# Supplementary material for: Transcriptome Analysis of the Accumulation of Astaxanthin in Haematococcus pluvialis Treated with White and Blue Lights as well as Salicylic Acid
Source: Hindawi journal article supplement (doi:10.1155/2022/4827595), 2022-01-01
Supplement: f3 [file 4827595.f3.pdf]

| Query                    | swissprot           | swissprot | swissprot_descripti | swissprot | swissprot_evalue |
|--------------------------|---------------------|-----------|---------------------|-----------|------------------|
| TRINITY_sp Q8WV C4orf3   | Uncharacterized pro | 100.00    | 0.00                |           |                  |
| TRINITY_sp Q925 H1FX     | Histone H1x OS=Homo | 100.00    | 0.00                |           |                  |
| TRINITY_sp Q9Y3 STARD10  | PCTP-like protein O | 100.00    | 0.00                |           |                  |
| TRINITY_sp O155 ARPC5    | Actin-related prote | 100.00    | 0.00                |           |                  |
| TRINITY_sp Q150 TNIP1    | TNFAIP3-interacting | 100.00    | 0.00                |           |                  |
| TRINITY_sp P141 rpsA     | 30S ribosomal prote | 100.00    | 0.00                |           |                  |
| TRINITY_sp Q9GZ SLIRP    | SRA stem-loop-inter | 100.00    | 0.00                |           |                  |
| TRINITY_sp Q9NZ PSENE    | Gamma-secretase sub | 100.00    | 0.00                |           |                  |
| TRINITY_sp P486 PRRC2A   | Protein PRRC2A OS=H | 100.00    | 0.00                |           |                  |
| TRINITY_sp Q054 FABP7    | Fatty acid-binding  | 100.00    | 0.00                |           |                  |
| TRINITY_sp Q5M9 Fostc-b  | Oligosaccharyltrans | 100.00    | 0.00                |           |                  |
| TRINITY_sp Q9Y5 MAGED1   | Melanoma-associated | 100.00    | 0.00                |           |                  |
| TRINITY_sp Q279 CAPN2    | Calpain-2 catalytic | 100.00    | 0.00                |           |                  |
| TRINITY_sp Q95L EIF4G2   | Eukaryotic translat | 100.00    | 0.00                |           |                  |
| TRINITY_sp P122 Apcs     | Serum amyloid P-com | 100.00    | 0.00                |           |                  |
| TRINITY_sp P008 Odc1     | Ornithine decarboxy | 100.00    | 0.00                |           |                  |
| TRINITY_sp Q3UB Tbrg1    | Transforming growth | 100.00    | 0.00                |           |                  |
| TRINITY_sp P151 GSPT1    | Eukaryotic peptide  | 100.00    | 0.00                |           |                  |
| TRINITY_sp Q9H0 MRPL18   | 39S ribosomal prote | 100.00    | 0.00                |           |                  |
| TRINITY_sp Q3SZ FAAMP    | Angio-associated mi | 100.00    | 0.00                |           |                  |
| TRINITY_sp Q9UK VPS28    | Vacuolar protein so | 100.00    | 0.00                |           |                  |
| TRINITY_sp P438 Plin2    | Perilipin-2 OS=Mus  | 100.00    | 0.00                |           |                  |
| TRINITY_sp Q90W MXRA8    | Matrix-remodeling-a | 100.00    | 0.00                |           |                  |
| TRINITY_sp Q168 ATP6V1F  | V-type proton ATPas | 100.00    | 0.00                |           |                  |
| TRINITY_sp Q5E9 DNAJA1   | DnaJ homolog subfam | 100.00    | 0.00                |           |                  |
| TRINITY_sp Q3SZ ERH      | Enhancer of rudimen | 100.00    | 0.00                |           |                  |
| TRINITY_sp P102 MYBL2    | Myb-related protein | 100.00    | 0.00                |           |                  |
| TRINITY_sp Q0P5 IRBM42   | RNA-binding protein | 100.00    | 0.00                |           |                  |
| TRINITY_sp Q9Y5 SRPRB    | Signal recognition  | 100.00    | 0.00                |           |                  |
| TRINITY_sp P072 -        | Serralysin OS=Serra | 100.00    | 0.00                |           |                  |
| TRINITY_sp P297 Vtn      | Vitronectin OS=Mus  | 100.00    | 0.00                |           |                  |
| TRINITY_sp P563 Cox6b1   | Cytochrome c oxidas | 100.00    | 0.00                |           |                  |
| TRINITY_sp P148 COX6B1   | Cytochrome c oxidas | 100.00    | 0.00                |           |                  |
| TRINITY_sp Q0MQ NDUFAB1  | Acyl carrier protei | 100.00    | 0.00                |           |                  |
| TRINITY_sp P504 Csrp3    | Cysteine and glycin | 100.00    | 0.00                |           |                  |
| TRINITY_sp P412 GARS     | Glycine--tRNA ligas | 100.00    | 0.00                |           |                  |
| TRINITY_sp P102 MYBL2    | Myb-related protein | 100.00    | 0.00                |           |                  |
| TRINITY_sp O002 ATOX1    | Copper transport pr | 100.00    | 0.00                |           |                  |
| TRINITY_sp P079 HSP90AA1 | Heat shock protein  | 100.00    | 0.00                |           |                  |
| TRINITY_sp P614 PCBD1    | Pterin-4-alpha-carb | 100.00    | 0.00                |           |                  |
| TRINITY_sp Q3T1 RPS23    | 40S ribosomal prote | 100.00    | 0.00                |           |                  |
| TRINITY_sp Q3T1 RPS23    | 40S ribosomal prote | 100.00    | 0.00                |           |                  |
| TRINITY_sp P115 MTHFD1   | C-1-tetrahydrofolat | 100.00    | 0.00                |           |                  |
| TRINITY_sp Q6ZW Rpl35    | 60S ribosomal prote | 100.00    | 0.00                |           |                  |
| TRINITY_sp P427 RPL35    | 60S ribosomal prote | 100.00    | 0.00                |           |                  |
| TRINITY_sp P616 HSPE1    | 10 kDa heat shock p | 100.00    | 0.00                |           |                  |
| TRINITY_sp P614 rpl36a   | 60S ribosomal prote | 100.00    | 0.00                |           |                  |
| TRINITY_sp Q618 Pzp      | Pregnancy zone prot | 100.00    | 0.00                |           |                  |
| TRINITY_sp Q151 NOMO1    | Nodal modulator 1 O | 100.00    | 0.00                |           |                  |
| TRINITY_sp Q96A MRPL24   | 39S ribosomal prote | 100.00    | 0.00                |           |                  |
| TRINITY_sp O704 Fhl2     | Four and a half LIM | 100.00    | 0.00                |           |                  |
| TRINITY_sp Q56J RPS13    | 40S ribosomal prote | 100.00    | 0.00                |           |                  |
| TRINITY_sp Q9R0 Bcam     | Basal cell adhesion | 100.00    | 0.00                |           |                  |
| TRINITY_sp P085 PDHA1    | Pyruvate dehydrogen | 100.00    | 0.00                |           |                  |
| TRINITY_sp Q9CQ Rnaset2  | Ribonuclease T2 OS= | 100.00    | 0.00                |           |                  |

|                  |           |                     |        |      |
|------------------|-----------|---------------------|--------|------|
| TRINITY_sp Q1354 | HDAC1     | Histone deacetylase | 100.00 | 0.00 |
| TRINITY_sp P2663 | Sars      | Serine--tRNA ligase | 100.00 | 0.00 |
| TRINITY_sp P4173 | Cd63      | CD63 antigen OS=Mus | 100.00 | 0.00 |
| TRINITY_sp Q3MH1 | SMAP      | Small acidic protei | 100.00 | 0.00 |
| TRINITY_sp O7054 | Tcap      | Telethonin OS=Mus m | 100.00 | 0.00 |
| TRINITY_sp Q9DBM | Ehhdh     | Peroxisomal bifunct | 100.00 | 0.00 |
| TRINITY_sp P7066 | Sparcl1   | SPARC-like protein  | 100.00 | 0.00 |
| TRINITY_sp P0512 | Nppa      | Natriuretic peptide | 100.00 | 0.00 |
| TRINITY_sp P1517 | GSPT1     | Eukaryotic peptide  | 100.00 | 0.00 |
| TRINITY_sp Q29R1 | THOC3     | THO complex subunit | 100.00 | 0.00 |
| TRINITY_sp Q1279 | ASPH      | Aspartyl/asparaginy | 100.00 | 0.00 |
| TRINITY_sp Q8WUN | SLC20A1   | Sodium-dependent ph | 100.00 | 0.00 |
| TRINITY_sp P6336 | (SEPW1    | Selenoprotein W OS= | 100.00 | 0.00 |
| TRINITY_sp Q3T02 | UBL5      | Ubiquitin-like prot | 100.00 | 0.00 |
| TRINITY_sp Q3T02 | UBL5      | Ubiquitin-like prot | 100.00 | 0.00 |
| TRINITY_sp Q1677 | GUK1      | Guanylate kinase OS | 100.00 | 0.00 |
| TRINITY_sp P3046 | (TM4SF1   | Transmembrane 4 L6  | 100.00 | 0.00 |
| TRINITY_sp P3046 | (TM4SF1   | Transmembrane 4 L6  | 100.00 | 0.00 |
| TRINITY_sp O7508 | WDR1      | WD repeat-containin | 100.00 | 0.00 |
| TRINITY_sp O7564 | SNRNP200  | U5 small nuclear ri | 100.00 | 0.00 |
| TRINITY_sp Q91V9 | Mgst1     | Microsomal glutathi | 100.00 | 0.00 |
| TRINITY_sp Q0706 | CKAP4     | Cytoskeleton-associ | 100.00 | 0.00 |
| TRINITY_sp P3062 | SRI       | Sorcin OS=Homo sapi | 100.00 | 0.00 |
| TRINITY_sp Q5B10 | CNIH1     | Protein cornichon h | 100.00 | 0.00 |
| TRINITY_sp P3109 | PSAN      | Photosystem I react | 100.00 | 0.00 |
| TRINITY_sp Q0745 | Ambp      | Protein AMBP OS=Mus | 100.00 | 0.00 |
| TRINITY_sp Q0745 | Ambp      | Protein AMBP OS=Mus | 100.00 | 0.00 |
| TRINITY_sp Q6NZ0 | Eif4g1    | Eukaryotic translat | 100.00 | 0.00 |
| TRINITY_sp Q8VC1 | Alas1     | 5-aminolevulinate s | 100.00 | 0.00 |
| TRINITY_sp P9745 | Atp5j     | ATP synthase-coupli | 100.00 | 0.00 |
| TRINITY_sp O7582 | EIF3G     | Eukaryotic translat | 100.00 | 0.00 |
| TRINITY_sp P4906 | (POLD2    | DNA polymerase delt | 100.00 | 0.00 |
| TRINITY_sp O8883 | Cyp4a10   | Cytochrome P450 4A1 | 100.00 | 0.00 |
| TRINITY_sp Q7Z2V | MRPL21    | 39S ribosomal prote | 100.00 | 0.00 |
| TRINITY_sp P3242 | RPL7A     | 60S ribosomal prote | 100.00 | 0.00 |
| TRINITY_sp Q2816 | (PABPN1   | Polyadenylate-bindi | 100.00 | 0.00 |
| TRINITY_sp Q9UK4 | LSM7      | U6 snRNA-associated | 100.00 | 0.00 |
| TRINITY_sp P2167 | SAT1      | Diamine acetyltrans | 100.00 | 0.00 |
| TRINITY_sp Q3T06 | (SAT1     | Diamine acetyltrans | 100.00 | 0.00 |
| TRINITY_sp Q9DC9 | Atp5h     | ATP synthase subuni | 100.00 | 0.00 |
| TRINITY_sp Q9CZ1 | Uqcrc1    | Cytochrome b-c1 com | 100.00 | 0.00 |
| TRINITY_sp Q1322 | (SELENBP1 | Selenium-binding pr | 100.00 | 0.00 |
| TRINITY_sp P1756 | (Selenbp1 | Selenium-binding pr | 100.00 | 0.00 |
| TRINITY_sp P5046 | (CSRP3    | Cysteine and glycin | 100.00 | 0.00 |
| TRINITY_sp P0775 | Serpina1  | Alpha-1-antitrypsin | 100.00 | 0.00 |
| TRINITY_sp Q9CQC | (Tmem100  | Transmembrane prote | 100.00 | 0.00 |
| TRINITY_sp P3965 | DDOST     | Dolichyl-diphosphoo | 100.00 | 0.00 |
| TRINITY_sp Q9H35 | (PRO1933  | Putative uncharacte | 100.00 | 0.00 |
| TRINITY_sp Q9QY  | (NdrG2    | Protein NDRG2 OS=M  | 100.00 | 0.00 |
| TRINITY_sp P3846 | (GNAI2    | Guanine nucleotide- | 100.00 | 0.00 |
| TRINITY_sp P0261 | -         | Myosin regulatory 1 | 100.00 | 0.00 |
| TRINITY_sp Q6142 | Hadh      | Hydroxyacyl-coenzym | 100.00 | 0.00 |
| TRINITY_sp P7912 | PPM1G     | Protein phosphatase | 100.00 | 0.00 |
| TRINITY_sp Q0MQ1 | (INDUFC2  | NADH dehydrogenase  | 100.00 | 0.00 |
| TRINITY_sp Q8BK3 | (Ndufv3   | NADH dehydrogenase  | 100.00 | 0.00 |
| TRINITY_sp P0916 | (P4HB     | Protein disulfide-i | 100.00 | 0.00 |

|                  |          |                      |        |      |
|------------------|----------|----------------------|--------|------|
| TRINITY_sp P2129 | CSR1     | Cysteine and glycin  | 100.00 | 0.00 |
| TRINITY_sp P0758 | -        | Beta-galactoside-bi  | 100.00 | 0.00 |
| TRINITY_sp Q5E9E | CLIC1    | Chloride intracellu  | 100.00 | 0.00 |
| TRINITY_sp Q0494 | PLP2     | Proteolipid protein  | 100.00 | 0.00 |
| TRINITY_sp Q9JJV | Myoz2    | Myozenin-2 OS=Mus m  | 100.00 | 0.00 |
| TRINITY_sp P2659 | PTBP1    | Polypyrimidine trac  | 100.00 | 0.00 |
| TRINITY_sp Q3ZBI | PSMD7    | 26S proteasome non-  | 100.00 | 0.00 |
| TRINITY_sp Q96G2 | CERS2    | Ceramide synthase 2  | 100.00 | 0.00 |
| TRINITY_sp Q6P82 | Ckmt2    | Creatine kinase S-t  | 100.00 | 0.00 |
| TRINITY_sp Q2825 | SPCS2    | Signal peptidase co  | 100.00 | 0.00 |
| TRINITY_sp P9743 | Slpi     | Antileukoproteinase  | 100.00 | 0.00 |
| TRINITY_sp P3362 | Apoc3    | Apolipoprotein C-II  | 100.00 | 0.00 |
| TRINITY_sp Q5JTY | CBWD3    | COBW domain-contain  | 100.00 | 0.00 |
| TRINITY_sp Q32PI | RPS19    | 40S ribosomal prote  | 100.00 | 0.00 |
| TRINITY_sp Q1627 | IGFBP7   | Insulin-like growth  | 100.00 | 0.00 |
| TRINITY_sp P5516 | CRYBA2   | Beta-crystallin A2   | 100.00 | 0.00 |
| TRINITY_sp Q6114 | Cp       | Ceruloplasmin OS=Mu  | 100.00 | 0.00 |
| TRINITY_sp P4941 | TUFM     | Elongation factor T  | 100.00 | 0.00 |
| TRINITY_sp Q1558 | TGFBI    | Transforming growth  | 100.00 | 0.00 |
| TRINITY_sp O4151 | MAP1LC3F | Microtubule-associa  | 100.00 | 0.00 |
| TRINITY_sp Q7L2E | EIF3M    | Eukaryotic translat  | 100.00 | 0.00 |
| TRINITY_sp P2807 | PSMB6    | Proteasome subunit   | 100.00 | 0.00 |
| TRINITY_sp P2807 | PSMB6    | Proteasome subunit   | 100.00 | 0.00 |
| TRINITY_sp Q7L5M | COPS6    | COP9 signalosome co  | 100.00 | 0.00 |
| TRINITY_sp Q8CE1 | Bola3    | BolaA-like protein 3 | 100.00 | 0.00 |
| TRINITY_sp Q969C | SMARCE1  | SWI/SNF-related mat  | 100.00 | 0.00 |
| TRINITY_sp Q9NPF | INGRN    | Neugrin OS=Homo sap  | 100.00 | 0.00 |
| TRINITY_sp Q0811 | AES      | Amino-terminal enha  | 100.00 | 0.00 |
| TRINITY_sp Q0811 | AES      | Amino-terminal enha  | 100.00 | 0.00 |
| TRINITY_sp Q1651 | PKN1     | Serine/threonine-pr  | 100.00 | 0.00 |
| TRINITY_sp P1324 | pac      | Puromycin N-acetylt  | 100.00 | 0.00 |
| TRINITY_sp P3783 | TALDO1   | Transaldolase OS=Ho  | 100.00 | 0.00 |
| TRINITY_sp P6115 | ACTR3    | Actin-related prote  | 100.00 | 0.00 |
| TRINITY_sp P5196 | UBE2E1   | Ubiquitin-conjugati  | 100.00 | 0.00 |
| TRINITY_sp Q9BV5 | ADI1     | 1,2-dihydroxy-3-ket  | 100.00 | 0.00 |
| TRINITY_sp Q9ER5 | Ndufa13  | NADH dehydrogenase   | 100.00 | 0.00 |
| TRINITY_sp P0952 | ANXA4    | Annexin A4 OS=Homo   | 100.00 | 0.00 |
| TRINITY_sp Q5BIN | SMARCB1  | SWI/SNF-related mat  | 100.00 | 0.00 |
| TRINITY_sp P5278 | SMS      | Spermine synthase O  | 100.00 | 0.00 |
| TRINITY_sp P0862 | SNRNP70  | U1 small nuclear ri  | 100.00 | 0.00 |
| TRINITY_sp Q1482 | ARPC4    | Actin-related prote  | 100.00 | 0.00 |
| TRINITY_sp Q9D6U | Fam162a  | Protein FAM162A OS=  | 100.00 | 0.00 |
| TRINITY_sp Q96A2 | FAM162A  | Protein FAM162A OS=  | 100.00 | 0.00 |
| TRINITY_sp P109C | CLU      | Clusterin OS=Homo s  | 100.00 | 0.00 |
| TRINITY_sp Q6CZV | tuf1     | Elongation factor T  | 100.00 | 0.00 |
| TRINITY_sp P0993 | UCHL1    | Ubiquitin carboxyl-  | 100.00 | 0.00 |
| TRINITY_sp P7837 | CCT2     | T-complex protein 1  | 100.00 | 0.00 |
| TRINITY_sp Q9JM7 | Arpc3    | Actin-related prote  | 100.00 | 0.00 |
| TRINITY_sp Q56JU | RPS24    | 40S ribosomal prote  | 100.00 | 0.00 |
| TRINITY_sp P6163 | COX7C    | Cytochrome c oxidas  | 100.00 | 0.00 |
| TRINITY_sp P1766 | Cox7c    | Cytochrome c oxidas  | 100.00 | 0.00 |
| TRINITY_sp P9902 | Uqcrh    | Cytochrome b-cl com  | 100.00 | 0.00 |
| TRINITY_sp P8292 | MRPS21   | 28S ribosomal prote  | 100.00 | 0.00 |
| TRINITY_sp P5099 | CCT8     | T-complex protein 1  | 100.00 | 0.00 |
| TRINITY_sp P2603 | Tln1     | Talin-1 OS=Mus musc  | 100.00 | 0.00 |
| TRINITY_sp P2603 | Tln1     | Talin-1 OS=Mus musc  | 100.00 | 0.00 |

|                          |                     |        |      |
|--------------------------|---------------------|--------|------|
| TRINITY_sp P2133FLNA     | Filamin-A OS=Homo s | 100.00 | 0.00 |
| TRINITY_sp P0673PYGL     | Glycogen phosphoryl | 100.00 | 0.00 |
| TRINITY_sp O3538Phyh     | Phytanoyl-CoA dioxy | 100.00 | 0.00 |
| TRINITY_sp Q9UM1NOL7     | Nucleolar protein 7 | 100.00 | 0.00 |
| TRINITY_sp P0731Ckm      | Creatine kinase M-t | 100.00 | 0.00 |
| TRINITY_sp P0731Ckm      | Creatine kinase M-t | 100.00 | 0.00 |
| TRINITY_sp P2969Ahsg     | Alpha-2-HS-glycopro | 100.00 | 0.00 |
| TRINITY_sp P4855PSMD8    | 26S proteasome non- | 100.00 | 0.00 |
| TRINITY_sp P1172FN1      | Fibronectin (Fragme | 100.00 | 0.00 |
| TRINITY_sp Q9BR1UQCC2    | Ubiquinol-cytochrom | 100.00 | 0.00 |
| TRINITY_sp P4855PSMD8    | 26S proteasome non- | 100.00 | 0.00 |
| TRINITY_sp Q32PFLSM3     | U6 snRNA-associated | 100.00 | 0.00 |
| TRINITY_sp Q8QZ1Acat1    | Acetyl-CoA acetyltr | 100.00 | 0.00 |
| TRINITY_sp Q2M21WDR83OS  | Protein Asterix OS= | 100.00 | 0.00 |
| TRINITY_sp Q7811Usmg5    | Up-regulated during | 100.00 | 0.00 |
| TRINITY_sp P9902Rplp2    | 60S acidic ribosoma | 100.00 | 0.00 |
| TRINITY_sp P0538RPLP2    | 60S acidic ribosoma | 100.00 | 0.00 |
| TRINITY_sp Q9NZ1CHMP5    | Charged multivesicu | 100.00 | 0.00 |
| TRINITY_sp P4982NDUFV1   | NADH dehydrogenase  | 100.00 | 0.00 |
| TRINITY_sp Q9D01Cycl1    | Cytochrome c1, heme | 100.00 | 0.00 |
| TRINITY_sp P2663TARS     | Threonine--tRNA lig | 100.00 | 0.00 |
| TRINITY_sp P2663TARS     | Threonine--tRNA lig | 100.00 | 0.00 |
| TRINITY_sp Q0446IDH2     | Isocitrate dehydrog | 100.00 | 0.00 |
| TRINITY_sp Q9HB1CACYPB   | Calcyclin-binding p | 100.00 | 0.00 |
| TRINITY_sp Q8BM1Hadha    | Trifunctional enzym | 100.00 | 0.00 |
| TRINITY_sp Q9R01Ak1      | Adenylate kinase is | 100.00 | 0.00 |
| TRINITY_sp Q9276HDAC2    | Histone deacetylase | 100.00 | 0.00 |
| TRINITY_sp P2133FLNA     | Filamin-A OS=Homo s | 100.00 | 0.00 |
| TRINITY_sp Q8MJ1FBLN1    | Fibulin-1 (Fragment | 100.00 | 0.00 |
| TRINITY_sp Q1688TXNRD1   | Thioredoxin reducta | 100.00 | 0.00 |
| TRINITY_sp Q1585USF2     | Upstream stimulator | 100.00 | 0.00 |
| TRINITY_sp Q9W61ube2ia   | SUMO-conjugating en | 100.00 | 0.00 |
| TRINITY_sp P115(HSP90AA1 | Heat shock protein  | 100.00 | 0.00 |
| TRINITY_sp Q9NX1NDUFB11  | NADH dehydrogenase  | 100.00 | 0.00 |
| TRINITY_sp P567(PSMD2    | 26S proteasome non- | 100.00 | 0.00 |
| TRINITY_sp P7852PRKDC    | DNA-dependent prote | 100.00 | 0.00 |
| TRINITY_sp Q9Z01Cd97     | CD97 antigen OS=Mus | 100.00 | 0.00 |
| TRINITY_sp P0035ALDH1A1  | Retinal dehydrogena | 100.00 | 0.00 |
| TRINITY_sp Q561URPS24    | 40S ribosomal prote | 100.00 | 0.00 |
| TRINITY_sp P6219PSMC5    | 26S protease regula | 100.00 | 0.00 |
| TRINITY_sp P519(PGK      | Phosphoglycerate ki | 100.00 | 0.00 |
| TRINITY_sp Q9NX2NHP2     | H/ACA ribonucleopro | 100.00 | 0.00 |
| TRINITY_sp Q4234RPL24A   | 60S ribosomal prote | 100.00 | 0.00 |
| TRINITY_sp O7553SF3B1    | Splicing factor 3B  | 100.00 | 0.00 |
| TRINITY_sp Q129(LMAN2    | Vesicular integral- | 100.00 | 0.00 |
| TRINITY_sp Q1558TGFBI    | Transforming growth | 100.00 | 0.00 |
| TRINITY_sp Q025(Myh6     | Myosin-6 OS=Mus mus | 100.00 | 0.00 |
| TRINITY_sp Q025(Myh6     | Myosin-6 OS=Mus mus | 100.00 | 0.00 |
| TRINITY_sp Q3T01RPS16    | 40S ribosomal prote | 100.00 | 0.00 |
| TRINITY_sp Q8BT1Flna     | Filamin-A OS=Mus mu | 100.00 | 0.00 |
| TRINITY_sp P7021Sepp1    | Selenoprotein P OS= | 100.00 | 0.00 |
| TRINITY_sp P2004EIF2S2   | Eukaryotic translat | 100.00 | 0.00 |
| TRINITY_sp P2004EIF2S2   | Eukaryotic translat | 100.00 | 0.00 |
| TRINITY_sp Q69B1UQCRFS1  | Cytochrome b-c1 com | 100.00 | 0.00 |
| TRINITY_sp Q9NPE1NOP10   | H/ACA ribonucleopro | 100.00 | 0.00 |
| TRINITY_sp P6321RPS17    | 40S ribosomal prote | 100.00 | 0.00 |

|                         |                     |        |      |
|-------------------------|---------------------|--------|------|
| TRINITY_sp P087(RPS17   | 40S ribosomal prote | 100.00 | 0.00 |
| TRINITY_sp P2314CES1    | Liver carboxylester | 100.00 | 0.00 |
| TRINITY_sp Q1JP7ARPC1A  | Actin-related prote | 100.00 | 0.00 |
| TRINITY_sp P0758DCN     | Decorin OS=Homo sap | 100.00 | 0.00 |
| TRINITY_sp P0758DCN     | Decorin OS=Homo sap | 100.00 | 0.00 |
| TRINITY_sp Q9Y31STRAP   | Serine-threonine ki | 100.00 | 0.00 |
| TRINITY_sp P4972PSMB2   | Proteasome subunit  | 100.00 | 0.00 |
| TRINITY_sp O3572Cyp4a14 | Cytochrome P450 4A1 | 100.00 | 0.00 |
| TRINITY_sp Q1491DRAP1   | Dr1-associated core | 100.00 | 0.00 |
| TRINITY_sp P4606RANGAP1 | Ran GTPase-activati | 100.00 | 0.00 |
| TRINITY_sp A3KN2UBE2M   | NEDD8-conjugating e | 100.00 | 0.00 |
| TRINITY_sp P1172FN1     | Fibronectin (Fragme | 100.00 | 0.00 |
| TRINITY_sp P1172FN1     | Fibronectin (Fragme | 100.00 | 0.00 |
| TRINITY_sp P1798TCP1    | T-complex protein 1 | 100.00 | 0.00 |
| TRINITY_sp P190(Krt19   | Keratin, type I cyt | 100.00 | 0.00 |
| TRINITY_sp P0709S100a4  | Protein S100-A4 OS= | 100.00 | 0.00 |
| TRINITY_sp P2644S100A4  | Protein S100-A4 OS= | 100.00 | 0.00 |
| TRINITY_sp P1861NELFE   | Negative elongation | 100.00 | 0.00 |
| TRINITY_sp Q6445Cyp3a11 | Cytochrome P450 3A1 | 100.00 | 0.00 |
| TRINITY_sp Q6445Cyp3a11 | Cytochrome P450 3A1 | 100.00 | 0.00 |
| TRINITY_sp Q8K0EFgb     | Fibrinogen beta cha | 100.00 | 0.00 |
| TRINITY_sp Q91X7Hpx     | Hemopexin OS=Mus mu | 100.00 | 0.00 |
| TRINITY_sp Q91X7Hpx     | Hemopexin OS=Mus mu | 100.00 | 0.00 |
| TRINITY_sp Q8K0EFgb     | Fibrinogen beta cha | 100.00 | 0.00 |
| TRINITY_sp Q91X7Hpx     | Hemopexin OS=Mus mu | 100.00 | 0.00 |
| TRINITY_sp Q9JH8Cwc15   | Spliceosome-associa | 100.00 | 0.00 |
| TRINITY_sp P0506APP     | Amyloid beta A4 pro | 100.00 | 0.00 |
| TRINITY_sp O3545Ech1    | Delta(3,5)-Delta(2, | 100.00 | 0.00 |
| TRINITY_sp Q9UK7ACIN1   | Apoptotic chromatin | 100.00 | 0.00 |
| TRINITY_sp Q32KM-       | Protein C10 OS=Bos  | 100.00 | 0.00 |
| TRINITY_sp Q32KM-       | Protein C10 OS=Bos  | 100.00 | 0.00 |
| TRINITY_sp P1807RPL35A  | 60S ribosomal prote | 100.00 | 0.00 |
| TRINITY_sp P6786CSNK2B  | Casein kinase II su | 100.00 | 0.00 |
| TRINITY_sp P1492UQCRB   | Cytochrome b-c1 com | 100.00 | 0.00 |
| TRINITY_sp Q56J7RPS13   | 40S ribosomal prote | 100.00 | 0.00 |
| TRINITY_sp Q56J7RPS13   | 40S ribosomal prote | 100.00 | 0.00 |
| TRINITY_sp Q56J7RPS13   | 40S ribosomal prote | 100.00 | 0.00 |
| TRINITY_sp P0051PRKAR1A | cAMP-dependent prot | 100.00 | 0.00 |
| TRINITY_sp A9JR(ppp4cb  | Serine/threonine-pr | 100.00 | 0.00 |
| TRINITY_sp O1495UQCR11  | Cytochrome b-c1 com | 100.00 | 0.00 |
| TRINITY_sp P5656EIF6    | Eukaryotic translat | 100.00 | 0.00 |
| TRINITY_sp P4959SARS    | Serine--tRNA ligase | 100.00 | 0.00 |
| TRINITY_sp Q6226Sptbn1  | Spectrin beta chain | 100.00 | 0.00 |
| TRINITY_sp P609(S100A10 | Protein S100-A10 OS | 100.00 | 0.00 |
| TRINITY_sp Q9QX7Egf17   | Epidermal growth fa | 100.00 | 0.00 |
| TRINITY_sp P6231SNRPD3  | Small nuclear ribon | 100.00 | 0.00 |
| TRINITY_sp Q1504KARS    | Lysine--tRNA ligase | 100.00 | 0.00 |
| TRINITY_sp Q3MI(RPL37A  | 60S ribosomal prote | 100.00 | 0.00 |
| TRINITY_sp Q3MI(RPL37A  | 60S ribosomal prote | 100.00 | 0.00 |
| TRINITY_sp Q3T14DYNLRB1 | Dynein light chain  | 100.00 | 0.00 |
| TRINITY_sp P4677RPL28   | 60S ribosomal prote | 100.00 | 0.00 |
| TRINITY_sp P411(Rpl28   | 60S ribosomal prote | 100.00 | 0.00 |
| TRINITY_sp P0423H2-Eb1  | H-2 class II histoc | 100.00 | 0.00 |
| TRINITY_sp P5916HTR4    | Histone H3.3 OS=Ara | 100.00 | 0.00 |
| TRINITY_sp Q1RM7CTDNEP1 | CTD nuclear envelop | 100.00 | 0.00 |
| TRINITY_sp P4942Hpd     | 4-hydroxyphenylpyru | 100.00 | 0.00 |

|                          |                     |        |      |
|--------------------------|---------------------|--------|------|
| TRINITY_sp Q32L7H2AFV    | Histone H2A.V OS=Bo | 100.00 | 0.00 |
| TRINITY_sp Q56J9RPL31    | 60S ribosomal prote | 100.00 | 0.00 |
| TRINITY_sp P9902Prdx5    | Peroxiredoxin-5, mi | 100.00 | 0.00 |
| TRINITY_sp Q1449RBM39    | RNA-binding protein | 100.00 | 0.00 |
| TRINITY_sp Q1449RBM39    | RNA-binding protein | 100.00 | 0.00 |
| TRINITY_sp Q3T0(RPL18A   | 60S ribosomal prote | 100.00 | 0.00 |
| TRINITY_sp P6271Rpl18a   | 60S ribosomal prote | 100.00 | 0.00 |
| TRINITY_sp Q9R0FAcox1    | Peroxisomal acyl-co | 100.00 | 0.00 |
| TRINITY_sp Q6445Cyp2c29  | Cytochrome P450 2C2 | 100.00 | 0.00 |
| TRINITY_sp P091(P4hb     | Protein disulfide-i | 100.00 | 0.00 |
| TRINITY_sp Q9UNESTUB1    | E3 ubiquitin-protei | 100.00 | 0.00 |
| TRINITY_sp O4366PRC1     | Protein regulator o | 100.00 | 0.00 |
| TRINITY_sp P0424Mb       | Myoglobin OS=Mus mu | 100.00 | 0.00 |
| TRINITY_sp O7538NDUFS6   | NADH dehydrogenase  | 100.00 | 0.00 |
| TRINITY_sp Q3SZ7SMS      | Spermine synthase O | 100.00 | 0.00 |
| TRINITY_sp Q9Y22C14orf16 | UPF0568 protein C14 | 100.00 | 0.00 |
| TRINITY_sp P6226RPS14    | 40S ribosomal prote | 100.00 | 0.00 |
| TRINITY_sp O1556RGS5     | Regulator of G-prot | 100.00 | 0.00 |
| TRINITY_sp P0A91cspC     | Cold shock-like pro | 100.00 | 0.00 |
| TRINITY_sp Q9UM9NENF     | Neudesin OS=Homo sa | 100.00 | 0.00 |
| TRINITY_sp P5514MANF     | Mesencephalic astro | 100.00 | 0.00 |
| TRINITY_sp Q0821DHX9     | ATP-dependent RNA h | 100.00 | 0.00 |
| TRINITY_sp Q3ZB1VCP      | Transitional endopl | 100.00 | 0.00 |
| TRINITY_sp Q1409CCNI     | Cyclin-I OS=Homo sa | 100.00 | 0.00 |
| TRINITY_sp Q9DCVetfb     | Electron transfer f | 100.00 | 0.00 |
| TRINITY_sp P6003CD81     | CD81 antigen OS=Hom | 100.00 | 0.00 |
| TRINITY_sp P5259HNRNPF   | Heterogeneous nucle | 100.00 | 0.00 |
| TRINITY_sp Q9UB1RNF7     | RING-box protein 2  | 100.00 | 0.00 |
| TRINITY_sp Q9BR(VPS25    | Vacuolar protein-so | 100.00 | 0.00 |
| TRINITY_sp Q1RMRHOC      | Rho-related GTP-bin | 100.00 | 0.00 |
| TRINITY_sp Q3T03PSMC4    | 26S protease regula | 100.00 | 0.00 |
| TRINITY_sp A4FU1SNRPE    | Small nuclear ribon | 100.00 | 0.00 |
| TRINITY_sp P6128NEDD8    | NEDD8 OS=Bos taurus | 100.00 | 0.00 |
| TRINITY_sp Q32P7POLR2J   | DNA-directed RNA po | 100.00 | 0.00 |
| TRINITY_sp Q0108TIAL1    | Nucleolysin TIAR OS | 100.00 | 0.00 |
| TRINITY_sp Q2KIVPSMC6    | 26S protease regula | 100.00 | 0.00 |
| TRINITY_sp Q91WINdufs2   | NADH dehydrogenase  | 100.00 | 0.00 |
| TRINITY_sp Q3T05RPL39    | 60S ribosomal prote | 100.00 | 0.00 |
| TRINITY_sp P4787Igfbp4   | Insulin-like growth | 100.00 | 0.00 |
| TRINITY_sp P2161Gc       | Vitamin D-binding p | 100.00 | 0.00 |
| TRINITY_sp P2917CSDE1    | Cold shock domain-c | 100.00 | 0.00 |
| TRINITY_sp P052(Got2     | Aspartate aminotran | 100.00 | 0.00 |
| TRINITY_sp P052(Got2     | Aspartate aminotran | 100.00 | 0.00 |
| TRINITY_sp Q6243NdrG1    | Protein NDRG1 OS=Mu | 100.00 | 0.00 |
| TRINITY_sp Q1326TRIM28   | Transcription inter | 100.00 | 0.00 |
| TRINITY_sp P1463CCNB1    | G2/mitotic-specific | 100.00 | 0.00 |
| TRINITY_sp P5054S100a11  | Protein S100-A11 OS | 100.00 | 0.00 |
| TRINITY_sp P3194S100A11  | Protein S100-A11 OS | 100.00 | 0.00 |
| TRINITY_sp P3193ATIC     | Bifunctional purine | 100.00 | 0.00 |
| TRINITY_sp P6287GNB1     | Guanine nucleotide- | 100.00 | 0.00 |
| TRINITY_sp P5361COPB1    | Coatomer subunit be | 100.00 | 0.00 |
| TRINITY_sp Q1401CIRBP    | Cold-inducible RNA- | 100.00 | 0.00 |
| TRINITY_sp P0555ITGB1    | Integrin beta-1 OS= | 100.00 | 0.00 |
| TRINITY_sp P8408ARF5     | ADP-ribosylation fa | 100.00 | 0.00 |
| TRINITY_sp Q9H61RNF167   | E3 ubiquitin-protei | 100.00 | 0.00 |
| TRINITY_sp P0733CTSD     | Cathepsin D OS=Homo | 100.00 | 0.00 |

|                          |                     |        |      |
|--------------------------|---------------------|--------|------|
| TRINITY_sp Q2VIFEIF2S3L  | Putative eukaryotic | 100.00 | 0.00 |
| TRINITY_sp P1486HNRNPL   | Heterogeneous nucle | 100.00 | 0.00 |
| TRINITY_sp Q3ZBFRPS20    | 40S ribosomal prote | 100.00 | 0.00 |
| TRINITY_sp Q3T0MVPS29    | Vacuolar protein so | 100.00 | 0.00 |
| TRINITY_sp Q8WUVBRK1     | Protein BRICK1 OS=H | 100.00 | 0.00 |
| TRINITY_sp Q5E9FRPL10A   | 60S ribosomal prote | 100.00 | 0.00 |
| TRINITY_sp P6284RPS15    | 40S ribosomal prote | 100.00 | 0.00 |
| TRINITY_sp P6284RPS15    | 40S ribosomal prote | 100.00 | 0.00 |
| TRINITY_sp O003(EIF3F    | Eukaryotic translat | 100.00 | 0.00 |
| TRINITY_sp P6122RAP1B    | Ras-related protein | 100.00 | 0.00 |
| TRINITY_sp Q6444Cox8a    | Cytochrome c oxidas | 100.00 | 0.00 |
| TRINITY_sp Q9NZ6MTCH1    | Mitochondrial carri | 100.00 | 0.00 |
| TRINITY_sp Q9NZ6MTCH1    | Mitochondrial carri | 100.00 | 0.00 |
| TRINITY_sp O7025Eef1b    | Elongation factor 1 | 100.00 | 0.00 |
| TRINITY_sp P2453EEF1B2   | Elongation factor 1 | 100.00 | 0.00 |
| TRINITY_sp Q99LCEtfa     | Electron transfer f | 100.00 | 0.00 |
| TRINITY_sp O4392NDUFS5   | NADH dehydrogenase  | 100.00 | 0.00 |
| TRINITY_sp Q56JURPS24    | 40S ribosomal prote | 100.00 | 0.00 |
| TRINITY_sp Q928CTAF15    | TATA-binding protei | 100.00 | 0.00 |
| TRINITY_sp Q945I-        | Eukaryotic translat | 100.00 | 0.00 |
| TRINITY_sp Q1RME5SNX3    | Sorting nexin-3 OS= | 100.00 | 0.00 |
| TRINITY_sp Q9Y67AUP1     | Ancient ubiquitous  | 100.00 | 0.00 |
| TRINITY_sp Q9H63RNF167   | E3 ubiquitin-protei | 100.00 | 0.00 |
| TRINITY_sp P5227HNRNPM   | Heterogeneous nucle | 100.00 | 0.00 |
| TRINITY_sp Q96K7CLPTM1L  | Cleft lip and palat | 100.00 | 0.00 |
| TRINITY_sp O5502Copb2    | Coatomer subunit be | 100.00 | 0.00 |
| TRINITY_sp Q9Y63NPTN     | Neuroplastin OS=Hom | 100.00 | 0.00 |
| TRINITY_sp Q8VCF6Acaalb  | 3-ketoacyl-CoA thio | 100.00 | 0.00 |
| TRINITY_sp Q9211Acaala   | 3-ketoacyl-CoA thio | 100.00 | 0.00 |
| TRINITY_sp P5638Atp5e    | ATP synthase subuni | 100.00 | 0.00 |
| TRINITY_sp Q3ZBICKMT2    | Creatine kinase S-t | 100.00 | 0.00 |
| TRINITY_sp P5075Tnnt2    | Troponin T, cardiac | 100.00 | 0.00 |
| TRINITY_sp Q9D71Mrp130   | 39S ribosomal prote | 100.00 | 0.00 |
| TRINITY_sp P1186CDK4     | Cyclin-dependent ki | 100.00 | 0.00 |
| TRINITY_sp P0324-        | E1B protein, small  | 100.00 | 0.00 |
| TRINITY_sp P0324-        | E1B 55 kDa protein  | 100.00 | 0.00 |
| TRINITY_sp Q8R1FHopx     | Homeodomain-only pr | 100.00 | 0.00 |
| TRINITY_sp P4587VDAC1    | Voltage-dependent a | 100.00 | 0.00 |
| TRINITY_sp Q9UNISSR3     | Translocon-associat | 100.00 | 0.00 |
| TRINITY_sp Q3SZ8SSR3     | Translocon-associat | 100.00 | 0.00 |
| TRINITY_sp P492(RPL34    | 60S ribosomal prote | 100.00 | 0.00 |
| TRINITY_sp Q9D1FRpl34    | 60S ribosomal prote | 100.00 | 0.00 |
| TRINITY_sp P2636U2AF2    | Splicing factor U2A | 100.00 | 0.00 |
| TRINITY_sp P1709Hmga1    | High mobility group | 100.00 | 0.00 |
| TRINITY_sp P5256ARHGDISA | Rho GDP-dissociatio | 100.00 | 0.00 |
| TRINITY_sp Q3T02SNRPF    | Small nuclear ribon | 100.00 | 0.00 |
| TRINITY_sp Q8621RPL24    | 60S ribosomal prote | 100.00 | 0.00 |
| TRINITY_sp Q8621RPL24    | 60S ribosomal prote | 100.00 | 0.00 |
| TRINITY_sp P1562Gstm2    | Glutathione S-trans | 100.00 | 0.00 |
| TRINITY_sp Q3T07PSMA1    | Proteasome subunit  | 100.00 | 0.00 |
| TRINITY_sp P2454Aldh1a1  | Retinal dehydrogena | 100.00 | 0.00 |
| TRINITY_sp P2454Aldh1a1  | Retinal dehydrogena | 100.00 | 0.00 |
| TRINITY_sp Q9UNINPIPA1   | Nuclear pore comple | 100.00 | 0.00 |
| TRINITY_sp P5117Acadl    | Long-chain specific | 100.00 | 0.00 |
| TRINITY_sp P5117Acadl    | Long-chain specific | 100.00 | 0.00 |
| TRINITY_sp P5117Acadl    | Long-chain specific | 100.00 | 0.00 |

|                         |                     |        |      |
|-------------------------|---------------------|--------|------|
| TRINITY_sp P0256ASL1    | Delta-1 crystallin  | 100.00 | 0.00 |
| TRINITY_sp P1060Ctsb    | Cathepsin B OS=Mus  | 100.00 | 0.00 |
| TRINITY_sp Q56K1RPLP1   | 60S acidic ribosoma | 100.00 | 0.00 |
| TRINITY_sp Q9D60Ndufv2  | NADH dehydrogenase  | 100.00 | 0.00 |
| TRINITY_sp P6177B2M     | Beta-2-microglobuli | 100.00 | 0.00 |
| TRINITY_sp P3526RPL22   | 60S ribosomal prote | 100.00 | 0.00 |
| TRINITY_sp Q4R51RPL22   | 60S ribosomal prote | 100.00 | 0.00 |
| TRINITY_sp O6265DES     | Desmin OS=Bos tauru | 100.00 | 0.00 |
| TRINITY_sp Q9CZUCs      | Citrate synthase, m | 100.00 | 0.00 |
| TRINITY_sp P5166Myl2    | Myosin regulatory 1 | 100.00 | 0.00 |
| TRINITY_sp P6135RPL27   | 60S ribosomal prote | 100.00 | 0.00 |
| TRINITY_sp P6135RPL27   | 60S ribosomal prote | 100.00 | 0.00 |
| TRINITY_sp P1884ATF4    | Cyclic AMP-dependen | 100.00 | 0.00 |
| TRINITY_sp P6135RPL27   | 60S ribosomal prote | 100.00 | 0.00 |
| TRINITY_sp Q0256Myh6    | Myosin-6 OS=Mus mus | 100.00 | 0.00 |
| TRINITY_sp Q2KJ9CDC42   | Cell division contr | 100.00 | 0.00 |
| TRINITY_sp Q16Y0Cdc42   | Cdc42 homolog OS=Ae | 100.00 | 0.00 |
| TRINITY_sp O8866Psmc3   | 26S protease regula | 100.00 | 0.00 |
| TRINITY_sp P4125IARS    | Isoleucine--tRNA li | 100.00 | 0.00 |
| TRINITY_sp P5639Cyb5a   | Cytochrome b5 OS=MU | 100.00 | 0.00 |
| TRINITY_sp P2067COX5A   | Cytochrome c oxidas | 100.00 | 0.00 |
| TRINITY_sp Q3ZC6PAIP2   | Polyadenylate-bindi | 100.00 | 0.00 |
| TRINITY_sp P0875Gnai2   | Guanine nucleotide- | 100.00 | 0.00 |
| TRINITY_sp Q3T0FRPS10   | 40S ribosomal prote | 100.00 | 0.00 |
| TRINITY_sp Q99P7Rtn4    | Reticulon-4 OS=Mus  | 100.00 | 0.00 |
| TRINITY_sp P5141Rpl9    | 60S ribosomal prote | 100.00 | 0.00 |
| TRINITY_sp P3296RPL9    | 60S ribosomal prote | 100.00 | 0.00 |
| TRINITY_sp P3193UQCRC1  | Cytochrome b-c1 com | 100.00 | 0.00 |
| TRINITY_sp P3193UQCRC1  | Cytochrome b-c1 com | 100.00 | 0.00 |
| TRINITY_sp O8845Capns1  | Calpain small subun | 100.00 | 0.00 |
| TRINITY_sp Q3ZC1SKP1    | S-phase kinase-asso | 100.00 | 0.00 |
| TRINITY_sp P2769APEX1   | DNA-(apurinic or ap | 100.00 | 0.00 |
| TRINITY_sp Q9UN9RPL26L1 | 60S ribosomal prote | 100.00 | 0.00 |
| TRINITY_sp P2136FLNA    | Filamin-A OS=Homo s | 100.00 | 0.00 |
| TRINITY_sp P2239NME2    | Nucleoside diphosph | 100.00 | 0.00 |
| TRINITY_sp P0670S100A6  | Protein S100-A6 OS= | 100.00 | 0.00 |
| TRINITY_sp Q3T05RPL23   | 60S ribosomal prote | 100.00 | 0.00 |
| TRINITY_sp Q3T05RPL23   | 60S ribosomal prote | 100.00 | 0.00 |
| TRINITY_sp P3211PRDX2   | Peroxiredoxin-2 OS= | 100.00 | 0.00 |
| TRINITY_sp P4677RPL21   | 60S ribosomal prote | 100.00 | 0.00 |
| TRINITY_sp O4366PRC1    | Protein regulator o | 100.00 | 0.00 |
| TRINITY_sp O4385CALU    | Calumenin OS=Homo s | 100.00 | 0.00 |
| TRINITY_sp P0484RPN2    | Dolichyl-diphosphoo | 100.00 | 0.00 |
| TRINITY_sp P0484RPN2    | Dolichyl-diphosphoo | 100.00 | 0.00 |
| TRINITY_sp Q3T05RPL23   | 60S ribosomal prote | 100.00 | 0.00 |
| TRINITY_sp Q3T05RPL23   | 60S ribosomal prote | 100.00 | 0.00 |
| TRINITY_sp Q2KI1TCEB1   | Transcription elong | 100.00 | 0.00 |
| TRINITY_sp P6125RPL26   | 60S ribosomal prote | 100.00 | 0.00 |
| TRINITY_sp P6125RPL26   | 60S ribosomal prote | 100.00 | 0.00 |
| TRINITY_sp P6125RPL26   | 60S ribosomal prote | 100.00 | 0.00 |
| TRINITY_sp P2636U2AF2   | Splicing factor U2A | 100.00 | 0.00 |
| TRINITY_sp Q3T0FRPS18   | 40S ribosomal prote | 100.00 | 0.00 |
| TRINITY_sp Q3T0FRPS18   | 40S ribosomal prote | 100.00 | 0.00 |
| TRINITY_sp P3639ARF1    | ADP-ribosylation fa | 100.00 | 0.00 |
| TRINITY_sp P1808ARF4    | ADP-ribosylation fa | 100.00 | 0.00 |
| TRINITY_sp Q3T05RAN     | GTP-binding nuclear | 100.00 | 0.00 |



|                          |                      |        |      |
|--------------------------|----------------------|--------|------|
| TRINITY_sp Q2418RpS5a    | 40S ribosomal prote  | 100.00 | 0.00 |
| TRINITY_sp Q5E98RPS5     | 40S ribosomal prote  | 100.00 | 0.00 |
| TRINITY_sp P0578KRT8     | Keratin, type II cy  | 100.00 | 0.00 |
| TRINITY_sp P6066MYL6     | Myosin light polype  | 100.00 | 0.00 |
| TRINITY_sp Q1515NOMO1    | Nodal modulator 1 O  | 100.00 | 0.00 |
| TRINITY_sp P6128PPP1CC   | Serine/threonine-pr  | 100.00 | 0.00 |
| TRINITY_sp P6213Ppp1ca   | Serine/threonine-pr  | 100.00 | 0.00 |
| TRINITY_sp P0C08H2AFZ    | Histone H2A.Z OS=Bo  | 100.00 | 0.00 |
| TRINITY_sp Q27IIgag      | Gag polyprotein OS=  | 100.00 | 0.00 |
| TRINITY_sp P0335gag-pol  | Gag-Pol polyprotein  | 100.00 | 0.00 |
| TRINITY_sp Q9699RPL36AL  | 60S ribosomal prote  | 100.00 | 0.00 |
| TRINITY_sp Q3SZ5RPL36A   | 60S ribosomal prote  | 100.00 | 0.00 |
| TRINITY_sp Q3ZCFEIF3L    | Eukaryotic translat  | 100.00 | 0.00 |
| TRINITY_sp Q3SZ5RPL36A   | 60S ribosomal prote  | 100.00 | 0.00 |
| TRINITY_sp Q3ZCFACTN2    | Alpha-actinin-2 OS=  | 100.00 | 0.00 |
| TRINITY_sp O4370ACTN4    | Alpha-actinin-4 OS=  | 100.00 | 0.00 |
| TRINITY_sp A5D7IACFN4    | Alpha-actinin-4 OS=  | 100.00 | 0.00 |
| TRINITY_sp Q0184EWSR1    | RNA-binding protein  | 100.00 | 0.00 |
| TRINITY_sp Q3T10SEC61G   | Protein transport p  | 100.00 | 0.00 |
| TRINITY_sp P6242RPL7A    | 60S ribosomal prote  | 100.00 | 0.00 |
| TRINITY_sp P1297Rpl7a    | 60S ribosomal prote  | 100.00 | 0.00 |
| TRINITY_sp P1611Lgals3   | Galectin-3 OS=Mus m  | 100.00 | 0.00 |
| TRINITY_sp Q9Y30RPL36    | 60S ribosomal prote  | 100.00 | 0.00 |
| TRINITY_sp Q3SZ6PGAM1    | Phosphoglycerate mu  | 100.00 | 0.00 |
| TRINITY_sp Q9Y30RPL36    | 60S ribosomal prote  | 100.00 | 0.00 |
| TRINITY_sp Q3T01RPL30    | 60S ribosomal prote  | 100.00 | 0.00 |
| TRINITY_sp Q3T01RPL30    | 60S ribosomal prote  | 100.00 | 0.00 |
| TRINITY_sp Q3MH1UBE2L3   | Ubiquitin-conjugati  | 100.00 | 0.00 |
| TRINITY_sp Q5E93EIF1     | Eukaryotic translat  | 100.00 | 0.00 |
| TRINITY_sp Q9CP9Atp51    | ATP synthase subuni  | 100.00 | 0.00 |
| TRINITY_sp Q2NK2CCT7     | T-complex protein 1  | 100.00 | 0.00 |
| TRINITY_sp Q6120Psap     | Prosaposin OS=Mus m  | 100.00 | 0.00 |
| TRINITY_sp Q3MH1ARPC2    | Actin-related prote  | 100.00 | 0.00 |
| TRINITY_sp Q9Y26NUDC     | Nuclear migration p  | 100.00 | 0.00 |
| TRINITY_sp Q9Z21Mbd2     | Methyl-CpG-binding   | 100.00 | 0.00 |
| TRINITY_sp Q0683PRDX1    | Peroxiredoxin-1 OS=  | 100.00 | 0.00 |
| TRINITY_sp P0102C3       | Complement C3 OS=Mu  | 100.00 | 0.00 |
| TRINITY_sp Q0631Scgbla1  | Uteroglobulin OS=Mus | 100.00 | 0.00 |
| TRINITY_sp P0102C3       | Complement C3 OS=Mu  | 100.00 | 0    |
| TRINITY_sp E9PV2Fga      | Fibrinogen alpha ch  | 100.00 | 0.00 |
| TRINITY_sp Q6164Hp       | Haptoglobin OS=Mus   | 100.00 | 0.00 |
| TRINITY_sp P0775Serpina3 | Serine protease inh  | 100.00 | 0.00 |
| TRINITY_sp Q0702RPL18    | 60S ribosomal prote  | 100.00 | 0.00 |
| TRINITY_sp Q0062Apoa1    | Apolipoprotein A-I   | 100.00 | 0.00 |
| TRINITY_sp P0772Alb      | Serum albumin OS=Mu  | 100.00 | 0    |
| TRINITY_sp Q8VCMFgg      | Fibrinogen gamma ch  | 100.00 | 0.00 |
| TRINITY_sp P0775Serpina3 | Serine protease inh  | 100.00 | 0.00 |
| TRINITY_sp P0822ApoE     | Apolipoprotein E OS  | 100.00 | 0.00 |
| TRINITY_sp P3598Rpl18    | 60S ribosomal prote  | 100.00 | 0.00 |
| TRINITY_sp P0208Hbb-b1   | Hemoglobin subunit   | 100.00 | 0.00 |
| TRINITY_sp P5199HNRNPA3  | Heterogeneous nucle  | 100.00 | 0.00 |
| TRINITY_sp P7924RPL37    | 60S ribosomal prote  | 100.00 | 0.00 |
| TRINITY_sp P3902RPL3     | 60S ribosomal prote  | 100.00 | 0.00 |
| TRINITY_sp Q05A1eif3e-a  | Eukaryotic translat  | 100.00 | 0.00 |
| TRINITY_sp P7924RPL37    | 60S ribosomal prote  | 100.00 | 0.00 |
| TRINITY_sp P0536Saa1     | Serum amyloid A-1 p  | 100.00 | 0.00 |

|                         |                     |        |      |
|-------------------------|---------------------|--------|------|
| TRINITY_sp P0491Saa3    | Serum amyloid A-3 p | 100.00 | 0.00 |
| TRINITY_sp Q3SZ6LAMTOR5 | Ragulator complex p | 100.00 | 0.00 |
| TRINITY_sp P6101Pln     | Cardiac phospholamb | 100.00 | 0.00 |
| TRINITY_sp O5514Atp2a2  | Sarcoplasmic/endopl | 100.00 | 0    |
| TRINITY_sp E2RK7RPL32   | 60S ribosomal prote | 100.00 | 0.00 |
| TRINITY_sp P0CG8UBI11   | Polyubiquitin OS=Ni | 100.00 | 0.00 |
| TRINITY_sp P482(ATP5G3  | ATP synthase F(0) c | 100.00 | 0.00 |
| TRINITY_sp P2133FLNA    | Filamin-A OS=Homo s | 100.00 | 0.00 |
| TRINITY_sp P2352CFL1    | Cofilin-1 OS=Homo s | 100.00 | 0.00 |
| TRINITY_sp P1876Cfl1    | Cofilin-1 OS=Mus mu | 100.00 | 0.00 |
| TRINITY_sp P6107UBE2D3  | Ubiquitin-conjugati | 100.00 | 0.00 |
| TRINITY_sp P1092Spp1    | Osteopontin OS=Mus  | 100.00 | 0.00 |
| TRINITY_sp P1092Spp1    | Osteopontin OS=Mus  | 100.00 | 0.00 |
| TRINITY_sp Q0133ApoH    | Beta-2-glycoprotein | 100.00 | 0.00 |
| TRINITY_sp Q4296-       | Phosphoglycerate ki | 100.00 | 0.00 |
| TRINITY_sp P5638ATP5E   | ATP synthase subuni | 100.00 | 0.00 |
| TRINITY_sp Q5EAI RPL15  | 60S ribosomal prote | 100.00 | 0.00 |
| TRINITY_sp Q2NKVBLOC1S1 | Biogenesis of lysos | 100.00 | 0.00 |
| TRINITY_sp P3657RPL4    | 60S ribosomal prote | 100.00 | 0.00 |
| TRINITY_sp P6317DYNL1   | Dynein light chain  | 100.00 | 0.00 |
| TRINITY_sp Q3T16RPS3    | 40S ribosomal prote | 100.00 | 0.00 |
| TRINITY_sp E2RH4RPS3    | 40S ribosomal prote | 100.00 | 0.00 |
| TRINITY_sp P0189HLA-A   | HLA class I histoco | 100.00 | 0.00 |
| TRINITY_sp Q76N2RPS4X   | 40S ribosomal prote | 100.00 | 0.00 |
| TRINITY_sp Q76N2RPS4X   | 40S ribosomal prote | 100.00 | 0.00 |
| TRINITY_sp Q32PEEF1A2   | Elongation factor 1 | 100.00 | 0.00 |
| TRINITY_sp P2952-       | Elongation factor 1 | 100.00 | 0.00 |
| TRINITY_sp P1588RPS2    | 40S ribosomal prote | 100.00 | 0.00 |
| TRINITY_sp P1136gag     | Retrovirus-related  | 100.00 | 0.00 |
| TRINITY_sp P2544Rps2    | 40S ribosomal prote | 100.00 | 0.00 |
| TRINITY_sp P1136gag     | Retrovirus-related  | 100.00 | 0.00 |
| TRINITY_sp P1289-       | Probable Pol polypr | 100.00 | 0.00 |
| TRINITY_sp P0397Iap     | IgE-binding protein | 100.00 | 0.00 |
| TRINITY_sp P5648Atp5b   | ATP synthase subuni | 100.00 | 0.00 |
| TRINITY_sp O7534TBCA    | Tubulin-specific ch | 100.00 | 0.00 |
| TRINITY_sp P6293PPIA    | Peptidyl-prolyl cis | 100.00 | 0.00 |
| TRINITY_sp P1774Ppia    | Peptidyl-prolyl cis | 100.00 | 0.00 |
| TRINITY_sp P5347-       | Actin, cytoplasmic  | 100.00 | 0.00 |
| TRINITY_sp P5350-       | Actin, cytoplasmic  | 100.00 | 0.00 |
| TRINITY_sp A5D7IACTN4   | Alpha-actinin-4 OS= | 100.00 | 0.00 |
| TRINITY_sp P1363EEF2    | Elongation factor 2 | 100.00 | 0    |
| TRINITY_sp P0514SLC25A5 | ADP/ATP translocase | 100.00 | 0.00 |
| TRINITY_sp P1411Rpl27a  | 60S ribosomal prote | 100.00 | 0.00 |
| TRINITY_sp P1462HSP90B1 | Endoplasmin OS=Homo | 100.00 | 0.00 |
| TRINITY_sp P4677RPL27A  | 60S ribosomal prote | 100.00 | 0.00 |
| TRINITY_sp Q3T0VRPL19   | 60S ribosomal prote | 100.00 | 0.00 |
| TRINITY_sp Q3T0VRPL19   | 60S ribosomal prote | 100.00 | 0.00 |
| TRINITY_sp P4677RPL5    | 60S ribosomal prote | 100.00 | 0.00 |
| TRINITY_sp Q9R0IEsd     | S-formylglutathione | 100.00 | 0.00 |
| TRINITY_sp P2763RPL10   | 60S ribosomal prote | 100.00 | 0.00 |
| TRINITY_sp P3104SDHA    | Succinate dehydroge | 100.00 | 0.00 |
| TRINITY_sp Q8K2ESdha    | Succinate dehydroge | 100.00 | 0.00 |
| TRINITY_sp O1473PCDC5   | Programmed cell dea | 100.00 | 0.00 |
| TRINITY_sp Q8K2ESdha    | Succinate dehydroge | 100.00 | 0.00 |
| TRINITY_sp P0044SOD1    | Superoxide dismutas | 100.00 | 0.00 |
| TRINITY_sp P8417RPS12   | 40S ribosomal prote | 100.00 | 0.00 |

|                          |                     |        |      |
|--------------------------|---------------------|--------|------|
| TRINITY_sp P1978Cox4i1   | Cytochrome c oxidas | 100.00 | 0.00 |
| TRINITY_sp Q76I8RPS12    | 40S ribosomal prote | 100.00 | 0.00 |
| TRINITY_sp P0407ALDOA    | Fructose-bisphospha | 100.00 | 0.00 |
| TRINITY_sp P0822Sod1     | Superoxide dismutas | 100.00 | 0.00 |
| TRINITY_sp Q76I8RPS12    | 40S ribosomal prote | 100.00 | 0.00 |
| TRINITY_sp P1167Lcn2     | Neutrophil gelatina | 100.00 | 0.00 |
| TRINITY_sp P115(HSP90AA1 | Heat shock protein  | 100.00 | 0.00 |
| TRINITY_sp P0CG7ubi4     | Polyubiquitin OS=Sc | 100.00 | 0.00 |
| TRINITY_sp P5488Hmgcs2   | Hydroxymethylglutar | 100.00 | 0.00 |
| TRINITY_sp P682(crps27a  | Ubiquitin-40S ribos | 100.00 | 0.00 |
| TRINITY_sp P0CG8UBI11    | Polyubiquitin OS=Ni | 100.00 | 0.00 |
| TRINITY_sp P0CG8UBI11    | Polyubiquitin OS=Ni | 100.00 | 0.00 |
| TRINITY_sp Q1657RBBP7    | Histone-binding pro | 100.00 | 0.00 |
| TRINITY_sp P0785CTSB     | Cathepsin B OS=Homo | 100.00 | 0.00 |
| TRINITY_sp P1295XRCC6    | X-ray repair cross- | 100.00 | 0.00 |
| TRINITY_sp P0735Anxa2    | Annexin A2 OS=Mus m | 100.00 | 0.00 |
| TRINITY_sp P0735ANXA2    | Annexin A2 OS=Homo  | 100.00 | 0.00 |
| TRINITY_sp Q3SZ1YWHAQ    | 14-3-3 protein thet | 100.00 | 0.00 |
| TRINITY_sp P1295XRCC6    | X-ray repair cross- | 100.00 | 0.00 |
| TRINITY_sp Q3T08RPS16    | 40S ribosomal prote | 100.00 | 0.00 |
| TRINITY_sp P8404His4     | Histone H4 OS=Acrol | 100.00 | 0.00 |
| TRINITY_sp P0822-        | Chlorophyll a-b bin | 100.00 | 0.00 |
| TRINITY_sp P1232CAB1     | Chlorophyll a-b bin | 100.00 | 0.00 |
| TRINITY_sp A2XJ3OsI_012( | Chlorophyll a-b bin | 100.00 | 0.00 |
| TRINITY_sp Q3719rbcL     | Ribulose bisphospha | 100.00 | 0.00 |
| TRINITY_sp Q0095BEX3     | Protein BEX3 OS=Hom | 100.00 | 0.00 |
| TRINITY_sp P5927RPS27AA  | Ubiquitin-40S ribos | 100.00 | 0.00 |
| TRINITY_sp P0C22crp-79   | Ubiquitin-60S ribos | 100.00 | 0.00 |
| TRINITY_sp P0CG8UBI11    | Polyubiquitin OS=Ni | 100.00 | 0.00 |
| TRINITY_sp P0CG8UBI11    | Polyubiquitin OS=Ni | 100.00 | 0.00 |
| TRINITY_sp P0CG8UBI11    | Polyubiquitin OS=Ni | 100.00 | 0.00 |
| TRINITY_sp Q0605ATP5G2   | ATP synthase F(0) c | 100.00 | 0.00 |
| TRINITY_sp Q9CR8Atp5g1   | ATP synthase F(0) c | 100.00 | 0.00 |
| TRINITY_sp P6158RHOA     | Transforming protei | 100.00 | 0.00 |
| TRINITY_sp Q9H18NUCKS1   | Nuclear ubiquitous  | 100.00 | 0.00 |
| TRINITY_sp Q5E91H3F3A    | Histone H3.3 OS=Bos | 100.00 | 0.00 |
| TRINITY_sp P5095CCT4     | T-complex protein 1 | 100.00 | 0.00 |
| TRINITY_sp O0062CYR61    | Protein CYR61 OS=Ho | 100.00 | 0.00 |
| TRINITY_sp Q1432FAM50A   | Protein FAM50A OS=H | 100.00 | 0.00 |
| TRINITY_sp P101(HMGB1    | High mobility group | 100.00 | 0.00 |
| TRINITY_sp P0714-        | Catalase OS=Ipomoea | 100.00 | 0.00 |
| TRINITY_sp P5023CRIP1    | Cysteine-rich prote | 100.00 | 0.00 |
| TRINITY_sp P0275FTL      | Ferritin light chai | 100.00 | 0.00 |
| TRINITY_sp P4093Inmt     | Indolethylamine N-m | 100.00 | 0.00 |
| TRINITY_sp P3554FAU      | Ubiquitin-like prot | 100.00 | 0.00 |
| TRINITY_sp P2777Pdia3    | Protein disulfide-i | 100.00 | 0.00 |
| TRINITY_sp P3554Fau      | Ubiquitin-like prot | 100.00 | 0.00 |
| TRINITY_sp Q8JG6PDIA3    | Protein disulfide-i | 100.00 | 0.00 |
| TRINITY_sp P2777Pdia3    | Protein disulfide-i | 100.00 | 0.00 |
| TRINITY_sp Q9055HSPA5    | 78 kDa glucose-regu | 100.00 | 0.00 |
| TRINITY_sp P1912HSPA8    | Heat shock cognate  | 100.00 | 0.00 |
| TRINITY_sp P2002Hspa5    | 78 kDa glucose-regu | 100.00 | 0.00 |
| TRINITY_sp Q0VC8HSPA5    | 78 kDa glucose-regu | 100.00 | 0.00 |
| TRINITY_sp P1207COX6A1   | Cytochrome c oxidas | 100.00 | 0.00 |
| TRINITY_sp P1369TPT1     | Translationally-con | 100.00 | 0.00 |
| TRINITY_sp P6302Tpt1     | Translationally-con | 100.00 | 0.00 |

|                          |                     |        |      |
|--------------------------|---------------------|--------|------|
| TRINITY_sp P0245COL1A1   | Collagen alpha-1(I) | 100.00 | 0.00 |
| TRINITY_sp P5089RPSA     | 40S ribosomal prote | 100.00 | 0.00 |
| TRINITY_sp Q96C9PPP1R14F | Protein phosphatase | 100.00 | 0.00 |
| TRINITY_sp P1420Rpsa     | 40S ribosomal prote | 100.00 | 0.00 |
| TRINITY_sp Q4QY7rpsa     | 40S ribosomal prote | 100.00 | 0.00 |
| TRINITY_sp P1198Tcp1     | T-complex protein 1 | 100.00 | 0.00 |
| TRINITY_sp P0940Ncl      | Nucleolin OS=Mus mu | 100.00 | 0.00 |
| TRINITY_sp P6298Rps27a   | Ubiquitin-40S ribos | 100.00 | 0.00 |
| TRINITY_sp P0CG8UBI11    | Polyubiquitin OS=Ni | 100.00 | 0.00 |
| TRINITY_sp P6299RPS27A   | Ubiquitin-40S ribos | 100.00 | 0.00 |
| TRINITY_sp A2Q02HSPA8    | Heat shock cognate  | 100.00 | 0.00 |
| TRINITY_sp P1937HSPA8    | Heat shock cognate  | 100.00 | 0.00 |
| TRINITY_sp P3597Rp112    | 60S ribosomal prote | 100.00 | 0.00 |
| TRINITY_sp P6128RPL12    | 60S ribosomal prote | 100.00 | 0.00 |
| TRINITY_sp P1784DDX5     | Probable ATP-depend | 100.00 | 0.00 |
| TRINITY_sp Q95L4EIF4G2   | Eukaryotic translat | 100.00 | 0.00 |
| TRINITY_sp Q95L4EIF4G2   | Eukaryotic translat | 100.00 | 0.00 |
| TRINITY_sp Q95L4EIF4G2   | Eukaryotic translat | 100.00 | 0.00 |
| TRINITY_sp Q95L4EIF4G2   | Eukaryotic translat | 100.00 | 0.00 |
| TRINITY_sp Q6244Eif4g2   | Eukaryotic translat | 100.00 | 0.00 |
| TRINITY_sp Q95L4EIF4G2   | Eukaryotic translat | 100.00 | 0.00 |
| TRINITY_sp P5927RPS27AA  | Ubiquitin-40S ribos | 100.00 | 0.00 |
| TRINITY_sp Q8VC1Ces1d    | Carboxylesterase 1D | 100.00 | 0.00 |
| TRINITY_sp Q5DU5Nlrc3    | Protein NLRC3 OS=M  | 100.00 | 0.00 |
| TRINITY_sp P0807Cbr2     | Carbonyl reductase  | 100.00 | 0.00 |
| TRINITY_sp P2039-        | Actin, alpha cardia | 100.00 | 0.00 |
| TRINITY_sp Q3ZC0ACTC1    | Actin, alpha cardia | 100.00 | 0.00 |
| TRINITY_sp P0103CST3     | Cystatin-C OS=Homo  | 100.00 | 0.00 |
| TRINITY_sp P6273ACTA2    | Actin, aortic smoot | 100.00 | 0.00 |
| TRINITY_sp P1271Fabp1    | Fatty acid-binding  | 100.00 | 0.00 |
| TRINITY_sp Q0072Rbp4     | Retinol-binding pro | 100.00 | 0.00 |
| TRINITY_sp P5114RAB7A    | Ras-related protein | 100.00 | 0.00 |
| TRINITY_sp P2358EIF4B    | Eukaryotic translat | 100.00 | 0.00 |
| TRINITY_sp P0867VIM      | Vimentin OS=Homo sa | 100.00 | 0.00 |
| TRINITY_sp Q9CR5Rp114    | 60S ribosomal prote | 100.00 | 0.00 |
| TRINITY_sp P0986HNRNPA1  | Heterogeneous nucle | 100.00 | 0.00 |
| TRINITY_sp Q2KH7RPS27    | 40S ribosomal prote | 100.00 | 0.00 |
| TRINITY_sp Q9699ERGIC1   | Endoplasmic reticul | 100.00 | 0.00 |
| TRINITY_sp P1933NCL      | Nucleolin OS=Homo s | 100.00 | 0.00 |
| TRINITY_sp Q9BQ6C19orf43 | Uncharacterized pro | 100.00 | 0.00 |
| TRINITY_sp A1A4FU2AF1    | Splicing factor U2A | 100.00 | 0.00 |
| TRINITY_sp Q1503SNX17    | Sorting nexin-17 OS | 100.00 | 0.00 |
| TRINITY_sp P1383Rlc-a    | Myosin regulatory 1 | 100.00 | 0.00 |
| TRINITY_sp P2403-        | Myosin regulatory 1 | 100.00 | 0.00 |
| TRINITY_sp P0086Odc1     | Ornithine decarboxy | 100.00 | 0.00 |
| TRINITY_sp P9735Rps3a    | 40S ribosomal prote | 100.00 | 0.00 |
| TRINITY_sp Q56JV RPS3A   | 40S ribosomal prote | 100.00 | 0.00 |
| TRINITY_sp P6017TPI1     | Triosephosphate iso | 100.00 | 0.00 |
| TRINITY_sp Q9CQ6Uqcrq    | Cytochrome b-c1 com | 100.00 | 0.00 |
| TRINITY_sp P1354eef1as   | Elongation factor 1 | 100.00 | 0.00 |
| TRINITY_sp P1354eef1as   | Elongation factor 1 | 100.00 | 0.00 |
| TRINITY_sp P2155Eno3     | Beta-enolase OS=Mus | 100.00 | 0.00 |
| TRINITY_sp Q9CQ6Uqcrq    | Cytochrome b-c1 com | 100.00 | 0.00 |
| TRINITY_sp Q1497KPNB1    | Importin subunit be | 100.00 | 0.00 |
| TRINITY_sp P6287RBX1     | E3 ubiquitin-protei | 100.00 | 0.00 |
| TRINITY_sp Q6242Ndufa4   | Cytochrome c oxidas | 100.00 | 0.00 |

|                          |                     |        |      |
|--------------------------|---------------------|--------|------|
| TRINITY_sp P1812RPL7     | 60S ribosomal prote | 100.00 | 0.00 |
| TRINITY_sp Q2HJ6HNRNPA2E | Heterogeneous nucle | 100.00 | 0.00 |
| TRINITY_sp Q1654CDC37    | Hsp90 co-chaperone  | 100.00 | 0.00 |
| TRINITY_sp P1414Rpl7     | 60S ribosomal prote | 100.00 | 0.00 |
| TRINITY_sp Q2KJ1CKS2     | Cyclin-dependent ki | 100.00 | 0.00 |
| TRINITY_sp P0941Pgk1     | Phosphoglycerate ki | 100.00 | 0.00 |
| TRINITY_sp Q9211Tf       | Serotransferrin OS= | 100.00 | 0.00 |
| TRINITY_sp Q9211Tf       | Serotransferrin OS= | 100.00 | 0.00 |
| TRINITY_sp Q9211Tf       | Serotransferrin OS= | 100.00 | 0.00 |
| TRINITY_sp Q1334EIF3I    | Eukaryotic translat | 100.00 | 0.00 |
| TRINITY_sp Q5E96EIF3I    | Eukaryotic translat | 100.00 | 0.00 |
| TRINITY_sp P0033LDHA     | L-lactate dehydroge | 100.00 | 0.00 |
| TRINITY_sp Q3T08RPL8     | 60S ribosomal prote | 100.00 | 0.00 |
| TRINITY_sp P0613UROD     | Uroporphyrinogen de | 100.00 | 0.00 |
| TRINITY_sp Q3T08RPL8     | 60S ribosomal prote | 100.00 | 0.00 |
| TRINITY_sp P7008H4-VIII  | Histone H4 type VII | 100.00 | 0.00 |
| TRINITY_sp P7008H4-VIII  | Histone H4 type VII | 100.00 | 0.00 |
| TRINITY_sp P7008H4-VIII  | Histone H4 type VII | 100.00 | 0.00 |
| TRINITY_sp Q3T08RPS11    | 40S ribosomal prote | 100.00 | 0.00 |
| TRINITY_sp Q3T08RPS11    | 40S ribosomal prote | 100.00 | 0.00 |
| TRINITY_sp Q32P8EEF1A2   | Elongation factor 1 | 100.00 | 0.00 |
| TRINITY_sp P1868HSPD1    | 60 kDa heat shock p | 100.00 | 0.00 |
| TRINITY_sp P6810EEF1A1   | Elongation factor 1 | 100.00 | 0.00 |
| TRINITY_sp Q9088EEF1A    | Elongation factor 1 | 100.00 | 0.00 |
| TRINITY_sp P0773PFN1     | Profilin-1 OS=Homo  | 100.00 | 0.00 |
| TRINITY_sp O0054PES1     | Pescadillo homolog  | 100.00 | 0.00 |
| TRINITY_sp P1512AKR1B1   | Aldose reductase OS | 100.00 | 0.00 |
| TRINITY_sp P0183-        | Ig kappa chain C re | 100.00 | 0.00 |
| TRINITY_sp Q76I8RPS15A   | 40S ribosomal prote | 100.00 | 0.00 |
| TRINITY_sp Q76I8RPS15A   | 40S ribosomal prote | 100.00 | 0.00 |
| TRINITY_sp P0538RPLP0    | 60S acidic ribosoma | 100.00 | 0.00 |
| TRINITY_sp Q3S25EIF4A1   | Eukaryotic initiati | 100.00 | 0.00 |
| TRINITY_sp P6325ACTG1    | Actin, cytoplasmic  | 100.00 | 0.00 |
| TRINITY_sp Q3T12EIF3D    | Eukaryotic translat | 100.00 | 0.00 |
| TRINITY_sp P8194-        | Tubulin alpha-1B ch | 100.00 | 0.00 |
| TRINITY_sp Q9Y28POLR1D   | DNA-directed RNA po | 100.00 | 0.00 |
| TRINITY_sp P8194-        | Tubulin alpha-1B ch | 100.00 | 0.00 |
| TRINITY_sp P6310YWHAZ    | 14-3-3 protein zeta | 100.00 | 0.00 |
| TRINITY_sp Q3S28SNRPD2   | Small nuclear ribon | 100.00 | 0.00 |
| TRINITY_sp Q9D37Ephx1    | Epoxide hydrolase 1 | 100.00 | 0.00 |
| TRINITY_sp P0C61OST4     | Dolichyl-diphosphoo | 100.00 | 0.00 |
| TRINITY_sp Q76L8HSP90AB1 | Heat shock protein  | 100.00 | 0.00 |
| TRINITY_sp Q8VDMAtpla1   | Sodium/potassium-tr | 100.00 | 0.00 |
| TRINITY_sp P0502ATP1A1   | Sodium/potassium-tr | 100.00 | 0.00 |
| TRINITY_sp P0502ATP1A1   | Sodium/potassium-tr | 100.00 | 0.00 |
| TRINITY_sp P1517GSPT1    | Eukaryotic peptide  | 100.00 | 0.00 |
| TRINITY_sp Q0606YBX1     | Nuclease-sensitive  | 100.00 | 0.00 |
| TRINITY_sp P6786YBX1     | Nuclease-sensitive  | 100.00 | 0.00 |
| TRINITY_sp Q9M68SAMDC    | S-adenosylmethionin | 100.00 | 0.00 |
| TRINITY_sp P1685Gapdh    | Glyceraldehyde-3-ph | 100.00 | 0.00 |
| TRINITY_sp P0952Fth1     | Ferritin heavy chai | 100.00 | 0.00 |
| TRINITY_sp P0826FTH      | Ferritin heavy chai | 100.00 | 0.00 |
| TRINITY_sp P0279FTH1     | Ferritin heavy chai | 100.00 | 0.00 |
| TRINITY_sp P0446GAPDH    | Glyceraldehyde-3-ph | 100.00 | 0.00 |
| TRINITY_sp P0890Lyz2     | Lysozyme C-2 OS=Mus | 100.00 | 0.00 |
| TRINITY_sp P0DN3Ndufb1   | NADH dehydrogenase  | 100.00 | 0.00 |

|                  |          |                     |        |      |
|------------------|----------|---------------------|--------|------|
| TRINITY_sp P0035 | GAPDH    | Glyceraldehyde-3-ph | 100.00 | 0.00 |
| TRINITY_sp P192  | (hsp-3   | Heat shock 70 kDa p | 100.00 | 0.00 |
| TRINITY_sp P0645 | PTMA     | Prothymosin alpha O | 100.00 | 0.00 |
| TRINITY_sp P5045 | SERPINH1 | Serpin H1 OS=Homo s | 100.00 | 0.00 |
| TRINITY_sp Q0165 | SLC7A5   | Large neutral amino | 100.00 | 0.00 |
| TRINITY_sp Q1324 | SRSF5    | Serine/arginine-ric | 100.00 | 0.00 |
| TRINITY_sp P5114 | RAB5C    | Ras-related protein | 100.00 | 0.00 |
| TRINITY_sp P5114 | RAB5C    | Ras-related protein | 100.00 | 0.00 |
| TRINITY_sp P1765 | CAPN2    | Calpain-2 catalytic | 100.00 | 0.00 |
| TRINITY_sp A6H76 | RPS7     | 40S ribosomal prote | 100.00 | 0.00 |
| TRINITY_sp Q8IV  | (MT-RNR2 | Humanin OS=Homo sap | 100.00 | 0.00 |
| TRINITY_sp A6H76 | RPS7     | 40S ribosomal prote | 100.00 | 0.00 |
| TRINITY_sp P6195 | SUMO2    | Small ubiquitin-rel | 100.00 | 0.00 |
| TRINITY_sp Q1508 | PDIA6    | Protein disulfide-i | 100.00 | 0.00 |
| TRINITY_sp Q9CX2 | Ndufs4   | NADH dehydrogenase  | 100.00 | 0.00 |
| TRINITY_sp P0245 | COL1A1   | Collagen alpha-1(I) | 100.00 | 0.00 |
| TRINITY_sp P4024 | Cd9      | CD9 antigen OS=Mus  | 100.00 | 0.00 |
| TRINITY_sp Q3T13 | TMED9    | Transmembrane emp24 | 100.00 | 0.00 |
| TRINITY_sp Q9CQ7 | Sdhb     | Succinate dehydroge | 100.00 | 0.00 |
| TRINITY_sp Q9CQ7 | Sdhb     | Succinate dehydroge | 100.00 | 0.00 |
| TRINITY_sp Q8JF  | EIF4A2   | Eukaryotic initiati | 100.00 | 0.00 |
| TRINITY_sp Q3SZ6 | EIF4A2   | Eukaryotic initiati | 100.00 | 0.00 |
| TRINITY_sp P3974 | FEN1     | Flap endonuclease 1 | 100.00 | 0.00 |
| TRINITY_sp P4791 | Rpl6     | 60S ribosomal prote | 100.00 | 0.00 |
| TRINITY_sp Q66P  | ARL6IP4  | ADP-ribosylation fa | 100.00 | 0.00 |
| TRINITY_sp O7762 | JUN      | Transcription facto | 100.00 | 0.00 |
| TRINITY_sp P1281 | ACTN1    | Alpha-actinin-1 OS= | 100.00 | 0.00 |
| TRINITY_sp P9737 | Psmc1    | Proteasome activato | 100.00 | 0.00 |
| TRINITY_sp Q3V55 | psbA     | Photosystem II prot | 100.00 | 0.00 |
| TRINITY_sp Q3V55 | psbA     | Photosystem II prot | 100.00 | 0.00 |
| TRINITY_sp P114  | (Fabp3   | Fatty acid-binding  | 100.00 | 0.00 |
| TRINITY_sp Q6EW  | (EIF5A   | Eukaryotic translat | 100.00 | 0.00 |
| TRINITY_sp Q3ZC1 | SNRPD1   | Small nuclear ribon | 100.00 | 0.00 |
| TRINITY_sp P4537 | Akr1b1   | Aldose reductase OS | 100.00 | 0.00 |
| TRINITY_sp P0555 | ITGB1    | Integrin beta-1 OS= | 100.00 | 0.00 |
| TRINITY_sp O9755 | GDI1     | Rab GDP dissociatio | 100.00 | 0.00 |
| TRINITY_sp P1321 | SPARC    | SPARC OS=Bos taurus | 100.00 | 0.00 |
| TRINITY_sp O0438 | TUBB     | Tubulin beta chain  | 100.00 | 0.00 |
| TRINITY_sp P1791 | Pcna     | Proliferating cell  | 100.00 | 0.00 |
| TRINITY_sp P2637 | RPL13    | 60S ribosomal prote | 100.00 | 0.00 |
| TRINITY_sp P1604 | Lgals1   | Galectin-1 OS=Mus m | 100.00 | 0.00 |
| TRINITY_sp P0938 | LGALS1   | Galectin-1 OS=Homo  | 100.00 | 0.00 |
| TRINITY_sp P6128 | PABPC1   | Polyadenylate-bindi | 100.00 | 0.00 |
| TRINITY_sp P2637 | RPL13    | 60S ribosomal prote | 100.00 | 0.00 |
| TRINITY_sp Q4R75 | GNB2L1   | Guanine nucleotide- | 100.00 | 0.00 |
| TRINITY_sp P6128 | PABPC1   | Polyadenylate-bindi | 100.00 | 0.00 |
| TRINITY_sp P1227 | CKB      | Creatine kinase B-t | 100.00 | 0.00 |
| TRINITY_sp A6QL  | (RPS9    | 40S ribosomal prote | 100.00 | 0.00 |
| TRINITY_sp A6QL  | (RPS9    | 40S ribosomal prote | 100.00 | 0.00 |
| TRINITY_sp A6QL  | (RPS9    | 40S ribosomal prote | 100.00 | 0.00 |
| TRINITY_sp P0325 | -        | Early E1A protein O | 100.00 | 0.00 |
| TRINITY_sp Q3ZB  | (SHFM1   | 26S proteasome comp | 100.00 | 0.00 |
| TRINITY_sp Q32P7 | SNRPC    | U1 small nuclear ri | 100.00 | 0.00 |
| TRINITY_sp P0673 | ENO1     | Alpha-enolase OS=Ho | 100.00 | 0.00 |
| TRINITY_sp P1718 | Eno1     | Alpha-enolase OS=Mu | 100.00 | 0.00 |
| TRINITY_sp P2934 | Pabpc1   | Polyadenylate-bindi | 100.00 | 0.00 |

|                         |                     |        |      |
|-------------------------|---------------------|--------|------|
| TRINITY_sp Q5E9 RPS8    | 40S ribosomal prote | 100.00 | 0.00 |
| TRINITY_sp Q5E9 RPS8    | 40S ribosomal prote | 100.00 | 0.00 |
| TRINITY_sp P4334TPT1    | Translationally-con | 100.00 | 0.00 |
| TRINITY_sp Q99L{Ndufa10 | NADH dehydrogenase  | 100.00 | 0.00 |
| TRINITY_sp O952{NDUFA10 | NADH dehydrogenase  | 100.00 | 0.00 |
| TRINITY_sp P6071ACTB    | Actin, cytoplasmic  | 100.00 | 0.00 |
| TRINITY_sp P109{Act5C   | Actin-5C OS=Drosoph | 100.00 | 0.00 |
| TRINITY_sp P184{Cyr61   | Protein CYR61 OS=Mu | 100.00 | 0.00 |
| TRINITY_sp Q151{NOMO1   | Nodal modulator 1 O | 100.00 | 0.00 |
| TRINITY_sp Q32P{POLR2F  | DNA-directed RNA po | 100.00 | 0.00 |
| TRINITY_sp P509{CCT4    | T-complex protein 1 | 100.00 | 0.00 |
| TRINITY_sp P6331{TMSB10 | Thymosin beta-10 OS | 100.00 | 0.00 |
| TRINITY_sp Q3ZC{METAP2  | Methionine aminopep | 100.00 | 0.00 |
| TRINITY_sp Q3ZC{EIF3L   | Eukaryotic translat | 100.00 | 0.00 |
| TRINITY_sp Q0581{Fabp5  | Fatty acid-binding  | 100.00 | 0.00 |
| TRINITY_sp P115{Mup2    | Major urinary prote | 100.00 | 0.00 |
| TRINITY_sp Q9YH{HMGB1   | High mobility group | 100.00 | 0.00 |
| TRINITY_sp Q98T{RPL39   | 60S ribosomal prote | 100.00 | 0.00 |
| TRINITY_sp Q3T0{RPL39   | 60S ribosomal prote | 100.00 | 0.00 |
| TRINITY_sp P141{MIF     | Macrophage migratio | 100.00 | 0.00 |
| TRINITY_sp Q029{MIF     | Macrophage migratio | 100.00 | 0.00 |
| TRINITY_sp P348{Mif     | Macrophage migratio | 100.00 | 0.00 |
| TRINITY_sp P348{SHMT2   | Serine hydroxymethy | 100.00 | 0.00 |
| TRINITY_sp P179{PSMC3   | 26S protease regula | 100.00 | 0.00 |
| TRINITY_sp P355{MYH9    | Myosin-9 OS=Homo sa | 100.00 | 0.00 |
| TRINITY_sp P128{-       | Probable Pol polypr | 100.00 | 0.00 |
| TRINITY_sp Q922{Ubxn1   | UBX domain-containi | 100.00 | 0.00 |
| TRINITY_sp O149{HNRNPDL | Heterogeneous nucle | 100.00 | 0.00 |
| TRINITY_sp Q9DE{-       | Thymosin beta-15A h | 100.00 | 0.00 |
| TRINITY_sp O551{Sap18   | Histone deacetylase | 100.00 | 0.00 |
| TRINITY_sp Q994{PFDN5   | Prefoldin subunit 5 | 100.00 | 0.00 |
| TRINITY_sp P0CG{UBB     | Polyubiquitin-B OS= | 100.00 | 0.00 |
| TRINITY_sp P0CG{UBB     | Polyubiquitin-B OS= | 100.00 | 0.00 |
| TRINITY_sp Q6NZ{MZT2B   | Mitotic-spindle org | 100.00 | 0.00 |
| TRINITY_sp Q9M4{RPS10   | 30S ribosomal prote | 100.00 | 0.00 |
| TRINITY_sp Q3ZB{SNRPG   | Small nuclear ribon | 100.00 | 0.00 |
| TRINITY_sp P479{RPL29   | 60S ribosomal prote | 100.00 | 0.00 |
| TRINITY_sp P479{Rpl29   | 60S ribosomal prote | 100.00 | 0.00 |
| TRINITY_sp Q56J{RPS25   | 40S ribosomal prote | 100.00 | 0.00 |
| TRINITY_sp Q56J{RPS25   | 40S ribosomal prote | 100.00 | 0.00 |
| TRINITY_sp Q3SZ{THOC7   | THO complex subunit | 100.00 | 0.00 |
| TRINITY_sp Q9CY{Tecr    | Very-long-chain eno | 100.00 | 0.00 |
| TRINITY_sp A6X9{Itih4   | Inter alpha-trypsin | 100.00 | 0.00 |
| TRINITY_sp Q9DB{Ehhadh  | Peroxisomal bifunct | 100.00 | 0.00 |
| TRINITY_sp P704{Ucp2    | Mitochondrial uncou | 100.00 | 0.00 |
| TRINITY_sp P332{Cyp2f2  | Cytochrome P450 2F2 | 100.00 | 0.00 |
| TRINITY_sp Q9JJ{Rpl38   | 60S ribosomal prote | 100.00 | 0.00 |
| TRINITY_sp P047{PEP1    | Phosphoenolpyruvate | 100.00 | 0.00 |
| TRINITY_sp Q9WVIC{xcl15 | C-X-C motif chemoki | 100.00 | 0.00 |
| TRINITY_sp Q71U{RPS27L  | 40S ribosomal prote | 100.00 | 0.00 |
| TRINITY_sp P025{CRYAA   | Alpha-crystallin A  | 100.00 | 0.00 |
| TRINITY_sp P235{EIF4B   | Eukaryotic translat | 100.00 | 0.00 |
| TRINITY_sp P612{DYNLL1  | Dynein light chain  | 100.00 | 0.00 |
| TRINITY_sp Q2KJ{TUBB5   | Tubulin beta-5 chai | 100.00 | 0.00 |
| TRINITY_sp P622{RPS14   | 40S ribosomal prote | 100.00 | 0.00 |
| TRINITY_sp Q2KJ{TUBB5   | Tubulin beta-5 chai | 100.00 | 0.00 |

|                           |                     |        |      |
|---------------------------|---------------------|--------|------|
| TRINITY_sp P6226RPS14     | 40S ribosomal prote | 100.00 | 0.00 |
| TRINITY_sp P6226RPS14     | 40S ribosomal prote | 100.00 | 0.00 |
| TRINITY_sp Q9JJVMMyoz2    | Myozenin-2 OS=Mus m | 100.00 | 0.00 |
| TRINITY_sp Q0551SRSF11    | Serine/arginine-ric | 100.00 | 0.00 |
| TRINITY_sp P567(PSMD2     | 26S proteasome non- | 100.00 | 0.00 |
| TRINITY_sp P4974ACADVL    | Very long-chain spe | 100.00 | 0.00 |
| TRINITY_sp P1461PKM       | Pyruvate kinase PKM | 100.00 | 0.00 |
| TRINITY_sp P0054PKM       | Pyruvate kinase PKM | 100.00 | 0.00 |
| TRINITY_sp P5248Pkm       | Pyruvate kinase PKM | 100.00 | 0.00 |
| TRINITY_sp A5D78CSE1L     | Exportin-2 OS=Bos t | 100.00 | 0.00 |
| TRINITY_sp P6836TUBA1A    | Tubulin alpha-1A ch | 100.00 | 0.00 |
| TRINITY_sp P6836TUBA1A    | Tubulin alpha-1A ch | 100.00 | 0.00 |
| TRINITY_sp Q9CQ2Ndufb3    | NADH dehydrogenase  | 100.00 | 0.00 |
| TRINITY_sp P0CG7ubi4      | Polyubiquitin OS=Sc | 100.00 | 0.00 |
| TRINITY_sp P0CG7ubqD      | Polyubiquitin-D OS= | 100.00 | 0.00 |
| TRINITY_sp P0DM4act-1     | Actin-1 OS=Caenorha | 100.00 | 0.00 |
| TRINITY_sp P5347-         | Actin, cytoplasmic  | 100.00 | 0.00 |
| TRINITY_sp P0DM4act-1     | Actin-1 OS=Caenorha | 100.00 | 0.00 |
| TRINITY_sp P0674NPM1      | Nucleophosmin OS=Ho | 100.00 | 0.00 |
| TRINITY_sp Q6193Npm1      | Nucleophosmin OS=Mu | 100.00 | 0.00 |
| TRINITY_sp Q9H77DCTPP1    | dCTP pyrophosphatas | 100.00 | 0.00 |
| TRINITY_sp P5588EIF3B     | Eukaryotic translat | 100.00 | 0.00 |
| TRINITY_sp P1115PPDK1     | Pyruvate, phosphate | 100.00 | 0.00 |
| TRINITY_sp P2664EEF1G     | Elongation factor 1 | 100.00 | 0.00 |
| TRINITY_sp Q9FFC(At5g2288 | Histone H2B.10 OS=A | 100.00 | 0.00 |
| TRINITY_sp Q8BJM Tyw1     | S-adenosyl-L-methio | 100.00 | 0.00 |
| TRINITY_sp P1925Rp113a    | 60S ribosomal prote | 100.00 | 0.00 |
| TRINITY_sp P4042RPL13A    | 60S ribosomal prote | 100.00 | 0.00 |
| TRINITY_sp P6814acta1a    | Actin, alpha skelet | 100.00 | 0.00 |
| TRINITY_sp P3178Dbi       | Acyl-CoA-binding pr | 100.00 | 0.00 |
| TRINITY_sp P0768HEXB      | Beta-hexosaminidase | 100.00 | 0.00 |
| TRINITY_sp P0183IGKC      | Ig kappa chain C re | 100.00 | 0.00 |
| TRINITY_sp Q0542Cyp2e1    | Cytochrome P450 2E1 | 100.00 | 0.00 |
| TRINITY_sp P6226YWHAE     | 14-3-3 protein epsi | 100.00 | 0.00 |
| TRINITY_sp P2006Tmsb4x    | Thymosin beta-4 OS= | 100.00 | 0.00 |
| TRINITY_sp Q3T08RPL11     | 60S ribosomal prote | 100.00 | 0.00 |
| TRINITY_sp Q5ZLN PGAM1    | Phosphoglycerate mu | 100.00 | 0.00 |
| TRINITY_sp P072(GPX1      | Glutathione peroxid | 100.00 | 0.00 |
| TRINITY_sp P1135Gpx1      | Glutathione peroxid | 100.00 | 0.00 |
| TRINITY_sp P567(PSMD2     | 26S proteasome non- | 100.00 | 0.00 |
| TRINITY_sp Q3ZC5ACTN2     | Alpha-actinin-2 OS= | 100.00 | 0.00 |
| TRINITY_sp P2269UQCRC2    | Cytochrome b-cl com | 100.00 | 0.00 |
| TRINITY_sp P8031Cct5      | T-complex protein 1 | 100.00 | 0.00 |
| TRINITY_sp P209(-         | Actin OS=Volvox car | 100.00 | 0.00 |
| TRINITY_sp P1978Mgp       | Matrix Gla protein  | 100.00 | 0.00 |
| TRINITY_sp P504(Sftpb     | Pulmonary surfactan | 100.00 | 0.00 |
| TRINITY_sp P504(Sftpb     | Pulmonary surfactan | 100.00 | 0.00 |
| TRINITY_sp P9736Bpifa1    | BPI fold-containing | 100.00 | 0.00 |
| TRINITY_sp O1537HDAC3     | Histone deacetylase | 100.00 | 0.00 |
| TRINITY_sp P0862TXN       | Thioredoxin OS=Gall | 100.00 | 0.00 |
| TRINITY_sp P2081CAST      | Calpastatin OS=Homo | 100.00 | 0.00 |
| TRINITY_sp Q2HJ2MAP1LC37  | Microtubule-associa | 100.00 | 0.00 |
| TRINITY_sp Q6PBFrps28     | 40S ribosomal prote | 100.00 | 0.00 |
| TRINITY_sp Q9BZ3SLC25A39  | Solute carrier fami | 100.00 | 0.00 |
| TRINITY_sp P2015Vim       | Vimentin OS=Mus mus | 100.00 | 0.00 |
| TRINITY_sp P1059TXN       | Thioredoxin OS=Homo | 100.00 | 0.00 |



|                          |                     |        |      |
|--------------------------|---------------------|--------|------|
| TRINITY_sp Q5T65MRPL2    | 39S ribosomal prote | 100.00 | 0.00 |
| TRINITY_sp P6227RPS29    | 40S ribosomal prote | 100.00 | 0.00 |
| TRINITY_sp Q6135Pcolce   | Procollagen C-endop | 100.00 | 0.00 |
| TRINITY_sp A5YK1CNOT1    | CCR4-NOT transcript | 100.00 | 0.00 |
| TRINITY_sp Q0MQCNDUFB2   | NADH dehydrogenase  | 100.00 | 0.00 |
| TRINITY_sp P5637Mp68     | 6.8 kDa mitochondri | 100.00 | 0.00 |
| TRINITY_sp Q0618Atp5i    | ATP synthase subuni | 100.00 | 0.00 |
| TRINITY_sp Q0885Cd36     | Platelet glycoprote | 100.00 | 0.00 |
| TRINITY_sp P3492Apoc1    | Apolipoprotein C-I  | 100.00 | 0.00 |
| TRINITY_sp Q9259NDRG1    | Protein NDRG1 OS=Ho | 100.00 | 0.00 |
| TRINITY_sp A1L57ADRM1    | Proteasomal ubiquit | 100.00 | 0.00 |
| TRINITY_sp Q3ZC5ACTN2    | Alpha-actinin-2 OS= | 100.00 | 0.00 |
| TRINITY_sp P4302Cox6a2   | Cytochrome c oxidas | 100.00 | 0.00 |
| TRINITY_sp P0121CGA      | Glycoprotein hormon | 100.00 | 0.00 |
| TRINITY_sp P3204RPL37A   | 60S ribosomal prote | 100.00 | 0.00 |
| TRINITY_sp Q56JVRPS26    | 40S ribosomal prote | 100.00 | 0.00 |
| TRINITY_sp Q32L5GRINA    | Protein lifeguard 1 | 100.00 | 0.00 |
| TRINITY_sp P9737Psme2    | Proteasome activato | 100.00 | 0.00 |
| TRINITY_sp O8905Corola   | Coronin-1A OS=Mus m | 100.00 | 0.00 |
| TRINITY_sp P0996LTA4H    | Leukotriene A-4 hyd | 100.00 | 0.00 |
| TRINITY_sp P0771CTSL     | Cathepsin L1 OS=Hom | 100.00 | 0.00 |
| TRINITY_sp P0726-        | Serralysin OS=Serra | 100.00 | 0.00 |
| TRINITY_sp P3489SHMT2    | Serine hydroxymethy | 100.00 | 0.00 |
| TRINITY_sp P2879GRN      | Granulins OS=Homo s | 100.00 | 0.00 |
| TRINITY_sp Q56JVRPS26    | 40S ribosomal prote | 100.00 | 0.00 |
| TRINITY_sp Q9UBIATXN10   | Ataxin-10 OS=Homo s | 100.00 | 0.00 |
| TRINITY_sp O8883Cyp4a10  | Cytochrome P450 4A1 | 100.00 | 0.00 |
| TRINITY_sp O0048NDUFA4   | Cytochrome c oxidas | 100.00 | 0.00 |
| TRINITY_sp Q9205Scgb3a2  | Secretoglobin famil | 100.00 | 0.00 |
| TRINITY_sp Q32P1RPL38    | 60S ribosomal prote | 100.00 | 0.00 |
| TRINITY_sp Q0MQCNDUFA11  | NADH dehydrogenase  | 100.00 | 0.00 |
| TRINITY_sp Q9UHISEPT9    | Septin-9 OS=Homo sa | 100.00 | 0.00 |
| TRINITY_sp P0185-        | T-cell receptor bet | 100.00 | 0.00 |
| TRINITY_sp Q24JVRPL23A   | 60S ribosomal prote | 100.00 | 0.00 |
| TRINITY_sp O7579RNASEH2A | Ribonuclease H2 sub | 100.00 | 0.00 |
| TRINITY_sp P5639Cox7a1   | Cytochrome c oxidas | 100.00 | 0.00 |
| TRINITY_sp Q9NX4OCIA1    | OCIA domain-contain | 100.00 | 0.00 |
| TRINITY_sp P3053TSPO     | Translocator protei | 100.00 | 0.00 |
| TRINITY_sp P6227RPS29    | 40S ribosomal prote | 100.00 | 0.00 |
| TRINITY_sp P0730Ttr      | Transthyretin OS=Mu | 100.00 | 0.00 |
| TRINITY_sp Q96A7KIAA1191 | Putative monooxygen | 100.00 | 0.00 |
| TRINITY_sp P1239Ctla2a   | Protein CTLA-2-alph | 100.00 | 0.00 |
| TRINITY_sp P1307COX4I1   | Cytochrome c oxidas | 100.00 | 0.00 |
| TRINITY_sp Q1315HNRNPA0  | Heterogeneous nucle | 100.00 | 0.00 |
| TRINITY_sp Q6PD0Ppp2r5a  | Serine/threonine-pr | 100.00 | 0.00 |
| TRINITY_sp P4878Tnni3    | Troponin I, cardiac | 100.00 | 0.00 |
| TRINITY_sp P1063Txn      | Thioredoxin OS=Mus  | 100.00 | 0.00 |
| TRINITY_sp O1523NDUFA1   | NADH dehydrogenase  | 100.00 | 0.00 |
| TRINITY_sp P3172S100a9   | Protein S100-A9 OS= | 100.00 | 0.00 |
| TRINITY_sp P0DJ0PET100   | Protein PET100 homo | 100.00 | 0.00 |
| TRINITY_sp Q5E91PSMC2    | 26S protease regula | 100.00 | 0.00 |
| TRINITY_sp P1328IFI30    | Gamma-interferon-in | 100.00 | 0.00 |
| TRINITY_sp Q8BW1Acaa2    | 3-ketoacyl-CoA thio | 100.00 | 0.00 |
| TRINITY_sp Q8BW1Acaa2    | 3-ketoacyl-CoA thio | 100.00 | 0.00 |
| TRINITY_sp P0423CD74     | HLA class II histoc | 100.00 | 0.00 |
| TRINITY_sp Q9UB1CKLF     | Chemokine-like fact | 100.00 | 0.00 |

|                  |         |                     |        |      |
|------------------|---------|---------------------|--------|------|
| TRINITY_sp P5613 | ATP5J2  | ATP synthase subuni | 100.00 | 0.00 |
| TRINITY_sp P4112 | RPL13   | 60S ribosomal prote | 100.00 | 0.00 |
| TRINITY_sp Q0181 | PFKP    | ATP-dependent 6-pho | 100.00 | 0.00 |
| TRINITY_sp Q9CXI | Mem50a  | Transmembrane prote | 100.00 | 0.00 |
| TRINITY_sp Q2KI9 | FHL2    | Four and a half LIM | 100.00 | 0.00 |
| TRINITY_sp Q1356 | DCTN2   | Dynactin subunit 2  | 100.00 | 0.00 |
| TRINITY_sp Q99K1 | Aco2    | Aconitate hydratase | 100.00 | 0.00 |
| TRINITY_sp P1624 | MOD1    | NADP-dependent mali | 100.00 | 0.00 |
| TRINITY_sp P0981 | Apoa2   | Apolipoprotein A-II | 100.00 | 0.00 |
| TRINITY_sp Q56J7 | RPS28   | 40S ribosomal prote | 100.00 | 0.00 |
| TRINITY_sp Q56J7 | RPS28   | 40S ribosomal prote | 100.00 | 0.00 |
| TRINITY_sp Q9H46 | CUEDC2  | CUE domain-containi | 100.00 | 0.00 |
| TRINITY_sp Q9959 | TIMM17A | Mitochondrial impor | 100.00 | 0.00 |
| TRINITY_sp O9583 | AIFM1   | Apoptosis-inducing  | 100.00 | 0.00 |
| TRINITY_sp P0471 | PEP1    | Phosphoenolpyruvate | 100.00 | 0.00 |
| TRINITY_sp P2161 | Gc      | Vitamin D-binding p | 100.00 | 0.00 |
| TRINITY_sp P1090 | CLU     | Clusterin OS=Homo s | 100.00 | 0.00 |
| TRINITY_sp Q32L9 | CNN3    | Calponin-3 OS=Bos t | 100.00 | 0.00 |
| TRINITY_sp Q9CQF | Rps21   | 40S ribosomal prote | 100.00 | 0.00 |
| TRINITY_sp P2879 | Grn     | Granulins OS=Mus mu | 100.00 | 0.00 |
| TRINITY_sp Q32P  | RPS21   | 40S ribosomal prote | 100.00 | 0.00 |
| TRINITY_sp O0867 | Knq1    | Kininogen-1 OS=Mus  | 100.00 | 0.00 |
| TRINITY_sp O5514 | Rpl35a  | 60S ribosomal prote | 100.00 | 0.00 |
| TRINITY_sp O3398 | ompF    | Outer membrane prot | 100.00 | 0.00 |
| TRINITY_sp P5613 | Atp5j2  | ATP synthase subuni | 100.00 | 0.00 |
| TRINITY_sp A4QJ9 | psbA    | Photosystem II prot | 100.00 | 0.00 |
| TRINITY_sp P1739 | P       | Protein P OS=Woodch | 100.00 | 0.00 |
| TRINITY_sp Q86T9 | MRPL52  | 39S ribosomal prote | 100.00 | 0.00 |
| TRINITY_sp Q9Y67 | TACC3   | Transforming acidic | 100.00 | 0.00 |
| TRINITY_sp Q2HJ9 | OLA1    | Obg-like ATPase 1 O | 100.00 | 0.00 |
| TRINITY_sp P4595 | Acadm   | Medium-chain specif | 100.00 | 0.00 |
| TRINITY_sp Q71K  | Fgl1    | Fibrinogen-like pro | 100.00 | 0.00 |
| TRINITY_sp Q2HJ9 | PHB2    | Prohibitin-2 OS=Bos | 100.00 | 0.00 |
| TRINITY_sp O9477 | MTA2    | Metastasis-associat | 100.00 | 0.00 |
| TRINITY_sp P1062 | MGST1   | Microsomal glutathi | 100.00 | 0.00 |
| TRINITY_sp Q0689 | Clu     | Clusterin OS=Mus mu | 100.00 | 0.00 |
| TRINITY_sp O3514 | Atpif1  | ATPase inhibitor, m | 100.00 | 0.00 |
| TRINITY_sp P1532 | FOLR1   | Folate receptor alp | 100.00 | 0.00 |
| TRINITY_sp Q9Y57 | SNX5    | Sorting nexin-5 OS= | 100.00 | 0.00 |
| TRINITY_sp Q6445 | Cyp2c29 | Cytochrome P450 2C2 | 100.00 | 0.00 |
| TRINITY_sp Q3T07 | RPS16   | 40S ribosomal prote | 100.00 | 0.00 |
| TRINITY_sp Q9QX7 | Egf17   | Epidermal growth fa | 100.00 | 0.00 |
| TRINITY_sp P6128 | PABPC1  | Polyadenylate-bindi | 100.00 | 0.00 |
| TRINITY_sp Q1290 | ILF3    | Interleukin enhance | 100.00 | 0.00 |
| TRINITY_sp Q9Y37 | UTP11   | Probable U3 small n | 100.00 | 0.00 |
| TRINITY_sp Q90Y  | Frps10  | 40S ribosomal prote | 100.00 | 0.00 |
| TRINITY_sp Q0571 | CRYAB   | Alpha-crystallin B  | 100.00 | 0.00 |
| TRINITY_sp P3202 | Scp2    | Non-specific lipid- | 100.00 | 0.00 |

|                        |                       |        |      |
|------------------------|-----------------------|--------|------|
| TRINITY_sp Q9H3 PPDPF  | Pancreatic progenerit | 100.00 | 0.00 |
| TRINITY_sp Q3ZC CCT8   | T-complex protein 1   | 100.00 | 0.00 |
| TRINITY_sp P041 Fabp4  | Fatty acid-binding    | 100.00 | 0.00 |
| TRINITY_sp Q025 Myh6   | Myosin-6 OS=Mus mus   | 100.00 | 0.00 |
| TRINITY_sp P223 UBA1   | Ubiquitin-like modi   | 100.00 | 0.00 |
| TRINITY_sp P493 NASP   | Nuclear autoantigen   | 100.00 | 0.00 |
| TRINITY_sp P632 Crip1  | Cysteine-rich prote   | 100.00 | 0.00 |
| TRINITY_sp Q128 CDC20  | Cell division cycle   | 100.00 | 0.00 |
| TRINITY_sp Q96E DAZAP1 | DAZ-associated prot   | 100.00 | 0.00 |
| TRINITY_sp P378 TALDO1 | Transaldolase OS=Ho   | 100.00 | 0.00 |
| TRINITY_sp A8YX -      | Uncharacterized pro   | 100.00 | 0.00 |
| TRINITY_sp Q9Y4 HYOU1  | Hypoxia up-regulate   | 100.00 | 0.00 |
| TRINITY_sp P243 COX7B  | Cytochrome c oxidas   | 100.00 | 0.00 |
| TRINITY_sp P352 RFC2   | Replication factor    | 100.00 | 0.00 |
| TRINITY_sp Q3T0 PPP1CA | Serine/threonine-pr   | 100.00 | 0.00 |
| TRINITY_sp P611 Kap    | Kidney androgen-reg   | 100.00 | 0.00 |
| TRINITY_sp P509 ANXA11 | Annexin A11 OS=Homo   | 100.00 | 0.00 |
| TRINITY_sp Q604 APP    | Amyloid beta A4 pro   | 100.00 | 0.00 |
| TRINITY_sp O704 Mybpc3 | Myosin-binding prot   | 100.00 | 0.00 |
| TRINITY_sp P009 ASS1   | Argininosuccinate s   | 100.00 | 0.00 |
| TRINITY_sp Q643 Tm4sf1 | Transmembrane 4 L6    | 100.00 | 0.00 |
| TRINITY_sp P088 RPSA   | 40S ribosomal prote   | 99.70  | 0.00 |
| TRINITY_sp Q028 RPL6   | 60S ribosomal prote   | 99.70  | 0.00 |
| TRINITY_sp P024 COL3A1 | Collagen alpha-1(II   | 99.60  | 0.00 |
| TRINITY_sp P148 Rplp0  | 60S acidic ribosoma   | 99.60  | 0.00 |
| TRINITY_sp P162 MOD1   | NADP-dependent mali   | 99.60  | 0.00 |
| TRINITY_sp P519 ENO1   | Alpha-enolase OS=Ga   | 99.50  | 0.00 |
| TRINITY_sp Q605 Orm1   | Alpha-1-acid glycop   | 99.50  | 0.00 |
| TRINITY_sp P095 Myl3   | Myosin light chain    | 99.50  | 0.00 |
| TRINITY_sp P974 Rps5   | 40S ribosomal prote   | 99.50  | 0.00 |
| TRINITY_sp P218 Sftpc  | Pulmonary surfactan   | 99.50  | 0.00 |
| TRINITY_sp P276 RPL10  | 60S ribosomal prote   | 99.50  | 0.00 |
| TRINITY_sp P293 Ftl1   | Ferritin light chai   | 99.50  | 0.00 |
| TRINITY_sp Q137 NACA   | Nascent polypeptide   | 99.50  | 0.00 |
| TRINITY_sp P479 Rpl13  | 60S ribosomal prote   | 99.50  | 0.00 |
| TRINITY_sp E9PV Fga    | Fibrinogen alpha ch   | 99.40  | 0.00 |
| TRINITY_sp P543 OAZ1   | Ornithine decarboxy   | 99.40  | 0.00 |
| TRINITY_sp Q3T0 RPL8   | 60S ribosomal prote   | 99.40  | 0.00 |
| TRINITY_sp Q24J RPL23A | 60S ribosomal prote   | 99.40  | 0.00 |
| TRINITY_sp Q24J RPL23A | 60S ribosomal prote   | 99.40  | 0.00 |
| TRINITY_sp P019 Hba    | Hemoglobin subunit    | 99.30  | 0.00 |
| TRINITY_sp Q3BB NBPF8  | Putative neuroblast   | 99.30  | 0.00 |
| TRINITY_sp P183 DSTN   | Destrin OS=Gallus g   | 99.30  | 0.00 |
| TRINITY_sp P422 GFP    | Green fluorescent p   | 99.30  | 0.00 |
| TRINITY_sp P535 -      | Actin, cytoplasmic    | 99.30  | 0.00 |
| TRINITY_sp P209 -      | Actin OS=Volvox car   | 99.30  | 0.00 |
| TRINITY_sp Q90Y rps23  | 40S ribosomal prote   | 99.30  | 0.00 |
| TRINITY_sp Q56J RPS25  | 40S ribosomal prote   | 99.20  | 0.00 |
| TRINITY_sp P018 B2m    | Beta-2-microglobuli   | 99.20  | 0.00 |
| TRINITY_sp P328 psaD   | Photosystem I react   | 99.20  | 0.00 |
| TRINITY_sp Q76I RPS15A | 40S ribosomal prote   | 99.20  | 0.00 |
| TRINITY_sp Q0MQ NDUFA6 | NADH dehydrogenase    | 99.20  | 0.00 |
| TRINITY_sp Q5EAI RPL15 | 60S ribosomal prote   | 99.10  | 0.00 |
| TRINITY_sp Q56J RPL31  | 60S ribosomal prote   | 99.10  | 0.00 |
| TRINITY_sp Q6UZ rpl35  | 60S ribosomal prote   | 99.10  | 0.00 |
| TRINITY_sp P026 MYL6   | Myosin light polype   | 99.10  | 0.00 |

|                           |                     |       |      |
|---------------------------|---------------------|-------|------|
| TRINITY_sp P0976{rplK     | 50S ribosomal prote | 99.10 | 0.00 |
| TRINITY_sp Q9SP{CRTZ      | Beta-carotene 3-hyd | 99.10 | 0.00 |
| TRINITY_sp Q0089{Serpinal | Alpha-1-antitrypsin | 99.10 | 0.00 |
| TRINITY_sp P1112{CMD1     | Calmodulin OS=Pleur | 99.10 | 0.00 |
| TRINITY_sp O7508{WDR1     | WD repeat-containin | 99.00 | 0.00 |
| TRINITY_sp Q8621{RPL24    | 60S ribosomal prote | 99.00 | 0.00 |
| TRINITY_sp Q3T0{RPS10     | 40S ribosomal prote | 99.00 | 0.00 |
| TRINITY_sp Q68F{Idh3B     | Isocitrate dehydrog | 99.00 | 0.00 |
| TRINITY_sp Q5E9{RPS6      | 40S ribosomal prote | 99.00 | 0.00 |
| TRINITY_sp P534{-         | Actin OS=Chlamydomo | 99.00 | 0.00 |
| TRINITY_sp Q54G{act10     | Actin-10 OS=Dictyos | 99.00 | 0.00 |
| TRINITY_sp P4835{CAT1     | Catalase isozyme 1  | 99.00 | 0.00 |
| TRINITY_sp P0029{PETE     | Plastocyanin OS=Cuc | 98.90 | 0.00 |
| TRINITY_sp Q1A7(-         | Dimethyladenosine t | 98.90 | 0.00 |
| TRINITY_sp P0791{UQCRH    | Cytochrome b-c1 com | 98.90 | 0.00 |
| TRINITY_sp Q0151{CAP1     | Adenylyl cyclase-as | 98.90 | 0.00 |
| TRINITY_sp P1148{TUBB1    | Tubulin beta chain  | 98.90 | 0.00 |
| TRINITY_sp Q3MI{RPL37A    | 60S ribosomal prote | 98.80 | 0.00 |
| TRINITY_sp P3242{RPL7A    | 60S ribosomal prote | 98.80 | 0.00 |
| TRINITY_sp Q9NR{MRPL17    | 39S ribosomal prote | 98.80 | 0.00 |
| TRINITY_sp P0484{ompA     | Outer membrane prot | 98.80 | 0.00 |
| TRINITY_sp P6115{rps19    | 40S ribosomal prote | 98.80 | 0.00 |
| TRINITY_sp P1756{Selenbp1 | Selenium-binding pr | 98.80 | 0.00 |
| TRINITY_sp Q4104{PSBQ1    | Oxygen-evolving enh | 98.80 | 0.00 |
| TRINITY_sp O2234{TUBA1    | Tubulin alpha-1 cha | 98.80 | 0.00 |
| TRINITY_sp Q9MI{mt-co3    | Cytochrome c oxidas | 98.80 | 0.00 |
| TRINITY_sp P268{gag       | Gag polyprotein OS= | 98.80 | 0.00 |
| TRINITY_sp P4929{PCK1     | Phosphoenolpyruvate | 98.80 | 0.00 |
| TRINITY_sp P6843{-        | Histone H3.1 OS=Bos | 98.80 | 0.00 |
| TRINITY_sp O0438{TUBB     | Tubulin beta chain  | 98.80 | 0.00 |
| TRINITY_sp Q5E95{RPS8     | 40S ribosomal prote | 98.80 | 0.00 |
| TRINITY_sp Q7ZW{rpl18a    | 60S ribosomal prote | 98.80 | 0.00 |
| TRINITY_sp A8G8{rplJ      | 50S ribosomal prote | 98.80 | 0.00 |
| TRINITY_sp P0335{pol      | Pol polyprotein OS= | 98.70 | 0.00 |
| TRINITY_sp P0259{-        | Calmodulin OS=Tetra | 98.70 | 0.00 |
| TRINITY_sp Q9M6{SAMDC     | S-adenosylmethionin | 98.70 | 0.00 |
| TRINITY_sp O0438{TUBB     | Tubulin beta chain  | 98.70 | 0.00 |
| TRINITY_sp Q0199{TAGLN    | Transgelin OS=Homo  | 98.70 | 0.00 |
| TRINITY_sp Q32S2{BRD2     | Bromodomain-contain | 98.60 | 0.00 |
| TRINITY_sp Q9CR4{Nsa2     | Ribosome biogenesis | 98.60 | 0.00 |
| TRINITY_sp O2457{SAMDC    | S-adenosylmethionin | 98.60 | 0.00 |
| TRINITY_sp Q9FG2{UBL5     | Ubiquitin-like prot | 98.60 | 0.00 |
| TRINITY_sp O1878{RPS2     | 40S ribosomal prote | 98.60 | 0.00 |
| TRINITY_sp P6128{RPL12    | 60S ribosomal prote | 98.60 | 0.00 |
| TRINITY_sp Q9M6{SAMDC     | S-adenosylmethionin | 98.60 | 0.00 |
| TRINITY_sp P2339{-        | Polyubiquitin (Frag | 98.60 | 0.00 |
| TRINITY_sp Q2KH{RPS27     | 40S ribosomal prote | 98.60 | 0.00 |
| TRINITY_sp P5638{ATP5I    | ATP synthase subuni | 98.60 | 0.00 |
| TRINITY_sp A7Z03{CLINT1   | Clathrin interactor | 98.60 | 0.00 |
| TRINITY_sp Q3SZ9{RPL13A   | 60S ribosomal prote | 98.50 | 0.00 |
| TRINITY_sp P7006{rps15    | 40S ribosomal prote | 98.50 | 0.00 |
| TRINITY_sp A8G8{tuf1      | Elongation factor T | 98.50 | 0.00 |
| TRINITY_sp Q7ZV{rpl27     | 60S ribosomal prote | 98.50 | 0.00 |
| TRINITY_sp P3194{HNRNPH1  | Heterogeneous nucle | 98.50 | 0.00 |
| TRINITY_sp A2XJ3{OsI_012  | Chlorophyll a-b bin | 98.50 | 0.00 |
| TRINITY_sp P0478{CAB25    | Chlorophyll a-b bin | 98.50 | 0.00 |

|                          |                     |       |      |
|--------------------------|---------------------|-------|------|
| TRINITY_sp P1233CAB1R    | Chlorophyll a-b bin | 98.50 | 0.00 |
| TRINITY_sp O7381rps3a    | 40S ribosomal prote | 98.50 | 0.00 |
| TRINITY_sp P0484ompA     | Outer membrane prot | 98.40 | 0.00 |
| TRINITY_sp Q9LE4ENO1     | Enolase 1 OS=Hevea  | 98.40 | 0.00 |
| TRINITY_sp P0822-        | Chlorophyll a-b bin | 98.40 | 0.00 |
| TRINITY_sp E2RH4RPS3     | 40S ribosomal prote | 98.30 | 0.00 |
| TRINITY_sp P1289-        | Probable Pol polypr | 98.30 | 0.00 |
| TRINITY_sp P6214CALM     | Calmodulin OS=Anas  | 98.30 | 0.00 |
| TRINITY_sp P6286FAU      | 40S ribosomal prote | 98.30 | 0.00 |
| TRINITY_sp Q32PFRPL38    | 60S ribosomal prote | 98.30 | 0.00 |
| TRINITY_sp P1185TUBB1    | Tubulin beta chain  | 98.30 | 0.00 |
| TRINITY_sp P2344rps20    | 40S ribosomal prote | 98.30 | 0.00 |
| TRINITY_sp Q1279ASPH     | Aspartyl/asparaginy | 98.20 | 0.00 |
| TRINITY_sp Q6415Btf3     | Transcription facto | 98.20 | 0.00 |
| TRINITY_sp P1910MYL12A   | Myosin regulatory 1 | 98.20 | 0.00 |
| TRINITY_sp Q76I8RPS15A   | 40S ribosomal prote | 98.20 | 0.00 |
| TRINITY_sp A6QLCRPS9     | 40S ribosomal prote | 98.20 | 0.00 |
| TRINITY_sp P2086-        | Chlorophyll a-b bin | 98.20 | 0.00 |
| TRINITY_sp O0438TUBB     | Tubulin beta chain  | 98.20 | 0.00 |
| TRINITY_sp P0920TUBA1    | Tubulin alpha-1 cha | 98.20 | 0.00 |
| TRINITY_sp P5837rp130    | 60S ribosomal prote | 98.20 | 0.00 |
| TRINITY_sp P4823TM4SF4   | Transmembrane 4 L6  | 98.20 | 0.00 |
| TRINITY_sp Q6Y26rp124    | 60S ribosomal prote | 98.10 | 0.00 |
| TRINITY_sp P6331TNNC1    | Troponin C, slow sk | 98.10 | 0.00 |
| TRINITY_sp P1096GSPO-B1  | Sporamin B OS=Ipomo | 98.10 | 0.00 |
| TRINITY_sp P6278-        | Histone H4 variant  | 98.10 | 0.00 |
| TRINITY_sp Q9SL2-        | Phosphoenolpyruvate | 98.10 | 0.00 |
| TRINITY_sp P0660alphaTub | Tubulin alpha-1 cha | 98.00 | 0.00 |
| TRINITY_sp P8288-        | Histone H4 OS=Olist | 98.00 | 0.00 |
| TRINITY_sp P8288-        | Histone H4 OS=Olist | 98.00 | 0.00 |
| TRINITY_sp P6280-        | Histone H4 OS=Bos t | 98.00 | 0.00 |
| TRINITY_sp P6278-        | Histone H4 variant  | 98.00 | 0.00 |
| TRINITY_sp P3780Tagln    | Transgelin OS=Mus m | 98.00 | 0.00 |
| TRINITY_sp P1115PPDK1    | Pyruvate, phosphate | 98.00 | 0.00 |
| TRINITY_sp Q1308MRPL28   | 39S ribosomal prote | 97.90 | 0.00 |
| TRINITY_sp P0CG5UBB      | Polyubiquitin-B OS= | 97.90 | 0.00 |
| TRINITY_sp P6278-        | Histone H4 variant  | 97.90 | 0.00 |
| TRINITY_sp P3513-        | Ubiquitin-conjugati | 97.80 | 0.00 |
| TRINITY_sp P0822-        | Chlorophyll a-b bin | 97.80 | 0.00 |
| TRINITY_sp P0555Ly6a     | Lymphocyte antigen  | 97.80 | 0.00 |
| TRINITY_sp Q3BA1-        | Uncharacterized pro | 97.80 | 0.00 |
| TRINITY_sp Q0089Serpinal | Alpha-1-antitrypsin | 97.80 | 0.00 |
| TRINITY_sp Q9CR1Ppid     | Peptidyl-prolyl cis | 97.80 | 0.00 |
| TRINITY_sp Q24J1RPL23A   | 60S ribosomal prote | 97.70 | 0.00 |
| TRINITY_sp P7924RPL37    | 60S ribosomal prote | 97.70 | 0.00 |
| TRINITY_sp P3901rps6     | 40S ribosomal prote | 97.70 | 0.00 |
| TRINITY_sp O5759rp17a    | 60S ribosomal prote | 97.70 | 0.00 |
| TRINITY_sp P0CG5UBB      | Polyubiquitin-B OS= | 97.70 | 0.00 |
| TRINITY_sp Q9DD0Rarres2  | Retinoic acid recep | 97.70 | 0.00 |
| TRINITY_sp P1482Anxa6    | Annexin A6 OS=Mus m | 97.60 | 0.00 |
| TRINITY_sp Q7T31rp115    | 60S ribosomal prote | 97.60 | 0.00 |
| TRINITY_sp P5710MDH2     | Malate dehydrogenas | 97.60 | 0.00 |
| TRINITY_sp P0CG5UBB      | Polyubiquitin-B OS= | 97.60 | 0.00 |
| TRINITY_sp P0CG5UBB      | Polyubiquitin-B OS= | 97.60 | 0.00 |
| TRINITY_sp Q99P1Arhgdia  | Rho GDP-dissociatio | 97.50 | 0.00 |
| TRINITY_sp P5185HDGF     | Hepatoma-derived gr | 97.40 | 0.00 |

|                          |                     |       |      |
|--------------------------|---------------------|-------|------|
| TRINITY_sp P0714-        | Catalase OS=Ipomoea | 97.40 | 0.00 |
| TRINITY_sp P113(pol      | Putative Pol polypr | 97.40 | 0.00 |
| TRINITY_sp P0CGUBB       | Polyubiquitin-B OS= | 97.40 | 0.00 |
| TRINITY_sp P2284-        | Histone H3 OS=Acrop | 97.40 | 0.00 |
| TRINITY_sp P2284-        | Histone H3 OS=Acrop | 97.40 | 0.00 |
| TRINITY_sp P3414rac1A    | Rho-related protein | 97.40 | 0.00 |
| TRINITY_sp P6278-        | Histone H4 variant  | 97.40 | 0.00 |
| TRINITY_sp Q9033-        | Myosin heavy chain, | 97.30 | 0.00 |
| TRINITY_sp P276(DHAPS-1  | Phospho-2-dehydro-3 | 97.30 | 0.00 |
| TRINITY_sp Q3ZB(RPS20    | 40S ribosomal prote | 97.30 | 0.00 |
| TRINITY_sp P2323petD     | Cytochrome b6-f com | 97.30 | 0.00 |
| TRINITY_sp P4135-        | Tubulin alpha chain | 97.30 | 0.00 |
| TRINITY_sp Q0571(CRYBB2  | Beta-crystallin B2  | 97.30 | 0.00 |
| TRINITY_sp P6128(PABPC1  | Polyadenylate-bindi | 97.20 | 0.00 |
| TRINITY_sp P1807(RPL35A  | 60S ribosomal prote | 97.20 | 0.00 |
| TRINITY_sp P1894(MT-ND6  | NADH-ubiquinone oxi | 97.20 | 0.00 |
| TRINITY_sp P3343(Mmp2    | 72 kDa type IV coll | 97.20 | 0.00 |
| TRINITY_sp P0335(pol     | Pol polyprotein OS= | 97.10 | 0.00 |
| TRINITY_sp Q90Y(rps2     | 40S ribosomal prote | 97.10 | 0.00 |
| TRINITY_sp A6MZ(MGOS2    | Protein translation | 97.10 | 0.00 |
| TRINITY_sp Q9FY(-        | Inositol-3-phosphat | 97.10 | 0.00 |
| TRINITY_sp Q5E95(RPS8    | 40S ribosomal prote | 97.10 | 0.00 |
| TRINITY_sp Q964(-        | Actin, cytoplasmic  | 97.10 | 0.00 |
| TRINITY_sp P6843-        | Histone H3.1 OS=Bos | 97.10 | 0.00 |
| TRINITY_sp P8422-        | Histone H3.2 OS=Bos | 97.10 | 0.00 |
| TRINITY_sp P0904(GAPB    | Glyceraldehyde-3-ph | 97.00 | 0.00 |
| TRINITY_sp Q8RX(RPL37AC  | 60S ribosomal prote | 97.00 | 0.00 |
| TRINITY_sp Q0162(IFITM2  | Interferon-induced  | 97.00 | 0.00 |
| TRINITY_sp Q56K1(RPLP1   | 60S acidic ribosoma | 97.00 | 0.00 |
| TRINITY_sp P4364-        | Elongation factor 1 | 97.00 | 0.00 |
| TRINITY_sp P5349-        | Actin OS=Chlamydomo | 97.00 | 0.00 |
| TRINITY_sp P4221(GFP     | Green fluorescent p | 97.00 | 0.00 |
| TRINITY_sp Q56K1(RPLP1   | 60S acidic ribosoma | 97.00 | 0.00 |
| TRINITY_sp P4233(AKR1C3  | Aldo-keto reductase | 96.90 | 0.00 |
| TRINITY_sp P4289-        | Enolase OS=Ricinus  | 96.90 | 0.00 |
| TRINITY_sp Q3965(PSAL    | Photosystem I react | 96.90 | 0.00 |
| TRINITY_sp Q6154(Ewsr1   | RNA-binding protein | 96.90 | 0.00 |
| TRINITY_sp Q9W6(hsc70    | Heat shock cognate  | 96.90 | 0.00 |
| TRINITY_sp P151(-        | Glutamine synthetas | 96.90 | 0.00 |
| TRINITY_sp P0CGUBB       | Polyubiquitin-B OS= | 96.90 | 0.00 |
| TRINITY_sp P0CGUBB       | Polyubiquitin-B OS= | 96.90 | 0.00 |
| TRINITY_sp P5349-        | Actin OS=Chlamydomo | 96.90 | 0.00 |
| TRINITY_sp O4238(rps24   | 40S ribosomal prote | 96.80 | 0.00 |
| TRINITY_sp Q3BA1-        | Uncharacterized pro | 96.80 | 0.00 |
| TRINITY_sp P3513(UBC10   | Ubiquitin-conjugati | 96.70 | 0.00 |
| TRINITY_sp Q5E9(RPL10A   | 60S ribosomal prote | 96.70 | 0.00 |
| TRINITY_sp O0037-        | LINE-1 retrotranspo | 96.70 | 0.00 |
| TRINITY_sp Q0MQ(INDUFB3  | NADH dehydrogenase  | 96.70 | 0.00 |
| TRINITY_sp Q5EE(CENPW    | Centromere protein  | 96.70 | 0.00 |
| TRINITY_sp P9333(GAPN    | NADP-dependent glyc | 96.60 | 0.00 |
| TRINITY_sp P2492(EIF-5A2 | Eukaryotic translat | 96.60 | 0.00 |
| TRINITY_sp Q9SSI(PRP8A   | Pre-mRNA-processing | 96.60 | 0.00 |
| TRINITY_sp Q9YGI(rps6    | 40S ribosomal prote | 96.60 | 0.00 |
| TRINITY_sp P0CGUBB       | Polyubiquitin-B OS= | 96.60 | 0.00 |
| TRINITY_sp P0CGUBB       | Polyubiquitin-B OS= | 96.60 | 0.00 |
| TRINITY_sp P6125(RPL26   | 60S ribosomal prote | 96.50 | 0.00 |

|                          |                     |       |      |
|--------------------------|---------------------|-------|------|
| TRINITY_sp O4916EF1      | Elongation factor 1 | 96.50 | 0.00 |
| TRINITY_sp P0606psbD     | Photosystem II D2 p | 96.50 | 0.00 |
| TRINITY_sp P3016-        | Actin-1 OS=Pisum sa | 96.50 | 0.00 |
| TRINITY_sp P1409MT-ATP6  | ATP synthase subuni | 96.40 | 0.00 |
| TRINITY_sp Q6PC6rp110a   | 60S ribosomal prote | 96.40 | 0.00 |
| TRINITY_sp Q6P06rp18     | 60S ribosomal prote | 96.40 | 0.00 |
| TRINITY_sp Q90Y6rps7     | 40S ribosomal prote | 96.40 | 0.00 |
| TRINITY_sp Q9FG6UBL5     | Ubiquitin-like prot | 96.40 | 0.00 |
| TRINITY_sp P6906EIF-5A1  | Eukaryotic translat | 96.30 | 0.00 |
| TRINITY_sp Q4UD6TA12105  | Heat shock protein  | 96.30 | 0.00 |
| TRINITY_sp P4626FBP      | Fructose-1,6-bispho | 96.30 | 0.00 |
| TRINITY_sp Q5XT6RPL17    | 60S ribosomal prote | 96.20 | 0.00 |
| TRINITY_sp P6276-        | Histone H4 variant  | 96.20 | 0.00 |
| TRINITY_sp P0256ARDA     | Actin, plasmodial i | 96.20 | 0.00 |
| TRINITY_sp P0236-        | Histone H4, major O | 96.20 | 0.00 |
| TRINITY_sp Q6PB6rps25    | 40S ribosomal prote | 96.10 | 0.00 |
| TRINITY_sp Q1A76-        | Dimethyladenosine t | 96.10 | 0.00 |
| TRINITY_sp Q4296-        | Phosphoglycerate ki | 96.10 | 0.00 |
| TRINITY_sp P0306-        | Large T antigen OS= | 96.10 | 0.00 |
| TRINITY_sp P0CG6UBB      | Polyubiquitin-B OS= | 96.10 | 0.00 |
| TRINITY_sp O4916EF1      | Elongation factor 1 | 96.00 | 0.00 |
| TRINITY_sp P0CG6UBB      | Polyubiquitin-B OS= | 95.90 | 0.00 |
| TRINITY_sp O2376-        | Elongation factor 2 | 95.80 | 0.00 |
| TRINITY_sp Q9HZ6rpsA     | 30S ribosomal prote | 95.80 | 0.00 |
| TRINITY_sp P0336gag-pol  | Gag-Pol polyprotein | 95.80 | 0.00 |
| TRINITY_sp Q9SH6RUB1     | Ubiquitin-NEDD8-lik | 95.80 | 0.00 |
| TRINITY_sp P4926RPL44    | 60S ribosomal prote | 95.80 | 0.00 |
| TRINITY_sp Q54G6act10    | Actin-10 OS=Dictyos | 95.80 | 0.00 |
| TRINITY_sp Q9SB6PSBO     | Oxygen-evolving enh | 95.80 | 0.00 |
| TRINITY_sp P1786DDX5     | Probable ATP-depend | 95.70 | 0.00 |
| TRINITY_sp Q4316RPE      | Ribulose-phosphate  | 95.70 | 0.00 |
| TRINITY_sp P6906rp118    | 60S ribosomal prote | 95.70 | 0.00 |
| TRINITY_sp P3596Rp118    | 60S ribosomal prote | 95.70 | 0.00 |
| TRINITY_sp P0196(H2-D1   | H-2 class I histoco | 95.70 | 0.00 |
| TRINITY_sp P0A96cspC     | Cold shock-like pro | 95.70 | 0.00 |
| TRINITY_sp Q56J6RPS26    | 40S ribosomal prote | 95.70 | 0.00 |
| TRINITY_sp P0336gag-pol  | Gag-Pol polyprotein | 95.60 | 0.00 |
| TRINITY_sp P0086rbcL     | Ribulose bisphospha | 95.60 | 0.00 |
| TRINITY_sp Q90Y6rp136    | 60S ribosomal prote | 95.50 | 0.00 |
| TRINITY_sp P0976psbA     | Photosystem II prot | 95.50 | 0.00 |
| TRINITY_sp Q6R06Gnas     | Guanine nucleotide- | 95.50 | 0.00 |
| TRINITY_sp P0036ALDH1A1  | Retinal dehydrogena | 95.40 | 0.00 |
| TRINITY_sp P8246RPL19    | 50S ribosomal prote | 95.40 | 0.00 |
| TRINITY_sp Q90Y6rps3     | 40S ribosomal prote | 95.40 | 0.00 |
| TRINITY_sp O5756rp17a    | 60S ribosomal prote | 95.40 | 0.00 |
| TRINITY_sp Q3SZ6RPL32    | 60S ribosomal prote | 95.30 | 0.00 |
| TRINITY_sp P0826-        | Chlorophyll a-b bin | 95.30 | 0.00 |
| TRINITY_sp P4136BTU1     | Tubulin beta chain  | 95.30 | 0.00 |
| TRINITY_sp P1146TUBB1    | Tubulin beta chain  | 95.30 | 0.00 |
| TRINITY_sp P9386RPL10    | 60S ribosomal prote | 95.20 | 0.00 |
| TRINITY_sp A0CD6CFAP20   | Cilia- and flagella | 95.20 | 0.00 |
| TRINITY_sp Q90Y6rp118a   | 60S ribosomal prote | 95.20 | 0.00 |
| TRINITY_sp P2586GAPA1    | Glyceraldehyde-3-ph | 95.10 | 0.00 |
| TRINITY_sp Q3ZC6ACTN2    | Alpha-actinin-2 OS= | 95.10 | 0.00 |
| TRINITY_sp P5086rp122    | 60S ribosomal prote | 95.10 | 0.00 |
| TRINITY_sp P1086BETA-TT1 | Tubulin beta chain  | 95.10 | 0.00 |

|                          |                     |       |      |
|--------------------------|---------------------|-------|------|
| TRINITY_sp P2752LHCA4    | Chlorophyll a-b bin | 95.00 | 0.00 |
| TRINITY_sp P1344HPR-A    | Glycerate dehydroge | 95.00 | 0.00 |
| TRINITY_sp P0040(MT-CO2  | Cytochrome c oxidas | 95.00 | 0.00 |
| TRINITY_sp Q3965PSAL     | Photosystem I react | 94.90 | 0.00 |
| TRINITY_sp Q90YVrp19     | 60S ribosomal prote | 94.90 | 0.00 |
| TRINITY_sp Q5Z97FTSH1    | ATP-dependent zinc  | 94.80 | 0.00 |
| TRINITY_sp P1321SPARC    | SPARC OS=Bos taurus | 94.80 | 0.00 |
| TRINITY_sp P1215psaA     | Photosystem I P700  | 94.80 | 0    |
| TRINITY_sp Q9MI1mt-co1   | Cytochrome c oxidas | 94.70 | 0.00 |
| TRINITY_sp Q5R7VSLC25A3  | Phosphate carrier p | 94.70 | 0.00 |
| TRINITY_sp P3902RPL3     | 60S ribosomal prote | 94.70 | 0.00 |
| TRINITY_sp A0CDICFAP20   | Cilia- and flagella | 94.70 | 0.00 |
| TRINITY_sp P1427CAB4     | Chlorophyll a-b bin | 94.70 | 0.00 |
| TRINITY_sp Q1KV5tufa     | Elongation factor T | 94.70 | 0.00 |
| TRINITY_sp O2375-        | Elongation factor 2 | 94.60 | 0.00 |
| TRINITY_sp Q3T02RPL17    | 60S ribosomal prote | 94.60 | 0.00 |
| TRINITY_sp Q9YICeef1a    | Elongation factor 1 | 94.60 | 0.00 |
| TRINITY_sp P1235PSAG     | Photosystem I react | 94.50 | 0.00 |
| TRINITY_sp P0391MT-ND5   | NADH-ubiquinone oxi | 94.50 | 0.00 |
| TRINITY_sp P2984Hsc70-3  | Heat shock 70 kDa p | 94.50 | 0.00 |
| TRINITY_sp Q9SN5UGE5     | UDP-glucose 4-epime | 94.50 | 0.00 |
| TRINITY_sp Q9FG2UBL5     | Ubiquitin-like prot | 94.50 | 0.00 |
| TRINITY_sp P1207Cox5b    | Cytochrome c oxidas | 94.40 | 0.00 |
| TRINITY_sp P1386-        | Chlorophyll a-b bin | 94.40 | 0.00 |
| TRINITY_sp O0495SODCP    | Superoxide dismutas | 94.40 | 0.00 |
| TRINITY_sp P0997ALDOC    | Fructose-bisphospha | 94.40 | 0.00 |
| TRINITY_sp P2086-        | Chlorophyll a-b bin | 94.40 | 0.00 |
| TRINITY_sp P1286GAPB     | Glyceraldehyde-3-ph | 94.30 | 0.00 |
| TRINITY_sp Q4346TUFA     | Elongation factor T | 94.30 | 0.00 |
| TRINITY_sp P0791HNRNPC   | Heterogeneous nucle | 94.30 | 0.00 |
| TRINITY_sp Q4296-        | Phosphoglycerate ki | 94.30 | 0.00 |
| TRINITY_sp Q1KV7petB     | Cytochrome b6 OS=Ac | 94.30 | 0.00 |
| TRINITY_sp Q8NF1ST13P5   | Putative protein FA | 94.20 | 0.00 |
| TRINITY_sp P2268-        | Chlorophyll a-b bin | 94.20 | 0.00 |
| TRINITY_sp Q9M45TPI      | Triosephosphate iso | 94.20 | 0.00 |
| TRINITY_sp Q9XJ2RPS9     | 30S ribosomal prote | 94.20 | 0.00 |
| TRINITY_sp Q9FPIPSBS     | Photosystem II 22 k | 94.10 | 0.00 |
| TRINITY_sp Q4384-        | Ribulose-phosphate  | 94.10 | 0.00 |
| TRINITY_sp P1086psbC     | Photosystem II CP43 | 94.10 | 0.00 |
| TRINITY_sp Q58DISDC2     | Syndecan-2 OS=Bos t | 94.10 | 0.00 |
| TRINITY_sp P1893MT-ND1   | NADH-ubiquinone oxi | 94.00 | 0.00 |
| TRINITY_sp Q9LEJENO1     | Enolase 1 OS=Hevea  | 93.90 | 0.00 |
| TRINITY_sp O4945CCOAOMT1 | Caffeoyl-CoA O-meth | 93.80 | 0.00 |
| TRINITY_sp Q1343SF3B2    | Splicing factor 3B  | 93.80 | 0.00 |
| TRINITY_sp P1893MT-ND3   | NADH-ubiquinone oxi | 93.80 | 0.00 |
| TRINITY_sp P4265-        | 14-3-3-like protein | 93.80 | 0.00 |
| TRINITY_sp P0084Mtatp6   | ATP synthase subuni | 93.80 | 0.00 |
| TRINITY_sp P1223SLC25A6  | ADP/ATP translocase | 93.70 | 0.00 |
| TRINITY_sp A0CDICFAP20   | Cilia- and flagella | 93.70 | 0.00 |
| TRINITY_sp P7925ATP6V1G1 | V-type proton ATPas | 93.70 | 0.00 |
| TRINITY_sp Q90YCrps21    | 40S ribosomal prote | 93.70 | 0.00 |
| TRINITY_sp Q9SQ1lhca-P4  | Chlorophyll a-b bin | 93.60 | 0.00 |
| TRINITY_sp Q9ZTIRPE      | Ribulose-phosphate  | 93.60 | 0.00 |
| TRINITY_sp Q9FKVLFNR1    | Ferredoxin--NADP re | 93.60 | 0.00 |
| TRINITY_sp P1894MT-CO2   | Cytochrome c oxidas | 93.60 | 0.00 |
| TRINITY_sp P7924RPL37    | 60S ribosomal prote | 93.50 | 0.00 |



|                         |                      |       |      |
|-------------------------|----------------------|-------|------|
| TRINITY_sp Q9LRFGLO1    | Peroxisomal (S)-2-h  | 93.50 | 0.00 |
| TRINITY_sp Q9M38RPL17   | 50S ribosomal prote  | 93.50 | 0.00 |
| TRINITY_sp Q9137eef1g-b | Elongation factor 1  | 93.50 | 0.00 |
| TRINITY_sp P0041MT-CO3  | Cytochrome c oxidas  | 93.50 | 0.00 |
| TRINITY_sp Q2F70gag-pol | Gag-Pol polyprotein  | 93.50 | 0.00 |
| TRINITY_sp Q0808CHSP70  | Stromal 70 kDa heat  | 93.50 | 0.00 |
| TRINITY_sp Q9FUM-       | Elongation factor 1  | 93.50 | 0.00 |
| TRINITY_sp Q9148rpl13a  | 60S ribosomal prote  | 93.40 | 0.00 |
| TRINITY_sp P3286psaD    | Photosystem I react  | 93.30 | 0.00 |
| TRINITY_sp Q9XI0PBC1    | Proteasome subunit   | 93.30 | 0.00 |
| TRINITY_sp P0CH2-       | Ubiquitin-60S ribos  | 93.30 | 0.00 |
| TRINITY_sp Q8DR8radA    | DNA repair protein   | 93.30 | 0.00 |
| TRINITY_sp Q4122PSAEA   | Photosystem I react  | 93.30 | 0.00 |
| TRINITY_sp Q0166LHCA1   | Chlorophyll a-b bin  | 93.20 | 0.00 |
| TRINITY_sp P2752CAB8    | Chlorophyll a-b bin  | 93.20 | 0.00 |
| TRINITY_sp Q0870PIP1-3  | Aquaporin PIP1-3 OS  | 93.20 | 0.00 |
| TRINITY_sp P0335gag-pol | Gag-Pol polyprotein  | 93.20 | 0.00 |
| TRINITY_sp Q5E99RPS6    | 40S ribosomal prote  | 93.20 | 0.00 |
| TRINITY_sp A5JS8SERF2   | Small EDRK-rich fac  | 93.20 | 0.00 |
| TRINITY_sp Q4VITCALR    | Calreticulin OS=Chl  | 93.20 | 0.00 |
| TRINITY_sp Q7ZW2chmp2a  | Charged multivesicu  | 93.10 | 0.00 |
| TRINITY_sp Q9SDMLHC     | Chlorophyll a-b bin  | 93.10 | 0.00 |
| TRINITY_sp Q9613mt-co3  | Cytochrome c oxidas  | 93.10 | 0.00 |
| TRINITY_sp Q5E99RPS6    | 40S ribosomal prote  | 93.10 | 0.00 |
| TRINITY_sp P3725psbB    | Photosystem II CP47  | 93.10 | 0.00 |
| TRINITY_sp P4994-       | Ferritin, heavy sub  | 93.10 | 0.00 |
| TRINITY_sp P6293PPIA    | Peptidyl-prolyl cis  | 93.10 | 0.00 |
| TRINITY_sp P2752CAB215  | Chlorophyll a-b bin  | 93.10 | 0.00 |
| TRINITY_sp P4568PA3623  | Lipoprotein NlpD/Lp  | 93.10 | 0.00 |
| TRINITY_sp P938(-       | Phosphoglucomutase,  | 93.00 | 0.00 |
| TRINITY_sp P2748CAB13   | Chlorophyll a-b bin  | 92.90 | 0.00 |
| TRINITY_sp P2498MT-CO1  | Cytochrome c oxidas  | 92.90 | 0.00 |
| TRINITY_sp Q4319LOX1.5  | Probable linoleate   | 92.80 | 0.00 |
| TRINITY_sp P1093PETH    | Ferredoxin--NADP re  | 92.80 | 0.00 |
| TRINITY_sp P4788RPS4    | 40S ribosomal prote  | 92.80 | 0.00 |
| TRINITY_sp P0015MT-CYB  | Cytochrome b OS=Hom  | 92.80 | 0.00 |
| TRINITY_sp P1995-       | 40S ribosomal prote  | 92.80 | 0.00 |
| TRINITY_sp P0899HTA3    | Histone H2A.Z OS=Te  | 92.80 | 0.00 |
| TRINITY_sp P0914psaB    | Photosystem I P700   | 92.80 | 0    |
| TRINITY_sp P0041mt-Co3  | Cytochrome c oxidas  | 92.70 | 0.00 |
| TRINITY_sp Q9FF5PIP2-4  | Probable aquaporin   | 92.60 | 0.00 |
| TRINITY_sp P3154CD4B    | ATP-dependent Clp p  | 92.60 | 0.00 |
| TRINITY_sp O4855RPL17   | 60S ribosomal prote  | 92.60 | 0.00 |
| TRINITY_sp Q0206PSBS    | Photosystem II 22 k  | 92.60 | 0.00 |
| TRINITY_sp Q90YHrps6    | 40S ribosomal prote  | 92.60 | 0.00 |
| TRINITY_sp P1427cabII-1 | Chlorophyll a-b bin  | 92.60 | 0.00 |
| TRINITY_sp P4972petC    | Cytochrome b6-f com  | 92.60 | 0.00 |
| TRINITY_sp P6914-       | Histone H3 OS=Tetra  | 92.60 | 0.00 |
| TRINITY_sp Q9SIHSP90-5  | Heat shock protein   | 92.60 | 0.00 |
| TRINITY_sp P3987RPL3    | 60S ribosomal prote  | 92.50 | 0.00 |
| TRINITY_sp O4864ARF1    | ADP-ribosylation fa  | 92.50 | 0.00 |
| TRINITY_sp Q1LZFDDRGRK1 | DDRGRK domain-contai | 92.50 | 0.00 |
| TRINITY_sp Q3957YPTC4   | GTP-binding protein  | 92.40 | 0.00 |
| TRINITY_sp P4920RPS18   | 40S ribosomal prote  | 92.30 | 0.00 |
| TRINITY_sp P1427cabII-1 | Chlorophyll a-b bin  | 92.30 | 0.00 |
| TRINITY_sp Q9FW0HAC12   | Histone acetyltrans  | 92.30 | 0.00 |

|                          |                     |       |      |
|--------------------------|---------------------|-------|------|
| TRINITY_sp O2286RPL38A   | 60S ribosomal prote | 92.30 | 0.00 |
| TRINITY_sp Q90Y7rpl32    | 60S ribosomal prote | 92.20 | 0.00 |
| TRINITY_sp Q4045PSBO     | Oxygen-evolving enh | 92.20 | 0.00 |
| TRINITY_sp P0396MT-ND4   | NADH-ubiquinone oxi | 92.20 | 0.00 |
| TRINITY_sp P2652atpA     | ATP synthase subuni | 92.20 | 0.00 |
| TRINITY_sp P0036MT-CO1   | Cytochrome c oxidas | 92.10 | 0.00 |
| TRINITY_sp P3057-        | Metallothionein-lik | 92.10 | 0.00 |
| TRINITY_sp Q8WY6CHCHD10  | Coiled-coil-helix-c | 92.10 | 0.00 |
| TRINITY_sp Q0856ACO1     | 1-aminocyclopropane | 92.00 | 0.00 |
| TRINITY_sp P5276trs-1    | Threonine--tRNA lig | 92.00 | 0.00 |
| TRINITY_sp Q0806CHSP70   | Stromal 70 kDa heat | 91.90 | 0.00 |
| TRINITY_sp Q95L4EIF4G2   | Eukaryotic translat | 91.90 | 0.00 |
| TRINITY_sp P2584HSP70    | Heat shock 70 kDa p | 91.90 | 0.00 |
| TRINITY_sp P2124CPN60B1  | Chaperonin 60 subun | 91.90 | 0.00 |
| TRINITY_sp Q6UN7RPL5     | 60S ribosomal prote | 91.80 | 0.00 |
| TRINITY_sp Q4267TKT3     | Transketolase, chlo | 91.80 | 0.00 |
| TRINITY_sp Q7RT6PHF5A    | PHD finger-like dom | 91.80 | 0.00 |
| TRINITY_sp Q4142PCM3     | Putative calmodulin | 91.80 | 0.00 |
| TRINITY_sp P0386MT-ND1   | NADH-ubiquinone oxi | 91.80 | 0.00 |
| TRINITY_sp Q0743HSP70    | Heat shock 70 kDa p | 91.80 | 0.00 |
| TRINITY_sp P1605PSBP     | Oxygen-evolving enh | 91.80 | 0.00 |
| TRINITY_sp P0036Mtco1    | Cytochrome c oxidas | 91.70 | 0.00 |
| TRINITY_sp P0046Mtco2    | Cytochrome c oxidas | 91.70 | 0.00 |
| TRINITY_sp O2396GDCST    | Aminomethyltransfer | 91.70 | 0.00 |
| TRINITY_sp Q9ZS6ABC18    | UPF0051 protein ABC | 91.70 | 0.00 |
| TRINITY_sp P0386Mtnd3    | NADH-ubiquinone oxi | 91.70 | 0.00 |
| TRINITY_sp Q9FS6IMD1     | Malate dehydrogenas | 91.70 | 0.00 |
| TRINITY_sp P0386Mtnd1    | NADH-ubiquinone oxi | 91.50 | 0.00 |
| TRINITY_sp Q3966IDA4     | 28 kDa inner dynein | 91.40 | 0.00 |
| TRINITY_sp P0C16PETN     | Cytochrome b6-f com | 91.40 | 0.00 |
| TRINITY_sp P2086-        | Chlorophyll a-b bin | 91.40 | 0.00 |
| TRINITY_sp Q4006Amz2     | Archaemetzincin-2 O | 91.30 | 0.00 |
| TRINITY_sp P2636-        | Phosphoribulokinase | 91.30 | 0.00 |
| TRINITY_sp P2746CAB40    | Chlorophyll a-b bin | 91.30 | 0.00 |
| TRINITY_sp Q9SA6CSP41B   | Chloroplast stem-lo | 91.20 | 0.00 |
| TRINITY_sp Q6K56GAPC3    | Glyceraldehyde-3-ph | 91.20 | 0.00 |
| TRINITY_sp Q3956-        | Dynein 8 kDa light  | 91.20 | 0.00 |
| TRINITY_sp P4136HHT3     | Histone H3.3 OS=Tet | 91.20 | 0.00 |
| TRINITY_sp Q9SY6LHCA3    | Photosystem I chlor | 91.20 | 0.00 |
| TRINITY_sp Q3SY6RPL9     | 60S ribosomal prote | 91.20 | 0.00 |
| TRINITY_sp A4XY6smpB     | SsrA-binding protei | 91.10 | 0.00 |
| TRINITY_sp P1946-        | Malate dehydrogenas | 91.00 | 0.00 |
| TRINITY_sp B7EA7Os08g056 | Puromycin-sensitive | 91.00 | 0.00 |
| TRINITY_sp O9686Cdlc2    | Dynein light chain  | 91.00 | 0.00 |
| TRINITY_sp P4846TPIP1    | Triosephosphate iso | 90.90 | 0.00 |
| TRINITY_sp P3666-        | 50S ribosomal prote | 90.90 | 0.00 |
| TRINITY_sp Q9FJ6RPS3C    | 40S ribosomal prote | 90.90 | 0.00 |
| TRINITY_sp P1896MT-ND4   | NADH-ubiquinone oxi | 90.80 | 0.00 |
| TRINITY_sp P4636RPS28    | 40S ribosomal prote | 90.80 | 0.00 |
| TRINITY_sp Q9LR6GLO2     | Peroxisomal (S)-2-h | 90.70 | 0.00 |
| TRINITY_sp Q4142PCM3     | Putative calmodulin | 90.70 | 0.00 |
| TRINITY_sp P0386MT-ND2   | NADH-ubiquinone oxi | 90.70 | 0.00 |
| TRINITY_sp Q4126FLBR     | Leghemoglobin reduc | 90.60 | 0.00 |
| TRINITY_sp Q4QY6rpsa     | 40S ribosomal prote | 90.60 | 0.00 |
| TRINITY_sp P0396Mtnd5    | NADH-ubiquinone oxi | 90.60 | 0.00 |
| TRINITY_sp P1476ubqB     | Ubiquitin-60S ribos | 90.60 | 0.00 |

|                         |                      |       |      |
|-------------------------|----------------------|-------|------|
| TRINITY_sp P0386MT-ND3  | NADH-ubiquinone oxi  | 90.60 | 0.00 |
| TRINITY_sp P4835CAT1    | Catalase isozyme 1   | 90.60 | 0.00 |
| TRINITY_sp Q9SM(-       | V-type proton ATPas  | 90.60 | 0.00 |
| TRINITY_sp Q0319PMA4    | Plasma membrane ATP  | 90.50 | 0.00 |
| TRINITY_sp O4864GPX6    | Probable phospholip  | 90.50 | 0.00 |
| TRINITY_sp P5141Rpl9    | 60S ribosomal prote  | 90.40 | 0.00 |
| TRINITY_sp P0391Mtnd4   | NADH-ubiquinone oxi  | 90.40 | 0.00 |
| TRINITY_sp P529(-       | 14-3-3-like protein  | 90.40 | 0.00 |
| TRINITY_sp Q7XJ9GAS8    | Growth arrest-speci  | 90.40 | 0.00 |
| TRINITY_sp P4111rps11   | 40S ribosomal prote  | 90.40 | 0.00 |
| TRINITY_sp Q7RTVPHF5A   | PHD finger-like dom  | 90.30 | 0.00 |
| TRINITY_sp Q9SLQPSBP    | Oxygen-evolving enh  | 90.20 | 0.00 |
| TRINITY_sp Q8LPABCE2    | ABC transporter E f  | 90.20 | 0.00 |
| TRINITY_sp O2025-       | Transketolase, chlo  | 90.20 | 0.00 |
| TRINITY_sp Q8W17Cyp1    | Peptidyl-prolyl cis  | 90.10 | 0.00 |
| TRINITY_sp P5056H2B     | Histone H2B.1 OS=Ch  | 90.10 | 0.00 |
| TRINITY_sp P0899HTB1    | Histone H2B.1 OS=Te  | 90.10 | 0.00 |
| TRINITY_sp Q3T0URPL14   | 60S ribosomal prote  | 90.00 | 0.00 |
| TRINITY_sp P4931CAT1    | Catalase isozyme 1   | 90.00 | 0.00 |
| TRINITY_sp P1896MT-ND2  | NADH-ubiquinone oxi  | 90.00 | 0.00 |
| TRINITY_sp P2352-       | 2-methyl-6-phytyl-1  | 90.00 | 0.00 |
| TRINITY_sp Q7X99RCA2    | Ribulose biphospha   | 90.00 | 0.00 |
| TRINITY_sp Q6ZDSDH1     | Succinate dehydroge  | 90.00 | 0.00 |
| TRINITY_sp A0CCI Ppx4   | Serine/threonine-pr  | 90.00 | 0.00 |
| TRINITY_sp O8179IDH3    | Isocitrate dehydrog  | 90.00 | 0.00 |
| TRINITY_sp Q9MB1DHC10   | Dynein-1-beta heavy  | 90.00 | 0.00 |
| TRINITY_sp Q90Y1rpl35a  | 60S ribosomal prote  | 90.00 | 0.00 |
| TRINITY_sp P0DI1At2g300 | (PHD finger-like dom | 89.90 | 0.00 |
| TRINITY_sp P4783rpl27a  | 60S ribosomal prote  | 89.90 | 0.00 |
| TRINITY_sp Q9XF9PIP1-2  | Aquaporin PIP1-2 OS  | 89.90 | 0.00 |
| TRINITY_sp P2651GAPC    | Glyceraldehyde-3-ph  | 89.90 | 0.00 |
| TRINITY_sp Q0325RBG7    | Glycine-rich RNA-bi  | 89.80 | 0.00 |
| TRINITY_sp P5056H2A-II  | Histone H2A OS=Chla  | 89.80 | 0.00 |
| TRINITY_sp P2872-       | Formate--tetrahydro  | 89.70 | 0.00 |
| TRINITY_sp P2946TPT     | Triose phosphate/ph  | 89.70 | 0.00 |
| TRINITY_sp P0964CTSL    | Cathepsin L1 (Fragm  | 89.70 | 0.00 |
| TRINITY_sp Q4267TKT3    | Transketolase, chlo  | 89.70 | 0.00 |
| TRINITY_sp O2466AS      | Asparagine syntheta  | 89.70 | 0.00 |
| TRINITY_sp P9333GAPN    | NADP-dependent glyc  | 89.60 | 0.00 |
| TRINITY_sp Q4122PSAEA   | Photosystem I react  | 89.60 | 0.00 |
| TRINITY_sp Q9S7EGGAT2   | Glutamate--glyoxyla  | 89.60 | 0.00 |
| TRINITY_sp Q9SLQPSBP    | Oxygen-evolving enh  | 89.60 | 0.00 |
| TRINITY_sp P8241PSRP3   | 30S ribosomal prote  | 89.60 | 0.00 |
| TRINITY_sp P3436prp-8   | Pre-mRNA-splicing f  | 89.50 | 0.00 |
| TRINITY_sp Q3T02RPL17   | 60S ribosomal prote  | 89.50 | 0.00 |
| TRINITY_sp Q3905CO      | Zinc finger protein  | 89.50 | 0.00 |
| TRINITY_sp P307(RPL9    | 60S ribosomal prote  | 89.40 | 0.00 |
| TRINITY_sp P4853APX1    | L-ascorbate peroxid  | 89.40 | 0.00 |
| TRINITY_sp P3657RPL4    | 60S ribosomal prote  | 89.40 | 0.00 |
| TRINITY_sp Q9PVVc8b     | Complement componen  | 89.40 | 0.00 |
| TRINITY_sp Q6VAI-       | Tubulin alpha-4 cha  | 89.30 | 0.00 |
| TRINITY_sp P350(-       | Histone H2B.1/H2B.2  | 89.30 | 0.00 |
| TRINITY_sp P5036GAPA    | Glyceraldehyde-3-ph  | 89.30 | 0.00 |
| TRINITY_sp Q680IRPS29A  | 40S ribosomal prote  | 89.30 | 0.00 |
| TRINITY_sp P4963-       | Ubiquitin-60S ribos  | 89.30 | 0.00 |
| TRINITY_sp Q8W17PK      | Pyridoxal kinase OS  | 89.30 | 0.00 |

|                          |                     |       |      |
|--------------------------|---------------------|-------|------|
| TRINITY_sp Q8VZ5RPL35    | 50S ribosomal prote | 89.20 | 0.00 |
| TRINITY_sp Q9ZSVTCTP     | Translationally-con | 89.20 | 0.00 |
| TRINITY_sp Q9SA7YchF1    | Obg-like ATPase 1 O | 89.10 | 0.00 |
| TRINITY_sp P4994-        | Ferritin, heavy sub | 89.00 | 0.00 |
| TRINITY_sp Q944CFBA2     | Fructose-bisphospha | 88.90 | 0.00 |
| TRINITY_sp O6481At2g2309 | Uncharacterized pro | 88.90 | 0.00 |
| TRINITY_sp P1235PSAG     | Photosystem I react | 88.90 | 0.00 |
| TRINITY_sp Q6EU5PIP1-1   | Aquaporin PIP1-1 OS | 88.90 | 0.00 |
| TRINITY_sp Q3929-        | DNA-directed RNA po | 88.90 | 0.00 |
| TRINITY_sp P0231-        | Histone H4, major O | 88.90 | 0.00 |
| TRINITY_sp B7G81PHATRDR7 | Translation factor  | 88.90 | 0.00 |
| TRINITY_sp P3783PFL      | Formate acetyltrans | 88.90 | 0.00 |
| TRINITY_sp Q5XJ1gapdh    | Glyceraldehyde-3-ph | 88.80 | 0.00 |
| TRINITY_sp P1136gag      | Retrovirus-related  | 88.70 | 0.00 |
| TRINITY_sp P2752CAP10A   | Chlorophyll a-b bin | 88.70 | 0.00 |
| TRINITY_sp P6914-        | Histone H3 OS=Tetra | 88.70 | 0.00 |
| TRINITY_sp O7866mt-cyb   | Cytochrome b OS=Car | 88.70 | 0.00 |
| TRINITY_sp O2216At2g4486 | Probable ribosome b | 88.70 | 0.00 |
| TRINITY_sp Q9SV6NIP5-1   | Probable aquaporin  | 88.60 | 0.00 |
| TRINITY_sp Q9AX9-        | Eukaryotic translat | 88.60 | 0.00 |
| TRINITY_sp Q3957ODA2     | Dynein gamma chain, | 88.60 | 0.00 |
| TRINITY_sp Q9FNECHLH     | Magnesium-chelatase | 88.60 | 0.00 |
| TRINITY_sp Q58D1RPL7     | 60S ribosomal prote | 88.50 | 0.00 |
| TRINITY_sp Q56Y7AGT1     | Serine--glyoxylate  | 88.50 | 0.00 |
| TRINITY_sp Q3868-        | V-type proton ATPas | 88.50 | 0.00 |
| TRINITY_sp P5577mt-co3   | Cytochrome c oxidas | 88.40 | 0.00 |
| TRINITY_sp P2752CAP10A   | Chlorophyll a-b bin | 88.30 | 0.00 |
| TRINITY_sp P0CH2-        | Ubiquitin-60S ribos | 88.30 | 0.00 |
| TRINITY_sp P6128RPL12    | 60S ribosomal prote | 88.30 | 0.00 |
| TRINITY_sp Q9S91HSP70-5  | Heat shock 70 kDa p | 88.30 | 0.00 |
| TRINITY_sp A8HS4CHLREDR7 | 40S ribosomal prote | 88.30 | 0.00 |
| TRINITY_sp P0C22crp-79   | Ubiquitin-60S ribos | 88.30 | 0.00 |
| TRINITY_sp P1235PSAF     | Photosystem I react | 88.20 | 0.00 |
| TRINITY_sp P4114HSP90B1  | Endoplasmin OS=Cani | 88.20 | 0.00 |
| TRINITY_sp O8143PAP1     | Probable plastid-li | 88.20 | 0.00 |
| TRINITY_sp Q5AD9HHT3     | Histone H3.3 OS=Can | 88.20 | 0.00 |
| TRINITY_sp Q3961ODA11    | Dynein alpha chain, | 88.20 | 0    |
| TRINITY_sp Q9SU1PSAK     | Photosystem I react | 88.20 | 0.00 |
| TRINITY_sp A2XK1OsI_0126 | Costars family prot | 88.10 | 0.00 |
| TRINITY_sp P5521CGS1     | Cystathionine gamma | 88.10 | 0.00 |
| TRINITY_sp Q9AR2CTH1     | Magnesium-protoporp | 88.10 | 0.00 |
| TRINITY_sp O934actb      | Actin, cytoplasmic  | 88.00 | 0.00 |
| TRINITY_sp Q9CA6CHLP     | Geranylgeranyl diph | 88.00 | 0.00 |
| TRINITY_sp P9754Nptn     | Neuroplastin OS=Rat | 87.90 | 0.00 |
| TRINITY_sp P5932Eif5     | Eukaryotic translat | 87.90 | 0.00 |
| TRINITY_sp O8908Rbm3     | RNA-binding protein | 87.80 | 0.00 |
| TRINITY_sp Q3SZ1RPN2     | Dolichyl-diphosphoo | 87.80 | 0.00 |
| TRINITY_sp Q9SSI PRP8A   | Pre-mRNA-processing | 87.80 | 0.00 |
| TRINITY_sp Q9AR2CTH1     | Magnesium-protoporp | 87.80 | 0.00 |
| TRINITY_sp Q7YKVchlN     | Light-independent p | 87.80 | 0.00 |
| TRINITY_sp Q8TGMART2     | Putative uncharacte | 87.70 | 0.00 |
| TRINITY_sp Q3956ODA4     | Dynein beta chain,  | 87.70 | 0    |
| TRINITY_sp P3568RPL3     | 60S ribosomal prote | 87.70 | 0.00 |
| TRINITY_sp Q9SIFCYP18-2  | Peptidyl-prolyl cis | 87.70 | 0.00 |
| TRINITY_sp P8387TXNL4A   | Thioredoxin-like pr | 87.70 | 0.00 |
| TRINITY_sp Q8RX1TYW1     | S-adenosyl-L-methio | 87.60 | 0.00 |

|                         |                      |       |      |
|-------------------------|----------------------|-------|------|
| TRINITY_sp Q9SZIRPT2A   | 26S proteasome regu  | 87.60 | 0.00 |
| TRINITY_sp Q9LY7CSP41A  | Chloroplast stem-lo  | 87.50 | 0.00 |
| TRINITY_sp Q9FW6HAC12   | Histone acetyltrans  | 87.50 | 0.00 |
| TRINITY_sp Q9SL(ATG8D   | Autophagy-related p  | 87.50 | 0.00 |
| TRINITY_sp P5056H2A-II  | Histone H2A OS=Chla  | 87.50 | 0.00 |
| TRINITY_sp Q9H88METTL7A | Methyltransferase-1  | 87.50 | 0.00 |
| TRINITY_sp O8092RPL36A  | 60S ribosomal prote  | 87.40 | 0.00 |
| TRINITY_sp Q56Y7AGT1    | Serine--glyoxylate   | 87.40 | 0.00 |
| TRINITY_sp Q54L7smc4    | Structural maintena  | 87.40 | 0.00 |
| TRINITY_sp P3226CYSK    | Cysteine synthase,   | 87.30 | 0.00 |
| TRINITY_sp Q8JJ6fabp1   | Fatty acid-binding   | 87.20 | 0.00 |
| TRINITY_sp P0389Mtnd2   | NADH-ubiquinone oxi  | 87.20 | 0.00 |
| TRINITY_sp Q3961psaD    | Photosystem I react  | 87.20 | 0.00 |
| TRINITY_sp C1F97thrS    | Threonine--tRNA lig  | 87.10 | 0.00 |
| TRINITY_sp A2XJ3OsI_012 | (Chlorophyll a-b bin | 87.10 | 0.00 |
| TRINITY_sp P4852PPX2    | Serine/threonine-pr  | 87.00 | 0.00 |
| TRINITY_sp Q9STI-       | Calreticulin OS=Chl  | 87.00 | 0.00 |
| TRINITY_sp Q9C9VHPR     | Glycerate dehydroge  | 87.00 | 0.00 |
| TRINITY_sp O6555CIPK6   | CBL-interacting ser  | 86.90 | 0.00 |
| TRINITY_sp P1148TUBA1   | Tubulin alpha-1/alp  | 86.90 | 0.00 |
| TRINITY_sp P0C22crp-79  | Ubiquitin-60S ribos  | 86.90 | 0.00 |
| TRINITY_sp Q4014CYP-3   | Cysteine proteinase  | 86.80 | 0.00 |
| TRINITY_sp P4921RPL32A  | 60S ribosomal prote  | 86.80 | 0.00 |
| TRINITY_sp P4935-       | Serine hydroxymethy  | 86.80 | 0.00 |
| TRINITY_sp Q9MI7mt-co1  | Cytochrome c oxidas  | 86.80 | 0.00 |
| TRINITY_sp P2579TRG-31  | Probable aquaporin   | 86.70 | 0.00 |
| TRINITY_sp Q8LZ9mt-cyb  | Cytochrome b OS=Aeq  | 86.70 | 0.00 |
| TRINITY_sp O2266RPL5    | 60S ribosomal prote  | 86.70 | 0.00 |
| TRINITY_sp Q86C6tor     | Target of rapamycin  | 86.70 | 0.00 |
| TRINITY_sp P1686-       | Histone H2B.3 OS=Vo  | 86.70 | 0.00 |
| TRINITY_sp P4273RPS13   | 30S ribosomal prote  | 86.60 | 0.00 |
| TRINITY_sp P0783act1    | Major actin OS=Dict  | 86.60 | 0.00 |
| TRINITY_sp P2635TFIID   | TATA-box-binding pr  | 86.60 | 0.00 |
| TRINITY_sp Q94SI7mt-cyb | Cytochrome b OS=Dac  | 86.50 | 0.00 |
| TRINITY_sp P4629RPS23   | 40S ribosomal prote  | 86.50 | 0.00 |
| TRINITY_sp P2934RPS1    | 30S ribosomal prote  | 86.40 | 0.00 |
| TRINITY_sp Q9AR2CTH1    | Magnesium-protoporp  | 86.30 | 0.00 |
| TRINITY_sp Q2QV6CLPC2   | Chaperone protein C  | 86.30 | 0.00 |
| TRINITY_sp P4646TBP1    | 26S protease regula  | 86.20 | 0.00 |
| TRINITY_sp O2255-       | V-type proton ATPas  | 86.20 | 0.00 |
| TRINITY_sp P5426GDCST   | Aminomethyltransfer  | 86.20 | 0.00 |
| TRINITY_sp P4817MT-ND1  | NADH-ubiquinone oxi  | 86.10 | 0.00 |
| TRINITY_sp F4J36CTPA3   | Carboxyl-terminal-p  | 86.10 | 0.00 |
| TRINITY_sp F6H77THI1-2  | Thiamine thiazole s  | 86.10 | 0.00 |
| TRINITY_sp P2268-       | Chlorophyll a-b bin  | 86.10 | 0.00 |
| TRINITY_sp P3168ENO     | Enolase (Fragment)   | 86.00 | 0.00 |
| TRINITY_sp Q8LG6TDT     | Tonoplast dicarboxy  | 85.90 | 0.00 |
| TRINITY_sp Q9SB8PER42   | Peroxidase 42 OS=Ar  | 85.90 | 0.00 |
| TRINITY_sp Q6K66Os02g07 | Leucine aminopeptid  | 85.90 | 0.00 |
| TRINITY_sp Q9481-       | Ferritin-3, chlorop  | 85.80 | 0.00 |
| TRINITY_sp P4827rps4    | 30S ribosomal prote  | 85.80 | 0.00 |
| TRINITY_sp Q9U71-       | Histone H3 OS=Masti  | 85.80 | 0.00 |
| TRINITY_sp P3259GLC7    | Serine/threonine-pr  | 85.80 | 0.00 |
| TRINITY_sp A0CCI7Ppx4   | Serine/threonine-pr  | 85.80 | 0.00 |
| TRINITY_sp P0189H2-L    | H-2 class I histoco  | 85.80 | 0.00 |
| TRINITY_sp P3848ATP2    | ATP synthase subuni  | 85.80 | 0.00 |

|                           |                     |       |      |
|---------------------------|---------------------|-------|------|
| TRINITY_sp Q7PXFAGAP001   | Ubiquitin-fold modi | 85.70 | 0.00 |
| TRINITY_sp Q5E9ICHCHD3    | MICOS complex subun | 85.70 | 0.00 |
| TRINITY_sp B9DH7RPL40A    | Ubiquitin-60S ribos | 85.70 | 0.00 |
| TRINITY_sp Q54R5rsrfB     | Serum response fact | 85.70 | 0.00 |
| TRINITY_sp Q94A9UBC35     | Ubiquitin-conjugati | 85.70 | 0.00 |
| TRINITY_sp P0538RPLP2     | 60S acidic ribosoma | 85.70 | 0.00 |
| TRINITY_sp Q8RX8PNSB4     | Photosynthetic NDH  | 85.70 | 0.00 |
| TRINITY_sp P4848-         | Serine/threonine-pr | 85.60 | 0.00 |
| TRINITY_sp P0258-         | Calmodulin OS=Tetra | 85.60 | 0.00 |
| TRINITY_sp P0CG8TU20      | Polyubiquitin OS=Te | 85.60 | 0.00 |
| TRINITY_sp Q8LFCNRPB10    | DNA-directed RNA po | 85.50 | 0.00 |
| TRINITY_sp O4851RPL13     | 60S ribosomal prote | 85.50 | 0.00 |
| TRINITY_sp Q3958YPTC1     | GTP-binding protein | 85.50 | 0.00 |
| TRINITY_sp Q96CEC8orf44   | Putative uncharacte | 85.40 | 0.00 |
| TRINITY_sp P2158CYP       | Peptidyl-prolyl cis | 85.40 | 0.00 |
| TRINITY_sp P4191RAN1      | GTP-binding nuclear | 85.40 | 0.00 |
| TRINITY_sp P5578HSP90-2   | Heat shock protein  | 85.40 | 0.00 |
| TRINITY_sp A4GFC-         | Profilin-4 OS=Olea  | 85.40 | 0.00 |
| TRINITY_sp O0461CURT1A    | Protein CURVATURE T | 85.30 | 0.00 |
| TRINITY_sp P0908GAPC      | Glyceraldehyde-3-ph | 85.30 | 0.00 |
| TRINITY_sp Q6368Cdc37     | Hsp90 co-chaperone  | 85.30 | 0.00 |
| TRINITY_sp Q9LR8GGAT1     | Glutamate--glyoxyla | 85.20 | 0.00 |
| TRINITY_sp O0408-         | Acyl-CoA-binding pr | 85.20 | 0.00 |
| TRINITY_sp Q8YZ8trpB1     | Tryptophan synthase | 85.20 | 0.00 |
| TRINITY_sp Q9Y08ppp4c     | Serine/threonine-pr | 85.20 | 0.00 |
| TRINITY_sp Q6P28PRPF8     | Pre-mRNA-processing | 85.20 | 0.00 |
| TRINITY_sp O7418UBC1      | Ubiquitin-conjugati | 85.10 | 0.00 |
| TRINITY_sp P2468HSC-I     | Heat shock cognate  | 85.10 | 0.00 |
| TRINITY_sp Q54Y8ints11    | Integrator complex  | 85.10 | 0.00 |
| TRINITY_sp P2268-         | Chlorophyll a-b bin | 85.10 | 0.00 |
| TRINITY_sp Q69T8PRXIIIE-1 | Peroxiredoxin-2E-1, | 85.10 | 0.00 |
| TRINITY_sp P4908-         | Asparagine syntheta | 85.00 | 0.00 |
| TRINITY_sp P1688-         | Histone H2A-IV OS=V | 85.00 | 0.00 |
| TRINITY_sp P0848GAPC      | Glyceraldehyde-3-ph | 84.90 | 0.00 |
| TRINITY_sp Q9M28RPS27B    | 40S ribosomal prote | 84.90 | 0.00 |
| TRINITY_sp Q9LZ8CDC48E    | Cell division contr | 84.90 | 0.00 |
| TRINITY_sp Q8BW8Dnah3     | Dynein heavy chain  | 84.80 | 0.00 |
| TRINITY_sp Q56Y8MAP2B     | Methionine aminopep | 84.80 | 0.00 |
| TRINITY_sp O2308KAB1      | Probable voltage-ga | 84.80 | 0.00 |
| TRINITY_sp Q9PV8c8b       | Complement componen | 84.80 | 0.00 |
| TRINITY_sp O8268HCF136    | Photosystem II stab | 84.70 | 0.00 |
| TRINITY_sp Q9HF8pphA      | Serine/threonine-pr | 84.70 | 0.00 |
| TRINITY_sp P4858pph-1     | Serine/threonine-pr | 84.60 | 0.00 |
| TRINITY_sp O2438-         | Plastidic ATP/ADP-t | 84.60 | 0.00 |
| TRINITY_sp Q8SE8VMT-CO3   | Cytochrome c oxidas | 84.60 | 0.00 |
| TRINITY_sp Q32L8bhmt      | Betaine--homocystei | 84.60 | 0.00 |
| TRINITY_sp Q3908MPK7      | Mitogen-activated p | 84.60 | 0.00 |
| TRINITY_sp Q9SA8CSP41B    | Chloroplast stem-lo | 84.50 | 0.00 |
| TRINITY_sp Q6558FTSH2     | ATP-dependent zinc  | 84.50 | 0.00 |
| TRINITY_sp O7418UBC1      | Ubiquitin-conjugati | 84.50 | 0.00 |
| TRINITY_sp Q9ST8VHSP70-6  | Heat shock 70 kDa p | 84.50 | 0.00 |
| TRINITY_sp P1688-         | Histone H2B.3 OS=Vo | 84.50 | 0.00 |
| TRINITY_sp Q4JQ8FMT-ND4   | NADH-ubiquinone oxi | 84.40 | 0.00 |
| TRINITY_sp P0858tuba      | Tubulin alpha chain | 84.40 | 0.00 |
| TRINITY_sp Q9C68LSM3B     | Sm-like protein LSM | 84.40 | 0.00 |
| TRINITY_sp Q6558FTSH2     | ATP-dependent zinc  | 84.40 | 0.00 |

|                          |                     |       |      |
|--------------------------|---------------------|-------|------|
| TRINITY_sp Q94E5PR46a    | Ubiquitin-fold modi | 84.40 | 0.00 |
| TRINITY_sp Q9M17LSM6A    | Sm-like protein LSM | 84.40 | 0.00 |
| TRINITY_sp Q9ZVINFYC3    | Nuclear transcripti | 84.40 | 0.00 |
| TRINITY_sp O6505RPS15    | 40S ribosomal prote | 84.40 | 0.00 |
| TRINITY_sp P4677RPL5     | 60S ribosomal prote | 84.30 | 0.00 |
| TRINITY_sp P2086-        | Chlorophyll a-b bin | 84.30 | 0.00 |
| TRINITY_sp P8387TXNL4A   | Thioredoxin-like pr | 84.30 | 0.00 |
| TRINITY_sp P5472Rad23a   | UV excision repair  | 84.20 | 0.00 |
| TRINITY_sp Q3Y81DAW1     | Dynein assembly fac | 84.20 | 0.00 |
| TRINITY_sp O2371PBB1     | Proteasome subunit  | 84.00 | 0.00 |
| TRINITY_sp Q56Y7AGT1     | Serine--glyoxylate  | 84.00 | 0.00 |
| TRINITY_sp Q6KA6RPL39A   | 60S ribosomal prote | 84.00 | 0.00 |
| TRINITY_sp P1285PSBO     | Oxygen-evolving enh | 84.00 | 0.00 |
| TRINITY_sp Q9STVHSP70-6  | Heat shock 70 kDa p | 84.00 | 0.00 |
| TRINITY_sp Q3956ODA4     | Dynein beta chain,  | 83.90 | 0    |
| TRINITY_sp Q9SSI PRP8A   | Pre-mRNA-processing | 83.90 | 0    |
| TRINITY_sp Q9STI-        | Calreticulin OS=Chl | 83.80 | 0.00 |
| TRINITY_sp A2XFC TOP6A3  | DNA topoisomerase 6 | 83.80 | 0.00 |
| TRINITY_sp Q9MIYmt-co1   | Cytochrome c oxidas | 83.80 | 0.00 |
| TRINITY_sp P2708ABT      | ADP,ATP carrier pro | 83.80 | 0.00 |
| TRINITY_sp Q9MB1DHC10    | Dynein-1-beta heavy | 83.80 | 0.00 |
| TRINITY_sp P5573HSP90-2  | Heat shock protein  | 83.70 | 0.00 |
| TRINITY_sp A8JB2CCDC65   | Coiled-coil domain- | 83.70 | 0.00 |
| TRINITY_sp Q8W41CYP71    | Peptidyl-prolyl cis | 83.70 | 0.00 |
| TRINITY_sp P385(NIR1     | Ferredoxin--nitrite | 83.70 | 0.00 |
| TRINITY_sp Q4067ALDP     | Fructose-bisphospha | 83.60 | 0.00 |
| TRINITY_sp Q9LY6RPL1     | 50S ribosomal prote | 83.60 | 0.00 |
| TRINITY_sp Q8AV8btd      | Biotinidase OS=Taki | 83.60 | 0.00 |
| TRINITY_sp O7851ftsH     | ATP-dependent zinc  | 83.60 | 0.00 |
| TRINITY_sp Q9MB1DHC10    | Dynein-1-beta heavy | 83.60 | 0    |
| TRINITY_sp P0DK6RPT1A    | 26S protease regula | 83.50 | 0.00 |
| TRINITY_sp O934(actb     | Actin, cytoplasmic  | 83.50 | 0.00 |
| TRINITY_sp Q9SJAAGO5     | Protein argonaute 5 | 83.30 | 0.00 |
| TRINITY_sp P0578KRT8     | Keratin, type II cy | 83.30 | 0.00 |
| TRINITY_sp P0922-        | Parvalbumin alpha 0 | 83.30 | 0.00 |
| TRINITY_sp Q9M77RPL29A   | 60S ribosomal prote | 83.30 | 0.00 |
| TRINITY_sp P4625-        | Fructose-bisphospha | 83.30 | 0.00 |
| TRINITY_sp Q9VLU Sirup   | Succinate dehydroge | 83.30 | 0.00 |
| TRINITY_sp Q7XS6PIP1-2   | Probable aquaporin  | 83.30 | 0.00 |
| TRINITY_sp Q9070EEF2     | Elongation factor 2 | 83.30 | 0.00 |
| TRINITY_sp Q3961PCKR1    | Peptidyl-prolyl cis | 83.30 | 0.00 |
| TRINITY_sp Q4268HEMB     | Delta-aminolevulini | 83.30 | 0.00 |
| TRINITY_sp Q4362-        | Glutathione reducta | 83.30 | 0.00 |
| TRINITY_sp P4629RPS13    | 40S ribosomal prote | 83.20 | 0.00 |
| TRINITY_sp P3687ppplcc-a | Serine/threonine-pr | 83.20 | 0.00 |
| TRINITY_sp Q86C6tor      | Target of rapamycin | 83.10 | 0.00 |
| TRINITY_sp Q9AT3RPS15A   | 40S ribosomal prote | 83.10 | 0.00 |
| TRINITY_sp Q3957ODA2     | Dynein gamma chain, | 83.10 | 0    |
| TRINITY_sp Q6YU0s02g015  | Putative multidrug  | 83.10 | 0.00 |
| TRINITY_sp Q9SSI PRP8A   | Pre-mRNA-processing | 83.00 | 0.00 |
| TRINITY_sp P2585GAPA1    | Glyceraldehyde-3-ph | 83.00 | 0.00 |
| TRINITY_sp Q4046-        | Ribulose bisphospha | 83.00 | 0.00 |
| TRINITY_sp Q9MB1DHC10    | Dynein-1-beta heavy | 83.00 | 0.00 |
| TRINITY_sp O7722cata     | Catalase-A OS=Dicty | 82.90 | 0.00 |
| TRINITY_sp Q74Z3DPH3     | Diphthamide biosynt | 82.90 | 0.00 |
| TRINITY_sp Q9VH6RpS29    | 40S ribosomal prote | 82.90 | 0.00 |

|                         |                     |       |      |
|-------------------------|---------------------|-------|------|
| TRINITY_sp Q2NL1CLPTM1  | Cleft lip and palat | 82.90 | 0.00 |
| TRINITY_sp Q0747LHCB4.1 | Chlorophyll a-b bin | 82.80 | 0.00 |
| TRINITY_sp Q8RWEVTC2    | GDP-L-galactose pho | 82.80 | 0.00 |
| TRINITY_sp P0CG5UBB     | Polyubiquitin-B OS= | 82.80 | 0.00 |
| TRINITY_sp Q9262DHX38   | Pre-mRNA-splicing f | 82.70 | 0.00 |
| TRINITY_sp Q9C5URPT6A   | 26S protease regula | 82.70 | 0.00 |
| TRINITY_sp Q9U7I-       | Histone H3 OS=Masti | 82.70 | 0.00 |
| TRINITY_sp Q9FNAAt5g085 | NADH dehydrogenase  | 82.60 | 0.00 |
| TRINITY_sp Q9MAIRPT4B   | 26S protease regula | 82.60 | 0.00 |
| TRINITY_sp O2324CKS1    | Cyclin-dependent ki | 82.50 | 0.00 |
| TRINITY_sp Q95V8RPL38   | 60S ribosomal prote | 82.50 | 0.00 |
| TRINITY_sp Q0I53rpsL    | 30S ribosomal prote | 82.40 | 0.00 |
| TRINITY_sp P2156CYP     | Peptidyl-prolyl cis | 82.40 | 0.00 |
| TRINITY_sp P3618HSC80   | Heat shock cognate  | 82.40 | 0.00 |
| TRINITY_sp Q9U97ppp6c   | Serine/threonine-pr | 82.30 | 0.00 |
| TRINITY_sp Q0483CP31A   | 31 kDa ribonucleopr | 82.20 | 0.00 |
| TRINITY_sp P1285GAPB    | Glyceraldehyde-3-ph | 82.20 | 0.00 |
| TRINITY_sp Q3961psaD    | Photosystem I react | 82.20 | 0.00 |
| TRINITY_sp Q54Y7dhkJ    | Hybrid signal trans | 82.20 | 0.00 |
| TRINITY_sp P3618HSC80   | Heat shock cognate  | 82.20 | 0.00 |
| TRINITY_sp Q9441GLYK    | D-glycerate 3-kinas | 82.20 | 0.00 |
| TRINITY_sp Q9AS6PNLS5   | Photosynthetic NDH  | 82.10 | 0.00 |
| TRINITY_sp Q9Y26EIF3L   | Eukaryotic translat | 82.10 | 0.00 |
| TRINITY_sp O603(AQR     | Intron-binding prot | 82.10 | 0.00 |
| TRINITY_sp Q9M33rps6    | 40S ribosomal prote | 82.10 | 0.00 |
| TRINITY_sp P2586UBC2    | Ubiquitin-conjugati | 82.10 | 0.00 |
| TRINITY_sp P2864CLKR27  | 3-oxoacyl-[acyl-car | 82.10 | 0.00 |
| TRINITY_sp Q4268SODA    | Superoxide dismutas | 82.10 | 0.00 |
| TRINITY_sp Q54Y7dhkJ    | Hybrid signal trans | 82.10 | 0.00 |
| TRINITY_sp Q9FG2UBL5    | Ubiquitin-like prot | 82.10 | 0.00 |
| TRINITY_sp P0842rp14-a  | 60S ribosomal prote | 82.00 | 0.00 |
| TRINITY_sp P9295KIN11   | SNF1-related protei | 82.00 | 0.00 |
| TRINITY_sp Q9MB1DHC10   | Dynein-1-beta heavy | 82.00 | 0    |
| TRINITY_sp Q9LY6RPL1    | 50S ribosomal prote | 81.90 | 0.00 |
| TRINITY_sp Q3958TUBG    | Tubulin gamma chain | 81.90 | 0.00 |
| TRINITY_sp O4944AAC3    | ADP,ATP carrier pro | 81.80 | 0.00 |
| TRINITY_sp Q9STVHSP70-6 | Heat shock 70 kDa p | 81.80 | 0.00 |
| TRINITY_sp Q5XXEMSH2    | DNA mismatch repair | 81.80 | 0.00 |
| TRINITY_sp O268(msrB    | Peptide methionine  | 81.80 | 0.00 |
| TRINITY_sp P3641hspB    | Heat shock cognate  | 81.80 | 0.00 |
| TRINITY_sp P1604GDCSH   | Glycine cleavage sy | 81.80 | 0.00 |
| TRINITY_sp P4648-       | Malate dehydrogenas | 81.80 | 0.00 |
| TRINITY_sp P8327hbb2    | Hemoglobin subunit  | 81.70 | 0.00 |
| TRINITY_sp O805(RABH1B  | Ras-related protein | 81.70 | 0.00 |
| TRINITY_sp P2348-       | Ribulose bisphospha | 81.70 | 0.00 |
| TRINITY_sp P3123ACO     | 1-aminocyclopropane | 81.60 | 0.00 |
| TRINITY_sp Q7X97ARCA1   | Ribulose bisphospha | 81.60 | 0.00 |
| TRINITY_sp A2XN4PP2A2   | Serine/threonine-pr | 81.60 | 0.00 |
| TRINITY_sp P2814TBP1    | TATA-box-binding pr | 81.60 | 0.00 |
| TRINITY_sp Q8LP6ABCE2   | ABC transporter E f | 81.60 | 0.00 |
| TRINITY_sp P0847RBCS    | Ribulose bisphospha | 81.60 | 0.00 |
| TRINITY_sp P0614-       | 40S ribosomal prote | 81.60 | 0.00 |
| TRINITY_sp P411(Rp128   | 60S ribosomal prote | 81.50 | 0.00 |
| TRINITY_sp Q9XHERPL37A  | 60S ribosomal prote | 81.50 | 0.00 |
| TRINITY_sp P0493Fn1     | Fibronectin OS=Ratt | 81.50 | 0.00 |
| TRINITY_sp P5922RPS13B  | 40S ribosomal prote | 81.50 | 0.00 |



|                          |                     |       |      |
|--------------------------|---------------------|-------|------|
| TRINITY_sp Q9C94Atlg5274 | Probable histone H2 | 81.50 | 0.00 |
| TRINITY_sp Q9C81Atlg3342 | PHD finger protein  | 81.50 | 0.00 |
| TRINITY_sp Q4051PSBR     | Photosystem II 10 k | 81.50 | 0.00 |
| TRINITY_sp Q4308-        | Histone H4 OS=Pyren | 81.40 | 0.00 |
| TRINITY_sp Q6ZR(DNAH12   | Dynein heavy chain  | 81.30 | 0.00 |
| TRINITY_sp Q4051PSBR     | Photosystem II 10 k | 81.30 | 0.00 |
| TRINITY_sp Q9FR5TOR      | Serine/threonine-pr | 81.30 | 0.00 |
| TRINITY_sp P3016act-1a   | Actin-1 OS=Onchocer | 81.30 | 0.00 |
| TRINITY_sp P5036GAPA     | Glyceraldehyde-3-ph | 81.30 | 0.00 |
| TRINITY_sp P314(VHA55    | V-type proton ATPas | 81.30 | 0.00 |
| TRINITY_sp P2295MED37D   | Probable mediator o | 81.20 | 0.00 |
| TRINITY_sp P0282-        | Heat shock 70 kDa p | 81.20 | 0.00 |
| TRINITY_sp Q6556FTSH2    | ATP-dependent zinc  | 81.20 | 0.00 |
| TRINITY_sp Q9SUMAt4g3022 | Probable small nucl | 81.20 | 0.00 |
| TRINITY_sp P2267ARG7     | Argininosuccinate l | 81.20 | 0.00 |
| TRINITY_sp P571(MDH2     | Malate dehydrogenas | 81.20 | 0.00 |
| TRINITY_sp Q4R88HSPA1L   | Heat shock 70 kDa p | 81.20 | 0.00 |
| TRINITY_sp Q0326MYBL2    | Myb-related protein | 81.10 | 0.00 |
| TRINITY_sp Q3T0EPPP1CA   | Serine/threonine-pr | 81.10 | 0.00 |
| TRINITY_sp Q86C6tor      | Target of rapamycin | 81.10 | 0.00 |
| TRINITY_sp Q02331NFYB3   | Nuclear transcripti | 81.10 | 0.00 |
| TRINITY_sp P0554Cd8b     | T-cell surface glyc | 81.00 | 0.00 |
| TRINITY_sp Q9LY6RPL1     | 50S ribosomal prote | 81.00 | 0.00 |
| TRINITY_sp Q2KH1RPS27    | 40S ribosomal prote | 81.00 | 0.00 |
| TRINITY_sp P1379oprF     | Outer membrane pori | 81.00 | 0.00 |
| TRINITY_sp Q9SPICRTZ     | Beta-carotene 3-hyd | 81.00 | 0.00 |
| TRINITY_sp Q9SMFDHC1     | Dynein-1-alpha heav | 81.00 | 0    |
| TRINITY_sp Q9Y24POMP     | Proteasome maturati | 80.90 | 0.00 |
| TRINITY_sp Q8JH7aldob    | Fructose-bisphospha | 80.90 | 0.00 |
| TRINITY_sp Q0806RPS8     | 40S ribosomal prote | 80.90 | 0.00 |
| TRINITY_sp P0743BETA     | Tubulin beta-1 chai | 80.90 | 0.00 |
| TRINITY_sp P6777PPP2CA   | Serine/threonine-pr | 80.90 | 0.00 |
| TRINITY_sp Q2156M28.5    | NHP2-like protein 1 | 80.80 | 0.00 |
| TRINITY_sp Q9ZRIYKT61    | VAMP-like protein Y | 80.80 | 0.00 |
| TRINITY_sp P5481-        | 26S protease regula | 80.80 | 0.00 |
| TRINITY_sp P4966RPL19C   | 60S ribosomal prote | 80.70 | 0.00 |
| TRINITY_sp Q9FKHLSM5     | Sm-like protein LSM | 80.70 | 0.00 |
| TRINITY_sp Q8TGMART2     | Putative uncharacte | 80.70 | 0.00 |
| TRINITY_sp Q3977-        | Acyl-CoA-binding pr | 80.60 | 0.00 |
| TRINITY_sp P8088petM     | Cytochrome b6-f com | 80.60 | 0.00 |
| TRINITY_sp P692(UB-EP52  | Ubiquitin-60S ribos | 80.60 | 0.00 |
| TRINITY_sp Q54Y2dhkJ     | Hybrid signal trans | 80.60 | 0.00 |
| TRINITY_sp Q3956GSA      | Glutamate-1-semiald | 80.60 | 0.00 |
| TRINITY_sp Q852IHD16     | Casein kinase 1-lik | 80.60 | 0.00 |
| TRINITY_sp Q9AR2CTH1     | Magnesium-protoporp | 80.60 | 0.00 |
| TRINITY_sp Q9SJT1VHA-a2  | V-type proton ATPas | 80.60 | 0.00 |
| TRINITY_sp Q9ZR(FH       | Frataxin, mitochond | 80.60 | 0.00 |
| TRINITY_sp Q2RBN0s11g01  | Clathrin heavy chai | 80.60 | 0.00 |
| TRINITY_sp A8JANDRC7     | Dynein regulatory c | 80.50 | 0.00 |
| TRINITY_sp Q7F9JCLPC1    | Chaperone protein C | 80.50 | 0.00 |
| TRINITY_sp P5476RAN1A    | GTP-binding nuclear | 80.40 | 0.00 |
| TRINITY_sp Q54GMnsa2     | Ribosome biogenesis | 80.40 | 0.00 |
| TRINITY_sp P5477CDC48    | Cell division cycle | 80.40 | 0    |
| TRINITY_sp Q54Y2dhkJ     | Hybrid signal trans | 80.40 | 0.00 |
| TRINITY_sp P1206CAB37    | Chlorophyll a-b bin | 80.30 | 0.00 |
| TRINITY_sp P1507env      | Envelope glycoprote | 80.30 | 0.00 |

|                         |                      |       |      |
|-------------------------|----------------------|-------|------|
| TRINITY_sp P492(RPS18   | 40S ribosomal prote  | 80.30 | 0.00 |
| TRINITY_sp Q2827FN1     | Fibronectin (Fragme  | 80.30 | 0.00 |
| TRINITY_sp Q4266ALDCHL  | Fructose-bisphospha  | 80.30 | 0.00 |
| TRINITY_sp Q9UVUUBC1    | Ubiquitin-conjugati  | 80.30 | 0.00 |
| TRINITY_sp Q9FJ7RPL26B  | 60S ribosomal prote  | 80.30 | 0.00 |
| TRINITY_sp Q9SMFDHC1    | Dynein-1-alpha heav  | 80.30 | 0    |
| TRINITY_sp P0DI1At2g300 | (PHD finger-like dom | 80.20 | 0.00 |
| TRINITY_sp O0409FD1     | Ferredoxin-1, chlor  | 80.20 | 0.00 |
| TRINITY_sp P507(-       | Osmotin-like protei  | 80.20 | 0.00 |
| TRINITY_sp Q7X7IELP3    | Elongator complex p  | 80.20 | 0.00 |
| TRINITY_sp Q69J4NFYB10  | Nuclear transcripti  | 80.20 | 0.00 |
| TRINITY_sp F4IFNPOL2B   | DNA polymerase epsi  | 80.20 | 0.00 |
| TRINITY_sp Q9LT(RPN11   | 26S proteasome non-  | 80.10 | 0.00 |
| TRINITY_sp Q9FNMAt5g085 | NADH dehydrogenase   | 80.10 | 0.00 |
| TRINITY_sp P1081sahA    | Adenosylhomocystein  | 80.10 | 0.00 |
| TRINITY_sp Q6829RPT2    | Root phototropism p  | 80.00 | 0.00 |
| TRINITY_sp O2437LOX2.1  | Linoleate 13S-lipox  | 80.00 | 0.00 |
| TRINITY_sp Q8AV8btd     | Biotinidase OS=Taki  | 80.00 | 0.00 |
| TRINITY_sp Q8L79RH3     | DEAD-box ATP-depend  | 80.00 | 0.00 |
| TRINITY_sp Q5F37UGDH    | UDP-glucose 6-dehyd  | 80.00 | 0.00 |
| TRINITY_sp Q9FNMAt5g085 | NADH dehydrogenase   | 80.00 | 0.00 |
| TRINITY_sp P3641hspB    | Heat shock cognate   | 80.00 | 0.00 |
| TRINITY_sp Q5ZJ(YARS    | Tyrosine--tRNA liga  | 80.00 | 0.00 |
| TRINITY_sp P492(RPS18   | 40S ribosomal prote  | 80.00 | 0.00 |
| TRINITY_sp P5837RpL30   | 60S ribosomal prote  | 80.00 | 0.00 |
| TRINITY_sp Q6277gsp-2   | Serine/threonine-pr  | 80.00 | 0.00 |
| TRINITY_sp Q9FJISMC4    | Structural maintena  | 80.00 | 0.00 |
| TRINITY_sp O4989FTRC    | Ferredoxin-thioredo  | 80.00 | 0.00 |
| TRINITY_sp P2069bimG    | Serine/threonine-pr  | 79.90 | 0.00 |
| TRINITY_sp P392(NDK1    | Nucleoside diphosph  | 79.90 | 0.00 |
| TRINITY_sp Q109(Os10g05 | (DEAD-box ATP-depend | 79.90 | 0.00 |
| TRINITY_sp P492(RPS18   | 40S ribosomal prote  | 79.80 | 0.00 |
| TRINITY_sp Q3924NTR2    | Thioredoxin reducta  | 79.80 | 0.00 |
| TRINITY_sp P024(Rp1p2   | 60S acidic ribosoma  | 79.70 | 0.00 |
| TRINITY_sp P4282LDJ2    | DnaJ protein homolo  | 79.70 | 0.00 |
| TRINITY_sp Q54CFmobB    | MOB kinase activato  | 79.70 | 0.00 |
| TRINITY_sp Q9P2IDNAH1   | Dynein heavy chain   | 79.70 | 0.00 |
| TRINITY_sp Q9JLJSpag6   | Sperm-associated an  | 79.70 | 0.00 |
| TRINITY_sp Q9JLJSpag6   | Sperm-associated an  | 79.70 | 0.00 |
| TRINITY_sp P5648Atp5b   | ATP synthase subuni  | 79.70 | 0.00 |
| TRINITY_sp P4791Rp129   | 60S ribosomal prote  | 79.70 | 0.00 |
| TRINITY_sp Q9STVHSP70-6 | Heat shock 70 kDa p  | 79.70 | 0.00 |
| TRINITY_sp P0538RPLP2   | 60S acidic ribosoma  | 79.70 | 0.00 |
| TRINITY_sp Q9ZV(CYP22   | Peptidyl-prolyl cis  | 79.60 | 0.00 |
| TRINITY_sp Q8LP(ABCE2   | ABC transporter E f  | 79.60 | 0.00 |
| TRINITY_sp P8387TXNL4A  | Thioredoxin-like pr  | 79.60 | 0.00 |
| TRINITY_sp Q9AT(PDX1    | Probable pyridoxal   | 79.60 | 0.00 |
| TRINITY_sp Q3ZB(RPS20   | 40S ribosomal prote  | 79.60 | 0.00 |
| TRINITY_sp Q9DE2ruvbl2  | RuvB-like 2 OS=Xeno  | 79.60 | 0.00 |
| TRINITY_sp P2644S100A4  | Protein S100-A4 OS=  | 79.60 | 0.00 |
| TRINITY_sp O8208CCH     | Copper transport pr  | 79.50 | 0.00 |
| TRINITY_sp P0868COX1    | Cytochrome c oxidas  | 79.50 | 0.00 |
| TRINITY_sp Q9FG2UBL5    | Ubiquitin-like prot  | 79.50 | 0.00 |
| TRINITY_sp P4862FAD3    | Acyl-lipid omega-3   | 79.50 | 0.00 |
| TRINITY_sp Q94B(RPT6B   | 26S protease regula  | 79.50 | 0.00 |
| TRINITY_sp P5056H2A-II  | Histone H2A OS=Chla  | 79.50 | 0.00 |

|                         |                     |       |      |
|-------------------------|---------------------|-------|------|
| TRINITY_sp Q6P2CPRPF8   | Pre-mRNA-processing | 79.50 | 0    |
| TRINITY_sp Q8WXD DNAH7  | Dynein heavy chain  | 79.50 | 0.00 |
| TRINITY_sp Q9SZIRPT2A   | 26S proteasome regu | 79.40 | 0.00 |
| TRINITY_sp P2976-       | 60S acidic ribosoma | 79.40 | 0.00 |
| TRINITY_sp Q9S7HTS1     | Threonine synthase  | 79.40 | 0.00 |
| TRINITY_sp O826GATA9    | GATA transcription  | 79.40 | 0.00 |
| TRINITY_sp O650SB62     | 60S ribosomal prote | 79.40 | 0.00 |
| TRINITY_sp Q9Y2UBE2D4   | Ubiquitin-conjugati | 79.30 | 0.00 |
| TRINITY_sp P350SAHH     | Adenosylhomocystein | 79.30 | 0.00 |
| TRINITY_sp P329ATPD     | ATP synthase delta  | 79.20 | 0.00 |
| TRINITY_sp P221PSAH     | Photosystem I react | 79.20 | 0.00 |
| TRINITY_sp Q8LPLACS6    | Long chain acyl-CoA | 79.20 | 0.00 |
| TRINITY_sp P123PSAE     | Photosystem I react | 79.20 | 0.00 |
| TRINITY_sp Q6PIVFIGNL1  | Fidgetin-like prote | 79.10 | 0.00 |
| TRINITY_sp P1114HSP70   | Heat shock 70 kDa p | 79.10 | 0.00 |
| TRINITY_sp O0264mdh-2   | Probable malate deh | 79.10 | 0.00 |
| TRINITY_sp B9DGIACS     | Acetyl-coenzyme A s | 79.10 | 0.00 |
| TRINITY_sp P462CSBP     | Sedoheptulose-1,7-b | 79.00 | 0.00 |
| TRINITY_sp P5634mind    | Putative septum sit | 79.00 | 0.00 |
| TRINITY_sp Q2QVCLPC2    | Chaperone protein C | 79.00 | 0.00 |
| TRINITY_sp P2896-       | Elongation factor 2 | 78.90 | 0.00 |
| TRINITY_sp P3618HSC80   | Heat shock cognate  | 78.90 | 0.00 |
| TRINITY_sp Q9UW6pph-3   | Serine/threonine-pr | 78.90 | 0.00 |
| TRINITY_sp Q9MBIDHC10   | Dynein-1-beta heavy | 78.90 | 0.00 |
| TRINITY_sp A1Z0Mhamp    | Hepcidin OS=Larimic | 78.80 | 0.00 |
| TRINITY_sp P3446mog-1   | Probable pre-mRNA-s | 78.80 | 0.00 |
| TRINITY_sp O6498RPT1    | 26S protease regula | 78.80 | 0.00 |
| TRINITY_sp P0C8MCCRP1   | Probable serine/thr | 78.80 | 0.00 |
| TRINITY_sp Q86A6polr3a  | DNA-directed RNA po | 78.70 | 0.00 |
| TRINITY_sp Q9XI6ELF5A-1 | Eukaryotic translat | 78.70 | 0.00 |
| TRINITY_sp P0C5IIPP2A4  | Putative serine/thr | 78.70 | 0.00 |
| TRINITY_sp Q9SHRUB1     | Ubiquitin-NEDD8-lik | 78.70 | 0.00 |
| TRINITY_sp P2396PSAL    | Photosystem I react | 78.60 | 0.00 |
| TRINITY_sp P1127Fn1     | Fibronectin OS=Mus  | 78.60 | 0.00 |
| TRINITY_sp P3506-       | Histone H2A OS=Acro | 78.60 | 0.00 |
| TRINITY_sp P3506-       | Histone H2A OS=Acro | 78.60 | 0.00 |
| TRINITY_sp A8JF7NCS6    | Cytoplasmic tRNA 2- | 78.60 | 0.00 |
| TRINITY_sp P0227HTA1    | Histone H2AX OS=Tet | 78.60 | 0.00 |
| TRINITY_sp P2066bimG    | Serine/threonine-pr | 78.60 | 0.00 |
| TRINITY_sp Q9SL6PGR5    | Protein PROTON GRAD | 78.40 | 0.00 |
| TRINITY_sp P0616PSBR    | Photosystem II 10 k | 78.40 | 0.00 |
| TRINITY_sp Q32PELSM3    | U6 snRNA-associated | 78.40 | 0.00 |
| TRINITY_sp Q93Y6ppa1    | Soluble inorganic p | 78.40 | 0.00 |
| TRINITY_sp Q9LD6CBF5    | H/ACA ribonucleopro | 78.40 | 0.00 |
| TRINITY_sp Q8LK6DME     | Transcriptional act | 78.40 | 0.00 |
| TRINITY_sp Q3774mt-co2  | Cytochrome c oxidas | 78.40 | 0.00 |
| TRINITY_sp A4IJ6mns1    | Meiosis-specific nu | 78.40 | 0.00 |
| TRINITY_sp P2776ODA6    | Dynein, 70 kDa inte | 78.40 | 0.00 |
| TRINITY_sp Q3956ODA4    | Dynein beta chain,  | 78.40 | 0    |
| TRINITY_sp Q6QJFSULP2   | Sulfate permease 2, | 78.30 | 0.00 |
| TRINITY_sp O650SB62     | 60S ribosomal prote | 78.30 | 0.00 |
| TRINITY_sp Q8LPLABC2    | ABC transporter B f | 78.30 | 0.00 |
| TRINITY_sp Q9H6ITASP1   | Threonine aspartase | 78.30 | 0.00 |
| TRINITY_sp Q6ZR6DNAH12  | Dynein heavy chain  | 78.30 | 0.00 |
| TRINITY_sp Q3T0URPL14   | 60S ribosomal prote | 78.20 | 0.00 |
| TRINITY_sp A4QNinip7    | 60S ribosome subuni | 78.20 | 0.00 |

|                          |                     |       |      |
|--------------------------|---------------------|-------|------|
| TRINITY_sp P484{-        | Serine/threonine-pr | 78.20 | 0.00 |
| TRINITY_sp Q9ULCINO80    | DNA helicase INO80  | 78.10 | 0.00 |
| TRINITY_sp Q84U2ERY2     | 50S ribosomal prote | 78.10 | 0.00 |
| TRINITY_sp P175(eef1ao   | Elongation factor 1 | 78.10 | 0.00 |
| TRINITY_sp Q9MB1DHC10    | Dynein-1-beta heavy | 78.10 | 0.00 |
| TRINITY_sp P0991PETF     | Ferredoxin-1, chlor | 78.10 | 0.00 |
| TRINITY_sp O603(AQR      | Intron-binding prot | 78.00 | 0.00 |
| TRINITY_sp P0DJ5RPL23    | 60S ribosomal prote | 78.00 | 0.00 |
| TRINITY_sp P0783PETF     | Ferredoxin, chlorop | 78.00 | 0.00 |
| TRINITY_sp Q5ZIHCP3F3L   | Integrator complex  | 78.00 | 0.00 |
| TRINITY_sp P3641rab7A    | Ras-related protein | 78.00 | 0.00 |
| TRINITY_sp P1285PSBO     | Oxygen-evolving enh | 78.00 | 0.00 |
| TRINITY_sp Q7S6Vrps-28   | 40S ribosomal prote | 78.00 | 0.00 |
| TRINITY_sp Q426{-        | Malate dehydrogenas | 78.00 | 0.00 |
| TRINITY_sp Q3957ODA9     | Dynein, 78 kDa inte | 78.00 | 0.00 |
| TRINITY_sp Q9Y0Eppp4c    | Serine/threonine-pr | 78.00 | 0.00 |
| TRINITY_sp P4965RPL23A   | 60S ribosomal prote | 77.90 | 0.00 |
| TRINITY_sp P2538GBLP     | Guanine nucleotide- | 77.90 | 0.00 |
| TRINITY_sp Q54QFerKB     | Extracellular signa | 77.90 | 0.00 |
| TRINITY_sp P0227HTA1     | Histone H2AX OS=Tet | 77.90 | 0.00 |
| TRINITY_sp P1545CYC1     | Cytochrome c OS=Ch1 | 77.90 | 0.00 |
| TRINITY_sp Q9SE1RPT4A    | 26S protease regula | 77.80 | 0.00 |
| TRINITY_sp A81S1ARL3     | ADP-ribosylation fa | 77.80 | 0.00 |
| TRINITY_sp Q2KHUEIF2S3   | Eukaryotic translat | 77.80 | 0.00 |
| TRINITY_sp P0227HTA1     | Histone H2AX OS=Tet | 77.80 | 0.00 |
| TRINITY_sp I2CY2CHLREDR  | Acyl-lipid (7-3)-de | 77.80 | 0.00 |
| TRINITY_sp Q9CA1CKL2     | Casein kinase 1-lik | 77.80 | 0.00 |
| TRINITY_sp Q8H11PGRL1A   | PGR5-like protein 1 | 77.80 | 0.00 |
| TRINITY_sp P4911-        | Luminal-binding pro | 77.70 | 0.00 |
| TRINITY_sp Q9C55IPMS2    | 2-isopropylmalate s | 77.70 | 0.00 |
| TRINITY_sp P4646TBP1     | 26S protease regula | 77.70 | 0.00 |
| TRINITY_sp P1114-        | Heat shock 70 kDa p | 77.70 | 0.00 |
| TRINITY_sp Q1ZX(celp3    | Probable elongator  | 77.70 | 0.00 |
| TRINITY_sp Q4319LOX1.5   | Probable linoleate  | 77.60 | 0.00 |
| TRINITY_sp A9VE5 13033   | Inosine triphosphat | 77.60 | 0.00 |
| TRINITY_sp P1099-        | Actin, cytoplasmic  | 77.60 | 0.00 |
| TRINITY_sp A5EKIgata     | Glutamyl-tRNA (Gln) | 77.60 | 0.00 |
| TRINITY_sp O7553SF3B1    | Splicing factor 3B  | 77.60 | 0.00 |
| TRINITY_sp Q3895At3g2656 | Probable pre-mRNA-s | 77.60 | 0    |
| TRINITY_sp P5142RPL39A   | 60S ribosomal prote | 77.60 | 0.00 |
| TRINITY_sp Q3961ODA11    | Dynein alpha chain, | 77.60 | 0    |
| TRINITY_sp Q5F4FAAT      | Aspartate aminotran | 77.50 | 0.00 |
| TRINITY_sp Q32L7TRAPPC6F | Trafficking protein | 77.50 | 0.00 |
| TRINITY_sp Q9FXHGOLS2    | Galactinol synthase | 77.50 | 0.00 |
| TRINITY_sp Q3T0EPPP1CA   | Serine/threonine-pr | 77.50 | 0.00 |
| TRINITY_sp Q9MAHISU2     | Iron-sulfur cluster | 77.50 | 0.00 |
| TRINITY_sp P5242PAC1     | Proteasome subunit  | 77.50 | 0.00 |
| TRINITY_sp Q9SP(CYP20-1  | Peptidyl-prolyl cis | 77.50 | 0.00 |

|                                              |                     |       |      |
|----------------------------------------------|---------------------|-------|------|
| TRINITY_sp P5056(H2A-II                      | Histone H2A OS=Chla | 77.50 | 0.00 |
| TRINITY_sp P4275(RPS11                       | 40S ribosomal prote | 77.50 | 0.00 |
| TRINITY_sp P3414(racB                        | Rho-related protein | 77.50 | 0.00 |
| TRINITY_sp Q4266(ATPD                        | ATP synthase delta  | 77.50 | 0.00 |
| TRINITY_sp Q0276(RPL24                       | 50S ribosomal prote | 77.40 | 0.00 |
| TRINITY_sp Q9SMFDHC1                         | Dynein-1-alpha heav | 77.40 | 0.00 |
| TRINITY_sp P2864-                            | 28 kDa ribonucleopr | 77.40 | 0.00 |
| TRINITY_sp F4KG3RVE1                         | Protein REVEILLE 1  | 77.40 | 0.00 |
| TRINITY_sp O5001AP-17                        | AP-2 complex subuni | 77.40 | 0.00 |
| TRINITY_sp Q8H51Os07g066(Manganese-dependent |                     | 77.40 | 0.00 |
| TRINITY_sp A2ZC6SC34                         | 60S ribosomal prote | 77.40 | 0.00 |
| TRINITY_sp Q6317Dnah7                        | Dynein heavy chain  | 77.40 | 0.00 |
| TRINITY_sp Q3961ODA11                        | Dynein alpha chain, | 77.40 | 0.00 |
| TRINITY_sp Q9R01Ctsf                         | Cathepsin F OS=Mus  | 77.30 | 0.00 |
| TRINITY_sp Q2S06(pckA2                       | Phosphoenolpyruvate | 77.30 | 0.00 |
| TRINITY_sp P3411cdk5                         | Cyclin-dependent ki | 77.30 | 0.00 |
| TRINITY_sp A8HYUMETM                         | S-adenosylmethionin | 77.30 | 0.00 |
| TRINITY_sp Q9SE1RPT3                         | 26S protease regula | 77.30 | 0.00 |
| TRINITY_sp Q9SZ6SHM1                         | Serine hydroxymethy | 77.30 | 0.00 |
| TRINITY_sp Q6556FTSH2                        | ATP-dependent zinc  | 77.30 | 0.00 |
| TRINITY_sp P0DL6(DRC1                        | Dynein regulatory c | 77.20 | 0.00 |
| TRINITY_sp P4926(RPS20A                      | 40S ribosomal prote | 77.20 | 0.00 |
| TRINITY_sp Q9ST1-                            | Calreticulin OS=Chl | 77.20 | 0.00 |
| TRINITY_sp Q9FMFRIN1                         | RuvB-like protein 1 | 77.20 | 0.00 |
| TRINITY_sp P2156(CYP                         | Peptidyl-prolyl cis | 77.20 | 0.00 |
| TRINITY_sp P9297APR1                         | 5'-adenylylsulfate  | 77.10 | 0.00 |
| TRINITY_sp Q3BA1-                            | Uncharacterized pro | 77.10 | 0.00 |
| TRINITY_sp Q4301Os06g026(Asparagine syntheta |                     | 77.10 | 0.00 |
| TRINITY_sp Q2717DHC-8                        | Dynein heavy chain, | 77.10 | 0.00 |
| TRINITY_sp Q7F91CLPC1                        | Chaperone protein C | 77.00 | 0.00 |
| TRINITY_sp Q56Y6MAP2B                        | Methionine aminopep | 77.00 | 0.00 |
| TRINITY_sp A8LP7hslU                         | ATP-dependent prote | 77.00 | 0.00 |
| TRINITY_sp Q6ZD1SDH1                         | Succinate dehydroge | 77.00 | 0.00 |
| TRINITY_sp P6286RAB1A                        | Ras-related protein | 77.00 | 0.00 |
| TRINITY_sp Q7616(RPS15A                      | 40S ribosomal prote | 76.90 | 0.00 |
| TRINITY_sp Q9636(ARF1                        | ADP-ribosylation fa | 76.90 | 0.00 |
| TRINITY_sp O6506SB62                         | 60S ribosomal prote | 76.90 | 0.00 |
| TRINITY_sp Q54U6(dnapkcs                     | DNA-dependent prote | 76.90 | 0.00 |
| TRINITY_sp Q8LQ6FTSH5                        | ATP-dependent zinc  | 76.90 | 0.00 |
| TRINITY_sp P2226fbl                          | rRNA 2'-O-methyltra | 76.90 | 0.00 |
| TRINITY_sp Q54J4pdx1                         | Probable pyridoxal  | 76.90 | 0.00 |
| TRINITY_sp P1796PSMC3                        | 26S protease regula | 76.90 | 0.00 |
| TRINITY_sp P5396PETH                         | Ferredoxin--NADP re | 76.90 | 0.00 |
| TRINITY_sp Q9LH6(At3g1236Nascent polypeptide |                     | 76.90 | 0.00 |
| TRINITY_sp P4626(RPL8A                       | 60S ribosomal prote | 76.90 | 0.00 |
| TRINITY_sp Q9VH6eIF4AIII1Eukaryotic initiati |                     | 76.90 | 0.00 |
| TRINITY_sp P4931-                            | Glycine-rich RNA-bi | 76.90 | 0.00 |
| TRINITY_sp Q9SF6PAH1                         | Phosphatidate phosp | 76.90 | 0.00 |
| TRINITY_sp Q9CY6Serbp1                       | Plasminogen activat | 76.80 | 0.00 |
| TRINITY_sp P8386-                            | Histone H2B (Fragme | 76.80 | 0.00 |
| TRINITY_sp P5186-                            | ADP-ribosylation fa | 76.80 | 0.00 |
| TRINITY_sp P5186-                            | ADP-ribosylation fa | 76.80 | 0.00 |
| TRINITY_sp P5186-                            | ADP-ribosylation fa | 76.80 | 0.00 |
| TRINITY_sp Q9LX6(RPS9B                       | 40S ribosomal prote | 76.80 | 0.00 |
| TRINITY_sp P4136FTRC                         | Ferredoxin-thioredo | 76.80 | 0.00 |
| TRINITY_sp Q9LR6RPL13AB                      | 60S ribosomal prote | 76.80 | 0.00 |

|                           |                     |       |      |
|---------------------------|---------------------|-------|------|
| TRINITY_sp P514 RPL18AB   | 60S ribosomal prote | 76.80 | 0.00 |
| TRINITY_sp P793 PCCB      | Propionyl-CoA carbo | 76.80 | 0.00 |
| TRINITY_sp Q9VU SmD1      | Probable small nucl | 76.70 | 0.00 |
| TRINITY_sp P378 PFL       | Formate acetyltrans | 76.70 | 0.00 |
| TRINITY_sp P458 RPL31     | 60S ribosomal prote | 76.70 | 0.00 |
| TRINITY_sp P485 pph-1     | Serine/threonine-pr | 76.70 | 0.00 |
| TRINITY_sp Q9YGI SUCLG1   | Succinate--CoA liga | 76.70 | 0.00 |
| TRINITY_sp Q599 trpB      | Tryptophan synthase | 76.70 | 0.00 |
| TRINITY_sp Q9SI At2g402   | Eukaryotic translat | 76.70 | 0.00 |
| TRINITY_sp O603 AQR       | Intron-binding prot | 76.70 | 0.00 |
| TRINITY_sp P264 HSP70     | Heat shock 70 kDa p | 76.70 | 0.00 |
| TRINITY_sp Q31K mmnG      | tRNA uridine 5-carb | 76.70 | 0.00 |
| TRINITY_sp P0CT HTB1      | Histone H2B OS=Magn | 76.60 | 0.00 |
| TRINITY_sp P0CY RPS23A    | 40S ribosomal prote | 76.60 | 0.00 |
| TRINITY_sp Q395 YPTC5     | GTP-binding protein | 76.60 | 0.00 |
| TRINITY_sp Q4G2 DER2.1    | Derlin-2.1 OS=Zea m | 76.60 | 0.00 |
| TRINITY_sp Q2W8 argG      | Argininosuccinate s | 76.60 | 0.00 |
| TRINITY_sp P462 RPL8A     | 60S ribosomal prote | 76.60 | 0.00 |
| TRINITY_sp Q8VZI ASK5     | Shaggy-related prot | 76.60 | 0.00 |
| TRINITY_sp O650 SB62      | 60S ribosomal prote | 76.60 | 0.00 |
| TRINITY_sp Q395 ODA2      | Dynein gamma chain, | 76.60 | 0    |
| TRINITY_sp Q9P2 IDNAH1    | Dynein heavy chain  | 76.60 | 0.00 |
| TRINITY_sp P9WQ treS      | Trehalose synthase/ | 76.50 | 0.00 |
| TRINITY_sp Q426 GLN1      | Glutamine synthetas | 76.50 | 0.00 |
| TRINITY_sp Q9AUF Os03g071 | Coatomer subunit al | 76.50 | 0.00 |
| TRINITY_sp Q9LD CBF5      | H/ACA ribonucleopro | 76.50 | 0.00 |
| TRINITY_sp P843 ACTB      | Actin, cytoplasmic  | 76.40 | 0.00 |
| TRINITY_sp Q425 At1g7901  | NADH dehydrogenase  | 76.40 | 0.00 |
| TRINITY_sp Q9TW cypB      | Peptidyl-prolyl cis | 76.40 | 0.00 |
| TRINITY_sp Q9FF RPL12C    | 60S ribosomal prote | 76.40 | 0.00 |
| TRINITY_sp P490 Os12g02   | Protein mago nashi  | 76.40 | 0.00 |
| TRINITY_sp Q9ZW At2g430   | 3-isopropylmalate d | 76.40 | 0.00 |
| TRINITY_sp P492 RPS17     | 40S ribosomal prote | 76.40 | 0.00 |
| TRINITY_sp Q9LV BOB1      | Protein BOBBER 1 OS | 76.40 | 0.00 |
| TRINITY_sp P327 RBCS-3    | Ribulose bisphospha | 76.40 | 0.00 |
| TRINITY_sp Q425 At1g7901  | NADH dehydrogenase  | 76.40 | 0.00 |
| TRINITY_sp Q431 LOX1.5    | Probable linoleate  | 76.40 | 0.00 |
| TRINITY_sp Q9SJ MBF1A     | Multiprotein-bridgi | 76.30 | 0.00 |
| TRINITY_sp Q94F CHLI      | Magnesium-chelatase | 76.30 | 0.00 |
| TRINITY_sp Q8GT SCOA      | Succinate--CoA liga | 76.30 | 0.00 |
| TRINITY_sp O233 NFYB3     | Nuclear transcripti | 76.30 | 0.00 |
| TRINITY_sp Q32P FCF1      | rRNA-processing pro | 76.20 | 0.00 |
| TRINITY_sp Q32L H2AFV     | Histone H2A.V OS=Bo | 76.20 | 0.00 |
| TRINITY_sp P0CG UBB       | Polyubiquitin-B OS= | 76.20 | 0.00 |
| TRINITY_sp P484 Pp1alpha  | Serine/threonine-pr | 76.20 | 0.00 |
| TRINITY_sp Q9NI cypE      | Peptidyl-prolyl cis | 76.10 | 0.00 |
| TRINITY_sp Q54I FragA     | Ras-related GTP-bin | 76.10 | 0.00 |
| TRINITY_sp Q9SB PGK       | Phosphoglycerate ki | 76.10 | 0.00 |
| TRINITY_sp Q9UF IDNAH17   | Dynein heavy chain  | 76.10 | 0.00 |
| TRINITY_sp P0C8 CCRP1     | Probable serine/thr | 76.10 | 0.00 |
| TRINITY_sp Q6C0 SNU13     | 13 kDa ribonucleopr | 76.00 | 0.00 |
| TRINITY_sp Q59L MCSE4     | Histone H3-like cen | 76.00 | 0.00 |
| TRINITY_sp P229 MED37D    | Probable mediator o | 76.00 | 0.00 |
| TRINITY_sp C1MI MICPUCDF  | tRNA-splicing ligas | 76.00 | 0.00 |
| TRINITY_sp Q9AX DHS       | Deoxyhypusine synth | 76.00 | 0.00 |
| TRINITY_sp H3JU SGT1      | Peptidyl serine alp | 76.00 | 0.00 |

|                  |         |                              |       |      |
|------------------|---------|------------------------------|-------|------|
| TRINITY_sp Q9DE2 | ruvbl2  | RuvB-like 2 OS=Xeno          | 76.00 | 0.00 |
| TRINITY_sp Q94J  | Atlg542 | Protein translation          | 75.90 | 0.00 |
| TRINITY_sp P817  | (-      | Lysozyme C, spleen           | 75.90 | 0.00 |
| TRINITY_sp Q3BA  | 1-      | Uncharacterized pro          | 75.90 | 0.00 |
| TRINITY_sp Q9YH  | 1       | SDHB Succinate dehydroge     | 75.90 | 0.00 |
| TRINITY_sp Q55C  | 1       | ascc31 Activating signal c   | 75.90 | 0.00 |
| TRINITY_sp Q245  | 1       | EIF6 Eukaryotic translat     | 75.90 | 0.00 |
| TRINITY_sp O803  | 4       | ERF4 Ethylene-responsive     | 75.90 | 0.00 |
| TRINITY_sp Q395  | 7       | ODA2 Dynein gamma chain,     | 75.90 | 0    |
| TRINITY_sp A2Y6  | (       | CAM2 Calmodulin-2 OS=Ory     | 75.80 | 0.00 |
| TRINITY_sp P044  | 4       | Cd74 H-2 class II histoc     | 75.80 | 0.00 |
| TRINITY_sp P325  | (       | RPD3 Histone deacetylase     | 75.80 | 0.00 |
| TRINITY_sp Q54Q  | 1       | FerKB Extracellular signa    | 75.80 | 0.00 |
| TRINITY_sp Q5E9  | 8       | RPS5 40S ribosomal prote     | 75.80 | 0.00 |
| TRINITY_sp O576  | 8       | sf3b1 Splicing factor 3B     | 75.80 | 0    |
| TRINITY_sp P206  | 6       | bimG Serine/threonine-pr     | 75.80 | 0.00 |
| TRINITY_sp Q426  | 8       | GLN2 Glutamine synthetas     | 75.80 | 0.00 |
| TRINITY_sp P496  | (       | RPL23A 60S ribosomal prote   | 75.80 | 0.00 |
| TRINITY_sp Q3BA  | 1-      | Uncharacterized pro          | 75.70 | 0.00 |
| TRINITY_sp Q070  | (       | PP2A1 Serine/threonine-pr    | 75.70 | 0.00 |
| TRINITY_sp P798  | 1       | tf Serotransferrin OS=       | 75.70 | 0.00 |
| TRINITY_sp Q9SU  | (       | ALDH2B4 Aldehyde dehydrogen  | 75.70 | 0.00 |
| TRINITY_sp Q949  | 9       | ADS3 Palmitoyl-monogalac     | 75.70 | 0.00 |
| TRINITY_sp O786  | 8       | mt-atp6 ATP synthase subuni  | 75.60 | 0.00 |
| TRINITY_sp A2Y6  | (       | CAM2 Calmodulin-2 OS=Ory     | 75.60 | 0.00 |
| TRINITY_sp Q086  | (       | RPS14 40S ribosomal prote    | 75.60 | 0.00 |
| TRINITY_sp P629  | (       | RAC1 Ras-related C3 botu     | 75.60 | 0.00 |
| TRINITY_sp Q8W2  | (       | CNS2 COP9 signalosome co     | 75.60 | 0.00 |
| TRINITY_sp P387  | (       | DYS1 Deoxyhypusine synth     | 75.60 | 0.00 |
| TRINITY_sp Q96C  | 1       | C8orf44 Putative uncharacte  | 75.60 | 0.00 |
| TRINITY_sp P502  | 5       | ALTA Tubulin alpha-1A ch     | 75.60 | 0.00 |
| TRINITY_sp Q039  | (       | L1818 Chlorophyll a-b bin    | 75.60 | 0.00 |
| TRINITY_sp Q9Y2  | (       | RUVBL1 RuvB-like 1 OS=Homo   | 75.60 | 0.00 |
| TRINITY_sp Q84K  | 1       | SQD1 UDP-sulfoquinovose      | 75.60 | 0.00 |
| TRINITY_sp Q396  | 1       | ODA11 Dynein alpha chain,    | 75.60 | 0.00 |
| TRINITY_sp O808  | 4       | PMM Phosphomannomutase       | 75.60 | 0.00 |
| TRINITY_sp P314  | 1       | AVP1 Pyrophosphate-energ     | 75.60 | 0.00 |
| TRINITY_sp P546  | 3       | fttB 14-3-3-like protein     | 75.50 | 0.00 |
| TRINITY_sp P364  | (       | gpbA Guanine nucleotide-     | 75.50 | 0.00 |
| TRINITY_sp Q2II  | 8       | rp1L 50S ribosomal prote     | 75.50 | 0.00 |
| TRINITY_sp Q6LC  | 1       | vch3-II Histone H3 type 2 O  | 75.50 | 0.00 |
| TRINITY_sp P285  | 5       | PDS Phytoene dehydrogen      | 75.50 | 0.00 |
| TRINITY_sp Q6PF  | 1       | ppdpfa Pancreatic progenit   | 75.40 | 0.00 |
| TRINITY_sp Q6PB  | 1       | rp18 60S ribosomal prote     | 75.40 | 0.00 |
| TRINITY_sp A8HU  | 7       | CFAP58 Cilia- and flagella   | 75.40 | 0.00 |
| TRINITY_sp P301  | (-      | Actin-1 OS=Pisum sa          | 75.30 | 0.00 |
| TRINITY_sp P257  | 7       | Os04g065 Oryzain alpha chain | 75.30 | 0.00 |
| TRINITY_sp O966  | 2       | arcD Actin-related prote     | 75.30 | 0.00 |
| TRINITY_sp P258  | (       | UBC1 Ubiquitin-conjugati     | 75.30 | 0.00 |
| TRINITY_sp Q137  | 3       | ATP1A4 Sodium/potassium-tr   | 75.30 | 0.00 |
| TRINITY_sp Q8LS  | 1       | FYPP Phytochrome-associa     | 75.30 | 0.00 |
| TRINITY_sp Q8RV  | (       | SULP1 Sulfate permease 1,    | 75.30 | 0.00 |
| TRINITY_sp Q9VH  | 8       | EIF4AII Eukaryotic initiati  | 75.20 | 0.00 |
| TRINITY_sp C4IZ  | 7       | TATC Sec-independent pro     | 75.20 | 0.00 |
| TRINITY_sp Q9SC  | 1       | RPS2D 40S ribosomal prote    | 75.20 | 0.00 |
| TRINITY_sp Q9SX  | (       | PAD1 Proteasome subunit      | 75.20 | 0.00 |

|                             |                      |       |      |
|-----------------------------|----------------------|-------|------|
| TRINITY_sp P6777 PPP2CA     | Serine/threonine-pr  | 75.10 | 0.00 |
| TRINITY_sp P2635 TBP1       | TATA-box-binding pr  | 75.10 | 0.00 |
| TRINITY_sp Q6MVI dut-1      | Deoxyuridine 5'-tri  | 75.00 | 0.00 |
| TRINITY_sp Q95JI DNAJA1     | DnaJ homolog subfam  | 75.00 | 0.00 |
| TRINITY_sp P3403 dhcA       | Dynein heavy chain,  | 75.00 | 0.00 |
| TRINITY_sp Q9STI -          | Calreticulin OS=Chl  | 75.00 | 0.00 |
| TRINITY_sp Q6P26 PRPF8      | Pre-mRNA-processing  | 75.00 | 0.00 |
| TRINITY_sp Q3998 -          | Beta-carotene ketol  | 75.00 | 0.00 |
| TRINITY_sp Q5VRI HGO        | Homogentisate 1,2-d  | 75.00 | 0.00 |
| TRINITY_sp Q6DRH nop10      | H/ACA ribonucleopro  | 75.00 | 0.00 |
| TRINITY_sp Q8H1I MED37B     | Probable mediator o  | 75.00 | 0.00 |
| TRINITY_sp Q3885 DXS        | 1-deoxy-D-xylulose-  | 75.00 | 0.00 |
| TRINITY_sp Q94AF IIL1       | 3-isopropylmalate d  | 75.00 | 0.00 |
| TRINITY_sp Q9C07 rpl37      | 60S ribosomal prote  | 75.00 | 0.00 |
| TRINITY_sp Q0QHI -          | Probable citrate sy  | 75.00 | 0.00 |
| TRINITY_sp Q1090 Os10g05050 | (DEAD-box ATP-depend | 74.90 | 0.00 |
| TRINITY_sp P3640 ARL2       | ADP-ribosylation fa  | 74.90 | 0.00 |
| TRINITY_sp Q0189 -          | Heat shock 70 kDa p  | 74.90 | 0.00 |
| TRINITY_sp P6299 RAC1       | Ras-related C3 botu  | 74.90 | 0.00 |
| TRINITY_sp Q9DD6 -          | Lysozyme C OS=Paral  | 74.80 | 0.00 |
| TRINITY_sp P2580 -          | Cysteine proteinase  | 74.80 | 0.00 |
| TRINITY_sp P5466 fttB       | 14-3-3-like protein  | 74.80 | 0.00 |
| TRINITY_sp P2818 rps13      | 40S ribosomal prote  | 74.80 | 0.00 |
| TRINITY_sp Q86CF atg8       | Autophagy-related p  | 74.80 | 0.00 |
| TRINITY_sp Q3957 -          | Dynein 11 kDa light  | 74.80 | 0.00 |
| TRINITY_sp Q4268 GLN2       | Glutamine synthetas  | 74.80 | 0.00 |
| TRINITY_sp Q32L6 bhmt       | Betaine--homocystei  | 74.80 | 0.00 |
| TRINITY_sp Q4269 -          | RuBisCO large subun  | 74.80 | 0.00 |
| TRINITY_sp P2586 UBC1       | Ubiquitin-conjugati  | 74.70 | 0.00 |
| TRINITY_sp Q9LD9 CBF5       | H/ACA ribonucleopro  | 74.70 | 0.00 |
| TRINITY_sp O6146 RPL37A     | 60S ribosomal prote  | 74.70 | 0.00 |
| TRINITY_sp Q9MBI DHC10      | Dynein-1-beta heavy  | 74.70 | 0    |
| TRINITY_sp O8084 PEX11D     | Peroxisomal membran  | 74.70 | 0.00 |
| TRINITY_sp Q84XU PAPP5      | Serine/threonine-pr  | 74.60 | 0.00 |
| TRINITY_sp O2370 PAB1       | Proteasome subunit   | 74.60 | 0.00 |
| TRINITY_sp O1414 ino80      | Putative DNA helica  | 74.60 | 0.00 |
| TRINITY_sp Q6DUH Rab7b      | Ras-related protein  | 74.60 | 0.00 |
| TRINITY_sp Q9AR2 HD6        | Casein kinase II su  | 74.60 | 0.00 |
| TRINITY_sp P7981 tf         | Serotransferrin OS=  | 74.60 | 0.00 |
| TRINITY_sp P7009 RAD51      | DNA repair protein   | 74.60 | 0.00 |
| TRINITY_sp Q0906 TEF        | Elongation factor 1  | 74.60 | 0.00 |
| TRINITY_sp P3100 RpS2       | 40S ribosomal prote  | 74.60 | 0.00 |
| TRINITY_sp P0962 LPD1       | Dihydrolypoyl dehyd  | 74.60 | 0.00 |
| TRINITY_sp P8327 hba1       | Hemoglobin subunit   | 74.60 | 0.00 |
| TRINITY_sp Q9XXI H28O16.1   | ATP synthase subuni  | 74.60 | 0.00 |
| TRINITY_sp Q9LE8 IRE        | Probable serine/thr  | 74.60 | 0.00 |
| TRINITY_sp Q61L7 arf-1.2    | ADP-ribosylation fa  | 74.60 | 0.00 |
| TRINITY_sp Q0597 RAB1A      | Ras-related protein  | 74.60 | 0.00 |
| TRINITY_sp P4088 -          | Carbonic anhydrase,  | 74.60 | 0.00 |
| TRINITY_sp Q0045 RPL27A     | 60S ribosomal prote  | 74.50 | 0.00 |
| TRINITY_sp Q9P2E KIF17      | Kinesin-like protei  | 74.50 | 0.00 |
| TRINITY_sp O4855 RPL17      | 60S ribosomal prote  | 74.50 | 0.00 |
| TRINITY_sp P1235 PSAF       | Photosystem I react  | 74.50 | 0.00 |
| TRINITY_sp Q9AR2 HD6        | Casein kinase II su  | 74.50 | 0.00 |
| TRINITY_sp Q8RW3 CHR11      | ISWI chromatin-remo  | 74.50 | 0.00 |
| TRINITY_sp Q852I HD16       | Casein kinase 1-lik  | 74.50 | 0.00 |



|                         |                      |       |      |
|-------------------------|----------------------|-------|------|
| TRINITY_sp Q557HfpaB-1  | SCF ubiquitin ligas  | 74.40 | 0.00 |
| TRINITY_sp Q54F3narfl   | Probable cytosolic   | 74.40 | 0.00 |
| TRINITY_sp P6299RAC1    | Ras-related C3 botu  | 74.40 | 0.00 |
| TRINITY_sp P4464mog     | Molybdopterin adeny  | 74.40 | 0.00 |
| TRINITY_sp B0C0EmiaB    | tRNA-2-methylthio-N  | 74.40 | 0.00 |
| TRINITY_sp A7MB4RQCD1   | Cell differentiatio  | 74.40 | 0.00 |
| TRINITY_sp Q54R0ar18    | ADP-ribosylation fa  | 74.40 | 0.00 |
| TRINITY_sp P5201cyn-7   | Peptidyl-prolyl cis  | 74.40 | 0.00 |
| TRINITY_sp O598(SPCC550 | Putative ATP-depend  | 74.30 | 0.00 |
| TRINITY_sp Q54G5ascc3   | Activating signal c  | 74.30 | 0.00 |
| TRINITY_sp Q0072-       | Histone H2A type 4   | 74.30 | 0.00 |
| TRINITY_sp Q8LAUGATA1   | GATA transcription   | 74.30 | 0.00 |
| TRINITY_sp A8IEIPRMT1   | Protein arginine N-  | 74.30 | 0.00 |
| TRINITY_sp Q2569VAPB    | V-type proton ATPas  | 74.20 | 0.00 |
| TRINITY_sp P4904-       | Vacuolar-processing  | 74.20 | 0.00 |
| TRINITY_sp Q54QEdimt1   | Probable dimethylad  | 74.20 | 0.00 |
| TRINITY_sp Q9LEENENO1   | Enolase 1 OS=Hevea   | 74.20 | 0.00 |
| TRINITY_sp P0949CLTA    | Clathrin light chai  | 74.20 | 0.00 |
| TRINITY_sp Q9BZCDPH1    | Diphthamide biosynt  | 74.20 | 0.00 |
| TRINITY_sp Q3956ODA4    | Dynein beta chain,   | 74.20 | 0    |
| TRINITY_sp Q8L32FZR2    | Protein FIZZY-RELAT  | 74.20 | 0.00 |
| TRINITY_sp P0497CLTB    | Clathrin light chai  | 74.20 | 0.00 |
| TRINITY_sp Q9DC7Ndufs7  | NADH dehydrogenase   | 74.10 | 0.00 |
| TRINITY_sp Q9DC7Ndufs7  | NADH dehydrogenase   | 74.10 | 0.00 |
| TRINITY_sp Q3BA1-       | Uncharacterized pro  | 74.10 | 0.00 |
| TRINITY_sp P3686YPTV3   | GTP-binding protein  | 74.10 | 0.00 |
| TRINITY_sp Q9MA7SDC     | Serine decarboxylas  | 74.10 | 0.00 |
| TRINITY_sp O2264RPS16   | 40S ribosomal prote  | 74.10 | 0.00 |
| TRINITY_sp P8183Ppc1    | Phosphoenolpyruvate  | 74.10 | 0.00 |
| TRINITY_sp Q9M07AUR1    | Serine/threonine-pr  | 74.10 | 0.00 |
| TRINITY_sp Q6ZDSDH1     | Succinate dehydroge  | 74.10 | 0.00 |
| TRINITY_sp Q4257At5g117 | NADH dehydrogenase   | 74.10 | 0.00 |
| TRINITY_sp P5593-       | Probable cyclin-dep  | 74.00 | 0.00 |
| TRINITY_sp P3403dhcA    | Dynein heavy chain,  | 74.00 | 0.00 |
| TRINITY_sp P611(RAB2A   | Ras-related protein  | 74.00 | 0.00 |
| TRINITY_sp Q5R54ATP5A1  | ATP synthase subuni  | 74.00 | 0.00 |
| TRINITY_sp O6508SB62    | 60S ribosomal prote  | 74.00 | 0.00 |
| TRINITY_sp Q6H53Os09g02 | Enoyl-[acyl-carrier  | 74.00 | 0.00 |
| TRINITY_sp Q3901CPK11   | Calcium-dependent p  | 74.00 | 0.00 |
| TRINITY_sp O8184PUMP1   | Mitochondrial uncou  | 74.00 | 0.00 |
| TRINITY_sp Q9SEJRPT4A   | 26S protease regula  | 74.00 | 0.00 |
| TRINITY_sp Q54X7aco1    | Probable cytoplasmic | 74.00 | 0.00 |
| TRINITY_sp Q4015HSF8    | Heat shock factor p  | 74.00 | 0.00 |
| TRINITY_sp Q9CP9Cox6c   | Cytochrome c oxidas  | 74.00 | 0.00 |
| TRINITY_sp Q047(-       | Tubulin beta chain   | 73.90 | 0.00 |
| TRINITY_sp Q245HEIF6    | Eukaryotic translat  | 73.90 | 0.00 |
| TRINITY_sp Q945URPS15   | 40S ribosomal prote  | 73.90 | 0.00 |
| TRINITY_sp Q3T0IRPL30   | 60S ribosomal prote  | 73.90 | 0.00 |
| TRINITY_sp Q9DE2ruvbl1  | RuvB-like 1 OS=Xeno  | 73.90 | 0.00 |
| TRINITY_sp Q9409TMN2    | Transmembrane 9 sup  | 73.90 | 0.00 |
| TRINITY_sp Q9I81fabp10a | Fatty acid-binding   | 73.80 | 0.00 |
| TRINITY_sp Q86C6tor     | Target of rapamycin  | 73.80 | 0.00 |
| TRINITY_sp Q54HImybQ    | Myb-like protein Q   | 73.80 | 0.00 |
| TRINITY_sp Q1W37-       | Phosphomannomutase   | 73.80 | 0.00 |
| TRINITY_sp P1211ATPC    | ATP synthase gamma   | 73.80 | 0.00 |
| TRINITY_sp Q9FM6PI4KB1  | Phosphatidylinosito  | 73.80 | 0.00 |

|                           |                     |       |      |
|---------------------------|---------------------|-------|------|
| TRINITY_sp P0746CAM       | Calmodulin OS=Param | 73.80 | 0.00 |
| TRINITY_sp Q8H16NBP35     | Cytosolic Fe-S clus | 73.80 | 0.00 |
| TRINITY_sp Q2QM6Os12g0612 | 2-methyl-6-phytyl-1 | 73.80 | 0.00 |
| TRINITY_sp A8IL6CFAP52    | Cilia- and flagella | 73.80 | 0.00 |
| TRINITY_sp A8J97THI1      | Thiamine thiazole s | 73.80 | 0.00 |
| TRINITY_sp Q9SSI6PRP8A    | Pre-mRNA-processing | 73.80 | 0.00 |
| TRINITY_sp Q3BA1-         | Uncharacterized pro | 73.70 | 0.00 |
| TRINITY_sp E9L77-         | Bifunctional aspart | 73.70 | 0.00 |
| TRINITY_sp A2YW6HSP81-1   | Heat shock protein  | 73.70 | 0.00 |
| TRINITY_sp O4296fkh1      | Peptidyl-prolyl cis | 73.70 | 0.00 |
| TRINITY_sp O0466THRRS     | Threonine--tRNA lig | 73.70 | 0.00 |
| TRINITY_sp Q9466RAP1      | Ras-related protein | 73.70 | 0.00 |
| TRINITY_sp Q3BA1-         | Uncharacterized pro | 73.70 | 0.00 |
| TRINITY_sp O1546ABCC4     | Multidrug resistanc | 73.70 | 0.00 |
| TRINITY_sp Q3906MPK6      | Mitogen-activated p | 73.60 | 0.00 |
| TRINITY_sp Q9SIF6RPS25B   | 40S ribosomal prote | 73.60 | 0.00 |
| TRINITY_sp F4K26FCUV      | Pre-mRNA-splicing f | 73.60 | 0.00 |
| TRINITY_sp Q8IQ6Mocs1     | Molybdenum cofactor | 73.60 | 0.00 |
| TRINITY_sp Q0644-         | Cysteine proteinase | 73.60 | 0.00 |
| TRINITY_sp Q5UAI6RpS4     | 40S ribosomal prote | 73.50 | 0.00 |
| TRINITY_sp Q5E96RPS5      | 40S ribosomal prote | 73.50 | 0.00 |
| TRINITY_sp O2376PAB1      | Proteasome subunit  | 73.50 | 0.00 |
| TRINITY_sp Q54M6dhx16     | Putative pre-mRNA-s | 73.50 | 0.00 |
| TRINITY_sp Q54R6srfB      | Serum response fact | 73.50 | 0.00 |
| TRINITY_sp Q9SL6PGR5      | Protein PROTON GRAD | 73.50 | 0.00 |
| TRINITY_sp P8057-         | Alcohol dehydrogena | 73.50 | 0.00 |
| TRINITY_sp P2686ATPA      | ATP synthase subuni | 73.50 | 0.00 |
| TRINITY_sp A8I26LIP1P     | Lipoyl synthase, ch | 73.50 | 0.00 |
| TRINITY_sp Q3SZ6ISNRPD2   | Small nuclear ribon | 73.40 | 0.00 |
| TRINITY_sp P2296MED37E    | Probable mediator o | 73.40 | 0.00 |
| TRINITY_sp P1706-         | Carbonic anhydrase, | 73.40 | 0.00 |
| TRINITY_sp Q8H86UAM1      | UDP-arabinopyranose | 73.40 | 0.00 |
| TRINITY_sp Q9FJ6ABCF1     | ABC transporter F f | 73.40 | 0.00 |
| TRINITY_sp Q3SZ6ISNRPD2   | Small nuclear ribon | 73.40 | 0.00 |
| TRINITY_sp P1236PSBQ      | Oxygen-evolving enh | 73.30 | 0.00 |
| TRINITY_sp P4626RPS14     | 40S ribosomal prote | 73.30 | 0.00 |
| TRINITY_sp O2436-         | Plastidic ATP/ADP-t | 73.30 | 0.00 |
| TRINITY_sp Q54X6sec61a    | Protein transport p | 73.30 | 0.00 |
| TRINITY_sp P4966-         | Ubiquitin-60S ribos | 73.30 | 0.00 |
| TRINITY_sp Q4266SODA      | Superoxide dismutas | 73.30 | 0.00 |
| TRINITY_sp Q8L76BSL1      | Serine/threonine-pr | 73.30 | 0.00 |
| TRINITY_sp Q9T06At4g3886  | tRNA-dihydrouridine | 73.30 | 0.00 |
| TRINITY_sp Q3B86katnal2   | Katanin p60 ATPase- | 73.30 | 0.00 |
| TRINITY_sp Q9C56ACLB-1    | ATP-citrate synthas | 73.30 | 0.00 |
| TRINITY_sp Q6BX6RPS6      | 40S ribosomal prote | 73.20 | 0.00 |
| TRINITY_sp Q9506metK      | S-adenosylmethionin | 73.20 | 0.00 |
| TRINITY_sp Q9XX6FH28O16.1 | ATP synthase subuni | 73.20 | 0.00 |
| TRINITY_sp P3646rab14     | Ras-related protein | 73.10 | 0.00 |
| TRINITY_sp Q7576RPS29     | 40S ribosomal prote | 73.10 | 0.00 |
| TRINITY_sp P5296-         | 14-3-3-like protein | 73.10 | 0.00 |
| TRINITY_sp Q9SF6TIM14-2   | Mitochondrial impor | 73.10 | 0.00 |
| TRINITY_sp Q9SV6DRG3      | Developmentally-reg | 73.10 | 0.00 |
| TRINITY_sp Q8CG6Abcc1     | Multidrug resistanc | 73.10 | 0.00 |
| TRINITY_sp Q94A6UBC35     | Ubiquitin-conjugati | 73.10 | 0.00 |
| TRINITY_sp Q9P36cyp41     | 41 kDa peptidyl-pro | 73.10 | 0.00 |
| TRINITY_sp P3836Os02g017  | Protein transport p | 73.10 | 0.00 |

|                          |                     |       |      |
|--------------------------|---------------------|-------|------|
| TRINITY_sp P2213ACTA     | Actin-1 OS=Phytopht | 73.10 | 0.00 |
| TRINITY_sp Q9M06EIF6-2   | Eukaryotic translat | 73.10 | 0.00 |
| TRINITY_sp Q4AE6GPX4     | Phospholipid hydrop | 73.00 | 0.00 |
| TRINITY_sp Q7ZUCsnrpe    | Small nuclear ribon | 73.00 | 0.00 |
| TRINITY_sp P544(-        | T-complex protein 1 | 72.90 | 0.00 |
| TRINITY_sp P4252arpC     | Actin-related prote | 72.90 | 0.00 |
| TRINITY_sp Q9LZ6At3g6231 | Probable pre-mRNA-s | 72.90 | 0.00 |
| TRINITY_sp Q4JQ1MT-ND2   | NADH-ubiquinone oxi | 72.90 | 0.00 |
| TRINITY_sp A2T21IFT46    | Intraflagellar tran | 72.80 | 0.00 |
| TRINITY_sp Q9ST6DUT      | Deoxyuridine 5'-tri | 72.80 | 0.00 |
| TRINITY_sp O6112svkA     | Serine/threonine-pr | 72.80 | 0.00 |
| TRINITY_sp Q3957YPTC6    | Ras-related protein | 72.80 | 0.00 |
| TRINITY_sp Q4088MPK1     | Mitogen-activated p | 72.80 | 0.00 |
| TRINITY_sp Q4254FTSZ1    | Cell division prote | 72.80 | 0.00 |
| TRINITY_sp Q0571IGFBP4   | Insulin-like growth | 72.70 | 0.00 |
| TRINITY_sp A8JB1CHLREDR7 | Pescadillo homolog  | 72.70 | 0.00 |
| TRINITY_sp Q3SZ6RPL32    | 60S ribosomal prote | 72.70 | 0.00 |
| TRINITY_sp Q9LR3RPL27AB  | 60S ribosomal prote | 72.70 | 0.00 |
| TRINITY_sp Q8LE5CHMP1A   | ESCRT-related prote | 72.70 | 0.00 |
| TRINITY_sp P0C8MCCRP1    | Probable serine/thr | 72.70 | 0.00 |
| TRINITY_sp Q6P26PRPF8    | Pre-mRNA-processing | 72.70 | 0.00 |
| TRINITY_sp Q9FLMNRPB12   | DNA-directed RNA po | 72.70 | 0.00 |
| TRINITY_sp Q6WWVUPL3     | E3 ubiquitin-protei | 72.70 | 0.00 |
| TRINITY_sp Q68E1rab4b    | Ras-related protein | 72.70 | 0.00 |
| TRINITY_sp P479(rps27    | 40S ribosomal prote | 72.70 | 0.00 |
| TRINITY_sp P3905-        | Dynein beta chain,  | 72.70 | 0.00 |
| TRINITY_sp Q9BSUNAA11    | N-alpha-acetyltrans | 72.70 | 0.00 |
| TRINITY_sp Q1ZX6elp3     | Probable elongator  | 72.60 | 0.00 |
| TRINITY_sp Q2797HSPA1A   | Heat shock 70 kDa p | 72.60 | 0.00 |
| TRINITY_sp Q1KV1infA     | Translation initiat | 72.60 | 0.00 |
| TRINITY_sp Q9Y33LSM2     | U6 snRNA-associated | 72.60 | 0.00 |
| TRINITY_sp P4929PCK1     | Phosphoenolpyruvate | 72.60 | 0.00 |
| TRINITY_sp Q9P21DNAH1    | Dynein heavy chain  | 72.50 | 0.00 |
| TRINITY_sp Q6F48RpL39    | 60S ribosomal prote | 72.50 | 0.00 |
| TRINITY_sp Q6F48RpL39    | 60S ribosomal prote | 72.50 | 0.00 |
| TRINITY_sp P4202NDUFS7   | NADH dehydrogenase  | 72.50 | 0.00 |
| TRINITY_sp P5025ALTA     | Tubulin alpha-1A ch | 72.50 | 0.00 |
| TRINITY_sp Q2HJ1LSM5     | U6 snRNA-associated | 72.50 | 0.00 |
| TRINITY_sp Q54K6manG     | Alpha-mannosidase G | 72.50 | 0.00 |
| TRINITY_sp O0445CCT5     | T-complex protein 1 | 72.50 | 0.00 |
| TRINITY_sp Q56Y8MAP2B    | Methionine aminopep | 72.50 | 0.00 |
| TRINITY_sp A5D8Msbds     | Ribosome maturation | 72.50 | 0.00 |
| TRINITY_sp Q949FMPC1     | Mitochondrial pyruv | 72.50 | 0.00 |
| TRINITY_sp Q75IMOs05g012 | Isovaleryl-CoA dehy | 72.50 | 0.00 |
| TRINITY_sp Q2714EFA2     | Elongation factor 1 | 72.50 | 0.00 |
| TRINITY_sp Q8L41CDKB1-1  | Cyclin-dependent ki | 72.50 | 0.00 |
| TRINITY_sp A8JF7NCS6     | Cytoplasmic tRNA 2- | 72.50 | 0.00 |
| TRINITY_sp Q9ZS3CHLP     | Geranylgeranyl diph | 72.50 | 0.00 |
| TRINITY_sp Q4196PSBQ2    | Oxygen-evolving enh | 72.40 | 0.00 |
| TRINITY_sp Q9M06EIF6-2   | Eukaryotic translat | 72.40 | 0.00 |
| TRINITY_sp P4191-        | GTP-binding nuclear | 72.40 | 0.00 |
| TRINITY_sp Q8LA6GATA1    | GATA transcription  | 72.40 | 0.00 |
| TRINITY_sp Q7X91PIE1     | Protein PHOTOPERIOD | 72.40 | 0.00 |
| TRINITY_sp P544(-        | T-complex protein 1 | 72.40 | 0.00 |
| TRINITY_sp O8239THIC     | Phosphomethylpyrimi | 72.40 | 0.00 |
| TRINITY_sp Q9SIFAt2g2990 | Presenilin-like pro | 72.40 | 0.00 |

|                          |                     |       |      |
|--------------------------|---------------------|-------|------|
| TRINITY_sp P5348arp2     | Actin-related prote | 72.40 | 0.00 |
| TRINITY_sp P6777PPP2CA   | Serine/threonine-pr | 72.30 | 0.00 |
| TRINITY_sp Q9XG9PRS2     | Ribose-phosphate py | 72.30 | 0.00 |
| TRINITY_sp Q6316Dnah1    | Dynein heavy chain  | 72.30 | 0.00 |
| TRINITY_sp Q2752enol-1   | Enolase OS=Caenorha | 72.30 | 0.00 |
| TRINITY_sp Q9LUMRAP2-2   | Ethylene-responsive | 72.30 | 0.00 |
| TRINITY_sp P2872-        | Formate--tetrahydro | 72.30 | 0.00 |
| TRINITY_sp Q9LW6At3g2332 | Uncharacterized pro | 72.30 | 0.00 |
| TRINITY_sp Q9ZP3SDH1-2   | Succinate dehydroge | 72.30 | 0.00 |
| TRINITY_sp Q8TD5DNAH3    | Dynein heavy chain  | 72.30 | 0.00 |
| TRINITY_sp Q3925CAX1     | Vacuolar cation/pro | 72.20 | 0.00 |
| TRINITY_sp P5026TUBB4    | Tubulin beta-4 chai | 72.20 | 0.00 |
| TRINITY_sp P4252rnrB-1   | Ribonucleoside-diph | 72.20 | 0.00 |
| TRINITY_sp O8603bdhA     | D-beta-hydroxybutyr | 72.20 | 0.00 |
| TRINITY_sp Q54Q7rnrA     | Ribonucleoside-diph | 72.20 | 0.00 |
| TRINITY_sp Q54X8sec61a   | Protein transport p | 72.20 | 0.00 |
| TRINITY_sp Q9LT6RPN11    | 26S proteasome non- | 72.20 | 0.00 |
| TRINITY_sp P5426CA1      | Cation-transporting | 72.20 | 0.00 |
| TRINITY_sp P0783act1     | Major actin OS=Dict | 72.20 | 0.00 |
| TRINITY_sp A8HTVtuf1     | Elongation factor T | 72.20 | 0.00 |
| TRINITY_sp Q84K1SQD1     | UDP-sulfoquinovose  | 72.20 | 0.00 |
| TRINITY_sp Q76I8RPS15A   | 40S ribosomal prote | 72.10 | 0.00 |
| TRINITY_sp Q4193PSBQ2    | Oxygen-evolving enh | 72.10 | 0.00 |
| TRINITY_sp P5446-        | T-complex protein 1 | 72.10 | 0.00 |
| TRINITY_sp P3416myoD     | Myosin ID heavy cha | 72.10 | 0.00 |
| TRINITY_sp P6296RAC1     | Ras-related C3 botu | 72.10 | 0.00 |
| TRINITY_sp A2XCFCKS1     | Cyclin-dependent ki | 72.10 | 0.00 |
| TRINITY_sp Q5E96SSNA1    | Sjoegren syndrome n | 72.10 | 0.00 |
| TRINITY_sp Q9JL1Spag6    | Sperm-associated an | 72.10 | 0.00 |
| TRINITY_sp A4SX6cynS     | Cyanate hydratase O | 72.10 | 0.00 |
| TRINITY_sp Q9SJ4VPS11    | Vacuolar protein-so | 72.10 | 0.00 |
| TRINITY_sp Q3896KIN10    | SNF1-related protei | 72.00 | 0.00 |
| TRINITY_sp O2367At1g0214 | Protein mago nashi  | 72.00 | 0.00 |
| TRINITY_sp O2371PBB1     | Proteasome subunit  | 72.00 | 0.00 |
| TRINITY_sp Q86J6rab5A    | Ras-related protein | 72.00 | 0.00 |
| TRINITY_sp P0CT6rps3001  | 40S ribosomal prote | 72.00 | 0.00 |
| TRINITY_sp Q3ZB6LSM4     | U6 snRNA-associated | 72.00 | 0.00 |
| TRINITY_sp Q9SJ2RNR1     | Ribonucleoside-diph | 72.00 | 0    |
| TRINITY_sp P1056SSA1     | Heat shock protein  | 72.00 | 0.00 |
| TRINITY_sp Q9P21DNAH1    | Dynein heavy chain  | 72.00 | 0.00 |
| TRINITY_sp P2296let-60   | Ras protein let-60  | 71.90 | 0.00 |
| TRINITY_sp Q54N1DDB_G026 | Probable methylthio | 71.90 | 0.00 |
| TRINITY_sp P1286PSBQ     | Oxygen-evolving enh | 71.90 | 0.00 |
| TRINITY_sp Q9FS6IVD      | Isovaleryl-CoA dehy | 71.90 | 0.00 |
| TRINITY_sp Q9191rad51-a  | DNA repair protein  | 71.90 | 0.00 |
| TRINITY_sp P2906FER1     | Ferritin-1, chlorop | 71.90 | 0.00 |
| TRINITY_sp Q9XHF1LC1     | Dynein light chain  | 71.90 | 0.00 |
| TRINITY_sp P1286ANT2     | ADP,ATP carrier pro | 71.90 | 0.00 |
| TRINITY_sp P4266GRF5     | 14-3-3-like protein | 71.90 | 0.00 |
| TRINITY_sp P3186-        | RNA-directed DNA po | 71.90 | 0.00 |
| TRINITY_sp P9296RABB1C   | Ras-related protein | 71.80 | 0.00 |
| TRINITY_sp P0646env      | Envelope glycoprote | 71.80 | 0.00 |
| TRINITY_sp Q6Z66NCS6     | Cytoplasmic tRNA 2- | 71.80 | 0.00 |
| TRINITY_sp Q54R6gcdh     | Glutaryl-CoA dehydr | 71.80 | 0.00 |
| TRINITY_sp P5196NEK2     | Serine/threonine-pr | 71.80 | 0.00 |
| TRINITY_sp Q9SE1RPT3     | 26S protease regula | 71.80 | 0.00 |

|                          |                     |       |      |
|--------------------------|---------------------|-------|------|
| TRINITY_sp Q09J1RpL38    | 60S ribosomal prote | 71.80 | 0.00 |
| TRINITY_sp Q9191rad51-a  | DNA repair protein  | 71.80 | 0.00 |
| TRINITY_sp Q3896LWD2     | WD repeat-containin | 71.80 | 0.00 |
| TRINITY_sp Q3958-        | 5-methyltetrahydrop | 71.80 | 0.00 |
| TRINITY_sp P3414racC     | Rho-related protein | 71.70 | 0.00 |
| TRINITY_sp P240(abpB     | Calcium-regulated a | 71.70 | 0.00 |
| TRINITY_sp Q9DE2ruvb12   | RuvB-like 2 OS=Xeno | 71.70 | 0.00 |
| TRINITY_sp Q9628RpL37    | 60S ribosomal prote | 71.70 | 0.00 |
| TRINITY_sp Q6ZD1SDH1     | Succinate dehydroge | 71.70 | 0.00 |
| TRINITY_sp Q9LXCRPS9B    | 40S ribosomal prote | 71.70 | 0.00 |
| TRINITY_sp Q9STFHOP3     | Hsp70-Hsp90 organiz | 71.70 | 0.00 |
| TRINITY_sp B9DGIACS      | Acetyl-coenzyme A s | 71.70 | 0.00 |
| TRINITY_sp Q9W3\xit      | Probable dolichyl p | 71.60 | 0.00 |
| TRINITY_sp Q3961PCKR1    | Peptidyl-prolyl cis | 71.60 | 0.00 |
| TRINITY_sp Q2944HMGCL    | Hydroxymethylglutar | 71.60 | 0.00 |
| TRINITY_sp Q0UV9NSA2     | Ribosome biogenesis | 71.60 | 0.00 |
| TRINITY_sp Q54Pfcns5     | COP9 signalosome co | 71.60 | 0.00 |
| TRINITY_sp Q9Z01Eif2s3y  | Eukaryotic translat | 71.60 | 0.00 |
| TRINITY_sp Q9AUUGD3      | UDP-glucose 6-dehyd | 71.60 | 0.00 |
| TRINITY_sp Q54Mfdhx16    | Putative pre-mRNA-s | 71.50 | 0.00 |
| TRINITY_sp Q9LHEFYPP3    | Phytochrome-associa | 71.50 | 0.00 |
| TRINITY_sp Q9SA5CSP41B   | Chloroplast stem-lo | 71.50 | 0.00 |
| TRINITY_sp O0048PSMD14   | 26S proteasome non- | 71.50 | 0.00 |
| TRINITY_sp Q9SY7NRPB10L  | DNA-directed RNA po | 71.40 | 0.00 |
| TRINITY_sp Q9UT1SPAC15E1 | Probable thymidylat | 71.40 | 0.00 |
| TRINITY_sp O8239THIC     | Phosphomethylpyrimi | 71.40 | 0.00 |
| TRINITY_sp P4191-        | GTP-binding nuclear | 71.40 | 0.00 |
| TRINITY_sp P5525FUMR     | Fumarate hydratase, | 71.40 | 0.00 |
| TRINITY_sp P1056MIC      | Myosin IC heavy cha | 71.40 | 0.00 |
| TRINITY_sp Q54Mfdhx16    | Putative pre-mRNA-s | 71.40 | 0.00 |
| TRINITY_sp P4646TBP2     | 26S protease regula | 71.40 | 0.00 |
| TRINITY_sp Q9ZS8DER2.2   | Derlin-2.2 OS=Arabi | 71.40 | 0.00 |
| TRINITY_sp Q9W5FRoc1a    | RING-box protein 1A | 71.40 | 0.00 |
| TRINITY_sp P9809c3       | Complement C3 (Frag | 71.40 | 0.00 |
| TRINITY_sp P2751-        | Chlorophyll a-b bin | 71.40 | 0.00 |
| TRINITY_sp O822(At2g1979 | AP-4 complex subuni | 71.40 | 0.00 |
| TRINITY_sp Q8ISIRPS18    | 40S ribosomal prote | 71.40 | 0.00 |
| TRINITY_sp P071(DBI      | Acyl-CoA-binding pr | 71.40 | 0.00 |
| TRINITY_sp P1285PSBQ     | Oxygen-evolving enh | 71.40 | 0.00 |
| TRINITY_sp O4988-        | Peptidyl-prolyl cis | 71.40 | 0.00 |
| TRINITY_sp A2XF1PDC2     | Pyruvate decarboxyl | 71.40 | 0.00 |
| TRINITY_sp P5651HDAC1    | Histone deacetylase | 71.40 | 0.00 |
| TRINITY_sp Q8LP6ABCE2    | ABC transporter E f | 71.40 | 0.00 |
| TRINITY_sp Q2V9F-        | Transcription facto | 71.40 | 0.00 |
| TRINITY_sp Q17Q2TFDP1    | Transcription facto | 71.40 | 0.00 |
| TRINITY_sp Q9C5CSAC7     | Phosphoinositide ph | 71.40 | 0.00 |
| TRINITY_sp Q9C0CDNAH6    | Dynein heavy chain  | 71.40 | 0.00 |
| TRINITY_sp P3298ATPD     | ATP synthase delta  | 71.30 | 0.00 |
| TRINITY_sp P0DJ6RPL19    | 60S ribosomal prote | 71.30 | 0.00 |
| TRINITY_sp Q9CAIABCI6    | ABC transporter I f | 71.30 | 0.00 |
| TRINITY_sp P4687KLP1     | Kinesin-like protei | 71.30 | 0.00 |
| TRINITY_sp Q9AT1UVH3     | DNA repair protein  | 71.30 | 0.00 |
| TRINITY_sp P128(bud31    | Protein BUD31 homol | 71.30 | 0.00 |
| TRINITY_sp P4274UBC4     | Ubiquitin-conjugati | 71.20 | 0.00 |
| TRINITY_sp Q9UVFUBC1     | Ubiquitin-conjugati | 71.20 | 0.00 |
| TRINITY_sp Q552Fwdr68    | DDB1- and CUL4-asso | 71.20 | 0.00 |

|                          |                     |       |      |
|--------------------------|---------------------|-------|------|
| TRINITY_sp Q0707HSP81-3  | Heat shock protein  | 71.20 | 0.00 |
| TRINITY_sp B8HVIrplK     | 50S ribosomal prote | 71.20 | 0.00 |
| TRINITY_sp Q0147SAR1B    | GTP-binding protein | 71.20 | 0.00 |
| TRINITY_sp P4919RPS8     | 40S ribosomal prote | 71.20 | 0.00 |
| TRINITY_sp A2XUVCDKG-2   | Cyclin-dependent ki | 71.20 | 0.00 |
| TRINITY_sp P2906-        | Acidic endochitinas | 71.10 | 0.00 |
| TRINITY_sp P3513UBC2     | Ubiquitin-conjugati | 71.10 | 0.00 |
| TRINITY_sp Q3BA1-        | Uncharacterized pro | 71.10 | 0.00 |
| TRINITY_sp Q3BA1-        | Uncharacterized pro | 71.10 | 0.00 |
| TRINITY_sp Q9FJHABC1     | ABC transporter F f | 71.10 | 0.00 |
| TRINITY_sp B0C31dapF     | Diaminopimelate epi | 71.10 | 0.00 |
| TRINITY_sp Q8H6HSPT16    | FACT complex subuni | 71.10 | 0.00 |
| TRINITY_sp P2005pyr1-3   | Protein PYR1-3 OS=D | 71.10 | 0.00 |
| TRINITY_sp P7332argB     | Acetylglutamate kin | 71.10 | 0.00 |
| TRINITY_sp Q9SL7TCX6     | Protein tesmin/TSO1 | 71.10 | 0.00 |
| TRINITY_sp Q9AR2HD6      | Casein kinase II su | 71.10 | 0.00 |
| TRINITY_sp P2876CCT1     | T-complex protein 1 | 71.10 | 0.00 |
| TRINITY_sp Q6AV7PPDK1    | Pyruvate, phosphate | 71.10 | 0.00 |
| TRINITY_sp P4648-        | Malate dehydrogenas | 71.10 | 0.00 |
| TRINITY_sp Q54K3rbx1     | RING-box protein 1  | 71.10 | 0.00 |
| TRINITY_sp P3225rasS     | Ras-like protein ra | 71.10 | 0.00 |
| TRINITY_sp Q9496PSAO     | Photosystem I subun | 71.00 | 0.00 |
| TRINITY_sp P4629RPS16    | 40S ribosomal prote | 71.00 | 0.00 |
| TRINITY_sp Q9M81Atlg7426 | Probable phosphorib | 71.00 | 0.00 |
| TRINITY_sp P5811yhhW     | Quercetin 2,3-dioxy | 71.00 | 0.00 |
| TRINITY_sp Q2KIVPSMC6    | 26S protease regula | 71.00 | 0.00 |
| TRINITY_sp Q940FRPL18C   | 60S ribosomal prote | 71.00 | 0.00 |
| TRINITY_sp A9NUHMETK1    | S-adenosylmethionin | 71.00 | 0.00 |
| TRINITY_sp Q2KH2GCDH     | Glutaryl-CoA dehydr | 71.00 | 0.00 |
| TRINITY_sp Q962FRpS17    | 40S ribosomal prote | 71.00 | 0.00 |
| TRINITY_sp A2XCFCKS1     | Cyclin-dependent ki | 71.00 | 0.00 |
| TRINITY_sp Q9448ctu1     | Cytoplasmic tRNA 2- | 71.00 | 0.00 |
| TRINITY_sp O7566GCAT     | 2-amino-3-ketobutyr | 71.00 | 0.00 |
| TRINITY_sp Q9SJ2RNR1     | Ribonucleoside-diph | 71.00 | 0.00 |
| TRINITY_sp Q8LAUGATA1    | GATA transcription  | 71.00 | 0.00 |
| TRINITY_sp Q0189-        | Heat shock 70 kDa p | 71.00 | 0.00 |
| TRINITY_sp Q0504CPN60-2  | Chaperonin CPN60-2, | 71.00 | 0.00 |
| TRINITY_sp P535(CYME_CMM | Actin OS=Cyanidiosc | 71.00 | 0.00 |
| TRINITY_sp Q9P77nop10    | H/ACA ribonucleopro | 71.00 | 0.00 |
| TRINITY_sp O2447-        | Eukaryotic translat | 71.00 | 0.00 |
| TRINITY_sp Q9LZ6TOP6A    | DNA topoisomerase 6 | 71.00 | 0.00 |
| TRINITY_sp Q94AFMED36A   | Mediator of RNA pol | 70.90 | 0.00 |
| TRINITY_sp Q93W2NIFU2    | NifU-like protein 2 | 70.90 | 0.00 |
| TRINITY_sp Q9M77RPL29A   | 60S ribosomal prote | 70.90 | 0.00 |
| TRINITY_sp P4972Oat      | Ornithine aminotran | 70.90 | 0.00 |
| TRINITY_sp Q2717DHC-8    | Dynein heavy chain, | 70.90 | 0.00 |
| TRINITY_sp Q54P7prsA     | Ribose-phosphate py | 70.90 | 0.00 |
| TRINITY_sp Q84XUPAPP5    | Serine/threonine-pr | 70.90 | 0.00 |
| TRINITY_sp Q9M01PFK1     | ATP-dependent 6-pho | 70.90 | 0.00 |
| TRINITY_sp Q9M31KPHMT2   | 3-methyl-2-oxobutan | 70.90 | 0.00 |
| TRINITY_sp Q8LB5PRP38    | Pre-mRNA-splicing f | 70.90 | 0.00 |
| TRINITY_sp P2396KAS12    | 3-oxoacyl-[acyl-car | 70.90 | 0.00 |
| TRINITY_sp Q9AR2CTH1     | Magnesium-protoporp | 70.90 | 0.00 |
| TRINITY_sp Q8L7UBSL1     | Serine/threonine-pr | 70.90 | 0.00 |
| TRINITY_sp P4984GSK3A    | Glycogen synthase k | 70.80 | 0.00 |
| TRINITY_sp B8EQ2mnmG     | tRNA uridine 5-carb | 70.80 | 0.00 |

|                         |                           |       |      |
|-------------------------|---------------------------|-------|------|
| TRINITY_sp P7975c9      | Complement componen       | 70.80 | 0.00 |
| TRINITY_sp P9054-       | Tubulin gamma-2 cha       | 70.80 | 0.00 |
| TRINITY_sp Q5QMOs01g01  | DEAD-box ATP-depend       | 70.80 | 0.00 |
| TRINITY_sp Q8JFIEIF4A2  | Eukaryotic initiati       | 70.80 | 0.00 |
| TRINITY_sp Q3E81YLR154C | Uncharacterized pro       | 70.80 | 0.00 |
| TRINITY_sp P344smog-1   | Probable pre-mRNA-s       | 70.80 | 0.00 |
| TRINITY_sp P483FK506-b  | 12 kDa FK506-bindin       | 70.80 | 0.00 |
| TRINITY_sp P436drg1     | Developmentally-reg       | 70.80 | 0.00 |
| TRINITY_sp O755SF3B1    | Splicing factor 3B        | 70.80 | 0    |
| TRINITY_sp Q9M3NPF8.1   | Protein NRT1/ PTR F       | 70.70 | 0.00 |
| TRINITY_sp P546pika     | Phosphatidylinosito       | 70.70 | 0.00 |
| TRINITY_sp P496RPL19C   | 60S ribosomal prote       | 70.70 | 0.00 |
| TRINITY_sp Q9SIWRKY1    | WRKY transcription        | 70.70 | 0.00 |
| TRINITY_sp Q388CHLG     | Chlorophyll synthas       | 70.70 | 0.00 |
| TRINITY_sp O426smd1     | Small nuclear ribon       | 70.70 | 0.00 |
| TRINITY_sp Q416CDC2     | Cell division contr       | 70.70 | 0.00 |
| TRINITY_sp Q2R1VGME-2   | GDP-mannose 3,5-epi       | 70.70 | 0.00 |
| TRINITY_sp Q9FNMBB1     | PsbB mRNA maturatio       | 70.70 | 0.00 |
| TRINITY_sp Q54Krbx1     | RING-box protein 1        | 70.70 | 0.00 |
| TRINITY_sp P427PAB2     | Polyadenylate-bindi       | 70.70 | 0.00 |
| TRINITY_sp Q9SMHHC1     | Dynein-1-alpha heav       | 70.70 | 0    |
| TRINITY_sp Q3BA1-       | Uncharacterized pro       | 70.70 | 0.00 |
| TRINITY_sp P168-        | Histone H2A-III OS=       | 70.70 | 0.00 |
| TRINITY_sp P222fbl      | rRNA 2'-O-methyltra       | 70.60 | 0.00 |
| TRINITY_sp P524Ubc2     | Ubiquitin-conjugati       | 70.60 | 0.00 |
| TRINITY_sp Q54IMacad8   | Isobutyryl-CoA dehy       | 70.60 | 0.00 |
| TRINITY_sp Q426SAMDC    | S-adenosylmethionin       | 70.60 | 0.00 |
| TRINITY_sp O243-        | Plastidic ATP/ADP-t       | 70.60 | 0.00 |
| TRINITY_sp P736muts2    | Endonuclease Muts2        | 70.60 | 0.00 |
| TRINITY_sp Q9SAABCDH    | 2-oxoisovalerate de       | 70.60 | 0.00 |
| TRINITY_sp Q0E2UVR3     | (6-4)DNA photolyase       | 70.50 | 0.00 |
| TRINITY_sp Q55FbkdB     | 2-oxoisovalerate de       | 70.50 | 0.00 |
| TRINITY_sp P491(RAB2A   | Ras-related protein       | 70.50 | 0.00 |
| TRINITY_sp O157(vaca    | Vacuolin-A OS=Dicty       | 70.50 | 0.00 |
| TRINITY_sp Q9AR2HD6     | Casein kinase II su       | 70.50 | 0.00 |
| TRINITY_sp P800GGPS1    | Geranylgeranyl pyro       | 70.50 | 0.00 |
| TRINITY_sp Q8RY1PEX6    | Peroxisome biogenes       | 70.50 | 0.00 |
| TRINITY_sp P804PSBY     | Photosystem II core       | 70.50 | 0.00 |
| TRINITY_sp B0G1ap1s2    | AP-1 complex subuni       | 70.50 | 0.00 |
| TRINITY_sp Q428RPB2     | DNA-directed RNA po       | 70.50 | 0    |
| TRINITY_sp P0C8MCCRP1   | Probable serine/thr       | 70.50 | 0.00 |
| TRINITY_sp Q9HB(ATP6V0A | V-type proton ATPas       | 70.50 | 0.00 |
| TRINITY_sp P3411mvpA    | Major vault protein       | 70.50 | 0.00 |
| TRINITY_sp Q9SLRAD50    | DNA repair protein        | 70.50 | 0.00 |
| TRINITY_sp Q84J1B'      | EPSII Probable serine/thr | 70.50 | 0.00 |
| TRINITY_sp A4FU1SNRPE   | Small nuclear ribon       | 70.40 | 0.00 |
| TRINITY_sp Q9XG'PAA1    | Proteasome subunit        | 70.40 | 0.00 |
| TRINITY_sp Q28I{poc1a   | POC1 centriolar pro       | 70.40 | 0.00 |
| TRINITY_sp P207MAK      | Serine/threonine-pr       | 70.40 | 0.00 |
| TRINITY_sp Q922Dyrk3    | Dual specificity ty       | 70.40 | 0.00 |
| TRINITY_sp O225CLA1     | 1-deoxy-D-xylulose-       | 70.40 | 0.00 |
| TRINITY_sp Q9C5CMSRB2   | Peptide methionine        | 70.30 | 0.00 |
| TRINITY_sp Q182rap-1    | Ras-related protein       | 70.30 | 0.00 |
| TRINITY_sp P331IDH2     | Isocitrate dehydrog       | 70.30 | 0.00 |
| TRINITY_sp Q8H1ABCI10   | ABC transporter I f       | 70.30 | 0.00 |
| TRINITY_sp Q7ZXrap1b    | Ras-related protein       | 70.30 | 0.00 |

|                          |                     |       |      |
|--------------------------|---------------------|-------|------|
| TRINITY_sp P542(CA1      | Cation-transporting | 70.30 | 0.00 |
| TRINITY_sp Q5Z9(FTSH1    | ATP-dependent zinc  | 70.30 | 0.00 |
| TRINITY_sp Q9T0(At4g2774 | Protein yippee-like | 70.30 | 0.00 |
| TRINITY_sp P068(PLG      | Plasminogen OS=Bos  | 70.20 | 0.00 |
| TRINITY_sp O228(At2g4725 | Probable pre-mRNA-s | 70.20 | 0.00 |
| TRINITY_sp P5064RNR1     | Ribonucleoside-diph | 70.20 | 0.00 |
| TRINITY_sp A2XUVCDKG-2   | Cyclin-dependent ki | 70.20 | 0.00 |
| TRINITY_sp P427(RPL11B   | 60S ribosomal prote | 70.20 | 0.00 |
| TRINITY_sp P557(HSP90-2  | Heat shock protein  | 70.20 | 0.00 |
| TRINITY_sp Q8LS(FYPP     | Phytochrome-associa | 70.20 | 0.00 |
| TRINITY_sp Q8RW(TKL-1    | Transketolase-1, ch | 70.20 | 0.00 |
| TRINITY_sp O822(At2g2393 | Probable small nucl | 70.20 | 0.00 |
| TRINITY_sp P008(RBCS-1   | Ribulose bisphospha | 70.20 | 0.00 |
| TRINITY_sp Q67E(RAD51A   | DNA repair protein  | 70.20 | 0.00 |
| TRINITY_sp Q9ZT(ERD2     | ER lumen protein-re | 70.20 | 0.00 |
| TRINITY_sp A8XJ(rpl-11.2 | 60S ribosomal prote | 70.20 | 0.00 |
| TRINITY_sp O943(psm1     | Structural maintena | 70.10 | 0.00 |
| TRINITY_sp P623(LSM6     | U6 snRNA-associated | 70.10 | 0.00 |
| TRINITY_sp P088(his-2    | Histone H3 OS=Caeno | 70.10 | 0.00 |
| TRINITY_sp Q9XF(LHCB5    | Chlorophyll a-b bin | 70.10 | 0.00 |
| TRINITY_sp Q8T2(Inubp1   | Cytosolic Fe-S clus | 70.10 | 0.00 |
| TRINITY_sp Q148(CHD4     | Chromodomain-helica | 70.10 | 0.00 |
| TRINITY_sp O813(DRTS     | Bifunctional dihydr | 70.10 | 0.00 |
| TRINITY_sp P490(Os12g028 | Protein mago nashi  | 70.10 | 0.00 |
| TRINITY_sp Q396(PORA     | Protochlorophyllide | 70.10 | 0.00 |
| TRINITY_sp Q9LV(At5g5297 | Thylakoid lumenal 1 | 70.10 | 0.00 |
| TRINITY_sp Q55C(vps26    | Vacuolar protein so | 70.10 | 0.00 |
| TRINITY_sp Q8LK(GAPN     | NADP-dependent glyc | 70.10 | 0.00 |
| TRINITY_sp Q2JS4pyrH     | Uridylate kinase OS | 70.10 | 0.00 |
| TRINITY_sp P364(hspB     | Heat shock cognate  | 70.10 | 0.00 |
| TRINITY_sp P479(rps27    | 40S ribosomal prote | 70.10 | 0.00 |
| TRINITY_sp P806(-        | Ferredoxin-thioredo | 70.00 | 0.00 |
| TRINITY_sp Q401(MTB      | Metallothionein-lik | 70.00 | 0.00 |
| TRINITY_sp Q8VY(CKL12    | Casein kinase 1-lik | 70.00 | 0.00 |
| TRINITY_sp P348(CPN10    | 10 kDa chaperonin,  | 70.00 | 0.00 |
| TRINITY_sp P385(TUBG2    | Tubulin gamma-2 cha | 70.00 | 0.00 |
| TRINITY_sp Q9LV2CCT4     | T-complex protein 1 | 70.00 | 0.00 |
| TRINITY_sp A7MB4RQCD1    | Cell differentiatio | 70.00 | 0.00 |
| TRINITY_sp Q9UF(DNAH17   | Dynein heavy chain  | 70.00 | 0.00 |
| TRINITY_sp Q437(WAXY     | Granule-bound starc | 70.00 | 0.00 |
| TRINITY_sp Q9QX(Trip4    | Activating signal c | 70.00 | 0.00 |
| TRINITY_sp Q1542SF3B4    | Splicing factor 3B  | 69.90 | 0.00 |
| TRINITY_sp Q9ZN2GLU1     | Ferredoxin-dependen | 69.90 | 0.00 |
| TRINITY_sp Q93V(At5g2884 | GDP-mannose 3,5-epi | 69.90 | 0.00 |
| TRINITY_sp Q8AV(bttd     | Biotinidase OS=Taki | 69.80 | 0.00 |
| TRINITY_sp P0CG(TU20     | Polyubiquitin OS=Te | 69.80 | 0.00 |
| TRINITY_sp P518(PDC1     | Pyruvate decarboxyl | 69.80 | 0.00 |
| TRINITY_sp Q462(pf1      | Formate acetyltrans | 69.80 | 0.00 |
| TRINITY_sp Q392(SKP1A    | SKP1-like protein 1 | 69.80 | 0.00 |
| TRINITY_sp B3QP(gpmA     | 2,3-bisphosphoglyce | 69.80 | 0.00 |
| TRINITY_sp A1JH(HST      | Homogentisate solan | 69.80 | 0.00 |
| TRINITY_sp Q9SE(JRPT3    | 26S protease regula | 69.80 | 0.00 |
| TRINITY_sp Q8WX(DNAH7    | Dynein heavy chain  | 69.80 | 0.00 |
| TRINITY_sp Q9LV(PYD1     | Dihydropyrimidine d | 69.80 | 0.00 |
| TRINITY_sp Q8LS(FYPP     | Phytochrome-associa | 69.80 | 0.00 |
| TRINITY_sp P296(CDKA-1   | Cyclin-dependent ki | 69.80 | 0.00 |



|                           |                     |       |      |
|---------------------------|---------------------|-------|------|
| TRINITY_sp Q9STI-         | Calreticulin OS=Chl | 69.80 | 0.00 |
| TRINITY_sp Q9979ACO2      | Aconitate hydratase | 69.80 | 0.00 |
| TRINITY_sp Q0DHI FTSH8    | ATP-dependent zinc  | 69.80 | 0.00 |
| TRINITY_sp Q0E29UVR3      | (6-4)DNA photolyase | 69.70 | 0.00 |
| TRINITY_sp Q54CV rtpR     | Probable adenosylco | 69.70 | 0.00 |
| TRINITY_sp P6779PPP2CA    | Serine/threonine-pr | 69.70 | 0.00 |
| TRINITY_sp Q9ZP9ARL2      | ADP-ribosylation fa | 69.70 | 0.00 |
| TRINITY_sp Q3E99ANTR6     | Probable anion tran | 69.70 | 0.00 |
| TRINITY_sp O2289FKBP16-3  | Peptidyl-prolyl cis | 69.70 | 0.00 |
| TRINITY_sp P4979-         | Ribonucleoside-diph | 69.70 | 0.00 |
| TRINITY_sp B3FH9SCSa      | Succinate--CoA liga | 69.70 | 0.00 |
| TRINITY_sp Q8S29FTSH3     | ATP-dependent zinc  | 69.70 | 0.00 |
| TRINITY_sp P4859pph-1     | Serine/threonine-pr | 69.70 | 0.00 |
| TRINITY_sp Q8LC9LHCA6     | Photosystem I chlor | 69.70 | 0.00 |
| TRINITY_sp P4599ARP       | DNA-(apurinic or ap | 69.70 | 0.00 |
| TRINITY_sp Q4259ACO1      | Aconitate hydratase | 69.70 | 0.00 |
| TRINITY_sp P0089ATP5B     | ATP synthase subuni | 69.70 | 0.00 |
| TRINITY_sp Q4379APG1      | Glucose-6-phosphate | 69.70 | 0.00 |
| TRINITY_sp Q3769ND4       | NADH-ubiquinone oxi | 69.70 | 0.00 |
| TRINITY_sp Q0369BIP4      | Luminal-binding pro | 69.60 | 0.00 |
| TRINITY_sp Q6WV9-         | Histone H4 OS=Mytil | 69.60 | 0.00 |
| TRINITY_sp A7RW9vlg22659  | Probable cytosolic  | 69.60 | 0.00 |
| TRINITY_sp B6U19GATA      | Glutamyl-tRNA(Gln)  | 69.60 | 0.00 |
| TRINITY_sp Q54S9DDB_G029  | Probable myosin lig | 69.60 | 0.00 |
| TRINITY_sp O6559WRKY34    | Probable WRKY trans | 69.60 | 0.00 |
| TRINITY_sp P2229RET1      | DNA-directed RNA po | 69.60 | 0.00 |
| TRINITY_sp Q9FJ9CYP65     | Peptidyl-prolyl cis | 69.60 | 0.00 |
| TRINITY_sp O1589-         | T-complex protein 1 | 69.60 | 0.00 |
| TRINITY_sp Q4HW9FGRRES_1  | Putative heme-bindi | 69.60 | 0.00 |
| TRINITY_sp Q8H09URH42     | DEAD-box ATP-depend | 69.60 | 0.00 |
| TRINITY_sp P6239LSM6      | U6 snRNA-associated | 69.60 | 0.00 |
| TRINITY_sp Q55G9psmB6     | Proteasome subunit  | 69.50 | 0.00 |
| TRINITY_sp A8J29FEN1      | Flap endonuclease 1 | 69.50 | 0.00 |
| TRINITY_sp Q0569CTR1      | Serine/threonine-pr | 69.50 | 0.00 |
| TRINITY_sp P1279RSP3      | Flagellar radial sp | 69.50 | 0.00 |
| TRINITY_sp P1769-         | 3-phosphoshikimate  | 69.50 | 0.00 |
| TRINITY_sp P3159CD4B      | ATP-dependent Clp p | 69.50 | 0.00 |
| TRINITY_sp Q2359MRPL10    | 60S ribosomal prote | 69.50 | 0.00 |
| TRINITY_sp P1809PETE      | Plastocyanin, chlor | 69.50 | 0.00 |
| TRINITY_sp O2439-         | Proteasome subunit  | 69.50 | 0.00 |
| TRINITY_sp Q8VZ9(ALDH12A1 | Delta-1-pyrroline-5 | 69.50 | 0.00 |
| TRINITY_sp Q54M9fdhx16    | Putative pre-mRNA-s | 69.50 | 0.00 |
| TRINITY_sp Q9LH9FOLD2     | Bifunctional protei | 69.50 | 0.00 |
| TRINITY_sp Q9299UPF1      | Regulator of nonsen | 69.40 | 0.00 |
| TRINITY_sp O4999GDCSP     | Glycine dehydrogena | 69.40 | 0.00 |
| TRINITY_sp Q8VX9GapA      | Glyceraldehyde-3-ph | 69.40 | 0.00 |
| TRINITY_sp P5199(Myb11    | Myb-related protein | 69.40 | 0.00 |
| TRINITY_sp P2079rab8A     | Ras-related protein | 69.40 | 0.00 |
| TRINITY_sp Q9SI9CPEFG     | Elongation factor G | 69.40 | 0.00 |
| TRINITY_sp Q54J9Fabcc3    | ABC transporter C f | 69.40 | 0.00 |
| TRINITY_sp Q3BA9-         | Uncharacterized pro | 69.40 | 0.00 |
| TRINITY_sp P5299(-        | 14-3-3-like protein | 69.30 | 0.00 |
| TRINITY_sp P9329SAHH      | Adenosylhomocystein | 69.30 | 0.00 |
| TRINITY_sp P3569ERF1-3    | Eukaryotic peptide  | 69.30 | 0.00 |
| TRINITY_sp Q54E9cct2      | T-complex protein 1 | 69.30 | 0.00 |
| TRINITY_sp Q8W19SMU1      | Suppressor of mec-8 | 69.30 | 0.00 |

|                           |                      |       |      |
|---------------------------|----------------------|-------|------|
| TRINITY_sp Q3879PDH2      | Pyruvate dehydrogen  | 69.30 | 0.00 |
| TRINITY_sp Q9LIFDHAD      | Dihydroxy-acid dehy  | 69.30 | 0.00 |
| TRINITY_sp O0398HSP90-4   | Heat shock protein   | 69.30 | 0.00 |
| TRINITY_sp Q0806-         | Malate dehydrogenas  | 69.30 | 0.00 |
| TRINITY_sp O3524Nsmaf     | Protein FAN OS=Mus   | 69.20 | 0.00 |
| TRINITY_sp Q3B71CHD1L     | Chromodomain-helica  | 69.20 | 0.00 |
| TRINITY_sp Q0189-         | Heat shock 70 kDa p  | 69.20 | 0.00 |
| TRINITY_sp Q7XR3RFC4      | Replication factor   | 69.20 | 0.00 |
| TRINITY_sp O4443SmD3      | Small nuclear ribon  | 69.20 | 0.00 |
| TRINITY_sp Q8L96At4g1372  | Inosine triphosphat  | 69.20 | 0.00 |
| TRINITY_sp O0486NPP5      | Serine/threonine-pr  | 69.20 | 0.00 |
| TRINITY_sp O8241At3g461   | (Histidine--tRNA lig | 69.20 | 0.00 |
| TRINITY_sp L7HU1ICL1      | Isocitrate lyase OS  | 69.20 | 0.00 |
| TRINITY_sp Q6VNEWdfy3     | WD repeat and FYVE   | 69.20 | 0.00 |
| TRINITY_sp Q8RY2DEGP7     | Protease Do-like 7   | 69.20 | 0.00 |
| TRINITY_sp O8603bdhA      | D-beta-hydroxybutyr  | 69.20 | 0.00 |
| TRINITY_sp O018(acbp-1    | Acyl-CoA-binding pr  | 69.20 | 0.00 |
| TRINITY_sp Q7XZUSAC9      | Probable phosphoino  | 69.20 | 0.00 |
| TRINITY_sp O4224gnb211    | Guanine nucleotide-  | 69.20 | 0.00 |
| TRINITY_sp Q6317Dnah7     | Dynein heavy chain   | 69.20 | 0.00 |
| TRINITY_sp Q8TD5DNAH3     | Dynein heavy chain   | 69.10 | 0.00 |
| TRINITY_sp Q17QCUBE2G2    | Ubiquitin-conjugati  | 69.10 | 0.00 |
| TRINITY_sp Q54KfcysS      | Cysteine--tRNA liga  | 69.10 | 0.00 |
| TRINITY_sp P4629RPL38     | 60S ribosomal prote  | 69.10 | 0.00 |
| TRINITY_sp O0241-         | Dynein light chain   | 69.10 | 0.00 |
| TRINITY_sp P1099-         | Actin, macronuclear  | 69.10 | 0.00 |
| TRINITY_sp Q55F1pyd1      | Dihydropyrimidine d  | 69.10 | 0    |
| TRINITY_sp Q9SS7RAP2-12   | Ethylene-responsive  | 69.10 | 0.00 |
| TRINITY_sp B8AN1CHLH      | Magnesium-chelatase  | 69.10 | 0    |
| TRINITY_sp Q9D1(Ube2c     | Ubiquitin-conjugati  | 69.00 | 0.00 |
| TRINITY_sp O2261DRM1      | Dormancy-associated  | 69.00 | 0.00 |
| TRINITY_sp Q9SSI PRP8A    | Pre-mRNA-processing  | 69.00 | 0.00 |
| TRINITY_sp B9L9IrpmH      | 50S ribosomal prote  | 69.00 | 0.00 |
| TRINITY_sp Q8LGFPEX4      | Protein PEROXIN-4 O  | 69.00 | 0.00 |
| TRINITY_sp A8J78ATPG      | ATP synthase subuni  | 69.00 | 0.00 |
| TRINITY_sp Q8H0\Atlg0811  | Lactoylglutathione   | 69.00 | 0.00 |
| TRINITY_sp Q4P73DED1      | ATP-dependent RNA h  | 69.00 | 0.00 |
| TRINITY_sp Q6Z1(YchF1     | Obg-like ATPase 1 O  | 69.00 | 0.00 |
| TRINITY_sp Q3BA1-         | Uncharacterized pro  | 69.00 | 0.00 |
| TRINITY_sp Q9HZHetfA      | Electron transfer f  | 69.00 | 0.00 |
| TRINITY_sp P3411mvpA      | Major vault protein  | 69.00 | 0.00 |
| TRINITY_sp Q9LJ\ABCB19    | ABC transporter B f  | 68.90 | 0.00 |
| TRINITY_sp Q54X(mobA      | MOB kinase activato  | 68.90 | 0.00 |
| TRINITY_sp Q86H\pdhB      | Pyruvate dehydrogen  | 68.90 | 0.00 |
| TRINITY_sp Q8T2(mccb      | Methylcrotonoyl-CoA  | 68.90 | 0.00 |
| TRINITY_sp Q9CA\ABCI6     | ABC transporter I f  | 68.90 | 0.00 |
| TRINITY_sp P368(YPTV2     | GTP-binding protein  | 68.90 | 0.00 |
| TRINITY_sp Q5DM5IFT172    | Intraflagellar tran  | 68.90 | 0    |
| TRINITY_sp Q9FNIPEX1      | Peroxisome biogenes  | 68.90 | 0.00 |
| TRINITY_sp P0DJ2RPL37     | 60S ribosomal prote  | 68.90 | 0.00 |
| TRINITY_sp Q8WX\DNAH7     | Dynein heavy chain   | 68.90 | 0.00 |
| TRINITY_sp Q0P5IPPIH      | Peptidyl-prolyl cis  | 68.80 | 0.00 |
| TRINITY_sp Q4015MTB       | Metallothionein-lik  | 68.80 | 0.00 |
| TRINITY_sp P2587chcA      | Clathrin heavy chai  | 68.80 | 0.00 |
| TRINITY_sp Q569I\selenbp1 | Selenium-binding pr  | 68.80 | 0.00 |
| TRINITY_sp Q8GX9CFIS2     | Pre-mRNA cleavage f  | 68.80 | 0.00 |

|                          |                      |       |      |
|--------------------------|----------------------|-------|------|
| TRINITY_sp Q8W4JML1      | Protein MEI2-like 1  | 68.80 | 0.00 |
| TRINITY_sp Q54DIDDDB_G02 | Probable serine/thr  | 68.80 | 0.00 |
| TRINITY_sp Q229THERM     | (POC1 centriolar pro | 68.80 | 0.00 |
| TRINITY_sp Q9FLJDEGP9    | Protease Do-like 9   | 68.80 | 0.00 |
| TRINITY_sp F4KDNRPC2     | DNA-directed RNA po  | 68.80 | 0.00 |
| TRINITY_sp Q9UWpph-3     | Serine/threonine-pr  | 68.80 | 0.00 |
| TRINITY_sp Q036BIP4      | Luminal-binding pro  | 68.80 | 0.00 |
| TRINITY_sp O495NIFS1     | Cysteine desulfuras  | 68.80 | 0.00 |
| TRINITY_sp P222(-        | Pyruvate kinase, cy  | 68.80 | 0.00 |
| TRINITY_sp P5201cyn-7    | Peptidyl-prolyl cis  | 68.80 | 0.00 |
| TRINITY_sp P614{rp136a   | 60S ribosomal prote  | 68.80 | 0.00 |
| TRINITY_sp B5EZUmete     | 5-methyltetrahydrop  | 68.80 | 0.00 |
| TRINITY_sp A2Q8ncs6      | Cytoplasmic tRNA 2-  | 68.80 | 0.00 |
| TRINITY_sp Q9C0DNAH6     | Dynein heavy chain   | 68.80 | 0.00 |
| TRINITY_sp Q8S8TET8      | Tetraspanin-8 OS=Ar  | 68.80 | 0.00 |
| TRINITY_sp A2XCCKS1      | Cyclin-dependent ki  | 68.70 | 0.00 |
| TRINITY_sp Q9LKUTATA     | Sec-independent pro  | 68.70 | 0.00 |
| TRINITY_sp Q5NA\HDH      | Histidinol dehydrog  | 68.70 | 0.00 |
| TRINITY_sp Q9CAAt1g7771  | Ubiquitin-fold modi  | 68.60 | 0.00 |
| TRINITY_sp P369(-        | Protein AMBP (Fragm  | 68.60 | 0.00 |
| TRINITY_sp P171(-        | Actin, non-muscle 6  | 68.60 | 0.00 |
| TRINITY_sp P816(-        | Alcohol dehydrogena  | 68.60 | 0.00 |
| TRINITY_sp P869TEF1      | Elongation factor 1  | 68.60 | 0.00 |
| TRINITY_sp Q431(-        | Proliferating cell   | 68.60 | 0.00 |
| TRINITY_sp A2YPCARM1     | Probable histone-ar  | 68.60 | 0.00 |
| TRINITY_sp Q8RYPEX6      | Peroxisome biogenes  | 68.60 | 0.00 |
| TRINITY_sp O045FAD4L1    | Fatty acid desatura  | 68.60 | 0.00 |
| TRINITY_sp Q550IstkA     | Transcription facto  | 68.60 | 0.00 |
| TRINITY_sp O246AS        | Asparagine syntheta  | 68.60 | 0.00 |
| TRINITY_sp Q274{his-41   | Probable histone H2  | 68.60 | 0.00 |
| TRINITY_sp Q86Auroc1     | Probable urocanate   | 68.60 | 0.00 |
| TRINITY_sp B1XK4lepA     | Elongation factor 4  | 68.60 | 0.00 |
| TRINITY_sp F4K2FCUV      | Pre-mRNA-splicing f  | 68.50 | 0.00 |
| TRINITY_sp Q102{rpc2     | DNA-directed RNA po  | 68.50 | 0.00 |
| TRINITY_sp Q9M8UGT80A2   | Sterol 3-beta-gluco  | 68.50 | 0.00 |
| TRINITY_sp P114PSBP      | Oxygen-evolving enh  | 68.50 | 0.00 |
| TRINITY_sp P929AATP2     | ADP,ATP carrier pro  | 68.50 | 0.00 |
| TRINITY_sp Q9DGI{tpt1    | Translationally-con  | 68.50 | 0.00 |
| TRINITY_sp Q76NVapA      | V-type proton ATPas  | 68.50 | 0.00 |
| TRINITY_sp Q7S7{cpr2     | Peptidyl-prolyl cis  | 68.50 | 0.00 |
| TRINITY_sp A4QNI{nip7    | 60S ribosome subuni  | 68.50 | 0.00 |
| TRINITY_sp P0DJ{RPL37    | 60S ribosomal prote  | 68.50 | 0.00 |
| TRINITY_sp P0CZ{ACX3     | Acyl-coenzyme A oxi  | 68.40 | 0.00 |
| TRINITY_sp P290(-        | Acidic endochitinas  | 68.40 | 0.00 |
| TRINITY_sp Q091{rp11001  | 60S ribosomal prote  | 68.40 | 0.00 |
| TRINITY_sp P130{acpA     | F-actin-capping pro  | 68.40 | 0.00 |
| TRINITY_sp Q044{IDH2     | Isocitrate dehydrog  | 68.40 | 0.00 |
| TRINITY_sp P540{Idh2     | Isocitrate dehydrog  | 68.40 | 0.00 |
| TRINITY_sp P870{spg1     | Septum-promoting GT  | 68.40 | 0.00 |
| TRINITY_sp Q395YPTC4     | GTP-binding protein  | 68.40 | 0.00 |
| TRINITY_sp F4HX\NUP155   | Nuclear pore comple  | 68.40 | 0.00 |
| TRINITY_sp Q084{CKA2     | Casein kinase II su  | 68.40 | 0.00 |
| TRINITY_sp Q7SDM{rgt-1   | tRNA(His) guanylylt  | 68.40 | 0.00 |
| TRINITY_sp Q395{ODA9     | Dynein, 78 kDa inte  | 68.40 | 0.00 |
| TRINITY_sp P349{gap3     | Glyceraldehyde-3-ph  | 68.40 | 0.00 |
| TRINITY_sp Q044{IDH2     | Isocitrate dehydrog  | 68.30 | 0.00 |

|                           |                     |       |      |
|---------------------------|---------------------|-------|------|
| TRINITY_sp P6116ACTR1A    | Alpha-centractin OS | 68.30 | 0.00 |
| TRINITY_sp Q9SB6PDK       | [Pyruvate dehydroge | 68.30 | 0.00 |
| TRINITY_sp P1474-         | Alpha-galactosidase | 68.30 | 0.00 |
| TRINITY_sp Q8LP6ABCE2     | ABC transporter E f | 68.30 | 0.00 |
| TRINITY_sp Q964Ipyd3      | Beta-ureidopropiona | 68.30 | 0.00 |
| TRINITY_sp Q55G6cnbA      | Calcineurin subunit | 68.30 | 0.00 |
| TRINITY_sp Q8696scsB      | Succinate--CoA liga | 68.30 | 0.00 |
| TRINITY_sp P9786Fh        | Fumarate hydratase, | 68.30 | 0.00 |
| TRINITY_sp P3281gpd-3.1   | Glyceraldehyde-3-ph | 68.30 | 0.00 |
| TRINITY_sp P3356ABCC1     | Multidrug resistanc | 68.30 | 0.00 |
| TRINITY_sp Q4286CS1       | Chorismate synthase | 68.30 | 0.00 |
| TRINITY_sp Q9636-         | Metallothionein-lik | 68.20 | 0.00 |
| TRINITY_sp P3411cdk1      | Cyclin-dependent ki | 68.20 | 0.00 |
| TRINITY_sp P3416myoD      | Myosin ID heavy cha | 68.20 | 0.00 |
| TRINITY_sp P9066-         | Actin OS=Brugia mal | 68.20 | 0.00 |
| TRINITY_sp P0DK6RNR2B     | Ribonucleoside-diph | 68.20 | 0.00 |
| TRINITY_sp P4234MTOR      | Serine/threonine-pr | 68.20 | 0.00 |
| TRINITY_sp P5421-         | Caltractin OS=Dunal | 68.20 | 0.00 |
| TRINITY_sp Q1026ssa1      | Probable heat shock | 68.20 | 0.00 |
| TRINITY_sp Q9CAMRFC2      | Replication factor  | 68.20 | 0.00 |
| TRINITY_sp Q86J6ilvsB     | BEACH domain-contai | 68.10 | 0.00 |
| TRINITY_sp P2046CSNK2A2   | Casein kinase II su | 68.10 | 0.00 |
| TRINITY_sp D4B06ARB_0207  | Probable glucan end | 68.10 | 0.00 |
| TRINITY_sp P6306UBA52     | Ubiquitin-60S ribos | 68.10 | 0.00 |
| TRINITY_sp P5466vatD-1    | V-type proton ATPas | 68.10 | 0.00 |
| TRINITY_sp Q8W46XPD       | DNA repair helicase | 68.10 | 0.00 |
| TRINITY_sp Q9ZP6ARL2      | ADP-ribosylation fa | 68.10 | 0.00 |
| TRINITY_sp P4936GDCST     | Aminomethyltransfer | 68.10 | 0.00 |
| TRINITY_sp Q0DJ6TOR       | Serine/threonine-pr | 68.10 | 0.00 |
| TRINITY_sp Q3ZB6POLR2K    | DNA-directed RNA po | 68.10 | 0.00 |
| TRINITY_sp Q54N6stt3      | Dolichyl-diphosphoo | 68.10 | 0.00 |
| TRINITY_sp P0446-         | Calmodulin OS=Triti | 68.10 | 0.00 |
| TRINITY_sp B6SH6-         | tRNA (guanine-N(7)- | 68.10 | 0.00 |
| TRINITY_sp Q9SR6At3g0466  | Tryptophan--tRNA li | 68.10 | 0.00 |
| TRINITY_sp Q9C06DNAH6     | Dynein heavy chain  | 68.10 | 0.00 |
| TRINITY_sp Q9JL6Spag6     | Sperm-associated an | 68.10 | 0.00 |
| TRINITY_sp Q5BB6has1      | ATP-dependent RNA h | 68.10 | 0.00 |
| TRINITY_sp Q9FFF6At5g4167 | 6-phosphogluconate  | 68.10 | 0.00 |
| TRINITY_sp A8MS6LPD1      | Dihydrolipoyl dehyd | 68.10 | 0.00 |
| TRINITY_sp Q4296PPD       | Pyruvate, phosphate | 68.10 | 0.00 |
| TRINITY_sp Q9WV6Mok       | MAPK/MAK/MRK overla | 68.00 | 0.00 |
| TRINITY_sp P0CT6rpl1101   | 60S ribosomal prote | 68.00 | 0.00 |
| TRINITY_sp Q54C6rad50     | DNA repair protein  | 68.00 | 0.00 |
| TRINITY_sp Q2946HMGCL     | Hydroxymethylglutar | 68.00 | 0.00 |
| TRINITY_sp Q54J6oxct1     | Probable succinyl-C | 68.00 | 0.00 |
| TRINITY_sp O2436TOP2      | DNA topoisomerase 2 | 68.00 | 0.00 |
| TRINITY_sp Q54S6ddx18     | Probable ATP-depend | 68.00 | 0.00 |
| TRINITY_sp O7606CDKL5     | Cyclin-dependent ki | 68.00 | 0.00 |
| TRINITY_sp O0406FD1       | Ferredoxin-1, chlor | 68.00 | 0.00 |
| TRINITY_sp Q9SZ6SHM1      | Serine hydroxymethy | 68.00 | 0.00 |
| TRINITY_sp Q3766NAD7      | NADH-ubiquinone oxi | 68.00 | 0.00 |
| TRINITY_sp Q70G6Os07g066  | Thioredoxin reducta | 68.00 | 0.00 |
| TRINITY_sp P3251-         | Deoxyuridine 5'-tri | 67.90 | 0.00 |
| TRINITY_sp Q54C6pex6      | Peroxisomal biogene | 67.90 | 0.00 |
| TRINITY_sp O7726cata      | Catalase-A OS=Dicty | 67.90 | 0.00 |
| TRINITY_sp Q54Y6scai      | Protein SCAI homolo | 67.90 | 0.00 |

|                          |                     |       |      |
|--------------------------|---------------------|-------|------|
| TRINITY_sp Q9SUNAt4g3022 | Probable small nucl | 67.90 | 0.00 |
| TRINITY_sp Q4185RPS21    | 40S ribosomal prote | 67.90 | 0.00 |
| TRINITY_sp Q54K6pno1     | RNA-binding protein | 67.90 | 0.00 |
| TRINITY_sp Q9LPCYYP18-1  | Peptidyl-prolyl cis | 67.90 | 0.00 |
| TRINITY_sp P7378slr1251  | Peptidyl-prolyl cis | 67.90 | 0.00 |
| TRINITY_sp Q9VCHme4      | Probable N6-adenosi | 67.90 | 0.00 |
| TRINITY_sp Q9LJdvPE      | Vacuolar-processing | 67.90 | 0.00 |
| TRINITY_sp A9LNF CPSF30  | 30-kDa cleavage and | 67.90 | 0.00 |
| TRINITY_sp Q54CVrtpr     | Probable adenosylco | 67.90 | 0.00 |
| TRINITY_sp Q8CDfAgb12    | Cytosolic carboxype | 67.90 | 0.00 |
| TRINITY_sp Q9LF6BOLA4    | Protein BOLA4, chlo | 67.90 | 0.00 |
| TRINITY_sp Q9M2fRH52     | DEAD-box ATP-depend | 67.90 | 0.00 |
| TRINITY_sp Q8Y1cmrA      | Peptide methionine  | 67.90 | 0.00 |
| TRINITY_sp Q9CR(Ufc1     | Ubiquitin-fold modi | 67.80 | 0.00 |
| TRINITY_sp P1363ATP1A3   | Sodium/potassium-tr | 67.80 | 0.00 |
| TRINITY_sp O9396pyrABCN  | Protein pyrABCN OS= | 67.80 | 0.00 |
| TRINITY_sp Q8HXfSOD2     | Superoxide dismutas | 67.80 | 0.00 |
| TRINITY_sp O1518CETN3    | Centrin-3 OS=Homo s | 67.80 | 0.00 |
| TRINITY_sp Q8LE7AAP19-1  | AP-1 complex subuni | 67.80 | 0.00 |
| TRINITY_sp Q9C82At1g5236 | Coatomer subunit be | 67.80 | 0.00 |
| TRINITY_sp Q1W37-        | Phosphomannomutase  | 67.70 | 0.00 |
| TRINITY_sp P4873CDK1     | Cyclin-dependent ki | 67.70 | 0.00 |
| TRINITY_sp Q9T07PCKA     | Phosphoenolpyruvate | 67.70 | 0.00 |
| TRINITY_sp B9DGIACS      | Acetyl-coenzyme A s | 67.70 | 0.00 |
| TRINITY_sp Q3959-        | Dynein 16 kDa light | 67.70 | 0.00 |
| TRINITY_sp Q4255SCE1     | SUMO-conjugating en | 67.70 | 0.00 |
| TRINITY_sp Q5596ppsA     | Phosphoenolpyruvate | 67.70 | 0    |
| TRINITY_sp P3412psmA7    | Proteasome subunit  | 67.70 | 0.00 |
| TRINITY_sp P0087RBCS-1   | Ribulose bisphospha | 67.70 | 0.00 |
| TRINITY_sp P3411mvpA     | Major vault protein | 67.70 | 0.00 |
| TRINITY_sp P4797zfs1     | Zinc finger protein | 67.70 | 0.00 |
| TRINITY_sp P4797zfs1     | Zinc finger protein | 67.70 | 0.00 |
| TRINITY_sp P4624ASP5     | Aspartate aminotran | 67.70 | 0.00 |
| TRINITY_sp P6148rpl36a   | 60S ribosomal prote | 67.70 | 0.00 |
| TRINITY_sp Q5YLF6GYRA    | DNA gyrase subunit  | 67.70 | 0.00 |
| TRINITY_sp Q8W4MXPDP     | DNA repair helicase | 67.70 | 0.00 |
| TRINITY_sp Q2W2Htuf1     | Elongation factor T | 67.70 | 0.00 |
| TRINITY_sp Q6317Dnah7    | Dynein heavy chain  | 67.70 | 0.00 |
| TRINITY_sp Q0P57CKS1B    | Cyclin-dependent ki | 67.60 | 0.00 |
| TRINITY_sp O5987RPL44    | 60S ribosomal prote | 67.60 | 0.00 |
| TRINITY_sp P4916PSAN     | Photosystem I react | 67.60 | 0.00 |
| TRINITY_sp Q9636ARF1     | ADP-ribosylation fa | 67.60 | 0.00 |
| TRINITY_sp Q9BYIACTRT3   | Actin-related prote | 67.60 | 0.00 |
| TRINITY_sp Q4259At1g7901 | NADH dehydrogenase  | 67.60 | 0.00 |
| TRINITY_sp Q6F22STT3A    | Dolichyl-diphosphoo | 67.60 | 0.00 |
| TRINITY_sp Q10I2Os03g056 | DEAD-box ATP-depend | 67.60 | 0.00 |
| TRINITY_sp Q9U97ppp6c    | Serine/threonine-pr | 67.60 | 0.00 |
| TRINITY_sp Q9XF9RPL4     | 60S ribosomal prote | 67.60 | 0.00 |
| TRINITY_sp Q9Z4HifcA     | Fumarate reductase  | 67.60 | 0.00 |
| TRINITY_sp P4274UBC4     | Ubiquitin-conjugati | 67.60 | 0.00 |
| TRINITY_sp Q8DJ4clpB1    | Chaperone protein C | 67.60 | 0    |
| TRINITY_sp Q0323MYBL2    | Myb-related protein | 67.60 | 0.00 |
| TRINITY_sp A5UW7nfi      | Endonuclease V OS=R | 67.60 | 0.00 |
| TRINITY_sp O6508PBC1     | Proteasome subunit  | 67.60 | 0.00 |
| TRINITY_sp P5421PMA1     | Plasma membrane ATP | 67.60 | 0    |
| TRINITY_sp Q9SQ1lhca-P4  | Chlorophyll a-b bin | 67.60 | 0.00 |

|                  |            |                       |       |      |
|------------------|------------|-----------------------|-------|------|
| TRINITY_sp Q6NU4 | chtfl8     | Chromosome transmis   | 67.50 | 0.00 |
| TRINITY_sp Q9QU  | Polk       | DNA polymerase kapp   | 67.50 | 0.00 |
| TRINITY_sp Q9I6  | dht        | D-hydantoinase/dihy   | 67.50 | 0.00 |
| TRINITY_sp O946  | rpc1       | DNA-directed RNA po   | 67.50 | 0.00 |
| TRINITY_sp B9KH  | clpP       | ATP-dependent Clp p   | 67.50 | 0.00 |
| TRINITY_sp Q9NQ  | IRRAGD     | Ras-related GTP-bin   | 67.50 | 0.00 |
| TRINITY_sp Q54C  | fddx17     | Probable ATP-depend   | 67.50 | 0.00 |
| TRINITY_sp Q9SD  | (At3g4712  | Zinc finger CCCH do   | 67.50 | 0.00 |
| TRINITY_sp Q6H6  | IHEMC      | Porphobilinogen dea   | 67.50 | 0.00 |
| TRINITY_sp F4KG  | (FBA4      | Fructose-bisphospha   | 67.50 | 0.00 |
| TRINITY_sp Q56X  | AOX4       | Ubiquinol oxidase 4   | 67.50 | 0.00 |
| TRINITY_sp Q9C0  | (DNAH6     | Dynein heavy chain    | 67.50 | 0.00 |
| TRINITY_sp Q95V  | I-         | Profilin-1B OS=Acan   | 67.50 | 0.00 |
| TRINITY_sp Q84K  | ISQD1      | UDP-sulfoquinovose    | 67.50 | 0.00 |
| TRINITY_sp Q965  | UGD1       | UDP-glucose 6-dehyd   | 67.50 | 0.00 |
| TRINITY_sp Q9V6  | (SEC61G1   | Protein transport p   | 67.40 | 0.00 |
| TRINITY_sp A7SE  | Ivlg24474  | U1 small nuclear ri   | 67.40 | 0.00 |
| TRINITY_sp Q1JQ  | (DPM1      | Dolichol-phosphate    | 67.40 | 0.00 |
| TRINITY_sp Q54V  | coq5       | 2-methoxy-6-polypre   | 67.40 | 0.00 |
| TRINITY_sp C1FI  | I MICPUN   | (Inosine triphospat   | 67.40 | 0.00 |
| TRINITY_sp P403  | 4 YTA12    | Mitochondrial respi   | 67.40 | 0.00 |
| TRINITY_sp Q462  | (pfl       | Formate acetyltrans   | 67.40 | 0.00 |
| TRINITY_sp O155  | 2 OGG1     | N-glycosylase/DNA l   | 67.40 | 0.00 |
| TRINITY_sp Q852  | (OSK1      | Serine/threonine pr   | 67.40 | 0.00 |
| TRINITY_sp F4HP  | I DRP5A    | Dynamamin-related pro | 67.40 | 0.00 |
| TRINITY_sp Q5WW  | 2 purC     | Phosphoribosylamino   | 67.40 | 0.00 |
| TRINITY_sp Q8S2  | I Os01g072 | Ribose-phosphate py   | 67.40 | 0.00 |
| TRINITY_sp Q86A  | uroc1      | Probable urocanate    | 67.40 | 0.00 |
| TRINITY_sp Q014  | (SBE1      | 1,4-alpha-glucan-br   | 67.40 | 0.00 |
| TRINITY_sp Q9SI  | I PHB6     | Prohibitin-6, mitoc   | 67.40 | 0.00 |
| TRINITY_sp Q423  | 4 RPS16C   | 40S ribosomal prote   | 67.40 | 0.00 |
| TRINITY_sp O500  | 5 COL1     | Zinc finger protein   | 67.40 | 0.00 |
| TRINITY_sp O804  | 5 AMPD     | AMP deaminase OS=Ar   | 67.40 | 0.00 |
| TRINITY_sp Q9S7  | (MYB3R-1   | Myb-related protein   | 67.30 | 0.00 |
| TRINITY_sp P044  | (-         | Calmodulin OS=Triti   | 67.30 | 0.00 |
| TRINITY_sp Q8TG  | MART2      | Putative uncharacte   | 67.30 | 0.00 |
| TRINITY_sp P0DJ  | 5 RPL30    | 60S ribosomal prote   | 67.30 | 0.00 |
| TRINITY_sp Q86A  | gltA       | Citrate synthase OS   | 67.30 | 0.00 |
| TRINITY_sp Q1XD  | f dnaK     | Chaperone protein d   | 67.30 | 0.00 |
| TRINITY_sp Q9C6  | 2 PDH-E1   | Pyruvate dehydrogen   | 67.30 | 0.00 |
| TRINITY_sp Q54Q  | FerkB      | Extracellular signa   | 67.30 | 0.00 |
| TRINITY_sp P186  | 1 NRPB1    | DNA-directed RNA po   | 67.30 | 0.00 |
| TRINITY_sp Q655  | 5 FTSH2    | ATP-dependent zinc    | 67.30 | 0.00 |
| TRINITY_sp P562  | 9 accD     | Acetyl-coenzyme A c   | 67.30 | 0.00 |
| TRINITY_sp P398  | 7 RPL3     | 60S ribosomal prote   | 67.30 | 0.00 |
| TRINITY_sp Q154  | 2 SF3B4    | Splicing factor 3B    | 67.20 | 0.00 |
| TRINITY_sp O137  | 4 SPAC16E  | (RING finger protein  | 67.20 | 0.00 |
| TRINITY_sp A4K4  | 3 RTEL1    | Regulator of telome   | 67.20 | 0.00 |

|                          |                     |       |      |
|--------------------------|---------------------|-------|------|
| TRINITY_sp Q3BA1-        | Uncharacterized pro | 67.20 | 0.00 |
| TRINITY_sp Q8GY8RH10     | DEAD-box ATP-depend | 67.20 | 0.00 |
| TRINITY_sp O4856CAT4     | Catalase-4 OS=Glyci | 67.20 | 0.00 |
| TRINITY_sp Q9SMFDHC1B    | Cytoplasmic dynein  | 67.20 | 0    |
| TRINITY_sp Q2QS1UGD4     | UDP-glucose 6-dehyd | 67.20 | 0.00 |
| TRINITY_sp Q9D0IRfc5     | Replication factor  | 67.10 | 0.00 |
| TRINITY_sp P2258-        | Polyubiquitin OS=Ph | 67.10 | 0.00 |
| TRINITY_sp P2751-        | Chlorophyll a-b bin | 67.10 | 0.00 |
| TRINITY_sp Q9VXISNRPG    | Probable small nucl | 67.10 | 0.00 |
| TRINITY_sp Q5AG7HSL1     | Serine/threonine-pr | 67.10 | 0.00 |
| TRINITY_sp P0257Act79B   | Actin, larval muscl | 67.10 | 0.00 |
| TRINITY_sp Q4255SCE1     | SUMO-conjugating en | 67.10 | 0.00 |
| TRINITY_sp P5344CTN      | Caltractin OS=Naegl | 67.10 | 0.00 |
| TRINITY_sp P4852PPX2     | Serine/threonine-pr | 67.10 | 0.00 |
| TRINITY_sp Q9P2HIFT80    | Intraflagellar tran | 67.10 | 0.00 |
| TRINITY_sp P1395-        | G2/mitotic-specific | 67.10 | 0.00 |
| TRINITY_sp Q9Y3ESF3B6    | Splicing factor 3B  | 67.00 | 0.00 |
| TRINITY_sp Q2HH4GAR1     | H/ACA ribonucleopro | 67.00 | 0.00 |
| TRINITY_sp Q9LHFYPP3     | Phytochrome-associa | 67.00 | 0.00 |
| TRINITY_sp Q55Fmbkdb     | 2-oxoisovalerate de | 67.00 | 0.00 |
| TRINITY_sp O8896Yme111   | ATP-dependent zinc  | 67.00 | 0.00 |
| TRINITY_sp P0418TK1      | Thymidine kinase, c | 66.90 | 0.00 |
| TRINITY_sp Q3SEFIcl1e    | Caltractin ICL1e OS | 66.90 | 0.00 |
| TRINITY_sp Q4336VAP      | V-type proton ATPas | 66.90 | 0.00 |
| TRINITY_sp Q9FN6BRR2C    | DExH-box ATP-depend | 66.90 | 0.00 |
| TRINITY_sp Q8NKIrrp13    | 60S ribosomal prote | 66.90 | 0.00 |
| TRINITY_sp Q9U7I-        | Histone H3 OS=Masti | 66.90 | 0.00 |
| TRINITY_sp Q10G8MSI1     | Histone-binding pro | 66.90 | 0.00 |
| TRINITY_sp P5464vata     | V-type proton ATPas | 66.90 | 0.00 |
| TRINITY_sp P5196UBE2E1   | Ubiquitin-conjugati | 66.90 | 0.00 |
| TRINITY_sp Q8VZUSYP132   | Syntaxin-132 OS=Ara | 66.90 | 0.00 |
| TRINITY_sp O4884RPN2A    | 26S proteasome non- | 66.90 | 0.00 |
| TRINITY_sp Q55Gcuprt     | Uracil phosphoribos | 66.80 | 0.00 |
| TRINITY_sp Q54Qfdimt1    | Probable dimethylad | 66.80 | 0.00 |
| TRINITY_sp Q8S36ALB3.1   | Inner membrane ALBI | 66.80 | 0.00 |
| TRINITY_sp P9376-        | Acid beta-fructofur | 66.80 | 0.00 |
| TRINITY_sp Q8RXEIOVA4    | Tryptophan--tRNA li | 66.80 | 0.00 |
| TRINITY_sp Q54Gnsa2      | Ribosome biogenesis | 66.80 | 0.00 |
| TRINITY_sp Q9CAJCKL2     | Casein kinase 1-lik | 66.70 | 0.00 |
| TRINITY_sp Q86Ilnat9     | N-acetyltransferase | 66.70 | 0.00 |
| TRINITY_sp A8ISMARL3     | ADP-ribosylation fa | 66.70 | 0.00 |
| TRINITY_sp Q54RjcnrB     | CLPTM1-like membran | 66.70 | 0.00 |
| TRINITY_sp Q9622-        | Protein BUD31 homol | 66.70 | 0.00 |
| TRINITY_sp P4274UBC5     | Ubiquitin-conjugati | 66.70 | 0.00 |
| TRINITY_sp P5468fima     | Fimbrin OS=Dictyost | 66.70 | 0.00 |
| TRINITY_sp Q54H3ap2s1    | AP-2 complex subuni | 66.70 | 0.00 |
| TRINITY_sp Q6UX7C16orf89 | UPF0764 protein C16 | 66.70 | 0.00 |
| TRINITY_sp Q9NQ7KIF13B   | Kinesin-like protei | 66.70 | 0.00 |
| TRINITY_sp Q54Y2etfb     | Electron transfer f | 66.70 | 0.00 |
| TRINITY_sp Q9BM2erf1     | Eukaryotic peptide  | 66.70 | 0.00 |
| TRINITY_sp Q56JVRPS26    | 40S ribosomal prote | 66.70 | 0.00 |
| TRINITY_sp Q8HX2MUT      | Methylmalonyl-CoA m | 66.70 | 0.00 |
| TRINITY_sp Q8BJ6Chdh     | Choline dehydrogena | 66.70 | 0.00 |
| TRINITY_sp Q4164FKBP15   | FK506-binding prote | 66.70 | 0.00 |
| TRINITY_sp Q9M2VPGPS2    | CDP-diacylglycerol- | 66.70 | 0.00 |
| TRINITY_sp Q8RUIINLP3    | Omega-amidase, chlo | 66.70 | 0.00 |

|                          |                     |       |      |
|--------------------------|---------------------|-------|------|
| TRINITY_sp O0384MT-CO2   | Cytochrome c oxidas | 66.70 | 0.00 |
| TRINITY_sp Q9LF1VAMP713  | Vesicle-associated  | 66.70 | 0.00 |
| TRINITY_sp Q9VI1SmD2     | Probable small nucl | 66.70 | 0.00 |
| TRINITY_sp O8045AMPD     | AMP deaminase OS=Ar | 66.70 | 0.00 |
| TRINITY_sp Q96NCZMAT2    | Zinc finger matrin- | 66.70 | 0.00 |
| TRINITY_sp Q9DA1Pacrg    | Parkin coregulated  | 66.70 | 0.00 |
| TRINITY_sp Q9K9FaceA     | Isocitrate lyase OS | 66.70 | 0.00 |
| TRINITY_sp P294(PGK1     | Phosphoglycerate ki | 66.70 | 0.00 |
| TRINITY_sp Q71UMRPS27L   | 40S ribosomal prote | 66.70 | 0.00 |
| TRINITY_sp Q9411PMS1     | DNA mismatch repair | 66.70 | 0.00 |
| TRINITY_sp Q54U(kif3     | Kinesin-related pro | 66.70 | 0.00 |
| TRINITY_sp Q9I0fpurB     | Adenylosuccinate ly | 66.70 | 0.00 |
| TRINITY_sp Q84TCDKE-1    | Cyclin-dependent ki | 66.70 | 0.00 |
| TRINITY_sp Q8LPAt5g1459  | Isocitrate dehydrog | 66.70 | 0.00 |
| TRINITY_sp Q2LRrpmA      | 50S ribosomal prote | 66.70 | 0.00 |
| TRINITY_sp B8ZRproS      | Proline--tRNA ligas | 66.70 | 0.00 |
| TRINITY_sp A8IDCHLREDR7  | Ribosome biogenesis | 66.70 | 0.00 |
| TRINITY_sp P0879mhcA     | Myosin-2 heavy chai | 66.70 | 0.00 |
| TRINITY_sp Q7RYVcys-17   | Cysteine synthase 1 | 66.60 | 0.00 |
| TRINITY_sp A2YI1OsI_2503 | Glutamine-dependent | 66.60 | 0.00 |
| TRINITY_sp P3319IDH2     | Isocitrate dehydrog | 66.50 | 0.00 |
| TRINITY_sp P5476RAN1A    | GTP-binding nuclear | 66.50 | 0.00 |
| TRINITY_sp O7722cata     | Catalase-A OS=Dicty | 66.50 | 0.00 |
| TRINITY_sp O0437B'BETA   | Serine/threonine pr | 66.50 | 0.00 |
| TRINITY_sp Q54N4ino1     | Inositol-3-phosphat | 66.50 | 0.00 |
| TRINITY_sp Q015(Ot07g018 | Probable alanine--t | 66.50 | 0.00 |
| TRINITY_sp Q3SWdnaK      | Chaperone protein D | 66.40 | 0.00 |
| TRINITY_sp Q86Auroc1     | Probable urocanate  | 66.40 | 0.00 |
| TRINITY_sp Q93VCRPS1     | 30S ribosomal prote | 66.40 | 0.00 |
| TRINITY_sp Q9SV7DRG3     | Developmentally-reg | 66.40 | 0.00 |
| TRINITY_sp Q9VH\Gie      | ADP-ribosylation fa | 66.40 | 0.00 |
| TRINITY_sp Q555(trpC     | Indole-3-glycerol p | 66.40 | 0.00 |
| TRINITY_sp Q8DJ4clpB1    | Chaperone protein C | 66.40 | 0.00 |
| TRINITY_sp O8115-        | Cysteine synthase,  | 66.40 | 0.00 |
| TRINITY_sp Q9FL1ABCA9    | ABC transporter A f | 66.30 | 0.00 |
| TRINITY_sp Q54W2abcB4    | ABC transporter B f | 66.30 | 0.00 |
| TRINITY_sp Q54M(dhps     | Probable deoxyhypus | 66.30 | 0.00 |
| TRINITY_sp Q9CA1CKL2     | Casein kinase 1-lik | 66.30 | 0.00 |
| TRINITY_sp P491(RAB2A    | Ras-related protein | 66.30 | 0.00 |
| TRINITY_sp Q9K9FaceA     | Isocitrate lyase OS | 66.30 | 0.00 |
| TRINITY_sp Q642(Serpind1 | Heparin cofactor 2  | 66.30 | 0.00 |
| TRINITY_sp P0C8MCCRP1    | Probable serine/thr | 66.30 | 0.00 |
| TRINITY_sp B9N84POPTR_0  | (Biotin carboxylase | 66.30 | 0.00 |
| TRINITY_sp A0CX1FEN1-1   | Flap endonuclease 1 | 66.30 | 0.00 |
| TRINITY_sp Q7T2Fcsnk1da  | Casein kinase I iso | 66.30 | 0.00 |
| TRINITY_sp Q09J7ODA7     | Leucine-rich repeat | 66.30 | 0.00 |
| TRINITY_sp Q6DH(prpf38a  | Pre-mRNA-splicing f | 66.30 | 0.00 |
| TRINITY_sp Q55CImekA     | Dual specificity mi | 66.30 | 0.00 |
| TRINITY_sp O426(smd1     | Small nuclear ribon | 66.30 | 0.00 |
| TRINITY_sp Q9FH1TMN4     | Transmembrane 9 sup | 66.30 | 0.00 |
| TRINITY_sp P2751CBR      | Carotene biosynthes | 66.30 | 0.00 |
| TRINITY_sp A4IHfttc30a   | Tetratricopeptide r | 66.30 | 0.00 |
| TRINITY_sp P0801Mgst1    | Microsomal glutathi | 66.20 | 0.00 |
| TRINITY_sp Q3B8Ikatnal2  | Katanin p60 ATPase- | 66.20 | 0.00 |
| TRINITY_sp Q8IYIFANCM    | Fanconi anemia grou | 66.20 | 0.00 |
| TRINITY_sp Q86I7pex4     | Ubiquitin-conjugati | 66.20 | 0.00 |



|                            |                     |       |      |
|----------------------------|---------------------|-------|------|
| TRINITY_sp Q6F9>msbA       | Lipid A export ATP- | 66.20 | 0.00 |
| TRINITY_sp Q9LSVETFB       | Electron transfer f | 66.20 | 0.00 |
| TRINITY_sp Q6P5Ihds12      | Hydroxysteroid dehy | 66.20 | 0.00 |
| TRINITY_sp G5EGilet-92     | Serine/threonine-pr | 66.20 | 0.00 |
| TRINITY_sp Q8LGF CUL4      | Cullin-4 OS=Arabido | 66.20 | 0.00 |
| TRINITY_sp Q8K22Nat10      | RNA cytidine acetyl | 66.20 | 0.00 |
| TRINITY_sp Q9SUMAt4g3022   | Probable small nucl | 66.20 | 0.00 |
| TRINITY_sp O8266At2g2042   | Succinate--CoA liga | 66.20 | 0.00 |
| TRINITY_sp P0DJ5RPL8       | 60S ribosomal prote | 66.20 | 0.00 |
| TRINITY_sp B7K96miaB       | tRNA-2-methylthio-N | 66.20 | 0.00 |
| TRINITY_sp Q2371-          | Elongation factor 2 | 66.20 | 0.00 |
| TRINITY_sp B0G18ap1s2      | AP-1 complex subuni | 66.20 | 0.00 |
| TRINITY_sp Q0875myb        | Transcriptional act | 66.10 | 0.00 |
| TRINITY_sp Q86C6tor        | Target of rapamycin | 66.10 | 0.00 |
| TRINITY_sp P2338WARS       | Tryptophan--tRNA li | 66.10 | 0.00 |
| TRINITY_sp Q57AIdnaK       | Chaperone protein D | 66.10 | 0.00 |
| TRINITY_sp Q0J0fOs09g05    | Pyruvate dehydrogen | 66.10 | 0.00 |
| TRINITY_sp A0BD5GSPATT0    | Adenylosuccinate sy | 66.10 | 0.00 |
| TRINITY_sp P8183Ppc1       | Phosphoenolpyruvate | 66.10 | 0.00 |
| TRINITY_sp Q8LPIABCB2      | ABC transporter B f | 66.10 | 0.00 |
| TRINITY_sp Q0848ADK-B      | Adenylate kinase 4  | 66.10 | 0.00 |
| TRINITY_sp A9NKI-          | Mitotic-spindle org | 66.10 | 0.00 |
| TRINITY_sp Q6J96ERF086     | Ethylene-responsive | 66.10 | 0.00 |
| TRINITY_sp Q4CUMTc00.104   | Major vault protein | 66.10 | 0.00 |
| TRINITY_sp Q3961ODA11      | Dynein alpha chain, | 66.10 | 0    |
| TRINITY_sp P1164UOX        | Uricase OS=Oryctola | 66.00 | 0.00 |
| TRINITY_sp Q1477NAA30      | N-alpha-acetyltrans | 66.00 | 0.00 |
| TRINITY_sp Q86K3ube2n      | Probable ubiquitin- | 66.00 | 0.00 |
| TRINITY_sp A7RP6pno1       | RNA-binding protein | 66.00 | 0.00 |
| TRINITY_sp Q54LMacmsd      | 2-amino-3-carboxymu | 66.00 | 0.00 |
| TRINITY_sp Q0907Slc25a5    | ADP/ATP translocase | 66.00 | 0.00 |
| TRINITY_sp Q54E2rfc2       | Probable replicatio | 66.00 | 0.00 |
| TRINITY_sp Q54QFrab32A     | Ras-related protein | 66.00 | 0.00 |
| TRINITY_sp Q3HVTCPA        | N-carbamoylputresci | 66.00 | 0.00 |
| TRINITY_sp Q94ACSTR6       | Rhodanese-like doma | 66.00 | 0.00 |
| TRINITY_sp P0CO2HIS3       | Imidazoleglycerol-p | 66.00 | 0.00 |
| TRINITY_sp Q9C83NIFU5      | NifU-like protein 5 | 66.00 | 0.00 |
| TRINITY_sp Q24J3RPL23A     | 60S ribosomal prote | 66.00 | 0.00 |
| TRINITY_sp P0879mhca       | Myosin-2 heavy chai | 66.00 | 0.00 |
| TRINITY_sp P0565-          | Myosin-2 heavy chai | 66.00 | 0.00 |
| TRINITY_sp Q93ZMDAP        | LL-diaminopimelate  | 66.00 | 0.00 |
| TRINITY_sp P3409manA       | Lysosomal alpha-man | 65.90 | 0.00 |
| TRINITY_sp A8GWEiscS       | Cysteine desulfuras | 65.90 | 0.00 |
| TRINITY_sp Q86H4malaS      | Alanine--tRNA ligas | 65.90 | 0.00 |
| TRINITY_sp Q23M1Tt116a     | Probable beta-tubul | 65.90 | 0.00 |
| TRINITY_sp P2295MED37D     | Probable mediator o | 65.90 | 0.00 |
| TRINITY_sp Q9SX(At1g2753   | Ubiquitin-fold modi | 65.90 | 0.00 |
| TRINITY_sp Q9ZVVHEN2       | DExH-box ATP-depend | 65.90 | 0.00 |
| TRINITY_sp Q6E7IDDB1       | DNA damage-binding  | 65.90 | 0.00 |
| TRINITY_sp F4J3(CTPA3      | Carboxyl-terminal-p | 65.90 | 0.00 |
| TRINITY_sp Q9LM3MPK8       | Mitogen-activated p | 65.90 | 0.00 |
| TRINITY_sp Q9SG7RPS19A     | 40S ribosomal prote | 65.90 | 0.00 |
| TRINITY_sp Q9P6Ippk15      | Serine/threonine-pr | 65.90 | 0.00 |
| TRINITY_sp Q6Z83Os02g013   | L-aspartate oxidase | 65.90 | 0.00 |
| TRINITY_sp Q9RYEfole       | GTP cyclohydrolase  | 65.90 | 0.00 |
| TRINITY_sp Q9P42B11B22.(E3 | ubiquitin-protei    | 65.90 | 0.00 |

|                          |                     |       |      |
|--------------------------|---------------------|-------|------|
| TRINITY_sp P0082ACYP2    | Acylphosphatase-2 O | 65.80 | 0.00 |
| TRINITY_sp P4109RPL34    | 60S ribosomal prote | 65.80 | 0.00 |
| TRINITY_sp P3601YNK1     | Nucleoside diphosph | 65.80 | 0.00 |
| TRINITY_sp O4867RER1A    | Protein RER1A OS=Ar | 65.80 | 0.00 |
| TRINITY_sp Q9XFICBP20    | Nuclear cap-binding | 65.80 | 0.00 |
| TRINITY_sp P2969eef-2    | Elongation factor 2 | 65.80 | 0.00 |
| TRINITY_sp B8HUMndk      | Nucleoside diphosph | 65.80 | 0.00 |
| TRINITY_sp Q4236PPDK2    | Pyruvate, phosphate | 65.80 | 0.00 |
| TRINITY_sp P2042pyrK     | UMP-CMP kinase OS=D | 65.80 | 0.00 |
| TRINITY_sp P5498CYPA     | Peptidyl-prolyl cis | 65.80 | 0.00 |
| TRINITY_sp Q3884PP2AA1   | Serine/threonine-pr | 65.80 | 0.00 |
| TRINITY_sp Q7461pckG     | Phosphoenolpyruvate | 65.80 | 0.00 |
| TRINITY_sp P0887awd      | Nucleoside diphosph | 65.80 | 0.00 |
| TRINITY_sp P930(RH21     | DEAD-box ATP-depend | 65.80 | 0.00 |
| TRINITY_sp Q8RXNTYW1     | S-adenosyl-L-methio | 65.80 | 0.00 |
| TRINITY_sp A9RY(PHYPADR7 | ATP-dependent (S)-N | 65.80 | 0.00 |
| TRINITY_sp P4039RIC2     | Ras-related protein | 65.70 | 0.00 |
| TRINITY_sp P4039RIC2     | Ras-related protein | 65.70 | 0.00 |
| TRINITY_sp Q9FI7OXP1     | 5-oxoprolinase OS=A | 65.70 | 0.00 |
| TRINITY_sp Q6AIIaroC     | Chorismate synthase | 65.70 | 0.00 |
| TRINITY_sp Q3SEIIClle    | Caltractin ICLle OS | 65.70 | 0.00 |
| TRINITY_sp Q54QferkB     | Extracellular signa | 65.70 | 0.00 |
| TRINITY_sp O4963MPC4     | Mitochondrial pyruv | 65.70 | 0.00 |
| TRINITY_sp Q9M1(ABCC9    | ABC transporter C f | 65.70 | 0.00 |
| TRINITY_sp P024(Rplp2    | 60S acidic ribosoma | 65.70 | 0.00 |
| TRINITY_sp Q9SJ2RNR1     | Ribonucleoside-diph | 65.70 | 0.00 |
| TRINITY_sp Q0739PDS      | 15-cis-phytoene des | 65.70 | 0.00 |
| TRINITY_sp Q9LD9CBF5     | H/ACA ribonucleopro | 65.70 | 0.00 |
| TRINITY_sp Q9FJ7RPS3C    | 40S ribosomal prote | 65.70 | 0.00 |
| TRINITY_sp P5141RPL26A   | 60S ribosomal prote | 65.70 | 0.00 |
| TRINITY_sp Q8VYIORLIKE   | Protein ORANGE-LIKE | 65.70 | 0.00 |
| TRINITY_sp Q9FE(Os03g05( | Elongation factor G | 65.70 | 0.00 |
| TRINITY_sp P5303RFC2     | Replication factor  | 65.70 | 0.00 |
| TRINITY_sp Q9LX(RPS9B    | 40S ribosomal prote | 65.60 | 0.00 |
| TRINITY_sp P4837FK506-bf | 12 kDa FK506-bindin | 65.60 | 0.00 |
| TRINITY_sp P3031pol3     | DNA polymerase delt | 65.60 | 0.00 |
| TRINITY_sp Q9SCMRPS2D    | 40S ribosomal prote | 65.60 | 0.00 |
| TRINITY_sp Q9LZICDC48E   | Cell division contr | 65.60 | 0    |
| TRINITY_sp Q54Qurm1      | Ubiquitin-related m | 65.60 | 0.00 |
| TRINITY_sp P0C8MCCRP1    | Probable serine/thr | 65.60 | 0.00 |
| TRINITY_sp P491(PSBR     | Photosystem II 10 k | 65.60 | 0.00 |
| TRINITY_sp A6QP1PIN4     | Peptidyl-prolyl cis | 65.60 | 0.00 |
| TRINITY_sp Q6QNM-        | Casein kinase I OS= | 65.60 | 0.00 |
| TRINITY_sp Q9FS8IVD      | Isovaleryl-CoA dehy | 65.60 | 0.00 |
| TRINITY_sp Q9FYFOVA6     | Proline--tRNA ligas | 65.60 | 0.00 |
| TRINITY_sp P4468ychF     | Ribosome-binding AT | 65.50 | 0.00 |
| TRINITY_sp Q9C81SUC5     | Sucrose transport p | 65.50 | 0.00 |
| TRINITY_sp P1069SAM1     | S-adenosylmethionin | 65.50 | 0.00 |
| TRINITY_sp A7EQ7INO80    | Putative DNA helica | 65.50 | 0.00 |
| TRINITY_sp P4274UBC5     | Ubiquitin-conjugati | 65.50 | 0.00 |
| TRINITY_sp Q54P(hbx10    | Homeobox protein 10 | 65.50 | 0.00 |
| TRINITY_sp Q9Y81ubc15    | Ubiquitin-conjugati | 65.50 | 0.00 |
| TRINITY_sp Q66K(clec3a   | C-type lectin domai | 65.50 | 0.00 |
| TRINITY_sp Q2QS1UGD5     | UDP-glucose 6-dehyd | 65.50 | 0.00 |
| TRINITY_sp Q6C5\YNG2     | Chromatin modificat | 65.50 | 0.00 |
| TRINITY_sp Q9S71TS1      | Threonine synthase  | 65.50 | 0.00 |

|                          |                     |       |      |
|--------------------------|---------------------|-------|------|
| TRINITY_sp Q6Z4fPL10B    | DEAD-box ATP-depend | 65.50 | 0.00 |
| TRINITY_sp Q9SPjpsbW     | Photosystem II reac | 65.50 | 0.00 |
| TRINITY_sp A4PBIRAD54    | DNA repair and reco | 65.50 | 0.00 |
| TRINITY_sp P0DJjRPL7     | 60S ribosomal prote | 65.50 | 0.00 |
| TRINITY_sp Q397fPPDK     | Pyruvate, phosphate | 65.50 | 0.00 |
| TRINITY_sp Q431fLOX1.5   | Probable linoleate  | 65.50 | 0.00 |
| TRINITY_sp Q70GfOs07g06f | Thioredoxin reducta | 65.50 | 0.00 |
| TRINITY_sp A0JMfkatnal2  | Katanin p60 ATPase- | 65.40 | 0.00 |
| TRINITY_sp Q6PHflias     | Lipoyl synthase, mi | 65.40 | 0.00 |
| TRINITY_sp A8JJfCHLREDRf | Molybdopterin synth | 65.40 | 0.00 |
| TRINITY_sp Q8TGMfTAR1    | Protein TAR1 OS=Sac | 65.40 | 0.00 |
| TRINITY_sp Q9FJfHUPF1    | Regulator of nonsen | 65.40 | 0.00 |
| TRINITY_sp O246fRPOT3    | DNA-directed RNA po | 65.40 | 0.00 |
| TRINITY_sp Q54Cfcct4     | T-complex protein 1 | 65.40 | 0.00 |
| TRINITY_sp Q55Bfcpsf2    | Cleavage and polyad | 65.40 | 0.00 |
| TRINITY_sp B1LUfnuoC     | NADH-quinone oxidor | 65.40 | 0.00 |
| TRINITY_sp Q9LQfDRG1     | Developmentally-reg | 65.40 | 0.00 |
| TRINITY_sp Q570fEFL4     | Protein ELF4-LIKE 4 | 65.40 | 0.00 |
| TRINITY_sp Q9SWfRPL10A   | 60S ribosomal prote | 65.40 | 0.00 |
| TRINITY_sp A7RXfamdhd1   | Probable imidazonon | 65.40 | 0.00 |
| TRINITY_sp Q8S9fAt2g338f | Tyrosine--tRNA liga | 65.40 | 0.00 |
| TRINITY_sp P435fcpr-4    | Cathepsin B-like cy | 65.30 | 0.00 |
| TRINITY_sp P268fFKBP2    | Peptidyl-prolyl cis | 65.30 | 0.00 |
| TRINITY_sp B9K8frrpmA    | 50S ribosomal prote | 65.30 | 0.00 |
| TRINITY_sp Q9M7fSEP1     | Stress enhanced pro | 65.30 | 0.00 |
| TRINITY_sp Q0VDfVPS4B    | Vacuolar protein so | 65.30 | 0.00 |
| TRINITY_sp Q3M6f lipB    | Octanoyltransferase | 65.30 | 0.00 |
| TRINITY_sp Q9UKfCNOT11   | CCR4-NOT transcript | 65.30 | 0.00 |
| TRINITY_sp P341fmyoD     | Myosin ID heavy cha | 65.30 | 0.00 |
| TRINITY_sp P200fALDH2    | Aldehyde dehydrogen | 65.30 | 0.00 |
| TRINITY_sp Q406fKOB1     | Probable voltage-ga | 65.30 | 0.00 |
| TRINITY_sp Q087fmyb      | Transcriptional act | 65.30 | 0.00 |
| TRINITY_sp P466fASP1     | Aspartate aminotran | 65.30 | 0.00 |
| TRINITY_sp Q9FHfMOB1A    | MOB kinase activato | 65.30 | 0.00 |
| TRINITY_sp Q8LSfFYFP     | Phytochrome-associa | 65.30 | 0.00 |
| TRINITY_sp P268fATP9     | ATP synthase subuni | 65.30 | 0.00 |
| TRINITY_sp P268fATP9     | ATP synthase subuni | 65.30 | 0.00 |
| TRINITY_sp Q93VfCRPS1    | 30S ribosomal prote | 65.30 | 0.00 |
| TRINITY_sp P056f-        | Myosin-2 heavy chai | 65.30 | 0.00 |
| TRINITY_sp P534fCTN      | Caltractin OS=Naegl | 65.30 | 0.00 |
| TRINITY_sp Q051fRac2     | Ras-related C3 botu | 65.20 | 0.00 |
| TRINITY_sp Q402fFIS1     | Probable aldehyde d | 65.20 | 0.00 |
| TRINITY_sp P519fNEK2     | Serine/threonine-pr | 65.20 | 0.00 |
| TRINITY_sp Q54Df febA    | Eukaryotic translat | 65.20 | 0.00 |
| TRINITY_sp Q6QNf-        | Casein kinase I OS= | 65.20 | 0.00 |
| TRINITY_sp B8JHfA2cp1_1f | Maf-like protein A2 | 65.20 | 0.00 |
| TRINITY_sp P478f-        | Eukaryotic translat | 65.20 | 0.00 |
| TRINITY_sp Q5RJfSirt2    | NAD-dependent prote | 65.20 | 0.00 |
| TRINITY_sp Q54Xfnfs1     | Probable cysteine d | 65.20 | 0.00 |
| TRINITY_sp Q54Tfcct5     | T-complex protein 1 | 65.20 | 0.00 |
| TRINITY_sp Q3MHfRBBP4    | Histone-binding pro | 65.20 | 0.00 |
| TRINITY_sp P091fALS      | Acetolactate syntha | 65.20 | 0.00 |
| TRINITY_sp Q3JCfpgi      | Glucose-6-phosphate | 65.20 | 0.00 |
| TRINITY_sp Q039fL1818    | Chlorophyll a-b bin | 65.20 | 0.00 |
| TRINITY_sp O609fcula     | Cullin-1 OS=Dictyos | 65.20 | 0.00 |
| TRINITY_sp Q23FfRPL26    | 60S ribosomal prote | 65.20 | 0.00 |

|                          |                     |       |      |
|--------------------------|---------------------|-------|------|
| TRINITY_sp Q23F7RPL26    | 60S ribosomal prote | 65.20 | 0.00 |
| TRINITY_sp Q54D1mrka     | Probable serine/thr | 65.20 | 0.00 |
| TRINITY_sp P4961-        | Ubiquitin-60S ribos | 65.20 | 0.00 |
| TRINITY_sp Q97U1SSO2899  | Uncharacterized pro | 65.10 | 0.00 |
| TRINITY_sp Q9Y21UBE2D4   | Ubiquitin-conjugati | 65.10 | 0.00 |
| TRINITY_sp Q54Q1psmB7    | Proteasome subunit  | 65.10 | 0.00 |
| TRINITY_sp O2264CYTC     | Cytochrome c OS=Fri | 65.10 | 0.00 |
| TRINITY_sp P4234MTOR     | Serine/threonine-pr | 65.10 | 0.00 |
| TRINITY_sp Q9SX2CPLS1    | ATP-dependent Clp p | 65.10 | 0.00 |
| TRINITY_sp P1460Echs1    | Enoyl-CoA hydratase | 65.10 | 0.00 |
| TRINITY_sp P3406PAF1     | Proteasome subunit  | 65.10 | 0.00 |
| TRINITY_sp Q8SS1nat5     | N-alpha-acetyltrans | 65.10 | 0.00 |
| TRINITY_sp Q55C0sdhB     | Succinate dehydroge | 65.10 | 0.00 |
| TRINITY_sp Q23M1Tt116a   | Probable beta-tubul | 65.10 | 0.00 |
| TRINITY_sp Q86A1vglta    | Citrate synthase OS | 65.10 | 0.00 |
| TRINITY_sp Q9ZP1TMN3     | Transmembrane 9 sup | 65.10 | 0.00 |
| TRINITY_sp Q9BG1PRDX4    | Peroxiredoxin-4 OS= | 65.10 | 0.00 |
| TRINITY_sp Q86I12fahd1   | Acylpyruvase FAHD1, | 65.10 | 0.00 |
| TRINITY_sp Q94J1SHM3     | Serine hydroxymethy | 65.10 | 0.00 |
| TRINITY_sp Q9ZP1At2g0361 | Ubiquinone biosynth | 65.10 | 0.00 |
| TRINITY_sp Q8L71RPL18AA  | 60S ribosomal prote | 65.10 | 0.00 |
| TRINITY_sp P6321RPS17    | 40S ribosomal prote | 65.10 | 0.00 |
| TRINITY_sp Q99M1Pccb     | Propionyl-CoA carbo | 65.10 | 0.00 |
| TRINITY_sp Q8MM1paxB     | Paxillin-B OS=Dicty | 65.10 | 0.00 |
| TRINITY_sp P5151AFC1     | Serine/threonine-pr | 65.10 | 0.00 |
| TRINITY_sp Q54T1rio2     | Serine/threonine-pr | 65.00 | 0.00 |
| TRINITY_sp Q9W41Erg      | Neurobeachin OS=Dro | 65.00 | 0.00 |
| TRINITY_sp Q9SN1At3g4752 | Malate dehydrogenas | 65.00 | 0.00 |
| TRINITY_sp O8601bdhA     | D-beta-hydroxybutyr | 65.00 | 0.00 |
| TRINITY_sp Q6Z11VTE4     | Probable tocopherol | 65.00 | 0.00 |
| TRINITY_sp Q9FN1CLPP2    | ATP-dependent Clp p | 65.00 | 0.00 |
| TRINITY_sp A4XK1dnaJ     | Chaperone protein D | 65.00 | 0.00 |
| TRINITY_sp Q9LH1FOLD2    | Bifunctional protei | 65.00 | 0.00 |
| TRINITY_sp Q4301PYRB1    | Aspartate carbamoyl | 65.00 | 0.00 |
| TRINITY_sp P3781KARS     | Lysine--tRNA ligase | 65.00 | 0.00 |
| TRINITY_sp P4601NOP2     | Probable 28S rRNA ( | 65.00 | 0.00 |
| TRINITY_sp P2361MT-CYB   | Cytochrome b OS=Chl | 65.00 | 0.00 |
| TRINITY_sp Q0311AAEL0061 | Lysosomal aspartic  | 65.00 | 0.00 |
| TRINITY_sp Q68R1IFT81    | Intraflagellar tran | 65.00 | 0.00 |
| TRINITY_sp Q9LI1CNIFU4   | NifU-like protein 4 | 64.90 | 0.00 |
| TRINITY_sp O1791ran-1    | GTP-binding nuclear | 64.90 | 0.00 |
| TRINITY_sp B8B91RPL10A   | 60S ribosomal prote | 64.90 | 0.00 |
| TRINITY_sp A4S61OSTLU_41 | Lon protease homolo | 64.90 | 0.00 |
| TRINITY_sp Q9FJ1FUPF1    | Regulator of nonsen | 64.90 | 0.00 |
| TRINITY_sp Q54D1mdhB     | Probable malate deh | 64.90 | 0.00 |
| TRINITY_sp C6TB1AKR1     | Probable aldo-keto  | 64.90 | 0.00 |
| TRINITY_sp Q8E91hslV     | ATP-dependent prote | 64.90 | 0.00 |
| TRINITY_sp Q66L1mak16-a  | Protein MAK16 homol | 64.90 | 0.00 |
| TRINITY_sp Q32P1FCF1     | rRNA-processing pro | 64.90 | 0.00 |
| TRINITY_sp Q93Z1STT3A    | Dolichyl-diphosphoo | 64.90 | 0.00 |
| TRINITY_sp Q7T31ccdc25   | Coiled-coil domain- | 64.90 | 0.00 |
| TRINITY_sp Q9Y31RBMX2    | RNA-binding motif p | 64.90 | 0.00 |
| TRINITY_sp Q8RW1At4g3131 | Uncharacterized aar | 64.90 | 0.00 |
| TRINITY_sp Q5F31EFTUD2   | 116 kDa U5 small nu | 64.90 | 0.00 |
| TRINITY_sp Q9ZV1CCT1     | Choline-phosphate c | 64.90 | 0.00 |
| TRINITY_sp Q9SK1CAF1-7   | Probable CCR4-assoc | 64.90 | 0.00 |

|                              |                     |       |      |
|------------------------------|---------------------|-------|------|
| TRINITY_sp Q9FJFUPF1         | Regulator of nonsen | 64.90 | 0    |
| TRINITY_sp Q54H\$apm1        | AP-1 complex subuni | 64.90 | 0.00 |
| TRINITY_sp P275\$LHCA4       | Chlorophyll a-b bin | 64.90 | 0.00 |
| TRINITY_sp Q8T1\$ kif5       | Kinesin-related pro | 64.90 | 0.00 |
| TRINITY_sp Q9P8\$GPD1        | Glyceraldehyde-3-ph | 64.80 | 0.00 |
| TRINITY_sp Q23M\$Tt116a      | Probable beta-tubul | 64.80 | 0.00 |
| TRINITY_sp Q3KQ\$Inubp1-A    | Cytosolic Fe-S clus | 64.80 | 0.00 |
| TRINITY_sp Q9UE\$FTSJ1       | Putative tRNA (cyti | 64.80 | 0.00 |
| TRINITY_sp Q9FJ\$NRPB6A      | DNA-directed RNA po | 64.80 | 0.00 |
| TRINITY_sp P197\$MIB         | Myosin heavy chain  | 64.80 | 0.00 |
| TRINITY_sp Q5RC\$ACOX1       | Peroxisomal acyl-co | 64.80 | 0.00 |
| TRINITY_sp Q9FJ\$HBCF1       | ABC transporter F f | 64.80 | 0.00 |
| TRINITY_sp Q25A\$H0410G0\$   | Double-strand break | 64.80 | 0.00 |
| TRINITY_sp P264\$HSP70       | Heat shock 70 kDa p | 64.80 | 0.00 |
| TRINITY_sp O348\$yngF        | Putative enoyl-CoA  | 64.80 | 0.00 |
| TRINITY_sp Q8WX\$DNAH7       | Dynein heavy chain  | 64.80 | 0.00 |
| TRINITY_sp Q9BV\$EDEM2       | ER degradation-enha | 64.80 | 0.00 |
| TRINITY_sp A9IF\$gpmA        | 2,3-bisphosphoglyce | 64.80 | 0.00 |
| TRINITY_sp Q413\$DIT1        | Dicarboxylate trans | 64.80 | 0.00 |
| TRINITY_sp P364\$ILSA        | Isoleucine--tRNA li | 64.80 | 0.00 |
| TRINITY_sp P537\$At3g570\$   | Cystathionine beta- | 64.80 | 0.00 |
| TRINITY_sp B9EX\$CARB        | Carbamoyl-phosphate | 64.80 | 0    |
| TRINITY_sp Q964\$-           | Actin, cytoplasmic  | 64.80 | 0.00 |
| TRINITY_sp Q5L6\$gata        | Glutamyl-tRNA(Gln)  | 64.70 | 0.00 |
| TRINITY_sp Q2NS\$(ung        | Uracil-DNA glycosyl | 64.70 | 0.00 |
| TRINITY_sp P025\$-           | Actin-1 OS=Acantham | 64.70 | 0.00 |
| TRINITY_sp O600\$6-PGD       | 6-phosphogluconate  | 64.70 | 0.00 |
| TRINITY_sp Q425\$ACO1        | Aconitate hydratase | 64.70 | 0    |
| TRINITY_sp Q431\$APT1        | Adenine phosphoribo | 64.70 | 0.00 |
| TRINITY_sp Q631\$Dnah7       | Dynein heavy chain  | 64.70 | 0.00 |
| TRINITY_sp P0C8\$MCCRP1      | Probable serine/thr | 64.70 | 0.00 |
| TRINITY_sp Q9ZV\$CCT1        | Choline-phosphate c | 64.70 | 0.00 |
| TRINITY_sp Q9GP\$RpL31       | 60S ribosomal prote | 64.70 | 0.00 |
| TRINITY_sp Q746\$ppckG       | Phosphoenolpyruvate | 64.70 | 0.00 |
| TRINITY_sp Q9SH\$UBC34       | Ubiquitin-conjugati | 64.70 | 0.00 |
| TRINITY_sp P501\$Rdh2        | Retinol dehydrogena | 64.60 | 0.00 |
| TRINITY_sp Q54Q\$EerkB       | Extracellular signa | 64.60 | 0.00 |
| TRINITY_sp O026\$ITIH2       | Inter-alpha-trypsin | 64.60 | 0.00 |
| TRINITY_sp Q6P8\$Alg8        | Probable dolichyl p | 64.60 | 0.00 |
| TRINITY_sp Q014\$SAR1B       | GTP-binding protein | 64.60 | 0.00 |
| TRINITY_sp B8EI\$HdnaK       | Chaperone protein D | 64.60 | 0.00 |
| TRINITY_sp Q54F\$(metK       | S-adenosylmethionin | 64.60 | 0.00 |
| TRINITY_sp Q4U4\$Xirp2       | Xin actin-binding r | 64.60 | 0.00 |
| TRINITY_sp Q8T6\$(abcH2      | ABC transporter H f | 64.60 | 0.00 |
| TRINITY_sp Q9VW\$H1(1)G01\$  | Probable isocitrate | 64.60 | 0.00 |
| TRINITY_sp Q3KP\$Tssc1       | Protein TSSC1 OS=Xe | 64.60 | 0.00 |
| TRINITY_sp P499\$(SRP54-1    | Signal recognition  | 64.60 | 0.00 |
| TRINITY_sp Q2QM\$BSL2        | Serine/threonine-pr | 64.60 | 0.00 |
| TRINITY_sp Q9SI\$LSM7        | Sm-like protein LSM | 64.60 | 0.00 |
| TRINITY_sp A8IW\$(PURA       | Adenylosuccinate sy | 64.60 | 0.00 |
| TRINITY_sp Q7XT\$(Os04g011\$ | tRNA-dihydrouridine | 64.60 | 0.00 |
| TRINITY_sp O603\$(AQR        | Intron-binding prot | 64.60 | 0.00 |
| TRINITY_sp Q921\$(CAPN3      | Calpain-3 OS=Gallus | 64.60 | 0.00 |
| TRINITY_sp Q9S8\$(At1g778\$  | Probable eukaryotic | 64.60 | 0.00 |
| TRINITY_sp Q9M5\$(LPD1       | Dihydrolipoyl dehyd | 64.60 | 0.00 |
| TRINITY_sp Q9SV\$(At4g314\$  | Coatomer subunit be | 64.60 | 0    |

|                          |                     |       |      |
|--------------------------|---------------------|-------|------|
| TRINITY_sp P3838Os02g017 | Protein transport p | 64.60 | 0.00 |
| TRINITY_sp Q553\cs       | Citrate synthase, m | 64.50 | 0.00 |
| TRINITY_sp Q3ZC(CNOT7    | CCR4-NOT transcript | 64.50 | 0.00 |
| TRINITY_sp Q94J\RIDA     | Reactive Intermedia | 64.50 | 0.00 |
| TRINITY_sp Q54EVshmt2    | Serine hydroxymethy | 64.50 | 0.00 |
| TRINITY_sp P234(TRXM     | Thioredoxin M-type, | 64.50 | 0.00 |
| TRINITY_sp P545(yqjY     | Uncharacterized pro | 64.50 | 0.00 |
| TRINITY_sp O226(DEGP1    | Protease Do-like 1, | 64.50 | 0.00 |
| TRINITY_sp Q9ZVWHEN2     | DExH-box ATP-depend | 64.50 | 0.00 |
| TRINITY_sp Q9SN5UGE5     | UDP-glucose 4-epime | 64.50 | 0.00 |
| TRINITY_sp Q7G8\Os01g03( | Probable chromatin- | 64.50 | 0.00 |
| TRINITY_sp P2935-        | Fructose-bisphospha | 64.50 | 0.00 |
| TRINITY_sp P4039RIC2     | Ras-related protein | 64.50 | 0.00 |
| TRINITY_sp A8HS4CHLREDR4 | 40S ribosomal prote | 64.50 | 0.00 |
| TRINITY_sp P5241AGPC     | Glucose-1-phosphate | 64.50 | 0.00 |
| TRINITY_sp Q0ABFmdh      | Malate dehydrogenas | 64.50 | 0.00 |
| TRINITY_sp Q56WIPED1     | 3-ketoacyl-CoA thio | 64.50 | 0.00 |
| TRINITY_sp Q7XT\Os04g011 | Pyruvate dehydrogen | 64.50 | 0.00 |
| TRINITY_sp Q9ZN7SKD1     | Protein SUPPRESSOR  | 64.50 | 0.00 |
| TRINITY_sp P5468fima     | Fimbrin OS=Dictyost | 64.50 | 0.00 |
| TRINITY_sp Q7ZV(vps29    | Vacuolar protein so | 64.50 | 0.00 |
| TRINITY_sp O226(DEGP1    | Protease Do-like 1, | 64.50 | 0.00 |
| TRINITY_sp Q9M0\NSF      | Vesicle-fusing ATPa | 64.50 | 0.00 |
| TRINITY_sp Q215(M28.5    | NHP2-like protein 1 | 64.40 | 0.00 |
| TRINITY_sp P5777EEFSEC   | Selenocysteine-spec | 64.40 | 0.00 |
| TRINITY_sp Q9SEH-        | Pirin-like protein  | 64.40 | 0.00 |
| TRINITY_sp O9448tef3     | Elongation factor 3 | 64.40 | 0.00 |
| TRINITY_sp F4K4FLSM4     | Sm-like protein LSM | 64.40 | 0.00 |
| TRINITY_sp Q6MVIDut-1    | Deoxyuridine 5'-tri | 64.40 | 0.00 |
| TRINITY_sp Q9Z1(Vars     | Valine--tRNA ligase | 64.40 | 0.00 |
| TRINITY_sp O1498BTAF1    | TATA-binding protei | 64.40 | 0.00 |
| TRINITY_sp O1371smc5     | Structural maintena | 64.40 | 0.00 |
| TRINITY_sp Q3885CRT2     | Calreticulin-2 OS=A | 64.40 | 0.00 |
| TRINITY_sp P4285ZBP14    | 14 kDa zinc-binding | 64.40 | 0.00 |
| TRINITY_sp Q9C51RPS7A    | 40S ribosomal prote | 64.40 | 0.00 |
| TRINITY_sp Q55Bfraptor   | Protein raptor homo | 64.40 | 0.00 |
| TRINITY_sp Q9HG(BiP      | 78 kDa glucose-regu | 64.40 | 0.00 |
| TRINITY_sp P9298APR3     | 5'-adenylylsulfate  | 64.40 | 0.00 |
| TRINITY_sp P305(CAT2     | Catalase isozyme 2  | 64.40 | 0.00 |
| TRINITY_sp Q7VA2infB     | Translation initiat | 64.40 | 0.00 |
| TRINITY_sp P0AF\irseA    | Anti-sigma-E factor | 64.30 | 0.00 |
| TRINITY_sp Q9UW8pph-3    | Serine/threonine-pr | 64.30 | 0.00 |
| TRINITY_sp Q9HDV\gpi12   | Probable N-acetylgl | 64.30 | 0.00 |
| TRINITY_sp Q90Y8rps4     | 40S ribosomal prote | 64.30 | 0.00 |
| TRINITY_sp P4585prpD     | 2-methylcitrate deh | 64.30 | 0.00 |
| TRINITY_sp Q54W\drq2     | Developmentally-reg | 64.30 | 0.00 |
| TRINITY_sp Q9MAFNOP5-2   | Probable nucleolar  | 64.30 | 0.00 |
| TRINITY_sp Q6H78Os02g064 | DEAD-box ATP-depend | 64.30 | 0.00 |
| TRINITY_sp Q437(ROA1     | DNA replication lic | 64.30 | 0.00 |
| TRINITY_sp Q9182aurka-a  | Aurora kinase A-A O | 64.30 | 0.00 |
| TRINITY_sp Q84W\CCT3     | T-complex protein 1 | 64.30 | 0.00 |
| TRINITY_sp Q2756psmA1    | Proteasome subunit  | 64.30 | 0.00 |
| TRINITY_sp A8J78ATPG     | ATP synthase subuni | 64.30 | 0.00 |
| TRINITY_sp Q141(cadc     | Probable acetoaceta | 64.30 | 0.00 |
| TRINITY_sp Q034(-        | Glutamate synthase  | 64.30 | 0    |
| TRINITY_sp Q9XIH\PLT1    | Putative polyol tra | 64.30 | 0.00 |

|                          |                     |       |      |
|--------------------------|---------------------|-------|------|
| TRINITY_sp O2355BAM3     | Beta-amylase 3, chl | 64.30 | 0.00 |
| TRINITY_sp A6GYdapF      | Diaminopimelate epi | 64.30 | 0.00 |
| TRINITY_sp F6QXVdna2     | DNA replication ATP | 64.20 | 0.00 |
| TRINITY_sp P913CF46F11.1 | Inositol hexakispho | 64.20 | 0.00 |
| TRINITY_sp P406JARL1     | ADP-ribosylation fa | 64.20 | 0.00 |
| TRINITY_sp Q4R5JRPRL22   | 60S ribosomal prote | 64.20 | 0.00 |
| TRINITY_sp Q9VV4CG4933   | Probable tRNA N6-ad | 64.20 | 0.00 |
| TRINITY_sp Q54E5ppil3    | Peptidyl-prolyl cis | 64.20 | 0.00 |
| TRINITY_sp Q9DAIPacrg    | Parkin coregulated  | 64.20 | 0.00 |
| TRINITY_sp B3RTITRIADDR7 | Ubiquitin-fold modi | 64.20 | 0.00 |
| TRINITY_sp O489(MDH1     | Malate dehydrogenas | 64.20 | 0.00 |
| TRINITY_sp Q9M0MABC9     | ABC transporter B f | 64.20 | 0.00 |
| TRINITY_sp O2285At2g4725 | Probable pre-mRNA-s | 64.20 | 0.00 |
| TRINITY_sp Q54EVLpd      | Dihydrolipoyl dehyd | 64.20 | 0.00 |
| TRINITY_sp B8AM7OsI_1408 | PHD finger protein  | 64.20 | 0.00 |
| TRINITY_sp Q96T6inuE     | Extracellular exo-i | 64.20 | 0.00 |
| TRINITY_sp Q9LT(RPN11    | 26S proteasome non- | 64.20 | 0.00 |
| TRINITY_sp P611(RAB2A    | Ras-related protein | 64.20 | 0.00 |
| TRINITY_sp Q9C8IEMB3003  | Dihydrolipoyllysine | 64.20 | 0.00 |
| TRINITY_sp Q148JTMEM1677 | Protein kish-A OS=B | 64.10 | 0.00 |
| TRINITY_sp Q5R65RBBP7    | Histone-binding pro | 64.10 | 0.00 |
| TRINITY_sp Q6UK6pirA     | Protein pirA OS=Dic | 64.10 | 0.00 |
| TRINITY_sp Q1RMVPEX5     | Peroxisomal targeti | 64.10 | 0.00 |
| TRINITY_sp Q0CBIhta1     | Histone H2A OS=Aspe | 64.10 | 0.00 |
| TRINITY_sp F4IPVSYCO     | Cysteine--tRNA liga | 64.10 | 0.00 |
| TRINITY_sp Q8IT5RPS18    | 40S ribosomal prote | 64.10 | 0.00 |
| TRINITY_sp Q9SJ7RSZ22A   | Serine/arginine-ric | 64.10 | 0.00 |
| TRINITY_sp Q8LF6At1g2227 | Multifunctional met | 64.10 | 0.00 |
| TRINITY_sp P3866RPL24B   | 60S ribosomal prote | 64.10 | 0.00 |
| TRINITY_sp P4275RPS11    | 40S ribosomal prote | 64.10 | 0.00 |
| TRINITY_sp Q207JF53F4.1  | Probable NADH dehyd | 64.10 | 0.00 |
| TRINITY_sp Q9HG(BiP      | 78 kDa glucose-regu | 64.10 | 0.00 |
| TRINITY_sp P4797zfs1     | Zinc finger protein | 64.10 | 0.00 |
| TRINITY_sp Q86A7uroc1    | Probable urocanate  | 64.10 | 0.00 |
| TRINITY_sp Q9LN7At1g3447 | Probable magnesium  | 64.10 | 0.00 |
| TRINITY_sp Q9Y3E5SF3B6   | Splicing factor 3B  | 64.10 | 0.00 |
| TRINITY_sp O2364SBE2.1   | 1,4-alpha-glucan-br | 64.10 | 0.00 |
| TRINITY_sp Q3957YPTC6    | Ras-related protein | 64.00 | 0.00 |
| TRINITY_sp P2578LCP2     | Digestive cysteine  | 64.00 | 0.00 |
| TRINITY_sp Q8WX7DNAH7    | Dynein heavy chain  | 64.00 | 0.00 |
| TRINITY_sp Q9655UGD1     | UDP-glucose 6-dehyd | 64.00 | 0.00 |
| TRINITY_sp P0C8MCCRP1    | Probable serine/thr | 64.00 | 0.00 |
| TRINITY_sp Q940MAGT2     | Alanine--glyoxylate | 64.00 | 0.00 |
| TRINITY_sp P2435rps14    | Plastid 30S ribosom | 64.00 | 0.00 |
| TRINITY_sp Q3965PSAL     | Photosystem I react | 64.00 | 0.00 |
| TRINITY_sp Q9FF5RPS10B   | 40S ribosomal prote | 64.00 | 0.00 |
| TRINITY_sp Q9MBIDHC10    | Dynein-1-beta heavy | 64.00 | 0.00 |
| TRINITY_sp Q4287RPB2     | DNA-directed RNA po | 64.00 | 0    |
| TRINITY_sp Q9CA1CKL2     | Casein kinase 1-lik | 64.00 | 0.00 |
| TRINITY_sp Q5LI8murQ     | N-acetylmuramic aci | 63.90 | 0.00 |
| TRINITY_sp O7497SPCC1827 | Probable choline-ph | 63.90 | 0.00 |
| TRINITY_sp P117(-        | Probable pancreatic | 63.90 | 0.00 |
| TRINITY_sp Q0P5IPIIH     | Peptidyl-prolyl cis | 63.90 | 0.00 |
| TRINITY_sp O7477mis3     | KRR1 small subunit  | 63.90 | 0.00 |
| TRINITY_sp Q23M7Tt116a   | Probable beta-tubul | 63.90 | 0.00 |
| TRINITY_sp Q5NC5Dph1     | Diphthamide biosynt | 63.90 | 0.00 |

|                          |                     |       |      |
|--------------------------|---------------------|-------|------|
| TRINITY_sp P5043-        | Serine hydroxymethy | 63.90 | 0.00 |
| TRINITY_sp P496(-        | Aconitate hydratase | 63.90 | 0    |
| TRINITY_sp O2334HISN5B   | Imidazoleglycerol-p | 63.90 | 0.00 |
| TRINITY_sp Q9FN3OGG1     | N-glycosylase/DNA 1 | 63.90 | 0.00 |
| TRINITY_sp Q55DvcysA     | Cystathionine gamma | 63.90 | 0.00 |
| TRINITY_sp A8HN5IFT27    | Intraflagellar tran | 63.90 | 0.00 |
| TRINITY_sp Q9LHGATA17    | GATA transcription  | 63.90 | 0.00 |
| TRINITY_sp Q9M03SFC1     | Mitochondrial succi | 63.90 | 0.00 |
| TRINITY_sp P4817mt-atp6  | ATP synthase subuni | 63.80 | 0.00 |
| TRINITY_sp Q54S7vps15    | Probable serine/thr | 63.80 | 0.00 |
| TRINITY_sp P0CQ5RPL44    | 60S ribosomal prote | 63.80 | 0.00 |
| TRINITY_sp Q9VK4Tor      | Target of rapamycin | 63.80 | 0.00 |
| TRINITY_sp Q6BY8RPS29    | 40S ribosomal prote | 63.80 | 0.00 |
| TRINITY_sp O8253PBF1     | Proteasome subunit  | 63.80 | 0.00 |
| TRINITY_sp Q1542SF3A2    | Splicing factor 3A  | 63.80 | 0.00 |
| TRINITY_sp Q9SH3HMA5     | Probable copper-tra | 63.80 | 0.00 |
| TRINITY_sp Q9M72BCE2     | Lipoamide acyltrans | 63.80 | 0.00 |
| TRINITY_sp Q9D78Ppil2    | Peptidyl-prolyl cis | 63.80 | 0.00 |
| TRINITY_sp P4061F01G4.6  | Phosphate carrier p | 63.80 | 0.00 |
| TRINITY_sp Q54V7ctps     | CTP synthase OS=Dic | 63.80 | 0.00 |
| TRINITY_sp A8IR4CHLREDR7 | Ribosome biogenesis | 63.80 | 0.00 |
| TRINITY_sp H2L09gck-1    | Germinal center kin | 63.80 | 0.00 |
| TRINITY_sp Q8LS1WNK7     | Probable serine/thr | 63.80 | 0.00 |
| TRINITY_sp P5525FUMR     | Fumarate hydratase, | 63.80 | 0.00 |
| TRINITY_sp Q08D6abcb6    | ATP-binding cassett | 63.80 | 0.00 |
| TRINITY_sp A8IV3DRC3     | Dynein regulatory c | 63.80 | 0.00 |
| TRINITY_sp Q9FV4-        | Zeta-carotene desat | 63.80 | 0.00 |
| TRINITY_sp Q4007PSBR     | Photosystem II 10 k | 63.80 | 0.00 |
| TRINITY_sp Q5FXMacbA     | Acyl-CoA-binding pr | 63.80 | 0.00 |
| TRINITY_sp Q4VXUPABPC1L  | Polyadenylate-bindi | 63.80 | 0.00 |
| TRINITY_sp Q4106secA     | Protein translocase | 63.80 | 0    |
| TRINITY_sp A8ISMARL3     | ADP-ribosylation fa | 63.80 | 0.00 |
| TRINITY_sp P5156AFC1     | Serine/threonine-pr | 63.80 | 0.00 |
| TRINITY_sp Q8WUIRAB2B    | Ras-related protein | 63.80 | 0.00 |
| TRINITY_sp P9051-        | Proteasome subunit  | 63.70 | 0.00 |
| TRINITY_sp Q76I8RPS12    | 40S ribosomal prote | 63.70 | 0.00 |
| TRINITY_sp Q1ZXIechsl    | Probable enoyl-CoA  | 63.70 | 0.00 |
| TRINITY_sp Q940MAGT2     | Alanine--glyoxylate | 63.70 | 0.00 |
| TRINITY_sp Q8W2(CSN2     | COP9 signalosome co | 63.70 | 0.00 |
| TRINITY_sp Q54J6thrS1    | Probable threonine- | 63.70 | 0.00 |
| TRINITY_sp Q54QJhgd      | Homogentisate 1,2-d | 63.70 | 0.00 |
| TRINITY_sp P1344HPR-A    | Glycerate dehydroge | 63.70 | 0.00 |
| TRINITY_sp P9383IMDH2    | 3-isopropylmalate d | 63.70 | 0.00 |
| TRINITY_sp P5364sodB     | Superoxide dismutas | 63.70 | 0.00 |
| TRINITY_sp Q3919PRL2     | Protein pleiotropic | 63.70 | 0.00 |
| TRINITY_sp Q8EJVprpB     | 2-methylisocitrate  | 63.70 | 0.00 |
| TRINITY_sp P4686FLA10    | Kinesin-like protei | 63.70 | 0.00 |
| TRINITY_sp P5376uglA     | Uracil-DNA glycosyl | 63.70 | 0.00 |
| TRINITY_sp E1C1FUSP47    | Ubiquitin carboxyl- | 63.60 | 0.00 |
| TRINITY_sp Q6112Cfi      | Complement factor I | 63.60 | 0.00 |
| TRINITY_sp Q4SUFtma7     | Translation machine | 63.60 | 0.00 |
| TRINITY_sp O4962ISU1     | Iron-sulfur cluster | 63.60 | 0.00 |
| TRINITY_sp A8IC4URM1     | Ubiquitin-related m | 63.60 | 0.00 |
| TRINITY_sp Q9EPIAtp13a1  | Manganese-transport | 63.60 | 0.00 |
| TRINITY_sp P802(-        | NADH dehydrogenase  | 63.60 | 0.00 |
| TRINITY_sp Q8K13Sde2     | Protein SDE2 homolo | 63.60 | 0.00 |



|                         |                      |       |      |
|-------------------------|----------------------|-------|------|
| TRINITY_sp O8114PAA2    | Proteasome subunit   | 63.60 | 0.00 |
| TRINITY_sp P492(RPL9B   | 60S ribosomal prote  | 63.60 | 0.00 |
| TRINITY_sp P1235PSAE    | Photosystem I react  | 63.60 | 0.00 |
| TRINITY_sp Q8LPIABC2    | ABC transporter B f  | 63.60 | 0.00 |
| TRINITY_sp Q54QferkB    | Extracellular signa  | 63.60 | 0.00 |
| TRINITY_sp Q54QferkB    | Extracellular signa  | 63.60 | 0.00 |
| TRINITY_sp Q9M3IRPL35C  | 60S ribosomal prote  | 63.60 | 0.00 |
| TRINITY_sp Q9LP4RPN6    | 26S proteasome non-  | 63.60 | 0.00 |
| TRINITY_sp Q54Y2dhkJ    | Hybrid signal trans  | 63.60 | 0.00 |
| TRINITY_sp Q9WV5Mok     | MAPK/MAK/MRK overla  | 63.60 | 0.00 |
| TRINITY_sp Q4372OASC    | Cysteine synthase,   | 63.60 | 0.00 |
| TRINITY_sp Q56Y8MAP2B   | Methionine aminopep  | 63.60 | 0.00 |
| TRINITY_sp Q9LYMFER3    | Ferritin-3, chlorop  | 63.60 | 0.00 |
| TRINITY_sp Q3877CDC2A   | Cell division contr  | 63.60 | 0.00 |
| TRINITY_sp Q8LEIABCI11  | ABC transporter I f  | 63.60 | 0.00 |
| TRINITY_sp Q6F21CLPB1   | Chaperone protein C  | 63.60 | 0.00 |
| TRINITY_sp Q84M2ABCA1   | ABC transporter A f  | 63.60 | 0.00 |
| TRINITY_sp Q940ICCT2    | T-complex protein 1  | 63.60 | 0.00 |
| TRINITY_sp P0DK(PGLP1A  | Phosphoglycolate ph  | 63.60 | 0.00 |
| TRINITY_sp A6BLVNFYC2   | Nuclear transcripti  | 63.50 | 0.00 |
| TRINITY_sp Q54RIacadsb  | Probable short/bran  | 63.50 | 0.00 |
| TRINITY_sp P3352ABCC1   | Multidrug resistanc  | 63.50 | 0.00 |
| TRINITY_sp O4906-       | Probable phospholip  | 63.50 | 0.00 |
| TRINITY_sp Q9BT(DIDO1   | Death-inducer oblit  | 63.50 | 0.00 |
| TRINITY_sp Q8I0Iilis1   | Lissencephaly-1 hom  | 63.50 | 0.00 |
| TRINITY_sp Q9SHRUB1     | Ubiquitin-NEDD8-lik  | 63.50 | 0.00 |
| TRINITY_sp P0396rasD    | Ras-like protein ra  | 63.50 | 0.00 |
| TRINITY_sp Q54Efcct7    | T-complex protein 1  | 63.50 | 0.00 |
| TRINITY_sp P5179CLCN6   | Chloride transport   | 63.50 | 0.00 |
| TRINITY_sp Q8K31TSTA3   | GDP-L-fucose syntha  | 63.50 | 0.00 |
| TRINITY_sp Q96A2CPNE4   | Copine-4 OS=Homo sa  | 63.50 | 0.00 |
| TRINITY_sp Q9LVMABC25   | ABC transporter B f  | 63.50 | 0.00 |
| TRINITY_sp Q3899KIN10   | SNF1-related protei  | 63.50 | 0.00 |
| TRINITY_sp A2Y4FCDKD-1  | Cyclin-dependent ki  | 63.50 | 0.00 |
| TRINITY_sp Q3957ODA2    | Dynein gamma chain,  | 63.50 | 0.00 |
| TRINITY_sp F4K0CKIN4C   | Kinesin-like protei  | 63.50 | 0.00 |
| TRINITY_sp Q6CQETAR1-A  | Protein TAR1 OS=Klu  | 63.50 | 0.00 |
| TRINITY_sp Q9UK(ANGPTL2 | Angiopietin-relate   | 63.40 | 0.00 |
| TRINITY_sp Q8L8VCYP21-2 | Peptidyl-prolyl cis  | 63.40 | 0.00 |
| TRINITY_sp P3275-       | Alpha-1-antitrypsin  | 63.40 | 0.00 |
| TRINITY_sp Q9VD1Ino80   | Putative DNA helica  | 63.40 | 0.00 |
| TRINITY_sp Q17QCAP2S1   | AP-2 complex subuni  | 63.40 | 0.00 |
| TRINITY_sp Q54Kfncbp2   | Nuclear cap-binding  | 63.40 | 0.00 |
| TRINITY_sp Q7XA7ABCG21  | ABC transporter G f  | 63.40 | 0.00 |
| TRINITY_sp Q0597RAB2    | Ras-related protein  | 63.40 | 0.00 |
| TRINITY_sp O6121daf-31  | N-alpha-acetyltrans  | 63.40 | 0.00 |
| TRINITY_sp P3409myoB    | Myosin IB heavy cha  | 63.40 | 0.00 |
| TRINITY_sp Q9503metK    | S-adenosylmethionin  | 63.40 | 0.00 |
| TRINITY_sp Q94F(IMPL1   | Phosphatase IMPL1,   | 63.40 | 0.00 |
| TRINITY_sp P1826Gsk3b   | Glycogen synthase k  | 63.40 | 0.00 |
| TRINITY_sp Q6UK(pirA    | Protein pirA OS=Dic  | 63.40 | 0.00 |
| TRINITY_sp P0CO(HHT1    | Histone H3 OS=Crypt  | 63.40 | 0.00 |
| TRINITY_sp A0E77GSPATT0 | (ATPase ASNA1 homolo | 63.40 | 0.00 |
| TRINITY_sp P0446-       | Calmodulin OS=Triti  | 63.40 | 0.00 |
| TRINITY_sp P4642GstS1   | Glutathione S-trans  | 63.40 | 0.00 |
| TRINITY_sp A2ZV(CPK1    | Calcium-dependent p  | 63.40 | 0.00 |

|                           |                      |       |      |
|---------------------------|----------------------|-------|------|
| TRINITY_sp Q9LS\GLYR1     | Glyoxylate/succinic  | 63.40 | 0.00 |
| TRINITY_sp Q6F2\CLPB1     | Chaperone protein C  | 63.40 | 0.00 |
| TRINITY_sp Q169\PRKC1     | Calcium-dependent p  | 63.40 | 0.00 |
| TRINITY_sp A4S6\OSTLU_41  | Lon protease homolo  | 63.40 | 0.00 |
| TRINITY_sp Q6YV\CARA      | Carbamoyl-phosphate  | 63.40 | 0.00 |
| TRINITY_sp Q9M4\PGMP      | Phosphoglucomutase,  | 63.40 | 0.00 |
| TRINITY_sp Q9ZV\CUL3A     | Cullin-3A OS=Arabid  | 63.40 | 0.00 |
| TRINITY_sp Q8SS\mat5      | N-alpha-acetyltrans  | 63.40 | 0.00 |
| TRINITY_sp Q9VT\CG7949    | MIP18 family protei  | 63.40 | 0.00 |
| TRINITY_sp Q649\ORF1      | RNA replication pol  | 63.40 | 0.00 |
| TRINITY_sp P207\MAK       | Serine/threonine-pr  | 63.30 | 0.00 |
| TRINITY_sp Q8LD\CYP19-4   | Peptidyl-prolyl cis  | 63.30 | 0.00 |
| TRINITY_sp F1Q4\atp9b     | Probable phospholip  | 63.30 | 0.00 |
| TRINITY_sp Q9SB\PDK       | [Pyruvate dehydroge  | 63.30 | 0.00 |
| TRINITY_sp A8XJ\cst-1     | Serine/threonine-pr  | 63.30 | 0.00 |
| TRINITY_sp P133\PSAH      | Photosystem I react  | 63.30 | 0.00 |
| TRINITY_sp Q9SC\KIN8B     | Kinesin-like protei  | 63.30 | 0.00 |
| TRINITY_sp P469\dad1      | Dolichyl-diphosphoo  | 63.30 | 0.00 |
| TRINITY_sp Q272\TFA       | 4-hydroxyphenylpyru  | 63.30 | 0.00 |
| TRINITY_sp Q55A\scsC      | Succinate--CoA liga  | 63.30 | 0.00 |
| TRINITY_sp P242\yjiA      | Uncharacterized GTP  | 63.30 | 0.00 |
| TRINITY_sp P222\(-        | Pyruvate kinase, cy  | 63.30 | 0.00 |
| TRINITY_sp Q9SS\FADT2     | Arogenate dehydrata  | 63.30 | 0.00 |
| TRINITY_sp Q8RW\IBR3      | Probable acyl-CoA d  | 63.30 | 0.00 |
| TRINITY_sp Q6QN\(-        | Casein kinase I OS=  | 63.30 | 0.00 |
| TRINITY_sp O826\HCF136    | Photosystem II stab  | 63.30 | 0.00 |
| TRINITY_sp C5WZ\Hsb01g020 | Inosine triphosphat  | 63.20 | 0.00 |
| TRINITY_sp Q9Z0\Txnrd2    | Thioredoxin reducta  | 63.20 | 0.00 |
| TRINITY_sp B8BK\Osi_3612  | DNA replication lic  | 63.20 | 0.00 |
| TRINITY_sp P0AB\elbB      | Glyoxalase ElbB OS=  | 63.20 | 0.00 |
| TRINITY_sp Q8BW\Dnah3     | Dynein heavy chain   | 63.20 | 0.00 |
| TRINITY_sp Q9FI\IRPS8B    | 40S ribosomal prote  | 63.20 | 0.00 |
| TRINITY_sp Q23A\TLL3E     | Tubulin glycyclase 3 | 63.20 | 0.00 |
| TRINITY_sp Q371\ACA1      | Calcium-transportin  | 63.20 | 0.00 |
| TRINITY_sp P0CQ\PRP28     | Pre-mRNA-splicing A  | 63.20 | 0.00 |
| TRINITY_sp Q8LB\PRP38     | Pre-mRNA-splicing f  | 63.20 | 0.00 |
| TRINITY_sp O230\RPL6      | 50S ribosomal prote  | 63.20 | 0.00 |
| TRINITY_sp Q8GS\HCAR      | 7-hydroxymethyl chl  | 63.20 | 0.00 |
| TRINITY_sp Q9VV\CG4933    | Probable tRNA N6-ad  | 63.20 | 0.00 |
| TRINITY_sp Q9LD\CAC3      | Acetyl-coenzyme A c  | 63.20 | 0.00 |
| TRINITY_sp Q70G\Osi07g065 | Thioredoxin reducta  | 63.20 | 0.00 |
| TRINITY_sp P291\CPN60I    | Chaperonin CPN60-1,  | 63.20 | 0.00 |
| TRINITY_sp Q9SR\At3g0931  | UPF0161 protein At3  | 63.20 | 0.00 |
| TRINITY_sp Q94K\At3g5814  | Phenylalanine--tRNA  | 63.20 | 0.00 |
| TRINITY_sp A0A0\IOR       | Protein ORANGE-GREE  | 63.20 | 0.00 |
| TRINITY_sp A4S6\OSTLU_41  | Lon protease homolo  | 63.20 | 0.00 |
| TRINITY_sp Q7G8\Osi01g036 | Probable chromatin-  | 63.20 | 0.00 |
| TRINITY_sp P937\TWN2      | Valine--tRNA ligase  | 63.20 | 0.00 |
| TRINITY_sp Q66K\rbm42     | RNA-binding protein  | 63.20 | 0.00 |
| TRINITY_sp Q2KI\NAA10     | N-alpha-acetyltrans  | 63.10 | 0.00 |
| TRINITY_sp B4KC\Cbp20     | Nuclear cap-binding  | 63.10 | 0.00 |
| TRINITY_sp Q9CA\CKL2      | Casein kinase 1-lik  | 63.10 | 0.00 |
| TRINITY_sp Q556\mad211-1  | Mitotic spindle ass  | 63.10 | 0.00 |
| TRINITY_sp Q9GP\RpL31     | 60S ribosomal prote  | 63.10 | 0.00 |
| TRINITY_sp Q5B2\acpA      | Acetate permease A   | 63.10 | 0.00 |
| TRINITY_sp P281\pkgB      | Protein kinase 2 OS  | 63.10 | 0.00 |

|                  |          |                     |       |      |
|------------------|----------|---------------------|-------|------|
| TRINITY_sp Q569I | selenbp1 | Selenium-binding pr | 63.10 | 0.00 |
| TRINITY_sp Q9FDZ | RPL21E   | 60S ribosomal prote | 63.10 | 0.00 |
| TRINITY_sp P2079 | MAK      | Serine/threonine-pr | 63.10 | 0.00 |
| TRINITY_sp P5099 | CCT4     | T-complex protein 1 | 63.10 | 0.00 |
| TRINITY_sp O6157 | gch      | GTP cyclohydrolase  | 63.10 | 0.00 |
| TRINITY_sp O5000 | OTC      | Ornithine carbamoyl | 63.10 | 0.00 |
| TRINITY_sp P2161 | -        | Pyrophosphate-energ | 63.10 | 0.00 |
| TRINITY_sp Q9R00 | Lgmn     | Legumain OS=Rattus  | 63.10 | 0.00 |
| TRINITY_sp Q9VA0 | CG11837  | Probable dimethylad | 63.10 | 0.00 |
| TRINITY_sp Q9ZW6 | CKL9     | Casein kinase 1-lik | 63.10 | 0.00 |
| TRINITY_sp C0SU1 | JMJ16    | Putative lysine-spe | 63.10 | 0.00 |
| TRINITY_sp O8253 | FTSZ2-1  | Cell division prote | 63.10 | 0.00 |
| TRINITY_sp Q9H07 | NAT10    | RNA cytidine acetyl | 63.10 | 0.00 |
| TRINITY_sp Q3MH1 | RBBP4    | Histone-binding pro | 63.00 | 0.00 |
| TRINITY_sp P1187 | -        | High mobility group | 63.00 | 0.00 |
| TRINITY_sp O7648 | -        | Casein kinase II su | 63.00 | 0.00 |
| TRINITY_sp Q0913 | tif213   | Eukaryotic translat | 63.00 | 0.00 |
| TRINITY_sp Q54H0 | cauh     | Methylglutaconyl-Co | 63.00 | 0.00 |
| TRINITY_sp Q9SM1 | DHC1     | Dynein-1-alpha heav | 63.00 | 0.00 |
| TRINITY_sp Q8GX3 | CFIS2    | Pre-mRNA cleavage f | 63.00 | 0.00 |
| TRINITY_sp Q76N1 | hpd      | 4-hydroxyphenylpyru | 63.00 | 0.00 |
| TRINITY_sp P9309 | -        | 60S ribosomal prote | 63.00 | 0.00 |
| TRINITY_sp Q9997 | TEP1     | Telomerase protein  | 63.00 | 0.00 |
| TRINITY_sp Q1542 | SF3B4    | Splicing factor 3B  | 63.00 | 0.00 |
| TRINITY_sp Q9BV6 | RNF126   | E3 ubiquitin-protei | 63.00 | 0.00 |
| TRINITY_sp Q0992 | yakc     | Aldo-keto reductase | 63.00 | 0.00 |
| TRINITY_sp Q4309 | -        | Granule-bound starc | 63.00 | 0.00 |
| TRINITY_sp Q8C32 | Guf1     | Translation factor  | 63.00 | 0.00 |
| TRINITY_sp Q9Y30 | NAALAD2  | N-acetylated-alpha- | 63.00 | 0.00 |
| TRINITY_sp Q9C51 | SMC2-1   | Structural maintena | 63.00 | 0.00 |
| TRINITY_sp Q9SY1 | PEX10    | Peroxisome biogenes | 63.00 | 0.00 |
| TRINITY_sp Q9LNC | CLO      | 110 kDa U5 small nu | 63.00 | 0    |
| TRINITY_sp P3204 | RPL37A   | 60S ribosomal prote | 63.00 | 0.00 |
| TRINITY_sp P3204 | RPL37A   | 60S ribosomal prote | 63.00 | 0.00 |
| TRINITY_sp P2311 | CDC2     | Cell division contr | 63.00 | 0.00 |
| TRINITY_sp P2834 | acuE     | Malate synthase, gl | 63.00 | 0.00 |
| TRINITY_sp P2090 | aarA     | Citrate synthase OS | 62.90 | 0.00 |
| TRINITY_sp P3728 | PIGA     | Phosphatidylinosito | 62.90 | 0.00 |
| TRINITY_sp Q9US1 | gpi10    | GPI mannosyltransfe | 62.90 | 0.00 |
| TRINITY_sp C1D67 | pyrC     | Dihydroorotase OS=L | 62.90 | 0.00 |
| TRINITY_sp P0DK1 | RPS10-1  | 40S ribosomal prote | 62.90 | 0.00 |
| TRINITY_sp Q8TF0 | DYNLRB2  | Dynein light chain  | 62.90 | 0.00 |
| TRINITY_sp Q9C87 | At1g6334 | Putative flavin-con | 62.90 | 0.00 |
| TRINITY_sp Q9LY8 | RGLG2    | E3 ubiquitin-protei | 62.90 | 0.00 |
| TRINITY_sp Q9LRF | CID9     | Polyadenylate-bindi | 62.90 | 0.00 |
| TRINITY_sp Q54W7 | pex7     | Peroxisomal targeti | 62.90 | 0.00 |
| TRINITY_sp O6030 | AQR      | Intron-binding prot | 62.90 | 0.00 |
| TRINITY_sp Q84M2 | ABCA1    | ABC transporter A f | 62.80 | 0.00 |
| TRINITY_sp P9310 | CDC2     | Cell division contr | 62.80 | 0.00 |
| TRINITY_sp D4B00 | ARB_0207 | Probable glucan end | 62.80 | 0.00 |
| TRINITY_sp Q7MA3 | clpX1    | ATP-dependent Clp p | 62.80 | 0.00 |
| TRINITY_sp Q55G0 | psmA5    | Proteasome subunit  | 62.80 | 0.00 |
| TRINITY_sp Q86I0 | dst1     | Serine/threonine-pr | 62.80 | 0.00 |
| TRINITY_sp Q9LW0 | -        | Inositol-3-phosphat | 62.80 | 0.00 |
| TRINITY_sp Q9CA1 | DRG2     | Developmentally-reg | 62.80 | 0.00 |
| TRINITY_sp Q9BZ0 | CRNKL1   | Crooked neck-like p | 62.80 | 0.00 |

|                          |                     |       |      |
|--------------------------|---------------------|-------|------|
| TRINITY_sp Q2KJ PRPF6    | Pre-mRNA-processing | 62.80 | 0.00 |
| TRINITY_sp O046 ADNT1    | Mitochondrial adeni | 62.80 | 0.00 |
| TRINITY_sp O238 SIR      | Sulfite reductase [ | 62.80 | 0.00 |
| TRINITY_sp P234 -        | Ribulose bisphospha | 62.80 | 0.00 |
| TRINITY_sp Q8T6 abcf2    | ABC transporter F f | 62.80 | 0.00 |
| TRINITY_sp P0AC fumA     | Fumarate hydratase  | 62.80 | 0.00 |
| TRINITY_sp Q9LS UBC32    | Ubiquitin-conjugati | 62.70 | 0.00 |
| TRINITY_sp P024 Rp1p2    | 60S acidic ribosoma | 62.70 | 0.00 |
| TRINITY_sp O228 HEME2    | Uroporphyrinogen de | 62.70 | 0.00 |
| TRINITY_sp Q54I polr3b   | DNA-directed RNA po | 62.70 | 0.00 |
| TRINITY_sp Q6QN -        | Casein kinase I OS= | 62.70 | 0.00 |
| TRINITY_sp Q8GW At1g1844 | Peptidyl-tRNA hydro | 62.70 | 0.00 |
| TRINITY_sp A8G8 tatD     | 3'-5' ssDNA/RNA exo | 62.70 | 0.00 |
| TRINITY_sp Q8LP ABCE2    | ABC transporter E f | 62.70 | 0.00 |
| TRINITY_sp O646 URT1     | UTP:RNA uridylyltra | 62.70 | 0.00 |
| TRINITY_sp Q9SE -        | Pirin-like protein  | 62.70 | 0.00 |
| TRINITY_sp Q9SI At2g4029 | Eukaryotic translat | 62.70 | 0.00 |
| TRINITY_sp Q655 FTSH2    | ATP-dependent zinc  | 62.70 | 0.00 |
| TRINITY_sp O224 HDA19    | Histone deacetylase | 62.70 | 0.00 |
| TRINITY_sp P496 -        | Aconitate hydratase | 62.70 | 0.00 |
| TRINITY_sp Q9SE AAA1     | Katanin p60 ATPase- | 62.70 | 0.00 |
| TRINITY_sp Q9SM DHC1B    | Cytoplasmic dynein  | 62.70 | 0.00 |
| TRINITY_sp Q652 PHT4;4   | Probable anion tran | 62.70 | 0.00 |
| TRINITY_sp A5PJ SF3A2    | Splicing factor 3A  | 62.70 | 0.00 |
| TRINITY_sp C5D4 deoC     | Deoxyribose-phospha | 62.60 | 0.00 |
| TRINITY_sp P534 -        | Actin OS=Chlamydomo | 62.60 | 0.00 |
| TRINITY_sp Q55C amdhd1   | Probable imidazonon | 62.60 | 0.00 |
| TRINITY_sp Q6QN -        | Casein kinase I OS= | 62.60 | 0.00 |
| TRINITY_sp P264 HSP70    | Heat shock 70 kDa p | 62.60 | 0.00 |
| TRINITY_sp Q414 PCM3     | Putative calmodulin | 62.60 | 0.00 |
| TRINITY_sp Q964 -        | Meiotic recombinati | 62.60 | 0.00 |
| TRINITY_sp Q9SV UEV1D    | Ubiquitin-conjugati | 62.60 | 0.00 |
| TRINITY_sp Q6AV Os03g061 | Probable N-acetyl-g | 62.60 | 0.00 |
| TRINITY_sp O005 NOP56    | Nucleolar protein 5 | 62.60 | 0.00 |
| TRINITY_sp O229 RH24     | DEAD-box ATP-depend | 62.60 | 0.00 |
| TRINITY_sp Q9D2 Dnaaf1   | Dynein assembly fac | 62.60 | 0.00 |
| TRINITY_sp Q9MB DHC10    | Dynein-1-beta heavy | 62.60 | 0.00 |
| TRINITY_sp Q9QY Abcc5    | Multidrug resistanc | 62.60 | 0.00 |
| TRINITY_sp P465 ubc4     | Ubiquitin-conjugati | 62.50 | 0.00 |
| TRINITY_sp Q7KW prp19    | Pre-mRNA-processing | 62.50 | 0.00 |
| TRINITY_sp E2RK RPL32    | 60S ribosomal prote | 62.50 | 0.00 |
| TRINITY_sp P306 cdc-25.1 | M-phase inducer pho | 62.50 | 0.00 |
| TRINITY_sp Q54Y mrpl33   | Probable 39S riboso | 62.50 | 0.00 |
| TRINITY_sp Q46E msrB     | Peptide methionine  | 62.50 | 0.00 |
| TRINITY_sp Q2HJ PKNOX1   | Homeobox protein PK | 62.50 | 0.00 |
| TRINITY_sp P623 CPK1     | Calcium-dependent p | 62.50 | 0.00 |
| TRINITY_sp B8AM CHLD     | Magnesium-chelatase | 62.50 | 0.00 |
| TRINITY_sp O830 pip      | Probable proline im | 62.50 | 0.00 |
| TRINITY_sp Q2KI TCEB1    | Transcription elong | 62.50 | 0.00 |
| TRINITY_sp Q54Q FerkB    | Extracellular signa | 62.50 | 0.00 |
| TRINITY_sp P316 parp1    | Poly [ADP-ribose] p | 62.50 | 0.00 |
| TRINITY_sp Q9FV DHDP52   | 4-hydroxy-tetrahydr | 62.50 | 0.00 |
| TRINITY_sp Q56K SF3B5    | Splicing factor 3B  | 62.50 | 0.00 |
| TRINITY_sp Q922 Plrg1    | Pleiotropic regulat | 62.50 | 0.00 |
| TRINITY_sp Q8MQ cshA     | Citrate synthase, p | 62.50 | 0.00 |
| TRINITY_sp A4K4 RTEL1    | Regulator of telome | 62.50 | 0.00 |

|                          |                      |       |      |
|--------------------------|----------------------|-------|------|
| TRINITY_sp Q3886XPB1     | DNA repair helicase  | 62.50 | 0.00 |
| TRINITY_sp O4892CYP97B2  | Cytochrome P450 97B  | 62.50 | 0.00 |
| TRINITY_sp B9DGIACS      | Acetyl-coenzyme A s  | 62.50 | 0.00 |
| TRINITY_sp Q9Y3E5SF3B6   | Splicing factor 3B   | 62.50 | 0.00 |
| TRINITY_sp A8J06CHLREDR1 | 1-acyl-sn-glycerol-  | 62.50 | 0.00 |
| TRINITY_sp Q8VYFCKL12    | Casein kinase 1-lik  | 62.50 | 0.00 |
| TRINITY_sp Q74ZFHAGR231C | Lipoyl synthase, mi  | 62.50 | 0.00 |
| TRINITY_sp Q5DM5IFT172   | Intraflagellar tran  | 62.50 | 0.00 |
| TRINITY_sp Q5ZJNGLY1     | Peptide-N(4)-(N-ace  | 62.50 | 0.00 |
| TRINITY_sp Q1ZX1DDB_G027 | Probable serine/thr  | 62.50 | 0.00 |
| TRINITY_sp P0272SLC25A4  | ADP/ATP translocase  | 62.40 | 0.00 |
| TRINITY_sp P5242PAC1     | Proteasome subunit   | 62.40 | 0.00 |
| TRINITY_sp P1686-        | Histone H2A-III OS=  | 62.40 | 0.00 |
| TRINITY_sp A0L57acsA     | Acetyl-coenzyme A s  | 62.40 | 0.00 |
| TRINITY_sp Q54S2nfya     | Nuclear transcripti  | 62.40 | 0.00 |
| TRINITY_sp P0257Act79B   | Actin, larval muscl  | 62.40 | 0.00 |
| TRINITY_sp Q2371-        | Elongation factor 2  | 62.40 | 0    |
| TRINITY_sp Q54JHoatA     | Probable ornithine   | 62.40 | 0.00 |
| TRINITY_sp Q6YS3Os07g03C | (DEAD-box ATP-depend | 62.40 | 0.00 |
| TRINITY_sp O8278HISN3    | 1-(5-phosphoribosyl  | 62.40 | 0.00 |
| TRINITY_sp Q4KTJIRPL5    | 60S ribosomal prote  | 62.40 | 0.00 |
| TRINITY_sp P1117DLST     | Dihydrolipoyllysine  | 62.40 | 0.00 |
| TRINITY_sp Q0WM2ALDH6B2  | Methylmalonate-semi  | 62.40 | 0.00 |
| TRINITY_sp A8IB2CHLREDR1 | 40S ribosomal prote  | 62.40 | 0.00 |
| TRINITY_sp Q08D7PANK3    | Pantothenate kinase  | 62.30 | 0.00 |
| TRINITY_sp Q8GWVGFA2     | Chaperone protein d  | 62.30 | 0.00 |
| TRINITY_sp P0CC(DDB_G028 | Enolase superfamily  | 62.30 | 0.00 |
| TRINITY_sp O2405MT2      | Metallothionein-lik  | 62.30 | 0.00 |
| TRINITY_sp Q86A2psmB1    | Proteasome subunit   | 62.30 | 0.00 |
| TRINITY_sp Q86K9trappc3  | Trafficking protein  | 62.30 | 0.00 |
| TRINITY_sp Q55D6psmB3    | Proteasome subunit   | 62.30 | 0.00 |
| TRINITY_sp Q9LHFYPP3     | Phytochrome-associa  | 62.30 | 0.00 |
| TRINITY_sp Q75JIpckA     | Phosphoenolpyruvate  | 62.30 | 0.00 |
| TRINITY_sp Q0597RAB1A    | Ras-related protein  | 62.30 | 0.00 |
| TRINITY_sp P4234MTOR     | Serine/threonine-pr  | 62.30 | 0.00 |
| TRINITY_sp P4608NOP2     | Probable 28S rRNA (  | 62.30 | 0.00 |
| TRINITY_sp Q9XYIfcpA     | Probable C-terminal  | 62.30 | 0.00 |
| TRINITY_sp P0678TOP2     | DNA topoisomerase 2  | 62.30 | 0.00 |
| TRINITY_sp A8JA4DYF13    | Intraflagellar tran  | 62.30 | 0.00 |
| TRINITY_sp Q3ED6ABC119   | ABC transporter I f  | 62.30 | 0.00 |
| TRINITY_sp P5039Gdi1     | Rab GDP dissociatio  | 62.30 | 0.00 |
| TRINITY_sp O6549XCP1     | Cysteine protease X  | 62.30 | 0.00 |
| TRINITY_sp A1WZCrpmG     | 50S ribosomal prote  | 62.30 | 0.00 |
| TRINITY_sp Q2436Iswi     | Chromatin-remodelin  | 62.30 | 0.00 |
| TRINITY_sp Q8K01Oplah    | 5-oxoprolinase OS=M  | 62.30 | 0.00 |
| TRINITY_sp Q3924PP2AB2   | Serine/threonine pr  | 62.30 | 0.00 |
| TRINITY_sp Q8RWURVE8     | Protein REVEILLE 8   | 62.30 | 0.00 |
| TRINITY_sp A8HTVtuf1     | Elongation factor T  | 62.20 | 0.00 |
| TRINITY_sp Q2SJImsrB     | Peptide methionine   | 62.20 | 0.00 |
| TRINITY_sp P5113MSK-2    | Glycogen synthase k  | 62.20 | 0.00 |
| TRINITY_sp Q9UR8ACT      | Actin, gamma OS=Pen  | 62.20 | 0.00 |
| TRINITY_sp P2975ACTB     | Actin, cytoplasmic   | 62.20 | 0.00 |
| TRINITY_sp Q1JQIMOCS1    | Molybdenum cofactor  | 62.20 | 0.00 |
| TRINITY_sp Q9I0IppurB    | Adenylosuccinate ly  | 62.20 | 0.00 |
| TRINITY_sp Q8DJ4clpB1    | Chaperone protein C  | 62.20 | 0.00 |
| TRINITY_sp Q54QferkB     | Extracellular signa  | 62.20 | 0.00 |

|                          |                     |       |      |
|--------------------------|---------------------|-------|------|
| TRINITY_sp Q59S6IPL1     | Spindle assembly ch | 62.20 | 0.00 |
| TRINITY_sp Q6DBUgmppb    | Mannose-1-phosphate | 62.20 | 0.00 |
| TRINITY_sp Q2047kin-20   | Casein kinase I iso | 62.20 | 0.00 |
| TRINITY_sp Q8LAAGATA1    | GATA transcription  | 62.20 | 0.00 |
| TRINITY_sp Q54S5nvl      | Putative ribosome b | 62.20 | 0.00 |
| TRINITY_sp P5424PGIC     | Glucose-6-phosphate | 62.20 | 0.00 |
| TRINITY_sp Q2RBN0s1lg010 | Clathrin heavy chai | 62.20 | 0    |
| TRINITY_sp P0DJ2RPL35A   | 60S ribosomal prote | 62.20 | 0.00 |
| TRINITY_sp Q10M1R40C1    | Ricin B-like lectin | 62.10 | 0.00 |
| TRINITY_sp Q3910FTSH1    | ATP-dependent zinc  | 62.10 | 0.00 |
| TRINITY_sp Q54V7ctps     | CTP synthase OS=Dic | 62.10 | 0.00 |
| TRINITY_sp Q6FUIURA7     | CTP synthase OS=Can | 62.10 | 0.00 |
| TRINITY_sp A7MB7SGK1     | Serine/threonine-pr | 62.10 | 0.00 |
| TRINITY_sp Q0662GDB1     | Glycogen debranchin | 62.10 | 0.00 |
| TRINITY_sp Q8L32KAS      | 3-oxoacyl-[acyl-car | 62.10 | 0.00 |
| TRINITY_sp P2338WARS     | Tryptophan--tRNA li | 62.10 | 0.00 |
| TRINITY_sp Q9BP0B9D2     | B9 domain-containin | 62.10 | 0.00 |
| TRINITY_sp Q5688gtdc1    | Glycosyltransferase | 62.10 | 0.00 |
| TRINITY_sp Q8TFHrp11802  | 60S ribosomal prote | 62.10 | 0.00 |
| TRINITY_sp P1061CTSA     | Lysosomal protectiv | 62.10 | 0.00 |
| TRINITY_sp Q9C61At1g5092 | Nucleolar GTP-bindi | 62.10 | 0.00 |
| TRINITY_sp Q9M81At1g7426 | Probable phosphorib | 62.10 | 0    |
| TRINITY_sp Q94F0IMPL1    | Phosphatase IMPL1,  | 62.10 | 0.00 |
| TRINITY_sp Q9LS0ASF1B    | Histone chaperone A | 62.10 | 0.00 |
| TRINITY_sp Q7ZX2kif19    | Kinesin-like protei | 62.10 | 0.00 |
| TRINITY_sp F41S0At2g3200 | DNA topoisomerase 3 | 62.00 | 0.00 |
| TRINITY_sp Q9D7Hiscu     | Iron-sulfur cluster | 62.00 | 0.00 |
| TRINITY_sp Q8LBNAt2g1671 | Iron-sulfur assembl | 62.00 | 0.00 |
| TRINITY_sp Q4025FIS1     | Probable aldehyde d | 62.00 | 0.00 |
| TRINITY_sp Q6DE0epabp    | Embryonic polyadeny | 62.00 | 0.00 |
| TRINITY_sp Q9SI0DSK2B    | Ubiquitin domain-co | 62.00 | 0.00 |
| TRINITY_sp P3232DCTD     | Deoxycytidylate dea | 62.00 | 0.00 |
| TRINITY_sp Q5606prpC     | 2-methylcitrate syn | 62.00 | 0.00 |
| TRINITY_sp Q8GWWAIH      | Agmatine deiminase  | 62.00 | 0.00 |
| TRINITY_sp Q0A90Mlg_1172 | Putative 4-hydroxy- | 62.00 | 0.00 |
| TRINITY_sp P5583RPS27    | 40S ribosomal prote | 62.00 | 0.00 |
| TRINITY_sp O2285ETFQO    | Electron transfer f | 62.00 | 0.00 |
| TRINITY_sp Q8W3IMFDR     | NADPH:adrenodoxin o | 62.00 | 0.00 |
| TRINITY_sp Q29S2DDX47    | Probable ATP-depend | 62.00 | 0.00 |
| TRINITY_sp Q0WPVVRMR4    | Receptor homology r | 62.00 | 0.00 |
| TRINITY_sp Q9C50SUF4     | Protein SUPPRESSOR  | 62.00 | 0.00 |
| TRINITY_sp P7421ffh      | Signal recognition  | 62.00 | 0.00 |
| TRINITY_sp A6QR5USP4     | Ubiquitin carboxyl- | 61.90 | 0.00 |
| TRINITY_sp Q0143AMPD2    | AMP deaminase 2 OS= | 61.90 | 0.00 |
| TRINITY_sp P4646Vps4b    | Vacuolar protein so | 61.90 | 0.00 |
| TRINITY_sp A3RL1-        | 40S ribosomal prote | 61.90 | 0.00 |
| TRINITY_sp Q54B0psmB5    | Proteasome subunit  | 61.90 | 0.00 |
| TRINITY_sp Q78P0Ccdc25   | Coiled-coil domain- | 61.90 | 0.00 |
| TRINITY_sp P2273ARP2     | 60S ribosomal prote | 61.90 | 0.00 |
| TRINITY_sp P0C23-        | 40S ribosomal prote | 61.90 | 0.00 |
| TRINITY_sp Q9C50NADK2    | NAD kinase 2, chlor | 61.90 | 0.00 |
| TRINITY_sp Q76N0cct6     | T-complex protein 1 | 61.90 | 0.00 |
| TRINITY_sp Q9ZV0PECT1    | Ethanolamine-phosph | 61.90 | 0.00 |
| TRINITY_sp Q8L60RPOT1-S0 | DNA-directed RNA po | 61.90 | 0.00 |
| TRINITY_sp O8882Sc5d     | Lathosterol oxidase | 61.80 | 0.00 |
| TRINITY_sp Q9UM0ANAPC10  | Anaphase-promoting  | 61.80 | 0.00 |

|                          |                      |       |      |
|--------------------------|----------------------|-------|------|
| TRINITY_sp P107(CAB7     | Chlorophyll a-b bin  | 61.80 | 0.00 |
| TRINITY_sp Q86JHlvsB     | BEACH domain-contai  | 61.80 | 0.00 |
| TRINITY_sp Q9ZQIACX1.2   | Putative peroxisoma  | 61.80 | 0.00 |
| TRINITY_sp Q59XIRAS1     | Ras-like protein 1   | 61.80 | 0.00 |
| TRINITY_sp P2431-        | Proliferating cell   | 61.80 | 0.00 |
| TRINITY_sp P8235-        | Non-specific lipid-  | 61.80 | 0.00 |
| TRINITY_sp Q31QNglgC     | Glucose-1-phosphate  | 61.80 | 0.00 |
| TRINITY_sp Q9SZJLIP5     | Protein HOMOLOG OF   | 61.80 | 0.00 |
| TRINITY_sp P0AF(mog      | Molybdopterin adeny  | 61.80 | 0.00 |
| TRINITY_sp Q0657-        | Pyrophosphate-energ  | 61.80 | 0.00 |
| TRINITY_sp P197(MIB      | Myosin heavy chain   | 61.80 | 0.00 |
| TRINITY_sp Q9SUNATR2     | NADPH--cytochrome P  | 61.80 | 0.00 |
| TRINITY_sp Q92Mfc1pB     | Chaperone protein C  | 61.80 | 0.00 |
| TRINITY_sp Q0597RAB1A    | Ras-related protein  | 61.80 | 0.00 |
| TRINITY_sp Q0594UTP13    | U3 small nucleolar   | 61.80 | 0.00 |
| TRINITY_sp O7477mis3     | KRR1 small subunit   | 61.80 | 0.00 |
| TRINITY_sp O4995GDCSP    | Glycine dehydrogena  | 61.80 | 0.00 |
| TRINITY_sp P2004ATP2B1   | Plasma membrane cal  | 61.80 | 0.00 |
| TRINITY_sp Q3ZBMASPN     | Asporin OS=Bos taur  | 61.80 | 0.00 |
| TRINITY_sp P5423PGIC1    | Glucose-6-phosphate  | 61.70 | 0.00 |
| TRINITY_sp Q8R32Rfc3     | Replication factor   | 61.70 | 0.00 |
| TRINITY_sp Q92J(fdxB     | 2Fe-2S ferredoxin O  | 61.70 | 0.00 |
| TRINITY_sp Q6NS2cdk11    | Threonylcarbamoylad  | 61.70 | 0.00 |
| TRINITY_sp Q56X(RH15     | DEAD-box ATP-depend  | 61.70 | 0.00 |
| TRINITY_sp Q6TB\CYP97C1  | Carotene epsilon-mo  | 61.70 | 0.00 |
| TRINITY_sp Q9LJIM3KE1    | MAP3K epsilon prote  | 61.70 | 0.00 |
| TRINITY_sp Q9C9(RPL6C    | 60S ribosomal prote  | 61.70 | 0.00 |
| TRINITY_sp P6004RPL7B    | 60S ribosomal prote  | 61.70 | 0.00 |
| TRINITY_sp Q3UT(Cdk15    | Cyclin-dependent ki  | 61.70 | 0.00 |
| TRINITY_sp Q9BW6CCDC94   | Coiled-coil domain-  | 61.70 | 0.00 |
| TRINITY_sp Q45E7-        | Serine/threonine-pr  | 61.70 | 0.00 |
| TRINITY_sp Q6YUOs02g015  | Putative multidrug   | 61.70 | 0.00 |
| TRINITY_sp Q54DIamdA     | AMP deaminase OS=Di  | 61.70 | 0.00 |
| TRINITY_sp Q9C5(At4g1783 | Acetylornithine dea  | 61.70 | 0.00 |
| TRINITY_sp O6007ubp12    | Probable ubiquitin   | 61.70 | 0.00 |
| TRINITY_sp O7477mis3     | KRR1 small subunit   | 61.70 | 0.00 |
| TRINITY_sp Q9AXE0s01g062 | Uroporphyrinogen de  | 61.70 | 0.00 |
| TRINITY_sp Q0021DHS2     | Phospho-2-dehydro-3  | 61.70 | 0.00 |
| TRINITY_sp Q9M1FAt3g6212 | Proline--tRNA ligas  | 61.70 | 0.00 |
| TRINITY_sp F4KE(EMB2247  | Valine--tRNA ligase  | 61.70 | 0.00 |
| TRINITY_sp Q4285WAXY     | Granule-bound starc  | 61.70 | 0.00 |
| TRINITY_sp Q4V8FSteap4   | Metalloreductase ST  | 61.60 | 0.00 |
| TRINITY_sp Q9BGJPRDX2    | Peroxioredoxin-2 OS= | 61.60 | 0.00 |
| TRINITY_sp O6555CIPK6    | CBL-interacting ser  | 61.60 | 0.00 |
| TRINITY_sp P1095-        | Actin, macronuclear  | 61.60 | 0.00 |
| TRINITY_sp P357(Prdx1    | Peroxioredoxin-1 OS= | 61.60 | 0.00 |
| TRINITY_sp P3472ARF      | ADP-ribosylation fa  | 61.60 | 0.00 |
| TRINITY_sp Q86K\vals1    | Probable valine--tR  | 61.60 | 0.00 |
| TRINITY_sp P1142-        | Actin OS=Entamoeba   | 61.60 | 0.00 |
| TRINITY_sp Q9ZWMCAO      | Chlorophyllide a ox  | 61.60 | 0.00 |
| TRINITY_sp Q6YZ2Os08g015 | Putative aconitate   | 61.60 | 0    |
| TRINITY_sp P0DJ1RPL13A   | 60S ribosomal prote  | 61.60 | 0.00 |
| TRINITY_sp Q54P1abcC8    | ABC transporter C f  | 61.60 | 0.00 |
| TRINITY_sp P4041-        | T-complex protein 1  | 61.60 | 0.00 |
| TRINITY_sp Q9UL2RAB21    | Ras-related protein  | 61.60 | 0.00 |
| TRINITY_sp Q9KN\trps     | Tryptophan--tRNA li  | 61.60 | 0.00 |

|                          |                     |       |      |
|--------------------------|---------------------|-------|------|
| TRINITY_sp Q75INOs05g012 | Isovaleryl-CoA dehy | 61.60 | 0.00 |
| TRINITY_sp Q0396L1818    | Chlorophyll a-b bin | 61.60 | 0.00 |
| TRINITY_sp O0757yhdF     | Uncharacterized oxi | 61.60 | 0.00 |
| TRINITY_sp F4JLMA4g1032  | Isoleucine--tRNA li | 61.60 | 0    |
| TRINITY_sp O2436PAG1     | Proteasome subunit  | 61.60 | 0.00 |
| TRINITY_sp Q9SYIBRR2A    | DExH-box ATP-depend | 61.60 | 0.00 |
| TRINITY_sp O320(yokD     | SPBc2 prophage-deri | 61.60 | 0.00 |
| TRINITY_sp E9L77-        | Bifunctional aspart | 61.60 | 0.00 |
| TRINITY_sp Q54UCdnapkcs  | DNA-dependent prote | 61.60 | 0.00 |
| TRINITY_sp Q9XE7EMB2369  | Leucine--tRNA ligas | 61.60 | 0    |
| TRINITY_sp Q94AHOOP      | Organellar oligopep | 61.60 | 0.00 |
| TRINITY_sp Q6DJ5cars2    | Probable cysteine-- | 61.50 | 0.00 |
| TRINITY_sp Q8NKGGLC3     | 1,4-alpha-glucan-br | 61.50 | 0.00 |
| TRINITY_sp Q6NRMmcm9     | DNA helicase MCM9 O | 61.50 | 0.00 |
| TRINITY_sp O1543ABCC4    | Multidrug resistanc | 61.50 | 0.00 |
| TRINITY_sp P9054-        | Histone H3 OS=Euplo | 61.50 | 0.00 |
| TRINITY_sp Q28H(qtrt1    | Queuine tRNA-ribosy | 61.50 | 0.00 |
| TRINITY_sp Q9632ACX4     | Acyl-coenzyme A oxi | 61.50 | 0.00 |
| TRINITY_sp A7SBNvlg24415 | Zinc finger CCCH-ty | 61.50 | 0.00 |
| TRINITY_sp Q2HFHTIF1     | ATP-dependent RNA h | 61.50 | 0.00 |
| TRINITY_sp B8AL3OsI_110  | Arginine biosynthes | 61.50 | 0.00 |
| TRINITY_sp P1506rasG     | Ras-like protein ra | 61.50 | 0.00 |
| TRINITY_sp Q3957YPTC6    | Ras-related protein | 61.50 | 0.00 |
| TRINITY_sp P3018TOP2     | DNA topoisomerase 2 | 61.50 | 0.00 |
| TRINITY_sp Q99MKars      | Lysine--tRNA ligase | 61.50 | 0.00 |
| TRINITY_sp P6295RAC1     | Ras-related C3 botu | 61.50 | 0.00 |
| TRINITY_sp Q9FE6Os03g056 | Elongation factor G | 61.50 | 0.00 |
| TRINITY_sp O2204ANP1     | Mitogen-activated p | 61.50 | 0.00 |
| TRINITY_sp Q6316Dnah1    | Dynein heavy chain  | 61.50 | 0.00 |
| TRINITY_sp Q9FN6BRR2C    | DExH-box ATP-depend | 61.50 | 0    |
| TRINITY_sp P3328RPS28    | 40S ribosomal prote | 61.50 | 0.00 |
| TRINITY_sp Q2223enpl-1   | Endoplasmin homolog | 61.40 | 0.00 |
| TRINITY_sp A9NKI-        | Mitotic-spindle org | 61.40 | 0.00 |
| TRINITY_sp F4K2FCUV      | Pre-mRNA-splicing f | 61.40 | 0.00 |
| TRINITY_sp Q9SL3Os05g015 | Importin subunit al | 61.40 | 0.00 |
| TRINITY_sp P6295HINT1    | Histidine triad nuc | 61.40 | 0.00 |
| TRINITY_sp Q4255thrc     | Threonine synthase  | 61.40 | 0.00 |
| TRINITY_sp Q55AfvatF     | V-type proton ATPas | 61.40 | 0.00 |
| TRINITY_sp P320(SLC25A6  | ADP/ATP translocase | 61.40 | 0.00 |
| TRINITY_sp Q8T21sepA     | Serine/threonine-pr | 61.40 | 0.00 |
| TRINITY_sp Q55BVhdaB     | Histone deacetylase | 61.40 | 0.00 |
| TRINITY_sp Q6CQFTAR1-A   | Protein TAR1 OS=Klu | 61.40 | 0.00 |
| TRINITY_sp Q9SW1PUB35    | U-box domain-contai | 61.40 | 0.00 |
| TRINITY_sp P3568RPL7A-1  | 60S ribosomal prote | 61.40 | 0.00 |
| TRINITY_sp O243(TOP2     | DNA topoisomerase 2 | 61.40 | 0.00 |
| TRINITY_sp Q6T48rbrA     | Probable E3 ubiquit | 61.40 | 0.00 |
| TRINITY_sp P1261T-cp1    | T-complex protein 1 | 61.40 | 0.00 |
| TRINITY_sp P4373dnaJ     | Chaperone protein D | 61.40 | 0.00 |



|                          |                     |       |      |
|--------------------------|---------------------|-------|------|
| TRINITY_sp Q0755Gyc32E   | Guanylate cyclase 3 | 61.40 | 0.00 |
| TRINITY_sp Q6I53CDKC-1   | Cyclin-dependent ki | 61.40 | 0.00 |
| TRINITY_sp Q7XP0Os04g066 | Kinesin-like calmod | 61.40 | 0.00 |
| TRINITY_sp Q9LR3GGAT1    | Glutamate--glyoxyla | 61.40 | 0.00 |
| TRINITY_sp Q9M4CPGM1     | Phosphoglucomutase, | 61.40 | 0.00 |
| TRINITY_sp Q8T13kif5     | Kinesin-related pro | 61.40 | 0.00 |
| TRINITY_sp Q9C0CDNAH6    | Dynein heavy chain  | 61.40 | 0.00 |
| TRINITY_sp P2773TR       | Transthyretin OS=Ga | 61.30 | 0.00 |
| TRINITY_sp Q1313PRKAA1   | 5'-AMP-activated pr | 61.30 | 0.00 |
| TRINITY_sp Q54P4ppa1     | Inorganic pyrophosp | 61.30 | 0.00 |
| TRINITY_sp Q9DAIPacrg    | Parkin coregulated  | 61.30 | 0.00 |
| TRINITY_sp Q9C8IEMB3003  | Dihydrolipoyllysine | 61.30 | 0.00 |
| TRINITY_sp Q949CGLY1     | Glycerol-3-phosphat | 61.30 | 0.00 |
| TRINITY_sp Q5ZK3SPAST    | Spastin OS=Gallus g | 61.30 | 0.00 |
| TRINITY_sp O489CMDH      | Malate dehydrogenas | 61.30 | 0.00 |
| TRINITY_sp P2748GRP-2    | Glycine-rich protei | 61.30 | 0.00 |
| TRINITY_sp Q9WU8DPM1     | Dolichol-phosphate  | 61.30 | 0.00 |
| TRINITY_sp O7438SPBC3H7  | Uncharacterized met | 61.30 | 0.00 |
| TRINITY_sp B1XJFprfA     | Peptide chain relea | 61.30 | 0.00 |
| TRINITY_sp B0G12pip5k3   | 1-phosphatidylinosi | 61.30 | 0.00 |
| TRINITY_sp Q8W2IASAT4    | Serine acetyltransf | 61.30 | 0.00 |
| TRINITY_sp P6781SEC11A   | Signal peptidase co | 61.30 | 0.00 |
| TRINITY_sp B3VMCBADH2    | Betaine aldehyde de | 61.30 | 0.00 |
| TRINITY_sp Q6DCIseLenbp1 | Selenium-binding pr | 61.30 | 0.00 |
| TRINITY_sp P4846CNAG_004 | Actin OS=Cryptococc | 61.30 | 0.00 |
| TRINITY_sp Q8W11SMU1     | Suppressor of mec-8 | 61.20 | 0.00 |
| TRINITY_sp O4293sec27    | Probable coatomer s | 61.20 | 0.00 |
| TRINITY_sp Q9W4Erg       | Neurobeachin OS=Dro | 61.20 | 0.00 |
| TRINITY_sp P5088RPL12A   | 60S ribosomal prote | 61.20 | 0.00 |
| TRINITY_sp Q9HEH2E4.130  | Regulator of nonsen | 61.20 | 0.00 |
| TRINITY_sp Q8IX2ZC3H3    | Zinc finger CCCH do | 61.20 | 0.00 |
| TRINITY_sp Q9D83Dnajb4   | DnaJ homolog subfam | 61.20 | 0.00 |
| TRINITY_sp O8203HPA      | Histidinol-phosphat | 61.20 | 0.00 |
| TRINITY_sp Q24JTP4H5     | Prolyl 4-hydroxylas | 61.20 | 0.00 |
| TRINITY_sp A7YWIHAL      | Histidine ammonia-l | 61.20 | 0.00 |
| TRINITY_sp Q9SB3PDK      | [Pyruvate dehydroge | 61.20 | 0.00 |
| TRINITY_sp Q8C5MCwc22    | Pre-mRNA-splicing f | 61.20 | 0.00 |
| TRINITY_sp P3234PPH3     | Serine/threonine-pr | 61.20 | 0.00 |
| TRINITY_sp Q75G7CLPB2    | Chaperone protein C | 61.20 | 0.00 |
| TRINITY_sp B0C62prfC     | Peptide chain relea | 61.20 | 0.00 |
| TRINITY_sp Q6238Atm      | Serine-protein kina | 61.20 | 0.00 |
| TRINITY_sp Q9SL7At2g2005 | Protein phosphatase | 61.20 | 0.00 |
| TRINITY_sp B8AZ3MCM6     | DNA replication lic | 61.20 | 0.00 |
| TRINITY_sp F4IFCEMB2761  | Threonine--tRNA lig | 61.20 | 0.00 |
| TRINITY_sp Q6NYImak16    | Protein MAK16 homol | 61.10 | 0.00 |
| TRINITY_sp Q9TU2RAC2     | Ras-related C3 botu | 61.10 | 0.00 |
| TRINITY_sp Q8S43AAT1     | Acetyl-CoA acetyltr | 61.10 | 0.00 |
| TRINITY_sp Q9BR3WDR83    | WD repeat domain-co | 61.10 | 0.00 |
| TRINITY_sp Q8S96At2g3384 | Tyrosine--tRNA liga | 61.10 | 0.00 |
| TRINITY_sp P4646Vps4b    | Vacuolar protein so | 61.10 | 0.00 |
| TRINITY_sp Q55F1gabt     | 4-aminobutyrate ami | 61.10 | 0.00 |
| TRINITY_sp A3KP3ndufaf5  | Arginine-hydroxylas | 61.10 | 0.00 |
| TRINITY_sp Q0297SLC25A11 | Mitochondrial 2-oxo | 61.10 | 0.00 |
| TRINITY_sp J9RY1DVR      | Divinyl chlorophyll | 61.10 | 0.00 |
| TRINITY_sp P5492IMP2     | Inositol monophosph | 61.10 | 0.00 |
| TRINITY_sp Q9UHFNDOR1    | NADPH-dependent dif | 61.10 | 0.00 |

|                          |                     |       |      |
|--------------------------|---------------------|-------|------|
| TRINITY_sp Q76P(DDB_G027 | Probable serine/thr | 61.10 | 0.00 |
| TRINITY_sp C1F38lipB     | Octanoyltransferase | 61.10 | 0.00 |
| TRINITY_sp P8295hamp     | Hepcidin OS=Morone  | 61.10 | 0.00 |
| TRINITY_sp A0AU9wdsu1    | WD repeat, SAM and  | 61.10 | 0.00 |
| TRINITY_sp P5503RPN10    | 26S proteasome non- | 61.10 | 0.00 |
| TRINITY_sp Q9S72RPI3     | Probable ribose-5-p | 61.10 | 0.00 |
| TRINITY_sp Q1MT0nip7     | 60S ribosome subuni | 61.10 | 0.00 |
| TRINITY_sp Q9Z20Mtm1     | Myotubularin OS=Mus | 61.10 | 0.00 |
| TRINITY_sp P4861FAD7     | Omega-3 fatty acid  | 61.10 | 0.00 |
| TRINITY_sp Q7XZ0SAC1     | Phosphoinositide ph | 61.10 | 0.00 |
| TRINITY_sp P3279YME1     | Mitochondrial inner | 61.10 | 0.00 |
| TRINITY_sp Q6880GSH1-1   | Glutamate--cysteine | 61.10 | 0.00 |
| TRINITY_sp B8AP1MRS2-A   | Magnesium transport | 61.10 | 0.00 |
| TRINITY_sp Q54X1sec61a   | Protein transport p | 61.10 | 0.00 |
| TRINITY_sp Q9ZP3SDH1-2   | Succinate dehydroge | 61.10 | 0.00 |
| TRINITY_sp Q3880XPB1     | DNA repair helicase | 61.10 | 0.00 |
| TRINITY_sp P6317DYNLT1   | Dynein light chain  | 61.10 | 0.00 |
| TRINITY_sp Q84M2ABCA1    | ABC transporter A f | 61.10 | 0.00 |
| TRINITY_sp P9745Bop1     | Ribosome biogenesis | 61.10 | 0.00 |
| TRINITY_sp O652(ACX1     | Peroxisomal acyl-co | 61.10 | 0.00 |
| TRINITY_sp Q9292SMARCC1  | SWI/SNF complex sub | 61.00 | 0.00 |
| TRINITY_sp Q1542SF3B4    | Splicing factor 3B  | 61.00 | 0.00 |
| TRINITY_sp P5509Abcd3    | ATP-binding cassett | 61.00 | 0.00 |
| TRINITY_sp B9RA1RCOM_150 | Probable aspartyl a | 61.00 | 0.00 |
| TRINITY_sp Q0991has1     | ATP-dependent RNA h | 61.00 | 0.00 |
| TRINITY_sp P3184-        | RNA-directed DNA po | 61.00 | 0.00 |
| TRINITY_sp P4918Serpind1 | Heparin cofactor 2  | 61.00 | 0.00 |
| TRINITY_sp Q7WG6fumC     | Fumarate hydratase  | 61.00 | 0.00 |
| TRINITY_sp O6276TXNRD1   | Thioredoxin reducta | 61.00 | 0.00 |
| TRINITY_sp Q2QMUAH       | Probable ureidoglyc | 61.00 | 0.00 |
| TRINITY_sp P0446(-       | Calmodulin OS=Triti | 61.00 | 0.00 |
| TRINITY_sp Q8VYHSQE3     | Squalene epoxidase  | 61.00 | 0.00 |
| TRINITY_sp P3642ILSA     | Isoleucine--tRNA li | 61.00 | 0.00 |
| TRINITY_sp E9Q9IRab12    | Rab-like protein 2A | 61.00 | 0.00 |
| TRINITY_sp Q9V971(2)0452 | Probable methylcrot | 61.00 | 0.00 |
| TRINITY_sp O2461MSH2     | DNA mismatch repair | 61.00 | 0.00 |
| TRINITY_sp Q93Y3MNS3     | Mannosyl-oligosacch | 61.00 | 0.00 |
| TRINITY_sp Q95K5NOP56    | Nucleolar protein 5 | 61.00 | 0.00 |
| TRINITY_sp Q9UJ1DDX41    | Probable ATP-depend | 61.00 | 0.00 |
| TRINITY_sp A8N01GET3     | ATPase GET3 OS=Copr | 61.00 | 0.00 |
| TRINITY_sp Q9C91CDKD-1   | Cyclin-dependent ki | 61.00 | 0.00 |
| TRINITY_sp P5857chlI     | Magnesium-chelatase | 61.00 | 0.00 |
| TRINITY_sp Q2NK1DPY30    | Protein dpy-30 homo | 61.00 | 0.00 |
| TRINITY_sp P1474-        | Alpha-galactosidase | 60.90 | 0.00 |
| TRINITY_sp Q4P80DPH3     | Diphthamide biosynt | 60.90 | 0.00 |
| TRINITY_sp P2480TSJT1    | Stem-specific prote | 60.90 | 0.00 |
| TRINITY_sp Q0E21UVR3     | (6-4)DNA photolyase | 60.90 | 0.00 |
| TRINITY_sp Q0976pim1     | Lon protease homolo | 60.90 | 0.00 |
| TRINITY_sp Q9UK4LSM7     | U6 snRNA-associated | 60.90 | 0.00 |
| TRINITY_sp Q9ST4PH1      | Pleckstrin homology | 60.90 | 0.00 |
| TRINITY_sp A4IF6POLR3A   | DNA-directed RNA po | 60.90 | 0.00 |
| TRINITY_sp Q4252TSA1     | Tryptophan synthase | 60.90 | 0.00 |
| TRINITY_sp Q56Y8MAP2B    | Methionine aminopep | 60.90 | 0.00 |
| TRINITY_sp Q2T9FNIT2     | Omega-amidase NIT2  | 60.90 | 0.00 |
| TRINITY_sp Q9SL1DGAT1    | Diacylglycerol O-ac | 60.90 | 0.00 |
| TRINITY_sp Q9FI1At5g4772 | Probable acetyl-CoA | 60.90 | 0.00 |

|                          |                     |       |      |
|--------------------------|---------------------|-------|------|
| TRINITY_sp Q9SN5UGE5     | UDP-glucose 4-epime | 60.90 | 0.00 |
| TRINITY_sp Q9C5MDTC      | Mitochondrial dicar | 60.90 | 0.00 |
| TRINITY_sp Q9SJ2RNR1     | Ribonucleoside-diph | 60.90 | 0.00 |
| TRINITY_sp Q6P5IhSDL2    | Hydroxysteroid dehy | 60.90 | 0.00 |
| TRINITY_sp Q2XQ1IFT57    | Intraflagellar tran | 60.90 | 0.00 |
| TRINITY_sp Q2KI1DNAJB4   | DnaJ homolog subfam | 60.90 | 0.00 |
| TRINITY_sp Q9M88CCT6A    | T-complex protein 1 | 60.90 | 0.00 |
| TRINITY_sp Q4341LCY1     | Lycopene beta cycla | 60.90 | 0.00 |
| TRINITY_sp P2124CPN60B1  | Chaperonin 60 subun | 60.90 | 0.00 |
| TRINITY_sp O813CPAP11    | Probable plastid-li | 60.90 | 0.00 |
| TRINITY_sp P2269CELA     | Endoglucanase OS=Di | 60.90 | 0.00 |
| TRINITY_sp O8198-        | Serine--tRNA ligase | 60.90 | 0.00 |
| TRINITY_sp Q54J2NOP10    | H/ACA ribonucleopro | 60.90 | 0.00 |
| TRINITY_sp P0743BETA     | Tubulin beta-1 chai | 60.80 | 0.00 |
| TRINITY_sp Q9SJIHIPP05   | Heavy metal-associa | 60.80 | 0.00 |
| TRINITY_sp O8051CYCU4-1  | Cyclin-U4-1 OS=Arab | 60.80 | 0.00 |
| TRINITY_sp Q54NIgtf2a2   | Transcription initi | 60.80 | 0.00 |
| TRINITY_sp P4098HUS5     | SUMO-conjugating en | 60.80 | 0.00 |
| TRINITY_sp Q557Ecb1A-1   | E3 ubiquitin-protei | 60.80 | 0.00 |
| TRINITY_sp O0266PP63-2   | Phosphoglucomutase- | 60.80 | 0.00 |
| TRINITY_sp P3421TAL1     | Transaldolase OS=Kl | 60.80 | 0.00 |
| TRINITY_sp A7SG7QPRT     | Nicotinate-nucleoti | 60.80 | 0.00 |
| TRINITY_sp A1A41U2AF1    | Splicing factor U2A | 60.80 | 0.00 |
| TRINITY_sp Q6CQ1TAR1-A   | Protein TAR1 OS=Klu | 60.80 | 0.00 |
| TRINITY_sp P0257-        | Actin-1 OS=Acantham | 60.80 | 0.00 |
| TRINITY_sp P3283PPG1     | Serine/threonine-pr | 60.80 | 0.00 |
| TRINITY_sp Q6PFVPPPIP5K1 | Inositol hexakispho | 60.80 | 0.00 |
| TRINITY_sp Q9SB5AP4M     | AP-4 complex subuni | 60.80 | 0.00 |
| TRINITY_sp A7RR1FEN1     | Flap endonuclease 1 | 60.80 | 0.00 |
| TRINITY_sp M1V41FAP73    | Cilia- and flagella | 60.80 | 0.00 |
| TRINITY_sp Q54J1HSPA     | 60 kDa heat shock p | 60.80 | 0.00 |
| TRINITY_sp B4GZ1Sgf11    | SAGA-associated fac | 60.80 | 0.00 |
| TRINITY_sp P2182-        | Triosephosphate iso | 60.80 | 0.00 |
| TRINITY_sp P0C8MCCRP1    | Probable serine/thr | 60.80 | 0.00 |
| TRINITY_sp Q9SR1HIR3     | Hypersensitive-indu | 60.80 | 0.00 |
| TRINITY_sp Q6AX1Sf3a2    | Splicing factor 3A  | 60.80 | 0.00 |
| TRINITY_sp Q55E1rab32B   | Ras-related protein | 60.80 | 0.00 |
| TRINITY_sp Q4359-        | Stearoyl-[acyl-carr | 60.80 | 0.00 |
| TRINITY_sp H3JU1SGT1     | Peptidyl serine alp | 60.80 | 0.00 |
| TRINITY_sp Q28E1ub1cp1   | Ubiquitin-like doma | 60.80 | 0.00 |
| TRINITY_sp Q7S81pim1     | Lon protease homolo | 60.80 | 0.00 |
| TRINITY_sp P5435DOD      | Putative peptidyl-p | 60.70 | 0.00 |
| TRINITY_sp Q7SA1msp-41   | Pre-mRNA-splicing f | 60.70 | 0.00 |
| TRINITY_sp Q9LX1CAL53    | Callose synthase 3  | 60.70 | 0.00 |
| TRINITY_sp P0044SOD1     | Superoxide dismutas | 60.70 | 0.00 |
| TRINITY_sp P1761ryh1     | GTP-binding protein | 60.70 | 0.00 |
| TRINITY_sp Q9SB5AP4M     | AP-4 complex subuni | 60.70 | 0.00 |
| TRINITY_sp Q8TFM-        | 60S acidic ribosoma | 60.70 | 0.00 |
| TRINITY_sp Q9WV1Mok      | MAPK/MAK/MRK overla | 60.70 | 0.00 |
| TRINITY_sp Q9FL1HAM1     | Histone acetyltrans | 60.70 | 0.00 |
| TRINITY_sp O4236APOEB    | Apolipoprotein Eb O | 60.70 | 0.00 |
| TRINITY_sp Q6B41GLN1     | Glutamine synthetas | 60.70 | 0.00 |
| TRINITY_sp P5344CTN      | Caltractin OS=Naegl | 60.70 | 0.00 |
| TRINITY_sp Q8R51Mutyh    | Adenine DNA glycosy | 60.70 | 0.00 |
| TRINITY_sp Q19A1F2       | Prothrombin OS=Sus  | 60.70 | 0.00 |
| TRINITY_sp Q7XJ1FAAH     | Fatty acid amide hy | 60.70 | 0.00 |

|                            |                     |       |      |
|----------------------------|---------------------|-------|------|
| TRINITY_sp Q8LDFCYP23      | Peptidyl-prolyl cis | 60.70 | 0.00 |
| TRINITY_sp Q8N1HLRRC75A-   | Putative uncharacte | 60.70 | 0.00 |
| TRINITY_sp Q9038-          | Peroxiredoxin OS=Cy | 60.70 | 0.00 |
| TRINITY_sp Q8CXIdnaJ       | Chaperone protein D | 60.70 | 0.00 |
| TRINITY_sp Q9LRFPOLD1      | DNA polymerase delt | 60.70 | 0    |
| TRINITY_sp Q9SA1AKHSDH1    | Bifunctional aspart | 60.70 | 0.00 |
| TRINITY_sp P4233At1g6049   | Phosphatidylinosito | 60.70 | 0.00 |
| TRINITY_sp Q94AFCUL1       | Cullin-1 OS=Arabido | 60.70 | 0.00 |
| TRINITY_sp Q9SIIACO2       | Aconitate hydratase | 60.60 | 0.00 |
| TRINITY_sp Q54NVoplah      | 5-oxoprolinase OS=D | 60.60 | 0.00 |
| TRINITY_sp Q0829RD22       | BURP domain protein | 60.60 | 0.00 |
| TRINITY_sp Q86B(rlp24      | Probable ribosome b | 60.60 | 0.00 |
| TRINITY_sp Q9WV9Mok        | MAPK/MAK/MRK overla | 60.60 | 0.00 |
| TRINITY_sp P4837FK506-bx12 | kDa FK506-bindin    | 60.60 | 0.00 |
| TRINITY_sp P2532mlkA       | Myosin light chain  | 60.60 | 0.00 |
| TRINITY_sp P0CG7ubq-1      | Polyubiquitin-A OS= | 60.60 | 0.00 |
| TRINITY_sp Q5559glgB       | 1,4-alpha-glucan-br | 60.60 | 0.00 |
| TRINITY_sp O9431SPBC215    | UPF0743 protein C21 | 60.60 | 0.00 |
| TRINITY_sp Q9M19ABC21      | ABC transporter B f | 60.60 | 0.00 |
| TRINITY_sp Q54N2culC       | Cullin-3 OS=Dictyos | 60.60 | 0.00 |
| TRINITY_sp Q0WQ9AGD15      | Probable ADP-ribosy | 60.60 | 0.00 |
| TRINITY_sp Q3Y81DAW1       | Dynein assembly fac | 60.60 | 0.00 |
| TRINITY_sp P2317ABC24      | Phosphatidylcholine | 60.60 | 0.00 |
| TRINITY_sp Q9C69DCP5       | Protein decapping 5 | 60.60 | 0.00 |
| TRINITY_sp P5628tif211     | Eukaryotic translat | 60.60 | 0.00 |
| TRINITY_sp P5128ycf45      | Uncharacterized pro | 60.60 | 0.00 |
| TRINITY_sp Q55E9gfm1       | Elongation factor G | 60.60 | 0.00 |
| TRINITY_sp P496(-          | Aconitate hydratase | 60.60 | 0.00 |
| TRINITY_sp Q5D01rbm8a      | RNA-binding protein | 60.60 | 0.00 |
| TRINITY_sp Q9HEH2E4.130    | Regulator of nonsen | 60.60 | 0.00 |
| TRINITY_sp Q9ZU1At1g6007   | AP-1 complex subuni | 60.60 | 0.00 |
| TRINITY_sp Q8GWWAIH        | Agmatine deiminase  | 60.60 | 0.00 |
| TRINITY_sp Q94CFEHD1       | EH domain-containin | 60.60 | 0.00 |
| TRINITY_sp Q9LZ9At3g6231   | Probable pre-mRNA-s | 60.60 | 0.00 |
| TRINITY_sp Q9D69Tubel      | Tubulin epsilon cha | 60.60 | 0.00 |
| TRINITY_sp Q9CA1CKL2       | Casein kinase 1-lik | 60.50 | 0.00 |
| TRINITY_sp Q54F(metK       | S-adenosylmethionin | 60.50 | 0.00 |
| TRINITY_sp Q9Y38RBMX2      | RNA-binding motif p | 60.50 | 0.00 |
| TRINITY_sp Q9QY9Abcb11     | Bile salt export pu | 60.50 | 0.00 |
| TRINITY_sp P5362COPG1      | Coatomer subunit ga | 60.50 | 0.00 |
| TRINITY_sp Q8LA9SFGH       | S-formylglutathione | 60.50 | 0.00 |
| TRINITY_sp Q6DW7DGD1       | Digalactosyldiacylg | 60.50 | 0.00 |
| TRINITY_sp Q94JVAt1g5429   | Protein translation | 60.50 | 0.00 |
| TRINITY_sp B9DGIACS        | Acetyl-coenzyme A s | 60.50 | 0.00 |
| TRINITY_sp Q54H1prmt2      | Protein arginine N- | 60.50 | 0.00 |
| TRINITY_sp Q5XH9ppip5k2    | Inositol hexakispho | 60.50 | 0.00 |
| TRINITY_sp Q9SA2RH36       | DEAD-box ATP-depend | 60.50 | 0.00 |
| TRINITY_sp Q9C77RPN8B      | 26S proteasome non- | 60.50 | 0.00 |
| TRINITY_sp Q9LTFNMT1       | Glycylpeptide N-tet | 60.50 | 0.00 |
| TRINITY_sp Q9SM9DHC1B      | Cytoplasmic dynein  | 60.50 | 0    |
| TRINITY_sp Q6UB9RSP2       | Flagellar radial sp | 60.50 | 0.00 |
| TRINITY_sp Q9FL9At5g5507   | Dihydrolipoyllysine | 60.50 | 0.00 |
| TRINITY_sp A4IR9dnaJ       | Chaperone protein D | 60.40 | 0.00 |
| TRINITY_sp Q9LSVETFB       | Electron transfer f | 60.40 | 0.00 |
| TRINITY_sp Q6QNM-          | Casein kinase I OS= | 60.40 | 0.00 |
| TRINITY_sp O6499NDPK2      | Nucleoside diphosph | 60.40 | 0.00 |

|                          |                      |       |      |
|--------------------------|----------------------|-------|------|
| TRINITY_sp Q5UP2MIMI_R2  | DnaJ-like protein R  | 60.40 | 0.00 |
| TRINITY_sp Q9164aad-a    | Alpha-aspartyl dipe  | 60.40 | 0.00 |
| TRINITY_sp B0BNEsd       | S-formylglutathione  | 60.40 | 0.00 |
| TRINITY_sp Q9417Os01g084 | Probable mannose-1-  | 60.40 | 0.00 |
| TRINITY_sp Q93W5BP2      | Selenium-binding pr  | 60.40 | 0.00 |
| TRINITY_sp O1423mtr4     | ATP-dependent RNA h  | 60.40 | 0.00 |
| TRINITY_sp Q93X1CPA      | N-carbamoylputresci  | 60.40 | 0.00 |
| TRINITY_sp Q3923TOUSLED  | Serine/threonine-pr  | 60.40 | 0.00 |
| TRINITY_sp O8241At3g4610 | (Histidine--tRNA lig | 60.40 | 0.00 |
| TRINITY_sp O4890CMDH     | Malate dehydrogenas  | 60.40 | 0.00 |
| TRINITY_sp O2325SHM4     | Serine hydroxymethy  | 60.40 | 0.00 |
| TRINITY_sp Q6111(Abcb7   | ATP-binding cassett  | 60.40 | 0.00 |
| TRINITY_sp Q9SC1DHS1     | Deoxyhypusine synth  | 60.40 | 0.00 |
| TRINITY_sp Q9SF4RPL4A    | 60S ribosomal prote  | 60.40 | 0.00 |
| TRINITY_sp B6D51Dnaaf1   | Dynein assembly fac  | 60.40 | 0.00 |
| TRINITY_sp Q5K51Os07g064 | DEAD-box ATP-depend  | 60.40 | 0.00 |
| TRINITY_sp Q9SR7FKBP16-4 | Peptidyl-prolyl cis  | 60.40 | 0.00 |
| TRINITY_sp Q9FIIRPS8B    | 40S ribosomal prote  | 60.40 | 0.00 |
| TRINITY_sp P0731ACYP1    | Acylphosphatase-1 O  | 60.30 | 0.00 |
| TRINITY_sp P1261MLYCD    | Malonyl-CoA decarbo  | 60.30 | 0.00 |
| TRINITY_sp P4232CNB1     | Calcineurin subunit  | 60.30 | 0.00 |
| TRINITY_sp Q9SL7TCX6     | Protein tesmin/TSO1  | 60.30 | 0.00 |
| TRINITY_sp Q0MQ1NDUFS6   | NADH dehydrogenase   | 60.30 | 0.00 |
| TRINITY_sp Q9CW6Dph5     | Diphthine methyl es  | 60.30 | 0.00 |
| TRINITY_sp Q97Y4msrA     | Peptide methionine   | 60.30 | 0.00 |
| TRINITY_sp Q9FW6HAC12    | Histone acetyltrans  | 60.30 | 0.00 |
| TRINITY_sp P5156AFC2     | Serine/threonine-pr  | 60.30 | 0.00 |
| TRINITY_sp Q5X44purC     | Phosphoribosylamino  | 60.30 | 0.00 |
| TRINITY_sp Q3BA1-        | Uncharacterized pro  | 60.30 | 0.00 |
| TRINITY_sp Q9FL7NLE1     | Notchless protein h  | 60.30 | 0.00 |
| TRINITY_sp P3489-        | Serine hydroxymethy  | 60.30 | 0.00 |
| TRINITY_sp Q5UP2MIMI_R2  | DnaJ-like protein R  | 60.30 | 0.00 |
| TRINITY_sp P4964MAN2A2   | Alpha-mannosidase 2  | 60.30 | 0.00 |
| TRINITY_sp Q6L49DBB1     | DNA damage-binding   | 60.30 | 0.00 |
| TRINITY_sp F4I90GLYR2    | Glyoxylate/succinic  | 60.30 | 0.00 |
| TRINITY_sp Q9Y77tor2     | Serine/threonine-pr  | 60.30 | 0.00 |
| TRINITY_sp P3527Rab6a    | Ras-related protein  | 60.30 | 0.00 |
| TRINITY_sp Q71UMRPS27L   | 40S ribosomal prote  | 60.30 | 0.00 |
| TRINITY_sp P0565sacC     | Levanase OS=Bacillu  | 60.30 | 0.00 |
| TRINITY_sp Q9SP0RRP41    | Exosome complex com  | 60.30 | 0.00 |
| TRINITY_sp Q7KQ1PF10_008 | Tubulin beta chain   | 60.30 | 0.00 |
| TRINITY_sp P1147PSBP     | Oxygen-evolving enh  | 60.30 | 0.00 |
| TRINITY_sp Q54Q6erkB     | Extracellular signa  | 60.30 | 0.00 |
| TRINITY_sp P4936CCT3     | T-complex protein 1  | 60.30 | 0.00 |
| TRINITY_sp Q9656ADH2     | Alcohol dehydrogena  | 60.30 | 0.00 |
| TRINITY_sp Q54K1gcvP     | Glycine dehydrogena  | 60.30 | 0    |
| TRINITY_sp Q9MA9ERCC1    | DNA excision repair  | 60.30 | 0.00 |
| TRINITY_sp B0R01chd8     | Chromodomain-helica  | 60.30 | 0.00 |
| TRINITY_sp Q9M81At1g7426 | Probable phosphorib  | 60.20 | 0.00 |
| TRINITY_sp P2177rps-26   | 40S ribosomal prote  | 60.20 | 0.00 |
| TRINITY_sp P9536mls      | Malate synthase OS=  | 60.20 | 0.00 |
| TRINITY_sp P4627-        | Fructose-1,6-bispho  | 60.20 | 0.00 |
| TRINITY_sp P0DJ1RPL18    | 60S ribosomal prote  | 60.20 | 0.00 |
| TRINITY_sp P3141AVP1     | Pyrophosphate-energ  | 60.20 | 0.00 |
| TRINITY_sp Q95U0Rab7a    | Ras-related protein  | 60.20 | 0.00 |
| TRINITY_sp A7HW7recA     | Protein RecA OS=Par  | 60.20 | 0.00 |

|                          |                     |       |      |
|--------------------------|---------------------|-------|------|
| TRINITY_sp Q8VX2AGAL3    | Alpha-galactosidase | 60.20 | 0.00 |
| TRINITY_sp Q167(MAN2A1   | Alpha-mannosidase 2 | 60.20 | 0.00 |
| TRINITY_sp Q1007SPAC3H1  | Glutathione gamma-g | 60.20 | 0.00 |
| TRINITY_sp Q9ZQVU2AF35A  | Splicing factor U2a | 60.20 | 0.00 |
| TRINITY_sp Q86I1dst1     | Serine/threonine-pr | 60.20 | 0.00 |
| TRINITY_sp Q6DF5chmp2a   | Charged multivesicu | 60.20 | 0.00 |
| TRINITY_sp Q54XMetfdh    | Electron transfer f | 60.20 | 0.00 |
| TRINITY_sp Q54MfhkD      | Probable serine/thr | 60.20 | 0.00 |
| TRINITY_sp Q9SRECOG0212  | 5-formyltetrahydrof | 60.20 | 0.00 |
| TRINITY_sp Q69T1PRXIEE-1 | Peroxiredoxin-2E-1, | 60.20 | 0.00 |
| TRINITY_sp P3684NITA     | Nitrate reductase [ | 60.20 | 0    |
| TRINITY_sp P0C02NUDT24   | Nudix hydrolase 24, | 60.20 | 0.00 |
| TRINITY_sp Q425(ASB1     | Anthranilate syntha | 60.20 | 0.00 |
| TRINITY_sp Q8LGF CUL4    | Cullin-4 OS=Arabido | 60.20 | 0.00 |
| TRINITY_sp O222(CYT1     | Mannose-1-phosphate | 60.20 | 0.00 |
| TRINITY_sp Q5687gmd      | GDP-mannose 4,6-deh | 60.20 | 0.00 |
| TRINITY_sp Q54V7ctps     | CTP synthase OS=Dic | 60.20 | 0.00 |
| TRINITY_sp P940(HAL3B    | Probable phosphopan | 60.20 | 0.00 |
| TRINITY_sp Q8H11PGRL1A   | PGR5-like protein 1 | 60.20 | 0.00 |
| TRINITY_sp Q54P9mtr      | Methionine synthase | 60.20 | 0    |
| TRINITY_sp Q6AV7PPDK1    | Pyruvate, phosphate | 60.20 | 0.00 |
| TRINITY_sp Q8H0\ABCF3    | ABC transporter F f | 60.20 | 0.00 |
| TRINITY_sp Q9655SAMDC    | S-adenosylmethionin | 60.20 | 0.00 |
| TRINITY_sp O9662arcC     | Actin-related prote | 60.10 | 0.00 |
| TRINITY_sp Q93V6At3g0269 | WAT1-related protei | 60.10 | 0.00 |
| TRINITY_sp Q8W4FRH30     | DEAD-box ATP-depend | 60.10 | 0.00 |
| TRINITY_sp P4816rp127a   | 60S ribosomal prote | 60.10 | 0.00 |
| TRINITY_sp O8176At4g3179 | Probable diphthine  | 60.10 | 0.00 |
| TRINITY_sp Q6S0(kif6     | Kinesin-related pro | 60.10 | 0.00 |
| TRINITY_sp Q95Yfcdk8     | Probable cyclin-dep | 60.10 | 0.00 |
| TRINITY_sp P0DJ1RPL17    | 60S ribosomal prote | 60.10 | 0.00 |
| TRINITY_sp Q86A\gltA     | Citrate synthase OS | 60.10 | 0.00 |
| TRINITY_sp Q3Y8IDAW1     | Dynein assembly fac | 60.10 | 0.00 |
| TRINITY_sp Q9625GDI1     | Guanosine nucleotid | 60.10 | 0.00 |
| TRINITY_sp Q4297Os12g063 | Malate dehydrogenas | 60.10 | 0.00 |
| TRINITY_sp P1788crn      | Protein crooked nec | 60.10 | 0.00 |
| TRINITY_sp Q2YDMARL1     | ADP-ribosylation fa | 60.10 | 0.00 |
| TRINITY_sp P1778FBA1     | Fructose-bisphospha | 60.10 | 0.00 |
| TRINITY_sp A8IEFPRMT1    | Protein arginine N- | 60.10 | 0.00 |
| TRINITY_sp Q5LAFhisS     | Histidine--tRNA lig | 60.00 | 0.00 |
| TRINITY_sp Q8L77AGD11    | Probable ADP-ribosy | 60.00 | 0.00 |
| TRINITY_sp P1761ypt3     | GTP-binding protein | 60.00 | 0.00 |
| TRINITY_sp B8AEFMCM5     | DNA replication lic | 60.00 | 0.00 |
| TRINITY_sp Q2173rskn-1   | Putative ribosomal  | 60.00 | 0.00 |
| TRINITY_sp Q54JcpurL     | Phosphoribosylformy | 60.00 | 0.00 |
| TRINITY_sp P366(rad8     | DNA repair protein  | 60.00 | 0.00 |
| TRINITY_sp Q9VH1CG11985  | Probable splicing f | 60.00 | 0.00 |
| TRINITY_sp Q93V6GIF3     | GRF1-interacting fa | 60.00 | 0.00 |
| TRINITY_sp Q6ERV CAD8B   | Probable cinnamyl a | 60.00 | 0.00 |
| TRINITY_sp Q8T6(arsA     | ATPase ASNA1 homolo | 60.00 | 0.00 |
| TRINITY_sp Q4QQVAdhfe1   | Hydroxyacid-oxoacid | 60.00 | 0.00 |
| TRINITY_sp Q9VD\Ino80    | Putative DNA helica | 60.00 | 0.00 |
| TRINITY_sp Q9LH7At5g0606 | Tropinone reductase | 60.00 | 0.00 |
| TRINITY_sp Q29A\GA17800  | Leishmanolysin-like | 60.00 | 0.00 |
| TRINITY_sp Q9UE7FTSJ1    | Putative tRNA (cyti | 60.00 | 0.00 |
| TRINITY_sp Q84SIOs07g056 | Zinc finger CCCH do | 60.00 | 0.00 |

|                          |                     |       |      |
|--------------------------|---------------------|-------|------|
| TRINITY_sp O8036RPL4     | 50S ribosomal prote | 60.00 | 0.00 |
| TRINITY_sp Q6C0CDPH3     | Diphthamide biosynt | 60.00 | 0.00 |
| TRINITY_sp Q8VXVENT1     | Equilibrative nucle | 60.00 | 0.00 |
| TRINITY_sp Q6BJ7PNO1     | Pre-rRNA-processing | 60.00 | 0.00 |
| TRINITY_sp Q0485Mak      | Serine/threonine-pr | 60.00 | 0.00 |
| TRINITY_sp P094(snrnp70  | U1 small nuclear ri | 60.00 | 0.00 |
| TRINITY_sp Q8VZCVPS25    | Vacuolar protein so | 60.00 | 0.00 |
| TRINITY_sp Q5BIMPIN1     | Peptidyl-prolyl cis | 60.00 | 0.00 |
| TRINITY_sp Q9M12MPK10    | Mitogen-activated p | 60.00 | 0.00 |
| TRINITY_sp Q8VZ(UXS1     | UDP-glucuronic acid | 60.00 | 0.00 |
| TRINITY_sp P2751-        | Chlorophyll a-b bin | 60.00 | 0.00 |
| TRINITY_sp P6019ELAC     | Nuclear ribonucleas | 60.00 | 0.00 |
| TRINITY_sp P2005pyr1-3   | Protein PYR1-3 OS=D | 60.00 | 0.00 |
| TRINITY_sp P5927RPS27AA  | Ubiquitin-40S ribos | 60.00 | 0.00 |
| TRINITY_sp Q9SZ4FAD4     | Fatty acid desatura | 60.00 | 0.00 |
| TRINITY_sp Q86IVDDB_G027 | Uncharacterized pro | 60.00 | 0.00 |
| TRINITY_sp Q7U6FdnaK1    | Chaperone protein d | 60.00 | 0.00 |
| TRINITY_sp O7055Srpk1    | SRSF protein kinase | 60.00 | 0.00 |
| TRINITY_sp Q2866ABCC2    | Canalicular multisp | 60.00 | 0.00 |
| TRINITY_sp P8087ydaD     | General stress prot | 60.00 | 0.00 |
| TRINITY_sp Q9LVMABC25    | ABC transporter B f | 60.00 | 0.00 |
| TRINITY_sp P1089PLCD1    | 1-phosphatidylinosi | 60.00 | 0.00 |
| TRINITY_sp F4KEVFHIT     | Bifunctional bis(5' | 60.00 | 0.00 |
| TRINITY_sp Q5SPFchac1    | Glutathione-specifi | 60.00 | 0.00 |
| TRINITY_sp Q9SL(RAD50    | DNA repair protein  | 60.00 | 0.00 |
| TRINITY_sp Q9QYIRdh11    | Retinol dehydrogena | 60.00 | 0.00 |
| TRINITY_sp Q9ZR2RH28     | DEAD-box ATP-depend | 60.00 | 0.00 |
| TRINITY_sp Q55Gdst2      | Serine/threonine-pr | 60.00 | 0.00 |
| TRINITY_sp F4ILIP4H13    | Prolyl 4-hydroxylas | 60.00 | 0.00 |
| TRINITY_sp Q9XT7PREP     | Prolyl endopeptidas | 60.00 | 0.00 |
| TRINITY_sp Q2FK4pflB     | Formate acetyltrans | 60.00 | 0.00 |
| TRINITY_sp Q7ZZ7ran      | GTP-binding nuclear | 60.00 | 0.00 |
| TRINITY_sp Q9NP1NMRK2    | Nicotinamide ribosi | 60.00 | 0.00 |
| TRINITY_sp Q0MXICSE4     | Histone H3-like cen | 60.00 | 0.00 |
| TRINITY_sp Q0045TPRP-F1  | 36.4 kDa proline-ri | 60.00 | 0.00 |
| TRINITY_sp Q8CEIRdh13    | Retinol dehydrogena | 60.00 | 0.00 |
| TRINITY_sp Q8697pakF     | Serine/threonine-pr | 59.90 | 0.00 |
| TRINITY_sp Q54YVpolr2h   | DNA-directed RNA po | 59.90 | 0.00 |
| TRINITY_sp O6504ECR1     | NEDD8-activating en | 59.90 | 0.00 |
| TRINITY_sp Q9FFFCKL7     | Casein kinase 1-lik | 59.90 | 0.00 |
| TRINITY_sp P5242PUR5     | Phosphoribosylformy | 59.90 | 0.00 |
| TRINITY_sp O598(SPCC550  | Putative ATP-depend | 59.90 | 0.00 |
| TRINITY_sp O4992ADK      | Adenosine kinase OS | 59.90 | 0.00 |
| TRINITY_sp Q8K22Nat10    | RNA cytidine acetyl | 59.90 | 0.00 |
| TRINITY_sp Q9LU8PAP4     | Probable plastid-li | 59.90 | 0.00 |
| TRINITY_sp Q96K(CARL5B   | ADP-ribosylation fa | 59.90 | 0.00 |
| TRINITY_sp Q9HCMGPN1     | GPN-loop GTPase 1 O | 59.90 | 0.00 |
| TRINITY_sp Q54H4drkA     | Probable serine/thr | 59.90 | 0.00 |
| TRINITY_sp Q3925SKP1A    | SKP1-like protein 1 | 59.90 | 0.00 |
| TRINITY_sp O8174BETAC-AI | Beta-adaptin-like p | 59.90 | 0.00 |
| TRINITY_sp P3229ARG2     | Indole-3-acetic aci | 59.80 | 0.00 |
| TRINITY_sp P1363Cp       | Ceruloplasmin OS=Ra | 59.80 | 0.00 |
| TRINITY_sp Q54Qmurm1     | Ubiquitin-related m | 59.80 | 0.00 |
| TRINITY_sp Q53N7MPK15    | Mitogen-activated p | 59.80 | 0.00 |
| TRINITY_sp Q6IV7UBA5     | Ubiquitin-like modi | 59.80 | 0.00 |
| TRINITY_sp Q2GHFrplT     | 50S ribosomal prote | 59.80 | 0.00 |

|                          |                     |       |      |
|--------------------------|---------------------|-------|------|
| TRINITY_sp Q9JI1Stk3     | Serine/threonine-pr | 59.80 | 0.00 |
| TRINITY_sp P8726RPL34A   | 60S ribosomal prote | 59.80 | 0.00 |
| TRINITY_sp Q8VYJLSM8     | Sm-like protein LSM | 59.80 | 0.00 |
| TRINITY_sp Q9MB5FKFBP    | 6-phosphofructo-2-k | 59.80 | 0.00 |
| TRINITY_sp Q2TACKIF19    | Kinesin-like protei | 59.80 | 0.00 |
| TRINITY_sp P5831ltaE     | Low specificity L-t | 59.80 | 0.00 |
| TRINITY_sp Q9C0CDNAH6    | Dynein heavy chain  | 59.80 | 0.00 |
| TRINITY_sp A2YGIUSP      | UDP-sugar pyrophosp | 59.70 | 0.00 |
| TRINITY_sp P2177rps-26   | 40S ribosomal prote | 59.70 | 0.00 |
| TRINITY_sp O1505SYNJ2    | Synaptojanin-2 OS=H | 59.70 | 0.00 |
| TRINITY_sp Q9TU2RAC2     | Ras-related C3 botu | 59.70 | 0.00 |
| TRINITY_sp Q9H55DHX35    | Probable ATP-depend | 59.70 | 0.00 |
| TRINITY_sp Q9LXIHAM2     | Histone acetyltrans | 59.70 | 0.00 |
| TRINITY_sp P1275RSP3     | Flagellar radial sp | 59.70 | 0.00 |
| TRINITY_sp Q9400ZTP29    | Zinc transporter ZT | 59.70 | 0.00 |
| TRINITY_sp Q9ZU5PDSYN1   | Spermidine synthase | 59.70 | 0.00 |
| TRINITY_sp Q9AT0TGD3     | Protein TRIGALACTOS | 59.70 | 0.00 |
| TRINITY_sp P3725PSY1     | Phytoene synthase,  | 59.70 | 0.00 |
| TRINITY_sp Q1JPIID2HGDH  | D-2-hydroxyglutarat | 59.70 | 0.00 |
| TRINITY_sp P4685KRP95    | Kinesin-II 95 kDa s | 59.70 | 0.00 |
| TRINITY_sp B9FMCIN13A    | Kinesin-like protei | 59.70 | 0.00 |
| TRINITY_sp P0C8MCCRP1    | Probable serine/thr | 59.70 | 0.00 |
| TRINITY_sp Q9FICAt5g4784 | Adenylate kinase 2, | 59.70 | 0.00 |
| TRINITY_sp Q9FIHRPS8B    | 40S ribosomal prote | 59.70 | 0.00 |
| TRINITY_sp P2315ABCB4    | Phosphatidylcholine | 59.70 | 0.00 |
| TRINITY_sp P1875pila     | Fimbrial protein OS | 59.60 | 0.00 |
| TRINITY_sp Q9SGCALA5     | Probable phospholip | 59.60 | 0.00 |
| TRINITY_sp Q54IICox17    | Cytochrome c oxidas | 59.60 | 0.00 |
| TRINITY_sp O822CAt2g1975 | AP-4 complex subuni | 59.60 | 0.00 |
| TRINITY_sp Q5R4VCPNE6    | Copine-6 OS=Pongo a | 59.60 | 0.00 |
| TRINITY_sp P8286fdxr     | NADPH:adrenodoxin o | 59.60 | 0.00 |
| TRINITY_sp Q8BY8Usp47    | Ubiquitin carboxyl- | 59.60 | 0.00 |
| TRINITY_sp Q54Gact10     | Actin-10 OS=Dictyos | 59.60 | 0.00 |
| TRINITY_sp Q75H5SAPK10   | Serine/threonine-pr | 59.60 | 0.00 |
| TRINITY_sp Q54Kncdh1     | Anaphase-promoting  | 59.60 | 0.00 |
| TRINITY_sp Q9C75ATE2     | Arginyl-tRNA--prote | 59.60 | 0.00 |
| TRINITY_sp A2XFEPRR73    | Two-component respo | 59.60 | 0.00 |
| TRINITY_sp Q54Jlhal      | Probable histidine  | 59.60 | 0.00 |
| TRINITY_sp P4658POL3     | DNA polymerase delt | 59.60 | 0.00 |
| TRINITY_sp Q54DIDDB_G025 | Protein unc-50 homo | 59.60 | 0.00 |
| TRINITY_sp B6TRIPYRD     | Riboflavin biosynth | 59.60 | 0.00 |
| TRINITY_sp Q54VJddx47    | Probable ATP-depend | 59.60 | 0.00 |
| TRINITY_sp Q8S25FTSH3    | ATP-dependent zinc  | 59.60 | 0.00 |
| TRINITY_sp Q0394IM30     | Membrane-associated | 59.60 | 0.00 |
| TRINITY_sp P391CYCF1     | Metal resistance pr | 59.60 | 0.00 |
| TRINITY_sp Q9C9IKAS2     | 3-oxoacyl-[acyl-car | 59.60 | 0.00 |
| TRINITY_sp Q9FT5RECQL3   | ATP-dependent DNA h | 59.60 | 0.00 |
| TRINITY_sp P3568RPS20    | 40S ribosomal prote | 59.60 | 0.00 |
| TRINITY_sp P8031Cct6a    | T-complex protein 1 | 59.60 | 0.00 |
| TRINITY_sp P1165ND1      | NADH-ubiquinone oxi | 59.60 | 0.00 |
| TRINITY_sp Q1456DHX8     | ATP-dependent RNA h | 59.60 | 0    |
| TRINITY_sp Q54XIDDB_G025 | Probable serine/thr | 59.60 | 0.00 |
| TRINITY_sp A8F15prfA     | Peptide chain relea | 59.50 | 0.00 |
| TRINITY_sp Q93Z5At4g1168 | E3 ubiquitin-protei | 59.50 | 0.00 |
| TRINITY_sp D4A5CHmgcl11  | 3-hydroxymethyl-3-m | 59.50 | 0.00 |
| TRINITY_sp Q1PF5EDA2     | Probable serine pro | 59.50 | 0.00 |



|                          |                      |       |      |
|--------------------------|----------------------|-------|------|
| TRINITY_sp Q612Avha-2    | V-type proton ATPas  | 59.50 | 0.00 |
| TRINITY_sp P2817pkgB     | Protein kinase 2 OS  | 59.50 | 0.00 |
| TRINITY_sp Q9LGV\CIPK1   | CBL-interacting pro  | 59.50 | 0.00 |
| TRINITY_sp Q76N2nubp2    | Cytosolic Fe-S clus  | 59.50 | 0.00 |
| TRINITY_sp Q5RG6gnptab   | N-acetylglucosamine  | 59.50 | 0.00 |
| TRINITY_sp Q3957YPTC6    | Ras-related protein  | 59.50 | 0.00 |
| TRINITY_sp Q54C2gpn1     | GPN-loop GTPase 1 O  | 59.50 | 0.00 |
| TRINITY_sp O8102HMGCL    | Hydroxymethylglutar  | 59.50 | 0.00 |
| TRINITY_sp P3223Cbs      | Cystathionine beta-  | 59.50 | 0.00 |
| TRINITY_sp P5523AGPS1    | Glucose-1-phosphate  | 59.50 | 0.00 |
| TRINITY_sp O1544MPPED1   | Metallophosphoester  | 59.50 | 0.00 |
| TRINITY_sp O8043MAK3     | N-alpha-acetyltrans  | 59.50 | 0.00 |
| TRINITY_sp P4921RPS17    | 40S ribosomal prote  | 59.50 | 0.00 |
| TRINITY_sp P0DK6PGLP1A   | Phosphoglycolate ph  | 59.50 | 0.00 |
| TRINITY_sp Q9SJ7SAE2     | SUMO-activating enz  | 59.50 | 0.00 |
| TRINITY_sp Q8699odhB     | Dihydrolipoyllysine  | 59.50 | 0.00 |
| TRINITY_sp Q9SMNR1       | Malate dehydrogenas  | 59.50 | 0.00 |
| TRINITY_sp P0432pol      | Retrovirus-related   | 59.50 | 0.00 |
| TRINITY_sp Q86B1anapc8   | Anaphase-promoting   | 59.50 | 0.00 |
| TRINITY_sp P834(DDB_G027 | Putative aldehyde d  | 59.50 | 0.00 |
| TRINITY_sp Q9SZ3HISN4    | Imidazole glycerol   | 59.50 | 0.00 |
| TRINITY_sp F4K0EISPG     | 4-hydroxy-3-methylb  | 59.50 | 0.00 |
| TRINITY_sp Q6DH6setd7    | Histone-lysine N-me  | 59.40 | 0.00 |
| TRINITY_sp O745(msh6     | DNA mismatch repair  | 59.40 | 0.00 |
| TRINITY_sp P391(YCF1     | Metal resistance pr  | 59.40 | 0.00 |
| TRINITY_sp Q84M2ABCA1    | ABC transporter A f  | 59.40 | 0.00 |
| TRINITY_sp P0CM6ATG7     | Ubiquitin-like modi  | 59.40 | 0.00 |
| TRINITY_sp Q0IIIGK       | Glycerol kinase OS=  | 59.40 | 0.00 |
| TRINITY_sp P1689gpaA     | Guanine nucleotide-  | 59.40 | 0.00 |
| TRINITY_sp A7Z01SMARCA4  | Transcription activ  | 59.40 | 0.00 |
| TRINITY_sp Q9PT5urod     | Uroporphyrinogen de  | 59.40 | 0.00 |
| TRINITY_sp Q9LVC\TOE2    | AP2-like ethylene-r  | 59.40 | 0.00 |
| TRINITY_sp P834(DDB_G027 | Putative aldehyde d  | 59.40 | 0.00 |
| TRINITY_sp P2333TK       | Thymidine kinase OS  | 59.40 | 0.00 |
| TRINITY_sp O009(carfa    | ADP-ribosylation fa  | 59.40 | 0.00 |
| TRINITY_sp P1059TXN      | Thioredoxin OS=Homo  | 59.40 | 0.00 |
| TRINITY_sp O0754yheH     | Probable multidrug   | 59.40 | 0.00 |
| TRINITY_sp Q2HJ4PRPF18   | Pre-mRNA-splicing f  | 59.40 | 0.00 |
| TRINITY_sp Q4376-        | Glutamate--tRNA lig  | 59.40 | 0.00 |
| TRINITY_sp P1556ade6     | Phosphoribosylamino  | 59.40 | 0.00 |
| TRINITY_sp Q8H0VHDA9     | Histone deacetylase  | 59.40 | 0.00 |
| TRINITY_sp Q5R61PIGK     | GPI-anchor transami  | 59.40 | 0.00 |
| TRINITY_sp Q76P(DDB_G027 | Probable serine/thr  | 59.40 | 0.00 |
| TRINITY_sp Q9SI2RKP      | E3 ubiquitin-protei  | 59.40 | 0.00 |
| TRINITY_sp Q5J4VMPK2     | Mitogen-activated p  | 59.40 | 0.00 |
| TRINITY_sp Q8LE9At3g0229 | E3 ubiquitin-protei  | 59.40 | 0.00 |
| TRINITY_sp P5589SUMO1    | Small ubiquitin-rel  | 59.30 | 0.00 |
| TRINITY_sp Q9FH1MOB1A    | MOB kinase activato  | 59.30 | 0.00 |
| TRINITY_sp O9581SDPR     | Serum deprivation-r  | 59.30 | 0.00 |
| TRINITY_sp Q6UX7C16orf89 | UPF0764 protein C16  | 59.30 | 0.00 |
| TRINITY_sp Q55A4snrpb    | Small nuclear ribon  | 59.30 | 0.00 |
| TRINITY_sp Q5M79PAP7     | Probable plastid-li  | 59.30 | 0.00 |
| TRINITY_sp Q7YSVcanA     | Calcineurin subunit  | 59.30 | 0.00 |
| TRINITY_sp Q553EpsmD4    | 26S proteasome non-  | 59.30 | 0.00 |
| TRINITY_sp Q8W11SMU1     | Suppressor of mec-8  | 59.30 | 0.00 |
| TRINITY_sp Q23FFITLL3C   | Tubulin glycyclase 3 | 59.30 | 0.00 |

|                           |                     |       |      |
|---------------------------|---------------------|-------|------|
| TRINITY_sp P5496 BIO2     | Biotin synthase OS= | 59.30 | 0.00 |
| TRINITY_sp Q8LAN UBP4     | Ubiquitin carboxyl- | 59.30 | 0.00 |
| TRINITY_sp A2XUV CDKG-2   | Cyclin-dependent ki | 59.30 | 0.00 |
| TRINITY_sp Q3923 At5g2747 | Serine--tRNA ligase | 59.30 | 0.00 |
| TRINITY_sp P3618 -        | Endoplasmin homolog | 59.30 | 0.00 |
| TRINITY_sp Q3B88 SNU13    | NHP2-like protein 1 | 59.30 | 0.00 |
| TRINITY_sp Q6P88 snu13    | NHP2-like protein 1 | 59.30 | 0.00 |
| TRINITY_sp Q9SJ9 NRPB6B   | DNA-directed RNA po | 59.30 | 0.00 |
| TRINITY_sp P0782 act18    | Actin-18 OS=Dictyos | 59.30 | 0.00 |
| TRINITY_sp Q9Y68 STK24    | Serine/threonine-pr | 59.30 | 0.00 |
| TRINITY_sp Q8WU7 PPIL4    | Peptidyl-prolyl cis | 59.30 | 0.00 |
| TRINITY_sp Q9HCF CHD8     | Chromodomain-helica | 59.30 | 0.00 |
| TRINITY_sp Q54W6 glnA3    | Type-3 glutamine sy | 59.20 | 0.00 |
| TRINITY_sp Q9I0F purB     | Adenylosuccinate ly | 59.20 | 0.00 |
| TRINITY_sp Q3943 RAB1BV   | Ras-related protein | 59.20 | 0.00 |
| TRINITY_sp O2666 msrA     | Peptide methionine  | 59.20 | 0.00 |
| TRINITY_sp A6VNE infB     | Translation initiat | 59.20 | 0.00 |
| TRINITY_sp Q9299 BRF1     | Transcription facto | 59.20 | 0.00 |
| TRINITY_sp Q9XXV myoK     | Myosin-K heavy chai | 59.20 | 0.00 |
| TRINITY_sp B7PX8 spas     | Spastin OS=Ixodes s | 59.20 | 0.00 |
| TRINITY_sp F1NTI ascc3    | Activating signal c | 59.20 | 0.00 |
| TRINITY_sp Q24F5 RPL36    | 60S ribosomal prote | 59.20 | 0.00 |
| TRINITY_sp O2324 D2HGDH   | D-2-hydroxyglutarat | 59.20 | 0.00 |
| TRINITY_sp Q3877 CDC2A    | Cell division contr | 59.20 | 0.00 |
| TRINITY_sp Q54PI lvsF     | BEACH domain-contai | 59.20 | 0.00 |
| TRINITY_sp P1191 Scp2     | Non-specific lipid- | 59.20 | 0.00 |
| TRINITY_sp A2YVF PAB1     | Proteasome subunit  | 59.20 | 0.00 |
| TRINITY_sp P0C10 cyp15    | Peptidyl-prolyl cis | 59.20 | 0.00 |
| TRINITY_sp Q9YGF slbp2    | Oocyte-specific his | 59.20 | 0.00 |
| TRINITY_sp Q2VY1 hslV     | ATP-dependent prote | 59.20 | 0.00 |
| TRINITY_sp Q550F DDB_G027 | Probable serine/thr | 59.20 | 0.00 |
| TRINITY_sp Q9H17 ANAPC1   | Anaphase-promoting  | 59.20 | 0.00 |
| TRINITY_sp P2396 VMA16    | V-type proton ATPas | 59.10 | 0.00 |
| TRINITY_sp P4910 RAB2B    | Ras-related protein | 59.10 | 0.00 |
| TRINITY_sp P4039 RIC2     | Ras-related protein | 59.10 | 0.00 |
| TRINITY_sp Q84NI POLIB    | DNA polymerase I B, | 59.10 | 0.00 |
| TRINITY_sp Q54NV oplah    | 5-oxoprolinase OS=D | 59.10 | 0.00 |
| TRINITY_sp Q7SY8 qtrt1    | Queuine tRNA-ribosy | 59.10 | 0.00 |
| TRINITY_sp Q6Z10 YchF1    | Obg-like ATPase 1 O | 59.10 | 0.00 |
| TRINITY_sp Q55F2 aatA     | Aspartate aminotran | 59.10 | 0.00 |
| TRINITY_sp Q86GF Cys      | Crustapain OS=Panda | 59.10 | 0.00 |
| TRINITY_sp O6489 Acx      | Acyl-coenzyme A oxi | 59.10 | 0.00 |
| TRINITY_sp Q0P51 GCAT     | 2-amino-3-ketobuty  | 59.10 | 0.00 |
| TRINITY_sp P1027 pol      | Pol polyprotein OS= | 59.10 | 0.00 |
| TRINITY_sp Q5571 g6pd-1   | Glucose-6-phosphate | 59.10 | 0.00 |
| TRINITY_sp Q5Z11 DOHH     | Deoxyhypusine hydro | 59.10 | 0.00 |
| TRINITY_sp Q7TMF Prpcp    | Lysosomal Pro-X car | 59.10 | 0.00 |
| TRINITY_sp Q9BY5 SEC11C   | Signal peptidase co | 59.10 | 0.00 |
| TRINITY_sp Q8H13 RH14     | DEAD-box ATP-depend | 59.10 | 0.00 |
| TRINITY_sp Q8GWF COX11    | Cytochrome c oxidas | 59.10 | 0.00 |
| TRINITY_sp Q9C51 SMC2-1   | Structural maintena | 59.10 | 0.00 |
| TRINITY_sp A2CDF rp1A     | 50S ribosomal prote | 59.10 | 0.00 |
| TRINITY_sp Q1JQF BUB3     | Mitotic checkpoint  | 59.10 | 0.00 |
| TRINITY_sp Q3998 -        | Beta-carotene ketol | 59.10 | 0.00 |
| TRINITY_sp A2XUN OsI_1632 | Pachytene checkpoin | 59.10 | 0.00 |
| TRINITY_sp O2260 DEGP1    | Protease Do-like 1, | 59.10 | 0.00 |

|                          |                      |       |      |
|--------------------------|----------------------|-------|------|
| TRINITY_sp Q9LK3UKL2     | Uridine kinase-like  | 59.10 | 0.00 |
| TRINITY_sp Q9C8FABCC11   | ABC transporter C f  | 59.10 | 0.00 |
| TRINITY_sp Q3867-        | V-type proton ATPas  | 59.10 | 0.00 |
| TRINITY_sp Q54QV\yaka    | Probable serine/thr  | 59.10 | 0.00 |
| TRINITY_sp Q94JVNLP2     | Nitrilase-like prot  | 59.10 | 0.00 |
| TRINITY_sp Q4253PIMT1    | Protein-L-isoaspart  | 59.10 | 0.00 |
| TRINITY_sp P4964GAPC     | Glyceraldehyde-3-ph  | 59.10 | 0.00 |
| TRINITY_sp Q9M08IBI1     | Aspartate--tRNA lig  | 59.10 | 0.00 |
| TRINITY_sp Q94GFIASA1    | Anthranilate syntha  | 59.10 | 0.00 |
| TRINITY_sp Q8LI3Os07g062 | Putative MYST-like   | 59.10 | 0.00 |
| TRINITY_sp Q5BH8spb1     | AdoMet-dependent rR  | 59.10 | 0.00 |
| TRINITY_sp Q9NRIFUBQLN4  | Ubiquilin-4 OS=Homo  | 59.10 | 0.00 |
| TRINITY_sp Q6UW6PCSK4    | Proprotein converta  | 59.10 | 0.00 |
| TRINITY_sp Q6CN6ASF1     | Histone chaperone A  | 59.00 | 0.00 |
| TRINITY_sp Q54D7abcA9    | ABC transporter A f  | 59.00 | 0.00 |
| TRINITY_sp P3641rab11A   | Ras-related protein  | 59.00 | 0.00 |
| TRINITY_sp Q23FETTLL3C   | Tubulin glycyclase 3 | 59.00 | 0.00 |
| TRINITY_sp Q6137Ift88    | Intraflagellar tran  | 59.00 | 0.00 |
| TRINITY_sp Q2JU7rpme     | 50S ribosomal prote  | 59.00 | 0.00 |
| TRINITY_sp P5242PUR3     | Phosphoribosylglyci  | 59.00 | 0.00 |
| TRINITY_sp Q54S9rps11    | 40S ribosomal prote  | 59.00 | 0.00 |
| TRINITY_sp Q9ZQ7VHA-F    | V-type proton ATPas  | 59.00 | 0.00 |
| TRINITY_sp Q8S27GRIP     | Protein GRIP OS=Ara  | 59.00 | 0.00 |
| TRINITY_sp P1444FGA      | Fibrinogen alpha ch  | 59.00 | 0.00 |
| TRINITY_sp P0774Rrm1     | Ribonucleoside-diph  | 59.00 | 0.00 |
| TRINITY_sp Q84K4ABCA2    | ABC transporter A f  | 59.00 | 0.00 |
| TRINITY_sp Q9NPIEXOSC4   | Exosome complex com  | 59.00 | 0.00 |
| TRINITY_sp Q54U7serA     | D-3-phosphoglycerat  | 59.00 | 0.00 |
| TRINITY_sp P9325ELI3     | Probable mannitol d  | 59.00 | 0.00 |
| TRINITY_sp Q997(MTR      | Methionine synthase  | 59.00 | 0.00 |
| TRINITY_sp Q8KA8clpB2    | Probable chaperone   | 59.00 | 0.00 |
| TRINITY_sp O7441SPCC1223 | Chorismate synthase  | 58.90 | 0.00 |
| TRINITY_sp Q56Y1At5g5877 | Dehydrodolichyl dip  | 58.90 | 0.00 |
| TRINITY_sp Q08DIDNM1     | Dynamin-1 OS=Bos ta  | 58.90 | 0.00 |
| TRINITY_sp P0236rps7     | 40S ribosomal prote  | 58.90 | 0.00 |
| TRINITY_sp Q54U6kif3     | Kinesin-related pro  | 58.90 | 0.00 |
| TRINITY_sp Q84K4ABCA2    | ABC transporter A f  | 58.90 | 0.00 |
| TRINITY_sp Q9FNCTOM9-2   | Mitochondrial impor  | 58.90 | 0.00 |
| TRINITY_sp P1024MYBL1    | Myb-related protein  | 58.90 | 0.00 |
| TRINITY_sp Q75H7SAPK10   | Serine/threonine-pr  | 58.90 | 0.00 |
| TRINITY_sp P3266FBP26    | Fructose-2,6-bispho  | 58.90 | 0.00 |
| TRINITY_sp P0565sacC     | Levanase OS=Bacillu  | 58.90 | 0.00 |
| TRINITY_sp Q5B02cwc15    | Pre-mRNA-splicing f  | 58.90 | 0.00 |
| TRINITY_sp Q9LXIRLF      | Cytochrome b5 domai  | 58.90 | 0.00 |
| TRINITY_sp Q9FLFAt5g3990 | Translation factor   | 58.90 | 0.00 |
| TRINITY_sp Q9LM9SMD3B    | Small nuclear ribon  | 58.90 | 0.00 |
| TRINITY_sp Q9S77PKL      | CHD3-type chromatin  | 58.90 | 0.00 |
| TRINITY_sp Q3V1IAmpd1    | AMP deaminase 1 OS=  | 58.90 | 0.00 |
| TRINITY_sp Q9313-        | Actin, muscle OS=Br  | 58.90 | 0.00 |
| TRINITY_sp P4627-        | DNA-directed RNA po  | 58.90 | 0.00 |
| TRINITY_sp Q9UK2CNOT11   | CCR4-NOT transcript  | 58.90 | 0.00 |
| TRINITY_sp P0787Acaa1b   | 3-ketoacyl-CoA thio  | 58.90 | 0.00 |
| TRINITY_sp O6527KEA2     | K(+) efflux antipor  | 58.90 | 0.00 |
| TRINITY_sp Q55D1DDB_G026 | KIN17-like protein   | 58.90 | 0.00 |
| TRINITY_sp Q9LZMPPCS2    | Phosphopantothenate  | 58.90 | 0.00 |
| TRINITY_sp Q69R6GLU      | Ferredoxin-dependen  | 58.90 | 0    |

|                         |                     |       |      |
|-------------------------|---------------------|-------|------|
| TRINITY_sp Q9SF1CCT7    | T-complex protein 1 | 58.90 | 0.00 |
| TRINITY_sp Q9SM\XPO1    | Protein EXPORTIN 1A | 58.90 | 0    |
| TRINITY_sp O823\THIC    | Phosphomethylpyrimi | 58.90 | 0.00 |
| TRINITY_sp Q9BY\SEC11C  | Signal peptidase co | 58.80 | 0.00 |
| TRINITY_sp Q4P2\UMAG_05 | Tubulin beta chain  | 58.80 | 0.00 |
| TRINITY_sp Q9Z3\Top3b   | DNA topoisomerase 3 | 58.80 | 0.00 |
| TRINITY_sp Q96R\BBS4    | Bardet-Biedl syndro | 58.80 | 0.00 |
| TRINITY_sp B6IP\gatB    | Aspartyl/glutamyl-t | 58.80 | 0.00 |
| TRINITY_sp O942\spt16   | FACT complex subuni | 58.80 | 0.00 |
| TRINITY_sp P492\IRPL9   | 60S ribosomal prote | 58.80 | 0.00 |
| TRINITY_sp Q8WV\SNRNP27 | U4/U6.U5 small nucl | 58.80 | 0.00 |
| TRINITY_sp P411\rrpL    | 50S ribosomal prote | 58.80 | 0.00 |
| TRINITY_sp Q86K\DDB_G02 | Probable GH family  | 58.80 | 0.00 |
| TRINITY_sp P478\-       | Eukaryotic translat | 58.80 | 0.00 |
| TRINITY_sp P499\SRP-54C | Signal recognition  | 58.80 | 0.00 |
| TRINITY_sp Q8RX\IOVA4   | Tryptophan--tRNA li | 58.80 | 0.00 |
| TRINITY_sp Q9P2\DNAH2   | Dynein heavy chain  | 58.80 | 0.00 |
| TRINITY_sp Q55D\DDB_G02 | Putative methylster | 58.80 | 0.00 |
| TRINITY_sp A4IF\POLR3A  | DNA-directed RNA po | 58.80 | 0.00 |
| TRINITY_sp Q55G\glcS    | Glycogen [starch] s | 58.80 | 0.00 |
| TRINITY_sp Q059\myb11   | Myb-related protein | 58.80 | 0.00 |
| TRINITY_sp O149\BTAF1   | TATA-binding protei | 58.80 | 0.00 |
| TRINITY_sp Q54M\asns    | Probable asparagine | 58.80 | 0.00 |
| TRINITY_sp Q55G\osgep   | Probable tRNA N6-ad | 58.80 | 0.00 |
| TRINITY_sp Q21C\dnaJ    | Chaperone protein D | 58.80 | 0.00 |
| TRINITY_sp Q8H0\PLSP1   | Chloroplast process | 58.80 | 0.00 |
| TRINITY_sp Q8MZ\-       | Physarolisin OS=Phy | 58.80 | 0.00 |
| TRINITY_sp Q8RH\lon     | Lon protease OS=Fus | 58.80 | 0.00 |
| TRINITY_sp Q9M1\ABC4    | ABC transporter F f | 58.80 | 0.00 |
| TRINITY_sp Q8VX\RFC3    | Replication factor  | 58.80 | 0.00 |
| TRINITY_sp Q9ZT\Os06g05 | Probable methionine | 58.80 | 0.00 |
| TRINITY_sp O231\HCF164  | Thioredoxin-like pr | 58.80 | 0.00 |
| TRINITY_sp P215\-       | Malate dehydrogenas | 58.80 | 0.00 |
| TRINITY_sp Q31K\tsf     | Elongation factor T | 58.80 | 0.00 |
| TRINITY_sp O153\PMM2    | Phosphomannomutase  | 58.80 | 0.00 |
| TRINITY_sp P010\C4      | Complement C4 (Frag | 58.70 | 0.00 |
| TRINITY_sp Q55A\DDB_G02 | PH and Rap-GAP doma | 58.70 | 0.00 |
| TRINITY_sp P546\pikA    | Phosphatidylinosito | 58.70 | 0.00 |
| TRINITY_sp P399\DL3     | D-lactate dehydroge | 58.70 | 0.00 |
| TRINITY_sp A1L2\d2hgdh  | D-2-hydroxyglutarat | 58.70 | 0.00 |
| TRINITY_sp Q6FL\ASF1    | Histone chaperone A | 58.70 | 0.00 |
| TRINITY_sp Q9BM\RPS6    | 40S ribosomal prote | 58.70 | 0.00 |
| TRINITY_sp Q6ZI\ML2     | Protein MEI2-like 2 | 58.70 | 0.00 |
| TRINITY_sp P0CN\CWC26   | Pre-mRNA-splicing f | 58.70 | 0.00 |
| TRINITY_sp Q3BA\-       | Uncharacterized pro | 58.70 | 0.00 |
| TRINITY_sp Q414\PCM3    | Putative calmodulin | 58.70 | 0.00 |
| TRINITY_sp P200\pyr1-3  | Protein PYR1-3 OS=D | 58.70 | 0.00 |
| TRINITY_sp Q60B\gloB    | Hydroxyacylglutathi | 58.70 | 0.00 |
| TRINITY_sp P265\hema    | 5-aminolevulinate s | 58.70 | 0.00 |
| TRINITY_sp Q8LF\IDH1    | Isocitrate dehydrog | 58.70 | 0.00 |
| TRINITY_sp Q8LG\CDC27B  | Cell division cycle | 58.70 | 0.00 |
| TRINITY_sp F4IR\ATG1C   | Serine/threonine-pr | 58.70 | 0.00 |
| TRINITY_sp Q6GP\dbr1-a  | Lariat debranching  | 58.70 | 0.00 |
| TRINITY_sp Q8RX\WIN2    | Probable protein ph | 58.70 | 0.00 |
| TRINITY_sp Q8H8\UAM1    | UDP-arabinopyranose | 58.70 | 0.00 |
| TRINITY_sp P205\CAH1    | Carbonic anhydrase  | 58.70 | 0.00 |

|                          |                      |       |      |
|--------------------------|----------------------|-------|------|
| TRINITY_sp Q9C79AERO1    | Endoplasmic reticul  | 58.70 | 0.00 |
| TRINITY_sp Q9M89NSN1     | Guanine nucleotide-  | 58.70 | 0.00 |
| TRINITY_sp Q54IILZIC     | Protein LZIC OS=Dic  | 58.70 | 0.00 |
| TRINITY_sp Q6P6CRsl24d1  | Probable ribosome b  | 58.60 | 0.00 |
| TRINITY_sp P3471pgp-1    | Multidrug resistanc  | 58.60 | 0.00 |
| TRINITY_sp Q96DJSNRNP40  | U5 small nuclear ri  | 58.60 | 0.00 |
| TRINITY_sp A0AT1-        | Non-specific lipid-  | 58.60 | 0.00 |
| TRINITY_sp Q23MTt116a    | Probable beta-tubul  | 58.60 | 0.00 |
| TRINITY_sp O94221lys1    | Homocitrate synthas  | 58.60 | 0.00 |
| TRINITY_sp Q1IQ9rpsO     | 30S ribosomal prote  | 58.60 | 0.00 |
| TRINITY_sp Q8WX9DNAH7    | Dynein heavy chain   | 58.60 | 0.00 |
| TRINITY_sp Q1502EFTUD2   | 116 kDa U5 small nu  | 58.60 | 0    |
| TRINITY_sp P0857CYC1     | Cytochrome c1, heme  | 58.60 | 0.00 |
| TRINITY_sp Q9VB7CG6066   | NKAP family protein  | 58.60 | 0.00 |
| TRINITY_sp O5355ilvX     | Putative acetolacta  | 58.60 | 0.00 |
| TRINITY_sp Q54Y5shkC     | Dual specificity pr  | 58.60 | 0.00 |
| TRINITY_sp O8217GDH2     | Glycine cleavage sy  | 58.60 | 0.00 |
| TRINITY_sp Q8VZFRIBF2    | FAD synthetase 2, c  | 58.60 | 0.00 |
| TRINITY_sp Q86Z9KLP1     | Kinesin heavy chain  | 58.60 | 0.00 |
| TRINITY_sp Q0753ALDH6A1  | Methylmalonate-semi  | 58.60 | 0.00 |
| TRINITY_sp O2244HDA19    | Histone deacetylase  | 58.60 | 0.00 |
| TRINITY_sp Q9SIFRPS25B   | 40S ribosomal prote  | 58.60 | 0.00 |
| TRINITY_sp Q6317Dnah7    | Dynein heavy chain   | 58.60 | 0.00 |
| TRINITY_sp P2011CSY4     | Citrate synthase 4,  | 58.50 | 0.00 |
| TRINITY_sp Q8LPIABCA8    | ABC transporter A f  | 58.50 | 0.00 |
| TRINITY_sp Q9VR51(1)G019 | Inositol hexakispho  | 58.50 | 0.00 |
| TRINITY_sp Q6PF7Cdc14b   | Dual specificity pr  | 58.50 | 0.00 |
| TRINITY_sp Q7NBVdnaJ     | Chaperone protein D  | 58.50 | 0.00 |
| TRINITY_sp A2YMC0sI_2638 | Probable histone H2  | 58.50 | 0.00 |
| TRINITY_sp Q54P9ucpC     | Probable mitochondr  | 58.50 | 0.00 |
| TRINITY_sp Q7ZV6vps29    | Vacuolar protein so  | 58.50 | 0.00 |
| TRINITY_sp Q8TDCHELQ     | Helicase POLQ-like   | 58.50 | 0.00 |
| TRINITY_sp Q9VP1Clp      | Cleavage and polyad  | 58.50 | 0.00 |
| TRINITY_sp P2079MAK      | Serine/threonine-pr  | 58.50 | 0.00 |
| TRINITY_sp P5255myb12    | Myb-related protein  | 58.50 | 0.00 |
| TRINITY_sp Q94C5At4g2712 | DDR GK domain-contai | 58.50 | 0.00 |
| TRINITY_sp Q869Imdn1     | Midasin OS=Dictyost  | 58.50 | 0.00 |
| TRINITY_sp O4929PPD4     | PsbP domain-contain  | 58.50 | 0.00 |
| TRINITY_sp H9BW9rab7     | Ras-related protein  | 58.50 | 0.00 |
| TRINITY_sp B0KK2cbpA     | Curved DNA-binding   | 58.50 | 0.00 |
| TRINITY_sp A4SM3fbp      | Fructose-1,6-bispho  | 58.50 | 0.00 |
| TRINITY_sp Q9SHIRRP44A   | Exosome complex exo  | 58.50 | 0.00 |
| TRINITY_sp Q0875myb      | Transcriptional act  | 58.50 | 0.00 |
| TRINITY_sp Q9ZR7ABCB1    | ABC transporter B f  | 58.50 | 0.00 |
| TRINITY_sp Q6K6fOs02g050 | Ubiquitin-like modi  | 58.50 | 0.00 |
| TRINITY_sp Q56A5abcb8    | ATP-binding cassett  | 58.50 | 0.00 |
| TRINITY_sp E8XYHtatD     | 3'-5' ssDNA/RNA exo  | 58.50 | 0.00 |
| TRINITY_sp B2SA9rlmE     | Ribosomal RNA large  | 58.50 | 0.00 |
| TRINITY_sp P9298APR2     | 5'-adenylylsulfate   | 58.50 | 0.00 |
| TRINITY_sp Q9STIAt3g4838 | Probable Ufm1-speci  | 58.50 | 0.00 |
| TRINITY_sp O8054At1g2280 | Putative methyltran  | 58.50 | 0.00 |
| TRINITY_sp Q59LNCSE4     | Histone H3-like cen  | 58.50 | 0.00 |
| TRINITY_sp P6128DYNLL1   | Dynein light chain   | 58.40 | 0.00 |
| TRINITY_sp P491(PHI1     | Glucose-6-phosphate  | 58.40 | 0.00 |
| TRINITY_sp Q9C9CRPL6C    | 60S ribosomal prote  | 58.40 | 0.00 |
| TRINITY_sp Q4U49Xirp2    | Xin actin-binding r  | 58.40 | 0.00 |

|                  |          |                      |       |      |
|------------------|----------|----------------------|-------|------|
| TRINITY_sp Q9SKQ | CYP19-2  | Peptidyl-prolyl cis  | 58.40 | 0.00 |
| TRINITY_sp Q9283 | KAT2A    | Histone acetyltrans  | 58.40 | 0.00 |
| TRINITY_sp A0CXJ | FEN1-1   | Flap endonuclease 1  | 58.40 | 0.00 |
| TRINITY_sp Q4G2C | DER2.1   | Derlin-2.1 OS=Zea m  | 58.40 | 0.00 |
| TRINITY_sp F4JLJ | IMPA2    | Importin subunit al  | 58.40 | 0.00 |
| TRINITY_sp Q9P3J | cyp41    | 41 kDa peptidyl-pro  | 58.40 | 0.00 |
| TRINITY_sp Q54C9 | pex6     | Peroxisomal biogene  | 58.40 | 0.00 |
| TRINITY_sp Q9XH8 | RPS12    | 40S ribosomal prote  | 58.40 | 0.00 |
| TRINITY_sp O9408 | ANB1     | Eukaryotic translat  | 58.40 | 0.00 |
| TRINITY_sp P3411 | glpD     | Glycogen phosphoryl  | 58.40 | 0.00 |
| TRINITY_sp Q56X5 | AOX4     | Ubiquinol oxidase 4  | 58.40 | 0.00 |
| TRINITY_sp Q9FF6 | UBC22    | Ubiquitin-conjugati  | 58.40 | 0.00 |
| TRINITY_sp Q9FIC | BOLA2    | Protein BOLA2 OS=Ar  | 58.40 | 0.00 |
| TRINITY_sp Q9SKQ | CYP19-2  | Peptidyl-prolyl cis  | 58.40 | 0.00 |
| TRINITY_sp P1142 | -        | Actin OS=Entamoeba   | 58.30 | 0.00 |
| TRINITY_sp Q8VX2 | AGAL3    | Alpha-galactosidase  | 58.30 | 0.00 |
| TRINITY_sp O6573 | RPS5     | 40S ribosomal prote  | 58.30 | 0.00 |
| TRINITY_sp Q9LZ1 | PCP12-2  | Calvin cycle protei  | 58.30 | 0.00 |
| TRINITY_sp B4EU1 | rbn      | Ribonuclease BN OS=  | 58.30 | 0.00 |
| TRINITY_sp Q28C2 | cyb5r4   | Cytochrome b5 reduc  | 58.30 | 0.00 |
| TRINITY_sp Q8033 | memo1    | Protein MEMO1 OS=Da  | 58.30 | 0.00 |
| TRINITY_sp A3LP1 | RKI1     | Ribose-5-phosphate   | 58.30 | 0.00 |
| TRINITY_sp Q9DA1 | Pacrg    | Parkin coregulated   | 58.30 | 0.00 |
| TRINITY_sp P5464 | pkbA     | RAC family serine/t  | 58.30 | 0.00 |
| TRINITY_sp Q54QF | rab32A   | Ras-related protein  | 58.30 | 0.00 |
| TRINITY_sp Q86K1 | ap2a1-1  | AP-2 complex subuni  | 58.30 | 0.00 |
| TRINITY_sp Q8T21 | fam49    | Protein FAM49 homol  | 58.30 | 0.00 |
| TRINITY_sp Q9SJ5 | BLH1     | BEL1-like homeodoma  | 58.30 | 0.00 |
| TRINITY_sp Q941C | HUA1     | Zinc finger CCCH do  | 58.30 | 0.00 |
| TRINITY_sp Q75J0 | dph5     | Diphthine methyl es  | 58.30 | 0.00 |
| TRINITY_sp Q6PH5 | trip13   | Pachytene checkpoin  | 58.30 | 0.00 |
| TRINITY_sp A6Q01 | PCP12    | Calvin cycle protei  | 58.30 | 0.00 |
| TRINITY_sp Q8LF1 | LSM1B    | Sm-like protein LSM  | 58.30 | 0.00 |
| TRINITY_sp P5467 | pikE     | Phosphatidylinosito  | 58.30 | 0.00 |
| TRINITY_sp Q1733 | H24K24.3 | Alcohol dehydrogena  | 58.30 | 0.00 |
| TRINITY_sp Q6317 | Dnah7    | Dynein heavy chain   | 58.30 | 0.00 |
| TRINITY_sp Q2M38 | KIAA1033 | WASH complex subuni  | 58.30 | 0.00 |
| TRINITY_sp Q95R1 | CG10038  | UPF0528 protein CG1  | 58.30 | 0.00 |
| TRINITY_sp Q54P0 | gcsA     | Glutamate--cysteine  | 58.30 | 0.00 |
| TRINITY_sp P7281 | menG     | 2-phytyl-1,4-naphto  | 58.30 | 0.00 |
| TRINITY_sp Q54X0 | DDB_G027 | Probable serine/thr  | 58.30 | 0.00 |
| TRINITY_sp P5362 | COPA     | Coatomer subunit al  | 58.30 | 0.00 |
| TRINITY_sp Q8L41 | FTGD1    | Protein TRIGALACTOS  | 58.30 | 0.00 |
| TRINITY_sp Q8W48 | At5g5010 | (Uncharacterized pro | 58.30 | 0.00 |
| TRINITY_sp O6464 | At2g4564 | Histone deacetylase  | 58.30 | 0.00 |
| TRINITY_sp Q9SV1 | UEV1D    | Ubiquitin-conjugati  | 58.30 | 0.00 |
| TRINITY_sp Q9BU1 | TUBB6    | Tubulin beta-6 chai  | 58.30 | 0.00 |
| TRINITY_sp F8RP1 | HOP      | Hsp70-Hsp90 organiz  | 58.30 | 0.00 |
| TRINITY_sp Q9XG1 | 'ALPH2   | Serine/threonine pr  | 58.30 | 0.00 |
| TRINITY_sp Q9C81 | CID8     | Polyadenylate-bindi  | 58.30 | 0.00 |
| TRINITY_sp Q7XQ8 | STT3B    | Dolichyl-diphosphoo  | 58.30 | 0.00 |
| TRINITY_sp Q9LV5 | ABCF5    | ABC transporter F f  | 58.30 | 0.00 |
| TRINITY_sp Q6R21 | Ppc2     | Phosphoenolpyruvate  | 58.30 | 0    |
| TRINITY_sp P2899 | -        | Elongation factor 2  | 58.30 | 0.00 |
| TRINITY_sp P9337 | -        | Actin-104 (Fragment  | 58.20 | 0.00 |
| TRINITY_sp P9819 | Atp9b    | Probable phospholip  | 58.20 | 0.00 |

|                          |                     |       |      |
|--------------------------|---------------------|-------|------|
| TRINITY_sp P3352ABCC1    | Multidrug resistanc | 58.20 | 0.00 |
| TRINITY_sp Q0CFYATEG_068 | Leukotriene A-4 hyd | 58.20 | 0.00 |
| TRINITY_sp Q8TD5DNAH3    | Dynein heavy chain  | 58.20 | 0.00 |
| TRINITY_sp P3787KARS     | Lysine--tRNA ligase | 58.20 | 0.00 |
| TRINITY_sp P2086-        | Chlorophyll a-b bin | 58.20 | 0.00 |
| TRINITY_sp Q55Ffrab6     | Ras-related protein | 58.20 | 0.00 |
| TRINITY_sp Q54BcpmB5     | Proteasome subunit  | 58.20 | 0.00 |
| TRINITY_sp B0G12pip5k3   | 1-phosphatidylinosi | 58.20 | 0.00 |
| TRINITY_sp B0JXIfabH     | 3-oxoacyl-[acyl-car | 58.20 | 0.00 |
| TRINITY_sp P5922HTR2     | Histone H3.2 OS=Ara | 58.20 | 0.00 |
| TRINITY_sp Q9FN9MBB1     | PsbB mRNA maturatio | 58.20 | 0.00 |
| TRINITY_sp Q9M8MWIN1     | Acetylornithine ami | 58.20 | 0.00 |
| TRINITY_sp Q1491DRAP1    | Dr1-associated core | 58.20 | 0.00 |
| TRINITY_sp Q9LH7VHA-d2   | V-type proton ATPas | 58.20 | 0.00 |
| TRINITY_sp Q9UQC(MOK     | MAPK/MAK/MRK overla | 58.20 | 0.00 |
| TRINITY_sp Q54Y2ugpB     | UTP--glucose-1-phos | 58.20 | 0.00 |
| TRINITY_sp P2271Gucylb2  | Guanylate cyclase s | 58.20 | 0.00 |
| TRINITY_sp Q56X5AOX4     | Ubiquinol oxidase 4 | 58.20 | 0.00 |
| TRINITY_sp Q6I51CDKC-1   | Cyclin-dependent ki | 58.20 | 0.00 |
| TRINITY_sp Q1H44tuf1     | Elongation factor T | 58.20 | 0.00 |
| TRINITY_sp A2YX(SPL15    | Squamosa promoter-b | 58.20 | 0.00 |
| TRINITY_sp Q54M4pigC     | Putative phosphatid | 58.10 | 0.00 |
| TRINITY_sp P4175PGK      | Phosphoglycerate ki | 58.10 | 0.00 |
| TRINITY_sp P5585SUMO1    | Small ubiquitin-rel | 58.10 | 0.00 |
| TRINITY_sp P3513UBC2     | Ubiquitin-conjugati | 58.10 | 0.00 |
| TRINITY_sp A2VE4TTC30A   | Tetratricopeptide r | 58.10 | 0.00 |
| TRINITY_sp Q54KIwdr5     | WD repeat-containin | 58.10 | 0.00 |
| TRINITY_sp P3854Bm1_4472 | GTP-binding nuclear | 58.10 | 0.00 |
| TRINITY_sp P9099djr-1.1  | Glutathione-indepen | 58.10 | 0.00 |
| TRINITY_sp A9UN0bysl     | Bystin OS=Monosiga  | 58.10 | 0.00 |
| TRINITY_sp Q64M7ML4      | Protein MEI2-like 4 | 58.10 | 0.00 |
| TRINITY_sp Q56K(CRIP1    | Cysteine-rich prote | 58.10 | 0.00 |
| TRINITY_sp Q54N4bcaA     | Branched-chain-amin | 58.10 | 0.00 |
| TRINITY_sp O4299fkh1     | Peptidyl-prolyl cis | 58.10 | 0.00 |
| TRINITY_sp Q3884PP2AA1   | Serine/threonine-pr | 58.10 | 0.00 |
| TRINITY_sp P1539rpa1     | DNA-directed RNA po | 58.10 | 0.00 |
| TRINITY_sp Q9070EEF2     | Elongation factor 2 | 58.10 | 0.00 |
| TRINITY_sp Q9LM9SMD3B    | Small nuclear ribon | 58.10 | 0.00 |
| TRINITY_sp Q8LD2PBA1     | Proteasome subunit  | 58.10 | 0.00 |
| TRINITY_sp Q54D0lst8     | Protein LST8 homolo | 58.10 | 0.00 |
| TRINITY_sp O4948PGDH1    | D-3-phosphoglycerat | 58.10 | 0.00 |
| TRINITY_sp O7703trfA     | General transcripti | 58.10 | 0.00 |
| TRINITY_sp Q654\Os06g024 | Pyruvate dehydrogen | 58.10 | 0.00 |
| TRINITY_sp O7060Rsd2     | Radical S-adenosyl  | 58.10 | 0.00 |
| TRINITY_sp Q6DW7DGD1     | Digalactosyldiacylg | 58.10 | 0.00 |
| TRINITY_sp F4ICI5EC31A   | Protein transport p | 58.10 | 0.00 |
| TRINITY_sp Q8BGIWdr92    | WD repeat-containin | 58.10 | 0.00 |
| TRINITY_sp B2RX1Abcc3    | Canalicular multisp | 58.10 | 0.00 |
| TRINITY_sp F4IV4CHR10    | Probable helicase C | 58.10 | 0.00 |
| TRINITY_sp Q5A59NIK1     | Histidine protein k | 58.00 | 0.00 |
| TRINITY_sp Q9VCHme4      | Probable N6-adenosi | 58.00 | 0.00 |
| TRINITY_sp Q55Bmek2      | Probable serine/thr | 58.00 | 0.00 |
| TRINITY_sp A2VD9ddx1     | ATP-dependent RNA h | 58.00 | 0.00 |
| TRINITY_sp Q8ST8abcC10   | ABC transporter C f | 58.00 | 0.00 |
| TRINITY_sp Q6FL8ASF1     | Histone chaperone A | 58.00 | 0.00 |
| TRINITY_sp Q60E6Os05g038 | Putative NAD kinase | 58.00 | 0.00 |

|                           |                     |       |      |
|---------------------------|---------------------|-------|------|
| TRINITY_sp Q32LISTOML2    | Stomatin-like prote | 58.00 | 0.00 |
| TRINITY_sp P4512etta      | Energy-dependent tr | 58.00 | 0.00 |
| TRINITY_sp Q9M9IAPC11     | Anaphase-promoting  | 58.00 | 0.00 |
| TRINITY_sp Q148MTAF13     | Transcription initi | 58.00 | 0.00 |
| TRINITY_sp P5031PGK       | Phosphoglycerate ki | 58.00 | 0.00 |
| TRINITY_sp Q8IYIFANCM     | Fanconi anemia grou | 58.00 | 0.00 |
| TRINITY_sp Q9FX1PEX14     | Peroxisomal membran | 58.00 | 0.00 |
| TRINITY_sp Q54JHdnmA      | DNA (cytosine-5)-me | 58.00 | 0.00 |
| TRINITY_sp Q54MINadsyn1   | Glutamine-dependent | 58.00 | 0.00 |
| TRINITY_sp Q9SH3HMA5      | Probable copper-tra | 58.00 | 0.00 |
| TRINITY_sp P4277EMB2360   | Glutathione reducta | 58.00 | 0.00 |
| TRINITY_sp P6299RAC1      | Ras-related C3 botu | 58.00 | 0.00 |
| TRINITY_sp P386(CAS1      | Cycloartenol syntha | 58.00 | 0.00 |
| TRINITY_sp Q9LP5Atlg5059  | Pirin-like protein  | 58.00 | 0.00 |
| TRINITY_sp Q6Z38Os07g020  | Coatomer subunit ga | 58.00 | 0.00 |
| TRINITY_sp P5339ACLY      | ATP-citrate synthas | 58.00 | 0    |
| TRINITY_sp Q9NU2MDN1      | Midasin OS=Homo sap | 58.00 | 0.00 |
| TRINITY_sp P5859rca       | Ribulose bisphospha | 58.00 | 0.00 |
| TRINITY_sp Q8WX9DNAH7     | Dynein heavy chain  | 58.00 | 0.00 |
| TRINITY_sp Q23TCRPL21     | 60S ribosomal prote | 58.00 | 0.00 |
| TRINITY_sp P0C8MCCRP1     | Probable serine/thr | 58.00 | 0.00 |
| TRINITY_sp Q54SEDDDB_G028 | Peroxioredoxin-like | 57.90 | 0.00 |
| TRINITY_sp Q9C9MCDKD-2    | Cyclin-dependent ki | 57.90 | 0.00 |
| TRINITY_sp O7052ZNF330    | Zinc finger protein | 57.90 | 0.00 |
| TRINITY_sp Q2KJ8AP1M1     | AP-1 complex subuni | 57.90 | 0.00 |
| TRINITY_sp Q2F6314-3-3ze  | 14-3-3 protein zeta | 57.90 | 0.00 |
| TRINITY_sp Q9JHFIde       | Insulin-degrading e | 57.90 | 0.00 |
| TRINITY_sp Q54M9dhps      | Probable deoxyhypus | 57.90 | 0.00 |
| TRINITY_sp Q9FI6UBC27     | Ubiquitin-conjugati | 57.90 | 0.00 |
| TRINITY_sp Q9LT6PDR2      | Probable manganese- | 57.90 | 0.00 |
| TRINITY_sp Q9C7INTF2      | Nuclear transport f | 57.90 | 0.00 |
| TRINITY_sp O0407ctpA      | C-terminal processi | 57.90 | 0.00 |
| TRINITY_sp Q3903ATPK2     | Serine/threonine-pr | 57.90 | 0.00 |
| TRINITY_sp F4JY3RUK       | Serine/threonine-pr | 57.90 | 0.00 |
| TRINITY_sp Q55G9cdk10     | Probable cyclin-dep | 57.90 | 0.00 |
| TRINITY_sp Q86I6nek3      | Probable serine/thr | 57.90 | 0.00 |
| TRINITY_sp O8242SPY       | Probable UDP-N-acet | 57.90 | 0.00 |
| TRINITY_sp P2271Gucylb2   | Guanylate cyclase s | 57.90 | 0.00 |
| TRINITY_sp Q6DD7snrnp27   | U4/U6.U5 small nucl | 57.90 | 0.00 |
| TRINITY_sp Q5DU6Cep164    | Centrosomal protein | 57.90 | 0.00 |
| TRINITY_sp P5421-         | SF-assemblin OS=Dun | 57.90 | 0.00 |
| TRINITY_sp Q0VC7TTLL1     | Probable tubulin po | 57.90 | 0.00 |
| TRINITY_sp Q9T07LACS4     | Long chain acyl-CoA | 57.90 | 0.00 |
| TRINITY_sp Q1025SPAC56F8  | Eukaryotic translat | 57.90 | 0.00 |
| TRINITY_sp Q56W6PLC3      | Phosphoinositide ph | 57.90 | 0.00 |
| TRINITY_sp Q8S89WNK2      | Serine/threonine-pr | 57.90 | 0.00 |
| TRINITY_sp Q28Gftma7      | Translation machine | 57.80 | 0.00 |
| TRINITY_sp Q6ZQ6Ppip5k2   | Inositol hexakispho | 57.80 | 0.00 |
| TRINITY_sp P4984GSK3B     | Glycogen synthase k | 57.80 | 0.00 |
| TRINITY_sp Q7KQ6PF14_036  | DNA primase small s | 57.80 | 0.00 |
| TRINITY_sp P9731Csrp1     | Cysteine and glycin | 57.80 | 0.00 |
| TRINITY_sp Q5ZK9SPAST     | Spastin OS=Gallus g | 57.80 | 0.00 |
| TRINITY_sp Q3ZC6CRIPT     | Cysteine-rich PDZ-b | 57.80 | 0.00 |
| TRINITY_sp O3496ytsJ      | Probable NAD-depend | 57.80 | 0.00 |
| TRINITY_sp Q9D26Ak7       | Adenylate kinase 7  | 57.80 | 0.00 |
| TRINITY_sp Q8VX9ENT1      | Equilibrative nucle | 57.80 | 0.00 |



|                          |                     |       |      |
|--------------------------|---------------------|-------|------|
| TRINITY_sp Q9401CCT2     | T-complex protein 1 | 57.80 | 0.00 |
| TRINITY_sp P052(Su(var)2 | Heterochromatin pro | 57.80 | 0.00 |
| TRINITY_sp O3412clpP2    | ATP-dependent Clp p | 57.80 | 0.00 |
| TRINITY_sp O2266CYN      | Cyanate hydratase O | 57.80 | 0.00 |
| TRINITY_sp Q5411mmsdh    | Probable methylmal  | 57.80 | 0.00 |
| TRINITY_sp P0DL(DRC1     | Dynein regulatory c | 57.80 | 0.00 |
| TRINITY_sp Q8TE7DTD1     | D-tyrosyl-tRNA(Tyr) | 57.80 | 0.00 |
| TRINITY_sp Q4741pdxH     | Pyridoxine/pyridoxa | 57.80 | 0.00 |
| TRINITY_sp Q6551MCSU3    | Molybdenum cofactor | 57.80 | 0.00 |
| TRINITY_sp Q851(Os03g079 | Probable GTP-bindin | 57.80 | 0.00 |
| TRINITY_sp Q8H01RH42     | DEAD-box ATP-depend | 57.80 | 0.00 |
| TRINITY_sp Q8031ergic3   | Endoplasmic reticul | 57.80 | 0.00 |
| TRINITY_sp Q8DG6gatB     | Aspartyl/glutamyl-t | 57.80 | 0.00 |
| TRINITY_sp O2416PPXI     | Protoporphyrinogen  | 57.80 | 0.00 |
| TRINITY_sp B3CL1rplT     | 50S ribosomal prote | 57.80 | 0.00 |
| TRINITY_sp Q1LZ1SNRNP35  | U11/U12 small nucle | 57.80 | 0.00 |
| TRINITY_sp Q72M6ppa      | Inorganic pyrophosp | 57.70 | 0.00 |
| TRINITY_sp Q0WN1CHC1     | Clathrin heavy chai | 57.70 | 0.00 |
| TRINITY_sp Q9UR1rmt1     | Protein arginine N- | 57.70 | 0.00 |
| TRINITY_sp Q6P64dnajb6   | DnaJ homolog subfam | 57.70 | 0.00 |
| TRINITY_sp Q8LPMAt3g1995 | E3 ubiquitin-protei | 57.70 | 0.00 |
| TRINITY_sp Q55B1nek2     | Probable serine/thr | 57.70 | 0.00 |
| TRINITY_sp P0864R        | Ras-like protein 3  | 57.70 | 0.00 |
| TRINITY_sp Q9VT1RpL10Ab  | 60S ribosomal prote | 57.70 | 0.00 |
| TRINITY_sp Q1526RAB35    | Ras-related protein | 57.70 | 0.00 |
| TRINITY_sp Q54Q1erkB     | Extracellular signa | 57.70 | 0.00 |
| TRINITY_sp Q2W11rpmG     | 50S ribosomal prote | 57.70 | 0.00 |
| TRINITY_sp Q7U01glpX     | Fructose-1,6-bispho | 57.70 | 0.00 |
| TRINITY_sp Q5411ddx42    | Probable ATP-depend | 57.70 | 0.00 |
| TRINITY_sp Q6S0(kif6     | Kinesin-related pro | 57.70 | 0.00 |
| TRINITY_sp Q54GVDDB_G026 | Coiled-coil domain- | 57.70 | 0.00 |
| TRINITY_sp P5511gale     | UDP-glucose 4-epime | 57.70 | 0.00 |
| TRINITY_sp Q9W79cpsf2    | Cleavage and polyad | 57.70 | 0.00 |
| TRINITY_sp Q9625PSAT1    | Phosphoserine amino | 57.70 | 0.00 |
| TRINITY_sp Q8L71ALY2     | THO complex subunit | 57.70 | 0.00 |
| TRINITY_sp Q54JIoxct1    | Probable succinyl-C | 57.70 | 0.00 |
| TRINITY_sp Q5NV1TXNRD1   | Thioredoxin reducta | 57.70 | 0.00 |
| TRINITY_sp Q429(PGM1     | 2,3-bisphosphoglyce | 57.70 | 0.00 |
| TRINITY_sp F4IA(CSS3     | Starch synthase 3,  | 57.70 | 0.00 |
| TRINITY_sp O4291eso1     | N-acetyltransferase | 57.70 | 0.00 |
| TRINITY_sp P9342Os05g015 | Histidine--tRNA lig | 57.70 | 0.00 |
| TRINITY_sp Q6K51CDKG-1   | Cyclin-dependent ki | 57.70 | 0.00 |
| TRINITY_sp Q55B1pcta     | Ethanolamine-phosph | 57.70 | 0.00 |
| TRINITY_sp P6296RAC1     | Ras-related C3 botu | 57.70 | 0.00 |
| TRINITY_sp A8I91CFAP45   | Cilia- and flagella | 57.70 | 0.00 |
| TRINITY_sp Q54P1DDB_G026 | Stromal cell-derive | 57.70 | 0.00 |
| TRINITY_sp Q54N(cyb5r1   | NADH-cytochrome b5  | 57.60 | 0.00 |
| TRINITY_sp A6TU1mnmA     | tRNA-specific 2-thi | 57.60 | 0.00 |
| TRINITY_sp Q9VL1SmE      | Probable small nucl | 57.60 | 0.00 |
| TRINITY_sp Q9DG6RPLP0    | 60S acidic ribosoma | 57.60 | 0.00 |
| TRINITY_sp Q9NU2MDN1     | Midasin OS=Homo sap | 57.60 | 0.00 |
| TRINITY_sp P4646Vps4b    | Vacuolar protein so | 57.60 | 0.00 |
| TRINITY_sp P3184-        | RNA-directed DNA po | 57.60 | 0.00 |
| TRINITY_sp Q54W(cdenr    | Density-regulated p | 57.60 | 0.00 |
| TRINITY_sp Q1261DNF2     | Phospholipid-transp | 57.60 | 0.00 |
| TRINITY_sp Q54F1xdh      | Xanthine dehydrogen | 57.60 | 0.00 |

|                             |                     |       |      |
|-----------------------------|---------------------|-------|------|
| TRINITY_sp Q5ZJKCTD7        | BTB/POZ domain-cont | 57.60 | 0.00 |
| TRINITY_sp Q8S1\CML1        | Calmodulin-like pro | 57.60 | 0.00 |
| TRINITY_sp P297(-           | 60S acidic ribosoma | 57.60 | 0.00 |
| TRINITY_sp O655\FBA5        | Fructose-bisphospha | 57.60 | 0.00 |
| TRINITY_sp O426\ncrc-2      | Serine/threonine-pr | 57.60 | 0.00 |
| TRINITY_sp B3DX\IaroC       | Chorismate synthase | 57.60 | 0.00 |
| TRINITY_sp Q9C6\DCP5        | Protein decapping 5 | 57.60 | 0.00 |
| TRINITY_sp Q94B\PIGA        | Phosphatidylinosito | 57.60 | 0.00 |
| TRINITY_sp Q56Z\NAVPL1      | Pyrophosphate-energ | 57.60 | 0.00 |
| TRINITY_sp Q8DI\fusA        | Elongation factor G | 57.50 | 0.00 |
| TRINITY_sp Q23M\Tt116a      | Probable beta-tubul | 57.50 | 0.00 |
| TRINITY_sp Q9VK\Bug22       | Cilia- and flagella | 57.50 | 0.00 |
| TRINITY_sp P109(-           | Actin, cytoplasmic  | 57.50 | 0.00 |
| TRINITY_sp Q1ZX\Iechsl      | Probable enoyl-CoA  | 57.50 | 0.00 |
| TRINITY_sp Q99J\Adi1        | 1,2-dihydroxy-3-ket | 57.50 | 0.00 |
| TRINITY_sp Q91X\Erlin1      | Erlin-1 OS=Mus musc | 57.50 | 0.00 |
| TRINITY_sp P168\gpaA        | Guanine nucleotide- | 57.50 | 0.00 |
| TRINITY_sp Q54Q\Cuba3       | NEDD8-activating en | 57.50 | 0.00 |
| TRINITY_sp O946\tad2        | tRNA-specific adeno | 57.50 | 0.00 |
| TRINITY_sp Q8N1\CFAP52      | Cilia- and flagella | 57.50 | 0.00 |
| TRINITY_sp P0DJ\RPL4        | 60S ribosomal prote | 57.50 | 0.00 |
| TRINITY_sp Q5XF\Atp13a3     | Probable cation-tra | 57.50 | 0.00 |
| TRINITY_sp Q1LY\setd1ba     | Histone-lysine N-me | 57.50 | 0.00 |
| TRINITY_sp Q84N\POLIB       | DNA polymerase I B, | 57.50 | 0.00 |
| TRINITY_sp Q337\EOs10g051   | Electron transfer f | 57.50 | 0.00 |
| TRINITY_sp F5A8\DAB1        | Dynein assembly fac | 57.50 | 0.00 |
| TRINITY_sp Q8LP\ABCB2       | ABC transporter B f | 57.50 | 0.00 |
| TRINITY_sp A4R0\FMSH3       | DNA mismatch repair | 57.50 | 0.00 |
| TRINITY_sp Q9Y4\MYO5A       | Unconventional myos | 57.50 | 0.00 |
| TRINITY_sp Q93V\FCYP97A3    | Protein LUTEIN DEFI | 57.50 | 0.00 |
| TRINITY_sp O810\NRPB5A      | DNA-directed RNA po | 57.50 | 0.00 |
| TRINITY_sp Q9AS\PNSL5       | Photosynthetic NDH  | 57.50 | 0.00 |
| TRINITY_sp Q9SZ\At4g318(-   | Probable protein ph | 57.50 | 0.00 |
| TRINITY_sp Q55G\repD        | TFIIH basal transcr | 57.50 | 0.00 |
| TRINITY_sp Q54N\pold1       | DNA polymerase delt | 57.40 | 0.00 |
| TRINITY_sp Q32P\FCF1        | rRNA-processing pro | 57.40 | 0.00 |
| TRINITY_sp A6WV\Oant_00(-   | Putative pterin-4-a | 57.40 | 0.00 |
| TRINITY_sp Q9FK\COX15       | Cytochrome c oxidas | 57.40 | 0.00 |
| TRINITY_sp Q9LR\POLD1       | DNA polymerase delt | 57.40 | 0.00 |
| TRINITY_sp Q6GQ\Cdc14a      | Dual specificity pr | 57.40 | 0.00 |
| TRINITY_sp A2Y5\SNAT1       | Serotonin N-acetylt | 57.40 | 0.00 |
| TRINITY_sp Q54X\pah         | Phenylalanine-4-hyd | 57.40 | 0.00 |
| TRINITY_sp D2K6\ISLT2       | Sodium/sulfate cotr | 57.40 | 0.00 |
| TRINITY_sp Q54Y\((DDB_G02(- | Adenylate kinase is | 57.40 | 0.00 |
| TRINITY_sp Q9FQ\SPPI        | Sucrose-phosphatase | 57.40 | 0.00 |
| TRINITY_sp O813\((PAP11     | Probable plastid-li | 57.40 | 0.00 |
| TRINITY_sp Q9C9\At1g527(-   | Probable histone H2 | 57.40 | 0.00 |
| TRINITY_sp P151\efbA        | Elongation factor 2 | 57.40 | 0.00 |

|                          |                      |       |      |
|--------------------------|----------------------|-------|------|
| TRINITY_sp Q500VPIGM     | GPI mannosyltransfe  | 57.40 | 0.00 |
| TRINITY_sp P0DJ1RPL7A    | 60S ribosomal prote  | 57.40 | 0.00 |
| TRINITY_sp Q8CXIdnaJ     | Chaperone protein D  | 57.40 | 0.00 |
| TRINITY_sp Q9Y0JctxB     | Cortexillin-2 OS=Po  | 57.40 | 0.00 |
| TRINITY_sp Q6P8JCaps1    | Calcyphosin-like pr  | 57.40 | 0.00 |
| TRINITY_sp O226(DEGP1    | Protease Do-like 1,  | 57.40 | 0.00 |
| TRINITY_sp Q9SRVAPK3     | Adenylyl-sulfate ki  | 57.40 | 0.00 |
| TRINITY_sp P935JCYP51    | Obtusifoliol 14-alp  | 57.40 | 0.00 |
| TRINITY_sp P976JOploh    | 5-oxoprolinase OS=R  | 57.40 | 0.00 |
| TRINITY_sp Q9R0JLgmn     | Legumain OS=Rattus   | 57.40 | 0.00 |
| TRINITY_sp P145JSrp54    | Signal recognition   | 57.40 | 0.00 |
| TRINITY_sp O760JCDKL5    | Cyclin-dependent ki  | 57.40 | 0.00 |
| TRINITY_sp P737Jslr1251  | Peptidyl-prolyl cis  | 57.40 | 0.00 |
| TRINITY_sp Q5ZJHDDX10    | Probable ATP-depend  | 57.40 | 0.00 |
| TRINITY_sp Q6AZJlmp21    | Mitochondrial inner  | 57.40 | 0.00 |
| TRINITY_sp Q54MJnadsyn1  | Glutamine-dependent  | 57.40 | 0.00 |
| TRINITY_sp Q55FJaatA     | Aspartate aminotran  | 57.40 | 0.00 |
| TRINITY_sp P552JCGS1     | Cystathionine gamma  | 57.40 | 0.00 |
| TRINITY_sp Q84KJABCA2    | ABC transporter A f  | 57.40 | 0.00 |
| TRINITY_sp A1A4JATP9B    | Probable phospholip  | 57.40 | 0    |
| TRINITY_sp Q8TFJATP8B4   | Probable phospholip  | 57.40 | 0.00 |
| TRINITY_sp O808JAt2g458J | UPF0187 protein At2  | 57.40 | 0.00 |
| TRINITY_sp O440J(PYK     | Pyruvate kinase OS=  | 57.40 | 0.00 |
| TRINITY_sp P275JCAB8     | Chlorophyll a-b bin  | 57.40 | 0.00 |
| TRINITY_sp Q5UQJMIMI_R5J | Probable ubiquitin-  | 57.30 | 0.00 |
| TRINITY_sp P415JICL1     | Isocitrate lyase OS  | 57.30 | 0.00 |
| TRINITY_sp Q239Jcopb     | Coatomer subunit be  | 57.30 | 0.00 |
| TRINITY_sp Q9Y3JUBE2J1   | Ubiquitin-conjugati  | 57.30 | 0.00 |
| TRINITY_sp Q54SJrc11     | Probable RNA 3'-ter  | 57.30 | 0.00 |
| TRINITY_sp Q66GJCLPX3    | CLP protease regula  | 57.30 | 0.00 |
| TRINITY_sp Q4R5JNADSYN1  | Glutamine-dependent  | 57.30 | 0.00 |
| TRINITY_sp Q9FMIHDA6     | Histone deacetylase  | 57.30 | 0.00 |
| TRINITY_sp Q9SQJLTA2     | Dihydrolipoyllysine  | 57.30 | 0.00 |
| TRINITY_sp Q9M5JLPD1     | Dihydrolipoyl dehyd  | 57.30 | 0.00 |
| TRINITY_sp P129JPEPD     | Xaa-Pro dipeptidase  | 57.30 | 0.00 |
| TRINITY_sp Q8T6J(abch2   | ABC transporter H f  | 57.30 | 0.00 |
| TRINITY_sp Q9LEJNAC2     | PsbD mRNA maturatio  | 57.30 | 0.00 |
| TRINITY_sp Q9FEC(OHP2    | Light-harvesting co  | 57.30 | 0.00 |
| TRINITY_sp O658J(CDA1    | Cytidine deaminase   | 57.30 | 0.00 |
| TRINITY_sp Q96MJ(PACRG   | Parkin coregulated   | 57.30 | 0.00 |
| TRINITY_sp P341JmvpA     | Major vault protein  | 57.30 | 0.00 |
| TRINITY_sp Q9LMJTYRAAT2  | Arogenate dehydroge  | 57.30 | 0.00 |
| TRINITY_sp P581J(coaE    | Dephospho-CoA kinas  | 57.30 | 0.00 |
| TRINITY_sp Q940J(TMN1    | Transmembrane 9 sup  | 57.30 | 0.00 |
| TRINITY_sp B1HMJrpsM     | 30S ribosomal prote  | 57.30 | 0.00 |
| TRINITY_sp Q428JDCUP     | Uroporphyrinogen de  | 57.30 | 0.00 |
| TRINITY_sp Q54RIDDB_G02J | Probable serine/thr  | 57.30 | 0.00 |
| TRINITY_sp O221JGCP1     | Probable tRNA N6-ad  | 57.30 | 0.00 |
| TRINITY_sp P546Japm2     | AP-2 complex subuni  | 57.30 | 0.00 |
| TRINITY_sp P0C8JNCCRP1   | Probable serine/thr  | 57.30 | 0.00 |
| TRINITY_sp Q55EIDDB_G02J | (NKAP family protein | 57.30 | 0.00 |
| TRINITY_sp Q8RVJESPY     | Probable UDP-N-acet  | 57.30 | 0.00 |
| TRINITY_sp A8IQJCCDC39   | Coiled-coil domain-  | 57.30 | 0.00 |
| TRINITY_sp Q427J-        | Stearoyl-[acyl-carr  | 57.30 | 0.00 |
| TRINITY_sp Q9M9J(CRTISO  | Prolycopene isomera  | 57.30 | 0.00 |
| TRINITY_sp O653J-        | Actin OS=Coleochaet  | 57.30 | 0.00 |

|                          |                     |       |      |
|--------------------------|---------------------|-------|------|
| TRINITY_sp Q9LH7RHM3     | Trifunctional UDP-g | 57.20 | 0.00 |
| TRINITY_sp Q9FY6RPS15C   | 40S ribosomal prote | 57.20 | 0.00 |
| TRINITY_sp Q8LDICYP19-4  | Peptidyl-prolyl cis | 57.20 | 0.00 |
| TRINITY_sp Q55G5pakC     | Serine/threonine-pr | 57.20 | 0.00 |
| TRINITY_sp O5985gpx1     | Glutathione peroxid | 57.20 | 0.00 |
| TRINITY_sp Q9SLMAMAP1A   | Methionine aminopep | 57.20 | 0.00 |
| TRINITY_sp Q9P2ICHD7     | Chromodomain-helica | 57.20 | 0.00 |
| TRINITY_sp Q2386race     | Rho-related protein | 57.20 | 0.00 |
| TRINITY_sp P3751ychF     | Ribosome-binding AT | 57.20 | 0.00 |
| TRINITY_sp Q8BGIWdr92    | WD repeat-containin | 57.20 | 0.00 |
| TRINITY_sp P0C8MCCRP1    | Probable serine/thr | 57.20 | 0.00 |
| TRINITY_sp F4I6MPOLIA    | DNA polymerase I A, | 57.20 | 0.00 |
| TRINITY_sp O6531-        | Actin OS=Coleochaet | 57.20 | 0.00 |
| TRINITY_sp Q8LKI1ALB3.2  | Inner membrane ALBI | 57.20 | 0.00 |
| TRINITY_sp Q9LZICP12-2   | Calvin cycle protei | 57.10 | 0.00 |
| TRINITY_sp P4285ZBP14    | 14 kDa zinc-binding | 57.10 | 0.00 |
| TRINITY_sp Q633IcoaE     | Dephospho-CoA kinas | 57.10 | 0.00 |
| TRINITY_sp B1AR1Cisd3    | CDGSH iron-sulfur d | 57.10 | 0.00 |
| TRINITY_sp O227(CB5LP    | Cytochrome B5-like  | 57.10 | 0.00 |
| TRINITY_sp O6527FOLD4    | Bifunctional protei | 57.10 | 0.00 |
| TRINITY_sp P4234MTOR     | Serine/threonine-pr | 57.10 | 0.00 |
| TRINITY_sp P0CR5SLU7     | Pre-mRNA-splicing f | 57.10 | 0.00 |
| TRINITY_sp Q8BR1Man2a2   | Alpha-mannosidase 2 | 57.10 | 0.00 |
| TRINITY_sp Q96R1IFT140   | Intraflagellar tran | 57.10 | 0.00 |
| TRINITY_sp P1187-        | High mobility group | 57.10 | 0.00 |
| TRINITY_sp Q94A1SEC22    | 25.3 kDa vesicle tr | 57.10 | 0.00 |
| TRINITY_sp Q553Iserp     | Probable stress-ass | 57.10 | 0.00 |
| TRINITY_sp Q3MHPMSMB6    | Proteasome subunit  | 57.10 | 0.00 |
| TRINITY_sp Q3MHPMSMB6    | Proteasome subunit  | 57.10 | 0.00 |
| TRINITY_sp Q9WU1Prodh    | Proline dehydrogena | 57.10 | 0.00 |
| TRINITY_sp O6481At2g2309 | Uncharacterized pro | 57.10 | 0.00 |
| TRINITY_sp Q0969SPAC2F7  | Putative peptide ch | 57.10 | 0.00 |
| TRINITY_sp P2976-        | 60S acidic ribosoma | 57.10 | 0.00 |
| TRINITY_sp O8257RPL21    | 60S ribosomal prote | 57.10 | 0.00 |
| TRINITY_sp Q4229At3g0209 | Probable mitochondr | 57.10 | 0.00 |
| TRINITY_sp Q1071CCP2     | Cysteine proteinase | 57.10 | 0.00 |
| TRINITY_sp Q1JQ7AP3S2    | AP-3 complex subuni | 57.10 | 0.00 |
| TRINITY_sp P3017ybiA     | N-glycosidase YbiA  | 57.10 | 0.00 |
| TRINITY_sp Q9WY7TM_0508  | Uncharacterized pro | 57.10 | 0.00 |
| TRINITY_sp Q9CZ1Skiv212  | Superkiller viralic | 57.10 | 0    |
| TRINITY_sp Q9XF5PEX7     | Peroxisome biogenes | 57.10 | 0.00 |
| TRINITY_sp O0414At4g1899 | Cyclic phosphodiect | 57.10 | 0.00 |
| TRINITY_sp O6716gap      | Glyceraldehyde-3-ph | 57.10 | 0.00 |
| TRINITY_sp Q9M08IBI1     | Aspartate--tRNA lig | 57.10 | 0.00 |
| TRINITY_sp Q1I51ung      | Uracil-DNA glycosyl | 57.10 | 0.00 |
| TRINITY_sp O2413CHLD     | Magnesium-chelatase | 57.10 | 0.00 |
| TRINITY_sp P1861NRPB1    | DNA-directed RNA po | 57.10 | 0    |
| TRINITY_sp Q84M2ABCA1    | ABC transporter A f | 57.10 | 0.00 |
| TRINITY_sp Q0808CHSP70   | Stromal 70 kDa heat | 57.10 | 0.00 |
| TRINITY_sp Q8T13kif5     | Kinesin-related pro | 57.10 | 0.00 |
| TRINITY_sp P8014-        | Extracellular serin | 57.00 | 0.00 |
| TRINITY_sp Q9M21ABCG17   | ABC transporter G f | 57.00 | 0.00 |
| TRINITY_sp Q54GFmdhA     | Probable malate deh | 57.00 | 0.00 |
| TRINITY_sp Q9D11Hddc3    | Guanosine-3',5'-bis | 57.00 | 0.00 |
| TRINITY_sp Q55E5pats1    | Probable serine/thr | 57.00 | 0.00 |
| TRINITY_sp Q9BW9NUDT9    | ADP-ribose pyrophos | 57.00 | 0.00 |

|                          |                     |       |      |
|--------------------------|---------------------|-------|------|
| TRINITY_sp Q9D0IRfc5     | Replication factor  | 57.00 | 0.00 |
| TRINITY_sp O2432-        | Vacuolar-processing | 57.00 | 0.00 |
| TRINITY_sp Q6Z1YchF1     | Obg-like ATPase 1 O | 57.00 | 0.00 |
| TRINITY_sp Q54M2cdc20    | Anaphase-promoting  | 57.00 | 0.00 |
| TRINITY_sp Q8WU4PPIL4    | Peptidyl-prolyl cis | 57.00 | 0.00 |
| TRINITY_sp Q1KVUrp112    | 50S ribosomal prote | 57.00 | 0.00 |
| TRINITY_sp O7566GCAT     | 2-amino-3-ketobuty  | 57.00 | 0.00 |
| TRINITY_sp Q6NR4mcts1-b  | Malignant T-cell-am | 57.00 | 0.00 |
| TRINITY_sp Q86C6tor      | Target of rapamycin | 57.00 | 0.00 |
| TRINITY_sp A7MB4RQCD1    | Cell differentiatio | 57.00 | 0.00 |
| TRINITY_sp Q9FK2UBC33    | Probable ubiquitin- | 57.00 | 0.00 |
| TRINITY_sp Q32L5TRAPPC6F | Trafficking protein | 57.00 | 0.00 |
| TRINITY_sp P5255MYBL1    | Myb-related protein | 57.00 | 0.00 |
| TRINITY_sp P7452slr1419  | Uncharacterized Suf | 57.00 | 0.00 |
| TRINITY_sp O0241-        | Dynein light chain  | 57.00 | 0.00 |
| TRINITY_sp Q8LS4FYPP     | Phytochrome-associa | 57.00 | 0.00 |
| TRINITY_sp O1538NVL      | Nuclear valosin-con | 57.00 | 0.00 |
| TRINITY_sp Q66J7unc119b- | Protein unc-119 hom | 57.00 | 0.00 |
| TRINITY_sp Q54Q4adkA     | Adenylate kinase OS | 57.00 | 0.00 |
| TRINITY_sp Q9SZ5GPX7     | Putative glutathion | 57.00 | 0.00 |
| TRINITY_sp Q8T13kif5     | Kinesin-related pro | 57.00 | 0.00 |
| TRINITY_sp Q2156M28.5    | NHP2-like protein 1 | 56.90 | 0.00 |
| TRINITY_sp Q2945LIPF     | Gastric triacylglyc | 56.90 | 0.00 |
| TRINITY_sp P0007-        | Cytochrome c OS=Tet | 56.90 | 0.00 |
| TRINITY_sp P9WQ2treY     | Putative maltooligo | 56.90 | 0.00 |
| TRINITY_sp O5992SOD1     | Superoxide dismutas | 56.90 | 0.00 |
| TRINITY_sp Q1DR0CIMG_071 | Mitotic-spindle org | 56.90 | 0.00 |
| TRINITY_sp O4400PYK      | Pyruvate kinase OS= | 56.90 | 0.00 |
| TRINITY_sp Q54Y7gacA     | Rho GTPase-activati | 56.90 | 0.00 |
| TRINITY_sp Q86J4rab5A    | Ras-related protein | 56.90 | 0.00 |
| TRINITY_sp Q0197RAB2A    | Ras-related protein | 56.90 | 0.00 |
| TRINITY_sp Q8L7UBSL1     | Serine/threonine-pr | 56.90 | 0.00 |
| TRINITY_sp P4275ELI3     | Mannitol dehydrogen | 56.90 | 0.00 |
| TRINITY_sp A5DJ0HTA2     | Histone H2A.2 OS=Me | 56.90 | 0.00 |
| TRINITY_sp Q1013fep1     | Iron-sensing transc | 56.90 | 0.00 |
| TRINITY_sp Q9ZR4U2AF65B  | Splicing factor U2a | 56.90 | 0.00 |
| TRINITY_sp P3185tabA     | Protein TabA OS=Pse | 56.90 | 0.00 |
| TRINITY_sp B9G27Os09g024 | Auxin transport pro | 56.90 | 0.00 |
| TRINITY_sp P5195Nek1     | Serine/threonine-pr | 56.90 | 0.00 |
| TRINITY_sp Q9SN2ATL7     | RING-H2 finger prot | 56.90 | 0.00 |
| TRINITY_sp A8HY4IFT43    | Intraflagellar tran | 56.90 | 0.00 |
| TRINITY_sp Q8G2EipurD    | Phosphoribosylamine | 56.90 | 0.00 |
| TRINITY_sp Q2200pde-4    | Probable 3',5'-cycl | 56.90 | 0.00 |
| TRINITY_sp Q9MA4NOP5-2   | Probable nucleolar  | 56.90 | 0.00 |
| TRINITY_sp Q3925SKP1A    | SKP1-like protein 1 | 56.90 | 0.00 |
| TRINITY_sp P4280HEMA1    | Glutamyl-tRNA reduc | 56.90 | 0.00 |
| TRINITY_sp Q8L77DIT2     | Dicarboxylate trans | 56.90 | 0.00 |
| TRINITY_sp A5VJ4dnaJ     | Chaperone protein D | 56.90 | 0.00 |
| TRINITY_sp Q9CA4HIR2     | Hypersensitive-indu | 56.90 | 0.00 |
| TRINITY_sp Q6H64FTSH7    | ATP-dependent zinc  | 56.90 | 0.00 |
| TRINITY_sp Q9FJ2CYP65    | Peptidyl-prolyl cis | 56.80 | 0.00 |
| TRINITY_sp O0062PIR      | Pirin OS=Homo sapie | 56.80 | 0.00 |
| TRINITY_sp Q93W4SAG21    | Protein SENESENCE-  | 56.80 | 0.00 |
| TRINITY_sp Q9SZE4t4g2912 | Probable 3-hydroxyi | 56.80 | 0.00 |
| TRINITY_sp P6180rpl-12   | 60S ribosomal prote | 56.80 | 0.00 |
| TRINITY_sp Q2KJ4AFG3L2   | AFG3-like protein 2 | 56.80 | 0.00 |

|                           |                      |       |      |
|---------------------------|----------------------|-------|------|
| TRINITY_sp P341(myoD      | Myosin ID heavy cha  | 56.80 | 0.00 |
| TRINITY_sp Q86AIDDB_G02   | Probable acetyl-CoA  | 56.80 | 0.00 |
| TRINITY_sp Q58DIALAD      | Delta-aminolevulini  | 56.80 | 0.00 |
| TRINITY_sp P537(GFA1      | Glutamine--fructose  | 56.80 | 0.00 |
| TRINITY_sp Q10GMSI1       | Histone-binding pro  | 56.80 | 0.00 |
| TRINITY_sp P258(UBC1      | Ubiquitin-conjugati  | 56.80 | 0.00 |
| TRINITY_sp Q944(seld      | Selenide, water dik  | 56.80 | 0.00 |
| TRINITY_sp Q8W5(FTSH8     | ATP-dependent zinc   | 56.80 | 0.00 |
| TRINITY_sp Q551IDDB_G02   | WD repeat-containin  | 56.80 | 0.00 |
| TRINITY_sp B0TG(secA      | Protein translocase  | 56.80 | 0.00 |
| TRINITY_sp Q7XKI(TRX-X    | Thioredoxin X, chlo  | 56.80 | 0.00 |
| TRINITY_sp Q58DIGPN2      | GPN-loop GTPase 2 O  | 56.80 | 0.00 |
| TRINITY_sp Q9FM(PEX5      | Peroxisome biogenes  | 56.80 | 0.00 |
| TRINITY_sp P239(VMA16     | V-type proton ATPas  | 56.80 | 0.00 |
| TRINITY_sp Q9FQ(XRN3      | 5'-3' exoribonuclea  | 56.80 | 0.00 |
| TRINITY_sp D0NV(PITG_16   | Adenylosuccinate sy  | 56.80 | 0.00 |
| TRINITY_sp P109(-         | Retrovirus-related   | 56.80 | 0.00 |
| TRINITY_sp P775(yfcG      | Disulfide-bond oxid  | 56.80 | 0.00 |
| TRINITY_sp Q6PF(Cdc14b    | Dual specificity pr  | 56.70 | 0.00 |
| TRINITY_sp Q498(ismarcal1 | SWI/SNF-related mat  | 56.70 | 0.00 |
| TRINITY_sp O091(Hgd       | Homogentisate 1,2-d  | 56.70 | 0.00 |
| TRINITY_sp A0LY(rplT      | 50S ribosomal prote  | 56.70 | 0.00 |
| TRINITY_sp Q54T(DDB_G02   | Maf-like protein DD  | 56.70 | 0.00 |
| TRINITY_sp Q551(mettl1    | tRNA (guanine-N(7)-  | 56.70 | 0.00 |
| TRINITY_sp Q54R(trappc2   | Trafficking protein  | 56.70 | 0.00 |
| TRINITY_sp Q5F3(ABCC1     | Multidrug resistanc  | 56.70 | 0.00 |
| TRINITY_sp Q86AIDDB_G02   | Probable myosin lig  | 56.70 | 0.00 |
| TRINITY_sp Q8ST(abcC10    | ABC transporter C f  | 56.70 | 0.00 |
| TRINITY_sp Q55G(mcft      | Probable mitochondr  | 56.70 | 0.00 |
| TRINITY_sp P271(cora      | Coronin-A OS=Dictyo  | 56.70 | 0.00 |
| TRINITY_sp O487(HO1       | Heme oxygenase 1, c  | 56.70 | 0.00 |
| TRINITY_sp E9Q9(Rab12     | Rab-like protein 2A  | 56.70 | 0.00 |
| TRINITY_sp O574(fech      | Ferrochelataase, mit | 56.70 | 0.00 |
| TRINITY_sp Q9C5(DPL1      | Sphingosine-1-phosp  | 56.70 | 0.00 |
| TRINITY_sp O810(NRPB5A    | DNA-directed RNA po  | 56.70 | 0.00 |
| TRINITY_sp Q869(pakB      | Serine/threonine-pr  | 56.70 | 0.00 |
| TRINITY_sp Q9FG(MNS4      | Alpha-mannosidase I  | 56.70 | 0.00 |
| TRINITY_sp Q9LV(GLT1      | Glutamate synthase   | 56.70 | 0.00 |
| TRINITY_sp Q3SZ(SNRPD2    | Small nuclear ribon  | 56.70 | 0.00 |
| TRINITY_sp P304(PPIF      | Peptidyl-prolyl cis  | 56.70 | 0.00 |
| TRINITY_sp Q9ZW(TIM10     | Mitochondrial impor  | 56.70 | 0.00 |
| TRINITY_sp A1CK(get3      | ATPase get3 OS=Aspe  | 56.70 | 0.00 |
| TRINITY_sp Q109(CUTA1     | Protein CutA 1, chl  | 56.70 | 0.00 |
| TRINITY_sp Q54N(chprT     | Hypoxanthine-guanin  | 56.70 | 0.00 |
| TRINITY_sp O049(-         | Alpha-glucosidase O  | 56.70 | 0.00 |
| TRINITY_sp P123(CAB1R     | Chlorophyll a-b bin  | 56.70 | 0.00 |
| TRINITY_sp Q80V(-         | Probable peptide ch  | 56.60 | 0.00 |
| TRINITY_sp P469(dad1      | Dolichyl-diphosphoo  | 56.60 | 0.00 |
| TRINITY_sp Q54C(vrtpR     | Probable adenosylco  | 56.60 | 0.00 |
| TRINITY_sp Q54L(anapc11   | Anaphase-promoting   | 56.60 | 0.00 |
| TRINITY_sp Q2KJ(AFG3L2    | AFG3-like protein 2  | 56.60 | 0.00 |
| TRINITY_sp Q6CQ(TAR1-A    | Protein TAR1 OS=Klu  | 56.60 | 0.00 |
| TRINITY_sp Q554(act17     | Actin-17 OS=Dictyos  | 56.60 | 0.00 |
| TRINITY_sp Q23F(TTLL3C    | Tubulin glycyclase 3 | 56.60 | 0.00 |
| TRINITY_sp Q0D5(SAP16     | Zinc finger AN1 and  | 56.60 | 0.00 |
| TRINITY_sp P391(citZ      | Citrate synthase 2   | 56.60 | 0.00 |

|                          |                     |       |      |
|--------------------------|---------------------|-------|------|
| TRINITY_sp Q9SGUMGL      | Methionine gamma-ly | 56.60 | 0.00 |
| TRINITY_sp Q9SSEADT2     | Arogenate dehydrata | 56.60 | 0.00 |
| TRINITY_sp Q3B8sdhb      | Succinate dehydroge | 56.60 | 0.00 |
| TRINITY_sp Q9FMIPYD2     | Dihydropyrimidinase | 56.60 | 0.00 |
| TRINITY_sp Q9SIIHPS3A    | 40S ribosomal prote | 56.60 | 0.00 |
| TRINITY_sp P4968RPS30A   | 40S ribosomal prote | 56.60 | 0.00 |
| TRINITY_sp Q8T8IabcD2    | ABC transporter D f | 56.60 | 0.00 |
| TRINITY_sp Q9QZMUbqln2   | Ubiquilin-2 OS=Mus  | 56.60 | 0.00 |
| TRINITY_sp Q9JMTxnrD1    | Thioredoxin reducta | 56.60 | 0.00 |
| TRINITY_sp Q9SE4Os09g05  | (Ribulose-phosphate | 56.60 | 0.00 |
| TRINITY_sp Q7SDMrgt-1    | tRNA(His) guanylylt | 56.60 | 0.00 |
| TRINITY_sp P2752CAB8     | Chlorophyll a-b bin | 56.60 | 0.00 |
| TRINITY_sp Q1KV\psbK     | Photosystem II reac | 56.50 | 0.00 |
| TRINITY_sp Q6GL4mcm4     | DNA replication lic | 56.50 | 0.00 |
| TRINITY_sp Q8T2ImasA     | Malate synthase OS= | 56.50 | 0.00 |
| TRINITY_sp Q3956ODA4     | Dynein beta chain,  | 56.50 | 0.00 |
| TRINITY_sp Q54YHsnfA     | 5'-AMP-activated se | 56.50 | 0.00 |
| TRINITY_sp Q54JCpurL     | Phosphoribosylformy | 56.50 | 0.00 |
| TRINITY_sp Q9H0(SLC25A31 | ADP/ATP translocase | 56.50 | 0.00 |
| TRINITY_sp Q9C8MMSRB1    | Peptide methionine  | 56.50 | 0.00 |
| TRINITY_sp Q7KQIARF1     | ADP-ribosylation fa | 56.50 | 0.00 |
| TRINITY_sp O2397GPXHA-1  | Glutathione peroxid | 56.50 | 0.00 |
| TRINITY_sp Q2462ref(2)P  | Protein ref(2)P OS= | 56.50 | 0.00 |
| TRINITY_sp Q54QFrab32A   | Ras-related protein | 56.50 | 0.00 |
| TRINITY_sp Q9SG7RPS19A   | 40S ribosomal prote | 56.50 | 0.00 |
| TRINITY_sp Q6MECasnS     | Asparagine--tRNA li | 56.50 | 0.00 |
| TRINITY_sp P2227RAS2     | Ras-like protein 2  | 56.50 | 0.00 |
| TRINITY_sp B8B9FRPL10A   | 60S ribosomal prote | 56.50 | 0.00 |
| TRINITY_sp O0463THRRS    | Threonine--tRNA lig | 56.50 | 0.00 |
| TRINITY_sp Q54Tlube2m    | NEDD8-conjugating e | 56.50 | 0.00 |
| TRINITY_sp O2365AK2      | Aspartokinase 2, ch | 56.50 | 0.00 |
| TRINITY_sp P0725URA2     | Protein URA2 OS=Sac | 56.50 | 0.00 |
| TRINITY_sp Q76NMERD2     | ER lumen protein-re | 56.50 | 0.00 |
| TRINITY_sp Q9C92NUG2     | Nuclear/nucleolar G | 56.50 | 0.00 |
| TRINITY_sp P537(GFA1     | Glutamine--fructose | 56.50 | 0.00 |
| TRINITY_sp Q4R63AGBL2    | Cytosolic carboxype | 56.50 | 0.00 |
| TRINITY_sp Q86K9trappc3  | Trafficking protein | 56.40 | 0.00 |
| TRINITY_sp Q9175gsk3b    | Glycogen synthase k | 56.40 | 0.00 |
| TRINITY_sp O0463THRRS    | Threonine--tRNA lig | 56.40 | 0.00 |
| TRINITY_sp P4252erka     | Extracellular signa | 56.40 | 0.00 |
| TRINITY_sp Q553\mcee     | Methylmalonyl-CoA e | 56.40 | 0.00 |
| TRINITY_sp Q6UX7C16orf89 | UPF0764 protein C16 | 56.40 | 0.00 |
| TRINITY_sp P3473BMH2     | Protein BMH2 OS=Sac | 56.40 | 0.00 |
| TRINITY_sp Q29AIGA17800  | Leishmanolysin-like | 56.40 | 0.00 |
| TRINITY_sp Q964I-        | Actin, cytoplasmic  | 56.40 | 0.00 |
| TRINITY_sp Q2365RPL32    | 60S ribosomal prote | 56.40 | 0.00 |
| TRINITY_sp A9A5\guaB     | Inosine-5'-monophos | 56.40 | 0.00 |
| TRINITY_sp Q8I5IproRS    | Proline--tRNA ligas | 56.40 | 0.00 |
| TRINITY_sp P2079MAK      | Serine/threonine-pr | 56.40 | 0.00 |
| TRINITY_sp P5573SEC13    | Protein SEC13 homol | 56.40 | 0.00 |
| TRINITY_sp F4JA7SKI2     | DExH-box ATP-depend | 56.40 | 0.00 |
| TRINITY_sp P3184-        | RNA-directed DNA po | 56.40 | 0.00 |
| TRINITY_sp O975(TXN      | Thioredoxin OS=Equu | 56.40 | 0.00 |
| TRINITY_sp P5586mcm2     | DNA replication lic | 56.40 | 0.00 |
| TRINITY_sp Q6P5IUggt1    | UDP-glucose:glycopr | 56.40 | 0.00 |
| TRINITY_sp B9MQ9rp1S     | 50S ribosomal prote | 56.40 | 0.00 |

|                          |                     |       |      |
|--------------------------|---------------------|-------|------|
| TRINITY_sp Q9SK7At2g3204 | Folate-biopterin tr | 56.40 | 0.00 |
| TRINITY_sp Q9CWF5myd3    | Histone-lysine N-me | 56.40 | 0.00 |
| TRINITY_sp Q9H88MOB1A    | MOB kinase activato | 56.40 | 0.00 |
| TRINITY_sp P2961CYCL     | Cytochrome c1-2, he | 56.40 | 0.00 |
| TRINITY_sp Q7DL8PBB2     | Proteasome subunit  | 56.40 | 0.00 |
| TRINITY_sp Q8N40CARNMT1  | Carnosine N-methylt | 56.30 | 0.00 |
| TRINITY_sp Q7GB2ABCC5    | ABC transporter C f | 56.30 | 0.00 |
| TRINITY_sp Q8T15udkB     | Uridine-cytidine ki | 56.30 | 0.00 |
| TRINITY_sp Q54X9metS     | Probable methionine | 56.30 | 0.00 |
| TRINITY_sp O1410lys12    | Homoisocitrate dehy | 56.30 | 0.00 |
| TRINITY_sp Q54IFragA     | Ras-related GTP-bin | 56.30 | 0.00 |
| TRINITY_sp Q0JM1AIP1     | DEAD-box ATP-depend | 56.30 | 0.00 |
| TRINITY_sp P1982PRKA     | Phosphoribulokinase | 56.30 | 0.00 |
| TRINITY_sp O3513Emg1     | Ribosomal RNA small | 56.30 | 0.00 |
| TRINITY_sp B8B81OsI_2544 | PHD finger protein  | 56.30 | 0.00 |
| TRINITY_sp Q0514Rac2     | Ras-related C3 botu | 56.30 | 0.00 |
| TRINITY_sp P5633-        | Eukaryotic translat | 56.30 | 0.00 |
| TRINITY_sp Q93Z0FKBP53   | Peptidyl-prolyl cis | 56.30 | 0.00 |
| TRINITY_sp Q54J7papA     | Poly(A) polymerase  | 56.30 | 0.00 |
| TRINITY_sp O5971dph1     | Diphthamide biosynt | 56.30 | 0.00 |
| TRINITY_sp Q6YZ5RFC3     | Replication factor  | 56.30 | 0.00 |
| TRINITY_sp Q91ZVSmarca5  | SWI/SNF-related mat | 56.30 | 0.00 |
| TRINITY_sp Q6R3MPoli     | DNA polymerase iota | 56.30 | 0.00 |
| TRINITY_sp Q0875myb      | Transcriptional act | 56.30 | 0.00 |
| TRINITY_sp O9453sua5     | Threonylcarbamoyl-A | 56.30 | 0.00 |
| TRINITY_sp Q6316Dnah1    | Dynein heavy chain  | 56.30 | 0.00 |
| TRINITY_sp Q0076glpV     | Glycogen phosphoryl | 56.30 | 0.00 |
| TRINITY_sp P0269PMP2     | Myelin P2 protein O | 56.20 | 0.00 |
| TRINITY_sp P4658POL3     | DNA polymerase delt | 56.20 | 0.00 |
| TRINITY_sp O7564SNRNP200 | U5 small nuclear ri | 56.20 | 0.00 |
| TRINITY_sp Q9P40SAR1     | Small COPII coat GT | 56.20 | 0.00 |
| TRINITY_sp Q96P3NEK1     | Serine/threonine-pr | 56.20 | 0.00 |
| TRINITY_sp Q54EVlpd      | Dihydrolipoyl dehyd | 56.20 | 0.00 |
| TRINITY_sp Q0047L41P1A   | 60S ribosomal prote | 56.20 | 0.00 |
| TRINITY_sp Q9VLA5me      | Probable small nucl | 56.20 | 0.00 |
| TRINITY_sp Q9FJ1PABN2    | Polyadenylate-bindi | 56.20 | 0.00 |
| TRINITY_sp Q54U0kif3     | Kinesin-related pro | 56.20 | 0.00 |
| TRINITY_sp A8EZ5hisS     | Histidine--tRNA lig | 56.20 | 0.00 |
| TRINITY_sp Q0IM0MT4A     | Metallothionein-lik | 56.20 | 0.00 |
| TRINITY_sp P5467pikC     | Phosphatidylinosito | 56.20 | 0.00 |
| TRINITY_sp Q55D0cysA     | Cystathionine gamma | 56.20 | 0.00 |
| TRINITY_sp Q8W11SMU1     | Suppressor of mec-8 | 56.20 | 0.00 |
| TRINITY_sp A2X21OsI_0062 | Serine/threonine pr | 56.20 | 0.00 |
| TRINITY_sp Q3ZC0OAT      | Ornithine aminotran | 56.20 | 0.00 |
| TRINITY_sp P7355s110875  | Uncharacterized mem | 56.20 | 0.00 |
| TRINITY_sp Q0110H0219H12 | ATP-dependent RNA h | 56.20 | 0.00 |
| TRINITY_sp Q9975ABCA3    | ATP-binding cassett | 56.20 | 0.00 |
| TRINITY_sp Q66I2aldh8a1  | Aldehyde dehydrogen | 56.20 | 0.00 |
| TRINITY_sp Q54S7sf3b3    | Probable splicing f | 56.20 | 0.00 |
| TRINITY_sp Q9SM0NFYC1    | Nuclear transcripti | 56.20 | 0.00 |
| TRINITY_sp Q9T00At4g3928 | Phenylalanine--tRNA | 56.20 | 0.00 |
| TRINITY_sp Q2310RPL5     | 60S ribosomal prote | 56.20 | 0.00 |
| TRINITY_sp Q9CW8Cpsf31   | Integrator complex  | 56.20 | 0.00 |
| TRINITY_sp A8NE0TRP-1    | Tryptophan synthase | 56.20 | 0.00 |
| TRINITY_sp B2IZ0ileS     | Isoleucine--tRNA li | 56.20 | 0.00 |
| TRINITY_sp Q4WK0ppe1     | Protein phosphatase | 56.20 | 0.00 |



|                             |                      |       |      |
|-----------------------------|----------------------|-------|------|
| TRINITY_sp Q84QUPPT2        | Phosphoenolpyruvate  | 56.20 | 0.00 |
| TRINITY_sp Q1414DHX34       | Probable ATP-depend  | 56.20 | 0.00 |
| TRINITY_sp Q5PQ4-           | Uncharacterized pro  | 56.20 | 0.00 |
| TRINITY_sp Q56YNSMC3        | Structural maintena  | 56.20 | 0.00 |
| TRINITY_sp Q54F1ndufv2      | NADH dehydrogenase   | 56.20 | 0.00 |
| TRINITY_sp Q54P9mtr         | Methionine synthase  | 56.20 | 0.00 |
| TRINITY_sp Q704FAbcb7       | ATP-binding cassett  | 56.20 | 0.00 |
| TRINITY_sp Q8DJ4clpB1       | Chaperone protein C  | 56.20 | 0.00 |
| TRINITY_sp Q5F36ABCC1       | Multidrug resistanc  | 56.20 | 0.00 |
| TRINITY_sp O7579RNASEH27    | Ribonuclease H2 sub  | 56.10 | 0.00 |
| TRINITY_sp Q93VFATG18A      | Autophagy-related p  | 56.10 | 0.00 |
| TRINITY_sp Q74ZCYSH1        | Endoribonuclease YS  | 56.10 | 0.00 |
| TRINITY_sp Q96BMARL8A       | ADP-ribosylation fa  | 56.10 | 0.00 |
| TRINITY_sp A2ZBVVATP-P1     | V-type proton ATPas  | 56.10 | 0.00 |
| TRINITY_sp A5PKHFAH         | Fumarylacetoacetase  | 56.10 | 0.00 |
| TRINITY_sp P5468fimA        | Fimbrin OS=Dictyost  | 56.10 | 0.00 |
| TRINITY_sp Q9NX7DUS2        | tRNA-dihydrouridine  | 56.10 | 0.00 |
| TRINITY_sp Q6INUttc30a      | Tetratricopeptide r  | 56.10 | 0.00 |
| TRINITY_sp Q8VZ9FZR1        | Protein FIZZY-RELAT  | 56.10 | 0.00 |
| TRINITY_sp Q4WI0rps21       | 40S ribosomal prote  | 56.10 | 0.00 |
| TRINITY_sp Q23FETLL3C       | Tubulin glycyclase 3 | 56.10 | 0.00 |
| TRINITY_sp Q9XY1fcpA        | Probable C-terminal  | 56.10 | 0.00 |
| TRINITY_sp P3411mvpA        | Major vault protein  | 56.10 | 0.00 |
| TRINITY_sp P4262yqjG        | Glutathionyl-hydroq  | 56.10 | 0.00 |
| TRINITY_sp Q182EdnaJ        | Chaperone protein D  | 56.10 | 0.00 |
| TRINITY_sp Q9BLCamtA        | Ammonium transporte  | 56.10 | 0.00 |
| TRINITY_sp P3413hmgB        | 3-hydroxy-3-methylg  | 56.10 | 0.00 |
| TRINITY_sp Q9SS1RPS24A      | 40S ribosomal prote  | 56.10 | 0.00 |
| TRINITY_sp Q5A43GAT1        | Transcriptional reg  | 56.10 | 0.00 |
| TRINITY_sp Q0WR0FKBP20-2    | Peptidyl-prolyl cis  | 56.10 | 0.00 |
| TRINITY_sp Q9S76HISN1A      | ATP phosphoribosylt  | 56.10 | 0.00 |
| TRINITY_sp P4687KIN14N      | Kinesin-like protei  | 56.10 | 0.00 |
| TRINITY_sp P1048-           | Phosphatidylcholine  | 56.10 | 0.00 |
| TRINITY_sp Q9SJ4UEV1C       | Ubiquitin-conjugati  | 56.10 | 0.00 |
| TRINITY_sp P791(CPSF3       | Cleavage and polyad  | 56.10 | 0.00 |
| TRINITY_sp P1141sod1        | Superoxide dismutas  | 56.10 | 0.00 |
| TRINITY_sp Q9LZIRABE1D      | Ras-related protein  | 56.10 | 0.00 |
| TRINITY_sp O7564SNRNP20(U5  | small nuclear ri     | 56.00 | 0.00 |
| TRINITY_sp Q93WISAG21       | Protein SENESCENCE-  | 56.00 | 0.00 |
| TRINITY_sp P5657-           | ES1 protein homolog  | 56.00 | 0.00 |
| TRINITY_sp Q6C4IDBP2        | ATP-dependent RNA h  | 56.00 | 0.00 |
| TRINITY_sp Q387(THI1        | Thiamine thiazole s  | 56.00 | 0.00 |
| TRINITY_sp Q3MI1PUS10       | Putative tRNA pseud  | 56.00 | 0.00 |
| TRINITY_sp B7T1\ftsH        | ATP-dependent zinc   | 56.00 | 0.00 |
| TRINITY_sp Q1267DNF2        | Phospholipid-transp  | 56.00 | 0.00 |
| TRINITY_sp O9438psm1        | Structural maintena  | 56.00 | 0.00 |
| TRINITY_sp Q9DAFPacrg       | Parkin coregulated   | 56.00 | 0.00 |
| TRINITY_sp Q3957YPTC1       | GTP-binding protein  | 56.00 | 0.00 |
| TRINITY_sp Q75M3ML3         | Protein MEI2-like 3  | 56.00 | 0.00 |
| TRINITY_sp Q3958-           | 5-methyltetrahydrop  | 56.00 | 0.00 |
| TRINITY_sp Q0992yakc        | Aldo-keto reductase  | 56.00 | 0.00 |
| TRINITY_sp Q6BV1PMP3        | Plasma membrane pro  | 56.00 | 0.00 |
| TRINITY_sp Q1ZXHgxcdD       | Guanine exchange fa  | 56.00 | 0.00 |
| TRINITY_sp Q54M2bkda        | 2-oxoisovalerate de  | 56.00 | 0.00 |
| TRINITY_sp Q8LH(Os07g01(DDR | DRGK domain-contai   | 56.00 | 0.00 |
| TRINITY_sp O1543ABCC4       | Multidrug resistanc  | 56.00 | 0.00 |

|                          |                      |       |      |
|--------------------------|----------------------|-------|------|
| TRINITY_sp P529(-        | Pyruvate dehydrogen  | 56.00 | 0.00 |
| TRINITY_sp F4IYNDEX1     | Protein DEFECTIVE I  | 56.00 | 0.00 |
| TRINITY_sp Q0PGAKR4C9    | Aldo-keto reductase  | 56.00 | 0.00 |
| TRINITY_sp O489(POLD1    | DNA polymerase delt  | 56.00 | 0.00 |
| TRINITY_sp Q8RWNAPRT1    | Nicotinate phosphor  | 56.00 | 0.00 |
| TRINITY_sp Q0564dnaJ     | Chaperone protein D  | 56.00 | 0.00 |
| TRINITY_sp O2214GCP1     | Probable tRNA N6-ad  | 56.00 | 0.00 |
| TRINITY_sp Q23FETLL3C    | Tubulin glycyclase 3 | 56.00 | 0.00 |
| TRINITY_sp Q9SW(SYNC1    | Asparagine--tRNA li  | 56.00 | 0.00 |
| TRINITY_sp Q8W4ICYP71    | Peptidyl-prolyl cis  | 56.00 | 0.00 |
| TRINITY_sp A4QVITIF1     | ATP-dependent RNA h  | 56.00 | 0.00 |
| TRINITY_sp F4K5RVE2      | Protein REVEILLE 2   | 56.00 | 0.00 |
| TRINITY_sp Q5W9IUSP      | UDP-sugar pyrophosp  | 56.00 | 0.00 |
| TRINITY_sp P162(F9       | Coagulation factor   | 55.90 | 0.00 |
| TRINITY_sp Q6ZWUbe2d2b   | Ubiquitin-conjugati  | 55.90 | 0.00 |
| TRINITY_sp Q946(-        | DNA polymerase alph  | 55.90 | 0.00 |
| TRINITY_sp Q54U(dhka     | Hybrid signal trans  | 55.90 | 0.00 |
| TRINITY_sp Q86C(tor      | Target of rapamycin  | 55.90 | 0.00 |
| TRINITY_sp Q54R(DDB_G02( | Probable iron/ascor  | 55.90 | 0.00 |
| TRINITY_sp P5467pikC     | Phosphatidylinosito  | 55.90 | 0.00 |
| TRINITY_sp P6234CPK4     | Calcium-dependent p  | 55.90 | 0.00 |
| TRINITY_sp P252(NFYB     | Nuclear transcripti  | 55.90 | 0.00 |
| TRINITY_sp O665(aq_141   | Uncharacterized HIT  | 55.90 | 0.00 |
| TRINITY_sp Q9DAFpacrg    | Parkin coregulated   | 55.90 | 0.00 |
| TRINITY_sp P484(CNAG_004 | Actin OS=Cryptococc  | 55.90 | 0.00 |
| TRINITY_sp P412(Abca2    | ATP-binding cassett  | 55.90 | 0.00 |
| TRINITY_sp Q86Klap2a1-1  | AP-2 complex subuni  | 55.90 | 0.00 |
| TRINITY_sp Q0P5IRBM42    | RNA-binding protein  | 55.90 | 0.00 |
| TRINITY_sp Q452(hbdA     | 3-hydroxybutyryl-Co  | 55.90 | 0.00 |
| TRINITY_sp Q653(SPS1     | Solanesyl-diphospha  | 55.90 | 0.00 |
| TRINITY_sp Q557(sll10608 | Ycf49-like protein   | 55.90 | 0.00 |
| TRINITY_sp Q54VIrio1     | Serine/threonine-pr  | 55.90 | 0.00 |
| TRINITY_sp Q94IIGGPS     | Geranylgeranyl pyro  | 55.90 | 0.00 |
| TRINITY_sp Q2QPVGK1      | Guanylate kinase 1   | 55.90 | 0.00 |
| TRINITY_sp Q405(AOX2     | Ubiquinol oxidase 2  | 55.90 | 0.00 |
| TRINITY_sp P328(IMP3     | U3 small nucleolar   | 55.90 | 0.00 |
| TRINITY_sp P932(-        | Zeaxanthin epoxidas  | 55.90 | 0.00 |
| TRINITY_sp Q5R4IXRN2     | 5'-3' exoribonuclea  | 55.90 | 0.00 |
| TRINITY_sp Q8PFI(dusA    | tRNA-dihydrouridine  | 55.90 | 0.00 |
| TRINITY_sp Q9FMUMPT3     | Mitochondrial phosp  | 55.90 | 0.00 |
| TRINITY_sp O181(ogt-1    | UDP-N-acetylglucosa  | 55.90 | 0.00 |
| TRINITY_sp P402(CKB1     | Casein kinase II su  | 55.90 | 0.00 |
| TRINITY_sp Q93V(RPS1     | 30S ribosomal prote  | 55.90 | 0.00 |
| TRINITY_sp Q54X(ap1b1    | AP-1 complex subuni  | 55.90 | 0.00 |
| TRINITY_sp Q8DIH(hemC    | Porphobilinogen dea  | 55.90 | 0.00 |
| TRINITY_sp Q6P8(Caps1    | Calcyphosin-like pr  | 55.90 | 0.00 |
| TRINITY_sp Q9FR(AMI1     | Amidase 1 OS=Arabid  | 55.90 | 0.00 |
| TRINITY_sp Q550(rheb     | GTP-binding protein  | 55.90 | 0.00 |
| TRINITY_sp Q5R6(RPF1     | Ribosome production  | 55.90 | 0.00 |
| TRINITY_sp Q8H1(PYD3     | Beta-ureidopropiona  | 55.90 | 0.00 |
| TRINITY_sp G0S8(CTHT_002 | Eukaryotic translat  | 55.90 | 0.00 |
| TRINITY_sp O045(SNL4     | Paired amphipathic   | 55.90 | 0.00 |
| TRINITY_sp Q336(CDKE-1   | Cyclin-dependent ki  | 55.90 | 0.00 |
| TRINITY_sp Q2QM(BSL2     | Serine/threonine-pr  | 55.90 | 0.00 |
| TRINITY_sp P281(RABD2A   | Ras-related protein  | 55.90 | 0.00 |
| TRINITY_sp Q9SH(PSAF     | Photosystem I react  | 55.80 | 0.00 |

|                          |                     |       |      |
|--------------------------|---------------------|-------|------|
| TRINITY_sp P4094Arf102F  | ADP-ribosylation fa | 55.80 | 0.00 |
| TRINITY_sp Q55G\pakC     | Serine/threonine-pr | 55.80 | 0.00 |
| TRINITY_sp O741\UBC1     | Ubiquitin-conjugati | 55.80 | 0.00 |
| TRINITY_sp Q6NP\HRD1B    | ERAD-associated E3  | 55.80 | 0.00 |
| TRINITY_sp Q5TA\DCAF8    | DDB1- and CUL4-asso | 55.80 | 0.00 |
| TRINITY_sp P519\Nek1     | Serine/threonine-pr | 55.80 | 0.00 |
| TRINITY_sp O744\cdps1    | Aspartate--tRNA lig | 55.80 | 0.00 |
| TRINITY_sp Q23H\CFAP206  | Cilia- and flagella | 55.80 | 0.00 |
| TRINITY_sp O611\svkA     | Serine/threonine-pr | 55.80 | 0.00 |
| TRINITY_sp Q9SY\BRR2A    | DExH-box ATP-depend | 55.80 | 0.00 |
| TRINITY_sp Q54K\mcca     | Methylcrotonoyl-CoA | 55.80 | 0.00 |
| TRINITY_sp P425\erka     | Extracellular signa | 55.80 | 0.00 |
| TRINITY_sp Q8DJ\clpB1    | Chaperone protein C | 55.80 | 0.00 |
| TRINITY_sp P0C8\CCRP1    | Probable serine/thr | 55.80 | 0.00 |
| TRINITY_sp B0TE\efp      | Elongation factor P | 55.80 | 0.00 |
| TRINITY_sp P548\hgsA     | Hydroxymethylglutar | 55.80 | 0.00 |
| TRINITY_sp Q54J\purB     | Adenylosuccinate ly | 55.80 | 0.00 |
| TRINITY_sp Q8UV\brix1    | Ribosome biogenesis | 55.80 | 0.00 |
| TRINITY_sp A4S6\OSTLU_41 | Lon protease homolo | 55.80 | 0.00 |
| TRINITY_sp O221\GCP1     | Probable tRNA N6-ad | 55.80 | 0.00 |
| TRINITY_sp Q8VZ\IGEP     | Probable glutamyl e | 55.80 | 0.00 |
| TRINITY_sp Q9C7\VLACS3   | Long chain acyl-CoA | 55.80 | 0.00 |
| TRINITY_sp Q9UR\plg7     | Putative phospholip | 55.80 | 0.00 |
| TRINITY_sp O760\CDKL5    | Cyclin-dependent ki | 55.80 | 0.00 |
| TRINITY_sp O230\ECA2     | Calcium-transportin | 55.80 | 0.00 |
| TRINITY_sp P527\-        | Glutamine--tRNA lig | 55.80 | 0.00 |
| TRINITY_sp Q631\Dnah1    | Dynein heavy chain  | 55.80 | 0.00 |
| TRINITY_sp Q3E9\CPK34    | Calcium-dependent p | 55.80 | 0.00 |
| TRINITY_sp Q557\fdpp3-1  | Dipeptidyl peptidas | 55.80 | 0.00 |
| TRINITY_sp P426\-        | 14-3-3 protein 1 OS | 55.70 | 0.00 |
| TRINITY_sp Q86C\tor      | Target of rapamycin | 55.70 | 0.00 |
| TRINITY_sp Q9VY\Coq5     | 2-methoxy-6-polypre | 55.70 | 0.00 |
| TRINITY_sp Q6PB\crp135   | 60S ribosomal prote | 55.70 | 0.00 |
| TRINITY_sp Q953\MANBA    | Beta-mannosidase OS | 55.70 | 0.00 |
| TRINITY_sp Q54N\pex12    | Putative peroxisome | 55.70 | 0.00 |
| TRINITY_sp Q54I\HDDB_G02 | WASH complex subuni | 55.70 | 0.00 |
| TRINITY_sp O499\-        | 14-3-3-like protein | 55.70 | 0.00 |
| TRINITY_sp Q8LG\ABCC8    | ABC transporter C f | 55.70 | 0.00 |
| TRINITY_sp Q9ZE\ogt      | Methylated-DNA--pro | 55.70 | 0.00 |
| TRINITY_sp B0TC\crp1Q    | 50S ribosomal prote | 55.70 | 0.00 |
| TRINITY_sp Q56Y\PLR1     | Pyridoxal reductase | 55.70 | 0.00 |
| TRINITY_sp Q9FX\RFC2     | Replication factor  | 55.70 | 0.00 |
| TRINITY_sp Q3UM\Spata5   | Spermatogenesis-ass | 55.70 | 0.00 |
| TRINITY_sp Q54E\sptB     | Serine palmitoyltra | 55.70 | 0.00 |
| TRINITY_sp Q6P8\Alg8     | Probable dolichyl p | 55.70 | 0.00 |
| TRINITY_sp O942\nop2     | 25S rRNA (cytosine- | 55.70 | 0.00 |
| TRINITY_sp Q8RC\psuG     | Pseudouridine-5'-ph | 55.70 | 0.00 |
| TRINITY_sp Q9NW\POLR3B   | DNA-directed RNA po | 55.70 | 0.00 |
| TRINITY_sp O154\MPPED1   | Metallophosphoester | 55.70 | 0.00 |
| TRINITY_sp Q021\PAT1     | Anthranilate phosph | 55.70 | 0.00 |
| TRINITY_sp Q94B\ISPH     | 4-hydroxy-3-methylb | 55.70 | 0.00 |
| TRINITY_sp A0AV\UBA6     | Ubiquitin-like modi | 55.70 | 0.00 |
| TRINITY_sp Q54L\fvps13A  | Putative vacuolar p | 55.70 | 0.00 |
| TRINITY_sp Q8H0\At5g234  | Katanin p80 WD40 re | 55.70 | 0.00 |
| TRINITY_sp Q6NV\CDPF1    | Cysteine-rich DPF m | 55.70 | 0.00 |
| TRINITY_sp Q5XI\Galk2    | N-acetylgalactosami | 55.70 | 0.00 |

|                          |                     |       |      |
|--------------------------|---------------------|-------|------|
| TRINITY_sp Q9FJ7TOP1B    | DNA topoisomerase 1 | 55.70 | 0.00 |
| TRINITY_sp Q86ZCklp1     | Kinesin heavy chain | 55.70 | 0.00 |
| TRINITY_sp O8603bdhA     | D-beta-hydroxybutyr | 55.70 | 0.00 |
| TRINITY_sp Q963CSPY      | Probable UDP-N-acet | 55.70 | 0.00 |
| TRINITY_sp Q2669-        | Thioredoxin peroxid | 55.60 | 0.00 |
| TRINITY_sp A5D7CDDX52    | Probable ATP-depend | 55.60 | 0.00 |
| TRINITY_sp Q9C0CDNAH6    | Dynein heavy chain  | 55.60 | 0.00 |
| TRINITY_sp Q9ZQIMBR1     | E3 ubiquitin-protei | 55.60 | 0.00 |
| TRINITY_sp Q9LDUDWF5     | 7-dehydrocholestero | 55.60 | 0.00 |
| TRINITY_sp Q54X7DDB_G027 | DEP domain-containi | 55.60 | 0.00 |
| TRINITY_sp A8EXCmnmG     | tRNA uridine 5-carb | 55.60 | 0.00 |
| TRINITY_sp Q94K7At3g5814 | Phenylalanine--tRNA | 55.60 | 0.00 |
| TRINITY_sp Q9FF6UBC22    | Ubiquitin-conjugati | 55.60 | 0.00 |
| TRINITY_sp Q9SB5AP4M     | AP-4 complex subuni | 55.60 | 0.00 |
| TRINITY_sp Q54DIGcvT     | Aminomethyltransfer | 55.60 | 0.00 |
| TRINITY_sp Q9449ubcB     | Ubiquitin conjugati | 55.60 | 0.00 |
| TRINITY_sp Q9NPIUBE2T    | Ubiquitin-conjugati | 55.60 | 0.00 |
| TRINITY_sp Q9WV6Mok      | MAPK/MAK/MRK overla | 55.60 | 0.00 |
| TRINITY_sp O141Clys12    | Homoisocitrate dehy | 55.60 | 0.00 |
| TRINITY_sp Q5Z87Os06g056 | Probable inositol o | 55.60 | 0.00 |
| TRINITY_sp P5347CYIA     | Actin, cytoskeletal | 55.60 | 0.00 |
| TRINITY_sp Q54E9rpc19    | DNA-directed RNA po | 55.60 | 0.00 |
| TRINITY_sp Q0VD4VPS4B    | Vacuolar protein so | 55.60 | 0.00 |
| TRINITY_sp O7535VPS4B    | Vacuolar protein so | 55.60 | 0.00 |
| TRINITY_sp Q9UQC(MOK     | MAPK/MAK/MRK overla | 55.60 | 0.00 |
| TRINITY_sp Q9261GCN1     | eIF-2-alpha kinase  | 55.60 | 0.00 |
| TRINITY_sp P1395-        | G2/mitotic-specific | 55.60 | 0.00 |
| TRINITY_sp P529C(-       | 14-3-3-like protein | 55.60 | 0.00 |
| TRINITY_sp Q23MTt116a    | Probable beta-tubul | 55.60 | 0.00 |
| TRINITY_sp Q9SB5AP4M     | AP-4 complex subuni | 55.60 | 0.00 |
| TRINITY_sp Q75M3ML3      | Protein MEI2-like 3 | 55.60 | 0.00 |
| TRINITY_sp P1419AAC4     | AAC-rich mRNA clone | 55.60 | 0.00 |
| TRINITY_sp Q10M7V2       | Guanylate kinase 2, | 55.60 | 0.00 |
| TRINITY_sp Q54G7nsa2     | Ribosome biogenesis | 55.60 | 0.00 |
| TRINITY_sp Q54S7sf3b3    | Probable splicing f | 55.60 | 0.00 |
| TRINITY_sp Q9SBIABC1     | Protein ABC transpo | 55.60 | 0.00 |
| TRINITY_sp Q2756thyB     | Thymidine kinase 1  | 55.60 | 0.00 |
| TRINITY_sp Q9SYMRHM1     | Trifunctional UDP-g | 55.60 | 0.00 |
| TRINITY_sp Q9FLMNRPB12   | DNA-directed RNA po | 55.60 | 0.00 |
| TRINITY_sp Q9P77rpa2     | Probable DNA-direct | 55.60 | 0.00 |
| TRINITY_sp Q9FSIMD1      | Malate dehydrogenas | 55.60 | 0.00 |
| TRINITY_sp Q5VQ6Os06g014 | Translation factor  | 55.60 | 0.00 |
| TRINITY_sp P5488P5CSB    | Delta-1-pyrroline-5 | 55.60 | 0.00 |
| TRINITY_sp Q3V0Cdnah12   | Dynein heavy chain  | 55.60 | 0.00 |
| TRINITY_sp Q9ZQIMBR1     | E3 ubiquitin-protei | 55.60 | 0.00 |
| TRINITY_sp Q9D7EAcad8    | Isobutyryl-CoA dehy | 55.60 | 0.00 |
| TRINITY_sp Q7X87GATA     | Glutamyl-tRNA(Gln)  | 55.60 | 0.00 |
| TRINITY_sp Q54T(rio2     | Serine/threonine-pr | 55.60 | 0.00 |
| TRINITY_sp O5985gpx1     | Glutathione peroxid | 55.60 | 0.00 |
| TRINITY_sp Q9C6VABC14    | ABC transporter G f | 55.60 | 0.00 |
| TRINITY_sp P4273CLPB1    | Chaperone protein C | 55.60 | 0.00 |
| TRINITY_sp Q8NBRDH13     | Retinol dehydrogena | 55.50 | 0.00 |
| TRINITY_sp D4B0VARB_0207 | Probable glucan end | 55.50 | 0.00 |
| TRINITY_sp P0396rasD     | Ras-like protein ra | 55.50 | 0.00 |
| TRINITY_sp Q6312Abcc2    | Canalicular multisp | 55.50 | 0.00 |
| TRINITY_sp P372Cdis3     | Exosome complex exo | 55.50 | 0.00 |

|                  |          |                     |       |      |
|------------------|----------|---------------------|-------|------|
| TRINITY_sp O2260 | DEGP1    | Protease Do-like 1, | 55.50 | 0.00 |
| TRINITY_sp P4993 | Ctsh     | Pro-cathepsin H OS= | 55.50 | 0.00 |
| TRINITY_sp Q8BW7 | Kdm4a    | Lysine-specific dem | 55.50 | 0.00 |
| TRINITY_sp Q8BU1 | Txn14b   | Thioredoxin-like pr | 55.50 | 0.00 |
| TRINITY_sp Q6ZHF | Os02g07  | Putative D-cysteine | 55.50 | 0.00 |
| TRINITY_sp P9192 | -        | ADP-ribosylation fa | 55.50 | 0.00 |
| TRINITY_sp P3289 | IMP3     | U3 small nucleolar  | 55.50 | 0.00 |
| TRINITY_sp Q4362 | -        | Glutathione reducta | 55.50 | 0.00 |
| TRINITY_sp Q0076 | glpV     | Glycogen phosphoryl | 55.50 | 0.00 |
| TRINITY_sp Q7SY1 | qtrt1    | Queuine tRNA-ribosy | 55.50 | 0.00 |
| TRINITY_sp P2479 | ATP1A2   | Sodium/potassium-tr | 55.50 | 0.00 |
| TRINITY_sp A8IE1 | PRMT1    | Protein arginine N- | 55.50 | 0.00 |
| TRINITY_sp P3125 | UBA2     | Ubiquitin-activatin | 55.50 | 0    |
| TRINITY_sp O6508 | PBC1     | Proteasome subunit  | 55.50 | 0.00 |
| TRINITY_sp Q9612 | PYURF    | Protein preY, mitoc | 55.40 | 0.00 |
| TRINITY_sp P4039 | RIC1     | Ras-related protein | 55.40 | 0.00 |
| TRINITY_sp P4061 | F01G4.6  | Phosphate carrier p | 55.40 | 0.00 |
| TRINITY_sp P3659 | rpb6     | DNA-directed RNA po | 55.40 | 0.00 |
| TRINITY_sp Q9175 | gsk3b    | Glycogen synthase k | 55.40 | 0.00 |
| TRINITY_sp P1325 | PCT1     | Choline-phosphate c | 55.40 | 0.00 |
| TRINITY_sp Q54X6 | brk1     | Protein BRICK1 OS=D | 55.40 | 0.00 |
| TRINITY_sp Q5521 | ccchl    | Probable cytochrome | 55.40 | 0.00 |
| TRINITY_sp P5514 | -        | Glutaredoxin OS=Ric | 55.40 | 0.00 |
| TRINITY_sp P1763 | fgg      | Fibrinogen gamma ch | 55.40 | 0.00 |
| TRINITY_sp Q7T31 | ccdc25   | Coiled-coil domain- | 55.40 | 0.00 |
| TRINITY_sp P3411 | mvpA     | Major vault protein | 55.40 | 0.00 |
| TRINITY_sp Q0596 | GRP10    | Glycine-rich RNA-bi | 55.40 | 0.00 |
| TRINITY_sp Q5RG1 | gnptab   | N-acetylglucosamine | 55.40 | 0.00 |
| TRINITY_sp P1286 | -        | Triosephosphate iso | 55.40 | 0.00 |
| TRINITY_sp Q8LPI | FZR3     | Protein FIZZY-RELAT | 55.40 | 0.00 |
| TRINITY_sp P1147 | PSBP     | Oxygen-evolving enh | 55.40 | 0.00 |
| TRINITY_sp B6JK1 | acsA     | Acetyl-coenzyme A s | 55.40 | 0.00 |
| TRINITY_sp A4111 | ttc26    | Intraflagellar tran | 55.40 | 0.00 |
| TRINITY_sp A2XY1 | PRMT6.1  | Probable protein ar | 55.40 | 0.00 |
| TRINITY_sp Q54R1 | DDB_G028 | Delta-1-pyrroline-5 | 55.40 | 0.00 |
| TRINITY_sp B9RA1 | RCOM_15  | Probable aspartyl a | 55.40 | 0.00 |
| TRINITY_sp Q1JP1 | farsa    | Phenylalanine--tRNA | 55.40 | 0.00 |
| TRINITY_sp P0AF1 | mog      | Molybdopterin adeny | 55.40 | 0.00 |
| TRINITY_sp Q9LY1 | FKBP19   | Peptidyl-prolyl cis | 55.40 | 0.00 |
| TRINITY_sp O6771 | asd      | Aspartate-semialdeh | 55.40 | 0.00 |
| TRINITY_sp O0083 | repB     | TFIIH basal transcr | 55.40 | 0.00 |
| TRINITY_sp Q1343 | SF3B2    | Splicing factor 3B  | 55.40 | 0.00 |
| TRINITY_sp Q5RF1 | ALDH2    | Aldehyde dehydrogen | 55.40 | 0.00 |
| TRINITY_sp Q2QM1 | MCCA     | Methylcrotonoyl-CoA | 55.40 | 0.00 |
| TRINITY_sp P3343 | SOD1     | Superoxide dismutas | 55.40 | 0.00 |
| TRINITY_sp O0448 | UCH2     | Ubiquitin carboxyl- | 55.40 | 0.00 |
| TRINITY_sp Q9ZR1 | RH28     | DEAD-box ATP-depend | 55.40 | 0.00 |
| TRINITY_sp P4595 | ARP      | DNA-(apurinic or ap | 55.40 | 0.00 |
| TRINITY_sp P0DJ1 | RPL18A   | 60S ribosomal prote | 55.30 | 0.00 |
| TRINITY_sp Q0209 | rad3     | Protein kinase rad3 | 55.30 | 0.00 |
| TRINITY_sp Q23M1 | Tt116a   | Probable beta-tubul | 55.30 | 0.00 |
| TRINITY_sp Q9LZ1 | IRABE1D  | Ras-related protein | 55.30 | 0.00 |
| TRINITY_sp Q2194 | R11F4.1  | Probable glycerol k | 55.30 | 0.00 |
| TRINITY_sp Q9US1 | klp3     | Kinesin-like protei | 55.30 | 0.00 |
| TRINITY_sp Q9SZ1 | At4g2912 | Probable 3-hydroxyi | 55.30 | 0.00 |
| TRINITY_sp Q86A1 | cpsf3    | Cleavage and polyad | 55.30 | 0.00 |

|                            |                     |       |      |
|----------------------------|---------------------|-------|------|
| TRINITY_sp P0C8MCCR1       | Probable serine/thr | 55.30 | 0.00 |
| TRINITY_sp Q940FSRK2E      | Serine/threonine-pr | 55.30 | 0.00 |
| TRINITY_sp Q554&slr0537    | Uncharacterized sug | 55.30 | 0.00 |
| TRINITY_sp Q54DCcomG       | Aldehyde dehydrogen | 55.30 | 0.00 |
| TRINITY_sp Q8WX>DNAH7      | Dynein heavy chain  | 55.30 | 0.00 |
| TRINITY_sp A5N6MdnaJ       | Chaperone protein D | 55.30 | 0.00 |
| TRINITY_sp Q6S0(kif6       | Kinesin-related pro | 55.30 | 0.00 |
| TRINITY_sp Q9LJIM3KE1      | MAP3K epsilon prote | 55.30 | 0.00 |
| TRINITY_sp O236&At1g298&   | Glycine--tRNA ligas | 55.30 | 0.00 |
| TRINITY_sp Q9FX&STT3B      | Dolichyl-diphosphoo | 55.30 | 0.00 |
| TRINITY_sp P056&CTSZ       | Cathepsin Z OS=Bos  | 55.30 | 0.00 |
| TRINITY_sp Q55B&nod2       | Superoxide dismutas | 55.30 | 0.00 |
| TRINITY_sp O353&Abcc1      | Multidrug resistanc | 55.30 | 0.00 |
| TRINITY_sp Q39V&mutS       | DNA mismatch repair | 55.30 | 0.00 |
| TRINITY_sp Q917&gsk3b      | Glycogen synthase k | 55.30 | 0.00 |
| TRINITY_sp A2E3(ALG5D      | Dolichyl-phosphate  | 55.20 | 0.00 |
| TRINITY_sp Q9VD&CG6353     | Protein archease-li | 55.20 | 0.00 |
| TRINITY_sp Q54N&der12      | Probable derlin-2 h | 55.20 | 0.00 |
| TRINITY_sp Q55G&ChLim      | Calponin homology a | 55.20 | 0.00 |
| TRINITY_sp Q9SZ&HISN4      | Imidazole glycerol  | 55.20 | 0.00 |
| TRINITY_sp Q91VIN&dufs1    | NADH-ubiquinone oxi | 55.20 | 0.00 |
| TRINITY_sp Q3MF&FrpsQ      | 30S ribosomal prote | 55.20 | 0.00 |
| TRINITY_sp P395&DRS2       | Probable phospholip | 55.20 | 0.00 |
| TRINITY_sp P265&At2g306&   | Histone H1.2 OS=Ara | 55.20 | 0.00 |
| TRINITY_sp Q9FGI&PUB50     | Putative U-box doma | 55.20 | 0.00 |
| TRINITY_sp Q112(&PARP2     | Poly [ADP-ribose] p | 55.20 | 0.00 |
| TRINITY_sp Q54I&indrB      | Probable serine/thr | 55.20 | 0.00 |
| TRINITY_sp F4IH&SYD        | Chromatin structure | 55.20 | 0.00 |
| TRINITY_sp Q097&pan2       | PAB-dependent poly( | 55.20 | 0.00 |
| TRINITY_sp Q9Y8&ubc15      | Ubiquitin-conjugati | 55.20 | 0.00 |
| TRINITY_sp P266&VARS       | Valine--tRNA ligase | 55.20 | 0.00 |
| TRINITY_sp Q8W4&ICYP71     | Peptidyl-prolyl cis | 55.20 | 0.00 |
| TRINITY_sp Q27I&KIN12D     | Kinesin-like protei | 55.20 | 0.00 |
| TRINITY_sp P283&acuE       | Malate synthase, gl | 55.20 | 0.00 |
| TRINITY_sp Q54N&gpn3       | GPN-loop GTPase 3 O | 55.20 | 0.00 |
| TRINITY_sp Q84W&SHM7       | Serine hydroxymethy | 55.20 | 0.00 |
| TRINITY_sp Q52Q&AIL6       | AP2-like ethylene-r | 55.20 | 0.00 |
| TRINITY_sp Q6PB&rps3a      | 40S ribosomal prote | 55.20 | 0.00 |
| TRINITY_sp Q9LY&AK1        | Aspartokinase 1, ch | 55.20 | 0.00 |
| TRINITY_sp P243&al-3       | Geranylgeranyl pyro | 55.20 | 0.00 |
| TRINITY_sp Q9SZ&FABCG9     | ABC transporter G f | 55.20 | 0.00 |
| TRINITY_sp Q102&SPAC56F&   | Eukaryotic translat | 55.20 | 0.00 |
| TRINITY_sp A2Y9M&OsI_021(  | Soluble starch synt | 55.20 | 0.00 |
| TRINITY_sp Q0VD(IMP4       | U3 small nucleolar  | 55.20 | 0.00 |
| TRINITY_sp P566&KNOX1      | Homeobox protein kn | 55.20 | 0.00 |
| TRINITY_sp Q8VC&Acsf2      | Acyl-CoA synthetase | 55.20 | 0.00 |
| TRINITY_sp F4HY&At1g486&   | DExH-box ATP-depend | 55.20 | 0.00 |
| TRINITY_sp Q8WX>DNAH7      | Dynein heavy chain  | 55.20 | 0.00 |
| TRINITY_sp P872( &RPL34A   | 60S ribosomal prote | 55.20 | 0.00 |
| TRINITY_sp O947&ALG2       | Alpha-1,3/1,6-manno | 55.20 | 0.00 |
| TRINITY_sp Q9Y8( &TOP2     | DNA topoisomerase 2 | 55.10 | 0.00 |
| TRINITY_sp A6Q4&dnaJ       | Chaperone protein D | 55.10 | 0.00 |
| TRINITY_sp F4IG&BCHC2      | BEACH domain-contai | 55.10 | 0.00 |
| TRINITY_sp F4IS( &At2g320( | DNA topoisomerase 3 | 55.10 | 0.00 |
| TRINITY_sp Q920I&Mlycd     | Malonyl-CoA decarbo | 55.10 | 0.00 |
| TRINITY_sp Q101( &SPAC26A& | Hydrolase C26A3.11  | 55.10 | 0.00 |

|                          |                     |       |      |
|--------------------------|---------------------|-------|------|
| TRINITY_sp Q86W7SLC26A11 | Sodium-independent  | 55.10 | 0.00 |
| TRINITY_sp Q92S7FubiE    | Ubiquinone/menaquin | 55.10 | 0.00 |
| TRINITY_sp Q54W7fgna1    | Glucosamine 6-phosp | 55.10 | 0.00 |
| TRINITY_sp Q5501DDB_G027 | Probable serine/thr | 55.10 | 0.00 |
| TRINITY_sp P4252erka     | Extracellular signa | 55.10 | 0.00 |
| TRINITY_sp Q54W7metap1   | Methionine aminopep | 55.10 | 0.00 |
| TRINITY_sp Q55E7gfm1     | Elongation factor G | 55.10 | 0.00 |
| TRINITY_sp Q9XII7ISCA    | Iron-sulfur assembl | 55.10 | 0.00 |
| TRINITY_sp Q54J7abcC3    | ABC transporter C f | 55.10 | 0.00 |
| TRINITY_sp Q9FI7AGD9     | Probable ADP-ribosy | 55.10 | 0.00 |
| TRINITY_sp Q54N7gpn3     | GPN-loop GTPase 3 O | 55.10 | 0.00 |
| TRINITY_sp Q54T7DDB_G028 | Coiled-coil domain- | 55.10 | 0.00 |
| TRINITY_sp Q1032SPAC17G8 | Inositol phosphocer | 55.10 | 0.00 |
| TRINITY_sp Q8WX7DNAH7    | Dynein heavy chain  | 55.10 | 0.00 |
| TRINITY_sp Q54U7abcC12   | ABC transporter C f | 55.10 | 0.00 |
| TRINITY_sp Q1EC7tlk2     | Serine/threonine-pr | 55.10 | 0.00 |
| TRINITY_sp Q6TU7mala     | NADP-dependent mali | 55.10 | 0.00 |
| TRINITY_sp Q56Y7NADK1    | NAD(H) kinase 1 OS= | 55.10 | 0.00 |
| TRINITY_sp Q9C57PFK7     | ATP-dependent 6-pho | 55.10 | 0.00 |
| TRINITY_sp Q5PN7AMSH3    | AMSH-like ubiquitin | 55.10 | 0.00 |
| TRINITY_sp A8IR7CHLREDR7 | Ribosome biogenesis | 55.10 | 0.00 |
| TRINITY_sp Q4457nifS1    | Cysteine desulfuras | 55.10 | 0.00 |
| TRINITY_sp Q5577slr0074  | UPF0051 protein slr | 55.10 | 0.00 |
| TRINITY_sp Q9M07MABCB9   | ABC transporter B f | 55.10 | 0.00 |
| TRINITY_sp Q9SG7Atlg7255 | Phenylalanine--tRNA | 55.10 | 0.00 |
| TRINITY_sp Q8C57Cwc22    | Pre-mRNA-splicing f | 55.10 | 0.00 |
| TRINITY_sp P9307RH21     | DEAD-box ATP-depend | 55.10 | 0.00 |
| TRINITY_sp Q2QP7VGK1     | Guanylate kinase 1  | 55.10 | 0.00 |
| TRINITY_sp Q8RW7CCB3     | Protein COFACTOR AS | 55.10 | 0.00 |
| TRINITY_sp Q8BI7Dyrk4    | Dual specificity ty | 55.10 | 0.00 |
| TRINITY_sp P5347ACT7     | Actin-7 OS=Arabidop | 55.10 | 0.00 |
| TRINITY_sp Q9DB7Mcts1    | Malignant T-cell-am | 55.10 | 0.00 |
| TRINITY_sp Q0717Suox     | Sulfite oxidase, mi | 55.10 | 0.00 |
| TRINITY_sp Q94LV7HOS66   | Homeobox protein kn | 55.10 | 0.00 |
| TRINITY_sp Q9VH7Coq2     | 4-hydroxybenzoate p | 55.10 | 0.00 |
| TRINITY_sp Q55F7DDB_G026 | Uncharacterized pro | 55.00 | 0.00 |
| TRINITY_sp Q54R7mkkA     | Mitogen-activated p | 55.00 | 0.00 |
| TRINITY_sp Q55B7ddx49    | Probable ATP-depend | 55.00 | 0.00 |
| TRINITY_sp Q8L37FZR2     | Protein FIZZY-RELAT | 55.00 | 0.00 |
| TRINITY_sp Q54Q7yipf5    | Protein YIPF5 homol | 55.00 | 0.00 |
| TRINITY_sp Q52J7VIP2     | Probable NOT transc | 55.00 | 0.00 |
| TRINITY_sp Q55F7rab6     | Ras-related protein | 55.00 | 0.00 |
| TRINITY_sp Q9Y27UBE2D4   | Ubiquitin-conjugati | 55.00 | 0.00 |
| TRINITY_sp O4217apoa1    | Apolipoprotein A-I  | 55.00 | 0.00 |
| TRINITY_sp P0277FN1      | Fibronectin OS=Homo | 55.00 | 0.00 |
| TRINITY_sp P3417myoD     | Myosin ID heavy cha | 55.00 | 0.00 |
| TRINITY_sp Q93W7NIFU1    | NifU-like protein 1 | 55.00 | 0.00 |
| TRINITY_sp Q54P7pwp2     | Periodic tryptophan | 55.00 | 0.00 |
| TRINITY_sp P2007pyr1-3   | Protein PYR1-3 OS=D | 55.00 | 0.00 |
| TRINITY_sp Q6NL7ABCC2    | ABC transporter D f | 55.00 | 0.00 |
| TRINITY_sp Q54I7mycbp    | C-Myc-binding prote | 55.00 | 0.00 |
| TRINITY_sp Q2RA7CPK25    | Calcium-dependent p | 55.00 | 0.00 |
| TRINITY_sp Q5547aslB     | Acyl-CoA synthetase | 55.00 | 0.00 |
| TRINITY_sp O1397crn1     | Coronin-like protei | 55.00 | 0.00 |
| TRINITY_sp Q0DH7FTSH8    | ATP-dependent zinc  | 55.00 | 0.00 |
| TRINITY_sp Q6ST7HCF101   | Fe-S cluster assemb | 55.00 | 0.00 |

|                          |                      |       |      |
|--------------------------|----------------------|-------|------|
| TRINITY_sp Q8L7FHHSK     | Homoserine kinase O  | 55.00 | 0.00 |
| TRINITY_sp Q1LZ9IDI1     | Isopentenyl-diphosp  | 55.00 | 0.00 |
| TRINITY_sp F4KI7At5g108  | (Protein RRC1-like O | 55.00 | 0.00 |
| TRINITY_sp Q4291-        | Glucose-6-phosphate  | 55.00 | 0.00 |
| TRINITY_sp A5D8Msbds     | Ribosome maturation  | 55.00 | 0.00 |
| TRINITY_sp O226(DEGP1    | Protease Do-like 1,  | 55.00 | 0.00 |
| TRINITY_sp Q54GFctdspl2  | CTD small phosphata  | 55.00 | 0.00 |
| TRINITY_sp P0257-        | Actin-1 OS=Acantham  | 55.00 | 0.00 |
| TRINITY_sp F4IU9UPF2     | Regulator of nonsen  | 55.00 | 0.00 |
| TRINITY_sp B0S6Ueral1    | GTPase Era, mitoch   | 55.00 | 0.00 |
| TRINITY_sp Q4239CPK12    | Calcium-dependent p  | 55.00 | 0.00 |
| TRINITY_sp A8J66SULTR2   | Proton/sulfate cotr  | 55.00 | 0.00 |
| TRINITY_sp A5H06DUR1,2   | Urea amidolyase OS=  | 55.00 | 0.00 |
| TRINITY_sp P3644ALATS    | Alanine--tRNA ligas  | 55.00 | 0.00 |
| TRINITY_sp Q9SGUMGL      | Methionine gamma-ly  | 55.00 | 0.00 |
| TRINITY_sp Q9STIVPS29    | Vacuolar protein so  | 55.00 | 0.00 |
| TRINITY_sp A4FV7PPIE     | Peptidyl-prolyl cis  | 55.00 | 0.00 |
| TRINITY_sp O049(UMK3     | UMP-CMP kinase 3 OS  | 54.90 | 0.00 |
| TRINITY_sp Q86J6trmt61a  | tRNA (adenine(58)-N  | 54.90 | 0.00 |
| TRINITY_sp Q8JI3-        | Type-4 ice-structur  | 54.90 | 0.00 |
| TRINITY_sp Q9KVIlysa     | Diaminopimelate dec  | 54.90 | 0.00 |
| TRINITY_sp Q66K9cuta     | Protein CutA homolo  | 54.90 | 0.00 |
| TRINITY_sp Q1339TARBP1   | Probable methyltran  | 54.90 | 0.00 |
| TRINITY_sp Q9FIVDEGP10   | Protease Do-like 10  | 54.90 | 0.00 |
| TRINITY_sp Q9C57TIF3H1   | Eukaryotic translat  | 54.90 | 0.00 |
| TRINITY_sp O2214GCP1     | Probable tRNA N6-ad  | 54.90 | 0.00 |
| TRINITY_sp B0R07si:dkey- | von Willebrand fact  | 54.90 | 0.00 |
| TRINITY_sp Q9TVIcdk-9    | Probable cyclin-dep  | 54.90 | 0.00 |
| TRINITY_sp Q7KWNiunH     | Inosine-uridine-pre  | 54.90 | 0.00 |
| TRINITY_sp Q7YZMerf3     | Eukaryotic peptide   | 54.90 | 0.00 |
| TRINITY_sp Q96N6ZMAT2    | Zinc finger matrin-  | 54.90 | 0.00 |
| TRINITY_sp Q0JCI7ZEP     | Zeaxanthin epoxidas  | 54.90 | 0.00 |
| TRINITY_sp Q94BUAt1g7181 | Uncharacterized aar  | 54.90 | 0.00 |
| TRINITY_sp P197(MIB      | Myosin heavy chain   | 54.90 | 0.00 |
| TRINITY_sp Q2KJ6CDC5L    | Cell division cycle  | 54.90 | 0.00 |
| TRINITY_sp Q9ZS8OMR1     | Threonine dehydrata  | 54.90 | 0.00 |
| TRINITY_sp Q32L9CNN3     | Calponin-3 OS=Bos t  | 54.90 | 0.00 |
| TRINITY_sp P0C03RUB3     | Ubiquitin-like prot  | 54.90 | 0.00 |
| TRINITY_sp Q9AT6RPL23A   | 60S ribosomal prote  | 54.90 | 0.00 |
| TRINITY_sp Q8RC7psuG     | Pseudouridine-5'-ph  | 54.90 | 0.00 |
| TRINITY_sp Q7DM7PAS1     | Peptidyl-prolyl cis  | 54.90 | 0.00 |
| TRINITY_sp M1CZ6EBP1     | ERBB-3 BINDING PROT  | 54.90 | 0.00 |
| TRINITY_sp Q8W5FKIN7D    | Kinesin-like protei  | 54.90 | 0.00 |
| TRINITY_sp O8092AGD7     | ADP-ribosylation fa  | 54.90 | 0.00 |
| TRINITY_sp Q0VF7kctd7    | BTB/POZ domain-cont  | 54.90 | 0.00 |
| TRINITY_sp Q91V7Abca7    | ATP-binding cassett  | 54.90 | 0.00 |
| TRINITY_sp Q54JFabcC3    | ABC transporter C f  | 54.90 | 0.00 |
| TRINITY_sp P4228Dbi      | Acyl-CoA-binding pr  | 54.80 | 0.00 |
| TRINITY_sp Q95RCG11412   | N-alpha-acetyltrans  | 54.80 | 0.00 |
| TRINITY_sp O8184PUMP1    | Mitochondrial uncou  | 54.80 | 0.00 |
| TRINITY_sp P3018TOP2     | DNA topoisomerase 2  | 54.80 | 0.00 |
| TRINITY_sp Q86B1anapc8   | Anaphase-promoting   | 54.80 | 0.00 |
| TRINITY_sp Q0976pim1     | Lon protease homolo  | 54.80 | 0.00 |
| TRINITY_sp Q2R2ERFC1     | Replication factor   | 54.80 | 0.00 |
| TRINITY_sp P527(trs-1    | Threonine--tRNA lig  | 54.80 | 0.00 |
| TRINITY_sp Q2PQ7AGL      | Glycogen debranchin  | 54.80 | 0.00 |



|                          |                     |       |      |
|--------------------------|---------------------|-------|------|
| TRINITY_sp Q9ZQVU2AF35A  | Splicing factor U2a | 54.80 | 0.00 |
| TRINITY_sp Q54TFgpn2     | GPN-loop GTPase 2 h | 54.80 | 0.00 |
| TRINITY_sp Q9SIIRKP      | E3 ubiquitin-protei | 54.80 | 0.00 |
| TRINITY_sp P1524PCMT1    | Protein-L-isoaspart | 54.80 | 0.00 |
| TRINITY_sp Q9FMFDIT2-1   | Dicarboxylate trans | 54.80 | 0.00 |
| TRINITY_sp Q6Q47Atp2b4   | Plasma membrane cal | 54.80 | 0.00 |
| TRINITY_sp Q05B1shq1     | Protein SHQ1 homolo | 54.80 | 0.00 |
| TRINITY_sp Q6WWWUPL3     | E3 ubiquitin-protei | 54.80 | 0.00 |
| TRINITY_sp F4IV5CHR5     | Protein CHROMATIN R | 54.80 | 0.00 |
| TRINITY_sp Q6316Dnah1    | Dynein heavy chain  | 54.80 | 0.00 |
| TRINITY_sp Q0368BIP4     | Luminal-binding pro | 54.80 | 0.00 |
| TRINITY_sp Q6NY2slc25a25 | Calcium-binding mit | 54.80 | 0.00 |
| TRINITY_sp B3PDMtal      | Transaldolase OS=Ce | 54.80 | 0.00 |
| TRINITY_sp P0C8MCCRP1    | Probable serine/thr | 54.80 | 0.00 |
| TRINITY_sp Q80U5Xpo1     | Exportin-1 OS=Rattu | 54.80 | 0    |
| TRINITY_sp P2837SMARCA1  | Probable global tra | 54.80 | 0.00 |
| TRINITY_sp Q5DM5IFT172   | Intraflagellar tran | 54.80 | 0.00 |
| TRINITY_sp Q56X5AOX4     | Ubiquinol oxidase 4 | 54.80 | 0.00 |
| TRINITY_sp Q4086EMB8     | Embryogenesis-assoc | 54.80 | 0.00 |
| TRINITY_sp Q84S7NOL      | Chlorophyll(ide) b  | 54.80 | 0.00 |
| TRINITY_sp Q7F2ECSB      | DNA excision repair | 54.80 | 0.00 |
| TRINITY_sp Q9BX1GTPBP2   | GTP-binding protein | 54.80 | 0.00 |
| TRINITY_sp O1543ABCC4    | Multidrug resistanc | 54.80 | 0.00 |
| TRINITY_sp Q28Gftma7     | Translation machine | 54.70 | 0.00 |
| TRINITY_sp Q9M57PEAMT    | Phosphoethanolamine | 54.70 | 0.00 |
| TRINITY_sp Q9UPVCEP164   | Centrosomal protein | 54.70 | 0.00 |
| TRINITY_sp Q5SI1TTHA1564 | DNA base-flipping p | 54.70 | 0.00 |
| TRINITY_sp Q54I5mycbp    | C-Myc-binding prote | 54.70 | 0.00 |
| TRINITY_sp Q0157facA     | Acetyl-coenzyme A s | 54.70 | 0.00 |
| TRINITY_sp Q54D1DDB_G025 | Down syndrome criti | 54.70 | 0.00 |
| TRINITY_sp Q86A5vamp7B   | Vesicle-associated  | 54.70 | 0.00 |
| TRINITY_sp O8198-        | Serine--tRNA ligase | 54.70 | 0.00 |
| TRINITY_sp Q6K10CAX3     | Vacuolar cation/pro | 54.70 | 0.00 |
| TRINITY_sp P3211PRDX2    | Peroxiredoxin-2 OS= | 54.70 | 0.00 |
| TRINITY_sp Q8H10NBP35    | Cytosolic Fe-S clus | 54.70 | 0.00 |
| TRINITY_sp P3120pab1     | Polyadenylate-bindi | 54.70 | 0.00 |
| TRINITY_sp Q9P77SPBC1703 | Probable mitochondr | 54.70 | 0.00 |
| TRINITY_sp Q9UVMRE11     | Double-strand break | 54.70 | 0.00 |
| TRINITY_sp P1705crtD     | Hydroxyneurosporene | 54.70 | 0.00 |
| TRINITY_sp Q9401CCT2     | T-complex protein 1 | 54.70 | 0.00 |
| TRINITY_sp Q9C81FAS4     | ATP-dependent RNA h | 54.70 | 0.00 |
| TRINITY_sp P0787Acaa1b   | 3-ketoacyl-CoA thio | 54.70 | 0.00 |
| TRINITY_sp O3514Copb2    | Coatomer subunit be | 54.70 | 0.00 |
| TRINITY_sp Q9SYMTPS1     | Alpha,alpha-trehalo | 54.70 | 0.00 |
| TRINITY_sp Q54YIileS     | Probable isoleucine | 54.70 | 0    |
| TRINITY_sp P3435ced-7    | ABC transporter ced | 54.70 | 0.00 |
| TRINITY_sp P1506rasG     | Ras-like protein ra | 54.70 | 0.00 |
| TRINITY_sp Q67X0CBSDUF1  | DUF21 domain-contai | 54.70 | 0.00 |
| TRINITY_sp P4023hhp2     | Casein kinase I hom | 54.70 | 0.00 |
| TRINITY_sp O7564SNRNP200 | U5 small nuclear ri | 54.70 | 0    |
| TRINITY_sp P4898-        | Beta-galactosidase  | 54.60 | 0.00 |
| TRINITY_sp Q1414MORC3    | MORC family CW-type | 54.60 | 0.00 |
| TRINITY_sp O8095PGPS1    | CDP-diacylglycerol- | 54.60 | 0.00 |
| TRINITY_sp Q9295BRF1     | Transcription facto | 54.60 | 0.00 |
| TRINITY_sp Q93Y0UBP9     | Ubiquitin carboxyl- | 54.60 | 0.00 |
| TRINITY_sp Q5520cct8     | T-complex protein 1 | 54.60 | 0.00 |

|                         |                     |       |      |
|-------------------------|---------------------|-------|------|
| TRINITY_sp Q4P5 DBP4    | ATP-dependent RNA h | 54.60 | 0.00 |
| TRINITY_sp Q9D3 Pus10   | Putative tRNA pseud | 54.60 | 0.00 |
| TRINITY_sp Q8H1 RH14    | DEAD-box ATP-depend | 54.60 | 0.00 |
| TRINITY_sp Q9LVI TOP3A  | DNA topoisomerase 3 | 54.60 | 0.00 |
| TRINITY_sp Q9CY Wbscr22 | Probable 18S rRNA ( | 54.60 | 0.00 |
| TRINITY_sp P513 ycf65   | Probable 30S riboso | 54.60 | 0.00 |
| TRINITY_sp Q2VY hslV    | ATP-dependent prote | 54.60 | 0.00 |
| TRINITY_sp O601 SPBC16G | Uncharacterized pro | 54.60 | 0.00 |
| TRINITY_sp B4M3 GJ19011 | NFU1 iron-sulfur cl | 54.60 | 0.00 |
| TRINITY_sp Q949 EGY1    | Probable zinc metal | 54.60 | 0.00 |
| TRINITY_sp Q55E udkA    | Uridine-cytidine ki | 54.60 | 0.00 |
| TRINITY_sp Q9LUV RH9    | DEAD-box ATP-depend | 54.60 | 0.00 |
| TRINITY_sp Q8W1 KIN14F  | Kinesin-like protei | 54.60 | 0.00 |
| TRINITY_sp Q9LD ALAAT2  | Alanine aminotransf | 54.60 | 0.00 |
| TRINITY_sp P200 ATP2B1  | Plasma membrane cal | 54.50 | 0.00 |
| TRINITY_sp Q9EQ Dpys    | Dihydropyrimidinase | 54.50 | 0.00 |
| TRINITY_sp Q8L6 SIN2    | Short integuments 2 | 54.50 | 0.00 |
| TRINITY_sp P531 INO80   | Putative DNA helica | 54.50 | 0.00 |
| TRINITY_sp A0JN KIF3C   | Kinesin-like protei | 54.50 | 0.00 |
| TRINITY_sp P163 Galphao | G protein alpha o s | 54.50 | 0.00 |
| TRINITY_sp P130 acpB    | F-actin-capping pro | 54.50 | 0.00 |
| TRINITY_sp P433 snf     | U1 small nuclear ri | 54.50 | 0.00 |
| TRINITY_sp P607 RAC3    | Ras-related C3 botu | 54.50 | 0.00 |
| TRINITY_sp P026 FGB     | Fibrinogen beta cha | 54.50 | 0.00 |
| TRINITY_sp P428 LDJ2    | DnaJ protein homolo | 54.50 | 0.00 |
| TRINITY_sp Q7ZV sirt2   | NAD-dependent prote | 54.50 | 0.00 |
| TRINITY_sp B1Y8 nuoA    | NADH-quinone oxidor | 54.50 | 0.00 |
| TRINITY_sp P0AF ribC    | Riboflavin synthase | 54.50 | 0.00 |
| TRINITY_sp Q54B idhB    | Isocitrate dehydrog | 54.50 | 0.00 |
| TRINITY_sp Q9W6 ube2ia  | SUMO-conjugating en | 54.50 | 0.00 |
| TRINITY_sp Q9C8 ABCC11  | ABC transporter C f | 54.50 | 0.00 |
| TRINITY_sp Q84V FAD12   | Delta(12)-acyl-lipi | 54.50 | 0.00 |
| TRINITY_sp Q9WV Cpq     | Carboxypeptidase Q  | 54.50 | 0.00 |
| TRINITY_sp Q8L3 KAS     | 3-oxoacyl-[acyl-car | 54.50 | 0.00 |
| TRINITY_sp Q8YN gcvP    | Glycine dehydrogena | 54.50 | 0.00 |
| TRINITY_sp O803 RPL3    | 50S ribosomal prote | 54.50 | 0.00 |
| TRINITY_sp P378 FES1    | Cytochrome b-cl com | 54.50 | 0.00 |
| TRINITY_sp Q099 yakc    | Aldo-keto reductase | 54.50 | 0.00 |
| TRINITY_sp Q9XZI-       | Peroxisomal catalas | 54.50 | 0.00 |
| TRINITY_sp Q6RF rps-21  | 40S ribosomal prote | 54.50 | 0.00 |
| TRINITY_sp Q243 Iswi    | Chromatin-remodelin | 54.50 | 0.00 |
| TRINITY_sp B0U6 rpsI    | 30S ribosomal prote | 54.50 | 0.00 |
| TRINITY_sp Q3KQ nubp1-A | Cytosolic Fe-S clus | 54.50 | 0.00 |
| TRINITY_sp P539 Rab2a   | Ras-related protein | 54.50 | 0.00 |
| TRINITY_sp A7YW HAL     | Histidine ammonia-l | 54.50 | 0.00 |
| TRINITY_sp Q86A guaD    | Guanine deaminase O | 54.50 | 0.00 |
| TRINITY_sp Q9CA YDA     | Mitogen-activated p | 54.50 | 0.00 |
| TRINITY_sp O748 esf1    | Pre-rRNA-processing | 54.50 | 0.00 |
| TRINITY_sp Q149 SHPRH   | E3 ubiquitin-protei | 54.50 | 0.00 |
| TRINITY_sp Q8RW At3g266 | Probable magnesium  | 54.50 | 0.00 |
| TRINITY_sp Q407 -       | Putative glucose-6- | 54.50 | 0.00 |
| TRINITY_sp P340 pkaC    | cAMP-dependent prot | 54.50 | 0.00 |
| TRINITY_sp Q9SQ AMT1-3  | Ammonium transporte | 54.50 | 0.00 |
| TRINITY_sp Q631 Dnah1   | Dynein heavy chain  | 54.50 | 0.00 |
| TRINITY_sp A2YQ OsI_276 | Pre-mRNA-splicing f | 54.50 | 0.00 |
| TRINITY_sp Q395 ODA2    | Dynein gamma chain, | 54.50 | 0.00 |

|                         |                      |       |      |
|-------------------------|----------------------|-------|------|
| TRINITY_sp A6GY>dapF    | Diaminopimelate epi  | 54.50 | 0.00 |
| TRINITY_sp P0DJ1RPL27   | 60S ribosomal prote  | 54.40 | 0.00 |
| TRINITY_sp Q631&Abcc2   | Canalicular multisp  | 54.40 | 0.00 |
| TRINITY_sp Q54H&drkA    | Probable serine/thr  | 54.40 | 0.00 |
| TRINITY_sp O763&dco     | Discs overgrown pro  | 54.40 | 0.00 |
| TRINITY_sp Q6DJ&cars2   | Probable cysteine--  | 54.40 | 0.00 |
| TRINITY_sp Q182&rap-1   | Ras-related protein  | 54.40 | 0.00 |
| TRINITY_sp Q86K(DDB_G02 | Probable GH family   | 54.40 | 0.00 |
| TRINITY_sp Q390&CKL11   | Casein kinase 1-lik  | 54.40 | 0.00 |
| TRINITY_sp Q9931TY3B-G  | Transposon Ty3-G Ga  | 54.40 | 0.00 |
| TRINITY_sp O075&yhdW    | Putative glyceropho  | 54.40 | 0.00 |
| TRINITY_sp P361&-       | Endoplasmin homolog  | 54.40 | 0.00 |
| TRINITY_sp Q99J&Mlycd   | Malonyl-CoA decarbo  | 54.40 | 0.00 |
| TRINITY_sp B2GU&Man1b1  | Endoplasmic reticul  | 54.40 | 0.00 |
| TRINITY_sp P103&ND6     | NADH-ubiquinone oxi  | 54.40 | 0.00 |
| TRINITY_sp P072&URA2    | Protein URA2 OS=Sac  | 54.40 | 0.00 |
| TRINITY_sp Q8WX&DNAH7   | Dynein heavy chain   | 54.40 | 0.00 |
| TRINITY_sp P068&Myb     | Transcriptional act  | 54.40 | 0.00 |
| TRINITY_sp P0DO&PpSQ1_0 | (3-sulfolactaldehyde | 54.40 | 0.00 |
| TRINITY_sp Q6FC&ACIAD12 | Adenine deaminase O  | 54.40 | 0.00 |
| TRINITY_sp O750(mcm7    | DNA replication lic  | 54.40 | 0.00 |
| TRINITY_sp Q55G(cpnD    | Copine-D OS=Dictyos  | 54.40 | 0.00 |
| TRINITY_sp O5001PARP2   | Poly [ADP-ribose] p  | 54.40 | 0.00 |
| TRINITY_sp Q8WX&DNAH7   | Dynein heavy chain   | 54.40 | 0.00 |
| TRINITY_sp Q6CQ&TAR1-A  | Protein TAR1 OS=Klu  | 54.40 | 0.00 |
| TRINITY_sp P5581sgaA    | Serine--glyoxylate   | 54.40 | 0.00 |
| TRINITY_sp P118&-       | High mobility group  | 54.40 | 0.00 |
| TRINITY_sp Q9HC&XAB2    | Pre-mRNA-splicing f  | 54.40 | 0.00 |
| TRINITY_sp Q9UE&FTSJ1   | Putative tRNA (cyti  | 54.40 | 0.00 |
| TRINITY_sp P048&-       | Actin, cytoplasmic   | 54.40 | 0.00 |
| TRINITY_sp Q7NH&mnme    | tRNA modification G  | 54.40 | 0.00 |
| TRINITY_sp Q55F&acrA    | Adenylate cyclase,   | 54.40 | 0.00 |
| TRINITY_sp Q5FW1Tmem2   | Transmembrane prote  | 54.40 | 0.00 |
| TRINITY_sp A8JF&CFAP65  | Cilia- and flagella  | 54.40 | 0.00 |
| TRINITY_sp Q7SD&ccp-1   | Cytochrome c peroxi  | 54.40 | 0.00 |
| TRINITY_sp P519&Nek1    | Serine/threonine-pr  | 54.40 | 0.00 |
| TRINITY_sp O489&TATB    | Sec-independent pro  | 54.40 | 0.00 |
| TRINITY_sp P785&FCA1    | Cytosine deaminase   | 54.40 | 0.00 |
| TRINITY_sp Q5X3&mdnaJ   | Chaperone protein D  | 54.40 | 0.00 |
| TRINITY_sp Q9VW&h(1)G01 | Probable isocitrate  | 54.30 | 0.00 |
| TRINITY_sp P469&RPE1    | Ribulose-phosphate   | 54.30 | 0.00 |
| TRINITY_sp Q131&PRKAA1  | 5'-AMP-activated pr  | 54.30 | 0.00 |
| TRINITY_sp Q54I&arpA    | Centractin OS=Dicty  | 54.30 | 0.00 |
| TRINITY_sp Q32P&DYNLRB2 | Dynein light chain   | 54.30 | 0.00 |
| TRINITY_sp P619&DCAF7   | DDB1- and CUL4-asso  | 54.30 | 0.00 |
| TRINITY_sp Q007&glpV    | Glycogen phosphoryl  | 54.30 | 0.00 |
| TRINITY_sp O308&HD_0322 | RutC family protein  | 54.30 | 0.00 |
| TRINITY_sp O952&MBD4    | Methyl-CpG-binding   | 54.30 | 0.00 |
| TRINITY_sp Q997&ABCA3   | ATP-binding cassett  | 54.30 | 0.00 |
| TRINITY_sp Q9FM&RD21B   | Probable cysteine p  | 54.30 | 0.00 |
| TRINITY_sp Q6C5&ERT1-1  | Transcription activ  | 54.30 | 0.00 |
| TRINITY_sp P347&ARF     | ADP-ribosylation fa  | 54.30 | 0.00 |
| TRINITY_sp P2961CDKA-2  | Cyclin-dependent ki  | 54.30 | 0.00 |
| TRINITY_sp Q1ZX&fah     | Fumarylacetoacetase  | 54.30 | 0.00 |
| TRINITY_sp O627&SCP2    | Non-specific lipid-  | 54.30 | 0.00 |
| TRINITY_sp Q5ZK&METTL14 | N6-adenosine-methyl  | 54.30 | 0.00 |

|                          |                     |       |      |
|--------------------------|---------------------|-------|------|
| TRINITY_sp D2GXMAGBL5    | Cytosolic carboxype | 54.30 | 0.00 |
| TRINITY_sp Q8YPVlysS     | Lysine--tRNA ligase | 54.30 | 0.00 |
| TRINITY_sp P3409pkac     | cAMP-dependent prot | 54.30 | 0.00 |
| TRINITY_sp Q338EGCN5     | Histone acetyltrans | 54.30 | 0.00 |
| TRINITY_sp O2324D2HGDH   | D-2-hydroxyglutarat | 54.30 | 0.00 |
| TRINITY_sp Q8WX9DNAH7    | Dynein heavy chain  | 54.30 | 0.00 |
| TRINITY_sp Q5548slr0537  | Uncharacterized sug | 54.20 | 0.00 |
| TRINITY_sp P3410pkgC     | Protein kinase 3 OS | 54.20 | 0.00 |
| TRINITY_sp P0110(V-MYB   | Transforming protei | 54.20 | 0.00 |
| TRINITY_sp P0569sacC     | Levanase OS=Bacillu | 54.20 | 0.00 |
| TRINITY_sp Q8BV0Dpp9     | Dipeptidyl peptidas | 54.20 | 0.00 |
| TRINITY_sp Q7ZV9pitrm1   | Presequence proteas | 54.20 | 0.00 |
| TRINITY_sp Q9LI8RBG4     | Glycine-rich RNA-bi | 54.20 | 0.00 |
| TRINITY_sp Q68J4LIPE     | Hormone-sensitive l | 54.20 | 0.00 |
| TRINITY_sp Q9UT2nnt1     | Protein N-methyltra | 54.20 | 0.00 |
| TRINITY_sp Q54U0kif3     | Kinesin-related pro | 54.20 | 0.00 |
| TRINITY_sp O0417TAF10    | Transcription initi | 54.20 | 0.00 |
| TRINITY_sp P5490PROC1    | Pyrroline-5-carboxy | 54.20 | 0.00 |
| TRINITY_sp A0BQIGSPATT00 | Probable protein ph | 54.20 | 0.00 |
| TRINITY_sp O0469NOP5-1   | Probable nucleolar  | 54.20 | 0.00 |
| TRINITY_sp Q9XY9spsA     | Spermidine synthase | 54.20 | 0.00 |
| TRINITY_sp P4281ATPK1    | Serine/threonine-pr | 54.20 | 0.00 |
| TRINITY_sp A8XJvcst-1    | Serine/threonine-pr | 54.20 | 0.00 |
| TRINITY_sp Q9LTFNMT1     | Glycylpeptide N-tet | 54.20 | 0.00 |
| TRINITY_sp P9WQ1treS     | Trehalose synthase/ | 54.20 | 0.00 |
| TRINITY_sp Q54PVdph1     | Diphthamide biosynt | 54.20 | 0.00 |
| TRINITY_sp Q54M0gpt      | Probable alanine am | 54.20 | 0.00 |
| TRINITY_sp Q9NKVmfEA     | Peroxisomal multifu | 54.20 | 0.00 |
| TRINITY_sp Q9XF8LHCB5    | Chlorophyll a-b bin | 54.20 | 0.00 |
| TRINITY_sp Q5560rps30-1  | 40S ribosomal prote | 54.20 | 0.00 |
| TRINITY_sp Q86JIsec11    | Signal peptidase co | 54.20 | 0.00 |
| TRINITY_sp P5460pkbA     | RAC family serine/t | 54.20 | 0.00 |
| TRINITY_sp Q5VQ0CPK2     | Calcium-dependent p | 54.20 | 0.00 |
| TRINITY_sp Q56J0RPL35A   | 60S ribosomal prote | 54.20 | 0.00 |
| TRINITY_sp P4079Rac1     | Ras-related protein | 54.20 | 0.00 |
| TRINITY_sp Q67X0GLB3     | Two-on-two hemoglob | 54.20 | 0.00 |
| TRINITY_sp Q4301Os06g020 | Asparagine syntheta | 54.20 | 0.00 |
| TRINITY_sp Q9M27OVAL     | Methionine--tRNA li | 54.20 | 0.00 |
| TRINITY_sp Q8VY0PFK5     | ATP-dependent 6-pho | 54.20 | 0.00 |
| TRINITY_sp Q68R0IFT81    | Intraflagellar tran | 54.20 | 0.00 |
| TRINITY_sp Q8TA8RP9      | Retinitis pigmentos | 54.20 | 0.00 |
| TRINITY_sp Q9S70ISPL12   | Squamosa promoter-b | 54.20 | 0.00 |
| TRINITY_sp O4980(-       | Glyoxysomal fatty a | 54.20 | 0.00 |
| TRINITY_sp Q8L30FZR2     | Protein FIZZY-RELAT | 54.20 | 0.00 |
| TRINITY_sp P7274typA     | GTP-binding protein | 54.20 | 0.00 |
| TRINITY_sp Q9LJIPREP1    | Presequence proteas | 54.20 | 0.00 |
| TRINITY_sp W4VS0(-       | Acetylcholinesteras | 54.20 | 0.00 |
| TRINITY_sp P1098Act87E   | Actin-87E OS=Drosop | 54.20 | 0.00 |

|                                             |                     |       |      |
|---------------------------------------------|---------------------|-------|------|
| TRINITY_sp Q6I57SPL9                        | Squamosa promoter-b | 54.20 | 0.00 |
| TRINITY_sp Q9I4FPA1195                      | N(G),N(G)-dimethyla | 54.20 | 0.00 |
| TRINITY_sp Q5ZJ2FOPNL                       | LisH domain-contain | 54.10 | 0.00 |
| TRINITY_sp Q54I2polr3b                      | DNA-directed RNA po | 54.10 | 0.00 |
| TRINITY_sp A7HC6mutS                        | DNA mismatch repair | 54.10 | 0.00 |
| TRINITY_sp Q8L32FZR2                        | Protein FIZZY-RELAT | 54.10 | 0.00 |
| TRINITY_sp Q9UD3DNAJB4                      | DnaJ homolog subfam | 54.10 | 0.00 |
| TRINITY_sp F4HW6POL2A                       | DNA polymerase epsi | 54.10 | 0.00 |
| TRINITY_sp P7287dus2                        | tRNA-dihydrouridine | 54.10 | 0.00 |
| TRINITY_sp P9191ola-1                       | Obg-like ATPase 1 O | 54.10 | 0.00 |
| TRINITY_sp Q84JFAt2g3927                    | Probable adenylate  | 54.10 | 0.00 |
| TRINITY_sp Q8TD2CHD6                        | Chromodomain-helica | 54.10 | 0.00 |
| TRINITY_sp O6084EIF5B                       | Eukaryotic translat | 54.10 | 0.00 |
| TRINITY_sp Q8W4IDDL                         | FHA domain-containi | 54.10 | 0.00 |
| TRINITY_sp P0025-                           | Ferredoxin-1 OS=Des | 54.10 | 0.00 |
| TRINITY_sp Q8CIECopa                        | Coatomer subunit al | 54.10 | 0.00 |
| TRINITY_sp Q949UPHL6                        | Myb family transcri | 54.10 | 0.00 |
| TRINITY_sp P2366PREP                        | Prolyl endopeptidas | 54.10 | 0.00 |
| TRINITY_sp Q1JP3farsa                       | Phenylalanine--tRNA | 54.10 | 0.00 |
| TRINITY_sp Q9LN2TIM17-1                     | Mitochondrial impor | 54.10 | 0.00 |
| TRINITY_sp Q54JIoxt1                        | Probable succinyl-C | 54.10 | 0.00 |
| TRINITY_sp P2864CLKR27                      | 3-oxoacyl-[acyl-car | 54.10 | 0.00 |
| TRINITY_sp Q10R1Os03g015                    | DEAD-box ATP-depend | 54.10 | 0.00 |
| TRINITY_sp B3Q16thim                        | Hydroxyethylthiazol | 54.10 | 0.00 |
| TRINITY_sp Q0J03Os09g053                    | Pantothenate kinase | 54.10 | 0.00 |
| TRINITY_sp O6057EIF4E2                      | Eukaryotic translat | 54.10 | 0.00 |
| TRINITY_sp Q54KMrab11B                      | Ras-related protein | 54.10 | 0.00 |
| TRINITY_sp Q964F-                           | Actin, cytoplasmic  | 54.10 | 0.00 |
| TRINITY_sp P0C8MCCRP1                       | Probable serine/thr | 54.10 | 0.00 |
| TRINITY_sp Q5XG2usp44-b                     | Ubiquitin carboxyl- | 54.10 | 0.00 |
| TRINITY_sp Q0576THY-1                       | Bifunctional dihydr | 54.10 | 0.00 |
| TRINITY_sp B6SE7MAA3                        | Probable helicase M | 54.10 | 0.00 |
| TRINITY_sp Q9ZR6FH                          | Frataxin, mitochond | 54.10 | 0.00 |
| TRINITY_sp Q680FAt4g3997                    | Haloacid dehalogena | 54.10 | 0.00 |
| TRINITY_sp Q9XI7LACS2                       | Long chain acyl-CoA | 54.00 | 0.00 |
| TRINITY_sp O9497TRIM37                      | E3 ubiquitin-protei | 54.00 | 0.00 |
| TRINITY_sp P3036cdc25-1-M-phase inducer pho |                     | 54.00 | 0.00 |
| TRINITY_sp Q8WU7PPIL4                       | Peptidyl-prolyl cis | 54.00 | 0.00 |
| TRINITY_sp Q9H0FINTS2                       | Integrator complex  | 54.00 | 0.00 |
| TRINITY_sp Q9VF6CG5038                      | Transmembrane and T | 54.00 | 0.00 |
| TRINITY_sp B3RMI TRIADDR7                   | CDGSH iron-sulfur d | 54.00 | 0.00 |
| TRINITY_sp P5584-                           | Probable 60S riboso | 54.00 | 0.00 |
| TRINITY_sp F4JY6TCX7                        | Protein tesmin/TSO1 | 54.00 | 0.00 |
| TRINITY_sp Q8037sepsecs                     | O-phosphoseryl-tRNA | 54.00 | 0.00 |
| TRINITY_sp Q6MD3tgt                         | Queuine tRNA-ribosy | 54.00 | 0.00 |
| TRINITY_sp Q45F7-                           | Serine/threonine-pr | 54.00 | 0.00 |
| TRINITY_sp O7722cata                        | Catalase-A OS=Dicty | 54.00 | 0.00 |
| TRINITY_sp Q9FM6PI4KB1                      | Phosphatidylinosito | 54.00 | 0.00 |
| TRINITY_sp P1608NIA1                        | Nitrate reductase [ | 54.00 | 0.00 |
| TRINITY_sp Q9W27CG15309                     | Protein yippee-like | 54.00 | 0.00 |
| TRINITY_sp Q0886H1-I                        | Histone H1-I OS=Vol | 54.00 | 0.00 |
| TRINITY_sp Q7YSVcanA                        | Calcineurin subunit | 54.00 | 0.00 |
| TRINITY_sp Q552FpkgA                        | Probable serine/thr | 54.00 | 0.00 |
| TRINITY_sp P5467patB                        | Probable plasma mem | 54.00 | 0.00 |
| TRINITY_sp Q0862PUDP                        | Pseudouridine-5'-ph | 54.00 | 0.00 |
| TRINITY_sp F1NTI ascc3                      | Activating signal c | 54.00 | 0.00 |

|                         |                     |       |      |
|-------------------------|---------------------|-------|------|
| TRINITY_sp P4622-       | Triosephosphate iso | 54.00 | 0.00 |
| TRINITY_sp Q9261EDEM1   | ER degradation-enha | 54.00 | 0.00 |
| TRINITY_sp Q0445-       | Glycine--tRNA ligas | 54.00 | 0.00 |
| TRINITY_sp Q5KY4GK2103  | UPF0317 protein GK2 | 54.00 | 0.00 |
| TRINITY_sp P8057aro-8   | Phospho-2-dehydro-3 | 54.00 | 0.00 |
| TRINITY_sp Q9C4MgyaR    | Glyoxylate reductas | 54.00 | 0.00 |
| TRINITY_sp Q1469BMS1    | Ribosome biogenesis | 54.00 | 0.00 |
| TRINITY_sp P286(SYNPCC7 | Uncharacterized pro | 54.00 | 0.00 |
| TRINITY_sp P9364LON1    | Lon protease homolo | 54.00 | 0.00 |
| TRINITY_sp P8223RRF     | Ribosome-recycling  | 54.00 | 0.00 |
| TRINITY_sp Q9LF9SMC5    | Structural maintena | 54.00 | 0.00 |
| TRINITY_sp Q6RCHIFT74   | Intraflagellar tran | 54.00 | 0.00 |
| TRINITY_sp Q9BV(KIFC3   | Kinesin-like protei | 54.00 | 0.00 |
| TRINITY_sp Q0WU(SBT6.1  | Subtilisin-like pro | 54.00 | 0.00 |
| TRINITY_sp Q2HJIDPH6    | Diphthine--ammonia  | 54.00 | 0.00 |
| TRINITY_sp P2752LHCA4   | Chlorophyll a-b bin | 54.00 | 0.00 |
| TRINITY_sp P0DJ2RPL29   | 60S ribosomal prote | 54.00 | 0.00 |
| TRINITY_sp O7012Abcb11  | Bile salt export pu | 53.90 | 0.00 |
| TRINITY_sp P2079rab8B   | Ras-related protein | 53.90 | 0.00 |
| TRINITY_sp P1959-       | Probable reverse tr | 53.90 | 0.00 |
| TRINITY_sp O8184PUMP1   | Mitochondrial uncou | 53.90 | 0.00 |
| TRINITY_sp Q9D84Tex9    | Testis-expressed se | 53.90 | 0.00 |
| TRINITY_sp Q96G2IMP4    | U3 small nucleolar  | 53.90 | 0.00 |
| TRINITY_sp P2157VPS1    | Vacuolar protein so | 53.90 | 0.00 |
| TRINITY_sp Q8VDEAlg12   | Dol-P-Man:Man(7)Glc | 53.90 | 0.00 |
| TRINITY_sp P4779Gsr     | Glutathione reducta | 53.90 | 0.00 |
| TRINITY_sp Q54C7pdhA    | Pyruvate dehydrogen | 53.90 | 0.00 |
| TRINITY_sp Q4054NPK1    | Mitogen-activated p | 53.90 | 0.00 |
| TRINITY_sp Q3T0(CPROSC  | Proline synthase co | 53.90 | 0.00 |
| TRINITY_sp Q5E9IEIF2S2  | Eukaryotic translat | 53.90 | 0.00 |
| TRINITY_sp O2441RPN8A   | 26S proteasome non- | 53.90 | 0.00 |
| TRINITY_sp O6112svkA    | Serine/threonine-pr | 53.90 | 0.00 |
| TRINITY_sp P5039GDI2    | Rab GDP dissociatio | 53.90 | 0.00 |
| TRINITY_sp Q9C81FAS4    | ATP-dependent RNA h | 53.90 | 0.00 |
| TRINITY_sp Q4253BCCP1   | Biotin carboxyl car | 53.90 | 0.00 |
| TRINITY_sp Q93Y1Atlg279 | Probable pre-mRNA-s | 53.90 | 0.00 |
| TRINITY_sp Q6128Abcd2   | ATP-binding cassett | 53.90 | 0.00 |
| TRINITY_sp Q74H5dnaJ    | Chaperone protein D | 53.90 | 0.00 |
| TRINITY_sp Q86AIDDB_G02 | Probable myosin lig | 53.90 | 0.00 |
| TRINITY_sp Q55D6dr1     | Protein Dr1 homolog | 53.90 | 0.00 |
| TRINITY_sp Q2PG(CSR     | Serine racemase OS= | 53.90 | 0.00 |
| TRINITY_sp Q9ZU3QPT     | Nicotinate-nucleoti | 53.90 | 0.00 |
| TRINITY_sp Q9M83SEC     | Probable UDP-N-acet | 53.90 | 0.00 |
| TRINITY_sp P7135HI_0568 | Uncharacterized pro | 53.90 | 0.00 |
| TRINITY_sp P1761PRKACA  | cAMP-dependent prot | 53.80 | 0.00 |
| TRINITY_sp P1243-       | Actin A OS=Trypanos | 53.80 | 0.00 |
| TRINITY_sp Q5PQ4-       | Uncharacterized pro | 53.80 | 0.00 |
| TRINITY_sp O1543ABCC4   | Multidrug resistanc | 53.80 | 0.00 |
| TRINITY_sp P5467pikB    | Phosphatidylinosito | 53.80 | 0.00 |
| TRINITY_sp P5195NEK3    | Serine/threonine-pr | 53.80 | 0.00 |
| TRINITY_sp Q0WQILTA3    | Dihydrolipoyllysine | 53.80 | 0.00 |
| TRINITY_sp Q3J58rplC    | 50S ribosomal prote | 53.80 | 0.00 |
| TRINITY_sp F4JA7SKI2    | DExH-box ATP-depend | 53.80 | 0.00 |
| TRINITY_sp Q8R75prs     | Ribose-phosphate py | 53.80 | 0.00 |
| TRINITY_sp Q9FHIABC7    | ABC transporter B f | 53.80 | 0.00 |
| TRINITY_sp Q9P2FKIF17   | Kinesin-like protei | 53.80 | 0.00 |

|                           |                     |       |      |
|---------------------------|---------------------|-------|------|
| TRINITY_sp Q10P ADIPOR3   | Heptahelical transm | 53.80 | 0.00 |
| TRINITY_sp Q9M8 FTSHI3    | Probable inactive A | 53.80 | 0.00 |
| TRINITY_sp Q2QP VGK1      | Guanylate kinase 1  | 53.80 | 0.00 |
| TRINITY_sp Q3SZ IWDR18    | WD repeat-containin | 53.80 | 0.00 |
| TRINITY_sp Q6FR GSP1      | GTP-binding nuclear | 53.80 | 0.00 |
| TRINITY_sp O7474 SPBC170  | 4,5-DOPA dioxygenas | 53.80 | 0.00 |
| TRINITY_sp P132 LCP1      | Digestive cysteine  | 53.80 | 0.00 |
| TRINITY_sp Q54E EpnA      | Epsin OS=Dictyostel | 53.80 | 0.00 |
| TRINITY_sp P9374 NUDT23   | Nudix hydrolase 23, | 53.80 | 0.00 |
| TRINITY_sp P5481 cdc-48.1 | Transitional endopl | 53.80 | 0.00 |
| TRINITY_sp Q420 ABCC2     | ABC transporter C f | 53.80 | 0.00 |
| TRINITY_sp O4852 POLD2    | DNA polymerase delt | 53.80 | 0.00 |
| TRINITY_sp Q6ZR DNAH12    | Dynein heavy chain  | 53.80 | 0.00 |
| TRINITY_sp Q2TE PCS2      | Glutathione gamma-g | 53.80 | 0.00 |
| TRINITY_sp A2RV CdpH6     | Diphthine--ammonia  | 53.80 | 0.00 |
| TRINITY_sp Q54W metap1    | Methionine aminopep | 53.80 | 0.00 |
| TRINITY_sp Q8VY ESP3      | Pre-mRNA-splicing f | 53.80 | 0.00 |
| TRINITY_sp Q1PD SCL28     | Serine/arginine-ric | 53.80 | 0.00 |
| TRINITY_sp Q7XT Os04g011  | tRNA-dihydrouridine | 53.80 | 0.00 |
| TRINITY_sp Q55E nat10     | RNA cytidine acetyl | 53.80 | 0.00 |
| TRINITY_sp Q5F3 EFTUD2    | 116 kDa U5 small nu | 53.80 | 0.00 |
| TRINITY_sp A8HM FAP9      | Intraflagellar tran | 53.80 | 0.00 |
| TRINITY_sp P567 PSMD2     | 26S proteasome non- | 53.80 | 0.00 |
| TRINITY_sp Q8NK scon-3    | E3 ubiquitin ligase | 53.80 | 0.00 |
| TRINITY_sp Q7TM Narf1     | Cytosolic Fe-S clus | 53.80 | 0.00 |
| TRINITY_sp Q2RB Os11g011  | Clathrin heavy chai | 53.80 | 0.00 |
| TRINITY_sp A2XU CDKG-2    | Cyclin-dependent ki | 53.70 | 0.00 |
| TRINITY_sp Q9SF TIM14-2   | Mitochondrial impor | 53.70 | 0.00 |
| TRINITY_sp Q024 Sfri_36   | Uncharacterized pro | 53.70 | 0.00 |
| TRINITY_sp P0AB elbB      | Glyoxalase ElbB OS= | 53.70 | 0.00 |
| TRINITY_sp Q9FK LSM5      | Sm-like protein LSM | 53.70 | 0.00 |
| TRINITY_sp P092 -         | Tubulin beta-1 chai | 53.70 | 0.00 |
| TRINITY_sp P044 -         | Calmodulin OS=Triti | 53.70 | 0.00 |
| TRINITY_sp P322 rasS      | Ras-like protein ra | 53.70 | 0.00 |
| TRINITY_sp O808 MTACP2    | Acyl carrier protei | 53.70 | 0.00 |
| TRINITY_sp Q2RK rsgA      | Putative ribosome b | 53.70 | 0.00 |
| TRINITY_sp Q6T3 Spata20   | Spermatogenesis-ass | 53.70 | 0.00 |
| TRINITY_sp Q9H4 WNK1      | Serine/threonine-pr | 53.70 | 0.00 |
| TRINITY_sp Q099 yakc      | Aldo-keto reductase | 53.70 | 0.00 |
| TRINITY_sp Q64J PIMT2     | Protein-L-isoaspart | 53.70 | 0.00 |
| TRINITY_sp Q8HX MUT       | Methylmalonyl-CoA m | 53.70 | 0.00 |
| TRINITY_sp Q479 -         | L-sorbose 1-dehydro | 53.70 | 0.00 |
| TRINITY_sp Q9C5 TIF3E1    | Eukaryotic translat | 53.70 | 0.00 |
| TRINITY_sp Q8EJ vprpC     | 2-methylcitrate syn | 53.70 | 0.00 |
| TRINITY_sp P356 RPL7A-1   | 60S ribosomal prote | 53.70 | 0.00 |
| TRINITY_sp Q9HC CPNE5     | Copine-5 OS=Homo sa | 53.70 | 0.00 |
| TRINITY_sp P629 RAC1      | Ras-related C3 botu | 53.70 | 0.00 |
| TRINITY_sp Q395 -         | Dynein 18 kDa light | 53.70 | 0.00 |
| TRINITY_sp Q9Y6 ARL5A     | ADP-ribosylation fa | 53.70 | 0.00 |
| TRINITY_sp Q5N8 ISPD      | 2-C-methyl-D-erythr | 53.70 | 0.00 |
| TRINITY_sp D3ZA Chd6      | Chromodomain-helica | 53.70 | 0.00 |
| TRINITY_sp Q8S2 ISPE      | 4-diphosphocytidyl- | 53.70 | 0.00 |
| TRINITY_sp B8NY Ibx1B     | Probable exo-1,4-be | 53.70 | 0.00 |
| TRINITY_sp P087 ND5       | NADH-ubiquinone oxi | 53.70 | 0.00 |
| TRINITY_sp Q86I dst1      | Serine/threonine-pr | 53.70 | 0.00 |
| TRINITY_sp Q150 EFTUD2    | 116 kDa U5 small nu | 53.70 | 0.00 |

|                           |                     |       |      |
|---------------------------|---------------------|-------|------|
| TRINITY_sp P5242GPDH      | Glycerol-3-phosphat | 53.70 | 0.00 |
| TRINITY_sp Q5539dfa1      | Diflavin flavoprote | 53.70 | 0.00 |
| TRINITY_sp A2XVIOsI_0160  | DEAD-box ATP-depend | 53.70 | 0.00 |
| TRINITY_sp C0SU7JMJ16     | Putative lysine-spe | 53.70 | 0.00 |
| TRINITY_sp P8716trz2      | Ribonuclease Z 2, m | 53.70 | 0.00 |
| TRINITY_sp Q94AN0OP       | Organellar oligopep | 53.60 | 0.00 |
| TRINITY_sp Q6Q19CYP57     | Peptidyl-prolyl cis | 53.60 | 0.00 |
| TRINITY_sp Q99K9Gak       | Cyclin-G-associated | 53.60 | 0.00 |
| TRINITY_sp Q9931TY3B-G    | Transposon Ty3-G Ga | 53.60 | 0.00 |
| TRINITY_sp Q6DG9supt4h1   | Transcription elong | 53.60 | 0.00 |
| TRINITY_sp Q9H59DHX35     | Probable ATP-depend | 53.60 | 0.00 |
| TRINITY_sp A71P9rp10      | 50S ribosomal prote | 53.60 | 0.00 |
| TRINITY_sp O1839Rab6      | Ras-related protein | 53.60 | 0.00 |
| TRINITY_sp Q0320ced-10    | Ras-related protein | 53.60 | 0.00 |
| TRINITY_sp O0490UMK3      | UMP-CMP kinase 3 OS | 53.60 | 0.00 |
| TRINITY_sp Q9I8IMYO6      | Unconventional myos | 53.60 | 0.00 |
| TRINITY_sp Q84K1PP5       | Serine/threonine-pr | 53.60 | 0.00 |
| TRINITY_sp Q91X9DCXR      | L-xylulose reductas | 53.60 | 0.00 |
| TRINITY_sp Q9ZV9PAHX      | Phytanoyl-CoA dioxy | 53.60 | 0.00 |
| TRINITY_sp P7429gpx1      | Hydroperoxy fatty a | 53.60 | 0.00 |
| TRINITY_sp Q6I59CDKC-1    | Cyclin-dependent ki | 53.60 | 0.00 |
| TRINITY_sp Q7VG9rlmN      | Dual-specificity RN | 53.60 | 0.00 |
| TRINITY_sp P6009RPL7C     | 60S ribosomal prote | 53.60 | 0.00 |
| TRINITY_sp O1411SPAC31G9  | Uncharacterized AAA | 53.60 | 0.00 |
| TRINITY_sp Q9LZ9ABCC14    | ABC transporter C f | 53.60 | 0.00 |
| TRINITY_sp Q54Q9DG1039    | Probable ubiquitin  | 53.60 | 0.00 |
| TRINITY_sp Q9SJTGC1       | Epimerase family pr | 53.60 | 0.00 |
| TRINITY_sp Q9M89GLPK      | Glycerol kinase OS= | 53.60 | 0.00 |
| TRINITY_sp Q9M29HRH52     | DEAD-box ATP-depend | 53.60 | 0.00 |
| TRINITY_sp Q9SC9FKBP13    | Peptidyl-prolyl cis | 53.60 | 0.00 |
| TRINITY_sp Q9CA9IERF013   | Ethylene-responsive | 53.60 | 0.00 |
| TRINITY_sp Q6V59Znf474    | Zinc finger protein | 53.60 | 0.00 |
| TRINITY_sp Q5F39EFTUD2    | 116 kDa U5 small nu | 53.60 | 0.00 |
| TRINITY_sp Q6FP9ICL1      | Isocitrate lyase OS | 53.60 | 0.00 |
| TRINITY_sp P2839RPA2      | DNA-directed RNA po | 53.60 | 0    |
| TRINITY_sp Q9FP9UBP12     | Ubiquitin carboxyl- | 53.60 | 0.00 |
| TRINITY_sp Q8W49VHA-a3    | V-type proton ATPas | 53.60 | 0.00 |
| TRINITY_sp Q0WV9MCM4      | DNA replication lic | 53.60 | 0.00 |
| TRINITY_sp C6E59rnhB      | Ribonuclease HII OS | 53.60 | 0.00 |
| TRINITY_sp Q5VQ9IOs01g017 | DEAD-box ATP-depend | 53.60 | 0.00 |
| TRINITY_sp P5199Nek1      | Serine/threonine-pr | 53.60 | 0.00 |
| TRINITY_sp A8JG9LIP1      | Lipoyl synthase, mi | 53.60 | 0.00 |
| TRINITY_sp Q8519GRXS7     | Monothiol glutaredo | 53.60 | 0.00 |
| TRINITY_sp Q9P29IDNAH1    | Dynein heavy chain  | 53.60 | 0.00 |
| TRINITY_sp Q9ZV9At2g3871  | Uncharacterized pro | 53.50 | 0.00 |
| TRINITY_sp Q8BP9Fra10ac1  | Protein FRA10AC1 ho | 53.50 | 0.00 |
| TRINITY_sp Q6CU9SMP3      | GPI mannosyltransfe | 53.50 | 0.00 |
| TRINITY_sp Q9LP9RPN6      | 26S proteasome non- | 53.50 | 0.00 |
| TRINITY_sp Q9UB9EMBD2     | Methyl-CpG-binding  | 53.50 | 0.00 |
| TRINITY_sp B0T69EmnmG     | tRNA uridine 5-carb | 53.50 | 0.00 |
| TRINITY_sp Q1PF9CPK19     | Calcium-dependent p | 53.50 | 0.00 |
| TRINITY_sp Q68E9lagb15    | Cytosolic carboxype | 53.50 | 0.00 |
| TRINITY_sp P0519PRKACB    | cAMP-dependent prot | 53.50 | 0.00 |
| TRINITY_sp Q9239trp1      | Multifunctional try | 53.50 | 0.00 |
| TRINITY_sp B8AR9SRT1      | NAD-dependent prote | 53.50 | 0.00 |
| TRINITY_sp P4099Arf102F   | ADP-ribosylation fa | 53.50 | 0.00 |



|                          |                      |       |      |
|--------------------------|----------------------|-------|------|
| TRINITY_sp Q0PI1NAXE     | NAD(P)H-hydrate epi  | 53.50 | 0.00 |
| TRINITY_sp P3894cat2     | 4-hydroxybutyrate c  | 53.50 | 0.00 |
| TRINITY_sp O8304pip      | Probable proline im  | 53.50 | 0.00 |
| TRINITY_sp P5467patB     | Probable plasma mem  | 53.50 | 0.00 |
| TRINITY_sp Q9SSAAt1g7296 | Protein ROOT HAIR D  | 53.50 | 0.00 |
| TRINITY_sp Q80Z1Arl5a    | ADP-ribosylation fa  | 53.50 | 0.00 |
| TRINITY_sp Q9SX2At1g6865 | GDT1-like protein 5  | 53.50 | 0.00 |
| TRINITY_sp P4252erkA     | Extracellular signa  | 53.50 | 0.00 |
| TRINITY_sp Q5971kata     | Catalase OS=Pseudom  | 53.50 | 0.00 |
| TRINITY_sp Q4UJ1TA09515  | U1 small nuclear ri  | 53.50 | 0.00 |
| TRINITY_sp Q2462ref(2)P  | Protein ref(2)P OS=  | 53.50 | 0.00 |
| TRINITY_sp P3283GSP1     | GTP-binding nuclear  | 53.50 | 0.00 |
| TRINITY_sp Q9SF4PAH1     | Phosphatidate phosph | 53.50 | 0.00 |
| TRINITY_sp P5464pkbA     | RAC family serine/t  | 53.50 | 0.00 |
| TRINITY_sp Q84V1STT7     | Serine/threonine-pr  | 53.50 | 0.00 |
| TRINITY_sp Q16K1king-tuk | Protein king tubby   | 53.50 | 0.00 |
| TRINITY_sp B1KU6fabZ     | 3-hydroxyacyl-[acyl  | 53.50 | 0.00 |
| TRINITY_sp Q8BP7Fra10ac1 | Protein FRA10AC1 ho  | 53.50 | 0.00 |
| TRINITY_sp Q9SR7TAF12    | Transcription initi  | 53.50 | 0.00 |
| TRINITY_sp Q3960IDA4     | 28 kDa inner dynein  | 53.50 | 0.00 |
| TRINITY_sp A9CR6RAD25    | Probable DNA repair  | 53.50 | 0.00 |
| TRINITY_sp Q55C7vps26    | Vacuolar protein so  | 53.40 | 0.00 |
| TRINITY_sp Q29R1TBC1D31  | TBC1 domain family   | 53.40 | 0.00 |
| TRINITY_sp Q9Y51PCYT1B   | Choline-phosphate c  | 53.40 | 0.00 |
| TRINITY_sp Q8GW6COX11    | Cytochrome c oxidas  | 53.40 | 0.00 |
| TRINITY_sp Q9C50At4g1783 | Acetylornithine dea  | 53.40 | 0.00 |
| TRINITY_sp Q9FP1EDR1     | Serine/threonine-pr  | 53.40 | 0.00 |
| TRINITY_sp O6480ACA7     | Putative calcium-tr  | 53.40 | 0.00 |
| TRINITY_sp Q54S0haao     | 3-hydroxyanthranila  | 53.40 | 0.00 |
| TRINITY_sp P4935FPS      | Farnesyl pyrophosph  | 53.40 | 0.00 |
| TRINITY_sp Q8WX0DNAH7    | Dynein heavy chain   | 53.40 | 0.00 |
| TRINITY_sp Q3TI0Usp39    | U4/U6.U5 tri-snRNP-  | 53.40 | 0.00 |
| TRINITY_sp P9805c3       | Complement C3 (Frag  | 53.40 | 0.00 |
| TRINITY_sp P4664ASP2     | Aspartate aminotran  | 53.40 | 0.00 |
| TRINITY_sp Q0992yakc     | Aldo-keto reductase  | 53.40 | 0.00 |
| TRINITY_sp Q8W11SYN4     | Sister chromatid co  | 53.40 | 0.00 |
| TRINITY_sp Q7Z01-        | Temptin OS=Aplysia   | 53.40 | 0.00 |
| TRINITY_sp Q5SN5MPK8     | Mitogen-activated p  | 53.40 | 0.00 |
| TRINITY_sp O6306SECY     | Preprotein transloc  | 53.40 | 0.00 |
| TRINITY_sp Q2717DHC-8    | Dynein heavy chain,  | 53.40 | 0.00 |
| TRINITY_sp O9600MOCS2    | Molybdopterin synth  | 53.40 | 0.00 |
| TRINITY_sp Q69T0OPR3     | Putative 12-oxophyt  | 53.40 | 0.00 |
| TRINITY_sp Q4054NPK1     | Mitogen-activated p  | 53.40 | 0.00 |
| TRINITY_sp Q54I5smc6     | Structural maintena  | 53.40 | 0.00 |
| TRINITY_sp P0545SUP35    | Eukaryotic peptide   | 53.40 | 0.00 |
| TRINITY_sp O2324EMB1027  | Arginine--tRNA liga  | 53.40 | 0.00 |
| TRINITY_sp Q8K01Acsm2    | Acyl-coenzyme A syn  | 53.40 | 0.00 |
| TRINITY_sp Q2RA1CCDA1    | Cytochrome c-type b  | 53.40 | 0.00 |
| TRINITY_sp P4896Slc25a4  | ADP/ATP translocase  | 53.40 | 0.00 |
| TRINITY_sp Q6316Dnah1    | Dynein heavy chain   | 53.40 | 0.00 |
| TRINITY_sp Q0J03Os09g053 | Pantothenate kinase  | 53.40 | 0.00 |
| TRINITY_sp Q9C60At1g5805 | DExH-box ATP-depend  | 53.40 | 0.00 |
| TRINITY_sp Q29R1CHORDC1  | Cysteine and histid  | 53.30 | 0.00 |
| TRINITY_sp Q1456DHX8     | ATP-dependent RNA h  | 53.30 | 0.00 |
| TRINITY_sp Q9SS1INPS1    | Inositol-3-phosphat  | 53.30 | 0.00 |
| TRINITY_sp Q3SY6DNAAF1   | Dynein assembly fac  | 53.30 | 0.00 |

|                          |                     |       |      |
|--------------------------|---------------------|-------|------|
| TRINITY_sp Q9LY5At3g5589 | Protein yippee-like | 53.30 | 0.00 |
| TRINITY_sp Q54J1cnrN     | Phosphatidylinosito | 53.30 | 0.00 |
| TRINITY_sp A0A8Mlsm14a-a | Protein LSM14 homol | 53.30 | 0.00 |
| TRINITY_sp P0705NCU06606 | Cytochrome b-c1 com | 53.30 | 0.00 |
| TRINITY_sp Q54Kncb1      | Kynurenine--oxoglut | 53.30 | 0.00 |
| TRINITY_sp A2WNFOsI_0138 | Glucosidase 2 subun | 53.30 | 0.00 |
| TRINITY_sp Q54M1sun2     | SUN domain-containi | 53.30 | 0.00 |
| TRINITY_sp Q3957YPTC6    | Ras-related protein | 53.30 | 0.00 |
| TRINITY_sp P3416fhkC     | Probable serine/thr | 53.30 | 0.00 |
| TRINITY_sp P3202Scp2     | Non-specific lipid- | 53.30 | 0.00 |
| TRINITY_sp Q32L1STOML2   | Stomatin-like prote | 53.30 | 0.00 |
| TRINITY_sp Q2RK7obg      | GTPase Obg OS=Moore | 53.30 | 0.00 |
| TRINITY_sp Q8VY6LTD      | Protein LHCP TRANSL | 53.30 | 0.00 |
| TRINITY_sp Q9ST1PYRR     | Riboflavin biosynth | 53.30 | 0.00 |
| TRINITY_sp P3915ywlC     | Threonylcarbamoyl-A | 53.30 | 0.00 |
| TRINITY_sp Q6121pcca-1   | Propionyl-CoA carbo | 53.30 | 0.00 |
| TRINITY_sp Q9P61end4     | Endocytosis protein | 53.30 | 0.00 |
| TRINITY_sp P0783PETF     | Ferredoxin, chlorop | 53.30 | 0.00 |
| TRINITY_sp Q75K2ncsA     | Calcium-binding pro | 53.30 | 0.00 |
| TRINITY_sp P3783Os01g076 | Aspartate aminotran | 53.30 | 0.00 |
| TRINITY_sp Q54R7DDB_G028 | Delta-1-pyrroline-5 | 53.30 | 0.00 |
| TRINITY_sp Q8691pakB     | Serine/threonine-pr | 53.30 | 0.00 |
| TRINITY_sp Q9EQ1Ighmbp2  | DNA-binding protein | 53.30 | 0.00 |
| TRINITY_sp Q7KW6serS     | Serine--tRNA ligase | 53.30 | 0.00 |
| TRINITY_sp Q9LU4RH35     | DEAD-box ATP-depend | 53.30 | 0.00 |
| TRINITY_sp Q9C77RPN8B    | 26S proteasome non- | 53.30 | 0.00 |
| TRINITY_sp Q31L4leuS     | Leucine--tRNA ligas | 53.30 | 0.00 |
| TRINITY_sp Q9XFFSR30     | Serine/arginine-ric | 53.30 | 0.00 |
| TRINITY_sp P4245cobA     | Uroporphyrinogen-II | 53.30 | 0.00 |
| TRINITY_sp Q9LY6RGLG2    | E3 ubiquitin-protei | 53.30 | 0.00 |
| TRINITY_sp Q32P4EML3     | Echinoderm microtub | 53.30 | 0.00 |
| TRINITY_sp Q6C31ALG13    | UDP-N-acetylglucosa | 53.30 | 0.00 |
| TRINITY_sp Q6NZ1Ptpdc1   | Protein tyrosine ph | 53.30 | 0.00 |
| TRINITY_sp Q2HJ6FAHD1    | Acylpyruvase FAHD1, | 53.30 | 0.00 |
| TRINITY_sp Q5VY6ECM29    | Proteasome-associat | 53.30 | 0.00 |
| TRINITY_sp Q86C6tor      | Target of rapamycin | 53.20 | 0.00 |
| TRINITY_sp O8176At4g3179 | Probable diphthine  | 53.20 | 0.00 |
| TRINITY_sp A4I11zfp3612  | mRNA decay activato | 53.20 | 0.00 |
| TRINITY_sp Q9699RAB24    | Ras-related protein | 53.20 | 0.00 |
| TRINITY_sp Q4166ANT-G1   | ADP,ATP carrier pro | 53.20 | 0.00 |
| TRINITY_sp O2276At4g0258 | NADH dehydrogenase  | 53.20 | 0.00 |
| TRINITY_sp O1544ABCC5    | Multidrug resistanc | 53.20 | 0.00 |
| TRINITY_sp Q9Y71set1     | Histone-lysine N-me | 53.20 | 0.00 |
| TRINITY_sp P1464Pde4b    | cAMP-specific 3',5' | 53.20 | 0.00 |
| TRINITY_sp Q11E1rlmN     | Dual-specificity RN | 53.20 | 0.00 |
| TRINITY_sp Q0AW6purH     | Bifunctional purine | 53.20 | 0.00 |
| TRINITY_sp Q54E1dtd      | D-tyrosyl-tRNA(Tyr) | 53.20 | 0.00 |
| TRINITY_sp Q9FI1SPP      | Stromal processing  | 53.20 | 0.00 |
| TRINITY_sp A2XUVCDKG-2   | Cyclin-dependent ki | 53.20 | 0.00 |
| TRINITY_sp Q0P51ANKRD39  | Ankyrin repeat doma | 53.20 | 0.00 |
| TRINITY_sp Q5R87UBA5     | Ubiquitin-like modi | 53.20 | 0.00 |
| TRINITY_sp Q31L4proB     | Glutamate 5-kinase  | 53.20 | 0.00 |
| TRINITY_sp Q55F6krsB     | Serine/threonine-pr | 53.20 | 0.00 |
| TRINITY_sp Q8VY6ORTH2    | E3 ubiquitin-protei | 53.20 | 0.00 |
| TRINITY_sp O0448UCH2     | Ubiquitin carboxyl- | 53.20 | 0.00 |
| TRINITY_sp Q99J7Taf11    | Transcription initi | 53.20 | 0.00 |

|                          |                      |       |      |
|--------------------------|----------------------|-------|------|
| TRINITY_sp Q55AfvatF     | V-type proton ATPas  | 53.20 | 0.00 |
| TRINITY_sp A4IFFKCTD7    | BTB/POZ domain-cont  | 53.20 | 0.00 |
| TRINITY_sp P3124RAD16    | DNA repair protein   | 53.20 | 0.00 |
| TRINITY_sp Q5022fmdA     | Formamidase OS=Meth  | 53.20 | 0.00 |
| TRINITY_sp Q54Kvcdk5rap1 | CDK5RAP1-like prote  | 53.20 | 0.00 |
| TRINITY_sp B3EM2gata     | Glutamyl-tRNA(Gln)   | 53.20 | 0.00 |
| TRINITY_sp D2XNCFLOT2    | Flotillin-like prot  | 53.20 | 0.00 |
| TRINITY_sp Q7KRVCG1646   | Pre-mRNA-processing  | 53.20 | 0.00 |
| TRINITY_sp P5099ada1     | AMP deaminase OS=Sc  | 53.20 | 0.00 |
| TRINITY_sp Q8GY8SRX      | Sulfiredoxin, chlor  | 53.20 | 0.00 |
| TRINITY_sp Q8YH2ndvA     | Beta-(1-->2)glucan   | 53.20 | 0.00 |
| TRINITY_sp P4937XYL1     | NAD(P)H-dependent D  | 53.10 | 0.00 |
| TRINITY_sp Q5XTYRPL17    | 60S ribosomal prote  | 53.10 | 0.00 |
| TRINITY_sp P1366HOM2     | Aspartate-semialdeh  | 53.10 | 0.00 |
| TRINITY_sp Q94A2DLD      | D-lactate dehydroge  | 53.10 | 0.00 |
| TRINITY_sp Q54D7drap1    | Drl-associated core  | 53.10 | 0.00 |
| TRINITY_sp Q54F2mroh1    | Maestro heat-like r  | 53.10 | 0.00 |
| TRINITY_sp Q8R75prs      | Ribose-phosphate py  | 53.10 | 0.00 |
| TRINITY_sp Q9ST7ABCA7    | ABC transporter A f  | 53.10 | 0.00 |
| TRINITY_sp Q8LPIABCA8    | ABC transporter A f  | 53.10 | 0.00 |
| TRINITY_sp P4963-        | Ubiquitin-60S ribos  | 53.10 | 0.00 |
| TRINITY_sp P4121Acsl1    | Long-chain-fatty-ac  | 53.10 | 0.00 |
| TRINITY_sp Q72BEgluQ     | Glutamyl-Q tRNA(Asp  | 53.10 | 0.00 |
| TRINITY_sp P3421rab-6.1  | Ras-related protein  | 53.10 | 0.00 |
| TRINITY_sp O4931At2g3322 | NADH dehydrogenase   | 53.10 | 0.00 |
| TRINITY_sp P5195Nek1     | Serine/threonine-pr  | 53.10 | 0.00 |
| TRINITY_sp Q9C77RPN8B    | 26S proteasome non-  | 53.10 | 0.00 |
| TRINITY_sp P4627-        | TATA-box-binding pr  | 53.10 | 0.00 |
| TRINITY_sp Q9SG7ABCB10   | ABC transporter B f  | 53.10 | 0.00 |
| TRINITY_sp Q6PIVFIGNL1   | Fidgetin-like prote  | 53.10 | 0.00 |
| TRINITY_sp P0DJ5RPL24    | 60S ribosomal prote  | 53.10 | 0.00 |
| TRINITY_sp Q9FGIRER1     | Protein RETICULATA-  | 53.10 | 0.00 |
| TRINITY_sp Q8RW7TMN10    | Transmembrane 9 sup  | 53.10 | 0.00 |
| TRINITY_sp Q5M72At1g5422 | Dihydrolipoyllysine  | 53.10 | 0.00 |
| TRINITY_sp A3DJFpckG     | Phosphoenolpyruvate  | 53.10 | 0.00 |
| TRINITY_sp Q4R64BBS5     | Bardet-Biedl syndro  | 53.10 | 0.00 |
| TRINITY_sp Q55A2dlpC     | Dynammin-like protei | 53.10 | 0.00 |
| TRINITY_sp Q9632ACX4     | Acyl-coenzyme A oxi  | 53.10 | 0.00 |
| TRINITY_sp Q54Y8DDB_G027 | DNA-binding protein  | 53.10 | 0.00 |
| TRINITY_sp O8084CPFTSY   | Cell division prote  | 53.10 | 0.00 |
| TRINITY_sp D7SFHRLK10L-2 | Protein SUPPRESSOR   | 53.10 | 0.00 |
| TRINITY_sp Q7X28clpB     | Chaperone protein C  | 53.10 | 0.00 |
| TRINITY_sp Q014(SBE1     | 1,4-alpha-glucan-br  | 53.10 | 0.00 |
| TRINITY_sp Q9SU1PSAK     | Photosystem I react  | 53.10 | 0.00 |
| TRINITY_sp Q56Y1At5g5877 | Dehydrolipoyllysine  | 53.00 | 0.00 |
| TRINITY_sp A8PT(DUS3     | tRNA-dihydrouridine  | 53.00 | 0.00 |
| TRINITY_sp Q1WC(Cript    | Cysteine-rich PDZ-b  | 53.00 | 0.00 |
| TRINITY_sp P4548ftsZ2    | Cell division prote  | 53.00 | 0.00 |
| TRINITY_sp A8K2(A2ML1    | Alpha-2-macroglobul  | 53.00 | 0.00 |
| TRINITY_sp Q54I7cox19    | Cytochrome c oxidas  | 53.00 | 0.00 |
| TRINITY_sp Q6P9(hagh     | Hydroxyacylglutathi  | 53.00 | 0.00 |
| TRINITY_sp Q4WVfspb1     | AdoMet-dependent rR  | 53.00 | 0.00 |
| TRINITY_sp Q8BM(Flat     | Dihydrolipoyllysine  | 53.00 | 0.00 |
| TRINITY_sp Q9LZ5RPL36C   | 60S ribosomal prote  | 53.00 | 0.00 |
| TRINITY_sp Q86I7dst1     | Serine/threonine-pr  | 53.00 | 0.00 |
| TRINITY_sp Q5ZIVPEO1     | Twinkle protein, mi  | 53.00 | 0.00 |

|                           |                     |       |      |
|---------------------------|---------------------|-------|------|
| TRINITY_sp P52921khA      | Leukotriene A-4 hyd | 53.00 | 0.00 |
| TRINITY_sp Q9C5FAt5g06292 | -Cys peroxiredoxin  | 53.00 | 0.00 |
| TRINITY_sp Q94A(STR6      | Rhodanese-like doma | 53.00 | 0.00 |
| TRINITY_sp Q9HG)-         | Histone H2A OS=Agar | 53.00 | 0.00 |
| TRINITY_sp A8J6)CFAP221   | Cilia- and flagella | 53.00 | 0.00 |
| TRINITY_sp Q54DEpsenB     | Presenilin-B OS=Dic | 53.00 | 0.00 |
| TRINITY_sp P931(PF20      | Flagellar WD repeat | 53.00 | 0.00 |
| TRINITY_sp O154)ABCC4     | Multidrug resistanc | 53.00 | 0.00 |
| TRINITY_sp A8J1)CFAP44    | Cilia- and flagella | 53.00 | 0    |
| TRINITY_sp Q101)SPAC26A3  | Hydrolase C26A3.11  | 53.00 | 0.00 |
| TRINITY_sp Q396(IDA4      | 28 kDa inner dynein | 53.00 | 0.00 |
| TRINITY_sp P0AF4yjbQ      | UPF0047 protein Yjb | 53.00 | 0.00 |
| TRINITY_sp Q6NYI)gpt21    | Alanine aminotransf | 52.90 | 0.00 |
| TRINITY_sp Q059)RAB1A     | Ras-related protein | 52.90 | 0.00 |
| TRINITY_sp Q9D1)Fam96b    | Mitotic spindle-ass | 52.90 | 0.00 |
| TRINITY_sp Q8NC)DYNC2H1   | Cytoplasmic dynein  | 52.90 | 0.00 |
| TRINITY_sp P490)-         | Cytochrome b5 OS=Ni | 52.90 | 0.00 |
| TRINITY_sp Q428)GLX1      | Lactoylglutathione  | 52.90 | 0.00 |
| TRINITY_sp Q5A5)NIK1      | Histidine protein k | 52.90 | 0.00 |
| TRINITY_sp Q9FF)NFXL2     | NF-X1-type zinc fin | 52.90 | 0.00 |
| TRINITY_sp Q6CD)BNA5      | Kynureninase OS=Yar | 52.90 | 0.00 |
| TRINITY_sp Q2KI)IDNAL1    | Dynein light chain  | 52.90 | 0.00 |
| TRINITY_sp Q820)serC      | Phosphoserine amino | 52.90 | 0.00 |
| TRINITY_sp Q9CP)Mgst3     | Microsomal glutathi | 52.90 | 0.00 |
| TRINITY_sp B8G6)panC      | Pantothenate synthe | 52.90 | 0.00 |
| TRINITY_sp Q86H)polr1a    | DNA-directed RNA po | 52.90 | 0.00 |
| TRINITY_sp Q6F9)ung       | Uracil-DNA glycosyl | 52.90 | 0.00 |
| TRINITY_sp O948)ATP10B    | Probable phospholip | 52.90 | 0.00 |
| TRINITY_sp O221)GCP1      | Probable tRNA N6-ad | 52.90 | 0.00 |
| TRINITY_sp P736)trpS      | Tryptophan--tRNA li | 52.90 | 0.00 |
| TRINITY_sp P435(cpr-4     | Cathepsin B-like cy | 52.90 | 0.00 |
| TRINITY_sp Q1ED)nr2c2ap   | Nuclear receptor 2C | 52.90 | 0.00 |
| TRINITY_sp Q050)TRI1      | Protein TRI1 OS=Sac | 52.90 | 0.00 |
| TRINITY_sp A2YX(SPL15     | Squamosa promoter-b | 52.90 | 0.00 |
| TRINITY_sp Q502)cyb5r4    | Cytochrome b5 reduc | 52.90 | 0.00 |
| TRINITY_sp C6DI)tatD      | 3'-5' ssDNA/RNA exo | 52.90 | 0.00 |
| TRINITY_sp F4HT)SAMC2     | Probable S-adenosyl | 52.90 | 0.00 |
| TRINITY_sp Q7KW)iuNH      | Inosine-uridine-pre | 52.90 | 0.00 |
| TRINITY_sp Q9SB)AP4M      | AP-4 complex subuni | 52.90 | 0.00 |
| TRINITY_sp Q6L4)DBB1      | DNA damage-binding  | 52.90 | 0.00 |
| TRINITY_sp P427)UBC5      | Ubiquitin-conjugati | 52.90 | 0.00 |
| TRINITY_sp Q940)KIN13B    | Kinesin-like protei | 52.90 | 0.00 |
| TRINITY_sp Q54Q)impdh     | Inosine-5'-monophos | 52.90 | 0.00 |
| TRINITY_sp Q7G1)AAO1      | Indole-3-acetaldehy | 52.90 | 0.00 |
| TRINITY_sp B9MJ)mutS      | DNA mismatch repair | 52.90 | 0.00 |
| TRINITY_sp Q9SA)MRS2-10   | Magnesium transport | 52.90 | 0.00 |
| TRINITY_sp Q7DN)Cht2      | Chitinase 2 OS=Oryz | 52.90 | 0.00 |
| TRINITY_sp Q55CI)DDB_G02  | Probable NADH dehyd | 52.90 | 0.00 |
| TRINITY_sp Q2751)cyp-13A4 | Putative cytochrome | 52.90 | 0.00 |
| TRINITY_sp P614)thiDE     | Thiamine biosynthes | 52.90 | 0.00 |
| TRINITY_sp Q54V)abcC2     | ABC transporter C f | 52.90 | 0.00 |
| TRINITY_sp A0Q1)fdnaJ     | Chaperone protein D | 52.90 | 0.00 |
| TRINITY_sp P9301)rps5     | 30S ribosomal prote | 52.90 | 0.00 |
| TRINITY_sp Q7SY)slc44a2   | Choline transporter | 52.90 | 0.00 |
| TRINITY_sp Q9SB(PHR1      | Deoxyribodipyrimidi | 52.90 | 0.00 |
| TRINITY_sp Q8L6)SEC31B    | Protein transport p | 52.90 | 0.00 |

|                          |                     |       |      |
|--------------------------|---------------------|-------|------|
| TRINITY_sp Q54IFragA     | Ras-related GTP-bin | 52.90 | 0.00 |
| TRINITY_sp Q9JJ5Abcb9    | ATP-binding cassett | 52.90 | 0.00 |
| TRINITY_sp Q1339TARBP1   | Probable methyltran | 52.90 | 0.00 |
| TRINITY_sp Q5SNN0s06g017 | Zinc finger CCCH do | 52.90 | 0.00 |
| TRINITY_sp Q2756psmA1    | Proteasome subunit  | 52.90 | 0.00 |
| TRINITY_sp Q9Y39DHRS7    | Dehydrogenase/reduc | 52.90 | 0.00 |
| TRINITY_sp Q4326PCNA     | Proliferating cell  | 52.90 | 0.00 |
| TRINITY_sp Q4054NPK1     | Mitogen-activated p | 52.80 | 0.00 |
| TRINITY_sp Q5A59NIK1     | Histidine protein k | 52.80 | 0.00 |
| TRINITY_sp P3245GBP1     | Guanylate-binding p | 52.80 | 0.00 |
| TRINITY_sp Q3956ODA4     | Dynein beta chain,  | 52.80 | 0.00 |
| TRINITY_sp Q9NEVrsp-3    | Probable splicing f | 52.80 | 0.00 |
| TRINITY_sp Q69K5HAL3     | Phosphopantothenoyl | 52.80 | 0.00 |
| TRINITY_sp Q1703Cdc42    | Cdc42 homolog OS=An | 52.80 | 0.00 |
| TRINITY_sp Q9FKIABCA11   | ABC transporter A f | 52.80 | 0.00 |
| TRINITY_sp Q9NR2DYRK4    | Dual specificity ty | 52.80 | 0.00 |
| TRINITY_sp Q9SS9RGLG1    | E3 ubiquitin-protei | 52.80 | 0.00 |
| TRINITY_sp A6QR4RAB6B    | Ras-related protein | 52.80 | 0.00 |
| TRINITY_sp Q9C56PFK7     | ATP-dependent 6-pho | 52.80 | 0.00 |
| TRINITY_sp Q9LTVRD21C    | Probable cysteine p | 52.80 | 0.00 |
| TRINITY_sp P1511efbA     | Elongation factor 2 | 52.80 | 0.00 |
| TRINITY_sp Q0WW2At4g3445 | Coatomer subunit ga | 52.80 | 0.00 |
| TRINITY_sp Q0825CRYZ     | Quinone oxidoreduct | 52.80 | 0.00 |
| TRINITY_sp Q7DLFPBG1     | Proteasome subunit  | 52.80 | 0.00 |
| TRINITY_sp Q1414DHX34    | Probable ATP-depend | 52.80 | 0.00 |
| TRINITY_sp P2361WARS     | Tryptophan--tRNA li | 52.80 | 0.00 |
| TRINITY_sp Q95URab7a     | Ras-related protein | 52.80 | 0.00 |
| TRINITY_sp B4FHU-        | 15-cis-zeta-caroten | 52.80 | 0.00 |
| TRINITY_sp G0SEVRLI1     | Translation initiat | 52.80 | 0.00 |
| TRINITY_sp Q8L35FZR2     | Protein FIZZY-RELAT | 52.80 | 0.00 |
| TRINITY_sp Q8CF6Aqr      | Intron-binding prot | 52.80 | 0.00 |
| TRINITY_sp F4IM6At2g0113 | DExH-box ATP-depend | 52.80 | 0.00 |
| TRINITY_sp Q9ZTNERD2     | ER lumen protein-re | 52.80 | 0.00 |
| TRINITY_sp Q7T37rab13    | Ras-related protein | 52.80 | 0.00 |
| TRINITY_sp Q9SE9-        | Methylenetetrahydro | 52.80 | 0.00 |
| TRINITY_sp Q54V6isca1    | Iron-sulfur cluster | 52.80 | 0.00 |
| TRINITY_sp O9546ZFYVE9   | Zinc finger FYVE do | 52.80 | 0.00 |
| TRINITY_sp Q1RJUicd      | Isocitrate dehydrog | 52.80 | 0.00 |
| TRINITY_sp Q54S9nvl      | Putative ribosome b | 52.80 | 0.00 |
| TRINITY_sp Q9FMFRD21B    | Probable cysteine p | 52.80 | 0.00 |
| TRINITY_sp Q9FY7BCAT5    | Branched-chain-amin | 52.80 | 0.00 |
| TRINITY_sp Q9LY6AK1      | Aspartokinase 1, ch | 52.80 | 0.00 |
| TRINITY_sp Q9WX6rbpE     | Putative RNA-bindin | 52.80 | 0.00 |
| TRINITY_sp Q8H16TL20.3   | Thylakoid lumenal p | 52.80 | 0.00 |
| TRINITY_sp P0565-        | Myosin-2 heavy chai | 52.80 | 0.00 |
| TRINITY_sp P5366-        | Actin OS=Phaffia rh | 52.80 | 0.00 |
| TRINITY_sp A8MS6LPD1     | Dihydrolipoyl dehyd | 52.80 | 0.00 |
| TRINITY_sp Q9SF4PAH1     | Phosphatidate phosp | 52.80 | 0.00 |
| TRINITY_sp Q8W13PK       | Pyridoxal kinase OS | 52.80 | 0.00 |
| TRINITY_sp Q9P22DNAH2    | Dynein heavy chain  | 52.80 | 0.00 |
| TRINITY_sp Q9FIFAt5g4772 | Probable acetyl-CoA | 52.80 | 0.00 |
| TRINITY_sp Q6AUVXDH      | Xanthine dehydrogen | 52.80 | 0    |
| TRINITY_sp Q9M86DSPTP1B  | Dual specificity pr | 52.70 | 0.00 |
| TRINITY_sp P5337NUDT6    | Nucleoside diphosph | 52.70 | 0.00 |
| TRINITY_sp Q9SK6ABCC13   | ABC transporter C f | 52.70 | 0.00 |
| TRINITY_sp Q9ZRICAD      | Probable mannitol d | 52.70 | 0.00 |

|                          |                      |       |      |
|--------------------------|----------------------|-------|------|
| TRINITY_sp Q5U25usp47    | Ubiquitin carboxyl-  | 52.70 | 0.00 |
| TRINITY_sp Q9M8FDJ1D     | Protein DJ-1 homolo  | 52.70 | 0.00 |
| TRINITY_sp Q10Q4Os03g021 | Putative cysteine p  | 52.70 | 0.00 |
| TRINITY_sp Q8BYRdh12     | Retinol dehydrogena  | 52.70 | 0.00 |
| TRINITY_sp Q86Kfhit      | Bis(5'-adenosyl)-tr  | 52.70 | 0.00 |
| TRINITY_sp Q0VF\kctd7    | BTB/POZ domain-cont  | 52.70 | 0.00 |
| TRINITY_sp Q9NR3DDX21    | Nucleolar RNA helic  | 52.70 | 0.00 |
| TRINITY_sp Q9LV(BOB1     | Protein BOBBER 1 OS  | 52.70 | 0.00 |
| TRINITY_sp O6095lime     | LIM domain-containi  | 52.70 | 0.00 |
| TRINITY_sp Q54Y(ctrappc5 | Trafficking protein  | 52.70 | 0.00 |
| TRINITY_sp Q32P1MPZL1    | Myelin protein zero  | 52.70 | 0.00 |
| TRINITY_sp O356(Abca4    | Retinal-specific AT  | 52.70 | 0.00 |
| TRINITY_sp P094(snrnp70  | U1 small nuclear ri  | 52.70 | 0.00 |
| TRINITY_sp P0477-        | Glutamine synthetas  | 52.70 | 0.00 |
| TRINITY_sp Q640\tatdn1   | Putative deoxyribon  | 52.70 | 0.00 |
| TRINITY_sp P7905rhp16    | ATP-dependent helic  | 52.70 | 0.00 |
| TRINITY_sp Q1DD\kynU     | Kynureninase OS=Myx  | 52.70 | 0.00 |
| TRINITY_sp Q9MB1DHC10    | Dynein-1-beta heavy  | 52.70 | 0.00 |
| TRINITY_sp Q3SZ7PMPCB    | Mitochondrial-proce  | 52.70 | 0.00 |
| TRINITY_sp P4075Rac1     | Ras-related protein  | 52.70 | 0.00 |
| TRINITY_sp Q1656CAMK4    | Calcium/calmodulin-  | 52.70 | 0.00 |
| TRINITY_sp P2976-        | 60S acidic ribosoma  | 52.70 | 0.00 |
| TRINITY_sp Q52R(SPL      | Sphingosine-1-phosp  | 52.70 | 0.00 |
| TRINITY_sp Q9C58RFC1     | Replication factor   | 52.70 | 0.00 |
| TRINITY_sp P1148TUBB1    | Tubulin beta chain   | 52.70 | 0.00 |
| TRINITY_sp Q8GY5At2g4324 | CMP-sialic acid tra  | 52.70 | 0.00 |
| TRINITY_sp O8105NRPB8A   | DNA-directed RNA po  | 52.70 | 0.00 |
| TRINITY_sp Q1907pho-1    | Intestinal acid pho  | 52.70 | 0.00 |
| TRINITY_sp O9598TOP3B    | DNA topoisomerase 3  | 52.70 | 0.00 |
| TRINITY_sp Q9LUMRAP2-2   | Ethylene-responsive  | 52.70 | 0.00 |
| TRINITY_sp Q9NW2UCKL1    | Uridine-cytidine ki  | 52.70 | 0.00 |
| TRINITY_sp P5435eas      | Ethanolamine kinase  | 52.70 | 0.00 |
| TRINITY_sp Q8VY1HCC1     | Protein SCO1 homolo  | 52.70 | 0.00 |
| TRINITY_sp O6455STR1     | Thiosulfate/3-merca  | 52.70 | 0.00 |
| TRINITY_sp A7HT6rpmA     | 50S ribosomal prote  | 52.70 | 0.00 |
| TRINITY_sp P9655gtfB     | Vancomycin aglycone  | 52.70 | 0.00 |
| TRINITY_sp Q0276RPL24    | 50S ribosomal prote  | 52.70 | 0.00 |
| TRINITY_sp P0DJ5RPL6     | 60S ribosomal prote  | 52.70 | 0.00 |
| TRINITY_sp Q2HJ5FAHD1    | Acylpyruvase FAHD1,  | 52.60 | 0.00 |
| TRINITY_sp O8051CYCU4-1  | Cyclin-U4-1 OS=Arab  | 52.60 | 0.00 |
| TRINITY_sp Q9FV7E2FC     | Transcription facto  | 52.60 | 0.00 |
| TRINITY_sp Q6PH6hpx      | Hemopexin OS=Danio   | 52.60 | 0.00 |
| TRINITY_sp Q54R2DDB_G028 | Probable serine/thr  | 52.60 | 0.00 |
| TRINITY_sp Q2101kin-29   | Serine/threonine-pr  | 52.60 | 0.00 |
| TRINITY_sp P5181PRKX     | cAMP-dependent prot  | 52.60 | 0.00 |
| TRINITY_sp Q86A5erh      | Enhancer of rudimen  | 52.60 | 0.00 |
| TRINITY_sp Q9UF1CNOT8    | CCR4-NOT transcript  | 52.60 | 0.00 |
| TRINITY_sp Q7107spp2     | Secreted phosphopro  | 52.60 | 0.00 |
| TRINITY_sp Q8RX7NDK4     | Nucleoside diphosph  | 52.60 | 0.00 |
| TRINITY_sp Q5KW7dnaJ     | Chaperone protein D  | 52.60 | 0.00 |
| TRINITY_sp Q23M1Tt116a   | Probable beta-tubul  | 52.60 | 0.00 |
| TRINITY_sp Q23F1TTLL3C   | Tubulin glycyclase 3 | 52.60 | 0.00 |
| TRINITY_sp P3866RPL24B   | 60S ribosomal prote  | 52.60 | 0.00 |
| TRINITY_sp Q86G1Cys      | Crustapain OS=Panda  | 52.60 | 0.00 |
| TRINITY_sp A9WS6glpK     | Glycerol kinase OS=  | 52.60 | 0.00 |
| TRINITY_sp Q99J6Rfc4     | Replication factor   | 52.60 | 0.00 |

|                           |                      |       |      |
|---------------------------|----------------------|-------|------|
| TRINITY_sp Q54HFsrr       | Probable serine rac  | 52.60 | 0.00 |
| TRINITY_sp Q86I\DDDB_G027 | PH domain-contains   | 52.60 | 0.00 |
| TRINITY_sp Q9R1sB9d1      | B9 domain-contains   | 52.60 | 0.00 |
| TRINITY_sp Q54FIetfa      | Electron transfer f  | 52.60 | 0.00 |
| TRINITY_sp P470\VTC4      | Vacuolar transporte  | 52.60 | 0.00 |
| TRINITY_sp Q54E4haox      | Hydroxyacid oxidase  | 52.60 | 0.00 |
| TRINITY_sp Q6F3\CPK10     | Calcium-dependent p  | 52.60 | 0.00 |
| TRINITY_sp Q6EE\CCT8      | T-complex protein 1  | 52.60 | 0.00 |
| TRINITY_sp O2331NFYB3     | Nuclear transcripti  | 52.60 | 0.00 |
| TRINITY_sp Q869\pakF      | Serine/threonine-pr  | 52.60 | 0.00 |
| TRINITY_sp Q9C6\ABCG14    | ABC transporter G f  | 52.60 | 0.00 |
| TRINITY_sp Q6EV\FBM       | ATP-dependent helic  | 52.60 | 0.00 |
| TRINITY_sp A2C4\crnz      | Ribonuclease Z OS=P  | 52.60 | 0.00 |
| TRINITY_sp Q5KQ\CAX2      | Vacuolar cation/pro  | 52.60 | 0.00 |
| TRINITY_sp P1824-         | Tubulin beta-1 chai  | 52.60 | 0.00 |
| TRINITY_sp H3JU\SGT1      | Peptidyl serine alp  | 52.60 | 0.00 |
| TRINITY_sp O244\RABE1A    | Ras-related protein  | 52.60 | 0.00 |
| TRINITY_sp O818\LGALDH    | L-galactose dehydro  | 52.60 | 0.00 |
| TRINITY_sp Q8IQ\CG5021    | Uncharacterized Gol  | 52.60 | 0.00 |
| TRINITY_sp Q9FG\KCS20     | 3-ketoacyl-CoA synt  | 52.60 | 0.00 |
| TRINITY_sp B1WV\hemE      | Uroporphyrinogen de  | 52.60 | 0.00 |
| TRINITY_sp P286\SYNPCC70  | Uncharacterized pro  | 52.60 | 0.00 |
| TRINITY_sp Q6ZM\KIF6      | Kinesin-like protei  | 52.60 | 0.00 |
| TRINITY_sp Q7ZX\Inle1     | Notchless protein h  | 52.60 | 0.00 |
| TRINITY_sp P107\sevA      | Severin OS=Dictyost  | 52.60 | 0.00 |
| TRINITY_sp Q6DI\ublcpl    | Ubiquitin-like doma  | 52.60 | 0.00 |
| TRINITY_sp Q6P7\mak16     | Protein MAK16 homol  | 52.60 | 0.00 |
| TRINITY_sp Q9FL\AGD5      | Probable ADP-ribosy  | 52.60 | 0.00 |
| TRINITY_sp Q0WL\UGGT      | UDP-glucose:glycopr  | 52.60 | 0.00 |
| TRINITY_sp Q9UT\SPAC1093  | Putative CCA tRNA n  | 52.50 | 0.00 |
| TRINITY_sp Q5ZI\IXRN2     | 5'-3' exoribonuclea  | 52.50 | 0.00 |
| TRINITY_sp Q9ST\ICEP2     | KDEL-tailed cystein  | 52.50 | 0.00 |
| TRINITY_sp Q5ZI\TBCD      | Tubulin-specific ch  | 52.50 | 0.00 |
| TRINITY_sp Q86C\tor       | Target of rapamycin  | 52.50 | 0.00 |
| TRINITY_sp Q54Y\DDDB_G027 | DNA-binding protein  | 52.50 | 0.00 |
| TRINITY_sp A8P5\HAMPP     | Probable Xaa-Pro am  | 52.50 | 0.00 |
| TRINITY_sp Q9LT\At3g1280  | Peroxisomal 2,4-die  | 52.50 | 0.00 |
| TRINITY_sp Q079\PAM18     | Mitochondrial impor  | 52.50 | 0.00 |
| TRINITY_sp O026\HSD17B10  | (3-hydroxyacyl-CoA d | 52.50 | 0.00 |
| TRINITY_sp Q4IA\CYM1      | Mitochondrial prese  | 52.50 | 0.00 |
| TRINITY_sp Q54W\ccdc94    | Coiled-coil domain-  | 52.50 | 0.00 |
| TRINITY_sp Q86A\mcfX      | Mitochondrial subst  | 52.50 | 0.00 |
| TRINITY_sp B4JH\IGH18624  | Lateral signaling t  | 52.50 | 0.00 |
| TRINITY_sp Q54Q\lig3      | DNA ligase 3 OS=Dic  | 52.50 | 0.00 |
| TRINITY_sp B1LX\apaG      | Protein ApaG OS=Met  | 52.50 | 0.00 |
| TRINITY_sp Q5Z8\Os06g071  | RNA pseudouridine s  | 52.50 | 0.00 |
| TRINITY_sp Q6DR\ric8b     | Synembryn-B OS=Dani  | 52.50 | 0.00 |
| TRINITY_sp B7LS\treF      | Cytoplasmic trehala  | 52.50 | 0.00 |
| TRINITY_sp F4KG\FBA4      | Fructose-bisphospha  | 52.50 | 0.00 |
| TRINITY_sp Q4U4\Xirp2     | Xin actin-binding r  | 52.50 | 0.00 |
| TRINITY_sp Q9FK\RABA1C    | Ras-related protein  | 52.50 | 0.00 |
| TRINITY_sp Q9NE\pph-5     | Serine/threonine-pr  | 52.50 | 0.00 |
| TRINITY_sp P511\apeA      | DNA-(apurinic or ap  | 52.50 | 0.00 |
| TRINITY_sp Q9SK\At2g3204  | Folate-biopterin tr  | 52.50 | 0.00 |
| TRINITY_sp O784\ycf19     | Uncharacterized pro  | 52.50 | 0.00 |
| TRINITY_sp P0C8\CCRP1     | Probable serine/thr  | 52.50 | 0.00 |

|                          |                     |       |      |
|--------------------------|---------------------|-------|------|
| TRINITY_sp P5503RPN10    | 26S proteasome non- | 52.50 | 0.00 |
| TRINITY_sp Q54DIamdA     | AMP deaminase OS=Di | 52.50 | 0.00 |
| TRINITY_sp Q54H4drkB     | Probable serine/thr | 52.50 | 0.00 |
| TRINITY_sp Q8VX3UAH      | Ureidoglycolate hyd | 52.50 | 0.00 |
| TRINITY_sp Q5ZK1DPH2     | Diphthamide biosynt | 52.50 | 0.00 |
| TRINITY_sp Q9C8(LCV2     | Protein LIKE COV 2  | 52.50 | 0.00 |
| TRINITY_sp O949(PRPF6    | Pre-mRNA-processing | 52.50 | 0.00 |
| TRINITY_sp Q3TX3Psmd1    | 26S proteasome non- | 52.50 | 0.00 |
| TRINITY_sp Q53N1Os11g013 | Probable NAD kinase | 52.50 | 0.00 |
| TRINITY_sp Q5ZK(SUB1     | Activated RNA polym | 52.50 | 0.00 |
| TRINITY_sp Q0074Mdr65    | Multidrug resistanc | 52.50 | 0.00 |
| TRINITY_sp Q9DA7Exosc1   | Exosome complex com | 52.50 | 0.00 |
| TRINITY_sp Q2HJFUSP15    | Ubiquitin carboxyl- | 52.50 | 0.00 |
| TRINITY_sp Q8DG3rlmN     | Probable dual-speci | 52.50 | 0.00 |
| TRINITY_sp Q9LY8RGLG2    | E3 ubiquitin-protei | 52.50 | 0.00 |
| TRINITY_sp O226(DEGP1    | Protease Do-like 1, | 52.50 | 0.00 |
| TRINITY_sp P2082pol      | Retrovirus-related  | 52.50 | 0.00 |
| TRINITY_sp Q9931TY3B-G   | Transposon Ty3-G Ga | 52.50 | 0.00 |
| TRINITY_sp P3412psmA7    | Proteasome subunit  | 52.50 | 0.00 |
| TRINITY_sp Q9C5\TOP6B    | DNA topoisomerase 6 | 52.50 | 0.00 |
| TRINITY_sp Q0VC7SAMHD1   | Deoxynucleoside tri | 52.50 | 0.00 |
| TRINITY_sp Q9LFFVAMP713  | Vesicle-associated  | 52.50 | 0.00 |
| TRINITY_sp A5DQFACT1     | Actin OS=Meyerozyma | 52.50 | 0.00 |
| TRINITY_sp O2204ANP3     | Mitogen-activated p | 52.40 | 0.00 |
| TRINITY_sp Q8ML2pdeD     | cGMP-dependent 3',5 | 52.40 | 0.00 |
| TRINITY_sp O3594Nek2     | Serine/threonine-pr | 52.40 | 0.00 |
| TRINITY_sp Q7ZW2alg11    | GDP-Man:Man(3)GlcNA | 52.40 | 0.00 |
| TRINITY_sp P1896YPK2     | Serine/threonine-pr | 52.40 | 0.00 |
| TRINITY_sp Q5VV4CDKAL1   | Threonylcarbamoylad | 52.40 | 0.00 |
| TRINITY_sp Q9MB5FKFBP    | 6-phosphofructo-2-k | 52.40 | 0.00 |
| TRINITY_sp Q9M81DSPTP1B  | Dual specificity pr | 52.40 | 0.00 |
| TRINITY_sp O8188LGALDH   | L-galactose dehydro | 52.40 | 0.00 |
| TRINITY_sp Q0992yakc     | Aldo-keto reductase | 52.40 | 0.00 |
| TRINITY_sp E9PU1Abca17   | ATP-binding cassett | 52.40 | 0.00 |
| TRINITY_sp P2801AAT-1    | Aspartate aminotran | 52.40 | 0.00 |
| TRINITY_sp Q1EB3DBP4     | ATP-dependent RNA h | 52.40 | 0.00 |
| TRINITY_sp Q8LDFCYP23    | Peptidyl-prolyl cis | 52.40 | 0.00 |
| TRINITY_sp Q4047ERF4     | Ethylene-responsive | 52.40 | 0.00 |
| TRINITY_sp Q6PFIndor1    | NADPH-dependent dif | 52.40 | 0.00 |
| TRINITY_sp F4KF\At5g3984 | DEXH-box ATP-depend | 52.40 | 0.00 |
| TRINITY_sp B7KH1PCC7424  | Nucleoid-associated | 52.40 | 0.00 |
| TRINITY_sp A7YE3ttc30a   | Tetratricopeptide r | 52.40 | 0.00 |
| TRINITY_sp Q8SK1TIC62    | Protein TIC 62, chl | 52.40 | 0.00 |
| TRINITY_sp Q9ZUICKL5     | Casein kinase 1-lik | 52.40 | 0.00 |
| TRINITY_sp P4333At1g0976 | U2 small nuclear ri | 52.40 | 0.00 |
| TRINITY_sp A81C3CFAP46   | Cilia- and flagella | 52.40 | 0.00 |
| TRINITY_sp Q8WX3DNAH7    | Dynein heavy chain  | 52.40 | 0.00 |
| TRINITY_sp O0858Gtpbp1   | GTP-binding protein | 52.40 | 0.00 |
| TRINITY_sp Q9SV(ASAT1    | Acyl-CoA--sterol O- | 52.40 | 0.00 |
| TRINITY_sp Q7TX1ppsB     | Phthiocerol/phenolp | 52.40 | 0.00 |
| TRINITY_sp Q8S61ACC1     | Acetyl-CoA carboxyl | 52.40 | 0.00 |
| TRINITY_sp Q0HA3Ttc21b   | Tetratricopeptide r | 52.40 | 0.00 |
| TRINITY_sp Q5FG3dnaJ     | Chaperone protein D | 52.40 | 0.00 |
| TRINITY_sp Q1K9(SPAC167  | Probable E3 ubiquit | 52.40 | 0.00 |
| TRINITY_sp Q8IU8CAMK1D   | Calcium/calmodulin- | 52.40 | 0.00 |
| TRINITY_sp Q54Y3DDB_G02  | DNA-binding protein | 52.40 | 0.00 |



|                          |                      |       |      |
|--------------------------|----------------------|-------|------|
| TRINITY_sp B6SF7MAA3     | Probable helicase M  | 52.40 | 0.00 |
| TRINITY_sp Q7T3Ekyat3    | Kynurenine--oxoglut  | 52.40 | 0.00 |
| TRINITY_sp Q9DBCSelo     | Selenoprotein O OS=  | 52.40 | 0.00 |
| TRINITY_sp A2Y4EICKD-1   | Cyclin-dependent ki  | 52.40 | 0.00 |
| TRINITY_sp Q8MYHDDB_G027 | Probable serine/thr  | 52.30 | 0.00 |
| TRINITY_sp P868(-        | Non-specific lipid-  | 52.30 | 0.00 |
| TRINITY_sp Q9UBSDNAJB11  | DnaJ homolog subfam  | 52.30 | 0.00 |
| TRINITY_sp P512Eycf45    | Uncharacterized pro  | 52.30 | 0.00 |
| TRINITY_sp Q93V1PABN1    | Polyadenylate-bindi  | 52.30 | 0.00 |
| TRINITY_sp F4HPNIRE4     | Probable serine/thr  | 52.30 | 0.00 |
| TRINITY_sp P465Eubc4     | Ubiquitin-conjugati  | 52.30 | 0.00 |
| TRINITY_sp A7RP1vlg2284E | NAD(P)H-hydrate epi  | 52.30 | 0.00 |
| TRINITY_sp Q5ZJYGARNL3   | GTPase-activating R  | 52.30 | 0.00 |
| TRINITY_sp P375EiaaA     | Isoaspartyl peptida  | 52.30 | 0.00 |
| TRINITY_sp Q99JYActr3    | Actin-related prote  | 52.30 | 0.00 |
| TRINITY_sp P0477-        | Glutamine synthetas  | 52.30 | 0.00 |
| TRINITY_sp Q7ZV7smu1     | WD40 repeat-contain  | 52.30 | 0.00 |
| TRINITY_sp Q1774trxr-1   | Thioredoxin reducta  | 52.30 | 0.00 |
| TRINITY_sp P2644PARP1    | Poly [ADP-ribose] p  | 52.30 | 0.00 |
| TRINITY_sp Q8L5YIPANK2   | Pantothenate kinase  | 52.30 | 0.00 |
| TRINITY_sp Q08C1znrf2    | E3 ubiquitin-protei  | 52.30 | 0.00 |
| TRINITY_sp B3EFFinfB     | Translation initiat  | 52.30 | 0.00 |
| TRINITY_sp P0787Acox1    | Peroxisomal acyl-co  | 52.30 | 0.00 |
| TRINITY_sp Q8L97RPL21M   | 50S ribosomal prote  | 52.30 | 0.00 |
| TRINITY_sp P364(rab2A    | Ras-related protein  | 52.30 | 0.00 |
| TRINITY_sp P5467pata     | Calcium-transportin  | 52.30 | 0.00 |
| TRINITY_sp Q6GN6adrm1-a  | Proteasomal ubiquit  | 52.30 | 0.00 |
| TRINITY_sp Q96DEHDAC11   | Histone deacetylase  | 52.30 | 0.00 |
| TRINITY_sp Q55EYube2w    | Probable ubiquitin-  | 52.30 | 0.00 |
| TRINITY_sp P538EJJJ1     | J protein JJJ1 OS=S  | 52.30 | 0.00 |
| TRINITY_sp P044E(-       | Calmodulin OS=Triti  | 52.30 | 0.00 |
| TRINITY_sp P451Eetta     | Energy-dependent tr  | 52.30 | 0.00 |
| TRINITY_sp Q9SX(CROA2    | DNA replication lic  | 52.30 | 0.00 |
| TRINITY_sp O1544MPPED1   | Metallophosphoester  | 52.30 | 0.00 |
| TRINITY_sp B5X8Mbrcc3    | Lys-63-specific deu  | 52.30 | 0.00 |
| TRINITY_sp O947EALG2     | Alpha-1,3/1,6-manno  | 52.30 | 0.00 |
| TRINITY_sp P4324Abcb1    | Multidrug resistanc  | 52.30 | 0.00 |
| TRINITY_sp Q311EpanB     | 3-methyl-2-oxobutan  | 52.30 | 0.00 |
| TRINITY_sp O949(CRPF6    | Pre-mRNA-processing  | 52.30 | 0.00 |
| TRINITY_sp B2RW3Cfap58   | Cilia- and flagella  | 52.30 | 0.00 |
| TRINITY_sp A9UN(bysl     | Bystin OS=Monosiga   | 52.30 | 0.00 |
| TRINITY_sp Q9STEALDH10A5 | Betaine aldehyde de  | 52.30 | 0.00 |
| TRINITY_sp P124E(-       | Vignain OS=Vigna mu  | 52.30 | 0.00 |
| TRINITY_sp Q23FEITLL3C   | Tubulin glycyclase 3 | 52.30 | 0.00 |
| TRINITY_sp P0CA2TLL3B    | Tubulin glycyclase 3 | 52.30 | 0.00 |
| TRINITY_sp Q6TEHfam91a1  | Protein FAM91A1 OS=  | 52.30 | 0.00 |
| TRINITY_sp Q8TAMTTC8     | Tetratricopeptide r  | 52.30 | 0.00 |
| TRINITY_sp C4LA(hcp      | Hydroxylamine reduc  | 52.30 | 0.00 |
| TRINITY_sp Q55DEcas1     | Cycloartenol syntha  | 52.30 | 0.00 |
| TRINITY_sp P598Erdh12    | Retinol dehydrogena  | 52.30 | 0.00 |
| TRINITY_sp A7E3EPTPDC1   | Protein tyrosine ph  | 52.30 | 0.00 |
| TRINITY_sp P142Epsak     | Photosystem I react  | 52.30 | 0.00 |
| TRINITY_sp Q1PFHAIL1     | AP2-like ethylene-r  | 52.30 | 0.00 |
| TRINITY_sp Q54JEogdh     | 2-oxoglutarate dehy  | 52.30 | 0.00 |
| TRINITY_sp Q9SS4SDP6     | Glycerol-3-phosphat  | 52.30 | 0.00 |
| TRINITY_sp Q755EIPL1     | Spindle assembly ch  | 52.30 | 0.00 |

|                  |                 |                     |       |      |
|------------------|-----------------|---------------------|-------|------|
| TRINITY_sp P2984 | cysE            | Serine acetyltransf | 52.30 | 0.00 |
| TRINITY_sp O758  | (CAPN15         | Calpain-15 OS=Homo  | 52.20 | 0.00 |
| TRINITY_sp Q9C9F | PPF-ALP         | Pyrophosphate--fruc | 52.20 | 0.00 |
| TRINITY_sp Q5XF8 | Atp13a3         | Probable cation-tra | 52.20 | 0.00 |
| TRINITY_sp P0DJ5 | RPL13           | 60S ribosomal prote | 52.20 | 0.00 |
| TRINITY_sp Q9SI1 | DSK2B           | Ubiquitin domain-co | 52.20 | 0.00 |
| TRINITY_sp Q1729 | unc-119         | Protein unc-119 OS= | 52.20 | 0.00 |
| TRINITY_sp O1415 | SPAC4A8.UPF0047 | protein C4A         | 52.20 | 0.00 |
| TRINITY_sp O1415 | SPAC4A8.UPF0047 | protein C4A         | 52.20 | 0.00 |
| TRINITY_sp Q6C01 | COF1            | Cofilin OS=Yarrowia | 52.20 | 0.00 |
| TRINITY_sp B2ZX9 | FSM             | Chromatin assembly  | 52.20 | 0.00 |
| TRINITY_sp O3501 | yfkJ            | Low molecular weigh | 52.20 | 0.00 |
| TRINITY_sp P5141 | RPL26A          | 60S ribosomal prote | 52.20 | 0.00 |
| TRINITY_sp Q54F1 | nubpl           | Iron-sulfur protein | 52.20 | 0.00 |
| TRINITY_sp Q9Y68 | ARL5A           | ADP-ribosylation fa | 52.20 | 0.00 |
| TRINITY_sp O0917 | Amacr           | Alpha-methylacyl-Co | 52.20 | 0.00 |
| TRINITY_sp Q4L31 | SH2450          | Uncharacterized epi | 52.20 | 0.00 |
| TRINITY_sp Q0U31 | DDI1            | DNA damage-inducibl | 52.20 | 0.00 |
| TRINITY_sp Q9FK1 | ABCA11          | ABC transporter A f | 52.20 | 0.00 |
| TRINITY_sp Q55D1 | mcff            | Mitoferrin OS=Dicty | 52.20 | 0.00 |
| TRINITY_sp Q75S1 | AFP1            | Peroxiredoxin Q, ch | 52.20 | 0.00 |
| TRINITY_sp Q9LM1 | (SMT1           | Cycloartenol-C-24-m | 52.20 | 0.00 |
| TRINITY_sp O4884 | RPN2A           | 26S proteasome non- | 52.20 | 0.00 |
| TRINITY_sp Q7MA1 | (ung            | Uracil-DNA glycosyl | 52.20 | 0.00 |
| TRINITY_sp P3411 | mvpA            | Major vault protein | 52.20 | 0.00 |
| TRINITY_sp Q6T39 | Spata20         | Spermatogenesis-ass | 52.20 | 0.00 |
| TRINITY_sp Q9D84 | Tex9            | Testis-expressed se | 52.20 | 0.00 |
| TRINITY_sp Q8IZ1 | INALCN          | Sodium leak channel | 52.20 | 0.00 |
| TRINITY_sp Q0JL4 | Os01g062        | Neutral ceramidase  | 52.20 | 0.00 |
| TRINITY_sp Q3956 | ODA4            | Dynein beta chain,  | 52.20 | 0.00 |
| TRINITY_sp P0482 | tpiA            | Triosephosphate iso | 52.20 | 0.00 |
| TRINITY_sp P4911 | (RAB2A          | Ras-related protein | 52.20 | 0.00 |
| TRINITY_sp C6E71 | fgpsA           | Glycerol-3-phosphat | 52.20 | 0.00 |
| TRINITY_sp Q87A1 | blh             | Beta-lactamase hydr | 52.20 | 0.00 |
| TRINITY_sp Q6NZ1 | rbm22           | Pre-mRNA-splicing f | 52.20 | 0.00 |
| TRINITY_sp Q0PG1 | (AKR4C9         | Aldo-keto reductase | 52.20 | 0.00 |
| TRINITY_sp Q9C55 | RH5             | DEAD-box ATP-depend | 52.20 | 0.00 |
| TRINITY_sp Q5BP1 | LOG2            | Cytokinin riboside  | 52.20 | 0.00 |
| TRINITY_sp Q54S1 | vallB1          | Probable allantoina | 52.20 | 0.00 |
| TRINITY_sp P3184 | -               | RNA-directed DNA po | 52.20 | 0.00 |
| TRINITY_sp B5XF1 | kdm8            | Lysine-specific dem | 52.20 | 0.00 |
| TRINITY_sp Q52N1 | (RAB1A          | Ras-related protein | 52.20 | 0.00 |
| TRINITY_sp O2221 | (NDT1           | Nicotinamide adenin | 52.20 | 0.00 |
| TRINITY_sp H9BF1 | -               | Tropinone reductase | 52.20 | 0.00 |
| TRINITY_sp Q08D1 | -               | Probable tRNA methy | 52.20 | 0.00 |
| TRINITY_sp Q4315 | RPE             | Ribulose-phosphate  | 52.20 | 0.00 |
| TRINITY_sp Q9491 | FMPC1           | Mitochondrial pyruv | 52.20 | 0.00 |
| TRINITY_sp Q9NB1 | hiw             | E3 ubiquitin-protei | 52.20 | 0.00 |
| TRINITY_sp Q9LS1 | PBD1            | Proteasome subunit  | 52.20 | 0.00 |
| TRINITY_sp P9051 | -               | Elongation factor 1 | 52.20 | 0.00 |
| TRINITY_sp P4595 | ARP             | DNA-(apurinic or ap | 52.10 | 0.00 |
| TRINITY_sp Q1ZX1 | fgxcDD          | Guanine exchange fa | 52.10 | 0.00 |
| TRINITY_sp B2RT1 | MYO9A           | Unconventional myos | 52.10 | 0.00 |
| TRINITY_sp Q0654 | GPN3            | GPN-loop GTPase 3 O | 52.10 | 0.00 |
| TRINITY_sp Q54J1 | abcC3           | ABC transporter C f | 52.10 | 0.00 |
| TRINITY_sp Q99M1 | Kars            | Lysine--tRNA ligase | 52.10 | 0.00 |

|                         |                     |       |      |
|-------------------------|---------------------|-------|------|
| TRINITY_sp Q55E atxn10  | Ataxin-10 homolog O | 52.10 | 0.00 |
| TRINITY_sp P342 rab-6.1 | Ras-related protein | 52.10 | 0.00 |
| TRINITY_sp Q7T0 poc1a   | POC1 centriolar pro | 52.10 | 0.00 |
| TRINITY_sp Q54V sepsecs | O-phosphoseryl-tRNA | 52.10 | 0.00 |
| TRINITY_sp P412 Abca1   | ATP-binding cassett | 52.10 | 0.00 |
| TRINITY_sp P402 -       | Histone H2A OS=Plas | 52.10 | 0.00 |
| TRINITY_sp Q6ZM KIF6    | Kinesin-like protei | 52.10 | 0.00 |
| TRINITY_sp Q54J abcC3   | ABC transporter C f | 52.10 | 0.00 |
| TRINITY_sp Q9SFV NLP5   | Protein NLP5 OS=Ara | 52.10 | 0.00 |
| TRINITY_sp Q0P5 IRBM42  | RNA-binding protein | 52.10 | 0.00 |
| TRINITY_sp Q54X nt5c2   | Cytosolic purine 5' | 52.10 | 0.00 |
| TRINITY_sp Q2KH MACROD1 | O-acetyl-ADP-ribose | 52.10 | 0.00 |
| TRINITY_sp Q54U kif3    | Kinesin-related pro | 52.10 | 0.00 |
| TRINITY_sp Q9C7 BUB3.2  | Mitotic checkpoint  | 52.10 | 0.00 |
| TRINITY_sp Q01J CYCB2-1 | Cyclin-B2-1 OS=Oryz | 52.10 | 0.00 |
| TRINITY_sp Q8TC POC1B   | POC1 centriolar pro | 52.10 | 0.00 |
| TRINITY_sp P0DJ RPL23A  | 60S ribosomal prote | 52.10 | 0.00 |
| TRINITY_sp O360 aap1    | Aspartyl aminopepti | 52.10 | 0.00 |
| TRINITY_sp Q1AR treT    | Trehalose synthase  | 52.10 | 0.00 |
| TRINITY_sp Q7X9 AERO2   | Endoplasmic reticul | 52.10 | 0.00 |
| TRINITY_sp P315 RHN1    | Ras-related protein | 52.10 | 0.00 |
| TRINITY_sp P186 NRPB1   | DNA-directed RNA po | 52.10 | 0.00 |
| TRINITY_sp Q6CL DED1    | ATP-dependent RNA h | 52.10 | 0.00 |
| TRINITY_sp Q58E armt1   | Protein-glutamate O | 52.10 | 0.00 |
| TRINITY_sp Q9S7 COX6B-1 | Cytochrome c oxidas | 52.10 | 0.00 |
| TRINITY_sp Q395 -       | Dynein 14 kDa light | 52.10 | 0.00 |
| TRINITY_sp Q5F3 mcm8    | DNA helicase MCM8 O | 52.10 | 0.00 |
| TRINITY_sp Q1H5 LSM2    | Sm-like protein LSM | 52.10 | 0.00 |
| TRINITY_sp Q8EJ prpC    | 2-methylcitrate syn | 52.10 | 0.00 |
| TRINITY_sp Q6FL DBP2    | ATP-dependent RNA h | 52.10 | 0.00 |
| TRINITY_sp P116 ypt1    | GTP-binding protein | 52.10 | 0.00 |
| TRINITY_sp Q8VY MED31   | Mediator of RNA pol | 52.10 | 0.00 |
| TRINITY_sp P239 menB    | 1,4-dihydroxy-2-nap | 52.10 | 0.00 |
| TRINITY_sp Q8L7 EDD1    | Glycine--tRNA ligas | 52.10 | 0.00 |
| TRINITY_sp P208 pol     | Retrovirus-related  | 52.10 | 0.00 |
| TRINITY_sp B8BK OsI_361 | DNA replication lic | 52.10 | 0.00 |
| TRINITY_sp O243 SUS2    | Sucrose synthase 2  | 52.10 | 0.00 |
| TRINITY_sp Q24J P4H5    | Prolyl 4-hydroxylas | 52.10 | 0.00 |
| TRINITY_sp Q8XY clpP    | ATP-dependent Clp p | 52.10 | 0.00 |
| TRINITY_sp P420 NDUFS8  | NADH dehydrogenase  | 52.00 | 0.00 |
| TRINITY_sp Q920 DNMT1   | DNA (cytosine-5)-me | 52.00 | 0.00 |
| TRINITY_sp Q5DU Cep164  | Centrosomal protein | 52.00 | 0.00 |
| TRINITY_sp Q5XI Mccc2   | Methylcrotonoyl-CoA | 52.00 | 0.00 |
| TRINITY_sp Q9LR BSU1    | Serine/threonine-pr | 52.00 | 0.00 |
| TRINITY_sp Q9HF -       | Cytochrome b5 OS=Rh | 52.00 | 0.00 |
| TRINITY_sp B9DF ISE2    | DExH-box ATP-depend | 52.00 | 0.00 |
| TRINITY_sp Q9LR POLD1   | DNA polymerase delt | 52.00 | 0.00 |
| TRINITY_sp Q420 ABCC2   | ABC transporter C f | 52.00 | 0.00 |
| TRINITY_sp Q94J HSFA4B  | Heat stress transcr | 52.00 | 0.00 |
| TRINITY_sp P0DJ RPL35   | 60S ribosomal prote | 52.00 | 0.00 |
| TRINITY_sp Q643 Sqstm1  | Sequestosome-1 OS=M | 52.00 | 0.00 |
| TRINITY_sp P546 pkbA    | RAC family serine/t | 52.00 | 0.00 |
| TRINITY_sp Q017 EXOSC10 | Exosome component 1 | 52.00 | 0.00 |
| TRINITY_sp Q86A polr3a  | DNA-directed RNA po | 52.00 | 0.00 |
| TRINITY_sp Q8C5 Cwc22   | Pre-mRNA-splicing f | 52.00 | 0.00 |
| TRINITY_sp Q54E exo1    | Exonuclease 1 OS=Di | 52.00 | 0.00 |

|                          |                      |       |      |
|--------------------------|----------------------|-------|------|
| TRINITY_sp Q9FIHRPN5A    | 26S proteasome non-  | 52.00 | 0.00 |
| TRINITY_sp Q9P38SPBC13A2 | Putative phosphatid  | 52.00 | 0.00 |
| TRINITY_sp Q9QY3Abcb11   | Bile salt export pu  | 52.00 | 0.00 |
| TRINITY_sp Q3957YPTC6    | Ras-related protein  | 52.00 | 0.00 |
| TRINITY_sp Q5T65CFAP58   | Cilia- and flagella  | 52.00 | 0.00 |
| TRINITY_sp Q6DG5kctd6    | BTB/POZ domain-cont  | 52.00 | 0.00 |
| TRINITY_sp Q8MY1DDB_G027 | Probable serine/thr  | 52.00 | 0.00 |
| TRINITY_sp Q93Y5RPOT1    | DNA-directed RNA po  | 52.00 | 0.00 |
| TRINITY_sp Q9AS5At5g0520 | (Uncharacterized aar | 52.00 | 0.00 |
| TRINITY_sp Q2371-        | Elongation factor 2  | 52.00 | 0.00 |
| TRINITY_sp B8BK8OsI_3591 | Protein KTI12 homol  | 52.00 | 0.00 |
| TRINITY_sp Q6WWVUPL3     | E3 ubiquitin-protei  | 52.00 | 0.00 |
| TRINITY_sp Q8LP5LACS6    | Long chain acyl-CoA  | 52.00 | 0.00 |
| TRINITY_sp Q9ZT5Os06g050 | (Probable methionine | 52.00 | 0.00 |
| TRINITY_sp O7445naa20    | N-terminal acetyltr  | 52.00 | 0.00 |
| TRINITY_sp Q9ZT5PEL1     | Protein PELOTA 1 OS  | 52.00 | 0.00 |
| TRINITY_sp O9655Ate1     | Arginyl-tRNA--prote  | 52.00 | 0.00 |
| TRINITY_sp Q6410rnf12-a  | E3 ubiquitin-protei  | 52.00 | 0.00 |
| TRINITY_sp Q9ZU5ABCG7    | ABC transporter G f  | 52.00 | 0.00 |
| TRINITY_sp Q8H21POLH     | DNA polymerase eta   | 52.00 | 0.00 |
| TRINITY_sp P0446(-       | Calmodulin OS=Triti  | 52.00 | 0.00 |
| TRINITY_sp P4356RIM15    | Serine/threonine-pr  | 51.90 | 0.00 |
| TRINITY_sp Q8BV5Mett16   | Methyltransferase-1  | 51.90 | 0.00 |
| TRINITY_sp Q54F0dhx8     | ATP-dependent RNA h  | 51.90 | 0.00 |
| TRINITY_sp Q5017gtpbp3   | tRNA modification G  | 51.90 | 0.00 |
| TRINITY_sp Q5R91DARS     | Aspartate--tRNA lig  | 51.90 | 0.00 |
| TRINITY_sp Q8LFCIDH1     | Isocitrate dehydrog  | 51.90 | 0.00 |
| TRINITY_sp Q9CA5UEV1B    | Ubiquitin-conjugati  | 51.90 | 0.00 |
| TRINITY_sp Q9FD5CB5-A    | Cytochrome b5 isofo  | 51.90 | 0.00 |
| TRINITY_sp P1056MIC      | Myosin IC heavy cha  | 51.90 | 0.00 |
| TRINITY_sp Q9SZ5GPX7     | Putative glutathion  | 51.90 | 0.00 |
| TRINITY_sp Q91Z5Grhpr    | Glyoxylate reductas  | 51.90 | 0.00 |
| TRINITY_sp Q9LG5CIPK1    | CBL-interacting pro  | 51.90 | 0.00 |
| TRINITY_sp Q9ZUIETL1     | Protein CHROMATIN R  | 51.90 | 0.00 |
| TRINITY_sp Q9UL5ACSL5    | Long-chain-fatty-ac  | 51.90 | 0.00 |
| TRINITY_sp Q9SR5LSF2     | Phosphoglucan phosp  | 51.90 | 0.00 |
| TRINITY_sp Q2JS5crpsP    | 30S ribosomal prote  | 51.90 | 0.00 |
| TRINITY_sp Q0995yakc     | Aldo-keto reductase  | 51.90 | 0.00 |
| TRINITY_sp P0A15livF     | High-affinity branc  | 51.90 | 0.00 |
| TRINITY_sp Q5F36TBCK     | TBC domain-containi  | 51.90 | 0.00 |
| TRINITY_sp Q9H75IATP13A3 | Probable cation-tra  | 51.90 | 0.00 |
| TRINITY_sp Q9M15ABCB21   | ABC transporter B f  | 51.90 | 0.00 |
| TRINITY_sp Q8P55XCC3184  | Macro domain-contai  | 51.90 | 0.00 |
| TRINITY_sp P1695FAH      | Fumarylacetoacetase  | 51.90 | 0.00 |
| TRINITY_sp Q8R35Rbm19    | Probable RNA-bindin  | 51.90 | 0.00 |
| TRINITY_sp Q9VK5Tor      | Target of rapamycin  | 51.90 | 0.00 |
| TRINITY_sp Q9LE5BRIX1-1  | Ribosome biogenesis  | 51.90 | 0.00 |
| TRINITY_sp Q10S5NLP1     | Protein NLP1 OS=Ory  | 51.90 | 0.00 |
| TRINITY_sp Q9C55MSRB2    | Peptide methionine   | 51.90 | 0.00 |
| TRINITY_sp Q9M05DDB1A    | DNA damage-binding   | 51.90 | 0.00 |
| TRINITY_sp O0495UMK3     | UMP-CMP kinase 3 OS  | 51.90 | 0.00 |
| TRINITY_sp P5115ANT18    | Dihydroflavonol 4-r  | 51.90 | 0.00 |
| TRINITY_sp Q8I85aplg1    | AP-1 complex subuni  | 51.90 | 0.00 |
| TRINITY_sp Q9ZQ5IACX1.2  | Putative peroxisoma  | 51.90 | 0.00 |
| TRINITY_sp Q54N5asf1     | Histone chaperone a  | 51.90 | 0.00 |
| TRINITY_sp Q2665-        | Cathepsin L OS=Sarc  | 51.90 | 0.00 |

|                          |                      |       |      |
|--------------------------|----------------------|-------|------|
| TRINITY_sp Q6L5C0s05g057 | Zinc finger CCCH do  | 51.90 | 0.00 |
| TRINITY_sp P0C8MCCR1     | Probable serine/thr  | 51.90 | 0.00 |
| TRINITY_sp P5053smc4     | Structural maintena  | 51.90 | 0.00 |
| TRINITY_sp Q9I8I-        | Heat shock 70 kDa p  | 51.90 | 0.00 |
| TRINITY_sp C0QT1prfA     | Peptide chain relea  | 51.90 | 0.00 |
| TRINITY_sp Q4287RBP2     | DNA-directed RNA po  | 51.90 | 0    |
| TRINITY_sp P4069-        | Aldo-keto reductase  | 51.90 | 0.00 |
| TRINITY_sp P0AG1purF     | Amidophosphoribosyl  | 51.90 | 0.00 |
| TRINITY_sp Q9446dymA     | Dynammin-A OS=Dictyo | 51.90 | 0.00 |
| TRINITY_sp Q2N5fgroL2    | 60 kDa chaperonin 2  | 51.90 | 0.00 |
| TRINITY_sp Q9LDNUMPS1    | Uridine 5'-monophos  | 51.90 | 0.00 |
| TRINITY_sp Q4U2\agtpbp1  | Cytosolic carboxype  | 51.90 | 0.00 |
| TRINITY_sp Q9ZG1pikAI    | Narbonolide/10-deox  | 51.90 | 0.00 |
| TRINITY_sp Q0259PK2      | Probable serine/thr  | 51.90 | 0.00 |
| TRINITY_sp P0864R        | Ras-like protein 3   | 51.90 | 0.00 |
| TRINITY_sp Q9M64CPI1     | Cycloecalenol cycl   | 51.90 | 0.00 |
| TRINITY_sp O8098FTSH4    | ATP-dependent zinc   | 51.90 | 0.00 |
| TRINITY_sp A4FUFRPL22L1  | 60S ribosomal prote  | 51.80 | 0.00 |
| TRINITY_sp Q55Efbub2     | Putative mitotic ch  | 51.80 | 0.00 |
| TRINITY_sp Q9LTFNMT1     | Glycylpeptide N-tet  | 51.80 | 0.00 |
| TRINITY_sp Q9P4\utp7     | Probable U3 small n  | 51.80 | 0.00 |
| TRINITY_sp Q8NEFPIK3C3   | Phosphatidylinosito  | 51.80 | 0.00 |
| TRINITY_sp Q54J4alg5     | Dolichyl-phosphate   | 51.80 | 0.00 |
| TRINITY_sp P930(RH21     | DEAD-box ATP-depend  | 51.80 | 0.00 |
| TRINITY_sp Q4249petM     | Cytochrome b6-f com  | 51.80 | 0.00 |
| TRINITY_sp P5621Gfer     | FAD-linked sulfhydr  | 51.80 | 0.00 |
| TRINITY_sp P2751CBR      | Carotene biosynthes  | 51.80 | 0.00 |
| TRINITY_sp O1349rca-1    | Myb-like DNA-bindin  | 51.80 | 0.00 |
| TRINITY_sp Q93V1PABN1    | Polyadenylate-bindi  | 51.80 | 0.00 |
| TRINITY_sp P237(ltxB     | Leukotoxin export A  | 51.80 | 0.00 |
| TRINITY_sp P0AF4yjbQ     | UPF0047 protein Yjb  | 51.80 | 0.00 |
| TRINITY_sp Q9M02KEA3     | K(+) efflux antipor  | 51.80 | 0.00 |
| TRINITY_sp Q9SR6DML2     | DEMETER-like protei  | 51.80 | 0.00 |
| TRINITY_sp O8279PSP      | Phosphoserine phosp  | 51.80 | 0.00 |
| TRINITY_sp B2I16metE     | 5-methyltetrahydrop  | 51.80 | 0.00 |
| TRINITY_sp B9SQ1RCOM_059 | Probable bifunction  | 51.80 | 0.00 |
| TRINITY_sp Q9ZU9VAC14    | Protein VAC14 homol  | 51.80 | 0.00 |
| TRINITY_sp P5199Nek1     | Serine/threonine-pr  | 51.80 | 0.00 |
| TRINITY_sp P4901GPI8     | GPI-anchor transami  | 51.80 | 0.00 |
| TRINITY_sp Q54Vfddx56    | Probable ATP-depend  | 51.80 | 0.00 |
| TRINITY_sp Q86G\gcy-28   | Receptor-type guany  | 51.80 | 0.00 |
| TRINITY_sp Q8LF6AMY2     | Probable alpha-amyl  | 51.80 | 0.00 |
| TRINITY_sp O4916TIF3C1   | Eukaryotic translat  | 51.80 | 0.00 |
| TRINITY_sp F4I19ELP2     | Elongator complex p  | 51.80 | 0.00 |
| TRINITY_sp Q9T07LACS4    | Long chain acyl-CoA  | 51.80 | 0.00 |
| TRINITY_sp Q3V09Dnah12   | Dynein heavy chain   | 51.70 | 0.00 |
| TRINITY_sp Q9M77RPL29A   | 60S ribosomal prote  | 51.70 | 0.00 |
| TRINITY_sp Q7Z67HUWE1    | E3 ubiquitin-protei  | 51.70 | 0.00 |
| TRINITY_sp Q6NW1ypel3    | Protein yippee-like  | 51.70 | 0.00 |
| TRINITY_sp Q9C7INTF2     | Nuclear transport f  | 51.70 | 0.00 |
| TRINITY_sp Q9YH\ncapd2   | Condensin complex s  | 51.70 | 0.00 |
| TRINITY_sp E1BB6ZRANB3   | DNA annealing helic  | 51.70 | 0.00 |
| TRINITY_sp Q54M7ku70     | ATP-dependent DNA h  | 51.70 | 0.00 |
| TRINITY_sp Q4109SBEI     | 1,4-alpha-glucan-br  | 51.70 | 0.00 |
| TRINITY_sp E1VB7HELO_232 | Putative glutathion  | 51.70 | 0.00 |
| TRINITY_sp Q0089MAPK     | Mitogen-activated p  | 51.70 | 0.00 |

|                          |                     |       |      |
|--------------------------|---------------------|-------|------|
| TRINITY_sp Q0KI7CG9801   | PP2C-like domain-co | 51.70 | 0.00 |
| TRINITY_sp Q9FH4TAF14B   | Transcription initi | 51.70 | 0.00 |
| TRINITY_sp Q54S8midA     | Protein arginine me | 51.70 | 0.00 |
| TRINITY_sp Q8BM1Lipk     | Lipase member K OS= | 51.70 | 0.00 |
| TRINITY_sp P341(pkgC     | Protein kinase 3 OS | 51.70 | 0.00 |
| TRINITY_sp Q8H1(ALEU     | Thiol protease aleu | 51.70 | 0.00 |
| TRINITY_sp P981(Atp9b    | Probable phospholip | 51.70 | 0.00 |
| TRINITY_sp Q9SB(PHR1     | Deoxyribodipyrimidi | 51.70 | 0.00 |
| TRINITY_sp Q556(rexo2-1  | Probable oligoribon | 51.70 | 0.00 |
| TRINITY_sp Q8VZ(FZR1     | Protein FIZZY-RELAT | 51.70 | 0.00 |
| TRINITY_sp Q008(MAPK     | Mitogen-activated p | 51.70 | 0.00 |
| TRINITY_sp A7HT(rpma     | 50S ribosomal prote | 51.70 | 0.00 |
| TRINITY_sp Q9C0(DNAH6    | Dynein heavy chain  | 51.70 | 0.00 |
| TRINITY_sp Q942(IPDIL2-2 | Protein disulfide i | 51.70 | 0.00 |
| TRINITY_sp Q9JK(Myg1     | UPF0160 protein MYG | 51.70 | 0.00 |
| TRINITY_sp Q6GL(desil    | Desumoylating isope | 51.70 | 0.00 |
| TRINITY_sp O647(GLCNAC1I | UDP-N-acetylglucosa | 51.70 | 0.00 |
| TRINITY_sp Q207(atad-3   | ATPase family AAA d | 51.70 | 0.00 |
| TRINITY_sp Q8TGM(TAR1    | Protein TAR1 OS=Sac | 51.70 | 0.00 |
| TRINITY_sp Q6NQ(SDG40    | Protein SET DOMAIN  | 51.70 | 0.00 |
| TRINITY_sp Q9Y6(ARL5A    | ADP-ribosylation fa | 51.70 | 0.00 |
| TRINITY_sp Q8RX(PR31     | U4/U6 small nuclear | 51.70 | 0.00 |
| TRINITY_sp Q8LG(COL6     | Zinc finger protein | 51.70 | 0.00 |
| TRINITY_sp Q323(ybiA     | N-glycosidase YbiA  | 51.70 | 0.00 |
| TRINITY_sp Q9HZ(PA3240   | Putative quercetin  | 51.70 | 0.00 |
| TRINITY_sp Q8Y2(FRSc0270 | UPF0225 protein RSc | 51.70 | 0.00 |
| TRINITY_sp P0AG(trmH     | tRNA (guanosine(18) | 51.70 | 0.00 |
| TRINITY_sp Q6MD(clpB     | Chaperone protein C | 51.70 | 0.00 |
| TRINITY_sp Q6PF(jmjd6    | Bifunctional argini | 51.70 | 0.00 |
| TRINITY_sp Q8KA(pckG     | Phosphoenolpyruvate | 51.70 | 0.00 |
| TRINITY_sp Q0WW(ZEU1     | Thymidylate kinase  | 51.70 | 0.00 |
| TRINITY_sp Q9C5(CM3      | Chorismate mutase 3 | 51.70 | 0.00 |
| TRINITY_sp Q926(EDEM1    | ER degradation-enha | 51.70 | 0.00 |
| TRINITY_sp Q323(ybiA     | N-glycosidase YbiA  | 51.70 | 0.00 |
| TRINITY_sp A8I4(FAP100   | Cilia- and flagella | 51.70 | 0.00 |
| TRINITY_sp Q9UB(MHDAC6   | Histone deacetylase | 51.70 | 0.00 |
| TRINITY_sp O748(caf1     | Poly(A) ribonucleas | 51.70 | 0.00 |
| TRINITY_sp Q7XK(PYRD     | Dihydroorotate dehy | 51.70 | 0.00 |
| TRINITY_sp Q286(ABCC2    | Canalicular multisp | 51.70 | 0.00 |
| TRINITY_sp Q711(CCL4     | C-C motif chemokine | 51.70 | 0.00 |
| TRINITY_sp P492(RPL9     | 60S ribosomal prote | 51.60 | 0.00 |
| TRINITY_sp Q9LS(PAE1     | Proteasome subunit  | 51.60 | 0.00 |
| TRINITY_sp Q8I7(coq-2    | 4-hydroxybenzoate p | 51.60 | 0.00 |
| TRINITY_sp Q6NV(decr2    | Peroxisomal 2,4-die | 51.60 | 0.00 |
| TRINITY_sp Q9VH(GstZ2    | Probable maleylacet | 51.60 | 0.00 |
| TRINITY_sp Q86A(polr3a   | DNA-directed RNA po | 51.60 | 0.00 |
| TRINITY_sp Q7T3(dbr1     | Lariat debranching  | 51.60 | 0.00 |
| TRINITY_sp Q7YS(vcanA    | Calcineurin subunit | 51.60 | 0.00 |

|                          |                     |       |      |
|--------------------------|---------------------|-------|------|
| TRINITY_sp O644(BMY1     | Beta-amylase OS=Vig | 51.60 | 0.00 |
| TRINITY_sp Q9P7Ggad8     | Serine/threonine-pr | 51.60 | 0.00 |
| TRINITY_sp Q9C5(ELF5A-3  | Eukaryotic translat | 51.60 | 0.00 |
| TRINITY_sp Q6Z54SAP12    | Zinc finger A20 and | 51.60 | 0.00 |
| TRINITY_sp P2317ABCBA    | Phosphatidylcholine | 51.60 | 0.00 |
| TRINITY_sp Q9BU7TRMO     | tRNA (adenine(37)-N | 51.60 | 0.00 |
| TRINITY_sp Q9FZ9SMG7L    | Protein SMG7L OS=Ar | 51.60 | 0.00 |
| TRINITY_sp P485(-        | Cytochrome b-c1 com | 51.60 | 0.00 |
| TRINITY_sp G5DB3CPP1     | Protein CHAPERONE-L | 51.60 | 0.00 |
| TRINITY_sp O4993TLP40    | Peptidyl-prolyl cis | 51.60 | 0.00 |
| TRINITY_sp Q54W8lsm1     | Probable U6 snRNA-a | 51.60 | 0.00 |
| TRINITY_sp Q54GIDDB_G029 | PXMP2/4 family prot | 51.60 | 0.00 |
| TRINITY_sp Q86A8purF     | Amidophosphoribosyl | 51.60 | 0.00 |
| TRINITY_sp Q54KEmccA     | Methylcrotonoyl-CoA | 51.60 | 0.00 |
| TRINITY_sp Q7ZV8sirt2    | NAD-dependent prote | 51.60 | 0.00 |
| TRINITY_sp Q9SH1UBC34    | Ubiquitin-conjugati | 51.60 | 0.00 |
| TRINITY_sp P0785SUOX     | Sulfite oxidase OS= | 51.60 | 0.00 |
| TRINITY_sp P5242PAC1     | Proteasome subunit  | 51.60 | 0.00 |
| TRINITY_sp Q568Egtdc1    | Glycosyltransferase | 51.60 | 0.00 |
| TRINITY_sp Q54S7sf3b3    | Probable splicing f | 51.60 | 0.00 |
| TRINITY_sp Q9FI6UBC27    | Ubiquitin-conjugati | 51.60 | 0.00 |
| TRINITY_sp Q0189YPT1     | Ras-like GTP-bindin | 51.60 | 0.00 |
| TRINITY_sp Q9BZ8GTPBP4   | Nucleolar GTP-bindi | 51.60 | 0.00 |
| TRINITY_sp Q9C9CRPL6B    | 60S ribosomal prote | 51.60 | 0.00 |
| TRINITY_sp Q2NC7ELI_0298 | Blue-light-activate | 51.60 | 0.00 |
| TRINITY_sp F4IE6RID1     | Pre-mRNA-splicing f | 51.60 | 0.00 |
| TRINITY_sp Q8ND8PAPD5    | Non-canonical poly( | 51.60 | 0.00 |
| TRINITY_sp Q0992yakc     | Aldo-keto reductase | 51.60 | 0.00 |
| TRINITY_sp F4KA8MCM6     | DNA replication lic | 51.60 | 0.00 |
| TRINITY_sp F1Q48atp9b    | Probable phospholip | 51.60 | 0.00 |
| TRINITY_sp P3472RAS1     | Ras-like protein 1  | 51.60 | 0.00 |
| TRINITY_sp P1535RpS27A   | Ubiquitin-40S ribos | 51.60 | 0.00 |
| TRINITY_sp Q54R8mkkA     | Mitogen-activated p | 51.60 | 0.00 |
| TRINITY_sp Q9LX8At5g1285 | Zinc finger CCCH do | 51.60 | 0.00 |
| TRINITY_sp Q9C58SMC2-1   | Structural maintena | 51.60 | 0.00 |
| TRINITY_sp Q86A7spkA-1   | Stress-activated pr | 51.60 | 0.00 |
| TRINITY_sp P5188lig1     | DNA ligase 1 OS=Xen | 51.60 | 0.00 |
| TRINITY_sp Q5513purU     | Formyltetrahydrofol | 51.60 | 0.00 |
| TRINITY_sp A3QK1erlin2   | Erlin-2 OS=Danio re | 51.60 | 0.00 |
| TRINITY_sp B7ZC8KIF28P   | Kinesin-like protei | 51.50 | 0.00 |
| TRINITY_sp P0515CFI      | Complement factor I | 51.50 | 0.00 |
| TRINITY_sp Q3S47AHK5     | Histidine kinase 5  | 51.50 | 0.00 |
| TRINITY_sp F1Q48atp9b    | Probable phospholip | 51.50 | 0.00 |
| TRINITY_sp Q9LE8GPXMC1   | Probable phospholip | 51.50 | 0.00 |
| TRINITY_sp P5217kpna1    | Importin subunit al | 51.50 | 0.00 |
| TRINITY_sp Q9XGFB'ALPH7  | Serine/threonine pr | 51.50 | 0.00 |
| TRINITY_sp Q54SIpemtA    | Phosphatidylethanol | 51.50 | 0.00 |
| TRINITY_sp Q55C8rasU     | Ras-like protein ra | 51.50 | 0.00 |
| TRINITY_sp P9818ATP8B2   | Phospholipid-transp | 51.50 | 0.00 |
| TRINITY_sp Q5XJI fip111  | Pre-mRNA 3'-end-pro | 51.50 | 0.00 |
| TRINITY_sp O2308ECA2     | Calcium-transportin | 51.50 | 0.00 |
| TRINITY_sp P2298let-60   | Ras protein let-60  | 51.50 | 0.00 |
| TRINITY_sp A0Q38ribBA    | Riboflavin biosynth | 51.50 | 0.00 |
| TRINITY_sp Q8L78RPL18AA  | 60S ribosomal prote | 51.50 | 0.00 |
| TRINITY_sp Q2KI8TDH      | L-threonine 3-dehyd | 51.50 | 0.00 |
| TRINITY_sp Q9FJ8UPF1     | Regulator of nonsen | 51.50 | 0.00 |

|                          |                     |       |      |
|--------------------------|---------------------|-------|------|
| TRINITY_sp Q0823REX4     | RNA exonuclease 4 O | 51.50 | 0.00 |
| TRINITY_sp P5255myb12    | Myb-related protein | 51.50 | 0.00 |
| TRINITY_sp P1422PSAG     | Photosystem I react | 51.50 | 0.00 |
| TRINITY_sp P5195Nek1     | Serine/threonine-pr | 51.50 | 0.00 |
| TRINITY_sp Q8C01Agps     | Alkyldihydroxyaceto | 51.50 | 0.00 |
| TRINITY_sp P1024MYB      | Transcriptional act | 51.50 | 0.00 |
| TRINITY_sp Q9PTMkcnab2   | Voltage-gated potas | 51.50 | 0.00 |
| TRINITY_sp B0G15mcfC     | Mitochondrial subst | 51.50 | 0.00 |
| TRINITY_sp Q1386EXOSC2   | Exosome complex com | 51.50 | 0.00 |
| TRINITY_sp P9186Mo25     | Protein Mo25 OS=Dro | 51.50 | 0.00 |
| TRINITY_sp P3513UBC11    | Ubiquitin-conjugati | 51.50 | 0.00 |
| TRINITY_sp Q8NG6TTL      | Tubulin--tyrosine l | 51.50 | 0.00 |
| TRINITY_sp Q6DEHfctnpp1  | Ethanolamine-phosph | 51.50 | 0.00 |
| TRINITY_sp B2RX1Abcc3    | Canalicular multisp | 51.50 | 0.00 |
| TRINITY_sp Q9ST1ABCA5    | ABC transporter A f | 51.50 | 0.00 |
| TRINITY_sp A8IB2CFAP77   | Cilia- and flagella | 51.50 | 0.00 |
| TRINITY_sp Q3896KIN10    | SNF1-related protei | 51.50 | 0.00 |
| TRINITY_sp Q6NMFAt5g5974 | UDP-galactose/UDP-g | 51.50 | 0.00 |
| TRINITY_sp Q5ZLIGPAT3    | Glycerol-3-phosphat | 51.50 | 0.00 |
| TRINITY_sp Q9SMFDHC1     | Dynein-1-alpha heav | 51.50 | 0    |
| TRINITY_sp Q641Hublcp1   | Ubiquitin-like doma | 51.50 | 0.00 |
| TRINITY_sp Q8NBRDH13     | Retinol dehydrogena | 51.50 | 0.00 |
| TRINITY_sp Q66KHube2z    | Ubiquitin-conjugati | 51.50 | 0.00 |
| TRINITY_sp Q8T13kif5     | Kinesin-related pro | 51.50 | 0.00 |
| TRINITY_sp P4679cysB     | Cystathionine beta- | 51.50 | 0.00 |
| TRINITY_sp O8603bdhA     | D-beta-hydroxybutyr | 51.50 | 0.00 |
| TRINITY_sp Q54Pfcsnk2b   | Casein kinase II su | 51.50 | 0.00 |
| TRINITY_sp Q01J6CYCB2-1  | Cyclin-B2-1 OS=Oryz | 51.50 | 0.00 |
| TRINITY_sp F4I11At1g0962 | Leucine--tRNA ligas | 51.50 | 0    |
| TRINITY_sp Q9C53ATX1     | Histone-lysine N-me | 51.50 | 0.00 |
| TRINITY_sp F4JXINRPC1    | DNA-directed RNA po | 51.50 | 0.00 |
| TRINITY_sp P2407-        | Glu S.griseus prote | 51.50 | 0.00 |
| TRINITY_sp Q9VQCG3326    | Fidgetin-like prote | 51.40 | 0.00 |
| TRINITY_sp P5291VPS4     | Vacuolar protein so | 51.40 | 0.00 |
| TRINITY_sp O3221yvgN     | Glyoxal reductase O | 51.40 | 0.00 |
| TRINITY_sp Q55E1vps13E   | Putative vacuolar p | 51.40 | 0.00 |
| TRINITY_sp Q5E96NFYA     | Nuclear transcripti | 51.40 | 0.00 |
| TRINITY_sp Q93Y3RPN7     | 26S proteasome non- | 51.40 | 0.00 |
| TRINITY_sp Q3388GCN5     | Histone acetyltrans | 51.40 | 0.00 |
| TRINITY_sp Q9CB0RABF1    | Ras-related protein | 51.40 | 0.00 |
| TRINITY_sp Q9SL7TCX6     | Protein tesmin/TSO1 | 51.40 | 0.00 |
| TRINITY_sp Q9UNFCDC14A   | Dual specificity pr | 51.40 | 0.00 |
| TRINITY_sp O3496ytsJ     | Probable NAD-depend | 51.40 | 0.00 |
| TRINITY_sp Q5888TEB      | Helicase and polyme | 51.40 | 0.00 |
| TRINITY_sp P0C61Dnah2    | Dynein heavy chain  | 51.40 | 0.00 |
| TRINITY_sp Q9NR2HELLS    | Lymphoid-specific h | 51.40 | 0.00 |
| TRINITY_sp P2411(CDKA-1  | Cyclin-dependent ki | 51.40 | 0.00 |
| TRINITY_sp Q7ZU6stk3     | Serine/threonine-pr | 51.40 | 0.00 |
| TRINITY_sp P8329CBR2     | NADH-cytochrome b5  | 51.40 | 0.00 |
| TRINITY_sp G5EGHlet-92   | Serine/threonine-pr | 51.40 | 0.00 |
| TRINITY_sp P7773yajO     | Uncharacterized oxi | 51.40 | 0.00 |
| TRINITY_sp Q4072RGP2     | Ras-related protein | 51.40 | 0.00 |
| TRINITY_sp Q9C50SUF4     | Protein SUPPRESSOR  | 51.40 | 0.00 |
| TRINITY_sp Q0DJ6Os05g031 | Coatomer subunit de | 51.40 | 0.00 |
| TRINITY_sp Q1LK6gluQ     | Glutamyl-Q tRNA(Asp | 51.40 | 0.00 |
| TRINITY_sp B0F91GC6      | Golgin candidate 6  | 51.40 | 0.00 |



|                           |                     |       |      |
|---------------------------|---------------------|-------|------|
| TRINITY_sp Q554{slr0537   | Uncharacterized sug | 51.40 | 0.00 |
| TRINITY_sp O649{RPT1      | 26S protease regula | 51.40 | 0.00 |
| TRINITY_sp Q9UT{SPAC343.  | Uncharacterized WD  | 51.40 | 0.00 |
| TRINITY_sp Q6B8{TKT       | Transketolase OS=Bo | 51.40 | 0.00 |
| TRINITY_sp P152{AMD1      | AMP deaminase OS=Sa | 51.40 | 0.00 |
| TRINITY_sp B7NT{ydiU      | UPF0061 protein Ydi | 51.40 | 0.00 |
| TRINITY_sp A8WK{CBG24191  | Putative ATP-depend | 51.40 | 0.00 |
| TRINITY_sp Q554{aslB      | Acyl-CoA synthetase | 51.40 | 0.00 |
| TRINITY_sp Q9XY{noxA      | Superoxide-generati | 51.40 | 0.00 |
| TRINITY_sp P428{MTHFR     | Methylenetetrahydro | 51.40 | 0.00 |
| TRINITY_sp Q007{glpV      | Glycogen phosphoryl | 51.40 | 0.00 |
| TRINITY_sp Q940{RBX1A     | RING-box protein 1a | 51.40 | 0.00 |
| TRINITY_sp Q54B{ggps1     | Geranylgeranyl pyro | 51.40 | 0.00 |
| TRINITY_sp Q8L8{RECQL4A   | ATP-dependent DNA h | 51.40 | 0.00 |
| TRINITY_sp P0CR{SEC23     | Protein transport p | 51.40 | 0.00 |
| TRINITY_sp Q9FL{At5g645{  | Probable sphingolip | 51.40 | 0.00 |
| TRINITY_sp Q54UV{DDB_G02{ | Bromodomain-contain | 51.40 | 0.00 |
| TRINITY_sp P933{UPP       | Uracil phosphoribos | 51.40 | 0.00 |
| TRINITY_sp Q7XP{Os04g06{  | Kinesin-like calmod | 51.40 | 0.00 |
| TRINITY_sp D2K6{SLT2      | Sodium/sulfate cotr | 51.40 | 0.00 |
| TRINITY_sp P0CM{CNBB373{  | Pentafunctional ARO | 51.40 | 0.00 |
| TRINITY_sp Q642{impact    | Protein IMPACT OS=D | 51.40 | 0.00 |
| TRINITY_sp Q3ZC{ANAPC11   | Anaphase-promoting  | 51.30 | 0.00 |
| TRINITY_sp O605{CDC40     | Pre-mRNA-processing | 51.30 | 0.00 |
| TRINITY_sp Q8R1{Phykpl    | 5-phosphohydroxy-L- | 51.30 | 0.00 |
| TRINITY_sp P905{-         | 66 kDa stress prote | 51.30 | 0.00 |
| TRINITY_sp Q9FN{At5g227{  | Putative SWI/SNF-re | 51.30 | 0.00 |
| TRINITY_sp Q498{smarcal1  | SWI/SNF-related mat | 51.30 | 0.00 |
| TRINITY_sp Q8LF{IDH1      | Isocitrate dehydrog | 51.30 | 0.00 |
| TRINITY_sp Q54DM{alg11    | GDP-Man:Man(3)GlcNA | 51.30 | 0.00 |
| TRINITY_sp Q7KW{exosc3    | Putative exosome co | 51.30 | 0.00 |
| TRINITY_sp Q279{COPA      | Coatomer subunit al | 51.30 | 0.00 |
| TRINITY_sp A4IQ{namA      | NADPH dehydrogenase | 51.30 | 0.00 |
| TRINITY_sp Q102{rrp8      | 25S rRNA (adenine(6 | 51.30 | 0.00 |
| TRINITY_sp Q55CI{DDB_G02{ | Probable NADH dehyd | 51.30 | 0.00 |
| TRINITY_sp Q920{pcmt      | Protein-L-isoaspart | 51.30 | 0.00 |
| TRINITY_sp Q9FM{FRD21B    | Probable cysteine p | 51.30 | 0.00 |
| TRINITY_sp Q9QZ{Eif2ak4   | eIF-2-alpha kinase  | 51.30 | 0.00 |
| TRINITY_sp Q9M8{EMB2768   | Tyrosine--tRNA liga | 51.30 | 0.00 |
| TRINITY_sp Q8GT{CCS1      | Cytochrome c biogen | 51.30 | 0.00 |
| TRINITY_sp Q9Y2{FSTK38L   | Serine/threonine-pr | 51.30 | 0.00 |
| TRINITY_sp Q84Q{PPT2      | Phosphoenolpyruvate | 51.30 | 0.00 |
| TRINITY_sp P078{SUOX      | Sulfite oxidase OS= | 51.30 | 0.00 |
| TRINITY_sp B9G2{Os09g02{  | Auxin transport pro | 51.30 | 0.00 |
| TRINITY_sp Q339{BGLU34    | Beta-glucosidase 34 | 51.30 | 0.00 |
| TRINITY_sp Q89N{guaA      | GMP synthase [gluta | 51.30 | 0.00 |
| TRINITY_sp Q75V{dnaJ      | Chaperone protein D | 51.30 | 0.00 |
| TRINITY_sp F4J8{FRP5      | rRNA biogenesis pro | 51.30 | 0.00 |
| TRINITY_sp F4I2{CTN       | Cactin OS=Arabidops | 51.30 | 0.00 |
| TRINITY_sp Q55G{cdk10     | Probable cyclin-dep | 51.30 | 0.00 |
| TRINITY_sp O748{caf1      | Poly(A) ribonucleas | 51.30 | 0.00 |
| TRINITY_sp Q54P{pwp2      | Periodic tryptophan | 51.30 | 0.00 |
| TRINITY_sp Q0WS{ALDH22A1  | Aldehyde dehydrogen | 51.30 | 0.00 |
| TRINITY_sp Q9ZW{PUMP2     | Mitochondrial uncou | 51.20 | 0.00 |
| TRINITY_sp P623{CPK4      | Calcium-dependent p | 51.20 | 0.00 |
| TRINITY_sp Q9BS{TUBGCP2   | Gamma-tubulin compl | 51.20 | 0.00 |

|                           |                     |       |      |
|---------------------------|---------------------|-------|------|
| TRINITY_sp Q4WP3cym1      | Mitochondrial prese | 51.20 | 0.00 |
| TRINITY_sp Q55E5pats1     | Probable serine/thr | 51.20 | 0.00 |
| TRINITY_sp P356(COPZ1     | Coatomer subunit ze | 51.20 | 0.00 |
| TRINITY_sp Q0922cpna-2    | Copine family prote | 51.20 | 0.00 |
| TRINITY_sp Q8BG(CZadh2    | Prostaglandin reduc | 51.20 | 0.00 |
| TRINITY_sp P4075Rac1      | Ras-related protein | 51.20 | 0.00 |
| TRINITY_sp O430(-         | Kinesin heavy chain | 51.20 | 0.00 |
| TRINITY_sp Q9ZN(SKD1      | Protein SUPPRESSOR  | 51.20 | 0.00 |
| TRINITY_sp Q4254UBC7      | Ubiquitin-conjugati | 51.20 | 0.00 |
| TRINITY_sp P5348arp2      | Actin-related prote | 51.20 | 0.00 |
| TRINITY_sp Q9SU(AUXI1     | Auxilin-related pro | 51.20 | 0.00 |
| TRINITY_sp Q5XIN(Traf3ip1 | TRAF3-interacting p | 51.20 | 0.00 |
| TRINITY_sp Q8H8(Os03g028  | Cardiolipin synthas | 51.20 | 0.00 |
| TRINITY_sp Q8H0\ABCf3     | ABC transporter F f | 51.20 | 0.00 |
| TRINITY_sp Q8VH2Imp4      | U3 small nucleolar  | 51.20 | 0.00 |
| TRINITY_sp Q8VZ(CBSDUF6   | DUF21 domain-contai | 51.20 | 0.00 |
| TRINITY_sp Q6PC5btf3l4    | Transcription facto | 51.20 | 0.00 |
| TRINITY_sp Q9C9(FAPUM7    | Putative pumilio ho | 51.20 | 0.00 |
| TRINITY_sp Q6CF2YAF9      | Protein AF-9 homolo | 51.20 | 0.00 |
| TRINITY_sp Q54EIgrwd1     | Glutamate-rich WD r | 51.20 | 0.00 |
| TRINITY_sp A9AF7recA      | Protein RecA OS=Bur | 51.20 | 0.00 |
| TRINITY_sp Q8H1(At4g2691  | Dihydrolipoyllysine | 51.20 | 0.00 |
| TRINITY_sp P5464pkbA      | RAC family serine/t | 51.20 | 0.00 |
| TRINITY_sp Q3921NRPB3     | DNA-directed RNA po | 51.20 | 0.00 |
| TRINITY_sp Q9XY5noxA      | Superoxide-generati | 51.20 | 0.00 |
| TRINITY_sp P5464pkbA      | RAC family serine/t | 51.20 | 0.00 |
| TRINITY_sp Q557fdpp3-1    | Dipeptidyl peptidas | 51.20 | 0.00 |
| TRINITY_sp P8391CBX1      | Chromobox protein h | 51.20 | 0.00 |
| TRINITY_sp Q9ZV6AXL1      | NEDD8-activating en | 51.20 | 0.00 |
| TRINITY_sp Q9SU7PAO5      | Probable polyamine  | 51.20 | 0.00 |
| TRINITY_sp Q8W4fAt4g0467  | tRNA wybutosine-syn | 51.20 | 0.00 |
| TRINITY_sp Q6K4(MRSZP21   | Serine/arginine-ric | 51.20 | 0.00 |
| TRINITY_sp O1543ABCC4     | Multidrug resistanc | 51.20 | 0.00 |
| TRINITY_sp Q54U(kif3      | Kinesin-related pro | 51.20 | 0.00 |
| TRINITY_sp A8IQ5CCDC40    | Coiled-coil domain- | 51.20 | 0.00 |
| TRINITY_sp O018(rab-11.1  | Ras-related protein | 51.20 | 0.00 |
| TRINITY_sp Q32PELSM3      | U6 snRNA-associated | 51.20 | 0.00 |
| TRINITY_sp Q9M82UGT80A2   | Sterol 3-beta-gluco | 51.20 | 0.00 |
| TRINITY_sp O2285At2g4725  | Probable pre-mRNA-s | 51.20 | 0.00 |
| TRINITY_sp Q097(pld1      | Phospholipase D1 OS | 51.20 | 0.00 |
| TRINITY_sp O9443SPBC660   | Uncharacterized RNA | 51.10 | 0.00 |
| TRINITY_sp O0915Man2b1    | Lysosomal alpha-man | 51.10 | 0.00 |
| TRINITY_sp Q3923At5g2747  | Serine--tRNA ligase | 51.10 | 0.00 |
| TRINITY_sp Q7KQIARF1      | ADP-ribosylation fa | 51.10 | 0.00 |
| TRINITY_sp Q9LE5At5g0818  | H/ACA ribonucleopro | 51.10 | 0.00 |
| TRINITY_sp Q3T0(CPROSC    | Proline synthase co | 51.10 | 0.00 |
| TRINITY_sp Q69TYPRXIIE-1  | Peroxiredoxin-2E-1, | 51.10 | 0.00 |
| TRINITY_sp Q1343SF3B2     | Splicing factor 3B  | 51.10 | 0.00 |
| TRINITY_sp Q6IP7akt2-b    | RAC-beta serine/thr | 51.10 | 0.00 |
| TRINITY_sp Q54F7cpnE      | Copine-E OS=Dictyos | 51.10 | 0.00 |
| TRINITY_sp Q9UQ(CMOK      | MAPK/MAK/MRK overla | 51.10 | 0.00 |
| TRINITY_sp Q54N6sfxn      | Sideroflexin OS=Dic | 51.10 | 0.00 |
| TRINITY_sp P4123Abca2     | ATP-binding cassett | 51.10 | 0.00 |
| TRINITY_sp P0CD6alg7      | UDP-N-acetylglucosa | 51.10 | 0.00 |
| TRINITY_sp Q93Z1CKL3      | Casein kinase 1-lik | 51.10 | 0.00 |
| TRINITY_sp Q1LZ7LIMD2     | LIM domain-containi | 51.10 | 0.00 |

|                           |                     |       |      |
|---------------------------|---------------------|-------|------|
| TRINITY_sp A8JF7ODA1      | Outer dynein arm pr | 51.10 | 0.00 |
| TRINITY_sp Q54GVDDDB_G028 | Coiled-coil domain- | 51.10 | 0.00 |
| TRINITY_sp Q869MDDB_G027  | 3-hydroxybutyryl-Co | 51.10 | 0.00 |
| TRINITY_sp Q54Rfpyk       | Pyruvate kinase OS= | 51.10 | 0.00 |
| TRINITY_sp A2ARfPpip5k1   | Inositol hexakispho | 51.10 | 0.00 |
| TRINITY_sp Q9P2IWD35      | WD repeat-containin | 51.10 | 0.00 |
| TRINITY_sp Q86C6tor       | Target of rapamycin | 51.10 | 0.00 |
| TRINITY_sp A5D97SPRTN     | SprT-like domain-co | 51.10 | 0.00 |
| TRINITY_sp Q9UJ7TUBE1     | Tubulin epsilon cha | 51.10 | 0.00 |
| TRINITY_sp O0493GDHA      | Glutamate dehydroge | 51.10 | 0.00 |
| TRINITY_sp Q54R2yipf6     | Protein YIPF6 homol | 51.10 | 0.00 |
| TRINITY_sp O6488COX10     | Protoheme IX farnes | 51.10 | 0.00 |
| TRINITY_sp Q9SI7RPN1A     | 26S proteasome non- | 51.10 | 0.00 |
| TRINITY_sp P290CTIV1      | Acid beta-fructofur | 51.10 | 0.00 |
| TRINITY_sp Q3UT7Cdk15     | Cyclin-dependent ki | 51.10 | 0.00 |
| TRINITY_sp O7517CNOT3     | CCR4-NOT transcript | 51.10 | 0.00 |
| TRINITY_sp Q9NVVRLIM      | E3 ubiquitin-protei | 51.10 | 0.00 |
| TRINITY_sp Q5M73TH1       | Thiamine biosynthes | 51.10 | 0.00 |
| TRINITY_sp O8231At2g2583  | Probable transcript | 51.10 | 0.00 |
| TRINITY_sp Q93YURUS6      | Protein root UVB se | 51.10 | 0.00 |
| TRINITY_sp P1097-         | Retrovirus-related  | 51.10 | 0.00 |
| TRINITY_sp O6474At2g3484  | Coatomer subunit ep | 51.10 | 0.00 |
| TRINITY_sp Q6DG9kctd6     | BTB/POZ domain-cont | 51.10 | 0.00 |
| TRINITY_sp Q68E7amdh1     | Probable imidazolon | 51.10 | 0.00 |
| TRINITY_sp Q9BR8RIOK1     | Serine/threonine-pr | 51.10 | 0.00 |
| TRINITY_sp P7362sl11770   | Uncharacterized pro | 51.10 | 0.00 |
| TRINITY_sp O652CACX2      | Acyl-coenzyme A oxi | 51.10 | 0.00 |
| TRINITY_sp P5652HDAC3     | Histone deacetylase | 51.10 | 0.00 |
| TRINITY_sp Q9C9CSPPA      | Serine protease SPP | 51.10 | 0.00 |
| TRINITY_sp F4KD7DUR3      | Urea-proton symport | 51.10 | 0.00 |
| TRINITY_sp Q9SM7AAE3      | Oxalate--CoA ligase | 51.10 | 0.00 |
| TRINITY_sp P1141CRYZ      | Quinone oxidoreduct | 51.00 | 0.00 |
| TRINITY_sp Q9C0CDNAH6     | Dynein heavy chain  | 51.00 | 0.00 |
| TRINITY_sp Q1209TSR3      | Ribosome biogenesis | 51.00 | 0.00 |
| TRINITY_sp P5092upp       | Uracil phosphoribos | 51.00 | 0.00 |
| TRINITY_sp Q9C5VGRF12     | 14-3-3-like protein | 51.00 | 0.00 |
| TRINITY_sp Q55E5pats1     | Probable serine/thr | 51.00 | 0.00 |
| TRINITY_sp Q54Q9phr2aB    | Serine/threonine-pr | 51.00 | 0.00 |
| TRINITY_sp Q9LE7At5g0818  | H/ACA ribonucleopro | 51.00 | 0.00 |
| TRINITY_sp Q9JI1Stk3      | Serine/threonine-pr | 51.00 | 0.00 |
| TRINITY_sp Q8RX7RH8       | DEAD-box ATP-depend | 51.00 | 0.00 |
| TRINITY_sp Q0383MSH6      | DNA mismatch repair | 51.00 | 0.00 |
| TRINITY_sp Q54R7cnrB      | CLPTM1-like membran | 51.00 | 0.00 |
| TRINITY_sp Q9LXIHAM2      | Histone acetyltrans | 51.00 | 0.00 |
| TRINITY_sp P2644PARP1     | Poly [ADP-ribose] p | 51.00 | 0.00 |
| TRINITY_sp Q96P1NSUN5     | Probable 28S rRNA ( | 51.00 | 0.00 |
| TRINITY_sp Q9RH7ssb2      | Single-stranded DNA | 51.00 | 0.00 |
| TRINITY_sp Q7ZX7kif19     | Kinesin-like protei | 51.00 | 0.00 |
| TRINITY_sp B0DZIAMPP      | Probable Xaa-Pro am | 51.00 | 0.00 |
| TRINITY_sp Q8LR7HDA18     | Histone deacetylase | 51.00 | 0.00 |
| TRINITY_sp Q8T27mccb      | Methylcrotonoyl-CoA | 51.00 | 0.00 |
| TRINITY_sp Q8AV7syf2      | Pre-mRNA-splicing f | 51.00 | 0.00 |
| TRINITY_sp Q8BZ7Slc25a21  | Mitochondrial 2-oxo | 51.00 | 0.00 |
| TRINITY_sp B3PF7dnaK      | Chaperone protein D | 51.00 | 0.00 |
| TRINITY_sp O0461CURT1A    | Protein CURVATURE T | 51.00 | 0.00 |
| TRINITY_sp Q9LZ7RPL36C    | 60S ribosomal prote | 51.00 | 0.00 |

|                          |                     |       |      |
|--------------------------|---------------------|-------|------|
| TRINITY_sp P2752LHCA4    | Chlorophyll a-b bin | 51.00 | 0.00 |
| TRINITY_sp Q9C0CDNAH6    | Dynein heavy chain  | 51.00 | 0.00 |
| TRINITY_sp Q6AU0DBR1     | Lariat debranching  | 51.00 | 0.00 |
| TRINITY_sp P2793AMY1.2   | Alpha-amylase isozy | 51.00 | 0.00 |
| TRINITY_sp B4F10hcp      | Hydroxylamine reduc | 51.00 | 0.00 |
| TRINITY_sp P6786CSNK2B   | Casein kinase II su | 51.00 | 0.00 |
| TRINITY_sp Q8MV0gbcC     | Cyclic GMP-binding  | 51.00 | 0.00 |
| TRINITY_sp A2XF0PDC2     | Pyruvate decarboxyl | 51.00 | 0.00 |
| TRINITY_sp Q5SNI0s06g017 | Fanconi-associated  | 51.00 | 0.00 |
| TRINITY_sp O8656sdaA     | L-serine dehydratas | 51.00 | 0.00 |
| TRINITY_sp O9443SPBC660  | Uncharacterized RNA | 50.90 | 0.00 |
| TRINITY_sp Q1573INPP5J   | Phosphatidylinosito | 50.90 | 0.00 |
| TRINITY_sp Q7NM0cry      | Cryptochrome DASH O | 50.90 | 0.00 |
| TRINITY_sp Q5FW4aspdh    | Putative L-aspartat | 50.90 | 0.00 |
| TRINITY_sp P8280Gfpt1    | Glutamine--fructose | 50.90 | 0.00 |
| TRINITY_sp O1847mus308   | DNA polymerase thet | 50.90 | 0.00 |
| TRINITY_sp Q2SR0aguA     | Putative agmatine d | 50.90 | 0.00 |
| TRINITY_sp Q9H52DHX35    | Probable ATP-depend | 50.90 | 0.00 |
| TRINITY_sp Q9SMTAAE3     | Oxalate--CoA ligase | 50.90 | 0.00 |
| TRINITY_sp Q86A0spkA-1   | Stress-activated pr | 50.90 | 0.00 |
| TRINITY_sp O5160pfkA     | ATP-dependent 6-pho | 50.90 | 0.00 |
| TRINITY_sp Q1036sck2     | Serine/threonine-pr | 50.90 | 0.00 |
| TRINITY_sp P2580UBC1     | Ubiquitin-conjugati | 50.90 | 0.00 |
| TRINITY_sp Q9PW0GPHN     | Gephyrin OS=Gallus  | 50.90 | 0.00 |
| TRINITY_sp P5932Ythdf1   | YTH domain-containi | 50.90 | 0.00 |
| TRINITY_sp Q0WR0TSC10A   | 3-dehydrosphingani  | 50.90 | 0.00 |
| TRINITY_sp Q8696scsB     | Succinate--CoA liga | 50.90 | 0.00 |
| TRINITY_sp Q54P0csn5     | COP9 signalosome co | 50.90 | 0.00 |
| TRINITY_sp P2751CBR      | Carotene biosynthes | 50.90 | 0.00 |
| TRINITY_sp Q8L60RPOT1-T0 | DNA-directed RNA po | 50.90 | 0.00 |
| TRINITY_sp B0C07pdxH     | Pyridoxine/pyridoxa | 50.90 | 0.00 |
| TRINITY_sp O0754yheH     | Probable multidrug  | 50.90 | 0.00 |
| TRINITY_sp Q4KM0cry-das0 | Cryptochrome DASH O | 50.90 | 0.00 |
| TRINITY_sp O2204ANP1     | Mitogen-activated p | 50.90 | 0.00 |
| TRINITY_sp Q8RW0TMN10    | Transmembrane 9 sup | 50.90 | 0.00 |
| TRINITY_sp Q9XF0DDM1     | ATP-dependent DNA h | 50.90 | 0.00 |
| TRINITY_sp P3404gpaD     | Guanine nucleotide- | 50.90 | 0.00 |
| TRINITY_sp F8RP0HOP      | Hsp70-Hsp90 organiz | 50.90 | 0.00 |
| TRINITY_sp P1859Atp2a3   | Sarcoplasmic/endopl | 50.90 | 0.00 |
| TRINITY_sp Q86A0spkA-1   | Stress-activated pr | 50.90 | 0.00 |
| TRINITY_sp Q5ZI0TRAPPC3  | Trafficking protein | 50.90 | 0.00 |
| TRINITY_sp O5487AIMP1    | Aminoacyl tRNA synt | 50.90 | 0.00 |
| TRINITY_sp H3JU0SGT1     | Peptidyl serine alp | 50.90 | 0.00 |
| TRINITY_sp P5344CTN      | Caltractin OS=Naegl | 50.90 | 0.00 |
| TRINITY_sp Q8LC0At5g0390 | Iron-sulfur assembl | 50.90 | 0.00 |
| TRINITY_sp F8WL0Kif28p   | Kinesin-like protei | 50.80 | 0.00 |
| TRINITY_sp Q29A0GA14342  | Mitochondrial GTPas | 50.80 | 0.00 |
| TRINITY_sp Q4060RGB1     | Guanine nucleotide- | 50.80 | 0.00 |
| TRINITY_sp Q54N0memo1    | Protein MEMO1 homol | 50.80 | 0.00 |
| TRINITY_sp Q9XW0acdh-11  | Acyl-CoA dehydrogen | 50.80 | 0.00 |
| TRINITY_sp Q54V0ctps     | CTP synthase OS=Dic | 50.80 | 0.00 |
| TRINITY_sp Q8UV0brix1    | Ribosome biogenesis | 50.80 | 0.00 |
| TRINITY_sp Q8R20Ptrh2    | Peptidyl-tRNA hydro | 50.80 | 0.00 |
| TRINITY_sp Q54C0csn6     | COP9 signalosome co | 50.80 | 0.00 |
| TRINITY_sp Q9M00MFDX1    | Adrenodoxin-like pr | 50.80 | 0.00 |
| TRINITY_sp Q9LK0AMT1-5   | Putative ammonium t | 50.80 | 0.00 |

|                  |          |                     |       |      |
|------------------|----------|---------------------|-------|------|
| TRINITY_sp Q91VF | Ddx1     | ATP-dependent RNA h | 50.80 | 0.00 |
| TRINITY_sp Q54EY | eif2b2   | Translation initiat | 50.80 | 0.00 |
| TRINITY_sp Q8K3I | Tdh      | L-threonine 3-dehyd | 50.80 | 0.00 |
| TRINITY_sp Q6317 | Dnah7    | Dynein heavy chain  | 50.80 | 0    |
| TRINITY_sp Q1EB\ | BPM5     | BTB/POZ and MATH do | 50.80 | 0.00 |
| TRINITY_sp Q1545 | SF3A1    | Splicing factor 3A  | 50.80 | 0.00 |
| TRINITY_sp Q9FK1 | COX15    | Cytochrome c oxidas | 50.80 | 0.00 |
| TRINITY_sp P3414 | racA     | Rho-related protein | 50.80 | 0.00 |
| TRINITY_sp P2161 | -        | Pyrophosphate-energ | 50.80 | 0.00 |
| TRINITY_sp P4177 | Nolc1    | Nucleolar and coile | 50.80 | 0.00 |
| TRINITY_sp Q5QU3 | msbA     | Lipid A export ATP- | 50.80 | 0.00 |
| TRINITY_sp Q0922 | cpna-2   | Copine family prote | 50.80 | 0.00 |
| TRINITY_sp Q3905 | CNX1     | Molybdopterin biosy | 50.80 | 0.00 |
| TRINITY_sp Q8WX\ | DNAH7    | Dynein heavy chain  | 50.80 | 0.00 |
| TRINITY_sp P5467 | patB     | Probable plasma mem | 50.80 | 0.00 |
| TRINITY_sp P3899 | LYS5     | Saccharopine dehydr | 50.80 | 0.00 |
| TRINITY_sp Q9FV\ | NAP5     | Probable non-intrin | 50.80 | 0.00 |
| TRINITY_sp Q8T21 | sepA     | Serine/threonine-pr | 50.80 | 0.00 |
| TRINITY_sp O1551 | POLR2D   | DNA-directed RNA po | 50.80 | 0.00 |
| TRINITY_sp P1512 | AKR1B1   | Aldose reductase OS | 50.80 | 0.00 |
| TRINITY_sp Q3MG8 | grpE     | Protein GrpE OS=Ana | 50.80 | 0.00 |
| TRINITY_sp Q9469 | RAP1     | Ras-related protein | 50.80 | 0.00 |
| TRINITY_sp F4JN\ | P4H8     | Probable prolyl 4-h | 50.80 | 0.00 |
| TRINITY_sp Q9P95 | alxA     | Alternative oxidase | 50.80 | 0.00 |
| TRINITY_sp Q9C0\ | DNAH6    | Dynein heavy chain  | 50.80 | 0.00 |
| TRINITY_sp O8065 | SKIP     | SNW/SKI-interacting | 50.80 | 0.00 |
| TRINITY_sp Q8X02 | carRA    | Bifunctional lycope | 50.80 | 0.00 |
| TRINITY_sp P5498 | carB     | Phytoene desaturase | 50.80 | 0.00 |
| TRINITY_sp Q56V5 | FAD7     | sn-2 acyl-lipid ome | 50.80 | 0.00 |
| TRINITY_sp Q9C5I | At3g4742 | Putative glycerol-3 | 50.80 | 0.00 |
| TRINITY_sp Q54IF | DDB_G028 | WASH complex subuni | 50.80 | 0.00 |
| TRINITY_sp O461\ | (noi     | Splicing factor 3A  | 50.80 | 0.00 |
| TRINITY_sp Q6C6\ | ATM1     | Iron-sulfur cluster | 50.80 | 0.00 |
| TRINITY_sp O6007 | ubp12    | Probable ubiquitin  | 50.80 | 0.00 |
| TRINITY_sp Q86L\ | (trap1   | TNF receptor-associ | 50.80 | 0.00 |
| TRINITY_sp O7603 | CDKL5    | Cyclin-dependent ki | 50.80 | 0.00 |
| TRINITY_sp Q9HC5 | XAB2     | Pre-mRNA-splicing f | 50.80 | 0.00 |
| TRINITY_sp Q2R0\ | U2AF65A  | Splicing factor U2a | 50.80 | 0.00 |
| TRINITY_sp Q8BM\ | Lars     | Leucine--tRNA ligas | 50.80 | 0    |
| TRINITY_sp Q9Z27 | MBTPS1   | Membrane-bound tran | 50.80 | 0.00 |
| TRINITY_sp Q551H | fray2    | Serine/threonine-pr | 50.80 | 0.00 |
| TRINITY_sp P0257 | -        | Actin-1 OS=Acantham | 50.80 | 0.00 |
| TRINITY_sp Q9Y37 | COQ4     | Ubiquinone biosynth | 50.80 | 0.00 |
| TRINITY_sp P5427 | Pms2     | Mismatch repair end | 50.70 | 0.00 |
| TRINITY_sp Q8QZ\ | Fgpt     | Alanine aminotransf | 50.70 | 0.00 |
| TRINITY_sp Q5ZM7 | PRPF19   | Pre-mRNA-processing | 50.70 | 0.00 |
| TRINITY_sp Q8RB\ | (dnaJ    | Chaperone protein D | 50.70 | 0.00 |
| TRINITY_sp Q3S27 | mokA     | Lovastatin nonaketi | 50.70 | 0.00 |
| TRINITY_sp Q86C\ | (tor     | Target of rapamycin | 50.70 | 0.00 |
| TRINITY_sp Q6EM\ | TTLL5    | Tubulin polyglutamy | 50.70 | 0.00 |
| TRINITY_sp Q8VY1 | LSM8     | Sm-like protein LSM | 50.70 | 0.00 |
| TRINITY_sp Q7YS\ | vcanA    | Calcineurin subunit | 50.70 | 0.00 |
| TRINITY_sp Q9ZV\ | UBC23    | Probable ubiquitin- | 50.70 | 0.00 |
| TRINITY_sp Q6P3\ | FNEK5    | Serine/threonine-pr | 50.70 | 0.00 |
| TRINITY_sp Q9V3I | Dyrk2    | Dual specificity ty | 50.70 | 0.00 |
| TRINITY_sp Q52K1 | Srrm1    | Serine/arginine rep | 50.70 | 0.00 |

|                              |                     |       |      |
|------------------------------|---------------------|-------|------|
| TRINITY_sp Q8LB(DAPB2        | 4-hydroxy-tetrahydr | 50.70 | 0.00 |
| TRINITY_sp O816(KIN14G       | Kinesin-like protei | 50.70 | 0.00 |
| TRINITY_sp Q2357dbt-1        | Lipoamide acyltrans | 50.70 | 0.00 |
| TRINITY_sp Q9P77vas2         | AP-1 complex subuni | 50.70 | 0.00 |
| TRINITY_sp Q54P5cpnC         | Copine-C OS=Dictyos | 50.70 | 0.00 |
| TRINITY_sp Q54I1smkA         | Suppressor of Mek1  | 50.70 | 0.00 |
| TRINITY_sp Q9ATFADA2B        | Transcriptional ada | 50.70 | 0.00 |
| TRINITY_sp Q9ZT5Os06g05(     | Probable methionine | 50.70 | 0.00 |
| TRINITY_sp Q5587argS1        | Probable arginine-- | 50.70 | 0.00 |
| TRINITY_sp Q0085MAPK         | Mitogen-activated p | 50.70 | 0.00 |
| TRINITY_sp Q5RJ(CNo110       | Nucleolar protein 1 | 50.70 | 0.00 |
| TRINITY_sp P5519PURKE        | Phosphoribosylamino | 50.70 | 0.00 |
| TRINITY_sp P4329MCM7         | DNA replication lic | 50.70 | 0.00 |
| TRINITY_sp P1946Gclc         | Glutamate--cysteine | 50.70 | 0.00 |
| TRINITY_sp Q9SHERUB1         | Ubiquitin-NEDD8-lik | 50.70 | 0.00 |
| TRINITY_sp Q9ASUPPAN         | Peter Pan-like prot | 50.70 | 0.00 |
| TRINITY_sp Q54U9pgmB         | Probable phosphoglu | 50.70 | 0.00 |
| TRINITY_sp Q54Y2ndrA         | Probable serine/thr | 50.70 | 0.00 |
| TRINITY_sp P4597USP5         | Ubiquitin carboxyl- | 50.70 | 0.00 |
| TRINITY_sp Q6QNM-            | Casein kinase I OS= | 50.70 | 0.00 |
| TRINITY_sp Q8LPIALPHA-AIAP-2 | complex subuni      | 50.70 | 0.00 |
| TRINITY_sp Q94C1At3g5212     | SURP and G-patch do | 50.70 | 0.00 |
| TRINITY_sp Q8T13kif5         | Kinesin-related pro | 50.70 | 0.00 |
| TRINITY_sp Q8VB2Clptm1       | Cleft lip and palat | 50.70 | 0.00 |
| TRINITY_sp Q6317Dnah7        | Dynein heavy chain  | 50.70 | 0    |
| TRINITY_sp B4SD2xerC         | Tyrosine recombinas | 50.70 | 0.00 |
| TRINITY_sp Q9H58HEATR1       | HEAT repeat-contain | 50.60 | 0.00 |
| TRINITY_sp P4648GDCSH        | Glycine cleavage sy | 50.60 | 0.00 |
| TRINITY_sp Q0VC2YTHDF2       | YTH domain-containi | 50.60 | 0.00 |
| TRINITY_sp Q5JLICIPK8        | CBL-interacting pro | 50.60 | 0.00 |
| TRINITY_sp I0IUIMCM9         | DNA helicase MCM9 O | 50.60 | 0.00 |
| TRINITY_sp Q2PQFAGL          | Glycogen debranchin | 50.60 | 0.00 |
| TRINITY_sp P3488pkc-1        | Protein kinase C-li | 50.60 | 0.00 |
| TRINITY_sp Q2413TH1          | Negative elongation | 50.60 | 0.00 |
| TRINITY_sp Q54N77tmk1        | Seven transmembrane | 50.60 | 0.00 |
| TRINITY_sp Q9ZPF CDC48B      | Cell division contr | 50.60 | 0.00 |
| TRINITY_sp Q96S1WDR24        | WD repeat-containin | 50.60 | 0.00 |
| TRINITY_sp Q86A9wars2        | Tryptophan--tRNA li | 50.60 | 0.00 |
| TRINITY_sp B3QWFfbp          | Fructose-1,6-bispho | 50.60 | 0.00 |
| TRINITY_sp Q75LVOs03g062     | U3 snoRNP-associate | 50.60 | 0.00 |
| TRINITY_sp Q4P62CYP3         | Peptidyl-prolyl cis | 50.60 | 0.00 |
| TRINITY_sp Q8INEAkt1         | RAC serine/threonin | 50.60 | 0.00 |
| TRINITY_sp Q1ZX9prlA         | Proliferation-assoc | 50.60 | 0.00 |
| TRINITY_sp F4HYIDCD          | Bifunctional D-cyst | 50.60 | 0.00 |
| TRINITY_sp Q8LHI0s07g063     | Transcription elong | 50.60 | 0.00 |
| TRINITY_sp P1147PSBP         | Oxygen-evolving enh | 50.60 | 0.00 |
| TRINITY_sp Q8L72DIT2         | Dicarboxylate trans | 50.60 | 0.00 |
| TRINITY_sp D2HX1MASTL        | Serine/threonine-pr | 50.60 | 0.00 |
| TRINITY_sp Q54H7adprh        | [Protein ADP-ribosy | 50.60 | 0.00 |
| TRINITY_sp Q9R17Abcc5        | Multidrug resistanc | 50.60 | 0.00 |
| TRINITY_sp Q8MZ9-            | Physarolisin OS=Phy | 50.60 | 0.00 |
| TRINITY_sp Q1473PPP2R5D      | Serine/threonine-pr | 50.60 | 0.00 |
| TRINITY_sp Q9NWM SMOX        | Spermine oxidase OS | 50.60 | 0.00 |
| TRINITY_sp P4929-            | Citrate synthase, g | 50.60 | 0.00 |
| TRINITY_sp Q0573YPTM2        | GTP-binding protein | 50.60 | 0.00 |
| TRINITY_sp Q54P\ppa1         | Inorganic pyrophosp | 50.60 | 0.00 |

|                          |                      |       |      |
|--------------------------|----------------------|-------|------|
| TRINITY_sp Q0J09TOP3B    | DNA topoisomerase 3  | 50.60 | 0.00 |
| TRINITY_sp Q9630SPY      | Probable UDP-N-acet  | 50.60 | 0.00 |
| TRINITY_sp Q54I4HndrB    | Probable serine/thr  | 50.60 | 0.00 |
| TRINITY_sp Q0394IM30     | Membrane-associated  | 50.60 | 0.00 |
| TRINITY_sp Q9SS0FAB1C    | Putative 1-phosphat  | 50.60 | 0.00 |
| TRINITY_sp Q3895At3g2656 | Probable pre-mRNA-s  | 50.60 | 0.00 |
| TRINITY_sp Q94K0CCT8     | T-complex protein 1  | 50.60 | 0.00 |
| TRINITY_sp Q1DX0PAB1     | Polyadenylate-bindi  | 50.60 | 0.00 |
| TRINITY_sp Q54K0Pelof1   | Transcription elong  | 50.60 | 0.00 |
| TRINITY_sp Q7F80CYCA1-1  | Cyclin-A1-1 OS=Oryz  | 50.60 | 0.00 |
| TRINITY_sp Q3894RAE1     | Protein RAE1 OS=Ara  | 50.60 | 0.00 |
| TRINITY_sp H2QL0PDE9A    | High affinity cGMP-  | 50.60 | 0.00 |
| TRINITY_sp Q3900ATPK2    | Serine/threonine-pr  | 50.60 | 0.00 |
| TRINITY_sp Q54P0smc2     | Structural maintena  | 50.50 | 0.00 |
| TRINITY_sp A6QL0SACM1L   | Phosphatidylinositi  | 50.50 | 0.00 |
| TRINITY_sp P6120DYNLL1   | Dynein light chain   | 50.50 | 0.00 |
| TRINITY_sp Q9LE0L2HGDH   | L-2-hydroxyglutarat  | 50.50 | 0.00 |
| TRINITY_sp Q2NL0TKTL1    | Transketolase-like   | 50.50 | 0.00 |
| TRINITY_sp Q8RW0ISTY17   | Serine/threonine-pr  | 50.50 | 0.00 |
| TRINITY_sp P2780ERV1     | Mitochondrial FAD-l  | 50.50 | 0.00 |
| TRINITY_sp Q1ZX0pXi      | Probable serine/thr  | 50.50 | 0.00 |
| TRINITY_sp Q55F0copa     | Coatomer subunit al  | 50.50 | 0.00 |
| TRINITY_sp Q54X0ap1b1    | AP-1 complex subuni  | 50.50 | 0.00 |
| TRINITY_sp A8EX0mnmG     | tRNA uridine 5-carb  | 50.50 | 0.00 |
| TRINITY_sp P4120Abca2    | ATP-binding cassett  | 50.50 | 0.00 |
| TRINITY_sp Q9T00IHSFB2B  | Heat stress transcr  | 50.50 | 0.00 |
| TRINITY_sp Q9M80FDJ1D    | Protein DJ-1 homolo  | 50.50 | 0.00 |
| TRINITY_sp Q8BY0Rdh12    | Retinol dehydrogena  | 50.50 | 0.00 |
| TRINITY_sp P1890YPK2     | Serine/threonine-pr  | 50.50 | 0.00 |
| TRINITY_sp Q54Q0Esir2A   | NAD-dependent deace  | 50.50 | 0.00 |
| TRINITY_sp P3120pab1     | Polyadenylate-bindi  | 50.50 | 0.00 |
| TRINITY_sp O8240At3g4610 | (Histidine--tRNA lig | 50.50 | 0.00 |
| TRINITY_sp Q6310Dnah1    | Dynein heavy chain   | 50.50 | 0.00 |
| TRINITY_sp Q9Z20Letm1    | LETM1 and EF-hand d  | 50.50 | 0.00 |
| TRINITY_sp Q5F30HCCS     | Cytochrome c-type h  | 50.50 | 0.00 |
| TRINITY_sp P0C80MCCRP1   | Probable serine/thr  | 50.50 | 0.00 |
| TRINITY_sp O9330smc3     | Structural maintena  | 50.50 | 0.00 |
| TRINITY_sp Q0160LHCA1    | Chlorophyll a-b bin  | 50.50 | 0.00 |
| TRINITY_sp Q9SM0SRP9     | Signal recognition   | 50.50 | 0.00 |
| TRINITY_sp Q3880NRPB11   | DNA-directed RNA po  | 50.50 | 0.00 |
| TRINITY_sp Q8AX0slc35b1  | Solute carrier fami  | 50.50 | 0.00 |
| TRINITY_sp Q54E0Igrwd1   | Glutamate-rich WD r  | 50.50 | 0.00 |
| TRINITY_sp B0R00si:dkey- | von Willebrand fact  | 50.50 | 0.00 |
| TRINITY_sp Q9FY0HPAT3    | Hydroxyproline O-ar  | 50.50 | 0.00 |
| TRINITY_sp P7750yfcG     | Disulfide-bond oxid  | 50.50 | 0.00 |
| TRINITY_sp Q99J0VAcyl1   | Aminoacylase-1 OS=M  | 50.50 | 0.00 |
| TRINITY_sp O2440UBP3     | Ubiquitin carboxyl-  | 50.50 | 0.00 |
| TRINITY_sp F4JR0At4g1846 | Probable pre-mRNA-s  | 50.50 | 0.00 |
| TRINITY_sp Q8BW0Dnah3    | Dynein heavy chain   | 50.50 | 0.00 |
| TRINITY_sp P2800RPC19    | DNA-directed RNA po  | 50.50 | 0.00 |
| TRINITY_sp Q8LC0PLP3B    | Thioredoxin domain-  | 50.50 | 0.00 |
| TRINITY_sp Q8QZ0FTat     | Tyrosine aminotrans  | 50.50 | 0.00 |
| TRINITY_sp O0490-        | Lon protease homolo  | 50.50 | 0.00 |
| TRINITY_sp Q53G0USP39    | U4/U6.U5 tri-snRNP-  | 50.50 | 0.00 |
| TRINITY_sp Q3920NTR1     | Thioredoxin reducta  | 50.50 | 0.00 |
| TRINITY_sp F4HY0IRE3     | Probable serine/thr  | 50.50 | 0.00 |

|                           |                     |       |      |
|---------------------------|---------------------|-------|------|
| TRINITY_sp Q9BW5SLC4A1AI  | Kanadaptin OS=Homo  | 50.50 | 0.00 |
| TRINITY_sp P3642ILSA      | Isoleucine--tRNA li | 50.50 | 0.00 |
| TRINITY_sp B2V6EhslU      | ATP-dependent prote | 50.50 | 0.00 |
| TRINITY_sp Q9FR5TOR       | Serine/threonine-pr | 50.50 | 0.00 |
| TRINITY_sp P545(yqjZ      | Uncharacterized pro | 50.50 | 0.00 |
| TRINITY_sp O042(PXN       | Peroxisomal nicotin | 50.50 | 0.00 |
| TRINITY_sp O004(MANBA     | Beta-mannosidase OS | 50.50 | 0.00 |
| TRINITY_sp Q9C0(DNAH6     | Dynein heavy chain  | 50.50 | 0.00 |
| TRINITY_sp Q9Y2(POLR3K    | DNA-directed RNA po | 50.50 | 0.00 |
| TRINITY_sp Q9SY(LHCA3     | Photosystem I chlor | 50.50 | 0.00 |
| TRINITY_sp Q54B(rfc3      | Probable replicatio | 50.40 | 0.00 |
| TRINITY_sp Q644(Atp7a     | Copper-transporting | 50.40 | 0.00 |
| TRINITY_sp Q08E(SARAF     | Store-operated calc | 50.40 | 0.00 |
| TRINITY_sp O322(yvgN      | Glyoxal reductase O | 50.40 | 0.00 |
| TRINITY_sp Q54NI DDB_G02( | Protein UXT homolog | 50.40 | 0.00 |
| TRINITY_sp Q1AU(rplM      | 50S ribosomal prote | 50.40 | 0.00 |
| TRINITY_sp Q86K(cycC      | Cyclin-C OS=Dictyos | 50.40 | 0.00 |
| TRINITY_sp P428(ZBP14     | 14 kDa zinc-binding | 50.40 | 0.00 |
| TRINITY_sp Q54F(mcfW      | Mitochondrial subst | 50.40 | 0.00 |
| TRINITY_sp Q86K(lap2a1-1  | AP-2 complex subuni | 50.40 | 0.00 |
| TRINITY_sp O811(PAA1      | Proteasome subunit  | 50.40 | 0.00 |
| TRINITY_sp Q10Q(ERV1      | FAD-linked sulphydr | 50.40 | 0.00 |
| TRINITY_sp P511(ANP32A    | Acidic leucine-rich | 50.40 | 0.00 |
| TRINITY_sp Q9PV(SNRPB     | Small nuclear ribon | 50.40 | 0.00 |
| TRINITY_sp Q8H0(EUEL-3    | Probable UDP-arabin | 50.40 | 0.00 |
| TRINITY_sp Q0II(DNAJC21   | DnaJ homolog subfam | 50.40 | 0.00 |
| TRINITY_sp P524(PAC1      | Proteasome subunit  | 50.40 | 0.00 |
| TRINITY_sp Q5ZJ(YARS      | Tyrosine--tRNA liga | 50.40 | 0.00 |
| TRINITY_sp O887(Birc6     | Baculoviral IAP rep | 50.40 | 0.00 |
| TRINITY_sp P067(CMD1      | Calmodulin OS=Sacch | 50.40 | 0.00 |
| TRINITY_sp Q9ES(Nek7      | Serine/threonine-pr | 50.40 | 0.00 |
| TRINITY_sp Q9DBE(Alg2     | Alpha-1,3/1,6-manno | 50.40 | 0.00 |
| TRINITY_sp B0TE(purH      | Bifunctional purine | 50.40 | 0.00 |
| TRINITY_sp O040(Atlg0894  | Phosphoglycerate mu | 50.40 | 0.00 |
| TRINITY_sp Q8W4(VHA-a3    | V-type proton ATPas | 50.40 | 0.00 |
| TRINITY_sp Q766(REV3      | DNA polymerase zeta | 50.40 | 0.00 |
| TRINITY_sp Q9HZ(etfA      | Electron transfer f | 50.40 | 0.00 |
| TRINITY_sp Q6ZG(SPP1      | Signal peptide pept | 50.40 | 0.00 |
| TRINITY_sp Q9C9(RER3      | Protein RETICULATA- | 50.40 | 0.00 |
| TRINITY_sp Q0E0(RIBA2     | Probable bifunction | 50.40 | 0.00 |
| TRINITY_sp P056(CTSZ      | Cathepsin Z OS=Bos  | 50.40 | 0.00 |
| TRINITY_sp P142(RPS24     | 40S ribosomal prote | 50.40 | 0.00 |
| TRINITY_sp Q91Y(Uckl1     | Uridine-cytidine ki | 50.30 | 0.00 |
| TRINITY_sp P0CD(alg7      | UDP-N-acetylglucosa | 50.30 | 0.00 |
| TRINITY_sp Q47P(pamO      | Phenylacetone monoo | 50.30 | 0.00 |
| TRINITY_sp Q9SH(RRP44A    | Exosome complex exo | 50.30 | 0.00 |
| TRINITY_sp Q182(rap-1     | Ras-related protein | 50.30 | 0.00 |
| TRINITY_sp Q9BW(CCDC94    | Coiled-coil domain- | 50.30 | 0.00 |
| TRINITY_sp Q86AI DDB_G02( | Probable myosin lig | 50.30 | 0.00 |
| TRINITY_sp P011(RAS1      | Ras-like protein 1  | 50.30 | 0.00 |
| TRINITY_sp Q6ZN(AGMO      | Alkylglycerol monoo | 50.30 | 0.00 |
| TRINITY_sp Q99L(Hibadh    | 3-hydroxyisobutyrat | 50.30 | 0.00 |
| TRINITY_sp Q9RX(treZ      | Malto-oligosyltreha | 50.30 | 0.00 |
| TRINITY_sp B1M7(prfA      | Peptide chain relea | 50.30 | 0.00 |
| TRINITY_sp Q17R(RAB21     | Ras-related protein | 50.30 | 0.00 |
| TRINITY_sp Q80W(Abcc12    | Multidrug resistanc | 50.30 | 0.00 |



|                          |                     |       |      |
|--------------------------|---------------------|-------|------|
| TRINITY_sp Q9FTMED34     | Mediator of RNA pol | 50.30 | 0.00 |
| TRINITY_sp B0G14ucpB     | Mitochondrial subst | 50.30 | 0.00 |
| TRINITY_sp Q63S2prmb     | 50S ribosomal prote | 50.30 | 0.00 |
| TRINITY_sp P4324MSH2     | DNA mismatch repair | 50.30 | 0.00 |
| TRINITY_sp Q9LFXPT       | Xylulose 5-phosphat | 50.30 | 0.00 |
| TRINITY_sp P3745hprT     | Hypoxanthine-guanin | 50.30 | 0.00 |
| TRINITY_sp O8055At2g4405 | 6,7-dimethyl-8-ribi | 50.30 | 0.00 |
| TRINITY_sp Q9XZ0culB     | Cullin-2 OS=Dictyos | 50.30 | 0.00 |
| TRINITY_sp Q84K4ABCA2    | ABC transporter A f | 50.30 | 0.00 |
| TRINITY_sp P5249UBA1     | Ubiquitin-activatin | 50.30 | 0.00 |
| TRINITY_sp Q4384SS3      | Soluble starch synt | 50.30 | 0.00 |
| TRINITY_sp P5115RAB22A   | Ras-related protein | 50.30 | 0.00 |
| TRINITY_sp P4039RIC1     | Ras-related protein | 50.30 | 0.00 |
| TRINITY_sp P4039RIC1     | Ras-related protein | 50.30 | 0.00 |
| TRINITY_sp Q9FG9QS       | Quinolinate synthas | 50.30 | 0.00 |
| TRINITY_sp Q9652CAT1     | Catalase-1 OS=Arabi | 50.30 | 0.00 |
| TRINITY_sp Q3905CNX1     | Molybdopterin biosy | 50.30 | 0.00 |
| TRINITY_sp Q6312Abcc2    | Canalicular multisp | 50.30 | 0.00 |
| TRINITY_sp A6N60Wdr35    | WD repeat-containin | 50.30 | 0    |
| TRINITY_sp P5370GFA1     | Glutamine--fructose | 50.30 | 0.00 |
| TRINITY_sp Q5E91BCS1L    | Mitochondrial chape | 50.20 | 0.00 |
| TRINITY_sp Q9VPICG13690  | Ribonuclease H2 sub | 50.20 | 0.00 |
| TRINITY_sp Q54KEgluD     | Glutamate dehydroge | 50.20 | 0.00 |
| TRINITY_sp O3221yvgN     | Glyoxal reductase O | 50.20 | 0.00 |
| TRINITY_sp O1543ABCC4    | Multidrug resistanc | 50.20 | 0.00 |
| TRINITY_sp Q55E1pykA     | Pyridoxal kinase OS | 50.20 | 0.00 |
| TRINITY_sp Q8A02asnS     | Asparagine--tRNA li | 50.20 | 0.00 |
| TRINITY_sp Q8BV1Mett16   | Methyltransferase-1 | 50.20 | 0.00 |
| TRINITY_sp Q7YSVcanA     | Calcineurin subunit | 50.20 | 0.00 |
| TRINITY_sp O9562DUS4L    | tRNA-dihydrouridine | 50.20 | 0.00 |
| TRINITY_sp P1593acu-8    | Acetyl-CoA hydrolas | 50.20 | 0.00 |
| TRINITY_sp O8246At5g2670 | Glutamate--tRNA lig | 50.20 | 0.00 |
| TRINITY_sp O6112svkA     | Serine/threonine-pr | 50.20 | 0.00 |
| TRINITY_sp P4679cysB     | Cystathionine beta- | 50.20 | 0.00 |
| TRINITY_sp Q73KEserS     | Serine--tRNA ligase | 50.20 | 0.00 |
| TRINITY_sp Q9C55RH5      | DEAD-box ATP-depend | 50.20 | 0.00 |
| TRINITY_sp Q3895At3g2656 | Probable pre-mRNA-s | 50.20 | 0.00 |
| TRINITY_sp Q8TD5DNAH3    | Dynein heavy chain  | 50.20 | 0.00 |
| TRINITY_sp Q8XIFdeoc     | Deoxyribose-phospha | 50.20 | 0.00 |
| TRINITY_sp Q8H30ILL8     | IAA-amino acid hydr | 50.20 | 0.00 |
| TRINITY_sp P2587RPL15    | 50S ribosomal prote | 50.20 | 0.00 |
| TRINITY_sp P5464pkbA     | RAC family serine/t | 50.20 | 0.00 |
| TRINITY_sp Q54T0rio2     | Serine/threonine-pr | 50.20 | 0.00 |
| TRINITY_sp Q55B1nmd3     | 60S ribosomal expor | 50.20 | 0.00 |
| TRINITY_sp P1556ade6     | Phosphoribosylamino | 50.20 | 0.00 |
| TRINITY_sp Q5631TM_0019  | Uncharacterized oxi | 50.20 | 0.00 |
| TRINITY_sp Q9Y61PARP3    | Poly [ADP-ribose] p | 50.20 | 0.00 |
| TRINITY_sp Q54S7wdr3     | WD repeat-containin | 50.20 | 0.00 |
| TRINITY_sp P7362mutS2    | Endonuclease MutS2  | 50.20 | 0.00 |
| TRINITY_sp O0419ISA1     | Isoamylase 1, chlor | 50.20 | 0.00 |
| TRINITY_sp B9DH1ARIA     | ARM REPEAT PROTEIN  | 50.20 | 0.00 |
| TRINITY_sp Q0846ADK-B    | Adenylate kinase 4  | 50.20 | 0.00 |
| TRINITY_sp Q10M1Os03g030 | DEAD-box ATP-depend | 50.10 | 0.00 |
| TRINITY_sp Q1030gdi1     | Probable secretory  | 50.10 | 0.00 |
| TRINITY_sp E1BN0ascc3    | Activating signal c | 50.10 | 0.00 |
| TRINITY_sp Q9Z00Txnrd2   | Thioredoxin reducta | 50.10 | 0.00 |

|                          |                     |       |      |
|--------------------------|---------------------|-------|------|
| TRINITY_sp P0477-        | Glutamine synthetas | 50.10 | 0.00 |
| TRINITY_sp Q54JHogdh     | 2-oxoglutarate dehy | 50.10 | 0.00 |
| TRINITY_sp Q54GEmdhA     | Probable malate deh | 50.00 | 0.00 |
| TRINITY_sp Q50E)ODO1     | Protein ODORANT1 OS | 50.00 | 0.00 |
| TRINITY_sp Q9UR)SPAC869  | Uncharacterized hem | 50.00 | 0.00 |
| TRINITY_sp Q008)MAPK     | Mitogen-activated p | 50.00 | 0.00 |
| TRINITY_sp Q4QT)NCS1     | S-norcoclaurine syn | 50.00 | 0.00 |
| TRINITY_sp P407)Rac1     | Ras-related protein | 50.00 | 0.00 |
| TRINITY_sp P631)SNRPN    | Small nuclear ribon | 50.00 | 0.00 |
| TRINITY_sp Q93D)sdcbA    | Putative ABC transp | 50.00 | 0.00 |
| TRINITY_sp P617)aptx     | Aprataxin OS=Danio  | 50.00 | 0.00 |
| TRINITY_sp O344)pgl      | 6-phosphogluconolac | 50.00 | 0.00 |
| TRINITY_sp Q3UD)Wdr41    | WD repeat-containin | 50.00 | 0.00 |
| TRINITY_sp Q5E9)ARF3     | ADP-ribosylation fa | 50.00 | 0.00 |
| TRINITY_sp P505)vps34    | Phosphatidylinosito | 50.00 | 0.00 |
| TRINITY_sp Q8TA)SNIP1    | Smad nuclear-intera | 50.00 | 0.00 |
| TRINITY_sp Q103)SPBC582  | Putative alanine am | 50.00 | 0.00 |
| TRINITY_sp Q212)K07E3.7  | Probable cation-tra | 50.00 | 0.00 |
| TRINITY_sp Q6XH)roco4    | Probable serine/thr | 50.00 | 0.00 |
| TRINITY_sp Q9DE)latr     | Serine/threonine-pr | 50.00 | 0.00 |
| TRINITY_sp Q9FP)THA2     | Probable low-specif | 50.00 | 0.00 |
| TRINITY_sp Q55G)gtaE     | GATA zinc finger do | 50.00 | 0.00 |
| TRINITY_sp P2407-        | Glu S.griseus prote | 50.00 | 0.00 |
| TRINITY_sp P2407-        | Glu S.griseus prote | 50.00 | 0.00 |
| TRINITY_sp P175)RENBP    | N-acylglucosamine 2 | 50.00 | 0.00 |
| TRINITY_sp Q220)R166.3   | Uncharacterized pro | 50.00 | 0.00 |
| TRINITY_sp P0CM)ARP6     | Actin-like protein  | 50.00 | 0.00 |
| TRINITY_sp P176)FMO2     | Dimethylaniline mon | 50.00 | 0.00 |
| TRINITY_sp Q6AX)Sae1     | SUMO-activating enz | 50.00 | 0.00 |
| TRINITY_sp P0DJ)STRA13   | Centromere protein  | 50.00 | 0.00 |
| TRINITY_sp B1I1)lrpmD    | 50S ribosomal prote | 50.00 | 0.00 |
| TRINITY_sp Q65N)topB     | DNA topoisomerase 3 | 50.00 | 0.00 |
| TRINITY_sp Q278)DYH1B    | Cytoplasmic dynein  | 50.00 | 0.00 |
| TRINITY_sp Q54U)DDB_G02  | Glutathione S-trans | 50.00 | 0.00 |
| TRINITY_sp Q8LF)IDH1     | Isocitrate dehydrog | 50.00 | 0.00 |
| TRINITY_sp B2UX)asnS     | Asparagine--tRNA li | 50.00 | 0.00 |
| TRINITY_sp Q9CZ)Rab32    | Ras-related protein | 50.00 | 0.00 |
| TRINITY_sp Q5BM)PLD      | Phospholipase D OS= | 50.00 | 0.00 |
| TRINITY_sp B9Q0)TGVEG_21 | Anamorsin homolog O | 50.00 | 0.00 |
| TRINITY_sp Q8WY)SLC7A3   | Cationic amino acid | 50.00 | 0.00 |
| TRINITY_sp Q9XY)fcfA     | Probable C-terminal | 50.00 | 0.00 |
| TRINITY_sp P454)nudA     | Dynein heavy chain, | 50.00 | 0.00 |
| TRINITY_sp Q0V8)EASNSD1  | Asparagine syntheta | 50.00 | 0.00 |
| TRINITY_sp Q53F)TP53I3   | Quinone oxidoreduct | 50.00 | 0.00 |
| TRINITY_sp B8CX)IdnaJ    | Chaperone protein D | 50.00 | 0.00 |
| TRINITY_sp Q097)SPBC12C2 | Probable glutamine- | 50.00 | 0.00 |
| TRINITY_sp Q59R)PIF1     | ATP-dependent DNA h | 50.00 | 0.00 |
| TRINITY_sp Q9BV)PBDC1    | Protein PBDC1 OS=Ho | 50.00 | 0.00 |
| TRINITY_sp Q5M9)rnf181   | E3 ubiquitin-protei | 50.00 | 0.00 |
| TRINITY_sp Q09X)Chd8     | Chromodomain-helica | 50.00 | 0.00 |
| TRINITY_sp Q9C7)INT2     | Probable inositol t | 50.00 | 0.00 |
| TRINITY_sp Q401)RAB11D   | Ras-related protein | 50.00 | 0.00 |
| TRINITY_sp Q4R5)MCTSB    | Cathepsin B OS=Maca | 50.00 | 0.00 |
| TRINITY_sp Q148)LASP1    | LIM and SH3 domain  | 50.00 | 0.00 |
| TRINITY_sp Q7YS)vcnA     | Calcineurin subunit | 50.00 | 0.00 |
| TRINITY_sp Q1ZX)gxcDD    | Guanine exchange fa | 50.00 | 0.00 |

|                           |                     |       |      |
|---------------------------|---------------------|-------|------|
| TRINITY_sp F4JY{TCX7      | Protein tesmin/TSO1 | 50.00 | 0.00 |
| TRINITY_sp Q9UKIMRTO4     | mRNA turnover prote | 50.00 | 0.00 |
| TRINITY_sp Q145{DHX8      | ATP-dependent RNA h | 50.00 | 0.00 |
| TRINITY_sp Q294{MAN2B1    | Lysosomal alpha-man | 50.00 | 0.00 |
| TRINITY_sp Q9XF{DDM1      | ATP-dependent DNA h | 50.00 | 0.00 |
| TRINITY_sp Q54W{bzipF     | Probable basic-leuc | 50.00 | 0.00 |
| TRINITY_sp Q94K{PAP2      | Plastid lipid-assoc | 50.00 | 0.00 |
| TRINITY_sp P277{TRP1      | Multifunctional try | 50.00 | 0.00 |
| TRINITY_sp Q099{nth1      | Endonuclease III ho | 50.00 | 0.00 |
| TRINITY_sp Q86C{tor       | Target of rapamycin | 50.00 | 0.00 |
| TRINITY_sp Q99P{Lpin3     | Phosphatidate phosp | 50.00 | 0.00 |
| TRINITY_sp Q9SN{ATL59     | E3 ubiquitin-protei | 50.00 | 0.00 |
| TRINITY_sp A8I9{CFAP45    | Cilia- and flagella | 50.00 | 0.00 |
| TRINITY_sp Q9D8{Dnajb4    | DnaJ homolog subfam | 50.00 | 0.00 |
| TRINITY_sp Q3ZB{-         | UPF0235 protein C15 | 50.00 | 0.00 |
| TRINITY_sp Q6DB{At5g0582  | Probable sugar phos | 50.00 | 0.00 |
| TRINITY_sp Q005{CDKL1     | Cyclin-dependent ki | 50.00 | 0.00 |
| TRINITY_sp Q93V{ATG18A    | Autophagy-related p | 50.00 | 0.00 |
| TRINITY_sp P267{bvgS      | Virulence sensor pr | 50.00 | 0.00 |
| TRINITY_sp P512{ycf36     | Uncharacterized pro | 50.00 | 0.00 |
| TRINITY_sp Q54Q{UDB_G02{  | Probable zinc trans | 50.00 | 0.00 |
| TRINITY_sp Q9FG{GCP3      | Gamma-tubulin compl | 50.00 | 0.00 |
| TRINITY_sp A2YX{SPL15     | Squamosa promoter-b | 50.00 | 0.00 |
| TRINITY_sp Q8VZ{RMR2      | Receptor homology r | 50.00 | 0.00 |
| TRINITY_sp Q9NZ{EIF2AK3   | Eukaryotic translat | 50.00 | 0.00 |
| TRINITY_sp Q9Y3{EXOSC1    | Exosome complex com | 50.00 | 0.00 |
| TRINITY_sp Q135{SQSTM1    | Sequestosome-1 OS=H | 50.00 | 0.00 |
| TRINITY_sp Q104{gsk3      | Protein kinase gsk3 | 50.00 | 0.00 |
| TRINITY_sp P368{YPTV2     | GTP-binding protein | 50.00 | 0.00 |
| TRINITY_sp Q9NW{RBM28     | RNA-binding protein | 50.00 | 0.00 |
| TRINITY_sp Q926{NUP205    | Nuclear pore comple | 50.00 | 0.00 |
| TRINITY_sp Q203{ppt-1     | Palmitoyl-protein t | 50.00 | 0.00 |
| TRINITY_sp B1XL{HglgC     | Glucose-1-phosphate | 50.00 | 0.00 |
| TRINITY_sp P980{c3        | Complement C3 (Frag | 50.00 | 0.00 |
| TRINITY_sp O154{ABCC4     | Multidrug resistanc | 50.00 | 0.00 |
| TRINITY_sp A5H0{DUR1,2    | Urea amidolyase OS= | 50.00 | 0.00 |
| TRINITY_sp Q8BW{Dnah3     | Dynein heavy chain  | 50.00 | 0.00 |
| TRINITY_sp Q9HZ{HefB      | Electron transfer f | 50.00 | 0.00 |
| TRINITY_sp P929{MDAR5     | Monodehydroascorbat | 50.00 | 0.00 |
| TRINITY_sp Q93V{RPS1      | 30S ribosomal prote | 50.00 | 0.00 |
| TRINITY_sp A3KM{RANBP10   | Ran-binding protein | 50.00 | 0.00 |
| TRINITY_sp P929{RANBP1C   | Ran-binding protein | 50.00 | 0.00 |
| TRINITY_sp P943{ycgL      | Uncharacterized pro | 50.00 | 0.00 |
| TRINITY_sp Q3SZ{PTRHD1    | Putative peptidyl-t | 50.00 | 0.00 |
| TRINITY_sp Q9ZR{MLH1      | DNA mismatch repair | 50.00 | 0.00 |
| TRINITY_sp Q54F{neif2b4   | Translation initiat | 50.00 | 0.00 |
| TRINITY_sp P052{(Su(var)2 | Heterochromatin pro | 50.00 | 0.00 |
| TRINITY_sp P919{-         | ADP-ribosylation fa | 50.00 | 0.00 |
| TRINITY_sp Q9C5{HISN8     | Histidinol dehydrog | 50.00 | 0.00 |
| TRINITY_sp Q7Z7{TMED4     | Transmembrane emp24 | 50.00 | 0.00 |
| TRINITY_sp O597{gyp1      | GTPase-activating p | 50.00 | 0.00 |
| TRINITY_sp Q5RB{PRCP      | Lysosomal Pro-X car | 50.00 | 0.00 |
| TRINITY_sp Q54S{vps15     | Probable serine/thr | 50.00 | 0.00 |
| TRINITY_sp Q9NEV{rsp-3    | Probable splicing f | 50.00 | 0.00 |
| TRINITY_sp Q9NI{PEK       | Eukaryotic translat | 50.00 | 0.00 |
| TRINITY_sp A2BD{Mocs3     | Adenylyltransferase | 50.00 | 0.00 |

|                                             |                     |       |      |
|---------------------------------------------|---------------------|-------|------|
| TRINITY_sp Q839fhpt                         | Hypoxanthine-guanin | 50.00 | 0.00 |
| TRINITY_sp O597fgyp1                        | GTPase-activating p | 50.00 | 0.00 |
| TRINITY_sp Q395fYPTC6                       | Ras-related protein | 50.00 | 0.00 |
| TRINITY_sp O044zSRP14                       | Signal recognition  | 50.00 | 0.00 |
| TRINITY_sp Q8GW4BIOF                        | 8-amino-7-oxonono   | 50.00 | 0.00 |
| TRINITY_sp O137fssr1                        | SWI/SNF and RSC com | 50.00 | 0.00 |
| TRINITY_sp P762fmsrC                        | Free methionine-R-s | 50.00 | 0.00 |
| TRINITY_sp Q3T0MRANBP1                      | Ran-specific GTPase | 50.00 | 0.00 |
| TRINITY_sp Q9JWfcrsmI                       | Ribosomal RNA small | 50.00 | 0.00 |
| TRINITY_sp Q69ZfHbs11                       | HBS1-like protein O | 50.00 | 0.00 |
| TRINITY_sp Q9ZVfRRP4                        | Exosome complex com | 50.00 | 0.00 |
| TRINITY_sp O087fAmpd3                       | AMP deaminase 3 OS= | 50.00 | 0.00 |
| TRINITY_sp Q9C0fDNAH6                       | Dynein heavy chain  | 50.00 | 0.00 |
| TRINITY_sp Q9P2fHIFT80                      | Intraflagellar tran | 50.00 | 0.00 |
| TRINITY_sp O807fMCM5                        | DNA replication lic | 50.00 | 0.00 |
| TRINITY_sp P451fcan                         | Carbonic anhydrase  | 50.00 | 0.00 |
| TRINITY_sp Q0JGfPSB28                       | Photosystem II reac | 50.00 | 0.00 |
| TRINITY_sp Q93WfLhcb4                       | Chlorophyll a-b bin | 50.00 | 0.00 |
| TRINITY_sp Q9FTfTPT                         | Triose phosphate/ph | 50.00 | 0.00 |
| TRINITY_sp Q8YMfftsH                        | ATP-dependent zinc  | 50.00 | 0.00 |
| TRINITY_sp Q6DDfTbcl1d31                    | TBC1 domain family  | 50.00 | 0.00 |
| TRINITY_sp Q27YfURSP5                       | Flagellar radial sp | 50.00 | 0.00 |
| TRINITY_sp A7MVfVIBHAR_(UPF0061 protein VIB |                     | 50.00 | 0.00 |
| TRINITY_sp Q54Xfpah                         | Phenylalanine-4-hyd | 50.00 | 0.00 |
| TRINITY_sp Q5U3fkatn11                      | Katanin p60 ATPase- | 50.00 | 0.00 |
| TRINITY_sp Q2KHfMACROD1                     | O-acetyl-ADP-ribose | 50.00 | 0.00 |
| TRINITY_sp Q2TBfVZNHIT2                     | Zinc finger HIT dom | 50.00 | 0.00 |
| TRINITY_sp Q027fMAP3K10                     | Mitogen-activated p | 50.00 | 0.00 |
| TRINITY_sp P628fRAP1A                       | Ras-related protein | 50.00 | 0.00 |
| TRINITY_sp Q9FFfABCG28                      | ABC transporter G f | 50.00 | 0.00 |
| TRINITY_sp B8J8fEglgA                       | Glycogen synthase O | 50.00 | 0.00 |
| TRINITY_sp Q7SCfcrps-25                     | 40S ribosomal prote | 50.00 | 0.00 |
| TRINITY_sp Q9VXfCG6762                      | Putative sulfiredox | 50.00 | 0.00 |
| TRINITY_sp A7E3fPTPDC1                      | Protein tyrosine ph | 50.00 | 0.00 |
| TRINITY_sp Q93VfAt3g026fWAT1-related protei |                     | 50.00 | 0.00 |
| TRINITY_sp P623fCPK4                        | Calcium-dependent p | 50.00 | 0.00 |
| TRINITY_sp Q54FfmcfW                        | Mitochondrial subst | 50.00 | 0.00 |
| TRINITY_sp F4I3fNRPA2                       | DNA-directed RNA po | 50.00 | 0.00 |
| TRINITY_sp Q9H1fKIF13A                      | Kinesin-like protei | 50.00 | 0.00 |
| TRINITY_sp P0C7fIUMAG_111                   | Putative DEAH-box A | 50.00 | 0.00 |
| TRINITY_sp Q9ZQfACX1.2                      | Putative peroxisoma | 50.00 | 0.00 |
| TRINITY_sp O440fPYK                         | Pyruvate kinase OS= | 50.00 | 0.00 |
| TRINITY_sp Q653fOs06g06f                    | Probable alpha-gluc | 50.00 | 0.00 |
| TRINITY_sp Q9CQf-                           | Uncharacterized pro | 50.00 | 0.00 |
| TRINITY_sp P078fCel                         | Bile salt-activated | 50.00 | 0.00 |
| TRINITY_sp Q9FPfUBP24                       | Ubiquitin carboxyl- | 50.00 | 0.00 |
| TRINITY_sp Q213fgst-4                       | Glutathione S-trans | 50.00 | 0.00 |
| TRINITY_sp Q9S7fACL5                        | Thermospermine synt | 50.00 | 0.00 |
| TRINITY_sp Q9DEfBAZ2B                       | Bromodomain adjacen | 50.00 | 0.00 |
| TRINITY_sp Q8MLfzpded                       | cGMP-dependent 3',5 | 50.00 | 0.00 |
| TRINITY_sp P505fsck1                        | Serine/threonine-pr | 50.00 | 0.00 |
| TRINITY_sp Q95PfdhkC                        | Hybrid signal trans | 50.00 | 0.00 |
| TRINITY_sp P126fBCKDHA                      | 2-oxoisovalerate de | 49.90 | 0.00 |
| TRINITY_sp Q54Pfabcc8                       | ABC transporter C f | 49.90 | 0.00 |
| TRINITY_sp Q9LRFGL01                        | Peroxisomal (S)-2-h | 49.90 | 0.00 |
| TRINITY_sp Q9LIFBAM1                        | Beta-amylase 1, chl | 49.90 | 0.00 |

|                          |                      |       |      |
|--------------------------|----------------------|-------|------|
| TRINITY_sp B9F67Os03g021 | Probable glucan 1,3  | 49.90 | 0.00 |
| TRINITY_sp A0A01tkt      | Transketolase OS=Ge  | 49.90 | 0.00 |
| TRINITY_sp Q54Y2alaS     | Alanine--tRNA ligas  | 49.90 | 0.00 |
| TRINITY_sp Q6PFVPPIP5K1  | Inositol hexakispho  | 49.90 | 0.00 |
| TRINITY_sp O1413elf1     | mRNA export factor   | 49.90 | 0.00 |
| TRINITY_sp Q0508UBE3A    | Ubiquitin-protein 1  | 49.80 | 0.00 |
| TRINITY_sp P4265-        | 14-3-3-like protein  | 49.80 | 0.00 |
| TRINITY_sp Q86K0DDB_G027 | Probable GH family   | 49.80 | 0.00 |
| TRINITY_sp Q54N2memo1    | Protein MEMO1 homol  | 49.80 | 0.00 |
| TRINITY_sp Q9268ALG3     | Dol-P-Man:Man(5)Glc  | 49.80 | 0.00 |
| TRINITY_sp A5PLITMEM189  | Transmembrane prote  | 49.80 | 0.00 |
| TRINITY_sp P5989Nek6     | Serine/threonine-pr  | 49.80 | 0.00 |
| TRINITY_sp Q9SA2RH36     | DEAD-box ATP-depend  | 49.80 | 0.00 |
| TRINITY_sp Q9C00DNAH6    | Dynein heavy chain   | 49.80 | 0.00 |
| TRINITY_sp Q54WVDDB_G027 | Probable serine/thr  | 49.80 | 0.00 |
| TRINITY_sp Q9LK0SYP32    | Syntaxin-32 OS=Arab  | 49.80 | 0.00 |
| TRINITY_sp Q86AIDDB_G027 | Probable myosin lig  | 49.80 | 0.00 |
| TRINITY_sp Q54Mfadk      | Adenosine kinase OS  | 49.80 | 0.00 |
| TRINITY_sp Q8L33FZR2     | Protein FIZZY-RELAT  | 49.80 | 0.00 |
| TRINITY_sp P4333At1g0976 | U2 small nuclear ri  | 49.80 | 0.00 |
| TRINITY_sp Q7XK0PYRD     | Dihydroorotate dehy  | 49.80 | 0.00 |
| TRINITY_sp A2Q0UrpSa     | 40S ribosomal prote  | 49.80 | 0.00 |
| TRINITY_sp Q84RFARI7     | Probable E3 ubiquit  | 49.80 | 0.00 |
| TRINITY_sp Q3965PSAL     | Photosystem I react  | 49.80 | 0.00 |
| TRINITY_sp H2E77TMT-1    | Squalene methyltran  | 49.80 | 0.00 |
| TRINITY_sp A2YR1ARP4     | Actin-related prote  | 49.80 | 0.00 |
| TRINITY_sp Q9U64cmfB     | Conditioned medium   | 49.80 | 0.00 |
| TRINITY_sp P2818RABD2A   | Ras-related protein  | 49.80 | 0.00 |
| TRINITY_sp Q6WWWUPL3     | E3 ubiquitin-protei  | 49.80 | 0.00 |
| TRINITY_sp F4KD7DUR3     | Urea-proton symport  | 49.80 | 0.00 |
| TRINITY_sp P5181PRKX     | cAMP-dependent prot  | 49.80 | 0.00 |
| TRINITY_sp Q55Ganca2     | Nuclear control of   | 49.70 | 0.00 |
| TRINITY_sp P0446-        | Calmodulin OS=Triti  | 49.70 | 0.00 |
| TRINITY_sp Q0573YPTM2    | GTP-binding protein  | 49.70 | 0.00 |
| TRINITY_sp P4039RIC1     | Ras-related protein  | 49.70 | 0.00 |
| TRINITY_sp Q6PC1ssu72    | RNA polymerase II s  | 49.70 | 0.00 |
| TRINITY_sp Q9D77EDus2    | tRNA-dihydrouridine  | 49.70 | 0.00 |
| TRINITY_sp Q54I7cpox     | Oxygen-dependent co  | 49.70 | 0.00 |
| TRINITY_sp Q7YSVcanA     | Calcineurin subunit  | 49.70 | 0.00 |
| TRINITY_sp F4HY0IRE3     | Probable serine/thr  | 49.70 | 0.00 |
| TRINITY_sp Q9UK5CCNL1    | Cyclin-L1 OS=Homo s  | 49.70 | 0.00 |
| TRINITY_sp Q3T01CTSH     | Pro-cathepsin H OS=  | 49.70 | 0.00 |
| TRINITY_sp O9535ATG7     | Ubiquitin-like modi  | 49.70 | 0.00 |
| TRINITY_sp O6560MSH3     | DNA mismatch repair  | 49.70 | 0.00 |
| TRINITY_sp Q76Nvhpd      | 4-hydroxyphenylpyru  | 49.70 | 0.00 |
| TRINITY_sp A0JN5SF3B3    | Splicing factor 3B   | 49.70 | 0.00 |
| TRINITY_sp Q9FPFTHA2     | Probable low-specif  | 49.70 | 0.00 |
| TRINITY_sp Q53G5USP39    | U4/U6.U5 tri-snRNP-  | 49.70 | 0.00 |
| TRINITY_sp O2457RP-P0    | 60S acidic ribosoma  | 49.70 | 0.00 |
| TRINITY_sp Q0974dbp5     | ATP-dependent RNA h  | 49.70 | 0.00 |
| TRINITY_sp O4290rti1     | DNA repair and reco  | 49.70 | 0.00 |
| TRINITY_sp Q8BMFDlat     | Dihydrolipoyllysine  | 49.70 | 0.00 |
| TRINITY_sp Q55D9paka     | Serine/threonine-pr  | 49.70 | 0.00 |
| TRINITY_sp Q9P71SPAC186  | .2-hydroxyacid dehyd | 49.70 | 0.00 |
| TRINITY_sp Q5L07psuG     | Pseudouridine-5'-ph  | 49.70 | 0.00 |
| TRINITY_sp Q9UQVspe1     | Ornithine decarboxy  | 49.70 | 0.00 |

|                           |                     |       |      |
|---------------------------|---------------------|-------|------|
| TRINITY_sp Q91V4Abca7     | ATP-binding cassett | 49.70 | 0.00 |
| TRINITY_sp Q86A6polr3a    | DNA-directed RNA po | 49.70 | 0.00 |
| TRINITY_sp Q9QXINme7      | Nucleoside diphosph | 49.70 | 0.00 |
| TRINITY_sp Q54BMDDB_G029  | UPF0652 protein OS= | 49.70 | 0.00 |
| TRINITY_sp Q8BU3Ilvb1     | Acetolactate syntha | 49.70 | 0.00 |
| TRINITY_sp Q9MAFSCPL44    | Serine carboxypepti | 49.70 | 0.00 |
| TRINITY_sp Q27YURSP1      | Flagellar radial sp | 49.70 | 0.00 |
| TRINITY_sp Q6EVEBRM       | ATP-dependent helic | 49.70 | 0.00 |
| TRINITY_sp Q9FNISS1       | Starch synthase 1,  | 49.70 | 0.00 |
| TRINITY_sp Q9LFRPOT2      | DNA-directed RNA po | 49.70 | 0.00 |
| TRINITY_sp Q84K1GAMMA-AI  | AP-1 complex subuni | 49.60 | 0.00 |
| TRINITY_sp O7584SC5D      | Lathosterol oxidase | 49.60 | 0.00 |
| TRINITY_sp Q4312-         | Non-specific lipid- | 49.60 | 0.00 |
| TRINITY_sp P1366HOM2      | Aspartate-semialdeh | 49.60 | 0.00 |
| TRINITY_sp Q8VI4Abcc2     | Canalicular multisp | 49.60 | 0.00 |
| TRINITY_sp O8603bdhA      | D-beta-hydroxybutyr | 49.60 | 0.00 |
| TRINITY_sp A5G14glpK      | Glycerol kinase OS= | 49.60 | 0.00 |
| TRINITY_sp Q91W7Hdac11    | Histone deacetylase | 49.60 | 0.00 |
| TRINITY_sp Q86I(nek3      | Probable serine/thr | 49.60 | 0.00 |
| TRINITY_sp Q7F83CYCA1-1   | Cyclin-A1-1 OS=Oryz | 49.60 | 0.00 |
| TRINITY_sp Q9M39NPF8.1    | Protein NRT1/ PTR F | 49.60 | 0.00 |
| TRINITY_sp Q3232ybiA      | N-glycosidase YbiA  | 49.60 | 0.00 |
| TRINITY_sp Q9LX\At5g1285  | Zinc finger CCCH do | 49.60 | 0.00 |
| TRINITY_sp Q8WV(CANT1     | Soluble calcium-act | 49.60 | 0.00 |
| TRINITY_sp Q54KEgluD      | Glutamate dehydroge | 49.60 | 0.00 |
| TRINITY_sp Q94E(CAt5g0224 | Uncharacterized pro | 49.60 | 0.00 |
| TRINITY_sp O1392crn1      | Coronin-like protei | 49.60 | 0.00 |
| TRINITY_sp Q8RXNTYW1      | S-adenosyl-L-methio | 49.60 | 0.00 |
| TRINITY_sp A8J78ATPG      | ATP synthase subuni | 49.60 | 0.00 |
| TRINITY_sp O1386SPAC1A6.  | tRNA threonylcarbam | 49.60 | 0.00 |
| TRINITY_sp P0467-         | Uricase-2 isozyme 1 | 49.60 | 0.00 |
| TRINITY_sp P3472RAS1      | Ras-like protein 1  | 49.60 | 0.00 |
| TRINITY_sp Q9C0(CDNAH6    | Dynein heavy chain  | 49.60 | 0.00 |
| TRINITY_sp A2YPF0BGC1     | Probable GTP-bindin | 49.60 | 0.00 |
| TRINITY_sp Q0917krp1      | Dibasic-processing  | 49.60 | 0.00 |
| TRINITY_sp A6NKISDR42E2   | Putative short-chai | 49.60 | 0.00 |
| TRINITY_sp Q556(CpsmB4-1  | Proteasome subunit  | 49.60 | 0.00 |
| TRINITY_sp Q8K17Mett15    | Methyltransferase-1 | 49.60 | 0.00 |
| TRINITY_sp Q8CG6Elac2     | Zinc phosphodiester | 49.50 | 0.00 |
| TRINITY_sp P4981DLD       | Dihydrolipoyl dehyd | 49.50 | 0.00 |
| TRINITY_sp P3186XYL1      | NAD(P)H-dependent D | 49.50 | 0.00 |
| TRINITY_sp Q9ZWEPCS2      | Glutathione gamma-g | 49.50 | 0.00 |
| TRINITY_sp Q68W(grxC2     | Probable monothiol  | 49.50 | 0.00 |
| TRINITY_sp P5025TUBB1     | Tubulin beta chain  | 49.50 | 0.00 |
| TRINITY_sp Q3T13BOLA1     | BolA-like protein 1 | 49.50 | 0.00 |
| TRINITY_sp Q8LD2At1g5622  | Dormancy-associated | 49.50 | 0.00 |
| TRINITY_sp B1ZGVglpK      | Glycerol kinase OS= | 49.50 | 0.00 |
| TRINITY_sp Q6123Lcp1      | Plastin-2 OS=Mus mu | 49.50 | 0.00 |
| TRINITY_sp O9443SPBC660.  | Uncharacterized RNA | 49.50 | 0.00 |
| TRINITY_sp P2391DTYMK     | Thymidylate kinase  | 49.50 | 0.00 |
| TRINITY_sp Q99J2Gorasp2   | Golgi reassembly-st | 49.50 | 0.00 |
| TRINITY_sp Q54V(chdaC     | Type-2 histone deac | 49.50 | 0.00 |
| TRINITY_sp Q2016copb-2    | Probable coatomer s | 49.50 | 0.00 |
| TRINITY_sp Q8MXNDDB_G027  | Transmembrane prote | 49.50 | 0.00 |
| TRINITY_sp Q941FGONST1    | GDP-mannose transpo | 49.50 | 0.00 |
| TRINITY_sp Q9LEVUBP22     | Ubiquitin carboxyl- | 49.50 | 0.00 |

|                          |                     |       |      |
|--------------------------|---------------------|-------|------|
| TRINITY_sp M0ZYI\NDA1    | Internal alternativ | 49.50 | 0.00 |
| TRINITY_sp Q91YF\Mett113 | Methyltransferase-1 | 49.50 | 0.00 |
| TRINITY_sp Q9XV\Frpb-11  | Probable DNA-direct | 49.50 | 0.00 |
| TRINITY_sp Q54Q\phbB     | Prohibitin-2 OS=Dic | 49.50 | 0.00 |
| TRINITY_sp O230\KAB1     | Probable voltage-ga | 49.50 | 0.00 |
| TRINITY_sp Q0III\IDUSP10 | Dual specificity pr | 49.50 | 0.00 |
| TRINITY_sp P484\PPP3CC   | Serine/threonine-pr | 49.50 | 0.00 |
| TRINITY_sp Q8GX\CFIS2    | Pre-mRNA cleavage f | 49.50 | 0.00 |
| TRINITY_sp D0NL\CPITG_12 | tRNA (guanine(37)-N | 49.50 | 0.00 |
| TRINITY_sp Q6BI\FREX4    | RNA exonuclease 4 O | 49.50 | 0.00 |
| TRINITY_sp Q9UN\FCDC14A  | Dual specificity pr | 49.50 | 0.00 |
| TRINITY_sp Q127\pab1     | Protein phosphatase | 49.50 | 0.00 |
| TRINITY_sp Q8VY\DJ1C     | Protein DJ-1 homolo | 49.50 | 0.00 |
| TRINITY_sp O355\Pfkb3    | 6-phosphofructo-2-k | 49.50 | 0.00 |
| TRINITY_sp Q165\CAMK4    | Calcium/calmodulin- | 49.50 | 0.00 |
| TRINITY_sp Q9ES\Ube4b    | Ubiquitin conjugati | 49.50 | 0.00 |
| TRINITY_sp Q5T0\CFAP70   | Cilia- and flagella | 49.50 | 0.00 |
| TRINITY_sp P295\TUBB7    | Tubulin beta-7 chai | 49.50 | 0.00 |
| TRINITY_sp Q3ZB\IPTRH2   | Peptidyl-tRNA hydro | 49.50 | 0.00 |
| TRINITY_sp P929\RS31     | Serine/arginine-ric | 49.50 | 0.00 |
| TRINITY_sp Q9LT\At3g128  | Peroxisomal 2,4-die | 49.50 | 0.00 |
| TRINITY_sp O151\NPC1     | Niemann-Pick C1 pro | 49.50 | 0.00 |
| TRINITY_sp Q6AY\Alg14    | UDP-N-acetylglucosa | 49.50 | 0.00 |
| TRINITY_sp Q395\ODA4     | Dynein beta chain,  | 49.50 | 0.00 |
| TRINITY_sp Q9SY\IBRR2A   | DExH-box ATP-depend | 49.50 | 0.00 |
| TRINITY_sp Q1ZX\pXi      | Probable serine/thr | 49.50 | 0.00 |
| TRINITY_sp Q9SD\RCE1     | NEDD8-conjugating e | 49.50 | 0.00 |
| TRINITY_sp Q9C5\MDTC     | Mitochondrial dicar | 49.50 | 0.00 |
| TRINITY_sp Q9NK\vmfeA    | Peroxisomal multifu | 49.50 | 0.00 |
| TRINITY_sp Q389\LCY1     | Lycopene beta cycla | 49.50 | 0.00 |
| TRINITY_sp Q425\LIG1     | DNA ligase 1 OS=Ara | 49.50 | 0.00 |
| TRINITY_sp P320\-        | Stearoyl-[acyl-carr | 49.50 | 0.00 |
| TRINITY_sp Q631\Dnah1    | Dynein heavy chain  | 49.50 | 0.00 |
| TRINITY_sp Q54D\IamDA    | AMP deaminase OS=Di | 49.50 | 0.00 |
| TRINITY_sp Q437\WAXY     | Granule-bound starc | 49.50 | 0.00 |
| TRINITY_sp P563\EIF5A4   | Eukaryotic translat | 49.50 | 0.00 |
| TRINITY_sp Q5RH\dcun1d4  | DCN1-like protein 4 | 49.50 | 0.00 |
| TRINITY_sp Q8IN\Gyc88E   | Soluble guanylate c | 49.50 | 0.00 |
| TRINITY_sp Q93Y\At2g3181 | Acetolactate syntha | 49.50 | 0.00 |
| TRINITY_sp Q94B\PIGA     | Phosphatidylinosito | 49.40 | 0.00 |
| TRINITY_sp Q8CH\Tt115    | Tubulin polyglutamy | 49.40 | 0.00 |
| TRINITY_sp Q54T\drkC     | Probable serine/thr | 49.40 | 0.00 |
| TRINITY_sp Q266\-        | 33 kDa inner dynein | 49.40 | 0.00 |
| TRINITY_sp P196\-        | Non-specific lipid- | 49.40 | 0.00 |
| TRINITY_sp Q9SR\CHIP     | E3 ubiquitin-protei | 49.40 | 0.00 |
| TRINITY_sp A6LT\apt      | Adenine phosphoribo | 49.40 | 0.00 |
| TRINITY_sp Q2VZ\infb     | Translation initiat | 49.40 | 0.00 |
| TRINITY_sp P518\pdcA     | Pyruvate decarboxyl | 49.40 | 0.00 |
| TRINITY_sp Q3SE\Icl1e    | Caltractin ICL1e OS | 49.40 | 0.00 |
| TRINITY_sp Q0DH\FTSH8    | ATP-dependent zinc  | 49.40 | 0.00 |
| TRINITY_sp Q8YM\clpB2    | Chaperone protein C | 49.40 | 0.00 |
| TRINITY_sp Q9GZ\FREXO4   | RNA exonuclease 4 O | 49.40 | 0.00 |
| TRINITY_sp O952\MBD4     | Methyl-CpG-binding  | 49.40 | 0.00 |
| TRINITY_sp Q54S\pldZ     | Phospholipase D Z O | 49.40 | 0.00 |
| TRINITY_sp Q8JI\nifk     | MKI67 FHA domain-in | 49.40 | 0.00 |
| TRINITY_sp A7SL\nat9     | N-acetyltransferase | 49.40 | 0.00 |

|                           |                     |       |      |
|---------------------------|---------------------|-------|------|
| TRINITY_sp Q8BRFMan2a2    | Alpha-mannosidase 2 | 49.40 | 0.00 |
| TRINITY_sp P167(V-UBI     | Ubiquitin-like prot | 49.40 | 0.00 |
| TRINITY_sp A9V2C 37534    | Probable nitrile hy | 49.40 | 0.00 |
| TRINITY_sp O653GGH2       | Gamma-glutamyl hydr | 49.40 | 0.00 |
| TRINITY_sp B9F1(LOGL2     | Probable cytokinin  | 49.40 | 0.00 |
| TRINITY_sp Q9C8NUP50A     | Nuclear pore comple | 49.40 | 0.00 |
| TRINITY_sp Q9BRRIOK1      | Serine/threonine-pr | 49.40 | 0.00 |
| TRINITY_sp Q9SUAAt4g323   | Probable sugar phos | 49.40 | 0.00 |
| TRINITY_sp Q5RK(Sbds      | Ribosome maturation | 49.40 | 0.00 |
| TRINITY_sp P454(CSN1      | COP9 signalosome co | 49.40 | 0.00 |
| TRINITY_sp A6LMFalaS      | Alanine--tRNA ligas | 49.40 | 0.00 |
| TRINITY_sp Q8ST(abcC10    | ABC transporter C f | 49.40 | 0.00 |
| TRINITY_sp Q0WQ(LTA3      | Dihydrolypoyllysine | 49.40 | 0.00 |
| TRINITY_sp Q056(CTR1      | Serine/threonine-pr | 49.40 | 0.00 |
| TRINITY_sp A2X8MPUT1      | Polyamine transport | 49.40 | 0.00 |
| TRINITY_sp O230(KAB1      | Probable voltage-ga | 49.40 | 0.00 |
| TRINITY_sp Q7YSVcanA      | Calcineurin subunit | 49.40 | 0.00 |
| TRINITY_sp Q9M9(UTR3      | UDP-galactose/UDP-g | 49.40 | 0.00 |
| TRINITY_sp Q8I8(ap1g1     | AP-1 complex subuni | 49.40 | 0.00 |
| TRINITY_sp Q9CZ(Fopn1     | LisH domain-contain | 49.40 | 0.00 |
| TRINITY_sp Q8L7(MSDN5     | Small RNA degrading | 49.40 | 0.00 |
| TRINITY_sp Q0WR(PBL7      | Probable serine/thr | 49.40 | 0.00 |
| TRINITY_sp Q96R(BBS4      | Bardet-Biedl syndro | 49.40 | 0.00 |
| TRINITY_sp Q86H(polr1a    | DNA-directed RNA po | 49.40 | 0.00 |
| TRINITY_sp P109-          | Retrovirus-related  | 49.40 | 0.00 |
| TRINITY_sp Q9M3(ATG6      | Beclin-1-like prote | 49.40 | 0.00 |
| TRINITY_sp P479(AP2       | Floral homeotic pro | 49.40 | 0.00 |
| TRINITY_sp Q138(GNL2      | Nucleolar GTP-bindi | 49.30 | 0.00 |
| TRINITY_sp Q9SB(ABC1      | Protein ABC transpo | 49.30 | 0.00 |
| TRINITY_sp Q6DC(hace1     | E3 ubiquitin-protei | 49.30 | 0.00 |
| TRINITY_sp Q39J(dnaJ      | Chaperone protein D | 49.30 | 0.00 |
| TRINITY_sp Q54L(hints4    | Integrator complex  | 49.30 | 0.00 |
| TRINITY_sp Q54C(utrappc2) | Trafficking protein | 49.30 | 0.00 |
| TRINITY_sp A0PZ(NT01CX_1  | Putative 3-methylad | 49.30 | 0.00 |
| TRINITY_sp Q5MB(ABCG2     | ATP-binding cassett | 49.30 | 0.00 |
| TRINITY_sp Q9BR(CBWD1     | COBW domain-contain | 49.30 | 0.00 |
| TRINITY_sp Q9SK(At2g202   | Zinc finger CCCH do | 49.30 | 0.00 |
| TRINITY_sp Q550(vslc35c1  | GDP-fucose transpor | 49.30 | 0.00 |
| TRINITY_sp Q8NC(DYNC2H1   | Cytoplasmic dynein  | 49.30 | 0.00 |
| TRINITY_sp Q8L4(WEE1      | Wee1-like protein k | 49.30 | 0.00 |
| TRINITY_sp P396(nirA      | Ferredoxin--nitrite | 49.30 | 0.00 |
| TRINITY_sp Q9M2(IRPS27B   | 40S ribosomal prote | 49.30 | 0.00 |
| TRINITY_sp Q8IU(CAMK1D    | Calcium/calmodulin- | 49.30 | 0.00 |
| TRINITY_sp Q940(TMN1      | Transmembrane 9 sup | 49.30 | 0.00 |
| TRINITY_sp Q55E(dhak      | Probable dihydroxya | 49.30 | 0.00 |
| TRINITY_sp Q75J(aspS1     | Aspartate--tRNA lig | 49.30 | 0.00 |
| TRINITY_sp Q9LN(P4H3      | Probable prolyl 4-h | 49.30 | 0.00 |
| TRINITY_sp Q4QE(GMPR      | GMP reductase OS=Le | 49.30 | 0.00 |



|                           |                     |       |      |
|---------------------------|---------------------|-------|------|
| TRINITY_sp P0111 RAS1     | Ras-like protein 1  | 49.30 | 0.00 |
| TRINITY_sp O810 GEM2001   | GTP-binding protein | 49.30 | 0.00 |
| TRINITY_sp A8IL CFAP52    | Cilia- and flagella | 49.30 | 0.00 |
| TRINITY_sp D4AVI ARB_0014 | Calnexin homolog AR | 49.30 | 0.00 |
| TRINITY_sp A3GF SEC23     | Protein transport p | 49.30 | 0.00 |
| TRINITY_sp B0G1 DDB_G027  | Deoxynucleoside tri | 49.30 | 0.00 |
| TRINITY_sp P275 PHO91     | Low-affinity phosph | 49.30 | 0.00 |
| TRINITY_sp Q3SY XYLB      | Xylulose kinase OS= | 49.30 | 0.00 |
| TRINITY_sp Q136 RAB32     | Ras-related protein | 49.30 | 0.00 |
| TRINITY_sp Q55D abcG1     | ABC transporter G f | 49.30 | 0.00 |
| TRINITY_sp Q8VZ P4H9      | Probable prolyl 4-h | 49.30 | 0.00 |
| TRINITY_sp P138 -         | Chlorophyll a-b bin | 49.30 | 0.00 |
| TRINITY_sp O137 osm1      | Fumarate reductase  | 49.30 | 0.00 |
| TRINITY_sp P581 atp2b2    | Plasma membrane cal | 49.30 | 0.00 |
| TRINITY_sp Q803 ppp2r3c   | Serine/threonine-pr | 49.30 | 0.00 |
| TRINITY_sp Q8IV MMAA      | Methylmalonic acidu | 49.30 | 0.00 |
| TRINITY_sp Q922 SREP      | GATA factor SREP OS | 49.30 | 0.00 |
| TRINITY_sp A8J8 CHLREDR1  | Tektin OS=Chlamydom | 49.30 | 0.00 |
| TRINITY_sp O753 GUCY1B2   | Guanylate cyclase s | 49.30 | 0.00 |
| TRINITY_sp P341 mvpa      | Major vault protein | 49.30 | 0.00 |
| TRINITY_sp Q54D DDB_G029  | Probable protein ty | 49.30 | 0.00 |
| TRINITY_sp Q8H2 POLH      | DNA polymerase eta  | 49.30 | 0.00 |
| TRINITY_sp Q54Z phg1b     | Putative phagocytic | 49.30 | 0.00 |
| TRINITY_sp Q8C2 Dus11     | tRNA-dihydrouridine | 49.30 | 0.00 |
| TRINITY_sp Q9VL wol       | Dolichyl-phosphate  | 49.30 | 0.00 |
| TRINITY_sp Q9FL DEGP9     | Protease Do-like 9  | 49.30 | 0.00 |
| TRINITY_sp Q54E vatM      | Vacuolar proton tra | 49.30 | 0.00 |
| TRINITY_sp Q9VH Invadol1  | Leishmanolysin-like | 49.30 | 0.00 |
| TRINITY_sp Q82E acsa      | Acetyl-coenzyme A s | 49.30 | 0.00 |
| TRINITY_sp P551 -         | Glutaredoxin OS=Ric | 49.30 | 0.00 |
| TRINITY_sp P005 PRKACA    | cAMP-dependent prot | 49.30 | 0.00 |
| TRINITY_sp F4IY At3g0276  | Histidine--tRNA lig | 49.30 | 0.00 |
| TRINITY_sp Q9CA CKL2      | Casein kinase 1-lik | 49.30 | 0.00 |
| TRINITY_sp Q2KI DNAJC5B   | DnaJ homolog subfam | 49.30 | 0.00 |
| TRINITY_sp P053 Eflalpha  | Elongation factor 1 | 49.30 | 0.00 |
| TRINITY_sp Q54U trappc4   | Trafficking protein | 49.30 | 0.00 |
| TRINITY_sp Q7XQ AMT1-1    | Ammonium transporte | 49.30 | 0.00 |
| TRINITY_sp P402 -         | Histone H1 OS=Solan | 49.30 | 0.00 |
| TRINITY_sp Q9JM Cyp3a41a  | Cytochrome P450 3A4 | 49.30 | 0.00 |
| TRINITY_sp P395 TIM17     | Mitochondrial impor | 49.20 | 0.00 |
| TRINITY_sp Q9ZW ECKL9     | Casein kinase 1-lik | 49.20 | 0.00 |
| TRINITY_sp F4K4 LSM4      | Sm-like protein LSM | 49.20 | 0.00 |
| TRINITY_sp Q9CR Golt1b    | Vesicle transport p | 49.20 | 0.00 |
| TRINITY_sp Q6YV Os02g055  | Zinc finger CCCH do | 49.20 | 0.00 |
| TRINITY_sp Q55E mcfe      | Mitochondrial subst | 49.20 | 0.00 |
| TRINITY_sp P817 -         | Subtilisin inhibito | 49.20 | 0.00 |
| TRINITY_sp Q9JJ Pigb      | GPI mannosyltransfe | 49.20 | 0.00 |
| TRINITY_sp Q150 PSMD6     | 26S proteasome non- | 49.20 | 0.00 |
| TRINITY_sp P629 RAC1      | Ras-related C3 botu | 49.20 | 0.00 |
| TRINITY_sp Q9SC UPL7      | E3 ubiquitin-protei | 49.20 | 0.00 |
| TRINITY_sp Q5RA SEPSECS   | O-phosphoseryl-tRNA | 49.20 | 0.00 |
| TRINITY_sp Q9FG IRKD3     | Protein RKD3 OS=Ara | 49.20 | 0.00 |
| TRINITY_sp Q1ZX psmd3     | 26S proteasome non- | 49.20 | 0.00 |
| TRINITY_sp P175 -         | Acidic endochitinas | 49.20 | 0.00 |
| TRINITY_sp Q6AJ prs       | Ribose-phosphate py | 49.20 | 0.00 |
| TRINITY_sp Q7X9 PIE1      | Protein PHOTOPERIOD | 49.20 | 0.00 |

|                          |                     |       |      |
|--------------------------|---------------------|-------|------|
| TRINITY_sp O947(rpa12    | DNA-directed RNA po | 49.20 | 0.00 |
| TRINITY_sp Q9FN(UVR8     | Ultraviolet-B recep | 49.20 | 0.00 |
| TRINITY_sp Q9LE(SP1L2    | Protein SPIRAL1-lik | 49.20 | 0.00 |
| TRINITY_sp P258(chcA     | Clathrin heavy chai | 49.20 | 0.00 |
| TRINITY_sp P871(SPBC25H2 | Protein VAC14 homol | 49.20 | 0.00 |
| TRINITY_sp P615(can      | Carbonic anhydrase  | 49.20 | 0.00 |
| TRINITY_sp Q8LB(GRXS15   | Monothiol glutaredo | 49.20 | 0.00 |
| TRINITY_sp Q9NR(BIRC6    | Baculoviral IAP rep | 49.20 | 0.00 |
| TRINITY_sp Q87L(dusa     | tRNA-dihydrouridine | 49.20 | 0.00 |
| TRINITY_sp P110(NNT      | NAD(P) transhydroge | 49.20 | 0.00 |
| TRINITY_sp Q54S(dhkM     | Hybrid signal trans | 49.20 | 0.00 |
| TRINITY_sp O226(DEGP1    | Protease Do-like 1, | 49.20 | 0.00 |
| TRINITY_sp Q6ZT(ANKRD13I | Ankyrin repeat doma | 49.20 | 0.00 |
| TRINITY_sp Q8LG(CUL4     | Cullin-4 OS=Arabido | 49.20 | 0.00 |
| TRINITY_sp Q389(PHT2-1   | Inorganic phosphate | 49.20 | 0.00 |
| TRINITY_sp Q8C7(Uba6     | Ubiquitin-like modi | 49.20 | 0.00 |
| TRINITY_sp Q56Z(At5g1615 | Plastidic glucose t | 49.20 | 0.00 |
| TRINITY_sp Q9NC(ipitB    | Phosphatidylinosito | 49.20 | 0.00 |
| TRINITY_sp Q3T0(DHRS7B   | Dehydrogenase/reduc | 49.20 | 0.00 |
| TRINITY_sp Q9VH(Invadoly | Leishmanolysin-like | 49.20 | 0.00 |
| TRINITY_sp Q8LB(At2g1671 | Iron-sulfur assembl | 49.20 | 0.00 |
| TRINITY_sp Q9C0(DNAH6    | Dynein heavy chain  | 49.20 | 0.00 |
| TRINITY_sp Q8RY(ELI5     | Tyrosine decarboxyl | 49.20 | 0.00 |
| TRINITY_sp Q5XI(Galk2    | N-acetylgalactosami | 49.20 | 0.00 |
| TRINITY_sp Q54X(Metfdh   | Electron transfer f | 49.20 | 0.00 |
| TRINITY_sp P527(Hrsp12   | Ribonuclease UK114  | 49.20 | 0.00 |
| TRINITY_sp A2X6(CDKG-1   | Cyclin-dependent ki | 49.20 | 0.00 |
| TRINITY_sp Q625(Ift52    | Intraflagellar tran | 49.20 | 0.00 |
| TRINITY_sp Q2KI(FAM63B   | Ubiquitin carboxyl- | 49.20 | 0.00 |
| TRINITY_sp Q9Z2(Gfpt2    | Glutamine--fructose | 49.20 | 0.00 |
| TRINITY_sp Q8GY(UPL1     | E3 ubiquitin-protei | 49.10 | 0.00 |
| TRINITY_sp Q9NB(hiw      | E3 ubiquitin-protei | 49.10 | 0.00 |
| TRINITY_sp Q6BV(PMP3     | Plasma membrane pro | 49.10 | 0.00 |
| TRINITY_sp P322(rasC     | Ras-like protein ra | 49.10 | 0.00 |
| TRINITY_sp Q5JT(RAB41    | Ras-related protein | 49.10 | 0.00 |
| TRINITY_sp P840(ARF1     | ADP-ribosylation fa | 49.10 | 0.00 |
| TRINITY_sp Q906(CDC42    | Cell division contr | 49.10 | 0.00 |
| TRINITY_sp A7MH(rbn      | Ribonuclease BN OS= | 49.10 | 0.00 |
| TRINITY_sp O944(SPBC660  | Uncharacterized RNA | 49.10 | 0.00 |
| TRINITY_sp O048(-        | Alpha-glucosidase O | 49.10 | 0.00 |
| TRINITY_sp Q23M(Tt116a   | Probable beta-tubul | 49.10 | 0.00 |
| TRINITY_sp Q54G(uap1     | Probable UDP-N-acet | 49.10 | 0.00 |
| TRINITY_sp Q6UK(pirA     | Protein pirA OS=Dic | 49.10 | 0.00 |
| TRINITY_sp P831(Dyrk3    | Putative dual speci | 49.10 | 0.00 |
| TRINITY_sp Q7T3(rab13    | Ras-related protein | 49.10 | 0.00 |
| TRINITY_sp Q86A(DDDB_G02 | Probable myosin lig | 49.10 | 0.00 |
| TRINITY_sp Q8H1(MTPC4    | Metal tolerance pro | 49.10 | 0.00 |
| TRINITY_sp Q284(CRYZ     | Quinone oxidoreduct | 49.10 | 0.00 |
| TRINITY_sp Q9LI(BAM1     | Beta-amylase 1, chl | 49.10 | 0.00 |
| TRINITY_sp P490(AKHS DH2 | Bifunctional aspart | 49.10 | 0.00 |
| TRINITY_sp P0CR(SEC23    | Protein transport p | 49.10 | 0.00 |
| TRINITY_sp Q9CB(fb1C     | FO synthase OS=Myco | 49.10 | 0.00 |
| TRINITY_sp O701(Dpm1     | Dolichol-phosphate  | 49.10 | 0.00 |
| TRINITY_sp Q9T0(At4g1355 | GDT1-like protein 2 | 49.10 | 0.00 |
| TRINITY_sp Q9M1(ABC21    | ABC transporter B f | 49.10 | 0.00 |
| TRINITY_sp Q9JI(Stk3     | Serine/threonine-pr | 49.10 | 0.00 |

|                          |                     |       |      |
|--------------------------|---------------------|-------|------|
| TRINITY_sp Q4097-        | Monodehydroascorbat | 49.10 | 0.00 |
| TRINITY_sp P4543CSN1     | COP9 signalosome co | 49.10 | 0.00 |
| TRINITY_sp Q54WfEglnA3   | Type-3 glutamine sy | 49.10 | 0.00 |
| TRINITY_sp Q54Y7maf1     | Repressor of RNA po | 49.10 | 0.00 |
| TRINITY_sp Q6JQACAD10    | Acyl-CoA dehydrogen | 49.10 | 0.00 |
| TRINITY_sp Q10M2Os03g025 | Asparagine syntheta | 49.10 | 0.00 |
| TRINITY_sp P8014-        | Extracellular serin | 49.10 | 0.00 |
| TRINITY_sp Q8031ergic3   | Endoplasmic reticul | 49.10 | 0.00 |
| TRINITY_sp Q1526PWP2     | Periodic tryptophan | 49.10 | 0.00 |
| TRINITY_sp Q9LE8RANGAP1  | RAN GTPase-activati | 49.10 | 0.00 |
| TRINITY_sp P4257-        | Soma ferritin OS=Ly | 49.10 | 0.00 |
| TRINITY_sp Q9C52HAC1     | Histone acetyltrans | 49.10 | 0.00 |
| TRINITY_sp Q3892FTB      | Protein farnesyltra | 49.10 | 0.00 |
| TRINITY_sp Q9632ACX4     | Acyl-coenzyme A oxi | 49.10 | 0.00 |
| TRINITY_sp P8711not1     | General negative re | 49.10 | 0.00 |
| TRINITY_sp B0D66LACBIDR7 | Pentafunctional ARO | 49.10 | 0.00 |
| TRINITY_sp P2587chcA     | Clathrin heavy chai | 49.10 | 0.00 |
| TRINITY_sp Q9SG9ATL72    | RING-H2 finger prot | 49.00 | 0.00 |
| TRINITY_sp Q32P8DYNLRB2  | Dynein light chain  | 49.00 | 0.00 |
| TRINITY_sp C1FI1MICPUN_6 | Inosine triphosphat | 49.00 | 0.00 |
| TRINITY_sp Q0WVERRP6L1   | Protein RRP6-like 1 | 49.00 | 0.00 |
| TRINITY_sp Q66K1TBC1D9B  | TBC1 domain family  | 49.00 | 0.00 |
| TRINITY_sp O1421trm10    | tRNA (guanine(9)-N1 | 49.00 | 0.00 |
| TRINITY_sp Q9CQ(Commd4   | COMM domain-contain | 49.00 | 0.00 |
| TRINITY_sp Q86AIDDB_G027 | Probable myosin lig | 49.00 | 0.00 |
| TRINITY_sp Q54I8eif2b1   | Translation initiat | 49.00 | 0.00 |
| TRINITY_sp O1586CPK2     | Calcium-dependent p | 49.00 | 0.00 |
| TRINITY_sp Q93ZHSDF2     | Stromal cell-derive | 49.00 | 0.00 |
| TRINITY_sp Q58D3SORD     | Sorbitol dehydrogen | 49.00 | 0.00 |
| TRINITY_sp F4HY(IRE3     | Probable serine/thr | 49.00 | 0.00 |
| TRINITY_sp O2278PXG3     | Probable peroxygena | 49.00 | 0.00 |
| TRINITY_sp Q86A1spkA-1   | Stress-activated pr | 49.00 | 0.00 |
| TRINITY_sp Q5UP9MIMI_R58 | Uncharacterized pro | 49.00 | 0.00 |
| TRINITY_sp Q9Y53OARD1    | O-acetyl-ADP-ribose | 49.00 | 0.00 |
| TRINITY_sp Q8C93Spf2     | Sperm flagellar pro | 49.00 | 0.00 |
| TRINITY_sp A5GW1rpsJ     | 30S ribosomal prote | 49.00 | 0.00 |
| TRINITY_sp Q2M29ALKBH7   | Alpha-ketoglutarate | 49.00 | 0.00 |
| TRINITY_sp Q8LF7DRP3B    | Dynamin-related pro | 49.00 | 0.00 |
| TRINITY_sp Q08D8AP2B1    | AP-1 complex subuni | 49.00 | 0.00 |
| TRINITY_sp Q9XF8LHCB5    | Chlorophyll a-b bin | 49.00 | 0.00 |
| TRINITY_sp P4687KRP95    | Kinesin-II 95 kDa s | 49.00 | 0.00 |
| TRINITY_sp Q9XGMVHA-D    | V-type proton ATPas | 49.00 | 0.00 |
| TRINITY_sp Q9XF7DEE76    | Degreening-related  | 49.00 | 0.00 |
| TRINITY_sp Q54J1hal      | Probable histidine  | 49.00 | 0.00 |
| TRINITY_sp F4J66IREH1    | Probable serine/thr | 49.00 | 0.00 |
| TRINITY_sp P223(SODB     | Superoxide dismutas | 49.00 | 0.00 |
| TRINITY_sp A4S63OSTLU_41 | Lon protease homolo | 49.00 | 0.00 |
| TRINITY_sp Q31V7treF     | Cytoplasmic trehala | 49.00 | 0.00 |
| TRINITY_sp Q655FMCSU3    | Molybdenum cofactor | 49.00 | 0.00 |
| TRINITY_sp Q86AIDDB_G027 | Probable acetyl-CoA | 49.00 | 0.00 |
| TRINITY_sp P2725ahr      | Aldehyde reductase  | 49.00 | 0.00 |
| TRINITY_sp Q9931TY3B-G   | Transposon Ty3-G Ga | 49.00 | 0.00 |
| TRINITY_sp P0ABIdedA     | Protein DedA OS=Esc | 49.00 | 0.00 |
| TRINITY_sp Q8GY9PGM      | Phosphoglycerate mu | 49.00 | 0.00 |
| TRINITY_sp Q2NK1DPY30    | Protein dpy-30 homo | 49.00 | 0.00 |
| TRINITY_sp Q9SF9RABE1E   | Ras-related protein | 49.00 | 0.00 |

|                              |                      |       |      |
|------------------------------|----------------------|-------|------|
| TRINITY_sp P5166Akr1a1       | Alcohol dehydrogena  | 49.00 | 0.00 |
| TRINITY_sp O1546ABCC4        | Multidrug resistanc  | 49.00 | 0.00 |
| TRINITY_sp P1295PEPD         | Xaa-Pro dipeptidase  | 49.00 | 0.00 |
| TRINITY_sp Q8LCVPLP3B        | Thioredoxin domain-  | 49.00 | 0.00 |
| TRINITY_sp O3501yfkJ         | Low molecular weigh  | 49.00 | 0.00 |
| TRINITY_sp Q8T66abcH2        | ABC transporter H f  | 48.90 | 0.00 |
| TRINITY_sp Q75WEOPLAH        | 5-oxoprolinase OS=B  | 48.90 | 0.00 |
| TRINITY_sp P1187-            | High mobility group  | 48.90 | 0.00 |
| TRINITY_sp Q29S(OSCP1        | Protein OSCP1 OS=Bo  | 48.90 | 0.00 |
| TRINITY_sp Q9278DPF3         | Zinc finger protein  | 48.90 | 0.00 |
| TRINITY_sp P6135RPL27        | 60S ribosomal prote  | 48.90 | 0.00 |
| TRINITY_sp Q9LTYUKL5         | Uridine kinase-like  | 48.90 | 0.00 |
| TRINITY_sp Q9SE9FIP2         | FH protein interact  | 48.90 | 0.00 |
| TRINITY_sp Q54R2yipf6        | Protein YIPF6 homol  | 48.90 | 0.00 |
| TRINITY_sp P2227RAS1         | Ras-like protein 1   | 48.90 | 0.00 |
| TRINITY_sp Q54R2yipf6        | Protein YIPF6 homol  | 48.90 | 0.00 |
| TRINITY_sp Q097(pld1         | Phospholipase D1 OS  | 48.90 | 0.00 |
| TRINITY_sp Q54G(dgat2        | Diacylglycerol O-ac  | 48.90 | 0.00 |
| TRINITY_sp Q54N(anapc1       | Anaphase-promoting   | 48.90 | 0.00 |
| TRINITY_sp Q9Y6ESIRT4        | NAD-dependent prote  | 48.90 | 0.00 |
| TRINITY_sp P3071Gstt2        | Glutathione S-trans  | 48.90 | 0.00 |
| TRINITY_sp P4228SKIV2L2      | Superkiller viralic  | 48.90 | 0.00 |
| TRINITY_sp Q55EfabCG23       | ABC transporter G f  | 48.90 | 0.00 |
| TRINITY_sp P4954ycf45        | Uncharacterized pro  | 48.90 | 0.00 |
| TRINITY_sp P5518gale         | UDP-glucose 4-epime  | 48.90 | 0.00 |
| TRINITY_sp A0JM5celf5        | CUGBP Elav-like fam  | 48.90 | 0.00 |
| TRINITY_sp P5156AFC1         | Serine/threonine-pr  | 48.90 | 0.00 |
| TRINITY_sp Q0446Vars         | Valine--tRNA ligase  | 48.90 | 0.00 |
| TRINITY_sp A41FKCTD7         | BTB/POZ domain-cont  | 48.90 | 0.00 |
| TRINITY_sp Q0849PDE4D        | cAMP-specific 3',5'  | 48.90 | 0.00 |
| TRINITY_sp A3DDJmutS         | DNA mismatch repair  | 48.90 | 0.00 |
| TRINITY_sp Q9ZQFCBSDUF3      | DUF21 domain-contai  | 48.90 | 0.00 |
| TRINITY_sp Q6DIHrnf126       | E3 ubiquitin-protei  | 48.90 | 0.00 |
| TRINITY_sp Q9FPFDJ1A         | Protein DJ-1 homolo  | 48.90 | 0.00 |
| TRINITY_sp Q8W49VHA-a3       | V-type proton ATPas  | 48.90 | 0.00 |
| TRINITY_sp Q54FIetfa         | Electron transfer f  | 48.90 | 0.00 |
| TRINITY_sp Q9C89NIFU5        | NifU-like protein 5  | 48.90 | 0.00 |
| TRINITY_sp O3513Emg1         | Ribosomal RNA small  | 48.90 | 0.00 |
| TRINITY_sp P4021NDE1         | External NADH-ubiqu  | 48.90 | 0.00 |
| TRINITY_sp Q9LF9CLPB3        | Chaperone protein C  | 48.90 | 0.00 |
| TRINITY_sp Q0617NMA1         | Nicotinamide/nicoti  | 48.90 | 0.00 |
| TRINITY_sp A7MBHift46        | Intraflagellar tran  | 48.90 | 0.00 |
| TRINITY_sp Q8LP9BTS          | Zinc finger protein  | 48.90 | 0.00 |
| TRINITY_sp P1432glnS         | Probable glutamine-  | 48.90 | 0.00 |
| TRINITY_sp Q5ZLVNSUN2        | tRNA (cytosine(34)-  | 48.90 | 0.00 |
| TRINITY_sp Q96TUinuE         | Extracellular exo-i  | 48.90 | 0.00 |
| TRINITY_sp P944(yciC         | Putative metal chap  | 48.90 | 0.00 |
| TRINITY_sp Q0DI\Os05g036     | Ferrochelataase-2, c | 48.90 | 0.00 |
| TRINITY_sp Q8L7CRWA1         | Protein REDUCED WAL  | 48.90 | 0.00 |
| TRINITY_sp Q9FI9CLPC1        | Chaperone protein C  | 48.90 | 0.00 |
| TRINITY_sp Q8LPIALPHA-AIAP-2 | complex subuni       | 48.90 | 0.00 |
| TRINITY_sp Q9ZVVHEN2         | DExH-box ATP-depend  | 48.90 | 0.00 |
| TRINITY_sp Q86GVgcy-28       | Receptor-type guany  | 48.90 | 0.00 |
| TRINITY_sp Q9M19ABCB21       | ABC transporter B f  | 48.90 | 0.00 |
| TRINITY_sp Q1HF9Nsun2        | tRNA (cytosine(34)-  | 48.90 | 0.00 |
| TRINITY_sp O2025-            | Sedoheptulose-1,7-b  | 48.90 | 0.00 |

|                          |                      |       |      |
|--------------------------|----------------------|-------|------|
| TRINITY_sp Q08D5PRPF4B   | Serine/threonine-pr  | 48.90 | 0.00 |
| TRINITY_sp Q9FP1UBP12    | Ubiquitin carboxyl-  | 48.90 | 0.00 |
| TRINITY_sp Q9VHF DppIII  | Dipeptidyl peptidas  | 48.90 | 0.00 |
| TRINITY_sp P5927RPS27AA  | Ubiquitin-40S ribos  | 48.80 | 0.00 |
| TRINITY_sp Q9FG6EB1C     | Microtubule-associa  | 48.80 | 0.00 |
| TRINITY_sp Q9P79mit1     | Chromatin remodelin  | 48.80 | 0.00 |
| TRINITY_sp Q86K6fhit     | Bis(5'-adenosyl)-tr  | 48.80 | 0.00 |
| TRINITY_sp B6EK7cutC     | Copper homeostasis   | 48.80 | 0.00 |
| TRINITY_sp Q640\tatdn1   | Putative deoxyribon  | 48.80 | 0.00 |
| TRINITY_sp A0DSFGSPATT0  | (Probable protein ph | 48.80 | 0.00 |
| TRINITY_sp Q8BV(Dpp9     | Dipeptidyl peptidas  | 48.80 | 0.00 |
| TRINITY_sp Q2KH2HBS1L    | HBS1-like protein O  | 48.80 | 0.00 |
| TRINITY_sp Q059(Slc25a4  | ADP/ATP translocase  | 48.80 | 0.00 |
| TRINITY_sp Q6EPFACE1     | CAAX prenyl proteas  | 48.80 | 0.00 |
| TRINITY_sp Q9WX3rbpF     | Putative RNA-bindin  | 48.80 | 0.00 |
| TRINITY_sp Q9C6FGAMMACA2 | Gamma carbonic anhy  | 48.80 | 0.00 |
| TRINITY_sp Q9FG1ARR18    | Two-component respo  | 48.80 | 0.00 |
| TRINITY_sp Q8691pakF     | Serine/threonine-pr  | 48.80 | 0.00 |
| TRINITY_sp Q54IHndrB     | Probable serine/thr  | 48.80 | 0.00 |
| TRINITY_sp O7431SPBC15D4 | COBW domain-contain  | 48.80 | 0.00 |
| TRINITY_sp Q55G\UDB_G026 | (Probable mitochondr | 48.80 | 0.00 |
| TRINITY_sp Q7SZFsec23a   | Protein transport p  | 48.80 | 0.00 |
| TRINITY_sp F4JGFKIN14D   | Kinesin-like protei  | 48.80 | 0.00 |
| TRINITY_sp P2532PRKACA   | cAMP-dependent prot  | 48.80 | 0.00 |
| TRINITY_sp Q54DFpolr2c   | DNA-directed RNA po  | 48.80 | 0.00 |
| TRINITY_sp F4HX1PLA1     | Phospholipase A I O  | 48.80 | 0.00 |
| TRINITY_sp P0466tyrB     | Aromatic-amino-acid  | 48.80 | 0.00 |
| TRINITY_sp P7036Ufd11    | Ubiquitin fusion de  | 48.80 | 0.00 |
| TRINITY_sp Q29R2PPWD1    | Peptidylprolyl isom  | 48.80 | 0.00 |
| TRINITY_sp Q8H11MNS2     | Mannosyl-oligosacch  | 48.80 | 0.00 |
| TRINITY_sp B2RW3Cfap58   | Cilia- and flagella  | 48.80 | 0.00 |
| TRINITY_sp Q8LFCAt1g2227 | Multifunctional met  | 48.80 | 0.00 |
| TRINITY_sp Q8R15Znfx1    | NFX1-type zinc fing  | 48.80 | 0.00 |
| TRINITY_sp Q9AS1At1g3241 | Vacuolar protein so  | 48.80 | 0.00 |
| TRINITY_sp Q8AV1rpf1     | Ribosome production  | 48.80 | 0.00 |
| TRINITY_sp Q54JFabcC3    | ABC transporter C f  | 48.80 | 0.00 |
| TRINITY_sp O8098FTSH4    | ATP-dependent zinc   | 48.80 | 0.00 |
| TRINITY_sp Q9SEEGAL1     | Galactokinase OS=Ar  | 48.80 | 0.00 |
| TRINITY_sp Q8JFvadat3    | Probable inactive t  | 48.80 | 0.00 |
| TRINITY_sp Q6572EX2      | Protein EXECUTER 2,  | 48.80 | 0.00 |
| TRINITY_sp Q54X1DDB_G027 | Glucose-induced deg  | 48.80 | 0.00 |
| TRINITY_sp Q6177Kif3b    | Kinesin-like protei  | 48.80 | 0.00 |
| TRINITY_sp Q9SFAAt3g0710 | (Protein transport p | 48.80 | 0.00 |
| TRINITY_sp Q6PC6btf314   | Transcription facto  | 48.70 | 0.00 |
| TRINITY_sp O7564SNRNP20  | (U5 small nuclear ri | 48.70 | 0.00 |
| TRINITY_sp P7274typA     | GTP-binding protein  | 48.70 | 0.00 |
| TRINITY_sp Q18C\crlm     | 50S ribosomal prote  | 48.70 | 0.00 |
| TRINITY_sp Q1029pla1     | Poly(A) polymerase   | 48.70 | 0.00 |
| TRINITY_sp Q9QXINme7     | Nucleoside diphosph  | 48.70 | 0.00 |
| TRINITY_sp Q54Q2treh     | Trehalase OS=Dictyo  | 48.70 | 0.00 |
| TRINITY_sp O2466PBD2     | Proteasome subunit   | 48.70 | 0.00 |
| TRINITY_sp P2817pkgB     | Protein kinase 2 OS  | 48.70 | 0.00 |
| TRINITY_sp C4YK1RAS1     | Ras-like protein 1   | 48.70 | 0.00 |
| TRINITY_sp Q86AIDDB_G027 | Probable myosin lig  | 48.70 | 0.00 |
| TRINITY_sp Q55D7DDB_G026 | (Probable 18S rRNA ( | 48.70 | 0.00 |
| TRINITY_sp Q0CC\gedE     | Glutathione S-trans  | 48.70 | 0.00 |

|                           |                      |       |      |
|---------------------------|----------------------|-------|------|
| TRINITY_sp Q9C0C DNAH6    | Dynein heavy chain   | 48.70 | 0.00 |
| TRINITY_sp Q2S41 SRU_076  | Maf-like protein SR  | 48.70 | 0.00 |
| TRINITY_sp Q681C At1g0390 | Uncharacterized pro  | 48.70 | 0.00 |
| TRINITY_sp Q9LRN RPL3B    | 50S ribosomal prote  | 48.70 | 0.00 |
| TRINITY_sp Q9D51 Ccdc130  | Coiled-coil domain-  | 48.70 | 0.00 |
| TRINITY_sp Q54E1 dst3     | Serine/threonine-pr  | 48.70 | 0.00 |
| TRINITY_sp P397C Bx42     | Puff-specific prote  | 48.70 | 0.00 |
| TRINITY_sp Q9LZ1 BTR1     | Protein BTR1 OS=Ara  | 48.70 | 0.00 |
| TRINITY_sp Q1LVE sf3b3    | Splicing factor 3B   | 48.70 | 0.00 |
| TRINITY_sp Q10P1 Os03g021 | DEAD-box ATP-depend  | 48.70 | 0.00 |
| TRINITY_sp Q9441 GLYK     | D-glycerate 3-kinas  | 48.70 | 0.00 |
| TRINITY_sp Q4I81 TRM10    | tRNA (guanine(9)-N1  | 48.70 | 0.00 |
| TRINITY_sp P629C RAC1     | Ras-related C3 botu  | 48.70 | 0.00 |
| TRINITY_sp Q9SQ1 At3g0478 | PITH domain-contain  | 48.70 | 0.00 |
| TRINITY_sp Q54G1 phbA     | Prohibitin-1, mitoc  | 48.70 | 0.00 |
| TRINITY_sp Q54S1 polr1c   | DNA-directed RNA po  | 48.70 | 0.00 |
| TRINITY_sp Q54Y1 dhkJ     | Hybrid signal trans  | 48.70 | 0.00 |
| TRINITY_sp O239C GPXHA-2  | Probable phospholip  | 48.70 | 0.00 |
| TRINITY_sp Q54Q1 trmt11   | tRNA (guanine(10)-N  | 48.70 | 0.00 |
| TRINITY_sp Q1971 frs-2    | Phenylalanine--tRNA  | 48.70 | 0.00 |
| TRINITY_sp Q1ZX1 gxcDD    | Guanine exchange fa  | 48.60 | 0.00 |
| TRINITY_sp P966C yddQ     | Uncharacterized iso  | 48.60 | 0.00 |
| TRINITY_sp Q1LU1 hddc2    | HD domain-containin  | 48.60 | 0.00 |
| TRINITY_sp Q6CE1 ALG10    | Dol-P-Glc:Glc(2)Man  | 48.60 | 0.00 |
| TRINITY_sp Q8K41 Abca8b   | ATP-binding cassett  | 48.60 | 0.00 |
| TRINITY_sp Q6311 Dnah7    | Dynein heavy chain   | 48.60 | 0.00 |
| TRINITY_sp Q8IU1 CAMK1D   | Calcium/calmodulin-  | 48.60 | 0.00 |
| TRINITY_sp P245C ptrB     | Protease 2 OS=Esche  | 48.60 | 0.00 |
| TRINITY_sp Q9FT1 MED34    | Mediator of RNA pol  | 48.60 | 0.00 |
| TRINITY_sp P5431 Lipe     | Hormone-sensitive l  | 48.60 | 0.00 |
| TRINITY_sp Q54W1 gnal     | Glucosamine 6-phosp  | 48.60 | 0.00 |
| TRINITY_sp Q9P61 brf1     | Transcription facto  | 48.60 | 0.00 |
| TRINITY_sp P328C BCS1     | Mitochondrial chape  | 48.60 | 0.00 |
| TRINITY_sp Q9XT1 PREP     | Prolyl endopeptidas  | 48.60 | 0.00 |
| TRINITY_sp A2YR1 ARP4     | Actin-related prote  | 48.60 | 0.00 |
| TRINITY_sp O697C betC     | Choline-sulfatase O  | 48.60 | 0.00 |
| TRINITY_sp Q8VZ1 P4H9     | Probable prolyl 4-h  | 48.60 | 0.00 |
| TRINITY_sp O652C At4g005C | Putative threonine   | 48.60 | 0.00 |
| TRINITY_sp B4NJ1 VMOcs2   | Molybdopterin synth  | 48.60 | 0.00 |
| TRINITY_sp Q9SL1 Os05g011 | Importin subunit al  | 48.60 | 0.00 |
| TRINITY_sp P368C YPTV3    | GTP-binding protein  | 48.60 | 0.00 |
| TRINITY_sp Q6RS1 dnaJ     | Chaperone protein D  | 48.60 | 0.00 |
| TRINITY_sp Q9GM1 PGA      | Pepsin A OS=Sorex u  | 48.60 | 0.00 |
| TRINITY_sp Q55G1 dcd2B    | Neutral ceramidase   | 48.60 | 0.00 |
| TRINITY_sp Q869C DDB_G021 | COBW domain-contain  | 48.60 | 0.00 |
| TRINITY_sp P4361 -        | DnaJ protein homolo  | 48.60 | 0.00 |
| TRINITY_sp Q22X1 THERM_   | (Alpha-tubulin N-ace | 48.60 | 0.00 |
| TRINITY_sp D2XV1 Gtpbp1   | GTP-binding protein  | 48.60 | 0.00 |
| TRINITY_sp Q6I51 CDKC-1   | Cyclin-dependent ki  | 48.60 | 0.00 |
| TRINITY_sp Q9NS1 FARSB    | Phenylalanine--tRNA  | 48.60 | 0.00 |
| TRINITY_sp P2711 ODC1     | Ornithine decarboxy  | 48.60 | 0.00 |
| TRINITY_sp A0AU1 wdsub1   | WD repeat, SAM and   | 48.60 | 0.00 |
| TRINITY_sp Q4V71 Osgepl1  | Probable tRNA N6-ad  | 48.60 | 0.00 |
| TRINITY_sp Q94A1 At1g066C | Uncharacterized oxi  | 48.60 | 0.00 |
| TRINITY_sp O2301 KAB1     | Probable voltage-ga  | 48.60 | 0.00 |
| TRINITY_sp Q55G1 cdk10    | Probable cyclin-dep  | 48.60 | 0.00 |

|                         |                     |       |      |
|-------------------------|---------------------|-------|------|
| TRINITY_sp P187(NSF     | Vesicle-fusing ATPa | 48.60 | 0.00 |
| TRINITY_sp Q389(ACC1    | Acetyl-CoA carboxyl | 48.60 | 0.00 |
| TRINITY_sp Q8WX(DNAH7   | Dynein heavy chain  | 48.60 | 0.00 |
| TRINITY_sp Q5M9(Dph6    | Diphthine--ammonia  | 48.60 | 0.00 |
| TRINITY_sp Q165(MAP3K11 | Mitogen-activated p | 48.60 | 0.00 |
| TRINITY_sp Q235(BAM3    | Beta-amylase 3, chl | 48.60 | 0.00 |
| TRINITY_sp Q9FL(RH18    | DEAD-box ATP-depend | 48.60 | 0.00 |
| TRINITY_sp Q8CG(Elac2   | Zinc phosphodiester | 48.60 | 0.00 |
| TRINITY_sp Q6P1(DUS1L   | tRNA-dihydrouridine | 48.60 | 0.00 |
| TRINITY_sp P496(-       | Ubiquitin-60S ribos | 48.60 | 0.00 |
| TRINITY_sp P982(Atp8a2  | Phospholipid-transp | 48.60 | 0.00 |
| TRINITY_sp Q99M(Mccc1   | Methylcrotonoyl-CoA | 48.60 | 0.00 |
| TRINITY_sp P434(cdk2    | Cyclin-dependent ki | 48.60 | 0.00 |
| TRINITY_sp P525(myb12   | Myb-related protein | 48.60 | 0.00 |
| TRINITY_sp Q075(Gyc32E  | Guanylate cyclase 3 | 48.60 | 0.00 |
| TRINITY_sp Q9SN(NRAMP3  | Metal transporter N | 48.60 | 0.00 |
| TRINITY_sp B2GK(mdh     | Malate dehydrogenas | 48.50 | 0.00 |
| TRINITY_sp O942(SPBC887 | Probable phospholip | 48.50 | 0.00 |
| TRINITY_sp Q98E(mlr4350 | Putative pterin-4-a | 48.50 | 0.00 |
| TRINITY_sp F4JY(TCX7    | Protein tesmin/TSO1 | 48.50 | 0.00 |
| TRINITY_sp P710(ygaD    | Putative multidrug  | 48.50 | 0.00 |
| TRINITY_sp Q9Y3(MEMO1   | Protein MEMO1 OS=Ho | 48.50 | 0.00 |
| TRINITY_sp Q8RX(ABC11   | ABC transporter G f | 48.50 | 0.00 |
| TRINITY_sp Q1ZX(gxcDD   | Guanine exchange fa | 48.50 | 0.00 |
| TRINITY_sp O975(TXN     | Thioredoxin OS=Equu | 48.50 | 0.00 |
| TRINITY_sp Q84N(AMPD    | Probable AMP deamin | 48.50 | 0.00 |
| TRINITY_sp Q9H6(PIF1    | ATP-dependent DNA h | 48.50 | 0.00 |
| TRINITY_sp A2XD(UBP26   | Ubiquitin carboxyl- | 48.50 | 0.00 |
| TRINITY_sp Q0DH(FTSH8   | ATP-dependent zinc  | 48.50 | 0.00 |
| TRINITY_sp A7RX(amdhd1  | Probable imidazonon | 48.50 | 0.00 |
| TRINITY_sp P736(sll1773 | Putative quercetin  | 48.50 | 0.00 |
| TRINITY_sp A7MK(mtnA    | Methylthioribose-1- | 48.50 | 0.00 |
| TRINITY_sp Q9XF(DDM1    | ATP-dependent DNA h | 48.50 | 0.00 |
| TRINITY_sp Q6P9(CYB5D1  | Cytochrome b5 domai | 48.50 | 0.00 |
| TRINITY_sp P519(NEK2    | Serine/threonine-pr | 48.50 | 0.00 |
| TRINITY_sp Q8VI(Abcc2   | Canalicular multisp | 48.50 | 0.00 |
| TRINITY_sp Q93V(EATG18A | Autophagy-related p | 48.50 | 0.00 |
| TRINITY_sp Q1ZX(gxcDD   | Guanine exchange fa | 48.50 | 0.00 |
| TRINITY_sp B1ZX(truB    | tRNA pseudouridine  | 48.50 | 0.00 |
| TRINITY_sp Q54N(4bcaA   | Branched-chain-amin | 48.50 | 0.00 |
| TRINITY_sp Q644(Cyp3a13 | Cytochrome P450 3A1 | 48.50 | 0.00 |
| TRINITY_sp P466(GUS1    | Glutamate--tRNA lig | 48.50 | 0.00 |
| TRINITY_sp P251(Pfkfb4  | 6-phosphofructo-2-k | 48.50 | 0.00 |
| TRINITY_sp Q9NV(TBC1D13 | TBC1 domain family  | 48.50 | 0.00 |
| TRINITY_sp Q67S(dnaJ    | Chaperone protein D | 48.50 | 0.00 |
| TRINITY_sp Q94K(NAP1;3  | Nucleosome assembly | 48.50 | 0.00 |
| TRINITY_sp Q9FT(RECQL1  | ATP-dependent DNA h | 48.50 | 0.00 |
| TRINITY_sp Q8C0(Efl1    | Elongation factor-1 | 48.50 | 0.00 |
| TRINITY_sp Q9PD(lipB    | Octanoyltransferase | 48.50 | 0.00 |
| TRINITY_sp Q8TB(DEPTOR  | DEP domain-containi | 48.50 | 0.00 |
| TRINITY_sp Q9SE(GAL1    | Galactokinase OS=Ar | 48.50 | 0.00 |
| TRINITY_sp P271(ODC1    | Ornithine decarboxy | 48.50 | 0.00 |
| TRINITY_sp Q7NB(dnaJ    | Chaperone protein D | 48.50 | 0.00 |
| TRINITY_sp Q9D6(Calm13  | Calmodulin-like pro | 48.50 | 0.00 |
| TRINITY_sp Q9SG(HMGB9   | High mobility group | 48.50 | 0.00 |
| TRINITY_sp Q9SZ(GPX7    | Putative glutathion | 48.50 | 0.00 |

|                           |                     |       |      |
|---------------------------|---------------------|-------|------|
| TRINITY_sp Q54NVLIMB      | LIM domain-containi | 48.50 | 0.00 |
| TRINITY_sp Q0WWWATG3      | Autophagy-related p | 48.50 | 0.00 |
| TRINITY_sp Q08JZNSUN2     | tRNA (cytosine(34)- | 48.50 | 0.00 |
| TRINITY_sp P5314TOS8      | Homeobox protein TO | 48.50 | 0.00 |
| TRINITY_sp Q5IFNOt01g064  | Cryptochrome DASH,  | 48.50 | 0.00 |
| TRINITY_sp Q9NR(BIRC6     | Baculoviral IAP rep | 48.50 | 0.00 |
| TRINITY_sp F4IACSS3       | Starch synthase 3,  | 48.50 | 0.00 |
| TRINITY_sp F4IV(CHR5      | Protein CHROMATIN R | 48.50 | 0.00 |
| TRINITY_sp Q6GN(nt5dc3    | 5'-nucleotidase dom | 48.50 | 0.00 |
| TRINITY_sp P348(CPN10     | 10 kDa chaperonin,  | 48.50 | 0.00 |
| TRINITY_sp Q922FPrkx      | cAMP-dependent prot | 48.40 | 0.00 |
| TRINITY_sp Q9M7METR1      | Ethylene receptor O | 48.40 | 0.00 |
| TRINITY_sp O548(Dusp5     | Dual specificity pr | 48.40 | 0.00 |
| TRINITY_sp P256(PWP2      | Periodic tryptophan | 48.40 | 0.00 |
| TRINITY_sp Q47P(pamO      | Phenylacetone monoo | 48.40 | 0.00 |
| TRINITY_sp Q6AYI(Pa2g4    | Proliferation-assoc | 48.40 | 0.00 |
| TRINITY_sp P4274-         | Polyubiquitin OS=Ag | 48.40 | 0.00 |
| TRINITY_sp O458(ndx-1     | Putative nudix hydr | 48.40 | 0.00 |
| TRINITY_sp Q9ZR(DSPTP1    | Dual specificity pr | 48.40 | 0.00 |
| TRINITY_sp Q9SF(TIM14-2   | Mitochondrial impor | 48.40 | 0.00 |
| TRINITY_sp Q0JI(CIPK11    | CBL-interacting pro | 48.40 | 0.00 |
| TRINITY_sp Q9Z2(Pdpk1     | 3-phosphoinositide- | 48.40 | 0.00 |
| TRINITY_sp P0C5(mic-33    | Putative mitochondr | 48.40 | 0.00 |
| TRINITY_sp O647(At2g3017  | Probable protein ph | 48.40 | 0.00 |
| TRINITY_sp Q8K1(Sde2      | Protein SDE2 homolo | 48.40 | 0.00 |
| TRINITY_sp Q54G(tagxt     | Serine--pyruvate am | 48.40 | 0.00 |
| TRINITY_sp P281(pkgb      | Protein kinase 2 OS | 48.40 | 0.00 |
| TRINITY_sp Q140(CAMK1     | Calcium/calmodulin- | 48.40 | 0.00 |
| TRINITY_sp O745(qcr7      | Cytochrome b-c1 com | 48.40 | 0.00 |
| TRINITY_sp Q9SE(FIP2      | FH protein interact | 48.40 | 0.00 |
| TRINITY_sp Q54D(stil      | Protein STIP1 homol | 48.40 | 0.00 |
| TRINITY_sp A7SDV(v1g16942 | Eukaryotic translat | 48.40 | 0.00 |
| TRINITY_sp Q5AIF(ENG1     | Endo-1,3(4)-beta-gl | 48.40 | 0.00 |
| TRINITY_sp Q1LU(weif3eb   | Eukaryotic translat | 48.40 | 0.00 |
| TRINITY_sp A8JF(CFAP65    | Cilia- and flagella | 48.40 | 0.00 |
| TRINITY_sp Q55C(vps16     | Vacuolar protein so | 48.40 | 0.00 |
| TRINITY_sp P253(mlkA      | Myosin light chain  | 48.40 | 0.00 |
| TRINITY_sp Q9MB(FKFBP     | 6-phosphofructo-2-k | 48.40 | 0.00 |
| TRINITY_sp Q1RL(Cpne9     | Copine-9 OS=Mus mus | 48.40 | 0.00 |
| TRINITY_sp Q9LE(IRE       | Probable serine/thr | 48.40 | 0.00 |
| TRINITY_sp P271(odc1-a    | Ornithine decarboxy | 48.40 | 0.00 |
| TRINITY_sp Q5T6(CFAP58    | Cilia- and flagella | 48.40 | 0.00 |
| TRINITY_sp Q9M8(UGT80A2   | Sterol 3-beta-gluco | 48.40 | 0.00 |
| TRINITY_sp P617(APTX      | Aprataxin (Fragment | 48.40 | 0.00 |
| TRINITY_sp Q617(Kif3b     | Kinesin-like protei | 48.40 | 0.00 |
| TRINITY_sp Q7XA(THF1      | Protein THYLAKOID F | 48.40 | 0.00 |
| TRINITY_sp B8GF(igpma     | 2,3-bisphosphoglyce | 48.40 | 0.00 |
| TRINITY_sp Q9FT(RECQL3    | ATP-dependent DNA h | 48.40 | 0.00 |
| TRINITY_sp P126(YPK1      | Serine/threonine-pr | 48.40 | 0.00 |
| TRINITY_sp Q54K(cysS      | Cysteine--tRNA liga | 48.40 | 0.00 |
| TRINITY_sp A8AK(hslU      | ATP-dependent prote | 48.40 | 0.00 |
| TRINITY_sp Q229(C37C3.2   | Eukaryotic translat | 48.40 | 0.00 |
| TRINITY_sp O744(dps1      | Aspartate--tRNA lig | 48.40 | 0.00 |
| TRINITY_sp P223(HSF24     | Heat shock factor p | 48.40 | 0.00 |
| TRINITY_sp Q452(hbdA      | 3-hydroxybutyryl-Co | 48.40 | 0.00 |
| TRINITY_sp Q28F(morn5     | MORN repeat-contain | 48.40 | 0.00 |



|                           |                     |       |      |
|---------------------------|---------------------|-------|------|
| TRINITY_sp A1Z9Fmip120    | Protein lin-54 homo | 48.40 | 0.00 |
| TRINITY_sp Q8GZFPPLA2-BE7 | Phospholipase A2-be | 48.40 | 0.00 |
| TRINITY_sp Q9SEF-         | Pirin-like protein  | 48.40 | 0.00 |
| TRINITY_sp Q54YfdhkB      | Hybrid signal trans | 48.40 | 0.00 |
| TRINITY_sp C0QKQgroS      | 10 kDa chaperonin O | 48.40 | 0.00 |
| TRINITY_sp P426f-         | 14-3-3-like protein | 48.30 | 0.00 |
| TRINITY_sp Q9XYIfcpA      | Probable C-terminal | 48.30 | 0.00 |
| TRINITY_sp Q9U7Exnp-1     | Transcriptional reg | 48.30 | 0.00 |
| TRINITY_sp Q86C6tor       | Target of rapamycin | 48.30 | 0.00 |
| TRINITY_sp Q294fMAN2B1    | Lysosomal alpha-man | 48.30 | 0.00 |
| TRINITY_sp Q9914HIS1      | ATP phosphoribosylt | 48.30 | 0.00 |
| TRINITY_sp Q91WUAs3mt     | Arsenite methyltran | 48.30 | 0.00 |
| TRINITY_sp Q9LZCABCC14    | ABC transporter C f | 48.30 | 0.00 |
| TRINITY_sp Q6DJFccdc130   | Coiled-coil domain- | 48.30 | 0.00 |
| TRINITY_sp Q7XA6MTN2      | 5'-methylthioadenos | 48.30 | 0.00 |
| TRINITY_sp Q55CfmaspS     | Aspartate--tRNA lig | 48.30 | 0.00 |
| TRINITY_sp Q9H61PIF1      | ATP-dependent DNA h | 48.30 | 0.00 |
| TRINITY_sp P527f-         | Glutamine--tRNA lig | 48.30 | 0.00 |
| TRINITY_sp P905f-         | 66 kDa stress prote | 48.30 | 0.00 |
| TRINITY_sp O027fPARG      | Poly(ADP-ribose) gl | 48.30 | 0.00 |
| TRINITY_sp P044f-         | Calmodulin OS=Triti | 48.30 | 0.00 |
| TRINITY_sp O494fPHB1      | Prohibitin-1, mitoc | 48.30 | 0.00 |
| TRINITY_sp Q5RDUPARP6     | Poly [ADP-ribose] p | 48.30 | 0.00 |
| TRINITY_sp P162fMOD1      | NADP-dependent mali | 48.30 | 0.00 |
| TRINITY_sp P490fPOLD2     | DNA polymerase delt | 48.30 | 0.00 |
| TRINITY_sp Q5VRfHGO       | Homogentisate 1,2-d | 48.30 | 0.00 |
| TRINITY_sp Q91YfCamk1     | Calcium/calmodulin- | 48.30 | 0.00 |
| TRINITY_sp P1761ypt3      | GTP-binding protein | 48.30 | 0.00 |
| TRINITY_sp Q9C6fLHCA5     | Photosystem I chlor | 48.30 | 0.00 |
| TRINITY_sp Q54TfmrkC      | Probable serine/thr | 48.30 | 0.00 |
| TRINITY_sp A4IHfobp1      | Ribosome biogenesis | 48.30 | 0.00 |
| TRINITY_sp Q9LNfRAA3      | Arabinosyltransfera | 48.30 | 0.00 |
| TRINITY_sp Q6Z8fOs02g01f  | L-aspartate oxidase | 48.30 | 0.00 |
| TRINITY_sp Q8LGfIDH6      | Isocitrate dehydrog | 48.30 | 0.00 |
| TRINITY_sp Q5U2fFbxo9     | F-box only protein  | 48.30 | 0.00 |
| TRINITY_sp P465fpip       | Proline iminopeptid | 48.30 | 0.00 |
| TRINITY_sp Q053fSchC      | Putative polyketide | 48.30 | 0.00 |
| TRINITY_sp Q5XICeci2      | Enoyl-CoA delta iso | 48.30 | 0.00 |
| TRINITY_sp Q168fTXNRD1    | Thioredoxin reducta | 48.30 | 0.00 |
| TRINITY_sp A1A5fPrpf6     | Pre-mRNA-processing | 48.30 | 0.00 |
| TRINITY_sp Q96JfDNAH8     | Dynein heavy chain  | 48.30 | 0.00 |
| TRINITY_sp Q9BUfTRMO      | tRNA (adenine(37)-N | 48.30 | 0.00 |
| TRINITY_sp Q5M9fIarl6     | ADP-ribosylation fa | 48.30 | 0.00 |
| TRINITY_sp Q921fSf3b3     | Splicing factor 3B  | 48.30 | 0    |
| TRINITY_sp Q125fAO-I      | Copper amine oxidas | 48.30 | 0.00 |
| TRINITY_sp Q5U4fmeis3-a   | Homeobox protein me | 48.30 | 0.00 |
| TRINITY_sp Q9Y3fIAK6      | Adenylate kinase is | 48.20 | 0.00 |
| TRINITY_sp Q9SFfRABE1E    | Ras-related protein | 48.20 | 0.00 |
| TRINITY_sp Q54X1DDB_G02f  | Glucose-induced deg | 48.20 | 0.00 |
| TRINITY_sp B3DNfAPC6      | Anaphase-promoting  | 48.20 | 0.00 |
| TRINITY_sp Q54F1nubp1     | Iron-sulfur protein | 48.20 | 0.00 |
| TRINITY_sp O140f(mak2     | Peroxide stress-act | 48.20 | 0.00 |
| TRINITY_sp Q2KJfPGS1      | CDP-diacylglycerol- | 48.20 | 0.00 |
| TRINITY_sp Q8T1famd1      | S-adenosylmethionin | 48.20 | 0.00 |
| TRINITY_sp Q55Ff(mef2A    | Transcription facto | 48.20 | 0.00 |
| TRINITY_sp Q0WW2At4g344f  | Coatomer subunit ga | 48.20 | 0.00 |

|                          |                     |       |      |
|--------------------------|---------------------|-------|------|
| TRINITY_sp P0498cprA     | Cysteine proteinase | 48.20 | 0.00 |
| TRINITY_sp Q9P2FZNF1     | NFX1-type zinc fing | 48.20 | 0.00 |
| TRINITY_sp Q5ZIVPEO1     | Twinkle protein, mi | 48.20 | 0.00 |
| TRINITY_sp B8BM1MCM7     | DNA replication lic | 48.20 | 0.00 |
| TRINITY_sp Q8W11KIN14F   | Kinesin-like protei | 48.20 | 0.00 |
| TRINITY_sp Q5ZICSLU7     | Pre-mRNA-splicing f | 48.20 | 0.00 |
| TRINITY_sp Q54Y2ndrA     | Probable serine/thr | 48.20 | 0.00 |
| TRINITY_sp Q9LNRPN3A     | 26S proteasome non- | 48.20 | 0.00 |
| TRINITY_sp P0432pol      | Retrovirus-related  | 48.20 | 0.00 |
| TRINITY_sp P2751CBR      | Carotene biosynthes | 48.20 | 0.00 |
| TRINITY_sp P4703PRY3     | Cell wall protein P | 48.20 | 0.00 |
| TRINITY_sp Q8R9vacpP     | Acyl carrier protei | 48.20 | 0.00 |
| TRINITY_sp Q54B3pake     | Serine/threonine-pr | 48.20 | 0.00 |
| TRINITY_sp P5467pikD     | Phosphatidylinosito | 48.20 | 0.00 |
| TRINITY_sp P4329SRK2G    | Serine/threonine-pr | 48.20 | 0.00 |
| TRINITY_sp Q8BW9Camk1d   | Calcium/calmodulin- | 48.20 | 0.00 |
| TRINITY_sp Q9207Scpep1   | Retinoid-inducible  | 48.20 | 0.00 |
| TRINITY_sp Q9FHMKIN14E   | Kinesin-like protei | 48.20 | 0.00 |
| TRINITY_sp O0492GPX2     | Probable glutathion | 48.20 | 0.00 |
| TRINITY_sp Q9FT7RECQL1   | ATP-dependent DNA h | 48.20 | 0.00 |
| TRINITY_sp Q0433YMR196W  | Uncharacterized pro | 48.20 | 0.00 |
| TRINITY_sp Q9NR9BIRC6    | Baculoviral IAP rep | 48.20 | 0.00 |
| TRINITY_sp Q9SC9UPL7     | E3 ubiquitin-protei | 48.20 | 0.00 |
| TRINITY_sp Q9C0CDNAH6    | Dynein heavy chain  | 48.20 | 0.00 |
| TRINITY_sp Q8GY2UPL1     | E3 ubiquitin-protei | 48.20 | 0.00 |
| TRINITY_sp Q52K1Srrm1    | Serine/arginine rep | 48.20 | 0.00 |
| TRINITY_sp Q9LTCPDR2     | Probable manganese- | 48.20 | 0.00 |
| TRINITY_sp Q54VFhb9      | Homeobox protein 9  | 48.20 | 0.00 |
| TRINITY_sp Q3T03POLD4    | DNA polymerase delt | 48.20 | 0.00 |
| TRINITY_sp Q6317Dnah7    | Dynein heavy chain  | 48.20 | 0    |
| TRINITY_sp Q93Z5At3g1619 | Probable inactive n | 48.20 | 0.00 |
| TRINITY_sp Q9M35AGD6     | Probable ADP-ribosy | 48.20 | 0.00 |
| TRINITY_sp Q0WVIMCM4     | DNA replication lic | 48.20 | 0.00 |
| TRINITY_sp Q9UHIDPP7     | Dipeptidyl peptidas | 48.10 | 0.00 |
| TRINITY_sp Q8X53ydiF     | Acetate CoA-transfe | 48.10 | 0.00 |
| TRINITY_sp Q9XIHALA3     | Phospholipid-transp | 48.10 | 0.00 |
| TRINITY_sp B3RY9TRIADDR7 | E3 UFM1-protein lig | 48.10 | 0.00 |
| TRINITY_sp P0901SNRPA    | U1 small nuclear ri | 48.10 | 0.00 |
| TRINITY_sp Q54Y1mai      | Maleylacetoacetate  | 48.10 | 0.00 |
| TRINITY_sp A6QLV7TGDS    | dTDP-D-glucose 4,6- | 48.10 | 0.00 |
| TRINITY_sp P1187-        | High mobility group | 48.10 | 0.00 |
| TRINITY_sp Q2128K07E3.7  | Probable cation-tra | 48.10 | 0.00 |
| TRINITY_sp Q55G1pomp     | Proteasome maturati | 48.10 | 0.00 |
| TRINITY_sp D5D81ftsH     | ATP-dependent zinc  | 48.10 | 0.00 |
| TRINITY_sp Q9EP9Arfgap1  | ADP-ribosylation fa | 48.10 | 0.00 |
| TRINITY_sp Q6GN1dis31    | DIS3-like exonuclea | 48.10 | 0.00 |
| TRINITY_sp Q9SF9RABE1E   | Ras-related protein | 48.10 | 0.00 |
| TRINITY_sp Q54F2mroh1    | Maestro heat-like r | 48.10 | 0.00 |
| TRINITY_sp Q9HDVpgs1     | CDP-diacylglycerol- | 48.10 | 0.00 |
| TRINITY_sp P0477-        | Glutamine synthetas | 48.10 | 0.00 |
| TRINITY_sp O1899DNASE1   | Deoxyribonuclease-1 | 48.10 | 0.00 |
| TRINITY_sp Q4U23agtpbp1  | Cytosolic carboxype | 48.10 | 0.00 |
| TRINITY_sp Q9XTFZK262.3  | Lipase ZK262.3 OS=C | 48.10 | 0.00 |
| TRINITY_sp A8J69CFAP54   | Cilia- and flagella | 48.10 | 0.00 |
| TRINITY_sp P2744MARK3    | MAP/microtubule aff | 48.10 | 0.00 |
| TRINITY_sp Q55B1nmd3     | 60S ribosomal expor | 48.10 | 0.00 |

|                           |                      |       |      |
|---------------------------|----------------------|-------|------|
| TRINITY_sp Q9FKHAt5g4884  | Pantoate--beta-alan  | 48.10 | 0.00 |
| TRINITY_sp P5353SSU72     | RNA polymerase II s  | 48.10 | 0.00 |
| TRINITY_sp O440(PYK       | Pyruvate kinase OS=  | 48.10 | 0.00 |
| TRINITY_sp Q9FYERS2Z32    | Serine/arginine-ric  | 48.10 | 0.00 |
| TRINITY_sp Q1414DHX34     | Probable ATP-depend  | 48.10 | 0.00 |
| TRINITY_sp Q2HJ1RAB8B     | Ras-related protein  | 48.10 | 0.00 |
| TRINITY_sp A0Q3FribBA     | Riboflavin biosynth  | 48.10 | 0.00 |
| TRINITY_sp Q9M3(ATM       | Serine/threonine-pr  | 48.10 | 0.00 |
| TRINITY_sp P3952DRS2      | Probable phospholip  | 48.10 | 0.00 |
| TRINITY_sp Q9P2IDNAH1     | Dynein heavy chain   | 48.10 | 0.00 |
| TRINITY_sp Q0VA6usp16     | Ubiquitin carboxyl-  | 48.10 | 0.00 |
| TRINITY_sp P1579Camk2d    | Calcium/calmodulin-  | 48.10 | 0.00 |
| TRINITY_sp Q944FHDA2      | Histone deacetylase  | 48.10 | 0.00 |
| TRINITY_sp Q9LE8IRE       | Probable serine/thr  | 48.10 | 0.00 |
| TRINITY_sp P9166(1(2)0365 | Probable multidrug   | 48.10 | 0.00 |
| TRINITY_sp F4JZ(TEEC      | Thylakoid membrane   | 48.10 | 0.00 |
| TRINITY_sp P4827ycf39     | Uncharacterized pro  | 48.10 | 0.00 |
| TRINITY_sp C1C4Mapip      | Methylthioribulose-  | 48.10 | 0.00 |
| TRINITY_sp Q8GW(At5g6344  | UPF0235 protein At5  | 48.10 | 0.00 |
| TRINITY_sp Q9D62Nop56     | Nucleolar protein 5  | 48.10 | 0.00 |
| TRINITY_sp A6LP6pth       | Peptidyl-tRNA hydro  | 48.10 | 0.00 |
| TRINITY_sp F4HX\NUP155    | Nuclear pore comple  | 48.10 | 0.00 |
| TRINITY_sp Q9LZINCS1      | Purine-uracil perme  | 48.10 | 0.00 |
| TRINITY_sp Q9DE1BAZ2B     | Bromodomain adjacen  | 48.10 | 0.00 |
| TRINITY_sp Q54B8csn4      | COP9 signalosome co  | 48.10 | 0.00 |
| TRINITY_sp A8GAImtnK      | Methylthioribose ki  | 48.10 | 0.00 |
| TRINITY_sp Q8UA7blh       | Beta-lactamase hydr  | 48.10 | 0.00 |
| TRINITY_sp Q54V1glud2     | Glutamate dehydroge  | 48.10 | 0.00 |
| TRINITY_sp P0CM3ATG7      | Ubiquitin-like modi  | 48.10 | 0.00 |
| TRINITY_sp Q6NW\Ift122    | Intraflagellar tran  | 48.10 | 0    |
| TRINITY_sp P0432pol       | Retrovirus-related   | 48.10 | 0.00 |
| TRINITY_sp Q54CncysK      | Cysteine synthase O  | 48.10 | 0.00 |
| TRINITY_sp Q22X2THERM_    | (Alpha-tubulin N-ace | 48.00 | 0.00 |
| TRINITY_sp P176(ypt2      | GTP-binding protein  | 48.00 | 0.00 |
| TRINITY_sp Q9ST1VPS29     | Vacuolar protein so  | 48.00 | 0.00 |
| TRINITY_sp Q86CFatg12     | Ubiquitin-like prot  | 48.00 | 0.00 |
| TRINITY_sp Q2KIIOSTC      | Oligosaccharyltrans  | 48.00 | 0.00 |
| TRINITY_sp P491(Os05g01(  | Cytochrome b5 OS=Or  | 48.00 | 0.00 |
| TRINITY_sp Q9SK3MP3       | Probable steroid-bi  | 48.00 | 0.00 |
| TRINITY_sp Q8101Trim50    | E3 ubiquitin-protei  | 48.00 | 0.00 |
| TRINITY_sp A9GF1apt       | Adenine phosphoribo  | 48.00 | 0.00 |
| TRINITY_sp O8072ABCB4     | ABC transporter B f  | 48.00 | 0.00 |
| TRINITY_sp Q5RB1PSMD12    | 26S proteasome non-  | 48.00 | 0.00 |
| TRINITY_sp Q1452HABP2     | Hyaluronan-binding   | 48.00 | 0.00 |
| TRINITY_sp Q54H4drkB      | Probable serine/thr  | 48.00 | 0.00 |
| TRINITY_sp Q9BZ(ABCA2     | ATP-binding cassett  | 48.00 | 0.00 |
| TRINITY_sp Q52JFVIP2      | Probable NOT transc  | 48.00 | 0.00 |
| TRINITY_sp Q9FJ1EB1B      | Microtubule-associa  | 48.00 | 0.00 |
| TRINITY_sp Q500VPIGM      | GPI mannosyltransfe  | 48.00 | 0.00 |
| TRINITY_sp O6052NEMF      | Nuclear export medi  | 48.00 | 0.00 |
| TRINITY_sp Q5WL6rplX      | 50S ribosomal prote  | 48.00 | 0.00 |
| TRINITY_sp Q9FE1SRT1      | NAD-dependent prote  | 48.00 | 0.00 |
| TRINITY_sp A0T0(rpl21     | 50S ribosomal prote  | 48.00 | 0.00 |
| TRINITY_sp Q9STICEP2      | KDEL-tailed cystein  | 48.00 | 0.00 |
| TRINITY_sp Q22X2THERM_    | (Alpha-tubulin N-ace | 48.00 | 0.00 |
| TRINITY_sp P527(trs-1     | Threonine--tRNA lig  | 48.00 | 0.00 |

|                          |                     |       |      |
|--------------------------|---------------------|-------|------|
| TRINITY_sp O5992pkar     | cAMP-dependent prot | 48.00 | 0.00 |
| TRINITY_sp O0011AGPS     | Alkyldihydroxyaceto | 48.00 | 0.00 |
| TRINITY_sp Q7U2FMb0150   | Putative S-adenosyl | 48.00 | 0.00 |
| TRINITY_sp P0406FUCA1    | Tissue alpha-L-fuco | 48.00 | 0.00 |
| TRINITY_sp Q9R11Ctsz     | Cathepsin Z OS=Ratt | 48.00 | 0.00 |
| TRINITY_sp Q3981-        | Calnexin homolog OS | 48.00 | 0.00 |
| TRINITY_sp Q7L27KCTD9    | BTB/POZ domain-cont | 48.00 | 0.00 |
| TRINITY_sp Q3892RABB1B   | Ras-related protein | 48.00 | 0.00 |
| TRINITY_sp Q6QN1-        | Nascent polypeptide | 48.00 | 0.00 |
| TRINITY_sp P2881PA3568   | Uncharacterized pro | 48.00 | 0.00 |
| TRINITY_sp O5748-        | Voltage-dependent L | 48.00 | 0.00 |
| TRINITY_sp E0X91At3g6355 | Zinc finger CCCH do | 48.00 | 0.00 |
| TRINITY_sp P1275RSP3     | Flagellar radial sp | 48.00 | 0.00 |
| TRINITY_sp O7606TM7SF2   | Delta(14)-sterol re | 48.00 | 0.00 |
| TRINITY_sp Q8W02CCR4-1   | Carbon catabolite r | 48.00 | 0.00 |
| TRINITY_sp P5415MSR4     | Peptide methionine  | 48.00 | 0.00 |
| TRINITY_sp B9DGIACS      | Acetyl-coenzyme A s | 48.00 | 0.00 |
| TRINITY_sp Q54BMmcfG     | Mitochondrial subst | 48.00 | 0.00 |
| TRINITY_sp Q84RFARI7     | Probable E3 ubiquit | 48.00 | 0.00 |
| TRINITY_sp B5FY1LAMTOR2  | Ragulator complex p | 48.00 | 0.00 |
| TRINITY_sp F5A89DAB1     | Dynein assembly fac | 48.00 | 0.00 |
| TRINITY_sp Q2JM7aspS     | Aspartate--tRNA(Asp | 48.00 | 0.00 |
| TRINITY_sp Q3ZC(CNOT7    | CCR4-NOT transcript | 48.00 | 0.00 |
| TRINITY_sp P3158YPTV1    | GTP-binding protein | 48.00 | 0.00 |
| TRINITY_sp O8088ARASP    | Membrane metallopro | 48.00 | 0.00 |
| TRINITY_sp A2CE8cyb5d2   | Neuferricin OS=Dani | 48.00 | 0.00 |
| TRINITY_sp P5347-        | Actin-2 OS=Schistos | 48.00 | 0.00 |
| TRINITY_sp P2271Gucylb2  | Guanylate cyclase s | 48.00 | 0.00 |
| TRINITY_sp Q6DF7papd4-b  | Poly(A) RNA polymer | 48.00 | 0.00 |
| TRINITY_sp Q6174Eif2b4   | Translation initiat | 48.00 | 0.00 |
| TRINITY_sp Q9C58MKP1     | Protein-tyrosine-ph | 48.00 | 0.00 |
| TRINITY_sp Q6038MJ0079   | Uncharacterized pro | 48.00 | 0.00 |
| TRINITY_sp Q9T07PCKA     | Phosphoenolpyruvate | 48.00 | 0.00 |
| TRINITY_sp P222(-        | Pyruvate kinase, cy | 48.00 | 0.00 |
| TRINITY_sp O9448tef3     | Elongation factor 3 | 48.00 | 0.00 |
| TRINITY_sp Q15K1PHYLLO   | Protein PHYLLO, chl | 48.00 | 0.00 |
| TRINITY_sp P0073F2       | Prothrombin OS=Homo | 47.90 | 0.00 |
| TRINITY_sp Q9MB1DHC10    | Dynein-1-beta heavy | 47.90 | 0.00 |
| TRINITY_sp P5016Rdh3     | Retinol dehydrogena | 47.90 | 0.00 |
| TRINITY_sp O0066FCN1     | Ficolin-1 OS=Homo s | 47.90 | 0.00 |
| TRINITY_sp Q9FL1ABCA9    | ABC transporter A f | 47.90 | 0.00 |
| TRINITY_sp Q5VJ1gdt9     | Probable serine/thr | 47.90 | 0.00 |
| TRINITY_sp Q54T1mrpl17   | Probable 39S riboso | 47.90 | 0.00 |
| TRINITY_sp Q54Q1erKB     | Extracellular signa | 47.90 | 0.00 |
| TRINITY_sp Q9P95alxA     | Alternative oxidase | 47.90 | 0.00 |
| TRINITY_sp Q9Z21Mtmr2    | Myotubularin-relate | 47.90 | 0.00 |
| TRINITY_sp Q54X7DDB_G027 | DEP domain-containi | 47.90 | 0.00 |
| TRINITY_sp E9PV7Gcn1     | eIF-2-alpha kinase  | 47.90 | 0.00 |
| TRINITY_sp Q54G(xpnpep1  | Xaa-Pro aminopeptid | 47.90 | 0.00 |
| TRINITY_sp Q96G7SDSL     | Serine dehydratase- | 47.90 | 0.00 |
| TRINITY_sp Q54W(bud32    | EKC/KEOPS complex s | 47.90 | 0.00 |
| TRINITY_sp Q5VJ1gdt9     | Probable serine/thr | 47.90 | 0.00 |
| TRINITY_sp Q54V7DDB_G028 | Probable serine/thr | 47.90 | 0.00 |
| TRINITY_sp Q4G33-        | Peptidyl-prolyl cis | 47.90 | 0.00 |
| TRINITY_sp P7362sl11773  | Putative quercetin  | 47.90 | 0.00 |
| TRINITY_sp Q76N1ERD2     | ER lumen protein-re | 47.90 | 0.00 |

|                          |                     |       |      |
|--------------------------|---------------------|-------|------|
| TRINITY_sp Q2KI2TMEM256  | Transmembrane prote | 47.90 | 0.00 |
| TRINITY_sp Q62JHalcl1    | Probable allantoica | 47.90 | 0.00 |
| TRINITY_sp Q2556UMP      | Uridine 5'-monophos | 47.90 | 0.00 |
| TRINITY_sp A7RZ5blocls2  | Biogenesis of lysos | 47.90 | 0.00 |
| TRINITY_sp Q54H5DDB_G028 | CBS domain-containi | 47.90 | 0.00 |
| TRINITY_sp A1A61NSRA     | Nuclear speckle RNA | 47.90 | 0.00 |
| TRINITY_sp Q6CR6mge1     | GrpE protein homolo | 47.90 | 0.00 |
| TRINITY_sp Q54TVpdkA     | Probable serine/thr | 47.90 | 0.00 |
| TRINITY_sp O6052NEMF     | Nuclear export medi | 47.90 | 0.00 |
| TRINITY_sp P5467apm2     | AP-2 complex subuni | 47.90 | 0.00 |
| TRINITY_sp Q3B40zupt     | Zinc transporter Zu | 47.90 | 0.00 |
| TRINITY_sp Q9FIFAt5g4772 | Probable acetyl-CoA | 47.90 | 0.00 |
| TRINITY_sp Q8S00Os01g089 | Probable membrane-a | 47.90 | 0.00 |
| TRINITY_sp Q9M9URKD1     | Protein RKD1 OS=Ara | 47.90 | 0.00 |
| TRINITY_sp Q4268SODA     | Superoxide dismutas | 47.90 | 0.00 |
| TRINITY_sp Q7Z6FRBBP6    | E3 ubiquitin-protei | 47.90 | 0.00 |
| TRINITY_sp A7SWFv1g19425 | Pescadillo homolog  | 47.90 | 0.00 |
| TRINITY_sp P4700PRY3     | Cell wall protein P | 47.90 | 0.00 |
| TRINITY_sp P3209mutT     | 8-oxo-dGTP diphosph | 47.90 | 0.00 |
| TRINITY_sp Q66HEIft80    | Intraflagellar tran | 47.90 | 0.00 |
| TRINITY_sp Q94E5PR46b    | Coiled-coil domain- | 47.90 | 0.00 |
| TRINITY_sp Q75LIADA2     | Transcriptional ada | 47.90 | 0.00 |
| TRINITY_sp Q6GQFatg3     | Ubiquitin-like-conj | 47.90 | 0.00 |
| TRINITY_sp Q9Z9MbsaA     | Glutathione peroxid | 47.90 | 0.00 |
| TRINITY_sp Q9FV1AMT1-3   | Ammonium transporte | 47.90 | 0.00 |
| TRINITY_sp Q9WUUCtsz     | Cathepsin Z OS=Mus  | 47.90 | 0.00 |
| TRINITY_sp Q9V37Catsup   | Protein catecholami | 47.90 | 0.00 |
| TRINITY_sp Q1IN1gcvH     | Glycine cleavage sy | 47.90 | 0.00 |
| TRINITY_sp Q3919PSBW     | Photosystem II reac | 47.80 | 0.00 |
| TRINITY_sp Q54LEabcC5    | ABC transporter C f | 47.80 | 0.00 |
| TRINITY_sp O2356RABB1A   | Ras-related protein | 47.80 | 0.00 |
| TRINITY_sp Q96P4AGAP3    | Arf-GAP with GTPase | 47.80 | 0.00 |
| TRINITY_sp Q8WNECSTA     | Cystatin-A OS=Felis | 47.80 | 0.00 |
| TRINITY_sp Q9GL1ITIH3    | Inter-alpha-trypsin | 47.80 | 0.00 |
| TRINITY_sp Q54R7DDB_G028 | Probable iron/ascor | 47.80 | 0.00 |
| TRINITY_sp Q5PQ2slc30a9  | Zinc transporter 9  | 47.80 | 0.00 |
| TRINITY_sp Q9SR1PEX13    | Peroxisomal membran | 47.80 | 0.00 |
| TRINITY_sp A7YT8nmt2     | Glycylpeptide N-tet | 47.80 | 0.00 |
| TRINITY_sp Q54VEcoq7     | 5-demethoxyubiquino | 47.80 | 0.00 |
| TRINITY_sp O9443SPBC660  | Uncharacterized RNA | 47.80 | 0.00 |
| TRINITY_sp Q58D4MMAB     | Cob(I)yrinic acid a | 47.80 | 0.00 |
| TRINITY_sp C5CG7glgA     | Glycogen synthase O | 47.80 | 0.00 |
| TRINITY_sp P3641rab7A    | Ras-related protein | 47.80 | 0.00 |
| TRINITY_sp Q0VC7OXSM     | 3-oxoacyl-[acyl-car | 47.80 | 0.00 |
| TRINITY_sp Q2868ABCC2    | Canalicular multisp | 47.80 | 0.00 |
| TRINITY_sp Q9Y4VAFG3L2   | AFG3-like protein 2 | 47.80 | 0.00 |
| TRINITY_sp C0QTRpsO      | 30S ribosomal prote | 47.80 | 0.00 |
| TRINITY_sp Q54P6gefA     | Ras guanine nucleot | 47.80 | 0.00 |
| TRINITY_sp Q8RWEUPL6     | E3 ubiquitin-protei | 47.80 | 0.00 |
| TRINITY_sp P0CG5UBB      | Polyubiquitin-B OS= | 47.80 | 0.00 |
| TRINITY_sp Q07G4sde2     | Protein SDE2 homolo | 47.80 | 0.00 |
| TRINITY_sp Q54N6uch2     | Ubiquitin carboxyl- | 47.80 | 0.00 |
| TRINITY_sp Q9M11At3g5446 | F-box protein At3g5 | 47.80 | 0.00 |
| TRINITY_sp Q9CQ1Immp11   | Mitochondrial inner | 47.80 | 0.00 |
| TRINITY_sp O6146-        | 60S acidic ribosoma | 47.80 | 0.00 |
| TRINITY_sp P0846Dlat     | Dihydrolypoyllysine | 47.80 | 0.00 |

|                          |                     |       |      |
|--------------------------|---------------------|-------|------|
| TRINITY_sp Q9SY>LIL3.1   | Light-harvesting co | 47.80 | 0.00 |
| TRINITY_sp O882(Aspg     | 60 kDa lysophosphol | 47.80 | 0.00 |
| TRINITY_sp Q9BIIB0464.9  | Probable protein ph | 47.80 | 0.00 |
| TRINITY_sp Q54Pfcwc2     | Pre-mRNA-splicing f | 47.80 | 0.00 |
| TRINITY_sp Q9AS(FREE1    | Protein FREE1 OS=Ar | 47.80 | 0.00 |
| TRINITY_sp Q5ZJNGLY1     | Peptide-N(4)-(N-ace | 47.80 | 0.00 |
| TRINITY_sp Q059(Dusp2    | Dual specificity pr | 47.80 | 0.00 |
| TRINITY_sp Q54Q(tceb1    | Transcription elong | 47.80 | 0.00 |
| TRINITY_sp P005(V-YES    | Tyrosine-protein ki | 47.80 | 0.00 |
| TRINITY_sp Q9VN(CG12163  | Putative cysteine p | 47.80 | 0.00 |
| TRINITY_sp A2YH(OsI_023( | Serine/threonine-pr | 47.80 | 0.00 |
| TRINITY_sp Q8K2JManba    | Beta-mannosidase OS | 47.80 | 0.00 |
| TRINITY_sp Q9TT(pro-pol  | Pro-Pol polyprotein | 47.80 | 0.00 |
| TRINITY_sp Q2N2F-        | Probable phytol kin | 47.80 | 0.00 |
| TRINITY_sp Q6ZR(DNAH12   | Dynein heavy chain  | 47.80 | 0.00 |
| TRINITY_sp P0A3(cspLA    | Cold shock-like pro | 47.80 | 0.00 |
| TRINITY_sp P459(ARP      | DNA-(apurinic or ap | 47.80 | 0.00 |
| TRINITY_sp Q641Vt119     | Probable tubulin po | 47.80 | 0.00 |
| TRINITY_sp Q008(-        | Cysteine synthase O | 47.80 | 0.00 |
| TRINITY_sp Q099(yakc     | Aldo-keto reductase | 47.80 | 0.00 |
| TRINITY_sp Q9LKJUVH1     | DNA repair endonucl | 47.80 | 0.00 |
| TRINITY_sp P536(CLTCL1   | Clathrin heavy chai | 47.80 | 0.00 |
| TRINITY_sp Q9SHIRRP44A   | Exosome complex exo | 47.80 | 0.00 |
| TRINITY_sp Q9SNE LUX     | Transcription facto | 47.80 | 0.00 |
| TRINITY_sp Q55CJuba1     | Ubiquitin-like modi | 47.80 | 0.00 |
| TRINITY_sp Q9LD(TIF3A1   | Eukaryotic translat | 47.80 | 0.00 |
| TRINITY_sp Q8IY(DIS3L2   | DIS3-like exonuclea | 47.80 | 0.00 |
| TRINITY_sp Q395(-        | 5-methyltetrahydrop | 47.80 | 0.00 |
| TRINITY_sp Q9C5(DPL1     | Sphingosine-1-phosp | 47.80 | 0.00 |
| TRINITY_sp P258(chcA     | Clathrin heavy chai | 47.80 | 0    |
| TRINITY_sp Q9BXJGTPBP2   | GTP-binding protein | 47.80 | 0.00 |
| TRINITY_sp Q7Z7(CENPV    | Centromere protein  | 47.70 | 0.00 |
| TRINITY_sp Q9SA(AKHSDH1  | Bifunctional aspart | 47.70 | 0.00 |
| TRINITY_sp P706JMapk14   | Mitogen-activated p | 47.70 | 0.00 |
| TRINITY_sp Q08B(tyw5     | tRNA wybutosine-syn | 47.70 | 0.00 |
| TRINITY_sp Q54J(atg6B    | Beclin-1-like prote | 47.70 | 0.00 |
| TRINITY_sp Q6NLFNRPB9A   | DNA-directed RNA po | 47.70 | 0.00 |
| TRINITY_sp Q5RI(adat2    | tRNA-specific adeno | 47.70 | 0.00 |
| TRINITY_sp Q559(slr0305  | TVP38/TMEM64 family | 47.70 | 0.00 |
| TRINITY_sp Q8L6(EXO1     | Exonuclease 1 OS=Ar | 47.70 | 0.00 |
| TRINITY_sp Q9UK(PARP4    | Poly [ADP-ribose] p | 47.70 | 0.00 |
| TRINITY_sp P087(ND2      | NADH-ubiquinone oxi | 47.70 | 0.00 |
| TRINITY_sp Q1HD(CHX16    | Cation/H(+) antipor | 47.70 | 0.00 |
| TRINITY_sp O220(ANP3     | Mitogen-activated p | 47.70 | 0.00 |
| TRINITY_sp A5DN(YPI1     | Type 1 phosphatases | 47.70 | 0.00 |
| TRINITY_sp O154(MPPED1   | Metallophosphoester | 47.70 | 0.00 |
| TRINITY_sp Q5HK(pf1B     | Formate acetyltrans | 47.70 | 0.00 |
| TRINITY_sp Q94A(MKK1     | Mitogen-activated p | 47.70 | 0.00 |
| TRINITY_sp Q6Z6(MADS57   | MADS-box transcript | 47.70 | 0.00 |
| TRINITY_sp Q9AR(HAG1     | Histone acetyltrans | 47.70 | 0.00 |
| TRINITY_sp Q9SI(DSK2B    | Ubiquitin domain-co | 47.70 | 0.00 |
| TRINITY_sp P216(-        | Pyrophosphate-energ | 47.70 | 0.00 |
| TRINITY_sp Q6AE(dnaJ     | Chaperone protein D | 47.70 | 0.00 |
| TRINITY_sp Q54S(idhkD    | Hybrid signal trans | 47.70 | 0.00 |
| TRINITY_sp Q8BY(Rdh12    | Retinol dehydrogena | 47.70 | 0.00 |
| TRINITY_sp B9RA(RCOM_15( | Probable aspartyl a | 47.70 | 0.00 |

|                            |                     |       |      |
|----------------------------|---------------------|-------|------|
| TRINITY_sp Q9FKVAt5g6615   | Probable alpha-mann | 47.70 | 0.00 |
| TRINITY_sp B3N4(Trip1      | Eukaryotic translat | 47.70 | 0.00 |
| TRINITY_sp Q9GLVPRDX5      | Peroxiredoxin-5, mi | 47.70 | 0.00 |
| TRINITY_sp Q9NRIABCB10     | ATP-binding cassett | 47.70 | 0.00 |
| TRINITY_sp Q84JIAt5g093(   | 2-oxoisovalerate de | 47.70 | 0.00 |
| TRINITY_sp A5FNlrpsK       | 30S ribosomal prote | 47.70 | 0.00 |
| TRINITY_sp Q9M0IPFK1       | ATP-dependent 6-pho | 47.70 | 0.00 |
| TRINITY_sp P5052ssp1       | Serine/threonine-pr | 47.70 | 0.00 |
| TRINITY_sp Q9XEHALG11      | GDP-Man:Man(3)GlcNA | 47.70 | 0.00 |
| TRINITY_sp F4HP2LIG6       | DNA ligase 6 OS=Ara | 47.70 | 0.00 |
| TRINITY_sp Q9XYIfcpA       | Probable C-terminal | 47.70 | 0.00 |
| TRINITY_sp Q9FJIKPNB1      | Importin subunit be | 47.70 | 0.00 |
| TRINITY_sp Q9LV5DPE1       | 4-alpha-glucanotran | 47.70 | 0.00 |
| TRINITY_sp O6638sigA       | RNA polymerase sigm | 47.70 | 0.00 |
| TRINITY_sp Q9LSIARP2       | Actin-related prote | 47.70 | 0.00 |
| TRINITY_sp Q67X2At5g0655   | F-box protein At5g0 | 47.70 | 0.00 |
| TRINITY_sp Q9SM2LKR/SDH    | Alpha-aminoadipic s | 47.70 | 0.00 |
| TRINITY_sp P2271Gucylb2    | Guanylate cyclase s | 47.70 | 0.00 |
| TRINITY_sp P3703Por        | NADPH--cytochrome P | 47.70 | 0.00 |
| TRINITY_sp Q6454Atpla4     | Sodium/potassium-tr | 47.70 | 0.00 |
| TRINITY_sp P3905-          | Dynein beta chain,  | 47.70 | 0.00 |
| TRINITY_sp Q9M0IRPL28C     | 60S ribosomal prote | 47.70 | 0.00 |
| TRINITY_sp Q9C6IMTK        | Methylthioribose ki | 47.70 | 0.00 |
| TRINITY_sp Q86S(DHDDS      | Dehydrodolichyl dip | 47.70 | 0.00 |
| TRINITY_sp Q8WX2DNAH7      | Dynein heavy chain  | 47.70 | 0.00 |
| TRINITY_sp Q9C52HAC1       | Histone acetyltrans | 47.70 | 0.00 |
| TRINITY_sp Q8WX2DNAH7      | Dynein heavy chain  | 47.70 | 0.00 |
| TRINITY_sp Q4142PCM3       | Putative calmodulin | 47.60 | 0.00 |
| TRINITY_sp Q4551-          | D-hydantoinase OS=G | 47.60 | 0.00 |
| TRINITY_sp F0NBI\$SiRe_144 | Protein-lysine N-me | 47.60 | 0.00 |
| TRINITY_sp Q9188hspa5      | 78 kDa glucose-regu | 47.60 | 0.00 |
| TRINITY_sp Q55E5pats1      | Probable serine/thr | 47.60 | 0.00 |
| TRINITY_sp P5707NMA0194    | Uncharacterized pro | 47.60 | 0.00 |
| TRINITY_sp Q54Nfvps28      | Vacuolar protein so | 47.60 | 0.00 |
| TRINITY_sp Q05A1Sdr16c6    | Short-chain dehydro | 47.60 | 0.00 |
| TRINITY_sp Q54Bfgggs1      | Geranylgeranyl pyro | 47.60 | 0.00 |
| TRINITY_sp P3862PRE3       | Proteasome subunit  | 47.60 | 0.00 |
| TRINITY_sp Q7RA\CPK3       | Calcium-dependent p | 47.60 | 0.00 |
| TRINITY_sp Q9AT7FAD2       | Delta(12) fatty aci | 47.60 | 0.00 |
| TRINITY_sp Q9P2FKIF17      | Kinesin-like protei | 47.60 | 0.00 |
| TRINITY_sp Q9XT5PDE6D      | Retinal rod rhodops | 47.60 | 0.00 |
| TRINITY_sp O2278PRP19B     | Pre-mRNA-processing | 47.60 | 0.00 |
| TRINITY_sp Q9LP4RPN6       | 26S proteasome non- | 47.60 | 0.00 |
| TRINITY_sp O1544MPPED1     | Metallophosphoester | 47.60 | 0.00 |
| TRINITY_sp Q86K2cpnB-1     | Copine-B OS=Dictyos | 47.60 | 0.00 |
| TRINITY_sp P707(Atp7a      | Copper-transporting | 47.60 | 0.00 |
| TRINITY_sp O1526SPTLC1     | Serine palmitoyltra | 47.60 | 0.00 |
| TRINITY_sp P4512etta       | Energy-dependent tr | 47.60 | 0.00 |
| TRINITY_sp Q5Z81Os06g071   | RNA pseudouridine s | 47.60 | 0.00 |
| TRINITY_sp P0CQ4REX4       | RNA exonuclease 4 O | 47.60 | 0.00 |
| TRINITY_sp Q6P3FNEK5       | Serine/threonine-pr | 47.60 | 0.00 |
| TRINITY_sp C0QRfgatA       | Glutamyl-tRNA(Gln)  | 47.60 | 0.00 |
| TRINITY_sp O009(-          | Lysosomal acid alph | 47.60 | 0.00 |
| TRINITY_sp Q8WZMGCN5       | Histone acetyltrans | 47.60 | 0.00 |
| TRINITY_sp F1R34ddx11      | ATP-dependent DNA h | 47.60 | 0.00 |
| TRINITY_sp A7MGVpepB       | Peptidase B OS=Cron | 47.60 | 0.00 |

|                          |                     |       |      |
|--------------------------|---------------------|-------|------|
| TRINITY_sp Q54U shkD     | Dual specificity pr | 47.60 | 0.00 |
| TRINITY_sp P067 Polb     | DNA polymerase beta | 47.60 | 0.00 |
| TRINITY_sp Q7Z4 HDCC2    | HD domain-containin | 47.60 | 0.00 |
| TRINITY_sp P136 Atpalpha | Sodium/potassium-tr | 47.60 | 0.00 |
| TRINITY_sp Q96M CFAP44   | Cilia- and flagella | 47.60 | 0.00 |
| TRINITY_sp P227 Gucylb2  | Guanylate cyclase s | 47.60 | 0.00 |
| TRINITY_sp Q9AT UVH3     | DNA repair protein  | 47.60 | 0.00 |
| TRINITY_sp Q631 Dnah7    | Dynein heavy chain  | 47.50 | 0.00 |
| TRINITY_sp P480 gacS     | Sensor protein GacS | 47.50 | 0.00 |
| TRINITY_sp O943 ppk31    | Serine/threonine-pr | 47.50 | 0.00 |
| TRINITY_sp Q54G DDB_G02  | Protein CLEC16A hom | 47.50 | 0.00 |
| TRINITY_sp C1AB engB     | Probable GTP-bindin | 47.50 | 0.00 |
| TRINITY_sp Q125 rasA     | Ras-like protein OS | 47.50 | 0.00 |
| TRINITY_sp P530 SLC25A1  | Tricarboxylate tran | 47.50 | 0.00 |
| TRINITY_sp A1CB alg3     | Dol-P-Man:Man(5)Glc | 47.50 | 0.00 |
| TRINITY_sp O221 RHC1A    | Probable E3 ubiquit | 47.50 | 0.00 |
| TRINITY_sp Q418 -        | ATP synthase subuni | 47.50 | 0.00 |
| TRINITY_sp Q95U rdiA     | Putative rho GDP-di | 47.50 | 0.00 |
| TRINITY_sp Q5T3 ABCC10   | Multidrug resistanc | 47.50 | 0.00 |
| TRINITY_sp O438 ATP9B    | Probable phospholip | 47.50 | 0.00 |
| TRINITY_sp Q246 ref(2)P  | Protein ref(2)P OS= | 47.50 | 0.00 |
| TRINITY_sp Q8RW PUX4     | Plant UBX domain-co | 47.50 | 0.00 |
| TRINITY_sp Q91V Memo1    | Protein MEMO1 OS=Mu | 47.50 | 0.00 |
| TRINITY_sp Q8BX Ctdsp2   | Carboxy-terminal do | 47.50 | 0.00 |
| TRINITY_sp G0Y2 SSL-2    | Botryococcus squale | 47.50 | 0.00 |
| TRINITY_sp A8IZ CHLREDR  | Probable cytosolic  | 47.50 | 0.00 |
| TRINITY_sp Q3MG rsgA     | Putative ribosome b | 47.50 | 0.00 |
| TRINITY_sp Q2UG atg1     | Serine/threonine-pr | 47.50 | 0.00 |
| TRINITY_sp Q625 Ift52    | Intraflagellar tran | 47.50 | 0.00 |
| TRINITY_sp O087 Ube3a    | Ubiquitin-protein l | 47.50 | 0.00 |
| TRINITY_sp Q8TC MARCH1   | E3 ubiquitin-protei | 47.50 | 0.00 |
| TRINITY_sp Q9AS SBH2     | Sphinganine C4-mono | 47.50 | 0.00 |
| TRINITY_sp Q2RB Os11g01  | Clathrin heavy chai | 47.50 | 0.00 |
| TRINITY_sp Q4V7 Insun2   | tRNA (cytosine(34)- | 47.50 | 0.00 |
| TRINITY_sp Q246 ref(2)P  | Protein ref(2)P OS= | 47.50 | 0.00 |
| TRINITY_sp Q6ZD Os07g01  | Phosphoacetylglucos | 47.50 | 0.00 |
| TRINITY_sp Q9ST HSP90-7  | Endoplasmin homolog | 47.50 | 0.00 |
| TRINITY_sp P308 Aldh3a2  | Fatty aldehyde dehy | 47.50 | 0.00 |
| TRINITY_sp O227 AP1M2    | AP-1 complex subuni | 47.50 | 0.00 |
| TRINITY_sp O043 PHB3     | Prohibitin-3, mitoc | 47.50 | 0.00 |
| TRINITY_sp Q6FS DBP3     | ATP-dependent RNA h | 47.50 | 0.00 |
| TRINITY_sp Q9VX Cyp4s3   | Probable cytochrome | 47.50 | 0.00 |
| TRINITY_sp A0AV UBA6     | Ubiquitin-like modi | 47.50 | 0.00 |
| TRINITY_sp Q9FZ PEX11A   | Peroxisomal membran | 47.50 | 0.00 |
| TRINITY_sp Q6EU PUB4     | U-box domain-contai | 47.50 | 0.00 |
| TRINITY_sp Q7TX IppsC    | Phthiocerol/phenolp | 47.50 | 0.00 |
| TRINITY_sp Q54T GtaI     | GATA zinc finger do | 47.50 | 0.00 |
| TRINITY_sp Q7XR YSL6     | Probable metal-nico | 47.50 | 0.00 |
| TRINITY_sp Q9D2 Mmab     | Cob(I)yrinic acid a | 47.50 | 0.00 |
| TRINITY_sp Q8L6 RPOT1-T  | DNA-directed RNA po | 47.50 | 0.00 |
| TRINITY_sp Q66K phospho  | Probable phosphatas | 47.50 | 0.00 |
| TRINITY_sp Q3ZC LSM8     | U6 snRNA-associated | 47.50 | 0.00 |
| TRINITY_sp Q69U RMR1     | Receptor homology r | 47.50 | 0.00 |
| TRINITY_sp Q8GW PMRT15   | Protein arginine N- | 47.50 | 0.00 |
| TRINITY_sp O944 tef3     | Elongation factor 3 | 47.50 | 0.00 |
| TRINITY_sp Q5E9 ARF3     | ADP-ribosylation fa | 47.50 | 0.00 |



|                           |                      |       |      |
|---------------------------|----------------------|-------|------|
| TRINITY_sp Q9452Dlc90F    | Dynein light chain   | 47.50 | 0.00 |
| TRINITY_sp P5652HDAC3     | Histone deacetylase  | 47.40 | 0.00 |
| TRINITY_sp Q9LJIM3KE1     | MAP3K epsilon prote  | 47.40 | 0.00 |
| TRINITY_sp Q6BY2PSF3      | DNA replication com  | 47.40 | 0.00 |
| TRINITY_sp Q6IMAlra       | Aldose reductase A   | 47.40 | 0.00 |
| TRINITY_sp Q9UIHMUTYH     | Adenine DNA glycosy  | 47.40 | 0.00 |
| TRINITY_sp Q9P71vas2      | AP-1 complex subuni  | 47.40 | 0.00 |
| TRINITY_sp P8237scrK      | Fructokinase OS=Lac  | 47.40 | 0.00 |
| TRINITY_sp Q8IB8CPK4      | Calcium-dependent p  | 47.40 | 0.00 |
| TRINITY_sp P3867ro-4      | Actin-like protein   | 47.40 | 0.00 |
| TRINITY_sp Q54K8talB      | Talin-B OS=Dictyost  | 47.40 | 0.00 |
| TRINITY_sp P5427PMS1      | PMS1 protein homolo  | 47.40 | 0.00 |
| TRINITY_sp B7F9CADIPOR1   | Heptahelical transm  | 47.40 | 0.00 |
| TRINITY_sp Q9SRQPEX19-1   | Peroxisome biogenes  | 47.40 | 0.00 |
| TRINITY_sp P2955-         | Eukaryotic translat  | 47.40 | 0.00 |
| TRINITY_sp O6446PBF1      | Proteasome subunit   | 47.40 | 0.00 |
| TRINITY_sp Q2RR1msrA      | Peptide methionine   | 47.40 | 0.00 |
| TRINITY_sp Q9931TY3B-G    | Transposon Ty3-G Ga  | 47.40 | 0.00 |
| TRINITY_sp Q8T6cabca6     | ABC transporter A f  | 47.40 | 0.00 |
| TRINITY_sp Q101(mra1      | Ribosomal RNA small  | 47.40 | 0.00 |
| TRINITY_sp Q54N0cyb5r1    | NADH-cytochrome b5   | 47.40 | 0.00 |
| TRINITY_sp Q9LXFAt5g1062  | Putative RNA methyl  | 47.40 | 0.00 |
| TRINITY_sp Q28IIglrx3     | Glutaredoxin-3 OS=X  | 47.40 | 0.00 |
| TRINITY_sp Q0VG1Zgrf1     | Protein ZGRF1 OS=MU  | 47.40 | 0.00 |
| TRINITY_sp Q465(hndD      | NADP-reducing hydro  | 47.40 | 0.00 |
| TRINITY_sp Q56XCRH15      | DEAD-box ATP-depend  | 47.40 | 0.00 |
| TRINITY_sp A8X6fcmk-1     | Calcium/calmodulin-  | 47.40 | 0.00 |
| TRINITY_sp O1497GAK       | Cyclin-G-associated  | 47.40 | 0.00 |
| TRINITY_sp Q86Icomt6      | Probable caffeoyle-C | 47.40 | 0.00 |
| TRINITY_sp Q9FE1SRT1      | NAD-dependent prote  | 47.40 | 0.00 |
| TRINITY_sp Q9M1FABCF4     | ABC transporter F f  | 47.40 | 0.00 |
| TRINITY_sp Q54QCuba3      | NEDD8-activating en  | 47.40 | 0.00 |
| TRINITY_sp Q9FK1COX15     | Cytochrome c oxidas  | 47.40 | 0.00 |
| TRINITY_sp Q8LAI PDX2     | Probable pyridoxal   | 47.40 | 0.00 |
| TRINITY_sp Q54LFDDDB_G028 | Uncharacterized pro  | 47.40 | 0.00 |
| TRINITY_sp Q5E91DCAF11    | DDB1- and CUL4-asso  | 47.40 | 0.00 |
| TRINITY_sp Q3T0HTRAPPC2   | Trafficking protein  | 47.40 | 0.00 |
| TRINITY_sp Q6KC7NIPBL     | Nipped-B-like prote  | 47.40 | 0.00 |
| TRINITY_sp Q0165RSP6      | Flagellar radial sp  | 47.40 | 0.00 |
| TRINITY_sp Q1658MAP3K11   | Mitogen-activated p  | 47.40 | 0.00 |
| TRINITY_sp Q9M1FABCF4     | ABC transporter F f  | 47.40 | 0.00 |
| TRINITY_sp Q9SS3GYRBC     | DNA gyrase subunit   | 47.40 | 0.00 |
| TRINITY_sp P052(Su(var)2  | Heterochromatin pro  | 47.40 | 0.00 |
| TRINITY_sp Q928fgadB      | Glutamate decarboxy  | 47.40 | 0.00 |
| TRINITY_sp Q8BI5Dyrk4     | Dual specificity ty  | 47.40 | 0.00 |
| TRINITY_sp Q8UA7blh       | Beta-lactamase hydr  | 47.40 | 0.00 |
| TRINITY_sp P0C7IUMAG_111  | Putative DEAH-box A  | 47.40 | 0.00 |
| TRINITY_sp Q9UVVACT       | Actin, gamma OS=Acr  | 47.30 | 0.00 |
| TRINITY_sp O773(RPS10     | 40S ribosomal prote  | 47.30 | 0.00 |
| TRINITY_sp Q8L07mg1       | L-methionine gamma-  | 47.30 | 0.00 |
| TRINITY_sp Q67XAt5g0655   | F-box protein At5g0  | 47.30 | 0.00 |
| TRINITY_sp Q54T1ube2m     | NEDD8-conjugating e  | 47.30 | 0.00 |
| TRINITY_sp Q54N7mybL      | Myb-like protein L   | 47.30 | 0.00 |
| TRINITY_sp Q91V7Smap1     | Stromal membrane-as  | 47.30 | 0.00 |
| TRINITY_sp O8175RKD5      | Protein RKD5 OS=Ara  | 47.30 | 0.00 |
| TRINITY_sp Q9ZVAt2g3871   | Uncharacterized pro  | 47.30 | 0.00 |

|                  |          |                      |       |      |
|------------------|----------|----------------------|-------|------|
| TRINITY_sp P4773 | RAP1GAP  | Rap1 GTPase-activat  | 47.30 | 0.00 |
| TRINITY_sp Q8L83 | NUDT3    | Nudix hydrolase 3 O  | 47.30 | 0.00 |
| TRINITY_sp Q0185 | YPT1     | Ras-like GTP-bindin  | 47.30 | 0.00 |
| TRINITY_sp P5492 | IMP2     | Inositol monophosph  | 47.30 | 0.00 |
| TRINITY_sp A1CD1 | ddi1     | DNA damage-inducibl  | 47.30 | 0.00 |
| TRINITY_sp Q5XG2 | rnps1-a  | RNA-binding protein  | 47.30 | 0.00 |
| TRINITY_sp Q9FN5 | E2FA     | Transcription facto  | 47.30 | 0.00 |
| TRINITY_sp Q8TH1 | dapA     | 4-hydroxy-tetrahydr  | 47.30 | 0.00 |
| TRINITY_sp P4262 | yqjG     | Glutathionyl-hydroq  | 47.30 | 0.00 |
| TRINITY_sp P2587 | chcA     | Clathrin heavy chai  | 47.30 | 0.00 |
| TRINITY_sp Q8RX8 | FACE1    | CAAX prenyl proteas  | 47.30 | 0.00 |
| TRINITY_sp P5670 | PSMD2    | 26S proteasome non-  | 47.30 | 0.00 |
| TRINITY_sp P4183 | rae1     | Poly(A)+ RNA export  | 47.30 | 0.00 |
| TRINITY_sp B2GU5 | kdm8     | Lysine-specific dem  | 47.30 | 0.00 |
| TRINITY_sp B9GE1 | KIN12F   | Kinesin-like protei  | 47.30 | 0.00 |
| TRINITY_sp O8884 | Arl6     | ADP-ribosylation fa  | 47.30 | 0.00 |
| TRINITY_sp Q94A2 | Atlg6415 | GDT1-like protein 1  | 47.30 | 0.00 |
| TRINITY_sp Q54S7 | vps15    | Probable serine/thr  | 47.30 | 0.00 |
| TRINITY_sp Q7Z6V | DNAJB7   | DnaJ homolog subfam  | 47.30 | 0.00 |
| TRINITY_sp Q8L72 | BGLU6    | Beta-glucosidase 6   | 47.30 | 0.00 |
| TRINITY_sp P2685 | COX2     | Cytochrome c oxidas  | 47.30 | 0.00 |
| TRINITY_sp Q9RU5 | sodA     | Superoxide dismutas  | 47.30 | 0.00 |
| TRINITY_sp Q9D85 | Bola1    | Bola-like protein 1  | 47.30 | 0.00 |
| TRINITY_sp B8LI2 | IFT25    | Intraflagellar tran  | 47.30 | 0.00 |
| TRINITY_sp Q8VZF | INT1     | Inositol transporte  | 47.30 | 0.00 |
| TRINITY_sp Q6GQ1 | Rab31    | Ras-related protein  | 47.30 | 0.00 |
| TRINITY_sp P0920 | -        | Tubulin beta-6 chai  | 47.30 | 0.00 |
| TRINITY_sp O1543 | ABCC4    | Multidrug resistanc  | 47.30 | 0.00 |
| TRINITY_sp Q82W1 | mdh      | Malate dehydrogenas  | 47.20 | 0.00 |
| TRINITY_sp O0444 | RABA2A   | Ras-related protein  | 47.20 | 0.00 |
| TRINITY_sp Q1581 | TBCC     | Tubulin-specific ch  | 47.20 | 0.00 |
| TRINITY_sp Q55F1 | hdaA     | Type-1 histone deac  | 47.20 | 0.00 |
| TRINITY_sp Q54E1 | eif2b2   | Translation initiat  | 47.20 | 0.00 |
| TRINITY_sp O7732 | MAL3P3.  | (T-complex protein 1 | 47.20 | 0.00 |
| TRINITY_sp P9WH1 | dead     | ATP-dependent RNA h  | 47.20 | 0.00 |
| TRINITY_sp Q9S71 | MYB98    | Transcription facto  | 47.20 | 0.00 |
| TRINITY_sp P5467 | pikB     | Phosphatidylinosito  | 47.20 | 0.00 |
| TRINITY_sp Q9SXI | AHK1     | Histidine kinase 1   | 47.20 | 0.00 |
| TRINITY_sp F4K52 | RVE2     | Protein REVEILLE 2   | 47.20 | 0.00 |
| TRINITY_sp Q6Q11 | HSMC1    | Structural maintena  | 47.20 | 0.00 |
| TRINITY_sp Q1LZ7 | ERCC1    | DNA excision repair  | 47.20 | 0.00 |
| TRINITY_sp Q9V61 | Kdm4B    | Probable lysine-spe  | 47.20 | 0.00 |
| TRINITY_sp Q0TMI | rsmA     | Ribosomal RNA small  | 47.20 | 0.00 |
| TRINITY_sp Q6NV5 | dcaf13   | DDB1- and CUL4-asso  | 47.20 | 0.00 |
| TRINITY_sp Q9SGV | RPN12A   | 26S proteasome non-  | 47.20 | 0.00 |
| TRINITY_sp Q8IB5 | CPK4     | Calcium-dependent p  | 47.20 | 0.00 |
| TRINITY_sp P3711 | -        | NADPH--cytochrome P  | 47.20 | 0.00 |
| TRINITY_sp F4J22 | RVE7L    | Protein REVEILLE 7-  | 47.20 | 0.00 |

|                          |                     |       |      |
|--------------------------|---------------------|-------|------|
| TRINITY_sp Q5ZJ(HIBCH    | 3-hydroxyisobutyryl | 47.20 | 0.00 |
| TRINITY_sp Q54L(gata     | Glutamyl-tRNA (Gln) | 47.20 | 0.00 |
| TRINITY_sp Q100(grs-1    | Glycine--tRNA ligas | 47.20 | 0.00 |
| TRINITY_sp F4K4(KIN14S   | Kinesin-like protei | 47.20 | 0.00 |
| TRINITY_sp Q1PE4CDS3     | Phosphatidate cytid | 47.20 | 0.00 |
| TRINITY_sp Q9LE(CIP111   | Calmodulin-interact | 47.20 | 0.00 |
| TRINITY_sp Q054(LIPE     | Hormone-sensitive l | 47.20 | 0.00 |
| TRINITY_sp Q9SLIDGAT1    | Diacylglycerol O-ac | 47.20 | 0.00 |
| TRINITY_sp Q9XF(At3g027( | Thioredoxin F1, chl | 47.20 | 0.00 |
| TRINITY_sp P493(FNTB     | Protein farnesyltra | 47.20 | 0.00 |
| TRINITY_sp Q431(CRY1     | Cryptochrome-1 OS=A | 47.20 | 0.00 |
| TRINITY_sp P176(ypt3     | GTP-binding protein | 47.20 | 0.00 |
| TRINITY_sp Q8AB(BT_0258  | Putative glucosamin | 47.20 | 0.00 |
| TRINITY_sp Q54L(zntB     | Protein zntB OS=Dic | 47.20 | 0.00 |
| TRINITY_sp O646(At2g456( | Histone deacetylase | 47.20 | 0.00 |
| TRINITY_sp Q9ZT(STA1     | Protein STABILIZED1 | 47.20 | 0.00 |
| TRINITY_sp A2YW(PLP2     | Patatin-like protei | 47.20 | 0.00 |
| TRINITY_sp Q9UR(SPAC195( | TBC domain-containi | 47.20 | 0.00 |
| TRINITY_sp Q9M2(CEF      | Protein transport p | 47.20 | 0.00 |
| TRINITY_sp P257(RGP1     | Ras-related protein | 47.20 | 0.00 |
| TRINITY_sp Q9FG(RAX1     | Transcription facto | 47.20 | 0.00 |
| TRINITY_sp O226(DEGP1    | Protease Do-like 1, | 47.20 | 0.00 |
| TRINITY_sp P378(CBP3     | Serine carboxypepti | 47.20 | 0.00 |
| TRINITY_sp Q54R(top1     | DNA topoisomerase 1 | 47.20 | 0.00 |
| TRINITY_sp Q9XI(PUMP3    | Mitochondrial uncou | 47.20 | 0.00 |
| TRINITY_sp Q945(modA     | Neutral alpha-gluco | 47.20 | 0.00 |
| TRINITY_sp Q3UR(Acsf3    | Acyl-CoA synthetase | 47.20 | 0.00 |
| TRINITY_sp Q54W(ap3d1    | AP-3 complex subuni | 47.20 | 0.00 |
| TRINITY_sp Q9FZ(ANP2     | Mitogen-activated p | 47.20 | 0.00 |
| TRINITY_sp Q7G8(Os01g03( | Probable chromatin- | 47.20 | 0.00 |
| TRINITY_sp Q6P9(CYB5D1   | Cytochrome b5 domai | 47.20 | 0.00 |
| TRINITY_sp Q9DB(Nv1      | Nuclear valosin-con | 47.20 | 0.00 |
| TRINITY_sp P0DK(NRT2.1   | High-affinity nitra | 47.20 | 0.00 |
| TRINITY_sp Q9MA(At1g796( | Uncharacterized aar | 47.20 | 0.00 |
| TRINITY_sp Q89Z(cutC     | Copper homeostasis  | 47.20 | 0.00 |
| TRINITY_sp Q54N(cyb5r1   | NADH-cytochrome b5  | 47.20 | 0.00 |
| TRINITY_sp Q9CF(gpo      | Glutathione peroxid | 47.20 | 0.00 |
| TRINITY_sp Q126(YPK9     | Vacuolar cation-tra | 47.10 | 0.00 |
| TRINITY_sp Q15R(anmK     | Anhydro-N-acetylmur | 47.10 | 0.00 |
| TRINITY_sp P0AE(barA     | Signal transduction | 47.10 | 0.00 |
| TRINITY_sp Q0811-        | Tubulin beta chain  | 47.10 | 0.00 |
| TRINITY_sp P3451K11H3.3  | Putative tricarboxy | 47.10 | 0.00 |
| TRINITY_sp P303(CDC25B   | M-phase inducer pho | 47.10 | 0.00 |
| TRINITY_sp Q018(YPT1     | Ras-like GTP-bindin | 47.10 | 0.00 |
| TRINITY_sp Q9C0(DNAH6    | Dynein heavy chain  | 47.10 | 0.00 |
| TRINITY_sp P3031cdc25-3  | M-phase inducer pho | 47.10 | 0.00 |
| TRINITY_sp Q55E(pats1    | Probable serine/thr | 47.10 | 0.00 |
| TRINITY_sp F4JL1IMPA2    | Importin subunit al | 47.10 | 0.00 |
| TRINITY_sp O147(CDIPT    | CDP-diacylglycerol- | 47.10 | 0.00 |
| TRINITY_sp Q9FY(FRS2Z32  | Serine/arginine-ric | 47.10 | 0.00 |
| TRINITY_sp Q9SUI(COX6B-3 | Cytochrome c oxidas | 47.10 | 0.00 |
| TRINITY_sp B4SQ(fnpn     | Polyribonucleotide  | 47.10 | 0.00 |
| TRINITY_sp P0CD(pan3     | PAB-dependent poly( | 47.10 | 0.00 |
| TRINITY_sp O042(IMP3     | Importin subunit al | 47.10 | 0.00 |
| TRINITY_sp Q9BZ(TBL1XR1  | F-box-like/WD repea | 47.10 | 0.00 |
| TRINITY_sp Q54J(wdr24    | WD repeat-containin | 47.10 | 0.00 |

|                           |                     |       |      |
|---------------------------|---------------------|-------|------|
| TRINITY_sp Q54KH DDB_G02  | Uncharacterized pro | 47.10 | 0.00 |
| TRINITY_sp Q7ZY Cacsbg2   | Long-chain-fatty-ac | 47.10 | 0.00 |
| TRINITY_sp Q7XHI Os07g04  | Tyrosine decarboxyl | 47.10 | 0.00 |
| TRINITY_sp Q5EAI PGGT1B   | Geranylgeranyl tran | 47.10 | 0.00 |
| TRINITY_sp Q503I cpsf31   | Integrator complex  | 47.10 | 0.00 |
| TRINITY_sp Q7RAI CPK1     | Calcium-dependent p | 47.10 | 0.00 |
| TRINITY_sp Q5ZKI CEPT1    | Choline/ethanolamin | 47.10 | 0.00 |
| TRINITY_sp Q9MAI PDIL2-2  | Protein disulfide-i | 47.10 | 0.00 |
| TRINITY_sp Q3SZI MAPRE2   | Microtubule-associa | 47.10 | 0.00 |
| TRINITY_sp Q9FQ C XRN3    | 5'-3' exoribonuclea | 47.10 | 0.00 |
| TRINITY_sp Q5CCI VAL2     | B3 domain-containin | 47.10 | 0.00 |
| TRINITY_sp Q8AB BT_0258   | Putative glucosamin | 47.10 | 0.00 |
| TRINITY_sp Q9XG TIM9      | Mitochondrial impor | 47.10 | 0.00 |
| TRINITY_sp Q9FPI PSBS     | Photosystem II 22 k | 47.10 | 0.00 |
| TRINITY_sp Q9Z1 C Vars    | Valine--tRNA ligase | 47.10 | 0.00 |
| TRINITY_sp A6NNM TTLL13P  | Tubulin polyglutamy | 47.10 | 0.00 |
| TRINITY_sp P154 I DI1     | Isopentenyl-diphosp | 47.10 | 0.00 |
| TRINITY_sp Q6PD C TR9     | RNA polymerase-asso | 47.10 | 0.00 |
| TRINITY_sp Q9LZ I ERDJ3B  | DnaJ protein ERDJ3B | 47.10 | 0.00 |
| TRINITY_sp A1SP V acyP    | Acylphosphatase OS= | 47.10 | 0.00 |
| TRINITY_sp Q7SH C cys-12  | Cysteine synthase 2 | 47.10 | 0.00 |
| TRINITY_sp A4FV I rbm48   | RNA-binding protein | 47.10 | 0.00 |
| TRINITY_sp F4K2 I FPGS1   | Folylpolyglutamate  | 47.10 | 0.00 |
| TRINITY_sp Q8K4 C Neil1   | Endonuclease 8-like | 47.10 | 0.00 |
| TRINITY_sp P380 I lamA    | Putative urea carbo | 47.10 | 0.00 |
| TRINITY_sp P099 C LTA4H   | Leukotriene A-4 hyd | 47.10 | 0.00 |
| TRINITY_sp Q5T9 I ATAD3B  | ATPase family AAA d | 47.10 | 0.00 |
| TRINITY_sp Q9EQ T tpp1    | Tripeptidyl-peptida | 47.10 | 0.00 |
| TRINITY_sp Q8MZ I -       | Physarolisin OS=Phy | 47.10 | 0.00 |
| TRINITY_sp Q7F0 C CML13   | Probable calcium-bi | 47.10 | 0.00 |
| TRINITY_sp O827 C HISN2   | Histidine biosynthe | 47.10 | 0.00 |
| TRINITY_sp A8JF C CFAP65  | Cilia- and flagella | 47.10 | 0.00 |
| TRINITY_sp P0AG I purF    | Amidophosphoribosyl | 47.10 | 0.00 |
| TRINITY_sp Q8BG I Pan2    | PAB-dependent poly( | 47.10 | 0.00 |
| TRINITY_sp Q8K0 I Ift80   | Intraflagellar tran | 47.10 | 0.00 |
| TRINITY_sp Q396 I ODA11   | Dynein alpha chain, | 47.10 | 0    |
| TRINITY_sp Q54R I mkkA    | Mitogen-activated p | 47.10 | 0.00 |
| TRINITY_sp Q9FX C BLH10   | BEL1-like homeodoma | 47.10 | 0.00 |
| TRINITY_sp Q1PFI BLH11    | BEL1-like homeodoma | 47.10 | 0.00 |
| TRINITY_sp Q7XQ I SAPK7   | Serine/threonine-pr | 47.10 | 0.00 |
| TRINITY_sp P526 I ldhA    | D-lactate dehydroge | 47.10 | 0.00 |
| TRINITY_sp Q9SH I At1g172 | Translation initiat | 47.10 | 0.00 |
| TRINITY_sp Q6ZQ C Cand1   | Cullin-associated N | 47.10 | 0.00 |
| TRINITY_sp F4K0 I VIII-2  | Myosin-2 OS=Arabido | 47.10 | 0.00 |
| TRINITY_sp Q54P I osbI    | Oxysterol-binding p | 47.10 | 0.00 |
| TRINITY_sp Q92E I rlmN    | Probable dual-speci | 47.10 | 0.00 |
| TRINITY_sp Q54JI cnrN     | Phosphatidylinosito | 47.10 | 0.00 |
| TRINITY_sp P517 C CLCN7   | H(+)/Cl(-) exchange | 47.10 | 0.00 |
| TRINITY_sp Q0P4 I dpcd    | Protein DPCD OS=Dan | 47.10 | 0.00 |
| TRINITY_sp Q95P I dhkC    | Hybrid signal trans | 47.10 | 0.00 |
| TRINITY_sp Q7TM I Abcg2   | ATP-binding cassett | 47.10 | 0.00 |
| TRINITY_sp P339 C bsr     | Blasticidin-S deami | 47.00 | 0.00 |
| TRINITY_sp Q54Q I sir2A   | NAD-dependent deace | 47.00 | 0.00 |
| TRINITY_sp Q9D8 C Actr6   | Actin-related prote | 47.00 | 0.00 |
| TRINITY_sp Q5RG I mysm1   | Histone H2A deubiqu | 47.00 | 0.00 |
| TRINITY_sp P453 I Akrlb8  | Aldose reductase-re | 47.00 | 0.00 |

|                          |                      |       |      |
|--------------------------|----------------------|-------|------|
| TRINITY_sp P1477BPT1     | Bile pigment transp  | 47.00 | 0.00 |
| TRINITY_sp P4919rps-12   | 40S ribosomal prote  | 47.00 | 0.00 |
| TRINITY_sp O7043Psm3     | Proteasome subunit   | 47.00 | 0.00 |
| TRINITY_sp Q9C6IMTK      | Methylthioribose ki  | 47.00 | 0.00 |
| TRINITY_sp B0JZvagbl5    | Cytosolic carboxype  | 47.00 | 0.00 |
| TRINITY_sp Q9M02At5g0146 | LIMR family protein  | 47.00 | 0.00 |
| TRINITY_sp Q91V7Smcp1    | Stromal membrane-as  | 47.00 | 0.00 |
| TRINITY_sp Q9V41Cyt-b5   | Cytochrome b5 OS=Dr  | 47.00 | 0.00 |
| TRINITY_sp Q54E5ykt6     | Putative synaptobre  | 47.00 | 0.00 |
| TRINITY_sp C5BS3mtaD     | 5-methylthioadenosi  | 47.00 | 0.00 |
| TRINITY_sp F4JW5QCR7-2   | Cytochrome b-c1 com  | 47.00 | 0.00 |
| TRINITY_sp Q1NZ2F13E9.13 | Uncharacterized pro  | 47.00 | 0.00 |
| TRINITY_sp Q9M4FAIP3     | Probable prefoldin   | 47.00 | 0.00 |
| TRINITY_sp Q7XA7D27      | Beta-carotene isome  | 47.00 | 0.00 |
| TRINITY_sp K7IM6-        | Eukaryotic translat  | 47.00 | 0.00 |
| TRINITY_sp Q05D3CTDSPL2  | CTD small phosphata  | 47.00 | 0.00 |
| TRINITY_sp Q1573NSDHL    | Sterol-4-alpha-carb  | 47.00 | 0.00 |
| TRINITY_sp Q9532MANBA    | Beta-mannosidase OS  | 47.00 | 0.00 |
| TRINITY_sp Q55DEsdad1    | Protein SDA1 homolo  | 47.00 | 0.00 |
| TRINITY_sp Q9282GGH      | Gamma-glutamyl hydr  | 47.00 | 0.00 |
| TRINITY_sp Q9SS4SDP6     | Glycerol-3-phosphat  | 47.00 | 0.00 |
| TRINITY_sp O8035FPG1     | Formamidopyrimidine  | 47.00 | 0.00 |
| TRINITY_sp Q54T7mrkC     | Probable serine/thr  | 47.00 | 0.00 |
| TRINITY_sp Q9SX5TOM40-2  | Probable mitochondr  | 47.00 | 0.00 |
| TRINITY_sp Q9BS(NOL10    | Nucleolar protein 1  | 47.00 | 0.00 |
| TRINITY_sp O7485caf1     | Poly(A) ribonucleas  | 47.00 | 0.00 |
| TRINITY_sp P3727PSY1     | Phytoene synthase,   | 47.00 | 0.00 |
| TRINITY_sp Q6316Dnah1    | Dynein heavy chain   | 47.00 | 0    |
| TRINITY_sp Q9H07NAT10    | RNA cytidine acetyl  | 47.00 | 0.00 |
| TRINITY_sp Q3V06Dnah12   | Dynein heavy chain   | 47.00 | 0.00 |
| TRINITY_sp P0C58mic-33   | Putative mitochondr  | 47.00 | 0.00 |
| TRINITY_sp P3646rab2A    | Ras-related protein  | 47.00 | 0.00 |
| TRINITY_sp Q1EA1CCR4     | Glucose-repressible  | 47.00 | 0.00 |
| TRINITY_sp P0432pol      | Retrovirus-related   | 47.00 | 0.00 |
| TRINITY_sp Q9S71MYB98    | Transcription facto  | 46.90 | 0.00 |
| TRINITY_sp Q9ESFAbca2    | ATP-binding cassett  | 46.90 | 0.00 |
| TRINITY_sp Q86K1fhit     | Bis(5'-adenosyl)-tr  | 46.90 | 0.00 |
| TRINITY_sp Q8R23Nabp2    | SOSS complex subuni  | 46.90 | 0.00 |
| TRINITY_sp A1L11hptpdcl  | Protein tyrosine ph  | 46.90 | 0.00 |
| TRINITY_sp Q9V971(2)0452 | Probable methylcrot  | 46.90 | 0.00 |
| TRINITY_sp B9N11POPTR_00 | Probable bifunction  | 46.90 | 0.00 |
| TRINITY_sp P2156ALP1     | Alpha-amylase OS=Sa  | 46.90 | 0.00 |
| TRINITY_sp O1586CPK2     | Calcium-dependent p  | 46.90 | 0.00 |
| TRINITY_sp Q86H6gmppA    | Mannose-1-phosphate  | 46.90 | 0.00 |
| TRINITY_sp Q6521PHT4;4   | Probable anion tran  | 46.90 | 0.00 |
| TRINITY_sp O4306pre3     | Probable proteasome  | 46.90 | 0.00 |
| TRINITY_sp O1996pbsA     | Heme oxygenase OS=R  | 46.90 | 0.00 |
| TRINITY_sp A8IL1CFAP52   | Cilia- and flagella  | 46.90 | 0.00 |
| TRINITY_sp Q55B1yod1     | Ubiquitin thioester  | 46.90 | 0.00 |
| TRINITY_sp Q9LD1BETAA-AI | Beta-adaptin-like p  | 46.90 | 0.00 |
| TRINITY_sp Q55C1ppp2r4A  | Probable serine/thr  | 46.90 | 0.00 |
| TRINITY_sp Q9M26RRP45B   | Exosome complex com  | 46.90 | 0.00 |
| TRINITY_sp O5976gyp1     | GTPase-activating p  | 46.90 | 0.00 |
| TRINITY_sp Q7SX1dnm11    | Dynammin-1-like prot | 46.90 | 0.00 |
| TRINITY_sp Q9UH1SLC23A1  | Solute carrier fami  | 46.90 | 0.00 |
| TRINITY_sp Q52T6PAT24    | Protein S-acyltrans  | 46.90 | 0.00 |

|                          |                      |       |      |
|--------------------------|----------------------|-------|------|
| TRINITY_sp Q9M9FSOL1     | Carboxypeptidase SO  | 46.90 | 0.00 |
| TRINITY_sp Q8BW7Kdm4a    | Lysine-specific dem  | 46.90 | 0.00 |
| TRINITY_sp Q8XC0cysQ     | 3'(2'),5'-bisphosph  | 46.90 | 0.00 |
| TRINITY_sp Q2RK2obg      | GTPase Obg OS=Moore  | 46.90 | 0.00 |
| TRINITY_sp Q8RY1At5g4356 | MATH domain-contain  | 46.90 | 0.00 |
| TRINITY_sp Q9SZ\MithPPK  | Folate synthesis bi  | 46.90 | 0.00 |
| TRINITY_sp Q5EA9MFAP1    | Microfibrillar-asso  | 46.90 | 0.00 |
| TRINITY_sp Q7TN0Ldhd     | Probable D-lactate   | 46.90 | 0.00 |
| TRINITY_sp Q54H9mybI     | Myb-like protein I   | 46.90 | 0.00 |
| TRINITY_sp Q9SRIENGASE2  | Cytosolic endo-beta  | 46.90 | 0.00 |
| TRINITY_sp A8IU0CFAP99   | Cilia- and flagella  | 46.90 | 0.00 |
| TRINITY_sp Q5D01rbm8a    | RNA-binding protein  | 46.90 | 0.00 |
| TRINITY_sp P1024MYBL1    | Myb-related protein  | 46.90 | 0.00 |
| TRINITY_sp P0940mlcE     | Myosin, essential 1  | 46.90 | 0.00 |
| TRINITY_sp Q10Q0EUROS    | Uroporphyrinogen-II  | 46.90 | 0.00 |
| TRINITY_sp Q9Y6MSLC30A1  | Zinc transporter 1   | 46.90 | 0.00 |
| TRINITY_sp Q9ST0ABCA4    | ABC transporter A f  | 46.90 | 0.00 |
| TRINITY_sp Q8LC0At3g4575 | Probable trans-2-en  | 46.90 | 0.00 |
| TRINITY_sp Q9SX0ALA9     | Putative phospholip  | 46.90 | 0.00 |
| TRINITY_sp Q54Y0trappc5  | Trafficking protein  | 46.90 | 0.00 |
| TRINITY_sp Q9SP0TERT     | Telomerase reverse   | 46.90 | 0.00 |
| TRINITY_sp P1090-        | Retrovirus-related   | 46.90 | 0.00 |
| TRINITY_sp Q1010SPAC26A0 | Hydrolase C26A3.11   | 46.90 | 0.00 |
| TRINITY_sp Q9SB0PDK      | [Pyruvate dehydroge  | 46.90 | 0.00 |
| TRINITY_sp P5340CTN      | Caltractin OS=Naegl  | 46.80 | 0.00 |
| TRINITY_sp Q2780DYH1B    | Cytoplasmic dynein   | 46.80 | 0.00 |
| TRINITY_sp O3490yodQ     | Uncharacterized met  | 46.80 | 0.00 |
| TRINITY_sp C6Y40SPCC16C0 | Putative transcript  | 46.80 | 0.00 |
| TRINITY_sp D9HP0CNR4     | Cell number regulat  | 46.80 | 0.00 |
| TRINITY_sp Q54D0DDB_G020 | WD repeat-containin  | 46.80 | 0.00 |
| TRINITY_sp Q9CQ0-        | Uncharacterized pro  | 46.80 | 0.00 |
| TRINITY_sp Q6FL0RPE1     | Ribulose-phosphate   | 46.80 | 0.00 |
| TRINITY_sp Q0II0NAA50    | N-alpha-acetyltrans  | 46.80 | 0.00 |
| TRINITY_sp Q2TA0PRCP     | Lysosomal Pro-X car  | 46.80 | 0.00 |
| TRINITY_sp P1600-        | Subtilisin inhibito  | 46.80 | 0.00 |
| TRINITY_sp Q23K0TLL3D    | Tubulin glycyclase 3 | 46.80 | 0.00 |
| TRINITY_sp P0980-        | Hemoglobinase OS=Sc  | 46.80 | 0.00 |
| TRINITY_sp Q86A0DDB_G020 | Probable myosin lig  | 46.80 | 0.00 |
| TRINITY_sp O2830rp119e   | 50S ribosomal prote  | 46.80 | 0.00 |
| TRINITY_sp Q7XU0Os04g050 | Lysine-specific his  | 46.80 | 0.00 |
| TRINITY_sp Q7Y00Os03g040 | Probable nucleoredo  | 46.80 | 0.00 |
| TRINITY_sp Q4240PAI1     | N-(5'-phosphoribosy  | 46.80 | 0.00 |
| TRINITY_sp Q9M80NSN1     | Guanine nucleotide-  | 46.80 | 0.00 |
| TRINITY_sp Q54R0kmo      | Kynurenine 3-monoox  | 46.80 | 0.00 |
| TRINITY_sp Q8IZ0ABCA7    | ATP-binding cassett  | 46.80 | 0.00 |
| TRINITY_sp Q8KP0mnme     | tRNA modification G  | 46.80 | 0.00 |
| TRINITY_sp Q4240RNU1     | U1 small nuclear ri  | 46.80 | 0.00 |
| TRINITY_sp F4JL0EBS      | Chromatin remodelin  | 46.80 | 0.00 |
| TRINITY_sp Q7S00nhp-1    | Non-histone chromos  | 46.80 | 0.00 |
| TRINITY_sp Q55G0naprt    | Nicotinate phosphor  | 46.80 | 0.00 |
| TRINITY_sp P3410racA     | Rho-related protein  | 46.80 | 0.00 |
| TRINITY_sp P2810pkgB     | Protein kinase 2 OS  | 46.80 | 0.00 |
| TRINITY_sp Q9NU0MDN1     | Midasin OS=Homo sap  | 46.80 | 0.00 |
| TRINITY_sp Q9420IPDIL2-2 | Protein disulfide i  | 46.80 | 0.00 |
| TRINITY_sp Q8WW0DNAJB3   | DnaJ homolog subfam  | 46.80 | 0.00 |
| TRINITY_sp B0G10mcfC     | Mitochondrial subst  | 46.80 | 0.00 |

|                           |                       |       |      |
|---------------------------|-----------------------|-------|------|
| TRINITY_sp Q06A CDC27A    | Cell division cycle   | 46.80 | 0.00 |
| TRINITY_sp Q5B1 atm1      | Iron-sulfur cluster   | 46.80 | 0.00 |
| TRINITY_sp O2314 AP2M     | AP-2 complex subuni   | 46.80 | 0.00 |
| TRINITY_sp Q8C17 Thop1    | Thimet oligopeptida   | 46.80 | 0.00 |
| TRINITY_sp F4K2 FCUV      | Pre-mRNA-splicing f   | 46.80 | 0.00 |
| TRINITY_sp Q9FH DCI1      | Delta (3,5)-Delta (2, | 46.80 | 0.00 |
| TRINITY_sp Q812 Nadsyn1   | Glutamine-dependent   | 46.80 | 0.00 |
| TRINITY_sp E4NK PUB1      | U-box domain-contai   | 46.80 | 0.00 |
| TRINITY_sp Q8L77 At1g3173 | AP-4 complex subuni   | 46.80 | 0.00 |
| TRINITY_sp F4HP2 LIG6     | DNA ligase 6 OS=Ara   | 46.80 | 0.00 |
| TRINITY_sp A4IF METTL14   | N6-adenosine-methyl   | 46.80 | 0.00 |
| TRINITY_sp Q2RF rplA      | 50S ribosomal prote   | 46.80 | 0.00 |
| TRINITY_sp Q9FN ATXR6     | Histone-lysine N-me   | 46.80 | 0.00 |
| TRINITY_sp P2271 Gucylb2  | Guanylate cyclase s   | 46.80 | 0.00 |
| TRINITY_sp P2213 ACTB     | Actin-2 OS=Phytopht   | 46.80 | 0.00 |
| TRINITY_sp Q6174 Eif2b4   | Translation initiat   | 46.80 | 0.00 |
| TRINITY_sp O2446 -        | LEC14B homolog OS=P   | 46.80 | 0.00 |
| TRINITY_sp O7456 SPCC594  | Uncharacterized pro   | 46.80 | 0.00 |
| TRINITY_sp P1464 Pde4b    | cAMP-specific 3',5'   | 46.80 | 0.00 |
| TRINITY_sp Q9SA2 SYP51    | Syntaxin-51 OS=Arab   | 46.80 | 0.00 |
| TRINITY_sp Q9D88 Hm13     | Minor histocompatib   | 46.80 | 0.00 |
| TRINITY_sp Q9UB CTSZ      | Cathepsin Z OS=Homo   | 46.80 | 0.00 |
| TRINITY_sp Q9FV AMT1-3    | Ammonium transporte   | 46.80 | 0.00 |
| TRINITY_sp Q9499 ADS3     | Palmitoyl-monogalac   | 46.80 | 0.00 |
| TRINITY_sp Q9SU5 GLDH     | L-galactono-1,4-lac   | 46.80 | 0.00 |
| TRINITY_sp Q9W44 CG3527   | Ribosomal RNA small   | 46.80 | 0.00 |
| TRINITY_sp Q8R40 P4HB     | Protein disulfide-i   | 46.80 | 0.00 |
| TRINITY_sp Q9M16 ABCB21   | ABC transporter B f   | 46.70 | 0.00 |
| TRINITY_sp Q6AB8 ileS     | Isoleucine--tRNA li   | 46.70 | 0.00 |
| TRINITY_sp Q4JH XBOS36    | Probable E3 ubiquit   | 46.70 | 0.00 |
| TRINITY_sp P1982 ITIH2    | Inter-alpha-trypsin   | 46.70 | 0.00 |
| TRINITY_sp Q5TM5 RPP21    | Ribonuclease P prot   | 46.70 | 0.00 |
| TRINITY_sp Q9FL3 MCM3     | DNA replication lic   | 46.70 | 0.00 |
| TRINITY_sp Q8K44 Trib1    | Tribbles homolog 1    | 46.70 | 0.00 |
| TRINITY_sp Q3955 ODA2     | Dynein gamma chain,   | 46.70 | 0.00 |
| TRINITY_sp Q1047 alg8     | Dolichyl pyrophosph   | 46.70 | 0.00 |
| TRINITY_sp Q08D1 MRPL47   | 39S ribosomal prote   | 46.70 | 0.00 |
| TRINITY_sp A5DL EDBP8     | ATP-dependent RNA h   | 46.70 | 0.00 |
| TRINITY_sp Q86H8 coq9     | Probable ubiquinone   | 46.70 | 0.00 |
| TRINITY_sp Q8MZ9 -        | Physarolisin OS=Phy   | 46.70 | 0.00 |
| TRINITY_sp O0048 PSMD14   | 26S proteasome non-   | 46.70 | 0.00 |
| TRINITY_sp P5115 RAB13    | Ras-related protein   | 46.70 | 0.00 |
| TRINITY_sp O2883 rtcA     | RNA 3'-terminal pho   | 46.70 | 0.00 |
| TRINITY_sp A2BK pcm       | Protein-L-isoaspart   | 46.70 | 0.00 |
| TRINITY_sp Q6I53 CDKC-1   | Cyclin-dependent ki   | 46.70 | 0.00 |
| TRINITY_sp Q9LJ M3KE1     | MAP3K epsilon prote   | 46.70 | 0.00 |
| TRINITY_sp P1268 YPK1     | Serine/threonine-pr   | 46.70 | 0.00 |
| TRINITY_sp Q8C62 Fam221b  | Protein FAM221B OS=   | 46.70 | 0.00 |
| TRINITY_sp Q6GP rnf181    | E3 ubiquitin-protei   | 46.70 | 0.00 |
| TRINITY_sp Q9PI1 lysA     | Diaminopimelate dec   | 46.70 | 0.00 |
| TRINITY_sp Q9I16 treA     | Periplasmic trehala   | 46.70 | 0.00 |
| TRINITY_sp Q9M08 ISA3     | Isoamylase 3, chlor   | 46.70 | 0.00 |
| TRINITY_sp Q9UT mrp119    | 54S ribosomal prote   | 46.70 | 0.00 |
| TRINITY_sp Q8L77 NAD-ME2  | NAD-dependent malic   | 46.70 | 0.00 |
| TRINITY_sp Q9M01 PUX10    | Plant UBX domain-co   | 46.70 | 0.00 |
| TRINITY_sp Q3T07 SERP2    | Stress-associated e   | 46.70 | 0.00 |

|                             |                      |       |      |
|-----------------------------|----------------------|-------|------|
| TRINITY_sp P2817pkgB        | Protein kinase 2 OS  | 46.70 | 0.00 |
| TRINITY_sp Q8GUFDGS1        | Protein DGS1, mitoc  | 46.70 | 0.00 |
| TRINITY_sp Q9H0FTMEM222     | Transmembrane prote  | 46.70 | 0.00 |
| TRINITY_sp Q9C11SPBC713     | Periodic tryptophan  | 46.70 | 0.00 |
| TRINITY_sp Q84WNA5g1211     | Elongation factor 1  | 46.70 | 0.00 |
| TRINITY_sp Q9SD5VHA-C       | V-type proton ATPas  | 46.70 | 0.00 |
| TRINITY_sp O4852POLD2       | DNA polymerase delt  | 46.70 | 0.00 |
| TRINITY_sp Q0JL4Os01g062    | Neutral ceramidase   | 46.70 | 0.00 |
| TRINITY_sp Q8MZ5-           | Phyisarolisin OS=Phy | 46.70 | 0.00 |
| TRINITY_sp P2309-           | Dynein beta chain,   | 46.70 | 0.00 |
| TRINITY_sp Q9JMFAP3b2       | AP-3 complex subuni  | 46.70 | 0.00 |
| TRINITY_sp Q9994RNF5        | E3 ubiquitin-protei  | 46.70 | 0.00 |
| TRINITY_sp Q6DC3desi2       | Desumoylating isope  | 46.70 | 0.00 |
| TRINITY_sp Q69TYPRXIIIE-1   | Peroxiredoxin-2E-1,  | 46.70 | 0.00 |
| TRINITY_sp C3Y43BRAFLDR7DDR | DDR domain-contai    | 46.70 | 0.00 |
| TRINITY_sp Q94K7At3g4842    | Haloacid dehalogena  | 46.70 | 0.00 |
| TRINITY_sp P3083Aldh3a2     | Fatty aldehyde dehy  | 46.70 | 0.00 |
| TRINITY_sp Q1H31cysG        | Siroheme synthase O  | 46.70 | 0.00 |
| TRINITY_sp Q5TY5lace1b      | Lactation elevated   | 46.70 | 0.00 |
| TRINITY_sp Q9LRMRPL3B       | 50S ribosomal prote  | 46.70 | 0.00 |
| TRINITY_sp Q3961ODA11       | Dynein alpha chain,  | 46.70 | 0.00 |
| TRINITY_sp B7GY1rlmE        | Ribosomal RNA large  | 46.70 | 0.00 |
| TRINITY_sp O7502ABCB7       | ATP-binding cassett  | 46.70 | 0.00 |
| TRINITY_sp Q9LEISSRP1       | FACT complex subuni  | 46.70 | 0.00 |
| TRINITY_sp O1543ABCC4       | Multidrug resistanc  | 46.70 | 0.00 |
| TRINITY_sp Q9S77PKL         | CHD3-type chromatin  | 46.70 | 0.00 |
| TRINITY_sp Q641VTt119       | Probable tubulin po  | 46.70 | 0.00 |
| TRINITY_sp Q9UT1vps29       | Vacuolar protein so  | 46.70 | 0.00 |
| TRINITY_sp O7019Prep        | Prolyl endopeptidas  | 46.70 | 0.00 |
| TRINITY_sp Q54H4drkB        | Probable serine/thr  | 46.70 | 0.00 |
| TRINITY_sp Q9493ADS3        | Palmitoyl-monogalac  | 46.70 | 0.00 |
| TRINITY_sp Q9C00DNAH6       | Dynein heavy chain   | 46.70 | 0.00 |
| TRINITY_sp P4909AS2         | Asparagine syntheta  | 46.70 | 0.00 |
| TRINITY_sp B0BL1znf593      | Zinc finger protein  | 46.60 | 0.00 |
| TRINITY_sp Q4WA2psoF        | Dual-functional mon  | 46.60 | 0.00 |
| TRINITY_sp P4802gacS        | Sensor protein GacS  | 46.60 | 0.00 |
| TRINITY_sp Q9YGIslbp2       | Oocyte-specific his  | 46.60 | 0.00 |
| TRINITY_sp P2493rbr         | Rubrerhythrin OS=Des | 46.60 | 0.00 |
| TRINITY_sp Q3957ODA2        | Dynein gamma chain,  | 46.60 | 0.00 |
| TRINITY_sp Q9XFMSBP1        | Membrane steroid-bi  | 46.60 | 0.00 |
| TRINITY_sp Q9UQC(MOK        | MAPK/MAK/MRK overla  | 46.60 | 0.00 |
| TRINITY_sp Q6209Ddx3y       | ATP-dependent RNA h  | 46.60 | 0.00 |
| TRINITY_sp Q8R31Cluap1      | Clusterin-associate  | 46.60 | 0.00 |
| TRINITY_sp P5464pkbA        | RAC family serine/t  | 46.60 | 0.00 |
| TRINITY_sp Q55CNDDB_G026    | DDR domain-contai    | 46.60 | 0.00 |
| TRINITY_sp Q8TGMTAR1        | Protein TAR1 OS=Sac  | 46.60 | 0.00 |
| TRINITY_sp Q55D7DDB_G026    | Probable 18S rRNA (  | 46.60 | 0.00 |
| TRINITY_sp Q5U3\slc25a43    | Solute carrier fami  | 46.60 | 0.00 |
| TRINITY_sp Q9CYC(Dcp2       | m7GpppN-mRNA hydrol  | 46.60 | 0.00 |
| TRINITY_sp Q55D9cda         | Probable phosphatid  | 46.60 | 0.00 |
| TRINITY_sp Q8CH(Synj1       | Synaptojanin-1 OS=M  | 46.60 | 0.00 |
| TRINITY_sp Q10R9Os03g016    | Receptor homology r  | 46.60 | 0.00 |
| TRINITY_sp Q9C9C(RRA2       | Arabinosyltransfera  | 46.60 | 0.00 |
| TRINITY_sp Q54Ultrappc4     | Trafficking protein  | 46.60 | 0.00 |
| TRINITY_sp A1A51cnot1       | CCR4-NOT transcript  | 46.60 | 0.00 |
| TRINITY_sp Q8L7UBSL1        | Serine/threonine-pr  | 46.60 | 0.00 |



|                          |                     |       |      |
|--------------------------|---------------------|-------|------|
| TRINITY_sp Q9I34prmb     | 50S ribosomal prote | 46.60 | 0.00 |
| TRINITY_sp Q9LU6EBP2     | Probable rRNA-proce | 46.60 | 0.00 |
| TRINITY_sp P0432pol      | Retrovirus-related  | 46.60 | 0.00 |
| TRINITY_sp O0866Pi4ka    | Phosphatidylinosito | 46.60 | 0.00 |
| TRINITY_sp Q54Rfpyk      | Pyruvate kinase OS= | 46.60 | 0.00 |
| TRINITY_sp E5R46Lema_P04 | Methionine aminopep | 46.60 | 0.00 |
| TRINITY_sp O8092AGD7     | ADP-ribosylation fa | 46.60 | 0.00 |
| TRINITY_sp Q65JfcheB     | Chemotaxis response | 46.60 | 0.00 |
| TRINITY_sp Q54E6ddx55    | Probable ATP-depend | 46.60 | 0.00 |
| TRINITY_sp Q8I7fpol      | Retrovirus-related  | 46.60 | 0.00 |
| TRINITY_sp Q8RW1OVA7     | Serine--tRNA ligase | 46.60 | 0.00 |
| TRINITY_sp Q5RJCNol110   | Nucleolar protein 1 | 46.60 | 0.00 |
| TRINITY_sp Q9WV(Kif9     | Kinesin-like protei | 46.60 | 0.00 |
| TRINITY_sp O4864ARF1     | ADP-ribosylation fa | 46.60 | 0.00 |
| TRINITY_sp Q4134ETR1     | Ethylene receptor 1 | 46.60 | 0.00 |
| TRINITY_sp Q9S7fICS1     | Isochorismate synth | 46.60 | 0.00 |
| TRINITY_sp O2216RHC1A    | Probable E3 ubiquit | 46.60 | 0.00 |
| TRINITY_sp Q72JNlon2     | Lon protease 2 OS=T | 46.60 | 0.00 |
| TRINITY_sp Q9FJ1AAK6     | Adenylate kinase is | 46.60 | 0.00 |
| TRINITY_sp Q8LB7PIS1     | CDP-diacylglycerol- | 46.60 | 0.00 |
| TRINITY_sp Q2QM4BSL2     | Serine/threonine-pr | 46.60 | 0.00 |
| TRINITY_sp Q0P43tmem14c  | Transmembrane prote | 46.60 | 0.00 |
| TRINITY_sp A2YB3OsI_2231 | tRNA (guanine-N(7)- | 46.50 | 0.00 |
| TRINITY_sp F4JL6SFH1     | Phosphatidylinosito | 46.50 | 0.00 |
| TRINITY_sp Q7ZW4polr2g   | DNA-directed RNA po | 46.50 | 0.00 |
| TRINITY_sp Q3232ybiA     | N-glycosidase YbiA  | 46.50 | 0.00 |
| TRINITY_sp Q5566DDB_G027 | Probable rhodanese  | 46.50 | 0.00 |
| TRINITY_sp Q54N4pex12    | Putative peroxisome | 46.50 | 0.00 |
| TRINITY_sp P5464pkbA     | RAC family serine/t | 46.50 | 0.00 |
| TRINITY_sp P5682TIF3B1   | Eukaryotic translat | 46.50 | 0.00 |
| TRINITY_sp Q9SF4PAH1     | Phosphatidate phosp | 46.50 | 0.00 |
| TRINITY_sp Q3ZB2STIP1    | Stress-induced-phos | 46.50 | 0.00 |
| TRINITY_sp Q9931TY3B-G   | Transposon Ty3-G Ga | 46.50 | 0.00 |
| TRINITY_sp Q54Iftmem120  | Transmembrane prote | 46.50 | 0.00 |
| TRINITY_sp Q9FX1Os10g046 | Alpha-galactosidase | 46.50 | 0.00 |
| TRINITY_sp O3555Pfkfb3   | 6-phosphofructo-2-k | 46.50 | 0.00 |
| TRINITY_sp Q54KfDDB_G028 | Uncharacterized pro | 46.50 | 0.00 |
| TRINITY_sp O6475EDA3     | Protein EMBRYO SAC  | 46.50 | 0.00 |
| TRINITY_sp Q2459Xpc      | DNA repair protein  | 46.50 | 0.00 |
| TRINITY_sp Q54S7wdr3     | WD repeat-containin | 46.50 | 0.00 |
| TRINITY_sp Q54T(DDB_G028 | Probable zinc trans | 46.50 | 0.00 |
| TRINITY_sp Q6P3fNEK5     | Serine/threonine-pr | 46.50 | 0.00 |
| TRINITY_sp P3158RABF2A   | Ras-related protein | 46.50 | 0.00 |
| TRINITY_sp Q55Afsnrnp40  | U5 small nuclear ri | 46.50 | 0.00 |
| TRINITY_sp Q8VC4Mic1     | Uncharacterized pro | 46.50 | 0.00 |
| TRINITY_sp Q8CC6Vwa8     | von Willebrand fact | 46.50 | 0.00 |
| TRINITY_sp Q45F7-        | Serine/threonine-pr | 46.50 | 0.00 |
| TRINITY_sp B6IJ5mtp-18   | Mitochondrial fissi | 46.50 | 0.00 |
| TRINITY_sp Q9H55ALG2     | Alpha-1,3/1,6-manno | 46.50 | 0.00 |
| TRINITY_sp P4278ctpA     | Carboxyl-terminal-p | 46.50 | 0.00 |
| TRINITY_sp A6RD2MRPL4    | 54S ribosomal prote | 46.50 | 0.00 |
| TRINITY_sp P2218cta3     | Calcium-transportin | 46.50 | 0.00 |
| TRINITY_sp Q8BG6Zadh2    | Prostaglandin reduc | 46.50 | 0.00 |
| TRINITY_sp Q8036crnf8    | E3 ubiquitin-protei | 46.50 | 0.00 |
| TRINITY_sp A1A41FAM188B  | Probable ubiquitin  | 46.50 | 0.00 |
| TRINITY_sp P3406dhcA     | Dynein heavy chain, | 46.50 | 0.00 |

|                           |                     |       |      |
|---------------------------|---------------------|-------|------|
| TRINITY_sp C0SPF ytcI     | Uncharacterized acy | 46.50 | 0.00 |
| TRINITY_sp Q9T07 LACS4    | Long chain acyl-CoA | 46.50 | 0.00 |
| TRINITY_sp Q54F cpnE      | Copine-E OS=Dictyos | 46.50 | 0.00 |
| TRINITY_sp Q8I5 proRS     | Proline--tRNA ligas | 46.50 | 0.00 |
| TRINITY_sp P109 -         | Retrovirus-related  | 46.50 | 0.00 |
| TRINITY_sp Q75H SAPK10    | Serine/threonine-pr | 46.50 | 0.00 |
| TRINITY_sp Q6QN -         | Casein kinase I OS= | 46.50 | 0.00 |
| TRINITY_sp Q8RXI BRCA1    | Protein BREAST CANC | 46.40 | 0.00 |
| TRINITY_sp Q9H0 TMEM222   | Transmembrane prote | 46.40 | 0.00 |
| TRINITY_sp A0BD Rp17-2    | 60S ribosomal prote | 46.40 | 0.00 |
| TRINITY_sp Q6UD ManS      | Mannan synthase 1 O | 46.40 | 0.00 |
| TRINITY_sp Q54L (DDB_G02  | Probable LIM domain | 46.40 | 0.00 |
| TRINITY_sp P458 mmgB      | Probable 3-hydroxyb | 46.40 | 0.00 |
| TRINITY_sp Q8K4 Insun5    | Probable 28S rRNA ( | 46.40 | 0.00 |
| TRINITY_sp Q96N RDH12     | Retinol dehydrogena | 46.40 | 0.00 |
| TRINITY_sp P0CP CPK1      | Mitogen-activated p | 46.40 | 0.00 |
| TRINITY_sp Q54P (DDB_G02  | Probable myosin lig | 46.40 | 0.00 |
| TRINITY_sp Q6Z3 Os07g02   | Zinc finger CCCH do | 46.40 | 0.00 |
| TRINITY_sp Q9LH ELC       | Protein ELC OS=Arab | 46.40 | 0.00 |
| TRINITY_sp Q9M8 UGT80A2   | Sterol 3-beta-gluco | 46.40 | 0.00 |
| TRINITY_sp Q8RW MEE4      | NADH dehydrogenase  | 46.40 | 0.00 |
| TRINITY_sp Q5E9 BCS1L     | Mitochondrial chape | 46.40 | 0.00 |
| TRINITY_sp Q54M gpt       | Probable alanine am | 46.40 | 0.00 |
| TRINITY_sp A8WG ift122    | Intraflagellar tran | 46.40 | 0.00 |
| TRINITY_sp Q2RK (rsgA     | Putative ribosome b | 46.40 | 0.00 |
| TRINITY_sp Q8W0 CCR4-1    | Carbon catabolite r | 46.40 | 0.00 |
| TRINITY_sp O222 ACA4      | Calcium-transportin | 46.40 | 0.00 |
| TRINITY_sp Q9P5 (tca-9    | Succinate--CoA liga | 46.40 | 0.00 |
| TRINITY_sp O761 Rab1C     | Ras-related protein | 46.40 | 0.00 |
| TRINITY_sp A2AP Ndufaf5   | Arginine-hydroxylas | 46.40 | 0.00 |
| TRINITY_sp Q5RB DNPEP     | Aspartyl aminopepti | 46.40 | 0.00 |
| TRINITY_sp A2QC cbr1      | NADH-cytochrome b5  | 46.40 | 0.00 |
| TRINITY_sp Q8H9 (NPC6     | Non-specific phosph | 46.40 | 0.00 |
| TRINITY_sp Q9XY fcpA      | Probable C-terminal | 46.40 | 0.00 |
| TRINITY_sp Q5XG (gtppb1   | GTP-binding protein | 46.40 | 0.00 |
| TRINITY_sp Q54R shkA      | Dual specificity pr | 46.40 | 0.00 |
| TRINITY_sp A5D8 (xiap     | E3 ubiquitin-protei | 46.40 | 0.00 |
| TRINITY_sp O749 rial      | Ribosome assembly p | 46.40 | 0.00 |
| TRINITY_sp P326 (FBP26    | Fructose-2,6-bispho | 46.40 | 0.00 |
| TRINITY_sp O803 (FPG1     | Formamidopyrimidine | 46.40 | 0.00 |
| TRINITY_sp Q3AC ackA      | Acetate kinase OS=C | 46.40 | 0.00 |
| TRINITY_sp Q2HJ (RTCA     | RNA 3'-terminal pho | 46.40 | 0.00 |
| TRINITY_sp Q8WU (SDR42E1  | Short-chain dehydro | 46.40 | 0.00 |
| TRINITY_sp Q9LU (At3g2362 | Ribosome production | 46.40 | 0.00 |
| TRINITY_sp P395 (DRS2     | Probable phospholip | 46.40 | 0.00 |
| TRINITY_sp O045 (FAD4L1   | Fatty acid desatura | 46.40 | 0.00 |
| TRINITY_sp Q54W ctns      | Cystinosin homolog  | 46.40 | 0.00 |
| TRINITY_sp Q9SK (At2g3204 | Folate-biopterin tr | 46.40 | 0.00 |
| TRINITY_sp P053 (PRKACB   | cAMP-dependent prot | 46.40 | 0.00 |
| TRINITY_sp Q555 (rnf160   | E3 ubiquitin-protei | 46.40 | 0.00 |
| TRINITY_sp Q9LK (EXI-2    | Myosin-6 OS=Arabido | 46.40 | 0.00 |
| TRINITY_sp P126 (YPK1     | Serine/threonine-pr | 46.40 | 0.00 |
| TRINITY_sp F1QB (nipblb   | Nipped-B-like prote | 46.40 | 0.00 |
| TRINITY_sp Q54Y (vps11    | Vacuolar protein so | 46.40 | 0.00 |
| TRINITY_sp Q0UJ (NST1     | Stress response pro | 46.40 | 0.00 |
| TRINITY_sp Q54T (mrkC     | Probable serine/thr | 46.40 | 0.00 |

|                          |                     |       |      |
|--------------------------|---------------------|-------|------|
| TRINITY_sp Q55EUact23    | Putative actin-23 O | 46.40 | 0.00 |
| TRINITY_sp Q95YIpefB     | Penta-EF hand domai | 46.40 | 0.00 |
| TRINITY_sp Q9LMTAtlg1803 | Probable protein ph | 46.40 | 0.00 |
| TRINITY_sp O1544ABCC5    | Multidrug resistanc | 46.40 | 0.00 |
| TRINITY_sp O2392-        | 4-hydroxyphenylpyru | 46.40 | 0.00 |
| TRINITY_sp P4996SRP19    | Signal recognition  | 46.40 | 0.00 |
| TRINITY_sp Q6317Dnah7    | Dynein heavy chain  | 46.40 | 0    |
| TRINITY_sp P8706DODA     | DOPA 4,5-dioxygenas | 46.30 | 0.00 |
| TRINITY_sp Q4IL8INO80    | Putative DNA helica | 46.30 | 0.00 |
| TRINITY_sp Q9173ephb1-b  | Ephrin type-B recep | 46.30 | 0.00 |
| TRINITY_sp Q4255SCE1     | SUMO-conjugating en | 46.30 | 0.00 |
| TRINITY_sp F1MF7MICAL2   | Protein-methionine  | 46.30 | 0.00 |
| TRINITY_sp Q5XJ3kctd151  | BTB/POZ domain-cont | 46.30 | 0.00 |
| TRINITY_sp Q54YIcopb2    | Coatomer subunit be | 46.30 | 0.00 |
| TRINITY_sp O8880Lect2    | Leukocyte cell-deri | 46.30 | 0.00 |
| TRINITY_sp P0CH2UBC      | Polyubiquitin-C OS= | 46.30 | 0.00 |
| TRINITY_sp O4963CDS2     | Phosphatidate cytid | 46.30 | 0.00 |
| TRINITY_sp O6549XCP1     | Cysteine protease X | 46.30 | 0.00 |
| TRINITY_sp Q8VCFcant1    | Soluble calcium-act | 46.30 | 0.00 |
| TRINITY_sp P4262yqjG     | Glutathionyl-hydroq | 46.30 | 0.00 |
| TRINITY_sp Q7TSCNek5     | Serine/threonine-pr | 46.30 | 0.00 |
| TRINITY_sp F4JZ0TERC     | Thylakoid membrane  | 46.30 | 0.00 |
| TRINITY_sp Q9UYHsua5     | Threonylcarbamoyl-A | 46.30 | 0.00 |
| TRINITY_sp Q25A7H0410G08 | Double-strand break | 46.30 | 0.00 |
| TRINITY_sp A1SWElacZ     | Beta-galactosidase  | 46.30 | 0.00 |
| TRINITY_sp Q1166tsf      | Elongation factor T | 46.30 | 0.00 |
| TRINITY_sp Q5530DDB_G027 | Adenosine deaminase | 46.30 | 0.00 |
| TRINITY_sp Q54N4bcaA     | Branched-chain-amin | 46.30 | 0.00 |
| TRINITY_sp Q0759sav      | Protein SAV OS=Sulf | 46.30 | 0.00 |
| TRINITY_sp Q5PP7At5g4449 | Alpha N-terminal pr | 46.30 | 0.00 |
| TRINITY_sp Q3909ERF1-1   | Eukaryotic peptide  | 46.30 | 0.00 |
| TRINITY_sp Q1209TSR3     | Ribosome biogenesis | 46.30 | 0.00 |
| TRINITY_sp Q0981SPAC16C9 | Putative general ne | 46.30 | 0.00 |
| TRINITY_sp O9527TNKS     | Tankyrase-1 OS=Homo | 46.30 | 0.00 |
| TRINITY_sp Q9LJ9ABC19    | ABC transporter B f | 46.30 | 0.00 |
| TRINITY_sp Q9SL7TCX6     | Protein tesmin/TSO1 | 46.30 | 0.00 |
| TRINITY_sp O6549XCP1     | Cysteine protease X | 46.30 | 0.00 |
| TRINITY_sp Q9FL3MCM3     | DNA replication lic | 46.30 | 0.00 |
| TRINITY_sp Q9S7IMYB98    | Transcription facto | 46.30 | 0.00 |
| TRINITY_sp Q9HBFrdh14    | Retinol dehydrogena | 46.30 | 0.00 |
| TRINITY_sp F4J07P4H6     | Probable prolyl 4-h | 46.30 | 0.00 |
| TRINITY_sp Q2TB9VBP1     | Prefoldin subunit 3 | 46.30 | 0.00 |
| TRINITY_sp Q8GXMTGH      | G patch domain-cont | 46.30 | 0.00 |
| TRINITY_sp P2013BET2     | Geranylgeranyl tran | 46.30 | 0.00 |
| TRINITY_sp Q9HFV-        | Cytochrome b5 OS=Rh | 46.30 | 0.00 |
| TRINITY_sp Q6Y7VIGIGYF2  | PERQ amino acid-ric | 46.30 | 0.00 |
| TRINITY_sp C5FP6sconB    | Probable E3 ubiquit | 46.30 | 0.00 |
| TRINITY_sp B0G10DDB_G027 | Deoxynucleoside tri | 46.30 | 0.00 |
| TRINITY_sp Q9FJHAt5g6076 | P-loop NTPase domai | 46.30 | 0.00 |
| TRINITY_sp Q8R15Znfx1    | NFX1-type zinc fing | 46.30 | 0.00 |
| TRINITY_sp P4597CBX5     | Chromobox protein h | 46.30 | 0.00 |
| TRINITY_sp Q9C63LHCA5    | Photosystem I chlor | 46.30 | 0.00 |
| TRINITY_sp O2204ANP3     | Mitogen-activated p | 46.30 | 0.00 |
| TRINITY_sp P6931-        | Polyubiquitin (Frag | 46.30 | 0.00 |
| TRINITY_sp Q6103Hars     | Histidine--tRNA lig | 46.30 | 0.00 |
| TRINITY_sp Q8L50APRR9    | Two-component respo | 46.30 | 0.00 |

|                            |                     |       |      |
|----------------------------|---------------------|-------|------|
| TRINITY_sp C1C3Fube2s      | Ubiquitin-conjugati | 46.30 | 0.00 |
| TRINITY_sp Q6NTV\hnp2      | H/ACA ribonucleopro | 46.30 | 0.00 |
| TRINITY_sp F4JIITCX2       | Protein tesmin/TSO1 | 46.30 | 0.00 |
| TRINITY_sp Q9Y3ZCOQ4       | Ubiquinone biosynth | 46.30 | 0.00 |
| TRINITY_sp O7569RP2        | Protein XRP2 OS=Hom | 46.30 | 0.00 |
| TRINITY_sp F4JTI\CHR7      | CHD3-type chromatin | 46.30 | 0.00 |
| TRINITY_sp Q9Y6IARFGEF2    | Brefeldin A-inhibit | 46.20 | 0.00 |
| TRINITY_sp Q9C7ZAtlg5509   | Glutamine-dependent | 46.20 | 0.00 |
| TRINITY_sp Q275Ccah-3      | Putative carbonic a | 46.20 | 0.00 |
| TRINITY_sp Q9FE1SRT1       | NAD-dependent prote | 46.20 | 0.00 |
| TRINITY_sp Q2KIIEXOSC2     | Exosome complex com | 46.20 | 0.00 |
| TRINITY_sp Q54I4slc44a2    | Choline transporter | 46.20 | 0.00 |
| TRINITY_sp Q042ELGAS_134   | Putative RNA (cytid | 46.20 | 0.00 |
| TRINITY_sp Q9M8IAtlg7426   | Probable phosphorib | 46.20 | 0.00 |
| TRINITY_sp Q54KH\DDDB_G028 | Uncharacterized pro | 46.20 | 0.00 |
| TRINITY_sp P5287sl10615    | GDT1-like protein s | 46.20 | 0.00 |
| TRINITY_sp Q9N2IAHSG       | Alpha-2-HS-glycopro | 46.20 | 0.00 |
| TRINITY_sp Q01283PCR       | Protochlorophyllide | 46.20 | 0.00 |
| TRINITY_sp Q7F0C\ML13      | Probable calcium-bi | 46.20 | 0.00 |
| TRINITY_sp O9662arcC       | Actin-related prote | 46.20 | 0.00 |
| TRINITY_sp Q9UT(paa1       | Protein phosphatase | 46.20 | 0.00 |
| TRINITY_sp Q2462ref(2)P    | Protein ref(2)P OS= | 46.20 | 0.00 |
| TRINITY_sp Q557C\nit1-1    | Nitrilase homolog 1 | 46.20 | 0.00 |
| TRINITY_sp Q2HH4GAR1       | H/ACA ribonucleopro | 46.20 | 0.00 |
| TRINITY_sp Q1101pepN       | Aminopeptidase N OS | 46.20 | 0.00 |
| TRINITY_sp O6549XCP1       | Cysteine protease X | 46.20 | 0.00 |
| TRINITY_sp Q9M04WLIM2B     | LIM domain-containi | 46.20 | 0.00 |
| TRINITY_sp Q54P4isca2      | Iron-sulfur cluster | 46.20 | 0.00 |
| TRINITY_sp E1BP9MMS19      | MMS19 nucleotide ex | 46.20 | 0.00 |
| TRINITY_sp O6549XCP1       | Cysteine protease X | 46.20 | 0.00 |
| TRINITY_sp Q86H3polr1a     | DNA-directed RNA po | 46.20 | 0.00 |
| TRINITY_sp Q9VIF\Nbr       | Exonuclease mut-7 h | 46.20 | 0.00 |
| TRINITY_sp Q5TC8OGFRL1     | Opioid growth facto | 46.20 | 0.00 |
| TRINITY_sp Q6WWVUPL3       | E3 ubiquitin-protei | 46.20 | 0.00 |
| TRINITY_sp P3447hcp-3      | Histone H3-like cen | 46.20 | 0.00 |
| TRINITY_sp Q0WPFATG18D     | Autophagy-related p | 46.20 | 0.00 |
| TRINITY_sp Q1288COX10      | Protoheme IX farnes | 46.20 | 0.00 |
| TRINITY_sp P5816atp2b2     | Plasma membrane cal | 46.20 | 0.00 |
| TRINITY_sp Q4R79GNB2L1     | Guanine nucleotide- | 46.20 | 0.00 |
| TRINITY_sp O7049Clcn7      | H(+)/Cl(-) exchange | 46.20 | 0.00 |
| TRINITY_sp Q86AIDDB_G027   | Probable myosin lig | 46.20 | 0.00 |
| TRINITY_sp Q32L9SDR42E1    | Short-chain dehydro | 46.20 | 0.00 |
| TRINITY_sp Q94K6ELIP2      | Early light-induced | 46.20 | 0.00 |
| TRINITY_sp Q9NXISIDT1      | SID1 transmembrane  | 46.20 | 0.00 |
| TRINITY_sp Q7S56NCU02305   | Probable hexaprenyl | 46.20 | 0.00 |
| TRINITY_sp O1387not3       | General negative re | 46.20 | 0.00 |
| TRINITY_sp Q6P2CPRPF8      | Pre-mRNA-processing | 46.20 | 0.00 |
| TRINITY_sp Q8LP3At5g1398   | Probable alpha-mann | 46.20 | 0.00 |
| TRINITY_sp P1163NHP6B      | Non-histone chromos | 46.20 | 0.00 |
| TRINITY_sp A7KAIatg7       | Ubiquitin-like modi | 46.20 | 0.00 |
| TRINITY_sp Q1QZ7mutS       | DNA mismatch repair | 46.20 | 0.00 |
| TRINITY_sp Q8LAI\PDx2      | Probable pyridoxal  | 46.20 | 0.00 |
| TRINITY_sp Q8TC1RDH11      | Retinol dehydrogena | 46.20 | 0.00 |
| TRINITY_sp Q5U52AGBL2      | Cytosolic carboxype | 46.20 | 0.00 |
| TRINITY_sp G5E82Atp2b1     | Plasma membrane cal | 46.20 | 0.00 |
| TRINITY_sp A5PKIube2d4     | Ubiquitin-conjugati | 46.20 | 0.00 |

|                          |                      |       |      |
|--------------------------|----------------------|-------|------|
| TRINITY_sp Q6CE1TRM8     | tRNA (guanine-N(7)-  | 46.20 | 0.00 |
| TRINITY_sp Q54H8apm1     | AP-1 complex subuni  | 46.20 | 0.00 |
| TRINITY_sp Q7U0cfbiC     | FO synthase OS=Myco  | 46.20 | 0.00 |
| TRINITY_sp Q0325RBG8     | Glycine-rich RNA-bi  | 46.20 | 0.00 |
| TRINITY_sp Q0WMIABC27    | ABC transporter B f  | 46.20 | 0.00 |
| TRINITY_sp B8ACfERH1     | Phosphatidylinosito  | 46.20 | 0.00 |
| TRINITY_sp Q6DJ2med10    | Mediator of RNA pol  | 46.20 | 0.00 |
| TRINITY_sp A0RU1proS     | Proline--tRNA ligas  | 46.20 | 0.00 |
| TRINITY_sp Q9CR1Ppid     | Peptidyl-prolyl cis  | 46.20 | 0.00 |
| TRINITY_sp Q28Qcder      | GTPase Der OS=Janna  | 46.20 | 0.00 |
| TRINITY_sp Q0DW1Os02g079 | DEAD-box ATP-depend  | 46.20 | 0.00 |
| TRINITY_sp Q9M64CPI1     | Cycloeucaleanol cycl | 46.20 | 0.00 |
| TRINITY_sp Q8JZVCpne5    | Copine-5 OS=Mus mus  | 46.20 | 0.00 |
| TRINITY_sp Q3961ODA11    | Dynein alpha chain,  | 46.20 | 0.00 |
| TRINITY_sp O0403CCX5     | Cation/calcium exch  | 46.20 | 0.00 |
| TRINITY_sp Q945(modA     | Neutral alpha-gluco  | 46.20 | 0.00 |
| TRINITY_sp Q75HVCYCP3-1  | Cyclin-P3-1 OS=Oryz  | 46.20 | 0.00 |
| TRINITY_sp Q3SX(PUS3     | tRNA pseudouridine(  | 46.20 | 0.00 |
| TRINITY_sp Q58WWDCAF6    | DDB1- and CUL4-asso  | 46.20 | 0.00 |
| TRINITY_sp Q1672ATP2B3   | Plasma membrane cal  | 46.20 | 0.00 |
| TRINITY_sp P5464pkbA     | RAC family serine/t  | 46.20 | 0.00 |
| TRINITY_sp O5496Rnf13    | E3 ubiquitin-protei  | 46.20 | 0.00 |
| TRINITY_sp Q54PVdph1     | Diphthamide biosynt  | 46.20 | 0.00 |
| TRINITY_sp Q1656CAMK4    | Calcium/calmodulin-  | 46.20 | 0.00 |
| TRINITY_sp Q7K0EMob4     | MOB kinase activato  | 46.10 | 0.00 |
| TRINITY_sp Q9VLWwox      | WW domain-containin  | 46.10 | 0.00 |
| TRINITY_sp O9497TRIM37   | E3 ubiquitin-protei  | 46.10 | 0.00 |
| TRINITY_sp Q54S7vps15    | Probable serine/thr  | 46.10 | 0.00 |
| TRINITY_sp E1C65HACE1    | E3 ubiquitin-protei  | 46.10 | 0.00 |
| TRINITY_sp Q4019RAB11A   | Ras-related protein  | 46.10 | 0.00 |
| TRINITY_sp P6282RAB1A    | Ras-related protein  | 46.10 | 0.00 |
| TRINITY_sp P491(RAB2A    | Ras-related protein  | 46.10 | 0.00 |
| TRINITY_sp O2293CIPK11   | CBL-interacting ser  | 46.10 | 0.00 |
| TRINITY_sp P3238YBT1     | ATP-dependent bile   | 46.10 | 0.00 |
| TRINITY_sp P4252cycB     | G2/mitotic-specific  | 46.10 | 0.00 |
| TRINITY_sp P341(myoD     | Myosin ID heavy cha  | 46.10 | 0.00 |
| TRINITY_sp P7725nema     | N-ethylmaleimide re  | 46.10 | 0.00 |
| TRINITY_sp P5585smo-1    | Small ubiquitin-rel  | 46.10 | 0.00 |
| TRINITY_sp Q5552abcA4    | ABC transporter A f  | 46.10 | 0.00 |
| TRINITY_sp P2664eef1g-a  | Elongation factor 1  | 46.10 | 0.00 |
| TRINITY_sp Q9651Y57E12AM | Transmembrane prote  | 46.10 | 0.00 |
| TRINITY_sp O7049Clcn7    | H(+)/Cl(-) exchange  | 46.10 | 0.00 |
| TRINITY_sp Q61Y(CBG03556 | Leishmanolysin-like  | 46.10 | 0.00 |
| TRINITY_sp A6QLfERI3     | ERI1 exoribonucleas  | 46.10 | 0.00 |
| TRINITY_sp Q86I\ctnA     | Countin-1 OS=Dictyo  | 46.10 | 0.00 |
| TRINITY_sp Q8W25DXR      | 1-deoxy-D-xylulose   | 46.10 | 0.00 |
| TRINITY_sp Q9STICEP2     | KDEL-tailed cystein  | 46.10 | 0.00 |
| TRINITY_sp O8051CYCU4-1  | Cyclin-U4-1 OS=Arab  | 46.10 | 0.00 |
| TRINITY_sp P462(MYB      | Transcriptional act  | 46.10 | 0.00 |
| TRINITY_sp Q54K\cdh1     | Anaphase-promoting   | 46.10 | 0.00 |
| TRINITY_sp Q54G7agxt     | Serine--pyruvate am  | 46.10 | 0.00 |
| TRINITY_sp O4885VAMP725  | Vesicle-associated   | 46.10 | 0.00 |
| TRINITY_sp Q7Z7fCENPV    | Centromere protein   | 46.10 | 0.00 |
| TRINITY_sp Q6NPMHISN7    | Bifunctional phosph  | 46.10 | 0.00 |
| TRINITY_sp Q68J4LIPE     | Hormone-sensitive 1  | 46.10 | 0.00 |
| TRINITY_sp Q9P6fppk15    | Serine/threonine-pr  | 46.10 | 0.00 |

|                          |                     |       |      |
|--------------------------|---------------------|-------|------|
| TRINITY_sp Q93WJAt5g1937 | Rhodanese-like/PpiC | 46.10 | 0.00 |
| TRINITY_sp Q9VU9CG8745   | Alanine--glyoxylate | 46.10 | 0.00 |
| TRINITY_sp D9R4VhflX     | GTPase HflX OS=Clos | 46.10 | 0.00 |
| TRINITY_sp Q9SI5PI4KG7   | Phosphatidylinosito | 46.10 | 0.00 |
| TRINITY_sp A3EWIREV1     | DNA repair protein  | 46.10 | 0.00 |
| TRINITY_sp Q9C0CDNAH6    | Dynein heavy chain  | 46.10 | 0.00 |
| TRINITY_sp Q149IGspt2    | Eukaryotic peptide  | 46.10 | 0.00 |
| TRINITY_sp C0LGNLRR-RLK  | Probable leucine-ri | 46.10 | 0.00 |
| TRINITY_sp Q9FE1SRT1     | NAD-dependent prote | 46.00 | 0.00 |
| TRINITY_sp Q9UJFTSR3     | Ribosome biogenesis | 46.00 | 0.00 |
| TRINITY_sp Q8LBU GPX8    | Probable glutathion | 46.00 | 0.00 |
| TRINITY_sp Q9LINCIFU4    | NifU-like protein 4 | 46.00 | 0.00 |
| TRINITY_sp P2644PARP1    | Poly [ADP-ribose] p | 46.00 | 0.00 |
| TRINITY_sp Q9M8FDSPTP1B  | Dual specificity pr | 46.00 | 0.00 |
| TRINITY_sp P4256EPS15    | Epidermal growth fa | 46.00 | 0.00 |
| TRINITY_sp Q9R0CArpcla   | Actin-related prote | 46.00 | 0.00 |
| TRINITY_sp A6Q48dnaJ     | Chaperone protein D | 46.00 | 0.00 |
| TRINITY_sp A6QLCERCC2    | TFIIH basal transcr | 46.00 | 0.00 |
| TRINITY_sp Q5E9IEIF2S2   | Eukaryotic translat | 46.00 | 0.00 |
| TRINITY_sp O0757yhdF     | Uncharacterized oxi | 46.00 | 0.00 |
| TRINITY_sp Q7YXUcpnA     | Copine-A OS=Dictyos | 46.00 | 0.00 |
| TRINITY_sp Q9M8FDJ1D     | Protein DJ-1 homolo | 46.00 | 0.00 |
| TRINITY_sp Q7KWIwdsof1   | DDB1- and CUL4-asso | 46.00 | 0.00 |
| TRINITY_sp A8I9FCFAP45   | Cilia- and flagella | 46.00 | 0.00 |
| TRINITY_sp Q112(PARP2    | Poly [ADP-ribose] p | 46.00 | 0.00 |
| TRINITY_sp Q1335PPIL2    | Peptidyl-prolyl cis | 46.00 | 0.00 |
| TRINITY_sp P7752yfcG     | Disulfide-bond oxid | 46.00 | 0.00 |
| TRINITY_sp Q86Y7ZGRF1    | Protein ZGRF1 OS=Ho | 46.00 | 0.00 |
| TRINITY_sp Q9NW1RBM28    | RNA-binding protein | 46.00 | 0.00 |
| TRINITY_sp Q1RMDCUN1D5   | DCN1-like protein 5 | 46.00 | 0.00 |
| TRINITY_sp Q558ficmt-1   | Protein-S-isoprenyl | 46.00 | 0.00 |
| TRINITY_sp P2858-        | Calcium-dependent p | 46.00 | 0.00 |
| TRINITY_sp Q6X5WR11      | Ethylene-responsive | 46.00 | 0.00 |
| TRINITY_sp Q9931TY3B-G   | Transposon Ty3-G Ga | 46.00 | 0.00 |
| TRINITY_sp Q9EQ(Hsd17b11 | Estradiol 17-beta-d | 46.00 | 0.00 |
| TRINITY_sp Q8C7FUba6     | Ubiquitin-like modi | 46.00 | 0.00 |
| TRINITY_sp F4IAAt1g0591  | ATPase family AAA d | 46.00 | 0.00 |
| TRINITY_sp Q6M9npc1998   | Uncharacterized RNA | 46.00 | 0.00 |
| TRINITY_sp O227(CB5LP    | Cytochrome B5-like  | 46.00 | 0.00 |
| TRINITY_sp Q99MFbbs2     | Bardet-Biedl syndro | 46.00 | 0.00 |
| TRINITY_sp Q9LEVAt3g6108 | Protein-ribulosamin | 46.00 | 0.00 |
| TRINITY_sp O8109NRPB5A   | DNA-directed RNA po | 46.00 | 0.00 |
| TRINITY_sp Q9Z33Dynlt1   | Dynein light chain  | 46.00 | 0.00 |
| TRINITY_sp F4K1CATXR7    | Histone-lysine N-me | 46.00 | 0.00 |
| TRINITY_sp P7433s111541  | Apocarotenoid-15,15 | 46.00 | 0.00 |
| TRINITY_sp Q9C52TIF3H1   | Eukaryotic translat | 46.00 | 0.00 |
| TRINITY_sp P2817pkgB     | Protein kinase 2 OS | 46.00 | 0.00 |
| TRINITY_sp Q567Vdph1     | Diphthamide biosynt | 46.00 | 0.00 |
| TRINITY_sp Q9NDdom       | Helicase domino OS= | 46.00 | 0.00 |
| TRINITY_sp P1097-        | Retrovirus-related  | 46.00 | 0.00 |
| TRINITY_sp P5262Upp1     | Uridine phosphoryla | 46.00 | 0.00 |
| TRINITY_sp Q54ZFsrpra    | Signal recognition  | 46.00 | 0.00 |
| TRINITY_sp Q54C9hibA     | Probable 3-hydroxyi | 46.00 | 0.00 |
| TRINITY_sp Q94C9RER4     | Protein RETICULATA- | 46.00 | 0.00 |
| TRINITY_sp Q1005SPAC1F5  | Putative oxidoreduc | 46.00 | 0.00 |
| TRINITY_sp Q8RVIDEK1     | Calpain-type cystei | 46.00 | 0.00 |

|                                                |                     |       |      |
|------------------------------------------------|---------------------|-------|------|
| TRINITY_sp Q32NV leng8                         | Leukocyte receptor  | 46.00 | 0.00 |
| TRINITY_sp Q9ZQ COAE                           | Dephospho-CoA kinas | 46.00 | 0.00 |
| TRINITY_sp Q8LF DRP1C                          | Dynamin-related pro | 46.00 | 0.00 |
| TRINITY_sp Q9P4 utp7                           | Probable U3 small n | 46.00 | 0.00 |
| TRINITY_sp Q9BZ ASPSCR1                        | Tether containing U | 46.00 | 0.00 |
| TRINITY_sp Q17Q TAF9                           | Transcription initi | 46.00 | 0.00 |
| TRINITY_sp Q8TF -                              | Thioredoxin-like pr | 46.00 | 0.00 |
| TRINITY_sp Q6TP -                              | Cysteine proteinase | 46.00 | 0.00 |
| TRINITY_sp D0N7 (PITG_07 (Glutamyl-tRNA (Gln)  |                     | 45.90 | 0.00 |
| TRINITY_sp P516 arf4                           | ADP-ribosylation fa | 45.90 | 0.00 |
| TRINITY_sp O598 csl4                           | Exosome complex com | 45.90 | 0.00 |
| TRINITY_sp F4IR VATG1C                         | Serine/threonine-pr | 45.90 | 0.00 |
| TRINITY_sp O229 U2B''                          | U2 small nuclear ri | 45.90 | 0.00 |
| TRINITY_sp F4K6 (NMNAT                         | Nicotinamide/nicoti | 45.90 | 0.00 |
| TRINITY_sp P281 pkgB                           | Protein kinase 2 OS | 45.90 | 0.00 |
| TRINITY_sp Q54D mcfp                           | Mitochondrial subst | 45.90 | 0.00 |
| TRINITY_sp G3MW FICAL3                         | Protein-methionine  | 45.90 | 0.00 |
| TRINITY_sp Q9MB FKFBP                          | 6-phosphofructo-2-k | 45.90 | 0.00 |
| TRINITY_sp Q0II FDDX1                          | ATP-dependent RNA h | 45.90 | 0.00 |
| TRINITY_sp Q156 TRIP4                          | Activating signal c | 45.90 | 0.00 |
| TRINITY_sp Q7WH vhmp                           | Flavoheprotein OS   | 45.90 | 0.00 |
| TRINITY_sp Q5U4 seh11                          | Nucleoporin seh1 OS | 45.90 | 0.00 |
| TRINITY_sp Q2H2 END3                           | Actin cytoskeleton- | 45.90 | 0.00 |
| TRINITY_sp D0NL (PITG_12 (tRNA (guanine(37))-N |                     | 45.90 | 0.00 |
| TRINITY_sp A5D7 DNAJC27                        | DnaJ homolog subfam | 45.90 | 0.00 |
| TRINITY_sp Q6P2 dnajc2                         | DnaJ homolog subfam | 45.90 | 0.00 |
| TRINITY_sp P479 XDH                            | Xanthine dehydrogen | 45.90 | 0.00 |
| TRINITY_sp Q86H PLK                            | Probable serine/thr | 45.90 | 0.00 |
| TRINITY_sp Q1EN CythPPK,                       | Folate synthesis bi | 45.90 | 0.00 |
| TRINITY_sp Q8T6 abcH2                          | ABC transporter H f | 45.90 | 0.00 |
| TRINITY_sp Q54I cox19                          | Cytochrome c oxidas | 45.90 | 0.00 |
| TRINITY_sp Q5T6 CFAP58                         | Cilia- and flagella | 45.90 | 0.00 |
| TRINITY_sp P273 sbpA                           | Sulfate-binding pro | 45.90 | 0.00 |
| TRINITY_sp Q9FZ ANP2                           | Mitogen-activated p | 45.90 | 0.00 |
| TRINITY_sp Q9XG ARAC9                          | Rac-like GTP-bindin | 45.90 | 0.00 |
| TRINITY_sp C6A3 ogt                            | Methylated-DNA--pro | 45.90 | 0.00 |
| TRINITY_sp A6LM dnaK                           | Chaperone protein D | 45.90 | 0.00 |
| TRINITY_sp P367 LONP1                          | Lon protease homolo | 45.90 | 0.00 |
| TRINITY_sp Q94A VATJ3                          | Chaperone protein d | 45.90 | 0.00 |
| TRINITY_sp P496 -                              | Ubiquitin-60S ribos | 45.90 | 0.00 |
| TRINITY_sp A8HU CFAP58                         | Cilia- and flagella | 45.90 | 0.00 |
| TRINITY_sp Q9Y6 URNF215                        | RING finger protein | 45.90 | 0.00 |
| TRINITY_sp B6JC grpE                           | Protein GrpE OS=Oli | 45.90 | 0.00 |
| TRINITY_sp O494 At4g2844                       | Uncharacterized pro | 45.90 | 0.00 |
| TRINITY_sp O348 yfmJ                           | Putative NADP-depen | 45.90 | 0.00 |
| TRINITY_sp P351 TOR1                           | Serine/threonine-pr | 45.90 | 0.00 |
| TRINITY_sp B1XH vrpsT                          | 30S ribosomal prote | 45.90 | 0.00 |
| TRINITY_sp Q55B raptor                         | Protein raptor homo | 45.90 | 0.00 |
| TRINITY_sp Q389 KIN10                          | SNF1-related protei | 45.90 | 0.00 |
| TRINITY_sp Q54Z fsrpra                         | Signal recognition  | 45.90 | 0.00 |
| TRINITY_sp P543 sodA                           | Superoxide dismutas | 45.90 | 0.00 |
| TRINITY_sp Q9C5 MDTC                           | Mitochondrial dicar | 45.90 | 0.00 |
| TRINITY_sp Q993 TY3B-G                         | Transposon Ty3-G Ga | 45.90 | 0.00 |
| TRINITY_sp Q8H7 GRXS16                         | Bifunctional monoth | 45.90 | 0.00 |
| TRINITY_sp Q6K4 TRX1                           | Histone-lysine N-me | 45.90 | 0.00 |
| TRINITY_sp Q54I DDB_G02 (UPF0553 protein OS=   |                     | 45.90 | 0.00 |

|                          |                      |       |      |
|--------------------------|----------------------|-------|------|
| TRINITY_sp P4069MLH1     | DNA mismatch repair  | 45.90 | 0.00 |
| TRINITY_sp P4100cut3     | Structural maintena  | 45.90 | 0.00 |
| TRINITY_sp Q2946ATP6V0A1 | V-type proton ATPas  | 45.90 | 0.00 |
| TRINITY_sp O1543ABCC4    | Multidrug resistanc  | 45.90 | 0.00 |
| TRINITY_sp O4871SMU2     | Suppressor of mec-8  | 45.90 | 0.00 |
| TRINITY_sp P2271Gucy1b2  | Guanylate cyclase s  | 45.90 | 0.00 |
| TRINITY_sp Q9931TY3B-G   | Transposon Ty3-G Ga  | 45.90 | 0.00 |
| TRINITY_sp Q55F1fam45    | Protein FAM45 homol  | 45.90 | 0.00 |
| TRINITY_sp O4309-        | Kinesin heavy chain  | 45.90 | 0.00 |
| TRINITY_sp A7GS6fold     | Bifunctional protei  | 45.90 | 0.00 |
| TRINITY_sp Q2871PPP2R4   | Serine/threonine-pr  | 45.90 | 0.00 |
| TRINITY_sp O6073EIF1B    | Eukaryotic translat  | 45.90 | 0.00 |
| TRINITY_sp P7101fabD     | Malonyl CoA-acyl ca  | 45.80 | 0.00 |
| TRINITY_sp Q3237ybiA     | N-glycosidase YbiA   | 45.80 | 0.00 |
| TRINITY_sp P5023CRIP1    | Cysteine-rich prote  | 45.80 | 0.00 |
| TRINITY_sp Q3UDE1t1112   | Tubulin--tyrosine l  | 45.80 | 0.00 |
| TRINITY_sp O9556MPC2     | Mitochondrial pyruv  | 45.80 | 0.00 |
| TRINITY_sp O1497GAK      | Cyclin-G-associated  | 45.80 | 0.00 |
| TRINITY_sp Q8L97RPL21M   | 50S ribosomal prote  | 45.80 | 0.00 |
| TRINITY_sp Q6Y1FHACD2    | Very-long-chain (3R  | 45.80 | 0.00 |
| TRINITY_sp Q9XW2acdh-11  | Acyl-CoA dehydrogen  | 45.80 | 0.00 |
| TRINITY_sp A0KK1rlmI     | Ribosomal RNA large  | 45.80 | 0.00 |
| TRINITY_sp Q5F31PCMT1    | Protein-L-isoaspart  | 45.80 | 0.00 |
| TRINITY_sp Q9FF9RPL13D   | 60S ribosomal prote  | 45.80 | 0.00 |
| TRINITY_sp P1395-        | G2/mitotic-specific  | 45.80 | 0.00 |
| TRINITY_sp A7TS1TRM13    | tRNA:m(4)X modifica  | 45.80 | 0.00 |
| TRINITY_sp P1475CRYL1    | Lambda-crystallin O  | 45.80 | 0.00 |
| TRINITY_sp Q9P21DNAH1    | Dynein heavy chain   | 45.80 | 0.00 |
| TRINITY_sp P0572-        | DNA endonuclease I-  | 45.80 | 0.00 |
| TRINITY_sp B5FZ6ENY2     | Transcription and m  | 45.80 | 0.00 |
| TRINITY_sp Q55F7pyd1     | Dihydropyrimidine d  | 45.80 | 0.00 |
| TRINITY_sp P5464pkbA     | RAC family serine/t  | 45.80 | 0.00 |
| TRINITY_sp Q9P77rpa2     | Probable DNA-direct  | 45.80 | 0.00 |
| TRINITY_sp Q4R53NOB1     | RNA-binding protein  | 45.80 | 0.00 |
| TRINITY_sp Q7XK1BGLU12   | Beta-glucosidase 12  | 45.80 | 0.00 |
| TRINITY_sp Q9181aurka-b  | Aurora kinase A-B O  | 45.80 | 0.00 |
| TRINITY_sp P0043PAH      | Phenylalanine-4-hyd  | 45.80 | 0.00 |
| TRINITY_sp Q9UK1PARP4    | Poly [ADP-ribose] p  | 45.80 | 0.00 |
| TRINITY_sp O9465nog1     | Probable nucleolar   | 45.80 | 0.00 |
| TRINITY_sp P0C81MCCRP1   | Probable serine/thr  | 45.80 | 0.00 |
| TRINITY_sp Q9446dymA     | Dynammin-A OS=Dictyo | 45.80 | 0.00 |
| TRINITY_sp Q9MB5FKFBP    | 6-phosphofructo-2-k  | 45.80 | 0.00 |
| TRINITY_sp C6HQ1UTP25    | U3 small nucleolar   | 45.80 | 0.00 |
| TRINITY_sp Q9ZR2RH28     | DEAD-box ATP-depend  | 45.80 | 0.00 |
| TRINITY_sp Q9290CDS1     | Phosphatidate cytid  | 45.80 | 0.00 |
| TRINITY_sp Q8TC1RDH11    | Retinol dehydrogena  | 45.80 | 0.00 |
| TRINITY_sp Q99M7Pecr     | Peroxisomal trans-2  | 45.80 | 0.00 |
| TRINITY_sp Q9NG0kif1     | Kinesin-related pro  | 45.80 | 0.00 |
| TRINITY_sp P5859egl      | Endoglucanase OS=Ra  | 45.80 | 0.00 |
| TRINITY_sp B3E51hldE     | Bifunctional protei  | 45.80 | 0.00 |
| TRINITY_sp Q9931TY3B-G   | Transposon Ty3-G Ga  | 45.80 | 0.00 |
| TRINITY_sp F41Y6UGP3     | UTP--glucose-1-phos  | 45.80 | 0.00 |
| TRINITY_sp Q54G1vps45    | Vacuolar protein so  | 45.80 | 0.00 |
| TRINITY_sp Q5AT0capdG    | Acyl-CoA dehydrogen  | 45.80 | 0.00 |
| TRINITY_sp Q8MV1gbpC     | Cyclic GMP-binding   | 45.80 | 0.00 |
| TRINITY_sp Q9931TY3B-G   | Transposon Ty3-G Ga  | 45.80 | 0.00 |



|                           |                     |       |      |
|---------------------------|---------------------|-------|------|
| TRINITY_sp P8137-         | Ferredoxin-A OS=Alo | 45.80 | 0.00 |
| TRINITY_sp Q9XZC culB     | Cullin-2 OS=Dictyos | 45.80 | 0.00 |
| TRINITY_sp Q8LCC At5g0856 | Transcription elong | 45.80 | 0.00 |
| TRINITY_sp Q69S7 PDIL5-4  | Protein disulfide i | 45.80 | 0.00 |
| TRINITY_sp Q1016 dph1     | Deubiquitination-pr | 45.80 | 0.00 |
| TRINITY_sp Q54H4 drkA     | Probable serine/thr | 45.80 | 0.00 |
| TRINITY_sp Q8LAMP4H4      | Probable prolyl 4-h | 45.80 | 0.00 |
| TRINITY_sp Q9FJX CYP65    | Peptidyl-prolyl cis | 45.80 | 0.00 |
| TRINITY_sp Q5CC6 petC-1   | Cytochrome b6-f com | 45.80 | 0.00 |
| TRINITY_sp Q9M8F DJ1D     | Protein DJ-1 homolo | 45.70 | 0.00 |
| TRINITY_sp Q0426 PDS5     | Sister chromatid co | 45.70 | 0.00 |
| TRINITY_sp P0916 P4HB     | Protein disulfide-i | 45.70 | 0.00 |
| TRINITY_sp P8056 TBCA     | Tubulin-specific ch | 45.70 | 0.00 |
| TRINITY_sp P1376 Msh3     | DNA mismatch repair | 45.70 | 0.00 |
| TRINITY_sp A0AU9 wdsu1    | WD repeat, SAM and  | 45.70 | 0.00 |
| TRINITY_sp Q8WUI RAB2B    | Ras-related protein | 45.70 | 0.00 |
| TRINITY_sp Q5RGU coq8a    | Atypical kinase COQ | 45.70 | 0.00 |
| TRINITY_sp P1326 Camk4    | Calcium/calmodulin- | 45.70 | 0.00 |
| TRINITY_sp P5467 pikB     | Phosphatidylinosito | 45.70 | 0.00 |
| TRINITY_sp Q54T7 DDB_G026 | Probable dual speci | 45.70 | 0.00 |
| TRINITY_sp Q1336 PLD1     | Phospholipase D1 OS | 45.70 | 0.00 |
| TRINITY_sp Q54T4 uch1     | Probable ubiquitin  | 45.70 | 0.00 |
| TRINITY_sp P8112 NAPB     | Beta-soluble NSF at | 45.70 | 0.00 |
| TRINITY_sp Q7DM5 ABCC4    | ABC transporter C f | 45.70 | 0.00 |
| TRINITY_sp Q08BV otud5a   | OTU domain-containi | 45.70 | 0.00 |
| TRINITY_sp A5HI1-         | Actinidain OS=Actin | 45.70 | 0.00 |
| TRINITY_sp O7556 MYCBP2   | E3 ubiquitin-protei | 45.70 | 0.00 |
| TRINITY_sp Q54CF expo6    | Exportin-6 OS=Dicty | 45.70 | 0.00 |
| TRINITY_sp Q9NU2 MDN1     | Midasin OS=Homo sap | 45.70 | 0.00 |
| TRINITY_sp Q9FM6 PI4KB1   | Phosphatidylinosito | 45.70 | 0.00 |
| TRINITY_sp Q8NSH prpB1    | Probable 2-methylis | 45.70 | 0.00 |
| TRINITY_sp P4364-         | DnaJ protein homolo | 45.70 | 0.00 |
| TRINITY_sp Q54VW DDB_G026 | Serine carboxypepti | 45.70 | 0.00 |
| TRINITY_sp O2294 At2g4176 | Protein N-terminal  | 45.70 | 0.00 |
| TRINITY_sp Q6GN7-         | UPF0454 protein C12 | 45.70 | 0.00 |
| TRINITY_sp Q0JL4 SGT1     | Protein SGT1 homolo | 45.70 | 0.00 |
| TRINITY_sp Q84XC ILL1     | IAA-amino acid hydr | 45.70 | 0.00 |
| TRINITY_sp Q2426 eIF-2gaa | Eukaryotic translat | 45.70 | 0.00 |
| TRINITY_sp Q2011 gcs-1    | Glutamate--cysteine | 45.70 | 0.00 |
| TRINITY_sp P4232 kata     | Catalase OS=Proteus | 45.70 | 0.00 |
| TRINITY_sp O5876 treT     | Trehalose synthase  | 45.70 | 0.00 |
| TRINITY_sp P5317 ERV14    | ER-derived vesicles | 45.70 | 0.00 |
| TRINITY_sp Q9SCY KINB2    | SNF1-related protei | 45.70 | 0.00 |
| TRINITY_sp Q3966 IDA4     | 28 kDa inner dynein | 45.70 | 0.00 |
| TRINITY_sp Q9BX6 BRIP1    | Fanconi anemia grou | 45.70 | 0.00 |
| TRINITY_sp P1097-         | Retrovirus-related  | 45.70 | 0.00 |
| TRINITY_sp Q7XVE BASS1    | Probable sodium/met | 45.70 | 0.00 |
| TRINITY_sp Q9M87 UGT80A2  | Sterol 3-beta-gluco | 45.70 | 0.00 |
| TRINITY_sp Q9FNE GRXC2    | Glutaredoxin-C2 OS= | 45.70 | 0.00 |
| TRINITY_sp Q54S6 rc11     | Probable RNA 3'-ter | 45.70 | 0.00 |
| TRINITY_sp Q8GWE UCH3     | Ubiquitin carboxyl- | 45.70 | 0.00 |
| TRINITY_sp Q75QJ CFDP1    | Craniofacial develo | 45.70 | 0.00 |
| TRINITY_sp A1A46 ATP9B    | Probable phospholip | 45.70 | 0.00 |
| TRINITY_sp Q8N11 CYP4X1   | Cytochrome P450 4X1 | 45.70 | 0.00 |
| TRINITY_sp Q8C16 Cps1     | Carbamoyl-phosphate | 45.70 | 0.00 |
| TRINITY_sp Q0VA6 letm1    | LETM1 and EF-hand d | 45.70 | 0.00 |

|                          |                     |       |      |
|--------------------------|---------------------|-------|------|
| TRINITY_sp Q9MAFDJ1B     | Protein DJ-1 homolo | 45.70 | 0.00 |
| TRINITY_sp Q8L9P4H7      | Probable prolyl 4-h | 45.70 | 0.00 |
| TRINITY_sp Q0JJSHCF101   | Fe-S cluster assemb | 45.70 | 0.00 |
| TRINITY_sp P2622celD     | Endoglucanase E-4 O | 45.70 | 0.00 |
| TRINITY_sp Q9FJISMC4     | Structural maintena | 45.70 | 0.00 |
| TRINITY_sp Q9HGMyta12    | Mitochondrial respi | 45.70 | 0.00 |
| TRINITY_sp Q54Hlcsn2     | COP9 signalosome co | 45.70 | 0.00 |
| TRINITY_sp O440CPYK      | Pyruvate kinase OS= | 45.70 | 0.00 |
| TRINITY_sp Q9931TY3B-G   | Transposon Ty3-G Ga | 45.70 | 0.00 |
| TRINITY_sp Q22S\RPL38    | 60S ribosomal prote | 45.70 | 0.00 |
| TRINITY_sp P9252AtMg008  | Uncharacterized mit | 45.60 | 0.00 |
| TRINITY_sp P3513UBC8     | Ubiquitin-conjugati | 45.60 | 0.00 |
| TRINITY_sp Q0593myb11    | Myb-related protein | 45.60 | 0.00 |
| TRINITY_sp Q0732PIGF     | Phosphatidylinosito | 45.60 | 0.00 |
| TRINITY_sp Q9VR9HERC2    | Probable E3 ubiquit | 45.60 | 0.00 |
| TRINITY_sp Q1269YPK9     | Vacuolar cation-tra | 45.60 | 0.00 |
| TRINITY_sp Q6CGIYALI0A18 | Acyl-protein thioes | 45.60 | 0.00 |
| TRINITY_sp Q3ZCIANAPC11  | Anaphase-promoting  | 45.60 | 0.00 |
| TRINITY_sp A8AF7treA     | Periplasmic trehala | 45.60 | 0.00 |
| TRINITY_sp Q6Z8EOs02g022 | Probable protein ph | 45.60 | 0.00 |
| TRINITY_sp P5361ARCN1    | Coatomer subunit de | 45.60 | 0.00 |
| TRINITY_sp O6016SPBC19F5 | Uncharacterized pro | 45.60 | 0.00 |
| TRINITY_sp Q7ZV6bcs11    | Mitochondrial chape | 45.60 | 0.00 |
| TRINITY_sp O4867RER1A    | Protein RER1A OS=Ar | 45.60 | 0.00 |
| TRINITY_sp Q7S45rcf1     | Respiratory superco | 45.60 | 0.00 |
| TRINITY_sp Q2391kinX     | Probable serine/thr | 45.60 | 0.00 |
| TRINITY_sp Q7RA\CPK3     | Calcium-dependent p | 45.60 | 0.00 |
| TRINITY_sp Q9VR9HERC2    | Probable E3 ubiquit | 45.60 | 0.00 |
| TRINITY_sp Q9FM\PI4KB1   | Phosphatidylinosito | 45.60 | 0.00 |
| TRINITY_sp P6299RAC1     | Ras-related C3 botu | 45.60 | 0.00 |
| TRINITY_sp O2365RABC1    | Ras-related protein | 45.60 | 0.00 |
| TRINITY_sp Q5VJlgdt9     | Probable serine/thr | 45.60 | 0.00 |
| TRINITY_sp Q8LCUAt3g4577 | Probable trans-2-en | 45.60 | 0.00 |
| TRINITY_sp Q54T7DDB_G028 | Probable dual speci | 45.60 | 0.00 |
| TRINITY_sp Q2GZ9ESF2     | Pre-rRNA-processing | 45.60 | 0.00 |
| TRINITY_sp Q4254UBC7     | Ubiquitin-conjugati | 45.60 | 0.00 |
| TRINITY_sp Q2R2IKIN7L    | Kinesin-like protei | 45.60 | 0.00 |
| TRINITY_sp Q9H47RBKS     | Ribokinase OS=Homo  | 45.60 | 0.00 |
| TRINITY_sp Q388(HSP22.0  | 22.0 kDa heat shock | 45.60 | 0.00 |
| TRINITY_sp Q86Y9C2CD5    | C2 domain-containin | 45.60 | 0.00 |
| TRINITY_sp O2814AF_2138  | Phosphoserine phosp | 45.60 | 0.00 |
| TRINITY_sp Q9SB5AP4M     | AP-4 complex subuni | 45.60 | 0.00 |
| TRINITY_sp P2944trxB     | Thioredoxin-2 (Frag | 45.60 | 0.00 |
| TRINITY_sp P5195Nek1     | Serine/threonine-pr | 45.60 | 0.00 |
| TRINITY_sp Q9UT8SPAC343  | Uncharacterized WD  | 45.60 | 0.00 |
| TRINITY_sp Q9411PMS1     | DNA mismatch repair | 45.60 | 0.00 |
| TRINITY_sp A3QJ\coq8b    | Atypical kinase COQ | 45.60 | 0.00 |
| TRINITY_sp P5333RNH70    | RNA exonuclease 1 O | 45.60 | 0.00 |
| TRINITY_sp Q9WX9rbsA1    | Ribose import ATP-b | 45.60 | 0.00 |
| TRINITY_sp Q9LN2P4H3     | Probable prolyl 4-h | 45.60 | 0.00 |
| TRINITY_sp P5487hgsA     | Hydroxymethylglutar | 45.60 | 0.00 |
| TRINITY_sp O243(TOP2     | DNA topoisomerase 2 | 45.60 | 0.00 |
| TRINITY_sp A0JPI\Ccdc61  | Coiled-coil domain- | 45.60 | 0.00 |
| TRINITY_sp Q0314Epha2    | Ephrin type-A recep | 45.60 | 0.00 |
| TRINITY_sp Q6GM9prpf18   | Pre-mRNA-splicing f | 45.60 | 0.00 |
| TRINITY_sp Q9FJIFKBP65   | Peptidyl-prolyl cis | 45.60 | 0.00 |

|                          |                     |       |      |
|--------------------------|---------------------|-------|------|
| TRINITY_sp Q8T15fam91    | Protein FAM91 homol | 45.60 | 0.00 |
| TRINITY_sp Q9LZMORP3A    | Oxysterol-binding p | 45.60 | 0.00 |
| TRINITY_sp O8246At5g2670 | Glutamate--tRNA lig | 45.60 | 0.00 |
| TRINITY_sp Q9AS6RFK1     | Probable LRR recept | 45.60 | 0.00 |
| TRINITY_sp Q9938VCX1     | Vacuolar calcium io | 45.60 | 0.00 |
| TRINITY_sp Q9FWJUBC16    | Probable ubiquitin- | 45.60 | 0.00 |
| TRINITY_sp P2961CDKA-1   | Cyclin-dependent ki | 45.60 | 0.00 |
| TRINITY_sp P332(ARC19    | Actin-related prote | 45.60 | 0.00 |
| TRINITY_sp Q55D7abcG22   | ABC transporter G f | 45.60 | 0.00 |
| TRINITY_sp O0018STXBP3   | Syntaxin-binding pr | 45.60 | 0.00 |
| TRINITY_sp A3EWIREV1     | DNA repair protein  | 45.60 | 0.00 |
| TRINITY_sp P7437dfa3     | Putative diflavin f | 45.60 | 0.00 |
| TRINITY_sp Q5JVIEFHC1    | EF-hand domain-cont | 45.60 | 0.00 |
| TRINITY_sp Q86Y6CPNE8    | Copine-8 OS=Homo sa | 45.60 | 0.00 |
| TRINITY_sp O9468plh1     | Phospholipid:diacyl | 45.60 | 0.00 |
| TRINITY_sp Q9M82UGT80A2  | Sterol 3-beta-gluco | 45.60 | 0.00 |
| TRINITY_sp Q10E6KIN8B    | Kinesin-like protei | 45.60 | 0.00 |
| TRINITY_sp Q10M6GEP      | Probable glutamyl e | 45.60 | 0.00 |
| TRINITY_sp O6502EAAC     | Probable envelope A | 45.60 | 0.00 |
| TRINITY_sp B9A1FSEP1     | Thioredoxin reducta | 45.50 | 0.00 |
| TRINITY_sp P9761Faah     | Fatty-acid amide hy | 45.50 | 0.00 |
| TRINITY_sp Q9UI1HERC5    | E3 ISG15--protein l | 45.50 | 0.00 |
| TRINITY_sp Q8BZ6Anapc2   | Anaphase-promoting  | 45.50 | 0.00 |
| TRINITY_sp Q0341frk      | Fructokinase OS=Zym | 45.50 | 0.00 |
| TRINITY_sp O8126TK       | Thymidine kinase OS | 45.50 | 0.00 |
| TRINITY_sp Q3907ATJ13    | Chaperone protein d | 45.50 | 0.00 |
| TRINITY_sp P3132PKAR     | cAMP-dependent prot | 45.50 | 0.00 |
| TRINITY_sp O4386ATP9B    | Probable phospholip | 45.50 | 0.00 |
| TRINITY_sp P391(YCF1     | Metal resistance pr | 45.50 | 0.00 |
| TRINITY_sp Q2866ABCC2    | Canalicular multisp | 45.50 | 0.00 |
| TRINITY_sp Q9VH1Invadol5 | Leishmanolysin-like | 45.50 | 0.00 |
| TRINITY_sp P5465cap      | Adenylyl cyclase-as | 45.50 | 0.00 |
| TRINITY_sp Q9QX1Prss16   | Thymus-specific ser | 45.50 | 0.00 |
| TRINITY_sp Q7551DBP2     | ATP-dependent RNA h | 45.50 | 0.00 |
| TRINITY_sp F1Q48atp9b    | Probable phospholip | 45.50 | 0.00 |
| TRINITY_sp P9341Os09g050 | Cyclin-C1-1 OS=Oryz | 45.50 | 0.00 |
| TRINITY_sp Q8W41RH47     | DEAD-box ATP-depend | 45.50 | 0.00 |
| TRINITY_sp P4861pelo     | Protein pelota OS=D | 45.50 | 0.00 |
| TRINITY_sp O6112krsA     | Serine/threonine-pr | 45.50 | 0.00 |
| TRINITY_sp Q49G1pi4kb    | Phosphatidylinosito | 45.50 | 0.00 |
| TRINITY_sp E3QB1UTP25    | U3 small nucleolar  | 45.50 | 0.00 |
| TRINITY_sp Q1018abc2     | ATP-binding cassett | 45.50 | 0.00 |
| TRINITY_sp P0CR6SEC23    | Protein transport p | 45.50 | 0.00 |
| TRINITY_sp Q9A82CC_1201  | Putative aldolase c | 45.50 | 0.00 |
| TRINITY_sp Q8T21fam49    | Protein FAM49 homol | 45.50 | 0.00 |
| TRINITY_sp Q94A(CDS4     | Phosphatidate cytid | 45.50 | 0.00 |
| TRINITY_sp P8726SPAC16A1 | Putative RNA polyme | 45.50 | 0.00 |
| TRINITY_sp Q8WX1DNAH7    | Dynein heavy chain  | 45.50 | 0    |
| TRINITY_sp Q8IY1GSPT2    | Eukaryotic peptide  | 45.50 | 0.00 |
| TRINITY_sp Q9UI(EVL      | Ena/VASP-like prote | 45.50 | 0.00 |
| TRINITY_sp Q8RW2SD25     | G-type lectin S-rec | 45.50 | 0.00 |
| TRINITY_sp P7438s110418  | 2-methyl-6-phytyl-1 | 45.50 | 0.00 |
| TRINITY_sp Q7L87VASH1    | Vasohibin-1 OS=Homo | 45.50 | 0.00 |
| TRINITY_sp P2577Os04g065 | Oryzain alpha chain | 45.50 | 0.00 |
| TRINITY_sp P0A44purU     | Formyltetrahydrofol | 45.50 | 0.00 |
| TRINITY_sp Q4V8(Lrrc56   | Leucine-rich repeat | 45.50 | 0.00 |

|                           |                      |       |      |
|---------------------------|----------------------|-------|------|
| TRINITY_sp Q54G5ascc3     | Activating signal c  | 45.50 | 0.00 |
| TRINITY_sp Q65XFOs05g057  | Ketol-acid reductoi  | 45.50 | 0.00 |
| TRINITY_sp Q0WWQATG3      | Autophagy-related p  | 45.50 | 0.00 |
| TRINITY_sp Q9LS7PBD1      | Proteasome subunit   | 45.50 | 0.00 |
| TRINITY_sp U3KRIDHQ5      | 3-dehydroquinone sy  | 45.50 | 0.00 |
| TRINITY_sp Q3ZBFTTC1      | Tetratricopeptide r  | 45.50 | 0.00 |
| TRINITY_sp Q9FPFEDR1      | Serine/threonine-pr  | 45.50 | 0.00 |
| TRINITY_sp Q8BG(Tmem184k  | Transmembrane prote  | 45.50 | 0.00 |
| TRINITY_sp Q9FR5TOR       | Serine/threonine-pr  | 45.50 | 0.00 |
| TRINITY_sp Q8IV5MCAT      | Malonyl-CoA-acyl ca  | 45.50 | 0.00 |
| TRINITY_sp P4862FAD8      | Temperature-sensiti  | 45.50 | 0.00 |
| TRINITY_sp P4679cysB      | Cystathionine beta-  | 45.50 | 0.00 |
| TRINITY_sp Q7NDVrnz       | Ribonuclease Z OS=G  | 45.50 | 0.00 |
| TRINITY_sp F4J22LPPE1     | Lipid phosphate pho  | 45.50 | 0.00 |
| TRINITY_sp P1097-         | Retrovirus-related   | 45.50 | 0.00 |
| TRINITY_sp Q9SJIAtlg0837  | mRNA-decapping enzy  | 45.50 | 0.00 |
| TRINITY_sp B2V61lon       | Lon protease OS=Sul  | 45.50 | 0.00 |
| TRINITY_sp Q9ZMMmrp       | Iron-sulfur cluster  | 45.50 | 0.00 |
| TRINITY_sp Q8VZ7ABCC6     | ABC transporter C f  | 45.50 | 0.00 |
| TRINITY_sp O4264ubc6      | Ubiquitin-conjugati  | 45.50 | 0.00 |
| TRINITY_sp Q8LFILPP3      | Putative lipid phos  | 45.50 | 0.00 |
| TRINITY_sp Q6MA9glgA      | Glycogen synthase O  | 45.50 | 0.00 |
| TRINITY_sp Q96UIradC      | DNA repair and reco  | 45.50 | 0.00 |
| TRINITY_sp Q2787pcm-1     | Protein-L-isoaspart  | 45.50 | 0.00 |
| TRINITY_sp Q8LAMP4H4      | Probable prolyl 4-h  | 45.50 | 0.00 |
| TRINITY_sp Q8TD2CHD6      | Chromodomain-helica  | 45.50 | 0.00 |
| TRINITY_sp Q9ZV7GTF2H2    | General transcripti  | 45.50 | 0.00 |
| TRINITY_sp Q6K43TRX1      | Histone-lysine N-me  | 45.50 | 0.00 |
| TRINITY_sp O544CreIA      | GTP pyrophosphokina  | 45.50 | 0.00 |
| TRINITY_sp P6101RAB4B     | Ras-related protein  | 45.50 | 0.00 |
| TRINITY_sp P4628At3g5580  | (Sedoheptulose-1,7-b | 45.50 | 0.00 |
| TRINITY_sp Q8W11SMU1      | Suppressor of mec-8  | 45.40 | 0.00 |
| TRINITY_sp P2227RAS1      | Ras-like protein 1   | 45.40 | 0.00 |
| TRINITY_sp Q53F7TP53I3    | Quinone oxidoreduct  | 45.40 | 0.00 |
| TRINITY_sp Q9JJIHo66      | Bifunctional lysine  | 45.40 | 0.00 |
| TRINITY_sp P3413ptpB      | Tyrosine-protein ph  | 45.40 | 0.00 |
| TRINITY_sp P3282SCPL49    | Serine carboxypepti  | 45.40 | 0.00 |
| TRINITY_sp Q9P27USP36     | Ubiquitin carboxyl-  | 45.40 | 0.00 |
| TRINITY_sp Q9FMFRD21B     | Probable cysteine p  | 45.40 | 0.00 |
| TRINITY_sp Q54N4bcaA      | Branched-chain-amin  | 45.40 | 0.00 |
| TRINITY_sp Q7RAFCPK1      | Calcium-dependent p  | 45.40 | 0.00 |
| TRINITY_sp O5982SPCC965   | Putative voltage-ga  | 45.40 | 0.00 |
| TRINITY_sp P2648fixL      | Sensor protein FixL  | 45.40 | 0.00 |
| TRINITY_sp Q76P(DDB_G027  | Probable serine/thr  | 45.40 | 0.00 |
| TRINITY_sp P136(Atpalpha2 | Sodium/potassium-tr  | 45.40 | 0.00 |
| TRINITY_sp Q84U(Os08g015  | DEAD-box ATP-depend  | 45.40 | 0.00 |
| TRINITY_sp Q9UD1DNAJB4    | DnaJ homolog subfam  | 45.40 | 0.00 |
| TRINITY_sp Q8L72GSTT2     | Glutathione S-trans  | 45.40 | 0.00 |

|                           |                     |       |      |
|---------------------------|---------------------|-------|------|
| TRINITY_sp Q0181PFKP      | ATP-dependent 6-pho | 45.40 | 0.00 |
| TRINITY_sp Q9LTKNHD1      | Sodium/proton antip | 45.40 | 0.00 |
| TRINITY_sp Q5ZLSTRAP      | Serine-threonine ki | 45.40 | 0.00 |
| TRINITY_sp P2309-         | Dynein beta chain,  | 45.40 | 0    |
| TRINITY_sp F4JJCND3       | External alternativ | 45.40 | 0.00 |
| TRINITY_sp Q54DIDDDB_G029 | Probable serine/thr | 45.40 | 0.00 |
| TRINITY_sp P5466cprD      | Cysteine proteinase | 45.40 | 0.00 |
| TRINITY_sp Q9FWCHAC12     | Histone acetyltrans | 45.40 | 0.00 |
| TRINITY_sp Q9FM8At5g5645  | Probable ADP,ATP ca | 45.30 | 0.00 |
| TRINITY_sp Q3ZBI-         | UPF0235 protein C15 | 45.30 | 0.00 |
| TRINITY_sp A0BD7Rp17-2    | 60S ribosomal prote | 45.30 | 0.00 |
| TRINITY_sp Q0IQFCML3      | Calmodulin-like pro | 45.30 | 0.00 |
| TRINITY_sp Q0007tpsA      | Alpha,alpha-trehalo | 45.30 | 0.00 |
| TRINITY_sp Q6NRMchmp3     | Charged multivesicu | 45.30 | 0.00 |
| TRINITY_sp A0PJEDHRS12    | Dehydrogenase/reduc | 45.30 | 0.00 |
| TRINITY_sp Q3TX(Trmt1     | tRNA (guanine(26)-N | 45.30 | 0.00 |
| TRINITY_sp P3547-         | Stefin-C OS=Bos tau | 45.30 | 0.00 |
| TRINITY_sp Q86A7atp6v1d   | V-type proton ATPas | 45.30 | 0.00 |
| TRINITY_sp Q58DISDC2      | Syndecan-2 OS=Bos t | 45.30 | 0.00 |
| TRINITY_sp Q9LZ7BIG2      | Brefeldin A-inhibit | 45.30 | 0.00 |
| TRINITY_sp Q9ZRICAD       | Probable mannitol d | 45.30 | 0.00 |
| TRINITY_sp Q9ZRICAD       | Probable mannitol d | 45.30 | 0.00 |
| TRINITY_sp Q75JCasps1     | Aspartate--tRNA lig | 45.30 | 0.00 |
| TRINITY_sp Q9HCFCPNE5     | Copine-5 OS=Homo sa | 45.30 | 0.00 |
| TRINITY_sp O6549XCP1      | Cysteine protease X | 45.30 | 0.00 |
| TRINITY_sp Q80XIWnk3      | Serine/threonine-pr | 45.30 | 0.00 |
| TRINITY_sp Q7TSCNek5      | Serine/threonine-pr | 45.30 | 0.00 |
| TRINITY_sp Q0VG7Zgrf1     | Protein ZGRF1 OS=Mu | 45.30 | 0.00 |
| TRINITY_sp Q4VB8metap1d   | Methionine aminopep | 45.30 | 0.00 |
| TRINITY_sp Q9C51SMC2-1    | Structural maintena | 45.30 | 0.00 |
| TRINITY_sp A7Z05PPIP5K1   | Inositol hexakispho | 45.30 | 0.00 |
| TRINITY_sp Q84LMAARE      | Acylamino-acid-rele | 45.30 | 0.00 |
| TRINITY_sp Q9202-         | Nuclear factor 7, b | 45.30 | 0.00 |
| TRINITY_sp P1419AAC4      | AAC-rich mRNA clone | 45.30 | 0.00 |
| TRINITY_sp Q54QCDDDB_G028 | Probable E3 ubiquit | 45.30 | 0.00 |
| TRINITY_sp P5195NEK4      | Serine/threonine-pr | 45.30 | 0.00 |
| TRINITY_sp Q9GRHefalB     | Elongation factor 1 | 45.30 | 0.00 |
| TRINITY_sp O8222At2g2393  | Probable small nucl | 45.30 | 0.00 |
| TRINITY_sp Q54Q6dhkG      | Hybrid signal trans | 45.30 | 0.00 |
| TRINITY_sp Q9ER7Cars      | Cysteine--tRNA liga | 45.30 | 0.00 |
| TRINITY_sp A8IRCFAP53     | Cilia- and flagella | 45.30 | 0.00 |
| TRINITY_sp P7324sll1917   | Oxygen-independent  | 45.30 | 0.00 |
| TRINITY_sp Q5UNVMIMI_R71  | Uncharacterized pro | 45.30 | 0.00 |
| TRINITY_sp Q55DFfcsA      | Fatty acyl-CoA synt | 45.30 | 0.00 |
| TRINITY_sp O4935COQ3      | Ubiquinone biosynth | 45.30 | 0.00 |
| TRINITY_sp P1188Aldh3a1   | Aldehyde dehydrogen | 45.30 | 0.00 |
| TRINITY_sp Q9ZR3DSPTP1    | Dual specificity pr | 45.30 | 0.00 |
| TRINITY_sp O4352ATP8B1    | Phospholipid-transp | 45.30 | 0.00 |
| TRINITY_sp O0403At1g0894  | Phosphoglycerate mu | 45.30 | 0.00 |
| TRINITY_sp Q9U51Gtp-bp    | Signal recognition  | 45.30 | 0.00 |
| TRINITY_sp Q6278Ddx46     | Probable ATP-depend | 45.30 | 0.00 |
| TRINITY_sp Q6GQ1Cdc14a    | Dual specificity pr | 45.30 | 0.00 |
| TRINITY_sp Q8IUICBWD2     | COBW domain-contain | 45.30 | 0.00 |
| TRINITY_sp P0876Eip71CD   | Peptide methionine  | 45.30 | 0.00 |
| TRINITY_sp Q9M1(CPK23     | Calcium-dependent p | 45.30 | 0.00 |
| TRINITY_sp Q9LDMRRP45A    | Exosome complex com | 45.30 | 0.00 |

|                          |                     |       |      |
|--------------------------|---------------------|-------|------|
| TRINITY_sp Q67P rnc      | Ribonuclease 3 OS=S | 45.30 | 0.00 |
| TRINITY_sp Q96H TMEM19   | Transmembrane prote | 45.30 | 0.00 |
| TRINITY_sp P930 PHOT2    | Phototropin-2 OS=Ar | 45.30 | 0.00 |
| TRINITY_sp P525 mybl2    | Myb-related protein | 45.30 | 0.00 |
| TRINITY_sp Q0DW Os02g07  | DEAD-box ATP-depend | 45.30 | 0.00 |
| TRINITY_sp Q9NJ CPK3     | Calcium-dependent p | 45.30 | 0.00 |
| TRINITY_sp P808 AN1      | Ananain OS=Ananas c | 45.30 | 0.00 |
| TRINITY_sp Q8TV (pth     | Peptidyl-tRNA hydro | 45.30 | 0.00 |
| TRINITY_sp Q8GW PGLP2    | Phosphoglycolate ph | 45.30 | 0.00 |
| TRINITY_sp Q94C INAR1    | Protein NAR1 OS=Ara | 45.30 | 0.00 |
| TRINITY_sp Q9NT (SIRT3   | NAD-dependent prote | 45.30 | 0.00 |
| TRINITY_sp Q54T drkD     | Probable serine/thr | 45.30 | 0.00 |
| TRINITY_sp Q54E DDB_G02  | Probable protein ki | 45.30 | 0.00 |
| TRINITY_sp Q91Y (Rab29   | Ras-related protein | 45.20 | 0.00 |
| TRINITY_sp Q4L7 SH1032   | Uncharacterized pro | 45.20 | 0.00 |
| TRINITY_sp Q9C1 (cat-1   | Catalase-1 OS=Neuro | 45.20 | 0.00 |
| TRINITY_sp Q131 PAK2     | Serine/threonine-pr | 45.20 | 0.00 |
| TRINITY_sp P137 (fs(1)h  | Homeotic protein fe | 45.20 | 0.00 |
| TRINITY_sp P110 NIA2     | Nitrate reductase [ | 45.20 | 0.00 |
| TRINITY_sp Q54P abcC8    | ABC transporter C f | 45.20 | 0.00 |
| TRINITY_sp Q6DC slc30a9  | Zinc transporter 9  | 45.20 | 0.00 |
| TRINITY_sp P218 RYSR1    | Ryanodine receptor  | 45.20 | 0.00 |
| TRINITY_sp Q09J ODA7     | Leucine-rich repeat | 45.20 | 0.00 |
| TRINITY_sp P519 NEK3     | Serine/threonine-pr | 45.20 | 0.00 |
| TRINITY_sp Q9C9 At1g781  | Probable mitochondr | 45.20 | 0.00 |
| TRINITY_sp Q6Q1 CYP57    | Peptidyl-prolyl cis | 45.20 | 0.00 |
| TRINITY_sp O956 ASMTL    | N-acetylserotonin O | 45.20 | 0.00 |
| TRINITY_sp P459 USP5     | Ubiquitin carboxyl- | 45.20 | 0.00 |
| TRINITY_sp Q111 ofd1     | Prolyl 3,4-dihydrox | 45.20 | 0.00 |
| TRINITY_sp Q8C2 Kiaa019  | WASH complex subuni | 45.20 | 0.00 |
| TRINITY_sp Q5BJ Carnmt1  | Carnosine N-methylt | 45.20 | 0.00 |
| TRINITY_sp P067 Cts1     | Cathepsin L1 OS=Mus | 45.20 | 0.00 |
| TRINITY_sp Q8H0 ABCF3    | ABC transporter F f | 45.20 | 0.00 |
| TRINITY_sp A2YF HK1      | Probable histidine  | 45.20 | 0.00 |
| TRINITY_sp P0AD ygiC     | Putative acid--amin | 45.20 | 0.00 |
| TRINITY_sp Q6R5 (RMA1H1  | E3 ubiquitin-protei | 45.20 | 0.00 |
| TRINITY_sp Q91W Rrp9     | U3 small nucleolar  | 45.20 | 0.00 |
| TRINITY_sp O086 Sqstm1   | Sequestosome-1 OS=R | 45.20 | 0.00 |
| TRINITY_sp O234 (PPD1    | PsbP domain-contain | 45.20 | 0.00 |
| TRINITY_sp Q5BK chmp3    | Charged multivesicu | 45.20 | 0.00 |
| TRINITY_sp B2S9 Der      | GTPase Der OS=Bruce | 45.20 | 0.00 |
| TRINITY_sp Q2JI HnmME    | tRNA modification G | 45.20 | 0.00 |
| TRINITY_sp Q9VV Cyp312a1 | Probable cytochrome | 45.20 | 0.00 |
| TRINITY_sp P423 CNB1     | Calcineurin subunit | 45.20 | 0.00 |
| TRINITY_sp Q55G pakC     | Serine/threonine-pr | 45.20 | 0.00 |
| TRINITY_sp A1L1 Idnlz    | DNL-type zinc finge | 45.20 | 0.00 |
| TRINITY_sp Q8RWE UPL6    | E3 ubiquitin-protei | 45.20 | 0.00 |
| TRINITY_sp P844 (LSS     | Lanosterol synthase | 45.20 | 0.00 |
| TRINITY_sp Q2LA ASHH2    | Histone-lysine N-me | 45.20 | 0.00 |
| TRINITY_sp Q9XY fcpA     | Probable C-terminal | 45.20 | 0.00 |
| TRINITY_sp Q8H1 At1g069  | U2 small nuclear ri | 45.20 | 0.00 |
| TRINITY_sp A2YF HK1      | Probable histidine  | 45.20 | 0.00 |
| TRINITY_sp P043 pol      | Retrovirus-related  | 45.20 | 0.00 |
| TRINITY_sp P319 SPS      | Sucrose-phosphate s | 45.20 | 0.00 |
| TRINITY_sp P9WP dapC     | Probable N-succinyl | 45.20 | 0.00 |
| TRINITY_sp Q7ZX mtmr4    | Myotubularin-relate | 45.20 | 0.00 |

|                         |                     |       |      |
|-------------------------|---------------------|-------|------|
| TRINITY_sp P397AIM1     | Altered inheritance | 45.20 | 0.00 |
| TRINITY_sp Q9P2FZNFx1   | NFX1-type zinc fing | 45.20 | 0.00 |
| TRINITY_sp Q2TAJPRCP    | Lysosomal Pro-X car | 45.20 | 0.00 |
| TRINITY_sp Q54QJmcfR    | Mitochondrial subst | 45.10 | 0.00 |
| TRINITY_sp Q9VFIrdx     | Protein roadkill OS | 45.10 | 0.00 |
| TRINITY_sp P426SRK1     | Tyrosine-protein ki | 45.10 | 0.00 |
| TRINITY_sp Q4Z1IPB00032 | Actin-1 OS=Plasmodi | 45.10 | 0.00 |
| TRINITY_sp P542PGIC     | Glucose-6-phosphate | 45.10 | 0.00 |
| TRINITY_sp Q6G3IctaA    | Heme A synthase OS= | 45.10 | 0.00 |
| TRINITY_sp Q54Gfctdsp12 | CTD small phosphata | 45.10 | 0.00 |
| TRINITY_sp Q32P1PPP2R1A | Serine/threonine-pr | 45.10 | 0.00 |
| TRINITY_sp O599pkar     | cAMP-dependent prot | 45.10 | 0.00 |
| TRINITY_sp B5X0Vvisoc1  | Isochorismatase dom | 45.10 | 0.00 |
| TRINITY_sp Q23MTt116a   | Probable beta-tubul | 45.10 | 0.00 |
| TRINITY_sp Q3TYUAtp13a5 | Probable cation-tra | 45.10 | 0.00 |
| TRINITY_sp Q54Fneif2b4  | Translation initiat | 45.10 | 0.00 |
| TRINITY_sp Q54Yfmeccr   | Trans-2-enoyl-CoA r | 45.10 | 0.00 |
| TRINITY_sp Q9LEIRE      | Probable serine/thr | 45.10 | 0.00 |
| TRINITY_sp B8J1rplA     | 50S ribosomal prote | 45.10 | 0.00 |
| TRINITY_sp Q9P2HSIPA1L2 | Signal-induced prol | 45.10 | 0.00 |
| TRINITY_sp Q869twfA     | Twinfilin OS=Dictyo | 45.10 | 0.00 |
| TRINITY_sp Q8CFDnajc27  | DnaJ homolog subfam | 45.10 | 0.00 |
| TRINITY_sp B9DFPAA2     | Copper-transporting | 45.10 | 0.00 |
| TRINITY_sp Q5ATcapdG    | Acyl-CoA dehydrogen | 45.10 | 0.00 |
| TRINITY_sp P008ATP6     | ATP synthase subuni | 45.10 | 0.00 |
| TRINITY_sp Q8H1MNS2     | Mannosyl-oligosacch | 45.10 | 0.00 |
| TRINITY_sp Q60GCEXO1    | Exonuclease 1 OS=Or | 45.10 | 0.00 |
| TRINITY_sp O139otul     | Putative ubiquitin  | 45.10 | 0.00 |
| TRINITY_sp O318yngI     | Putative acyl-CoA s | 45.10 | 0.00 |
| TRINITY_sp Q54XJDDB_G02 | Glucose-induced deg | 45.10 | 0.00 |
| TRINITY_sp Q653NRAMP3   | Metal transporter N | 45.10 | 0.00 |
| TRINITY_sp Q8L7CLPR3    | ATP-dependent Clp p | 45.10 | 0.00 |
| TRINITY_sp Q54Ivrft1    | Protein RFT1 homolo | 45.10 | 0.00 |
| TRINITY_sp Q29AIGA17800 | Leishmanolysin-like | 45.10 | 0.00 |
| TRINITY_sp Q6NP(At5g511 | Probable RNA methyl | 45.10 | 0.00 |
| TRINITY_sp P546myoJ     | Myosin-J heavy chai | 45.10 | 0.00 |
| TRINITY_sp Q9KXxyoA     | Xylitol oxidase OS= | 45.10 | 0.00 |
| TRINITY_sp Q7XIIIRE1    | Serine/threonine-pr | 45.10 | 0.00 |
| TRINITY_sp O748fmn1     | Riboflavin kinase O | 45.10 | 0.00 |
| TRINITY_sp O041(-       | Uricase-2 isozyme 2 | 45.10 | 0.00 |
| TRINITY_sp A3KMUBA1     | Ubiquitin-like modi | 45.10 | 0.00 |
| TRINITY_sp Q67X(At5g065 | F-box protein At5g0 | 45.10 | 0.00 |
| TRINITY_sp Q3E9CPK34    | Calcium-dependent p | 45.10 | 0.00 |
| TRINITY_sp Q67X(CBSDUF1 | DUF21 domain-contai | 45.10 | 0.00 |
| TRINITY_sp Q8K2(Alkbh6  | Alpha-ketoglutarate | 45.10 | 0.00 |
| TRINITY_sp Q0WVI PRMT3  | Probable protein ar | 45.10 | 0.00 |
| TRINITY_sp Q9SE(SCL33   | Serine/arginine-ric | 45.10 | 0.00 |
| TRINITY_sp Q5Z6(CIPK25  | CBL-interacting pro | 45.10 | 0.00 |
| TRINITY_sp P546pikD     | Phosphatidylinosito | 45.10 | 0.00 |
| TRINITY_sp Q093hmg-1.2  | High mobility group | 45.10 | 0.00 |
| TRINITY_sp Q54S(ech1    | Delta(3,5)-Delta(2, | 45.10 | 0.00 |
| TRINITY_sp Q8T2top3     | DNA topoisomerase 3 | 45.10 | 0.00 |
| TRINITY_sp O818IRT2     | Fe(2+) transport pr | 45.10 | 0.00 |
| TRINITY_sp Q9P7(SPBP35G | Uncharacterized Nud | 45.10 | 0.00 |
| TRINITY_sp P165proA     | Alkaline serine exo | 45.10 | 0.00 |
| TRINITY_sp O942mph1     | Serine/threonine-pr | 45.10 | 0.00 |

|                           |                     |       |      |
|---------------------------|---------------------|-------|------|
| TRINITY_sp O4928RH29      | Putative DEAD-box A | 45.10 | 0.00 |
| TRINITY_sp F1QC4rp2       | Protein XRP2 OS=Dan | 45.10 | 0.00 |
| TRINITY_sp Q96MIKCTD7     | BTB/POZ domain-cont | 45.10 | 0.00 |
| TRINITY_sp Q8CCINemf      | Nuclear export medi | 45.10 | 0.00 |
| TRINITY_sp A4IIHsdad1     | Protein SDA1 homolo | 45.10 | 0.00 |
| TRINITY_sp Q4VBIier3ip1   | Immediate early res | 45.10 | 0.00 |
| TRINITY_sp D2QZ3ftsH      | ATP-dependent zinc  | 45.10 | 0.00 |
| TRINITY_sp Q8SS0gefr      | Ras guanine nucleot | 45.10 | 0.00 |
| TRINITY_sp P5383BOR1      | Boron transporter 1 | 45.10 | 0.00 |
| TRINITY_sp P8731tma20     | Translation machine | 45.10 | 0.00 |
| TRINITY_sp Q9H09NUAK2     | NUAK family SNF1-li | 45.00 | 0.00 |
| TRINITY_sp Q54I7pigm      | GPI mannosyltransfe | 45.00 | 0.00 |
| TRINITY_sp Q54K8talB      | Talin-B OS=Dictyost | 45.00 | 0.00 |
| TRINITY_sp Q9UK4LSM7      | U6 snRNA-associated | 45.00 | 0.00 |
| TRINITY_sp Q96NCZMAT2     | Zinc finger matrin- | 45.00 | 0.00 |
| TRINITY_sp Q6GQ3tmem135   | Transmembrane prote | 45.00 | 0.00 |
| TRINITY_sp Q6TJ1RPS6KB1   | Ribosomal protein S | 45.00 | 0.00 |
| TRINITY_sp P1689gpaA      | Guanine nucleotide- | 45.00 | 0.00 |
| TRINITY_sp Q9UN1CDC14A    | Dual specificity pr | 45.00 | 0.00 |
| TRINITY_sp Q54K8talB      | Talin-B OS=Dictyost | 45.00 | 0.00 |
| TRINITY_sp Q9WY1TM_0508   | Uncharacterized pro | 45.00 | 0.00 |
| TRINITY_sp Q94A(MKK1      | Mitogen-activated p | 45.00 | 0.00 |
| TRINITY_sp P6234CPK1      | Calcium-dependent p | 45.00 | 0.00 |
| TRINITY_sp Q6S71TAF5      | Transcription initi | 45.00 | 0.00 |
| TRINITY_sp Q9XY9noxA      | Superoxide-generati | 45.00 | 0.00 |
| TRINITY_sp P1784DDX5      | Probable ATP-depend | 45.00 | 0.00 |
| TRINITY_sp Q9FW1ABCB11    | ABC transporter B f | 45.00 | 0.00 |
| TRINITY_sp Q1236RIB2      | Bifunctional protei | 45.00 | 0.00 |
| TRINITY_sp O2735dnaJ      | Chaperone protein D | 45.00 | 0.00 |
| TRINITY_sp Q9LM1At1g1370  | Probable 6-phosphog | 45.00 | 0.00 |
| TRINITY_sp Q9LX1PPD6      | PsbP domain-contain | 45.00 | 0.00 |
| TRINITY_sp Q9S91VPS28-2   | Vacuolar protein so | 45.00 | 0.00 |
| TRINITY_sp Q54P74c11      | Probable 4-coumarat | 45.00 | 0.00 |
| TRINITY_sp F4J07P4H6      | Probable prolyl 4-h | 45.00 | 0.00 |
| TRINITY_sp Q8T15fam91     | Protein FAM91 homol | 45.00 | 0.00 |
| TRINITY_sp Q8VX1XEG113    | Arabinosyltransfera | 45.00 | 0.00 |
| TRINITY_sp P1605gpaB      | Guanine nucleotide- | 45.00 | 0.00 |
| TRINITY_sp Q8H01ABCF3     | ABC transporter F f | 45.00 | 0.00 |
| TRINITY_sp P5471PSBS      | Photosystem II 22 k | 45.00 | 0.00 |
| TRINITY_sp Q6316Dnah1     | Dynein heavy chain  | 45.00 | 0    |
| TRINITY_sp P1097-         | Retrovirus-related  | 45.00 | 0.00 |
| TRINITY_sp O6276TXNRD1    | Thioredoxin reducta | 45.00 | 0.00 |
| TRINITY_sp Q5EA1MFAP1     | Microfibrillar-asso | 45.00 | 0.00 |
| TRINITY_sp Q8K58Dus11     | tRNA-dihydrouridine | 45.00 | 0.00 |
| TRINITY_sp O8065SKIP      | SNW/SKI-interacting | 45.00 | 0.00 |
| TRINITY_sp Q54B1nfx1      | Transcriptional rep | 45.00 | 0.00 |
| TRINITY_sp P5464pkbA      | RAC family serine/t | 45.00 | 0.00 |
| TRINITY_sp Q9P61pc11      | Fe(2+)/Mn(2+) trans | 45.00 | 0.00 |
| TRINITY_sp Q9931TY3B-G    | Transposon Ty3-G Ga | 45.00 | 0.00 |
| TRINITY_sp Q4170PFE2      | Ferritin-2, chlorop | 45.00 | 0.00 |
| TRINITY_sp Q9LY1(NADP-ME2 | NADP-dependent mali | 45.00 | 0.00 |
| TRINITY_sp A5PJ1HYKK      | Hydroxylysine kinas | 45.00 | 0.00 |
| TRINITY_sp Q4189-         | ATP synthase subuni | 45.00 | 0.00 |
| TRINITY_sp Q9FT1ABCG27    | ABC transporter G f | 45.00 | 0.00 |
| TRINITY_sp Q54S1dhkD      | Hybrid signal trans | 45.00 | 0.00 |
| TRINITY_sp Q9Z32Top3b     | DNA topoisomerase 3 | 44.90 | 0.00 |



|                          |                     |       |      |
|--------------------------|---------------------|-------|------|
| TRINITY_sp O489(POLD1    | DNA polymerase delt | 44.90 | 0.00 |
| TRINITY_sp O009(-        | Lysosomal acid alph | 44.90 | 0.00 |
| TRINITY_sp O009(-        | Lysosomal acid alph | 44.90 | 0.00 |
| TRINITY_sp Q6DI5nme6     | Nucleoside diphosph | 44.90 | 0.00 |
| TRINITY_sp F4IVIGRV2     | DnaJ homolog subfam | 44.90 | 0.00 |
| TRINITY_sp Q9M0\MFDX1    | Adrenodoxin-like pr | 44.90 | 0.00 |
| TRINITY_sp Q8VZ\FIE2     | Polycomb group prot | 44.90 | 0.00 |
| TRINITY_sp Q54P\abcC8    | ABC transporter C f | 44.90 | 0.00 |
| TRINITY_sp P0C8\MCCRP1   | Probable serine/thr | 44.90 | 0.00 |
| TRINITY_sp Q6365Grk1     | Rhodopsin kinase OS | 44.90 | 0.00 |
| TRINITY_sp Q6265Ech1     | Delta(3,5)-Delta(2, | 44.90 | 0.00 |
| TRINITY_sp Q1RM\TRNAU1A  | tRNA selenocysteine | 44.90 | 0.00 |
| TRINITY_sp A9KH\lon      | Lon protease OS=Clo | 44.90 | 0.00 |
| TRINITY_sp P552(BRPF1    | Peregrin OS=Homo sa | 44.90 | 0.00 |
| TRINITY_sp O6545XCP1     | Cysteine protease X | 44.90 | 0.00 |
| TRINITY_sp Q7G18FIM1     | Fimbrin-1 OS=Arabid | 44.90 | 0.00 |
| TRINITY_sp P5287Tmem165  | Transmembrane prote | 44.90 | 0.00 |
| TRINITY_sp Q8L7MTUN      | UDP-glycosyltransfe | 44.90 | 0.00 |
| TRINITY_sp Q9WTILypla2   | Acyl-protein thioes | 44.90 | 0.00 |
| TRINITY_sp Q7ZY\dcdf13   | DDB1- and CUL4-asso | 44.90 | 0.00 |
| TRINITY_sp Q6AY\Recq1    | ATP-dependent DNA h | 44.90 | 0.00 |
| TRINITY_sp Q9532MANBA    | Beta-mannosidase OS | 44.90 | 0.00 |
| TRINITY_sp Q9M2IACA11    | Putative calcium-tr | 44.90 | 0.00 |
| TRINITY_sp O9475ALG2     | Alpha-1,3/1,6-manno | 44.90 | 0.00 |
| TRINITY_sp Q9LJIM3KE1    | MAP3K epsilon prote | 44.90 | 0.00 |
| TRINITY_sp Q96F\TRMT61A  | tRNA (adenine(58)-N | 44.90 | 0.00 |
| TRINITY_sp F1QH\mical3a  | Protein-methionine  | 44.90 | 0.00 |
| TRINITY_sp Q54N4clp1     | Protein CLP1 homolo | 44.90 | 0.00 |
| TRINITY_sp O0471MSH6     | DNA mismatch repair | 44.90 | 0.00 |
| TRINITY_sp Q55C5glkA     | Probable serine/thr | 44.90 | 0.00 |
| TRINITY_sp Q9VC\Udcr-1   | Endoribonuclease Dc | 44.90 | 0.00 |
| TRINITY_sp Q5AT\capdG    | Acyl-CoA dehydrogen | 44.90 | 0.00 |
| TRINITY_sp Q54P5cpnC     | Copine-C OS=Dictyos | 44.90 | 0.00 |
| TRINITY_sp O2226CKI1     | Histidine kinase CK | 44.90 | 0.00 |
| TRINITY_sp Q9LX\HIRA     | Protein HIRA OS=Ara | 44.90 | 0.00 |
| TRINITY_sp Q9P0IMARK1    | Serine/threonine-pr | 44.90 | 0.00 |
| TRINITY_sp Q76N\dyrk1    | Probable serine/thr | 44.90 | 0.00 |
| TRINITY_sp Q9VY\Bap60    | Brahma-associated p | 44.90 | 0.00 |
| TRINITY_sp P7362sll11770 | Uncharacterized pro | 44.90 | 0.00 |
| TRINITY_sp Q8BW\Kdm4a    | Lysine-specific dem | 44.90 | 0.00 |
| TRINITY_sp Q7TM\Narf1    | Cytosolic Fe-S clus | 44.90 | 0.00 |
| TRINITY_sp Q94K\ELIP2    | Early light-induced | 44.90 | 0.00 |
| TRINITY_sp P0432pol      | Retrovirus-related  | 44.90 | 0.00 |
| TRINITY_sp Q6AX\Isg2012  | Interferon-stimulat | 44.90 | 0.00 |
| TRINITY_sp Q9M2\CSPL15   | Squamosa promoter-b | 44.90 | 0.00 |
| TRINITY_sp P2332-        | Polyubiquitin OS=Eu | 44.90 | 0.00 |
| TRINITY_sp Q9P6\Ippk15   | Serine/threonine-pr | 44.90 | 0.00 |
| TRINITY_sp Q9SJMEMB11    | Membrin-11 OS=Arabi | 44.90 | 0.00 |
| TRINITY_sp Q8WX\DNAH7    | Dynein heavy chain  | 44.90 | 0.00 |
| TRINITY_sp Q9LM\TPS7     | Probable alpha,alph | 44.90 | 0.00 |
| TRINITY_sp O7445scw1     | Cell wall integrity | 44.90 | 0.00 |
| TRINITY_sp Q9SR\At3g0232 | Probable tRNA (guan | 44.90 | 0.00 |
| TRINITY_sp Q9ZG\pikAIII  | Narbonolide/10-deox | 44.90 | 0.00 |
| TRINITY_sp Q76N\ERD2     | ER lumen protein-re | 44.90 | 0.00 |
| TRINITY_sp Q9ZU\TOM3     | Tobamovirus multipl | 44.90 | 0.00 |
| TRINITY_sp Q395\ODA2     | Dynein gamma chain, | 44.90 | 0.00 |

|                          |                      |       |      |
|--------------------------|----------------------|-------|------|
| TRINITY_sp A4QN ctdspl2k | CTD small phosphata  | 44.90 | 0.00 |
| TRINITY_sp P1201-        | Cyclohexanone 1,2-m  | 44.80 | 0.00 |
| TRINITY_sp Q10GFNEK1     | Serine/threonine-pr  | 44.80 | 0.00 |
| TRINITY_sp Q8R0 Trim31   | E3 ubiquitin-protei  | 44.80 | 0.00 |
| TRINITY_sp Q9SF\FHA2     | FHA domain-containi  | 44.80 | 0.00 |
| TRINITY_sp Q54G phbA     | Prohibitin-1, mitoc  | 44.80 | 0.00 |
| TRINITY_sp P341(pkgC     | Protein kinase 3 OS  | 44.80 | 0.00 |
| TRINITY_sp Q5TJ RING1    | E3 ubiquitin-protei  | 44.80 | 0.00 |
| TRINITY_sp A6QR USP4     | Ubiquitin carboxyl-  | 44.80 | 0.00 |
| TRINITY_sp Q55D gdt6     | Probable inactive s  | 44.80 | 0.00 |
| TRINITY_sp Q01JI SPL7    | Squamosa promoter-b  | 44.80 | 0.00 |
| TRINITY_sp B8AJ MRS2-I   | Magnesium transport  | 44.80 | 0.00 |
| TRINITY_sp Q9XY noxA     | Superoxide-generati  | 44.80 | 0.00 |
| TRINITY_sp P295 -        | Eukaryotic translat  | 44.80 | 0.00 |
| TRINITY_sp Q54P 4c12     | Probable 4-coumarat  | 44.80 | 0.00 |
| TRINITY_sp Q8W2 DXR      | 1-deoxy-D-xylulose   | 44.80 | 0.00 |
| TRINITY_sp C0LGN LRR-RLK | Probable leucine-ri  | 44.80 | 0.00 |
| TRINITY_sp Q9NR DDX21    | Nucleolar RNA helic  | 44.80 | 0.00 |
| TRINITY_sp Q230 KAB1     | Probable voltage-ga  | 44.80 | 0.00 |
| TRINITY_sp Q8LP DMT105   | DNA (cytosine-5)-me  | 44.80 | 0.00 |
| TRINITY_sp Q7V6 uppS     | Isoprenyl transfera  | 44.80 | 0.00 |
| TRINITY_sp A7SN v1g2305  | UPF0553 protein vlg  | 44.80 | 0.00 |
| TRINITY_sp Q99L Usp16    | Ubiquitin carboxyl-  | 44.80 | 0.00 |
| TRINITY_sp Q9FM ICMTA    | Protein-S-isoprenyl  | 44.80 | 0.00 |
| TRINITY_sp F4KB IAAE17   | Probable acyl-activ  | 44.80 | 0.00 |
| TRINITY_sp Q54Y mvd      | Diphosphomevalonate  | 44.80 | 0.00 |
| TRINITY_sp Q9SL Os05g01  | Importin subunit al  | 44.80 | 0.00 |
| TRINITY_sp Q0VC PQLC1    | PQ-loop repeat-cont  | 44.80 | 0.00 |
| TRINITY_sp Q94J WLIM1    | LIM domain-containi  | 44.80 | 0.00 |
| TRINITY_sp Q8BK Pdhx     | Pyruvate dehydrogen  | 44.80 | 0.00 |
| TRINITY_sp Q7XR YSL6     | Probable metal-nico  | 44.80 | 0.00 |
| TRINITY_sp Q9X3 topA     | DNA topoisomerase 1  | 44.80 | 0.00 |
| TRINITY_sp Q54T drkD     | Probable serine/thr  | 44.80 | 0.00 |
| TRINITY_sp Q6ZM EML6     | Echinoderm microtub  | 44.80 | 0.00 |
| TRINITY_sp Q9SH IRRP44A  | Exosome complex exo  | 44.80 | 0.00 |
| TRINITY_sp Q9V9 CG30152  | MIP18 family protei  | 44.80 | 0.00 |
| TRINITY_sp Q652 CYP28    | Peptidyl-prolyl cis  | 44.80 | 0.00 |
| TRINITY_sp Q0VC TMEM65   | Transmembrane prote  | 44.80 | 0.00 |
| TRINITY_sp Q69VI Os06g05 | Probable protein ph  | 44.80 | 0.00 |
| TRINITY_sp P468 KLP1     | Kinesin-like protei  | 44.80 | 0.00 |
| TRINITY_sp Q8IC CPK2     | Calcium-dependent p  | 44.80 | 0.00 |
| TRINITY_sp P412 Abca2    | ATP-binding cassett  | 44.80 | 0.00 |
| TRINITY_sp P227 Gucylb2  | Guanylate cyclase s  | 44.80 | 0.00 |
| TRINITY_sp P0C6 Dnah2    | Dynein heavy chain   | 44.80 | 0    |
| TRINITY_sp F4I7 ALAAT1   | Alanine aminotransf  | 44.80 | 0.00 |
| TRINITY_sp Q010 PDE1B    | Calcium/calmodulin-  | 44.80 | 0.00 |
| TRINITY_sp A1A5 usp47    | Ubiquitin carboxyl-  | 44.70 | 0.00 |
| TRINITY_sp P490 -        | Cytochrome b5 OS=Ni  | 44.70 | 0.00 |
| TRINITY_sp P462 At3g558  | (Sedoheptulose-1,7-b | 44.70 | 0.00 |
| TRINITY_sp Q5UQ MIMI_L5  | Putative ADP-ribosy  | 44.70 | 0.00 |
| TRINITY_sp P426 DRT111   | DNA-damage-repair/t  | 44.70 | 0.00 |
| TRINITY_sp Q3MI PUS10    | Putative tRNA pseud  | 44.70 | 0.00 |
| TRINITY_sp Q9ST VPS29    | Vacuolar protein so  | 44.70 | 0.00 |
| TRINITY_sp Q6PIV FIGNL1  | Fidgetin-like prote  | 44.70 | 0.00 |
| TRINITY_sp Q550 DDB_G02  | Protein TAPT1 homol  | 44.70 | 0.00 |
| TRINITY_sp A2BE arid3a   | AT-rich interactive  | 44.70 | 0.00 |

|                          |                     |       |      |
|--------------------------|---------------------|-------|------|
| TRINITY_sp Q9BIH0464.9   | Probable protein ph | 44.70 | 0.00 |
| TRINITY_sp Q1362CUL4B    | Cullin-4B OS=Homo s | 44.70 | 0.00 |
| TRINITY_sp Q9FG6EB1C     | Microtubule-associa | 44.70 | 0.00 |
| TRINITY_sp Q3949VH-PTP13 | Dual specificity pr | 44.70 | 0.00 |
| TRINITY_sp Q86H3polr1a   | DNA-directed RNA po | 44.70 | 0.00 |
| TRINITY_sp Q3TUIYeats2   | YEATS domain-contai | 44.70 | 0.00 |
| TRINITY_sp Q5F44GPR89    | Golgi pH regulator  | 44.70 | 0.00 |
| TRINITY_sp F4NU6TRM5     | tRNA (guanine(37)-N | 44.70 | 0.00 |
| TRINITY_sp Q8GW1PMRT15   | Protein arginine N- | 44.70 | 0.00 |
| TRINITY_sp Q28B3c2cd5    | C2 domain-contains  | 44.70 | 0.00 |
| TRINITY_sp Q6UK6pirA     | Protein pirA OS=Dic | 44.70 | 0.00 |
| TRINITY_sp Q8LP5LACS6    | Long chain acyl-CoA | 44.70 | 0.00 |
| TRINITY_sp Q54T7mrkC     | Probable serine/thr | 44.70 | 0.00 |
| TRINITY_sp P2577Os04g065 | Oryzain alpha chain | 44.70 | 0.00 |
| TRINITY_sp Q8LP6BTS      | Zinc finger protein | 44.70 | 0.00 |
| TRINITY_sp Q8VZ1PAS2     | Very-long-chain (3R | 44.70 | 0.00 |
| TRINITY_sp Q9SB6At4g2473 | Manganese-dependent | 44.70 | 0.00 |
| TRINITY_sp Q2424sw       | Cytoplasmic dynein  | 44.70 | 0.00 |
| TRINITY_sp Q7T07rhbg     | Ammonium transporte | 44.70 | 0.00 |
| TRINITY_sp Q9931TY3B-G   | Transposon Ty3-G Ga | 44.70 | 0.00 |
| TRINITY_sp Q5NC1Trappc1  | Trafficking protein | 44.70 | 0.00 |
| TRINITY_sp Q8BY1Rdh12    | Retinol dehydrogena | 44.70 | 0.00 |
| TRINITY_sp Q3762ND4L     | NADH-ubiquinone oxi | 44.70 | 0.00 |
| TRINITY_sp Q8WX3DNAH7    | Dynein heavy chain  | 44.70 | 0.00 |
| TRINITY_sp Q3957ODA2     | Dynein gamma chain, | 44.70 | 0.00 |
| TRINITY_sp Q9WU6Spint2   | Kunitz-type proteas | 44.70 | 0.00 |
| TRINITY_sp Q9LT2MED35C   | Pre-mRNA-processing | 44.70 | 0.00 |
| TRINITY_sp P4115HSFA1A   | Heat stress transcr | 44.70 | 0.00 |
| TRINITY_sp Q9ZP1PPOX2    | Pyridoxine/pyridoxa | 44.70 | 0.00 |
| TRINITY_sp Q55G6DDB_G026 | UPF0160 protein OS= | 44.70 | 0.00 |
| TRINITY_sp Q54V6odhA     | Probable 2-oxogluta | 44.70 | 0.00 |
| TRINITY_sp Q6DN1MCTP1    | Multiple C2 and tra | 44.70 | 0.00 |
| TRINITY_sp Q8LB1CLPR4    | ATP-dependent Clp p | 44.70 | 0.00 |
| TRINITY_sp A2ZV6FTSH9    | ATP-dependent zinc  | 44.70 | 0.00 |
| TRINITY_sp Q8GY6APX6     | Putative L-ascorbat | 44.70 | 0.00 |
| TRINITY_sp Q8VY1PFK5     | ATP-dependent 6-pho | 44.70 | 0.00 |
| TRINITY_sp Q3Y41ckk-1    | Calcium/calmodulin- | 44.70 | 0.00 |
| TRINITY_sp Q9LM1PAPS1    | Nuclear poly(A) pol | 44.70 | 0.00 |
| TRINITY_sp Q8L85PIP5K9   | Phosphatidylinosito | 44.70 | 0.00 |
| TRINITY_sp P9251AtMg0081 | Uncharacterized mit | 44.70 | 0.00 |
| TRINITY_sp P0432pol      | Retrovirus-related  | 44.70 | 0.00 |
| TRINITY_sp Q6DD3cep76    | Centrosomal protein | 44.70 | 0.00 |
| TRINITY_sp P5271CBP31    | Serine carboxypepti | 44.60 | 0.00 |
| TRINITY_sp Q6ZNIACP7     | Acid phosphatase ty | 44.60 | 0.00 |
| TRINITY_sp Q94A4At1g6202 | Coatomer subunit al | 44.60 | 0.00 |
| TRINITY_sp Q9V85lack     | E3 ubiquitin-protei | 44.60 | 0.00 |
| TRINITY_sp Q9Y66KPTN     | Kaptin OS=Homo sapi | 44.60 | 0.00 |
| TRINITY_sp Q02A1thrB     | Homoserine kinase O | 44.60 | 0.00 |
| TRINITY_sp P3412coaA     | Coactosin OS=Dictyo | 44.60 | 0.00 |
| TRINITY_sp Q9CB6RABF1    | Ras-related protein | 44.60 | 0.00 |
| TRINITY_sp Q54R1DDB_G028 | NuA4 complex subuni | 44.60 | 0.00 |
| TRINITY_sp Q54M1fhkD     | Probable serine/thr | 44.60 | 0.00 |
| TRINITY_sp Q8R31Cluap1   | Clusterin-associate | 44.60 | 0.00 |
| TRINITY_sp Q5UP6MIMI_L92 | Putative ankyrin re | 44.60 | 0.00 |
| TRINITY_sp Q9LJ6At3g2248 | Probable prefoldin  | 44.60 | 0.00 |
| TRINITY_sp Q9WY6TM_0508  | Uncharacterized pro | 44.60 | 0.00 |

|                           |                      |       |      |
|---------------------------|----------------------|-------|------|
| TRINITY_sp Q5ZKIFACSBG2   | Long-chain-fatty-ac  | 44.60 | 0.00 |
| TRINITY_sp O6509PFC1      | Ribosomal RNA small  | 44.60 | 0.00 |
| TRINITY_sp Q5HJ1Jdus      | Probable tRNA-dihyd  | 44.60 | 0.00 |
| TRINITY_sp P4276CLPD      | Chaperone protein C  | 44.60 | 0.00 |
| TRINITY_sp Q8DW1pth       | Peptidyl-tRNA hydro  | 44.60 | 0.00 |
| TRINITY_sp Q24C2RPL14     | 60S ribosomal prote  | 44.60 | 0.00 |
| TRINITY_sp Q54BVcpras2    | Circularly permutat  | 44.60 | 0.00 |
| TRINITY_sp P2002ATP2B1    | Plasma membrane cal  | 44.60 | 0.00 |
| TRINITY_sp P0C8MCCRP1     | Probable serine/thr  | 44.60 | 0.00 |
| TRINITY_sp O810(EMB2001   | GTP-binding protein  | 44.60 | 0.00 |
| TRINITY_sp Q8H85Os03g022  | Coatomer subunit ga  | 44.60 | 0.00 |
| TRINITY_sp Q89E7cobB2     | NAD-dependent prote  | 44.60 | 0.00 |
| TRINITY_sp Q94J5At3g4947  | Nascent polypeptide  | 44.60 | 0.00 |
| TRINITY_sp P2525-         | Cysteine proteinase  | 44.60 | 0.00 |
| TRINITY_sp O1882AOAH      | Acyloxyacyl hydroly  | 44.60 | 0.00 |
| TRINITY_sp B4S4imenD      | 2-succinyl-5-enolpy  | 44.60 | 0.00 |
| TRINITY_sp A1RYIproS      | Proline--tRNA ligas  | 44.60 | 0.00 |
| TRINITY_sp Q2LAFASHH2     | Histone-lysine N-me  | 44.60 | 0.00 |
| TRINITY_sp Q9S33pcrA      | ATP-dependent DNA h  | 44.60 | 0.00 |
| TRINITY_sp B8BD\LON1      | Lon protease homolo  | 44.60 | 0.00 |
| TRINITY_sp Q54BMDDDB_G029 | UPF0652 protein OS=  | 44.60 | 0.00 |
| TRINITY_sp P4964PRIM2     | DNA primase large s  | 44.60 | 0.00 |
| TRINITY_sp Q9M81DSPTP1B   | Dual specificity pr  | 44.60 | 0.00 |
| TRINITY_sp Q7XJ9GAS8      | Growth arrest-speci  | 44.60 | 0.00 |
| TRINITY_sp Q9Y7Fset1      | Histone-lysine N-me  | 44.60 | 0.00 |
| TRINITY_sp O4264prp22     | Pre-mRNA-splicing f  | 44.60 | 0.00 |
| TRINITY_sp O5031bchH      | Magnesium-chelatase  | 44.60 | 0.00 |
| TRINITY_sp Q54M7commd6    | COMM domain-contain  | 44.60 | 0.00 |
| TRINITY_sp Q54T7mrkC      | Probable serine/thr  | 44.60 | 0.00 |
| TRINITY_sp Q9FR5TOR       | Serine/threonine-pr  | 44.60 | 0.00 |
| TRINITY_sp Q9Y23CDYL      | Chromodomain Y-like  | 44.60 | 0.00 |
| TRINITY_sp Q9Y23ARL2BP    | ADP-ribosylation fa  | 44.60 | 0.00 |
| TRINITY_sp Q54JFogdh      | 2-oxoglutarate dehy  | 44.60 | 0.00 |
| TRINITY_sp Q2255dvc-1     | SprT-like domain-co  | 44.60 | 0.00 |
| TRINITY_sp Q6IN(flad1     | FAD synthase OS=Xen  | 44.60 | 0.00 |
| TRINITY_sp Q11H(rplP      | 50S ribosomal prote  | 44.60 | 0.00 |
| TRINITY_sp F4HX1PLA1      | Phospholipase A I O  | 44.60 | 0.00 |
| TRINITY_sp Q9FJ7TOP1B     | DNA topoisomerase 1  | 44.60 | 0.00 |
| TRINITY_sp Q9XF1SR30      | Serine/arginine-ric  | 44.60 | 0.00 |
| TRINITY_sp P707(Atp8a1    | Phospholipid-transp  | 44.60 | 0.00 |
| TRINITY_sp Q0492GTB1      | Glucosidase 2 subun  | 44.60 | 0.00 |
| TRINITY_sp O6225F45G2.1   | (MIP18 family protei | 44.60 | 0.00 |
| TRINITY_sp Q69Q(DPE2      | 4-alpha-glucanotran  | 44.60 | 0.00 |
| TRINITY_sp P4975VPS41     | Vacuolar protein so  | 44.60 | 0.00 |
| TRINITY_sp Q54ZFsrpra     | Signal recognition   | 44.60 | 0.00 |
| TRINITY_sp O6026SMARCA5   | SWI/SNF-related mat  | 44.60 | 0.00 |
| TRINITY_sp Q9BW(SLC4A1AI  | Kanadaptin OS=Homo   | 44.60 | 0.00 |
| TRINITY_sp Q9931TY3B-G    | Transposon Ty3-G Ga  | 44.60 | 0.00 |
| TRINITY_sp B8BM1OsI_3745  | Pyruvate kinase 2,   | 44.60 | 0.00 |
| TRINITY_sp P0446(-        | Calmodulin OS=Triti  | 44.60 | 0.00 |
| TRINITY_sp Q9096RAB2A     | Ras-related protein  | 44.50 | 0.00 |
| TRINITY_sp Q3892IPP1      | Isopentenyl-diphosp  | 44.50 | 0.00 |
| TRINITY_sp O9451SPBC646   | Putative enoyl redu  | 44.50 | 0.00 |
| TRINITY_sp Q3957YPTC1     | GTP-binding protein  | 44.50 | 0.00 |
| TRINITY_sp Q9LS(SAMDC3    | S-adenosylmethionin  | 44.50 | 0.00 |
| TRINITY_sp Q54L(gghA      | Gamma-glutamyl hydr  | 44.50 | 0.00 |

|                          |                      |       |      |
|--------------------------|----------------------|-------|------|
| TRINITY_sp B8G4 info     | Probable endonuclea  | 44.50 | 0.00 |
| TRINITY_sp Q8L3 FZR2     | Protein FIZZY-RELAT  | 44.50 | 0.00 |
| TRINITY_sp P546 pkbA     | RAC family serine/t  | 44.50 | 0.00 |
| TRINITY_sp Q110 tag-320  | Probable protein di  | 44.50 | 0.00 |
| TRINITY_sp P623 CPK1     | Calcium-dependent p  | 44.50 | 0.00 |
| TRINITY_sp P623 CPK1     | Calcium-dependent p  | 44.50 | 0.00 |
| TRINITY_sp Q9VX DENR     | Density-regulated p  | 44.50 | 0.00 |
| TRINITY_sp P126 YPK1     | Serine/threonine-pr  | 44.50 | 0.00 |
| TRINITY_sp Q9W5 Ns3      | Large subunit GTPas  | 44.50 | 0.00 |
| TRINITY_sp P043 pol      | Retrovirus-related   | 44.50 | 0.00 |
| TRINITY_sp Q9M3 HMA1     | Probable cadmium/zi  | 44.50 | 0.00 |
| TRINITY_sp Q5NT SK2      | Shikimate kinase 2,  | 44.50 | 0.00 |
| TRINITY_sp Q96N RDH12    | Retinol dehydrogena  | 44.50 | 0.00 |
| TRINITY_sp Q924 Rad51c   | DNA repair protein   | 44.50 | 0.00 |
| TRINITY_sp Q8N5 AADAT    | Kynurenine/alpha-am  | 44.50 | 0.00 |
| TRINITY_sp Q8H0 VLP A3   | Protein LOW PSII AC  | 44.50 | 0.00 |
| TRINITY_sp Q8L5 5FCL     | 5-formyltetrahydrof  | 44.50 | 0.00 |
| TRINITY_sp Q1XD ycf52    | Uncharacterized N-a  | 44.50 | 0.00 |
| TRINITY_sp Q4PE SEC23    | Protein transport p  | 44.50 | 0.00 |
| TRINITY_sp Q0JL Os01g061 | DEAD-box ATP-depend  | 44.50 | 0.00 |
| TRINITY_sp Q7TX nudC     | NADH pyrophosphatas  | 44.50 | 0.00 |
| TRINITY_sp Q9FM At5g1405 | U3 small nucleolar   | 44.50 | 0.00 |
| TRINITY_sp Q9PU copg2    | Coatomer subunit ga  | 44.50 | 0.00 |
| TRINITY_sp P552 GUCY2C   | Heat-stable enterot  | 44.50 | 0.00 |
| TRINITY_sp Q5VQ Os06g014 | Coatomer subunit be  | 44.50 | 0.00 |
| TRINITY_sp O748 esf1     | Pre-rRNA-processing  | 44.50 | 0.00 |
| TRINITY_sp P610 RAB4B    | Ras-related protein  | 44.50 | 0.00 |
| TRINITY_sp O803 MKK3     | Mitogen-activated p  | 44.50 | 0.00 |
| TRINITY_sp Q7X6 VPS35A   | Vacuolar protein so  | 44.50 | 0.00 |
| TRINITY_sp C4YK RAS1     | Ras-like protein 1   | 44.40 | 0.00 |
| TRINITY_sp Q6T4 rbrA     | Probable E3 ubiquit  | 44.40 | 0.00 |
| TRINITY_sp Q9ZV OBAP1A   | Oil body-associated  | 44.40 | 0.00 |
| TRINITY_sp Q05A Sdr16c6  | Short-chain dehydro  | 44.40 | 0.00 |
| TRINITY_sp Q86A polr3a   | DNA-directed RNA po  | 44.40 | 0.00 |
| TRINITY_sp Q9XG At5g2601 | Probable protein ph  | 44.40 | 0.00 |
| TRINITY_sp Q55C mp11     | MAP kinase phosphat  | 44.40 | 0.00 |
| TRINITY_sp Q6DF ttc37    | Tetratricopeptide r  | 44.40 | 0.00 |
| TRINITY_sp Q9UB DNAJB9   | DnaJ homolog subfam  | 44.40 | 0.00 |
| TRINITY_sp Q394 RAB1BV   | Ras-related protein  | 44.40 | 0.00 |
| TRINITY_sp Q9M3 AGD6     | Probable ADP-ribosy  | 44.40 | 0.00 |
| TRINITY_sp Q909 RAB2A    | Ras-related protein  | 44.40 | 0.00 |
| TRINITY_sp Q9NU TBC1D22E | TBC1 domain family   | 44.40 | 0.00 |
| TRINITY_sp Q54Y mp13     | MAP kinase phosphat  | 44.40 | 0.00 |
| TRINITY_sp Q54T vpdkA    | Probable serine/thr  | 44.40 | 0.00 |
| TRINITY_sp Q082 MED7     | Mediator of RNA pol  | 44.40 | 0.00 |
| TRINITY_sp Q395 ODA2     | Dynein gamma chain,  | 44.40 | 0.00 |
| TRINITY_sp Q9WY TM_0508  | Uncharacterized pro  | 44.40 | 0.00 |
| TRINITY_sp P982 Atp8a2   | Phospholipid-transp  | 44.40 | 0.00 |
| TRINITY_sp P328 SCPL49   | Serine carboxypepti  | 44.40 | 0.00 |
| TRINITY_sp Q9ZV PAHX     | Phytanoyl-CoA dioxy  | 44.40 | 0.00 |
| TRINITY_sp Q3EA ZIFL2    | Probable peptide/ni  | 44.40 | 0.00 |
| TRINITY_sp Q8MJ SPG21    | Masparidin OS=Bos ta | 44.40 | 0.00 |
| TRINITY_sp O751 ATP9A    | Probable phospholip  | 44.40 | 0.00 |
| TRINITY_sp Q6P3 NEK5     | Serine/threonine-pr  | 44.40 | 0.00 |
| TRINITY_sp Q8T6 abcG20   | ABC transporter G f  | 44.40 | 0.00 |
| TRINITY_sp Q54R DDB_G02E | Probable iron/ascor  | 44.40 | 0.00 |

|                          |                     |       |      |
|--------------------------|---------------------|-------|------|
| TRINITY_sp P5932Eif5     | Eukaryotic translat | 44.40 | 0.00 |
| TRINITY_sp Q5ZLVNSUN2    | tRNA (cytosine(34)- | 44.40 | 0.00 |
| TRINITY_sp Q6MA0rlmH     | Ribosomal RNA large | 44.40 | 0.00 |
| TRINITY_sp Q5M72At3g5226 | RNA pseudouridine s | 44.40 | 0.00 |
| TRINITY_sp Q96N2CAMK1G   | Calcium/calmodulin- | 44.40 | 0.00 |
| TRINITY_sp Q498Esmarcal1 | SWI/SNF-related mat | 44.40 | 0.00 |
| TRINITY_sp A2YFFHK1      | Probable histidine  | 44.40 | 0.00 |
| TRINITY_sp P0AD1ygiC     | Putative acid--amin | 44.40 | 0.00 |
| TRINITY_sp Q9M72CITRX    | Thioredoxin-like pr | 44.40 | 0.00 |
| TRINITY_sp Q6GQ2slc35b1  | Solute carrier fami | 44.40 | 0.00 |
| TRINITY_sp Q6402wdr82-a  | WD repeat-containin | 44.40 | 0.00 |
| TRINITY_sp Q6317Dnah7    | Dynein heavy chain  | 44.40 | 0.00 |
| TRINITY_sp A8HNVRSF14    | Radial spoke protei | 44.40 | 0.00 |
| TRINITY_sp Q5D1IGBP1     | Guanylate-binding p | 44.40 | 0.00 |
| TRINITY_sp Q9CA4NUDT1    | Nudix hydrolase 1 O | 44.40 | 0.00 |
| TRINITY_sp Q54Dftaf1     | Transcription initi | 44.40 | 0.00 |
| TRINITY_sp P1536rpa1     | DNA-directed RNA po | 44.40 | 0.00 |
| TRINITY_sp P4706PRY1     | Protein PRY1 OS=Sac | 44.40 | 0.00 |
| TRINITY_sp Q5RJUsnf8     | Vacuolar-sorting pr | 44.40 | 0.00 |
| TRINITY_sp Q0314Epha2    | Ephrin type-A recep | 44.40 | 0.00 |
| TRINITY_sp B7IFEdnaJ     | Chaperone protein D | 44.40 | 0.00 |
| TRINITY_sp Q9ZR7ABCB1    | ABC transporter B f | 44.40 | 0.00 |
| TRINITY_sp P0987PARP1    | Poly [ADP-ribose] p | 44.40 | 0.00 |
| TRINITY_sp Q921VChmp1a   | Charged multivesicu | 44.40 | 0.00 |
| TRINITY_sp Q9SK1VPS2.1   | Vacuolar protein so | 44.40 | 0.00 |
| TRINITY_sp B1XJ2rplR     | 50S ribosomal prote | 44.40 | 0.00 |
| TRINITY_sp Q9R10LIPE     | Hormone-sensitive l | 44.40 | 0.00 |
| TRINITY_sp Q93Y6RPN7     | 26S proteasome non- | 44.40 | 0.00 |
| TRINITY_sp Q9M57PEAMT    | Phosphoethanolamine | 44.40 | 0.00 |
| TRINITY_sp Q1382GNL2     | Nucleolar GTP-bindi | 44.40 | 0.00 |
| TRINITY_sp Q9T0IH5FB2B   | Heat stress transcr | 44.40 | 0.00 |
| TRINITY_sp Q4R8IGNL1     | Guanine nucleotide- | 44.40 | 0.00 |
| TRINITY_sp P3655CPOX     | Oxygen-dependent co | 44.40 | 0.00 |
| TRINITY_sp Q9FLMVHA-e1   | V-type proton ATPas | 44.40 | 0.00 |
| TRINITY_sp Q9HEF2E4.130  | Regulator of nonsen | 44.40 | 0.00 |
| TRINITY_sp Q9LZ2ABCC14   | ABC transporter C f | 44.40 | 0.00 |
| TRINITY_sp Q55B2pctA     | Ethanolamine-phosph | 44.40 | 0.00 |
| TRINITY_sp P0051PRKAR1A  | cAMP-dependent prot | 44.40 | 0.00 |
| TRINITY_sp P5195NEK4     | Serine/threonine-pr | 44.40 | 0.00 |
| TRINITY_sp P5195NEK4     | Serine/threonine-pr | 44.40 | 0.00 |
| TRINITY_sp Q4FE4XBAT35   | Putative E3 ubiquit | 44.40 | 0.00 |
| TRINITY_sp Q86C6atg1     | Serine/threonine-pr | 44.40 | 0.00 |
| TRINITY_sp Q9SL2Os05g015 | Importin subunit al | 44.40 | 0.00 |
| TRINITY_sp Q1048pnu1     | Nuclease 1, mitoch  | 44.40 | 0.00 |
| TRINITY_sp Q551Hfray2    | Serine/threonine-pr | 44.40 | 0.00 |
| TRINITY_sp A6N62Wdr35    | WD repeat-containin | 44.40 | 0.00 |
| TRINITY_sp Q9SF1CCT7     | T-complex protein 1 | 44.40 | 0.00 |
| TRINITY_sp P8295-        | Horcolin OS=Hordeum | 44.40 | 0.00 |
| TRINITY_sp B8AR6SRT1     | NAD-dependent prote | 44.40 | 0.00 |
| TRINITY_sp P1103NIA2     | Nitrate reductase [ | 44.30 | 0.00 |
| TRINITY_sp P3735rpiB     | Ribose-5-phosphate  | 44.30 | 0.00 |
| TRINITY_sp Q9UPNB9D1     | B9 domain-containin | 44.30 | 0.00 |
| TRINITY_sp P4727ychF     | Ribosome-binding AT | 44.30 | 0.00 |
| TRINITY_sp C1DS6pyrG     | CTP synthase OS=Azo | 44.30 | 0.00 |
| TRINITY_sp O4945At4g2844 | Uncharacterized pro | 44.30 | 0.00 |
| TRINITY_sp A6WX2ubiG     | Ubiquinone biosynth | 44.30 | 0.00 |

|                          |                      |       |      |
|--------------------------|----------------------|-------|------|
| TRINITY_sp Q8ICFCPK2     | Calcium-dependent p  | 44.30 | 0.00 |
| TRINITY_sp P0CS(TRM61    | tRNA (adenine(58)-N  | 44.30 | 0.00 |
| TRINITY_sp Q7RVMNCU0834  | (ADP-ribosylation fa | 44.30 | 0.00 |
| TRINITY_sp A5N6MdnaJ     | Chaperone protein D  | 44.30 | 0.00 |
| TRINITY_sp Q56WISCPL48   | Serine carboxypepti  | 44.30 | 0.00 |
| TRINITY_sp Q3UHFSlc2a13  | Proton myo-inositol  | 44.30 | 0.00 |
| TRINITY_sp Q140JCAMK1    | Calcium/calmodulin-  | 44.30 | 0.00 |
| TRINITY_sp Q9C0(DNAH6    | Dynein heavy chain   | 44.30 | 0.00 |
| TRINITY_sp P470(PRY1     | Protein PRY1 OS=Sac  | 44.30 | 0.00 |
| TRINITY_sp Q68E(INTS3    | Integrator complex   | 44.30 | 0.00 |
| TRINITY_sp Q043(RPC11    | DNA-directed RNA po  | 44.30 | 0.00 |
| TRINITY_sp Q86A(SDB_G02  | Probable helicase D  | 44.30 | 0.00 |
| TRINITY_sp Q9SEIDEGP5    | Protease Do-like 5,  | 44.30 | 0.00 |
| TRINITY_sp O139(rrp40    | Exosome complex com  | 44.30 | 0.00 |
| TRINITY_sp Q54NiscrA     | Protein SCAR OS=Dic  | 44.30 | 0.00 |
| TRINITY_sp Q85FVdnaK     | Chaperone protein d  | 44.30 | 0.00 |
| TRINITY_sp B5YF(Lon      | Lon protease OS=Dic  | 44.30 | 0.00 |
| TRINITY_sp Q5F3(HCCS     | Cytochrome c-type h  | 44.30 | 0.00 |
| TRINITY_sp F4HP(LIG6     | DNA ligase 6 OS=Ara  | 44.30 | 0.00 |
| TRINITY_sp Q550(FctxB    | Cortexillin-2 OS=Di  | 44.30 | 0.00 |
| TRINITY_sp P360(YKL069W  | Free methionine-R-s  | 44.30 | 0.00 |
| TRINITY_sp P056(sacC     | Levanase OS=Bacillu  | 44.30 | 0.00 |
| TRINITY_sp Q9V5(Cyp4p2   | Probable cytochrome  | 44.30 | 0.00 |
| TRINITY_sp Q0J7(MOs08g01 | Phosphopantothenate  | 44.30 | 0.00 |
| TRINITY_sp Q9FN(POLL     | DNA polymerase lamb  | 44.30 | 0.00 |
| TRINITY_sp Q1LV(selo     | Selenoprotein O OS=  | 44.30 | 0.00 |
| TRINITY_sp P464(GST1     | Glutathione S-trans  | 44.30 | 0.00 |
| TRINITY_sp Q8BI(Cstf2    | Cleavage stimulatio  | 44.30 | 0.00 |
| TRINITY_sp Q54W(SDB_G02  | Probable protein ph  | 44.30 | 0.00 |
| TRINITY_sp Q9SJ(SAE2     | SUMO-activating enz  | 44.30 | 0.00 |
| TRINITY_sp Q9FZ(KINUA    | Kinesin-like protei  | 44.30 | 0.00 |
| TRINITY_sp Q9FM(At5g629  | GDSL esterase/lipas  | 44.30 | 0.00 |
| TRINITY_sp Q9SL(At2g200  | Protein phosphatase  | 44.30 | 0.00 |
| TRINITY_sp Q8S4(SQD2     | Sulfoquinovosyl tra  | 44.30 | 0.00 |
| TRINITY_sp Q9FW(AVPL2    | Pyrophosphate-energ  | 44.30 | 0.00 |
| TRINITY_sp Q54I(upf1     | Regulator of nonsen  | 44.30 | 0.00 |
| TRINITY_sp Q5W6(MAN5     | Putative mannan end  | 44.30 | 0.00 |
| TRINITY_sp F4HT(GCS1     | Mannosyl-oligosacch  | 44.30 | 0.00 |
| TRINITY_sp P936(LON1     | Lon protease homolo  | 44.30 | 0.00 |
| TRINITY_sp Q28I(dnajb14  | DnaJ homolog subfam  | 44.30 | 0.00 |
| TRINITY_sp Q8S9(ATG4A    | Cysteine protease A  | 44.30 | 0.00 |
| TRINITY_sp Q9LF(SMC5     | Structural maintena  | 44.30 | 0.00 |
| TRINITY_sp Q9ST(ICEP2    | KDEL-tailed cystein  | 44.30 | 0.00 |
| TRINITY_sp Q7XA(ABCG21   | ABC transporter G f  | 44.30 | 0.00 |
| TRINITY_sp Q9LY(CSP41A   | Chloroplast stem-lo  | 44.30 | 0.00 |
| TRINITY_sp Q9P2(HIFT80   | Intraflagellar tran  | 44.30 | 0.00 |
| TRINITY_sp B2B3(Pa_6_65  | Very-long-chain 3-o  | 44.30 | 0.00 |
| TRINITY_sp P405(NEO1     | Probable phospholip  | 44.20 | 0.00 |
| TRINITY_sp Q58E(hibch    | 3-hydroxyisobutyryl  | 44.20 | 0.00 |
| TRINITY_sp Q2TA(PRCP     | Lysosomal Pro-X car  | 44.20 | 0.00 |
| TRINITY_sp Q149(Irpusd2  | RNA pseudouridylate  | 44.20 | 0.00 |
| TRINITY_sp Q8LG(ABCC8    | ABC transporter C f  | 44.20 | 0.00 |
| TRINITY_sp P453(Akr1b8   | Aldose reductase-re  | 44.20 | 0.00 |
| TRINITY_sp Q6GL(desil    | Desumoylating isope  | 44.20 | 0.00 |
| TRINITY_sp Q2RA(CYCT1-3  | Cyclin-T1-3 OS=Oryz  | 44.20 | 0.00 |
| TRINITY_sp Q54U(dhkA     | Hybrid signal trans  | 44.20 | 0.00 |

|                           |                      |       |      |
|---------------------------|----------------------|-------|------|
| TRINITY_sp P3719NUP62     | Nuclear pore glycop  | 44.20 | 0.00 |
| TRINITY_sp Q8T16gnt1      | [Skp1-protein]-hydr  | 44.20 | 0.00 |
| TRINITY_sp Q1676MAN2A1    | Alpha-mannosidase 2  | 44.20 | 0.00 |
| TRINITY_sp P2236SCP2      | Non-specific lipid-  | 44.20 | 0.00 |
| TRINITY_sp Q86C6tor       | Target of rapamycin  | 44.20 | 0.00 |
| TRINITY_sp O0854Sec22b    | Vesicle-trafficking  | 44.20 | 0.00 |
| TRINITY_sp Q9H96USP42     | Ubiquitin carboxyl-  | 44.20 | 0.00 |
| TRINITY_sp Q54Y6tcea1     | Transcription elong  | 44.20 | 0.00 |
| TRINITY_sp Q9416GONST1    | GDP-mannose transpo  | 44.20 | 0.00 |
| TRINITY_sp Q5XI6atp6v1c1  | V-type proton ATPas  | 44.20 | 0.00 |
| TRINITY_sp Q54M6ndufa12   | NADH dehydrogenase   | 44.20 | 0.00 |
| TRINITY_sp Q9436SRP19     | Signal recognition   | 44.20 | 0.00 |
| TRINITY_sp Q9UG6PISD      | Phosphatidylserine   | 44.20 | 0.00 |
| TRINITY_sp C5PC6CPC735_   | (Putative dipeptidas | 44.20 | 0.00 |
| TRINITY_sp P4256erka      | Extracellular signa  | 44.20 | 0.00 |
| TRINITY_sp Q8LF6GRXC4     | Glutaredoxin-C4 OS=  | 44.20 | 0.00 |
| TRINITY_sp Q9LZ6IRABE1D   | Ras-related protein  | 44.20 | 0.00 |
| TRINITY_sp P6236CPK4      | Calcium-dependent p  | 44.20 | 0.00 |
| TRINITY_sp P3276AFG2      | ATPase family gene   | 44.20 | 0.00 |
| TRINITY_sp O0716regX3     | Sensory transductio  | 44.20 | 0.00 |
| TRINITY_sp Q5F46PAN2      | PAB-dependent poly(  | 44.20 | 0.00 |
| TRINITY_sp O6036AQR       | Intron-binding prot  | 44.20 | 0.00 |
| TRINITY_sp Q8S96DIVARIC7  | Transcription facto  | 44.20 | 0.00 |
| TRINITY_sp Q9VB6Clbn      | Nuclear export medi  | 44.20 | 0.00 |
| TRINITY_sp P4196-         | GTP-binding nuclear  | 44.20 | 0.00 |
| TRINITY_sp B8BM6OsI_3746  | Pyruvate kinase 2,   | 44.20 | 0.00 |
| TRINITY_sp Q2HJ6FAHD1     | Acylpyruvase FAHD1,  | 44.20 | 0.00 |
| TRINITY_sp Q8AW6rnf128    | E3 ubiquitin-protei  | 44.20 | 0.00 |
| TRINITY_sp Q70I6hdaH      | Histone deacetylase  | 44.20 | 0.00 |
| TRINITY_sp Q4606PARP15    | Poly [ADP-ribose] p  | 44.20 | 0.00 |
| TRINITY_sp A8JB6ECHLREDR7 | Pescadillo homolog   | 44.20 | 0.00 |
| TRINITY_sp Q9D06Wdsub1    | WD repeat, SAM and   | 44.20 | 0.00 |
| TRINITY_sp Q9LT6CBSDUF5   | DUF21 domain-contai  | 44.20 | 0.00 |
| TRINITY_sp Q54B6abcB1     | ABC transporter B f  | 44.20 | 0.00 |
| TRINITY_sp Q94A6SRT2      | NAD-dependent prote  | 44.20 | 0.00 |
| TRINITY_sp Q1266OLE1      | Acyl-CoA desaturase  | 44.20 | 0.00 |
| TRINITY_sp Q4076RGP2      | Ras-related protein  | 44.20 | 0.00 |
| TRINITY_sp Q54N6leuS      | Leucine--tRNA ligas  | 44.20 | 0.00 |
| TRINITY_sp A2YH6OsI_0236  | Serine/threonine-pr  | 44.20 | 0.00 |
| TRINITY_sp Q8RW6SRL1      | Pre-mRNA splicing f  | 44.20 | 0.00 |
| TRINITY_sp B8DZ6iscS      | Cysteine desulfuras  | 44.20 | 0.00 |
| TRINITY_sp Q3SX6PUS3      | tRNA pseudouridine(  | 44.20 | 0.00 |
| TRINITY_sp Q9VW6CG6179    | Nitric oxide syntha  | 44.20 | 0.00 |
| TRINITY_sp Q86C6atg1      | Serine/threonine-pr  | 44.20 | 0.00 |
| TRINITY_sp Q96G6IRNF185   | E3 ubiquitin-protei  | 44.20 | 0.00 |
| TRINITY_sp P5396SUB1      | Activated RNA polym  | 44.20 | 0.00 |
| TRINITY_sp Q7XA6DODA      | 4,5-DOPA dioxygenas  | 44.20 | 0.00 |
| TRINITY_sp Q6C46IDBP2     | ATP-dependent RNA h  | 44.20 | 0.00 |
| TRINITY_sp P5436Lipe      | Hormone-sensitive l  | 44.20 | 0.00 |
| TRINITY_sp B9FD6ALN       | Probable allantoina  | 44.20 | 0.00 |
| TRINITY_sp Q69L6PNP1      | Probable polyribonu  | 44.20 | 0.00 |
| TRINITY_sp Q9M36ATX3      | Histone-lysine N-me  | 44.20 | 0.00 |
| TRINITY_sp Q54D6fdft      | Squalene synthase O  | 44.20 | 0.00 |
| TRINITY_sp Q9KW6pyc       | Pyruvate carboxylas  | 44.20 | 0.00 |
| TRINITY_sp Q84M6ABCA1     | ABC transporter A f  | 44.20 | 0.00 |
| TRINITY_sp G5EE6(daf-18   | Phosphatidylinosito  | 44.20 | 0.00 |



|                           |                      |       |      |
|---------------------------|----------------------|-------|------|
| TRINITY_sp P0C57-         | 3'(2'),5'-bisphosph  | 44.20 | 0.00 |
| TRINITY_sp P2587chca      | Clathrin heavy chain | 44.20 | 0    |
| TRINITY_sp O2446RABE1A    | Ras-related protein  | 44.10 | 0.00 |
| TRINITY_sp Q9VIFCG2614    | Methyltransferase-1  | 44.10 | 0.00 |
| TRINITY_sp Q8R1FHid1      | Protein HID1 OS=Mus  | 44.10 | 0.00 |
| TRINITY_sp P5344CTN       | Caltractin OS=Naegl  | 44.10 | 0.00 |
| TRINITY_sp Q5AH7CHK1      | Histidine protein k  | 44.10 | 0.00 |
| TRINITY_sp Q54M4pigC      | Putative phosphatid  | 44.10 | 0.00 |
| TRINITY_sp Q9FR5TOR       | Serine/threonine-pr  | 44.10 | 0.00 |
| TRINITY_sp D3Z61Pdia2     | Protein disulfide-i  | 44.10 | 0.00 |
| TRINITY_sp Q9US1rnh1      | Ribonuclease H OS=S  | 44.10 | 0.00 |
| TRINITY_sp Q0CC3gedE      | Glutathione S-trans  | 44.10 | 0.00 |
| TRINITY_sp B5XAMmrpl58    | Peptidyl-tRNA hydro  | 44.10 | 0.00 |
| TRINITY_sp P4778THOP1     | Thimet oligopeptida  | 44.10 | 0.00 |
| TRINITY_sp B9G3MKIN7I     | Kinesin-like protei  | 44.10 | 0.00 |
| TRINITY_sp Q9SF6RABE1E    | Ras-related protein  | 44.10 | 0.00 |
| TRINITY_sp P9166(1(2)0365 | Probable multidrug   | 44.10 | 0.00 |
| TRINITY_sp Q95V7carmil    | Protein CARMIL OS=D  | 44.10 | 0.00 |
| TRINITY_sp Q8C17Abhd18    | Protein ABHD18 OS=M  | 44.10 | 0.00 |
| TRINITY_sp B0SH1def       | Peptide deformylase  | 44.10 | 0.00 |
| TRINITY_sp Q8H85Os03g022  | Coatomer subunit ga  | 44.10 | 0.00 |
| TRINITY_sp Q54JFabcc3     | ABC transporter C f  | 44.10 | 0.00 |
| TRINITY_sp Q1502EXOSC7    | Exosome complex com  | 44.10 | 0.00 |
| TRINITY_sp Q6I62PSS2      | CDP-diacylglycerol-  | 44.10 | 0.00 |
| TRINITY_sp F4J77PPD7      | PsbP domain-contain  | 44.10 | 0.00 |
| TRINITY_sp Q5842MJ1023    | Uncharacterized ABC  | 44.10 | 0.00 |
| TRINITY_sp P1134Qdpr      | Dihydropteridine re  | 44.10 | 0.00 |
| TRINITY_sp O2249GSH2      | Glutathione synthet  | 44.10 | 0.00 |
| TRINITY_sp Q1045gsk3      | Protein kinase gsk3  | 44.10 | 0.00 |
| TRINITY_sp Q8RWFAt5g1196  | Probable magnesium   | 44.10 | 0.00 |
| TRINITY_sp P3508polr2a    | DNA-directed RNA po  | 44.10 | 0    |
| TRINITY_sp P0258TNNC2     | Troponin C, skeleta  | 44.10 | 0.00 |
| TRINITY_sp O6761acpP      | Acyl carrier protei  | 44.10 | 0.00 |
| TRINITY_sp O0091dstA      | Signal transducer a  | 44.10 | 0.00 |
| TRINITY_sp Q8VX2AGAL3     | Alpha-galactosidase  | 44.10 | 0.00 |
| TRINITY_sp Q96A6CLUAP1    | Clusterin-associate  | 44.10 | 0.00 |
| TRINITY_sp A7SWFv1g19425  | Pescadillo homolog   | 44.10 | 0.00 |
| TRINITY_sp A0JP3Chid1     | Chitinase domain-co  | 44.10 | 0.00 |
| TRINITY_sp Q9FLFPRA1B3    | PRA1 family protein  | 44.10 | 0.00 |
| TRINITY_sp Q9S7IMYB98     | Transcription facto  | 44.10 | 0.00 |
| TRINITY_sp Q54P4isca2     | Iron-sulfur cluster  | 44.10 | 0.00 |
| TRINITY_sp Q3T03POLD4     | DNA polymerase delt  | 44.10 | 0.00 |
| TRINITY_sp F4JV7SFH2      | Phosphatidylinosito  | 44.10 | 0.00 |
| TRINITY_sp Q1261OLE1      | Acyl-CoA desaturase  | 44.10 | 0.00 |
| TRINITY_sp Q9U64cmfB      | Conditioned medium   | 44.10 | 0.00 |
| TRINITY_sp Q8LG6At1g2812  | Ubiquitin thioester  | 44.10 | 0.00 |
| TRINITY_sp A2QP6eglB      | Probable endo-beta-  | 44.10 | 0.00 |
| TRINITY_sp Q8BY1Rdh12     | Retinol dehydrogena  | 44.10 | 0.00 |
| TRINITY_sp Q91V3Atp6v0b   | V-type proton ATPas  | 44.10 | 0.00 |
| TRINITY_sp Q0053NAM8      | Protein NAM8 OS=Sac  | 44.10 | 0.00 |
| TRINITY_sp P0922-         | 25 kDa calcium-bind  | 44.10 | 0.00 |
| TRINITY_sp F4I93STR8      | Rhodanese-like doma  | 44.10 | 0.00 |
| TRINITY_sp P0432pol       | Retrovirus-related   | 44.10 | 0.00 |
| TRINITY_sp B8AP1MRS2-A    | Magnesium transport  | 44.10 | 0.00 |
| TRINITY_sp Q6PD6Sarm1     | Sterile alpha and T  | 44.10 | 0.00 |
| TRINITY_sp Q3961ODA11     | Dynein alpha chain,  | 44.10 | 0.00 |

|                          |                     |       |      |
|--------------------------|---------------------|-------|------|
| TRINITY_sp Q54G dgat2    | Diacylglycerol O-ac | 44.10 | 0.00 |
| TRINITY_sp Q6NW dnajc2   | DnaJ homolog subfam | 44.10 | 0.00 |
| TRINITY_sp Q191 gcy-12   | Receptor-type guany | 44.10 | 0.00 |
| TRINITY_sp Q4UB rab1     | Ras-related protein | 44.10 | 0.00 |
| TRINITY_sp P296 eef-2    | Elongation factor 2 | 44.10 | 0.00 |
| TRINITY_sp Q3SZ POLE3    | DNA polymerase epsi | 44.00 | 0.00 |
| TRINITY_sp Q54Z xab2     | Pre-mRNA-splicing f | 44.00 | 0.00 |
| TRINITY_sp P201 GSTM2    | Glutathione S-trans | 44.00 | 0.00 |
| TRINITY_sp Q020 rad3     | Protein kinase rad3 | 44.00 | 0.00 |
| TRINITY_sp Q017 EXOSC10  | Exosome component 1 | 44.00 | 0.00 |
| TRINITY_sp Q9LE IRE      | Probable serine/thr | 44.00 | 0.00 |
| TRINITY_sp Q395 -        | Dynein 8 kDa light  | 44.00 | 0.00 |
| TRINITY_sp Q0DJ TOR      | Serine/threonine-pr | 44.00 | 0.00 |
| TRINITY_sp Q86J polr2j   | DNA-directed RNA po | 44.00 | 0.00 |
| TRINITY_sp Q8N4 CARNMT1  | Carnosine N-methylt | 44.00 | 0.00 |
| TRINITY_sp Q96M HSPA12B  | Heat shock 70 kDa p | 44.00 | 0.00 |
| TRINITY_sp O087 Vps45    | Vacuolar protein so | 44.00 | 0.00 |
| TRINITY_sp Q9LX MBF1B    | Multiprotein-bridgi | 44.00 | 0.00 |
| TRINITY_sp P491 -        | Nitrate reductase [ | 44.00 | 0.00 |
| TRINITY_sp Q149 SHPRH    | E3 ubiquitin-protei | 44.00 | 0.00 |
| TRINITY_sp Q754 ERT1     | Transcription activ | 44.00 | 0.00 |
| TRINITY_sp Q103 p23fy    | Translationally-con | 44.00 | 0.00 |
| TRINITY_sp Q08D MRPL47   | 39S ribosomal prote | 44.00 | 0.00 |
| TRINITY_sp F4I2 FSWI2    | Switch 2 OS=Arabido | 44.00 | 0.00 |
| TRINITY_sp P011 MYB      | Transcriptional act | 44.00 | 0.00 |
| TRINITY_sp Q84M LUL3     | Probable E3 ubiquit | 44.00 | 0.00 |
| TRINITY_sp O162 sti-1    | Stress-induced-phos | 44.00 | 0.00 |
| TRINITY_sp Q9ZS GLB1     | Nitrogen regulatory | 44.00 | 0.00 |
| TRINITY_sp P043 pol      | Retrovirus-related  | 44.00 | 0.00 |
| TRINITY_sp Q6EE TTLL5    | Tubulin polyglutamy | 44.00 | 0.00 |
| TRINITY_sp Q55A DDB_G02  | Probable serine/thr | 44.00 | 0.00 |
| TRINITY_sp O949 PROSC    | Proline synthase co | 44.00 | 0.00 |
| TRINITY_sp Q5T0 CFAP70   | Cilia- and flagella | 44.00 | 0.00 |
| TRINITY_sp Q6QH PAOX     | Peroxisomal N(1)-ac | 44.00 | 0.00 |
| TRINITY_sp A4II tppp3    | Tubulin polymerizat | 44.00 | 0.00 |
| TRINITY_sp P100 -        | Caricain OS=Carica  | 44.00 | 0.00 |
| TRINITY_sp Q9P2 FAM135A  | Protein FAM135A OS= | 44.00 | 0.00 |
| TRINITY_sp Q9FG MAG5     | Protein transport p | 44.00 | 0.00 |
| TRINITY_sp B6JE rplD     | 50S ribosomal prote | 44.00 | 0.00 |
| TRINITY_sp Q2HJ EUSP15   | Ubiquitin carboxyl- | 44.00 | 0.00 |
| TRINITY_sp Q9UB CTSZ     | Cathepsin Z OS=Homo | 44.00 | 0.00 |
| TRINITY_sp A3LU FMP521   | Protein FMP52-1, mi | 44.00 | 0.00 |
| TRINITY_sp Q96P LENG8    | Leukocyte receptor  | 44.00 | 0.00 |
| TRINITY_sp Q650 Os09g052 | DEAD-box ATP-depend | 44.00 | 0.00 |
| TRINITY_sp Q9NG mkcB     | Probable serine/thr | 44.00 | 0.00 |
| TRINITY_sp Q93Y URS6     | Protein root UVB se | 44.00 | 0.00 |
| TRINITY_sp O550 Aurkb    | Aurora kinase B OS= | 44.00 | 0.00 |
| TRINITY_sp Q941 BON1     | Protein BONZAI 1 OS | 44.00 | 0.00 |
| TRINITY_sp O252 typA     | GTP-binding protein | 44.00 | 0.00 |
| TRINITY_sp Q3MH NUBP2    | Cytosolic Fe-S clus | 44.00 | 0.00 |
| TRINITY_sp P231 ABCB4    | Phosphatidylcholine | 44.00 | 0.00 |
| TRINITY_sp Q9GR aif      | Apoptosis-inducing  | 44.00 | 0.00 |
| TRINITY_sp P250 CML12    | Calmodulin-like pro | 44.00 | 0.00 |
| TRINITY_sp P403 RIC1     | Ras-related protein | 44.00 | 0.00 |
| TRINITY_sp Q9SU KCS15    | 3-ketoacyl-CoA synt | 44.00 | 0.00 |
| TRINITY_sp Q9LH At5g352  | Putative clathrin a | 44.00 | 0.00 |

|                          |                     |       |      |
|--------------------------|---------------------|-------|------|
| TRINITY_sp Q56X7RH39     | DEAD-box ATP-depend | 44.00 | 0.00 |
| TRINITY_sp Q6C78FIP1     | Pre-mRNA polyadenyl | 44.00 | 0.00 |
| TRINITY_sp Q94C4PAT13    | Probable protein S- | 44.00 | 0.00 |
| TRINITY_sp Q54I1DDB_G028 | UPF0553 protein OS= | 44.00 | 0.00 |
| TRINITY_sp Q6L48DBB1     | DNA damage-binding  | 44.00 | 0.00 |
| TRINITY_sp P2082pol      | Retrovirus-related  | 44.00 | 0.00 |
| TRINITY_sp Q3Y41ckk-1    | Calcium/calmodulin- | 44.00 | 0.00 |
| TRINITY_sp P2873MSP1     | Protein MSP1 OS=Sac | 44.00 | 0.00 |
| TRINITY_sp Q9S70HSP70-14 | Heat shock 70 kDa p | 44.00 | 0.00 |
| TRINITY_sp A6WX0ubiG     | Ubiquinone biosynth | 43.90 | 0.00 |
| TRINITY_sp Q8R02Sgp11    | Sphingosine-1-phosp | 43.90 | 0.00 |
| TRINITY_sp Q5HR0SERP0230 | UPF0382 membrane pr | 43.90 | 0.00 |
| TRINITY_sp Q18A8speE     | Polyamine aminoprop | 43.90 | 0.00 |
| TRINITY_sp P3601VPS21    | Vacuolar protein so | 43.90 | 0.00 |
| TRINITY_sp Q9M20ECR      | Very-long-chain eno | 43.90 | 0.00 |
| TRINITY_sp Q5561DDB_G027 | Probable rhodanese  | 43.90 | 0.00 |
| TRINITY_sp Q5ZHVRAB5B    | Ras-related protein | 43.90 | 0.00 |
| TRINITY_sp Q54I7cox19    | Cytochrome c oxidas | 43.90 | 0.00 |
| TRINITY_sp P0DK0PGLP1A   | Phosphoglycolate ph | 43.90 | 0.00 |
| TRINITY_sp Q9WV0Kif9     | Kinesin-like protei | 43.90 | 0.00 |
| TRINITY_sp P4221RAP      | Aspartic proteinase | 43.90 | 0.00 |
| TRINITY_sp P2120CCA1     | CCA tRNA nucleotidy | 43.90 | 0.00 |
| TRINITY_sp Q8GW0OSB3     | Protein OSB3, chlor | 43.90 | 0.00 |
| TRINITY_sp Q9FW0Os10g052 | Probable trehalase  | 43.90 | 0.00 |
| TRINITY_sp Q8690cpv1     | Probable serine car | 43.90 | 0.00 |
| TRINITY_sp Q6Z90Os08g018 | mRNA cap guanine-N7 | 43.90 | 0.00 |
| TRINITY_sp Q9LU4ACA9     | Calcium-transportin | 43.90 | 0.00 |
| TRINITY_sp O5994fim1     | Fimbrin OS=Schizosa | 43.90 | 0.00 |
| TRINITY_sp P0A94rimI     | Ribosomal-protein-a | 43.90 | 0.00 |
| TRINITY_sp Q2XQ0lacZ     | Beta-galactosidase  | 43.90 | 0.00 |
| TRINITY_sp O6225F45G2.10 | MIP18 family protei | 43.90 | 0.00 |
| TRINITY_sp Q8H90NPC6     | Non-specific phosph | 43.90 | 0.00 |
| TRINITY_sp Q5W60MAN5     | Putative mannan end | 43.90 | 0.00 |
| TRINITY_sp Q5GF2Manea    | Glycoprotein endo-a | 43.90 | 0.00 |
| TRINITY_sp Q86A1DDB_G027 | Probable myosin lig | 43.90 | 0.00 |
| TRINITY_sp Q9CZ4Naxd     | ATP-dependent (S)-N | 43.90 | 0.00 |
| TRINITY_sp Q54TMdrkD     | Probable serine/thr | 43.90 | 0.00 |
| TRINITY_sp Q6317Dnah7    | Dynein heavy chain  | 43.90 | 0.00 |
| TRINITY_sp Q1LW1dusp22a  | Dual specificity pr | 43.90 | 0.00 |
| TRINITY_sp Q5PP3ATXR2    | Histone-lysine N-me | 43.90 | 0.00 |
| TRINITY_sp Q9M68GK-2     | Guanylate kinase 2  | 43.90 | 0.00 |
| TRINITY_sp O4928RH29     | Putative DEAD-box A | 43.90 | 0.00 |
| TRINITY_sp P1097-        | Retrovirus-related  | 43.90 | 0.00 |
| TRINITY_sp Q54W7pex7     | Peroxisomal targeti | 43.90 | 0.00 |
| TRINITY_sp P8705SPAC57A1 | Uncharacterized pro | 43.90 | 0.00 |
| TRINITY_sp Q6113Prpf4b   | Serine/threonine-pr | 43.90 | 0.00 |
| TRINITY_sp F2Z69NDH2     | External alternativ | 43.90 | 0.00 |
| TRINITY_sp Q5VQ0CPK2     | Calcium-dependent p | 43.90 | 0.00 |
| TRINITY_sp Q94F0IMPL1    | Phosphatase IMPL1,  | 43.90 | 0.00 |
| TRINITY_sp Q9ZB0xyoA     | Probable xylitol ox | 43.90 | 0.00 |
| TRINITY_sp Q8IU0CBWD2    | COBW domain-contain | 43.90 | 0.00 |
| TRINITY_sp P5431Lipe     | Hormone-sensitive l | 43.90 | 0.00 |
| TRINITY_sp Q84MERBL11    | Rhomboid-like prote | 43.90 | 0.00 |
| TRINITY_sp Q2HJ4PRPF18   | Pre-mRNA-splicing f | 43.90 | 0.00 |
| TRINITY_sp B1AQ0Usp36    | Ubiquitin carboxyl- | 43.90 | 0.00 |
| TRINITY_sp Q5031ngly1    | Peptide-N(4)-(N-ace | 43.90 | 0.00 |

|                          |                     |       |      |
|--------------------------|---------------------|-------|------|
| TRINITY_sp Q70I5hdaH     | Histone deacetylase | 43.90 | 0.00 |
| TRINITY_sp Q5ZJIABHD13   | Protein ABHD13 OS=G | 43.90 | 0.00 |
| TRINITY_sp P5195Nek1     | Serine/threonine-pr | 43.90 | 0.00 |
| TRINITY_sp Q6NV3wdr82    | WD repeat-containin | 43.90 | 0.00 |
| TRINITY_sp Q9NRIBAZ1A    | Bromodomain adjacen | 43.90 | 0.00 |
| TRINITY_sp O8835Baz1a    | Bromodomain adjacen | 43.90 | 0.00 |
| TRINITY_sp Q0E25UVR3     | (6-4)DNA photolyase | 43.90 | 0.00 |
| TRINITY_sp Q9SRFAZG1     | Adenine/guanine per | 43.90 | 0.00 |
| TRINITY_sp Q8IS2gefB     | Ras guanine nucleot | 43.90 | 0.00 |
| TRINITY_sp Q9R1(LIPE     | Hormone-sensitive 1 | 43.90 | 0.00 |
| TRINITY_sp Q9ZWCKL9      | Casein kinase 1-lik | 43.90 | 0.00 |
| TRINITY_sp O8355pfp      | Pyrophosphate--fruc | 43.80 | 0.00 |
| TRINITY_sp Q9FKVAt5g6615 | Probable alpha-mann | 43.80 | 0.00 |
| TRINITY_sp A8M52rpsQ     | 30S ribosomal prote | 43.80 | 0.00 |
| TRINITY_sp Q55C7gtf2h5   | General transcripti | 43.80 | 0.00 |
| TRINITY_sp Q55C7gtf2h5   | General transcripti | 43.80 | 0.00 |
| TRINITY_sp Q1005SPAC3H1  | Glutathione gamma-g | 43.80 | 0.00 |
| TRINITY_sp Q8BH5Noc41    | Nucleolar complex p | 43.80 | 0.00 |
| TRINITY_sp Q0WREPPC6-7   | Probable protein ph | 43.80 | 0.00 |
| TRINITY_sp P6855hup2     | SPBc2 prophage-deri | 43.80 | 0.00 |
| TRINITY_sp Q2YDIDRAP1    | Dr1-associated core | 43.80 | 0.00 |
| TRINITY_sp Q9H75ELAC1    | Zinc phosphodiester | 43.80 | 0.00 |
| TRINITY_sp Q9H45PLK3     | Serine/threonine-pr | 43.80 | 0.00 |
| TRINITY_sp Q55E5pats1    | Probable serine/thr | 43.80 | 0.00 |
| TRINITY_sp Q9635ACX4     | Acyl-coenzyme A oxi | 43.80 | 0.00 |
| TRINITY_sp Q0295CAD8     | Cinnamyl alcohol de | 43.80 | 0.00 |
| TRINITY_sp A1A65HK5      | Probable histidine  | 43.80 | 0.00 |
| TRINITY_sp Q9NJUCPK3     | Calcium-dependent p | 43.80 | 0.00 |
| TRINITY_sp Q3ED6At1g2295 | Uncharacterized PKH | 43.80 | 0.00 |
| TRINITY_sp A2Z35ESGR     | Protein STAY-GREEN, | 43.80 | 0.00 |
| TRINITY_sp F4HX5PSS1     | CDP-diacylglycerol- | 43.80 | 0.00 |
| TRINITY_sp P8415TCTP     | Translationally-con | 43.80 | 0.00 |
| TRINITY_sp Q9JJ5Dync2h1  | Cytoplasmic dynein  | 43.80 | 0.00 |
| TRINITY_sp Q9X35topA     | DNA topoisomerase 1 | 43.80 | 0.00 |
| TRINITY_sp Q9FL5ATJ6     | Chaperone protein d | 43.80 | 0.00 |
| TRINITY_sp Q7TS5Ppp6r1   | Serine/threonine-pr | 43.80 | 0.00 |
| TRINITY_sp Q9NGVmkcB     | Probable serine/thr | 43.80 | 0.00 |
| TRINITY_sp Q8MZ5-        | Physarolisin OS=Phy | 43.80 | 0.00 |
| TRINITY_sp Q8SS(TCP1     | T-complex protein 1 | 43.80 | 0.00 |
| TRINITY_sp P2275Gucy1b2  | Guanylate cyclase s | 43.80 | 0.00 |
| TRINITY_sp Q9VVERbp6     | RNA-binding protein | 43.80 | 0.00 |
| TRINITY_sp Q54U5shkD     | Dual specificity pr | 43.80 | 0.00 |
| TRINITY_sp O8865Stk16    | Serine/threonine-pr | 43.80 | 0.00 |
| TRINITY_sp Q8BNIKctd6    | BTB/POZ domain-cont | 43.80 | 0.00 |
| TRINITY_sp Q9495At2g1734 | Uncharacterized pro | 43.80 | 0.00 |
| TRINITY_sp Q9SZ5FABCG9   | ABC transporter G f | 43.80 | 0.00 |
| TRINITY_sp P4215CKL1     | Casein kinase 1-lik | 43.80 | 0.00 |
| TRINITY_sp Q8EI5pepA1    | Probable cytosol am | 43.80 | 0.00 |
| TRINITY_sp Q9C45MINE1    | Cell division topol | 43.80 | 0.00 |
| TRINITY_sp Q9NR5DDX21    | Nucleolar RNA helic | 43.80 | 0.00 |
| TRINITY_sp Q6NY5slc25a25 | Calcium-binding mit | 43.80 | 0.00 |
| TRINITY_sp A0JPI5Ccdc61  | Coiled-coil domain- | 43.80 | 0.00 |
| TRINITY_sp Q8LP5LACS6    | Long chain acyl-CoA | 43.80 | 0.00 |
| TRINITY_sp Q68F5vac14    | Protein VAC14 homol | 43.80 | 0.00 |
| TRINITY_sp P0CD5alg7     | UDP-N-acetylglucosa | 43.80 | 0.00 |
| TRINITY_sp F4IV5CHR10    | Probable helicase C | 43.80 | 0.00 |

|                          |                     |       |      |
|--------------------------|---------------------|-------|------|
| TRINITY_sp Q9ZU5VAC14    | Protein VAC14 homol | 43.80 | 0.00 |
| TRINITY_sp Q9PWFKCNAB1   | Voltage-gated potas | 43.80 | 0.00 |
| TRINITY_sp Q9I4CPA1210   | Putative quercetin  | 43.80 | 0.00 |
| TRINITY_sp Q9LR7CPX1     | Coproporphyrinogen- | 43.80 | 0.00 |
| TRINITY_sp Q3SZ2RPP30    | Ribonuclease P prot | 43.80 | 0.00 |
| TRINITY_sp Q54Q6dhkG     | Hybrid signal trans | 43.80 | 0.00 |
| TRINITY_sp P3905-        | Dynein beta chain,  | 43.80 | 0.00 |
| TRINITY_sp Q54Y5shkC     | Dual specificity pr | 43.80 | 0.00 |
| TRINITY_sp Q54K3rgaA     | Ras GTPase-activati | 43.80 | 0.00 |
| TRINITY_sp Q5VQ5CPK2     | Calcium-dependent p | 43.80 | 0.00 |
| TRINITY_sp Q9632HSFB1    | Heat stress transcr | 43.80 | 0.00 |
| TRINITY_sp Q2YDFANAPC10  | Anaphase-promoting  | 43.80 | 0.00 |
| TRINITY_sp Q056(CTR1     | Serine/threonine-pr | 43.80 | 0.00 |
| TRINITY_sp Q5F45PAN2     | PAB-dependent poly( | 43.80 | 0.00 |
| TRINITY_sp Q3SZ2RPP30    | Ribonuclease P prot | 43.80 | 0.00 |
| TRINITY_sp Q9C81ABCG12   | ABC transporter G f | 43.80 | 0.00 |
| TRINITY_sp O7495SPCC736  | Uncharacterized oxi | 43.80 | 0.00 |
| TRINITY_sp Q2302unc-51   | Serine/threonine-pr | 43.80 | 0.00 |
| TRINITY_sp Q5597pola     | DNA polymerase I OS | 43.80 | 0.00 |
| TRINITY_sp Q9244Rad51c   | DNA repair protein  | 43.80 | 0.00 |
| TRINITY_sp Q9ZR3DSPTP1   | Dual specificity pr | 43.80 | 0.00 |
| TRINITY_sp Q1538UBE3C    | Ubiquitin-protein l | 43.80 | 0.00 |
| TRINITY_sp P6095-        | Ervatamin-B OS=Tab  | 43.80 | 0.00 |
| TRINITY_sp P0A99adhE     | Aldehyde-alcohol de | 43.80 | 0.00 |
| TRINITY_sp Q9HEF2E4.130  | Regulator of nonsen | 43.80 | 0.00 |
| TRINITY_sp Q9ZU5BAT1     | Amino-acid permease | 43.80 | 0.00 |
| TRINITY_sp Q9ZSMEZA1     | Histone-lysine N-me | 43.80 | 0.00 |
| TRINITY_sp Q9I41PA1204   | NAD(P)H-dependent F | 43.80 | 0.00 |
| TRINITY_sp Q0111DYNC1I2  | Cytoplasmic dynein  | 43.80 | 0.00 |
| TRINITY_sp Q55DFDDB_G026 | Alpha N-terminal pr | 43.70 | 0.00 |
| TRINITY_sp F4JA7SKI2     | DExH-box ATP-depend | 43.70 | 0.00 |
| TRINITY_sp P611(RAB2A    | Ras-related protein | 43.70 | 0.00 |
| TRINITY_sp Q8VZ4SAP11    | Zinc finger AN1 and | 43.70 | 0.00 |
| TRINITY_sp C3KJ1swi5     | DNA repair protein  | 43.70 | 0.00 |
| TRINITY_sp Q6GN1usp22-a  | Ubiquitin carboxyl- | 43.70 | 0.00 |
| TRINITY_sp Q9C11SPAP32A8 | Uncharacterized RIN | 43.70 | 0.00 |
| TRINITY_sp Q9MACABCG24   | ABC transporter G f | 43.70 | 0.00 |
| TRINITY_sp A2XL3ERS1     | Probable ethylene r | 43.70 | 0.00 |
| TRINITY_sp Q8VY7RS2Z33   | Serine/arginine-ric | 43.70 | 0.00 |
| TRINITY_sp Q54F2mroh1    | Maestro heat-like r | 43.70 | 0.00 |
| TRINITY_sp O440(PYK      | Pyruvate kinase OS= | 43.70 | 0.00 |
| TRINITY_sp Q9HD4SEPSECS  | O-phosphoseryl-tRNA | 43.70 | 0.00 |
| TRINITY_sp Q86X8COMM2    | COMM domain-contain | 43.70 | 0.00 |
| TRINITY_sp Q9FJ1UPF1     | Regulator of nonsen | 43.70 | 0.00 |
| TRINITY_sp Q8T15ggtA     | Probable UDP-glucos | 43.70 | 0.00 |
| TRINITY_sp Q9C5(PUX13    | Plant UBX domain-co | 43.70 | 0.00 |
| TRINITY_sp Q9SS1At1g5259 | DCC family protein  | 43.70 | 0.00 |
| TRINITY_sp Q94AVATJ3     | Chaperone protein d | 43.70 | 0.00 |
| TRINITY_sp P5574RAB21    | Ras-related protein | 43.70 | 0.00 |
| TRINITY_sp Q8L97P4H7     | Probable prolyl 4-h | 43.70 | 0.00 |
| TRINITY_sp A0BQ1GSPATT0  | Probable protein ph | 43.70 | 0.00 |
| TRINITY_sp Q5U5(prpf31   | U4/U6 small nuclear | 43.70 | 0.00 |
| TRINITY_sp P4012CAP2     | Adenylyl cyclase-as | 43.70 | 0.00 |
| TRINITY_sp Q3ZB1TRA2B    | Transformer-2 prote | 43.70 | 0.00 |
| TRINITY_sp Q99K1Aco2     | Aconitate hydratase | 43.70 | 0.00 |
| TRINITY_sp P4138-        | Eukaryotic initiati | 43.70 | 0.00 |

|                          |                       |       |      |
|--------------------------|-----------------------|-------|------|
| TRINITY_sp Q9SIFAt2g299  | Presenilin-like pro   | 43.70 | 0.00 |
| TRINITY_sp Q135TRA2A     | Transformer-2 prote   | 43.70 | 0.00 |
| TRINITY_sp A5PJSRD5A1    | 3-oxo-5-alpha-ster    | 43.70 | 0.00 |
| TRINITY_sp B8ARISRT1     | NAD-dependent prote   | 43.70 | 0.00 |
| TRINITY_sp Q96NFRDH12    | Retinol dehydrogena   | 43.70 | 0.00 |
| TRINITY_sp B2T4Bphyt_1   | UPF0061 protein Bph   | 43.70 | 0.00 |
| TRINITY_sp Q54KfMccA     | Methylcrotonoyl-CoA   | 43.70 | 0.00 |
| TRINITY_sp Q75Jrapgap1   | RapA guanosine trip   | 43.70 | 0.00 |
| TRINITY_sp Q9HC2TMBIM4   | Protein lifeguard 4   | 43.70 | 0.00 |
| TRINITY_sp F4JAP4H2      | Prolyl 4-hydroxylas   | 43.70 | 0.00 |
| TRINITY_sp P982(ALA2     | Phospholipid-transp   | 43.70 | 0.00 |
| TRINITY_sp Q3T0GDE1      | Glycerophosphodiester | 43.70 | 0.00 |
| TRINITY_sp Q8LKLACS7     | Long chain acyl-CoA   | 43.70 | 0.00 |
| TRINITY_sp Q86YRAB43     | Ras-related protein   | 43.70 | 0.00 |
| TRINITY_sp O822At2g479   | NPL4-like protein 2   | 43.70 | 0.00 |
| TRINITY_sp Q9XIFALA3     | Phospholipid-transp   | 43.70 | 0.00 |
| TRINITY_sp O154ABCC4     | Multidrug resistanc   | 43.70 | 0.00 |
| TRINITY_sp P499(-        | Arginase, hepatic O   | 43.70 | 0.00 |
| TRINITY_sp Q0IIIDUSP10   | Dual specificity pr   | 43.70 | 0.00 |
| TRINITY_sp O244UBP3      | Ubiquitin carboxyl-   | 43.70 | 0.00 |
| TRINITY_sp P325SAC6      | Fimbrin OS=Saccharo   | 43.70 | 0.00 |
| TRINITY_sp P0A9tas       | Protein tas OS=Esch   | 43.70 | 0.00 |
| TRINITY_sp Q9P4utp7      | Probable U3 small n   | 43.70 | 0.00 |
| TRINITY_sp Q432(PCM      | Protein-L-isoaspart   | 43.70 | 0.00 |
| TRINITY_sp Q623Zpr1      | Zinc finger protein   | 43.60 | 0.00 |
| TRINITY_sp B5DSGA24966   | Adenylyltransferase   | 43.60 | 0.00 |
| TRINITY_sp Q96DJSNRNP40  | U5 small nuclear ri   | 43.60 | 0.00 |
| TRINITY_sp Q8VYFMED31    | Mediator of RNA pol   | 43.60 | 0.00 |
| TRINITY_sp Q291IAats-cys | Cysteine--tRNA liga   | 43.60 | 0.00 |
| TRINITY_sp G5ED(mtm-6    | Myotubularin-relate   | 43.60 | 0.00 |
| TRINITY_sp Q8HYJPFDN5    | Prefoldin subunit 5   | 43.60 | 0.00 |
| TRINITY_sp Q0P4kti12     | Protein KTI12 homol   | 43.60 | 0.00 |
| TRINITY_sp P126YPK1      | Serine/threonine-pr   | 43.60 | 0.00 |
| TRINITY_sp Q54Nppan      | Peter Pan-like prot   | 43.60 | 0.00 |
| TRINITY_sp F4JUIARPC4    | Actin-related prote   | 43.60 | 0.00 |
| TRINITY_sp O183Seld      | Selenide, water dik   | 43.60 | 0.00 |
| TRINITY_sp Q54I{smt1     | Probable cycloarten   | 43.60 | 0.00 |
| TRINITY_sp Q8WWRRTN4IP1  | Reticulon-4-interac   | 43.60 | 0.00 |
| TRINITY_sp Q4I8(FGRRES_  | (Acyl-protein thioes  | 43.60 | 0.00 |
| TRINITY_sp P1281hsp16.9  | 16.9 kDa class I he   | 43.60 | 0.00 |
| TRINITY_sp P126YPK1      | Serine/threonine-pr   | 43.60 | 0.00 |
| TRINITY_sp Q6S4MHSPA1B   | Heat shock 70 kDa p   | 43.60 | 0.00 |
| TRINITY_sp Q9FWABC11     | ABC transporter B f   | 43.60 | 0.00 |
| TRINITY_sp Q54Nivmp1     | Vacuole membrane pr   | 43.60 | 0.00 |
| TRINITY_sp Q9H3TPK1      | Thiamin pyrophospho   | 43.60 | 0.00 |
| TRINITY_sp Q680At4g399   | Haloacid dehalogena   | 43.60 | 0.00 |
| TRINITY_sp P577Snrpa1    | U2 small nuclear ri   | 43.60 | 0.00 |
| TRINITY_sp P192adaB      | Methylated-DNA--pro   | 43.60 | 0.00 |

|                          |                     |       |      |
|--------------------------|---------------------|-------|------|
| TRINITY_sp A1K51azo1574  | UPF0061 protein azo | 43.60 | 0.00 |
| TRINITY_sp Q94B7NUDT2    | Nudix hydrolase 2 O | 43.60 | 0.00 |
| TRINITY_sp Q8H13RH14     | DEAD-box ATP-depend | 43.60 | 0.00 |
| TRINITY_sp Q8S2E0s01g072 | Ribose-phosphate py | 43.60 | 0.00 |
| TRINITY_sp Q9TV6rab1     | Ras-related protein | 43.60 | 0.00 |
| TRINITY_sp Q9XY9noxA     | Superoxide-generati | 43.60 | 0.00 |
| TRINITY_sp Q9VH7Ada      | Adenosine deaminase | 43.60 | 0.00 |
| TRINITY_sp Q9SG3ACLA-1   | ATP-citrate synthas | 43.60 | 0.00 |
| TRINITY_sp Q2661-        | cAMP-dependent prot | 43.60 | 0.00 |
| TRINITY_sp B2V65gpsA     | Glycerol-3-phosphat | 43.60 | 0.00 |
| TRINITY_sp Q2QW7Os12g019 | Probable thiamine b | 43.60 | 0.00 |
| TRINITY_sp P9294CLC-D    | Chloride channel pr | 43.60 | 0.00 |
| TRINITY_sp Q9UR9ACT      | Actin, gamma OS=Pen | 43.60 | 0.00 |
| TRINITY_sp O6549XCP1     | Cysteine protease X | 43.60 | 0.00 |
| TRINITY_sp Q8697nramp1   | Metal transporter n | 43.60 | 0.00 |
| TRINITY_sp P1360Atpalpha | Sodium/potassium-tr | 43.60 | 0.00 |
| TRINITY_sp Q0110RAB5A    | Ras-related protein | 43.60 | 0.00 |
| TRINITY_sp O1294RAD54L   | DNA repair and reco | 43.60 | 0.00 |
| TRINITY_sp P2042pyrK     | UMP-CMP kinase OS=D | 43.60 | 0.00 |
| TRINITY_sp Q7ZX7Inle1    | Notchless protein h | 43.60 | 0.00 |
| TRINITY_sp Q24K0IDE      | Insulin-degrading e | 43.60 | 0.00 |
| TRINITY_sp Q1420DYNC1H1  | Cytoplasmic dynein  | 43.60 | 0.00 |
| TRINITY_sp Q9H07TMEM222  | Transmembrane prote | 43.60 | 0.00 |
| TRINITY_sp Q9632ACX4     | Acyl-coenzyme A oxi | 43.60 | 0.00 |
| TRINITY_sp P1262RPL13    | 50S ribosomal prote | 43.60 | 0.00 |
| TRINITY_sp Q0734GAD      | Glutamate decarboxy | 43.60 | 0.00 |
| TRINITY_sp Q9471GSPATT00 | Cathepsin L 1 OS=Pa | 43.60 | 0.00 |
| TRINITY_sp Q8R94pckA     | Phosphoenolpyruvate | 43.60 | 0.00 |
| TRINITY_sp P4018MMF1     | Protein MMF1, mitoc | 43.60 | 0.00 |
| TRINITY_sp Q5JK3Os01g092 | Long chain base bio | 43.60 | 0.00 |
| TRINITY_sp Q9FN0BRR2C    | DExH-box ATP-depend | 43.60 | 0.00 |
| TRINITY_sp Q5RB0PRCP     | Lysosomal Pro-X car | 43.60 | 0.00 |
| TRINITY_sp P5464pkbA     | RAC family serine/t | 43.60 | 0.00 |
| TRINITY_sp Q8TC1RDH11    | Retinol dehydrogena | 43.50 | 0.00 |
| TRINITY_sp Q86A7atp6v1d  | V-type proton ATPas | 43.50 | 0.00 |
| TRINITY_sp A2WY1HK3      | Probable histidine  | 43.50 | 0.00 |
| TRINITY_sp Q9C59IRE1A    | Serine/threonine-pr | 43.50 | 0.00 |
| TRINITY_sp Q9MB1DHC10    | Dynein-1-beta heavy | 43.50 | 0.00 |
| TRINITY_sp Q1457ITPR2    | Inositol 1,4,5-tris | 43.50 | 0.00 |
| TRINITY_sp Q8RY2NUP98A   | Nuclear pore comple | 43.50 | 0.00 |
| TRINITY_sp Q2GA0engB     | Probable GTP-bindin | 43.50 | 0.00 |
| TRINITY_sp P1633Pah      | Phenylalanine-4-hyd | 43.50 | 0.00 |
| TRINITY_sp Q55D1mhisS    | Probable histidine- | 43.50 | 0.00 |
| TRINITY_sp P3640rab2A    | Ras-related protein | 43.50 | 0.00 |
| TRINITY_sp Q8C17Thop1    | Thimet oligopeptida | 43.50 | 0.00 |
| TRINITY_sp Q6ZV7TTLL10   | Inactive polyglycyl | 43.50 | 0.00 |
| TRINITY_sp P0C18Amy3     | Alpha-amylase A typ | 43.50 | 0.00 |
| TRINITY_sp Q5106-        | Uncharacterized pro | 43.50 | 0.00 |
| TRINITY_sp Q3ZB3DEGS1    | Sphingolipid delta( | 43.50 | 0.00 |
| TRINITY_sp Q55G0DDB_G020 | Probable serine/thr | 43.50 | 0.00 |
| TRINITY_sp O8239ANTR1    | Sodium-dependent ph | 43.50 | 0.00 |
| TRINITY_sp A7MB1COMT     | Catechol O-methyltr | 43.50 | 0.00 |
| TRINITY_sp Q6H94alkB2    | Alkane 1-monooxygen | 43.50 | 0.00 |
| TRINITY_sp P5165HSD17B4  | Peroxisomal multifu | 43.50 | 0.00 |
| TRINITY_sp Q5XM2aprA     | Autocrine prolifera | 43.50 | 0.00 |
| TRINITY_sp Q54G6ctdsp12  | CTD small phosphata | 43.50 | 0.00 |

|                            |                     |       |      |
|----------------------------|---------------------|-------|------|
| TRINITY_sp Q54Tfgacy       | Rho GTPase-activati | 43.50 | 0.00 |
| TRINITY_sp Q9MA\ COPZ1     | Coatomer subunit ze | 43.50 | 0.00 |
| TRINITY_sp P153\ RpS27A    | Ubiquitin-40S ribos | 43.50 | 0.00 |
| TRINITY_sp Q54U\ lvsC      | BEACH domain-contai | 43.50 | 0.00 |
| TRINITY_sp Q8N5\ TBC1D19   | TBC1 domain family  | 43.50 | 0.00 |
| TRINITY_sp Q9LX\ GUN4      | Tetrapyrrole-bindin | 43.50 | 0.00 |
| TRINITY_sp Q918\ aurka-b   | Aurora kinase A-B O | 43.50 | 0.00 |
| TRINITY_sp Q9ZVI\ At1g547\ | UPF0603 protein At1 | 43.50 | 0.00 |
| TRINITY_sp O807\ WDR55     | WD repeat-containin | 43.50 | 0.00 |
| TRINITY_sp Q0WP\ At2g410\  | Uncharacterized met | 43.50 | 0.00 |
| TRINITY_sp P426\ DRT111    | DNA-damage-repair/t | 43.50 | 0.00 |
| TRINITY_sp O957\ HERC2     | E3 ubiquitin-protei | 43.50 | 0.00 |
| TRINITY_sp Q54G\ ascc3     | Activating signal c | 43.50 | 0.00 |
| TRINITY_sp Q9FW\ ABCB11    | ABC transporter B f | 43.50 | 0.00 |
| TRINITY_sp Q1RM\ LRRC6     | Protein tilB homolo | 43.50 | 0.00 |
| TRINITY_sp Q9VA\ Slbp      | Histone RNA hairpin | 43.50 | 0.00 |
| TRINITY_sp Q8LR\ HDA18     | Histone deacetylase | 43.50 | 0.00 |
| TRINITY_sp P226\ cela      | Endoglucanase OS=Di | 43.50 | 0.00 |
| TRINITY_sp A6QQ\ ZNF474    | Zinc finger protein | 43.50 | 0.00 |
| TRINITY_sp P137\ hexa1     | Beta-hexosaminidase | 43.50 | 0.00 |
| TRINITY_sp P050\ abpA      | Alpha-actinin A OS= | 43.50 | 0.00 |
| TRINITY_sp Q93Z\ SFH3      | Phosphatidylinosito | 43.50 | 0.00 |
| TRINITY_sp Q7M6\ Kif27     | Kinesin-like protei | 43.50 | 0.00 |
| TRINITY_sp Q9CV\ Arpc2     | Actin-related prote | 43.50 | 0.00 |
| TRINITY_sp A8CV\ tt116     | Tubulin polyglutamy | 43.50 | 0.00 |
| TRINITY_sp F4I8\ GDPD4     | Glycerophosphodiect | 43.50 | 0.00 |
| TRINITY_sp Q5JV\ EFHC1     | EF-hand domain-cont | 43.50 | 0.00 |
| TRINITY_sp Q6K4\ PAP2      | Probable plastid-li | 43.50 | 0.00 |
| TRINITY_sp Q1BK\ adc       | Probable acetoaceta | 43.50 | 0.00 |
| TRINITY_sp O487\ PDIL2-3   | Protein disulfide-i | 43.50 | 0.00 |
| TRINITY_sp Q3E9\ ANTR6     | Probable anion tran | 43.50 | 0.00 |
| TRINITY_sp Q133\ PABPC4    | Polyadenylate-bindi | 43.50 | 0.00 |
| TRINITY_sp C7EX\ ATP8A2    | Phospholipid-transp | 43.50 | 0.00 |
| TRINITY_sp P617\ Vbp1      | Prefoldin subunit 3 | 43.50 | 0.00 |
| TRINITY_sp Q9XY\ noxA      | Superoxide-generati | 43.50 | 0.00 |
| TRINITY_sp O946\ ypt7      | GTP-binding protein | 43.50 | 0.00 |
| TRINITY_sp Q54W\ DDB_G02\  | Probable myosin lig | 43.50 | 0.00 |
| TRINITY_sp P828\ CYP37     | Peptidyl-prolyl cis | 43.50 | 0.00 |
| TRINITY_sp Q9SR\ FAZG1     | Adenine/guanine per | 43.50 | 0.00 |
| TRINITY_sp Q5AV\ ampp      | Probable Xaa-Pro am | 43.50 | 0.00 |
| TRINITY_sp Q389\ KIN10     | SNF1-related protei | 43.50 | 0.00 |
| TRINITY_sp Q6F3\ CPK10     | Calcium-dependent p | 43.50 | 0.00 |
| TRINITY_sp Q54S\ polr1c    | DNA-directed RNA po | 43.40 | 0.00 |
| TRINITY_sp P137\ (fs(1)h   | Homeotic protein fe | 43.40 | 0.00 |
| TRINITY_sp Q6GP\ wdr70     | WD repeat-containin | 43.40 | 0.00 |
| TRINITY_sp B8B7\ D2HGDH    | Probable D-2-hydrox | 43.40 | 0.00 |
| TRINITY_sp Q55A\ (DDB_G02\ | Probable serine/thr | 43.40 | 0.00 |
| TRINITY_sp P863\ RPP14     | Hydroxyacyl-thioest | 43.40 | 0.00 |
| TRINITY_sp Q54V\ elmoB     | ELMO domain-contain | 43.40 | 0.00 |
| TRINITY_sp Q6GM\ itatdn1   | Putative deoxyribon | 43.40 | 0.00 |
| TRINITY_sp Q55C\ sec31     | Protein transport p | 43.40 | 0.00 |
| TRINITY_sp Q8BH\ (-        | UPF0587 protein Cl0 | 43.40 | 0.00 |
| TRINITY_sp P612\ PSME3     | Proteasome activato | 43.40 | 0.00 |
| TRINITY_sp Q54F\ mroh1     | Maestro heat-like r | 43.40 | 0.00 |
| TRINITY_sp O551\ Pdpk1     | 3-phosphoinositide- | 43.40 | 0.00 |
| TRINITY_sp Q86K\ ap2a1-1   | AP-2 complex subuni | 43.40 | 0.00 |



|                            |                     |       |      |
|----------------------------|---------------------|-------|------|
| TRINITY_sp Q551Mzfp11      | Zinc finger protein | 43.40 | 0.00 |
| TRINITY_sp Q1656CAMK4      | Calcium/calmodulin- | 43.40 | 0.00 |
| TRINITY_sp Q9C92At3g0865   | Putative zinc trans | 43.40 | 0.00 |
| TRINITY_sp Q23FETTL3C      | Tubulin glycyrase 3 | 43.40 | 0.00 |
| TRINITY_sp Q4KL\chpt1      | Cholinephosphotrans | 43.40 | 0.00 |
| TRINITY_sp O1597SCGOA      | Guanine nucleotide- | 43.40 | 0.00 |
| TRINITY_sp P1005-          | Caricain OS=Carica  | 43.40 | 0.00 |
| TRINITY_sp Q8H1HDGP3       | DAR GTPase 3, chlor | 43.40 | 0.00 |
| TRINITY_sp Q9DE1BAZ2B      | Bromodomain adjacen | 43.40 | 0.00 |
| TRINITY_sp B1MGFMAB_3787   | Putative S-adenosyl | 43.40 | 0.00 |
| TRINITY_sp Q6NM2UTR5       | UDP-galactose/UDP-g | 43.40 | 0.00 |
| TRINITY_sp F4HX1PLA1       | Phospholipase A I O | 43.40 | 0.00 |
| TRINITY_sp P3026BpOF4_1    | Uncharacterized ami | 43.40 | 0.00 |
| TRINITY_sp Q54I8eif2b1     | Translation initiat | 43.40 | 0.00 |
| TRINITY_sp Q0J07Os09g052   | Probable 1-acylglyc | 43.40 | 0.00 |
| TRINITY_sp Q9HDVpmc1       | Calcium-transportin | 43.40 | 0.00 |
| TRINITY_sp Q9LT\VP59A      | Vacuolar protein so | 43.40 | 0.00 |
| TRINITY_sp Q7XA(D1BLIC     | Cytoplasmic dynein  | 43.40 | 0.00 |
| TRINITY_sp Q9FGMFTSH11     | ATP-dependent zinc  | 43.40 | 0.00 |
| TRINITY_sp Q75A2ARF1       | ADP-ribosylation fa | 43.40 | 0.00 |
| TRINITY_sp Q9XYI\fcfA      | Probable C-terminal | 43.40 | 0.00 |
| TRINITY_sp Q1RJUicd        | Isocitrate dehydrog | 43.40 | 0.00 |
| TRINITY_sp A1A4\ATP9B      | Probable phospholip | 43.40 | 0.00 |
| TRINITY_sp Q93V\IPABN1     | Polyadenylate-bindi | 43.40 | 0.00 |
| TRINITY_sp Q90W5\dup1-b    | Dual specificity pr | 43.40 | 0.00 |
| TRINITY_sp Q7LH\TY3B-I     | Transposon Ty3-I Ga | 43.40 | 0.00 |
| TRINITY_sp O1543ABCC4      | Multidrug resistanc | 43.40 | 0.00 |
| TRINITY_sp Q9SL\RAD50      | DNA repair protein  | 43.40 | 0.00 |
| TRINITY_sp O603\AQR        | Intron-binding prot | 43.40 | 0.00 |
| TRINITY_sp O9428\hmt2      | Sulfide:quinone oxi | 43.40 | 0.00 |
| TRINITY_sp Q6AYH\Isy1      | Pre-mRNA-splicing f | 43.40 | 0.00 |
| TRINITY_sp Q8L7\NAD-ME2    | NAD-dependent malic | 43.40 | 0.00 |
| TRINITY_sp P2268-          | Chlorophyll a-b bin | 43.40 | 0.00 |
| TRINITY_sp Q1419WRN        | Werner syndrome ATP | 43.40 | 0.00 |
| TRINITY_sp Q9FW\HAC12      | Histone acetyltrans | 43.40 | 0.00 |
| TRINITY_sp Q8IN\Gyc88E     | Soluble guanylate c | 43.40 | 0.00 |
| TRINITY_sp P0432\pol       | Retrovirus-related  | 43.40 | 0.00 |
| TRINITY_sp Q9LS\ATL77      | RING-H2 finger prot | 43.30 | 0.00 |
| TRINITY_sp P2999\Itp-r837  | Inositol 1,4,5-tris | 43.30 | 0.00 |
| TRINITY_sp O1414\tps2      | Trehalose-phosphata | 43.30 | 0.00 |
| TRINITY_sp Q8NE\DENND6B    | Protein DENND6B OS= | 43.30 | 0.00 |
| TRINITY_sp Q1211\SGT2      | Small glutamine-ric | 43.30 | 0.00 |
| TRINITY_sp Q243\Diap2      | Death-associated in | 43.30 | 0.00 |
| TRINITY_sp Q55G\cpnD       | Copine-D OS=Dictyos | 43.30 | 0.00 |
| TRINITY_sp P8409RHOG       | Rho-related GTP-bin | 43.30 | 0.00 |
| TRINITY_sp F0NB\SiRe_144   | Protein-lysine N-me | 43.30 | 0.00 |
| TRINITY_sp P3508\cbpP      | Calcium-binding pro | 43.30 | 0.00 |
| TRINITY_sp Q4KL\btbf314    | Transcription facto | 43.30 | 0.00 |
| TRINITY_sp Q54TH\DDDB_G028 | Golgi to ER traffic | 43.30 | 0.00 |
| TRINITY_sp Q6137\Ift88     | Intraflagellar tran | 43.30 | 0.00 |
| TRINITY_sp Q9SF9\RABE1E    | Ras-related protein | 43.30 | 0.00 |
| TRINITY_sp Q54P\abcC8      | ABC transporter C f | 43.30 | 0.00 |
| TRINITY_sp P049\Gstm1      | Glutathione S-trans | 43.30 | 0.00 |
| TRINITY_sp Q54M\lgpt       | Probable alanine am | 43.30 | 0.00 |
| TRINITY_sp Q9234\SPAC6G9   | Uncharacterized pro | 43.30 | 0.00 |
| TRINITY_sp Q94B\NDB2       | External alternativ | 43.30 | 0.00 |

|                          |                      |       |      |
|--------------------------|----------------------|-------|------|
| TRINITY_sp O1393trm4b    | Multisite-specific   | 43.30 | 0.00 |
| TRINITY_sp Q0II1NAA50    | N-alpha-acetyltrans  | 43.30 | 0.00 |
| TRINITY_sp Q9D94Atg7     | Ubiquitin-like modi  | 43.30 | 0.00 |
| TRINITY_sp P6234CPK1     | Calcium-dependent p  | 43.30 | 0.00 |
| TRINITY_sp Q9931TY3B-G   | Transposon Ty3-G Ga  | 43.30 | 0.00 |
| TRINITY_sp Q6421diexf    | Digestive organ exp  | 43.30 | 0.00 |
| TRINITY_sp Q5SK1trmI     | tRNA (adenine(58))-N | 43.30 | 0.00 |
| TRINITY_sp Q9S75LOG2     | Probable E3 ubiquit  | 43.30 | 0.00 |
| TRINITY_sp Q9411BON1     | Protein BONZAI 1 OS  | 43.30 | 0.00 |
| TRINITY_sp Q7X91AERO2    | Endoplasmic reticul  | 43.30 | 0.00 |
| TRINITY_sp Q06A1UCHL3    | Ubiquitin carboxyl-  | 43.30 | 0.00 |
| TRINITY_sp P5456yqjY     | Uncharacterized pro  | 43.30 | 0.00 |
| TRINITY_sp Q1732W        | Protein white OS=Ce  | 43.30 | 0.00 |
| TRINITY_sp P0809top2     | DNA topoisomerase 2  | 43.30 | 0.00 |
| TRINITY_sp O4391AIRE     | Autoimmune regulato  | 43.30 | 0.00 |
| TRINITY_sp Q9SL1DGAT1    | Diacylglycerol O-ac  | 43.30 | 0.00 |
| TRINITY_sp Q0783GPI13    | GPI ethanolamine ph  | 43.30 | 0.00 |
| TRINITY_sp Q8RA7mutS     | DNA mismatch repair  | 43.30 | 0.00 |
| TRINITY_sp Q84WEAt5g0450 | Glycosyltransferase  | 43.30 | 0.00 |
| TRINITY_sp Q9FH4TAF14B   | Transcription initi  | 43.30 | 0.00 |
| TRINITY_sp P0CR3SEC23    | Protein transport p  | 43.30 | 0.00 |
| TRINITY_sp Q4692tcdA     | tRNA threonylcarbam  | 43.30 | 0.00 |
| TRINITY_sp Q1AU6rplM     | 50S ribosomal prote  | 43.30 | 0.00 |
| TRINITY_sp Q9NR3DDX21    | Nucleolar RNA helic  | 43.30 | 0.00 |
| TRINITY_sp P5509Abcd3    | ATP-binding cassett  | 43.30 | 0.00 |
| TRINITY_sp Q8LS3Os03g013 | Probable signal rec  | 43.30 | 0.00 |
| TRINITY_sp Q54S1tmem104  | Transmembrane prote  | 43.30 | 0.00 |
| TRINITY_sp F4KH3CTPA1    | Carboxyl-terminal-p  | 43.30 | 0.00 |
| TRINITY_sp Q9XF4-        | Profilin-3 OS=Malus  | 43.30 | 0.00 |
| TRINITY_sp Q86S3DHDDS    | Dehydrodolichyl dip  | 43.30 | 0.00 |
| TRINITY_sp Q8LB7PHR2     | Blue-light photorec  | 43.30 | 0.00 |
| TRINITY_sp Q9493PSAO     | Photosystem I subun  | 43.30 | 0.00 |
| TRINITY_sp Q23M1Tt116a   | Probable beta-tubul  | 43.30 | 0.00 |
| TRINITY_sp Q7X91PIE1     | Protein PHOTOPERIOD  | 43.30 | 0.00 |
| TRINITY_sp Q5Z91IMCEL1   | Probable isoprenylc  | 43.30 | 0.00 |
| TRINITY_sp Q9SZ1FACA10   | Calcium-transportin  | 43.30 | 0.00 |
| TRINITY_sp O2355BAM3     | Beta-amylase 3, chl  | 43.30 | 0.00 |
| TRINITY_sp Q0952tag-124  | Probable tRNA pseud  | 43.30 | 0.00 |
| TRINITY_sp Q7TM1Slc35f2  | Solute carrier fami  | 43.30 | 0.00 |
| TRINITY_sp Q8VY1TIM50    | Mitochondrial impor  | 43.30 | 0.00 |
| TRINITY_sp P222(-        | Pyruvate kinase, cy  | 43.30 | 0.00 |
| TRINITY_sp Q54W1mtyrS    | Probable tyrosine--  | 43.30 | 0.00 |
| TRINITY_sp Q6GM3plaa     | Phospholipase A-2-a  | 43.30 | 0.00 |
| TRINITY_sp O2279RPL28    | 50S ribosomal prote  | 43.30 | 0.00 |
| TRINITY_sp A5GE3rlmN     | Dual-specificity RN  | 43.30 | 0.00 |
| TRINITY_sp C0LG3At4g3618 | Probable LRR recept  | 43.30 | 0.00 |
| TRINITY_sp P3194HNRNPH3  | Heterogeneous nucle  | 43.30 | 0.00 |
| TRINITY_sp Q6346Prpsap1  | Phosphoribosyl pyro  | 43.30 | 0.00 |
| TRINITY_sp Q54N1voplah   | 5-oxoprolinase OS=D  | 43.30 | 0.00 |
| TRINITY_sp Q7TX1pkps15/1 | Phenolphthiocerol s  | 43.20 | 0.00 |
| TRINITY_sp Q86Y3CPNE8    | Copine-8 OS=Homo sa  | 43.20 | 0.00 |
| TRINITY_sp Q0914bt1      | Fibroblast growth f  | 43.20 | 0.00 |
| TRINITY_sp A1XD3stip-1   | Septin and tuftelin  | 43.20 | 0.00 |
| TRINITY_sp A7SK1vlg17156 | Eukaryotic translat  | 43.20 | 0.00 |
| TRINITY_sp P5293lacA     | Galactoside O-acety  | 43.20 | 0.00 |
| TRINITY_sp P4963Kcnj10   | ATP-sensitive inwar  | 43.20 | 0.00 |

|                           |                     |       |      |
|---------------------------|---------------------|-------|------|
| TRINITY_sp O4309-         | Kinesin heavy chain | 43.20 | 0.00 |
| TRINITY_sp Q8BU\Gpr107    | Protein GPR107 OS=M | 43.20 | 0.00 |
| TRINITY_sp P5465mvpB      | Major vault protein | 43.20 | 0.00 |
| TRINITY_sp Q7ZT\Ibcs11    | Mitochondrial chape | 43.20 | 0.00 |
| TRINITY_sp Q5QN\BZIP02    | Basic leucine zippe | 43.20 | 0.00 |
| TRINITY_sp P4356AGX1      | Alanine--glyoxylate | 43.20 | 0.00 |
| TRINITY_sp Q863\OXR1      | Serine/threonine-pr | 43.20 | 0.00 |
| TRINITY_sp Q9FG\GCP3      | Gamma-tubulin compl | 43.20 | 0.00 |
| TRINITY_sp Q9SR\CLPS3     | Protein CLP1 homolo | 43.20 | 0.00 |
| TRINITY_sp Q9625RpS7      | 40S ribosomal prote | 43.20 | 0.00 |
| TRINITY_sp Q993\TY3B-G    | Transposon Ty3-G Ga | 43.20 | 0.00 |
| TRINITY_sp Q1343SF3B2     | Splicing factor 3B  | 43.20 | 0.00 |
| TRINITY_sp Q3TT\Plb1      | Phospholipase B1, m | 43.20 | 0.00 |
| TRINITY_sp Q9FN\At5g0642  | Zinc finger CCCH do | 43.20 | 0.00 |
| TRINITY_sp Q6NX\Dennd5b   | DENN domain-contain | 43.20 | 0.00 |
| TRINITY_sp Q9FP\FEDR1     | Serine/threonine-pr | 43.20 | 0.00 |
| TRINITY_sp P6128NEDD8     | NEDD8 OS=Bos taurus | 43.20 | 0.00 |
| TRINITY_sp Q9M2\CSPL15    | Squamosa promoter-b | 43.20 | 0.00 |
| TRINITY_sp Q9LD5TIF3A1    | Eukaryotic translat | 43.20 | 0.00 |
| TRINITY_sp Q9LE8IRE       | Probable serine/thr | 43.20 | 0.00 |
| TRINITY_sp Q9067THYN1     | Thymocyte nuclear p | 43.20 | 0.00 |
| TRINITY_sp Q5LR\dmdb      | 3-methylmercaptopro | 43.20 | 0.00 |
| TRINITY_sp Q55D\IDDB_G027 | Histidine protein m | 43.20 | 0.00 |
| TRINITY_sp Q9FL\TNS2      | Ribonuclease TUDOR  | 43.20 | 0.00 |
| TRINITY_sp Q5548slr0537   | Uncharacterized sug | 43.10 | 0.00 |
| TRINITY_sp B7PX\spas      | Spastin OS=Ixodes s | 43.10 | 0.00 |
| TRINITY_sp Q3V0\Ilrrc43   | Leucine-rich repeat | 43.10 | 0.00 |
| TRINITY_sp P4766MG425     | Probable ATP-depend | 43.10 | 0.00 |
| TRINITY_sp Q91Y\Irnf126   | E3 ubiquitin-protei | 43.10 | 0.00 |
| TRINITY_sp P2465PTP       | Tyrosine-protein ph | 43.10 | 0.00 |
| TRINITY_sp Q6GN\mrm       | Nurim OS=Xenopus la | 43.10 | 0.00 |
| TRINITY_sp Q197\IF22B5.1  | Calcium load-activa | 43.10 | 0.00 |
| TRINITY_sp Q54V\IDDB_G028 | Probable serine/thr | 43.10 | 0.00 |
| TRINITY_sp Q5EB5Wdr70     | WD repeat-containin | 43.10 | 0.00 |
| TRINITY_sp O8275AGL24     | MADS-box protein AG | 43.10 | 0.00 |
| TRINITY_sp Q9WU\Akt3      | RAC-gamma serine/th | 43.10 | 0.00 |
| TRINITY_sp Q54Q\FerkB     | Extracellular signa | 43.10 | 0.00 |
| TRINITY_sp Q9LZ\IRABE1D   | Ras-related protein | 43.10 | 0.00 |
| TRINITY_sp F4J8\FRRP5     | rRNA biogenesis pro | 43.10 | 0.00 |
| TRINITY_sp Q8MV\FgbpC     | Cyclic GMP-binding  | 43.10 | 0.00 |
| TRINITY_sp Q9JM\Dnaja4    | DnaJ homolog subfam | 43.10 | 0.00 |
| TRINITY_sp Q84Q\FOPR1     | 12-oxophytodienoate | 43.10 | 0.00 |
| TRINITY_sp P1985RABA5E    | Ras-related protein | 43.10 | 0.00 |
| TRINITY_sp P2818RABA5C    | Ras-related protein | 43.10 | 0.00 |
| TRINITY_sp P0257-         | Actin-1 OS=Acantham | 43.10 | 0.00 |
| TRINITY_sp Q2462ref(2)P   | Protein ref(2)P OS= | 43.10 | 0.00 |
| TRINITY_sp Q9LT\FRDL2     | Probable cysteine p | 43.10 | 0.00 |
| TRINITY_sp P9052alg1      | Chitobiosyldiphosph | 43.10 | 0.00 |
| TRINITY_sp P1816splA      | Dual specificity pr | 43.10 | 0.00 |
| TRINITY_sp B5Y95truA      | tRNA pseudouridine  | 43.10 | 0.00 |
| TRINITY_sp P7885SPBC16A3  | Probable lipase C16 | 43.10 | 0.00 |
| TRINITY_sp P0432pol       | Retrovirus-related  | 43.10 | 0.00 |
| TRINITY_sp Q6P2\dnajc2    | DnaJ homolog subfam | 43.10 | 0.00 |
| TRINITY_sp Q8GY\FRPN9B    | 26S proteasome non- | 43.10 | 0.00 |
| TRINITY_sp Q9UG\FARP2     | Poly [ADP-ribose] p | 43.10 | 0.00 |
| TRINITY_sp Q0P5Vvps8      | Vacuolar protein so | 43.10 | 0.00 |

|                  |           |                     |       |      |
|------------------|-----------|---------------------|-------|------|
| TRINITY_sp Q70FC | DODA      | 4,5-DOPA dioxygenas | 43.10 | 0.00 |
| TRINITY_sp Q9MAU | TAF6      | Transcription initi | 43.10 | 0.00 |
| TRINITY_sp Q8TAC | RFESD     | Rieske domain-conta | 43.10 | 0.00 |
| TRINITY_sp Q6IN  | semc2-a   | ER membrane protei  | 43.10 | 0.00 |
| TRINITY_sp Q3ED  | TPST      | Protein-tyrosine su | 43.10 | 0.00 |
| TRINITY_sp Q8H1  | XCT       | Protein XAP5 CIRCAD | 43.10 | 0.00 |
| TRINITY_sp P335  | RpS7      | 40S ribosomal prote | 43.10 | 0.00 |
| TRINITY_sp Q54P  | (abkD     | Probable serine/thr | 43.10 | 0.00 |
| TRINITY_sp Q96N  | ZMAT2     | Zinc finger matrin- | 43.10 | 0.00 |
| TRINITY_sp P470  | PRY3      | Cell wall protein P | 43.10 | 0.00 |
| TRINITY_sp Q54K  | rgaA      | Ras GTPase-activati | 43.10 | 0.00 |
| TRINITY_sp P146  | Pde4c     | cAMP-specific 3',5' | 43.10 | 0.00 |
| TRINITY_sp P562  | pcrA      | ATP-dependent DNA h | 43.10 | 0.00 |
| TRINITY_sp Q9SL  | SLY1      | SEC1 family transpo | 43.10 | 0.00 |
| TRINITY_sp Q7X9  | PIE1      | Protein PHOTOPERIOD | 43.10 | 0.00 |
| TRINITY_sp Q94A  | STR6      | Rhodanese-like doma | 43.10 | 0.00 |
| TRINITY_sp Q8GX  | FND C1    | Alternative NAD(P)H | 43.10 | 0.00 |
| TRINITY_sp C4L8  | adk       | Adenylate kinase OS | 43.10 | 0.00 |
| TRINITY_sp O225  | STY8      | Serine/threonine-pr | 43.10 | 0.00 |
| TRINITY_sp Q8W4  | IBPG2     | GTP-binding protein | 43.10 | 0.00 |
| TRINITY_sp Q17R  | (RAB21    | Ras-related protein | 43.10 | 0.00 |
| TRINITY_sp Q8LI  | Os07g062  | Putative MYST-like  | 43.10 | 0.00 |
| TRINITY_sp Q8H6  | FSP T16   | FACT complex subuni | 43.10 | 0.00 |
| TRINITY_sp Q9SC  | (tubA     | Tubulin alpha chain | 43.10 | 0.00 |
| TRINITY_sp P109  | -         | Retrovirus-related  | 43.10 | 0.00 |
| TRINITY_sp Q8IY  | (DHX37    | Probable ATP-depend | 43.10 | 0.00 |
| TRINITY_sp Q605  | (IGHM BP2 | DNA-binding protein | 43.10 | 0.00 |
| TRINITY_sp Q54G  | (ctd spl2 | CTD small phosphata | 43.10 | 0.00 |
| TRINITY_sp P252  | -         | Cysteine proteinase | 43.10 | 0.00 |
| TRINITY_sp Q9V1  | (PYRAB062 | tRNA (cytosine(49)- | 43.00 | 0.00 |
| TRINITY_sp Q54P  | (osbI     | Oxysterol-binding p | 43.00 | 0.00 |
| TRINITY_sp P469  | GYG1      | Glycogenin-1 OS=Hom | 43.00 | 0.00 |
| TRINITY_sp Q8T1  | (omt3     | O-methyltransferase | 43.00 | 0.00 |
| TRINITY_sp Q16Q  | (icoq2    | 4-hydroxybenzoate p | 43.00 | 0.00 |
| TRINITY_sp P533  | (CAB4     | Phosphopantetheine  | 43.00 | 0.00 |
| TRINITY_sp Q9SB  | (AP4M     | AP-4 complex subuni | 43.00 | 0.00 |
| TRINITY_sp Q54V  | (vps55    | Vacuolar protein so | 43.00 | 0.00 |
| TRINITY_sp Q9Z2  | (Tulp1    | Tubby-related prote | 43.00 | 0.00 |
| TRINITY_sp O142  | (SPAC6B12 | Uncharacterized ami | 43.00 | 0.00 |
| TRINITY_sp P322  | (rasS     | Ras-like protein ra | 43.00 | 0.00 |
| TRINITY_sp A1CV  | (gar1     | H/ACA ribonucleopro | 43.00 | 0.00 |
| TRINITY_sp Q102  | (SPAC4G9  | Uncharacterized mit | 43.00 | 0.00 |
| TRINITY_sp A6QR  | (RAB6B    | Ras-related protein | 43.00 | 0.00 |
| TRINITY_sp Q54S  | (wdr3     | WD repeat-containin | 43.00 | 0.00 |
| TRINITY_sp Q4AE  | (DNASE1   | Deoxyribonuclease-1 | 43.00 | 0.00 |
| TRINITY_sp Q5EA  | (MFAP1    | Microfibrillar-asso | 43.00 | 0.00 |
| TRINITY_sp Q5U2  | (DIS31    | DIS3-like exonuclea | 43.00 | 0.00 |
| TRINITY_sp Q104  | (stm1     | Seven transmembrane | 43.00 | 0.00 |
| TRINITY_sp B0G1  | (rabggtb  | Probable geranylger | 43.00 | 0.00 |
| TRINITY_sp Q9BX  | (PAPPA2   | Pappalysin-2 OS=Hom | 43.00 | 0.00 |
| TRINITY_sp Q8BR  | (Man2a2   | Alpha-mannosidase 2 | 43.00 | 0.00 |
| TRINITY_sp Q8RW  | (NHX6     | Sodium/hydrogen exc | 43.00 | 0.00 |
| TRINITY_sp Q54R  | (shkA     | Dual specificity pr | 43.00 | 0.00 |
| TRINITY_sp Q8GX  | (VPS20.1  | Vacuolar protein so | 43.00 | 0.00 |
| TRINITY_sp Q6JQ  | (ACAD10   | Acyl-CoA dehydrogen | 43.00 | 0.00 |
| TRINITY_sp D4AZ  | (PAC1     | Nuclear distributio | 43.00 | 0.00 |

|                  |           |                       |       |      |
|------------------|-----------|-----------------------|-------|------|
| TRINITY_sp P2383 | SCO1      | Protein SCO1, mitoc   | 43.00 | 0.00 |
| TRINITY_sp P3905 | -         | Dynein beta chain,    | 43.00 | 0.00 |
| TRINITY_sp Q9UVM | MRE11     | Double-strand break   | 43.00 | 0.00 |
| TRINITY_sp P4325 | COP1      | E3 ubiquitin-protei   | 43.00 | 0.00 |
| TRINITY_sp Q8TD  | (BRSK1    | Serine/threonine-pr   | 43.00 | 0.00 |
| TRINITY_sp O744  | (taf6     | Transcription initi   | 43.00 | 0.00 |
| TRINITY_sp Q9ZR  | (FH       | Frataxin, mitochond   | 43.00 | 0.00 |
| TRINITY_sp Q8L5  | (CAND1    | Cullin-associated N   | 43.00 | 0.00 |
| TRINITY_sp Q9M1  | (ABCB21   | ABC transporter B f   | 43.00 | 0.00 |
| TRINITY_sp Q9PL  | (ribD     | Riboflavin biosynth   | 43.00 | 0.00 |
| TRINITY_sp P5994 | Sirt6     | NAD-dependent prote   | 43.00 | 0.00 |
| TRINITY_sp P4861 | pelo      | Protein pelota OS=D   | 43.00 | 0.00 |
| TRINITY_sp Q9FL  | (AGD5     | Probable ADP-ribosy   | 43.00 | 0.00 |
| TRINITY_sp Q54V  | (odhA     | Probable 2-oxogluta   | 43.00 | 0.00 |
| TRINITY_sp O807  | (At1g6042 | Probable nucleoredo   | 43.00 | 0.00 |
| TRINITY_sp O741  | (pop3     | Target of rapamycin   | 43.00 | 0.00 |
| TRINITY_sp Q9FY  | (PAO      | Pheophorbide a oxyg   | 43.00 | 0.00 |
| TRINITY_sp O154  | (ABCC4    | Multidrug resistanc   | 43.00 | 0.00 |
| TRINITY_sp P1915 | Gstp1     | Glutathione S-trans   | 43.00 | 0.00 |
| TRINITY_sp Q9ATE | (ADA2B    | Transcriptional ada   | 43.00 | 0.00 |
| TRINITY_sp Q5A5  | (NIK1     | Histidine protein k   | 43.00 | 0.00 |
| TRINITY_sp Q2H5  | (TMA22    | Translation machine   | 43.00 | 0.00 |
| TRINITY_sp O942  | (SPBC887  | Probable phospholip   | 43.00 | 0.00 |
| TRINITY_sp P0A9  | (adhE     | Aldehyde-alcohol de   | 43.00 | 0.00 |
| TRINITY_sp Q9SH  | (LSG1-1   | GTPase LSG1-1 OS=Ar   | 43.00 | 0.00 |
| TRINITY_sp Q6T3  | (Npc111   | Niemann-Pick C1-lik   | 43.00 | 0.00 |
| TRINITY_sp P307  | (ZMO1242  | Uncharacterized pro   | 43.00 | 0.00 |
| TRINITY_sp O049  | (-        | Alpha-glucosidase O   | 43.00 | 0.00 |
| TRINITY_sp O751  | (KDM4A    | Lysine-specific dem   | 43.00 | 0.00 |
| TRINITY_sp Q7LH  | (TY3B-I   | Transposon Ty3-I Ga   | 43.00 | 0.00 |
| TRINITY_sp P9WQ  | (treY     | Putative maltooligo   | 42.90 | 0.00 |
| TRINITY_sp Q0VG  | (Gdpd1    | Glycerophosphodiester | 42.90 | 0.00 |
| TRINITY_sp Q9UL  | (HECTD1   | E3 ubiquitin-protei   | 42.90 | 0.00 |
| TRINITY_sp Q5ZI  | (TBCD     | Tubulin-specific ch   | 42.90 | 0.00 |
| TRINITY_sp Q3S4  | (AHK5     | Histidine kinase 5    | 42.90 | 0.00 |
| TRINITY_sp Q9WY  | (TM_0508  | Uncharacterized pro   | 42.90 | 0.00 |
| TRINITY_sp Q9FN  | (BGAL10   | Beta-galactosidase    | 42.90 | 0.00 |
| TRINITY_sp A8WH  | (narfl    | Cytosolic Fe-S clus   | 42.90 | 0.00 |
| TRINITY_sp Q9XG  | (ARAC9    | Rac-like GTP-bindin   | 42.90 | 0.00 |
| TRINITY_sp Q9GZ  | (FSEN6    | Sentrin-specific pr   | 42.90 | 0.00 |
| TRINITY_sp Q769  | (empA     | Transmembrane emp24   | 42.90 | 0.00 |
| TRINITY_sp Q124  | (TFC7     | Transcription facto   | 42.90 | 0.00 |
| TRINITY_sp Q3TW  | (Wdr70    | WD repeat-containin   | 42.90 | 0.00 |
| TRINITY_sp Q96N  | (TTC14    | Tetratricopeptide r   | 42.90 | 0.00 |
| TRINITY_sp Q2MH  | (EHT1     | Serine/threonine-pr   | 42.90 | 0.00 |
| TRINITY_sp Q8GX  | (At1g0135 | Zinc finger CCCH do   | 42.90 | 0.00 |
| TRINITY_sp Q0JL  | (Os01g061 | Probable protein ph   | 42.90 | 0.00 |
| TRINITY_sp P312  | (pab1     | Polyadenylate-bindi   | 42.90 | 0.00 |
| TRINITY_sp O133  | (ded1     | ATP-dependent RNA h   | 42.90 | 0.00 |
| TRINITY_sp P4325 | COP1      | E3 ubiquitin-protei   | 42.90 | 0.00 |
| TRINITY_sp Q8WT  | (F DUSP19 | Dual specificity pr   | 42.90 | 0.00 |
| TRINITY_sp Q95Y  | (IpefB    | Penta-EF hand domai   | 42.90 | 0.00 |
| TRINITY_sp Q54Y  | (dhkJ     | Hybrid signal trans   | 42.90 | 0.00 |
| TRINITY_sp Q54W  | (pI dB    | Phospholipase D B O   | 42.90 | 0.00 |
| TRINITY_sp Q9FIV | (BGLU42   | Beta-glucosidase 42   | 42.90 | 0.00 |
| TRINITY_sp Q6ZT  | (TLL7     | Tubulin polyglutamy   | 42.90 | 0.00 |

|                          |                      |       |      |
|--------------------------|----------------------|-------|------|
| TRINITY_sp Q9H49PIGU     | Phosphatidylinosito  | 42.90 | 0.00 |
| TRINITY_sp A9CB2ZNF259   | Zinc finger protein  | 42.90 | 0.00 |
| TRINITY_sp Q9BW3TPPP3    | Tubulin polymerizat  | 42.90 | 0.00 |
| TRINITY_sp Q1824rap-1    | Ras-related protein  | 42.90 | 0.00 |
| TRINITY_sp Q86JHrab5A    | Ras-related protein  | 42.90 | 0.00 |
| TRINITY_sp Q29AAGA17800  | Leishmanolysin-like  | 42.90 | 0.00 |
| TRINITY_sp Q8BXIArfrp1   | ADP-ribosylation fa  | 42.90 | 0.00 |
| TRINITY_sp P3528Rab23    | Ras-related protein  | 42.90 | 0.00 |
| TRINITY_sp P4685yhhW     | Quercetin 2,3-dioxy  | 42.90 | 0.00 |
| TRINITY_sp P2207bglA     | Beta-glucosidase A   | 42.90 | 0.00 |
| TRINITY_sp Q2368gcy-5    | Receptor-type guany  | 42.90 | 0.00 |
| TRINITY_sp P1608NIA1     | Nitrate reductase [  | 42.90 | 0.00 |
| TRINITY_sp A2ARIPpip5k1  | Inositol hexakispho  | 42.90 | 0.00 |
| TRINITY_sp Q9W79cpsf2    | Cleavage and polyad  | 42.90 | 0.00 |
| TRINITY_sp Q9VQICG9662   | Putative oligosacch  | 42.90 | 0.00 |
| TRINITY_sp O2855hmgA     | 3-hydroxy-3-methylg  | 42.90 | 0.00 |
| TRINITY_sp P6781SEC11A   | Signal peptidase co  | 42.90 | 0.00 |
| TRINITY_sp Q557HDDB_G027 | UPF0505 protein OS=  | 42.90 | 0.00 |
| TRINITY_sp Q9ER7SMC4     | Structural maintena  | 42.90 | 0.00 |
| TRINITY_sp O2215GOS12    | Golgi SNAP receptor  | 42.90 | 0.00 |
| TRINITY_sp Q3232ybiA     | N-glycosidase YbiA   | 42.90 | 0.00 |
| TRINITY_sp O1404SPAC2C4  | Putative tRNA 2'-ph  | 42.90 | 0.00 |
| TRINITY_sp Q55CIDDB_G027 | Probable NADH dehyd  | 42.90 | 0.00 |
| TRINITY_sp F4JL1IMPA2    | Importin subunit al  | 42.90 | 0.00 |
| TRINITY_sp Q6439ATP12A   | Potassium-transport  | 42.90 | 0.00 |
| TRINITY_sp P2271Gucylb2  | Guanylate cyclase s  | 42.90 | 0.00 |
| TRINITY_sp Q9C6IKCS5     | 3-ketoacyl-CoA synt  | 42.90 | 0.00 |
| TRINITY_sp P2346CYR1     | Adenylate cyclase O  | 42.90 | 0.00 |
| TRINITY_sp Q8L7MTUN      | UDP-glycosyltransfe  | 42.90 | 0.00 |
| TRINITY_sp P9447ynbB     | Uncharacterized pro  | 42.90 | 0.00 |
| TRINITY_sp Q6DF6isoc2    | Isochorismatase dom  | 42.90 | 0.00 |
| TRINITY_sp Q9UR(Tf2-11   | Transposon Tf2-11 p  | 42.90 | 0.00 |
| TRINITY_sp Q9Y21MTMR7    | Myotubularin-relate  | 42.90 | 0.00 |
| TRINITY_sp P4262yqjG     | Glutathionyl-hydroq  | 42.90 | 0.00 |
| TRINITY_sp Q4R53CELF4    | CUGBP Elav-like fam  | 42.90 | 0.00 |
| TRINITY_sp P4081USP8     | Ubiquitin carboxyl-  | 42.90 | 0.00 |
| TRINITY_sp Q7PQVAGAP0023 | ADP,ATP carrier pro  | 42.90 | 0.00 |
| TRINITY_sp Q9LK1UVH1     | DNA repair endonucl  | 42.90 | 0.00 |
| TRINITY_sp Q8LPQABC28    | ABC transporter B f  | 42.90 | 0.00 |
| TRINITY_sp Q9LM2HRD3A    | ERAD-associated E3   | 42.90 | 0.00 |
| TRINITY_sp A4QNFleng8    | Leukocyte receptor   | 42.90 | 0.00 |
| TRINITY_sp P4877uapC     | Purine permease OS=  | 42.90 | 0.00 |
| TRINITY_sp Q5XINTraf3ip1 | TRAF3-interacting p  | 42.90 | 0.00 |
| TRINITY_sp B5BU2pfl3     | Protein kintoun OS=  | 42.90 | 0.00 |
| TRINITY_sp Q9C79AERO1    | Endoplasmic reticul  | 42.90 | 0.00 |
| TRINITY_sp P1097-        | Retrovirus-related   | 42.90 | 0.00 |
| TRINITY_sp P1097-        | Retrovirus-related   | 42.90 | 0.00 |
| TRINITY_sp Q7LH(TY3B-I   | Transposon Ty3-I Ga  | 42.90 | 0.00 |
| TRINITY_sp Q5566mad211-1 | Mitotic spindle ass  | 42.90 | 0.00 |
| TRINITY_sp P0423CD74     | HLA class II histoc  | 42.90 | 0.00 |
| TRINITY_sp Q6NSMzgc:661  | (Serine/threonine-pr | 42.90 | 0.00 |
| TRINITY_sp Q2YDFANAPC10  | Anaphase-promoting   | 42.90 | 0.00 |
| TRINITY_sp P3396bsr      | Blasticidin-S deami  | 42.90 | 0.00 |
| TRINITY_sp A5DIIDHH1     | ATP-dependent RNA h  | 42.90 | 0.00 |
| TRINITY_sp Q94ADLD       | D-lactate dehydroge  | 42.80 | 0.00 |
| TRINITY_sp Q9UJ8HACL1    | 2-hydroxyacyl-CoA 1  | 42.80 | 0.00 |

|                          |                       |       |      |
|--------------------------|-----------------------|-------|------|
| TRINITY_sp Q9USVSPBC21B1 | Uncharacterized pro   | 42.80 | 0.00 |
| TRINITY_sp Q9VHYTaf7     | Transcription initi   | 42.80 | 0.00 |
| TRINITY_sp Q9SVzAt4g314f | Coatomer subunit be   | 42.80 | 0.00 |
| TRINITY_sp Q55E(sys1     | Protein SYS1 homolo   | 42.80 | 0.00 |
| TRINITY_sp F4IA1THO2     | THO complex subunit   | 42.80 | 0.00 |
| TRINITY_sp Q9DBFNaa16    | N-alpha-acetyltrans   | 42.80 | 0.00 |
| TRINITY_sp Q9P2IFAM135A  | Protein FAM135A OS=   | 42.80 | 0.00 |
| TRINITY_sp Q993fVCX1     | Vacuolar calcium io   | 42.80 | 0.00 |
| TRINITY_sp A6N6Wdr35     | WD repeat-containin   | 42.80 | 0.00 |
| TRINITY_sp Q6NR(noc41-a  | Nucleolar complex p   | 42.80 | 0.00 |
| TRINITY_sp O5284bgaM     | Beta-galactosidase    | 42.80 | 0.00 |
| TRINITY_sp Q146fBMS1     | Ribosome biogenesis   | 42.80 | 0.00 |
| TRINITY_sp Q9LDFBETAA-AI | Beta-adaptin-like p   | 42.80 | 0.00 |
| TRINITY_sp Q9C5fPFK7     | ATP-dependent 6-pho   | 42.80 | 0.00 |
| TRINITY_sp Q9SDfGDPD6    | Glycerophosphodiester | 42.80 | 0.00 |
| TRINITY_sp P0CQfTIF1     | ATP-dependent RNA h   | 42.80 | 0.00 |
| TRINITY_sp Q7SXMprpf31   | U4/U6 small nuclear   | 42.80 | 0.00 |
| TRINITY_sp Q9LVfAt5g667f | Probable protein ph   | 42.80 | 0.00 |
| TRINITY_sp P617falaS     | Alanine--tRNA ligas   | 42.80 | 0.00 |
| TRINITY_sp Q1101Npepps   | Puromycin-sensitive   | 42.80 | 0.00 |
| TRINITY_sp Q9FPfRBP45A   | Polyadenylate-bindi   | 42.80 | 0.00 |
| TRINITY_sp P153frrpa1    | DNA-directed RNA po   | 42.80 | 0.00 |
| TRINITY_sp Q7T3frrab13   | Ras-related protein   | 42.80 | 0.00 |
| TRINITY_sp Q8VCfPlbd1    | Phospholipase B-lik   | 42.80 | 0.00 |
| TRINITY_sp F4IYMDEX1     | Protein DEFECTIVE I   | 42.80 | 0.00 |
| TRINITY_sp Q8GTFPU1      | Pullulanase 1, chlo   | 42.80 | 0.00 |
| TRINITY_sp O500fFIM2     | Fimbrin-2 OS=Arabid   | 42.80 | 0.00 |
| TRINITY_sp Q9C6fIKCS5    | 3-ketoacyl-CoA synt   | 42.80 | 0.00 |
| TRINITY_sp Q9BWfTARS2    | Threonine--tRNA lig   | 42.70 | 0.00 |
| TRINITY_sp Q1RIRBE_069f  | SCO2-like protein R   | 42.70 | 0.00 |
| TRINITY_sp Q0MQfNDUFAB1  | Acyl carrier protei   | 42.70 | 0.00 |
| TRINITY_sp Q278fDYH1B    | Cytoplasmic dynein    | 42.70 | 0.00 |
| TRINITY_sp B0M0fgefL     | Ras guanine nucleot   | 42.70 | 0.00 |
| TRINITY_sp Q504fRab26    | Ras-related protein   | 42.70 | 0.00 |
| TRINITY_sp Q68BfTK1108   | Phosphoglucomutase/   | 42.70 | 0.00 |
| TRINITY_sp Q7ZVfAbhd17c  | Protein ABHD17C OS=   | 42.70 | 0.00 |
| TRINITY_sp O809fAGD7     | ADP-ribosylation fa   | 42.70 | 0.00 |
| TRINITY_sp Q8K2fNmrA1    | NmrA-like family do   | 42.70 | 0.00 |
| TRINITY_sp Q135fPIN1     | Peptidyl-prolyl cis   | 42.70 | 0.00 |
| TRINITY_sp Q29FfGA18292  | Ubiquitin thioester   | 42.70 | 0.00 |
| TRINITY_sp F4JXfINRPC1   | DNA-directed RNA po   | 42.70 | 0.00 |
| TRINITY_sp O149fRAB29    | Ras-related protein   | 42.70 | 0.00 |
| TRINITY_sp Q8L7fBSL1     | Serine/threonine-pr   | 42.70 | 0.00 |
| TRINITY_sp Q9FNfNAGLU    | Alpha-N-acetylgluco   | 42.70 | 0.00 |
| TRINITY_sp Q016f-        | Bacterial leucyl am   | 42.70 | 0.00 |
| TRINITY_sp Q54Bfvttc27   | Tetratricopeptide r   | 42.70 | 0.00 |
| TRINITY_sp O803fRPL17    | 50S ribosomal prote   | 42.70 | 0.00 |
| TRINITY_sp Q410fSBEI     | 1,4-alpha-glucan-br   | 42.70 | 0.00 |
| TRINITY_sp Q8TBfSPATA20  | Spermatogenesis-ass   | 42.70 | 0.00 |
| TRINITY_sp Q75BfMCA1     | Metacaspase-1 OS=As   | 42.70 | 0.00 |
| TRINITY_sp Q54Mfdnajc3   | DnaJ homolog subfam   | 42.70 | 0.00 |
| TRINITY_sp Q055fHRQ1     | ATP-dependent helic   | 42.70 | 0.00 |
| TRINITY_sp Q75BfADL233W  | Leukotriene A-4 hyd   | 42.70 | 0.00 |
| TRINITY_sp Q7Z5fBRAP     | BRCA1-associated pr   | 42.70 | 0.00 |
| TRINITY_sp Q9H8fDDX31    | Probable ATP-depend   | 42.70 | 0.00 |
| TRINITY_sp A1JKfYE1008   | tRNA1(Val) (adenine   | 42.70 | 0.00 |

|                          |                     |       |      |
|--------------------------|---------------------|-------|------|
| TRINITY_sp Q8WTFDUSP19   | Dual specificity pr | 42.70 | 0.00 |
| TRINITY_sp Q9HD2ATP13A1  | Manganese-transport | 42.70 | 0.00 |
| TRINITY_sp Q54Q(dhkG     | Hybrid signal trans | 42.70 | 0.00 |
| TRINITY_sp Q55G\UDB_G026 | Probable serine/thr | 42.70 | 0.00 |
| TRINITY_sp Q8C0IEfl1     | Elongation factor-1 | 42.70 | 0.00 |
| TRINITY_sp Q6MEHtruA1    | tRNA pseudouridine  | 42.70 | 0.00 |
| TRINITY_sp Q8BQ\Zdhhc14  | Probable palmitoylt | 42.70 | 0.00 |
| TRINITY_sp Q9ST2PHOT2    | Phototropin-2 OS=Or | 42.70 | 0.00 |
| TRINITY_sp P384(GNAI1    | Guanine nucleotide- | 42.70 | 0.00 |
| TRINITY_sp Q9SS4APUM4    | Pumilio homolog 4 O | 42.70 | 0.00 |
| TRINITY_sp E9Q8IDnajc21  | DnaJ homolog subfam | 42.70 | 0.00 |
| TRINITY_sp Q9LS2GTE12    | Transcription facto | 42.70 | 0.00 |
| TRINITY_sp P563Usp5      | Ubiquitin carboxyl- | 42.70 | 0.00 |
| TRINITY_sp F4KE(EMB2247  | Valine--tRNA ligase | 42.70 | 0.00 |
| TRINITY_sp Q24U\crpsO    | 30S ribosomal prote | 42.70 | 0.00 |
| TRINITY_sp P4959PP2CA    | Protein phosphatase | 42.70 | 0.00 |
| TRINITY_sp Q6TG\ATG9     | Autophagy-related p | 42.70 | 0.00 |
| TRINITY_sp Q6421Sf1      | Splicing factor 1 O | 42.70 | 0.00 |
| TRINITY_sp Q5VREBASS2    | Probable sodium/met | 42.70 | 0.00 |
| TRINITY_sp Q5BB4tah18    | NADPH-dependent dif | 42.70 | 0.00 |
| TRINITY_sp Q010(Pdelb    | Calcium/calmodulin- | 42.70 | 0.00 |
| TRINITY_sp Q9BW\TPPP3    | Tubulin polymerizat | 42.70 | 0.00 |
| TRINITY_sp O6033MAPKBP1  | Mitogen-activated p | 42.70 | 0.00 |
| TRINITY_sp P7614sad      | Succinate semialdeh | 42.60 | 0.00 |
| TRINITY_sp H2L0Fchat-1   | CDC50 family protei | 42.60 | 0.00 |
| TRINITY_sp Q93V(At4g1748 | DeSI-like protein A | 42.60 | 0.00 |
| TRINITY_sp Q86C(tor      | Target of rapamycin | 42.60 | 0.00 |
| TRINITY_sp P2212-        | Ras-related protein | 42.60 | 0.00 |
| TRINITY_sp Q72A\acps     | Holo-[acyl-carrier- | 42.60 | 0.00 |
| TRINITY_sp Q55BNH3b      | Histone H3.3 type b | 42.60 | 0.00 |
| TRINITY_sp Q1971F22B5.10 | Calcium load-activa | 42.60 | 0.00 |
| TRINITY_sp Q9LZ\FERDJ3B  | DnaJ protein ERDJ3B | 42.60 | 0.00 |
| TRINITY_sp Q54YI\fol1    | Folic acid synthesi | 42.60 | 0.00 |
| TRINITY_sp Q8RW\NDT2     | Nicotinamide adenin | 42.60 | 0.00 |
| TRINITY_sp Q5AU(nmrA     | Nitrogen metabolite | 42.60 | 0.00 |
| TRINITY_sp D4B0\ARB_0207 | Probable glucan end | 42.60 | 0.00 |
| TRINITY_sp Q8K3I\Tdh     | L-threonine 3-dehyd | 42.60 | 0.00 |
| TRINITY_sp Q9NCI\pitB    | Phosphatidylinosito | 42.60 | 0.00 |
| TRINITY_sp O009(-        | Lysosomal acid alph | 42.60 | 0.00 |
| TRINITY_sp Q9HC(TMEM165  | Transmembrane prote | 42.60 | 0.00 |
| TRINITY_sp O1563RPS19    | 40S ribosomal prote | 42.60 | 0.00 |
| TRINITY_sp A1A4\ATP9B    | Probable phospholip | 42.60 | 0.00 |
| TRINITY_sp P4412\ligA    | DNA ligase OS=Haemo | 42.60 | 0.00 |
| TRINITY_sp Q3UW\Fgucy2c  | Heat-stable enterot | 42.60 | 0.00 |
| TRINITY_sp O0199\efk-1   | Eukaryotic elongati | 42.60 | 0.00 |
| TRINITY_sp Q0712\maoI    | Primary amine oxida | 42.60 | 0.00 |
| TRINITY_sp F4JA\ASKI2    | DExH-box ATP-depend | 42.60 | 0.00 |
| TRINITY_sp O8073\TPS10   | Probable alpha,alph | 42.60 | 0.00 |
| TRINITY_sp Q93V\FPPCK2   | Phosphoenolpyruvate | 42.60 | 0.00 |
| TRINITY_sp Q9FE1\SRT1    | NAD-dependent prote | 42.60 | 0.00 |
| TRINITY_sp Q9FVV\UPF3    | Regulator of nonsen | 42.60 | 0.00 |
| TRINITY_sp Q9ZU\VAC14    | Protein VAC14 homol | 42.60 | 0.00 |
| TRINITY_sp P391(YCF1     | Metal resistance pr | 42.60 | 0.00 |
| TRINITY_sp A2ZM\FNEK2    | Serine/threonine-pr | 42.60 | 0.00 |
| TRINITY_sp Q9C7C\PUB45   | U-box domain-contai | 42.60 | 0.00 |
| TRINITY_sp Q564\FCAPH    | Condensin complex s | 42.60 | 0.00 |



|                           |                     |       |      |
|---------------------------|---------------------|-------|------|
| TRINITY_sp P0AB6nth       | Endonuclease III OS | 42.60 | 0.00 |
| TRINITY_sp P5153SMARCA4   | Transcription activ | 42.60 | 0.00 |
| TRINITY_sp Q9ZNV\AHP1     | Histidine-containin | 42.60 | 0.00 |
| TRINITY_sp Q08D0AAR2      | Protein AAR2 homolo | 42.60 | 0.00 |
| TRINITY_sp Q9JIC\Clrela   | DNA cross-link repa | 42.60 | 0.00 |
| TRINITY_sp O7438\SPBC3H7  | Uncharacterized met | 42.60 | 0.00 |
| TRINITY_sp Q55G0DDB_G026  | Probable serine/thr | 42.60 | 0.00 |
| TRINITY_sp O6583\CRTL-E-1 | Lycopene epsilon cy | 42.60 | 0.00 |
| TRINITY_sp Q8LH0CYP734A5  | Cytochrome P450 734 | 42.60 | 0.00 |
| TRINITY_sp Q9239\spm1     | Mitogen-activated p | 42.60 | 0.00 |
| TRINITY_sp Q9VHF\Kdm2     | JmjC domain-contain | 42.60 | 0.00 |
| TRINITY_sp P0881\CBP2     | Serine carboxypepti | 42.60 | 0.00 |
| TRINITY_sp Q54X0DDB_G027  | Probable serine/thr | 42.60 | 0.00 |
| TRINITY_sp Q94J0\PUX7     | Plant UBX domain-co | 42.60 | 0.00 |
| TRINITY_sp P5399\SEC24C   | Protein transport p | 42.60 | 0.00 |
| TRINITY_sp Q6BJV\INV      | Invertase OS=Debary | 42.60 | 0.00 |
| TRINITY_sp Q0981\nmd3     | 60S ribosomal expor | 42.60 | 0.00 |
| TRINITY_sp P5520\GUCY2D   | Retinal guanylyl cy | 42.60 | 0.00 |
| TRINITY_sp Q5I00\slc30a8  | Zinc transporter 8  | 42.60 | 0.00 |
| TRINITY_sp C0LGM\LRR-RLK  | Probable leucine-ri | 42.60 | 0.00 |
| TRINITY_sp Q3910\XI-1     | Myosin-5 OS=Arabido | 42.60 | 0.00 |
| TRINITY_sp Q5F38\PIGM     | GPI mannosyltransfe | 42.60 | 0.00 |
| TRINITY_sp P3820\NCL1     | Multisite-specific  | 42.60 | 0.00 |
| TRINITY_sp Q54R0\trappc2  | Trafficking protein | 42.60 | 0.00 |
| TRINITY_sp Q54N0DDB_G028  | Isochorismatase fam | 42.60 | 0.00 |
| TRINITY_sp P5460\cprD     | Cysteine proteinase | 42.50 | 0.00 |
| TRINITY_sp A5DN0\YPI1     | Type 1 phosphatases | 42.50 | 0.00 |
| TRINITY_sp A2XD0\UBP26    | Ubiquitin carboxyl- | 42.50 | 0.00 |
| TRINITY_sp P1401\ODC1     | Ornithine decarboxy | 42.50 | 0.00 |
| TRINITY_sp Q6P30\rnf121   | RING finger protein | 42.50 | 0.00 |
| TRINITY_sp Q6DF0\Ncoa7    | Nuclear receptor co | 42.50 | 0.00 |
| TRINITY_sp Q6FZ0\engB     | Probable GTP-bindin | 42.50 | 0.00 |
| TRINITY_sp P4080\Odc1     | Ornithine decarboxy | 42.50 | 0.00 |
| TRINITY_sp O2220\CKI1     | Histidine kinase CK | 42.50 | 0.00 |
| TRINITY_sp Q55B0\nek2     | Probable serine/thr | 42.50 | 0.00 |
| TRINITY_sp Q6110\Mapre1   | Microtubule-associa | 42.50 | 0.00 |
| TRINITY_sp A0NG1\AGAP0121 | Transmembrane prote | 42.50 | 0.00 |
| TRINITY_sp Q8GY0\CAT3     | Cationic amino acid | 42.50 | 0.00 |
| TRINITY_sp Q8N50\EIF4E3   | Eukaryotic translat | 42.50 | 0.00 |
| TRINITY_sp Q9S70\MKK2     | Mitogen-activated p | 42.50 | 0.00 |
| TRINITY_sp Q59P0\VMA2     | V-type proton ATPas | 42.50 | 0.00 |
| TRINITY_sp O1580\CPK2     | Calcium-dependent p | 42.50 | 0.00 |
| TRINITY_sp Q5ZM0\USP48    | Ubiquitin carboxyl- | 42.50 | 0.00 |
| TRINITY_sp O0870\Ogg1     | N-glycosylase/DNA 1 | 42.50 | 0.00 |
| TRINITY_sp Q6DD0\zc3h15   | Zinc finger CCCH do | 42.50 | 0.00 |
| TRINITY_sp Q0VF0\kctd7    | BTB/POZ domain-cont | 42.50 | 0.00 |
| TRINITY_sp Q55B0\ufd1     | Ubiquitin fusion de | 42.50 | 0.00 |
| TRINITY_sp Q8IB0\CPK4     | Calcium-dependent p | 42.50 | 0.00 |
| TRINITY_sp Q54P0DDB_G029  | Stromal cell-derive | 42.50 | 0.00 |
| TRINITY_sp Q9FV0\CSN5A    | COP9 signalosome co | 42.50 | 0.00 |
| TRINITY_sp Q1ZX0\gxcDD    | Guanine exchange fa | 42.50 | 0.00 |
| TRINITY_sp P6040\PTEN     | Phosphatidylinosito | 42.50 | 0.00 |
| TRINITY_sp Q54L0\jcdC     | JmjC domain-contain | 42.50 | 0.00 |
| TRINITY_sp Q8RY0\NUP98A   | Nuclear pore comple | 42.50 | 0.00 |
| TRINITY_sp Q8WN0\ITPR2    | Inositol 1,4,5-tris | 42.50 | 0.00 |
| TRINITY_sp F4K50\RVE2     | Protein REVEILLE 2  | 42.50 | 0.00 |

|                          |                     |       |      |
|--------------------------|---------------------|-------|------|
| TRINITY_sp Q9SDIHMT-1    | Homocysteine S-meth | 42.50 | 0.00 |
| TRINITY_sp Q0759sav      | Protein SAV OS=Sulf | 42.50 | 0.00 |
| TRINITY_sp P0C11cyp5     | Peptidyl-prolyl cis | 42.50 | 0.00 |
| TRINITY_sp Q9TX6cmk-1    | Calcium/calmodulin- | 42.50 | 0.00 |
| TRINITY_sp Q9SH8BSL3     | Serine/threonine-pr | 42.50 | 0.00 |
| TRINITY_sp Q9M01NSF      | Vesicle-fusing ATPa | 42.50 | 0.00 |
| TRINITY_sp P2187GART     | Trifunctional purin | 42.50 | 0.00 |
| TRINITY_sp F4JN1APE2     | DNA-(apurinic or ap | 42.50 | 0.00 |
| TRINITY_sp A2WNEARP6     | Actin-related prote | 42.50 | 0.00 |
| TRINITY_sp P2525-        | Cysteine proteinase | 42.50 | 0.00 |
| TRINITY_sp P1408-        | Chymopapain OS=Cari | 42.50 | 0.00 |
| TRINITY_sp P5291VPS4     | Vacuolar protein so | 42.50 | 0.00 |
| TRINITY_sp P7403rsmI     | Ribosomal RNA small | 42.50 | 0.00 |
| TRINITY_sp Q0972trm112   | Multifunctional met | 42.50 | 0.00 |
| TRINITY_sp Q64J1PIMT2    | Protein-L-isoaspart | 42.50 | 0.00 |
| TRINITY_sp P982(ALA2     | Phospholipid-transp | 42.50 | 0.00 |
| TRINITY_sp Q9BU1MSTO1    | Protein misato homo | 42.50 | 0.00 |
| TRINITY_sp F4JA1P4H2     | Prolyl 4-hydroxylas | 42.50 | 0.00 |
| TRINITY_sp P5777EEFSEC   | Selenocysteine-spec | 42.50 | 0.00 |
| TRINITY_sp Q91W1Slc22a7  | Solute carrier fami | 42.50 | 0.00 |
| TRINITY_sp P3716-        | Actophorin OS=Acant | 42.50 | 0.00 |
| TRINITY_sp Q08BVzgc:154( | Uncharacterized pro | 42.50 | 0.00 |
| TRINITY_sp P1097-        | Retrovirus-related  | 42.50 | 0.00 |
| TRINITY_sp Q87A1PD_1892  | UPF0394 membrane pr | 42.50 | 0.00 |
| TRINITY_sp Q502(tmem41aa | Transmembrane prote | 42.50 | 0.00 |
| TRINITY_sp O5979ark1     | Serine/threonine-pr | 42.50 | 0.00 |
| TRINITY_sp Q8BH8Napepld  | N-acyl-phosphatidyl | 42.50 | 0.00 |
| TRINITY_sp Q6517Os09g057 | P-loop NTPase domai | 42.50 | 0.00 |
| TRINITY_sp Q9M29CEF      | Protein transport p | 42.50 | 0.00 |
| TRINITY_sp P1097-        | Retrovirus-related  | 42.50 | 0.00 |
| TRINITY_sp Q54X2mfeB     | Probable enoyl-CoA  | 42.40 | 0.00 |
| TRINITY_sp Q4FZVseh11-a  | Nucleoporin seh1-A  | 42.40 | 0.00 |
| TRINITY_sp Q54R1dhkL     | Hybrid signal trans | 42.40 | 0.00 |
| TRINITY_sp Q5NC(Ttf2     | Transcription termi | 42.40 | 0.00 |
| TRINITY_sp P6299RAC1     | Ras-related C3 botu | 42.40 | 0.00 |
| TRINITY_sp Q8RU1NLP3     | Omega-amidase, chlo | 42.40 | 0.00 |
| TRINITY_sp P2066Prim1    | DNA primase small s | 42.40 | 0.00 |
| TRINITY_sp Q2KJ4PPP2R4   | Serine/threonine-pr | 42.40 | 0.00 |
| TRINITY_sp Q3ABIcoaE     | Dephospho-CoA kinas | 42.40 | 0.00 |
| TRINITY_sp Q9LD1DWF5     | 7-dehydrocholester  | 42.40 | 0.00 |
| TRINITY_sp Q1418DOCK1    | Dedicator of cytoki | 42.40 | 0.00 |
| TRINITY_sp A4QQ(FMN1     | Riboflavin kinase O | 42.40 | 0.00 |
| TRINITY_sp P2042pyrK     | UMP-CMP kinase OS=D | 42.40 | 0.00 |
| TRINITY_sp Q3T01CTSH     | Pro-cathepsin H OS= | 42.40 | 0.00 |
| TRINITY_sp Q8H0VHDA9     | Histone deacetylase | 42.40 | 0.00 |
| TRINITY_sp Q08B2alg11    | GDP-Man:Man(3)GlcNA | 42.40 | 0.00 |
| TRINITY_sp P0776SI       | Sucrase-isomaltase, | 42.40 | 0.00 |
| TRINITY_sp P5025ALTA     | Tubulin alpha-1A ch | 42.40 | 0.00 |
| TRINITY_sp Q9253GBF1     | Golgi-specific bref | 42.40 | 0.00 |
| TRINITY_sp Q6AI(HEATR6   | HEAT repeat-contain | 42.40 | 0.00 |
| TRINITY_sp Q9307TATDN2   | Putative deoxyribon | 42.40 | 0.00 |
| TRINITY_sp P5344CTN      | Caltractin OS=Naegl | 42.40 | 0.00 |
| TRINITY_sp Q6AY6Nudt5    | ADP-sugar pyrophosp | 42.40 | 0.00 |
| TRINITY_sp Q1ZX1DDB_G027 | Probable serine/thr | 42.40 | 0.00 |
| TRINITY_sp F4J52SRFR1    | Suppressor of RPS4- | 42.40 | 0.00 |
| TRINITY_sp Q8IY1TRMT44   | Probable tRNA (urac | 42.40 | 0.00 |

|                           |                     |       |      |
|---------------------------|---------------------|-------|------|
| TRINITY_sp Q54S7vps15     | Probable serine/thr | 42.40 | 0.00 |
| TRINITY_sp Q9SVR8BG2      | Glycine-rich RNA-bi | 42.40 | 0.00 |
| TRINITY_sp O4339TXNL1     | Thioredoxin-like pr | 42.40 | 0.00 |
| TRINITY_sp Q9J57FPV151    | Probable deoxycytid | 42.40 | 0.00 |
| TRINITY_sp Q54T9yipf1     | Protein YIPF1 homol | 42.40 | 0.00 |
| TRINITY_sp Q5RD9TEX10     | Testis-expressed se | 42.40 | 0.00 |
| TRINITY_sp P1967yqxC      | Putative rRNA methy | 42.40 | 0.00 |
| TRINITY_sp Q54P7DDB_G028  | OTU domain-containi | 42.40 | 0.00 |
| TRINITY_sp Q86C6tor       | Target of rapamycin | 42.40 | 0.00 |
| TRINITY_sp Q8INF8Akt1     | RAC serine/threonin | 42.40 | 0.00 |
| TRINITY_sp Q54CIhe1A      | ATP-dependent RNA h | 42.40 | 0.00 |
| TRINITY_sp Q72Q2hppA      | Putative K(+)-stimu | 42.40 | 0.00 |
| TRINITY_sp A2YM3PDRP1     | Probable pyruvate,  | 42.40 | 0.00 |
| TRINITY_sp P9296RS41      | Serine/arginine-ric | 42.40 | 0.00 |
| TRINITY_sp Q9M11At3g5446  | F-box protein At3g5 | 42.40 | 0.00 |
| TRINITY_sp Q9SR9At3g0893  | LIMR family protein | 42.40 | 0.00 |
| TRINITY_sp Q9FV1AMT1-3    | Ammonium transporte | 42.40 | 0.00 |
| TRINITY_sp Q54B1abcB2     | ABC transporter B f | 42.40 | 0.00 |
| TRINITY_sp P6186aptx      | Aprataxin OS=Takifu | 42.40 | 0.00 |
| TRINITY_sp P4457arcB      | Aerobic respiration | 42.40 | 0.00 |
| TRINITY_sp Q6GLV6alyref-k | THO complex subunit | 42.40 | 0.00 |
| TRINITY_sp Q1236RIB2      | Bifunctional protei | 42.40 | 0.00 |
| TRINITY_sp Q54Y1copb2     | Coatomer subunit be | 42.40 | 0.00 |
| TRINITY_sp O1511NPC1      | Niemann-Pick C1 pro | 42.40 | 0.00 |
| TRINITY_sp Q9AT1UVH3      | DNA repair protein  | 42.40 | 0.00 |
| TRINITY_sp O0471MSH6      | DNA mismatch repair | 42.40 | 0.00 |
| TRINITY_sp P4845Ppp3cc    | Serine/threonine-pr | 42.40 | 0.00 |
| TRINITY_sp Q54B1fhkA      | Probable serine/thr | 42.40 | 0.00 |
| TRINITY_sp P5467pata      | Calcium-transportin | 42.40 | 0.00 |
| TRINITY_sp P4916CPK2      | Calcium-dependent p | 42.40 | 0.00 |
| TRINITY_sp Q5XI6Alkbh3    | Alpha-ketoglutarate | 42.40 | 0.00 |
| TRINITY_sp Q8GY2UPL1      | E3 ubiquitin-protei | 42.40 | 0.00 |
| TRINITY_sp Q9V55Cyp4p2    | Probable cytochrome | 42.40 | 0.00 |
| TRINITY_sp Q9PW7DUSP4     | Dual specificity pr | 42.40 | 0.00 |
| TRINITY_sp O7014Tesk1     | Dual specificity te | 42.40 | 0.00 |
| TRINITY_sp P4916CPK2      | Calcium-dependent p | 42.40 | 0.00 |
| TRINITY_sp Q3UG1Wdr19     | WD repeat-containin | 42.30 | 0.00 |
| TRINITY_sp Q9FMM8RHG1A    | Probable E3 ubiquit | 42.30 | 0.00 |
| TRINITY_sp Q69T1PRXIIIE-1 | Peroxiredoxin-2E-1, | 42.30 | 0.00 |
| TRINITY_sp Q94A7At3g0947  | UNC93-like protein  | 42.30 | 0.00 |
| TRINITY_sp Q86H6abcG8     | ABC transporter G f | 42.30 | 0.00 |
| TRINITY_sp O5202arsM      | Putative arsenite m | 42.30 | 0.00 |
| TRINITY_sp Q1E71TPC1      | Mitochondrial thiam | 42.30 | 0.00 |
| TRINITY_sp Q94B1ATL75     | RING-H2 finger prot | 42.30 | 0.00 |
| TRINITY_sp Q1252SET6      | Potential protein l | 42.30 | 0.00 |
| TRINITY_sp Q54R5DDB_G028  | Probable tyrosine-p | 42.30 | 0.00 |
| TRINITY_sp P0C61Dnah2     | Dynein heavy chain  | 42.30 | 0.00 |
| TRINITY_sp Q0296amyA      | Alpha-amylase A OS= | 42.30 | 0.00 |
| TRINITY_sp Q9SC9At3g5052  | Phosphoglycerate mu | 42.30 | 0.00 |
| TRINITY_sp Q6U11SGK1      | Serine/threonine-pr | 42.30 | 0.00 |
| TRINITY_sp D4AC1Recq15    | ATP-dependent DNA h | 42.30 | 0.00 |
| TRINITY_sp Q61Y6CBG03556  | Leishmanolysin-like | 42.30 | 0.00 |
| TRINITY_sp P3937iadA      | Isoaspartyl dipepti | 42.30 | 0.00 |
| TRINITY_sp Q4V86Lrrc56    | Leucine-rich repeat | 42.30 | 0.00 |
| TRINITY_sp P1056MIC       | Myosin IC heavy cha | 42.30 | 0.00 |
| TRINITY_sp P0533p20       | Uncharacterized N-a | 42.30 | 0.00 |

|                           |                     |       |      |
|---------------------------|---------------------|-------|------|
| TRINITY_sp Q9FWGHAC12     | Histone acetyltrans | 42.30 | 0.00 |
| TRINITY_sp Q949YUBP6      | Ubiquitin carboxyl- | 42.30 | 0.00 |
| TRINITY_sp Q8GWWGFA2      | Chaperone protein d | 42.30 | 0.00 |
| TRINITY_sp Q9XYIfcpA      | Probable C-terminal | 42.30 | 0.00 |
| TRINITY_sp Q54UCdnapkcs   | DNA-dependent prote | 42.30 | 0.00 |
| TRINITY_sp Q9D83Dnajb4    | DnaJ homolog subfam | 42.30 | 0.00 |
| TRINITY_sp Q3886XPB1      | DNA repair helicase | 42.30 | 0.00 |
| TRINITY_sp P5831atpla3    | Sodium/potassium-tr | 42.30 | 0.00 |
| TRINITY_sp Q6AZIimmp21    | Mitochondrial inner | 42.30 | 0.00 |
| TRINITY_sp F4ID3Atlg1891  | Zinc finger protein | 42.30 | 0.00 |
| TRINITY_sp Q8GUFPI52      | Probable CDP-diacyl | 42.30 | 0.00 |
| TRINITY_sp P3246pab       | Para-aminobenzoate  | 42.30 | 0.00 |
| TRINITY_sp Q6BZ3TIM22     | Mitochondrial impor | 42.30 | 0.00 |
| TRINITY_sp Q3166dnaJ      | Chaperone protein D | 42.30 | 0.00 |
| TRINITY_sp Q5D01mettl10   | Protein-lysine N-me | 42.30 | 0.00 |
| TRINITY_sp Q5533p2xB      | P2X receptor B OS=D | 42.30 | 0.00 |
| TRINITY_sp O6549XCP1      | Cysteine protease X | 42.30 | 0.00 |
| TRINITY_sp Q8LF6RBL19     | Rhomboid-like prote | 42.30 | 0.00 |
| TRINITY_sp P4856-         | Cytochrome b-cl com | 42.30 | 0.00 |
| TRINITY_sp D3ZG6Ocr1      | Inositol polyphosph | 42.30 | 0.00 |
| TRINITY_sp P1346abpC      | Gelation factor OS= | 42.30 | 0.00 |
| TRINITY_sp Q9FM6PI4KB1    | Phosphatidylinosito | 42.30 | 0.00 |
| TRINITY_sp Q17QITMEM1846  | Transmembrane prote | 42.30 | 0.00 |
| TRINITY_sp Q8SS6UGP1      | UTP--glucose-1-phos | 42.30 | 0.00 |
| TRINITY_sp Q9XHMTIF3C1    | Eukaryotic translat | 42.30 | 0.00 |
| TRINITY_sp P7049Pld1      | Phospholipase D1 OS | 42.30 | 0.00 |
| TRINITY_sp P2781PDE4A     | cAMP-specific 3',5' | 42.30 | 0.00 |
| TRINITY_sp Q9FZIMGD       | Probable monogalact | 42.30 | 0.00 |
| TRINITY_sp Q7KW6exosc3    | Putative exosome co | 42.30 | 0.00 |
| TRINITY_sp B2S71acsa      | Acetyl-coenzyme A s | 42.30 | 0.00 |
| TRINITY_sp P2536mlkA      | Myosin light chain  | 42.30 | 0.00 |
| TRINITY_sp Q8H16At2g3446  | Uncharacterized pro | 42.30 | 0.00 |
| TRINITY_sp Q6D76lacZ      | Beta-galactosidase  | 42.30 | 0.00 |
| TRINITY_sp Q8L86PIP5K9    | Phosphatidylinosito | 42.30 | 0.00 |
| TRINITY_sp Q5591DDB_G027  | Probable serine/thr | 42.30 | 0.00 |
| TRINITY_sp P2577Os04g066  | Oryzain alpha chain | 42.30 | 0.00 |
| TRINITY_sp Q8VII Dhrs4    | Dehydrogenase/reduc | 42.30 | 0.00 |
| TRINITY_sp Q8LP7R1        | Alpha-glucan water  | 42.30 | 0.00 |
| TRINITY_sp P1097-         | Retrovirus-related  | 42.30 | 0.00 |
| TRINITY_sp Q8WX6DNAH7     | Dynein heavy chain  | 42.30 | 0.00 |
| TRINITY_sp O0096arfA      | ADP-ribosylation fa | 42.30 | 0.00 |
| TRINITY_sp Q84M6ABCA1     | ABC transporter A f | 42.30 | 0.00 |
| TRINITY_sp O0486SAR1A     | GTP-binding protein | 42.30 | 0.00 |
| TRINITY_sp Q8VX6AGAL3     | Alpha-galactosidase | 42.20 | 0.00 |
| TRINITY_sp Q7PLJCG17528   | Serine/threonine-pr | 42.20 | 0.00 |
| TRINITY_sp O9411nudG      | Dynein light chain, | 42.20 | 0.00 |
| TRINITY_sp Q9UT6eng1      | Endo-1,3(4)-beta-gl | 42.20 | 0.00 |
| TRINITY_sp Q4E16Tc00.106  | Probable eukaryotic | 42.20 | 0.00 |
| TRINITY_sp Q54QJDDDB_G028 | Serine/threonine-pr | 42.20 | 0.00 |
| TRINITY_sp A8ISNARL3      | ADP-ribosylation fa | 42.20 | 0.00 |
| TRINITY_sp Q54J6alg5      | Dolichyl-phosphate  | 42.20 | 0.00 |
| TRINITY_sp Q9Y26AKT3      | RAC-gamma serine/th | 42.20 | 0.00 |
| TRINITY_sp Q32L6ARFRP1    | ADP-ribosylation fa | 42.20 | 0.00 |
| TRINITY_sp Q5R96VMP1      | Vacuole membrane pr | 42.20 | 0.00 |
| TRINITY_sp Q0J76Os08g017  | Phosphopantothenate | 42.20 | 0.00 |
| TRINITY_sp Q54R6fntA      | Protein farnesyltra | 42.20 | 0.00 |

|                          |                     |       |      |
|--------------------------|---------------------|-------|------|
| TRINITY_sp Q9H88MOB1A    | MOB kinase activato | 42.20 | 0.00 |
| TRINITY_sp O440(HSP90    | Heat shock protein  | 42.20 | 0.00 |
| TRINITY_sp F4HP2LIG6     | DNA ligase 6 OS=Ara | 42.20 | 0.00 |
| TRINITY_sp Q9Y07ctxA     | Cortexillin-1 OS=Po | 42.20 | 0.00 |
| TRINITY_sp P4802gacS     | Sensor protein GacS | 42.20 | 0.00 |
| TRINITY_sp Q5UQ(MIMI_R81 | Putative serine/thr | 42.20 | 0.00 |
| TRINITY_sp P4245cobA     | Uroporphyrinogen-II | 42.20 | 0.00 |
| TRINITY_sp Q30W1truB     | tRNA pseudouridine  | 42.20 | 0.00 |
| TRINITY_sp Q9C58RFC1     | Replication factor  | 42.20 | 0.00 |
| TRINITY_sp O7445scw1     | Cell wall integrity | 42.20 | 0.00 |
| TRINITY_sp Q9H78SMYD3    | Histone-lysine N-me | 42.20 | 0.00 |
| TRINITY_sp Q2NL8TSR1     | Pre-rRNA-processing | 42.20 | 0.00 |
| TRINITY_sp Q9M9URKD1     | Protein RKD1 OS=Ara | 42.20 | 0.00 |
| TRINITY_sp Q55B1mela     | Probable alpha-gala | 42.20 | 0.00 |
| TRINITY_sp P4262yqjG     | Glutathionyl-hydroq | 42.20 | 0.00 |
| TRINITY_sp Q9FW2ABCB11   | ABC transporter B f | 42.20 | 0.00 |
| TRINITY_sp Q8IYIGSPT2    | Eukaryotic peptide  | 42.20 | 0.00 |
| TRINITY_sp Q9FI(AGD9     | Probable ADP-ribosy | 42.20 | 0.00 |
| TRINITY_sp O7035Hsd17b1( | 3-hydroxyacyl-CoA d | 42.20 | 0.00 |
| TRINITY_sp P0A97tas      | Protein tas OS=Esch | 42.20 | 0.00 |
| TRINITY_sp Q6FV(IPL1     | Spindle assembly ch | 42.20 | 0.00 |
| TRINITY_sp Q6AX(Mtm1     | Myotubularin OS=Rat | 42.20 | 0.00 |
| TRINITY_sp Q8WYHNG5      | Inhibitor of growth | 42.20 | 0.00 |
| TRINITY_sp Q6DJMttamm41  | Phosphatidate cytid | 42.20 | 0.00 |
| TRINITY_sp A6WYHfmt      | Methionyl-tRNA form | 42.20 | 0.00 |
| TRINITY_sp P134(abpC     | Gelation factor OS= | 42.20 | 0.00 |
| TRINITY_sp P5303YIP1     | Protein transport p | 42.20 | 0.00 |
| TRINITY_sp P4973-        | Ribonucleoside-diph | 42.20 | 0.00 |
| TRINITY_sp Q9D9FRnf125   | E3 ubiquitin-protei | 42.20 | 0.00 |
| TRINITY_sp Q0WU(MTP10    | Metal tolerance pro | 42.20 | 0.00 |
| TRINITY_sp Q8W49PTC52    | Protochlorophyllide | 42.20 | 0.00 |
| TRINITY_sp O6088BRD4     | Bromodomain-contain | 42.20 | 0.00 |
| TRINITY_sp Q9444OST48    | Dolichyl-diphosphoo | 42.20 | 0.00 |
| TRINITY_sp Q8VEHCbwd1    | COBW domain-contain | 42.20 | 0.00 |
| TRINITY_sp Q8LPFABCA8    | ABC transporter A f | 42.20 | 0.00 |
| TRINITY_sp F4KBIAAE17    | Probable acyl-activ | 42.20 | 0.00 |
| TRINITY_sp Q9NZ(SACS     | Sacsin OS=Homo sapi | 42.20 | 0.00 |
| TRINITY_sp Q8VY7RS2Z33   | Serine/arginine-ric | 42.20 | 0.00 |
| TRINITY_sp Q9QXIKif21a   | Kinesin-like protei | 42.20 | 0.00 |
| TRINITY_sp Q54IHDDB_G028 | Probable serine/thr | 42.20 | 0.00 |
| TRINITY_sp Q9VTURhoGAP68 | Rho GTPase-activati | 42.20 | 0.00 |
| TRINITY_sp Q9LWMCIPK5    | CBL-interacting pro | 42.10 | 0.00 |
| TRINITY_sp Q9CPIIipf     | Gastric triacylglyc | 42.10 | 0.00 |
| TRINITY_sp Q9P7(alg9     | Alpha-1,2-mannosylt | 42.10 | 0.00 |
| TRINITY_sp A2YS(ATG8C    | Autophagy-related p | 42.10 | 0.00 |
| TRINITY_sp D9HP2CNR11    | Cell number regulat | 42.10 | 0.00 |
| TRINITY_sp O0471MSH6     | DNA mismatch repair | 42.10 | 0.00 |
| TRINITY_sp Q9Y21POLR3K   | DNA-directed RNA po | 42.10 | 0.00 |
| TRINITY_sp P0DKCHSD4     | 11-beta-hydroxyster | 42.10 | 0.00 |
| TRINITY_sp P116(NIA1     | Nitrate reductase [ | 42.10 | 0.00 |
| TRINITY_sp Q9NZ1OGFR     | Opioid growth facto | 42.10 | 0.00 |
| TRINITY_sp Q9SB5AP4M     | AP-4 complex subuni | 42.10 | 0.00 |
| TRINITY_sp P5407F44G4.1  | Brix domain-contain | 42.10 | 0.00 |
| TRINITY_sp Q86I7ddx52    | Probable ATP-depend | 42.10 | 0.00 |
| TRINITY_sp Q54C(pgl      | Probable 6-phosphog | 42.10 | 0.00 |
| TRINITY_sp Q9283INPP5D   | Phosphatidylinosito | 42.10 | 0.00 |

|                           |                     |       |      |
|---------------------------|---------------------|-------|------|
| TRINITY_sp Q9SL\Os05g015  | Importin subunit al | 42.10 | 0.00 |
| TRINITY_sp Q7L9IMOB1B     | MOB kinase activato | 42.10 | 0.00 |
| TRINITY_sp P517\USP11     | Ubiquitin carboxyl- | 42.10 | 0.00 |
| TRINITY_sp P323\IRE1      | Serine/threonine-pr | 42.10 | 0.00 |
| TRINITY_sp O438\ATP9B     | Probable phospholip | 42.10 | 0.00 |
| TRINITY_sp O944\tef3      | Elongation factor 3 | 42.10 | 0.00 |
| TRINITY_sp O652\CPN20     | 20 kDa chaperonin,  | 42.10 | 0.00 |
| TRINITY_sp Q5ZL\ZRANB2    | Zinc finger Ran-bin | 42.10 | 0.00 |
| TRINITY_sp Q9NZ\SACS      | Sacsin OS=Homo sapi | 42.10 | 0.00 |
| TRINITY_sp Q8CH\Tt115     | Tubulin polyglutamy | 42.10 | 0.00 |
| TRINITY_sp O821\VPS32.1   | Vacuolar protein so | 42.10 | 0.00 |
| TRINITY_sp O143\ubl1      | Ubiquitin-like prot | 42.10 | 0.00 |
| TRINITY_sp A8QC\Bml_4952  | Lateral signaling t | 42.10 | 0.00 |
| TRINITY_sp Q9NZ\OGFR      | Opioid growth facto | 42.10 | 0.00 |
| TRINITY_sp B0DZ\IAMPP     | Probable Xaa-Pro am | 42.10 | 0.00 |
| TRINITY_sp P252\Rab3      | Ras-related protein | 42.10 | 0.00 |
| TRINITY_sp Q0P4\dcakd     | Dephospho-CoA kinas | 42.10 | 0.00 |
| TRINITY_sp Q9LK\ALA8      | Probable phospholip | 42.10 | 0.00 |
| TRINITY_sp P623\CPK1      | Calcium-dependent p | 42.10 | 0.00 |
| TRINITY_sp Q9AS\At5g2741  | Branched-chain-amin | 42.10 | 0.00 |
| TRINITY_sp O157\vacA      | Vacuolin-A OS=Dicty | 42.10 | 0.00 |
| TRINITY_sp Q810\Kiaa0895  | Uncharacterized pro | 42.10 | 0.00 |
| TRINITY_sp Q54G\ctdspl2   | CTD small phosphata | 42.10 | 0.00 |
| TRINITY_sp Q24C\RPL14     | 60S ribosomal prote | 42.10 | 0.00 |
| TRINITY_sp Q9XI\UGT80B1   | Sterol 3-beta-gluco | 42.10 | 0.00 |
| TRINITY_sp Q9TV\DHDH      | Trans-1,2-dihydrobe | 42.10 | 0.00 |
| TRINITY_sp Q10S\CIPK9     | CBL-interacting pro | 42.10 | 0.00 |
| TRINITY_sp Q88F\nicT      | Putative metabolite | 42.10 | 0.00 |
| TRINITY_sp P134\abpC      | Gelation factor OS= | 42.10 | 0.00 |
| TRINITY_sp Q86G\gcy-28    | Receptor-type guany | 42.10 | 0.00 |
| TRINITY_sp Q8BH\Rhbdd1    | Rhomboid-related pr | 42.10 | 0.00 |
| TRINITY_sp Q96M\COG8      | Conserved oligomeri | 42.10 | 0.00 |
| TRINITY_sp Q2Y6\irlmN     | Dual-specificity RN | 42.10 | 0.00 |
| TRINITY_sp O605\CDC40     | Pre-mRNA-processing | 42.10 | 0.00 |
| TRINITY_sp Q8T8\abcd2     | ABC transporter D f | 42.10 | 0.00 |
| TRINITY_sp P518\lig1      | DNA ligase 1 OS=Xen | 42.10 | 0.00 |
| TRINITY_sp Q6IDI\Atlg0958 | Transmembrane emp24 | 42.10 | 0.00 |
| TRINITY_sp Q8RX\Atlg1465  | Probable splicing f | 42.10 | 0.00 |
| TRINITY_sp Q8RY\ABC26     | ABC transporter B f | 42.10 | 0.00 |
| TRINITY_sp Q272\lap-2     | Putative aminopepti | 42.10 | 0.00 |
| TRINITY_sp Q00I\CPL4      | RNA polymerase II C | 42.10 | 0.00 |
| TRINITY_sp Q96N\AIFM3     | Apoptosis-inducing  | 42.10 | 0.00 |
| TRINITY_sp P577\EEFSEC    | Selenocysteine-spec | 42.10 | 0.00 |
| TRINITY_sp O432\PSMD3     | 26S proteasome non- | 42.10 | 0.00 |
| TRINITY_sp B9DG\TAF7      | Transcription initi | 42.10 | 0.00 |
| TRINITY_sp B5DE\Xpnpep3   | Probable Xaa-Pro am | 42.10 | 0.00 |
| TRINITY_sp P419\YRB1      | Ran-specific GTPase | 42.10 | 0.00 |
| TRINITY_sp Q9FV\Atlg3222  | Uncharacterized pro | 42.10 | 0.00 |
| TRINITY_sp Q8NDV\TTC21A   | Tetratricopeptide r | 42.10 | 0.00 |
| TRINITY_sp Q9ZRI\YKT61    | VAMP-like protein Y | 42.10 | 0.00 |
| TRINITY_sp Q55C\tppl      | Tripeptidyl-peptida | 42.10 | 0.00 |
| TRINITY_sp Q0P5\Tppp2     | Tubulin polymerizat | 42.10 | 0.00 |
| TRINITY_sp P484\Tbca      | Tubulin-specific ch | 42.10 | 0.00 |
| TRINITY_sp A0AV\UBA6      | Ubiquitin-like modi | 42.10 | 0.00 |
| TRINITY_sp O428\ski6      | Exosome complex com | 42.10 | 0.00 |
| TRINITY_sp Q54P\lmem1847  | Transmembrane prote | 42.00 | 0.00 |

|                              |                      |       |      |
|------------------------------|----------------------|-------|------|
| TRINITY_sp P9089F56F10.1     | Putative serine pro  | 42.00 | 0.00 |
| TRINITY_sp P9734Nxn          | Nucleoredoxin OS=Mu  | 42.00 | 0.00 |
| TRINITY_sp Q7TSIKif15        | Kinesin-like protei  | 42.00 | 0.00 |
| TRINITY_sp Q6XHZroco9        | Probable serine/thr  | 42.00 | 0.00 |
| TRINITY_sp Q91YFMettl13      | Methyltransferase-1  | 42.00 | 0.00 |
| TRINITY_sp Q3232ybiA         | N-glycosidase YbiA   | 42.00 | 0.00 |
| TRINITY_sp Q9FICBOLA2        | Protein BOLA2 OS=Ar  | 42.00 | 0.00 |
| TRINITY_sp Q8HYIACOX1        | Peroxisomal acyl-co  | 42.00 | 0.00 |
| TRINITY_sp Q6BV4IPL1         | Spindle assembly ch  | 42.00 | 0.00 |
| TRINITY_sp Q86IVctnA         | Countin-1 OS=Dictyo  | 42.00 | 0.00 |
| TRINITY_sp O4605Cyp4ae1      | Cytochrome P450 4ae  | 42.00 | 0.00 |
| TRINITY_sp P366(bip1         | 78 kDa glucose-regu  | 42.00 | 0.00 |
| TRINITY_sp O2898AF_1281      | Uncharacterized pro  | 42.00 | 0.00 |
| TRINITY_sp A8Y19pfd-6        | Probable prefoldin   | 42.00 | 0.00 |
| TRINITY_sp Q55E9pats1        | Probable serine/thr  | 42.00 | 0.00 |
| TRINITY_sp P0479HSP17.5-17.5 | kDa class I he       | 42.00 | 0.00 |
| TRINITY_sp A5DY3DRS1         | ATP-dependent RNA h  | 42.00 | 0.00 |
| TRINITY_sp Q7ZVMzgc:559      | (WASH complex subuni | 42.00 | 0.00 |
| TRINITY_sp Q8C6C-            | Protein C21orf2 hom  | 42.00 | 0.00 |
| TRINITY_sp Q9XJ3CLPR2        | ATP-dependent Clp p  | 42.00 | 0.00 |
| TRINITY_sp P4597USP5         | Ubiquitin carboxyl-  | 42.00 | 0.00 |
| TRINITY_sp Q75LV0s03g062U3   | snoRNP-associate     | 42.00 | 0.00 |
| TRINITY_sp Q7TMEeril         | 3'-5' exoribonuclea  | 42.00 | 0.00 |
| TRINITY_sp P3409pkaC         | cAMP-dependent prot  | 42.00 | 0.00 |
| TRINITY_sp Q86I1commd7       | COMM domain-contain  | 42.00 | 0.00 |
| TRINITY_sp Q9JJ6Cdc20        | Cell division cycle  | 42.00 | 0.00 |
| TRINITY_sp Q9U88DHFR         | Dihydrofolate reduc  | 42.00 | 0.00 |
| TRINITY_sp Q9SJ6ROS1         | Protein ROS1 OS=Ara  | 42.00 | 0.00 |
| TRINITY_sp P2355xynB         | Beta-xylosidase OS=  | 42.00 | 0.00 |
| TRINITY_sp Q9VH7CG8412       | Probable Dol-P-Man:  | 42.00 | 0.00 |
| TRINITY_sp Q9SE7At2g251      | (Ribonuclease H2 sub | 42.00 | 0.00 |
| TRINITY_sp Q91W3-            | RUS1 family protein  | 42.00 | 0.00 |
| TRINITY_sp Q9LS4CASP         | Protein CASP OS=Ara  | 42.00 | 0.00 |
| TRINITY_sp Q8H0\ABCF3        | ABC transporter F f  | 42.00 | 0.00 |
| TRINITY_sp B0TAYbeY          | Endoribonuclease Yb  | 42.00 | 0.00 |
| TRINITY_sp Q8RD7FN1419       | L-methionine gamma-  | 42.00 | 0.00 |
| TRINITY_sp Q6801GGT2         | Gamma-glutamyltrans  | 42.00 | 0.00 |
| TRINITY_sp Q6L50Os05g058     | Probable protein ph  | 42.00 | 0.00 |
| TRINITY_sp P3169-            | ADP,ATP carrier pro  | 42.00 | 0.00 |
| TRINITY_sp Q9C7(BUB3.2       | Mitotic checkpoint   | 42.00 | 0.00 |
| TRINITY_sp O627(CTNNBL1      | Beta-catenin-like p  | 42.00 | 0.00 |
| TRINITY_sp Q4V77-            | UPF0585 protein C16  | 42.00 | 0.00 |
| TRINITY_sp Q2TACKIF19        | Kinesin-like protei  | 42.00 | 0.00 |
| TRINITY_sp P761(ydcP         | Uncharacterized pro  | 42.00 | 0.00 |
| TRINITY_sp Q9D08Ebp1         | Emopamil-binding pr  | 42.00 | 0.00 |
| TRINITY_sp Q9S71MYB98        | Transcription facto  | 42.00 | 0.00 |
| TRINITY_sp Q6PC6dctn1        | Dynactin subunit 1   | 42.00 | 0.00 |
| TRINITY_sp Q54IHDDB_G028     | Probable serine/thr  | 42.00 | 0.00 |
| TRINITY_sp Q2462ref(2)P      | Protein ref(2)P OS=  | 42.00 | 0.00 |
| TRINITY_sp Q0508UBE3A        | Ubiquitin-protein 1  | 42.00 | 0.00 |
| TRINITY_sp Q5YYHidi          | Isopentenyl-diphosp  | 42.00 | 0.00 |
| TRINITY_sp Q6361Vps33a       | Vacuolar protein so  | 42.00 | 0.00 |
| TRINITY_sp P3195pac          | Penicillin G acylas  | 42.00 | 0.00 |
| TRINITY_sp Q86UVDTX2         | Probable E3 ubiquit  | 42.00 | 0.00 |
| TRINITY_sp P0C07Chmp6        | Charged multivesicu  | 42.00 | 0.00 |
| TRINITY_sp Q8L77SLP1         | Shewanella-like pro  | 42.00 | 0.00 |

|                           |                     |       |      |
|---------------------------|---------------------|-------|------|
| TRINITY_sp Q0376{TAF12    | Transcription initi | 42.00 | 0.00 |
| TRINITY_sp A4QW4{TOA2     | Transcription initi | 42.00 | 0.00 |
| TRINITY_sp P3528{Rab22a   | Ras-related protein | 42.00 | 0.00 |
| TRINITY_sp Q8W03{CDC6B    | Cell division contr | 42.00 | 0.00 |
| TRINITY_sp Q8WY7{CTNNBL1  | Beta-catenin-like p | 42.00 | 0.00 |
| TRINITY_sp P091{P4HB      | Protein disulfide-i | 42.00 | 0.00 |
| TRINITY_sp Q6R0{LHY       | Protein LHY OS=Arab | 42.00 | 0.00 |
| TRINITY_sp Q9LI8{RBG4     | Glycine-rich RNA-bi | 42.00 | 0.00 |
| TRINITY_sp A8XW8{kin-1    | cAMP-dependent prot | 42.00 | 0.00 |
| TRINITY_sp P1097{-        | Retrovirus-related  | 42.00 | 0.00 |
| TRINITY_sp Q6148{Pdela    | Calcium/calmodulin- | 42.00 | 0.00 |
| TRINITY_sp Q84K4{ABCA2    | ABC transporter A f | 42.00 | 0.00 |
| TRINITY_sp Q8WX3{DNAH7    | Dynein heavy chain  | 42.00 | 0.00 |
| TRINITY_sp F4IU3{UPF2     | Regulator of nonsen | 42.00 | 0.00 |
| TRINITY_sp Q962{ITUBA6    | Tubulin alpha-6 cha | 41.90 | 0.00 |
| TRINITY_sp Q54Q3{yipf5    | Protein YIPF5 homol | 41.90 | 0.00 |
| TRINITY_sp Q9S84{SPL2     | Squamosa promoter-b | 41.90 | 0.00 |
| TRINITY_sp Q9LNV{HSP17.8  | 17.8 kDa class I he | 41.90 | 0.00 |
| TRINITY_sp Q9UK1{DNAJC12  | DnaJ homolog subfam | 41.90 | 0.00 |
| TRINITY_sp Q4WI8{pam18    | Mitochondrial impor | 41.90 | 0.00 |
| TRINITY_sp Q4WT8{clf1     | Pre-mRNA-splicing f | 41.90 | 0.00 |
| TRINITY_sp Q9ST3{CIPK8    | CBL-interacting ser | 41.90 | 0.00 |
| TRINITY_sp Q54Z2{pIdC     | Phospholipase D C O | 41.90 | 0.00 |
| TRINITY_sp P3768{hetM     | Polyketide synthase | 41.90 | 0.00 |
| TRINITY_sp B9JV1{fusA     | Elongation factor G | 41.90 | 0.00 |
| TRINITY_sp P3952{DRS2     | Probable phospholip | 41.90 | 0.00 |
| TRINITY_sp A8GM1{rlmE     | Ribosomal RNA large | 41.90 | 0.00 |
| TRINITY_sp Q54B1{mcfN     | Mitochondrial subst | 41.90 | 0.00 |
| TRINITY_sp Q69VI{Os06g058 | Probable protein ph | 41.90 | 0.00 |
| TRINITY_sp Q9XF7{PCK2     | Phosphoenolpyruvate | 41.90 | 0.00 |
| TRINITY_sp A3KP1{ttc38    | Tetratricopeptide r | 41.90 | 0.00 |
| TRINITY_sp Q9DBV{Cyp4v2   | Cytochrome P450 4V2 | 41.90 | 0.00 |
| TRINITY_sp O8076{At1g6042 | Probable nucleoredo | 41.90 | 0.00 |
| TRINITY_sp Q54IF{DDB_G028 | WASH complex subuni | 41.90 | 0.00 |
| TRINITY_sp Q1ZX1{gxcDD    | Guanine exchange fa | 41.90 | 0.00 |
| TRINITY_sp P3888{NMD3     | 60S ribosomal expor | 41.90 | 0.00 |
| TRINITY_sp Q6Z82{WEE1     | Wee1-like protein k | 41.90 | 0.00 |
| TRINITY_sp B5YI1{ligA     | DNA ligase OS=Therm | 41.90 | 0.00 |
| TRINITY_sp Q9C51{At3g4742 | Putative glycerol-3 | 41.90 | 0.00 |
| TRINITY_sp Q55C9{maspS    | Aspartate--tRNA lig | 41.90 | 0.00 |
| TRINITY_sp Q5RA7{FAM135A  | Protein FAM135A OS= | 41.90 | 0.00 |
| TRINITY_sp Q8IU8{CAMK1D   | Calcium/calmodulin- | 41.90 | 0.00 |
| TRINITY_sp A7HZ8{infB     | Translation initiat | 41.90 | 0.00 |
| TRINITY_sp Q55D1{DDB_G026 | Alpha N-terminal pr | 41.90 | 0.00 |
| TRINITY_sp Q7TQ1{Exosc3   | Exosome complex com | 41.90 | 0.00 |
| TRINITY_sp P1903{HSP18.1  | 18.1 kDa class I he | 41.90 | 0.00 |
| TRINITY_sp Q9ZR3{DSPTP1   | Dual specificity pr | 41.90 | 0.00 |
| TRINITY_sp Q8T19{DDB_G027 | Dehydrogenase/reduc | 41.90 | 0.00 |



|                           |                     |       |      |
|---------------------------|---------------------|-------|------|
| TRINITY_sp F1RA\coq6      | Ubiquinone biosynth | 41.90 | 0.00 |
| TRINITY_sp Q8CF\Aqr       | Intron-binding prot | 41.90 | 0.00 |
| TRINITY_sp Q9LW\5PAP6     | Probable plastid-li | 41.90 | 0.00 |
| TRINITY_sp Q54V\cascc2    | Activating signal c | 41.90 | 0.00 |
| TRINITY_sp Q8RD\anmK      | Anhydro-N-acetylmur | 41.90 | 0.00 |
| TRINITY_sp Q54B\msf1      | Branchpoint-bridgin | 41.90 | 0.00 |
| TRINITY_sp Q96H\ISH3YL1   | SH3 domain-containi | 41.90 | 0.00 |
| TRINITY_sp Q5RC\8RBM39    | RNA-binding protein | 41.90 | 0.00 |
| TRINITY_sp O221\7PAB4     | Polyadenylate-bindi | 41.90 | 0.00 |
| TRINITY_sp Q8L6\4BB       | E3 ubiquitin ligase | 41.90 | 0.00 |
| TRINITY_sp Q3ZC\EMC3      | ER membrane protein | 41.90 | 0.00 |
| TRINITY_sp P4851\TFIIB1   | Transcription initi | 41.90 | 0.00 |
| TRINITY_sp Q9UP\USP24     | Ubiquitin carboxyl- | 41.90 | 0.00 |
| TRINITY_sp P432\5CSN8     | COP9 signalosome co | 41.90 | 0.00 |
| TRINITY_sp Q9GM\1PGA      | Pepsin A OS=Rhinolo | 41.90 | 0.00 |
| TRINITY_sp Q9LV\At5g6672  | Probable protein ph | 41.90 | 0.00 |
| TRINITY_sp Q9XJ\3CLPR1    | ATP-dependent Clp p | 41.90 | 0.00 |
| TRINITY_sp Q68F\7march3   | E3 ubiquitin-protei | 41.90 | 0.00 |
| TRINITY_sp Q7TM\1Prpc     | Lysosomal Pro-X car | 41.90 | 0.00 |
| TRINITY_sp Q9FW\1IMPA6    | Importin subunit al | 41.90 | 0.00 |
| TRINITY_sp Q54P\EMrd1     | Multiple RNA-bindin | 41.90 | 0.00 |
| TRINITY_sp Q94J\UCSN7     | COP9 signalosome co | 41.90 | 0.00 |
| TRINITY_sp A6VC\prmA      | Ribosomal protein L | 41.90 | 0.00 |
| TRINITY_sp P109\7-        | Retrovirus-related  | 41.90 | 0.00 |
| TRINITY_sp A5GF\VRTFDC1   | Protein RTF2 homolo | 41.90 | 0.00 |
| TRINITY_sp O944\3SPBC660  | Uncharacterized RNA | 41.90 | 0.00 |
| TRINITY_sp Q389\6SNM1     | DNA cross-link repa | 41.90 | 0.00 |
| TRINITY_sp Q47W\1lepA     | Elongation factor 4 | 41.90 | 0.00 |
| TRINITY_sp A7SD\8cdc51    | Cell division cycle | 41.90 | 0.00 |
| TRINITY_sp O229\4PXM16    | Insulin-degrading e | 41.90 | 0.00 |
| TRINITY_sp Q8LP\2CPK3     | Calcium-dependent p | 41.90 | 0.00 |
| TRINITY_sp P546\7pika     | Phosphatidylinosito | 41.90 | 0.00 |
| TRINITY_sp Q2HIV\MAPR4    | Membrane-associated | 41.90 | 0.00 |
| TRINITY_sp Q0HA\3Ttc21b   | Tetratricopeptide r | 41.90 | 0.00 |
| TRINITY_sp P323\3YMC1     | Carrier protein YMC | 41.80 | 0.00 |
| TRINITY_sp Q9ZT\HEIN4     | Protein EIN4 OS=Ara | 41.80 | 0.00 |
| TRINITY_sp Q3SW\2WRAP53   | Telomerase Cajal bo | 41.80 | 0.00 |
| TRINITY_sp Q5RK\1Poll     | DNA polymerase lamb | 41.80 | 0.00 |
| TRINITY_sp Q7ZV\1esrp2    | Epithelial splicing | 41.80 | 0.00 |
| TRINITY_sp Q54S\1DDB_G028 | DDT domain-containi | 41.80 | 0.00 |
| TRINITY_sp Q9QZ\1Dctn5    | Dynactin subunit 5  | 41.80 | 0.00 |
| TRINITY_sp Q395\8-        | Dynein 18 kDa light | 41.80 | 0.00 |
| TRINITY_sp Q948\1DAD1     | Phospholipase A(1)  | 41.80 | 0.00 |
| TRINITY_sp P421\2E(z)     | Histone-lysine N-me | 41.80 | 0.00 |
| TRINITY_sp Q3U4\8Mfsd12   | Major facilitator s | 41.80 | 0.00 |
| TRINITY_sp Q8H1\8PYD3     | Beta-ureidopropiona | 41.80 | 0.00 |
| TRINITY_sp Q58C\UM EAF6   | Chromatin modificat | 41.80 | 0.00 |
| TRINITY_sp P503\8SSO2706  | Purine nucleoside p | 41.80 | 0.00 |
| TRINITY_sp Q9LK\5ALA8     | Probable phospholip | 41.80 | 0.00 |
| TRINITY_sp P278\0Mgat1    | Alpha-1,3-mannosyl- | 41.80 | 0.00 |
| TRINITY_sp Q86V\1SLC25A42 | Mitochondrial coenz | 41.80 | 0.00 |
| TRINITY_sp Q8RX\1At1g1465 | Probable splicing f | 41.80 | 0.00 |
| TRINITY_sp P929\5KIN11    | SNF1-related protei | 41.80 | 0.00 |
| TRINITY_sp Q9FZ\3ANP2     | Mitogen-activated p | 41.80 | 0.00 |
| TRINITY_sp A7A1\1STE11    | Serine/threonine-pr | 41.80 | 0.00 |
| TRINITY_sp A7YW\6RARS     | Arginine--tRNA liga | 41.80 | 0.00 |

|                          |                      |       |      |
|--------------------------|----------------------|-------|------|
| TRINITY_sp Q9SG ALA5     | Probable phospholip  | 41.80 | 0.00 |
| TRINITY_sp P749 pola     | DNA polymerase I OS  | 41.80 | 0.00 |
| TRINITY_sp Q54T gacY     | Rho GTPase-activati  | 41.80 | 0.00 |
| TRINITY_sp A7MB pkn2     | Serine/threonine-pr  | 41.80 | 0.00 |
| TRINITY_sp Q8RX At1g1465 | Probable splicing f  | 41.80 | 0.00 |
| TRINITY_sp Q58D RAB5C    | Ras-related protein  | 41.80 | 0.00 |
| TRINITY_sp Q6BC CYB5R2   | NADH-cytochrome b5   | 41.80 | 0.00 |
| TRINITY_sp P049 Gstm1    | Glutathione S-trans  | 41.80 | 0.00 |
| TRINITY_sp Q9JH Eefsec   | Selenocysteine-spec  | 41.80 | 0.00 |
| TRINITY_sp B4IB Mat89Ba  | Nucleolar protein 6  | 41.80 | 0.00 |
| TRINITY_sp P435 cpr-4    | Cathepsin B-like cy  | 41.80 | 0.00 |
| TRINITY_sp Q6Z9 KIN7H    | Kinesin-like protei  | 41.80 | 0.00 |
| TRINITY_sp P539 Anapc1   | Anaphase-promoting   | 41.80 | 0.00 |
| TRINITY_sp Q5PP ATXR2    | Histone-lysine N-me  | 41.80 | 0.00 |
| TRINITY_sp Q004 Ptbp1    | Polypyrimidine trac  | 41.80 | 0.00 |
| TRINITY_sp Q9ZW CYTB5-D  | Cytochrome B5 isofa  | 41.80 | 0.00 |
| TRINITY_sp Q993 TY3B-G   | Transposon Ty3-G Ga  | 41.80 | 0.00 |
| TRINITY_sp P463 bccA     | Acetyl-/propionyl-c  | 41.80 | 0.00 |
| TRINITY_sp Q86Y CPNE8    | Copine-8 OS=Homo sa  | 41.80 | 0.00 |
| TRINITY_sp Q86W METTL16  | Methyltransferase-1  | 41.80 | 0.00 |
| TRINITY_sp Q056 Cbei_02  | (Uncharacterized pro | 41.80 | 0.00 |
| TRINITY_sp Q11G crpLY    | 50S ribosomal prote  | 41.80 | 0.00 |
| TRINITY_sp Q9UB DNAJB9   | DnaJ homolog subfam  | 41.80 | 0.00 |
| TRINITY_sp Q8YH ssb      | Single-stranded DNA  | 41.80 | 0.00 |
| TRINITY_sp Q54Z tbcB     | Tubulin-specific ch  | 41.80 | 0.00 |
| TRINITY_sp Q9CS Ecd      | Protein ecdysoneles  | 41.80 | 0.00 |
| TRINITY_sp Q6NS Pdcd11   | Protein RRP5 homolo  | 41.80 | 0.00 |
| TRINITY_sp Q54B sf1      | Branchpoint-bridgin  | 41.80 | 0.00 |
| TRINITY_sp Q945 modA     | Neutral alpha-gluco  | 41.80 | 0.00 |
| TRINITY_sp Q245 U2af50   | Splicing factor U2A  | 41.80 | 0.00 |
| TRINITY_sp Q9I6 PA0142   | 8-oxoguanine deamin  | 41.80 | 0.00 |
| TRINITY_sp Q9LT VPS9A    | Vacuolar protein so  | 41.80 | 0.00 |
| TRINITY_sp A2X6 CDKG-1   | Cyclin-dependent ki  | 41.80 | 0.00 |
| TRINITY_sp P118 CDK4     | Cyclin-dependent ki  | 41.80 | 0.00 |
| TRINITY_sp P973 Nxn      | Nucleoredoxin OS=Mu  | 41.80 | 0.00 |
| TRINITY_sp P278 ERV1     | Mitochondrial FAD-1  | 41.80 | 0.00 |
| TRINITY_sp Q9FE SRT1     | NAD-dependent prote  | 41.80 | 0.00 |
| TRINITY_sp Q9KT truC     | tRNA pseudouridine   | 41.80 | 0.00 |
| TRINITY_sp F4HN At1g0690 | (Nardilysin-like OS= | 41.80 | 0.00 |
| TRINITY_sp O227 PXG3     | Probable peroxygena  | 41.80 | 0.00 |
| TRINITY_sp Q9C5 PFK7     | ATP-dependent 6-pho  | 41.80 | 0.00 |
| TRINITY_sp P378 CNN1     | Calponin-1 (Fragmen  | 41.80 | 0.00 |
| TRINITY_sp O246 MSH2     | DNA mismatch repair  | 41.80 | 0.00 |
| TRINITY_sp A4K2 STK4     | Serine/threonine-pr  | 41.80 | 0.00 |
| TRINITY_sp Q8L8 RECQL4A  | ATP-dependent DNA h  | 41.80 | 0.00 |
| TRINITY_sp Q9SJ SAE2     | SUMO-activating enz  | 41.80 | 0.00 |
| TRINITY_sp Q9FF NFXL2    | NF-X1-type zinc fin  | 41.80 | 0.00 |
| TRINITY_sp P422 SKIV2L2  | Superkiller viralic  | 41.80 | 0.00 |
| TRINITY_sp Q99K Aass     | Alpha-aminoadipic s  | 41.80 | 0.00 |
| TRINITY_sp O229 FTSHI1   | Probable inactive A  | 41.80 | 0.00 |
| TRINITY_sp P221 cta3     | Calcium-transportin  | 41.80 | 0.00 |
| TRINITY_sp Q8KQ cphE     | Cyanophycinase OS=P  | 41.80 | 0.00 |
| TRINITY_sp P230 -        | Dynein beta chain,   | 41.80 | 0.00 |
| TRINITY_sp Q9ZP CAS      | Exportin-2 OS=Arabi  | 41.80 | 0.00 |
| TRINITY_sp Q152 PWP2     | Periodic tryptophan  | 41.80 | 0.00 |
| TRINITY_sp P269 -        | ADP-ribosylation fa  | 41.80 | 0.00 |

|                                            |                     |       |      |
|--------------------------------------------|---------------------|-------|------|
| TRINITY_sp Q2TBUCUHL3                      | Ubiquitin carboxyl- | 41.80 | 0.00 |
| TRINITY_sp O0783dapb1                      | Dipeptidyl aminopep | 41.80 | 0.00 |
| TRINITY_sp Q9LW7HRD1A                      | ERAD-associated E3  | 41.80 | 0.00 |
| TRINITY_sp Q6148Pdela                      | Calcium/calmodulin- | 41.80 | 0.00 |
| TRINITY_sp Q8H12PAP3                       | Purple acid phospho | 41.80 | 0.00 |
| TRINITY_sp Q9CQ2Ndufa6                     | NADH dehydrogenase  | 41.70 | 0.00 |
| TRINITY_sp Q8RVIDEK1                       | Calpain-type cystei | 41.70 | 0.00 |
| TRINITY_sp Q54IILzic                       | Protein LZIC OS=Dic | 41.70 | 0.00 |
| TRINITY_sp P3029mik1                       | Mitosis inhibitor p | 41.70 | 0.00 |
| TRINITY_sp Q54Bfipsenen                    | Probable gamma-secr | 41.70 | 0.00 |
| TRINITY_sp A8WUCpkc-3                      | Protein kinase C-li | 41.70 | 0.00 |
| TRINITY_sp O675(aq_1546                    | Uncharacterized pho | 41.70 | 0.00 |
| TRINITY_sp O9427atg8                       | Autophagy-related p | 41.70 | 0.00 |
| TRINITY_sp Q96J6ABCC12                     | Multidrug resistanc | 41.70 | 0.00 |
| TRINITY_sp Q3957ODA2                       | Dynein gamma chain, | 41.70 | 0.00 |
| TRINITY_sp Q9H7fSMYD3                      | Histone-lysine N-me | 41.70 | 0.00 |
| TRINITY_sp P5638Cda                        | Cytidine deaminase  | 41.70 | 0.00 |
| TRINITY_sp B8AXfOsI_1821E3                 | UFM1-protein lig    | 41.70 | 0.00 |
| TRINITY_sp O9655chmp1                      | Charged multivesicu | 41.70 | 0.00 |
| TRINITY_sp Q54BjredA                       | NADPH oxidoreductas | 41.70 | 0.00 |
| TRINITY_sp Q5M8NSdr39u1                    | Epimerase family pr | 41.70 | 0.00 |
| TRINITY_sp Q2945LIPF                       | Gastric triacylglyc | 41.70 | 0.00 |
| TRINITY_sp Q8BMjLipk                       | Lipase member K OS= | 41.70 | 0.00 |
| TRINITY_sp Q54MvmrkB                       | Probable serine/thr | 41.70 | 0.00 |
| TRINITY_sp Q8L5jCAND1                      | Cullin-associated N | 41.70 | 0.00 |
| TRINITY_sp Q8LPALPHA-AIAP-2 complex subuni |                     | 41.70 | 0.00 |
| TRINITY_sp O774(-                          | Tryparedoxin OS=Try | 41.70 | 0.00 |
| TRINITY_sp P4976Doa                        | Serine/threonine-pr | 41.70 | 0.00 |
| TRINITY_sp P258(cpr-1                      | Gut-specific cystei | 41.70 | 0.00 |
| TRINITY_sp Q8L7vNUDT8                      | Nudix hydrolase 8 O | 41.70 | 0.00 |
| TRINITY_sp A4FV9METTL21F                   | Protein-lysine meth | 41.70 | 0.00 |
| TRINITY_sp P3468cap-2                      | F-actin-capping pro | 41.70 | 0.00 |
| TRINITY_sp Q9JI1Utp3                       | Something about sil | 41.70 | 0.00 |
| TRINITY_sp Q55C7DDB_G027                   | Mitochondrial inner | 41.70 | 0.00 |
| TRINITY_sp Q7L27KCTD9                      | BTB/POZ domain-cont | 41.70 | 0.00 |
| TRINITY_sp Q96RfCAMKK2                     | Calcium/calmodulin- | 41.70 | 0.00 |
| TRINITY_sp O4382C21orf2                    | Protein C21orf2 OS= | 41.70 | 0.00 |
| TRINITY_sp Q5056fdhC                       | Probable formate tr | 41.70 | 0.00 |
| TRINITY_sp Q5DU(Cep164                     | Centrosomal protein | 41.70 | 0.00 |
| TRINITY_sp Q54VIriol                       | Serine/threonine-pr | 41.70 | 0.00 |
| TRINITY_sp Q9SG9HMGB9                      | High mobility group | 41.70 | 0.00 |
| TRINITY_sp P5588EIF3B                      | Eukaryotic translat | 41.70 | 0.00 |
| TRINITY_sp P1097-                          | Retrovirus-related  | 41.70 | 0.00 |
| TRINITY_sp Q2717DHC-8                      | Dynein heavy chain, | 41.70 | 0.00 |
| TRINITY_sp P1099-                          | Actin, cytoplasmic  | 41.70 | 0.00 |
| TRINITY_sp P1579Camk2d                     | Calcium/calmodulin- | 41.70 | 0.00 |
| TRINITY_sp Q9BXfPAPPA2                     | Pappalysin-2 OS=Hom | 41.70 | 0.00 |
| TRINITY_sp B2RW3Cfap58                     | Cilia- and flagella | 41.70 | 0.00 |
| TRINITY_sp A6H74PLS1                       | Plastin-1 OS=Bos ta | 41.70 | 0.00 |
| TRINITY_sp Q8RWF SRL1                      | Pre-mRNA splicing f | 41.70 | 0.00 |
| TRINITY_sp B5FZ1EIF3I                      | Eukaryotic translat | 41.70 | 0.00 |
| TRINITY_sp Q0WSfALDH22A1                   | Aldehyde dehydrogen | 41.70 | 0.00 |
| TRINITY_sp Q0P4(smarmc11                   | SWI/SNF-related mat | 41.70 | 0.00 |
| TRINITY_sp A1VE8seld                       | Selenide, water dik | 41.70 | 0.00 |
| TRINITY_sp P2271Gucylb2                    | Guanylate cyclase s | 41.70 | 0.00 |
| TRINITY_sp P1097-                          | Retrovirus-related  | 41.70 | 0.00 |

|                          |                       |       |      |
|--------------------------|-----------------------|-------|------|
| TRINITY_sp Q8VW HPT1     | Homogentisate phyty   | 41.70 | 0.00 |
| TRINITY_sp P296 MPP      | Mitochondrial-proce   | 41.70 | 0.00 |
| TRINITY_sp Q5U3 Rab16    | Rab-like protein 6    | 41.70 | 0.00 |
| TRINITY_sp Q395 ODA4     | Dynein beta chain,    | 41.70 | 0.00 |
| TRINITY_sp B5F7 rihC     | Non-specific ribonu   | 41.70 | 0.00 |
| TRINITY_sp Q54I tmem120  | Transmembrane prote   | 41.70 | 0.00 |
| TRINITY_sp Q8GW At5g039  | (Uncharacterized pro  | 41.70 | 0.00 |
| TRINITY_sp Q9LTF TGD2    | Protein TRIGALACTOS   | 41.70 | 0.00 |
| TRINITY_sp B7ZM Xpnpep3  | Probable Xaa-Pro am   | 41.70 | 0.00 |
| TRINITY_sp Q5M8 Pir      | Pirin OS=Rattus nor   | 41.70 | 0.00 |
| TRINITY_sp Q9FM RD21B    | Probable cysteine p   | 41.70 | 0.00 |
| TRINITY_sp Q55D abcG22   | ABC transporter G f   | 41.70 | 0.00 |
| TRINITY_sp Q191 gcy-12   | Receptor-type guany   | 41.70 | 0.00 |
| TRINITY_sp Q9W4 dnc      | cAMP-specific 3',5'   | 41.70 | 0.00 |
| TRINITY_sp A7RZ Vdpp3    | Dipeptidyl peptidas   | 41.70 | 0.00 |
| TRINITY_sp P167 (V-UBI   | Ubiquitin-like prot   | 41.70 | 0.00 |
| TRINITY_sp P423 CNB1     | Calcineurin subunit   | 41.60 | 0.00 |
| TRINITY_sp Q9MB DHC10    | Dynein-1-beta heavy   | 41.60 | 0.00 |
| TRINITY_sp Q54G ndtymk   | Thymidylate kinase    | 41.60 | 0.00 |
| TRINITY_sp Q6PB zgc:733  | Coenzyme Q-binding    | 41.60 | 0.00 |
| TRINITY_sp Q993 TY3B-G   | Transposon Ty3-G Ga   | 41.60 | 0.00 |
| TRINITY_sp Q5ZK FACSBG2  | Long-chain-fatty-ac   | 41.60 | 0.00 |
| TRINITY_sp Q9P7 (prp11   | Pre-mRNA-processing   | 41.60 | 0.00 |
| TRINITY_sp A2XK OsI_012  | (Costars family prot  | 41.60 | 0.00 |
| TRINITY_sp Q54P tmem184  | Transmembrane prote   | 41.60 | 0.00 |
| TRINITY_sp Q9ST WNK3     | Probable serine/thr   | 41.60 | 0.00 |
| TRINITY_sp Q9SL ALIS3    | ALA-interacting sub   | 41.60 | 0.00 |
| TRINITY_sp Q9C5 ABA3     | Molybdenum cofactor   | 41.60 | 0.00 |
| TRINITY_sp Q8ER OB1403   | N-acetyldiaminopime   | 41.60 | 0.00 |
| TRINITY_sp Q104 mug157   | Meiotically up-regu   | 41.60 | 0.00 |
| TRINITY_sp Q5FW pcid2    | PCI domain-containi   | 41.60 | 0.00 |
| TRINITY_sp O809 AGD7     | ADP-ribosylation fa   | 41.60 | 0.00 |
| TRINITY_sp Q102 SPAC4H3  | .Uncharacterized pro  | 41.60 | 0.00 |
| TRINITY_sp P253 mlkA     | Myosin light chain    | 41.60 | 0.00 |
| TRINITY_sp A8IN CARL13   | ADP-ribosylation fa   | 41.60 | 0.00 |
| TRINITY_sp O008 cuda     | Putative transcript   | 41.60 | 0.00 |
| TRINITY_sp P519 Nek1     | Serine/threonine-pr   | 41.60 | 0.00 |
| TRINITY_sp Q6ME crsmH    | Ribosomal RNA small   | 41.60 | 0.00 |
| TRINITY_sp Q655 MCUS3    | Molybdenum cofactor   | 41.60 | 0.00 |
| TRINITY_sp Q9N9          | - Ciliary WD repeat-c | 41.60 | 0.00 |
| TRINITY_sp Q9H0 CCDC113  | Coiled-coil domain-   | 41.60 | 0.00 |
| TRINITY_sp Q9M9 EAtlg782 | EF-box protein Atlg7  | 41.60 | 0.00 |
| TRINITY_sp Q93Z NYC1     | Probable chlorophyl   | 41.60 | 0.00 |
| TRINITY_sp Q050 UBE3A    | Ubiquitin-protein 1   | 41.60 | 0.00 |
| TRINITY_sp P192 adaB     | Methylated-DNA--pro   | 41.60 | 0.00 |
| TRINITY_sp Q9FT RECQL3   | ATP-dependent DNA h   | 41.60 | 0.00 |
| TRINITY_sp Q54R shkA     | Dual specificity pr   | 41.60 | 0.00 |
| TRINITY_sp O944 bdp1     | Transcription facto   | 41.60 | 0.00 |
| TRINITY_sp Q6NP ATR3     | NADPH-dependent dif   | 41.60 | 0.00 |
| TRINITY_sp Q5D0 rbm8a    | RNA-binding protein   | 41.60 | 0.00 |
| TRINITY_sp O226 (DEGP1   | Protease Do-like 1,   | 41.60 | 0.00 |
| TRINITY_sp P739 menA     | 2-carboxy-1,4-napht   | 41.60 | 0.00 |
| TRINITY_sp Q9P7 SPBC1711 | Uncharacterized WD    | 41.60 | 0.00 |
| TRINITY_sp Q5Y2 (HTAY    | Histone H2A.Y OS=Te   | 41.60 | 0.00 |
| TRINITY_sp Q9P2 HIFT80   | Intraflagellar tran   | 41.60 | 0.00 |
| TRINITY_sp P477 Cbr1     | Carbonyl reductase    | 41.60 | 0.00 |

|                          |                     |       |      |
|--------------------------|---------------------|-------|------|
| TRINITY_sp Q8GX\UGLYAH   | (S)-ureidoglycine a | 41.60 | 0.00 |
| TRINITY_sp Q503\ngly1    | Peptide-N(4)-(N-ace | 41.60 | 0.00 |
| TRINITY_sp P056\sacC     | Levanase OS=Bacillu | 41.60 | 0.00 |
| TRINITY_sp Q9SL\ALIS3    | ALA-interacting sub | 41.60 | 0.00 |
| TRINITY_sp Q9Y8\MET3     | Sulfate adenylyltra | 41.60 | 0.00 |
| TRINITY_sp P736\sl11770  | Uncharacterized pro | 41.60 | 0.00 |
| TRINITY_sp Q6NZ\QDdx31   | Probable ATP-depend | 41.60 | 0.00 |
| TRINITY_sp Q7ZZ\atad1a   | ATPase family AAA d | 41.60 | 0.00 |
| TRINITY_sp Q073\uapA     | Uric acid-xanthine  | 41.60 | 0.00 |
| TRINITY_sp Q157\HERC1    | Probable E3 ubiquit | 41.60 | 0.00 |
| TRINITY_sp P109\-        | Actin, cytoplasmic  | 41.60 | 0.00 |
| TRINITY_sp Q6PG\srnps1   | RNA-binding protein | 41.60 | 0.00 |
| TRINITY_sp Q5RF\PGM2     | Phosphoglucomutase- | 41.60 | 0.00 |
| TRINITY_sp P546\pata     | Calcium-transportin | 41.60 | 0.00 |
| TRINITY_sp Q2FI\saes     | Histidine protein k | 41.50 | 0.00 |
| TRINITY_sp B2HL\MMAR_19  | UPF0678 fatty acid- | 41.50 | 0.00 |
| TRINITY_sp Q7Z4\ITTC21B  | Tetratricopeptide r | 41.50 | 0.00 |
| TRINITY_sp P045\SPINK1   | Serine protease inh | 41.50 | 0.00 |
| TRINITY_sp P623\CPK1     | Calcium-dependent p | 41.50 | 0.00 |
| TRINITY_sp Q8LB\GRXS15   | Monothiol glutaredo | 41.50 | 0.00 |
| TRINITY_sp P930\BSH      | Chromatin structure | 41.50 | 0.00 |
| TRINITY_sp Q947\-        | Probable dynein lig | 41.50 | 0.00 |
| TRINITY_sp Q9NP\ALG13    | Putative bifunction | 41.50 | 0.00 |
| TRINITY_sp A2R5\atpc1    | Mitochondrial thiam | 41.50 | 0.00 |
| TRINITY_sp Q5N7\MOR1     | Protein MOR1 OS=Ory | 41.50 | 0.00 |
| TRINITY_sp Q9Y2\ATP8A1   | Phospholipid-transp | 41.50 | 0.00 |
| TRINITY_sp Q557\trappc1- | Trafficking protein | 41.50 | 0.00 |
| TRINITY_sp Q55G\DDB_G02  | UPF0160 protein OS= | 41.50 | 0.00 |
| TRINITY_sp Q55E\pats1    | Probable serine/thr | 41.50 | 0.00 |
| TRINITY_sp Q041\HPT1     | Hypoxanthine-guanin | 41.50 | 0.00 |
| TRINITY_sp Q2SJ\msrB     | Peptide methionine  | 41.50 | 0.00 |
| TRINITY_sp P277\ODA6     | Dynein, 70 kDa inte | 41.50 | 0.00 |
| TRINITY_sp P558\faf      | Probable ubiquitin  | 41.50 | 0.00 |
| TRINITY_sp Q9UY\fsua5    | Threonylcarbamoyl-A | 41.50 | 0.00 |
| TRINITY_sp Q929\BRF1     | Transcription facto | 41.50 | 0.00 |
| TRINITY_sp C0SU\JMJ16    | Putative lysine-spe | 41.50 | 0.00 |
| TRINITY_sp Q54D\DDB_G02  | Serine carboxypepti | 41.50 | 0.00 |
| TRINITY_sp Q54M\mcfB     | Mitochondrial subst | 41.50 | 0.00 |
| TRINITY_sp P140\-        | Chymopapain OS=Cari | 41.50 | 0.00 |
| TRINITY_sp P0C8\OsI_027  | Uncharacterized pro | 41.50 | 0.00 |
| TRINITY_sp Q55C\tppl     | Tripeptidyl-peptida | 41.50 | 0.00 |
| TRINITY_sp Q3Z8\hisC     | Histidinol-phosphat | 41.50 | 0.00 |
| TRINITY_sp Q9VC\EIF-3p6  | Eukaryotic translat | 41.50 | 0.00 |
| TRINITY_sp P506\TUB      | Tubby protein homol | 41.50 | 0.00 |
| TRINITY_sp Q8L7\NPC1     | Non-specific phosph | 41.50 | 0.00 |
| TRINITY_sp P736\spPA     | Protease 4 OS=Synec | 41.50 | 0.00 |
| TRINITY_sp A0Q1\fdnaJ    | Chaperone protein D | 41.50 | 0.00 |
| TRINITY_sp Q3MH\MSH2     | DNA mismatch repair | 41.50 | 0.00 |
| TRINITY_sp Q7XB\HGGT     | Homogentisate geran | 41.50 | 0.00 |
| TRINITY_sp Q9SV\At4g137  | Methionine--tRNA li | 41.50 | 0.00 |
| TRINITY_sp Q8WV\SCFD1    | Sec1 family domain- | 41.50 | 0.00 |
| TRINITY_sp Q8BG\Htatsf1  | HIV Tat-specific fa | 41.50 | 0.00 |
| TRINITY_sp Q86I\DDB_G02  | Uncharacterized Gol | 41.50 | 0.00 |
| TRINITY_sp Q8VE\Exd2     | Exonuclease 3'-5' d | 41.50 | 0.00 |
| TRINITY_sp Q32L\HMGB3    | High mobility group | 41.50 | 0.00 |
| TRINITY_sp O609\TBL1X    | F-box-like/WD repea | 41.50 | 0.00 |

|                            |                     |       |      |
|----------------------------|---------------------|-------|------|
| TRINITY_sp B9DF\At5g4743E3 | ubiquitin ligase    | 41.50 | 0.00 |
| TRINITY_sp F4J3\CTPA3      | Carboxyl-terminal-p | 41.50 | 0.00 |
| TRINITY_sp P543\LiPe       | Hormone-sensitive l | 41.50 | 0.00 |
| TRINITY_sp Q476\mmuM       | Homocysteine S-meth | 41.50 | 0.00 |
| TRINITY_sp Q03A\clpP       | ATP-dependent Clp p | 41.50 | 0.00 |
| TRINITY_sp O890\Tpp1       | Tripeptidyl-peptida | 41.50 | 0.00 |
| TRINITY_sp Q9Z1\IDPM2      | Dolichol phosphate- | 41.50 | 0.00 |
| TRINITY_sp P495\Ppx1       | Serine/threonine-pr | 41.50 | 0.00 |
| TRINITY_sp O150\SYNJ2      | Synaptojanin-2 OS=H | 41.50 | 0.00 |
| TRINITY_sp O597\vcx1       | Vacuolar calcium io | 41.50 | 0.00 |
| TRINITY_sp E9PZ\Ascc3      | Activating signal c | 41.50 | 0.00 |
| TRINITY_sp Q145\NBR1       | Next to BRCA1 gene  | 41.50 | 0.00 |
| TRINITY_sp Q9FZ\BGLU40     | Beta-glucosidase 40 | 41.50 | 0.00 |
| TRINITY_sp P583\sseA       | 3-mercaptopyruvate  | 41.50 | 0.00 |
| TRINITY_sp Q9FN\E2FA       | Transcription facto | 41.50 | 0.00 |
| TRINITY_sp Q029\YRK        | Proto-oncogene tyro | 41.50 | 0.00 |
| TRINITY_sp Q8RX\WIN2       | Probable protein ph | 41.50 | 0.00 |
| TRINITY_sp Q2TA\AURKA      | Aurora kinase A OS= | 41.50 | 0.00 |
| TRINITY_sp P109\-          | Retrovirus-related  | 41.50 | 0.00 |
| TRINITY_sp Q7X9\AERO2      | Endoplasmic reticul | 41.50 | 0.00 |
| TRINITY_sp Q704\xpo7-a     | Exportin-7-A OS=Xen | 41.50 | 0.00 |
| TRINITY_sp Q101\rtf2       | Replication termina | 41.50 | 0.00 |
| TRINITY_sp Q9BX\MAP1LC3C   | Microtubule-associa | 41.40 | 0.00 |
| TRINITY_sp Q396\ODA11      | Dynein alpha chain, | 41.40 | 0.00 |
| TRINITY_sp O049\-          | Alpha-glucosidase O | 41.40 | 0.00 |
| TRINITY_sp Q5TH\VPS13D     | Vacuolar protein so | 41.40 | 0.00 |
| TRINITY_sp Q54G\vpvs45     | Vacuolar protein so | 41.40 | 0.00 |
| TRINITY_sp Q644\Atp7a      | Copper-transporting | 41.40 | 0.00 |
| TRINITY_sp P525\myb12      | Myb-related protein | 41.40 | 0.00 |
| TRINITY_sp Q73W\MAP_283C   | UPF0678 fatty acid- | 41.40 | 0.00 |
| TRINITY_sp Q54B\abcB2      | ABC transporter B f | 41.40 | 0.00 |
| TRINITY_sp Q54R\xpot       | Exportin-T OS=Dicty | 41.40 | 0.00 |
| TRINITY_sp Q502\eri2       | ERI1 exoribonucleas | 41.40 | 0.00 |
| TRINITY_sp Q96L\MARK4      | MAP/microtubule aff | 41.40 | 0.00 |
| TRINITY_sp Q8H8\Os03g022   | Coatomer subunit ga | 41.40 | 0.00 |
| TRINITY_sp Q6IR\abhd13     | Protein ABHD13 OS=X | 41.40 | 0.00 |
| TRINITY_sp Q5T3\ABCC10     | Multidrug resistanc | 41.40 | 0.00 |
| TRINITY_sp Q2GV\ADK1       | Adenylate kinase OS | 41.40 | 0.00 |
| TRINITY_sp Q9ZT\ATE1       | Arginyl-tRNA--prote | 41.40 | 0.00 |
| TRINITY_sp Q1JP\INDB1      | External alternativ | 41.40 | 0.00 |
| TRINITY_sp A7IS\QPCT       | Glutaminy-peptide   | 41.40 | 0.00 |
| TRINITY_sp D2XN\FLOT2      | Flotillin-like prot | 41.40 | 0.00 |
| TRINITY_sp Q9SB\AP4M       | AP-4 complex subuni | 41.40 | 0.00 |
| TRINITY_sp B3PG\agaA       | Alpha-galactosidase | 41.40 | 0.00 |
| TRINITY_sp Q9SH\HMA5       | Probable copper-tra | 41.40 | 0.00 |
| TRINITY_sp Q8W4\At4g0467   | tRNA wybutosine-syn | 41.40 | 0.00 |
| TRINITY_sp Q9JM\Wrap73     | WD repeat-containin | 41.40 | 0.00 |
| TRINITY_sp Q9Z2\Hdac6      | Histone deacetylase | 41.40 | 0.00 |
| TRINITY_sp Q90X\gpkow      | G patch domain and  | 41.40 | 0.00 |
| TRINITY_sp Q9UN\A4GNT      | Alpha-1,4-N-acetylg | 41.40 | 0.00 |
| TRINITY_sp Q7TQ\Poln       | DNA polymerase nu O | 41.40 | 0.00 |
| TRINITY_sp P239\Eci1       | Enoyl-CoA delta iso | 41.40 | 0.00 |
| TRINITY_sp Q6NX\Rcbtb1     | RCC1 and BTB domain | 41.40 | 0.00 |
| TRINITY_sp Q9M2\RRP45B     | Exosome complex com | 41.40 | 0.00 |
| TRINITY_sp Q55E\nat10      | RNA cytidine acetyl | 41.40 | 0.00 |
| TRINITY_sp P109\-          | Retrovirus-related  | 41.40 | 0.00 |

|                           |                     |       |      |
|---------------------------|---------------------|-------|------|
| TRINITY_sp P1281hsp16.9   | 16.9 kDa class I he | 41.40 | 0.00 |
| TRINITY_sp O6717aq_1088   | Uncharacterized pro | 41.40 | 0.00 |
| TRINITY_sp A5DE2FMP52     | Protein FMP52, mito | 41.40 | 0.00 |
| TRINITY_sp Q9UP7USP22     | Ubiquitin carboxyl- | 41.40 | 0.00 |
| TRINITY_sp B5DE6chd8      | Chromodomain-helica | 41.40 | 0.00 |
| TRINITY_sp Q9SY1ABC3      | ABC transporter B f | 41.40 | 0.00 |
| TRINITY_sp Q554IbzbpJ     | Probable basic-leuc | 41.40 | 0.00 |
| TRINITY_sp Q54CDDDB_G029  | Probable myosin lig | 41.40 | 0.00 |
| TRINITY_sp Q9Y71AOX1      | Alternative oxidase | 41.40 | 0.00 |
| TRINITY_sp P0C87Jmjd7     | JmjC domain-contain | 41.40 | 0.00 |
| TRINITY_sp Q54R2yipf6     | Protein YIPF6 homol | 41.40 | 0.00 |
| TRINITY_sp O7493POX2      | Acyl-coenzyme A oxi | 41.40 | 0.00 |
| TRINITY_sp Q54TMDrkd      | Probable serine/thr | 41.40 | 0.00 |
| TRINITY_sp Q93V6VCL1      | Protein VACUOLELESS | 41.40 | 0.00 |
| TRINITY_sp Q9CR5Rchyl     | RING finger and CHY | 41.40 | 0.00 |
| TRINITY_sp P3611PRY2      | Protein PRY2 OS=Sac | 41.40 | 0.00 |
| TRINITY_sp P2823-         | Betaine aldehyde de | 41.40 | 0.00 |
| TRINITY_sp Q9ZV7Atlg5457  | Acyltransferase-lik | 41.40 | 0.00 |
| TRINITY_sp P0CH3adhc1     | NADP-dependent alco | 41.40 | 0.00 |
| TRINITY_sp P0AD1ygiC      | Putative acid--amin | 41.40 | 0.00 |
| TRINITY_sp P1030RRAS      | Ras-related protein | 41.40 | 0.00 |
| TRINITY_sp A8J11CFAP157   | Cilia- and flagella | 41.40 | 0.00 |
| TRINITY_sp Q6ZY5GWD3      | Phosphoglucan, wate | 41.40 | 0.00 |
| TRINITY_sp P2944-         | Thioredoxin H-type  | 41.40 | 0.00 |
| TRINITY_sp P1097-         | Retrovirus-related  | 41.40 | 0.00 |
| TRINITY_sp Q3MH1RAB11B    | Ras-related protein | 41.40 | 0.00 |
| TRINITY_sp Q6294Slc30a2   | Zinc transporter 2  | 41.30 | 0.00 |
| TRINITY_sp Q1ZXIgxcdD     | Guanine exchange fa | 41.30 | 0.00 |
| TRINITY_sp Q7Z31C14orf15  | UPF0317 protein C14 | 41.30 | 0.00 |
| TRINITY_sp P2936thrC      | Threonine synthase  | 41.30 | 0.00 |
| TRINITY_sp Q9119-         | Cystatin OS=Oncorhy | 41.30 | 0.00 |
| TRINITY_sp P3412coaA      | Coactosin OS=Dictyo | 41.30 | 0.00 |
| TRINITY_sp O7022Atp9a     | Probable phospholip | 41.30 | 0.00 |
| TRINITY_sp Q8691mdn1      | Midasin OS=Dictyost | 41.30 | 0.00 |
| TRINITY_sp Q9M88PMI1      | Mannose-6-phosphate | 41.30 | 0.00 |
| TRINITY_sp P5467pikD      | Phosphatidylinosito | 41.30 | 0.00 |
| TRINITY_sp Q54H4drkA      | Probable serine/thr | 41.30 | 0.00 |
| TRINITY_sp Q4V77pigb      | GPI mannosyltransfe | 41.30 | 0.00 |
| TRINITY_sp P0104CSTA      | Cystatin-A OS=Homo  | 41.30 | 0.00 |
| TRINITY_sp A2RVMTIC32     | Short-chain dehydro | 41.30 | 0.00 |
| TRINITY_sp P9323VPS41     | Vacuolar protein so | 41.30 | 0.00 |
| TRINITY_sp Q9SA2RH36      | DEAD-box ATP-depend | 41.30 | 0.00 |
| TRINITY_sp P3068-         | Guanine nucleotide- | 41.30 | 0.00 |
| TRINITY_sp P5465cap       | Adenylyl cyclase-as | 41.30 | 0.00 |
| TRINITY_sp Q9493ppa2      | Soluble inorganic p | 41.30 | 0.00 |
| TRINITY_sp Q8BT6Cpne3     | Copine-3 OS=Mus mus | 41.30 | 0.00 |
| TRINITY_sp P3636-         | Endochitinase CH5B  | 41.30 | 0.00 |
| TRINITY_sp Q8W4FPI4KG6    | Phosphatidylinosito | 41.30 | 0.00 |
| TRINITY_sp P1097-         | Retrovirus-related  | 41.30 | 0.00 |
| TRINITY_sp Q8R34Ccdc12    | Coiled-coil domain- | 41.30 | 0.00 |
| TRINITY_sp P5195Nek1      | Serine/threonine-pr | 41.30 | 0.00 |
| TRINITY_sp Q8VC5Rbpms2    | RNA-binding protein | 41.30 | 0.00 |
| TRINITY_sp B6TV1-         | Calcium sensing rec | 41.30 | 0.00 |
| TRINITY_sp Q2RIVmetX      | Homoserine O-acetyl | 41.30 | 0.00 |
| TRINITY_sp Q54KHDDDB_G028 | Uncharacterized pro | 41.30 | 0.00 |
| TRINITY_sp Q9ZQ8PAP9      | Probable inactive p | 41.30 | 0.00 |

|                          |                     |       |      |
|--------------------------|---------------------|-------|------|
| TRINITY_sp Q5Z92Os06g056 | Solute carrier fami | 41.30 | 0.00 |
| TRINITY_sp Q8L79MIOX1    | Inositol oxygenase  | 41.30 | 0.00 |
| TRINITY_sp Q9DG6RAD54B   | DNA repair and reco | 41.30 | 0.00 |
| TRINITY_sp Q1ZXHgxcdD    | Guanine exchange fa | 41.30 | 0.00 |
| TRINITY_sp P4136BH0855   | Thermostable alkali | 41.30 | 0.00 |
| TRINITY_sp Q9632SAC8     | Phosphoinositide ph | 41.30 | 0.00 |
| TRINITY_sp P1097-        | Retrovirus-related  | 41.30 | 0.00 |
| TRINITY_sp Q54K1gemin2   | Gem-associated prot | 41.30 | 0.00 |
| TRINITY_sp Q9EQ1Vps35    | Vacuolar protein so | 41.30 | 0.00 |
| TRINITY_sp Q55B1nek2     | Probable serine/thr | 41.30 | 0.00 |
| TRINITY_sp F4IRFSAD2     | Importin beta-like  | 41.30 | 0.00 |
| TRINITY_sp Q9444ABCI12   | Protein ABCI12, chl | 41.30 | 0.00 |
| TRINITY_sp Q8LANP4H4     | Probable prolyl 4-h | 41.30 | 0.00 |
| TRINITY_sp P1097-        | Retrovirus-related  | 41.30 | 0.00 |
| TRINITY_sp Q652EHSFB2C   | Heat stress transcr | 41.30 | 0.00 |
| TRINITY_sp P2379RIT1     | tRNA A64-2'-O-ribos | 41.30 | 0.00 |
| TRINITY_sp P482(dnaJ     | Chaperone protein D | 41.30 | 0.00 |
| TRINITY_sp Q9ZNVMOCS3    | Adenylyltransferase | 41.30 | 0.00 |
| TRINITY_sp A6QP(DHRS12   | Dehydrogenase/reduc | 41.30 | 0.00 |
| TRINITY_sp Q941FGONST1   | GDP-mannose transpo | 41.30 | 0.00 |
| TRINITY_sp Q8TD5DNAH3    | Dynein heavy chain  | 41.30 | 0.00 |
| TRINITY_sp Q9HC6GBA2     | Non-lysosomal gluco | 41.30 | 0.00 |
| TRINITY_sp P4601KAPP     | Protein phosphatase | 41.30 | 0.00 |
| TRINITY_sp P0CQ2ATP23    | Mitochondrial inner | 41.30 | 0.00 |
| TRINITY_sp F4ICIRBL10    | RHOMBOID-like prote | 41.30 | 0.00 |
| TRINITY_sp O4604Parg     | Poly(ADP-ribose) gl | 41.30 | 0.00 |
| TRINITY_sp Q8CG(Abcc1    | Multidrug resistanc | 41.20 | 0.00 |
| TRINITY_sp Q9SC1CYP71B31 | Cytochrome P450 71B | 41.20 | 0.00 |
| TRINITY_sp Q2TBFPFDN4    | Prefoldin subunit 4 | 41.20 | 0.00 |
| TRINITY_sp O3163yjck     | Putative ribosomal- | 41.20 | 0.00 |
| TRINITY_sp Q9Y24GINS2    | DNA replication com | 41.20 | 0.00 |
| TRINITY_sp Q9QY2Smok2b   | Sperm motility kina | 41.20 | 0.00 |
| TRINITY_sp Q9LK9ALA8     | Probable phospholip | 41.20 | 0.00 |
| TRINITY_sp Q9LPCRHM2     | Trifunctional UDP-g | 41.20 | 0.00 |
| TRINITY_sp Q3899KIN10    | SNF1-related protei | 41.20 | 0.00 |
| TRINITY_sp Q5XM2apra     | Autocrine prolifera | 41.20 | 0.00 |
| TRINITY_sp Q9ZV1At1g0337 | C2 and GRAM domain- | 41.20 | 0.00 |
| TRINITY_sp P9WLMNT2089   | Uncharacterized pro | 41.20 | 0.00 |
| TRINITY_sp Q5ZK1SLC25A36 | Solute carrier fami | 41.20 | 0.00 |
| TRINITY_sp Q54J9wdr24    | WD repeat-containin | 41.20 | 0.00 |
| TRINITY_sp Q9ZT1EIN4     | Protein EIN4 OS=Ara | 41.20 | 0.00 |
| TRINITY_sp Q9CZ1Bcs11    | Mitochondrial chape | 41.20 | 0.00 |
| TRINITY_sp Q84W1At1g6732 | Probable DNA primas | 41.20 | 0.00 |
| TRINITY_sp Q5A41DED1     | ATP-dependent RNA h | 41.20 | 0.00 |
| TRINITY_sp D0PV9laf-1    | ATP-dependent RNA h | 41.20 | 0.00 |
| TRINITY_sp Q9VJ9Nedd8    | NEDD8 OS=Drosophila | 41.20 | 0.00 |
| TRINITY_sp Q6DC1-        | UPF0668 protein C10 | 41.20 | 0.00 |
| TRINITY_sp O9452SPCC1281 | ER membrane protein | 41.20 | 0.00 |
| TRINITY_sp Q54P9osbI     | Oxysterol-binding p | 41.20 | 0.00 |
| TRINITY_sp Q6GK9FOLB3    | Probable dihydroneo | 41.20 | 0.00 |
| TRINITY_sp Q8K41Nsun5    | Probable 28S rRNA ( | 41.20 | 0.00 |
| TRINITY_sp Q6PG1TTC37    | Tetratricopeptide r | 41.20 | 0.00 |
| TRINITY_sp P0C81MCCRP1   | Probable serine/thr | 41.20 | 0.00 |
| TRINITY_sp P1819glpF     | Glycerol uptake fac | 41.20 | 0.00 |
| TRINITY_sp A2AP9Scn1a    | Sodium channel prot | 41.20 | 0.00 |
| TRINITY_sp Q6NU1cwc15-a  | Protein CWC15 homol | 41.20 | 0.00 |



|                          |                      |       |      |
|--------------------------|----------------------|-------|------|
| TRINITY_sp Q5842psts     | Phosphate-binding p  | 41.20 | 0.00 |
| TRINITY_sp Q94K0VPS33    | Vacuolar protein-so  | 41.20 | 0.00 |
| TRINITY_sp O7559MYCBP2   | E3 ubiquitin-protei  | 41.20 | 0.00 |
| TRINITY_sp Q9D30Pus10    | Putative tRNA pseud  | 41.20 | 0.00 |
| TRINITY_sp Q4019RAB11A   | Ras-related protein  | 41.20 | 0.00 |
| TRINITY_sp Q96D1DNAH11   | Dynein heavy chain   | 41.20 | 0.00 |
| TRINITY_sp O3549Clcn6    | Chloride transport   | 41.20 | 0.00 |
| TRINITY_sp Q9FP1UBP1     | Ubiquitin carboxyl-  | 41.20 | 0.00 |
| TRINITY_sp Q48M1PSPPH_1  | (Renalase OS=Pseudom | 41.20 | 0.00 |
| TRINITY_sp Q2462ref(2)P  | Protein ref(2)P OS=  | 41.20 | 0.00 |
| TRINITY_sp Q9FN0PSL5     | Probable glucan 1,3  | 41.20 | 0.00 |
| TRINITY_sp Q9FY9HPAT3    | Hydroxyproline O-ar  | 41.20 | 0.00 |
| TRINITY_sp P8174-        | Macrophage migratio  | 41.20 | 0.00 |
| TRINITY_sp Q67Z9TFCB     | Tubulin-folding cof  | 41.20 | 0.00 |
| TRINITY_sp P0490GST3     | Glutathione S-trans  | 41.20 | 0.00 |
| TRINITY_sp P9252AtMg0082 | Uncharacterized mit  | 41.20 | 0.00 |
| TRINITY_sp Q9EQ0Tpp1     | Tripeptidyl-peptida  | 41.20 | 0.00 |
| TRINITY_sp P3706-        | L-ascorbate oxidase  | 41.20 | 0.00 |
| TRINITY_sp Q1246SKM1     | Serine/threonine-pr  | 41.20 | 0.00 |
| TRINITY_sp Q8VC9Rbps2    | RNA-binding protein  | 41.20 | 0.00 |
| TRINITY_sp Q9SIIHSP90-5  | Heat shock protein   | 41.20 | 0.00 |
| TRINITY_sp Q67U0Os02g014 | Probable protein ph  | 41.20 | 0.00 |
| TRINITY_sp Q6BU9RRD2     | Serine/threonine-pr  | 41.20 | 0.00 |
| TRINITY_sp A2A59Arfgef2  | Brefeldin A-inhibit  | 41.20 | 0.00 |
| TRINITY_sp Q9FZ9Atlg5188 | Probable LRR recept  | 41.20 | 0.00 |
| TRINITY_sp Q54N9atg9     | Autophagy-related p  | 41.20 | 0.00 |
| TRINITY_sp P6120Arf79F   | ADP-ribosylation fa  | 41.20 | 0.00 |
| TRINITY_sp Q9TT0RGN      | Regucalcin OS=Oryct  | 41.20 | 0.00 |
| TRINITY_sp P0AE0barA     | Signal transduction  | 41.20 | 0.00 |
| TRINITY_sp Q8N10CCAR2    | Cell cycle and apop  | 41.20 | 0.00 |
| TRINITY_sp O2260DEGP1    | Protease Do-like 1,  | 41.20 | 0.00 |
| TRINITY_sp Q6R80PHO1-H8  | Phosphate transport  | 41.10 | 0.00 |
| TRINITY_sp Q9LP0BIG3     | Brefeldin A-inhibit  | 41.10 | 0.00 |
| TRINITY_sp Q1ZX9echs1    | Probable enoyl-CoA   | 41.10 | 0.00 |
| TRINITY_sp Q7XJ9GAS8     | Growth arrest-speci  | 41.10 | 0.00 |
| TRINITY_sp Q8GY9SULTR4;2 | Probable sulfate tr  | 41.10 | 0.00 |
| TRINITY_sp P1268YPK1     | Serine/threonine-pr  | 41.10 | 0.00 |
| TRINITY_sp P0569sacC     | Levanase OS=Bacillu  | 41.10 | 0.00 |
| TRINITY_sp Q9FE9EIF2A    | Eukaryotic translat  | 41.10 | 0.00 |
| TRINITY_sp Q0189YPT1     | Ras-like GTP-bindin  | 41.10 | 0.00 |
| TRINITY_sp Q72I0fusA     | Elongation factor G  | 41.10 | 0.00 |
| TRINITY_sp O6464At2g4564 | Histone deacetylase  | 41.10 | 0.00 |
| TRINITY_sp O1409cta4     | Manganese-transport  | 41.10 | 0.00 |
| TRINITY_sp Q8R49Dusp15   | Dual specificity pr  | 41.10 | 0.00 |
| TRINITY_sp Q9NA9iplA     | Inositol 1,4,5-tris  | 41.10 | 0.00 |
| TRINITY_sp Q9M89FTSHI3   | Probable inactive A  | 41.10 | 0.00 |
| TRINITY_sp Q9FNEATXR6    | Histone-lysine N-me  | 41.10 | 0.00 |
| TRINITY_sp O7849ycf27    | Probable transcript  | 41.10 | 0.00 |
| TRINITY_sp C7EX9ATP8A2   | Phospholipid-transp  | 41.10 | 0.00 |
| TRINITY_sp Q9STICEP2     | KDEL-tailed cystein  | 41.10 | 0.00 |
| TRINITY_sp Q54K9gtaN     | GATA zinc finger do  | 41.10 | 0.00 |
| TRINITY_sp P3289GSP1     | GTP-binding nuclear  | 41.10 | 0.00 |
| TRINITY_sp Q4IN9FGRRES_  | (Succinate dehydroge | 41.10 | 0.00 |
| TRINITY_sp Q9510WASL     | Neural Wiskott-Aldr  | 41.10 | 0.00 |
| TRINITY_sp Q9XY9fcpA     | Probable C-terminal  | 41.10 | 0.00 |
| TRINITY_sp Q5A59NIK1     | Histidine protein k  | 41.10 | 0.00 |

|                          |                     |       |      |
|--------------------------|---------------------|-------|------|
| TRINITY_sp Q7Y2 GTE7     | Transcription facto | 41.10 | 0.00 |
| TRINITY_sp P109 -        | Retrovirus-related  | 41.10 | 0.00 |
| TRINITY_sp Q9WY TM_0508  | Uncharacterized pro | 41.10 | 0.00 |
| TRINITY_sp A6QL HERI3    | ERI1 exoribonucleas | 41.10 | 0.00 |
| TRINITY_sp Q54L fvps13A  | Putative vacuolar p | 41.10 | 0.00 |
| TRINITY_sp Q9FN PP7      | Serine/threonine-pr | 41.10 | 0.00 |
| TRINITY_sp Q8RE adk      | Adenylate kinase OS | 41.10 | 0.00 |
| TRINITY_sp Q3MH RNPC3    | RNA-binding protein | 41.10 | 0.00 |
| TRINITY_sp Q8T8 abcd2    | ABC transporter D f | 41.10 | 0.00 |
| TRINITY_sp P258 FBP      | Fructose-1,6-bispho | 41.10 | 0.00 |
| TRINITY_sp Q86J mmgt     | Membrane magnesium  | 41.10 | 0.00 |
| TRINITY_sp Q9C6 IMTK     | Methylthioribose ki | 41.10 | 0.00 |
| TRINITY_sp A0A0 frnf213b | E3 ubiquitin-protei | 41.10 | 0.00 |
| TRINITY_sp Q9C0 DNAH6    | Dynein heavy chain  | 41.10 | 0    |
| TRINITY_sp Q0UJ NST1     | Stress response pro | 41.10 | 0.00 |
| TRINITY_sp Q9S7 TADA     | tRNA(adenine(34)) d | 41.10 | 0.00 |
| TRINITY_sp Q96P ARHGEF1  | Rho guanine nucleot | 41.10 | 0.00 |
| TRINITY_sp O047 MSH6     | DNA mismatch repair | 41.10 | 0.00 |
| TRINITY_sp P280 AOAH     | Acyloxyacyl hydroly | 41.10 | 0.00 |
| TRINITY_sp P388 NMD3     | 60S ribosomal expor | 41.10 | 0.00 |
| TRINITY_sp A3RF ALDH3A1  | Aldehyde dehydrogen | 41.10 | 0.00 |
| TRINITY_sp Q156 MAPRE1   | Microtubule-associa | 41.10 | 0.00 |
| TRINITY_sp Q8WT NOC3L    | Nucleolar complex p | 41.10 | 0.00 |
| TRINITY_sp Q5BL atp8b1   | Phospholipid-transp | 41.10 | 0.00 |
| TRINITY_sp Q9SF At3g0710 | Protein transport p | 41.10 | 0.00 |
| TRINITY_sp Q9C5 PUX13    | Plant UBX domain-co | 41.10 | 0.00 |
| TRINITY_sp Q54Y DDB_G02  | DNA-binding protein | 41.10 | 0.00 |
| TRINITY_sp A6R7 PAN1     | Actin cytoskeleton- | 41.10 | 0.00 |
| TRINITY_sp Q5C9 NOM1     | Nucleolar MIF4G dom | 41.10 | 0.00 |
| TRINITY_sp Q8RW EURL6    | E3 ubiquitin-protei | 41.10 | 0.00 |
| TRINITY_sp B5XAM mrp158  | Peptidyl-tRNA hydro | 41.10 | 0.00 |
| TRINITY_sp Q9P7 SPAC521  | NADP-dependent 3-hy | 41.10 | 0.00 |
| TRINITY_sp O654 XCP1     | Cysteine protease X | 41.10 | 0.00 |
| TRINITY_sp Q9FG CEP1     | KDEL-tailed cystein | 41.10 | 0.00 |
| TRINITY_sp Q6Q4 Atp2b4   | Plasma membrane cal | 41.10 | 0.00 |
| TRINITY_sp Q9LM PAPS1    | Nuclear poly(A) pol | 41.10 | 0.00 |
| TRINITY_sp P981 Gnpat    | Dihydroxyacetone ph | 41.00 | 0.00 |
| TRINITY_sp Q54P pwp2     | Periodic tryptophan | 41.00 | 0.00 |
| TRINITY_sp Q7L2 ABHD13   | Protein ABHD13 OS=H | 41.00 | 0.00 |
| TRINITY_sp O430 SPBC2G2  | Deoxycytidylate dea | 41.00 | 0.00 |
| TRINITY_sp Q6ZR DNAH12   | Dynein heavy chain  | 41.00 | 0.00 |
| TRINITY_sp Q0VC PQLC1    | PQ-loop repeat-cont | 41.00 | 0.00 |
| TRINITY_sp P0CQ SPT16    | FACT complex subuni | 41.00 | 0.00 |
| TRINITY_sp A1XD stip-1   | Septin and tuftelin | 41.00 | 0.00 |
| TRINITY_sp Q55F wdr91    | WD repeat-contains  | 41.00 | 0.00 |
| TRINITY_sp O957 HERC2    | E3 ubiquitin-protei | 41.00 | 0.00 |
| TRINITY_sp Q1RM ZNRD1    | DNA-directed RNA po | 41.00 | 0.00 |
| TRINITY_sp B0W3 CPIJ0016 | Adenylyltransferase | 41.00 | 0.00 |
| TRINITY_sp P241 Thop1    | Thimet oligopeptida | 41.00 | 0.00 |
| TRINITY_sp Q9UB CTSF     | Cathepsin F OS=Homo | 41.00 | 0.00 |
| TRINITY_sp P169 Pka-C3   | Protein kinase DC2  | 41.00 | 0.00 |
| TRINITY_sp Q9M9 SOL1     | Carboxypeptidase SO | 41.00 | 0.00 |
| TRINITY_sp P543 Pdi      | Protein disulfide-i | 41.00 | 0.00 |
| TRINITY_sp P441 ligA     | DNA ligase OS=Haemo | 41.00 | 0.00 |
| TRINITY_sp Q2KJ CDC42    | Cell division contr | 41.00 | 0.00 |
| TRINITY_sp Q5VQ Os06g014 | Coatomer subunit be | 41.00 | 0.00 |

|                          |                      |       |      |
|--------------------------|----------------------|-------|------|
| TRINITY_sp Q54GIarv1     | Protein arv1 homolo  | 41.00 | 0.00 |
| TRINITY_sp Q6NRlccnyl1-k | Cyclin-Y-like prote  | 41.00 | 0.00 |
| TRINITY_sp Q930(USP9X    | Probable ubiquitin   | 41.00 | 0.00 |
| TRINITY_sp Q5XM2aprA     | Autocrine prolifera  | 41.00 | 0.00 |
| TRINITY_sp P105(MAL63    | Maltose fermentatio  | 41.00 | 0.00 |
| TRINITY_sp O3444yrrC     | ATP-dependent RecD-  | 41.00 | 0.00 |
| TRINITY_sp P0C8MCCRP1    | Probable serine/thr  | 41.00 | 0.00 |
| TRINITY_sp Q7T03rnf12-b  | E3 ubiquitin-protei  | 41.00 | 0.00 |
| TRINITY_sp Q9246pub1     | E3 ubiquitin-protei  | 41.00 | 0.00 |
| TRINITY_sp F4I2HSWI2     | Switch 2 OS=Arabido  | 41.00 | 0.00 |
| TRINITY_sp Q8IS1gefD     | Ras guanine nucleot  | 41.00 | 0.00 |
| TRINITY_sp Q4PC(HOG1     | Mitogen-activated p  | 41.00 | 0.00 |
| TRINITY_sp O6052NEMF     | Nuclear export medi  | 41.00 | 0.00 |
| TRINITY_sp O5966SPBC29A5 | LisH domain-contain  | 41.00 | 0.00 |
| TRINITY_sp Q9NY5STK32B   | Serine/threonine-pr  | 41.00 | 0.00 |
| TRINITY_sp Q8GY2UPL1     | E3 ubiquitin-protei  | 41.00 | 0.00 |
| TRINITY_sp P4877uapC     | Purine permease OS=  | 41.00 | 0.00 |
| TRINITY_sp Q9I86azin2    | Antizyme inhibitor   | 41.00 | 0.00 |
| TRINITY_sp Q9TR1FKBP4    | Peptidyl-prolyl cis  | 41.00 | 0.00 |
| TRINITY_sp Q54RselmoC    | ELMO domain-contain  | 41.00 | 0.00 |
| TRINITY_sp P4944GSPATT0  | (Protein phosphatase | 41.00 | 0.00 |
| TRINITY_sp O659(CAP1     | Cyclase-associated   | 41.00 | 0.00 |
| TRINITY_sp Q6INIadck1    | Uncharacterized aar  | 41.00 | 0.00 |
| TRINITY_sp P4364-        | DnaJ protein homolo  | 41.00 | 0.00 |
| TRINITY_sp Q8INIgyc88E   | Soluble guanylate c  | 41.00 | 0.00 |
| TRINITY_sp Q84WEAt5g045  | (Glycosyltransferase | 41.00 | 0.00 |
| TRINITY_sp P1539rpa1     | DNA-directed RNA po  | 41.00 | 0.00 |
| TRINITY_sp O6782guaB     | Inosine-5'-monophos  | 41.00 | 0.00 |
| TRINITY_sp F4IE6RID1     | Pre-mRNA-splicing f  | 41.00 | 0.00 |
| TRINITY_sp O7538ULK1     | Serine/threonine-pr  | 41.00 | 0.00 |
| TRINITY_sp Q7T0Vbop1-a   | Ribosome biogenesis  | 41.00 | 0.00 |
| TRINITY_sp Q9C95SRK2B    | Serine/threonine-pr  | 41.00 | 0.00 |
| TRINITY_sp Q8R3IMcat     | Malonyl-CoA-acyl ca  | 41.00 | 0.00 |
| TRINITY_sp Q54FIgefK     | Ras guanine nucleot  | 41.00 | 0.00 |
| TRINITY_sp P2708ABT      | ADP,ATP carrier pro  | 41.00 | 0.00 |
| TRINITY_sp Q9FNYE2FA     | Transcription facto  | 41.00 | 0.00 |
| TRINITY_sp Q9LZ1STN8     | Serine/threonine-pr  | 41.00 | 0.00 |
| TRINITY_sp P1097-        | Retrovirus-related   | 41.00 | 0.00 |
| TRINITY_sp P6234CPK1     | Calcium-dependent p  | 41.00 | 0.00 |
| TRINITY_sp E1BZFTTECPR1  | Tectonin beta-prope  | 41.00 | 0.00 |
| TRINITY_sp Q8MR6viaf     | Viral IAP-associate  | 41.00 | 0.00 |
| TRINITY_sp Q9945CDC5L    | Cell division cycle  | 41.00 | 0.00 |
| TRINITY_sp B9DFCISE2     | DExH-box ATP-depend  | 41.00 | 0.00 |
| TRINITY_sp Q9XT9tbh-1    | Tyramine beta-hydro  | 41.00 | 0.00 |
| TRINITY_sp Q2XQ1IFT57    | Intraflagellar tran  | 41.00 | 0.00 |
| TRINITY_sp P0CY3SEC4     | Ras-related protein  | 41.00 | 0.00 |
| TRINITY_sp O8102EMB1187  | Probable ethanolami  | 41.00 | 0.00 |
| TRINITY_sp P6234CPK4     | Calcium-dependent p  | 41.00 | 0.00 |
| TRINITY_sp O433(HSPA12A  | Heat shock 70 kDa p  | 41.00 | 0.00 |
| TRINITY_sp Q7T03cfap36   | Cilia- and flagella  | 41.00 | 0.00 |
| TRINITY_sp Q0297CAD8     | Cinnamyl alcohol de  | 41.00 | 0.00 |
| TRINITY_sp Q5ZJ1GARNL3   | GTPase-activating R  | 41.00 | 0.00 |
| TRINITY_sp Q5AVMdbp5     | ATP-dependent RNA h  | 41.00 | 0.00 |
| TRINITY_sp Q0JL7Os01g061 | Probable protein ph  | 41.00 | 0.00 |
| TRINITY_sp Q9QX6Dpf1     | Zinc finger protein  | 41.00 | 0.00 |
| TRINITY_sp O3444yloB     | Calcium-transportin  | 41.00 | 0.00 |

|                           |                     |       |      |
|---------------------------|---------------------|-------|------|
| TRINITY_sp Q0897NEW1      | [NU+] prion formati | 41.00 | 0.00 |
| TRINITY_sp Q641CFAM21A    | WASH complex subuni | 41.00 | 0.00 |
| TRINITY_sp Q8RWISTY17     | Serine/threonine-pr | 41.00 | 0.00 |
| TRINITY_sp Q6ZSJCAPN12    | Calpain-12 OS=Homo  | 41.00 | 0.00 |
| TRINITY_sp Q1583STXBP2    | Syntaxin-binding pr | 41.00 | 0.00 |
| TRINITY_sp Q54E3dtd       | D-tyrosyl-tRNA(Tyr) | 40.90 | 0.00 |
| TRINITY_sp O5967SPBC29A3  | Uncharacterized ABC | 40.90 | 0.00 |
| TRINITY_sp O9662arce      | Actin-related prote | 40.90 | 0.00 |
| TRINITY_sp Q32P7CTEX1D2   | Tctex1 domain-conta | 40.90 | 0.00 |
| TRINITY_sp Q9X1HglpK2     | Glycerol kinase 2 O | 40.90 | 0.00 |
| TRINITY_sp Q0981rqh1      | ATP-dependent DNA h | 40.90 | 0.00 |
| TRINITY_sp Q54CFmobB      | MOB kinase activato | 40.90 | 0.00 |
| TRINITY_sp Q9LR2PLDZETA1  | Phospholipase D zet | 40.90 | 0.00 |
| TRINITY_sp F1QC4rp2       | Protein XRP2 OS=Dan | 40.90 | 0.00 |
| TRINITY_sp Q84ZCOs07g054  | Probable V-type pro | 40.90 | 0.00 |
| TRINITY_sp Q9LDFMYB108    | Transcription facto | 40.90 | 0.00 |
| TRINITY_sp Q7XR\RM11      | RecQ-mediated genom | 40.90 | 0.00 |
| TRINITY_sp Q55E5pats1     | Probable serine/thr | 40.90 | 0.00 |
| TRINITY_sp D7UQ\aur       | Aurora kinase OS=Pa | 40.90 | 0.00 |
| TRINITY_sp Q6433Sqstm1    | Sequestosome-1 OS=M | 40.90 | 0.00 |
| TRINITY_sp Q1DN\CCIMG_081 | Very-long-chain 3-o | 40.90 | 0.00 |
| TRINITY_sp Q8RWISTY17     | Serine/threonine-pr | 40.90 | 0.00 |
| TRINITY_sp Q1414MORC3     | MORC family CW-type | 40.90 | 0.00 |
| TRINITY_sp Q86XVNME9      | Thioredoxin domain- | 40.90 | 0.00 |
| TRINITY_sp Q5ZKVARL2BP    | ADP-ribosylation fa | 40.90 | 0.00 |
| TRINITY_sp Q0QLE\dm1      | 2,3-dimethylmalate  | 40.90 | 0.00 |
| TRINITY_sp Q1005shk2      | Serine/threonine-pr | 40.90 | 0.00 |
| TRINITY_sp Q7XZ\USAC1     | Phosphoinositide ph | 40.90 | 0.00 |
| TRINITY_sp Q55G\UDDB_G026 | Probable serine/thr | 40.90 | 0.00 |
| TRINITY_sp Q4R8\RAB1B     | Ras-related protein | 40.90 | 0.00 |
| TRINITY_sp Q54Q\UDDB_G028 | Probable zinc trans | 40.90 | 0.00 |
| TRINITY_sp P0CQ8\DDH1     | ATP-dependent RNA h | 40.90 | 0.00 |
| TRINITY_sp Q1033SPBC582   | Uncharacterized ATP | 40.90 | 0.00 |
| TRINITY_sp Q2YDE\GOLT1B   | Vesicle transport p | 40.90 | 0.00 |
| TRINITY_sp Q86Y\CPNE8     | Copine-8 OS=Homo sa | 40.90 | 0.00 |
| TRINITY_sp O0084\cuda     | Putative transcript | 40.90 | 0.00 |
| TRINITY_sp Q2MHE\HT1      | Serine/threonine-pr | 40.90 | 0.00 |
| TRINITY_sp Q54BM\mcfG     | Mitochondrial subst | 40.90 | 0.00 |
| TRINITY_sp Q56A4\ccdc40   | Coiled-coil domain- | 40.90 | 0.00 |
| TRINITY_sp Q84L3\RAD23B   | Ubiquitin receptor  | 40.90 | 0.00 |
| TRINITY_sp Q5RJ\coq9      | Ubiquinone biosynth | 40.90 | 0.00 |
| TRINITY_sp Q94F\SDX1      | Probable tocopherol | 40.90 | 0.00 |
| TRINITY_sp Q9ZRI\CAD      | Probable mannitol d | 40.90 | 0.00 |
| TRINITY_sp Q557\cpolr3h-1 | DNA-directed RNA po | 40.90 | 0.00 |
| TRINITY_sp P8377\GRP2     | Putative NADPH-depe | 40.90 | 0.00 |
| TRINITY_sp Q0D7\ENRAMP1   | Metal transporter N | 40.90 | 0.00 |
| TRINITY_sp Q9C5\OEP80     | Outer envelope prot | 40.90 | 0.00 |
| TRINITY_sp Q69Z\Hbs11     | HBS1-like protein O | 40.90 | 0.00 |
| TRINITY_sp Q9Y6\IARFGEF2  | Brefeldin A-inhibit | 40.90 | 0.00 |
| TRINITY_sp Q1412\PDE1C    | Calcium/calmodulin- | 40.90 | 0.00 |
| TRINITY_sp O8226\DEGP2    | Protease Do-like 2, | 40.90 | 0.00 |
| TRINITY_sp B5X42\NAGS2    | Probable amino-acid | 40.90 | 0.00 |
| TRINITY_sp O0421\At2g4009 | Putative ABC1 prote | 40.90 | 0.00 |
| TRINITY_sp Q8VY\CCR4-6    | Carbon catabolite r | 40.90 | 0.00 |
| TRINITY_sp P0829-         | Pathogenesis-relate | 40.90 | 0.00 |
| TRINITY_sp P2817\pkgB     | Protein kinase 2 OS | 40.90 | 0.00 |

|                          |                     |       |      |
|--------------------------|---------------------|-------|------|
| TRINITY_sp Q84K DDB2     | DNA damage-binding  | 40.90 | 0.00 |
| TRINITY_sp Q8W5 At3g1514 | Uncharacterized exo | 40.90 | 0.00 |
| TRINITY_sp P562 tif225   | Probable translatio | 40.90 | 0.00 |
| TRINITY_sp Q9UJ TRMT6    | tRNA (adenine(58)-N | 40.90 | 0.00 |
| TRINITY_sp Q9M1 ABCB21   | ABC transporter B f | 40.90 | 0.00 |
| TRINITY_sp Q8UV baz1a    | Bromodomain adjacen | 40.90 | 0.00 |
| TRINITY_sp Q7T6 MIMI_R8  | Putative serine/thr | 40.90 | 0.00 |
| TRINITY_sp Q294 Su(var)3 | Histone-lysine N-me | 40.80 | 0.00 |
| TRINITY_sp P324 GBP2     | Guanylate-binding p | 40.80 | 0.00 |
| TRINITY_sp Q28F mfsd7-A  | Major facilitator s | 40.80 | 0.00 |
| TRINITY_sp P347 RAS-2    | Ras-like protein 2  | 40.80 | 0.00 |
| TRINITY_sp F4JZ ENGASE1  | Cytosolic endo-beta | 40.80 | 0.00 |
| TRINITY_sp Q6Z8 Os02g022 | Probable protein ph | 40.80 | 0.00 |
| TRINITY_sp P201 GSTM2    | Glutathione S-trans | 40.80 | 0.00 |
| TRINITY_sp Q9LE CAF1-10  | Probable CCR4-assoc | 40.80 | 0.00 |
| TRINITY_sp P412 Abca1    | ATP-binding cassett | 40.80 | 0.00 |
| TRINITY_sp O225 STY8     | Serine/threonine-pr | 40.80 | 0.00 |
| TRINITY_sp Q8GW GFA2     | Chaperone protein d | 40.80 | 0.00 |
| TRINITY_sp Q6AX Mtm1     | Myotubularin OS=Rat | 40.80 | 0.00 |
| TRINITY_sp Q8BL Cpne4    | Copine-4 OS=Mus mus | 40.80 | 0.00 |
| TRINITY_sp P331 ACSL1    | Long-chain-fatty-ac | 40.80 | 0.00 |
| TRINITY_sp Q995 TSNAX    | Translin-associated | 40.80 | 0.00 |
| TRINITY_sp F4I2 FSWI2    | Switch 2 OS=Arabido | 40.80 | 0.00 |
| TRINITY_sp O756 USP2     | Ubiquitin carboxyl- | 40.80 | 0.00 |
| TRINITY_sp O953 ATG7     | Ubiquitin-like modi | 40.80 | 0.00 |
| TRINITY_sp Q76F NOL8     | Nucleolar protein 8 | 40.80 | 0.00 |
| TRINITY_sp Q5TI VWA5B1   | von Willebrand fact | 40.80 | 0.00 |
| TRINITY_sp Q9SU PAO5     | Probable polyamine  | 40.80 | 0.00 |
| TRINITY_sp Q9LV APRR3    | Two-component respo | 40.80 | 0.00 |
| TRINITY_sp Q54D rer1     | Protein RER1 homolo | 40.80 | 0.00 |
| TRINITY_sp O763 RACG     | Rho-related protein | 40.80 | 0.00 |
| TRINITY_sp O151 NPC1     | Niemann-Pick C1 pro | 40.80 | 0.00 |
| TRINITY_sp Q86Y CPNE8    | Copine-8 OS=Homo sa | 40.80 | 0.00 |
| TRINITY_sp P975 Acox2    | Peroxisomal acyl-co | 40.80 | 0.00 |
| TRINITY_sp Q9FH GSTT3    | Glutathione S-trans | 40.80 | 0.00 |
| TRINITY_sp O229 At2g3416 | Uncharacterized pro | 40.80 | 0.00 |
| TRINITY_sp Q9HB RRAGC    | Ras-related GTP-bin | 40.80 | 0.00 |
| TRINITY_sp Q9FF EGY2     | Probable zinc metal | 40.80 | 0.00 |
| TRINITY_sp Q54W gna1     | Glucosamine 6-phosp | 40.80 | 0.00 |
| TRINITY_sp Q94B GCP1     | Germination-specifi | 40.80 | 0.00 |
| TRINITY_sp Q54U abcC12   | ABC transporter C f | 40.80 | 0.00 |
| TRINITY_sp Q9VR l(1)G01  | Inositol hexakispho | 40.80 | 0.00 |
| TRINITY_sp Q8BL -        | UPF0769 protein C21 | 40.80 | 0.00 |
| TRINITY_sp P270 Parp1    | Poly [ADP-ribose] p | 40.80 | 0.00 |
| TRINITY_sp Q80X Usp6n1   | USP6 N-terminal-lik | 40.80 | 0.00 |
| TRINITY_sp P496 PRIM1    | DNA primase small s | 40.80 | 0.00 |
| TRINITY_sp O749 mug40    | DNA polymerase kapp | 40.80 | 0.00 |
| TRINITY_sp Q8RY At2g3325 | Haloacid dehalogena | 40.80 | 0.00 |
| TRINITY_sp Q9TT pro-pol  | Pro-Pol polyprotein | 40.80 | 0.00 |
| TRINITY_sp P516 arf4     | ADP-ribosylation fa | 40.80 | 0.00 |
| TRINITY_sp Q0IW GRXS11   | Monothiol glutaredo | 40.80 | 0.00 |
| TRINITY_sp Q9LP CRHM2    | Trifunctional UDP-g | 40.80 | 0.00 |
| TRINITY_sp O354 Folh1    | Glutamate carboxype | 40.80 | 0.00 |
| TRINITY_sp A1TF hpxO     | FAD-dependent urate | 40.80 | 0.00 |
| TRINITY_sp Q9GR efa1B    | Elongation factor 1 | 40.80 | 0.00 |
| TRINITY_sp P0CT UMAG_10  | Small glutamine-ric | 40.80 | 0.00 |

|                           |                     |       |      |
|---------------------------|---------------------|-------|------|
| TRINITY_sp O3479yvkC      | Uncharacterized pho | 40.80 | 0.00 |
| TRINITY_sp O7539VPS4B     | Vacuolar protein so | 40.80 | 0.00 |
| TRINITY_sp A8IC9CFAP46    | Cilia- and flagella | 40.80 | 0.00 |
| TRINITY_sp Q54W9bzbpF     | Probable basic-leuc | 40.80 | 0.00 |
| TRINITY_sp Q6PG9traf3ip1  | TRAF3-interacting p | 40.80 | 0.00 |
| TRINITY_sp Q66G9NOA1      | NO-associated prote | 40.80 | 0.00 |
| TRINITY_sp Q9LM9FKBP18    | Peptidyl-prolyl cis | 40.80 | 0.00 |
| TRINITY_sp P0CY9SEC4      | Ras-related protein | 40.80 | 0.00 |
| TRINITY_sp P1099-         | Retrovirus-related  | 40.80 | 0.00 |
| TRINITY_sp Q7G19AAO4      | Benzaldehyde dehydr | 40.80 | 0.00 |
| TRINITY_sp O5979ark1      | Serine/threonine-pr | 40.80 | 0.00 |
| TRINITY_sp Q9ST1At3g4838  | Probable Ufm1-speci | 40.80 | 0.00 |
| TRINITY_sp Q7TX9ppscC     | Phthiocerol/phenolp | 40.80 | 0.00 |
| TRINITY_sp Q9FW9DHAR1     | Glutathione S-trans | 40.80 | 0.00 |
| TRINITY_sp Q3911At4g3294  | Vacuolar-processing | 40.80 | 0.00 |
| TRINITY_sp Q99J9Taf11     | Transcription initi | 40.80 | 0.00 |
| TRINITY_sp Q7XM9Os04g059  | DEAD-box ATP-depend | 40.80 | 0.00 |
| TRINITY_sp Q54Q9UDDB_G028 | Probable zinc trans | 40.70 | 0.00 |
| TRINITY_sp Q9Z29Hdac6     | Histone deacetylase | 40.70 | 0.00 |
| TRINITY_sp P5199NEK3      | Serine/threonine-pr | 40.70 | 0.00 |
| TRINITY_sp Q96M9ZDHHC15   | Palmitoyltransferas | 40.70 | 0.00 |
| TRINITY_sp A5PK9IABHD17C  | Protein ABHD17C OS= | 40.70 | 0.00 |
| TRINITY_sp Q8MM9ipaxB     | Paxillin-B OS=Dicty | 40.70 | 0.00 |
| TRINITY_sp P0CG9UBI4      | Polyubiquitin OS=Ca | 40.70 | 0.00 |
| TRINITY_sp Q94K9At3g5814  | Phenylalanine--tRNA | 40.70 | 0.00 |
| TRINITY_sp Q0J99EME1      | Crossover junction  | 40.70 | 0.00 |
| TRINITY_sp Q9SU9At4g1658  | Probable protein ph | 40.70 | 0.00 |
| TRINITY_sp Q5VJ9Igd9      | Probable serine/thr | 40.70 | 0.00 |
| TRINITY_sp Q54Y9ngap      | Probable Ras GTPase | 40.70 | 0.00 |
| TRINITY_sp P5209proC      | Pyrroline-5-carboxy | 40.70 | 0.00 |
| TRINITY_sp Q8MI9TGIF2LX   | Homeobox protein TG | 40.70 | 0.00 |
| TRINITY_sp Q8WT9DUSP19    | Dual specificity pr | 40.70 | 0.00 |
| TRINITY_sp Q1ZX9IDDB_G027 | PH domain-containin | 40.70 | 0.00 |
| TRINITY_sp Q9SJ9FIM4      | Fimbrin-4 OS=Arabid | 40.70 | 0.00 |
| TRINITY_sp Q9RS9fpnp      | Polyribonucleotide  | 40.70 | 0.00 |
| TRINITY_sp P0869CYP3A4    | Cytochrome P450 3A4 | 40.70 | 0.00 |
| TRINITY_sp P0859pstI      | Aqualysin-1 OS=Ther | 40.70 | 0.00 |
| TRINITY_sp Q6439Sqstm1    | Sequestosome-1 OS=M | 40.70 | 0.00 |
| TRINITY_sp O0879Ogg1      | N-glycosylase/DNA l | 40.70 | 0.00 |
| TRINITY_sp Q5519Hfray2    | Serine/threonine-pr | 40.70 | 0.00 |
| TRINITY_sp Q8699doka      | Hybrid signal trans | 40.70 | 0.00 |
| TRINITY_sp Q9D29Vps33a    | Vacuolar protein so | 40.70 | 0.00 |
| TRINITY_sp Q6I59CDKC-1    | Cyclin-dependent ki | 40.70 | 0.00 |
| TRINITY_sp P2569PWP2      | Periodic tryptophan | 40.70 | 0.00 |
| TRINITY_sp P1699CNJC      | Conjugation stage-s | 40.70 | 0.00 |
| TRINITY_sp O3219yuid      | Uncharacterized mem | 40.70 | 0.00 |
| TRINITY_sp Q1329SRSF6     | Serine/arginine-ric | 40.70 | 0.00 |
| TRINITY_sp Q6189Ras12-9   | GTP-binding nuclear | 40.70 | 0.00 |
| TRINITY_sp P6299RAC1      | Ras-related C3 botu | 40.70 | 0.00 |
| TRINITY_sp P0CS9AKR1      | Palmitoyltransferas | 40.70 | 0.00 |
| TRINITY_sp O1559PDPK1     | 3-phosphoinositide- | 40.70 | 0.00 |
| TRINITY_sp Q0229hemB      | Delta-aminolevulini | 40.70 | 0.00 |
| TRINITY_sp A2XU9OsI_1632  | Pachytene checkpoin | 40.70 | 0.00 |
| TRINITY_sp Q9UT9paal      | Protein phosphatase | 40.70 | 0.00 |
| TRINITY_sp Q2279sym-2     | RNA-binding protein | 40.70 | 0.00 |
| TRINITY_sp Q0199CPP1      | Cysteine proteinase | 40.70 | 0.00 |

|                          |                       |       |      |
|--------------------------|-----------------------|-------|------|
| TRINITY_sp Q0974dnm1     | Dynamamin-related pro | 40.70 | 0.00 |
| TRINITY_sp Q6460Ptprf    | Receptor-type tyros   | 40.70 | 0.00 |
| TRINITY_sp C0QTRpsO      | 30S ribosomal prote   | 40.70 | 0.00 |
| TRINITY_sp Q9Y71SPBC2A9  | Uncharacterized WD    | 40.70 | 0.00 |
| TRINITY_sp Q67Y1ATL65    | RING-H2 finger prot   | 40.70 | 0.00 |
| TRINITY_sp Q3SZHLTA4H    | Leukotriene A-4 hyd   | 40.70 | 0.00 |
| TRINITY_sp P0414GIP      | Copia protein OS=Dr   | 40.70 | 0.00 |
| TRINITY_sp Q9CWMcm8      | DNA helicase MCM8 O   | 40.70 | 0.00 |
| TRINITY_sp P7400prmc     | Release factor glut   | 40.70 | 0.00 |
| TRINITY_sp P0432pol      | Retrovirus-related    | 40.70 | 0.00 |
| TRINITY_sp P2913isp      | Intracellular serin   | 40.70 | 0.00 |
| TRINITY_sp Q6DI3ublcp1   | Ubiquitin-like doma   | 40.70 | 0.00 |
| TRINITY_sp Q9FNQVIP4     | Protein LEO1 homolo   | 40.70 | 0.00 |
| TRINITY_sp A7SK0dph2     | Diphthamide biosynt   | 40.70 | 0.00 |
| TRINITY_sp Q2JN1ftsH     | ATP-dependent zinc    | 40.70 | 0.00 |
| TRINITY_sp Q91V2Abca7    | ATP-binding cassett   | 40.70 | 0.00 |
| TRINITY_sp O6549XCP1     | Cysteine protease X   | 40.70 | 0.00 |
| TRINITY_sp P1097-        | Retrovirus-related    | 40.70 | 0.00 |
| TRINITY_sp Q8GW0PGLP2    | Phosphoglycolate ph   | 40.60 | 0.00 |
| TRINITY_sp Q0539PTK2     | Focal adhesion kina   | 40.60 | 0.00 |
| TRINITY_sp Q9FK7SBT5.6   | Subtilisin-like pro   | 40.60 | 0.00 |
| TRINITY_sp Q9SJEWBC30    | Putative white-brow   | 40.60 | 0.00 |
| TRINITY_sp Q9DA0Dynlrb2  | Dynein light chain    | 40.60 | 0.00 |
| TRINITY_sp Q8K44Abca5    | ATP-binding cassett   | 40.60 | 0.00 |
| TRINITY_sp Q9ZR3DSPTP1   | Dual specificity pr   | 40.60 | 0.00 |
| TRINITY_sp Q2FK4pflB     | Formate acetyltrans   | 40.60 | 0.00 |
| TRINITY_sp Q84Q0OPR1     | 12-oxophytodienoate   | 40.60 | 0.00 |
| TRINITY_sp Q0322divJ     | Histidine protein k   | 40.60 | 0.00 |
| TRINITY_sp O3148ydcI     | Uncharacterized pro   | 40.60 | 0.00 |
| TRINITY_sp P0407-        | Thermitase OS=Therm   | 40.60 | 0.00 |
| TRINITY_sp Q8ND7CCNY     | Cyclin-Y OS=Homo sa   | 40.60 | 0.00 |
| TRINITY_sp Q149MSHPRH    | E3 ubiquitin-protei   | 40.60 | 0.00 |
| TRINITY_sp B9KZ4der      | GTPase Der OS=Therm   | 40.60 | 0.00 |
| TRINITY_sp Q9H0IRNF38    | E3 ubiquitin-protei   | 40.60 | 0.00 |
| TRINITY_sp A2YE2SAP8     | Zinc finger A20 and   | 40.60 | 0.00 |
| TRINITY_sp Q3Z60trpD     | Anthranilate phosph   | 40.60 | 0.00 |
| TRINITY_sp P4356RIM15    | Serine/threonine-pr   | 40.60 | 0.00 |
| TRINITY_sp Q9ZP0AMT1-2   | Ammonium transporte   | 40.60 | 0.00 |
| TRINITY_sp Q8N61SIRT6    | NAD-dependent prote   | 40.60 | 0.00 |
| TRINITY_sp Q4J60PREPL    | Prolyl endopeptidas   | 40.60 | 0.00 |
| TRINITY_sp Q90Y3ZNF622   | Zinc finger protein   | 40.60 | 0.00 |
| TRINITY_sp O2372MVD1     | Diphosphomevalonate   | 40.60 | 0.00 |
| TRINITY_sp Q9PK0malQ     | 4-alpha-glucanotran   | 40.60 | 0.00 |
| TRINITY_sp P4953ycf39    | Uncharacterized pro   | 40.60 | 0.00 |
| TRINITY_sp Q9SD8GDPD6    | Glycerophosphodiast   | 40.60 | 0.00 |
| TRINITY_sp Q9651Y57E12AM | Transmembrane prote   | 40.60 | 0.00 |
| TRINITY_sp Q9CQCmem216   | Transmembrane prote   | 40.60 | 0.00 |
| TRINITY_sp Q8BT6Cpne3    | Copine-3 OS=Mus mus   | 40.60 | 0.00 |
| TRINITY_sp Q948FTHH1     | Protein TOM THREE H   | 40.60 | 0.00 |
| TRINITY_sp Q74ZSPAB1     | Polyadenylate-bindi   | 40.60 | 0.00 |
| TRINITY_sp Q9LTAAt3g1944 | RNA pseudouridine s   | 40.60 | 0.00 |
| TRINITY_sp Q6PF1ndor1    | NADPH-dependent dif   | 40.60 | 0.00 |
| TRINITY_sp O5031bchH     | Magnesium-chelatase   | 40.60 | 0.00 |
| TRINITY_sp Q54DUmcfP     | Mitochondrial subst   | 40.60 | 0.00 |
| TRINITY_sp Q54W0bzipF    | Probable basic-leuc   | 40.60 | 0.00 |
| TRINITY_sp Q3E90CPK34    | Calcium-dependent p   | 40.60 | 0.00 |

|                           |                     |       |      |
|---------------------------|---------------------|-------|------|
| TRINITY_sp Q0666 OMS1     | Methyltransferase O | 40.60 | 0.00 |
| TRINITY_sp Q5864 aroB'    | 3-dehydroquinate sy | 40.60 | 0.00 |
| TRINITY_sp O9444 bdp1     | Transcription facto | 40.60 | 0.00 |
| TRINITY_sp Q8L97 P4H7     | Probable prolyl 4-h | 40.60 | 0.00 |
| TRINITY_sp Q6IQ5 sae1     | SUMO-activating enz | 40.60 | 0.00 |
| TRINITY_sp Q6P80 arl8a    | ADP-ribosylation fa | 40.60 | 0.00 |
| TRINITY_sp Q5T28 C9orf114 | Putative methyltran | 40.60 | 0.00 |
| TRINITY_sp O7940 MT-CO3   | Cytochrome c oxidas | 40.60 | 0.00 |
| TRINITY_sp Q94A8 NUDT19   | Nudix hydrolase 19, | 40.60 | 0.00 |
| TRINITY_sp B4I44 GM10981  | Diacylglycerol kina | 40.60 | 0.00 |
| TRINITY_sp Q7580 BTN1     | Protein BTN1 OS=Ash | 40.60 | 0.00 |
| TRINITY_sp Q9299 BRF1     | Transcription facto | 40.60 | 0.00 |
| TRINITY_sp Q2KI7 PRPF3    | U4/U6 small nuclear | 40.60 | 0.00 |
| TRINITY_sp Q9SS5 FAB1C    | Putative 1-phosphat | 40.60 | 0.00 |
| TRINITY_sp Q9LY6 FKBP19   | Peptidyl-prolyl cis | 40.60 | 0.00 |
| TRINITY_sp Q9P77 rpa2     | Probable DNA-direct | 40.60 | 0.00 |
| TRINITY_sp O7388 HPGDS    | Hematopoietic prost | 40.60 | 0.00 |
| TRINITY_sp Q9JM0 Edf1     | Endothelial differe | 40.60 | 0.00 |
| TRINITY_sp O2284 At2g4361 | Endochitinase At2g4 | 40.60 | 0.00 |
| TRINITY_sp A8XN5 sgk-1    | Serine/threonine-pr | 40.50 | 0.00 |
| TRINITY_sp C7G04 DDB_G028 | von Willebrand fact | 40.50 | 0.00 |
| TRINITY_sp F4JMI At4g1680 | Probable enoyl-CoA  | 40.50 | 0.00 |
| TRINITY_sp P5094 INP52    | Polyphosphatidyli   | 40.50 | 0.00 |
| TRINITY_sp Q0IXI Os10g041 | Acylamino-acid-rele | 40.50 | 0.00 |
| TRINITY_sp Q8N47 CBR4     | Carbonyl reductase  | 40.50 | 0.00 |
| TRINITY_sp Q9JH0 Pigp     | Phosphatidylinosito | 40.50 | 0.00 |
| TRINITY_sp Q92JH tIIS     | tRNA(Ile)-lysidine  | 40.50 | 0.00 |
| TRINITY_sp Q569I selenbp1 | Selenium-binding pr | 40.50 | 0.00 |
| TRINITY_sp Q8NI0 NCOA7    | Nuclear receptor co | 40.50 | 0.00 |
| TRINITY_sp P5464 pkbA     | RAC family serine/t | 40.50 | 0.00 |
| TRINITY_sp O9567 ASMTL    | N-acetylserotonin O | 40.50 | 0.00 |
| TRINITY_sp P8192 -        | Superoxide dismutas | 40.50 | 0.00 |
| TRINITY_sp P8286 fdxr     | NADPH:adrenodoxin o | 40.50 | 0.00 |
| TRINITY_sp Q9ZT4 ATE1     | Arginyl-tRNA--prote | 40.50 | 0.00 |
| TRINITY_sp Q9D77 Rtca     | RNA 3'-terminal pho | 40.50 | 0.00 |
| TRINITY_sp Q6NV3 wdr82    | WD repeat-containin | 40.50 | 0.00 |
| TRINITY_sp F4IP0 SWC2     | SWR1 complex subuni | 40.50 | 0.00 |
| TRINITY_sp P4273 PAB2     | Polyadenylate-bindi | 40.50 | 0.00 |
| TRINITY_sp Q55BI csn7     | COP9 signalosome co | 40.50 | 0.00 |
| TRINITY_sp Q8CA0 Iba57    | Putative transferas | 40.50 | 0.00 |
| TRINITY_sp Q7T60 MIMI_R80 | Putative serine/thr | 40.50 | 0.00 |
| TRINITY_sp Q54S5 DDB_G028 | Protein PIEZO homol | 40.50 | 0.00 |
| TRINITY_sp D3YV1 Ccdc13   | Coiled-coil domain- | 40.50 | 0.00 |
| TRINITY_sp P0418 Cfb      | Complement factor B | 40.50 | 0.00 |
| TRINITY_sp Q9S71 MYB98    | Transcription facto | 40.50 | 0.00 |
| TRINITY_sp Q54BM mcfg     | Mitochondrial subst | 40.50 | 0.00 |
| TRINITY_sp P0783 PETF     | Ferredoxin, chlorop | 40.50 | 0.00 |
| TRINITY_sp P6234 CPK1     | Calcium-dependent p | 40.50 | 0.00 |
| TRINITY_sp Q5M71 Ino16    | Nucleolar protein 6 | 40.50 | 0.00 |
| TRINITY_sp Q99P0 Ogfr     | Opioid growth facto | 40.50 | 0.00 |
| TRINITY_sp Q9VB0 Clbn     | Nuclear export medi | 40.50 | 0.00 |
| TRINITY_sp Q9JI0 Dclrela  | DNA cross-link repa | 40.50 | 0.00 |
| TRINITY_sp Q6ZS1 CAPN12   | Calpain-12 OS=Homo  | 40.50 | 0.00 |
| TRINITY_sp P2580 -        | Cysteine proteinase | 40.50 | 0.00 |
| TRINITY_sp A7SN0 vlg24640 | Serine/threonine-pr | 40.50 | 0.00 |
| TRINITY_sp Q7TP0 Pigv     | GPI mannosyltransfe | 40.50 | 0.00 |



|                          |                      |       |      |
|--------------------------|----------------------|-------|------|
| TRINITY_sp P2752LHCA4    | Chlorophyll a-b bin  | 40.50 | 0.00 |
| TRINITY_sp Q9LI6TMN7     | Transmembrane 9 sup  | 40.50 | 0.00 |
| TRINITY_sp A2YV8OsI_0282 | DEAD-box ATP-depend  | 40.50 | 0.00 |
| TRINITY_sp Q4R81GNL1     | Guanine nucleotide-  | 40.50 | 0.00 |
| TRINITY_sp P1725Mvk      | Mevalonate kinase O  | 40.50 | 0.00 |
| TRINITY_sp Q8TF6ATP8B4   | Probable phospholip  | 40.50 | 0.00 |
| TRINITY_sp Q6DJ1pithd1   | PITH domain-contain  | 40.50 | 0.00 |
| TRINITY_sp O7593DNAJC8   | DnaJ homolog subfam  | 40.50 | 0.00 |
| TRINITY_sp Q8RW4SNRNP65  | U11/U12 small nucle  | 40.50 | 0.00 |
| TRINITY_sp Q5562snf12-1  | SWI/SNF complex com  | 40.50 | 0.00 |
| TRINITY_sp Q4A16walR     | Transcriptional reg  | 40.50 | 0.00 |
| TRINITY_sp Q58A4DD3-3    | Protein DD3-3 OS=Di  | 40.50 | 0.00 |
| TRINITY_sp Q67X2At5g0655 | F-box protein At5g0  | 40.50 | 0.00 |
| TRINITY_sp Q7TM6Prpc     | Lysosomal Pro-X car  | 40.50 | 0.00 |
| TRINITY_sp P2212-        | Ras-related protein  | 40.50 | 0.00 |
| TRINITY_sp D3ZN4Ndufaf6  | NADH dehydrogenase   | 40.50 | 0.00 |
| TRINITY_sp Q8GY2UPL1     | E3 ubiquitin-protei  | 40.50 | 0.00 |
| TRINITY_sp Q9256FIG4     | Polyphosphoinositid  | 40.50 | 0.00 |
| TRINITY_sp Q7YR6PLCZ     | 1-phosphatidylinosi  | 40.50 | 0.00 |
| TRINITY_sp Q3958-        | Dynein 18 kDa light  | 40.50 | 0.00 |
| TRINITY_sp Q54H1mybQ     | Myb-like protein Q   | 40.50 | 0.00 |
| TRINITY_sp F4JB1ATG1B    | Serine/threonine-pr  | 40.50 | 0.00 |
| TRINITY_sp P4329SRK2G    | Serine/threonine-pr  | 40.50 | 0.00 |
| TRINITY_sp O1429wis4     | MAP kinase kinase k  | 40.50 | 0.00 |
| TRINITY_sp Q5RH1ift172   | Intraflagellar tran  | 40.50 | 0    |
| TRINITY_sp Q9SU6ITPK3    | Inositol-tetrakisph  | 40.50 | 0.00 |
| TRINITY_sp P1473IDE      | Insulin-degrading e  | 40.50 | 0.00 |
| TRINITY_sp Q7PN1AGAP0058 | Alpha-tubulin N-ace  | 40.50 | 0.00 |
| TRINITY_sp Q8LE1At2g3066 | (BTB/POZ domain-cont | 40.50 | 0.00 |
| TRINITY_sp Q9FF1RLT2     | Homeobox-DDT domain  | 40.50 | 0.00 |
| TRINITY_sp Q28D1eed      | Polycomb protein ee  | 40.50 | 0.00 |
| TRINITY_sp Q5FW1ZRANB3   | DNA annealing helic  | 40.50 | 0.00 |
| TRINITY_sp Q2663-        | Cathepsin L OS=Sarc  | 40.50 | 0.00 |
| TRINITY_sp O7534GUCY1B2  | Guanylate cyclase s  | 40.50 | 0.00 |
| TRINITY_sp P2577Os04g065 | Oryzain alpha chain  | 40.50 | 0.00 |
| TRINITY_sp Q54R5DDB_G028 | Probable tyrosine-p  | 40.50 | 0.00 |
| TRINITY_sp Q6DR1ddx51    | ATP-dependent RNA h  | 40.40 | 0.00 |
| TRINITY_sp O5105BB_0024  | Uncharacterized pro  | 40.40 | 0.00 |
| TRINITY_sp P5399Rab2a    | Ras-related protein  | 40.40 | 0.00 |
| TRINITY_sp Q5ZJ1ABHD13   | Protein ABHD13 OS=G  | 40.40 | 0.00 |
| TRINITY_sp Q9BX1MAP1LC3C | Microtubule-associa  | 40.40 | 0.00 |
| TRINITY_sp Q6067Sik1     | Serine/threonine-pr  | 40.40 | 0.00 |
| TRINITY_sp P4031CYB5     | Cytochrome b5 OS=Sa  | 40.40 | 0.00 |
| TRINITY_sp P3245APE2     | Aminopeptidase 2, m  | 40.40 | 0.00 |
| TRINITY_sp Q9LH1ABCB15   | ABC transporter B f  | 40.40 | 0.00 |
| TRINITY_sp Q95Z5tdc-1    | Tyrosine decarboxyl  | 40.40 | 0.00 |
| TRINITY_sp Q9NZ1OGFR     | Opioid growth facto  | 40.40 | 0.00 |
| TRINITY_sp O8109NRPB8A   | DNA-directed RNA po  | 40.40 | 0.00 |
| TRINITY_sp Q9YD1thsA     | Thermosome subunit   | 40.40 | 0.00 |
| TRINITY_sp O1543ABCC4    | Multidrug resistanc  | 40.40 | 0.00 |
| TRINITY_sp Q2N21-        | Probable phytol kin  | 40.40 | 0.00 |
| TRINITY_sp Q9FV1AMT1-3   | Ammonium transporte  | 40.40 | 0.00 |
| TRINITY_sp Q9NT1ATP8A2   | Phospholipid-transp  | 40.40 | 0.00 |
| TRINITY_sp Q4VY7hiuH     | 5-hydroxyisourate h  | 40.40 | 0.00 |
| TRINITY_sp Q8GW1PMRT15   | Protein arginine N-  | 40.40 | 0.00 |
| TRINITY_sp Q6CJ5MDV1     | Mitochondrial divis  | 40.40 | 0.00 |

|                          |                     |       |      |
|--------------------------|---------------------|-------|------|
| TRINITY_sp Q54R\sglA     | Sphingosine-1-phosp | 40.40 | 0.00 |
| TRINITY_sp O697\betC     | Choline-sulfatase O | 40.40 | 0.00 |
| TRINITY_sp Q54E\srcp19   | DNA-directed RNA po | 40.40 | 0.00 |
| TRINITY_sp P2204P100/11E | Prostaglandin F syn | 40.40 | 0.00 |
| TRINITY_sp Q652\PH4;4    | Probable anion tran | 40.40 | 0.00 |
| TRINITY_sp Q925\FIG4     | Polyphosphoinositid | 40.40 | 0.00 |
| TRINITY_sp P281\pkgB     | Protein kinase 2 OS | 40.40 | 0.00 |
| TRINITY_sp O751\CPNE3    | Copine-3 OS=Homo sa | 40.40 | 0.00 |
| TRINITY_sp B8AE\FRR23    | Two-component respo | 40.40 | 0.00 |
| TRINITY_sp Q4FE4XBAT35   | Putative E3 ubiquit | 40.40 | 0.00 |
| TRINITY_sp Q9ST\CIPK8    | CBL-interacting ser | 40.40 | 0.00 |
| TRINITY_sp Q8VY\FSQE3    | Squalene epoxidase  | 40.40 | 0.00 |
| TRINITY_sp Q54I\DDB_G02\ | Vacuolar fusion pro | 40.40 | 0.00 |
| TRINITY_sp Q54W\mem184\  | Transmembrane prote | 40.40 | 0.00 |
| TRINITY_sp Q247\-        | Myophilin OS=Echino | 40.40 | 0.00 |
| TRINITY_sp Q169\-        | Dynein intermediate | 40.40 | 0.00 |
| TRINITY_sp Q5ZJ\SUPV3L1  | ATP-dependent RNA h | 40.40 | 0.00 |
| TRINITY_sp O233\ATXR3    | Histone-lysine N-me | 40.40 | 0.00 |
| TRINITY_sp Q9PU\smurf1   | E3 ubiquitin-protei | 40.40 | 0.00 |
| TRINITY_sp Q9GR\aiif     | Apoptosis-inducing  | 40.40 | 0.00 |
| TRINITY_sp Q605\Wrap53   | Telomerase Cajal bo | 40.40 | 0.00 |
| TRINITY_sp P0CB4Ylpm1    | YLP motif-containin | 40.40 | 0.00 |
| TRINITY_sp Q9FI\FRABA2D  | Ras-related protein | 40.40 | 0.00 |
| TRINITY_sp O597\SPBC3B8  | Uncharacterized tra | 40.40 | 0.00 |
| TRINITY_sp Q8BH\Dtd2     | Probable D-tyrosyl- | 40.40 | 0.00 |
| TRINITY_sp Q86A\guaD     | Guanine deaminase O | 40.40 | 0.00 |
| TRINITY_sp Q9Y5\N6AMT1   | HemK methyltransfer | 40.40 | 0.00 |
| TRINITY_sp Q84M\ELUL3    | Probable E3 ubiquit | 40.40 | 0.00 |
| TRINITY_sp Q148\TAF13    | Transcription initi | 40.40 | 0.00 |
| TRINITY_sp Q9SV\At4g314\ | Coatomer subunit be | 40.40 | 0.00 |
| TRINITY_sp O494\AAH      | Allantoate deiminas | 40.40 | 0.00 |
| TRINITY_sp Q9FP\FEDR1    | Serine/threonine-pr | 40.40 | 0.00 |
| TRINITY_sp Q53F\TP53I3   | Quinone oxidoreduct | 40.40 | 0.00 |
| TRINITY_sp Q5XG\tsr1     | Pre-rRNA-processing | 40.40 | 0.00 |
| TRINITY_sp Q84J\At5g405\ | Ribosomal RNA-proce | 40.40 | 0.00 |
| TRINITY_sp Q9SR\CHIP     | E3 ubiquitin-protei | 40.40 | 0.00 |
| TRINITY_sp Q58D\GTPBP1   | GTP-binding protein | 40.40 | 0.00 |
| TRINITY_sp P169\YPTM1    | GTP-binding protein | 40.40 | 0.00 |
| TRINITY_sp Q9FN\UVR8     | Ultraviolet-B recep | 40.40 | 0.00 |
| TRINITY_sp Q395\ODA2     | Dynein gamma chain, | 40.40 | 0.00 |
| TRINITY_sp Q9SU\FAH2     | Dihydroceramide fat | 40.40 | 0.00 |
| TRINITY_sp Q9LX\IRLF     | Cytochrome b5 domai | 40.40 | 0.00 |
| TRINITY_sp P283\Gst1     | Glutathione S-trans | 40.40 | 0.00 |
| TRINITY_sp Q9LT\PPOX1    | Pyridoxine/pyridoxa | 40.40 | 0.00 |
| TRINITY_sp Q9FY\TMN11    | Transmembrane 9 sup | 40.40 | 0.00 |
| TRINITY_sp Q9M0\NSF      | Vesicle-fusing ATPa | 40.40 | 0.00 |
| TRINITY_sp Q54W\DDB_G02\ | Probable serine/thr | 40.40 | 0.00 |
| TRINITY_sp Q9WTV\Slc23a1 | Solute carrier fami | 40.30 | 0.00 |

|                           |                     |       |      |
|---------------------------|---------------------|-------|------|
| TRINITY_sp Q8C6C-         | Protein C21orf2 hom | 40.30 | 0.00 |
| TRINITY_sp Q6NPN(At5g5111 | Probable RNA methyl | 40.30 | 0.00 |
| TRINITY_sp Q8R5F(Utp11    | Probable U3 small n | 40.30 | 0.00 |
| TRINITY_sp Q7ZXI(mtmr4    | Myotubularin-relate | 40.30 | 0.00 |
| TRINITY_sp Q4JH(XBOS36    | Probable E3 ubiquit | 40.30 | 0.00 |
| TRINITY_sp Q5ZMI(SETD3    | Histone-lysine N-me | 40.30 | 0.00 |
| TRINITY_sp P176(FMO2      | Dimethylaniline mon | 40.30 | 0.00 |
| TRINITY_sp Q9DC(Cyb5r3    | NADH-cytochrome b5  | 40.30 | 0.00 |
| TRINITY_sp A8NU1(CC-RAS   | 24 kDa Ras-like pro | 40.30 | 0.00 |
| TRINITY_sp Q9D6(Ttc33     | Tetratricopeptide r | 40.30 | 0.00 |
| TRINITY_sp Q5M8(Nudcd2    | NudC domain-contain | 40.30 | 0.00 |
| TRINITY_sp Q9LKV(NHX7     | Sodium/hydrogen exc | 40.30 | 0.00 |
| TRINITY_sp Q6DH(mrp124    | Probable 39S riboso | 40.30 | 0.00 |
| TRINITY_sp Q76P(mcfQ      | Mitochondrial subst | 40.30 | 0.00 |
| TRINITY_sp B2GV1(Agb15    | Cytosolic carboxype | 40.30 | 0.00 |
| TRINITY_sp Q08DM(TSN      | Translin OS=Bos tau | 40.30 | 0.00 |
| TRINITY_sp Q7DM(ABCC4     | ABC transporter C f | 40.30 | 0.00 |
| TRINITY_sp Q0P5(DNTTIP2   | Deoxynucleotidyltra | 40.30 | 0.00 |
| TRINITY_sp Q923V(Tgs1     | Trimethylguanosine  | 40.30 | 0.00 |
| TRINITY_sp Q54C(jcdE      | JmjC domain-contain | 40.30 | 0.00 |
| TRINITY_sp Q08BE(ctdsp12a | CTD small phosphata | 40.30 | 0.00 |
| TRINITY_sp Q8VD(Alg9      | Alpha-1,2-mannosylt | 40.30 | 0.00 |
| TRINITY_sp O550(Copb2     | Coatomer subunit be | 40.30 | 0.00 |
| TRINITY_sp Q9H2V(MRPL46   | 39S ribosomal prote | 40.30 | 0.00 |
| TRINITY_sp P929(UBA2      | Ubiquitin-activatin | 40.30 | 0.00 |
| TRINITY_sp P208(CYP3A5    | Cytochrome P450 3A5 | 40.30 | 0.00 |
| TRINITY_sp Q1021(SPAC4H3  | Putative thiosulfat | 40.30 | 0.00 |
| TRINITY_sp P0DM(rcsC      | Sensor histidine ki | 40.30 | 0.00 |
| TRINITY_sp P323(MVD1      | Diphosphomevalonate | 40.30 | 0.00 |
| TRINITY_sp Q9SK(MON1      | Vacuolar fusion pro | 40.30 | 0.00 |
| TRINITY_sp Q8GX(HDA15     | Histone deacetylase | 40.30 | 0.00 |
| TRINITY_sp P529(lkhA      | Leukotriene A-4 hyd | 40.30 | 0.00 |
| TRINITY_sp P618(rpl-12    | 60S ribosomal prote | 40.30 | 0.00 |
| TRINITY_sp Q10S(CIPK9     | CBL-interacting pro | 40.30 | 0.00 |
| TRINITY_sp Q86Y(CPNE8     | Copine-8 OS=Homo sa | 40.30 | 0.00 |
| TRINITY_sp O745(msh6      | DNA mismatch repair | 40.30 | 0.00 |
| TRINITY_sp Q8H1(At1g069(  | U2 small nuclear ri | 40.30 | 0.00 |
| TRINITY_sp Q220(R166.3    | Uncharacterized pro | 40.30 | 0.00 |
| TRINITY_sp P623(CPK1      | Calcium-dependent p | 40.30 | 0.00 |
| TRINITY_sp Q9CVI(Atxn3    | Ataxin-3 OS=Mus mus | 40.30 | 0.00 |
| TRINITY_sp Q3ED(At1g229(  | Uncharacterized PKH | 40.30 | 0.00 |
| TRINITY_sp Q54P(nagk      | N-acetyl-D-glucosam | 40.30 | 0.00 |
| TRINITY_sp Q9GPI(apm3     | AP-3 complex subuni | 40.30 | 0.00 |
| TRINITY_sp O225(STY8      | Serine/threonine-pr | 40.30 | 0.00 |
| TRINITY_sp Q6D7(lacZ      | Beta-galactosidase  | 40.30 | 0.00 |
| TRINITY_sp Q9Y3(SBDS      | Ribosome maturation | 40.30 | 0.00 |
| TRINITY_sp Q921(Hemk1     | HemK methyltransfer | 40.30 | 0.00 |
| TRINITY_sp Q8IY(CPNE9     | Copine-9 OS=Homo sa | 40.30 | 0.00 |
| TRINITY_sp Q1024(SPAC4G9  | Uncharacterized mit | 40.30 | 0.00 |
| TRINITY_sp Q203(ppt-1     | Palmitoyl-protein t | 40.30 | 0.00 |
| TRINITY_sp F4JBI(ATG1B    | Serine/threonine-pr | 40.30 | 0.00 |
| TRINITY_sp O234(ARA1      | L-arabinokinase OS= | 40.30 | 0.00 |
| TRINITY_sp Q54R(elf2b5    | Translation initiat | 40.30 | 0.00 |
| TRINITY_sp Q3B7(MURI1     | Unconventional pref | 40.30 | 0.00 |
| TRINITY_sp Q54X(DDB_G02   | Probable serine/thr | 40.30 | 0.00 |
| TRINITY_sp Q5ZK(TRAPPC2   | Trafficking protein | 40.30 | 0.00 |

|                          |                          |       |      |
|--------------------------|--------------------------|-------|------|
| TRINITY_sp O6469CYP710A1 | Cytochrome P450 710      | 40.30 | 0.00 |
| TRINITY_sp Q3YRF         | fold Bifunctional protei | 40.30 | 0.00 |
| TRINITY_sp Q9FEETON2     | Probable serine/thr      | 40.30 | 0.00 |
| TRINITY_sp P1163NHP6A    | Non-histone chromos      | 40.30 | 0.00 |
| TRINITY_sp P5191CNN1     | Calponin-1 OS=Homo       | 40.30 | 0.00 |
| TRINITY_sp Q4G03CCDC40   | Coiled-coil domain-      | 40.30 | 0.00 |
| TRINITY_sp Q9M87NSN1     | Guanine nucleotide-      | 40.30 | 0.00 |
| TRINITY_sp Q9404SRK2E    | Serine/threonine-pr      | 40.30 | 0.00 |
| TRINITY_sp A7RK3vlg23885 | Quinone oxidoreduct      | 40.30 | 0.00 |
| TRINITY_sp P1048-        | Phosphatidylcholine      | 40.30 | 0.00 |
| TRINITY_sp Q9M81DSPTP1B  | Dual specificity pr      | 40.30 | 0.00 |
| TRINITY_sp Q9LF4PUB1     | Probable ubiquitin       | 40.30 | 0.00 |
| TRINITY_sp P1097-        | Retrovirus-related       | 40.30 | 0.00 |
| TRINITY_sp Q8044dio1     | Type I iodothyronin      | 40.30 | 0.00 |
| TRINITY_sp Q9SLFALIS3    | ALA-interacting sub      | 40.30 | 0.00 |
| TRINITY_sp Q9RSFpnp      | Polyribonucleotide       | 40.30 | 0.00 |
| TRINITY_sp P2115csgA     | C-factor OS=Myxococ      | 40.30 | 0.00 |
| TRINITY_sp Q7SY4heatr1   | HEAT repeat-contain      | 40.30 | 0.00 |
| TRINITY_sp P077(LYS2     | L-2-aminoadipate re      | 40.30 | 0.00 |
| TRINITY_sp Q7588MRPL51   | 54S ribosomal prote      | 40.20 | 0.00 |
| TRINITY_sp Q5999cyp120   | Putative cytochrome      | 40.20 | 0.00 |
| TRINITY_sp Q8IYMTRIM22   | E3 ubiquitin-protei      | 40.20 | 0.00 |
| TRINITY_sp Q72M9LIC_1329 | Macro domain-contai      | 40.20 | 0.00 |
| TRINITY_sp D9HP2CNR7     | Cell number regulat      | 40.20 | 0.00 |
| TRINITY_sp P9761Txn2     | Thioredoxin, mitoch      | 40.20 | 0.00 |
| TRINITY_sp Q8IVINUDCD3   | NudC domain-contain      | 40.20 | 0.00 |
| TRINITY_sp Q5ZKIMOV10    | Putative helicase M      | 40.20 | 0.00 |
| TRINITY_sp Q54RfdhkL     | Hybrid signal trans      | 40.20 | 0.00 |
| TRINITY_sp P5028-        | Isoaspartyl peptida      | 40.20 | 0.00 |
| TRINITY_sp O6549XCP1     | Cysteine protease X      | 40.20 | 0.00 |
| TRINITY_sp Q06A3CHD7     | Chromodomain-helica      | 40.20 | 0.00 |
| TRINITY_sp P2013GSTM2    | Glutathione S-trans      | 40.20 | 0.00 |
| TRINITY_sp Q9RSFpnp      | Polyribonucleotide       | 40.20 | 0.00 |
| TRINITY_sp F4HPNIRE4     | Probable serine/thr      | 40.20 | 0.00 |
| TRINITY_sp P0715Cts1     | Cathepsin L1 OS=Rat      | 40.20 | 0.00 |
| TRINITY_sp Q94AVERF003   | Ethylene-responsive      | 40.20 | 0.00 |
| TRINITY_sp B7ID(THA_1434 | UPF0145 protein THA      | 40.20 | 0.00 |
| TRINITY_sp Q7T2Imx1      | Interferon-induced       | 40.20 | 0.00 |
| TRINITY_sp Q1111ubp14    | Ubiquitin carboxyl-      | 40.20 | 0.00 |
| TRINITY_sp Q6NRIagap1    | Arf-GAP with GTPase      | 40.20 | 0.00 |
| TRINITY_sp Q2QE1dio1     | Type I iodothyronin      | 40.20 | 0.00 |
| TRINITY_sp P1689gpaA     | Guanine nucleotide-      | 40.20 | 0.00 |
| TRINITY_sp Q55EFmanC     | Alpha-mannosidase C      | 40.20 | 0.00 |
| TRINITY_sp P491(FMO5     | Dimethylaniline mon      | 40.20 | 0.00 |
| TRINITY_sp Q9LZ9ABCI20   | ABC transporter I f      | 40.20 | 0.00 |
| TRINITY_sp Q9FH(SCPL41   | Serine carboxypepti      | 40.20 | 0.00 |
| TRINITY_sp E9PYWdr78     | WD repeat-contains       | 40.20 | 0.00 |
| TRINITY_sp Q9SEF-        | Pirin-like protein       | 40.20 | 0.00 |
| TRINITY_sp Q54P5cpnC     | Copine-C OS=Dictyos      | 40.20 | 0.00 |
| TRINITY_sp Q0WVIMMS19    | MMS19 nucleotide ex      | 40.20 | 0.00 |
| TRINITY_sp Q9VXFEG9132   | NECAP-like protein       | 40.20 | 0.00 |
| TRINITY_sp Q9C7INTF2     | Nuclear transport f      | 40.20 | 0.00 |
| TRINITY_sp Q6CEVMRD1     | Multiple RNA-bindin      | 40.20 | 0.00 |
| TRINITY_sp P3303yeiR     | Zinc-binding GTPase      | 40.20 | 0.00 |
| TRINITY_sp P4123Abca1    | ATP-binding casset       | 40.20 | 0.00 |
| TRINITY_sp Q24V1htpG     | Chaperone protein H      | 40.20 | 0.00 |

|                           |                     |       |      |
|---------------------------|---------------------|-------|------|
| TRINITY_sp Q1024SPAC4G9   | Uncharacterized mit | 40.20 | 0.00 |
| TRINITY_sp Q9SX7PI4KA1    | Phosphatidylinosito | 40.20 | 0.00 |
| TRINITY_sp Q9UB1POLK      | DNA polymerase kapp | 40.20 | 0.00 |
| TRINITY_sp Q2V9E-         | Transcription facto | 40.20 | 0.00 |
| TRINITY_sp Q9SEH-         | Pirin-like protein  | 40.20 | 0.00 |
| TRINITY_sp Q2725w         | Protein white OS=An | 40.20 | 0.00 |
| TRINITY_sp P4552-         | Actin (Fragment) OS | 40.20 | 0.00 |
| TRINITY_sp Q9LNI SKIP16   | F-box protein SKIP1 | 40.20 | 0.00 |
| TRINITY_sp C0LGNLRR-RLK   | Probable leucine-ri | 40.20 | 0.00 |
| TRINITY_sp Q8TB2SPATA20   | Spermatogenesis-ass | 40.20 | 0.00 |
| TRINITY_sp O4884RPN2A     | 26S proteasome non- | 40.20 | 0.00 |
| TRINITY_sp Q9NQ2UTP3      | Something about sil | 40.20 | 0.00 |
| TRINITY_sp Q9SPMAPY2      | Apyrase 2 OS=Arabid | 40.20 | 0.00 |
| TRINITY_sp Q86C5atg1      | Serine/threonine-pr | 40.20 | 0.00 |
| TRINITY_sp P5534shc       | Probable squalene-- | 40.20 | 0.00 |
| TRINITY_sp Q9HA6KIF9      | Kinesin-like protei | 40.20 | 0.00 |
| TRINITY_sp Q5JK5Os01g095  | Probable NAD kinase | 40.20 | 0.00 |
| TRINITY_sp P6048PTEN      | Phosphatidylinosito | 40.20 | 0.00 |
| TRINITY_sp Q8GW1At4g1825  | Uncharacterized pro | 40.20 | 0.00 |
| TRINITY_sp P2183cryS      | Crystal protein OS= | 40.20 | 0.00 |
| TRINITY_sp Q2RJVmtaD      | 5-methylthioadenosi | 40.20 | 0.00 |
| TRINITY_sp O7418pop3      | Target of rapamycin | 40.20 | 0.00 |
| TRINITY_sp P4329RD21A     | Cysteine proteinase | 40.20 | 0.00 |
| TRINITY_sp Q55C1redB      | NADPH--cytochrome P | 40.20 | 0.00 |
| TRINITY_sp Q54M2mcfB      | Mitochondrial subst | 40.20 | 0.00 |
| TRINITY_sp Q4HX1CPR6      | Peptidyl-prolyl cis | 40.20 | 0.00 |
| TRINITY_sp Q8TD2CHD6      | Chromodomain-helica | 40.20 | 0.00 |
| TRINITY_sp Q96B1ALKBH8    | Alkylated DNA repai | 40.20 | 0.00 |
| TRINITY_sp P496(UAC1      | Adenylate cyclase O | 40.20 | 0.00 |
| TRINITY_sp P4773fdh       | S-(hydroxymethyl)gl | 40.20 | 0.00 |
| TRINITY_sp P2712odc1-a    | Ornithine decarboxy | 40.10 | 0.00 |
| TRINITY_sp Q68E1rab4b     | Ras-related protein | 40.10 | 0.00 |
| TRINITY_sp B71F1dnaJ      | Chaperone protein D | 40.10 | 0.00 |
| TRINITY_sp Q3957ODA2      | Dynein gamma chain, | 40.10 | 0.00 |
| TRINITY_sp P0CC(DDB_G028  | Enolase superfamily | 40.10 | 0.00 |
| TRINITY_sp Q54S3rc11      | Probable RNA 3'-ter | 40.10 | 0.00 |
| TRINITY_sp Q54S8midA      | Protein arginine me | 40.10 | 0.00 |
| TRINITY_sp O1387not3      | General negative re | 40.10 | 0.00 |
| TRINITY_sp Q9LUI CHX19    | Cation/H(+) antipor | 40.10 | 0.00 |
| TRINITY_sp Q54J1chmp5     | Charged multivesicu | 40.10 | 0.00 |
| TRINITY_sp P9295KIN11     | SNF1-related protei | 40.10 | 0.00 |
| TRINITY_sp Q54H4drkB      | Probable serine/thr | 40.10 | 0.00 |
| TRINITY_sp Q8L71SPHK1     | Sphingosine kinase  | 40.10 | 0.00 |
| TRINITY_sp Q6GL6nifk      | MKI67 FHA domain-in | 40.10 | 0.00 |
| TRINITY_sp O7444ubp16     | Probable ubiquitin  | 40.10 | 0.00 |
| TRINITY_sp Q8RX1MIRO1     | Mitochondrial Rho G | 40.10 | 0.00 |
| TRINITY_sp P5287Tmem165   | Transmembrane prote | 40.10 | 0.00 |
| TRINITY_sp Q9D9E-         | Leucine-rich repeat | 40.10 | 0.00 |
| TRINITY_sp Q9LZ7SDP1      | Triacylglycerol lip | 40.10 | 0.00 |
| TRINITY_sp Q5XM2aprA      | Autocrine prolifera | 40.10 | 0.00 |
| TRINITY_sp Q8RW1STY17     | Serine/threonine-pr | 40.10 | 0.00 |
| TRINITY_sp Q1361MTMR1     | Myotubularin-relate | 40.10 | 0.00 |
| TRINITY_sp Q9M84PEX12     | Peroxisome biogenes | 40.10 | 0.00 |
| TRINITY_sp D0NL(CPITG_128 | tRNA (guanine(37)-N | 40.10 | 0.00 |
| TRINITY_sp P3131-         | cAMP-dependent prot | 40.10 | 0.00 |
| TRINITY_sp P1295PEPD      | Xaa-Pro dipeptidase | 40.10 | 0.00 |

|                          |                     |       |      |
|--------------------------|---------------------|-------|------|
| TRINITY_sp P5195Nek1     | Serine/threonine-pr | 40.10 | 0.00 |
| TRINITY_sp Q61L7arf-1.2  | ADP-ribosylation fa | 40.10 | 0.00 |
| TRINITY_sp Q1265ENA5     | Sodium transport AT | 40.10 | 0.00 |
| TRINITY_sp Q7Y1VVSAP9    | Zinc finger A20 and | 40.10 | 0.00 |
| TRINITY_sp Q0279FKBP4    | Peptidyl-prolyl cis | 40.10 | 0.00 |
| TRINITY_sp Q0808CHSP70   | Stromal 70 kDa heat | 40.10 | 0.00 |
| TRINITY_sp Q4X07pim1     | Lon protease homolo | 40.00 | 0.00 |
| TRINITY_sp Q3V1FHeph11   | Hephaestin-like pro | 40.00 | 0.00 |
| TRINITY_sp A8WYFpar-1    | Serine/threonine-pr | 40.00 | 0.00 |
| TRINITY_sp Q4266CYP89A2  | Cytochrome P450 89A | 40.00 | 0.00 |
| TRINITY_sp O603(AQR      | Intron-binding prot | 40.00 | 0.00 |
| TRINITY_sp Q0189YPT1     | Ras-like GTP-bindin | 40.00 | 0.00 |
| TRINITY_sp Q8755AKR1     | Palmitoyltransferas | 40.00 | 0.00 |
| TRINITY_sp P4687KRP95    | Kinesin-II 95 kDa s | 40.00 | 0.00 |
| TRINITY_sp Q9Y7FSPBC2A9  | Uncharacterized WD  | 40.00 | 0.00 |
| TRINITY_sp P9819Atp11a   | Probable phospholip | 40.00 | 0.00 |
| TRINITY_sp Q1RMFSNX3     | Sorting nexin-3 OS= | 40.00 | 0.00 |
| TRINITY_sp Q9D8VHm13     | Minor histocompatib | 40.00 | 0.00 |
| TRINITY_sp Q559FsarA     | GTP-binding protein | 40.00 | 0.00 |
| TRINITY_sp G3MWFMICAL3   | Protein-methionine  | 40.00 | 0.00 |
| TRINITY_sp P4355cya      | Adenylate cyclase O | 40.00 | 0.00 |
| TRINITY_sp O6112krsA     | Serine/threonine-pr | 40.00 | 0.00 |
| TRINITY_sp P3237DAL1     | Allantoinase OS=Sac | 40.00 | 0.00 |
| TRINITY_sp P0CH6RING1    | E3 ubiquitin-protei | 40.00 | 0.00 |
| TRINITY_sp F4JTFISTY46   | Serine/threonine-pr | 40.00 | 0.00 |
| TRINITY_sp Q9SM2LKR/SDH  | Alpha-aminoadipic s | 40.00 | 0.00 |
| TRINITY_sp Q3URIKctd21   | BTB/POZ domain-cont | 40.00 | 0.00 |
| TRINITY_sp Q6073Slc30a1  | Zinc transporter 1  | 40.00 | 0.00 |
| TRINITY_sp Q6ID5MKRN     | E3 ubiquitin-protei | 40.00 | 0.00 |
| TRINITY_sp P0105-        | Subtilisin-chymotry | 40.00 | 0.00 |
| TRINITY_sp Q8WT5ABHD5    | 1-acylglycerol-3-ph | 40.00 | 0.00 |
| TRINITY_sp Q556Fcf50-1   | Counting factor 50  | 40.00 | 0.00 |
| TRINITY_sp Q9M9FAtlg7828 | F-box protein Atlg7 | 40.00 | 0.00 |
| TRINITY_sp Q54M6plbC     | Phospholipase B-lik | 40.00 | 0.00 |
| TRINITY_sp Q55A7dotA     | Histone-lysine N-me | 40.00 | 0.00 |
| TRINITY_sp P4331egl5     | Endoglucanase-5 OS= | 40.00 | 0.00 |
| TRINITY_sp O6708pheA     | P-protein OS=Aquife | 40.00 | 0.00 |
| TRINITY_sp Q90YJtimm8a   | Mitochondrial impor | 40.00 | 0.00 |
| TRINITY_sp A6W3(mtnN     | 5'-methylthioadenos | 40.00 | 0.00 |
| TRINITY_sp Q6K43TRX1     | Histone-lysine N-me | 40.00 | 0.00 |
| TRINITY_sp P1464Pde4c    | cAMP-specific 3',5' | 40.00 | 0.00 |
| TRINITY_sp P1464Pde4c    | cAMP-specific 3',5' | 40.00 | 0.00 |
| TRINITY_sp Q9ZNVDES6     | Acyl-lipid (9-3)-de | 40.00 | 0.00 |
| TRINITY_sp Q51TFCWC2     | Pre-mRNA-splicing f | 40.00 | 0.00 |
| TRINITY_sp Q94IFCCD1     | Carotenoid 9,10(9', | 40.00 | 0.00 |
| TRINITY_sp Q9FI4SDHAF2   | Succinate dehydroge | 40.00 | 0.00 |
| TRINITY_sp P0CT2UMAG_12  | Glucosidase 2 subun | 40.00 | 0.00 |
| TRINITY_sp P2622celD     | Endoglucanase E-4 O | 40.00 | 0.00 |
| TRINITY_sp Q9P0IVAPA     | Vesicle-associated  | 40.00 | 0.00 |
| TRINITY_sp Q9N97-        | Ciliary WD repeat-c | 40.00 | 0.00 |
| TRINITY_sp O7842ycf19    | Uncharacterized pro | 40.00 | 0.00 |
| TRINITY_sp Q17QFSDR39U1  | Epimerase family pr | 40.00 | 0.00 |
| TRINITY_sp Q7XJFAMC2     | Metacaspase-2 OS=Ar | 40.00 | 0.00 |
| TRINITY_sp P1477cyp102A1 | Bifunctional cytoch | 40.00 | 0.00 |
| TRINITY_sp Q1PDJDGK4     | Diacylglycerol kina | 40.00 | 0.00 |
| TRINITY_sp Q5568recG     | ATP-dependent DNA h | 40.00 | 0.00 |

|                           |                     |       |      |
|---------------------------|---------------------|-------|------|
| TRINITY_sp A7SD{cdc51     | Cell division cycle | 40.00 | 0.00 |
| TRINITY_sp Q9LQ\RDRL      | RNA-dependent RNA p | 40.00 | 0.00 |
| TRINITY_sp Q54I\shkB      | Dual specificity pr | 40.00 | 0.00 |
| TRINITY_sp Q61M\gpa-7     | Guanine nucleotide- | 40.00 | 0.00 |
| TRINITY_sp O496\{PAM68    | Protein PAM68, chlo | 40.00 | 0.00 |
| TRINITY_sp P629\{RAC1     | Ras-related C3 botu | 40.00 | 0.00 |
| TRINITY_sp Q54Q\{abcH4    | ABC transporter H f | 40.00 | 0.00 |
| TRINITY_sp Q9MU\{ycf66    | Uncharacterized pro | 40.00 | 0.00 |
| TRINITY_sp Q9LJ\{At3g224{ | Probable prefoldin  | 40.00 | 0.00 |
| TRINITY_sp P797\{TSN      | Translin OS=Gallus  | 40.00 | 0.00 |
| TRINITY_sp Q6NT\{nae1     | NEDD8-activating en | 40.00 | 0.00 |
| TRINITY_sp Q9C5\{AHK3     | Histidine kinase 3  | 40.00 | 0.00 |
| TRINITY_sp A6UY\{vbioC    | Malonyl-[acyl-carri | 40.00 | 0.00 |
| TRINITY_sp P268\{ATPA     | ATP synthase subuni | 40.00 | 0.00 |
| TRINITY_sp P386\{-        | Probable protein di | 40.00 | 0.00 |
| TRINITY_sp Q5Z8\{PARP2-A  | Poly [ADP-ribose] p | 40.00 | 0.00 |
| TRINITY_sp Q9SX\{FYPP1    | Phytochrome-associa | 40.00 | 0.00 |
| TRINITY_sp P487\{EIF5     | Eukaryotic translat | 40.00 | 0.00 |
| TRINITY_sp O944\{tef3     | Elongation factor 3 | 40.00 | 0.00 |
| TRINITY_sp Q962\{ATPC     | ATP synthase subuni | 40.00 | 0.00 |
| TRINITY_sp Q5R9\{ZFAND2A  | AN1-type zinc finge | 40.00 | 0.00 |
| TRINITY_sp O942\{hmt2     | Sulfide:quinone oxi | 40.00 | 0.00 |
| TRINITY_sp Q9P2\{SIPA1L2  | Signal-induced prol | 40.00 | 0.00 |
| TRINITY_sp O655\{At4g309{ | BTB/POZ domain-cont | 40.00 | 0.00 |
| TRINITY_sp O252\{typA     | GTP-binding protein | 40.00 | 0.00 |
| TRINITY_sp O943\{SPBC29A1 | Uncharacterized ATP | 40.00 | 0.00 |
| TRINITY_sp Q84T\{SR45A    | Serine/arginine-ric | 40.00 | 0.00 |
| TRINITY_sp Q618\{Mns1     | Meiosis-specific nu | 40.00 | 0.00 |
| TRINITY_sp Q9SR\{PEX19-1  | Peroxisome biogenes | 40.00 | 0.00 |
| TRINITY_sp P109\{-        | Retrovirus-related  | 40.00 | 0.00 |
| TRINITY_sp P530\{Rfc4     | Replication factor  | 40.00 | 0.00 |
| TRINITY_sp Q75V\{SAPK9    | Serine/threonine-pr | 40.00 | 0.00 |
| TRINITY_sp P395\{DRS2     | Probable phospholip | 40.00 | 0.00 |
| TRINITY_sp Q9UT\{SPAC144  | MIP18 family protei | 40.00 | 0.00 |
| TRINITY_sp Q241\{shark    | Tyrosine-protein ki | 40.00 | 0.00 |
| TRINITY_sp Q78J\{Ubf1     | Ubiquitin domain-co | 40.00 | 0.00 |
| TRINITY_sp A5PK\{METTL13  | Methyltransferase-1 | 40.00 | 0.00 |
| TRINITY_sp O755\{ECI2     | Enoyl-CoA delta iso | 40.00 | 0.00 |
| TRINITY_sp Q9HB\{RDH14    | Retinol dehydrogena | 40.00 | 0.00 |
| TRINITY_sp Q6CP\{TRM13    | tRNA:m(4)X modifica | 40.00 | 0.00 |
| TRINITY_sp Q86C\{tor      | Target of rapamycin | 40.00 | 0.00 |
| TRINITY_sp D0NL\{PITG_12{ | tRNA (guanine(37)-N | 39.90 | 0.00 |
| TRINITY_sp Q8LE\{ECH      | Golgi apparatus mem | 39.90 | 0.00 |
| TRINITY_sp P281\{RABA5C   | Ras-related protein | 39.90 | 0.00 |
| TRINITY_sp P092\{-        | 25 kDa calcium-bind | 39.90 | 0.00 |
| TRINITY_sp Q8CF\{Abca5    | ATP-binding cassett | 39.90 | 0.00 |
| TRINITY_sp Q9NT\{ATP8A2   | Phospholipid-transp | 39.90 | 0.00 |
| TRINITY_sp Q93V\{ATG18A   | Autophagy-related p | 39.90 | 0.00 |
| TRINITY_sp Q6IQ\{alkbh6   | Alpha-ketoglutarate | 39.90 | 0.00 |
| TRINITY_sp O137\{nop12    | Nucleolar protein 1 | 39.90 | 0.00 |
| TRINITY_sp Q145\{ITPR2    | Inositol 1,4,5-tris | 39.90 | 0.00 |
| TRINITY_sp Q927\{SYN2     | Synapsin-2 OS=Homo  | 39.90 | 0.00 |
| TRINITY_sp Q2KH\{USP2     | Ubiquitin carboxyl- | 39.90 | 0.00 |
| TRINITY_sp P215\{ALP1     | Alpha-amylase OS=Sa | 39.90 | 0.00 |
| TRINITY_sp O155\{RNF113A  | RING finger protein | 39.90 | 0.00 |
| TRINITY_sp Q135\{TDG      | G/T mismatch-specif | 39.90 | 0.00 |

|                         |                     |       |      |
|-------------------------|---------------------|-------|------|
| TRINITY_sp Q54Dcbxdc1   | Ribosome production | 39.90 | 0.00 |
| TRINITY_sp P604PTEN     | Phosphatidylinosito | 39.90 | 0.00 |
| TRINITY_sp Q9QWRad1     | Cell cycle checkpoi | 39.90 | 0.00 |
| TRINITY_sp Q6J4SLC8B1   | Sodium/potassium/ca | 39.90 | 0.00 |
| TRINITY_sp A9RY(PHYPADR | ATP-dependent (S)-N | 39.90 | 0.00 |
| TRINITY_sp Q6DEslc25a3  | Solute carrier fami | 39.90 | 0.00 |
| TRINITY_sp Q5F4PAN2     | PAB-dependent poly( | 39.90 | 0.00 |
| TRINITY_sp Q54Mmog1     | Probable ran guanin | 39.90 | 0.00 |
| TRINITY_sp P174Ap2a2    | AP-2 complex subuni | 39.90 | 0.00 |
| TRINITY_sp Q54N7tmk1    | Seven transmembrane | 39.90 | 0.00 |
| TRINITY_sp Q7RYnmp-1    | Nuclear distributio | 39.90 | 0.00 |
| TRINITY_sp Q7KZSUPT6H   | Transcription elong | 39.90 | 0.00 |
| TRINITY_sp Q9SWRH16     | DEAD-box ATP-depend | 39.90 | 0.00 |
| TRINITY_sp O157spnA     | Protein spalten OS= | 39.90 | 0.00 |
| TRINITY_sp A5H0DUR1,2   | Urea amidolyase OS= | 39.90 | 0.00 |
| TRINITY_sp P623CPK1     | Calcium-dependent p | 39.90 | 0.00 |
| TRINITY_sp Q4V9slc25a2  | S-adenosylmethionin | 39.90 | 0.00 |
| TRINITY_sp Q6NVsdad1    | Protein SDA1 homolo | 39.90 | 0.00 |
| TRINITY_sp Q54Qphr2aB   | Serine/threonine-pr | 39.90 | 0.00 |
| TRINITY_sp Q8VZRBL6     | RHOMBOID-like prote | 39.90 | 0.00 |
| TRINITY_sp Q8L5CSN4     | COP9 signalosome co | 39.90 | 0.00 |
| TRINITY_sp Q5ZJNOC4L    | Nucleolar complex p | 39.90 | 0.00 |
| TRINITY_sp Q84WIP5P15   | Type II inositol po | 39.90 | 0.00 |
| TRINITY_sp Q9SRUSUVR3   | Histone-lysine N-me | 39.90 | 0.00 |
| TRINITY_sp Q5JKTPK1     | Thiamine pyrophosph | 39.90 | 0.00 |
| TRINITY_sp Q9M8DSPTP1B  | Dual specificity pr | 39.90 | 0.00 |
| TRINITY_sp Q8WTABHD5    | 1-acylglycerol-3-ph | 39.90 | 0.00 |
| TRINITY_sp Q07G1alkbh8  | Alkylated DNA repai | 39.90 | 0.00 |
| TRINITY_sp P081ABCB1    | Multidrug resistanc | 39.90 | 0.00 |
| TRINITY_sp Q93Y1Atlg279 | Probable pre-mRNA-s | 39.90 | 0.00 |
| TRINITY_sp Q54DIDDB_G02 | Protein unc-50 homo | 39.90 | 0.00 |
| TRINITY_sp A8J6CFAP221  | Cilia- and flagella | 39.90 | 0.00 |
| TRINITY_sp Q9BYCYTHDF1  | YTH domain-containi | 39.90 | 0.00 |
| TRINITY_sp Q432GDH1     | Glutamate dehydroge | 39.90 | 0.00 |
| TRINITY_sp Q9ZRICAD     | Probable mannitol d | 39.90 | 0.00 |
| TRINITY_sp Q67YTRUS4    | Protein root UVB se | 39.90 | 0.00 |
| TRINITY_sp Q9BX1GTPBP2  | GTP-binding protein | 39.90 | 0.00 |
| TRINITY_sp O954SEC24B   | Protein transport p | 39.90 | 0.00 |
| TRINITY_sp O276apgm1    | 2,3-bisphosphoglyce | 39.90 | 0.00 |
| TRINITY_sp Q9931TY3B-G  | Transposon Ty3-G Ga | 39.90 | 0.00 |
| TRINITY_sp Q5A8SLN1     | Histidine protein k | 39.80 | 0.00 |
| TRINITY_sp Q9VGCG6345   | CDK5RAP1-like prote | 39.80 | 0.00 |
| TRINITY_sp Q54Ntrab1D   | Ras-related protein | 39.80 | 0.00 |
| TRINITY_sp Q54Cmcm5     | DNA replication lic | 39.80 | 0.00 |
| TRINITY_sp P418cut9     | Anaphase-promoting  | 39.80 | 0.00 |
| TRINITY_sp Q8TC1RDH11   | Retinol dehydrogena | 39.80 | 0.00 |
| TRINITY_sp Q9V7CG8152   | G patch domain and  | 39.80 | 0.00 |
| TRINITY_sp Q56WISCPL48  | Serine carboxypepti | 39.80 | 0.00 |
| TRINITY_sp P707(Atp8a1  | Phospholipid-transp | 39.80 | 0.00 |
| TRINITY_sp Q5EBIelp2    | Elongator complex p | 39.80 | 0.00 |
| TRINITY_sp Q54YfdhkB    | Hybrid signal trans | 39.80 | 0.00 |
| TRINITY_sp Q9JHCpigp    | Phosphatidylinosito | 39.80 | 0.00 |
| TRINITY_sp Q9LJFFUT11   | Glycoprotein 3-alph | 39.80 | 0.00 |
| TRINITY_sp Q55GvpakC    | Serine/threonine-pr | 39.80 | 0.00 |
| TRINITY_sp Q9W0NaCP60E  | Sodium channel prot | 39.80 | 0.00 |
| TRINITY_sp A4QNctdsp12k | CTD small phosphata | 39.80 | 0.00 |



|                          |                     |       |      |
|--------------------------|---------------------|-------|------|
| TRINITY_sp Q8VWZSMO2-2   | Methylsterol monoox | 39.80 | 0.00 |
| TRINITY_sp Q54GFctdspl2  | CTD small phosphata | 39.80 | 0.00 |
| TRINITY_sp P341(pkgc     | Protein kinase 3 OS | 39.80 | 0.00 |
| TRINITY_sp Q54EHDDB_G02  | GTPase-activating p | 39.80 | 0.00 |
| TRINITY_sp Q056(CTR1     | Serine/threonine-pr | 39.80 | 0.00 |
| TRINITY_sp O496(SAP9     | Zinc finger A20 and | 39.80 | 0.00 |
| TRINITY_sp Q9N4\scpl-3   | CTD small phosphata | 39.80 | 0.00 |
| TRINITY_sp Q55A\DDB_G02  | Probable serine/thr | 39.80 | 0.00 |
| TRINITY_sp Q8LP\LACS6    | Long chain acyl-CoA | 39.80 | 0.00 |
| TRINITY_sp Q8WN\ITPR2    | Inositol 1,4,5-tris | 39.80 | 0.00 |
| TRINITY_sp Q9SJ\NUDT5    | Nudix hydrolase 5 O | 39.80 | 0.00 |
| TRINITY_sp Q9LV\TOE2     | AP2-like ethylene-r | 39.80 | 0.00 |
| TRINITY_sp Q54E\abpF     | Actin-binding prote | 39.80 | 0.00 |
| TRINITY_sp Q0V8\TPP1     | Tripeptidyl-peptida | 39.80 | 0.00 |
| TRINITY_sp Q9JL\Pnkp     | Bifunctional polynu | 39.80 | 0.00 |
| TRINITY_sp Q049\HAT3.1   | Homeobox protein HA | 39.80 | 0.00 |
| TRINITY_sp Q86I\gtf2h3   | General transcripti | 39.80 | 0.00 |
| TRINITY_sp Q8CX\LA_3128  | UPF0176 protein LA_ | 39.80 | 0.00 |
| TRINITY_sp Q7T6\MIMI_R8  | Putative serine/thr | 39.80 | 0.00 |
| TRINITY_sp Q29S\OSCP1    | Protein OSCP1 OS=Bo | 39.80 | 0.00 |
| TRINITY_sp B8AE\MCM5     | DNA replication lic | 39.80 | 0.00 |
| TRINITY_sp P341\racB     | Rho-related protein | 39.80 | 0.00 |
| TRINITY_sp Q2NK\DPY30    | Protein dpy-30 homo | 39.80 | 0.00 |
| TRINITY_sp P011\RAS1     | Ras-like protein 1  | 39.80 | 0.00 |
| TRINITY_sp Q5ZI\TBCD     | Tubulin-specific ch | 39.80 | 0.00 |
| TRINITY_sp Q9FN\E2FA     | Transcription facto | 39.80 | 0.00 |
| TRINITY_sp Q86L\gachH    | Rho GTPase-activati | 39.80 | 0.00 |
| TRINITY_sp O810\EMB1187  | Probable ethanolami | 39.80 | 0.00 |
| TRINITY_sp P239\NDUFA5   | NADH dehydrogenase  | 39.80 | 0.00 |
| TRINITY_sp P239\metG     | Methionine--tRNA li | 39.80 | 0.00 |
| TRINITY_sp Q6DG\mpv1712  | Mpv17-like protein  | 39.80 | 0.00 |
| TRINITY_sp O945\iqw1     | WD repeat protein i | 39.80 | 0.00 |
| TRINITY_sp P932\TFT7     | 14-3-3 protein 7 OS | 39.80 | 0.00 |
| TRINITY_sp Q9BX\NAA15    | N-alpha-acetyltrans | 39.80 | 0.00 |
| TRINITY_sp Q631\Dnah7    | Dynein heavy chain  | 39.80 | 0.00 |
| TRINITY_sp Q86A\gud      | Guanine deaminase O | 39.80 | 0.00 |
| TRINITY_sp P028\psmd8-1  | Probable 26S protea | 39.80 | 0.00 |
| TRINITY_sp Q54J\abcC3    | ABC transporter C f | 39.80 | 0.00 |
| TRINITY_sp D4B1\FARB_023 | Probable glutamate  | 39.80 | 0.00 |
| TRINITY_sp O772\CG4061   | RNA 3'-terminal pho | 39.80 | 0.00 |
| TRINITY_sp Q9W6\req-a    | Zinc finger protein | 39.80 | 0.00 |
| TRINITY_sp Q681\Atlg609  | Putative transferas | 39.80 | 0.00 |
| TRINITY_sp Q9UN\VPS4A    | Vacuolar protein so | 39.80 | 0.00 |
| TRINITY_sp Q5RG\ccdc53   | WASH complex subuni | 39.80 | 0.00 |
| TRINITY_sp Q912\Rep      | Replication-associa | 39.80 | 0.00 |
| TRINITY_sp Q0P4\Fdis31   | DIS3-like exonuclea | 39.80 | 0.00 |
| TRINITY_sp Q9M2\IACA11   | Putative calcium-tr | 39.80 | 0.00 |
| TRINITY_sp P109\-        | Retrovirus-related  | 39.80 | 0.00 |
| TRINITY_sp Q9FV\PLGG1    | Plastidal glycolate | 39.80 | 0.00 |
| TRINITY_sp O956\YEATS4   | YEATS domain-contai | 39.80 | 0.00 |
| TRINITY_sp Q929\UPF1     | Regulator of nonsen | 39.80 | 0.00 |
| TRINITY_sp Q28G\melk     | Maternal embryonic  | 39.80 | 0.00 |
| TRINITY_sp Q944\ISLP2    | Shewanella-like pro | 39.80 | 0.00 |
| TRINITY_sp Q2AB\pRB      | Retinoblastoma-rela | 39.80 | 0.00 |
| TRINITY_sp Q54H\gghB     | Gamma-glutamyl hydr | 39.80 | 0.00 |
| TRINITY_sp Q5F4\RAB8A    | Ras-related protein | 39.80 | 0.00 |

|                          |                     |       |      |
|--------------------------|---------------------|-------|------|
| TRINITY_sp Q9FG3PNG1     | Peptide-N(4)-(N-ace | 39.80 | 0.00 |
| TRINITY_sp Q75J3CR4      | Serine/threonine-pr | 39.80 | 0.00 |
| TRINITY_sp Q54JFabcC3    | ABC transporter C f | 39.80 | 0.00 |
| TRINITY_sp P7905rhp16    | ATP-dependent helic | 39.80 | 0.00 |
| TRINITY_sp P2271Gucylb2  | Guanylate cyclase s | 39.80 | 0.00 |
| TRINITY_sp P1097-        | Retrovirus-related  | 39.80 | 0.00 |
| TRINITY_sp Q8CE3Cdk11    | Cyclin-dependent ki | 39.70 | 0.00 |
| TRINITY_sp Q0IUUCML2     | Putative calmodulin | 39.70 | 0.00 |
| TRINITY_sp Q7ZU1ykt6     | Synaptobrevin homol | 39.70 | 0.00 |
| TRINITY_sp Q54W1DDB_G027 | U6 snRNA phosphodie | 39.70 | 0.00 |
| TRINITY_sp Q9SL2Os05g015 | Importin subunit al | 39.70 | 0.00 |
| TRINITY_sp P5352ML1149   | Cob(I)yrinic acid a | 39.70 | 0.00 |
| TRINITY_sp Q5M91Rbm34    | RNA-binding protein | 39.70 | 0.00 |
| TRINITY_sp Q6P03Znf511   | Zinc finger protein | 39.70 | 0.00 |
| TRINITY_sp Q05A1elp2     | Elongator complex p | 39.70 | 0.00 |
| TRINITY_sp Q6DC1hikeshi  | Protein Hikeshi OS= | 39.70 | 0.00 |
| TRINITY_sp Q8642RGS5     | Regulator of G-prot | 39.70 | 0.00 |
| TRINITY_sp Q9ZV1SGPP     | Haloacid dehalogena | 39.70 | 0.00 |
| TRINITY_sp Q9D11Mthfs    | 5-formyltetrahydrof | 39.70 | 0.00 |
| TRINITY_sp Q9NX1TRMT1    | tRNA (guanine(26)-N | 39.70 | 0.00 |
| TRINITY_sp Q8S12Os01g081 | Probable U3 small n | 39.70 | 0.00 |
| TRINITY_sp Q2KJ1INTS9    | Integrator complex  | 39.70 | 0.00 |
| TRINITY_sp P3494NDUFA9   | NADH dehydrogenase  | 39.70 | 0.00 |
| TRINITY_sp P2668B52      | Serine-arginine pro | 39.70 | 0.00 |
| TRINITY_sp Q5R82OLA1     | Obg-like ATPase 1 O | 39.70 | 0.00 |
| TRINITY_sp P244(RAB10    | Ras-related protein | 39.70 | 0.00 |
| TRINITY_sp Q8BY1Rdh12    | Retinol dehydrogena | 39.70 | 0.00 |
| TRINITY_sp Q8R34Ccdc12   | Coiled-coil domain- | 39.70 | 0.00 |
| TRINITY_sp O2255STY8     | Serine/threonine-pr | 39.70 | 0.00 |
| TRINITY_sp Q84L(GONST4   | GDP-mannose transpo | 39.70 | 0.00 |
| TRINITY_sp O6528CPN20    | 20 kDa chaperonin,  | 39.70 | 0.00 |
| TRINITY_sp Q9DB5Osbp13   | Oxysterol-binding p | 39.70 | 0.00 |
| TRINITY_sp P9074catp-8   | Probable manganese- | 39.70 | 0.00 |
| TRINITY_sp O0084cudA     | Putative transcript | 39.70 | 0.00 |
| TRINITY_sp P6234CPK4     | Calcium-dependent p | 39.70 | 0.00 |
| TRINITY_sp P1605gpaB     | Guanine nucleotide- | 39.70 | 0.00 |
| TRINITY_sp Q9SU\At4g3235 | Probable sugar phos | 39.70 | 0.00 |
| TRINITY_sp Q6411Nuak1    | NUAK family SNF1-li | 39.70 | 0.00 |
| TRINITY_sp Q92J7era      | GTPase Era OS=Ricke | 39.70 | 0.00 |
| TRINITY_sp Q54S1dhkD     | Hybrid signal trans | 39.70 | 0.00 |
| TRINITY_sp Q5XM2aprA     | Autocrine prolifera | 39.70 | 0.00 |
| TRINITY_sp P1097-        | Retrovirus-related  | 39.70 | 0.00 |
| TRINITY_sp Q7XA8FOLT1    | Folate transporter  | 39.70 | 0.00 |
| TRINITY_sp P3278GTF2H1   | General transcripti | 39.70 | 0.00 |
| TRINITY_sp Q4W94encD     | 2-oxoglutarate-Fe(I | 39.70 | 0.00 |
| TRINITY_sp Q86I5DDB_G027 | Uncharacterized Gol | 39.70 | 0.00 |
| TRINITY_sp P343(C50C3.5  | Uncharacterized cal | 39.70 | 0.00 |
| TRINITY_sp Q7XR\RM11     | RecQ-mediated genom | 39.70 | 0.00 |
| TRINITY_sp Q9LJ1CRK2     | CDPK-related kinase | 39.70 | 0.00 |
| TRINITY_sp Q8C85Myef2    | Myelin expression f | 39.70 | 0.00 |
| TRINITY_sp Q9QX1Nme7     | Nucleoside diphosph | 39.70 | 0.00 |
| TRINITY_sp P5315GUP1     | Glycerol uptake pro | 39.70 | 0.00 |
| TRINITY_sp O945(SPBC12D1 | Uncharacterized mit | 39.70 | 0.00 |
| TRINITY_sp Q54F1mybO     | Myb-like protein O  | 39.70 | 0.00 |
| TRINITY_sp O005(MPHOSPH1 | U3 small nucleolar  | 39.70 | 0.00 |
| TRINITY_sp A8WY1par-1    | Serine/threonine-pr | 39.70 | 0.00 |

|                          |                      |       |      |
|--------------------------|----------------------|-------|------|
| TRINITY_sp Q54JFabC3     | ABC transporter C f  | 39.70 | 0.00 |
| TRINITY_sp Q556YDDB_G027 | Probable rhodanese   | 39.70 | 0.00 |
| TRINITY_sp Q3963-        | Glycerol-3-phosphat  | 39.70 | 0.00 |
| TRINITY_sp Q8RWISTY17    | Serine/threonine-pr  | 39.70 | 0.00 |
| TRINITY_sp Q3SX4LUC7L3   | Luc7-like protein 3  | 39.70 | 0.00 |
| TRINITY_sp P259MXAN_59   | (Uncharacterized oxi | 39.70 | 0.00 |
| TRINITY_sp Q69Q(DPE2     | 4-alpha-glucanotran  | 39.70 | 0.00 |
| TRINITY_sp Q54H4drkB     | Probable serine/thr  | 39.70 | 0.00 |
| TRINITY_sp Q56YMSMC3     | Structural maintena  | 39.70 | 0.00 |
| TRINITY_sp Q9LZ7SDP1     | Triacylglycerol lip  | 39.70 | 0.00 |
| TRINITY_sp Q9FV(AGD12    | ADP-ribosylation fa  | 39.70 | 0.00 |
| TRINITY_sp P3294CLB6     | S-phase entry cycli  | 39.70 | 0.00 |
| TRINITY_sp Q96U(DGAT2A   | Diacylglycerol O-ac  | 39.70 | 0.00 |
| TRINITY_sp Q2462ref(2)P  | Protein ref(2)P OS=  | 39.70 | 0.00 |
| TRINITY_sp Q9C5(RFC1     | Replication factor   | 39.70 | 0.00 |
| TRINITY_sp O942(SPBC887. | Probable phospholip  | 39.70 | 0.00 |
| TRINITY_sp Q5JWFDOPEY1   | Protein dopey-1 OS=  | 39.70 | 0.00 |
| TRINITY_sp A2XQFOsI_148  | (Senescence-specific | 39.70 | 0.00 |
| TRINITY_sp Q0IQ(RAPTOR1  | Regulatory-associat  | 39.70 | 0.00 |
| TRINITY_sp F4I9(At1g580  | (DEXH-box ATP-depend | 39.70 | 0.00 |
| TRINITY_sp Q54YHdhkB     | Hybrid signal trans  | 39.70 | 0.00 |
| TRINITY_sp Q9SLJNEK1     | Serine/threonine-pr  | 39.70 | 0.00 |
| TRINITY_sp Q045(YDR109C  | Uncharacterized sug  | 39.70 | 0.00 |
| TRINITY_sp Q6PB(grtp1a   | Growth hormone-regu  | 39.60 | 0.00 |
| TRINITY_sp O550(Ralgapa1 | Ral GTPase-activati  | 39.60 | 0.00 |
| TRINITY_sp P3031cdc25-3  | M-phase inducer pho  | 39.60 | 0.00 |
| TRINITY_sp Q9SEH-        | Pirin-like protein   | 39.60 | 0.00 |
| TRINITY_sp Q9VCFCG17119  | Cystinosin homolog   | 39.60 | 0.00 |
| TRINITY_sp Q6322Gmfb     | Glia maturation fac  | 39.60 | 0.00 |
| TRINITY_sp Q2HVMtrDRAF7  | Putative N6-adenosi  | 39.60 | 0.00 |
| TRINITY_sp Q9Y25CHKB     | Choline/ethanolamin  | 39.60 | 0.00 |
| TRINITY_sp O654(XCP1     | Cysteine protease X  | 39.60 | 0.00 |
| TRINITY_sp Q9Y3(ACOT9    | Acyl-coenzyme A thi  | 39.60 | 0.00 |
| TRINITY_sp Q6DC(mett116  | Methyltransferase-1  | 39.60 | 0.00 |
| TRINITY_sp O803(MKK3     | Mitogen-activated p  | 39.60 | 0.00 |
| TRINITY_sp Q6UK(pirA     | Protein pirA OS=Dic  | 39.60 | 0.00 |
| TRINITY_sp Q6NV(brd9     | Bromodomain-contain  | 39.60 | 0.00 |
| TRINITY_sp O9411nudG     | Dynein light chain,  | 39.60 | 0.00 |
| TRINITY_sp P3414rabC     | Ras-related protein  | 39.60 | 0.00 |
| TRINITY_sp P3003PBLD     | Phenazine biosynthe  | 39.60 | 0.00 |
| TRINITY_sp Q0WK(ULP2A    | Probable ubiquitin-  | 39.60 | 0.00 |
| TRINITY_sp P3518PTC1     | Protein phosphatase  | 39.60 | 0.00 |
| TRINITY_sp Q8JZV(Cpne5   | Copine-5 OS=Mus mus  | 39.60 | 0.00 |
| TRINITY_sp P0565(sacC    | Levanase OS=Bacillu  | 39.60 | 0.00 |
| TRINITY_sp Q96AI(ZUFSP   | Zinc finger with UF  | 39.60 | 0.00 |
| TRINITY_sp Q9SL(Os05g015 | Importin subunit al  | 39.60 | 0.00 |
| TRINITY_sp P6234CPK4     | Calcium-dependent p  | 39.60 | 0.00 |
| TRINITY_sp Q5RBE(SEN1    | Sentrin-specific pr  | 39.60 | 0.00 |
| TRINITY_sp Q2355unc-22   | Twitchin OS=Caenorh  | 39.60 | 0.00 |
| TRINITY_sp P2143(ABC4    | Phosphatidylcholine  | 39.60 | 0.00 |
| TRINITY_sp Q55F(plbG     | Phospholipase B-lik  | 39.60 | 0.00 |
| TRINITY_sp Q7ZV(otud6b   | OTU domain-containi  | 39.60 | 0.00 |
| TRINITY_sp Q6302Add1     | Alpha-adducin OS=Ra  | 39.60 | 0.00 |
| TRINITY_sp Q54R(pyk      | Pyruvate kinase OS=  | 39.60 | 0.00 |
| TRINITY_sp B3DN(APC6     | Anaphase-promoting   | 39.60 | 0.00 |
| TRINITY_sp Q9Z1(Nek4     | Serine/threonine-pr  | 39.60 | 0.00 |

|                   |          |                     |       |      |
|-------------------|----------|---------------------|-------|------|
| TRINITY_sp Q8RYFA | At2g3325 | Haloacid dehalogena | 39.60 | 0.00 |
| TRINITY_sp Q9FYFR | S2Z32    | Serine/arginine-ric | 39.60 | 0.00 |
| TRINITY_sp Q9BXVF | ANCD2    | Fanconi anemia grou | 39.60 | 0.00 |
| TRINITY_sp Q9P7C  | oma1     | Mitochondrial metal | 39.60 | 0.00 |
| TRINITY_sp Q9S8C  | CLPP5    | ATP-dependent Clp p | 39.60 | 0.00 |
| TRINITY_sp Q059C  | myb11    | Myb-related protein | 39.60 | 0.00 |
| TRINITY_sp A8XAI  | rheb-1   | GTP-binding protein | 39.60 | 0.00 |
| TRINITY_sp Q54B   | abcB2    | ABC transporter B f | 39.60 | 0.00 |
| TRINITY_sp Q9BIIB | B0464.9  | Probable protein ph | 39.60 | 0.00 |
| TRINITY_sp Q5XI1  | Grwd1    | Glutamate-rich WD r | 39.60 | 0.00 |
| TRINITY_sp Q9SJ4  | VPS11    | Vacuolar protein-so | 39.60 | 0.00 |
| TRINITY_sp Q9LKC  | CHY1     | 3-hydroxyisobutyryl | 39.60 | 0.00 |
| TRINITY_sp P582E  | Rnf216   | E3 ubiquitin-protei | 39.60 | 0.00 |
| TRINITY_sp Q5W6C  | MAN5     | Putative mannan end | 39.60 | 0.00 |
| TRINITY_sp Q3891  | ANT      | AP2-like ethylene-r | 39.60 | 0.00 |
| TRINITY_sp O751C  | KDM4A    | Lysine-specific dem | 39.60 | 0.00 |
| TRINITY_sp Q5C91  | -        | (S)-coclaurine N-me | 39.60 | 0.00 |
| TRINITY_sp O4904  | VPS45    | Vacuolar protein so | 39.60 | 0.00 |
| TRINITY_sp P056E  | sacC     | Levanase OS=Bacillu | 39.60 | 0.00 |
| TRINITY_sp P322E  | rasB     | Ras-like protein ra | 39.60 | 0.00 |
| TRINITY_sp Q6P7Z  | Gaa      | Lysosomal alpha-glu | 39.60 | 0.00 |
| TRINITY_sp E9Q4E  | Pde8b    | High affinity cAMP- | 39.60 | 0.00 |
| TRINITY_sp Q9BZ   | OSBPL6   | Oxysterol-binding p | 39.60 | 0.00 |
| TRINITY_sp Q54N   | chus1    | Checkpoint protein  | 39.60 | 0.00 |
| TRINITY_sp Q944E  | dymA     | Dynamin-A OS=Dictyo | 39.60 | 0.00 |
| TRINITY_sp O006Z  | PIR      | Pirin OS=Homo sapie | 39.60 | 0.00 |
| TRINITY_sp O064Y  | yfmR     | Uncharacterized ABC | 39.60 | 0.00 |
| TRINITY_sp P085E  | pstI     | Aqualysin-1 OS=Ther | 39.60 | 0.00 |
| TRINITY_sp Q54J   | abcC3    | ABC transporter C f | 39.60 | 0.00 |
| TRINITY_sp Q9SZ1  | P4H11    | Probable prolyl 4-h | 39.60 | 0.00 |
| TRINITY_sp Q9M3E  | At3g5411 | Ataxin-3 homolog OS | 39.50 | 0.00 |
| TRINITY_sp A4FV   | PPIE     | Peptidyl-prolyl cis | 39.50 | 0.00 |
| TRINITY_sp Q8R1H  | Hid1     | Protein HID1 OS=Mus | 39.50 | 0.00 |
| TRINITY_sp Q8BT   | Cpne3    | Copine-3 OS=Mus mus | 39.50 | 0.00 |
| TRINITY_sp U4PR   | pig-1    | Maternal embryonic  | 39.50 | 0.00 |
| TRINITY_sp Q641   | facbd5   | Acyl-CoA-binding do | 39.50 | 0.00 |
| TRINITY_sp Q91YI  | Rnf126   | E3 ubiquitin-protei | 39.50 | 0.00 |
| TRINITY_sp Q605C  | IGHMBP2  | DNA-binding protein | 39.50 | 0.00 |
| TRINITY_sp Q54R   | cnrB     | CLPTM1-like membran | 39.50 | 0.00 |
| TRINITY_sp Q099E  | K10B2.2  | Uncharacterized ser | 39.50 | 0.00 |
| TRINITY_sp A9UM   | lyrm1    | LYR motif-containin | 39.50 | 0.00 |
| TRINITY_sp P253Z  | mlkA     | Myosin light chain  | 39.50 | 0.00 |
| TRINITY_sp Q246Z  | ref(2)P  | Protein ref(2)P OS= | 39.50 | 0.00 |
| TRINITY_sp B9DS   | Ipth     | Peptidyl-tRNA hydro | 39.50 | 0.00 |
| TRINITY_sp Q54L   | Uuox     | Uricase OS=Dictyost | 39.50 | 0.00 |
| TRINITY_sp Q5UP   | MIMI_R61 | Putative band 7 fam | 39.50 | 0.00 |
| TRINITY_sp Q5BL   | atp8b1   | Phospholipid-transp | 39.50 | 0.00 |
| TRINITY_sp O956Z  | CNOT4    | CCR4-NOT transcript | 39.50 | 0.00 |
| TRINITY_sp Q9AV   | PRP19    | Pre-mRNA-processing | 39.50 | 0.00 |
| TRINITY_sp Q8HY   | ELAC2    | Zinc phosphodiester | 39.50 | 0.00 |
| TRINITY_sp Q4U5   | FRNF114  | E3 ubiquitin-protei | 39.50 | 0.00 |
| TRINITY_sp A7TM   | EEFG1    | rRNA-processing pro | 39.50 | 0.00 |
| TRINITY_sp Q54B   | empB     | Transmembrane emp24 | 39.50 | 0.00 |
| TRINITY_sp Q8WX   | DNAH7    | Dynein heavy chain  | 39.50 | 0.00 |
| TRINITY_sp Q999E  | DUSP9    | Dual specificity pr | 39.50 | 0.00 |
| TRINITY_sp Q4IE   | PPM2     | tRNA wybutosine-syn | 39.50 | 0.00 |

|                          |                     |       |      |
|--------------------------|---------------------|-------|------|
| TRINITY_sp P4996SRP19    | Signal recognition  | 39.50 | 0.00 |
| TRINITY_sp P5243Polr1c   | DNA-directed RNA po | 39.50 | 0.00 |
| TRINITY_sp Q9SZ6VIP3     | WD repeat-containin | 39.50 | 0.00 |
| TRINITY_sp A8HMNRSP14    | Radial spoke protei | 39.50 | 0.00 |
| TRINITY_sp Q1513CDK10    | Cyclin-dependent ki | 39.50 | 0.00 |
| TRINITY_sp Q8H1FABCI10   | ABC transporter I f | 39.50 | 0.00 |
| TRINITY_sp Q9H89TTC12    | Tetratricopeptide r | 39.50 | 0.00 |
| TRINITY_sp P2201TUB1     | Tubulin beta-1 chai | 39.50 | 0.00 |
| TRINITY_sp O1896SYNJ1    | Synaptojanin-1 (Fra | 39.50 | 0.00 |
| TRINITY_sp Q54DIgcvT     | Aminomethyltransfer | 39.50 | 0.00 |
| TRINITY_sp Q0137fox-2    | Peroxisomal hydrata | 39.50 | 0.00 |
| TRINITY_sp Q5BJ5Cpne9    | Copine-9 OS=Rattus  | 39.50 | 0.00 |
| TRINITY_sp O5355ilvX     | Putative acetolacta | 39.50 | 0.00 |
| TRINITY_sp Q6ZMKIF6      | Kinesin-like protei | 39.50 | 0.00 |
| TRINITY_sp A9VVSspeE     | Polyamine aminoprop | 39.50 | 0.00 |
| TRINITY_sp Q6NMF8H       | Probable glucuronox | 39.50 | 0.00 |
| TRINITY_sp Q7PLJNipped-B | Nipped-B protein OS | 39.50 | 0.00 |
| TRINITY_sp Q9WY7TM_0508  | Uncharacterized pro | 39.50 | 0.00 |
| TRINITY_sp Q6P36rnf121   | RING finger protein | 39.50 | 0.00 |
| TRINITY_sp Q5953ptrB     | Protease 2 OS=Morax | 39.50 | 0.00 |
| TRINITY_sp Q9UN3VPS4A    | Vacuolar protein so | 39.50 | 0.00 |
| TRINITY_sp Q54BMsfl      | Branchpoint-bridgin | 39.50 | 0.00 |
| TRINITY_sp Q9ER7SMC4     | Structural maintena | 39.50 | 0.00 |
| TRINITY_sp Q9FR3AMI1     | Amidase 1 OS=Arabid | 39.50 | 0.00 |
| TRINITY_sp Q3URIKctd21   | BTB/POZ domain-cont | 39.50 | 0.00 |
| TRINITY_sp P2086PHYPADRA | Chlorophyll a-b bin | 39.50 | 0.00 |
| TRINITY_sp Q9H86VCPKMT   | Protein-lysine meth | 39.50 | 0.00 |
| TRINITY_sp O4300syj1     | Inositol-1,4,5-tris | 39.50 | 0.00 |
| TRINITY_sp F4J79SFH9     | Phosphatidylinosito | 39.50 | 0.00 |
| TRINITY_sp Q6AWUHOL3     | Probable thiol meth | 39.50 | 0.00 |
| TRINITY_sp Q9LSIUBC32    | Ubiquitin-conjugati | 39.50 | 0.00 |
| TRINITY_sp Q54XCDDB_G027 | Uncharacterized G-p | 39.50 | 0.00 |
| TRINITY_sp Q9FG6ATO      | Splicing factor SF3 | 39.50 | 0.00 |
| TRINITY_sp O8266SDH1-1   | Succinate dehydroge | 39.50 | 0.00 |
| TRINITY_sp P3056CAT2     | Catalase isozyme 2  | 39.50 | 0.00 |
| TRINITY_sp Q55D7abcG22   | ABC transporter G f | 39.50 | 0.00 |
| TRINITY_sp Q54XCcrop     | Luc7-like protein O | 39.50 | 0.00 |
| TRINITY_sp Q54JFabcC3    | ABC transporter C f | 39.50 | 0.00 |
| TRINITY_sp Q8MVFgbcC     | Cyclic GMP-binding  | 39.50 | 0.00 |
| TRINITY_sp Q9N5Iparg-2   | Poly(ADP-ribose) gl | 39.40 | 0.00 |
| TRINITY_sp Q8BMFEif4e2   | Eukaryotic translat | 39.40 | 0.00 |
| TRINITY_sp Q55AVsac1     | Phosphatidylinositi | 39.40 | 0.00 |
| TRINITY_sp Q7ZWEbbs5     | Bardet-Biedl syndro | 39.40 | 0.00 |
| TRINITY_sp Q5E97VPS25    | Vacuolar protein-so | 39.40 | 0.00 |
| TRINITY_sp P1612THR4     | Threonine synthase  | 39.40 | 0.00 |
| TRINITY_sp Q54DIamdA     | AMP deaminase OS=Di | 39.40 | 0.00 |
| TRINITY_sp Q9RPFrh1G     | Rhamnolipids biosyn | 39.40 | 0.00 |
| TRINITY_sp Q9FV7Atlg5772 | Probable elongation | 39.40 | 0.00 |
| TRINITY_sp P4364-        | DnaJ protein homolo | 39.40 | 0.00 |
| TRINITY_sp P2507CML12    | Calmodulin-like pro | 39.40 | 0.00 |
| TRINITY_sp Q9SC6At3g5052 | Phosphoglycerate mu | 39.40 | 0.00 |
| TRINITY_sp Q9SYUPEX10    | Peroxisome biogenes | 39.40 | 0.00 |
| TRINITY_sp Q8NG6TTL      | Tubulin--tyrosine l | 39.40 | 0.00 |
| TRINITY_sp Q945(modA     | Neutral alpha-gluco | 39.40 | 0.00 |
| TRINITY_sp Q31QFrp1J     | 50S ribosomal prote | 39.40 | 0.00 |
| TRINITY_sp Q6DE7ogfod1   | Prolyl 3-hydroxylas | 39.40 | 0.00 |

|                           |                                            |       |      |
|---------------------------|--------------------------------------------|-------|------|
| TRINITY_sp Q8BNIWdr35     | WD repeat-contains                         | 39.40 | 0.00 |
| TRINITY_sp P3508cbpP      | Calcium-binding protein                    | 39.40 | 0.00 |
| TRINITY_sp Q9ASUDGAT2     | Diacylglycerol O-acyltransferase           | 39.40 | 0.00 |
| TRINITY_sp Q7KV9Trf4-1    | Non-canonical poly(ADP-ribose) polymerase  | 39.40 | 0.00 |
| TRINITY_sp Q8C11Ccz1      | Vacuolar fusion protein                    | 39.40 | 0.00 |
| TRINITY_sp Q0288FMP30     | N-acyl-phosphatidylcholine synthase        | 39.40 | 0.00 |
| TRINITY_sp Q8L64BB        | E3 ubiquitin ligase                        | 39.40 | 0.00 |
| TRINITY_sp Q73PMrpsS      | 30S ribosomal protein S1                   | 39.40 | 0.00 |
| TRINITY_sp Q7ZX2utp15     | U3 small nucleolar ribonucleoprotein       | 39.40 | 0.00 |
| TRINITY_sp Q1246TRM11     | tRNA (guanine(10)-N-acetylhistidine)       | 39.40 | 0.00 |
| TRINITY_sp Q9VGF1CG17726  | Protein arginine methyltransferase         | 39.40 | 0.00 |
| TRINITY_sp Q6304Gfer      | FAD-linked sulfhydrylase                   | 39.40 | 0.00 |
| TRINITY_sp F4JL8LDL3      | Lysine-specific histone demethylase        | 39.40 | 0.00 |
| TRINITY_sp Q8IY1PNPLA6    | Neuropathy target esterase                 | 39.40 | 0.00 |
| TRINITY_sp P412(Cetn1     | Centrin-1 OS=Mus musculus                  | 39.40 | 0.00 |
| TRINITY_sp Q9469RAP1      | Ras-related protein                        | 39.40 | 0.00 |
| TRINITY_sp Q72L1fo1E      | GTP cyclohydrolase                         | 39.40 | 0.00 |
| TRINITY_sp Q8TBF1KLHDC4   | Kelch domain-containing protein            | 39.40 | 0.00 |
| TRINITY_sp Q8ZNYpphA      | Serine/threonine-protein phosphatase       | 39.40 | 0.00 |
| TRINITY_sp P1097-         | Retrovirus-related                         | 39.40 | 0.00 |
| TRINITY_sp Q9M88PMI1      | Mannose-6-phosphate isomerase              | 39.40 | 0.00 |
| TRINITY_sp Q14CFMocos     | Molybdenum cofactor                        | 39.40 | 0.00 |
| TRINITY_sp Q9QY2Smok3a    | Sperm motility kinase                      | 39.40 | 0.00 |
| TRINITY_sp Q8H08MPA1      | Puromycin-sensitive nucleoside transferase | 39.40 | 0.00 |
| TRINITY_sp Q54P1tmem1847  | Transmembrane protein                      | 39.40 | 0.00 |
| TRINITY_sp Q9VM9TTLL3B    | Tubulin glycosylase 3                      | 39.40 | 0.00 |
| TRINITY_sp Q5ZJ(YARS      | Tyrosine--tRNA ligase                      | 39.40 | 0.00 |
| TRINITY_sp Q8H18At1g0647  | Probable sugar phosphatase                 | 39.40 | 0.00 |
| TRINITY_sp Q9KD5era       | GTPase Era OS=Bacillus                     | 39.40 | 0.00 |
| TRINITY_sp Q5854nudF      | ADP-ribose pyrophosphatase                 | 39.40 | 0.00 |
| TRINITY_sp Q8VZ1SWC4      | SWR1-complex protein                       | 39.40 | 0.00 |
| TRINITY_sp Q9C0(CDNAH6    | Dynein heavy chain                         | 39.40 | 0.00 |
| TRINITY_sp Q54VDDDB_G028  | Probable serine/threonine phosphatase      | 39.40 | 0.00 |
| TRINITY_sp P5339Dbt       | Lipoamide acyltransferase                  | 39.40 | 0.00 |
| TRINITY_sp Q7268pta       | Phosphate acetyltransferase                | 39.40 | 0.00 |
| TRINITY_sp B8BJ3OsI_351(C | Pyruvate kinase 1, cytosolic               | 39.40 | 0.00 |
| TRINITY_sp P1097-         | Retrovirus-related                         | 39.40 | 0.00 |
| TRINITY_sp Q9FIHSPP       | Stromal processing                         | 39.40 | 0.00 |
| TRINITY_sp Q5A87SLN1      | Histidine protein kinase                   | 39.40 | 0.00 |
| TRINITY_sp Q8VE5Ogfr11    | Opioid growth factor                       | 39.40 | 0.00 |
| TRINITY_sp B4JV2GH17388   | E3 UFM1-protein ligase                     | 39.30 | 0.00 |
| TRINITY_sp P3482-         | Elongation factor 1                        | 39.30 | 0.00 |
| TRINITY_sp Q9VL(CG4968    | Ubiquitin thioesterase                     | 39.30 | 0.00 |
| TRINITY_sp Q9441OST48     | Dolichyl-diphosphooligase                  | 39.30 | 0.00 |
| TRINITY_sp P2969eef-2     | Elongation factor 2                        | 39.30 | 0.00 |
| TRINITY_sp O4904VPS45     | Vacuolar protein sorting factor            | 39.30 | 0.00 |
| TRINITY_sp P384(GNA14     | Guanine nucleotide-binding protein         | 39.30 | 0.00 |
| TRINITY_sp F4JV7SFH6      | Phosphatidylinositol 3-kinase              | 39.30 | 0.00 |
| TRINITY_sp Q5E91EIF2S2    | Eukaryotic translation initiation factor   | 39.30 | 0.00 |
| TRINITY_sp Q3KP4ANKRD55   | Ankyrin repeat domain protein              | 39.30 | 0.00 |
| TRINITY_sp Q86K1phyA      | Prolyl 4-hydroxylase                       | 39.30 | 0.00 |
| TRINITY_sp Q9CX2Ndufs4    | NADH dehydrogenase                         | 39.30 | 0.00 |
| TRINITY_sp Q1658MAP3K11   | Mitogen-activated protein kinase           | 39.30 | 0.00 |
| TRINITY_sp Q9EPIAcox3     | Peroxisomal acyl-coenzyme oxidase          | 39.30 | 0.00 |
| TRINITY_sp Q4PC1SEC13     | Protein transport protein                  | 39.30 | 0.00 |
| TRINITY_sp Q2LVImsbA      | Lipid A export ATP-binding protein         | 39.30 | 0.00 |

|                          |                      |       |      |
|--------------------------|----------------------|-------|------|
| TRINITY_sp A7S7 vlg16724 | Anamorsin homolog O  | 39.30 | 0.00 |
| TRINITY_sp A6UV Maao_10  | Lactaldehyde dehydr  | 39.30 | 0.00 |
| TRINITY_sp Q6S7 TAF5     | Transcription initi  | 39.30 | 0.00 |
| TRINITY_sp Q0P5 RPRD1A   | Regulation of nucle  | 39.30 | 0.00 |
| TRINITY_sp Q54V hdaC     | Type-2 histone deac  | 39.30 | 0.00 |
| TRINITY_sp P353 -        | Sodium/potassium-tr  | 39.30 | 0.00 |
| TRINITY_sp Q9P7 SPBP35G2 | ZZ-type zinc finger  | 39.30 | 0.00 |
| TRINITY_sp Q5BU Eapp     | E2F-associated phos  | 39.30 | 0.00 |
| TRINITY_sp Q75J cdcl23   | Cell division cycle  | 39.30 | 0.00 |
| TRINITY_sp Q5E9 NECAP2   | Adaptin ear-binding  | 39.30 | 0.00 |
| TRINITY_sp Q9VH Invadol  | Leishmanolysin-like  | 39.30 | 0.00 |
| TRINITY_sp Q0954F26C11.1 | Putative acid phosp  | 39.30 | 0.00 |
| TRINITY_sp O809 AGD7     | ADP-ribosylation fa  | 39.30 | 0.00 |
| TRINITY_sp Q2RF rsmG     | Ribosomal RNA small  | 39.30 | 0.00 |
| TRINITY_sp O8454CT_544   | Probable hexose pho  | 39.30 | 0.00 |
| TRINITY_sp O237 GSH2     | Glutathione synthet  | 39.30 | 0.00 |
| TRINITY_sp Q090 -        | Hibernation-specifi  | 39.30 | 0.00 |
| TRINITY_sp Q869 pakB     | Serine/threonine-pr  | 39.30 | 0.00 |
| TRINITY_sp O188 AOAH     | Acyloxyacyl hydrola  | 39.30 | 0.00 |
| TRINITY_sp Q7NM cry      | Cryptochrome DASH O  | 39.30 | 0.00 |
| TRINITY_sp Q9SL ZIP3     | Zinc transporter 3   | 39.30 | 0.00 |
| TRINITY_sp O6244Y43F4A.1 | Leishmanolysin-like  | 39.30 | 0.00 |
| TRINITY_sp Q9UD DNAJB4   | DnaJ homolog subfam  | 39.30 | 0.00 |
| TRINITY_sp Q9LE IRE      | Probable serine/thr  | 39.30 | 0.00 |
| TRINITY_sp Q54BI dstC    | Signal transducer a  | 39.30 | 0.00 |
| TRINITY_sp Q54KI lmbd1   | Probable lysosomal   | 39.30 | 0.00 |
| TRINITY_sp Q53P PHT4;6   | Probable anion tran  | 39.30 | 0.00 |
| TRINITY_sp Q9UT mrp119   | 54S ribosomal prote  | 39.30 | 0.00 |
| TRINITY_sp Q9FM At5g1405 | U3 small nucleolar   | 39.30 | 0.00 |
| TRINITY_sp Q8BW Cmtr2    | Cap-specific mRNA (  | 39.30 | 0.00 |
| TRINITY_sp Q556 snf12-1  | SWI/SNF complex com  | 39.30 | 0.00 |
| TRINITY_sp Q582 MJ0812   | Uncharacterized pro  | 39.30 | 0.00 |
| TRINITY_sp Q8MZ -        | Physoarolisin OS=Phy | 39.30 | 0.00 |
| TRINITY_sp Q134 MKRN4P   | Putative E3 ubiquit  | 39.30 | 0.00 |
| TRINITY_sp P0021 fd1     | Ferredoxin-1 OS=Des  | 39.30 | 0.00 |
| TRINITY_sp O6476 GLCNAC1 | UDP-N-acetylglucosa  | 39.30 | 0.00 |
| TRINITY_sp P427 CLPB1    | Chaperone protein C  | 39.30 | 0.00 |
| TRINITY_sp Q5E9 EMC2     | ER membrane protein  | 39.30 | 0.00 |
| TRINITY_sp Q9CZ NaaIad2  | N-acetylated-alpha-  | 39.30 | 0.00 |
| TRINITY_sp Q8LP At3g1995 | E3 ubiquitin-protei  | 39.30 | 0.00 |
| TRINITY_sp Q8ND EHBP1    | EH domain-binding p  | 39.30 | 0.00 |
| TRINITY_sp Q555 gabD     | Probable succinate-  | 39.30 | 0.00 |
| TRINITY_sp O1404 SPAC2C4 | Putative tRNA 2'-ph  | 39.30 | 0.00 |
| TRINITY_sp Q93Y GTE9     | Transcription facto  | 39.30 | 0.00 |
| TRINITY_sp Q9C5 KEU      | SNARE-interacting p  | 39.30 | 0.00 |
| TRINITY_sp O4354 ATP8B1  | Phospholipid-transp  | 39.30 | 0.00 |
| TRINITY_sp Q8R1 Znfx1    | NFX1-type zinc fing  | 39.30 | 0.00 |
| TRINITY_sp B0D6 LACBIDR  | Pentafunctional ARO  | 39.30 | 0.00 |
| TRINITY_sp Q54U4 abcC12  | ABC transporter C f  | 39.30 | 0.00 |
| TRINITY_sp A2XQ OsI_1486 | Senescence-specific  | 39.30 | 0.00 |
| TRINITY_sp F4HW XI-E     | Myosin-11 OS=Arabid  | 39.30 | 0.00 |
| TRINITY_sp Q54J abcC3    | ABC transporter C f  | 39.30 | 0.00 |
| TRINITY_sp Q8AX cyp3a56  | Cytochrome P450 3A5  | 39.30 | 0.00 |
| TRINITY_sp Q2QY CIPK14   | CBL-interacting pro  | 39.30 | 0.00 |
| TRINITY_sp P213 pncA     | Pyrazinamidase/nico  | 39.30 | 0.00 |
| TRINITY_sp Q2NL GSTT1    | Glutathione S-trans  | 39.20 | 0.00 |

|                          |                     |       |      |
|--------------------------|---------------------|-------|------|
| TRINITY_sp P9375GK-1     | Guanylate kinase 1  | 39.20 | 0.00 |
| TRINITY_sp P5847pepB     | Putative peptidase  | 39.20 | 0.00 |
| TRINITY_sp O1473CDIPT    | CDP-diacylglycerol- | 39.20 | 0.00 |
| TRINITY_sp P011(V-MYB    | Transforming protei | 39.20 | 0.00 |
| TRINITY_sp Q9JMCEdf1     | Endothelial differe | 39.20 | 0.00 |
| TRINITY_sp Q9LDCRK33     | Putative cysteine-r | 39.20 | 0.00 |
| TRINITY_sp Q6361Vps33a   | Vacuolar protein so | 39.20 | 0.00 |
| TRINITY_sp Q5M72At3g5226 | RNA pseudouridine s | 39.20 | 0.00 |
| TRINITY_sp C5H42DBR2     | Artemisinic aldehyd | 39.20 | 0.00 |
| TRINITY_sp P4872Ppn1     | Serine/threonine-pr | 39.20 | 0.00 |
| TRINITY_sp O4286sco1     | Protein sco1 OS=Sch | 39.20 | 0.00 |
| TRINITY_sp Q4P6FCOF1     | Cofilin OS=Ustilago | 39.20 | 0.00 |
| TRINITY_sp Q8CE6Trmt6    | tRNA (adenine(58)-N | 39.20 | 0.00 |
| TRINITY_sp Q2391kinX     | Probable serine/thr | 39.20 | 0.00 |
| TRINITY_sp O6093CTNS     | Cystinosin OS=Homo  | 39.20 | 0.00 |
| TRINITY_sp Q05B1shq1     | Protein SHQ1 homolo | 39.20 | 0.00 |
| TRINITY_sp Q55GUDDB_G026 | Probable serine/thr | 39.20 | 0.00 |
| TRINITY_sp B8GQ5tsf      | Elongation factor T | 39.20 | 0.00 |
| TRINITY_sp Q55DQrabggta  | Geranylgeranyl tran | 39.20 | 0.00 |
| TRINITY_sp Q550FDDB_G027 | Probable serine/thr | 39.20 | 0.00 |
| TRINITY_sp O4242EPHA7    | Ephrin type-A recep | 39.20 | 0.00 |
| TRINITY_sp D4DHLAP1      | Probable leucine am | 39.20 | 0.00 |
| TRINITY_sp P5195Nek1     | Serine/threonine-pr | 39.20 | 0.00 |
| TRINITY_sp Q0U3MSNOG_136 | Very-long-chain 3-o | 39.20 | 0.00 |
| TRINITY_sp Q8RVIDEK1     | Calpain-type cystei | 39.20 | 0.00 |
| TRINITY_sp P3225rasC     | Ras-like protein ra | 39.20 | 0.00 |
| TRINITY_sp Q8L77At1g3173 | AP-4 complex subuni | 39.20 | 0.00 |
| TRINITY_sp O59711lys9    | Saccharopine dehydr | 39.20 | 0.00 |
| TRINITY_sp Q6CT1FYV4     | Protein FYV4, mitoc | 39.20 | 0.00 |
| TRINITY_sp A6TW6gltX     | Glutamate--tRNA lig | 39.20 | 0.00 |
| TRINITY_sp P1336-        | Actin OS=Phytophtho | 39.20 | 0.00 |
| TRINITY_sp Q54CFDDB_G029 | WAS protein family  | 39.20 | 0.00 |
| TRINITY_sp Q9XICSERK2    | Somatic embryogenes | 39.20 | 0.00 |
| TRINITY_sp Q8T9VabcB3    | ABC transporter B f | 39.20 | 0.00 |
| TRINITY_sp F6Z5Cusp15    | Ubiquitin carboxyl- | 39.20 | 0.00 |
| TRINITY_sp P3836PHO89    | Phosphate permease  | 39.20 | 0.00 |
| TRINITY_sp Q5ZM3GK5      | Putative glycerol k | 39.20 | 0.00 |
| TRINITY_sp Q28I1hsd17b12 | Very-long-chain 3-o | 39.20 | 0.00 |
| TRINITY_sp Q9SRIUDP-GAL1 | UDP-galactose trans | 39.20 | 0.00 |
| TRINITY_sp Q54T5yipf1    | Protein YIPF1 homol | 39.20 | 0.00 |
| TRINITY_sp Q5NA1MTP5     | Metal tolerance pro | 39.20 | 0.00 |
| TRINITY_sp P4037ptc1     | Protein phosphatase | 39.20 | 0.00 |
| TRINITY_sp Q96MKREMEN1   | Kremen protein 1 OS | 39.20 | 0.00 |
| TRINITY_sp O0405DHBK     | Putative 3,4-dihydr | 39.20 | 0.00 |
| TRINITY_sp Q10QFUROS     | Uroporphyrinogen-II | 39.20 | 0.00 |
| TRINITY_sp Q3714ACA1     | Calcium-transportin | 39.20 | 0.00 |
| TRINITY_sp Q9UT(SPAC227. | Putative uridine ki | 39.20 | 0.00 |
| TRINITY_sp P2006Hexb     | Beta-hexosaminidase | 39.20 | 0.00 |
| TRINITY_sp Q8BG6Nudt15   | Nucleotide triphosp | 39.20 | 0.00 |
| TRINITY_sp A8IZ(CHLREDR7 | Probable cytosolic  | 39.20 | 0.00 |
| TRINITY_sp Q0783GPI13    | GPI ethanolamine ph | 39.20 | 0.00 |
| TRINITY_sp Q810\mphosph1 | U3 small nucleolar  | 39.20 | 0.00 |
| TRINITY_sp P5431Lipe     | Hormone-sensitive l | 39.20 | 0.00 |
| TRINITY_sp Q9SRI SNL1    | Paired amphipathic  | 39.20 | 0.00 |
| TRINITY_sp Q9SRI AZG1    | Adenine/guanine per | 39.20 | 0.00 |
| TRINITY_sp A7A25ATG18    | Autophagy-related p | 39.20 | 0.00 |



|                         |                     |       |      |
|-------------------------|---------------------|-------|------|
| TRINITY_sp Q0WV\SS4     | Probable starch syn | 39.20 | 0.00 |
| TRINITY_sp Q8W4\ICYP71  | Peptidyl-prolyl cis | 39.20 | 0.00 |
| TRINITY_sp Q54M\mrkB    | Probable serine/thr | 39.20 | 0.00 |
| TRINITY_sp Q8L4\CSTF50  | Cleavage stimulatio | 39.20 | 0.00 |
| TRINITY_sp Q7TN\Em12    | Echinoderm microtub | 39.20 | 0.00 |
| TRINITY_sp G5EB\let-418 | Protein let-418 OS= | 39.20 | 0.00 |
| TRINITY_sp Q59W\GIN4    | Serine/threonine-pr | 39.20 | 0.00 |
| TRINITY_sp Q9SK\IRPA1A  | Replication protein | 39.20 | 0.00 |
| TRINITY_sp D7UQ\aur     | Aurora kinase OS=Pa | 39.20 | 0.00 |
| TRINITY_sp Q747\FrimO   | Ribosomal protein S | 39.20 | 0.00 |
| TRINITY_sp Q084\PDE4C   | cAMP-specific 3',5' | 39.20 | 0.00 |
| TRINITY_sp Q500\DPB2    | DNA polymerase epsi | 39.20 | 0.00 |
| TRINITY_sp Q5E9\BYSL    | Bystin OS=Bos tauru | 39.20 | 0.00 |
| TRINITY_sp Q141\WRN     | Werner syndrome ATP | 39.20 | 0.00 |
| TRINITY_sp Q3ZC\CCNC    | Cyclin-C OS=Bos tau | 39.20 | 0.00 |
| TRINITY_sp A0AV\UBA6    | Ubiquitin-like modi | 39.20 | 0.00 |
| TRINITY_sp Q6RW\-       | Sodium/potassium-tr | 39.20 | 0.00 |
| TRINITY_sp Q55D\mcfF    | Mitoferrin OS=Dicty | 39.20 | 0.00 |
| TRINITY_sp P262\celD    | Endoglucanase E-4 O | 39.20 | 0.00 |
| TRINITY_sp Q9SZ\CHHP4   | Heptahelical transm | 39.20 | 0.00 |
| TRINITY_sp Q3SY\TNPO1   | Transportin-1 OS=Bo | 39.10 | 0.00 |
| TRINITY_sp P758\yliI    | Soluble aldose suga | 39.10 | 0.00 |
| TRINITY_sp Q0WU\FAB1A   | 1-phosphatidylinosi | 39.10 | 0.00 |
| TRINITY_sp Q9P7\clp1    | Tyrosine-protein ph | 39.10 | 0.00 |
| TRINITY_sp Q9U1\FSras   | CAAX prenyl proteas | 39.10 | 0.00 |
| TRINITY_sp O494\At4g284 | Uncharacterized pro | 39.10 | 0.00 |
| TRINITY_sp Q8NF\SYNE1   | Nesprin-1 OS=Homo s | 39.10 | 0.00 |
| TRINITY_sp P981\Atp8b2  | Phospholipid-transp | 39.10 | 0.00 |
| TRINITY_sp P0CH\adhcl1  | NADP-dependent alco | 39.10 | 0.00 |
| TRINITY_sp Q6EP\ISPF    | 2-C-methyl-D-erythr | 39.10 | 0.00 |
| TRINITY_sp P0C8\MCCRP1  | Probable serine/thr | 39.10 | 0.00 |
| TRINITY_sp Q9D3\Snx29   | Sorting nexin-29 OS | 39.10 | 0.00 |
| TRINITY_sp Q55D\DDB_G02 | Putative methylster | 39.10 | 0.00 |
| TRINITY_sp P0CD\pan3    | PAB-dependent poly( | 39.10 | 0.00 |
| TRINITY_sp Q6TG\CBK1    | Serine/threonine-pr | 39.10 | 0.00 |
| TRINITY_sp Q54S\dhkM    | Hybrid signal trans | 39.10 | 0.00 |
| TRINITY_sp Q54B\abcB2   | ABC transporter B f | 39.10 | 0.00 |
| TRINITY_sp Q8IQ\CG31957 | Probable RNA-bindin | 39.10 | 0.00 |
| TRINITY_sp P366\dsk1    | Protein kinase dsk1 | 39.10 | 0.00 |
| TRINITY_sp F4J6\HIREH1  | Probable serine/thr | 39.10 | 0.00 |
| TRINITY_sp Q0D4\ICIPK21 | CBL-interacting pro | 39.10 | 0.00 |
| TRINITY_sp O422\kras1   | GTPase KRas OS=Oryz | 39.10 | 0.00 |
| TRINITY_sp Q55B\plbB    | Phospholipase B-lik | 39.10 | 0.00 |
| TRINITY_sp P217\EPHA1   | Ephrin type-A recep | 39.10 | 0.00 |
| TRINITY_sp Q55B\dcd1A   | Protein dcd1A OS=Di | 39.10 | 0.00 |
| TRINITY_sp Q9QY\Smok3a  | Sperm motility kina | 39.10 | 0.00 |
| TRINITY_sp Q8CF\Aqr     | Intron-binding prot | 39.10 | 0.00 |
| TRINITY_sp O054\yrpG    | Uncharacterized oxi | 39.10 | 0.00 |
| TRINITY_sp O704\Prmt3   | Protein arginine N- | 39.10 | 0.00 |
| TRINITY_sp O154\ABCC4   | Multidrug resistanc | 39.10 | 0.00 |
| TRINITY_sp P518\lig1    | DNA ligase 1 OS=Xen | 39.10 | 0.00 |
| TRINITY_sp Q092\ccdc-55 | Nuclear speckle spl | 39.10 | 0.00 |
| TRINITY_sp Q5T0\MARCH8  | E3 ubiquitin-protei | 39.10 | 0.00 |
| TRINITY_sp Q54G\ssrp1   | FACT complex subuni | 39.10 | 0.00 |
| TRINITY_sp Q84M\CAT1    | Cationic amino acid | 39.10 | 0.00 |
| TRINITY_sp P0DK\PGLP1A  | Phosphoglycolate ph | 39.10 | 0.00 |

|                                               |                      |       |      |
|-----------------------------------------------|----------------------|-------|------|
| TRINITY_sp O009(-                             | Lysosomal acid alph  | 39.10 | 0.00 |
| TRINITY_sp P707(Atp8a1                        | Phospholipid-transp  | 39.10 | 0.00 |
| TRINITY_sp O890(Pde4a                         | cAMP-specific 3',5'  | 39.10 | 0.00 |
| TRINITY_sp Q645(Atp7b                         | Copper-transporting  | 39.10 | 0.00 |
| TRINITY_sp P186(rapA                          | Ras-related protein  | 39.10 | 0.00 |
| TRINITY_sp F9VN(rnhA                          | Ribonuclease HI OS=  | 39.10 | 0.00 |
| TRINITY_sp B4SQ(fnp                           | Polyribonucleotide   | 39.10 | 0.00 |
| TRINITY_sp B9DF(PAA2                          | Copper-transporting  | 39.10 | 0.00 |
| TRINITY_sp Q91W(Dgkg                          | Diacylglycerol kina  | 39.10 | 0.00 |
| TRINITY_sp Q8IW(DENND6A                       | Protein DENND6A OS=  | 39.10 | 0.00 |
| TRINITY_sp P623(CPK4                          | Calcium-dependent p  | 39.10 | 0.00 |
| TRINITY_sp Q5BJ(Carnmt1                       | Carnosine N-methylt  | 39.10 | 0.00 |
| TRINITY_sp Q9ZV(CHR8                          | Protein CHROMATIN R  | 39.10 | 0.00 |
| TRINITY_sp Q6N0(MFSD5                         | Molybdate-anion tra  | 39.10 | 0.00 |
| TRINITY_sp Q54G(I DDB_G02(PXMP2/4 family prot |                      | 39.10 | 0.00 |
| TRINITY_sp Q3V3(Lac1                          | Lactation elevated   | 39.10 | 0.00 |
| TRINITY_sp Q8N5(IRPP25L                       | Ribonuclease P prot  | 39.10 | 0.00 |
| TRINITY_sp Q9FN(UVR8                          | Ultraviolet-B recep  | 39.10 | 0.00 |
| TRINITY_sp O805(CYCU4-1                       | Cyclin-U4-1 OS=Arab  | 39.10 | 0.00 |
| TRINITY_sp Q6Z9(KIN7H                         | Kinesin-like protei  | 39.10 | 0.00 |
| TRINITY_sp Q9H0(WWP1                          | NEDD4-like E3 ubiqu  | 39.10 | 0.00 |
| TRINITY_sp O136(mrd1                          | Multiple RNA-bindin  | 39.10 | 0.00 |
| TRINITY_sp Q6UD(ManS                          | Mannan synthase 1 O  | 39.10 | 0.00 |
| TRINITY_sp O091(Man2b1                        | Lysosomal alpha-man  | 39.10 | 0.00 |
| TRINITY_sp P817(TL17                          | Thylakoid lumenal 1  | 39.10 | 0.00 |
| TRINITY_sp P623(CPK4                          | Calcium-dependent p  | 39.10 | 0.00 |
| TRINITY_sp Q8PN(glnS                          | Glutamine--tRNA lig  | 39.10 | 0.00 |
| TRINITY_sp O807(WDR55                         | WD repeat-containin  | 39.10 | 0.00 |
| TRINITY_sp Q9XG(B 'ALPH(Serine/threonine pr   |                      | 39.00 | 0.00 |
| TRINITY_sp A2YH(OsI_023(Serine/threonine-pr   |                      | 39.00 | 0.00 |
| TRINITY_sp Q9FV(MAP1D                         | Methionine aminopep  | 39.00 | 0.00 |
| TRINITY_sp Q0AF(facsA                         | Acetyl-coenzyme A s  | 39.00 | 0.00 |
| TRINITY_sp Q0VA(wdr70                         | WD repeat-containin  | 39.00 | 0.00 |
| TRINITY_sp Q906(DPYSL2                        | Dihydropyrimidinase  | 39.00 | 0.00 |
| TRINITY_sp Q54G(fvps45                        | Vacuolar protein so  | 39.00 | 0.00 |
| TRINITY_sp Q5XG(gtgbp1                        | GTP-binding protein  | 39.00 | 0.00 |
| TRINITY_sp Q6XH(eroco4                        | Probable serine/thr  | 39.00 | 0.00 |
| TRINITY_sp Q96B(DOCK10                        | Dedicator of cytoki  | 39.00 | 0.00 |
| TRINITY_sp Q9NU(TBC1D22(TBC1 domain family    |                      | 39.00 | 0.00 |
| TRINITY_sp Q6UE(fnadA                         | NADH-dependent flav  | 39.00 | 0.00 |
| TRINITY_sp Q93V(At4g174(DeSI-like protein A   |                      | 39.00 | 0.00 |
| TRINITY_sp Q9FH(At5g051(Probable leucine-ri   |                      | 39.00 | 0.00 |
| TRINITY_sp Q7KW(pgs1                          | Probable CDP-diacyl  | 39.00 | 0.00 |
| TRINITY_sp Q102(SPAC4G9                       | Uncharacterized mit  | 39.00 | 0.00 |
| TRINITY_sp Q8IZ(TRMT2A                        | tRNA (uracil-5-)-me  | 39.00 | 0.00 |
| TRINITY_sp A1JS(rsmJ                          | Ribosomal RNA small  | 39.00 | 0.00 |
| TRINITY_sp Q55F(I DDB_G02(Probable carboxypep |                      | 39.00 | 0.00 |
| TRINITY_sp P497(RBM25                         | RNA-binding protein  | 39.00 | 0.00 |
| TRINITY_sp P805(aro-8                         | Phospho-2-dehydro-3  | 39.00 | 0.00 |
| TRINITY_sp Q0IU(CML2                          | Putative calmodulin  | 39.00 | 0.00 |
| TRINITY_sp Q8VC(Zdhhc12                       | Probable palmitoylt  | 39.00 | 0.00 |
| TRINITY_sp Q23K(TTLL3D                        | Tubulin glycyclase 3 | 39.00 | 0.00 |
| TRINITY_sp Q949(UBP6                          | Ubiquitin carboxyl-  | 39.00 | 0.00 |
| TRINITY_sp O139(pnk1                          | Bifunctional polynu  | 39.00 | 0.00 |
| TRINITY_sp Q7ZV(ipoc1a                        | POC1 centriolar pro  | 39.00 | 0.00 |
| TRINITY_sp Q8MY(I DDB_G02(Probable serine/thr |                      | 39.00 | 0.00 |

|                          |                     |       |      |
|--------------------------|---------------------|-------|------|
| TRINITY_sp B0R0 chd8     | Chromodomain-helica | 39.00 | 0.00 |
| TRINITY_sp P468 yhgF     | Protein YhgF OS=Esc | 39.00 | 0.00 |
| TRINITY_sp Q126 YPK9     | Vacuolar cation-tra | 39.00 | 0.00 |
| TRINITY_sp Q9FV NUCL1    | Nucleolin 1 OS=Arab | 39.00 | 0.00 |
| TRINITY_sp Q6NV HIBCH    | 3-hydroxyisobutyryl | 39.00 | 0.00 |
| TRINITY_sp O6034 TBC1D12 | TBC1 domain family  | 39.00 | 0.00 |
| TRINITY_sp Q95X laat-1   | Lysosomal amino aci | 39.00 | 0.00 |
| TRINITY_sp Q7TP Shprh    | E3 ubiquitin-protei | 39.00 | 0.00 |
| TRINITY_sp Q55B plbB     | Phospholipase B-lik | 39.00 | 0.00 |
| TRINITY_sp Q962 MYB23    | Transcription facto | 39.00 | 0.00 |
| TRINITY_sp Q8RX FAGD14   | Probable ADP-ribosy | 39.00 | 0.00 |
| TRINITY_sp Q8IU CAMK1D   | Calcium/calmodulin- | 39.00 | 0.00 |
| TRINITY_sp Q75J DDB_G02  | SH3 and F-BAR domai | 39.00 | 0.00 |
| TRINITY_sp O749 rrp45    | Exosome complex com | 39.00 | 0.00 |
| TRINITY_sp P470 PRY1     | Protein PRY1 OS=Sac | 39.00 | 0.00 |
| TRINITY_sp Q9UB ERNF14   | E3 ubiquitin-protei | 39.00 | 0.00 |
| TRINITY_sp Q4KW PLCH1    | 1-phosphatidylinosi | 39.00 | 0.00 |
| TRINITY_sp Q927 SYN2     | Synapsin-2 OS=Homo  | 39.00 | 0.00 |
| TRINITY_sp O139 crn1     | Coronin-like protei | 39.00 | 0.00 |
| TRINITY_sp P505 ssp1     | Serine/threonine-pr | 39.00 | 0.00 |
| TRINITY_sp P051 PRKACB   | cAMP-dependent prot | 39.00 | 0.00 |
| TRINITY_sp Q941 PMS1     | DNA mismatch repair | 39.00 | 0.00 |
| TRINITY_sp O548 Cacna1g  | Voltage-dependent T | 39.00 | 0.00 |
| TRINITY_sp C5FT LAP2     | Leucine aminopeptid | 39.00 | 0.00 |
| TRINITY_sp O945 cut23    | Anaphase-promoting  | 39.00 | 0.00 |
| TRINITY_sp Q6NX Rcbtb1   | RCC1 and BTB domain | 39.00 | 0.00 |
| TRINITY_sp Q6PC cdc123   | Cell division cycle | 39.00 | 0.00 |
| TRINITY_sp A4Q9 Tt112    | Probable tubulin po | 39.00 | 0.00 |
| TRINITY_sp Q5TC GRTP1    | Growth hormone-regu | 39.00 | 0.00 |
| TRINITY_sp Q7PC SAT2     | Diamine acetyltrans | 39.00 | 0.00 |
| TRINITY_sp P109 -        | Retrovirus-related  | 39.00 | 0.00 |
| TRINITY_sp Q6IR tipr1    | TIP41-like protein  | 39.00 | 0.00 |
| TRINITY_sp Q54W forA     | Formin-A OS=Dictyos | 39.00 | 0.00 |
| TRINITY_sp P525 myb12    | Myb-related protein | 39.00 | 0.00 |
| TRINITY_sp Q9XS TTPP1    | Tripeptidyl-peptida | 39.00 | 0.00 |
| TRINITY_sp Q614 Pdela    | Calcium/calmodulin- | 39.00 | 0.00 |
| TRINITY_sp P295 -        | Elongation factor 1 | 39.00 | 0.00 |
| TRINITY_sp Q9BZ PUS3     | tRNA pseudouridine( | 39.00 | 0.00 |
| TRINITY_sp O149 AURKA    | Aurora kinase A OS= | 39.00 | 0.00 |
| TRINITY_sp Q9N5 cdc-73   | Cell division cycle | 39.00 | 0.00 |
| TRINITY_sp Q9SF PAH1     | Phosphatidate phosp | 39.00 | 0.00 |
| TRINITY_sp O069 yvdB     | Putative sulfate tr | 39.00 | 0.00 |
| TRINITY_sp Q54Y dhkB     | Hybrid signal trans | 39.00 | 0.00 |
| TRINITY_sp Q29R TBC1D31  | TBC1 domain family  | 39.00 | 0.00 |
| TRINITY_sp D4P3 CFAP74   | Cilia- and flagella | 39.00 | 0.00 |
| TRINITY_sp P221 cta3     | Calcium-transportin | 39.00 | 0.00 |
| TRINITY_sp F4JY TCX7     | Protein tesmin/TSO1 | 38.90 | 0.00 |
| TRINITY_sp Q924 pub1     | E3 ubiquitin-protei | 38.90 | 0.00 |
| TRINITY_sp Q065 TAZ1     | Lysophosphatidylcho | 38.90 | 0.00 |
| TRINITY_sp Q9PU smurf1   | E3 ubiquitin-protei | 38.90 | 0.00 |
| TRINITY_sp O970 CG1307   | Probable peptidyl-t | 38.90 | 0.00 |
| TRINITY_sp A6QL MTMR2    | Myotubularin-relate | 38.90 | 0.00 |
| TRINITY_sp A0L5 urpmB    | 50S ribosomal prote | 38.90 | 0.00 |
| TRINITY_sp Q6L5 IMCE     | Probable isoprenylc | 38.90 | 0.00 |
| TRINITY_sp Q9SU CHX17    | Cation/H(+) antipor | 38.90 | 0.00 |
| TRINITY_sp A8WY par-1    | Serine/threonine-pr | 38.90 | 0.00 |

|                          |                      |       |      |
|--------------------------|----------------------|-------|------|
| TRINITY_sp A6H79TRMT61A  | tRNA (adenine(58)-N  | 38.90 | 0.00 |
| TRINITY_sp Q8BYFRdh12    | Retinol dehydrogena  | 38.90 | 0.00 |
| TRINITY_sp Q6N06NAA16    | N-alpha-acetyltrans  | 38.90 | 0.00 |
| TRINITY_sp P8237scrK     | Fructokinase OS=Lac  | 38.90 | 0.00 |
| TRINITY_sp Q9SD3At3g5113 | UPF0183 protein At3  | 38.90 | 0.00 |
| TRINITY_sp P1101isp      | Major intracellular  | 38.90 | 0.00 |
| TRINITY_sp Q54BMmcfG     | Mitochondrial subst  | 38.90 | 0.00 |
| TRINITY_sp Q54B1redA     | NADPH oxidoreductas  | 38.90 | 0.00 |
| TRINITY_sp Q3924PP2AB2   | Serine/threonine pr  | 38.90 | 0.00 |
| TRINITY_sp A7SBIints9    | Integrator complex   | 38.90 | 0.00 |
| TRINITY_sp Q5JTRRRP12    | RRP12-like protein   | 38.90 | 0.00 |
| TRINITY_sp Q7YXIp80      | Protein P80 OS=Dict  | 38.90 | 0.00 |
| TRINITY_sp Q8VHFDnah5    | Dynein heavy chain   | 38.90 | 0.00 |
| TRINITY_sp Q5C9I-        | (S)-coclaurine N-me  | 38.90 | 0.00 |
| TRINITY_sp Q8LP1ABCB6    | ABC transporter B f  | 38.90 | 0.00 |
| TRINITY_sp P4966pkwA     | Probable serine/thr  | 38.90 | 0.00 |
| TRINITY_sp F4I21RMR3     | Receptor homology r  | 38.90 | 0.00 |
| TRINITY_sp Q3SZ1HPRT1    | Hypoxanthine-guanin  | 38.90 | 0.00 |
| TRINITY_sp P4123Abca1    | ATP-binding cassett  | 38.90 | 0.00 |
| TRINITY_sp O583(alaxS    | Alanyl-tRNA editing  | 38.90 | 0.00 |
| TRINITY_sp Q9VQ8mio      | WD repeat-containin  | 38.90 | 0.00 |
| TRINITY_sp Q67ZF3BETAHSI | 3beta-hydroxysteroid | 38.90 | 0.00 |
| TRINITY_sp Q86G4gefQ     | Ras guanine nucleot  | 38.90 | 0.00 |
| TRINITY_sp Q8RWISTY17    | Serine/threonine-pr  | 38.90 | 0.00 |
| TRINITY_sp Q9SMFDHC1B    | Cytoplasmic dynein   | 38.90 | 0.00 |
| TRINITY_sp P2212-        | Ras-related protein  | 38.90 | 0.00 |
| TRINITY_sp Q4078-        | Putative glucose-6-  | 38.90 | 0.00 |
| TRINITY_sp Q7SC1sym-1    | Protein sym-1 OS=Ne  | 38.90 | 0.00 |
| TRINITY_sp Q9C52UDP-GAL1 | UDP-galactose trans  | 38.90 | 0.00 |
| TRINITY_sp O6486Acx      | Acyl-coenzyme A oxi  | 38.90 | 0.00 |
| TRINITY_sp P1539rpa1     | DNA-directed RNA po  | 38.90 | 0.00 |
| TRINITY_sp O2289LACS1    | Long chain acyl-CoA  | 38.90 | 0.00 |
| TRINITY_sp Q1449RBM39    | RNA-binding protein  | 38.90 | 0.00 |
| TRINITY_sp B7KDEglgC     | Glucose-1-phosphate  | 38.90 | 0.00 |
| TRINITY_sp Q4PFIATG2     | Autophagy-related p  | 38.90 | 0.00 |
| TRINITY_sp Q9FP9UBP23    | Ubiquitin carboxyl-  | 38.90 | 0.00 |
| TRINITY_sp Q9SR7At3g1013 | Heme-binding-like p  | 38.90 | 0.00 |
| TRINITY_sp P1464Pde4c    | cAMP-specific 3',5'  | 38.90 | 0.00 |
| TRINITY_sp Q88K2pheT     | Phenylalanine--tRNA  | 38.90 | 0.00 |
| TRINITY_sp Q08D1PUS7     | Pseudouridylate syn  | 38.90 | 0.00 |
| TRINITY_sp Q4V81Fam221a  | Protein FAM221A OS=  | 38.90 | 0.00 |
| TRINITY_sp Q54D1taf1     | Transcription initi  | 38.90 | 0.00 |
| TRINITY_sp Q0DJCOST1A    | Dolichyl-diphosphoo  | 38.90 | 0.00 |
| TRINITY_sp P1097-        | Retrovirus-related   | 38.90 | 0.00 |
| TRINITY_sp Q9FN1At5g2275 | Putative SWI/SNF-re  | 38.90 | 0.00 |
| TRINITY_sp Q9C61GAMMACA2 | Gamma carbonic anhy  | 38.90 | 0.00 |
| TRINITY_sp Q47L1rplX     | 50S ribosomal prote  | 38.90 | 0.00 |
| TRINITY_sp Q758(BTN1     | Protein BTN1 OS=Ash  | 38.90 | 0.00 |

|                           |                     |       |      |
|---------------------------|---------------------|-------|------|
| TRINITY_sp Q32KNDNAL4     | Dynein light chain  | 38.90 | 0.00 |
| TRINITY_sp Q5BL4slc20a1   | Sodium-dependent ph | 38.90 | 0.00 |
| TRINITY_sp Q9BY1SCAPER    | S phase cyclin A-as | 38.90 | 0.00 |
| TRINITY_sp Q0WW8RBP47B    | Polyadenylate-bindi | 38.90 | 0.00 |
| TRINITY_sp Q758FLAS21     | GPI ethanolamine ph | 38.90 | 0.00 |
| TRINITY_sp P2346CYR1      | Adenylate cyclase O | 38.90 | 0.00 |
| TRINITY_sp Q1321PAPPA     | Pappalysin-1 OS=Hom | 38.90 | 0.00 |
| TRINITY_sp Q2978nero      | Deoxyhypusine hydro | 38.90 | 0.00 |
| TRINITY_sp Q54LHabcC5     | ABC transporter C f | 38.90 | 0.00 |
| TRINITY_sp D7U6CANR       | Anthocyanidin reduc | 38.90 | 0.00 |
| TRINITY_sp Q84W6SUFE1     | SufE-like protein 1 | 38.90 | 0.00 |
| TRINITY_sp Q9C86RH34      | DEAD-box ATP-depend | 38.80 | 0.00 |
| TRINITY_sp Q557Edpp3-1    | Dipeptidyl peptidas | 38.80 | 0.00 |
| TRINITY_sp A0A08msl3      | Mycolipanoate synth | 38.80 | 0.00 |
| TRINITY_sp P4315-         | Microbial collagena | 38.80 | 0.00 |
| TRINITY_sp Q1036sck2      | Serine/threonine-pr | 38.80 | 0.00 |
| TRINITY_sp Q9Z36Itpr2     | Inositol 1,4,5-tris | 38.80 | 0.00 |
| TRINITY_sp P3986NIA2      | Nitrate reductase [ | 38.80 | 0.00 |
| TRINITY_sp Q3T06QDPR      | Dihydropteridine re | 38.80 | 0.00 |
| TRINITY_sp B8IS8rplW      | 50S ribosomal prote | 38.80 | 0.00 |
| TRINITY_sp Q2T96TRMT6     | tRNA (adenine(58)-N | 38.80 | 0.00 |
| TRINITY_sp Q1226GIN4      | Serine/threonine-pr | 38.80 | 0.00 |
| TRINITY_sp Q9Y86APE_2601  | Uncharacterized pro | 38.80 | 0.00 |
| TRINITY_sp B4K66fig       | Protein phosphatase | 38.80 | 0.00 |
| TRINITY_sp Q9QZ6Dcun1d1   | DCN1-like protein 1 | 38.80 | 0.00 |
| TRINITY_sp P5016linX      | 2,5-dichloro-2,5-cy | 38.80 | 0.00 |
| TRINITY_sp Q0586NNT1      | Protein N-methyltra | 38.80 | 0.00 |
| TRINITY_sp Q9LT6PDR2      | Probable manganese- | 38.80 | 0.00 |
| TRINITY_sp Q9VR6HERC2     | Probable E3 ubiquit | 38.80 | 0.00 |
| TRINITY_sp Q55C6mpl2      | MAP kinase phosphat | 38.80 | 0.00 |
| TRINITY_sp Q76PI6SPCC1226 | E3 ubiquitin-protei | 38.80 | 0.00 |
| TRINITY_sp Q2666KAP115    | Kinesin-associated  | 38.80 | 0.00 |
| TRINITY_sp Q3U26Otud5     | OTU domain-containi | 38.80 | 0.00 |
| TRINITY_sp Q8GU6URIE1     | E3 ubiquitin protei | 38.80 | 0.00 |
| TRINITY_sp Q9VR6HERC2     | Probable E3 ubiquit | 38.80 | 0.00 |
| TRINITY_sp F4I26CTN       | Cactin OS=Arabidops | 38.80 | 0.00 |
| TRINITY_sp Q2446RABE1A    | Ras-related protein | 38.80 | 0.00 |
| TRINITY_sp Q9Z16Epn2      | Epsin-2 OS=Rattus n | 38.80 | 0.00 |
| TRINITY_sp O8126RHL1      | DNA-binding protein | 38.80 | 0.00 |
| TRINITY_sp Q67Z6ULIP2     | Triacylglycerol lip | 38.80 | 0.00 |
| TRINITY_sp Q4V86Gpat3     | Glycerol-3-phosphat | 38.80 | 0.00 |
| TRINITY_sp O8076WDR55     | WD repeat-containin | 38.80 | 0.00 |
| TRINITY_sp Q9236Dnah12    | Dynein heavy chain  | 38.80 | 0.00 |
| TRINITY_sp O4336TXNL1     | Thioredoxin-like pr | 38.80 | 0.00 |
| TRINITY_sp Q9NS6KIF15     | Kinesin-like protei | 38.80 | 0.00 |
| TRINITY_sp Q9FL6MRS2-2    | Magnesium transport | 38.80 | 0.00 |
| TRINITY_sp Q86H6Pde4      | cAMP-specific 3',5' | 38.80 | 0.00 |
| TRINITY_sp A9V26_37534    | Probable nitrile hy | 38.80 | 0.00 |
| TRINITY_sp Q5E96RBL       | Protein RBL OS=Arab | 38.80 | 0.00 |
| TRINITY_sp Q7K26Rpn13     | Proteasomal ubiquit | 38.80 | 0.00 |
| TRINITY_sp Q8L76At1g3176  | AP-4 complex subuni | 38.80 | 0.00 |
| TRINITY_sp Q8GW6GFA2      | Chaperone protein d | 38.80 | 0.00 |
| TRINITY_sp Q7Z66HUWE1     | E3 ubiquitin-protei | 38.80 | 0.00 |
| TRINITY_sp Q9JIV6Polm     | DNA-directed DNA/RN | 38.80 | 0.00 |
| TRINITY_sp F4J76EAF1A     | Chromatin modificat | 38.80 | 0.00 |
| TRINITY_sp Q80U6Xpo1      | Exportin-1 OS=Rattu | 38.80 | 0.00 |

|                          |                     |       |      |
|--------------------------|---------------------|-------|------|
| TRINITY_sp Q8R5F Usp33   | Ubiquitin carboxyl- | 38.80 | 0.00 |
| TRINITY_sp Q54M rbbe     | Retinoblastoma-bind | 38.80 | 0.00 |
| TRINITY_sp Q6Q1 SMC1     | Structural maintena | 38.80 | 0.00 |
| TRINITY_sp Q54G slmo     | Protein slowmo homo | 38.80 | 0.00 |
| TRINITY_sp Q6AX Mtm1     | Myotubularin OS=Rat | 38.80 | 0.00 |
| TRINITY_sp Q6GLM desi1   | Desumoylating isope | 38.80 | 0.00 |
| TRINITY_sp P3611 PRY2    | Protein PRY2 OS=Sac | 38.80 | 0.00 |
| TRINITY_sp Q7G8 Os01g036 | Probable chromatin- | 38.80 | 0.00 |
| TRINITY_sp Q9ZN SAP3     | Zinc finger A20 and | 38.80 | 0.00 |
| TRINITY_sp A2XW BRE1A    | E3 ubiquitin-protei | 38.80 | 0.00 |
| TRINITY_sp Q8S9 DRP3A    | Dynamin-related pro | 38.80 | 0.00 |
| TRINITY_sp Q9FJ KPNB1    | Importin subunit be | 38.80 | 0.00 |
| TRINITY_sp Q9M9 SCPL50   | Serine carboxypepti | 38.80 | 0.00 |
| TRINITY_sp A2VE ARIH1    | E3 ubiquitin-protei | 38.80 | 0.00 |
| TRINITY_sp Q7XG Os10g014 | Auxin transporter-1 | 38.80 | 0.00 |
| TRINITY_sp O268 MTH_771  | UPF0047 protein MTH | 38.80 | 0.00 |
| TRINITY_sp Q9ZP At2g1822 | Nucleolar complex p | 38.80 | 0.00 |
| TRINITY_sp P025 -        | Actin, cytoplasmic  | 38.80 | 0.00 |
| TRINITY_sp Q5Z6 CML29    | Probable calcium-bi | 38.80 | 0.00 |
| TRINITY_sp Q032 TOM1     | E3 ubiquitin-protei | 38.70 | 0.00 |
| TRINITY_sp Q54D rab4     | Ras-related protein | 38.70 | 0.00 |
| TRINITY_sp Q86V IQCH     | IQ domain-containin | 38.70 | 0.00 |
| TRINITY_sp Q631 Dnah1    | Dynein heavy chain  | 38.70 | 0.00 |
| TRINITY_sp Q0P4 kti12    | Protein KTI12 homol | 38.70 | 0.00 |
| TRINITY_sp P531 GUP1     | Glycerol uptake pro | 38.70 | 0.00 |
| TRINITY_sp Q8MM paxB     | Paxillin-B OS=Dicty | 38.70 | 0.00 |
| TRINITY_sp Q5DU Cep164   | Centrosomal protein | 38.70 | 0.00 |
| TRINITY_sp O945 trp3     | Probable anthranila | 38.70 | 0.00 |
| TRINITY_sp Q5XX MSH2     | DNA mismatch repair | 38.70 | 0.00 |
| TRINITY_sp Q54Y DDB_G02  | Probable serine/thr | 38.70 | 0.00 |
| TRINITY_sp P407 yuxG     | Uncharacterized oxi | 38.70 | 0.00 |
| TRINITY_sp Q54C eloA     | Elongation of fatty | 38.70 | 0.00 |
| TRINITY_sp P391 YCF1     | Metal resistance pr | 38.70 | 0.00 |
| TRINITY_sp Q095 paa-1    | Probable serine/thr | 38.70 | 0.00 |
| TRINITY_sp F4KD MIP      | Probable mitochondr | 38.70 | 0.00 |
| TRINITY_sp Q6EW fyna     | Tyrosine-protein ki | 38.70 | 0.00 |
| TRINITY_sp F4I1 ACC2     | Acetyl-CoA carboxyl | 38.70 | 0.00 |
| TRINITY_sp Q5U3 slc25a4  | Solute carrier fami | 38.70 | 0.00 |
| TRINITY_sp Q653 Os06g06  | Probable alpha-gluc | 38.70 | 0.00 |
| TRINITY_sp Q9ZV At1g0337 | C2 and GRAM domain- | 38.70 | 0.00 |
| TRINITY_sp O148 RASGRF2  | Ras-specific guanin | 38.70 | 0.00 |
| TRINITY_sp Q588 TEB      | Helicase and polyme | 38.70 | 0.00 |
| TRINITY_sp Q122 DIP2     | U3 small nucleolar  | 38.70 | 0.00 |
| TRINITY_sp Q9BU NDERL1   | Derlin-1 OS=Homo sa | 38.70 | 0.00 |
| TRINITY_sp Q99L St13     | Hsc70-interacting p | 38.70 | 0.00 |
| TRINITY_sp Q0CE bglL     | Probable beta-gluco | 38.70 | 0.00 |
| TRINITY_sp Q8LK LACS7    | Long chain acyl-CoA | 38.70 | 0.00 |
| TRINITY_sp Q068 STAUR_4  | Putative epoxide hy | 38.70 | 0.00 |
| TRINITY_sp B9FJ SPP2     | Signal peptide pept | 38.70 | 0.00 |
| TRINITY_sp D2XN FLOT6    | Flotillin-like prot | 38.70 | 0.00 |
| TRINITY_sp P382 NCL1     | Multisite-specific  | 38.70 | 0.00 |
| TRINITY_sp P328 GSP2     | GTP-binding nuclear | 38.70 | 0.00 |
| TRINITY_sp A1DG vba5-1   | Kynureninase 1 OS=N | 38.70 | 0.00 |
| TRINITY_sp Q8CH Mbtps2   | Membrane-bound tran | 38.70 | 0.00 |
| TRINITY_sp Q17Q TFDP1    | Transcription facto | 38.70 | 0.00 |
| TRINITY_sp O281 AF_2138  | Phosphoserine phosp | 38.70 | 0.00 |

|                          |                     |       |      |
|--------------------------|---------------------|-------|------|
| TRINITY_sp Q9LP9At1g5059 | Pirin-like protein  | 38.70 | 0.00 |
| TRINITY_sp Q3899KIN10    | SNF1-related protei | 38.70 | 0.00 |
| TRINITY_sp Q6DK8kcnrg    | Putative potassium  | 38.70 | 0.00 |
| TRINITY_sp Q9SAFAKR2A    | Ankyrin repeat doma | 38.70 | 0.00 |
| TRINITY_sp B8ARV0sI_1804 | Transportin-1 OS=Or | 38.70 | 0.00 |
| TRINITY_sp O627(CTNNBL1  | Beta-catenin-like p | 38.70 | 0.00 |
| TRINITY_sp Q9C6EGAMMACA2 | Gamma carbonic anhy | 38.70 | 0.00 |
| TRINITY_sp Q9SHUTIC21    | Protein TIC 21, chl | 38.70 | 0.00 |
| TRINITY_sp Q6NWIft122    | Intraflagellar tran | 38.70 | 0.00 |
| TRINITY_sp P189(ATP1A1   | Sodium/potassium-tr | 38.70 | 0.00 |
| TRINITY_sp O042(TIF3F1   | Eukaryotic translat | 38.70 | 0.00 |
| TRINITY_sp Q9M09NSF      | Vesicle-fusing ATPa | 38.70 | 0.00 |
| TRINITY_sp Q9STIAt3g4838 | Probable Ufml-speci | 38.70 | 0.00 |
| TRINITY_sp P4597USP5     | Ubiquitin carboxyl- | 38.70 | 0.00 |
| TRINITY_sp P0CB4Ylpm1    | YLP motif-containin | 38.70 | 0.00 |
| TRINITY_sp Q5BPIAt4g0667 | Protein EI24 homolo | 38.70 | 0.00 |
| TRINITY_sp Q8W3IMFDR     | NADPH:adrenodoxin o | 38.70 | 0.00 |
| TRINITY_sp Q8J1FTUBB2    | Tubulin beta-2 chai | 38.70 | 0.00 |
| TRINITY_sp Q54L5DDB_G028 | G8 domain-containin | 38.70 | 0.00 |
| TRINITY_sp Q8LQ3Os0lg085 | Putative ataxin-3 h | 38.70 | 0.00 |
| TRINITY_sp Q8IYHZZZ3     | ZZ-type zinc finger | 38.70 | 0.00 |
| TRINITY_sp P2864CLKR27   | 3-oxoacyl-[acyl-car | 38.70 | 0.00 |
| TRINITY_sp Q7XT9AGO2     | Protein argonaute 2 | 38.70 | 0.00 |
| TRINITY_sp P3702hrpB     | ATP-dependent RNA h | 38.70 | 0.00 |
| TRINITY_sp Q9SK2At2g3204 | Folate-biopterin tr | 38.70 | 0.00 |
| TRINITY_sp Q552MDDB_G027 | Putative ZDHHC-type | 38.70 | 0.00 |
| TRINITY_sp P0599-        | Papaya proteinase 4 | 38.70 | 0.00 |
| TRINITY_sp O0421At2g4009 | Putative ABC1 prote | 38.70 | 0.00 |
| TRINITY_sp Q8699doka     | Hybrid signal trans | 38.70 | 0.00 |
| TRINITY_sp Q6QA3hsd17b12 | Very-long-chain 3-o | 38.70 | 0.00 |
| TRINITY_sp Q3957ODA2     | Dynein gamma chain, | 38.70 | 0.00 |
| TRINITY_sp Q9H27VPS11    | Vacuolar protein so | 38.70 | 0.00 |
| TRINITY_sp Q8GYRIN4      | RPM1-interacting pr | 38.70 | 0.00 |
| TRINITY_sp O598(SPCC550  | Putative ATP-depend | 38.60 | 0.00 |
| TRINITY_sp Q5572slr0642  | Folate-biopterin tr | 38.60 | 0.00 |
| TRINITY_sp G5EC9csk-1    | Tyrosine-protein ki | 38.60 | 0.00 |
| TRINITY_sp Q2417Slh      | Protein sly1 homolo | 38.60 | 0.00 |
| TRINITY_sp O9519RCBTB2   | RCC1 and BTB domain | 38.60 | 0.00 |
| TRINITY_sp Q55F1zswim7   | Zinc finger SWIM do | 38.60 | 0.00 |
| TRINITY_sp Q56WFSCPL48   | Serine carboxypepti | 38.60 | 0.00 |
| TRINITY_sp O8039MKK3     | Mitogen-activated p | 38.60 | 0.00 |
| TRINITY_sp P4971Hcls1    | Hematopoietic linea | 38.60 | 0.00 |
| TRINITY_sp Q96VHHBN1     | Putative nitroreduc | 38.60 | 0.00 |
| TRINITY_sp Q9LXIRLF      | Cytochrome b5 domai | 38.60 | 0.00 |
| TRINITY_sp Q8WYISSH1     | Protein phosphatase | 38.60 | 0.00 |
| TRINITY_sp Q6035MJ0044   | Isopentenyl phospho | 38.60 | 0.00 |
| TRINITY_sp O9429SPBC887  | Probable phospholip | 38.60 | 0.00 |
| TRINITY_sp Q28BFpitrm1   | Presequence proteas | 38.60 | 0.00 |
| TRINITY_sp O009(-        | Lysosomal acid alph | 38.60 | 0.00 |
| TRINITY_sp C0SP9adhA     | Probable formaldehy | 38.60 | 0.00 |
| TRINITY_sp Q9LK9ALA8     | Probable phospholip | 38.60 | 0.00 |
| TRINITY_sp Q6411fam135b  | Protein FAM135B OS= | 38.60 | 0.00 |
| TRINITY_sp Q94E7SPP1     | Probable sucrose-ph | 38.60 | 0.00 |
| TRINITY_sp Q55C9vps16    | Vacuolar protein so | 38.60 | 0.00 |
| TRINITY_sp Q9FMFVAMP714  | Vesicle-associated  | 38.60 | 0.00 |
| TRINITY_sp A7YWC9GH      | Gamma-glutamyl hydr | 38.60 | 0.00 |

|                           |                     |       |      |
|---------------------------|---------------------|-------|------|
| TRINITY_sp Q9WY6TM_0225   | Putative 1-aminocyc | 38.60 | 0.00 |
| TRINITY_sp Q4PJV_CYP51A1  | Lanosterol 14-alpha | 38.60 | 0.00 |
| TRINITY_sp P1097-         | Retrovirus-related  | 38.60 | 0.00 |
| TRINITY_sp Q54E7gr1E      | Metabotropic glutam | 38.60 | 0.00 |
| TRINITY_sp O1498BTAF1     | TATA-binding protei | 38.60 | 0.00 |
| TRINITY_sp Q8T26DDB_G027  | Putative ZDHHC-type | 38.60 | 0.00 |
| TRINITY_sp A6TU6Amet_3638 | 8-amino-7-oxonono   | 38.60 | 0.00 |
| TRINITY_sp O4296SPBC119   | Uncharacterized pro | 38.60 | 0.00 |
| TRINITY_sp P1875RCC1      | Regulator of chromo | 38.60 | 0.00 |
| TRINITY_sp Q2XW6svop      | Synaptic vesicle 2- | 38.60 | 0.00 |
| TRINITY_sp Q2TAKIF19      | Kinesin-like protei | 38.60 | 0.00 |
| TRINITY_sp O3125alkB      | Alkane 1-monooxygen | 38.60 | 0.00 |
| TRINITY_sp Q9FP6UBP23     | Ubiquitin carboxyl- | 38.60 | 0.00 |
| TRINITY_sp Q17R6DHX38     | Pre-mRNA-splicing f | 38.60 | 0.00 |
| TRINITY_sp O6506CYSEP     | Vignain OS=Ricinus  | 38.60 | 0.00 |
| TRINITY_sp Q84K6CCD       | Carotenoid 9,10(9', | 38.60 | 0.00 |
| TRINITY_sp Q95YIpefB      | Penta-EF hand domai | 38.60 | 0.00 |
| TRINITY_sp O6466At2g1896  | Thioredoxin domain- | 38.60 | 0.00 |
| TRINITY_sp Q5U26Arhgap24  | Rho GTPase-activati | 38.60 | 0.00 |
| TRINITY_sp Q6AXIHexb      | Beta-hexosaminidase | 38.60 | 0.00 |
| TRINITY_sp Q55GUDDB_G026  | Probable serine/thr | 38.60 | 0.00 |
| TRINITY_sp Q9D26Kif12     | Kinesin-like protei | 38.60 | 0.00 |
| TRINITY_sp O4376CYTH3     | Cytohesin-3 OS=Homo | 38.60 | 0.00 |
| TRINITY_sp Q84SI0s07g056  | Zinc finger CCCH do | 38.60 | 0.00 |
| TRINITY_sp Q3EAIAt3g6226  | Probable protein ph | 38.60 | 0.00 |
| TRINITY_sp Q9S76At3g0906  | BTB/POZ domain-cont | 38.60 | 0.00 |
| TRINITY_sp Q9LZ6STN8      | Serine/threonine-pr | 38.60 | 0.00 |
| TRINITY_sp Q54E6gaceE     | Rho GTPase-activati | 38.60 | 0.00 |
| TRINITY_sp Q9LW6HRD1A     | ERAD-associated E3  | 38.60 | 0.00 |
| TRINITY_sp Q9SF6SYP71     | Syntaxin-71 OS=Arab | 38.60 | 0.00 |
| TRINITY_sp Q8R16Bud13     | BUD13 homolog OS=Mu | 38.60 | 0.00 |
| TRINITY_sp Q9ZW6PRN2      | Pirin-like protein  | 38.60 | 0.00 |
| TRINITY_sp Q8R36Slf1      | SMC5-SMC6 complex 1 | 38.60 | 0.00 |
| TRINITY_sp Q54K6eps15     | Epidermal growth fa | 38.60 | 0.00 |
| TRINITY_sp Q2NUIcdd       | Cytidine deaminase  | 38.60 | 0.00 |
| TRINITY_sp Q9SU6SYP43     | Syntaxin-43 OS=Arab | 38.60 | 0.00 |
| TRINITY_sp Q8LP6PR1       | Alpha-glucan water  | 38.60 | 0.00 |
| TRINITY_sp O1596CYCE      | G1/S-specific cycli | 38.60 | 0.00 |
| TRINITY_sp Q17Q6RAB30     | Ras-related protein | 38.50 | 0.00 |
| TRINITY_sp P5991DNAJB13   | DnaJ homolog subfam | 38.50 | 0.00 |
| TRINITY_sp Q5526pkgA      | Probable serine/thr | 38.50 | 0.00 |
| TRINITY_sp P3416ptpB      | Tyrosine-protein ph | 38.50 | 0.00 |
| TRINITY_sp Q0VA6wdr70     | WD repeat-containin | 38.50 | 0.00 |
| TRINITY_sp P6236CPK1      | Calcium-dependent p | 38.50 | 0.00 |
| TRINITY_sp A8WH6narfl     | Cytosolic Fe-S clus | 38.50 | 0.00 |
| TRINITY_sp P4706PRY1      | Protein PRY1 OS=Sac | 38.50 | 0.00 |
| TRINITY_sp Q0VC6PQLC1     | PQ-loop repeat-cont | 38.50 | 0.00 |
| TRINITY_sp O9556SFT2D2    | Vesicle transport p | 38.50 | 0.00 |
| TRINITY_sp Q9CQ6Lztr1     | Leucine-zipper-like | 38.50 | 0.00 |
| TRINITY_sp O8231At2g2576  | Probably inactive 1 | 38.50 | 0.00 |
| TRINITY_sp Q5M86Hsd17b16  | 17-beta-hydroxyster | 38.50 | 0.00 |
| TRINITY_sp O5826gck       | Glycerate 2-kinase  | 38.50 | 0.00 |
| TRINITY_sp D0PV6laf-1     | ATP-dependent RNA h | 38.50 | 0.00 |
| TRINITY_sp P2176EPHA1     | Ephrin type-A recep | 38.50 | 0.00 |
| TRINITY_sp P1096ugpQ      | Glycerophosphoryl d | 38.50 | 0.00 |
| TRINITY_sp Q91W6Txndc5    | Thioredoxin domain- | 38.50 | 0.00 |



|                           |                     |       |      |
|---------------------------|---------------------|-------|------|
| TRINITY_sp Q5056fdhC      | Probable formate tr | 38.50 | 0.00 |
| TRINITY_sp Q9FG3SNX1      | Sorting nexin 1 OS= | 38.50 | 0.00 |
| TRINITY_sp Q70Gf3sed3     | Tripeptidyl-peptida | 38.50 | 0.00 |
| TRINITY_sp Q3S47AHK5      | Histidine kinase 5  | 38.50 | 0.00 |
| TRINITY_sp Q86H3polr1a    | DNA-directed RNA po | 38.50 | 0.00 |
| TRINITY_sp Q1968F21D5.5   | Uncharacterized pro | 38.50 | 0.00 |
| TRINITY_sp Q54Y7mecr      | Trans-2-enoyl-CoA r | 38.50 | 0.00 |
| TRINITY_sp A5DW1PAB1      | Polyadenylate-bindi | 38.50 | 0.00 |
| TRINITY_sp Q4G03KCTD21    | BTB/POZ domain-cont | 38.50 | 0.00 |
| TRINITY_sp Q8107Ddx42     | ATP-dependent RNA h | 38.50 | 0.00 |
| TRINITY_sp Q5HZ1sirt5-a   | NAD-dependent prote | 38.50 | 0.00 |
| TRINITY_sp Q9SL7Os05g015  | Importin subunit al | 38.50 | 0.00 |
| TRINITY_sp P2577Os04g065  | Oryzain alpha chain | 38.50 | 0.00 |
| TRINITY_sp Q557cabpE-1    | Drebrin-like protei | 38.50 | 0.00 |
| TRINITY_sp Q59YIESF2      | Pre-rRNA-processing | 38.50 | 0.00 |
| TRINITY_sp Q9FFFDGK2      | Diacylglycerol kina | 38.50 | 0.00 |
| TRINITY_sp Q3SZ3MED6      | Mediator of RNA pol | 38.50 | 0.00 |
| TRINITY_sp Q54LIDDB_G028  | Lipid droplet-assoc | 38.50 | 0.00 |
| TRINITY_sp Q5677ch25hl1   | Cholesterol 25-hydr | 38.50 | 0.00 |
| TRINITY_sp Q1LVEsf3b3     | Splicing factor 3B  | 38.50 | 0.00 |
| TRINITY_sp Q9M33LCB2b     | Long chain base bio | 38.50 | 0.00 |
| TRINITY_sp Q7XI4URA6      | UMP-CMP kinase 3 OS | 38.50 | 0.00 |
| TRINITY_sp Q3SW1NOSIP     | Nitric oxide syntha | 38.50 | 0.00 |
| TRINITY_sp Q1ZXHgxcDD     | Guanine exchange fa | 38.50 | 0.00 |
| TRINITY_sp Q8CH1Sgpl1     | Sphingosine-1-phosp | 38.50 | 0.00 |
| TRINITY_sp Q8L71NUP62     | Nuclear pore comple | 38.50 | 0.00 |
| TRINITY_sp Q7PQVAGAP0023  | ADP,ATP carrier pro | 38.50 | 0.00 |
| TRINITY_sp Q96A1TTC28     | Tetratricopeptide r | 38.50 | 0.00 |
| TRINITY_sp Q54TmdrkD      | Probable serine/thr | 38.50 | 0.00 |
| TRINITY_sp P3311spaR      | Transcriptional reg | 38.50 | 0.00 |
| TRINITY_sp Q9BZ1PUS3      | tRNA pseudouridine( | 38.50 | 0.00 |
| TRINITY_sp Q9XZ1-         | Guanine nucleotide- | 38.50 | 0.00 |
| TRINITY_sp Q6144p38b      | Mitogen-activated p | 38.50 | 0.00 |
| TRINITY_sp Q6318Eif2ak2   | Interferon-induced, | 38.50 | 0.00 |
| TRINITY_sp Q5UQC(MIMI_R81 | Putative serine/thr | 38.50 | 0.00 |
| TRINITY_sp Q1ZXHgxcDD     | Guanine exchange fa | 38.50 | 0.00 |
| TRINITY_sp Q6TC4SRY       | Sex-determining reg | 38.50 | 0.00 |
| TRINITY_sp Q6Q47Atp2b4    | Plasma membrane cal | 38.50 | 0.00 |
| TRINITY_sp Q9ER1ORF11     | Probable ergosterol | 38.50 | 0.00 |
| TRINITY_sp Q8277soxA      | Monomeric sarcosine | 38.50 | 0.00 |
| TRINITY_sp Q7Y01SAPK8     | Serine/threonine-pr | 38.50 | 0.00 |
| TRINITY_sp Q9CQ3Riok2     | Serine/threonine-pr | 38.50 | 0.00 |
| TRINITY_sp A8IC3CFAP46    | Cilia- and flagella | 38.50 | 0.00 |
| TRINITY_sp Q95P1dhkC      | Hybrid signal trans | 38.50 | 0.00 |
| TRINITY_sp Q9493MOS4      | Pre-mRNA-splicing f | 38.50 | 0.00 |
| TRINITY_sp Q9LZ3BIG2      | Brefeldin A-inhibit | 38.50 | 0.00 |
| TRINITY_sp Q6CX3SET5      | Potential protein l | 38.50 | 0.00 |
| TRINITY_sp Q8LEM CBL3     | Calcineurin B-like  | 38.40 | 0.00 |
| TRINITY_sp Q3M87sasa      | Adaptive-response s | 38.40 | 0.00 |
| TRINITY_sp Q8ML2pdeD      | cGMP-dependent 3',5 | 38.40 | 0.00 |
| TRINITY_sp Q5FW1mmcm6     | Maternal DNA replic | 38.40 | 0.00 |
| TRINITY_sp Q5RC3GLRX2     | Glutaredoxin-2, mit | 38.40 | 0.00 |
| TRINITY_sp Q54Y1snfA      | 5'-AMP-activated se | 38.40 | 0.00 |
| TRINITY_sp Q9D08Alg14     | UDP-N-acetylglucosa | 38.40 | 0.00 |
| TRINITY_sp Q54Y1dhkB      | Hybrid signal trans | 38.40 | 0.00 |
| TRINITY_sp Q9J11Ercc612   | DNA excision repair | 38.40 | 0.00 |

|                           |                     |       |      |
|---------------------------|---------------------|-------|------|
| TRINITY_sp Q84LMVPE1      | Vacuolar-processing | 38.40 | 0.00 |
| TRINITY_sp P5492Napa      | Alpha-soluble NSF a | 38.40 | 0.00 |
| TRINITY_sp Q2M38KIAA1033  | WASH complex subuni | 38.40 | 0.00 |
| TRINITY_sp P1423Fgr       | Tyrosine-protein ki | 38.40 | 0.00 |
| TRINITY_sp Q9ZRICAD       | Probable mannitol d | 38.40 | 0.00 |
| TRINITY_sp Q54VDDDB_G028  | Probable serine/thr | 38.40 | 0.00 |
| TRINITY_sp P3413ptpB      | Tyrosine-protein ph | 38.40 | 0.00 |
| TRINITY_sp O1518CETN3     | Centrin-3 OS=Homo s | 38.40 | 0.00 |
| TRINITY_sp Q6CGIYALI0A18  | Acyl-protein thioes | 38.40 | 0.00 |
| TRINITY_sp Q8BUVGpr107    | Protein GPR107 OS=M | 38.40 | 0.00 |
| TRINITY_sp Q0QLHmii       | 3-methylitaconate i | 38.40 | 0.00 |
| TRINITY_sp O8038FPG1      | Formamidopyrimidine | 38.40 | 0.00 |
| TRINITY_sp Q54M1mkcA      | Probable serine/thr | 38.40 | 0.00 |
| TRINITY_sp Q0U61LAP1      | Leucine aminopeptid | 38.40 | 0.00 |
| TRINITY_sp Q7X61MMD1      | PHD finger protein  | 38.40 | 0.00 |
| TRINITY_sp Q8LP8LACS6     | Long chain acyl-CoA | 38.40 | 0.00 |
| TRINITY_sp P0A21ucpA      | Oxidoreductase UcpA | 38.40 | 0.00 |
| TRINITY_sp Q66G1PRORP1    | Proteinaceous RNase | 38.40 | 0.00 |
| TRINITY_sp Q9SJUGC1       | Epimerase family pr | 38.40 | 0.00 |
| TRINITY_sp Q7571HUL4      | Probable E3 ubiquit | 38.40 | 0.00 |
| TRINITY_sp P0CO1GEM1      | Mitochondrial Rho G | 38.40 | 0.00 |
| TRINITY_sp P448(HI_0658   | Uncharacterized ABC | 38.40 | 0.00 |
| TRINITY_sp P5778ALA12     | Probable phospholip | 38.40 | 0.00 |
| TRINITY_sp O605(CDC40     | Pre-mRNA-processing | 38.40 | 0.00 |
| TRINITY_sp P189(ATP1A1    | Sodium/potassium-tr | 38.40 | 0.00 |
| TRINITY_sp B8AJ(BASS4     | Probable sodium/met | 38.40 | 0.00 |
| TRINITY_sp Q9FL(MRS2-2    | Magnesium transport | 38.40 | 0.00 |
| TRINITY_sp Q9VR8HERC2     | Probable E3 ubiquit | 38.40 | 0.00 |
| TRINITY_sp Q6IA8NADSYN1   | Glutamine-dependent | 38.40 | 0.00 |
| TRINITY_sp Q9P21HIFT80    | Intraflagellar tran | 38.40 | 0.00 |
| TRINITY_sp Q9HD1SPAPB1A1  | Putative ATP-depend | 38.40 | 0.00 |
| TRINITY_sp Q1ZX1gxcDD     | Guanine exchange fa | 38.40 | 0.00 |
| TRINITY_sp Q08C8crnf44    | RING finger protein | 38.40 | 0.00 |
| TRINITY_sp Q9ZU8BAT1      | Amino-acid permease | 38.40 | 0.00 |
| TRINITY_sp Q54VDDDB_G028  | Probable serine/thr | 38.40 | 0.00 |
| TRINITY_sp Q9FF8VPS36     | Vacuolar protein so | 38.40 | 0.00 |
| TRINITY_sp B5BT1BTAF1     | TATA-binding protei | 38.40 | 0.00 |
| TRINITY_sp Q2662KAP115    | Kinesin-associated  | 38.40 | 0.00 |
| TRINITY_sp Q9US8mug71     | Diphthine--ammonia  | 38.40 | 0.00 |
| TRINITY_sp Q4364-         | NADH dehydrogenase  | 38.40 | 0.00 |
| TRINITY_sp Q5SLM1TTHA0270 | Thermostable carbox | 38.40 | 0.00 |
| TRINITY_sp Q9SQ1EMB3004   | Bifunctional 3-dehy | 38.40 | 0.00 |
| TRINITY_sp Q9SYM1VTE6     | Protein VTE6, chlor | 38.40 | 0.00 |
| TRINITY_sp Q0IZ8PHT4;5    | Probable anion tran | 38.40 | 0.00 |
| TRINITY_sp Q55E4dhkE      | Hybrid signal trans | 38.30 | 0.00 |
| TRINITY_sp Q54Y1dhkB      | Hybrid signal trans | 38.30 | 0.00 |
| TRINITY_sp D9HP2CNR11     | Cell number regulat | 38.30 | 0.00 |
| TRINITY_sp Q5BI1DUSP18    | Dual specificity pr | 38.30 | 0.00 |
| TRINITY_sp Q7T01lamtor3-  | Ragulator complex p | 38.30 | 0.00 |
| TRINITY_sp P4471HI_0454   | Uncharacterized met | 38.30 | 0.00 |
| TRINITY_sp Q7XA8FOLT1     | Folate transporter  | 38.30 | 0.00 |
| TRINITY_sp Q54V(abcC15    | ABC transporter C f | 38.30 | 0.00 |
| TRINITY_sp Q0DA8Os06g067  | Zinc finger CCCH do | 38.30 | 0.00 |
| TRINITY_sp Q54H4drkB      | Probable serine/thr | 38.30 | 0.00 |
| TRINITY_sp F4JT1STY46     | Serine/threonine-pr | 38.30 | 0.00 |
| TRINITY_sp Q1824rap-1     | Ras-related protein | 38.30 | 0.00 |

|                          |                     |       |      |
|--------------------------|---------------------|-------|------|
| TRINITY_sp Q4R6{AMZ2     | Archaemetzincin-2 O | 38.30 | 0.00 |
| TRINITY_sp Q8TC{RDH11    | Retinol dehydrogena | 38.30 | 0.00 |
| TRINITY_sp P266{Sos      | Protein son of seve | 38.30 | 0.00 |
| TRINITY_sp E0X9{ctodS    | Sensor histidine ki | 38.30 | 0.00 |
| TRINITY_sp E1BF{MASTL    | Serine/threonine-pr | 38.30 | 0.00 |
| TRINITY_sp A1A4{PRORS1   | Prolyl-tRNA synthet | 38.30 | 0.00 |
| TRINITY_sp Q5RJ{Ftsj3    | pre-rRNA processing | 38.30 | 0.00 |
| TRINITY_sp P324{GBP2     | Guanylate-binding p | 38.30 | 0.00 |
| TRINITY_sp Q8L7{SCPL20   | Serine carboxypepti | 38.30 | 0.00 |
| TRINITY_sp P388{NMD3     | 60S ribosomal expor | 38.30 | 0.00 |
| TRINITY_sp Q8BQ{Adipor2  | Adiponectin recepto | 38.30 | 0.00 |
| TRINITY_sp A0LE{dapL     | LL-diaminopimelate  | 38.30 | 0.00 |
| TRINITY_sp O076{yhfo     | Uncharacterized N-a | 38.30 | 0.00 |
| TRINITY_sp Q9LD{BI-1     | Bax inhibitor 1 OS= | 38.30 | 0.00 |
| TRINITY_sp O487{SPX2     | SPX domain-containi | 38.30 | 0.00 |
| TRINITY_sp Q9CA{LPLAT2   | Lysophospholipid ac | 38.30 | 0.00 |
| TRINITY_sp Q9JL{Pnkp     | Bifunctional polynu | 38.30 | 0.00 |
| TRINITY_sp Q54F{gacJJ    | Rho GTPase-activati | 38.30 | 0.00 |
| TRINITY_sp Q86H{cf45-1   | Counting factor 45- | 38.30 | 0.00 |
| TRINITY_sp Q55G{abkC     | Probable serine/thr | 38.30 | 0.00 |
| TRINITY_sp Q9WT{Cdy1     | Chromodomain Y-like | 38.30 | 0.00 |
| TRINITY_sp Q54W{DDB_G027 | Sestrin homolog OS= | 38.30 | 0.00 |
| TRINITY_sp Q9Y5{GTF3C3   | General transcripti | 38.30 | 0.00 |
| TRINITY_sp Q54V{DDB_G028 | Serine carboxypepti | 38.30 | 0.00 |
| TRINITY_sp Q96R{CAMKK2   | Calcium/calmodulin- | 38.30 | 0.00 |
| TRINITY_sp Q563{cheY     | Chemotaxis protein  | 38.30 | 0.00 |
| TRINITY_sp Q500{PAT15    | Probable protein S- | 38.30 | 0.00 |
| TRINITY_sp Q9SA{At1g1178 | Alpha-ketoglutarate | 38.30 | 0.00 |
| TRINITY_sp Q8ND{IAGBL5   | Cytosolic carboxype | 38.30 | 0.00 |
| TRINITY_sp Q54G{ctdsp12  | CTD small phosphata | 38.30 | 0.00 |
| TRINITY_sp F4IL{KIN14I   | Kinesin-like protei | 38.30 | 0.00 |
| TRINITY_sp Q54G{pex1     | Peroxisome biogenes | 38.30 | 0.00 |
| TRINITY_sp O946{ptr3     | Ubiquitin-activatin | 38.30 | 0.00 |
| TRINITY_sp Q3UM{Lsg1     | Large subunit GTPas | 38.30 | 0.00 |
| TRINITY_sp O044{FCA      | Flowering time cont | 38.30 | 0.00 |
| TRINITY_sp Q9W1{FCG5532  | Transmembrane prote | 38.30 | 0.00 |
| TRINITY_sp Q6DH{slc25a40 | Solute carrier fami | 38.30 | 0.00 |
| TRINITY_sp Q4N4{TP02_060 | Thioredoxin domain- | 38.30 | 0.00 |
| TRINITY_sp P0DM{Fer115   | Fer-1-like protein  | 38.30 | 0.00 |
| TRINITY_sp O550{Trdmt1   | tRNA (cytosine(38)- | 38.30 | 0.00 |
| TRINITY_sp Q5CC{petC-1   | Cytochrome b6-f com | 38.30 | 0.00 |
| TRINITY_sp Q6A9{pgk      | Phosphoglycerate ki | 38.30 | 0.00 |
| TRINITY_sp Q9SJ{AGO5     | Protein argonaute 5 | 38.30 | 0.00 |
| TRINITY_sp P129{PEPD     | Xaa-Pro dipeptidase | 38.30 | 0.00 |
| TRINITY_sp Q16N{Art7     | Protein arginine N- | 38.30 | 0.00 |
| TRINITY_sp Q8T7{alxA     | ALG-2 interacting p | 38.30 | 0.00 |
| TRINITY_sp Q8BV{Trank1   | TPR and ankyrin rep | 38.30 | 0.00 |
| TRINITY_sp O804{At1g0916 | Probable protein ph | 38.30 | 0.00 |
| TRINITY_sp Q6P4{Lcmt1    | Leucine carboxyl me | 38.30 | 0.00 |
| TRINITY_sp P189{ATP1A1   | Sodium/potassium-tr | 38.30 | 0.00 |
| TRINITY_sp Q8LL{CPL3     | RNA polymerase II C | 38.30 | 0.00 |
| TRINITY_sp Q996{DNAJC7   | DnaJ homolog subfam | 38.30 | 0.00 |
| TRINITY_sp Q88R{davT     | 5-aminovalerate ami | 38.30 | 0.00 |
| TRINITY_sp Q501{pskh1    | Serine/threonine-pr | 38.30 | 0.00 |
| TRINITY_sp Q3E9{CPK34    | Calcium-dependent p | 38.30 | 0.00 |
| TRINITY_sp Q7XA{IRSH2    | Probable GTP diphos | 38.30 | 0.00 |

|                  |          |                     |       |      |
|------------------|----------|---------------------|-------|------|
| TRINITY_sp Q9938 | HRP1     | Nuclear polyadenyla | 38.30 | 0.00 |
| TRINITY_sp Q0WW1 | STR11    | Rhodanese-like doma | 38.30 | 0.00 |
| TRINITY_sp Q8I7I | pol      | Retrovirus-related  | 38.30 | 0.00 |
| TRINITY_sp Q3T07 | TPPP2    | Tubulin polymerizat | 38.30 | 0.00 |
| TRINITY_sp A2QC4 | An02g035 | Very-long-chain 3-o | 38.30 | 0.00 |
| TRINITY_sp Q7Z62 | HUWE1    | E3 ubiquitin-protei | 38.20 | 0.00 |
| TRINITY_sp P3640 | rab2A    | Ras-related protein | 38.20 | 0.00 |
| TRINITY_sp O6444 | RMA1     | E3 ubiquitin-protei | 38.20 | 0.00 |
| TRINITY_sp Q9033 | FGFR4    | Fibroblast growth f | 38.20 | 0.00 |
| TRINITY_sp Q8CF0 | Aqr      | Intron-binding prot | 38.20 | 0.00 |
| TRINITY_sp O0180 | rab-11.1 | Ras-related protein | 38.20 | 0.00 |
| TRINITY_sp Q9LT7 | RDL2     | Probable cysteine p | 38.20 | 0.00 |
| TRINITY_sp Q2HVM | trDRAF1  | Putative N6-adenosi | 38.20 | 0.00 |
| TRINITY_sp Q9169 | epha4-b  | Ephrin type-A recep | 38.20 | 0.00 |
| TRINITY_sp Q0VCC | PQLC1    | PQ-loop repeat-cont | 38.20 | 0.00 |
| TRINITY_sp Q6NX0 | ESRP1    | Epithelial splicing | 38.20 | 0.00 |
| TRINITY_sp Q54Q0 | commd3   | COMM domain-contain | 38.20 | 0.00 |
| TRINITY_sp P9817 | XIAP     | E3 ubiquitin-protei | 38.20 | 0.00 |
| TRINITY_sp P5517 | -        | Hydrolase in pqqF 5 | 38.20 | 0.00 |
| TRINITY_sp P4270 | GSTF10   | Glutathione S-trans | 38.20 | 0.00 |
| TRINITY_sp O9545 | PSMG1    | Proteasome assembly | 38.20 | 0.00 |
| TRINITY_sp P3410 | SODB     | Superoxide dismutas | 38.20 | 0.00 |
| TRINITY_sp P2834 | acu-9    | Malate synthase, gl | 38.20 | 0.00 |
| TRINITY_sp P4325 | COP1     | E3 ubiquitin-protei | 38.20 | 0.00 |
| TRINITY_sp Q9M88 | PMI1     | Mannose-6-phosphate | 38.20 | 0.00 |
| TRINITY_sp Q54Q0 | sphr2aB  | Serine/threonine-pr | 38.20 | 0.00 |
| TRINITY_sp Q6X47 | CIPK31   | CBL-interacting pro | 38.20 | 0.00 |
| TRINITY_sp Q94A0 | CUL1     | Cullin-1 OS=Arabido | 38.20 | 0.00 |
| TRINITY_sp A8IW5 | CHLREDR1 | Mitochondrial cardi | 38.20 | 0.00 |
| TRINITY_sp Q5VX0 | LIPK     | Lipase member K OS= | 38.20 | 0.00 |
| TRINITY_sp Q55G0 | pakC     | Serine/threonine-pr | 38.20 | 0.00 |
| TRINITY_sp Q55E4 | mcfE     | Mitochondrial subst | 38.20 | 0.00 |
| TRINITY_sp Q6IV0 | ssh      | Protein phosphatase | 38.20 | 0.00 |
| TRINITY_sp Q4U20 | Herc2    | E3 ubiquitin-protei | 38.20 | 0.00 |
| TRINITY_sp A8LV0 | kmo      | Kynurenine 3-monoox | 38.20 | 0.00 |
| TRINITY_sp Q9LX0 | CSY2     | Citrate synthase 2, | 38.20 | 0.00 |
| TRINITY_sp Q9LE0 | IRE      | Probable serine/thr | 38.20 | 0.00 |
| TRINITY_sp P2360 | ATP2B4   | Plasma membrane cal | 38.20 | 0.00 |
| TRINITY_sp Q9NV0 | TYW1     | S-adenosyl-L-methio | 38.20 | 0.00 |
| TRINITY_sp A2YR1 | ARP4     | Actin-related prote | 38.20 | 0.00 |
| TRINITY_sp Q6DF0 | coq6     | Ubiquinone biosynth | 38.20 | 0.00 |
| TRINITY_sp Q8BM1 | Lipk     | Lipase member K OS= | 38.20 | 0.00 |
| TRINITY_sp Q8RVI | DEK1     | Calpain-type cystei | 38.20 | 0.00 |
| TRINITY_sp Q9S7I | MYB98    | Transcription facto | 38.20 | 0.00 |
| TRINITY_sp Q9LD0 | BETAA-AI | Beta-adaptin-like p | 38.20 | 0.00 |
| TRINITY_sp Q9M90 | CSTF64   | Cleavage stimulin   | 38.20 | 0.00 |
| TRINITY_sp Q6VN1 | Ranbp10  | Ran-binding protein | 38.20 | 0.00 |
| TRINITY_sp Q9SK0 | RAP2-7   | Ethylene-responsive | 38.20 | 0.00 |
| TRINITY_sp P1431 | Mp20     | Muscle-specific pro | 38.20 | 0.00 |
| TRINITY_sp P4037 | ptc1     | Protein phosphatase | 38.20 | 0.00 |
| TRINITY_sp Q3SY0 | TNPO1    | Transportin-1 OS=Bo | 38.20 | 0.00 |
| TRINITY_sp Q3940 | VH-PTP10 | Dual specificity pr | 38.20 | 0.00 |
| TRINITY_sp Q9XY1 | fcfA     | Probable C-terminal | 38.20 | 0.00 |
| TRINITY_sp Q9H80 | VCPKMT   | Protein-lysine meth | 38.20 | 0.00 |
| TRINITY_sp P2881 | Rasgrf1  | Ras-specific guanin | 38.20 | 0.00 |
| TRINITY_sp P6234 | CPK1     | Calcium-dependent p | 38.20 | 0.00 |

|                           |                     |       |      |
|---------------------------|---------------------|-------|------|
| TRINITY_sp Q8R5I Vps39    | Vam6/Vps39-like pro | 38.20 | 0.00 |
| TRINITY_sp Q9C6I LHCA5    | Photosystem I chlor | 38.20 | 0.00 |
| TRINITY_sp Q103I SPBC582  | Uncharacterized ATP | 38.20 | 0.00 |
| TRINITY_sp Q8RU9 ATG9     | Autophagy-related p | 38.20 | 0.00 |
| TRINITY_sp Q9CXI Kdm8     | Lysine-specific dem | 38.20 | 0.00 |
| TRINITY_sp Q8IU8 CAMK1D   | Calcium/calmodulin- | 38.20 | 0.00 |
| TRINITY_sp P464I GST1     | Glutathione S-trans | 38.20 | 0.00 |
| TRINITY_sp Q58D5 GLB1     | Beta-galactosidase  | 38.20 | 0.00 |
| TRINITY_sp Q8CGI Abcc1    | Multidrug resistanc | 38.20 | 0.00 |
| TRINITY_sp O7478 cho2     | Phosphatidylethanol | 38.20 | 0.00 |
| TRINITY_sp Q54S5 vps15    | Probable serine/thr | 38.20 | 0.00 |
| TRINITY_sp P5435 DNAPol-c | DNA polymerase delt | 38.20 | 0.00 |
| TRINITY_sp Q9KLI luxQ     | Autoinducer 2 senso | 38.20 | 0.00 |
| TRINITY_sp Q8INI Gyc88E   | Soluble guanylate c | 38.20 | 0.00 |
| TRINITY_sp Q5558 gabD     | Probable succinate- | 38.20 | 0.00 |
| TRINITY_sp Q8VEIM tmr14   | Myotubularin-relate | 38.20 | 0.00 |
| TRINITY_sp Q9P2I DNAH1    | Dynein heavy chain  | 38.20 | 0.00 |
| TRINITY_sp Q9FVI AGD12    | ADP-ribosylation fa | 38.20 | 0.00 |
| TRINITY_sp Q8RXI ATL6     | E3 ubiquitin-protei | 38.20 | 0.00 |
| TRINITY_sp Q0VFI kctd7    | BTB/POZ domain-cont | 38.20 | 0.00 |
| TRINITY_sp P982I ALA1     | Phospholipid-transp | 38.20 | 0.00 |
| TRINITY_sp Q6ZKI BIO3-BI  | Bifunctional dethio | 38.20 | 0.00 |
| TRINITY_sp Q86XI FBXO11   | F-box only protein  | 38.20 | 0.00 |
| TRINITY_sp Q6K6I Os02g075 | Leucine aminopeptid | 38.20 | 0.00 |
| TRINITY_sp Q4R6I IQUB     | IQ and ubiquitin-li | 38.20 | 0.00 |
| TRINITY_sp Q1RMI SYS1     | Protein SYS1 homolo | 38.20 | 0.00 |
| TRINITY_sp Q59TI TRM5     | tRNA (guanine(37)-N | 38.10 | 0.00 |
| TRINITY_sp P571I (-       | Glutathione S-trans | 38.10 | 0.00 |
| TRINITY_sp P355I AGL      | Glycogen debranchin | 38.10 | 0.00 |
| TRINITY_sp Q4WGI ddi1     | DNA damage-inducibl | 38.10 | 0.00 |
| TRINITY_sp P040I GBA      | Glucosylceramidase  | 38.10 | 0.00 |
| TRINITY_sp Q6I6I PSS2     | CDP-diacylglycerol- | 38.10 | 0.00 |
| TRINITY_sp Q84YI CXIP4    | CAX-interacting pro | 38.10 | 0.00 |
| TRINITY_sp C0SP7 adhA     | Probable formaldehy | 38.10 | 0.00 |
| TRINITY_sp Q9P8I (trm1    | tRNA (guanine(26)-N | 38.10 | 0.00 |
| TRINITY_sp Q8VZI FZR1     | Protein FIZZY-RELAT | 38.10 | 0.00 |
| TRINITY_sp P623I CPK1     | Calcium-dependent p | 38.10 | 0.00 |
| TRINITY_sp P804I AOX1     | Aldehyde oxidase 1  | 38.10 | 0.00 |
| TRINITY_sp O882I Abcc6    | Multidrug resistanc | 38.10 | 0.00 |
| TRINITY_sp O140I (mak2    | Peroxide stress-act | 38.10 | 0.00 |
| TRINITY_sp Q9SDI At3g5111 | UPF0183 protein At3 | 38.10 | 0.00 |
| TRINITY_sp Q6NWI spast    | Spastin OS=Danio re | 38.10 | 0.00 |
| TRINITY_sp Q6PGI maf1     | Repressor of RNA po | 38.10 | 0.00 |
| TRINITY_sp Q55AI snrnp40  | U5 small nuclear ri | 38.10 | 0.00 |
| TRINITY_sp Q9XII At1g5975 | Putative cullin-lik | 38.10 | 0.00 |
| TRINITY_sp Q2KJI PHKG2    | Phosphorylase b kin | 38.10 | 0.00 |
| TRINITY_sp Q96RI IFT140   | Intraflagellar tran | 38.10 | 0.00 |
| TRINITY_sp Q28GI uba2     | SUMO-activating enz | 38.10 | 0.00 |
| TRINITY_sp Q9Z0I Lipa     | Lysosomal acid lipa | 38.10 | 0.00 |
| TRINITY_sp Q96BI ALKBH8   | Alkylated DNA repai | 38.10 | 0.00 |
| TRINITY_sp Q9C6I CPK33    | Calcium-dependent p | 38.10 | 0.00 |
| TRINITY_sp Q389I KIN10    | SNF1-related protei | 38.10 | 0.00 |
| TRINITY_sp Q105I CPSF1    | Cleavage and polyad | 38.10 | 0.00 |
| TRINITY_sp Q54TI drkD     | Probable serine/thr | 38.10 | 0.00 |
| TRINITY_sp Q9MI2 IRH52    | DEAD-box ATP-depend | 38.10 | 0.00 |
| TRINITY_sp Q9W0I NaCP60E  | Sodium channel prot | 38.10 | 0.00 |

|                           |                     |       |      |
|---------------------------|---------------------|-------|------|
| TRINITY_sp Q6IQ2NAPEPLD   | N-acyl-phosphatidyl | 38.10 | 0.00 |
| TRINITY_sp Q6AXURnf181    | E3 ubiquitin-protei | 38.10 | 0.00 |
| TRINITY_sp P3518PTC1      | Protein phosphatase | 38.10 | 0.00 |
| TRINITY_sp P4773RAP1GAP   | Rap1 GTPase-activat | 38.10 | 0.00 |
| TRINITY_sp O7055CYP3A31   | Cytochrome P450 3A3 | 38.10 | 0.00 |
| TRINITY_sp Q68J4LIPE      | Hormone-sensitive l | 38.10 | 0.00 |
| TRINITY_sp Q5PRIcsnk1g1   | Casein kinase I iso | 38.10 | 0.00 |
| TRINITY_sp Q9D18Cfap57    | Cilia- and flagella | 38.10 | 0.00 |
| TRINITY_sp Q6NZ5Ddx31     | Probable ATP-depend | 38.10 | 0.00 |
| TRINITY_sp F4JCU\SUA      | SUPPRESSOR OF ABI3- | 38.10 | 0.00 |
| TRINITY_sp A7HZ7rpsM      | 30S ribosomal prote | 38.10 | 0.00 |
| TRINITY_sp Q54Sfdhkd      | Hybrid signal trans | 38.10 | 0.00 |
| TRINITY_sp Q8RWISTY17     | Serine/threonine-pr | 38.10 | 0.00 |
| TRINITY_sp Q5JJJ\TOM20    | Probable mitochondr | 38.10 | 0.00 |
| TRINITY_sp Q9SII\ALKBH2   | DNA oxidative demet | 38.10 | 0.00 |
| TRINITY_sp Q8AV8btd       | Biotinidase OS=Taki | 38.10 | 0.00 |
| TRINITY_sp P0CZ2ACX3      | Acyl-coenzyme A oxi | 38.10 | 0.00 |
| TRINITY_sp Q9M3FHMA1      | Probable cadmium/zi | 38.10 | 0.00 |
| TRINITY_sp P4781-         | Eukaryotic translat | 38.10 | 0.00 |
| TRINITY_sp Q9C0F\ARHGAP35 | Rho GTPase-activati | 38.10 | 0.00 |
| TRINITY_sp P4268SRK2      | Tyrosine-protein ki | 38.10 | 0.00 |
| TRINITY_sp Q54V\DDB_G028  | Probable serine/thr | 38.10 | 0.00 |
| TRINITY_sp Q2RAC\CYCT1-3  | Cyclin-T1-3 OS=Oryz | 38.10 | 0.00 |
| TRINITY_sp Q9LZ2CAT6      | Cationic amino acid | 38.10 | 0.00 |
| TRINITY_sp Q6NYH\mem208   | Transmembrane prote | 38.10 | 0.00 |
| TRINITY_sp Q1255agdA      | Alpha-glucosidase O | 38.00 | 0.00 |
| TRINITY_sp Q9XF7cardA     | Procardosin-A OS=Cy | 38.00 | 0.00 |
| TRINITY_sp Q9P8(mis18     | Kinetochoe protein  | 38.00 | 0.00 |
| TRINITY_sp Q55Gf\roco7    | Probable serine/thr | 38.00 | 0.00 |
| TRINITY_sp P2817pkgB      | Protein kinase 2 OS | 38.00 | 0.00 |
| TRINITY_sp Q54Vf\rsad1    | Radical S-adenosyl  | 38.00 | 0.00 |
| TRINITY_sp Q54Gf\ctdsp12  | CTD small phosphata | 38.00 | 0.00 |
| TRINITY_sp Q8K4f\Nsun5    | Probable 28S rRNA ( | 38.00 | 0.00 |
| TRINITY_sp Q5854nudF      | ADP-ribose pyrophos | 38.00 | 0.00 |
| TRINITY_sp Q84Xf\ETN8     | Equilibrative nucle | 38.00 | 0.00 |
| TRINITY_sp B9G27Os09g024  | Auxin transport pro | 38.00 | 0.00 |
| TRINITY_sp Q5UPf\MIMI_R61 | Putative band 7 fam | 38.00 | 0.00 |
| TRINITY_sp P462(usf       | Protein usf OS=Aqui | 38.00 | 0.00 |
| TRINITY_sp G5ECf\cck-1    | Tyrosine-protein ki | 38.00 | 0.00 |
| TRINITY_sp Q9278STAM      | Signal transducing  | 38.00 | 0.00 |
| TRINITY_sp Q0BUf\engB     | Probable GTP-bindin | 38.00 | 0.00 |
| TRINITY_sp Q5JK5Os01g095  | Probable NAD kinase | 38.00 | 0.00 |
| TRINITY_sp C9WMM-         | Venom serine carbox | 38.00 | 0.00 |
| TRINITY_sp P5156AFC3      | Serine/threonine-pr | 38.00 | 0.00 |
| TRINITY_sp Q8BF5Asnsd1    | Asparagine syntheta | 38.00 | 0.00 |
| TRINITY_sp P2873MSP1      | Protein MSP1 OS=Sac | 38.00 | 0.00 |
| TRINITY_sp Q8IXf\PPIL6    | Peptidyl-prolyl cis | 38.00 | 0.00 |
| TRINITY_sp Q2R2f\IKIN7L   | Kinesin-like protei | 38.00 | 0.00 |
| TRINITY_sp P169f\Pka-C3   | Protein kinase DC2  | 38.00 | 0.00 |
| TRINITY_sp Q9173ephb1-b   | Ephrin type-B recep | 38.00 | 0.00 |
| TRINITY_sp Q7TXf\Mb2977   | Trans-acting enoyl  | 38.00 | 0.00 |
| TRINITY_sp Q8TEf\RHBD1    | Rhomboid-related pr | 38.00 | 0.00 |
| TRINITY_sp Q9CAf\PEX2     | Peroxisome biogenes | 38.00 | 0.00 |
| TRINITY_sp P462(MYB       | Transcriptional act | 38.00 | 0.00 |
| TRINITY_sp Q8R15Znfx1     | NFX1-type zinc fing | 38.00 | 0.00 |
| TRINITY_sp Q641f\Hexa     | Beta-hexosaminidase | 38.00 | 0.00 |

|                          |                     |       |      |
|--------------------------|---------------------|-------|------|
| TRINITY_sp B1I1 rp1D     | 50S ribosomal prote | 38.00 | 0.00 |
| TRINITY_sp P395 DRS2     | Probable phospholip | 38.00 | 0.00 |
| TRINITY_sp Q54I shkB     | Dual specificity pr | 38.00 | 0.00 |
| TRINITY_sp O884 Aurkc    | Aurora kinase C OS= | 38.00 | 0.00 |
| TRINITY_sp A7SDV v1g1694 | Eukaryotic translat | 38.00 | 0.00 |
| TRINITY_sp Q9SR BIG      | Auxin transport pro | 38.00 | 0.00 |
| TRINITY_sp Q8H2 Os07g02  | Glycerol-3-phosphat | 38.00 | 0.00 |
| TRINITY_sp Q9SZ PAA1     | Copper-transporting | 38.00 | 0.00 |
| TRINITY_sp P049 cprA     | Cysteine proteinase | 38.00 | 0.00 |
| TRINITY_sp Q207 atad-3   | ATPase family AAA d | 38.00 | 0.00 |
| TRINITY_sp Q96N GUCD1    | Protein GUCD1 OS=Ho | 38.00 | 0.00 |
| TRINITY_sp Q55D abcG22   | ABC transporter G f | 38.00 | 0.00 |
| TRINITY_sp P400 TPA1     | Prolyl 3,4-dihydrox | 38.00 | 0.00 |
| TRINITY_sp P123 GLRX     | Glutaredoxin-1 OS=S | 38.00 | 0.00 |
| TRINITY_sp P0C7 DA1      | Protein DA1 OS=Arab | 38.00 | 0.00 |
| TRINITY_sp O212 RPL14    | 60S ribosomal prote | 38.00 | 0.00 |
| TRINITY_sp Q3MI PUS10    | Putative tRNA pseud | 38.00 | 0.00 |
| TRINITY_sp Q8VZ SUVH6    | Histone-lysine N-me | 38.00 | 0.00 |
| TRINITY_sp P041 Myb      | Myb protein OS=Dros | 38.00 | 0.00 |
| TRINITY_sp Q8LB CYCU3-1  | Cyclin-U3-1 OS=Arab | 38.00 | 0.00 |
| TRINITY_sp Q9SI TTM3     | Triphosphate tunel  | 38.00 | 0.00 |
| TRINITY_sp P374 alkB     | Alpha-ketoglutarate | 38.00 | 0.00 |
| TRINITY_sp P395 DRS2     | Probable phospholip | 38.00 | 0.00 |
| TRINITY_sp Q9FN UVR8     | Ultraviolet-B recep | 38.00 | 0.00 |
| TRINITY_sp Q9C9 CEL3     | Endoglucanase 9 OS= | 38.00 | 0.00 |
| TRINITY_sp Q0W5 alaS     | Alanine--tRNA ligas | 38.00 | 0.00 |
| TRINITY_sp Q9M9 SRK2C    | Serine/threonine-pr | 38.00 | 0.00 |
| TRINITY_sp Q8LP At3g199  | E3 ubiquitin-protei | 37.90 | 0.00 |
| TRINITY_sp Q9UT pub2     | E3 ubiquitin-protei | 37.90 | 0.00 |
| TRINITY_sp P531 GUP1     | Glycerol uptake pro | 37.90 | 0.00 |
| TRINITY_sp O449 C34B2.1  | Probable signal pep | 37.90 | 0.00 |
| TRINITY_sp P357 -        | Venom allergen 3 OS | 37.90 | 0.00 |
| TRINITY_sp Q63Z -        | UPF0568 protein C14 | 37.90 | 0.00 |
| TRINITY_sp Q5XH slc25a2  | Calcium-binding mit | 37.90 | 0.00 |
| TRINITY_sp Q4P9 CCR4     | Glucose-repressible | 37.90 | 0.00 |
| TRINITY_sp Q964 ORM1     | Protein ORM1 OS=Sac | 37.90 | 0.00 |
| TRINITY_sp Q99K Usp11    | Ubiquitin carboxyl- | 37.90 | 0.00 |
| TRINITY_sp Q2TB COG8     | Conserved oligomeri | 37.90 | 0.00 |
| TRINITY_sp A5PK METTL13  | Methyltransferase-1 | 37.90 | 0.00 |
| TRINITY_sp Q9QY DnaJ2    | DnaJ homolog subfam | 37.90 | 0.00 |
| TRINITY_sp Q8BY Trmt13   | tRNA:m(4)X modifica | 37.90 | 0.00 |
| TRINITY_sp Q420 ABCC2    | ABC transporter C f | 37.90 | 0.00 |
| TRINITY_sp P190 GNAT2    | Guanine nucleotide- | 37.90 | 0.00 |
| TRINITY_sp Q953 MANBA    | Beta-mannosidase OS | 37.90 | 0.00 |
| TRINITY_sp Q6V4 10HGO    | 8-hydroxygeraniol d | 37.90 | 0.00 |
| TRINITY_sp Q004 pho2     | 4-nitrophenylphosph | 37.90 | 0.00 |
| TRINITY_sp Q8W4 PTC52    | Protochlorophyllide | 37.90 | 0.00 |
| TRINITY_sp Q9N5 cdc-73   | Cell division cycle | 37.90 | 0.00 |
| TRINITY_sp Q8II PF11_01  | Probable cathepsin  | 37.90 | 0.00 |
| TRINITY_sp P176 ypt2     | GTP-binding protein | 37.90 | 0.00 |
| TRINITY_sp Q2QN CYCA3-2  | Cyclin-A3-2 OS=Oryz | 37.90 | 0.00 |
| TRINITY_sp Q9LD BETAA-AI | Beta-adaptin-like p | 37.90 | 0.00 |
| TRINITY_sp Q9FP UBP15    | Ubiquitin carboxyl- | 37.90 | 0.00 |
| TRINITY_sp A6W2 betB     | NAD/NADP-dependent  | 37.90 | 0.00 |
| TRINITY_sp Q9S7 HSP70-1  | Heat shock 70 kDa p | 37.90 | 0.00 |
| TRINITY_sp Q9FE SRT1     | NAD-dependent prote | 37.90 | 0.00 |

|                          |                     |       |      |
|--------------------------|---------------------|-------|------|
| TRINITY_sp Q111{wht-1    | ABC transporter ATP | 37.90 | 0.00 |
| TRINITY_sp A9Z1\Wwa5b1   | von Willebrand fact | 37.90 | 0.00 |
| TRINITY_sp Q087{myb      | Transcriptional act | 37.90 | 0.00 |
| TRINITY_sp Q9PK{fabG     | 3-oxoacyl-[acyl-car | 37.90 | 0.00 |
| TRINITY_sp Q84N{CDSP32   | Thioredoxin-like pr | 37.90 | 0.00 |
| TRINITY_sp Q5TZ{mpv17    | Protein Mpv17 OS=Da | 37.90 | 0.00 |
| TRINITY_sp P109{-        | Retrovirus-related  | 37.90 | 0.00 |
| TRINITY_sp P774{yqaB     | Fructose-1-phosphat | 37.90 | 0.00 |
| TRINITY_sp Q0WRE{PPC6-7  | Probable protein ph | 37.90 | 0.00 |
| TRINITY_sp Q963{GSTF11   | Glutathione S-trans | 37.90 | 0.00 |
| TRINITY_sp A2RV{RRP41L   | Exosome complex com | 37.90 | 0.00 |
| TRINITY_sp B8AS{OsI_167{ | Vacuolar-processing | 37.90 | 0.00 |
| TRINITY_sp Q9UT{Foch1    | Initiation-specific | 37.90 | 0.00 |
| TRINITY_sp Q559{slr0305  | TVP38/TMEM64 family | 37.90 | 0.00 |
| TRINITY_sp Q55F{mef2A    | Transcription facto | 37.90 | 0.00 |
| TRINITY_sp Q9VY{NnaD     | Cytosolic carboxype | 37.90 | 0.00 |
| TRINITY_sp Q1LZ{FAIM2    | Protein lifeguard 2 | 37.90 | 0.00 |
| TRINITY_sp P671{yqfA     | UPF0073 inner membr | 37.90 | 0.00 |
| TRINITY_sp Q54G{pex1     | Peroxisome biogenes | 37.90 | 0.00 |
| TRINITY_sp Q9FV{At1g577{ | Probable elongation | 37.90 | 0.00 |
| TRINITY_sp Q2LAE{ASHH2   | Histone-lysine N-me | 37.90 | 0.00 |
| TRINITY_sp Q8JH{ddx55    | ATP-dependent RNA h | 37.90 | 0.00 |
| TRINITY_sp O652{ACX1     | Peroxisomal acyl-co | 37.90 | 0.00 |
| TRINITY_sp Q96F{KIF12    | Kinesin-like protei | 37.90 | 0.00 |
| TRINITY_sp Q246{ref(2)P  | Protein ref(2)P OS= | 37.90 | 0.00 |
| TRINITY_sp Q6L4{Os05g05{ | Probable protein ph | 37.90 | 0.00 |
| TRINITY_sp O645{STR1     | Thiosulfate/3-merca | 37.90 | 0.00 |
| TRINITY_sp Q2QP{VGK1     | Guanylate kinase 1  | 37.90 | 0.00 |
| TRINITY_sp Q5UP{MIMI_R61 | Putative band 7 fam | 37.90 | 0.00 |
| TRINITY_sp O946{gyp10    | GTPase-activating p | 37.90 | 0.00 |
| TRINITY_sp Q6C6{ISN1     | IMP-specific 5'-nuc | 37.90 | 0.00 |
| TRINITY_sp Q3E6{DEGP14   | Putative protease D | 37.90 | 0.00 |
| TRINITY_sp Q9SL{ALIS3    | ALA-interacting sub | 37.90 | 0.00 |
| TRINITY_sp Q9FV{CYCA1-2  | Cyclin-A1-2 OS=Arab | 37.90 | 0.00 |
| TRINITY_sp Q851{ILL3     | IAA-amino acid hydr | 37.90 | 0.00 |
| TRINITY_sp O229{At2g303{ | Putative tRNA pseud | 37.90 | 0.00 |
| TRINITY_sp Q9ER{Cars     | Cysteine--tRNA liga | 37.90 | 0.00 |
| TRINITY_sp Q9FY{RS2Z32   | Serine/arginine-ric | 37.90 | 0.00 |
| TRINITY_sp Q52K{NUDT13   | Nudix hydrolase 13, | 37.90 | 0.00 |
| TRINITY_sp Q8H1{AAE13    | Malonate--CoA ligas | 37.90 | 0.00 |
| TRINITY_sp Q6V4{H10HGO   | 8-hydroxygeraniol d | 37.90 | 0.00 |
| TRINITY_sp Q2T9{POLR3F   | DNA-directed RNA po | 37.90 | 0.00 |
| TRINITY_sp Q54S{spt16    | FACT complex subuni | 37.90 | 0.00 |
| TRINITY_sp Q941{IPAP8    | Probable plastid-li | 37.90 | 0.00 |
| TRINITY_sp Q2RA{CYCT1-3  | Cyclin-T1-3 OS=Oryz | 37.90 | 0.00 |
| TRINITY_sp Q8VE{Tmem30a  | Cell cycle control  | 37.90 | 0.00 |
| TRINITY_sp Q9SH{STIPL1   | Septin and tuftelin | 37.90 | 0.00 |
| TRINITY_sp O804{At1g091{ | Probable protein ph | 37.90 | 0.00 |
| TRINITY_sp Q3E9{CPK34    | Calcium-dependent p | 37.90 | 0.00 |
| TRINITY_sp O221{GCP1     | Probable tRNA N6-ad | 37.90 | 0.00 |
| TRINITY_sp B1Q3{MET1B    | DNA (cytosine-5)-me | 37.90 | 0.00 |
| TRINITY_sp Q9V0{tuf      | Elongation factor 1 | 37.90 | 0.00 |
| TRINITY_sp Q1LV{abhd14a  | Protein ABHD14A OS= | 37.90 | 0.00 |
| TRINITY_sp Q8DK{Der      | GTPase Der OS=Therm | 37.90 | 0.00 |
| TRINITY_sp Q6C7{HAS1     | ATP-dependent RNA h | 37.90 | 0.00 |
| TRINITY_sp O577{rpl11    | 50S ribosomal prote | 37.90 | 0.00 |



|                          |                     |       |      |
|--------------------------|---------------------|-------|------|
| TRINITY_sp P0A0MSAOUHSC  | Putative acetyltran | 37.90 | 0.00 |
| TRINITY_sp P1091MCF2     | Proto-oncogene DBL  | 37.80 | 0.00 |
| TRINITY_sp P137(mvaA     | 3-hydroxy-3-methylg | 37.80 | 0.00 |
| TRINITY_sp Q3958-        | Dynein 18 kDa light | 37.80 | 0.00 |
| TRINITY_sp Q4409-        | L-sorbose dehydro   | 37.80 | 0.00 |
| TRINITY_sp Q54Jlatg6B    | Beclin-1-like prote | 37.80 | 0.00 |
| TRINITY_sp Q6PQ0-        | 3-oxo-Delta(4,5)-st | 37.80 | 0.00 |
| TRINITY_sp O8068PAT02    | Probable protein S- | 37.80 | 0.00 |
| TRINITY_sp Q54RidhkL     | Hybrid signal trans | 37.80 | 0.00 |
| TRINITY_sp P2364Rab27a   | Ras-related protein | 37.80 | 0.00 |
| TRINITY_sp Q54Jfchmp5    | Charged multivesicu | 37.80 | 0.00 |
| TRINITY_sp A8F00pepA     | Probable cytosol am | 37.80 | 0.00 |
| TRINITY_sp Q56X7RH39     | DEAD-box ATP-depend | 37.80 | 0.00 |
| TRINITY_sp P1477-        | Soluble hydrogenase | 37.80 | 0.00 |
| TRINITY_sp P3233YMC1     | Carrier protein YMC | 37.80 | 0.00 |
| TRINITY_sp Q6PE0Tbca     | Tubulin-specific ch | 37.80 | 0.00 |
| TRINITY_sp Q9NQ0RPRD1B   | Regulation of nucle | 37.80 | 0.00 |
| TRINITY_sp Q9P42B11B22.  | E3 ubiquitin-protei | 37.80 | 0.00 |
| TRINITY_sp Q66Hyeif4e3   | Eukaryotic translat | 37.80 | 0.00 |
| TRINITY_sp Q9WUENprl2    | Nitrogen permease r | 37.80 | 0.00 |
| TRINITY_sp F4JC0At3g4780 | Putative DNA glycos | 37.80 | 0.00 |
| TRINITY_sp Q54I9smt1     | Probable cycloarten | 37.80 | 0.00 |
| TRINITY_sp Q4015-        | LEC14B protein OS=L | 37.80 | 0.00 |
| TRINITY_sp P6048PTEN     | Phosphatidylinosito | 37.80 | 0.00 |
| TRINITY_sp P2251CMK2     | Calcium/calmodulin- | 37.80 | 0.00 |
| TRINITY_sp Q54HIcopG     | Coatomer subunit ga | 37.80 | 0.00 |
| TRINITY_sp Q9ZU0ADK      | Adenylate kinase 1, | 37.80 | 0.00 |
| TRINITY_sp A2Q8fnpl4     | Nuclear protein loc | 37.80 | 0.00 |
| TRINITY_sp Q8I4fshk-1    | Potassium voltage-g | 37.80 | 0.00 |
| TRINITY_sp O2260MSI4     | WD-40 repeat-contai | 37.80 | 0.00 |
| TRINITY_sp Q54I1smkA     | Suppressor of Mek1  | 37.80 | 0.00 |
| TRINITY_sp O0521ywrD     | Putative gamma-glut | 37.80 | 0.00 |
| TRINITY_sp Q86W0PARG     | Poly(ADP-ribose) gl | 37.80 | 0.00 |
| TRINITY_sp Q2125gsnl-1   | Gelsolin-like prote | 37.80 | 0.00 |
| TRINITY_sp P2751CBR      | Carotene biosynthes | 37.80 | 0.00 |
| TRINITY_sp Q0770HVA22    | Protein HVA22 OS=Ho | 37.80 | 0.00 |
| TRINITY_sp P7438s110418  | 2-methyl-6-phytyl-1 | 37.80 | 0.00 |
| TRINITY_sp Q8GW0TPPH     | Probable trehalose- | 37.80 | 0.00 |
| TRINITY_sp P2347Xrcc6    | X-ray repair cross- | 37.80 | 0.00 |
| TRINITY_sp M4MR0rnj      | Ribonuclease J OS=S | 37.80 | 0.00 |
| TRINITY_sp Q6NW0RWDD4    | RWD domain-containi | 37.80 | 0.00 |
| TRINITY_sp Q54I1shkB     | Dual specificity pr | 37.80 | 0.00 |
| TRINITY_sp P7731ybdR     | Uncharacterized zin | 37.80 | 0.00 |
| TRINITY_sp Q54B0DDB_G020 | Probable GH family  | 37.80 | 0.00 |
| TRINITY_sp Q7XJ0GAS8     | Growth arrest-speci | 37.80 | 0.00 |
| TRINITY_sp Q8VE0Tmem144  | Transmembrane prote | 37.80 | 0.00 |
| TRINITY_sp Q9NR0DYRK4    | Dual specificity ty | 37.80 | 0.00 |
| TRINITY_sp Q1401CAMK1    | Calcium/calmodulin- | 37.80 | 0.00 |
| TRINITY_sp O0448At1g0964 | Probable elongation | 37.80 | 0.00 |
| TRINITY_sp B4JV0GH22679  | Eukaryotic translat | 37.80 | 0.00 |
| TRINITY_sp Q69U0RMR1     | Receptor homology r | 37.80 | 0.00 |
| TRINITY_sp Q0WW0ATG3     | Autophagy-related p | 37.80 | 0.00 |
| TRINITY_sp Q8520OSK1     | Serine/threonine pr | 37.80 | 0.00 |
| TRINITY_sp P1097-        | Retrovirus-related  | 37.80 | 0.00 |
| TRINITY_sp Q0GZ0USP      | UDP-sugar pyrophosp | 37.80 | 0.00 |
| TRINITY_sp P3170OV16     | OV-16 antigen OS=On | 37.80 | 0.00 |

|                          |                     |       |      |
|--------------------------|---------------------|-------|------|
| TRINITY_sp P9WK{nlhH     | Carboxylesterase N1 | 37.80 | 0.00 |
| TRINITY_sp Q54BIddx51    | Probable ATP-depend | 37.80 | 0.00 |
| TRINITY_sp Q086{-        | Pathogenesis-relate | 37.80 | 0.00 |
| TRINITY_sp Q2RM{hcp      | Hydroxylamine reduc | 37.80 | 0.00 |
| TRINITY_sp Q7K4{bin3     | Probable RNA methyl | 37.80 | 0.00 |
| TRINITY_sp A8J6{CFAP54   | Cilia- and flagella | 37.80 | 0.00 |
| TRINITY_sp Q993 TY3B-G   | Transposon Ty3-G Ga | 37.80 | 0.00 |
| TRINITY_sp P789{cof1     | Cofilin OS=Schizosa | 37.80 | 0.00 |
| TRINITY_sp Q9P2 DNAH1    | Dynein heavy chain  | 37.80 | 0.00 |
| TRINITY_sp Q8WV{FAR1     | Fatty acyl-CoA redu | 37.80 | 0.00 |
| TRINITY_sp Q021{-        | Coat protein OS=Pop | 37.70 | 0.00 |
| TRINITY_sp P046{Lipf     | Gastric triacylglyc | 37.70 | 0.00 |
| TRINITY_sp Q5FW{zmynd10  | Zinc finger MYND do | 37.70 | 0.00 |
| TRINITY_sp Q091{cds1     | Serine/threonine-pr | 37.70 | 0.00 |
| TRINITY_sp Q940{TMN2     | Transmembrane 9 sup | 37.70 | 0.00 |
| TRINITY_sp P702{Vamp7    | Vesicle-associated  | 37.70 | 0.00 |
| TRINITY_sp P260{PTPN3    | Tyrosine-protein ph | 37.70 | 0.00 |
| TRINITY_sp O822{SCPL23   | Putative serine car | 37.70 | 0.00 |
| TRINITY_sp Q7XQ{Os04g04{ | Probable protein ph | 37.70 | 0.00 |
| TRINITY_sp Q5ZM{RAP1GAP{ | Rap1 GTPase-activat | 37.70 | 0.00 |
| TRINITY_sp Q8GY{MND1     | Meiotic nuclear div | 37.70 | 0.00 |
| TRINITY_sp P630{AP2B1    | AP-2 complex subuni | 37.70 | 0.00 |
| TRINITY_sp P958{treZ     | Malto-oligosyltreha | 37.70 | 0.00 |
| TRINITY_sp O945{iqw1     | WD repeat protein i | 37.70 | 0.00 |
| TRINITY_sp O154{ABCC4    | Multidrug resistanc | 37.70 | 0.00 |
| TRINITY_sp Q7SC{cln3     | Protein btn-1 OS=Ne | 37.70 | 0.00 |
| TRINITY_sp Q8C9{Endov    | Endonuclease V OS=M | 37.70 | 0.00 |
| TRINITY_sp Q6PD{Fam63b   | Ubiquitin carboxyl- | 37.70 | 0.00 |
| TRINITY_sp P208{pol      | Retrovirus-related  | 37.70 | 0.00 |
| TRINITY_sp Q5EA{ABHD4    | Protein ABHD4 OS=Bo | 37.70 | 0.00 |
| TRINITY_sp Q6GN{coq10b   | Coenzyme Q-binding  | 37.70 | 0.00 |
| TRINITY_sp Q9JH{Ide      | Insulin-degrading e | 37.70 | 0.00 |
| TRINITY_sp A8QC{Bml_495{ | Lateral signaling t | 37.70 | 0.00 |
| TRINITY_sp P538{Pctp     | Phosphatidylcholine | 37.70 | 0.00 |
| TRINITY_sp Q54W{pldb     | Phospholipase D B O | 37.70 | 0.00 |
| TRINITY_sp Q94J{Atlg542{ | Protein translation | 37.70 | 0.00 |
| TRINITY_sp P212{CCA1     | CCA tRNA nucleotidy | 37.70 | 0.00 |
| TRINITY_sp Q8R4{Pappa    | Pappalysin-1 OS=Mus | 37.70 | 0.00 |
| TRINITY_sp Q54R{iksA     | Probable serine/thr | 37.70 | 0.00 |
| TRINITY_sp Q027{Cacnals  | Voltage-dependent L | 37.70 | 0.00 |
| TRINITY_sp A2XX{COLD1    | GPCR-type G protein | 37.70 | 0.00 |
| TRINITY_sp F4I2{SWI2     | Switch 2 OS=Arabido | 37.70 | 0.00 |
| TRINITY_sp Q9Z7{CPn_065{ | Uncharacterized acy | 37.70 | 0.00 |
| TRINITY_sp Q839{fhpt     | Hypoxanthine-guanin | 37.70 | 0.00 |
| TRINITY_sp Q128{BPTF     | Nucleosome-remodeli | 37.70 | 0.00 |
| TRINITY_sp Q60E{BSL1     | Serine/threonine-pr | 37.70 | 0.00 |
| TRINITY_sp Q2KH{USP2     | Ubiquitin carboxyl- | 37.70 | 0.00 |
| TRINITY_sp Q9CWF{Smyd3   | Histone-lysine N-me | 37.70 | 0.00 |
| TRINITY_sp Q9LKV{NHX7    | Sodium/hydrogen exc | 37.70 | 0.00 |
| TRINITY_sp Q928{ERCC4    | DNA repair endonucl | 37.70 | 0.00 |
| TRINITY_sp Q7T6{MIMI_R8{ | Putative serine/thr | 37.70 | 0.00 |
| TRINITY_sp Q8GRI{TFCE    | Tubulin-folding cof | 37.70 | 0.00 |
| TRINITY_sp O810{EMB1187  | Probable ethanolami | 37.70 | 0.00 |
| TRINITY_sp A7EY{vdbp3    | ATP-dependent RNA h | 37.70 | 0.00 |
| TRINITY_sp Q558{sl10103  | Uncharacterized pro | 37.70 | 0.00 |
| TRINITY_sp Q6F3{CPK10    | Calcium-dependent p | 37.70 | 0.00 |

|                          |                       |       |      |
|--------------------------|-----------------------|-------|------|
| TRINITY_sp P5195NEK4     | Serine/threonine-pr   | 37.70 | 0.00 |
| TRINITY_sp Q4940HPAT2    | Hydroxyproline O-ar   | 37.70 | 0.00 |
| TRINITY_sp B0F48BIO3-BI  | Bifunctional dethio   | 37.70 | 0.00 |
| TRINITY_sp D9HP2CNR4     | Cell number regulat   | 37.70 | 0.00 |
| TRINITY_sp Q5Y20HTAY     | Histone H2A.Y OS=Te   | 37.70 | 0.00 |
| TRINITY_sp Q1QH2thrB     | Homoserine kinase O   | 37.70 | 0.00 |
| TRINITY_sp Q5UP7MIMI_R61 | Putative band 7 fam   | 37.70 | 0.00 |
| TRINITY_sp P2648fixL     | Sensor protein FixL   | 37.70 | 0.00 |
| TRINITY_sp Q9C50RRC1     | Protein RRC1 OS=Ara   | 37.70 | 0.00 |
| TRINITY_sp B9DF0ISE2     | DExH-box ATP-depend   | 37.70 | 0.00 |
| TRINITY_sp Q8AY7cse11    | Exportin-2 OS=Oreoc   | 37.70 | 0.00 |
| TRINITY_sp Q6CB0RMT2     | Protein arginine N-   | 37.70 | 0.00 |
| TRINITY_sp Q29R0PDIA4    | Protein disulfide-i   | 37.70 | 0.00 |
| TRINITY_sp Q86U0RBM23    | Probable RNA-bindin   | 37.70 | 0.00 |
| TRINITY_sp Q9XF0PDPK1    | 3-phosphoinositide-   | 37.70 | 0.00 |
| TRINITY_sp Q9ST0NDB1     | External alternativ   | 37.70 | 0.00 |
| TRINITY_sp Q96M0CFAP57   | Cilia- and flagella   | 37.70 | 0.00 |
| TRINITY_sp Q54G0DDB_G028 | Protein CLEC16A hom   | 37.70 | 0.00 |
| TRINITY_sp O2221LIS      | U4/U6 small nuclear   | 37.70 | 0.00 |
| TRINITY_sp P2258-        | Polyubiquitin OS=Ph   | 37.70 | 0.00 |
| TRINITY_sp Q8VD0Sft2d2   | Vesicle transport p   | 37.70 | 0.00 |
| TRINITY_sp Q54S0midA     | Protein arginine me   | 37.70 | 0.00 |
| TRINITY_sp Q9SJ0LACS8    | Long chain acyl-CoA   | 37.60 | 0.00 |
| TRINITY_sp P1121UDA1     | Lectin/endochitinas   | 37.60 | 0.00 |
| TRINITY_sp Q8RU0Os01g058 | Probable V-type pro   | 37.60 | 0.00 |
| TRINITY_sp Q9FI0At5g4789 | NADH dehydrogenase    | 37.60 | 0.00 |
| TRINITY_sp Q3380GCN5     | Histone acetyltrans   | 37.60 | 0.00 |
| TRINITY_sp Q2TB0COMMD9   | COMM domain-contain   | 37.60 | 0.00 |
| TRINITY_sp Q54C0kxcB     | Kinase and exchange   | 37.60 | 0.00 |
| TRINITY_sp Q95J0IAK7     | Adenylate kinase 7    | 37.60 | 0.00 |
| TRINITY_sp Q9ZU0At2g3724 | Thioredoxin-like pr   | 37.60 | 0.00 |
| TRINITY_sp Q9NR0ABCB10   | ATP-binding cassett   | 37.60 | 0.00 |
| TRINITY_sp Q8690fbpnt1   | 3' (2'), 5'-bisphosph | 37.60 | 0.00 |
| TRINITY_sp Q8AV0syf2     | Pre-mRNA-splicing f   | 37.60 | 0.00 |
| TRINITY_sp Q4960Elp2     | Elongator complex p   | 37.60 | 0.00 |
| TRINITY_sp Q9LR0PSB27-1  | Photosystem II repa   | 37.60 | 0.00 |
| TRINITY_sp Q7XT0Os04g062 | Nucleolin 2 OS=Oryz   | 37.60 | 0.00 |
| TRINITY_sp Q5510DDB_G027 | WD repeat-containin   | 37.60 | 0.00 |
| TRINITY_sp O3430ytcJ     | Putative amidohydro   | 37.60 | 0.00 |
| TRINITY_sp P2990CYP4C1   | Cytochrome P450 4C1   | 37.60 | 0.00 |
| TRINITY_sp P4960Os01g083 | Coatomer subunit de   | 37.60 | 0.00 |
| TRINITY_sp Q0630DER1     | Derlin-1 OS=Oryza s   | 37.60 | 0.00 |
| TRINITY_sp Q9FG0ATO      | Splicing factor SF3   | 37.60 | 0.00 |
| TRINITY_sp O0780dapb1    | Dipeptidyl aminopep   | 37.60 | 0.00 |
| TRINITY_sp Q2250chd-3    | Chromodomain-helica   | 37.60 | 0.00 |
| TRINITY_sp K7WI0PYRR     | Riboflavin biosynth   | 37.60 | 0.00 |
| TRINITY_sp O8260At4g3295 | Probable protein ph   | 37.60 | 0.00 |
| TRINITY_sp Q3890KIN10    | SNF1-related protei   | 37.60 | 0.00 |
| TRINITY_sp Q67W0RR25     | Two-component respo   | 37.60 | 0.00 |
| TRINITY_sp O9460SPBC776  | Uncharacterized mem   | 37.60 | 0.00 |
| TRINITY_sp Q4370TOC75    | Protein TOC75, chlo   | 37.60 | 0.00 |
| TRINITY_sp P4070CYPRO4   | Protein CYPRO4 OS=C   | 37.60 | 0.00 |
| TRINITY_sp Q54W0aurK     | Aurora kinase OS=Di   | 37.60 | 0.00 |
| TRINITY_sp Q9FM0TIC20-V  | Protein TIC 20-v, c   | 37.60 | 0.00 |
| TRINITY_sp Q9EQ0Tpp1     | Tripeptidyl-peptida   | 37.60 | 0.00 |
| TRINITY_sp A4QN0slc25a47 | Solute carrier fami   | 37.60 | 0.00 |

|                           |                      |       |      |
|---------------------------|----------------------|-------|------|
| TRINITY_sp Q54LHvps13A    | Putative vacuolar p  | 37.60 | 0.00 |
| TRINITY_sp Q77NCLuc712    | Putative RNA-bindin  | 37.60 | 0.00 |
| TRINITY_sp Q9FK1THO3      | THO complex subunit  | 37.60 | 0.00 |
| TRINITY_sp O7482esf1      | Pre-rRNA-processing  | 37.60 | 0.00 |
| TRINITY_sp O7425GAM1      | Glucoamylase 1 OS=C  | 37.60 | 0.00 |
| TRINITY_sp Q8VYCCCR4-6    | Carbon catabolite r  | 37.60 | 0.00 |
| TRINITY_sp O4331PPIP5K2   | Inositol hexakispho  | 37.60 | 0.00 |
| TRINITY_sp Q9NVHFXD2      | Exonuclease 3'-5' d  | 37.60 | 0.00 |
| TRINITY_sp P2532mlkA      | Myosin light chain   | 37.60 | 0.00 |
| TRINITY_sp Q54WVDDDB_G027 | Probable serine/thr  | 37.60 | 0.00 |
| TRINITY_sp Q08D1PUS7      | Pseudouridylate syn  | 37.60 | 0.00 |
| TRINITY_sp Q9N92-         | Ciliary WD repeat-c  | 37.60 | 0.00 |
| TRINITY_sp Q7Z41MAATS1    | Protein MAATS1 OS=H  | 37.60 | 0.00 |
| TRINITY_sp Q54K3rgaA      | Ras GTPase-activati  | 37.60 | 0.00 |
| TRINITY_sp Q54QFerkB      | Extracellular signa  | 37.60 | 0.00 |
| TRINITY_sp Q54TMDrkD      | Probable serine/thr  | 37.60 | 0.00 |
| TRINITY_sp Q9MANKCS1      | 3-ketoacyl-CoA synt  | 37.60 | 0.00 |
| TRINITY_sp O0078vate      | V-type proton ATPas  | 37.60 | 0.00 |
| TRINITY_sp Q0JI4CIPK11    | CBL-interacting pro  | 37.60 | 0.00 |
| TRINITY_sp P3225rasC      | Ras-like protein ra  | 37.60 | 0.00 |
| TRINITY_sp Q9US6tum1      | Probable 3-mercapto  | 37.60 | 0.00 |
| TRINITY_sp Q4Z81RanBPM    | Ran-binding protein  | 37.60 | 0.00 |
| TRINITY_sp Q9625At5g4703  | ATP synthase subuni  | 37.60 | 0.00 |
| TRINITY_sp Q94F3ESD4      | Ubiquitin-like-spec  | 37.60 | 0.00 |
| TRINITY_sp Q6451Tpp2      | Tripeptidyl-peptida  | 37.60 | 0.00 |
| TRINITY_sp Q6137Ift88     | Intraflagellar tran  | 37.60 | 0.00 |
| TRINITY_sp A7Z91uvse      | UV DNA damage endon  | 37.60 | 0.00 |
| TRINITY_sp Q9ATFADA2B     | Transcriptional ada  | 37.60 | 0.00 |
| TRINITY_sp Q8GW1PGLP2     | Phosphoglycolate ph  | 37.60 | 0.00 |
| TRINITY_sp Q5TKIOs05g020  | (Thioredoxin-like 2, | 37.60 | 0.00 |
| TRINITY_sp Q1RH3grxC1     | Glutaredoxin-1 OS=R  | 37.60 | 0.00 |
| TRINITY_sp Q86C7dhkK      | Hybrid signal trans  | 37.50 | 0.00 |
| TRINITY_sp Q9MB1DHC10     | Dynein-1-beta heavy  | 37.50 | 0.00 |
| TRINITY_sp Q6ZV1TLL10     | Inactive polyglycyl  | 37.50 | 0.00 |
| TRINITY_sp Q9UU7pfh1      | ATP-dependent DNA h  | 37.50 | 0.00 |
| TRINITY_sp Q9W11FCG5532   | Transmembrane prote  | 37.50 | 0.00 |
| TRINITY_sp Q388(HSP22.0   | 22.0 kDa heat shock  | 37.50 | 0.00 |
| TRINITY_sp Q8BY1Rdh12     | Retinol dehydrogena  | 37.50 | 0.00 |
| TRINITY_sp Q2481RACB      | Rho-related protein  | 37.50 | 0.00 |
| TRINITY_sp P0678RHO2      | GTP-binding protein  | 37.50 | 0.00 |
| TRINITY_sp Q99L(Dhrs1     | Dehydrogenase/reduc  | 37.50 | 0.00 |
| TRINITY_sp Q86C7dhkK      | Hybrid signal trans  | 37.50 | 0.00 |
| TRINITY_sp Q6IE5Mug2      | Murinoglobulin-2 OS  | 37.50 | 0.00 |
| TRINITY_sp P8032-         | Troponin C OS=Branc  | 37.50 | 0.00 |
| TRINITY_sp P1395-         | G2/mitotic-specific  | 37.50 | 0.00 |
| TRINITY_sp P1415AAC4      | AAC-rich mRNA clone  | 37.50 | 0.00 |
| TRINITY_sp Q8T15DDB_G027  | Dehydrogenase/reduc  | 37.50 | 0.00 |
| TRINITY_sp O6896idhA      | Inositol 2-dehydrog  | 37.50 | 0.00 |
| TRINITY_sp A1ZA1CG8303    | Putative fatty acyl  | 37.50 | 0.00 |
| TRINITY_sp Q9M81DSPTP1B   | Dual specificity pr  | 37.50 | 0.00 |
| TRINITY_sp Q9LM6ATL80     | RING-H2 finger prot  | 37.50 | 0.00 |
| TRINITY_sp O1545ABCC4     | Multidrug resistanc  | 37.50 | 0.00 |
| TRINITY_sp Q2Y61rlmN      | Dual-specificity RN  | 37.50 | 0.00 |
| TRINITY_sp Q54M7ku70      | ATP-dependent DNA h  | 37.50 | 0.00 |
| TRINITY_sp Q72N1msrB      | Peptide methionine   | 37.50 | 0.00 |
| TRINITY_sp Q6GV1Kdsr      | 3-ketodihydrosphing  | 37.50 | 0.00 |

|                          |                       |       |      |
|--------------------------|-----------------------|-------|------|
| TRINITY_sp O2293CIPK11   | CBL-interacting ser   | 37.50 | 0.00 |
| TRINITY_sp D0MV5KEX1     | Pheromone-processin   | 37.50 | 0.00 |
| TRINITY_sp O8076At1g6042 | Probable nucleoredo   | 37.50 | 0.00 |
| TRINITY_sp Q2945LIPF     | Gastric triacylglyc   | 37.50 | 0.00 |
| TRINITY_sp Q9LT1BBR      | E3 ubiquitin ligase   | 37.50 | 0.00 |
| TRINITY_sp Q9CAFHIR2     | Hypersensitive-indu   | 37.50 | 0.00 |
| TRINITY_sp P1367inaC     | Protein kinase C, e   | 37.50 | 0.00 |
| TRINITY_sp Q54VDDDB_G028 | Probable serine/thr   | 37.50 | 0.00 |
| TRINITY_sp Q0255PK2      | Probable serine/thr   | 37.50 | 0.00 |
| TRINITY_sp Q7ZU7polr3c   | DNA-directed RNA po   | 37.50 | 0.00 |
| TRINITY_sp Q6IN1smek1    | Serine/threonine-pr   | 37.50 | 0.00 |
| TRINITY_sp Q9SHFRUB1     | Ubiquitin-NEDD8-lik   | 37.50 | 0.00 |
| TRINITY_sp P0446(-       | Calmodulin OS=Triti   | 37.50 | 0.00 |
| TRINITY_sp Q9N44pme-1    | Poly(ADP-ribose) po   | 37.50 | 0.00 |
| TRINITY_sp Q5555slr0328  | Putative low molecu   | 37.50 | 0.00 |
| TRINITY_sp A6LL4rpsG     | 30S ribosomal prote   | 37.50 | 0.00 |
| TRINITY_sp Q9M44AIP3     | Probable prefoldin    | 37.50 | 0.00 |
| TRINITY_sp Q6P64Grina    | Protein lifeguard 1   | 37.50 | 0.00 |
| TRINITY_sp Q38A4MTR1     | Cap-specific mRNA (   | 37.50 | 0.00 |
| TRINITY_sp Q1021SPAC4H3  | .MEMO1 family protei  | 37.50 | 0.00 |
| TRINITY_sp A6VD1ubiB     | Probable protein ki   | 37.50 | 0.00 |
| TRINITY_sp F4I64POLIA    | DNA polymerase I A,   | 37.50 | 0.00 |
| TRINITY_sp Q8695doka     | Hybrid signal trans   | 37.50 | 0.00 |
| TRINITY_sp Q9VCF17119    | Cystinosin homolog    | 37.50 | 0.00 |
| TRINITY_sp P0CN2DUS3     | tRNA-dihydrouridine   | 37.50 | 0.00 |
| TRINITY_sp Q54T4gacY     | Rho GTPase-activati   | 37.50 | 0.00 |
| TRINITY_sp Q8NF4BBS1     | Bardet-Biedl syndro   | 37.50 | 0.00 |
| TRINITY_sp F4JM4HSP70-1  | Heat shock 70 kDa p   | 37.50 | 0.00 |
| TRINITY_sp Q9SJI4LACS8   | Long chain acyl-CoA   | 37.50 | 0.00 |
| TRINITY_sp P4277EMB2360  | Glutathione reducta   | 37.50 | 0.00 |
| TRINITY_sp A5YK4CNOT1    | CCR4-NOT transcript   | 37.50 | 0.00 |
| TRINITY_sp Q55A4dlpC     | Dynamamin-like protei | 37.50 | 0.00 |
| TRINITY_sp Q54M4mrkB     | Probable serine/thr   | 37.50 | 0.00 |
| TRINITY_sp P0AE4barA     | Signal transduction   | 37.50 | 0.00 |
| TRINITY_sp Q8RY4At2g3325 | Haloacid dehalogena   | 37.50 | 0.00 |
| TRINITY_sp P2475ATP1A2   | Sodium/potassium-tr   | 37.50 | 0.00 |
| TRINITY_sp Q1ZXI4roco5   | Probable serine/thr   | 37.50 | 0.00 |
| TRINITY_sp Q3TZ4Cdk14    | Cyclin-dependent ki   | 37.50 | 0.00 |
| TRINITY_sp Q4PH1ATM1     | Iron-sulfur cluster   | 37.50 | 0.00 |
| TRINITY_sp Q84M4ABCA1    | ABC transporter A f   | 37.50 | 0.00 |
| TRINITY_sp B0G1(DDB_G027 | Deoxynucleoside tri   | 37.50 | 0.00 |
| TRINITY_sp O1496AURKA    | Aurora kinase A OS=   | 37.50 | 0.00 |
| TRINITY_sp Q8S14Os01g092 | Probable glucuronos   | 37.50 | 0.00 |
| TRINITY_sp Q3S44AHK5     | Histidine kinase 5    | 37.50 | 0.00 |
| TRINITY_sp F4J11LSF1     | Phosphoglucan phosp   | 37.40 | 0.00 |
| TRINITY_sp Q54Q5DDB_G028 | E3 UFM1-protein lig   | 37.40 | 0.00 |
| TRINITY_sp Q9UK4CNOT11   | CCR4-NOT transcript   | 37.40 | 0.00 |
| TRINITY_sp O9466jnj4     | JmjC domain-contain   | 37.40 | 0.00 |
| TRINITY_sp Q9M11At3g5446 | F-box protein At3g5   | 37.40 | 0.00 |
| TRINITY_sp Q9UQ3SRRM2    | Serine/arginine rep   | 37.40 | 0.00 |
| TRINITY_sp Q3MQ2ATG5     | Autophagy protein 5   | 37.40 | 0.00 |
| TRINITY_sp Q5E94APEX2    | DNA-(apurinic or ap   | 37.40 | 0.00 |
| TRINITY_sp Q0JI4CIPK11   | CBL-interacting pro   | 37.40 | 0.00 |
| TRINITY_sp Q9JL4Capn15   | Calpain-15 OS=Mus m   | 37.40 | 0.00 |
| TRINITY_sp Q54HI4gghB    | Gamma-glutamyl hydr   | 37.40 | 0.00 |
| TRINITY_sp Q5HM4SERP1785 | Zinc-type alcohol d   | 37.40 | 0.00 |

|                          |                     |       |      |
|--------------------------|---------------------|-------|------|
| TRINITY_sp Q0799-        | NADPH--cytochrome P | 37.40 | 0.00 |
| TRINITY_sp P4188rbf-1    | Rabphilin-1 OS=Caen | 37.40 | 0.00 |
| TRINITY_sp Q9XF4DDM1     | ATP-dependent DNA h | 37.40 | 0.00 |
| TRINITY_sp Q9BLCamtB     | Ammonium transporte | 37.40 | 0.00 |
| TRINITY_sp D2GXMAGBL5    | Cytosolic carboxype | 37.40 | 0.00 |
| TRINITY_sp P5291VPS4     | Vacuolar protein so | 37.40 | 0.00 |
| TRINITY_sp Q9931TY3B-G   | Transposon Ty3-G Ga | 37.40 | 0.00 |
| TRINITY_sp Q9ZS7CPK27    | Calcium-dependent p | 37.40 | 0.00 |
| TRINITY_sp P6179APT      | Aprataxin (Fragment | 37.40 | 0.00 |
| TRINITY_sp Q8H0UTRN1     | Transportin-1 OS=Ar | 37.40 | 0.00 |
| TRINITY_sp O1529ACOX3    | Peroxisomal acyl-co | 37.40 | 0.00 |
| TRINITY_sp Q7ZV8tigarb   | Fructose-2,6-bispho | 37.40 | 0.00 |
| TRINITY_sp P3552CLNS1A   | Methylosome subunit | 37.40 | 0.00 |
| TRINITY_sp Q8697DDB_G027 | Putative protein di | 37.40 | 0.00 |
| TRINITY_sp Q84M7CAT1     | Cationic amino acid | 37.40 | 0.00 |
| TRINITY_sp Q9C5(DPL1     | Sphingosine-1-phosp | 37.40 | 0.00 |
| TRINITY_sp B2X09MNR1     | (+)-neomenthol dehy | 37.40 | 0.00 |
| TRINITY_sp Q8S17Os01g081 | Probable U3 small n | 37.40 | 0.00 |
| TRINITY_sp P4329RD19A    | Cysteine protease R | 37.40 | 0.00 |
| TRINITY_sp Q8BN8Slc17a5  | Sialin OS=Mus muscu | 37.40 | 0.00 |
| TRINITY_sp Q8K47Dusp19   | Dual specificity pr | 37.40 | 0.00 |
| TRINITY_sp Q91WAs3mt     | Arsenite methyltran | 37.40 | 0.00 |
| TRINITY_sp A5PF4garn13   | GTPase-activating R | 37.40 | 0.00 |
| TRINITY_sp Q9NP6HMG20A   | High mobility group | 37.40 | 0.00 |
| TRINITY_sp Q8DH0secA     | Protein translocase | 37.40 | 0.00 |
| TRINITY_sp Q8VEIMtmr14   | Myotubularin-relate | 37.40 | 0.00 |
| TRINITY_sp Q96JCVPS39    | Vam6/Vps39-like pro | 37.40 | 0.00 |
| TRINITY_sp Q6148Pdela    | Calcium/calmodulin- | 37.40 | 0.00 |
| TRINITY_sp Q54S9DDB_G028 | Protein PIEZO homol | 37.40 | 0.00 |
| TRINITY_sp O9482LTN1     | E3 ubiquitin-protei | 37.40 | 0.00 |
| TRINITY_sp P5099ANXA11   | Annexin A11 OS=Homo | 37.40 | 0.00 |
| TRINITY_sp P2048stg      | M-phase inducer pho | 37.40 | 0.00 |
| TRINITY_sp Q9FKIUBP17    | Ubiquitin carboxyl- | 37.40 | 0.00 |
| TRINITY_sp Q6GQ2Anks6    | Ankyrin repeat and  | 37.40 | 0.00 |
| TRINITY_sp Q9P28ZNF1     | NFX1-type zinc fing | 37.40 | 0.00 |
| TRINITY_sp P3757rada     | DNA repair protein  | 37.40 | 0.00 |
| TRINITY_sp Q9NZMITSN2    | Intersectin-2 OS=Ho | 37.40 | 0.00 |
| TRINITY_sp A2VD9SCLY     | Selenocysteine lyas | 37.40 | 0.00 |
| TRINITY_sp O3497pbu0     | Guanine/hypoxanthin | 37.40 | 0.00 |
| TRINITY_sp Q54B1abcB2    | ABC transporter B f | 37.40 | 0.00 |
| TRINITY_sp Q9P29RCC2     | Protein RCC2 OS=Hom | 37.40 | 0.00 |
| TRINITY_sp F4IF3FGT1     | Protein FORGETTER 1 | 37.40 | 0.00 |
| TRINITY_sp Q9HA9KIF9     | Kinesin-like protei | 37.40 | 0.00 |
| TRINITY_sp Q7T69MIMI_R83 | Putative serine/thr | 37.40 | 0.00 |
| TRINITY_sp Q9C99RAA2     | Arabinosyltransfera | 37.40 | 0.00 |
| TRINITY_sp Q6TG9ATG9     | Autophagy-related p | 37.40 | 0.00 |
| TRINITY_sp Q0071mdmC     | O-methyltransferase | 37.40 | 0.00 |
| TRINITY_sp Q55A(DDB_G027 | Probable serine/thr | 37.40 | 0.00 |

|                          |                      |       |      |
|--------------------------|----------------------|-------|------|
| TRINITY_sp Q55GIvps25    | Vacuolar protein-so  | 37.40 | 0.00 |
| TRINITY_sp Q55C8DDB_G027 | Bromodomain-contain  | 37.40 | 0.00 |
| TRINITY_sp P5481ymel-1   | ATP-dependent zinc   | 37.40 | 0.00 |
| TRINITY_sp Q9BU7TRMO     | tRNA (adenine(37)-N  | 37.40 | 0.00 |
| TRINITY_sp Q54W2aurK     | Aurora kinase OS=Di  | 37.40 | 0.00 |
| TRINITY_sp Q69ZMStk36    | Serine/threonine-pr  | 37.40 | 0.00 |
| TRINITY_sp O6029SIPA1L3  | Signal-induced prol  | 37.40 | 0.00 |
| TRINITY_sp Q54JMnae1     | NEDD8-activating en  | 37.40 | 0.00 |
| TRINITY_sp Q2TBNPCID2    | PCI domain-containi  | 37.40 | 0.00 |
| TRINITY_sp Q86GVgcy-28   | Receptor-type guany  | 37.40 | 0.00 |
| TRINITY_sp Q1509HERC3    | Probable E3 ubiquit  | 37.30 | 0.00 |
| TRINITY_sp A3PT6Mjls_04  | (UPF0678 fatty acid- | 37.30 | 0.00 |
| TRINITY_sp P2354phoR     | Alkaline phosphatas  | 37.30 | 0.00 |
| TRINITY_sp Q0787VPS13    | Vacuolar protein so  | 37.30 | 0.00 |
| TRINITY_sp E1C65HACE1    | E3 ubiquitin-protei  | 37.30 | 0.00 |
| TRINITY_sp Q54T8tra1     | Probable transcript  | 37.30 | 0.00 |
| TRINITY_sp Q8VY6At4g0739 | Mannose-P-dolichol   | 37.30 | 0.00 |
| TRINITY_sp O0448At1g0964 | Probable elongation  | 37.30 | 0.00 |
| TRINITY_sp Q1681PHKG1    | Phosphorylase b kin  | 37.30 | 0.00 |
| TRINITY_sp Q1552SURF2    | Surfeit locus prote  | 37.30 | 0.00 |
| TRINITY_sp P1777TDC      | Aromatic-L-amino-ac  | 37.30 | 0.00 |
| TRINITY_sp P4329COP1     | E3 ubiquitin-protei  | 37.30 | 0.00 |
| TRINITY_sp P6048PTEN     | Phosphatidylinosito  | 37.30 | 0.00 |
| TRINITY_sp Q2A32dnaJ     | Chaperone protein D  | 37.30 | 0.00 |
| TRINITY_sp Q6ZS9NBEAL1   | Neurobeachin-like p  | 37.30 | 0.00 |
| TRINITY_sp Q2758Cyp4d2   | Cytochrome P450 4d2  | 37.30 | 0.00 |
| TRINITY_sp Q6P77hmces    | Embryonic stem cell  | 37.30 | 0.00 |
| TRINITY_sp Q0000SRP68    | Signal recognition   | 37.30 | 0.00 |
| TRINITY_sp P8409RHOG     | Rho-related GTP-bin  | 37.30 | 0.00 |
| TRINITY_sp P0C82OsI_0279 | Uncharacterized pro  | 37.30 | 0.00 |
| TRINITY_sp Q9LH9OCT4     | Organic cation/carn  | 37.30 | 0.00 |
| TRINITY_sp Q1MI1ctaA     | Heme A synthase OS=  | 37.30 | 0.00 |
| TRINITY_sp Q9JJ8Rpf2     | Ribosome production  | 37.30 | 0.00 |
| TRINITY_sp P1438-        | Transposon TX1 unch  | 37.30 | 0.00 |
| TRINITY_sp Q5VVV GARNL3  | GTPase-activating R  | 37.30 | 0.00 |
| TRINITY_sp Q9C5HMAPKKK5  | Mitogen-activated p  | 37.30 | 0.00 |
| TRINITY_sp O9598NUDT3    | Diphosphoinositol p  | 37.30 | 0.00 |
| TRINITY_sp O6827dusC     | tRNA-dihydrouridine  | 37.30 | 0.00 |
| TRINITY_sp P2817pkgB     | Protein kinase 2 OS  | 37.30 | 0.00 |
| TRINITY_sp Q3KQ9UAP1L1   | UDP-N-acetylhexosam  | 37.30 | 0.00 |
| TRINITY_sp Q142HmsbA     | Lipid A export ATP-  | 37.30 | 0.00 |
| TRINITY_sp O8114PAE1     | Proteasome subunit   | 37.30 | 0.00 |
| TRINITY_sp Q6456Atp2b3   | Plasma membrane cal  | 37.30 | 0.00 |
| TRINITY_sp Q0WQ9RBL1     | RHOMBOID-like prote  | 37.30 | 0.00 |
| TRINITY_sp Q5569DDB_G027 | Probable rhodanese   | 37.30 | 0.00 |
| TRINITY_sp P4048HOS4     | Protein HOS4 OS=Sac  | 37.30 | 0.00 |
| TRINITY_sp Q5ZP1SPO11-2  | Meiotic recombinati  | 37.30 | 0.00 |
| TRINITY_sp Q5F38WVOX     | WW domain-containin  | 37.30 | 0.00 |
| TRINITY_sp A0A0IP58A     | DnaJ protein P58IPK  | 37.30 | 0.00 |
| TRINITY_sp Q9SE4Os09g05  | (Ribulose-phosphate  | 37.30 | 0.00 |
| TRINITY_sp Q02P7lap      | Aminopeptidase OS=P  | 37.30 | 0.00 |
| TRINITY_sp Q9D99Efhc1    | EF-hand domain-cont  | 37.30 | 0.00 |
| TRINITY_sp Q9ES2Sacm11   | Phosphatidylinositi  | 37.30 | 0.00 |
| TRINITY_sp Q8VZFINT1     | Inositol transporte  | 37.30 | 0.00 |
| TRINITY_sp Q9FKIKIN14B   | Kinesin-like protei  | 37.30 | 0.00 |
| TRINITY_sp Q7ZT4gins2    | DNA replication com  | 37.30 | 0.00 |

|                   |          |                     |       |      |
|-------------------|----------|---------------------|-------|------|
| TRINITY_sp Q9M8FD | SPTP1B   | Dual specificity pr | 37.30 | 0.00 |
| TRINITY_sp Q9CUI  | Iqca1    | IQ and AAA domain-c | 37.30 | 0.00 |
| TRINITY_sp Q28GV  | melk     | Maternal embryonic  | 37.30 | 0.00 |
| TRINITY_sp Q6Z43  | MPK3     | Mitogen-activated p | 37.30 | 0.00 |
| TRINITY_sp Q54G3  | surf6    | Surfeit locus prote | 37.30 | 0.00 |
| TRINITY_sp Q8S95  | NACK1    | Kinesin-like protei | 37.30 | 0.00 |
| TRINITY_sp Q5F35  | NRAS     | GTPase NRas OS=Gall | 37.30 | 0.00 |
| TRINITY_sp A4KDI  | D5Des    | Acyl-lipid (8-3)-de | 37.30 | 0.00 |
| TRINITY_sp Q9ES\  | Ddx24    | ATP-dependent RNA h | 37.30 | 0.00 |
| TRINITY_sp B8B4   | (MCM9    | Probable DNA helica | 37.30 | 0.00 |
| TRINITY_sp Q9632  | SAC8     | Phosphoinositide ph | 37.30 | 0.00 |
| TRINITY_sp Q9Y07  | itr-1    | Inositol 1,4,5-tris | 37.30 | 0.00 |
| TRINITY_sp Q9C8   | (MOS2    | Protein MOS2 OS=Ara | 37.30 | 0.00 |
| TRINITY_sp Q8TD5  | DNAH3    | Dynein heavy chain  | 37.30 | 0.00 |
| TRINITY_sp Q9FV\  | CYCA1-2  | Cyclin-A1-2 OS=Arab | 37.30 | 0.00 |
| TRINITY_sp Q60G   | (EXO1    | Exonuclease 1 OS=Or | 37.30 | 0.00 |
| TRINITY_sp Q8L7I  | SPHK1    | Sphingosine kinase  | 37.30 | 0.00 |
| TRINITY_sp E9PY\  | Wdr78    | WD repeat-containin | 37.30 | 0.00 |
| TRINITY_sp Q9SQ2  | CAT7     | Cationic amino acid | 37.30 | 0.00 |
| TRINITY_sp Q8IS1  | gefI     | Ras guanine nucleot | 37.30 | 0.00 |
| TRINITY_sp Q2135  | gst-4    | Glutathione S-trans | 37.30 | 0.00 |
| TRINITY_sp P1468  | YAK1     | Dual specificity pr | 37.30 | 0.00 |
| TRINITY_sp Q91Z   | FNek8    | Serine/threonine-pr | 37.30 | 0.00 |
| TRINITY_sp Q9ZP\  | ARL2     | ADP-ribosylation fa | 37.20 | 0.00 |
| TRINITY_sp Q5ZJ\  | MCMBP    | Mini-chromosome mai | 37.20 | 0.00 |
| TRINITY_sp Q9LU\  | UBC25    | Probable ubiquitin- | 37.20 | 0.00 |
| TRINITY_sp Q2373  | GSH2     | Glutathione synthet | 37.20 | 0.00 |
| TRINITY_sp A1SS1  | rlmF     | Ribosomal RNA large | 37.20 | 0.00 |
| TRINITY_sp B6EK\  | cutC     | Copper homeostasis  | 37.20 | 0.00 |
| TRINITY_sp O7484  | fft2     | ATP-dependent helic | 37.20 | 0.00 |
| TRINITY_sp Q9UHF  | SAP30BP  | SAP30-binding prote | 37.20 | 0.00 |
| TRINITY_sp Q5XJ3  | kctd151  | BTB/POZ domain-cont | 37.20 | 0.00 |
| TRINITY_sp Q6085  | Ripk1    | Receptor-interactin | 37.20 | 0.00 |
| TRINITY_sp Q9ES   | (Slc15a2 | Solute carrier fami | 37.20 | 0.00 |
| TRINITY_sp Q55C9  | mpl1     | MAP kinase phosphat | 37.20 | 0.00 |
| TRINITY_sp Q54SF  | sgmC     | Sphingomyelinase ph | 37.20 | 0.00 |
| TRINITY_sp Q1PF5  | EDA2     | Probable serine pro | 37.20 | 0.00 |
| TRINITY_sp Q21L6  | mgsA     | Methylglyoxal synth | 37.20 | 0.00 |
| TRINITY_sp Q9C77  | At3g1123 | Protein yippee-like | 37.20 | 0.00 |
| TRINITY_sp Q9SB5  | PAT08    | Protein S-acyltrans | 37.20 | 0.00 |
| TRINITY_sp Q8K2   | (Bbs7    | Bardet-Biedl syndro | 37.20 | 0.00 |
| TRINITY_sp Q556F  | cf50-1   | Counting factor 50  | 37.20 | 0.00 |
| TRINITY_sp Q2LTF  | proS     | Proline--tRNA ligas | 37.20 | 0.00 |
| TRINITY_sp Q0373  | YML018C  | Uncharacterized vac | 37.20 | 0.00 |
| TRINITY_sp Q6NL\  | HVA22K   | HVA22-like protein  | 37.20 | 0.00 |
| TRINITY_sp Q75J\  | pex2     | Peroxisome biogenes | 37.20 | 0.00 |
| TRINITY_sp Q8WU   | (STK32A  | Serine/threonine-pr | 37.20 | 0.00 |
| TRINITY_sp Q08E   | JRNF10   | RING finger protein | 37.20 | 0.00 |
| TRINITY_sp Q9CXI  | Tbc1d15  | TBC1 domain family  | 37.20 | 0.00 |
| TRINITY_sp Q1552  | SURF1    | Surfeit locus prote | 37.20 | 0.00 |
| TRINITY_sp A7SK\  | dph2     | Diphthamide biosynt | 37.20 | 0.00 |
| TRINITY_sp Q9LY\  | LAC13    | Laccase-13 OS=Arabi | 37.20 | 0.00 |
| TRINITY_sp C6E54  | pepA     | Probable cytosol am | 37.20 | 0.00 |
| TRINITY_sp A0AV\  | UBA6     | Ubiquitin-like modi | 37.20 | 0.00 |
| TRINITY_sp P7516  | MPN_633  | Uncharacterized pro | 37.20 | 0.00 |
| TRINITY_sp P4433  | rbsK     | Ribokinase OS=Haemo | 37.20 | 0.00 |



|                          |                     |       |      |
|--------------------------|---------------------|-------|------|
| TRINITY_sp P3446gln-2    | Probable glutamine  | 37.20 | 0.00 |
| TRINITY_sp Q6GL7grtp1    | Growth hormone-regu | 37.20 | 0.00 |
| TRINITY_sp Q8RXCCLC-F    | Chloride channel pr | 37.20 | 0.00 |
| TRINITY_sp P7777yajO     | Uncharacterized oxi | 37.20 | 0.00 |
| TRINITY_sp Q0IH2spef1    | Sperm flagellar pro | 37.20 | 0.00 |
| TRINITY_sp Q54Lmvps13D   | Putative vacuolar p | 37.20 | 0.00 |
| TRINITY_sp O1382dcp2     | mRNA decapping comp | 37.20 | 0.00 |
| TRINITY_sp Q9VW(1(3)76BI | E3 ubiquitin-protei | 37.20 | 0.00 |
| TRINITY_sp Q9P2ICHHD7    | Chromodomain-helica | 37.20 | 0.00 |
| TRINITY_sp A1ZA1CG5065   | Putative fatty acyl | 37.20 | 0.00 |
| TRINITY_sp Q9JL(Capn15   | Calpain-15 OS=Mus m | 37.20 | 0.00 |
| TRINITY_sp P3992SLN1     | Osmosensing histidi | 37.20 | 0.00 |
| TRINITY_sp P239(glcA     | Glucan endo-1,3-bet | 37.20 | 0.00 |
| TRINITY_sp Q9LZVPUB16    | U-box domain-contai | 37.20 | 0.00 |
| TRINITY_sp P4115CAPS     | Calcyphosin OS=Oryc | 37.20 | 0.00 |
| TRINITY_sp A4RF5PAN2     | PAB-dependent poly( | 37.20 | 0.00 |
| TRINITY_sp Q9SHIRRP44A   | Exosome complex exo | 37.20 | 0.00 |
| TRINITY_sp Q60HFTPP1     | Tripeptidyl-peptida | 37.20 | 0.00 |
| TRINITY_sp Q9UU8ppk34    | Serine/threonine-pr | 37.20 | 0.00 |
| TRINITY_sp Q8GUIMOS14    | Transportin MOS14 O | 37.20 | 0.00 |
| TRINITY_sp Q4P0HYOP1     | Protein YOP1 OS=Ust | 37.20 | 0.00 |
| TRINITY_sp Q6PCippt2-a   | Lysosomal thioester | 37.20 | 0.00 |
| TRINITY_sp Q54H4drkB     | Probable serine/thr | 37.20 | 0.00 |
| TRINITY_sp P1097-        | Retrovirus-related  | 37.20 | 0.00 |
| TRINITY_sp P0922-        | 25 kDa calcium-bind | 37.20 | 0.00 |
| TRINITY_sp Q5EB5Wdr70    | WD repeat-containin | 37.20 | 0.00 |
| TRINITY_sp Q94B(Atlg7181 | Uncharacterized aar | 37.20 | 0.00 |
| TRINITY_sp Q9T07LACS4    | Long chain acyl-CoA | 37.20 | 0.00 |
| TRINITY_sp Q641Mtmem18   | Transmembrane prote | 37.20 | 0.00 |
| TRINITY_sp Q8IYFCDC146   | Coiled-coil domain- | 37.20 | 0.00 |
| TRINITY_sp P3987EXO1     | Exodeoxyribonucleas | 37.20 | 0.00 |
| TRINITY_sp Q8S92ATG8E    | Autophagy-related p | 37.20 | 0.00 |
| TRINITY_sp Q8H07UPL2     | E3 ubiquitin-protei | 37.20 | 0.00 |
| TRINITY_sp Q54Y(ctrappc5 | Trafficking protein | 37.10 | 0.00 |
| TRINITY_sp Q2731-        | Gelsolin, cytoplasm | 37.10 | 0.00 |
| TRINITY_sp Q9BZ(ABCA2    | ATP-binding cassett | 37.10 | 0.00 |
| TRINITY_sp Q9QXN Trip4   | Activating signal c | 37.10 | 0.00 |
| TRINITY_sp A5PK1METTL13  | Methyltransferase-1 | 37.10 | 0.00 |
| TRINITY_sp Q54B7abcB2    | ABC transporter B f | 37.10 | 0.00 |
| TRINITY_sp P0678CMD1     | Calmodulin OS=Sacch | 37.10 | 0.00 |
| TRINITY_sp Q921(Tubgcp2  | Gamma-tubulin compl | 37.10 | 0.00 |
| TRINITY_sp D9HP2CNR4     | Cell number regulat | 37.10 | 0.00 |
| TRINITY_sp Q8IV(HERC6    | Probable E3 ubiquit | 37.10 | 0.00 |
| TRINITY_sp P4346scrK     | Fructokinase OS=Ped | 37.10 | 0.00 |
| TRINITY_sp Q1255hxA      | Xanthine dehydrogen | 37.10 | 0.00 |
| TRINITY_sp Q136(PEX6     | Peroxisome assembly | 37.10 | 0.00 |
| TRINITY_sp O3155yfhM     | AB hydrolase superf | 37.10 | 0.00 |
| TRINITY_sp Q3924PP2AB2   | Serine/threonine pr | 37.10 | 0.00 |
| TRINITY_sp Q9P27USP36    | Ubiquitin carboxyl- | 37.10 | 0.00 |
| TRINITY_sp Q54E3gacEE    | Rho GTPase-activati | 37.10 | 0.00 |
| TRINITY_sp Q54S4spt16    | FACT complex subuni | 37.10 | 0.00 |
| TRINITY_sp Q54DumcfP     | Mitochondrial subst | 37.10 | 0.00 |
| TRINITY_sp P552(BRPF1    | Peregrin OS=Homo sa | 37.10 | 0.00 |
| TRINITY_sp P9WK8nlhH     | Carboxylesterase N1 | 37.10 | 0.00 |
| TRINITY_sp Q5RJ5Mctp2    | Multiple C2 and tra | 37.10 | 0.00 |
| TRINITY_sp Q9WWalkJ      | Alcohol dehydrogena | 37.10 | 0.00 |

|                          |                      |       |      |
|--------------------------|----------------------|-------|------|
| TRINITY_sp Q9ZV GTF2H2   | General transcripti  | 37.10 | 0.00 |
| TRINITY_sp P912 gst-8    | Probable glutathion  | 37.10 | 0.00 |
| TRINITY_sp Q2HJ MEST     | Mesoderm-specific t  | 37.10 | 0.00 |
| TRINITY_sp Q9NP ACP6     | Lysophosphatidic ac  | 37.10 | 0.00 |
| TRINITY_sp Q0MQ NDUFA12  | NADH dehydrogenase   | 37.10 | 0.00 |
| TRINITY_sp Q940 SRK2E    | Serine/threonine-pr  | 37.10 | 0.00 |
| TRINITY_sp Q10X infb     | Translation initiat  | 37.10 | 0.00 |
| TRINITY_sp Q94F PAP1     | Plastid lipid-assoc  | 37.10 | 0.00 |
| TRINITY_sp Q54K ccbl     | Kynurenine--oxoglut  | 37.10 | 0.00 |
| TRINITY_sp G5EC gba-3    | Putative glucosylce  | 37.10 | 0.00 |
| TRINITY_sp Q94A At4g2770 | (Rhodanese-like doma | 37.10 | 0.00 |
| TRINITY_sp Q5ZI TAF2     | Transcription initi  | 37.10 | 0.00 |
| TRINITY_sp P129 PEPD     | Xaa-Pro dipeptidase  | 37.10 | 0.00 |
| TRINITY_sp Q552 gefY     | Ras guanine nucleot  | 37.10 | 0.00 |
| TRINITY_sp P978 Ctsc     | Dipeptidyl peptidas  | 37.10 | 0.00 |
| TRINITY_sp Q55E cyp524A1 | Probable cytochrome  | 37.10 | 0.00 |
| TRINITY_sp Q8AX kit      | Mast/stem cell grow  | 37.10 | 0.00 |
| TRINITY_sp O427 BMH1     | 14-3-3 protein homo  | 37.10 | 0.00 |
| TRINITY_sp P586 glk      | Glucokinase OS=Nost  | 37.10 | 0.00 |
| TRINITY_sp P511 RAB5C    | Ras-related protein  | 37.10 | 0.00 |
| TRINITY_sp Q8BZ Dcun1d2  | DCN1-like protein 2  | 37.10 | 0.00 |
| TRINITY_sp Q556 sl10005  | Uncharacterized pro  | 37.10 | 0.00 |
| TRINITY_sp Q550 captC    | Uncharacterized CDP  | 37.10 | 0.00 |
| TRINITY_sp O225 STY8     | Serine/threonine-pr  | 37.10 | 0.00 |
| TRINITY_sp Q9ZT PSAM2    | Secretory carrier-a  | 37.10 | 0.00 |
| TRINITY_sp Q9ZT MERD2    | ER lumen protein-re  | 37.10 | 0.00 |
| TRINITY_sp Q9LF PUB1     | Probable ubiquitin   | 37.10 | 0.00 |
| TRINITY_sp Q8L5 TFCD     | Tubulin-folding cof  | 37.10 | 0.00 |
| TRINITY_sp O147 TCERG1   | Transcription elong  | 37.10 | 0.00 |
| TRINITY_sp A8N5 EFG1     | rRNA-processing pro  | 37.10 | 0.00 |
| TRINITY_sp Q8IB CPK4     | Calcium-dependent p  | 37.10 | 0.00 |
| TRINITY_sp Q804 smib1    | E3 ubiquitin-protei  | 37.10 | 0.00 |
| TRINITY_sp Q6PC nmnat2   | Nicotinamide/nicoti  | 37.10 | 0.00 |
| TRINITY_sp Q75K ncsA     | Calcium-binding pro  | 37.10 | 0.00 |
| TRINITY_sp O599 LIP      | Lipase OS=Thermomyc  | 37.10 | 0.00 |
| TRINITY_sp Q9ZG pikAII   | Narbonolide/10-deox  | 37.10 | 0.00 |
| TRINITY_sp Q9BX BRIP1    | Fanconi anemia grou  | 37.10 | 0.00 |
| TRINITY_sp Q7YR EXOSC4   | Exosome complex com  | 37.10 | 0.00 |
| TRINITY_sp Q9C5 PAT22    | Probable protein S-  | 37.10 | 0.00 |
| TRINITY_sp Q9H8 CNTD2    | Cyclin N-terminal d  | 37.10 | 0.00 |
| TRINITY_sp P041 Myb      | Myb protein OS=Dros  | 37.10 | 0.00 |
| TRINITY_sp Q3UG Wdr19    | WD repeat-containin  | 37.10 | 0.00 |
| TRINITY_sp Q9M3 PAT05    | Probable protein S-  | 37.10 | 0.00 |
| TRINITY_sp Q8GW NDA1     | Internal alternativ  | 37.10 | 0.00 |
| TRINITY_sp Q6VV Npr2     | Atrial natriuretic   | 37.10 | 0.00 |
| TRINITY_sp Q54Y dhkB     | Hybrid signal trans  | 37.10 | 0.00 |
| TRINITY_sp Q96J ITCH     | E3 ubiquitin-protei  | 37.00 | 0.00 |
| TRINITY_sp Q55F plbG     | Phospholipase B-lik  | 37.00 | 0.00 |
| TRINITY_sp Q54Y dhkB     | Hybrid signal trans  | 37.00 | 0.00 |
| TRINITY_sp Q6Z8 WEE1     | Wee1-like protein k  | 37.00 | 0.00 |
| TRINITY_sp Q06A RAB32    | Ras-related protein  | 37.00 | 0.00 |
| TRINITY_sp O890 Tpp1     | Tripeptidyl-peptida  | 37.00 | 0.00 |
| TRINITY_sp P627 VSNL1    | Visinin-like protei  | 37.00 | 0.00 |
| TRINITY_sp P583 arcB     | Aerobic respiration  | 37.00 | 0.00 |
| TRINITY_sp Q941 BON1     | Protein BONZAI 1 OS  | 37.00 | 0.00 |
| TRINITY_sp Q6GR spopl    | Speckle-type POZ pr  | 37.00 | 0.00 |

|                           |                     |       |      |
|---------------------------|---------------------|-------|------|
| TRINITY_sp O5852taw2      | tRNA(Phe) (4-demeth | 37.00 | 0.00 |
| TRINITY_sp Q1PF5EDA2      | Probable serine pro | 37.00 | 0.00 |
| TRINITY_sp Q0WU6FAB1A     | 1-phosphatidylinosi | 37.00 | 0.00 |
| TRINITY_sp Q9S21LIP5      | Protein HOMOLOG OF  | 37.00 | 0.00 |
| TRINITY_sp Q68E6flad1     | FAD synthase OS=Dan | 37.00 | 0.00 |
| TRINITY_sp P3952DRS2      | Probable phospholip | 37.00 | 0.00 |
| TRINITY_sp Q86Y6CPNE8     | Copine-8 OS=Homo sa | 37.00 | 0.00 |
| TRINITY_sp Q0597RAB2      | Ras-related protein | 37.00 | 0.00 |
| TRINITY_sp P7378slr1251   | Peptidyl-prolyl cis | 37.00 | 0.00 |
| TRINITY_sp Q9M96At1g7828  | F-box protein At1g7 | 37.00 | 0.00 |
| TRINITY_sp Q69T6OPR2      | Putative 12-oxophyt | 37.00 | 0.00 |
| TRINITY_sp Q9LP6At1g5059  | Pirin-like protein  | 37.00 | 0.00 |
| TRINITY_sp O3461ytqB      | Putative rRNA methy | 37.00 | 0.00 |
| TRINITY_sp P5836arcB      | Aerobic respiration | 37.00 | 0.00 |
| TRINITY_sp O1391hpt1      | Hypoxanthine-guanin | 37.00 | 0.00 |
| TRINITY_sp Q8L76SDN5      | Small RNA degrading | 37.00 | 0.00 |
| TRINITY_sp Q9CQ6Tmem216   | Transmembrane prote | 37.00 | 0.00 |
| TRINITY_sp Q9SI1DSK2B     | Ubiquitin domain-co | 37.00 | 0.00 |
| TRINITY_sp B4LN4Adam      | Eukaryotic translat | 37.00 | 0.00 |
| TRINITY_sp P0CE6tala      | Talin-A OS=Dictyost | 37.00 | 0.00 |
| TRINITY_sp P7316trmB      | tRNA (guanine-N(7)- | 37.00 | 0.00 |
| TRINITY_sp P5017Rdh2      | Retinol dehydrogena | 37.00 | 0.00 |
| TRINITY_sp Q9P36bdb14     | E3 ubiquitin-protei | 37.00 | 0.00 |
| TRINITY_sp Q6NRI6snx33    | Sorting nexin-33 OS | 37.00 | 0.00 |
| TRINITY_sp Q9H46PIGU      | Phosphatidylinosito | 37.00 | 0.00 |
| TRINITY_sp Q4KL6chpt1     | Cholinephosphotrans | 37.00 | 0.00 |
| TRINITY_sp Q8WS6IP3R      | Inositol 1,4,5-tris | 37.00 | 0.00 |
| TRINITY_sp P1056SSA1      | Heat shock protein  | 37.00 | 0.00 |
| TRINITY_sp Q17R6DHX38     | Pre-mRNA-splicing f | 37.00 | 0.00 |
| TRINITY_sp Q86H6fcf45-1   | Counting factor 45- | 37.00 | 0.00 |
| TRINITY_sp Q7ZV6abhd17c   | Protein ABHD17C OS= | 37.00 | 0.00 |
| TRINITY_sp Q9M06At4g3264  | Protein transport p | 37.00 | 0.00 |
| TRINITY_sp Q9P26IDNAH1    | Dynein heavy chain  | 37.00 | 0.00 |
| TRINITY_sp Q9FJ6At5g5673  | Zinc protease PQQL- | 37.00 | 0.00 |
| TRINITY_sp Q1ZX6fgxcDD    | Guanine exchange fa | 37.00 | 0.00 |
| TRINITY_sp P3416racB      | Rho-related protein | 37.00 | 0.00 |
| TRINITY_sp Q0276MAP3K10   | Mitogen-activated p | 37.00 | 0.00 |
| TRINITY_sp F1RC6trip12    | E3 ubiquitin-protei | 37.00 | 0.00 |
| TRINITY_sp Q7KQ6IARF1     | ADP-ribosylation fa | 37.00 | 0.00 |
| TRINITY_sp P5906NLRP5     | NACHT, LRR and PYD  | 37.00 | 0.00 |
| TRINITY_sp Q5ZK6IMOV10    | Putative helicase M | 37.00 | 0.00 |
| TRINITY_sp Q9W66PTPRJ     | Receptor-type tyros | 37.00 | 0.00 |
| TRINITY_sp O5256cah       | Carbonic anhydrase  | 36.90 | 0.00 |
| TRINITY_sp O6266SI        | Sucrase-isomaltase, | 36.90 | 0.00 |
| TRINITY_sp Q9ST6CIPK8     | CBL-interacting ser | 36.90 | 0.00 |
| TRINITY_sp F4IU6UPF2      | Regulator of nonsen | 36.90 | 0.00 |
| TRINITY_sp G5EF6pak-2     | Serine/threonine-pr | 36.90 | 0.00 |
| TRINITY_sp Q28Y6GA21225   | Zinc finger CCCH do | 36.90 | 0.00 |
| TRINITY_sp P3526Rab12     | Ras-related protein | 36.90 | 0.00 |
| TRINITY_sp P6186-         | Lipase OS=Rhizopus  | 36.90 | 0.00 |
| TRINITY_sp P9656topB      | DNA topoisomerase 3 | 36.90 | 0.00 |
| TRINITY_sp Q8696VDDB_G027 | Probable myosin lig | 36.90 | 0.00 |
| TRINITY_sp P2876GRN       | Granulins OS=Homo s | 36.90 | 0.00 |
| TRINITY_sp Q94A6At1g6202  | Coatomer subunit al | 36.90 | 0.00 |
| TRINITY_sp Q1696-         | Neurocalcin OS=Aply | 36.90 | 0.00 |
| TRINITY_sp Q8N96WDSUB1    | WD repeat, SAM and  | 36.90 | 0.00 |

|                          |                     |       |      |
|--------------------------|---------------------|-------|------|
| TRINITY_sp Q95N(DIO1     | Type I iodothyronin | 36.90 | 0.00 |
| TRINITY_sp Q8R3I(Tbc1d13 | TBC1 domain family  | 36.90 | 0.00 |
| TRINITY_sp P405(YIR042C  | Uncharacterized pro | 36.90 | 0.00 |
| TRINITY_sp Q28I(cops3    | COP9 signalosome co | 36.90 | 0.00 |
| TRINITY_sp F4IP(SYCO     | Cysteine--tRNA liga | 36.90 | 0.00 |
| TRINITY_sp Q55D(vgacZ    | Rho GTPase-activati | 36.90 | 0.00 |
| TRINITY_sp Q3MI(Echdc3   | Enoyl-CoA hydratase | 36.90 | 0.00 |
| TRINITY_sp Q91V(Abca7    | ATP-binding cassett | 36.90 | 0.00 |
| TRINITY_sp Q7K5(Ttd14    | TRPL translocation  | 36.90 | 0.00 |
| TRINITY_sp Q9QZ(Dcun1d1  | DCN1-like protein 1 | 36.90 | 0.00 |
| TRINITY_sp P468(KIN14N   | Kinesin-like protei | 36.90 | 0.00 |
| TRINITY_sp Q993I(TY3B-G  | Transposon Ty3-G Ga | 36.90 | 0.00 |
| TRINITY_sp Q9H1(ANAPC1   | Anaphase-promoting  | 36.90 | 0.00 |
| TRINITY_sp A0BK(GSPATT0  | Protein SEY1 homolo | 36.90 | 0.00 |
| TRINITY_sp Q9ZV(CUL3A    | Cullin-3A OS=Arabid | 36.90 | 0.00 |
| TRINITY_sp Q54P(dlcA     | Dynein light chain  | 36.90 | 0.00 |
| TRINITY_sp Q4V8(Wdr78    | WD repeat-containin | 36.90 | 0.00 |
| TRINITY_sp Q8L7(GSTT2    | Glutathione S-trans | 36.90 | 0.00 |
| TRINITY_sp Q3MH(SPTLC1   | Serine palmitoyltra | 36.90 | 0.00 |
| TRINITY_sp O757(TRPA1    | Transient receptor  | 36.90 | 0.00 |
| TRINITY_sp P478I(Pdcd2   | Programmed cell dea | 36.90 | 0.00 |
| TRINITY_sp Q098(ayr1     | NADPH-dependent 1-a | 36.90 | 0.00 |
| TRINITY_sp P239(amp      | Mitochondrial-proce | 36.90 | 0.00 |
| TRINITY_sp P492(mao      | Amine oxidase [flav | 36.90 | 0.00 |
| TRINITY_sp Q1JP(EIF4H    | Eukaryotic translat | 36.90 | 0.00 |
| TRINITY_sp P110(RAB3A    | Ras-related protein | 36.90 | 0.00 |
| TRINITY_sp Q9BQ(NUDT12   | Peroxisomal NADH py | 36.90 | 0.00 |
| TRINITY_sp Q8TD(DNAH3    | Dynein heavy chain  | 36.90 | 0.00 |
| TRINITY_sp Q74F(vtdcB    | L-threonine ammonia | 36.90 | 0.00 |
| TRINITY_sp Q8K2(Ipo11    | Importin-11 OS=Mus  | 36.90 | 0.00 |
| TRINITY_sp Q111(wht-1    | ABC transporter ATP | 36.90 | 0.00 |
| TRINITY_sp P386(PDIA6    | Protein disulfide-i | 36.90 | 0.00 |
| TRINITY_sp Q8N5(CAMKK1   | Calcium/calmodulin- | 36.90 | 0.00 |
| TRINITY_sp O043(B'BETA   | Serine/threonine pr | 36.90 | 0.00 |
| TRINITY_sp Q96H(FREEP6   | Receptor expression | 36.90 | 0.00 |
| TRINITY_sp P932(VPS41    | Vacuolar protein so | 36.90 | 0.00 |
| TRINITY_sp Q9FP(EDR1     | Serine/threonine-pr | 36.90 | 0.00 |
| TRINITY_sp Q8TAC(JOSD2   | Josephin-2 OS=Homo  | 36.90 | 0.00 |
| TRINITY_sp Q8IS(gefJ     | Ras guanine nucleot | 36.90 | 0.00 |
| TRINITY_sp Q5M7(PAT12    | Probable protein S- | 36.90 | 0.00 |
| TRINITY_sp Q9QX(Tbl1x    | F-box-like/WD repea | 36.90 | 0.00 |
| TRINITY_sp Q1ZX(HgxcDD   | Guanine exchange fa | 36.90 | 0.00 |
| TRINITY_sp Q5MB(ABCG2    | ATP-binding cassett | 36.90 | 0.00 |
| TRINITY_sp Q8RVI(IDEK1   | Calpain-type cystei | 36.90 | 0.00 |
| TRINITY_sp O597(ark1     | Serine/threonine-pr | 36.90 | 0.00 |
| TRINITY_sp A6QR(USP4     | Ubiquitin carboxyl- | 36.90 | 0.00 |
| TRINITY_sp Q408(EMB8     | Embryogenesis-assoc | 36.90 | 0.00 |
| TRINITY_sp P395(DRS2     | Probable phospholip | 36.90 | 0.00 |
| TRINITY_sp P227I(Gucylb2 | Guanylate cyclase s | 36.90 | 0.00 |
| TRINITY_sp Q9S7(SYN1     | Sister chromatid co | 36.90 | 0.00 |
| TRINITY_sp Q0V9(Fdis312  | DIS3-like exonuclea | 36.90 | 0.00 |
| TRINITY_sp Q6WN(CD4      | Acyl-lipid (7-3)-de | 36.90 | 0.00 |
| TRINITY_sp Q080(TEF1     | Elongation factor 1 | 36.90 | 0.00 |
| TRINITY_sp Q54B(dyrc2    | Probable serine/thr | 36.90 | 0.00 |
| TRINITY_sp P253(mlkA     | Myosin light chain  | 36.90 | 0.00 |
| TRINITY_sp Q54KI(DDB_G02 | TPR repeat-containi | 36.90 | 0.00 |

|                           |                     |       |      |
|---------------------------|---------------------|-------|------|
| TRINITY_sp O9747ancA      | Mitochondrial subst | 36.90 | 0.00 |
| TRINITY_sp Q8Z4Myhfr      | Uncharacterized pro | 36.80 | 0.00 |
| TRINITY_sp P0979CDC16     | Anaphase-promoting  | 36.80 | 0.00 |
| TRINITY_sp Q1411VEZF1     | Vascular endothelia | 36.80 | 0.00 |
| TRINITY_sp Q9P25RCC2      | Protein RCC2 OS=Hom | 36.80 | 0.00 |
| TRINITY_sp Q55F0tipC      | Putative vacuolar p | 36.80 | 0.00 |
| TRINITY_sp Q8NDIPAPD5     | Non-canonical poly( | 36.80 | 0.00 |
| TRINITY_sp Q9FG(ATO       | Splicing factor SF3 | 36.80 | 0.00 |
| TRINITY_sp Q54C1rrp8      | Ribosomal RNA-proce | 36.80 | 0.00 |
| TRINITY_sp Q9M17FAP1      | Fatty-acid-binding  | 36.80 | 0.00 |
| TRINITY_sp O1436naf1      | H/ACA ribonucleopro | 36.80 | 0.00 |
| TRINITY_sp P4902PXN       | Paxillin OS=Gallus  | 36.80 | 0.00 |
| TRINITY_sp Q5ZITRAB10     | Ras-related protein | 36.80 | 0.00 |
| TRINITY_sp P4329RD21A     | Cysteine proteinase | 36.80 | 0.00 |
| TRINITY_sp Q6UX(DHRS13    | Dehydrogenase/reduc | 36.80 | 0.00 |
| TRINITY_sp Q7K55Ttd14     | TRPL translocation  | 36.80 | 0.00 |
| TRINITY_sp C6KTISET1      | Putative histone-ly | 36.80 | 0.00 |
| TRINITY_sp Q9CA2TKPR2     | Tetraketide alpha-p | 36.80 | 0.00 |
| TRINITY_sp Q68F0-         | Uncharacterized pro | 36.80 | 0.00 |
| TRINITY_sp P9089F56F10.1  | Putative serine pro | 36.80 | 0.00 |
| TRINITY_sp Q5JVIEFH1      | EF-hand domain-cont | 36.80 | 0.00 |
| TRINITY_sp Q499USlc25a38  | Solute carrier fami | 36.80 | 0.00 |
| TRINITY_sp Q8NI9WDR36     | WD repeat-containin | 36.80 | 0.00 |
| TRINITY_sp P7659yfeX      | Probable deferroche | 36.80 | 0.00 |
| TRINITY_sp O356(Abca4     | Retinal-specific AT | 36.80 | 0.00 |
| TRINITY_sp Q6IRIabhd13    | Protein ABHD13 OS=X | 36.80 | 0.00 |
| TRINITY_sp Q54WVDDDB_G027 | Probable serine/thr | 36.80 | 0.00 |
| TRINITY_sp Q9T0(LACS5     | Long chain acyl-CoA | 36.80 | 0.00 |
| TRINITY_sp P5779ALA12     | Probable phospholip | 36.80 | 0.00 |
| TRINITY_sp Q16X9AAEL0089  | Regulator of telome | 36.80 | 0.00 |
| TRINITY_sp Q94EJAt3g1441  | Probable sugar phos | 36.80 | 0.00 |
| TRINITY_sp Q554IbzipJ     | Probable basic-leuc | 36.80 | 0.00 |
| TRINITY_sp Q2HJ9FAHD1     | Acylpyruvase FAHD1, | 36.80 | 0.00 |
| TRINITY_sp Q1ZXHgxcdD     | Guanine exchange fa | 36.80 | 0.00 |
| TRINITY_sp Q96FKIF12      | Kinesin-like protei | 36.80 | 0.00 |
| TRINITY_sp Q921(Brwd1     | Bromodomain and WD  | 36.80 | 0.00 |
| TRINITY_sp Q7X6IRUS1      | Protein root UVB se | 36.80 | 0.00 |
| TRINITY_sp Q4PKICLCN7     | H(+)/Cl(-) exchange | 36.80 | 0.00 |
| TRINITY_sp Q4V3EMRG2      | Protein MRG2 OS=Ara | 36.80 | 0.00 |
| TRINITY_sp Q9CR2Nudt8     | Nucleoside diphosph | 36.80 | 0.00 |
| TRINITY_sp Q75KIATG4A     | Cysteine protease A | 36.80 | 0.00 |
| TRINITY_sp O3159yfhM      | AB hydrolase superf | 36.80 | 0.00 |
| TRINITY_sp Q9C79AERO1     | Endoplasmic reticul | 36.80 | 0.00 |
| TRINITY_sp P0C8MCCRP1     | Probable serine/thr | 36.80 | 0.00 |
| TRINITY_sp Q8Z0fcysA      | Sulfate/thiosulfate | 36.80 | 0.00 |
| TRINITY_sp O0026SUPT5H    | Transcription elong | 36.80 | 0.00 |
| TRINITY_sp Q6TMfpoxA      | Peroxiectin A OS=D  | 36.80 | 0.00 |
| TRINITY_sp O0029PSMD9     | 26S proteasome non- | 36.80 | 0.00 |
| TRINITY_sp Q5EA9ABHD4     | Protein ABHD4 OS=Bo | 36.80 | 0.00 |
| TRINITY_sp B8BM1OsI_3745  | Pyruvate kinase 2,  | 36.80 | 0.00 |
| TRINITY_sp P4059NEO1      | Probable phospholip | 36.80 | 0.00 |
| TRINITY_sp Q9929GRESAG    | Receptor-type adeny | 36.80 | 0.00 |
| TRINITY_sp Q9R1USik1      | Serine/threonine-pr | 36.80 | 0.00 |
| TRINITY_sp B2GU9Usp4      | Ubiquitin carboxyl- | 36.80 | 0.00 |
| TRINITY_sp Q99L9Gstt3     | Glutathione S-trans | 36.80 | 0.00 |
| TRINITY_sp P1249-         | Actin A OS=Trypanos | 36.70 | 0.00 |

|                          |                               |       |      |
|--------------------------|-------------------------------|-------|------|
| TRINITY_sp Q9SEJWER      | Transcription facto           | 36.70 | 0.00 |
| TRINITY_sp Q6361Vps33a   | Vacuolar protein so           | 36.70 | 0.00 |
| TRINITY_sp Q8NFFNUP37    | Nucleoporin Nup37 O           | 36.70 | 0.00 |
| TRINITY_sp Q2KHLEXOSC8   | Exosome complex com           | 36.70 | 0.00 |
| TRINITY_sp Q2362tgt-1    | Queuine tRNA-ribosy           | 36.70 | 0.00 |
| TRINITY_sp P5457USP14    | Ubiquitin carboxyl-           | 36.70 | 0.00 |
| TRINITY_sp Q8R77rplD     | 50S ribosomal prote           | 36.70 | 0.00 |
| TRINITY_sp Q55A9captA    | Uncharacterized CDP           | 36.70 | 0.00 |
| TRINITY_sp Q9T01HMGB13   | High mobility group           | 36.70 | 0.00 |
| TRINITY_sp Q95V2carmil   | Protein CARMIL OS=D           | 36.70 | 0.00 |
| TRINITY_sp O8262VHA-G1   | V-type proton ATPas           | 36.70 | 0.00 |
| TRINITY_sp P3475FAB1     | 1-phosphatidylinosi           | 36.70 | 0.00 |
| TRINITY_sp Q7ZV2pitrm1   | Presequence proteas           | 36.70 | 0.00 |
| TRINITY_sp Q7SY2nt5c3    | Cytosolic 5'-nucleo           | 36.70 | 0.00 |
| TRINITY_sp Q94BIFAO4B    | Long-chain-alcohol            | 36.70 | 0.00 |
| TRINITY_sp P5584-        | Probable 60S riboso           | 36.70 | 0.00 |
| TRINITY_sp Q9NV2UQCC1    | Ubiquinol-cytochrom           | 36.70 | 0.00 |
| TRINITY_sp Q9TU2LMAN1    | Protein ERGIC-53 OS           | 36.70 | 0.00 |
| TRINITY_sp Q0233ADA2     | Transcriptional ada           | 36.70 | 0.00 |
| TRINITY_sp Q9961DNAJC7   | DnaJ homolog subfam           | 36.70 | 0.00 |
| TRINITY_sp P4959ppm-2    | Probable protein ph           | 36.70 | 0.00 |
| TRINITY_sp Q8NH2TLL11    | Tubulin polyglutamy           | 36.70 | 0.00 |
| TRINITY_sp Q9CPI2Lipf    | Gastric triacylglyc           | 36.70 | 0.00 |
| TRINITY_sp O6420         | 10 Endolysin A OS=Myco        | 36.70 | 0.00 |
| TRINITY_sp Q9LJ2At3g2248 | Probable prefoldin            | 36.70 | 0.00 |
| TRINITY_sp O6010         | (SPBC14F2 Alkaline phosphatas | 36.70 | 0.00 |
| TRINITY_sp Q1462ITI4     | Inter-alpha-trypsin           | 36.70 | 0.00 |
| TRINITY_sp Q9FJ2FUPF1    | Regulator of nonsen           | 36.70 | 0.00 |
| TRINITY_sp Q9SS2HIPL1    | HIPL1 protein OS=Ar           | 36.70 | 0.00 |
| TRINITY_sp Q49U2sat      | Sulfate adenylyltra           | 36.70 | 0.00 |
| TRINITY_sp Q5842coaD     | Phosphopantetheine            | 36.70 | 0.00 |
| TRINITY_sp Q54E2DDB_G022 | Protein TEX261 homo           | 36.70 | 0.00 |
| TRINITY_sp Q9NW1RBM28    | RNA-binding protein           | 36.70 | 0.00 |
| TRINITY_sp P0768HEXB     | Beta-hexosaminidase           | 36.70 | 0.00 |
| TRINITY_sp Q9LX2GCN2     | eIF-2-alpha kinase            | 36.70 | 0.00 |
| TRINITY_sp A7UX1egt-2    | Hercynylcysteine su           | 36.70 | 0.00 |
| TRINITY_sp O1882AOAH     | Acyloxyacyl hydroly           | 36.70 | 0.00 |
| TRINITY_sp Q9M02SCPL24   | Serine carboxypepti           | 36.70 | 0.00 |
| TRINITY_sp Q8HY2ELAC2    | Zinc phosphodiester           | 36.70 | 0.00 |
| TRINITY_sp Q0352Itk      | Tyrosine-protein ki           | 36.70 | 0.00 |
| TRINITY_sp P2112P4HB     | Protein disulfide-i           | 36.70 | 0.00 |
| TRINITY_sp Q4252FATA     | Oleoyl-acyl carrier           | 36.70 | 0.00 |
| TRINITY_sp Q8BQ2Zdhhc14  | Probable palmitoylt           | 36.70 | 0.00 |
| TRINITY_sp Q54D2DDB_G022 | SET and MYND domain           | 36.70 | 0.00 |
| TRINITY_sp B7K22truA     | tRNA pseudouridine            | 36.70 | 0.00 |
| TRINITY_sp P4852eIF-4E   | Eukaryotic translat           | 36.70 | 0.00 |
| TRINITY_sp Q8R31Tcf25    | Transcription facto           | 36.70 | 0.00 |
| TRINITY_sp Q8882PSPTO_11 | Renalase OS=Pseudom           | 36.70 | 0.00 |
| TRINITY_sp Q9952MPHOSPH2 | M-phase phosphoprot           | 36.70 | 0.00 |
| TRINITY_sp Q1ZX2hgxcDD   | Guanine exchange fa           | 36.70 | 0.00 |
| TRINITY_sp Q9W02bab2     | Protein bric-a-brac           | 36.70 | 0.00 |
| TRINITY_sp Q9FL2PAT06    | Probable protein S-           | 36.70 | 0.00 |
| TRINITY_sp O9491PCF11    | Pre-mRNA cleavage c           | 36.70 | 0.00 |
| TRINITY_sp Q9UT2SPAC25B2 | Uncharacterized met           | 36.70 | 0.00 |
| TRINITY_sp Q7XJ2EB1A     | Microtubule-associa           | 36.70 | 0.00 |
| TRINITY_sp P3842TIF5     | Eukaryotic translat           | 36.70 | 0.00 |

|                          |                     |       |      |
|--------------------------|---------------------|-------|------|
| TRINITY_sp Q4FP3atpG     | ATP synthase gamma  | 36.70 | 0.00 |
| TRINITY_sp Q54B1abcB2    | ABC transporter B f | 36.70 | 0.00 |
| TRINITY_sp F4IC1IWS1     | Protein IWS1 homolo | 36.70 | 0.00 |
| TRINITY_sp A8WX1CBG04561 | Protein FAM50 homol | 36.70 | 0.00 |
| TRINITY_sp Q7LH1TY3B-I   | Transposon Ty3-I Ga | 36.70 | 0.00 |
| TRINITY_sp Q6EU1Os02g067 | Probable N6-adenosi | 36.70 | 0.00 |
| TRINITY_sp Q54Y1ngap     | Probable Ras GTPase | 36.70 | 0.00 |
| TRINITY_sp Q54E1epnA     | Epsin OS=Dictyostel | 36.70 | 0.00 |
| TRINITY_sp Q8N11CYP4X1   | Cytochrome P450 4X1 | 36.70 | 0.00 |
| TRINITY_sp Q9ZG1pikAII   | Narbonolide/10-deox | 36.70 | 0.00 |
| TRINITY_sp Q56X1NHX2     | Sodium/hydrogen exc | 36.70 | 0.00 |
| TRINITY_sp Q96P1ACAP3    | Arf-GAP with coiled | 36.70 | 0.00 |
| TRINITY_sp Q2QQ1CYCT1-1  | Cyclin-T1-4 OS=Oryz | 36.70 | 0.00 |
| TRINITY_sp Q9931TY3B-G   | Transposon Ty3-G Ga | 36.70 | 0.00 |
| TRINITY_sp P6234CPK4     | Calcium-dependent p | 36.70 | 0.00 |
| TRINITY_sp Q9VY1Bap60    | Brahma-associated p | 36.70 | 0.00 |
| TRINITY_sp Q9691TMBIM1   | Protein lifeguard 3 | 36.70 | 0.00 |
| TRINITY_sp Q6401slc37a3  | Sugar phosphate exc | 36.60 | 0.00 |
| TRINITY_sp O4331TXNL1    | Thioredoxin-like pr | 36.60 | 0.00 |
| TRINITY_sp Q9621MYB23    | Transcription facto | 36.60 | 0.00 |
| TRINITY_sp P6234CPK4     | Calcium-dependent p | 36.60 | 0.00 |
| TRINITY_sp Q3UJ1Armc7    | Armadillo repeat-co | 36.60 | 0.00 |
| TRINITY_sp O2331ECI3     | Enoyl-CoA delta iso | 36.60 | 0.00 |
| TRINITY_sp P2591MXAN_59  | Uncharacterized oxi | 36.60 | 0.00 |
| TRINITY_sp Q1ZX1gxcDD    | Guanine exchange fa | 36.60 | 0.00 |
| TRINITY_sp Q1031yaf9     | Protein AF-9 homolo | 36.60 | 0.00 |
| TRINITY_sp Q54S1mcfU     | Mitochondrial subst | 36.60 | 0.00 |
| TRINITY_sp B7GI1Hobg     | GTPase Obg OS=Anoxy | 36.60 | 0.00 |
| TRINITY_sp Q1ZX1gxcDD    | Guanine exchange fa | 36.60 | 0.00 |
| TRINITY_sp Q4011-        | LEC14B protein OS=L | 36.60 | 0.00 |
| TRINITY_sp Q1LX1ints3    | Integrator complex  | 36.60 | 0.00 |
| TRINITY_sp Q0KI1CG9801   | PP2C-like domain-co | 36.60 | 0.00 |
| TRINITY_sp Q8LP1BTS      | Zinc finger protein | 36.60 | 0.00 |
| TRINITY_sp Q9CP1rsuA     | Ribosomal small sub | 36.60 | 0.00 |
| TRINITY_sp B8AA1CEST     | Protein CHLOROPLAST | 36.60 | 0.00 |
| TRINITY_sp Q9C11SPBC713  | Periodic tryptophan | 36.60 | 0.00 |
| TRINITY_sp Q9W51CG43867  | Uncharacterized pro | 36.60 | 0.00 |
| TRINITY_sp Q0561CTR1     | Serine/threonine-pr | 36.60 | 0.00 |
| TRINITY_sp Q55F1plbG     | Phospholipase B-lik | 36.60 | 0.00 |
| TRINITY_sp Q9441dymA     | Dynamin-A OS=Dictyo | 36.60 | 0.00 |
| TRINITY_sp O9461bms1     | Ribosome biogenesis | 36.60 | 0.00 |
| TRINITY_sp Q5F31SBNO1    | Protein strawberry  | 36.60 | 0.00 |
| TRINITY_sp Q9LI1TMN7     | Transmembrane 9 sup | 36.60 | 0.00 |
| TRINITY_sp Q80W1Gad11    | Acidic amino acid d | 36.60 | 0.00 |
| TRINITY_sp Q9FV1At1g5772 | Probable elongation | 36.60 | 0.00 |
| TRINITY_sp Q8NC1MTMR14   | Myotubularin-relate | 36.60 | 0.00 |
| TRINITY_sp Q1E31FES1     | Hsp70 nucleotide ex | 36.60 | 0.00 |
| TRINITY_sp O0021PSMD12   | 26S proteasome non- | 36.60 | 0.00 |
| TRINITY_sp Q16A1crp10    | 50S ribosomal prote | 36.60 | 0.00 |
| TRINITY_sp Q2SW1surE     | 5'-nucleotidase Sur | 36.60 | 0.00 |
| TRINITY_sp A6QR1USP4     | Ubiquitin carboxyl- | 36.60 | 0.00 |
| TRINITY_sp Q7S71NCU06732 | Leukotriene A-4 hyd | 36.60 | 0.00 |
| TRINITY_sp Q8L81COG4     | Conserved oligomeri | 36.60 | 0.00 |
| TRINITY_sp Q8L91P4H7     | Probable prolyl 4-h | 36.60 | 0.00 |
| TRINITY_sp Q9ZU1At2g3724 | Thioredoxin-like pr | 36.60 | 0.00 |
| TRINITY_sp O1581CPK2     | Calcium-dependent p | 36.60 | 0.00 |

|                          |                     |       |      |
|--------------------------|---------------------|-------|------|
| TRINITY_sp O0783dapb1    | Dipeptidyl aminopep | 36.60 | 0.00 |
| TRINITY_sp Q8GY2UPL1     | E3 ubiquitin-protei | 36.60 | 0.00 |
| TRINITY_sp Q86K2cpnB-1   | Copine-B OS=Dictyos | 36.60 | 0.00 |
| TRINITY_sp Q8RW1STY17    | Serine/threonine-pr | 36.60 | 0.00 |
| TRINITY_sp Q4356CCAMK    | Calcium and calcium | 36.60 | 0.00 |
| TRINITY_sp Q9EPIAcox3    | Peroxisomal acyl-co | 36.60 | 0.00 |
| TRINITY_sp P3285STX2     | Syntaxin-2 OS=Homo  | 36.50 | 0.00 |
| TRINITY_sp Q9W25BTBD9    | BTB/POZ domain-cont | 36.50 | 0.00 |
| TRINITY_sp Q9AT7FAD2     | Delta(12) fatty aci | 36.50 | 0.00 |
| TRINITY_sp O1385its3     | Phosphatidylinosito | 36.50 | 0.00 |
| TRINITY_sp P4457arcB     | Aerobic respiration | 36.50 | 0.00 |
| TRINITY_sp Q08B7slc38a9  | Sodium-coupled neut | 36.50 | 0.00 |
| TRINITY_sp Q8RB1coaE     | Dephospho-CoA kinas | 36.50 | 0.00 |
| TRINITY_sp Q2MH1HT1      | Serine/threonine-pr | 36.50 | 0.00 |
| TRINITY_sp P9815ATP8B2   | Phospholipid-transp | 36.50 | 0.00 |
| TRINITY_sp Q5413pyk3     | Dual specificity pr | 36.50 | 0.00 |
| TRINITY_sp Q1355CAMK2G   | Calcium/calmodulin- | 36.50 | 0.00 |
| TRINITY_sp Q7XJ6FAAH     | Fatty acid amide hy | 36.50 | 0.00 |
| TRINITY_sp Q1015lkh1     | Dual specificity pr | 36.50 | 0.00 |
| TRINITY_sp Q8X11-        | Actin OS=Exophiala  | 36.50 | 0.00 |
| TRINITY_sp Q4WX7pdcA     | Pyruvate decarboxyl | 36.50 | 0.00 |
| TRINITY_sp Q1PF5EDA2     | Probable serine pro | 36.50 | 0.00 |
| TRINITY_sp Q6345Mapk4    | Mitogen-activated p | 36.50 | 0.00 |
| TRINITY_sp P3472RAS-2    | Ras-like protein 2  | 36.50 | 0.00 |
| TRINITY_sp Q54Q1yipf5    | Protein YIPF5 homol | 36.50 | 0.00 |
| TRINITY_sp Q5RC5NBR1     | Next to BRCA1 gene  | 36.50 | 0.00 |
| TRINITY_sp P9WN4egtD     | Histidine N-alpha-m | 36.50 | 0.00 |
| TRINITY_sp Q5U21Zfand2a  | AN1-type zinc finge | 36.50 | 0.00 |
| TRINITY_sp Q6P51Uggt1    | UDP-glucose:glycopr | 36.50 | 0.00 |
| TRINITY_sp P4356RIM15    | Serine/threonine-pr | 36.50 | 0.00 |
| TRINITY_sp Q0966SPAC13C5 | Putative glutamine  | 36.50 | 0.00 |
| TRINITY_sp Q5YLEGYRA     | DNA gyrase subunit  | 36.50 | 0.00 |
| TRINITY_sp Q4UM1RF_0314  | Putative ankyrin re | 36.50 | 0.00 |
| TRINITY_sp Q86C2dhkK     | Hybrid signal trans | 36.50 | 0.00 |
| TRINITY_sp Q9SF1At3g0710 | Protein transport p | 36.50 | 0.00 |
| TRINITY_sp Q8N55AADAT    | Kynurenine/alpha-am | 36.50 | 0.00 |
| TRINITY_sp Q9WW1alkJ     | Alcohol dehydrogena | 36.50 | 0.00 |
| TRINITY_sp Q1466TRIP12   | E3 ubiquitin-protei | 36.50 | 0.00 |
| TRINITY_sp O8062At2g3936 | Probable receptor-1 | 36.50 | 0.00 |
| TRINITY_sp Q8W26CSN6A    | COP9 signalosome co | 36.50 | 0.00 |
| TRINITY_sp Q8LP1MYB86    | Transcription facto | 36.50 | 0.00 |
| TRINITY_sp Q8LP1MYB86    | Transcription facto | 36.50 | 0.00 |
| TRINITY_sp A1CQ1ACLA_026 | Eukaryotic translat | 36.50 | 0.00 |
| TRINITY_sp Q0071mdmC     | O-methyltransferase | 36.50 | 0.00 |
| TRINITY_sp Q9M91At1g7828 | F-box protein At1g7 | 36.50 | 0.00 |
| TRINITY_sp Q9401ARID3    | AT-rich interactive | 36.50 | 0.00 |
| TRINITY_sp O2366TOC33    | Translocase of chlo | 36.50 | 0.00 |
| TRINITY_sp P8377GRP2     | Putative NADPH-depe | 36.50 | 0.00 |
| TRINITY_sp Q8L71ESCPL20  | Serine carboxypepti | 36.50 | 0.00 |
| TRINITY_sp Q55E1DDB_G026 | Probable serine/thr | 36.50 | 0.00 |
| TRINITY_sp P4597CBX5     | Chromobox protein h | 36.50 | 0.00 |
| TRINITY_sp Q5RD1CSTF3    | Cleavage stimulatio | 36.50 | 0.00 |
| TRINITY_sp Q55A1DDB_G027 | Probable serine/thr | 36.50 | 0.00 |
| TRINITY_sp Q9SJ2DJA6     | Chaperone protein d | 36.50 | 0.00 |
| TRINITY_sp Q54W1DDB_0206 | Protein SEY1 homolo | 36.50 | 0.00 |
| TRINITY_sp Q5551vps13B   | Putative vacuolar p | 36.50 | 0.00 |



|                          |                     |       |      |
|--------------------------|---------------------|-------|------|
| TRINITY_sp B1AZ Thoc2    | THO complex subunit | 36.50 | 0.00 |
| TRINITY_sp Q95K IRNF125  | E3 ubiquitin-protei | 36.50 | 0.00 |
| TRINITY_sp Q2JN ftsH     | ATP-dependent zinc  | 36.50 | 0.00 |
| TRINITY_sp P388 TRA1     | Transcription-assoc | 36.50 | 0.00 |
| TRINITY_sp Q93Y ABCG22   | ABC transporter G f | 36.50 | 0.00 |
| TRINITY_sp Q993 TY3B-G   | Transposon Ty3-G Ga | 36.50 | 0.00 |
| TRINITY_sp A8XN sgk-1    | Serine/threonine-pr | 36.50 | 0.00 |
| TRINITY_sp P535 Cebpz    | CCAAT/enhancer-bind | 36.50 | 0.00 |
| TRINITY_sp O956 FGFR1OP  | FGFR1 oncogene part | 36.50 | 0.00 |
| TRINITY_sp Q9SH HMA5     | Probable copper-tra | 36.50 | 0.00 |
| TRINITY_sp Q55A (DDB_G02 | Probable serine/thr | 36.50 | 0.00 |
| TRINITY_sp Q145 ITPR2    | Inositol 1,4,5-tris | 36.50 | 0.00 |
| TRINITY_sp Q9FG FTSH11   | ATP-dependent zinc  | 36.50 | 0.00 |
| TRINITY_sp F4IV CHR5     | Protein CHROMATIN R | 36.50 | 0.00 |
| TRINITY_sp O150 TRANK1   | TPR and ankyrin rep | 36.50 | 0.00 |
| TRINITY_sp Q7LH TY3B-I   | Transposon Ty3-I Ga | 36.50 | 0.00 |
| TRINITY_sp P341 fhkC     | Probable serine/thr | 36.40 | 0.00 |
| TRINITY_sp Q9LZ INCS1    | Purine-uracil perme | 36.40 | 0.00 |
| TRINITY_sp Q7SY arl2bp   | ADP-ribosylation fa | 36.40 | 0.00 |
| TRINITY_sp Q9FW ABCB12   | ABC transporter B f | 36.40 | 0.00 |
| TRINITY_sp P117 (CYP3A6  | Cytochrome P450 3A6 | 36.40 | 0.00 |
| TRINITY_sp Q86H mrt4     | Ribosome assembly f | 36.40 | 0.00 |
| TRINITY_sp P086 R        | Ras-like protein 3  | 36.40 | 0.00 |
| TRINITY_sp Q99J Def8     | Differentially expr | 36.40 | 0.00 |
| TRINITY_sp Q9US snx12    | Sorting nexin-12 OS | 36.40 | 0.00 |
| TRINITY_sp Q0CH sec13    | Protein transport p | 36.40 | 0.00 |
| TRINITY_sp Q8BW Ip6k3    | Inositol hexakispho | 36.40 | 0.00 |
| TRINITY_sp Q55B ufd1     | Ubiquitin fusion de | 36.40 | 0.00 |
| TRINITY_sp Q9LX PAP20    | Probable purple aci | 36.40 | 0.00 |
| TRINITY_sp P007 PGA      | Pepsin A OS=Sus scr | 36.40 | 0.00 |
| TRINITY_sp Q5XI March7   | E3 ubiquitin-protei | 36.40 | 0.00 |
| TRINITY_sp A7SB ints9    | Integrator complex  | 36.40 | 0.00 |
| TRINITY_sp P005 Src64B   | Tyrosine-protein ki | 36.40 | 0.00 |
| TRINITY_sp O537 ufaA1    | Tuberculostearic ac | 36.40 | 0.00 |
| TRINITY_sp Q54U lvsC     | BEACH domain-contai | 36.40 | 0.00 |
| TRINITY_sp Q8WN ITPR3    | Inositol 1,4,5-tris | 36.40 | 0.00 |
| TRINITY_sp Q68W ubiE     | Ubiquinone/menaquin | 36.40 | 0.00 |
| TRINITY_sp P538 DUG3     | Probable glutamine  | 36.40 | 0.00 |
| TRINITY_sp Q8VY ESP3     | Pre-mRNA-splicing f | 36.40 | 0.00 |
| TRINITY_sp O745 (SPCC594 | Uncharacterized pro | 36.40 | 0.00 |
| TRINITY_sp Q084 CKA2     | Casein kinase II su | 36.40 | 0.00 |
| TRINITY_sp Q9VU Ran-like | GTP-binding nuclear | 36.40 | 0.00 |
| TRINITY_sp P470 VTC4     | Vacuolar transporte | 36.40 | 0.00 |
| TRINITY_sp P199 Rplp0    | 60S acidic ribosoma | 36.40 | 0.00 |
| TRINITY_sp Q3UJ Usp19    | Ubiquitin carboxyl- | 36.40 | 0.00 |
| TRINITY_sp O138 its3     | Phosphatidylinosito | 36.40 | 0.00 |
| TRINITY_sp Q6K4 Os09g03  | Aminopeptidase M1-D | 36.40 | 0.00 |
| TRINITY_sp B6IS tsf      | Elongation factor T | 36.40 | 0.00 |
| TRINITY_sp P341 racD     | Rho-related protein | 36.40 | 0.00 |
| TRINITY_sp P0C8 CCRP1    | Probable serine/thr | 36.40 | 0.00 |
| TRINITY_sp Q9EQ Enpp5    | Ectonucleotide pyro | 36.40 | 0.00 |
| TRINITY_sp F4HT CYP26-2  | Peptidyl-prolyl cis | 36.40 | 0.00 |
| TRINITY_sp Q051 (-       | Venom allergen 5 OS | 36.40 | 0.00 |
| TRINITY_sp Q76L rbm24    | RNA-binding protein | 36.40 | 0.00 |
| TRINITY_sp Q7XW Os04g02  | Probable cleavage a | 36.40 | 0.00 |
| TRINITY_sp Q32K DNAL4    | Dynein light chain  | 36.40 | 0.00 |

|                          |                      |       |      |
|--------------------------|----------------------|-------|------|
| TRINITY_sp Q7PC7PSD      | Exportin-T OS=Arabi  | 36.40 | 0.00 |
| TRINITY_sp O8051CYCU4-1  | Cyclin-U4-1 OS=Arab  | 36.40 | 0.00 |
| TRINITY_sp Q5A47SKN7     | Transcription facto  | 36.40 | 0.00 |
| TRINITY_sp Q9D18Cfap57   | Cilia- and flagella  | 36.40 | 0.00 |
| TRINITY_sp A1D37sds23    | Protein sds23 OS=Ne  | 36.40 | 0.00 |
| TRINITY_sp O7444sif2     | Sad1-interacting fa  | 36.40 | 0.00 |
| TRINITY_sp Q54N0cyb5r1   | NADH-cytochrome b5   | 36.40 | 0.00 |
| TRINITY_sp P4959ppm-2    | Probable protein ph  | 36.40 | 0.00 |
| TRINITY_sp Q5ZLH7MEM230  | Transmembrane prote  | 36.40 | 0.00 |
| TRINITY_sp G3X90Sipal13  | Signal-induced prol  | 36.40 | 0.00 |
| TRINITY_sp Q86H0cf45-1   | Counting factor 45-  | 36.40 | 0.00 |
| TRINITY_sp O3485ykfA     | Probable murein pep  | 36.40 | 0.00 |
| TRINITY_sp A0AU6wdsu1    | WD repeat, SAM and   | 36.40 | 0.00 |
| TRINITY_sp Q8CH0Tt115    | Tubulin polyglutamy  | 36.40 | 0.00 |
| TRINITY_sp Q0077cmkA     | Calcium/calmodulin-  | 36.40 | 0.00 |
| TRINITY_sp Q55F9dlpA     | Dynammin-like protei | 36.40 | 0.00 |
| TRINITY_sp O2290At2g3410 | Uncharacterized pro  | 36.40 | 0.00 |
| TRINITY_sp Q3SY0NOC2L    | Nucleolar complex p  | 36.40 | 0.00 |
| TRINITY_sp F4JL1IMPA2    | Importin subunit al  | 36.40 | 0.00 |
| TRINITY_sp P3410fhkC     | Probable serine/thr  | 36.40 | 0.00 |
| TRINITY_sp Q6PD1Ecm29    | Proteasome-associat  | 36.40 | 0.00 |
| TRINITY_sp Q0750YDL086W  | Putative carboxymet  | 36.40 | 0.00 |
| TRINITY_sp Q54R0DDB_G020 | Probable serine/thr  | 36.40 | 0.00 |
| TRINITY_sp Q6840RAP1GAP2 | Rap1 GTPase-activat  | 36.40 | 0.00 |
| TRINITY_sp Q86H0prodh    | Proline dehydrogena  | 36.40 | 0.00 |
| TRINITY_sp Q9Z30Itpr2    | Inositol 1,4,5-tris  | 36.40 | 0.00 |
| TRINITY_sp Q6160Cbx5     | Chromobox protein h  | 36.40 | 0.00 |
| TRINITY_sp Q7Z20EFL1     | Elongation factor-1  | 36.40 | 0.00 |
| TRINITY_sp B9FX0Os07g050 | Eukaryotic translat  | 36.40 | 0.00 |
| TRINITY_sp P5800CYP71B10 | Cytochrome P450 71B  | 36.40 | 0.00 |
| TRINITY_sp F4K00KIN4C    | Kinesin-like protei  | 36.40 | 0.00 |
| TRINITY_sp Q9N00EMOCOS   | Molybdenum cofactor  | 36.40 | 0.00 |
| TRINITY_sp F4I80ILA      | Protein ILITYHIA OS  | 36.40 | 0.00 |
| TRINITY_sp Q15K1PHYLLO   | Protein PHYLLO, chl  | 36.40 | 0.00 |
| TRINITY_sp P5830arcB     | Aerobic respiration  | 36.30 | 0.00 |
| TRINITY_sp Q6200CBG02880 | Mitoferrin OS=Caeno  | 36.30 | 0.00 |
| TRINITY_sp Q9LU0PAP28    | Probable inactive p  | 36.30 | 0.00 |
| TRINITY_sp Q6IN0flad1    | FAD synthase OS=Xen  | 36.30 | 0.00 |
| TRINITY_sp O4330MSI1     | RNA-binding protein  | 36.30 | 0.00 |
| TRINITY_sp P3520Rab17    | Ras-related protein  | 36.30 | 0.00 |
| TRINITY_sp Q54X0captB    | Uncharacterized CDP  | 36.30 | 0.00 |
| TRINITY_sp Q9V40Hcf      | Host cell factor OS  | 36.30 | 0.00 |
| TRINITY_sp Q9D20Polr3h   | DNA-directed RNA po  | 36.30 | 0.00 |
| TRINITY_sp Q9FK0THO3     | THO complex subunit  | 36.30 | 0.00 |
| TRINITY_sp Q9C90VHA-E2   | V-type proton ATPas  | 36.30 | 0.00 |
| TRINITY_sp Q8T60abcA7    | ABC transporter A f  | 36.30 | 0.00 |
| TRINITY_sp Q54S0dhkD     | Hybrid signal trans  | 36.30 | 0.00 |
| TRINITY_sp P9180Mo25     | Protein Mo25 OS=Dro  | 36.30 | 0.00 |
| TRINITY_sp P0440-        | Calmodulin OS=Triti  | 36.30 | 0.00 |
| TRINITY_sp O1570spnA     | Protein spalten OS=  | 36.30 | 0.00 |
| TRINITY_sp Q9ZQ0ACX1.2   | Putative peroxisoma  | 36.30 | 0.00 |
| TRINITY_sp O0440RABA2A   | Ras-related protein  | 36.30 | 0.00 |
| TRINITY_sp A6VX0rpsI     | 30S ribosomal prote  | 36.30 | 0.00 |
| TRINITY_sp Q8N50FAM63A   | Ubiquitin carboxyl-  | 36.30 | 0.00 |
| TRINITY_sp Q1050CPSF1    | Cleavage and polyad  | 36.30 | 0.00 |
| TRINITY_sp Q54H0ctxA     | Cortexillin-1 OS=Di  | 36.30 | 0.00 |

|                           |                     |       |      |
|---------------------------|---------------------|-------|------|
| TRINITY_sp Q6GR1maea      | Macrophage erythro  | 36.30 | 0.00 |
| TRINITY_sp P3018TOP2      | DNA topoisomerase 2 | 36.30 | 0.00 |
| TRINITY_sp Q86UYNAA40     | N-alpha-acetyltrans | 36.30 | 0.00 |
| TRINITY_sp Q86UCRSPH3     | Radial spoke head p | 36.30 | 0.00 |
| TRINITY_sp Q5ZLHSLC30A5   | Zinc transporter 5  | 36.30 | 0.00 |
| TRINITY_sp O356(Abca4     | Retinal-specific AT | 36.30 | 0.00 |
| TRINITY_sp Q86IGach       | Rho GTPase-activati | 36.30 | 0.00 |
| TRINITY_sp Q8N5IRPP25L    | Ribonuclease P prot | 36.30 | 0.00 |
| TRINITY_sp Q9C5UAK4       | Histidine kinase 4  | 36.30 | 0.00 |
| TRINITY_sp P2803AOAH      | Acyloxyacyl hydroly | 36.30 | 0.00 |
| TRINITY_sp Q9SG(RDR6      | RNA-dependent RNA p | 36.30 | 0.00 |
| TRINITY_sp Q1575HERC1     | Probable E3 ubiquit | 36.30 | 0.00 |
| TRINITY_sp Q9M72BCE2      | Lipoamide acyltrans | 36.30 | 0.00 |
| TRINITY_sp Q9ZSEUBP10     | Ubiquitin carboxyl- | 36.30 | 0.00 |
| TRINITY_sp Q7LHC(TY3B-I   | Transposon Ty3-I Ga | 36.30 | 0.00 |
| TRINITY_sp Q54C3folC      | Putative folylpolyg | 36.30 | 0.00 |
| TRINITY_sp Q9JJ5Abcb9     | ATP-binding cassett | 36.30 | 0.00 |
| TRINITY_sp Q9NX5KLHL28    | Kelch-like protein  | 36.30 | 0.00 |
| TRINITY_sp Q0GGVSTK11     | Serine/threonine-pr | 36.30 | 0.00 |
| TRINITY_sp B8AJ7MRS2-I    | Magnesium transport | 36.30 | 0.00 |
| TRINITY_sp P5467pike      | Phosphatidylinosito | 36.30 | 0.00 |
| TRINITY_sp Q7TQC(Plekha6  | Pleckstrin homology | 36.30 | 0.00 |
| TRINITY_sp O4297SPBC20F1  | Uncharacterized mem | 36.30 | 0.00 |
| TRINITY_sp Q9NJUCPK3      | Calcium-dependent p | 36.30 | 0.00 |
| TRINITY_sp O5006FIM2      | Fimbrin-2 OS=Arabid | 36.30 | 0.00 |
| TRINITY_sp Q6ZF2ADL1      | Calpain-type cystei | 36.30 | 0.00 |
| TRINITY_sp Q9M9URKD1      | Protein RKD1 OS=Ara | 36.30 | 0.00 |
| TRINITY_sp Q2005wdr-48    | WD repeat-containin | 36.30 | 0.00 |
| TRINITY_sp P1097-         | Retrovirus-related  | 36.30 | 0.00 |
| TRINITY_sp Q695UR0M1      | Rhomboid-like prote | 36.30 | 0.00 |
| TRINITY_sp A8MX3-         | Putative IQ motif a | 36.30 | 0.00 |
| TRINITY_sp Q9X24fabG      | 3-oxoacyl-[acyl-car | 36.30 | 0.00 |
| TRINITY_sp P2319Cbx3      | Chromobox protein h | 36.20 | 0.00 |
| TRINITY_sp Q9ZR7ABCB1     | ABC transporter B f | 36.20 | 0.00 |
| TRINITY_sp Q8C0(Trim35    | Tripartite motif-co | 36.20 | 0.00 |
| TRINITY_sp Q8BH8-         | UPF0317 protein C14 | 36.20 | 0.00 |
| TRINITY_sp Q1DN(CIMG_081  | Very-long-chain 3-o | 36.20 | 0.00 |
| TRINITY_sp Q54NIabcC9     | ABC transporter C f | 36.20 | 0.00 |
| TRINITY_sp Q9UTC(SPAC227. | Putative uridine ki | 36.20 | 0.00 |
| TRINITY_sp O7044Syn3      | Synapsin-3 OS=Rattu | 36.20 | 0.00 |
| TRINITY_sp Q0VD1SMPD1     | Sphingomyelin phosp | 36.20 | 0.00 |
| TRINITY_sp Q5F46(SLC38A2  | Sodium-coupled neut | 36.20 | 0.00 |
| TRINITY_sp Q8S17Os01g092  | Probable glucuronos | 36.20 | 0.00 |
| TRINITY_sp Q5T5(ARHGAP21  | Rho GTPase-activati | 36.20 | 0.00 |
| TRINITY_sp P4859eIF-4E    | Eukaryotic translat | 36.20 | 0.00 |
| TRINITY_sp Q5XG5gtppb1    | GTP-binding protein | 36.20 | 0.00 |
| TRINITY_sp Q9NV1FANCI     | Fanconi anemia grou | 36.20 | 0.00 |
| TRINITY_sp Q6Q4(LVRN      | Aminopeptidase Q OS | 36.20 | 0.00 |
| TRINITY_sp Q8BJ3Marf1     | Meiosis arrest fema | 36.20 | 0.00 |
| TRINITY_sp Q5591s110286   | Uncharacterized N-a | 36.20 | 0.00 |
| TRINITY_sp Q8L64BB        | E3 ubiquitin ligase | 36.20 | 0.00 |
| TRINITY_sp O5995LIP       | Lipase OS=Thermomyc | 36.20 | 0.00 |
| TRINITY_sp Q9NI6Myt1      | Membrane-associated | 36.20 | 0.00 |
| TRINITY_sp Q8HYIACOX1     | Peroxisomal acyl-co | 36.20 | 0.00 |
| TRINITY_sp Q8T6(abcA7     | ABC transporter A f | 36.20 | 0.00 |
| TRINITY_sp P6234CPK1      | Calcium-dependent p | 36.20 | 0.00 |

|                          |                     |       |      |
|--------------------------|---------------------|-------|------|
| TRINITY_sp P1346abpC     | Gelation factor OS= | 36.20 | 0.00 |
| TRINITY_sp A4W46pnp      | Polyribonucleotide  | 36.20 | 0.00 |
| TRINITY_sp Q9C76AERO1    | Endoplasmic reticul | 36.20 | 0.00 |
| TRINITY_sp Q54I6smt1     | Probable cycloarten | 36.20 | 0.00 |
| TRINITY_sp Q5586pcyA     | Phycocyanobilin:fer | 36.20 | 0.00 |
| TRINITY_sp P3754yabD     | Uncharacterized met | 36.20 | 0.00 |
| TRINITY_sp P1107ARF1     | ADP-ribosylation fa | 36.20 | 0.00 |
| TRINITY_sp Q9UK6NOCT     | Nocturnin OS=Homo s | 36.20 | 0.00 |
| TRINITY_sp Q54S6gbpD     | Cyclic GMP-binding  | 36.20 | 0.00 |
| TRINITY_sp F4IRVATG1C    | Serine/threonine-pr | 36.20 | 0.00 |
| TRINITY_sp P9817RBM10    | RNA-binding protein | 36.20 | 0.00 |
| TRINITY_sp Q54I6shkB     | Dual specificity pr | 36.20 | 0.00 |
| TRINITY_sp Q9P76qcr1     | Probable mitochondr | 36.20 | 0.00 |
| TRINITY_sp P3556CLNS1A   | Methylosome subunit | 36.20 | 0.00 |
| TRINITY_sp P5566NGR_a016 | Uncharacterized pep | 36.20 | 0.00 |
| TRINITY_sp A2Y86PRMT7    | Protein arginine N- | 36.20 | 0.00 |
| TRINITY_sp D3YY6Lonrf1   | LON peptidase N-ter | 36.20 | 0.00 |
| TRINITY_sp Q8CD6Vcpip1   | Deubiquitinating pr | 36.20 | 0.00 |
| TRINITY_sp Q93Z6SPPL1    | Signal peptide pept | 36.20 | 0.00 |
| TRINITY_sp A1L16lox12b   | Lysyl oxidase homol | 36.20 | 0.00 |
| TRINITY_sp Q9DG6RAD54B   | DNA repair and reco | 36.20 | 0.00 |
| TRINITY_sp Q8696cpv1     | Probable serine car | 36.20 | 0.00 |
| TRINITY_sp Q8LE6ABCI11   | ABC transporter I f | 36.20 | 0.00 |
| TRINITY_sp Q5TR6AGAP0057 | ATPase ASNA1 homolo | 36.20 | 0.00 |
| TRINITY_sp Q55E6mcfE     | Mitochondrial subst | 36.20 | 0.00 |
| TRINITY_sp Q9FG6SNX1     | Sorting nexin 1 OS= | 36.20 | 0.00 |
| TRINITY_sp Q6RU6Ptx4     | Pentraxin-4 OS=Mus  | 36.20 | 0.00 |
| TRINITY_sp Q66H6Ankzf1   | Ankyrin repeat and  | 36.20 | 0.00 |
| TRINITY_sp Q9Z16ACOX1    | Peroxisomal acyl-co | 36.20 | 0.00 |
| TRINITY_sp O8246MTA      | N6-adenosine-methyl | 36.20 | 0.00 |
| TRINITY_sp E1C16FUSP47   | Ubiquitin carboxyl- | 36.20 | 0.00 |
| TRINITY_sp Q9P26SIPA1L2  | Signal-induced prol | 36.20 | 0.00 |
| TRINITY_sp P3856TTL      | Tubulin--tyrosine l | 36.20 | 0.00 |
| TRINITY_sp P0056Ab11     | Tyrosine-protein ki | 36.20 | 0.00 |
| TRINITY_sp P1096-        | Retrovirus-related  | 36.20 | 0.00 |
| TRINITY_sp A5D76CDC25C   | M-phase inducer pho | 36.20 | 0.00 |
| TRINITY_sp P0436pol      | Retrovirus-related  | 36.20 | 0.00 |
| TRINITY_sp Q8NE6ABCF1    | ATP-binding cassett | 36.20 | 0.00 |
| TRINITY_sp Q6416Hexa     | Beta-hexosaminidase | 36.20 | 0.00 |
| TRINITY_sp Q9D86Tmem41a  | Transmembrane prote | 36.20 | 0.00 |
| TRINITY_sp Q9UK6PARP4    | Poly [ADP-ribose] p | 36.20 | 0.00 |
| TRINITY_sp Q54R6dhkL     | Hybrid signal trans | 36.20 | 0.00 |
| TRINITY_sp Q9SZ6SAP7     | Zinc finger A20 and | 36.20 | 0.00 |
| TRINITY_sp Q8R76prs      | Ribose-phosphate py | 36.10 | 0.00 |
| TRINITY_sp O0486-        | Alpha-glucosidase O | 36.10 | 0.00 |
| TRINITY_sp Q9LT6VALIS1   | ALA-interacting sub | 36.10 | 0.00 |
| TRINITY_sp Q9H86RMND5A   | Protein RMD5 homolo | 36.10 | 0.00 |
| TRINITY_sp Q8TD6NEK9     | Serine/threonine-pr | 36.10 | 0.00 |
| TRINITY_sp Q9VY6Upf1     | Regulator of nonsen | 36.10 | 0.00 |
| TRINITY_sp Q54Y6dhkB     | Hybrid signal trans | 36.10 | 0.00 |
| TRINITY_sp Q5506rab11C   | Ras-related protein | 36.10 | 0.00 |
| TRINITY_sp O6216tag-175  | Transmembrane prote | 36.10 | 0.00 |
| TRINITY_sp Q8S96ATG8E    | Autophagy-related p | 36.10 | 0.00 |
| TRINITY_sp O7486esf1     | Pre-rRNA-processing | 36.10 | 0.00 |
| TRINITY_sp Q5R96ZFAND2A  | AN1-type zinc finge | 36.10 | 0.00 |
| TRINITY_sp G4RK6tpsp     | Bifunctional trehal | 36.10 | 0.00 |

|                           |                     |       |      |
|---------------------------|---------------------|-------|------|
| TRINITY_sp Q8K0C(Eipr1    | Protein TSSC1 OS=Mu | 36.10 | 0.00 |
| TRINITY_sp P3424(HCS1     | DNA polymerase alph | 36.10 | 0.00 |
| TRINITY_sp Q8ICFCPK2      | Calcium-dependent p | 36.10 | 0.00 |
| TRINITY_sp O0833(cypB     | Bifunctional cytoch | 36.10 | 0.00 |
| TRINITY_sp P7022(Itpr3    | Inositol 1,4,5-tris | 36.10 | 0.00 |
| TRINITY_sp P0387(AI2      | Putative COX1/OXI3  | 36.10 | 0.00 |
| TRINITY_sp Q9SH8(At2g3799 | Ribosome biogenesis | 36.10 | 0.00 |
| TRINITY_sp P0505(alkB     | Alpha-ketoglutarate | 36.10 | 0.00 |
| TRINITY_sp Q8T19(omt3     | O-methyltransferase | 36.10 | 0.00 |
| TRINITY_sp Q8L85(PIP5K9   | Phosphatidylinosito | 36.10 | 0.00 |
| TRINITY_sp Q0562(Cbei_020 | Uncharacterized pro | 36.10 | 0.00 |
| TRINITY_sp B4NP(CIntS3    | Integrator complex  | 36.10 | 0.00 |
| TRINITY_sp Q8H66(PHT1-6   | Inorganic phosphate | 36.10 | 0.00 |
| TRINITY_sp Q3SZ(NSFL1C    | NSFL1 cofactor p47  | 36.10 | 0.00 |
| TRINITY_sp Q9BW(TPPP3     | Tubulin polymerizat | 36.10 | 0.00 |
| TRINITY_sp Q8VC(Plbd1     | Phospholipase B-lik | 36.10 | 0.00 |
| TRINITY_sp Q9LS2(GTE12    | Transcription facto | 36.10 | 0.00 |
| TRINITY_sp Q9Y3(ACOT9     | Acyl-coenzyme A thi | 36.10 | 0.00 |
| TRINITY_sp Q9SZ(FABCG9    | ABC transporter G f | 36.10 | 0.00 |
| TRINITY_sp Q9HF(B2J23.07  | Acyl-protein thioes | 36.10 | 0.00 |
| TRINITY_sp D4AYVARB_0137  | ABC transporter G f | 36.10 | 0.00 |
| TRINITY_sp Q9SF(OST1A     | Dolichyl-diphosphoo | 36.10 | 0.00 |
| TRINITY_sp O6055(EIF4E2   | Eukaryotic translat | 36.10 | 0.00 |
| TRINITY_sp Q54R(pyk       | Pyruvate kinase OS= | 36.10 | 0.00 |
| TRINITY_sp Q687(Enpp      | Nucleotide pyrophos | 36.10 | 0.00 |
| TRINITY_sp Q8631(OXSR1    | Serine/threonine-pr | 36.10 | 0.00 |
| TRINITY_sp Q067(CSR1      | Phosphatidylinosito | 36.10 | 0.00 |
| TRINITY_sp Q9M9(URKD1     | Protein RKD1 OS=Ara | 36.10 | 0.00 |
| TRINITY_sp Q8CI(Cog3      | Conserved oligomeri | 36.10 | 0.00 |
| TRINITY_sp Q8GY(MND1      | Meiotic nuclear div | 36.10 | 0.00 |
| TRINITY_sp Q928(ERCC4     | DNA repair endonucl | 36.10 | 0.00 |
| TRINITY_sp Q55E2(gxcB     | Rac guanine nucleot | 36.10 | 0.00 |
| TRINITY_sp Q54J(FabcC3    | ABC transporter C f | 36.10 | 0.00 |
| TRINITY_sp P7852(ST5      | Suppression of tumo | 36.10 | 0.00 |
| TRINITY_sp Q7DM(FPAS1     | Peptidyl-prolyl cis | 36.10 | 0.00 |
| TRINITY_sp A0RUM(tuf      | Elongation factor 1 | 36.10 | 0.00 |
| TRINITY_sp Q86C(tor       | Target of rapamycin | 36.10 | 0.00 |
| TRINITY_sp Q86G4(gefQ     | Ras guanine nucleot | 36.10 | 0.00 |
| TRINITY_sp P5481(mspn-1   | Mitochondrial sorti | 36.10 | 0.00 |
| TRINITY_sp O5031(bchH     | Magnesium-chelatase | 36.10 | 0.00 |
| TRINITY_sp O1586(CPK2     | Calcium-dependent p | 36.10 | 0.00 |
| TRINITY_sp Q390(AATP1     | ADP,ATP carrier pro | 36.10 | 0.00 |
| TRINITY_sp O2885(AF_1420  | Uncharacterized pro | 36.10 | 0.00 |
| TRINITY_sp Q7LH(CTY3B-I   | Transposon Ty3-I Ga | 36.10 | 0.00 |
| TRINITY_sp Q8L64(BB       | E3 ubiquitin ligase | 36.10 | 0.00 |
| TRINITY_sp Q6GP(rnf181    | E3 ubiquitin-protei | 36.00 | 0.00 |
| TRINITY_sp Q6NM(At5g4592  | GDSL esterase/lipas | 36.00 | 0.00 |
| TRINITY_sp P3412(coaA     | Coactosin OS=Dictyo | 36.00 | 0.00 |
| TRINITY_sp Q949(FLIGB     | Extradiol ring-clea | 36.00 | 0.00 |
| TRINITY_sp Q930(USP9X     | Probable ubiquitin  | 36.00 | 0.00 |
| TRINITY_sp Q54S1(pex10    | Peroxisome biogenes | 36.00 | 0.00 |
| TRINITY_sp Q0WPF(SCPL34   | Serine carboxypepti | 36.00 | 0.00 |
| TRINITY_sp Q8J1(KIP1      | Kinesin-like protei | 36.00 | 0.00 |
| TRINITY_sp Q8VZ(ISWC4     | SWR1-complex protei | 36.00 | 0.00 |
| TRINITY_sp Q9C5(AHK4      | Histidine kinase 4  | 36.00 | 0.00 |
| TRINITY_sp Q941(FGONST1   | GDP-mannose transpo | 36.00 | 0.00 |

|                            |                     |       |      |
|----------------------------|---------------------|-------|------|
| TRINITY_sp Q54PflvsF       | BEACH domain-contai | 36.00 | 0.00 |
| TRINITY_sp Q32Ncrnf10      | RING finger protein | 36.00 | 0.00 |
| TRINITY_sp Q1RM3cfap36     | Cilia- and flagella | 36.00 | 0.00 |
| TRINITY_sp Q6CRrRI1        | COP9 signalosome co | 36.00 | 0.00 |
| TRINITY_sp P4919elo-3      | Putative fatty acid | 36.00 | 0.00 |
| TRINITY_sp Q9SIUPPC3-1.2   | Probable protein ph | 36.00 | 0.00 |
| TRINITY_sp P7317sll1290    | Uncharacterized rib | 36.00 | 0.00 |
| TRINITY_sp Q0896LEA1       | U2 small nuclear ri | 36.00 | 0.00 |
| TRINITY_sp Q9DC5Cpne8      | Copine-8 OS=Mus mus | 36.00 | 0.00 |
| TRINITY_sp Q9XA1SCO3848    | Probable serine/thr | 36.00 | 0.00 |
| TRINITY_sp P3416fhkC       | Probable serine/thr | 36.00 | 0.00 |
| TRINITY_sp Q54DFDDB_G029   | Probable serine/thr | 36.00 | 0.00 |
| TRINITY_sp Q9FP9UBP24      | Ubiquitin carboxyl- | 36.00 | 0.00 |
| TRINITY_sp Q9GZ7NIF3L1     | NIF3-like protein 1 | 36.00 | 0.00 |
| TRINITY_sp P0C8MCCRP1      | Probable serine/thr | 36.00 | 0.00 |
| TRINITY_sp F4JBRBL4        | RHOMBOID-like prote | 36.00 | 0.00 |
| TRINITY_sp Q55C9tnpo       | Transportin OS=Dict | 36.00 | 0.00 |
| TRINITY_sp Q810\mphosph1U3 | small nucleolar     | 36.00 | 0.00 |
| TRINITY_sp A1ZA1CG5065     | Putative fatty acyl | 36.00 | 0.00 |
| TRINITY_sp Q2778PYK        | Pyruvate kinase OS= | 36.00 | 0.00 |
| TRINITY_sp O9416SNF1       | Carbon catabolite-d | 36.00 | 0.00 |
| TRINITY_sp Q9JM7Arpc3      | Actin-related prote | 36.00 | 0.00 |
| TRINITY_sp O009(-          | Lysosomal acid alph | 36.00 | 0.00 |
| TRINITY_sp O7418pop3       | Target of rapamycin | 36.00 | 0.00 |
| TRINITY_sp Q75IIKU80       | ATP-dependent DNA h | 36.00 | 0.00 |
| TRINITY_sp P9376(-         | Acid beta-fructofur | 36.00 | 0.00 |
| TRINITY_sp Q9931TY3B-G     | Transposon Ty3-G Ga | 36.00 | 0.00 |
| TRINITY_sp A2Z9VMRS2-G     | Putative magnesium  | 36.00 | 0.00 |
| TRINITY_sp O8856Pde8a      | High affinity cAMP- | 36.00 | 0.00 |
| TRINITY_sp Q54FCgacJJ      | Rho GTPase-activati | 36.00 | 0.00 |
| TRINITY_sp P6187(-         | Lipase OS=Rhizopus  | 36.00 | 0.00 |
| TRINITY_sp Q2368gcy-5      | Receptor-type guany | 36.00 | 0.00 |
| TRINITY_sp O7456SPCC594    | Uncharacterized pro | 36.00 | 0.00 |
| TRINITY_sp P3519GCS1       | ADP-ribosylation fa | 36.00 | 0.00 |
| TRINITY_sp Q9SJ4VPS11      | Vacuolar protein-so | 36.00 | 0.00 |
| TRINITY_sp P2622cenB       | Endoglucanase B OS= | 36.00 | 0.00 |
| TRINITY_sp P8042t1p        | Trypsin-like protea | 36.00 | 0.00 |
| TRINITY_sp O0262aex-3      | MAP kinase-activati | 36.00 | 0.00 |
| TRINITY_sp Q9446dymA       | Dynamin-A OS=Dictyo | 36.00 | 0.00 |
| TRINITY_sp Q0WUFFAB1A      | 1-phosphatidylinosi | 36.00 | 0.00 |
| TRINITY_sp P4221RAP        | Aspartic proteinase | 36.00 | 0.00 |
| TRINITY_sp P1376HMGCS1     | Hydroxymethylglutar | 36.00 | 0.00 |
| TRINITY_sp Q2HJEUSP15      | Ubiquitin carboxyl- | 36.00 | 0.00 |
| TRINITY_sp P6175Vbp1       | Prefoldin subunit 3 | 36.00 | 0.00 |
| TRINITY_sp Q9LX7CAL3       | Callose synthase 3  | 36.00 | 0.00 |
| TRINITY_sp F4JTI8STY46     | Serine/threonine-pr | 36.00 | 0.00 |
| TRINITY_sp P0509abpA       | Alpha-actinin A OS= | 36.00 | 0.00 |
| TRINITY_sp Q9SH3HMA5       | Probable copper-tra | 36.00 | 0.00 |
| TRINITY_sp Q8VZIEEDR2L     | Protein ENHANCED DI | 36.00 | 0.00 |
| TRINITY_sp O4604Parg       | Poly(ADP-ribose) gl | 36.00 | 0.00 |
| TRINITY_sp O2124CTAG       | Cytochrome c oxidas | 36.00 | 0.00 |
| TRINITY_sp P4035NTA1       | Protein N-terminal  | 35.90 | 0.00 |
| TRINITY_sp Q5SUFpfas       | Phosphoribosylformy | 35.90 | 0.00 |
| TRINITY_sp Q54KHDDDB_G028  | Uncharacterized pro | 35.90 | 0.00 |
| TRINITY_sp P5164arf4       | ADP-ribosylation fa | 35.90 | 0.00 |
| TRINITY_sp P0CH3adhcl      | NADP-dependent alco | 35.90 | 0.00 |

|                          |                     |       |      |
|--------------------------|---------------------|-------|------|
| TRINITY_sp Q1968F21D5.5  | Uncharacterized pro | 35.90 | 0.00 |
| TRINITY_sp Q68F3vac14    | Protein VAC14 homol | 35.90 | 0.00 |
| TRINITY_sp O6464URT1     | UTP:RNA uridylyltra | 35.90 | 0.00 |
| TRINITY_sp Q9D88Arfgap3  | ADP-ribosylation fa | 35.90 | 0.00 |
| TRINITY_sp O642010       | Endolysin A OS=Myco | 35.90 | 0.00 |
| TRINITY_sp Q3V0FPls1     | Plastin-1 OS=Mus mu | 35.90 | 0.00 |
| TRINITY_sp Q550FctxB     | Cortexillin-2 OS=Di | 35.90 | 0.00 |
| TRINITY_sp Q5ZL(GOLGA7   | Golgin subfamily A  | 35.90 | 0.00 |
| TRINITY_sp Q227(sym-2    | RNA-binding protein | 35.90 | 0.00 |
| TRINITY_sp Q54Q(dhkG     | Hybrid signal trans | 35.90 | 0.00 |
| TRINITY_sp Q8H4(Os07g056 | Probable protein ph | 35.90 | 0.00 |
| TRINITY_sp Q8T2(DDB_G027 | Probable GH family  | 35.90 | 0.00 |
| TRINITY_sp Q294(LIPF     | Gastric triacylglyc | 35.90 | 0.00 |
| TRINITY_sp Q0V9(eiflad   | Probable RNA-bindin | 35.90 | 0.00 |
| TRINITY_sp P435(AGX1     | Alanine--glyoxylate | 35.90 | 0.00 |
| TRINITY_sp P0CC(DDB_G028 | Enolase superfamily | 35.90 | 0.00 |
| TRINITY_sp O229(VSR2     | Vacuolar-sorting re | 35.90 | 0.00 |
| TRINITY_sp O944(bdp1     | Transcription facto | 35.90 | 0.00 |
| TRINITY_sp O597(iki3     | Elongator complex p | 35.90 | 0.00 |
| TRINITY_sp Q8WTFDUSP19   | Dual specificity pr | 35.90 | 0.00 |
| TRINITY_sp Q8H1(ITDP1    | Tyrosyl-DNA phospho | 35.90 | 0.00 |
| TRINITY_sp Q8IC(CPK2     | Calcium-dependent p | 35.90 | 0.00 |
| TRINITY_sp Q8CB(Wdr37    | WD repeat-containin | 35.90 | 0.00 |
| TRINITY_sp Q9WU(Pus1     | tRNA pseudouridine  | 35.90 | 0.00 |
| TRINITY_sp O885(Cops4    | COP9 signalosome co | 35.90 | 0.00 |
| TRINITY_sp Q54R(pyk      | Pyruvate kinase OS= | 35.90 | 0.00 |
| TRINITY_sp A6WS(Shew185  | Non-canonical purin | 35.90 | 0.00 |
| TRINITY_sp O756(NUP155   | Nuclear pore comple | 35.90 | 0.00 |
| TRINITY_sp Q5BJ(Prune2   | Protein prune homol | 35.90 | 0.00 |
| TRINITY_sp Q0V8(MKRI1    | Protein KRI1 homolo | 35.90 | 0.00 |
| TRINITY_sp Q9ZW(PrN2     | Pirin-like protein  | 35.90 | 0.00 |
| TRINITY_sp Q9VB(Clbn     | Nuclear export medi | 35.90 | 0.00 |
| TRINITY_sp Q9ZR(MLH1     | DNA mismatch repair | 35.90 | 0.00 |
| TRINITY_sp Q8IC(CPK2     | Calcium-dependent p | 35.90 | 0.00 |
| TRINITY_sp Q9SA(PGK3     | Phosphoglycerate ki | 35.90 | 0.00 |
| TRINITY_sp Q0WQ(VPS53    | Vacuolar protein so | 35.90 | 0.00 |
| TRINITY_sp O887(Birc6    | Baculoviral IAP rep | 35.90 | 0.00 |
| TRINITY_sp Q4DJ(Tc00.104 | Prostaglandin F syn | 35.90 | 0.00 |
| TRINITY_sp O041(RABG3B   | Ras-related protein | 35.90 | 0.00 |
| TRINITY_sp Q4Z8(RanBPM   | Ran-binding protein | 35.90 | 0.00 |
| TRINITY_sp Q9FH(DTX16    | Protein DETOXIFICAT | 35.90 | 0.00 |
| TRINITY_sp Q1ZX(fcsB     | Fatty acyl-CoA synt | 35.90 | 0.00 |
| TRINITY_sp Q8C0(Efl1     | Elongation factor-1 | 35.90 | 0.00 |
| TRINITY_sp P437(polA     | DNA polymerase I OS | 35.90 | 0.00 |
| TRINITY_sp Q5VQ(PPT3     | Phosphoenolpyruvate | 35.90 | 0.00 |
| TRINITY_sp Q641(ncaph2   | Condensin-2 complex | 35.90 | 0.00 |
| TRINITY_sp Q55G(mcft     | Probable mitochondr | 35.90 | 0.00 |
| TRINITY_sp Q9FX(PEX14    | Peroxisomal membran | 35.90 | 0.00 |
| TRINITY_sp Q7S1(apg-12   | Sterol 3-beta-gluco | 35.90 | 0.00 |
| TRINITY_sp Q6DF(ppp4r3b  | Serine/threonine-pr | 35.90 | 0.00 |
| TRINITY_sp Q5VY(ECM29    | Proteasome-associat | 35.90 | 0.00 |
| TRINITY_sp P128(AMO      | Peroxisomal primary | 35.90 | 0.00 |
| TRINITY_sp Q925(Slc8b1   | Sodium/potassium/ca | 35.90 | 0.00 |
| TRINITY_sp O186(pde-1    | Probable 3',5'-cycl | 35.90 | 0.00 |
| TRINITY_sp A6QQ(VPS51    | Vacuolar protein so | 35.90 | 0.00 |
| TRINITY_sp Q9UR(Tf2-11   | Transposon Tf2-11 p | 35.80 | 0.00 |

|                          |                     |       |      |
|--------------------------|---------------------|-------|------|
| TRINITY_sp Q9K7\BH3256   | Probable non-canoni | 35.80 | 0.00 |
| TRINITY_sp F4IN\GGP4     | Gamma-glutamyl pept | 35.80 | 0.00 |
| TRINITY_sp Q097\SPBC12C2 | Uncharacterized pro | 35.80 | 0.00 |
| TRINITY_sp O137\sgt2     | Small glutamine-ric | 35.80 | 0.00 |
| TRINITY_sp Q9FW\GAMMACA1 | Gamma carbonic anhy | 35.80 | 0.00 |
| TRINITY_sp Q4PC\FSEC13   | Protein transport p | 35.80 | 0.00 |
| TRINITY_sp Q54P\osbI     | Oxysterol-binding p | 35.80 | 0.00 |
| TRINITY_sp Q9HU\laruS    | Sensor histidine ki | 35.80 | 0.00 |
| TRINITY_sp Q9GQ\XNP      | Transcriptional reg | 35.80 | 0.00 |
| TRINITY_sp Q55E\late1    | Arginyl-tRNA--prote | 35.80 | 0.00 |
| TRINITY_sp Q54K\ccbl     | Kynurenine--oxoglut | 35.80 | 0.00 |
| TRINITY_sp Q9R0\Fhl3     | Four and a half LIM | 35.80 | 0.00 |
| TRINITY_sp Q1PF\EDA2     | Probable serine pro | 35.80 | 0.00 |
| TRINITY_sp Q8T6\abcA7    | ABC transporter A f | 35.80 | 0.00 |
| TRINITY_sp Q5XH\march8   | E3 ubiquitin-protei | 35.80 | 0.00 |
| TRINITY_sp Q0DL\Os05g011 | DEAD-box ATP-depend | 35.80 | 0.00 |
| TRINITY_sp Q9NP\PNPLA8   | Calcium-independent | 35.80 | 0.00 |
| TRINITY_sp P050\alkB     | Alpha-ketoglutarate | 35.80 | 0.00 |
| TRINITY_sp Q9SI\At2g4029 | Eukaryotic translat | 35.80 | 0.00 |
| TRINITY_sp Q5UP\MIMI_R61 | Putative band 7 fam | 35.80 | 0.00 |
| TRINITY_sp Q5PP\zc2hc1a  | Zinc finger C2HC do | 35.80 | 0.00 |
| TRINITY_sp P046\Lipf     | Gastric triacylglyc | 35.80 | 0.00 |
| TRINITY_sp Q9LQ\VRDR1    | RNA-dependent RNA p | 35.80 | 0.00 |
| TRINITY_sp Q9FM\FAP29    | Probable inactive p | 35.80 | 0.00 |
| TRINITY_sp O027\PARG     | Poly(ADP-ribose) gl | 35.80 | 0.00 |
| TRINITY_sp P333\SKN1     | Beta-glucan synthes | 35.80 | 0.00 |
| TRINITY_sp Q54G\ctdsp12  | CTD small phosphata | 35.80 | 0.00 |
| TRINITY_sp Q926\TBC1D5   | TBC1 domain family  | 35.80 | 0.00 |
| TRINITY_sp P0A3\ultra    | Group II intron-enc | 35.80 | 0.00 |
| TRINITY_sp P054\petA     | Ubiquinol-cytochrom | 35.80 | 0.00 |
| TRINITY_sp Q9KA\frf      | Ribosome-recycling  | 35.80 | 0.00 |
| TRINITY_sp C4L9\mutL     | DNA mismatch repair | 35.80 | 0.00 |
| TRINITY_sp O806\SUC3     | Sucrose transport p | 35.80 | 0.00 |
| TRINITY_sp Q9D9\Efhc1    | EF-hand domain-cont | 35.80 | 0.00 |
| TRINITY_sp O601\SPBC19F5 | Uncharacterized pro | 35.80 | 0.00 |
| TRINITY_sp P379\yusZ     | Uncharacterized oxi | 35.80 | 0.00 |
| TRINITY_sp O763\abpD     | Interaptin OS=Dicty | 35.80 | 0.00 |
| TRINITY_sp P222\RAS1     | Ras-like protein 1  | 35.80 | 0.00 |
| TRINITY_sp Q5PP\At2g3543 | Zinc finger CCCH do | 35.80 | 0.00 |
| TRINITY_sp Q8DJ\GrpE     | Protein GrpE OS=The | 35.80 | 0.00 |
| TRINITY_sp Q9FL\FKBP15-3 | Peptidyl-prolyl cis | 35.80 | 0.00 |
| TRINITY_sp A3D0\crihA    | Pyrimidine-specific | 35.80 | 0.00 |
| TRINITY_sp Q7XU\CCD7     | Carotenoid cleavage | 35.80 | 0.00 |
| TRINITY_sp Q9SS\JMJ25    | Lysine-specific dem | 35.80 | 0.00 |
| TRINITY_sp B4ND\GK24923  | Regulator of telome | 35.80 | 0.00 |
| TRINITY_sp B0W2\CPIJ0014 | Clustered mitochond | 35.80 | 0.00 |
| TRINITY_sp P214\ABCB1    | Multidrug resistanc | 35.80 | 0.00 |
| TRINITY_sp B8AE\OsI_0778 | NAP1-related protei | 35.80 | 0.00 |



|                          |                     |       |      |
|--------------------------|---------------------|-------|------|
| TRINITY_sp Q8TC1RDH11    | Retinol dehydrogena | 35.80 | 0.00 |
| TRINITY_sp P1606-        | Speract receptor OS | 35.80 | 0.00 |
| TRINITY_sp F4JTIISTY46   | Serine/threonine-pr | 35.80 | 0.00 |
| TRINITY_sp Q8MMIvath     | V-type proton ATPas | 35.80 | 0.00 |
| TRINITY_sp P1995PSRP1    | Ribosome-binding fa | 35.80 | 0.00 |
| TRINITY_sp P2786yigZ     | IMPACT family membe | 35.80 | 0.00 |
| TRINITY_sp Q9LJIM3KE1    | MAP3K epsilon prote | 35.80 | 0.00 |
| TRINITY_sp Q7NBVdnaJ     | Chaperone protein D | 35.80 | 0.00 |
| TRINITY_sp Q75ENRAD18    | Postreplication rep | 35.80 | 0.00 |
| TRINITY_sp Q9FIVDEGP10   | Protease Do-like 10 | 35.80 | 0.00 |
| TRINITY_sp F4HYCIRE3     | Probable serine/thr | 35.80 | 0.00 |
| TRINITY_sp Q9GKYGALM     | Aldose 1-epimerase  | 35.80 | 0.00 |
| TRINITY_sp A0FGFESYT3    | Extended synaptotag | 35.80 | 0.00 |
| TRINITY_sp P5475PDE1A    | Calcium/calmodulin- | 35.80 | 0.00 |
| TRINITY_sp Q1101pepN     | Aminopeptidase N OS | 35.80 | 0.00 |
| TRINITY_sp Q4209ABCC2    | ABC transporter C f | 35.80 | 0.00 |
| TRINITY_sp Q7TP9Rps6ka6  | Ribosomal protein S | 35.80 | 0.00 |
| TRINITY_sp Q9VJ3Nedd8    | NEDD8 OS=Drosophila | 35.80 | 0.00 |
| TRINITY_sp Q32L5GRINA    | Protein lifeguard 1 | 35.80 | 0.00 |
| TRINITY_sp P4802gacS     | Sensor protein GacS | 35.80 | 0.00 |
| TRINITY_sp Q9FPFIEDR1    | Serine/threonine-pr | 35.70 | 0.00 |
| TRINITY_sp Q8K93dnaJ     | Chaperone protein D | 35.70 | 0.00 |
| TRINITY_sp Q9LSIARP2     | Actin-related prote | 35.70 | 0.00 |
| TRINITY_sp Q9SF9RABE1E   | Ras-related protein | 35.70 | 0.00 |
| TRINITY_sp Q9LE8IRE      | Probable serine/thr | 35.70 | 0.00 |
| TRINITY_sp Q1824rap-1    | Ras-related protein | 35.70 | 0.00 |
| TRINITY_sp Q6C61YALIOE09 | Solute carrier fami | 35.70 | 0.00 |
| TRINITY_sp Q9CA9BAC2     | Mitochondrial argin | 35.70 | 0.00 |
| TRINITY_sp Q86AIDDB_G027 | Probable myosin lig | 35.70 | 0.00 |
| TRINITY_sp Q55E4dhkE     | Hybrid signal trans | 35.70 | 0.00 |
| TRINITY_sp Q94AFCUL1     | Cullin-1 OS=Arabido | 35.70 | 0.00 |
| TRINITY_sp P3132PKAR     | cAMP-dependent prot | 35.70 | 0.00 |
| TRINITY_sp Q55A(DDB_G027 | Probable serine/thr | 35.70 | 0.00 |
| TRINITY_sp Q55F7abiA     | Abl interactor homo | 35.70 | 0.00 |
| TRINITY_sp Q0252Mgat3    | Beta-1,4-mannosyl-g | 35.70 | 0.00 |
| TRINITY_sp Q9LDFEK       | Delta(14)-sterol re | 35.70 | 0.00 |
| TRINITY_sp P2126CCA1     | CCA tRNA nucleotidy | 35.70 | 0.00 |
| TRINITY_sp Q9LK4TMK4     | Receptor-like kinas | 35.70 | 0.00 |
| TRINITY_sp O5317Rv2449c  | Putative trans-acti | 35.70 | 0.00 |
| TRINITY_sp Q8N35SLC35F6  | Solute carrier fami | 35.70 | 0.00 |
| TRINITY_sp P5467patA     | Calcium-transportin | 35.70 | 0.00 |
| TRINITY_sp Q7ZXInle1     | Notchless protein h | 35.70 | 0.00 |
| TRINITY_sp Q54P9gefA     | Ras guanine nucleot | 35.70 | 0.00 |
| TRINITY_sp Q6Z8F0s02g022 | Probable protein ph | 35.70 | 0.00 |
| TRINITY_sp Q8VZFRAP      | RAP domain-containi | 35.70 | 0.00 |
| TRINITY_sp Q54X8elp4     | Probable elongator  | 35.70 | 0.00 |
| TRINITY_sp Q84L3RAD23A   | Probable ubiquitin  | 35.70 | 0.00 |
| TRINITY_sp Q54B9med8     | Putative mediator o | 35.70 | 0.00 |
| TRINITY_sp Q5ZM9NCOA7    | Nuclear receptor co | 35.70 | 0.00 |
| TRINITY_sp Q86B9met1     | Methyltransferase-1 | 35.70 | 0.00 |
| TRINITY_sp Q54Y9shkC     | Dual specificity pr | 35.70 | 0.00 |
| TRINITY_sp Q1ZXHgxCD     | Guanine exchange fa | 35.70 | 0.00 |
| TRINITY_sp Q0591iphP     | Tyrosine-protein ph | 35.70 | 0.00 |
| TRINITY_sp Q8LB6CYCU3-1  | Cyclin-U3-1 OS=Arab | 35.70 | 0.00 |
| TRINITY_sp Q54UCdnapkcs  | DNA-dependent prote | 35.70 | 0.00 |
| TRINITY_sp Q9P49GSP1     | GTP-binding nuclear | 35.70 | 0.00 |

|                          |                       |       |      |
|--------------------------|-----------------------|-------|------|
| TRINITY_sp Q6MC7pepA     | Probable cytosol am   | 35.70 | 0.00 |
| TRINITY_sp Q54M1DDB_G028 | Coiled-coil domain-   | 35.70 | 0.00 |
| TRINITY_sp Q6VTIVcath    | Viral cathepsin OS=   | 35.70 | 0.00 |
| TRINITY_sp Q6ZUMARHGAP27 | Rho GTPase-activati   | 35.70 | 0.00 |
| TRINITY_sp O8061APY6     | Probable apyrase 6    | 35.70 | 0.00 |
| TRINITY_sp Q81HFBC_0906  | Delta(1)-pyrroline-   | 35.70 | 0.00 |
| TRINITY_sp Q9C51IPT9     | tRNA dimethylallylt   | 35.70 | 0.00 |
| TRINITY_sp Q2KNEHXK2     | Hexokinase-2 OS=Ory   | 35.70 | 0.00 |
| TRINITY_sp Q9C01WDR33    | pre-mRNA 3' end pro   | 35.70 | 0.00 |
| TRINITY_sp Q3KTMGDPD5    | Glycerophosphodiester | 35.70 | 0.00 |
| TRINITY_sp P3031cada     | Probable cadmium-tr   | 35.70 | 0.00 |
| TRINITY_sp Q8L41WEE1     | Weel-like protein k   | 35.70 | 0.00 |
| TRINITY_sp P2211-        | Ras-related protein   | 35.70 | 0.00 |
| TRINITY_sp A5PK1ABHD17C  | Protein ABHD17C OS=   | 35.70 | 0.00 |
| TRINITY_sp F4HV1VAD1     | Protein VASCULAR AS   | 35.70 | 0.00 |
| TRINITY_sp Q6TE1fam91a1  | Protein FAM91A1 OS=   | 35.70 | 0.00 |
| TRINITY_sp Q9LI1At3g2136 | Clavaminic synthase   | 35.70 | 0.00 |
| TRINITY_sp Q78JVUbfd1    | Ubiquitin domain-co   | 35.70 | 0.00 |
| TRINITY_sp B0F91IGC6     | Golgin candidate 6    | 35.70 | 0.00 |
| TRINITY_sp Q0971akr1     | Palmitoyltransferase  | 35.70 | 0.00 |
| TRINITY_sp P2271Gucylb2  | Guanylate cyclase s   | 35.70 | 0.00 |
| TRINITY_sp Q91Y1Mett113  | Methyltransferase-1   | 35.70 | 0.00 |
| TRINITY_sp Q6NL1ABCC2    | ABC transporter D f   | 35.70 | 0.00 |
| TRINITY_sp Q9931TY3B-G   | Transposon Ty3-G Ga   | 35.70 | 0.00 |
| TRINITY_sp Q9SH1TIC21    | Protein TIC 21, chl   | 35.70 | 0.00 |
| TRINITY_sp P9121gst-6    | Probable glutathion   | 35.70 | 0.00 |
| TRINITY_sp Q9FK1UBP17    | Ubiquitin carboxyl-   | 35.70 | 0.00 |
| TRINITY_sp Q9SK1At2g2036 | NADH dehydrogenase    | 35.60 | 0.00 |
| TRINITY_sp B6ZJ1PNC1     | Peroxisomal adenine   | 35.60 | 0.00 |
| TRINITY_sp G5EB1sma-5    | Mitogen-activated p   | 35.60 | 0.00 |
| TRINITY_sp Q5531gxcJJ    | Rac guanine nucleot   | 35.60 | 0.00 |
| TRINITY_sp Q6PE1Tbca     | Tubulin-specific ch   | 35.60 | 0.00 |
| TRINITY_sp F4HP1IRE4     | Probable serine/thr   | 35.60 | 0.00 |
| TRINITY_sp Q7ZU1ykt6     | Synaptobrevin homol   | 35.60 | 0.00 |
| TRINITY_sp Q3T01ABHD1    | Protein ABHD1 OS=Bo   | 35.60 | 0.00 |
| TRINITY_sp F1QG1melk     | Maternal embryonic    | 35.60 | 0.00 |
| TRINITY_sp Q0881SWA2     | Alpha-amylase 2 OS=   | 35.60 | 0.00 |
| TRINITY_sp Q0391RUB1     | NEDD8-like protein    | 35.60 | 0.00 |
| TRINITY_sp Q3901bvPE     | Vacuolar-processing   | 35.60 | 0.00 |
| TRINITY_sp Q1PF1EDA2     | Probable serine pro   | 35.60 | 0.00 |
| TRINITY_sp Q9SH1PVA12    | Vesicle-associated    | 35.60 | 0.00 |
| TRINITY_sp O4601Parg     | Poly(ADP-ribose) gl   | 35.60 | 0.00 |
| TRINITY_sp Q9W01Cyp4d20  | Probable cytochrome   | 35.60 | 0.00 |
| TRINITY_sp Q3871MTD      | Mannitol dehydrogen   | 35.60 | 0.00 |
| TRINITY_sp Q2741mec-2    | Mechanosensory prot   | 35.60 | 0.00 |
| TRINITY_sp Q54M1tipr1    | TIP41-like protein    | 35.60 | 0.00 |
| TRINITY_sp O4931VAMP711  | Vesicle-associated    | 35.60 | 0.00 |
| TRINITY_sp Q54P1gefA     | Ras guanine nucleot   | 35.60 | 0.00 |
| TRINITY_sp Q86H1mrt4     | Ribosome assembly f   | 35.60 | 0.00 |
| TRINITY_sp Q4WJ1mrd1     | Multiple RNA-bindin   | 35.60 | 0.00 |
| TRINITY_sp Q9ZS1FIP37    | FKBP12-interacting    | 35.60 | 0.00 |
| TRINITY_sp Q8MY1DDB_G027 | Probable serine/thr   | 35.60 | 0.00 |
| TRINITY_sp Q5561psmB4-1  | Proteasome subunit    | 35.60 | 0.00 |
| TRINITY_sp A2WY1HK3      | Probable histidine    | 35.60 | 0.00 |
| TRINITY_sp O3171tdh      | L-threonine 3-dehyd   | 35.60 | 0.00 |
| TRINITY_sp Q0WQ1LTA3     | Dihydrolipoyllysine   | 35.60 | 0.00 |

|                           |                     |       |      |
|---------------------------|---------------------|-------|------|
| TRINITY_sp O6087KIN       | DNA/RNA-binding pro | 35.60 | 0.00 |
| TRINITY_sp A7S87vlg18706  | Coiled-coil domain- | 35.60 | 0.00 |
| TRINITY_sp A1A69HK4       | Probable histidine  | 35.60 | 0.00 |
| TRINITY_sp Q86JMDDB_G027  | Putative elongation | 35.60 | 0.00 |
| TRINITY_sp P1097-         | Retrovirus-related  | 35.60 | 0.00 |
| TRINITY_sp Q54P7exoc4     | Exocyst complex com | 35.60 | 0.00 |
| TRINITY_sp Q9ZQFCBSDUF3   | DUF21 domain-contai | 35.60 | 0.00 |
| TRINITY_sp Q5PPCEif2d     | Eukaryotic translat | 35.60 | 0.00 |
| TRINITY_sp Q1ZXHgxcdD     | Guanine exchange fa | 35.60 | 0.00 |
| TRINITY_sp Q6C59YKT6      | Synaptobrevin homol | 35.60 | 0.00 |
| TRINITY_sp Q9C06WDR33     | pre-mRNA 3' end pro | 35.60 | 0.00 |
| TRINITY_sp Q54RfdhkL      | Hybrid signal trans | 35.60 | 0.00 |
| TRINITY_sp P1079-         | Venom allergen 5.02 | 35.60 | 0.00 |
| TRINITY_sp Q9409GLCNAC1F  | UDP-N-acetylglucosa | 35.60 | 0.00 |
| TRINITY_sp Q9FJIFKBP65    | Peptidyl-prolyl cis | 35.60 | 0.00 |
| TRINITY_sp Q8L49DAAT      | D-amino-acid transa | 35.60 | 0.00 |
| TRINITY_sp Q4U2FHerc2     | E3 ubiquitin-protei | 35.60 | 0.00 |
| TRINITY_sp Q93ZVLA1       | La protein 1 OS=Ara | 35.60 | 0.00 |
| TRINITY_sp P0539p20       | Uncharacterized N-a | 35.60 | 0.00 |
| TRINITY_sp Q54T7drkC      | Probable serine/thr | 35.60 | 0.00 |
| TRINITY_sp Q9M2ESDR1      | (+)-neomenthol dehy | 35.60 | 0.00 |
| TRINITY_sp Q9US9SPCC4B3   | Uncharacterized tra | 35.60 | 0.00 |
| TRINITY_sp Q6GPIXAF1      | XIAP-associated fac | 35.60 | 0.00 |
| TRINITY_sp Q6FKRAT1       | 5'-3' exoribonuclea | 35.60 | 0.00 |
| TRINITY_sp Q9CR9Ccdc96    | Coiled-coil domain- | 35.60 | 0.00 |
| TRINITY_sp P0549SSB       | Lupus La protein OS | 35.60 | 0.00 |
| TRINITY_sp O3179cdsA      | Phosphatidate cytid | 35.60 | 0.00 |
| TRINITY_sp O5379ufaa1     | Tuberculostearic ac | 35.60 | 0.00 |
| TRINITY_sp O0889Rgs4      | Regulator of G-prot | 35.60 | 0.00 |
| TRINITY_sp P4659cdk-12    | Cyclin-dependent ki | 35.60 | 0.00 |
| TRINITY_sp Q84K9ABCA2     | ABC transporter A f | 35.60 | 0.00 |
| TRINITY_sp Q99J9Mrm1      | rRNA methyltransfer | 35.60 | 0.00 |
| TRINITY_sp Q0749EPHB5     | Ephrin type-B recep | 35.60 | 0.00 |
| TRINITY_sp D4AZ9ARB_0144  | Probable endo-1,3(4 | 35.60 | 0.00 |
| TRINITY_sp P1719Cyp27a1   | Sterol 26-hydroxyla | 35.60 | 0.00 |
| TRINITY_sp Q9931TY3B-G    | Transposon Ty3-G Ga | 35.60 | 0.00 |
| TRINITY_sp P0719cyt-1     | Cytochrome c1, heme | 35.60 | 0.00 |
| TRINITY_sp Q9P79mak1      | Peroxide stress-act | 35.60 | 0.00 |
| TRINITY_sp P4849RasGAP1   | GTPase-activating p | 35.50 | 0.00 |
| TRINITY_sp Q9SA9Atlg1178  | Alpha-ketoglutarate | 35.50 | 0.00 |
| TRINITY_sp Q8TEURAPGEF6   | Rap guanine nucleot | 35.50 | 0.00 |
| TRINITY_sp Q6AW9At5g1701D | -xylose-proton sym  | 35.50 | 0.00 |
| TRINITY_sp Q54UEtrmt6     | tRNA (adenine(58)-N | 35.50 | 0.00 |
| TRINITY_sp Q9VT9CG10681   | KxDL motif-containi | 35.50 | 0.00 |
| TRINITY_sp Q9XC9tsf       | Elongation factor T | 35.50 | 0.00 |
| TRINITY_sp A0AU9Gm7168    | Sperm motility kina | 35.50 | 0.00 |
| TRINITY_sp P6239CPK4      | Calcium-dependent p | 35.50 | 0.00 |
| TRINITY_sp Q86H9DDB_G027  | Probable serine/thr | 35.50 | 0.00 |
| TRINITY_sp Q54Q9dhkG      | Hybrid signal trans | 35.50 | 0.00 |
| TRINITY_sp Q9P39ptr2      | Probable peptide tr | 35.50 | 0.00 |
| TRINITY_sp F4K29ATG101    | Autophagy-related p | 35.50 | 0.00 |
| TRINITY_sp Q5509captC     | Uncharacterized CDP | 35.50 | 0.00 |
| TRINITY_sp Q54M9DDB_G028  | Serine hydrolase-li | 35.50 | 0.00 |
| TRINITY_sp Q9ER9Rdh14     | Retinol dehydrogena | 35.50 | 0.00 |
| TRINITY_sp Q4Z89RanBPM    | Ran-binding protein | 35.50 | 0.00 |
| TRINITY_sp Q96N9RDH12     | Retinol dehydrogena | 35.50 | 0.00 |

|                          |                      |       |      |
|--------------------------|----------------------|-------|------|
| TRINITY_sp P3952DRS2     | Probable phospholip  | 35.50 | 0.00 |
| TRINITY_sp P3857LIPA     | Lysosomal acid lipa  | 35.50 | 0.00 |
| TRINITY_sp Q9BT8SOX7     | Transcription facto  | 35.50 | 0.00 |
| TRINITY_sp Q2HVMtrDRAFT  | Putative N6-adenosi  | 35.50 | 0.00 |
| TRINITY_sp Q08BEctdspl2a | CTD small phosphata  | 35.50 | 0.00 |
| TRINITY_sp Q9NJUCPK3     | Calcium-dependent p  | 35.50 | 0.00 |
| TRINITY_sp Q2896CBR1     | Carbonyl reductase   | 35.50 | 0.00 |
| TRINITY_sp Q7XU8Os04g050 | Probable protein ph  | 35.50 | 0.00 |
| TRINITY_sp B8ZX1Qtrt2    | Queueine tRNA-ribosy | 35.50 | 0.00 |
| TRINITY_sp Q4V87ergic1   | Endoplasmic reticul  | 35.50 | 0.00 |
| TRINITY_sp P5406bem46    | Protein bem46 OS=Sc  | 35.50 | 0.00 |
| TRINITY_sp Q9FJVFR01     | NADH dehydrogenase   | 35.50 | 0.00 |
| TRINITY_sp Q9LN6Atlg4812 | Serine/threonine-pr  | 35.50 | 0.00 |
| TRINITY_sp Q84W4QCT      | Glutaminyl-peptide   | 35.50 | 0.00 |
| TRINITY_sp Q9I37pmpM     | Multidrug resistanc  | 35.50 | 0.00 |
| TRINITY_sp Q6NQ3Atlg1358 | LAG1 longevity assu  | 35.50 | 0.00 |
| TRINITY_sp Q5056fdhC     | Probable formate tr  | 35.50 | 0.00 |
| TRINITY_sp Q9M27RAX3     | Transcription facto  | 35.50 | 0.00 |
| TRINITY_sp Q8IX6SLC35F2  | Solute carrier fami  | 35.50 | 0.00 |
| TRINITY_sp P1281hsp16.97 | 16.9 kDa class I he  | 35.50 | 0.00 |
| TRINITY_sp Q70D6ALDH3H1  | Aldehyde dehydrogen  | 35.50 | 0.00 |
| TRINITY_sp O7496POX2     | Acyl-coenzyme A oxi  | 35.50 | 0.00 |
| TRINITY_sp Q3ZCEMC3      | ER membrane protein  | 35.50 | 0.00 |
| TRINITY_sp Q6H76CIPK26   | CBL-interacting pro  | 35.50 | 0.00 |
| TRINITY_sp Q9VR51(1)G019 | Inositol hexakispho  | 35.50 | 0.00 |
| TRINITY_sp Q5027samhd1   | Deoxynucleoside tri  | 35.50 | 0.00 |
| TRINITY_sp Q2898-        | Cystatin-A1 OS=Sus   | 35.50 | 0.00 |
| TRINITY_sp Q9S96CCR1     | Cinnamoyl-CoA reduc  | 35.50 | 0.00 |
| TRINITY_sp Q8NF6ZMIZ2    | Zinc finger MIZ dom  | 35.50 | 0.00 |
| TRINITY_sp Q8RX6Atlg0716 | Probable protein ph  | 35.50 | 0.00 |
| TRINITY_sp Q8VY6CCR4-6   | Carbon catabolite r  | 35.50 | 0.00 |
| TRINITY_sp Q55C7tpp1     | Tripeptidyl-peptida  | 35.50 | 0.00 |
| TRINITY_sp Q32L6UBE2Q2   | Ubiquitin-conjugati  | 35.50 | 0.00 |
| TRINITY_sp Q84JERUS3     | Protein root UVB se  | 35.50 | 0.00 |
| TRINITY_sp Q55E5pats1    | Probable serine/thr  | 35.50 | 0.00 |
| TRINITY_sp A0A06KIN4A    | Kinesin-like protei  | 35.50 | 0.00 |
| TRINITY_sp Q0849PDE4D    | cAMP-specific 3',5'  | 35.50 | 0.00 |
| TRINITY_sp O7466SPCC162  | Uncharacterized oxi  | 35.50 | 0.00 |
| TRINITY_sp Q6956ROM1     | Rhomboid-like prote  | 35.40 | 0.00 |
| TRINITY_sp Q8D56luxQ     | Autoinducer 2 senso  | 35.40 | 0.00 |
| TRINITY_sp Q4015-        | LEC14B protein OS=L  | 35.40 | 0.00 |
| TRINITY_sp Q5RB6PRCP     | Lysosomal Pro-X car  | 35.40 | 0.00 |
| TRINITY_sp O6016snx41    | Sorting nexin-41 OS  | 35.40 | 0.00 |
| TRINITY_sp O7586ZMYND10  | Zinc finger MYND do  | 35.40 | 0.00 |
| TRINITY_sp Q6IM6dnajc27  | DnaJ homolog subfam  | 35.40 | 0.00 |
| TRINITY_sp Q9SV6At4g1301 | Putative quinone-ox  | 35.40 | 0.00 |
| TRINITY_sp Q9SL6At2g2005 | Protein phosphatase  | 35.40 | 0.00 |
| TRINITY_sp Q55B6nek2     | Probable serine/thr  | 35.40 | 0.00 |
| TRINITY_sp Q5RD6SLC25A44 | Solute carrier fami  | 35.40 | 0.00 |
| TRINITY_sp Q9XT6RAD17    | Cell cycle checkpoi  | 35.40 | 0.00 |
| TRINITY_sp Q0346FBP1     | Floral homeotic pro  | 35.40 | 0.00 |
| TRINITY_sp Q7Y06Os03g040 | Probable nucleoredo  | 35.40 | 0.00 |
| TRINITY_sp Q54H6drkB     | Probable serine/thr  | 35.40 | 0.00 |
| TRINITY_sp Q2HCVGWT1     | GPI-anchored wall t  | 35.40 | 0.00 |
| TRINITY_sp P0419Myb      | Myb protein OS=Dros  | 35.40 | 0.00 |
| TRINITY_sp A4J46hs10     | 33 kDa chaperonin O  | 35.40 | 0.00 |

|                                              |                      |       |      |
|----------------------------------------------|----------------------|-------|------|
| TRINITY_sp Q86C\$atg1                        | Serine/threonine-pr  | 35.40 | 0.00 |
| TRINITY_sp Q54R7DDB_G02\$WASH complex subuni |                      | 35.40 | 0.00 |
| TRINITY_sp Q9LP\ERF1-2                       | Eukaryotic peptide   | 35.40 | 0.00 |
| TRINITY_sp Q9SK\NDB4                         | External alternativ  | 35.40 | 0.00 |
| TRINITY_sp Q803\$memo1                       | Protein MEMO1 OS=Da  | 35.40 | 0.00 |
| TRINITY_sp Q2KH\CPNE6                        | Copine-6 OS=Bos tau  | 35.40 | 0.00 |
| TRINITY_sp P404\$PBX3                        | Pre-B-cell leukemia  | 35.40 | 0.00 |
| TRINITY_sp Q8CD\$Iqub                        | IQ and ubiquitin-li  | 35.40 | 0.00 |
| TRINITY_sp C5FW\CPYA                         | Carboxypeptidase Y   | 35.40 | 0.00 |
| TRINITY_sp Q76P(DDB_G027                     | Probable serine/thr  | 35.40 | 0.00 |
| TRINITY_sp Q5ZJ\TLDC1                        | TLD domain-containi  | 35.40 | 0.00 |
| TRINITY_sp A5FKI\rpsP                        | 30S ribosomal prote  | 35.40 | 0.00 |
| TRINITY_sp Q55C\$wdr85                       | Diphthine methyltra  | 35.40 | 0.00 |
| TRINITY_sp P341(pk\$gC                       | Protein kinase 3 OS  | 35.40 | 0.00 |
| TRINITY_sp Q01I\H0219H1\$                    | ATP-dependent RNA h  | 35.40 | 0.00 |
| TRINITY_sp Q652IOs09g05\$                    | Protein HIRA OS=Ory  | 35.40 | 0.00 |
| TRINITY_sp Q006\$gp63                        | Leishmanolysin OS=L  | 35.40 | 0.00 |
| TRINITY_sp Q8ST\$gefG                        | Ras guanine nucleot  | 35.40 | 0.00 |
| TRINITY_sp O944\$SPBC660                     | Uncharacterized RNA  | 35.40 | 0.00 |
| TRINITY_sp Q9ZR\$U2AF65A                     | Splicing factor U2a  | 35.40 | 0.00 |
| TRINITY_sp Q23F\TLL3C                        | Tubulin glycyclase 3 | 35.40 | 0.00 |
| TRINITY_sp Q035\$Itk                         | Tyrosine-protein ki  | 35.40 | 0.00 |
| TRINITY_sp P239(gl\$CA                       | Glucan endo-1,3-bet  | 35.40 | 0.00 |
| TRINITY_sp Q9VR\$HERC2                       | Probable E3 ubiquit  | 35.40 | 0.00 |
| TRINITY_sp Q8MZ\$-                           | Physarolisin OS=Phy  | 35.40 | 0.00 |
| TRINITY_sp P364\vilB                         | Protovillin OS=Dict  | 35.40 | 0.00 |
| TRINITY_sp Q407\$RGP2                        | Ras-related protein  | 35.40 | 0.00 |
| TRINITY_sp Q7F0\CML13                        | Probable calcium-bi  | 35.40 | 0.00 |
| TRINITY_sp B1WA\Adv13                        | Segment polarity pr  | 35.40 | 0.00 |
| TRINITY_sp Q6PN(Dmx11                        | DmX-like protein 1   | 35.40 | 0.00 |
| TRINITY_sp Q566F\Them4                       | Acyl-coenzyme A thi  | 35.40 | 0.00 |
| TRINITY_sp Q9MA1At1g796\$                    | Uncharacterized aar  | 35.40 | 0.00 |
| TRINITY_sp F4IU\UPF2                         | Regulator of nonsen  | 35.40 | 0.00 |
| TRINITY_sp Q245\$Syx1A                       | Syntaxin-1A OS=Dros  | 35.30 | 0.00 |
| TRINITY_sp Q8WW\$TCTEX1D\$                   | Tctex1 domain-conta  | 35.30 | 0.00 |
| TRINITY_sp Q9NP\$CABP5                       | Calcium-binding pro  | 35.30 | 0.00 |
| TRINITY_sp Q8IL(CPF14_03\$                   | STI1-like protein O  | 35.30 | 0.00 |
| TRINITY_sp O133\$msh-2                       | DNA mismatch repair  | 35.30 | 0.00 |
| TRINITY_sp O138\$utp17                       | U3 small nucleolar   | 35.30 | 0.00 |
| TRINITY_sp Q9FH\SWC6                         | SWR1 complex subuni  | 35.30 | 0.00 |
| TRINITY_sp Q6A0\$Fam179b                     | Crescerin-1 OS=Mus   | 35.30 | 0.00 |
| TRINITY_sp Q9LDEMYB108                       | Transcription facto  | 35.30 | 0.00 |
| TRINITY_sp Q925\$GBF1                        | Golgi-specific bref  | 35.30 | 0.00 |
| TRINITY_sp P340\$manA                        | Lysosomal alpha-man  | 35.30 | 0.00 |
| TRINITY_sp A3KP\tttc38                       | Tetratricopeptide r  | 35.30 | 0.00 |
| TRINITY_sp Q24K(CIDE                         | Insulin-degrading e  | 35.30 | 0.00 |
| TRINITY_sp Q9P2IFAM135A                      | Protein FAM135A OS=  | 35.30 | 0.00 |
| TRINITY_sp Q58D\ELMOD3                       | ELMO domain-contain  | 35.30 | 0.00 |
| TRINITY_sp Q125\$rasA                        | Ras-like protein OS  | 35.30 | 0.00 |
| TRINITY_sp Q5ZL\LRRC40                       | Leucine-rich repeat  | 35.30 | 0.00 |
| TRINITY_sp Q9GY\$KIF15                       | Kinesin-like protei  | 35.30 | 0.00 |
| TRINITY_sp O646\$URT1                        | UTP:RNA uridylyltra  | 35.30 | 0.00 |
| TRINITY_sp O764(nft-1                        | Nitrilase and fragi  | 35.30 | 0.00 |
| TRINITY_sp B4FG\$-                           | Spindle and kinetoc  | 35.30 | 0.00 |
| TRINITY_sp P232\$Mov10                       | Putative helicase M  | 35.30 | 0.00 |
| TRINITY_sp O170\$hpo-8                       | Very-long-chain (3R  | 35.30 | 0.00 |

|                          |                     |       |      |
|--------------------------|---------------------|-------|------|
| TRINITY_sp P364 rab14    | Ras-related protein | 35.30 | 0.00 |
| TRINITY_sp P546 ptpC     | Tyrosine-protein ph | 35.30 | 0.00 |
| TRINITY_sp Q5ZJ LSG1     | Large subunit GTPas | 35.30 | 0.00 |
| TRINITY_sp Q7S8 vesf-2   | Pre-rRNA-processing | 35.30 | 0.00 |
| TRINITY_sp P814 PGA      | Pepsin A OS=Suncus  | 35.30 | 0.00 |
| TRINITY_sp Q7ZX kif19    | Kinesin-like protei | 35.30 | 0.00 |
| TRINITY_sp Q54N ppan     | Peter Pan-like prot | 35.30 | 0.00 |
| TRINITY_sp Q6IC ASPFD2   | Aspartate beta-hydr | 35.30 | 0.00 |
| TRINITY_sp Q923 ssb1     | Replication factor  | 35.30 | 0.00 |
| TRINITY_sp Q869 DDB_G027 | COBW domain-contain | 35.30 | 0.00 |
| TRINITY_sp Q9NA tim-22   | Mitochondrial impor | 35.30 | 0.00 |
| TRINITY_sp Q851 Os03g079 | Probable GTP-bindin | 35.30 | 0.00 |
| TRINITY_sp P292 fol1     | Folic acid synthesi | 35.30 | 0.00 |
| TRINITY_sp O944 bdp1     | Transcription facto | 35.30 | 0.00 |
| TRINITY_sp Q2YD ISG20L2  | Interferon-stimulat | 35.30 | 0.00 |
| TRINITY_sp Q86C dhkK     | Hybrid signal trans | 35.30 | 0.00 |
| TRINITY_sp P251 rccl1    | Regulator of chromo | 35.30 | 0.00 |
| TRINITY_sp Q86Y CPNE8    | Copine-8 OS=Homo sa | 35.30 | 0.00 |
| TRINITY_sp P533 tbg      | Tubulin gamma chain | 35.30 | 0.00 |
| TRINITY_sp Q945 MCIB22   | NADH dehydrogenase  | 35.30 | 0.00 |
| TRINITY_sp Q54C pex6     | Peroxisomal biogene | 35.30 | 0.00 |
| TRINITY_sp P412 CSK      | Tyrosine-protein ki | 35.30 | 0.00 |
| TRINITY_sp Q9LT VALIS1   | ALA-interacting sub | 35.30 | 0.00 |
| TRINITY_sp Q86I dolpp1   | Dolichyldiphosphata | 35.30 | 0.00 |
| TRINITY_sp B0RZ adk      | Adenylate kinase OS | 35.30 | 0.00 |
| TRINITY_sp Q680 GGT2     | Gamma-glutamyltrans | 35.30 | 0.00 |
| TRINITY_sp Q8IW BBS7     | Bardet-Biedl syndro | 35.30 | 0.00 |
| TRINITY_sp Q6NS trmt11   | tRNA (guanine(10)-N | 35.30 | 0.00 |
| TRINITY_sp Q86I nek3     | Probable serine/thr | 35.30 | 0.00 |
| TRINITY_sp Q84K ABCA2    | ABC transporter A f | 35.30 | 0.00 |
| TRINITY_sp Q96R IFT140   | Intraflagellar tran | 35.30 | 0.00 |
| TRINITY_sp Q7T6 MIMI_R83 | Putative serine/thr | 35.30 | 0.00 |
| TRINITY_sp O601 lcf1     | Long-chain-fatty-ac | 35.20 | 0.00 |
| TRINITY_sp Q851 VSLY1    | SEC1 family transpo | 35.20 | 0.00 |
| TRINITY_sp Q54R dhkL     | Hybrid signal trans | 35.20 | 0.00 |
| TRINITY_sp Q7SD msh-3    | DNA mismatch repair | 35.20 | 0.00 |
| TRINITY_sp A9I0 Bpet0443 | Nucleotide-binding  | 35.20 | 0.00 |
| TRINITY_sp Q75J zaka     | Dual specificity pr | 35.20 | 0.00 |
| TRINITY_sp Q9BZ FWR11    | WD repeat-containin | 35.20 | 0.00 |
| TRINITY_sp P213 NF1      | Neurofibromin OS=Ho | 35.20 | 0.00 |
| TRINITY_sp Q9NX DUS2     | tRNA-dihydrouridine | 35.20 | 0.00 |
| TRINITY_sp Q54B mcfG     | Mitochondrial subst | 35.20 | 0.00 |
| TRINITY_sp Q32P C1D      | Nuclear nucleic aci | 35.20 | 0.00 |
| TRINITY_sp P412 Csk      | Tyrosine-protein ki | 35.20 | 0.00 |
| TRINITY_sp P426 SRK1     | Tyrosine-protein ki | 35.20 | 0.00 |
| TRINITY_sp Q9LK ALA8     | Probable phospholip | 35.20 | 0.00 |
| TRINITY_sp Q0P5 Vps8     | Vacuolar protein so | 35.20 | 0.00 |
| TRINITY_sp Q90Z lancl1   | LanC-like protein 1 | 35.20 | 0.00 |
| TRINITY_sp Q588 TEB      | Helicase and polyme | 35.20 | 0.00 |
| TRINITY_sp Q0UU TPC1     | Mitochondrial thiam | 35.20 | 0.00 |
| TRINITY_sp P308 evgS     | Sensor protein EvgS | 35.20 | 0.00 |
| TRINITY_sp Q84Y CXIP4    | CAX-interacting pro | 35.20 | 0.00 |
| TRINITY_sp Q54F eif2b3   | Translation initiat | 35.20 | 0.00 |
| TRINITY_sp Q55E ctu2     | Cytoplasmic tRNA 2- | 35.20 | 0.00 |
| TRINITY_sp Q9FW ABC11    | ABC transporter B f | 35.20 | 0.00 |
| TRINITY_sp P518 fabG     | 3-oxoacyl-[acyl-car | 35.20 | 0.00 |

|                           |                     |       |      |
|---------------------------|---------------------|-------|------|
| TRINITY_sp Q8K4IDdx54     | ATP-dependent RNA h | 35.20 | 0.00 |
| TRINITY_sp Q76NVDDDB_G027 | Protein HGH1 homolo | 35.20 | 0.00 |
| TRINITY_sp Q6C04ATG18     | Autophagy-related p | 35.20 | 0.00 |
| TRINITY_sp Q96QJSMG1      | Serine/threonine-pr | 35.20 | 0.00 |
| TRINITY_sp Q1989F28H7.4   | Putative selT-like  | 35.20 | 0.00 |
| TRINITY_sp Q96KQEHMT2     | Histone-lysine N-me | 35.20 | 0.00 |
| TRINITY_sp Q8QZHTat       | Tyrosine aminotrans | 35.20 | 0.00 |
| TRINITY_sp Q2U66caf17     | Putative transferas | 35.20 | 0.00 |
| TRINITY_sp Q8RWVCLASP     | CLIP-associated pro | 35.20 | 0.00 |
| TRINITY_sp F4JA7SKI2      | DEXH-box ATP-depend | 35.20 | 0.00 |
| TRINITY_sp P4183rae1      | Poly(A)+ RNA export | 35.20 | 0.00 |
| TRINITY_sp P527(MSH6      | DNA mismatch repair | 35.20 | 0.00 |
| TRINITY_sp Q90Z7parn      | Poly(A)-specific ri | 35.20 | 0.00 |
| TRINITY_sp Q7T29fam172a   | Protein FAM172A OS= | 35.20 | 0.00 |
| TRINITY_sp Q58DUMMTAG2    | Multiple myeloma tu | 35.20 | 0.00 |
| TRINITY_sp Q0IIMARL6      | ADP-ribosylation fa | 35.20 | 0.00 |
| TRINITY_sp Q5YDECPL2      | RNA polymerase II C | 35.20 | 0.00 |
| TRINITY_sp Q8BY0Tbc1d4    | TBC1 domain family  | 35.20 | 0.00 |
| TRINITY_sp Q54B7abcB2     | ABC transporter B f | 35.20 | 0.00 |
| TRINITY_sp Q5U2VtBl3      | Transducin beta-lik | 35.20 | 0.00 |
| TRINITY_sp P0CM9CWC25     | Pre-mRNA-splicing f | 35.20 | 0.00 |
| TRINITY_sp Q9UI1HERC5     | E3 ISG15--protein 1 | 35.20 | 0.00 |
| TRINITY_sp Q000(SRP68     | Signal recognition  | 35.20 | 0.00 |
| TRINITY_sp Q24K1GPATCH1   | G patch domain-cont | 35.20 | 0.00 |
| TRINITY_sp Q640\rmnd5a    | Protein RMD5 homolo | 35.20 | 0.00 |
| TRINITY_sp Q9SLHFOC132    | Translocase of chlo | 35.20 | 0.00 |
| TRINITY_sp Q6ZD6FAS2      | Chromatin assembly  | 35.20 | 0.00 |
| TRINITY_sp Q1285MAP3K12   | Mitogen-activated p | 35.20 | 0.00 |
| TRINITY_sp Q1LU9fam206a   | Protein Simiate OS= | 35.20 | 0.00 |
| TRINITY_sp Q54LEvps13A    | Putative vacuolar p | 35.20 | 0.00 |
| TRINITY_sp Q9H2IHSD3B7    | 3 beta-hydroxystero | 35.20 | 0.00 |
| TRINITY_sp P2858TRK2      | Low-affinity potass | 35.20 | 0.00 |
| TRINITY_sp Q8WU6PTPMT1    | Phosphatidylglycero | 35.20 | 0.00 |
| TRINITY_sp Q9M2HSDR1      | (+)-neomenthol dehy | 35.20 | 0.00 |
| TRINITY_sp Q9XI(SKIP32    | F-box protein 7 OS= | 35.20 | 0.00 |
| TRINITY_sp Q9FF7PPH       | Pheophytinase, chlo | 35.20 | 0.00 |
| TRINITY_sp O1389SPAC22A1  | Uncharacterized CDP | 35.20 | 0.00 |
| TRINITY_sp Q7XJ6FAAH      | Fatty acid amide hy | 35.20 | 0.00 |
| TRINITY_sp A1ZA1CG5065    | Putative fatty acyl | 35.20 | 0.00 |
| TRINITY_sp Q96A7VPS33A    | Vacuolar protein so | 35.20 | 0.00 |
| TRINITY_sp X5M51wnk-1     | Serine/threonine-pr | 35.20 | 0.00 |
| TRINITY_sp Q84QGGCT2;3    | Gamma-glutamylcyclo | 35.20 | 0.00 |
| TRINITY_sp Q3E97ANTR6     | Probable anion tran | 35.20 | 0.00 |
| TRINITY_sp P3852HSF1      | Heat shock factor p | 35.20 | 0.00 |
| TRINITY_sp Q2312rsp-1     | Probable splicing f | 35.20 | 0.00 |
| TRINITY_sp Q8LP1CCD1      | Carotenoid 9,10(9', | 35.20 | 0.00 |
| TRINITY_sp A7RZVdpp3      | Dipeptidyl peptidas | 35.20 | 0.00 |
| TRINITY_sp Q99K1Reep3     | Receptor expression | 35.10 | 0.00 |
| TRINITY_sp Q9UI1HERC5     | E3 ISG15--protein 1 | 35.10 | 0.00 |
| TRINITY_sp P3414rab1B     | Ras-related protein | 35.10 | 0.00 |
| TRINITY_sp Q6NW6arih11    | E3 ubiquitin-protei | 35.10 | 0.00 |
| TRINITY_sp Q8WY1SSH1      | Protein phosphatase | 35.10 | 0.00 |
| TRINITY_sp Q2RACCYCT1-3   | Cyclin-T1-3 OS=Oryz | 35.10 | 0.00 |
| TRINITY_sp P4433rbsK      | Ribokinase OS=Haemo | 35.10 | 0.00 |
| TRINITY_sp Q5AV1ampp      | Probable Xaa-Pro am | 35.10 | 0.00 |
| TRINITY_sp Q9P89tcsA      | Two-component syste | 35.10 | 0.00 |

|                           |                      |       |      |
|---------------------------|----------------------|-------|------|
| TRINITY_sp F1Q4&atp9b     | Probable phospholip  | 35.10 | 0.00 |
| TRINITY_sp A5PK1METTL13   | Methyltransferase-1  | 35.10 | 0.00 |
| TRINITY_sp Q8UI(truA      | tRNA pseudouridine   | 35.10 | 0.00 |
| TRINITY_sp Q54H4drkA      | Probable serine/thr  | 35.10 | 0.00 |
| TRINITY_sp Q9P3(ldb14     | E3 ubiquitin-protei  | 35.10 | 0.00 |
| TRINITY_sp P242(ARDD      | Actin, spherule iso  | 35.10 | 0.00 |
| TRINITY_sp A8JB2CCDC65    | Coiled-coil domain-  | 35.10 | 0.00 |
| TRINITY_sp Q3ED(At1g2295  | Uncharacterized PKH  | 35.10 | 0.00 |
| TRINITY_sp Q9CR5Rchyl     | RING finger and CHY  | 35.10 | 0.00 |
| TRINITY_sp Q9DG1star      | Steroidogenic acute  | 35.10 | 0.00 |
| TRINITY_sp Q69Z2Dnah17    | Dynein heavy chain   | 35.10 | 0.00 |
| TRINITY_sp O6484CID7      | Polyadenylate-bindi  | 35.10 | 0.00 |
| TRINITY_sp Q58E(eparl     | Presenilins-associa  | 35.10 | 0.00 |
| TRINITY_sp P200(PSAP      | Saposin-C OS=Cavia   | 35.10 | 0.00 |
| TRINITY_sp Q54I&eif2b1    | Translation initiat  | 35.10 | 0.00 |
| TRINITY_sp Q0VD1SMPD1     | Sphingomyelin phosp  | 35.10 | 0.00 |
| TRINITY_sp Q9SJ4VPS11     | Vacuolar protein-so  | 35.10 | 0.00 |
| TRINITY_sp Q869(napA      | Nck-associated prot  | 35.10 | 0.00 |
| TRINITY_sp Q8N9(ESCAI     | Protein SCAI OS=Hom  | 35.10 | 0.00 |
| TRINITY_sp P608&Megf8     | Multiple epidermal   | 35.10 | 0.00 |
| TRINITY_sp O510&trmH      | tRNA (guanosine(18)  | 35.10 | 0.00 |
| TRINITY_sp P4975RBM25     | RNA-binding protein  | 35.10 | 0.00 |
| TRINITY_sp P703(Uspx      | Probable ubiquitin   | 35.10 | 0.00 |
| TRINITY_sp P577(Rec1      | CAAX prenyl proteas  | 35.10 | 0.00 |
| TRINITY_sp Q54M(DDDB_G02& | von Willebrand fact  | 35.10 | 0.00 |
| TRINITY_sp O0862Sqstm1    | Sequestosome-1 OS=R  | 35.10 | 0.00 |
| TRINITY_sp Q8FM4dcd       | dCTP deaminase OS=C  | 35.10 | 0.00 |
| TRINITY_sp Q4HWRAT1       | 5'-3' exoribonuclea  | 35.10 | 0.00 |
| TRINITY_sp O1387not3      | General negative re  | 35.10 | 0.00 |
| TRINITY_sp Q84R1CRSH      | Probable GTP diphos  | 35.10 | 0.00 |
| TRINITY_sp Q8RV(SEC10     | Exocyst complex com  | 35.10 | 0.00 |
| TRINITY_sp P048(Cyp3a1    | Cytochrome P450 3A1  | 35.10 | 0.00 |
| TRINITY_sp Q8H15AAE13     | Malonate--CoA ligas  | 35.10 | 0.00 |
| TRINITY_sp Q9C5(IGCP2     | Gamma-tubulin compl  | 35.10 | 0.00 |
| TRINITY_sp Q6V5(IZnf474   | Zinc finger protein  | 35.10 | 0.00 |
| TRINITY_sp Q9P2(IZNFX1    | NFX1-type zinc fing  | 35.10 | 0.00 |
| TRINITY_sp Q5ZJ(IREG1     | Protein CREG1 OS=Ga  | 35.10 | 0.00 |
| TRINITY_sp Q9WV(EMarch7   | E3 ubiquitin-protei  | 35.10 | 0.00 |
| TRINITY_sp P3132PKAR      | cAMP-dependent prot  | 35.10 | 0.00 |
| TRINITY_sp Q5BL(Imettl21& | Protein N-lysine me  | 35.10 | 0.00 |
| TRINITY_sp Q8BL(ARhgap22  | Rho GTPase-activati  | 35.10 | 0.00 |
| TRINITY_sp B4SD(EPpha_214 | UPF0301 protein Pph  | 35.10 | 0.00 |
| TRINITY_sp Q54X(rcrkA     | RGS domain-containi  | 35.10 | 0.00 |
| TRINITY_sp Q2537PKC1      | Protein kinase C OS  | 35.10 | 0.00 |
| TRINITY_sp Q9HD(lypt71    | GTP-binding protein  | 35.10 | 0.00 |
| TRINITY_sp Q050(UBE3A     | Ubiquitin-protein 1  | 35.10 | 0.00 |
| TRINITY_sp Q9VR(HERC2     | Probable E3 ubiquit  | 35.10 | 0.00 |
| TRINITY_sp Q5B(IMERCC8    | DNA excision repair  | 35.10 | 0.00 |
| TRINITY_sp Q2944ATP8A1    | Probable phospholip  | 35.10 | 0.00 |
| TRINITY_sp F4IF(FFGT1     | Protein FORGETTER 1  | 35.10 | 0.00 |
| TRINITY_sp Q86I(DDDB_G027 | PH domain-containin  | 35.10 | 0.00 |
| TRINITY_sp Q6ZI4SAPK6     | Serine/threonine-pr  | 35.10 | 0.00 |
| TRINITY_sp Q9SV(At4g2177  | tRNA pseudouridine s | 35.10 | 0.00 |
| TRINITY_sp Q0VF(Bloloc1s1 | Biogenesis of lysos  | 35.10 | 0.00 |
| TRINITY_sp Q9P7(ymak1     | Peroxide stress-act  | 35.00 | 0.00 |
| TRINITY_sp Q90Z(yparn     | Poly(A)-specific ri  | 35.00 | 0.00 |



|                  |           |                      |       |      |
|------------------|-----------|----------------------|-------|------|
| TRINITY_sp Q1793 | daf-36    | Cholesterol 7-desat  | 35.00 | 0.00 |
| TRINITY_sp Q9UT  | (paal     | Protein phosphatase  | 35.00 | 0.00 |
| TRINITY_sp Q84V  | PSD1      | Phosphatidylserine   | 35.00 | 0.00 |
| TRINITY_sp Q9UK  | GPATCH8   | G patch domain-cont  | 35.00 | 0.00 |
| TRINITY_sp O946  | (SPCC622  | Uncharacterized pro  | 35.00 | 0.00 |
| TRINITY_sp Q9M8  | DSPTP1B   | Dual specificity pr  | 35.00 | 0.00 |
| TRINITY_sp Q54C  | DDB_G02   | Probable myosin lig  | 35.00 | 0.00 |
| TRINITY_sp Q5M8  | (impact-1 | Protein IMPACT-A OS  | 35.00 | 0.00 |
| TRINITY_sp Q9GL  | CTSL      | Cathepsin L1 OS=Can  | 35.00 | 0.00 |
| TRINITY_sp Q8T6  | abcG20    | ABC transporter G f  | 35.00 | 0.00 |
| TRINITY_sp Q9FG  | At5g068   | CDK5RAP3-like prote  | 35.00 | 0.00 |
| TRINITY_sp Q8QH  | dna2      | DNA replication ATP  | 35.00 | 0.00 |
| TRINITY_sp P0CT  | UMAG_10   | Uncharacterized hyd  | 35.00 | 0.00 |
| TRINITY_sp Q9FP  | EEDR1     | Serine/threonine-pr  | 35.00 | 0.00 |
| TRINITY_sp O944  | {bmt5     | 25S rRNA (uridine-N  | 35.00 | 0.00 |
| TRINITY_sp Q245  | (U2af50   | Splicing factor U2A  | 35.00 | 0.00 |
| TRINITY_sp O089  | (Cyth3    | Cytohesin-3 OS=Mus   | 35.00 | 0.00 |
| TRINITY_sp O646  | AUR3      | Serine/threonine-pr  | 35.00 | 0.00 |
| TRINITY_sp Q6DE  | (aurkb-a  | Aurora kinase B-A O  | 35.00 | 0.00 |
| TRINITY_sp Q0JI  | (CIPK11   | CBL-interacting pro  | 35.00 | 0.00 |
| TRINITY_sp Q9ZP  | ARL2      | ADP-ribosylation fa  | 35.00 | 0.00 |
| TRINITY_sp F4HP  | LIG6      | DNA ligase 6 OS=Ara  | 35.00 | 0.00 |
| TRINITY_sp Q8ST  | gefG      | Ras guanine nucleot  | 35.00 | 0.00 |
| TRINITY_sp Q8IZ  | IDOCK3    | Dedicator of cytoki  | 35.00 | 0.00 |
| TRINITY_sp A8MS  | {SPT6     | Transcription elong  | 35.00 | 0.00 |
| TRINITY_sp Q553  | (DDB_G02  | Adenosine deaminase  | 35.00 | 0.00 |
| TRINITY_sp Q9LT  | (PDR2     | Probable manganese-  | 35.00 | 0.00 |
| TRINITY_sp O941  | (SNF1     | Carbon catabolite-d  | 35.00 | 0.00 |
| TRINITY_sp Q9UJ  | TUBD1     | Tubulin delta chain  | 35.00 | 0.00 |
| TRINITY_sp Q9VB  | (CG5521   | Probable Rho GTPase  | 35.00 | 0.00 |
| TRINITY_sp O137  | (SPAC16E  | Uncharacterized end  | 35.00 | 0.00 |
| TRINITY_sp Q4U2  | Herc2     | E3 ubiquitin-protei  | 35.00 | 0.00 |
| TRINITY_sp Q9UR  | Inrf1     | Vacuolar transporte  | 35.00 | 0.00 |
| TRINITY_sp Q8CG  | (Elac2    | Zinc phosphodiester  | 35.00 | 0.00 |
| TRINITY_sp Q294  | LIPF      | Gastric triacylglyc  | 35.00 | 0.00 |
| TRINITY_sp P418  | (gar2     | Protein gar2 OS=Sch  | 35.00 | 0.00 |
| TRINITY_sp O749  | {nat1     | N-terminal acetyltr  | 35.00 | 0.00 |
| TRINITY_sp Q86J  | polr3f    | DNA-directed RNA po  | 35.00 | 0.00 |
| TRINITY_sp Q8L7  | SDN5      | Small RNA degrading  | 35.00 | 0.00 |
| TRINITY_sp Q54E  | polr2e    | DNA-directed RNA po  | 35.00 | 0.00 |
| TRINITY_sp Q8R3  | (Rbm19    | Probable RNA-bindin  | 35.00 | 0.00 |
| TRINITY_sp P360  | YPT52     | GTP-binding protein  | 35.00 | 0.00 |
| TRINITY_sp Q949  | ARI1      | Probable E3 ubiquit  | 35.00 | 0.00 |
| TRINITY_sp O225  | (STY8     | Serine/threonine-pr  | 35.00 | 0.00 |
| TRINITY_sp Q8N6  | (ZFAND2A  | AN1-type zinc finge  | 35.00 | 0.00 |
| TRINITY_sp Q75H  | (SPS2     | Solanesyl-diphospha  | 35.00 | 0.00 |
| TRINITY_sp Q389  | (KIN10    | SNF1-related protei  | 35.00 | 0.00 |
| TRINITY_sp Q5HN  | (pcrA     | ATP-dependent DNA h  | 35.00 | 0.00 |
| TRINITY_sp Q9FG  | (SNX1     | Sorting nexin 1 OS=  | 35.00 | 0.00 |
| TRINITY_sp Q93Y  | (ABCG22   | ABC transporter G f  | 35.00 | 0.00 |
| TRINITY_sp Q5AG  | (HSL1     | Serine/threonine-pr  | 35.00 | 0.00 |
| TRINITY_sp Q82W  | (rluD     | Ribosomal large sub  | 35.00 | 0.00 |
| TRINITY_sp Q8T8  | (abcD2    | ABC transporter D f  | 35.00 | 0.00 |
| TRINITY_sp O804  | (At1g091  | Probable protein ph  | 35.00 | 0.00 |
| TRINITY_sp A4YI  | (Msed_20  | (3-hydroxypropionyl- | 35.00 | 0.00 |
| TRINITY_sp P222  | (RAS1     | Ras-like protein 1   | 35.00 | 0.00 |

|                          |                     |       |      |
|--------------------------|---------------------|-------|------|
| TRINITY_sp Q9SR7At3g1013 | Heme-binding-like p | 35.00 | 0.00 |
| TRINITY_sp Q5ZK1ATP13A4  | Probable cation-tra | 34.90 | 0.00 |
| TRINITY_sp Q8L9CKCR1     | Very-long-chain 3-o | 34.90 | 0.00 |
| TRINITY_sp Q0352SCS7     | Ceramide very long  | 34.90 | 0.00 |
| TRINITY_sp A1L27slc29a4  | Equilibrative nucle | 34.90 | 0.00 |
| TRINITY_sp Q566FThem4    | Acyl-coenzyme A thi | 34.90 | 0.00 |
| TRINITY_sp P3518PTC1     | Protein phosphatase | 34.90 | 0.00 |
| TRINITY_sp Q59V1HHT1     | Histone H3.1/H3.2 O | 34.90 | 0.00 |
| TRINITY_sp Q28I1ngdn     | Neuroguidin OS=Xeno | 34.90 | 0.00 |
| TRINITY_sp Q041(-        | Pathogenesis-relate | 34.90 | 0.00 |
| TRINITY_sp Q96G7RMND5B   | Protein RMD5 homolo | 34.90 | 0.00 |
| TRINITY_sp Q6345Mapk4    | Mitogen-activated p | 34.90 | 0.00 |
| TRINITY_sp Q55F4atp5D    | ATP synthase subuni | 34.90 | 0.00 |
| TRINITY_sp Q8GY7RPN9B    | 26S proteasome non- | 34.90 | 0.00 |
| TRINITY_sp Q4015-        | LEC14B protein OS=L | 34.90 | 0.00 |
| TRINITY_sp O9443SPBC660  | Uncharacterized RNA | 34.90 | 0.00 |
| TRINITY_sp Q8LF9ASK21    | SKP1-like protein 2 | 34.90 | 0.00 |
| TRINITY_sp Q9FE5RPL22C   | 60S ribosomal prote | 34.90 | 0.00 |
| TRINITY_sp O1882AOAH     | Acyloxyacyl hydrola | 34.90 | 0.00 |
| TRINITY_sp Q9JK2Aatf     | Protein AATF OS=Mus | 34.90 | 0.00 |
| TRINITY_sp F4K26ATG101   | Autophagy-related p | 34.90 | 0.00 |
| TRINITY_sp Q9P41LYS3     | Saccharopine dehydr | 34.90 | 0.00 |
| TRINITY_sp O2292At2g3032 | Putative tRNA pseud | 34.90 | 0.00 |
| TRINITY_sp O0051FAAH     | Fatty-acid amide hy | 34.90 | 0.00 |
| TRINITY_sp Q2QK1PCS3     | Glutathione gamma-g | 34.90 | 0.00 |
| TRINITY_sp Q9P41AGM1     | Phosphoacetylglucos | 34.90 | 0.00 |
| TRINITY_sp Q5548argS     | Arginine--tRNA liga | 34.90 | 0.00 |
| TRINITY_sp Q9P77mak1     | Peroxide stress-act | 34.90 | 0.00 |
| TRINITY_sp Q94D1PHT1-11  | Inorganic phosphate | 34.90 | 0.00 |
| TRINITY_sp Q0D91STAR1    | Protein STAR1 OS=Or | 34.90 | 0.00 |
| TRINITY_sp Q94C1TIP1-2   | Probable aquaporin  | 34.90 | 0.00 |
| TRINITY_sp B0G18spcs3    | Signal peptidase co | 34.90 | 0.00 |
| TRINITY_sp Q8CG1Rbm28    | RNA-binding protein | 34.90 | 0.00 |
| TRINITY_sp P3789CBP1     | Serine carboxypepti | 34.90 | 0.00 |
| TRINITY_sp Q68C1HGSNAT   | Heparan-alpha-gluco | 34.90 | 0.00 |
| TRINITY_sp Q9LD1BETAA-AI | Beta-adaptin-like p | 34.90 | 0.00 |
| TRINITY_sp Q6C71PHO85    | Negative regulator  | 34.90 | 0.00 |
| TRINITY_sp Q5KQ1CMT2     | DNA (cytosine-5)-me | 34.90 | 0.00 |
| TRINITY_sp Q5001TKPR1    | Tetraketide alpha-p | 34.90 | 0.00 |
| TRINITY_sp P5464pkbA     | RAC family serine/t | 34.90 | 0.00 |
| TRINITY_sp P0042COX5B    | Cytochrome c oxidas | 34.90 | 0.00 |
| TRINITY_sp Q8RW1CPK29    | Calcium-dependent p | 34.90 | 0.00 |
| TRINITY_sp Q0ZD1urad     | 2-oxo-4-hydroxy-4-c | 34.90 | 0.00 |
| TRINITY_sp P148(yoxD     | Uncharacterized oxi | 34.90 | 0.00 |
| TRINITY_sp Q5M94Rrp15    | RRP15-like protein  | 34.90 | 0.00 |
| TRINITY_sp P3239Arp3     | Actin-related prote | 34.90 | 0.00 |
| TRINITY_sp Q9XT1tbh-1    | Tyramine beta-hydro | 34.90 | 0.00 |
| TRINITY_sp Q99J1K1hl22   | Kelch-like protein  | 34.90 | 0.00 |
| TRINITY_sp Q9ZRIYKT61    | VAMP-like protein Y | 34.90 | 0.00 |
| TRINITY_sp Q5R96ZFAND2A  | AN1-type zinc finge | 34.90 | 0.00 |
| TRINITY_sp P341(fhkC     | Probable serine/thr | 34.90 | 0.00 |
| TRINITY_sp Q095(C45G9.2  | Uncharacterized tRN | 34.90 | 0.00 |
| TRINITY_sp Q54N1vmp1     | Vacuole membrane pr | 34.90 | 0.00 |
| TRINITY_sp Q5F31TTC27    | Tetratricopeptide r | 34.90 | 0.00 |
| TRINITY_sp Q220(pde-4    | Probable 3',5'-cycl | 34.90 | 0.00 |
| TRINITY_sp Q6NM1At5g6568 | Probable sphingolip | 34.90 | 0.00 |

|                          |                     |       |      |
|--------------------------|---------------------|-------|------|
| TRINITY_sp P2271Gucy1b2  | Guanylate cyclase s | 34.90 | 0.00 |
| TRINITY_sp Q9XWY37D8A.2  | Putative phospholip | 34.80 | 0.00 |
| TRINITY_sp Q9025es1      | ES1 protein, mitoch | 34.80 | 0.00 |
| TRINITY_sp Q9FPFIEDR1    | Serine/threonine-pr | 34.80 | 0.00 |
| TRINITY_sp P5821LOXL3    | Lysyl oxidase homol | 34.80 | 0.00 |
| TRINITY_sp Q8WV6NUDCD2   | NudC domain-contain | 34.80 | 0.00 |
| TRINITY_sp Q86CFatg8     | Autophagy-related p | 34.80 | 0.00 |
| TRINITY_sp Q6MC7pepA     | Probable cytosol am | 34.80 | 0.00 |
| TRINITY_sp Q0JI4CIPK11   | CBL-interacting pro | 34.80 | 0.00 |
| TRINITY_sp Q9VR9HERC2    | Probable E3 ubiquit | 34.80 | 0.00 |
| TRINITY_sp Q969fPOP5     | Ribonuclease P/MRP  | 34.80 | 0.00 |
| TRINITY_sp Q6525Os06g052 | Probable protein ph | 34.80 | 0.00 |
| TRINITY_sp Q96QFATAD5    | ATPase family AAA d | 34.80 | 0.00 |
| TRINITY_sp A8FH3ppaX     | Pyrophosphatase Ppa | 34.80 | 0.00 |
| TRINITY_sp P2764spoVK    | Stage V sporulation | 34.80 | 0.00 |
| TRINITY_sp Q86S4C50D2.7  | Probable ADP-depend | 34.80 | 0.00 |
| TRINITY_sp Q55B2dcd1A    | Protein dcd1A OS=Di | 34.80 | 0.00 |
| TRINITY_sp Q9VIVRanGAP   | Ran GTPase-activati | 34.80 | 0.00 |
| TRINITY_sp Q5568slr0021  | Putative protease s | 34.80 | 0.00 |
| TRINITY_sp Q54F2mroh1    | Maestro heat-like r | 34.80 | 0.00 |
| TRINITY_sp O3163yjcL     | Uncharacterized mem | 34.80 | 0.00 |
| TRINITY_sp Q6CF6FIS1     | Mitochondria fissio | 34.80 | 0.00 |
| TRINITY_sp Q8YSUalr2987  | UPF0187 protein alr | 34.80 | 0.00 |
| TRINITY_sp A2VDUMAP3K7   | Mitogen-activated p | 34.80 | 0.00 |
| TRINITY_sp Q6GLValyref-k | THO complex subunit | 34.80 | 0.00 |
| TRINITY_sp Q80LIVCATH    | Viral cathepsin OS= | 34.80 | 0.00 |
| TRINITY_sp A1YV7KDM5C    | Lysine-specific dem | 34.80 | 0.00 |
| TRINITY_sp Q8NE8MCU      | Calcium uniporter p | 34.80 | 0.00 |
| TRINITY_sp Q7Z73YTHDF3   | YTH domain-containi | 34.80 | 0.00 |
| TRINITY_sp Q55CFrasX     | Ras-like protein ra | 34.80 | 0.00 |
| TRINITY_sp Q6P0lexosc6   | Exosome complex com | 34.80 | 0.00 |
| TRINITY_sp Q8L54LT01     | Thiol-disulfide oxi | 34.80 | 0.00 |
| TRINITY_sp Q54BIdstC     | Signal transducer a | 34.80 | 0.00 |
| TRINITY_sp Q1816C25E10.1 | UPF0046 protein C25 | 34.80 | 0.00 |
| TRINITY_sp Q6H7UCIPK26   | CBL-interacting pro | 34.80 | 0.00 |
| TRINITY_sp P091CP4HB     | Protein disulfide-i | 34.80 | 0.00 |
| TRINITY_sp Q93YVCLS      | Cardiolipin synthas | 34.80 | 0.00 |
| TRINITY_sp Q54Dvergic3   | Probable endoplasmi | 34.80 | 0.00 |
| TRINITY_sp Q54N7fsjC     | Putative rRNA methy | 34.80 | 0.00 |
| TRINITY_sp P7426slr1673  | Uncharacterized tRN | 34.80 | 0.00 |
| TRINITY_sp Q8LF4TFB4     | RNA polymerase II t | 34.80 | 0.00 |
| TRINITY_sp Q9QYfRdh11    | Retinol dehydrogena | 34.80 | 0.00 |
| TRINITY_sp B3MF3Art7     | Protein arginine N- | 34.80 | 0.00 |
| TRINITY_sp Q86C2dhkK     | Hybrid signal trans | 34.80 | 0.00 |
| TRINITY_sp Q6NZ6Eif4g1   | Eukaryotic translat | 34.80 | 0.00 |
| TRINITY_sp A6RBVHCAG_071 | Very-long-chain 3-o | 34.80 | 0.00 |
| TRINITY_sp Q8GU6RH50     | DEAD-box ATP-depend | 34.80 | 0.00 |
| TRINITY_sp P4606RECQL    | ATP-dependent DNA h | 34.80 | 0.00 |
| TRINITY_sp Q9H17ANAPC1   | Anaphase-promoting  | 34.80 | 0.00 |
| TRINITY_sp P3565DEK      | Protein DEK OS=Homo | 34.80 | 0.00 |
| TRINITY_sp O9582MLYCD    | Malonyl-CoA decarbo | 34.80 | 0.00 |
| TRINITY_sp Q9Y07itr-1    | Inositol 1,4,5-tris | 34.80 | 0.00 |
| TRINITY_sp Q75D7FMN1     | Riboflavin kinase O | 34.80 | 0.00 |
| TRINITY_sp Q9LIHUNG      | Uracil-DNA glycosyl | 34.80 | 0.00 |
| TRINITY_sp Q55C1uba1     | Ubiquitin-like modi | 34.80 | 0.00 |
| TRINITY_sp Q54N7kif4     | Kinesin-related pro | 34.80 | 0.00 |

|                           |                     |       |      |
|---------------------------|---------------------|-------|------|
| TRINITY_sp Q6341Pcsk6     | Proprotein converta | 34.80 | 0.00 |
| TRINITY_sp Q9ZU5BAT1      | Amino-acid permease | 34.80 | 0.00 |
| TRINITY_sp Q8BY1Itpk1     | Inositol-tetrakisph | 34.80 | 0.00 |
| TRINITY_sp Q2202cfxQ      | Protein CfxQ homolo | 34.80 | 0.00 |
| TRINITY_sp Q6DF\Ncapg2    | Condensin-2 complex | 34.80 | 0.00 |
| TRINITY_sp Q9S9VSDRA      | Short-chain dehydro | 34.80 | 0.00 |
| TRINITY_sp Q5BPIAt4g0667  | Protein EI24 homolo | 34.80 | 0.00 |
| TRINITY_sp P4352cya       | Adenylate cyclase O | 34.80 | 0.00 |
| TRINITY_sp Q6B9\vwkA      | Alpha-protein kinas | 34.80 | 0.00 |
| TRINITY_sp Q94A3SFH12     | Phosphatidylinosito | 34.70 | 0.00 |
| TRINITY_sp Q9FVFAt1g3222  | Uncharacterized pro | 34.70 | 0.00 |
| TRINITY_sp Q8VY7RS2Z33    | Serine/arginine-ric | 34.70 | 0.00 |
| TRINITY_sp Q5P4IgatA      | Glutamyl-tRNA(Gln)  | 34.70 | 0.00 |
| TRINITY_sp Q9ESVPgpep1    | Pyroglutamyl-peptid | 34.70 | 0.00 |
| TRINITY_sp Q8BI\Gpatch3   | G patch domain-cont | 34.70 | 0.00 |
| TRINITY_sp O8275RBL7      | RHOMBOID-like prote | 34.70 | 0.00 |
| TRINITY_sp Q2929CSTB      | Cystatin-B OS=Sus s | 34.70 | 0.00 |
| TRINITY_sp Q6IVWift57     | Intraflagellar tran | 34.70 | 0.00 |
| TRINITY_sp P2379RIT1      | tRNA A64-2'-O-ribos | 34.70 | 0.00 |
| TRINITY_sp P6339yheS      | Uncharacterized ABC | 34.70 | 0.00 |
| TRINITY_sp Q5ZII\COPE     | Coatomer subunit ep | 34.70 | 0.00 |
| TRINITY_sp P3089evgS      | Sensor protein EvgS | 34.70 | 0.00 |
| TRINITY_sp O3461ytqB      | Putative rRNA methy | 34.70 | 0.00 |
| TRINITY_sp Q9209Msi2      | RNA-binding protein | 34.70 | 0.00 |
| TRINITY_sp Q9FII\ATL30    | RING-H2 finger prot | 34.70 | 0.00 |
| TRINITY_sp Q8VEHPla2g15   | Group XV phospholip | 34.70 | 0.00 |
| TRINITY_sp Q9AV8PRP19     | Pre-mRNA-processing | 34.70 | 0.00 |
| TRINITY_sp Q2UN9oct1      | Mitochondrial inter | 34.70 | 0.00 |
| TRINITY_sp Q9GV1-         | Endoglycoceramidase | 34.70 | 0.00 |
| TRINITY_sp Q9M2IAAt3g6132 | UPF0187 protein At3 | 34.70 | 0.00 |
| TRINITY_sp Q9FVWUPF3      | Regulator of nonsen | 34.70 | 0.00 |
| TRINITY_sp Q99L9Abtb1     | Ankyrin repeat and  | 34.70 | 0.00 |
| TRINITY_sp Q6TA9ADCS      | Aminodeoxychorismat | 34.70 | 0.00 |
| TRINITY_sp Q54J9DDB_G029  | Probable serine/thr | 34.70 | 0.00 |
| TRINITY_sp Q5SS9Sft2d1    | Vesicle transport p | 34.70 | 0.00 |
| TRINITY_sp Q9SC9PAP17     | Purple acid phospho | 34.70 | 0.00 |
| TRINITY_sp P5469pikD      | Phosphatidylinosito | 34.70 | 0.00 |
| TRINITY_sp Q54B1redA      | NADPH oxidoreductas | 34.70 | 0.00 |
| TRINITY_sp Q54C9cog6      | Conserved oligomeri | 34.70 | 0.00 |
| TRINITY_sp Q55G9DDB_G029  | Probable phosphatid | 34.70 | 0.00 |
| TRINITY_sp Q8CII9Sidt2    | SID1 transmembrane  | 34.70 | 0.00 |
| TRINITY_sp Q8BX9Ppk       | PX domain-containin | 34.70 | 0.00 |
| TRINITY_sp Q91X9Chia      | Acidic mammalian ch | 34.70 | 0.00 |
| TRINITY_sp Q54D9DDB_G029  | Putative protein DD | 34.70 | 0.00 |
| TRINITY_sp Q8LE9NUDT11    | Nudix hydrolase 11  | 34.70 | 0.00 |
| TRINITY_sp Q86UVN4BP2     | NEDD4-binding prote | 34.70 | 0.00 |
| TRINITY_sp Q1HF9Nsun2     | tRNA (cytosine(34)- | 34.70 | 0.00 |
| TRINITY_sp Q5SP9wdr26     | WD repeat-containin | 34.70 | 0.00 |
| TRINITY_sp Q9449SNF4      | Sucrose nonfermenti | 34.70 | 0.00 |
| TRINITY_sp Q54L9cog7      | Conserved oligomeri | 34.70 | 0.00 |
| TRINITY_sp Q6GL9ibrd9     | Bromodomain-contain | 34.70 | 0.00 |
| TRINITY_sp Q9TW9myoM      | Myosin-M heavy chai | 34.70 | 0.00 |
| TRINITY_sp Q8W59CYCH1-1   | Cyclin-H1-1 OS=Arab | 34.70 | 0.00 |
| TRINITY_sp Q9ES9Dusp10    | Dual specificity pr | 34.70 | 0.00 |
| TRINITY_sp Q8ND9CCNY      | Cyclin-Y OS=Homo sa | 34.70 | 0.00 |
| TRINITY_sp Q54B9nfx1      | Transcriptional rep | 34.70 | 0.00 |

|                         |                     |       |      |
|-------------------------|---------------------|-------|------|
| TRINITY_sp Q8NFI FLAD1  | FAD synthase OS=Hom | 34.70 | 0.00 |
| TRINITY_sp Q61Y CBG0355 | Leishmanolysin-like | 34.70 | 0.00 |
| TRINITY_sp Q8BL Met121  | Protein-lysine meth | 34.70 | 0.00 |
| TRINITY_sp P480 gacS    | Sensor protein GacS | 34.70 | 0.00 |
| TRINITY_sp P554 NGR_a03 | Uncharacterized pro | 34.70 | 0.00 |
| TRINITY_sp E9L7-        | Bifunctional aspart | 34.70 | 0.00 |
| TRINITY_sp Q8BT Rccd1   | RCC1 domain-contain | 34.70 | 0.00 |
| TRINITY_sp O806 APY6    | Probable apyrase 6  | 34.70 | 0.00 |
| TRINITY_sp Q9Y2 TRAPPC4 | Trafficking protein | 34.70 | 0.00 |
| TRINITY_sp P590 vps18   | Vacuolar protein so | 34.70 | 0.00 |
| TRINITY_sp O149 PIP5K1B | Phosphatidylinosito | 34.70 | 0.00 |
| TRINITY_sp Q5BU Eapp    | E2F-associated phos | 34.70 | 0.00 |
| TRINITY_sp Q8C0 Slc25a1 | Graves disease carr | 34.70 | 0.00 |
| TRINITY_sp P547 pknA    | Serine/threonine-pr | 34.70 | 0.00 |
| TRINITY_sp Q8L5 TFCD    | Tubulin-folding cof | 34.70 | 0.00 |
| TRINITY_sp Q80Y Alkbh8  | Alkylated DNA repai | 34.70 | 0.00 |
| TRINITY_sp O440 PYK     | Pyruvate kinase OS= | 34.70 | 0.00 |
| TRINITY_sp A5PK IOXR1   | Oxidation resistanc | 34.70 | 0.00 |
| TRINITY_sp O056 vanA    | Vanillate O-demethy | 34.70 | 0.00 |
| TRINITY_sp Q86H cf45-1  | Counting factor 45- | 34.70 | 0.00 |
| TRINITY_sp Q6CN HSV2    | SVP1-like protein 2 | 34.70 | 0.00 |
| TRINITY_sp Q54S allB1   | Probable allantoina | 34.60 | 0.00 |
| TRINITY_sp Q8RV IDEK1   | Calpain-type cystei | 34.60 | 0.00 |
| TRINITY_sp P238 sds21   | Serine/threonine-pr | 34.60 | 0.00 |
| TRINITY_sp Q8LAI HCC2   | Protein SCO1 homolo | 34.60 | 0.00 |
| TRINITY_sp P372 FRM2    | Fatty acid repressi | 34.60 | 0.00 |
| TRINITY_sp Q0BW mnmG    | tRNA uridine 5-carb | 34.60 | 0.00 |
| TRINITY_sp Q8RX HDA5    | Histone deacetylase | 34.60 | 0.00 |
| TRINITY_sp Q54R fdhkL   | Hybrid signal trans | 34.60 | 0.00 |
| TRINITY_sp Q9UK GPATCH8 | G patch domain-cont | 34.60 | 0.00 |
| TRINITY_sp P684 erg3    | C-5 sterol desatura | 34.60 | 0.00 |
| TRINITY_sp Q96Q ALKBH3  | Alpha-ketoglutarate | 34.60 | 0.00 |
| TRINITY_sp Q8WW RTN4IP1 | Reticulon-4-interac | 34.60 | 0.00 |
| TRINITY_sp Q5FV Wdsub1  | WD repeat, SAM and  | 34.60 | 0.00 |
| TRINITY_sp Q9NB-        | T-complex protein 1 | 34.60 | 0.00 |
| TRINITY_sp Q9SM LKR/SDH | Alpha-aminoadipic s | 34.60 | 0.00 |
| TRINITY_sp Q6XP PLA2G15 | Group XV phospholip | 34.60 | 0.00 |
| TRINITY_sp P598 RDH12   | Retinol dehydrogena | 34.60 | 0.00 |
| TRINITY_sp F4JT STY46   | Serine/threonine-pr | 34.60 | 0.00 |
| TRINITY_sp Q8LB RBL15   | Rhomboid-like prote | 34.60 | 0.00 |
| TRINITY_sp F4JY DHFS    | Dihydrofolate synth | 34.60 | 0.00 |
| TRINITY_sp O946 rev1    | DNA repair protein  | 34.60 | 0.00 |
| TRINITY_sp A0JP cnot1   | CCR4-NOT transcript | 34.60 | 0.00 |
| TRINITY_sp Q66J trmt10a | tRNA methyltransfer | 34.60 | 0.00 |
| TRINITY_sp Q9UN ABCG2   | ATP-binding cassett | 34.60 | 0.00 |
| TRINITY_sp Q2KI SUGT1   | Protein SGT1 homolo | 34.60 | 0.00 |
| TRINITY_sp Q9P2 VPS18   | Vacuolar protein so | 34.60 | 0.00 |
| TRINITY_sp Q9FY TRS120  | Trafficking protein | 34.60 | 0.00 |
| TRINITY_sp Q1EB BPM5    | BTB/POZ and MATH do | 34.60 | 0.00 |
| TRINITY_sp Q54T drkC    | Probable serine/thr | 34.60 | 0.00 |
| TRINITY_sp Q653 Os09g05 | Probable protein ph | 34.60 | 0.00 |
| TRINITY_sp Q000 SLC25A5 | ADP/ATP translocase | 34.60 | 0.00 |
| TRINITY_sp P743 sl11541 | Apocarotenoid-15,15 | 34.60 | 0.00 |
| TRINITY_sp Q9JK Cyp39a1 | 24-hydroxycholester | 34.60 | 0.00 |
| TRINITY_sp Q5JI TK1689  | Subtilisin-like ser | 34.60 | 0.00 |
| TRINITY_sp O154 ABCC4   | Multidrug resistanc | 34.60 | 0.00 |

|                          |                     |       |      |
|--------------------------|---------------------|-------|------|
| TRINITY_sp Q6GPFtaok2    | Serine/threonine-pr | 34.60 | 0.00 |
| TRINITY_sp A3KMRANBP10   | Ran-binding protein | 34.60 | 0.00 |
| TRINITY_sp P800cpcsa1    | Thermostable carbox | 34.60 | 0.00 |
| TRINITY_sp A6H7ECOPS3    | COP9 signalosome co | 34.60 | 0.00 |
| TRINITY_sp Q5VYFECM29    | Proteasome-associat | 34.60 | 0.00 |
| TRINITY_sp Q4PIRRP36     | rRNA biogenesis pro | 34.60 | 0.00 |
| TRINITY_sp A7Z0PPIP5K1   | Inositol hexakispho | 34.60 | 0.00 |
| TRINITY_sp A0JMFmtmr2    | Myotubularin-relate | 34.60 | 0.00 |
| TRINITY_sp O138imp3      | U3 small nucleolar  | 34.60 | 0.00 |
| TRINITY_sp Q8BXGpigt     | GPI transamidase co | 34.60 | 0.00 |
| TRINITY_sp P418gar2      | Protein gar2 OS=Sch | 34.60 | 0.00 |
| TRINITY_sp Q5BLImettl21a | Protein N-lysine me | 34.60 | 0.00 |
| TRINITY_sp Q8N3SLC35F6   | Solute carrier fami | 34.60 | 0.00 |
| TRINITY_sp Q9UTtif222    | Probable translatio | 34.60 | 0.00 |
| TRINITY_sp P621NCS1      | Neuronal calcium se | 34.60 | 0.00 |
| TRINITY_sp Q207tbcb-1    | Tubulin-specific ch | 34.60 | 0.00 |
| TRINITY_sp Q9ATFADA2B    | Transcriptional ada | 34.60 | 0.00 |
| TRINITY_sp Q9SKAt2g203a  | NADH dehydrogenase  | 34.60 | 0.00 |
| TRINITY_sp Q87AIPD_1893  | UPF0394 membrane pr | 34.60 | 0.00 |
| TRINITY_sp Q55EgxcB      | Rac guanine nucleot | 34.60 | 0.00 |
| TRINITY_sp Q9SJSPP2      | Probable sucrose-ph | 34.60 | 0.00 |
| TRINITY_sp A5YKFCNOT1    | CCR4-NOT transcript | 34.60 | 0.00 |
| TRINITY_sp Q9ZUIETL1     | Protein CHROMATIN R | 34.60 | 0.00 |
| TRINITY_sp Q8Z0dfa5      | Putative diflavin f | 34.60 | 0.00 |
| TRINITY_sp P535Cebpz     | CCAAT/enhancer-bind | 34.60 | 0.00 |
| TRINITY_sp P109-         | Retrovirus-related  | 34.60 | 0.00 |
| TRINITY_sp Q54Iupf1      | Regulator of nonsen | 34.60 | 0.00 |
| TRINITY_sp Q5U3-         | UPF0769 protein C21 | 34.60 | 0.00 |
| TRINITY_sp D2Z0dcsG      | Cycloserine biosynt | 34.50 | 0.00 |
| TRINITY_sp Q6V5FZnf474   | Zinc finger protein | 34.50 | 0.00 |
| TRINITY_sp Q91YSlc13a3   | Solute carrier fami | 34.50 | 0.00 |
| TRINITY_sp A3B5CIPK28    | CBL-interacting pro | 34.50 | 0.00 |
| TRINITY_sp Q55Bp1bB      | Phospholipase B-lik | 34.50 | 0.00 |
| TRINITY_sp C9J7RASA4B    | Ras GTPase-activati | 34.50 | 0.00 |
| TRINITY_sp Q86Jtrmt61a   | tRNA (adenine(58)-N | 34.50 | 0.00 |
| TRINITY_sp Q4I0TIM50     | Mitochondrial impor | 34.50 | 0.00 |
| TRINITY_sp Q54Ntatg9     | Autophagy-related p | 34.50 | 0.00 |
| TRINITY_sp Q54BMmcfG     | Mitochondrial subst | 34.50 | 0.00 |
| TRINITY_sp Q69Q4CIPK24   | CBL-interacting pro | 34.50 | 0.00 |
| TRINITY_sp P6234CPK4     | Calcium-dependent p | 34.50 | 0.00 |
| TRINITY_sp Q6C2INOP14    | Probable nucleolar  | 34.50 | 0.00 |
| TRINITY_sp Q8EPybeY      | Endoribonuclease Yb | 34.50 | 0.00 |
| TRINITY_sp Q136RAB32     | Ras-related protein | 34.50 | 0.00 |
| TRINITY_sp Q9LVADS3.2    | Probable lipid desa | 34.50 | 0.00 |
| TRINITY_sp A2VE4ADPGK    | ADP-dependent gluco | 34.50 | 0.00 |
| TRINITY_sp Q9VYUpf1      | Regulator of nonsen | 34.50 | 0.00 |
| TRINITY_sp Q9VHInvadoly  | Leishmanolysin-like | 34.50 | 0.00 |
| TRINITY_sp P193NCL       | Nucleolin OS=Homo s | 34.50 | 0.00 |
| TRINITY_sp Q8W5EKIN7D    | Kinesin-like protei | 34.50 | 0.00 |
| TRINITY_sp Q4V7Insun2    | tRNA (cytosine(34)- | 34.50 | 0.00 |
| TRINITY_sp Q55Bfdgat1    | Diacylglycerol O-ac | 34.50 | 0.00 |
| TRINITY_sp Q5AYfpob3     | FACT complex subuni | 34.50 | 0.00 |
| TRINITY_sp Q5XI>Dnajc14  | DnaJ homolog subfam | 34.50 | 0.00 |
| TRINITY_sp Q99LCTtc5     | Tetratricopeptide r | 34.50 | 0.00 |
| TRINITY_sp Q91ZfAbhd3    | Phospholipase ABHD3 | 34.50 | 0.00 |
| TRINITY_sp P966(ydbI     | UPF0118 membrane pr | 34.50 | 0.00 |

|                          |                     |       |      |
|--------------------------|---------------------|-------|------|
| TRINITY_sp P377{rfbC     | dTDP-4-dehydrorhamn | 34.50 | 0.00 |
| TRINITY_sp Q86JMDDB_G02  | Putative elongation | 34.50 | 0.00 |
| TRINITY_sp Q8MYIDDB_G02  | Probable serine/thr | 34.50 | 0.00 |
| TRINITY_sp Q755{OXR1     | Oxidation resistanc | 34.50 | 0.00 |
| TRINITY_sp Q963{IMPA1    | Importin subunit al | 34.50 | 0.00 |
| TRINITY_sp O435{ATP8B1   | Phospholipid-transp | 34.50 | 0.00 |
| TRINITY_sp Q9UK{PARP4    | Poly [ADP-ribose] p | 34.50 | 0.00 |
| TRINITY_sp Q9FP{UBP24    | Ubiquitin carboxyl- | 34.50 | 0.00 |
| TRINITY_sp Q05B{GTF2H3   | General transcripti | 34.50 | 0.00 |
| TRINITY_sp Q54B{exoc6    | Exocyst complex com | 34.50 | 0.00 |
| TRINITY_sp Q9FG{TIL      | Temperature-induced | 34.50 | 0.00 |
| TRINITY_sp Q9ZU{BAT1     | Amino-acid permease | 34.50 | 0.00 |
| TRINITY_sp Q9S7{LOG2     | Probable E3 ubiquit | 34.50 | 0.00 |
| TRINITY_sp Q96E{MCRS1    | Microspherule prote | 34.50 | 0.00 |
| TRINITY_sp Q8I7{Ipol     | Retrovirus-related  | 34.50 | 0.00 |
| TRINITY_sp O129{RAD54L   | DNA repair and reco | 34.50 | 0.00 |
| TRINITY_sp Q8BG{Tmtc4    | Transmembrane and T | 34.50 | 0.00 |
| TRINITY_sp Q9LQ{ABCI7    | Protein ABCI7, chlo | 34.50 | 0.00 |
| TRINITY_sp Q8LB{SPX1     | SPX domain-containi | 34.50 | 0.00 |
| TRINITY_sp A8IS{ARL3     | ADP-ribosylation fa | 34.50 | 0.00 |
| TRINITY_sp Q8W4{CAT4     | Cationic amino acid | 34.50 | 0.00 |
| TRINITY_sp Q079{ARHGAP1  | Rho GTPase-activati | 34.50 | 0.00 |
| TRINITY_sp Q8C7{Emc1     | ER membrane protein | 34.50 | 0.00 |
| TRINITY_sp Q55A{DDB_G02  | Probable serine/thr | 34.50 | 0.00 |
| TRINITY_sp Q4P2{UMAG_05{ | ATP-dependent (S)-N | 34.50 | 0.00 |
| TRINITY_sp Q8R3{Nop14    | Nucleolar protein 1 | 34.50 | 0.00 |
| TRINITY_sp O343{ylbH     | Putative rRNA methy | 34.50 | 0.00 |
| TRINITY_sp Q055{CHI17    | Acidic 27 kDa endoc | 34.50 | 0.00 |
| TRINITY_sp A7J1{map3k13- | Mitogen-activated p | 34.50 | 0.00 |
| TRINITY_sp Q9S7{PPD3     | PsbP domain-contain | 34.50 | 0.00 |
| TRINITY_sp Q9P3{bud20    | Zinc finger protein | 34.50 | 0.00 |
| TRINITY_sp Q9ZU{BAT1     | Amino-acid permease | 34.50 | 0.00 |
| TRINITY_sp Q9SW{CHLM     | Magnesium protoporp | 34.50 | 0.00 |
| TRINITY_sp P360{EBP2     | rRNA-processing pro | 34.50 | 0.00 |
| TRINITY_sp Q9M9{At3g0564 | Probable protein ph | 34.50 | 0.00 |
| TRINITY_sp Q8HX{ABCC1    | Multidrug resistanc | 34.50 | 0.00 |
| TRINITY_sp P109{-        | Retrovirus-related  | 34.50 | 0.00 |
| TRINITY_sp Q028{PNG1     | Peptide-N(4)-(N-ace | 34.50 | 0.00 |
| TRINITY_sp Q9P8{tcsA     | Two-component syste | 34.50 | 0.00 |
| TRINITY_sp Q7SX{fmaea    | Macrophage erythrob | 34.50 | 0.00 |
| TRINITY_sp P605{GABARAPI | Gamma-aminobutyric  | 34.40 | 0.00 |
| TRINITY_sp A5UX{igata    | Glutamyl-tRNA (Gln) | 34.40 | 0.00 |
| TRINITY_sp Q9VD{meigo    | Solute carrier fami | 34.40 | 0.00 |
| TRINITY_sp Q02V{mutS     | DNA mismatch repair | 34.40 | 0.00 |
| TRINITY_sp O137{SPAC17A5 | Uncharacterized pro | 34.40 | 0.00 |
| TRINITY_sp Q499{Tmco4    | Transmembrane and c | 34.40 | 0.00 |
| TRINITY_sp Q9UT{SPAC513. | Probable phosphatas | 34.40 | 0.00 |
| TRINITY_sp Q7G1{FIM1     | Fimbrin-1 OS=Arabid | 34.40 | 0.00 |
| TRINITY_sp A1A0{rpsE     | 30S ribosomal prote | 34.40 | 0.00 |
| TRINITY_sp Q1MT{vid27    | Vacuolar import and | 34.40 | 0.00 |
| TRINITY_sp P800{-        | Extracellular ribon | 34.40 | 0.00 |
| TRINITY_sp Q2KI{TDH      | L-threonine 3-dehyd | 34.40 | 0.00 |
| TRINITY_sp Q84M{ABCA1    | ABC transporter A f | 34.40 | 0.00 |
| TRINITY_sp F4IN{GGP4     | Gamma-glutamyl pept | 34.40 | 0.00 |
| TRINITY_sp Q9LD{CYCB2-3  | Cyclin-B2-3 OS=Arab | 34.40 | 0.00 |
| TRINITY_sp O510{trmH     | tRNA (guanosine(18) | 34.40 | 0.00 |

|                  |          |                     |       |      |
|------------------|----------|---------------------|-------|------|
| TRINITY_sp P0987 | PARP1    | Poly [ADP-ribose] p | 34.40 | 0.00 |
| TRINITY_sp Q6444 | Atp7b    | Copper-transporting | 34.40 | 0.00 |
| TRINITY_sp P0D0C | dkey-242 | Protein C8orf37 hom | 34.40 | 0.00 |
| TRINITY_sp P5198 | -        | G2/mitotic-specific | 34.40 | 0.00 |
| TRINITY_sp P4917 | IVR1     | Beta-fructofuranosi | 34.40 | 0.00 |
| TRINITY_sp Q3SZ8 | BOLA3    | Bola-like protein 3 | 34.40 | 0.00 |
| TRINITY_sp C7G04 | DDB_G028 | von Willebrand fact | 34.40 | 0.00 |
| TRINITY_sp P1464 | Pde4c    | cAMP-specific 3',5' | 34.40 | 0.00 |
| TRINITY_sp Q9C9C | ENDO2    | Endonuclease 2 OS=A | 34.40 | 0.00 |
| TRINITY_sp P2817 | pkgB     | Protein kinase 2 OS | 34.40 | 0.00 |
| TRINITY_sp Q6P3V | SCYL2    | SCY1-like protein 2 | 34.40 | 0.00 |
| TRINITY_sp Q8RWI | STY17    | Serine/threonine-pr | 34.40 | 0.00 |
| TRINITY_sp Q149M | SHPRH    | E3 ubiquitin-protei | 34.40 | 0.00 |
| TRINITY_sp O8899 | Marc2    | Mitochondrial amido | 34.40 | 0.00 |
| TRINITY_sp Q3ZC6 | CFAP36   | Cilia- and flagella | 34.40 | 0.00 |
| TRINITY_sp Q52T6 | PAT24    | Protein S-acyltrans | 34.40 | 0.00 |
| TRINITY_sp O7673 | tupA     | General transcripti | 34.40 | 0.00 |
| TRINITY_sp Q6522 | Os06g052 | Probable protein ph | 34.40 | 0.00 |
| TRINITY_sp Q9P77 | SPBC1711 | Dipeptidyl-peptidas | 34.40 | 0.00 |
| TRINITY_sp Q9UL8 | RNF112   | RING finger protein | 34.40 | 0.00 |
| TRINITY_sp Q5UP5 | MIMI_R58 | Uncharacterized pro | 34.40 | 0.00 |
| TRINITY_sp Q54C8 | ddx17    | Probable ATP-depend | 34.40 | 0.00 |
| TRINITY_sp P0509 | abpA     | Alpha-actinin A OS= | 34.40 | 0.00 |
| TRINITY_sp P4189 | gar2     | Protein gar2 OS=Sch | 34.40 | 0.00 |
| TRINITY_sp Q07G1 | alkbh8   | Alkylated DNA repai | 34.40 | 0.00 |
| TRINITY_sp Q9UI1 | LCMT1    | Leucine carboxyl me | 34.40 | 0.00 |
| TRINITY_sp Q1457 | ITPR3    | Inositol 1,4,5-tris | 34.40 | 0.00 |
| TRINITY_sp Q8VZ6 | At4g1919 | Uncharacterized zin | 34.40 | 0.00 |
| TRINITY_sp Q2XV8 | scn4aa   | Sodium channel prot | 34.40 | 0.00 |
| TRINITY_sp Q8VY8 | NUDT21   | Nudix hydrolase 21, | 34.40 | 0.00 |
| TRINITY_sp Q8LH8 | SHL2     | Probable RNA-depend | 34.40 | 0.00 |
| TRINITY_sp O758C | CAPN15   | Calpain-15 OS=Homo  | 34.40 | 0.00 |
| TRINITY_sp P7317 | s111290  | Uncharacterized rib | 34.40 | 0.00 |
| TRINITY_sp Q9QZ7 | XPR1     | Xenotropic and poly | 34.40 | 0.00 |
| TRINITY_sp Q86TV | ADCK1    | Uncharacterized aar | 34.40 | 0.00 |
| TRINITY_sp Q54H4 | drkA     | Probable serine/thr | 34.40 | 0.00 |
| TRINITY_sp P3858 | TTL      | Tubulin--tyrosine 1 | 34.40 | 0.00 |
| TRINITY_sp Q0V9F | dis3l2   | DIS3-like exonuclea | 34.40 | 0.00 |
| TRINITY_sp Q9LU4 | ACA9     | Calcium-transportin | 34.40 | 0.00 |
| TRINITY_sp Q2462 | ref(2)P  | Protein ref(2)P OS= | 34.40 | 0.00 |
| TRINITY_sp Q96V8 | HBN1     | Putative nitroreduc | 34.40 | 0.00 |
| TRINITY_sp Q3TZ7 | Cdk14    | Cyclin-dependent ki | 34.40 | 0.00 |
| TRINITY_sp P2271 | Gucylb2  | Guanylate cyclase s | 34.40 | 0.00 |
| TRINITY_sp Q8IZ8 | FXRN1    | 5'-3' exoribonuclea | 34.40 | 0.00 |
| TRINITY_sp Q9BV8 | EMC6     | ER membrane protein | 34.40 | 0.00 |
| TRINITY_sp P4977 | aph1     | Bis(5'-nucleosyl)-t | 34.30 | 0.00 |
| TRINITY_sp Q6Z82 | WEE1     | Wee1-like protein k | 34.30 | 0.00 |
| TRINITY_sp B6QM8 | vps10    | Vacuolar protein so | 34.30 | 0.00 |
| TRINITY_sp Q6TB3 | CYP97C1  | Carotene epsilon-mo | 34.30 | 0.00 |
| TRINITY_sp P364C | TRIM23   | E3 ubiquitin-protei | 34.30 | 0.00 |
| TRINITY_sp Q6X47 | CIPK31   | CBL-interacting pro | 34.30 | 0.00 |
| TRINITY_sp Q8IS1 | gefI     | Ras guanine nucleot | 34.30 | 0.00 |
| TRINITY_sp P3245 | GBP2     | Guanylate-binding p | 34.30 | 0.00 |
| TRINITY_sp Q2KI5 | COPS7B   | COP9 signalosome co | 34.30 | 0.00 |
| TRINITY_sp Q9LE7 | RBL20    | Rhomboid-like prote | 34.30 | 0.00 |
| TRINITY_sp P4636 | birA     | Bifunctional ligase | 34.30 | 0.00 |



|                          |                       |       |      |
|--------------------------|-----------------------|-------|------|
| TRINITY_sp Q08DCHSF1     | Heat shock factor p   | 34.30 | 0.00 |
| TRINITY_sp Q54BVttc27    | Tetratricopeptide r   | 34.30 | 0.00 |
| TRINITY_sp Q6L5C0s05g058 | Probable protein ph   | 34.30 | 0.00 |
| TRINITY_sp P2577-        | Cruzipain OS=Trypan   | 34.30 | 0.00 |
| TRINITY_sp Q6NLCPK32     | Calcium-dependent p   | 34.30 | 0.00 |
| TRINITY_sp P3318yhxA     | Uncharacterized ami   | 34.30 | 0.00 |
| TRINITY_sp Q9TW2myoM     | Myosin-M heavy chai   | 34.30 | 0.00 |
| TRINITY_sp Q54GEctdsp12  | CTD small phosphata   | 34.30 | 0.00 |
| TRINITY_sp Q8VW2SMO2-2   | Methylsterol monoox   | 34.30 | 0.00 |
| TRINITY_sp E9Q48Pde8b    | High affinity cAMP-   | 34.30 | 0.00 |
| TRINITY_sp Q6AYCMmadhc   | Methylmalonic acidu   | 34.30 | 0.00 |
| TRINITY_sp Q80Z2Nampt    | Nicotinamide phosph   | 34.30 | 0.00 |
| TRINITY_sp Q9ZB8lysa     | Diaminopimelate dec   | 34.30 | 0.00 |
| TRINITY_sp Q9GSEcrtp1    | Crt homolog 1 OS=Di   | 34.30 | 0.00 |
| TRINITY_sp Q552MDDB_G027 | Putative ZDHHC-type   | 34.30 | 0.00 |
| TRINITY_sp Q9SFCMCM8     | Probable DNA helica   | 34.30 | 0.00 |
| TRINITY_sp Q54L8DDB_G028 | Probable serine/thr   | 34.30 | 0.00 |
| TRINITY_sp Q6PC2yif1a    | Protein YIF1A OS=Da   | 34.30 | 0.00 |
| TRINITY_sp Q54H8DDB_G028 | FAD-linked oxidored   | 34.30 | 0.00 |
| TRINITY_sp Q9VGF17726    | Protein arginine me   | 34.30 | 0.00 |
| TRINITY_sp Q98T8rent1    | Putative regulator    | 34.30 | 0.00 |
| TRINITY_sp Q9CP8Glod4    | Glyoxalase domain-c   | 34.30 | 0.00 |
| TRINITY_sp O7518DNAJC13  | DnaJ homolog subfam   | 34.30 | 0.00 |
| TRINITY_sp Q02P8lap      | Aminopeptidase OS=P   | 34.30 | 0.00 |
| TRINITY_sp Q1231SFM1     | Protein arginine N-   | 34.30 | 0.00 |
| TRINITY_sp Q6B98vwkA     | Alpha-protein kinas   | 34.30 | 0.00 |
| TRINITY_sp P3228rasS     | Ras-like protein ra   | 34.30 | 0.00 |
| TRINITY_sp P4288VNX1     | Low affinity vacuol   | 34.30 | 0.00 |
| TRINITY_sp Q9SV8GH9B16   | Endoglucanase 22 OS   | 34.30 | 0.00 |
| TRINITY_sp Q9SM8TFCC     | Tubulin-folding cof   | 34.30 | 0.00 |
| TRINITY_sp O6268CYP2C41  | Cytochrome P450 2C4   | 34.30 | 0.00 |
| TRINITY_sp Q9SL8HCS1     | Biotin--protein lig   | 34.30 | 0.00 |
| TRINITY_sp A4W98seld     | Selenide, water dik   | 34.30 | 0.00 |
| TRINITY_sp P8241RPL19    | 50S ribosomal prote   | 34.30 | 0.00 |
| TRINITY_sp Q9ST8At4g0838 | Putative transcript   | 34.30 | 0.00 |
| TRINITY_sp O2438TIC110   | Protein TIC110, chl   | 34.30 | 0.00 |
| TRINITY_sp Q91Y8Mettl13  | Methyltransferase-1   | 34.30 | 0.00 |
| TRINITY_sp Q8N98IGDPD1   | Glycerophosphodiester | 34.30 | 0.00 |
| TRINITY_sp Q6V48H10HGO   | 8-hydroxygeraniol d   | 34.30 | 0.00 |
| TRINITY_sp P4288ECE1     | Endothelin-converto   | 34.30 | 0.00 |
| TRINITY_sp P3578-        | Venom allergen 5 OS   | 34.30 | 0.00 |
| TRINITY_sp Q9MA8PRMT10   | Protein arginine N-   | 34.30 | 0.00 |
| TRINITY_sp Q84J8EZDP     | Polynucleotide 3'-p   | 34.30 | 0.00 |
| TRINITY_sp Q9VG8ClC-a    | Chloride channel pr   | 34.30 | 0.00 |
| TRINITY_sp Q5BA8dpp5     | Probable dipeptidyl   | 34.30 | 0.00 |
| TRINITY_sp Q55C8vps26    | Vacuolar protein so   | 34.30 | 0.00 |
| TRINITY_sp Q55E8DDB_G026 | Probable serine/thr   | 34.30 | 0.00 |
| TRINITY_sp Q8QZ8Pde9a    | High affinity cGMP-   | 34.30 | 0.00 |
| TRINITY_sp Q4018-        | LEC14B protein OS=L   | 34.30 | 0.00 |
| TRINITY_sp Q7LH8TY3B-I   | Transposon Ty3-I Ga   | 34.30 | 0.00 |
| TRINITY_sp Q94K8VPS33    | Vacuolar protein-so   | 34.20 | 0.00 |
| TRINITY_sp Q9448POST48   | Dolichyl-diphosphoo   | 34.20 | 0.00 |
| TRINITY_sp Q54W8egcn1    | eIF-2-alpha kinase    | 34.20 | 0.00 |
| TRINITY_sp Q0748-        | Ribonuclease OS=Aer   | 34.20 | 0.00 |
| TRINITY_sp Q82T8vdef1    | Peptide deformylase   | 34.20 | 0.00 |
| TRINITY_sp Q9XY8noxA     | Superoxide-generati   | 34.20 | 0.00 |

|                          |                     |       |      |
|--------------------------|---------------------|-------|------|
| TRINITY_sp P5346-        | Actin, larval muscl | 34.20 | 0.00 |
| TRINITY_sp B1VG6infB     | Translation initiat | 34.20 | 0.00 |
| TRINITY_sp P3446polk-1   | DNA polymerase kapp | 34.20 | 0.00 |
| TRINITY_sp Q5U25usp47    | Ubiquitin carboxyl- | 34.20 | 0.00 |
| TRINITY_sp Q6AX6mast3    | Microtubule-associa | 34.20 | 0.00 |
| TRINITY_sp P2916PCSK6    | Proprotein converta | 34.20 | 0.00 |
| TRINITY_sp P0CM6CWC21    | Pre-mRNA-splicing f | 34.20 | 0.00 |
| TRINITY_sp Q54U6pIdA     | Phospholipase D A O | 34.20 | 0.00 |
| TRINITY_sp P2506CML12    | Calmodulin-like pro | 34.20 | 0.00 |
| TRINITY_sp Q9416rac-2    | Ras-related protein | 34.20 | 0.00 |
| TRINITY_sp F4IVIGRV2     | DnaJ homolog subfam | 34.20 | 0.00 |
| TRINITY_sp Q8BG6Zadh2    | Prostaglandin reduc | 34.20 | 0.00 |
| TRINITY_sp P4186gar2     | Protein gar2 OS=Sch | 34.20 | 0.00 |
| TRINITY_sp Q9CX1Utp23    | rRNA-processing pro | 34.20 | 0.00 |
| TRINITY_sp Q28B6c2cd5    | C2 domain-containin | 34.20 | 0.00 |
| TRINITY_sp O1406SPAC2C4  | Putative tRNA 2'-ph | 34.20 | 0.00 |
| TRINITY_sp Q9UR6Tf2-11   | Transposon Tf2-11 p | 34.20 | 0.00 |
| TRINITY_sp P1096-        | Retrovirus-related  | 34.20 | 0.00 |
| TRINITY_sp P2806AOAH     | Acyloxyacyl hydroly | 34.20 | 0.00 |
| TRINITY_sp Q2396kinX     | Probable serine/thr | 34.20 | 0.00 |
| TRINITY_sp Q9S76HSP70-14 | Heat shock 70 kDa p | 34.20 | 0.00 |
| TRINITY_sp Q86A6DDB_G026 | Probable myosin lig | 34.20 | 0.00 |
| TRINITY_sp Q9SY6HEX02    | Beta-hexosaminidase | 34.20 | 0.00 |
| TRINITY_sp Q69Z6Kiaa1161 | Uncharacterized fam | 34.20 | 0.00 |
| TRINITY_sp P2096RASA1    | Ras GTPase-activati | 34.20 | 0.00 |
| TRINITY_sp F4IA6THO2     | THO complex subunit | 34.20 | 0.00 |
| TRINITY_sp Q2KH6USP2     | Ubiquitin carboxyl- | 34.20 | 0.00 |
| TRINITY_sp Q2206pde-4    | Probable 3',5'-cycl | 34.20 | 0.00 |
| TRINITY_sp A5A66ASAH1    | Acid ceramidase OS= | 34.20 | 0.00 |
| TRINITY_sp O1316epha3    | Ephrin type-A recep | 34.20 | 0.00 |
| TRINITY_sp A8IU6CFAP99   | Cilia- and flagella | 34.20 | 0.00 |
| TRINITY_sp B7J96rlmD     | 23S rRNA (uracil(19 | 34.20 | 0.00 |
| TRINITY_sp Q55E6DDB_G026 | Probable serine/thr | 34.20 | 0.00 |
| TRINITY_sp O8266HCF136   | Photosystem II stab | 34.20 | 0.00 |
| TRINITY_sp Q96A6RAB37    | Ras-related protein | 34.20 | 0.00 |
| TRINITY_sp Q9SL6FALA6    | Phospholipid-transp | 34.20 | 0.00 |
| TRINITY_sp P8316LACTB    | Serine beta-lactama | 34.20 | 0.00 |
| TRINITY_sp P4366RMD8     | Sporulation protein | 34.20 | 0.00 |
| TRINITY_sp Q54J6fabcc3   | ABC transporter C f | 34.20 | 0.00 |
| TRINITY_sp Q7LH6TY3B-I   | Transposon Ty3-I Ga | 34.20 | 0.00 |
| TRINITY_sp Q5MB6ABCG2    | ATP-binding cassett | 34.20 | 0.00 |
| TRINITY_sp Q9LQ6RDR1     | RNA-dependent RNA p | 34.20 | 0.00 |
| TRINITY_sp H2DH6-        | Cytochrome P450 CYP | 34.20 | 0.00 |
| TRINITY_sp Q8L76LPEAT1   | Lysophospholipid ac | 34.20 | 0.00 |
| TRINITY_sp Q55E6corB     | Coronin-B OS=Dictyo | 34.20 | 0.00 |
| TRINITY_sp Q4V36FSPPL3   | Signal peptide pept | 34.20 | 0.00 |
| TRINITY_sp Q9ZU6BAT1     | Amino-acid permease | 34.20 | 0.00 |
| TRINITY_sp Q8RY6DEGP7    | Protease Do-like 7  | 34.20 | 0.00 |

|                          |                      |       |      |
|--------------------------|----------------------|-------|------|
| TRINITY_sp Q9UT(paa1     | Protein phosphatase  | 34.20 | 0.00 |
| TRINITY_sp Q9VV(Nedd4    | E3 ubiquitin-protei  | 34.20 | 0.00 |
| TRINITY_sp Q1PF(CPK19    | Calcium-dependent p  | 34.20 | 0.00 |
| TRINITY_sp Q8K0(Dync2li1 | Cytoplasmic dynein   | 34.20 | 0.00 |
| TRINITY_sp Q55G(VDDB_G02 | (AN1-type zinc finge | 34.10 | 0.00 |
| TRINITY_sp A2YH(OsI_023  | (Serine/threonine-pr | 34.10 | 0.00 |
| TRINITY_sp F4J5(FMT      | Clustered mitochond  | 34.10 | 0.00 |
| TRINITY_sp P116(ypt1     | GTP-binding protein  | 34.10 | 0.00 |
| TRINITY_sp Q9FJ(IMPA5    | Importin subunit al  | 34.10 | 0.00 |
| TRINITY_sp B2DB(IGGS-D   | Geranylgeranyl pyro  | 34.10 | 0.00 |
| TRINITY_sp O004(IPO5     | Importin-5 OS=Homo   | 34.10 | 0.00 |
| TRINITY_sp Q2W7(efp      | Elongation factor P  | 34.10 | 0.00 |
| TRINITY_sp Q9M2(FSDR1    | (+)-neomenthol dehy  | 34.10 | 0.00 |
| TRINITY_sp Q921(Mfsd5    | Molybdate-anion tra  | 34.10 | 0.00 |
| TRINITY_sp Q5HZ(FSlc25a2 | (Mitochondrial basic | 34.10 | 0.00 |
| TRINITY_sp P803(-        | Crustacean calcium-  | 34.10 | 0.00 |
| TRINITY_sp O444(Es2      | Protein DGCR14 homo  | 34.10 | 0.00 |
| TRINITY_sp Q643(Syn2     | Synapsin-2 OS=Mus m  | 34.10 | 0.00 |
| TRINITY_sp P264(PARP1    | Poly [ADP-ribose] p  | 34.10 | 0.00 |
| TRINITY_sp Q9UT(SPAPYUK  | Uncharacterized pro  | 34.10 | 0.00 |
| TRINITY_sp O677(aspC     | Aspartate aminotran  | 34.10 | 0.00 |
| TRINITY_sp Q86A(spkA-1   | Stress-activated pr  | 34.10 | 0.00 |
| TRINITY_sp Q53H(KLHL26   | Kelch-like protein   | 34.10 | 0.00 |
| TRINITY_sp O009(-        | Lysosomal acid alph  | 34.10 | 0.00 |
| TRINITY_sp B6EU(PR40A    | Pre-mRNA-processing  | 34.10 | 0.00 |
| TRINITY_sp Q8QH(xpo6     | Exportin-6 OS=Danio  | 34.10 | 0.00 |
| TRINITY_sp P357(-        | Venom allergen 5 OS  | 34.10 | 0.00 |
| TRINITY_sp B8FL(rlmE     | Ribosomal RNA large  | 34.10 | 0.00 |
| TRINITY_sp Q80X(Bdh1     | D-beta-hydroxybutyr  | 34.10 | 0.00 |
| TRINITY_sp P976(Txn2     | Thioredoxin, mitoch  | 34.10 | 0.00 |
| TRINITY_sp A3BN(Os07g06  | (RNA pseudouridine s | 34.10 | 0.00 |
| TRINITY_sp Q145(SCN5A    | Sodium channel prot  | 34.10 | 0.00 |
| TRINITY_sp Q4R8(STIP1    | Stress-induced-phos  | 34.10 | 0.00 |
| TRINITY_sp Q050(CPR      | NADPH--cytochrome P  | 34.10 | 0.00 |
| TRINITY_sp Q8C1(Mtrr     | Methionine synthase  | 34.10 | 0.00 |
| TRINITY_sp P454(yraR     | Uncharacterized pro  | 34.10 | 0.00 |
| TRINITY_sp D4GP(HVO_B00  | (D-xylose 1-dehydrog | 34.10 | 0.00 |
| TRINITY_sp Q145(ITPR3    | Inositol 1,4,5-tris  | 34.10 | 0.00 |
| TRINITY_sp P293(RPS1     | 30S ribosomal prote  | 34.10 | 0.00 |
| TRINITY_sp Q55D(abcG22   | ABC transporter G f  | 34.10 | 0.00 |
| TRINITY_sp Q55A(DDB_G02  | (Probable serine/thr | 34.10 | 0.00 |
| TRINITY_sp P352(Rab24    | Ras-related protein  | 34.10 | 0.00 |
| TRINITY_sp F4JT(ISTY46   | Serine/threonine-pr  | 34.10 | 0.00 |
| TRINITY_sp P0CS(PFA4     | Palmitoyltransferas  | 34.10 | 0.00 |
| TRINITY_sp Q9ZG(pikAI    | Narbonolide/10-deox  | 34.10 | 0.00 |
| TRINITY_sp Q9CX(Tbc1d15  | TBC1 domain family   | 34.10 | 0.00 |
| TRINITY_sp Q54D(xpo7     | Exportin-7 OS=Dicty  | 34.10 | 0.00 |
| TRINITY_sp Q54T(srel     | Elongation of fatty  | 34.10 | 0.00 |
| TRINITY_sp Q3SW(ZUFSP    | Zinc finger with UF  | 34.10 | 0.00 |
| TRINITY_sp Q993(TY3B-G   | Transposon Ty3-G Ga  | 34.10 | 0.00 |
| TRINITY_sp Q626(Frk      | Tyrosine-protein ki  | 34.10 | 0.00 |
| TRINITY_sp Q55F(cych     | Putative cyclin-H O  | 34.10 | 0.00 |
| TRINITY_sp C5DX(MAIM41   | Altered inheritance  | 34.10 | 0.00 |
| TRINITY_sp P157(NCL      | Nucleolin OS=Gallus  | 34.10 | 0.00 |
| TRINITY_sp Q8W4(VHA-a3   | V-type proton ATPas  | 34.10 | 0.00 |
| TRINITY_sp Q7XZ(SAC9     | Probable phosphoino  | 34.10 | 0.00 |

|                          |                     |       |      |
|--------------------------|---------------------|-------|------|
| TRINITY_sp F4JY3RUK      | Serine/threonine-pr | 34.10 | 0.00 |
| TRINITY_sp Q8HX3ABCC1    | Multidrug resistanc | 34.10 | 0.00 |
| TRINITY_sp Q9CQFRwdd1    | RWD domain-containi | 34.10 | 0.00 |
| TRINITY_sp Q95ZVddr-2    | Discoidin domain-co | 34.10 | 0.00 |
| TRINITY_sp Q6NN1SAP1     | Zinc finger A20 and | 34.00 | 0.00 |
| TRINITY_sp Q54RfdhkL     | Hybrid signal trans | 34.00 | 0.00 |
| TRINITY_sp Q71N5LCAT4    | Lecithin-cholester  | 34.00 | 0.00 |
| TRINITY_sp Q8MS1Sym      | Symplekin OS=Drosop | 34.00 | 0.00 |
| TRINITY_sp P0033adh1     | Alcohol dehydrogena | 34.00 | 0.00 |
| TRINITY_sp Q7Z47DHX29    | ATP-dependent RNA h | 34.00 | 0.00 |
| TRINITY_sp P3132PKAR     | cAMP-dependent prot | 34.00 | 0.00 |
| TRINITY_sp B9DH1ARIA     | ARM REPEAT PROTEIN  | 34.00 | 0.00 |
| TRINITY_sp Q8111Atpaf1   | ATP synthase mitoch | 34.00 | 0.00 |
| TRINITY_sp Q3904bVPE     | Vacuolar-processing | 34.00 | 0.00 |
| TRINITY_sp Q93VIELF5A-2  | Eukaryotic translat | 34.00 | 0.00 |
| TRINITY_sp Q99PVKif17    | Kinesin-like protei | 34.00 | 0.00 |
| TRINITY_sp P8056SGR_5806 | Aminopeptidase S OS | 34.00 | 0.00 |
| TRINITY_sp Q9FN(UVR8     | Ultraviolet-B recep | 34.00 | 0.00 |
| TRINITY_sp Q17RILONRF1   | LON peptidase N-ter | 34.00 | 0.00 |
| TRINITY_sp Q8LDVENDO3    | Endonuclease 3 OS=A | 34.00 | 0.00 |
| TRINITY_sp Q08DESTX5     | Syntaxin-5 OS=Bos t | 34.00 | 0.00 |
| TRINITY_sp Q54NIabcC9    | ABC transporter C f | 34.00 | 0.00 |
| TRINITY_sp Q8C14Dock8    | Dedicator of cytoki | 34.00 | 0.00 |
| TRINITY_sp Q1491SHPRH    | E3 ubiquitin-protei | 34.00 | 0.00 |
| TRINITY_sp Q55C1rsc5     | Random slug protein | 34.00 | 0.00 |
| TRINITY_sp Q121(RTK1     | Probable serine/thr | 34.00 | 0.00 |
| TRINITY_sp Q9BZVUBXN6    | UBX domain-containi | 34.00 | 0.00 |
| TRINITY_sp Q9FG7EMB2731  | ER membrane protein | 34.00 | 0.00 |
| TRINITY_sp A7MB1MAP3K13  | Mitogen-activated p | 34.00 | 0.00 |
| TRINITY_sp Q9GTVGK1      | Glucokinase 1 OS=Tr | 34.00 | 0.00 |
| TRINITY_sp Q94A5UBC35    | Ubiquitin-conjugati | 34.00 | 0.00 |
| TRINITY_sp P1697YPTM1    | GTP-binding protein | 34.00 | 0.00 |
| TRINITY_sp Q9I31PA1538   | Baeyer-Villiger mon | 34.00 | 0.00 |
| TRINITY_sp Q1ZXIDDB_G027 | PH domain-containin | 34.00 | 0.00 |
| TRINITY_sp Q4PC(HOG1     | Mitogen-activated p | 34.00 | 0.00 |
| TRINITY_sp Q7M75Abhd17b  | Protein ABHD17B OS= | 34.00 | 0.00 |
| TRINITY_sp Q9Z0MLipa     | Lysosomal acid lipa | 34.00 | 0.00 |
| TRINITY_sp P366(rad8     | DNA repair protein  | 34.00 | 0.00 |
| TRINITY_sp Q8ZG1rsuA     | Ribosomal small sub | 34.00 | 0.00 |
| TRINITY_sp Q8SS3gefR     | Ras guanine nucleot | 34.00 | 0.00 |
| TRINITY_sp Q5XF6Atp13a3  | Probable cation-tra | 34.00 | 0.00 |
| TRINITY_sp Q0235UTP6     | U3 small nucleolar  | 34.00 | 0.00 |
| TRINITY_sp O8275DTX49    | Protein DETOXIFICAT | 34.00 | 0.00 |
| TRINITY_sp O6057EIF4E2   | Eukaryotic translat | 34.00 | 0.00 |
| TRINITY_sp P5416ypgQ     | Uncharacterized pro | 34.00 | 0.00 |
| TRINITY_sp Q84JU1BR5     | Protein-tyrosine-ph | 34.00 | 0.00 |
| TRINITY_sp Q9SFUPAP15    | Purple acid phospho | 34.00 | 0.00 |
| TRINITY_sp B4JB4Trip1    | Eukaryotic translat | 34.00 | 0.00 |
| TRINITY_sp Q8ILCPF14_032 | STI1-like protein O | 34.00 | 0.00 |
| TRINITY_sp O1543ABCC4    | Multidrug resistanc | 34.00 | 0.00 |
| TRINITY_sp Q9VG1ClC-a    | Chloride channel pr | 34.00 | 0.00 |
| TRINITY_sp P9303FUM1     | Fumarate hydratase  | 34.00 | 0.00 |
| TRINITY_sp Q0256PK2      | Probable serine/thr | 34.00 | 0.00 |
| TRINITY_sp Q6N11clpB     | Chaperone protein C | 34.00 | 0.00 |
| TRINITY_sp P2635TBP1     | TATA-box-binding pr | 34.00 | 0.00 |
| TRINITY_sp Q54HIcsn2     | COP9 signalosome co | 34.00 | 0.00 |

|                           |                     |       |      |
|---------------------------|---------------------|-------|------|
| TRINITY_sp P4232 CNB1     | Calcineurin subunit | 34.00 | 0.00 |
| TRINITY_sp P3071 GSTT1    | Glutathione S-trans | 34.00 | 0.00 |
| TRINITY_sp Q8YX trpS      | Tryptophan--tRNA li | 34.00 | 0.00 |
| TRINITY_sp Q2812 dtwd1    | DTW domain-containi | 34.00 | 0.00 |
| TRINITY_sp Q7XJ5 At3g0627 | Probable protein ph | 34.00 | 0.00 |
| TRINITY_sp Q8BG Htatsf1   | HIV Tat-specific fa | 34.00 | 0.00 |
| TRINITY_sp Q9DC Pbld1     | Phenazine biosynthe | 34.00 | 0.00 |
| TRINITY_sp Q7LF CHST15    | Carbohydrate sulfot | 34.00 | 0.00 |
| TRINITY_sp O4344 KCNAB3   | Voltage-gated potas | 34.00 | 0.00 |
| TRINITY_sp Q54B7 DDB_G025 | Ankyrin repeat, bro | 34.00 | 0.00 |
| TRINITY_sp Q0252 Mgat3    | Beta-1,4-mannosyl-g | 34.00 | 0.00 |
| TRINITY_sp Q4UK HspC2     | Small heat shock pr | 34.00 | 0.00 |
| TRINITY_sp Q08B1 pm20d1   | N-fatty-acyl-amino  | 34.00 | 0.00 |
| TRINITY_sp Q7KZ ISND1     | Staphylococcal nucl | 34.00 | 0.00 |
| TRINITY_sp Q1457 ITPR2    | Inositol 1,4,5-tris | 34.00 | 0.00 |
| TRINITY_sp Q5577 sl10182  | Uncharacterized ABC | 34.00 | 0.00 |
| TRINITY_sp P8138 -        | L-amino-acid oxidas | 34.00 | 0.00 |
| TRINITY_sp Q54Y dhkB      | Hybrid signal trans | 34.00 | 0.00 |
| TRINITY_sp P0432 pol      | Retrovirus-related  | 34.00 | 0.00 |
| TRINITY_sp Q6312 Abcc2    | Canalicular multisp | 34.00 | 0.00 |
| TRINITY_sp Q9SH CAL57     | Callose synthase 7  | 34.00 | 0.00 |
| TRINITY_sp Q3SZ HTLL9     | Probable tubulin po | 34.00 | 0.00 |
| TRINITY_sp Q2203 rho-1    | Ras-like GTP-bindin | 33.90 | 0.00 |
| TRINITY_sp Q074 ht1       | Fibroblast growth f | 33.90 | 0.00 |
| TRINITY_sp Q7PC ANR       | Anthocyanidin reduc | 33.90 | 0.00 |
| TRINITY_sp Q0917 cds1     | Serine/threonine-pr | 33.90 | 0.00 |
| TRINITY_sp P5836 arcB     | Aerobic respiration | 33.90 | 0.00 |
| TRINITY_sp P2373 Si       | Sucrase-isomaltase, | 33.90 | 0.00 |
| TRINITY_sp P3695 RpIII5   | DNA-directed RNA po | 33.90 | 0.00 |
| TRINITY_sp A9LL RRP6L3    | Protein RRP6-like 3 | 33.90 | 0.00 |
| TRINITY_sp Q4WV caf17     | Putative transferas | 33.90 | 0.00 |
| TRINITY_sp P4882 cht60    | Beta-hexosaminidase | 33.90 | 0.00 |
| TRINITY_sp Q9Y71 SPBC2A9  | Phosducin-like prot | 33.90 | 0.00 |
| TRINITY_sp B0F9 IGC6      | Golgin candidate 6  | 33.90 | 0.00 |
| TRINITY_sp Q54B mcfg      | Mitochondrial subst | 33.90 | 0.00 |
| TRINITY_sp Q6Q88 sirJ     | Dipeptidase sirJ OS | 33.90 | 0.00 |
| TRINITY_sp Q55D nosip     | Nitric oxide syntha | 33.90 | 0.00 |
| TRINITY_sp Q2M5 ERGS21    | Regulator of G-prot | 33.90 | 0.00 |
| TRINITY_sp Q5E96 DUSP11   | RNA/RNP complex-1-i | 33.90 | 0.00 |
| TRINITY_sp A4FV5 METTL21F | Protein-lysine meth | 33.90 | 0.00 |
| TRINITY_sp Q5VS1 ABHD17B  | Protein ABHD17B OS= | 33.90 | 0.00 |
| TRINITY_sp Q9S71 KIN7N    | Kinesin-like protei | 33.90 | 0.00 |
| TRINITY_sp Q52L4 serpinb1 | Leukocyte elastase  | 33.90 | 0.00 |
| TRINITY_sp P7276 slr0245  | Uncharacterized pro | 33.90 | 0.00 |
| TRINITY_sp P8723 mdj1     | DnaJ homolog 1, mit | 33.90 | 0.00 |
| TRINITY_sp Q5F31 UTP15    | U3 small nucleolar  | 33.90 | 0.00 |
| TRINITY_sp Q4P6 COF1      | Cofilin OS=Ustilago | 33.90 | 0.00 |
| TRINITY_sp Q5XT5 PNPLA8   | Calcium-independent | 33.90 | 0.00 |
| TRINITY_sp Q6FN5 STE20    | Serine/threonine-pr | 33.90 | 0.00 |
| TRINITY_sp Q8QZ Tat       | Tyrosine aminotrans | 33.90 | 0.00 |
| TRINITY_sp Q67U2 Os02g014 | Probable protein ph | 33.90 | 0.00 |
| TRINITY_sp P6048 PTEN     | Phosphatidylinosito | 33.90 | 0.00 |
| TRINITY_sp Q8LF7 At1g1934 | Methyltransferase-1 | 33.90 | 0.00 |
| TRINITY_sp P4268 FRK      | Tyrosine-protein ki | 33.90 | 0.00 |
| TRINITY_sp Q54F gacJJ     | Rho GTPase-activati | 33.90 | 0.00 |
| TRINITY_sp Q9C58 MKP1     | Protein-tyrosine-ph | 33.90 | 0.00 |

|                          |                     |       |      |
|--------------------------|---------------------|-------|------|
| TRINITY_sp P0C8MCCR1     | Probable serine/thr | 33.90 | 0.00 |
| TRINITY_sp O806PAT02     | Probable protein S- | 33.90 | 0.00 |
| TRINITY_sp P4364-        | DnaJ protein homolo | 33.90 | 0.00 |
| TRINITY_sp Q6L7kanJ      | Kanamycin B dioxyge | 33.90 | 0.00 |
| TRINITY_sp Q1KKmfsd5     | Molybdate-anion tra | 33.90 | 0.00 |
| TRINITY_sp A1C8umanF     | Mannan endo-1,4-bet | 33.90 | 0.00 |
| TRINITY_sp Q6NVrhot1a    | Mitochondrial Rho G | 33.90 | 0.00 |
| TRINITY_sp Q8WNIKKBKAP   | Elongator complex p | 33.90 | 0.00 |
| TRINITY_sp Q755CIPL1     | Spindle assembly ch | 33.90 | 0.00 |
| TRINITY_sp Q54TgefP      | Ras guanine nucleot | 33.90 | 0.00 |
| TRINITY_sp Q566Them4     | Acyl-coenzyme A thi | 33.90 | 0.00 |
| TRINITY_sp P8271PPD5     | PsbP domain-contain | 33.90 | 0.00 |
| TRINITY_sp Q3SX4LUC7L3   | Luc7-like protein 3 | 33.90 | 0.00 |
| TRINITY_sp A8JAI CFAP43  | Cilia- and flagella | 33.90 | 0.00 |
| TRINITY_sp Q5ZM FAR1     | Fatty acyl-CoA redu | 33.90 | 0.00 |
| TRINITY_sp Q54L DDB_G02  | Protein KRTCAP2 hom | 33.90 | 0.00 |
| TRINITY_sp E0X9At3g635   | Zinc finger CCCH do | 33.90 | 0.00 |
| TRINITY_sp F4IA1LPXC1    | Probable UDP-3-O-ac | 33.90 | 0.00 |
| TRINITY_sp Q9ES Nploc4   | Nuclear protein loc | 33.90 | 0.00 |
| TRINITY_sp Q1KPFZL       | Probable transmembr | 33.90 | 0.00 |
| TRINITY_sp Q5T2IOTUD3    | OTU domain-containi | 33.90 | 0.00 |
| TRINITY_sp Q9M2FSDR1     | (+)-neomenthol dehy | 33.90 | 0.00 |
| TRINITY_sp D2SW COPB1    | Coatomer subunit be | 33.90 | 0.00 |
| TRINITY_sp A9F8 infc     | Translation initiat | 33.90 | 0.00 |
| TRINITY_sp Q6DG mpv1712  | Mpv17-like protein  | 33.90 | 0.00 |
| TRINITY_sp Q9M0 LAF1     | Transcription facto | 33.90 | 0.00 |
| TRINITY_sp Q8MYH DDB_G02 | Probable serine/thr | 33.90 | 0.00 |
| TRINITY_sp O6034TBC1D12  | TBC1 domain family  | 33.90 | 0.00 |
| TRINITY_sp Q5RF ZNHIT6   | Box C/D snoRNA prot | 33.90 | 0.00 |
| TRINITY_sp H2QL PDE9A    | High affinity cGMP- | 33.90 | 0.00 |
| TRINITY_sp P428 ATPK1    | Serine/threonine-pr | 33.90 | 0.00 |
| TRINITY_sp Q9FL1DEGP9    | Protease Do-like 9  | 33.90 | 0.00 |
| TRINITY_sp O137 ercc3    | Probable DNA repair | 33.90 | 0.00 |
| TRINITY_sp O430 syj1     | Inositol-1,4,5-tris | 33.80 | 0.00 |
| TRINITY_sp Q9C5VGRF12    | 14-3-3-like protein | 33.80 | 0.00 |
| TRINITY_sp Q8VI4Abcc2    | Canalicular multisp | 33.80 | 0.00 |
| TRINITY_sp P618-         | Lipase OS=Rhizopus  | 33.80 | 0.00 |
| TRINITY_sp Q6MC pepA     | Probable cytosol am | 33.80 | 0.00 |
| TRINITY_sp O941 SNF1     | Carbon catabolite-d | 33.80 | 0.00 |
| TRINITY_sp O598 SPCC965  | Probable cytosine d | 33.80 | 0.00 |
| TRINITY_sp Q9H11NAPB     | Beta-soluble NSF at | 33.80 | 0.00 |
| TRINITY_sp Q9P3 ptr2     | Probable peptide tr | 33.80 | 0.00 |
| TRINITY_sp A7SG upsmg2   | Proteasome assembly | 33.80 | 0.00 |
| TRINITY_sp D9N1-         | Inward rectifier po | 33.80 | 0.00 |
| TRINITY_sp P707(Atp7a    | Copper-transporting | 33.80 | 0.00 |
| TRINITY_sp Q9W01Cyp4d20  | Probable cytochrome | 33.80 | 0.00 |
| TRINITY_sp Q9UU SPCC23B  | CRAL-TRIO domain-co | 33.80 | 0.00 |
| TRINITY_sp Q6NXI dennd5b | DENN domain-contain | 33.80 | 0.00 |
| TRINITY_sp Q9UR(Tf2-11   | Transposon Tf2-11 p | 33.80 | 0.00 |
| TRINITY_sp Q146 TTLL4    | Tubulin polyglutamy | 33.80 | 0.00 |
| TRINITY_sp P385 HSF1     | Heat shock factor p | 33.80 | 0.00 |
| TRINITY_sp Q9SB(At4g247  | Manganese-dependent | 33.80 | 0.00 |
| TRINITY_sp Q9UT SPAC8F11 | Putative ribosome b | 33.80 | 0.00 |
| TRINITY_sp Q9Y2 PLAA     | Phospholipase A-2-a | 33.80 | 0.00 |
| TRINITY_sp Q2IMiproB     | Glutamate 5-kinase  | 33.80 | 0.00 |
| TRINITY_sp Q9FHD TX16    | Protein DETOXIFICAT | 33.80 | 0.00 |

|                          |                     |       |      |
|--------------------------|---------------------|-------|------|
| TRINITY_sp Q9D57Ubxn11   | UBX domain-containi | 33.80 | 0.00 |
| TRINITY_sp Q9203ACHE     | Acetylcholinesteras | 33.80 | 0.00 |
| TRINITY_sp Q8RWISTY17    | Serine/threonine-pr | 33.80 | 0.00 |
| TRINITY_sp Q0IWNNDX1     | Protein NEOXANTHIN- | 33.80 | 0.00 |
| TRINITY_sp Q6H7UCIPK26   | CBL-interacting pro | 33.80 | 0.00 |
| TRINITY_sp Q55Bfdgat1    | Diacylglycerol O-ac | 33.80 | 0.00 |
| TRINITY_sp Q9STVCIPK8    | CBL-interacting ser | 33.80 | 0.00 |
| TRINITY_sp P2126GSTM3    | Glutathione S-trans | 33.80 | 0.00 |
| TRINITY_sp P4457arcB     | Aerobic respiration | 33.80 | 0.00 |
| TRINITY_sp O8093At2g3766 | Uncharacterized pro | 33.80 | 0.00 |
| TRINITY_sp P1816splB     | Dual specificity pr | 33.80 | 0.00 |
| TRINITY_sp A6QN3NXT2     | NTF2-related export | 33.80 | 0.00 |
| TRINITY_sp B2HC\MMAR_106 | Putative S-adenosyl | 33.80 | 0.00 |
| TRINITY_sp Q9CR9Ccdc96   | Coiled-coil domain- | 33.80 | 0.00 |
| TRINITY_sp Q3SXCPUS3     | tRNA pseudouridine( | 33.80 | 0.00 |
| TRINITY_sp P4316CA7      | Carbonic anhydrase  | 33.80 | 0.00 |
| TRINITY_sp Q2I66inpp11b  | Phosphatidylinosito | 33.80 | 0.00 |
| TRINITY_sp Q0554CHI17    | Acidic 27 kDa endoc | 33.80 | 0.00 |
| TRINITY_sp Q1245OSH2     | Oxysterol-binding p | 33.80 | 0.00 |
| TRINITY_sp Q3A6Madk      | Adenylate kinase OS | 33.80 | 0.00 |
| TRINITY_sp Q4209ABCC2    | ABC transporter C f | 33.80 | 0.00 |
| TRINITY_sp Q0JI4CIPK11   | CBL-interacting pro | 33.80 | 0.00 |
| TRINITY_sp Q0WT1IP5P8    | Type I inositol pol | 33.80 | 0.00 |
| TRINITY_sp Q3943RAB1BV   | Ras-related protein | 33.70 | 0.00 |
| TRINITY_sp Q7566TOM1     | Probable E3 ubiquit | 33.70 | 0.00 |
| TRINITY_sp B4KY3SAK      | Serine/threonine-pr | 33.70 | 0.00 |
| TRINITY_sp P9125gst-6    | Probable glutathion | 33.70 | 0.00 |
| TRINITY_sp Q8H27Os07g064 | Probable protein ph | 33.70 | 0.00 |
| TRINITY_sp Q6H66HSFA3    | Heat stress transcr | 33.70 | 0.00 |
| TRINITY_sp Q9VC3lili     | Protein Lilipod OS= | 33.70 | 0.00 |
| TRINITY_sp Q9Y22RNF24    | RING finger protein | 33.70 | 0.00 |
| TRINITY_sp Q1223PKH2     | Serine/threonine-pr | 33.70 | 0.00 |
| TRINITY_sp Q93Y5ppa1     | Soluble inorganic p | 33.70 | 0.00 |
| TRINITY_sp A1A4IALKBH8   | Alkylated DNA repai | 33.70 | 0.00 |
| TRINITY_sp P0593cam1     | Calmodulin OS=Schiz | 33.70 | 0.00 |
| TRINITY_sp Q54TFgacY     | Rho GTPase-activati | 33.70 | 0.00 |
| TRINITY_sp Q5RE3SIK2     | Serine/threonine-pr | 33.70 | 0.00 |
| TRINITY_sp Q54H4drkA     | Probable serine/thr | 33.70 | 0.00 |
| TRINITY_sp Q9LK3UKL2     | Uridine kinase-like | 33.70 | 0.00 |
| TRINITY_sp Q0V8EASNSD1   | Asparagine syntheta | 33.70 | 0.00 |
| TRINITY_sp Q9P89tcsA     | Two-component syste | 33.70 | 0.00 |
| TRINITY_sp O2897AF_1297  | Cell division cycle | 33.70 | 0.00 |
| TRINITY_sp Q8H12At2g3446 | Uncharacterized pro | 33.70 | 0.00 |
| TRINITY_sp P1755chrA1    | Chromate transport  | 33.70 | 0.00 |
| TRINITY_sp Q8BW1Nob1     | RNA-binding protein | 33.70 | 0.00 |
| TRINITY_sp P5416ypgQ     | Uncharacterized pro | 33.70 | 0.00 |
| TRINITY_sp Q2NL6TSR1     | Pre-rRNA-processing | 33.70 | 0.00 |
| TRINITY_sp Q8TD\HELQ     | Helicase POLQ-like  | 33.70 | 0.00 |
| TRINITY_sp Q9U51-        | L-asparaginase OS=D | 33.70 | 0.00 |
| TRINITY_sp B2RT1MYO9A    | Unconventional myos | 33.70 | 0.00 |
| TRINITY_sp Q9NV1FANCI    | Fanconi anemia grou | 33.70 | 0.00 |
| TRINITY_sp P9819ATP8B2   | Phospholipid-transp | 33.70 | 0.00 |
| TRINITY_sp Q9MA5ACBP4    | Acyl-CoA-binding do | 33.70 | 0.00 |
| TRINITY_sp C5DD6AIM32    | Altered inheritance | 33.70 | 0.00 |
| TRINITY_sp Q9P71SPCC24B1 | Uncharacterized oxi | 33.70 | 0.00 |
| TRINITY_sp Q8Y36lmo2759  | Macro domain-contai | 33.70 | 0.00 |

|                          |                     |       |      |
|--------------------------|---------------------|-------|------|
| TRINITY_sp O7456SPCC970  | Uncharacterized ino | 33.70 | 0.00 |
| TRINITY_sp Q86HCDDDB_G02 | Probable serine/thr | 33.70 | 0.00 |
| TRINITY_sp Q8CDMLrrc9    | Leucine-rich repeat | 33.70 | 0.00 |
| TRINITY_sp Q9SD(At3g514  | Probable protein ph | 33.70 | 0.00 |
| TRINITY_sp Q0455CYP6B1   | Cytochrome P450 6B1 | 33.70 | 0.00 |
| TRINITY_sp B4KBslx1      | Structure-specific  | 33.70 | 0.00 |
| TRINITY_sp Q9ZU3ABCG7    | ABC transporter G f | 33.70 | 0.00 |
| TRINITY_sp Q9FX9FUT12    | Putative fucosyltra | 33.70 | 0.00 |
| TRINITY_sp Q8IVLLOXHD1   | Lipoxygenase homolo | 33.70 | 0.00 |
| TRINITY_sp A9A3IrlmN     | Ribosomal RNA large | 33.70 | 0.00 |
| TRINITY_sp P1073PAM      | Peptidyl-glycine al | 33.70 | 0.00 |
| TRINITY_sp P1275RSP3     | Flagellar radial sp | 33.70 | 0.00 |
| TRINITY_sp Q9699TRIM63   | E3 ubiquitin-protei | 33.70 | 0.00 |
| TRINITY_sp Q2KN7SPECCL   | Cytospin-A OS=Canis | 33.70 | 0.00 |
| TRINITY_sp O7566TIPRL    | TIP41-like protein  | 33.70 | 0.00 |
| TRINITY_sp Q9FI1At5g4353 | Putative SWI/SNF-re | 33.70 | 0.00 |
| TRINITY_sp Q6AX8dcaf12-k | DDB1- and CUL4-asso | 33.70 | 0.00 |
| TRINITY_sp O042CPXN      | Peroxisomal nicotin | 33.70 | 0.00 |
| TRINITY_sp Q9H4HDEF6     | Differentially expr | 33.70 | 0.00 |
| TRINITY_sp Q9C83TRO      | Protein TRAUCO OS=A | 33.70 | 0.00 |
| TRINITY_sp Q5XH1hunk-a   | Hormonally up-regul | 33.70 | 0.00 |
| TRINITY_sp Q0023me10     | Tyrosinase OS=Asper | 33.70 | 0.00 |
| TRINITY_sp A5PJMAIFM2    | Apoptosis-inducing  | 33.70 | 0.00 |
| TRINITY_sp Q7XJ8FRK2     | Fructokinase-2 OS=S | 33.70 | 0.00 |
| TRINITY_sp G5EDIceeh-2   | Epoxide hydrolase 2 | 33.70 | 0.00 |
| TRINITY_sp Q5UQ8MIMI_R52 | Probable ubiquitin- | 33.70 | 0.00 |
| TRINITY_sp Q54JFabcc3    | ABC transporter C f | 33.70 | 0.00 |
| TRINITY_sp Q86L9gachH    | Rho GTPase-activati | 33.70 | 0.00 |
| TRINITY_sp Q6X47CIPK31   | CBL-interacting pro | 33.70 | 0.00 |
| TRINITY_sp Q5SN7Os01g065 | Probable protein ph | 33.70 | 0.00 |
| TRINITY_sp Q8LPMAt3g1995 | E3 ubiquitin-protei | 33.70 | 0.00 |
| TRINITY_sp O6707ftsH     | ATP-dependent zinc  | 33.70 | 0.00 |
| TRINITY_sp Q6AX9Iqca11   | IQ and AAA domain-c | 33.70 | 0.00 |
| TRINITY_sp Q0844YOR059C  | Putative lipase YOR | 33.70 | 0.00 |
| TRINITY_sp Q9FM1HIR1     | Hypersensitive-indu | 33.70 | 0.00 |
| TRINITY_sp Q9DD(Rab13    | Ras-related protein | 33.70 | 0.00 |
| TRINITY_sp Q96NMAIFM3    | Apoptosis-inducing  | 33.70 | 0.00 |
| TRINITY_sp Q54M2cdc20    | Anaphase-promoting  | 33.70 | 0.00 |
| TRINITY_sp Q9VJ7Pde11    | Dual 3',5'-cyclic-A | 33.70 | 0.00 |
| TRINITY_sp Q8RWICLT3     | Protein CLT3, chlor | 33.70 | 0.00 |
| TRINITY_sp Q54TIddx24    | ATP-dependent RNA h | 33.70 | 0.00 |
| TRINITY_sp Q05B6TRMT11   | tRNA (guanine(10)-N | 33.70 | 0.00 |
| TRINITY_sp O758(CAPN15   | Calpain-15 OS=Homo  | 33.70 | 0.00 |
| TRINITY_sp Q755C IPL1    | Spindle assembly ch | 33.70 | 0.00 |
| TRINITY_sp Q96FCELMOD3   | ELMO domain-contain | 33.70 | 0.00 |
| TRINITY_sp D7UQaur       | Aurora kinase OS=Pa | 33.70 | 0.00 |
| TRINITY_sp O1869pde-1    | Probable 3',5'-cycl | 33.70 | 0.00 |
| TRINITY_sp Q3E68CpNIFS3  | Probable L-cysteine | 33.70 | 0.00 |
| TRINITY_sp Q80Y8Elac2    | Zinc phosphodiester | 33.70 | 0.00 |
| TRINITY_sp Q1009seh1     | Nucleoporin seh1 OS | 33.60 | 0.00 |
| TRINITY_sp Q6INFtollip-k | Toll-interacting pr | 33.60 | 0.00 |
| TRINITY_sp P2532mlkA     | Myosin light chain  | 33.60 | 0.00 |
| TRINITY_sp Q9DAN-        | Uncharacterized pro | 33.60 | 0.00 |
| TRINITY_sp Q5ZMFSEPT2    | Septin-2 OS=Gallus  | 33.60 | 0.00 |
| TRINITY_sp P4703PRY1     | Protein PRY1 OS=Sac | 33.60 | 0.00 |
| TRINITY_sp Q2LVImsbA     | Lipid A export ATP- | 33.60 | 0.00 |



|                           |                     |       |      |
|---------------------------|---------------------|-------|------|
| TRINITY_sp Q3ZCCTPPP3     | Tubulin polymerizat | 33.60 | 0.00 |
| TRINITY_sp F4I0IVPS35B    | Vacuolar protein so | 33.60 | 0.00 |
| TRINITY_sp Q041(-         | Pathogenesis-relate | 33.60 | 0.00 |
| TRINITY_sp Q9C5(CIPK10    | CBL-interacting ser | 33.60 | 0.00 |
| TRINITY_sp Q86W(PARG      | Poly(ADP-ribose) gl | 33.60 | 0.00 |
| TRINITY_sp Q9GK(FAXDC2    | Fatty acid hydroxyl | 33.60 | 0.00 |
| TRINITY_sp B5BS(CYP88D6   | Beta-amyrin 11-oxid | 33.60 | 0.00 |
| TRINITY_sp Q9LZ(ABCC14    | ABC transporter C f | 33.60 | 0.00 |
| TRINITY_sp Q031(gt2f2     | General transcripti | 33.60 | 0.00 |
| TRINITY_sp Q2M3(CCDC96    | Coiled-coil domain- | 33.60 | 0.00 |
| TRINITY_sp Q9DB(Cyp4v2    | Cytochrome P450 4V2 | 33.60 | 0.00 |
| TRINITY_sp Q9WV(Pole      | DNA polymerase epsi | 33.60 | 0.00 |
| TRINITY_sp Q92E(Flin0452  | Uncharacterized oxi | 33.60 | 0.00 |
| TRINITY_sp Q9C8(At3g065(  | Uncharacterized pro | 33.60 | 0.00 |
| TRINITY_sp Q9VH(Invadol)  | Leishmanolysin-like | 33.60 | 0.00 |
| TRINITY_sp Q54Y(dhkB      | Hybrid signal trans | 33.60 | 0.00 |
| TRINITY_sp O945(SPCC144(  | Ubiquitin and WLM d | 33.60 | 0.00 |
| TRINITY_sp C9WM(-         | Venom serine carbox | 33.60 | 0.00 |
| TRINITY_sp Q9UI(RABAC1    | Prenylated Rab acce | 33.60 | 0.00 |
| TRINITY_sp C5D2(IdeoD     | Purine nucleoside p | 33.60 | 0.00 |
| TRINITY_sp Q231(W02B12.(  | Mitoferrin OS=Caeno | 33.60 | 0.00 |
| TRINITY_sp Q8QZ(Tat       | Tyrosine aminotrans | 33.60 | 0.00 |
| TRINITY_sp P227(Gucylb2   | Guanylate cyclase s | 33.60 | 0.00 |
| TRINITY_sp Q644(Atp7b     | Copper-transporting | 33.60 | 0.00 |
| TRINITY_sp Q54Y(ngap      | Probable Ras GTPase | 33.60 | 0.00 |
| TRINITY_sp Q869(FDDB_G02( | CTL-like protein DD | 33.60 | 0.00 |
| TRINITY_sp Q6CJ(RSM10     | 37S ribosomal prote | 33.60 | 0.00 |
| TRINITY_sp Q54Q(alg6      | Probable dolichyl p | 33.60 | 0.00 |
| TRINITY_sp A6QL(TRAPPC11  | Trafficking protein | 33.60 | 0.00 |
| TRINITY_sp P376(yhiN      | Uncharacterized pro | 33.60 | 0.00 |
| TRINITY_sp O139(crnl      | Coronin-like protei | 33.60 | 0.00 |
| TRINITY_sp Q9M1(At3g544(  | F-box protein At3g5 | 33.60 | 0.00 |
| TRINITY_sp P217(UBC1      | Ubiquitin-conjugati | 33.60 | 0.00 |
| TRINITY_sp Q9H4(RWDD1     | RWD domain-containi | 33.60 | 0.00 |
| TRINITY_sp Q019(ACS5      | 1-aminocyclopropane | 33.60 | 0.00 |
| TRINITY_sp Q7XR(Os04g06(  | Probable protein ph | 33.60 | 0.00 |
| TRINITY_sp O432(RODH      | Proline dehydrogena | 33.60 | 0.00 |
| TRINITY_sp Q339(Os10g03(  | Probable protein ph | 33.60 | 0.00 |
| TRINITY_sp Q8IC(CPK2      | Calcium-dependent p | 33.60 | 0.00 |
| TRINITY_sp Q8G8(btrR      | L-glutamine:2-deoxy | 33.60 | 0.00 |
| TRINITY_sp Q8BX(Acp7      | Acid phosphatase ty | 33.60 | 0.00 |
| TRINITY_sp P399(SLN1      | Osmosensing histidi | 33.60 | 0.00 |
| TRINITY_sp Q030(GSTM4     | Glutathione S-trans | 33.60 | 0.00 |
| TRINITY_sp Q8TD(DNAH3     | Dynein heavy chain  | 33.60 | 0.00 |
| TRINITY_sp Q3UD(Tt1112    | Tubulin--tyrosine 1 | 33.60 | 0.00 |
| TRINITY_sp Q044(Vars      | Valine--tRNA ligase | 33.60 | 0.00 |
| TRINITY_sp Q6P4(fam175b   | BRISC complex subun | 33.60 | 0.00 |
| TRINITY_sp Q5BL(mett121(  | Protein N-lysine me | 33.60 | 0.00 |
| TRINITY_sp B4I1(GM12339   | Bifunctional lysine | 33.60 | 0.00 |
| TRINITY_sp Q54U(dhKA      | Hybrid signal trans | 33.60 | 0.00 |
| TRINITY_sp Q010(Pde1b     | Calcium/calmodulin- | 33.60 | 0.00 |
| TRINITY_sp Q0J9(Os04g06(  | Probable carboxyles | 33.60 | 0.00 |
| TRINITY_sp P138(RSR1      | Ras-related protein | 33.50 | 0.00 |
| TRINITY_sp Q55B(plbB      | Phospholipase B-lik | 33.50 | 0.00 |
| TRINITY_sp P046(Lipf      | Gastric triacylglyc | 33.50 | 0.00 |
| TRINITY_sp O358(Stip1     | Stress-induced-phos | 33.50 | 0.00 |

|                          |                     |       |      |
|--------------------------|---------------------|-------|------|
| TRINITY_sp Q8H12At2g3446 | Uncharacterized pro | 33.50 | 0.00 |
| TRINITY_sp Q5TJ5ford     | Formin-D OS=Dictyos | 33.50 | 0.00 |
| TRINITY_sp Q8L7FLPEAT1   | Lysophospholipid ac | 33.50 | 0.00 |
| TRINITY_sp Q6FR7TIM50    | Mitochondrial impor | 33.50 | 0.00 |
| TRINITY_sp P2803AOAH     | Acyloxyacyl hydrola | 33.50 | 0.00 |
| TRINITY_sp B6E14HP       | Haptoglobin OS=Capr | 33.50 | 0.00 |
| TRINITY_sp Q10L6CIPK10   | CBL-interacting pro | 33.50 | 0.00 |
| TRINITY_sp Q6IN9emc2-a   | ER membrane protein | 33.50 | 0.00 |
| TRINITY_sp Q9D97Efhc1    | EF-hand domain-cont | 33.50 | 0.00 |
| TRINITY_sp A9BG6glgA     | Glycogen synthase O | 33.50 | 0.00 |
| TRINITY_sp Q7TXFMb2976   | Phthiotriol/phenolp | 33.50 | 0.00 |
| TRINITY_sp P3515dacB     | D-alanyl-D-alanine  | 33.50 | 0.00 |
| TRINITY_sp Q0373YML018C  | Uncharacterized vac | 33.50 | 0.00 |
| TRINITY_sp O4418F33D4.4  | Putative sphingolip | 33.50 | 0.00 |
| TRINITY_sp Q7MD1luxQ     | Autoinducer 2 senso | 33.50 | 0.00 |
| TRINITY_sp P5485TGL2     | Lipase 2 OS=Sacchar | 33.50 | 0.00 |
| TRINITY_sp Q9FW6GAMMACA1 | Gamma carbonic anhy | 33.50 | 0.00 |
| TRINITY_sp Q9VS6Srp68    | Signal recognition  | 33.50 | 0.00 |
| TRINITY_sp Q9C77ATE2     | Arginyl-tRNA--prote | 33.50 | 0.00 |
| TRINITY_sp Q9P3Udbl4     | E3 ubiquitin-protei | 33.50 | 0.00 |
| TRINITY_sp Q9LFE DOT2    | SART-1 family prote | 33.50 | 0.00 |
| TRINITY_sp A7RX3thoc7    | THO complex subunit | 33.50 | 0.00 |
| TRINITY_sp B0G12pip5k3   | 1-phosphatidylinosi | 33.50 | 0.00 |
| TRINITY_sp A4TECMflv_502 | Putative S-adenosyl | 33.50 | 0.00 |
| TRINITY_sp Q96G2CERS2    | Ceramide synthase 2 | 33.50 | 0.00 |
| TRINITY_sp Q6CR6mgel     | GrpE protein homolo | 33.50 | 0.00 |
| TRINITY_sp P3352ABCC1    | Multidrug resistanc | 33.50 | 0.00 |
| TRINITY_sp Q9FZ4ACR11    | ACT domain-containi | 33.50 | 0.00 |
| TRINITY_sp Q1L52LONRF2   | LON peptidase N-ter | 33.50 | 0.00 |
| TRINITY_sp Q4G01HYDIN    | Hydrocephalus-induc | 33.50 | 0.00 |
| TRINITY_sp Q9V66Taz      | Tafazzin homolog OS | 33.50 | 0.00 |
| TRINITY_sp O2255STY8     | Serine/threonine-pr | 33.50 | 0.00 |
| TRINITY_sp O1377SPAC17A2 | Putative metal ion  | 33.50 | 0.00 |
| TRINITY_sp Q9FV1At1g5772 | Probable elongation | 33.50 | 0.00 |
| TRINITY_sp Q7TQ6Poln     | DNA polymerase nu O | 33.50 | 0.00 |
| TRINITY_sp P6234CPK4     | Calcium-dependent p | 33.50 | 0.00 |
| TRINITY_sp Q9LX1PAP21    | Purple acid phospho | 33.50 | 0.00 |
| TRINITY_sp Q8VX2XEG113   | Arabinosyltransfera | 33.50 | 0.00 |
| TRINITY_sp Q9LL8LIG4     | DNA ligase 4 OS=Ara | 33.50 | 0.00 |
| TRINITY_sp P2183cryS     | Crystal protein OS= | 33.50 | 0.00 |
| TRINITY_sp Q9FM6At5g1405 | U3 small nucleolar  | 33.50 | 0.00 |
| TRINITY_sp O1419SPAC56E4 | Aromatic amino acid | 33.50 | 0.00 |
| TRINITY_sp O7388HPGDS    | Hematopoietic prost | 33.50 | 0.00 |
| TRINITY_sp Q08DIPDE12    | 2',5'-phosphodieste | 33.50 | 0.00 |
| TRINITY_sp Q7TP6Shprh    | E3 ubiquitin-protei | 33.50 | 0.00 |
| TRINITY_sp Q0597-        | Sodium channel prot | 33.50 | 0.00 |
| TRINITY_sp Q0454cbxXP    | Protein CbxX, plasm | 33.50 | 0.00 |
| TRINITY_sp Q9S91CCR1     | Cinnamoyl-CoA reduc | 33.40 | 0.00 |
| TRINITY_sp Q54WVDDB_G027 | Probable serine/thr | 33.40 | 0.00 |
| TRINITY_sp O1543ABCC4    | Multidrug resistanc | 33.40 | 0.00 |
| TRINITY_sp Q2TBE CWF19L2 | CWF19-like protein  | 33.40 | 0.00 |
| TRINITY_sp Q55G6scyl     | Probable inactive s | 33.40 | 0.00 |
| TRINITY_sp Q9LQVRDR1     | RNA-dependent RNA p | 33.40 | 0.00 |
| TRINITY_sp Q9P89tcsA     | Two-component syste | 33.40 | 0.00 |
| TRINITY_sp P9WQIMT1137   | 3 beta-hydroxystero | 33.40 | 0.00 |
| TRINITY_sp Q1ZXIDDB_G028 | Sphingomyelinase DD | 33.40 | 0.00 |

|                          |                        |       |      |
|--------------------------|------------------------|-------|------|
| TRINITY_sp Q96K CNDP1    | Beta-Ala-His dipept    | 33.40 | 0.00 |
| TRINITY_sp Q8TA SMARCC2  | SWI/SNF complex sub    | 33.40 | 0.00 |
| TRINITY_sp O137 osm1     | Fumarate reductase     | 33.40 | 0.00 |
| TRINITY_sp F4IR SAD2     | Importin beta-like     | 33.40 | 0.00 |
| TRINITY_sp Q9S7 PNP2     | Polyribonucleotide     | 33.40 | 0.00 |
| TRINITY_sp Q54P osbI     | Oxysterol-binding p    | 33.40 | 0.00 |
| TRINITY_sp Q8W4 AAE15    | Long-chain-fatty-ac    | 33.40 | 0.00 |
| TRINITY_sp O840 tlcA     | ADP,ATP carrier pro    | 33.40 | 0.00 |
| TRINITY_sp Q6Z6 Os02g021 | Aminopeptidase M1-A    | 33.40 | 0.00 |
| TRINITY_sp Q54S DDB_G02  | Protein PIEZO homol    | 33.40 | 0.00 |
| TRINITY_sp O004 IPO5     | Importin-5 OS=Homo     | 33.40 | 0.00 |
| TRINITY_sp P463 csbC     | Probable metabolite    | 33.40 | 0.00 |
| TRINITY_sp A2XM FARP7    | Actin-related prote    | 33.40 | 0.00 |
| TRINITY_sp O158 clua     | Clustered mitochond    | 33.40 | 0.00 |
| TRINITY_sp Q8WM PLA2G15  | Group XV phospholip    | 33.30 | 0.00 |
| TRINITY_sp Q8L9 ATL2     | RING-H2 finger prot    | 33.30 | 0.00 |
| TRINITY_sp P378 CBP1     | Serine carboxypepti    | 33.30 | 0.00 |
| TRINITY_sp P127 -        | Actin, cytoplasmic     | 33.30 | 0.00 |
| TRINITY_sp Q8IB CPK4     | Calcium-dependent p    | 33.30 | 0.00 |
| TRINITY_sp Q54R DDB_G02  | Probable tyrosine-p    | 33.30 | 0.00 |
| TRINITY_sp Q074 -        | Ribonuclease OS=Aer    | 33.30 | 0.00 |
| TRINITY_sp Q95Z spc97    | Spindle pole body c    | 33.30 | 0.00 |
| TRINITY_sp O154 ABCC5    | Multidrug resistanc    | 33.30 | 0.00 |
| TRINITY_sp P399 GEA2     | ARF guanine-nucleot    | 33.30 | 0.00 |
| TRINITY_sp Q869 etnKA    | Probable ethanolami    | 33.30 | 0.00 |
| TRINITY_sp Q5A8 SLN1     | Histidine protein k    | 33.30 | 0.00 |
| TRINITY_sp P187 est      | Esterase OS=Acineto    | 33.30 | 0.00 |
| TRINITY_sp Q953 MANBA    | Beta-mannosidase OS    | 33.30 | 0.00 |
| TRINITY_sp P093 strG     | Streptomycin biosyn    | 33.30 | 0.00 |
| TRINITY_sp Q552 DDB_G02  | Putative ZDHHC-type    | 33.30 | 0.00 |
| TRINITY_sp P116 NHP6B    | Non-histone chromos    | 33.30 | 0.00 |
| TRINITY_sp Q54Y hdhkB    | Hybrid signal trans    | 33.30 | 0.00 |
| TRINITY_sp Q5JL CIPK12   | CBL-interacting pro    | 33.30 | 0.00 |
| TRINITY_sp Q54J Fabcc3   | ABC transporter C f    | 33.30 | 0.00 |
| TRINITY_sp Q89W norM     | Probable multidrug     | 33.30 | 0.00 |
| TRINITY_sp Q9M2 At3g6132 | UPF0187 protein At3    | 33.30 | 0.00 |
| TRINITY_sp P201 -        | Uncharacterized 37.    | 33.30 | 0.00 |
| TRINITY_sp Q87A infC     | Translation initiat    | 33.30 | 0.00 |
| TRINITY_sp Q045 Smpd1    | Sphingomyelin phosp    | 33.30 | 0.00 |
| TRINITY_sp P212 CCA1     | CCA tRNA nucleotidy    | 33.30 | 0.00 |
| TRINITY_sp Q54T hgacY    | Rho GTPase-activati    | 33.30 | 0.00 |
| TRINITY_sp Q8S8 PUB34    | U-box domain-contai    | 33.30 | 0.00 |
| TRINITY_sp Q2KH USP2     | Ubiquitin carboxyl-    | 33.30 | 0.00 |
| TRINITY_sp Q383          | 37 Long tail fiber pro | 33.30 | 0.00 |
| TRINITY_sp O430 mot1     | Probable helicase m    | 33.30 | 0.00 |
| TRINITY_sp Q6T4 CWC2     | Pre-mRNA-splicing f    | 33.30 | 0.00 |
| TRINITY_sp P793 RGS20    | Regulator of G-prot    | 33.30 | 0.00 |
| TRINITY_sp Q9W4 dnc      | cAMP-specific 3',5'    | 33.30 | 0.00 |
| TRINITY_sp Q5M8 -        | UPF0415 protein C7o    | 33.30 | 0.00 |
| TRINITY_sp Q637 Map3k12  | Mitogen-activated p    | 33.30 | 0.00 |
| TRINITY_sp A6ZU ATG1     | Serine/threonine-pr    | 33.30 | 0.00 |
| TRINITY_sp Q146 ITPR1    | Inositol 1,4,5-tris    | 33.30 | 0.00 |
| TRINITY_sp Q54P osbI     | Oxysterol-binding p    | 33.30 | 0.00 |
| TRINITY_sp Q9UR nrf1     | Vacuolar transporte    | 33.30 | 0.00 |
| TRINITY_sp Q6NX Rcctb1   | RCC1 and BTB domain    | 33.30 | 0.00 |
| TRINITY_sp Q95Y pefA     | Penta-EF hand domai    | 33.30 | 0.00 |

|                          |                     |       |      |
|--------------------------|---------------------|-------|------|
| TRINITY_sp Q6P63csn8     | COP9 signalosome co | 33.30 | 0.00 |
| TRINITY_sp P3172OV16     | OV-16 antigen OS=On | 33.30 | 0.00 |
| TRINITY_sp B0SD7atpA     | ATP synthase subuni | 33.30 | 0.00 |
| TRINITY_sp Q5RH1dt1      | Denticleless protei | 33.30 | 0.00 |
| TRINITY_sp Q9UR(Tf2-11   | Transposon Tf2-11 p | 33.30 | 0.00 |
| TRINITY_sp Q8L7(SYT5     | Synaptotagmin-5 OS= | 33.30 | 0.00 |
| TRINITY_sp Q9H2(VPS16    | Vacuolar protein so | 33.30 | 0.00 |
| TRINITY_sp Q93Z(NPF8.5   | Protein NRT1/ PTR F | 33.30 | 0.00 |
| TRINITY_sp Q08D(PDE12    | 2',5'-phosphodieste | 33.30 | 0.00 |
| TRINITY_sp Q550(DDB_G027 | Probable serine/thr | 33.30 | 0.00 |
| TRINITY_sp Q8BL(Arhgap22 | Rho GTPase-activati | 33.30 | 0.00 |
| TRINITY_sp Q28X(Anp32a   | Acidic leucine-rich | 33.30 | 0.00 |
| TRINITY_sp Q6NR(dcaf8    | DDB1- and CUL4-asso | 33.30 | 0.00 |
| TRINITY_sp P623(CPK1     | Calcium-dependent p | 33.30 | 0.00 |
| TRINITY_sp Q9VJ(Nnp-1    | Ribosomal RNA proce | 33.30 | 0.00 |
| TRINITY_sp Q54F(igt2b    | Transcription initi | 33.30 | 0.00 |
| TRINITY_sp Q6NR(ppp6r3-k | Serine/threonine-pr | 33.30 | 0.00 |
| TRINITY_sp Q6NQ(At4g2727 | Probable NAD(P)H de | 33.30 | 0.00 |
| TRINITY_sp Q5BJ(Ccdc93   | Coiled-coil domain- | 33.30 | 0.00 |
| TRINITY_sp Q17C(Papst2   | Adenosine 3'-phosph | 33.30 | 0.00 |
| TRINITY_sp Q6P4(Sik3     | Serine/threonine-pr | 33.30 | 0.00 |
| TRINITY_sp Q9SF(OST1A    | Dolichyl-diphosphoo | 33.30 | 0.00 |
| TRINITY_sp O139(hrq1     | ATP-dependent helic | 33.30 | 0.00 |
| TRINITY_sp Q8GU(PUB33    | U-box domain-contai | 33.30 | 0.00 |
| TRINITY_sp Q6AX(Utp3     | Something about sil | 33.30 | 0.00 |
| TRINITY_sp Q644(Ptprj    | Receptor-type tyros | 33.30 | 0.00 |
| TRINITY_sp P144(FGA      | Fibrinogen alpha ch | 33.30 | 0.00 |
| TRINITY_sp P641(nei1     | Endonuclease 8 1 OS | 33.30 | 0.00 |
| TRINITY_sp Q9NS(BRWD1    | Bromodomain and WD  | 33.30 | 0.00 |
| TRINITY_sp O574(-        | Voltage-dependent L | 33.30 | 0.00 |
| TRINITY_sp Q7XJ(GAS8     | Growth arrest-speci | 33.30 | 0.00 |
| TRINITY_sp Q55A(DDB_G027 | Probable serine/thr | 33.30 | 0.00 |
| TRINITY_sp Q9Y5(HEBP2    | Heme-binding protei | 33.30 | 0.00 |
| TRINITY_sp Q54R(dhkL     | Hybrid signal trans | 33.30 | 0.00 |
| TRINITY_sp Q8BV(Trank1   | TPR and ankyrin rep | 33.30 | 0.00 |
| TRINITY_sp Q9H2(DHX36    | ATP-dependent RNA h | 33.30 | 0.00 |
| TRINITY_sp Q9R0(Amfr     | E3 ubiquitin-protei | 33.30 | 0.00 |
| TRINITY_sp P528(DGKQ     | Diacylglycerol kina | 33.30 | 0.00 |
| TRINITY_sp P527(VAV2     | Guanine nucleotide  | 33.30 | 0.00 |
| TRINITY_sp Q4R4(IIFT22   | Intraflagellar tran | 33.30 | 0.00 |
| TRINITY_sp P9WN(MT2788   | Uncharacterized pro | 33.30 | 0.00 |
| TRINITY_sp C7YT(IRRP36   | rRNA biogenesis pro | 33.30 | 0.00 |
| TRINITY_sp Q5A5(NIK1     | Histidine protein k | 33.30 | 0.00 |
| TRINITY_sp Q7LH(TY3B-I   | Transposon Ty3-I Ga | 33.30 | 0.00 |
| TRINITY_sp Q6CB(SAR1     | Small COPII coat GT | 33.30 | 0.00 |
| TRINITY_sp P235(ACS1     | 1-aminocyclopropane | 33.30 | 0.00 |
| TRINITY_sp Q54T(drkd     | Probable serine/thr | 33.30 | 0.00 |
| TRINITY_sp P333(PRIP8    | Pre-mRNA-splicing f | 33.30 | 0.00 |
| TRINITY_sp P041(Myb      | Myb protein OS=Dros | 33.30 | 0.00 |
| TRINITY_sp Q964(CYP4C21  | Cytochrome P450 4c2 | 33.30 | 0.00 |
| TRINITY_sp Q54D(DDB_G029 | Putative potassium  | 33.30 | 0.00 |
| TRINITY_sp Q55G(scyl     | Probable inactive s | 33.30 | 0.00 |
| TRINITY_sp Q0WT(ERDJ2A   | DnaJ protein ERDJ2A | 33.30 | 0.00 |
| TRINITY_sp Q80U(Sass6    | Spindle assembly ab | 33.30 | 0.00 |
| TRINITY_sp Q94B(At1g7181 | Uncharacterized aar | 33.30 | 0.00 |
| TRINITY_sp Q944(SNF4     | Sucrose nonfermenti | 33.30 | 0.00 |

|                            |                     |       |      |
|----------------------------|---------------------|-------|------|
| TRINITY_sp P146(cyr1       | Adenylate cyclase O | 33.30 | 0.00 |
| TRINITY_sp A9CJ(cphrA      | Deoxyribodipyrimidi | 33.30 | 0.00 |
| TRINITY_sp Q039(Elf2ak2    | Interferon-induced, | 33.30 | 0.00 |
| TRINITY_sp Q6Z1(ML2        | Protein MEI2-like 2 | 33.30 | 0.00 |
| TRINITY_sp Q9ZUI(ETL1      | Protein CHROMATIN R | 33.30 | 0.00 |
| TRINITY_sp Q54M(fcnbB      | Calcineurin subunit | 33.30 | 0.00 |
| TRINITY_sp A1L1(Wdr55      | WD repeat-containin | 33.30 | 0.00 |
| TRINITY_sp P227(Gucy1b2    | Guanylate cyclase s | 33.30 | 0.00 |
| TRINITY_sp P041(GIP        | Copia protein OS=Dr | 33.30 | 0.00 |
| TRINITY_sp Q559(slr0305    | TVP38/TMEM64 family | 33.30 | 0.00 |
| TRINITY_sp Q9ZP(TMN3       | Transmembrane 9 sup | 33.30 | 0.00 |
| TRINITY_sp Q9QY(Vapb       | Vesicle-associated  | 33.30 | 0.00 |
| TRINITY_sp P411(hsf1       | Heat shock factor p | 33.20 | 0.00 |
| TRINITY_sp Q54N(ψpsmD13    | 26S proteasome non- | 33.20 | 0.00 |
| TRINITY_sp Q9XZ(culB       | Cullin-2 OS=Dictyos | 33.20 | 0.00 |
| TRINITY_sp Q8R1(Cog4       | Conserved oligomeri | 33.20 | 0.00 |
| TRINITY_sp Q8K2(Trappc12   | Trafficking protein | 33.20 | 0.00 |
| TRINITY_sp Q1ZX(I)DDB_G02( | Sphingomyelinase DD | 33.20 | 0.00 |
| TRINITY_sp Q6CS(ATG1       | Serine/threonine-pr | 33.20 | 0.00 |
| TRINITY_sp Q6H7(CIPK26     | CBL-interacting pro | 33.20 | 0.00 |
| TRINITY_sp Q54C(dcd1B      | Protein dcd1B OS=Di | 33.20 | 0.00 |
| TRINITY_sp Q8PW(MM_1767    | Geranylgeranyl diph | 33.20 | 0.00 |
| TRINITY_sp Q5AG(HSL1       | Serine/threonine-pr | 33.20 | 0.00 |
| TRINITY_sp Q8RW(ISTY17     | Serine/threonine-pr | 33.20 | 0.00 |
| TRINITY_sp Q8T2(prkag      | 5'-AMP-activated pr | 33.20 | 0.00 |
| TRINITY_sp Q0IW(IGRXS11    | Monothiol glutaredo | 33.20 | 0.00 |
| TRINITY_sp P432(RD19B      | Probable cysteine p | 33.20 | 0.00 |
| TRINITY_sp Q0JI(CIPK11     | CBL-interacting pro | 33.20 | 0.00 |
| TRINITY_sp Q54E(pdi2       | Protein disulfide-i | 33.20 | 0.00 |
| TRINITY_sp O429(ale1       | Lysophospholipid ac | 33.20 | 0.00 |
| TRINITY_sp Q8VY(At4g073(   | Mannose-P-dolichol  | 33.20 | 0.00 |
| TRINITY_sp F4HT(M)GCS1     | Mannosyl-oligosacch | 33.20 | 0.00 |
| TRINITY_sp A5PN(fam151a    | Protein FAM151A OS= | 33.20 | 0.00 |
| TRINITY_sp Q9CQ(A)asdhppt  | L-aminoadipate-semi | 33.20 | 0.00 |
| TRINITY_sp Q940(ψGLCNAC1(  | UDP-N-acetylglucosa | 33.20 | 0.00 |
| TRINITY_sp Q5AF(GLX3       | Glyoxalase 3 OS=Can | 33.20 | 0.00 |
| TRINITY_sp O239(SF21       | Pollen-specific pro | 33.20 | 0.00 |
| TRINITY_sp A2RR(WDR27      | WD repeat-containin | 33.20 | 0.00 |
| TRINITY_sp Q54W(abcD3      | ABC transporter D f | 33.20 | 0.00 |
| TRINITY_sp A6H8(s)sgsm3    | Small G protein sig | 33.20 | 0.00 |
| TRINITY_sp P141(PDE1A      | Calcium/calmodulin- | 33.20 | 0.00 |
| TRINITY_sp P315(RHN1       | Ras-related protein | 33.20 | 0.00 |
| TRINITY_sp Q5JK(Os01g05(   | Probable protein ph | 33.20 | 0.00 |
| TRINITY_sp Q86V(KIF27      | Kinesin-like protei | 33.20 | 0.00 |
| TRINITY_sp Q153(ψPUM3      | Pumilio homolog 3 O | 33.20 | 0.00 |
| TRINITY_sp Q9R1(ψPARP1     | Poly [ADP-ribose] p | 33.20 | 0.00 |
| TRINITY_sp O525(cah        | Carbonic anhydrase  | 33.20 | 0.00 |
| TRINITY_sp P0C2(ψ)ddx20    | Probable ATP-depend | 33.20 | 0.00 |
| TRINITY_sp C5A1(gyaR       | Glyoxylate reductas | 33.20 | 0.00 |
| TRINITY_sp Q9M3(ERID3      | Protein ROOT INITIA | 33.20 | 0.00 |
| TRINITY_sp Q6UX(DHRS13     | Dehydrogenase/reduc | 33.20 | 0.00 |
| TRINITY_sp Q102(ψ)SPAC4G9. | Uncharacterized mit | 33.20 | 0.00 |
| TRINITY_sp P091(P4HB       | Protein disulfide-i | 33.20 | 0.00 |
| TRINITY_sp Q5VV(ψYOD1      | Ubiquitin thioester | 33.20 | 0.00 |
| TRINITY_sp P098(PARP1      | Poly [ADP-ribose] p | 33.20 | 0.00 |
| TRINITY_sp Q55G(abkC       | Probable serine/thr | 33.20 | 0.00 |

|                          |                     |       |      |
|--------------------------|---------------------|-------|------|
| TRINITY_sp Q5EBInt5c2    | Cytosolic purine 5' | 33.20 | 0.00 |
| TRINITY_sp Q8CG(Abcc1    | Multidrug resistanc | 33.20 | 0.00 |
| TRINITY_sp Q9Y4ISPEF1    | Sperm flagellar pro | 33.20 | 0.00 |
| TRINITY_sp A7HQpyrD      | Dihydroorotate dehy | 33.10 | 0.00 |
| TRINITY_sp Q408(EMB8     | Embryogenesis-assoc | 33.10 | 0.00 |
| TRINITY_sp Q5TIHVWA5B1   | von Willebrand fact | 33.10 | 0.00 |
| TRINITY_sp O1392SPAC23C4 | UPF0665 family prot | 33.10 | 0.00 |
| TRINITY_sp Q0761SPAG1    | Sperm-associated an | 33.10 | 0.00 |
| TRINITY_sp Q3SEIcl1e     | Caltractin ICL1e OS | 33.10 | 0.00 |
| TRINITY_sp Q54DabcA9     | ABC transporter A f | 33.10 | 0.00 |
| TRINITY_sp Q9491Reg-2    | Rhythmically expres | 33.10 | 0.00 |
| TRINITY_sp Q54Pcxpo5     | Exportin-5 OS=Dicty | 33.10 | 0.00 |
| TRINITY_sp Q54C1sgmB     | Sphingomyelin phosp | 33.10 | 0.00 |
| TRINITY_sp Q55C7gdt2     | Probable serine/thr | 33.10 | 0.00 |
| TRINITY_sp Q9LT1BBR      | E3 ubiquitin ligase | 33.10 | 0.00 |
| TRINITY_sp Q9ZR1GSTT1    | Glutathione S-trans | 33.10 | 0.00 |
| TRINITY_sp Q1ZXIDDB_G027 | PH domain-containin | 33.10 | 0.00 |
| TRINITY_sp Q9W01NaCP60E  | Sodium channel prot | 33.10 | 0.00 |
| TRINITY_sp Q92F4radA     | DNA repair protein  | 33.10 | 0.00 |
| TRINITY_sp P1539rpa1     | DNA-directed RNA po | 33.10 | 0.00 |
| TRINITY_sp Q94ACSTR6     | Rhodanese-like doma | 33.10 | 0.00 |
| TRINITY_sp O5284bgam     | Beta-galactosidase  | 33.10 | 0.00 |
| TRINITY_sp C0SV(RVE5     | Protein REVEILLE 5  | 33.10 | 0.00 |
| TRINITY_sp O9465SPBC405  | Uncharacterized tra | 33.10 | 0.00 |
| TRINITY_sp O9571HERC2    | E3 ubiquitin-protei | 33.10 | 0.00 |
| TRINITY_sp Q3UFMNom1     | Nucleolar MIF4G dom | 33.10 | 0.00 |
| TRINITY_sp Q9X24fabG     | 3-oxoacyl-[acyl-car | 33.10 | 0.00 |
| TRINITY_sp G4SW8erg      | Delta(14)-sterol re | 33.10 | 0.00 |
| TRINITY_sp B1AZ9Otud3    | OTU domain-containi | 33.10 | 0.00 |
| TRINITY_sp Q9FJIFKBP65   | Peptidyl-prolyl cis | 33.10 | 0.00 |
| TRINITY_sp Q7TNAbca7     | ATP-binding cassett | 33.10 | 0.00 |
| TRINITY_sp Q9VR9HERC2    | Probable E3 ubiquit | 33.10 | 0.00 |
| TRINITY_sp P7066Siae     | Sialate O-acetylest | 33.10 | 0.00 |
| TRINITY_sp Q54PcgcsA     | Glutamate--cysteine | 33.10 | 0.00 |
| TRINITY_sp Q6NZ(nc11     | Nicalin-1 OS=Danio  | 33.10 | 0.00 |
| TRINITY_sp Q1L81rnf19b   | E3 ubiquitin-protei | 33.10 | 0.00 |
| TRINITY_sp P242(yjiA     | Uncharacterized GTP | 33.10 | 0.00 |
| TRINITY_sp Q9DBVCyp4v2   | Cytochrome P450 4V2 | 33.10 | 0.00 |
| TRINITY_sp Q408(EMB8     | Embryogenesis-assoc | 33.10 | 0.00 |
| TRINITY_sp Q9DB8Osbp13   | Oxysterol-binding p | 33.10 | 0.00 |
| TRINITY_sp Q9947PFDN5    | Prefoldin subunit 5 | 33.10 | 0.00 |
| TRINITY_sp Q8RXIBRCA1    | Protein BREAST CANC | 33.10 | 0.00 |
| TRINITY_sp Q55FctipC     | Putative vacuolar p | 33.10 | 0.00 |
| TRINITY_sp Q0536W        | Protein white OS=Lu | 33.10 | 0.00 |
| TRINITY_sp Q6P2MPNCK     | Calcium/calmodulin- | 33.10 | 0.00 |
| TRINITY_sp O8051CYCU4-1  | Cyclin-U4-1 OS=Arab | 33.10 | 0.00 |
| TRINITY_sp O1477TPP1     | Tripeptidyl-peptida | 33.10 | 0.00 |
| TRINITY_sp Q9SH8At2g3799 | Ribosome biogenesis | 33.10 | 0.00 |
| TRINITY_sp Q54TmybC      | Myb-like protein C  | 33.10 | 0.00 |
| TRINITY_sp Q6DG8atg4b    | Cysteine protease A | 33.10 | 0.00 |
| TRINITY_sp Q91WVnpla3    | Patatin-like phosph | 33.10 | 0.00 |
| TRINITY_sp Q9968MGLL     | Monoglyceride lipas | 33.10 | 0.00 |
| TRINITY_sp O5488Gucy1b3  | Guanylate cyclase s | 33.10 | 0.00 |
| TRINITY_sp Q6J11Usp19    | Ubiquitin carboxyl- | 33.10 | 0.00 |
| TRINITY_sp Q94KIVPS52    | Vacuolar protein so | 33.10 | 0.00 |
| TRINITY_sp B3E42era      | GTPase Era OS=Geoba | 33.10 | 0.00 |

|                          |                     |       |      |
|--------------------------|---------------------|-------|------|
| TRINITY_sp O1447ssr2     | SWI/SNF and RSC com | 33.10 | 0.00 |
| TRINITY_sp Q9Y4FVPRBP    | Protein VPRBP OS=Ho | 33.10 | 0.00 |
| TRINITY_sp Q93W2At4g1554 | Uncharacterized pro | 33.10 | 0.00 |
| TRINITY_sp Q9FMICPK17    | Calcium-dependent p | 33.10 | 0.00 |
| TRINITY_sp A8I9FCFAP45   | Cilia- and flagella | 33.10 | 0.00 |
| TRINITY_sp P4802gacS     | Sensor protein GacS | 33.10 | 0.00 |
| TRINITY_sp O613(Dbp80    | DEAD-box helicase D | 33.10 | 0.00 |
| TRINITY_sp Q9Y1VfadA     | Delta(5) fatty acid | 33.10 | 0.00 |
| TRINITY_sp A8Y19pfd-6    | Probable prefoldin  | 33.10 | 0.00 |
| TRINITY_sp P5322NQM1     | Transaldolase NQM1  | 33.10 | 0.00 |
| TRINITY_sp Q0277MAP3K10  | Mitogen-activated p | 33.10 | 0.00 |
| TRINITY_sp P7881vtc4     | Vacuolar transporte | 33.10 | 0.00 |
| TRINITY_sp G5CEV-        | Eukaryotic translat | 33.10 | 0.00 |
| TRINITY_sp Q54JFabcC3    | ABC transporter C f | 33.10 | 0.00 |
| TRINITY_sp Q3U4ELipn     | Lipase member N OS= | 33.00 | 0.00 |
| TRINITY_sp P2665rad15    | DNA repair helicase | 33.00 | 0.00 |
| TRINITY_sp P4597Su(var)3 | Histone-lysine N-me | 33.00 | 0.00 |
| TRINITY_sp Q0JI4CIPK11   | CBL-interacting pro | 33.00 | 0.00 |
| TRINITY_sp O0891Faah     | Fatty-acid amide hy | 33.00 | 0.00 |
| TRINITY_sp Q8VZ6At4g1919 | Uncharacterized zin | 33.00 | 0.00 |
| TRINITY_sp Q8VE9Slc35f6  | Solute carrier fami | 33.00 | 0.00 |
| TRINITY_sp Q4U2FHerc2    | E3 ubiquitin-protei | 33.00 | 0.00 |
| TRINITY_sp Q9HC2TMBIM4   | Protein lifeguard 4 | 33.00 | 0.00 |
| TRINITY_sp Q8RY7At4g1762 | Decapping nuclease  | 33.00 | 0.00 |
| TRINITY_sp Q647(Plk4     | Serine/threonine-pr | 33.00 | 0.00 |
| TRINITY_sp Q9VH1Invadol1 | Leishmanolysin-like | 33.00 | 0.00 |
| TRINITY_sp Q9DB7Uqcrc2   | Cytochrome b-c1 com | 33.00 | 0.00 |
| TRINITY_sp Q5KU2COLEC12  | Collectin-12 OS=Hom | 33.00 | 0.00 |
| TRINITY_sp Q54DUDDB_G029 | von Willebrand fact | 33.00 | 0.00 |
| TRINITY_sp B0G00mybAA    | Myb-like protein AA | 33.00 | 0.00 |
| TRINITY_sp Q9SSFRBL5     | RHOMBOID-like prote | 33.00 | 0.00 |
| TRINITY_sp P9213CP1      | Cathepsin B-like CP | 33.00 | 0.00 |
| TRINITY_sp P1889Dao      | D-amino-acid oxidas | 33.00 | 0.00 |
| TRINITY_sp Q9VNIrheb     | GTP-binding protein | 33.00 | 0.00 |
| TRINITY_sp Q7M39rngB     | RING finger protein | 33.00 | 0.00 |
| TRINITY_sp Q54J7papA     | Poly(A) polymerase  | 33.00 | 0.00 |
| TRINITY_sp Q8Z01gmk      | Guanylate kinase OS | 33.00 | 0.00 |
| TRINITY_sp Q6433Syn2     | Synapsin-2 OS=Mus m | 33.00 | 0.00 |
| TRINITY_sp Q9LDFBETAA-AI | Beta-adaptin-like p | 33.00 | 0.00 |
| TRINITY_sp Q8DIHtilS     | tRNA(Ile)-lysidine  | 33.00 | 0.00 |
| TRINITY_sp Q94K1TPC1     | Two pore calcium ch | 33.00 | 0.00 |
| TRINITY_sp Q54TMDrkd     | Probable serine/thr | 33.00 | 0.00 |
| TRINITY_sp Q1918gcy-12   | Receptor-type guany | 33.00 | 0.00 |
| TRINITY_sp P0598pkar     | cAMP-dependent prot | 33.00 | 0.00 |
| TRINITY_sp Q5SMCTTHA106  | Magnesium transport | 33.00 | 0.00 |
| TRINITY_sp Q8IYFCDC146   | Coiled-coil domain- | 33.00 | 0.00 |
| TRINITY_sp Q2QAVTIO      | Serine/threonine-pr | 33.00 | 0.00 |
| TRINITY_sp Q8ICFCPK2     | Calcium-dependent p | 33.00 | 0.00 |
| TRINITY_sp Q0VC(ABHD3    | Phospholipase ABHD3 | 33.00 | 0.00 |
| TRINITY_sp P5475EPHA5    | Ephrin type-A recep | 33.00 | 0.00 |
| TRINITY_sp P104(pol      | Retrovirus-related  | 33.00 | 0.00 |
| TRINITY_sp Q5UPIMIMI_L75 | Uncharacterized pro | 33.00 | 0.00 |
| TRINITY_sp Q8L7FLPEAT1   | Lysophospholipid ac | 33.00 | 0.00 |
| TRINITY_sp Q9HBFIRDH14   | Retinol dehydrogena | 33.00 | 0.00 |
| TRINITY_sp Q86I9DDB_G027 | Uncharacterized Gol | 33.00 | 0.00 |
| TRINITY_sp O6473At2g3017 | Probable protein ph | 33.00 | 0.00 |

|                          |                     |       |      |
|--------------------------|---------------------|-------|------|
| TRINITY_sp B8AJ(BASS4    | Probable sodium/met | 33.00 | 0.00 |
| TRINITY_sp Q96B(AIDA     | Axin interactor, do | 33.00 | 0.00 |
| TRINITY_sp O346(ydiP     | Probable BsuMI modi | 33.00 | 0.00 |
| TRINITY_sp Q1PF(CPK19    | Calcium-dependent p | 33.00 | 0.00 |
| TRINITY_sp Q9M0(GGP3     | Gamma-glutamyl pept | 33.00 | 0.00 |
| TRINITY_sp Q95R(Orc2     | Organic cation tran | 33.00 | 0.00 |
| TRINITY_sp Q9M8(SIP1-1   | Aquaporin SIP1-1 OS | 33.00 | 0.00 |
| TRINITY_sp Q177(nuc-1    | Deoxyribonuclease-2 | 33.00 | 0.00 |
| TRINITY_sp P0CZ(ACX3     | Acyl-coenzyme A oxi | 33.00 | 0.00 |
| TRINITY_sp Q10X(Obg      | GTPase Obg OS=Trich | 33.00 | 0.00 |
| TRINITY_sp Q9W4(dnc      | cAMP-specific 3',5' | 33.00 | 0.00 |
| TRINITY_sp O764(GstD7    | Glutathione S-trans | 33.00 | 0.00 |
| TRINITY_sp O040(Atlg0894 | Phosphoglycerate mu | 33.00 | 0.00 |
| TRINITY_sp P340(manA     | Lysosomal alpha-man | 33.00 | 0.00 |
| TRINITY_sp Q75J(cpras1   | Circularly permutat | 33.00 | 0.00 |
| TRINITY_sp Q0V9(ccdc39   | Coiled-coil domain- | 33.00 | 0.00 |
| TRINITY_sp Q32P(Fubp1    | Far upstream elemen | 33.00 | 0.00 |
| TRINITY_sp Q6AX(bbs9     | Protein PTHB1 OS=Xe | 33.00 | 0.00 |
| TRINITY_sp Q8W4(UBP2     | Ubiquitin carboxyl- | 33.00 | 0.00 |
| TRINITY_sp P383(PHO89    | Phosphate permease  | 33.00 | 0.00 |
| TRINITY_sp Q54R(idhKL    | Hybrid signal trans | 32.90 | 0.00 |
| TRINITY_sp Q1AU(fusA     | Elongation factor G | 32.90 | 0.00 |
| TRINITY_sp G5EF(igd-4    | Poly(A) RNA polymer | 32.90 | 0.00 |
| TRINITY_sp Q54F(arpin    | Arpin OS=Dictyostel | 32.90 | 0.00 |
| TRINITY_sp Q567(yod1     | Ubiquitin thioester | 32.90 | 0.00 |
| TRINITY_sp Q6PD(Ecm29    | Proteasome-associat | 32.90 | 0.00 |
| TRINITY_sp A0PQ(MUL_2009 | Probable phthiotrio | 32.90 | 0.00 |
| TRINITY_sp Q9XT(ZK262.3  | Lipase ZK262.3 OS=C | 32.90 | 0.00 |
| TRINITY_sp B6MF(BRAFLDR7 | Protein Hook homolo | 32.90 | 0.00 |
| TRINITY_sp Q9D1(Cfap57   | Cilia- and flagella | 32.90 | 0.00 |
| TRINITY_sp Q29A(GA17800  | Leishmanolysin-like | 32.90 | 0.00 |
| TRINITY_sp Q54H(ighB     | Gamma-glutamyl hydr | 32.90 | 0.00 |
| TRINITY_sp Q96G(DCUN1D1  | DCN1-like protein 1 | 32.90 | 0.00 |
| TRINITY_sp O525(cah      | Carbonic anhydrase  | 32.90 | 0.00 |
| TRINITY_sp Q8XJ(def2     | Peptide deformylase | 32.90 | 0.00 |
| TRINITY_sp Q3U4(Hectd3   | E3 ubiquitin-protei | 32.90 | 0.00 |
| TRINITY_sp Q54Y(dhkJ     | Hybrid signal trans | 32.90 | 0.00 |
| TRINITY_sp Q54H(drkA     | Probable serine/thr | 32.90 | 0.00 |
| TRINITY_sp Q84L(PAP14    | Probable inactive p | 32.90 | 0.00 |
| TRINITY_sp Q54Q(esir2A   | NAD-dependent deace | 32.90 | 0.00 |
| TRINITY_sp Q96R(CAMKK2   | Calcium/calmodulin- | 32.90 | 0.00 |
| TRINITY_sp Q3UG(Wdr19    | WD repeat-containin | 32.90 | 0.00 |
| TRINITY_sp Q9VY(Usp7     | Ubiquitin carboxyl- | 32.90 | 0.00 |
| TRINITY_sp Q0JI(CIPK11   | CBL-interacting pro | 32.90 | 0.00 |
| TRINITY_sp Q7XZ(IAPX5    | L-ascorbate peroxid | 32.90 | 0.00 |
| TRINITY_sp Q5XF(TIM44-2  | Mitochondrial impor | 32.90 | 0.00 |
| TRINITY_sp O087(Ube3a    | Ubiquitin-protein 1 | 32.90 | 0.00 |
| TRINITY_sp Q8RV(IDEK1    | Calpain-type cystei | 32.90 | 0.00 |
| TRINITY_sp P404(rdgC     | Serine/threonine-pr | 32.90 | 0.00 |
| TRINITY_sp P484(Ppp3cc   | Serine/threonine-pr | 32.90 | 0.00 |
| TRINITY_sp Q7FG(RH1      | DEAD-box ATP-depend | 32.90 | 0.00 |
| TRINITY_sp Q7SY(slc44a2  | Choline transporter | 32.90 | 0.00 |
| TRINITY_sp O049(-        | Alpha-glucosidase O | 32.90 | 0.00 |
| TRINITY_sp Q6ZP(Ibtk     | Inhibitor of Bruton | 32.90 | 0.00 |
| TRINITY_sp Q8BV(Trank1   | TPR and ankyrin rep | 32.90 | 0.00 |
| TRINITY_sp Q54I(pyk3     | Dual specificity pr | 32.90 | 0.00 |



|                          |                     |       |      |
|--------------------------|---------------------|-------|------|
| TRINITY_sp Q6TY2Pabpn11- | Embryonic polyadeny | 32.90 | 0.00 |
| TRINITY_sp Q5XG6PAPD7    | Non-canonical poly( | 32.90 | 0.00 |
| TRINITY_sp A4IF6GNPAT    | Dihydroxyacetone ph | 32.90 | 0.00 |
| TRINITY_sp A2QV6creC     | Probable catabolite | 32.90 | 0.00 |
| TRINITY_sp A5PJ2NUP93    | Nuclear pore comple | 32.90 | 0.00 |
| TRINITY_sp Q93VICCD8A    | Carotenoid cleavage | 32.90 | 0.00 |
| TRINITY_sp P5161Xpc      | DNA repair protein  | 32.90 | 0.00 |
| TRINITY_sp Q3UGMnek10    | Serine/threonine-pr | 32.90 | 0.00 |
| TRINITY_sp Q8I7Ipol      | Retrovirus-related  | 32.90 | 0.00 |
| TRINITY_sp Q3906CNX2     | GTP 3',8-cyclase, m | 32.90 | 0.00 |
| TRINITY_sp Q9ZUICKL5     | Casein kinase 1-lik | 32.90 | 0.00 |
| TRINITY_sp A5PJ6IHSDL1   | Inactive hydroxyste | 32.90 | 0.00 |
| TRINITY_sp Q9906act      | Actin OS=Hypocrea j | 32.90 | 0.00 |
| TRINITY_sp Q9LU4PUB53    | Putative U-box doma | 32.90 | 0.00 |
| TRINITY_sp Q76L6cpr-c1   | NADPH-dependent con | 32.90 | 0.00 |
| TRINITY_sp Q869Ibpnt1    | 3'(2'),5'-bisphosph | 32.90 | 0.00 |
| TRINITY_sp A8JAI6CFAP43  | Cilia- and flagella | 32.90 | 0.00 |
| TRINITY_sp Q652MPHT4;4   | Probable anion tran | 32.90 | 0.00 |
| TRINITY_sp Q4106SBEI     | 1,4-alpha-glucan-br | 32.90 | 0.00 |
| TRINITY_sp Q54RIDhkL     | Hybrid signal trans | 32.80 | 0.00 |
| TRINITY_sp Q9779TBC1D1   | TBC1 domain family  | 32.80 | 0.00 |
| TRINITY_sp Q96P6ACAP3    | Arf-GAP with coiled | 32.80 | 0.00 |
| TRINITY_sp Q1ZXI6roco5   | Probable serine/thr | 32.80 | 0.00 |
| TRINITY_sp Q94A6At5g5314 | Probable protein ph | 32.80 | 0.00 |
| TRINITY_sp Q6766aq_1758  | Uncharacterized RNA | 32.80 | 0.00 |
| TRINITY_sp Q1D96deoD     | Purine nucleoside p | 32.80 | 0.00 |
| TRINITY_sp Q54DF6commd1  | COMM domain-contain | 32.80 | 0.00 |
| TRINITY_sp Q8RWI6STY17   | Serine/threonine-pr | 32.80 | 0.00 |
| TRINITY_sp Q4266pep2     | Vacuolar protease A | 32.80 | 0.00 |
| TRINITY_sp Q54P6gefA     | Ras guanine nucleot | 32.80 | 0.00 |
| TRINITY_sp Q9UR6(Tf2-11  | Transposon Tf2-11 p | 32.80 | 0.00 |
| TRINITY_sp Q9ZV6At1g5457 | Acyltransferase-lik | 32.80 | 0.00 |
| TRINITY_sp P4986STK19    | Serine/threonine-pr | 32.80 | 0.00 |
| TRINITY_sp P2006-        | Myb-related protein | 32.80 | 0.00 |
| TRINITY_sp Q9C86FABCC11  | ABC transporter C f | 32.80 | 0.00 |
| TRINITY_sp Q54S6vps15    | Probable serine/thr | 32.80 | 0.00 |
| TRINITY_sp Q6IQ6SPOPL    | Speckle-type POZ pr | 32.80 | 0.00 |
| TRINITY_sp Q1886AOAH     | Acyloxyacyl hydrola | 32.80 | 0.00 |
| TRINITY_sp Q54V6DDB_G026 | Probable serine/thr | 32.80 | 0.00 |
| TRINITY_sp Q9P86tcsA     | Two-component syste | 32.80 | 0.00 |
| TRINITY_sp P4086USP8     | Ubiquitin carboxyl- | 32.80 | 0.00 |
| TRINITY_sp Q54DI6mrkA    | Probable serine/thr | 32.80 | 0.00 |
| TRINITY_sp Q9236SPAC6G9. | Pumilio domain-cont | 32.80 | 0.00 |
| TRINITY_sp Q54N6(alkB    | Alpha-ketoglutarate | 32.80 | 0.00 |
| TRINITY_sp Q1396av19     | Late secretory path | 32.80 | 0.00 |
| TRINITY_sp Q5ZK6DCUN1D1  | DCN1-like protein 1 | 32.80 | 0.00 |
| TRINITY_sp Q54F6(gacJJ   | Rho GTPase-activati | 32.80 | 0.00 |
| TRINITY_sp Q0436NSP3     | Nitrile-specifier p | 32.80 | 0.00 |
| TRINITY_sp Q0496GPX2     | Probable glutathion | 32.80 | 0.00 |
| TRINITY_sp P0AF6(tsaE    | tRNA threonylcarbam | 32.80 | 0.00 |
| TRINITY_sp P5286DGKQ     | Diacylglycerol kina | 32.80 | 0.00 |
| TRINITY_sp P5936Eif5     | Eukaryotic translat | 32.80 | 0.00 |
| TRINITY_sp Q8RX6WIN2     | Probable protein ph | 32.80 | 0.00 |
| TRINITY_sp Q0JI6CIPK11   | CBL-interacting pro | 32.80 | 0.00 |
| TRINITY_sp Q8VH6Ikbkap   | Elongator complex p | 32.80 | 0.00 |
| TRINITY_sp Q94C6At5g4994 | Uncharacterized pro | 32.80 | 0.00 |

|                          |                     |       |      |
|--------------------------|---------------------|-------|------|
| TRINITY_sp Q6DH\ADAL     | Adenosine deaminase | 32.80 | 0.00 |
| TRINITY_sp Q5ZM\PEX5     | Peroxisomal targeti | 32.80 | 0.00 |
| TRINITY_sp B5FE\rlmI     | Ribosomal RNA large | 32.80 | 0.00 |
| TRINITY_sp B5RM\rrplB    | 50S ribosomal prote | 32.80 | 0.00 |
| TRINITY_sp Q54U\shkD     | Dual specificity pr | 32.80 | 0.00 |
| TRINITY_sp Q9CA\PEX2     | Peroxisome biogenes | 32.80 | 0.00 |
| TRINITY_sp Q80Z\NampT    | Nicotinamide phosph | 32.80 | 0.00 |
| TRINITY_sp O624\Y43F4A.1 | Leishmanolysin-like | 32.80 | 0.00 |
| TRINITY_sp P649\stf3     | PAPS-dependent sulf | 32.80 | 0.00 |
| TRINITY_sp Q9LZ\BTR1     | Protein BTR1 OS=Ara | 32.80 | 0.00 |
| TRINITY_sp Q54S\idhkD    | Hybrid signal trans | 32.80 | 0.00 |
| TRINITY_sp F4IL\At2g3592 | DEXH-box ATP-depend | 32.80 | 0.00 |
| TRINITY_sp Q8GU\PUB33    | U-box domain-contai | 32.80 | 0.00 |
| TRINITY_sp P315\-        | 47 kDa protein OS=P | 32.80 | 0.00 |
| TRINITY_sp Q9ZU\BAT1     | Amino-acid permease | 32.80 | 0.00 |
| TRINITY_sp P696\Necap1   | Adaptin ear-binding | 32.80 | 0.00 |
| TRINITY_sp Q120\FSF1     | Probable mitochondr | 32.80 | 0.00 |
| TRINITY_sp Q9VY\Evi5     | Ecotropic viral int | 32.70 | 0.00 |
| TRINITY_sp O140\kap104   | Importin subunit be | 32.70 | 0.00 |
| TRINITY_sp Q8BU\Usp43    | Ubiquitin carboxyl- | 32.70 | 0.00 |
| TRINITY_sp Q499\xpo4     | Exportin-4 OS=Xenop | 32.70 | 0.00 |
| TRINITY_sp Q8VZ\PLT5     | Polyol transporter  | 32.70 | 0.00 |
| TRINITY_sp Q9CZ\Polr3e   | DNA-directed RNA po | 32.70 | 0.00 |
| TRINITY_sp Q68D\KCTD16   | BTB/POZ domain-cont | 32.70 | 0.00 |
| TRINITY_sp Q9VH\Invadoly | Leishmanolysin-like | 32.70 | 0.00 |
| TRINITY_sp Q5ZJ\ULK3     | Serine/threonine-pr | 32.70 | 0.00 |
| TRINITY_sp Q8N2\ARHGAP24 | Rho GTPase-activati | 32.70 | 0.00 |
| TRINITY_sp Q8N9\WDSUB1   | WD repeat, SAM and  | 32.70 | 0.00 |
| TRINITY_sp O551\Pdpk1    | 3-phosphoinositide- | 32.70 | 0.00 |
| TRINITY_sp Q6SP\Enkur    | Enkurin OS=Mus musc | 32.70 | 0.00 |
| TRINITY_sp Q9YG\sand     | Protein SAND OS=Tak | 32.70 | 0.00 |
| TRINITY_sp Q86L\gachH    | Rho GTPase-activati | 32.70 | 0.00 |
| TRINITY_sp Q54C\dync1li1 | Cytoplasmic dynein  | 32.70 | 0.00 |
| TRINITY_sp Q2TC\Htgfbli1 | Transforming growth | 32.70 | 0.00 |
| TRINITY_sp Q5ZI\KLHL7    | Kelch-like protein  | 32.70 | 0.00 |
| TRINITY_sp O431\csh3     | Protein csh3 OS=Sch | 32.70 | 0.00 |
| TRINITY_sp P246\PTP      | Tyrosine-protein ph | 32.70 | 0.00 |
| TRINITY_sp Q1LW\tldc1    | TLD domain-containi | 32.70 | 0.00 |
| TRINITY_sp Q94A\TPS6     | Alpha,alpha-trehalo | 32.70 | 0.00 |
| TRINITY_sp O088\Was1     | Neural Wiskott-Aldr | 32.70 | 0.00 |
| TRINITY_sp P524\UBA1     | Ubiquitin-activatin | 32.70 | 0.00 |
| TRINITY_sp Q0JC\ZEP      | Zeaxanthin epoxidas | 32.70 | 0.00 |
| TRINITY_sp Q6ZR\DNAH12   | Dynein heavy chain  | 32.70 | 0.00 |
| TRINITY_sp Q105\CPSF2    | Cleavage and polyad | 32.70 | 0.00 |
| TRINITY_sp Q9VI\CG10166  | Probable dolichol-p | 32.70 | 0.00 |
| TRINITY_sp Q55A\DDB_G027 | Probable serine/thr | 32.70 | 0.00 |
| TRINITY_sp Q5Y2\HTAY     | Histone H2A.Y OS=Te | 32.70 | 0.00 |
| TRINITY_sp Q86C\atg1     | Serine/threonine-pr | 32.70 | 0.00 |
| TRINITY_sp O702\Dgcr14   | Protein DGCR14 OS=M | 32.70 | 0.00 |
| TRINITY_sp P731\sl11290  | Uncharacterized rib | 32.70 | 0.00 |
| TRINITY_sp P832\CBR2     | NADH-cytochrome b5  | 32.70 | 0.00 |
| TRINITY_sp Q84U\CAC1     | Mitochondrial argin | 32.70 | 0.00 |
| TRINITY_sp Q84M\FAL1     | RAP domain-containi | 32.70 | 0.00 |
| TRINITY_sp Q1ZX\hgxcDD   | Guanine exchange fa | 32.70 | 0.00 |
| TRINITY_sp Q9ZV\RRP4     | Exosome complex com | 32.70 | 0.00 |
| TRINITY_sp Q8GT\MUS81    | Crossover junction  | 32.70 | 0.00 |

|                           |                       |       |      |
|---------------------------|-----------------------|-------|------|
| TRINITY_sp O9437rex4      | RNA exonuclease 4 O   | 32.70 | 0.00 |
| TRINITY_sp Q9LHCOCT4      | Organic cation/carn   | 32.70 | 0.00 |
| TRINITY_sp Q9VH1Invadoly  | Leishmanolysin-like   | 32.70 | 0.00 |
| TRINITY_sp Q8H27Os07g064  | Probable protein ph   | 32.70 | 0.00 |
| TRINITY_sp Q6Z71GLU14     | Endoglucanase 4 OS=   | 32.70 | 0.00 |
| TRINITY_sp P5548NGR_a033  | Uncharacterized oxi   | 32.70 | 0.00 |
| TRINITY_sp Q6DRMnoc31     | Nucleolar complex p   | 32.70 | 0.00 |
| TRINITY_sp Q097(akr1      | Palmitoyltransferas   | 32.70 | 0.00 |
| TRINITY_sp Q54RmosbG      | Oxysterol-binding p   | 32.70 | 0.00 |
| TRINITY_sp Q9MAC(ABCG24   | ABC transporter G f   | 32.70 | 0.00 |
| TRINITY_sp Q94A1SEC6      | Exocyst complex com   | 32.70 | 0.00 |
| TRINITY_sp P5775DRT101    | Phosphoacetylglucos   | 32.70 | 0.00 |
| TRINITY_sp Q220(pde-4     | Probable 3',5'-cycl   | 32.70 | 0.00 |
| TRINITY_sp P295(-         | Ubiquitin-40S ribos   | 32.70 | 0.00 |
| TRINITY_sp Q96W(eg1B      | Probable endo-beta-   | 32.60 | 0.00 |
| TRINITY_sp Q6NXMRcbtb1    | RCC1 and BTB domain   | 32.60 | 0.00 |
| TRINITY_sp P4055YIA6      | Mitochondrial nicot   | 32.60 | 0.00 |
| TRINITY_sp Q0971apm4      | AP-2 complex subuni   | 32.60 | 0.00 |
| TRINITY_sp P3893IGHMBP2   | DNA-binding protein   | 32.60 | 0.00 |
| TRINITY_sp Q4Z8FRanBPM    | Ran-binding protein   | 32.60 | 0.00 |
| TRINITY_sp Q6PDJEcm29     | Proteasome-associat   | 32.60 | 0.00 |
| TRINITY_sp O9471SPCC1259  | Uncharacterized pro   | 32.60 | 0.00 |
| TRINITY_sp Q4086EMB8      | Embryogenesis-assoc   | 32.60 | 0.00 |
| TRINITY_sp Q7L51GDPD3     | Glycerophosphodiester | 32.60 | 0.00 |
| TRINITY_sp P1116SLC2A2    | Solute carrier fami   | 32.60 | 0.00 |
| TRINITY_sp Q9237ssb1      | Replication factor    | 32.60 | 0.00 |
| TRINITY_sp Q54E7DDB_G029  | Probable serine/thr   | 32.60 | 0.00 |
| TRINITY_sp Q6ZTFCFAP47    | Cilia- and flagella   | 32.60 | 0.00 |
| TRINITY_sp Q54M(pigw      | Phosphatidylinosito   | 32.60 | 0.00 |
| TRINITY_sp Q9411EO        | 2-methylene-furan-3   | 32.60 | 0.00 |
| TRINITY_sp O5498Kcnu1     | Potassium channel s   | 32.60 | 0.00 |
| TRINITY_sp Q1ZXHfgxcDD    | Guanine exchange fa   | 32.60 | 0.00 |
| TRINITY_sp Q54X7DDB_G027  | Probable serine/thr   | 32.60 | 0.00 |
| TRINITY_sp Q0933Ugt       | UDP-glucose:glycopro  | 32.60 | 0.00 |
| TRINITY_sp O7577RAD51D    | DNA repair protein    | 32.60 | 0.00 |
| TRINITY_sp Q0966tnc-2     | Troponin C, isoform   | 32.60 | 0.00 |
| TRINITY_sp Q54B6mcfZ      | Mitochondrial subst   | 32.60 | 0.00 |
| TRINITY_sp O9331rad21     | Double-strand-break   | 32.60 | 0.00 |
| TRINITY_sp Q1EC6SMO1-2    | Methylsterol monoox   | 32.60 | 0.00 |
| TRINITY_sp Q08D6abcb6     | ATP-binding cassett   | 32.60 | 0.00 |
| TRINITY_sp Q9M35GCP4      | Gamma-tubulin compl   | 32.60 | 0.00 |
| TRINITY_sp Q8BT1Srrm2     | Serine/arginine rep   | 32.60 | 0.00 |
| TRINITY_sp Q59W6GIN4      | Serine/threonine-pr   | 32.60 | 0.00 |
| TRINITY_sp P0A87yidA      | Sugar phosphatase Y   | 32.60 | 0.00 |
| TRINITY_sp Q54E3gacEE     | Rho GTPase-activati   | 32.60 | 0.00 |
| TRINITY_sp Q84WUUBP13     | Ubiquitin carboxyl-   | 32.60 | 0.00 |
| TRINITY_sp Q7ZXHfar1      | Fatty acyl-CoA redu   | 32.60 | 0.00 |
| TRINITY_sp Q54Efabcc7     | ABC transporter C f   | 32.60 | 0.00 |
| TRINITY_sp Q99M6Sec1412   | SEC14-like protein    | 32.60 | 0.00 |
| TRINITY_sp Q1DNC(CIMG_081 | Very-long-chain 3-o   | 32.60 | 0.00 |
| TRINITY_sp Q54L7DDB_G028  | G8 domain-containin   | 32.60 | 0.00 |
| TRINITY_sp Q6F67hpxO      | FAD-dependent urate   | 32.60 | 0.00 |
| TRINITY_sp Q9SR7LPA1      | Protein LOW PSII AC   | 32.60 | 0.00 |
| TRINITY_sp Q5UP5MIMI_R58  | Uncharacterized pro   | 32.60 | 0.00 |
| TRINITY_sp O7445sfc4      | Transcription facto   | 32.60 | 0.00 |
| TRINITY_sp Q9FL7EXPA24    | Expansin-A24 OS=Ara   | 32.60 | 0.00 |

|                          |                     |       |      |
|--------------------------|---------------------|-------|------|
| TRINITY_sp Q9BVQSPATA5L1 | Spermatogenesis-ass | 32.60 | 0.00 |
| TRINITY_sp Q505Hwsl      | Protein IWS1 homolo | 32.60 | 0.00 |
| TRINITY_sp Q9KWFprop     | Putative proline/be | 32.60 | 0.00 |
| TRINITY_sp Q6123Lcp1     | Plastin-2 OS=Mus mu | 32.60 | 0.00 |
| TRINITY_sp P341(pkgC     | Protein kinase 3 OS | 32.60 | 0.00 |
| TRINITY_sp P6234CPK1     | Calcium-dependent p | 32.60 | 0.00 |
| TRINITY_sp Q6PGZtraf3ip1 | TRAF3-interacting p | 32.60 | 0.00 |
| TRINITY_sp Q9235SPAC6G9  | Pumilio domain-cont | 32.60 | 0.00 |
| TRINITY_sp Q0053CDK17    | Cyclin-dependent ki | 32.60 | 0.00 |
| TRINITY_sp P7403rimM     | Ribosome maturation | 32.60 | 0.00 |
| TRINITY_sp Q3V11Int5c2   | Cytosolic purine 5' | 32.60 | 0.00 |
| TRINITY_sp Q0277MAP3K10  | Mitogen-activated p | 32.60 | 0.00 |
| TRINITY_sp Q4V9Edgat2    | Diacylglycerol O-ac | 32.60 | 0.00 |
| TRINITY_sp Q948FTHH1     | Protein TOM THREE H | 32.60 | 0.00 |
| TRINITY_sp F4IXVBIG5     | Brefeldin A-inhibit | 32.60 | 0.00 |
| TRINITY_sp F4IUUSAC3A    | SAC3 family protein | 32.60 | 0.00 |
| TRINITY_sp Q8BHFRab9b    | Ras-related protein | 32.60 | 0.00 |
| TRINITY_sp Q28HFsIc38a6  | Probable sodium-cou | 32.50 | 0.00 |
| TRINITY_sp Q66J7epc2     | Enhancer of polycom | 32.50 | 0.00 |
| TRINITY_sp Q9QXN Trip4   | Activating signal c | 32.50 | 0.00 |
| TRINITY_sp Q9NJUCPK3     | Calcium-dependent p | 32.50 | 0.00 |
| TRINITY_sp Q552MDDB_G027 | Putative ZDHHC-type | 32.50 | 0.00 |
| TRINITY_sp Q9M9IMP7      | Importin subunit al | 32.50 | 0.00 |
| TRINITY_sp Q54X8syn7B    | Probable syntaxin-7 | 32.50 | 0.00 |
| TRINITY_sp Q54W8roco6    | Probable serine/thr | 32.50 | 0.00 |
| TRINITY_sp P4013cyaA     | Adenylate cyclase 1 | 32.50 | 0.00 |
| TRINITY_sp Q4UB1rab1     | Ras-related protein | 32.50 | 0.00 |
| TRINITY_sp Q8DE2hscB     | Co-chaperone protei | 32.50 | 0.00 |
| TRINITY_sp Q54EfabC7     | ABC transporter C f | 32.50 | 0.00 |
| TRINITY_sp Q54HlgghB     | Gamma-glutamyl hydr | 32.50 | 0.00 |
| TRINITY_sp Q54BMmcfG     | Mitochondrial subst | 32.50 | 0.00 |
| TRINITY_sp F1LR8Cd2ap    | CD2-associated prot | 32.50 | 0.00 |
| TRINITY_sp Q54Dfatp5C1   | ATP synthase subuni | 32.50 | 0.00 |
| TRINITY_sp P4344CCNA2    | Cyclin-A2 OS=Gallus | 32.50 | 0.00 |
| TRINITY_sp Q5R68DIRAS2   | GTP-binding protein | 32.50 | 0.00 |
| TRINITY_sp O8056LARP6B   | La-related protein  | 32.50 | 0.00 |
| TRINITY_sp Q9NI\PEK      | Eukaryotic translat | 32.50 | 0.00 |
| TRINITY_sp Q70EUFUSP53   | Inactive ubiquitin  | 32.50 | 0.00 |
| TRINITY_sp P8711not1     | General negative re | 32.50 | 0.00 |
| TRINITY_sp Q6NRfdcaf8    | DDB1- and CUL4-asso | 32.50 | 0.00 |
| TRINITY_sp Q54BDDDB_G029 | LIMR family protein | 32.50 | 0.00 |
| TRINITY_sp P1875RCC1     | Regulator of chromo | 32.50 | 0.00 |
| TRINITY_sp P4061HMGB3    | High mobility group | 32.50 | 0.00 |
| TRINITY_sp O8106SPP      | Signal peptide pept | 32.50 | 0.00 |
| TRINITY_sp Q5BGfmesA     | Protein mesA OS=Eme | 32.50 | 0.00 |
| TRINITY_sp Q5W7CSTAR2    | UPF0014 membrane pr | 32.50 | 0.00 |
| TRINITY_sp Q6PF8Prorsd1  | Prolyl-tRNA synthet | 32.50 | 0.00 |
| TRINITY_sp P117CYP3A6    | Cytochrome P450 3A6 | 32.50 | 0.00 |

|                                              |                     |       |      |
|----------------------------------------------|---------------------|-------|------|
| TRINITY_sp Q5PQ(nudt17                       | Nucleoside diphosph | 32.50 | 0.00 |
| TRINITY_sp P945(araB                         | Ribulokinase OS=Bac | 32.50 | 0.00 |
| TRINITY_sp Q5ZJ(PIP5K1B                      | Phosphatidylinosito | 32.50 | 0.00 |
| TRINITY_sp O144(ssr2                         | SWI/SNF and RSC com | 32.50 | 0.00 |
| TRINITY_sp Q3V0(Garn13                       | GTPase-activating R | 32.50 | 0.00 |
| TRINITY_sp Q133(TARBP1                       | Probable methyltran | 32.50 | 0.00 |
| TRINITY_sp O133(TRI11                        | Isotrichodermin C-1 | 32.50 | 0.00 |
| TRINITY_sp Q8RW(PUX4                         | Plant UBX domain-co | 32.50 | 0.00 |
| TRINITY_sp Q8GUMAt3g526(Nicastrin OS=Arabid  |                     | 32.50 | 0.00 |
| TRINITY_sp Q9Y6(ARFGEF2                      | Brefeldin A-inhibit | 32.50 | 0.00 |
| TRINITY_sp Q58D(DNAJB12                      | DnaJ homolog subfam | 32.50 | 0.00 |
| TRINITY_sp Q7TX(fadD29                       | Long-chain-fatty-ac | 32.50 | 0.00 |
| TRINITY_sp Q5ZK(IRRP12                       | RRP12-like protein  | 32.50 | 0.00 |
| TRINITY_sp P940(RBCMT                        | Ribulose-1,5 bispho | 32.50 | 0.00 |
| TRINITY_sp Q5SM(TTHA106(Magnesium transport  |                     | 32.50 | 0.00 |
| TRINITY_sp Q496(Elp2                         | Elongator complex p | 32.50 | 0.00 |
| TRINITY_sp Q9Y5(GTF3C3                       | General transcripti | 32.50 | 0.00 |
| TRINITY_sp Q54G(acox1                        | Peroxisomal acyl-co | 32.50 | 0.00 |
| TRINITY_sp Q9CR(Ccdc96                       | Coiled-coil domain- | 32.50 | 0.00 |
| TRINITY_sp Q91W(Dag1b                        | Sn1-specific diacyl | 32.50 | 0.00 |
| TRINITY_sp Q9MA(ACBP4                        | Acyl-CoA-binding do | 32.50 | 0.00 |
| TRINITY_sp Q9FW(GAMMACA1                     | Gamma carbonic anhy | 32.50 | 0.00 |
| TRINITY_sp Q020(-                            | Zinc-binding protei | 32.50 | 0.00 |
| TRINITY_sp Q9Y7(SPCC645                      | Putative CCA tRNA n | 32.40 | 0.00 |
| TRINITY_sp P341(pkad                         | Developmentally-reg | 32.40 | 0.00 |
| TRINITY_sp B8AS(OsI_167(Vacuolar-processing  |                     | 32.40 | 0.00 |
| TRINITY_sp Q212(K07E3.7                      | Probable cation-tra | 32.40 | 0.00 |
| TRINITY_sp P0CA(TTLL3B                       | Tubulin glycyrase 3 | 32.40 | 0.00 |
| TRINITY_sp Q568(Icfap161                     | Cilia- and flagella | 32.40 | 0.00 |
| TRINITY_sp B2GV(Ufl1                         | E3 UFM1-protein lig | 32.40 | 0.00 |
| TRINITY_sp O044(ECI1                         | Enoyl-CoA delta iso | 32.40 | 0.00 |
| TRINITY_sp P1951-                            | Lipase OS=Rhizomuco | 32.40 | 0.00 |
| TRINITY_sp Q6H7(CIPK26                       | CBL-interacting pro | 32.40 | 0.00 |
| TRINITY_sp Q54C(vt11A                        | Vesicle transport t | 32.40 | 0.00 |
| TRINITY_sp Q8CG(Rbm28                        | RNA-binding protein | 32.40 | 0.00 |
| TRINITY_sp Q1QE(1plA                         | Lipoate-protein lig | 32.40 | 0.00 |
| TRINITY_sp Q54D(DDDB_G02(Serine carboxypepti |                     | 32.40 | 0.00 |
| TRINITY_sp O352(Aoah                         | Acyloxyacyl hydrola | 32.40 | 0.00 |
| TRINITY_sp Q9C5(AHK4                         | Histidine kinase 4  | 32.40 | 0.00 |
| TRINITY_sp Q8RXIAt1g068(Uncharacterized mem  |                     | 32.40 | 0.00 |
| TRINITY_sp O605(BUB1B                        | Mitotic checkpoint  | 32.40 | 0.00 |
| TRINITY_sp Q86X(HIQCA1                       | IQ and AAA domain-c | 32.40 | 0.00 |
| TRINITY_sp Q5D1(IGBP1                        | Guanylate-binding p | 32.40 | 0.00 |
| TRINITY_sp Q76P(DDDB_G02(Probable serine/thr |                     | 32.40 | 0.00 |
| TRINITY_sp Q9LR(BSU1                         | Serine/threonine-pr | 32.40 | 0.00 |
| TRINITY_sp E1BV(HENMT1                       | Small RNA 2'-O-meth | 32.40 | 0.00 |
| TRINITY_sp Q608(Akt2                         | RAC-beta serine/thr | 32.40 | 0.00 |
| TRINITY_sp Q9N0(MX2                          | Interferon-induced  | 32.40 | 0.00 |
| TRINITY_sp Q9FM(At5g140(U3 small nucleolar   |                     | 32.40 | 0.00 |
| TRINITY_sp O343(ytcJ                         | Putative amidohydro | 32.40 | 0.00 |
| TRINITY_sp A3KM(RANBP10                      | Ran-binding protein | 32.40 | 0.00 |
| TRINITY_sp A8IR(4CHLREDR(Ribosome biogenesis |                     | 32.40 | 0.00 |
| TRINITY_sp Q756(TOM1                         | Probable E3 ubiquit | 32.40 | 0.00 |
| TRINITY_sp Q9NP(PNPLA8                       | Calcium-independent | 32.40 | 0.00 |
| TRINITY_sp Q920(ACHE                         | Acetylcholinesteras | 32.40 | 0.00 |
| TRINITY_sp Q056(cna-1                        | Serine/threonine-pr | 32.40 | 0.00 |

|                          |                     |       |      |
|--------------------------|---------------------|-------|------|
| TRINITY_sp Q5UR(MIMI_L9( | Uncharacterized pro | 32.40 | 0.00 |
| TRINITY_sp Q8CB(March11  | E3 ubiquitin-protei | 32.40 | 0.00 |
| TRINITY_sp Q10L(VLN2     | Villin-2 OS=Oryza s | 32.40 | 0.00 |
| TRINITY_sp Q9M3(ATM      | Serine/threonine-pr | 32.40 | 0.00 |
| TRINITY_sp O957(HERC2    | E3 ubiquitin-protei | 32.40 | 0.00 |
| TRINITY_sp Q6DR(abhd11   | Protein ABHD11 OS=D | 32.40 | 0.00 |
| TRINITY_sp Q924(VSmc6    | Structural maintena | 32.40 | 0.00 |
| TRINITY_sp Q54P(gefA     | Ras guanine nucleot | 32.40 | 0.00 |
| TRINITY_sp A8WY(par-1    | Serine/threonine-pr | 32.40 | 0.00 |
| TRINITY_sp O297(AF_0491  | Ribosome maturation | 32.40 | 0.00 |
| TRINITY_sp Q680(TFB2     | RNA polymerase II t | 32.40 | 0.00 |
| TRINITY_sp P562(tif225   | Probable translatio | 32.40 | 0.00 |
| TRINITY_sp Q55C(sec31    | Protein transport p | 32.40 | 0.00 |
| TRINITY_sp Q5TC(MLK4     | Mitogen-activated p | 32.40 | 0.00 |
| TRINITY_sp Q91W(Ascc2    | Activating signal c | 32.40 | 0.00 |
| TRINITY_sp Q9FI(NIP4-1   | Putative aquaporin  | 32.40 | 0.00 |
| TRINITY_sp P425(erka     | Extracellular signa | 32.40 | 0.00 |
| TRINITY_sp Q54U(kif3     | Kinesin-related pro | 32.40 | 0.00 |
| TRINITY_sp P803(-        | Crustacean calcium- | 32.40 | 0.00 |
| TRINITY_sp Q5XG(PAPD7    | Non-canonical poly( | 32.40 | 0.00 |
| TRINITY_sp Q70C(USP34    | Ubiquitin carboxyl- | 32.40 | 0.00 |
| TRINITY_sp Q9NU(MDN1     | Midasin OS=Homo sap | 32.40 | 0.00 |
| TRINITY_sp Q9VK(alial    | Aurora kinase B OS= | 32.40 | 0.00 |
| TRINITY_sp B3EW(-        | Hephaestin-like pro | 32.40 | 0.00 |
| TRINITY_sp Q9ZT(RKS1     | G-type lectin S-rec | 32.40 | 0.00 |
| TRINITY_sp A4UM(TFIP11   | Tuftelin-interactin | 32.40 | 0.00 |
| TRINITY_sp Q4PA(CLU1     | Clustered mitochond | 32.30 | 0.00 |
| TRINITY_sp B0M0(gefL     | Ras guanine nucleot | 32.30 | 0.00 |
| TRINITY_sp Q8N6(METTLL13 | Methyltransferase-1 | 32.30 | 0.00 |
| TRINITY_sp P091(P4HB     | Protein disulfide-i | 32.30 | 0.00 |
| TRINITY_sp P253(YGL010W  | Uncharacterized end | 32.30 | 0.00 |
| TRINITY_sp P212(GSTM3    | Glutathione S-trans | 32.30 | 0.00 |
| TRINITY_sp Q9UL(IPLEKHG1 | Pleckstrin homology | 32.30 | 0.00 |
| TRINITY_sp P232(fixL     | Sensor protein FixL | 32.30 | 0.00 |
| TRINITY_sp P273(sol      | Calpain-D OS=Drosop | 32.30 | 0.00 |
| TRINITY_sp O974(-        | Polygalacturonase O | 32.30 | 0.00 |
| TRINITY_sp P583(arcB     | Aerobic respiration | 32.30 | 0.00 |
| TRINITY_sp Q86A(DDB_G02  | Recoverin family pr | 32.30 | 0.00 |
| TRINITY_sp Q55C(gtaG     | GATA zinc finger do | 32.30 | 0.00 |
| TRINITY_sp Q7TP(Rps6ka6  | Ribosomal protein S | 32.30 | 0.00 |
| TRINITY_sp Q54T(mybC     | Myb-like protein C  | 32.30 | 0.00 |
| TRINITY_sp Q125(SET6     | Potential protein 1 | 32.30 | 0.00 |
| TRINITY_sp Q5W6(MAN5     | Putative mannan end | 32.30 | 0.00 |
| TRINITY_sp Q5JJ(Os01g054 | Protein kinase and  | 32.30 | 0.00 |
| TRINITY_sp Q6ZF(ADL1     | Calpain-type cystei | 32.30 | 0.00 |
| TRINITY_sp Q6NY(rngtt    | mRNA-capping enzyme | 32.30 | 0.00 |
| TRINITY_sp Q6DD(gats12   | GATS-like protein 2 | 32.30 | 0.00 |
| TRINITY_sp Q9SR(RAF1.2   | Rubisco accumulatio | 32.30 | 0.00 |
| TRINITY_sp F4JT(ISTY46   | Serine/threonine-pr | 32.30 | 0.00 |
| TRINITY_sp Q8H0(UPL2     | E3 ubiquitin-protei | 32.30 | 0.00 |
| TRINITY_sp Q426(GLN1     | Glutamine synthetas | 32.30 | 0.00 |
| TRINITY_sp P0CE(talA     | Talin-A OS=Dictyost | 32.30 | 0.00 |
| TRINITY_sp O758(CAPN15   | Calpain-15 OS=Homo  | 32.30 | 0.00 |
| TRINITY_sp A9AB(rnz      | Ribonuclease Z OS=M | 32.30 | 0.00 |
| TRINITY_sp Q99P(Arl4d    | ADP-ribosylation fa | 32.30 | 0.00 |
| TRINITY_sp Q1ZX(DDB_G02  | Sphingomyelinase DD | 32.30 | 0.00 |

|                           |                     |       |      |
|---------------------------|---------------------|-------|------|
| TRINITY_sp Q9LD\FKBP17-2  | Peptidyl-prolyl cis | 32.30 | 0.00 |
| TRINITY_sp Q2RB\CIPK15    | CBL-interacting pro | 32.30 | 0.00 |
| TRINITY_sp Q9SV\At4g1378  | Methionine--tRNA li | 32.30 | 0.00 |
| TRINITY_sp Q8IU\CBWD2     | COBW domain-contain | 32.30 | 0.00 |
| TRINITY_sp Q8W4\VHA-a3    | V-type proton ATPas | 32.30 | 0.00 |
| TRINITY_sp Q54Q\DDB_G028  | LMBR1 domain-contai | 32.30 | 0.00 |
| TRINITY_sp Q8VX\XEG113    | Arabinosyltransfera | 32.30 | 0.00 |
| TRINITY_sp Q6CF\CBK1      | Serine/threonine-pr | 32.30 | 0.00 |
| TRINITY_sp Q6T4\rbra      | Probable E3 ubiquit | 32.30 | 0.00 |
| TRINITY_sp P517\CLCN2     | Chloride channel pr | 32.30 | 0.00 |
| TRINITY_sp Q54R\DDB_G028  | Probable serine/thr | 32.30 | 0.00 |
| TRINITY_sp Q5UQ\MIMI_R88  | Uncharacterized pro | 32.30 | 0.00 |
| TRINITY_sp Q5ZL\CSNK1E    | Casein kinase I iso | 32.30 | 0.00 |
| TRINITY_sp O076\yhfk      | Uncharacterized sug | 32.30 | 0.00 |
| TRINITY_sp P9WM\MT3116    | Glycogen synthase O | 32.30 | 0.00 |
| TRINITY_sp Q55G\DDB_G028  | Probable serine/thr | 32.30 | 0.00 |
| TRINITY_sp Q9M2\At3g6132  | UPF0187 protein At3 | 32.30 | 0.00 |
| TRINITY_sp Q9VM\lid       | Lysine-specific dem | 32.30 | 0.00 |
| TRINITY_sp Q554\IDDB_G027 | Probable inactive s | 32.30 | 0.00 |
| TRINITY_sp B7Q5\ISCW0218  | Queuine tRNA-ribosy | 32.30 | 0.00 |
| TRINITY_sp Q9LY\VLUL1     | Probable E3 ubiquit | 32.30 | 0.00 |
| TRINITY_sp P387\YHL008C   | Uncharacterized tra | 32.30 | 0.00 |
| TRINITY_sp P539\YNL011C   | Uncharacterized pro | 32.30 | 0.00 |
| TRINITY_sp Q96S\SIN3A     | Paired amphipathic  | 32.30 | 0.00 |
| TRINITY_sp Q9KL\fluxQ     | Autoinducer 2 senso | 32.30 | 0.00 |
| TRINITY_sp B2GU\Man1b1    | Endoplasmic reticul | 32.30 | 0.00 |
| TRINITY_sp Q017\GLX       | Aldehyde oxidase GL | 32.30 | 0.00 |
| TRINITY_sp Q030\Pkg21D    | cGMP-dependent prot | 32.30 | 0.00 |
| TRINITY_sp Q9NK\vmfeA     | Peroxisomal multifu | 32.30 | 0.00 |
| TRINITY_sp Q997\ABCA3     | ATP-binding cassett | 32.30 | 0.00 |
| TRINITY_sp Q8BK\Ipo5      | Importin-5 OS=Mus m | 32.30 | 0.00 |
| TRINITY_sp Q6L4\MSH5      | DNA mismatch repair | 32.30 | 0.00 |
| TRINITY_sp P009\glnA      | Glutamine synthetas | 32.30 | 0.00 |
| TRINITY_sp Q54L\fvps13A   | Putative vacuolar p | 32.30 | 0.00 |
| TRINITY_sp Q9SG\RDR6      | RNA-dependent RNA p | 32.30 | 0.00 |
| TRINITY_sp Q54R\sg1A      | Sphingosine-1-phosp | 32.20 | 0.00 |
| TRINITY_sp Q9SL\At2g2562  | Probable protein ph | 32.20 | 0.00 |
| TRINITY_sp P597\hiflan    | Hypoxia-inducible f | 32.20 | 0.00 |
| TRINITY_sp Q54P\veif2a    | Eukaryotic translat | 32.20 | 0.00 |
| TRINITY_sp P597\hiflan    | Hypoxia-inducible f | 32.20 | 0.00 |
| TRINITY_sp P070\LIPF      | Gastric triacylglyc | 32.20 | 0.00 |
| TRINITY_sp O188\AOAH      | Acyloxyacyl hydrola | 32.20 | 0.00 |
| TRINITY_sp P341\pkgC      | Protein kinase 3 OS | 32.20 | 0.00 |
| TRINITY_sp Q9Y0\itr-1     | Inositol 1,4,5-tris | 32.20 | 0.00 |
| TRINITY_sp Q5ZJ\FULK3     | Serine/threonine-pr | 32.20 | 0.00 |
| TRINITY_sp P758\hcr       | NADH oxidoreductase | 32.20 | 0.00 |
| TRINITY_sp O283\AF_1954   | Putative amidase AF | 32.20 | 0.00 |
| TRINITY_sp O805\At2g4466  | Probable dolichyl p | 32.20 | 0.00 |
| TRINITY_sp P870\teal      | Tip elongation aber | 32.20 | 0.00 |
| TRINITY_sp Q9SF\PAP15     | Purple acid phospho | 32.20 | 0.00 |
| TRINITY_sp Q050\TAF9      | Transcription initi | 32.20 | 0.00 |
| TRINITY_sp Q7TS\Enkd1     | Enkurin domain-cont | 32.20 | 0.00 |
| TRINITY_sp Q9Z0\Lipa      | Lysosomal acid lipa | 32.20 | 0.00 |
| TRINITY_sp D2H8\DCLRE1B   | 5' exonuclease Apol | 32.20 | 0.00 |
| TRINITY_sp A8I4\FAP100    | Cilia- and flagella | 32.20 | 0.00 |
| TRINITY_sp Q8KB\acsA      | Acetyl-coenzyme A s | 32.20 | 0.00 |

|                           |                      |       |      |
|---------------------------|----------------------|-------|------|
| TRINITY_sp Q9P2FDISP3     | Protein dispatched   | 32.20 | 0.00 |
| TRINITY_sp Q80XC(Usp6n1   | USP6 N-terminal-lik  | 32.20 | 0.00 |
| TRINITY_sp O6099(cula     | Cullin-1 OS=Dictyos  | 32.20 | 0.00 |
| TRINITY_sp Q3V3(Lace1     | Lactation elevated   | 32.20 | 0.00 |
| TRINITY_sp Q9SK(ARI10     | Probable E3 ubiquit  | 32.20 | 0.00 |
| TRINITY_sp P0AE(HynaI     | Low conductance mec  | 32.20 | 0.00 |
| TRINITY_sp Q9S7(MKK2      | Mitogen-activated p  | 32.20 | 0.00 |
| TRINITY_sp Q1ZX(HgacM     | Rho GTPase-activati  | 32.20 | 0.00 |
| TRINITY_sp Q93V(VCL1      | Protein VACUOLELESS  | 32.20 | 0.00 |
| TRINITY_sp Q8BR(Maats1    | Protein MAATS1 OS=M  | 32.20 | 0.00 |
| TRINITY_sp O5576(IIV6-179 | Uncharacterized pro  | 32.20 | 0.00 |
| TRINITY_sp P1097-         | Retrovirus-related   | 32.20 | 0.00 |
| TRINITY_sp Q2302(unc-51   | Serine/threonine-pr  | 32.20 | 0.00 |
| TRINITY_sp Q54P9(osbI     | Oxysterol-binding p  | 32.20 | 0.00 |
| TRINITY_sp Q55A(dlpC      | Dynammin-like protei | 32.20 | 0.00 |
| TRINITY_sp P831(Dyrk3     | Putative dual speci  | 32.20 | 0.00 |
| TRINITY_sp Q54P9(osbI     | Oxysterol-binding p  | 32.20 | 0.00 |
| TRINITY_sp Q1015(trz1     | Ribonuclease Z 1 OS  | 32.20 | 0.00 |
| TRINITY_sp P0C6(Prkg1     | cGMP-dependent prot  | 32.20 | 0.00 |
| TRINITY_sp Q0947(dpff-1   | Zinc finger protein  | 32.20 | 0.00 |
| TRINITY_sp O4884(LUH      | Transcriptional cor  | 32.20 | 0.00 |
| TRINITY_sp A8X77(dlk-1    | Mitogen-activated p  | 32.20 | 0.00 |
| TRINITY_sp O1535(INPPL1   | Phosphatidylinosito  | 32.20 | 0.00 |
| TRINITY_sp Q02P1(PA14_249 | Probable lipid kina  | 32.20 | 0.00 |
| TRINITY_sp A8JAM(DRC7     | Dynein regulatory c  | 32.20 | 0.00 |
| TRINITY_sp Q5TC6(GRTP1    | Growth hormone-regu  | 32.20 | 0.00 |
| TRINITY_sp Q9SL7(At2g2005 | Protein phosphatase  | 32.20 | 0.00 |
| TRINITY_sp P7357(slr0889  | Uncharacterized pro  | 32.20 | 0.00 |
| TRINITY_sp Q1821(ula-1    | NEDD8-activating en  | 32.20 | 0.00 |
| TRINITY_sp Q8GY(IULP1A    | Ubiquitin-like-spec  | 32.10 | 0.00 |
| TRINITY_sp Q9ZT4(ATE1     | Arginyl-tRNA--prote  | 32.10 | 0.00 |
| TRINITY_sp A2CE1(piwil2   | Piwi-like protein 2  | 32.10 | 0.00 |
| TRINITY_sp Q91XI(Osbp11a  | Oxysterol-binding p  | 32.10 | 0.00 |
| TRINITY_sp Q9DBV(Cyp4v2   | Cytochrome P450 4V2  | 32.10 | 0.00 |
| TRINITY_sp Q9CR7(Exosc5   | Exosome complex com  | 32.10 | 0.00 |
| TRINITY_sp O8112(ETR1     | Ethylene receptor O  | 32.10 | 0.00 |
| TRINITY_sp G3XM(EazaE     | Ketoreductase azaE   | 32.10 | 0.00 |
| TRINITY_sp Q9NR(CPRTFDC1  | Phosphoribosyltrans  | 32.10 | 0.00 |
| TRINITY_sp Q0JI4(CIPK11   | CBL-interacting pro  | 32.10 | 0.00 |
| TRINITY_sp Q095(C45G9.2   | Uncharacterized tRN  | 32.10 | 0.00 |
| TRINITY_sp Q54V1(fhkE     | Probable serine/thr  | 32.10 | 0.00 |
| TRINITY_sp Q0JI4(CIPK11   | CBL-interacting pro  | 32.10 | 0.00 |
| TRINITY_sp Q2349(asm-2    | Sphingomyelin phosp  | 32.10 | 0.00 |
| TRINITY_sp Q9NE9(pph-5    | Serine/threonine-pr  | 32.10 | 0.00 |
| TRINITY_sp B5X8M(brcc3    | Lys-63-specific deu  | 32.10 | 0.00 |
| TRINITY_sp Q3SY1(PSMD8    | 26S proteasome non-  | 32.10 | 0.00 |
| TRINITY_sp Q920(Iak5      | Adenylate kinase is  | 32.10 | 0.00 |
| TRINITY_sp Q55C7(gdt2     | Probable serine/thr  | 32.10 | 0.00 |
| TRINITY_sp B3FW(Hpmp2     | Glutathione S-trans  | 32.10 | 0.00 |
| TRINITY_sp B9DH1(ARIA     | ARM REPEAT PROTEIN   | 32.10 | 0.00 |
| TRINITY_sp Q8C7(FUba6     | Ubiquitin-like modi  | 32.10 | 0.00 |
| TRINITY_sp Q9DBV(Cyp4v2   | Cytochrome P450 4V2  | 32.10 | 0.00 |
| TRINITY_sp F4IN(GGP4      | Gamma-glutamyl pept  | 32.10 | 0.00 |
| TRINITY_sp Q54R1(dhkL     | Hybrid signal trans  | 32.10 | 0.00 |
| TRINITY_sp O2255(STY8     | Serine/threonine-pr  | 32.10 | 0.00 |
| TRINITY_sp P219(cglf      | Glucose facilitated  | 32.10 | 0.00 |



|                          |                     |       |      |
|--------------------------|---------------------|-------|------|
| TRINITY_sp Q8CI3Cwf1911  | CWF19-like protein  | 32.10 | 0.00 |
| TRINITY_sp Q6YY7NEK6     | Serine/threonine-pr | 32.10 | 0.00 |
| TRINITY_sp Q74Z5GPI13    | GPI ethanolamine ph | 32.10 | 0.00 |
| TRINITY_sp Q9CS7Ecd      | Protein ecdysoeles  | 32.10 | 0.00 |
| TRINITY_sp O758(CAPN15   | Calpain-15 OS=Homo  | 32.10 | 0.00 |
| TRINITY_sp D4GP3HVO_B002 | D-xylose 1-dehydrog | 32.10 | 0.00 |
| TRINITY_sp P3901MPT5     | Suppressor protein  | 32.10 | 0.00 |
| TRINITY_sp Q9TW2myoM     | Myosin-M heavy chai | 32.10 | 0.00 |
| TRINITY_sp Q0979kri1     | Protein kri1 OS=Sch | 32.10 | 0.00 |
| TRINITY_sp Q8K0UHspa12a  | Heat shock 70 kDa p | 32.10 | 0.00 |
| TRINITY_sp Q9Y2VKCNIP3   | Calsenilin OS=Homo  | 32.10 | 0.00 |
| TRINITY_sp Q7KWNiunH     | Inosine-uridine-pre | 32.10 | 0.00 |
| TRINITY_sp Q5956ptrB     | Protease 2 OS=Morax | 32.10 | 0.00 |
| TRINITY_sp P4981TSC2     | Tuberin OS=Homo sap | 32.10 | 0.00 |
| TRINITY_sp Q8R01Sec1414  | SEC14-like protein  | 32.10 | 0.00 |
| TRINITY_sp O2217PAB4     | Polyadenylate-bindi | 32.10 | 0.00 |
| TRINITY_sp P2529PHO84    | Inorganic phosphate | 32.10 | 0.00 |
| TRINITY_sp Q8ND1RCBTB1   | RCC1 and BTB domain | 32.10 | 0.00 |
| TRINITY_sp Q10K1CAMK1    | Calcium/calmodulin- | 32.10 | 0.00 |
| TRINITY_sp O6244Y43F4A.1 | Leishmanolysin-like | 32.10 | 0.00 |
| TRINITY_sp Q54LEabcC5    | ABC transporter C f | 32.10 | 0.00 |
| TRINITY_sp Q9RR1menG     | Demethylmenaquinone | 32.10 | 0.00 |
| TRINITY_sp Q9FG1RKD3     | Protein RKD3 OS=Ara | 32.10 | 0.00 |
| TRINITY_sp Q55GUDDB_G026 | Probable serine/thr | 32.10 | 0.00 |
| TRINITY_sp Q0JI4CIPK11   | CBL-interacting pro | 32.10 | 0.00 |
| TRINITY_sp F4HY4At1g4865 | DEXH-box ATP-depend | 32.10 | 0.00 |
| TRINITY_sp Q8LP1R1       | Alpha-glucan water  | 32.10 | 0.00 |
| TRINITY_sp Q2KI(PHOSPHO2 | Pyridoxal phosphate | 32.10 | 0.00 |
| TRINITY_sp B0TA5rp1I     | 50S ribosomal prote | 32.10 | 0.00 |
| TRINITY_sp Q6ES1HATB     | Probable histone ac | 32.10 | 0.00 |
| TRINITY_sp O004(SLC33A1  | Acetyl-coenzyme A t | 32.10 | 0.00 |
| TRINITY_sp Q9JJIlancl2   | LanC-like protein 2 | 32.10 | 0.00 |
| TRINITY_sp Q9XF1MSBP1    | Membrane steroid-bi | 32.10 | 0.00 |
| TRINITY_sp Q54D1abcA9    | ABC transporter A f | 32.10 | 0.00 |
| TRINITY_sp Q8S11Os01g092 | Probable glucuronos | 32.10 | 0.00 |
| TRINITY_sp Q54T5yipf1    | Protein YIPF1 homol | 32.10 | 0.00 |
| TRINITY_sp O0274GUCY2F   | Retinal guanylyl cy | 32.10 | 0.00 |
| TRINITY_sp O1917UNC119   | Protein unc-119 hom | 32.10 | 0.00 |
| TRINITY_sp Q55A(DDB_G027 | Probable serine/thr | 32.10 | 0.00 |
| TRINITY_sp Q044(Adcy5    | Adenylate cyclase t | 32.10 | 0.00 |
| TRINITY_sp Q8LQ5GLU8     | Endoglucanase 3 OS= | 32.10 | 0.00 |
| TRINITY_sp Q9H01TOLLIP   | Toll-interacting pr | 32.00 | 0.00 |
| TRINITY_sp Q6DE7slc25a38 | Solute carrier fami | 32.00 | 0.00 |
| TRINITY_sp C4R19VPS10    | Vacuolar protein so | 32.00 | 0.00 |
| TRINITY_sp O3501yogA     | Uncharacterized zin | 32.00 | 0.00 |
| TRINITY_sp A0PQ2MUL_2009 | Probable phthiotrio | 32.00 | 0.00 |
| TRINITY_sp Q6GP5naa50    | N-alpha-acetyltrans | 32.00 | 0.00 |
| TRINITY_sp A8GVIrp1O     | 50S ribosomal prote | 32.00 | 0.00 |
| TRINITY_sp Q167(MAN2A1   | Alpha-mannosidase 2 | 32.00 | 0.00 |
| TRINITY_sp P2967SF3      | Pollen-specific pro | 32.00 | 0.00 |
| TRINITY_sp O7483pet127   | mRNA degradation pr | 32.00 | 0.00 |
| TRINITY_sp O5253cah      | Carbonic anhydrase  | 32.00 | 0.00 |
| TRINITY_sp Q5F37YOD1     | Ubiquitin thioester | 32.00 | 0.00 |
| TRINITY_sp Q9VDImeigo    | Solute carrier fami | 32.00 | 0.00 |
| TRINITY_sp Q0041SEN1     | Helicase SEN1 OS=Sa | 32.00 | 0.00 |
| TRINITY_sp Q8K35Pigu     | Phosphatidylinosito | 32.00 | 0.00 |

|                          |                     |       |      |
|--------------------------|---------------------|-------|------|
| TRINITY_sp Q8WU SLC25A4  | Solute carrier fami | 32.00 | 0.00 |
| TRINITY_sp Q9LQ RAD51D   | DNA repair protein  | 32.00 | 0.00 |
| TRINITY_sp O745 SPCC970  | Uncharacterized ino | 32.00 | 0.00 |
| TRINITY_sp P546 pikD     | Phosphatidylinosito | 32.00 | 0.00 |
| TRINITY_sp Q9SJC CML31   | Probable calcium-bi | 32.00 | 0.00 |
| TRINITY_sp Q5XI March10  | Probable E3 ubiquit | 32.00 | 0.00 |
| TRINITY_sp P231 todF     | 2-hydroxy-6-oxo-2,4 | 32.00 | 0.00 |
| TRINITY_sp Q9VC CG7048   | Probable prefoldin  | 32.00 | 0.00 |
| TRINITY_sp P0CM CWC25    | Pre-mRNA-splicing f | 32.00 | 0.00 |
| TRINITY_sp P538 PDR17    | Phosphatidylinosito | 32.00 | 0.00 |
| TRINITY_sp Q1ZX DDB_G02  | PH domain-containin | 32.00 | 0.00 |
| TRINITY_sp Q54D DDB_G02  | von Willebrand fact | 32.00 | 0.00 |
| TRINITY_sp Q9SK ARI10    | Probable E3 ubiquit | 32.00 | 0.00 |
| TRINITY_sp O137 SPAC17A2 | Putative metal ion  | 32.00 | 0.00 |
| TRINITY_sp O647 At2g301  | Probable protein ph | 32.00 | 0.00 |
| TRINITY_sp P0CM ATG2     | Autophagy-related p | 32.00 | 0.00 |
| TRINITY_sp Q163 PDCD2    | Programmed cell dea | 32.00 | 0.00 |
| TRINITY_sp P426 VCP      | Vitellogenic carbox | 32.00 | 0.00 |
| TRINITY_sp Q86C dhkK     | Hybrid signal trans | 32.00 | 0.00 |
| TRINITY_sp Q9C0 DNAH6    | Dynein heavy chain  | 32.00 | 0.00 |
| TRINITY_sp Q82D SAV_512  | UPF0301 protein SAV | 32.00 | 0.00 |
| TRINITY_sp O044 At1g096  | Probable elongation | 32.00 | 0.00 |
| TRINITY_sp Q6ET Os02g01  | Probable protein ph | 32.00 | 0.00 |
| TRINITY_sp Q80X Ttc28    | Tetratricopeptide r | 32.00 | 0.00 |
| TRINITY_sp O758 CAPN15   | Calpain-15 OS=Homo  | 32.00 | 0.00 |
| TRINITY_sp Q8BL Slc25a2  | Mitochondrial basic | 32.00 | 0.00 |
| TRINITY_sp Q9ES Sel11    | Protein sel-1 homol | 32.00 | 0.00 |
| TRINITY_sp Q96H SGSM3    | Small G protein sig | 32.00 | 0.00 |
| TRINITY_sp Q9SR LPA1     | Protein LOW PSII AC | 32.00 | 0.00 |
| TRINITY_sp Q9H9 MARCH7   | E3 ubiquitin-protei | 32.00 | 0.00 |
| TRINITY_sp C9WMM-        | Venom serine carbox | 32.00 | 0.00 |
| TRINITY_sp Q8NF BBS1     | Bardet-Biedl syndro | 32.00 | 0.00 |
| TRINITY_sp P358 BDF1     | Bromodomain-contain | 32.00 | 0.00 |
| TRINITY_sp Q7LH TY3B-I   | Transposon Ty3-I Ga | 32.00 | 0.00 |
| TRINITY_sp Q93W NFS2     | Cysteine desulfuras | 32.00 | 0.00 |
| TRINITY_sp Q5ZJ HULK3    | Serine/threonine-pr | 32.00 | 0.00 |
| TRINITY_sp Q6T3 Npc111   | Niemann-Pick C1-lik | 32.00 | 0.00 |
| TRINITY_sp Q9FE DSP4     | Phosphoglucan phosp | 32.00 | 0.00 |
| TRINITY_sp Q628 Pcsk7    | Proprotein converta | 32.00 | 0.00 |
| TRINITY_sp F4IV IGRV2    | DnaJ homolog subfam | 32.00 | 0.00 |
| TRINITY_sp Q9W4 dnc      | cAMP-specific 3',5' | 32.00 | 0.00 |
| TRINITY_sp Q6U1 CMT1     | Alpha-1,3-mannosylt | 32.00 | 0.00 |
| TRINITY_sp P436 RMD8     | Sporulation protein | 32.00 | 0.00 |
| TRINITY_sp Q86U VN4BP2   | NEDD4-binding prote | 32.00 | 0.00 |
| TRINITY_sp O149 PLD2     | Phospholipase D2 OS | 31.90 | 0.00 |
| TRINITY_sp O749 toa2     | Transcription initi | 31.90 | 0.00 |
| TRINITY_sp Q3UR Tgfbrap1 | Transforming growth | 31.90 | 0.00 |
| TRINITY_sp Q54M mrkB     | Probable serine/thr | 31.90 | 0.00 |
| TRINITY_sp Q6IM alrA     | Aldose reductase A  | 31.90 | 0.00 |
| TRINITY_sp Q091 cds1     | Serine/threonine-pr | 31.90 | 0.00 |
| TRINITY_sp Q550 DDB_G02  | Probable serine/thr | 31.90 | 0.00 |
| TRINITY_sp O075 yhdW     | Putative glyceropho | 31.90 | 0.00 |
| TRINITY_sp Q9WU Pus1     | tRNA pseudouridine  | 31.90 | 0.00 |
| TRINITY_sp Q75W Vwa5a    | von Willebrand fact | 31.90 | 0.00 |
| TRINITY_sp P774 yqaB     | Fructose-1-phospat  | 31.90 | 0.00 |
| TRINITY_sp Q9CQ Tctex1d2 | Tctex1 domain-conta | 31.90 | 0.00 |

|                          |                     |       |      |
|--------------------------|---------------------|-------|------|
| TRINITY_sp P3516resA     | Thiol-disulfide oxi | 31.90 | 0.00 |
| TRINITY_sp Q0JI4CIPK11   | CBL-interacting pro | 31.90 | 0.00 |
| TRINITY_sp Q4R7FTLL10    | Protein polyglycyla | 31.90 | 0.00 |
| TRINITY_sp O8881Acs15    | Long-chain-fatty-ac | 31.90 | 0.00 |
| TRINITY_sp Q54E7abpF     | Actin-binding prote | 31.90 | 0.00 |
| TRINITY_sp P9068-        | Actin OS=Brugia mal | 31.90 | 0.00 |
| TRINITY_sp B7U17ABAP1    | ARMADILLO BTB ARABI | 31.90 | 0.00 |
| TRINITY_sp Q54E7gr1E     | Metabotropic glutam | 31.90 | 0.00 |
| TRINITY_sp P1689gpaA     | Guanine nucleotide- | 31.90 | 0.00 |
| TRINITY_sp Q2G16plc      | 1-phosphatidylinosi | 31.90 | 0.00 |
| TRINITY_sp P4271dmpM     | O-demethylpuromycin | 31.90 | 0.00 |
| TRINITY_sp P4289ECE1     | Endothelin-converti | 31.90 | 0.00 |
| TRINITY_sp Q4247CPK3     | Calcium-dependent p | 31.90 | 0.00 |
| TRINITY_sp Q550FDDB_G027 | Probable serine/thr | 31.90 | 0.00 |
| TRINITY_sp Q8N51DHRSX    | Dehydrogenase/reduc | 31.90 | 0.00 |
| TRINITY_sp O5190fes      | Enterochelin estera | 31.90 | 0.00 |
| TRINITY_sp P2006Hexb     | Beta-hexosaminidase | 31.90 | 0.00 |
| TRINITY_sp Q9K9FaceA     | Isocitrate lyase OS | 31.90 | 0.00 |
| TRINITY_sp A8I4FFAP100   | Cilia- and flagella | 31.90 | 0.00 |
| TRINITY_sp Q7JW1CG11007  | Thioredoxin-related | 31.90 | 0.00 |
| TRINITY_sp Q2XVfscn4ab   | Sodium channel prot | 31.90 | 0.00 |
| TRINITY_sp Q9JL0Capn15   | Calpain-15 OS=Mus m | 31.90 | 0.00 |
| TRINITY_sp Q5560bip1-1   | Luminal-binding pro | 31.90 | 0.00 |
| TRINITY_sp Q9DCMethel    | Persulfide dioxygen | 31.90 | 0.00 |
| TRINITY_sp Q8BR0Maats1   | Protein MAATS1 OS=M | 31.90 | 0.00 |
| TRINITY_sp Q9JI7Sphk2    | Sphingosine kinase  | 31.90 | 0.00 |
| TRINITY_sp Q5646CAPH     | Condensin complex s | 31.90 | 0.00 |
| TRINITY_sp Q9ZG1pikAI    | Narbonolide/10-deox | 31.90 | 0.00 |
| TRINITY_sp Q8VY0SWI3D    | SWI/SNF complex sub | 31.90 | 0.00 |
| TRINITY_sp O1387utp17    | U3 small nucleolar  | 31.90 | 0.00 |
| TRINITY_sp P0C10Os05g012 | Endoglucanase 14 OS | 31.90 | 0.00 |
| TRINITY_sp Q9LVMTTL      | Uric acid degradati | 31.90 | 0.00 |
| TRINITY_sp Q4PF8UMAG_012 | Eukaryotic translat | 31.90 | 0.00 |
| TRINITY_sp Q55G8abkC     | Probable serine/thr | 31.90 | 0.00 |
| TRINITY_sp Q8LLIREP      | Rab escort protein  | 31.90 | 0.00 |
| TRINITY_sp O1882AOAH     | Acyloxyacyl hydroly | 31.90 | 0.00 |
| TRINITY_sp P1829Npr1     | Atrial natriuretic  | 31.90 | 0.00 |
| TRINITY_sp Q9V0\utuf     | Elongation factor 1 | 31.90 | 0.00 |
| TRINITY_sp F4ILFAt2g3592 | DEXH-box ATP-depend | 31.90 | 0.00 |
| TRINITY_sp P0446-        | Calmodulin OS=Triti | 31.90 | 0.00 |
| TRINITY_sp O7558RPS6KA5  | Ribosomal protein S | 31.80 | 0.00 |
| TRINITY_sp O1543ABCC4    | Multidrug resistanc | 31.80 | 0.00 |
| TRINITY_sp Q6T93fibpb    | Acidic fibroblast g | 31.80 | 0.00 |
| TRINITY_sp F4IP1SGR6     | Protein SHOOT GRAVI | 31.80 | 0.00 |
| TRINITY_sp Q5VQIPPT3     | Phosphoenolpyruvate | 31.80 | 0.00 |
| TRINITY_sp Q8C43Pex51    | PEX5-related protei | 31.80 | 0.00 |
| TRINITY_sp Q9BS0ESYT1    | Extended synaptotag | 31.80 | 0.00 |
| TRINITY_sp P5052vps34    | Phosphatidylinosito | 31.80 | 0.00 |
| TRINITY_sp Q5JL5CIPK12   | CBL-interacting pro | 31.80 | 0.00 |
| TRINITY_sp Q6P67nup35    | Nucleoporin NUP53 O | 31.80 | 0.00 |
| TRINITY_sp Q32PERANGRF   | Ran guanine nucleot | 31.80 | 0.00 |
| TRINITY_sp P3194STIP1    | Stress-induced-phos | 31.80 | 0.00 |
| TRINITY_sp Q1108tmbi-4   | Transmembrane BAX i | 31.80 | 0.00 |
| TRINITY_sp Q9QY0Dnajb1   | DnaJ homolog subfam | 31.80 | 0.00 |
| TRINITY_sp O6212tag-175  | Transmembrane prote | 31.80 | 0.00 |
| TRINITY_sp Q61Y0CBG03556 | Leishmanolysin-like | 31.80 | 0.00 |

|                          |                     |       |      |
|--------------------------|---------------------|-------|------|
| TRINITY_sp O0431NSP3     | Nitrile-specifier p | 31.80 | 0.00 |
| TRINITY_sp Q1111ubp14    | Ubiquitin carboxyl- | 31.80 | 0.00 |
| TRINITY_sp Q7TM1Eri1     | 3'-5' exoribonuclea | 31.80 | 0.00 |
| TRINITY_sp P3061svop-1   | Putative transporte | 31.80 | 0.00 |
| TRINITY_sp Q54D1DDB_G021 | Serine carboxypepti | 31.80 | 0.00 |
| TRINITY_sp Q5591DDB_G021 | Probable serine/thr | 31.80 | 0.00 |
| TRINITY_sp O4281bub3     | Mitotic checkpoint  | 31.80 | 0.00 |
| TRINITY_sp Q5R51SERINC3  | Serine incorporator | 31.80 | 0.00 |
| TRINITY_sp Q8RVIDEK1     | Calpain-type cystei | 31.80 | 0.00 |
| TRINITY_sp Q9LVVARI4     | Putative E3 ubiquit | 31.80 | 0.00 |
| TRINITY_sp P5811PRKAG1   | 5'-AMP-activated pr | 31.80 | 0.00 |
| TRINITY_sp Q9SI1TMK3     | Receptor-like kinas | 31.80 | 0.00 |
| TRINITY_sp Q5XF1Atp13a3  | Probable cation-tra | 31.80 | 0.00 |
| TRINITY_sp Q7LH1TY3B-I   | Transposon Ty3-I Ga | 31.80 | 0.00 |
| TRINITY_sp Q8LC1At4g2961 | Thioredoxin-like 2- | 31.80 | 0.00 |
| TRINITY_sp Q0P41srd5a3   | Polyprenol reductas | 31.80 | 0.00 |
| TRINITY_sp Q54L1fvps13A  | Putative vacuolar p | 31.80 | 0.00 |
| TRINITY_sp Q75J1cpras1   | Circularly permutat | 31.80 | 0.00 |
| TRINITY_sp Q9NW1RBM28    | RNA-binding protein | 31.80 | 0.00 |
| TRINITY_sp Q9UT1SPAC824  | Uncharacterized pro | 31.80 | 0.00 |
| TRINITY_sp Q5531gxcJJ    | Rac guanine nucleot | 31.80 | 0.00 |
| TRINITY_sp Q9US1tim23    | Mitochondrial impor | 31.80 | 0.00 |
| TRINITY_sp P5091AVT4     | Vacuolar amino acid | 31.80 | 0.00 |
| TRINITY_sp Q6FQ1PKAR     | cAMP-dependent prot | 31.80 | 0.00 |
| TRINITY_sp Q6NX1Rcbtb1   | RCC1 and BTB domain | 31.80 | 0.00 |
| TRINITY_sp Q9LU1PNSB3    | Photosynthetic NDH  | 31.80 | 0.00 |
| TRINITY_sp F4JJ1ENDO4    | Endonuclease 4 OS=A | 31.80 | 0.00 |
| TRINITY_sp P5311ROG1     | Putative lipase ROG | 31.80 | 0.00 |
| TRINITY_sp Q54T1xpnpep3  | Probable Xaa-Pro am | 31.80 | 0.00 |
| TRINITY_sp Q9LH1LPAT5    | Probable 1-acyl-sn- | 31.80 | 0.00 |
| TRINITY_sp P0411GIP      | Copia protein OS=Dr | 31.80 | 0.00 |
| TRINITY_sp F4JE1NSE4B    | Non-structural main | 31.80 | 0.00 |
| TRINITY_sp Q9UU1gcn5     | Histone acetyltrans | 31.80 | 0.00 |
| TRINITY_sp Q9CX1Dhrs7    | Dehydrogenase/reduc | 31.80 | 0.00 |
| TRINITY_sp Q9SY1HEXO2    | Beta-hexosaminidase | 31.80 | 0.00 |
| TRINITY_sp Q9UN1ABCG2    | ATP-binding cassett | 31.80 | 0.00 |
| TRINITY_sp Q55E1gins4    | DNA replication com | 31.70 | 0.00 |
| TRINITY_sp Q06A1RAB1B    | Ras-related protein | 31.70 | 0.00 |
| TRINITY_sp Q8N41RNF175   | RING finger protein | 31.70 | 0.00 |
| TRINITY_sp Q9VR1HERC2    | Probable E3 ubiquit | 31.70 | 0.00 |
| TRINITY_sp Q9UM1FZR1     | Fizzy-related prote | 31.70 | 0.00 |
| TRINITY_sp Q60D1TPK3     | Thiamine pyrophosph | 31.70 | 0.00 |
| TRINITY_sp O3161metC     | Cystathionine beta- | 31.70 | 0.00 |
| TRINITY_sp Q32L1GRINA    | Protein lifeguard 1 | 31.70 | 0.00 |
| TRINITY_sp Q70C1USP34    | Ubiquitin carboxyl- | 31.70 | 0.00 |
| TRINITY_sp Q54Q1wdr89    | WD repeat-containin | 31.70 | 0.00 |
| TRINITY_sp Q54Z1tbcb     | Tubulin-specific ch | 31.70 | 0.00 |
| TRINITY_sp Q55G1DDB_G021 | Probable phosphatid | 31.70 | 0.00 |
| TRINITY_sp Q6FN1STE20    | Serine/threonine-pr | 31.70 | 0.00 |
| TRINITY_sp Q9VY1Cyp4g15  | Cytochrome P450 4g1 | 31.70 | 0.00 |
| TRINITY_sp Q8L71At1g3171 | AP-4 complex subuni | 31.70 | 0.00 |
| TRINITY_sp Q96M1AK7      | Adenylate kinase 7  | 31.70 | 0.00 |
| TRINITY_sp Q54X1captB    | Uncharacterized CDP | 31.70 | 0.00 |
| TRINITY_sp P5831arcB     | Aerobic respiration | 31.70 | 0.00 |
| TRINITY_sp Q5BD1sip5     | Protein sip5 OS=Eme | 31.70 | 0.00 |
| TRINITY_sp Q9FZ1MAN1     | Mannan endo-1,4-bet | 31.70 | 0.00 |

|                          |                     |       |      |
|--------------------------|---------------------|-------|------|
| TRINITY_sp Q0WK\ULP2A    | Probable ubiquitin- | 31.70 | 0.00 |
| TRINITY_sp F4JJIENDO4    | Endonuclease 4 OS=A | 31.70 | 0.00 |
| TRINITY_sp Q2TX\sym1     | Protein sym1 OS=Asp | 31.70 | 0.00 |
| TRINITY_sp O1421trm10    | tRNA (guanine(9)-N1 | 31.70 | 0.00 |
| TRINITY_sp O7534PDCD6    | Programmed cell dea | 31.70 | 0.00 |
| TRINITY_sp Q9HD4PTPRH    | Receptor-type tyros | 31.70 | 0.00 |
| TRINITY_sp W5EP1-        | 2-carboxy-D-arabini | 31.70 | 0.00 |
| TRINITY_sp P5505-        | Protein disulfide-i | 31.70 | 0.00 |
| TRINITY_sp O1498BTAF1    | TATA-binding protei | 31.70 | 0.00 |
| TRINITY_sp O6562CAD6     | Probable cinnamyl a | 31.70 | 0.00 |
| TRINITY_sp A8IL\CFAP52   | Cilia- and flagella | 31.70 | 0.00 |
| TRINITY_sp Q54B\DDB_G025 | LIMR family protein | 31.70 | 0.00 |
| TRINITY_sp P0055Mos      | Proto-oncogene seri | 31.70 | 0.00 |
| TRINITY_sp Q0352SCS7     | Ceramide very long  | 31.70 | 0.00 |
| TRINITY_sp Q94E\At3g1441 | Probable sugar phos | 31.70 | 0.00 |
| TRINITY_sp Q8N35SLC35F6  | Solute carrier fami | 31.70 | 0.00 |
| TRINITY_sp Q9C77ELP4     | Elongator complex p | 31.70 | 0.00 |
| TRINITY_sp Q0A79rlmL     | Ribosomal RNA large | 31.70 | 0.00 |
| TRINITY_sp Q6ZTF\CFAP47  | Cilia- and flagella | 31.70 | 0.00 |
| TRINITY_sp Q75J5cpras1   | Circularly permutat | 31.70 | 0.00 |
| TRINITY_sp Q8L7(SYT5     | Synaptotagmin-5 OS= | 31.70 | 0.00 |
| TRINITY_sp Q5YL(eg1A     | Endoglucanase A OS= | 31.70 | 0.00 |
| TRINITY_sp Q7FA2LECRK1   | G-type lectin S-rec | 31.70 | 0.00 |
| TRINITY_sp Q55A(DDB_G027 | Probable serine/thr | 31.70 | 0.00 |
| TRINITY_sp Q8I7\ipol     | Retrovirus-related  | 31.70 | 0.00 |
| TRINITY_sp Q90Y(ceef1g   | Elongation factor 1 | 31.70 | 0.00 |
| TRINITY_sp A8IT\CFAP70   | Cilia- and flagella | 31.70 | 0.00 |
| TRINITY_sp Q9C72TMN6     | Transmembrane 9 sup | 31.60 | 0.00 |
| TRINITY_sp O8856Abcc3    | Canalicular multisp | 31.60 | 0.00 |
| TRINITY_sp Q9FY(TMN11    | Transmembrane 9 sup | 31.60 | 0.00 |
| TRINITY_sp Q6H7\CIPK26   | CBL-interacting pro | 31.60 | 0.00 |
| TRINITY_sp Q9ST\CIPK8    | CBL-interacting ser | 31.60 | 0.00 |
| TRINITY_sp Q86TVADCK1    | Uncharacterized aar | 31.60 | 0.00 |
| TRINITY_sp P5242DGKE     | Diacylglycerol kina | 31.60 | 0.00 |
| TRINITY_sp Q55G5hibch    | 3-hydroxyisobutyryl | 31.60 | 0.00 |
| TRINITY_sp Q8IZ6(TRMT2A  | tRNA (uracil-5-)-me | 31.60 | 0.00 |
| TRINITY_sp A1L1Fshq1     | Protein SHQ1 homolo | 31.60 | 0.00 |
| TRINITY_sp Q0VFI\blocls1 | Biogenesis of lysos | 31.60 | 0.00 |
| TRINITY_sp Q54P5osbI     | Oxysterol-binding p | 31.60 | 0.00 |
| TRINITY_sp O0471MSH6     | DNA mismatch repair | 31.60 | 0.00 |
| TRINITY_sp Q54L6clcE     | Chloride channel pr | 31.60 | 0.00 |
| TRINITY_sp Q9QY1Dnajb12  | DnaJ homolog subfam | 31.60 | 0.00 |
| TRINITY_sp P2588rh1E     | ATP-dependent RNA h | 31.60 | 0.00 |
| TRINITY_sp Q2662KAP115   | Kinesin-associated  | 31.60 | 0.00 |
| TRINITY_sp F7AS2BTBD3    | BTB/POZ domain-cont | 31.60 | 0.00 |
| TRINITY_sp Q9SC(cbbX     | Protein cbbX homolo | 31.60 | 0.00 |
| TRINITY_sp Q4Z8FRanBPM   | Ran-binding protein | 31.60 | 0.00 |
| TRINITY_sp O9467SPBC776  | Uncharacterized mem | 31.60 | 0.00 |
| TRINITY_sp Q0215plc      | 1-phosphatidylinosi | 31.60 | 0.00 |
| TRINITY_sp Q6PD\Fbxo42   | F-box only protein  | 31.60 | 0.00 |
| TRINITY_sp Q9C5(AHK4     | Histidine kinase 4  | 31.60 | 0.00 |
| TRINITY_sp Q9Z16Vars     | Valine--tRNA ligase | 31.60 | 0.00 |
| TRINITY_sp Q1742trx-2    | Probable thioredoxi | 31.60 | 0.00 |
| TRINITY_sp Q8LP\ALPHAC-2 | AP-2 complex subuni | 31.60 | 0.00 |
| TRINITY_sp Q96HI\DOCK6   | Dedicator of cytoki | 31.60 | 0.00 |
| TRINITY_sp O2602HP_1491  | Putative phosphate  | 31.60 | 0.00 |

|                          |                     |       |      |
|--------------------------|---------------------|-------|------|
| TRINITY_sp Q940UFLU      | Protein FLUORESCENT | 31.60 | 0.00 |
| TRINITY_sp P2354-        | Ribonuclease MC OS= | 31.60 | 0.00 |
| TRINITY_sp P9818CYP4F8   | Cytochrome P450 4F8 | 31.60 | 0.00 |
| TRINITY_sp Q54R0sbG      | Oxysterol-binding p | 31.60 | 0.00 |
| TRINITY_sp Q9SKCARI10    | Probable E3 ubiquit | 31.60 | 0.00 |
| TRINITY_sp P5217NGTPT    | Triose phosphate/ph | 31.60 | 0.00 |
| TRINITY_sp Q6PHFULK3     | Serine/threonine-pr | 31.60 | 0.00 |
| TRINITY_sp Q54FIgtf2b    | Transcription initi | 31.60 | 0.00 |
| TRINITY_sp Q6NNIATG16    | Autophagy-related p | 31.60 | 0.00 |
| TRINITY_sp Q5ZM1ADCK1    | Uncharacterized aar | 31.60 | 0.00 |
| TRINITY_sp Q4V8IRabepk   | Rab9 effector prote | 31.60 | 0.00 |
| TRINITY_sp P7368sppA     | Protease 4 OS=Synec | 31.60 | 0.00 |
| TRINITY_sp P0CD6pan3     | PAB-dependent poly( | 31.60 | 0.00 |
| TRINITY_sp Q86JEkdelr    | ER lumen protein-re | 31.60 | 0.00 |
| TRINITY_sp Q3U48Mfsd12   | Major facilitator s | 31.60 | 0.00 |
| TRINITY_sp A4W82rihA     | Pyrimidine-specific | 31.60 | 0.00 |
| TRINITY_sp Q7LHCY3B-I    | Transposon Ty3-I Ga | 31.60 | 0.00 |
| TRINITY_sp Q8K2\ Ppp4r1  | Serine/threonine-pr | 31.60 | 0.00 |
| TRINITY_sp Q9M2IAt3g6132 | UPF0187 protein At3 | 31.60 | 0.00 |
| TRINITY_sp Q8K2\ Ppp4r1  | Serine/threonine-pr | 31.60 | 0.00 |
| TRINITY_sp Q86G4gefQ     | Ras guanine nucleot | 31.60 | 0.00 |
| TRINITY_sp Q9256RAPGEF5  | Rap guanine nucleot | 31.60 | 0.00 |
| TRINITY_sp Q499UTmco4    | Transmembrane and c | 31.60 | 0.00 |
| TRINITY_sp Q9Y5ICTDP1    | RNA polymerase II s | 31.60 | 0.00 |
| TRINITY_sp Q227(sym-2    | RNA-binding protein | 31.60 | 0.00 |
| TRINITY_sp O1543ABCC4    | Multidrug resistanc | 31.60 | 0.00 |
| TRINITY_sp P5456yqkD     | Uncharacterized pro | 31.60 | 0.00 |
| TRINITY_sp Q0WP2GLE1     | Protein GLE1 OS=Ara | 31.60 | 0.00 |
| TRINITY_sp Q8048mib1     | E3 ubiquitin-protei | 31.60 | 0.00 |
| TRINITY_sp Q3E68CpNIFS3  | Probable L-cysteine | 31.60 | 0.00 |
| TRINITY_sp Q55GUDDB_G026 | Probable serine/thr | 31.60 | 0.00 |
| TRINITY_sp Q5ZHMCHMP2A   | Charged multivesicu | 31.60 | 0.00 |
| TRINITY_sp P1089PLCD1    | 1-phosphatidylinosi | 31.60 | 0.00 |
| TRINITY_sp Q1357IQGAP2   | Ras GTPase-activati | 31.60 | 0.00 |
| TRINITY_sp Q7YXI p80     | Protein P80 OS=Dict | 31.60 | 0.00 |
| TRINITY_sp Q5ZLVNSUN2    | tRNA (cytosine(34)- | 31.60 | 0.00 |
| TRINITY_sp P4038exo2     | 5'-3' exoribonuclea | 31.60 | 0.00 |
| TRINITY_sp Q9LX3GCN2     | eIF-2-alpha kinase  | 31.50 | 0.00 |
| TRINITY_sp Q9C17SPAP32A8 | Uncharacterized RIN | 31.50 | 0.00 |
| TRINITY_sp Q54Z1plbE     | Phospholipase B-lik | 31.50 | 0.00 |
| TRINITY_sp Q99LNCdk5rap3 | CDK5 regulatory sub | 31.50 | 0.00 |
| TRINITY_sp Q564FCAPH     | Condensin complex s | 31.50 | 0.00 |
| TRINITY_sp A6QP8METTL21C | Protein-lysine meth | 31.50 | 0.00 |
| TRINITY_sp Q6DCIdym      | Dymeclin OS=Xenopus | 31.50 | 0.00 |
| TRINITY_sp B0F9IGC6      | Golgin candidate 6  | 31.50 | 0.00 |
| TRINITY_sp E9PZ3Ascc3    | Activating signal c | 31.50 | 0.00 |
| TRINITY_sp Q0597-        | Sodium channel prot | 31.50 | 0.00 |
| TRINITY_sp Q55DVgacZ     | Rho GTPase-activati | 31.50 | 0.00 |
| TRINITY_sp Q7RJCCKP4     | Calcium-dependent p | 31.50 | 0.00 |
| TRINITY_sp Q9LSIFCCB1    | Protein COFACTOR AS | 31.50 | 0.00 |
| TRINITY_sp P6234CPK4     | Calcium-dependent p | 31.50 | 0.00 |
| TRINITY_sp P7586ycbX     | Uncharacterized pro | 31.50 | 0.00 |
| TRINITY_sp Q5AC7RAD5     | DNA repair protein  | 31.50 | 0.00 |
| TRINITY_sp Q08DJ PUS7    | Pseudouridylate syn | 31.50 | 0.00 |
| TRINITY_sp Q54L3ku80     | X-ray repair cross- | 31.50 | 0.00 |
| TRINITY_sp P3029WEE1     | Wee1-like protein k | 31.50 | 0.00 |

|                           |                     |       |      |
|---------------------------|---------------------|-------|------|
| TRINITY_sp Q58C\FAM213B   | Prostamide/prostagl | 31.50 | 0.00 |
| TRINITY_sp Q8WZ\Fibp1     | Dual specificity ph | 31.50 | 0.00 |
| TRINITY_sp P547\Tango2    | Transport and Golgi | 31.50 | 0.00 |
| TRINITY_sp O671\aq_1088   | Uncharacterized pro | 31.50 | 0.00 |
| TRINITY_sp O887\Alg10b    | Putative Dol-P-Glc: | 31.50 | 0.00 |
| TRINITY_sp Q559\slr0305   | TVP38/TMEM64 family | 31.50 | 0.00 |
| TRINITY_sp Q9SY\GGH1      | Gamma-glutamyl hydr | 31.50 | 0.00 |
| TRINITY_sp Q5UP\MIMI_R2   | Uncharacterized pro | 31.50 | 0.00 |
| TRINITY_sp Q9FI\NIP4-1    | Putative aquaporin  | 31.50 | 0.00 |
| TRINITY_sp Q56Y\PLR1      | Pyridoxal reductase | 31.50 | 0.00 |
| TRINITY_sp Q86C\dhkK      | Hybrid signal trans | 31.50 | 0.00 |
| TRINITY_sp Q55A\DDB_G02   | Probable serine/thr | 31.50 | 0.00 |
| TRINITY_sp P100\w         | Protein white OS=Dr | 31.50 | 0.00 |
| TRINITY_sp Q54M\mcfB      | Mitochondrial subst | 31.50 | 0.00 |
| TRINITY_sp P944\yciC      | Putative metal chap | 31.50 | 0.00 |
| TRINITY_sp O941\SNF1      | Carbon catabolite-d | 31.50 | 0.00 |
| TRINITY_sp B1AZ\Otud3     | OTU domain-containi | 31.50 | 0.00 |
| TRINITY_sp Q94K\IVPS52    | Vacuolar protein so | 31.50 | 0.00 |
| TRINITY_sp Q75J\cpras1    | Circularly permutat | 31.50 | 0.00 |
| TRINITY_sp Q9SZ\FACA10    | Calcium-transportin | 31.50 | 0.00 |
| TRINITY_sp Q201\gcs-1     | Glutamate--cysteine | 31.50 | 0.00 |
| TRINITY_sp P543\CkIalpha  | Casein kinase I iso | 31.50 | 0.00 |
| TRINITY_sp Q70L\lgrD      | Linear gramicidin s | 31.50 | 0.00 |
| TRINITY_sp Q923\ssb2      | Replication factor  | 31.50 | 0.00 |
| TRINITY_sp Q0JI\CIPK11    | CBL-interacting pro | 31.50 | 0.00 |
| TRINITY_sp Q8VY\CCR4-6    | Carbon catabolite r | 31.50 | 0.00 |
| TRINITY_sp Q9M2\LPDP      | Lipid phosphate pho | 31.50 | 0.00 |
| TRINITY_sp Q2NL\PARP6     | Poly [ADP-ribose] p | 31.50 | 0.00 |
| TRINITY_sp Q8L7\BSL1      | Serine/threonine-pr | 31.50 | 0.00 |
| TRINITY_sp Q633\Nfkb1     | Nuclear factor NF-k | 31.50 | 0.00 |
| TRINITY_sp Q8CG\Smc5      | Structural maintena | 31.50 | 0.00 |
| TRINITY_sp Q8N6\OTUD6B    | OTU domain-containi | 31.50 | 0.00 |
| TRINITY_sp Q5TJ\forF      | Formin-F OS=Dictyos | 31.50 | 0.00 |
| TRINITY_sp Q54E\abpF      | Actin-binding prote | 31.50 | 0.00 |
| TRINITY_sp Q2MH\HT1       | Serine/threonine-pr | 31.50 | 0.00 |
| TRINITY_sp P370\last      | Uncharacterized tRN | 31.50 | 0.00 |
| TRINITY_sp Q460\PARP15    | Poly [ADP-ribose] p | 31.50 | 0.00 |
| TRINITY_sp Q7TS\Nsun6     | Putative methyltran | 31.50 | 0.00 |
| TRINITY_sp Q8BQ\Zdhhc14   | Probable palmitoylt | 31.50 | 0.00 |
| TRINITY_sp Q6Q2\MAOA      | Amine oxidase [flav | 31.50 | 0.00 |
| TRINITY_sp O759\CPD       | Carboxypeptidase D  | 31.50 | 0.00 |
| TRINITY_sp O287\tspO      | Tryptophan-rich pro | 31.50 | 0.00 |
| TRINITY_sp P067\CMD1      | Calmodulin OS=Sacch | 31.50 | 0.00 |
| TRINITY_sp Q6ZF\ADL1      | Calpain-type cystei | 31.50 | 0.00 |
| TRINITY_sp O044\At1g096   | Probable elongation | 31.50 | 0.00 |
| TRINITY_sp P357\-         | Pathogenesis-relate | 31.40 | 0.00 |
| TRINITY_sp Q7ZW\Nt5c3b-ε7 | methylguanosine p   | 31.40 | 0.00 |
| TRINITY_sp Q54FV\DDB_G02  | WD repeat-containin | 31.40 | 0.00 |
| TRINITY_sp Q9SL\Os05g01   | Importin subunit al | 31.40 | 0.00 |
| TRINITY_sp Q5PP\rnf170    | E3 ubiquitin-protei | 31.40 | 0.00 |
| TRINITY_sp P586\At2g399   | Probable signal pep | 31.40 | 0.00 |
| TRINITY_sp Q121\SPC3      | Signal peptidase co | 31.40 | 0.00 |
| TRINITY_sp P220\Pcmt1     | Protein-L-isoaspart | 31.40 | 0.00 |
| TRINITY_sp Q7LL\SPCC149   | UPF0676 protein C14 | 31.40 | 0.00 |
| TRINITY_sp Q2TB\NSMCE4A   | Non-structural main | 31.40 | 0.00 |
| TRINITY_sp Q0JI\CIPK11    | CBL-interacting pro | 31.40 | 0.00 |

|                           |                     |       |      |
|---------------------------|---------------------|-------|------|
| TRINITY_sp Q86I ppp4r2    | Serine/threonine-pr | 31.40 | 0.00 |
| TRINITY_sp Q6QA hsd17b12  | Very-long-chain 3-o | 31.40 | 0.00 |
| TRINITY_sp A0JN DGKA      | Diacylglycerol kina | 31.40 | 0.00 |
| TRINITY_sp Q54B vttc27    | Tetratricopeptide r | 31.40 | 0.00 |
| TRINITY_sp Q9VCF CG17119  | Cystinosin homolog  | 31.40 | 0.00 |
| TRINITY_sp Q9XZ 5NUC      | Protein 5NUC OS=Lut | 31.40 | 0.00 |
| TRINITY_sp Q153 EPHA7     | Ephrin type-A recep | 31.40 | 0.00 |
| TRINITY_sp Q9M0 BHLH140   | Transcription facto | 31.40 | 0.00 |
| TRINITY_sp Q96B EXOSC8    | Exosome complex com | 31.40 | 0.00 |
| TRINITY_sp P0CD DDB_G02   | Probable LIM domain | 31.40 | 0.00 |
| TRINITY_sp B0VH kce       | 3-keto-5-aminohexan | 31.40 | 0.00 |
| TRINITY_sp P084 SPS1      | Sporulation-specifi | 31.40 | 0.00 |
| TRINITY_sp B9DF SNX2B     | Sorting nexin 2B OS | 31.40 | 0.00 |
| TRINITY_sp Q9P8 tcsA      | Two-component syste | 31.40 | 0.00 |
| TRINITY_sp Q8VI Abcc2     | Canalicular multisp | 31.40 | 0.00 |
| TRINITY_sp Q84X GTE1      | Transcription facto | 31.40 | 0.00 |
| TRINITY_sp Q55D gacZ      | Rho GTPase-activati | 31.40 | 0.00 |
| TRINITY_sp Q9N0 ABC11     | Bile salt export pu | 31.40 | 0.00 |
| TRINITY_sp Q9FN (UVR8     | Ultraviolet-B recep | 31.40 | 0.00 |
| TRINITY_sp Q54N (forH     | Formin-H OS=Dictyos | 31.40 | 0.00 |
| TRINITY_sp Q925 (RAPGEF5  | Rap guanine nucleot | 31.40 | 0.00 |
| TRINITY_sp Q8BT Scfd2     | Sec1 family domain- | 31.40 | 0.00 |
| TRINITY_sp F4IU UPF2      | Regulator of nonsen | 31.40 | 0.00 |
| TRINITY_sp Q7Z2 ZC3HAV1   | Zinc finger CCCH-ty | 31.40 | 0.00 |
| TRINITY_sp G5EB ceeh-1    | Epoxide hydrolase 1 | 31.40 | 0.00 |
| TRINITY_sp Q6NQ At1g135   | LAG1 longevity assu | 31.40 | 0.00 |
| TRINITY_sp Q9LZ BIG2      | Brefeldin A-inhibit | 31.40 | 0.00 |
| TRINITY_sp Q9LH CHR27     | Helicase-like trans | 31.40 | 0.00 |
| TRINITY_sp Q9LH (At3g206  | mRNA cap guanine-N7 | 31.40 | 0.00 |
| TRINITY_sp Q9K9 speA      | Arginine decarboxyl | 31.40 | 0.00 |
| TRINITY_sp Q6AJ VmsbA     | Lipid A export ATP- | 31.40 | 0.00 |
| TRINITY_sp Q940 SRK2E     | Serine/threonine-pr | 31.40 | 0.00 |
| TRINITY_sp Q5MD (flt4     | Vascular endothelia | 31.40 | 0.00 |
| TRINITY_sp Q3UZ Eef2kmt   | Protein-lysine N-me | 31.40 | 0.00 |
| TRINITY_sp Q5ZL DCAF13    | DDB1- and CUL4-asso | 31.40 | 0.00 |
| TRINITY_sp Q928 ABCC2     | Canalicular multisp | 31.40 | 0.00 |
| TRINITY_sp Q020 (PSBS     | Photosystem II 22 k | 31.40 | 0.00 |
| TRINITY_sp P427 dmpM      | O-demethylpuromycin | 31.40 | 0.00 |
| TRINITY_sp Q2NK (PSMG3    | Proteasome assembly | 31.40 | 0.00 |
| TRINITY_sp O086 (Tep1     | Telomerase protein  | 31.40 | 0.00 |
| TRINITY_sp O430 (rpa43    | DNA-directed RNA po | 31.40 | 0.00 |
| TRINITY_sp Q9FG (MNS4     | Alpha-mannosidase I | 31.40 | 0.00 |
| TRINITY_sp O938 (BET4     | Geranylgeranyl tran | 31.30 | 0.00 |
| TRINITY_sp Q918 (melk     | Maternal embryonic  | 31.30 | 0.00 |
| TRINITY_sp Q084 (CKA2     | Casein kinase II su | 31.30 | 0.00 |
| TRINITY_sp O428 (SPAC8E11 | Acyl-protein thioes | 31.30 | 0.00 |
| TRINITY_sp E4US (CPYA     | Carboxypeptidase Y  | 31.30 | 0.00 |
| TRINITY_sp Q54KI DDB_G02  | TPR repeat-containi | 31.30 | 0.00 |
| TRINITY_sp Q9SP TERT      | Telomerase reverse  | 31.30 | 0.00 |
| TRINITY_sp Q54Z (mybH     | Myb-like protein H  | 31.30 | 0.00 |
| TRINITY_sp Q6UX (FAM151B  | Protein FAM151B OS= | 31.30 | 0.00 |
| TRINITY_sp P390 -         | D-alanyl-D-alanine  | 31.30 | 0.00 |
| TRINITY_sp Q55B (dcd1A    | Protein dcd1A OS=Di | 31.30 | 0.00 |
| TRINITY_sp O430 (fap1     | L-pipecolate oxidas | 31.30 | 0.00 |
| TRINITY_sp P511 (Ppox     | Protoporphyrinogen  | 31.30 | 0.00 |
| TRINITY_sp A0JP (Slc39a4  | Zinc transporter ZI | 31.30 | 0.00 |



|                            |                     |       |      |
|----------------------------|---------------------|-------|------|
| TRINITY_sp Q9R1FFzr1       | Fizzy-related prote | 31.30 | 0.00 |
| TRINITY_sp O1377SPAC17A2   | Putative metal ion  | 31.30 | 0.00 |
| TRINITY_sp Q5UNSMIMI_R6    | Uncharacterized pro | 31.30 | 0.00 |
| TRINITY_sp Q54M7ku70       | ATP-dependent DNA h | 31.30 | 0.00 |
| TRINITY_sp Q94HHTIF3K1     | Eukaryotic translat | 31.30 | 0.00 |
| TRINITY_sp P3515rluB       | Ribosomal large sub | 31.30 | 0.00 |
| TRINITY_sp Q9D66Cers4      | Ceramide synthase 4 | 31.30 | 0.00 |
| TRINITY_sp Q5000TKPR1      | Tetraketide alpha-p | 31.30 | 0.00 |
| TRINITY_sp Q9FPFEDR1       | Serine/threonine-pr | 31.30 | 0.00 |
| TRINITY_sp D4AYVARB_0137   | ABC transporter G f | 31.30 | 0.00 |
| TRINITY_sp Q6538Os06g025   | Potassium channel K | 31.30 | 0.00 |
| TRINITY_sp Q6UV6SASS6      | Spindle assembly ab | 31.30 | 0.00 |
| TRINITY_sp Q54B2DDB_G029   | Uncharacterized mem | 31.30 | 0.00 |
| TRINITY_sp Q6TN6rabl3      | Rab-like protein 3  | 31.30 | 0.00 |
| TRINITY_sp Q3MD9pcxA       | Proton extrusion pr | 31.30 | 0.00 |
| TRINITY_sp Q6GLVvallyref-k | THO complex subunit | 31.30 | 0.00 |
| TRINITY_sp P5194MNAT1      | CDK-activating kina | 31.30 | 0.00 |
| TRINITY_sp Q8CG6Thtpa      | Thiamine-triphospha | 31.30 | 0.00 |
| TRINITY_sp Q9FF4ABCG28     | ABC transporter G f | 31.30 | 0.00 |
| TRINITY_sp Q9256Slc8b1     | Sodium/potassium/ca | 31.30 | 0.00 |
| TRINITY_sp Q9ST9APC8       | Anaphase-promoting  | 31.30 | 0.00 |
| TRINITY_sp Q81M6speA       | Arginine decarboxyl | 31.30 | 0.00 |
| TRINITY_sp Q5L09mure       | UDP-N-acetylmuramoy | 31.30 | 0.00 |
| TRINITY_sp Q5WE9muts2      | Endonuclease Muts2  | 31.30 | 0.00 |
| TRINITY_sp Q7PC7PSD        | Exportin-T OS=Arabi | 31.30 | 0.00 |
| TRINITY_sp Q7T29map3k10    | Mitogen-activated p | 31.30 | 0.00 |
| TRINITY_sp Q5UP2MIMI_R25   | Uncharacterized pro | 31.20 | 0.00 |
| TRINITY_sp Q9LF4PUB1       | Probable ubiquitin  | 31.20 | 0.00 |
| TRINITY_sp Q54BMmcfG       | Mitochondrial subst | 31.20 | 0.00 |
| TRINITY_sp Q5KT6Naaa       | N-acylethanolamine- | 31.20 | 0.00 |
| TRINITY_sp Q54DIDDB_G029   | Thimet-like oligope | 31.20 | 0.00 |
| TRINITY_sp P0DK6HSD1       | 11-beta-hydroxyster | 31.20 | 0.00 |
| TRINITY_sp A0DS6GSPATT0    | Probable protein ph | 31.20 | 0.00 |
| TRINITY_sp Q7T29sgsm3      | Small G protein sig | 31.20 | 0.00 |
| TRINITY_sp P4126Abca2      | ATP-binding cassett | 31.20 | 0.00 |
| TRINITY_sp Q8RWEUPL6       | E3 ubiquitin-protei | 31.20 | 0.00 |
| TRINITY_sp O9562CNOT4      | CCR4-NOT transcript | 31.20 | 0.00 |
| TRINITY_sp P3071Gstt2      | Glutathione S-trans | 31.20 | 0.00 |
| TRINITY_sp Q8BK6Ahsa1      | Activator of 90 kDa | 31.20 | 0.00 |
| TRINITY_sp Q9VH1Invadol9   | Leishmanolysin-like | 31.20 | 0.00 |
| TRINITY_sp P6126STX1B      | Syntaxin-1B OS=Bos  | 31.20 | 0.00 |
| TRINITY_sp Q8R46Mgl1       | Monoglyceride lipas | 31.20 | 0.00 |
| TRINITY_sp Q0566CTR1       | Serine/threonine-pr | 31.20 | 0.00 |
| TRINITY_sp F4JL6LDL3       | Lysine-specific his | 31.20 | 0.00 |
| TRINITY_sp Q8L76LPEAT1     | Lysophospholipid ac | 31.20 | 0.00 |
| TRINITY_sp Q7TQ6Poln       | DNA polymerase nu O | 31.20 | 0.00 |
| TRINITY_sp Q84SIOs07g056   | Zinc finger CCCH do | 31.20 | 0.00 |
| TRINITY_sp Q96P6ACAP3      | Arf-GAP with coiled | 31.20 | 0.00 |
| TRINITY_sp Q55F6krsB       | Serine/threonine-pr | 31.20 | 0.00 |
| TRINITY_sp Q96J6VPS39      | Vam6/Vps39-like pro | 31.20 | 0.00 |
| TRINITY_sp A6H76ACPP       | Prostatic acid phos | 31.20 | 0.00 |
| TRINITY_sp Q4254UBC13      | Ubiquitin-conjugati | 31.20 | 0.00 |
| TRINITY_sp P3706Por        | NADPH--cytochrome P | 31.20 | 0.00 |
| TRINITY_sp Q2906ITIH1      | Inter-alpha-trypsin | 31.20 | 0.00 |
| TRINITY_sp O8226At2g1979   | AP-4 complex subuni | 31.20 | 0.00 |
| TRINITY_sp Q5596gacU       | Rho GTPase-activati | 31.20 | 0.00 |

|                          |                      |       |      |
|--------------------------|----------------------|-------|------|
| TRINITY_sp Q2QKHU2AF65B  | Splicing factor U2a  | 31.20 | 0.00 |
| TRINITY_sp Q5ZJPRPF3     | U4/U6 small nuclear  | 31.20 | 0.00 |
| TRINITY_sp P835(ARHGAP3  | Rho GTPase-activati  | 31.20 | 0.00 |
| TRINITY_sp O653SYP41     | Syntaxin-41 OS=Arab  | 31.20 | 0.00 |
| TRINITY_sp Q8RXIAt1g068  | Uncharacterized mem  | 31.20 | 0.00 |
| TRINITY_sp O749POX2      | Acyl-coenzyme A oxi  | 31.20 | 0.00 |
| TRINITY_sp O140imt1      | Inositol phosphocer  | 31.20 | 0.00 |
| TRINITY_sp Q54THgacY     | Rho GTPase-activati  | 31.20 | 0.00 |
| TRINITY_sp Q6BVWIPL1     | Spindle assembly ch  | 31.20 | 0.00 |
| TRINITY_sp Q94A(RFS2     | Probable galactinol  | 31.20 | 0.00 |
| TRINITY_sp F4J8IRRP5     | rRNA biogenesis pro  | 31.20 | 0.00 |
| TRINITY_sp Q9ZKVvd1C     | Probable short-chai  | 31.20 | 0.00 |
| TRINITY_sp Q8GYHSULTR4;  | Probable sulfate tr  | 31.20 | 0.00 |
| TRINITY_sp P205(CAH1     | Carbonic anhydrase   | 31.20 | 0.00 |
| TRINITY_sp O653SYP41     | Syntaxin-41 OS=Arab  | 31.20 | 0.00 |
| TRINITY_sp B6CZ(Lrrc51   | Leucine-rich repeat  | 31.20 | 0.00 |
| TRINITY_sp Q6L4ISIZ1     | E3 SUMO-protein lig  | 31.20 | 0.00 |
| TRINITY_sp Q84JIPPTAC14  | Protein PLASTID TRA  | 31.20 | 0.00 |
| TRINITY_sp A7SNV1g2464   | (Serine/threonine-pr | 31.20 | 0.00 |
| TRINITY_sp Q75Jrapgap1   | RapA guanosine trip  | 31.20 | 0.00 |
| TRINITY_sp Q8W4EHPAT1    | Hydroxyproline O-ar  | 31.20 | 0.00 |
| TRINITY_sp Q8RXAt3g633   | Probable inactive p  | 31.20 | 0.00 |
| TRINITY_sp P285(DUSP1    | Dual specificity pr  | 31.20 | 0.00 |
| TRINITY_sp Q54Pcgnt14    | Glycosyltransferase  | 31.20 | 0.00 |
| TRINITY_sp Q86K(DDDB_G02 | RUS1 family protein  | 31.20 | 0.00 |
| TRINITY_sp Q6C3\NUF2     | Probable kinetochor  | 31.20 | 0.00 |
| TRINITY_sp Q80V\Cep104   | Centrosomal protein  | 31.20 | 0.00 |
| TRINITY_sp Q54BabcB2     | ABC transporter B f  | 31.20 | 0.00 |
| TRINITY_sp I7CT-         | Protopanaxadiol 6-h  | 31.20 | 0.00 |
| TRINITY_sp Q614Pde1a     | Calcium/calmodulin-  | 31.20 | 0.00 |
| TRINITY_sp Q9LV(PVA21    | Vesicle-associated   | 31.20 | 0.00 |
| TRINITY_sp Q5TJforF      | Formin-F OS=Dictyos  | 31.20 | 0.00 |
| TRINITY_sp Q337ADF10     | Actin-depolymerizin  | 31.10 | 0.00 |
| TRINITY_sp P0DI1SAE1B-1  | SUMO-activating enz  | 31.10 | 0.00 |
| TRINITY_sp Q9FEE DSP4    | Phosphoglucan phosp  | 31.10 | 0.00 |
| TRINITY_sp P226dh1A      | Haloalkane dehaloge  | 31.10 | 0.00 |
| TRINITY_sp A4IIsslc47a1  | Multidrug and toxin  | 31.10 | 0.00 |
| TRINITY_sp Q7BWlsasA     | Adaptive-response s  | 31.10 | 0.00 |
| TRINITY_sp Q122INP53     | Polyphosphatidylino  | 31.10 | 0.00 |
| TRINITY_sp Q929KCNB2     | Potassium voltage-g  | 31.10 | 0.00 |
| TRINITY_sp Q96EMCRS1     | Microspherule prote  | 31.10 | 0.00 |
| TRINITY_sp Q585MJ1123    | Uncharacterized pro  | 31.10 | 0.00 |
| TRINITY_sp O177mpst-1    | Putative thiosulfat  | 31.10 | 0.00 |
| TRINITY_sp F4JTVPVS54    | Vacuolar protein so  | 31.10 | 0.00 |
| TRINITY_sp P235(MRS4     | Mitochondrial RNA-s  | 31.10 | 0.00 |
| TRINITY_sp P395DRS2      | Probable phospholip  | 31.10 | 0.00 |
| TRINITY_sp Q9BS(TUBGCP2  | Gamma-tubulin compl  | 31.10 | 0.00 |
| TRINITY_sp Q10L(MTP2     | Metal tolerance pro  | 31.10 | 0.00 |
| TRINITY_sp Q5K5EOs07g06  | DEAD-box ATP-depend  | 31.10 | 0.00 |
| TRINITY_sp P0A8yidA      | Sugar phosphatase Y  | 31.10 | 0.00 |
| TRINITY_sp Q9UP(USP24    | Ubiquitin carboxyl-  | 31.10 | 0.00 |
| TRINITY_sp P411(Rpl28    | 60S ribosomal prote  | 31.10 | 0.00 |
| TRINITY_sp Q922Trim59    | Tripartite motif-co  | 31.10 | 0.00 |
| TRINITY_sp Q9SUAAt4g323  | Probable sugar phos  | 31.10 | 0.00 |
| TRINITY_sp F4JJ(NDB3     | External alternativ  | 31.10 | 0.00 |
| TRINITY_sp Q653Os09g05   | Probable protein ph  | 31.10 | 0.00 |

|                          |                     |       |      |
|--------------------------|---------------------|-------|------|
| TRINITY_sp Q1962IIV3-084 | Putative ubiquitin  | 31.10 | 0.00 |
| TRINITY_sp Q5551DDB_G027 | SH3 and F-BAR domai | 31.10 | 0.00 |
| TRINITY_sp Q8CQIbutA     | Diacetyl reductase  | 31.10 | 0.00 |
| TRINITY_sp Q9FN6At5g5968 | Probable LRR recept | 31.10 | 0.00 |
| TRINITY_sp Q2322fat-3    | Delta(6)-fatty-acid | 31.10 | 0.00 |
| TRINITY_sp Q54U7crlA     | Cyclic AMP receptor | 31.10 | 0.00 |
| TRINITY_sp Q6C22NOP12    | Nucleolar protein 1 | 31.10 | 0.00 |
| TRINITY_sp Q0022me10     | Tyrosinase OS=Asper | 31.10 | 0.00 |
| TRINITY_sp Q75J1DDB_G027 | SH3 and F-BAR domai | 31.10 | 0.00 |
| TRINITY_sp Q8GYHSULTR4;2 | Probable sulfate tr | 31.10 | 0.00 |
| TRINITY_sp B9U31DISP3    | Protein dispatched  | 31.10 | 0.00 |
| TRINITY_sp A7MQIubiB     | Probable protein ki | 31.10 | 0.00 |
| TRINITY_sp Q5H80Vps13a   | Vacuolar protein so | 31.10 | 0.00 |
| TRINITY_sp Q1504RAB3GAP1 | Rab3 GTPase-activat | 31.10 | 0.00 |
| TRINITY_sp Q9DB6Osbsp13  | Oxysterol-binding p | 31.10 | 0.00 |
| TRINITY_sp P4055YIA6     | Mitochondrial nicot | 31.10 | 0.00 |
| TRINITY_sp A9IV2rplQ     | 50S ribosomal prote | 31.10 | 0.00 |
| TRINITY_sp Q8R31Nop14    | Nucleolar protein 1 | 31.10 | 0.00 |
| TRINITY_sp Q54HYbcs11a   | Probable mitochondr | 31.10 | 0.00 |
| TRINITY_sp Q0041SEN1     | Helicase SEN1 OS=Sa | 31.10 | 0.00 |
| TRINITY_sp Q0WQIVPS53    | Vacuolar protein so | 31.10 | 0.00 |
| TRINITY_sp Q54XMcaptB    | Uncharacterized CDP | 31.10 | 0.00 |
| TRINITY_sp Q1PF0DTX7     | Protein DETOXIFICAT | 31.10 | 0.00 |
| TRINITY_sp Q9ZG1pikAII   | Narbonolide/10-deox | 31.10 | 0.00 |
| TRINITY_sp O7489ret3     | Probable coatomer s | 31.10 | 0.00 |
| TRINITY_sp Q8RY2NUP98A   | Nuclear pore comple | 31.10 | 0.00 |
| TRINITY_sp Q7T2Imx1      | Interferon-induced  | 31.10 | 0.00 |
| TRINITY_sp P7392glbN     | Group 1 truncated h | 31.10 | 0.00 |
| TRINITY_sp P4183IME4     | N6-adenosine-methyl | 31.00 | 0.00 |
| TRINITY_sp Q0975SPAC24H6 | Putative membrane-b | 31.00 | 0.00 |
| TRINITY_sp Q75A3CDC123   | Cell division cycle | 31.00 | 0.00 |
| TRINITY_sp P3528Rab12    | Ras-related protein | 31.00 | 0.00 |
| TRINITY_sp Q86W3AMZ2     | Archaemetzincin-2 O | 31.00 | 0.00 |
| TRINITY_sp P1047ce1E     | Cellulase/esterase  | 31.00 | 0.00 |
| TRINITY_sp Q6DH9hvcn1    | Voltage-gated hydro | 31.00 | 0.00 |
| TRINITY_sp O0713echA8    | Probable enoyl-CoA  | 31.00 | 0.00 |
| TRINITY_sp Q5000TKPR1    | Tetraketide alpha-p | 31.00 | 0.00 |
| TRINITY_sp Q9S71GTE3     | Transcription facto | 31.00 | 0.00 |
| TRINITY_sp Q9UU9yop1     | Protein yop1 OS=Sch | 31.00 | 0.00 |
| TRINITY_sp Q54RfdhkL     | Hybrid signal trans | 31.00 | 0.00 |
| TRINITY_sp Q1337PDCL     | Phosducin-like prot | 31.00 | 0.00 |
| TRINITY_sp Q9963RAD9A    | Cell cycle checkpoi | 31.00 | 0.00 |
| TRINITY_sp O8217AGD10    | ADP-ribosylation fa | 31.00 | 0.00 |
| TRINITY_sp Q4R53NOB1     | RNA-binding protein | 31.00 | 0.00 |
| TRINITY_sp Q9P89tcsA     | Two-component syste | 31.00 | 0.00 |
| TRINITY_sp Q07G1alkbh8   | Alkylated DNA repai | 31.00 | 0.00 |
| TRINITY_sp Q3V05Slc47a2  | Multidrug and toxin | 31.00 | 0.00 |
| TRINITY_sp Q6760ATG16L1  | Autophagy-related p | 31.00 | 0.00 |
| TRINITY_sp Q1581ITSN1    | Intersectin-1 OS=Ho | 31.00 | 0.00 |
| TRINITY_sp Q5JJ6TK1782   | Uncharacterized ser | 31.00 | 0.00 |
| TRINITY_sp Q8H11TDP1     | Tyrosyl-DNA phospho | 31.00 | 0.00 |
| TRINITY_sp P1318KIN2     | Serine/threonine-pr | 31.00 | 0.00 |
| TRINITY_sp Q2KH1CPNE6    | Copine-6 OS=Bos tau | 31.00 | 0.00 |
| TRINITY_sp Q68F1Cog6     | Conserved oligomeri | 31.00 | 0.00 |
| TRINITY_sp A3LV4DBP9     | ATP-dependent RNA h | 31.00 | 0.00 |
| TRINITY_sp P4786Aqp4     | Aquaporin-4 OS=Ratt | 31.00 | 0.00 |

|                          |                      |       |      |
|--------------------------|----------------------|-------|------|
| TRINITY_sp P2006Hexb     | Beta-hexosaminidase  | 31.00 | 0.00 |
| TRINITY_sp Q4946HPAT2    | Hydroxyproline O-ar  | 31.00 | 0.00 |
| TRINITY_sp Q86Y9KIF18B   | Kinesin-like protei  | 31.00 | 0.00 |
| TRINITY_sp P4775Srprb    | Signal recognition   | 31.00 | 0.00 |
| TRINITY_sp Q9C51PAP6     | Purple acid phospho  | 31.00 | 0.00 |
| TRINITY_sp Q5R79FAM213B  | Prostamide/prostagl  | 31.00 | 0.00 |
| TRINITY_sp Q7M39rngB     | RING finger protein  | 31.00 | 0.00 |
| TRINITY_sp Q4L76ilvA     | L-threonine dehydra  | 31.00 | 0.00 |
| TRINITY_sp Q8NBRDH13     | Retinol dehydrogena  | 31.00 | 0.00 |
| TRINITY_sp P9817RBM10    | RNA-binding protein  | 31.00 | 0.00 |
| TRINITY_sp Q9SHICYCU2-1  | Cyclin-U2-1 OS=Arab  | 31.00 | 0.00 |
| TRINITY_sp Q1246TRM10    | tRNA (guanine(9)-N1  | 31.00 | 0.00 |
| TRINITY_sp Q3448yrrC     | ATP-dependent RecD-  | 31.00 | 0.00 |
| TRINITY_sp Q8NI2THOC2    | THO complex subunit  | 31.00 | 0.00 |
| TRINITY_sp P9401At1g1491 | Putative clathrin a  | 31.00 | 0.00 |
| TRINITY_sp Q52QVCRITIS01 | Prolycopene isomera  | 31.00 | 0.00 |
| TRINITY_sp Q8VWVSSL3     | Protein STRICTOSIDI  | 31.00 | 0.00 |
| TRINITY_sp Q9QY7Smok3a   | Sperm motility kina  | 31.00 | 0.00 |
| TRINITY_sp Q6NL7LPPG     | Lipid phosphate pho  | 31.00 | 0.00 |
| TRINITY_sp Q86I6nek3     | Probable serine/thr  | 31.00 | 0.00 |
| TRINITY_sp Q9LTYMAD1     | Mitotic spindle che  | 31.00 | 0.00 |
| TRINITY_sp Q9QY1Dnajc7   | DnaJ homolog subfam  | 31.00 | 0.00 |
| TRINITY_sp Q9C52TIF3E1   | Eukaryotic translat  | 31.00 | 0.00 |
| TRINITY_sp B5X01VIP6     | Protein CTR9 homolo  | 31.00 | 0.00 |
| TRINITY_sp Q8GUNC50      | Chaperone protein d  | 31.00 | 0.00 |
| TRINITY_sp Q9W47dnc      | cAMP-specific 3',5'  | 31.00 | 0.00 |
| TRINITY_sp Q8H13RH14     | DEAD-box ATP-depend  | 31.00 | 0.00 |
| TRINITY_sp Q1457ITPR3    | Inositol 1,4,5-tris  | 31.00 | 0.00 |
| TRINITY_sp Q9LY9CALS6    | Putative callose sy  | 31.00 | 0.00 |
| TRINITY_sp Q9AW7R1       | Alpha-glucan water   | 31.00 | 0.00 |
| TRINITY_sp Q54P8osbI     | Oxysterol-binding p  | 31.00 | 0.00 |
| TRINITY_sp P1464Pde4c    | cAMP-specific 3',5'  | 31.00 | 0.00 |
| TRINITY_sp A2WY1HK3      | Probable histidine   | 31.00 | 0.00 |
| TRINITY_sp Q5AFIKEX1     | Pheromone-processin  | 30.90 | 0.00 |
| TRINITY_sp O0125vps-26   | Vacuolar protein so  | 30.90 | 0.00 |
| TRINITY_sp Q8N5MATPAF2   | ATP synthase mitoch  | 30.90 | 0.00 |
| TRINITY_sp Q3892RABB1B   | Ras-related protein  | 30.90 | 0.00 |
| TRINITY_sp Q5823gck      | Glycerate 2-kinase   | 30.90 | 0.00 |
| TRINITY_sp Q6244Y43F4A.1 | Leishmanolysin-like  | 30.90 | 0.00 |
| TRINITY_sp Q4R81DNAJC2   | DnaJ homolog subfam  | 30.90 | 0.00 |
| TRINITY_sp Q55C7gdt2     | Probable serine/thr  | 30.90 | 0.00 |
| TRINITY_sp P2186yaaD     | Probable FKBP-type   | 30.90 | 0.00 |
| TRINITY_sp Q23FEITLL3C   | Tubulin glycyclase 3 | 30.90 | 0.00 |
| TRINITY_sp P3286SSO1     | Protein SSO1 OS=Sac  | 30.90 | 0.00 |
| TRINITY_sp Q9P76mak1     | Peroxide stress-act  | 30.90 | 0.00 |
| TRINITY_sp P3901MPT5     | Suppressor protein   | 30.90 | 0.00 |
| TRINITY_sp Q9ZVHTFIIS    | Transcription elong  | 30.90 | 0.00 |
| TRINITY_sp Q55DIpakD     | Serine/threonine-pr  | 30.90 | 0.00 |
| TRINITY_sp Q1491SHPRH    | E3 ubiquitin-protei  | 30.90 | 0.00 |
| TRINITY_sp Q9SI2RKP      | E3 ubiquitin-protei  | 30.90 | 0.00 |
| TRINITY_sp Q5AXVbcp1     | Protein bcp1 OS=Eme  | 30.90 | 0.00 |
| TRINITY_sp Q0JI4CIPK11   | CBL-interacting pro  | 30.90 | 0.00 |
| TRINITY_sp Q8BK6Ahsa1    | Activator of 90 kDa  | 30.90 | 0.00 |
| TRINITY_sp Q5XG6PAPD7    | Non-canonical poly(  | 30.90 | 0.00 |
| TRINITY_sp Q8K2Vppp4r1   | Serine/threonine-pr  | 30.90 | 0.00 |
| TRINITY_sp Q54Pveif2a    | Eukaryotic translat  | 30.90 | 0.00 |

|                          |                     |       |      |
|--------------------------|---------------------|-------|------|
| TRINITY_sp Q7ZU\dohh     | Deoxyhypusine hydro | 30.90 | 0.00 |
| TRINITY_sp P2133al-1     | Phytoene desaturase | 30.90 | 0.00 |
| TRINITY_sp Q54IIshkB     | Dual specificity pr | 30.90 | 0.00 |
| TRINITY_sp Q93VICCD8A    | Carotenoid cleavage | 30.90 | 0.00 |
| TRINITY_sp Q4R9FTCTN3    | Tectonic-3 OS=Macac | 30.90 | 0.00 |
| TRINITY_sp F4JM\HSP70-1  | Heat shock 70 kDa p | 30.90 | 0.00 |
| TRINITY_sp Q55C\gdt2     | Probable serine/thr | 30.90 | 0.00 |
| TRINITY_sp Q1032SPAC17G  | Inositol phosphocer | 30.90 | 0.00 |
| TRINITY_sp F4HV\POD1     | Protein POLLEN DEFE | 30.90 | 0.00 |
| TRINITY_sp Q5VVVGARNL3   | GTPase-activating R | 30.90 | 0.00 |
| TRINITY_sp P0414GIP      | Copia protein OS=Dr | 30.90 | 0.00 |
| TRINITY_sp P6974Trpv5    | Transient receptor  | 30.90 | 0.00 |
| TRINITY_sp Q9FN\DRP1E    | Dynamin-related pro | 30.90 | 0.00 |
| TRINITY_sp Q1ZX\clcd     | Chloride channel pr | 30.90 | 0.00 |
| TRINITY_sp O3296ML0855   | Uncharacterized zin | 30.90 | 0.00 |
| TRINITY_sp B3QP\dnaJ     | Chaperone protein D | 30.90 | 0.00 |
| TRINITY_sp Q9WT\Tpcn1    | Two pore calcium ch | 30.90 | 0.00 |
| TRINITY_sp P9547arbA     | Extracellular exo-a | 30.80 | 0.00 |
| TRINITY_sp F4IG\BCHC2    | BEACH domain-contai | 30.80 | 0.00 |
| TRINITY_sp P5729thrA     | Bifunctional aspart | 30.80 | 0.00 |
| TRINITY_sp Q9P2EIF2AK4   | eIF-2-alpha kinase  | 30.80 | 0.00 |
| TRINITY_sp P5809Nadk     | NAD kinase OS=Mus m | 30.80 | 0.00 |
| TRINITY_sp Q6361Vps33a   | Vacuolar protein so | 30.80 | 0.00 |
| TRINITY_sp Q7ZVfvps36    | Vacuolar protein-so | 30.80 | 0.00 |
| TRINITY_sp Q4251GN       | ARF guanine-nucleot | 30.80 | 0.00 |
| TRINITY_sp F4JL2SMO1-3   | Methylsterol monoox | 30.80 | 0.00 |
| TRINITY_sp Q5TG\FAXC     | Failed axon connect | 30.80 | 0.00 |
| TRINITY_sp Q9VG1Blm      | Bloom syndrome prot | 30.80 | 0.00 |
| TRINITY_sp Q8C14Dock8    | Dedicator of cytoki | 30.80 | 0.00 |
| TRINITY_sp Q99L2Gstt3    | Glutathione S-trans | 30.80 | 0.00 |
| TRINITY_sp Q2866ABCC2    | Canalicular multisp | 30.80 | 0.00 |
| TRINITY_sp Q55E9corB     | Coronin-B OS=Dictyo | 30.80 | 0.00 |
| TRINITY_sp P8219Tgfbi    | Transforming growth | 30.80 | 0.00 |
| TRINITY_sp Q9FN(UVR8     | Ultraviolet-B recep | 30.80 | 0.00 |
| TRINITY_sp Q0336DNAJ1    | DnaJ protein homolo | 30.80 | 0.00 |
| TRINITY_sp Q9SR(CLPS3    | Protein CLP1 homolo | 30.80 | 0.00 |
| TRINITY_sp Q9P3\tdbl4    | E3 ubiquitin-protei | 30.80 | 0.00 |
| TRINITY_sp Q5UN9MIMI_R6  | Uncharacterized pro | 30.80 | 0.00 |
| TRINITY_sp Q9632IMPA1    | Importin subunit al | 30.80 | 0.00 |
| TRINITY_sp Q550(DDB_G02  | Protein TAPT1 homol | 30.80 | 0.00 |
| TRINITY_sp Q8S88LPEAT2   | Lysophospholipid ac | 30.80 | 0.00 |
| TRINITY_sp Q8N8\GBP7     | Guanylate-binding p | 30.80 | 0.00 |
| TRINITY_sp Q641fNuak1    | NUAK family SNF1-li | 30.80 | 0.00 |
| TRINITY_sp Q54V\abcC2    | ABC transporter C f | 30.80 | 0.00 |
| TRINITY_sp Q6B51sgkB     | Sphingosine kinase  | 30.80 | 0.00 |
| TRINITY_sp Q9M07GGP2     | Gamma-glutamyl pept | 30.80 | 0.00 |
| TRINITY_sp Q55F9dlpA     | Dynamin-like protei | 30.80 | 0.00 |
| TRINITY_sp Q552\psmd9    | Probable 26S protea | 30.80 | 0.00 |
| TRINITY_sp Q54G(DDB_G02  | SPX and EXS domain- | 30.80 | 0.00 |
| TRINITY_sp Q5A32CDG1     | Cysteine dioxygenas | 30.80 | 0.00 |
| TRINITY_sp Q8C4\vcpkmt   | Protein-lysine meth | 30.80 | 0.00 |
| TRINITY_sp Q54V\IDDB_G02 | TPR-containing prot | 30.80 | 0.00 |
| TRINITY_sp Q8MI\FABCG2   | ATP-binding cassett | 30.80 | 0.00 |
| TRINITY_sp A6QL\FERI3    | ERI1 exoribonucleas | 30.80 | 0.00 |
| TRINITY_sp O6783rplI     | 50S ribosomal prote | 30.80 | 0.00 |
| TRINITY_sp Q54P(abkD     | Probable serine/thr | 30.80 | 0.00 |

|                           |                     |       |      |
|---------------------------|---------------------|-------|------|
| TRINITY_sp P5485TGL2      | Lipase 2 OS=Sacchar | 30.80 | 0.00 |
| TRINITY_sp Q93W2At4g1554  | Uncharacterized pro | 30.80 | 0.00 |
| TRINITY_sp Q9SY1At4g0290  | CSC1-like protein A | 30.80 | 0.00 |
| TRINITY_sp Q6GQ7Nomo1     | Nodal modulator 1 O | 30.80 | 0.00 |
| TRINITY_sp Q5UR(MIMI_L9)  | Uncharacterized pro | 30.80 | 0.00 |
| TRINITY_sp Q55GDDDB_G026  | Probable phosphatid | 30.80 | 0.00 |
| TRINITY_sp Q5XI7Dzip11    | Zinc finger protein | 30.80 | 0.00 |
| TRINITY_sp P0272PCTP      | Phosphatidylcholine | 30.80 | 0.00 |
| TRINITY_sp P2271Gucy1b2   | Guanylate cyclase s | 30.80 | 0.00 |
| TRINITY_sp Q6ZY5GWD3      | Phosphoglucan, wate | 30.80 | 0.00 |
| TRINITY_sp O0078vate      | V-type proton ATPas | 30.70 | 0.00 |
| TRINITY_sp Q9M3(PAT05     | Probable protein S- | 30.70 | 0.00 |
| TRINITY_sp Q2243T12E12.1  | Potential E3 ubiqui | 30.70 | 0.00 |
| TRINITY_sp Q96M9PACRG     | Parkin coregulated  | 30.70 | 0.00 |
| TRINITY_sp Q55BabcA8      | ABC transporter A f | 30.70 | 0.00 |
| TRINITY_sp Q5F3(C1GALT1   | Glycoprotein-N-acet | 30.70 | 0.00 |
| TRINITY_sp Q8VY7RS2Z33    | Serine/arginine-ric | 30.70 | 0.00 |
| TRINITY_sp Q9FLMPAT06     | Probable protein S- | 30.70 | 0.00 |
| TRINITY_sp Q6GL1pip4k2c   | Phosphatidylinosito | 30.70 | 0.00 |
| TRINITY_sp Q54Gyrab18     | Ras-related protein | 30.70 | 0.00 |
| TRINITY_sp Q8LF(RBL19     | Rhomboid-like prote | 30.70 | 0.00 |
| TRINITY_sp Q9VK8CG6388    | Probable tRNA (guan | 30.70 | 0.00 |
| TRINITY_sp Q84M2ABCA1     | ABC transporter A f | 30.70 | 0.00 |
| TRINITY_sp Q6P61ak8       | Adenylate kinase 8  | 30.70 | 0.00 |
| TRINITY_sp Q5AJ5MRD1      | Multiple RNA-bindin | 30.70 | 0.00 |
| TRINITY_sp Q9VMRat1       | 5'-3' exoribonuclea | 30.70 | 0.00 |
| TRINITY_sp P5443yrkH      | Uncharacterized pro | 30.70 | 0.00 |
| TRINITY_sp Q8L79ULP2B     | Probable ubiquitin- | 30.70 | 0.00 |
| TRINITY_sp Q0992tif224    | Probable translatio | 30.70 | 0.00 |
| TRINITY_sp O4855BRR2B     | DExH-box ATP-depend | 30.70 | 0.00 |
| TRINITY_sp O1391pnk1      | Bifunctional polynu | 30.70 | 0.00 |
| TRINITY_sp Q5UQ(MIMI_L4)  | Putative alpha/beta | 30.70 | 0.00 |
| TRINITY_sp Q8N6FMETT13    | Methyltransferase-1 | 30.70 | 0.00 |
| TRINITY_sp Q8BG4Stk17b    | Serine/threonine-pr | 30.70 | 0.00 |
| TRINITY_sp A6UWFhemL      | Glutamate-1-semiald | 30.70 | 0.00 |
| TRINITY_sp Q8C6(-         | Protein C21orf2 hom | 30.70 | 0.00 |
| TRINITY_sp Q9Z1M1k        | Protein Red OS=Mus  | 30.70 | 0.00 |
| TRINITY_sp B1ZW7trpC      | Indole-3-glycerol p | 30.70 | 0.00 |
| TRINITY_sp P0414GIP       | Copia protein OS=Dr | 30.70 | 0.00 |
| TRINITY_sp Q9LKVNHX7      | Sodium/hydrogen exc | 30.70 | 0.00 |
| TRINITY_sp P5094AVT4      | Vacuolar amino acid | 30.70 | 0.00 |
| TRINITY_sp P1027pol       | Pol polyprotein OS= | 30.70 | 0.00 |
| TRINITY_sp Q9FV5MAP1D     | Methionine aminopep | 30.70 | 0.00 |
| TRINITY_sp Q8H1IAPY4      | Probable apyrase 4  | 30.70 | 0.00 |
| TRINITY_sp Q9SB6PDK       | [Pyruvate dehydroge | 30.70 | 0.00 |
| TRINITY_sp Q86U(RSPH3     | Radial spoke head p | 30.70 | 0.00 |
| TRINITY_sp Q54B1DDDB_G029 | LIMR family protein | 30.70 | 0.00 |
| TRINITY_sp Q9LW2At3g2684  | Acyltransferase-lik | 30.70 | 0.00 |

|                          |                     |       |      |
|--------------------------|---------------------|-------|------|
| TRINITY_sp Q6DF(ccdc77   | Coiled-coil domain- | 30.70 | 0.00 |
| TRINITY_sp Q7MG(VVA0006  | Riboflavin biosynth | 30.70 | 0.00 |
| TRINITY_sp Q9P2(ANKIB1   | Ankyrin repeat and  | 30.70 | 0.00 |
| TRINITY_sp Q61Y(CBG0355( | Leishmanolysin-like | 30.70 | 0.00 |
| TRINITY_sp P443(rbsK     | Ribokinase OS=Haemo | 30.70 | 0.00 |
| TRINITY_sp Q9W0(NaCP60E  | Sodium channel prot | 30.70 | 0.00 |
| TRINITY_sp Q558(s110103  | Uncharacterized pro | 30.70 | 0.00 |
| TRINITY_sp Q9M0(At4g3264 | Protein transport p | 30.70 | 0.00 |
| TRINITY_sp P181(Acsl1    | Long-chain-fatty-ac | 30.70 | 0.00 |
| TRINITY_sp Q5XT(PNPLA8   | Calcium-independent | 30.70 | 0.00 |
| TRINITY_sp Q55G(abkC     | Probable serine/thr | 30.70 | 0.00 |
| TRINITY_sp Q8MI(FABCG2   | ATP-binding cassett | 30.70 | 0.00 |
| TRINITY_sp O818(IRT2     | Fe(2+) transport pr | 30.70 | 0.00 |
| TRINITY_sp Q9H8(CNTD2    | Cyclin N-terminal d | 30.70 | 0.00 |
| TRINITY_sp Q5FP(IGOX2015 | Glucose 1-dehydroge | 30.60 | 0.00 |
| TRINITY_sp Q928(GGH      | Gamma-glutamyl hydr | 30.60 | 0.00 |
| TRINITY_sp Q55B(abcA8    | ABC transporter A f | 30.60 | 0.00 |
| TRINITY_sp Q9FE(SULTR1;  | Sulfate transporter | 30.60 | 0.00 |
| TRINITY_sp Q8TD(NEK9     | Serine/threonine-pr | 30.60 | 0.00 |
| TRINITY_sp Q9Z1(MACOX1   | Peroxisomal acyl-co | 30.60 | 0.00 |
| TRINITY_sp P341(pkgC     | Protein kinase 3 OS | 30.60 | 0.00 |
| TRINITY_sp Q8H1(ITDP1    | Tyrosyl-DNA phospho | 30.60 | 0.00 |
| TRINITY_sp Q55G(l2hgdh   | L-2-hydroxyglutarat | 30.60 | 0.00 |
| TRINITY_sp Q8GY(CAT3     | Cationic amino acid | 30.60 | 0.00 |
| TRINITY_sp Q9D9(Zswim2   | E3 ubiquitin-protei | 30.60 | 0.00 |
| TRINITY_sp Q5A3(CDG1     | Cysteine dioxygenas | 30.60 | 0.00 |
| TRINITY_sp Q135(DGKZ     | Diacylglycerol kina | 30.60 | 0.00 |
| TRINITY_sp Q6PA(Klhdc10  | Kelch domain-contai | 30.60 | 0.00 |
| TRINITY_sp H3ZP(IOC_043( | Aromatic-amino-acid | 30.60 | 0.00 |
| TRINITY_sp Q6PG(Dhx29    | ATP-dependent RNA h | 30.60 | 0.00 |
| TRINITY_sp D3ZV(Nat81    | N-acetylaspartate s | 30.60 | 0.00 |
| TRINITY_sp O945(iqw1     | WD repeat protein i | 30.60 | 0.00 |
| TRINITY_sp Q679(PDLIM7   | PDZ and LIM domain  | 30.60 | 0.00 |
| TRINITY_sp O821(VPS32.1  | Vacuolar protein so | 30.60 | 0.00 |
| TRINITY_sp Q3U1(Tmem64   | Transmembrane prote | 30.60 | 0.00 |
| TRINITY_sp Q6P5(Mapk4    | Mitogen-activated p | 30.60 | 0.00 |
| TRINITY_sp F4I4(BARD1    | BRCA1-associated RI | 30.60 | 0.00 |
| TRINITY_sp O703(Nmt2     | Glycylpeptide N-tet | 30.60 | 0.00 |
| TRINITY_sp Q132(PRKG2    | cGMP-dependent prot | 30.60 | 0.00 |
| TRINITY_sp Q54T(yipf1    | Protein YIPF1 homol | 30.60 | 0.00 |
| TRINITY_sp F4JL(LDL3     | Lysine-specific his | 30.60 | 0.00 |
| TRINITY_sp Q9LR(APUM24   | Pumilio homolog 24  | 30.60 | 0.00 |
| TRINITY_sp Q8LF(BRN1     | RNA-binding protein | 30.60 | 0.00 |
| TRINITY_sp Q0P4(facsf2   | Acyl-CoA synthetase | 30.60 | 0.00 |
| TRINITY_sp Q84M(FAL1     | RAP domain-containi | 30.60 | 0.00 |
| TRINITY_sp Q9P4(CCA1     | CCA tRNA nucleotidy | 30.60 | 0.00 |
| TRINITY_sp Q0JI(CIPK11   | CBL-interacting pro | 30.60 | 0.00 |
| TRINITY_sp Q9NT(ATP8A2   | Phospholipid-transp | 30.60 | 0.00 |
| TRINITY_sp Q94B(CHR28    | Helicase-like trans | 30.60 | 0.00 |
| TRINITY_sp Q32T(EFHC2    | EF-hand domain-cont | 30.60 | 0.00 |
| TRINITY_sp Q617(Kif3b    | Kinesin-like protei | 30.60 | 0.00 |
| TRINITY_sp P196(Gucy1a3  | Guanylate cyclase s | 30.60 | 0.00 |
| TRINITY_sp Q54Y(dhkJ     | Hybrid signal trans | 30.60 | 0.00 |
| TRINITY_sp Q8L5(PANK2    | Pantothenate kinase | 30.60 | 0.00 |
| TRINITY_sp Q54Y(dhkJ     | Hybrid signal trans | 30.60 | 0.00 |
| TRINITY_sp Q6IN(ttc21b   | Tetratricopeptide r | 30.60 | 0.00 |

|                              |                     |       |      |
|------------------------------|---------------------|-------|------|
| TRINITY_sp Q5372pcrA         | ATP-dependent DNA h | 30.60 | 0.00 |
| TRINITY_sp Q08BEctdspl2a     | CTD small phosphata | 30.60 | 0.00 |
| TRINITY_sp P0CH3RING1        | E3 ubiquitin-protei | 30.50 | 0.00 |
| TRINITY_sp Q0IICRAB18        | Ras-related protein | 30.50 | 0.00 |
| TRINITY_sp Q1DT1FYV10        | Protein FYV10 OS=Co | 30.50 | 0.00 |
| TRINITY_sp E2RJ1MASTL        | Serine/threonine-pr | 30.50 | 0.00 |
| TRINITY_sp O1383ptr1         | E3 ubiquitin-protei | 30.50 | 0.00 |
| TRINITY_sp Q9D05Acer3        | Alkaline ceramidase | 30.50 | 0.00 |
| TRINITY_sp P0DK3SWEET15      | Bidirectional sugar | 30.50 | 0.00 |
| TRINITY_sp O138(ebp2         | Probable rRNA-proce | 30.50 | 0.00 |
| TRINITY_sp Q8GU1JMJ14        | Probable lysine-spe | 30.50 | 0.00 |
| TRINITY_sp Q5FV1Wdr89        | WD repeat-containin | 30.50 | 0.00 |
| TRINITY_sp Q0917cds1         | Serine/threonine-pr | 30.50 | 0.00 |
| TRINITY_sp Q555Hrnf160       | E3 ubiquitin-protei | 30.50 | 0.00 |
| TRINITY_sp P2805gpa-3        | Guanine nucleotide- | 30.50 | 0.00 |
| TRINITY_sp B3FW1hpm2         | Glutathione S-trans | 30.50 | 0.00 |
| TRINITY_sp Q9Y61PARP3        | Poly [ADP-ribose] p | 30.50 | 0.00 |
| TRINITY_sp Q9UUImok12        | Cell wall alpha-1,3 | 30.50 | 0.00 |
| TRINITY_sp P3704yaeI         | Phosphodiesterase Y | 30.50 | 0.00 |
| TRINITY_sp Q9FK1CCX1         | Cation/calcium exch | 30.50 | 0.00 |
| TRINITY_sp Q3SX4RRAGA        | Ras-related GTP-bin | 30.50 | 0.00 |
| TRINITY_sp Q6AY5Mmadhc       | Methylmalonic acidu | 30.50 | 0.00 |
| TRINITY_sp Q9LG2Os01g025     | Putative L-cysteine | 30.50 | 0.00 |
| TRINITY_sp O2275GLTP1        | Glycolipid transfer | 30.50 | 0.00 |
| TRINITY_sp O444(F37C4.5      | Protein F37C4.5 OS= | 30.50 | 0.00 |
| TRINITY_sp Q8Y21RSc0270      | UPF0225 protein RSc | 30.50 | 0.00 |
| TRINITY_sp Q6AX1babam1       | BRISC and BRCA1-A c | 30.50 | 0.00 |
| TRINITY_sp Q8XR1kynA2        | Tryptophan 2,3-diox | 30.50 | 0.00 |
| TRINITY_sp Q6446Cyp3a13      | Cytochrome P450 3A1 | 30.50 | 0.00 |
| TRINITY_sp A7IQVC42C1.13     | Protein-lysine meth | 30.50 | 0.00 |
| TRINITY_sp Q7KZ1MARK2        | Serine/threonine-pr | 30.50 | 0.00 |
| TRINITY_sp Q96B1SGK3         | Serine/threonine-pr | 30.50 | 0.00 |
| TRINITY_sp P2375SERPINA6     | Corticosteroid-bind | 30.50 | 0.00 |
| TRINITY_sp O6645adk          | Adenylate kinase OS | 30.50 | 0.00 |
| TRINITY_sp O1505TRANK1       | TPR and ankyrin rep | 30.50 | 0.00 |
| TRINITY_sp O1328xyrA         | NAD(P)H-dependent D | 30.50 | 0.00 |
| TRINITY_sp Q84K1GAMMA-AIAP-1 | complex subuni      | 30.50 | 0.00 |
| TRINITY_sp Q9173ephb1-b      | Ephrin type-B recep | 30.50 | 0.00 |
| TRINITY_sp Q9VM1Cyp28d2      | Probable cytochrome | 30.50 | 0.00 |
| TRINITY_sp A7MB1PDCD11       | Protein RRP5 homolo | 30.50 | 0.00 |
| TRINITY_sp Q9SX8SEC3A        | Exocyst complex com | 30.50 | 0.00 |
| TRINITY_sp Q9FL1VTC5         | GDP-L-galactose pho | 30.50 | 0.00 |
| TRINITY_sp B0M01gefL         | Ras guanine nucleot | 30.50 | 0.00 |
| TRINITY_sp Q55A(DDB_G027     | Probable serine/thr | 30.50 | 0.00 |
| TRINITY_sp P2167TAF1         | Transcription initi | 30.50 | 0.00 |
| TRINITY_sp Q9H01GBP3         | Guanylate-binding p | 30.50 | 0.00 |
| TRINITY_sp F4I6MTOR1L1       | TORTIFOLIA1-like pr | 30.50 | 0.00 |
| TRINITY_sp Q2175vdac-1       | Probable voltage-de | 30.50 | 0.00 |
| TRINITY_sp Q9VMVCG3792       | Mannose-P-dolichol  | 30.50 | 0.00 |
| TRINITY_sp Q5521pkgA         | Probable serine/thr | 30.50 | 0.00 |
| TRINITY_sp Q4WX1rna14        | mRNA 3'-end-process | 30.50 | 0.00 |
| TRINITY_sp Q6K64Os02g061     | Eukaryotic translat | 30.50 | 0.00 |
| TRINITY_sp Q9UP1USP24        | Ubiquitin carboxyl- | 30.50 | 0.00 |
| TRINITY_sp Q70C1USP34        | Ubiquitin carboxyl- | 30.50 | 0.00 |
| TRINITY_sp Q9S91CAL511       | Callose synthase 11 | 30.50 | 0.00 |
| TRINITY_sp Q1265YPK9         | Vacuolar cation-tra | 30.40 | 0.00 |



|                          |                               |       |      |
|--------------------------|-------------------------------|-------|------|
| TRINITY_sp Q29RNSLC25A1  | Mitochondrial thiam           | 30.40 | 0.00 |
| TRINITY_sp O748          | ccr4 Glucose-repressible      | 30.40 | 0.00 |
| TRINITY_sp Q9C6EGAMMACA2 | Gamma carbonic anhy           | 30.40 | 0.00 |
| TRINITY_sp Q54LHVps13A   | Putative vacuolar p           | 30.40 | 0.00 |
| TRINITY_sp P0825         | CHN48 Endochitinase A OS=     | 30.40 | 0.00 |
| TRINITY_sp P5204         | crt Short-chain-enoyl-C       | 30.40 | 0.00 |
| TRINITY_sp Q9FFIRMV1     | Polyamine transport           | 30.40 | 0.00 |
| TRINITY_sp F4KGUAt5g1037 | ATP-dependent RNA h           | 30.40 | 0.00 |
| TRINITY_sp Q9ESE         | Necab1 N-terminal EF-hand     | 30.40 | 0.00 |
| TRINITY_sp Q9JJ          | (Plscr1 Phospholipid scramb   | 30.40 | 0.00 |
| TRINITY_sp Q96MFCFAP57   | Cilia- and flagella           | 30.40 | 0.00 |
| TRINITY_sp Q54W          | ctns Cystinosin homolog       | 30.40 | 0.00 |
| TRINITY_sp Q4R7HTLL10    | Protein polyglycyla           | 30.40 | 0.00 |
| TRINITY_sp F4I1          | ELP2 Elongator complex p      | 30.40 | 0.00 |
| TRINITY_sp Q9VR          | cactin Cactin OS=Drosophil    | 30.40 | 0.00 |
| TRINITY_sp Q9SI          | (MTP12 Metal tolerance pro    | 30.40 | 0.00 |
| TRINITY_sp A7MR          | luxN Autoinducer 1 senso      | 30.40 | 0.00 |
| TRINITY_sp Q7TN          | Celf6 CUGBP Elav-like fam     | 30.40 | 0.00 |
| TRINITY_sp A8I9          | CFAP45 Cilia- and flagella    | 30.40 | 0.00 |
| TRINITY_sp A1Z8          | CG7741 CWF19-like protein     | 30.40 | 0.00 |
| TRINITY_sp P5874         | Aaas Aladin OS=Mus muscu      | 30.40 | 0.00 |
| TRINITY_sp A8WY          | par-1 Serine/threonine-pr     | 30.40 | 0.00 |
| TRINITY_sp Q6NU          | MFSD12 Major facilitator s    | 30.40 | 0.00 |
| TRINITY_sp Q86U          | NOP9 Nucleolar protein 9      | 30.40 | 0.00 |
| TRINITY_sp Q9SY          | TAF8 Transcription initi      | 30.40 | 0.00 |
| TRINITY_sp Q4R8          | EIF2AK1 Eukaryotic translat   | 30.40 | 0.00 |
| TRINITY_sp Q8LA          | At5g1074 Probable protein ph  | 30.40 | 0.00 |
| TRINITY_sp Q9H2          | SPTBN4 Spectrin beta chain    | 30.40 | 0.00 |
| TRINITY_sp A8IL          | CFAP52 Cilia- and flagella    | 30.40 | 0.00 |
| TRINITY_sp P379          | (pnbA Para-nitrobenzyl es     | 30.40 | 0.00 |
| TRINITY_sp Q75J          | cpras1 Circularly permutat    | 30.40 | 0.00 |
| TRINITY_sp P286          | - Endoglucanase 4 OS=         | 30.40 | 0.00 |
| TRINITY_sp Q54S          | vgr1F Metabotropic glutam     | 30.40 | 0.00 |
| TRINITY_sp B2VF          | (viaA Protein ViaA OS=Erw     | 30.40 | 0.00 |
| TRINITY_sp Q9VR          | HERC2 Probable E3 ubiquit     | 30.40 | 0.00 |
| TRINITY_sp Q9MY          | IHSD17B14 17-beta-hydroxyster | 30.40 | 0.00 |
| TRINITY_sp Q9C8          | At3g0653 Uncharacterized pro  | 30.40 | 0.00 |
| TRINITY_sp Q290          | ITIH1 Inter-alpha-trypsin     | 30.40 | 0.00 |
| TRINITY_sp Q14C          | NAA25 N-alpha-acetyltrans     | 30.40 | 0.00 |
| TRINITY_sp Q923          | SPAC6G9 Pumilio domain-cont   | 30.40 | 0.00 |
| TRINITY_sp Q2I6          | (inpp11a Phosphatidylinosito  | 30.40 | 0.00 |
| TRINITY_sp Q078          | VPS13 Vacuolar protein so     | 30.40 | 0.00 |
| TRINITY_sp Q54Q          | (secl Protein transport p     | 30.40 | 0.00 |
| TRINITY_sp Q4ZH          | GUCY1A3 Guanylate cyclase s   | 30.40 | 0.00 |
| TRINITY_sp P400          | (GLE2 Nucleoporin GLE2 OS     | 30.40 | 0.00 |
| TRINITY_sp Q54G          | DDB_G02 PXMP2/4 family prot   | 30.40 | 0.00 |
| TRINITY_sp Q9M1          | ISEN1 tRNA-splicing endon     | 30.40 | 0.00 |
| TRINITY_sp F4JT          | ISTY46 Serine/threonine-pr    | 30.40 | 0.00 |
| TRINITY_sp Q54B          | (DDB_G02 Probable GH family   | 30.40 | 0.00 |
| TRINITY_sp O433          | (HNRNPR Heterogeneous nucle   | 30.40 | 0.00 |
| TRINITY_sp Q5A5          | (NIK1 Histidine protein k     | 30.40 | 0.00 |
| TRINITY_sp P581          | (Plscr1 Phospholipid scramb   | 30.40 | 0.00 |
| TRINITY_sp Q9D1          | (Rrp7a Ribosomal RNA-proce    | 30.40 | 0.00 |
| TRINITY_sp Q9SF          | (PAP15 Purple acid phospho    | 30.40 | 0.00 |
| TRINITY_sp Q022          | (YVH1 Tyrosine-protein ph     | 30.40 | 0.00 |
| TRINITY_sp Q0WV          | (IGC5 Golgin candidate 5      | 30.40 | 0.00 |

|                           |                     |       |      |
|---------------------------|---------------------|-------|------|
| TRINITY_sp Q3969INV3      | Beta-fructofuranosi | 30.40 | 0.00 |
| TRINITY_sp Q32P4EML3      | Echinoderm microtub | 30.40 | 0.00 |
| TRINITY_sp Q9CAIFLD       | Protein FLOWERING L | 30.40 | 0.00 |
| TRINITY_sp Q54P1abcC8     | ABC transporter C f | 30.40 | 0.00 |
| TRINITY_sp Q9931TY3B-G    | Transposon Ty3-G Ga | 30.40 | 0.00 |
| TRINITY_sp Q9ATITIP2-1    | Aquaporin TIP2-1 OS | 30.30 | 0.00 |
| TRINITY_sp P2065Ppm1a     | Protein phosphatase | 30.30 | 0.00 |
| TRINITY_sp Q5852MJ1123    | Uncharacterized pro | 30.30 | 0.00 |
| TRINITY_sp Q8BG4Stk17b    | Serine/threonine-pr | 30.30 | 0.00 |
| TRINITY_sp Q9D4V-         | Uncharacterized pro | 30.30 | 0.00 |
| TRINITY_sp Q3URIKctd21    | BTB/POZ domain-cont | 30.30 | 0.00 |
| TRINITY_sp Q9NPNMRK2      | Nicotinamide ribosi | 30.30 | 0.00 |
| TRINITY_sp Q9C5UAHK3      | Histidine kinase 3  | 30.30 | 0.00 |
| TRINITY_sp Q66JIacbd6     | Acyl-CoA-binding do | 30.30 | 0.00 |
| TRINITY_sp Q6H7UCIPK26    | CBL-interacting pro | 30.30 | 0.00 |
| TRINITY_sp Q5ZINTSEN2     | tRNA-splicing endon | 30.30 | 0.00 |
| TRINITY_sp Q6312Abcc2     | Canalicular multisp | 30.30 | 0.00 |
| TRINITY_sp Q96G(EEF2KMT   | Protein-lysine N-me | 30.30 | 0.00 |
| TRINITY_sp Q96M5FGD4      | FYVE, RhoGEF and PH | 30.30 | 0.00 |
| TRINITY_sp Q9695ZNF622    | Zinc finger protein | 30.30 | 0.00 |
| TRINITY_sp P1464Pde4c     | cAMP-specific 3',5' | 30.30 | 0.00 |
| TRINITY_sp Q8AX5slc35b1   | Solute carrier fami | 30.30 | 0.00 |
| TRINITY_sp Q9M35GCP4      | Gamma-tubulin compl | 30.30 | 0.00 |
| TRINITY_sp Q9V8VRep       | Rab proteins gerany | 30.30 | 0.00 |
| TRINITY_sp Q9ES(Ube4b     | Ubiquitin conjugati | 30.30 | 0.00 |
| TRINITY_sp P1346abpC      | Gelation factor OS= | 30.30 | 0.00 |
| TRINITY_sp Q9S7(CHSP70-14 | Heat shock 70 kDa p | 30.30 | 0.00 |
| TRINITY_sp Q54TMDrkD      | Probable serine/thr | 30.30 | 0.00 |
| TRINITY_sp P5456yqkD      | Uncharacterized pro | 30.30 | 0.00 |
| TRINITY_sp P3883WSS1      | DNA-dependent metal | 30.30 | 0.00 |
| TRINITY_sp C4IY5-         | Ascorbate-specific  | 30.30 | 0.00 |
| TRINITY_sp P5094AVT4      | Vacuolar amino acid | 30.30 | 0.00 |
| TRINITY_sp Q9SN3RABA1D    | Ras-related protein | 30.30 | 0.00 |
| TRINITY_sp Q8BRCTmem209   | Transmembrane prote | 30.30 | 0.00 |
| TRINITY_sp O6005afg2      | ATPase family gene  | 30.30 | 0.00 |
| TRINITY_sp P9453ysgA      | Uncharacterized tRN | 30.30 | 0.00 |
| TRINITY_sp Q7NSIhmp       | Flavoheмоprotein OS | 30.30 | 0.00 |
| TRINITY_sp Q54K3vps13F    | Putative vacuolar p | 30.30 | 0.00 |
| TRINITY_sp B4JY1fig       | Protein phosphatase | 30.30 | 0.00 |
| TRINITY_sp Q1491SHPRH     | E3 ubiquitin-protei | 30.30 | 0.00 |
| TRINITY_sp A8IC3CFAP46    | Cilia- and flagella | 30.30 | 0.00 |
| TRINITY_sp B2KI3WDR76     | WD repeat-containin | 30.30 | 0.00 |
| TRINITY_sp Q55E4dhkE      | Hybrid signal trans | 30.30 | 0.00 |
| TRINITY_sp Q8RWISTY17     | Serine/threonine-pr | 30.30 | 0.00 |
| TRINITY_sp Q32LI3CORO2A   | Coronin-2A OS=Bos t | 30.30 | 0.00 |
| TRINITY_sp Q9JIS3Cacna1f  | Voltage-dependent L | 30.30 | 0.00 |
| TRINITY_sp A0A0IFUB4      | Hydrolase FUB4 OS=F | 30.30 | 0.00 |
| TRINITY_sp Q9XTF3ZK262.3  | Lipase ZK262.3 OS=C | 30.30 | 0.00 |
| TRINITY_sp Q6ZV3FGD6      | FYVE, RhoGEF and PH | 30.30 | 0.00 |
| TRINITY_sp Q7X91SAC6      | Phosphoinositide ph | 30.30 | 0.00 |
| TRINITY_sp P4115HSFA1A    | Heat stress transcr | 30.30 | 0.00 |
| TRINITY_sp P9294CLC-D     | Chloride channel pr | 30.30 | 0.00 |
| TRINITY_sp Q5U41Wdr34     | WD repeat-containin | 30.30 | 0.00 |
| TRINITY_sp Q7T2E3slc44a4  | Choline transporter | 30.30 | 0.00 |
| TRINITY_sp O9683fab1      | Putative 1-phosphat | 30.30 | 0.00 |
| TRINITY_sp B4F61aifm2     | Apoptosis-inducing  | 30.30 | 0.00 |

|                          |                     |       |      |
|--------------------------|---------------------|-------|------|
| TRINITY_sp A1L4}CLT2     | Protein CLT2, chlor | 30.30 | 0.00 |
| TRINITY_sp O433}HNRNPR   | Heterogeneous nucle | 30.30 | 0.00 |
| TRINITY_sp Q86G}gefQ     | Ras guanine nucleot | 30.30 | 0.00 |
| TRINITY_sp P464}Gst2     | Glutathione S-trans | 30.30 | 0.00 |
| TRINITY_sp Q9ZW}CYP735A2 | Cytokinin hydroxyla | 30.30 | 0.00 |
| TRINITY_sp Q2QA}TIO      | Serine/threonine-pr | 30.30 | 0.00 |
| TRINITY_sp A6WU}tdh      | L-threonine 3-dehyd | 30.30 | 0.00 |
| TRINITY_sp Q5N7}MOR1     | Protein MOR1 OS=Ory | 30.30 | 0.00 |
| TRINITY_sp P053}p20      | Uncharacterized N-a | 30.20 | 0.00 |
| TRINITY_sp Q96Q}ALS2     | Alsin OS=Homo sapie | 30.20 | 0.00 |
| TRINITY_sp Q55C}rasU     | Ras-like protein ra | 30.20 | 0.00 |
| TRINITY_sp Q9CX}Ist1     | IST1 homolog OS=Mus | 30.20 | 0.00 |
| TRINITY_sp Q9NS}DIAPH3   | Protein diaphanous  | 30.20 | 0.00 |
| TRINITY_sp Q9T0}MTN1     | 5'-methylthioadenos | 30.20 | 0.00 |
| TRINITY_sp B1MZ}frr      | Ribosome-recycling  | 30.20 | 0.00 |
| TRINITY_sp Q86I}pdi1     | Protein disulfide-i | 30.20 | 0.00 |
| TRINITY_sp Q0JI}CIPK11   | CBL-interacting pro | 30.20 | 0.00 |
| TRINITY_sp Q9FL}GNL1     | ARF guanine-nucleot | 30.20 | 0.00 |
| TRINITY_sp Q110}pepN     | Aminopeptidase N OS | 30.20 | 0.00 |
| TRINITY_sp Q9U9}fsmc     | Gamma-soluble NSF a | 30.20 | 0.00 |
| TRINITY_sp Q9NG}CenG1A   | Centaurin-gamma-1A  | 30.20 | 0.00 |
| TRINITY_sp Q5F4}PPP6R3   | Serine/threonine-pr | 30.20 | 0.00 |
| TRINITY_sp Q54Y}CRTF     | CAR1 transcription  | 30.20 | 0.00 |
| TRINITY_sp Q9LE}RBL20    | Rhomboid-like prote | 30.20 | 0.00 |
| TRINITY_sp O668}bioF     | Putative 8-amino-7- | 30.20 | 0.00 |
| TRINITY_sp A2C5}rpsF     | 30S ribosomal prote | 30.20 | 0.00 |
| TRINITY_sp Q000}PRMS     | Pathogenesis-relate | 30.20 | 0.00 |
| TRINITY_sp Q4U2}Herc2    | E3 ubiquitin-protei | 30.20 | 0.00 |
| TRINITY_sp O944}bdp1     | Transcription facto | 30.20 | 0.00 |
| TRINITY_sp Q037}CEBPZ    | CCAAT/enhancer-bind | 30.20 | 0.00 |
| TRINITY_sp O822}SKL2     | Probable inactive s | 30.20 | 0.00 |
| TRINITY_sp P408}-        | Crystallin J1C OS=T | 30.20 | 0.00 |
| TRINITY_sp Q76P}DDB_G027 | Probable serine/thr | 30.20 | 0.00 |
| TRINITY_sp Q6J4}SLC8B1   | Sodium/potassium/ca | 30.20 | 0.00 |
| TRINITY_sp Q963}IMPA1    | Importin subunit al | 30.20 | 0.00 |
| TRINITY_sp Q9V4}GLE1     | Nucleoporin GLE1 OS | 30.20 | 0.00 |
| TRINITY_sp Q5A7}CCR4     | Glucose-repressible | 30.20 | 0.00 |
| TRINITY_sp Q54I}slc44a2  | Choline transporter | 30.20 | 0.00 |
| TRINITY_sp B3H5}NEDD1    | Protein NEDD1 OS=Ar | 30.20 | 0.00 |
| TRINITY_sp Q6GR}spop1    | Speckle-type POZ pr | 30.20 | 0.00 |
| TRINITY_sp Q9VR}HERC2    | Probable E3 ubiquit | 30.20 | 0.00 |
| TRINITY_sp P561}RRP1     | Ribosomal RNA proce | 30.20 | 0.00 |
| TRINITY_sp O548}Dusp5    | Dual specificity pr | 30.20 | 0.00 |
| TRINITY_sp Q5RA}ARCN1    | Coatomer subunit de | 30.20 | 0.00 |
| TRINITY_sp Q54P}mrd1     | Multiple RNA-bindin | 30.20 | 0.00 |
| TRINITY_sp Q8JI}-        | Cysteine-rich venom | 30.20 | 0.00 |
| TRINITY_sp Q5VJ}gdt9     | Probable serine/thr | 30.20 | 0.00 |
| TRINITY_sp Q158}CACNA1E  | Voltage-dependent R | 30.20 | 0.00 |
| TRINITY_sp Q75J}cprsl    | Circularly permutat | 30.20 | 0.00 |
| TRINITY_sp O830}rsmE     | Ribosomal RNA small | 30.20 | 0.00 |
| TRINITY_sp Q6S7}TAF5     | Transcription initi | 30.20 | 0.00 |
| TRINITY_sp Q9HG}gcn2     | eIF-2-alpha kinase  | 30.20 | 0.00 |
| TRINITY_sp P340}cmfA     | Conditioned medium  | 30.20 | 0.00 |
| TRINITY_sp Q9XI}WRKY4    | Probable WRKY trans | 30.20 | 0.00 |
| TRINITY_sp Q16T}AAEL0101 | Band 7 protein AAEL | 30.20 | 0.00 |
| TRINITY_sp Q94A}At5g5314 | Probable protein ph | 30.20 | 0.00 |

|                          |                     |       |      |
|--------------------------|---------------------|-------|------|
| TRINITY_sp Q0WU(MTP10    | Metal tolerance pro | 30.20 | 0.00 |
| TRINITY_sp P261(ACT2     | Actin-2 OS=Absidia  | 30.20 | 0.00 |
| TRINITY_sp Q9CT(Atp13a2  | Probable cation-tra | 30.20 | 0.00 |
| TRINITY_sp O137(SPAC15A1 | Uncharacterized Na( | 30.20 | 0.00 |
| TRINITY_sp P225(bglB     | Beta-glucosidase B  | 30.20 | 0.00 |
| TRINITY_sp F2Z4(Herc6    | E3 ISG15--protein 1 | 30.20 | 0.00 |
| TRINITY_sp O243(TIC110   | Protein TIC110, chl | 30.20 | 0.00 |
| TRINITY_sp Q8BR(Kmt2c    | Histone-lysine N-me | 30.20 | 0.00 |
| TRINITY_sp O835(rpoD     | RNA polymerase sigm | 30.20 | 0.00 |
| TRINITY_sp Q950(ubc-9    | SUMO-conjugating en | 30.10 | 0.00 |
| TRINITY_sp F4IJ(KIN14R   | Kinesin-like protei | 30.10 | 0.00 |
| TRINITY_sp Q2TG(Zdhhc15  | Palmitoyltransferas | 30.10 | 0.00 |
| TRINITY_sp P395(ywbO     | Uncharacterized pro | 30.10 | 0.00 |
| TRINITY_sp Q2LGF(TOLLIP  | Toll-interacting pr | 30.10 | 0.00 |
| TRINITY_sp Q8S9(UBC5B    | Ubiquitin-conjugati | 30.10 | 0.00 |
| TRINITY_sp P138(-        | Aspartic acid-rich  | 30.10 | 0.00 |
| TRINITY_sp Q9H8(VCPKMT   | Protein-lysine meth | 30.10 | 0.00 |
| TRINITY_sp Q395(HUP2     | H(+)/hexose cotrans | 30.10 | 0.00 |
| TRINITY_sp Q4R7(TTLL10   | Protein polyglycyla | 30.10 | 0.00 |
| TRINITY_sp Q969(TMBIM1   | Protein lifeguard 3 | 30.10 | 0.00 |
| TRINITY_sp Q5ZK(EIF2A    | Eukaryotic translat | 30.10 | 0.00 |
| TRINITY_sp Q620(Cep131   | Centrosomal protein | 30.10 | 0.00 |
| TRINITY_sp P821(Tgfb1    | Transforming growth | 30.10 | 0.00 |
| TRINITY_sp Q54P(VDDB_G02 | Protein EI24 homolo | 30.10 | 0.00 |
| TRINITY_sp Q583(MJ0928   | Putative protein me | 30.10 | 0.00 |
| TRINITY_sp Q869(VDDB_G02 | Probable myosin lig | 30.10 | 0.00 |
| TRINITY_sp S4R2(Slca8a3  | Sodium/calcium exch | 30.10 | 0.00 |
| TRINITY_sp Q9ZP(CDC48B   | Cell division contr | 30.10 | 0.00 |
| TRINITY_sp Q9FF(PDIL1-4  | Protein disulfide i | 30.10 | 0.00 |
| TRINITY_sp Q390(CNX3     | Cyclic pyranopterin | 30.10 | 0.00 |
| TRINITY_sp Q79L(hopD2    | Effector protein ho | 30.10 | 0.00 |
| TRINITY_sp Q28G(mecr     | Trans-2-enoyl-CoA r | 30.10 | 0.00 |
| TRINITY_sp Q5A5(NIK1     | Histidine protein k | 30.10 | 0.00 |
| TRINITY_sp Q8TB(ITFG1    | T-cell immunomodula | 30.10 | 0.00 |
| TRINITY_sp A9US(22789    | Putative glycoside  | 30.10 | 0.00 |
| TRINITY_sp Q93V(THO1     | THO complex subunit | 30.10 | 0.00 |
| TRINITY_sp P146(Pde4c    | cAMP-specific 3',5' | 30.10 | 0.00 |
| TRINITY_sp Q8IY(DRC7     | Dynein regulatory c | 30.10 | 0.00 |
| TRINITY_sp P750(MPN_020  | Uncharacterized ATP | 30.10 | 0.00 |
| TRINITY_sp P731(s111290  | Uncharacterized rib | 30.10 | 0.00 |
| TRINITY_sp Q9NU(PLCXD1   | PI-PLC X domain-con | 30.10 | 0.00 |
| TRINITY_sp Q006(gp63     | Leishmanolysin OS=L | 30.10 | 0.00 |
| TRINITY_sp Q9ZV(SGPP     | Haloacid dehalogena | 30.10 | 0.00 |
| TRINITY_sp Q4U2(Herc2    | E3 ubiquitin-protei | 30.10 | 0.00 |
| TRINITY_sp A3EW(IREV1    | DNA repair protein  | 30.10 | 0.00 |
| TRINITY_sp Q54Y(shkC     | Dual specificity pr | 30.10 | 0.00 |
| TRINITY_sp Q8VY(PAP8     | Purple acid phospho | 30.10 | 0.00 |
| TRINITY_sp Q9ZT(-        | Delta(7)-sterol-C5( | 30.10 | 0.00 |
| TRINITY_sp C0ITI(-       | Venom allergen 5 (F | 30.10 | 0.00 |
| TRINITY_sp Q055(CHI17    | Acidic 27 kDa endoc | 30.10 | 0.00 |
| TRINITY_sp Q9US(SPAC103  | D-serine dehydratas | 30.10 | 0.00 |
| TRINITY_sp Q7SY(ncald    | Neurocalcin-delta O | 30.10 | 0.00 |
| TRINITY_sp Q7XS(AGO1B    | Protein argonaute 1 | 30.10 | 0.00 |
| TRINITY_sp P467(Pdcd2    | Programmed cell dea | 30.10 | 0.00 |
| TRINITY_sp Q9LX(PCO1     | Plant cysteine oxid | 30.10 | 0.00 |
| TRINITY_sp Q9P7(oma1     | Mitochondrial metal | 30.10 | 0.00 |

|                           |                     |       |      |
|---------------------------|---------------------|-------|------|
| TRINITY_sp P7887tpp1      | Trehalose-phosphata | 30.00 | 0.00 |
| TRINITY_sp Q54U4abcC12    | ABC transporter C f | 30.00 | 0.00 |
| TRINITY_sp Q9LT3VPS9A     | Vacuolar protein so | 30.00 | 0.00 |
| TRINITY_sp Q9FN(UVR8      | Ultraviolet-B recep | 30.00 | 0.00 |
| TRINITY_sp P221(APA2      | Diadenosine 5',5''' | 30.00 | 0.00 |
| TRINITY_sp Q8LA(URH2      | Probable uridine nu | 30.00 | 0.00 |
| TRINITY_sp A4FV(RSL1D1    | Ribosomal L1 domain | 30.00 | 0.00 |
| TRINITY_sp A6QN(RRP36     | Ribosomal RNA proce | 30.00 | 0.00 |
| TRINITY_sp O1375cns1      | Hsp70/Hsp90 co-chap | 30.00 | 0.00 |
| TRINITY_sp Q0II(DNAJC21   | DnaJ homolog subfam | 30.00 | 0.00 |
| TRINITY_sp Q5EA(CHID1     | Chitinase domain-co | 30.00 | 0.00 |
| TRINITY_sp Q92K2af        | 1,5-anhydro-D-fruct | 30.00 | 0.00 |
| TRINITY_sp Q9LR(BSU1      | Serine/threonine-pr | 30.00 | 0.00 |
| TRINITY_sp Q6T4(rbrA      | Probable E3 ubiquit | 30.00 | 0.00 |
| TRINITY_sp Q9S9(CCR1      | Cinnamoyl-CoA reduc | 30.00 | 0.00 |
| TRINITY_sp Q9P3(dbl4      | E3 ubiquitin-protei | 30.00 | 0.00 |
| TRINITY_sp Q7TP4Apm       | Adipocyte plasma me | 30.00 | 0.00 |
| TRINITY_sp Q9DB(Phkg2     | Phosphorylase b kin | 30.00 | 0.00 |
| TRINITY_sp P360(TUL1      | Transmembrane E3 ub | 30.00 | 0.00 |
| TRINITY_sp Q99J(Thumpd1   | THUMP domain-contai | 30.00 | 0.00 |
| TRINITY_sp Q94F(ABCC1     | ABC transporter D f | 30.00 | 0.00 |
| TRINITY_sp Q55A(DDB_G027  | PH and Rap-GAP doma | 30.00 | 0.00 |
| TRINITY_sp P5332YGR266W   | Uncharacterized pro | 30.00 | 0.00 |
| TRINITY_sp Q9M0(GGP3      | Gamma-glutamyl pept | 30.00 | 0.00 |
| TRINITY_sp Q84M(ABCA1     | ABC transporter A f | 30.00 | 0.00 |
| TRINITY_sp P0CU2CTHT_004  | Protein-lysine N-me | 30.00 | 0.00 |
| TRINITY_sp P511(A1        | Dihydroflavonol 4-r | 30.00 | 0.00 |
| TRINITY_sp Q54Y2dhkJ      | Hybrid signal trans | 30.00 | 0.00 |
| TRINITY_sp Q9Y5(POLR3H    | DNA-directed RNA po | 30.00 | 0.00 |
| TRINITY_sp A0QS(HMSMEG_14 | Putative S-adenosyl | 30.00 | 0.00 |
| TRINITY_sp Q893(hutG      | Formimidoylglutamas | 30.00 | 0.00 |
| TRINITY_sp Q54R(dhkL      | Hybrid signal trans | 30.00 | 0.00 |
| TRINITY_sp P4641-         | Glutathione S-trans | 30.00 | 0.00 |
| TRINITY_sp Q6RG(RGS1      | Regulator of G-prot | 30.00 | 0.00 |
| TRINITY_sp P5112Taf1      | Transcription initi | 30.00 | 0.00 |
| TRINITY_sp P966(nap       | Uncharacterized car | 30.00 | 0.00 |
| TRINITY_sp P266(sigA      | RNA polymerase sigm | 30.00 | 0.00 |
| TRINITY_sp Q866(ADCY10    | Adenylate cyclase t | 30.00 | 0.00 |
| TRINITY_sp Q0864PUS7      | Multisubstrate pseu | 30.00 | 0.00 |
| TRINITY_sp Q9TW2myoM      | Myosin-M heavy chai | 30.00 | 0.00 |
| TRINITY_sp Q5SN(serac1    | Protein SERAC1 OS=D | 30.00 | 0.00 |
| TRINITY_sp P215(ALP1      | Alpha-amylase OS=Sa | 30.00 | 0.00 |
| TRINITY_sp Q0547pksL      | Polyketide synthase | 30.00 | 0.00 |
| TRINITY_sp Q29B(GA18864   | Esterase GA18864 OS | 30.00 | 0.00 |
| TRINITY_sp H3JU(SGT1      | Peptidyl serine alp | 30.00 | 0.00 |
| TRINITY_sp Q54Q(DDB_G028  | Probable E3 ubiquit | 30.00 | 0.00 |
| TRINITY_sp Q54G(gacW      | Rho GTPase-activati | 30.00 | 0.00 |
| TRINITY_sp Q5RA(ACOX3     | Peroxisomal acyl-co | 30.00 | 0.00 |
| TRINITY_sp Q9MA(ACBP4     | Acyl-CoA-binding do | 30.00 | 0.00 |
| TRINITY_sp Q0794PSR2      | Probable phosphatas | 30.00 | 0.00 |
| TRINITY_sp Q5A5(NIK1      | Histidine protein k | 30.00 | 0.00 |
| TRINITY_sp P3881TRA1      | Transcription-assoc | 30.00 | 0.00 |
| TRINITY_sp Q2QN(Os12g058  | Probable protein ph | 30.00 | 0.00 |
| TRINITY_sp Q9FF1At5g3846  | Probable dolichyl p | 30.00 | 0.00 |
| TRINITY_sp Q944(FKBP16-1  | Peptidyl-prolyl cis | 30.00 | 0.00 |
| TRINITY_sp Q55G(DDB_G026  | Probable serine/thr | 30.00 | 0.00 |

|                          |                      |       |      |
|--------------------------|----------------------|-------|------|
| TRINITY_sp Q9S36pcrA     | ATP-dependent DNA h  | 30.00 | 0.00 |
| TRINITY_sp Q9345rae-1    | mRNA export factor   | 29.90 | 0.00 |
| TRINITY_sp Q28I0ppp4r2   | Serine/threonine-pr  | 29.90 | 0.00 |
| TRINITY_sp Q9H0E0TOLLIP  | Toll-interacting pr  | 29.90 | 0.00 |
| TRINITY_sp Q54P6osbI     | Oxysterol-binding p  | 29.90 | 0.00 |
| TRINITY_sp A1JM9rutB     | Peroxyureidoacrylat  | 29.90 | 0.00 |
| TRINITY_sp O8243ETR1     | Ethylene receptor 1  | 29.90 | 0.00 |
| TRINITY_sp Q55C7gdt2     | Probable serine/thr  | 29.90 | 0.00 |
| TRINITY_sp Q2KJ1AFG3L2   | AFG3-like protein 2  | 29.90 | 0.00 |
| TRINITY_sp Q84M6ARP4     | Actin-related prote  | 29.90 | 0.00 |
| TRINITY_sp B3FWHhpm2     | Glutathione S-trans  | 29.90 | 0.00 |
| TRINITY_sp Q6441PGC      | Gastricsin OS=Cavia  | 29.90 | 0.00 |
| TRINITY_sp P3063ZK637.14 | Uncharacterized RIN  | 29.90 | 0.00 |
| TRINITY_sp P2500pucl1    | Cyclin pucl1 OS=Schi | 29.90 | 0.00 |
| TRINITY_sp Q4UL5RF_0863  | Uncharacterized RNA  | 29.90 | 0.00 |
| TRINITY_sp P4097lys1     | L-2-aminoadipate re  | 29.90 | 0.00 |
| TRINITY_sp Q5M7Ino16     | Nucleolar protein 6  | 29.90 | 0.00 |
| TRINITY_sp Q8BW0Dclk3    | Serine/threonine-pr  | 29.90 | 0.00 |
| TRINITY_sp Q54X8ap1b1    | AP-1 complex subuni  | 29.90 | 0.00 |
| TRINITY_sp Q9203ACHE     | Acetylcholinesteras  | 29.90 | 0.00 |
| TRINITY_sp A5DSMFMP52    | Protein FMP52, mito  | 29.90 | 0.00 |
| TRINITY_sp E1BY0MSH6     | DNA mismatch repair  | 29.90 | 0.00 |
| TRINITY_sp P3120pab1     | Polyadenylate-bindi  | 29.90 | 0.00 |
| TRINITY_sp O9471SPCC1259 | Uncharacterized pro  | 29.90 | 0.00 |
| TRINITY_sp Q10Q0RPA1B    | Replication protein  | 29.90 | 0.00 |
| TRINITY_sp Q9HE1utp5     | U3 small nucleolar   | 29.90 | 0.00 |
| TRINITY_sp Q6DBNAt4g0845 | BTB/POZ domain-cont  | 29.90 | 0.00 |
| TRINITY_sp P4990Taf12    | Transcription initi  | 29.90 | 0.00 |
| TRINITY_sp Q86L9gachH    | Rho GTPase-activati  | 29.90 | 0.00 |
| TRINITY_sp Q9Y80CYP505   | Bifunctional cytoch  | 29.90 | 0.00 |
| TRINITY_sp Q9M04BHLH140  | Transcription facto  | 29.90 | 0.00 |
| TRINITY_sp Q8TB3WDR66    | WD repeat-containin  | 29.90 | 0.00 |
| TRINITY_sp P5061CDK7     | Cyclin-dependent ki  | 29.90 | 0.00 |
| TRINITY_sp Q2THVZDHHC8   | Probable palmitoylt  | 29.90 | 0.00 |
| TRINITY_sp Q6DG4ubtd2    | Ubiquitin domain-co  | 29.90 | 0.00 |
| TRINITY_sp Q5F1FDNAJC21  | DnaJ homolog subfam  | 29.90 | 0.00 |
| TRINITY_sp P3214yihV     | Sulfofructose kinas  | 29.90 | 0.00 |
| TRINITY_sp Q8IV5DENND1C  | DENN domain-contain  | 29.90 | 0.00 |
| TRINITY_sp Q9NV0TBC1D13  | TBC1 domain family   | 29.90 | 0.00 |
| TRINITY_sp O0091dstA     | Signal transducer a  | 29.90 | 0.00 |
| TRINITY_sp P2620CD36     | Platelet glycoprote  | 29.90 | 0.00 |
| TRINITY_sp Q9SA4MED22A   | Mediator of RNA pol  | 29.90 | 0.00 |
| TRINITY_sp Q3SZHTTLL9    | Probable tubulin po  | 29.90 | 0.00 |
| TRINITY_sp F4J11LSF1     | Phosphoglucan phosp  | 29.90 | 0.00 |
| TRINITY_sp Q9492LYSA1    | Diaminopimelate dec  | 29.90 | 0.00 |
| TRINITY_sp Q9FW0IMPA6    | Importin subunit al  | 29.90 | 0.00 |
| TRINITY_sp Q54D1DDB_G029 | Down syndrome criti  | 29.90 | 0.00 |
| TRINITY_sp Q1467TTLL4    | Tubulin polyglutamy  | 29.90 | 0.00 |
| TRINITY_sp Q9Y30ACOT9    | Acyl-coenzyme A thi  | 29.90 | 0.00 |
| TRINITY_sp Q7M38rngB     | RING finger protein  | 29.90 | 0.00 |
| TRINITY_sp Q54Y5shkC     | Dual specificity pr  | 29.90 | 0.00 |
| TRINITY_sp Q9UR0Tf2-11   | Transposon Tf2-11 p  | 29.90 | 0.00 |
| TRINITY_sp O9470rxt3     | Transcriptional reg  | 29.90 | 0.00 |
| TRINITY_sp Q4G20DER1.2   | Derlin-1.2 OS=Zea m  | 29.90 | 0.00 |
| TRINITY_sp P1797Shaw     | Potassium voltage-g  | 29.80 | 0.00 |
| TRINITY_sp P5477TYDC5    | Tyrosine/DOPA decar  | 29.80 | 0.00 |

|                          |                      |       |      |
|--------------------------|----------------------|-------|------|
| TRINITY_sp Q54R4gpaI     | Guanine nucleotide-  | 29.80 | 0.00 |
| TRINITY_sp P3789pleC     | Non-motile and phag  | 29.80 | 0.00 |
| TRINITY_sp Q54ZIDDB_G027 | WD repeat-containin  | 29.80 | 0.00 |
| TRINITY_sp A4IH7fign11   | Fidgetin-like prote  | 29.80 | 0.00 |
| TRINITY_sp Q5M72RNFT1    | RING finger and tra  | 29.80 | 0.00 |
| TRINITY_sp Q86A7DDB_G027 | Recoverin family pr  | 29.80 | 0.00 |
| TRINITY_sp P1926AMY1     | Alpha-amylase 1 OS=  | 29.80 | 0.00 |
| TRINITY_sp P3195pac      | Penicillin G acylas  | 29.80 | 0.00 |
| TRINITY_sp Q54Y2dhkJ     | Hybrid signal trans  | 29.80 | 0.00 |
| TRINITY_sp Q9LT1VCS      | Enhancer of mRNA-de  | 29.80 | 0.00 |
| TRINITY_sp A9UY9serinc   | Probable serine inc  | 29.80 | 0.00 |
| TRINITY_sp Q54QcpgtA     | Bifunctional glycos  | 29.80 | 0.00 |
| TRINITY_sp F4IL1At2g420  | (Amino acid transpor | 29.80 | 0.00 |
| TRINITY_sp Q9Y46RBM19    | Probable RNA-bindin  | 29.80 | 0.00 |
| TRINITY_sp A0LJ4dnaJ     | Chaperone protein D  | 29.80 | 0.00 |
| TRINITY_sp Q9436gei-17   | E3 SUMO-protein lig  | 29.80 | 0.00 |
| TRINITY_sp Q7XW1Os04g025 | Probable cleavage a  | 29.80 | 0.00 |
| TRINITY_sp O444(eri-1    | 3'-5' exonuclease e  | 29.80 | 0.00 |
| TRINITY_sp Q7TS6Nsun6    | Putative methyltran  | 29.80 | 0.00 |
| TRINITY_sp Q5T56STXBP5   | Syntaxin-binding pr  | 29.80 | 0.00 |
| TRINITY_sp P1689FUS3     | Mitogen-activated p  | 29.80 | 0.00 |
| TRINITY_sp Q8L79CID3     | Polyadenylate-bindi  | 29.80 | 0.00 |
| TRINITY_sp Q9SMFRABH1C   | Ras-related protein  | 29.80 | 0.00 |
| TRINITY_sp Q9FPFEDR1     | Serine/threonine-pr  | 29.80 | 0.00 |
| TRINITY_sp Q05B1shq1     | Protein SHQ1 homolo  | 29.80 | 0.00 |
| TRINITY_sp Q553IgxkJJ    | Rac guanine nucleot  | 29.80 | 0.00 |
| TRINITY_sp Q9FX1At1g6782 | Probable protein ph  | 29.80 | 0.00 |
| TRINITY_sp Q9Y36STARD10  | PCTP-like protein O  | 29.80 | 0.00 |
| TRINITY_sp P1035ry       | Xanthine dehydrogen  | 29.80 | 0.00 |
| TRINITY_sp B0VX6SETD3    | Histone-lysine N-me  | 29.80 | 0.00 |
| TRINITY_sp Q54J9gacX     | Rho GTPase-activati  | 29.80 | 0.00 |
| TRINITY_sp O9519RCBTB2   | RCC1 and BTB domain  | 29.80 | 0.00 |
| TRINITY_sp O6034TBC1D4   | TBC1 domain family   | 29.80 | 0.00 |
| TRINITY_sp Q8VENK1hdc3   | Kelch domain-contai  | 29.80 | 0.00 |
| TRINITY_sp B2RS9Rrn3     | RNA polymerase I-sp  | 29.80 | 0.00 |
| TRINITY_sp Q0304Pkg21D   | cGMP-dependent prot  | 29.80 | 0.00 |
| TRINITY_sp Q9VR9HERC2    | Probable E3 ubiquit  | 29.80 | 0.00 |
| TRINITY_sp Q6GL7slc25a26 | S-adenosylmethionin  | 29.80 | 0.00 |
| TRINITY_sp B5F01yfeW     | UPF0214 protein Yfe  | 29.80 | 0.00 |
| TRINITY_sp Q55D9rabggta  | Geranylgeranyl tran  | 29.80 | 0.00 |
| TRINITY_sp A1L11slc47a1  | Multidrug and toxin  | 29.80 | 0.00 |
| TRINITY_sp Q0077cmkA     | Calcium/calmodulin-  | 29.80 | 0.00 |
| TRINITY_sp Q9VR6Npclb    | Niemann-Pick type p  | 29.80 | 0.00 |
| TRINITY_sp Q7M01Nudt19   | Nucleoside diphosph  | 29.80 | 0.00 |
| TRINITY_sp O0789dapb1    | Dipeptidyl aminopep  | 29.80 | 0.00 |
| TRINITY_sp Q0349STE20    | Serine/threonine-pr  | 29.80 | 0.00 |
| TRINITY_sp Q9SC9UBP26    | Ubiquitin carboxyl-  | 29.80 | 0.00 |
| TRINITY_sp Q9235SPAC6G9  | Pumilio domain-cont  | 29.80 | 0.00 |
| TRINITY_sp A6SJVBC1G_127 | Eukaryotic translat  | 29.80 | 0.00 |
| TRINITY_sp O0059VWA5A    | von Willebrand fact  | 29.80 | 0.00 |
| TRINITY_sp Q55GUDDB_G026 | (Probable serine/thr | 29.80 | 0.00 |
| TRINITY_sp P3836PHO89    | Phosphate permease   | 29.80 | 0.00 |
| TRINITY_sp Q9JL6Capn15   | Calpain-15 OS=Mus m  | 29.80 | 0.00 |
| TRINITY_sp Q8C07Mfsd9    | Major facilitator s  | 29.70 | 0.00 |
| TRINITY_sp P6299RAC1     | Ras-related C3 botu  | 29.70 | 0.00 |
| TRINITY_sp Q6EE1TLL5     | Tubulin polyglutamy  | 29.70 | 0.00 |

|                           |                     |       |      |
|---------------------------|---------------------|-------|------|
| TRINITY_sp Q9V9FCG3107    | Presequence proteas | 29.70 | 0.00 |
| TRINITY_sp P3992SLN1      | Osmosensing histidi | 29.70 | 0.00 |
| TRINITY_sp Q9961DNAJC7    | DnaJ homolog subfam | 29.70 | 0.00 |
| TRINITY_sp Q6GNIc1galt1   | Glycoprotein-N-acet | 29.70 | 0.00 |
| TRINITY_sp Q0JI4CIPK11    | CBL-interacting pro | 29.70 | 0.00 |
| TRINITY_sp Q5XH5ddx1      | ATP-dependent RNA h | 29.70 | 0.00 |
| TRINITY_sp Q94AF CUL1     | Cullin-1 OS=Arabido | 29.70 | 0.00 |
| TRINITY_sp P2659PTBP1     | Polypyrimidine trac | 29.70 | 0.00 |
| TRINITY_sp O9471SPCC1259  | Uncharacterized pro | 29.70 | 0.00 |
| TRINITY_sp Q1457ITPR2     | Inositol 1,4,5-tris | 29.70 | 0.00 |
| TRINITY_sp Q54Wtmem1840   | Transmembrane prote | 29.70 | 0.00 |
| TRINITY_sp Q9UR0Tf2-11    | Transposon Tf2-11 p | 29.70 | 0.00 |
| TRINITY_sp P3559Ide       | Insulin-degrading e | 29.70 | 0.00 |
| TRINITY_sp P4657PBL10     | Probable serine/thr | 29.70 | 0.00 |
| TRINITY_sp Q54DVergic3    | Probable endoplasmi | 29.70 | 0.00 |
| TRINITY_sp Q8BZ1Gucd1     | Protein GUCD1 OS=Mu | 29.70 | 0.00 |
| TRINITY_sp B9FM0KIN13A    | Kinesin-like protei | 29.70 | 0.00 |
| TRINITY_sp Q54PFDDDB_G028 | Probable myosin lig | 29.70 | 0.00 |
| TRINITY_sp Q0068gp63      | Leishmanolysin OS=L | 29.70 | 0.00 |
| TRINITY_sp Q1048tim13     | Mitochondrial impor | 29.70 | 0.00 |
| TRINITY_sp O9427SPBP8B7   | Uncharacterized RIN | 29.70 | 0.00 |
| TRINITY_sp Q68E1wdr18     | WD repeat-containin | 29.70 | 0.00 |
| TRINITY_sp O7477msh2      | DNA mismatch repair | 29.70 | 0.00 |
| TRINITY_sp Q6TN9paklip1   | p21-activated prote | 29.70 | 0.00 |
| TRINITY_sp Q54E1gr1E      | Metabotropic glutam | 29.70 | 0.00 |
| TRINITY_sp B1ZX4truB      | tRNA pseudouridine  | 29.70 | 0.00 |
| TRINITY_sp P3117-         | Autolysin OS=Chlamy | 29.70 | 0.00 |
| TRINITY_sp P2221RAD53     | Serine/threonine-pr | 29.70 | 0.00 |
| TRINITY_sp Q0JL4SGT1      | Protein SGT1 homolo | 29.70 | 0.00 |
| TRINITY_sp P4631FAD6      | Omega-6 fatty acid  | 29.70 | 0.00 |
| TRINITY_sp Q2648FKBP46    | 46 kDa FK506-bindin | 29.70 | 0.00 |
| TRINITY_sp P6187-         | Lipase OS=Rhizopus  | 29.70 | 0.00 |
| TRINITY_sp Q75E1TPC1      | Mitochondrial thiam | 29.70 | 0.00 |
| TRINITY_sp O7648GstD7     | Glutathione S-trans | 29.70 | 0.00 |
| TRINITY_sp Q86G4gefQ      | Ras guanine nucleot | 29.70 | 0.00 |
| TRINITY_sp Q7K01PGAP3     | Post-GPI attachment | 29.70 | 0.00 |
| TRINITY_sp Q1760cel-1     | mRNA-capping enzyme | 29.70 | 0.00 |
| TRINITY_sp Q0P5VVps8      | Vacuolar protein so | 29.70 | 0.00 |
| TRINITY_sp Q54E1gr1E      | Metabotropic glutam | 29.70 | 0.00 |
| TRINITY_sp Q5BC1fmp52     | Protein fmp52, mito | 29.70 | 0.00 |
| TRINITY_sp P5179CLCN7     | H(+)/Cl(-) exchange | 29.70 | 0.00 |
| TRINITY_sp B0SA2adk       | Adenylate kinase OS | 29.70 | 0.00 |
| TRINITY_sp Q55GUDDDB_G026 | Probable serine/thr | 29.70 | 0.00 |
| TRINITY_sp Q54F2cln3      | Battenin OS=Dictyos | 29.70 | 0.00 |
| TRINITY_sp Q9UK1PARP4     | Poly [ADP-ribose] p | 29.70 | 0.00 |
| TRINITY_sp Q5TC0MLK4      | Mitogen-activated p | 29.70 | 0.00 |
| TRINITY_sp Q9SE2CIPK16    | CBL-interacting ser | 29.60 | 0.00 |
| TRINITY_sp P9407At3g2672  | Alpha-mannosidase A | 29.60 | 0.00 |
| TRINITY_sp Q9P70mak1      | Peroxide stress-act | 29.60 | 0.00 |
| TRINITY_sp Q54W1DDDB_G027 | U6 snRNA phosphodie | 29.60 | 0.00 |
| TRINITY_sp Q54P9osbI      | Oxysterol-binding p | 29.60 | 0.00 |
| TRINITY_sp P2469PTP       | Tyrosine-protein ph | 29.60 | 0.00 |
| TRINITY_sp Q9P70mak1      | Peroxide stress-act | 29.60 | 0.00 |
| TRINITY_sp Q9VSIcG7185    | Cleavage and polyad | 29.60 | 0.00 |
| TRINITY_sp Q8VY0ESP3      | Pre-mRNA-splicing f | 29.60 | 0.00 |
| TRINITY_sp Q94E1At3g1441  | Probable sugar phos | 29.60 | 0.00 |



|                           |                     |       |      |
|---------------------------|---------------------|-------|------|
| TRINITY_sp Q551>dhkF      | Hybrid signal trans | 29.60 | 0.00 |
| TRINITY_sp O157>tipD      | Protein tipD OS=Dic | 29.60 | 0.00 |
| TRINITY_sp Q9JL<Capn15    | Calpain-15 OS=Mus m | 29.60 | 0.00 |
| TRINITY_sp Q6AY>Sccpdh    | Saccharopine dehydr | 29.60 | 0.00 |
| TRINITY_sp Q9US>gaa1      | GPI transamidase co | 29.60 | 0.00 |
| TRINITY_sp A8MR>FMOGS-O>  | Flavin-containing m | 29.60 | 0.00 |
| TRINITY_sp Q5UQ<MIMI_L4<  | Putative alpha/beta | 29.60 | 0.00 |
| TRINITY_sp Q6NV<prpf31    | U4/U6 small nuclear | 29.60 | 0.00 |
| TRINITY_sp Q9H1>WDR13     | WD repeat-containin | 29.60 | 0.00 |
| TRINITY_sp Q4R5<SNX1      | Sorting nexin-1 OS= | 29.60 | 0.00 |
| TRINITY_sp Q9SZ<CYP81F4   | Cytochrome P450 81F | 29.60 | 0.00 |
| TRINITY_sp Q5Z9>Os06g05<  | Solute carrier fami | 29.60 | 0.00 |
| TRINITY_sp Q5RC<RBM39     | RNA-binding protein | 29.60 | 0.00 |
| TRINITY_sp Q54Q<sec1      | Protein transport p | 29.60 | 0.00 |
| TRINITY_sp A0BK<GSPATT0<  | Protein SEY1 homolo | 29.60 | 0.00 |
| TRINITY_sp Q5Z6>CIPK25    | CBL-interacting pro | 29.60 | 0.00 |
| TRINITY_sp Q287>-         | Pregnancy-associate | 29.60 | 0.00 |
| TRINITY_sp Q6TN>paklip1   | p21-activated prote | 29.60 | 0.00 |
| TRINITY_sp Q6PF<ngdn      | Neuroguidin OS=Dani | 29.60 | 0.00 |
| TRINITY_sp O890>Tpp1      | Tripeptidyl-peptida | 29.60 | 0.00 |
| TRINITY_sp Q9P3<ubd14     | E3 ubiquitin-protei | 29.60 | 0.00 |
| TRINITY_sp Q9D5>Zc2hc1b   | Zinc finger C2HC do | 29.60 | 0.00 |
| TRINITY_sp Q6JQ<ACAD10    | Acyl-CoA dehydrogen | 29.60 | 0.00 |
| TRINITY_sp Q54P>DDB_G02<  | Probable serine/thr | 29.60 | 0.00 |
| TRINITY_sp P254>RAD51     | DNA repair protein  | 29.60 | 0.00 |
| TRINITY_sp Q9KD>dnaJ      | Chaperone protein D | 29.60 | 0.00 |
| TRINITY_sp P407>recQ      | ATP-dependent DNA h | 29.60 | 0.00 |
| TRINITY_sp Q6NR<ppp6r3-a> | Serine/threonine-pr | 29.60 | 0.00 |
| TRINITY_sp A1L4>CLT2      | Protein CLT2, chlor | 29.60 | 0.00 |
| TRINITY_sp B3PJ>trmA      | tRNA/tmRNA (uracil- | 29.60 | 0.00 |
| TRINITY_sp O343>yticJ     | Putative amidohydro | 29.60 | 0.00 |
| TRINITY_sp Q5SN<Os06g01>  | Fanconi-associated  | 29.60 | 0.00 |
| TRINITY_sp Q54N<mipp1     | Multiple inositol p | 29.60 | 0.00 |
| TRINITY_sp Q7YX<cpnA      | Copine-A OS=Dictyos | 29.60 | 0.00 |
| TRINITY_sp Q9FJ<CCB2      | Protein COFACTOR AS | 29.60 | 0.00 |
| TRINITY_sp Q9SV<ASAT1     | Acyl-CoA--sterol O- | 29.60 | 0.00 |
| TRINITY_sp Q573>HI_0036   | Uncharacterized ABC | 29.60 | 0.00 |
| TRINITY_sp Q9UQ<EAURKC    | Aurora kinase C OS= | 29.60 | 0.00 |
| TRINITY_sp Q7S6>sun-4     | Mitochondrial impor | 29.50 | 0.00 |
| TRINITY_sp O814>-         | Eukaryotic translat | 29.50 | 0.00 |
| TRINITY_sp Q9Y5>NUB1      | NEDD8 ultimate bust | 29.50 | 0.00 |
| TRINITY_sp P110>RAB3A     | Ras-related protein | 29.50 | 0.00 |
| TRINITY_sp Q8CH<Tt115     | Tubulin polyglutamy | 29.50 | 0.00 |
| TRINITY_sp A6S3<ssh4      | Protein ssh4 OS=Bot | 29.50 | 0.00 |
| TRINITY_sp Q54E<scct2     | T-complex protein 1 | 29.50 | 0.00 |
| TRINITY_sp P011>H-RAS     | Transforming protei | 29.50 | 0.00 |
| TRINITY_sp Q08J>NSUN2     | tRNA (cytosine(34)- | 29.50 | 0.00 |
| TRINITY_sp Q0VC<FAP2A2    | AP-2 complex subuni | 29.50 | 0.00 |
| TRINITY_sp Q54W<mcfl      | Mitochondrial subst | 29.50 | 0.00 |
| TRINITY_sp Q3V1<Pnpla1    | Patatin-like phosph | 29.50 | 0.00 |
| TRINITY_sp Q54C<commd8    | COMM domain-contain | 29.50 | 0.00 |
| TRINITY_sp Q8T5>abcA1     | ABC transporter A f | 29.50 | 0.00 |
| TRINITY_sp P361>GPT2      | Glycerol-3-phosphat | 29.50 | 0.00 |
| TRINITY_sp Q93V<CYP97A3   | Protein LUTEIN DEFI | 29.50 | 0.00 |
| TRINITY_sp P837>GRP2      | Putative NADPH-depe | 29.50 | 0.00 |
| TRINITY_sp P748>fkbM      | 31-O-demethyl-FK506 | 29.50 | 0.00 |

|                           |                     |       |      |
|---------------------------|---------------------|-------|------|
| TRINITY_sp Q54L(DDB_G02{  | Probable LIM domain | 29.50 | 0.00 |
| TRINITY_sp A8WY{par-1     | Serine/threonine-pr | 29.50 | 0.00 |
| TRINITY_sp Q8T1{ltv1      | Protein LTV1 homolo | 29.50 | 0.00 |
| TRINITY_sp Q9P2{CC2D2A    | Coiled-coil and C2  | 29.50 | 0.00 |
| TRINITY_sp Q4E4{Tc00.10{  | Phosphatidylinosito | 29.50 | 0.00 |
| TRINITY_sp Q3LH{wge       | Protein winged eye  | 29.50 | 0.00 |
| TRINITY_sp Q7Z5{POLN      | DNA polymerase nu O | 29.50 | 0.00 |
| TRINITY_sp A2WW{ERG1      | Elicitor-responsive | 29.50 | 0.00 |
| TRINITY_sp Q557{atg4-1    | Cysteine protease a | 29.50 | 0.00 |
| TRINITY_sp Q149{SHPRH     | E3 ubiquitin-protei | 29.50 | 0.00 |
| TRINITY_sp Q9UI{IPO11     | Importin-11 OS=Homo | 29.50 | 0.00 |
| TRINITY_sp Q157{HERC1     | Probable E3 ubiquit | 29.50 | 0.00 |
| TRINITY_sp P509{AVT4      | Vacuolar amino acid | 29.50 | 0.00 |
| TRINITY_sp Q55F{gtf2h1    | General transcripti | 29.50 | 0.00 |
| TRINITY_sp O056{vanA      | Vanillate O-demethy | 29.50 | 0.00 |
| TRINITY_sp Q54U{shkD      | Dual specificity pr | 29.50 | 0.00 |
| TRINITY_sp A4IH{tttc9c    | Tetratricopeptide r | 29.50 | 0.00 |
| TRINITY_sp Q3UY{Rgl3      | Ral guanine nucleot | 29.50 | 0.00 |
| TRINITY_sp Q9VR{HERC2     | Probable E3 ubiquit | 29.50 | 0.00 |
| TRINITY_sp P618{-         | Lipase OS=Rhizopus  | 29.40 | 0.00 |
| TRINITY_sp A4II{zfp3612   | mRNA decay activato | 29.40 | 0.00 |
| TRINITY_sp Q5R9{GBP6      | Guanylate-binding p | 29.40 | 0.00 |
| TRINITY_sp Q8MP{snol      | Senecionine N-oxyge | 29.40 | 0.00 |
| TRINITY_sp Q5H7{CDC20     | Cell division cycle | 29.40 | 0.00 |
| TRINITY_sp Q9SH{STIPL1    | Septin and tuftelin | 29.40 | 0.00 |
| TRINITY_sp Q7XR{PDIL1-2   | Protein disulfide i | 29.40 | 0.00 |
| TRINITY_sp P297{AHSG      | Alpha-2-HS-glycopro | 29.40 | 0.00 |
| TRINITY_sp Q8DF{nutA      | 5'-nucleotidase OS= | 29.40 | 0.00 |
| TRINITY_sp F4J5{FMT       | Clustered mitochond | 29.40 | 0.00 |
| TRINITY_sp Q9LS{CASP      | Protein CASP OS=Ara | 29.40 | 0.00 |
| TRINITY_sp P612{STX1B     | Syntaxin-1B OS=Homo | 29.40 | 0.00 |
| TRINITY_sp Q2QV{SEC10     | Exocyst complex com | 29.40 | 0.00 |
| TRINITY_sp Q033{DNAJ1     | DnaJ protein homolo | 29.40 | 0.00 |
| TRINITY_sp Q3SZ{PIGS      | GPI transamidase co | 29.40 | 0.00 |
| TRINITY_sp Q088{FAR2      | Fatty acyl-CoA redu | 29.40 | 0.00 |
| TRINITY_sp Q869{napA      | Nck-associated prot | 29.40 | 0.00 |
| TRINITY_sp Q5I0{serpinb1  | Leukocyte elastase  | 29.40 | 0.00 |
| TRINITY_sp Q9Y4{DAAM1     | Disheveled-associat | 29.40 | 0.00 |
| TRINITY_sp Q54M{cxpr1     | SPX and EXS domain- | 29.40 | 0.00 |
| TRINITY_sp O431{PRPF4     | U4/U6 small nuclear | 29.40 | 0.00 |
| TRINITY_sp O749{bcp1      | Protein bcp1 OS=Sch | 29.40 | 0.00 |
| TRINITY_sp A7RR{vlg2321{  | Protein AKTIP homol | 29.40 | 0.00 |
| TRINITY_sp Q9XI{LSMT-L    | [Fructose-bisphosph | 29.40 | 0.00 |
| TRINITY_sp P551{Sh3bp1    | SH3 domain-binding  | 29.40 | 0.00 |
| TRINITY_sp Q018{OTUD4     | OTU domain-containi | 29.40 | 0.00 |
| TRINITY_sp Q9XH{TIF3C1    | Eukaryotic translat | 29.40 | 0.00 |
| TRINITY_sp Q9JH{Adat1     | tRNA-specific adeno | 29.40 | 0.00 |
| TRINITY_sp Q91W{Daglb     | Sn1-specific diacyl | 29.40 | 0.00 |
| TRINITY_sp C0HJ{-         | Alpha-mannosidase O | 29.40 | 0.00 |
| TRINITY_sp Q0II{RAB18     | Ras-related protein | 29.40 | 0.00 |
| TRINITY_sp P170{crtK      | Protein CrtK OS=Rho | 29.40 | 0.00 |
| TRINITY_sp Q95LI{TBC1D22{ | TBC1 domain family  | 29.40 | 0.00 |
| TRINITY_sp B4ES{gpmA      | 2,3-bisphosphoglyce | 29.40 | 0.00 |
| TRINITY_sp Q84L{FWEX      | Werner Syndrome-lik | 29.40 | 0.00 |
| TRINITY_sp Q9C5{At3g474{  | Putative glycerol-3 | 29.40 | 0.00 |
| TRINITY_sp Q4VN{SMT       | Selenocysteine Se-m | 29.40 | 0.00 |

|                           |                     |       |      |
|---------------------------|---------------------|-------|------|
| TRINITY_sp Q9XZUCas       | Exportin-2 OS=Droso | 29.40 | 0.00 |
| TRINITY_sp P3713Ache      | Acetylcholinesteras | 29.40 | 0.00 |
| TRINITY_sp Q9444RH22      | DEAD-box ATP-depend | 29.40 | 0.00 |
| TRINITY_sp P7433sll1541   | Apocarotenoid-15,15 | 29.40 | 0.00 |
| TRINITY_sp Q9FN(UVR8      | Ultraviolet-B recep | 29.40 | 0.00 |
| TRINITY_sp Q3UYFTbc1d9    | TBC1 domain family  | 29.40 | 0.00 |
| TRINITY_sp Q7TP(Shprh     | E3 ubiquitin-protei | 29.40 | 0.00 |
| TRINITY_sp Q0666IRC3      | Putative ATP-depend | 29.40 | 0.00 |
| TRINITY_sp Q9C7EPUB17     | U-box domain-contai | 29.40 | 0.00 |
| TRINITY_sp P0752wee1      | Mitosis inhibitor p | 29.40 | 0.00 |
| TRINITY_sp Q9NQMPIH1D3    | Protein PIH1D3 OS=H | 29.40 | 0.00 |
| TRINITY_sp Q045(UTP14     | U3 small nucleolar  | 29.40 | 0.00 |
| TRINITY_sp Q70C(USP34     | Ubiquitin carboxyl- | 29.40 | 0.00 |
| TRINITY_sp Q54KIDDB_G028  | TPR repeat-containi | 29.40 | 0.00 |
| TRINITY_sp Q9GR(mos       | Serine/threonine-pr | 29.40 | 0.00 |
| TRINITY_sp Q54LNgghA      | Gamma-glutamyl hydr | 29.40 | 0.00 |
| TRINITY_sp Q8IY(DHX37     | Probable ATP-depend | 29.30 | 0.00 |
| TRINITY_sp Q9938VCX1      | Vacuolar calcium io | 29.30 | 0.00 |
| TRINITY_sp P3431ncx-6     | Putative sodium/cal | 29.30 | 0.00 |
| TRINITY_sp Q640Islc37a3   | Sugar phosphate exc | 29.30 | 0.00 |
| TRINITY_sp Q2868ABCC2     | Canalicular multisp | 29.30 | 0.00 |
| TRINITY_sp Q0764Slc2a3    | Solute carrier fami | 29.30 | 0.00 |
| TRINITY_sp Q9MANCIPK9     | CBL-interacting ser | 29.30 | 0.00 |
| TRINITY_sp Q9ES2Sacm11    | Phosphatidylinositi | 29.30 | 0.00 |
| TRINITY_sp Q9EP(Wdr4      | tRNA (guanine-N(7)- | 29.30 | 0.00 |
| TRINITY_sp P4281ATPK1     | Serine/threonine-pr | 29.30 | 0.00 |
| TRINITY_sp Q9SC(KINB2     | SNF1-related protei | 29.30 | 0.00 |
| TRINITY_sp Q54MEleo1      | RNA polymerase-asso | 29.30 | 0.00 |
| TRINITY_sp Q7RX3egt-1     | Ergothioneine biosy | 29.30 | 0.00 |
| TRINITY_sp Q54Y(DDB_G027  | Probable serine/thr | 29.30 | 0.00 |
| TRINITY_sp Q6IN(mlec-a    | Malectin-A OS=Xenop | 29.30 | 0.00 |
| TRINITY_sp Q9JI(A4galt    | Lactosylceramide 4- | 29.30 | 0.00 |
| TRINITY_sp Q9LVIDTX40     | Protein DETOXIFICAT | 29.30 | 0.00 |
| TRINITY_sp Q54FVDDDB_G029 | WD repeat-containin | 29.30 | 0.00 |
| TRINITY_sp Q9Z0EGbp2      | Guanylate-binding p | 29.30 | 0.00 |
| TRINITY_sp Q9V6(CG16935   | Probable trans-2-en | 29.30 | 0.00 |
| TRINITY_sp Q6LXRrtcB      | tRNA-splicing ligas | 29.30 | 0.00 |
| TRINITY_sp Q29AAGA17800   | Leishmanolysin-like | 29.30 | 0.00 |
| TRINITY_sp P210(B4R       | Ankyrin repeat prot | 29.30 | 0.00 |
| TRINITY_sp P3333SLA2      | Protein SLA2 OS=Sac | 29.30 | 0.00 |
| TRINITY_sp P3333SLA2      | Protein SLA2 OS=Sac | 29.30 | 0.00 |
| TRINITY_sp Q9VK1(2)gd1    | Coiled-coil and C2  | 29.30 | 0.00 |
| TRINITY_sp Q8RXIAt1g1465  | Probable splicing f | 29.30 | 0.00 |
| TRINITY_sp Q9235SPAC6G9.  | Pumilio domain-cont | 29.30 | 0.00 |
| TRINITY_sp Q9498ari-1     | Potential E3 ubiqui | 29.30 | 0.00 |
| TRINITY_sp Q54XNgacr      | Rho GTPase-activati | 29.30 | 0.00 |
| TRINITY_sp A5YM(CARNS1    | Carnosine synthase  | 29.30 | 0.00 |
| TRINITY_sp Q3U1Dennd1b    | DENN domain-contain | 29.30 | 0.00 |
| TRINITY_sp Q9P3tubp2      | Probable ubiquitin  | 29.30 | 0.00 |
| TRINITY_sp Q9DB(Swt1      | Transcriptional pro | 29.30 | 0.00 |
| TRINITY_sp Q8BQ(Zdhhc14   | Probable palmitoylt | 29.30 | 0.00 |
| TRINITY_sp Q8RWISTY17     | Serine/threonine-pr | 29.30 | 0.00 |
| TRINITY_sp P9376-         | Acid beta-fructofur | 29.30 | 0.00 |
| TRINITY_sp Q6P4Hlmbird2b  | LMBR1 domain-contai | 29.30 | 0.00 |
| TRINITY_sp P7433sll1541   | Apocarotenoid-15,15 | 29.30 | 0.00 |
| TRINITY_sp Q8RYAt4g1762   | Decapping nuclease  | 29.30 | 0.00 |

|                          |                     |       |      |
|--------------------------|---------------------|-------|------|
| TRINITY_sp Q9FP1UBP12    | Ubiquitin carboxyl- | 29.30 | 0.00 |
| TRINITY_sp P2862-        | Endoglucanase 4 OS= | 29.30 | 0.00 |
| TRINITY_sp Q9FYCPAO      | Pheophorbide a oxyg | 29.30 | 0.00 |
| TRINITY_sp P0C1CPde11a   | Dual 3',5'-cyclic-A | 29.30 | 0.00 |
| TRINITY_sp Q8T1Vndufs4   | NADH dehydrogenase  | 29.20 | 0.00 |
| TRINITY_sp Q68E\mrp128   | 39S ribosomal prote | 29.20 | 0.00 |
| TRINITY_sp O947MKP1      | Mitogen-activated p | 29.20 | 0.00 |
| TRINITY_sp Q54GIDDB_G029 | PXMP2/4 family prot | 29.20 | 0.00 |
| TRINITY_sp Q8T21sepA     | Serine/threonine-pr | 29.20 | 0.00 |
| TRINITY_sp P5414amt-1    | Putative ammonium t | 29.20 | 0.00 |
| TRINITY_sp Q9SIFALKBH2   | DNA oxidative demet | 29.20 | 0.00 |
| TRINITY_sp Q55FFcopa     | Coatomer subunit al | 29.20 | 0.00 |
| TRINITY_sp Q0991SPAC30D1 | Uncharacterized pro | 29.20 | 0.00 |
| TRINITY_sp Q54LMgghA     | Gamma-glutamyl hydr | 29.20 | 0.00 |
| TRINITY_sp O0429IMPA3    | Importin subunit al | 29.20 | 0.00 |
| TRINITY_sp P2584chic     | Profilin OS=Drosoph | 29.20 | 0.00 |
| TRINITY_sp Q923FSteap4   | Metalloreductase ST | 29.20 | 0.00 |
| TRINITY_sp P794(CYP3A29  | Cytochrome P450 3A2 | 29.20 | 0.00 |
| TRINITY_sp Q8BJVEif2a    | Eukaryotic translat | 29.20 | 0.00 |
| TRINITY_sp Q86H2prodh    | Proline dehydrogena | 29.20 | 0.00 |
| TRINITY_sp Q8K24Uvrag    | UV radiation resist | 29.20 | 0.00 |
| TRINITY_sp O4374PRKAB2   | 5'-AMP-activated pr | 29.20 | 0.00 |
| TRINITY_sp O7053CYP3A31  | Cytochrome P450 3A3 | 29.20 | 0.00 |
| TRINITY_sp Q5591DDB_G027 | Probable serine/thr | 29.20 | 0.00 |
| TRINITY_sp Q54AyclcA     | Chloride channel pr | 29.20 | 0.00 |
| TRINITY_sp Q6H7CRPA2B    | Replication protein | 29.20 | 0.00 |
| TRINITY_sp Q6NWCprmt6    | Protein arginine N- | 29.20 | 0.00 |
| TRINITY_sp Q54CIpex13    | Probable peroxisoma | 29.20 | 0.00 |
| TRINITY_sp Q9FN(UVR8     | Ultraviolet-B recep | 29.20 | 0.00 |
| TRINITY_sp Q94ACSAMC1    | S-adenosylmethionin | 29.20 | 0.00 |
| TRINITY_sp Q8BVCPpme1    | Protein phosphatase | 29.20 | 0.00 |
| TRINITY_sp Q75J9cpras1   | Circularly permutat | 29.20 | 0.00 |
| TRINITY_sp Q54IhshkB     | Dual specificity pr | 29.20 | 0.00 |
| TRINITY_sp Q9LVMABCB25   | ABC transporter B f | 29.20 | 0.00 |
| TRINITY_sp P149(IDO1     | Indoleamine 2,3-dio | 29.20 | 0.00 |
| TRINITY_sp Q9FP(RBP45A   | Polyadenylate-bindi | 29.20 | 0.00 |
| TRINITY_sp B6EU7PRP40A   | Pre-mRNA-processing | 29.20 | 0.00 |
| TRINITY_sp O9467SPBC776  | Uncharacterized mem | 29.20 | 0.00 |
| TRINITY_sp Q5789MJ0457   | Uncharacterized met | 29.20 | 0.00 |
| TRINITY_sp F4JZ2P4H10    | Probable prolyl 4-h | 29.20 | 0.00 |
| TRINITY_sp B0CA9ycf3     | Photosystem I assem | 29.20 | 0.00 |
| TRINITY_sp Q9ZW9CYP735A2 | Cytokinin hydroxyla | 29.20 | 0.00 |
| TRINITY_sp Q8BG7Oxall    | Mitochondrial inner | 29.20 | 0.00 |
| TRINITY_sp O4944AAC3     | ADP,ATP carrier pro | 29.20 | 0.00 |
| TRINITY_sp P5332YGR266W  | Uncharacterized pro | 29.20 | 0.00 |
| TRINITY_sp Q91ZVTfam     | Transcription facto | 29.20 | 0.00 |
| TRINITY_sp Q5SS8Dhrs13   | Dehydrogenase/reduc | 29.20 | 0.00 |
| TRINITY_sp Q55E9pats1    | Probable serine/thr | 29.20 | 0.00 |
| TRINITY_sp Q54JFabcC3    | ABC transporter C f | 29.20 | 0.00 |
| TRINITY_sp Q55GUDDB_G026 | Probable serine/thr | 29.20 | 0.00 |
| TRINITY_sp Q7Z7FTMED4    | Transmembrane emp24 | 29.20 | 0.00 |
| TRINITY_sp D7UQ\aur      | Aurora kinase OS=Pa | 29.20 | 0.00 |
| TRINITY_sp Q9GR(mos      | Serine/threonine-pr | 29.20 | 0.00 |
| TRINITY_sp P0C8MCCRP1    | Probable serine/thr | 29.10 | 0.00 |
| TRINITY_sp Q3HRNCBL10    | Calcineurin B-like  | 29.10 | 0.00 |
| TRINITY_sp P256CPWP2     | Periodic tryptophan | 29.10 | 0.00 |

|                           |                       |       |      |
|---------------------------|-----------------------|-------|------|
| TRINITY_sp Q9SHUAt2g1531  | Probable ADP-ribosy   | 29.10 | 0.00 |
| TRINITY_sp Q8VYCCR4-6     | Carbon catabolite r   | 29.10 | 0.00 |
| TRINITY_sp O759RAD17      | Cell cycle checkpoi   | 29.10 | 0.00 |
| TRINITY_sp Q500TKPR1      | Tetraketide alpha-p   | 29.10 | 0.00 |
| TRINITY_sp Q5FVACSBG2     | Long-chain-fatty-ac   | 29.10 | 0.00 |
| TRINITY_sp Q9LYMML4       | Protein MEI2-like 4   | 29.10 | 0.00 |
| TRINITY_sp Q6C7CGI121     | EKC/KEOPS complex s   | 29.10 | 0.00 |
| TRINITY_sp Q1I61plsB      | Glycerol-3-phosphat   | 29.10 | 0.00 |
| TRINITY_sp Q8W4ARI8       | Probable E3 ubiquit   | 29.10 | 0.00 |
| TRINITY_sp Q5TCAK9        | Adenylate kinase 9    | 29.10 | 0.00 |
| TRINITY_sp Q7ZYAnkrd13c   | Ankyrin repeat doma   | 29.10 | 0.00 |
| TRINITY_sp Q6ZQVIDO2      | Indoleamine 2,3-dio   | 29.10 | 0.00 |
| TRINITY_sp Q9Z2Rasal1     | RasGAP-activating-l   | 29.10 | 0.00 |
| TRINITY_sp Q8W4RAD4       | DNA repair protein    | 29.10 | 0.00 |
| TRINITY_sp Q87GuluxQ      | Autoinducer 2 senso   | 29.10 | 0.00 |
| TRINITY_sp Q9M8DSPTP1B    | Dual specificity pr   | 29.10 | 0.00 |
| TRINITY_sp Q7TPShprh      | E3 ubiquitin-protei   | 29.10 | 0.00 |
| TRINITY_sp Q56ZQVSR4      | Vacuolar-sorting re   | 29.10 | 0.00 |
| TRINITY_sp Q55GMDDB_G02c  | Probable phosphatid   | 29.10 | 0.00 |
| TRINITY_sp A7MU4hscB      | Co-chaperone protei   | 29.10 | 0.00 |
| TRINITY_sp Q9VLFKBP59     | FK506-binding prote   | 29.10 | 0.00 |
| TRINITY_sp O959ECD        | Protein ecdysoneles   | 29.10 | 0.00 |
| TRINITY_sp C1DK2rppH      | RNA pyrophosphohydr   | 29.10 | 0.00 |
| TRINITY_sp P710epsO       | Putative pyruvyl tr   | 29.10 | 0.00 |
| TRINITY_sp F4K4THO5B      | THO complex subunit   | 29.10 | 0.00 |
| TRINITY_sp Q8R5Usp33      | Ubiquitin carboxyl-   | 29.10 | 0.00 |
| TRINITY_sp Q86IADDB_G02c  | PH domain-containin   | 29.10 | 0.00 |
| TRINITY_sp Q8GV4PLC6      | Phosphoinositide ph   | 29.10 | 0.00 |
| TRINITY_sp Q9LT2MED35C    | Pre-mRNA-processing   | 29.10 | 0.00 |
| TRINITY_sp Q9SL2Os05g015  | Importin subunit al   | 29.10 | 0.00 |
| TRINITY_sp Q84Cviod       | Capreomycinidine synt | 29.10 | 0.00 |
| TRINITY_sp Q5ZIIkbp       | KIF1-binding protei   | 29.10 | 0.00 |
| TRINITY_sp O600ykt6       | Synaptobrevin homol   | 29.10 | 0.00 |
| TRINITY_sp Q9ZQ8PAP9      | Probable inactive p   | 29.10 | 0.00 |
| TRINITY_sp Q5XE1HES01     | Protein HES01 OS=Ar   | 29.10 | 0.00 |
| TRINITY_sp Q5F3IDENND6A   | Protein DENND6A OS=   | 29.10 | 0.00 |
| TRINITY_sp O1511NPC1      | Niemann-Pick C1 pro   | 29.10 | 0.00 |
| TRINITY_sp O883Avil       | Advillin OS=Mus mus   | 29.10 | 0.00 |
| TRINITY_sp P3409manA      | Lysosomal alpha-man   | 29.10 | 0.00 |
| TRINITY_sp Q9235SPAC6G9   | Pumilio domain-cont   | 29.10 | 0.00 |
| TRINITY_sp Q9C5CSAC7      | Phosphoinositide ph   | 29.10 | 0.00 |
| TRINITY_sp Q9CXFDhrs7     | Dehydrogenase/reduc   | 29.10 | 0.00 |
| TRINITY_sp Q54SEIDDB_G02c | Beta-lactamase-like   | 29.10 | 0.00 |
| TRINITY_sp F1MH2AAK1      | AP2-associated prot   | 29.10 | 0.00 |
| TRINITY_sp Q96G4DUS3L     | tRNA-dihydrouridine   | 29.00 | 0.00 |
| TRINITY_sp B0G16exoc5     | Exocyst complex com   | 29.00 | 0.00 |
| TRINITY_sp O758CAPN15     | Calpain-15 OS=Homo    | 29.00 | 0.00 |
| TRINITY_sp P0AAItyrP      | Tyrosine-specific t   | 29.00 | 0.00 |
| TRINITY_sp Q5R6ATG4A      | Cysteine protease A   | 29.00 | 0.00 |
| TRINITY_sp P4712BNA2      | Indoleamine 2,3-dio   | 29.00 | 0.00 |
| TRINITY_sp F4HRCTHO5A     | THO complex subunit   | 29.00 | 0.00 |
| TRINITY_sp O0044RTCA      | RNA 3'-terminal pho   | 29.00 | 0.00 |
| TRINITY_sp Q52K2usp12-a   | Ubiquitin carboxyl-   | 29.00 | 0.00 |
| TRINITY_sp Q7TT3Ikkap     | Elongator complex p   | 29.00 | 0.00 |
| TRINITY_sp Q011cbah       | Acetyl-hydrolase OS   | 29.00 | 0.00 |
| TRINITY_sp P309RYR2       | Ryanodine receptor    | 29.00 | 0.00 |

|                           |                     |       |      |
|---------------------------|---------------------|-------|------|
| TRINITY_sp P814(GAPN      | NADP-dependent glyc | 29.00 | 0.00 |
| TRINITY_sp Q569(mfsd4b    | Sodium-dependent gl | 29.00 | 0.00 |
| TRINITY_sp Q4KL(rnf217    | Probable E3 ubiquit | 29.00 | 0.00 |
| TRINITY_sp Q84Y(CXIP4     | CAX-interacting pro | 29.00 | 0.00 |
| TRINITY_sp Q17Q(SCRN3     | Secernin-3 OS=Bos t | 29.00 | 0.00 |
| TRINITY_sp Q6C1(TIF32     | Eukaryotic translat | 29.00 | 0.00 |
| TRINITY_sp Q7T2(map3k10   | Mitogen-activated p | 29.00 | 0.00 |
| TRINITY_sp Q8GZ(BRN2      | RNA-binding protein | 29.00 | 0.00 |
| TRINITY_sp Q9FP(UBP12     | Ubiquitin carboxyl- | 29.00 | 0.00 |
| TRINITY_sp Q294(CYP3A24   | Cytochrome P450 3A2 | 29.00 | 0.00 |
| TRINITY_sp Q67Z(TFCB      | Tubulin-folding cof | 29.00 | 0.00 |
| TRINITY_sp Q0JI(CIPK11    | CBL-interacting pro | 29.00 | 0.00 |
| TRINITY_sp Q430(GALE      | UDP-glucose 4-epime | 29.00 | 0.00 |
| TRINITY_sp Q129(ELAVL2    | ELAV-like protein 2 | 29.00 | 0.00 |
| TRINITY_sp Q05B(EML5      | Echinoderm microtub | 29.00 | 0.00 |
| TRINITY_sp Q98T(PDCD4     | Programmed cell dea | 29.00 | 0.00 |
| TRINITY_sp Q55D(atxn2     | Ataxin-2 homolog OS | 29.00 | 0.00 |
| TRINITY_sp Q9SF(At3g071(  | Protein transport p | 29.00 | 0.00 |
| TRINITY_sp Q8H2(IPOLH     | DNA polymerase eta  | 29.00 | 0.00 |
| TRINITY_sp O142(wis4      | MAP kinase kinase k | 29.00 | 0.00 |
| TRINITY_sp Q9LY(MED7A     | Mediator of RNA pol | 29.00 | 0.00 |
| TRINITY_sp P344(clu-1     | Clustered mitochond | 29.00 | 0.00 |
| TRINITY_sp Q9VA(aralar1   | Calcium-binding mit | 29.00 | 0.00 |
| TRINITY_sp Q6ZM(EML6      | Echinoderm microtub | 29.00 | 0.00 |
| TRINITY_sp Q54I(rft1      | Protein RFT1 homolo | 29.00 | 0.00 |
| TRINITY_sp Q15K(PHYLLO    | Protein PHYLLO, chl | 29.00 | 0.00 |
| TRINITY_sp Q232(fat-3     | Delta(6)-fatty-acid | 29.00 | 0.00 |
| TRINITY_sp O017(him-1     | Structural maintena | 28.90 | 0.00 |
| TRINITY_sp C0SP(hywtG     | Putative metabolite | 28.90 | 0.00 |
| TRINITY_sp Q5PP(rnf170    | E3 ubiquitin-protei | 28.90 | 0.00 |
| TRINITY_sp P418(rael      | Poly(A)+ RNA export | 28.90 | 0.00 |
| TRINITY_sp P872(mus81     | Crossover junction  | 28.90 | 0.00 |
| TRINITY_sp P041(GIP       | Copia protein OS=Dr | 28.90 | 0.00 |
| TRINITY_sp Q54W(DDB_G02(  | Putative actin-frag | 28.90 | 0.00 |
| TRINITY_sp Q5ZL(VAMP7     | Vesicle-associated  | 28.90 | 0.00 |
| TRINITY_sp Q54B( nsfl1c   | NSFL1 cofactor p47  | 28.90 | 0.00 |
| TRINITY_sp Q122(NCR1      | Niemann-Pick type C | 28.90 | 0.00 |
| TRINITY_sp Q9DBV(Cyp4v2   | Cytochrome P450 4V2 | 28.90 | 0.00 |
| TRINITY_sp Q54B(DDB_G02(  | Probable GH family  | 28.90 | 0.00 |
| TRINITY_sp Q88F(nicC      | 6-hydroxynicotinate | 28.90 | 0.00 |
| TRINITY_sp Q54N(abcC9     | ABC transporter C f | 28.90 | 0.00 |
| TRINITY_sp Q497(Kdm8      | Lysine-specific dem | 28.90 | 0.00 |
| TRINITY_sp A0A0(CMT1      | DNA (cytosine-5)-me | 28.90 | 0.00 |
| TRINITY_sp Q94I(OST3      | Probable dolichyl-d | 28.90 | 0.00 |
| TRINITY_sp Q9CAN(Atlg6321 | Transcription elong | 28.90 | 0.00 |
| TRINITY_sp Q019(OCRL      | Inositol polyphosph | 28.90 | 0.00 |
| TRINITY_sp E1BY(MSH6      | DNA mismatch repair | 28.90 | 0.00 |
| TRINITY_sp Q11S(ctaB      | Protoheme IX farnes | 28.90 | 0.00 |
| TRINITY_sp Q9UTM(cox1101  | Rsm22-cox11 tandem  | 28.90 | 0.00 |
| TRINITY_sp Q917(gckr      | Glucokinase regulat | 28.90 | 0.00 |
| TRINITY_sp Q9JI(A4galt    | Lactosylceramide 4- | 28.90 | 0.00 |
| TRINITY_sp P041(GIP       | Copia protein OS=Dr | 28.90 | 0.00 |
| TRINITY_sp A4FII(iolG2    | Inositol 2-dehydrog | 28.90 | 0.00 |
| TRINITY_sp Q010(Pde4d     | cAMP-specific 3',5' | 28.90 | 0.00 |
| TRINITY_sp Q54X(gacP      | Rho GTPase-activati | 28.90 | 0.00 |
| TRINITY_sp A2VD(MAP3K7    | Mitogen-activated p | 28.90 | 0.00 |

|                          |                     |       |      |
|--------------------------|---------------------|-------|------|
| TRINITY_sp Q54D\DDB_G029 | von Willebrand fact | 28.90 | 0.00 |
| TRINITY_sp Q9LUCYP72A13  | Cytochrome P450 72A | 28.90 | 0.00 |
| TRINITY_sp P1642pol      | Retrovirus-related  | 28.90 | 0.00 |
| TRINITY_sp O2289At2g4043 | Uncharacterized pro | 28.90 | 0.00 |
| TRINITY_sp P5861glk      | Glucokinase OS=Nost | 28.90 | 0.00 |
| TRINITY_sp Q9VZ2Pxn      | Peroxidasin OS=Dros | 28.90 | 0.00 |
| TRINITY_sp A3KM\UBA1     | Ubiquitin-like modi | 28.90 | 0.00 |
| TRINITY_sp Q4V83tepsin   | AP-4 complex access | 28.90 | 0.00 |
| TRINITY_sp P290(INVA     | Acid beta-fructofur | 28.90 | 0.00 |
| TRINITY_sp P3939lgoT     | Probable L-galacton | 28.90 | 0.00 |
| TRINITY_sp Q9Y48DMXL1    | DmX-like protein 1  | 28.90 | 0.00 |
| TRINITY_sp P3117-        | Autolysin OS=Chlamy | 28.90 | 0.00 |
| TRINITY_sp Q5XF9Atp13a4  | Probable cation-tra | 28.90 | 0.00 |
| TRINITY_sp Q7KV5Trf4-1   | Non-canonical poly( | 28.90 | 0.00 |
| TRINITY_sp A7S41serinc   | Probable serine inc | 28.90 | 0.00 |
| TRINITY_sp Q54Bhexoc3    | Exocyst complex com | 28.90 | 0.00 |
| TRINITY_sp P3609VPS24    | Vacuolar protein-so | 28.90 | 0.00 |
| TRINITY_sp Q0922nrf-6    | Nose resistant to f | 28.90 | 0.00 |
| TRINITY_sp O1543ABCC4    | Multidrug resistanc | 28.90 | 0.00 |
| TRINITY_sp Q4G0IHYDIN    | Hydrocephalus-induc | 28.90 | 0.00 |
| TRINITY_sp Q1G3UPCO3     | Plant cysteine oxid | 28.90 | 0.00 |
| TRINITY_sp Q54V\DDB_G028 | Probable serine/thr | 28.90 | 0.00 |
| TRINITY_sp A0JP9heatr5a  | HEAT repeat-contain | 28.90 | 0.00 |
| TRINITY_sp Q94C9ATG1A    | Serine/threonine-pr | 28.80 | 0.00 |
| TRINITY_sp P5316MNP1     | 54S ribosomal prote | 28.80 | 0.00 |
| TRINITY_sp Q6BM1SYM1     | Protein SYM1 OS=Deb | 28.80 | 0.00 |
| TRINITY_sp Q4VB1stx18    | Syntaxin-18 OS=Dani | 28.80 | 0.00 |
| TRINITY_sp Q9166stk11    | Serine/threonine-pr | 28.80 | 0.00 |
| TRINITY_sp A5WW(chfr     | E3 ubiquitin-protei | 28.80 | 0.00 |
| TRINITY_sp Q9SE2CIPK16   | CBL-interacting ser | 28.80 | 0.00 |
| TRINITY_sp O1688dhs-16   | 3 beta-hydroxystero | 28.80 | 0.00 |
| TRINITY_sp Q8CN4SE_2036  | Uncharacterized oxi | 28.80 | 0.00 |
| TRINITY_sp Q5LDIengB     | Probable GTP-bindin | 28.80 | 0.00 |
| TRINITY_sp O5475Hsd17b6  | 17-beta-hydroxyster | 28.80 | 0.00 |
| TRINITY_sp Q9CQ(Commd4   | COMM domain-contain | 28.80 | 0.00 |
| TRINITY_sp Q641fNuak1    | NUAK family SNF1-li | 28.80 | 0.00 |
| TRINITY_sp O1899CYP3A21  | Cytochrome P450 3A2 | 28.80 | 0.00 |
| TRINITY_sp O4878CYP734A1 | Cytochrome P450 734 | 28.80 | 0.00 |
| TRINITY_sp Q8LF(RPA2B    | Replication protein | 28.80 | 0.00 |
| TRINITY_sp P3412coaA     | Coactosin OS=Dictyo | 28.80 | 0.00 |
| TRINITY_sp Q5VS1OBSCN    | Obscurin OS=Homo sa | 28.80 | 0.00 |
| TRINITY_sp Q6DE1tbc1d31  | TBC1 domain family  | 28.80 | 0.00 |
| TRINITY_sp Q55B9scy2     | Probable inactive s | 28.80 | 0.00 |
| TRINITY_sp O2292At2g3032 | Putative tRNA pseud | 28.80 | 0.00 |
| TRINITY_sp P8253PPL1     | PsbP-like protein 1 | 28.80 | 0.00 |
| TRINITY_sp Q1007mdm31    | Mitochondrial distr | 28.80 | 0.00 |
| TRINITY_sp A2A51R3hdml   | Peptidase inhibitor | 28.80 | 0.00 |
| TRINITY_sp Q54Q(sec1     | Protein transport p | 28.80 | 0.00 |
| TRINITY_sp P930(PP2C27   | Probable protein ph | 28.80 | 0.00 |
| TRINITY_sp A8JF(CFAP65   | Cilia- and flagella | 28.80 | 0.00 |
| TRINITY_sp P283(qorA     | Quinone oxidoreduct | 28.80 | 0.00 |
| TRINITY_sp Q9WV(Cyp46a1  | Cholesterol 24-hydr | 28.80 | 0.00 |
| TRINITY_sp Q944fMTM1     | Mitochondrial carri | 28.80 | 0.00 |
| TRINITY_sp O2317PLP1     | Patatin-like protei | 28.80 | 0.00 |
| TRINITY_sp A8MS8SPT6     | Transcription elong | 28.80 | 0.00 |
| TRINITY_sp Q9LUCYP72A13  | Cytochrome P450 72A | 28.80 | 0.00 |

|                          |                      |       |      |
|--------------------------|----------------------|-------|------|
| TRINITY_sp Q6DFCwdr75    | WD repeat-containin  | 28.80 | 0.00 |
| TRINITY_sp Q58C\KLDHC3   | Kelch domain-contai  | 28.80 | 0.00 |
| TRINITY_sp Q6C9CBFR2     | Protein BFR2 OS=Yar  | 28.80 | 0.00 |
| TRINITY_sp P4457arcB     | Aerobic respiration  | 28.80 | 0.00 |
| TRINITY_sp Q9LV\At3g178  | (UV-B-induced protei | 28.80 | 0.00 |
| TRINITY_sp O7454SPCC777  | .Putative hydrolase  | 28.80 | 0.00 |
| TRINITY_sp A8LH7Franean1 | Putative S-adenosyl  | 28.80 | 0.00 |
| TRINITY_sp Q54K1prmt5    | Protein arginine N-  | 28.80 | 0.00 |
| TRINITY_sp P1024MYBL1    | Myb-related protein  | 28.80 | 0.00 |
| TRINITY_sp D4AYVARB_0137 | ABC transporter G f  | 28.80 | 0.00 |
| TRINITY_sp Q84RFARI7     | Probable E3 ubiquit  | 28.80 | 0.00 |
| TRINITY_sp B0E2UVPS10    | Vacuolar protein so  | 28.80 | 0.00 |
| TRINITY_sp Q6RFHWDR74    | WD repeat-containin  | 28.80 | 0.00 |
| TRINITY_sp O1553PDPK1    | 3-phosphoinositide-  | 28.80 | 0.00 |
| TRINITY_sp O1405SPCC1672 | U3 small nucleolar   | 28.80 | 0.00 |
| TRINITY_sp Q8IS1gefJ     | Ras guanine nucleot  | 28.80 | 0.00 |
| TRINITY_sp Q4G0IHYDIN    | Hydrocephalus-induc  | 28.80 | 0.00 |
| TRINITY_sp Q8BU\Cndp1    | Beta-Ala-His dipept  | 28.80 | 0.00 |
| TRINITY_sp Q95YIpefB     | Penta-EF hand domai  | 28.80 | 0.00 |
| TRINITY_sp Q23TCTLL3A    | Tubulin glycyclase 3 | 28.70 | 0.00 |
| TRINITY_sp Q647CPlk4     | Serine/threonine-pr  | 28.70 | 0.00 |
| TRINITY_sp O4291ale1     | Lysophospholipid ac  | 28.70 | 0.00 |
| TRINITY_sp Q5RAUACOX3    | Peroxisomal acyl-co  | 28.70 | 0.00 |
| TRINITY_sp Q6P1CPLB1     | Phospholipase B1, m  | 28.70 | 0.00 |
| TRINITY_sp Q9DG1star     | Steroidogenic acute  | 28.70 | 0.00 |
| TRINITY_sp A2XDCUBP26    | Ubiquitin carboxyl-  | 28.70 | 0.00 |
| TRINITY_sp Q9HK5rhaD     | L-rhamnose 1-dehydr  | 28.70 | 0.00 |
| TRINITY_sp O5773alaXL    | Alanyl-tRNA editing  | 28.70 | 0.00 |
| TRINITY_sp Q54P5osbI     | Oxysterol-binding p  | 28.70 | 0.00 |
| TRINITY_sp Q65GCarab     | Ribulokinase OS=Bac  | 28.70 | 0.00 |
| TRINITY_sp Q9ER5Capn12   | Calpain-12 OS=Mus m  | 28.70 | 0.00 |
| TRINITY_sp Q0P5IACP2     | Lysosomal acid phos  | 28.70 | 0.00 |
| TRINITY_sp Q9DBVCyp4v2   | Cytochrome P450 4V2  | 28.70 | 0.00 |
| TRINITY_sp P0733CTSD     | Cathepsin D OS=Homo  | 28.70 | 0.00 |
| TRINITY_sp Q9641CYP4C21  | Cytochrome P450 4c2  | 28.70 | 0.00 |
| TRINITY_sp Q7KV5Trf4-1   | Non-canonical poly(  | 28.70 | 0.00 |
| TRINITY_sp P9321TFT9     | 14-3-3 protein 9 OS  | 28.70 | 0.00 |
| TRINITY_sp A2AP1Plch2    | 1-phosphatidylinosi  | 28.70 | 0.00 |
| TRINITY_sp Q94KIVPS52    | Vacuolar protein so  | 28.70 | 0.00 |
| TRINITY_sp Q9Y67CYP46A1  | Cholesterol 24-hydr  | 28.70 | 0.00 |
| TRINITY_sp P9818CYP4F8   | Cytochrome P450 4F8  | 28.70 | 0.00 |
| TRINITY_sp Q5597pola     | DNA polymerase I OS  | 28.70 | 0.00 |
| TRINITY_sp Q0725-        | Calcium/calmodulin-  | 28.70 | 0.00 |
| TRINITY_sp P6187-        | Lipase OS=Rhizopus   | 28.70 | 0.00 |
| TRINITY_sp Q8BXIArfrp1   | ADP-ribosylation fa  | 28.70 | 0.00 |
| TRINITY_sp Q1323PRKG2    | cGMP-dependent prot  | 28.70 | 0.00 |
| TRINITY_sp A8FDCBPUM_16  | (8-amino-7-oxononano | 28.70 | 0.00 |
| TRINITY_sp Q96JECOG3     | Conserved oligomeri  | 28.70 | 0.00 |



|                          |                      |       |      |
|--------------------------|----------------------|-------|------|
| TRINITY_sp Q2QMF0s12g060 | (Protein ROOT HAIR D | 28.70 | 0.00 |
| TRINITY_sp Q8IS1gfeE     | Ras guanine nucleot  | 28.70 | 0.00 |
| TRINITY_sp P715(MexAM1_M | Putative carboxymet  | 28.70 | 0.00 |
| TRINITY_sp Q8GZ7TIC20-I  | Protein TIC 20-I, c  | 28.70 | 0.00 |
| TRINITY_sp P0957nifa     | Nif-specific regula  | 28.70 | 0.00 |
| TRINITY_sp A8MBUcobB     | NAD-dependent prote  | 28.70 | 0.00 |
| TRINITY_sp P2648fixL     | Sensor protein FixL  | 28.70 | 0.00 |
| TRINITY_sp Q8R15Znfx1    | NFX1-type zinc fing  | 28.70 | 0.00 |
| TRINITY_sp Q7SXVemc3     | ER membrane protein  | 28.60 | 0.00 |
| TRINITY_sp Q9SD1At3g5137 | Probable protein ph  | 28.60 | 0.00 |
| TRINITY_sp P5397FAP1     | FKBP12-associated p  | 28.60 | 0.00 |
| TRINITY_sp A0MEFCYCA3-3  | Cyclin-A3-3 OS=Arab  | 28.60 | 0.00 |
| TRINITY_sp Q8TA1RHEBL1   | GTPase RhebL1 OS=Ho  | 28.60 | 0.00 |
| TRINITY_sp Q1ZXHemc6     | ER membrane protein  | 28.60 | 0.00 |
| TRINITY_sp Q2QNUTRS130   | Trafficking protein  | 28.60 | 0.00 |
| TRINITY_sp Q5NC(Ttf2     | Transcription termi  | 28.60 | 0.00 |
| TRINITY_sp B2RX6Plxnb2   | Plexin-B2 OS=Mus mu  | 28.60 | 0.00 |
| TRINITY_sp Q6Z35Os07g028 | Putative aldehyde o  | 28.60 | 0.00 |
| TRINITY_sp O1394ppk9     | Protein kinase doma  | 28.60 | 0.00 |
| TRINITY_sp Q9LP5CIPK18   | CBL-interacting ser  | 28.60 | 0.00 |
| TRINITY_sp O1363yvh1     | Tyrosine-protein ph  | 28.60 | 0.00 |
| TRINITY_sp Q8RW1STY17    | Serine/threonine-pr  | 28.60 | 0.00 |
| TRINITY_sp Q61Y(CBG03556 | Leishmanolysin-like  | 28.60 | 0.00 |
| TRINITY_sp Q9Y0(ripA     | Ras-interacting pro  | 28.60 | 0.00 |
| TRINITY_sp Q1503R3HDM1   | R3H domain-containi  | 28.60 | 0.00 |
| TRINITY_sp Q75B3NOP12    | Nucleolar protein 1  | 28.60 | 0.00 |
| TRINITY_sp Q96S1JMJD8    | JmjC domain-contain  | 28.60 | 0.00 |
| TRINITY_sp Q9FR4NMT1     | Phosphoethanolamine  | 28.60 | 0.00 |
| TRINITY_sp Q9LF7ACA8     | Calcium-transportin  | 28.60 | 0.00 |
| TRINITY_sp Q2758Cyp4d2   | Cytochrome P450 4d2  | 28.60 | 0.00 |
| TRINITY_sp Q9Z16Cog1     | Conserved oligomeri  | 28.60 | 0.00 |
| TRINITY_sp Q6P83Caps1    | Calcyphosin-like pr  | 28.60 | 0.00 |
| TRINITY_sp Q5RF7CHFR     | E3 ubiquitin-protei  | 28.60 | 0.00 |
| TRINITY_sp Q8KI3tmoS     | Sensor histidine ki  | 28.60 | 0.00 |
| TRINITY_sp Q9H6FNOL6     | Nucleolar protein 6  | 28.60 | 0.00 |
| TRINITY_sp Q8HXH LONRF3  | LON peptidase N-ter  | 28.60 | 0.00 |
| TRINITY_sp Q9LRIAt3g1743 | Probable sugar phos  | 28.60 | 0.00 |
| TRINITY_sp Q7PZIAGAP0118 | Clustered mitochond  | 28.60 | 0.00 |
| TRINITY_sp P0AG8pstS     | Phosphate-binding p  | 28.60 | 0.00 |
| TRINITY_sp Q9Z3(Kcnj16   | Inward rectifier po  | 28.60 | 0.00 |
| TRINITY_sp Q6EU1AGO1A    | Protein argonaute 1  | 28.60 | 0.00 |
| TRINITY_sp Q9SY1At4g0290 | CSC1-like protein A  | 28.60 | 0.00 |
| TRINITY_sp Q3E9(CPK34    | Calcium-dependent p  | 28.60 | 0.00 |
| TRINITY_sp Q8T63abcA2    | ABC transporter A f  | 28.60 | 0.00 |
| TRINITY_sp P3554Ret      | Proto-oncogene tyro  | 28.50 | 0.00 |
| TRINITY_sp Q93Z5At3g1619 | Probable inactive n  | 28.50 | 0.00 |
| TRINITY_sp P2507CML12    | Calmodulin-like pro  | 28.50 | 0.00 |
| TRINITY_sp O749(bcp1     | Protein bcp1 OS=Sch  | 28.50 | 0.00 |
| TRINITY_sp Q54D7rab4     | Ras-related protein  | 28.50 | 0.00 |
| TRINITY_sp Q8VX1PDIL1-3  | Protein disulfide i  | 28.50 | 0.00 |
| TRINITY_sp Q7ZY6uba2-b   | SUMO-activating enz  | 28.50 | 0.00 |
| TRINITY_sp O5748-        | Voltage-dependent L  | 28.50 | 0.00 |
| TRINITY_sp A2XH3ATG4A    | Cysteine protease A  | 28.50 | 0.00 |
| TRINITY_sp Q9P63SPBC1683 | Uncharacterized pro  | 28.50 | 0.00 |
| TRINITY_sp Q9ZQ1REIL2    | Cytoplasmic 60S sub  | 28.50 | 0.00 |
| TRINITY_sp P4088-        | Carbonic anhydrase,  | 28.50 | 0.00 |

|                                 |                     |       |      |
|---------------------------------|---------------------|-------|------|
| TRINITY_sp P0DK9qmcA            | Protein QmcA OS=Wig | 28.50 | 0.00 |
| TRINITY_sp Q1506POSTN           | Periostin OS=Homo s | 28.50 | 0.00 |
| TRINITY_sp Q9290HPS1            | Hermansky-Pudlak sy | 28.50 | 0.00 |
| TRINITY_sp P2704Man2a1          | Alpha-mannosidase 2 | 28.50 | 0.00 |
| TRINITY_sp O8136-               | Zeaxanthin epoxidas | 28.50 | 0.00 |
| TRINITY_sp Q6BX9SLD5            | DNA replication com | 28.50 | 0.00 |
| TRINITY_sp Q96A4SYAP1           | Synapse-associated  | 28.50 | 0.00 |
| TRINITY_sp Q9FJ7AT4             | Probable long-chain | 28.50 | 0.00 |
| TRINITY_sp Q54JEDDB_G028UPF0522 | protein A O         | 28.50 | 0.00 |
| TRINITY_sp Q86Y5DNAAF5          | Dynein assembly fac | 28.50 | 0.00 |
| TRINITY_sp Q8BK0Tmem87b         | Transmembrane prote | 28.50 | 0.00 |
| TRINITY_sp Q6AZMslc30a6-        | Zinc transporter 6- | 28.50 | 0.00 |
| TRINITY_sp Q8H2IPOLH            | DNA polymerase eta  | 28.50 | 0.00 |
| TRINITY_sp Q4KL6wdr76           | WD repeat-containin | 28.50 | 0.00 |
| TRINITY_sp Q91Z7Fgd4            | FYVE, RhoGEF and PH | 28.50 | 0.00 |
| TRINITY_sp Q9SL9Os05g015        | Importin subunit al | 28.50 | 0.00 |
| TRINITY_sp Q8RXVRBL14           | Rhomboid-like prote | 28.50 | 0.00 |
| TRINITY_sp F4HXVNUP155          | Nuclear pore comple | 28.50 | 0.00 |
| TRINITY_sp Q5JJ6TK1782          | Uncharacterized ser | 28.50 | 0.00 |
| TRINITY_sp P4352cya             | Adenylate cyclase O | 28.50 | 0.00 |
| TRINITY_sp Q149MSHPRH           | E3 ubiquitin-protei | 28.50 | 0.00 |
| TRINITY_sp Q969MPIGT            | GPI transamidase co | 28.50 | 0.00 |
| TRINITY_sp Q1457ITPR2           | Inositol 1,4,5-tris | 28.50 | 0.00 |
| TRINITY_sp Q96E9ADAT3           | Probable inactive t | 28.50 | 0.00 |
| TRINITY_sp P3117-               | Autolysin OS=Chlamy | 28.50 | 0.00 |
| TRINITY_sp Q4KL6znrf3           | E3 ubiquitin-protei | 28.40 | 0.00 |
| TRINITY_sp P1772-               | Group 1 truncated h | 28.40 | 0.00 |
| TRINITY_sp B8NDIabnA            | Probable arabinan e | 28.40 | 0.00 |
| TRINITY_sp Q8ILJPF14_025        | Acidic leucine-rich | 28.40 | 0.00 |
| TRINITY_sp A4FWWhisC            | Histidinol-phosphat | 28.40 | 0.00 |
| TRINITY_sp O0915Cyp3a25         | Cytochrome P450 3A2 | 28.40 | 0.00 |
| TRINITY_sp Q6FIFYME2            | Mitochondrial escap | 28.40 | 0.00 |
| TRINITY_sp Q5NC0Ttf2            | Transcription termi | 28.40 | 0.00 |
| TRINITY_sp O1394erv25           | Endoplasmic reticul | 28.40 | 0.00 |
| TRINITY_sp Q9UT9SPAC8F11        | Putative ribosome b | 28.40 | 0.00 |
| TRINITY_sp Q6448Cyp3a16         | Cytochrome P450 3A1 | 28.40 | 0.00 |
| TRINITY_sp A8WRkin-29           | Serine/threonine-pr | 28.40 | 0.00 |
| TRINITY_sp Q9ZQJREIL2           | Cytoplasmic 60S sub | 28.40 | 0.00 |
| TRINITY_sp Q54WfforA            | Formin-A OS=Dictyos | 28.40 | 0.00 |
| TRINITY_sp Q0979kri1            | Protein kri1 OS=Sch | 28.40 | 0.00 |
| TRINITY_sp Q9WZVtruB            | tRNA pseudouridine  | 28.40 | 0.00 |
| TRINITY_sp Q9LT9VPS9A           | Vacuolar protein so | 28.40 | 0.00 |
| TRINITY_sp Q4L9Fdrp35           | Lactonase drp35 OS= | 28.40 | 0.00 |
| TRINITY_sp Q5JJ9Os01g054        | Protein kinase and  | 28.40 | 0.00 |
| TRINITY_sp A4UH9SALR            | Salutaridine reduct | 28.40 | 0.00 |
| TRINITY_sp Q7SC9sym-1           | Protein sym-1 OS=Ne | 28.40 | 0.00 |
| TRINITY_sp Q5ZJIABHD13          | Protein ABHD13 OS=G | 28.40 | 0.00 |
| TRINITY_sp Q8R30Tspan8          | Tetraspanin-8 OS=Mu | 28.40 | 0.00 |
| TRINITY_sp Q9UH9PGAP2           | Post-GPI attachment | 28.40 | 0.00 |
| TRINITY_sp Q8RXFAGD14           | Probable ADP-ribosy | 28.40 | 0.00 |
| TRINITY_sp Q6AUCQSOX1           | Sulfhydryl oxidase  | 28.40 | 0.00 |
| TRINITY_sp P5094AVT4            | Vacuolar amino acid | 28.40 | 0.00 |
| TRINITY_sp P1555acyII           | Penicillin acylase  | 28.40 | 0.00 |
| TRINITY_sp O2359At4g1755        | Putative glycerol-3 | 28.40 | 0.00 |
| TRINITY_sp Q70C9USP34           | Ubiquitin carboxyl- | 28.40 | 0.00 |
| TRINITY_sp Q9924CACNA1D         | Voltage-dependent L | 28.40 | 0.00 |

|                         |                               |       |      |
|-------------------------|-------------------------------|-------|------|
| TRINITY_sp Q7PZIAGAP011 | Clustered mitochond           | 28.40 | 0.00 |
| TRINITY_sp P178         | recN DNA repair protein       | 28.40 | 0.00 |
| TRINITY_sp P581         | Plscr1 Phospholipid scramb    | 28.40 | 0.00 |
| TRINITY_sp P383         | PHO89 Phosphate permease      | 28.40 | 0.00 |
| TRINITY_sp Q8L9         | P4H7 Probable prolyl 4-h      | 28.40 | 0.00 |
| TRINITY_sp Q015         | Gstt1 Glutathione S-trans     | 28.40 | 0.00 |
| TRINITY_sp Q9US         | ubp1 Probable ubiquitin       | 28.40 | 0.00 |
| TRINITY_sp P263         | U2AF2 Splicing factor U2A     | 28.40 | 0.00 |
| TRINITY_sp A8JF         | CFAP65 Cilia- and flagella    | 28.40 | 0.00 |
| TRINITY_sp Q6NU         | PPP4R4 Serine/threonine-pr    | 28.40 | 0.00 |
| TRINITY_sp Q7LH         | TY3B-I Transposon Ty3-I Ga    | 28.40 | 0.00 |
| TRINITY_sp Q75L         | OSH10 Homeobox protein kn     | 28.40 | 0.00 |
| TRINITY_sp Q8TB         | PUM2 Pumilio homolog 2 O      | 28.40 | 0.00 |
| TRINITY_sp P577         | At5g406 Cystinosin homolog    | 28.30 | 0.00 |
| TRINITY_sp Q5VJ         | igt9 Probable serine/thr      | 28.30 | 0.00 |
| TRINITY_sp P867         | - Gigasin-6 OS=Crasso         | 28.30 | 0.00 |
| TRINITY_sp Q6DE         | smndc1 Survival of motor n    | 28.30 | 0.00 |
| TRINITY_sp P469         | (yccK Uncharacterized oxi     | 28.30 | 0.00 |
| TRINITY_sp Q0C0         | atpH ATP synthase subuni      | 28.30 | 0.00 |
| TRINITY_sp P423         | zCNB1 Calcineurin subunit     | 28.30 | 0.00 |
| TRINITY_sp P204         | - 23 kDa calcium-bind         | 28.30 | 0.00 |
| TRINITY_sp P106         | PRKAR1A cAMP-dependent prot   | 28.30 | 0.00 |
| TRINITY_sp Q3EB         | (PAT17 Probable protein S-    | 28.30 | 0.00 |
| TRINITY_sp Q9P2         | USP36 Ubiquitin carboxyl-     | 28.30 | 0.00 |
| TRINITY_sp Q96B         | ATG2B Autophagy-related p     | 28.30 | 0.00 |
| TRINITY_sp P569         | cphB Cyanophycinase OS=G      | 28.30 | 0.00 |
| TRINITY_sp Q54I         | 4slc44a2 Choline transporter  | 28.30 | 0.00 |
| TRINITY_sp P541         | (ypgQ Uncharacterized pro     | 28.30 | 0.00 |
| TRINITY_sp P934         | (BP80 Vacuolar-sorting re     | 28.30 | 0.00 |
| TRINITY_sp P360         | SRP102 Signal recognition     | 28.30 | 0.00 |
| TRINITY_sp O151         | (VILL Villin-like protein     | 28.30 | 0.00 |
| TRINITY_sp B5F0         | (yfeW UPF0214 protein Yfe     | 28.30 | 0.00 |
| TRINITY_sp Q9C9         | (VIP5 Protein RTF1 homolo     | 28.30 | 0.00 |
| TRINITY_sp Q8TW         | FMK0970 Glyceraldehyde 3-ph   | 28.30 | 0.00 |
| TRINITY_sp Q9C6         | (GAMMACA2 Gamma carbonic anhy | 28.30 | 0.00 |
| TRINITY_sp Q7XW         | (Os04g02 Probable cleavage a  | 28.30 | 0.00 |
| TRINITY_sp Q926         | (NSMAF Protein FAN OS=Homo    | 28.30 | 0.00 |
| TRINITY_sp Q9HD         | (cwh43 Protein cwh43 OS=Sc    | 28.30 | 0.00 |
| TRINITY_sp Q6GL         | (dscc1 Sister chromatid co    | 28.30 | 0.00 |
| TRINITY_sp Q08B         | (jmjd4 JmjC domain-contain    | 28.30 | 0.00 |
| TRINITY_sp Q9NY         | IZAK Mitogen-activated p      | 28.30 | 0.00 |
| TRINITY_sp Q54L         | (DDB0186 Calcium uniporter p  | 28.30 | 0.00 |
| TRINITY_sp A4RD         | (TIF34 Eukaryotic translat    | 28.30 | 0.00 |
| TRINITY_sp Q9UK         | (PARP4 Poly [ADP-ribose] p    | 28.30 | 0.00 |
| TRINITY_sp O942         | mdn1 Midasin OS=Schizosa      | 28.30 | 0.00 |
| TRINITY_sp O147         | (MAP2K7 Dual specificity mi   | 28.30 | 0.00 |
| TRINITY_sp Q8BR         | (Maats1 Protein MAATS1 OS=M   | 28.30 | 0.00 |
| TRINITY_sp Q75W         | (Vwa5a von Willebrand fact    | 28.30 | 0.00 |
| TRINITY_sp Q84M         | (MSL9 Mechanosensitive io     | 28.30 | 0.00 |
| TRINITY_sp Q86G         | (gcy-28 Receptor-type guany   | 28.30 | 0.00 |
| TRINITY_sp B9DF         | (At5g474 E3 ubiquitin ligase  | 28.30 | 0.00 |
| TRINITY_sp Q8IV         | (TBC1D10 Carabin OS=Homo sap  | 28.30 | 0.00 |
| TRINITY_sp O744         | (SPCC184 Uncharacterized pro  | 28.20 | 0.00 |
| TRINITY_sp Q54E         | (abcC7 ABC transporter C f    | 28.20 | 0.00 |
| TRINITY_sp P423         | (Nca Neurocalcin homolog      | 28.20 | 0.00 |
| TRINITY_sp Q9D2         | (Iqch IQ domain-containin     | 28.20 | 0.00 |

|                          |                     |       |      |
|--------------------------|---------------------|-------|------|
| TRINITY_sp Q91YIWas1     | Neural Wiskott-Aldr | 28.20 | 0.00 |
| TRINITY_sp Q54B DDB_G02  | LIMR family protein | 28.20 | 0.00 |
| TRINITY_sp Q9JL Bace2    | Beta-secretase 2 OS | 28.20 | 0.00 |
| TRINITY_sp Q104 etr1     | Probable trans-2-en | 28.20 | 0.00 |
| TRINITY_sp P204 -        | 23 kDa calcium-bind | 28.20 | 0.00 |
| TRINITY_sp Q4R0 rbmC     | 2-deoxy-scyлло-inos | 28.20 | 0.00 |
| TRINITY_sp Q2NL PARP6    | Poly [ADP-ribose] p | 28.20 | 0.00 |
| TRINITY_sp Q54X rcckA    | RGS domain-containi | 28.20 | 0.00 |
| TRINITY_sp Q9BZ GTPBP4   | Nucleolar GTP-bindi | 28.20 | 0.00 |
| TRINITY_sp Q9HC IGPAM    | Glycerol-3-phosphat | 28.20 | 0.00 |
| TRINITY_sp P518 Cyp4f4   | Cytochrome P450 4F4 | 28.20 | 0.00 |
| TRINITY_sp Q059 Ptprg    | Receptor-type tyros | 28.20 | 0.00 |
| TRINITY_sp O233 BLUS1    | Serine/threonine-pr | 28.20 | 0.00 |
| TRINITY_sp Q9LS CASP     | Protein CASP OS=Ara | 28.20 | 0.00 |
| TRINITY_sp Q59K APE2     | Aminopeptidase 2 OS | 28.20 | 0.00 |
| TRINITY_sp Q54R agta     | UDP-galactose:fucos | 28.20 | 0.00 |
| TRINITY_sp Q54P gefA     | Ras guanine nucleot | 28.20 | 0.00 |
| TRINITY_sp Q54Y elmoA    | ELMO domain-contain | 28.20 | 0.00 |
| TRINITY_sp C0LT CERK     | Ceramide kinase OS= | 28.20 | 0.00 |
| TRINITY_sp Q91W Kif18a   | Kinesin-like protei | 28.20 | 0.00 |
| TRINITY_sp P521 yfjv     | Putative arsenical  | 28.20 | 0.00 |
| TRINITY_sp P0C0 irpfC    | Sensory/regulatory  | 28.20 | 0.00 |
| TRINITY_sp Q5U2 Plbd1    | Phospholipase B-lik | 28.20 | 0.00 |
| TRINITY_sp P543 Lipe     | Hormone-sensitive l | 28.20 | 0.00 |
| TRINITY_sp Q125 RKM4     | Ribosomal lysine N- | 28.20 | 0.00 |
| TRINITY_sp Q5QD SUVH3    | Histone-lysine N-me | 28.20 | 0.00 |
| TRINITY_sp B8MG vps10    | Vacuolar protein so | 28.20 | 0.00 |
| TRINITY_sp Q70C USP34    | Ubiquitin carboxyl- | 28.20 | 0.00 |
| TRINITY_sp Q9JL Sart3    | Squamous cell carci | 28.20 | 0.00 |
| TRINITY_sp Q9U5 -        | V-type proton ATPas | 28.20 | 0.00 |
| TRINITY_sp Q4ZP quiP     | Acyl-homoserine lac | 28.20 | 0.00 |
| TRINITY_sp Q8WU NUP133   | Nuclear pore comple | 28.20 | 0.00 |
| TRINITY_sp Q1JQ FBLIM1   | Filamin-binding LIM | 28.10 | 0.00 |
| TRINITY_sp Q149 SHPRH    | E3 ubiquitin-protei | 28.10 | 0.00 |
| TRINITY_sp P739 hhoB     | Putative serine pro | 28.10 | 0.00 |
| TRINITY_sp Q9CR Ccdc96   | Coiled-coil domain- | 28.10 | 0.00 |
| TRINITY_sp Q027 RKIN1    | Carbon catabolite-d | 28.10 | 0.00 |
| TRINITY_sp Q3EA ZIFL2    | Probable peptide/ni | 28.10 | 0.00 |
| TRINITY_sp Q4WC mrs2     | Mitochondrial inner | 28.10 | 0.00 |
| TRINITY_sp Q54P ilvsF    | BEACH domain-contai | 28.10 | 0.00 |
| TRINITY_sp Q6ZV TTLL10   | Inactive polyglycyl | 28.10 | 0.00 |
| TRINITY_sp P794 CYP3A29  | Cytochrome P450 3A2 | 28.10 | 0.00 |
| TRINITY_sp Q644 Ptk6     | Protein-tyrosine ki | 28.10 | 0.00 |
| TRINITY_sp Q9D8 Ascc1    | Activating signal c | 28.10 | 0.00 |
| TRINITY_sp Q3T0 WDYHV1   | Protein N-terminal  | 28.10 | 0.00 |
| TRINITY_sp Q0IX Os10g041 | Acylamino-acid-rele | 28.10 | 0.00 |
| TRINITY_sp Q6ZF ADL1     | Calpain-type cystei | 28.10 | 0.00 |
| TRINITY_sp Q6DE chek1    | Serine/threonine-pr | 28.10 | 0.00 |
| TRINITY_sp P328 STX2     | Syntaxin-2 OS=Homo  | 28.10 | 0.00 |
| TRINITY_sp P290 gtf2b    | Transcription initi | 28.10 | 0.00 |
| TRINITY_sp Q8NH MFSD8    | Major facilitator s | 28.10 | 0.00 |
| TRINITY_sp Q8BG Slc25a4  | Solute carrier fami | 28.10 | 0.00 |
| TRINITY_sp O428 fcf2     | rRNA-processing pro | 28.10 | 0.00 |
| TRINITY_sp Q9BX BRIP1    | Fanconi anemia grou | 28.10 | 0.00 |
| TRINITY_sp P715 MexAM1   | Putative carboxymet | 28.10 | 0.00 |
| TRINITY_sp A8WY par-1    | Serine/threonine-pr | 28.10 | 0.00 |

|                          |                     |       |      |
|--------------------------|---------------------|-------|------|
| TRINITY_sp Q5M75PAT12    | Probable protein S- | 28.10 | 0.00 |
| TRINITY_sp Q9M1IBGLU27   | Beta-glucosidase 27 | 28.10 | 0.00 |
| TRINITY_sp O0915Man2b1   | Lysosomal alpha-man | 28.10 | 0.00 |
| TRINITY_sp Q08A7PRMT6    | Probable protein ar | 28.10 | 0.00 |
| TRINITY_sp Q9XV1rrrbs-1  | Ribosome biogenesis | 28.10 | 0.00 |
| TRINITY_sp A5UW2nfi      | Endonuclease V OS=R | 28.10 | 0.00 |
| TRINITY_sp Q9T01SPA2     | Protein SPA1-RELATE | 28.10 | 0.00 |
| TRINITY_sp P3326CYP3A8   | Cytochrome P450 3A8 | 28.10 | 0.00 |
| TRINITY_sp Q2622ku70     | ATP-dependent DNA h | 28.10 | 0.00 |
| TRINITY_sp A9B77Haur_175 | UPF0060 membrane pr | 28.10 | 0.00 |
| TRINITY_sp Q0575Dbh      | Dopamine beta-hydro | 28.10 | 0.00 |
| TRINITY_sp Q84M2ABCA1    | ABC transporter A f | 28.10 | 0.00 |
| TRINITY_sp C8YR3Loxhd1   | Lipoxygenase homolo | 28.10 | 0.00 |
| TRINITY_sp Q9C87ABCC11   | ABC transporter C f | 28.10 | 0.00 |
| TRINITY_sp Q54E7abpF     | Actin-binding prote | 28.10 | 0.00 |
| TRINITY_sp Q9DBV Cyp4v2  | Cytochrome P450 4V2 | 28.10 | 0.00 |
| TRINITY_sp O4303rpa43    | DNA-directed RNA po | 28.00 | 0.00 |
| TRINITY_sp Q29A7GA17800  | Leishmanolysin-like | 28.00 | 0.00 |
| TRINITY_sp Q86K5chmp7    | Charged multivesicu | 28.00 | 0.00 |
| TRINITY_sp Q9P21CHD7     | Chromodomain-helica | 28.00 | 0.00 |
| TRINITY_sp Q1MT1SPBC16D1 | Probable assembly c | 28.00 | 0.00 |
| TRINITY_sp Q5TD5RSPH4A   | Radial spoke head p | 28.00 | 0.00 |
| TRINITY_sp Q9ZR7ABCB1    | ABC transporter B f | 28.00 | 0.00 |
| TRINITY_sp Q9WU4CLCN2    | Chloride channel pr | 28.00 | 0.00 |
| TRINITY_sp Q89A1bbp_296  | Uncharacterized met | 28.00 | 0.00 |
| TRINITY_sp Q1MT1vid27    | Vacuolar import and | 28.00 | 0.00 |
| TRINITY_sp Q9451DTX47    | Protein DETOXIFICAT | 28.00 | 0.00 |
| TRINITY_sp Q54T7drkC     | Probable serine/thr | 28.00 | 0.00 |
| TRINITY_sp Q9BT7TBCD     | Tubulin-specific ch | 28.00 | 0.00 |
| TRINITY_sp O2432-        | Vacuolar-processing | 28.00 | 0.00 |
| TRINITY_sp P0866CYP3A4   | Cytochrome P450 3A4 | 28.00 | 0.00 |
| TRINITY_sp A2VDUMAP3K7   | Mitogen-activated p | 28.00 | 0.00 |
| TRINITY_sp P4716XPT1     | Xanthine phosphorib | 28.00 | 0.00 |
| TRINITY_sp Q80UAnkzfl    | Ankyrin repeat and  | 28.00 | 0.00 |
| TRINITY_sp Q54P6gefA     | Ras guanine nucleot | 28.00 | 0.00 |
| TRINITY_sp H3K21MED12    | Mediator of RNA pol | 28.00 | 0.00 |
| TRINITY_sp Q80T8Dcaf5    | DDB1- and CUL4-asso | 28.00 | 0.00 |
| TRINITY_sp Q54Y5shkC     | Dual specificity pr | 28.00 | 0.00 |
| TRINITY_sp Q54B6mcfZ     | Mitochondrial subst | 28.00 | 0.00 |
| TRINITY_sp Q54W7forA     | Formin-A OS=Dictyos | 28.00 | 0.00 |
| TRINITY_sp Q5AD7MNN24    | Alpha-1,2-mannosylt | 28.00 | 0.00 |
| TRINITY_sp Q8C01Cog5     | Conserved oligomeri | 28.00 | 0.00 |
| TRINITY_sp Q0364YMR210W  | Putative esterase Y | 28.00 | 0.00 |
| TRINITY_sp P2774acoC     | Dihydrolipoyllysine | 28.00 | 0.00 |
| TRINITY_sp A2RUC TYW5    | tRNA wybutosine-syn | 28.00 | 0.00 |
| TRINITY_sp Q78Z7Nap114   | Nucleosome assembly | 27.90 | 0.00 |
| TRINITY_sp Q2156amt-3    | Putative ammonium t | 27.90 | 0.00 |
| TRINITY_sp F1MK(RNF170   | E3 ubiquitin-protei | 27.90 | 0.00 |
| TRINITY_sp O0425IMPA3    | Importin subunit al | 27.90 | 0.00 |
| TRINITY_sp Q69Q2Os02g075 | Probable protein ph | 27.90 | 0.00 |
| TRINITY_sp P4003ERG28    | Ergosterol biosynth | 27.90 | 0.00 |
| TRINITY_sp Q96CNEVI5L    | EVI5-like protein O | 27.90 | 0.00 |
| TRINITY_sp Q9C91CUL3B    | Cullin-3B OS=Arabid | 27.90 | 0.00 |
| TRINITY_sp Q8NC(DAGLB    | Sn1-specific diacyl | 27.90 | 0.00 |
| TRINITY_sp P0AA5qmcA     | Protein QmcA OS=Esc | 27.90 | 0.00 |
| TRINITY_sp O2255STY8     | Serine/threonine-pr | 27.90 | 0.00 |

|                           |                     |       |      |
|---------------------------|---------------------|-------|------|
| TRINITY_sp Q9UT8SPAC343   | Uncharacterized WD  | 27.90 | 0.00 |
| TRINITY_sp P4655cdk-12    | Cyclin-dependent ki | 27.90 | 0.00 |
| TRINITY_sp Q7ZY0cept1     | Choline/ethanolamin | 27.90 | 0.00 |
| TRINITY_sp P3881TRA1      | Transcription-assoc | 27.90 | 0.00 |
| TRINITY_sp E1BY0MSH6      | DNA mismatch repair | 27.90 | 0.00 |
| TRINITY_sp O6457UBA1C     | UBP1-associated pro | 27.90 | 0.00 |
| TRINITY_sp P1555acyII     | Penicillin acylase  | 27.90 | 0.00 |
| TRINITY_sp Q5E98SLC38A5   | Sodium-coupled neut | 27.90 | 0.00 |
| TRINITY_sp Q9FV0At1g3209  | CSC1-like protein A | 27.90 | 0.00 |
| TRINITY_sp O7450SPCC594   | Uncharacterized pro | 27.90 | 0.00 |
| TRINITY_sp Q5BK1Capn13    | Calpain-13 OS=Rattu | 27.90 | 0.00 |
| TRINITY_sp Q54V0hdaC      | Type-2 histone deac | 27.90 | 0.00 |
| TRINITY_sp Q6NR1ppp6r3-a  | Serine/threonine-pr | 27.90 | 0.00 |
| TRINITY_sp Q9UT2pvg1      | Pyruvyl transferase | 27.90 | 0.00 |
| TRINITY_sp Q9FL7ABCA12    | ABC transporter A f | 27.90 | 0.00 |
| TRINITY_sp Q6CL8CDC123    | Cell division cycle | 27.90 | 0.00 |
| TRINITY_sp P3475FAB1      | 1-phosphatidylinosi | 27.80 | 0.00 |
| TRINITY_sp Q54R1dhkL      | Hybrid signal trans | 27.80 | 0.00 |
| TRINITY_sp Q5517DDB_G027  | Protein DDB_G027668 | 27.80 | 0.00 |
| TRINITY_sp Q8691pakB      | Serine/threonine-pr | 27.80 | 0.00 |
| TRINITY_sp Q1770cp        | Hermansky-Pudlak sy | 27.80 | 0.00 |
| TRINITY_sp P4284YNL320W   | Uncharacterized mem | 27.80 | 0.00 |
| TRINITY_sp Q8CH1Tt115     | Tubulin polyglutamy | 27.80 | 0.00 |
| TRINITY_sp P3579CHKA      | Choline kinase alph | 27.80 | 0.00 |
| TRINITY_sp P1275RSP3      | Flagellar radial sp | 27.80 | 0.00 |
| TRINITY_sp Q5NC0Ttf2      | Transcription termi | 27.80 | 0.00 |
| TRINITY_sp Q9MA0At1g0497  | Putative BPI/LBP fa | 27.80 | 0.00 |
| TRINITY_sp P9WG0MT1753.1  | Uncharacterized oxi | 27.80 | 0.00 |
| TRINITY_sp P7988GUCA1B    | Guanylyl cyclase-ac | 27.80 | 0.00 |
| TRINITY_sp Q9HC0SEN2      | Senrin-specific pr  | 27.80 | 0.00 |
| TRINITY_sp Q9XH5ETR2      | Ethylene receptor 2 | 27.80 | 0.00 |
| TRINITY_sp Q1LU0fam206a   | Protein Simiate OS= | 27.80 | 0.00 |
| TRINITY_sp F4IC0RBL10     | RHOMBOID-like prote | 27.80 | 0.00 |
| TRINITY_sp P9WK8MT0656    | Uncharacterized pro | 27.80 | 0.00 |
| TRINITY_sp Q7LF0CHST15    | Carbohydrate sulfot | 27.80 | 0.00 |
| TRINITY_sp O4375STX6      | Syntaxin-6 OS=Homo  | 27.80 | 0.00 |
| TRINITY_sp Q9FG0MAG5      | Protein transport p | 27.80 | 0.00 |
| TRINITY_sp Q76PI0SPCC1223 | E3 ubiquitin-protei | 27.80 | 0.00 |
| TRINITY_sp Q8TD0DNAH3     | Dynein heavy chain  | 27.80 | 0.00 |
| TRINITY_sp Q99P2Mutyh     | Adenine DNA glycosy | 27.80 | 0.00 |
| TRINITY_sp Q9NU2MDN1      | Midasin OS=Homo sap | 27.80 | 0.00 |
| TRINITY_sp Q86W1PKHD1L1   | Fibrocystin-L OS=Ho | 27.80 | 0.00 |
| TRINITY_sp Q9QY2Smok2a    | Sperm motility kina | 27.70 | 0.00 |
| TRINITY_sp Q4PL0HPCA      | Neuron-specific cal | 27.70 | 0.00 |
| TRINITY_sp Q95J0IAK7      | Adenylate kinase 7  | 27.70 | 0.00 |
| TRINITY_sp Q9UT2pvg1      | Pyruvyl transferase | 27.70 | 0.00 |
| TRINITY_sp Q9XG0TIM9      | Mitochondrial impor | 27.70 | 0.00 |
| TRINITY_sp Q54Z2nol9      | Polynucleotide 5'-h | 27.70 | 0.00 |
| TRINITY_sp Q6440Cyp3a13   | Cytochrome P450 3A1 | 27.70 | 0.00 |
| TRINITY_sp Q2397Myo61F    | Myosin-IB OS=Drosop | 27.70 | 0.00 |
| TRINITY_sp Q6PD1Ip6k1     | Inositol hexakispho | 27.70 | 0.00 |
| TRINITY_sp Q96M0NSMCE3    | Non-structural main | 27.70 | 0.00 |
| TRINITY_sp Q8CF0Scyl2     | SCY1-like protein 2 | 27.70 | 0.00 |
| TRINITY_sp Q8BIVPrune     | Protein prune homol | 27.70 | 0.00 |
| TRINITY_sp O4892ETR1      | Ethylene receptor 0 | 27.70 | 0.00 |
| TRINITY_sp Q08D2ELMOD2    | ELMO domain-contain | 27.70 | 0.00 |

|                          |                      |       |      |
|--------------------------|----------------------|-------|------|
| TRINITY_sp Q6YZ4RPA1A    | Replication protein  | 27.70 | 0.00 |
| TRINITY_sp Q55E7frmB     | FERM domain-contain  | 27.70 | 0.00 |
| TRINITY_sp Q9TUMSTAT5B   | Signal transducer a  | 27.70 | 0.00 |
| TRINITY_sp O444(F37C4.5  | Protein F37C4.5 OS=  | 27.70 | 0.00 |
| TRINITY_sp O4264SPAC10F6 | RCC1 repeat-contain  | 27.70 | 0.00 |
| TRINITY_sp O1569-        | Trypanin OS=Trypano  | 27.70 | 0.00 |
| TRINITY_sp Q9SU6CHX17    | Cation/H(+) antipor  | 27.70 | 0.00 |
| TRINITY_sp Q0496DNAJ1    | DnaJ protein homolo  | 27.70 | 0.00 |
| TRINITY_sp Q0068gp63     | Leishmanolysin OS=L  | 27.70 | 0.00 |
| TRINITY_sp Q75J9cpras1   | Circularly permutat  | 27.70 | 0.00 |
| TRINITY_sp Q149NWD1      | NACHT domain- and W  | 27.70 | 0.00 |
| TRINITY_sp Q9V66CG16935  | Probable trans-2-en  | 27.70 | 0.00 |
| TRINITY_sp Q0554HRQ1     | ATP-dependent helic  | 27.70 | 0.00 |
| TRINITY_sp P9752Nf1      | Neurofibromin OS=Ra  | 27.70 | 0.00 |
| TRINITY_sp P0678CMD1     | Calmodulin OS=Sacch  | 27.70 | 0.00 |
| TRINITY_sp Q23T6TLL3A    | Tubulin glycyclase 3 | 27.70 | 0.00 |
| TRINITY_sp Q6PD1-        | UPF0668 protein C10  | 27.70 | 0.00 |
| TRINITY_sp Q8BW7Usp38    | Ubiquitin carboxyl-  | 27.70 | 0.00 |
| TRINITY_sp P1149PHO8     | Repressible alkalin  | 27.70 | 0.00 |
| TRINITY_sp G5EFVdaf-10   | Intraflagellar tran  | 27.70 | 0.00 |
| TRINITY_sp Q86G4gefQ     | Ras guanine nucleot  | 27.70 | 0.00 |
| TRINITY_sp O7442SPCC162  | Uncharacterized pro  | 27.70 | 0.00 |
| TRINITY_sp Q9EP5Tsc1     | Hamartin OS=Mus mus  | 27.70 | 0.00 |
| TRINITY_sp Q5Z98Os06g072 | Serine/threonine-pr  | 27.70 | 0.00 |
| TRINITY_sp Q9Y11NELF-B   | Negative elongation  | 27.70 | 0.00 |
| TRINITY_sp Q99NIRwdd1    | RWD domain-containi  | 27.70 | 0.00 |
| TRINITY_sp Q930(USP9X    | Probable ubiquitin   | 27.70 | 0.00 |
| TRINITY_sp P3471-        | Elongation factor 1  | 27.70 | 0.00 |
| TRINITY_sp Q6B92vwkA     | Alpha-protein kinas  | 27.70 | 0.00 |
| TRINITY_sp Q56A4ccdc40   | Coiled-coil domain-  | 27.70 | 0.00 |
| TRINITY_sp O1416SPAC4A8  | Putative lipase C4A  | 27.70 | 0.00 |
| TRINITY_sp Q6FM6ATG18    | Autophagy-related p  | 27.70 | 0.00 |
| TRINITY_sp Q6XH7roco9    | Probable serine/thr  | 27.70 | 0.00 |
| TRINITY_sp A7RF7cdc123   | Cell division cycle  | 27.70 | 0.00 |
| TRINITY_sp O3177pbpX     | Putative penicillin  | 27.70 | 0.00 |
| TRINITY_sp Q86H6DDB_G027 | Probable serine/thr  | 27.70 | 0.00 |
| TRINITY_sp F4KD7DUR3     | Urea-proton symport  | 27.70 | 0.00 |
| TRINITY_sp P3446clu-1    | Clustered mitochond  | 27.70 | 0.00 |
| TRINITY_sp Q9P2FCC2D2A   | Coiled-coil and C2   | 27.70 | 0.00 |
| TRINITY_sp Q8L61SEC31B   | Protein transport p  | 27.70 | 0.00 |
| TRINITY_sp Q8TB1SLC25A40 | Solute carrier fami  | 27.60 | 0.00 |
| TRINITY_sp A8ILF6CFAP52  | Cilia- and flagella  | 27.60 | 0.00 |
| TRINITY_sp Q8C16Cpnel    | Copine-1 OS=Mus mus  | 27.60 | 0.00 |
| TRINITY_sp P2013BET2     | Geranylgeranyl tran  | 27.60 | 0.00 |
| TRINITY_sp P0C87Jmjd7    | JmjC domain-contain  | 27.60 | 0.00 |
| TRINITY_sp Q9BQ6GRWD1    | Glutamate-rich WD r  | 27.60 | 0.00 |
| TRINITY_sp Q8CHF7t115    | Tubulin polyglutamy  | 27.60 | 0.00 |
| TRINITY_sp Q9FF4ABCG28   | ABC transporter G f  | 27.60 | 0.00 |
| TRINITY_sp Q8051ctse-b   | Cathepsin E-B OS=Xe  | 27.60 | 0.00 |
| TRINITY_sp P5349AC       | Actin OS=Chondrus c  | 27.60 | 0.00 |
| TRINITY_sp Q2KJ7USP21    | Ubiquitin carboxyl-  | 27.60 | 0.00 |
| TRINITY_sp Q8VZ6TSN1     | Ribonuclease TUDOR   | 27.60 | 0.00 |
| TRINITY_sp Q8R0VCes4a    | Carboxylesterase 4A  | 27.60 | 0.00 |
| TRINITY_sp A2X5ESWEET15  | Bidirectional sugar  | 27.60 | 0.00 |
| TRINITY_sp Q86CFatg8     | Autophagy-related p  | 27.60 | 0.00 |
| TRINITY_sp Q9FT5GTE6     | Transcription facto  | 27.60 | 0.00 |

|                                             |                       |       |      |
|---------------------------------------------|-----------------------|-------|------|
| TRINITY_sp A4YI{Msed_2003-hydroxypropionyl- |                       | 27.60 | 0.00 |
| TRINITY_sp O2217PAB4                        | Polyadenylate-bindin  | 27.60 | 0.00 |
| TRINITY_sp Q8LLINUP96                       | Nuclear pore comple   | 27.60 | 0.00 |
| TRINITY_sp Q80ZFWdtc1                       | WD and tetratricope   | 27.60 | 0.00 |
| TRINITY_sp Q8TG7rrp42                       | Exosome complex com   | 27.60 | 0.00 |
| TRINITY_sp Q0502RRP5                        | rRNA biogenesis pro   | 27.60 | 0.00 |
| TRINITY_sp Q7ZX3jmjd6-b                     | Bifunctional argini   | 27.60 | 0.00 |
| TRINITY_sp P7416sll1374                     | Uncharacterized sym   | 27.60 | 0.00 |
| TRINITY_sp Q67B3A4galt                      | Lactosylceramide 4-   | 27.60 | 0.00 |
| TRINITY_sp Q9BV3SLC25A23                    | Calcium-binding mit   | 27.60 | 0.00 |
| TRINITY_sp P3442dpf-6                       | Dipeptidyl peptidas   | 27.60 | 0.00 |
| TRINITY_sp Q8CDMLrrc9                       | Leucine-rich repeat   | 27.60 | 0.00 |
| TRINITY_sp Q5U37klhl12                      | Kelch-like protein    | 27.60 | 0.00 |
| TRINITY_sp Q2NL6PARP6                       | Poly [ADP-ribose] p   | 27.60 | 0.00 |
| TRINITY_sp Q8LJVACR4                        | ACT domain-containi   | 27.60 | 0.00 |
| TRINITY_sp B5FY3ARL3                        | ADP-ribosylation fa   | 27.60 | 0.00 |
| TRINITY_sp Q6B93vwkA                        | Alpha-protein kinas   | 27.50 | 0.00 |
| TRINITY_sp D4AP3ARB_0622                    | Probable thioredoxi   | 27.50 | 0.00 |
| TRINITY_sp Q6NU7MFSD12                      | Major facilitator s   | 27.50 | 0.00 |
| TRINITY_sp A1L44BPM6                        | BTB/POZ and MATH do   | 27.50 | 0.00 |
| TRINITY_sp Q54N5dynB                        | Dynactin subunit 2    | 27.50 | 0.00 |
| TRINITY_sp Q9JI3A4galt                      | Lactosylceramide 4-   | 27.50 | 0.00 |
| TRINITY_sp Q54P3fcf60                       | Counting factor 60    | 27.50 | 0.00 |
| TRINITY_sp Q84C3viod                        | Capreomycinidene synt | 27.50 | 0.00 |
| TRINITY_sp Q6C13CDC123                      | Cell division cycle   | 27.50 | 0.00 |
| TRINITY_sp Q54J3fabcc3                      | ABC transporter C f   | 27.50 | 0.00 |
| TRINITY_sp Q56Z3VSR4                        | Vacuolar-sorting re   | 27.50 | 0.00 |
| TRINITY_sp Q4Z83RanBPM                      | Ran-binding protein   | 27.50 | 0.00 |
| TRINITY_sp P4352cya                         | Adenylate cyclase O   | 27.50 | 0.00 |
| TRINITY_sp Q9SK3MON1                        | Vacuolar fusion pro   | 27.50 | 0.00 |
| TRINITY_sp Q99N3Cep41                       | Centrosomal protein   | 27.50 | 0.00 |
| TRINITY_sp Q6AX3Ddx11                       | ATP-dependent DNA h   | 27.50 | 0.00 |
| TRINITY_sp Q54P3gefA                        | Ras guanine nucleot   | 27.50 | 0.00 |
| TRINITY_sp Q9QZ3Abhd1                       | Protein ABHD1 OS=Mu   | 27.50 | 0.00 |
| TRINITY_sp B1XL3tig                         | Trigger factor OS=S   | 27.50 | 0.00 |
| TRINITY_sp Q8VX3XEG113                      | Arabinosyltransfera   | 27.50 | 0.00 |
| TRINITY_sp Q0023melO                        | Tyrosinase OS=Asper   | 27.50 | 0.00 |
| TRINITY_sp Q7ZU3parn                        | Poly(A)-specific ri   | 27.50 | 0.00 |
| TRINITY_sp B3E63glmM                        | Phosphoglucosamine    | 27.50 | 0.00 |
| TRINITY_sp Q5023lpcat2                      | Lysophosphatidylcho   | 27.50 | 0.00 |
| TRINITY_sp Q8GT3TIC40                       | Protein TIC 40, chl   | 27.50 | 0.00 |
| TRINITY_sp Q9CA3LOX6                        | Lipoxygenase 6, chl   | 27.50 | 0.00 |
| TRINITY_sp Q9RT3sbcC                        | Nuclease SbcCD subu   | 27.50 | 0.00 |
| TRINITY_sp B6ET3SYT2                        | Synaptotagmin-2 OS=   | 27.50 | 0.00 |
| TRINITY_sp Q9QY3Dnajc7                      | DnaJ homolog subfam   | 27.50 | 0.00 |
| TRINITY_sp O1363SPAC11E3                    | Uncharacterized RWD   | 27.50 | 0.00 |
| TRINITY_sp A8G73ppc                         | Phosphoenolpyruvate   | 27.50 | 0.00 |
| TRINITY_sp Q8RW3SCD2                        | Coiled-coil domain-   | 27.50 | 0.00 |
| TRINITY_sp Q9Y73SPCC569                     | Aromatic amino acid   | 27.50 | 0.00 |
| TRINITY_sp O3463yloA                        | Uncharacterized pro   | 27.50 | 0.00 |
| TRINITY_sp O6073PLA2G6                      | 85/88 kDa calcium-i   | 27.50 | 0.00 |
| TRINITY_sp Q9SV3EDTX45                      | Protein DETOXIFICAT   | 27.50 | 0.00 |
| TRINITY_sp A6ZM3PIF1                        | ATP-dependent DNA h   | 27.50 | 0.00 |
| TRINITY_sp Q9C83ABCG13                      | ABC transporter G f   | 27.40 | 0.00 |
| TRINITY_sp Q6D33idi                         | Isopentenyl-diphosp   | 27.40 | 0.00 |
| TRINITY_sp O0084-                           | Uncharacterized 80    | 27.40 | 0.00 |



|                          |                     |       |      |
|--------------------------|---------------------|-------|------|
| TRINITY_sp D3ZENMicall12 | MICAL-like protein  | 27.40 | 0.00 |
| TRINITY_sp Q8GWFOS9      | Protein OS-9 homolo | 27.40 | 0.00 |
| TRINITY_sp Q9647CYP4C21  | Cytochrome P450 4c2 | 27.40 | 0.00 |
| TRINITY_sp O6244Y43F4A.1 | Leishmanolysin-like | 27.40 | 0.00 |
| TRINITY_sp Q01F(Ogd      | Prolyl 3,4-dihydrox | 27.40 | 0.00 |
| TRINITY_sp Q17Q2TFDP1    | Transcription facto | 27.40 | 0.00 |
| TRINITY_sp Q5TFEINT5DC1  | 5'-nucleotidase dom | 27.40 | 0.00 |
| TRINITY_sp Q8W02CCR4-1   | Carbon catabolite r | 27.40 | 0.00 |
| TRINITY_sp Q6UV3MOXD1    | DBH-like monooxygen | 27.40 | 0.00 |
| TRINITY_sp Q8IS1gefJ     | Ras guanine nucleot | 27.40 | 0.00 |
| TRINITY_sp Q1ZXIDDB_G028 | Sphingomyelinase DD | 27.40 | 0.00 |
| TRINITY_sp Q8KEMCT0663   | UPF0301 protein CT0 | 27.40 | 0.00 |
| TRINITY_sp O5487Hmgb3    | High mobility group | 27.40 | 0.00 |
| TRINITY_sp P7068PLA2G7   | Platelet-activating | 27.40 | 0.00 |
| TRINITY_sp P3899MSS4     | Probable phosphatid | 27.40 | 0.00 |
| TRINITY_sp A4Q09Tt1110   | Protein polyglycyla | 27.40 | 0.00 |
| TRINITY_sp B3DNAPC6      | Anaphase-promoting  | 27.40 | 0.00 |
| TRINITY_sp Q7ZVFwdr75    | WD repeat-containin | 27.40 | 0.00 |
| TRINITY_sp Q8JH1ar113b   | ADP-ribosylation fa | 27.40 | 0.00 |
| TRINITY_sp Q9M08ISA3     | Isoamylase 3, chlor | 27.40 | 0.00 |
| TRINITY_sp P4189scn1     | Cut9-interacting pr | 27.40 | 0.00 |
| TRINITY_sp Q94KIVPS52    | Vacuolar protein so | 27.40 | 0.00 |
| TRINITY_sp Q9699UTP4     | U3 small nucleolar  | 27.40 | 0.00 |
| TRINITY_sp Q0849PDE4D    | cAMP-specific 3',5' | 27.40 | 0.00 |
| TRINITY_sp Q9SA5CSP41B   | Chloroplast stem-lo | 27.40 | 0.00 |
| TRINITY_sp Q6TN8paklip1  | p21-activated prote | 27.40 | 0.00 |
| TRINITY_sp Q9VY9Evi5     | Ecotropic viral int | 27.40 | 0.00 |
| TRINITY_sp Q17R8GEN1     | Flap endonuclease G | 27.40 | 0.00 |
| TRINITY_sp Q6ZUC-        | Uncharacterized pro | 27.40 | 0.00 |
| TRINITY_sp Q8S19Os01g092 | Probable glucuronos | 27.40 | 0.00 |
| TRINITY_sp Q9NP8POLM     | DNA-directed DNA/RN | 27.40 | 0.00 |
| TRINITY_sp P3352ABCC1    | Multidrug resistanc | 27.30 | 0.00 |
| TRINITY_sp Q8CN4SE_2036  | Uncharacterized oxi | 27.30 | 0.00 |
| TRINITY_sp Q9MA5ACBP4    | Acyl-CoA-binding do | 27.30 | 0.00 |
| TRINITY_sp Q9VL7CCDC53   | WASH complex subuni | 27.30 | 0.00 |
| TRINITY_sp P3457epac-1   | Rap guanine nucleot | 27.30 | 0.00 |
| TRINITY_sp Q96S1JMJD8    | JmjC domain-contain | 27.30 | 0.00 |
| TRINITY_sp Q9Z12Eif2ak3  | Eukaryotic translat | 27.30 | 0.00 |
| TRINITY_sp O9601CHEK2    | Serine/threonine-pr | 27.30 | 0.00 |
| TRINITY_sp Q8WV2KBTBD7   | Kelch repeat and BT | 27.30 | 0.00 |
| TRINITY_sp Q6G1(truA     | tRNA pseudouridine  | 27.30 | 0.00 |
| TRINITY_sp Q8BZ1Nuak2    | NUAK family SNF1-li | 27.30 | 0.00 |
| TRINITY_sp A2YW9PLP2     | Patatin-like protei | 27.30 | 0.00 |
| TRINITY_sp Q0CBMfaeA     | Probable feruloyl e | 27.30 | 0.00 |
| TRINITY_sp Q9426cif-1    | COP9/Signalosome an | 27.30 | 0.00 |
| TRINITY_sp Q54V9mcfJ     | Mitochondrial subst | 27.30 | 0.00 |
| TRINITY_sp Q7SXVslc25a39 | Solute carrier fami | 27.30 | 0.00 |
| TRINITY_sp Q9NXEMKS1     | Meckel syndrome typ | 27.30 | 0.00 |
| TRINITY_sp P3899MSS4     | Probable phosphatid | 27.30 | 0.00 |
| TRINITY_sp Q0023me10     | Tyrosinase OS=Asper | 27.30 | 0.00 |
| TRINITY_sp Q6NK8At5g0170 | Probable protein ph | 27.30 | 0.00 |
| TRINITY_sp A6H88Kcnb2    | Potassium voltage-g | 27.30 | 0.00 |
| TRINITY_sp B1H1facp2     | Lysosomal acid phos | 27.30 | 0.00 |
| TRINITY_sp Q54K(vps51    | Vacuolar protein so | 27.30 | 0.00 |
| TRINITY_sp P5187Cyp4f6   | Cytochrome P450 4F6 | 27.30 | 0.00 |
| TRINITY_sp Q10S9Os03g010 | Probable glucuronos | 27.30 | 0.00 |

|                          |                      |       |      |
|--------------------------|----------------------|-------|------|
| TRINITY_sp Q55DVabcG1    | ABC transporter G f  | 27.30 | 0.00 |
| TRINITY_sp Q6NMNF8H      | Probable glucuronox  | 27.30 | 0.00 |
| TRINITY_sp P3444pat-2    | Integrin alpha pat-  | 27.30 | 0.00 |
| TRINITY_sp Q0166CACNA1D  | Voltage-dependent L  | 27.30 | 0.00 |
| TRINITY_sp Q3S2UmokB     | Lovastatin diketide  | 27.30 | 0.00 |
| TRINITY_sp O4937VAMP711  | Vesicle-associated   | 27.20 | 0.00 |
| TRINITY_sp Q0746-        | Ribonuclease OS=Aer  | 27.20 | 0.00 |
| TRINITY_sp Q0788SOS1     | Son of sevenless ho  | 27.20 | 0.00 |
| TRINITY_sp Q86YHDZIP1    | Zinc finger protein  | 27.20 | 0.00 |
| TRINITY_sp Q54R1xpot     | Exportin-T OS=Dicty  | 27.20 | 0.00 |
| TRINITY_sp Q54FFmcfS     | Mitochondrial subst  | 27.20 | 0.00 |
| TRINITY_sp O6985SCO6023  | Exopolysaccharide p  | 27.20 | 0.00 |
| TRINITY_sp Q0752TRM3     | tRNA (guanosine(18)  | 27.20 | 0.00 |
| TRINITY_sp O7568PPM1B    | Protein phosphatase  | 27.20 | 0.00 |
| TRINITY_sp Q8LPQBTB      | Zinc finger protein  | 27.20 | 0.00 |
| TRINITY_sp Q8BMEif4e2    | Eukaryotic translat  | 27.20 | 0.00 |
| TRINITY_sp Q9LX7RRP46    | Exosome complex exo  | 27.20 | 0.00 |
| TRINITY_sp Q8LEVAt2g306  | (BTB/POZ domain-cont | 27.20 | 0.00 |
| TRINITY_sp Q653IOs06g025 | Potassium channel K  | 27.20 | 0.00 |
| TRINITY_sp A4TNIbetaA    | Oxygen-dependent ch  | 27.20 | 0.00 |
| TRINITY_sp Q8VYCAAEE14   | 2-succinylbenzoate-  | 27.20 | 0.00 |
| TRINITY_sp Q6L5HIMCE     | Probable isoprenylc  | 27.20 | 0.00 |
| TRINITY_sp Q8FTHthiED    | Thiamine biosynthes  | 27.20 | 0.00 |
| TRINITY_sp Q9FPFEDR1     | Serine/threonine-pr  | 27.20 | 0.00 |
| TRINITY_sp Q9WVCSep7     | Septin-7 OS=Rattus   | 27.20 | 0.00 |
| TRINITY_sp Q9697TMBIM1   | Protein lifeguard 3  | 27.20 | 0.00 |
| TRINITY_sp Q8H1UAPC2     | Anaphase-promoting   | 27.20 | 0.00 |
| TRINITY_sp Q6PDJEcm29    | Proteasome-associat  | 27.20 | 0.00 |
| TRINITY_sp Q9Y2HSTK38L   | Serine/threonine-pr  | 27.20 | 0.00 |
| TRINITY_sp Q91Z1Fgd4     | FYVE, RhoGEF and PH  | 27.20 | 0.00 |
| TRINITY_sp P2093RASA1    | Ras GTPase-activati  | 27.20 | 0.00 |
| TRINITY_sp Q0VCHLSM12    | Protein LSM12 homol  | 27.20 | 0.00 |
| TRINITY_sp C8YR3Loxhd1   | Lipoxygenase homolo  | 27.20 | 0.00 |
| TRINITY_sp Q54C9gefF     | Ras guanine nucleot  | 27.10 | 0.00 |
| TRINITY_sp Q9AWFCML11    | Probable calcium-bi  | 27.10 | 0.00 |
| TRINITY_sp Q8LEVAt2g306  | (BTB/POZ domain-cont | 27.10 | 0.00 |
| TRINITY_sp Q2545-        | Muscle calcium chan  | 27.10 | 0.00 |
| TRINITY_sp Q4P97CCR4     | Glucose-repressible  | 27.10 | 0.00 |
| TRINITY_sp Q9P3Udb14     | E3 ubiquitin-protei  | 27.10 | 0.00 |
| TRINITY_sp P2858TRK2     | Low-affinity potass  | 27.10 | 0.00 |
| TRINITY_sp Q66HIKlh136   | Kelch-like protein   | 27.10 | 0.00 |
| TRINITY_sp Q1ZXHgxcdD    | Guanine exchange fa  | 27.10 | 0.00 |
| TRINITY_sp Q8697DDB_G027 | Putative protein di  | 27.10 | 0.00 |
| TRINITY_sp Q9D7FPgc      | Gastricsin OS=Mus m  | 27.10 | 0.00 |
| TRINITY_sp O7513CPNE3    | Copine-3 OS=Homo sa  | 27.10 | 0.00 |
| TRINITY_sp Q0652dnrK     | Carminomycin 4-O-me  | 27.10 | 0.00 |
| TRINITY_sp P1097-        | Retrovirus-related   | 27.10 | 0.00 |
| TRINITY_sp A6H7HFBXO3    | F-box only protein   | 27.10 | 0.00 |
| TRINITY_sp Q6F6EdnaJ     | Chaperone protein D  | 27.10 | 0.00 |
| TRINITY_sp Q7XJIGLR3.1   | Glutamate receptor   | 27.10 | 0.00 |
| TRINITY_sp Q54GIDDB_G029 | PXMP2/4 family prot  | 27.10 | 0.00 |
| TRINITY_sp Q9FF1At5g078  | (Flavin-containing m | 27.10 | 0.00 |
| TRINITY_sp Q54E7gr1E     | Metabotropic glutam  | 27.10 | 0.00 |
| TRINITY_sp Q9UIIVPS51    | Vacuolar protein so  | 27.10 | 0.00 |
| TRINITY_sp Q555VDDB_G027 | VID27-like protein   | 27.10 | 0.00 |
| TRINITY_sp Q8GUMAt3g5264 | Nicastrin OS=Arabid  | 27.10 | 0.00 |

|                          |                     |       |      |
|--------------------------|---------------------|-------|------|
| TRINITY_sp Q96N\KLHL32   | Kelch-like protein  | 27.10 | 0.00 |
| TRINITY_sp Q5WY\kmo      | Kynurenine 3-monoox | 27.10 | 0.00 |
| TRINITY_sp O945\kap113   | Importin beta-like  | 27.10 | 0.00 |
| TRINITY_sp Q2WG\FER1L6   | Fer-1-like protein  | 27.10 | 0.00 |
| TRINITY_sp P800\LPO      | Lactoperoxidase OS= | 27.10 | 0.00 |
| TRINITY_sp Q54H\Fgins1   | Probable DNA replic | 27.10 | 0.00 |
| TRINITY_sp Q9SZ\HHP4     | Heptahelical transm | 27.10 | 0.00 |
| TRINITY_sp Q5JM\Os01g075 | Potassium channel K | 27.10 | 0.00 |
| TRINITY_sp Q99K\Smox     | Spermine oxidase OS | 27.10 | 0.00 |
| TRINITY_sp Q6P0\Fcelf2   | CUGBP Elav-like fam | 27.10 | 0.00 |
| TRINITY_sp Q940\LARP1A   | La-related protein  | 27.10 | 0.00 |
| TRINITY_sp Q9LT\VCR      | Varicose-related pr | 27.10 | 0.00 |
| TRINITY_sp Q8BW\Dnah3    | Dynein heavy chain  | 27.10 | 0.00 |
| TRINITY_sp Q9P7\SPBC1711 | Uncharacterized WD  | 27.00 | 0.00 |
| TRINITY_sp Q6IC\At1g4315 | Polypyrimidine trac | 27.00 | 0.00 |
| TRINITY_sp A2YF\FHK1     | Probable histidine  | 27.00 | 0.00 |
| TRINITY_sp Q38W\atpA     | ATP synthase subuni | 27.00 | 0.00 |
| TRINITY_sp Q6NW\arih11   | E3 ubiquitin-protei | 27.00 | 0.00 |
| TRINITY_sp Q9C1\mc11     | Minichromosome loss | 27.00 | 0.00 |
| TRINITY_sp Q96P\IGBP4    | Guanylate-binding p | 27.00 | 0.00 |
| TRINITY_sp O546\Slc29a2  | Equilibrative nucle | 27.00 | 0.00 |
| TRINITY_sp Q4V8\brms11a  | Breast cancer metas | 27.00 | 0.00 |
| TRINITY_sp Q8H0\UPL2     | E3 ubiquitin-protei | 27.00 | 0.00 |
| TRINITY_sp Q84M\FHY      | Bifunctional ribofl | 27.00 | 0.00 |
| TRINITY_sp P871\SPBC3D6  | Uncharacterized WD  | 27.00 | 0.00 |
| TRINITY_sp Q6A3\SUC6     | Putative sucrose tr | 27.00 | 0.00 |
| TRINITY_sp O823\ATL67    | RING-H2 finger prot | 27.00 | 0.00 |
| TRINITY_sp A2VE\UNC93A   | Protein unc-93 homo | 27.00 | 0.00 |
| TRINITY_sp Q8LB\ISWEET7  | Bidirectional sugar | 27.00 | 0.00 |
| TRINITY_sp Q0P5\INSUN3   | Putative methyltran | 27.00 | 0.00 |
| TRINITY_sp Q8MY\HDB_G027 | Probable serine/thr | 27.00 | 0.00 |
| TRINITY_sp Q9SR\SNL1     | Paired amphipathic  | 27.00 | 0.00 |
| TRINITY_sp P0DL\DRC1     | Dynein regulatory c | 27.00 | 0.00 |
| TRINITY_sp P218\SRM1     | Guanine nucleotide  | 27.00 | 0.00 |
| TRINITY_sp Q9Y2\CHKB     | Choline/ethanolamin | 27.00 | 0.00 |
| TRINITY_sp Q9CQ\Fcyox1   | Prenylcysteine oxid | 27.00 | 0.00 |
| TRINITY_sp Q5ZII\USP28   | Ubiquitin carboxyl- | 27.00 | 0.00 |
| TRINITY_sp Q641V\Tt119   | Probable tubulin po | 27.00 | 0.00 |
| TRINITY_sp P007\PGA      | Pepsin A OS=Gallus  | 27.00 | 0.00 |
| TRINITY_sp Q9SL\HOC132   | Translocase of chlo | 27.00 | 0.00 |
| TRINITY_sp Q5UQ\MIMI_L54 | Putative ADP-ribosy | 27.00 | 0.00 |
| TRINITY_sp F4IP\MIP3     | Sec1 family domain- | 27.00 | 0.00 |
| TRINITY_sp Q126\YPK9     | Vacuolar cation-tra | 27.00 | 0.00 |
| TRINITY_sp Q86W\PKHD1L1  | Fibrocystin-L OS=Ho | 27.00 | 0.00 |
| TRINITY_sp Q0WTF\CYP81F3 | Cytochrome P450 81F | 26.90 | 0.00 |
| TRINITY_sp Q9W0\Cyp4d20  | Probable cytochrome | 26.90 | 0.00 |
| TRINITY_sp O744\SPPC162  | Uncharacterized pro | 26.90 | 0.00 |
| TRINITY_sp Q3U0\Tbc1d2b  | TBC1 domain family  | 26.90 | 0.00 |
| TRINITY_sp Q08C\smoxd2   | DBH-like monooxygen | 26.90 | 0.00 |
| TRINITY_sp Q129\BNIP1    | Vesicle transport p | 26.90 | 0.00 |
| TRINITY_sp P256\CDC39    | General negative re | 26.90 | 0.00 |
| TRINITY_sp Q68C\TNS3     | Tensin-3 OS=Homo sa | 26.90 | 0.00 |
| TRINITY_sp Q700\CSPL16   | Squamosa promoter-b | 26.90 | 0.00 |
| TRINITY_sp Q9M2\SDIR1    | E3 ubiquitin-protei | 26.90 | 0.00 |
| TRINITY_sp Q6RC\IFT74    | Intraflagellar tran | 26.90 | 0.00 |
| TRINITY_sp Q86L\rapB     | Ras-related protein | 26.90 | 0.00 |

|                          |                               |       |      |
|--------------------------|-------------------------------|-------|------|
| TRINITY_sp Q80VIFam98b   | Protein FAM98B OS=M           | 26.90 | 0.00 |
| TRINITY_sp P794(CYP3A29  | Cytochrome P450 3A2           | 26.90 | 0.00 |
| TRINITY_sp Q1ZXIDDB_G028 | Sphingomyelinase DD           | 26.90 | 0.00 |
| TRINITY_sp Q91XC         | Pex16 Peroxisomal membran     | 26.90 | 0.00 |
| TRINITY_sp Q7LHC(TY3B-I  | Transposon Ty3-I Ga           | 26.90 | 0.00 |
| TRINITY_sp Q99M8         | Sec1412 SEC14-like protein    | 26.90 | 0.00 |
| TRINITY_sp Q08D          | mael Protein maelstrom h      | 26.90 | 0.00 |
| TRINITY_sp Q54I8         | rtfdc1 Protein RTF2 homolo    | 26.90 | 0.00 |
| TRINITY_sp Q54E7         | abpF Actin-binding prote      | 26.90 | 0.00 |
| TRINITY_sp Q7RRR         | PHY00695 T-cell immunomodula  | 26.90 | 0.00 |
| TRINITY_sp Q61Y(CBG0355  | Leishmanolysin-like           | 26.90 | 0.00 |
| TRINITY_sp B6K6          | mmml Maintenance of mito      | 26.90 | 0.00 |
| TRINITY_sp Q3T1          | YIF1A Protein YIF1A OS=Bo     | 26.90 | 0.00 |
| TRINITY_sp Q9ST4         | PH1 Pleckstrin homology       | 26.90 | 0.00 |
| TRINITY_sp B1AZ7         | Tmem245 Transmembrane prote   | 26.90 | 0.00 |
| TRINITY_sp B0U0          | UrlmL Ribosomal RNA large     | 26.90 | 0.00 |
| TRINITY_sp P293          | EPHA3 Ephrin type-A recep     | 26.90 | 0.00 |
| TRINITY_sp A6VY          | ddl D-alanine--D-alanin       | 26.90 | 0.00 |
| TRINITY_sp Q7Z6          | FGD2 FYVE, RhoGEF and PH      | 26.90 | 0.00 |
| TRINITY_sp Q8VZI         | DEG15 Glyoxysomal process     | 26.90 | 0.00 |
| TRINITY_sp O552          | (Supt5h Transcription elong   | 26.90 | 0.00 |
| TRINITY_sp Q1581         | ITSN1 Intersectin-1 OS=Ho     | 26.90 | 0.00 |
| TRINITY_sp P551          | ybaR Putative sulfate tr      | 26.90 | 0.00 |
| TRINITY_sp Q169          | - Syntaxin OS=Aplysia         | 26.90 | 0.00 |
| TRINITY_sp Q4WZ          | Hmvp1 Sorting nexin mvpl      | 26.90 | 0.00 |
| TRINITY_sp Q9FL          | GNL1 ARF guanine-nucleot      | 26.90 | 0.00 |
| TRINITY_sp Q08D          | AAR2 Protein AAR2 homolo      | 26.90 | 0.00 |
| TRINITY_sp Q9H3          | (PABPC3 Polyadenylate-bindi   | 26.80 | 0.00 |
| TRINITY_sp Q5HRM         | SERP0172 Putative TrmH famil  | 26.80 | 0.00 |
| TRINITY_sp Q038          | YMR166C Uncharacterized mit   | 26.80 | 0.00 |
| TRINITY_sp Q5BLI         | mett121a Protein N-lysine me  | 26.80 | 0.00 |
| TRINITY_sp Q5AH          | CHK1 Histidine protein k      | 26.80 | 0.00 |
| TRINITY_sp Q2VQ          | cecr1 Adenosine deaminase     | 26.80 | 0.00 |
| TRINITY_sp Q55A          | (DDB_G027 Probable serine/thr | 26.80 | 0.00 |
| TRINITY_sp Q551          | (DDB_G027 Protein DDB_G027668 | 26.80 | 0.00 |
| TRINITY_sp P873          | (tfb2 RNA polymerase II t     | 26.80 | 0.00 |
| TRINITY_sp Q29A          | GA17800 Leishmanolysin-like   | 26.80 | 0.00 |
| TRINITY_sp Q9M8          | UGT80A2 Sterol 3-beta-gluco   | 26.80 | 0.00 |
| TRINITY_sp P838          | Ift81 Intraflagellar tran     | 26.80 | 0.00 |
| TRINITY_sp Q55A          | (DDB_G027 Probable serine/thr | 26.80 | 0.00 |
| TRINITY_sp Q8IY          | TEX11 Testis-expressed se     | 26.80 | 0.00 |
| TRINITY_sp Q08C          | smoxd2 DBH-like monooxygen    | 26.80 | 0.00 |
| TRINITY_sp P094          | LOX1.2 Seed linoleate 9S-1    | 26.80 | 0.00 |
| TRINITY_sp Q6IN          | inol11 Nucleolar protein 1    | 26.80 | 0.00 |
| TRINITY_sp O345          | sppA Putative signal pep      | 26.80 | 0.00 |
| TRINITY_sp O040          | CCX5 Cation/calcium exch      | 26.80 | 0.00 |
| TRINITY_sp Q14C          | VATXN7L3 Ataxin-7-like prote  | 26.80 | 0.00 |
| TRINITY_sp A4FII         | iolG2 Inositol 2-dehydrog     | 26.80 | 0.00 |
| TRINITY_sp Q2TB          | RAB4A Ras-related protein     | 26.80 | 0.00 |
| TRINITY_sp Q96J          | (VPS50 Syndetin OS=Homo sa    | 26.80 | 0.00 |
| TRINITY_sp Q8N7          | KLHDC1 Kelch domain-contai    | 26.80 | 0.00 |
| TRINITY_sp P304          | Fur2 Furin-like protease      | 26.80 | 0.00 |
| TRINITY_sp Q28E          | sctu2 Cytoplasmic tRNA 2-     | 26.80 | 0.00 |
| TRINITY_sp Q891          | gata Glutamyl-tRNA (Gln)      | 26.80 | 0.00 |
| TRINITY_sp Q8IY          | 2DDX60 Probable ATP-depend    | 26.80 | 0.00 |
| TRINITY_sp Q9SP          | 3DCL1 Endoribonuclease Di     | 26.80 | 0.00 |

|                          |                     |       |      |
|--------------------------|---------------------|-------|------|
| TRINITY_sp P457(MAN1A1   | Mannosyl-oligosacch | 26.80 | 0.00 |
| TRINITY_sp P0854-        | LINE-1 reverse tran | 26.80 | 0.00 |
| TRINITY_sp P1579-        | Macronuclear solute | 26.80 | 0.00 |
| TRINITY_sp B8H44ftsH     | ATP-dependent zinc  | 26.70 | 0.00 |
| TRINITY_sp P3432C14B9.2  | Probable protein di | 26.70 | 0.00 |
| TRINITY_sp P2782-        | Pepsin F OS=Oryctol | 26.70 | 0.00 |
| TRINITY_sp Q4P62UMAG_044 | Very-long-chain 3-o | 26.70 | 0.00 |
| TRINITY_sp A1A69HK5      | Probable histidine  | 26.70 | 0.00 |
| TRINITY_sp P4183rae1     | Poly(A)+ RNA export | 26.70 | 0.00 |
| TRINITY_sp B0Y38gmt1     | GDP-mannose transpo | 26.70 | 0.00 |
| TRINITY_sp P5187Cyp4f5   | Cytochrome P450 4F5 | 26.70 | 0.00 |
| TRINITY_sp Q9VY1Cyp4g15  | Cytochrome P450 4g1 | 26.70 | 0.00 |
| TRINITY_sp F4IRFSAD2     | Importin beta-like  | 26.70 | 0.00 |
| TRINITY_sp Q9P99xylS     | Alpha-xylosidase OS | 26.70 | 0.00 |
| TRINITY_sp A8IUCCFAP99   | Cilia- and flagella | 26.70 | 0.00 |
| TRINITY_sp Q9C51PAP6     | Purple acid phospho | 26.70 | 0.00 |
| TRINITY_sp Q9FN(UVR8     | Ultraviolet-B recep | 26.70 | 0.00 |
| TRINITY_sp Q8R11Kdelr3   | ER lumen protein-re | 26.70 | 0.00 |
| TRINITY_sp Q54W4DDB_G027 | Putative actin-frag | 26.70 | 0.00 |
| TRINITY_sp Q4U2FHerc2    | E3 ubiquitin-protei | 26.70 | 0.00 |
| TRINITY_sp Q4PE3SEC23    | Protein transport p | 26.70 | 0.00 |
| TRINITY_sp Q70C9USP34    | Ubiquitin carboxyl- | 26.70 | 0.00 |
| TRINITY_sp P3399shc      | Squalene--hopene cy | 26.70 | 0.00 |
| TRINITY_sp O433(HSPA12A  | Heat shock 70 kDa p | 26.70 | 0.00 |
| TRINITY_sp P3122DDO      | D-aspartate oxidase | 26.70 | 0.00 |
| TRINITY_sp Q6GYIRalgapa1 | Ral GTPase-activati | 26.70 | 0.00 |
| TRINITY_sp Q93V1CYP97A3  | Protein LUTEIN DEFI | 26.70 | 0.00 |
| TRINITY_sp O9429SPBC887. | Probable phospholip | 26.70 | 0.00 |
| TRINITY_sp Q6127vha-11   | V-type proton ATPas | 26.60 | 0.00 |
| TRINITY_sp Q9LZ1EXO70A1  | Exocyst complex com | 26.60 | 0.00 |
| TRINITY_sp A7RF1cdc123   | Cell division cycle | 26.60 | 0.00 |
| TRINITY_sp Q2249T14G10.5 | Probable coatomer s | 26.60 | 0.00 |
| TRINITY_sp P0CE9tala     | Talin-A OS=Dictyost | 26.60 | 0.00 |
| TRINITY_sp P2214XRN1     | 5'-3' exoribonuclea | 26.60 | 0.00 |
| TRINITY_sp O5966ccc2     | Copper-transporting | 26.60 | 0.00 |
| TRINITY_sp Q3ZB9SIRT5    | NAD-dependent prote | 26.60 | 0.00 |
| TRINITY_sp Q91WFAscc2    | Activating signal c | 26.60 | 0.00 |
| TRINITY_sp Q8K38Dennd1a  | DENN domain-contain | 26.60 | 0.00 |
| TRINITY_sp Q9SYHIP5P13   | Type I inositol pol | 26.60 | 0.00 |
| TRINITY_sp Q0WVVRECQL5   | ATP-dependent DNA h | 26.60 | 0.00 |
| TRINITY_sp Q54C9gefF     | Ras guanine nucleot | 26.60 | 0.00 |
| TRINITY_sp Q6DF9ccnj     | Cyclin-J OS=Xenopus | 26.60 | 0.00 |
| TRINITY_sp Q6RKEcar      | Carboxylic acid red | 26.60 | 0.00 |
| TRINITY_sp Q0519PAB5     | Polyadenylate-bindi | 26.60 | 0.00 |
| TRINITY_sp Q99L9Rcbtb2   | RCC1 and BTB domain | 26.60 | 0.00 |
| TRINITY_sp B7SIVxynC     | Endo-1,4-beta-xylan | 26.60 | 0.00 |
| TRINITY_sp Q5KZEcobB2    | NAD-dependent prote | 26.60 | 0.00 |
| TRINITY_sp Q1039SPBC582. | Uncharacterized ATP | 26.60 | 0.00 |
| TRINITY_sp O9449egt2     | Hercynylcysteine su | 26.60 | 0.00 |
| TRINITY_sp Q54P9gefA     | Ras guanine nucleot | 26.60 | 0.00 |
| TRINITY_sp Q54H4drkB     | Probable serine/thr | 26.60 | 0.00 |
| TRINITY_sp Q8IS1gefI     | Ras guanine nucleot | 26.60 | 0.00 |
| TRINITY_sp Q3899AKT1     | Potassium channel A | 26.60 | 0.00 |
| TRINITY_sp Q9AJTtreZ     | Malto-oligosyltreha | 26.60 | 0.00 |
| TRINITY_sp Q54B2DDB_G029 | Succinate dehydroge | 26.50 | 0.00 |
| TRINITY_sp Q1899cgp-1    | GTP-binding protein | 26.50 | 0.00 |

|                           |                     |       |      |
|---------------------------|---------------------|-------|------|
| TRINITY_sp B3TP(SLC7A2    | Cationic amino acid | 26.50 | 0.00 |
| TRINITY_sp Q91W(SETD3     | Histone-lysine N-me | 26.50 | 0.00 |
| TRINITY_sp Q7M3(rngB      | RING finger protein | 26.50 | 0.00 |
| TRINITY_sp Q966(JNK       | Stress-activated pr | 26.50 | 0.00 |
| TRINITY_sp Q006(gp63      | Leishmanolysin OS=L | 26.50 | 0.00 |
| TRINITY_sp Q8T6(abcA2     | ABC transporter A f | 26.50 | 0.00 |
| TRINITY_sp Q9LU(CYP72A15  | Cytochrome P450 72A | 26.50 | 0.00 |
| TRINITY_sp Q8EL(OB3336    | Putative modificati | 26.50 | 0.00 |
| TRINITY_sp O960(NAPSA     | Napsin-A OS=Homo sa | 26.50 | 0.00 |
| TRINITY_sp Q9D2(HAK7      | Adenylate kinase 7  | 26.50 | 0.00 |
| TRINITY_sp P471(BNA2      | Indoleamine 2,3-dio | 26.50 | 0.00 |
| TRINITY_sp Q9CX(Ist1      | IST1 homolog OS=Mus | 26.50 | 0.00 |
| TRINITY_sp P391(yeaD      | Putative glucose-6- | 26.50 | 0.00 |
| TRINITY_sp B0R0V(tbc1d8b  | TBC1 domain family  | 26.50 | 0.00 |
| TRINITY_sp Q006(gp63      | Leishmanolysin OS=L | 26.50 | 0.00 |
| TRINITY_sp Q8RW(CLASP     | CLIP-associated pro | 26.50 | 0.00 |
| TRINITY_sp O743(mak5      | ATP-dependent RNA h | 26.50 | 0.00 |
| TRINITY_sp Q54C(dync1li1  | Cytoplasmic dynein  | 26.50 | 0.00 |
| TRINITY_sp P273(sol       | Calpain-D OS=Drosop | 26.50 | 0.00 |
| TRINITY_sp Q55E(pats1     | Probable serine/thr | 26.50 | 0.00 |
| TRINITY_sp F4J5(FMT       | Clustered mitochond | 26.50 | 0.00 |
| TRINITY_sp O601(SPBC18H1  | Uncharacterized WD  | 26.50 | 0.00 |
| TRINITY_sp Q9UT(SPAC144   | Uncharacterized ATP | 26.50 | 0.00 |
| TRINITY_sp Q55E(zpr1      | Zinc finger protein | 26.50 | 0.00 |
| TRINITY_sp Q4G2(DER1.2    | Derlin-1.2 OS=Zea m | 26.50 | 0.00 |
| TRINITY_sp Q6NX(Rcbtb1    | RCC1 and BTB domain | 26.50 | 0.00 |
| TRINITY_sp F4IQ(ELP5      | Elongator complex p | 26.50 | 0.00 |
| TRINITY_sp P0414GIP       | Copia protein OS=Dr | 26.50 | 0.00 |
| TRINITY_sp Q8K0(Slc47a1   | Multidrug and toxin | 26.40 | 0.00 |
| TRINITY_sp P390(-         | Dynein beta chain,  | 26.40 | 0.00 |
| TRINITY_sp O942(hmt2      | Sulfide:quinone oxi | 26.40 | 0.00 |
| TRINITY_sp P248(Ccnb1     | G2/mitotic-specific | 26.40 | 0.00 |
| TRINITY_sp P262(PG1       | Exopolygalacturonas | 26.40 | 0.00 |
| TRINITY_sp B4F6(aiifm2    | Apoptosis-inducing  | 26.40 | 0.00 |
| TRINITY_sp A1D3(sds23     | Protein sds23 OS=Ne | 26.40 | 0.00 |
| TRINITY_sp O666(pth       | Peptidyl-tRNA hydro | 26.40 | 0.00 |
| TRINITY_sp P332(EIF2AK1   | Eukaryotic translat | 26.40 | 0.00 |
| TRINITY_sp Q9P7V(SPBC1703 | Probable ribonuclea | 26.40 | 0.00 |
| TRINITY_sp Q9PT(KCNH6     | Potassium voltage-g | 26.40 | 0.00 |
| TRINITY_sp Q928(RPGR      | X-linked retinitis  | 26.40 | 0.00 |
| TRINITY_sp P200(HOP1      | Meiosis-specific pr | 26.40 | 0.00 |
| TRINITY_sp O285(AF_1724   | Uncharacterized pro | 26.40 | 0.00 |
| TRINITY_sp P195(-         | Probable reverse tr | 26.40 | 0.00 |
| TRINITY_sp Q91Z(Habhd3    | Phospholipase ABHD3 | 26.40 | 0.00 |
| TRINITY_sp A2RB(sds23     | Protein sds23 OS=As | 26.40 | 0.00 |
| TRINITY_sp Q9D6(Cers4     | Ceramide synthase 4 | 26.40 | 0.00 |
| TRINITY_sp Q7F0(CML13     | Probable calcium-bi | 26.40 | 0.00 |
| TRINITY_sp P3581BDF1      | Bromodomain-contain | 26.40 | 0.00 |
| TRINITY_sp Q9SV(At4g3825  | Amino acid transpor | 26.40 | 0.00 |
| TRINITY_sp Q503(slc38a6   | Probable sodium-cou | 26.40 | 0.00 |
| TRINITY_sp Q8CF(Gbp5      | Guanylate-binding p | 26.40 | 0.00 |
| TRINITY_sp Q4UM(IRF_0338  | Uncharacterized zin | 26.40 | 0.00 |
| TRINITY_sp Q08B(tyw5      | tRNA wybutosine-syn | 26.40 | 0.00 |
| TRINITY_sp Q2YD(Mstol     | Protein misato homo | 26.40 | 0.00 |
| TRINITY_sp O600(CMD1      | Calmodulin OS=Kluyv | 26.30 | 0.00 |
| TRINITY_sp Q75J(cpras1    | Circularly permutat | 26.30 | 0.00 |

|                          |                     |       |      |
|--------------------------|---------------------|-------|------|
| TRINITY_sp B4PR1Mat89Ba  | Nucleolar protein 6 | 26.30 | 0.00 |
| TRINITY_sp Q54S5DDB_G028 | Protein PIEZO homol | 26.30 | 0.00 |
| TRINITY_sp P213CPWP1     | Periodic tryptophan | 26.30 | 0.00 |
| TRINITY_sp Q2TBI POLR3C  | DNA-directed RNA po | 26.30 | 0.00 |
| TRINITY_sp Q9USUtoal     | Transcription initi | 26.30 | 0.00 |
| TRINITY_sp Q9LFFDOT2     | SART-1 family prote | 26.30 | 0.00 |
| TRINITY_sp Q75J9cpas1    | Circularly permutat | 26.30 | 0.00 |
| TRINITY_sp Q5F3IUTP15    | U3 small nucleolar  | 26.30 | 0.00 |
| TRINITY_sp Q6ZUC-        | Uncharacterized pro | 26.30 | 0.00 |
| TRINITY_sp F4I2HTPX2     | Protein TPX2 OS=Ara | 26.30 | 0.00 |
| TRINITY_sp Q9Y6ICEPT1    | Choline/ethanolamin | 26.30 | 0.00 |
| TRINITY_sp Q3923SUC2     | Sucrose transport p | 26.30 | 0.00 |
| TRINITY_sp O5732SLC1A3   | Excitatory amino ac | 26.30 | 0.00 |
| TRINITY_sp Q8BKUTmem87b  | Transmembrane prote | 26.30 | 0.00 |
| TRINITY_sp B3P3EPde6     | cGMP-specific 3',5' | 26.30 | 0.00 |
| TRINITY_sp Q6CSVPAB1     | Polyadenylate-bindi | 26.30 | 0.00 |
| TRINITY_sp A7XDQ GALT2   | Hydroxyproline O-ga | 26.30 | 0.00 |
| TRINITY_sp Q8T49CG42684  | Probable Ras GTPase | 26.30 | 0.00 |
| TRINITY_sp Q54DEpsenB    | Presenilin-B OS=Dic | 26.30 | 0.00 |
| TRINITY_sp A0JM1ccdc176  | Basal body-orientat | 26.30 | 0.00 |
| TRINITY_sp Q8BHIRab39a   | Ras-related protein | 26.30 | 0.00 |
| TRINITY_sp Q8UVFsupt6h   | Transcription elong | 26.30 | 0.00 |
| TRINITY_sp F4J15DTX24    | Protein DETOXIFICAT | 26.30 | 0.00 |
| TRINITY_sp Q2074atad-3   | ATPase family AAA d | 26.30 | 0.00 |
| TRINITY_sp P2767PGA      | Pepsin A-4 OS=Macac | 26.30 | 0.00 |
| TRINITY_sp Q0177GLX      | Aldehyde oxidase GL | 26.30 | 0.00 |
| TRINITY_sp Q9C9ICUL3B    | Cullin-3B OS=Arabid | 26.30 | 0.00 |
| TRINITY_sp P2659PTBP1    | Polypyrimidine trac | 26.30 | 0.00 |
| TRINITY_sp B8M9ftropI    | Hydrolase tropI OS= | 26.20 | 0.00 |
| TRINITY_sp B4EZU hscB    | Co-chaperone protei | 26.20 | 0.00 |
| TRINITY_sp Q75AFAAGC1    | Mitochondrial aspar | 26.20 | 0.00 |
| TRINITY_sp Q2YDFimpad1   | Inositol monophosph | 26.20 | 0.00 |
| TRINITY_sp A8JF7ODA1     | Outer dynein arm pr | 26.20 | 0.00 |
| TRINITY_sp Q9SXFMOGS-O3  | Flavin-containing m | 26.20 | 0.00 |
| TRINITY_sp Q6GQncep41    | Centrosomal protein | 26.20 | 0.00 |
| TRINITY_sp Q3887CPK7     | Calcium-dependent p | 26.20 | 0.00 |
| TRINITY_sp Q1558TGFB1    | Transforming growth | 26.20 | 0.00 |
| TRINITY_sp F4KBVNUP205   | Nuclear pore comple | 26.20 | 0.00 |
| TRINITY_sp Q9W70clcnkb   | Chloride channel pr | 26.20 | 0.00 |
| TRINITY_sp O9444bdp1     | Transcription facto | 26.20 | 0.00 |
| TRINITY_sp Q8QG7ncor1    | Nuclear receptor co | 26.20 | 0.00 |
| TRINITY_sp Q2391regA     | 3',5'-cyclic-nucleo | 26.20 | 0.00 |
| TRINITY_sp P3373SRP72    | Signal recognition  | 26.20 | 0.00 |
| TRINITY_sp Q6DJ1znf830   | Zinc finger protein | 26.20 | 0.00 |
| TRINITY_sp P5138ycf21    | Uncharacterized pro | 26.20 | 0.00 |
| TRINITY_sp Q9256Slc8b1   | Sodium/potassium/ca | 26.20 | 0.00 |
| TRINITY_sp Q54E7gr1E     | Metabotropic glutam | 26.20 | 0.00 |
| TRINITY_sp Q10MVERDJ3A   | DnaJ protein ERDJ3A | 26.20 | 0.00 |
| TRINITY_sp Q9NYARRN3     | RNA polymerase I-sp | 26.20 | 0.00 |
| TRINITY_sp Q4384SS3      | Soluble starch synt | 26.20 | 0.00 |
| TRINITY_sp Q9ZVISE       | Serrate RNA effecto | 26.20 | 0.00 |
| TRINITY_sp Q9221Ppp6r3   | Serine/threonine-pr | 26.20 | 0.00 |
| TRINITY_sp Q81Z7ubiG     | Ubiquinone biosynth | 26.20 | 0.00 |
| TRINITY_sp C1F02pcp      | Pyrrolidone-carboxy | 26.20 | 0.00 |
| TRINITY_sp Q9FYC GLOX1   | Aldehyde oxidase GL | 26.20 | 0.00 |
| TRINITY_sp Q1945F14E5.2  | Golgi apparatus pro | 26.20 | 0.00 |

|                          |                      |       |      |
|--------------------------|----------------------|-------|------|
| TRINITY_sp Q9Y4FRAD54L2  | Helicase ARIP4 OS=H  | 26.20 | 0.00 |
| TRINITY_sp P9456glcD     | Glycolate oxidase s  | 26.20 | 0.00 |
| TRINITY_sp Q8CFE5scyl2   | SCY1-like protein 2  | 26.20 | 0.00 |
| TRINITY_sp Q7ZY7lmbrd2   | LMBR1 domain-contai  | 26.20 | 0.00 |
| TRINITY_sp Q8IWCWDR63    | WD repeat-containin  | 26.20 | 0.00 |
| TRINITY_sp P2758gpa1     | Guanine nucleotide-  | 26.10 | 0.00 |
| TRINITY_sp Q86X4LRRC6    | Protein tilB homolo  | 26.10 | 0.00 |
| TRINITY_sp Q9H2FSLC38A1  | Sodium-coupled neut  | 26.10 | 0.00 |
| TRINITY_sp Q8CI7Rmnd1    | Required for meioti  | 26.10 | 0.00 |
| TRINITY_sp P4096ceg1     | mRNA-capping enzyme  | 26.10 | 0.00 |
| TRINITY_sp Q9SR8CHIP     | E3 ubiquitin-protei  | 26.10 | 0.00 |
| TRINITY_sp Q29A6GA17800  | Leishmanolysin-like  | 26.10 | 0.00 |
| TRINITY_sp Q5ZH\NAA35    | N-alpha-acetyltrans  | 26.10 | 0.00 |
| TRINITY_sp A8ZN8atpA2    | ATP synthase subuni  | 26.10 | 0.00 |
| TRINITY_sp Q8LJ7TKI1     | TSL-kinase interact  | 26.10 | 0.00 |
| TRINITY_sp Q9UB\NXF1     | Nuclear RNA export   | 26.10 | 0.00 |
| TRINITY_sp Q6CUFSDS23    | Protein SDS23 OS=K1  | 26.10 | 0.00 |
| TRINITY_sp P5516ybbA     | Uncharacterized pro  | 26.10 | 0.00 |
| TRINITY_sp Q8KGFCT0009   | Uncharacterized RNA  | 26.10 | 0.00 |
| TRINITY_sp P7546MPN_348  | 5-formyltetrahydrof  | 26.10 | 0.00 |
| TRINITY_sp Q8IUFZDHHC17  | Palmitoyltransferas  | 26.10 | 0.00 |
| TRINITY_sp Q94B6SLK2     | Probable transcript  | 26.10 | 0.00 |
| TRINITY_sp Q54L6gr1D     | Metabotropic glutam  | 26.10 | 0.00 |
| TRINITY_sp Q3KP1tssc1    | Protein TSSC1 OS=Xe  | 26.10 | 0.00 |
| TRINITY_sp G4SL6ttn-1    | Titin homolog OS=Ca  | 26.10 | 0.00 |
| TRINITY_sp Q0296GDE1     | Glycerophosphodiast  | 26.10 | 0.00 |
| TRINITY_sp P0CM6BST1     | GPI inositol-deacyl  | 26.10 | 0.00 |
| TRINITY_sp P5706SLC37A1  | Glucose-6-phosphate  | 26.00 | 0.00 |
| TRINITY_sp P1276RSP3     | Flagellar radial sp  | 26.00 | 0.00 |
| TRINITY_sp Q81J6fyidC2   | Membrane protein in  | 26.00 | 0.00 |
| TRINITY_sp Q9P76pmo25    | Mo25-like protein O  | 26.00 | 0.00 |
| TRINITY_sp Q55E6mcfE     | Mitochondrial subst  | 26.00 | 0.00 |
| TRINITY_sp Q8BS6Tyw3     | tRNA wybutosine-syn  | 26.00 | 0.00 |
| TRINITY_sp O4446kgb-1    | GLH-binding kinase   | 26.00 | 0.00 |
| TRINITY_sp Q9496At1g4810 | (Polygalacturonase A | 26.00 | 0.00 |
| TRINITY_sp P7106ygaD     | Putative multidrug   | 26.00 | 0.00 |
| TRINITY_sp Q75J6cpras1   | Circularly permutat  | 26.00 | 0.00 |
| TRINITY_sp O3456sppA     | Putative signal pep  | 26.00 | 0.00 |
| TRINITY_sp Q96J6VPS39    | Vam6/Vps39-like pro  | 26.00 | 0.00 |
| TRINITY_sp O4446F37C4.5  | Protein F37C4.5 OS=  | 26.00 | 0.00 |
| TRINITY_sp Q7M36rngB     | RING finger protein  | 26.00 | 0.00 |
| TRINITY_sp P2666Sos      | Protein son of seve  | 26.00 | 0.00 |
| TRINITY_sp Q95V6carmil   | Protein CARMIL OS=D  | 26.00 | 0.00 |
| TRINITY_sp Q68Y6grid2    | Glutamate receptor   | 26.00 | 0.00 |
| TRINITY_sp Q28F6mfds7-A  | Major facilitator s  | 26.00 | 0.00 |
| TRINITY_sp P7831IGBP1    | Immunoglobulin-bind  | 26.00 | 0.00 |
| TRINITY_sp Q9SR1FLK      | Flowering locus K h  | 26.00 | 0.00 |
| TRINITY_sp Q8IS6gefC     | Ras guanine nucleot  | 26.00 | 0.00 |
| TRINITY_sp Q9TV6rab1     | Ras-related protein  | 26.00 | 0.00 |
| TRINITY_sp F4J56FMT      | Clustered mitochond  | 26.00 | 0.00 |
| TRINITY_sp Q3KQ6acpt     | Testicular acid pho  | 26.00 | 0.00 |
| TRINITY_sp Q5JW6DOPEY1   | Protein dopey-1 OS=  | 26.00 | 0.00 |
| TRINITY_sp Q8LB6SWEET7   | Bidirectional sugar  | 26.00 | 0.00 |
| TRINITY_sp Q9RB6absAa    | 2-aminobenzenesulfo  | 26.00 | 0.00 |
| TRINITY_sp Q9P26TBC1D14  | TBC1 domain family   | 26.00 | 0.00 |
| TRINITY_sp O6026SSSCA1   | Sjogren syndrome/s   | 26.00 | 0.00 |



|                  |           |                     |       |      |
|------------------|-----------|---------------------|-------|------|
| TRINITY_sp Q5VQC | CPK2      | Calcium-dependent p | 26.00 | 0.00 |
| TRINITY_sp Q2427 | Cnga      | Cyclic nucleotide-g | 26.00 | 0.00 |
| TRINITY_sp Q8L7U | At4g3967  | ACD11 homolog prote | 26.00 | 0.00 |
| TRINITY_sp Q94A2 | SAC2      | Phosphoinositide ph | 26.00 | 0.00 |
| TRINITY_sp Q8VDC | Mlk4      | Mitogen-activated p | 26.00 | 0.00 |
| TRINITY_sp Q1266 | CYP51     | Eburicol 14-alpha-d | 26.00 | 0.00 |
| TRINITY_sp P5988 | slc39a1   | Zinc transporter ZI | 26.00 | 0.00 |
| TRINITY_sp P1261 | abg       | Beta-glucosidase OS | 26.00 | 0.00 |
| TRINITY_sp Q8PSI | htpX2     | Protease HtpX homol | 26.00 | 0.00 |
| TRINITY_sp Q148\ | Kiaa1468  | LisH domain and HEA | 26.00 | 0.00 |
| TRINITY_sp P2787 | Vav1      | Proto-oncogene vav  | 26.00 | 0.00 |
| TRINITY_sp Q6TK5 | mx        | Interferon-induced  | 26.00 | 0.00 |
| TRINITY_sp Q3MKM | EMB2271   | U3 snoRNP-associate | 26.00 | 0.00 |
| TRINITY_sp B3EYM | abnB      | Intracellular endo- | 25.90 | 0.00 |
| TRINITY_sp Q9BJ2 | fus       | RNA-binding protein | 25.90 | 0.00 |
| TRINITY_sp Q8GY9 | PGM       | Phosphoglycerate mu | 25.90 | 0.00 |
| TRINITY_sp Q9FN  | (UVR8     | Ultraviolet-B recep | 25.90 | 0.00 |
| TRINITY_sp P6126 | STX1B     | Syntaxin-1B OS=Bos  | 25.90 | 0.00 |
| TRINITY_sp Q8VYU | GC4       | Golgin candidate 4  | 25.90 | 0.00 |
| TRINITY_sp Q96P5 | ACAP3     | Arf-GAP with coiled | 25.90 | 0.00 |
| TRINITY_sp Q9235 | SPAC6G9   | Pumilio domain-cont | 25.90 | 0.00 |
| TRINITY_sp Q682I | XRCC2     | DNA repair protein  | 25.90 | 0.00 |
| TRINITY_sp Q54E6 | nup98     | Nuclear pore comple | 25.90 | 0.00 |
| TRINITY_sp Q9UTI | erd1      | Protein ERD1 homolo | 25.90 | 0.00 |
| TRINITY_sp Q8RWI | ACBP5     | Acyl-CoA-binding do | 25.90 | 0.00 |
| TRINITY_sp Q54P6 | gefA      | Ras guanine nucleot | 25.90 | 0.00 |
| TRINITY_sp Q9C44 | paxM      | FAD-dependent monoo | 25.90 | 0.00 |
| TRINITY_sp Q59K6 | MNN21     | Alpha-1,2-mannosylt | 25.90 | 0.00 |
| TRINITY_sp Q5FWW | gpr180    | Integral membrane p | 25.90 | 0.00 |
| TRINITY_sp Q9LG2 | PARN      | Poly(A)-specific ri | 25.90 | 0.00 |
| TRINITY_sp P2767 | Rasgrf1   | Ras-specific guanin | 25.90 | 0.00 |
| TRINITY_sp Q8MV6 | gbpC      | Cyclic GMP-binding  | 25.90 | 0.00 |
| TRINITY_sp Q69XN | CYP734A4  | Cytochrome P450 734 | 25.90 | 0.00 |
| TRINITY_sp Q8VYF | KEA5      | K(+) efflux antipor | 25.90 | 0.00 |
| TRINITY_sp Q920I | Ak5       | Adenylate kinase is | 25.90 | 0.00 |
| TRINITY_sp Q1829 | trpa-1    | Transient receptor  | 25.90 | 0.00 |
| TRINITY_sp Q5JM  | (Os01g075 | Potassium channel K | 25.90 | 0.00 |
| TRINITY_sp Q9SC9 | At3g5052  | Phosphoglycerate mu | 25.80 | 0.00 |
| TRINITY_sp Q81V2 | prs       | Ribose-phosphate py | 25.80 | 0.00 |
| TRINITY_sp Q54E7 | abpF      | Actin-binding prote | 25.80 | 0.00 |
| TRINITY_sp P1082 | Prf1      | Perforin-1 OS=Mus m | 25.80 | 0.00 |
| TRINITY_sp Q99J3 | Thumpd1   | THUMP domain-contai | 25.80 | 0.00 |
| TRINITY_sp A1L02 | rsph6a    | Radial spoke head p | 25.80 | 0.00 |
| TRINITY_sp Q700I | BDG4      | Probable lysophosph | 25.80 | 0.00 |
| TRINITY_sp Q54Bf | dcd2A     | Neutral ceramidase  | 25.80 | 0.00 |
| TRINITY_sp Q81M  | tal2      | Probable transaldol | 25.80 | 0.00 |
| TRINITY_sp Q9SEI | VTI11     | Vesicle transport v | 25.80 | 0.00 |
| TRINITY_sp Q8L5Y | CAND1     | Cullin-associated N | 25.80 | 0.00 |
| TRINITY_sp Q5697 | mfsd4b    | Sodium-dependent gl | 25.80 | 0.00 |
| TRINITY_sp Q94Kf | SYP72     | Syntaxin-72 OS=Arab | 25.80 | 0.00 |
| TRINITY_sp B8I73 | era       | GTPase Era OS=Clost | 25.80 | 0.00 |
| TRINITY_sp Q9952 | SORT1     | Sortilin OS=Homo sa | 25.80 | 0.00 |
| TRINITY_sp Q94B5 | XBAT31    | Putative E3 ubiquit | 25.80 | 0.00 |
| TRINITY_sp O2292 | VSR2      | Vacuolar-sorting re | 25.80 | 0.00 |
| TRINITY_sp Q9HGI | SPBC800   | Uncharacterized cal | 25.80 | 0.00 |
| TRINITY_sp Q0632 | LOX1      | Linoleate 9S-lipoxy | 25.80 | 0.00 |

|                          |                     |       |      |
|--------------------------|---------------------|-------|------|
| TRINITY_sp O0793yist     | Uncharacterized pro | 25.80 | 0.00 |
| TRINITY_sp P3975mpr      | Extracellular metal | 25.80 | 0.00 |
| TRINITY_sp Q8VZ4HSR4     | Protein HYPER-SENSI | 25.80 | 0.00 |
| TRINITY_sp Q9FG2At5g0683 | CDK5RAP3-like prote | 25.80 | 0.00 |
| TRINITY_sp Q8VDMHnrnpul1 | Heterogeneous nucle | 25.80 | 0.00 |
| TRINITY_sp Q6531Os06g025 | Potassium channel K | 25.80 | 0.00 |
| TRINITY_sp Q6TB3CYP97C1  | Carotene epsilon-mo | 25.80 | 0.00 |
| TRINITY_sp Q6FR4SEC62    | Translocation prote | 25.80 | 0.00 |
| TRINITY_sp Q1254aphA     | Acid phosphatase OS | 25.70 | 0.00 |
| TRINITY_sp Q32L6mfsd1    | Major facilitator s | 25.70 | 0.00 |
| TRINITY_sp Q86C2dhkK     | Hybrid signal trans | 25.70 | 0.00 |
| TRINITY_sp O243(TIC110   | Protein TIC110, chl | 25.70 | 0.00 |
| TRINITY_sp P3425tc3a     | Transposable elemen | 25.70 | 0.00 |
| TRINITY_sp O6244Y43F4A.1 | Leishmanolysin-like | 25.70 | 0.00 |
| TRINITY_sp A2A43Cul4b    | Cullin-4B OS=Mus mu | 25.70 | 0.00 |
| TRINITY_sp Q8VENKlhdc3   | Kelch domain-contai | 25.70 | 0.00 |
| TRINITY_sp P8713SPAC57A7 | Uncharacterized pro | 25.70 | 0.00 |
| TRINITY_sp Q6WWWUPL3     | E3 ubiquitin-protei | 25.70 | 0.00 |
| TRINITY_sp Q95V2slo-1    | Calcium-activated p | 25.70 | 0.00 |
| TRINITY_sp Q9FF1At5g0780 | Flavin-containing m | 25.70 | 0.00 |
| TRINITY_sp Q8SS3gefM     | Ras guanine nucleot | 25.70 | 0.00 |
| TRINITY_sp Q3SE4Icl1e    | Caltractin ICL1e OS | 25.70 | 0.00 |
| TRINITY_sp Q8WNIKKBKAP   | Elongator complex p | 25.70 | 0.00 |
| TRINITY_sp Q276(Cyp4e2   | Cytochrome P450 4e2 | 25.70 | 0.00 |
| TRINITY_sp Q9ZU3ABCG7    | ABC transporter G f | 25.70 | 0.00 |
| TRINITY_sp Q1457ITPR2    | Inositol 1,4,5-tris | 25.70 | 0.00 |
| TRINITY_sp Q2FE2SAUSA300 | Uncharacterized oxi | 25.70 | 0.00 |
| TRINITY_sp Q54VDDDB_G028 | Probable serine/thr | 25.70 | 0.00 |
| TRINITY_sp Q28F3tmem147  | Transmembrane prote | 25.60 | 0.00 |
| TRINITY_sp Q86JEDDB_G027 | Recoverin family pr | 25.60 | 0.00 |
| TRINITY_sp Q9NZMGLTSCR2  | Glioma tumor suppre | 25.60 | 0.00 |
| TRINITY_sp Q54PIDDB_G028 | Probable myosin lig | 25.60 | 0.00 |
| TRINITY_sp Q5S0(Spag17   | Sperm-associated an | 25.60 | 0.00 |
| TRINITY_sp Q9PU3smurf1   | E3 ubiquitin-protei | 25.60 | 0.00 |
| TRINITY_sp A5DS1FMP52    | Protein FMP52, mito | 25.60 | 0.00 |
| TRINITY_sp P9708cobD     | Threonine-phosphate | 25.60 | 0.00 |
| TRINITY_sp P1269alkH     | Aldehyde dehydrogen | 25.60 | 0.00 |
| TRINITY_sp Q94A7EX2      | Protein EXECUTER 2, | 25.60 | 0.00 |
| TRINITY_sp Q75WVwa5a     | von Willebrand fact | 25.60 | 0.00 |
| TRINITY_sp Q9FF2PPH      | Pheophytinase, chlo | 25.60 | 0.00 |
| TRINITY_sp Q5PP3ATXR2    | Histone-lysine N-me | 25.60 | 0.00 |
| TRINITY_sp Q8LD3TAP46    | PP2A regulatory sub | 25.60 | 0.00 |
| TRINITY_sp P2093RASA1    | Ras GTPase-activati | 25.60 | 0.00 |
| TRINITY_sp Q75VITPC1B    | Two pore calcium ch | 25.60 | 0.00 |
| TRINITY_sp Q9FGIRKD3     | Protein RKD3 OS=Ara | 25.60 | 0.00 |
| TRINITY_sp Q5RJI5mg7     | Protein SMG7 OS=Mus | 25.60 | 0.00 |
| TRINITY_sp Q8NH3CFAP61   | Cilia- and flagella | 25.60 | 0.00 |
| TRINITY_sp Q96E4KIF1BP   | KIF1-binding protei | 25.60 | 0.00 |

|                  |                               |       |      |
|------------------|-------------------------------|-------|------|
| TRINITY_sp Q6DDV | kiaa1324UPF0577 protein KIA   | 25.60 | 0.00 |
| TRINITY_sp Q2545 | - Muscle calcium chan         | 25.60 | 0.00 |
| TRINITY_sp Q29D  | Klp68D Kinesin-like protei    | 25.60 | 0.00 |
| TRINITY_sp Q8ND  | RCC1 and BTB domain           | 25.50 | 0.00 |
| TRINITY_sp P080  | (Pdia4 Protein disulfide-i    | 25.50 | 0.00 |
| TRINITY_sp Q5RF  | CHFR E3 ubiquitin-protei      | 25.50 | 0.00 |
| TRINITY_sp Q8WZ  | DNASE2B Deoxyribonuclease-2   | 25.50 | 0.00 |
| TRINITY_sp Q6PG  | stmem56-k Transmembrane prote | 25.50 | 0.00 |
| TRINITY_sp Q9BV  | (RNF126 E3 ubiquitin-protei   | 25.50 | 0.00 |
| TRINITY_sp P146  | (KSS1 Mitogen-activated p     | 25.50 | 0.00 |
| TRINITY_sp Q68Y  | grid2 Glutamate receptor      | 25.50 | 0.00 |
| TRINITY_sp P232  | gp63 Leishmanolysin OS=L      | 25.50 | 0.00 |
| TRINITY_sp Q54Q  | Uwdr89 WD repeat-containin    | 25.50 | 0.00 |
| TRINITY_sp Q9VK  | (Cand1 Cullin-associated N    | 25.50 | 0.00 |
| TRINITY_sp Q9CR  | (Klh128 Kelch-like protein    | 25.50 | 0.00 |
| TRINITY_sp Q004  | (Ptbp1 Polypyrimidine trac    | 25.50 | 0.00 |
| TRINITY_sp Q098  | 1ppk5 Serine/threonine-pr     | 25.50 | 0.00 |
| TRINITY_sp F1MB  | (KLHL3 Kelch-like protein     | 25.50 | 0.00 |
| TRINITY_sp Q9UL  | (PALD1 Paladin OS=Homo sap    | 25.50 | 0.00 |
| TRINITY_sp A2VD  | (PLK4 Serine/threonine-pr     | 25.50 | 0.00 |
| TRINITY_sp P169  | 1elav Protein elav OS=Dro     | 25.50 | 0.00 |
| TRINITY_sp Q8RW  | ISTY17 Serine/threonine-pr    | 25.50 | 0.00 |
| TRINITY_sp P546  | (tagB Serine protease/ABC     | 25.50 | 0.00 |
| TRINITY_sp Q869  | (DDB_G02 COBW domain-contain  | 25.50 | 0.00 |
| TRINITY_sp Q8R7  | (adk Adenylate kinase OS      | 25.40 | 0.00 |
| TRINITY_sp Q6ZJ  | (URH1 Probable uridine nu     | 25.40 | 0.00 |
| TRINITY_sp Q275  | (Cyp4d2 Cytochrome P450 4d2   | 25.40 | 0.00 |
| TRINITY_sp Q9NY  | (SLC39A1 Zinc transporter ZI  | 25.40 | 0.00 |
| TRINITY_sp Q9VK  | (CG6488 Conserved oligomeri   | 25.40 | 0.00 |
| TRINITY_sp B2AC  | (Pa_2_141 Extracellular metal | 25.40 | 0.00 |
| TRINITY_sp Q997  | (ABCA3 ATP-binding cassett    | 25.40 | 0.00 |
| TRINITY_sp Q7Z3  | (PIWIL4 Piwi-like protein 4   | 25.40 | 0.00 |
| TRINITY_sp Q9C5  | (PAP6 Purple acid phospho     | 25.40 | 0.00 |
| TRINITY_sp P831  | (Tak11 Putative mitogen-ac    | 25.40 | 0.00 |
| TRINITY_sp Q9C5  | (At3g162 VHS domain-containi  | 25.40 | 0.00 |
| TRINITY_sp Q906  | (PLA2G7 Platelet-activating   | 25.40 | 0.00 |
| TRINITY_sp O460  | (msta Protein msta, isofo     | 25.40 | 0.00 |
| TRINITY_sp Q9V3  | (Eheix UbiA prenyltransfer    | 25.40 | 0.00 |
| TRINITY_sp Q004  | (Ptbp1 Polypyrimidine trac    | 25.40 | 0.00 |
| TRINITY_sp F4JT  | (ISTY46 Serine/threonine-pr   | 25.40 | 0.00 |
| TRINITY_sp O444  | (F37C4.5 Protein F37C4.5 OS=  | 25.40 | 0.00 |
| TRINITY_sp O944  | (SPAC168 UPF0616 protein C16  | 25.40 | 0.00 |
| TRINITY_sp Q5U3  | (klhl12 Kelch-like protein    | 25.40 | 0.00 |
| TRINITY_sp Q5R4  | (SNX4 Sorting nexin-4 OS=     | 25.40 | 0.00 |
| TRINITY_sp P086  | (ras1 Ras-like protein 1      | 25.40 | 0.00 |
| TRINITY_sp Q6NZ  | (Ddx31 Probable ATP-depend    | 25.40 | 0.00 |
| TRINITY_sp Q7SC  | (sym-1 Protein sym-1 OS=Ne    | 25.30 | 0.00 |
| TRINITY_sp P908  | (F26E4.3 Uncharacterized pep  | 25.30 | 0.00 |
| TRINITY_sp Q9R1  | 1Sqrcl Sulfide:quinone oxi    | 25.30 | 0.00 |
| TRINITY_sp P516  | 1HCFC1 Host cell factor 1     | 25.30 | 0.00 |
| TRINITY_sp A7S4  | 1serinc Probable serine inc   | 25.30 | 0.00 |
| TRINITY_sp Q9DG  | 1star Steroidogenic acute     | 25.30 | 0.00 |
| TRINITY_sp Q6NR  | (emc1 ER membrane protein     | 25.30 | 0.00 |
| TRINITY_sp Q2IB  | (MET Hepatocyte growth f      | 25.30 | 0.00 |
| TRINITY_sp A3LQ  | (SDS23 Protein SDS23 OS=Sc    | 25.30 | 0.00 |
| TRINITY_sp Q8TE  | (TRPC4AP Short transient rec  | 25.30 | 0.00 |

|                          |                      |       |      |
|--------------------------|----------------------|-------|------|
| TRINITY_sp Q3887CPK7     | Calcium-dependent p  | 25.30 | 0.00 |
| TRINITY_sp Q9HBJCYP4F11  | Phylloquinone omega  | 25.30 | 0.00 |
| TRINITY_sp Q0UQVBST1     | GPI inositol-deacyl  | 25.30 | 0.00 |
| TRINITY_sp Q9UT2pvg1     | Pyruvyl transferase  | 25.30 | 0.00 |
| TRINITY_sp P0CD6frmC     | FERM domain-contain  | 25.30 | 0.00 |
| TRINITY_sp F4JMJPGSIP7   | Putative glucuronos  | 25.30 | 0.00 |
| TRINITY_sp Q0166Pxd      | Peroxidase OS=Droso  | 25.30 | 0.00 |
| TRINITY_sp Q9CTRrhobtb3  | Rho-related BTB dom  | 25.30 | 0.00 |
| TRINITY_sp Q9UBIASH2L    | Set1/Ash2 histone m  | 25.30 | 0.00 |
| TRINITY_sp P2849CAPZA2   | F-actin-capping pro  | 25.30 | 0.00 |
| TRINITY_sp Q54E1gr1E     | Metabotropic glutam  | 25.30 | 0.00 |
| TRINITY_sp Q2UL6utp10    | U3 small nucleolar   | 25.20 | 0.00 |
| TRINITY_sp Q6IMFdnajc27  | DnaJ homolog subfam  | 25.20 | 0.00 |
| TRINITY_sp Q5RCNCYP4V2   | Cytochrome P450 4V2  | 25.20 | 0.00 |
| TRINITY_sp Q28FImfsd7-A  | Major facilitator s  | 25.20 | 0.00 |
| TRINITY_sp O1477TPP1     | Tripeptidyl-peptida  | 25.20 | 0.00 |
| TRINITY_sp Q0CR6atg5     | Autophagy protein 5  | 25.20 | 0.00 |
| TRINITY_sp Q9SF2SYP71    | Syntaxin-71 OS=Arab  | 25.20 | 0.00 |
| TRINITY_sp Q8LP6LACS6    | Long chain acyl-CoA  | 25.20 | 0.00 |
| TRINITY_sp Q9SW6SYP42    | Syntaxin-42 OS=Arab  | 25.20 | 0.00 |
| TRINITY_sp Q9406SRK2E    | Serine/threonine-pr  | 25.20 | 0.00 |
| TRINITY_sp Q9YG6RPE65    | Retinoid isomerohyd  | 25.20 | 0.00 |
| TRINITY_sp Q86A6mcfX     | Mitochondrial subst  | 25.20 | 0.00 |
| TRINITY_sp Q9XT6tbh-1    | Tyramine beta-hydro  | 25.20 | 0.00 |
| TRINITY_sp P4326npr      | Bacillolysins OS=Bre | 25.20 | 0.00 |
| TRINITY_sp Q0236GLG1     | Golgi apparatus pro  | 25.20 | 0.00 |
| TRINITY_sp O4346EIF4G3   | Eukaryotic translat  | 25.20 | 0.00 |
| TRINITY_sp Q5XG6Utp20    | Small subunit proce  | 25.20 | 0.00 |
| TRINITY_sp P4636iols     | Protein Iols OS=Bac  | 25.10 | 0.00 |
| TRINITY_sp Q8DF6nutA     | 5'-nucleotidase OS=  | 25.10 | 0.00 |
| TRINITY_sp P5156BRCA2    | Breast cancer type   | 25.10 | 0.00 |
| TRINITY_sp Q8CD6Ccdc38   | Coiled-coil domain-  | 25.10 | 0.00 |
| TRINITY_sp Q8GU6HYP1     | CSC1-like protein H  | 25.10 | 0.00 |
| TRINITY_sp Q9FI6ARC6     | Protein ACCUMULATIO  | 25.10 | 0.00 |
| TRINITY_sp Q5586s110103  | Uncharacterized pro  | 25.10 | 0.00 |
| TRINITY_sp Q9NU6AGPAT5   | 1-acyl-sn-glycerol-  | 25.10 | 0.00 |
| TRINITY_sp Q8BI6Ccdc40   | Coiled-coil domain-  | 25.10 | 0.00 |
| TRINITY_sp P5116GZMM     | Granzyme M OS=Homo   | 25.10 | 0.00 |
| TRINITY_sp P8916CTR9     | RNA polymerase-asso  | 25.10 | 0.00 |
| TRINITY_sp O2856AF_1724  | Uncharacterized pro  | 25.10 | 0.00 |
| TRINITY_sp F4JT6STY46    | Serine/threonine-pr  | 25.10 | 0.00 |
| TRINITY_sp Q5ZL6NSUN2    | tRNA (cytosine(34)-  | 25.10 | 0.00 |
| TRINITY_sp P5006KEL2     | Kelch repeat-contai  | 25.10 | 0.00 |
| TRINITY_sp Q9WU6Stxbp5   | Syntaxin-binding pr  | 25.10 | 0.00 |
| TRINITY_sp Q86I6psca     | Penicillin-sensitiv  | 25.10 | 0.00 |
| TRINITY_sp C0Z96mutS2    | Endonuclease Muts2   | 25.10 | 0.00 |
| TRINITY_sp Q29K6GA19813  | Ribosome biogenesis  | 25.10 | 0.00 |
| TRINITY_sp Q6GL6elav11   | ELAV-like protein 1  | 25.10 | 0.00 |
| TRINITY_sp O3456sppA     | Putative signal pep  | 25.10 | 0.00 |
| TRINITY_sp Q9V36Tak1     | Mitogen-activated p  | 25.10 | 0.00 |
| TRINITY_sp P3836PHO89    | Phosphate permease   | 25.10 | 0.00 |
| TRINITY_sp P1756SRV2     | Adenylyl cyclase-as  | 25.10 | 0.00 |
| TRINITY_sp Q8N86UBR7     | Putative E3 ubiquit  | 25.00 | 0.00 |
| TRINITY_sp Q8BK6Smg1     | Serine/threonine-pr  | 25.00 | 0.00 |
| TRINITY_sp O3166yjcL     | Uncharacterized mem  | 25.00 | 0.00 |
| TRINITY_sp Q8IZ6CACNA2D6 | Voltage-dependent c  | 25.00 | 0.00 |

|                          |                      |       |      |
|--------------------------|----------------------|-------|------|
| TRINITY_sp Q9LKVNHX7     | Sodium/hydrogen exc  | 25.00 | 0.00 |
| TRINITY_sp O6017SPBC23E6 | Uncharacterized ATP  | 25.00 | 0.00 |
| TRINITY_sp Q4I32BFR2     | Protein BFR2 OS=Gib  | 25.00 | 0.00 |
| TRINITY_sp Q99JTKlh122   | Kelch-like protein   | 25.00 | 0.00 |
| TRINITY_sp Q0WVRRP6L1    | Protein RRP6-like 1  | 25.00 | 0.00 |
| TRINITY_sp Q94A6Atlg0669 | Uncharacterized oxi  | 25.00 | 0.00 |
| TRINITY_sp Q9932zip      | Myosin heavy chain,  | 24.90 | 0.00 |
| TRINITY_sp P4099ceg1     | mRNA-capping enzyme  | 24.90 | 0.00 |
| TRINITY_sp Q9Z1MACOX1    | Peroxisomal acyl-co  | 24.90 | 0.00 |
| TRINITY_sp Q9FECOM1      | Tobamovirus multipl  | 24.90 | 0.00 |
| TRINITY_sp Q23TCTLL3A    | Tubulin glycyclase 3 | 24.90 | 0.00 |
| TRINITY_sp Q6CS\PAB1     | Polyadenylate-bindi  | 24.90 | 0.00 |
| TRINITY_sp P366(ncs-1    | Neuronal calcium se  | 24.90 | 0.00 |
| TRINITY_sp Q7M39rngB     | RING finger protein  | 24.90 | 0.00 |
| TRINITY_sp Q6IC6Atlg4319 | Polypyrimidine trac  | 24.90 | 0.00 |
| TRINITY_sp B1AUCArhgap36 | Rho GTPase-activati  | 24.90 | 0.00 |
| TRINITY_sp Q54U7crlA     | Cyclic AMP receptor  | 24.90 | 0.00 |
| TRINITY_sp A8JF7ODA1     | Outer dynein arm pr  | 24.90 | 0.00 |
| TRINITY_sp Q9VRIMembrin  | Probable Golgi SNAP  | 24.90 | 0.00 |
| TRINITY_sp Q9LZ9BIG2     | Brefeldin A-inhibit  | 24.90 | 0.00 |
| TRINITY_sp Q58DITRABD    | TraB domain-contain  | 24.90 | 0.00 |
| TRINITY_sp Q7ZUCptges2   | Prostaglandin E syn  | 24.90 | 0.00 |
| TRINITY_sp A2YFFHK1      | Probable histidine   | 24.90 | 0.00 |
| TRINITY_sp Q802Fsmc6     | Structural maintena  | 24.90 | 0.00 |
| TRINITY_sp Q0726ADH1     | Alcohol dehydrogena  | 24.80 | 0.00 |
| TRINITY_sp Q8027abhd2a   | Monoacylglycerol li  | 24.80 | 0.00 |
| TRINITY_sp P0A37bp26     | 26 kDa periplasmic   | 24.80 | 0.00 |
| TRINITY_sp Q5U79mx       | Interferon-induced   | 24.80 | 0.00 |
| TRINITY_sp Q4P99CCR4     | Glucose-repressible  | 24.80 | 0.00 |
| TRINITY_sp A2X87OsI_0846 | SPX domain-containi  | 24.80 | 0.00 |
| TRINITY_sp Q8RWICLT3     | Protein CLT3, chlor  | 24.80 | 0.00 |
| TRINITY_sp Q6DF6ccdc77   | Coiled-coil domain-  | 24.80 | 0.00 |
| TRINITY_sp Q6F67hpx0     | FAD-dependent urate  | 24.80 | 0.00 |
| TRINITY_sp Q68AInfda     | N-substituted forma  | 24.80 | 0.00 |
| TRINITY_sp F4I11Atlg0957 | Calcium uniporter p  | 24.80 | 0.00 |
| TRINITY_sp A8FW9rlmL     | Ribosomal RNA large  | 24.80 | 0.00 |
| TRINITY_sp Q6DF6poc5     | Centrosomal protein  | 24.80 | 0.00 |
| TRINITY_sp F4IA7THO2     | THO complex subunit  | 24.80 | 0.00 |
| TRINITY_sp Q4R87CFAP100  | Cilia- and flagella  | 24.80 | 0.00 |
| TRINITY_sp A0JP6cnot1    | CCR4-NOT transcript  | 24.80 | 0.00 |
| TRINITY_sp Q1KP7FZL      | Probable transmembr  | 24.80 | 0.00 |
| TRINITY_sp A1XD9TFIP11   | Tuftelin-interactin  | 24.80 | 0.00 |
| TRINITY_sp P1438-        | Transposon TX1 unch  | 24.80 | 0.00 |
| TRINITY_sp Q54L9gr1D     | Metabotropic glutam  | 24.80 | 0.00 |
| TRINITY_sp Q8RXIMIRO1    | Mitochondrial Rho G  | 24.80 | 0.00 |
| TRINITY_sp Q9LV6At5g6497 | Probable mitochondr  | 24.80 | 0.00 |
| TRINITY_sp Q54J7sibE     | Integrin beta-like   | 24.80 | 0.00 |
| TRINITY_sp Q9SI1SFH10    | Phosphatidylinosito  | 24.70 | 0.00 |
| TRINITY_sp Q6374Dlc1     | Rho GTPase-activati  | 24.70 | 0.00 |
| TRINITY_sp Q6P27TMEM53   | Transmembrane prote  | 24.70 | 0.00 |
| TRINITY_sp Q7XB(CNMT     | (S)-coclaurine N-me  | 24.70 | 0.00 |
| TRINITY_sp O9499FBX021   | F-box only protein   | 24.70 | 0.00 |
| TRINITY_sp P9816CYP4F8   | Cytochrome P450 4F8  | 24.70 | 0.00 |
| TRINITY_sp Q3SZILPCAT3   | Lysophospholipid ac  | 24.70 | 0.00 |
| TRINITY_sp Q8CHE7t115    | Tubulin polyglutamy  | 24.70 | 0.00 |
| TRINITY_sp O1384rsd1     | RNA-binding protein  | 24.70 | 0.00 |

|                          |          |                     |       |      |
|--------------------------|----------|---------------------|-------|------|
| TRINITY_sp Q8BV7         | Trank1   | TPR and ankyrin rep | 24.70 | 0.00 |
| TRINITY_sp Q098(SPAC2G11 |          | Calcium permeable s | 24.70 | 0.00 |
| TRINITY_sp Q8W02         | CCR4-1   | Carbon catabolite r | 24.60 | 0.00 |
| TRINITY_sp Q3UR3         | Armc2    | Armadillo repeat-co | 24.60 | 0.00 |
| TRINITY_sp A8JF7         | ODA1     | Outer dynein arm pr | 24.60 | 0.00 |
| TRINITY_sp Q1XD1         | ycf37    | Uncharacterized pro | 24.60 | 0.00 |
| TRINITY_sp P5161         | HCFC1    | Host cell factor 1  | 24.60 | 0.00 |
| TRINITY_sp O0041         | IPO5     | Importin-5 OS=Homo  | 24.60 | 0.00 |
| TRINITY_sp Q9JH2         | Slc38a3  | Sodium-coupled neut | 24.60 | 0.00 |
| TRINITY_sp Q6PF1         | wdr48    | WD repeat-containin | 24.60 | 0.00 |
| TRINITY_sp Q6NZ1         | Dnajc8   | DnaJ homolog subfam | 24.60 | 0.00 |
| TRINITY_sp Q5517         | DDB_G027 | Protein DDB_G027668 | 24.60 | 0.00 |
| TRINITY_sp P3373         | SRP72    | Signal recognition  | 24.60 | 0.00 |
| TRINITY_sp A2AS5         | Ankrd16  | Ankyrin repeat doma | 24.60 | 0.00 |
| TRINITY_sp B1H11         | facp2    | Lysosomal acid phos | 24.60 | 0.00 |
| TRINITY_sp O1543         | ABCC4    | Multidrug resistanc | 24.60 | 0.00 |
| TRINITY_sp P9WI1         | MT1821   | L-gulono-1,4-lacton | 24.50 | 0.00 |
| TRINITY_sp Q9ST1         | ABCA5    | ABC transporter A f | 24.50 | 0.00 |
| TRINITY_sp Q9AV8         | PRP19    | Pre-mRNA-processing | 24.50 | 0.00 |
| TRINITY_sp Q8BS1         | Ccdc151  | Coiled-coil domain- | 24.50 | 0.00 |
| TRINITY_sp Q8L75         | ORP1C    | Oxysterol-binding p | 24.50 | 0.00 |
| TRINITY_sp Q7RR1         | PY00695  | T-cell immunomodula | 24.50 | 0.00 |
| TRINITY_sp P5473         | pkcA     | Serine/threonine-pr | 24.50 | 0.00 |
| TRINITY_sp Q54M1         | lrlA     | Latrophilin recepto | 24.50 | 0.00 |
| TRINITY_sp Q8BG1         | Zadh2    | Prostaglandin reduc | 24.50 | 0.00 |
| TRINITY_sp Q9LU1         | CYP72A13 | Cytochrome P450 72A | 24.50 | 0.00 |
| TRINITY_sp Q88N1         | quiP     | Acyl-homoserine lac | 24.50 | 0.00 |
| TRINITY_sp Q5TH1         | VPS13D   | Vacuolar protein so | 24.50 | 0.00 |
| TRINITY_sp Q54F1         | ceif2b3  | Translation initiat | 24.50 | 0.00 |
| TRINITY_sp Q9Z01         | Itsn2    | Intersectin-2 OS=Mu | 24.50 | 0.00 |
| TRINITY_sp P3438         | crn-7    | Cell-death-related  | 24.50 | 0.00 |
| TRINITY_sp Q9PT8         | KCNH6    | Potassium voltage-g | 24.50 | 0.00 |
| TRINITY_sp Q5XI5         | Tt1110   | Protein polyglycyla | 24.50 | 0.00 |
| TRINITY_sp O1411         | pop2     | WD repeat-containin | 24.50 | 0.00 |
| TRINITY_sp A0R41         | fkshA    | 3-ketosteroid-9-alp | 24.50 | 0.00 |
| TRINITY_sp Q54B1         | DDB_G029 | LIMR family protein | 24.40 | 0.00 |
| TRINITY_sp B4P51         | eIF3-S9  | Eukaryotic translat | 24.40 | 0.00 |
| TRINITY_sp B3WC1         | cinA     | Putative competence | 24.40 | 0.00 |
| TRINITY_sp A2YW1         | PLP2     | Patatin-like protei | 24.40 | 0.00 |
| TRINITY_sp Q9NWR1        | RNF216   | E3 ubiquitin-protei | 24.40 | 0.00 |
| TRINITY_sp Q9H71         | NRDE2    | Protein NRDE2 homol | 24.40 | 0.00 |
| TRINITY_sp Q9FF1         | PPH      | Pheophytinase, chlo | 24.40 | 0.00 |
| TRINITY_sp Q9HF1         | tra1     | Transcription-assoc | 24.40 | 0.00 |
| TRINITY_sp Q08D1         | AP2B1    | AP-1 complex subuni | 24.40 | 0.00 |
| TRINITY_sp P7791         | secY     | Protein translocase | 24.40 | 0.00 |
| TRINITY_sp O7491         | ria1     | Ribosome assembly p | 24.40 | 0.00 |
| TRINITY_sp K7TQ1         | EHIP     | HSP-interacting pro | 24.40 | 0.00 |
| TRINITY_sp P7361         | sppA     | Protease 4 OS=Synec | 24.40 | 0.00 |
| TRINITY_sp Q17Q1         | TFDP1    | Transcription facto | 24.40 | 0.00 |
| TRINITY_sp Q9V71         | Cyp6a23  | Probable cytochrome | 24.40 | 0.00 |
| TRINITY_sp Q9SF1         | DTX43    | Protein DETOXIFICAT | 24.40 | 0.00 |
| TRINITY_sp Q6PD1         | AAGAB    | Alpha- and gamma-ad | 24.30 | 0.00 |
| TRINITY_sp Q8C11         | Vps9d1   | VPS9 domain-contain | 24.30 | 0.00 |
| TRINITY_sp O1851         | Cyp4d10  | Cytochrome P450 4d1 | 24.30 | 0.00 |
| TRINITY_sp Q9QX1         | Nufip1   | Nuclear fragile X m | 24.30 | 0.00 |
| TRINITY_sp Q6BZ1         | SNX4     | Sorting nexin-4 OS= | 24.30 | 0.00 |

|                          |                      |       |      |
|--------------------------|----------------------|-------|------|
| TRINITY_sp D3Z6 Pdia2    | Protein disulfide-i  | 24.30 | 0.00 |
| TRINITY_sp Q8CH Tt115    | Tubulin polyglutamy  | 24.30 | 0.00 |
| TRINITY_sp P532 MDR1     | GTPase-activating p  | 24.30 | 0.00 |
| TRINITY_sp Q5XIV Sart1   | U4/U6.U5 tri-snRNP-  | 24.30 | 0.00 |
| TRINITY_sp Q9SK PAO2     | Probable polyamine   | 24.20 | 0.00 |
| TRINITY_sp P516 HCFC1    | Host cell factor 1   | 24.20 | 0.00 |
| TRINITY_sp Q8K3 Fanci    | Fanconi anemia grou  | 24.20 | 0.00 |
| TRINITY_sp Q6CU SDS23    | Protein SDS23 OS=K1  | 24.20 | 0.00 |
| TRINITY_sp Q8BS Ccdc151  | Coiled-coil domain-  | 24.20 | 0.00 |
| TRINITY_sp Q078 amdA     | Acetamidase OS=Myco  | 24.20 | 0.00 |
| TRINITY_sp Q52K rcc2     | Protein RCC2 homolo  | 24.20 | 0.00 |
| TRINITY_sp Q9UB SRNF14   | E3 ubiquitin-protei  | 24.20 | 0.00 |
| TRINITY_sp F4HX PLA1     | Phospholipase A I O  | 24.20 | 0.00 |
| TRINITY_sp Q9Z1 Cdc45    | Cell division contr  | 24.20 | 0.00 |
| TRINITY_sp Q9SE SURF1    | Surfeit locus prote  | 24.20 | 0.00 |
| TRINITY_sp P0CB med14    | Putative mediator o  | 24.20 | 0.00 |
| TRINITY_sp Q54S vgr1F    | Metabotropic glutam  | 24.20 | 0.00 |
| TRINITY_sp Q80W Slc29a3  | Equilibrative nucle  | 24.20 | 0.00 |
| TRINITY_sp Q9SV At4g3825 | Amino acid transpor  | 24.20 | 0.00 |
| TRINITY_sp Q802 Ixp04    | Exportin-4 OS=Danio  | 24.20 | 0.00 |
| TRINITY_sp A6VY cddl     | D-alanine--D-alanin  | 24.10 | 0.00 |
| TRINITY_sp Q085 ALE1     | Lysophospholipid ac  | 24.10 | 0.00 |
| TRINITY_sp Q9C7 ATE2     | Arginyl-tRNA--prote  | 24.10 | 0.00 |
| TRINITY_sp P908 F56F10.1 | Putative serine pro  | 24.10 | 0.00 |
| TRINITY_sp B4F6 Iaifm2   | Apoptosis-inducing   | 24.10 | 0.00 |
| TRINITY_sp F4HP DTX20    | Protein DETOXIFICAT  | 24.10 | 0.00 |
| TRINITY_sp Q9LI CHUP1    | Protein CHUP1, chlo  | 24.10 | 0.00 |
| TRINITY_sp Q9LE DTX54    | Protein DETOXIFICAT  | 24.10 | 0.00 |
| TRINITY_sp Q9P3 fcp1     | RNA polymerase II s  | 24.10 | 0.00 |
| TRINITY_sp Q672 Nox3     | NADPH oxidase 3 OS=  | 24.10 | 0.00 |
| TRINITY_sp Q54I slc44a2  | Choline transporter  | 24.10 | 0.00 |
| TRINITY_sp Q7Z3 PIWIL3   | Piwi-like protein 3  | 24.10 | 0.00 |
| TRINITY_sp P515 tetA     | Tetracycline resist  | 24.00 | 0.00 |
| TRINITY_sp O349 yobE     | Putative SOS respon  | 24.00 | 0.00 |
| TRINITY_sp Q8T2 prkag    | 5'-AMP-activated pr  | 24.00 | 0.00 |
| TRINITY_sp Q8IW WDR63    | WD repeat-containin  | 24.00 | 0.00 |
| TRINITY_sp Q5D1 TFAM     | Transcription facto  | 24.00 | 0.00 |
| TRINITY_sp Q8S3 SEC5A    | Exocyst complex com  | 24.00 | 0.00 |
| TRINITY_sp Q5RF ZW10     | Centromere/kinetoch  | 24.00 | 0.00 |
| TRINITY_sp Q5NC Ttf2     | Transcription termi  | 24.00 | 0.00 |
| TRINITY_sp Q9P8 tcsA     | Two-component syste  | 24.00 | 0.00 |
| TRINITY_sp Q55F dlpA     | Dynammin-like protei | 24.00 | 0.00 |
| TRINITY_sp Q556 DDB_G027 | Probable rhodanese   | 24.00 | 0.00 |
| TRINITY_sp Q7MY rsmB     | Ribosomal RNA small  | 24.00 | 0.00 |
| TRINITY_sp Q6QB Plscr3   | Phospholipid scramb  | 24.00 | 0.00 |
| TRINITY_sp B0G1 ucpB     | Mitochondrial subst  | 24.00 | 0.00 |
| TRINITY_sp Q275 cyp-13A3 | Putative cytochrome  | 24.00 | 0.00 |
| TRINITY_sp Q54W egcn1    | eIF-2-alpha kinase   | 23.90 | 0.00 |
| TRINITY_sp F4JT VPS54    | Vacuolar protein so  | 23.90 | 0.00 |
| TRINITY_sp P146 KSS1     | Mitogen-activated p  | 23.90 | 0.00 |
| TRINITY_sp P400 AVT6     | Vacuolar amino acid  | 23.90 | 0.00 |
| TRINITY_sp Q80V Cfap100  | Cilia- and flagella  | 23.90 | 0.00 |
| TRINITY_sp P395 ywbF     | Uncharacterized tra  | 23.90 | 0.00 |
| TRINITY_sp P599 Sirt6    | NAD-dependent prote  | 23.90 | 0.00 |
| TRINITY_sp Q29R MAT2B    | Methionine adenosyl  | 23.90 | 0.00 |
| TRINITY_sp Q103 SPBC582  | Uncharacterized ATP  | 23.90 | 0.00 |

|                  |           |                      |       |      |
|------------------|-----------|----------------------|-------|------|
| TRINITY_sp Q0912 | Cyp24a1   | 1,25-dihydroxyvitam  | 23.90 | 0.00 |
| TRINITY_sp Q9V99 | RhoGAP1   | (Rho GTPase-activati | 23.90 | 0.00 |
| TRINITY_sp Q54E7 | abpF      | Actin-binding prote  | 23.90 | 0.00 |
| TRINITY_sp Q0234 | CACNA1E   | Voltage-dependent R  | 23.90 | 0.00 |
| TRINITY_sp Q3KQ  | acpt      | Testicular acid pho  | 23.80 | 0.00 |
| TRINITY_sp Q54I4 | slc44a2   | Choline transporter  | 23.80 | 0.00 |
| TRINITY_sp P278  | (PEP3     | Vacuolar membrane p  | 23.80 | 0.00 |
| TRINITY_sp Q8BI  | Ranbp6    | Ran-binding protein  | 23.80 | 0.00 |
| TRINITY_sp Q54M  | DDB_G02   | {von Willebrand fact | 23.80 | 0.00 |
| TRINITY_sp Q3SZ  | AAMP      | Angio-associated mi  | 23.80 | 0.00 |
| TRINITY_sp Q2UK  | clu1      | Clustered mitochond  | 23.80 | 0.00 |
| TRINITY_sp O353  | {Phyh     | Phytanoyl-CoA dioxy  | 23.70 | 0.00 |
| TRINITY_sp Q9LD  | LAG1      | LAG1 longevity assu  | 23.70 | 0.00 |
| TRINITY_sp Q5ZK  | SETD6     | N-lysine methyltran  | 23.70 | 0.00 |
| TRINITY_sp Q29L  | mon2      | Protein MON2 homolo  | 23.70 | 0.00 |
| TRINITY_sp Q017  | {EXOSC10  | Exosome component 1  | 23.70 | 0.00 |
| TRINITY_sp Q103  | {SPBC582  | .Uncharacterized ATP | 23.70 | 0.00 |
| TRINITY_sp Q7Z4  | {NPHP3    | Nephrocystin-3 OS=H  | 23.70 | 0.00 |
| TRINITY_sp Q17Q  | {SLC37A3  | Sugar phosphate exc  | 23.70 | 0.00 |
| TRINITY_sp Q190  | pho-1     | Intestinal acid pho  | 23.70 | 0.00 |
| TRINITY_sp Q8LB  | KING1     | SNF1-related protei  | 23.70 | 0.00 |
| TRINITY_sp O152  | {ACOX3    | Peroxisomal acyl-co  | 23.70 | 0.00 |
| TRINITY_sp Q55E  | vps13E    | Putative vacuolar p  | 23.70 | 0.00 |
| TRINITY_sp O042  | {IMPA3    | Importin subunit al  | 23.60 | 0.00 |
| TRINITY_sp Q6EM  | TLL5      | Tubulin polyglutamy  | 23.60 | 0.00 |
| TRINITY_sp Q9VR  | {HERC2    | Probable E3 ubiquit  | 23.60 | 0.00 |
| TRINITY_sp Q54T  | {tbc1d5B  | TBC1 domain family   | 23.60 | 0.00 |
| TRINITY_sp Q6FT  | {SFH1     | Chromatin structure  | 23.60 | 0.00 |
| TRINITY_sp D3Z8  | {Slc38a11 | Putative sodium-cou  | 23.60 | 0.00 |
| TRINITY_sp Q535  | {nahG     | Salicylate hydroxyl  | 23.60 | 0.00 |
| TRINITY_sp Q9WZ  | {corA     | Cobalt/magnesium tr  | 23.60 | 0.00 |
| TRINITY_sp P250  | {CML12    | Calmodulin-like pro  | 23.60 | 0.00 |
| TRINITY_sp A7S4  | {serinc   | Probable serine inc  | 23.60 | 0.00 |
| TRINITY_sp Q58D  | {DCAF4    | DDB1- and CUL4-asso  | 23.50 | 0.00 |
| TRINITY_sp Q8UU  | {eed-a    | Polycomb protein ee  | 23.50 | 0.00 |
| TRINITY_sp O805  | {ITPK4    | Inositol 1,3,4-tris  | 23.50 | 0.00 |
| TRINITY_sp A6QP  | {TBC1D2   | TBC1 domain family   | 23.50 | 0.00 |
| TRINITY_sp F2Z4  | {Herc6    | E3 ISG15--protein 1  | 23.50 | 0.00 |
| TRINITY_sp P400  | {FTR1     | Plasma membrane iro  | 23.50 | 0.00 |
| TRINITY_sp Q4PII | UMAG_001  | Acyl-protein thioes  | 23.50 | 0.00 |
| TRINITY_sp Q9LF  | {PIN8     | Auxin efflux carrie  | 23.40 | 0.00 |
| TRINITY_sp Q8R3  | {Tcf25    | Transcription facto  | 23.40 | 0.00 |
| TRINITY_sp Q6LL  | {pckA     | Phosphoenolpyruvate  | 23.40 | 0.00 |
| TRINITY_sp Q6ZP  | {Ankib1   | Ankyrin repeat and   | 23.40 | 0.00 |
| TRINITY_sp Q8NB  | {KDM1B    | Lysine-specific his  | 23.40 | 0.00 |
| TRINITY_sp Q9VC  | {Cyp6d4   | Probable cytochrome  | 23.40 | 0.00 |
| TRINITY_sp Q9LG  | {PARN     | Poly(A)-specific ri  | 23.40 | 0.00 |
| TRINITY_sp Q9P4  | {tcsB     | Two-component syste  | 23.40 | 0.00 |
| TRINITY_sp Q092  | {nrf-6    | Nose resistant to f  | 23.40 | 0.00 |
| TRINITY_sp Q8SR  | {ECU08_1  | Probable cell divis  | 23.40 | 0.00 |
| TRINITY_sp Q54E  | {gacEE    | Rho GTPase-activati  | 23.40 | 0.00 |
| TRINITY_sp Q5B4  | {btgC     | Glucan endo-1,3-bet  | 23.40 | 0.00 |
| TRINITY_sp Q4G0  | {CCDC40   | Coiled-coil domain-  | 23.40 | 0.00 |
| TRINITY_sp P360  | {VPS24    | Vacuolar protein-so  | 23.40 | 0.00 |
| TRINITY_sp Q8BV  | {Ifi44    | Interferon-induced   | 23.40 | 0.00 |
| TRINITY_sp Q6DF  | {ccdc77   | Coiled-coil domain-  | 23.30 | 0.00 |



|                          |                     |       |      |
|--------------------------|---------------------|-------|------|
| TRINITY_sp P207(uvsW     | ATP-dependent DNA h | 23.30 | 0.00 |
| TRINITY_sp P3451K11H3.3  | Putative tricarboxy | 23.30 | 0.00 |
| TRINITY_sp Q9FKY PILS7   | Protein PIN-LIKES 7 | 23.30 | 0.00 |
| TRINITY_sp Q0JJIMAN2     | Mannan endo-1,4-bet | 23.30 | 0.00 |
| TRINITY_sp Q96Q HS3ST6   | Heparan sulfate glu | 23.30 | 0.00 |
| TRINITY_sp Q66I srrt     | Serrate RNA effecto | 23.30 | 0.00 |
| TRINITY_sp Q8CH Mbtps2   | Membrane-bound tran | 23.30 | 0.00 |
| TRINITY_sp Q5XE HES01    | Protein HES01 OS=Ar | 23.30 | 0.00 |
| TRINITY_sp P146(cyrl     | Adenylate cyclase O | 23.30 | 0.00 |
| TRINITY_sp Q54K talB     | Talin-B OS=Dictyost | 23.20 | 0.00 |
| TRINITY_sp Q4WL lutp10   | U3 small nucleolar  | 23.20 | 0.00 |
| TRINITY_sp Q3KQ acpt     | Testicular acid pho | 23.20 | 0.00 |
| TRINITY_sp Q906 PLA2G7   | Platelet-activating | 23.20 | 0.00 |
| TRINITY_sp P973 Rhod     | Rho-related GTP-bin | 23.20 | 0.00 |
| TRINITY_sp P366 rad8     | DNA repair protein  | 23.20 | 0.00 |
| TRINITY_sp P343 ncx-6    | Putative sodium/cal | 23.20 | 0.00 |
| TRINITY_sp Q9SD GLR3.7   | Glutamate receptor  | 23.20 | 0.00 |
| TRINITY_sp P292 pds      | Phytoene dehydrogen | 23.20 | 0.00 |
| TRINITY_sp A2VE CG4495   | Calcium uptake prot | 23.20 | 0.00 |
| TRINITY_sp P196 LTA4H    | Leukotriene A-4 hyd | 23.20 | 0.00 |
| TRINITY_sp Q6PE Cfap206  | Cilia- and flagella | 23.20 | 0.00 |
| TRINITY_sp Q4GZ ABCG2    | ATP-binding cassett | 23.10 | 0.00 |
| TRINITY_sp Q425 GN       | ARF guanine-nucleot | 23.10 | 0.00 |
| TRINITY_sp Q556 ctpA     | Carboxyl-terminal-p | 23.10 | 0.00 |
| TRINITY_sp Q9P7 SPAC1142 | Uncharacterized NOC | 23.10 | 0.00 |
| TRINITY_sp P509 AVT4     | Vacuolar amino acid | 23.10 | 0.00 |
| TRINITY_sp P355 CSNK1B   | Casein kinase I iso | 23.10 | 0.00 |
| TRINITY_sp F4K3 KIN7L    | Kinesin-like protei | 23.10 | 0.00 |
| TRINITY_sp Q8VX XEG113   | Arabinosyltransfera | 23.10 | 0.00 |
| TRINITY_sp Q75C MVP1     | Sorting nexin MVP1  | 23.10 | 0.00 |
| TRINITY_sp Q9Y7 SPCC1450 | PX domain-containin | 23.10 | 0.00 |
| TRINITY_sp Q4PH BRO1     | Vacuolar protein-so | 23.10 | 0.00 |
| TRINITY_sp P323 PSE1     | Importin subunit be | 23.10 | 0.00 |
| TRINITY_sp Q100 C28F5.4  | Putative zinc prote | 23.10 | 0.00 |
| TRINITY_sp Q425 GN       | ARF guanine-nucleot | 23.00 | 0.00 |
| TRINITY_sp A7S4 serinc   | Probable serine inc | 23.00 | 0.00 |
| TRINITY_sp O429 las1     | Pre-rRNA-processing | 23.00 | 0.00 |
| TRINITY_sp Q86K phyA     | Prolyl 4-hydroxylas | 23.00 | 0.00 |
| TRINITY_sp Q8N8 TLL6     | Tubulin polyglutamy | 23.00 | 0.00 |
| TRINITY_sp A0A0 M3KE1    | MAP3K epsilon prote | 23.00 | 0.00 |
| TRINITY_sp O758 GABBR2   | Gamma-aminobutyric  | 23.00 | 0.00 |
| TRINITY_sp Q9LF VAMP713  | Vesicle-associated  | 23.00 | 0.00 |
| TRINITY_sp Q6P7 hzc3hc1  | NIPA-like protein O | 22.90 | 0.00 |
| TRINITY_sp Q49A FAM135B  | Protein FAM135B OS= | 22.90 | 0.00 |
| TRINITY_sp Q23M Tt116a   | Probable beta-tubul | 22.90 | 0.00 |
| TRINITY_sp Q7TS Ppp6r1   | Serine/threonine-pr | 22.90 | 0.00 |
| TRINITY_sp Q93V EATG18A  | Autophagy-related p | 22.90 | 0.00 |
| TRINITY_sp P400 AVT6     | Vacuolar amino acid | 22.90 | 0.00 |
| TRINITY_sp Q042 PDS5     | Sister chromatid co | 22.90 | 0.00 |
| TRINITY_sp Q5RD KBTBD2   | Kelch repeat and BT | 22.90 | 0.00 |
| TRINITY_sp P343 ncx-6    | Putative sodium/cal | 22.90 | 0.00 |
| TRINITY_sp Q8R3 Dyx1c1   | Dyslexia susceptibi | 22.90 | 0.00 |
| TRINITY_sp Q6F4 MAP25    | Aspartyl protease 2 | 22.90 | 0.00 |
| TRINITY_sp Q54J sibD     | Integrin beta-like  | 22.80 | 0.00 |
| TRINITY_sp Q5F4 PPP6R3   | Serine/threonine-pr | 22.80 | 0.00 |
| TRINITY_sp Q9LE DTX54    | Protein DETOXIFICAT | 22.80 | 0.00 |

|                          |                     |       |      |
|--------------------------|---------------------|-------|------|
| TRINITY_sp Q555(vps13B   | Putative vacuolar p | 22.80 | 0.00 |
| TRINITY_sp P342(EDE1     | EH domain-containin | 22.80 | 0.00 |
| TRINITY_sp Q96M(CFAP44   | Cilia- and flagella | 22.80 | 0.00 |
| TRINITY_sp Q023(GLG1     | Golgi apparatus pro | 22.80 | 0.00 |
| TRINITY_sp Q9FL(ABCA10   | ABC transporter A f | 22.80 | 0.00 |
| TRINITY_sp Q9P2(CANKIB1  | Ankyrin repeat and  | 22.70 | 0.00 |
| TRINITY_sp P128(PEP5     | E3 ubiquitin-protei | 22.70 | 0.00 |
| TRINITY_sp Q222(ugt-50   | Putative UDP-glucur | 22.70 | 0.00 |
| TRINITY_sp Q58C(KLHDC3   | Kelch domain-contai | 22.70 | 0.00 |
| TRINITY_sp P029(tetA     | Tetracycline resist | 22.70 | 0.00 |
| TRINITY_sp Q9SY(PIP5P13  | Type I inositol pol | 22.70 | 0.00 |
| TRINITY_sp Q6EM(TTLL5    | Tubulin polyglutamy | 22.70 | 0.00 |
| TRINITY_sp Q5EA(TMEM164  | Transmembrane prote | 22.70 | 0.00 |
| TRINITY_sp P189(IRA1     | Inhibitory regulato | 22.70 | 0.00 |
| TRINITY_sp Q6P6(ak8      | Adenylate kinase 8  | 22.60 | 0.00 |
| TRINITY_sp Q8ND(BBOF1    | Basal body-orientat | 22.60 | 0.00 |
| TRINITY_sp O046(GLR2.1   | Glutamate receptor  | 22.60 | 0.00 |
| TRINITY_sp P870(pop1     | WD repeat-containin | 22.60 | 0.00 |
| TRINITY_sp Q8CG(Elac2    | Zinc phosphodiester | 22.60 | 0.00 |
| TRINITY_sp Q7T6(MIMI_R8  | Putative serine/thr | 22.60 | 0.00 |
| TRINITY_sp Q9LII(LDL2    | Lysine-specific his | 22.50 | 0.00 |
| TRINITY_sp Q5QN(Os01g021 | Potassium channel K | 22.50 | 0.00 |
| TRINITY_sp Q088(FAR2     | Fatty acyl-CoA redu | 22.50 | 0.00 |
| TRINITY_sp P741(sll1374  | Uncharacterized sym | 22.50 | 0.00 |
| TRINITY_sp Q5RD(CTC1     | CST complex subunit | 22.50 | 0.00 |
| TRINITY_sp O598(SPCC550  | Probable importin c | 22.50 | 0.00 |
| TRINITY_sp Q146(PDCD11   | Protein RRP5 homolo | 22.50 | 0.00 |
| TRINITY_sp B1H1(acp2     | Lysosomal acid phos | 22.50 | 0.00 |
| TRINITY_sp Q8CQ(drp35    | Lactonase drp35 OS= | 22.40 | 0.00 |
| TRINITY_sp Q67V(Os06g04  | G patch domain-cont | 22.40 | 0.00 |
| TRINITY_sp Q54P(DDB_G02  | Probable acid phosp | 22.40 | 0.00 |
| TRINITY_sp P871(SPAC57A  | Uncharacterized pro | 22.30 | 0.00 |
| TRINITY_sp Q6NX(Rcctb1   | RCC1 and BTB domain | 22.30 | 0.00 |
| TRINITY_sp Q54L(vps13A   | Putative vacuolar p | 22.30 | 0.00 |
| TRINITY_sp Q1ZX(Gr1K     | Metabotropic glutam | 22.30 | 0.00 |
| TRINITY_sp Q9P8(SNF4     | Nuclear protein SNF | 22.30 | 0.00 |
| TRINITY_sp Q1KK(lnpa     | Protein lunapark-A  | 22.30 | 0.00 |
| TRINITY_sp Q0EE(Ptchd3   | Patched domain-cont | 22.30 | 0.00 |
| TRINITY_sp Q556(slr0021  | Putative protease s | 22.30 | 0.00 |
| TRINITY_sp P593(barA     | Signal transduction | 22.20 | 0.00 |
| TRINITY_sp P182(AAC3     | ADP,ATP carrier pro | 22.20 | 0.00 |
| TRINITY_sp P266(Sos      | Protein son of seve | 22.20 | 0.00 |
| TRINITY_sp P064(RB1      | Retinoblastoma-asso | 22.20 | 0.00 |
| TRINITY_sp Q54H(cswp1    | Dolichyl-diphosphoo | 22.20 | 0.00 |
| TRINITY_sp Q7Z1(CYP51    | Sterol 14-alpha dem | 22.20 | 0.00 |
| TRINITY_sp Q3LX(RBR3     | Retinoblastoma-rela | 22.20 | 0.00 |
| TRINITY_sp O889(Slc22a8  | Solute carrier fami | 22.20 | 0.00 |
| TRINITY_sp A8JF(ODA1     | Outer dynein arm pr | 22.20 | 0.00 |
| TRINITY_sp Q54F(igtgf2b  | Transcription initi | 22.10 | 0.00 |
| TRINITY_sp O008(-        | Uncharacterized 80  | 22.10 | 0.00 |
| TRINITY_sp Q4R5(ACP2     | Lysosomal acid phos | 22.10 | 0.00 |
| TRINITY_sp A6QL(TRAPPC11 | Trafficking protein | 22.10 | 0.00 |
| TRINITY_sp Q8LB(KING1    | SNF1-related protei | 22.10 | 0.00 |
| TRINITY_sp O315(YesF     | Uncharacterized oxi | 22.10 | 0.00 |
| TRINITY_sp B2S1(mnmA     | tRNA-specific 2-thi | 22.10 | 0.00 |
| TRINITY_sp Q54U(sec24    | Protein transport p | 22.00 | 0.00 |

|                          |                     |       |      |
|--------------------------|---------------------|-------|------|
| TRINITY_sp Q9HFHtra1     | Transcription-assoc | 22.00 | 0.00 |
| TRINITY_sp B3M12eIF3-S5  | Eukaryotic translat | 22.00 | 0.00 |
| TRINITY_sp Q9M88SKOR     | Potassium channel S | 22.00 | 0.00 |
| TRINITY_sp Q54J7sibC     | Integrin beta-like  | 22.00 | 0.00 |
| TRINITY_sp Q10S8NLP1     | Protein NLP1 OS=Ory | 22.00 | 0.00 |
| TRINITY_sp Q8RW8CNGC5    | Probable cyclic nuc | 21.90 | 0.00 |
| TRINITY_sp Q54TmdrkD     | Probable serine/thr | 21.90 | 0.00 |
| TRINITY_sp Q9M97APCB1    | Aspartyl protease A | 21.90 | 0.00 |
| TRINITY_sp O0762yhfW     | Putative Rieske 2Fe | 21.90 | 0.00 |
| TRINITY_sp Q54E7gr1E     | Metabotropic glutam | 21.90 | 0.00 |
| TRINITY_sp Q6DFEipoc5    | Centrosomal protein | 21.80 | 0.00 |
| TRINITY_sp Q0787VPS13    | Vacuolar protein so | 21.80 | 0.00 |
| TRINITY_sp Q66K8fam161a  | Protein FAM161A OS= | 21.80 | 0.00 |
| TRINITY_sp Q9BY1SCAPER   | S phase cyclin A-as | 21.80 | 0.00 |
| TRINITY_sp P2565CDC39    | General negative re | 21.80 | 0.00 |
| TRINITY_sp Q8WN1KCNH2    | Potassium voltage-g | 21.80 | 0.00 |
| TRINITY_sp P3660rad8     | DNA repair protein  | 21.70 | 0.00 |
| TRINITY_sp A6ZUCSDS23    | Protein SDS23 OS=Sa | 21.70 | 0.00 |
| TRINITY_sp Q5F36ABCC1    | Multidrug resistanc | 21.70 | 0.00 |
| TRINITY_sp Q9VF7ldlCp    | Conserved oligomeri | 21.70 | 0.00 |
| TRINITY_sp Q5W25pigC     | Prodigiosin synthes | 21.70 | 0.00 |
| TRINITY_sp A9UY9serinc   | Probable serine inc | 21.60 | 0.00 |
| TRINITY_sp Q6I51CPK16    | Calcium-dependent p | 21.60 | 0.00 |
| TRINITY_sp Q54J8sibB     | Integrin beta-like  | 21.60 | 0.00 |
| TRINITY_sp P5407KTR6     | Mannosyltransferase | 21.50 | 0.00 |
| TRINITY_sp P5568NGR_a010 | Uncharacterized zin | 21.50 | 0.00 |
| TRINITY_sp F4JK8SUD1     | Probable E3 ubiquit | 21.50 | 0.00 |
| TRINITY_sp Q5F31UTP15    | U3 small nucleolar  | 21.40 | 0.00 |
| TRINITY_sp Q1034cbs2     | 5'-AMP-activated pr | 21.40 | 0.00 |
| TRINITY_sp Q9SZ8PEP      | RNA-binding KH doma | 21.30 | 0.00 |
| TRINITY_sp Q4PS7MAP65-9  | 65-kDa microtubule- | 21.30 | 0.00 |
| TRINITY_sp O0084-        | Uncharacterized 80  | 21.30 | 0.00 |
| TRINITY_sp P5496TLN1     | Talin-1 OS=Gallus g | 21.20 | 0.00 |
| TRINITY_sp Q9SD9GLR3.7   | Glutamate receptor  | 21.20 | 0.00 |
| TRINITY_sp Q6400wdr82-a  | WD repeat-containin | 21.10 | 0.00 |
| TRINITY_sp Q56A4ccdc40   | Coiled-coil domain- | 21.10 | 0.00 |
| TRINITY_sp Q54G0crlf     | Cyclic AMP receptor | 21.10 | 0.00 |
| TRINITY_sp B7ZU8setd3    | Histone-lysine N-me | 21.10 | 0.00 |
| TRINITY_sp Q5QJ7TBCEL    | Tubulin-specific ch | 21.00 | 0.00 |
| TRINITY_sp Q74E0ubiE     | Ubiquinone/menaquin | 21.00 | 0.00 |
| TRINITY_sp P1111ACP2     | Lysosomal acid phos | 21.00 | 0.00 |
| TRINITY_sp P4656ckb-3    | Putative choline ki | 20.90 | 0.00 |
| TRINITY_sp Q0J70TPR2     | Protein TPR2 OS=Ory | 20.80 | 0.00 |
| TRINITY_sp Q8AY8CENPI    | Centromere protein  | 20.80 | 0.00 |
| TRINITY_sp Q7SC9sym-1    | Protein sym-1 OS=Ne | 20.70 | 0.00 |
| TRINITY_sp Q5FB0tmcb     | Tiny macrocysts pro | 20.60 | 0.00 |
| TRINITY_sp Q9VS4Rint1    | RINT1-like protein  | 20.50 | 0.00 |
| TRINITY_sp Q5NV8ACP2     | Lysosomal acid phos | 20.50 | 0.00 |
| TRINITY_sp O0084-        | Uncharacterized 80  | 20.40 | 0.00 |
| TRINITY_sp Q1828sec-15   | Exocyst complex com | 20.40 | 0.00 |
| TRINITY_sp Q8NDMCFAP43   | Cilia- and flagella | 20.20 | 0.00 |
| TRINITY_sp P3453rfp-1    | E3 ubiquitin-protei | 20.20 | 0.00 |
| TRINITY_sp Q8IV8LOXHD1   | Lipoxygenase homolo | 19.90 | 0.00 |
| TRINITY_sp Q50E8CYP716B2 | Cytochrome P450 716 | 19.60 | 0.00 |
| TRINITY_sp P4006KAP123   | Importin subunit be | 19.50 | 0.00 |
| TRINITY_sp A8JF8ODA1     | Outer dynein arm pr | 19.50 | 0.00 |

TRINITY\_sp|Q922IFpp6r3 Serine/threonine-pr 19.30 0.00
