# Supplementary material for: Transcriptome Analysis of the Accumulation of Astaxanthin in Haematococcus pluvialis Treated with White and Blue Lights as well as Salicylic Acid
Source: Hindawi journal article supplement (doi:10.1155/2022/4827595), 2022-01-01
Supplement: f4 [file 4827595.f4.pdf]

| Query            | NR_hit    | NR_desc | NR_species          | NR_identity | NR_evalue |
|------------------|-----------|---------|---------------------|-------------|-----------|
| TRINITY_XP_02294 | root      | phc     | Cucurbita_moschata  | 100.00      | 0.00      |
| TRINITY_XP_02292 | 50S       | ribc    | Cucurbita_moschata  | 100.00      | 0.00      |
| TRINITY_XP_02295 | photosys  |         | Cucurbita_moschata  | 100.00      | 0.00      |
| TRINITY_XP_02293 | 30S       | ribc    | Cucurbita_moschata  | 100.00      | 0.00      |
| TRINITY_XP_02352 | photosys  |         | Cucurbita_pepo      | 100.00      | 0.00      |
| TRINITY_XP_02352 | uncharac  |         | Cucurbita_pepo      | 100.00      | 0.00      |
| TRINITY_EEC8086  | (hypothet |         | Oryza_sativa        | 100.00      | 0.00      |
| TRINITY_XP_02296 | chloropl  |         | Cucurbita_moschata  | 100.00      | 0.00      |
| TRINITY_XP_02295 | uncharac  |         | Cucurbita_moschata  | 100.00      | 0.00      |
| TRINITY_XP_02296 | chloropl  |         | Cucurbita_moschata  | 100.00      | 0.00      |
| TRINITY_XP_02354 | protein   |         | Cucurbita_pepo      | 100.00      | 0.00      |
| TRINITY_XP_02295 | photosyr  |         | Cucurbita_moschata  | 100.00      | 0.00      |
| TRINITY_YP_00946 | DNA-dir   |         | Haematococcus_lacus | 100.00      | 0.00      |
| TRINITY_NP_00134 | uncharac  |         | Zea_mays            | 100.00      | 0.00      |
| TRINITY_XP_02295 | photosys  |         | Cucurbita_moschata  | 100.00      | 0.00      |
| TRINITY_XP_02298 | triosepl  |         | Cucurbita_maxima    | 100.00      | 0.00      |
| TRINITY_XP_02295 | uncharac  |         | Cucurbita_moschata  | 100.00      | 0.00      |
| TRINITY_XP_02353 | ethylene  |         | Cucurbita_pepo      | 100.00      | 0.00      |
| TRINITY_XP_02351 | floral    |         | Cucurbita_pepo      | 100.00      | 0.00      |
| TRINITY_XP_02294 | 50S       | ribc    | Cucurbita_moschata  | 100.00      | 0.00      |
| TRINITY_NP_00115 | photosys  |         | Zea_mays            | 100.00      | 0.00      |
| TRINITY_XP_01915 | PREDICTE  |         | Ipomoea_nil         | 100.00      | 0.00      |
| TRINITY_XP_01918 | PREDICTE  |         | Ipomoea_nil         | 100.00      | 0.00      |
| TRINITY_XP_02293 | 50S       | ribc    | Cucurbita_moschata  | 100.00      | 0.00      |
| TRINITY_YP_00946 | photosys  |         | Haematococcus_lacus | 100.00      | 0.00      |
| TRINITY_XP_01918 | PREDICTE  |         | Ipomoea_nil         | 100.00      | 0.00      |
| TRINITY_XP_02293 | plastocy  |         | Cucurbita_moschata  | 100.00      | 0.00      |
| TRINITY_XP_02296 | photosys  |         | Cucurbita_maxima    | 100.00      | 0.00      |
| TRINITY_XP_01916 | PREDICTE  |         | Ipomoea_nil         | 100.00      | 0.00      |
| TRINITY_XP_02292 | proteasc  |         | Cucurbita_moschata  | 100.00      | 0.00      |
| TRINITY_XP_02293 | glycerac  |         | Cucurbita_moschata  | 100.00      | 0.00      |
| TRINITY_XP_02353 | glycerac  |         | Cucurbita_pepo      | 100.00      | 0.00      |
| TRINITY_AFW90557 | 60S       | ribc    | Solanum_tuberosum   | 100.00      | 0.00      |
| TRINITY_XP_02292 | chloropl  |         | Cucurbita_moschata  | 100.00      | 0.00      |
| TRINITY_XP_02213 | chloropl  |         | Momordica_charantia | 100.00      | 0.00      |
| TRINITY_XP_02295 | chloropl  |         | Cucurbita_moschata  | 100.00      | 0.00      |
| TRINITY_AMS25549 | catalase  |         | Ipomoea_batatas     | 100.00      | 0.00      |
| TRINITY_XP_02295 | photosys  |         | Cucurbita_maxima    | 100.00      | 0.00      |
| TRINITY_QAY29594 | enolase   |         | Cucurbita_pepo      | 100.00      | 0.00      |
| TRINITY_XP_02292 | costars   |         | Cucurbita_moschata  | 100.00      | 0.00      |
| TRINITY_AAK69541 | cathepsi  |         | Ipomoea_batatas     | 100.00      | 0.00      |
| TRINITY_XP_02296 | chloropl  |         | Cucurbita_moschata  | 100.00      | 0.00      |
| TRINITY_XP_02294 | metallot  |         | Cucurbita_moschata  | 100.00      | 0.00      |
| TRINITY_XP_01917 | PREDICTE  |         | Ipomoea_nil         | 100.00      | 0.00      |
| TRINITY_XP_02293 | uncharac  |         | Cucurbita_moschata  | 100.00      | 0.00      |
| TRINITY_EMS46210 | (Elongati |         | Triticum_urartu     | 100.00      | 0.00      |
| TRINITY_XP_02292 | triose    |         | Cucurbita_moschata  | 100.00      | 0.00      |
| TRINITY_XP_02294 | phosphon  |         | Cucurbita_moschata  | 100.00      | 0.00      |
| TRINITY_XP_02295 | photosys  |         | Cucurbita_moschata  | 100.00      | 0.00      |
| TRINITY_XP_00414 | PREDICTE  |         | Cucumis_sativus     | 100.00      | 0.00      |
| TRINITY_XP_02294 | 60S       | ribc    | Cucurbita_moschata  | 100.00      | 0.00      |
| TRINITY_XP_02353 | ATP-depe  |         | Cucurbita_pepo      | 100.00      | 0.00      |
| TRINITY_XP_02353 | ferritir  |         | Cucurbita_pepo      | 100.00      | 0.00      |
| TRINITY_AMS24668 | LOXA [I   |         | Ipomoea_batatas     | 100.00      | 0.00      |
| TRINITY_XP_02354 | 60S       | ribc    | Cucurbita_pepo      | 100.00      | 0.00      |
| TRINITY_NP_00129 | ubiquiti  |         | Jatropha_curcas     | 100.00      | 0.00      |
| TRINITY_ACF85961 | unknown   |         | Zea_mays            | 100.00      | 0.00      |
| TRINITY_NP_00113 | photosys  |         | Zea_mays            | 100.00      | 0.00      |
| TRINITY_XP_00414 | PREDICTE  |         | Cucumis_sativus     | 100.00      | 0.00      |
| TRINITY_YP_00946 | RNA-depe  |         | Haematococcus_lacus | 100.00      | 0.00      |
| TRINITY_XP_01916 | PREDICTE  |         | Ipomoea_nil         | 100.00      | 0.00      |
| TRINITY_XP_02294 | elongati  |         | Cucurbita_moschata  | 100.00      | 0.00      |
| TRINITY_XP_02351 | indole-   |         | Cucurbita_pepo      | 100.00      | 0.00      |
| TRINITY_XP_02294 | transket  |         | Cucurbita_moschata  | 100.00      | 0.00      |
| TRINITY_XP_00843 | PREDICTE  |         | Cucumis_melo        | 100.00      | 0.00      |
| TRINITY_XP_02298 | uncharac  |         | Cucurbita_maxima    | 100.00      | 0.00      |
| TRINITY_AAD22104 | B12D prc  |         | Ipomoea_batatas     | 100.00      | 0.00      |
| TRINITY_XP_02352 | photosys  |         | Cucurbita_pepo      | 100.00      | 0.00      |
| TRINITY_ALO21551 | putative  |         | Haematococcus_lacus | 100.00      | 0.00      |
| TRINITY_XP_02354 | uncharac  |         | Cucurbita_pepo      | 100.00      | 0.00      |

|                  |          |                     |        |      |
|------------------|----------|---------------------|--------|------|
| TRINITY_XP_02790 | tubulin  | Vigna_unguiculata   | 100.00 | 0.00 |
| TRINITY_XP_02295 | photosy  | Cucurbita_moschata  | 100.00 | 0.00 |
| TRINITY_XP_01918 | PREDICTE | Ipomoea_nil         | 100.00 | 0.00 |
| TRINITY_XP_02293 | putative | Cucurbita_moschata  | 100.00 | 0.00 |
| TRINITY_XP_00495 | photosy  | Setaria_italica     | 100.00 | 0.00 |
| TRINITY_XP_02354 | cysteine | Cucurbita_pepo      | 100.00 | 0.00 |
| TRINITY_XP_00414 | PREDICTE | Cucumis_sativus     | 100.00 | 0.00 |
| TRINITY_XP_02292 | enolase  | Cucurbita_moschata  | 100.00 | 0.00 |
| TRINITY_XP_02353 | superoxi | Cucurbita_pepo      | 100.00 | 0.00 |
| TRINITY_XP_02352 | 50S rib  | Cucurbita_pepo      | 100.00 | 0.00 |
| TRINITY_XP_00413 | PREDICTE | Cucumis_sativus     | 100.00 | 0.00 |
| TRINITY_XP_02293 | uncharac | Cucurbita_moschata  | 100.00 | 0.00 |
| TRINITY_XP_02299 | protein  | Cucurbita_maxima    | 100.00 | 0.00 |
| TRINITY_XP_02295 | GTP-bin  | Cucurbita_moschata  | 100.00 | 0.00 |
| TRINITY_XP_00413 | PREDICTE | Cucumis_sativus     | 100.00 | 0.00 |
| TRINITY_XP_02355 | photosy  | Cucurbita_pepo      | 100.00 | 0.00 |
| TRINITY_XP_00414 | PREDICTE | Cucumis_sativus     | 100.00 | 0.00 |
| TRINITY_XP_02352 | ferredo  | Cucurbita_pepo      | 100.00 | 0.00 |
| TRINITY_XP_02354 | malate c | Cucurbita_pepo      | 100.00 | 0.00 |
| TRINITY_XP_02292 | photosy  | Cucurbita_moschata  | 100.00 | 0.00 |
| TRINITY_XP_02297 | ATP synt | Cucurbita_maxima    | 100.00 | 0.00 |
| TRINITY_XP_02293 | ATP synt | Cucurbita_moschata  | 100.00 | 0.00 |
| TRINITY_XP_02352 | ATP synt | Cucurbita_pepo      | 100.00 | 0.00 |
| TRINITY_XP_02295 | 50S rib  | Cucurbita_moschata  | 100.00 | 0.00 |
| TRINITY_XP_02292 | chloropl | Cucurbita_moschata  | 100.00 | 0.00 |
| TRINITY_XP_00244 | S-adenos | Sorghum_bicolor     | 100.00 | 0.00 |
| TRINITY_XP_02293 | 28 kDa r | Cucurbita_moschata  | 100.00 | 0.00 |
| TRINITY_XP_02353 | 28 kDa r | Cucurbita_pepo      | 100.00 | 0.00 |
| TRINITY_ADB03784 | catalase | Ipomoea_batatas     | 100.00 | 0.00 |
| TRINITY_XP_02300 | 60S rib  | Cucurbita_maxima    | 100.00 | 0.00 |
| TRINITY_NP_00114 | chloropl | Zea_mays            | 100.00 | 0.00 |
| TRINITY_XP_02352 | thiamine | Cucurbita_pepo      | 100.00 | 0.00 |
| TRINITY_XP_02352 | thiamine | Cucurbita_pepo      | 100.00 | 0.00 |
| TRINITY_XP_01146 | PREDICTE | Fragaria_vesca      | 100.00 | 0.00 |
| TRINITY_XP_02293 | eukaryot | Cucurbita_moschata  | 100.00 | 0.00 |
| TRINITY_XP_02293 | ATP-depe | Cucurbita_moschata  | 100.00 | 0.00 |
| TRINITY_XP_02293 | glyceral | Cucurbita_moschata  | 100.00 | 0.00 |
| TRINITY_XP_02352 | peptidyl | Cucurbita_pepo      | 100.00 | 0.00 |
| TRINITY_XP_02294 | 60S rib  | Cucurbita_moschata  | 100.00 | 0.00 |
| TRINITY_XP_02294 | fructose | Cucurbita_moschata  | 100.00 | 0.00 |
| TRINITY_XP_02293 | calvin c | Cucurbita_moschata  | 100.00 | 0.00 |
| TRINITY_NP_00123 | ubiquiti | Solanum_lycopersicu | 100.00 | 0.00 |
| TRINITY_XP_02354 | chloropl | Cucurbita_pepo      | 100.00 | 0.00 |
| TRINITY_XP_02294 | chloropl | Cucurbita_moschata  | 100.00 | 0.00 |
| TRINITY_XP_02354 | 60S rib  | Cucurbita_pepo      | 100.00 | 0.00 |
| TRINITY_XP_00844 | PREDICTE | Cucumis_melo        | 100.00 | 0.00 |
| TRINITY_XP_02355 | chloropl | Cucurbita_pepo      | 100.00 | 0.00 |
| TRINITY_XP_01918 | PREDICTE | Ipomoea_nil         | 100.00 | 0.00 |
| TRINITY_AAF69014 | cysteine | Ipomoea_batatas     | 100.00 | 0.00 |
| TRINITY_XP_02353 | uncharac | Cucurbita_pepo      | 100.00 | 0.00 |
| TRINITY_XP_02351 | serine l | Cucurbita_pepo      | 100.00 | 0.00 |
| TRINITY_XP_02298 | glutamat | Cucurbita_maxima    | 100.00 | 0.00 |
| TRINITY_XP_02300 | chloropl | Cucurbita_maxima    | 100.00 | 0.00 |
| TRINITY_XP_02352 | L-ascor  | Cucurbita_pepo      | 100.00 | 0.00 |
| TRINITY_XP_02352 | protein  | Cucurbita_pepo      | 100.00 | 0.00 |
| TRINITY_XP_02292 | protein  | Cucurbita_moschata  | 100.00 | 0.00 |
| TRINITY_XP_02295 | probable | Cucurbita_moschata  | 100.00 | 0.00 |
| TRINITY_XP_02295 | probable | Cucurbita_moschata  | 100.00 | 0.00 |
| TRINITY_XP_01010 | malate c | Morus_notabilis     | 100.00 | 0.00 |
| TRINITY_XP_00846 | PREDICTE | Cucumis_melo        | 100.00 | 0.00 |
| TRINITY_XP_01916 | PREDICTE | Ipomoea_nil         | 100.00 | 0.00 |
| TRINITY_XP_01916 | PREDICTE | Ipomoea_nil         | 100.00 | 0.00 |
| TRINITY_XP_02299 | photosy  | Cucurbita_maxima    | 100.00 | 0.00 |
| TRINITY_XP_02354 | oxygen-e | Cucurbita_pepo      | 100.00 | 0.00 |
| TRINITY_XP_02300 | oxygen-e | Cucurbita_maxima    | 100.00 | 0.00 |
| TRINITY_XP_02293 | 50S rib  | Cucurbita_moschata  | 100.00 | 0.00 |
| TRINITY_XP_02294 | serine-- | Cucurbita_moschata  | 100.00 | 0.00 |
| TRINITY_XP_01915 | PREDICTE | Ipomoea_nil         | 100.00 | 0.00 |
| TRINITY_XP_02292 | ribulose | Cucurbita_moschata  | 100.00 | 0.00 |
| TRINITY_XP_01916 | PREDICTE | Ipomoea_nil         | 100.00 | 0.00 |
| TRINITY_XP_02294 | ribulose | Cucurbita_moschata  | 100.00 | 0.00 |

|                                              |        |      |
|----------------------------------------------|--------|------|
| TRINITY_NP_00131ADP-ribcArabidopsis_thalian  | 100.00 | 0.00 |
| TRINITY_XP_02354vacuolarCucurbita_pepo       | 100.00 | 0.00 |
| TRINITY_ACF8588(unknown Zea_mays             | 100.00 | 0.00 |
| TRINITY_XP_02294oxygen-εCucurbita_moschata   | 100.00 | 0.00 |
| TRINITY_XP_02352oxygen-εCucurbita_pepo       | 100.00 | 0.00 |
| TRINITY_XP_02294ferredoCucurbita_moschata    | 100.00 | 0.00 |
| TRINITY_XP_01917PREDICTF Ipomoea_nil         | 100.00 | 0.00 |
| TRINITY_XP_02293phosphorCucurbita_moschata   | 100.00 | 0.00 |
| TRINITY_XP_02293cystathiCucurbita_moschata   | 100.00 | 0.00 |
| TRINITY_ACJ0591(putative Ipomoea_batatas     | 100.00 | 0.00 |
| TRINITY_ABP3552(εcyclophi Ipomoea_batatas    | 100.00 | 0.00 |
| TRINITY_AAA3339(sporamir Ipomoea_batatas     | 100.00 | 0.00 |
| TRINITY_XP_00844PREDICTF Cucumis_melo        | 100.00 | 0.00 |
| TRINITY_XP_02292glyceralCucurbita_moschata   | 100.00 | 0.00 |
| TRINITY_XP_02292glyceralCucurbita_moschata   | 100.00 | 0.00 |
| TRINITY_XP_02087phosphoC Arabidopsis_lyrata  | 100.00 | 0.00 |
| TRINITY_XP_01108phosphoC Sesamum_indicum     | 100.00 | 0.00 |
| TRINITY_XP_02294phosphoC Cucurbita_moschata  | 100.00 | 0.00 |
| TRINITY_XP_02355photosyεCucurbita_pepo       | 100.00 | 0.00 |
| TRINITY_XP_02354oxygen-εCucurbita_pepo       | 100.00 | 0.00 |
| TRINITY_XP_02353ribuloseCucurbita_pepo       | 100.00 | 0.00 |
| TRINITY_XP_02292acyl-CoC Cucurbita_moschata  | 100.00 | 0.00 |
| TRINITY_XP_02295elongatiCucurbita_moschata   | 100.00 | 0.00 |
| TRINITY_XP_01919PREDICTF Ipomoea_nil         | 100.00 | 0.00 |
| TRINITY_YP_0094630S ribcHaematococcus_lacus  | 100.00 | 0.00 |
| TRINITY_AIE89875GFP (chlTetraselmis_subcord  | 100.00 | 0.00 |
| TRINITY_AIE89875GFP (chlTetraselmis_subcord  | 100.00 | 0.00 |
| TRINITY_GAX81193hypothetChlamydomonas_eusti  | 100.00 | 0.00 |
| TRINITY_XP_02285polyubicOlea_europaea        | 100.00 | 0.00 |
| TRINITY_XP_02285polyubicOlea_europaea        | 100.00 | 0.00 |
| TRINITY_ALO21548D1 reactHaematococcus_lacus  | 100.00 | 0.00 |
| TRINITY_XP_00414PREDICTF Cucumis_sativus     | 100.00 | 0.00 |
| TRINITY_XP_01564chloroplOryza_sativa         | 100.00 | 0.00 |
| TRINITY_AAR1088(εchloroplTrifolium_pratense  | 100.00 | 0.00 |
| TRINITY_NP_00124uncharacGlycine_max          | 100.00 | 0.00 |
| TRINITY_QBB2036(εchloroplWithania_somnifera  | 100.00 | 0.00 |
| TRINITY_XP_02292chloroplCucurbita_moschata   | 100.00 | 0.00 |
| TRINITY_CAA48641type II Zea_mays             | 100.00 | 0.00 |
| TRINITY_XP_02352stress εCucurbita_pepo       | 100.00 | 0.00 |
| TRINITY_NP_00127ubiquitiSolanum_tuberosum    | 100.00 | 0.00 |
| TRINITY_XP_02374polyubicLactuca_sativa       | 100.00 | 0.00 |
| TRINITY_XP_02285polyubicOlea_europaea        | 100.00 | 0.00 |
| TRINITY_BAD90809histone Conocephalum_conicu  | 100.00 | 0.00 |
| TRINITY_P07145.1RecName:Ipomoea_batatas      | 100.00 | 0.00 |
| TRINITY_AAQ1007(εphosphoεMegathyrsus_maximus | 100.00 | 0.00 |
| TRINITY_YP_00946photosyεHaematococcus_lacus  | 100.00 | 0.00 |
| TRINITY_AFU3434770-kDa l Ipomoea_batatas     | 100.00 | 0.00 |
| TRINITY_RDY12638PolyubicMucuna_pruriens      | 100.00 | 0.00 |
| TRINITY_ACF88184unknown Zea_mays             | 100.00 | 0.00 |
| TRINITY_ACF88184unknown Zea_mays             | 100.00 | 0.00 |
| TRINITY_OVA00002hypothetMacleaya_cordata     | 100.00 | 0.00 |
| TRINITY_YP_00946homing εHaematococcus_lacus  | 100.00 | 0.00 |
| TRINITY_YP_00946hypothetHaematococcus_lacus  | 100.00 | 0.00 |
| TRINITY_XP_02293photosyεCucurbita_moschata   | 100.00 | 0.00 |
| TRINITY_XP_02351chromoplCucurbita_pepo       | 100.00 | 0.00 |
| TRINITY_XP_02295cysteineCucurbita_moschata   | 100.00 | 0.00 |
| TRINITY_XP_01389hypothetMonoraphidium_negle  | 100.00 | 0.00 |
| TRINITY_YP_00946cytochrεHaematococcus_lacus  | 100.00 | 0.00 |
| TRINITY_ADN95182oil glokHaematococcus_lacus  | 100.00 | 0.00 |
| TRINITY_XP_0229450S ribcCucurbita_moschata   | 100.00 | 0.00 |
| TRINITY_XP_022932-methylCucurbita_moschata   | 100.00 | 0.00 |
| TRINITY_AFU50381chloroplIpomoea_batatas      | 100.00 | 0.00 |
| TRINITY_XP_02354galactirCucurbita_pepo       | 100.00 | 0.00 |
| TRINITY_XP_022955'-adenCucurbita_moschata    | 100.00 | 0.00 |
| TRINITY_ADJ67213hypothetJatropha_curcas      | 100.00 | 0.00 |
| TRINITY_YP_009464-dihydH Haematococcus_lacus | 100.00 | 0.00 |
| TRINITY_XP_02294UDP-glucCucurbita_moschata   | 100.00 | 0.00 |
| TRINITY_AAZ15702beta-carHaematococcus_lacus  | 100.00 | 0.00 |
| TRINITY_XP_02295glutamirCucurbita_moschata   | 100.00 | 0.00 |
| TRINITY_XP_02292puromyciCucurbita_moschata   | 100.00 | 0.00 |
| TRINITY_XP_02352S-adenosCucurbita_pepo       | 100.00 | 0.00 |

|                                              |        |      |
|----------------------------------------------|--------|------|
| TRINITY_AAN03493uORF [I;Ipomoea_batatas      | 100.00 | 0.00 |
| TRINITY_Q9M6K1.1RecName:Ipomoea_batatas      | 100.00 | 0.00 |
| TRINITY_XP_02295photosy;Cucurbita_moschata   | 100.00 | 0.00 |
| TRINITY_XP_02351photosy;Cucurbita_pepo       | 100.00 | 0.00 |
| TRINITY_ALO21557D2 reactHaematococcus_lacus  | 100.00 | 0.00 |
| TRINITY_EPS74505hypothetGenlisea_aurea       | 100.00 | 0.00 |
| TRINITY_ABV72392plastid Haematococcus_lacus  | 100.00 | 0.00 |
| TRINITY_XP_0235160S rib;Cucurbita_pepo       | 100.00 | 0.00 |
| TRINITY_AAK15621phytoeneHaematococcus_lacus  | 100.00 | 0.00 |
| TRINITY_AAO73132photosy;Bassia_scoparia      | 100.00 | 0.00 |
| TRINITY_AAD34735photosy;Poa_annua            | 100.00 | 0.00 |
| TRINITY_XP_02351uncharacCucurbita_pepo       | 100.00 | 0.00 |
| TRINITY_AER58219channel;Haematococcus_lacus  | 100.00 | 0.00 |
| TRINITY_AER58219channel;Haematococcus_lacus  | 100.00 | 0.00 |
| TRINITY_BAL61084polyubid;Dianthus_caryophyll | 100.00 | 0.00 |
| TRINITY_XP_02300heat sh;Cucurbita_maxima     | 100.00 | 0.00 |
| TRINITY_YP_00946hypothetHaematococcus_lacus  | 100.00 | 0.00 |
| TRINITY_XP_02353glycine Cucurbita_pepo       | 100.00 | 0.00 |
| TRINITY_XP_00169beta tukChlamydomonas_reinh  | 100.00 | 0.00 |
| TRINITY_ALO21520CF1 alp;Haematococcus_lacus  | 100.00 | 0.00 |
| TRINITY_ADP36955hypothetAsterochloris_sp._D. | 100.00 | 0.00 |
| TRINITY_AJR272364-diphos;Haematococcus_lacus | 100.00 | 0.00 |
| TRINITY_ATU90143WDR dom;Haematococcus_lacus  | 100.00 | 0.00 |
| TRINITY_YP_00946LAGLIDAI Haematococcus_lacus | 100.00 | 0.00 |
| TRINITY_XP_02352probable;Cucurbita_pepo      | 100.00 | 0.00 |
| TRINITY_XP_02294ferredo;Cucurbita_moschata   | 100.00 | 0.00 |
| TRINITY_XP_01919PREDICTE Ipomoea_nil         | 100.00 | 0.00 |
| TRINITY_AKT95178chloropl;Haematococcus_lacus | 100.00 | 0.00 |
| TRINITY_ALO21545P700 ap;Haematococcus_lacus  | 100.00 | 0    |
| TRINITY_ADN95182oil glo;Haematococcus_lacus  | 100.00 | 0.00 |
| TRINITY_XP_01916PREDICTE Ipomoea_nil         | 100.00 | 0.00 |
| TRINITY_XP_00414PREDICTE Cucumis_sativus     | 100.00 | 0.00 |
| TRINITY_AJQ194851-deoxy- Haematococcus_lacus | 100.00 | 0.00 |
| TRINITY_XP_00226PREDICTE Vitis_vinifera      | 100.00 | 0.00 |
| TRINITY_AAW69292mitochor Haematococcus_lacus | 100.00 | 0.00 |
| TRINITY_CAD60555phosphoe;Zea_mays            | 100.00 | 0.00 |
| TRINITY_AAO64977lycopene;Haematococcus_lacus | 100.00 | 0.00 |
| TRINITY_BAR91105ribulose;Ipomoea_batatas     | 100.00 | 0.00 |
| TRINITY_ABB17556ribulose;Haematococcus_lacus | 100.00 | 0.00 |
| TRINITY_ABB17556ribulose;Haematococcus_lacus | 100.00 | 0.00 |
| TRINITY_ABV72392plastid Haematococcus_lacus  | 100.00 | 0.00 |
| TRINITY_XP_00414PREDICTE Cucumis_sativus     | 100.00 | 0.00 |
| TRINITY_AAO64977lycopene;Haematococcus_lacus | 100.00 | 0.00 |
| TRINITY_XP_02294glycine- Cucurbita_moschata  | 100.00 | 0.00 |
| TRINITY_ADC45376actin [(Cleistogenes_songor  | 100.00 | 0.00 |
| TRINITY_APO15836actin 11Sesuvium_portulacas  | 100.00 | 0.00 |
| TRINITY_ADC45376actin [(Cleistogenes_songor  | 100.00 | 0.00 |
| TRINITY_AAK30365cytochr;Polytomella_sp._Pri  | 100.00 | 0.00 |
| TRINITY_AAA33495pyruvate;Zea_mays            | 100.00 | 0.00 |
| TRINITY_XP_00296S-adenos;Selaginella_moellen | 100.00 | 0.00 |
| TRINITY_XP_00169predicte;Chlamydomonas_reinh | 100.00 | 0.00 |
| TRINITY_XP_02292aminomet;Cucurbita_moschata  | 100.00 | 0.00 |
| TRINITY_XP_00169transmen;Chlamydomonas_reinh | 100.00 | 0.00 |
| TRINITY_ACF85886unknown Zea_mays             | 100.00 | 0.00 |
| TRINITY_AAV37096phytoene;Haematococcus_lacus | 100.00 | 0.00 |
| TRINITY_GAX72580hypothet;Chlamydomonas_eusti | 100.00 | 0.00 |
| TRINITY_ABD37911light-h;Chlamydomonas_incer  | 100.00 | 0.00 |
| TRINITY_XP_00844PREDICTE Cucumis_melo        | 100.00 | 0.00 |
| TRINITY_XP_02352S-adenos;Cucurbita_pepo      | 100.00 | 0.00 |
| TRINITY_XP_02355ferredo;Cucurbita_pepo       | 100.00 | 0.00 |
| TRINITY_XP_02353polyol t;Cucurbita_pepo      | 100.00 | 0.00 |
| TRINITY_XP_02353uncharac;Cucurbita_pepo      | 100.00 | 0.00 |
| TRINITY_XP_02294PGR5-li;Cucurbita_moschata   | 100.00 | 0.00 |
| TRINITY_XP_02351MLO-like;Cucurbita_pepo      | 100.00 | 0.00 |
| TRINITY_EOY01046Phospho;Theobroma_cacao      | 100.00 | 0.00 |
| TRINITY_XP_02294profilir;Cucurbita_moschata  | 100.00 | 0.00 |
| TRINITY_YP_0094630S rib;Haematococcus_lacus  | 100.00 | 0.00 |
| TRINITY_XP_02295calmodul;Cucurbita_moschata  | 100.00 | 0.00 |
| TRINITY_XP_0229430S rib;Cucurbita_moschata   | 100.00 | 0.00 |
| TRINITY_NP_00110PL3K2 [2;Zea_mays            | 100.00 | 0.00 |
| TRINITY_XP_00414PREDICTE Cucumis_sativus     | 100.00 | 0.00 |

|                                             |        |      |
|---------------------------------------------|--------|------|
| TRINITY_XP_02353cysteineCucurbita_pepo      | 100.00 | 0.00 |
| TRINITY_YP_00946Light-irHaematococcus_lacus | 100.00 | 0.00 |
| TRINITY_XP_0229430S_ribcCucurbita_moschata  | 100.00 | 0.00 |
| TRINITY_QBB73041ruBisCO Cucurbita_pepo      | 100.00 | 0.00 |
| TRINITY_XP_02294peroxireCucurbita_moschata  | 100.00 | 0.00 |
| TRINITY_EEC8086ChypothetOryza_sativa        | 100.00 | 0.00 |
| TRINITY_XP_02352MLP-likeCucurbita_pepo      | 100.00 | 0.00 |
| TRINITY_RWR8388660S_ribcCinnamomum_micranth | 100.00 | 0.00 |
| TRINITY_XP_02353protein Cucurbita_pepo      | 100.00 | 0.00 |
| TRINITY_XP_02293cysteineCucurbita_moschata  | 100.00 | 0.00 |
| TRINITY_XP_02292magnesiCucurbita_moschata   | 100.00 | 0.00 |
| TRINITY_XP_02298photosyrCucurbita_maxima    | 100.00 | 0.00 |
| TRINITY_XP_02351D-glycerCucurbita_pepo      | 100.00 | 0.00 |
| TRINITY_XP_02293leucine Cucurbita_moschata  | 100.00 | 0.00 |
| TRINITY_XP_01918PREDICTEIpomoea_nil         | 100.00 | 0.00 |
| TRINITY_XP_02355beta-amycucurbita_pepo      | 100.00 | 0.00 |
| TRINITY_XP_02353tetraspCucurbita_pepo       | 100.00 | 0.00 |
| TRINITY_XP_02292peroxiscCucurbita_moschata  | 100.00 | 0.00 |
| TRINITY_XP_02293catalaseCucurbita_moschata  | 100.00 | 0.00 |
| TRINITY_AKN08992catalaseLuffa_aegyptiaca    | 100.00 | 0.00 |
| TRINITY_ACF78489unknown Zea_mays            | 100.00 | 0.00 |
| TRINITY_XP_00227PREDICTEVitis_vinifera      | 100.00 | 0.00 |
| TRINITY_NP_00114chloroplZea_mays            | 100.00 | 0.00 |
| TRINITY_NP_00111NADP-deZea_mays             | 100.00 | 0.00 |
| TRINITY_CAD60555phosphoeZea_mays            | 100.00 | 0.00 |
| TRINITY_NP_00133phosphoeZea_mays            | 100.00 | 0.00 |
| TRINITY_XP_02292ferredoCucurbita_moschata   | 100.00 | 0.00 |
| TRINITY_XP_02294probableCucurbita_moschata  | 100.00 | 0.00 |
| TRINITY_ACG26704photosyZea_mays             | 100.00 | 0.00 |
| TRINITY_YP_00946cytochrHaematococcus_lacus  | 100.00 | 0.00 |
| TRINITY_XP_02351photosyCucurbita_pepo       | 100.00 | 0.00 |
| TRINITY_XP_02351photosyCucurbita_pepo       | 100.00 | 0.00 |
| TRINITY_XP_0229330S_ribcCucurbita_moschata  | 100.00 | 0.00 |
| TRINITY_XP_02293fructoseCucurbita_moschata  | 100.00 | 0.00 |
| TRINITY_ACR36306unknown Zea_mays            | 100.00 | 0.00 |
| TRINITY_XP_02293ferredoCucurbita_moschata   | 100.00 | 0.00 |
| TRINITY_XP_02295V-type fCucurbita_moschata  | 100.00 | 0.00 |
| TRINITY_XP_02295malate cCucurbita_moschata  | 100.00 | 0.00 |
| TRINITY_XP_0229836.4 kDaCucurbita_maxima    | 100.00 | 0.00 |
| TRINITY_XP_02287oxygen-eOlea_europaea       | 100.00 | 0.00 |
| TRINITY_XP_02355uncharacCucurbita_pepo      | 100.00 | 0.00 |
| TRINITY_AML77653putativeHaematococcus_lacus | 99.90  | 0    |
| TRINITY_ALO21556CP43 chlHaematococcus_lacus | 99.80  | 0.00 |
| TRINITY_AEY80026heat shcHaematococcus_lacus | 99.80  | 0.00 |
| TRINITY_AJR272371-hydroHaematococcus_lacus  | 99.80  | 0.00 |
| TRINITY_AKO71906phytoeneHaematococcus_lacus | 99.80  | 0.00 |
| TRINITY_AKR53702chloroplHaematococcus_lacus | 99.80  | 0    |
| TRINITY_XP_02306fructoseCucurbita_maxima    | 99.70  | 0.00 |
| TRINITY_ALO21554hypothetHaematococcus_lacus | 99.70  | 0    |
| TRINITY_ACR78535cytosoliZea_mays            | 99.70  | 0.00 |
| TRINITY_XP_02292chloroplCucurbita_moschata  | 99.60  | 0.00 |
| TRINITY_XP_02352ribuloseCucurbita_pepo      | 99.60  | 0.00 |
| TRINITY_AKU47747inositolCucurbita_moschata  | 99.60  | 0.00 |
| TRINITY_AUT77175glutamatHaematococcus_lacus | 99.60  | 0    |
| TRINITY_AEF13159beta-ketHaematococcus_lacus | 99.60  | 0.00 |
| TRINITY_AAX8604214-3-3 fHaematococcus_lacus | 99.50  | 0.00 |
| TRINITY_AAB61311htrA-liHaematococcus_lacus  | 99.40  | 0.00 |
| TRINITY_AMK97820thioredeHaematococcus_lacus | 99.40  | 0.00 |
| TRINITY_XP_02354ribuloseCucurbita_pepo      | 99.40  | 0.00 |
| TRINITY_ABV72392plastid Haematococcus_lacus | 99.40  | 0.00 |
| TRINITY_AUT77175glutamatHaematococcus_lacus | 99.40  | 0.00 |
| TRINITY_XP_00295hypothetVolvox_carteri      | 99.30  | 0.00 |
| TRINITY_XP_02298glyceratCucurbita_maxima    | 99.20  | 0.00 |
| TRINITY_XP_00168splicinçChlamydomonas_reinh | 99.20  | 0.00 |
| TRINITY_APX64487geranylçHaematococcus_lacus | 99.20  | 0.00 |
| TRINITY_YP_00946P-loop cHaematococcus_lacus | 99.20  | 0.00 |
| TRINITY_AER58219channelcHaematococcus_lacus | 99.20  | 0.00 |
| TRINITY_BAK03519predicteHordeum_vulgare     | 99.20  | 0.00 |
| TRINITY_AUT77173glutamirHaematococcus_lacus | 99.10  | 0.00 |
| TRINITY_OIV89924hypothetLupinus_angustifoli | 99.10  | 0.00 |
| TRINITY_Q9SPK6.1RecName:Haematococcus_lacus | 99.10  | 0.00 |

|                 |           |                        |       |      |
|-----------------|-----------|------------------------|-------|------|
| TRINITY_AYU5883 | alpha-ti  | Haematococcus_lacus    | 99.10 | 0.00 |
| TRINITY_XP_0191 | PREDICTE  | Ipomoea_nil            | 99.00 | 0.00 |
| TRINITY_AMS2466 | LOXA      | [I]Ipomoea_batatas     | 99.00 | 0.00 |
| TRINITY_AAF6901 | cysteine  | Ipomoea_batatas        | 99.00 | 0.00 |
| TRINITY_AKT9517 | zeaxanti  | Haematococcus_lacus    | 99.00 | 0.00 |
| TRINITY_XP_0016 | actin     | [C]Chlamydomonas_reinh | 99.00 | 0.00 |
| TRINITY_XP_0229 | 50S rib   | Cucurbita_maxima       | 98.90 | 0.00 |
| TRINITY_XP_0191 | PREDICTE  | Ipomoea_nil            | 98.90 | 0.00 |
| TRINITY_XP_0191 | PREDICTE  | Ipomoea_nil            | 98.90 | 0.00 |
| TRINITY_XP_0235 | oxygen-ε  | Cucurbita_pepo         | 98.90 | 0.00 |
| TRINITY_XP_0016 | beta tuk  | Chlamydomonas_reinh    | 98.90 | 0.00 |
| TRINITY_AUI4110 | TAP38     | [F]Haematococcus_lacus | 98.90 | 0.00 |
| TRINITY_AFR3690 | chlorop   | Haematococcus_lacus    | 98.90 | 0.00 |
| TRINITY_AAO6497 | lycopene  | Haematococcus_lacus    | 98.90 | 0.00 |
| TRINITY_XP_0093 | PREDICTE  | Pyrus_x_bretschneid    | 98.80 | 0.00 |
| TRINITY_ALO2158 | beta''    | Haematococcus_lacus    | 98.80 | 0.00 |
| TRINITY_XP_0191 | PREDICTE  | Ipomoea_nil            | 98.80 | 0.00 |
| TRINITY_ACG3675 | oxygen-ε  | Zea_mays               | 98.80 | 0.00 |
| TRINITY_XP_0235 | non-spec  | Cucurbita_pepo         | 98.80 | 0.00 |
| TRINITY_XP_0191 | PREDICTE  | Ipomoea_nil            | 98.80 | 0.00 |
| TRINITY_AEI2916 | EF1a-li   | Vanilla_planifolia     | 98.80 | 0.00 |
| TRINITY_AAK7200 | calmodul  | Elaeis_oleifera        | 98.80 | 0.00 |
| TRINITY_XP_0110 | PREDICTE  | Populus_euphratica     | 98.80 | 0.00 |
| TRINITY_004386  | 1RecName: | Chlamydomonas_incer    | 98.80 | 0.00 |
| TRINITY_XP_0229 | copper    | tCucurbita_moschata    | 98.70 | 0.00 |
| TRINITY_AFD6280 | 73-deoxy- | Ipomoea_purpurea       | 98.70 | 0.00 |
| TRINITY_XP_0229 | photosys  | Cucurbita_moschata     | 98.70 | 0.00 |
| TRINITY_BAD9558 | metallo   | Ipomoea_batatas        | 98.70 | 0.00 |
| TRINITY_Q9M6K1  | 1RecName: | Ipomoea_batatas        | 98.70 | 0.00 |
| TRINITY_XP_0016 | beta tuk  | Chlamydomonas_reinh    | 98.70 | 0.00 |
| TRINITY_BAJ9821 | 1predicte | Hordeum_vulgare        | 98.70 | 0.00 |
| TRINITY_XP_0229 | 7protein  | Cucurbita_maxima       | 98.60 | 0.00 |
| TRINITY_KCW5138 | hypothet  | Eucalyptus_grandis     | 98.60 | 0.00 |
| TRINITY_XP_0238 | 7cell div | Quercus_suber          | 98.60 | 0.00 |
| TRINITY_Q9M6K1  | 1RecName: | Ipomoea_batatas        | 98.60 | 0.00 |
| TRINITY_AJQ1948 | 44-dipho  | Haematococcus_lacus    | 98.60 | 0.00 |
| TRINITY_AJR2723 | 64-dipho  | Haematococcus_lacus    | 98.60 | 0.00 |
| TRINITY_XP_0191 | PREDICTE  | Ipomoea_nil            | 98.60 | 0.00 |
| TRINITY_XP_0191 | PREDICTE  | Ipomoea_nil            | 98.50 | 0.00 |
| TRINITY_AWW1650 | 5stem-spe | Ipomoea_pes-caprae     | 98.50 | 0.00 |
| TRINITY_BAO5727 | 2elongati | Ipomoea_nil            | 98.50 | 0.00 |
| TRINITY_XP_0191 | PREDICTE  | Ipomoea_nil            | 98.50 | 0.00 |
| TRINITY_BAJ9369 | 6predicte | Hordeum_vulgare        | 98.50 | 0.00 |
| TRINITY_ABV7239 | 1plastid  | Haematococcus_lacus    | 98.50 | 0.00 |
| TRINITY_YP_0094 | 6Light-ir | Haematococcus_lacus    | 98.50 | 0.00 |
| TRINITY_XP_0191 | PREDICTE  | Ipomoea_nil            | 98.50 | 0.00 |
| TRINITY_AAK8330 | 1calmodul | Capsicum_annuum        | 98.40 | 0.00 |
| TRINITY_ACF8818 | 4unknown  | Zea_mays               | 98.40 | 0.00 |
| TRINITY_XP_0191 | PREDICTE  | Ipomoea_nil            | 98.30 | 0.00 |
| TRINITY_RWR9103 | 5polyubic | Cinnamomum_micranth    | 98.30 | 0.00 |
| TRINITY_ABF8579 | 0plastid  | Haematococcus_lacus    | 98.30 | 0.00 |
| TRINITY_ANQ4519 | 1putative | Haematococcus_lacus    | 98.30 | 0.00 |
| TRINITY_ABL6795 | 41-aminoc | Ipomoea_nil            | 98.20 | 0.00 |
| TRINITY_AFQ3161 | 2CYP97C   | [Haematococcus_lacus   | 98.20 | 0.00 |
| TRINITY_P20865  | 1RecName: | Dunaliella_salina      | 98.20 | 0.00 |
| TRINITY_XP_0016 | beta tuk  | Chlamydomonas_reinh    | 98.20 | 0.00 |
| TRINITY_AFR3178 | 6cytochr  | Haematococcus_lacus    | 98.20 | 0.00 |
| TRINITY_XP_0271 | 240S rib  | Coffea_arabica         | 98.20 | 0.00 |
| TRINITY_OIV8972 | 6hypothet | Lupinus_angustifoli    | 98.10 | 0.00 |
| TRINITY_ACG3053 | 5calmodul | Zea_mays               | 98.10 | 0.00 |
| TRINITY_AFD6280 | 2GAPDH2   | [Ipomoea_purpurea      | 98.00 | 0.00 |
| TRINITY_BAJ8900 | 1predicte | Hordeum_vulgare        | 98.00 | 0.00 |
| TRINITY_AJY5897 | 9histone  | Closterium_ehrenber    | 98.00 | 0.00 |
| TRINITY_BAK0351 | 9predicte | Hordeum_vulgare        | 98.00 | 0.00 |
| TRINITY_BAJ9006 | 1predicte | Hordeum_vulgare        | 98.00 | 0.00 |
| TRINITY_AUI4110 | 8thylakoi | Haematococcus_lacus    | 98.00 | 0    |
| TRINITY_XP_0191 | PREDICTE  | Ipomoea_nil            | 97.90 | 0.00 |
| TRINITY_XP_0191 | PREDICTE  | Ipomoea_nil            | 97.90 | 0.00 |
| TRINITY_XP_0191 | PREDICTE  | Ipomoea_nil            | 97.90 | 0.00 |
| TRINITY_XP_0235 | 2S-norcoc | Cucurbita_pepo         | 97.80 | 0.00 |
| TRINITY_XP_0191 | PREDICTE  | Ipomoea_nil            | 97.80 | 0.00 |

|                  |           |                     |       |      |
|------------------|-----------|---------------------|-------|------|
| TRINITY_AUI4111  | (violaxar | Haematococcus_lacus | 97.80 | 0.00 |
| TRINITY_ACN3155  | unknown   | Zea_mays            | 97.80 | 0.00 |
| TRINITY_YP_3586  | hypothet  | Phalaenopsis_aphrod | 97.80 | 0.00 |
| TRINITY_AEF1316  | (fatty ac | Haematococcus_lacus | 97.80 | 0.00 |
| TRINITY_XP_0235  | aminomet  | Cucurbita_pepo      | 97.80 | 0.00 |
| TRINITY_XP_0191  | PREDICTE  | Ipomoea_nil         | 97.70 | 0.00 |
| TRINITY_AUI4110  | photosy   | Haematococcus_lacus | 97.70 | 0.00 |
| TRINITY_AAK7150  | soluble   | Ipomoea_batatas     | 97.70 | 0.00 |
| TRINITY_CAA5229  | (polyubic | Volvox_carteri      | 97.70 | 0.00 |
| TRINITY_AEP3960  | heat sh   | Haematococcus_lacus | 97.70 | 0.00 |
| TRINITY_XP_0191  | PREDICTE  | Ipomoea_nil         | 97.60 | 0.00 |
| TRINITY_XP_0191  | PREDICTE  | Ipomoea_nil         | 97.60 | 0.00 |
| TRINITY_AUI4110  | LhcsR [I  | Haematococcus_lacus | 97.60 | 0.00 |
| TRINITY_CAI3483  | (ATP synt | Polytomella_sp._Pri | 97.60 | 0.00 |
| TRINITY_XP_0138  | UDP-sulf  | Monoraphidium_negle | 97.60 | 0.00 |
| TRINITY_XP_0191  | PREDICTE  | Ipomoea_nil         | 97.50 | 0.00 |
| TRINITY_XP_0191  | PREDICTE  | Ipomoea_nil         | 97.50 | 0.00 |
| TRINITY_BAJ8510  | predicte  | Hordeum_vulgare     | 97.50 | 0.00 |
| TRINITY_XP_0229  | MLP-like  | Cucurbita_moschata  | 97.40 | 0.00 |
| TRINITY_XP_0191  | PREDICTE  | Ipomoea_nil         | 97.40 | 0.00 |
| TRINITY_ANW7227  | calmodul  | Tradescantia_hirsut | 97.40 | 0.00 |
| TRINITY_GAX7401  | hypothet  | Chlamydomonas_eusti | 97.40 | 0.00 |
| TRINITY_XP_0058  | hypothet  | Chlorella_variabili | 97.40 | 0.00 |
| TRINITY_AEF1316  | malonyl   | Haematococcus_lacus | 97.40 | 0.00 |
| TRINITY_XP_0016  | vacuolar  | Chlamydomonas_reinh | 97.40 | 0.00 |
| TRINITY_AJR2723  | 1-hydro   | Haematococcus_lacus | 97.40 | 0.00 |
| TRINITY_AFK3361  | unknown   | Lotus_japonicus     | 97.30 | 0.00 |
| TRINITY_KEH3115  | polyubic  | Medicago_truncatula | 97.30 | 0.00 |
| TRINITY_BAJ90061 | predicte  | Hordeum_vulgare     | 97.30 | 0.00 |
| TRINITY_CAA1126  | polyubic  | Nicotiana_tabacum   | 97.30 | 0.00 |
| TRINITY_XP_0191  | PREDICTE  | Ipomoea_nil         | 97.20 | 0.00 |
| TRINITY_XP_0191  | PREDICTE  | Ipomoea_nil         | 97.20 | 0.00 |
| TRINITY_KMS6506  | hypothet  | Beta_vulgaris       | 97.20 | 0.00 |
| TRINITY_YP_0093  | photosy   | Chlamydomonas_leios | 97.20 | 0    |
| TRINITY_XP_0191  | PREDICTE  | Ipomoea_nil         | 97.20 | 0.00 |
| TRINITY_XP_0191  | PREDICTE  | Ipomoea_nil         | 97.10 | 0.00 |
| TRINITY_XP_0229  | 30S rib   | Cucurbita_maxima    | 97.10 | 0.00 |
| TRINITY_AAK7290  | protein   | Ipomoea_batatas     | 97.10 | 0.00 |
| TRINITY_GAX80571 | hypothet  | Chlamydomonas_eusti | 97.10 | 0.00 |
| TRINITY_BAK0099  | predicte  | Hordeum_vulgare     | 97.10 | 0.00 |
| TRINITY_OAE2671  | hypothet  | Marchantia_polymorp | 97.00 | 0.00 |
| TRINITY_XP_0016  | actin [C  | Chlamydomonas_reinh | 97.00 | 0.00 |
| TRINITY_ACF8818  | unknown   | Zea_mays            | 97.00 | 0.00 |
| TRINITY_GBG5920  | Glycine   | Chara_braunii       | 96.90 | 0.00 |
| TRINITY_XP_0273  | eukaryot  | Abrus_precatorius   | 96.90 | 0.00 |
| TRINITY_ALO6312  | (CP47 chl | Chloromonas_perfora | 96.90 | 0.00 |
| TRINITY_BAK0096  | predicte  | Hordeum_vulgare     | 96.90 | 0.00 |
| TRINITY_XP_0229  | carbonic  | Cucurbita_moschata  | 96.90 | 0.00 |
| TRINITY_XP_0056  | ribosom   | Coccomyxa_subellips | 96.90 | 0.00 |
| TRINITY_XP_0016  | ribosom   | Chlamydomonas_reinh | 96.90 | 0.00 |
| TRINITY_AEP3960  | heat sh   | Haematococcus_lacus | 96.90 | 0.00 |
| TRINITY_GBG0034  | hypothet  | Raphidocelis_subcap | 96.90 | 0.00 |
| TRINITY_XP_0191  | PREDICTE  | Ipomoea_nil         | 96.80 | 0.00 |
| TRINITY_XP_0228  | histone   | Olea_europaea       | 96.80 | 0.00 |
| TRINITY_XP_0139  | (Stromal  | Monoraphidium_negle | 96.80 | 0.00 |
| TRINITY_AEP3960  | heat sh   | Haematococcus_lacus | 96.80 | 0.00 |
| TRINITY_PNH0370  | PHD fin   | Tetrabaena_socialis | 96.80 | 0.00 |
| TRINITY_KNA0614  | hypothet  | Spinacia_oleracea   | 96.70 | 0.00 |
| TRINITY_ALO2159  | hypothet  | Haematococcus_lacus | 96.70 | 0.00 |
| TRINITY_ARN7958  | low co2   | Haematococcus_lacus | 96.70 | 0.00 |
| TRINITY_BAK0099  | predicte  | Hordeum_vulgare     | 96.70 | 0.00 |
| TRINITY_XP_0139  | (Stromal  | Monoraphidium_negle | 96.70 | 0.00 |
| TRINITY_XP_0191  | PREDICTE  | Ipomoea_nil         | 96.60 | 0.00 |
| TRINITY_XP_0191  | PREDICTE  | Ipomoea_nil         | 96.50 | 0.00 |
| TRINITY_BAJ8510  | predicte  | Hordeum_vulgare     | 96.50 | 0.00 |
| TRINITY_AAD4434  | actin [I  | Dunaliella_salina   | 96.50 | 0.00 |
| TRINITY_XP_0191  | PREDICTE  | Ipomoea_nil         | 96.40 | 0.00 |
| TRINITY_BAJ89001 | predicte  | Hordeum_vulgare     | 96.40 | 0.00 |
| TRINITY_ABC0018  | chlorop   | Dunaliella_viridis  | 96.40 | 0.00 |
| TRINITY_AUI4110  | LhcsR [I  | Haematococcus_lacus | 96.40 | 0.00 |
| TRINITY_XP_0016  | naphtho   | Chlamydomonas_reinh | 96.40 | 0.00 |

|                   |           |                     |       |      |
|-------------------|-----------|---------------------|-------|------|
| TRINITY_GAX78045  | hypothet  | Chlamydomonas_eusti | 96.40 | 0.00 |
| TRINITY_CDP06107  | unnamed   | Coffea_canephora    | 96.30 | 0.00 |
| TRINITY_XP_02164  | ankyrin   | Hevea_brasiliensis  | 96.30 | 0.00 |
| TRINITY_XP_01916  | PREDICTE  | Ipomoea_nil         | 96.30 | 0.00 |
| TRINITY_EFJ04348  | hypothet  | Selaginella_moellen | 96.30 | 0.00 |
| TRINITY_ABC67966  | heat shc  | Triticum_aestivum   | 96.30 | 0.00 |
| TRINITY_XP_02059  | polyubic  | Phalaenopsis_equest | 96.20 | 0.00 |
| TRINITY_KMS65539  | hypothet  | Beta_vulgaris       | 96.20 | 0.00 |
| TRINITY_AEY800271 | -deoxy-   | Haematococcus_lacus | 96.20 | 0.00 |
| TRINITY_XP_01918  | PREDICTE  | Ipomoea_nil         | 96.20 | 0.00 |
| TRINITY_BAK00999  | predicte  | Hordeum_vulgare     | 96.20 | 0.00 |
| TRINITY_XP_00295  | hypothet  | Volvox_carteri      | 96.20 | 0.00 |
| TRINITY_XP_01917  | PREDICTE  | Ipomoea_nil         | 96.10 | 0.00 |
| TRINITY_XP_01919  | PREDICTE  | Ipomoea_nil         | 96.10 | 0.00 |
| TRINITY_AKR76260  | (beta-1 t | Dendrobium_catenatu | 96.10 | 0.00 |
| TRINITY_XP_01916  | PREDICTE  | Ipomoea_nil         | 96.00 | 0.00 |
| TRINITY_XP_01915  | PREDICTE  | Ipomoea_nil         | 96.00 | 0.00 |
| TRINITY_AFD62802  | GAPDH2    | Ipomoea_purpurea    | 96.00 | 0.00 |
| TRINITY_BAJ90061  | predicte  | Hordeum_vulgare     | 96.00 | 0.00 |
| TRINITY_BAL61084  | polyubic  | Dianthus_caryophyll | 96.00 | 0.00 |
| TRINITY_KZM84921  | hypothet  | Daucus_carota       | 96.00 | 0.00 |
| TRINITY_ACG27456  | 60 ribos  | Zea_mays            | 95.90 | 0.00 |
| TRINITY_ACF88184  | unknown   | Zea_mays            | 95.90 | 0.00 |
| TRINITY_BAF20135  | Os06g065  | Oryza_sativa        | 95.90 | 0.00 |
| TRINITY_ACF84987  | unknown   | Zea_mays            | 95.80 | 0.00 |
| TRINITY_KXZ54499  | hypothet  | Gonium_pectorale    | 95.80 | 0.00 |
| TRINITY_XP_00170  | (predicte | Chlamydomonas_reinh | 95.80 | 0.00 |
| TRINITY_XP_00295  | subunit   | Volvox_carteri      | 95.80 | 0.00 |
| TRINITY_XP_01918  | PREDICTE  | Ipomoea_nil         | 95.70 | 0.00 |
| TRINITY_XP_01915  | PREDICTE  | Ipomoea_nil         | 95.70 | 0.00 |
| TRINITY_AKR53701  | chlorop   | Haematococcus_lacus | 95.70 | 0.00 |
| TRINITY_ACN31538  | unknown   | Zea_mays            | 95.70 | 0.00 |
| TRINITY_ADD52598  | pyruvate  | Dunaliella_salina   | 95.70 | 0.00 |
| TRINITY_ACN31553  | unknown   | Zea_mays            | 95.60 | 0.00 |
| TRINITY_XP_00295  | hypothet  | Volvox_carteri      | 95.60 | 0.00 |
| TRINITY_XP_01284  | PREDICTE  | Erythranthe_guttata | 95.50 | 0.00 |
| TRINITY_XP_01919  | PREDICTE  | Ipomoea_nil         | 95.50 | 0.00 |
| TRINITY_XP_00584  | 40S ribc  | Chlorella_variabili | 95.50 | 0.00 |
| TRINITY_GAX83790  | hypothet  | Chlamydomonas_eusti | 95.50 | 0.00 |
| TRINITY_XP_02181  | polyubic  | Prunus_avium        | 95.40 | 0.00 |
| TRINITY_XP_01390  | ribonucl  | Monoraphidium_negle | 95.30 | 0.00 |
| TRINITY_XP_00843  | PREDICTE  | Cucumis_melo        | 95.30 | 0.00 |
| TRINITY_XP_01916  | PREDICTE  | Ipomoea_nil         | 95.20 | 0.00 |
| TRINITY_AMT91861  | polyubic  | Apium_graveolens    | 95.20 | 0.00 |
| TRINITY_GAX79381  | hypothet  | Chlamydomonas_eusti | 95.20 | 0.00 |
| TRINITY_XP_02390  | uncharac  | Quercus_suber       | 95.20 | 0.00 |
| TRINITY_GAX81194  | hypothet  | Chlamydomonas_eusti | 95.20 | 0.00 |
| TRINITY_PNT61710  | hypothet  | Brachypodium_distac | 95.20 | 0.00 |
| TRINITY_GAX78273  | hypothet  | Chlamydomonas_eusti | 95.20 | 0.00 |
| TRINITY_BAJ90061  | predicte  | Hordeum_vulgare     | 95.10 | 0.00 |
| TRINITY_ADQ00181  | histone   | Chlamydomonas_sp._I | 95.10 | 0.00 |
| TRINITY_CAA52290  | (polyubic | Volvox_carteri      | 95.10 | 0.00 |
| TRINITY_KZN08869  | hypothet  | Daucus_carota       | 95.10 | 0.00 |
| TRINITY_CAA11269  | polyubic  | Nicotiana_tabacum   | 95.10 | 0.00 |
| TRINITY_ADV02772  | lipid tr  | Ipomoea_batatas     | 95.00 | 0.00 |
| TRINITY_XP_00169  | vacuolar  | Chlamydomonas_reinh | 95.00 | 0.00 |
| TRINITY_XP_00295  | p300/CB   | Volvox_carteri      | 95.00 | 0.00 |
| TRINITY_CAI34836  | ATP synt  | Polytomella_sp._Pri | 94.90 | 0.00 |
| TRINITY_CAA11269  | polyubic  | Nicotiana_tabacum   | 94.90 | 0.00 |
| TRINITY_XP_01916  | PREDICTE  | Ipomoea_nil         | 94.90 | 0.00 |
| TRINITY_GAX78733  | hypothet  | Chlamydomonas_eusti | 94.80 | 0.00 |
| TRINITY_XP_01915  | PREDICTE  | Ipomoea_nil         | 94.70 | 0.00 |
| TRINITY_XP_01916  | PREDICTE  | Ipomoea_nil         | 94.70 | 0.00 |
| TRINITY_GAX84375  | hypothet  | Chlamydomonas_eusti | 94.70 | 0.00 |
| TRINITY_GBF90101  | hypothet  | Raphidocelis_subcap | 94.70 | 0.00 |
| TRINITY_XP_01918  | PREDICTE  | Ipomoea_nil         | 94.70 | 0.00 |
| TRINITY_XP_00170  | (MUT9-rel | Chlamydomonas_reinh | 94.60 | 0.00 |
| TRINITY_XP_00169  | ran-like  | Chlamydomonas_reinh | 94.60 | 0.00 |
| TRINITY_XP_02069  | polyubic  | Dendrobium_catenatu | 94.60 | 0.00 |
| TRINITY_XP_00295  | F1F0 AT   | Volvox_carteri      | 94.60 | 0.00 |
| TRINITY_XP_01917  | PREDICTE  | Ipomoea_nil         | 94.50 | 0.00 |



|                  |                             |       |      |
|------------------|-----------------------------|-------|------|
| TRINITY_KXZ55936 | hypothetGonium_pectorale    | 94.50 | 0.00 |
| TRINITY_XP_00170 | dynein lChlamydomonas_reinh | 94.50 | 0.00 |
| TRINITY_XP_02214 | translatMomordica_charantia | 94.40 | 0.00 |
| TRINITY_XP_02008 | 26S protAnanas_comosus      | 94.40 | 0.00 |
| TRINITY_XP_01915 | PREDICTEIpomoea_nil         | 94.40 | 0.00 |
| TRINITY_AAV54188 | chloroplHaematococcus_lacus | 94.40 | 0.00 |
| TRINITY_XP_00565 | branchecCoccomyxa_subellips | 94.40 | 0.00 |
| TRINITY_XP_02435 | histone Physcomitrella_pate | 94.40 | 0.00 |
| TRINITY_XP_00935 | PREDICTEPyrus_x_bretschneid | 94.30 | 0.00 |
| TRINITY_XP_01390 | S- (hydrMonoraphidium_negle | 94.30 | 0.00 |
| TRINITY_ABL67954 | 1-aminocIpomoea_nil         | 94.20 | 0.00 |
| TRINITY_XP_01918 | PREDICTEIpomoea_nil         | 94.20 | 0.00 |
| TRINITY_XP_00294 | hypothetVolvox_carteri      | 94.20 | 0.00 |
| TRINITY_AUT77174 | glutamatHaematococcus_lacus | 94.20 | 0.00 |
| TRINITY_GAX74605 | hypothetChlamydomonas_eusti | 94.20 | 0.00 |
| TRINITY_CAA52290 | polyubicVolvox_carteri      | 94.20 | 0.00 |
| TRINITY_XP_01390 | 40S ribcMonoraphidium_negle | 94.20 | 0.00 |
| TRINITY_CAA52290 | polyubicVolvox_carteri      | 94.10 | 0.00 |
| TRINITY_ABA01099 | 40S ribcChlamydomonas_incer | 94.10 | 0.00 |
| TRINITY_ABV72392 | plastid Haematococcus_lacus | 94.10 | 0.00 |
| TRINITY_XP_00169 | phosphofChlamydomonas_reinh | 94.10 | 0.00 |
| TRINITY_XP_00294 | hypothetVolvox_carteri      | 94.10 | 0.00 |
| TRINITY_XP_01917 | PREDICTEIpomoea_nil         | 94.00 | 0.00 |
| TRINITY_XP_00169 | predicteChlamydomonas_reinh | 94.00 | 0.00 |
| TRINITY_XP_01917 | PREDICTEIpomoea_nil         | 94.00 | 0.00 |
| TRINITY_GAX80077 | hypothetChlamydomonas_eusti | 94.00 | 0.00 |
| TRINITY_XP_01915 | PREDICTEIpomoea_nil         | 94.00 | 0.00 |
| TRINITY_XP_01915 | PREDICTEIpomoea_nil         | 93.90 | 0.00 |
| TRINITY_XP_00295 | hypothetVolvox_carteri      | 93.90 | 0.00 |
| TRINITY_PSC70877 | nifU mitMicractinium_conduc | 93.90 | 0.00 |
| TRINITY_BAD95644 | metallotIpomoea_batatas     | 93.90 | 0.00 |
| TRINITY_KNA06142 | hypothetSpinacia_oleracea   | 93.90 | 0.00 |
| TRINITY_PON44187 | RibosomεTrema_orientale     | 93.80 | 0.00 |
| TRINITY_XP_01918 | PREDICTEIpomoea_nil         | 93.80 | 0.00 |
| TRINITY_KXZ44838 | hypothetGonium_pectorale    | 93.80 | 0.00 |
| TRINITY_BAJ89001 | predicteHordeum_vulgare     | 93.80 | 0.00 |
| TRINITY_XP_01090 | PREDICTEElaeis_guineensis   | 93.70 | 0.00 |
| TRINITY_GAQ89289 | transcriKlebsormidium_niten | 93.60 | 0.00 |
| TRINITY_GAX85109 | hypothetChlamydomonas_eusti | 93.60 | 0.00 |
| TRINITY_XP_02214 | photosyεMomordica_charantia | 93.50 | 0.00 |
| TRINITY_XP_01918 | PREDICTEIpomoea_nil         | 93.50 | 0.00 |
| TRINITY_PNH01896 | hypothetTetrabaena_socialis | 93.50 | 0.00 |
| TRINITY_XP_00169 | imidazolChlamydomonas_reinh | 93.50 | 0.00 |
| TRINITY_PRW56412 | eukaryotChlorella_sorokinia | 93.50 | 0.00 |
| TRINITY_ABD37911 | light-hεChlamydomonas_incer | 93.50 | 0.00 |
| TRINITY_GAX78901 | hypothetChlamydomonas_eusti | 93.40 | 0.00 |
| TRINITY_GAX80572 | hypothetChlamydomonas_eusti | 93.40 | 0.00 |
| TRINITY_XP_02352 | uncharacCucurbita_pepo      | 93.30 | 0.00 |
| TRINITY_KXZ42592 | hypothetGonium_pectorale    | 93.30 | 0.00 |
| TRINITY_AMK97820 | thioredeChlamydomonas_reinh | 93.30 | 0.00 |
| TRINITY_KXZ53148 | hypothetGonium_pectorale    | 93.20 | 0.00 |
| TRINITY_XP_00306 | predicteMicromonas_pusilla  | 93.20 | 0.00 |
| TRINITY_XP_00169 | 26S protChlamydomonas_reinh | 93.20 | 0.00 |
| TRINITY_OAE26716 | hypothetMarchantia_polymorp | 93.20 | 0.00 |
| TRINITY_APO15836 | actin 11Sesuvium_portulacas | 93.20 | 0.00 |
| TRINITY_XP_00294 | hypothetVolvox_carteri      | 93.10 | 0.00 |
| TRINITY_KXZ44004 | hypothetGonium_pectorale    | 93.10 | 0.00 |
| TRINITY_AKR53702 | chloroplHaematococcus_lacus | 93.10 | 0.00 |
| TRINITY_PNH12306 | NucleosiTetrabaena_socialis | 93.00 | 0.00 |
| TRINITY_GAQ89289 | transcriKlebsormidium_niten | 93.00 | 0.00 |
| TRINITY_RMZ55890 | hypothetAuxenochlorella_pro | 93.00 | 0.00 |
| TRINITY_XP_00170 | U5 snRNIClamydomonas_reinh  | 93.00 | 0.00 |
| TRINITY_AAQ63696 | NADH:ubiChlamydomonas_reinh | 93.00 | 0.00 |
| TRINITY_PNH01187 | Peptidy]Tetrabaena_socialis | 93.00 | 0.00 |
| TRINITY_XP_00935 | PREDICTEPyrus_x_bretschneid | 92.90 | 0.00 |
| TRINITY_XP_01926 | PREDICTENicotiana_attenuata | 92.90 | 0.00 |
| TRINITY_XP_02300 | photosyεCucurbita_maxima    | 92.90 | 0.00 |
| TRINITY_GAX72628 | hypothetChlamydomonas_eusti | 92.90 | 0.00 |
| TRINITY_PNH07376 | GTP-bincTetrabaena_socialis | 92.90 | 0.00 |
| TRINITY_GAX81393 | hypothetChlamydomonas_eusti | 92.90 | 0.00 |
| TRINITY_ALM54987 | DEAD bo>Chlamydomonas_sp._I | 92.90 | 0.00 |

|                                              |       |      |
|----------------------------------------------|-------|------|
| TRINITY_XP_00170(flagellæChlamydomonas_reinh | 92.90 | 0.00 |
| TRINITY_XP_01919PREDICTEIpomoea_nil          | 92.80 | 0.00 |
| TRINITY_XP_00413PREDICTECucumis_sativus      | 92.80 | 0.00 |
| TRINITY_CAJ4537040S_ribcChlamydomonas_sp._I  | 92.80 | 0.00 |
| TRINITY_GAX76309hypothetChlamydomonas_eusti  | 92.80 | 0.00 |
| TRINITY_ABA01131chloroplChlamydomonas_incer  | 92.60 | 0.00 |
| TRINITY_ABA01147chloroplChlamydomonas_incer  | 92.60 | 0.00 |
| TRINITY_BAJ90196predicteHordeum_vulgare      | 92.50 | 0.00 |
| TRINITY_XP_00564ADP-ribcCoccomyxa_subellips  | 92.50 | 0.00 |
| TRINITY_GAX79218hypothetChlamydomonas_eusti  | 92.50 | 0.00 |
| TRINITY_BAJ99287predicteHordeum_vulgare      | 92.50 | 0.00 |
| TRINITY_XP_01140(MagnesiAuxenochlorella_pro  | 92.50 | 0.00 |
| TRINITY_AQK39235aluminunZea_mays             | 92.50 | 0.00 |
| TRINITY_XP_00295hypothetVolvox_carteri       | 92.40 | 0.00 |
| TRINITY_ABA01131chloroplChlamydomonas_incer  | 92.30 | 0.00 |
| TRINITY_GAX72681hypothetChlamydomonas_eusti  | 92.30 | 0.00 |
| TRINITY_PNH12145AsparagiTetrabaena_socialis  | 92.30 | 0.00 |
| TRINITY_XP_00295hypothetVolvox_carteri       | 92.30 | 0.00 |
| TRINITY_XP_00170(predicteChlamydomonas_reinh | 92.30 | 0.00 |
| TRINITY_GAX79103hypothetChlamydomonas_eusti  | 92.30 | 0.00 |
| TRINITY_AJR272351-hydro>Haematococcus_lacus  | 92.30 | 0.00 |
| TRINITY_XP_00169predicteChlamydomonas_reinh  | 92.30 | 0.00 |
| TRINITY_XP_01919PREDICTEIpomoea_nil          | 92.10 | 0.00 |
| TRINITY_KMS93274hypothetBeta_vulgaris        | 92.10 | 0.00 |
| TRINITY_CBV7607260S_ribcPolytomella_sp._Pri  | 92.10 | 0.00 |
| TRINITY_RWW43537hypothetEnsete_ventricosum   | 92.10 | 0.00 |
| TRINITY_GBF87741hypothetRaphidocelis_subcap  | 92.10 | 0.00 |
| TRINITY_XP_00250(flagellæMicromonas_commoda  | 92.10 | 0.00 |
| TRINITY_GAX74274hypothetChlamydomonas_eusti  | 92.10 | 0    |
| TRINITY_XP_0216860S_ribcHevea_brasiliensis   | 92.00 | 0.00 |
| TRINITY_XP_01919PREDICTEIpomoea_nil          | 92.00 | 0.00 |
| TRINITY_AAL83989NADH-ubiOryza_sativa         | 92.00 | 0.00 |
| TRINITY_RVX05677PolyubicVitis_vinifera       | 92.00 | 0.00 |
| TRINITY_ACN31553unknown Zea_mays             | 92.00 | 0.00 |
| TRINITY_KXZ56472hypothetGonium_pectorale     | 92.00 | 0.00 |
| TRINITY_GAX73046hypothetChlamydomonas_eusti  | 92.00 | 0.00 |
| TRINITY_ACN31631unknown Zea_mays             | 91.90 | 0.00 |
| TRINITY_ASZ85176elongatiHylocereus_polyrhiz  | 91.90 | 0.00 |
| TRINITY_XP_00564topoisonCoccomyxa_subellips  | 91.90 | 0.00 |
| TRINITY_XP_00294dynein lVolvox_carteri       | 91.90 | 0.00 |
| TRINITY_AFA52040PsbA (clKirengeshoma_palmat  | 91.90 | 0.00 |
| TRINITY_XP_01918PREDICTEIpomoea_nil          | 91.80 | 0.00 |
| TRINITY_XP_02496ubiquitiCynara_cardunculus   | 91.80 | 0.00 |
| TRINITY_GAX84909hypothetChlamydomonas_eusti  | 91.80 | 0    |
| TRINITY_GBF98188ubiquitiRaphidocelis_subcap  | 91.80 | 0.00 |
| TRINITY_XP_00294hypothetVolvox_carteri       | 91.80 | 0.00 |
| TRINITY_XP_00295hypothetVolvox_carteri       | 91.80 | 0.00 |
| TRINITY_KMS64810hypothetBeta_vulgaris        | 91.70 | 0.00 |
| TRINITY_AAX7722414-3-3 rDunaliella_salina    | 91.60 | 0.00 |
| TRINITY_GAX76626hypothetChlamydomonas_eusti  | 91.60 | 0.00 |
| TRINITY_KXZ56588hypothetGonium_pectorale     | 91.60 | 0.00 |
| TRINITY_XP_00169eukaryotChlamydomonas_reinh  | 91.50 | 0.00 |
| TRINITY_AUI41105photosy>Haematococcus_lacus  | 91.50 | 0.00 |
| TRINITY_XP_00564ubiquitiCoccomyxa_subellips  | 91.40 | 0.00 |
| TRINITY_PNH08706TyrosineTetrabaena_socialis  | 91.40 | 0.00 |
| TRINITY_PNH03493Ferredo>Tetrabaena_socialis  | 91.40 | 0.00 |
| TRINITY_ABD379111light-hæChlamydomonas_incer | 91.40 | 0.00 |
| TRINITY_ABD37909light-hæChlamydomonas_incer  | 91.40 | 0.00 |
| TRINITY_XP_00168predicteChlamydomonas_reinh  | 91.40 | 0.00 |
| TRINITY_XP_00169ubiquincChlamydomonas_reinh  | 91.30 | 0.00 |
| TRINITY_XP_01916PREDICTEIpomoea_nil          | 91.20 | 0.00 |
| TRINITY_XP_02792LOW QUAIVigna_unguiculata    | 91.20 | 0.00 |
| TRINITY_XP_00170(outer d)Chlamydomonas_reinh | 91.20 | 0.00 |
| TRINITY_GAX76625hypothetChlamydomonas_eusti  | 91.20 | 0.00 |
| TRINITY_XP_00295hypothetVolvox_carteri       | 91.20 | 0.00 |
| TRINITY_ADN95182oil_glokHaematococcus_lacus  | 91.20 | 0.00 |
| TRINITY_GBF94862trafficlRaphidocelis_subcap  | 91.20 | 0.00 |
| TRINITY_XP_01919PREDICTEIpomoea_nil          | 91.10 | 0.00 |
| TRINITY_KDD76122glycosylHelicosporidium_sp.  | 91.10 | 0.00 |
| TRINITY_KXZ48295hypothetGonium_pectorale     | 91.10 | 0.00 |
| TRINITY_GAX81237hypothetChlamydomonas_eusti  | 91.10 | 0.00 |

|                  |           |                     |       |      |
|------------------|-----------|---------------------|-------|------|
| TRINITY_AAW69292 | mitochor  | Haematococcus_lacus | 91.10 | 0.00 |
| TRINITY_XP_02794 | tubulin   | Vigna_unguiculata   | 91.10 | 0.00 |
| TRINITY_BAJ91604 | predicte  | Hordeum_vulgare     | 91.00 | 0.00 |
| TRINITY_AFK33393 | unknown   | Lotus_japonicus     | 91.00 | 0.00 |
| TRINITY_XP_00250 | flagellæ  | Micromonas_commoda  | 91.00 | 0.00 |
| TRINITY_XP_01390 | Tubulin   | Monoraphidium_negle | 91.00 | 0.00 |
| TRINITY_XP_00294 | serine/t  | Volvox_carteri      | 91.00 | 0.00 |
| TRINITY_XP_01846 | PREDICTE  | Raphanus_sativus    | 90.90 | 0.00 |
| TRINITY_XP_00169 | isopropyl | Chlamydomonas_reinh | 90.90 | 0.00 |
| TRINITY_XP_00250 | predicte  | Micromonas_commoda  | 90.90 | 0.00 |
| TRINITY_XP_01915 | PREDICTE  | Ipomoea_nil         | 90.80 | 0.00 |
| TRINITY_CAB38612 | splicinç  | Arabidopsis_thalian | 90.80 | 0.00 |
| TRINITY_PIN14452 | Moleculæ  | Handroanthus_impeti | 90.80 | 0.00 |
| TRINITY_KXZ44083 | hypothet  | Gonium_pectorale    | 90.80 | 0.00 |
| TRINITY_KXZ47262 | hypothet  | Gonium_pectorale    | 90.80 | 0.00 |
| TRINITY_XP_00169 | predicte  | Chlamydomonas_reinh | 90.80 | 0.00 |
| TRINITY_GAX76969 | hypothet  | Chlamydomonas_eusti | 90.80 | 0.00 |
| TRINITY_XP_00643 | cell dix  | Citrus_clementina   | 90.70 | 0.00 |
| TRINITY_GBF94325 | 40S rib   | Raphidocelis_subcap | 90.70 | 0.00 |
| TRINITY_PNH05555 | Protein   | Tetrabaena_socialis | 90.70 | 0.00 |
| TRINITY_XP_00295 | adenylat  | Volvox_carteri      | 90.70 | 0.00 |
| TRINITY_XP_01916 | PREDICTE  | Ipomoea_nil         | 90.60 | 0.00 |
| TRINITY_O82018.3 | RecName:  | Mougeotia_scalaris  | 90.60 | 0.00 |
| TRINITY_GAX77250 | hypothet  | Chlamydomonas_eusti | 90.60 | 0.00 |
| TRINITY_XP_00169 | threonin  | Chlamydomonas_reinh | 90.60 | 0.00 |
| TRINITY_PRW21109 | malate c  | Chlorella_sorokinia | 90.60 | 0.00 |
| TRINITY_GAX74230 | hypothet  | Chlamydomonas_eusti | 90.60 | 0.00 |
| TRINITY_CAH59409 | hypothet  | Plantago_major      | 90.50 | 0.00 |
| TRINITY_XP_00295 | hypothet  | Volvox_carteri      | 90.50 | 0.00 |
| TRINITY_GAX74205 | hypothet  | Chlamydomonas_eusti | 90.50 | 0.00 |
| TRINITY_GAX74749 | hypothet  | Chlamydomonas_eusti | 90.50 | 0.00 |
| TRINITY_GAX77325 | hypothet  | Chlamydomonas_eusti | 90.50 | 0.00 |
| TRINITY_ACG29060 | bifuncti  | Zea_mays            | 90.50 | 0    |
| TRINITY_XP_02292 | proline-  | Cucurbita_moschata  | 90.40 | 0.00 |
| TRINITY_XP_00295 | hypothet  | Volvox_carteri      | 90.40 | 0.00 |
| TRINITY_XP_01650 | PREDICTE  | Nicotiana_tabacum   | 90.40 | 0.00 |
| TRINITY_GAX73482 | hypothet  | Chlamydomonas_eusti | 90.40 | 0.00 |
| TRINITY_XP_01915 | PREDICTE  | Ipomoea_nil         | 90.30 | 0.00 |
| TRINITY_XP_00935 | PREDICTE  | Pyrus_x_bretschneid | 90.30 | 0.00 |
| TRINITY_ACF79437 | unknown   | Zea_mays            | 90.30 | 0.00 |
| TRINITY_KMS94684 | hypothet  | Beta_vulgaris       | 90.30 | 0.00 |
| TRINITY_XP_00294 | hypothet  | Volvox_carteri      | 90.30 | 0.00 |
| TRINITY_XP_00584 | hypothet  | Chlorella_variabili | 90.30 | 0.00 |
| TRINITY_GAX72560 | hypothet  | Chlamydomonas_eusti | 90.30 | 0.00 |
| TRINITY_GAX72656 | hypothet  | Chlamydomonas_eusti | 90.30 | 0.00 |
| TRINITY_AUT77174 | glutamat  | Haematococcus_lacus | 90.30 | 0.00 |
| TRINITY_XP_00564 | small n   | Coccomyxa_subellips | 90.20 | 0.00 |
| TRINITY_ATU90143 | WDR domæ  | Haematococcus_lacus | 90.20 | 0.00 |
| TRINITY_PNH06746 | Outer r   | Tetrabaena_socialis | 90.20 | 0.00 |
| TRINITY_GAX76458 | hypothet  | Chlamydomonas_eusti | 90.20 | 0.00 |
| TRINITY_XP_00295 | flagellæ  | Volvox_carteri      | 90.20 | 0.00 |
| TRINITY_XP_00295 | hypothet  | Volvox_carteri      | 90.20 | 0.00 |
| TRINITY_GAX75289 | hypothet  | Chlamydomonas_eusti | 90.20 | 0.00 |
| TRINITY_BAJ94564 | predicte  | Hordeum_vulgare     | 90.10 | 0.00 |
| TRINITY_BAJ94564 | predicte  | Hordeum_vulgare     | 90.10 | 0.00 |
| TRINITY_XP_00295 | dynein l  | Volvox_carteri      | 90.10 | 0.00 |
| TRINITY_GAX80207 | hypothet  | Chlamydomonas_eusti | 90.10 | 0    |
| TRINITY_GAX75625 | hypothet  | Chlamydomonas_eusti | 90.10 | 0.00 |
| TRINITY_XP_00295 | hypothet  | Volvox_carteri      | 90.00 | 0.00 |
| TRINITY_OAE21405 | hypothet  | Marchantia_polymorp | 90.00 | 0.00 |
| TRINITY_XP_00305 | predicte  | Micromonas_pusilla  | 90.00 | 0.00 |
| TRINITY_GAX75940 | hypothet  | Chlamydomonas_eusti | 90.00 | 0.00 |
| TRINITY_XP_00170 | predicte  | Chlamydomonas_reinh | 90.00 | 0.00 |
| TRINITY_XP_01027 | PREDICTE  | Nelumbo_nucifera    | 90.00 | 0.00 |
| TRINITY_AAB68394 | Rac-like  | Arabidopsis_thalian | 90.00 | 0.00 |
| TRINITY_GAX75993 | hypothet  | Chlamydomonas_eusti | 90.00 | 0.00 |
| TRINITY_VDC79738 | unnamed   | Brassica_rapa       | 89.90 | 0.00 |
| TRINITY_AKR53701 | chlorop   | Haematococcus_lacus | 89.90 | 0.00 |
| TRINITY_ADI46891 | PR46af l  | Volvox_carteri      | 89.90 | 0.00 |
| TRINITY_GAX80401 | hypothet  | Chlamydomonas_eusti | 89.90 | 0.00 |
| TRINITY_BAU61572 | heat sh   | Gonium_pectorale    | 89.90 | 0.00 |

|                     |          |                     |       |      |
|---------------------|----------|---------------------|-------|------|
| TRINITY_XP_01916    | PREDICTE | Ipomoea_nil         | 89.80 | 0.00 |
| TRINITY_XP_00169    | histone  | Chlamydomonas_reinh | 89.80 | 0.00 |
| TRINITY_GAX84282    | hypothet | Chlamydomonas_eusti | 89.80 | 0.00 |
| TRINITY_XP_02452    | tubulin  | Selaginella_moellen | 89.80 | 0.00 |
| TRINITY_ADQ00181    | histone  | Chlamydomonas_sp._I | 89.80 | 0.00 |
| TRINITY_GAX80936    | hypothet | Chlamydomonas_eusti | 89.80 | 0.00 |
| TRINITY_PSR91579    | CBF1-int | Actinidia_chinensis | 89.70 | 0.00 |
| TRINITY_AEW46685    | histone  | Ulva_linza          | 89.70 | 0.00 |
| TRINITY_XP_00294    | hypothet | Volvox_carteri      | 89.70 | 0.00 |
| TRINITY_BAK00005    | predicte | Hordeum_vulgare     | 89.70 | 0.00 |
| TRINITY_GAX80077    | hypothet | Chlamydomonas_eusti | 89.70 | 0.00 |
| TRINITY_AFK33393    | unknown  | Lotus_japonicus     | 89.70 | 0.00 |
| TRINITY_XP_00169    | molybdo  | Chlamydomonas_reinh | 89.70 | 0.00 |
| TRINITY_XP_02392    | ras-rel  | Quercus_suber       | 89.70 | 0.00 |
| TRINITY_XP_00170    | mitogen- | Chlamydomonas_reinh | 89.70 | 0.00 |
| TRINITY_XP_00295    | hypothet | Volvox_carteri      | 89.50 | 0.00 |
| TRINITY_GAX81721    | hypothet | Chlamydomonas_eusti | 89.50 | 0.00 |
| TRINITY_BAE45242    | GDP-man  | Oryza_sativa        | 89.50 | 0.00 |
| TRINITY_GAX74343    | hypothet | Chlamydomonas_eusti | 89.40 | 0.00 |
| TRINITY_XP_00169    | SEC61-g  | Chlamydomonas_reinh | 89.40 | 0.00 |
| TRINITY_XP_00666    | PREDICTE | Oryza_brachyantha   | 89.30 | 0.00 |
| TRINITY_GBG0026440S | rib      | Raphidocelis_subcap | 89.30 | 0.00 |
| TRINITY_AKT95177    | zeaxant  | Haematococcus_lacus | 89.30 | 0.00 |
| TRINITY_GBF87741    | hypothet | Raphidocelis_subcap | 89.30 | 0.00 |
| TRINITY_GAX78143    | hypothet | Chlamydomonas_eusti | 89.30 | 0.00 |
| TRINITY_XP_01557    | ADP-rib  | Ricinus_communis    | 89.20 | 0.00 |
| TRINITY_XP_01850    | PREDICTE | Brassica_rapa       | 89.20 | 0.00 |
| TRINITY_GAX78420    | hypothet | Chlamydomonas_eusti | 89.20 | 0.00 |
| TRINITY_KXZ45435    | hypothet | Gonium_pectorale    | 89.20 | 0.00 |
| TRINITY_GBF87768U6  | snRN     | Raphidocelis_subcap | 89.10 | 0.00 |
| TRINITY_GAX83141    | hypothet | Chlamydomonas_eusti | 89.10 | 0.00 |
| TRINITY_XP_00294    | componer | Volvox_carteri      | 89.10 | 0.00 |
| TRINITY_GAX81721    | hypothet | Chlamydomonas_eusti | 89.10 | 0.00 |
| TRINITY_GAX79449    | hypothet | Chlamydomonas_eusti | 89.10 | 0.00 |
| TRINITY_GAX79938    | hypothet | Chlamydomonas_eusti | 89.00 | 0.00 |
| TRINITY_GAX79780    | hypothet | Chlamydomonas_eusti | 89.00 | 0.00 |
| TRINITY_XP_01025    | PREDICTE | Nelumbo_nucifera    | 88.90 | 0.00 |
| TRINITY_GAX79501    | hypothet | Chlamydomonas_eusti | 88.90 | 0.00 |
| TRINITY_AFK31313    | heat sh  | Dunaliella_salina   | 88.90 | 0.00 |
| TRINITY_XP_00169    | 26S prot | Chlamydomonas_reinh | 88.90 | 0.00 |
| TRINITY_AQQ11751    | clathrin | Chara_australis     | 88.90 | 0.00 |
| TRINITY_CAF04129    | pyruvate | Chlamydomonas_reinh | 88.90 | 0.00 |
| TRINITY_VDC70205    | unnamed  | Brassica_rapa       | 88.80 | 0.00 |
| TRINITY_NP_00134    | uncharac | Oryza_brachyantha   | 88.80 | 0.00 |
| TRINITY_XP_00295    | componer | Volvox_carteri      | 88.70 | 0.00 |
| TRINITY_XP_00295    | ribosom  | Volvox_carteri      | 88.70 | 0.00 |
| TRINITY_KMS94019    | hypothet | Beta_vulgaris       | 88.70 | 0.00 |
| TRINITY_ABS44863    | putative | Oryza_sativa        | 88.70 | 0.00 |
| TRINITY_ABS44863    | putative | Oryza_sativa        | 88.70 | 0.00 |
| TRINITY_AYU58838    | alpha-ti | Haematococcus_lacus | 88.70 | 0.00 |
| TRINITY_BAJ94564    | predicte | Hordeum_vulgare     | 88.70 | 0.00 |
| TRINITY_KXZ48829    | hypothet | Gonium_pectorale    | 88.60 | 0.00 |
| TRINITY_GBF97021    | extracel | Raphidocelis_subcap | 88.60 | 0.00 |
| TRINITY_KXZ56950    | hypothet | Gonium_pectorale    | 88.60 | 0.00 |
| TRINITY_XP_00169    | low CO2- | Chlamydomonas_reinh | 88.60 | 0.00 |
| TRINITY_BAU61570    | developn | Gonium_pectorale    | 88.60 | 0.00 |
| TRINITY_GAX75961    | hypothet | Chlamydomonas_eusti | 88.60 | 0.00 |
| TRINITY_GAX73507    | hypothet | Chlamydomonas_eusti | 88.60 | 0.00 |
| TRINITY_ACG26919    | hypothet | Zea_mays            | 88.50 | 0.00 |
| TRINITY_KXZ43842    | hypothet | Gonium_pectorale    | 88.50 | 0.00 |
| TRINITY_XP_00585    | hypothet | Chlorella_variabili | 88.50 | 0.00 |
| TRINITY_GAX81377    | hypothet | Chlamydomonas_eusti | 88.50 | 0.00 |
| TRINITY_GAX85959    | hypothet | Chlamydomonas_eusti | 88.50 | 0.00 |
| TRINITY_CAC86131    | isocitr  | Polytomella_sp._Pri | 88.50 | 0.00 |
| TRINITY_GBF92009    | hypothet | Raphidocelis_subcap | 88.50 | 0.00 |
| TRINITY_XP_00168    | deoxyphu | Chlamydomonas_reinh | 88.50 | 0.00 |
| TRINITY_XP_00295    | hypothet | Volvox_carteri      | 88.40 | 0.00 |
| TRINITY_GAX72976    | hypothet | Chlamydomonas_eusti | 88.40 | 0.00 |
| TRINITY_GAX77325    | hypothet | Chlamydomonas_eusti | 88.30 | 0.00 |
| TRINITY_XP_00295    | componer | Volvox_carteri      | 88.30 | 0.00 |
| TRINITY_KXZ41765    | hypothet | Gonium_pectorale    | 88.30 | 0.00 |

|                  |            |                     |       |      |
|------------------|------------|---------------------|-------|------|
| TRINITY_BAK05232 | predicte   | Hordeum_vulgare     | 88.30 | 0.00 |
| TRINITY_KXZ5346  | hypothet   | Gonium_pectorale    | 88.30 | 0.00 |
| TRINITY_YP_0088  | (NADH del  | Monomastix_sp._OKE- | 88.20 | 0.00 |
| TRINITY_XP_0029  | flagellæ   | Volvox_carteri      | 88.20 | 0.00 |
| TRINITY_PNH0708  | Fumarate   | Tetrabaena_socialis | 88.20 | 0.00 |
| TRINITY_XP_0029  | hypothet   | Volvox_carteri      | 88.20 | 0.00 |
| TRINITY_ABD32351 | Ubiquiti   | Medicago_truncatula | 88.20 | 0.00 |
| TRINITY_OTG05221 | putative   | Helianthus_annuus   | 88.20 | 0.00 |
| TRINITY_XP_0016  | outer d    | Chlamydomonas_reinh | 88.10 | 0.00 |
| TRINITY_XP_0030  | predicte   | Micromonas_pusilla  | 88.10 | 0.00 |
| TRINITY_XP_0016  | RNA bin    | Chlamydomonas_reinh | 88.10 | 0.00 |
| TRINITY_XP_0016  | copper t   | Chlamydomonas_reinh | 88.10 | 0.00 |
| TRINITY_XP_0029  | hypothet   | Volvox_carteri      | 88.10 | 0.00 |
| TRINITY_AAT0765  | putative   | Oryza_sativa        | 88.00 | 0.00 |
| TRINITY_XP_0058  | ribosomæ   | Chlorella_variabili | 88.00 | 0.00 |
| TRINITY_XP_0029  | hypothet   | Volvox_carteri      | 88.00 | 0.00 |
| TRINITY_GAX7349  | hypothet   | Chlamydomonas_eusti | 88.00 | 0.00 |
| TRINITY_GAX8366  | hypothet   | Chlamydomonas_eusti | 88.00 | 0.00 |
| TRINITY_XP_0065  | remorin    | Glycine_max         | 87.90 | 0.00 |
| TRINITY_KMS9450  | hypothet   | Beta_vulgaris       | 87.90 | 0.00 |
| TRINITY_GAX7480  | hypothet   | Chlamydomonas_eusti | 87.90 | 0.00 |
| TRINITY_PSC7550  | N-alpha-   | Micractinium_conduc | 87.90 | 0.00 |
| TRINITY_ACR3576  | unknown    | Zea_mays            | 87.90 | 0.00 |
| TRINITY_GAX8156  | hypothet   | Chlamydomonas_eusti | 87.90 | 0.00 |
| TRINITY_AGZ1935  | hypothet   | Chlorella_sp._ArM00 | 87.80 | 0.00 |
| TRINITY_GAX7401  | hypothet   | Chlamydomonas_eusti | 87.80 | 0.00 |
| TRINITY_KFK3047  | hypothet   | Arabis_alpina       | 87.80 | 0.00 |
| TRINITY_KXZ5493  | hypothet   | Gonium_pectorale    | 87.80 | 0.00 |
| TRINITY_KXZ5507  | RABH1 pr   | Gonium_pectorale    | 87.80 | 0.00 |
| TRINITY_GAX8436  | hypothet   | Chlamydomonas_eusti | 87.80 | 0.00 |
| TRINITY_GAX7257  | hypothet   | Chlamydomonas_eusti | 87.70 | 0.00 |
| TRINITY_GAX7707  | hypothet   | Chlamydomonas_eusti | 87.70 | 0.00 |
| TRINITY_KMS9434  | hypothet   | Beta_vulgaris       | 87.70 | 0.00 |
| TRINITY_AAK2797  | metallot   | Ipomoea_batatas     | 87.50 | 0.00 |
| TRINITY_GAX8617  | hypothet   | Chlamydomonas_eusti | 87.50 | 0.00 |
| TRINITY_XP_0139  | (DNA-dir   | Monoraphidium_negle | 87.50 | 0.00 |
| TRINITY_KMS9325  | hypothet   | Beta_vulgaris       | 87.50 | 0.00 |
| TRINITY_XP_0056  | ribosomæ   | Coccomyxa_subellips | 87.50 | 0.00 |
| TRINITY_PNH0488  | Ubiquiti   | Tetrabaena_socialis | 87.50 | 0.00 |
| TRINITY_GBF8783  | hypothet   | Raphidocelis_subcap | 87.50 | 0.00 |
| TRINITY_GAX7429  | hypothet   | Chlamydomonas_eusti | 87.50 | 0.00 |
| TRINITY_XP_0243  | 60S rib    | Physcomitrella_pate | 87.40 | 0.00 |
| TRINITY_GBF9014  | (diamino   | Raphidocelis_subcap | 87.40 | 0.00 |
| TRINITY_XP_0029  | iron-sul   | Volvox_carteri      | 87.40 | 0.00 |
| TRINITY_XP_0029  | 42-isopr   | Volvox_carteri      | 87.40 | 0.00 |
| TRINITY_KXZ5701  | hypothet   | Gonium_pectorale    | 87.40 | 0.00 |
| TRINITY_PNW8622  | hypothet   | Chlamydomonas_reinh | 87.40 | 0.00 |
| TRINITY_AHG0584  | cold sh    | Triticum_aestivum   | 87.30 | 0.00 |
| TRINITY_PHT2909  | hypothet   | Capsicum_baccatum   | 87.30 | 0.00 |
| TRINITY_KXZ4537  | hypothet   | Gonium_pectorale    | 87.30 | 0.00 |
| TRINITY_KMS9327  | hypothet   | Beta_vulgaris       | 87.20 | 0.00 |
| TRINITY_XP_0029  | hypothet   | Volvox_carteri      | 87.20 | 0.00 |
| TRINITY_XP_0220  | 23-oxoac   | Helianthus_annuus   | 87.20 | 0.00 |
| TRINITY_XP_0201  | uncharac   | Aegilops_tauschii   | 87.20 | 0.00 |
| TRINITY_GAX7675  | hypothet   | Chlamydomonas_eusti | 87.20 | 0.00 |
| TRINITY_XP_0029  | hypothet   | Volvox_carteri      | 87.20 | 0.00 |
| TRINITY_PNH1032  | Pyropho    | Tetrabaena_socialis | 87.20 | 0.00 |
| TRINITY_XP_0238  | heat sh    | Quercus_suber       | 87.10 | 0.00 |
| TRINITY_XP_0263  | ubiquiti   | Papaver_somniferum  | 87.10 | 0.00 |
| TRINITY_XP_0029  | hypothet   | Volvox_carteri      | 87.10 | 0.00 |
| TRINITY_XP_0030  | magnesi    | Micromonas_pusilla  | 87.10 | 0.00 |
| TRINITY_XP_0229  | non-spec   | Cucurbita_moschata  | 87.10 | 0.00 |
| TRINITY_XP_0138  | thylakoi   | Monoraphidium_negle | 87.10 | 0.00 |
| TRINITY_KXZ5567  | hypothet   | Gonium_pectorale    | 87.10 | 0.00 |
| TRINITY_GAX8557  | hypothet   | Chlamydomonas_eusti | 87.10 | 0.00 |
| TRINITY_XP_0030  | predicte   | Micromonas_pusilla  | 87.10 | 0.00 |
| TRINITY_GAX8037  | hypothet   | Chlamydomonas_eusti | 87.10 | 0.00 |
| TRINITY_ONM3991  | 4 carbonic | Zea_mays            | 87.10 | 0.00 |
| TRINITY_XP_0226  | uncharac   | Vigna_radiata       | 87.00 | 0.00 |
| TRINITY_XP_0139  | hypothet   | Monoraphidium_negle | 87.00 | 0.00 |
| TRINITY_XP_0029  | componer   | Volvox_carteri      | 87.00 | 0.00 |

|                  |          |                     |       |      |
|------------------|----------|---------------------|-------|------|
| TRINITY_XP_0191  | PREDICTF | Ipomoea_nil         | 86.90 | 0.00 |
| TRINITY_GAX8015  | hypothet | Chlamydomonas_eusti | 86.90 | 0.00 |
| TRINITY_KXZ4824  | ODA2 prc | Gonium_pectorale    | 86.90 | 0    |
| TRINITY_GAX8074  | hypothet | Chlamydomonas_eusti | 86.90 | 0    |
| TRINITY_BAK05232 | predicte | Hordeum_vulgare     | 86.90 | 0.00 |
| TRINITY_XP_0087  | actin, n | Phoenix_dactylifera | 86.90 | 0.00 |
| TRINITY_GAX85467 | hypothet | Chlamydomonas_eusti | 86.80 | 0.00 |
| TRINITY_BAU61572 | heat shc | Gonium_pectorale    | 86.80 | 0.00 |
| TRINITY_XP_0016  | R-SNARE  | Chlamydomonas_reinh | 86.80 | 0.00 |
| TRINITY_KXZ5252  | hypothet | Gonium_pectorale    | 86.80 | 0.00 |
| TRINITY_BAJ91591 | predicte | Hordeum_vulgare     | 86.80 | 0.00 |
| TRINITY_XP_0017  | predicte | Chlamydomonas_reinh | 86.80 | 0.00 |
| TRINITY_GAX8004  | hypothet | Chlamydomonas_eusti | 86.80 | 0.00 |
| TRINITY_BAJ99287 | predicte | Hordeum_vulgare     | 86.80 | 0.00 |
| TRINITY_KMS6524  | hypothet | Beta_vulgaris       | 86.80 | 0.00 |
| TRINITY_AAN0409  | S15 ribc | Dunaliella_tertiole | 86.80 | 0.00 |
| TRINITY_XP_0219  | probable | Helianthus_annuus   | 86.70 | 0.00 |
| TRINITY_XP_0029  | hypothet | Volvox_carteri      | 86.70 | 0.00 |
| TRINITY_O22608.1 | RecName: | Dunaliella_salina   | 86.70 | 0.00 |
| TRINITY_XP_0098  | PREDICTF | Nicotiana_sylvestri | 86.70 | 0.00 |
| TRINITY_KMS6493  | hypothet | Beta_vulgaris       | 86.70 | 0.00 |
| TRINITY_PIN0321  | Serine/t | Handroanthus_impeti | 86.70 | 0.00 |
| TRINITY_GAX75142 | hypothet | Chlamydomonas_eusti | 86.70 | 0.00 |
| TRINITY_AAK8483  | actin [F | Elaeis_oleifera     | 86.70 | 0.00 |
| TRINITY_GBF9745  | DEAD-bo  | Raphidocelis_subcap | 86.70 | 0.00 |
| TRINITY_XP_0070  | PREDICTF | Theobroma_cacao     | 86.70 | 0.00 |
| TRINITY_GBF90951 | 40S ribc | Raphidocelis_subcap | 86.60 | 0.00 |
| TRINITY_KXZ5055  | hypothet | Gonium_pectorale    | 86.60 | 0.00 |
| TRINITY_KXZ4869  | hypothet | Gonium_pectorale    | 86.60 | 0.00 |
| TRINITY_KXZ5327  | hypothet | Gonium_pectorale    | 86.60 | 0.00 |
| TRINITY_EAY8791  | hypothet | Oryza_sativa        | 86.60 | 0.00 |
| TRINITY_PNW7623  | hypothet | Chlamydomonas_reinh | 86.60 | 0.00 |
| TRINITY_KJB1390  | hypothet | Gossypium_raimondii | 86.60 | 0.00 |
| TRINITY_XP_0263  | ubiquiti | Papaver_somniferum  | 86.50 | 0.00 |
| TRINITY_PNH09797 | hypothet | Tetrabaena_socialis | 86.50 | 0.00 |
| TRINITY_BAK00542 | predicte | Hordeum_vulgare     | 86.50 | 0.00 |
| TRINITY_GAX8325  | hypothet | Chlamydomonas_eusti | 86.50 | 0.00 |
| TRINITY_KMS6493  | hypothet | Beta_vulgaris       | 86.50 | 0.00 |
| TRINITY_XP_0016  | peptidyl | Chlamydomonas_reinh | 86.50 | 0.00 |
| TRINITY_PNW7928  | hypothet | Chlamydomonas_reinh | 86.50 | 0.00 |
| TRINITY_GAX7709  | hypothet | Chlamydomonas_eusti | 86.50 | 0.00 |
| TRINITY_KXZ5633  | hypothet | Gonium_pectorale    | 86.50 | 0.00 |
| TRINITY_GAX8287  | hypothet | Chlamydomonas_eusti | 86.50 | 0.00 |
| TRINITY_PSC70667 | mitochor | Micractinium_conduc | 86.50 | 0.00 |
| TRINITY_GAX80077 | hypothet | Chlamydomonas_eusti | 86.50 | 0.00 |
| TRINITY_OAE3412  | hypothet | Marchantia_polymorp | 86.40 | 0.00 |
| TRINITY_GBF8914  | hypothet | Raphidocelis_subcap | 86.40 | 0.00 |
| TRINITY_GAX8278  | hypothet | Chlamydomonas_eusti | 86.40 | 0.00 |
| TRINITY_XP_0029  | hypothet | Volvox_carteri      | 86.40 | 0.00 |
| TRINITY_XP_0243  | 60S ribc | Physcomitrella_pate | 86.30 | 0.00 |
| TRINITY_XP_0029  | componer | Volvox_carteri      | 86.30 | 0.00 |
| TRINITY_KMS6481  | hypothet | Beta_vulgaris       | 86.30 | 0.00 |
| TRINITY_BAS3051  | histone  | Polyblepharides_amy | 86.30 | 0.00 |
| TRINITY_KXZ5637  | hypothet | Gonium_pectorale    | 86.30 | 0.00 |
| TRINITY_XP_0228  | Ubiquiti | Ostreococcus_tauri  | 86.20 | 0.00 |
| TRINITY_XP_0243  | 60S ribc | Physcomitrella_pate | 86.20 | 0.00 |
| TRINITY_GAX7642  | hypothet | Chlamydomonas_eusti | 86.20 | 0.00 |
| TRINITY_GAX8037  | hypothet | Chlamydomonas_eusti | 86.20 | 0.00 |
| TRINITY_XP_0139  | 60S ribc | Monoraphidium_negle | 86.20 | 0.00 |
| TRINITY_KXZ4470  | hypothet | Gonium_pectorale    | 86.20 | 0.00 |
| TRINITY_KXZ5613  | hypothet | Gonium_pectorale    | 86.20 | 0.00 |
| TRINITY_GBG00261 | aspartat | Raphidocelis_subcap | 86.10 | 0.00 |
| TRINITY_EPS74531 | hypothet | Genlisea_aurea      | 86.10 | 0.00 |
| TRINITY_GBF8957  | hypothet | Raphidocelis_subcap | 86.10 | 0.00 |
| TRINITY_P22686.1 | RecName: | Chlamydomonas_moewu | 86.10 | 0.00 |
| TRINITY_KXZ4839  | hypothet | Gonium_pectorale    | 86.10 | 0.00 |
| TRINITY_XP_0263  | ubiquiti | Papaver_somniferum  | 86.00 | 0.00 |
| TRINITY_GAX80251 | hypothet | Chlamydomonas_eusti | 86.00 | 0.00 |
| TRINITY_XP_0029  | componer | Volvox_carteri      | 86.00 | 0.00 |
| TRINITY_PNH07937 | AP-2 con | Tetrabaena_socialis | 86.00 | 0.00 |
| TRINITY_PNW88172 | hypothet | Chlamydomonas_reinh | 86.00 | 0.00 |

|                                             |       |      |
|---------------------------------------------|-------|------|
| TRINITY_KXZ51953hypothetGonium_pectorale    | 86.00 | 0.00 |
| TRINITY_GAX82490hypothetChlamydomonas_eusti | 86.00 | 0.00 |
| TRINITY_XP_00170ATP-NAD Chlamydomonas_reinh | 86.00 | 0.00 |
| TRINITY_GAX85061hypothetChlamydomonas_eusti | 86.00 | 0.00 |
| TRINITY_XP_01044PREDICTFCamelina_sativa     | 86.00 | 0.00 |
| TRINITY_OAE25449hypothetMarchantia_polymorp | 85.90 | 0.00 |

|                  |          |                     |       |      |
|------------------|----------|---------------------|-------|------|
| TRINITY_XP_00170 | elongati | Chlamydomonas_reinh | 85.90 | 0.00 |
| TRINITY_BAJ9608  | predicte | Hordeum_vulgare     | 85.90 | 0.00 |
| TRINITY_ADD5259  | pyruvate | Dunaliella_salina   | 85.80 | 0.00 |
| TRINITY_XP_00295 | hypothet | Volvox_carteri      | 85.80 | 0.00 |
| TRINITY_GAX8383  | hypothet | Chlamydomonas_eusti | 85.80 | 0.00 |
| TRINITY_XP_01918 | PREDICTE | Ipomoea_nil         | 85.70 | 0.00 |
| TRINITY_XP_02642 | DNA-dir  | Papaver_somniferum  | 85.70 | 0.00 |
| TRINITY_XP_00357 | 40S rib  | Brachypodium_distac | 85.70 | 0.00 |
| TRINITY_KXZ4273  | hypothet | Gonium_pectorale    | 85.70 | 0.00 |
| TRINITY_XP_01389 | 40S rib  | Monoraphidium_negle | 85.70 | 0.00 |
| TRINITY_PNH0711  | Chlorop  | Tetrabaena_socialis | 85.70 | 0.00 |
| TRINITY_XP_01360 | PREDICTE | Brassica_oleracea   | 85.70 | 0.00 |
| TRINITY_AEO8932  | serine/t | Dunaliella_salina   | 85.70 | 0.00 |
| TRINITY_GAX7502  | hypothet | Chlamydomonas_eusti | 85.70 | 0.00 |
| TRINITY_XP_00169 | predicte | Chlamydomonas_reinh | 85.70 | 0.00 |
| TRINITY_KXZ4903  | hypothet | Gonium_pectorale    | 85.70 | 0.00 |
| TRINITY_KXZ4630  | hypothet | Gonium_pectorale    | 85.70 | 0.00 |
| TRINITY_GBF9551  | 160S rib | Raphidocelis_subcap | 85.70 | 0.00 |
| TRINITY_XP_00294 | phospho  | Volvox_carteri      | 85.70 | 0.00 |
| TRINITY_GBF9876  | chaperon | Raphidocelis_subcap | 85.70 | 0.00 |
| TRINITY_XP_00169 | flagell  | Chlamydomonas_reinh | 85.70 | 0.00 |
| TRINITY_XP_01390 | Stromal  | Monoraphidium_negle | 85.70 | 0.00 |
| TRINITY_XP_00294 | hypothet | Volvox_carteri      | 85.70 | 0.00 |
| TRINITY_GBF9082  | ADP,ATP  | Raphidocelis_subcap | 85.60 | 0.00 |
| TRINITY_GAX7740  | hypothet | Chlamydomonas_eusti | 85.60 | 0.00 |
| TRINITY_GAX8352  | hypothet | Chlamydomonas_eusti | 85.60 | 0.00 |
| TRINITY_CAA7399  | cytochr  | Chlorogonium_elonga | 85.50 | 0.00 |
| TRINITY_XP_00169 | predicte | Chlamydomonas_reinh | 85.50 | 0.00 |
| TRINITY_GAX7958  | hypothet | Chlamydomonas_eusti | 85.50 | 0.00 |
| TRINITY_AFK3339  | unknown  | Lotus_japonicus     | 85.50 | 0.00 |
| TRINITY_AFK3339  | unknown  | Lotus_japonicus     | 85.50 | 0.00 |
| TRINITY_XP_01389 | hypothet | Monoraphidium_negle | 85.50 | 0.00 |
| TRINITY_XP_00295 | hypothet | Volvox_carteri      | 85.50 | 0.00 |
| TRINITY_KXZ4685  | hypothet | Gonium_pectorale    | 85.50 | 0.00 |
| TRINITY_XP_00170 | PP2A-twi | Chlamydomonas_reinh | 85.50 | 0.00 |
| TRINITY_XP_02438 | T-comple | Physcomitrella_pate | 85.40 | 0.00 |
| TRINITY_EPS6896  | hypothet | Genlisea_aurea      | 85.40 | 0.00 |
| TRINITY_XP_02387 | elongati | Quercus_suber       | 85.40 | 0.00 |
| TRINITY_XP_00169 | dynein   | Chlamydomonas_reinh | 85.40 | 0.00 |
| TRINITY_AUI4110  | LhcsR    | Haematococcus_lacus | 85.40 | 0.00 |
| TRINITY_GAX7354  | hypothet | Chlamydomonas_eusti | 85.40 | 0.00 |
| TRINITY_XP_00295 | mitochor | Volvox_carteri      | 85.40 | 0.00 |
| TRINITY_PSC7038  | SNF1-rel | Micractinium_conduc | 85.40 | 0.00 |
| TRINITY_GAX7586  | hypothet | Chlamydomonas_eusti | 85.40 | 0.00 |
| TRINITY_AFK3971  | unknown  | Lotus_japonicus     | 85.30 | 0.00 |
| TRINITY_XP_01918 | PREDICTE | Ipomoea_nil         | 85.30 | 0.00 |
| TRINITY_OMO5998  | Ribosom  | Corchorus_capsulari | 85.30 | 0.00 |
| TRINITY_GBF9344  | ribosom  | Raphidocelis_subcap | 85.30 | 0.00 |
| TRINITY_XP_01558 | LOW QUAI | Ricinus_communis    | 85.30 | 0.00 |
| TRINITY_XP_02388 | serine/t | Quercus_suber       | 85.30 | 0.00 |
| TRINITY_PSC7440  | Diphthan | Micractinium_conduc | 85.30 | 0.00 |
| TRINITY_GAX8214  | hypothet | Chlamydomonas_eusti | 85.30 | 0.00 |
| TRINITY_PIA3182  | hypothet | Aquilegia_coerulea  | 85.30 | 0.00 |
| TRINITY_PNH0366  | Dynein   | Tetrabaena_socialis | 85.30 | 0.00 |
| TRINITY_KCW4501  | hypothet | Eucalyptus_grandis  | 85.20 | 0.00 |
| TRINITY_GAQ8881  | putaive  | Klebsormidium_niten | 85.20 | 0.00 |
| TRINITY_XP_02276 | ADP,ATP  | Durio_zibethinus    | 85.20 | 0.00 |
| TRINITY_PNH1242  | hypothet | Tetrabaena_socialis | 85.20 | 0.00 |
| TRINITY_GAX7263  | hypothet | Chlamydomonas_eusti | 85.20 | 0.00 |
| TRINITY_XP_00294 | chaperon | Volvox_carteri      | 85.20 | 0.00 |
| TRINITY_XP_01390 | guanylat | Monoraphidium_negle | 85.20 | 0.00 |
| TRINITY_PRW5705  | succinat | Chlorella_sorokinia | 85.20 | 0.00 |
| TRINITY_GAX7709  | hypothet | Chlamydomonas_eusti | 85.20 | 0.00 |
| TRINITY_XP_02392 | ubiquiti | Quercus_suber       | 85.10 | 0.00 |
| TRINITY_PSS0610  | Serine/t | Actinidia_chinensis | 85.10 | 0.00 |
| TRINITY_KXZ5391  | hypothet | Gonium_pectorale    | 85.10 | 0.00 |



|                  |                              |       |      |
|------------------|------------------------------|-------|------|
| TRINITY_BAJ9714  | (predicteHordeum_vulgare     | 85.10 | 0.00 |
| TRINITY_XP_0029  | hypothetVolvox_carteri       | 85.10 | 0.00 |
| TRINITY_ABP5742  | stearoylHaematococcus_lacus  | 85.10 | 0.00 |
| TRINITY_P22686.1 | RecName:Chlamydomonas_moewu  | 85.10 | 0.00 |
| TRINITY_XP_0016  | adenine Chlamydomonas_reinh  | 85.00 | 0.00 |
| TRINITY_XP_0191  | PREDICTI Ipomoea_nil         | 85.00 | 0.00 |
| TRINITY_XP_0029  | hypothetVolvox_carteri       | 85.00 | 0.00 |
| TRINITY_XP_0017  | (arseniteChlamydomonas_reinh | 85.00 | 0.00 |
| TRINITY_XP_0029  | 20S protVolvox_carteri       | 85.00 | 0.00 |
| TRINITY_OAY8554  | ABC trarAnanas_comosus       | 85.00 | 0.00 |
| TRINITY_GAX7840  | (hypothetChlamydomonas_eusti | 85.00 | 0.00 |
| TRINITY_XP_0029  | hypothetVolvox_carteri       | 85.00 | 0.00 |
| TRINITY_XP_0202  | (thioeredCajanus_cajan       | 85.00 | 0.00 |
| TRINITY_GBG6244  | hypothetChara_braunii        | 84.90 | 0.00 |
| TRINITY_KXZ5243  | (hypothetGonium_pectorale    | 84.90 | 0.00 |
| TRINITY_XP_0243  | serine/tPhyscomitrella_pate  | 84.90 | 0.00 |
| TRINITY_KXZ4681  | (hypothetGonium_pectorale    | 84.90 | 0.00 |
| TRINITY_XP_0025  | (predicteMicromonas_commoda  | 84.80 | 0.00 |
| TRINITY_RWR9034  | stromal Cinnamomum_micranth  | 84.80 | 0.00 |
| TRINITY_KQK0586  | hypothetBrachypodium_distac  | 84.80 | 0.00 |
| TRINITY_XP_0138  | 40S ribcMonoraphidium_negle  | 84.80 | 0.00 |
| TRINITY_PNH0830  | NFX1-tyrTetrabaena_socialis  | 84.80 | 0.00 |
| TRINITY_GAX7701  | (hypothetChlamydomonas_eusti | 84.80 | 0.00 |
| TRINITY_ABY6196  | (chloroplDunaliella_salina   | 84.80 | 0.00 |
| TRINITY_KXZ5310  | hypothetGonium_pectorale     | 84.80 | 0.00 |
| TRINITY_GAX8386  | hypothetChlamydomonas_eusti  | 84.80 | 0.00 |
| TRINITY_GAX8607  | hypothetChlamydomonas_eusti  | 84.80 | 0.00 |
| TRINITY_XP_0124  | PREDICTI Gossypium_raimondii | 84.80 | 0.00 |
| TRINITY_XP_0029  | flagellcVolvox_carteri       | 84.80 | 0.00 |
| TRINITY_XP_0084  | PREDICTI Cucumis_melo        | 84.70 | 0.00 |
| TRINITY_XP_0201  | 26S protAegilops_tauschii    | 84.70 | 0.00 |
| TRINITY_GAX8322  | (hypothetChlamydomonas_eusti | 84.70 | 0.00 |
| TRINITY_AGZ1935  | hypothetChlorella_sp._ArM00  | 84.70 | 0.00 |
| TRINITY_GAX8316  | hypothetChlamydomonas_eusti  | 84.70 | 0.00 |
| TRINITY_XP_0016  | ribosomcChlamydomonas_reinh  | 84.70 | 0.00 |
| TRINITY_GAX8105  | (hypothetChlamydomonas_eusti | 84.70 | 0.00 |
| TRINITY_XP_0124  | PREDICTI Gossypium_raimondii | 84.70 | 0.00 |
| TRINITY_XP_0016  | (predicteChlamydomonas_reinh | 84.70 | 0.00 |
| TRINITY_GAQ8103  | 140S ribcKlebsormidium_niten | 84.60 | 0.00 |
| TRINITY_KJB6925  | hypothetGossypium_raimondii  | 84.60 | 0.00 |
| TRINITY_GAX7925  | hypothetChlamydomonas_eusti  | 84.60 | 0.00 |
| TRINITY_XP_0016  | (predicteChlamydomonas_reinh | 84.60 | 0.00 |
| TRINITY_XP_0191  | PREDICTI Ipomoea_nil         | 84.60 | 0.00 |
| TRINITY_ABD3790  | light-hcChlamydomonas_incer  | 84.60 | 0.00 |
| TRINITY_GAX7665  | hypothetChlamydomonas_eusti  | 84.60 | 0.00 |
| TRINITY_XP_0205  | polyubiccPhalaenopsis_equest | 84.60 | 0.00 |
| TRINITY_GAX8162  | hypothetChlamydomonas_eusti  | 84.60 | 0.00 |
| TRINITY_ALL5522  | NER endcChlamydomonas_reinh  | 84.60 | 0.00 |
| TRINITY_KXZ4855  | hypothetGonium_pectorale     | 84.60 | 0.00 |
| TRINITY_XP_0239  | ubiquitiQuercus_suber        | 84.50 | 0.00 |
| TRINITY_GAX7418  | hypothetChlamydomonas_eusti  | 84.50 | 0.00 |
| TRINITY_XP_0139  | (sec-indcMonoraphidium_negle | 84.50 | 0.00 |
| TRINITY_KXZ5273  | hypothetGonium_pectorale     | 84.50 | 0.00 |
| TRINITY_KDP2046  | hypothetJatropha_curcas      | 84.50 | 0.00 |
| TRINITY_GAX8267  | (hypothetChlamydomonas_eusti | 84.50 | 0.00 |
| TRINITY_PNH0209  | (Sulfite Tetrabaena_socialis | 84.50 | 0.00 |
| TRINITY_PNW7725  | hypothetChlamydomonas_reinh  | 84.50 | 0.00 |
| TRINITY_XP_0029  | hypothetVolvox_carteri       | 84.50 | 0.00 |
| TRINITY_XP_0029  | hypothetVolvox_carteri       | 84.40 | 0.00 |
| TRINITY_GAX8326  | hypothetChlamydomonas_eusti  | 84.40 | 0.00 |
| TRINITY_BAF3199  | putativeCryptomeria_japonic  | 84.40 | 0.00 |
| TRINITY_XP_0016  | isomercChlamydomonas_reinh   | 84.40 | 0.00 |
| TRINITY_KXZ4661  | hypothetGonium_pectorale     | 84.40 | 0.00 |
| TRINITY_GBF9986  | hypothetRaphidocelis_subcap  | 84.40 | 0.00 |
| TRINITY_KXZ5601  | hypothetGonium_pectorale     | 84.40 | 0.00 |
| TRINITY_KXZ4982  | hypothetGonium_pectorale     | 84.40 | 0.00 |

|                  |                              |       |      |
|------------------|------------------------------|-------|------|
| TRINITY_XP_00294 | hypothetVolvox_carteri       | 84.40 | 0.00 |
| TRINITY_XP_00168 | predicteChlamydomonas_reinh  | 84.40 | 0.00 |
| TRINITY_GAX7817  | hypothetChlamydomonas_eusti  | 84.40 | 0.00 |
| TRINITY_GAX7533  | hypothetChlamydomonas_eusti  | 84.40 | 0.00 |
| TRINITY_GAX7630  | hypothetChlamydomonas_eusti  | 84.40 | 0    |
| TRINITY_GAX7376  | hypothetChlamydomonas_eusti  | 84.30 | 0.00 |
| TRINITY_PNH0797  | MagnesiTetrabaena_socialis   | 84.30 | 0.00 |
| TRINITY_ACN3155  | unknown Zea_mays             | 84.30 | 0.00 |
| TRINITY_XP_0138  | SufE-liMonoraphidium_negle   | 84.30 | 0.00 |
| TRINITY_GAX7487  | hypothetChlamydomonas_eusti  | 84.30 | 0.00 |
| TRINITY_KMS6478  | hypothetBeta_vulgaris        | 84.20 | 0.00 |
| TRINITY_PHT2871  | hypothetCapsicum_baccatum    | 84.20 | 0.00 |
| TRINITY_PRW6026  | Serine tChlorella_sorokinia  | 84.20 | 0.00 |
| TRINITY_PNW8831  | hypothetChlamydomonas_reinh  | 84.20 | 0.00 |
| TRINITY_GAX8459  | hypothetChlamydomonas_eusti  | 84.20 | 0.00 |
| TRINITY_KXZ5043  | VAM1/VAMGonium_pectorale     | 84.20 | 0.00 |
| TRINITY_GAX8545  | hypothetChlamydomonas_eusti  | 84.20 | 0.00 |
| TRINITY_PNH0960  | FrataxirTetrabaena_socialis  | 84.20 | 0.00 |
| TRINITY_PNH0979  | hypothetTetrabaena_socialis  | 84.20 | 0.00 |
| TRINITY_GAX7423  | hypothetChlamydomonas_eusti  | 84.20 | 0.00 |
| TRINITY_PNH0567  | UbiquitiTetrabaena_socialis  | 84.10 | 0.00 |
| TRINITY_XP_0155  | ADP-ribRicinus_communis      | 84.10 | 0.00 |
| TRINITY_GAX8325  | hypothetChlamydomonas_eusti  | 84.10 | 0.00 |
| TRINITY_KXZ4194  | hypothetGonium_pectorale     | 84.10 | 0.00 |
| TRINITY_AAW2885  | phytoenHaematococcus_lacus   | 84.10 | 0.00 |
| TRINITY_PNW8648  | hypothetChlamydomonas_reinh  | 84.10 | 0.00 |
| TRINITY_ADN3391  | metallotCucumis_melo         | 84.00 | 0.00 |
| TRINITY_PRW2081  | ReceptorChlorella_sorokinia  | 84.00 | 0.00 |
| TRINITY_XP_0030  | predicteMicromonas_pusilla   | 84.00 | 0.00 |
| TRINITY_XP_0238  | transcriQuercus_suber        | 84.00 | 0.00 |
| TRINITY_GAX8054  | hypothetChlamydomonas_eusti  | 84.00 | 0.00 |
| TRINITY_XP_0029  | hypothetVolvox_carteri       | 84.00 | 0.00 |
| TRINITY_KXZ4373  | hypothetGonium_pectorale     | 84.00 | 0.00 |
| TRINITY_AEU2929  | ribuloseuncultured_Streptop  | 83.90 | 0.00 |
| TRINITY_XP_0029  | componerVolvox_carteri       | 83.90 | 0.00 |
| TRINITY_ACJ2424  | RPN10 [IDunaliella_viridis   | 83.90 | 0.00 |
| TRINITY_XP_0016  | mitochorChlamydomonas_reinh  | 83.90 | 0.00 |
| TRINITY_GBF9055  | gamma tRaphidocelis_subcap   | 83.90 | 0.00 |
| TRINITY_KXZ5290  | hypothetGonium_pectorale     | 83.90 | 0.00 |
| TRINITY_XP_0120  | polyubicJatropha_curcas      | 83.90 | 0.00 |
| TRINITY_BAK0054  | predicteHordeum_vulgare      | 83.90 | 0.00 |
| TRINITY_XP_0016  | calreticChlamydomonas_reinh  | 83.80 | 0.00 |
| TRINITY_XP_0029  | hypothetVolvox_carteri       | 83.80 | 0.00 |
| TRINITY_XP_0016  | selenopChlamydomonas_reinh   | 83.80 | 0.00 |
| TRINITY_XP_0029  | hypothetVolvox_carteri       | 83.80 | 0.00 |
| TRINITY_XP_0017  | nuclear Chlamydomonas_reinh  | 83.80 | 0.00 |
| TRINITY_OAE2224  | hypothetMarchantia_polymorp  | 83.80 | 0.00 |
| TRINITY_OAY5161  | hypothetManihot_esculenta    | 83.80 | 0.00 |
| TRINITY_GAX8322  | hypothetChlamydomonas_eusti  | 83.80 | 0.00 |
| TRINITY_GAX8138  | hypothetChlamydomonas_eusti  | 83.80 | 0    |
| TRINITY_KMS6493  | hypothetBeta_vulgaris        | 83.70 | 0.00 |
| TRINITY_BAJ1178  | dehydratCorchorus_olitorius  | 83.70 | 0.00 |
| TRINITY_XP_0120  | 26S protJatropha_curcas      | 83.70 | 0.00 |
| TRINITY_XP_0212  | histone Herrania_umbratica   | 83.70 | 0.00 |
| TRINITY_XP_0058  | hypothetChlorella_variabili  | 83.70 | 0.00 |
| TRINITY_AAT7272  | putativeCucurbita_maxima     | 83.60 | 0.00 |
| TRINITY_XP_0228  | acyl-Co/Olea_europaea        | 83.60 | 0.00 |
| TRINITY_RVW1687  | NADH de/Vitis_vinifera       | 83.60 | 0.00 |
| TRINITY_XP_0194  | PREDICTH Lupinus_angustifoli | 83.60 | 0.00 |
| TRINITY_GAX7651  | hypothetChlamydomonas_eusti  | 83.60 | 0.00 |
| TRINITY_GAX8642  | hypothetChlamydomonas_eusti  | 83.60 | 0.00 |
| TRINITY_XP_0029  | hypothetVolvox_carteri       | 83.60 | 0.00 |
| TRINITY_XP_0029  | target cVolvox_carteri       | 83.60 | 0    |
| TRINITY_XP_0016  | protein Chlamydomonas_reinh  | 83.60 | 0.00 |
| TRINITY_GAX8040  | hypothetChlamydomonas_eusti  | 83.60 | 0.00 |
| TRINITY_XP_0139  | (RING-bo)Monoraphidium_negle | 83.60 | 0.00 |

|                          |                     |       |      |
|--------------------------|---------------------|-------|------|
| TRINITY_XP_00169flagell  | Chlamydomonas_reinh | 83.60 | 0    |
| TRINITY_XP_01558LOW QUAI | Ricinus_communis    | 83.60 | 0.00 |
| TRINITY_GAX7722(hypothet | Chlamydomonas_eusti | 83.50 | 0.00 |
| TRINITY_XP_00169ketopant | Chlamydomonas_reinh | 83.50 | 0.00 |
| TRINITY_XP_00168EMP/non  | Chlamydomonas_reinh | 83.50 | 0.00 |
| TRINITY_KXZ5541(hypothet | Gonium_pectorale    | 83.50 | 0.00 |
| TRINITY_KXZ5563(hypothet | Gonium_pectorale    | 83.40 | 0.00 |
| TRINITY_ALM5498(DEAD bo  | Chlamydomonas_sp._I | 83.40 | 0.00 |
| TRINITY_KXZ4490(hypothet | Gonium_pectorale    | 83.40 | 0.00 |
| TRINITY_XP_00169cytokin  | Chlamydomonas_reinh | 83.40 | 0.00 |
| TRINITY_KXZ4956(hypothet | Gonium_pectorale    | 83.40 | 0.00 |
| TRINITY_XP_01722PREDICTI | Daucus_carota       | 83.30 | 0.00 |
| TRINITY_PIA3575(hypothet | Aquilegia_coerulea  | 83.30 | 0.00 |
| TRINITY_KXZ4925(hypothet | Gonium_pectorale    | 83.30 | 0.00 |
| TRINITY_XP_00564N-termir | Coccomyxa_subellips | 83.30 | 0.00 |
| TRINITY_KXZ5456(hypothet | Gonium_pectorale    | 83.30 | 0.00 |
| TRINITY_GAQ7888(prot eas | Klebsormidium_niten | 83.30 | 0.00 |
| TRINITY_XP_00564hypothet | Coccomyxa_subellips | 83.30 | 0.00 |
| TRINITY_GAX8509(hypothet | Chlamydomonas_eusti | 83.30 | 0.00 |
| TRINITY_XP_00169inactiv  | Chlamydomonas_reinh | 83.30 | 0.00 |
| TRINITY_PWA4079(histone  | Artemisia_annua     | 83.30 | 0.00 |
| TRINITY_KXZ4635(hypothet | Gonium_pectorale    | 83.30 | 0.00 |
| TRINITY_KXZ5310(hypothet | Gonium_pectorale    | 83.30 | 0.00 |
| TRINITY_GBF8904(metal AF | Raphidocelis_subcap | 83.30 | 0.00 |
| TRINITY_GAX8025(hypothet | Chlamydomonas_eusti | 83.30 | 0.00 |
| TRINITY_KXZ4995(hypothet | Gonium_pectorale    | 83.30 | 0.00 |
| TRINITY_GAX8510(hypothet | Chlamydomonas_eusti | 83.30 | 0    |
| TRINITY_XP_00935PREDICTI | Pyrus_x_bretschneid | 83.30 | 0.00 |
| TRINITY_PKA6189(Heat sh  | Apostasia_shenzheni | 83.20 | 0.00 |
| TRINITY_XP_02283Structur | Ostreococcus_tauri  | 83.20 | 0.00 |
| TRINITY_ABK4147(catalas  | Haematococcus_lacus | 83.20 | 0.00 |
| TRINITY_GAX7429(hypothet | Chlamydomonas_eusti | 83.20 | 0.00 |
| TRINITY_XP_00295magnesi  | Volvox_carteri      | 83.20 | 0    |
| TRINITY_AAX4399(UDP-gluc | Dunaliella_salina   | 83.20 | 0.00 |
| TRINITY_GAX7502(hypothet | Chlamydomonas_eusti | 83.20 | 0.00 |
| TRINITY_GAX8138(hypothet | Chlamydomonas_eusti | 83.20 | 0    |
| TRINITY_PNH0566840S rib  | Tetrabaena_socialis | 83.10 | 0.00 |
| TRINITY_KXZ5106(hypothet | Gonium_pectorale    | 83.10 | 0.00 |
| TRINITY_PIN00055Molecul  | Handroanthus_impeti | 83.10 | 0.00 |
| TRINITY_GAX7349(hypothet | Chlamydomonas_eusti | 83.10 | 0.00 |
| TRINITY_RMZ5358(hypothet | Auxenochlorella_pro | 83.10 | 0.00 |
| TRINITY_GBF88847RNA-bin  | Raphidocelis_subcap | 83.10 | 0.00 |
| TRINITY_GAQ9031(putativ  | Klebsormidium_niten | 83.10 | 0.00 |
| TRINITY_GAX8658(hypothet | Chlamydomonas_eusti | 83.10 | 0.00 |
| TRINITY_XP_00169predict  | Chlamydomonas_reinh | 83.10 | 0.00 |
| TRINITY_ACG4404660S rib  | Zea_mays            | 83.10 | 0.00 |
| TRINITY_XP_02283Ribosom  | Ostreococcus_tauri  | 83.00 | 0.00 |
| TRINITY_XP_02283Ribosom  | Ostreococcus_tauri  | 83.00 | 0.00 |
| TRINITY_KXZ4476(hypothet | Gonium_pectorale    | 83.00 | 0.00 |
| TRINITY_XP_00295hypothet | Volvox_carteri      | 83.00 | 0.00 |
| TRINITY_GAX8429(hypothet | Chlamydomonas_eusti | 83.00 | 0.00 |
| TRINITY_XP_00564long-ch  | Coccomyxa_subellips | 83.00 | 0.00 |
| TRINITY_PNT5216(hypothet | Populus_trichocarpa | 83.00 | 0.00 |
| TRINITY_GAX8247(hypothet | Chlamydomonas_eusti | 83.00 | 0.00 |
| TRINITY_XP_00941PREDICTI | Musa_acuminata      | 83.00 | 0.00 |
| TRINITY_KDD7707(hypothet | Helicosporidium_sp. | 83.00 | 0.00 |
| TRINITY_KXZ5241(hypothet | Gonium_pectorale    | 83.00 | 0.00 |
| TRINITY_XP_0025(dynein } | Micromonas_commoda  | 83.00 | 0.00 |
| TRINITY_XP_0025(dynein } | Micromonas_commoda  | 82.90 | 0.00 |
| TRINITY_PRW570023-ketoa  | Chlorella_sorokinia | 82.90 | 0.00 |
| TRINITY_PNW7366(hypothet | Chlamydomonas_reinh | 82.90 | 0.00 |
| TRINITY_GAX7828(hypothet | Chlamydomonas_eusti | 82.90 | 0.00 |
| TRINITY_GAX7777(hypothet | Chlamydomonas_eusti | 82.90 | 0.00 |
| TRINITY_VDD2476(unnamed  | Brassica_rapa       | 82.90 | 0.00 |
| TRINITY_XP_00169mitogen  | Chlamydomonas_reinh | 82.90 | 0.00 |
| TRINITY_GAX8181(hypothet | Chlamydomonas_eusti | 82.90 | 0.00 |

|                                                      |       |      |
|------------------------------------------------------|-------|------|
| TRINITY_BAU3704(choline-Chlamydomonas_asymr          | 82.90 | 0.00 |
| TRINITY_XP_01002(PREDICTEucalyptus_grandis           | 82.90 | 0.00 |
| TRINITY_GAX8510(hypothetChlamydomonas_eusti          | 82.90 | 0    |
| TRINITY_XP_0109(PREDICTElaeis_guineensis             | 82.80 | 0.00 |
| TRINITY_XP_0029(hypothetVolvox_carteri               | 82.80 | 0.00 |
| TRINITY_GAX7556(hypothetChlamydomonas_eusti          | 82.80 | 0.00 |
| TRINITY_XP_0016(ribose- $\gamma$ Chlamydomonas_reinh | 82.80 | 0.00 |
| TRINITY_GAX7790(hypothetChlamydomonas_eusti          | 82.80 | 0.00 |
| TRINITY_GAX7711(hypothetChlamydomonas_eusti          | 82.80 | 0.00 |
| TRINITY_GAX8038(hypothetChlamydomonas_eusti          | 82.80 | 0.00 |
| TRINITY_GAX7834(hypothetChlamydomonas_eusti          | 82.80 | 0.00 |
| TRINITY_GAX7918(hypothetChlamydomonas_eusti          | 82.80 | 0.00 |
| TRINITY_PNW8004(hypothetChlamydomonas_reinh          | 82.80 | 0.00 |
| TRINITY_GAX8490(hypothetChlamydomonas_eusti          | 82.80 | 0    |
| TRINITY_ACL5390(unknown Zea_mays                     | 82.70 | 0.00 |
| TRINITY_BAJ9531(predicteHordeum_vulgare              | 82.70 | 0.00 |
| TRINITY_GAX7812(hypothetChlamydomonas_eusti          | 82.70 | 0.00 |
| TRINITY_KXZ5147(hypothetGonium_pectorale             | 82.70 | 0.00 |
| TRINITY_XP_0056(ribosomæCoccomyxa_subellips          | 82.70 | 0.00 |
| TRINITY_PNW8777(hypothetChlamydomonas_reinh          | 82.70 | 0.00 |
| TRINITY_XP_0029(hypothetVolvox_carteri               | 82.70 | 0.00 |
| TRINITY_XP_0191(PREDICTEIpomoea_nil                  | 82.70 | 0.00 |
| TRINITY_GAX7992(hypothetChlamydomonas_eusti          | 82.60 | 0.00 |
| TRINITY_XP_0017(PP2A-twiChlamydomonas_reinh          | 82.60 | 0.00 |
| TRINITY_GAX8004(hypothetChlamydomonas_eusti          | 82.60 | 0.00 |
| TRINITY_GAQ9251(F0F1-tyxKlebsormidium_niten          | 82.50 | 0.00 |
| TRINITY_XP_0097(PREDICTENicotiana_sylvestri          | 82.50 | 0.00 |
| TRINITY_PNH1275(60S ribcTetrabaena_socialis          | 82.50 | 0.00 |
| TRINITY_XP_0139(Kinesin-Monoraphidium_negle          | 82.50 | 0.00 |
| TRINITY_XP_0029(hypothetVolvox_carteri               | 82.50 | 0.00 |
| TRINITY_KXZ4196(hypothetGonium_pectorale             | 82.50 | 0.00 |
| TRINITY_GAQ7859(Rab famiKlebsormidium_niten          | 82.50 | 0.00 |
| TRINITY_GAX7949(hypothetChlamydomonas_eusti          | 82.50 | 0.00 |
| TRINITY_KXZ5239(hypothetGonium_pectorale             | 82.50 | 0.00 |
| TRINITY_XP_0029(hypothetVolvox_carteri               | 82.50 | 0.00 |
| TRINITY_GAX8461(hypothetChlamydomonas_eusti          | 82.50 | 0.00 |
| TRINITY_XP_0017(fructoseChlamydomonas_reinh          | 82.50 | 0.00 |
| TRINITY_GAX7397(hypothetChlamydomonas_eusti          | 82.50 | 0.00 |
| TRINITY_AOO8541(PII sigrHaematococcus_lacus          | 82.40 | 0.00 |
| TRINITY_XP_0016(26S protChlamydomonas_reinh          | 82.40 | 0.00 |
| TRINITY_XP_0029(hypothetVolvox_carteri               | 82.40 | 0.00 |
| TRINITY_XP_0017(predicteChlamydomonas_reinh          | 82.40 | 0.00 |
| TRINITY_GAX8098(hypothetChlamydomonas_eusti          | 82.40 | 0.00 |
| TRINITY_PNH1269(TranslatTetrabaena_socialis          | 82.40 | 0.00 |
| TRINITY_PNH0354(Mitogen-Tetrabaena_socialis          | 82.40 | 0.00 |
| TRINITY_GAX7306(hypothetChlamydomonas_eusti          | 82.40 | 0.00 |
| TRINITY_XP_0029(hypothetVolvox_carteri               | 82.30 | 0    |
| TRINITY_GAX8057(hypothetChlamydomonas_eusti          | 82.30 | 0.00 |
| TRINITY_XP_0029(hypothetVolvox_carteri               | 82.30 | 0.00 |
| TRINITY_XP_0093(PREDICTEPyrus_x_bretschneid          | 82.20 | 0.00 |
| TRINITY_XP_0029(componerVolvox_carteri               | 82.20 | 0.00 |
| TRINITY_XP_0029(hypothetVolvox_carteri               | 82.20 | 0.00 |
| TRINITY_PTQ3630(hypothetMarchantia_polymorp          | 82.20 | 0.00 |
| TRINITY_GBF9353(peptidy]Raphidocelis_subcap          | 82.20 | 0.00 |
| TRINITY_KXZ5129(hypothetGonium_pectorale             | 82.20 | 0    |
| TRINITY_GAX7348(hypothetChlamydomonas_eusti          | 82.20 | 0.00 |
| TRINITY_KXZ4615(DHC6 prcGonium_pectorale             | 82.20 | 0.00 |
| TRINITY_GAX8138(hypothetChlamydomonas_eusti          | 82.10 | 0.00 |
| TRINITY_GBF9926(hypothetRaphidocelis_subcap          | 82.10 | 0.00 |
| TRINITY_XP_0016(predicteChlamydomonas_reinh          | 82.10 | 0.00 |
| TRINITY_AFD6228(mitochorChlamydomonas_reinh          | 82.10 | 0.00 |
| TRINITY_XP_0264(probablePapaver_somniferum           | 82.10 | 0.00 |
| TRINITY_GAX8037(hypothetChlamydomonas_eusti          | 82.10 | 0.00 |
| TRINITY_GAX7592(hypothetChlamydomonas_eusti          | 82.10 | 0.00 |
| TRINITY_PIA2624(hypothetAquilegia_coerulea           | 82.10 | 0.00 |
| TRINITY_ESQ4867(hypothetEutrema_salsugineur          | 82.10 | 0.00 |

|                  |                               |       |      |
|------------------|-------------------------------|-------|------|
| TRINITY_XP_00295 | hypothetVolvox_carteri        | 82.10 | 0.00 |
| TRINITY_XP_00169 | aminoacylChlamydomonas_reinh  | 82.10 | 0.00 |
| TRINITY_BAR88172 | TAG acciChlamydomonas_reinh   | 82.10 | 0.00 |
| TRINITY_GAX77981 | hypothetChlamydomonas_eusti   | 82.10 | 0.00 |
| TRINITY_GAX75195 | hypothetChlamydomonas_eusti   | 82.10 | 0.00 |
| TRINITY_AFD6228  | (mitochorChlamydomonas_reinh  | 82.10 | 0.00 |
| TRINITY_XP_00564 | WD40 rexCoccomyxa_subellips   | 82.10 | 0.00 |
| TRINITY_XP_02452 | pirin-liSelaginella_moellen   | 82.00 | 0.00 |
| TRINITY_ASZ85176 | elongatiHylocereus_polyrhiz   | 82.00 | 0.00 |
| TRINITY_XP_00294 | chaperonVolvox_carteri        | 82.00 | 0.00 |
| TRINITY_GAX77681 | hypothetChlamydomonas_eusti   | 82.00 | 0.00 |
| TRINITY_GBF93448 | ribosomæRaphidocelis_subcap   | 82.00 | 0.00 |
| TRINITY_XP_02436 | cyclin-cPhyscomitrella_pate   | 81.90 | 0.00 |
| TRINITY_PNH00778 | putativæTetrabaena_socialis   | 81.90 | 0.00 |
| TRINITY_GAX7363  | (hypothetChlamydomonas_eusti  | 81.90 | 0.00 |
| TRINITY_BAJ91591 | predictæHordeum_vulgare       | 81.90 | 0.00 |
| TRINITY_GAX81546 | hypothetChlamydomonas_eusti   | 81.90 | 0.00 |
| TRINITY_XP_00169 | flagellæChlamydomonas_reinh   | 81.90 | 0.00 |
| TRINITY_KXZ51889 | hypothetGonium_pectorale      | 81.90 | 0.00 |
| TRINITY_OAE21729 | hypothetMarchantia_polymorp   | 81.80 | 0.00 |
| TRINITY_GAX73623 | hypothetChlamydomonas_eusti   | 81.80 | 0.00 |
| TRINITY_PNW81822 | hypothetChlamydomonas_reinh   | 81.80 | 0.00 |
| TRINITY_GAX7423  | (hypothetChlamydomonas_eusti  | 81.80 | 0.00 |
| TRINITY_YP_00946 | DNA-diræHaematococcus_lacus   | 81.80 | 0.00 |
| TRINITY_XP_00565 | light-hæCoccomyxa_subellips   | 81.80 | 0.00 |
| TRINITY_GBF89326 | magnesiæRaphidocelis_subcap   | 81.80 | 0.00 |
| TRINITY_KXZ44838 | hypothetGonium_pectorale      | 81.80 | 0.00 |
| TRINITY_PNH10864 | UDP-arakTetrabaena_socialis   | 81.80 | 0.00 |
| TRINITY_GAX85466 | hypothetChlamydomonas_eusti   | 81.80 | 0.00 |
| TRINITY_XP_00169 | 20S protChlamydomonas_reinh   | 81.70 | 0.00 |
| TRINITY_XP_02059 | polyubiciPhalaenopsis_equest  | 81.70 | 0.00 |
| TRINITY_BAK00999 | predictæHordeum_vulgare       | 81.70 | 0.00 |
| TRINITY_GAX79914 | hypothetChlamydomonas_eusti   | 81.70 | 0.00 |
| TRINITY_GAX7305  | (hypothetChlamydomonas_eusti  | 81.70 | 0.00 |
| TRINITY_KXZ56985 | hypothetGonium_pectorale      | 81.70 | 0.00 |
| TRINITY_XP_00295 | hypothetVolvox_carteri        | 81.70 | 0.00 |
| TRINITY_KXZ51925 | hypothetGonium_pectorale      | 81.70 | 0.00 |
| TRINITY_GAX78749 | hypothetChlamydomonas_eusti   | 81.70 | 0.00 |
| TRINITY_XP_00294 | hypothetVolvox_carteri        | 81.70 | 0.00 |
| TRINITY_XP_00169 | nucleolæChlamydomonas_reinh   | 81.70 | 0.00 |
| TRINITY_PNW80375 | hypothetChlamydomonas_reinh   | 81.70 | 0.00 |
| TRINITY_XP_02709 | sm-like Coffea_arabica        | 81.60 | 0.00 |
| TRINITY_XP_00169 | flagellæChlamydomonas_reinh   | 81.60 | 0.00 |
| TRINITY_CAF04129 | pyruvateChlamydomonas_reinh   | 81.60 | 0.00 |
| TRINITY_XP_00169 | ribosomæChlamydomonas_reinh   | 81.60 | 0.00 |
| TRINITY_GAX73972 | hypothetChlamydomonas_eusti   | 81.60 | 0.00 |
| TRINITY_XP_00294 | hypothetVolvox_carteri        | 81.60 | 0.00 |
| TRINITY_XP_01507 | uncharacSolanum_pennellii     | 81.60 | 0.00 |
| TRINITY_GAX84108 | hypothetChlamydomonas_eusti   | 81.60 | 0.00 |
| TRINITY_PNG99839 | hypothetTetrabaena_socialis   | 81.60 | 0.00 |
| TRINITY_BAK02182 | predictæHordeum_vulgare       | 81.50 | 0.00 |
| TRINITY_AAX43992 | UDP-glucDunaliella_salina     | 81.50 | 0.00 |
| TRINITY_XP_0139  | (S-formyl)Monoraphidium_negle | 81.50 | 0.00 |
| TRINITY_XP_00295 | hypothetVolvox_carteri        | 81.50 | 0.00 |
| TRINITY_XP_00295 | hypothetVolvox_carteri        | 81.50 | 0.00 |
| TRINITY_GAX72626 | hypothetChlamydomonas_eusti   | 81.50 | 0.00 |
| TRINITY_KXZ50766 | hypothetGonium_pectorale      | 81.50 | 0.00 |
| TRINITY_AKA95377 | heat shcBryum_argenteum       | 81.50 | 0.00 |
| TRINITY_GAX72872 | hypothetChlamydomonas_eusti   | 81.50 | 0.00 |
| TRINITY_KMS65245 | hypothetBeta_vulgaris         | 81.50 | 0.00 |
| TRINITY_XP_00169 | Sigma1-7Chlamydomonas_reinh   | 81.50 | 0.00 |
| TRINITY_GAQ9141  | (60S ribcKlebsormidium_niten  | 81.40 | 0.00 |
| TRINITY_GAX76474 | hypothetChlamydomonas_eusti   | 81.40 | 0.00 |
| TRINITY_XP_00169 | predictæChlamydomonas_reinh   | 81.40 | 0.00 |
| TRINITY_GAX77777 | hypothetChlamydomonas_eusti   | 81.40 | 0.00 |
| TRINITY_KXZ45851 | hypothetGonium_pectorale      | 81.40 | 0.00 |

|                  |                              |       |      |
|------------------|------------------------------|-------|------|
| TRINITY_GAX80541 | hypothetChlamydomonas_eusti  | 81.40 | 0.00 |
| TRINITY_GAX7258  | hypothetChlamydomonas_eusti  | 81.40 | 0.00 |
| TRINITY_PNW7784  | hypothetChlamydomonas_reinh  | 81.40 | 0.00 |
| TRINITY_XP_00294 | dynein lVolvox_carteri       | 81.40 | 0.00 |
| TRINITY_XP_01165 | PREDICTfCucumis_sativus      | 81.30 | 0.00 |
| TRINITY_GAX7733  | hypothetChlamydomonas_eusti  | 81.30 | 0.00 |
| TRINITY_GAX78454 | hypothetChlamydomonas_eusti  | 81.30 | 0.00 |
| TRINITY_XP_00295 | hypothetVolvox_carteri       | 81.30 | 0.00 |
| TRINITY_GAX83295 | hypothetChlamydomonas_eusti  | 81.30 | 0.00 |
| TRINITY_KXZ54647 | hypothetGonium_pectorale     | 81.30 | 0.00 |
| TRINITY_KXZ54401 | hypothetGonium_pectorale     | 81.30 | 0.00 |
| TRINITY_XP_00169 | dihydro]Chlamydomonas_reinh  | 81.30 | 0.00 |
| TRINITY_XP_00229 | PHD finçPopulus_trichocarpa  | 81.20 | 0.00 |
| TRINITY_XP_02388 | 60S ribçQuercus_suber        | 81.20 | 0.00 |
| TRINITY_XP_00295 | flagellçVolvox_carteri       | 81.20 | 0.00 |
| TRINITY_PNH09822 | TranscriTetrabaena_socialis  | 81.20 | 0.00 |
| TRINITY_GAX8393  | hypothetChlamydomonas_eusti  | 81.20 | 0.00 |
| TRINITY_XP_00169 | eukaryotChlamydomonas_reinh  | 81.20 | 0.00 |
| TRINITY_KMS93253 | hypothetBeta_vulgaris        | 81.20 | 0.00 |
| TRINITY_GBF8891  | (sodium:çRaphidocelis_subcap | 81.20 | 0.00 |
| TRINITY_XP_01558 | LOW QUAIRicinus_communis     | 81.20 | 0.00 |
| TRINITY_XP_00170 | (threoninChlamydomonas_reinh | 81.20 | 0.00 |
| TRINITY_XP_00295 | hypothetVolvox_carteri       | 81.20 | 0.00 |
| TRINITY_PNW84782 | hypothetChlamydomonas_reinh  | 81.20 | 0.00 |
| TRINITY_XP_00295 | ubiquinçVolvox_carteri       | 81.20 | 0.00 |
| TRINITY_XP_02437 | 60S ribçPhyscomitrella_pate  | 81.10 | 0.00 |
| TRINITY_XP_00298 | serine/tSelaginella_moellen  | 81.10 | 0.00 |
| TRINITY_XP_00295 | hypothetVolvox_carteri       | 81.10 | 0.00 |
| TRINITY_KXZ46991 | hypothetGonium_pectorale     | 81.10 | 0.00 |
| TRINITY_GBF88998 | plastidiRaphidocelis_subcap  | 81.10 | 0.00 |
| TRINITY_XP_00170 | (predictçChlamydomonas_reinh | 81.10 | 0.00 |
| TRINITY_XP_00295 | mitochorVolvox_carteri       | 81.10 | 0.00 |
| TRINITY_XP_00306 | (predictçMicromonas_pusilla  | 81.10 | 0.00 |
| TRINITY_BAJ11784 | dehydratCorchorus_olitorius  | 81.10 | 0.00 |
| TRINITY_Q9SPK6.1 | RecName:Haematococcus_lacus  | 81.00 | 0.00 |
| TRINITY_XP_02213 | uncharaçMomordica_charantia  | 81.00 | 0.00 |
| TRINITY_ASZ85176 | elongatiHylocereus_polyrhiz  | 81.00 | 0.00 |
| TRINITY_ACN31553 | unknown Zea_mays             | 81.00 | 0.00 |
| TRINITY_ABR01232 | heat shçChlorella_vulgaris   | 81.00 | 0.00 |
| TRINITY_GAX7360  | hypothetChlamydomonas_eusti  | 81.00 | 0.00 |
| TRINITY_XP_00564 | histone-Coccomyxa_subellips  | 81.00 | 0.00 |
| TRINITY_XP_00169 | dynein lChlamydomonas_reinh  | 81.00 | 0.00 |
| TRINITY_KXZ49012 | DHC3 prçGonium_pectorale     | 81.00 | 0.00 |
| TRINITY_GAX73078 | hypothetChlamydomonas_eusti  | 81.00 | 0.00 |
| TRINITY_PNH08819 | BifunctiTetrabaena_socialis  | 81.00 | 0.00 |
| TRINITY_GBF88245 | dihydro]Raphidocelis_subcap  | 81.00 | 0.00 |
| TRINITY_GAX83107 | hypothetChlamydomonas_eusti  | 81.00 | 0.00 |
| TRINITY_XP_00296 | 40S ribçSelaginella_moellen  | 81.00 | 0.00 |
| TRINITY_AML30861 | axonema]Marsilea_vestita     | 81.00 | 0.00 |
| TRINITY_OAE3412  | (hypothetMarchantia_polymorp | 80.90 | 0.00 |
| TRINITY_BAJ85454 | predictçHordeum_vulgare      | 80.90 | 0.00 |
| TRINITY_BAJ85454 | predictçHordeum_vulgare      | 80.90 | 0.00 |
| TRINITY_GAX80157 | hypothetChlamydomonas_eusti  | 80.90 | 0.00 |
| TRINITY_PNH05527 | ChaperorTetrabaena_socialis  | 80.90 | 0.00 |
| TRINITY_XP_01390 | hypothetMonoraphidium_negle  | 80.90 | 0.00 |
| TRINITY_PNH05805 | chaperorTetrabaena_socialis  | 80.90 | 0.00 |
| TRINITY_GAX80657 | hypothetChlamydomonas_eusti  | 80.90 | 0    |
| TRINITY_XP_00169 | vacuolaçChlamydomonas_reinh  | 80.90 | 0.00 |
| TRINITY_PNW80223 | hypothetChlamydomonas_reinh  | 80.90 | 0.00 |
| TRINITY_XP_00295 | structurVolvox_carteri       | 80.90 | 0.00 |
| TRINITY_GAX73482 | hypothetChlamydomonas_eusti  | 80.90 | 0.00 |
| TRINITY_GAX72561 | hypothetChlamydomonas_eusti  | 80.90 | 0.00 |
| TRINITY_GAX82218 | hypothetChlamydomonas_eusti  | 80.80 | 0.00 |
| TRINITY_KXZ4636  | (hypothetGonium_pectorale    | 80.80 | 0.00 |
| TRINITY_XP_00170 | (asparagiChlamydomonas_reinh | 80.80 | 0.00 |
| TRINITY_GAX7770  | (hypothetChlamydomonas_eusti | 80.80 | 0    |

|                  |                             |       |      |
|------------------|-----------------------------|-------|------|
| TRINITY_XP_00294 | hypothetVolvox_carteri      | 80.80 | 0.00 |
| TRINITY_GAX8020  | hypothetChlamydomonas_eusti | 80.80 | 0    |
| TRINITY_YP_00931 | translatOedocladium_carolin | 80.70 | 0.00 |
| TRINITY_GAQ81594 | ATP-depeKlebsormidium_niten | 80.70 | 0.00 |
| TRINITY_OAY39005 | hypothetManihot_esculenta   | 80.70 | 0.00 |
| TRINITY_PNW82122 | hypothetChlamydomonas_reinh | 80.70 | 0.00 |
| TRINITY_GAX79462 | hypothetChlamydomonas_eusti | 80.70 | 0.00 |
| TRINITY_XP_00295 | hypothetVolvox_carteri      | 80.70 | 0.00 |
| TRINITY_XP_02392 | isocitræQuercus_suber       | 80.60 | 0.00 |
| TRINITY_XP_02708 | chloroplCoffea_arabica      | 80.60 | 0.00 |
| TRINITY_BAJ93696 | predictæHordeum_vulgare     | 80.60 | 0.00 |
| TRINITY_GAQ86484 | 26S protKlebsormidium_niten | 80.60 | 0.00 |
| TRINITY_CAA67588 | 70 kD hæMedicago_sativa     | 80.60 | 0.00 |
| TRINITY_XP_00295 | hypothetVolvox_carteri      | 80.60 | 0.00 |
| TRINITY_PNH12373 | hypothetTetrabaena_socialis | 80.60 | 0.00 |
| TRINITY_XP_01390 | thioestæMonoraphidium_negle | 80.60 | 0.00 |
| TRINITY_GBF90999 | peptide-Raphidocelis_subcap | 80.60 | 0.00 |
| TRINITY_XP_00169 | glutamatChlamydomonas_reinh | 80.60 | 0.00 |
| TRINITY_KXZ55950 | hypothetGonium_pectorale    | 80.60 | 0.00 |
| TRINITY_GAX75142 | hypothetChlamydomonas_eusti | 80.60 | 0.00 |
| TRINITY_XP_00169 | acetyl-(Chlamydomonas_reinh | 80.60 | 0.00 |
| TRINITY_PNW71636 | hypothetChlamydomonas_reinh | 80.60 | 0.00 |
| TRINITY_GAX83970 | hypothetChlamydomonas_eusti | 80.60 | 0.00 |
| TRINITY_XP_00564 | ribosomæCoccomyxa_subellips | 80.60 | 0.00 |
| TRINITY_XP_01043 | PREDICTæCamelina_sativa     | 80.60 | 0.00 |
| TRINITY_GAX79381 | hypothetChlamydomonas_eusti | 80.60 | 0.00 |
| TRINITY_GAX72588 | hypothetChlamydomonas_eusti | 80.60 | 0.00 |
| TRINITY_PNW70372 | hypothetChlamydomonas_reinh | 80.50 | 0.00 |
| TRINITY_PHT46832 | hypothetCapsicum_baccatum   | 80.50 | 0.00 |
| TRINITY_GAX75332 | hypothetChlamydomonas_eusti | 80.50 | 0.00 |
| TRINITY_PRW05942 | nuclear Chlorella_sorokinia | 80.50 | 0.00 |
| TRINITY_GAX85836 | hypothetChlamydomonas_eusti | 80.50 | 0.00 |
| TRINITY_XP_00168 | predictæChlamydomonas_reinh | 80.50 | 0.00 |
| TRINITY_GAX83717 | hypothetChlamydomonas_eusti | 80.50 | 0.00 |
| TRINITY_XP_00295 | mago naæVolvox_carteri      | 80.50 | 0.00 |
| TRINITY_XP_00170 | ribosomæChlamydomonas_reinh | 80.50 | 0.00 |
| TRINITY_GAX83864 | hypothetChlamydomonas_eusti | 80.50 | 0.00 |
| TRINITY_GAX81348 | hypothetChlamydomonas_eusti | 80.50 | 0.00 |
| TRINITY_XP_00169 | N-carbanChlamydomonas_reinh | 80.50 | 0.00 |
| TRINITY_GAX77718 | hypothetChlamydomonas_eusti | 80.50 | 0.00 |
| TRINITY_XP_00564 | hypothetCoccomyxa_subellips | 80.50 | 0.00 |
| TRINITY_RWR90844 | peptidy]Cinnamomum_micranth | 80.40 | 0.00 |
| TRINITY_GBF90642 | p-type æRaphidocelis_subcap | 80.40 | 0.00 |
| TRINITY_XP_02496 | 40S ribCynara_cardunculus   | 80.40 | 0.00 |
| TRINITY_GAX81488 | hypothetChlamydomonas_eusti | 80.40 | 0.00 |
| TRINITY_KFK29108 | hypothetArabis_alpina       | 80.40 | 0.00 |
| TRINITY_XP_02387 | serine/tQuercus_suber       | 80.40 | 0.00 |
| TRINITY_KXZ49938 | hypothetGonium_pectorale    | 80.40 | 0.00 |
| TRINITY_XP_00169 | ARF/SAR Chlamydomonas_reinh | 80.40 | 0.00 |
| TRINITY_GAX72654 | hypothetChlamydomonas_eusti | 80.40 | 0.00 |
| TRINITY_XP_00295 | hypothetVolvox_carteri      | 80.40 | 0.00 |
| TRINITY_GBF92627 | hypothetRaphidocelis_subcap | 80.40 | 0.00 |
| TRINITY_XP_00305 | predictæMicromonas_pusilla  | 80.40 | 0.00 |
| TRINITY_GAX75500 | hypothetChlamydomonas_eusti | 80.40 | 0.00 |
| TRINITY_GAX85882 | hypothetChlamydomonas_eusti | 80.40 | 0.00 |
| TRINITY_GAX85453 | hypothetChlamydomonas_eusti | 80.40 | 0.00 |
| TRINITY_GAX76625 | hypothetChlamydomonas_eusti | 80.40 | 0.00 |
| TRINITY_GAX83068 | hypothetChlamydomonas_eusti | 80.40 | 0.00 |
| TRINITY_BAK03134 | predictæHordeum_vulgare     | 80.30 | 0.00 |
| TRINITY_ASJ24776 | mitochorAllium_cepa         | 80.30 | 0.00 |
| TRINITY_ESQ50381 | hypothetEutrema_salsugineum | 80.30 | 0.00 |
| TRINITY_RVW91258 | Serine/tVitis_vinifera      | 80.30 | 0.00 |
| TRINITY_GAX77680 | hypothetChlamydomonas_eusti | 80.30 | 0.00 |
| TRINITY_XP_02390 | (ATP-depeQuercus_suber      | 80.30 | 0.00 |
| TRINITY_KXZ42311 | hypothetGonium_pectorale    | 80.30 | 0.00 |
| TRINITY_XP_00294 | hypothetVolvox_carteri      | 80.30 | 0.00 |

|                                             |       |      |
|---------------------------------------------|-------|------|
| TRINITY_GAX7581(hypothetChlamydomonas_eusti | 80.30 | 0    |
| TRINITY_XP_00169aldehydεChlamydomonas_reinh | 80.30 | 0.00 |
| TRINITY_GAX74859hypothetChlamydomonas_eusti | 80.30 | 0.00 |
| TRINITY_GAX8379(hypothetChlamydomonas_eusti | 80.30 | 0.00 |
| TRINITY_KXZ51187hypothetGonium_pectorale    | 80.30 | 0.00 |
| TRINITY_ADQ00181histone Chlamydomonas_sp._I | 80.30 | 0.00 |
| TRINITY_Q5PU89.1RecName:Chlamydomonas_incer | 80.20 | 0.00 |
| TRINITY_ASJ24776mitochorAllium_cepa         | 80.20 | 0.00 |
| TRINITY_AAX63394carotenεHaematococcus_lacus | 80.20 | 0.00 |
| TRINITY_XP_02097uncharacArachis_ipaensis    | 80.20 | 0.00 |
| TRINITY_KXZ5304(hypothetGonium_pectorale    | 80.20 | 0.00 |
| TRINITY_KXZ5576(hypothetGonium_pectorale    | 80.20 | 0.00 |
| TRINITY_BAJ93879predictεHordeum_vulgare     | 80.20 | 0.00 |
| TRINITY_GAX83119hypothetChlamydomonas_eusti | 80.20 | 0.00 |
| TRINITY_AOP12447RSH [HaεHaematococcus_lacus | 80.20 | 0.00 |
| TRINITY_KXZ41947hypothetGonium_pectorale    | 80.20 | 0.00 |
| TRINITY_GAX76088hypothetChlamydomonas_eusti | 80.10 | 0.00 |
| TRINITY_GAX85048hypothetChlamydomonas_eusti | 80.10 | 0.00 |
| TRINITY_KXZ54714hypothetGonium_pectorale    | 80.10 | 0.00 |
| TRINITY_KXZ42746hypothetGonium_pectorale    | 80.10 | 0.00 |
| TRINITY_GAX75975hypothetChlamydomonas_eusti | 80.10 | 0.00 |
| TRINITY_PNW81809hypothetChlamydomonas_reinh | 80.10 | 0.00 |
| TRINITY_XP_02451eukaryotSelaginella_moellen | 80.00 | 0.00 |
| TRINITY_XP_02388aldehydεQuercus_suber       | 80.00 | 0.00 |
| TRINITY_ABD74519ribosomεPteris_vittata      | 80.00 | 0.00 |
| TRINITY_AAK95644proteinεIpomoea_batatas     | 80.00 | 0.00 |
| TRINITY_KXZ56369hypothetGonium_pectorale    | 80.00 | 0.00 |
| TRINITY_PNW75601hypothetChlamydomonas_reinh | 80.00 | 0.00 |
| TRINITY_GAX82762hypothetChlamydomonas_eusti | 80.00 | 0.00 |
| TRINITY_KXZ51719hypothetGonium_pectorale    | 80.00 | 0.00 |
| TRINITY_PRW56576ADP-ribεChlorella_sorokinia | 80.00 | 0.00 |
| TRINITY_XP_00294hypothetVolvox_carteri      | 80.00 | 0.00 |
| TRINITY_PNH11719putativεTetrabaena_socialis | 80.00 | 0.00 |
| TRINITY_GAX86377hypothetChlamydomonas_eusti | 80.00 | 0.00 |
| TRINITY_XP_00294hypothetVolvox_carteri      | 80.00 | 0.00 |
| TRINITY_XP_002951,4-alpεVolvox_carteri      | 80.00 | 0.00 |
| TRINITY_AAZ15702beta-carHaematococcus_lacus | 80.00 | 0.00 |
| TRINITY_ALO21586beta'' εHaematococcus_lacus | 80.00 | 0.00 |
| TRINITY_PNH03829COBW donTetrabaena_socialis | 80.00 | 0.00 |
| TRINITY_GAX78779hypothetChlamydomonas_eusti | 80.00 | 0.00 |
| TRINITY_XP_00295chaperorVolvox_carteri      | 80.00 | 0.00 |
| TRINITY_GBF90548hypothetRaphidocelis_subcap | 80.00 | 0.00 |
| TRINITY_AIU49889FMN-linεAcorus_calamus      | 80.00 | 0.00 |
| TRINITY_XP_00294hypothetVolvox_carteri      | 80.00 | 0.00 |
| TRINITY_XP_00584hypothetChlorella_variabili | 80.00 | 0.00 |
| TRINITY_GAX74736hypothetChlamydomonas_eusti | 80.00 | 0    |
| TRINITY_XP_00564HAD-supεCoccomyxa_subellips | 80.00 | 0.00 |
| TRINITY_XP_0139(GTP-binεMonoraphidium_negle | 80.00 | 0.00 |
| TRINITY_XP_00295hypothetVolvox_carteri      | 79.90 | 0.00 |
| TRINITY_XP_0025(predictεMicromonas_commoda  | 79.90 | 0.00 |
| TRINITY_XP_00169UDP-glucChlamydomonas_reinh | 79.90 | 0.00 |
| TRINITY_PNW79209hypothetChlamydomonas_reinh | 79.90 | 0.00 |
| TRINITY_OWM71719hypothetPunica_granatum     | 79.90 | 0.00 |
| TRINITY_XP_01389prolyl-tMonoraphidium_negle | 79.90 | 0.00 |
| TRINITY_XP_00309predictεMicromonas_pusilla  | 79.80 | 0.00 |
| TRINITY_EFJ11196hypothetSelaginella_moellen | 79.80 | 0.00 |
| TRINITY_GAX8086(hypothetChlamydomonas_eusti | 79.80 | 0.00 |
| TRINITY_GAX7282(hypothetChlamydomonas_eusti | 79.80 | 0.00 |
| TRINITY_KXZ51402hypothetGonium_pectorale    | 79.80 | 0.00 |
| TRINITY_KXZ55679hypothetGonium_pectorale    | 79.80 | 0.00 |
| TRINITY_GAX75939hypothetChlamydomonas_eusti | 79.80 | 0.00 |
| TRINITY_GAX81349hypothetChlamydomonas_eusti | 79.80 | 0.00 |
| TRINITY_KXZ45756hypothetGonium_pectorale    | 79.80 | 0.00 |
| TRINITY_ABK23839unknown Picea_sitchensis    | 79.80 | 0.00 |
| TRINITY_XP_02387serine/tQuercus_suber       | 79.80 | 0.00 |
| TRINITY_AXF41554CCP430 εChlorella_sp._ArM00 | 79.80 | 0.00 |



|                  |                              |       |      |
|------------------|------------------------------|-------|------|
| TRINITY_PNW7226  | hypothetChlamydomonas_reinh  | 79.80 | 0.00 |
| TRINITY_KXZ5101  | hypothetGonium_pectorale     | 79.80 | 0.00 |
| TRINITY_XP_0029  | chloroplVolvox_carteri       | 79.80 | 0.00 |
| TRINITY_GBG7007  | hypothetChara_braunii        | 79.80 | 0.00 |
| TRINITY_ABA0110  | mitochorChlamydomonas_incer  | 79.80 | 0.00 |
| TRINITY_EES0224  | hypothetSorghum_bicolor      | 79.70 | 0.00 |
| TRINITY_EPS6218  | hypothetGenlisea_aurea       | 79.70 | 0.00 |
| TRINITY_AIZ7433  | eukaryotPinus_massoniana     | 79.70 | 0.00 |
| TRINITY_GAX7572  | hypothetChlamydomonas_eusti  | 79.70 | 0.00 |
| TRINITY_GAX7698  | hypothetChlamydomonas_eusti  | 79.70 | 0.00 |
| TRINITY_KXZ4897  | hypothetGonium_pectorale     | 79.70 | 0.00 |
| TRINITY_XP_0029  | hypothetVolvox_carteri       | 79.70 | 0.00 |
| TRINITY_KXZ5546  | hypothetGonium_pectorale     | 79.70 | 0.00 |
| TRINITY_XP_0086  | pre-mRNZea_mays              | 79.70 | 0    |
| TRINITY_YP_00131 | NADH delChlorokybus_atmophy  | 79.60 | 0.00 |
| TRINITY_KMS6481  | hypothetBeta_vulgaris        | 79.60 | 0.00 |
| TRINITY_XP_0016  | malate cChlamydomonas_reinh  | 79.60 | 0.00 |
| TRINITY_OAE3144  | hypothetMarchantia_polymorp  | 79.60 | 0.00 |
| TRINITY_KXZ4840  | hypothetGonium_pectorale     | 79.60 | 0.00 |
| TRINITY_GAX7885  | hypothetChlamydomonas_eusti  | 79.60 | 0.00 |
| TRINITY_GBF9474  | 30S ribcRaphidocelis_subcap  | 79.60 | 0.00 |
| TRINITY_GAX8301  | hypothetChlamydomonas_eusti  | 79.60 | 0.00 |
| TRINITY_XP_0029  | hypothetVolvox_carteri       | 79.60 | 0.00 |
| TRINITY_GAX7593  | hypothetChlamydomonas_eusti  | 79.60 | 0    |
| TRINITY_GBG7101  | hypothetChara_braunii        | 79.60 | 0.00 |
| TRINITY_GAX8368  | hypothetChlamydomonas_eusti  | 79.60 | 0.00 |
| TRINITY_GAX8644  | hypothetChlamydomonas_eusti  | 79.60 | 0.00 |
| TRINITY_ACG2448  | 60S ribcZea_mays             | 79.50 | 0.00 |
| TRINITY_PIA3575  | hypothetAquilegia_coerulea   | 79.50 | 0.00 |
| TRINITY_PIN2459  | NADH delHandroanthus_impeti  | 79.50 | 0.00 |
| TRINITY_OAE2389  | hypothetMarchantia_polymorp  | 79.50 | 0.00 |
| TRINITY_XP_0029  | hypothetVolvox_carteri       | 79.50 | 0.00 |
| TRINITY_PSC7532  | low-CO2-Micractinium_conduc  | 79.50 | 0.00 |
| TRINITY_BAJ9566  | predicteHordeum_vulgare      | 79.50 | 0.00 |
| TRINITY_GAX7634  | hypothetChlamydomonas_eusti  | 79.50 | 0.00 |
| TRINITY_GAX7878  | hypothetChlamydomonas_eusti  | 79.50 | 0.00 |
| TRINITY_KXZ4920  | hypothetGonium_pectorale     | 79.50 | 0.00 |
| TRINITY_XP_0029  | hypothetVolvox_carteri       | 79.50 | 0.00 |
| TRINITY_KXZ5431  | hypothetGonium_pectorale     | 79.50 | 0.00 |
| TRINITY_PRW3925  | 1SWR1 conChlorella_sorokinia | 79.50 | 0.00 |
| TRINITY_XP_0216  | nuclear Hevea_brasiliensis   | 79.50 | 0.00 |
| TRINITY_PIN2459  | NADH delHandroanthus_impeti  | 79.50 | 0.00 |
| TRINITY_GAX8269  | hypothetChlamydomonas_eusti  | 79.50 | 0.00 |
| TRINITY_ABS8554  | cyclophiTriticum_aestivum    | 79.50 | 0.00 |
| TRINITY_KXZ4514  | 1TTL8 prcGonium_pectorale    | 79.50 | 0.00 |
| TRINITY_XP_0243  | 60S ribcPhyscomitrella_pate  | 79.50 | 0.00 |
| TRINITY_RWW9125  | hypothetEnsete_ventricosum   | 79.40 | 0.00 |
| TRINITY_PNH1242  | putativeTetrabaena_socialis  | 79.40 | 0.00 |
| TRINITY_XP_0243  | 40S ribcPhyscomitrella_pate  | 79.40 | 0.00 |
| TRINITY_OAE3483  | hypothetMarchantia_polymorp  | 79.40 | 0.00 |
| TRINITY_XP_0029  | DEAD-boVolvox_carteri        | 79.40 | 0.00 |
| TRINITY_GAQ9220  | Serine/tKlebsormidium_niten  | 79.40 | 0.00 |
| TRINITY_GAX7943  | hypothetChlamydomonas_eusti  | 79.40 | 0.00 |
| TRINITY_XP_0029  | hypothetVolvox_carteri       | 79.40 | 0.00 |
| TRINITY_GAX8275  | hypothetChlamydomonas_eusti  | 79.40 | 0.00 |
| TRINITY_XP_0029  | hypothetVolvox_carteri       | 79.40 | 0.00 |
| TRINITY_PNW8739  | hypothetChlamydomonas_reinh  | 79.40 | 0.00 |
| TRINITY_XP_0029  | 40S ribcSelaginella_moellen  | 79.40 | 0.00 |
| TRINITY_XP_0029  | 40S ribcSelaginella_moellen  | 79.40 | 0.00 |
| TRINITY_XP_0094  | (PREDICT)Musa_acuminata      | 79.30 | 0.00 |
| TRINITY_XP_0029  | hypothetVolvox_carteri       | 79.30 | 0.00 |
| TRINITY_KVH9279  | ubiCynara_cardunculus        | 79.30 | 0.00 |
| TRINITY_KCW5391  | hypothetEucalyptus_grandis   | 79.30 | 0.00 |
| TRINITY_XP_0029  | hypothetVolvox_carteri       | 79.30 | 0.00 |
| TRINITY_GAX8565  | hypothetChlamydomonas_eusti  | 79.30 | 0.00 |
| TRINITY_KXZ5680  | 1METE prcGonium_pectorale    | 79.30 | 0.00 |

|                  |          |                     |       |      |
|------------------|----------|---------------------|-------|------|
| TRINITY_XP_01390 | Dynein   | Monoraphidium_negle | 79.30 | 0.00 |
| TRINITY_GAX7624  | hypothet | Chlamydomonas_eusti | 79.20 | 0.00 |
| TRINITY_GAX8305  | hypothet | Chlamydomonas_eusti | 79.20 | 0.00 |
| TRINITY_EPS6218  | hypothet | Genlisea_aurea      | 79.20 | 0.00 |
| TRINITY_KXZ4792  | hypothet | Gonium_pectorale    | 79.20 | 0.00 |
| TRINITY_GBF9117  | sulfur   | Raphidocelis_subcap | 79.20 | 0.00 |
| TRINITY_XP_00941 | PREDICTI | Musa_acuminata      | 79.20 | 0.00 |
| TRINITY_XP_01390 | 50S rib  | Monoraphidium_negle | 79.20 | 0.00 |
| TRINITY_XP_0016  | predict  | Chlamydomonas_reinh | 79.20 | 0.00 |
| TRINITY_GAX7833  | hypothet | Chlamydomonas_eusti | 79.20 | 0.00 |
| TRINITY_KXZ5614  | hypothet | Gonium_pectorale    | 79.20 | 0.00 |
| TRINITY_XP_02351 | 60S rib  | Cucurbita_pepo      | 79.20 | 0.00 |
| TRINITY_XP_02351 | 60S rib  | Cucurbita_pepo      | 79.20 | 0.00 |
| TRINITY_GBG7844  | hypothet | Chara_braunii       | 79.20 | 0.00 |
| TRINITY_GAX8186  | hypothet | Chlamydomonas_eusti | 79.20 | 0.00 |
| TRINITY_XP_0017  | GTP bin  | Chlamydomonas_reinh | 79.20 | 0.00 |
| TRINITY_XP_0016  | peptidy  | Chlamydomonas_reinh | 79.20 | 0.00 |
| TRINITY_PIA3575  | hypothet | Aquilegia_coerulea  | 79.10 | 0.00 |
| TRINITY_BAK0218  | predict  | Hordeum_vulgare     | 79.10 | 0    |
| TRINITY_BAJ9566  | predict  | Hordeum_vulgare     | 79.10 | 0.00 |
| TRINITY_PNH0697  | hypothet | Tetrabaena_socialis | 79.10 | 0.00 |
| TRINITY_XP_0029  | hypothet | Volvox_carteri      | 79.10 | 0.00 |
| TRINITY_RYR6719  | hypothet | Arachis_hypogaea    | 79.10 | 0.00 |
| TRINITY_PNW8181  | hypothet | Chlamydomonas_reinh | 79.10 | 0.00 |
| TRINITY_XP_0016  | ribosom  | Chlamydomonas_reinh | 79.10 | 0.00 |
| TRINITY_GAX8007  | hypothet | Chlamydomonas_eusti | 79.10 | 0    |
| TRINITY_GAX7360  | hypothet | Chlamydomonas_eusti | 79.10 | 0.00 |
| TRINITY_XP_0111  | eukaryot | Sesamum_indicum     | 79.00 | 0.00 |
| TRINITY_GAX8322  | hypothet | Chlamydomonas_eusti | 79.00 | 0.00 |
| TRINITY_GAX7839  | hypothet | Chlamydomonas_eusti | 79.00 | 0.00 |
| TRINITY_GAX7303  | hypothet | Chlamydomonas_eusti | 79.00 | 0.00 |
| TRINITY_XP_0093  | PREDICTI | Pyrus_x_bretschneid | 79.00 | 0.00 |
| TRINITY_XP_0016  | protein  | Chlamydomonas_reinh | 79.00 | 0.00 |
| TRINITY_KMS6524  | hypothet | Beta_vulgaris       | 79.00 | 0.00 |
| TRINITY_XP_0029  | hypothet | Volvox_carteri      | 78.90 | 0.00 |
| TRINITY_KXZ4730  | hypothet | Gonium_pectorale    | 78.90 | 0.00 |
| TRINITY_XP_0110  | PREDICTI | Populus_euphratica  | 78.90 | 0.00 |
| TRINITY_PNH0727  | Threonin | Tetrabaena_socialis | 78.90 | 0.00 |
| TRINITY_GAX8636  | hypothet | Chlamydomonas_eusti | 78.90 | 0.00 |
| TRINITY_XP_0138  | cystein  | Monoraphidium_negle | 78.90 | 0.00 |
| TRINITY_KXZ4794  | hypothet | Gonium_pectorale    | 78.90 | 0.00 |
| TRINITY_GAX7385  | hypothet | Chlamydomonas_eusti | 78.90 | 0.00 |
| TRINITY_AEL2957  | chlorop  | Auxenochlorella_pyr | 78.90 | 0.00 |
| TRINITY_PNH0216  | Erythror | Tetrabaena_socialis | 78.90 | 0.00 |
| TRINITY_XP_0016  | flagell  | Chlamydomonas_reinh | 78.90 | 0.00 |
| TRINITY_GAX7469  | hypothet | Chlamydomonas_eusti | 78.90 | 0.00 |
| TRINITY_GBF9819  | hypothet | Raphidocelis_subcap | 78.90 | 0.00 |
| TRINITY_XP_0029  | hypothet | Volvox_carteri      | 78.90 | 0.00 |
| TRINITY_KXZ4211  | hypothet | Gonium_pectorale    | 78.90 | 0.00 |
| TRINITY_GAX7771  | hypothet | Chlamydomonas_eusti | 78.90 | 0.00 |
| TRINITY_KXZ4692  | hypothet | Gonium_pectorale    | 78.90 | 0.00 |
| TRINITY_GAX8223  | hypothet | Chlamydomonas_eusti | 78.80 | 0.00 |
| TRINITY_PIA3455  | hypothet | Aquilegia_coerulea  | 78.80 | 0.00 |
| TRINITY_XP_0191  | PREDICTI | Ipomoea_nil         | 78.80 | 0.00 |
| TRINITY_GAX7506  | hypothet | Chlamydomonas_eusti | 78.80 | 0.00 |
| TRINITY_KXZ4464  | hypothet | Gonium_pectorale    | 78.80 | 0.00 |
| TRINITY_PRW3385  | peptidy  | Chlorella_sorokinia | 78.80 | 0.00 |
| TRINITY_GAX7547  | hypothet | Chlamydomonas_eusti | 78.80 | 0    |
| TRINITY_YP_0094  | hypothet | Haematococcus_lacus | 78.80 | 0.00 |
| TRINITY_AAL8773  | chlorop  | Chlamydomonas_reinh | 78.80 | 0.00 |
| TRINITY_XP_0030  | predict  | Micromonas_pusilla  | 78.80 | 0.00 |
| TRINITY_XP_0075  | 160S rib | Bathycoccus_prasinc | 78.80 | 0.00 |
| TRINITY_GAX8285  | hypothet | Chlamydomonas_eusti | 78.80 | 0.00 |
| TRINITY_KXZ4331  | hypothet | Gonium_pectorale    | 78.80 | 0.00 |
| TRINITY_XP_0017  | aminotr  | Chlamydomonas_reinh | 78.80 | 0.00 |
| TRINITY_XP_0029  | componer | Volvox_carteri      | 78.70 | 0.00 |

|                  |                              |       |      |
|------------------|------------------------------|-------|------|
| TRINITY_ACN3613  | unknown Zea_mays             | 78.70 | 0.00 |
| TRINITY_ASL2477  | mitochorAllium_cepa          | 78.70 | 0.00 |
| TRINITY_XP_00142 | Heat ShcOstreococcus_sp._'1  | 78.70 | 0.00 |
| TRINITY_XP_00295 | hypothetVolvox_carteri       | 78.70 | 0.00 |
| TRINITY_BAJ85104 | predicteHordeum_vulgare      | 78.70 | 0.00 |
| TRINITY_XP_00429 | PREDICTIFragaria_vesca       | 78.70 | 0.00 |
| TRINITY_PNH04559 | RiboflavlTetrabaena_socialis | 78.70 | 0.00 |
| TRINITY_XP_00294 | hypothetVolvox_carteri       | 78.70 | 0.00 |
| TRINITY_PNW79317 | hypothetChlamydomonas_reinh  | 78.70 | 0.00 |
| TRINITY_KXZ43852 | hypothetGonium_pectorale     | 78.70 | 0.00 |
| TRINITY_KXZ55916 | hypothetGonium_pectorale     | 78.70 | 0.00 |
| TRINITY_GAX81647 | hypothetChlamydomonas_eusti  | 78.70 | 0.00 |
| TRINITY_GAX80571 | hypothetChlamydomonas_eusti  | 78.70 | 0.00 |
| TRINITY_XP_00169 | clp protChlamydomonas_reinh  | 78.60 | 0.00 |
| TRINITY_KRH17766 | hypothetGlycine_max          | 78.60 | 0.00 |
| TRINITY_BAJ96063 | predicteHordeum_vulgare      | 78.60 | 0.00 |
| TRINITY_GBF99376 | 3-hydroRaphidocelis_subcap   | 78.60 | 0.00 |
| TRINITY_ABD37908 | light-hcChlamydomonas_incer  | 78.60 | 0.00 |
| TRINITY_GAX75404 | hypothetChlamydomonas_eusti  | 78.60 | 0.00 |
| TRINITY_AQK44205 | Protein Zea_mays             | 78.60 | 0.00 |
| TRINITY_XP_00295 | hypothetVolvox_carteri       | 78.60 | 0.00 |
| TRINITY_GAX75865 | hypothetChlamydomonas_eusti  | 78.60 | 0.00 |
| TRINITY_XP_00294 | hypothetVolvox_carteri       | 78.60 | 0.00 |
| TRINITY_OEL38974 | Cell di\Dichanthelium_oligo  | 78.60 | 0    |
| TRINITY_XP_00295 | hypothetVolvox_carteri       | 78.60 | 0    |
| TRINITY_XP_00295 | adenylatVolvox_carteri       | 78.60 | 0.00 |
| TRINITY_XP_00168 | oligoencChlamydomonas_reinh  | 78.60 | 0.00 |
| TRINITY_XP_00250 | predicteMicromonas_commoda   | 78.60 | 0.00 |
| TRINITY_GBG71017 | hypothetChara_braunii        | 78.60 | 0.00 |
| TRINITY_XP_00294 | hypothetVolvox_carteri       | 78.60 | 0    |
| TRINITY_KXZ47461 | hypothetGonium_pectorale     | 78.50 | 0.00 |
| TRINITY_PNH08757 | Carbon cTetrabaena_socialis  | 78.50 | 0.00 |
| TRINITY_KXZ55156 | hypothetGonium_pectorale     | 78.50 | 0.00 |
| TRINITY_XP_00169 | succinatChlamydomonas_reinh  | 78.50 | 0.00 |
| TRINITY_RLM73801 | nudix hPanicum_miliaceum     | 78.50 | 0.00 |
| TRINITY_XP_01558 | LOW QUAIRicinus_communis     | 78.50 | 0.00 |
| TRINITY_XP_00295 | ATP syntVolvox_carteri       | 78.50 | 0.00 |
| TRINITY_GAX81005 | hypothetChlamydomonas_eusti  | 78.50 | 0.00 |
| TRINITY_AAO86687 | long flcChlamydomonas_reinh  | 78.40 | 0.00 |
| TRINITY_GAX83344 | hypothetChlamydomonas_eusti  | 78.40 | 0.00 |
| TRINITY_GAX79915 | hypothetChlamydomonas_eusti  | 78.40 | 0.00 |
| TRINITY_KMS65245 | hypothetBeta_vulgaris        | 78.40 | 0.00 |
| TRINITY_VDC60402 | unnamed Brassica_rapa        | 78.40 | 0.00 |
| TRINITY_XP_01389 | FK506-biMonoraphidium_negle  | 78.40 | 0.00 |
| TRINITY_GAX74908 | hypothetChlamydomonas_eusti  | 78.40 | 0.00 |
| TRINITY_XP_00294 | componerVolvox_carteri       | 78.40 | 0.00 |
| TRINITY_GAX79432 | hypothetChlamydomonas_eusti  | 78.40 | 0.00 |
| TRINITY_XP_00305 | predicteMicromonas_pusilla   | 78.40 | 0.00 |
| TRINITY_PNH06570 | SuccinatTetrabaena_socialis  | 78.40 | 0.00 |
| TRINITY_GBG00160 | hypothetRaphidocelis_subcap  | 78.40 | 0.00 |
| TRINITY_GAX79381 | hypothetChlamydomonas_eusti  | 78.40 | 0.00 |
| TRINITY_GAX80055 | hypothetChlamydomonas_eusti  | 78.40 | 0.00 |
| TRINITY_GAX84077 | hypothetChlamydomonas_eusti  | 78.40 | 0.00 |
| TRINITY_XP_01915 | PREDICTIFIpomoea_nil         | 78.30 | 0.00 |
| TRINITY_GAX85754 | hypothetChlamydomonas_eusti  | 78.30 | 0.00 |
| TRINITY_KMS65245 | hypothetBeta_vulgaris        | 78.30 | 0.00 |
| TRINITY_Q6QJE2.1 | RecName:Chlamydomonas_reinh  | 78.30 | 0.00 |
| TRINITY_XP_00170 | dynein bChlamydomonas_reinh  | 78.30 | 0.00 |
| TRINITY_GBF96918 | hypothetRaphidocelis_subcap  | 78.30 | 0.00 |
| TRINITY_GBF99581 | glyceralRaphidocelis_subcap  | 78.30 | 0.00 |
| TRINITY_RWR95240 | 26S protCinnamomum_micranth  | 78.30 | 0.00 |
| TRINITY_PSC73574 | SRSF kirMicractinium_conduc  | 78.30 | 0.00 |
| TRINITY_XP_00169 | mitochorChlamydomonas_reinh  | 78.30 | 0.00 |
| TRINITY_XP_00305 | predicteMicromonas_pusilla   | 78.30 | 0.00 |
| TRINITY_GAX77720 | hypothetChlamydomonas_eusti  | 78.30 | 0.00 |
| TRINITY_XP_00306 | central Micromonas_pusilla   | 78.30 | 0.00 |

|                                              |       |      |
|----------------------------------------------|-------|------|
| TRINITY_GBF89622ubiquitinRaphidocelis_subcap | 78.30 | 0.00 |
| TRINITY_GAX74927hypothetChlamydomonas_eusti  | 78.30 | 0.00 |
| TRINITY_KMS64936hypothetBeta_vulgaris        | 78.30 | 0.00 |
| TRINITY_XP_01946PREDICTFLupinus_angustifoli  | 78.20 | 0.00 |
| TRINITY_PNW78157hypothetChlamydomonas_reinh  | 78.20 | 0.00 |
| TRINITY_GBF93361hypothetRaphidocelis_subcap  | 78.20 | 0.00 |
| TRINITY_OWM63623hypothetPunica_granatum      | 78.20 | 0    |
| TRINITY_PNW70220hypothetChlamydomonas_reinh  | 78.20 | 0.00 |
| TRINITY_XP_00169phosphoçChlamydomonas_reinh  | 78.20 | 0.00 |
| TRINITY_GAX72553hypothetChlamydomonas_eusti  | 78.20 | 0.00 |
| TRINITY_ADB65765oligosacDunaliella_salina    | 78.20 | 0.00 |
| TRINITY_GAX82698hypothetChlamydomonas_eusti  | 78.20 | 0.00 |
| TRINITY_GAX81185hypothetChlamydomonas_eusti  | 78.20 | 0.00 |
| TRINITY_PNW77006hypothetChlamydomonas_reinh  | 78.20 | 0.00 |
| TRINITY_XP_00170fructosçChlamydomonas_reinh  | 78.20 | 0.00 |
| TRINITY_KXZ47681hypothetGonium_pectorale     | 78.20 | 0.00 |
| TRINITY_KXZ53516hypothetGonium_pectorale     | 78.20 | 0.00 |
| TRINITY_PNH08514hypothetTetrabaena_socialis  | 78.20 | 0.00 |
| TRINITY_XP_01389RibulosçMonoraphidium_negle  | 78.20 | 0.00 |
| TRINITY_XP_00169eukaryotChlamydomonas_reinh  | 78.20 | 0.00 |
| TRINITY_XP_00564topoisonCoccomyxa_subellips  | 78.20 | 0.00 |
| TRINITY_GAQ92572catalasçKlebsormidium_niten  | 78.10 | 0.00 |
| TRINITY_KMS64810hypothetBeta_vulgaris        | 78.10 | 0.00 |
| TRINITY_XP_00294R-SNARE,Volvox_carteri       | 78.10 | 0.00 |
| TRINITY_GAX78066hypothetChlamydomonas_eusti  | 78.10 | 0.00 |
| TRINITY_GAX85074hypothetChlamydomonas_eusti  | 78.10 | 0.00 |
| TRINITY_XP_00295hypothetVolvox_carteri       | 78.10 | 0.00 |
| TRINITY_KXZ56723hypothetGonium_pectorale     | 78.10 | 0.00 |
| TRINITY_XP_02438ferritirPhyscomitrella_pate  | 78.10 | 0.00 |
| TRINITY_XP_01390tyraminçMonoraphidium_negle  | 78.10 | 0.00 |
| TRINITY_BAJ96199predictçHordeum_vulgare      | 78.00 | 0.00 |
| TRINITY_BAJ95967predictçHordeum_vulgare      | 78.00 | 0.00 |
| TRINITY_BAJ95967predictçHordeum_vulgare      | 78.00 | 0.00 |
| TRINITY_XP_0243640S_ribçPhyscomitrella_pate  | 78.00 | 0.00 |
| TRINITY_XP_0243640S_ribçPhyscomitrella_pate  | 78.00 | 0.00 |
| TRINITY_XP_00295hypothetVolvox_carteri       | 78.00 | 0.00 |
| TRINITY_BAJ93795predictçHordeum_vulgare      | 78.00 | 0.00 |
| TRINITY_PRW57838ubiquitinChlorella_sorokinia | 78.00 | 0.00 |
| TRINITY_XP_00170intraflçChlamydomonas_reinh  | 78.00 | 0.00 |
| TRINITY_GAX76941hypothetChlamydomonas_eusti  | 78.00 | 0.00 |
| TRINITY_GAX76713hypothetChlamydomonas_eusti  | 78.00 | 0.00 |
| TRINITY_XP_00169COP9_siçChlamydomonas_reinh  | 78.00 | 0.00 |
| TRINITY_XP_00170malate çChlamydomonas_reinh  | 78.00 | 0.00 |
| TRINITY_XP_00295target çVolvox_carteri       | 78.00 | 0.00 |
| TRINITY_XP_01915PREDICTFIpomoea_nil          | 78.00 | 0.00 |
| TRINITY_GAX83720hypothetChlamydomonas_eusti  | 78.00 | 0.00 |
| TRINITY_XP_00169ser/thr Chlamydomonas_reinh  | 78.00 | 0.00 |
| TRINITY_XP_00294serine lVolvox_carteri       | 78.00 | 0.00 |
| TRINITY_XP_01107heat_shçSesamum_indicum      | 78.00 | 0.00 |
| TRINITY_KXZ56136hypothetGonium_pectorale     | 78.00 | 0.00 |
| TRINITY_ACN31538unknown Zea_mays             | 77.90 | 0.00 |
| TRINITY_GAX72816hypothetChlamydomonas_eusti  | 77.90 | 0.00 |
| TRINITY_PNW79053hypothetChlamydomonas_reinh  | 77.90 | 0.00 |
| TRINITY_GAX84862hypothetChlamydomonas_eusti  | 77.90 | 0.00 |
| TRINITY_XP_00169predictçChlamydomonas_reinh  | 77.90 | 0.00 |
| TRINITY_XP_00169predictçChlamydomonas_reinh  | 77.90 | 0.00 |
| TRINITY_GBF89693PKHD-tyçRaphidocelis_subcap  | 77.90 | 0.00 |
| TRINITY_GAX77355hypothetChlamydomonas_eusti  | 77.90 | 0.00 |
| TRINITY_XP_01389ATP_syntMonoraphidium_negle  | 77.90 | 0.00 |
| TRINITY_XP_00169serine çChlamydomonas_reinh  | 77.90 | 0.00 |
| TRINITY_KXZ56933hypothetGonium_pectorale     | 77.90 | 0.00 |
| TRINITY_XP_01390Dynein lMonoraphidium_negle  | 77.90 | 0.00 |
| TRINITY_XP_02296uncharacCucurbita_maxima     | 77.80 | 0.00 |
| TRINITY_XP_00294hypothetVolvox_carteri       | 77.80 | 0.00 |
| TRINITY_XP_01390putativçMonoraphidium_negle  | 77.80 | 0.00 |
| TRINITY_KXZ52281hypothetGonium_pectorale     | 77.80 | 0.00 |

|                  |          |                     |       |      |
|------------------|----------|---------------------|-------|------|
| TRINITY_ERN00141 | hypothet | Amborella_trichopod | 77.80 | 0.00 |
| TRINITY_XP_00305 | predicte | Micromonas_pusilla  | 77.80 | 0.00 |
| TRINITY_XP_00169 | adenosir | Chlamydomonas_reinh | 77.80 | 0.00 |
| TRINITY_KXZ49415 | hypothet | Gonium_pectorale    | 77.80 | 0.00 |
| TRINITY_KXZ53829 | hypothet | Gonium_pectorale    | 77.80 | 0.00 |
| TRINITY_GAX74205 | hypothet | Chlamydomonas_eusti | 77.80 | 0.00 |
| TRINITY_GAX77476 | hypothet | Chlamydomonas_eusti | 77.80 | 0.00 |
| TRINITY_XP_00169 | predicte | Chlamydomonas_reinh | 77.80 | 0.00 |
| TRINITY_XP_00294 | hypothet | Volvox_carteri      | 77.80 | 0.00 |
| TRINITY_XP_00294 | hypothet | Volvox_carteri      | 77.80 | 0.00 |
| TRINITY_XP_00250 | predicte | Micromonas_commoda  | 77.80 | 0.00 |
| TRINITY_XP_02026 | serine/t | Asparagus_officinal | 77.80 | 0.00 |
| TRINITY_XP_01389 | hypothet | Monoraphidium_negle | 77.80 | 0.00 |
| TRINITY_PNW75221 | hypothet | Chlamydomonas_reinh | 77.80 | 0    |
| TRINITY_XP_00295 | hypothet | Volvox_carteri      | 77.80 | 0.00 |
| TRINITY_XP_00170 | predicte | Chlamydomonas_reinh | 77.80 | 0.00 |
| TRINITY_PNW70802 | hypothet | Chlamydomonas_reinh | 77.80 | 0.00 |
| TRINITY_PNW86325 | hypothet | Chlamydomonas_reinh | 77.70 | 0.00 |
| TRINITY_XP_02387 | serine/t | Quercus_suber       | 77.70 | 0.00 |
| TRINITY_XP_00295 | hypothet | Volvox_carteri      | 77.70 | 0.00 |
| TRINITY_PNW86884 | hypothet | Chlamydomonas_reinh | 77.70 | 0.00 |
| TRINITY_XP_00168 | chlorop  | Chlamydomonas_reinh | 77.70 | 0.00 |
| TRINITY_AGC12987 | long fl  | Chlamydomonas_reinh | 77.70 | 0.00 |
| TRINITY_XP_00170 | flagell  | Chlamydomonas_reinh | 77.70 | 0    |
| TRINITY_XP_00294 | dynein   | Volvox_carteri      | 77.70 | 0.00 |
| TRINITY_XP_02390 | eukaryot | Quercus_suber       | 77.60 | 0.00 |
| TRINITY_XP_00305 | predicte | Micromonas_pusilla  | 77.60 | 0.00 |
| TRINITY_GAV64434 | ubiquiti | Cephalotus_follicul | 77.60 | 0.00 |
| TRINITY_GAX83999 | hypothet | Chlamydomonas_eusti | 77.60 | 0.00 |
| TRINITY_XP_01881 | PREDICTE | Juglans_regia       | 77.60 | 0.00 |
| TRINITY_XP_01390 | small r  | Monoraphidium_negle | 77.60 | 0.00 |
| TRINITY_GAX81195 | hypothet | Chlamydomonas_eusti | 77.60 | 0.00 |
| TRINITY_XP_00294 | hypothet | Volvox_carteri      | 77.60 | 0.00 |
| TRINITY_GAX85083 | hypothet | Chlamydomonas_eusti | 77.60 | 0    |
| TRINITY_ACO50733 | NADH de  | Micromonas_pusilla  | 77.60 | 0.00 |
| TRINITY_OIV93941 | hypothet | Lupinus_angustifoli | 77.50 | 0.00 |
| TRINITY_XP_00628 | 60S rib  | Capsella_rubella    | 77.50 | 0.00 |
| TRINITY_XP_00565 | beta tu  | Coccomyxa_subellips | 77.50 | 0.00 |
| TRINITY_BAJ90196 | predicte | Hordeum_vulgare     | 77.50 | 0.00 |
| TRINITY_OAE3225  | hypothet | Marchantia_polymorp | 77.50 | 0.00 |
| TRINITY_XP_00306 | central  | Micromonas_pusilla  | 77.50 | 0.00 |
| TRINITY_GAX84909 | hypothet | Chlamydomonas_eusti | 77.50 | 0    |
| TRINITY_GAX82606 | hypothet | Chlamydomonas_eusti | 77.50 | 0.00 |
| TRINITY_GAX86074 | hypothet | Chlamydomonas_eusti | 77.50 | 0.00 |
| TRINITY_GAX74205 | hypothet | Chlamydomonas_eusti | 77.50 | 0    |
| TRINITY_PUZ50743 | hypothet | Panicum_hallii      | 77.50 | 0.00 |
| TRINITY_XP_00169 | dynein   | Chlamydomonas_reinh | 77.50 | 0.00 |
| TRINITY_KXZ41588 | hypothet | Gonium_pectorale    | 77.40 | 0.00 |
| TRINITY_GAX77297 | hypothet | Chlamydomonas_eusti | 77.40 | 0.00 |
| TRINITY_XP_01139 | DNA-dir  | Auxenochlorella_pro | 77.40 | 0.00 |
| TRINITY_XP_01140 | Alpha-g  | Auxenochlorella_pro | 77.40 | 0.00 |
| TRINITY_GAX72715 | hypothet | Chlamydomonas_eusti | 77.40 | 0.00 |
| TRINITY_AXF41554 | CCP430   | Chlorella_sp._ArM00 | 77.40 | 0.00 |
| TRINITY_GAX74816 | hypothet | Chlamydomonas_eusti | 77.40 | 0.00 |
| TRINITY_AQZ36519 | dehydin  | Ipomoea_pes-caprae  | 77.40 | 0.00 |
| TRINITY_KXZ53603 | hypothet | Gonium_pectorale    | 77.40 | 0.00 |
| TRINITY_XP_00169 | glycine  | Chlamydomonas_reinh | 77.40 | 0.00 |
| TRINITY_KXZ51826 | hypothet | Gonium_pectorale    | 77.40 | 0.00 |
| TRINITY_KXZ45836 | hypothet | Gonium_pectorale    | 77.40 | 0.00 |
| TRINITY_GAX77698 | hypothet | Chlamydomonas_eusti | 77.40 | 0.00 |
| TRINITY_XP_02642 | citrate  | Papaver_somniferum  | 77.30 | 0.00 |
| TRINITY_XP_02201 | 40S rib  | Helianthus_annuus   | 77.30 | 0.00 |
| TRINITY_AAX43992 | UDP-gluc | Dunaliella_salina   | 77.30 | 0.00 |
| TRINITY_PNH10231 | Zinc fir | Tetrabaena_socialis | 77.30 | 0.00 |
| TRINITY_PNW78701 | hypothet | Chlamydomonas_reinh | 77.30 | 0.00 |
| TRINITY_XP_00295 | hypothet | Volvox_carteri      | 77.30 | 0.00 |

|                           |                     |       |      |
|---------------------------|---------------------|-------|------|
| TRINITY_XP_00169aquaporin | Chlamydomonas_reinh | 77.30 | 0.00 |
| TRINITY_ADK36629vacuolar  | Dunaliella_viridis  | 77.30 | 0    |
| TRINITY_KXZ44799hypothet  | Gonium_pectorale    | 77.30 | 0.00 |
| TRINITY_XP_00170gamma-g   | Chlamydomonas_reinh | 77.30 | 0.00 |
| TRINITY_GAX77469hypothet  | Chlamydomonas_eusti | 77.30 | 0.00 |
| TRINITY_GAQ79247protein   | Klebsormidium_niten | 77.30 | 0.00 |
| TRINITY_GAX85639hypothet  | Chlamydomonas_eusti | 77.30 | 0.00 |
| TRINITY_GAX80207hypothet  | Chlamydomonas_eusti | 77.30 | 0.00 |
| TRINITY_PSC72612mRNA (2   | Micractinium_conduc | 77.20 | 0.00 |
| TRINITY_BAJ98899predicte  | Hordeum_vulgare     | 77.20 | 0.00 |
| TRINITY_XP_00169predicte  | Chlamydomonas_reinh | 77.20 | 0.00 |
| TRINITY_PRW59761cytochr   | Chlorella_sorokinia | 77.20 | 0.00 |
| TRINITY_PNH06209Chloropl  | Tetrabaena_socialis | 77.20 | 0.00 |
| TRINITY_GAX74099hypothet  | Chlamydomonas_eusti | 77.20 | 0.00 |
| TRINITY_PNH11270putativ   | Tetrabaena_socialis | 77.20 | 0.00 |
| TRINITY_PSC72642sar-type  | Micractinium_conduc | 77.20 | 0.00 |
| TRINITY_KXZ46110CDKA1 p   | Gonium_pectorale    | 77.20 | 0.00 |
| TRINITY_XP_01389uridylat  | Monoraphidium_negle | 77.20 | 0.00 |
| TRINITY_XP_00169predicte  | Chlamydomonas_reinh | 77.20 | 0.00 |
| TRINITY_GAX80062hypothet  | Chlamydomonas_eusti | 77.20 | 0.00 |
| TRINITY_PNW73732hypothet  | Chlamydomonas_reinh | 77.20 | 0.00 |
| TRINITY_GAU39360hypothet  | Trifolium_subterran | 77.10 | 0.00 |
| TRINITY_XP_01389formate   | Monoraphidium_negle | 77.10 | 0.00 |
| TRINITY_KXZ46900hypothet  | Gonium_pectorale    | 77.10 | 0.00 |
| TRINITY_GAX72626hypothet  | Chlamydomonas_eusti | 77.10 | 0.00 |
| TRINITY_XP_0159660S rib   | Arachis_duranensis  | 77.10 | 0.00 |
| TRINITY_GAX81649hypothet  | Chlamydomonas_eusti | 77.10 | 0.00 |
| TRINITY_GBF92721hypothet  | Raphidocelis_subcap | 77.10 | 0.00 |
| TRINITY_GAX72654hypothet  | Chlamydomonas_eusti | 77.10 | 0.00 |
| TRINITY_PNH09050Peptidy   | Tetrabaena_socialis | 77.10 | 0.00 |
| TRINITY_XP_00294hypothet  | Volvox_carteri      | 77.10 | 0.00 |
| TRINITY_XP_02436phosphor  | Physcomitrella_pate | 77.10 | 0.00 |
| TRINITY_GAX79189hypothet  | Chlamydomonas_eusti | 77.10 | 0.00 |
| TRINITY_XP_00294trypsin   | Volvox_carteri      | 77.10 | 0.00 |
| TRINITY_XP_00169transcri  | Chlamydomonas_reinh | 77.10 | 0.00 |
| TRINITY_GAX81869hypothet  | Chlamydomonas_eusti | 77.10 | 0.00 |
| TRINITY_AFK49397unknown   | Lotus_japonicus     | 77.00 | 0.00 |
| TRINITY_AFK49397unknown   | Lotus_japonicus     | 77.00 | 0.00 |
| TRINITY_XP_02166small n   | Hevea_brasiliensis  | 77.00 | 0.00 |
| TRINITY_AFK49397unknown   | Lotus_japonicus     | 77.00 | 0.00 |
| TRINITY_AFK49397unknown   | Lotus_japonicus     | 77.00 | 0.00 |
| TRINITY_XP_0220140S rib   | Helianthus_annuus   | 77.00 | 0.00 |
| TRINITY_XP_00309histone   | Micromonas_pusilla  | 77.00 | 0.00 |
| TRINITY_OIV89924hypothet  | Lupinus_angustifoli | 77.00 | 0.00 |
| TRINITY_GBF92034hypothet  | Raphidocelis_subcap | 77.00 | 0.00 |
| TRINITY_XP_00169pyruvat   | Chlamydomonas_reinh | 77.00 | 0.00 |
| TRINITY_PNW76230hypothet  | Chlamydomonas_reinh | 77.00 | 0.00 |
| TRINITY_KXZ43316hypothet  | Gonium_pectorale    | 77.00 | 0.00 |
| TRINITY_XP_00169flagell   | Chlamydomonas_reinh | 77.00 | 0.00 |
| TRINITY_GAX73154hypothet  | Chlamydomonas_eusti | 77.00 | 0.00 |
| TRINITY_XP_00169EMP/non   | Chlamydomonas_reinh | 77.00 | 0.00 |
| TRINITY_XP_00294vitamin   | Volvox_carteri      | 77.00 | 0.00 |
| TRINITY_RRT59180hypothet  | Ensete_ventricosum  | 77.00 | 0.00 |
| TRINITY_XP_00169dUTP py   | Chlamydomonas_reinh | 76.90 | 0.00 |
| TRINITY_XP_01949PREDICTI  | Lupinus_angustifoli | 76.90 | 0.00 |
| TRINITY_GBG70109hypothet  | Chara_braunii       | 76.90 | 0.00 |
| TRINITY_XP_00299iron-sul  | Volvox_carteri      | 76.90 | 0.00 |
| TRINITY_XP_0138960S rib   | Monoraphidium_negle | 76.90 | 0.00 |
| TRINITY_GBF92418small n   | Raphidocelis_subcap | 76.90 | 0.00 |
| TRINITY_KXZ44487hypothet  | Gonium_pectorale    | 76.90 | 0.00 |
| TRINITY_GAX75409hypothet  | Chlamydomonas_eusti | 76.90 | 0.00 |
| TRINITY_XP_00169protein   | Chlamydomonas_reinh | 76.90 | 0.00 |
| TRINITY_XP_00169lysyl-t   | Chlamydomonas_reinh | 76.90 | 0.00 |
| TRINITY_KXZ46531hypothet  | Gonium_pectorale    | 76.90 | 0.00 |
| TRINITY_PNH089725-methy   | Tetrabaena_socialis | 76.90 | 0.00 |
| TRINITY_GAX72561hypothet  | Chlamydomonas_eusti | 76.90 | 0.00 |

|                  |                             |       |      |
|------------------|-----------------------------|-------|------|
| TRINITY_KMZ63289 | Formate-Zostera_marina      | 76.80 | 0.00 |
| TRINITY_GBF91277 | hypothetRaphidocelis_subcap | 76.80 | 0.00 |
| TRINITY_EFJ09552 | hypothetSelaginella_moellen | 76.80 | 0.00 |
| TRINITY_BAJ96063 | predicteHordeum_vulgare     | 76.80 | 0.00 |
| TRINITY_OQU86657 | hypothetSorghum_bicolor     | 76.80 | 0.00 |
| TRINITY_KXZ51941 | hypothetGonium_pectorale    | 76.80 | 0.00 |
| TRINITY_GAX83443 | hypothetChlamydomonas_eusti | 76.80 | 0.00 |
| TRINITY_KXZ51233 | hypothetGonium_pectorale    | 76.80 | 0.00 |
| TRINITY_GAX82163 | hypothetChlamydomonas_eusti | 76.80 | 0.00 |
| TRINITY_GAX73618 | hypothetChlamydomonas_eusti | 76.80 | 0.00 |

|                     |           |                     |       |      |
|---------------------|-----------|---------------------|-------|------|
| TRINITY_XP_0094     | (PREDICTI | Musa_acuminata      | 76.70 | 0.00 |
| TRINITY_RZC7722     | hypothet  | Papaver_somniferum  | 76.70 | 0.00 |
| TRINITY_PSC6755     | hypothet  | Micractinium_conduc | 76.70 | 0.00 |
| TRINITY_KXZ4990     | hypothet  | Gonium_pectorale    | 76.70 | 0.00 |
| TRINITY_KMZ61531    | Serine/t  | Zostera_marina      | 76.70 | 0.00 |
| TRINITY_XP_0239     | (serine/t | Quercus_suber       | 76.70 | 0.00 |
| TRINITY_XP_0029     | hypothet  | Volvox_carteri      | 76.70 | 0.00 |
| TRINITY_XP_0016     | acetylo   | Chlamydomonas_reinh | 76.70 | 0.00 |
| TRINITY_KXZ4556     | hypothet  | Gonium_pectorale    | 76.70 | 0.00 |
| TRINITY_XP_0029     | hypothet  | Volvox_carteri      | 76.70 | 0.00 |
| TRINITY_XP_0016     | phospho   | Chlamydomonas_reinh | 76.70 | 0.00 |
| TRINITY_ADI8034     | glutathi  | Chlamydomonas_sp._I | 76.70 | 0.00 |
| TRINITY_XP_0029     | hypothet  | Volvox_carteri      | 76.70 | 0.00 |
| TRINITY_PNH05341    | Palmito   | Tetrabaena_socialis | 76.70 | 0.00 |
| TRINITY_PNH0754     | Ubiquiti  | Tetrabaena_socialis | 76.70 | 0.00 |
| TRINITY_XP_0239     | (histone  | Quercus_suber       | 76.60 | 0.00 |
| TRINITY_AFK3626     | unknown   | Medicago_truncatula | 76.60 | 0.00 |
| TRINITY_KXZ5497     | hypothet  | Gonium_pectorale    | 76.60 | 0.00 |
| TRINITY_OTG2352     | putativ   | Helianthus_annuus   | 76.60 | 0.00 |
| TRINITY_GAX7455     | hypothet  | Chlamydomonas_eusti | 76.60 | 0.00 |
| TRINITY_KXZ4974     | hypothet  | Gonium_pectorale    | 76.60 | 0.00 |
| TRINITY_GBF9551160S | rib       | Raphidocelis_subcap | 76.60 | 0.00 |
| TRINITY_KXZ4732     | hypothet  | Gonium_pectorale    | 76.60 | 0.00 |
| TRINITY_OIT2968     | 60s rib   | Nicotiana_attenuata | 76.60 | 0.00 |
| TRINITY_GBF9032     | aspartat  | Raphidocelis_subcap | 76.60 | 0.00 |
| TRINITY_GAX7776     | hypothet  | Chlamydomonas_eusti | 76.60 | 0.00 |
| TRINITY_XP_0029     | hypothet  | Volvox_carteri      | 76.60 | 0.00 |
| TRINITY_XP_0016     | ribosom   | Chlamydomonas_reinh | 76.60 | 0.00 |
| TRINITY_XP_0029     | hypothet  | Volvox_carteri      | 76.60 | 0.00 |
| TRINITY_PIA4570     | hypothet  | Aquilegia_coerulea  | 76.50 | 0.00 |
| TRINITY_KXZ50041    | hypothet  | Gonium_pectorale    | 76.50 | 0.00 |
| TRINITY_AAG50011    | actin, r  | Helicosporidium_sp. | 76.50 | 0.00 |
| TRINITY_BAJ8768     | predict   | Hordeum_vulgare     | 76.50 | 0.00 |
| TRINITY_XP_0029     | hypothet  | Volvox_carteri      | 76.50 | 0.00 |
| TRINITY_PNW8761     | (hypothet | Chlamydomonas_reinh | 76.50 | 0.00 |
| TRINITY_XP_0138     | 60S rib   | Monoraphidium_negle | 76.50 | 0.00 |
| TRINITY_PIN0931     | 60s rib   | Handroanthus_impeti | 76.50 | 0.00 |
| TRINITY_XP_0016     | aconitat  | Chlamydomonas_reinh | 76.50 | 0.00 |
| TRINITY_XP_0016     | nitrite   | Chlamydomonas_reinh | 76.50 | 0.00 |
| TRINITY_RAL4756     | hypothet  | Cuscuta_australis   | 76.50 | 0.00 |
| TRINITY_XP_0029     | hypothet  | Volvox_carteri      | 76.50 | 0.00 |
| TRINITY_PRW5090     | (Histone  | Chlorella_sorokinia | 76.50 | 0.00 |
| TRINITY_XP_0029     | hypothet  | Volvox_carteri      | 76.50 | 0.00 |
| TRINITY_XP_0138     | hypothet  | Monoraphidium_negle | 76.50 | 0.00 |
| TRINITY_GAX7649     | hypothet  | Chlamydomonas_eusti | 76.50 | 0    |
| TRINITY_GBF9631     | cysteine  | Raphidocelis_subcap | 76.50 | 0.00 |
| TRINITY_XP_0016     | LOW QUA   | Chlamydomonas_reinh | 76.50 | 0.00 |
| TRINITY_GAX74691    | hypothet  | Chlamydomonas_eusti | 76.50 | 0.00 |
| TRINITY_XP_0029     | hypothet  | Volvox_carteri      | 76.50 | 0.00 |
| TRINITY_XP_0029     | hypothet  | Volvox_carteri      | 76.50 | 0.00 |
| TRINITY_XP_0087     | actin, n  | Phoenix_dactylifera | 76.40 | 0.00 |
| TRINITY_OVA14881    | Ribosom   | Macleaya_cordata    | 76.40 | 0.00 |
| TRINITY_BAK0108     | predict   | Hordeum_vulgare     | 76.40 | 0.00 |
| TRINITY_XP_0245     | serine/t  | Selaginella_moellen | 76.40 | 0.00 |
| TRINITY_GAX7687     | (hypothet | Chlamydomonas_eusti | 76.40 | 0.00 |
| TRINITY_GAX8619     | hypothet  | Chlamydomonas_eusti | 76.40 | 0.00 |
| TRINITY_PNW7750     | hypothet  | Chlamydomonas_reinh | 76.40 | 0.00 |
| TRINITY_GAX7398     | (hypothet | Chlamydomonas_eusti | 76.40 | 0.00 |
| TRINITY_KXZ5060     | hypothet  | Gonium_pectorale    | 76.40 | 0.00 |
| TRINITY_PNW8496     | (hypothet | Chlamydomonas_reinh | 76.40 | 0.00 |
| TRINITY_GAX7344     | hypothet  | Chlamydomonas_eusti | 76.40 | 0.00 |
| TRINITY_XP_0017     | (oxoglut  | Chlamydomonas_reinh | 76.40 | 0.00 |
| TRINITY_GAX8373     | hypothet  | Chlamydomonas_eusti | 76.40 | 0.00 |
| TRINITY_XP_0016     | protein   | Chlamydomonas_reinh | 76.40 | 0.00 |
| TRINITY_GAX73631    | hypothet  | Chlamydomonas_eusti | 76.30 | 0.00 |
| TRINITY_XP_0029     | hypothet  | Volvox_carteri      | 76.30 | 0.00 |



|                                              |       |      |
|----------------------------------------------|-------|------|
| TRINITY_RXH7611(hypothetMalus_domestica      | 76.30 | 0.00 |
| TRINITY_GBF94202cell di\Raphidocelis_subcap  | 76.30 | 0.00 |
| TRINITY_XP_00295hypothetVolvox_carteri       | 76.30 | 0.00 |
| TRINITY_GAX80433hypothetChlamydomonas_eusti  | 76.30 | 0.00 |
| TRINITY_GAX79784hypothetChlamydomonas_eusti  | 76.30 | 0.00 |
| TRINITY_GAX83708hypothetChlamydomonas_eusti  | 76.30 | 0.00 |
| TRINITY_PNW70802hypothetChlamydomonas_reinh  | 76.30 | 0.00 |
| TRINITY_GAX75063hypothetChlamydomonas_eusti  | 76.30 | 0.00 |
| TRINITY_XP_00170(phosphocChlamydomonas_reinh | 76.30 | 0.00 |
| TRINITY_KXZ44338hypothetGonium_pectorale     | 76.30 | 0    |
| TRINITY_OQU86251hypothetSorghum_bicolor      | 76.30 | 0.00 |
| TRINITY_XP_0228440S_ribcOlea_europaea        | 76.30 | 0.00 |
| TRINITY_GAX85166hypothetChlamydomonas_eusti  | 76.30 | 0.00 |
| TRINITY_XP_0056460S_ribcCoccomyxa_subellips  | 76.20 | 0.00 |
| TRINITY_XP_00940(PREDICTIMusa_acuminata      | 76.20 | 0.00 |
| TRINITY_XP_00295hypothetVolvox_carteri       | 76.20 | 0.00 |
| TRINITY_GBF90642p-type cRaphidocelis_subcap  | 76.20 | 0.00 |
| TRINITY_EXC10888hypothetMorus_notabilis      | 76.20 | 0.00 |
| TRINITY_PSC73574SRSF_kirMicractinium_conduc  | 76.20 | 0.00 |
| TRINITY_GAX77591hypothetChlamydomonas_eusti  | 76.20 | 0.00 |
| TRINITY_KMS64936hypothetBeta_vulgaris        | 76.20 | 0.00 |
| TRINITY_XP_02295luminal-Cucurbita_moschata   | 76.20 | 0.00 |
| TRINITY_GBF95083glycine Raphidocelis_subcap  | 76.20 | 0.00 |
| TRINITY_PNW76676hypothetChlamydomonas_reinh  | 76.20 | 0.00 |
| TRINITY_PSC72448fructosεMicractinium_conduc  | 76.20 | 0.00 |
| TRINITY_XP_00295hypothetVolvox_carteri       | 76.20 | 0.00 |
| TRINITY_KMS65245hypothetBeta_vulgaris        | 76.20 | 0.00 |
| TRINITY_KXZ42995hypothetGonium_pectorale     | 76.20 | 0.00 |
| TRINITY_XP_01247PREDICTIGossypium_raimondii  | 76.20 | 0.00 |
| TRINITY_XP_00564T-compleCoccomyxa_subellips  | 76.20 | 0.00 |
| TRINITY_XP_00960(PREDICTINicotiana_tomentosi | 76.10 | 0.00 |
| TRINITY_PNH11304putativeTetrabaena_socialis  | 76.10 | 0.00 |
| TRINITY_GBF94488proteasεRaphidocelis_subcap  | 76.10 | 0.00 |
| TRINITY_PNW86298hypothetChlamydomonas_reinh  | 76.10 | 0.00 |
| TRINITY_GAX78017hypothetChlamydomonas_eusti  | 76.10 | 0.00 |
| TRINITY_KXZ54790hypothetGonium_pectorale     | 76.10 | 0.00 |
| TRINITY_XP_00294hypothetVolvox_carteri       | 76.10 | 0.00 |
| TRINITY_XP_00169NADH_nitChlamydomonas_reinh  | 76.10 | 0.00 |
| TRINITY_PNW73516hypothetChlamydomonas_reinh  | 76.10 | 0.00 |
| TRINITY_PNW75985hypothetChlamydomonas_reinh  | 76.10 | 0.00 |
| TRINITY_XP_00170(ATP-binεChlamydomonas_reinh | 76.10 | 0.00 |
| TRINITY_KXZ49964hypothetGonium_pectorale     | 76.10 | 0.00 |
| TRINITY_PNH06033FACT_conTetrabaena_socialis  | 76.10 | 0.00 |
| TRINITY_GAX82278hypothetChlamydomonas_eusti  | 76.10 | 0.00 |
| TRINITY_XP_00169methylnεChlamydomonas_reinh  | 76.10 | 0.00 |
| TRINITY_KXZ44050hypothetGonium_pectorale     | 76.10 | 0.00 |
| TRINITY_GAX84860hypothetChlamydomonas_eusti  | 76.10 | 0.00 |
| TRINITY_GBG77219hypothetChara_braunii        | 76.00 | 0.00 |
| TRINITY_PTQ4241(hypothetMarchantia_polymorp  | 76.00 | 0.00 |
| TRINITY_XP_00170(predictεChlamydomonas_reinh | 76.00 | 0.00 |
| TRINITY_GAX83975hypothetChlamydomonas_eusti  | 76.00 | 0.00 |
| TRINITY_BAJ97083predictεHordeum_vulgare      | 76.00 | 0.00 |
| TRINITY_GAX78735hypothetChlamydomonas_eusti  | 76.00 | 0.00 |
| TRINITY_XP_00305predictεMicromonas_pusilla   | 76.00 | 0.00 |
| TRINITY_GAX83741hypothetChlamydomonas_eusti  | 76.00 | 0.00 |
| TRINITY_PNW86211hypothetChlamydomonas_reinh  | 76.00 | 0.00 |
| TRINITY_GAQ89169DEAD-boεKlebsormidium_niten  | 75.90 | 0.00 |
| TRINITY_KMS65245hypothetBeta_vulgaris        | 75.90 | 0.00 |
| TRINITY_PNH06308CalreticεTetrabaena_socialis | 75.90 | 0.00 |
| TRINITY_XP_02437cleavagεPhyscomitrella_pate  | 75.90 | 0.00 |
| TRINITY_PNH08953LysosomεTetrabaena_socialis  | 75.90 | 0.00 |
| TRINITY_GAX75926hypothetChlamydomonas_eusti  | 75.90 | 0.00 |
| TRINITY_KXZ52009hypothetGonium_pectorale     | 75.90 | 0.00 |
| TRINITY_XP_01847PREDICTIRaphanus_sativus     | 75.90 | 0.00 |
| TRINITY_GAX78050hypothetChlamydomonas_eusti  | 75.90 | 0.00 |
| TRINITY_XP_02387serine/tQuercus_suber        | 75.90 | 0.00 |

|                 |                             |       |      |
|-----------------|-----------------------------|-------|------|
| TRINITY_KXZ4962 | hypothetGonium_pectorale    | 75.90 | 0.00 |
| TRINITY_KXZ5471 | hypothetGonium_pectorale    | 75.90 | 0.00 |
| TRINITY_XP_0217 | LOW QUAICHenopodium_quinoa  | 75.90 | 0.00 |
| TRINITY_GAX8307 | hypothetChlamydomonas_eusti | 75.90 | 0.00 |
| TRINITY_KMS9450 | hypothetBeta_vulgaris       | 75.90 | 0.00 |
| TRINITY_GAX7770 | hypothetChlamydomonas_eusti | 75.90 | 0    |
| TRINITY_GAX7804 | hypothetChlamydomonas_eusti | 75.90 | 0.00 |
| TRINITY_KXZ5364 | hypothetGonium_pectorale    | 75.90 | 0.00 |
| TRINITY_XP_0228 | RibosomæOstreococcus_tauri  | 75.80 | 0.00 |
| TRINITY_GBG5903 | hypothetChara_braunii       | 75.80 | 0.00 |
| TRINITY_XP_0029 | hypothetVolvox_carteri      | 75.80 | 0.00 |
| TRINITY_PIN1742 | Casein lHandroanthus_impeti | 75.80 | 0.00 |
| TRINITY_XP_0139 | arogenatMonoraphidium_negle | 75.80 | 0.00 |
| TRINITY_NP_0012 | enolase Solanum_lycopersicu | 75.80 | 0.00 |
| TRINITY_RWR7229 | serine/tCinnamomum_micranth | 75.80 | 0.00 |
| TRINITY_KXZ5605 | hypothetGonium_pectorale    | 75.80 | 0    |
| TRINITY_GAX8057 | hypothetChlamydomonas_eusti | 75.80 | 0    |
| TRINITY_XP_0017 | magnesiChlamydomonas_reinh  | 75.70 | 0.00 |
| TRINITY_KXZ5050 | hypothetGonium_pectorale    | 75.70 | 0.00 |
| TRINITY_OAE3244 | hypothetMarchantia_polymorp | 75.70 | 0.00 |
| TRINITY_XP_0239 | aldo-ketQuercus_suber       | 75.70 | 0.00 |
| TRINITY_PNW8846 | hypothetChlamydomonas_reinh | 75.70 | 0.00 |
| TRINITY_GAX7826 | hypothetChlamydomonas_eusti | 75.70 | 0.00 |
| TRINITY_GAX7745 | hypothetChlamydomonas_eusti | 75.70 | 0.00 |
| TRINITY_XP_0016 | minor cChlamydomonas_reinh  | 75.70 | 0.00 |
| TRINITY_GAX7963 | hypothetChlamydomonas_eusti | 75.70 | 0.00 |
| TRINITY_GAX7590 | hypothetChlamydomonas_eusti | 75.70 | 0.00 |
| TRINITY_XP_0016 | predictæChlamydomonas_reinh | 75.70 | 0.00 |
| TRINITY_KXZ5084 | hypothetGonium_pectorale    | 75.70 | 0.00 |
| TRINITY_GAX7334 | hypothetChlamydomonas_eusti | 75.70 | 0.00 |
| TRINITY_GAX7689 | hypothetChlamydomonas_eusti | 75.70 | 0.00 |
| TRINITY_XP_0017 | ClpB chæChlamydomonas_reinh | 75.70 | 0.00 |
| TRINITY_XP_0066 | PREDICTIOryza_brachyantha   | 75.60 | 0.00 |
| TRINITY_GAX8468 | hypothetChlamydomonas_eusti | 75.60 | 0.00 |
| TRINITY_GAX8468 | hypothetChlamydomonas_eusti | 75.60 | 0.00 |
| TRINITY_XP_0029 | dynein lVolvox_carteri      | 75.60 | 0.00 |
| TRINITY_XP_0029 | hypothetVolvox_carteri      | 75.60 | 0.00 |
| TRINITY_KMS6493 | hypothetBeta_vulgaris       | 75.60 | 0.00 |
| TRINITY_GAX8043 | hypothetChlamydomonas_eusti | 75.60 | 0.00 |
| TRINITY_GAX8607 | hypothetChlamydomonas_eusti | 75.60 | 0.00 |
| TRINITY_GAX7540 | hypothetChlamydomonas_eusti | 75.60 | 0.00 |
| TRINITY_PNW8444 | hypothetChlamydomonas_reinh | 75.60 | 0.00 |
| TRINITY_XP_0016 | ribosomæChlamydomonas_reinh | 75.60 | 0.00 |
| TRINITY_XP_0016 | soluble Chlamydomonas_reinh | 75.60 | 0.00 |
| TRINITY_PNW8442 | hypothetChlamydomonas_reinh | 75.60 | 0.00 |
| TRINITY_GAX7552 | hypothetChlamydomonas_eusti | 75.60 | 0.00 |
| TRINITY_XP_0029 | branchecVolvox_carteri      | 75.60 | 0.00 |
| TRINITY_XP_0167 | PREDICTIGossypium_hirsutum  | 75.60 | 0.00 |
| TRINITY_PSC7375 | ruvB 1 lMicractinium_conduc | 75.60 | 0.00 |
| TRINITY_XP_0029 | heat shcVolvox_carteri      | 75.50 | 0.00 |
| TRINITY_GAX7975 | hypothetChlamydomonas_eusti | 75.50 | 0.00 |
| TRINITY_GAX7572 | hypothetChlamydomonas_eusti | 75.50 | 0.00 |
| TRINITY_GBF9776 | peptidæRaphidocelis_subcap  | 75.50 | 0.00 |
| TRINITY_GAQ8681 | IsovalerKlebsormidium_niten | 75.50 | 0.00 |
| TRINITY_XP_0016 | low-affiChlamydomonas_reinh | 75.50 | 0.00 |
| TRINITY_XP_0068 | glutamyAmborella_trichopod  | 75.50 | 0.00 |
| TRINITY_BAJ9159 | predictæHordeum_vulgare     | 75.50 | 0.00 |
| TRINITY_BAJ9159 | predictæHordeum_vulgare     | 75.50 | 0.00 |
| TRINITY_XP_0016 | histone Chlamydomonas_reinh | 75.50 | 0.00 |
| TRINITY_GAX7775 | hypothetChlamydomonas_eusti | 75.50 | 0.00 |
| TRINITY_XP_0139 | UbiquiliMonoraphidium_negle | 75.50 | 0.00 |
| TRINITY_GAX8054 | hypothetChlamydomonas_eusti | 75.50 | 0.00 |
| TRINITY_GAX7357 | hypothetChlamydomonas_eusti | 75.50 | 0.00 |
| TRINITY_GAX7771 | hypothetChlamydomonas_eusti | 75.50 | 0.00 |
| TRINITY_GAX7804 | hypothetChlamydomonas_eusti | 75.50 | 0.00 |
| TRINITY_RDX6320 | Casein lMucuna_pruriens     | 75.50 | 0.00 |

|                                              |       |      |
|----------------------------------------------|-------|------|
| TRINITY_PNW7687(hypothetChlamydomonas_reinh  | 75.50 | 0.00 |
| TRINITY_XP_0029(hypothetVolvox_carteri       | 75.50 | 0    |
| TRINITY_GAX8322(hypothetChlamydomonas_eusti  | 75.50 | 0.00 |
| TRINITY_KXZ5513(hypothetGonium_pectorale     | 75.50 | 0    |
| TRINITY_ACG2448(60S_ribcZea_mays             | 75.40 | 0.00 |
| TRINITY_ACG2448(60S_ribcZea_mays             | 75.40 | 0.00 |
| TRINITY_RLN0897(4DEAD-boPanicum_miliaceum    | 75.40 | 0.00 |
| TRINITY_PNH0118(2PhosphoTetrabaena_socialis  | 75.40 | 0.00 |
| TRINITY_GAX8013(hypothetChlamydomonas_eusti  | 75.40 | 0.00 |
| TRINITY_AFK3421(unknown Lotus_japonicus      | 75.40 | 0.00 |
| TRINITY_XP_0056(5ribonucCoccomyxa_subellips  | 75.40 | 0.00 |
| TRINITY_XP_0056(4succinatCoccomyxa_subellips | 75.40 | 0.00 |
| TRINITY_GAX8323(hypothetChlamydomonas_eusti  | 75.40 | 0.00 |
| TRINITY_GBF9691(4protopoRaphidocelis_subcap  | 75.40 | 0.00 |
| TRINITY_KXZ5585(hypothetGonium_pectorale     | 75.40 | 0.00 |
| TRINITY_GAX8016(hypothetChlamydomonas_eusti  | 75.40 | 0.00 |
| TRINITY_GAX8258(hypothetChlamydomonas_eusti  | 75.40 | 0.00 |
| TRINITY_XP_0016(9predicteChlamydomonas_reinh | 75.40 | 0.00 |
| TRINITY_XP_0029(hypothetVolvox_carteri       | 75.40 | 0.00 |
| TRINITY_KXZ5506(hypothetGonium_pectorale     | 75.40 | 0.00 |
| TRINITY_ALM5499(6DEAD boChlamydomonas_sp._I  | 75.40 | 0.00 |
| TRINITY_PRW6157(1DNA_gyrChlorella_sorokinia  | 75.40 | 0.00 |
| TRINITY_KXZ5016(hypothetGonium_pectorale     | 75.40 | 0.00 |
| TRINITY_KXZ4403(hypothetGonium_pectorale     | 75.40 | 0.00 |
| TRINITY_PNH1222(9Pirin-liTetrabaena_socialis | 75.40 | 0.00 |
| TRINITY_XP_0029(hypothetVolvox_carteri       | 75.40 | 0.00 |
| TRINITY_PNW7379(hypothetChlamydomonas_reinh  | 75.40 | 0.00 |
| TRINITY_GAX7897(hypothetChlamydomonas_eusti  | 75.30 | 0.00 |
| TRINITY_XP_0063(sm-like Capsella_rubella     | 75.30 | 0.00 |
| TRINITY_XP_0029(hypothetVolvox_carteri       | 75.30 | 0.00 |
| TRINITY_GBG9125(hypothetChara_braunii        | 75.30 | 0.00 |
| TRINITY_XP_0124(6PREDICTIGossypium_raimondii | 75.30 | 0.00 |
| TRINITY_GAQ8294(2putativKlebsormidium_niten  | 75.30 | 0.00 |
| TRINITY_XP_0049(560S_ribcSetaria_italica     | 75.30 | 0.00 |
| TRINITY_KDD7539(hypothetHelicosporidium_sp.  | 75.30 | 0.00 |
| TRINITY_XP_0014(1predicteOstreococcus_sp._'l | 75.30 | 0.00 |
| TRINITY_GAX8134(hypothetChlamydomonas_eusti  | 75.30 | 0.00 |
| TRINITY_XP_0017(6predicteChlamydomonas_reinh | 75.30 | 0.00 |
| TRINITY_PNR4403(hypothetPhyscomitrella_pate  | 75.30 | 0.00 |
| TRINITY_XP_0075(6predicteBathycoccus_prasinc | 75.30 | 0.00 |
| TRINITY_KXZ4438(hypothetGonium_pectorale     | 75.30 | 0.00 |
| TRINITY_XP_0029(hypothetVolvox_carteri       | 75.30 | 0    |
| TRINITY_GBF9191(4chloroplRaphidocelis_subcap | 75.30 | 0.00 |
| TRINITY_XP_0016(9fumarateChlamydomonas_reinh | 75.30 | 0.00 |
| TRINITY_XP_0238(960S_ribcQuercus_suber       | 75.20 | 0.00 |
| TRINITY_BAK0038(5predicteHordeum_vulgare     | 75.20 | 0.00 |
| TRINITY_PIA5454(hypothetAquilegia_coerulea   | 75.20 | 0.00 |
| TRINITY_XP_0056(5ribosomCoccomyxa_subellips  | 75.20 | 0.00 |
| TRINITY_XP_0017(6componerChlamydomonas_reinh | 75.20 | 0.00 |
| TRINITY_GBF8734(8photosyRaphidocelis_subcap  | 75.20 | 0.00 |
| TRINITY_KXZ5249(hypothetGonium_pectorale     | 75.20 | 0.00 |
| TRINITY_GAX8343(hypothetChlamydomonas_eusti  | 75.20 | 0.00 |
| TRINITY_KXZ5217(hypothetGonium_pectorale     | 75.20 | 0.00 |
| TRINITY_GAX7437(hypothetChlamydomonas_eusti  | 75.20 | 0.00 |
| TRINITY_GAX7693(hypothetChlamydomonas_eusti  | 75.20 | 0.00 |
| TRINITY_GAX8212(hypothetChlamydomonas_eusti  | 75.20 | 0.00 |
| TRINITY_GAX7627(hypothetChlamydomonas_eusti  | 75.20 | 0.00 |
| TRINITY_GBF9460(hypothetRaphidocelis_subcap  | 75.20 | 0.00 |
| TRINITY_KXZ4473(hypothetGonium_pectorale     | 75.20 | 0.00 |
| TRINITY_XP_0029(hypothetVolvox_carteri       | 75.20 | 0.00 |
| TRINITY_GAX8164(hypothetChlamydomonas_eusti  | 75.20 | 0.00 |
| TRINITY_KXZ5600(hypothetGonium_pectorale     | 75.20 | 0.00 |
| TRINITY_KXZ5312(hypothetGonium_pectorale     | 75.20 | 0    |
| TRINITY_GAX8322(hypothetChlamydomonas_eusti  | 75.20 | 0.00 |
| TRINITY_ADF4316(6SPS1m [(Chlamydomonas_reinh | 75.20 | 0.00 |
| TRINITY_XP_0124(6PREDICTIGossypium_raimondii | 75.20 | 0.00 |

|                 |                              |       |      |
|-----------------|------------------------------|-------|------|
| TRINITY_GAX8088 | hypothetChlamydomonas_eusti  | 75.10 | 0.00 |
| TRINITY_GAX7537 | hypothetChlamydomonas_eusti  | 75.10 | 0.00 |
| TRINITY_XP_0016 | glycine Chlamydomonas_reinh  | 75.10 | 0.00 |
| TRINITY_KXZ4473 | hypothetGonium_pectorale     | 75.10 | 0.00 |
| TRINITY_XP_0239 | 260S ribcQuercus_suber       | 75.00 | 0.00 |
| TRINITY_GBG7844 | 2hypothetChara_braunii       | 75.00 | 0.00 |
| TRINITY_XP_0029 | 4hypothetVolvox_carteri      | 75.00 | 0.00 |
| TRINITY_XP_0064 | 1serine/tEutrema_salsugineum | 75.00 | 0.00 |
| TRINITY_PRW5674 | 740S ribcChlorella_sorokinia | 75.00 | 0.00 |
| TRINITY_GAX7570 | 5hypothetChlamydomonas_eusti | 75.00 | 0.00 |
| TRINITY_XP_0056 | 4ribosomcCoccomyxa_subellips | 75.00 | 0.00 |
| TRINITY_PTQ3799 | 9hypothetMarchantia_polymorp | 75.00 | 0.00 |
| TRINITY_PNH0830 | 3NFX1-tyrTetrabaena_socialis | 75.00 | 0.00 |
| TRINITY_GAX8226 | 4hypothetChlamydomonas_eusti | 75.00 | 0.00 |
| TRINITY_KDD7379 | 7hypothetHelicosporidium_sp. | 75.00 | 0.00 |
| TRINITY_XP_0029 | 5hypothetVolvox_carteri      | 75.00 | 0.00 |
| TRINITY_ACG2692 | 5glyceralZea_mays            | 75.00 | 0.00 |
| TRINITY_GBF9954 | 4hypothetRaphidocelis_subcap | 75.00 | 0.00 |
| TRINITY_GAX7767 | 9hypothetChlamydomonas_eusti | 75.00 | 0.00 |
| TRINITY_GAQ8291 | 6putativcKlebsormidium_niten | 75.00 | 0.00 |
| TRINITY_GAX8571 | 0hypothetChlamydomonas_eusti | 75.00 | 0.00 |
| TRINITY_ACL2816 | 1hypothetDunaliella_viridis  | 75.00 | 0.00 |
| TRINITY_KXZ4945 | 6hypothetGonium_pectorale    | 75.00 | 0.00 |
| TRINITY_PNW7263 | 4hypothetChlamydomonas_reinh | 75.00 | 0.00 |
| TRINITY_PRW6121 | 5actin-rcChlorella_sorokinia | 75.00 | 0.00 |
| TRINITY_XP_0029 | 4hypothetVolvox_carteri      | 75.00 | 0.00 |
| TRINITY_PNW7924 | 3hypothetChlamydomonas_reinh | 75.00 | 0.00 |
| TRINITY_XP_0029 | 4hypothetVolvox_carteri      | 75.00 | 0.00 |
| TRINITY_KXZ4701 | 3hypothetGonium_pectorale    | 75.00 | 0.00 |
| TRINITY_KXZ4275 | 0hypothetGonium_pectorale    | 75.00 | 0.00 |
| TRINITY_KDD7550 | 6DUF933 lHelicosporidium_sp. | 75.00 | 0.00 |
| TRINITY_GAX8236 | 0hypothetChlamydomonas_eusti | 75.00 | 0.00 |
| TRINITY_XP_0029 | 5hypothetVolvox_carteri      | 75.00 | 0.00 |
| TRINITY_XP_0029 | 4hypothetVolvox_carteri      | 75.00 | 0.00 |
| TRINITY_GAX8164 | 7hypothetChlamydomonas_eusti | 75.00 | 0.00 |
| TRINITY_XP_0139 | 040S ribcMonoraphidium_negle | 75.00 | 0.00 |
| TRINITY_XP_0058 | 5hypothetChlorella_variabili | 75.00 | 0.00 |
| TRINITY_ALM5500 | 6DEAD boChlamydomonas_sp._I  | 75.00 | 0.00 |
| TRINITY_OTG3562 | 6putativcHelianthus_annuus   | 75.00 | 0    |
| TRINITY_XP_0239 | 0cytoplasQuercus_suber       | 75.00 | 0.00 |
| TRINITY_GAX7381 | 2hypothetChlamydomonas_eusti | 75.00 | 0.00 |
| TRINITY_RLN2004 | 3calreticPanicum_miliaceum   | 75.00 | 0.00 |
| TRINITY_GAX7348 | 2hypothetChlamydomonas_eusti | 74.90 | 0    |
| TRINITY_XP_0016 | 9deoxyhyrChlamydomonas_reinh | 74.90 | 0.00 |
| TRINITY_XP_0029 | 5hypothetVolvox_carteri      | 74.90 | 0.00 |
| TRINITY_XP_0029 | 4hypothetVolvox_carteri      | 74.90 | 0.00 |
| TRINITY_PNW8352 | 4hypothetChlamydomonas_reinh | 74.90 | 0.00 |
| TRINITY_XP_0016 | 9aspartatChlamydomonas_reinh | 74.90 | 0.00 |
| TRINITY_GAX7310 | 7hypothetChlamydomonas_eusti | 74.90 | 0.00 |
| TRINITY_GAX7343 | 8hypothetChlamydomonas_eusti | 74.90 | 0.00 |
| TRINITY_XP_0017 | 0chaperorChlamydomonas_reinh | 74.90 | 0.00 |
| TRINITY_ACI2902 | 6glucose-Dunaliella_salina   | 74.90 | 0.00 |
| TRINITY_XP_0239 | 2putativcQuercus_suber       | 74.80 | 0.00 |
| TRINITY_XP_0139 | 0RNA-binMonoraphidium_negle  | 74.80 | 0.00 |
| TRINITY_XP_0243 | 814-3-3 rPhyscomitrella_pate | 74.80 | 0.00 |
| TRINITY_XP_0029 | 4hypothetVolvox_carteri      | 74.80 | 0.00 |
| TRINITY_GAX8461 | 5hypothetChlamydomonas_eusti | 74.80 | 0.00 |
| TRINITY_XP_0139 | 0hypothetMonoraphidium_negle | 74.80 | 0.00 |
| TRINITY_GAX7498 | 2hypothetChlamydomonas_eusti | 74.80 | 0.00 |
| TRINITY_GAX8428 | 2hypothetChlamydomonas_eusti | 74.80 | 0.00 |
| TRINITY_GAX7742 | 8hypothetChlamydomonas_eusti | 74.80 | 0.00 |
| TRINITY_XP_0029 | 4flagellcVolvox_carteri      | 74.80 | 0    |
| TRINITY_XP_0029 | 5hypothetVolvox_carteri      | 74.80 | 0.00 |
| TRINITY_GAX8021 | 3hypothetChlamydomonas_eusti | 74.80 | 0.00 |
| TRINITY_KXZ4092 | 4hypothetGonium_pectorale    | 74.80 | 0.00 |
| TRINITY_GAX7381 | 8hypothetChlamydomonas_eusti | 74.80 | 0    |

|                 |                               |       |      |
|-----------------|-------------------------------|-------|------|
| TRINITY_PNW7761 | hypothetChlamydomonas_reinh   | 74.80 | 0.00 |
| TRINITY_XP_0016 | predicteChlamydomonas_reinh   | 74.80 | 0.00 |
| TRINITY_XP_0102 | PREDICTINelumbo_nucifera      | 74.80 | 0.00 |
| TRINITY_GBF9290 | small nRaphidocelis_subcap    | 74.70 | 0.00 |
| TRINITY_KXZ5484 | hypothetGonium_pectorale      | 74.70 | 0.00 |
| TRINITY_GAX8474 | hypothetChlamydomonas_eusti   | 74.70 | 0.00 |
| TRINITY_XP_0097 | PREDICTINicotiana_sylvestri   | 74.70 | 0.00 |
| TRINITY_XP_0017 | (protein Chlamydomonas_reinh  | 74.70 | 0.00 |
| TRINITY_GAX7464 | hypothetChlamydomonas_eusti   | 74.70 | 0.00 |
| TRINITY_AGV5482 | (cell walPhaseolus_vulgaris   | 74.70 | 0.00 |
| TRINITY_GAQ7997 | bifunctiKlebsormidium_niten   | 74.70 | 0.00 |
| TRINITY_GAX8322 | (hypothetChlamydomonas_eusti  | 74.70 | 0    |
| TRINITY_XP_0110 | PREDICTIPopulus_euphratica    | 74.70 | 0.00 |
| TRINITY_KMS6524 | hypothetBeta_vulgaris         | 74.70 | 0.00 |
| TRINITY_GAX8635 | hypothetChlamydomonas_eusti   | 74.70 | 0.00 |
| TRINITY_XP_0029 | hypothetVolvox_carteri        | 74.70 | 0.00 |
| TRINITY_PNW8881 | hypothetChlamydomonas_reinh   | 74.70 | 0.00 |
| TRINITY_PNW8740 | hypothetChlamydomonas_reinh   | 74.70 | 0.00 |
| TRINITY_GAX8061 | (hypothetChlamydomonas_eusti  | 74.70 | 0.00 |
| TRINITY_GAX7423 | (hypothetChlamydomonas_eusti  | 74.70 | 0.00 |
| TRINITY_KXZ4484 | (hypothetGonium_pectorale     | 74.70 | 0.00 |
| TRINITY_GAX7498 | hypothetChlamydomonas_eusti   | 74.70 | 0.00 |
| TRINITY_GAX7790 | hypothetChlamydomonas_eusti   | 74.70 | 0    |
| TRINITY_PSC6827 | (DEAD-bo>Micractinium_conduc  | 74.70 | 0.00 |
| TRINITY_GAX8435 | hypothetChlamydomonas_eusti   | 74.70 | 0.00 |
| TRINITY_PNH0697 | hypothetTetrabaena_socialis   | 74.70 | 0.00 |
| TRINITY_GBF9290 | small nRaphidocelis_subcap    | 74.70 | 0.00 |
| TRINITY_ACN3153 | unknown Zea_mays              | 74.60 | 0.00 |
| TRINITY_XP_0014 | thiorede<Ostreococcus_sp._'1  | 74.60 | 0.00 |
| TRINITY_P31692  | .1RecName:Parachlorella_kessl | 74.60 | 0.00 |
| TRINITY_EPS7202 | proteas<Genlisea_aurea        | 74.60 | 0.00 |
| TRINITY_PNH0566 | 40S rib<Tetrabaena_socialis   | 74.60 | 0.00 |
| TRINITY_PNH0566 | 40S rib<Tetrabaena_socialis   | 74.60 | 0.00 |
| TRINITY_KMS6482 | hypothetBeta_vulgaris         | 74.60 | 0.00 |
| TRINITY_KXZ5156 | hypothetGonium_pectorale      | 74.60 | 0.00 |
| TRINITY_KXZ4654 | hypothetGonium_pectorale      | 74.60 | 0.00 |
| TRINITY_PNH0962 | hypothetTetrabaena_socialis   | 74.60 | 0.00 |
| TRINITY_GAX8465 | hypothetChlamydomonas_eusti   | 74.60 | 0.00 |
| TRINITY_XP_0016 | transcriChlamydomonas_reinh   | 74.60 | 0.00 |
| TRINITY_AFI5762 | Rpn8 [D]Dunaliella_salina     | 74.60 | 0.00 |
| TRINITY_PRW5719 | BromodonChlorella_sorokinia   | 74.60 | 0.00 |
| TRINITY_XP_0138 | Autopha<Monoraphidium_negle   | 74.60 | 0.00 |
| TRINITY_GAX7545 | hypothetChlamydomonas_eusti   | 74.60 | 0.00 |
| TRINITY_XP_0156 | eukaryotOryza_sativa          | 74.60 | 0.00 |
| TRINITY_XP_0086 | peptidy]Zea_mays              | 74.60 | 0.00 |
| TRINITY_ABN0394 | mitogen-Dunaliella_salina     | 74.60 | 0.00 |
| TRINITY_XP_0029 | DEAH-bo>Volvox_carteri        | 74.60 | 0.00 |
| TRINITY_GAX8005 | hypothetChlamydomonas_eusti   | 74.60 | 0    |
| TRINITY_XP_0239 | (histone Quercus_suber        | 74.50 | 0.00 |
| TRINITY_GAX8391 | hypothetChlamydomonas_eusti   | 74.50 | 0.00 |
| TRINITY_KMS6493 | hypothetBeta_vulgaris         | 74.50 | 0.00 |
| TRINITY_GAX7962 | hypothetChlamydomonas_eusti   | 74.50 | 0.00 |
| TRINITY_PNH0752 | Splicin<Tetrabaena_socialis   | 74.50 | 0.00 |
| TRINITY_ACG2692 | glyceralZea_mays              | 74.50 | 0.00 |
| TRINITY_KXZ5390 | hypothetGonium_pectorale      | 74.50 | 0.00 |
| TRINITY_XP_0029 | hypothetVolvox_carteri        | 74.50 | 0.00 |
| TRINITY_XP_0056 | P-loop <Coccomyxa_subellips   | 74.50 | 0.00 |
| TRINITY_XP_0016 | peptide Chlamydomonas_reinh   | 74.50 | 0.00 |
| TRINITY_PNW8461 | hypothetChlamydomonas_reinh   | 74.50 | 0.00 |
| TRINITY_GBG0011 | RNA heliRaphidocelis_subcap   | 74.50 | 0.00 |
| TRINITY_XP_0029 | hypothetVolvox_carteri        | 74.50 | 0.00 |
| TRINITY_GAX8060 | (hypothetChlamydomonas_eusti  | 74.50 | 0.00 |
| TRINITY_XP_0030 | (predicteMicromonas_pusilla   | 74.50 | 0.00 |
| TRINITY_AJQ2078 | acyl-Co/Helianthus_annuus     | 74.40 | 0.00 |
| TRINITY_RVW3222 | hypothetVitis_vinifera        | 74.40 | 0.00 |
| TRINITY_GAX7798 | hypothetChlamydomonas_eusti   | 74.40 | 0.00 |

|                  |          |                     |       |      |
|------------------|----------|---------------------|-------|------|
| TRINITY_XP_00170 | adenylat | Chlamydomonas_reinh | 74.40 | 0.00 |
| TRINITY_XP_00169 | NADH-de  | Chlamydomonas_reinh | 74.40 | 0.00 |
| TRINITY_ACG24489 | 60S rib  | Zea_mays            | 74.40 | 0.00 |
| TRINITY_PNH06436 | Vesicle  | Tetrabaena_socialis | 74.40 | 0.00 |
| TRINITY_KXZ53029 | hypothet | Gonium_pectorale    | 74.40 | 0.00 |
| TRINITY_XP_00169 | predicte | Chlamydomonas_reinh | 74.40 | 0.00 |
| TRINITY_XP_00170 | spermid  | Chlamydomonas_reinh | 74.40 | 0.00 |
| TRINITY_XP_00584 | hypothet | Chlorella_variabili | 74.40 | 0.00 |
| TRINITY_GBF98399 | hypothet | Raphidocelis_subcap | 74.40 | 0.00 |
| TRINITY_RZC61039 | hypothet | Papaver_somniferum  | 74.40 | 0.00 |
| TRINITY_XP_01390 | hypothet | Monoraphidium_negle | 74.40 | 0.00 |
| TRINITY_KXZ42999 | hypothet | Gonium_pectorale    | 74.40 | 0.00 |
| TRINITY_XP_00169 | SR prote | Chlamydomonas_reinh | 74.40 | 0.00 |
| TRINITY_GAX76361 | hypothet | Chlamydomonas_eusti | 74.40 | 0.00 |
| TRINITY_GBF93448 | ribosom  | Raphidocelis_subcap | 74.40 | 0.00 |
| TRINITY_GBF96219 | hypothet | Raphidocelis_subcap | 74.40 | 0.00 |
| TRINITY_VDC86159 | unnamed  | Brassica_oleracea   | 74.40 | 0.00 |
| TRINITY_GAX81559 | hypothet | Chlamydomonas_eusti | 74.40 | 0.00 |
| TRINITY_GBF99098 | peptida  | Raphidocelis_subcap | 74.40 | 0.00 |
| TRINITY_PNW72009 | hypothet | Chlamydomonas_reinh | 74.40 | 0    |
| TRINITY_KXZ44039 | hypothet | Gonium_pectorale    | 74.40 | 0.00 |
| TRINITY_XP_00142 | predicte | Ostreococcus_sp._'1 | 74.40 | 0.00 |
| TRINITY_XP_00170 | predicte | Chlamydomonas_reinh | 74.40 | 0.00 |
| TRINITY_XP_00299 | hypothet | Volvox_carteri      | 74.40 | 0.00 |
| TRINITY_GAX79654 | hypothet | Chlamydomonas_eusti | 74.40 | 0    |
| TRINITY_XP_00169 | predicte | Chlamydomonas_reinh | 74.40 | 0.00 |
| TRINITY_XP_00307 | HAD-sup  | Ostreococcus_tauri  | 74.40 | 0.00 |
| TRINITY_XP_00169 | predicte | Chlamydomonas_reinh | 74.40 | 0.00 |
| TRINITY_XP_01139 | Peroxi   | Auxenochlorella_pro | 74.30 | 0.00 |
| TRINITY_XP_00306 | predicte | Micromonas_pusilla  | 74.30 | 0.00 |
| TRINITY_XP_00306 | predicte | Micromonas_pusilla  | 74.30 | 0.00 |
| TRINITY_EPS72800 | hypothet | Genlisea_aurea      | 74.30 | 0.00 |
| TRINITY_BAK02259 | predicte | Hordeum_vulgare     | 74.30 | 0.00 |
| TRINITY_BAL46529 | hypothet | Gentiana_scabra_x_G | 74.30 | 0.00 |
| TRINITY_KXZ53208 | hypothet | Gonium_pectorale    | 74.30 | 0.00 |
| TRINITY_GAX74184 | hypothet | Chlamydomonas_eusti | 74.30 | 0.00 |
| TRINITY_XP_00878 | protein  | Phoenix_dactylifera | 74.30 | 0.00 |
| TRINITY_XP_00299 | hypothet | Volvox_carteri      | 74.30 | 0.00 |
| TRINITY_KXZ55809 | hypothet | Gonium_pectorale    | 74.30 | 0.00 |
| TRINITY_GAX75488 | hypothet | Chlamydomonas_eusti | 74.30 | 0.00 |
| TRINITY_GAX81558 | hypothet | Chlamydomonas_eusti | 74.30 | 0.00 |
| TRINITY_XP_00170 | protein  | Chlamydomonas_reinh | 74.30 | 0.00 |
| TRINITY_GAQ88969 | Serine   | Klebsormidium_niten | 74.30 | 0.00 |
| TRINITY_GAX84837 | hypothet | Chlamydomonas_eusti | 74.30 | 0.00 |
| TRINITY_XP_00170 | predicte | Chlamydomonas_reinh | 74.30 | 0.00 |
| TRINITY_PNW82087 | hypothet | Chlamydomonas_reinh | 74.30 | 0.00 |
| TRINITY_XP_01069 | PREDICT  | Beta_vulgaris       | 74.30 | 0.00 |
| TRINITY_XP_00299 | hypothet | Volvox_carteri      | 74.30 | 0.00 |
| TRINITY_XP_00169 | oligsac  | Chlamydomonas_reinh | 74.30 | 0.00 |
| TRINITY_GAX76369 | hypothet | Chlamydomonas_eusti | 74.30 | 0.00 |
| TRINITY_GAX80680 | hypothet | Chlamydomonas_eusti | 74.30 | 0.00 |
| TRINITY_EPS74531 | hypothet | Genlisea_aurea      | 74.30 | 0.00 |
| TRINITY_PIN01269 | 60S rib  | Handroanthus_impeti | 74.20 | 0.00 |
| TRINITY_VDD04969 | unnamed  | Brassica_rapa       | 74.20 | 0.00 |
| TRINITY_GAX77137 | hypothet | Chlamydomonas_eusti | 74.20 | 0.00 |
| TRINITY_PNW80052 | hypothet | Chlamydomonas_reinh | 74.20 | 0.00 |
| TRINITY_XP_00299 | mitochor | Volvox_carteri      | 74.20 | 0.00 |
| TRINITY_ERN03919 | hypothet | Amborella_trichopod | 74.20 | 0.00 |
| TRINITY_XP_00299 | hypothet | Volvox_carteri      | 74.20 | 0.00 |
| TRINITY_XP_00170 | predicte | Chlamydomonas_reinh | 74.20 | 0.00 |
| TRINITY_KXZ44834 | hypothet | Gonium_pectorale    | 74.20 | 0.00 |
| TRINITY_GBF89161 | phosphat | Raphidocelis_subcap | 74.20 | 0.00 |
| TRINITY_KXZ43524 | hypothet | Gonium_pectorale    | 74.20 | 0.00 |
| TRINITY_XP_00169 | chlorop  | Chlamydomonas_reinh | 74.20 | 0.00 |
| TRINITY_PRW39172 | mismatch | Chlorella_sorokinia | 74.20 | 0.00 |
| TRINITY_KXZ49651 | hypothet | Gonium_pectorale    | 74.20 | 0.00 |

|                                               |       |      |
|-----------------------------------------------|-------|------|
| TRINITY_XP_00170(predictεChlamydomonas_reinh  | 74.20 | 0.00 |
| TRINITY_XP_00294ABC trarVolvox_carteri        | 74.20 | 0.00 |
| TRINITY_KXZ43279hypothetGonium_pectorale      | 74.20 | 0.00 |
| TRINITY_BAK00960(predictεHordeum_vulgare      | 74.20 | 0.00 |
| TRINITY_KXZ43217hypothetGonium_pectorale      | 74.20 | 0.00 |
| TRINITY_GAX80402hypothetChlamydomonas_eusti   | 74.20 | 0.00 |
| TRINITY_AAX8604214-3-3 ρHaematococcus_lacus   | 74.10 | 0.00 |
| TRINITY_XP_00294hypothetVolvox_carteri        | 74.10 | 0.00 |
| TRINITY_GAQ86391Serine/τKlebsormidium_niten   | 74.10 | 0.00 |
| TRINITY_RWR7464140S ribcCinnamomum_micranth   | 74.10 | 0.00 |
| TRINITY_XP_00295RabC/RaτVolvox_carteri        | 74.10 | 0.00 |
| TRINITY_XP_00169catalytiChlamydomonas_reinh   | 74.10 | 0.00 |
| TRINITY_GAX8223(hypothetChlamydomonas_eusti   | 74.10 | 0.00 |
| TRINITY_KXZ50551hypothetGonium_pectorale      | 74.10 | 0.00 |
| TRINITY_P81831.2RecName:Chlamydomonas_reinh   | 74.10 | 0.00 |
| TRINITY_PNW72116hypothetChlamydomonas_reinh   | 74.10 | 0.00 |
| TRINITY_BBC28434hypothetYamagishiella_unico   | 74.10 | 0.00 |
| TRINITY_BAJ96199predictεHordeum_vulgare       | 74.10 | 0.00 |
| TRINITY_GAX78566hypothetChlamydomonas_eusti   | 74.10 | 0.00 |
| TRINITY_KXZ42548hypothetGonium_pectorale      | 74.10 | 0.00 |
| TRINITY_KXZ55064hypothetGonium_pectorale      | 74.10 | 0.00 |
| TRINITY_XP_00295hypothetVolvox_carteri        | 74.10 | 0.00 |
| TRINITY_KDD75499hypothetHelicosporidium_sp.   | 74.10 | 0.00 |
| TRINITY_KDD75499hypothetHelicosporidium_sp.   | 74.10 | 0.00 |
| TRINITY_XP_00169gamma-g]Chlamydomonas_reinh   | 74.10 | 0.00 |
| TRINITY_GAX79005hypothetChlamydomonas_eusti   | 74.10 | 0    |
| TRINITY_ACN31538unknown Zea_mays              | 74.00 | 0.00 |
| TRINITY_GAX78214hypothetChlamydomonas_eusti   | 74.00 | 0.00 |
| TRINITY_ACG2448960S ribcZea_mays              | 74.00 | 0.00 |
| TRINITY_GBF99014hypothetRaphidocelis_subcap   | 74.00 | 0.00 |
| TRINITY_RLM60208glyceralPanicum_miliaceum     | 74.00 | 0.00 |
| TRINITY_GBG68943hypothetChara_braunii         | 74.00 | 0.00 |
| TRINITY_KXZ49208hypothetGonium_pectorale      | 74.00 | 0.00 |
| TRINITY_GAX79964hypothetChlamydomonas_eusti   | 74.00 | 0.00 |
| TRINITY_GAX84383hypothetChlamydomonas_eusti   | 74.00 | 0.00 |
| TRINITY_PNH01984DNA repεTetrabaena_socialis   | 74.00 | 0.00 |
| TRINITY_P20364.2RecName:Daucus_carota         | 73.90 | 0.00 |
| TRINITY_XP_01569PREDICTIOrzyza_brachyantha    | 73.90 | 0.00 |
| TRINITY_XP_02566uncharacArachis_hypogaea      | 73.90 | 0.00 |
| TRINITY_BAJ93795predictεHordeum_vulgare       | 73.90 | 0.00 |
| TRINITY_XP_02736fumarateεAbrus_precatorius    | 73.90 | 0.00 |
| TRINITY_GAX79763hypothetChlamydomonas_eusti   | 73.90 | 0.00 |
| TRINITY_GAX78329hypothetChlamydomonas_eusti   | 73.90 | 0.00 |
| TRINITY_KXZ53206hypothetGonium_pectorale      | 73.90 | 0.00 |
| TRINITY_KXZ50796hypothetGonium_pectorale      | 73.90 | 0.00 |
| TRINITY_KXZ45579hypothetGonium_pectorale      | 73.90 | 0.00 |
| TRINITY_GBF93816hypothetRaphidocelis_subcap   | 73.90 | 0.00 |
| TRINITY_XP_00295hypothetVolvox_carteri        | 73.90 | 0.00 |
| TRINITY_XP_00169flagellεChlamydomonas_reinh   | 73.90 | 0.00 |
| TRINITY_XP_00169mitochorChlamydomonas_reinh   | 73.90 | 0.00 |
| TRINITY_XP_00170(pyruvateεChlamydomonas_reinh | 73.90 | 0.00 |
| TRINITY_XP_00294hypothetVolvox_carteri        | 73.90 | 0.00 |
| TRINITY_XP_02283ABC trarOstreococcus_tauri    | 73.90 | 0.00 |
| TRINITY_GBG65136hypothetChara_braunii         | 73.90 | 0.00 |
| TRINITY_PNW80087hypothetChlamydomonas_reinh   | 73.90 | 0.00 |
| TRINITY_GAX77083hypothetChlamydomonas_eusti   | 73.90 | 0.00 |
| TRINITY_GAX80969hypothetChlamydomonas_eusti   | 73.90 | 0.00 |
| TRINITY_XP_00169dynein ρChlamydomonas_reinh   | 73.80 | 0.00 |
| TRINITY_AFH89627actin, ρCymbidium_ensifoliu   | 73.80 | 0.00 |
| TRINITY_XP_00960(PREDICTINicotiana_tomentosi  | 73.80 | 0.00 |
| TRINITY_EFJ07482hypothetSelaginella_moellen   | 73.80 | 0.00 |
| TRINITY_XP_0239040S ribcQuercus_suber         | 73.80 | 0.00 |
| TRINITY_KMS94019hypothetBeta_vulgaris         | 73.80 | 0.00 |
| TRINITY_EPS71469hypothetGenlisea_aurea        | 73.80 | 0.00 |
| TRINITY_GAX75138hypothetChlamydomonas_eusti   | 73.80 | 0.00 |
| TRINITY_PNW75700hypothetChlamydomonas_reinh   | 73.80 | 0.00 |

|                  |           |                     |       |      |
|------------------|-----------|---------------------|-------|------|
| TRINITY_XP_02437 | pre-mRN   | Physcomitrella_pate | 73.80 | 0.00 |
| TRINITY_XP_00294 | hypothet  | Volvox_carteri      | 73.80 | 0.00 |
| TRINITY_GAX8243  | (hypothet | Chlamydomonas_eusti | 73.80 | 0.00 |
| TRINITY_XP_0110  | (PREDICTF | Populus_euphratica  | 73.80 | 0.00 |
| TRINITY_XP_02009 | tubulin   | Ananas_comosus      | 73.80 | 0.00 |
| TRINITY_XP_02387 | DNA-dir   | Quercus_suber       | 73.80 | 0.00 |
| TRINITY_PNW8596  | hypothet  | Chlamydomonas_reinh | 73.80 | 0.00 |
| TRINITY_KXZ5409  | (hypothet | Gonium_pectorale    | 73.80 | 0.00 |
| TRINITY_KXZ4672  | (hypothet | Gonium_pectorale    | 73.80 | 0.00 |
| TRINITY_PRW0594  | nuclear   | Chlorella_sorokinia | 73.80 | 0.00 |
| TRINITY_BAK0734  | predict   | Hordeum_vulgare     | 73.80 | 0.00 |
| TRINITY_GAX8574  | (hypothet | Chlamydomonas_eusti | 73.80 | 0.00 |
| TRINITY_KXZ5475  | (hypothet | Gonium_pectorale    | 73.80 | 0.00 |
| TRINITY_GAX8093  | (hypothet | Chlamydomonas_eusti | 73.80 | 0.00 |
| TRINITY_GAX7859  | hypothet  | Chlamydomonas_eusti | 73.80 | 0    |
| TRINITY_XP_00169 | flagell   | Chlamydomonas_reinh | 73.80 | 0.00 |
| TRINITY_PNW7169  | (hypothet | Chlamydomonas_reinh | 73.80 | 0    |
| TRINITY_GAX7605  | (hypothet | Chlamydomonas_eusti | 73.80 | 0.00 |
| TRINITY_GAX8376  | (hypothet | Chlamydomonas_eusti | 73.80 | 0    |
| TRINITY_XP_0207  | (60S rib  | Dendrobium_catenatu | 73.70 | 0.00 |
| TRINITY_XP_0156  | (DNA-dir  | Oryza_sativa        | 73.70 | 0.00 |
| TRINITY_GAX8248  | (hypothet | Chlamydomonas_eusti | 73.70 | 0.00 |
| TRINITY_KXZ5610  | (hypothet | Gonium_pectorale    | 73.70 | 0.00 |
| TRINITY_ANA5703  | ATP synt  | Pyramimonas_parkeae | 73.70 | 0.00 |
| TRINITY_XP_00295 | hypothet  | Volvox_carteri      | 73.70 | 0.00 |
| TRINITY_GAX7857  | (hypothet | Chlamydomonas_eusti | 73.70 | 0.00 |
| TRINITY_XP_00294 | sterol 1  | Volvox_carteri      | 73.70 | 0.00 |
| TRINITY_XP_0138  | Translat  | Monoraphidium_negle | 73.70 | 0.00 |
| TRINITY_XP_00169 | predict   | Chlamydomonas_reinh | 73.70 | 0.00 |
| TRINITY_AMY6315  | sulfate   | Tetraspora_sp._CU25 | 73.70 | 0.00 |
| TRINITY_XP_00294 | hypothet  | Volvox_carteri      | 73.70 | 0.00 |
| TRINITY_AEG7452  | kinesin   | Dunaliella_salina   | 73.70 | 0.00 |
| TRINITY_PNW8209  | (hypothet | Chlamydomonas_reinh | 73.70 | 0.00 |
| TRINITY_XP_00294 | hypothet  | Volvox_carteri      | 73.70 | 0.00 |
| TRINITY_XP_0017  | (predict  | Chlamydomonas_reinh | 73.70 | 0.00 |
| TRINITY_AAO7355  | reverse-  | Chlamydomonas_reinh | 73.70 | 0.00 |
| TRINITY_KXZ4526  | hypothet  | Gonium_pectorale    | 73.70 | 0.00 |
| TRINITY_GAX7662  | (hypothet | Chlamydomonas_eusti | 73.70 | 0.00 |
| TRINITY_GAX7864  | (hypothet | Chlamydomonas_eusti | 73.70 | 0.00 |
| TRINITY_GAX8146  | (hypothet | Chlamydomonas_eusti | 73.70 | 0.00 |
| TRINITY_KMS6461  | (hypothet | Beta_vulgaris       | 73.70 | 0.00 |
| TRINITY_EFH5379  | hypothet  | Arabidopsis_lyrata  | 73.60 | 0.00 |
| TRINITY_XP_0212  | (60S rib  | Herrania_umbratica  | 73.60 | 0.00 |
| TRINITY_XP_0201  | heat sh   | Ananas_comosus      | 73.60 | 0.00 |
| TRINITY_PNH0661  | (hypothet | Tetrabaena_socialis | 73.60 | 0.00 |
| TRINITY_XP_00169 | iron-su   | Chlamydomonas_reinh | 73.60 | 0.00 |
| TRINITY_XP_00295 | hypothet  | Volvox_carteri      | 73.60 | 0.00 |
| TRINITY_GAX8206  | (hypothet | Chlamydomonas_eusti | 73.60 | 0.00 |
| TRINITY_PNH1097  | putativ   | Tetrabaena_socialis | 73.60 | 0.00 |
| TRINITY_BAK0046  | (predict  | Hordeum_vulgare     | 73.60 | 0.00 |
| TRINITY_GAX7597  | (hypothet | Chlamydomonas_eusti | 73.60 | 0.00 |
| TRINITY_GAX8145  | (hypothet | Chlamydomonas_eusti | 73.60 | 0.00 |
| TRINITY_YP_0088  | (NADH del | Monomastix_sp._OKE- | 73.50 | 0.00 |
| TRINITY_PHT3740  | (40S rib  | Capsicum_baccatum   | 73.50 | 0.00 |
| TRINITY_PNW8807  | (hypothet | Chlamydomonas_reinh | 73.50 | 0.00 |
| TRINITY_PNW7165  | (hypothet | Chlamydomonas_reinh | 73.50 | 0.00 |
| TRINITY_GBF9704  | histone   | Raphidocelis_subcap | 73.50 | 0.00 |
| TRINITY_XP_0036  | (40S rib  | Medicago_truncatula | 73.50 | 0.00 |
| TRINITY_XP_0056  | polyader  | Coccomyxa_subellips | 73.50 | 0.00 |
| TRINITY_XP_00295 | hypothet  | Volvox_carteri      | 73.50 | 0.00 |
| TRINITY_KNA0305  | (hypothet | Spinacia_oleracea   | 73.50 | 0.00 |
| TRINITY_GAX7877  | (hypothet | Chlamydomonas_eusti | 73.50 | 0.00 |
| TRINITY_ABR1809  | (unknown  | Picea_sitchensis    | 73.50 | 0.00 |
| TRINITY_GBF8735  | (CMGC RCF | Raphidocelis_subcap | 73.50 | 0.00 |
| TRINITY_CAI8489  | (putativ  | Medicago_sativa     | 73.50 | 0.00 |
| TRINITY_GAX7280  | hypothet  | Chlamydomonas_eusti | 73.50 | 0.00 |



|                  |           |                     |       |      |
|------------------|-----------|---------------------|-------|------|
| TRINITY_XP_0279  | probable  | Vigna_unguiculata   | 73.50 | 0.00 |
| TRINITY_KFK3717  | hypothet  | Arabis_alpina       | 73.50 | 0.00 |
| TRINITY_PRW59761 | cytochr   | Chlorella_sorokinia | 73.50 | 0.00 |
| TRINITY_ABU5296  | hypothet  | Dunaliella_viridis  | 73.50 | 0.00 |
| TRINITY_XP_0016  | mitochor  | Chlamydomonas_reinh | 73.50 | 0.00 |
| TRINITY_XP_0212  | 60S rib   | Herrania_umbratica  | 73.40 | 0.00 |
| TRINITY_XP_0212  | 60S rib   | Herrania_umbratica  | 73.40 | 0.00 |
| TRINITY_XP_0016  | eukaryot  | Chlamydomonas_reinh | 73.40 | 0.00 |
| TRINITY_XP_0138  | Stage V   | Monoraphidium_negle | 73.40 | 0.00 |
| TRINITY_GBF9721  | hypothet  | Raphidocelis_subcap | 73.40 | 0.00 |
| TRINITY_GAX8352  | (hypothet | Chlamydomonas_eusti | 73.40 | 0.00 |
| TRINITY_GAX7557  | hypothet  | Chlamydomonas_eusti | 73.40 | 0.00 |
| TRINITY_GAX7451  | (hypothet | Chlamydomonas_eusti | 73.40 | 0.00 |
| TRINITY_GAX7978  | (hypothet | Chlamydomonas_eusti | 73.40 | 0.00 |
| TRINITY_PNH1037  | Geranyl   | Tetrabaena_socialis | 73.40 | 0.00 |
| TRINITY_ADI4711  | nicotin   | Chlamydomonas_reinh | 73.40 | 0.00 |
| TRINITY_XP_0045  | peptidy   | Cicer_arietinum     | 73.40 | 0.00 |
| TRINITY_PHT5416  | Ubiquiti  | Capsicum_baccatum   | 73.40 | 0.00 |
| TRINITY_XP_0056  | GDP-man   | Coccomyxa_subellips | 73.40 | 0.00 |
| TRINITY_PNW7316  | hypothet  | Chlamydomonas_reinh | 73.40 | 0.00 |
| TRINITY_GAX8339  | hypothet  | Chlamydomonas_eusti | 73.30 | 0.00 |
| TRINITY_XP_0030  | (predict  | Micromonas_pusilla  | 73.30 | 0.00 |
| TRINITY_XP_0106  | PREDICT   | Beta_vulgaris       | 73.30 | 0.00 |
| TRINITY_XP_0106  | PREDICT   | Beta_vulgaris       | 73.30 | 0.00 |
| TRINITY_KMS6509  | hypothet  | Beta_vulgaris       | 73.30 | 0.00 |
| TRINITY_PNG9987  | NADH de   | Tetrabaena_socialis | 73.30 | 0.00 |
| TRINITY_XP_0072  | pyruvat   | Prunus_persica      | 73.30 | 0.00 |
| TRINITY_ABF8243  | mitochor  | Haematococcus_lacus | 73.30 | 0.00 |
| TRINITY_GAX7493  | hypothet  | Chlamydomonas_eusti | 73.30 | 0.00 |
| TRINITY_XP_0029  | splice    | Volvox_carteri      | 73.30 | 0.00 |
| TRINITY_XP_0023  | (40S rib  | Populus_trichocarpa | 73.30 | 0.00 |
| TRINITY_CAA1126  | polyubi   | Nicotiana_tabacum   | 73.30 | 0.00 |
| TRINITY_GAX8266  | (hypothet | Chlamydomonas_eusti | 73.30 | 0.00 |
| TRINITY_XP_0058  | hypothet  | Chlorella_variabili | 73.30 | 0.00 |
| TRINITY_GAX8049  | hypothet  | Chlamydomonas_eusti | 73.30 | 0.00 |
| TRINITY_GAX8376  | (hypothet | Chlamydomonas_eusti | 73.30 | 0.00 |
| TRINITY_XP_0029  | RIO kin   | Volvox_carteri      | 73.30 | 0.00 |
| TRINITY_GAX8442  | hypothet  | Chlamydomonas_eusti | 73.30 | 0.00 |
| TRINITY_KZV4706  | hypothet  | Dorcoceras_hygromet | 73.20 | 0.00 |
| TRINITY_PNH0830  | NFX1-ty   | Tetrabaena_socialis | 73.20 | 0.00 |
| TRINITY_GBG7373  | hypothet  | Chara_braunii       | 73.20 | 0.00 |
| TRINITY_XP_0029  | hypothet  | Volvox_carteri      | 73.20 | 0.00 |
| TRINITY_GAX8512  | (hypothet | Chlamydomonas_eusti | 73.20 | 0.00 |
| TRINITY_XP_0220  | (histone  | Helianthus_annuus   | 73.20 | 0.00 |
| TRINITY_KXZ4760  | hypothet  | Gonium_pectorale    | 73.20 | 0.00 |
| TRINITY_PNW7200  | hypothet  | Chlamydomonas_reinh | 73.20 | 0.00 |
| TRINITY_GAX7539  | hypothet  | Chlamydomonas_eusti | 73.20 | 0.00 |
| TRINITY_PNW7765  | (hypothet | Chlamydomonas_reinh | 73.20 | 0.00 |
| TRINITY_GAX8374  | hypothet  | Chlamydomonas_eusti | 73.20 | 0.00 |
| TRINITY_GAX7984  | hypothet  | Chlamydomonas_eusti | 73.20 | 0.00 |
| TRINITY_PNH0791  | Chromos   | Tetrabaena_socialis | 73.20 | 0.00 |
| TRINITY_PNW8742  | hypothet  | Chlamydomonas_reinh | 73.20 | 0.00 |
| TRINITY_KXZ4577  | (hypothet | Gonium_pectorale    | 73.20 | 0.00 |
| TRINITY_GAX7821  | (hypothet | Chlamydomonas_eusti | 73.20 | 0.00 |
| TRINITY_XP_0016  | coiled-   | Chlamydomonas_reinh | 73.20 | 0.00 |
| TRINITY_GAX8123  | hypothet  | Chlamydomonas_eusti | 73.20 | 0.00 |
| TRINITY_GAX7624  | hypothet  | Chlamydomonas_eusti | 73.20 | 0    |
| TRINITY_OEL2077  | Ras-rel   | Dichanthelium_oligo | 73.10 | 0.00 |
| TRINITY_XP_0270  | (unchara  | Coffea_arabica      | 73.10 | 0.00 |
| TRINITY_XP_0229  | 60S rib   | Cucurbita_moschata  | 73.10 | 0.00 |
| TRINITY_XP_0029  | hypothet  | Volvox_carteri      | 73.10 | 0.00 |
| TRINITY_XP_0229  | serine/t  | Cucurbita_maxima    | 73.10 | 0.00 |
| TRINITY_GBF9312  | (diphthir | Raphidocelis_subcap | 73.10 | 0.00 |
| TRINITY_GBG6021  | (hypothet | Chara_braunii       | 73.10 | 0.00 |
| TRINITY_KXZ5407  | hypothet  | Gonium_pectorale    | 73.10 | 0.00 |
| TRINITY_GAQ8856  | (aconitat | Klebsormidium_niten | 73.10 | 0.00 |

|                 |                              |       |      |
|-----------------|------------------------------|-------|------|
| TRINITY_GAX8418 | hypothetChlamydomonas_eusti  | 73.10 | 0.00 |
| TRINITY_GAX7399 | hypothetChlamydomonas_eusti  | 73.10 | 0.00 |
| TRINITY_XP_0029 | hypothetVolvox_carteri       | 73.10 | 0.00 |
| TRINITY_GAX8128 | hypothetChlamydomonas_eusti  | 73.10 | 0.00 |
| TRINITY_KXZ4631 | hypothetGonium_pectorale     | 73.10 | 0.00 |
| TRINITY_XP_0029 | hypothetVolvox_carteri       | 73.10 | 0.00 |
| TRINITY_XP_0029 | hypothetVolvox_carteri       | 73.10 | 0.00 |
| TRINITY_PNH0503 | Histone Tetrabaena_socialis  | 73.10 | 0.00 |
| TRINITY_AFK0921 | calcium-Dunaliella_salina    | 73.10 | 0.00 |
| TRINITY_XP_0238 | uncharacQuercus_suber        | 73.00 | 0.00 |
| TRINITY_XP_0072 | (SUMO-corPrunus_persica      | 73.00 | 0.00 |
| TRINITY_XP_0029 | componerVolvox_carteri       | 73.00 | 0.00 |
| TRINITY_AEB4001 | cytochrFunaria_hygrometric   | 73.00 | 0.00 |
| TRINITY_XP_0138 | hypothetMonoraphidium_negle  | 73.00 | 0.00 |
| TRINITY_XP_0017 | (predicteChlamydomonas_reinh | 73.00 | 0.00 |
| TRINITY_GAX7733 | hypothetChlamydomonas_eusti  | 73.00 | 0.00 |
| TRINITY_KFK3932 | hypothetArabis_alpina        | 73.00 | 0.00 |
| TRINITY_XP_0014 | predicteOstreococcus_sp._'1  | 73.00 | 0.00 |
| TRINITY_GAX8165 | hypothetChlamydomonas_eusti  | 73.00 | 0.00 |
| TRINITY_GAX7805 | (hypothetChlamydomonas_eusti | 73.00 | 0.00 |
| TRINITY_GAX7535 | hypothetChlamydomonas_eusti  | 73.00 | 0.00 |
| TRINITY_XP_0029 | hypothetVolvox_carteri       | 73.00 | 0.00 |
| TRINITY_XP_0243 | (protein Physcomitrella_pate | 73.00 | 0.00 |
| TRINITY_KXZ5099 | RPT4 prcGonium_pectorale     | 73.00 | 0.00 |
| TRINITY_GAX7922 | hypothetChlamydomonas_eusti  | 73.00 | 0.00 |
| TRINITY_XP_0016 | low-CO2-Chlamydomonas_reinh  | 73.00 | 0.00 |
| TRINITY_XP_0029 | hypothetVolvox_carteri       | 73.00 | 0.00 |
| TRINITY_KXZ5161 | hypothetGonium_pectorale     | 73.00 | 0.00 |
| TRINITY_GAX8658 | hypothetChlamydomonas_eusti  | 73.00 | 0.00 |
| TRINITY_GAX7297 | hypothetChlamydomonas_eusti  | 73.00 | 0.00 |
| TRINITY_XP_0029 | hypothetVolvox_carteri       | 73.00 | 0.00 |
| TRINITY_KXZ5408 | hypothetGonium_pectorale     | 73.00 | 0.00 |
| TRINITY_XP_0058 | hypothetChlorella_variabili  | 73.00 | 0.00 |
| TRINITY_KDD7512 | (phosphatHelicosporidium_sp. | 72.90 | 0.00 |
| TRINITY_YP_0088 | (NADH delMonomastix_sp._OKE- | 72.90 | 0.00 |
| TRINITY_XP_0105 | PREDICTITarenaya_hasslerian  | 72.90 | 0.00 |
| TRINITY_XP_0239 | fimbrin-Quercus_suber        | 72.90 | 0.00 |
| TRINITY_BAK0218 | (predicteHordeum_vulgare     | 72.90 | 0.00 |
| TRINITY_AFK4638 | unknown Lotus_japonicus      | 72.90 | 0.00 |
| TRINITY_XP_0014 | predicteOstreococcus_sp._'1  | 72.90 | 0.00 |
| TRINITY_ABG6612 | retrotrOryza_sativa          | 72.90 | 0.00 |
| TRINITY_XP_0188 | PREDICTIJuglans_regia        | 72.90 | 0.00 |
| TRINITY_KFK3651 | hypothetArabis_alpina        | 72.90 | 0.00 |
| TRINITY_GAX7756 | hypothetChlamydomonas_eusti  | 72.90 | 0.00 |
| TRINITY_XP_0139 | (60S ribcMonoraphidium_negle | 72.90 | 0.00 |
| TRINITY_KXZ4588 | hypothetGonium_pectorale     | 72.90 | 0.00 |
| TRINITY_KXZ4708 | hypothetGonium_pectorale     | 72.90 | 0.00 |
| TRINITY_KXZ4636 | (hypothetGonium_pectorale    | 72.90 | 0.00 |
| TRINITY_GAX8517 | (hypothetChlamydomonas_eusti | 72.90 | 0.00 |
| TRINITY_GAX8482 | (hypothetChlamydomonas_eusti | 72.90 | 0.00 |
| TRINITY_GAX7968 | (hypothetChlamydomonas_eusti | 72.90 | 0.00 |
| TRINITY_AWK6783 | ACD [DurDunaliella_tertiole  | 72.90 | 0.00 |
| TRINITY_GAX7377 | hypothetChlamydomonas_eusti  | 72.90 | 0.00 |
| TRINITY_NP_0012 | ripeninçSolanum_lycopersicu  | 72.90 | 0.00 |
| TRINITY_KXZ4468 | hypothetGonium_pectorale     | 72.90 | 0.00 |
| TRINITY_XP_0016 | protoporChlamydomonas_reinh  | 72.90 | 0.00 |
| TRINITY_GAX8045 | hypothetChlamydomonas_eusti  | 72.90 | 0.00 |
| TRINITY_XP_0029 | hypothetVolvox_carteri       | 72.90 | 0.00 |
| TRINITY_KGN6251 | (hypothetCucumis_sativus     | 72.90 | 0.00 |
| TRINITY_ACG2448 | (60S ribcZea_mays            | 72.80 | 0.00 |
| TRINITY_XP_0063 | PREDICTISolanum_tuberosum    | 72.80 | 0.00 |
| TRINITY_PNH0179 | Ras-relTetrabaena_socialis   | 72.80 | 0.00 |
| TRINITY_GAX7794 | hypothetChlamydomonas_eusti  | 72.80 | 0.00 |
| TRINITY_XP_0056 | ribosomCoccomyxa_subellips   | 72.80 | 0.00 |
| TRINITY_PNW8710 | hypothetChlamydomonas_reinh  | 72.80 | 0.00 |
| TRINITY_RRT7395 | hypothetEnsete_ventricosum   | 72.80 | 0.00 |

|                  |                             |       |      |
|------------------|-----------------------------|-------|------|
| TRINITY_GBG72475 | hypothetChara_braunii       | 72.80 | 0.00 |
| TRINITY_A2T2X4.1 | RecName:Chlamydomonas_reinh | 72.80 | 0.00 |
| TRINITY_AML78291 | putativεPleurastrum_insigne | 72.80 | 0.00 |
| TRINITY_XP_00295 | hypothetVolvox_carteri      | 72.80 | 0.00 |
| TRINITY_KXZ55695 | hypothetGonium_pectorale    | 72.80 | 0.00 |
| TRINITY_XP_00584 | hypothetChlorella_variabili | 72.80 | 0.00 |
| TRINITY_GAX82654 | hypothetChlamydomonas_eusti | 72.80 | 0.00 |
| TRINITY_PNW73105 | hypothetChlamydomonas_reinh | 72.80 | 0.00 |
| TRINITY_XP_02644 | RING-bo>Papaver_somniferum  | 72.80 | 0.00 |
| TRINITY_XP_02644 | RING-bo>Papaver_somniferum  | 72.80 | 0.00 |
| TRINITY_GAX74406 | hypothetChlamydomonas_eusti | 72.80 | 0.00 |
| TRINITY_PNW89001 | hypothetChlamydomonas_reinh | 72.80 | 0.00 |
| TRINITY_OTG22836 | putativεHelianthus_annuus   | 72.70 | 0.00 |
| TRINITY_GAX83107 | hypothetChlamydomonas_eusti | 72.70 | 0.00 |
| TRINITY_GBG71266 | hypothetChara_braunii       | 72.70 | 0.00 |
| TRINITY_XP_02396 | 40S rib<Quercus_suber       | 72.70 | 0.00 |
| TRINITY_KMS64494 | hypothetBeta_vulgaris       | 72.70 | 0.00 |
| TRINITY_XP_00294 | hypothetVolvox_carteri      | 72.70 | 0.00 |
| TRINITY_P0C8M8.1 | RecName:Zea_mays            | 72.70 | 0.00 |
| TRINITY_PNW78506 | hypothetChlamydomonas_reinh | 72.70 | 0.00 |
| TRINITY_GAX77312 | hypothetChlamydomonas_eusti | 72.70 | 0.00 |
| TRINITY_PON97647 | U5 smallTrema_orientale     | 72.70 | 0.00 |
| TRINITY_GAX75458 | hypothetChlamydomonas_eusti | 72.70 | 0.00 |
| TRINITY_XP_00295 | hypothetVolvox_carteri      | 72.70 | 0.00 |
| TRINITY_KXZ45466 | hypothetGonium_pectorale    | 72.70 | 0.00 |
| TRINITY_RAL40391 | hypothetCuscuta_australis   | 72.70 | 0.00 |
| TRINITY_GAQ77748 | hypothetKlebsormidium_niten | 72.70 | 0.00 |
| TRINITY_KXZ51655 | hypothetGonium_pectorale    | 72.70 | 0.00 |
| TRINITY_XP_00256 | DEAD/DE7Micromonas_commoda  | 72.60 | 0.00 |
| TRINITY_XP_00295 | moleculεVolvox_carteri      | 72.60 | 0.00 |
| TRINITY_VDD49652 | unnamed Brassica_oleracea   | 72.60 | 0.00 |
| TRINITY_KMS64936 | hypothetBeta_vulgaris       | 72.60 | 0.00 |
| TRINITY_XP_00165 | predictεChlamydomonas_reinh | 72.60 | 0.00 |
| TRINITY_GAX82023 | hypothetChlamydomonas_eusti | 72.60 | 0.00 |
| TRINITY_KXZ42331 | hypothetGonium_pectorale    | 72.60 | 0.00 |
| TRINITY_XP_00295 | hypothetVolvox_carteri      | 72.60 | 0.00 |
| TRINITY_GAX79225 | hypothetChlamydomonas_eusti | 72.60 | 0.00 |
| TRINITY_XP_00295 | hypothetVolvox_carteri      | 72.60 | 0.00 |
| TRINITY_PSC74533 | ProtochlMicractinium_conduc | 72.60 | 0.00 |
| TRINITY_GAX84236 | hypothetChlamydomonas_eusti | 72.60 | 0.00 |
| TRINITY_KXZ52275 | hypothetGonium_pectorale    | 72.60 | 0.00 |
| TRINITY_XP_00294 | mitochorVolvox_carteri      | 72.60 | 0.00 |
| TRINITY_PNW87875 | hypothetChlamydomonas_reinh | 72.60 | 0.00 |
| TRINITY_GAX79372 | hypothetChlamydomonas_eusti | 72.60 | 0.00 |
| TRINITY_CAA69144 | apocyto<Chlorogonium_elonga | 72.60 | 0.00 |
| TRINITY_GAX81367 | hypothetChlamydomonas_eusti | 72.60 | 0.00 |
| TRINITY_GAX74236 | hypothetChlamydomonas_eusti | 72.60 | 0.00 |
| TRINITY_GAX84036 | hypothetChlamydomonas_eusti | 72.60 | 0.00 |
| TRINITY_XP_00294 | hypothetVolvox_carteri      | 72.60 | 0.00 |
| TRINITY_XP_00295 | histone Volvox_carteri      | 72.60 | 0.00 |
| TRINITY_XP_00564 | ribosomεCoccomyxa_subellips | 72.50 | 0.00 |
| TRINITY_EPS62326 | hypothetGenlisea_aurea      | 72.50 | 0.00 |
| TRINITY_PNW84966 | hypothetChlamydomonas_reinh | 72.50 | 0.00 |
| TRINITY_XP_01886 | PREDICTεJuglans_regia       | 72.50 | 0.00 |
| TRINITY_XP_02389 | 60S rib<Quercus_suber       | 72.50 | 0.00 |
| TRINITY_ABK96406 | unknown Populus_trichocarpa | 72.50 | 0.00 |
| TRINITY_GAX85453 | hypothetChlamydomonas_eusti | 72.50 | 0.00 |
| TRINITY_GBF95639 | glutamiRaphidocelis_subcap  | 72.50 | 0.00 |
| TRINITY_GAX81867 | hypothetChlamydomonas_eusti | 72.50 | 0.00 |
| TRINITY_PNW75706 | hypothetChlamydomonas_reinh | 72.50 | 0.00 |
| TRINITY_GBF96066 | chloroplRaphidocelis_subcap | 72.50 | 0.00 |
| TRINITY_GAX84032 | hypothetChlamydomonas_eusti | 72.50 | 0.00 |
| TRINITY_XP_00294 | hypothetVolvox_carteri      | 72.50 | 0.00 |
| TRINITY_PNW88355 | hypothetChlamydomonas_reinh | 72.50 | 0.00 |
| TRINITY_KXZ53533 | hypothetGonium_pectorale    | 72.50 | 0.00 |
| TRINITY_XP_02446 | uncharacPhyscomitrella_pate | 72.50 | 0.00 |

|                 |                              |       |      |
|-----------------|------------------------------|-------|------|
| TRINITY_GAX7620 | hypothetChlamydomonas_eusti  | 72.50 | 0.00 |
| TRINITY_KMS6478 | hypothetBeta_vulgaris        | 72.50 | 0.00 |
| TRINITY_PNW8630 | hypothetChlamydomonas_reinh  | 72.50 | 0.00 |
| TRINITY_PNW8614 | hypothetChlamydomonas_reinh  | 72.50 | 0.00 |
| TRINITY_XP_0138 | ribonuc]Monoraphidium_negle  | 72.50 | 0.00 |
| TRINITY_KXZ4323 | hypothetGonium_pectorale     | 72.50 | 0.00 |
| TRINITY_XP_0016 | mixed liChlamydomonas_reinh  | 72.50 | 0.00 |
| TRINITY_PSC7574 | AmidophcMicractinium_conduc  | 72.50 | 0.00 |
| TRINITY_XP_0016 | predicteChlamydomonas_reinh  | 72.50 | 0.00 |
| TRINITY_PIA3182 | hypothetAquilegia_coerulea   | 72.50 | 0.00 |
| TRINITY_KXZ4873 | hypothetGonium_pectorale     | 72.50 | 0.00 |
| TRINITY_PSC6927 | RibosomMicractinium_conduc   | 72.50 | 0.00 |
| TRINITY_XP_0029 | alanine Volvox_carteri       | 72.50 | 0.00 |
| TRINITY_PNW7409 | hypothetChlamydomonas_reinh  | 72.50 | 0.00 |
| TRINITY_XP_0029 | GTP-binSelaginella_moellen   | 72.50 | 0.00 |
| TRINITY_KXZ4845 | hypothetGonium_pectorale     | 72.50 | 0.00 |
| TRINITY_PNW7427 | hypothetChlamydomonas_reinh  | 72.50 | 0    |
| TRINITY_GAX7420 | hypothetChlamydomonas_eusti  | 72.50 | 0.00 |
| TRINITY_XP_0139 | ubiquitiMonoraphidium_negle  | 72.40 | 0.00 |
| TRINITY_RXH6945 | hypothetMalus_domestica      | 72.40 | 0.00 |
| TRINITY_XP_0029 | hypothetVolvox_carteri       | 72.40 | 0.00 |
| TRINITY_XP_0063 | PREDICTISolanum_tuberosum    | 72.40 | 0.00 |
| TRINITY_XP_0138 | hypothetMonoraphidium_negle  | 72.40 | 0.00 |
| TRINITY_KXZ4921 | hypothetGonium_pectorale     | 72.40 | 0.00 |
| TRINITY_PHU0042 | PolyubicCapsicum_chinense    | 72.40 | 0.00 |
| TRINITY_PNW7798 | hypothetChlamydomonas_reinh  | 72.40 | 0.00 |
| TRINITY_GAQ8332 | sumo corKlebsormidium_niten  | 72.40 | 0.00 |
| TRINITY_GAX7738 | hypothetChlamydomonas_eusti  | 72.40 | 0.00 |
| TRINITY_GAX7448 | hypothetChlamydomonas_eusti  | 72.40 | 0.00 |
| TRINITY_RLM7435 | 60S ribcPanicum_miliaceum    | 72.30 | 0.00 |
| TRINITY_XP_0202 | cytochrAsparagus_official    | 72.30 | 0.00 |
| TRINITY_GAQ8693 | hypothetKlebsormidium_niten  | 72.30 | 0.00 |
| TRINITY_EPS7280 | hypothetGenlisea_aurea       | 72.30 | 0.00 |
| TRINITY_XP_0029 | p300/CBIVolvox_carteri       | 72.30 | 0.00 |
| TRINITY_XP_0029 | isocitrVolvox_carteri        | 72.30 | 0.00 |
| TRINITY_BAT8558 | hypothetVigna_angularis      | 72.30 | 0.00 |
| TRINITY_PNW8183 | hypothetChlamydomonas_reinh  | 72.30 | 0.00 |
| TRINITY_XP_0243 | 626S protPhyscomitrella_pate | 72.30 | 0.00 |
| TRINITY_GAX8001 | hypothetChlamydomonas_eusti  | 72.30 | 0.00 |
| TRINITY_XP_0016 | predicteChlamydomonas_reinh  | 72.30 | 0.00 |
| TRINITY_XP_0243 | ribosomePhyscomitrella_pate  | 72.30 | 0.00 |
| TRINITY_KXZ4525 | hypothetGonium_pectorale     | 72.30 | 0.00 |
| TRINITY_GAX7866 | hypothetChlamydomonas_eusti  | 72.30 | 0.00 |
| TRINITY_XP_0016 | Qb-SNAREChlamydomonas_reinh  | 72.30 | 0.00 |
| TRINITY_PNW7891 | hypothetChlamydomonas_reinh  | 72.30 | 0.00 |
| TRINITY_XP_0016 | O-linkeChlamydomonas_reinh   | 72.30 | 0.00 |
| TRINITY_KXZ5015 | hypothetGonium_pectorale     | 72.30 | 0.00 |
| TRINITY_GAX7260 | hypothetChlamydomonas_eusti  | 72.30 | 0.00 |
| TRINITY_OWM8129 | hypothetPunica_granatum      | 72.30 | 0.00 |
| TRINITY_XP_0139 | OTU domMonoraphidium_negle   | 72.30 | 0.00 |
| TRINITY_PNW8257 | hypothetChlamydomonas_reinh  | 72.30 | 0.00 |
| TRINITY_PNW7423 | hypothetChlamydomonas_reinh  | 72.20 | 0.00 |
| TRINITY_XP_0243 | ras-relPhyscomitrella_pate   | 72.20 | 0.00 |
| TRINITY_PNH0830 | NFX1-tyTetrabaena_socialis   | 72.20 | 0.00 |
| TRINITY_PRW2050 | Pre-mRNChlorella_sorokinia   | 72.20 | 0.00 |
| TRINITY_XP_0029 | ribonuc]Selaginella_moellen  | 72.20 | 0.00 |
| TRINITY_XP_0056 | PLP-depeCoccomyxa_subellips  | 72.20 | 0.00 |
| TRINITY_GAX8277 | hypothetChlamydomonas_eusti  | 72.20 | 0.00 |
| TRINITY_KXZ5456 | hypothetGonium_pectorale     | 72.20 | 0.00 |
| TRINITY_PNW7672 | hypothetChlamydomonas_reinh  | 72.20 | 0.00 |
| TRINITY_GBF9115 | hypothetRaphidocelis_subcap  | 72.20 | 0.00 |
| TRINITY_XP_0058 | hypothetChlorella_variabili  | 72.20 | 0.00 |
| TRINITY_KXZ4921 | hypothetGonium_pectorale     | 72.20 | 0.00 |
| TRINITY_XP_0056 | FKBP-tyCoccomyxa_subellips   | 72.20 | 0.00 |
| TRINITY_GAX7876 | hypothetChlamydomonas_eusti  | 72.20 | 0.00 |
| TRINITY_PNW6989 | hypothetChlamydomonas_reinh  | 72.20 | 0.00 |

|                  |                              |       |      |
|------------------|------------------------------|-------|------|
| TRINITY_KXZ53544 | hypothetGonium_pectorale     | 72.20 | 0.00 |
| TRINITY_XP_01943 | PREDICTH Lupinus_angustifoli | 72.20 | 0.00 |
| TRINITY_GAX84944 | hypothetChlamydomonas_eusti  | 72.20 | 0.00 |
| TRINITY_GAX76879 | hypothetChlamydomonas_eusti  | 72.20 | 0.00 |
| TRINITY_XP_00169 | rubisco Chlamydomonas_reinh  | 72.20 | 0.00 |
| TRINITY_PNW76800 | hypothetChlamydomonas_reinh  | 72.20 | 0.00 |
| TRINITY_PNH08163 | Splicinç Tetrabaena_socialis | 72.20 | 0.00 |
| TRINITY_XP_00294 | succinatVolvox_carteri       | 72.20 | 0.00 |
| TRINITY_GAX77698 | hypothetChlamydomonas_eusti  | 72.20 | 0    |
| TRINITY_XP_01389 | thiaminç Monoraphidium_negle | 72.20 | 0.00 |
| TRINITY_AWK67839 | ACOX [D] Dunaliella_tertiole | 72.20 | 0.00 |
| TRINITY_PNW85682 | hypothetChlamydomonas_reinh  | 72.20 | 0.00 |
| TRINITY_KXZ53712 | hypothetGonium_pectorale     | 72.20 | 0.00 |
| TRINITY_ABK2651  | (unknown Picea_sitchensis    | 72.20 | 0.00 |
| TRINITY_ABK2651  | (unknown Picea_sitchensis    | 72.20 | 0.00 |
| TRINITY_KMS93274 | hypothetBeta_vulgaris        | 72.10 | 0.00 |
| TRINITY_PNH07376 | GTP-binç Tetrabaena_socialis | 72.10 | 0.00 |
| TRINITY_GAX76309 | hypothetChlamydomonas_eusti  | 72.10 | 0.00 |
| TRINITY_XP_00250 | predictç Micromonas_commoda  | 72.10 | 0.00 |
| TRINITY_XP_01390 | hypothetMonoraphidium_negle  | 72.10 | 0.00 |
| TRINITY_XP_00701 | PREDICTH Theobroma_cacao     | 72.10 | 0.00 |
| TRINITY_KXZ50612 | hypothetGonium_pectorale     | 72.10 | 0.00 |
| TRINITY_XP_00169 | sirohydç Chlamydomonas_reinh | 72.10 | 0.00 |
| TRINITY_XP_00294 | hypothetVolvox_carteri       | 72.10 | 0.00 |
| TRINITY_GAX86383 | hypothetChlamydomonas_eusti  | 72.10 | 0.00 |
| TRINITY_GAX82786 | hypothetChlamydomonas_eusti  | 72.10 | 0.00 |
| TRINITY_XP_02087 | ATP-depeç Arabidopsis_lyrata | 72.10 | 0.00 |
| TRINITY_GBF89565 | hypothetRaphidocelis_subcap  | 72.10 | 0.00 |
| TRINITY_KMZ59472 | Cyclin-ç Zostera_marina      | 72.10 | 0.00 |
| TRINITY_PNW85267 | hypothetChlamydomonas_reinh  | 72.10 | 0.00 |
| TRINITY_GAX80939 | hypothetChlamydomonas_eusti  | 72.10 | 0.00 |
| TRINITY_GAX85748 | hypothetChlamydomonas_eusti  | 72.10 | 0.00 |
| TRINITY_XP_01942 | PREDICTH Lupinus_angustifoli | 72.10 | 0.00 |
| TRINITY_KXZ44332 | hypothetGonium_pectorale     | 72.10 | 0.00 |
| TRINITY_KXZ42649 | hypothetGonium_pectorale     | 72.10 | 0.00 |
| TRINITY_PNH05527 | Chaperor Tetrabaena_socialis | 72.10 | 0.00 |
| TRINITY_XP_02300 | ATP-depeç Cucurbita_maxima   | 72.10 | 0.00 |
| TRINITY_XP_01069 | PREDICTH Beta_vulgaris       | 72.10 | 0.00 |
| TRINITY_XP_02127 | 60S ribç Herrania_umbratica  | 72.00 | 0.00 |
| TRINITY_OAE31958 | hypothetMarchantia_polymorp  | 72.00 | 0.00 |
| TRINITY_ACN94453 | photosyç Dunaliella_salina   | 72.00 | 0.00 |
| TRINITY_GAX74724 | hypothetChlamydomonas_eusti  | 72.00 | 0.00 |
| TRINITY_XP_01069 | PREDICTH Beta_vulgaris       | 72.00 | 0.00 |
| TRINITY_XP_00976 | PREDICTH Nicotiana_sylvestri | 72.00 | 0.00 |
| TRINITY_XP_00294 | hypothetVolvox_carteri       | 72.00 | 0.00 |
| TRINITY_ABD64591 | ribosomç Chlamydomonas_sp._I | 72.00 | 0.00 |
| TRINITY_XP_00584 | hypothetChlorella_variabili  | 72.00 | 0.00 |
| TRINITY_GAX84584 | hypothetChlamydomonas_eusti  | 72.00 | 0.00 |
| TRINITY_GAX81666 | hypothetChlamydomonas_eusti  | 72.00 | 0.00 |
| TRINITY_XP_00170 | peroxisç Chlamydomonas_reinh | 72.00 | 0.00 |
| TRINITY_XP_02437 | 26S protPhyscomitrella_pate  | 72.00 | 0.00 |
| TRINITY_XP_00169 | splicinç Chlamydomonas_reinh | 72.00 | 0.00 |
| TRINITY_GBF97232 | sec-indç Raphidocelis_subcap | 72.00 | 0.00 |
| TRINITY_XP_01650 | PREDICTH Nicotiana_tabacum   | 71.90 | 0.00 |
| TRINITY_XP_00169 | ribosomç Chlamydomonas_reinh | 71.90 | 0.00 |
| TRINITY_XP_02387 | uncharaç Quercus_suber       | 71.90 | 0.00 |
| TRINITY_XP_00169 | mitochor Chlamydomonas_reinh | 71.90 | 0.00 |
| TRINITY_PNH02109 | hypothetTetrabaena_socialis  | 71.90 | 0.00 |
| TRINITY_KXZ51559 | hypothetGonium_pectorale     | 71.90 | 0.00 |
| TRINITY_XP_00294 | hypothetVolvox_carteri       | 71.90 | 0.00 |
| TRINITY_XP_00169 | predictç Chlamydomonas_reinh | 71.90 | 0.00 |
| TRINITY_XP_00584 | hypothetChlorella_variabili  | 71.90 | 0.00 |
| TRINITY_GAX75437 | hypothetChlamydomonas_eusti  | 71.90 | 0.00 |
| TRINITY_XP_00170 | predictç Chlamydomonas_reinh | 71.90 | 0.00 |
| TRINITY_GAX83249 | hypothetChlamydomonas_eusti  | 71.90 | 0.00 |
| TRINITY_GAX80248 | hypothetChlamydomonas_eusti  | 71.90 | 0.00 |

|                   |          |                     |       |      |
|-------------------|----------|---------------------|-------|------|
| TRINITY_GAX80721  | hypothet | Chlamydomonas_eusti | 71.90 | 0.00 |
| TRINITY_XP_01067  | PREDICTI | Beta_vulgaris       | 71.80 | 0.00 |
| TRINITY_XP_00823  | PREDICTI | Prunus_mume         | 71.80 | 0.00 |
| TRINITY_XP_00823  | PREDICTI | Prunus_mume         | 71.80 | 0.00 |
| TRINITY_XP_00169  | uoporpr  | Chlamydomonas_reinh | 71.80 | 0.00 |
| TRINITY_AAO00863  | Unknown  | Arabidopsis_thalian | 71.80 | 0.00 |
| TRINITY_XP_02018  | cytoplas | Aegilops_tauschii   | 71.80 | 0.00 |
| TRINITY_GAX77074  | hypothet | Chlamydomonas_eusti | 71.80 | 0.00 |
| TRINITY_GAX75491  | hypothet | Chlamydomonas_eusti | 71.80 | 0.00 |
| TRINITY_XP_00168  | lipocate | Chlamydomonas_reinh | 71.80 | 0.00 |
| TRINITY_PNW80349  | hypothet | Chlamydomonas_reinh | 71.80 | 0.00 |
| TRINITY_GBF97134  | hypothet | Raphidocelis_subcap | 71.80 | 0.00 |
| TRINITY_GAX76659  | hypothet | Chlamydomonas_eusti | 71.80 | 0.00 |
| TRINITY_PRW60787  | Ribosom  | Chlorella_sorokinia | 71.80 | 0.00 |
| TRINITY_GBF92959  | ubiquiti | Raphidocelis_subcap | 71.80 | 0.00 |
| TRINITY_GAX79261  | hypothet | Chlamydomonas_eusti | 71.80 | 0.00 |
| TRINITY_XP_00169  | predicte | Chlamydomonas_reinh | 71.80 | 0.00 |
| TRINITY_PNW80590  | hypothet | Chlamydomonas_reinh | 71.80 | 0.00 |
| TRINITY_KMS64936  | hypothet | Beta_vulgaris       | 71.80 | 0.00 |
| TRINITY_GAX74230  | hypothet | Chlamydomonas_eusti | 71.80 | 0.00 |
| TRINITY_XP_02439  | NEDD8-c  | Physcomitrella_pate | 71.70 | 0.00 |
| TRINITY_XP_02273  | unchara  | Durio_zibethinus    | 71.70 | 0.00 |
| TRINITY_GAX80193  | hypothet | Chlamydomonas_eusti | 71.70 | 0.00 |
| TRINITY_XP_00294  | hypothet | Volvox_carteri      | 71.70 | 0.00 |
| TRINITY_GBG62922  | hypothet | Chara_braunii       | 71.70 | 0.00 |
| TRINITY_BAK05600  | predicte | Hordeum_vulgare     | 71.70 | 0.00 |
| TRINITY_XP_00170  | peptidy  | Chlamydomonas_reinh | 71.70 | 0.00 |
| TRINITY_PNW86969  | hypothet | Chlamydomonas_reinh | 71.70 | 0.00 |
| TRINITY_PNH07921  | Ribokin  | Tetrabaena_socialis | 71.70 | 0.00 |
| TRINITY_KXZ47131  | hypothet | Gonium_pectorale    | 71.70 | 0.00 |
| TRINITY_PRW60631  | starch   | Chlorella_sorokinia | 71.70 | 0.00 |
| TRINITY_GAX80960  | hypothet | Chlamydomonas_eusti | 71.70 | 0.00 |
| TRINITY_XP_00294  | hypothet | Volvox_carteri      | 71.70 | 0.00 |
| TRINITY_XP_02439  | ruvB-li  | Physcomitrella_pate | 71.70 | 0.00 |
| TRINITY_GAX82144  | hypothet | Chlamydomonas_eusti | 71.70 | 0.00 |
| TRINITY_GAX86014  | hypothet | Chlamydomonas_eusti | 71.70 | 0.00 |
| TRINITY_KXZ51620  | hypothet | Gonium_pectorale    | 71.70 | 0.00 |
| TRINITY_KXZ45060  | hypothet | Gonium_pectorale    | 71.70 | 0.00 |
| TRINITY_GAX73128  | hypothet | Chlamydomonas_eusti | 71.70 | 0.00 |
| TRINITY_XP_02289  | heat sh  | Olea_europaea       | 71.70 | 0.00 |
| TRINITY_GAX75387  | hypothet | Chlamydomonas_eusti | 71.70 | 0.00 |
| TRINITY_YP_009464 | 4-dihyd  | Haematococcus_lacus | 71.70 | 0.00 |
| TRINITY_GAX78214  | hypothet | Chlamydomonas_eusti | 71.70 | 0.00 |
| TRINITY_GAX75393  | hypothet | Chlamydomonas_eusti | 71.70 | 0.00 |
| TRINITY_PNW69577  | hypothet | Chlamydomonas_reinh | 71.70 | 0.00 |
| TRINITY_GAX80177  | hypothet | Chlamydomonas_eusti | 71.70 | 0.00 |
| TRINITY_XP_00294  | hypothet | Volvox_carteri      | 71.70 | 0.00 |
| TRINITY_GAX76799  | hypothet | Chlamydomonas_eusti | 71.70 | 0    |
| TRINITY_PNH02322  | Histone  | Tetrabaena_socialis | 71.70 | 0.00 |
| TRINITY_GAX83623  | hypothet | Chlamydomonas_eusti | 71.70 | 0.00 |
| TRINITY_GAX81924  | hypothet | Chlamydomonas_eusti | 71.70 | 0.00 |
| TRINITY_XP_01390  | cytochr  | Monoraphidium_negle | 71.70 | 0.00 |
| TRINITY_XP_00294  | hypothet | Volvox_carteri      | 71.70 | 0.00 |
| TRINITY_XP_02388  | ras-rel  | Quercus_suber       | 71.60 | 0.00 |
| TRINITY_XP_02452  | DEAD-bo  | Selaginella_moellen | 71.60 | 0.00 |
| TRINITY_XP_01564  | protein  | Oryza_sativa        | 71.60 | 0.00 |
| TRINITY_XP_02058  | 60S rib  | Phalaenopsis_equest | 71.60 | 0.00 |
| TRINITY_BAK00241  | predicte | Hordeum_vulgare     | 71.60 | 0    |
| TRINITY_XP_02167  | 60S rib  | Hevea_brasiliensis  | 71.60 | 0.00 |
| TRINITY_XP_00294  | peptidy  | Selaginella_moellen | 71.60 | 0.00 |
| TRINITY_KXZ50922  | hypothet | Gonium_pectorale    | 71.60 | 0.00 |
| TRINITY_PNW77923  | hypothet | Chlamydomonas_reinh | 71.60 | 0.00 |
| TRINITY_XP_00169  | dihydro  | Chlamydomonas_reinh | 71.60 | 0.00 |
| TRINITY_KXZ55909  | hypothet | Gonium_pectorale    | 71.60 | 0.00 |
| TRINITY_PNW73019  | hypothet | Chlamydomonas_reinh | 71.60 | 0.00 |
| TRINITY_XP_00170  | peptidy  | Chlamydomonas_reinh | 71.60 | 0.00 |

|                                             |       |      |
|---------------------------------------------|-------|------|
| TRINITY_XP_00169predictεChlamydomonas_reinh | 71.60 | 0.00 |
| TRINITY_GAX73748hypothetChlamydomonas_eusti | 71.60 | 0.00 |
| TRINITY_XP_01389MAP kinεMonoraphidium_negle | 71.60 | 0.00 |
| TRINITY_KGN62525hypothetCucumis_sativus     | 71.60 | 0.00 |
| TRINITY_XP_02021ubiquitiCajanus_cajan       | 71.50 | 0.00 |
| TRINITY_XP_00169sulfate Chlamydomonas_reinh | 71.50 | 0.00 |
| TRINITY_KXZ52564hypothetGonium_pectorale    | 71.50 | 0.00 |
| TRINITY_GAX81345hypothetChlamydomonas_eusti | 71.50 | 0.00 |
| TRINITY_KXZ50178hypothetGonium_pectorale    | 71.50 | 0.00 |
| TRINITY_BAK01187predictεHordeum_vulgare     | 71.50 | 0.00 |

|                  |          |                     |       |      |
|------------------|----------|---------------------|-------|------|
| TRINITY_XP_00295 | hypothet | Volvox_carteri      | 71.50 | 0.00 |
| TRINITY_XP_00168 | deoxy    | Chlamydomonas_reinh | 71.50 | 0.00 |
| TRINITY_PNW77593 | hypothet | Chlamydomonas_reinh | 71.50 | 0.00 |
| TRINITY_GAX76784 | hypothet | Chlamydomonas_eusti | 71.50 | 0.00 |
| TRINITY_GAX7647  | hypothet | Chlamydomonas_eusti | 71.50 | 0.00 |
| TRINITY_XP_00295 | meiotic  | Volvox_carteri      | 71.50 | 0.00 |
| TRINITY_PNW73926 | hypothet | Chlamydomonas_reinh | 71.50 | 0    |
| TRINITY_XP_00305 | predict  | Micromonas_pusilla  | 71.40 | 0.00 |
| TRINITY_ACU24256 | unknown  | Glycine_max         | 71.40 | 0.00 |
| TRINITY_XP_00305 | predict  | Micromonas_pusilla  | 71.40 | 0.00 |
| TRINITY_ACT33369 | mago na  | Lycoris_radiata     | 71.40 | 0.00 |
| TRINITY_BAK03491 | predict  | Hordeum_vulgare     | 71.40 | 0.00 |
| TRINITY_PNH12876 | Mitochor | Tetrabaena_socialis | 71.40 | 0.00 |
| TRINITY_XP_01101 | PREDICT  | Populus_euphratica  | 71.40 | 0.00 |
| TRINITY_XP_01389 | autopha  | Monoraphidium_negle | 71.40 | 0.00 |
| TRINITY_XP_02439 | 60S rib  | Physcomitrella_pate | 71.40 | 0.00 |
| TRINITY_PNH04467 | Methyl   | Tetrabaena_socialis | 71.40 | 0.00 |
| TRINITY_PIA58609 | hypothet | Aquilegia_coerulea  | 71.40 | 0.00 |
| TRINITY_CCC55422 | S-adenos | Pinus_pinaster      | 71.40 | 0.00 |
| TRINITY_GAX78892 | hypothet | Chlamydomonas_eusti | 71.40 | 0.00 |
| TRINITY_XP_00170 | ubiquin  | Chlamydomonas_reinh | 71.40 | 0.00 |
| TRINITY_PNW79612 | hypothet | Chlamydomonas_reinh | 71.40 | 0.00 |
| TRINITY_PNH03720 | hypothet | Tetrabaena_socialis | 71.40 | 0.00 |
| TRINITY_PNW77493 | hypothet | Chlamydomonas_reinh | 71.40 | 0.00 |
| TRINITY_PNH12733 | hypothet | Tetrabaena_socialis | 71.40 | 0.00 |
| TRINITY_XP_00169 | predict  | Chlamydomonas_reinh | 71.40 | 0.00 |
| TRINITY_GAX78639 | hypothet | Chlamydomonas_eusti | 71.40 | 0.00 |
| TRINITY_GAQ85287 | small n  | Klebsormidium_niten | 71.40 | 0.00 |
| TRINITY_GAX73482 | hypothet | Chlamydomonas_eusti | 71.40 | 0.00 |
| TRINITY_GAX79289 | hypothet | Chlamydomonas_eusti | 71.40 | 0.00 |
| TRINITY_KXZ43546 | hypothet | Gonium_pectorale    | 71.40 | 0.00 |
| TRINITY_KXZ51579 | hypothet | Gonium_pectorale    | 71.40 | 0.00 |
| TRINITY_XP_02454 | putativ  | Selaginella_moellen | 71.40 | 0.00 |
| TRINITY_GAX74145 | hypothet | Chlamydomonas_eusti | 71.40 | 0.00 |
| TRINITY_GAX82024 | hypothet | Chlamydomonas_eusti | 71.40 | 0.00 |
| TRINITY_XP_02641 | pyruvat  | Papaver_somniferum  | 71.40 | 0.00 |
| TRINITY_XP_00169 | predict  | Chlamydomonas_reinh | 71.40 | 0.00 |
| TRINITY_GAX79143 | hypothet | Chlamydomonas_eusti | 71.40 | 0.00 |
| TRINITY_GAX84985 | hypothet | Chlamydomonas_eusti | 71.40 | 0.00 |
| TRINITY_GAX81139 | hypothet | Chlamydomonas_eusti | 71.40 | 0.00 |
| TRINITY_ACG25031 | 60S rib  | Zea_mays            | 71.40 | 0.00 |
| TRINITY_XP_00940 | PREDICT  | Musa_acuminata      | 71.30 | 0.00 |
| TRINITY_ADE77564 | unknown  | Picea_sitchensis    | 71.30 | 0.00 |
| TRINITY_XP_02498 | transcri | Cynara_cardunculus  | 71.30 | 0.00 |
| TRINITY_AEG74028 | alpha-t  | Apopellia_endiviifo | 71.30 | 0.00 |
| TRINITY_XP_02387 | 40S rib  | Quercus_suber       | 71.30 | 0.00 |
| TRINITY_GAQ90682 | DNA rep  | Klebsormidium_niten | 71.30 | 0.00 |
| TRINITY_XP_01139 | Tubulin  | Auxenochlorella_pro | 71.30 | 0.00 |
| TRINITY_PNW80428 | hypothet | Chlamydomonas_reinh | 71.30 | 0.00 |
| TRINITY_XP_00170 | kinesin  | Chlamydomonas_reinh | 71.30 | 0.00 |
| TRINITY_XP_00170 | myo-ino  | Chlamydomonas_reinh | 71.30 | 0.00 |
| TRINITY_PNH02790 | hypothet | Tetrabaena_socialis | 71.30 | 0.00 |
| TRINITY_XP_00564 | formamic | Coccomyxa_subellips | 71.30 | 0.00 |
| TRINITY_ABA01140 | chlorop  | Chlamydomonas_incer | 71.30 | 0.00 |
| TRINITY_XP_01389 | ribulos  | Monoraphidium_negle | 71.30 | 0.00 |
| TRINITY_PNW78932 | hypothet | Chlamydomonas_reinh | 71.30 | 0.00 |
| TRINITY_XP_00294 | Kar3 men | Volvox_carteri      | 71.30 | 0    |
| TRINITY_GAX83470 | hypothet | Chlamydomonas_eusti | 71.30 | 0.00 |
| TRINITY_GAX84287 | hypothet | Chlamydomonas_eusti | 71.30 | 0.00 |
| TRINITY_GAX78677 | hypothet | Chlamydomonas_eusti | 71.30 | 0.00 |
| TRINITY_GAQ90760 | Inositol | Klebsormidium_niten | 71.30 | 0.00 |
| TRINITY_PNW76169 | hypothet | Chlamydomonas_reinh | 71.30 | 0    |
| TRINITY_EFJ16334 | hypothet | Selaginella_moellen | 71.20 | 0.00 |
| TRINITY_EMS68701 | Inositol | Triticum_urartu     | 71.20 | 0.00 |
| TRINITY_RLN24162 | hypothet | Panicum_miliaceum   | 71.20 | 0.00 |
| TRINITY_XP_00564 | threony  | Coccomyxa_subellips | 71.20 | 0.00 |



|                     |                             |       |      |
|---------------------|-----------------------------|-------|------|
| TRINITY_RLM86744    | hypothetPanicum_miliaceum   | 71.20 | 0.00 |
| TRINITY_XP_0238740S | ribcQuercus_suber           | 71.20 | 0.00 |
| TRINITY_XP_01284    | PREDICTErythranthe_guttata  | 71.20 | 0.00 |
| TRINITY_XP_0238860S | ribcQuercus_suber           | 71.20 | 0.00 |
| TRINITY_XP_0238860S | ribcQuercus_suber           | 71.20 | 0.00 |
| TRINITY_XP_00295    | hypothetVolvox_carteri      | 71.20 | 0.00 |
| TRINITY_XP_00295    | hypothetVolvox_carteri      | 71.20 | 0.00 |
| TRINITY_XP_00295    | hypothetVolvox_carteri      | 71.20 | 0.00 |
| TRINITY_XP_00169    | predicteChlamydomonas_reinh | 71.20 | 0.00 |
| TRINITY_OEL22242    | Heat shcDichanthelium_oligo | 71.20 | 0.00 |
| TRINITY_PNH08303    | NFX1-tyrTetrabaena_socialis | 71.20 | 0.00 |
| TRINITY_XP_00294    | hypothetVolvox_carteri      | 71.20 | 0.00 |
| TRINITY_PRW57382    | FO syntlChlorella_sorokinia | 71.20 | 0.00 |
| TRINITY_XP_00295    | hypothetVolvox_carteri      | 71.20 | 0.00 |
| TRINITY_OUS42089    | PsaL phcOstreococcus_tauri  | 71.20 | 0.00 |
| TRINITY_KXZ56693    | hypothetGonium_pectorale    | 71.20 | 0.00 |
| TRINITY_KXZ50302    | hypothetGonium_pectorale    | 71.20 | 0.00 |
| TRINITY_XP_00294    | hypothetVolvox_carteri      | 71.20 | 0.00 |
| TRINITY_PNW84602    | hypothetChlamydomonas_reinh | 71.20 | 0.00 |
| TRINITY_XP_01390    | DNA ligcMonoraphidium_negle | 71.20 | 0.00 |
| TRINITY_GAX78824    | hypothetChlamydomonas_eusti | 71.20 | 0    |
| TRINITY_AAO73551    | reverse-Chlamydomonas_reinh | 71.20 | 0.00 |
| TRINITY_XP_00294    | hypothetVolvox_carteri      | 71.20 | 0.00 |
| TRINITY_XP_00294    | copper tVolvox_carteri      | 71.20 | 0.00 |
| TRINITY_KRH17792    | hypothetGlycine_max         | 71.20 | 0.00 |
| TRINITY_GBF87741    | hypothetRaphidocelis_subcap | 71.20 | 0.00 |
| TRINITY_GAX76339    | hypothetChlamydomonas_eusti | 71.10 | 0.00 |
| TRINITY_XP_02790    | ADP-ribcVigna_unguiculata   | 71.10 | 0.00 |
| TRINITY_XP_00295    | isocitræVolvox_carteri      | 71.10 | 0.00 |
| TRINITY_XP_00169    | predicteChlamydomonas_reinh | 71.10 | 0.00 |
| TRINITY_XP_00294    | hypothetVolvox_carteri      | 71.10 | 0.00 |
| TRINITY_XP_00170    | predicteChlamydomonas_reinh | 71.10 | 0.00 |
| TRINITY_GBF89971    | FAD depcRaphidocelis_subcap | 71.10 | 0.00 |
| TRINITY_XP_00141    | predicteOstreococcus_sp._'1 | 71.10 | 0.00 |
| TRINITY_PWZ24088    | ADP-ribcZea_mays            | 71.10 | 0.00 |
| TRINITY_XP_02189    | eukaryotCarica_papaya       | 71.10 | 0.00 |
| TRINITY_KXZ47614    | hypothetGonium_pectorale    | 71.10 | 0.00 |
| TRINITY_GAX82839    | hypothetChlamydomonas_eusti | 71.10 | 0.00 |
| TRINITY_KXZ55977    | hypothetGonium_pectorale    | 71.10 | 0.00 |
| TRINITY_GBF99296    | hypothetRaphidocelis_subcap | 71.10 | 0.00 |
| TRINITY_GAX84151    | hypothetChlamydomonas_eusti | 71.10 | 0.00 |
| TRINITY_XP_00305    | mRNA spMicromonas_pusilla   | 71.10 | 0.00 |
| TRINITY_PNW70456    | hypothetChlamydomonas_reinh | 71.10 | 0.00 |
| TRINITY_PNW77250    | hypothetChlamydomonas_reinh | 71.10 | 0.00 |
| TRINITY_XP_00295    | hypothetVolvox_carteri      | 71.10 | 0.00 |
| TRINITY_ADE77177    | unknown Picea_sitchensis    | 71.10 | 0.00 |
| TRINITY_XP_00168    | peptidy]Chlamydomonas_reinh | 71.10 | 0.00 |
| TRINITY_XP_00169    | N-acety]Chlamydomonas_reinh | 71.10 | 0.00 |
| TRINITY_XP_00169    | peptidy]Chlamydomonas_reinh | 71.10 | 0.00 |
| TRINITY_PNH09081    | Prolyl 4Tetrabaena_socialis | 71.10 | 0.00 |
| TRINITY_PNH11228    | Peptidy]Tetrabaena_socialis | 71.10 | 0.00 |
| TRINITY_GAX78904    | hypothetChlamydomonas_eusti | 71.10 | 0.00 |
| TRINITY_GAX85978    | hypothetChlamydomonas_eusti | 71.10 | 0.00 |
| TRINITY_ABU95018    | intraflcChlamydomonas_reinh | 71.10 | 0.00 |
| TRINITY_XP_00564    | hypothetCoccomyxa_subellips | 71.00 | 0.00 |
| TRINITY_XP_02402    | H/ACA riMorus_notabilis     | 71.00 | 0.00 |
| TRINITY_BAJ93879    | predicteHordeum_vulgare     | 71.00 | 0.00 |
| TRINITY_XP_00306    | predicteMicromonas_pusilla  | 71.00 | 0.00 |
| TRINITY_GAX78992    | hypothetChlamydomonas_eusti | 71.00 | 0.00 |
| TRINITY_PRW58060    | ribonuc]Chlorella_sorokinia | 71.00 | 0.00 |
| TRINITY_XP_02392    | ras-relcQuercus_suber       | 71.00 | 0.00 |
| TRINITY_GAX74924    | hypothetChlamydomonas_eusti | 71.00 | 0.00 |
| TRINITY_XP_00169    | light-hcChlamydomonas_reinh | 71.00 | 0.00 |
| TRINITY_XP_00169    | R-SNARE Chlamydomonas_reinh | 71.00 | 0.00 |
| TRINITY_XP_00584    | hypothetChlorella_variabili | 71.00 | 0.00 |
| TRINITY_XP_00169    | inactiveChlamydomonas_reinh | 71.00 | 0.00 |

|                          |                     |       |      |
|--------------------------|---------------------|-------|------|
| TRINITY_PSC7223(FO synt  | Micractinium_conduc | 71.00 | 0.00 |
| TRINITY_PNW8627(hypothet | Chlamydomonas_reinh | 71.00 | 0.00 |
| TRINITY_XP_0029(hypothet | Volvox_carteri      | 71.00 | 0.00 |
| TRINITY_XP_0016(protein  | Chlamydomonas_reinh | 71.00 | 0.00 |
| TRINITY_KXZ4350(hypothet | Gonium_pectorale    | 71.00 | 0.00 |
| TRINITY_XP_0029(flagell  | Volvox_carteri      | 71.00 | 0.00 |
| TRINITY_PNW7415(hypothet | Chlamydomonas_reinh | 71.00 | 0.00 |
| TRINITY_GAX8227(hypothet | Chlamydomonas_eusti | 71.00 | 0.00 |
| TRINITY_GAX7863(hypothet | Chlamydomonas_eusti | 71.00 | 0.00 |
| TRINITY_PNW8529(hypothet | Chlamydomonas_reinh | 71.00 | 0.00 |
| TRINITY_KMS9434(hypothet | Beta_vulgaris       | 71.00 | 0.00 |
| TRINITY_XP_0167(PREDICTI | Gossypium_hirsutum  | 71.00 | 0.00 |
| TRINITY_XP_0058(hypothet | Chlorella_variabili | 71.00 | 0.00 |
| TRINITY_XP_0058(hypothet | Chlorella_variabili | 70.90 | 0.00 |
| TRINITY_RLN4024(ubiquiti | Panicum_miliaceum   | 70.90 | 0.00 |
| TRINITY_XP_0139(hypothet | Monoraphidium_negle | 70.90 | 0.00 |
| TRINITY_XP_0256(60S rib  | Arachis_hypogaea    | 70.90 | 0.00 |
| TRINITY_XP_0029(hypothet | Volvox_carteri      | 70.90 | 0.00 |
| TRINITY_OEL2224(Heat sh  | Dichanthelium_oligo | 70.90 | 0.00 |
| TRINITY_PNW7109(hypothet | Chlamydomonas_reinh | 70.90 | 0.00 |
| TRINITY_GAX8627(hypothet | Chlamydomonas_eusti | 70.90 | 0.00 |
| TRINITY_KXZ5582(hypothet | Gonium_pectorale    | 70.90 | 0.00 |
| TRINITY_GAX7279(hypothet | Chlamydomonas_eusti | 70.90 | 0.00 |
| TRINITY_KXZ4937(hypothet | Gonium_pectorale    | 70.90 | 0.00 |
| TRINITY_PNH0368(Poly(rC) | Tetrabaena_socialis | 70.90 | 0.00 |
| TRINITY_XP_0243(protein  | Physcomitrella_pate | 70.90 | 0.00 |
| TRINITY_XP_0016(mitochor | Chlamydomonas_reinh | 70.90 | 0.00 |
| TRINITY_RAL4797(hypothet | Cuscuta_australis   | 70.90 | 0.00 |
| TRINITY_XP_0240(DNA-dir  | Morus_notabilis     | 70.90 | 0.00 |
| TRINITY_ERM9372(hypothet | Amborella_trichopod | 70.90 | 0.00 |
| TRINITY_KXZ4766(hypothet | Gonium_pectorale    | 70.90 | 0.00 |
| TRINITY_XP_0025(histone  | Micromonas_commoda  | 70.90 | 0.00 |
| TRINITY_GBF9061(cadmium  | Raphidocelis_subcap | 70.90 | 0.00 |
| TRINITY_ACF7902(unknown  | Zea_mays            | 70.90 | 0.00 |
| TRINITY_GBF9937(3-hydro  | Raphidocelis_subcap | 70.90 | 0.00 |
| TRINITY_XP_0029(ATP-dep  | Volvox_carteri      | 70.90 | 0.00 |
| TRINITY_PNW8861(hypothet | Chlamydomonas_reinh | 70.90 | 0.00 |
| TRINITY_GAX7694(hypothet | Chlamydomonas_eusti | 70.90 | 0.00 |
| TRINITY_KXZ4493(hypothet | Gonium_pectorale    | 70.90 | 0.00 |
| TRINITY_XP_0016(mitogen- | Chlamydomonas_reinh | 70.90 | 0.00 |
| TRINITY_KXZ5394(hypothet | Gonium_pectorale    | 70.90 | 0.00 |
| TRINITY_PTQ4421(hypothet | Marchantia_polymorp | 70.90 | 0.00 |
| TRINITY_XP_0029(peroxir  | Volvox_carteri      | 70.80 | 0.00 |
| TRINITY_XP_0029(tubulin  | Selaginella_moellen | 70.80 | 0.00 |
| TRINITY_PKA5716(hypothet | Apostasia_shenzheni | 70.80 | 0.00 |
| TRINITY_KXZ5199(hypothet | Gonium_pectorale    | 70.80 | 0.00 |
| TRINITY_XP_0105(PREDICTI | Tarenaya_hasslerian | 70.80 | 0.00 |
| TRINITY_XP_0238(succinat | Quercus_suber       | 70.80 | 0.00 |
| TRINITY_GAX8022(hypothet | Chlamydomonas_eusti | 70.80 | 0.00 |
| TRINITY_GAX7532(hypothet | Chlamydomonas_eusti | 70.80 | 0.00 |
| TRINITY_GAX7493(hypothet | Chlamydomonas_eusti | 70.80 | 0.00 |
| TRINITY_KXZ4193(hypothet | Gonium_pectorale    | 70.80 | 0.00 |
| TRINITY_GAX7747(hypothet | Chlamydomonas_eusti | 70.80 | 0.00 |
| TRINITY_ONL9857(P-loop   | Zea_mays            | 70.80 | 0.00 |
| TRINITY_PSC7303(asparagi | Micractinium_conduc | 70.80 | 0.00 |
| TRINITY_GAX8316(hypothet | Chlamydomonas_eusti | 70.80 | 0.00 |
| TRINITY_XP_0016(DegP-ty  | Chlamydomonas_reinh | 70.80 | 0.00 |
| TRINITY_KXZ5593(hypothet | Gonium_pectorale    | 70.80 | 0.00 |
| TRINITY_GAX7544(hypothet | Chlamydomonas_eusti | 70.80 | 0.00 |
| TRINITY_KXZ4970(hypothet | Gonium_pectorale    | 70.80 | 0.00 |
| TRINITY_XP_0029(hypothet | Volvox_carteri      | 70.80 | 0.00 |
| TRINITY_PTQ4421(hypothet | Marchantia_polymorp | 70.80 | 0.00 |
| TRINITY_XP_0058(hypothet | Chlorella_variabili | 70.70 | 0.00 |
| TRINITY_XP_0109(PREDICTI | Elaeis_guineensis   | 70.70 | 0.00 |
| TRINITY_XP_0191(PREDICTI | Ipomoea_nil         | 70.70 | 0.00 |
| TRINITY_XP_0016(DNA-dir  | Chlamydomonas_reinh | 70.70 | 0.00 |

|                  |          |                     |       |      |
|------------------|----------|---------------------|-------|------|
| TRINITY_XP_00295 | hypothet | Volvox_carteri      | 70.70 | 0.00 |
| TRINITY_PNH04645 | putativ  | Tetrabaena_socialis | 70.70 | 0.00 |
| TRINITY_GAX73265 | hypothet | Chlamydomonas_eusti | 70.70 | 0.00 |
| TRINITY_XP_02055 | AP-4 con | Phalaenopsis_equest | 70.70 | 0.00 |
| TRINITY_XP_00165 | nickel c | Chlamydomonas_reinh | 70.70 | 0.00 |
| TRINITY_PTQ42665 | hypothet | Marchantia_polymorp | 70.70 | 0.00 |
| TRINITY_GAX74875 | hypothet | Chlamydomonas_eusti | 70.70 | 0.00 |
| TRINITY_GAX79135 | hypothet | Chlamydomonas_eusti | 70.70 | 0.00 |
| TRINITY_GAX72726 | hypothet | Chlamydomonas_eusti | 70.70 | 0.00 |
| TRINITY_PNW82498 | hypothet | Chlamydomonas_reinh | 70.70 | 0.00 |
| TRINITY_KXZ52805 | hypothet | Gonium_pectorale    | 70.70 | 0.00 |
| TRINITY_PNW72005 | hypothet | Chlamydomonas_reinh | 70.70 | 0.00 |
| TRINITY_GAX73974 | hypothet | Chlamydomonas_eusti | 70.70 | 0.00 |
| TRINITY_XP_00165 | glutath  | Chlamydomonas_reinh | 70.70 | 0.00 |
| TRINITY_GAX74821 | hypothet | Chlamydomonas_eusti | 70.70 | 0.00 |
| TRINITY_XP_02392 | 26S prot | Quercus_suber       | 70.60 | 0.00 |
| TRINITY_BAK02445 | predict  | Hordeum_vulgare     | 70.60 | 0.00 |
| TRINITY_PPD66875 | hypothet | Gossypium_barbadens | 70.60 | 0.00 |
| TRINITY_GAX76891 | hypothet | Chlamydomonas_eusti | 70.60 | 0.00 |
| TRINITY_EFJ23123 | hypothet | Selaginella_moellen | 70.60 | 0.00 |
| TRINITY_XP_00878 | diphth   | Phoenix_dactylifera | 70.60 | 0.00 |
| TRINITY_GAX76016 | hypothet | Chlamydomonas_eusti | 70.60 | 0.00 |
| TRINITY_GAX83344 | hypothet | Chlamydomonas_eusti | 70.60 | 0.00 |
| TRINITY_XP_02373 | histone  | Lactuca_sativa      | 70.60 | 0.00 |
| TRINITY_GBF90535 | 20S prot | Raphidocelis_subcap | 70.60 | 0.00 |
| TRINITY_GAX82711 | hypothet | Chlamydomonas_eusti | 70.60 | 0.00 |
| TRINITY_XP_00294 | hypothet | Volvox_carteri      | 70.60 | 0.00 |
| TRINITY_XP_00165 | isocitr  | Chlamydomonas_reinh | 70.60 | 0.00 |
| TRINITY_GAX77795 | hypothet | Chlamydomonas_eusti | 70.60 | 0.00 |
| TRINITY_GAQ78926 | Dynein   | Klebsormidium_niten | 70.60 | 0.00 |
| TRINITY_GAX77543 | hypothet | Chlamydomonas_eusti | 70.60 | 0.00 |
| TRINITY_BAK00756 | predict  | Hordeum_vulgare     | 70.60 | 0.00 |
| TRINITY_GAX86546 | hypothet | Chlamydomonas_eusti | 70.60 | 0.00 |
| TRINITY_XP_01881 | PREDICT  | Juglans_regia       | 70.60 | 0.00 |
| TRINITY_XP_00294 | hypothet | Volvox_carteri      | 70.60 | 0.00 |
| TRINITY_XP_00165 | predict  | Chlamydomonas_reinh | 70.60 | 0.00 |
| TRINITY_BAJ93875 | predict  | Hordeum_vulgare     | 70.50 | 0.00 |
| TRINITY_XP_00938 | PREDICT  | Musa_acuminata      | 70.50 | 0.00 |
| TRINITY_PNW83116 | hypothet | Chlamydomonas_reinh | 70.50 | 0.00 |
| TRINITY_XP_00165 | ribofla  | Chlamydomonas_reinh | 70.50 | 0.00 |
| TRINITY_PNW71163 | hypothet | Chlamydomonas_reinh | 70.50 | 0.00 |
| TRINITY_XP_01941 | PREDICT  | Lupinus_angustifoli | 70.50 | 0.00 |
| TRINITY_GAX80354 | hypothet | Chlamydomonas_eusti | 70.50 | 0.00 |
| TRINITY_GAX81523 | hypothet | Chlamydomonas_eusti | 70.50 | 0.00 |
| TRINITY_GAX82525 | hypothet | Chlamydomonas_eusti | 70.50 | 0.00 |
| TRINITY_XP_00294 | hypothet | Volvox_carteri      | 70.50 | 0.00 |
| TRINITY_GAX81425 | hypothet | Chlamydomonas_eusti | 70.50 | 0.00 |
| TRINITY_XP_01396 | arogenat | Monoraphidium_negle | 70.50 | 0.00 |
| TRINITY_BAU71138 | cysteine | Parachlorella_kessl | 70.50 | 0.00 |
| TRINITY_PNH08805 | V-type   | Tetrabaena_socialis | 70.50 | 0.00 |
| TRINITY_GAX79086 | hypothet | Chlamydomonas_eusti | 70.50 | 0.00 |
| TRINITY_GAX79064 | hypothet | Chlamydomonas_eusti | 70.50 | 0.00 |
| TRINITY_GAX83908 | hypothet | Chlamydomonas_eusti | 70.50 | 0.00 |
| TRINITY_KXZ42814 | hypothet | Gonium_pectorale    | 70.50 | 0.00 |
| TRINITY_POC8M8.1 | RecName: | Zea_mays            | 70.50 | 0.00 |
| TRINITY_XP_00295 | L-aspart | Volvox_carteri      | 70.50 | 0.00 |
| TRINITY_XP_00176 | mitochor | Chlamydomonas_reinh | 70.50 | 0.00 |
| TRINITY_GAX75143 | hypothet | Chlamydomonas_eusti | 70.50 | 0    |
| TRINITY_RRT35352 | hypothet | Ensete_ventricosum  | 70.50 | 0.00 |
| TRINITY_GAX76766 | hypothet | Chlamydomonas_eusti | 70.50 | 0.00 |
| TRINITY_GAX81383 | hypothet | Chlamydomonas_eusti | 70.50 | 0    |
| TRINITY_XP_00165 | triacyl  | Chlamydomonas_reinh | 70.50 | 0.00 |
| TRINITY_XP_00295 | light-h  | Volvox_carteri      | 70.50 | 0.00 |
| TRINITY_XP_01139 | 60S rib  | Auxenochlorella_pro | 70.40 | 0.00 |
| TRINITY_PRW60964 | pre-mRN  | Chlorella_sorokinia | 70.40 | 0.00 |
| TRINITY_PRW61433 | Proteas  | Chlorella_sorokinia | 70.40 | 0.00 |

|                     |          |                     |       |      |
|---------------------|----------|---------------------|-------|------|
| TRINITY_PNH05623    | ribonuc  | Tetrabaena_socialis | 70.40 | 0.00 |
| TRINITY_XP_00169    | methioni | Chlamydomonas_reinh | 70.40 | 0.00 |
| TRINITY_GAX73768    | hypothet | Chlamydomonas_eusti | 70.40 | 0.00 |
| TRINITY_GAX81558    | hypothet | Chlamydomonas_eusti | 70.40 | 0.00 |
| TRINITY_PNH12176    | hypothet | Tetrabaena_socialis | 70.40 | 0.00 |
| TRINITY_XP_00169    | predicte | Chlamydomonas_reinh | 70.40 | 0.00 |
| TRINITY_XP_00294    | hypothet | Volvox_carteri      | 70.40 | 0.00 |
| TRINITY_AAB61311    | htrA-li  | Haematococcus_lacus | 70.40 | 0.00 |
| TRINITY_GAQ89617    | nucleoti | Klebsormidium_niten | 70.40 | 0.00 |
| TRINITY_PRW59753    | Propiony | Chlorella_sorokinia | 70.40 | 0.00 |
| TRINITY_GBG79290    | hypothet | Chara_braunii       | 70.40 | 0.00 |
| TRINITY_GAX78992    | hypothet | Chlamydomonas_eusti | 70.40 | 0.00 |
| TRINITY_PNH11630    | Two-comp | Tetrabaena_socialis | 70.40 | 0.00 |
| TRINITY_GAX79064    | hypothet | Chlamydomonas_eusti | 70.40 | 0.00 |
| TRINITY_GAX73566    | hypothet | Chlamydomonas_eusti | 70.40 | 0.00 |
| TRINITY_GBF93736    | hypothet | Raphidocelis_subcap | 70.40 | 0.00 |
| TRINITY_PSC72804    | replicat | Micractinium_conduc | 70.40 | 0.00 |
| TRINITY_BAK00385    | predicte | Hordeum_vulgare     | 70.30 | 0.00 |
| TRINITY_XP_00565    | nucleic  | Coccomyxa_subellips | 70.30 | 0.00 |
| TRINITY_XP_02439    | ubiquiti | Physcomitrella_pate | 70.30 | 0.00 |
| TRINITY_PRW32849    | S-adenos | Chlorella_sorokinia | 70.30 | 0.00 |
| TRINITY_XP_00250    | predicte | Micromonas_commoda  | 70.30 | 0.00 |
| TRINITY_KJB07265    | hypothet | Gossypium_raimondii | 70.30 | 0.00 |
| TRINITY_KFK27360    | hypothet | Arabis_alpina       | 70.30 | 0.00 |
| TRINITY_GAX75984    | hypothet | Chlamydomonas_eusti | 70.30 | 0.00 |
| TRINITY_XP_01564    | DNA-dir  | Oryza_sativa        | 70.30 | 0.00 |
| TRINITY_XP_02175    | cytoplas | Chenopodium_quinoa  | 70.30 | 0.00 |
| TRINITY_XP_00295    | hypothet | Volvox_carteri      | 70.30 | 0    |
| TRINITY_P54209.1    | RecName: | Dunaliella_bioculat | 70.30 | 0.00 |
| TRINITY_XP_00169    | predicte | Chlamydomonas_reinh | 70.30 | 0.00 |
| TRINITY_XP_02283    | Zinc fir | Ostreococcus_tauri  | 70.30 | 0.00 |
| TRINITY_XP_00170    | predicte | Chlamydomonas_reinh | 70.30 | 0.00 |
| TRINITY_GAX76945    | hypothet | Chlamydomonas_eusti | 70.30 | 0.00 |
| TRINITY_ACG2503160S | rib      | Zea_mays            | 70.30 | 0.00 |
| TRINITY_XP_00295    | flagell  | Volvox_carteri      | 70.30 | 0.00 |
| TRINITY_RAL40849    | hypothet | Cuscuta_australis   | 70.30 | 0.00 |
| TRINITY_XP_00230    | DNA poly | Populus_trichocarpa | 70.20 | 0.00 |
| TRINITY_XP_01942    | PREDICTH | Lupinus_angustifoli | 70.20 | 0.00 |
| TRINITY_GBG87398    | hypothet | Chara_braunii       | 70.20 | 0.00 |
| TRINITY_GAX75126    | hypothet | Chlamydomonas_eusti | 70.20 | 0.00 |
| TRINITY_XP_00169    | predicte | Chlamydomonas_reinh | 70.20 | 0.00 |
| TRINITY_PIA39064    | hypothet | Aquilegia_coerulea  | 70.20 | 0.00 |
| TRINITY_PNW88835    | hypothet | Chlamydomonas_reinh | 70.20 | 0.00 |
| TRINITY_OAE32442    | hypothet | Marchantia_polymorp | 70.20 | 0.00 |
| TRINITY_EXC01912    | hypothet | Morus_notabilis     | 70.20 | 0.00 |
| TRINITY_KXZ51234    | hypothet | Gonium_pectorale    | 70.20 | 0.00 |
| TRINITY_PNH05039    | Histone  | Tetrabaena_socialis | 70.20 | 0.00 |
| TRINITY_KXZ48381    | hypothet | Gonium_pectorale    | 70.20 | 0.00 |
| TRINITY_XP_01107    | AP-1 con | Sesamum_indicum     | 70.20 | 0.00 |
| TRINITY_PNW83678    | hypothet | Chlamydomonas_reinh | 70.20 | 0.00 |
| TRINITY_GAX76983    | hypothet | Chlamydomonas_eusti | 70.20 | 0.00 |
| TRINITY_XP_02174    | ATP synt | Chenopodium_quinoa  | 70.20 | 0.00 |
| TRINITY_GAX72735    | hypothet | Chlamydomonas_eusti | 70.20 | 0.00 |
| TRINITY_GAX73599    | hypothet | Chlamydomonas_eusti | 70.20 | 0.00 |
| TRINITY_PNW72028    | hypothet | Chlamydomonas_reinh | 70.20 | 0    |
| TRINITY_GAX77454    | hypothet | Chlamydomonas_eusti | 70.20 | 0.00 |
| TRINITY_GAQ88233    | putative | Klebsormidium_niten | 70.20 | 0.00 |
| TRINITY_GAX74262    | hypothet | Chlamydomonas_eusti | 70.20 | 0.00 |
| TRINITY_ACN94454    | photosy  | Dunaliella_salina   | 70.20 | 0.00 |
| TRINITY_XP_00640    | vacuolar | Eutrema_salsugineur | 70.10 | 0.00 |
| TRINITY_GBF94476    | hypothet | Raphidocelis_subcap | 70.10 | 0.00 |
| TRINITY_GAX76074    | hypothet | Chlamydomonas_eusti | 70.10 | 0.00 |
| TRINITY_XP_00564    | Metallo- | Coccomyxa_subellips | 70.10 | 0.00 |
| TRINITY_KZV43402    | hypothet | Dorcoceras_hygromet | 70.10 | 0.00 |
| TRINITY_GAX76895    | hypothet | Chlamydomonas_eusti | 70.10 | 0.00 |
| TRINITY_XP_00584    | hypothet | Chlorella_variabili | 70.10 | 0.00 |

|                  |           |                     |       |      |
|------------------|-----------|---------------------|-------|------|
| TRINITY_XP_01053 | PREDICTE  | Tarenaya_hasslerian | 70.10 | 0.00 |
| TRINITY_AAC32209 | isopentε  | Haematococcus_lacus | 70.10 | 0.00 |
| TRINITY_RAL51635 | hypothet  | Cuscuta_australis   | 70.10 | 0.00 |
| TRINITY_OWM68833 | hypothet  | Punica_granatum     | 70.10 | 0.00 |
| TRINITY_XP_00585 | hypothet  | Chlorella_variabili | 70.10 | 0.00 |
| TRINITY_XP_00170 | TspO/MBF  | Chlamydomonas_reinh | 70.10 | 0.00 |
| TRINITY_GAX82302 | hypothet  | Chlamydomonas_eusti | 70.10 | 0.00 |
| TRINITY_GAX85689 | hypothet  | Chlamydomonas_eusti | 70.10 | 0.00 |
| TRINITY_PNH09810 | (hypothet | Tetrabaena_socialis | 70.10 | 0.00 |
| TRINITY_XP_00170 | (mitochor | Chlamydomonas_reinh | 70.10 | 0.00 |
| TRINITY_GAX80523 | hypothet  | Chlamydomonas_eusti | 70.10 | 0.00 |
| TRINITY_PON82037 | Ribosomε  | Trema_orientale     | 70.10 | 0.00 |
| TRINITY_GBF93585 | hypothet  | Raphidocelis_subcap | 70.10 | 0.00 |
| TRINITY_GAX73838 | hypothet  | Chlamydomonas_eusti | 70.10 | 0.00 |
| TRINITY_GAX84909 | hypothet  | Chlamydomonas_eusti | 70.10 | 0.00 |
| TRINITY_XP_00141 | predictε  | Ostreococcus_sp._'l | 70.00 | 0.00 |
| TRINITY_XP_02057 | ras-relε  | Phalaenopsis_equest | 70.00 | 0.00 |
| TRINITY_GBG66831 | hypothet  | Chara_braunii       | 70.00 | 0.00 |
| TRINITY_XP_02392 | 60S ribc  | Quercus_suber       | 70.00 | 0.00 |
| TRINITY_PUZ50743 | hypothet  | Panicum_hallii      | 70.00 | 0.00 |
| TRINITY_GAX74254 | hypothet  | Chlamydomonas_eusti | 70.00 | 0.00 |
| TRINITY_GAX82296 | hypothet  | Chlamydomonas_eusti | 70.00 | 0.00 |
| TRINITY_GAX73601 | hypothet  | Chlamydomonas_eusti | 70.00 | 0.00 |
| TRINITY_XP_00565 | hypothet  | Coccomyxa_subellips | 70.00 | 0.00 |
| TRINITY_GAX76713 | hypothet  | Chlamydomonas_eusti | 70.00 | 0.00 |
| TRINITY_XP_00169 | predictε  | Chlamydomonas_reinh | 70.00 | 0.00 |
| TRINITY_XP_01883 | PREDICTE  | Juglans_regia       | 70.00 | 0.00 |
| TRINITY_GAX79869 | hypothet  | Chlamydomonas_eusti | 70.00 | 0.00 |
| TRINITY_EFJ37754 | ATP-binε  | Selaginella_moellen | 70.00 | 0.00 |
| TRINITY_KMZ68121 | tubulin   | Zostera_marina      | 70.00 | 0.00 |
| TRINITY_KJB39322 | hypothet  | Gossypium_raimondii | 70.00 | 0.00 |
| TRINITY_XP_00294 | hypothet  | Volvox_carteri      | 70.00 | 0.00 |
| TRINITY_PNW73694 | hypothet  | Chlamydomonas_reinh | 70.00 | 0.00 |
| TRINITY_XP_00294 | hypothet  | Volvox_carteri      | 70.00 | 0.00 |
| TRINITY_XP_00294 | serine t  | Volvox_carteri      | 70.00 | 0.00 |
| TRINITY_PRW58429 | Peptidy]  | Chlorella_sorokinia | 70.00 | 0.00 |
| TRINITY_XP_00169 | CDP-Ethε  | Chlamydomonas_reinh | 70.00 | 0.00 |
| TRINITY_PNW81287 | hypothet  | Chlamydomonas_reinh | 70.00 | 0.00 |
| TRINITY_KXZ55064 | hypothet  | Gonium_pectorale    | 70.00 | 0.00 |
| TRINITY_GAX75302 | hypothet  | Chlamydomonas_eusti | 70.00 | 0.00 |
| TRINITY_XP_00169 | hybrid-ε  | Chlamydomonas_reinh | 70.00 | 0.00 |
| TRINITY_PNW81868 | hypothet  | Chlamydomonas_reinh | 70.00 | 0.00 |
| TRINITY_PNH10600 | (E3 ubiq  | Tetrabaena_socialis | 70.00 | 0.00 |
| TRINITY_KMS64494 | hypothet  | Beta_vulgaris       | 70.00 | 0.00 |
| TRINITY_KYP78757 | SsrA-bir  | Cajanus_cajan       | 70.00 | 0.00 |
| TRINITY_XP_01092 | PREDICTE  | Elaeis_guineensis   | 69.90 | 0.00 |
| TRINITY_GAX80107 | hypothet  | Chlamydomonas_eusti | 69.90 | 0.00 |
| TRINITY_GAX79678 | hypothet  | Chlamydomonas_eusti | 69.90 | 0.00 |
| TRINITY_XP_00751 | predictε  | Bathycoccus_prasinc | 69.90 | 0    |
| TRINITY_PNH01944 | Diphthar  | Tetrabaena_socialis | 69.90 | 0.00 |
| TRINITY_XP_00169 | (mitochor | Chlamydomonas_reinh | 69.90 | 0.00 |
| TRINITY_CAI84893 | putativε  | Medicago_sativa     | 69.90 | 0.00 |
| TRINITY_XP_00169 | predictε  | Chlamydomonas_reinh | 69.90 | 0.00 |
| TRINITY_XP_00294 | hypothet  | Volvox_carteri      | 69.90 | 0.00 |
| TRINITY_XP_00564 | MT-A70-ε  | Coccomyxa_subellips | 69.90 | 0.00 |
| TRINITY_PNW71117 | hypothet  | Chlamydomonas_reinh | 69.90 | 0.00 |
| TRINITY_XP_02067 | tRNA (c)  | Dendrobium_catenatu | 69.90 | 0.00 |
| TRINITY_KXZ56683 | hypothet  | Gonium_pectorale    | 69.90 | 0.00 |
| TRINITY_KXZ50112 | hypothet  | Gonium_pectorale    | 69.90 | 0.00 |
| TRINITY_XP_00295 | cobalt t  | Volvox_carteri      | 69.90 | 0.00 |
| TRINITY_PNH10585 | Vacuolar  | Tetrabaena_socialis | 69.90 | 0.00 |
| TRINITY_PKA51702 | 60S ribc  | Apostasia_shenzheni | 69.80 | 0.00 |
| TRINITY_GBG91254 | hypothet  | Chara_braunii       | 69.80 | 0.00 |
| TRINITY_ABK22790 | (unknown  | Picea_sitchensis    | 69.80 | 0.00 |
| TRINITY_PNH07865 | Mitogen-  | Tetrabaena_socialis | 69.80 | 0.00 |
| TRINITY_XP_02058 | 60S ribc  | Phalaenopsis_equest | 69.80 | 0.00 |

|                   |                              |       |      |
|-------------------|------------------------------|-------|------|
| TRINITY_PNR26531  | hypothetPhyscomitrella_pate  | 69.80 | 0.00 |
| TRINITY_XP_00295  | hypothetVolvox_carteri       | 69.80 | 0.00 |
| TRINITY_GAX84285  | hypothetChlamydomonas_eusti  | 69.80 | 0.00 |
| TRINITY_A1JHN0.1  | RecName:Chlamydomonas_reinh  | 69.80 | 0.00 |
| TRINITY_XP_00295  | hypothetVolvox_carteri       | 69.80 | 0.00 |
| TRINITY_PRW573985 | -oxoprChlorella_sorokinia    | 69.80 | 0.00 |
| TRINITY_GBF89372  | dihydroRaphidocelis_subcap   | 69.80 | 0.00 |
| TRINITY_PNG89305  | PyruvatεTetrabaena_socialis  | 69.80 | 0.00 |
| TRINITY_GAX77476  | hypothetChlamydomonas_eusti  | 69.80 | 0.00 |
| TRINITY_XP_02436  | ATP-depePhyscomitrella_pate  | 69.80 | 0.00 |
| TRINITY_GBG00094  | COP9 siçRaphidocelis_subcap  | 69.80 | 0.00 |
| TRINITY_XP_01162  | 40S ribcAmborella_trichopod  | 69.80 | 0.00 |
| TRINITY_AJR272364 | -diphosHaematococcus_lacus   | 69.80 | 0.00 |
| TRINITY_KXZ45032  | hypothetGonium_pectorale     | 69.80 | 0.00 |
| TRINITY_EOX99021  | CalcineiTheobroma_cacao      | 69.80 | 0.00 |
| TRINITY_KMS64494  | hypothetBeta_vulgaris        | 69.80 | 0.00 |
| TRINITY_GAX82663  | hypothetChlamydomonas_eusti  | 69.80 | 0.00 |
| TRINITY_KZV17201  | luminal-Dorcoceras_hygromet  | 69.80 | 0.00 |
| TRINITY_XP_00879  | heat shcPhoenix_dactylifera  | 69.80 | 0.00 |
| TRINITY_GAQ83185  | Protein-Klebsormidium_niten  | 69.80 | 0.00 |
| TRINITY_GAX82993  | hypothetChlamydomonas_eusti  | 69.80 | 0.00 |
| TRINITY_PNW77089  | hypothetChlamydomonas_reinh  | 69.80 | 0.00 |
| TRINITY_XP_00633  | PREDICTISolanum_tuberosum    | 69.80 | 0.00 |
| TRINITY_XP_01390  | hypothetMonoraphidium_negle  | 69.80 | 0.00 |
| TRINITY_AGT16090  | cyclophiSaccharum_hybrid_cu  | 69.80 | 0.00 |
| TRINITY_PNH09567  | C-factorTetrabaena_socialis  | 69.80 | 0.00 |
| TRINITY_XP_00751  | H/ACA riBathycoccus_prasinc  | 69.80 | 0.00 |
| TRINITY_GAX74023  | hypothetChlamydomonas_eusti  | 69.80 | 0.00 |
| TRINITY_PSC71603  | hypothetMicractinium_conduc  | 69.80 | 0.00 |
| TRINITY_KXZ56100  | hypothetGonium_pectorale     | 69.80 | 0.00 |
| TRINITY_BAJ90559  | predictεHordeum_vulgare      | 69.70 | 0.00 |
| TRINITY_NP_00114  | uncharacZea_mays             | 69.70 | 0.00 |
| TRINITY_EPS64136  | hypothetGenlisea_aurea       | 69.70 | 0.00 |
| TRINITY_GBF91863  | hypothetRaphidocelis_subcap  | 69.70 | 0.00 |
| TRINITY_KXZ49444  | RSP3 prcGonium_pectorale     | 69.70 | 0.00 |
| TRINITY_XP_00295  | hypothetVolvox_carteri       | 69.70 | 0.00 |
| TRINITY_XP_00250  | predictεMicromonas_commoda   | 69.70 | 0.00 |
| TRINITY_XP_00169  | flagellεChlamydomonas_reinh  | 69.70 | 0.00 |
| TRINITY_GBF98924  | appr-1-ıRaphidocelis_subcap  | 69.70 | 0.00 |
| TRINITY_PNW84951  | hypothetChlamydomonas_reinh  | 69.70 | 0.00 |
| TRINITY_Q9FPL6.1  | RecName:Suaeda_salsa         | 69.70 | 0.00 |
| TRINITY_XP_00170  | radial εChlamydomonas_reinh  | 69.70 | 0.00 |
| TRINITY_XP_00170  | predictεChlamydomonas_reinh  | 69.70 | 0.00 |
| TRINITY_GAX77719  | hypothetChlamydomonas_eusti  | 69.70 | 0.00 |
| TRINITY_GAX72848  | hypothetChlamydomonas_eusti  | 69.70 | 0.00 |
| TRINITY_GAX82222  | hypothetChlamydomonas_eusti  | 69.70 | 0.00 |
| TRINITY_PTQ37952  | hypothetMarchantia_polymorp  | 69.70 | 0.00 |
| TRINITY_GBF89463  | GTP-binçRaphidocelis_subcap  | 69.70 | 0.00 |
| TRINITY_GAX83246  | hypothetChlamydomonas_eusti  | 69.70 | 0.00 |
| TRINITY_GAX82226  | hypothetChlamydomonas_eusti  | 69.70 | 0.00 |
| TRINITY_GAX85743  | hypothetChlamydomonas_eusti  | 69.70 | 0.00 |
| TRINITY_KXZ52292  | hypothetGonium_pectorale     | 69.70 | 0.00 |
| TRINITY_GAX75961  | hypothetChlamydomonas_eusti  | 69.70 | 0.00 |
| TRINITY_OAY68863  | Heat shcAnanas_comosus       | 69.70 | 0.00 |
| TRINITY_GAX81647  | hypothetChlamydomonas_eusti  | 69.70 | 0.00 |
| TRINITY_XP_00564  | DUF92-dcCoccomyxa_subellips  | 69.70 | 0.00 |
| TRINITY_XP_02165  | protein Hevea_brasiliensis   | 69.60 | 0.00 |
| TRINITY_KXZ51570  | hypothetGonium_pectorale     | 69.60 | 0.00 |
| TRINITY_RZC92320  | hypothetPapaver_somniferum   | 69.60 | 0.00 |
| TRINITY_KXZ44036  | FTT1 14çGonium_pectorale     | 69.60 | 0.00 |
| TRINITY_XP_00169  | serine/tChlamydomonas_reinh  | 69.60 | 0.00 |
| TRINITY_XP_00295  | SelenopıVolvox_carteri       | 69.60 | 0.00 |
| TRINITY_XP_00294  | membraneVolvox_carteri       | 69.60 | 0.00 |
| TRINITY_XP_00168  | deoxyypuçChlamydomonas_reinh | 69.60 | 0.00 |
| TRINITY_AUE21889  | GADPH [UUncaria_rhynchophyl  | 69.60 | 0.00 |
| TRINITY_GAX75202  | hypothetChlamydomonas_eusti  | 69.60 | 0.00 |

|                                              |       |      |
|----------------------------------------------|-------|------|
| TRINITY_KXZ4697(hypothetGonium_pectorale     | 69.60 | 0.00 |
| TRINITY_KZV1890(hypothetDorcoceras_hygromet  | 69.60 | 0.00 |
| TRINITY_KXZ4875(hypothetGonium_pectorale     | 69.60 | 0.00 |
| TRINITY_OAE1910(hypothetMarchantia_polymorp  | 69.60 | 0.00 |
| TRINITY_OAE3310(hypothetMarchantia_polymorp  | 69.60 | 0.00 |
| TRINITY_XP_0016(predicteChlamydomonas_reinh  | 69.60 | 0.00 |
| TRINITY_PNW8027(hypothetChlamydomonas_reinh  | 69.60 | 0.00 |
| TRINITY_XP_0029(hypothetVolvox_carteri       | 69.60 | 0.00 |
| TRINITY_XP_0029(hypothetVolvox_carteri       | 69.60 | 0.00 |
| TRINITY_KXZ5690(hypothetGonium_pectorale     | 69.60 | 0.00 |
| TRINITY_XP_0029(hypothetVolvox_carteri       | 69.60 | 0.00 |
| TRINITY_XP_0016(predicteChlamydomonas_reinh  | 69.60 | 0.00 |
| TRINITY_PNW8408(hypothetChlamydomonas_reinh  | 69.60 | 0.00 |
| TRINITY_XP_0016(lysine cChlamydomonas_reinh  | 69.60 | 0.00 |
| TRINITY_KXZ5150(hypothetGonium_pectorale     | 69.60 | 0.00 |
| TRINITY_KXZ4194(hypothetGonium_pectorale     | 69.60 | 0.00 |
| TRINITY_GAX8002(hypothetChlamydomonas_eusti  | 69.60 | 0.00 |
| TRINITY_GAX7266(hypothetChlamydomonas_eusti  | 69.60 | 0.00 |
| TRINITY_XP_0102(PREDICTINelumbo_nucifera     | 69.50 | 0.00 |
| TRINITY_NP_0011(uncharacZea_mays             | 69.50 | 0.00 |
| TRINITY_BAJ8540(predicteHordeum_vulgare      | 69.50 | 0.00 |
| TRINITY_KVH9112(Protein Cynara_cardunculus   | 69.50 | 0.00 |
| TRINITY_O65353.1RecName:Helianthus_annuus    | 69.50 | 0.00 |
| TRINITY_XP_0016(nucleaseChlamydomonas_reinh  | 69.50 | 0.00 |
| TRINITY_KMS9434(hypothetBeta_vulgaris        | 69.50 | 0.00 |
| TRINITY_PNH0895(TranscriTetrabaena_socialis  | 69.50 | 0.00 |
| TRINITY_PNH0830(NFX1-tyTetrabaena_socialis   | 69.50 | 0.00 |
| TRINITY_KXZ5192(hypothetGonium_pectorale     | 69.50 | 0.00 |
| TRINITY_GAX7279(hypothetChlamydomonas_eusti  | 69.50 | 0.00 |
| TRINITY_GAX7361(hypothetChlamydomonas_eusti  | 69.50 | 0.00 |
| TRINITY_KXZ4646(hypothetGonium_pectorale     | 69.50 | 0.00 |
| TRINITY_XP_0017(5,10-metChlamydomonas_reinh  | 69.50 | 0.00 |
| TRINITY_GAX8339(hypothetChlamydomonas_eusti  | 69.50 | 0.00 |
| TRINITY_XP_0058(hypothetChlorella_variabili  | 69.50 | 0.00 |
| TRINITY_XP_0058(hypothetChlorella_variabili  | 69.50 | 0.00 |
| TRINITY_GAX7403(hypothetChlamydomonas_eusti  | 69.50 | 0.00 |
| TRINITY_XP_0029(hypothetVolvox_carteri       | 69.50 | 0.00 |
| TRINITY_GAX7382(hypothetChlamydomonas_eusti  | 69.50 | 0.00 |
| TRINITY_GAX8503(hypothetChlamydomonas_eusti  | 69.50 | 0.00 |
| TRINITY_KXZ5422(hypothetGonium_pectorale     | 69.50 | 0.00 |
| TRINITY_XP_0016(DNA repIChlamydomonas_reinh  | 69.50 | 0.00 |
| TRINITY_XP_0029(hypothetVolvox_carteri       | 69.50 | 0.00 |
| TRINITY_XP_0016(predicteChlamydomonas_reinh  | 69.50 | 0.00 |
| TRINITY_GAX8602(hypothetChlamydomonas_eusti  | 69.50 | 0    |
| TRINITY_PNW8496(hypothetChlamydomonas_reinh  | 69.50 | 0    |
| TRINITY_XP_0016(predicteChlamydomonas_reinh  | 69.40 | 0.00 |
| TRINITY_OVA1238(ProteasMacleaya_cordata      | 69.40 | 0.00 |
| TRINITY_XP_0025160S ribcRicinus_communis     | 69.40 | 0.00 |
| TRINITY_XP_0025160S ribcRicinus_communis     | 69.40 | 0.00 |
| TRINITY_XP_0029(hypothetVolvox_carteri       | 69.40 | 0.00 |
| TRINITY_AAB8649(calmodulZea_mays             | 69.40 | 0.00 |
| TRINITY_NP_0013(ribosomSolanum_lycopersicu   | 69.40 | 0.00 |
| TRINITY_KDD7497(hypothetHelicosporidium_sp.  | 69.40 | 0.00 |
| TRINITY_XP_0029(hypothetVolvox_carteri       | 69.40 | 0.00 |
| TRINITY_RWR7682(RibosomCinnamomum_micranth   | 69.40 | 0.00 |
| TRINITY_RWR7682(RibosomCinnamomum_micranth   | 69.40 | 0.00 |
| TRINITY_GAQ85021RNase L Klebsormidium_niten  | 69.40 | 0.00 |
| TRINITY_GAX8410(hypothetChlamydomonas_eusti  | 69.40 | 0.00 |
| TRINITY_XP_0016(predicteChlamydomonas_reinh  | 69.40 | 0.00 |
| TRINITY_XP_0029(hypothetVolvox_carteri       | 69.40 | 0.00 |
| TRINITY_AIJ00882multi-fDunaliella_salina     | 69.40 | 0.00 |
| TRINITY_XP_0016(predicteChlamydomonas_reinh  | 69.40 | 0.00 |
| TRINITY_XP_0100(PREDICTIEucalyptus_grandis   | 69.40 | 0.00 |
| TRINITY_PNW88152(hypothetChlamydomonas_reinh | 69.40 | 0.00 |
| TRINITY_GAX7977(hypothetChlamydomonas_eusti  | 69.40 | 0.00 |
| TRINITY_PNW8654(hypothetChlamydomonas_reinh  | 69.40 | 0.00 |

|                  |          |                     |       |      |
|------------------|----------|---------------------|-------|------|
| TRINITY_BAJ95005 | predict  | Hordeum_vulgare     | 69.40 | 0.00 |
| TRINITY_KXZ55677 | hypothet | Gonium_pectorale    | 69.40 | 0    |
| TRINITY_GAX80569 | hypothet | Chlamydomonas_eusti | 69.40 | 0.00 |
| TRINITY_GAX73286 | hypothet | Chlamydomonas_eusti | 69.40 | 0.00 |
| TRINITY_XP_00584 | hypothet | Chlorella_variabili | 69.40 | 0.00 |
| TRINITY_BAJ99731 | predict  | Hordeum_vulgare     | 69.30 | 0.00 |
| TRINITY_XP_02128 | histone  | Herrania_umbratica  | 69.30 | 0.00 |
| TRINITY_RAL4661  | hypothet | Cuscuta_australis   | 69.30 | 0.00 |
| TRINITY_RAL4661  | hypothet | Cuscuta_australis   | 69.30 | 0.00 |
| TRINITY_RAL4661  | hypothet | Cuscuta_australis   | 69.30 | 0.00 |
| TRINITY_PNW82678 | hypothet | Chlamydomonas_reinh | 69.30 | 0.00 |
| TRINITY_XP_00294 | plastid  | Volvox_carteri      | 69.30 | 0.00 |
| TRINITY_GAX76952 | hypothet | Chlamydomonas_eusti | 69.30 | 0.00 |
| TRINITY_KXZ47536 | hypothet | Gonium_pectorale    | 69.30 | 0.00 |
| TRINITY_PRW6045  | aldehyd  | Chlorella_sorokinia | 69.30 | 0.00 |
| TRINITY_XP_01389 | hypothet | Monoraphidium_negle | 69.30 | 0.00 |
| TRINITY_PNW86098 | hypothet | Chlamydomonas_reinh | 69.30 | 0.00 |
| TRINITY_XP_00295 | DEAH-box | Volvox_carteri      | 69.30 | 0.00 |
| TRINITY_GAX74631 | hypothet | Chlamydomonas_eusti | 69.30 | 0.00 |
| TRINITY_GAQ89092 | GTP-bin  | Klebsormidium_niten | 69.30 | 0.00 |
| TRINITY_GAX77666 | hypothet | Chlamydomonas_eusti | 69.30 | 0.00 |
| TRINITY_GAX78845 | hypothet | Chlamydomonas_eusti | 69.30 | 0    |
| TRINITY_GAX79678 | hypothet | Chlamydomonas_eusti | 69.30 | 0.00 |
| TRINITY_KXZ44735 | hypothet | Gonium_pectorale    | 69.30 | 0.00 |
| TRINITY_XP_02190 | uncharac | Carica_papaya       | 69.20 | 0.00 |
| TRINITY_XP_02390 | serine/t | Quercus_suber       | 69.20 | 0.00 |
| TRINITY_XP_00169 | triacyl  | Chlamydomonas_reinh | 69.20 | 0.00 |
| TRINITY_XP_02437 | uncharac | Physcomitrella_pate | 69.20 | 0.00 |
| TRINITY_GAX83156 | hypothet | Chlamydomonas_eusti | 69.20 | 0.00 |
| TRINITY_KMS93274 | hypothet | Beta_vulgaris       | 69.20 | 0.00 |
| TRINITY_GBG72475 | hypothet | Chara_braunii       | 69.20 | 0.00 |
| TRINITY_GAX76670 | hypothet | Chlamydomonas_eusti | 69.20 | 0.00 |
| TRINITY_XP_01389 | hypothet | Monoraphidium_negle | 69.20 | 0.00 |
| TRINITY_XP_01139 | Deoxycyt | Auxenochlorella_pro | 69.20 | 0.00 |
| TRINITY_GBF98414 | hypothet | Raphidocelis_subcap | 69.20 | 0.00 |
| TRINITY_GAX78996 | hypothet | Chlamydomonas_eusti | 69.20 | 0.00 |
| TRINITY_GBF93266 | U6 snRN  | Raphidocelis_subcap | 69.20 | 0.00 |
| TRINITY_XP_00169 | nucleic  | Chlamydomonas_reinh | 69.20 | 0.00 |
| TRINITY_GAX73068 | hypothet | Chlamydomonas_eusti | 69.20 | 0.00 |
| TRINITY_XP_00295 | hypothet | Volvox_carteri      | 69.20 | 0.00 |
| TRINITY_XP_01880 | PREDICTI | Juglans_regia       | 69.20 | 0.00 |
| TRINITY_XP_00295 | hypothet | Volvox_carteri      | 69.20 | 0.00 |
| TRINITY_KXZ40909 | hypothet | Gonium_pectorale    | 69.20 | 0.00 |
| TRINITY_GAX81886 | hypothet | Chlamydomonas_eusti | 69.20 | 0.00 |
| TRINITY_XP_00169 | AP2-dom  | Chlamydomonas_reinh | 69.20 | 0.00 |
| TRINITY_KXZ48211 | DHC-9 p  | Gonium_pectorale    | 69.20 | 0.00 |
| TRINITY_XP_00564 | hypothet | Coccomyxa_subellips | 69.20 | 0.00 |
| TRINITY_GAX82550 | hypothet | Chlamydomonas_eusti | 69.20 | 0.00 |
| TRINITY_GAX85259 | hypothet | Chlamydomonas_eusti | 69.20 | 0.00 |
| TRINITY_GAX74687 | hypothet | Chlamydomonas_eusti | 69.20 | 0.00 |
| TRINITY_PNH09678 | DNA-bin  | Tetrabaena_socialis | 69.20 | 0.00 |
| TRINITY_XP_02283 | Proteas  | Ostreococcus_tauri  | 69.20 | 0.00 |
| TRINITY_GAX78449 | hypothet | Chlamydomonas_eusti | 69.20 | 0.00 |
| TRINITY_GBF92611 | chlorop  | Raphidocelis_subcap | 69.20 | 0.00 |
| TRINITY_XP_00250 | predict  | Micromonas_commoda  | 69.10 | 0.00 |
| TRINITY_XP_02387 | 40S rib  | Quercus_suber       | 69.10 | 0.00 |
| TRINITY_PSC76694 | 60S acic | Micractinium_conduc | 69.10 | 0.00 |
| TRINITY_XP_01052 | PREDICTI | Tarenaya_hasslerian | 69.10 | 0.00 |
| TRINITY_GAX86545 | hypothet | Chlamydomonas_eusti | 69.10 | 0.00 |
| TRINITY_KMS64936 | hypothet | Beta_vulgaris       | 69.10 | 0.00 |
| TRINITY_GAX77522 | hypothet | Chlamydomonas_eusti | 69.10 | 0.00 |
| TRINITY_BAK02898 | predict  | Hordeum_vulgare     | 69.10 | 0.00 |
| TRINITY_CAA11269 | polyubi  | Nicotiana_tabacum   | 69.10 | 0.00 |
| TRINITY_PNH04402 | Glutath  | Tetrabaena_socialis | 69.10 | 0.00 |
| TRINITY_XP_00295 | hypothet | Volvox_carteri      | 69.10 | 0.00 |
| TRINITY_XP_00940 | PREDICTI | Musa_acuminata      | 69.10 | 0.00 |



|                  |            |                     |       |      |
|------------------|------------|---------------------|-------|------|
| TRINITY_PRW60273 | glyoxylate | Chlorella_sorokinia | 69.10 | 0.00 |
| TRINITY_GAX80204 | hypothet   | Chlamydomonas_eusti | 69.10 | 0.00 |
| TRINITY_XP_00295 | photosyn   | Volvox_carteri      | 69.10 | 0.00 |
| TRINITY_GBF98446 | DNA_top    | Raphidocelis_subcap | 69.10 | 0.00 |
| TRINITY_PNH00743 | Serine/t   | Tetrabaena_socialis | 69.10 | 0.00 |
| TRINITY_XP_00295 | hypothet   | Volvox_carteri      | 69.10 | 0.00 |
| TRINITY_PNW70423 | hypothet   | Chlamydomonas_reinh | 69.10 | 0.00 |
| TRINITY_GAX82949 | hypothet   | Chlamydomonas_eusti | 69.10 | 0.00 |
| TRINITY_GAX85463 | hypothet   | Chlamydomonas_eusti | 69.10 | 0.00 |
| TRINITY_KXZ49449 | hypothet   | Gonium_pectorale    | 69.10 | 0.00 |
| TRINITY_XP_00169 | UDP-gluc   | Chlamydomonas_reinh | 69.10 | 0.00 |
| TRINITY_KXZ53955 | hypothet   | Gonium_pectorale    | 69.10 | 0.00 |
| TRINITY_XP_00295 | hypothet   | Volvox_carteri      | 69.10 | 0.00 |
| TRINITY_XP_00294 | hypothet   | Volvox_carteri      | 69.10 | 0.00 |
| TRINITY_XP_00141 | predicte   | Ostreococcus_sp._'1 | 69.10 | 0.00 |
| TRINITY_GAX78858 | hypothet   | Chlamydomonas_eusti | 69.00 | 0.00 |
| TRINITY_GAQ93074 | mitochor   | Klebsormidium_niten | 69.00 | 0.00 |
| TRINITY_GAQ83932 | Ubiquiti   | Klebsormidium_niten | 69.00 | 0.00 |
| TRINITY_PSC72623 | DEAD-bo    | Micractinium_conduc | 69.00 | 0.00 |
| TRINITY_GAX80609 | hypothet   | Chlamydomonas_eusti | 69.00 | 0.00 |
| TRINITY_XP_00295 | hypothet   | Volvox_carteri      | 69.00 | 0.00 |
| TRINITY_GAX77149 | hypothet   | Chlamydomonas_eusti | 69.00 | 0.00 |
| TRINITY_XP_00295 | DEAD/DE    | Volvox_carteri      | 69.00 | 0.00 |
| TRINITY_XP_02436 | double-    | Physcomitrella_pate | 69.00 | 0.00 |
| TRINITY_KXZ55053 | hypothet   | Gonium_pectorale    | 69.00 | 0.00 |
| TRINITY_XP_01390 | (ESCRT-II) | Monoraphidium_negle | 69.00 | 0.00 |
| TRINITY_GAX82931 | hypothet   | Chlamydomonas_eusti | 69.00 | 0.00 |
| TRINITY_GAX83625 | hypothet   | Chlamydomonas_eusti | 69.00 | 0.00 |
| TRINITY_KXZ51335 | hypothet   | Gonium_pectorale    | 69.00 | 0.00 |
| TRINITY_GAX76513 | hypothet   | Chlamydomonas_eusti | 69.00 | 0.00 |
| TRINITY_XP_02790 | developn   | Vigna_unguiculata   | 69.00 | 0.00 |
| TRINITY_PNW77767 | hypothet   | Chlamydomonas_reinh | 69.00 | 0.00 |
| TRINITY_PNW74230 | hypothet   | Chlamydomonas_reinh | 69.00 | 0.00 |
| TRINITY_XP_00169 | predicte   | Chlamydomonas_reinh | 69.00 | 0.00 |
| TRINITY_BAJ96063 | predicte   | Hordeum_vulgare     | 69.00 | 0.00 |
| TRINITY_PNW80286 | hypothet   | Chlamydomonas_reinh | 69.00 | 0.00 |
| TRINITY_XP_00294 | hypothet   | Volvox_carteri      | 69.00 | 0.00 |
| TRINITY_GAX85702 | hypothet   | Chlamydomonas_eusti | 69.00 | 0.00 |
| TRINITY_KXZ41940 | hypothet   | Gonium_pectorale    | 69.00 | 0.00 |
| TRINITY_XP_00170 | predicte   | Chlamydomonas_reinh | 69.00 | 0.00 |
| TRINITY_XP_00249 | predicte   | Micromonas_commoda  | 68.90 | 0.00 |
| TRINITY_ADI46891 | PR46af     | Volvox_carteri      | 68.90 | 0.00 |
| TRINITY_BAJ21569 | cytochr    | Prasinococcus_capsu | 68.90 | 0.00 |
| TRINITY_GAX78260 | hypothet   | Chlamydomonas_eusti | 68.90 | 0.00 |
| TRINITY_KXZ44805 | hypothet   | Gonium_pectorale    | 68.90 | 0.00 |
| TRINITY_GAX83352 | hypothet   | Chlamydomonas_eusti | 68.90 | 0.00 |
| TRINITY_OWM88093 | hypothet   | Punica_granatum     | 68.90 | 0.00 |
| TRINITY_RWW90787 | hypothet   | Ensete_ventricosum  | 68.90 | 0.00 |
| TRINITY_PSC75329 | low-CO2-   | Micractinium_conduc | 68.90 | 0.00 |
| TRINITY_XP_00295 | hypothet   | Volvox_carteri      | 68.90 | 0.00 |
| TRINITY_XP_01657 | PREDICTE   | Capsicum_annuum     | 68.90 | 0.00 |
| TRINITY_PTQ43117 | hypothet   | Marchantia_polymorp | 68.90 | 0.00 |
| TRINITY_GAQ86818 | Isovaler   | Klebsormidium_niten | 68.90 | 0.00 |
| TRINITY_GAX75825 | hypothet   | Chlamydomonas_eusti | 68.90 | 0.00 |
| TRINITY_PNH08091 | NADH del   | Tetrabaena_socialis | 68.90 | 0.00 |
| TRINITY_PNH10461 | Leucine-   | Tetrabaena_socialis | 68.90 | 0.00 |
| TRINITY_XP_02776 | unchara    | Solanum_pennellii   | 68.90 | 0.00 |
| TRINITY_XP_00295 | hypothet   | Volvox_carteri      | 68.90 | 0.00 |
| TRINITY_PNW88301 | hypothet   | Chlamydomonas_reinh | 68.90 | 0.00 |
| TRINITY_BAJ99430 | predicte   | Hordeum_vulgare     | 68.90 | 0.00 |
| TRINITY_PRW20971 | phospho    | Chlorella_sorokinia | 68.90 | 0.00 |
| TRINITY_PNW84382 | hypothet   | Chlamydomonas_reinh | 68.90 | 0.00 |
| TRINITY_XP_00564 | hypothet   | Coccomyxa_subellips | 68.90 | 0.00 |
| TRINITY_OMP14120 | hypothet   | Corchorus_olitorius | 68.90 | 0.00 |
| TRINITY_XP_02641 | ubiquiti   | Papaver_somniferum  | 68.80 | 0.00 |
| TRINITY_XP_02026 | nifU-li    | Asparagus_officinal | 68.80 | 0.00 |

|                  |          |                     |       |      |
|------------------|----------|---------------------|-------|------|
| TRINITY_XP_02389 | eukaryot | Quercus_suber       | 68.80 | 0.00 |
| TRINITY_XP_02439 | uncharac | Physcomitrella_pate | 68.80 | 0.00 |
| TRINITY_VDC83802 | unnamed  | Brassica_rapa       | 68.80 | 0.00 |
| TRINITY_GAQ91677 | methioni | Klebsormidium_niten | 68.80 | 0.00 |
| TRINITY_KMS64782 | hypothet | Beta_vulgaris       | 68.80 | 0.00 |
| TRINITY_GAX85059 | hypothet | Chlamydomonas_eusti | 68.80 | 0.00 |
| TRINITY_GAX76494 | hypothet | Chlamydomonas_eusti | 68.80 | 0.00 |
| TRINITY_GAX75468 | hypothet | Chlamydomonas_eusti | 68.80 | 0.00 |
| TRINITY_XP_00295 | hypothet | Volvox_carteri      | 68.80 | 0.00 |
| TRINITY_KMS64936 | hypothet | Beta_vulgaris       | 68.80 | 0.00 |
| TRINITY_XP_01283 | PREDICTE | Erythranthe_guttata | 68.80 | 0.00 |
| TRINITY_GAX84178 | hypothet | Chlamydomonas_eusti | 68.80 | 0.00 |
| TRINITY_PRW56067 | beta-urc | Chlorella_sorokinia | 68.80 | 0.00 |
| TRINITY_GAX74958 | hypothet | Chlamydomonas_eusti | 68.80 | 0.00 |
| TRINITY_GAX84404 | hypothet | Chlamydomonas_eusti | 68.80 | 0.00 |
| TRINITY_GAX83494 | hypothet | Chlamydomonas_eusti | 68.80 | 0.00 |
| TRINITY_PNW86513 | hypothet | Chlamydomonas_reinh | 68.80 | 0.00 |
| TRINITY_GAX83450 | hypothet | Chlamydomonas_eusti | 68.80 | 0.00 |
| TRINITY_GAX72891 | hypothet | Chlamydomonas_eusti | 68.80 | 0.00 |
| TRINITY_PNW81732 | hypothet | Chlamydomonas_reinh | 68.80 | 0.00 |
| TRINITY_GAX82773 | hypothet | Chlamydomonas_eusti | 68.80 | 0.00 |
| TRINITY_GAX85660 | hypothet | Chlamydomonas_eusti | 68.80 | 0.00 |
| TRINITY_XP_00294 | hypothet | Volvox_carteri      | 68.80 | 0.00 |
| TRINITY_XP_00169 | hydroxye | Chlamydomonas_reinh | 68.80 | 0.00 |
| TRINITY_XP_00295 | hypothet | Volvox_carteri      | 68.80 | 0.00 |
| TRINITY_XP_00294 | hypothet | Volvox_carteri      | 68.80 | 0.00 |
| TRINITY_GAX74015 | hypothet | Chlamydomonas_eusti | 68.80 | 0.00 |
| TRINITY_KXZ55380 | hypothet | Gonium_pectorale    | 68.80 | 0.00 |
| TRINITY_PNW75691 | hypothet | Chlamydomonas_reinh | 68.80 | 0.00 |
| TRINITY_PNW80338 | hypothet | Chlamydomonas_reinh | 68.80 | 0.00 |
| TRINITY_XP_00564 | hypothet | Coccomyxa_subellips | 68.70 | 0.00 |
| TRINITY_OWM74069 | hypothet | Punica_granatum     | 68.70 | 0.00 |
| TRINITY_XP_02734 | isocitræ | Abrus_precatorius   | 68.70 | 0.00 |
| TRINITY_GAX85053 | hypothet | Chlamydomonas_eusti | 68.70 | 0.00 |
| TRINITY_GAX74421 | hypothet | Chlamydomonas_eusti | 68.70 | 0.00 |
| TRINITY_GBF89372 | dihydroç | Raphidocelis_subcap | 68.70 | 0.00 |
| TRINITY_GAX76373 | hypothet | Chlamydomonas_eusti | 68.70 | 0.00 |
| TRINITY_KXZ48343 | hypothet | Gonium_pectorale    | 68.70 | 0.00 |
| TRINITY_XP_01390 | RAN GTPæ | Monoraphidium_negle | 68.70 | 0.00 |
| TRINITY_PNH06569 | Chaperor | Tetrabaena_socialis | 68.70 | 0.00 |
| TRINITY_XP_00294 | hypothet | Volvox_carteri      | 68.70 | 0.00 |
| TRINITY_KXZ44027 | hypothet | Gonium_pectorale    | 68.70 | 0.00 |
| TRINITY_XP_00169 | NADP-deç | Chlamydomonas_reinh | 68.70 | 0.00 |
| TRINITY_AAY42381 | soluble  | Chlamydomonas_reinh | 68.70 | 0.00 |
| TRINITY_PNH10165 | Serine æ | Tetrabaena_socialis | 68.70 | 0.00 |
| TRINITY_KYP57004 | Putativæ | Cajanus_cajan       | 68.60 | 0.00 |
| TRINITY_KDD75734 | hypothet | Helicosporidium_sp. | 68.60 | 0.00 |
| TRINITY_XP_00169 | predictæ | Chlamydomonas_reinh | 68.60 | 0.00 |
| TRINITY_XP_00169 | predictæ | Chlamydomonas_reinh | 68.60 | 0.00 |
| TRINITY_BAK00999 | predictæ | Hordeum_vulgare     | 68.60 | 0.00 |
| TRINITY_PNH11960 | hypothet | Tetrabaena_socialis | 68.60 | 0.00 |
| TRINITY_PNW83553 | hypothet | Chlamydomonas_reinh | 68.60 | 0.00 |
| TRINITY_ACL97363 | elongati | Ignatius_tetrasporu | 68.60 | 0.00 |
| TRINITY_PIN08631 | Chaperor | Handroanthus_impeti | 68.60 | 0.00 |
| TRINITY_KXZ47669 | hypothet | Gonium_pectorale    | 68.60 | 0.00 |
| TRINITY_XP_00294 | hypothet | Volvox_carteri      | 68.60 | 0.00 |
| TRINITY_XP_00585 | hypothet | Chlorella_variabili | 68.60 | 0.00 |
| TRINITY_XP_01390 | NudC don | Monoraphidium_negle | 68.60 | 0.00 |
| TRINITY_GAX75256 | hypothet | Chlamydomonas_eusti | 68.60 | 0.00 |
| TRINITY_OUS43008 | hypothet | Ostreococcus_tauri  | 68.60 | 0.00 |
| TRINITY_GAX82983 | hypothet | Chlamydomonas_eusti | 68.60 | 0.00 |
| TRINITY_PNH01916 | Pantothe | Tetrabaena_socialis | 68.60 | 0.00 |
| TRINITY_GAX74680 | hypothet | Chlamydomonas_eusti | 68.60 | 0.00 |
| TRINITY_XP_00294 | hypothet | Volvox_carteri      | 68.60 | 0.00 |
| TRINITY_XP_00170 | predictæ | Chlamydomonas_reinh | 68.60 | 0.00 |
| TRINITY_KXZ43316 | hypothet | Gonium_pectorale    | 68.60 | 0.00 |

|                                              |       |      |
|----------------------------------------------|-------|------|
| TRINITY_GAX7423(hypothetChlamydomonas_eusti  | 68.60 | 0    |
| TRINITY_KXZ4194(hypothetGonium_pectorale     | 68.60 | 0.00 |
| TRINITY_GAX7998(hypothetChlamydomonas_eusti  | 68.60 | 0.00 |
| TRINITY_KXZ4781(hypothetGonium_pectorale     | 68.60 | 0    |
| TRINITY_PRW5849(secondarChlorella_sorokinia  | 68.60 | 0.00 |
| TRINITY_GAX8020(hypothetChlamydomonas_eusti  | 68.60 | 0    |
| TRINITY_XP_0017(ribosomChlamydomonas_reinh   | 68.50 | 0.00 |
| TRINITY_BAK0046(predicteHordeum_vulgare      | 68.50 | 0.00 |
| TRINITY_BAK0046(predicteHordeum_vulgare      | 68.50 | 0.00 |
| TRINITY_PON5752(ATPase, Trema_orientale      | 68.50 | 0.00 |
| TRINITY_KXZ5668(hypothetGonium_pectorale     | 68.50 | 0.00 |
| TRINITY_XP_0016(predicteChlamydomonas_reinh  | 68.50 | 0.00 |
| TRINITY_XP_0016(predicteChlamydomonas_reinh  | 68.50 | 0.00 |
| TRINITY_KXZ5079(hypothetGonium_pectorale     | 68.50 | 0.00 |
| TRINITY_XP_0016(esteraseChlamydomonas_reinh  | 68.50 | 0.00 |
| TRINITY_XP_0029(hypothetVolvox_carteri       | 68.50 | 0.00 |
| TRINITY_PNH0816(ConserveTetrabaena_socialis  | 68.50 | 0.00 |
| TRINITY_XP_0045(DNA repCicer_arietinum       | 68.50 | 0.00 |
| TRINITY_OAE2032(hypothetMarchantia_polymorp  | 68.50 | 0.00 |
| TRINITY_KXZ4901(hypothetGonium_pectorale     | 68.50 | 0.00 |
| TRINITY_GAX7634(hypothetChlamydomonas_eusti  | 68.50 | 0    |
| TRINITY_PNW8870(hypothetChlamydomonas_reinh  | 68.50 | 0.00 |
| TRINITY_XP_0025(predicteMicromonas_commoda   | 68.50 | 0.00 |
| TRINITY_PNW8761(hypothetChlamydomonas_reinh  | 68.50 | 0.00 |
| TRINITY_GBG6063(hypothetChara_braunii        | 68.50 | 0.00 |
| TRINITY_ACH8758(trehaloseDunaliella_viridis  | 68.50 | 0.00 |
| TRINITY_GAX7448(hypothetChlamydomonas_eusti  | 68.50 | 0.00 |
| TRINITY_ADW0902(ammoniumDunaliella_viridis   | 68.50 | 0.00 |
| TRINITY_XP_0017(sterol Chlamydomonas_reinh   | 68.50 | 0.00 |
| TRINITY_XP_0016(dynein Chlamydomonas_reinh   | 68.50 | 0.00 |
| TRINITY_BAK0046(predicteHordeum_vulgare      | 68.50 | 0.00 |
| TRINITY_OAE3336(hypothetMarchantia_polymorp  | 68.50 | 0.00 |
| TRINITY_GBG5883(hypothetChara_braunii        | 68.50 | 0.00 |
| TRINITY_GAQ8798(PhosphatKlebsormidium_niten  | 68.40 | 0.00 |
| TRINITY_KZN0100(hypothetDaucus_carota        | 68.40 | 0.00 |
| TRINITY_XP_0029(calmodulSelaginella_moellen  | 68.40 | 0.00 |
| TRINITY_RWR7259(RibosomCinnamomum_micranth   | 68.40 | 0.00 |
| TRINITY_XP_0072(60S ribPrunus_persica        | 68.40 | 0.00 |
| TRINITY_XP_0016(small rChlamydomonas_reinh   | 68.40 | 0.00 |
| TRINITY_GBG5915(hypothetChara_braunii        | 68.40 | 0.00 |
| TRINITY_KCW5592(hypothetEucalyptus_grandis   | 68.40 | 0.00 |
| TRINITY_XP_0238(protein Quercus_suber        | 68.40 | 0.00 |
| TRINITY_GAX7472(hypothetChlamydomonas_eusti  | 68.40 | 0.00 |
| TRINITY_XP_0243(probablePhyscomitrella_pate  | 68.40 | 0.00 |
| TRINITY_XP_0029(hypothetVolvox_carteri       | 68.40 | 0.00 |
| TRINITY_GBF9474(photosysRaphidocelis_subcap  | 68.40 | 0.00 |
| TRINITY_GAX8321(hypothetChlamydomonas_eusti  | 68.40 | 0.00 |
| TRINITY_XP_0139(RibosomMonoraphidium_negle   | 68.40 | 0.00 |
| TRINITY_XP_0029(hypothetVolvox_carteri       | 68.40 | 0.00 |
| TRINITY_GAX7574(hypothetChlamydomonas_eusti  | 68.40 | 0.00 |
| TRINITY_XP_0016(PsaB RNChlamydomonas_reinh   | 68.40 | 0.00 |
| TRINITY_XP_0016(predicteChlamydomonas_reinh  | 68.40 | 0.00 |
| TRINITY_GAX8027(hypothetChlamydomonas_eusti  | 68.40 | 0.00 |
| TRINITY_RYR5149(hypothetArachis_hypogaea     | 68.30 | 0.00 |
| TRINITY_XP_0029(hypothetVolvox_carteri       | 68.30 | 0.00 |
| TRINITY_ACV8343(QM-like Zea_mays             | 68.30 | 0.00 |
| TRINITY_XP_00564(Metallo-Coccomyxa_subellips | 68.30 | 0.00 |
| TRINITY_XP_0017(DNA repChlamydomonas_reinh   | 68.30 | 0.00 |
| TRINITY_XP_0082(PREDICTIPrunus_mume          | 68.30 | 0.00 |
| TRINITY_GAX7680(hypothetChlamydomonas_eusti  | 68.30 | 0.00 |
| TRINITY_XP_0139(UncharacMonoraphidium_negle  | 68.30 | 0.00 |
| TRINITY_GAX8602(hypothetChlamydomonas_eusti  | 68.30 | 0.00 |
| TRINITY_PNW8691(hypothetChlamydomonas_reinh  | 68.30 | 0.00 |
| TRINITY_XP_0016(pyruvateChlamydomonas_reinh  | 68.30 | 0.00 |
| TRINITY_XP_00564(small nCoccomyxa_subellips  | 68.30 | 0.00 |
| TRINITY_PNW7003(hypothetChlamydomonas_reinh  | 68.30 | 0.00 |

|                                             |       |      |
|---------------------------------------------|-------|------|
| TRINITY_GBF8787(hypothetRaphidocelis_subcap | 68.30 | 0.00 |
| TRINITY_PNW7573(hypothetChlamydomonas_reinh | 68.30 | 0.00 |
| TRINITY_GAX7504(hypothetChlamydomonas_eusti | 68.30 | 0.00 |
| TRINITY_PNW7632(hypothetChlamydomonas_reinh | 68.30 | 0.00 |
| TRINITY_GBF9588(hypothetRaphidocelis_subcap | 68.30 | 0.00 |
| TRINITY_AAT0251(unknown Chlamydomonas_reinh | 68.30 | 0.00 |
| TRINITY_GAX8065(hypothetChlamydomonas_eusti | 68.30 | 0.00 |
| TRINITY_PRW5718(ProteasChlorella_sorokinia  | 68.30 | 0.00 |
| TRINITY_XP_0029(hypothetVolvox_carteri      | 68.30 | 0.00 |
| TRINITY_PNW8123(hypothetChlamydomonas_reinh | 68.30 | 0.00 |
| TRINITY_GAX8256(hypothetChlamydomonas_eusti | 68.30 | 0.00 |
| TRINITY_GAX8368(hypothetChlamydomonas_eusti | 68.30 | 0.00 |
| TRINITY_XP_0016(EMP/nonChlamydomonas_reinh  | 68.30 | 0.00 |
| TRINITY_PNW8902(hypothetChlamydomonas_reinh | 68.30 | 0.00 |
| TRINITY_GAX7309(hypothetChlamydomonas_eusti | 68.30 | 0.00 |
| TRINITY_PNW8885(hypothetChlamydomonas_reinh | 68.30 | 0.00 |
| TRINITY_KXZ4466(hypothetGonium_pectorale    | 68.30 | 0.00 |
| TRINITY_ACF9853(delta-9 Chlamydomonas_reinh | 68.30 | 0.00 |
| TRINITY_XP_0016(pyruvatChlamydomonas_reinh  | 68.30 | 0.00 |
| TRINITY_CAJ3481(methioniPlantago_major      | 68.20 | 0.00 |
| TRINITY_XP_0091(PREDICTIBrassica_rapa       | 68.20 | 0.00 |
| TRINITY_KMS6524(hypothetBeta_vulgaris       | 68.20 | 0.00 |
| TRINITY_XP_0029(hypothetVolvox_carteri      | 68.20 | 0.00 |
| TRINITY_XP_0016(flagellChlamydomonas_reinh  | 68.20 | 0.00 |
| TRINITY_PNW7713(hypothetChlamydomonas_reinh | 68.20 | 0.00 |
| TRINITY_PNW6958(hypothetChlamydomonas_reinh | 68.20 | 0.00 |
| TRINITY_XP_0058(hypothetChlorella_variabili | 68.20 | 0.00 |
| TRINITY_XP_0263(serine/tPapaver_somniferum  | 68.20 | 0.00 |
| TRINITY_XP_0139(hypothetMonoraphidium_negle | 68.20 | 0.00 |
| TRINITY_PNW8734(hypothetChlamydomonas_reinh | 68.20 | 0.00 |
| TRINITY_XP_0264(AMP deanPapaver_somniferum  | 68.20 | 0.00 |
| TRINITY_KXZ4329(hypothetGonium_pectorale    | 68.20 | 0.00 |
| TRINITY_XP_0016(predictChlamydomonas_reinh  | 68.20 | 0.00 |
| TRINITY_GAX7910(hypothetChlamydomonas_eusti | 68.20 | 0.00 |
| TRINITY_RWR9150(mitochorCinnamomum_micranth | 68.20 | 0.00 |
| TRINITY_KXZ5106(hypothetGonium_pectorale    | 68.20 | 0.00 |
| TRINITY_GAX8565(hypothetChlamydomonas_eusti | 68.20 | 0.00 |
| TRINITY_P54213.1RecName:Dunaliella_salina   | 68.20 | 0.00 |
| TRINITY_XP_0029(dynein lVolvox_carteri      | 68.20 | 0.00 |
| TRINITY_GAX8035(hypothetChlamydomonas_eusti | 68.20 | 0.00 |
| TRINITY_GBF9955(ABC trarRaphidocelis_subcap | 68.20 | 0.00 |
| TRINITY_KXZ4889(hypothetGonium_pectorale    | 68.20 | 0.00 |
| TRINITY_PSC70851G8 domaiMicractinium_conduc | 68.20 | 0.00 |
| TRINITY_XP_0017(seleniumChlamydomonas_reinh | 68.20 | 0.00 |
| TRINITY_XP_0025(predictMicromonas_commoda   | 68.10 | 0.00 |
| TRINITY_XP_0238(probableQuercus_suber       | 68.10 | 0.00 |
| TRINITY_XP_0017(pyruvatChlamydomonas_reinh  | 68.10 | 0.00 |
| TRINITY_OAE1877(hypothetMarchantia_polymorp | 68.10 | 0.00 |
| TRINITY_PHT2541(hypothetCapsicum_baccatum   | 68.10 | 0.00 |
| TRINITY_XP_0016(ribosomChlamydomonas_reinh  | 68.10 | 0.00 |
| TRINITY_XP_0218(pre-mRN/Spinacia_oleracea   | 68.10 | 0.00 |
| TRINITY_GAX7694(hypothetChlamydomonas_eusti | 68.10 | 0.00 |
| TRINITY_PNH0504(putativTetrabaena_socialis  | 68.10 | 0.00 |
| TRINITY_XP_0024(heat shkSorghum_bicolor     | 68.10 | 0.00 |
| TRINITY_CDP1826(unnamed Coffea_canephora    | 68.10 | 0.00 |
| TRINITY_AAO4575(pol protCucumis_melo        | 68.10 | 0.00 |
| TRINITY_GAX8185(hypothetChlamydomonas_eusti | 68.10 | 0.00 |
| TRINITY_GAX7828(hypothetChlamydomonas_eusti | 68.10 | 0.00 |
| TRINITY_GBF9035(tRNA mocRaphidocelis_subcap | 68.10 | 0.00 |
| TRINITY_XP_0029(hypothetVolvox_carteri      | 68.10 | 0.00 |
| TRINITY_GAX7595(hypothetChlamydomonas_eusti | 68.10 | 0.00 |
| TRINITY_XP_0017(predictChlamydomonas_reinh  | 68.10 | 0.00 |
| TRINITY_P04464.3RecName:Triticum_aestivum   | 68.10 | 0.00 |
| TRINITY_GAX8041(hypothetChlamydomonas_eusti | 68.10 | 0.00 |
| TRINITY_GAX8006(hypothetChlamydomonas_eusti | 68.10 | 0.00 |
| TRINITY_XP_0058(hypothetChlorella_variabili | 68.10 | 0.00 |

|                                             |       |      |
|---------------------------------------------|-------|------|
| TRINITY_AAG298394-alpha-Chlamydomonas_reinh | 68.10 | 0.00 |
| TRINITY_GBF88574hypothetRaphidocelis_subcap | 68.10 | 0.00 |
| TRINITY_PNW73625hypothetChlamydomonas_reinh | 68.10 | 0.00 |
| TRINITY_PNH03569Heat shcTetrabaena_socialis | 68.10 | 0.00 |
| TRINITY_PNW7062(hypothetChlamydomonas_reinh | 68.10 | 0.00 |
| TRINITY_GAX74807hypothetChlamydomonas_eusti | 68.10 | 0.00 |
| TRINITY_XP_0216314-3-3-]Hevea_brasiliensis  | 68.10 | 0.00 |
| TRINITY_PNW74974hypothetChlamydomonas_reinh | 68.10 | 0.00 |
| TRINITY_PNW76835hypothetChlamydomonas_reinh | 68.10 | 0.00 |
| TRINITY_GAX80591hypothetChlamydomonas_eusti | 68.10 | 0.00 |
| TRINITY_XP_02419actin-rεRosa_chinensis      | 68.00 | 0.00 |
| TRINITY_XP_00168casein }Chlamydomonas_reinh | 68.00 | 0.00 |
| TRINITY_NP_00123uncharacGlycine_max         | 68.00 | 0.00 |
| TRINITY_PNW89075hypothetChlamydomonas_reinh | 68.00 | 0.00 |
| TRINITY_AAO73551reverse-Chlamydomonas_reinh | 68.00 | 0.00 |
| TRINITY_GAX83563hypothetChlamydomonas_eusti | 68.00 | 0.00 |
| TRINITY_XP_00294hypothetVolvox_carteri      | 68.00 | 0.00 |
| TRINITY_PNW78346hypothetChlamydomonas_reinh | 68.00 | 0.00 |
| TRINITY_KXZ50758hypothetGonium_pectorale    | 68.00 | 0.00 |
| TRINITY_XP_00295hypothetVolvox_carteri      | 68.00 | 0.00 |
| TRINITY_GAX7411(hypothetChlamydomonas_eusti | 68.00 | 0.00 |
| TRINITY_KXZ42742hypothetGonium_pectorale    | 68.00 | 0    |
| TRINITY_KXZ49383hypothetGonium_pectorale    | 68.00 | 0.00 |
| TRINITY_XP_0139(hypothetMonoraphidium_negle | 68.00 | 0.00 |
| TRINITY_GAX76053hypothetChlamydomonas_eusti | 68.00 | 0.00 |
| TRINITY_PNW82367hypothetChlamydomonas_reinh | 68.00 | 0.00 |
| TRINITY_XP_0017(predictεChlamydomonas_reinh | 68.00 | 0.00 |
| TRINITY_KXZ5299(hypothetGonium_pectorale    | 68.00 | 0.00 |
| TRINITY_GAX72717hypothetChlamydomonas_eusti | 68.00 | 0.00 |
| TRINITY_PNW78499hypothetChlamydomonas_reinh | 68.00 | 0.00 |
| TRINITY_GAX73233hypothetChlamydomonas_eusti | 68.00 | 0.00 |
| TRINITY_PNW84984hypothetChlamydomonas_reinh | 68.00 | 0.00 |
| TRINITY_KXZ5537(hypothetGonium_pectorale    | 68.00 | 0.00 |
| TRINITY_XP_00565hypothetCoccomyxa_subellips | 68.00 | 0.00 |
| TRINITY_OWM79329hypothetPunica_granatum     | 68.00 | 0.00 |
| TRINITY_GAX79021hypothetChlamydomonas_eusti | 68.00 | 0.00 |
| TRINITY_XP_02391myosin tQuercus_suber       | 68.00 | 0.00 |
| TRINITY_NP_00113uncharacZea_mays            | 68.00 | 0.00 |
| TRINITY_GAX8642(hypothetChlamydomonas_eusti | 67.90 | 0.00 |
| TRINITY_PNW77938hypothetChlamydomonas_reinh | 67.90 | 0.00 |
| TRINITY_YP_00904cytochrεBuxbaumia_aphylla   | 67.90 | 0.00 |
| TRINITY_PNW75488hypothetChlamydomonas_reinh | 67.90 | 0.00 |
| TRINITY_XP_00169mitochorChlamydomonas_reinh | 67.90 | 0.00 |
| TRINITY_XP_02289ABC trarOlea_europaea       | 67.90 | 0.00 |
| TRINITY_XP_01139Oxygen-εAuxenochlorella_pro | 67.90 | 0.00 |
| TRINITY_XP_00295hypothetVolvox_carteri      | 67.90 | 0.00 |
| TRINITY_RMZ52234hypothetAuxenochlorella_pro | 67.90 | 0.00 |
| TRINITY_GAX73726hypothetChlamydomonas_eusti | 67.90 | 0.00 |
| TRINITY_XP_00295hypothetVolvox_carteri      | 67.90 | 0.00 |
| TRINITY_GAX76945hypothetChlamydomonas_eusti | 67.90 | 0.00 |
| TRINITY_GAX81666hypothetChlamydomonas_eusti | 67.90 | 0.00 |
| TRINITY_XP_00295hypothetVolvox_carteri      | 67.90 | 0.00 |
| TRINITY_GAX76382hypothetChlamydomonas_eusti | 67.90 | 0.00 |
| TRINITY_KXZ45785hypothetGonium_pectorale    | 67.90 | 0.00 |
| TRINITY_PRW57572ornithirChlorella_sorokinia | 67.90 | 0.00 |
| TRINITY_PNW84615hypothetChlamydomonas_reinh | 67.90 | 0.00 |
| TRINITY_AFC88846putativeTetragonia_tetragon | 67.90 | 0.00 |
| TRINITY_XP_00295hypothetVolvox_carteri      | 67.90 | 0.00 |
| TRINITY_KXZ44338hypothetGonium_pectorale    | 67.90 | 0.00 |
| TRINITY_PSC68215GPI manrMicractinium_conduc | 67.90 | 0.00 |
| TRINITY_XP_00294hypothetVolvox_carteri      | 67.90 | 0.00 |
| TRINITY_PNW71706hypothetChlamydomonas_reinh | 67.90 | 0.00 |
| TRINITY_XP_00634PREDICTεSolanum_tuberosum   | 67.90 | 0.00 |
| TRINITY_XP_00295hypothetVolvox_carteri      | 67.90 | 0.00 |
| TRINITY_GAX75179hypothetChlamydomonas_eusti | 67.90 | 0.00 |
| TRINITY_KXZ49781hypothetGonium_pectorale    | 67.90 | 0.00 |

|                  |                               |       |      |
|------------------|-------------------------------|-------|------|
| TRINITY_GAX80077 | hypothetChlamydomonas_eusti   | 67.90 | 0.00 |
| TRINITY_KXZ48233 | hypothetGonium_pectorale      | 67.90 | 0.00 |
| TRINITY_GBG66955 | hypothetChara_braunii         | 67.90 | 0.00 |
| TRINITY_PNW70823 | hypothetChlamydomonas_reinh   | 67.90 | 0.00 |
| TRINITY_XP_01722 | PREDICTFDaucus_carota         | 67.80 | 0.00 |
| TRINITY_XP_00169 | ribosomæChlamydomonas_reinh   | 67.80 | 0.00 |
| TRINITY_XP_00170 | (plastid Chlamydomonas_reinh  | 67.80 | 0.00 |
| TRINITY_GBG89574 | hypothetChara_braunii         | 67.80 | 0.00 |
| TRINITY_XP_02388 | DNA repæQuercus_suber         | 67.80 | 0.00 |
| TRINITY_XP_00169 | mitochorChlamydomonas_reinh   | 67.80 | 0.00 |
| TRINITY_GAX84818 | hypothetChlamydomonas_eusti   | 67.80 | 0.00 |
| TRINITY_XP_02392 | ras-relæQuercus_suber         | 67.80 | 0.00 |
| TRINITY_XP_02189 | prolifeæCarica_papaya         | 67.80 | 0.00 |
| TRINITY_GBG77697 | hypothetChara_braunii         | 67.80 | 0.00 |
| TRINITY_GAX74312 | hypothetChlamydomonas_eusti   | 67.80 | 0.00 |
| TRINITY_ABK24758 | unknown Picea_sitchensis      | 67.80 | 0.00 |
| TRINITY_PNH08429 | RetrovirTetrabaena_socialis   | 67.80 | 0.00 |
| TRINITY_GAX79377 | hypothetChlamydomonas_eusti   | 67.80 | 0.00 |
| TRINITY_GAX80263 | hypothetChlamydomonas_eusti   | 67.80 | 0.00 |
| TRINITY_GAX72643 | hypothetChlamydomonas_eusti   | 67.80 | 0.00 |
| TRINITY_KXZ46869 | hypothetGonium_pectorale      | 67.80 | 0.00 |
| TRINITY_KXZ47301 | hypothetGonium_pectorale      | 67.80 | 0.00 |
| TRINITY_GAX79235 | hypothetChlamydomonas_eusti   | 67.80 | 0    |
| TRINITY_ONK75735 | uncharacAsparagus_officinal   | 67.70 | 0.00 |
| TRINITY_XP_00565 | nucleosæCoccomyxa_subellips   | 67.70 | 0.00 |
| TRINITY_KXZ55462 | hypothetGonium_pectorale      | 67.70 | 0.00 |
| TRINITY_XP_00169 | regulatæChlamydomonas_reinh   | 67.70 | 0.00 |
| TRINITY_GAX79238 | hypothetChlamydomonas_eusti   | 67.70 | 0.00 |
| TRINITY_XP_00169 | predictæChlamydomonas_reinh   | 67.70 | 0.00 |
| TRINITY_GAX77020 | hypothetChlamydomonas_eusti   | 67.70 | 0.00 |
| TRINITY_XP_00295 | fumarateæVolvox_carteri       | 67.70 | 0.00 |
| TRINITY_PNW88639 | hypothetChlamydomonas_reinh   | 67.70 | 0.00 |
| TRINITY_XP_00170 | (predictæChlamydomonas_reinh  | 67.70 | 0.00 |
| TRINITY_GAX72861 | hypothetChlamydomonas_eusti   | 67.70 | 0.00 |
| TRINITY_RAL52929 | hypothetCuscuta_australis     | 67.70 | 0.00 |
| TRINITY_PNW80134 | hypothetChlamydomonas_reinh   | 67.70 | 0.00 |
| TRINITY_XP_00169 | ser/thr Chlamydomonas_reinh   | 67.70 | 0.00 |
| TRINITY_PNW71679 | hypothetChlamydomonas_reinh   | 67.70 | 0.00 |
| TRINITY_XP_00295 | componerVolvox_carteri        | 67.70 | 0.00 |
| TRINITY_XP_02283 | Zinc firOstreococcus_tauri    | 67.70 | 0.00 |
| TRINITY_XP_02283 | Zinc firOstreococcus_tauri    | 67.70 | 0.00 |
| TRINITY_XP_00295 | hypothetVolvox_carteri        | 67.70 | 0.00 |
| TRINITY_XP_00295 | hypothetVolvox_carteri        | 67.70 | 0.00 |
| TRINITY_PNW77779 | hypothetChlamydomonas_reinh   | 67.70 | 0.00 |
| TRINITY_XP_00294 | hypothetVolvox_carteri        | 67.70 | 0.00 |
| TRINITY_PNH10835 | HelicasæTetrabaena_socialis   | 67.70 | 0.00 |
| TRINITY_KXZ50323 | hypothetGonium_pectorale      | 67.70 | 0    |
| TRINITY_PNW69696 | hypothetChlamydomonas_reinh   | 67.70 | 0.00 |
| TRINITY_GAX77700 | hypothetChlamydomonas_eusti   | 67.70 | 0.00 |
| TRINITY_XP_00169 | N-ethylæChlamydomonas_reinh   | 67.70 | 0.00 |
| TRINITY_PSC76694 | 60S acicMicractinium_conduc   | 67.60 | 0.00 |
| TRINITY_GAQ81505 | SelenocæKlebsormidium_niten   | 67.60 | 0.00 |
| TRINITY_XP_00305 | predictæMicromonas_pusilla    | 67.60 | 0.00 |
| TRINITY_RMZ55856 | hypothetAuxenochlorella_pro   | 67.60 | 0.00 |
| TRINITY_XP_00295 | isocitræVolvox_carteri        | 67.60 | 0.00 |
| TRINITY_KXZ41934 | hypothetGonium_pectorale      | 67.60 | 0.00 |
| TRINITY_GAX81863 | hypothetChlamydomonas_eusti   | 67.60 | 0.00 |
| TRINITY_XP_00228 | PREDICTIVitis_vinifera        | 67.60 | 0.00 |
| TRINITY_GBF92566 | hypothetRaphidocelis_subcap   | 67.60 | 0.00 |
| TRINITY_XP_00295 | hypothetVolvox_carteri        | 67.60 | 0.00 |
| TRINITY_XP_00170 | (molybdoxæChlamydomonas_reinh | 67.60 | 0.00 |
| TRINITY_KXZ53096 | hypothetGonium_pectorale      | 67.60 | 0.00 |
| TRINITY_XP_00306 | predictæMicromonas_pusilla    | 67.60 | 0.00 |
| TRINITY_GAX80419 | hypothetChlamydomonas_eusti   | 67.60 | 0.00 |
| TRINITY_KNA03059 | hypothetSpinacia_oleracea     | 67.60 | 0.00 |
| TRINITY_GAX74056 | hypothetChlamydomonas_eusti   | 67.60 | 0.00 |

|                                             |       |      |
|---------------------------------------------|-------|------|
| TRINITY_AFI57622Rpn8 [D]Dunaliella_salina   | 67.60 | 0.00 |
| TRINITY_XP_00666(PREDICTO)Oryza_brachyantha | 67.60 | 0.00 |
| TRINITY_GAX80861hypothetChlamydomonas_eusti | 67.60 | 0.00 |
| TRINITY_GAX7964(hypothetChlamydomonas_eusti | 67.60 | 0.00 |
| TRINITY_KXZ53964hypothetGonium_pectorale    | 67.60 | 0.00 |
| TRINITY_PNH0719ElicitorTetrabaena_socialis  | 67.60 | 0.00 |
| TRINITY_XP_0016(peptidy]Chlamydomonas_reinh | 67.60 | 0.00 |
| TRINITY_PNW6978(hypothetChlamydomonas_reinh | 67.60 | 0.00 |
| TRINITY_XP_0023(heat shcPopulus_trichocarpa | 67.60 | 0.00 |
| TRINITY_GAX8529hypothetChlamydomonas_eusti  | 67.60 | 0.00 |

|                                              |       |      |
|----------------------------------------------|-------|------|
| TRINITY_GBG8506(hypothetChara_braunii        | 67.60 | 0.00 |
| TRINITY_GBG7545(hypothetChara_braunii        | 67.60 | 0.00 |
| TRINITY_PNW8452(hypothetChlamydomonas_reinh  | 67.60 | 0.00 |
| TRINITY_XP_00564(ribosomæCoccomyxa_subellips | 67.60 | 0.00 |
| TRINITY_PNW8180(hypothetChlamydomonas_reinh  | 67.60 | 0.00 |
| TRINITY_PSC7629(integralMicractinium_conduc  | 67.60 | 0.00 |
| TRINITY_XP_00295(hypothetVolvox_carteri      | 67.60 | 0    |
| TRINITY_GAQ89712GTP-binκKlebsormidium_niten  | 67.60 | 0.00 |
| TRINITY_GAX7746(hypothetChlamydomonas_eusti  | 67.60 | 0.00 |
| TRINITY_PNW7964(hypothetChlamydomonas_reinh  | 67.60 | 0.00 |
| TRINITY_PNW7067(hypothetChlamydomonas_reinh  | 67.60 | 0.00 |
| TRINITY_XP_00941(PREDICTH)Musa_acuminata     | 67.50 | 0.00 |
| TRINITY_XP_00294(mitochorVolvox_carteri      | 67.50 | 0.00 |
| TRINITY_XP_0216760S_ribκHevea_brasiliensis   | 67.50 | 0.00 |
| TRINITY_KZV1520(hypothetDorcoceras_hygromet  | 67.50 | 0.00 |
| TRINITY_KXZ5701(hypothetGonium_pectorale     | 67.50 | 0.00 |
| TRINITY_ANE1053(γ cæDunaliella_salina        | 67.50 | 0.00 |
| TRINITY_XP_00295(hypothetVolvox_carteri      | 67.50 | 0.00 |
| TRINITY_AAB61311(htrA-li)Haematococcus_lacus | 67.50 | 0.00 |
| TRINITY_GAX7883(hypothetChlamydomonas_eusti  | 67.50 | 0.00 |
| TRINITY_KXZ4637(hypothetGonium_pectorale     | 67.50 | 0.00 |
| TRINITY_XP_00564(WD40_re)Coccomyxa_subellips | 67.50 | 0.00 |
| TRINITY_XP_00564(polyaderCoccomyxa_subellips | 67.50 | 0.00 |
| TRINITY_GAX8018(hypothetChlamydomonas_eusti  | 67.50 | 0.00 |
| TRINITY_KXZ5673(hypothetGonium_pectorale     | 67.50 | 0.00 |
| TRINITY_GAX7778(hypothetChlamydomonas_eusti  | 67.50 | 0.00 |
| TRINITY_XP_00169(predictæChlamydomonas_reinh | 67.50 | 0.00 |
| TRINITY_GAX7281(hypothetChlamydomonas_eusti  | 67.50 | 0.00 |
| TRINITY_XP_00169(predictæChlamydomonas_reinh | 67.50 | 0.00 |
| TRINITY_GAX7477(hypothetChlamydomonas_eusti  | 67.50 | 0.00 |
| TRINITY_XP_00295(hypothetVolvox_carteri      | 67.50 | 0.00 |
| TRINITY_KXZ4748(hypothetGonium_pectorale     | 67.50 | 0.00 |
| TRINITY_KXZ5469(hypothetGonium_pectorale     | 67.50 | 0.00 |
| TRINITY_KXZ4498(hypothetGonium_pectorale     | 67.50 | 0.00 |
| TRINITY_XP_00295(NimA-rel)Volvox_carteri     | 67.50 | 0.00 |
| TRINITY_GAX7909(hypothetChlamydomonas_eusti  | 67.50 | 0.00 |
| TRINITY_XP_01451(6-4)DN/Vigna_radiata        | 67.40 | 0.00 |
| TRINITY_BAJ9379(predictæHordeum_vulgare      | 67.40 | 0.00 |
| TRINITY_XP_0025(predictæMicromonas_commoda   | 67.40 | 0.00 |
| TRINITY_GBG6826(hypothetChara_braunii        | 67.40 | 0.00 |
| TRINITY_CBI2297(unnamed Vitis_vinifera       | 67.40 | 0.00 |
| TRINITY_BAJ8923(predictæHordeum_vulgare      | 67.40 | 0.00 |
| TRINITY_XP_0139(glycine Monoraphidium_negle  | 67.40 | 0.00 |
| TRINITY_XP_0238(cysteineQuercus_suber        | 67.40 | 0.00 |
| TRINITY_PHT8317(hypothetCapsicum_annuum      | 67.40 | 0.00 |
| TRINITY_XP_00169(predictæChlamydomonas_reinh | 67.40 | 0.00 |
| TRINITY_XP_00169(predictæChlamydomonas_reinh | 67.40 | 0.00 |
| TRINITY_GAX7634(hypothetChlamydomonas_eusti  | 67.40 | 0.00 |
| TRINITY_XP_00295(hypothetVolvox_carteri      | 67.40 | 0.00 |
| TRINITY_XP_02297(ras-relæCucurbita_maxima    | 67.40 | 0.00 |
| TRINITY_GAX7937(hypothetChlamydomonas_eusti  | 67.40 | 0.00 |
| TRINITY_GAX8363(hypothetChlamydomonas_eusti  | 67.40 | 0.00 |
| TRINITY_GBF9555(hypothetRaphidocelis_subcap  | 67.40 | 0.00 |
| TRINITY_XP_00295(hypothetVolvox_carteri      | 67.40 | 0.00 |
| TRINITY_KXZ4349(hypothetGonium_pectorale     | 67.40 | 0.00 |
| TRINITY_GAX8118(hypothetChlamydomonas_eusti  | 67.40 | 0.00 |
| TRINITY_GAX8349(hypothetChlamydomonas_eusti  | 67.40 | 0.00 |
| TRINITY_XP_00295(hypothetVolvox_carteri      | 67.40 | 0.00 |
| TRINITY_KXZ4606(hypothetGonium_pectorale     | 67.40 | 0.00 |
| TRINITY_GAX8091(hypothetChlamydomonas_eusti  | 67.40 | 0.00 |
| TRINITY_GAX7398(hypothetChlamydomonas_eusti  | 67.40 | 0.00 |
| TRINITY_KXZ4703(hypothetGonium_pectorale     | 67.40 | 0.00 |
| TRINITY_XP_00294(hypothetVolvox_carteri      | 67.40 | 0    |
| TRINITY_PTQ4603(hypothetMarchantia_polymorp  | 67.40 | 0.00 |
| TRINITY_GAX7925(hypothetChlamydomonas_eusti  | 67.40 | 0.00 |
| TRINITY_BAJ9409(predictæHordeum_vulgare      | 67.30 | 0.00 |



|                  |           |                     |       |      |
|------------------|-----------|---------------------|-------|------|
| TRINITY_XP_01101 | PREDICT   | Populus_euphratica  | 67.30 | 0.00 |
| TRINITY_GAQ8302  | rotamas   | Klebsormidium_niten | 67.30 | 0.00 |
| TRINITY_PIN0453  | Molecul   | Handroanthus_impeti | 67.30 | 0.00 |
| TRINITY_KXZ5273  | (hypothet | Gonium_pectorale    | 67.30 | 0.00 |
| TRINITY_GAX8393  | (hypothet | Chlamydomonas_eusti | 67.30 | 0.00 |
| TRINITY_GAX8481  | (hypothet | Chlamydomonas_eusti | 67.30 | 0.00 |
| TRINITY_XP_0016  | ubiquin   | Chlamydomonas_reinh | 67.30 | 0.00 |
| TRINITY_XP_0243  | phytoch   | Physcomitrella_pate | 67.30 | 0.00 |
| TRINITY_GAX7985  | (hypothet | Chlamydomonas_eusti | 67.30 | 0.00 |
| TRINITY_GAX8285  | (hypothet | Chlamydomonas_eusti | 67.30 | 0.00 |
| TRINITY_KXZ5583  | (hypothet | Gonium_pectorale    | 67.30 | 0.00 |
| TRINITY_GAX7412  | (hypothet | Chlamydomonas_eusti | 67.30 | 0.00 |
| TRINITY_GAX8219  | (hypothet | Chlamydomonas_eusti | 67.30 | 0.00 |
| TRINITY_KXZ4092  | (hypothet | Gonium_pectorale    | 67.30 | 0.00 |
| TRINITY_KXZ4824  | (hypothet | Gonium_pectorale    | 67.30 | 0.00 |
| TRINITY_PNW8634  | (hypothet | Chlamydomonas_reinh | 67.30 | 0.00 |
| TRINITY_GAX8467  | (hypothet | Chlamydomonas_eusti | 67.30 | 0.00 |
| TRINITY_OWM8305  | (hypothet | Punica_granatum     | 67.30 | 0.00 |
| TRINITY_XP_0017  | (intrafl  | Chlamydomonas_reinh | 67.30 | 0.00 |
| TRINITY_XP_0016  | isocitr   | Chlamydomonas_reinh | 67.30 | 0.00 |
| TRINITY_KMS6524  | (hypothet | Beta_vulgaris       | 67.30 | 0.00 |
| TRINITY_XP_0138  | 20S prot  | Monoraphidium_negle | 67.30 | 0.00 |
| TRINITY_GAX8446  | (hypothet | Chlamydomonas_eusti | 67.30 | 0.00 |
| TRINITY_PNW7001  | (hypothet | Chlamydomonas_reinh | 67.30 | 0.00 |
| TRINITY_GAX7950  | (hypothet | Chlamydomonas_eusti | 67.30 | 0.00 |
| TRINITY_GAX8266  | (hypothet | Chlamydomonas_eusti | 67.30 | 0.00 |
| TRINITY_GAX8015  | (hypothet | Chlamydomonas_eusti | 67.30 | 0.00 |
| TRINITY_GAX7423  | (hypothet | Chlamydomonas_eusti | 67.30 | 0.00 |
| TRINITY_KXZ4262  | (hypothet | Gonium_pectorale    | 67.20 | 0.00 |
| TRINITY_XP_0058  | (hypothet | Chlorella_variabili | 67.20 | 0.00 |
| TRINITY_CBI2297  | unnamed   | Vitis_vinifera      | 67.20 | 0.00 |
| TRINITY_ALM5501  | DEAD bo   | Chlamydomonas_sp._I | 67.20 | 0.00 |
| TRINITY_PNH0894  | (hypothet | Tetrabaena_socialis | 67.20 | 0.00 |
| TRINITY_PNW7759  | (hypothet | Chlamydomonas_reinh | 67.20 | 0.00 |
| TRINITY_PNH0830  | NFX1-ty   | Tetrabaena_socialis | 67.20 | 0.00 |
| TRINITY_XP_0029  | (hypothet | Volvox_carteri      | 67.20 | 0.00 |
| TRINITY_KXZ5702  | (hypothet | Gonium_pectorale    | 67.20 | 0.00 |
| TRINITY_GAX7414  | (hypothet | Chlamydomonas_eusti | 67.20 | 0.00 |
| TRINITY_XP_0029  | (hypothet | Volvox_carteri      | 67.20 | 0.00 |
| TRINITY_XP_0029  | Hsp70 p   | Volvox_carteri      | 67.20 | 0.00 |
| TRINITY_GAX8166  | (hypothet | Chlamydomonas_eusti | 67.20 | 0.00 |
| TRINITY_GAX7882  | (hypothet | Chlamydomonas_eusti | 67.20 | 0.00 |
| TRINITY_GAX8165  | (hypothet | Chlamydomonas_eusti | 67.20 | 0.00 |
| TRINITY_XP_0184  | PREDICT   | Raphanus_sativus    | 67.20 | 0.00 |
| TRINITY_GAX7983  | (hypothet | Chlamydomonas_eusti | 67.20 | 0.00 |
| TRINITY_AEF7996  | phospho   | Dunaliella_salina   | 67.20 | 0.00 |
| TRINITY_PRW5994  | 2pfkB fa  | Chlorella_sorokinia | 67.20 | 0.00 |
| TRINITY_KXZ4155  | (hypothet | Gonium_pectorale    | 67.20 | 0.00 |
| TRINITY_XP_0029  | (hypothet | Volvox_carteri      | 67.20 | 0.00 |
| TRINITY_XP_0029  | (hypothet | Volvox_carteri      | 67.20 | 0.00 |
| TRINITY_GAX7606  | (hypothet | Chlamydomonas_eusti | 67.20 | 0.00 |
| TRINITY_ABL0948  | omega-3   | Chlamydomonas_reinh | 67.20 | 0.00 |
| TRINITY_GAX7406  | (hypothet | Chlamydomonas_eusti | 67.20 | 0.00 |
| TRINITY_GAX8006  | (hypothet | Chlamydomonas_eusti | 67.20 | 0.00 |
| TRINITY_QBG3806  | NADH de   | Chlorosarcinopsis_e | 67.20 | 0.00 |
| TRINITY_GAX7667  | (hypothet | Chlamydomonas_eusti | 67.20 | 0.00 |
| TRINITY_GAX8204  | (hypothet | Chlamydomonas_eusti | 67.20 | 0.00 |
| TRINITY_XP_0029  | 2-oxogl   | Volvox_carteri      | 67.20 | 0.00 |
| TRINITY_GAX8460  | (hypothet | Chlamydomonas_eusti | 67.20 | 0.00 |
| TRINITY_ABS1121  | (protein  | Oldenlandia_affinis | 67.10 | 0.00 |
| TRINITY_XP_0219  | uracil-I  | Helianthus_annuus   | 67.10 | 0.00 |
| TRINITY_RWR9412  | ISWI ch   | Cinnamomum_micranth | 67.10 | 0.00 |
| TRINITY_EPS6264  | (hypothet | Genlisea_aurea      | 67.10 | 0.00 |
| TRINITY_PTQ3691  | (hypothet | Marchantia_polymorp | 67.10 | 0.00 |
| TRINITY_BAK0277  | (predict  | Hordeum_vulgare     | 67.10 | 0.00 |
| TRINITY_RWW9078  | (hypothet | Ensete_ventricosum  | 67.10 | 0.00 |

|                  |                              |       |      |
|------------------|------------------------------|-------|------|
| TRINITY_XP_02390 | aldo-ketQuercus_suber        | 67.10 | 0.00 |
| TRINITY_XP_00294 | hypothetVolvox_carteri       | 67.10 | 0.00 |
| TRINITY_KXZ52061 | hypothetGonium_pectorale     | 67.10 | 0.00 |
| TRINITY_KMS65245 | hypothetBeta_vulgaris        | 67.10 | 0.00 |
| TRINITY_XP_00295 | hypothetVolvox_carteri       | 67.10 | 0.00 |
| TRINITY_GAX77866 | hypothetChlamydomonas_eusti  | 67.10 | 0.00 |
| TRINITY_GAX82883 | hypothetChlamydomonas_eusti  | 67.10 | 0.00 |
| TRINITY_XP_00295 | hypothetVolvox_carteri       | 67.10 | 0.00 |
| TRINITY_GAX73174 | hypothetChlamydomonas_eusti  | 67.10 | 0.00 |
| TRINITY_KXZ53534 | hypothetGonium_pectorale     | 67.10 | 0.00 |
| TRINITY_GAX82776 | hypothetChlamydomonas_eusti  | 67.10 | 0.00 |
| TRINITY_KXZ44027 | hypothetGonium_pectorale     | 67.10 | 0.00 |
| TRINITY_XP_00295 | hypothetVolvox_carteri       | 67.10 | 0.00 |
| TRINITY_GAX84258 | hypothetChlamydomonas_eusti  | 67.10 | 0.00 |
| TRINITY_GAX74005 | hypothetChlamydomonas_eusti  | 67.10 | 0    |
| TRINITY_GAX82575 | hypothetChlamydomonas_eusti  | 67.10 | 0.00 |
| TRINITY_XP_01054 | PREDICTITarenaya_hasslerian  | 67.10 | 0.00 |
| TRINITY_KXZ47313 | hypothetGonium_pectorale     | 67.10 | 0.00 |
| TRINITY_PSC73956 | flagellatMicractinium_conduc | 67.10 | 0.00 |
| TRINITY_GAX73586 | hypothetChlamydomonas_eusti  | 67.10 | 0    |
| TRINITY_OVA12339 | K HomolcMacleaya_cordata     | 67.00 | 0.00 |
| TRINITY_XP_02284 | ABC trarOlea_europaea        | 67.00 | 0.00 |
| TRINITY_KMS64936 | hypothetBeta_vulgaris        | 67.00 | 0.00 |
| TRINITY_XP_02390 | septum-rQuercus_suber        | 67.00 | 0.00 |
| TRINITY_XP_00295 | hypothetVolvox_carteri       | 67.00 | 0.00 |
| TRINITY_XP_01762 | PREDICTIGossypium_arboreum   | 67.00 | 0.00 |
| TRINITY_GAX77804 | hypothetChlamydomonas_eusti  | 67.00 | 0.00 |
| TRINITY_KXZ48910 | hypothetGonium_pectorale     | 67.00 | 0.00 |
| TRINITY_XP_01389 | hypothetMonoraphidium_negle  | 67.00 | 0.00 |
| TRINITY_GAX77118 | hypothetChlamydomonas_eusti  | 67.00 | 0.00 |
| TRINITY_XP_02638 | agmatinεPapaver_somniferum   | 67.00 | 0.00 |
| TRINITY_GAX83518 | hypothetChlamydomonas_eusti  | 67.00 | 0.00 |
| TRINITY_PNW73366 | hypothetChlamydomonas_reinh  | 67.00 | 0.00 |
| TRINITY_KXZ55204 | hypothetGonium_pectorale     | 67.00 | 0.00 |
| TRINITY_KXZ56835 | hypothetGonium_pectorale     | 67.00 | 0.00 |
| TRINITY_PNW80057 | hypothetChlamydomonas_reinh  | 67.00 | 0.00 |
| TRINITY_KXZ46611 | hypothetGonium_pectorale     | 67.00 | 0.00 |
| TRINITY_GAX80077 | hypothetChlamydomonas_eusti  | 67.00 | 0.00 |
| TRINITY_GBG78327 | hypothetChara_braunii        | 67.00 | 0.00 |
| TRINITY_XP_00295 | hypothetVolvox_carteri       | 67.00 | 0.00 |
| TRINITY_KXZ45278 | hypothetGonium_pectorale     | 67.00 | 0.00 |
| TRINITY_XP_00169 | predictεChlamydomonas_reinh  | 67.00 | 0.00 |
| TRINITY_XP_01389 | hypothetMonoraphidium_negle  | 67.00 | 0.00 |
| TRINITY_XP_00295 | hypothetVolvox_carteri       | 67.00 | 0.00 |
| TRINITY_GAX83107 | hypothetChlamydomonas_eusti  | 67.00 | 0.00 |
| TRINITY_GAX75276 | hypothetChlamydomonas_eusti  | 67.00 | 0.00 |
| TRINITY_XP_02388 | nucleosiQuercus_suber        | 66.90 | 0.00 |
| TRINITY_AWW16521 | phosphonIpomoea_pes-caprae   | 66.90 | 0.00 |
| TRINITY_KXZ50468 | hypothetGonium_pectorale     | 66.90 | 0.00 |
| TRINITY_YP_00607 | cox1 gerNitella_hyalina      | 66.90 | 0.00 |
| TRINITY_PSC73502 | cytochrεMicractinium_conduc  | 66.90 | 0.00 |
| TRINITY_XP_00169 | mitogen Chlamydomonas_reinh  | 66.90 | 0.00 |
| TRINITY_GAX77556 | hypothetChlamydomonas_eusti  | 66.90 | 0.00 |
| TRINITY_XP_00295 | hypothetVolvox_carteri       | 66.90 | 0.00 |
| TRINITY_XP_00169 | T-complεChlamydomonas_reinh  | 66.90 | 0.00 |
| TRINITY_GAX83836 | hypothetChlamydomonas_eusti  | 66.90 | 0.00 |
| TRINITY_KXZ46129 | hypothetGonium_pectorale     | 66.90 | 0.00 |
| TRINITY_XP_00295 | hypothetVolvox_carteri       | 66.90 | 0.00 |
| TRINITY_GAX81833 | hypothetChlamydomonas_eusti  | 66.90 | 0.00 |
| TRINITY_XP_00169 | predictεChlamydomonas_reinh  | 66.90 | 0.00 |
| TRINITY_GAX75475 | hypothetChlamydomonas_eusti  | 66.90 | 0.00 |
| TRINITY_XP_00169 | phosphatChlamydomonas_reinh  | 66.90 | 0.00 |
| TRINITY_XP_00295 | hypothetVolvox_carteri       | 66.90 | 0.00 |
| TRINITY_KXZ46387 | hypothetGonium_pectorale     | 66.90 | 0.00 |
| TRINITY_KXZ51289 | hypothetGonium_pectorale     | 66.90 | 0.00 |
| TRINITY_GAX74602 | hypothetChlamydomonas_eusti  | 66.90 | 0.00 |

|                  |                             |       |      |
|------------------|-----------------------------|-------|------|
| TRINITY_PNW76185 | hypothetChlamydomonas_reinh | 66.90 | 0.00 |
| TRINITY_KXZ5426  | hypothetGonium_pectorale    | 66.90 | 0.00 |
| TRINITY_PNW84065 | hypothetChlamydomonas_reinh | 66.90 | 0.00 |
| TRINITY_PNW81828 | hypothetChlamydomonas_reinh | 66.90 | 0.00 |
| TRINITY_KXZ52394 | hypothetGonium_pectorale    | 66.90 | 0.00 |
| TRINITY_OMO78468 | PyruvatεCorchorus_olitorius | 66.80 | 0.00 |
| TRINITY_GAQ80628 | mitochorKlebsormidium_niten | 66.80 | 0.00 |
| TRINITY_XP_00295 | hypothetVolvox_carteri      | 66.80 | 0.00 |
| TRINITY_GBF97454 | DEAD-bo>Raphidocelis_subcap | 66.80 | 0.00 |
| TRINITY_PNW75145 | hypothetChlamydomonas_reinh | 66.80 | 0.00 |
| TRINITY_GAX76328 | hypothetChlamydomonas_eusti | 66.80 | 0.00 |
| TRINITY_OEL33898 | CalreticDichanthelium_oligo | 66.80 | 0.00 |
| TRINITY_GAX78152 | hypothetChlamydomonas_eusti | 66.80 | 0.00 |
| TRINITY_XP_00294 | hypothetVolvox_carteri      | 66.80 | 0.00 |
| TRINITY_GAX83429 | hypothetChlamydomonas_eusti | 66.80 | 0.00 |
| TRINITY_GAX83113 | hypothetChlamydomonas_eusti | 66.80 | 0.00 |
| TRINITY_GAX79050 | hypothetChlamydomonas_eusti | 66.80 | 0.00 |
| TRINITY_GAX85402 | hypothetChlamydomonas_eusti | 66.80 | 0.00 |
| TRINITY_GAX74909 | hypothetChlamydomonas_eusti | 66.80 | 0.00 |
| TRINITY_XP_02439 | angio-aεPhyscomitrella_pate | 66.80 | 0.00 |
| TRINITY_KXZ42134 | hypothetGonium_pectorale    | 66.80 | 0.00 |
| TRINITY_XP_00294 | hypothetVolvox_carteri      | 66.80 | 0    |
| TRINITY_KXZ56144 | hypothetGonium_pectorale    | 66.80 | 0.00 |
| TRINITY_EFJ07339 | hypothetSelaginella_moellen | 66.70 | 0.00 |
| TRINITY_PSS14475 | 26S_protActinidia_chinensis | 66.70 | 0.00 |
| TRINITY_XP_00646 | ras-relεCitrus_sinensis     | 66.70 | 0.00 |
| TRINITY_XP_01844 | PREDICTIRaphanus_sativus    | 66.70 | 0.00 |
| TRINITY_A8ISN6.2 | RecName:Chlamydomonas_reinh | 66.70 | 0.00 |
| TRINITY_YP_00913 | cytochrεLobosphaera_incisa  | 66.70 | 0.00 |
| TRINITY_XP_01849 | PREDICTIRaphanus_sativus    | 66.70 | 0.00 |
| TRINITY_RXI06913 | hypothetMalus_domestica     | 66.70 | 0.00 |
| TRINITY_XP_00306 | predictεMicromonas_pusilla  | 66.70 | 0.00 |
| TRINITY_XP_00307 | PyridoxεOstreococcus_tauri  | 66.70 | 0.00 |
| TRINITY_XP_02283 | CytochrεOstreococcus_tauri  | 66.70 | 0.00 |
| TRINITY_XP_02387 | ubiquitiQuercus_suber       | 66.70 | 0.00 |
| TRINITY_XP_02160 | ribonucManihot_esculenta    | 66.70 | 0.00 |
| TRINITY_NP_00110 | cell divZea_mays            | 66.70 | 0.00 |
| TRINITY_PNW81835 | hypothetChlamydomonas_reinh | 66.70 | 0.00 |
| TRINITY_GBF96605 | hypothetRaphidocelis_subcap | 66.70 | 0.00 |
| TRINITY_XP_00294 | hypothetVolvox_carteri      | 66.70 | 0.00 |
| TRINITY_XP_00295 | hypothetVolvox_carteri      | 66.70 | 0.00 |
| TRINITY_QBB20001 | heat shεEttlia_sp._YC001    | 66.70 | 0.00 |
| TRINITY_KXZ41939 | hypothetGonium_pectorale    | 66.70 | 0.00 |
| TRINITY_GAX79932 | hypothetChlamydomonas_eusti | 66.70 | 0.00 |
| TRINITY_ADC45376 | actin [(Cleistogenes_songor | 66.70 | 0.00 |
| TRINITY_PNH03631 | PhosphatTetrabaena_socialis | 66.70 | 0.00 |
| TRINITY_XP_00294 | hypothetVolvox_carteri      | 66.70 | 0.00 |
| TRINITY_GBF96972 | hypothetRaphidocelis_subcap | 66.70 | 0.00 |
| TRINITY_KZV58695 | hypothetDorcoceras_hygromet | 66.70 | 0.00 |
| TRINITY_AKR14032 | translatTengia_sp._MEN-2015 | 66.70 | 0.00 |
| TRINITY_XP_00169 | hypothetChlamydomonas_reinh | 66.70 | 0.00 |
| TRINITY_KXZ51346 | hypothetGonium_pectorale    | 66.70 | 0.00 |
| TRINITY_PNW70957 | hypothetChlamydomonas_reinh | 66.70 | 0.00 |
| TRINITY_PRW60274 | sm LSM8 Chlorella_sorokinia | 66.70 | 0.00 |
| TRINITY_XP_00294 | luminal Volvox_carteri      | 66.70 | 0.00 |
| TRINITY_XP_00295 | hypothetVolvox_carteri      | 66.70 | 0.00 |
| TRINITY_XP_00295 | hypothetVolvox_carteri      | 66.70 | 0.00 |
| TRINITY_XP_02175 | LOW QUAIChenopodium_quinoa  | 66.70 | 0.00 |
| TRINITY_AGH55992 | acyl Co/Tetraena_mongolica  | 66.70 | 0.00 |
| TRINITY_PNW73862 | hypothetChlamydomonas_reinh | 66.70 | 0.00 |
| TRINITY_PNH10011 | hypothetTetrabaena_socialis | 66.70 | 0.00 |
| TRINITY_KXZ40924 | hypothetGonium_pectorale    | 66.70 | 0.00 |
| TRINITY_GAX72623 | hypothetChlamydomonas_eusti | 66.70 | 0.00 |
| TRINITY_PNW71386 | hypothetChlamydomonas_reinh | 66.70 | 0.00 |
| TRINITY_KXZ45793 | hypothetGonium_pectorale    | 66.70 | 0.00 |
| TRINITY_GAX75605 | hypothetChlamydomonas_eusti | 66.70 | 0.00 |

|                 |          |                     |       |      |
|-----------------|----------|---------------------|-------|------|
| TRINITY_XP_0016 | predict  | Chlamydomonas_reinh | 66.70 | 0.00 |
| TRINITY_GAX7290 | hypothet | Chlamydomonas_eusti | 66.70 | 0.00 |
| TRINITY_GAX8484 | hypothet | Chlamydomonas_eusti | 66.70 | 0.00 |
| TRINITY_KMZ6542 | Phytoch  | Zostera_marina      | 66.70 | 0.00 |
| TRINITY_XP_0058 | hypothet | Chlorella_variabili | 66.70 | 0.00 |
| TRINITY_GAX8261 | hypothet | Chlamydomonas_eusti | 66.70 | 0.00 |
| TRINITY_KMS9195 | hypothet | Beta_vulgaris       | 66.70 | 0.00 |
| TRINITY_PNH0681 | hypothet | Tetrabaena_socialis | 66.70 | 0.00 |
| TRINITY_XP_0029 | hypothet | Volvox_carteri      | 66.70 | 0.00 |
| TRINITY_ONM1892 | ABC trar | Zea_mays            | 66.70 | 0.00 |
| TRINITY_GAX8243 | hypothet | Chlamydomonas_eusti | 66.70 | 0.00 |
| TRINITY_XP_0075 | predict  | Bathycoccus_prasinc | 66.70 | 0.00 |
| TRINITY_PRW4485 | tRNA-sp  | Chlorella_sorokinia | 66.70 | 0.00 |
| TRINITY_XP_0056 | hypothet | Coccomyxa_subellips | 66.70 | 0.00 |
| TRINITY_XP_0029 | hypothet | Volvox_carteri      | 66.70 | 0.00 |
| TRINITY_XP_0138 | hypothet | Monoraphidium_negle | 66.70 | 0.00 |
| TRINITY_GAX8093 | hypothet | Chlamydomonas_eusti | 66.70 | 0.00 |
| TRINITY_KXZ4131 | hypothet | Gonium_pectorale    | 66.70 | 0.00 |
| TRINITY_PNW8885 | hypothet | Chlamydomonas_reinh | 66.70 | 0.00 |
| TRINITY_PNW7680 | hypothet | Chlamydomonas_reinh | 66.70 | 0.00 |
| TRINITY_PRW4492 | nuclear  | Chlorella_sorokinia | 66.70 | 0.00 |
| TRINITY_GBF8837 | hypothet | Raphidocelis_subcap | 66.70 | 0.00 |
| TRINITY_XP_0056 | Aldo/ket | Coccomyxa_subellips | 66.70 | 0.00 |
| TRINITY_GAX8294 | hypothet | Chlamydomonas_eusti | 66.70 | 0.00 |
| TRINITY_KXZ4181 | hypothet | Gonium_pectorale    | 66.70 | 0.00 |
| TRINITY_PNW7296 | hypothet | Chlamydomonas_reinh | 66.70 | 0.00 |
| TRINITY_XP_0056 | glutath  | Coccomyxa_subellips | 66.70 | 0.00 |
| TRINITY_GAX8416 | hypothet | Chlamydomonas_eusti | 66.70 | 0.00 |
| TRINITY_KZV1502 | ATP-dep  | Dorcoceras_hygromet | 66.70 | 0.00 |
| TRINITY_XP_0221 | peroxis  | Momordica_charantia | 66.70 | 0.00 |
| TRINITY_XP_0245 | U3 small | Selaginella_moellen | 66.60 | 0.00 |
| TRINITY_XP_0238 | phospho  | Quercus_suber       | 66.60 | 0.00 |
| TRINITY_OMO7846 | Pyruvat  | Corchorus_olitorius | 66.60 | 0.00 |
| TRINITY_XP_0029 | Deoxyrik | Volvox_carteri      | 66.60 | 0.00 |
| TRINITY_KXZ5471 | hypothet | Gonium_pectorale    | 66.60 | 0.00 |
| TRINITY_GAX8435 | hypothet | Chlamydomonas_eusti | 66.60 | 0.00 |
| TRINITY_GAX7380 | hypothet | Chlamydomonas_eusti | 66.60 | 0.00 |
| TRINITY_GAX7320 | hypothet | Chlamydomonas_eusti | 66.60 | 0.00 |
| TRINITY_PNW7967 | hypothet | Chlamydomonas_reinh | 66.60 | 0.00 |
| TRINITY_GAX8473 | hypothet | Chlamydomonas_eusti | 66.60 | 0.00 |
| TRINITY_GAX7951 | hypothet | Chlamydomonas_eusti | 66.60 | 0.00 |
| TRINITY_XP_0159 | 60S rib  | Arachis_duranensis  | 66.50 | 0.00 |
| TRINITY_GAQ9125 | oxoprol  | Klebsormidium_niten | 66.50 | 0.00 |
| TRINITY_XP_0017 | SM/Sec1  | Chlamydomonas_reinh | 66.50 | 0.00 |
| TRINITY_BAK0236 | predict  | Hordeum_vulgare     | 66.50 | 0.00 |
| TRINITY_GAQ8352 | Alanine  | Klebsormidium_niten | 66.50 | 0.00 |
| TRINITY_KXZ5392 | hypothet | Gonium_pectorale    | 66.50 | 0.00 |
| TRINITY_GBF9353 | hypothet | Raphidocelis_subcap | 66.50 | 0.00 |
| TRINITY_XP_0029 | hypothet | Volvox_carteri      | 66.50 | 0.00 |
| TRINITY_KXZ4931 | hypothet | Gonium_pectorale    | 66.50 | 0.00 |
| TRINITY_KMS6493 | hypothet | Beta_vulgaris       | 66.50 | 0.00 |
| TRINITY_RRT3357 | hypothet | Ensete_ventricosum  | 66.50 | 0.00 |
| TRINITY_GAX7908 | hypothet | Chlamydomonas_eusti | 66.50 | 0.00 |
| TRINITY_GAX8209 | hypothet | Chlamydomonas_eusti | 66.50 | 0.00 |
| TRINITY_XP_0194 | PREDICT  | Lupinus_angustifoli | 66.50 | 0.00 |
| TRINITY_PNH0783 | NADPH--  | Tetrabaena_socialis | 66.50 | 0.00 |
| TRINITY_PNH0746 | Dihydro  | Tetrabaena_socialis | 66.50 | 0.00 |
| TRINITY_PNW8498 | hypothet | Chlamydomonas_reinh | 66.50 | 0.00 |
| TRINITY_XP_0029 | hypothet | Volvox_carteri      | 66.50 | 0.00 |
| TRINITY_XP_0218 | fumarat  | Spinacia_oleracea   | 66.50 | 0.00 |
| TRINITY_ADE9294 | mitochor | Polytomella_sp._Pri | 66.50 | 0.00 |
| TRINITY_GAX8176 | hypothet | Chlamydomonas_eusti | 66.50 | 0    |
| TRINITY_GAX7881 | hypothet | Chlamydomonas_eusti | 66.50 | 0.00 |
| TRINITY_PNW7149 | hypothet | Chlamydomonas_reinh | 66.50 | 0.00 |
| TRINITY_OIV9373 | hypothet | Lupinus_angustifoli | 66.40 | 0.00 |
| TRINITY_AAT7361 | calmodul | Daucus_carota       | 66.40 | 0.00 |

|                  |           |                      |       |      |
|------------------|-----------|----------------------|-------|------|
| TRINITY_YP_00912 | NADH de   | Dunaliella_viridis   | 66.40 | 0.00 |
| TRINITY_XP_00834 | PREDICTI  | Malus_domestica      | 66.40 | 0.00 |
| TRINITY_EPS7450  | hypothet  | Genlisea_aurea       | 66.40 | 0.00 |
| TRINITY_PNW7748  | hypothet  | Chlamydomonas_reinh  | 66.40 | 0.00 |
| TRINITY_GAX7546  | hypothet  | Chlamydomonas_eusti  | 66.40 | 0.00 |
| TRINITY_GBF8792  | superoxi  | Raphidocelis_subcap  | 66.40 | 0.00 |
| TRINITY_KXZ4906  | hypothet  | Gonium_pectorale     | 66.40 | 0.00 |
| TRINITY_AAL7935  | assimila  | Dunaliella_tertiole  | 66.40 | 0    |
| TRINITY_GBG0063  | ATP-depe  | Raphidocelis_subcap  | 66.40 | 0.00 |
| TRINITY_XP_0176  | PREDICTI  | Gossypium_arboreum   | 66.40 | 0.00 |
| TRINITY_KXZ5134  | hypothet  | Gonium_pectorale     | 66.40 | 0.00 |
| TRINITY_GAX8232  | hypothet  | Chlamydomonas_eusti  | 66.40 | 0.00 |
| TRINITY_XP_0245  | bifuncti  | Selaginella_moellen  | 66.40 | 0.00 |
| TRINITY_XP_0219  | 40S rib   | Helianthus_annuus    | 66.40 | 0.00 |
| TRINITY_GAX8086  | hypothet  | Chlamydomonas_eusti  | 66.40 | 0.00 |
| TRINITY_PNW7592  | hypothet  | Chlamydomonas_reinh  | 66.40 | 0.00 |
| TRINITY_GAX7399  | hypothet  | Chlamydomonas_eusti  | 66.40 | 0.00 |
| TRINITY_GAX8262  | hypothet  | Chlamydomonas_eusti  | 66.40 | 0.00 |
| TRINITY_ABD3790  | light-h   | Chlamydomonas_incer  | 66.40 | 0.00 |
| TRINITY_BAJ9943  | predicte  | Hordeum_vulgare      | 66.40 | 0.00 |
| TRINITY_XP_0056  | prokaryo  | Coccomyxa_subellips  | 66.30 | 0.00 |
| TRINITY_OTG0490  | putativ   | Helianthus_annuus    | 66.30 | 0.00 |
| TRINITY_PRW5897  | transmem  | Chlorella_sorokinia  | 66.30 | 0.00 |
| TRINITY_XP_0243  | protein   | Physcomitrella_pate  | 66.30 | 0.00 |
| TRINITY_KXZ4501  | hypothet  | Gonium_pectorale     | 66.30 | 0.00 |
| TRINITY_PNR3715  | hypothet  | Physcomitrella_pate  | 66.30 | 0.00 |
| TRINITY_XP_0029  | hypothet  | Volvox_carteri       | 66.30 | 0.00 |
| TRINITY_GAQ8291  | Acyl-Co   | Klebsormidium_niten  | 66.30 | 0.00 |
| TRINITY_BAK0277  | predicte  | Hordeum_vulgare      | 66.30 | 0.00 |
| TRINITY_KXZ4402  | hypothet  | Gonium_pectorale     | 66.30 | 0.00 |
| TRINITY_XP_0104  | PREDICTI  | Camelina_sativa      | 66.30 | 0.00 |
| TRINITY_XP_0138  | hypothet  | Monoraphidium_negle  | 66.30 | 0.00 |
| TRINITY_XP_0056  | NAD(P)-k  | Coccomyxa_subellips  | 66.30 | 0.00 |
| TRINITY_XP_0029  | hypothet  | Volvox_carteri       | 66.30 | 0.00 |
| TRINITY_EFJ2422  | hypothet  | Selaginella_moellen  | 66.30 | 0.00 |
| TRINITY_POC8M8.1 | RecName:  | Zea_mays             | 66.30 | 0.00 |
| TRINITY_XP_0064  | peptidy   | Citrus_clementina    | 66.30 | 0.00 |
| TRINITY_GAX8366  | hypothet  | Chlamydomonas_eusti  | 66.30 | 0.00 |
| TRINITY_KXZ5088  | hypothet  | Gonium_pectorale     | 66.30 | 0.00 |
| TRINITY_GAX8622  | hypothet  | Chlamydomonas_eusti  | 66.30 | 0.00 |
| TRINITY_PNW7957  | hypothet  | Chlamydomonas_reinh  | 66.30 | 0.00 |
| TRINITY_XP_0017  | (zinc fir | Chlamydomonas_reinh  | 66.30 | 0.00 |
| TRINITY_XP_0056  | PRP38-d   | Coccomyxa_subellips  | 66.30 | 0.00 |
| TRINITY_XP_0228  | Ribosom   | Ostreococcus_tauri   | 66.30 | 0.00 |
| TRINITY_PRW4517  | Malonyl-  | Chlorella_sorokinia  | 66.30 | 0.00 |
| TRINITY_XP_0017  | (ubiquin  | Chlamydomonas_reinh  | 66.30 | 0.00 |
| TRINITY_XP_0159  | regulat   | Arachis_duranensis   | 66.30 | 0    |
| TRINITY_KXZ5244  | hypothet  | Gonium_pectorale     | 66.30 | 0.00 |
| TRINITY_GBF9064  | p-type    | Raphidocelis_subcap  | 66.30 | 0.00 |
| TRINITY_KXZ4707  | hypothet  | Gonium_pectorale     | 66.30 | 0.00 |
| TRINITY_GAQ8116  | hypothet  | Klebsormidium_niten  | 66.30 | 0.00 |
| TRINITY_XP_0240  | 1,2-dih   | Morus_notabilis      | 66.20 | 0.00 |
| TRINITY_GBG8952  | hypothet  | Chara_braunii        | 66.20 | 0.00 |
| TRINITY_XP_0063  | (DNA rep  | Populus_trichocarpa  | 66.20 | 0.00 |
| TRINITY_XP_0194  | PREDICTI  | Lupinus_angustifoli  | 66.20 | 0.00 |
| TRINITY_GAQ7844  | Coatome   | Klebsormidium_niten  | 66.20 | 0.00 |
| TRINITY_GAX7899  | hypothet  | Chlamydomonas_eusti  | 66.20 | 0.00 |
| TRINITY_XP_0172  | PREDICTI  | Daucus_carota        | 66.20 | 0.00 |
| TRINITY_EFJ2180  | hypothet  | Selaginella_moellen  | 66.20 | 0.00 |
| TRINITY_XP_0017  | (alpha-S  | Chlamydomonas_reinh  | 66.20 | 0.00 |
| TRINITY_XP_0029  | hypothet  | Volvox_carteri       | 66.20 | 0.00 |
| TRINITY_GAQ7902  | Regulat   | Klebsormidium_niten  | 66.20 | 0.00 |
| TRINITY_PIN0733  | hypothet  | Handroanthus_impeti  | 66.20 | 0.00 |
| TRINITY_PKI3329  | hypothet  | Punica_granatum      | 66.20 | 0.00 |
| TRINITY_GAX7385  | hypothet  | Chlamydomonas_eusti  | 66.20 | 0.00 |
| TRINITY_XP_0016  | plasma    | nChlamydomonas_reinh | 66.20 | 0.00 |

|                  |                             |       |      |
|------------------|-----------------------------|-------|------|
| TRINITY_GBF89762 | hypothetRaphidocelis_subcap | 66.20 | 0.00 |
| TRINITY_XP_00295 | hypothetVolvox_carteri      | 66.20 | 0.00 |
| TRINITY_GAQ84757 | putativεKlebsormidium_niten | 66.20 | 0.00 |
| TRINITY_KXZ46309 | hypothetGonium_pectorale    | 66.20 | 0.00 |
| TRINITY_KXZ49072 | hypothetGonium_pectorale    | 66.20 | 0.00 |
| TRINITY_XP_00295 | flagellεVolvox_carteri      | 66.20 | 0.00 |
| TRINITY_ABR21759 | calmodulActinidia_deliciosa | 66.20 | 0.00 |
| TRINITY_PNW84728 | hypothetChlamydomonas_reinh | 66.20 | 0.00 |
| TRINITY_GAX72783 | hypothetChlamydomonas_eusti | 66.20 | 0.00 |
| TRINITY_PNH08115 | PeroxiεTetrabaena_socialis  | 66.20 | 0.00 |
| TRINITY_GAX82630 | hypothetChlamydomonas_eusti | 66.20 | 0.00 |
| TRINITY_KXZ48399 | hypothetGonium_pectorale    | 66.20 | 0.00 |
| TRINITY_KXZ56275 | hypothetGonium_pectorale    | 66.20 | 0.00 |
| TRINITY_GAX78445 | hypothetChlamydomonas_eusti | 66.20 | 0.00 |
| TRINITY_XP_00295 | CF0 ATP Volvox_carteri      | 66.20 | 0.00 |
| TRINITY_GBF92560 | hypothetRaphidocelis_subcap | 66.20 | 0.00 |
| TRINITY_GBF99462 | hypothetRaphidocelis_subcap | 66.20 | 0.00 |
| TRINITY_GAX79708 | hypothetChlamydomonas_eusti | 66.20 | 0.00 |
| TRINITY_XP_01564 | ras-relεOryza_sativa        | 66.20 | 0.00 |
| TRINITY_PNW71230 | hypothetChlamydomonas_reinh | 66.20 | 0.00 |
| TRINITY_ACF87913 | unknown Zea_mays            | 66.20 | 0.00 |
| TRINITY_PNW70131 | hypothetChlamydomonas_reinh | 66.20 | 0.00 |
| TRINITY_PNW69797 | hypothetChlamydomonas_reinh | 66.20 | 0.00 |
| TRINITY_KXZ46408 | hypothetGonium_pectorale    | 66.20 | 0.00 |
| TRINITY_XP_00295 | hypothetVolvox_carteri      | 66.20 | 0.00 |
| TRINITY_GAX78238 | hypothetChlamydomonas_eusti | 66.20 | 0.00 |
| TRINITY_XP_00879 | kinesin-Phoenix_dactylifera | 66.20 | 0.00 |
| TRINITY_XP_00250 | predictεMicromonas_commoda  | 66.10 | 0.00 |
| TRINITY_PNW84602 | hypothetChlamydomonas_reinh | 66.10 | 0.00 |
| TRINITY_GAX85351 | hypothetChlamydomonas_eusti | 66.10 | 0.00 |
| TRINITY_XP_01741 | PREDICTεVigna_angularis     | 66.10 | 0.00 |
| TRINITY_XP_00295 | transcriVolvox_carteri      | 66.10 | 0.00 |
| TRINITY_XP_02452 | aconitatSelaginella_moellen | 66.10 | 0    |
| TRINITY_PNH08913 | VacuolarTetrabaena_socialis | 66.10 | 0.00 |
| TRINITY_XP_00450 | DNA repεCicer_arietinum     | 66.10 | 0.00 |
| TRINITY_XP_02389 | flocculεQuercus_suber       | 66.10 | 0.00 |
| TRINITY_KXZ48819 | hypothetGonium_pectorale    | 66.10 | 0.00 |
| TRINITY_GAX78060 | hypothetChlamydomonas_eusti | 66.10 | 0.00 |
| TRINITY_GAX84826 | hypothetChlamydomonas_eusti | 66.10 | 0.00 |
| TRINITY_PRW55889 | alpha-1,Chlorella_sorokinia | 66.10 | 0.00 |
| TRINITY_AAZ31184 | central Chlamydomonas_reinh | 66.10 | 0.00 |
| TRINITY_P81831.2 | RecName:Chlamydomonas_reinh | 66.10 | 0.00 |
| TRINITY_XP_00628 | inositolCapsella_rubella    | 66.10 | 0.00 |
| TRINITY_PNW81070 | hypothetChlamydomonas_reinh | 66.10 | 0.00 |
| TRINITY_GBF98872 | hypothetRaphidocelis_subcap | 66.10 | 0.00 |
| TRINITY_GAQ90432 | Histone Klebsormidium_niten | 66.10 | 0.00 |
| TRINITY_PSC76139 | nucleosiMicractinium_conduc | 66.10 | 0.00 |
| TRINITY_GAX78150 | hypothetChlamydomonas_eusti | 66.10 | 0    |
| TRINITY_ALM55004 | DEAD boεChlamydomonas_sp._I | 66.10 | 0.00 |
| TRINITY_XP_00295 | hypothetVolvox_carteri      | 66.10 | 0.00 |
| TRINITY_KXZ49584 | hypothetGonium_pectorale    | 66.10 | 0.00 |
| TRINITY_GAX77344 | hypothetChlamydomonas_eusti | 66.10 | 0.00 |
| TRINITY_PNW74821 | hypothetChlamydomonas_reinh | 66.10 | 0.00 |
| TRINITY_GAX82457 | hypothetChlamydomonas_eusti | 66.10 | 0.00 |
| TRINITY_GBF92304 | hypothetRaphidocelis_subcap | 66.10 | 0.00 |
| TRINITY_XP_00865 | uncharaεZea_mays            | 66.00 | 0.00 |
| TRINITY_XP_00250 | long flεMicromonas_commoda  | 66.00 | 0.00 |
| TRINITY_GAX85084 | hypothetChlamydomonas_eusti | 66.00 | 0.00 |
| TRINITY_KXZ54656 | hypothetGonium_pectorale    | 66.00 | 0.00 |
| TRINITY_PNW73325 | hypothetChlamydomonas_reinh | 66.00 | 0.00 |
| TRINITY_GAX77127 | hypothetChlamydomonas_eusti | 66.00 | 0.00 |
| TRINITY_XP_00294 | componerVolvox_carteri      | 66.00 | 0.00 |
| TRINITY_XP_00295 | p300/CBIVolvox_carteri      | 66.00 | 0.00 |
| TRINITY_PNW85495 | hypothetChlamydomonas_reinh | 66.00 | 0.00 |
| TRINITY_XP_01053 | PREDICTεTarenaya_hasslerian | 66.00 | 0.00 |
| TRINITY_PNW73456 | hypothetChlamydomonas_reinh | 66.00 | 0.00 |

|                  |           |                     |       |      |
|------------------|-----------|---------------------|-------|------|
| TRINITY_XP_00169 | proline   | Chlamydomonas_reinh | 66.00 | 0.00 |
| TRINITY_XP_00170 | predicte  | Chlamydomonas_reinh | 66.00 | 0.00 |
| TRINITY_BAJ9323  | predicte  | Hordeum_vulgare     | 66.00 | 0.00 |
| TRINITY_XP_0139  | pyruvate  | Monoraphidium_negle | 66.00 | 0.00 |
| TRINITY_AAB8649  | calmodul  | Zea_mays            | 66.00 | 0.00 |
| TRINITY_XP_00295 | hypothet  | Volvox_carteri      | 66.00 | 0.00 |
| TRINITY_GBF9312  | alpha b   | Raphidocelis_subcap | 66.00 | 0.00 |
| TRINITY_KXZ4565  | hypothet  | Gonium_pectorale    | 66.00 | 0.00 |
| TRINITY_XP_00170 | predicte  | Chlamydomonas_reinh | 66.00 | 0.00 |
| TRINITY_GBF8863  | hypothet  | Raphidocelis_subcap | 66.00 | 0.00 |
| TRINITY_XP_00294 | hypothet  | Volvox_carteri      | 66.00 | 0.00 |
| TRINITY_XP_00294 | hypothet  | Volvox_carteri      | 66.00 | 0.00 |
| TRINITY_GAX7428  | hypothet  | Chlamydomonas_eusti | 66.00 | 0.00 |
| TRINITY_XP_00169 | caroten   | Chlamydomonas_reinh | 66.00 | 0.00 |
| TRINITY_XP_00295 | hypothet  | Volvox_carteri      | 66.00 | 0.00 |
| TRINITY_GBF9226  | hypothet  | Raphidocelis_subcap | 66.00 | 0.00 |
| TRINITY_XP_0243  | 60S rib   | Physcomitrella_pate | 66.00 | 0.00 |
| TRINITY_GAQ8349  | propion   | Klebsormidium_niten | 66.00 | 0.00 |
| TRINITY_XP_00169 | predicte  | Chlamydomonas_reinh | 66.00 | 0.00 |
| TRINITY_GAX7642  | hypothet  | Chlamydomonas_eusti | 66.00 | 0.00 |
| TRINITY_XP_00295 | hypothet  | Volvox_carteri      | 66.00 | 0.00 |
| TRINITY_KXZ5601  | hypothet  | Gonium_pectorale    | 66.00 | 0    |
| TRINITY_GAX8253  | hypothet  | Chlamydomonas_eusti | 66.00 | 0.00 |
| TRINITY_EXC2676  | (hypothet | Morus_notabilis     | 66.00 | 0.00 |
| TRINITY_EXC2676  | (hypothet | Morus_notabilis     | 66.00 | 0.00 |
| TRINITY_GAX8123  | hypothet  | Chlamydomonas_eusti | 66.00 | 0.00 |
| TRINITY_XP_00295 | hypothet  | Volvox_carteri      | 66.00 | 0.00 |
| TRINITY_GAX7675  | (hypothet | Chlamydomonas_eusti | 66.00 | 0.00 |
| TRINITY_XP_0238  | 60S rib   | Quercus_suber       | 65.90 | 0.00 |
| TRINITY_XP_0165  | PREDICTE  | Capsicum_annuum     | 65.90 | 0.00 |
| TRINITY_KXZ5045  | hypothet  | Gonium_pectorale    | 65.90 | 0.00 |
| TRINITY_XP_00169 | SEC61-g   | Chlamydomonas_reinh | 65.90 | 0.00 |
| TRINITY_XP_0238  | probable  | Quercus_suber       | 65.90 | 0.00 |
| TRINITY_XP_0104  | PREDICTE  | Camelina_sativa     | 65.90 | 0.00 |
| TRINITY_XP_0093  | PREDICTE  | Pyrus_x_bretschneid | 65.90 | 0.00 |
| TRINITY_XP_00295 | hypothet  | Volvox_carteri      | 65.90 | 0.00 |
| TRINITY_PNH1014  | (hypothet | Tetrabaena_socialis | 65.90 | 0.00 |
| TRINITY_XP_00295 | hypothet  | Volvox_carteri      | 65.90 | 0.00 |
| TRINITY_AKI3238  | DNA meic  | Watanabea_reniformi | 65.90 | 0.00 |
| TRINITY_KXZ5206  | hypothet  | Gonium_pectorale    | 65.90 | 0.00 |
| TRINITY_BAJ9371  | predicte  | Hordeum_vulgare     | 65.90 | 0.00 |
| TRINITY_XP_00170 | (cyclophi | Chlamydomonas_reinh | 65.90 | 0.00 |
| TRINITY_KXZ5597  | hypothet  | Gonium_pectorale    | 65.90 | 0.00 |
| TRINITY_GAX8285  | hypothet  | Chlamydomonas_eusti | 65.90 | 0.00 |
| TRINITY_GAX8080  | hypothet  | Chlamydomonas_eusti | 65.90 | 0.00 |
| TRINITY_GAU1829  | hypothet  | Trifolium_subterran | 65.90 | 0.00 |
| TRINITY_KXZ4924  | hypothet  | Gonium_pectorale    | 65.90 | 0.00 |
| TRINITY_GAX8182  | hypothet  | Chlamydomonas_eusti | 65.90 | 0.00 |
| TRINITY_GAX7937  | hypothet  | Chlamydomonas_eusti | 65.90 | 0.00 |
| TRINITY_XP_0218  | fructos   | Spinacia_oleracea   | 65.90 | 0.00 |
| TRINITY_XP_0113  | V-type    | Auxenochlorella_pro | 65.90 | 0.00 |
| TRINITY_XP_00170 | (sterol   | Chlamydomonas_reinh | 65.90 | 0.00 |
| TRINITY_GAX7988  | hypothet  | Chlamydomonas_eusti | 65.90 | 0.00 |
| TRINITY_XP_0058  | hypothet  | Chlorella_variabili | 65.90 | 0.00 |
| TRINITY_XP_0016  | chlorop   | Chlamydomonas_reinh | 65.90 | 0.00 |
| TRINITY_GAX7363  | hypothet  | Chlamydomonas_eusti | 65.90 | 0.00 |
| TRINITY_GAX8570  | hypothet  | Chlamydomonas_eusti | 65.90 | 0.00 |
| TRINITY_XP_00169 | predicte  | Chlamydomonas_reinh | 65.90 | 0.00 |
| TRINITY_XP_00295 | hypothet  | Volvox_carteri      | 65.90 | 0.00 |
| TRINITY_XP_0058  | hypothet  | Chlorella_variabili | 65.90 | 0.00 |
| TRINITY_XP_00170 | predicte  | Chlamydomonas_reinh | 65.90 | 0.00 |
| TRINITY_GAX7589  | hypothet  | Chlamydomonas_eusti | 65.90 | 0.00 |
| TRINITY_XP_0014  | predicte  | Ostreococcus_sp._'1 | 65.80 | 0.00 |
| TRINITY_CAA1126  | polyubiq  | Nicotiana_tabacum   | 65.80 | 0.00 |
| TRINITY_XP_00294 | componer  | Volvox_carteri      | 65.80 | 0.00 |
| TRINITY_KXZ5010  | hypothet  | Gonium_pectorale    | 65.80 | 0.00 |

|                           |                     |       |      |
|---------------------------|---------------------|-------|------|
| TRINITY_XP_01389aquaporin | Monoraphidium_negle | 65.80 | 0.00 |
| TRINITY_XP_00294hypothet  | Volvox_carteri      | 65.80 | 0.00 |
| TRINITY_CAE75981B1160F02  | Oryza_sativa        | 65.80 | 0.00 |
| TRINITY_GAX80591hypothet  | Chlamydomonas_eusti | 65.80 | 0.00 |
| TRINITY_XP_00294hypothet  | Volvox_carteri      | 65.80 | 0.00 |
| TRINITY_XP_00295hypothet  | Volvox_carteri      | 65.80 | 0.00 |
| TRINITY_XP_02736UDP-gluc  | Abrus_precatorius   | 65.80 | 0.00 |
| TRINITY_KXZ42325hypothet  | Gonium_pectorale    | 65.80 | 0.00 |
| TRINITY_PNW73794hypothet  | Chlamydomonas_reinh | 65.80 | 0.00 |
| TRINITY_XP_02392ras-rel   | Quercus_suber       | 65.80 | 0.00 |
| TRINITY_PNH12751F-box-lj  | Tetrabaena_socialis | 65.80 | 0.00 |
| TRINITY_GAX82581hypothet  | Chlamydomonas_eusti | 65.80 | 0.00 |
| TRINITY_PNW74497hypothet  | Chlamydomonas_reinh | 65.80 | 0.00 |
| TRINITY_GAX86246hypothet  | Chlamydomonas_eusti | 65.80 | 0.00 |
| TRINITY_XP_00169bifuncti  | Chlamydomonas_reinh | 65.80 | 0.00 |
| TRINITY_KXZ55547hypothet  | Gonium_pectorale    | 65.80 | 0.00 |
| TRINITY_XP_00169componer  | Chlamydomonas_reinh | 65.80 | 0.00 |
| TRINITY_GAX77228hypothet  | Chlamydomonas_eusti | 65.80 | 0.00 |
| TRINITY_PNH03318SUN dom   | Tetrabaena_socialis | 65.80 | 0.00 |
| TRINITY_GAX76615hypothet  | Chlamydomonas_eusti | 65.80 | 0.00 |
| TRINITY_GBF87462quinolir  | Raphidocelis_subcap | 65.80 | 0.00 |
| TRINITY_XP_00565galacto   | Coccomyxa_subellips | 65.80 | 0.00 |
| TRINITY_XP_02388nucleosi  | Quercus_suber       | 65.80 | 0.00 |
| TRINITY_GAX84816hypothet  | Chlamydomonas_eusti | 65.80 | 0.00 |
| TRINITY_KXZ42459hypothet  | Gonium_pectorale    | 65.80 | 0.00 |
| TRINITY_KXZ49298hypothet  | Gonium_pectorale    | 65.80 | 0    |
| TRINITY_PNR45218hypothet  | Physcomitrella_pate | 65.70 | 0.00 |
| TRINITY_RVW69187Zinc fir  | Vitis_vinifera      | 65.70 | 0.00 |
| TRINITY_GAX78858hypothet  | Chlamydomonas_eusti | 65.70 | 0.00 |
| TRINITY_GAQ8041940S rib   | Klebsormidium_niten | 65.70 | 0.00 |
| TRINITY_YP_00881cytochr   | Roya_obtusa         | 65.70 | 0.00 |
| TRINITY_GAQ78943methylm   | Klebsormidium_niten | 65.70 | 0.00 |
| TRINITY_KXZ5093(hypothet  | Gonium_pectorale    | 65.70 | 0.00 |
| TRINITY_GAX75759hypothet  | Chlamydomonas_eusti | 65.70 | 0.00 |
| TRINITY_GBF97375hypothet  | Raphidocelis_subcap | 65.70 | 0.00 |
| TRINITY_KNA0935(hypothet  | Spinacia_oleracea   | 65.70 | 0.00 |
| TRINITY_AER58219channel   | Haematococcus_lacus | 65.70 | 0.00 |
| TRINITY_GAX84249hypothet  | Chlamydomonas_eusti | 65.70 | 0.00 |
| TRINITY_KDD74537protein   | Helicosporidium_sp. | 65.70 | 0.00 |
| TRINITY_GAX82716hypothet  | Chlamydomonas_eusti | 65.70 | 0.00 |
| TRINITY_GAX7925(hypothet  | Chlamydomonas_eusti | 65.70 | 0.00 |
| TRINITY_PSC68273diphthan  | Micractinium_conduc | 65.70 | 0.00 |
| TRINITY_PNW71615hypothet  | Chlamydomonas_reinh | 65.70 | 0.00 |
| TRINITY_GAX74581hypothet  | Chlamydomonas_eusti | 65.70 | 0.00 |
| TRINITY_KXZ52148hypothet  | Gonium_pectorale    | 65.70 | 0.00 |
| TRINITY_GAX77615hypothet  | Chlamydomonas_eusti | 65.70 | 0.00 |
| TRINITY_XP_00295hypothet  | Volvox_carteri      | 65.70 | 0.00 |
| TRINITY_KXZ52857hypothet  | Gonium_pectorale    | 65.70 | 0.00 |
| TRINITY_XP_00294hypothet  | Volvox_carteri      | 65.70 | 0.00 |
| TRINITY_GAQ93561hypothet  | Klebsormidium_niten | 65.70 | 0.00 |
| TRINITY_NP_19127homolog   | Arabidopsis_thalian | 65.70 | 0.00 |
| TRINITY_PNW81009hypothet  | Chlamydomonas_reinh | 65.70 | 0.00 |
| TRINITY_KXZ5090(hypothet  | Gonium_pectorale    | 65.70 | 0.00 |
| TRINITY_PNW73634hypothet  | Chlamydomonas_reinh | 65.70 | 0.00 |
| TRINITY_PNW88555hypothet  | Chlamydomonas_reinh | 65.70 | 0.00 |
| TRINITY_PNW84782hypothet  | Chlamydomonas_reinh | 65.70 | 0.00 |
| TRINITY_PNW86443hypothet  | Chlamydomonas_reinh | 65.70 | 0.00 |
| TRINITY_XP_02389GTP-bin   | Quercus_suber       | 65.70 | 0.00 |
| TRINITY_XP_0243640S rib   | Physcomitrella_pate | 65.70 | 0.00 |
| TRINITY_XP_02390ras-lik   | Quercus_suber       | 65.60 | 0.00 |
| TRINITY_ACJ8589(unknown   | Medicago_truncatula | 65.60 | 0.00 |
| TRINITY_BAK02493predict   | Hordeum_vulgare     | 65.60 | 0.00 |
| TRINITY_BAK02363predict   | Hordeum_vulgare     | 65.60 | 0.00 |
| TRINITY_PNW77176hypothet  | Chlamydomonas_reinh | 65.60 | 0.00 |
| TRINITY_XP_00169predict   | Chlamydomonas_reinh | 65.60 | 0.00 |
| TRINITY_PNW83618hypothet  | Chlamydomonas_reinh | 65.60 | 0.00 |



|                                              |       |      |
|----------------------------------------------|-------|------|
| TRINITY_POC8M8.1RecName:Zea_mays             | 65.60 | 0.00 |
| TRINITY_GAX74404hypothetChlamydomonas_eusti  | 65.60 | 0.00 |
| TRINITY_PNW75091hypothetChlamydomonas_reinh  | 65.60 | 0.00 |
| TRINITY_XP_00295hypothetVolvox_carteri       | 65.60 | 0.00 |
| TRINITY_KXZ56469hypothetGonium_pectorale     | 65.60 | 0.00 |
| TRINITY_GAX75992hypothetChlamydomonas_eusti  | 65.60 | 0.00 |
| TRINITY_KXZ47132hypothetGonium_pectorale     | 65.60 | 0.00 |
| TRINITY_GAX77008hypothetChlamydomonas_eusti  | 65.60 | 0.00 |
| TRINITY_KXZ44082hypothetGonium_pectorale     | 65.60 | 0.00 |
| TRINITY_XP_00170photosynChlamydomonas_reinh  | 65.60 | 0.00 |
| TRINITY_GAX80936hypothetChlamydomonas_eusti  | 65.60 | 0.00 |
| TRINITY_GBF95525hypothetRaphidocelis_subcap  | 65.60 | 0.00 |
| TRINITY_GAX84621hypothetChlamydomonas_eusti  | 65.60 | 0.00 |
| TRINITY_XP_00169predicteChlamydomonas_reinh  | 65.60 | 0.00 |
| TRINITY_PNW78539hypothetChlamydomonas_reinh  | 65.60 | 0.00 |
| TRINITY_PSC69495Altered Micractinium_conduc  | 65.60 | 0.00 |
| TRINITY_PSC74501Serine tMicractinium_conduc  | 65.60 | 0.00 |
| TRINITY_XP_0029826S protSelaginella_moellen  | 65.60 | 0.00 |
| TRINITY_KDD76553GTP-binChelicosporidium_sp.  | 65.60 | 0.00 |
| TRINITY_PNW79609hypothetChlamydomonas_reinh  | 65.60 | 0.00 |
| TRINITY_XP_002995-oxoprChelicosporidium_sp.  | 65.50 | 0.00 |
| TRINITY_KZN03552hypothetDaucus_carota        | 65.50 | 0.00 |
| TRINITY_XP_00142predicteOstreococcus_sp._'1  | 65.50 | 0.00 |
| TRINITY_XP_00429PREDICTIFragaria_vesca       | 65.50 | 0.00 |
| TRINITY_GBF88604cytosoliRaphidocelis_subcap  | 65.50 | 0.00 |
| TRINITY_GAX78491hypothetChlamydomonas_eusti  | 65.50 | 0.00 |
| TRINITY_XP_02175ubiquitiChenopodium_quinoa   | 65.50 | 0.00 |
| TRINITY_GAX77956hypothetChlamydomonas_eusti  | 65.50 | 0.00 |
| TRINITY_XP_00585hypothetChlorella_variabili  | 65.50 | 0.00 |
| TRINITY_KXZ45928hypothetGonium_pectorale     | 65.50 | 0.00 |
| TRINITY_BAK05241predicteHordeum_vulgare      | 65.50 | 0.00 |
| TRINITY_PNW70906hypothetChlamydomonas_reinh  | 65.50 | 0.00 |
| TRINITY_GBF9369(hypothetRaphidocelis_subcap  | 65.50 | 0.00 |
| TRINITY_BAG12189Parkin-Chlamydomonas_reinh   | 65.50 | 0.00 |
| TRINITY_GAX82949hypothetChlamydomonas_eusti  | 65.50 | 0.00 |
| TRINITY_GAQ845463'-5'-eKlebsormidium_niten   | 65.50 | 0.00 |
| TRINITY_XP_02437RNA cytiPhyscomitrella_pate  | 65.50 | 0.00 |
| TRINITY_GAX85242hypothetChlamydomonas_eusti  | 65.50 | 0.00 |
| TRINITY_GAX74338hypothetChlamydomonas_eusti  | 65.50 | 0.00 |
| TRINITY_KXZ53682hypothetGonium_pectorale     | 65.50 | 0.00 |
| TRINITY_XP_02793actin-reVigna_unguiculata    | 65.50 | 0.00 |
| TRINITY_XP_00169predicteChlamydomonas_reinh  | 65.50 | 0.00 |
| TRINITY_KXZ5119(hypothetGonium_pectorale     | 65.50 | 0.00 |
| TRINITY_GAX73592hypothetChlamydomonas_eusti  | 65.50 | 0.00 |
| TRINITY_XP_00565beach-dCoccomyxa_subellips   | 65.40 | 0.00 |
| TRINITY_BAJ93074predicteHordeum_vulgare      | 65.40 | 0.00 |
| TRINITY_RID78408hypothetBrassica_rapa        | 65.40 | 0.00 |
| TRINITY_XP_01847PREDICTIRaphanus_sativus     | 65.40 | 0.00 |
| TRINITY_PSC72161carbohyMicractinium_conduc   | 65.40 | 0.00 |
| TRINITY_XP_00141predicteOstreococcus_sp._'1  | 65.40 | 0.00 |
| TRINITY_GAX82822hypothetChlamydomonas_eusti  | 65.40 | 0.00 |
| TRINITY_GAX7491(hypothetChlamydomonas_eusti  | 65.40 | 0.00 |
| TRINITY_EFJ11196hypothetSelaginella_moellen  | 65.40 | 0.00 |
| TRINITY_GAX8617(hypothetChlamydomonas_eusti  | 65.40 | 0.00 |
| TRINITY_GBF88109hypothetRaphidocelis_subcap  | 65.40 | 0.00 |
| TRINITY_XP_00295hypothetVolvox_carteri       | 65.40 | 0.00 |
| TRINITY_XP_00295hypothetVolvox_carteri       | 65.40 | 0.00 |
| TRINITY_PNW77038hypothetChlamydomonas_reinh  | 65.40 | 0.00 |
| TRINITY_XP_00170(predicteChlamydomonas_reinh | 65.40 | 0.00 |
| TRINITY_GBF88298hypothetRaphidocelis_subcap  | 65.40 | 0.00 |
| TRINITY_GAX82119hypothetChlamydomonas_eusti  | 65.40 | 0.00 |
| TRINITY_XP_00170(cyclin Chlamydomonas_reinh  | 65.40 | 0.00 |
| TRINITY_XP_00294hypothetVolvox_carteri       | 65.40 | 0.00 |
| TRINITY_XP_00250(predicteMicromonas_commoda  | 65.40 | 0.00 |
| TRINITY_GAX73229hypothetChlamydomonas_eusti  | 65.40 | 0.00 |
| TRINITY_GBF99877hypothetRaphidocelis_subcap  | 65.40 | 0.00 |

|                                              |       |      |
|----------------------------------------------|-------|------|
| TRINITY_KXZ5697(hypothetGonium_pectorale     | 65.40 | 0.00 |
| TRINITY_KXZ4274(hypothetGonium_pectorale     | 65.40 | 0.00 |
| TRINITY_KXZ5402(hypothetGonium_pectorale     | 65.40 | 0.00 |
| TRINITY_GAX7659(hypothetChlamydomonas_eusti  | 65.40 | 0.00 |
| TRINITY_PNW8122(hypothetChlamydomonas_reinh  | 65.40 | 0.00 |
| TRINITY_GAX7291(hypothetChlamydomonas_eusti  | 65.40 | 0.00 |
| TRINITY_ABM7438(major liDunaliella_salina    | 65.40 | 0.00 |
| TRINITY_XP_0029(hypothetVolvox_carteri       | 65.40 | 0.00 |
| TRINITY_GAQ9125(oxoprolidKlebsormidium_niten | 65.30 | 0.00 |
| TRINITY_XP_0219(casein lHelianthus_annuus    | 65.30 | 0.00 |
| TRINITY_ESQ5399(hypothetEutrema_salsugineur  | 65.30 | 0.00 |
| TRINITY_EPS7450(hypothetGenlisea_aurea       | 65.30 | 0.00 |
| TRINITY_KDD7549(hypothetHelicosporidium_sp.  | 65.30 | 0.00 |
| TRINITY_BAJ9637(predicteHordeum_vulgare      | 65.30 | 0.00 |
| TRINITY_GBG7567(hypothetChara_braunii        | 65.30 | 0.00 |
| TRINITY_XP_0036(casein lMedicago_truncatula  | 65.30 | 0.00 |
| TRINITY_XP_0238(uncharaQuercus_suber         | 65.30 | 0.00 |
| TRINITY_PNW7579(hypothetChlamydomonas_reinh  | 65.30 | 0.00 |
| TRINITY_GAQ9066(CleavageKlebsormidium_niten  | 65.30 | 0.00 |
| TRINITY_XP_0205(V-type rPhalaenopsis_equest  | 65.30 | 0.00 |
| TRINITY_XP_0257(casein lPanicum_hallii       | 65.30 | 0.00 |
| TRINITY_PNW7107(hypothetChlamydomonas_reinh  | 65.30 | 0.00 |
| TRINITY_XP_0016(predicteChlamydomonas_reinh  | 65.30 | 0.00 |
| TRINITY_GAX8175(hypothetChlamydomonas_eusti  | 65.30 | 0.00 |
| TRINITY_PRW5951(Rab famiChlorella_sorokinia  | 65.30 | 0.00 |
| TRINITY_GAX7423(hypothetChlamydomonas_eusti  | 65.30 | 0.00 |
| TRINITY_GBF9566(hypothetRaphidocelis_subcap  | 65.30 | 0.00 |
| TRINITY_KXZ5455(hypothetGonium_pectorale     | 65.30 | 0.00 |
| TRINITY_EFJ1726(hypothetSelaginella_moellen  | 65.30 | 0.00 |
| TRINITY_XP_0271(T-compleCoffea_arabica       | 65.30 | 0.00 |
| TRINITY_GAX7356(hypothetChlamydomonas_eusti  | 65.30 | 0.00 |
| TRINITY_KXZ5438(hypothetGonium_pectorale     | 65.30 | 0.00 |
| TRINITY_GBF9640(malate rRaphidocelis_subcap  | 65.30 | 0.00 |
| TRINITY_XP_0029(anaphaseSelaginella_moellen  | 65.30 | 0.00 |
| TRINITY_XP_0029(chaperonVolvox_carteri       | 65.30 | 0.00 |
| TRINITY_XP_0029(hypothetVolvox_carteri       | 65.30 | 0.00 |
| TRINITY_XP_0176(PREDICTFGossypium_arboreum   | 65.30 | 0.00 |
| TRINITY_GAX8322(hypothetChlamydomonas_eusti  | 65.30 | 0    |
| TRINITY_ONM0351(60S ribcZea_mays             | 65.30 | 0.00 |
| TRINITY_XP_0030(flagellrMicromonas_pusilla   | 65.20 | 0.00 |
| TRINITY_KNA0305(hypothetSpinacia_oleracea    | 65.20 | 0.00 |
| TRINITY_GAQ8768(AAA-typeKlebsormidium_niten  | 65.20 | 0.00 |
| TRINITY_XP_0243(pre-mRNrPhyscomitrella_pate  | 65.20 | 0.00 |
| TRINITY_KXZ4326(hypothetGonium_pectorale     | 65.20 | 0.00 |
| TRINITY_KXZ5407(hypothetGonium_pectorale     | 65.20 | 0.00 |
| TRINITY_PNW8517(hypothetChlamydomonas_reinh  | 65.20 | 0.00 |
| TRINITY_PNW8634(hypothetChlamydomonas_reinh  | 65.20 | 0.00 |
| TRINITY_XP_0016(predicteChlamydomonas_reinh  | 65.20 | 0.00 |
| TRINITY_XP_0243(spliceorPhyscomitrella_pate  | 65.20 | 0.00 |
| TRINITY_KXZ4316(hypothetGonium_pectorale     | 65.20 | 0.00 |
| TRINITY_PNW8461(hypothetChlamydomonas_reinh  | 65.20 | 0.00 |
| TRINITY_KXZ5029(hypothetGonium_pectorale     | 65.20 | 0.00 |
| TRINITY_XP_0058(hypothetChlorella_variabili  | 65.20 | 0.00 |
| TRINITY_XP_0016(predicteChlamydomonas_reinh  | 65.20 | 0.00 |
| TRINITY_GBG0025(60S acicRaphidocelis_subcap  | 65.20 | 0.00 |
| TRINITY_GAX8224(hypothetChlamydomonas_eusti  | 65.20 | 0.00 |
| TRINITY_XP_0273(U1 smallAbrus_precatorius    | 65.20 | 0.00 |
| TRINITY_XP_0237(ras-relrLactuca_sativa       | 65.20 | 0.00 |
| TRINITY_PNH1164(hypothetTetrabaena_socialis  | 65.20 | 0.00 |
| TRINITY_RIA0560(hypothetBrassica_rapa        | 65.20 | 0.00 |
| TRINITY_XP_0138(amidase Monoraphidium_negle  | 65.20 | 0.00 |
| TRINITY_GAX7690(hypothetChlamydomonas_eusti  | 65.20 | 0.00 |
| TRINITY_GBF9530(mitochorRaphidocelis_subcap  | 65.20 | 0.00 |
| TRINITY_GAX7609(hypothetChlamydomonas_eusti  | 65.20 | 0.00 |
| TRINITY_GAX8624(hypothetChlamydomonas_eusti  | 65.20 | 0.00 |
| TRINITY_KCW5023(hypothetEucalyptus_grandis   | 65.20 | 0.00 |

|                  |                               |       |      |
|------------------|-------------------------------|-------|------|
| TRINITY_XP_00584 | hypothetChlorella_variabili   | 65.10 | 0.00 |
| TRINITY_XP_02436 | DExH-bo>Physcomitrella_pate   | 65.10 | 0.00 |
| TRINITY_PPD7074  | hypothetGossypium_barbadens   | 65.10 | 0.00 |
| TRINITY_XP_01389 | hypothetMonoraphidium_negle   | 65.10 | 0.00 |
| TRINITY_XP_00295 | hypothetVolvox_carteri        | 65.10 | 0.00 |
| TRINITY_GAX8241  | hypothetChlamydomonas_eusti   | 65.10 | 0.00 |
| TRINITY_GAX7720  | hypothetChlamydomonas_eusti   | 65.10 | 0.00 |
| TRINITY_AEY8002  | 1-deoxy-Haematococcus_lacus   | 65.10 | 0.00 |
| TRINITY_KXZ5646  | (hypothetGonium_pectorale     | 65.10 | 0.00 |
| TRINITY_XP_00295 | hypothetVolvox_carteri        | 65.10 | 0.00 |
| TRINITY_XP_00295 | componerVolvox_carteri        | 65.10 | 0.00 |
| TRINITY_PNG9985  | Nuclear Tetrabaena_socialis   | 65.10 | 0.00 |
| TRINITY_ALM5501  | DEAD bo>Chlamydomonas_sp._I   | 65.10 | 0.00 |
| TRINITY_PNW7871  | hypothetChlamydomonas_reinh   | 65.10 | 0.00 |
| TRINITY_XP_01390 | (Vacuolar)Monoraphidium_negle | 65.10 | 0.00 |
| TRINITY_XP_01944 | PREDICTI<Lupinus_angustifoli  | 65.10 | 0.00 |
| TRINITY_XP_01390 | (aldo-ketMonoraphidium_negle  | 65.10 | 0.00 |
| TRINITY_XP_00169 | inositolChlamydomonas_reinh   | 65.10 | 0.00 |
| TRINITY_PNH0390  | hypothetTetrabaena_socialis   | 65.10 | 0.00 |
| TRINITY_XP_00170 | (glycosyl)Chlamydomonas_reinh | 65.10 | 0.00 |
| TRINITY_PWA7069  | DNA polyArtemisia_annua       | 65.10 | 0.00 |
| TRINITY_XP_02437 | 110 kDa Physcomitrella_pate   | 65.10 | 0.00 |
| TRINITY_XP_00169 | predicteChlamydomonas_reinh   | 65.10 | 0.00 |
| TRINITY_PNH0050  | hypothetTetrabaena_socialis   | 65.10 | 0.00 |
| TRINITY_PNH1038  | (IntraflaTetrabaena_socialis  | 65.10 | 0.00 |
| TRINITY_KXZ4558  | (hypothetGonium_pectorale     | 65.10 | 0.00 |
| TRINITY_GAX7316  | (hypothetChlamydomonas_eusti  | 65.10 | 0.00 |
| TRINITY_GAX7361  | (hypothetChlamydomonas_eusti  | 65.10 | 0    |
| TRINITY_GAX8420  | hypothetChlamydomonas_eusti   | 65.10 | 0.00 |
| TRINITY_GAX7834  | (hypothetChlamydomonas_eusti  | 65.10 | 0.00 |
| TRINITY_KXZ5696  | hypothetGonium_pectorale      | 65.10 | 0.00 |
| TRINITY_PNW8602  | (hypothetChlamydomonas_reinh  | 65.10 | 0.00 |
| TRINITY_KXZ4517  | hypothetGonium_pectorale      | 65.10 | 0.00 |
| TRINITY_AKI3238  | DNA misnWatanabea_reniformi   | 65.10 | 0.00 |
| TRINITY_XP_02390 | (phosphoQuercus_suber         | 65.00 | 0.00 |
| TRINITY_RZC9324  | hypothetPapaver_somniferum    | 65.00 | 0.00 |
| TRINITY_XP_00430 | (PREDICTI<Fragaria-vesca      | 65.00 | 0.00 |
| TRINITY_EXC3599  | RibuloseMorus_notabilis       | 65.00 | 0.00 |
| TRINITY_XP_00306 | predicteMicromonas_pusilla    | 65.00 | 0.00 |
| TRINITY_YP_00607 | cox1 gerNitella_hyalina       | 65.00 | 0.00 |
| TRINITY_XP_00294 | hypothetVolvox_carteri        | 65.00 | 0.00 |
| TRINITY_XP_01449 | 60S ribVigna_radiata          | 65.00 | 0.00 |
| TRINITY_KXZ5669  | (hypothetGonium_pectorale     | 65.00 | 0.00 |
| TRINITY_OAE2101  | hypothetMarchantia_polymorp   | 65.00 | 0.00 |
| TRINITY_GAX7788  | hypothetChlamydomonas_eusti   | 65.00 | 0.00 |
| TRINITY_GBF9553  | hypothetRaphidocelis_subcap   | 65.00 | 0.00 |
| TRINITY_GAX8028  | hypothetChlamydomonas_eusti   | 65.00 | 0.00 |
| TRINITY_GBF9077  | hypothetRaphidocelis_subcap   | 65.00 | 0.00 |
| TRINITY_XP_00564 | hypothetCoccomyxa_subellips   | 65.00 | 0.00 |
| TRINITY_PNW8662  | hypothetChlamydomonas_reinh   | 65.00 | 0.00 |
| TRINITY_GAX8398  | hypothetChlamydomonas_eusti   | 65.00 | 0.00 |
| TRINITY_AAO7355  | reverse-Chlamydomonas_reinh   | 65.00 | 0.00 |
| TRINITY_XP_00170 | (predicteChlamydomonas_reinh  | 65.00 | 0.00 |
| TRINITY_XP_00169 | isovaleChlamydomonas_reinh    | 65.00 | 0.00 |
| TRINITY_PNW7280  | hypothetChlamydomonas_reinh   | 65.00 | 0.00 |
| TRINITY_GAX7333  | (hypothetChlamydomonas_eusti  | 65.00 | 0.00 |
| TRINITY_XP_00294 | hypothetVolvox_carteri        | 65.00 | 0.00 |
| TRINITY_XP_00169 | predicteChlamydomonas_reinh   | 65.00 | 0.00 |
| TRINITY_GAX7295  | (hypothetChlamydomonas_eusti  | 65.00 | 0.00 |
| TRINITY_GBF8985  | proline Raphidocelis_subcap   | 65.00 | 0.00 |
| TRINITY_XP_00295 | hypothetVolvox_carteri        | 65.00 | 0.00 |
| TRINITY_RYQ8203  | hypothetArachis_hypogaea      | 65.00 | 0.00 |
| TRINITY_XP_00295 | hypothetVolvox_carteri        | 65.00 | 0.00 |
| TRINITY_XP_02070 | (protein Dendrobium_catenatu  | 65.00 | 0.00 |
| TRINITY_PNW8792  | hypothetChlamydomonas_reinh   | 65.00 | 0.00 |
| TRINITY_XP_02276 | uncharaDurio_zibethinus       | 64.90 | 0.00 |

|                  |          |                     |       |      |
|------------------|----------|---------------------|-------|------|
| TRINITY_AFK3783  | unknown  | Medicago_truncatula | 64.90 | 0.00 |
| TRINITY_XP_01052 | PREDICTI | Tarenaya_hasslerian | 64.90 | 0.00 |
| TRINITY_NP_00114 | putativ  | Zea_mays            | 64.90 | 0.00 |
| TRINITY_XP_00628 | regulat  | Capsella_rubella    | 64.90 | 0.00 |
| TRINITY_PRW33904 | Ubiquiti | Chlorella_sorokinia | 64.90 | 0.00 |
| TRINITY_GAX74259 | hypothet | Chlamydomonas_eusti | 64.90 | 0.00 |
| TRINITY_GBF94956 | hypothet | Raphidocelis_subcap | 64.90 | 0.00 |
| TRINITY_CAC14917 | trioseph | Triticum_aestivum   | 64.90 | 0.00 |
| TRINITY_KXZ50062 | hypothet | Gonium_pectorale    | 64.90 | 0.00 |
| TRINITY_KXZ47408 | hypothet | Gonium_pectorale    | 64.90 | 0.00 |
| TRINITY_XP_00170 | cyclophi | Chlamydomonas_reinh | 64.90 | 0.00 |
| TRINITY_XP_00295 | hypothet | Volvox_carteri      | 64.90 | 0.00 |
| TRINITY_KMS65245 | hypothet | Beta_vulgaris       | 64.90 | 0.00 |
| TRINITY_XP_00169 | peptidy  | Chlamydomonas_reinh | 64.90 | 0.00 |
| TRINITY_RDX83436 | T-compl  | Mucuna_pruriens     | 64.90 | 0.00 |
| TRINITY_XP_00564 | SHMT-don | Coccomyxa_subellips | 64.90 | 0.00 |
| TRINITY_PNW88442 | hypothet | Chlamydomonas_reinh | 64.90 | 0.00 |
| TRINITY_XP_02437 | probabl  | Physcomitrella_pate | 64.90 | 0.00 |
| TRINITY_XP_00170 | soluble  | Chlamydomonas_reinh | 64.90 | 0.00 |
| TRINITY_PNH05044 | Cyclin-c | Tetrabaena_socialis | 64.90 | 0.00 |
| TRINITY_GAQ86498 | mitochor | Klebsormidium_niten | 64.90 | 0.00 |
| TRINITY_PNW83733 | hypothet | Chlamydomonas_reinh | 64.90 | 0.00 |
| TRINITY_XP_00295 | hypothet | Volvox_carteri      | 64.90 | 0.00 |
| TRINITY_KXZ49103 | hypothet | Gonium_pectorale    | 64.90 | 0.00 |
| TRINITY_GAX83157 | hypothet | Chlamydomonas_eusti | 64.90 | 0.00 |
| TRINITY_PNW82235 | hypothet | Chlamydomonas_reinh | 64.90 | 0.00 |
| TRINITY_XP_00295 | hypothet | Volvox_carteri      | 64.90 | 0.00 |
| TRINITY_GAX82215 | hypothet | Chlamydomonas_eusti | 64.90 | 0.00 |
| TRINITY_GBG65241 | hypothet | Chara_braunii       | 64.80 | 0.00 |
| TRINITY_PNH10722 | hypothet | Tetrabaena_socialis | 64.80 | 0.00 |
| TRINITY_GAQ81501 | hypothet | Klebsormidium_niten | 64.80 | 0.00 |
| TRINITY_XP_01069 | PREDICTI | Beta_vulgaris       | 64.80 | 0.00 |
| TRINITY_OAE20756 | hypothet | Marchantia_polymorp | 64.80 | 0.00 |
| TRINITY_PNW77229 | hypothet | Chlamydomonas_reinh | 64.80 | 0.00 |
| TRINITY_XP_00170 | 5'-meth  | Chlamydomonas_reinh | 64.80 | 0.00 |
| TRINITY_XP_02402 | peroxis  | Morus_notabilis     | 64.80 | 0.00 |
| TRINITY_KXZ42759 | hypothet | Gonium_pectorale    | 64.80 | 0.00 |
| TRINITY_GBG73751 | hypothet | Chara_braunii       | 64.80 | 0.00 |
| TRINITY_XP_00295 | small A  | Volvox_carteri      | 64.80 | 0.00 |
| TRINITY_KMS64610 | hypothet | Beta_vulgaris       | 64.80 | 0.00 |
| TRINITY_XP_01390 | Unchara  | Monoraphidium_negle | 64.80 | 0.00 |
| TRINITY_XP_01389 | hypothet | Monoraphidium_negle | 64.80 | 0.00 |
| TRINITY_GAX73834 | hypothet | Chlamydomonas_eusti | 64.80 | 0.00 |
| TRINITY_GAX76723 | hypothet | Chlamydomonas_eusti | 64.80 | 0.00 |
| TRINITY_PNW85567 | hypothet | Chlamydomonas_reinh | 64.80 | 0.00 |
| TRINITY_GAX83461 | hypothet | Chlamydomonas_eusti | 64.80 | 0.00 |
| TRINITY_XP_00169 | predict  | Chlamydomonas_reinh | 64.80 | 0.00 |
| TRINITY_XP_00169 | predict  | Chlamydomonas_reinh | 64.80 | 0.00 |
| TRINITY_XP_00294 | mitochor | Volvox_carteri      | 64.80 | 0.00 |
| TRINITY_XP_00295 | componer | Volvox_carteri      | 64.80 | 0.00 |
| TRINITY_PNW85618 | hypothet | Chlamydomonas_reinh | 64.80 | 0.00 |
| TRINITY_KXZ50575 | hypothet | Gonium_pectorale    | 64.80 | 0.00 |
| TRINITY_XP_00294 | hypothet | Volvox_carteri      | 64.80 | 0.00 |
| TRINITY_XP_00170 | F1F0 AT  | Chlamydomonas_reinh | 64.80 | 0.00 |
| TRINITY_XP_00169 | haloaci  | Chlamydomonas_reinh | 64.80 | 0.00 |
| TRINITY_PNW72567 | hypothet | Chlamydomonas_reinh | 64.80 | 0.00 |
| TRINITY_PNW74645 | hypothet | Chlamydomonas_reinh | 64.80 | 0.00 |
| TRINITY_PNW74645 | hypothet | Chlamydomonas_reinh | 64.80 | 0.00 |
| TRINITY_RYR01403 | hypothet | Arachis_hypogaea    | 64.80 | 0.00 |
| TRINITY_PNW75461 | hypothet | Chlamydomonas_reinh | 64.80 | 0.00 |
| TRINITY_KXZ47560 | hypothet | Gonium_pectorale    | 64.80 | 0.00 |
| TRINITY_CAA11269 | polyubi  | Nicotiana_tabacum   | 64.80 | 0.00 |
| TRINITY_XP_01389 | U6 snRN  | Monoraphidium_negle | 64.70 | 0.00 |
| TRINITY_KVH96981 | Ran GTP  | Cynara_cardunculus  | 64.70 | 0.00 |
| TRINITY_GBF94875 | polynucl | Raphidocelis_subcap | 64.70 | 0.00 |
| TRINITY_BAK02675 | predict  | Hordeum_vulgare     | 64.70 | 0.00 |

|                  |                              |       |      |
|------------------|------------------------------|-------|------|
| TRINITY_AMP82925 | ABC trarCatalpa_bungei       | 64.70 | 0.00 |
| TRINITY_AML3086  | (axonema)Marsilea_vestita    | 64.70 | 0.00 |
| TRINITY_XP_02436 | 14 kDa ;Physcomitrella_pate  | 64.70 | 0.00 |
| TRINITY_XP_02185 | aldehydeSpinacia_oleracea    | 64.70 | 0.00 |
| TRINITY_XP_02436 | 40S rib;Physcomitrella_pate  | 64.70 | 0.00 |
| TRINITY_XP_02185 | ubiquitinSpinacia_oleracea   | 64.70 | 0.00 |
| TRINITY_XP_00305 | predicteMicromonas_pusilla   | 64.70 | 0.00 |
| TRINITY_XP_02402 | peroxis;Morus_notabilis      | 64.70 | 0.00 |
| TRINITY_GAX7606  | 1hypothetChlamydomonas_eusti | 64.70 | 0.00 |
| TRINITY_GBG72475 | hypothetChara_braunii        | 64.70 | 0.00 |
| TRINITY_GBF88475 | hypothetRaphidocelis_subcap  | 64.70 | 0.00 |
| TRINITY_EFJ29406 | inner a;Selaginella_moellen  | 64.70 | 0.00 |
| TRINITY_PNH07543 | UbiquitinTetrabaena_socialis | 64.70 | 0.00 |
| TRINITY_XP_01390 | (hypothetMonoraphidium_negle | 64.70 | 0.00 |
| TRINITY_XP_00169 | subunit Chlamydomonas_reinh  | 64.70 | 0.00 |
| TRINITY_PNW8574  | (hypothetChlamydomonas_reinh | 64.70 | 0.00 |
| TRINITY_POC8M8.1 | RecName:Zea_mays             | 64.70 | 0.00 |
| TRINITY_XP_00169 | lysyl-t;Chlamydomonas_reinh  | 64.70 | 0.00 |
| TRINITY_KXZ56164 | hypothetGonium_pectorale     | 64.70 | 0.00 |
| TRINITY_QBG38066 | NADH de;Chlorosarcinopsis_e  | 64.70 | 0.00 |
| TRINITY_GAX75403 | hypothetChlamydomonas_eusti  | 64.70 | 0.00 |
| TRINITY_XP_01091 | PREDICTHElaeis_guineensis    | 64.70 | 0.00 |
| TRINITY_XP_00294 | 20S protVolvox_carteri       | 64.70 | 0.00 |
| TRINITY_GAX80415 | hypothetChlamydomonas_eusti  | 64.70 | 0.00 |
| TRINITY_GAX83506 | hypothetChlamydomonas_eusti  | 64.70 | 0.00 |
| TRINITY_XP_00294 | componerVolvox_carteri       | 64.70 | 0.00 |
| TRINITY_XP_00169 | predicteChlamydomonas_reinh  | 64.70 | 0.00 |
| TRINITY_XP_01389 | pyridox;Monoraphidium_negle  | 64.70 | 0.00 |
| TRINITY_XP_00169 | glycerolChlamydomonas_reinh  | 64.70 | 0.00 |
| TRINITY_XP_00295 | hypothetVolvox_carteri       | 64.70 | 0.00 |
| TRINITY_GAX7690  | (hypothetChlamydomonas_eusti | 64.70 | 0.00 |
| TRINITY_XP_00169 | predicteChlamydomonas_reinh  | 64.70 | 0.00 |
| TRINITY_KXZ50765 | hypothetGonium_pectorale     | 64.70 | 0.00 |
| TRINITY_AAO73551 | reverse-Chlamydomonas_reinh  | 64.70 | 0.00 |
| TRINITY_XP_00249 | predicteMicromonas_commoda   | 64.70 | 0.00 |
| TRINITY_XP_00169 | Qa-SNAREChlamydomonas_reinh  | 64.70 | 0.00 |
| TRINITY_PNW8493  | (hypothetChlamydomonas_reinh | 64.70 | 0.00 |
| TRINITY_XP_00169 | dynein ;Chlamydomonas_reinh  | 64.70 | 0    |
| TRINITY_ADQ00181 | histone Chlamydomonas_sp._I  | 64.70 | 0.00 |
| TRINITY_PNH0922  | (Granule-Tetrabaena_socialis | 64.70 | 0.00 |
| TRINITY_XP_01208 | acyl car;Jatropha_curcas     | 64.60 | 0.00 |
| TRINITY_XP_00564 | UBC-likeCoccomyxa_subellips  | 64.60 | 0.00 |
| TRINITY_BAJ93795 | predicteHordeum_vulgare      | 64.60 | 0.00 |
| TRINITY_EMS63054 | NucleosiTriticum_urartu      | 64.60 | 0.00 |
| TRINITY_ABK2279  | (unknown Picea_sitchensis    | 64.60 | 0.00 |
| TRINITY_ABK2279  | (unknown Picea_sitchensis    | 64.60 | 0.00 |
| TRINITY_XP_00295 | hypothetVolvox_carteri       | 64.60 | 0.00 |
| TRINITY_GAX80279 | hypothetChlamydomonas_eusti  | 64.60 | 0.00 |
| TRINITY_OVA10185 | Cation-tMacleaya_cordata     | 64.60 | 0.00 |
| TRINITY_YP_00607 | cox1 gerNitella_hyalina      | 64.60 | 0.00 |
| TRINITY_PRW61499 | tryptop;Chlorella_sorokinia  | 64.60 | 0.00 |
| TRINITY_XP_00295 | molecul;Volvox_carteri       | 64.60 | 0.00 |
| TRINITY_PSC76321 | PhosphorMicractinium_conduc  | 64.60 | 0.00 |
| TRINITY_GAX7574  | (hypothetChlamydomonas_eusti | 64.60 | 0.00 |
| TRINITY_XP_00169 | NADPH-d;Chlamydomonas_reinh  | 64.60 | 0.00 |
| TRINITY_XP_00169 | glyoxyl;Chlamydomonas_reinh  | 64.60 | 0.00 |
| TRINITY_KXZ47678 | hypothetGonium_pectorale     | 64.60 | 0.00 |
| TRINITY_KXZ50174 | hypothetGonium_pectorale     | 64.60 | 0.00 |
| TRINITY_GAQ86825 | dynein ;Klebsormidium_niten  | 64.60 | 0.00 |
| TRINITY_GAX81782 | hypothetChlamydomonas_eusti  | 64.60 | 0.00 |
| TRINITY_GBF91728 | isoleuc;Raphidocelis_subcap  | 64.60 | 0.00 |
| TRINITY_XP_01389 | pyridox;Monoraphidium_negle  | 64.60 | 0.00 |
| TRINITY_PNW84202 | hypothetChlamydomonas_reinh  | 64.60 | 0.00 |
| TRINITY_XP_00294 | hypothetVolvox_carteri       | 64.60 | 0.00 |
| TRINITY_KXZ43695 | hypothetGonium_pectorale     | 64.60 | 0.00 |
| TRINITY_XP_00961 | PREDICTINicotiana_tomentosi  | 64.60 | 0.00 |

|                 |                               |       |      |
|-----------------|-------------------------------|-------|------|
| TRINITY_PNW8779 | hypothetChlamydomonas_reinh   | 64.60 | 0.00 |
| TRINITY_PNY1131 | (casein }Trifolium_pratense   | 64.60 | 0.00 |
| TRINITY_PNR3183 | (hypothetPhyscomitrella_pate  | 64.60 | 0.00 |
| TRINITY_GAX7649 | hypothetChlamydomonas_eusti   | 64.60 | 0.00 |
| TRINITY_KXZ4818 | (hypothetGonium_pectorale     | 64.60 | 0.00 |
| TRINITY_GBF9953 | hypothetRaphidocelis_subcap   | 64.60 | 0.00 |
| TRINITY_PNW7252 | hypothetChlamydomonas_reinh   | 64.60 | 0.00 |
| TRINITY_EFH6841 | predicteArabidopsis_lyrata    | 64.60 | 0.00 |
| TRINITY_GBG0007 | hypothetRaphidocelis_subcap   | 64.60 | 0.00 |
| TRINITY_KXZ5431 | hypothetGonium_pectorale      | 64.60 | 0.00 |
| TRINITY_GAX7304 | hypothetChlamydomonas_eusti   | 64.60 | 0.00 |
| TRINITY_GAX8624 | hypothetChlamydomonas_eusti   | 64.60 | 0.00 |
| TRINITY_GAX7503 | hypothetChlamydomonas_eusti   | 64.60 | 0.00 |
| TRINITY_XP_0110 | electrorSesamum_indicum       | 64.50 | 0.00 |
| TRINITY_XP_0091 | PREDICTI Brassica_rapa        | 64.50 | 0.00 |
| TRINITY_PTQ3809 | hypothetMarchantia_polymorp   | 64.50 | 0.00 |
| TRINITY_XP_0243 | ubiquitiPhyscomitrella_pate   | 64.50 | 0.00 |
| TRINITY_GAX8579 | hypothetChlamydomonas_eusti   | 64.50 | 0.00 |
| TRINITY_KNA1220 | hypothetSpinacia_oleracea     | 64.50 | 0.00 |
| TRINITY_KXZ5170 | hypothetGonium_pectorale      | 64.50 | 0.00 |
| TRINITY_KXZ4756 | hypothetGonium_pectorale      | 64.50 | 0.00 |
| TRINITY_XP_0029 | peptide Volvox_carteri        | 64.50 | 0.00 |
| TRINITY_PNW7885 | (hypothetChlamydomonas_reinh  | 64.50 | 0.00 |
| TRINITY_PNW7230 | hypothetChlamydomonas_reinh   | 64.50 | 0.00 |
| TRINITY_XP_0139 | (50S ribcMonoraphidium_negle  | 64.50 | 0.00 |
| TRINITY_GAX8352 | hypothetChlamydomonas_eusti   | 64.50 | 0.00 |
| TRINITY_GAX8253 | hypothetChlamydomonas_eusti   | 64.50 | 0.00 |
| TRINITY_GAX8104 | hypothetChlamydomonas_eusti   | 64.50 | 0.00 |
| TRINITY_XP_0083 | (PREDICTI Malus_domestica     | 64.50 | 0.00 |
| TRINITY_PNW8901 | (hypothetChlamydomonas_reinh  | 64.50 | 0.00 |
| TRINITY_XP_0029 | transcriVolvox_carteri        | 64.50 | 0.00 |
| TRINITY_XP_0158 | (casein }Ziziphus_jujuba      | 64.50 | 0.00 |
| TRINITY_XP_0016 | ribosomcChlamydomonas_reinh   | 64.50 | 0.00 |
| TRINITY_XP_0016 | tail-sp cChlamydomonas_reinh  | 64.50 | 0.00 |
| TRINITY_GAX8236 | hypothetChlamydomonas_eusti   | 64.50 | 0.00 |
| TRINITY_GAQ8362 | (HEAT reKlebsormidium_niten   | 64.50 | 0.00 |
| TRINITY_KXZ5334 | hypothetGonium_pectorale      | 64.50 | 0.00 |
| TRINITY_XP_0095 | (PREDICTI Nicotiana_tomentosi | 64.50 | 0.00 |
| TRINITY_GAX7948 | hypothetChlamydomonas_eusti   | 64.50 | 0.00 |
| TRINITY_XP_0014 | predicteOstreococcus_sp._'l   | 64.50 | 0.00 |
| TRINITY_GAX8624 | hypothetChlamydomonas_eusti   | 64.50 | 0.00 |
| TRINITY_GAX7300 | hypothetChlamydomonas_eusti   | 64.50 | 0.00 |
| TRINITY_GAX7942 | hypothetChlamydomonas_eusti   | 64.50 | 0.00 |
| TRINITY_KXZ4701 | hypothetGonium_pectorale      | 64.50 | 0.00 |
| TRINITY_XP_0014 | predicteOstreococcus_sp._'l   | 64.50 | 0.00 |
| TRINITY_XP_0029 | hypothetVolvox_carteri        | 64.50 | 0    |
| TRINITY_XP_0139 | (peptide-Monoraphidium_negle  | 64.50 | 0.00 |
| TRINITY_GBF9995 | chorismcRaphidocelis_subcap   | 64.40 | 0.00 |
| TRINITY_BAK0268 | predicteHordeum_vulgare       | 64.40 | 0.00 |
| TRINITY_RVW3358 | hypothetVitis_vinifera        | 64.40 | 0.00 |
| TRINITY_KZV4215 | (proline Dorcoceras_hygromet  | 64.40 | 0.00 |
| TRINITY_PNW7226 | hypothetChlamydomonas_reinh   | 64.40 | 0.00 |
| TRINITY_XP_0029 | photosyVolvox_carteri         | 64.40 | 0.00 |
| TRINITY_GAX7928 | hypothetChlamydomonas_eusti   | 64.40 | 0.00 |
| TRINITY_PNW8323 | hypothetChlamydomonas_reinh   | 64.40 | 0.00 |
| TRINITY_GAX7873 | hypothetChlamydomonas_eusti   | 64.40 | 0.00 |
| TRINITY_XP_0016 | predicteChlamydomonas_reinh   | 64.40 | 0.00 |
| TRINITY_KXZ5396 | (hypothetGonium_pectorale     | 64.40 | 0.00 |
| TRINITY_XP_0228 | Cation-tOstreococcus_tauri    | 64.40 | 0.00 |
| TRINITY_XP_0191 | (PREDICTI Ipomoea_nil         | 64.40 | 0.00 |
| TRINITY_GAX8403 | hypothetChlamydomonas_eusti   | 64.40 | 0.00 |
| TRINITY_XP_0056 | hypothetCoccomyxa_subellips   | 64.40 | 0.00 |
| TRINITY_XP_0156 | methioniOryza_sativa          | 64.40 | 0.00 |
| TRINITY_XP_0056 | mitochorCoccomyxa_subellips   | 64.40 | 0.00 |
| TRINITY_XP_0095 | (PREDICTI Nicotiana_tomentosi | 64.40 | 0.00 |
| TRINITY_XP_0016 | DNA damcChlamydomonas_reinh   | 64.40 | 0.00 |

|                                              |       |      |
|----------------------------------------------|-------|------|
| TRINITY_XP_00295hypothetVolvox_carteri       | 64.40 | 0.00 |
| TRINITY_GAX7554hypothetChlamydomonas_eusti   | 64.40 | 0.00 |
| TRINITY_XP_00169sodium/Chlamydomonas_reinh   | 64.40 | 0.00 |
| TRINITY_GAQ90652Alpha-L Klebsormidium_niten  | 64.40 | 0.00 |
| TRINITY_PNH0128(Bifuncti)Tetrabaena_socialis | 64.40 | 0.00 |
| TRINITY_XP_00294hypothetVolvox_carteri       | 64.40 | 0.00 |
| TRINITY_KXZ50689hypothetGonium_pectorale     | 64.40 | 0.00 |
| TRINITY_PNW71553hypothetChlamydomonas_reinh  | 64.40 | 0.00 |
| TRINITY_KXZ44021hypothetGonium_pectorale     | 64.40 | 0.00 |
| TRINITY_GAX81853hypothetChlamydomonas_eusti  | 64.40 | 0.00 |

|                          |                              |       |      |
|--------------------------|------------------------------|-------|------|
| TRINITY_KXZ42022VAM5/VAM | Gonium_pectorale             | 64.40 | 0.00 |
| TRINITY_GAX8310          | hypothetChlamydomonas_eusti  | 64.40 | 0    |
| TRINITY_KGN6251          | hypothetCucumis_sativus      | 64.40 | 0.00 |
| TRINITY_XP_0243          | transcriPhyscomitrella_pate  | 64.30 | 0.00 |
| TRINITY_XP_0030          | target cMicromonas_pusilla   | 64.30 | 0.00 |
| TRINITY_GAX8103          | hypothetChlamydomonas_eusti  | 64.30 | 0.00 |
| TRINITY_XP_0238          | guanine Quercus_suber        | 64.30 | 0.00 |
| TRINITY_XP_0188          | PREDICTI Juglans_regia       | 64.30 | 0.00 |
| TRINITY_XP_0106          | PREDICTI Beta_vulgaris       | 64.30 | 0.00 |
| TRINITY_XP_0238          | probable Quercus_suber       | 64.30 | 0.00 |
| TRINITY_XP_0029          | hypothetVolvox_carteri       | 64.30 | 0.00 |
| TRINITY_XP_0139          | anaphas Monoraphidium_negle  | 64.30 | 0.00 |
| TRINITY_GAX7451          | hypothetChlamydomonas_eusti  | 64.30 | 0.00 |
| TRINITY_EPS7471          | hypothetGenlisea_aurea       | 64.30 | 0.00 |
| TRINITY_KXZ4683          | hypothetGonium_pectorale     | 64.30 | 0.00 |
| TRINITY_XP_0228          | splicing Olea_europaea       | 64.30 | 0.00 |
| TRINITY_XP_0245          | queueine Selaginella_moellen | 64.30 | 0.00 |
| TRINITY_PNH0783          | GATA tr Tetrabaena_socialis  | 64.30 | 0.00 |
| TRINITY_XP_0029          | hypothetVolvox_carteri       | 64.30 | 0.00 |
| TRINITY_GBG7247          | hypothetChara_braunii        | 64.30 | 0.00 |
| TRINITY_XP_0016          | major irChlamydomonas_reinh  | 64.30 | 0.00 |
| TRINITY_BAU0370          | hypothetVigna_angularis      | 64.30 | 0.00 |
| TRINITY_GAX7602          | hypothetChlamydomonas_eusti  | 64.30 | 0.00 |
| TRINITY_XP_0056          | ALG6, AICoccomyxa_subellips  | 64.30 | 0.00 |
| TRINITY_XP_0016          | predicteChlamydomonas_reinh  | 64.30 | 0.00 |
| TRINITY_XP_0016          | DEAD/DE Chlamydomonas_reinh  | 64.30 | 0.00 |
| TRINITY_KXZ4181          | hypothetGonium_pectorale     | 64.30 | 0.00 |
| TRINITY_XP_0029          | hypothetVolvox_carteri       | 64.30 | 0.00 |
| TRINITY_GAX7330          | hypothetChlamydomonas_eusti  | 64.30 | 0.00 |
| TRINITY_PNH0328          | Uroporp Tetrabaena_socialis  | 64.30 | 0.00 |
| TRINITY_XP_0217          | dolichyl Chenopodium_quinoa  | 64.30 | 0.00 |
| TRINITY_GAX8432          | hypothetChlamydomonas_eusti  | 64.30 | 0.00 |
| TRINITY_XP_0023          | 40S rib Populus_trichocarpa  | 64.30 | 0.00 |
| TRINITY_GAX7947          | hypothetChlamydomonas_eusti  | 64.30 | 0.00 |
| TRINITY_XP_0029          | hypothetVolvox_carteri       | 64.30 | 0.00 |
| TRINITY_KXZ4299          | hypothetGonium_pectorale     | 64.30 | 0.00 |
| TRINITY_PRW0573          | Gag-Pol Chlorella_sorokinia  | 64.30 | 0.00 |
| TRINITY_GAX8224          | hypothetChlamydomonas_eusti  | 64.30 | 0.00 |
| TRINITY_PNW7376          | hypothetChlamydomonas_reinh  | 64.30 | 0.00 |
| TRINITY_GAX8241          | hypothetChlamydomonas_eusti  | 64.30 | 0.00 |
| TRINITY_GAX7741          | hypothetChlamydomonas_eusti  | 64.30 | 0.00 |
| TRINITY_KXZ5320          | hypothetGonium_pectorale     | 64.30 | 0.00 |
| TRINITY_GAX8240          | hypothetChlamydomonas_eusti  | 64.30 | 0.00 |
| TRINITY_GAX7754          | hypothetChlamydomonas_eusti  | 64.30 | 0.00 |
| TRINITY_XP_0016          | O-acetylChlamydomonas_reinh  | 64.30 | 0.00 |
| TRINITY_XP_0016          | predicteChlamydomonas_reinh  | 64.30 | 0.00 |
| TRINITY_XP_0029          | hypothetVolvox_carteri       | 64.30 | 0.00 |
| TRINITY_AAL3538          | putativeChlamydomonas_reinh  | 64.30 | 0.00 |
| TRINITY_KXZ4215          | hypothetGonium_pectorale     | 64.30 | 0.00 |
| TRINITY_GAX8460          | hypothetChlamydomonas_eusti  | 64.30 | 0.00 |
| TRINITY_XP_0029          | hypothetVolvox_carteri       | 64.30 | 0.00 |
| TRINITY_GAX8418          | hypothetChlamydomonas_eusti  | 64.30 | 0.00 |
| TRINITY_KXZ4929          | hypothetGonium_pectorale     | 64.30 | 0.00 |
| TRINITY_PNW7611          | hypothetChlamydomonas_reinh  | 64.30 | 0.00 |
| TRINITY_EPS7471          | hypothetGenlisea_aurea       | 64.30 | 0.00 |
| TRINITY_PRQ3638          | putative Rosa_chinensis      | 64.30 | 0.00 |
| TRINITY_BAJ9830          | predicteHordeum_vulgare      | 64.20 | 0.00 |
| TRINITY_XP_0030          | predicteMicromonas_pusilla   | 64.20 | 0.00 |
| TRINITY_NP_0422          | cytochr Prototheca_wickerha  | 64.20 | 0.00 |
| TRINITY_XP_0104          | PREDICTI Camelina_sativa     | 64.20 | 0.00 |
| TRINITY_GBF9251          | eukaryotRaphidocelis_subcap  | 64.20 | 0.00 |
| TRINITY_XP_0202          | cell divAsparagus_officinal  | 64.20 | 0.00 |
| TRINITY_BAK0099          | predicteHordeum_vulgare      | 64.20 | 0.00 |
| TRINITY_PNW7380          | hypothetChlamydomonas_reinh  | 64.20 | 0.00 |
| TRINITY_XP_0029          | mitogen-Volvox_carteri       | 64.20 | 0.00 |
| TRINITY_XP_0138          | heat shc Monoraphidium_negle | 64.20 | 0.00 |



|                    |                             |       |      |
|--------------------|-----------------------------|-------|------|
| TRINITY_GAX81601   | hypothetChlamydomonas_eusti | 64.20 | 0.00 |
| TRINITY_XP_02161   | putativεManihot_esculenta   | 64.20 | 0.00 |
| TRINITY_PNW7075    | hypothetChlamydomonas_reinh | 64.20 | 0.00 |
| TRINITY_PNW88162   | hypothetChlamydomonas_reinh | 64.20 | 0.00 |
| TRINITY_GAX81151   | hypothetChlamydomonas_eusti | 64.20 | 0.00 |
| TRINITY_KXZ4775    | hypothetGonium_pectorale    | 64.20 | 0.00 |
| TRINITY_ABD96891   | hypothetTarenaya_spinosa    | 64.20 | 0.00 |
| TRINITY_XP_0238    | serine/tQuercus_suber       | 64.20 | 0.00 |
| TRINITY_XP_00294   | hypothetVolvox_carteri      | 64.20 | 0.00 |
| TRINITY_XP_0025    | predictεMicromonas_commoda  | 64.20 | 0.00 |
| TRINITY_XP_00294   | hypothetVolvox_carteri      | 64.20 | 0.00 |
| TRINITY_PWA4164    | rab GDP Artemisia_annua     | 64.20 | 0.00 |
| TRINITY_XP_0138    | DNA polyMonoraphidium_negle | 64.20 | 0.00 |
| TRINITY_GAX8259    | hypothetChlamydomonas_eusti | 64.20 | 0.00 |
| TRINITY_PON7848    | IsocitrεTrema_orientale     | 64.20 | 0.00 |
| TRINITY_GAQ8856    | aconitatKlebsormidium_niten | 64.20 | 0    |
| TRINITY_XP_0016    | predictεChlamydomonas_reinh | 64.20 | 0.00 |
| TRINITY_ALM5501    | DEAD bo>Chlamydomonas_sp._I | 64.20 | 0.00 |
| TRINITY_PNW7403    | hypothetChlamydomonas_reinh | 64.20 | 0.00 |
| TRINITY_ABK2516    | unknown Picea_sitchensis    | 64.20 | 0.00 |
| TRINITY_OAE3091    | hypothetMarchantia_polymorp | 64.20 | 0.00 |
| TRINITY_KXZ4092    | hypothetGonium_pectorale    | 64.20 | 0.00 |
| TRINITY_XP_0238    | dynein lQuercus_suber       | 64.20 | 0.00 |
| TRINITY_XP_0144    | 60S ribcVigna_radiata       | 64.20 | 0.00 |
| TRINITY_XP_0228    | cell di\Olea_europaea       | 64.20 | 0.00 |
| TRINITY_XP_0016    | O-linkεChlamydomonas_reinh  | 64.20 | 0.00 |
| TRINITY_GAX8624    | hypothetChlamydomonas_eusti | 64.20 | 0.00 |
| TRINITY_XP_0017    | glyceralChlamydomonas_reinh | 64.10 | 0.00 |
| TRINITY_GAQ8958    | alpha-1,Klebsormidium_niten | 64.10 | 0.00 |
| TRINITY_GBG8021    | hypothetChara_braunii       | 64.10 | 0.00 |
| TRINITY_XP_0165    | PREDICTFCapsicum_annuum     | 64.10 | 0.00 |
| TRINITY_XP_0139    | 60S acicMonoraphidium_negle | 64.10 | 0.00 |
| TRINITY_XP_0139    | 60S acicMonoraphidium_negle | 64.10 | 0.00 |
| TRINITY_XP_0097    | PREDICTFNicotiana_sylvestri | 64.10 | 0.00 |
| TRINITY_XP_0238    | threonirQuercus_suber       | 64.10 | 0.00 |
| TRINITY_PSC76731E3 | ubiquMicractinium_conduc    | 64.10 | 0.00 |
| TRINITY_ACQ8347    | CBL-intεPhyscomitrella_pate | 64.10 | 0.00 |
| TRINITY_RVW9974    | Serine lVitis_vinifera      | 64.10 | 0.00 |
| TRINITY_XP_0138    | ethanolεMonoraphidium_negle | 64.10 | 0.00 |
| TRINITY_PNH0405    | CCR4-NO1Tetrabaena_socialis | 64.10 | 0.00 |
| TRINITY_GAX82101   | hypothetChlamydomonas_eusti | 64.10 | 0.00 |
| TRINITY_XP_0016    | peptidyChlamydomonas_reinh  | 64.10 | 0.00 |
| TRINITY_GBF94731   | IAA-amirRaphidocelis_subcap | 64.10 | 0.00 |
| TRINITY_KXZ45714   | hypothetGonium_pectorale    | 64.10 | 0.00 |
| TRINITY_XP_0017    | peroxirεChlamydomonas_reinh | 64.10 | 0.00 |
| TRINITY_GAX7987    | hypothetChlamydomonas_eusti | 64.10 | 0.00 |
| TRINITY_XP_0029    | hypothetVolvox_carteri      | 64.10 | 0.00 |
| TRINITY_GAX8524    | hypothetChlamydomonas_eusti | 64.10 | 0.00 |
| TRINITY_PNR6202    | hypothetPhyscomitrella_pate | 64.10 | 0.00 |
| TRINITY_PNW7328    | hypothetChlamydomonas_reinh | 64.10 | 0.00 |
| TRINITY_GAQ8698    | Serine lKlebsormidium_niten | 64.10 | 0.00 |
| TRINITY_XP_0243    | uncharacPhyscomitrella_pate | 64.10 | 0.00 |
| TRINITY_XP_0128    | PREDICTFErythranthe_guttata | 64.10 | 0.00 |
| TRINITY_XP_0139    | copropoιMonoraphidium_negle | 64.10 | 0.00 |
| TRINITY_XP_0016    | bardet-kChlamydomonas_reinh | 64.10 | 0.00 |
| TRINITY_XP_0016    | mitochorChlamydomonas_reinh | 64.10 | 0.00 |
| TRINITY_KXZ54384   | hypothetGonium_pectorale    | 64.10 | 0.00 |
| TRINITY_GAX75371   | hypothetChlamydomonas_eusti | 64.10 | 0.00 |
| TRINITY_GAX7419    | hypothetChlamydomonas_eusti | 64.10 | 0.00 |
| TRINITY_KXZ55064   | hypothetGonium_pectorale    | 64.10 | 0.00 |
| TRINITY_XP_01054   | PREDICTFTarenaya_hasslerian | 64.00 | 0.00 |
| TRINITY_GBG64374   | hypothetChara_braunii       | 64.00 | 0.00 |
| TRINITY_KMZ5989    | putativeZostera_marina      | 64.00 | 0.00 |
| TRINITY_BAJ9317    | predictεHordeum_vulgare     | 64.00 | 0.00 |
| TRINITY_PSC7447    | 60S ribcMicractinium_conduc | 64.00 | 0.00 |
| TRINITY_KXZ56552   | hypothetGonium_pectorale    | 64.00 | 0.00 |

|                   |                              |       |      |
|-------------------|------------------------------|-------|------|
| TRINITY_XP_00294  | hypothetVolvox_carteri       | 64.00 | 0.00 |
| TRINITY_KXZ43041  | hypothetGonium_pectorale     | 64.00 | 0.00 |
| TRINITY_GAX82981  | hypothetChlamydomonas_eusti  | 64.00 | 0.00 |
| TRINITY_GAX80829  | hypothetChlamydomonas_eusti  | 64.00 | 0.00 |
| TRINITY_XP_0017   | (predicteChlamydomonas_reinh | 64.00 | 0.00 |
| TRINITY_XP_00295  | diacylg]Volvox_carteri       | 64.00 | 0.00 |
| TRINITY_XP_00295  | hypothetVolvox_carteri       | 64.00 | 0.00 |
| TRINITY_P0C8M8.1  | RecName:Zea_mays             | 64.00 | 0.00 |
| TRINITY_KXZ51597  | hypothetGonium_pectorale     | 64.00 | 0.00 |
| TRINITY_KXZ4194   | (hypothetGonium_pectorale    | 64.00 | 0.00 |
| TRINITY_GAX77364  | hypothetChlamydomonas_eusti  | 64.00 | 0.00 |
| TRINITY_GBF93615  | zeaxant]Raphidocelis_subcap  | 64.00 | 0.00 |
| TRINITY_XP_02181  | flavin-cPrunus_avium         | 64.00 | 0.00 |
| TRINITY_GAX74989  | hypothetChlamydomonas_eusti  | 64.00 | 0.00 |
| TRINITY_GAX79819  | hypothetChlamydomonas_eusti  | 64.00 | 0.00 |
| TRINITY_GAX7581   | (hypothetChlamydomonas_eusti | 64.00 | 0.00 |
| TRINITY_GAX81341  | hypothetChlamydomonas_eusti  | 64.00 | 0.00 |
| TRINITY_XP_00295  | hypothetVolvox_carteri       | 64.00 | 0.00 |
| TRINITY_XP_00295  | hypothetVolvox_carteri       | 64.00 | 0.00 |
| TRINITY_GAX73288  | hypothetChlamydomonas_eusti  | 64.00 | 0.00 |
| TRINITY_GAX72737  | hypothetChlamydomonas_eusti  | 64.00 | 0    |
| TRINITY_XP_00565  | TPR-likeCoccomyxa_subellips  | 64.00 | 0.00 |
| TRINITY_PNW70419  | hypothetChlamydomonas_reinh  | 64.00 | 0.00 |
| TRINITY_GAX76466  | hypothetChlamydomonas_eusti  | 64.00 | 0.00 |
| TRINITY_XP_02453  | DNA-dirSelaginella_moellen   | 64.00 | 0    |
| TRINITY_PNH12173  | Golgi a]Tetrabaena_socialis  | 64.00 | 0.00 |
| TRINITY_XP_00295  | hypothetVolvox_carteri       | 64.00 | 0.00 |
| TRINITY_XP_00294  | hypothetVolvox_carteri       | 64.00 | 0.00 |
| TRINITY_XP_00294  | hypothetVolvox_carteri       | 64.00 | 0.00 |
| TRINITY_KXZ49758  | hypothetGonium_pectorale     | 64.00 | 0.00 |
| TRINITY_GBF97031  | amino a]Raphidocelis_subcap  | 64.00 | 0.00 |
| TRINITY_GAX77489  | hypothetChlamydomonas_eusti  | 64.00 | 0.00 |
| TRINITY_KXZ51618  | hypothetGonium_pectorale     | 64.00 | 0.00 |
| TRINITY_GBF87381  | N-acetyl]Raphidocelis_subcap | 64.00 | 0.00 |
| TRINITY_AFK36347  | unknown Lotus_japonicus      | 63.90 | 0.00 |
| TRINITY_GBG84961  | hypothetChara_braunii        | 63.90 | 0.00 |
| TRINITY_GAQ77648  | Dyneins Klebsormidium_niten  | 63.90 | 0.00 |
| TRINITY_GAX80604  | hypothetChlamydomonas_eusti  | 63.90 | 0.00 |
| TRINITY_GAX72792  | hypothetChlamydomonas_eusti  | 63.90 | 0.00 |
| TRINITY_GAX77149  | hypothetChlamydomonas_eusti  | 63.90 | 0.00 |
| TRINITY_GAX73284  | hypothetChlamydomonas_eusti  | 63.90 | 0.00 |
| TRINITY_XP_0025   | (predicteMicromonas_commoda  | 63.90 | 0.00 |
| TRINITY_PRW5627   | (Deoxyhy]Chlorella_sorokinia | 63.90 | 0.00 |
| TRINITY_GAX82062  | hypothetChlamydomonas_eusti  | 63.90 | 0.00 |
| TRINITY_PRW601163 | -oxoac]Chlorella_sorokinia   | 63.90 | 0.00 |
| TRINITY_PNW71355  | hypothetChlamydomonas_reinh  | 63.90 | 0.00 |
| TRINITY_GAX83348  | hypothetChlamydomonas_eusti  | 63.90 | 0.00 |
| TRINITY_XP_0036   | (WD-40 r]Medicago_truncatula | 63.90 | 0.00 |
| TRINITY_GAX82477  | hypothetChlamydomonas_eusti  | 63.90 | 0.00 |
| TRINITY_BAJ90795  | predicteHordeum_vulgare      | 63.90 | 0.00 |
| TRINITY_XP_01389  | hypothetMonoraphidium_negle  | 63.90 | 0.00 |
| TRINITY_GAX84579  | hypothetChlamydomonas_eusti  | 63.90 | 0.00 |
| TRINITY_KXZ52799  | hypothetGonium_pectorale     | 63.90 | 0.00 |
| TRINITY_GAX76959  | hypothetChlamydomonas_eusti  | 63.90 | 0.00 |
| TRINITY_XP_0017   | (predicteChlamydomonas_reinh | 63.90 | 0.00 |
| TRINITY_XP_00565  | putativeCoccomyxa_subellips  | 63.90 | 0.00 |
| TRINITY_XP_00295  | hypothetVolvox_carteri       | 63.90 | 0.00 |
| TRINITY_PNH09542  | Vacuolar]Tetrabaena_socialis | 63.90 | 0.00 |
| TRINITY_XP_00169  | ARF-rel]Chlamydomonas_reinh  | 63.90 | 0.00 |
| TRINITY_GAX83216  | hypothetChlamydomonas_eusti  | 63.90 | 0.00 |
| TRINITY_GAX7663   | (hypothetChlamydomonas_eusti | 63.90 | 0.00 |
| TRINITY_XP_00169  | peptidy]Chlamydomonas_reinh  | 63.90 | 0.00 |
| TRINITY_GAX83903  | hypothetChlamydomonas_eusti  | 63.90 | 0    |
| TRINITY_AAO73551  | reverse-Chlamydomonas_reinh  | 63.90 | 0.00 |
| TRINITY_XP_00878  | actin, nPhoenix_dactylifera  | 63.90 | 0.00 |
| TRINITY_AAP85534  | isoamyl]Chlamydomonas_reinh  | 63.90 | 0    |

|                  |                              |       |      |
|------------------|------------------------------|-------|------|
| TRINITY_XP_02069 | splicinçDendrobium_catenatu  | 63.90 | 0.00 |
| TRINITY_GAX73304 | hypothetChlamydomonas_eusti  | 63.90 | 0    |
| TRINITY_PNW70372 | hypothetChlamydomonas_reinh  | 63.90 | 0.00 |
| TRINITY_XP_00295 | light-hçVolvox_carteri       | 63.90 | 0.00 |
| TRINITY_GAQ83573 | RNA ligçKlebsormidium_niten  | 63.80 | 0.00 |
| TRINITY_GAQ80988 | AnaphasçKlebsormidium_niten  | 63.80 | 0.00 |
| TRINITY_GAQ91565 | clathrirKlebsormidium_niten  | 63.80 | 0.00 |
| TRINITY_PRW60832 | chitinasçChlorella_sorokinia | 63.80 | 0.00 |
| TRINITY_XP_01593 | BEL1-liçArachis_duranensis   | 63.80 | 0.00 |
| TRINITY_KMS65245 | hypothetBeta_vulgaris        | 63.80 | 0.00 |
| TRINITY_XP_01002 | PREDICTEucalyptus_grandis    | 63.80 | 0.00 |
| TRINITY_GBG00438 | hypothetRaphidocelis_subcap  | 63.80 | 0.00 |
| TRINITY_PRW60623 | ATPase çChlorella_sorokinia  | 63.80 | 0.00 |
| TRINITY_XP_00170 | predictçChlamydomonas_reinh  | 63.80 | 0.00 |
| TRINITY_GAQ79025 | RegulatçKlebsormidium_niten  | 63.80 | 0.00 |
| TRINITY_XP_02014 | DNA polçAegilops_tauschii    | 63.80 | 0.00 |
| TRINITY_XP_01139 | Serine/tAuxenochlorella_pro  | 63.80 | 0.00 |
| TRINITY_XP_00244 | 40S ribçSorghum_bicolor      | 63.80 | 0.00 |
| TRINITY_XP_01390 | Beclin-1Monoraphidium_negle  | 63.80 | 0.00 |
| TRINITY_XP_01847 | PREDICTERaphanus_sativus     | 63.80 | 0.00 |
| TRINITY_PNW87105 | hypothetChlamydomonas_reinh  | 63.80 | 0.00 |
| TRINITY_PNW74115 | hypothetChlamydomonas_reinh  | 63.80 | 0.00 |
| TRINITY_XP_00296 | 60S ribçSelaginella_moellen  | 63.80 | 0.00 |
| TRINITY_XP_01389 | ATP-depeçMonoraphidium_negle | 63.80 | 0.00 |
| TRINITY_XP_00565 | oxygenasçCoccomyxa_subellips | 63.80 | 0.00 |
| TRINITY_XP_00584 | hypothetChlorella_variabili  | 63.80 | 0.00 |
| TRINITY_GAX83866 | hypothetChlamydomonas_eusti  | 63.80 | 0.00 |
| TRINITY_GAX73417 | hypothetChlamydomonas_eusti  | 63.80 | 0.00 |
| TRINITY_GAX84705 | hypothetChlamydomonas_eusti  | 63.80 | 0.00 |
| TRINITY_XP_00169 | guanylatChlamydomonas_reinh  | 63.80 | 0.00 |
| TRINITY_GAX78085 | hypothetChlamydomonas_eusti  | 63.80 | 0.00 |
| TRINITY_KXZ49418 | hypothetGonium_pectorale     | 63.80 | 0.00 |
| TRINITY_KMS64936 | hypothetBeta_vulgaris        | 63.80 | 0.00 |
| TRINITY_KXZ41410 | hypothetGonium_pectorale     | 63.80 | 0.00 |
| TRINITY_GAX74379 | hypothetChlamydomonas_eusti  | 63.80 | 0.00 |
| TRINITY_KXZ55559 | hypothetGonium_pectorale     | 63.80 | 0.00 |
| TRINITY_XP_00170 | mitochorChlamydomonas_reinh  | 63.80 | 0.00 |
| TRINITY_GBF88757 | hypothetRaphidocelis_subcap  | 63.80 | 0.00 |
| TRINITY_GAX80072 | hypothetChlamydomonas_eusti  | 63.80 | 0    |
| TRINITY_GAX78554 | hypothetChlamydomonas_eusti  | 63.80 | 0.00 |
| TRINITY_XP_01389 | UDP-sulfMonoraphidium_negle  | 63.80 | 0.00 |
| TRINITY_XP_00295 | hypothetVolvox_carteri       | 63.80 | 0.00 |
| TRINITY_ADW09020 | ammoniumDunaliella_viridis   | 63.80 | 0.00 |
| TRINITY_KXZ48158 | hypothetGonium_pectorale     | 63.80 | 0.00 |
| TRINITY_GAX82082 | hypothetChlamydomonas_eusti  | 63.80 | 0.00 |
| TRINITY_RID80605 | hypothetBrassica_rapa        | 63.80 | 0.00 |
| TRINITY_RDY12947 | SplicinçMucuna_pruriens      | 63.70 | 0.00 |
| TRINITY_PNW78134 | hypothetChlamydomonas_reinh  | 63.70 | 0.00 |
| TRINITY_RMZ56147 | hypothetAuxenochlorella_pro  | 63.70 | 0.00 |
| TRINITY_GAX73115 | hypothetChlamydomonas_eusti  | 63.70 | 0.00 |
| TRINITY_XP_02024 | prolifeçAsparagus_officinal  | 63.70 | 0.00 |
| TRINITY_KZV15356 | hypothetDorcoceras_hygromet  | 63.70 | 0.00 |
| TRINITY_XP_01881 | PREDICTEJuglans_regia        | 63.70 | 0.00 |
| TRINITY_GAX72781 | hypothetChlamydomonas_eusti  | 63.70 | 0.00 |
| TRINITY_XP_00565 | Metallo-Coccomyxa_subellips  | 63.70 | 0.00 |
| TRINITY_KXZ50497 | hypothetGonium_pectorale     | 63.70 | 0.00 |
| TRINITY_GBF88998 | plastidiRaphidocelis_subcap  | 63.70 | 0.00 |
| TRINITY_GAX83522 | hypothetChlamydomonas_eusti  | 63.70 | 0.00 |
| TRINITY_GAX80229 | hypothetChlamydomonas_eusti  | 63.70 | 0.00 |
| TRINITY_GAX78572 | hypothetChlamydomonas_eusti  | 63.70 | 0.00 |
| TRINITY_GAX75705 | hypothetChlamydomonas_eusti  | 63.70 | 0.00 |
| TRINITY_KXZ44254 | hypothetGonium_pectorale     | 63.70 | 0.00 |
| TRINITY_XP_00170 | kinesin-Chlamydomonas_reinh  | 63.70 | 0.00 |
| TRINITY_KHN07182 | 60S ribçGlycine_soja         | 63.70 | 0.00 |
| TRINITY_RYR01403 | hypothetArachis_hypogaea     | 63.70 | 0.00 |
| TRINITY_KXZ49558 | hypothetGonium_pectorale     | 63.70 | 0.00 |

|                     |                              |       |      |
|---------------------|------------------------------|-------|------|
| TRINITY_GAX7447     | hypothetChlamydomonas_eusti  | 63.70 | 0.00 |
| TRINITY_PSC76051    | parvulirMicractinium_conduc  | 63.60 | 0.00 |
| TRINITY_KXZ44601    | hypothetGonium_pectorale     | 63.60 | 0.00 |
| TRINITY_XP_00295    | hypothetVolvox_carteri       | 63.60 | 0.00 |
| TRINITY_NP_00123    | uncharacGlycine_max          | 63.60 | 0.00 |
| TRINITY_XP_01390    | vacuolarMonoraphidium_negle  | 63.60 | 0.00 |
| TRINITY_XP_01108    | protein Sesamum_indicum      | 63.60 | 0.00 |
| TRINITY_RMZ5451     | (hypothetAuxenochlorella_pro | 63.60 | 0.00 |
| TRINITY_GAQ8749     | (RNA recKlebsormidium_niten  | 63.60 | 0.00 |
| TRINITY_GAQ8183&20S | protKlebsormidium_niten      | 63.60 | 0.00 |
| TRINITY_PSC75682    | EquilibrMicractinium_conduc  | 63.60 | 0.00 |
| TRINITY_PTQ26781    | hypothetMarchantia_polymorp  | 63.60 | 0.00 |
| TRINITY_XP_00170    | (ubiquitiChlamydomonas_reinh | 63.60 | 0.00 |
| TRINITY_OIW10003    | hypothetLupinus_angustifoli  | 63.60 | 0.00 |
| TRINITY_PWA44137    | cofactorArtemisia_annua      | 63.60 | 0.00 |
| TRINITY_ADK79127    | astaxantHaematococcus_lacus  | 63.60 | 0.00 |
| TRINITY_XP_02008    | protein Ananas_comosus       | 63.60 | 0.00 |
| TRINITY_XP_00295    | hypothetVolvox_carteri       | 63.60 | 0.00 |
| TRINITY_GAX81673    | hypothetChlamydomonas_eusti  | 63.60 | 0.00 |
| TRINITY_XP_00170    | (photosysChlamydomonas_reinh | 63.60 | 0.00 |
| TRINITY_OAE32442    | hypothetMarchantia_polymorp  | 63.60 | 0.00 |
| TRINITY_GAX82827    | hypothetChlamydomonas_eusti  | 63.60 | 0.00 |
| TRINITY_PNW8133     | (hypothetChlamydomonas_reinh | 63.60 | 0.00 |
| TRINITY_PNW88489    | hypothetChlamydomonas_reinh  | 63.60 | 0.00 |
| TRINITY_PNH08541    | hypothetTetrabaena_socialis  | 63.60 | 0.00 |
| TRINITY_BAJ11784    | dehydratCorchorus_olitorius  | 63.60 | 0.00 |
| TRINITY_KXZ41952    | hypothetGonium_pectorale     | 63.60 | 0.00 |
| TRINITY_XP_02389    | uncharacQuercus_suber        | 63.60 | 0.00 |
| TRINITY_XP_00169    | mitogen-Chlamydomonas_reinh  | 63.60 | 0.00 |
| TRINITY_XP_00295    | RabC/RaVolvox_carteri        | 63.60 | 0.00 |
| TRINITY_GAX72848    | hypothetChlamydomonas_eusti  | 63.60 | 0.00 |
| TRINITY_XP_01094    | PREDICTHElaeis_guineensis    | 63.60 | 0.00 |
| TRINITY_XP_02025    | 40S ribAsparagus_officinal   | 63.60 | 0.00 |
| TRINITY_PNW82526    | hypothetChlamydomonas_reinh  | 63.60 | 0.00 |
| TRINITY_XP_02437    | CTP syntPhyscomitrella_pate  | 63.60 | 0.00 |
| TRINITY_GAX8464     | (hypothetChlamydomonas_eusti | 63.60 | 0.00 |
| TRINITY_XP_00169    | serine/tChlamydomonas_reinh  | 63.60 | 0.00 |
| TRINITY_XP_00641    | cysteineEutrema_salsugineur  | 63.60 | 0.00 |
| TRINITY_GBF87781    | hypothetRaphidocelis_subcap  | 63.60 | 0.00 |
| TRINITY_PNW70942    | hypothetChlamydomonas_reinh  | 63.60 | 0.00 |
| TRINITY_OAE35429    | hypothetMarchantia_polymorp  | 63.60 | 0.00 |
| TRINITY_PNW7713     | (hypothetChlamydomonas_reinh | 63.60 | 0.00 |
| TRINITY_XP_02201    | chaperorHelianthus_annuus    | 63.60 | 0.00 |
| TRINITY_XP_02438    | protein Physcomitrella_pate  | 63.60 | 0.00 |
| TRINITY_XP_00170    | (predictChlamydomonas_reinh  | 63.60 | 0.00 |
| TRINITY_GAX79511    | hypothetChlamydomonas_eusti  | 63.60 | 0.00 |
| TRINITY_PNW84992    | hypothetChlamydomonas_reinh  | 63.60 | 0.00 |
| TRINITY_GAX78341    | hypothetChlamydomonas_eusti  | 63.60 | 0.00 |
| TRINITY_GBF9570     | (aspartatRaphidocelis_subcap | 63.60 | 0.00 |
| TRINITY_PNH08983    | SelenocTetrabaena_socialis   | 63.60 | 0.00 |
| TRINITY_GAX85979    | hypothetChlamydomonas_eusti  | 63.60 | 0.00 |
| TRINITY_GAX83444    | hypothetChlamydomonas_eusti  | 63.60 | 0.00 |
| TRINITY_GAX81523    | hypothetChlamydomonas_eusti  | 63.60 | 0.00 |
| TRINITY_GBG69032    | hypothetChara_braunii        | 63.60 | 0.00 |
| TRINITY_GAX73618    | hypothetChlamydomonas_eusti  | 63.60 | 0    |
| TRINITY_GAX75416    | hypothetChlamydomonas_eusti  | 63.60 | 0.00 |
| TRINITY_GAX82495    | hypothetChlamydomonas_eusti  | 63.60 | 0.00 |
| TRINITY_KXZ53813    | hypothetGonium_pectorale     | 63.60 | 0.00 |
| TRINITY_GAX7722     | (hypothetChlamydomonas_eusti | 63.60 | 0.00 |
| TRINITY_KXZ5550     | (hypothetGonium_pectorale    | 63.60 | 0.00 |
| TRINITY_GBF93403    | serine lRaphidocelis_subcap  | 63.60 | 0.00 |
| TRINITY_GAQ79454    | DNA topKlebsormidium_niten   | 63.50 | 0.00 |
| TRINITY_XP_00585    | hypothetChlorella_variabili  | 63.50 | 0.00 |
| TRINITY_PLY68696    | hypothetLactuca_sativa       | 63.50 | 0.00 |
| TRINITY_GAX74013    | hypothetChlamydomonas_eusti  | 63.50 | 0.00 |
| TRINITY_PNW84885    | hypothetChlamydomonas_reinh  | 63.50 | 0.00 |

|                 |           |                     |       |      |
|-----------------|-----------|---------------------|-------|------|
| TRINITY_PNH0200 | RNA pse   | Tetrabaena_socialis | 63.50 | 0.00 |
| TRINITY_XP_0029 | hypothet  | Volvox_carteri      | 63.50 | 0.00 |
| TRINITY_XP_0029 | hypothet  | Volvox_carteri      | 63.50 | 0.00 |
| TRINITY_XP_0029 | hypothet  | Volvox_carteri      | 63.50 | 0.00 |
| TRINITY_XP_0058 | hypothet  | Chlorella_variabili | 63.50 | 0.00 |
| TRINITY_PNR6252 | (hypothet | Physcomitrella_pate | 63.50 | 0.00 |
| TRINITY_KXZ4325 | hypothet  | Gonium_pectorale    | 63.50 | 0.00 |
| TRINITY_BAJ9577 | predict   | Hordeum_vulgare     | 63.50 | 0.00 |
| TRINITY_GAX7361 | hypothet  | Chlamydomonas_eusti | 63.50 | 0.00 |
| TRINITY_XP_0206 | poly [AI  | Dendrobium_catenatu | 63.50 | 0.00 |
| TRINITY_PNH0571 | (hypothet | Tetrabaena_socialis | 63.50 | 0.00 |
| TRINITY_BAK0277 | predict   | Hordeum_vulgare     | 63.50 | 0.00 |
| TRINITY_OAE3283 | hypothet  | Marchantia_polymorp | 63.50 | 0    |
| TRINITY_PSC6754 | hypothet  | Micractinium_conduc | 63.50 | 0.00 |
| TRINITY_XP_0191 | PREDICTI  | Ipomoea_nil         | 63.50 | 0.00 |
| TRINITY_PNH1000 | hypothet  | Tetrabaena_socialis | 63.50 | 0.00 |
| TRINITY_XP_0029 | hypothet  | Volvox_carteri      | 63.50 | 0.00 |
| TRINITY_GAX8111 | hypothet  | Chlamydomonas_eusti | 63.50 | 0.00 |
| TRINITY_XP_0150 | (SUMO-act | Solanum_pennellii   | 63.50 | 0.00 |
| TRINITY_XP_0029 | acetylgl  | Volvox_carteri      | 63.50 | 0.00 |
| TRINITY_GAX8302 | hypothet  | Chlamydomonas_eusti | 63.50 | 0.00 |
| TRINITY_ADI4685 | (DHC1bf   | Volvox_carteri      | 63.50 | 0.00 |
| TRINITY_GAX7598 | hypothet  | Chlamydomonas_eusti | 63.50 | 0.00 |
| TRINITY_XP_0030 | Ribosom   | Ostreococcus_tauri  | 63.50 | 0.00 |
| TRINITY_KMS6524 | hypothet  | Beta_vulgaris       | 63.50 | 0.00 |
| TRINITY_PNW8197 | hypothet  | Chlamydomonas_reinh | 63.50 | 0.00 |
| TRINITY_XP_0029 | hypothet  | Volvox_carteri      | 63.40 | 0.00 |
| TRINITY_PSC7261 | mRNA (2   | Micractinium_conduc | 63.40 | 0.00 |
| TRINITY_BAJ9887 | predict   | Hordeum_vulgare     | 63.40 | 0.00 |
| TRINITY_AAO7355 | reverse-  | Chlamydomonas_reinh | 63.40 | 0.00 |
| TRINITY_XP_0029 | hypothet  | Volvox_carteri      | 63.40 | 0.00 |
| TRINITY_GAQ7859 | (Rab fami | Klebsormidium_niten | 63.40 | 0.00 |
| TRINITY_GBG7247 | hypothet  | Chara_braunii       | 63.40 | 0.00 |
| TRINITY_PNW8180 | (hypothet | Chlamydomonas_reinh | 63.40 | 0.00 |
| TRINITY_XP_0016 | predict   | Chlamydomonas_reinh | 63.40 | 0.00 |
| TRINITY_GAX8242 | (hypothet | Chlamydomonas_eusti | 63.40 | 0.00 |
| TRINITY_XP_0016 | subunit   | Chlamydomonas_reinh | 63.40 | 0.00 |
| TRINITY_KXZ4753 | (hypothet | Gonium_pectorale    | 63.40 | 0.00 |
| TRINITY_XP_0016 | mitochor  | Chlamydomonas_reinh | 63.40 | 0.00 |
| TRINITY_XP_0139 | (heme pe  | Monoraphidium_negle | 63.40 | 0.00 |
| TRINITY_XP_0058 | hypothet  | Chlorella_variabili | 63.40 | 0.00 |
| TRINITY_GAQ8276 | Actin-r   | Klebsormidium_niten | 63.40 | 0.00 |
| TRINITY_XP_0017 | (flagell  | Chlamydomonas_reinh | 63.40 | 0.00 |
| TRINITY_XP_0029 | hypothet  | Volvox_carteri      | 63.40 | 0.00 |
| TRINITY_ONK7023 | uncharac  | Asparagus_officinal | 63.40 | 0.00 |
| TRINITY_XP_0271 | 160S rib  | Coffea_arabica      | 63.40 | 0.00 |
| TRINITY_KXZ4803 | (hypothet | Gonium_pectorale    | 63.40 | 0.00 |
| TRINITY_PNW7909 | hypothet  | Chlamydomonas_reinh | 63.40 | 0.00 |
| TRINITY_GAX8190 | hypothet  | Chlamydomonas_eusti | 63.40 | 0.00 |
| TRINITY_PNW7806 | (hypothet | Chlamydomonas_reinh | 63.40 | 0.00 |
| TRINITY_GAX7811 | (hypothet | Chlamydomonas_eusti | 63.40 | 0.00 |
| TRINITY_XP_0029 | hypothet  | Volvox_carteri      | 63.40 | 0.00 |
| TRINITY_GAX8297 | (hypothet | Chlamydomonas_eusti | 63.40 | 0.00 |
| TRINITY_GAX8558 | (hypothet | Chlamydomonas_eusti | 63.40 | 0.00 |
| TRINITY_GAX7348 | (hypothet | Chlamydomonas_eusti | 63.40 | 0.00 |
| TRINITY_XP_0134 | mitochor  | Medicago_truncatula | 63.40 | 0.00 |
| TRINITY_XP_0070 | (PREDICTI | Theobroma_cacao     | 63.30 | 0.00 |
| TRINITY_GAQ8831 | (hypothet | Klebsormidium_niten | 63.30 | 0.00 |
| TRINITY_GBF9126 | ABC trar  | Raphidocelis_subcap | 63.30 | 0.00 |
| TRINITY_AAL3264 | fructos   | Arabidopsis_thalian | 63.30 | 0.00 |
| TRINITY_GAX7899 | (hypothet | Chlamydomonas_eusti | 63.30 | 0.00 |
| TRINITY_XP_0109 | 1PREDICTI | Elaeis_guineensis   | 63.30 | 0.00 |
| TRINITY_PNW7482 | (hypothet | Chlamydomonas_reinh | 63.30 | 0.00 |
| TRINITY_XP_0176 | 1PREDICTI | Gossypium_arboreum  | 63.30 | 0.00 |
| TRINITY_OAE3212 | (hypothet | Marchantia_polymorp | 63.30 | 0.00 |
| TRINITY_EXC3489 | Metal t   | Morus_notabilis     | 63.30 | 0.00 |

|                  |                             |       |      |
|------------------|-----------------------------|-------|------|
| TRINITY_GBF93736 | hypothetRaphidocelis_subcap | 63.30 | 0.00 |
| TRINITY_GAX74987 | hypothetChlamydomonas_eusti | 63.30 | 0.00 |
| TRINITY_GBG92399 | hypothetChara_braunii       | 63.30 | 0.00 |
| TRINITY_PNH09611 | putativeTetrabaena_socialis | 63.30 | 0.00 |
| TRINITY_GBF90736 | nitrile Raphidocelis_subcap | 63.30 | 0.00 |
| TRINITY_GBF95211 | hypothetRaphidocelis_subcap | 63.30 | 0.00 |
| TRINITY_XP_00170 | cyclin cChlamydomonas_reinh | 63.30 | 0.00 |
| TRINITY_KXZ54894 | hypothetGonium_pectorale    | 63.30 | 0.00 |
| TRINITY_GBF94187 | tRNA (g)Raphidocelis_subcap | 63.30 | 0.00 |
| TRINITY_GAX78987 | hypothetChlamydomonas_eusti | 63.30 | 0.00 |
| TRINITY_GAX76217 | hypothetChlamydomonas_eusti | 63.30 | 0.00 |
| TRINITY_XP_00294 | hypothetVolvox_carteri      | 63.30 | 0.00 |
| TRINITY_XP_02392 | eukaryotQuercus_suber       | 63.30 | 0.00 |
| TRINITY_GAX78405 | hypothetChlamydomonas_eusti | 63.30 | 0.00 |
| TRINITY_XP_00169 | predicteChlamydomonas_reinh | 63.30 | 0.00 |
| TRINITY_XP_00169 | vacuolarChlamydomonas_reinh | 63.30 | 0.00 |
| TRINITY_GAX82481 | hypothetChlamydomonas_eusti | 63.30 | 0.00 |
| TRINITY_XP_00170 | predicteChlamydomonas_reinh | 63.30 | 0.00 |
| TRINITY_CAA66233 | cyclin-cAntirrhinum_majus   | 63.30 | 0.00 |
| TRINITY_PNW7920  | hypothetChlamydomonas_reinh | 63.30 | 0.00 |
| TRINITY_PNW77368 | hypothetChlamydomonas_reinh | 63.30 | 0.00 |
| TRINITY_GAQ78655 | RibosomeKlebsormidium_niten | 63.30 | 0.00 |
| TRINITY_GAQ83118 | FumaraseKlebsormidium_niten | 63.30 | 0.00 |
| TRINITY_KXZ44195 | hypothetGonium_pectorale    | 63.30 | 0.00 |
| TRINITY_PNW75836 | hypothetChlamydomonas_reinh | 63.30 | 0.00 |
| TRINITY_GAX79417 | hypothetChlamydomonas_eusti | 63.30 | 0.00 |
| TRINITY_KXZ47821 | hypothetGonium_pectorale    | 63.30 | 0.00 |
| TRINITY_XP_00169 | predicteChlamydomonas_reinh | 63.30 | 0.00 |
| TRINITY_XP_00294 | hypothetVolvox_carteri      | 63.30 | 0.00 |
| TRINITY_PNW85149 | hypothetChlamydomonas_reinh | 63.30 | 0.00 |
| TRINITY_XP_00295 | hypothetVolvox_carteri      | 63.30 | 0.00 |
| TRINITY_GAX83154 | hypothetChlamydomonas_eusti | 63.30 | 0.00 |
| TRINITY_PNW74476 | hypothetChlamydomonas_reinh | 63.30 | 0.00 |
| TRINITY_BAK02675 | predicteHordeum_vulgare     | 63.30 | 0.00 |
| TRINITY_XP_00250 | hypothetMicromonas_commoda  | 63.20 | 0.00 |
| TRINITY_XP_02294 | pirin-liCucurbita_moschata  | 63.20 | 0.00 |
| TRINITY_XP_02387 | uncharacQuercus_suber       | 63.20 | 0.00 |
| TRINITY_RWR9250  | AP-4 conCinnamomum_micranth | 63.20 | 0.00 |
| TRINITY_BAK00960 | predicteHordeum_vulgare     | 63.20 | 0.00 |
| TRINITY_XP_00294 | hypothetVolvox_carteri      | 63.20 | 0.00 |
| TRINITY_XP_00665 | PREDICTHOryza_brachyantha   | 63.20 | 0.00 |
| TRINITY_A9NUH8.1 | RecName:Picea_sitchensis    | 63.20 | 0.00 |
| TRINITY_PNH11554 | hypothetTetrabaena_socialis | 63.20 | 0.00 |
| TRINITY_XP_00170 | actin-liChlamydomonas_reinh | 63.20 | 0.00 |
| TRINITY_PRW59938 | RNA 3 -tChlorella_sorokinia | 63.20 | 0.00 |
| TRINITY_XP_00295 | hypothetVolvox_carteri      | 63.20 | 0.00 |
| TRINITY_XP_01140 | hypothetAuxenochlorella_pro | 63.20 | 0.00 |
| TRINITY_OAE21134 | hypothetMarchantia_polymorp | 63.20 | 0.00 |
| TRINITY_OVA19828 | WD40 re Macleaya_cordata    | 63.20 | 0.00 |
| TRINITY_GAX73519 | hypothetChlamydomonas_eusti | 63.20 | 0.00 |
| TRINITY_GAX85649 | hypothetChlamydomonas_eusti | 63.20 | 0.00 |
| TRINITY_PNW86805 | hypothetChlamydomonas_reinh | 63.20 | 0.00 |
| TRINITY_GAX86300 | hypothetChlamydomonas_eusti | 63.20 | 0.00 |
| TRINITY_GAX75092 | hypothetChlamydomonas_eusti | 63.20 | 0.00 |
| TRINITY_GAX82825 | hypothetChlamydomonas_eusti | 63.20 | 0.00 |
| TRINITY_KXZ53426 | hypothetGonium_pectorale    | 63.20 | 0.00 |
| TRINITY_PNW69893 | hypothetChlamydomonas_reinh | 63.20 | 0.00 |
| TRINITY_GAX81687 | hypothetChlamydomonas_eusti | 63.20 | 0.00 |
| TRINITY_KXZ46941 | hypothetGonium_pectorale    | 63.20 | 0.00 |
| TRINITY_XP_00169 | peptidy]Chlamydomonas_reinh | 63.20 | 0.00 |
| TRINITY_XP_00226 | PREDICTHVitis_vinifera      | 63.20 | 0.00 |
| TRINITY_XP_00295 | hypothetVolvox_carteri      | 63.20 | 0.00 |
| TRINITY_XP_00295 | hypothetVolvox_carteri      | 63.20 | 0.00 |
| TRINITY_GBG72475 | hypothetChara_braunii       | 63.20 | 0.00 |
| TRINITY_GAX75585 | hypothetChlamydomonas_eusti | 63.20 | 0.00 |
| TRINITY_GAX75222 | hypothetChlamydomonas_eusti | 63.20 | 0.00 |

|                  |                              |       |      |
|------------------|------------------------------|-------|------|
| TRINITY_KXZ43307 | hypothetGonium_pectorale     | 63.20 | 0.00 |
| TRINITY_XP_00169 | predicteChlamydomonas_reinh  | 63.20 | 0.00 |
| TRINITY_KXZ56708 | hypothetGonium_pectorale     | 63.20 | 0.00 |
| TRINITY_AAO73551 | reverse-Chlamydomonas_reinh  | 63.20 | 0.00 |
| TRINITY_GBF97619 | hypothetRaphidocelis_subcap  | 63.20 | 0.00 |
| TRINITY_OAE25199 | hypothetMarchantia_polymorp  | 63.10 | 0.00 |
| TRINITY_RDY12539 | ADP-ribcMucuna_pruriens      | 63.10 | 0.00 |
| TRINITY_GAX72640 | hypothetChlamydomonas_eusti  | 63.10 | 0.00 |
| TRINITY_PRW44490 | translatChlorella_sorokinia  | 63.10 | 0.00 |
| TRINITY_XP_02454 | isocitræSelaginella_moellen  | 63.10 | 0.00 |
| TRINITY_XP_02437 | eukaryotPhyscomitrella_pate  | 63.10 | 0.00 |
| TRINITY_GAX79612 | hypothetChlamydomonas_eusti  | 63.10 | 0.00 |
| TRINITY_XP_00299 | hypothetVolvox_carteri       | 63.10 | 0.00 |
| TRINITY_PNW74641 | hypothetChlamydomonas_reinh  | 63.10 | 0.00 |
| TRINITY_GAX76712 | hypothetChlamydomonas_eusti  | 63.10 | 0.00 |
| TRINITY_XP_02390 | ras-likeQuercus_suber        | 63.10 | 0.00 |
| TRINITY_PNW83260 | hypothetChlamydomonas_reinh  | 63.10 | 0.00 |
| TRINITY_AIU80189 | acyl-CoAChlorella_sp._KQ-20  | 63.10 | 0.00 |
| TRINITY_NP_56369 | dual spæArabidopsis_thalian  | 63.10 | 0.00 |
| TRINITY_AGC12987 | long flæChlamydomonas_reinh  | 63.10 | 0.00 |
| TRINITY_XP_01389 | pyridoxæMonoraphidium_negle  | 63.10 | 0.00 |
| TRINITY_XP_00169 | CAX famiChlamydomonas_reinh  | 63.10 | 0.00 |
| TRINITY_KXZ49758 | hypothetGonium_pectorale     | 63.10 | 0.00 |
| TRINITY_XP_00308 | FERM/acyOstreococcus_tauri   | 63.10 | 0.00 |
| TRINITY_XP_00250 | predicteMicromonas_commoda   | 63.10 | 0.00 |
| TRINITY_BAK00461 | predicteHordeum_vulgare      | 63.00 | 0.00 |
| TRINITY_XP_02438 | seleniumPhyscomitrella_pate  | 63.00 | 0.00 |
| TRINITY_XP_02391 | dolicholQuercus_suber        | 63.00 | 0.00 |
| TRINITY_RWR81709 | ubiquitiCinnamomum_micranth  | 63.00 | 0.00 |
| TRINITY_KXZ44241 | hypothetGonium_pectorale     | 63.00 | 0.00 |
| TRINITY_XP_00880 | uncharacPhoenix_dactylifera  | 63.00 | 0.00 |
| TRINITY_XP_02284 | RibosomæOstreococcus_tauri   | 63.00 | 0.00 |
| TRINITY_XP_00299 | hypothetVolvox_carteri       | 63.00 | 0.00 |
| TRINITY_XP_01389 | hypothetMonoraphidium_negle  | 63.00 | 0.00 |
| TRINITY_ABF93569 | Cell dixOryza_sativa         | 63.00 | 0.00 |
| TRINITY_AXU98877 | hypothetBrassica_juncea      | 63.00 | 0.00 |
| TRINITY_KXZ47429 | hypothetGonium_pectorale     | 63.00 | 0.00 |
| TRINITY_GAX74014 | hypothetChlamydomonas_eusti  | 63.00 | 0.00 |
| TRINITY_XP_00299 | hypothetVolvox_carteri       | 63.00 | 0.00 |
| TRINITY_XP_00584 | hypothetChlorella_variabili  | 63.00 | 0.00 |
| TRINITY_XP_00169 | predicteChlamydomonas_reinh  | 63.00 | 0.00 |
| TRINITY_XP_01101 | PREDICTIPopulus_euphratica   | 63.00 | 0.00 |
| TRINITY_XP_00294 | flagellæVolvox_carteri       | 63.00 | 0.00 |
| TRINITY_XP_01389 | myo-inoæMonoraphidium_negle  | 63.00 | 0.00 |
| TRINITY_GAX83106 | hypothetChlamydomonas_eusti  | 63.00 | 0.00 |
| TRINITY_PNW76206 | hypothetChlamydomonas_reinh  | 63.00 | 0.00 |
| TRINITY_XP_00141 | predicteOstreococcus_sp._'1  | 63.00 | 0.00 |
| TRINITY_GBF93549 | hypothetRaphidocelis_subcap  | 63.00 | 0.00 |
| TRINITY_GAX81652 | hypothetChlamydomonas_eusti  | 63.00 | 0.00 |
| TRINITY_PNW83119 | hypothetChlamydomonas_reinh  | 63.00 | 0.00 |
| TRINITY_PNW81486 | hypothetChlamydomonas_reinh  | 63.00 | 0.00 |
| TRINITY_XP_02070 | uncharacDendrobium_catenatu  | 63.00 | 0.00 |
| TRINITY_PTQ36959 | hypothetMarchantia_polymorp  | 63.00 | 0.00 |
| TRINITY_GAX86426 | hypothetChlamydomonas_eusti  | 63.00 | 0.00 |
| TRINITY_PNH10976 | InterferiTetrabaena_socialis | 63.00 | 0.00 |
| TRINITY_XP_02294 | intron-kCucurbita_moschata   | 63.00 | 0.00 |
| TRINITY_GBF89357 | hypothetRaphidocelis_subcap  | 63.00 | 0.00 |
| TRINITY_XP_00564 | hypothetCoccomyxa_subellips  | 63.00 | 0.00 |
| TRINITY_XP_01390 | UncharacMonoraphidium_negle  | 63.00 | 0.00 |
| TRINITY_XP_02292 | ubiquitiCucurbita_moschata   | 63.00 | 0.00 |
| TRINITY_PNW71822 | hypothetChlamydomonas_reinh  | 63.00 | 0.00 |
| TRINITY_XP_01389 | type I µMonoraphidium_negle  | 63.00 | 0.00 |
| TRINITY_XP_01672 | PREDICTIGossypium_hirsutum   | 63.00 | 0.00 |
| TRINITY_PNW82722 | hypothetChlamydomonas_reinh  | 63.00 | 0.00 |
| TRINITY_PNR31107 | hypothetPhyscomitrella_pate  | 63.00 | 0.00 |
| TRINITY_XP_00168 | beta-uræChlamydomonas_reinh  | 63.00 | 0.00 |

|                  |                              |       |      |
|------------------|------------------------------|-------|------|
| TRINITY_GAX7898  | hypothetChlamydomonas_eusti  | 63.00 | 0.00 |
| TRINITY_XP_00751 | predicteBathycoccus_prasinc  | 63.00 | 0.00 |
| TRINITY_GAX7381  | (hypothetChlamydomonas_eusti | 63.00 | 0.00 |
| TRINITY_GBF8866  | diacylg Raphidocelis_subcap  | 63.00 | 0.00 |
| TRINITY_KXZ4482  | (hypothetGonium_pectorale    | 63.00 | 0.00 |
| TRINITY_PRW4526  | apurinicChlorella_sorokinia  | 63.00 | 0.00 |
| TRINITY_GBF9197  | methylyt Raphidocelis_subcap | 63.00 | 0.00 |
| TRINITY_GAX7648  | (hypothetChlamydomonas_eusti | 63.00 | 0.00 |
| TRINITY_KXZ5189  | (hypothetGonium_pectorale    | 63.00 | 0.00 |
| TRINITY_XP_0113  | Tubulin Auxenochlorella_pro  | 62.90 | 0.00 |
| TRINITY_XP_0016  | hydin-l Chlamydomonas_reinh  | 62.90 | 0.00 |
| TRINITY_XP_0029  | hypothetVolvox_carteri       | 62.90 | 0.00 |
| TRINITY_XP_0228  | HistidirOstreococcus_tauri   | 62.90 | 0.00 |
| TRINITY_XP_0017  | (ubiquinChlamydomonas_reinh  | 62.90 | 0.00 |
| TRINITY_PNH0153  | actin [T]Tetrabaena_socialis | 62.90 | 0.00 |
| TRINITY_XP_0258  | V-type  Panicum_hallii       | 62.90 | 0.00 |
| TRINITY_XP_0238  | uncharacQuercus_suber        | 62.90 | 0.00 |
| TRINITY_XP_0029  | Mg2+ tr:Volvox_carteri       | 62.90 | 0.00 |
| TRINITY_XP_0029  | hypothetVolvox_carteri       | 62.90 | 0.00 |
| TRINITY_GBF8839  | WD repe:Raphidocelis_subcap  | 62.90 | 0.00 |
| TRINITY_GBF9263  | (hypothetRaphidocelis_subcap | 62.90 | 0.00 |
| TRINITY_PSC7438  | ethylenMicractinium_conduc   | 62.90 | 0.00 |
| TRINITY_GAX8359  | (hypothetChlamydomonas_eusti | 62.90 | 0.00 |
| TRINITY_XP_0016  | NAD-depeChlamydomonas_reinh  | 62.90 | 0.00 |
| TRINITY_PRW5625  | 120S protChlorella_sorokinia | 62.90 | 0.00 |
| TRINITY_KXZ4838  | (hypothetGonium_pectorale    | 62.90 | 0.00 |
| TRINITY_XP_0029  | hypothetVolvox_carteri       | 62.90 | 0.00 |
| TRINITY_PNH1174  | (hypothetTetrabaena_socialis | 62.90 | 0.00 |
| TRINITY_XP_0139  | (baculoviMonoraphidium_negle | 62.90 | 0.00 |
| TRINITY_XP_0138  | (hypothetMonoraphidium_negle | 62.90 | 0.00 |
| TRINITY_VDC7218  | (unnamed Brassica_rapa       | 62.90 | 0.00 |
| TRINITY_XP_0238  | phosphoQuercus_suber         | 62.90 | 0.00 |
| TRINITY_XP_0029  | hypothetVolvox_carteri       | 62.90 | 0.00 |
| TRINITY_XP_0243  | (pre-mRNPhyscomitrella_pate  | 62.90 | 0.00 |
| TRINITY_GBG0052  | (phosphoiRaphidocelis_subcap | 62.90 | 0.00 |
| TRINITY_GAX8344  | (hypothetChlamydomonas_eusti | 62.90 | 0.00 |
| TRINITY_RMZ5415  | (hypothetAuxenochlorella_pro | 62.90 | 0.00 |
| TRINITY_GAX7539  | (hypothetChlamydomonas_eusti | 62.90 | 0.00 |
| TRINITY_GAX8138  | (hypothetChlamydomonas_eusti | 62.90 | 0.00 |
| TRINITY_GAX7894  | (hypothetChlamydomonas_eusti | 62.90 | 0.00 |
| TRINITY_XP_0139  | (aurora  Monoraphidium_negle | 62.90 | 0.00 |
| TRINITY_PRW2067  | 40S ribChlorella_sorokinia   | 62.90 | 0.00 |
| TRINITY_XP_0029  | p300/CBIVolvox_carteri       | 62.90 | 0.00 |
| TRINITY_GAX7575  | (hypothetChlamydomonas_eusti | 62.90 | 0    |
| TRINITY_XP_0063  | PREDICTISolanum_tuberosum    | 62.90 | 0.00 |
| TRINITY_XP_0016  | predicteChlamydomonas_reinh  | 62.80 | 0.00 |
| TRINITY_XP_0167  | PREDICTIGossypium_hirsutum   | 62.80 | 0.00 |
| TRINITY_KXZ5680  | METE prcGonium_pectorale     | 62.80 | 0.00 |
| TRINITY_GAX7820  | (hypothetChlamydomonas_eusti | 62.80 | 0.00 |
| TRINITY_XP_0138  | (hypothetMonoraphidium_negle | 62.80 | 0.00 |
| TRINITY_XP_0017  | (serine  Chlamydomonas_reinh | 62.80 | 0.00 |
| TRINITY_PNW8336  | (hypothetChlamydomonas_reinh | 62.80 | 0.00 |
| TRINITY_KXZ4200  | (hypothetGonium_pectorale    | 62.80 | 0.00 |
| TRINITY_XP_0239  | (aldo-ketQuercus_suber       | 62.80 | 0.00 |
| TRINITY_GAX8214  | (hypothetChlamydomonas_eusti | 62.80 | 0.00 |
| TRINITY_XP_0017  | (SM/Sec1-Chlamydomonas_reinh | 62.80 | 0.00 |
| TRINITY_PNH1070  | Zeaxant Tetrabaena_socialis  | 62.80 | 0.00 |
| TRINITY_GAX8518  | (hypothetChlamydomonas_eusti | 62.80 | 0.00 |
| TRINITY_GAQ8244  | MembranKlebsormidium_niten   | 62.80 | 0.00 |
| TRINITY_XP_0029  | hypothetVolvox_carteri       | 62.80 | 0.00 |
| TRINITY_EOY3025  | CysteineTheobroma_cacao      | 62.80 | 0.00 |
| TRINITY_GAX7981  | (hypothetChlamydomonas_eusti | 62.80 | 0.00 |
| TRINITY_PNH1171  | (L-galactTetrabaena_socialis | 62.80 | 0.00 |
| TRINITY_GAX8322  | (hypothetChlamydomonas_eusti | 62.80 | 0.00 |
| TRINITY_KZV1503  | (NAD-depeDorcoceras_hygromet | 62.80 | 0.00 |
| TRINITY_XP_0238  | uncharacQuercus_suber        | 62.80 | 0.00 |



|                 |           |                             |                     |       |      |
|-----------------|-----------|-----------------------------|---------------------|-------|------|
| TRINITY_XP_0094 | (PREDICTI | Musa_acuminata              | 62.80               | 0.00  |      |
| TRINITY_GAX8320 | 1         | hypothetChlamydomonas_eusti | 62.80               | 0.00  |      |
| TRINITY_GAX7401 | 9         | hypothetChlamydomonas_eusti | 62.80               | 0     |      |
| TRINITY_GAQ9213 | 9         | putativeKlebsormidium_niten | 62.80               | 0.00  |      |
| TRINITY_KXZ5506 | 4         | hypothetGonium_pectorale    | 62.80               | 0.00  |      |
| TRINITY_GAX8127 | 8         | hypothetChlamydomonas_eusti | 62.80               | 0.00  |      |
| TRINITY_GAX8025 | 1         | hypothetChlamydomonas_eusti | 62.80               | 0.00  |      |
| TRINITY_PTQ4226 | 2         | hypothetMarchantia_polymorp | 62.80               | 0.00  |      |
| TRINITY_XP_0139 | (prolyl   | εMonoraphidium_negle        | 62.80               | 0.00  |      |
| TRINITY_GAX7544 | 2         | hypothetChlamydomonas_eusti | 62.80               | 0.00  |      |
| TRINITY_XP_0056 | 4         | threonylCoccomyxa_subellips | 62.70               | 0.00  |      |
| TRINITY_XP_0068 | 5         | heat shcAmborella_trichopod | 62.70               | 0.00  |      |
| TRINITY_BAJ9943 | (predictε | Hordeum_vulgare             | 62.70               | 0.00  |      |
| TRINITY_XP_0124 | 8         | (PREDICTI                   | Gossypium_raimondii | 62.70 | 0.00 |
| TRINITY_XP_0017 | (predictε | Chlamydomonas_reinh         | 62.70               | 0.00  |      |
| TRINITY_XP_0243 | (alpha-mε | Physcomitrella_pate         | 62.70               | 0.00  |      |
| TRINITY_PRQ4599 | 1         | putativeRosa_chinensis      | 62.70               | 0.00  |      |
| TRINITY_GBF9186 | 3         | hypothetRaphidocelis_subcap | 62.70               | 0.00  |      |
| TRINITY_OAE3367 | 8         | hypothetMarchantia_polymorp | 62.70               | 0.00  |      |
| TRINITY_GAX7941 | 1         | hypothetChlamydomonas_eusti | 62.70               | 0.00  |      |
| TRINITY_KXZ4194 | (hypothet | Gonium_pectorale            | 62.70               | 0.00  |      |
| TRINITY_PNH0794 | 9         | putativeTetrabaena_socialis | 62.70               | 0.00  |      |
| TRINITY_GBF9114 | 3         | hypothetRaphidocelis_subcap | 62.70               | 0.00  |      |
| TRINITY_XP_0139 | (hypothet | Monoraphidium_negle         | 62.70               | 0.00  |      |
| TRINITY_XP_0191 | (PREDICTI | Ipomoea_nil                 | 62.70               | 0.00  |      |
| TRINITY_XP_0017 | (NADH:ubi | Chlamydomonas_reinh         | 62.70               | 0.00  |      |
| TRINITY_XP_0029 | 5         | hypothetVolvox_carteri      | 62.70               | 0.00  |      |
| TRINITY_GAX8344 | 5         | hypothetChlamydomonas_eusti | 62.70               | 0.00  |      |
| TRINITY_GAX8188 | 7         | hypothetChlamydomonas_eusti | 62.70               | 0.00  |      |
| TRINITY_GAX7980 | 7         | hypothetChlamydomonas_eusti | 62.70               | 0.00  |      |
| TRINITY_XP_0017 | (inositol | Chlamydomonas_reinh         | 62.70               | 0.00  |      |
| TRINITY_ALM5500 | (DEAD bo  | Chlamydomonas_sp._I         | 62.70               | 0.00  |      |
| TRINITY_GAX7622 | 2         | hypothetChlamydomonas_eusti | 62.70               | 0.00  |      |
| TRINITY_GBG8742 | 7         | hypothetChara_braunii       | 62.70               | 0.00  |      |
| TRINITY_KXZ5134 | (hypothet | Gonium_pectorale            | 62.70               | 0.00  |      |
| TRINITY_XP_0029 | 4         | hypothetVolvox_carteri      | 62.70               | 0.00  |      |
| TRINITY_CAD7125 | (asparagi | Lotus_japonicus             | 62.70               | 0.00  |      |
| TRINITY_GAX8030 | 2         | hypothetChlamydomonas_eusti | 62.70               | 0.00  |      |
| TRINITY_GAX8607 | (hypothet | Chlamydomonas_eusti         | 62.70               | 0.00  |      |
| TRINITY_XP_0218 | (eukaryot | Spinacia_oleracea           | 62.70               | 0.00  |      |
| TRINITY_RID6206 | 2         | hypothetBrassica_rapa       | 62.70               | 0.00  |      |
| TRINITY_KXZ5398 | 3         | hypothetGonium_pectorale    | 62.70               | 0.00  |      |
| TRINITY_GAX7530 | 4         | hypothetChlamydomonas_eusti | 62.70               | 0.00  |      |
| TRINITY_GBF9253 | 7         | DNA repε                    | Raphidocelis_subcap | 62.70 | 0.00 |
| TRINITY_GAX7352 | (hypothet | Chlamydomonas_eusti         | 62.70               | 0.00  |      |
| TRINITY_XP_0016 | 9         | predictε                    | Chlamydomonas_reinh | 62.70 | 0.00 |
| TRINITY_PNW8026 | 5         | hypothetChlamydomonas_reinh | 62.70               | 0.00  |      |
| TRINITY_PNH0453 | 3         | E3 ubiq                     | Tetrabaena_socialis | 62.70 | 0.00 |
| TRINITY_GAX8246 | 1         | hypothetChlamydomonas_eusti | 62.70               | 0.00  |      |
| TRINITY_GAX7596 | 2         | hypothetChlamydomonas_eusti | 62.70               | 0.00  |      |
| TRINITY_VDD1037 | 2         | unnamed                     | Brassica_rapa       | 62.70 | 0.00 |
| TRINITY_PNW7893 | 7         | hypothetChlamydomonas_reinh | 62.70               | 0.00  |      |
| TRINITY_XP_0109 | 1         | (PREDICTI                   | Elaeis_guineensis   | 62.60 | 0.00 |
| TRINITY_XP_0056 | 5         | Mak16 p                     | Coccomyxa_subellips | 62.60 | 0.00 |
| TRINITY_XP_0093 | 5         | (PREDICTI                   | Pyrus_x_bretschneid | 62.60 | 0.00 |
| TRINITY_GAX8155 | 9         | hypothetChlamydomonas_eusti | 62.60               | 0.00  |      |
| TRINITY_EFJ2312 | 3         | hypothetSelaginella_moellen | 62.60               | 0.00  |      |
| TRINITY_KCW7583 | 3         | hypothetEucalyptus_grandis  | 62.60               | 0.00  |      |
| TRINITY_ACG3645 | 7         | histone                     | Zea_mays            | 62.60 | 0.00 |
| TRINITY_XP_0191 | 8         | (PREDICTI                   | Ipomoea_nil         | 62.60 | 0.00 |
| TRINITY_AGC8213 | 8         | phytochε                    | Suaeda_salsa        | 62.60 | 0.00 |
| TRINITY_GAX8205 | (hypothet | Chlamydomonas_eusti         | 62.60               | 0.00  |      |
| TRINITY_GBG0057 | 4         | hypothetRaphidocelis_subcap | 62.60               | 0.00  |      |
| TRINITY_GBF9885 | 4         | hypothetRaphidocelis_subcap | 62.60               | 0.00  |      |
| TRINITY_XP_0029 | 4         | hypothetVolvox_carteri      | 62.60               | 0.00  |      |
| TRINITY_XP_0016 | 9         | low CO2-                    | Chlamydomonas_reinh | 62.60 | 0.00 |

|                     |                             |       |      |
|---------------------|-----------------------------|-------|------|
| TRINITY_GAX73517    | hypothetChlamydomonas_eusti | 62.60 | 0.00 |
| TRINITY_GAX75888    | hypothetChlamydomonas_eusti | 62.60 | 0.00 |
| TRINITY_GAX81266    | hypothetChlamydomonas_eusti | 62.60 | 0.00 |
| TRINITY_PNW8390     | hypothetChlamydomonas_reinh | 62.60 | 0.00 |
| TRINITY_XP_02283    | ChaperonOstreococcus_tauri  | 62.60 | 0.00 |
| TRINITY_KXZ51028    | hypothetGonium_pectorale    | 62.60 | 0.00 |
| TRINITY_XP_0113960S | ribAAuxenochlorella_pro     | 62.60 | 0.00 |
| TRINITY_XP_00294    | hypothetVolvox_carteri      | 62.60 | 0.00 |
| TRINITY_B9NJI2.1    | RecName:Populus_trichocarpa | 62.60 | 0.00 |
| TRINITY_KXZ51045    | hypothetGonium_pectorale    | 62.60 | 0.00 |
| TRINITY_KXZ47506    | hypothetGonium_pectorale    | 62.60 | 0.00 |
| TRINITY_KXZ43272    | hypothetGonium_pectorale    | 62.60 | 0.00 |
| TRINITY_GAX73299    | hypothetChlamydomonas_eusti | 62.60 | 0.00 |
| TRINITY_GAX79048    | hypothetChlamydomonas_eusti | 62.60 | 0.00 |
| TRINITY_XP_01055    | PREDICTITarenaya_hasslerian | 62.60 | 0.00 |
| TRINITY_KXZ42698    | hypothetGonium_pectorale    | 62.60 | 0.00 |
| TRINITY_PNW77853    | hypothetChlamydomonas_reinh | 62.60 | 0.00 |
| TRINITY_GAX82476    | hypothetChlamydomonas_eusti | 62.60 | 0.00 |
| TRINITY_XP_00169    | sterol cChlamydomonas_reinh | 62.60 | 0.00 |
| TRINITY_XP_00295    | hypothetVolvox_carteri      | 62.60 | 0.00 |
| TRINITY_XP_02733    | peptidylAbrus_precatorius   | 62.60 | 0.00 |
| TRINITY_XP_00308    | UTP--gluOstreococcus_tauri  | 62.50 | 0.00 |
| TRINITY_XP_00251    | probableRicinus_communis    | 62.50 | 0.00 |
| TRINITY_XP_011072   | -metho>Sesamum_indicum      | 62.50 | 0.00 |
| TRINITY_XP_01004    | PREDICTIEucalyptus_grandis  | 62.50 | 0.00 |
| TRINITY_GAX85576    | hypothetChlamydomonas_eusti | 62.50 | 0.00 |
| TRINITY_GAX7997     | hypothetChlamydomonas_eusti | 62.50 | 0.00 |
| TRINITY_ABH09321    | leucine Arachis_hypogaea    | 62.50 | 0.00 |
| TRINITY_XP_00564    | protein Coccomyxa_subellips | 62.50 | 0.00 |
| TRINITY_XP_00295    | hypothetVolvox_carteri      | 62.50 | 0.00 |
| TRINITY_OM082274    | Band 7 rCorchorus_olitorius | 62.50 | 0.00 |
| TRINITY_OAE34398    | hypothetMarchantia_polymorp | 62.50 | 0.00 |
| TRINITY_XP_00584    | hypothetChlorella_variabili | 62.50 | 0.00 |
| TRINITY_GAX77331    | hypothetChlamydomonas_eusti | 62.50 | 0.00 |
| TRINITY_GAQ85599    | CalossirKlebsormidium_niten | 62.50 | 0.00 |
| TRINITY_GAX79199    | hypothetChlamydomonas_eusti | 62.50 | 0.00 |
| TRINITY_GAX75656    | hypothetChlamydomonas_eusti | 62.50 | 0.00 |
| TRINITY_OTG18495    | putativeHelianthus_annuus   | 62.50 | 0.00 |
| TRINITY_GAX85082    | hypothetChlamydomonas_eusti | 62.50 | 0.00 |
| TRINITY_GAX8435     | hypothetChlamydomonas_eusti | 62.50 | 0.00 |
| TRINITY_XP_00295    | hypothetVolvox_carteri      | 62.50 | 0.00 |
| TRINITY_XP_00169    | MutT/NUIChlamydomonas_reinh | 62.50 | 0.00 |
| TRINITY_GAX82401    | hypothetChlamydomonas_eusti | 62.50 | 0.00 |
| TRINITY_GBG00362    | hypothetRaphidocelis_subcap | 62.50 | 0.00 |
| TRINITY_KXZ53253    | hypothetGonium_pectorale    | 62.50 | 0.00 |
| TRINITY_PNH11155    | VegetatiTetrabaena_socialis | 62.50 | 0.00 |
| TRINITY_GAX81779    | hypothetChlamydomonas_eusti | 62.50 | 0.00 |
| TRINITY_PNW79097    | hypothetChlamydomonas_reinh | 62.50 | 0.00 |
| TRINITY_BAK0075     | predicteHordeum_vulgare     | 62.50 | 0.00 |
| TRINITY_XP_0139     | Protein Monoraphidium_negle | 62.50 | 0.00 |
| TRINITY_GAX77651    | hypothetChlamydomonas_eusti | 62.50 | 0.00 |
| TRINITY_GBF88231    | alpha bRaphidocelis_subcap  | 62.50 | 0.00 |
| TRINITY_KXZ53913    | hypothetGonium_pectorale    | 62.50 | 0.00 |
| TRINITY_GAX7732     | hypothetChlamydomonas_eusti | 62.50 | 0.00 |
| TRINITY_GAX78923    | hypothetChlamydomonas_eusti | 62.50 | 0.00 |
| TRINITY_GAX84067    | hypothetChlamydomonas_eusti | 62.50 | 0.00 |
| TRINITY_KXZ50139    | hypothetGonium_pectorale    | 62.50 | 0.00 |
| TRINITY_GAX73586    | hypothetChlamydomonas_eusti | 62.50 | 0    |
| TRINITY_GAX73525    | hypothetChlamydomonas_eusti | 62.50 | 0.00 |
| TRINITY_PNW84521    | hypothetChlamydomonas_reinh | 62.50 | 0.00 |
| TRINITY_GAX82631    | hypothetChlamydomonas_eusti | 62.50 | 0.00 |
| TRINITY_XP_00357    | ras-relaBrachypodium_distac | 62.40 | 0.00 |
| TRINITY_BAK01039    | predicteHordeum_vulgare     | 62.40 | 0.00 |
| TRINITY_BAK01039    | predicteHordeum_vulgare     | 62.40 | 0.00 |
| TRINITY_XP_00295    | hypothetVolvox_carteri      | 62.40 | 0.00 |
| TRINITY_GAQ84635    | hypothetKlebsormidium_niten | 62.40 | 0.00 |

|                  |           |                     |       |      |
|------------------|-----------|---------------------|-------|------|
| TRINITY_XP_00942 | PREDICTI  | Musa_acuminata      | 62.40 | 0.00 |
| TRINITY_XP_00942 | PREDICTI  | Musa_acuminata      | 62.40 | 0.00 |
| TRINITY_GBG8278  | hypothet  | Chara_braunii       | 62.40 | 0.00 |
| TRINITY_KXZ5143  | hypothet  | Gonium_pectorale    | 62.40 | 0.00 |
| TRINITY_PNW6997  | hypothet  | Chlamydomonas_reinh | 62.40 | 0.00 |
| TRINITY_XP_0114  | (ATP-depe | Auxenochlorella_pro | 62.40 | 0.00 |
| TRINITY_PNH0656  | putativ   | Tetrabaena_socialis | 62.40 | 0.00 |
| TRINITY_BAK0077  | predict   | Hordeum_vulgare     | 62.40 | 0.00 |
| TRINITY_XP_0029  | hypothet  | Volvox_carteri      | 62.40 | 0.00 |
| TRINITY_XP_0016  | predict   | Chlamydomonas_reinh | 62.40 | 0.00 |
| TRINITY_KXZ5199  | hypothet  | Gonium_pectorale    | 62.40 | 0.00 |
| TRINITY_XP_0029  | hypothet  | Volvox_carteri      | 62.40 | 0.00 |
| TRINITY_PNH1190  | Nuclear   | Tetrabaena_socialis | 62.40 | 0.00 |
| TRINITY_GAX8142  | hypothet  | Chlamydomonas_eusti | 62.40 | 0.00 |
| TRINITY_GBF9528  | hypothet  | Raphidocelis_subcap | 62.40 | 0.00 |
| TRINITY_XP_0243  | (nascent  | Physcomitrella_pate | 62.40 | 0.00 |
| TRINITY_XP_0016  | serine/t  | Chlamydomonas_reinh | 62.40 | 0.00 |
| TRINITY_XP_0017  | (predict  | Chlamydomonas_reinh | 62.40 | 0.00 |
| TRINITY_GAX8251  | hypothet  | Chlamydomonas_eusti | 62.40 | 0.00 |
| TRINITY_KXZ4879  | hypothet  | Gonium_pectorale    | 62.40 | 0.00 |
| TRINITY_PNW8875  | hypothet  | Chlamydomonas_reinh | 62.40 | 0.00 |
| TRINITY_GAX7422  | hypothet  | Chlamydomonas_eusti | 62.40 | 0.00 |
| TRINITY_XP_0264  | ras-rel   | Papaver_somniferum  | 62.40 | 0.00 |
| TRINITY_XP_0017  | (ribosom  | Chlamydomonas_reinh | 62.40 | 0.00 |
| TRINITY_GAX8251  | hypothet  | Chlamydomonas_eusti | 62.40 | 0.00 |
| TRINITY_GBF9656  | ATP-depe  | Raphidocelis_subcap | 62.40 | 0.00 |
| TRINITY_GAX8280  | hypothet  | Chlamydomonas_eusti | 62.40 | 0.00 |
| TRINITY_PNW7906  | hypothet  | Chlamydomonas_reinh | 62.40 | 0.00 |
| TRINITY_GAX7520  | hypothet  | Chlamydomonas_eusti | 62.40 | 0.00 |
| TRINITY_PNW8578  | hypothet  | Chlamydomonas_reinh | 62.40 | 0.00 |
| TRINITY_GAX8164  | hypothet  | Chlamydomonas_eusti | 62.40 | 0    |
| TRINITY_GAX8525  | hypothet  | Chlamydomonas_eusti | 62.40 | 0.00 |
| TRINITY_GBF8904  | hypothet  | Raphidocelis_subcap | 62.40 | 0.00 |
| TRINITY_XP_0064  | (glucose- | Eutrema_salsugineur | 62.30 | 0.00 |
| TRINITY_XP_0138  | hypothet  | Monoraphidium_negle | 62.30 | 0.00 |
| TRINITY_GAX8223  | hypothet  | Chlamydomonas_eusti | 62.30 | 0.00 |
| TRINITY_XP_0097  | PREDICTI  | Nicotiana_sylvestri | 62.30 | 0.00 |
| TRINITY_BAK0289  | predict   | Hordeum_vulgare     | 62.30 | 0.00 |
| TRINITY_XP_0243  | spermat   | Physcomitrella_pate | 62.30 | 0.00 |
| TRINITY_XP_0016  | 26S prot  | Chlamydomonas_reinh | 62.30 | 0.00 |
| TRINITY_GAX7865  | hypothet  | Chlamydomonas_eusti | 62.30 | 0.00 |
| TRINITY_GAX7591  | hypothet  | Chlamydomonas_eusti | 62.30 | 0.00 |
| TRINITY_KXZ4092  | hypothet  | Gonium_pectorale    | 62.30 | 0.00 |
| TRINITY_XP_0239  | ras-rel   | Quercus_suber       | 62.30 | 0.00 |
| TRINITY_GBF8805  | hypothet  | Raphidocelis_subcap | 62.30 | 0.00 |
| TRINITY_GAX8496  | hypothet  | Chlamydomonas_eusti | 62.30 | 0.00 |
| TRINITY_GAX7286  | hypothet  | Chlamydomonas_eusti | 62.30 | 0.00 |
| TRINITY_GBG0021  | hypothet  | Raphidocelis_subcap | 62.30 | 0.00 |
| TRINITY_PNH1137  | Gramicic  | Tetrabaena_socialis | 62.30 | 0.00 |
| TRINITY_PNH1147  | hypothet  | Tetrabaena_socialis | 62.30 | 0.00 |
| TRINITY_KXZ4861  | hypothet  | Gonium_pectorale    | 62.30 | 0.00 |
| TRINITY_PNH1158  | (Serine/t | Tetrabaena_socialis | 62.30 | 0.00 |
| TRINITY_PNW7380  | hypothet  | Chlamydomonas_reinh | 62.30 | 0.00 |
| TRINITY_XP_0058  | hypothet  | Chlorella_variabili | 62.30 | 0.00 |
| TRINITY_XP_0139  | (Serine/t | Monoraphidium_negle | 62.30 | 0.00 |
| TRINITY_XP_0016  | amino a   | Chlamydomonas_reinh | 62.30 | 0.00 |
| TRINITY_GAX8563  | hypothet  | Chlamydomonas_eusti | 62.30 | 0    |
| TRINITY_PNW7586  | hypothet  | Chlamydomonas_reinh | 62.30 | 0.00 |
| TRINITY_XP_0029  | hypothet  | Volvox_carteri      | 62.30 | 0.00 |
| TRINITY_XP_0017  | (predict  | Chlamydomonas_reinh | 62.30 | 0.00 |
| TRINITY_GBF9576  | hypothet  | Raphidocelis_subcap | 62.30 | 0.00 |
| TRINITY_KXZ4464  | hypothet  | Gonium_pectorale    | 62.30 | 0.00 |
| TRINITY_KXZ4407  | hypothet  | Gonium_pectorale    | 62.30 | 0.00 |
| TRINITY_ESQ4444  | hypothet  | Eutrema_salsugineur | 62.30 | 0.00 |
| TRINITY_GAX8525  | hypothet  | Chlamydomonas_eusti | 62.20 | 0.00 |
| TRINITY_GAX7562  | hypothet  | Chlamydomonas_eusti | 62.20 | 0.00 |

|                 |                              |       |      |
|-----------------|------------------------------|-------|------|
| TRINITY_GAX8595 | hypothetChlamydomonas_eusti  | 62.20 | 0.00 |
| TRINITY_PNW8879 | hypothetChlamydomonas_reinh  | 62.20 | 0.00 |
| TRINITY_KXZ5633 | hypothetGonium_pectorale     | 62.20 | 0.00 |
| TRINITY_XP_0029 | hypothetVolvox_carteri       | 62.20 | 0.00 |
| TRINITY_GAQ8708 | (2-amino-Klebsormidium_niten | 62.20 | 0.00 |
| TRINITY_GAQ8752 | {GSK3/SH/Klebsormidium_niten | 62.20 | 0.00 |
| TRINITY_XP_0014 | predicteOstreococcus_sp._'l  | 62.20 | 0.00 |
| TRINITY_KDD7215 | hypothetHelicosporidium_sp.  | 62.20 | 0.00 |
| TRINITY_XP_0029 | hypothetVolvox_carteri       | 62.20 | 0.00 |
| TRINITY_XP_0239 | (ATP-binQuercus_suber        | 62.20 | 0.00 |
| TRINITY_ABU5296 | hypothetDunaliella_viridis   | 62.20 | 0.00 |
| TRINITY_PNW8124 | hypothetChlamydomonas_reinh  | 62.20 | 0.00 |
| TRINITY_ABR1811 | (unknown Picea_sitchensis    | 62.20 | 0.00 |
| TRINITY_PNH0268 | {PhosphoTetrabaena_socialis  | 62.20 | 0.00 |
| TRINITY_XP_0017 | (preseniChlamydomonas_reinh  | 62.20 | 0.00 |
| TRINITY_XP_0138 | {TranscriMonoraphidium_negle | 62.20 | 0.00 |
| TRINITY_XP_0029 | hypothetVolvox_carteri       | 62.20 | 0.00 |
| TRINITY_GAX7362 | hypothetChlamydomonas_eusti  | 62.20 | 0.00 |
| TRINITY_PTQ4742 | hypothetMarchantia_polymorp  | 62.20 | 0.00 |
| TRINITY_GAX7314 | hypothetChlamydomonas_eusti  | 62.20 | 0.00 |
| TRINITY_XP_0016 | low CO2-Chlamydomonas_reinh  | 62.20 | 0.00 |
| TRINITY_XP_0029 | hypothetVolvox_carteri       | 62.20 | 0.00 |
| TRINITY_GBF9731 | {folylpolRaphidocelis_subcap | 62.20 | 0.00 |
| TRINITY_XP_0029 | hypothetVolvox_carteri       | 62.20 | 0.00 |
| TRINITY_XP_0016 | {2-cys pChlamydomonas_reinh  | 62.20 | 0.00 |
| TRINITY_PRW0573 | {Gag-Pol Chlorella_sorokinia | 62.20 | 0.00 |
| TRINITY_PNW8511 | hypothetChlamydomonas_reinh  | 62.20 | 0.00 |
| TRINITY_KXZ5545 | hypothetGonium_pectorale     | 62.20 | 0.00 |
| TRINITY_GAX7925 | (hypothetChlamydomonas_eusti | 62.20 | 0.00 |
| TRINITY_KXZ4962 | hypothetGonium_pectorale     | 62.20 | 0.00 |
| TRINITY_GAX7389 | hypothetChlamydomonas_eusti  | 62.20 | 0.00 |
| TRINITY_KXZ5192 | hypothetGonium_pectorale     | 62.20 | 0.00 |
| TRINITY_GBG8768 | hypothetChara_braunii        | 62.20 | 0.00 |
| TRINITY_XP_0016 | {gamma-gChlamydomonas_reinh  | 62.20 | 0.00 |
| TRINITY_PNH0206 | {Histone Tetrabaena_socialis | 62.20 | 0.00 |
| TRINITY_GAX8362 | (hypothetChlamydomonas_eusti | 62.20 | 0.00 |
| TRINITY_XP_0106 | PREDICTIBeta_vulgaris        | 62.20 | 0.00 |
| TRINITY_RXI0458 | (hypothetMalus_domestica     | 62.20 | 0.00 |
| TRINITY_GAQ9150 | TranslatKlebsormidium_niten  | 62.10 | 0.00 |
| TRINITY_XP_0238 | {guanine Quercus_suber       | 62.10 | 0.00 |
| TRINITY_XP_0106 | {PREDICTIBeta_vulgaris       | 62.10 | 0.00 |
| TRINITY_XP_0156 | {protein Oryza_sativa        | 62.10 | 0.00 |
| TRINITY_OAE1862 | hypothetMarchantia_polymorp  | 62.10 | 0.00 |
| TRINITY_XP_0218 | (probablePrunus_avium        | 62.10 | 0.00 |
| TRINITY_XP_0138 | hypothetMonoraphidium_negle  | 62.10 | 0.00 |
| TRINITY_XP_0017 | (thio:redChlamydomonas_reinh | 62.10 | 0.00 |
| TRINITY_XP_0167 | PREDICTIGossypium_hirsutum   | 62.10 | 0.00 |
| TRINITY_KXZ4350 | hypothetGonium_pectorale     | 62.10 | 0.00 |
| TRINITY_GBG8040 | hypothetChara_braunii        | 62.10 | 0.00 |
| TRINITY_XP_0243 | {40S ribPhyscomitrella_pate  | 62.10 | 0.00 |
| TRINITY_XP_0243 | {40S ribPhyscomitrella_pate  | 62.10 | 0.00 |
| TRINITY_XP_0016 | {DnaJ-liChlamydomonas_reinh  | 62.10 | 0.00 |
| TRINITY_GAX7960 | (hypothetChlamydomonas_eusti | 62.10 | 0.00 |
| TRINITY_VDD4680 | {unnamed Brassica_oleracea   | 62.10 | 0.00 |
| TRINITY_PNW8604 | hypothetChlamydomonas_reinh  | 62.10 | 0.00 |
| TRINITY_GAX7649 | hypothetChlamydomonas_eusti  | 62.10 | 0.00 |
| TRINITY_GAX8384 | hypothetChlamydomonas_eusti  | 62.10 | 0.00 |
| TRINITY_PNW8036 | hypothetChlamydomonas_reinh  | 62.10 | 0.00 |
| TRINITY_GAX8057 | hypothetChlamydomonas_eusti  | 62.10 | 0    |
| TRINITY_XP_0016 | {predicteChlamydomonas_reinh | 62.10 | 0.00 |
| TRINITY_KXZ4200 | (hypothetGonium_pectorale    | 62.10 | 0.00 |
| TRINITY_GAX7629 | hypothetChlamydomonas_eusti  | 62.10 | 0.00 |
| TRINITY_XP_0017 | (predicteChlamydomonas_reinh | 62.10 | 0.00 |
| TRINITY_KXZ5596 | {hypothetGonium_pectorale    | 62.10 | 0.00 |
| TRINITY_PNW7134 | hypothetChlamydomonas_reinh  | 62.10 | 0.00 |
| TRINITY_XP_0029 | {moleculVolvox_carteri       | 62.10 | 0.00 |

|                     |                               |       |      |
|---------------------|-------------------------------|-------|------|
| TRINITY_GBF87715    | hypothetRaphidocelis_subcap   | 62.10 | 0.00 |
| TRINITY_GAX77289    | hypothetChlamydomonas_eusti   | 62.10 | 0    |
| TRINITY_PNW7792     | (hypothetChlamydomonas_reinh  | 62.10 | 0.00 |
| TRINITY_GAX77364    | hypothetChlamydomonas_eusti   | 62.10 | 0.00 |
| TRINITY_XP_0017     | (sulfite Chlamydomonas_reinh  | 62.10 | 0.00 |
| TRINITY_GBF90915    | calcium-Raphidocelis_subcap   | 62.10 | 0.00 |
| TRINITY_XP_0243940S | rib<Physcomitrella_pate       | 62.00 | 0.00 |
| TRINITY_OTG18366    | (putativ<Helianthus_annuus    | 62.00 | 0.00 |
| TRINITY_XP_023894   | -hydro>Quercus_suber          | 62.00 | 0.00 |
| TRINITY_GAX8588     | (hypothetChlamydomonas_eusti  | 62.00 | 0.00 |
| TRINITY_XP_01257    | probable<Cicer_arietinum      | 62.00 | 0.00 |
| TRINITY_GAX74821    | hypothetChlamydomonas_eusti   | 62.00 | 0.00 |
| TRINITY_XP_01593    | clathrirArachis_duranensis    | 62.00 | 0.00 |
| TRINITY_XP_01561    | ADP-rib<Oryza_sativa          | 62.00 | 0.00 |
| TRINITY_XP_0136     | (PREDICT<Brassica_oleracea    | 62.00 | 0.00 |
| TRINITY_PNR5240     | (hypothetPhyscomitrella_pate  | 62.00 | 0.00 |
| TRINITY_GAQ8924     | (phosphatKlebsormidium_niten  | 62.00 | 0.00 |
| TRINITY_XP_00584    | hypothetChlorella_variabili   | 62.00 | 0.00 |
| TRINITY_XP_01345    | proteas<Medicago_truncatula   | 62.00 | 0.00 |
| TRINITY_PLY96929    | hypothetLactuca_sativa        | 62.00 | 0.00 |
| TRINITY_OTG27114    | (putativ<Helianthus_annuus    | 62.00 | 0.00 |
| TRINITY_XP_0219     | (threonirCarica_papaya        | 62.00 | 0.00 |
| TRINITY_XP_0017     | (DNA rep<Chlamydomonas_reinh  | 62.00 | 0.00 |
| TRINITY_PRW61185    | Glutare<Chlorella_sorokinia   | 62.00 | 0.00 |
| TRINITY_GAX74367    | hypothetChlamydomonas_eusti   | 62.00 | 0.00 |
| TRINITY_XP_00584    | hypothetChlorella_variabili   | 62.00 | 0.00 |
| TRINITY_XP_00565    | RNA-bin<Coccomyxa_subellips   | 62.00 | 0.00 |
| TRINITY_XP_02452    | transcri<Selaginella_moellen  | 62.00 | 0.00 |
| TRINITY_XP_0025     | (heat sh<Micromonas_commoda   | 62.00 | 0.00 |
| TRINITY_PNW73467    | hypothetChlamydomonas_reinh   | 62.00 | 0.00 |
| TRINITY_XP_0025     | (predict<Micromonas_commoda   | 62.00 | 0.00 |
| TRINITY_OMO76073    | Aminoac<Corchorus_capsulari   | 62.00 | 0.00 |
| TRINITY_XP_0139     | (hypothetMonoraphidium_negle  | 62.00 | 0.00 |
| TRINITY_BAJ94575    | (predict<Hordeum_vulgare      | 62.00 | 0.00 |
| TRINITY_PNW75679    | hypothetChlamydomonas_reinh   | 62.00 | 0.00 |
| TRINITY_XP_00941    | PREDICT<Musa_acuminata        | 62.00 | 0.00 |
| TRINITY_PNH11393    | ASC1-li<Tetrabaena_socialis   | 62.00 | 0.00 |
| TRINITY_XP_00294    | hypothetVolvox_carteri        | 62.00 | 0.00 |
| TRINITY_GAQ80401    | MitochorKlebsormidium_niten   | 62.00 | 0.00 |
| TRINITY_XP_0017     | (histidirChlamydomonas_reinh  | 62.00 | 0.00 |
| TRINITY_GBF90757    | ubiquiti<Raphidocelis_subcap  | 62.00 | 0.00 |
| TRINITY_GBF88037    | uridine Raphidocelis_subcap   | 62.00 | 0.00 |
| TRINITY_KXZ5501     | (hypothetGonium_pectorale     | 62.00 | 0.00 |
| TRINITY_XP_01563    | small n<Oryza_sativa          | 62.00 | 0.00 |
| TRINITY_KXZ44218    | hypothetGonium_pectorale      | 62.00 | 0.00 |
| TRINITY_GAX76258    | hypothetChlamydomonas_eusti   | 62.00 | 0.00 |
| TRINITY_KXZ50142    | hypothetGonium_pectorale      | 62.00 | 0.00 |
| TRINITY_KXZ55044    | hypothetGonium_pectorale      | 62.00 | 0.00 |
| TRINITY_GAQ89285    | TCP-1/c<Klebsormidium_niten   | 62.00 | 0.00 |
| TRINITY_GAX78844    | hypothetChlamydomonas_eusti   | 62.00 | 0.00 |
| TRINITY_RMZ5271     | (hypothetAuxenochlorella_pro  | 62.00 | 0.00 |
| TRINITY_KXZ44551    | hypothetGonium_pectorale      | 62.00 | 0.00 |
| TRINITY_ACF79297    | unknown Zea_mays              | 62.00 | 0.00 |
| TRINITY_XP_00169    | DNA-dir<Chlamydomonas_reinh   | 62.00 | 0.00 |
| TRINITY_KXZ42459    | hypothetGonium_pectorale      | 62.00 | 0.00 |
| TRINITY_XP_0017     | (sodium/r<Chlamydomonas_reinh | 62.00 | 0.00 |
| TRINITY_KVH94783    | AAA+ AT<Cynara_cardunculus    | 62.00 | 0.00 |
| TRINITY_XP_0238940S | rib<Quercus_suber             | 62.00 | 0.00 |
| TRINITY_XP_0139     | (beta-ketMonoraphidium_negle  | 61.90 | 0.00 |
| TRINITY_AAK26104    | SKP1-li<Arabidopsis_thalian   | 61.90 | 0.00 |
| TRINITY_GAX77149    | hypothetChlamydomonas_eusti   | 61.90 | 0.00 |
| TRINITY_XP_01104    | PREDICT<Populus_euphratica    | 61.90 | 0.00 |
| TRINITY_GAX79087    | hypothetChlamydomonas_eusti   | 61.90 | 0.00 |
| TRINITY_XP_0017     | (sulfite Chlamydomonas_reinh  | 61.90 | 0.00 |
| TRINITY_RWW01868    | hypothetEnsete_ventricosum    | 61.90 | 0.00 |
| TRINITY_KMS94501    | hypothetBeta_vulgaris         | 61.90 | 0.00 |

|                  |                               |       |      |
|------------------|-------------------------------|-------|------|
| TRINITY_PNW72397 | hypothetChlamydomonas_reinh   | 61.90 | 0.00 |
| TRINITY_KMS64936 | hypothetBeta_vulgaris         | 61.90 | 0.00 |
| TRINITY_PNW75326 | hypothetChlamydomonas_reinh   | 61.90 | 0.00 |
| TRINITY_KXZ40924 | hypothetGonium_pectorale      | 61.90 | 0.00 |
| TRINITY_PNH00470 | hypothetTetrabaena_socialis   | 61.90 | 0.00 |
| TRINITY_GBG59205 | Glycine Chara_braunii         | 61.90 | 0.00 |
| TRINITY_PNW76541 | hypothetChlamydomonas_reinh   | 61.90 | 0.00 |
| TRINITY_GBF92842 | hypothetRaphidocelis_subcap   | 61.90 | 0.00 |
| TRINITY_GAX73848 | hypothetChlamydomonas_eusti   | 61.90 | 0.00 |
| TRINITY_PRW44334 | DNA anneChlorella_sorokinia   | 61.90 | 0.00 |
| TRINITY_XP_00170 | (vacuolar)Chlamydomonas_reinh | 61.90 | 0.00 |
| TRINITY_KXZ52855 | hypothetGonium_pectorale      | 61.90 | 0.00 |
| TRINITY_GAX82851 | hypothetChlamydomonas_eusti   | 61.90 | 0.00 |
| TRINITY_KXZ52756 | hypothetGonium_pectorale      | 61.90 | 0.00 |
| TRINITY_GAX73341 | hypothetChlamydomonas_eusti   | 61.90 | 0.00 |
| TRINITY_XP_00169 | mitochorChlamydomonas_reinh   | 61.90 | 0.00 |
| TRINITY_GAX85899 | hypothetChlamydomonas_eusti   | 61.90 | 0.00 |
| TRINITY_GAX83418 | hypothetChlamydomonas_eusti   | 61.90 | 0    |
| TRINITY_XP_00565 | exostosiCoccomyxa_subellips   | 61.90 | 0.00 |
| TRINITY_XP_01389 | ChaperonMonoraphidium_negle   | 61.90 | 0.00 |
| TRINITY_GBF99166 | aconitatRaphidocelis_subcap   | 61.90 | 0.00 |
| TRINITY_XP_00170 | (F1F0 AT)Chlamydomonas_reinh  | 61.90 | 0.00 |
| TRINITY_GAX75259 | hypothetChlamydomonas_eusti   | 61.90 | 0.00 |
| TRINITY_PNW74022 | hypothetChlamydomonas_reinh   | 61.90 | 0.00 |
| TRINITY_BAK00750 | (predicteHordeum_vulgare      | 61.90 | 0.00 |
| TRINITY_GBF91407 | hypothetRaphidocelis_subcap   | 61.90 | 0.00 |
| TRINITY_XP_00564 | polyaderCoccomyxa_subellips   | 61.90 | 0.00 |
| TRINITY_PNW80327 | hypothetChlamydomonas_reinh   | 61.90 | 0.00 |
| TRINITY_GAX77222 | hypothetChlamydomonas_eusti   | 61.90 | 0.00 |
| TRINITY_GAX79126 | hypothetChlamydomonas_eusti   | 61.90 | 0    |
| TRINITY_GAX82851 | hypothetChlamydomonas_eusti   | 61.90 | 0.00 |
| TRINITY_GAX80387 | hypothetChlamydomonas_eusti   | 61.90 | 0.00 |
| TRINITY_XP_01915 | PREDICTI Ipomoea_nil          | 61.80 | 0.00 |
| TRINITY_PRW20465 | lysine--Chlorella_sorokinia   | 61.80 | 0.00 |
| TRINITY_XP_00294 | componerVolvox_carteri        | 61.80 | 0.00 |
| TRINITY_XP_01655 | PREDICTI Capsicum_annuum      | 61.80 | 0.00 |
| TRINITY_ESQ51803 | hypothetEutrema_salsugineum   | 61.80 | 0.00 |
| TRINITY_ABI48954 | putativeViola_baoshanensis    | 61.80 | 0.00 |
| TRINITY_XP_02388 | cytosoliQuercus_suber         | 61.80 | 0.00 |
| TRINITY_PNW87804 | hypothetChlamydomonas_reinh   | 61.80 | 0.00 |
| TRINITY_GBF99670 | hypothetRaphidocelis_subcap   | 61.80 | 0.00 |
| TRINITY_GAQ92572 | catalasKlebsormidium_niten    | 61.80 | 0.00 |
| TRINITY_AAK38732 | nucleosiDunaliella_tertiole   | 61.80 | 0.00 |
| TRINITY_KXZ55126 | hypothetGonium_pectorale      | 61.80 | 0.00 |
| TRINITY_KMZ59658 | ElongatiZostera_marina        | 61.80 | 0.00 |
| TRINITY_PNW83047 | hypothetChlamydomonas_reinh   | 61.80 | 0.00 |
| TRINITY_AAV54188 | chloroplHaematococcus_lacus   | 61.80 | 0.00 |
| TRINITY_PNW84039 | hypothetChlamydomonas_reinh   | 61.80 | 0.00 |
| TRINITY_PNW88093 | hypothetChlamydomonas_reinh   | 61.80 | 0.00 |
| TRINITY_GAX73563 | hypothetChlamydomonas_eusti   | 61.80 | 0.00 |
| TRINITY_AAD23383 | gamete--Chlamydomonas_reinh   | 61.80 | 0.00 |
| TRINITY_PNH12402 | hypothetTetrabaena_socialis   | 61.80 | 0.00 |
| TRINITY_XP_00294 | hypothetVolvox_carteri        | 61.80 | 0.00 |
| TRINITY_XP_02390 | (aldo-ket)Quercus_suber       | 61.80 | 0.00 |
| TRINITY_GAX79383 | hypothetChlamydomonas_eusti   | 61.80 | 0.00 |
| TRINITY_GAX83518 | hypothetChlamydomonas_eusti   | 61.80 | 0.00 |
| TRINITY_GAV68827 | RibosomCephalotus_follicul    | 61.80 | 0.00 |
| TRINITY_XP_02276 | (NHP2-li)Durio_zibethinus     | 61.80 | 0.00 |
| TRINITY_KXZ53368 | hypothetGonium_pectorale      | 61.80 | 0.00 |
| TRINITY_XP_00584 | hypothetChlorella_variabili   | 61.80 | 0.00 |
| TRINITY_GAX86315 | hypothetChlamydomonas_eusti   | 61.80 | 0.00 |
| TRINITY_GAX86246 | hypothetChlamydomonas_eusti   | 61.80 | 0.00 |
| TRINITY_GAQ89285 | TCP-1/cKlebsormidium_niten    | 61.80 | 0.00 |
| TRINITY_KXZ55139 | hypothetGonium_pectorale      | 61.80 | 0.00 |
| TRINITY_BAX38993 | phosphoChlamydomonas_appla    | 61.80 | 0.00 |
| TRINITY_GAQ89311 | ABC trarKlebsormidium_niten   | 61.80 | 0.00 |

|                                             |       |      |
|---------------------------------------------|-------|------|
| TRINITY_PRW60213TranscriChlorella_sorokinia | 61.80 | 0.00 |
| TRINITY_KXZ50012hypothetGonium_pectorale    | 61.80 | 0.00 |
| TRINITY_KXZ40924hypothetGonium_pectorale    | 61.80 | 0.00 |
| TRINITY_GAX73155hypothetChlamydomonas_eusti | 61.80 | 0.00 |
| TRINITY_KXZ49187hypothetGonium_pectorale    | 61.80 | 0.00 |
| TRINITY_GAX81216hypothetChlamydomonas_eusti | 61.80 | 0.00 |
| TRINITY_KXZ44229hypothetGonium_pectorale    | 61.80 | 0.00 |
| TRINITY_PNW72926hypothetChlamydomonas_reinh | 61.80 | 0    |
| TRINITY_GAX79076hypothetChlamydomonas_eusti | 61.80 | 0.00 |
| TRINITY_PNW69905hypothetChlamydomonas_reinh | 61.80 | 0.00 |

|                  |                             |       |      |
|------------------|-----------------------------|-------|------|
| TRINITY_GAX75117 | hypothetChlamydomonas_eusti | 61.80 | 0.00 |
| TRINITY_XP_00170 | predicteChlamydomonas_reinh | 61.80 | 0.00 |
| TRINITY_PNH02964 | MonothicTetrabaena_socialis | 61.80 | 0.00 |
| TRINITY_XP_01848 | PREDICTIRaphanus_sativus    | 61.70 | 0.00 |
| TRINITY_GAQ79584 | DNA replKlebsormidium_niten | 61.70 | 0.00 |
| TRINITY_EFJ26294 | hypothetSelaginella_moellen | 61.70 | 0.00 |
| TRINITY_XP_00423 | small nSolanum_lycopersicu  | 61.70 | 0.00 |
| TRINITY_XP_00423 | small nSolanum_lycopersicu  | 61.70 | 0.00 |
| TRINITY_NP_00113 | uncharacZea_mays            | 61.70 | 0.00 |
| TRINITY_GAQ90353 | copper/zKlebsormidium_niten | 61.70 | 0.00 |
| TRINITY_YP_00131 | putativeChlorokybus_atmophy | 61.70 | 0.00 |
| TRINITY_XP_00142 | predicteOstreococcus_sp._'1 | 61.70 | 0.00 |
| TRINITY_XP_02198 | T-compleHelianthus_annuus   | 61.70 | 0.00 |
| TRINITY_PNW77865 | hypothetChlamydomonas_reinh | 61.70 | 0.00 |
| TRINITY_GAX73939 | hypothetChlamydomonas_eusti | 61.70 | 0.00 |
| TRINITY_XP_01390 | hypothetMonoraphidium_negle | 61.70 | 0.00 |
| TRINITY_GAX82987 | hypothetChlamydomonas_eusti | 61.70 | 0.00 |
| TRINITY_PNH11010 | MitochorTetrabaena_socialis | 61.70 | 0.00 |
| TRINITY_GAX74588 | hypothetChlamydomonas_eusti | 61.70 | 0.00 |
| TRINITY_PNH10255 | Outer rTetrabaena_socialis  | 61.70 | 0.00 |
| TRINITY_XP_00294 | hypothetVolvox_carteri      | 61.70 | 0.00 |
| TRINITY_GAX72690 | hypothetChlamydomonas_eusti | 61.70 | 0.00 |
| TRINITY_PNW71586 | hypothetChlamydomonas_reinh | 61.70 | 0.00 |
| TRINITY_GAX74247 | hypothetChlamydomonas_eusti | 61.70 | 0.00 |
| TRINITY_PNW73131 | hypothetChlamydomonas_reinh | 61.70 | 0.00 |
| TRINITY_GBG67648 | hypothetChara_braunii       | 61.70 | 0.00 |
| TRINITY_GAX81505 | hypothetChlamydomonas_eusti | 61.70 | 0.00 |
| TRINITY_KXZ56653 | hypothetGonium_pectorale    | 61.70 | 0.00 |
| TRINITY_PNW73482 | hypothetChlamydomonas_reinh | 61.70 | 0.00 |
| TRINITY_GAX78075 | hypothetChlamydomonas_eusti | 61.70 | 0.00 |
| TRINITY_XP_01390 | hypothetMonoraphidium_negle | 61.70 | 0.00 |
| TRINITY_GAX85806 | hypothetChlamydomonas_eusti | 61.70 | 0.00 |
| TRINITY_XP_01390 | dynein lMonoraphidium_negle | 61.70 | 0.00 |
| TRINITY_GAX81485 | hypothetChlamydomonas_eusti | 61.70 | 0.00 |
| TRINITY_XP_00169 | signal pChlamydomonas_reinh | 61.70 | 0.00 |
| TRINITY_XP_00294 | hypothetVolvox_carteri      | 61.70 | 0.00 |
| TRINITY_XP_02390 | ras-likeQuercus_suber       | 61.70 | 0.00 |
| TRINITY_GAQ88925 | hypothetKlebsormidium_niten | 61.70 | 0.00 |
| TRINITY_GAX86246 | hypothetChlamydomonas_eusti | 61.70 | 0.00 |
| TRINITY_XP_00295 | hypothetVolvox_carteri      | 61.70 | 0.00 |
| TRINITY_GAX73985 | hypothetChlamydomonas_eusti | 61.70 | 0.00 |
| TRINITY_RAL48039 | hypothetCuscuta_australis   | 61.70 | 0.00 |
| TRINITY_GAX82052 | hypothetChlamydomonas_eusti | 61.70 | 0.00 |
| TRINITY_GAX76789 | hypothetChlamydomonas_eusti | 61.70 | 0.00 |
| TRINITY_XP_02388 | probableQuercus_suber       | 61.60 | 0.00 |
| TRINITY_XP_02712 | V-type pCoffea_arabica      | 61.60 | 0.00 |
| TRINITY_PNH09207 | PeroxireTetrabaena_socialis | 61.60 | 0.00 |
| TRINITY_OVA13198 | TetrapyMacleaya_cordata     | 61.60 | 0.00 |
| TRINITY_XP_00584 | hypothetChlorella_variabili | 61.60 | 0.00 |
| TRINITY_XP_02387 | acetate Quercus_suber       | 61.60 | 0.00 |
| TRINITY_XP_02284 | TetrahyOstreococcus_tauri   | 61.60 | 0.00 |
| TRINITY_BAJ85408 | predicteHordeum_vulgare     | 61.60 | 0.00 |
| TRINITY_XP_01248 | PREDICTIGossypium_raimondii | 61.60 | 0.00 |
| TRINITY_XP_00169 | predicteChlamydomonas_reinh | 61.60 | 0.00 |
| TRINITY_OWM70470 | hypothetPunica_granatum     | 61.60 | 0.00 |
| TRINITY_XP_00664 | PREDICTIOryza_brachyantha   | 61.60 | 0.00 |
| TRINITY_PSC72292 | YippeezMicractinium_conduc  | 61.60 | 0.00 |
| TRINITY_XP_02580 | DEAD-boPanicum_hallii       | 61.60 | 0.00 |
| TRINITY_GBF98414 | hypothetRaphidocelis_subcap | 61.60 | 0.00 |
| TRINITY_NP_00123 | uncharacGlycine_max         | 61.60 | 0.00 |
| TRINITY_EPS71060 | hypothetGenlisea_aurea      | 61.60 | 0.00 |
| TRINITY_GAX77423 | hypothetChlamydomonas_eusti | 61.60 | 0.00 |
| TRINITY_XP_00564 | polyaderCoccomyxa_subellips | 61.60 | 0.00 |
| TRINITY_KXZ51219 | hypothetGonium_pectorale    | 61.60 | 0.00 |
| TRINITY_XP_00295 | hypothetVolvox_carteri      | 61.60 | 0.00 |
| TRINITY_EFJ23123 | hypothetSelaginella_moellen | 61.60 | 0.00 |



|                 |                             |       |      |
|-----------------|-----------------------------|-------|------|
| TRINITY_EFJ0865 | hypothetSelaginella_moellen | 61.60 | 0.00 |
| TRINITY_PNW8622 | hypothetChlamydomonas_reinh | 61.60 | 0.00 |
| TRINITY_XP_0029 | mitochorVolvox_carteri      | 61.60 | 0.00 |
| TRINITY_KXZ5099 | hypothetGonium_pectorale    | 61.60 | 0.00 |
| TRINITY_XP_0016 | predicteChlamydomonas_reinh | 61.60 | 0.00 |
| TRINITY_XP_0016 | serine/tChlamydomonas_reinh | 61.60 | 0.00 |
| TRINITY_GAX8590 | hypothetChlamydomonas_eusti | 61.60 | 0.00 |
| TRINITY_XP_0016 | predicteChlamydomonas_reinh | 61.60 | 0.00 |
| TRINITY_KXZ5138 | hypothetGonium_pectorale    | 61.60 | 0.00 |
| TRINITY_GAX8575 | hypothetChlamydomonas_eusti | 61.60 | 0.00 |
| TRINITY_GAX7913 | hypothetChlamydomonas_eusti | 61.60 | 0.00 |
| TRINITY_GBF9420 | cell di\Raphidocelis_subcap | 61.60 | 0.00 |
| TRINITY_KXZ4245 | hypothetGonium_pectorale    | 61.60 | 0.00 |
| TRINITY_PNW8625 | hypothetChlamydomonas_reinh | 61.60 | 0.00 |
| TRINITY_PNW8573 | hypothetChlamydomonas_reinh | 61.60 | 0.00 |
| TRINITY_PNW7487 | hypothetChlamydomonas_reinh | 61.60 | 0.00 |
| TRINITY_GAX7261 | hypothetChlamydomonas_eusti | 61.60 | 0    |
| TRINITY_XP_0056 | anti-silCoccomyxa_subellips | 61.60 | 0.00 |
| TRINITY_GAX7271 | hypothetChlamydomonas_eusti | 61.60 | 0.00 |
| TRINITY_KXZ5464 | hypothetGonium_pectorale    | 61.60 | 0.00 |
| TRINITY_OAE2961 | hypothetMarchantia_polymorp | 61.60 | 0.00 |
| TRINITY_PNX5511 | (glutamy]Trifolium_pratense | 61.50 | 0.00 |
| TRINITY_XP_0238 | uncharacQuercus_suber       | 61.50 | 0.00 |
| TRINITY_GBG6334 | hypothetChara_braunii       | 61.50 | 0.00 |
| TRINITY_XP_0209 | GATA trArachis_duranensis   | 61.50 | 0.00 |
| TRINITY_XP_0243 | uncharacPhyscomitrella_pate | 61.50 | 0.00 |
| TRINITY_XP_0056 | Actin/aCoccomyxa_subellips  | 61.50 | 0.00 |
| TRINITY_GAQ8860 | hypothetKlebsormidium_niten | 61.50 | 0.00 |
| TRINITY_XP_0029 | eukaryotVolvox_carteri      | 61.50 | 0.00 |
| TRINITY_XP_0228 | V-ATPaseOstreococcus_tauri  | 61.50 | 0.00 |
| TRINITY_XP_0097 | PREDICTINicotiana_sylvestri | 61.50 | 0.00 |
| TRINITY_KXZ5369 | hypothetGonium_pectorale    | 61.50 | 0.00 |
| TRINITY_XP_0025 | predicteMicromonas_commoda  | 61.50 | 0.00 |
| TRINITY_XP_0202 | ankyrin-Asparagus_officinal | 61.50 | 0.00 |
| TRINITY_RHN4032 | putativMedicago_truncatula  | 61.50 | 0.00 |
| TRINITY_XP_0238 | homocitiQuercus_suber       | 61.50 | 0.00 |
| TRINITY_GAX7293 | hypothetChlamydomonas_eusti | 61.50 | 0.00 |
| TRINITY_GAX7753 | hypothetChlamydomonas_eusti | 61.50 | 0.00 |
| TRINITY_XP_0016 | predicteChlamydomonas_reinh | 61.50 | 0.00 |
| TRINITY_ERM9674 | hypothetAmborella_trichopod | 61.50 | 0.00 |
| TRINITY_BAK0218 | predicteHordeum_vulgare     | 61.50 | 0.00 |
| TRINITY_PNH0759 | Solute cTetrabaena_socialis | 61.50 | 0.00 |
| TRINITY_XP_0263 | T-complePapaver_somniferum  | 61.50 | 0.00 |
| TRINITY_XP_0016 | small rChlamydomonas_reinh  | 61.50 | 0.00 |
| TRINITY_ONL9584 | Small nZea_mays             | 61.50 | 0.00 |
| TRINITY_KXZ4438 | hypothetGonium_pectorale    | 61.50 | 0.00 |
| TRINITY_KXZ4194 | hypothetGonium_pectorale    | 61.50 | 0.00 |
| TRINITY_KXZ5227 | hypothetGonium_pectorale    | 61.50 | 0.00 |
| TRINITY_PNW8311 | hypothetChlamydomonas_reinh | 61.50 | 0.00 |
| TRINITY_PNW8489 | hypothetChlamydomonas_reinh | 61.50 | 0.00 |
| TRINITY_KXZ4404 | hypothetGonium_pectorale    | 61.50 | 0.00 |
| TRINITY_XP_0235 | transcriCucurbita_pepo      | 61.50 | 0.00 |
| TRINITY_XP_0029 | hypothetVolvox_carteri      | 61.50 | 0.00 |
| TRINITY_GAX8570 | hypothetChlamydomonas_eusti | 61.50 | 0.00 |
| TRINITY_GAX8179 | hypothetChlamydomonas_eusti | 61.50 | 0.00 |
| TRINITY_GAX7887 | hypothetChlamydomonas_eusti | 61.50 | 0.00 |
| TRINITY_XP_0017 | predicteChlamydomonas_reinh | 61.50 | 0.00 |
| TRINITY_XP_0029 | hypothetVolvox_carteri      | 61.50 | 0.00 |
| TRINITY_PNW8304 | hypothetChlamydomonas_reinh | 61.50 | 0.00 |
| TRINITY_XP_0070 | PREDICTITheobroma_cacao     | 61.50 | 0.00 |
| TRINITY_GAX7769 | hypothetChlamydomonas_eusti | 61.50 | 0.00 |
| TRINITY_PNW7731 | hypothetChlamydomonas_reinh | 61.50 | 0.00 |
| TRINITY_GAQ7876 | hypothetKlebsormidium_niten | 61.50 | 0.00 |
| TRINITY_GAX8420 | hypothetChlamydomonas_eusti | 61.50 | 0.00 |
| TRINITY_XP_0016 | cytochrChlamydomonas_reinh  | 61.50 | 0.00 |
| TRINITY_XP_0156 | importirOryza_sativa        | 61.40 | 0.00 |

|                  |                               |       |      |
|------------------|-------------------------------|-------|------|
| TRINITY_XP_0279  | (casein }Vigna_unguiculata    | 61.40 | 0.00 |
| TRINITY_XP_0016  | {flagellæChlamydomonas_reinh  | 61.40 | 0.00 |
| TRINITY_GBG9125  | {hypothetChara_braunii        | 61.40 | 0.00 |
| TRINITY_XP_00751 | PREDICT{Bathycoccus_prasinc   | 61.40 | 0.00 |
| TRINITY_PNW7082  | {hypothetChlamydomonas_reinh  | 61.40 | 0.00 |
| TRINITY_XP_02171 | DEAD-bo}Chenopodium_quinoa    | 61.40 | 0.00 |
| TRINITY_XP_0024  | {probable}Sorghum_bicolor     | 61.40 | 0.00 |
| TRINITY_GBG7003  | {hypothetChara_braunii        | 61.40 | 0.00 |
| TRINITY_PNW7321  | {hypothetChlamydomonas_reinh  | 61.40 | 0.00 |
| TRINITY_XP_0235  | {succinatCucurbita_pepo       | 61.40 | 0.00 |
| TRINITY_PNW7496  | {hypothetChlamydomonas_reinh  | 61.40 | 0.00 |
| TRINITY_GAX7975  | {hypothetChlamydomonas_eusti  | 61.40 | 0.00 |
| TRINITY_O65315   | .1RecName:Coleochaete_scutata | 61.40 | 0.00 |
| TRINITY_ONK5940  | (uncharacAsparagus_officinal  | 61.40 | 0.00 |
| TRINITY_KXZ4887  | (hypothetGonium_pectorale     | 61.40 | 0.00 |
| TRINITY_XP_0029  | {hypothetVolvox_carteri       | 61.40 | 0.00 |
| TRINITY_XP_0146  | {flap encSetaria_italica      | 61.40 | 0.00 |
| TRINITY_KXZ5549  | {hypothetGonium_pectorale     | 61.40 | 0.00 |
| TRINITY_GAX7411  | {hypothetChlamydomonas_eusti  | 61.40 | 0.00 |
| TRINITY_XP_0016  | {signal }Chlamydomonas_reinh  | 61.40 | 0.00 |
| TRINITY_XP_0029  | {3'5'-cycVolvox_carteri       | 61.40 | 0.00 |
| TRINITY_GAX7600  | {hypothetChlamydomonas_eusti  | 61.40 | 0.00 |
| TRINITY_XP_0176  | PREDICT{Gossypium_arboreum    | 61.40 | 0.00 |
| TRINITY_AGC1298  | long flæChlamydomonas_reinh   | 61.40 | 0.00 |
| TRINITY_XP_0029  | {light-hæVolvox_carteri       | 61.40 | 0.00 |
| TRINITY_KZV1751  | {dolicholDorcoceras_hygromet  | 61.40 | 0.00 |
| TRINITY_OAP0894  | .RNR1 [A}Arabidopsis_thalian  | 61.40 | 0.00 |
| TRINITY_KXZ5541  | {hypothetGonium_pectorale     | 61.40 | 0.00 |
| TRINITY_XP_0029  | {hypothetVolvox_carteri       | 61.40 | 0.00 |
| TRINITY_PNW7716  | {hypothetChlamydomonas_reinh  | 61.40 | 0.00 |
| TRINITY_XP_0270  | {proteasæCoffea_arabica       | 61.40 | 0.00 |
| TRINITY_PRW4573  | {lysine-æChlorella_sorokinia  | 61.40 | 0.00 |
| TRINITY_PNW7253  | {hypothetChlamydomonas_reinh  | 61.40 | 0.00 |
| TRINITY_XP_0029  | {hypothetVolvox_carteri       | 61.40 | 0.00 |
| TRINITY_XP_0016  | {predictæChlamydomonas_reinh  | 61.40 | 0.00 |
| TRINITY_XP_0029  | {hypothetVolvox_carteri       | 61.40 | 0.00 |
| TRINITY_AML7829  | {putativePleurastrum_insigne  | 61.40 | 0.00 |
| TRINITY_XP_0017  | {predictæChlamydomonas_reinh  | 61.40 | 0.00 |
| TRINITY_KXZ4646  | {hypothetGonium_pectorale     | 61.40 | 0.00 |
| TRINITY_XP_0029  | {tRNA psæVolvox_carteri       | 61.40 | 0.00 |
| TRINITY_GAX8091  | {hypothetChlamydomonas_eusti  | 61.40 | 0.00 |
| TRINITY_XP_0228  | {RibosomæOstreococcus_tauri   | 61.40 | 0.00 |
| TRINITY_PNW7059  | {hypothetChlamydomonas_reinh  | 61.40 | 0.00 |
| TRINITY_XP_0029  | {hypothetVolvox_carteri       | 61.40 | 0.00 |
| TRINITY_GAX8446  | {hypothetChlamydomonas_eusti  | 61.40 | 0.00 |
| TRINITY_XP_0029  | {hypothetVolvox_carteri       | 61.40 | 0.00 |
| TRINITY_KMZ6147  | 1Protein Zostera_marina       | 61.40 | 0.00 |
| TRINITY_GAX7994  | {hypothetChlamydomonas_eusti  | 61.40 | 0.00 |
| TRINITY_XP_0025  | {predictæMicromonas_commoda   | 61.30 | 0.00 |
| TRINITY_EFJ3361  | {hypothetSelaginella_moellen  | 61.30 | 0.00 |
| TRINITY_ACF8016  | {unknown Zea_mays             | 61.30 | 0.00 |
| TRINITY_PTQ3616  | {hypothetMarchantia_polymorp  | 61.30 | 0.00 |
| TRINITY_XP_0029  | {hypothetVolvox_carteri       | 61.30 | 0.00 |
| TRINITY_GAX7949  | {hypothetChlamydomonas_eusti  | 61.30 | 0.00 |
| TRINITY_GBG5920  | {Glycine Chara_braunii        | 61.30 | 0.00 |
| TRINITY_OAY8091  | .7Serine/tAnanas_comosus      | 61.30 | 0.00 |
| TRINITY_GAQ8802  | {RibosomeKlebsormidium_niten  | 61.30 | 0.00 |
| TRINITY_XP_0056  | {eukaryotCoccomyxa_subellips  | 61.30 | 0.00 |
| TRINITY_KVI0579  | .AAA+ AT{Cynara_cardunculus   | 61.30 | 0.00 |
| TRINITY_XP_0029  | {hypothetVolvox_carteri       | 61.30 | 0.00 |
| TRINITY_XP_0056  | {polyaderCoccomyxa_subellips  | 61.30 | 0.00 |
| TRINITY_XP_0277  | {uncharacSolanum_pennellii    | 61.30 | 0.00 |
| TRINITY_KXZ5285  | {hypothetGonium_pectorale     | 61.30 | 0.00 |
| TRINITY_PIA6133  | {hypothetAquilegia_coerulea   | 61.30 | 0.00 |
| TRINITY_GAX8181  | {hypothetChlamydomonas_eusti  | 61.30 | 0.00 |
| TRINITY_XP_0029  | {hypothetVolvox_carteri       | 61.30 | 0.00 |

|                 |                              |       |      |
|-----------------|------------------------------|-------|------|
| TRINITY_GAX7725 | hypothetChlamydomonas_eusti  | 61.30 | 0.00 |
| TRINITY_KXZ5439 | hypothetGonium_pectorale     | 61.30 | 0.00 |
| TRINITY_PNH0892 | ProtoherTetrabaena_socialis  | 61.30 | 0.00 |
| TRINITY_GAX8305 | hypothetChlamydomonas_eusti  | 61.30 | 0.00 |
| TRINITY_PNW8817 | hypothetChlamydomonas_reinh  | 61.30 | 0.00 |
| TRINITY_XP_0029 | hypothetVolvox_carteri       | 61.30 | 0.00 |
| TRINITY_GBG7157 | (hypothetChara_braunii       | 61.30 | 0.00 |
| TRINITY_XP_0220 | ubiquitiHelianthus_annuus    | 61.30 | 0.00 |
| TRINITY_XP_0029 | hypothetVolvox_carteri       | 61.30 | 0.00 |
| TRINITY_XP_0194 | PREDICTHLupinus_angustifoli  | 61.30 | 0.00 |
| TRINITY_XP_0016 | predicteChlamydomonas_reinh  | 61.30 | 0.00 |
| TRINITY_PNW7735 | hypothetChlamydomonas_reinh  | 61.30 | 0.00 |
| TRINITY_GAX8001 | hypothetChlamydomonas_eusti  | 61.30 | 0.00 |
| TRINITY_KXZ5409 | hypothetGonium_pectorale     | 61.30 | 0.00 |
| TRINITY_XP_0243 | phosphocPhyscomitrella_pate  | 61.30 | 0.00 |
| TRINITY_XP_0017 | (predicteChlamydomonas_reinh | 61.30 | 0.00 |
| TRINITY_BAG5542 | (hypothetTrebouxiophyceae_sp | 61.20 | 0.00 |
| TRINITY_PIA6434 | hypothetAquilegia_coerulea   | 61.20 | 0.00 |
| TRINITY_RWR9801 | LOW QUAI Cinnamomum_micranth | 61.20 | 0.00 |
| TRINITY_GAX7572 | hypothetChlamydomonas_eusti  | 61.20 | 0.00 |
| TRINITY_XP_0194 | PREDICTHLupinus_angustifoli  | 61.20 | 0.00 |
| TRINITY_PNW8229 | hypothetChlamydomonas_reinh  | 61.20 | 0.00 |
| TRINITY_XP_0024 | methioniSorghum_bicolor      | 61.20 | 0.00 |
| TRINITY_XP_0075 | (ABC trarBathycoccus_prasinc | 61.20 | 0.00 |
| TRINITY_XP_0138 | hypothetMonoraphidium_negle  | 61.20 | 0.00 |
| TRINITY_XP_0029 | rab-relaVolvox_carteri       | 61.20 | 0.00 |
| TRINITY_GAX7306 | (hypothetChlamydomonas_eusti | 61.20 | 0.00 |
| TRINITY_PNW7392 | hypothetChlamydomonas_reinh  | 61.20 | 0.00 |
| TRINITY_XP_0201 | (cyclin-cAnanas_comosus      | 61.20 | 0.00 |
| TRINITY_GAX8456 | hypothetChlamydomonas_eusti  | 61.20 | 0.00 |
| TRINITY_GAX8181 | hypothetChlamydomonas_eusti  | 61.20 | 0.00 |
| TRINITY_XP_0049 | (DNA damSetaria_italica      | 61.20 | 0.00 |
| TRINITY_XP_0128 | PREDICTHErythranthe_guttata  | 61.20 | 0.00 |
| TRINITY_XP_0017 | (3-methylChlamydomonas_reinh | 61.20 | 0.00 |
| TRINITY_KXZ4306 | hypothetGonium_pectorale     | 61.20 | 0.00 |
| TRINITY_XP_0029 | ferroporVolvox_carteri       | 61.20 | 0.00 |
| TRINITY_PNH1240 | Signal rTetrabaena_socialis  | 61.20 | 0.00 |
| TRINITY_GAX7627 | hypothetChlamydomonas_eusti  | 61.20 | 0.00 |
| TRINITY_PNW8038 | hypothetChlamydomonas_reinh  | 61.20 | 0.00 |
| TRINITY_GAX7725 | (hypothetChlamydomonas_eusti | 61.20 | 0.00 |
| TRINITY_GBF9542 | hypothetRaphidocelis_subcap  | 61.20 | 0.00 |
| TRINITY_GBF9572 | hypothetRaphidocelis_subcap  | 61.20 | 0.00 |
| TRINITY_RVW5219 | (MultidriVitis_vinifera      | 61.20 | 0.00 |
| TRINITY_XP_0139 | (purine rMonoraphidium_negle | 61.20 | 0.00 |
| TRINITY_XP_0025 | (dihydro Micromonas_commoda  | 61.20 | 0.00 |
| TRINITY_PNH0528 | ATP-depeTetrabaena_socialis  | 61.20 | 0.00 |
| TRINITY_GAX8026 | hypothetChlamydomonas_eusti  | 61.20 | 0.00 |
| TRINITY_PNW7948 | hypothetChlamydomonas_reinh  | 61.20 | 0.00 |
| TRINITY_XP_0056 | DUF292-cCoccomyxa_subellips  | 61.20 | 0.00 |
| TRINITY_XP_0016 | predicteChlamydomonas_reinh  | 61.20 | 0.00 |
| TRINITY_XP_0202 | casein lAsparagus_officinal  | 61.20 | 0.00 |
| TRINITY_XP_0016 | dynein lChlamydomonas_reinh  | 61.20 | 0.00 |
| TRINITY_XP_0229 | MOB kinCucurbita_maxima      | 61.10 | 0.00 |
| TRINITY_XP_0158 | uncharacZiziphus_jujuba      | 61.10 | 0.00 |
| TRINITY_OAE2663 | hypothetMarchantia_polymorp  | 61.10 | 0.00 |
| TRINITY_GAX8032 | hypothetChlamydomonas_eusti  | 61.10 | 0.00 |
| TRINITY_CAI8489 | putativeMedicago_sativa      | 61.10 | 0.00 |
| TRINITY_GAQ8481 | ubiquitiKlebsormidium_niten  | 61.10 | 0.00 |
| TRINITY_ESR3877 | hypothetCitrus_clementina    | 61.10 | 0.00 |
| TRINITY_GAX8242 | hypothetChlamydomonas_eusti  | 61.10 | 0.00 |
| TRINITY_GAU2165 | (hypothetTrifolium_subterran | 61.10 | 0.00 |
| TRINITY_RAL4980 | hypothetCuscuta_australis    | 61.10 | 0.00 |
| TRINITY_GAX7922 | hypothetChlamydomonas_eusti  | 61.10 | 0.00 |
| TRINITY_XP_0058 | hypothetChlorella_variabili  | 61.10 | 0.00 |
| TRINITY_PNW8438 | hypothetChlamydomonas_reinh  | 61.10 | 0.00 |
| TRINITY_PRW2113 | RING firChlorella_sorokinia  | 61.10 | 0.00 |

|                  |          |                     |       |      |
|------------------|----------|---------------------|-------|------|
| TRINITY_PSC75167 | DEAD-don | Micractinium_conduc | 61.10 | 0.00 |
| TRINITY_GAX81271 | hypothet | Chlamydomonas_eusti | 61.10 | 0.00 |
| TRINITY_XP_00294 | tubulin  | Volvox_carteri      | 61.10 | 0.00 |
| TRINITY_XP_00295 | hypothet | Volvox_carteri      | 61.10 | 0.00 |
| TRINITY_KXZ46249 | hypothet | Gonium_pectorale    | 61.10 | 0.00 |
| TRINITY_GAX82009 | hypothet | Chlamydomonas_eusti | 61.10 | 0.00 |
| TRINITY_GAX75634 | hypothet | Chlamydomonas_eusti | 61.10 | 0.00 |
| TRINITY_GAQ80173 | homogent | Klebsormidium_niten | 61.10 | 0.00 |
| TRINITY_XP_00564 | hypothet | Coccomyxa_subellips | 61.10 | 0.00 |
| TRINITY_XP_01104 | PREDICTI | Populus_euphratica  | 61.10 | 0.00 |
| TRINITY_GAX75973 | hypothet | Chlamydomonas_eusti | 61.10 | 0.00 |
| TRINITY_XP_00170 | acetyl   | Chlamydomonas_reinh | 61.10 | 0.00 |
| TRINITY_XP_00170 | predicte | Chlamydomonas_reinh | 61.10 | 0.00 |
| TRINITY_XP_00295 | hypothet | Volvox_carteri      | 61.10 | 0.00 |
| TRINITY_GAX81341 | hypothet | Chlamydomonas_eusti | 61.10 | 0.00 |
| TRINITY_GAX76158 | hypothet | Chlamydomonas_eusti | 61.10 | 0.00 |
| TRINITY_RZB6834  | ATP-depe | Glycine_soja        | 61.10 | 0.00 |
| TRINITY_GAQ93561 | hypothet | Klebsormidium_niten | 61.10 | 0.00 |
| TRINITY_XP_02022 | putative | Cajanus_cajan       | 61.10 | 0.00 |
| TRINITY_GAX81745 | hypothet | Chlamydomonas_eusti | 61.10 | 0.00 |
| TRINITY_PHT61905 | Phosphat | Capsicum_annuum     | 61.10 | 0.00 |
| TRINITY_PSC76694 | 60S acic | Micractinium_conduc | 61.10 | 0.00 |
| TRINITY_KXZ47713 | hypothet | Gonium_pectorale    | 61.10 | 0.00 |
| TRINITY_EFJ17474 | hypothet | Selaginella_moellen | 61.00 | 0.00 |
| TRINITY_PRW45383 | ATP-depe | Chlorella_sorokinia | 61.00 | 0.00 |
| TRINITY_XP_00295 | vesicle  | Volvox_carteri      | 61.00 | 0.00 |
| TRINITY_XP_01066 | PREDICTI | Beta_vulgaris       | 61.00 | 0.00 |
| TRINITY_XP_01360 | PREDICTI | Brassica_oleracea   | 61.00 | 0.00 |
| TRINITY_XP_01946 | PREDICTI | Lupinus_angustifoli | 61.00 | 0.00 |
| TRINITY_BAU7155  | parkin   | Marchantia_polymorp | 61.00 | 0.00 |
| TRINITY_GBF87937 | ATP synt | Raphidocelis_subcap | 61.00 | 0.00 |
| TRINITY_RMZ55187 | hypothet | Auxenochlorella_pro | 61.00 | 0.00 |
| TRINITY_GAX80023 | hypothet | Chlamydomonas_eusti | 61.00 | 0.00 |
| TRINITY_GBF90884 | phosphat | Raphidocelis_subcap | 61.00 | 0.00 |
| TRINITY_KXZ5075  | hypothet | Gonium_pectorale    | 61.00 | 0.00 |
| TRINITY_PRW6038  | glyoxal  | Chlorella_sorokinia | 61.00 | 0.00 |
| TRINITY_XP_0239  | ATP-depe | Quercus_suber       | 61.00 | 0.00 |
| TRINITY_GAX81558 | hypothet | Chlamydomonas_eusti | 61.00 | 0.00 |
| TRINITY_PNH10837 | Desiccat | Tetrabaena_socialis | 61.00 | 0.00 |
| TRINITY_XP_00359 | malate   | Medicago_truncatula | 61.00 | 0.00 |
| TRINITY_XP_00294 | hypothet | Volvox_carteri      | 61.00 | 0.00 |
| TRINITY_XP_00938 | PREDICTI | Musa_acuminata      | 61.00 | 0.00 |
| TRINITY_GAQ93439 | hypothet | Klebsormidium_niten | 61.00 | 0.00 |
| TRINITY_XP_0239  | dynein   | Quercus_suber       | 61.00 | 0.00 |
| TRINITY_GAX73942 | hypothet | Chlamydomonas_eusti | 61.00 | 0.00 |
| TRINITY_PNW81268 | hypothet | Chlamydomonas_reinh | 61.00 | 0.00 |
| TRINITY_GAX79658 | hypothet | Chlamydomonas_eusti | 61.00 | 0.00 |
| TRINITY_GAX7636  | hypothet | Chlamydomonas_eusti | 61.00 | 0.00 |
| TRINITY_XP_00295 | chlorop  | Volvox_carteri      | 61.00 | 0.00 |
| TRINITY_XP_00846 | PREDICTI | Cucumis_melo        | 61.00 | 0.00 |
| TRINITY_PRW61566 | Retrovir | Chlorella_sorokinia | 61.00 | 0.00 |
| TRINITY_GAX7891  | hypothet | Chlamydomonas_eusti | 61.00 | 0.00 |
| TRINITY_GAX77144 | hypothet | Chlamydomonas_eusti | 61.00 | 0.00 |
| TRINITY_GAX72766 | hypothet | Chlamydomonas_eusti | 61.00 | 0.00 |
| TRINITY_GBF9776  | peptida  | Raphidocelis_subcap | 61.00 | 0.00 |
| TRINITY_PKA62036 | 60S rib  | Apostasia_shenzheni | 61.00 | 0.00 |
| TRINITY_XP_00564 | exonucl  | Coccomyxa_subellips | 61.00 | 0.00 |
| TRINITY_GBF94175 | hypothet | Raphidocelis_subcap | 61.00 | 0.00 |
| TRINITY_GAX85202 | hypothet | Chlamydomonas_eusti | 61.00 | 0.00 |
| TRINITY_GAX80342 | hypothet | Chlamydomonas_eusti | 61.00 | 0.00 |
| TRINITY_GAX77534 | hypothet | Chlamydomonas_eusti | 61.00 | 0.00 |
| TRINITY_GBF98463 | hypothet | Raphidocelis_subcap | 61.00 | 0.00 |
| TRINITY_PNW84046 | hypothet | Chlamydomonas_reinh | 61.00 | 0.00 |
| TRINITY_CAX27437 | Na P-tyr | Marchantia_polymorp | 61.00 | 0.00 |
| TRINITY_XP_01139 | 60S acic | Auxenochlorella_pro | 60.90 | 0.00 |
| TRINITY_XP_00685 | ubiquiti | Amborella_trichopod | 60.90 | 0.00 |

|                                              |       |      |
|----------------------------------------------|-------|------|
| TRINITY_ABK2260(unknown Picea_sitchensis     | 60.90 | 0.00 |
| TRINITY_KZV15321hypothetDorcoceras_hygromet  | 60.90 | 0.00 |
| TRINITY_KQK02321hypothetBrachypodium_distac  | 60.90 | 0.00 |
| TRINITY_PIN07056MoleculæHandroanthus_impeti  | 60.90 | 0.00 |
| TRINITY_KXZ51231hypothetGonium_pectorale     | 60.90 | 0.00 |
| TRINITY_XP_02709iron-sulCoffea_arabica       | 60.90 | 0.00 |
| TRINITY_EXB37047CoatomeiMorus_notabilis      | 60.90 | 0.00 |
| TRINITY_XP_01919PREDICTIIPomoea_nil          | 60.90 | 0.00 |
| TRINITY_XP_01068PREDICTIBeta_vulgaris        | 60.90 | 0.00 |
| TRINITY_XP_00294hypothetVolvox_carteri       | 60.90 | 0.00 |
| TRINITY_XP_00295hypothetVolvox_carteri       | 60.90 | 0.00 |
| TRINITY_XP_00448protein Cicer_arietinum      | 60.90 | 0.00 |
| TRINITY_XP_00169predicteChlamydomonas_reinh  | 60.90 | 0.00 |
| TRINITY_XP_00835PREDICTIMalus_domestica      | 60.90 | 0.00 |
| TRINITY_XP_00564hypothetCoccomyxa_subellips  | 60.90 | 0.00 |
| TRINITY_GBF93992calcium Raphidocelis_subcap  | 60.90 | 0.00 |
| TRINITY_XP_00295hypothetVolvox_carteri       | 60.90 | 0.00 |
| TRINITY_XP_00169predicteChlamydomonas_reinh  | 60.90 | 0.00 |
| TRINITY_KXZ53096hypothetGonium_pectorale     | 60.90 | 0.00 |
| TRINITY_XP_00584GTP binChlorella_variabili   | 60.90 | 0.00 |
| TRINITY_GAX72754hypothetChlamydomonas_eusti  | 60.90 | 0.00 |
| TRINITY_GAX77106hypothetChlamydomonas_eusti  | 60.90 | 0.00 |
| TRINITY_XP_00169monooxyChlamydomonas_reinh   | 60.90 | 0.00 |
| TRINITY_XP_00294luminal Volvox_carteri       | 60.90 | 0.00 |
| TRINITY_XP_00170rhomboidChlamydomonas_reinh  | 60.90 | 0.00 |
| TRINITY_KXZ46175hypothetGonium_pectorale     | 60.90 | 0.00 |
| TRINITY_PNW71403hypothetChlamydomonas_reinh  | 60.90 | 0.00 |
| TRINITY_GAX77733hypothetChlamydomonas_eusti  | 60.90 | 0.00 |
| TRINITY_GAX82399hypothetChlamydomonas_eusti  | 60.90 | 0.00 |
| TRINITY_XP_00294hypothetVolvox_carteri       | 60.90 | 0.00 |
| TRINITY_PNW75024hypothetChlamydomonas_reinh  | 60.90 | 0.00 |
| TRINITY_GAQ84076fructosæKlebsormidium_niten  | 60.90 | 0.00 |
| TRINITY_XP_00294hypothetVolvox_carteri       | 60.90 | 0.00 |
| TRINITY_GAX81508hypothetChlamydomonas_eusti  | 60.90 | 0.00 |
| TRINITY_XP_02451glycine Selaginella_moellen  | 60.90 | 0    |
| TRINITY_XP_00565lipoiic æCoccomyxa_subellips | 60.90 | 0.00 |
| TRINITY_XP_00169cryptocChlamydomonas_reinh   | 60.90 | 0.00 |
| TRINITY_XP_00169predicteChlamydomonas_reinh  | 60.90 | 0.00 |
| TRINITY_GAX72651hypothetChlamydomonas_eusti  | 60.90 | 0    |
| TRINITY_KXZ49155hypothetGonium_pectorale     | 60.90 | 0.00 |
| TRINITY_XP_00751H/ACA riBathycoccus_prasinc  | 60.90 | 0.00 |
| TRINITY_BAJ85979predicteHordeum_vulgare      | 60.80 | 0.00 |
| TRINITY_GAQ78566putativeKlebsormidium_niten  | 60.80 | 0.00 |
| TRINITY_NP_00114uncharacZea_mays             | 60.80 | 0.00 |
| TRINITY_OAE27512hypothetMarchantia_polymorp  | 60.80 | 0.00 |
| TRINITY_XP_00169sugar 1,Chlamydomonas_reinh  | 60.80 | 0.00 |
| TRINITY_GAX76458hypothetChlamydomonas_eusti  | 60.80 | 0.00 |
| TRINITY_PSS31717FructosæActinidia_chinensis  | 60.80 | 0.00 |
| TRINITY_GAX84947hypothetChlamydomonas_eusti  | 60.80 | 0.00 |
| TRINITY_GBF90993hypothetRaphidocelis_subcap  | 60.80 | 0.00 |
| TRINITY_GAX82044hypothetChlamydomonas_eusti  | 60.80 | 0.00 |
| TRINITY_XP_00940PREDICTIMusa_acuminata       | 60.80 | 0.00 |
| TRINITY_GAQ859193-hydroKlebsormidium_niten   | 60.80 | 0.00 |
| TRINITY_BAK00999predicteHordeum_vulgare      | 60.80 | 0.00 |
| TRINITY_GBF89362adenylatRaphidocelis_subcap  | 60.80 | 0.00 |
| TRINITY_PNR60535hypothetPhyscomitrella_pate  | 60.80 | 0.00 |
| TRINITY_XP_00169predicteChlamydomonas_reinh  | 60.80 | 0.00 |
| TRINITY_KXZ56839hypothetGonium_pectorale     | 60.80 | 0.00 |
| TRINITY_GAX79417hypothetChlamydomonas_eusti  | 60.80 | 0.00 |
| TRINITY_GAX75591hypothetChlamydomonas_eusti  | 60.80 | 0.00 |
| TRINITY_OAE30955hypothetMarchantia_polymorp  | 60.80 | 0.00 |
| TRINITY_PSC75831Sterol-4Micractinium_conduc  | 60.80 | 0.00 |
| TRINITY_GBG76786hypothetChara_braunii        | 60.80 | 0.00 |
| TRINITY_XP_00585hypothetChlorella_variabili  | 60.80 | 0.00 |
| TRINITY_GAX81162hypothetChlamydomonas_eusti  | 60.80 | 0.00 |
| TRINITY_XP_00585hypothetChlorella_variabili  | 60.80 | 0.00 |

|                  |                               |       |      |
|------------------|-------------------------------|-------|------|
| TRINITY_XP_00295 | hypothetVolvox_carteri        | 60.80 | 0.00 |
| TRINITY_BAF44222 | malate cIris_x_hollandica     | 60.80 | 0.00 |
| TRINITY_RMZ52572 | hypothetAuxenochlorella_pro   | 60.80 | 0.00 |
| TRINITY_POC8M8.1 | RecName:Zea_mays              | 60.80 | 0.00 |
| TRINITY_XP_02008 | ATP-depAnanas_comosus         | 60.80 | 0.00 |
| TRINITY_KXZ53775 | hypothetGonium_pectorale      | 60.80 | 0.00 |
| TRINITY_PNH09838 | PolyubictTetrabaena_socialis  | 60.80 | 0.00 |
| TRINITY_GAX78146 | hypothetChlamydomonas_eusti   | 60.80 | 0.00 |
| TRINITY_XP_01724 | PREDICTIDaucus_carota         | 60.80 | 0.00 |
| TRINITY_XP_02213 | malignarMomordica_charantia   | 60.80 | 0.00 |
| TRINITY_XP_00295 | moleculcVolvox_carteri        | 60.80 | 0.00 |
| TRINITY_KXZ55463 | hypothetGonium_pectorale      | 60.80 | 0    |
| TRINITY_KXZ54465 | hypothetGonium_pectorale      | 60.80 | 0.00 |
| TRINITY_GAX78395 | hypothetChlamydomonas_eusti   | 60.80 | 0.00 |
| TRINITY_GAX86278 | hypothetChlamydomonas_eusti   | 60.80 | 0.00 |
| TRINITY_PNH09602 | CathepsiTetrabaena_socialis   | 60.80 | 0.00 |
| TRINITY_GAX76672 | hypothetChlamydomonas_eusti   | 60.80 | 0.00 |
| TRINITY_XP_00256 | predictcMicromonas_commoda    | 60.80 | 0.00 |
| TRINITY_GAX85497 | hypothetChlamydomonas_eusti   | 60.80 | 0.00 |
| TRINITY_XP_00305 | predictcMicromonas_pusilla    | 60.80 | 0.00 |
| TRINITY_XP_02389 | 40S ribcQuercus_suber         | 60.80 | 0.00 |
| TRINITY_XP_02439 | uncharacPhyscomitrella_pate   | 60.70 | 0.00 |
| TRINITY_XP_01396 | aldehydMonoraphidium_negle    | 60.70 | 0.00 |
| TRINITY_XP_01043 | PREDICTICamelina_sativa       | 60.70 | 0.00 |
| TRINITY_XP_02214 | acetyl-cMomordica_charantia   | 60.70 | 0.00 |
| TRINITY_GAX85628 | hypothetChlamydomonas_eusti   | 60.70 | 0.00 |
| TRINITY_XP_00846 | PREDICTICucumis_melo          | 60.70 | 0.00 |
| TRINITY_XP_01845 | PREDICTIRaphanus_sativus      | 60.70 | 0.00 |
| TRINITY_XP_00295 | hypothetVolvox_carteri        | 60.70 | 0.00 |
| TRINITY_PNW74192 | hypothetChlamydomonas_reinh   | 60.70 | 0.00 |
| TRINITY_PNW72341 | hypothetChlamydomonas_reinh   | 60.70 | 0.00 |
| TRINITY_GBG80578 | hypothetChara_braunii         | 60.70 | 0.00 |
| TRINITY_KXZ53174 | hypothetGonium_pectorale      | 60.70 | 0.00 |
| TRINITY_AMB19694 | 3-hydroTaraxacum_kok-saghy    | 60.70 | 0.00 |
| TRINITY_XP_00176 | (DnaJ-li)Chlamydomonas_reinh  | 60.70 | 0.00 |
| TRINITY_GAX78827 | hypothetChlamydomonas_eusti   | 60.70 | 0.00 |
| TRINITY_XP_00864 | uncharacZea_mays              | 60.70 | 0.00 |
| TRINITY_PSC71129 | serine tMicractinium_conduc   | 60.70 | 0.00 |
| TRINITY_XP_01396 | (Pentatri)Monoraphidium_negle | 60.70 | 0.00 |
| TRINITY_GAX73205 | hypothetChlamydomonas_eusti   | 60.70 | 0.00 |
| TRINITY_BAU37043 | ethanolcChlamydomonas_asymm   | 60.70 | 0.00 |
| TRINITY_XP_01389 | hypothetMonoraphidium_negle   | 60.70 | 0.00 |
| TRINITY_GAX74526 | hypothetChlamydomonas_eusti   | 60.70 | 0.00 |
| TRINITY_XP_00422 | 40S ribcSolanum_lycopersicu   | 60.70 | 0.00 |
| TRINITY_PNH10991 | hypothetTetrabaena_socialis   | 60.70 | 0.00 |
| TRINITY_XP_00294 | hypothetVolvox_carteri        | 60.70 | 0.00 |
| TRINITY_PNW79225 | hypothetChlamydomonas_reinh   | 60.70 | 0.00 |
| TRINITY_XP_02186 | aldehydSpinacia_oleracea      | 60.70 | 0.00 |
| TRINITY_GAX75792 | hypothetChlamydomonas_eusti   | 60.70 | 0.00 |
| TRINITY_GAX85076 | hypothetChlamydomonas_eusti   | 60.70 | 0.00 |
| TRINITY_GAX72736 | hypothetChlamydomonas_eusti   | 60.70 | 0.00 |
| TRINITY_KXZ56786 | hypothetGonium_pectorale      | 60.70 | 0.00 |
| TRINITY_PNW85286 | hypothetChlamydomonas_reinh   | 60.70 | 0.00 |
| TRINITY_KXZ41898 | hypothetGonium_pectorale      | 60.70 | 0.00 |
| TRINITY_GAX75027 | hypothetChlamydomonas_eusti   | 60.70 | 0.00 |
| TRINITY_XP_01723 | PREDICTIDaucus_carota         | 60.70 | 0.00 |
| TRINITY_KDD73899 | seleniumHelicosporidium_sp.   | 60.60 | 0.00 |
| TRINITY_XP_02387 | isocitrzQuercus_suber         | 60.60 | 0.00 |
| TRINITY_XP_02392 | 60S ribcQuercus_suber         | 60.60 | 0.00 |
| TRINITY_XP_00306 | predictcMicromonas_pusilla    | 60.60 | 0.00 |
| TRINITY_XP_02387 | GTP-binQuercus_suber          | 60.60 | 0.00 |
| TRINITY_EMS45817 | ABC trarTriticum_urartu       | 60.60 | 0.00 |
| TRINITY_AAV41811 | pyruvateChlamydomonas_incer   | 60.60 | 0.00 |
| TRINITY_KXZ44956 | hypothetGonium_pectorale      | 60.60 | 0.00 |
| TRINITY_XP_00295 | hypothetVolvox_carteri        | 60.60 | 0.00 |
| TRINITY_XP_00565 | 2-amino-Coccomyxa_subellips   | 60.60 | 0.00 |

|                 |                 |                     |                     |       |      |
|-----------------|-----------------|---------------------|---------------------|-------|------|
| TRINITY_CAA1126 | polyubiquitin   | Nicotiana_tabacum   | 60.60               | 0.00  |      |
| TRINITY_GAX7639 | hypothetical    | Chlamydomonas_eusti | 60.60               | 0.00  |      |
| TRINITY_PNH0803 | Glutathione     | Tetrabaena_socialis | 60.60               | 0.00  |      |
| TRINITY_XP_0017 | predicted       | Chlamydomonas_reinh | 60.60               | 0.00  |      |
| TRINITY_XP_0016 | predicted       | Chlamydomonas_reinh | 60.60               | 0.00  |      |
| TRINITY_GBF9173 | hypothetical    | Raphidocelis_subcap | 60.60               | 0.00  |      |
| TRINITY_KZV152  | citrate         | Dorcoceras_hygromet | 60.60               | 0.00  |      |
| TRINITY_GAX7476 | hypothetical    | Chlamydomonas_eusti | 60.60               | 0.00  |      |
| TRINITY_XP_0058 | hypothetical    | Chlorella_variabili | 60.60               | 0.00  |      |
| TRINITY_GAQ7758 | ABC             | truncated           | Klebsormidium_niten | 60.60 | 0.00 |
| TRINITY_KMS648  | hypothetical    | Beta_vulgaris       | 60.60               | 0.00  |      |
| TRINITY_KXZ513  | hypothetical    | Gonium_pectorale    | 60.60               | 0.00  |      |
| TRINITY_GAX834  | hypothetical    | Chlamydomonas_eusti | 60.60               | 0.00  |      |
| TRINITY_RXH706  | hypothetical    | Malus_domestica     | 60.60               | 0.00  |      |
| TRINITY_YP_0013 | putative        | Chlorokybus_atmophy | 60.60               | 0.00  |      |
| TRINITY_XP_0044 | ADP-ribosyl     | Cicer_arietinum     | 60.60               | 0.00  |      |
| TRINITY_GAX787  | hypothetical    | Chlamydomonas_eusti | 60.60               | 0.00  |      |
| TRINITY_PTQ47   | hypothetical    | Marchantia_polymorp | 60.60               | 0.00  |      |
| TRINITY_XP_0042 | serine          | Solanum_lycopersicu | 60.60               | 0.00  |      |
| TRINITY_KXZ47   | hypothetical    | Gonium_pectorale    | 60.60               | 0.00  |      |
| TRINITY_GBF962  | acyl-coenzyme   | Raphidocelis_subcap | 60.60               | 0.00  |      |
| TRINITY_KXZ53   | hypothetical    | Gonium_pectorale    | 60.60               | 0.00  |      |
| TRINITY_XP_0016 | U2 snRNA        | Chlamydomonas_reinh | 60.60               | 0.00  |      |
| TRINITY_GAX751  | hypothetical    | Chlamydomonas_eusti | 60.60               | 0.00  |      |
| TRINITY_GAX751  | hypothetical    | Chlamydomonas_eusti | 60.60               | 0.00  |      |
| TRINITY_PNW704  | hypothetical    | Chlamydomonas_reinh | 60.60               | 0.00  |      |
| TRINITY_PNW784  | hypothetical    | Chlamydomonas_reinh | 60.60               | 0.00  |      |
| TRINITY_PNH057  | Regulatory      | Tetrabaena_socialis | 60.60               | 0.00  |      |
| TRINITY_KXZ500  | hypothetical    | Gonium_pectorale    | 60.60               | 0.00  |      |
| TRINITY_KXZ45   | hypothetical    | Gonium_pectorale    | 60.60               | 0.00  |      |
| TRINITY_KXZ49   | hypothetical    | Gonium_pectorale    | 60.60               | 0.00  |      |
| TRINITY_GAX796  | hypothetical    | Chlamydomonas_eusti | 60.60               | 0.00  |      |
| TRINITY_PNW79   | hypothetical    | Chlamydomonas_reinh | 60.60               | 0     |      |
| TRINITY_EFJ04   | hypothetical    | Selaginella_moellen | 60.60               | 0.00  |      |
| TRINITY_RAL51   | hypothetical    | Cuscuta_australis   | 60.60               | 0.00  |      |
| TRINITY_RIA05   | hypothetical    | Brassica_rapa       | 60.50               | 0.00  |      |
| TRINITY_PRW60   | apoptotic       | Chlorella_sorokinia | 60.50               | 0.00  |      |
| TRINITY_XP_0030 | predicted       | Micromonas_pusilla  | 60.50               | 0.00  |      |
| TRINITY_GBF964  | glycosyl        | Raphidocelis_subcap | 60.50               | 0.00  |      |
| TRINITY_XP_023  | ras-related     | Quercus_suber       | 60.50               | 0.00  |      |
| TRINITY_GAX80   | hypothetical    | Chlamydomonas_eusti | 60.50               | 0.00  |      |
| TRINITY_GAQ92   | catalase        | Klebsormidium_niten | 60.50               | 0.00  |      |
| TRINITY_XP_001  | fructose        | Chlamydomonas_reinh | 60.50               | 0.00  |      |
| TRINITY_XP_002  | hypothetical    | Volvox_carteri      | 60.50               | 0.00  |      |
| TRINITY_BAK02   | predicted       | Hordeum_vulgare     | 60.50               | 0.00  |      |
| TRINITY_PNW7    | hypothetical    | Chlamydomonas_reinh | 60.50               | 0.00  |      |
| TRINITY_EEC6    | hypothetical    | Oryza_sativa        | 60.50               | 0.00  |      |
| TRINITY_XP_01   | Bifunctional    | Monoraphidium_negle | 60.50               | 0.00  |      |
| TRINITY_GBF8    | hypothetical    | Raphidocelis_subcap | 60.50               | 0.00  |      |
| TRINITY_XP_00   | hypothetical    | Volvox_carteri      | 60.50               | 0.00  |      |
| TRINITY_XP_00   | Emp24/gp        | Chlamydomonas_reinh | 60.50               | 0.00  |      |
| TRINITY_GAX7    | hypothetical    | Chlamydomonas_eusti | 60.50               | 0.00  |      |
| TRINITY_XP_00   | mitochondrial   | Chlamydomonas_reinh | 60.50               | 0.00  |      |
| TRINITY_XP_00   | predicted       | Ostreococcus_sp._'1 | 60.50               | 0.00  |      |
| TRINITY_KXZ5    | hypothetical    | Gonium_pectorale    | 60.50               | 0.00  |      |
| TRINITY_GAX8    | hypothetical    | Chlamydomonas_eusti | 60.50               | 0.00  |      |
| TRINITY_GAQ8    | polyadenylated  | Klebsormidium_niten | 60.50               | 0.00  |      |
| TRINITY_PNW7    | hypothetical    | Chlamydomonas_reinh | 60.50               | 0.00  |      |
| TRINITY_XP_00   | metal ion       | Chlamydomonas_reinh | 60.50               | 0.00  |      |
| TRINITY_PNW6    | hypothetical    | Chlamydomonas_reinh | 60.50               | 0.00  |      |
| TRINITY_KXZ5    | hypothetical    | Gonium_pectorale    | 60.50               | 0.00  |      |
| TRINITY_XP_00   | NADH:ubiquinone | Chlamydomonas_reinh | 60.50               | 0.00  |      |
| TRINITY_XP_00   | histone         | Volvox_carteri      | 60.50               | 0.00  |      |
| TRINITY_GAX7    | hypothetical    | Chlamydomonas_eusti | 60.50               | 0.00  |      |
| TRINITY_XP_00   | DNA-directed    | Prunus_persica      | 60.50               | 0.00  |      |
| TRINITY_XP_00   | adenylated      | Volvox_carteri      | 60.50               | 0.00  |      |

|                                             |       |      |
|---------------------------------------------|-------|------|
| TRINITY_GAX8257(hypothetChlamydomonas_eusti | 60.50 | 0.00 |
| TRINITY_GAX7745(hypothetChlamydomonas_eusti | 60.50 | 0.00 |
| TRINITY_KXZ5138(hypothetGonium_pectorale    | 60.50 | 0.00 |
| TRINITY_PNW8660(hypothetChlamydomonas_reinh | 60.50 | 0.00 |
| TRINITY_XP_0156(AP-1 conOryza_sativa        | 60.50 | 0.00 |
| TRINITY_GAX8400(hypothetChlamydomonas_eusti | 60.50 | 0.00 |
| TRINITY_XP_0017(radial εChlamydomonas_reinh | 60.50 | 0.00 |
| TRINITY_XP_0271(uncharacCoffea_eugenioides  | 60.50 | 0.00 |
| TRINITY_XP_0227(uncharacDurio_zibethinus    | 60.50 | 0.00 |
| TRINITY_BAG5542(hypothetTrebouxiophyceae_sp | 60.40 | 0.00 |
| TRINITY_GAQ8420(ubiquitiKlebsormidium_niten | 60.40 | 0.00 |
| TRINITY_XP_0228(GPI manrOstreococcus_tauri  | 60.40 | 0.00 |
| TRINITY_XP_0243(superoxiPhyscomitrella_pate | 60.40 | 0.00 |
| TRINITY_XP_0016(hypothetChlamydomonas_reinh | 60.40 | 0.00 |
| TRINITY_XP_0024(O-phosp†Micromonas_commoda  | 60.40 | 0.00 |
| TRINITY_GAX8351(hypothetChlamydomonas_eusti | 60.40 | 0.00 |
| TRINITY_XP_0029(hypothetVolvox_carteri      | 60.40 | 0.00 |
| TRINITY_XP_0029(hypothetVolvox_carteri      | 60.40 | 0.00 |
| TRINITY_PNW7860(hypothetChlamydomonas_reinh | 60.40 | 0.00 |
| TRINITY_XP_0271(omega-anCoffea_eugenioides  | 60.40 | 0.00 |
| TRINITY_GAX8470(hypothetChlamydomonas_eusti | 60.40 | 0.00 |
| TRINITY_PNH0762(ChaperorTetrabaena_socialis | 60.40 | 0.00 |
| TRINITY_PNW8706(hypothetChlamydomonas_reinh | 60.40 | 0.00 |
| TRINITY_GAX8291(hypothetChlamydomonas_eusti | 60.40 | 0.00 |
| TRINITY_XP_0029(hypothetVolvox_carteri      | 60.40 | 0.00 |
| TRINITY_GBG5917(hypothetChara_braunii       | 60.40 | 0.00 |
| TRINITY_PNW8185(hypothetChlamydomonas_reinh | 60.40 | 0.00 |
| TRINITY_AEA9262(peroxireDunaliella_viridis  | 60.40 | 0.00 |
| TRINITY_XP_0029(hypothetVolvox_carteri      | 60.40 | 0.00 |
| TRINITY_XP_0014(predictεOstreococcus_sp._'1 | 60.40 | 0.00 |
| TRINITY_GAX7943(hypothetChlamydomonas_eusti | 60.40 | 0.00 |
| TRINITY_GAX7385(hypothetChlamydomonas_eusti | 60.40 | 0.00 |
| TRINITY_XP_0104(PREDICTICamelina_sativa     | 60.40 | 0.00 |
| TRINITY_GAX7691(hypothetChlamydomonas_eusti | 60.40 | 0.00 |
| TRINITY_PRW5844(isoleuciChlorella_sorokinia | 60.40 | 0.00 |
| TRINITY_XP_0029(hypothetVolvox_carteri      | 60.40 | 0.00 |
| TRINITY_KXZ4703(hypothetGonium_pectorale    | 60.40 | 0.00 |
| TRINITY_XP_0029(hypothetVolvox_carteri      | 60.40 | 0.00 |
| TRINITY_KXZ5586(hypothetGonium_pectorale    | 60.40 | 0.00 |
| TRINITY_PRW6055(LOW PSI)Chlorella_sorokinia | 60.40 | 0.00 |
| TRINITY_KXZ4347(hypothetGonium_pectorale    | 60.40 | 0.00 |
| TRINITY_GAX7834(hypothetChlamydomonas_eusti | 60.40 | 0.00 |
| TRINITY_PNW7066(hypothetChlamydomonas_reinh | 60.40 | 0.00 |
| TRINITY_GAX7539(hypothetChlamydomonas_eusti | 60.40 | 0    |
| TRINITY_XP_0094(PREDICTIMusa_acuminata      | 60.30 | 0.00 |
| TRINITY_XP_0030(flagellεMicromonas_pusilla  | 60.30 | 0.00 |
| TRINITY_BAJ9524(predictεHordeum_vulgare     | 60.30 | 0.00 |
| TRINITY_XP_0201(AP-4 conAnanas_comosus      | 60.30 | 0.00 |
| TRINITY_GAX8595(hypothetChlamydomonas_eusti | 60.30 | 0.00 |
| TRINITY_XP_0243(chaperorPhyscomitrella_pate | 60.30 | 0.00 |
| TRINITY_XP_0239(6-phosp†Quercus_suber       | 60.30 | 0.00 |
| TRINITY_PSC6843(ubiquitiMicractinium_conduc | 60.30 | 0.00 |
| TRINITY_PWA4602(microtukArtemisia_annua     | 60.30 | 0.00 |
| TRINITY_XP_0227(developnDurio_zibethinus    | 60.30 | 0.00 |
| TRINITY_GBF9342(DNA-dirεRaphidocelis_subcap | 60.30 | 0.00 |
| TRINITY_XP_0056(hypothetCoccomyxa_subellips | 60.30 | 0.00 |
| TRINITY_KXZ4731(hypothetGonium_pectorale    | 60.30 | 0.00 |
| TRINITY_XP_0139(UreA carMonoraphidium_negle | 60.30 | 0.00 |
| TRINITY_XP_0128(PREDICTIErythranthe_guttata | 60.30 | 0.00 |
| TRINITY_XP_0139(putativεMonoraphidium_negle | 60.30 | 0.00 |
| TRINITY_XP_0063(60S acicEutrema_salsugineur | 60.30 | 0.00 |
| TRINITY_XP_0029(hypothetVolvox_carteri      | 60.30 | 0.00 |
| TRINITY_XP_0029(hypothetVolvox_carteri      | 60.30 | 0.00 |
| TRINITY_GAX8503(hypothetChlamydomonas_eusti | 60.30 | 0.00 |
| TRINITY_XP_0029(hypothetVolvox_carteri      | 60.30 | 0.00 |
| TRINITY_GAX8157(hypothetChlamydomonas_eusti | 60.30 | 0.00 |



|                  |           |                     |       |      |
|------------------|-----------|---------------------|-------|------|
| TRINITY_PNH11431 | hypothet  | Tetrabaena_socialis | 60.30 | 0.00 |
| TRINITY_PNW7373  | hypothet  | Chlamydomonas_reinh | 60.30 | 0.00 |
| TRINITY_GAQ9194  | Cytochr   | Klebsormidium_niten | 60.30 | 0.00 |
| TRINITY_GAX7262  | hypothet  | Chlamydomonas_eusti | 60.30 | 0.00 |
| TRINITY_XP_0058  | hypothet  | Chlorella_variabili | 60.30 | 0.00 |
| TRINITY_XP_0138  | hypothet  | Monoraphidium_negle | 60.30 | 0.00 |
| TRINITY_PSC7345  | dephosp   | Micractinium_conduc | 60.30 | 0.00 |
| TRINITY_XP_0139  | Uncharac  | Monoraphidium_negle | 60.30 | 0.00 |
| TRINITY_XP_0101  | (RNA-bin  | Morus_notabilis     | 60.30 | 0.00 |
| TRINITY_GAX8054  | hypothet  | Chlamydomonas_eusti | 60.30 | 0.00 |
| TRINITY_PNW8278  | hypothet  | Chlamydomonas_reinh | 60.30 | 0.00 |
| TRINITY_PNW7069  | hypothet  | Chlamydomonas_reinh | 60.30 | 0.00 |
| TRINITY_PNW7867  | hypothet  | Chlamydomonas_reinh | 60.30 | 0.00 |
| TRINITY_KXZ4651  | hypothet  | Gonium_pectorale    | 60.30 | 0.00 |
| TRINITY_XP_0056  | cation    | Coccomyxa_subellips | 60.30 | 0.00 |
| TRINITY_XP_0238  | structur  | Quercus_suber       | 60.30 | 0.00 |
| TRINITY_BAK0075  | (predict  | Hordeum_vulgare     | 60.30 | 0.00 |
| TRINITY_XP_0029  | hypothet  | Volvox_carteri      | 60.30 | 0.00 |
| TRINITY_PNW8535  | hypothet  | Chlamydomonas_reinh | 60.30 | 0.00 |
| TRINITY_GAX7808  | hypothet  | Chlamydomonas_eusti | 60.30 | 0.00 |
| TRINITY_GAQ9247  | EF-Hand   | Klebsormidium_niten | 60.30 | 0.00 |
| TRINITY_GAX8216  | (hypothet | Chlamydomonas_eusti | 60.30 | 0.00 |
| TRINITY_GAX8396  | hypothet  | Chlamydomonas_eusti | 60.30 | 0.00 |
| TRINITY_XP_0087  | ABC trar  | Phoenix_dactylifera | 60.30 | 0.00 |
| TRINITY_BAK0277  | (predict  | Hordeum_vulgare     | 60.30 | 0.00 |
| TRINITY_KXZ5419  | hypothet  | Gonium_pectorale    | 60.30 | 0.00 |
| TRINITY_XP_0016  | sodium/   | Chlamydomonas_reinh | 60.30 | 0.00 |
| TRINITY_PNH0890  | Elongati  | Tetrabaena_socialis | 60.30 | 0.00 |
| TRINITY_GAV8298  | RRM_1 d   | Cephalotus_follicul | 60.30 | 0.00 |
| TRINITY_XP_0087  | 60S rib   | Phoenix_dactylifera | 60.20 | 0.00 |
| TRINITY_GAQ8089  | hypothet  | Klebsormidium_niten | 60.20 | 0.00 |
| TRINITY_XP_0179  | PREDICT   | Theobroma_cacao     | 60.20 | 0.00 |
| TRINITY_YP_6656  | cytochr   | Nephroselmis_olivac | 60.20 | 0.00 |
| TRINITY_RZC6065  | hypothet  | Papaver_somniferum  | 60.20 | 0.00 |
| TRINITY_PKU6286  | 60S rib   | Dendrobium_catenatu | 60.20 | 0.00 |
| TRINITY_XP_0238  | dynein    | Quercus_suber       | 60.20 | 0.00 |
| TRINITY_RWR9572  | 4Fe-4S    | Cinnamomum_micranth | 60.20 | 0.00 |
| TRINITY_XP_0128  | PREDICT   | Erythranthe_guttata | 60.20 | 0.00 |
| TRINITY_GAX7441  | (hypothet | Chlamydomonas_eusti | 60.20 | 0.00 |
| TRINITY_EFJ0945  | hypothet  | Selaginella_moellen | 60.20 | 0.00 |
| TRINITY_KXZ5036  | (hypothet | Gonium_pectorale    | 60.20 | 0.00 |
| TRINITY_GAX7284  | hypothet  | Chlamydomonas_eusti | 60.20 | 0.00 |
| TRINITY_GAX7450  | hypothet  | Chlamydomonas_eusti | 60.20 | 0.00 |
| TRINITY_ABK2455  | unknown   | Picea_sitchensis    | 60.20 | 0.00 |
| TRINITY_ONK5610  | uncharac  | Asparagus_officinal | 60.20 | 0.00 |
| TRINITY_GAX7569  | hypothet  | Chlamydomonas_eusti | 60.20 | 0.00 |
| TRINITY_PNW7976  | hypothet  | Chlamydomonas_reinh | 60.20 | 0.00 |
| TRINITY_XP_0228  | DNA-dir   | Ostreococcus_tauri  | 60.20 | 0.00 |
| TRINITY_KXZ5552  | (hypothet | Gonium_pectorale    | 60.20 | 0.00 |
| TRINITY_EMS4635  | Serine/   | Triticum_urartu     | 60.20 | 0.00 |
| TRINITY_XP_0056  | hypothet  | Coccomyxa_subellips | 60.20 | 0.00 |
| TRINITY_PPS1612  | (hypothet | Gossypium_barbadens | 60.20 | 0.00 |
| TRINITY_GBF9777  | (hypothet | Raphidocelis_subcap | 60.20 | 0.00 |
| TRINITY_PNW7883  | hypothet  | Chlamydomonas_reinh | 60.20 | 0.00 |
| TRINITY_GAX7643  | (hypothet | Chlamydomonas_eusti | 60.20 | 0.00 |
| TRINITY_RMZ5214  | hypothet  | Auxenochlorella_pro | 60.20 | 0.00 |
| TRINITY_EPS6935  | hypothet  | Genlisea_aurea      | 60.20 | 0.00 |
| TRINITY_GAX7285  | (hypothet | Chlamydomonas_eusti | 60.20 | 0.00 |
| TRINITY_PNW7710  | hypothet  | Chlamydomonas_reinh | 60.20 | 0.00 |
| TRINITY_GAX7774  | hypothet  | Chlamydomonas_eusti | 60.20 | 0.00 |
| TRINITY_KXZ5377  | hypothet  | Gonium_pectorale    | 60.20 | 0.00 |
| TRINITY_XP_0139  | (DNA pol  | Monoraphidium_negle | 60.20 | 0.00 |
| TRINITY_GAX7550  | (hypothet | Chlamydomonas_eusti | 60.20 | 0.00 |
| TRINITY_GAX7942  | hypothet  | Chlamydomonas_eusti | 60.20 | 0.00 |
| TRINITY_KXZ4938  | hypothet  | Gonium_pectorale    | 60.20 | 0.00 |
| TRINITY_PNH0886  | (Protein  | Tetrabaena_socialis | 60.20 | 0.00 |

|                  |           |                     |       |      |
|------------------|-----------|---------------------|-------|------|
| TRINITY_XP_0016  | phosphat  | Chlamydomonas_reinh | 60.20 | 0.00 |
| TRINITY_KXZ5696  | hypothet  | Gonium_pectorale    | 60.20 | 0.00 |
| TRINITY_PNW87181 | hypothet  | Chlamydomonas_reinh | 60.20 | 0.00 |
| TRINITY_XP_0239  | dipeptic  | Quercus_suber       | 60.20 | 0.00 |
| TRINITY_AST0867  | cytochr   | Chlorella_heliozoae | 60.10 | 0.00 |
| TRINITY_XP_0029  | hypothet  | Volvox_carteri      | 60.10 | 0.00 |
| TRINITY_XP_0025  | predict   | Micromonas_commoda  | 60.10 | 0.00 |
| TRINITY_PSC6980  | phosphol  | Micractinium_conduc | 60.10 | 0.00 |
| TRINITY_PNW7412  | hypothet  | Chlamydomonas_reinh | 60.10 | 0.00 |
| TRINITY_GAX7634  | hypothet  | Chlamydomonas_eusti | 60.10 | 0.00 |
| TRINITY_XP_0102  | PREDICT   | Nelumbo_nucifera    | 60.10 | 0.00 |
| TRINITY_XP_0029  | hypothet  | Volvox_carteri      | 60.10 | 0.00 |
| TRINITY_KXZ5172  | hypothet  | Gonium_pectorale    | 60.10 | 0.00 |
| TRINITY_PSC6812  | (Methylt  | Micractinium_conduc | 60.10 | 0.00 |
| TRINITY_PSC6772  | putativ   | Micractinium_conduc | 60.10 | 0.00 |
| TRINITY_GAX7336  | hypothet  | Chlamydomonas_eusti | 60.10 | 0.00 |
| TRINITY_GAX7771  | hypothet  | Chlamydomonas_eusti | 60.10 | 0.00 |
| TRINITY_GAX8211  | hypothet  | Chlamydomonas_eusti | 60.10 | 0.00 |
| TRINITY_PNH0107  | Retrovir  | Tetrabaena_socialis | 60.10 | 0.00 |
| TRINITY_XP_0017  | (protein  | Chlamydomonas_reinh | 60.10 | 0.00 |
| TRINITY_RWW9106  | hypothet  | Ensete_ventricosum  | 60.10 | 0.00 |
| TRINITY_GAX7689  | hypothet  | Chlamydomonas_eusti | 60.10 | 0.00 |
| TRINITY_RID6413  | hypothet  | Brassica_rapa       | 60.10 | 0.00 |
| TRINITY_PNW7715  | hypothet  | Chlamydomonas_reinh | 60.10 | 0.00 |
| TRINITY_PPR9376  | hypothet  | Gossypium_barbadens | 60.10 | 0    |
| TRINITY_PRW3370  | low-CO2   | Chlorella_sorokinia | 60.10 | 0.00 |
| TRINITY_GAX8166  | hypothet  | Chlamydomonas_eusti | 60.10 | 0.00 |
| TRINITY_XP_0213  | uncharac  | Sorghum_bicolor     | 60.00 | 0.00 |
| TRINITY_BAF2219  | Os07g06   | Oryza_sativa        | 60.00 | 0.00 |
| TRINITY_EOX9856  | (Dolichyl | Theobroma_cacao     | 60.00 | 0.00 |
| TRINITY_PNH1194  | (BBSome-  | Tetrabaena_socialis | 60.00 | 0.00 |
| TRINITY_KDD7664  | hypothet  | Helicosporidium_sp. | 60.00 | 0.00 |
| TRINITY_GAQ7881  | Dynein-   | Klebsormidium_niten | 60.00 | 0.00 |
| TRINITY_XP_0105  | PREDICT   | Camelina_sativa     | 60.00 | 0.00 |
| TRINITY_PIN0870  | hypothet  | Handroanthus_impeti | 60.00 | 0.00 |
| TRINITY_BAJ9926  | (predict  | Hordeum_vulgare     | 60.00 | 0.00 |
| TRINITY_GAQ8524  | (hypothet | Klebsormidium_niten | 60.00 | 0.00 |
| TRINITY_XP_0030  | (predict  | Micromonas_pusilla  | 60.00 | 0.00 |
| TRINITY_XP_0217  | peptidy   | Chenopodium_quinoa  | 60.00 | 0.00 |
| TRINITY_PSC6734  | {ATP:cob  | Micractinium_conduc | 60.00 | 0.00 |
| TRINITY_ARQ8799  | ABC trar  | Helianthus_annuus   | 60.00 | 0.00 |
| TRINITY_PKA5461  | hypothet  | Apostasia_shenzheni | 60.00 | 0.00 |
| TRINITY_GAQ8252  | hypothet  | Klebsormidium_niten | 60.00 | 0.00 |
| TRINITY_GAU1796  | hypothet  | Trifolium_subterran | 60.00 | 0.00 |
| TRINITY_OEL2566  | S-adenos  | Dichanthelium_oligo | 60.00 | 0.00 |
| TRINITY_XP_0258  | obg-like  | Panicum_hallii      | 60.00 | 0.00 |
| TRINITY_XP_0068  | zinc fir  | Amborella_trichopod | 60.00 | 0.00 |
| TRINITY_GAX7278  | (hypothet | Chlamydomonas_eusti | 60.00 | 0.00 |
| TRINITY_XP_0228  | {D-2-hydr | Olea_europaea       | 60.00 | 0.00 |
| TRINITY_GAX8215  | (hypothet | Chlamydomonas_eusti | 60.00 | 0.00 |
| TRINITY_GAX7430  | hypothet  | Chlamydomonas_eusti | 60.00 | 0.00 |
| TRINITY_GBF9362  | (hypothet | Raphidocelis_subcap | 60.00 | 0.00 |
| TRINITY_XP_0056  | P-loop    | Coccomyxa_subellips | 60.00 | 0.00 |
| TRINITY_KXZ5511  | (hypothet | Gonium_pectorale    | 60.00 | 0.00 |
| TRINITY_XP_0029  | hypothet  | Volvox_carteri      | 60.00 | 0.00 |
| TRINITY_XP_0205  | {calmodul | Phalaenopsis_equest | 60.00 | 0.00 |
| TRINITY_EPS7450  | hypothet  | Genlisea_aurea      | 60.00 | 0.00 |
| TRINITY_PNH1293  | (hypothet | Tetrabaena_socialis | 60.00 | 0.00 |
| TRINITY_XP_0029  | {cinnamo  | Selaginella_moellen | 60.00 | 0.00 |
| TRINITY_BAJ9887  | (predict  | Hordeum_vulgare     | 60.00 | 0.00 |
| TRINITY_GAX8455  | (hypothet | Chlamydomonas_eusti | 60.00 | 0.00 |
| TRINITY_KXZ4873  | hypothet  | Gonium_pectorale    | 60.00 | 0.00 |
| TRINITY_PNW8407  | (hypothet | Chlamydomonas_reinh | 60.00 | 0.00 |
| TRINITY_XP_0113  | {GAF dom  | Auxenochlorella_pro | 60.00 | 0.00 |
| TRINITY_PNW7743  | hypothet  | Chlamydomonas_reinh | 60.00 | 0.00 |
| TRINITY_PNG9977  | hypothet  | Tetrabaena_socialis | 60.00 | 0.00 |

|                  |                              |       |      |
|------------------|------------------------------|-------|------|
| TRINITY_XP_00584 | hypothetChlorella_variabili  | 60.00 | 0.00 |
| TRINITY_ABS11064 | reverse Malus_domestica      | 60.00 | 0.00 |
| TRINITY_PSC72378 | acetolaMicractinium_conduc   | 60.00 | 0.00 |
| TRINITY_GAX78907 | hypothetChlamydomonas_eusti  | 60.00 | 0.00 |
| TRINITY_PNW75137 | hypothetChlamydomonas_reinh  | 60.00 | 0.00 |
| TRINITY_XP_00294 | hypothetVolvox_carteri       | 60.00 | 0.00 |
| TRINITY_AGC79720 | (glycerolDunaliella_tertiole | 60.00 | 0.00 |
| TRINITY_GAX83362 | hypothetChlamydomonas_eusti  | 60.00 | 0.00 |
| TRINITY_PNW80186 | (hypothetChlamydomonas_reinh | 60.00 | 0.00 |
| TRINITY_XP_00295 | hypothetVolvox_carteri       | 60.00 | 0.00 |
| TRINITY_GAX83223 | hypothetChlamydomonas_eusti  | 60.00 | 0.00 |
| TRINITY_KXZ51002 | hypothetGonium_pectorale     | 60.00 | 0.00 |
| TRINITY_XP_02735 | ABC trarAbrus_precatorius    | 60.00 | 0.00 |
| TRINITY_PNH09827 | F-box/WITetrabaena_socialis  | 60.00 | 0.00 |
| TRINITY_XP_01390 | (hypothetMonoraphidium_negle | 60.00 | 0.00 |
| TRINITY_PNW74663 | hypothetChlamydomonas_reinh  | 60.00 | 0.00 |
| TRINITY_PRW60390 | (UPF0420 Chlorella_sorokinia | 60.00 | 0.00 |
| TRINITY_XP_00170 | (Qa-SNARIChlamydomonas_reinh | 60.00 | 0.00 |
| TRINITY_GAX72880 | (hypothetChlamydomonas_eusti | 60.00 | 0.00 |
| TRINITY_GAX75943 | hypothetChlamydomonas_eusti  | 60.00 | 0.00 |
| TRINITY_GAX81260 | (hypothetChlamydomonas_eusti | 60.00 | 0.00 |
| TRINITY_XP_02016 | (mitogen-Aegilops_tauschii   | 60.00 | 0.00 |
| TRINITY_GAX85767 | hypothetChlamydomonas_eusti  | 60.00 | 0.00 |
| TRINITY_XP_01389 | putativeMonoraphidium_negle  | 60.00 | 0.00 |
| TRINITY_PNW82061 | hypothetChlamydomonas_reinh  | 60.00 | 0.00 |
| TRINITY_PNW79369 | hypothetChlamydomonas_reinh  | 60.00 | 0.00 |
| TRINITY_KMS64603 | hypothetBeta_vulgaris        | 60.00 | 0.00 |
| TRINITY_GAX78401 | hypothetChlamydomonas_eusti  | 60.00 | 0.00 |
| TRINITY_PNW78329 | hypothetChlamydomonas_reinh  | 60.00 | 0.00 |
| TRINITY_PNH03827 | General Tetrabaena_socialis  | 60.00 | 0.00 |
| TRINITY_XP_01389 | Cation tMonoraphidium_negle  | 60.00 | 0.00 |
| TRINITY_KNA23702 | hypothetSpinacia_oleracea    | 60.00 | 0.00 |
| TRINITY_GAX85699 | hypothetChlamydomonas_eusti  | 60.00 | 0.00 |
| TRINITY_GAX73206 | (hypothetChlamydomonas_eusti | 60.00 | 0.00 |
| TRINITY_XP_00684 | 60S ribcAmborella_trichopod  | 59.90 | 0.00 |
| TRINITY_XP_00584 | hypothetChlorella_variabili  | 59.90 | 0.00 |
| TRINITY_GAX75738 | hypothetChlamydomonas_eusti  | 59.90 | 0.00 |
| TRINITY_KXZ51897 | hypothetGonium_pectorale     | 59.90 | 0.00 |
| TRINITY_XP_00295 | pseudouVolvox_carteri        | 59.90 | 0.00 |
| TRINITY_XP_00356 | aldehydBrachypodium_distac   | 59.90 | 0.00 |
| TRINITY_GAX73544 | hypothetChlamydomonas_eusti  | 59.90 | 0.00 |
| TRINITY_PNW83409 | hypothetChlamydomonas_reinh  | 59.90 | 0.00 |
| TRINITY_GBG71621 | hypothetChara_braunii        | 59.90 | 0.00 |
| TRINITY_GAX76678 | hypothetChlamydomonas_eusti  | 59.90 | 0.00 |
| TRINITY_OAE22110 | (hypothetMarchantia_polymorp | 59.90 | 0.00 |
| TRINITY_XP_00169 | flavin-cChlamydomonas_reinh  | 59.90 | 0.00 |
| TRINITY_GBF88452 | hypothetRaphidocelis_subcap  | 59.90 | 0.00 |
| TRINITY_BAK02778 | predicteHordeum_vulgare      | 59.90 | 0.00 |
| TRINITY_XP_00294 | hypothetVolvox_carteri       | 59.90 | 0.00 |
| TRINITY_PNH12019 | hypothetTetrabaena_socialis  | 59.90 | 0.00 |
| TRINITY_XP_02375 | DEAD-boLactuca_sativa        | 59.90 | 0.00 |
| TRINITY_KZV15356 | hypothetDorcoceras_hygromet  | 59.90 | 0.00 |
| TRINITY_PSC73487 | tubulin Micractinium_conduc  | 59.90 | 0.00 |
| TRINITY_GAX86343 | hypothetChlamydomonas_eusti  | 59.90 | 0.00 |
| TRINITY_XP_00169 | esteraseChlamydomonas_reinh  | 59.90 | 0.00 |
| TRINITY_PKA62036 | 60S ribcApostasia_shenzheni  | 59.90 | 0.00 |
| TRINITY_XP_02438 | T-complePhyscomitrella_pate  | 59.90 | 0.00 |
| TRINITY_XP_00169 | Qc-SNARIChlamydomonas_reinh  | 59.90 | 0.00 |
| TRINITY_XP_00170 | (predicteChlamydomonas_reinh | 59.90 | 0.00 |
| TRINITY_KXZ55583 | hypothetGonium_pectorale     | 59.90 | 0.00 |
| TRINITY_PRW61136 | (N-acyl-γChlorella_sorokinia | 59.90 | 0.00 |
| TRINITY_PNW74826 | (hypothetChlamydomonas_reinh | 59.90 | 0.00 |
| TRINITY_EFJ32724 | hypothetSelaginella_moellen  | 59.80 | 0.00 |
| TRINITY_XP_00250 | (predicteMicromonas_commoda  | 59.80 | 0.00 |
| TRINITY_XP_02387 | lon protQuercus_suber        | 59.80 | 0.00 |
| TRINITY_GAX74887 | hypothetChlamydomonas_eusti  | 59.80 | 0.00 |

|                                              |       |      |
|----------------------------------------------|-------|------|
| TRINITY_PRW18297methylnaChlorella_sorokinia  | 59.80 | 0.00 |
| TRINITY_XP_01006(PREDICTEucalyptus_grandis   | 59.80 | 0.00 |
| TRINITY_XP_02163erlin-2-Hevea_brasiliensis   | 59.80 | 0.00 |
| TRINITY_XP_00170leucine-Chlamydomonas_reinh  | 59.80 | 0.00 |
| TRINITY_XP_00169peptidyChlamydomonas_reinh   | 59.80 | 0.00 |
| TRINITY_PNH03406(hypothetTetrabaena_socialis | 59.80 | 0.00 |
| TRINITY_XP_00294intraflaVolvox_carteri       | 59.80 | 0.00 |
| TRINITY_GAX86506(hypothetChlamydomonas_eusti | 59.80 | 0.00 |
| TRINITY_GAX8491(hypothetChlamydomonas_eusti  | 59.80 | 0.00 |
| TRINITY_PNW87796(hypothetChlamydomonas_reinh | 59.80 | 0.00 |
| TRINITY_XP_00169cytochrChlamydomonas_reinh   | 59.80 | 0.00 |
| TRINITY_GAX84186(hypothetChlamydomonas_eusti | 59.80 | 0.00 |
| TRINITY_PNW84055hypothetChlamydomonas_reinh  | 59.80 | 0.00 |
| TRINITY_PNW7294(hypothetChlamydomonas_reinh  | 59.80 | 0.00 |
| TRINITY_XP_00295hypothetVolvox_carteri       | 59.80 | 0.00 |
| TRINITY_PNW70767hypothetChlamydomonas_reinh  | 59.80 | 0.00 |
| TRINITY_KXZ43946(hypothetGonium_pectorale    | 59.80 | 0.00 |
| TRINITY_XP_00295hypothetVolvox_carteri       | 59.80 | 0.00 |
| TRINITY_PNW72217hypothetChlamydomonas_reinh  | 59.80 | 0.00 |
| TRINITY_GAX73852hypothetChlamydomonas_eusti  | 59.80 | 0.00 |
| TRINITY_XP_00169predicteChlamydomonas_reinh  | 59.80 | 0.00 |
| TRINITY_XP_00297glutamirSelaginella_moellen  | 59.80 | 0.00 |
| TRINITY_POO04133ATP-binChlamydomonas_reinh   | 59.80 | 0.00 |
| TRINITY_GAX7376(hypothetChlamydomonas_eusti  | 59.80 | 0.00 |
| TRINITY_PNH06935Sorting Tetrabaena_socialis  | 59.80 | 0.00 |
| TRINITY_KMS65245hypothetBeta_vulgaris        | 59.80 | 0.00 |
| TRINITY_KXZ4192(hypothetGonium_pectorale     | 59.80 | 0.00 |
| TRINITY_PNW84997hypothetChlamydomonas_reinh  | 59.80 | 0.00 |
| TRINITY_BAJ9943(predicteHordeum_vulgare      | 59.80 | 0.00 |
| TRINITY_PNW79225hypothetChlamydomonas_reinh  | 59.70 | 0.00 |
| TRINITY_XP_00635(PREDICTESolanum_tuberosum   | 59.70 | 0.00 |
| TRINITY_XP_02389bifunctiQuercus_suber        | 59.70 | 0.00 |
| TRINITY_AII20555cytosoliFestuca_ovina        | 59.70 | 0.00 |
| TRINITY_BAB08742nucleotiArabidopsis_thalian  | 59.70 | 0.00 |
| TRINITY_XP_0218640S ribChlamydomonas_reinh   | 59.70 | 0.00 |
| TRINITY_XP_00584hypothetChlorella_variabili  | 59.70 | 0.00 |
| TRINITY_ABK2444(unknown Picea_sitchensis     | 59.70 | 0.00 |
| TRINITY_KXZ51253hypothetGonium_pectorale     | 59.70 | 0.00 |
| TRINITY_EFJ2649(hypothetSelaginella_moellen  | 59.70 | 0.00 |
| TRINITY_XP_00169radial Chlamydomonas_reinh   | 59.70 | 0.00 |
| TRINITY_BAK02198predicteHordeum_vulgare      | 59.70 | 0.00 |
| TRINITY_XP_00308GuanylatOstreococcus_tauri   | 59.70 | 0.00 |
| TRINITY_GAX7606(hypothetChlamydomonas_eusti  | 59.70 | 0.00 |
| TRINITY_PNW78061hypothetChlamydomonas_reinh  | 59.70 | 0.00 |
| TRINITY_XP_00295hypothetVolvox_carteri       | 59.70 | 0.00 |
| TRINITY_XP_01389hypothetMonoraphidium_negle  | 59.70 | 0.00 |
| TRINITY_XP_00584hypothetChlorella_variabili  | 59.70 | 0.00 |
| TRINITY_XP_00295hypothetVolvox_carteri       | 59.70 | 0.00 |
| TRINITY_XP_00170(COP-II Chlamydomonas_reinh  | 59.70 | 0.00 |
| TRINITY_XP_00295hypothetVolvox_carteri       | 59.70 | 0.00 |
| TRINITY_PNW74316hypothetChlamydomonas_reinh  | 59.70 | 0.00 |
| TRINITY_GAX76808hypothetChlamydomonas_eusti  | 59.70 | 0.00 |
| TRINITY_ESR63546hypothetCitrus_clementina    | 59.70 | 0.00 |
| TRINITY_XP_00294hypothetVolvox_carteri       | 59.70 | 0.00 |
| TRINITY_XP_00169flagellaChlamydomonas_reinh  | 59.70 | 0.00 |
| TRINITY_XP_0075140S ribChlamydomonas_reinh   | 59.70 | 0.00 |
| TRINITY_GAX81709hypothetChlamydomonas_eusti  | 59.70 | 0.00 |
| TRINITY_XP_01389hypothetMonoraphidium_negle  | 59.70 | 0.00 |
| TRINITY_GAX84872hypothetChlamydomonas_eusti  | 59.70 | 0.00 |
| TRINITY_GBF98054histone-Raphidocelis_subcap  | 59.70 | 0.00 |
| TRINITY_GAX7901(hypothetChlamydomonas_eusti  | 59.70 | 0.00 |
| TRINITY_POC8M8.1RecName:Zea_mays             | 59.70 | 0.00 |
| TRINITY_KXZ42217hypothetGonium_pectorale     | 59.70 | 0.00 |
| TRINITY_KXZ50947hypothetGonium_pectorale     | 59.70 | 0.00 |
| TRINITY_GAX83788hypothetChlamydomonas_eusti  | 59.70 | 0.00 |
| TRINITY_KXZ56656hypothetGonium_pectorale     | 59.70 | 0.00 |

|                  |           |                     |       |      |
|------------------|-----------|---------------------|-------|------|
| TRINITY_XP_0138  | hypothet  | Monoraphidium_negle | 59.70 | 0.00 |
| TRINITY_XP_0029  | amine o   | Volvox_carteri      | 59.70 | 0.00 |
| TRINITY_GAX8243  | hypothet  | Chlamydomonas_eusti | 59.70 | 0.00 |
| TRINITY_XP_0110  | 40S rib   | Sesamum_indicum     | 59.70 | 0.00 |
| TRINITY_XP_0025  | (predict  | Micromonas_commoda  | 59.60 | 0.00 |
| TRINITY_AGN5202  | MYB-rel   | Salvia_miltiorrhiza | 59.60 | 0.00 |
| TRINITY_XP_0029  | dr1-ass   | Selaginella_moellen | 59.60 | 0.00 |
| TRINITY_XP_0271  | (pre-mRN  | Coffea_arabica      | 59.60 | 0.00 |
| TRINITY_XP_0238  | SUMO-cor  | Quercus_suber       | 59.60 | 0.00 |
| TRINITY_PNY1170  | phospho   | Trifolium_pratense  | 59.60 | 0.00 |
| TRINITY_GAQ8921  | (hypothet | Klebsormidium_niten | 59.60 | 0.00 |
| TRINITY_XP_0056  | U6 snRN   | Coccomyxa_subellips | 59.60 | 0.00 |
| TRINITY_XP_0029  | SET and   | Volvox_carteri      | 59.60 | 0.00 |
| TRINITY_XP_0239  | ras-rel   | Quercus_suber       | 59.60 | 0.00 |
| TRINITY_GAX7271  | (hypothet | Chlamydomonas_eusti | 59.60 | 0.00 |
| TRINITY_AGL0947  | TBP-ass   | Piper_nigrum        | 59.60 | 0.00 |
| TRINITY_KXZ48271 | hypothet  | Gonium_pectorale    | 59.60 | 0.00 |
| TRINITY_OAE2260  | hypothet  | Marchantia_polymorp | 59.60 | 0.00 |
| TRINITY_XP_0271  | (actin-11 | Coffea_arabica      | 59.60 | 0.00 |
| TRINITY_GAX7731  | hypothet  | Chlamydomonas_eusti | 59.60 | 0.00 |
| TRINITY_OAE3359  | hypothet  | Marchantia_polymorp | 59.60 | 0.00 |
| TRINITY_KXZ5455  | (hypothet | Gonium_pectorale    | 59.60 | 0.00 |
| TRINITY_GAX7389  | hypothet  | Chlamydomonas_eusti | 59.60 | 0.00 |
| TRINITY_PSC76291 | integral  | Micractinium_conduc | 59.60 | 0.00 |
| TRINITY_XP_0056  | alcohol   | Coccomyxa_subellips | 59.60 | 0.00 |
| TRINITY_PKA5985  | (60S rib  | Apostasia_shenzheni | 59.60 | 0.00 |
| TRINITY_XP_0058  | hypothet  | Chlorella_variabili | 59.60 | 0.00 |
| TRINITY_KXZ4427  | hypothet  | Gonium_pectorale    | 59.60 | 0.00 |
| TRINITY_GAQ8936  | putativ   | Klebsormidium_niten | 59.60 | 0.00 |
| TRINITY_KXZ5285  | hypothet  | Gonium_pectorale    | 59.60 | 0.00 |
| TRINITY_XP_0138  | hypothet  | Monoraphidium_negle | 59.60 | 0.00 |
| TRINITY_KXZ4794  | hypothet  | Gonium_pectorale    | 59.60 | 0.00 |
| TRINITY_XP_0016  | DRAP1-li  | Chlamydomonas_reinh | 59.60 | 0.00 |
| TRINITY_GAX8513  | (hypothet | Chlamydomonas_eusti | 59.60 | 0.00 |
| TRINITY_GAX7396  | hypothet  | Chlamydomonas_eusti | 59.60 | 0.00 |
| TRINITY_BAK0218  | (predict  | Hordeum_vulgare     | 59.60 | 0.00 |
| TRINITY_EAY8744  | hypothet  | Oryza_sativa        | 59.60 | 0.00 |
| TRINITY_GAX8090  | hypothet  | Chlamydomonas_eusti | 59.60 | 0.00 |
| TRINITY_XP_0016  | N6-DNA-n  | Chlamydomonas_reinh | 59.60 | 0.00 |
| TRINITY_GAX8370  | hypothet  | Chlamydomonas_eusti | 59.60 | 0.00 |
| TRINITY_KMS9434  | hypothet  | Beta_vulgaris       | 59.60 | 0.00 |
| TRINITY_GAX8355  | (hypothet | Chlamydomonas_eusti | 59.60 | 0.00 |
| TRINITY_GAX8072  | (hypothet | Chlamydomonas_eusti | 59.60 | 0.00 |
| TRINITY_XP_0017  | (ribosom  | Chlamydomonas_reinh | 59.60 | 0.00 |
| TRINITY_XP_0239  | (heat sh  | Quercus_suber       | 59.60 | 0.00 |
| TRINITY_KXZ4643  | (hypothet | Gonium_pectorale    | 59.60 | 0.00 |
| TRINITY_PNW7593  | (hypothet | Chlamydomonas_reinh | 59.60 | 0.00 |
| TRINITY_GBF9812  | ABC trar  | Raphidocelis_subcap | 59.60 | 0.00 |
| TRINITY_GAX7634  | hypothet  | Chlamydomonas_eusti | 59.60 | 0.00 |
| TRINITY_GAX7975  | hypothet  | Chlamydomonas_eusti | 59.60 | 0.00 |
| TRINITY_GAX8503  | hypothet  | Chlamydomonas_eusti | 59.60 | 0.00 |
| TRINITY_GAX8594  | hypothet  | Chlamydomonas_eusti | 59.60 | 0.00 |
| TRINITY_GAX8569  | hypothet  | Chlamydomonas_eusti | 59.60 | 0.00 |
| TRINITY_XP_0029  | hypothet  | Volvox_carteri      | 59.60 | 0.00 |
| TRINITY_PSC6774  | Gag-Pol   | Micractinium_conduc | 59.60 | 0.00 |
| TRINITY_XP_0029  | hypothet  | Volvox_carteri      | 59.60 | 0.00 |
| TRINITY_XP_0029  | hypothet  | Volvox_carteri      | 59.60 | 0.00 |
| TRINITY_XP_0239  | (lon prot | Quercus_suber       | 59.60 | 0.00 |
| TRINITY_PSC7135  | RCC2-li   | Micractinium_conduc | 59.50 | 0.00 |
| TRINITY_XP_0016  | flagell   | Chlamydomonas_reinh | 59.50 | 0.00 |
| TRINITY_PWA7013  | pigment   | Artemisia_annua     | 59.50 | 0.00 |
| TRINITY_BAK0051  | (predict  | Hordeum_vulgare     | 59.50 | 0.00 |
| TRINITY_XP_0217  | spastin-  | Chenopodium_quinoa  | 59.50 | 0.00 |
| TRINITY_EMS57891 | hypothet  | Triticum_urartu     | 59.50 | 0.00 |
| TRINITY_XP_0238  | ras-rel   | Quercus_suber       | 59.50 | 0.00 |
| TRINITY_XP_0238  | 40S rib   | Quercus_suber       | 59.50 | 0.00 |

|                 |          |                     |                |       |      |
|-----------------|----------|---------------------|----------------|-------|------|
| TRINITY_XP_0270 | tryptoph | Coffea_arabica      | 59.50          | 0.00  |      |
| TRINITY_KDD7516 | hypothet | Helicosporidium_sp. | 59.50          | 0.00  |      |
| TRINITY_RMZ5369 | hypothet | Auxenochlorella_pro | 59.50          | 0.00  |      |
| TRINITY_PNW7193 | hypothet | Chlamydomonas_reinh | 59.50          | 0.00  |      |
| TRINITY_RLM7453 | hypothet | Panicum_miliaceum   | 59.50          | 0.00  |      |
| TRINITY_PNW7586 | hypothet | Chlamydomonas_reinh | 59.50          | 0.00  |      |
| TRINITY_XP_0016 | small r  | Chlamydomonas_reinh | 59.50          | 0.00  |      |
| TRINITY_XP_0029 | hypothet | Volvox_carteri      | 59.50          | 0.00  |      |
| TRINITY_GAX8390 | hypothet | Chlamydomonas_eusti | 59.50          | 0.00  |      |
| TRINITY_GAX7756 | hypothet | Chlamydomonas_eusti | 59.50          | 0.00  |      |
| TRINITY_GAX8404 | hypothet | Chlamydomonas_eusti | 59.50          | 0.00  |      |
| TRINITY_PRW3917 | mismatch | Chlorella_sorokinia | 59.50          | 0.00  |      |
| TRINITY_PSC7492 | ubiquiti | Micractinium_conduc | 59.50          | 0.00  |      |
| TRINITY_ADN4307 | beta-ca  | Haematococcus_lacus | 59.50          | 0.00  |      |
| TRINITY_GAX8495 | hypothet | Chlamydomonas_eusti | 59.50          | 0.00  |      |
| TRINITY_GBF9034 | hypothet | Raphidocelis_subcap | 59.50          | 0.00  |      |
| TRINITY_GBF9563 | hypothet | Raphidocelis_subcap | 59.50          | 0.00  |      |
| TRINITY_XP_0016 | predict  | Chlamydomonas_reinh | 59.50          | 0.00  |      |
| TRINITY_XP_0029 | hypothet | Volvox_carteri      | 59.50          | 0.00  |      |
| TRINITY_XP_0239 | serine/t | Quercus_suber       | 59.50          | 0.00  |      |
| TRINITY_KXZ5425 | hypothet | Gonium_pectorale    | 59.50          | 0.00  |      |
| TRINITY_XP_0035 | chaperon | Brachypodium_distac | 59.50          | 0.00  |      |
| TRINITY_GAX7934 | hypothet | Chlamydomonas_eusti | 59.50          | 0.00  |      |
| TRINITY_XP_0016 | allanto  | Chlamydomonas_reinh | 59.50          | 0.00  |      |
| TRINITY_RYQ8594 | hypothet | Arachis_hypogaea    | 59.50          | 0.00  |      |
| TRINITY_XP_0029 | '3'5'    | -cyc                | Volvox_carteri | 59.50 | 0.00 |
| TRINITY_PRW5789 | RING fir | Chlorella_sorokinia | 59.50          | 0.00  |      |
| TRINITY_GAX8346 | hypothet | Chlamydomonas_eusti | 59.50          | 0.00  |      |
| TRINITY_PNW7881 | hypothet | Chlamydomonas_reinh | 59.50          | 0.00  |      |
| TRINITY_OUS4300 | uracil-I | Ostreococcus_tauri  | 59.50          | 0.00  |      |
| TRINITY_PNR4546 | hypothet | Physcomitrella_pate | 59.50          | 0.00  |      |
| TRINITY_XP_0029 | hypothet | Volvox_carteri      | 59.50          | 0.00  |      |
| TRINITY_GBF9838 | DNA rep  | Raphidocelis_subcap | 59.50          | 0.00  |      |
| TRINITY_RZB6735 | Cyclin-c | Glycine_soja        | 59.50          | 0.00  |      |
| TRINITY_PNW8396 | hypothet | Chlamydomonas_reinh | 59.50          | 0.00  |      |
| TRINITY_GAX8410 | hypothet | Chlamydomonas_eusti | 59.50          | 0.00  |      |
| TRINITY_GAX8164 | hypothet | Chlamydomonas_eusti | 59.50          | 0.00  |      |
| TRINITY_GAX7714 | hypothet | Chlamydomonas_eusti | 59.50          | 0.00  |      |
| TRINITY_XP_0116 | PREDICTI | Cucumis_sativus     | 59.50          | 0.00  |      |
| TRINITY_XP_0238 | 40S rib  | Quercus_suber       | 59.50          | 0.00  |      |
| TRINITY_OUS4464 | 5-aminol | Ostreococcus_tauri  | 59.40          | 0.00  |      |
| TRINITY_XP_0138 | citrate  | Monoraphidium_negle | 59.40          | 0.00  |      |
| TRINITY_RZB9585 | Programm | Glycine_soja        | 59.40          | 0.00  |      |
| TRINITY_XP_0216 | probable | Manihot_esculenta   | 59.40          | 0.00  |      |
| TRINITY_OAY8236 | ABC trar | Ananas_comosus      | 59.40          | 0.00  |      |
| TRINITY_XP_0014 | predict  | Ostreococcus_sp._'1 | 59.40          | 0.00  |      |
| TRINITY_GAX8105 | hypothet | Chlamydomonas_eusti | 59.40          | 0.00  |      |
| TRINITY_XP_0110 | PREDICTI | Populus_euphratica  | 59.40          | 0.00  |      |
| TRINITY_BAK0268 | predict  | Hordeum_vulgare     | 59.40          | 0.00  |      |
| TRINITY_KXZ4863 | hypothet | Gonium_pectorale    | 59.40          | 0.00  |      |
| TRINITY_PNW7183 | hypothet | Chlamydomonas_reinh | 59.40          | 0.00  |      |
| TRINITY_PNH0961 | hypothet | Tetrabaena_socialis | 59.40          | 0.00  |      |
| TRINITY_KXZ5025 | hypothet | Gonium_pectorale    | 59.40          | 0.00  |      |
| TRINITY_XP_0058 | hypothet | Chlorella_variabili | 59.40          | 0.00  |      |
| TRINITY_GAX7287 | hypothet | Chlamydomonas_eusti | 59.40          | 0.00  |      |
| TRINITY_GAX8370 | hypothet | Chlamydomonas_eusti | 59.40          | 0.00  |      |
| TRINITY_KXZ5481 | hypothet | Gonium_pectorale    | 59.40          | 0.00  |      |
| TRINITY_GAX7672 | hypothet | Chlamydomonas_eusti | 59.40          | 0.00  |      |
| TRINITY_GAX7985 | hypothet | Chlamydomonas_eusti | 59.40          | 0.00  |      |
| TRINITY_GAX7269 | hypothet | Chlamydomonas_eusti | 59.40          | 0.00  |      |
| TRINITY_PSC6940 | Lysosom  | Micractinium_conduc | 59.40          | 0.00  |      |
| TRINITY_GAX7965 | hypothet | Chlamydomonas_eusti | 59.40          | 0.00  |      |
| TRINITY_PSC7431 | epimera  | Micractinium_conduc | 59.40          | 0.00  |      |
| TRINITY_PNW8806 | hypothet | Chlamydomonas_reinh | 59.40          | 0.00  |      |
| TRINITY_PNW7536 | hypothet | Chlamydomonas_reinh | 59.40          | 0.00  |      |
| TRINITY_XP_0016 | predict  | Chlamydomonas_reinh | 59.40          | 0.00  |      |

|                                             |       |      |
|---------------------------------------------|-------|------|
| TRINITY_KXZ5645(hypothetGonium_pectorale    | 59.40 | 0.00 |
| TRINITY_GBF9460(hypothetRaphidocelis_subcap | 59.40 | 0.00 |
| TRINITY_XP_0016(methylc1Chlamydomonas_reinh | 59.40 | 0.00 |
| TRINITY_KZV1528(cystathiDorcoceras_hygromet | 59.40 | 0.00 |
| TRINITY_PNW7374(hypothetChlamydomonas_reinh | 59.40 | 0.00 |
| TRINITY_GAX7712(hypothetChlamydomonas_eusti | 59.40 | 0.00 |
| TRINITY_KXZ4688(hypothetGonium_pectorale    | 59.40 | 0.00 |
| TRINITY_GAX7451(hypothetChlamydomonas_eusti | 59.40 | 0.00 |
| TRINITY_AER5821(channelcChlamydomonas_raude | 59.40 | 0.00 |
| TRINITY_GAX8238(hypothetChlamydomonas_eusti | 59.40 | 0    |

|                  |          |                     |       |      |
|------------------|----------|---------------------|-------|------|
| TRINITY_XP_02284 | Ribosome | Ostreococcus_tauri  | 59.40 | 0.00 |
| TRINITY_XP_00169 | predict  | Chlamydomonas_reinh | 59.40 | 0.00 |
| TRINITY_XP_00295 | hypothet | Volvox_carteri      | 59.40 | 0.00 |
| TRINITY_PNW81872 | hypothet | Chlamydomonas_reinh | 59.40 | 0.00 |
| TRINITY_GAX80268 | hypothet | Chlamydomonas_eusti | 59.40 | 0.00 |
| TRINITY_GAX81908 | hypothet | Chlamydomonas_eusti | 59.40 | 0    |
| TRINITY_GAX79869 | hypothet | Chlamydomonas_eusti | 59.40 | 0.00 |
| TRINITY_PNW70372 | hypothet | Chlamydomonas_reinh | 59.40 | 0.00 |
| TRINITY_EPS74505 | hypothet | Genlisea_aurea      | 59.40 | 0.00 |
| TRINITY_GAX75982 | hypothet | Chlamydomonas_eusti | 59.40 | 0.00 |
| TRINITY_GAX80179 | hypothet | Chlamydomonas_eusti | 59.40 | 0.00 |
| TRINITY_XP_01910 | PREDICT  | Beta_vulgaris       | 59.40 | 0.00 |
| TRINITY_BAK02869 | predict  | Hordeum_vulgare     | 59.30 | 0.00 |
| TRINITY_XP_02391 | transac  | Quercus_suber       | 59.30 | 0.00 |
| TRINITY_XP_01919 | PREDICT  | Ipomoea_nil         | 59.30 | 0.00 |
| TRINITY_XP_00306 | ligase,  | Micromonas_pusilla  | 59.30 | 0.00 |
| TRINITY_BAK00513 | predict  | Hordeum_vulgare     | 59.30 | 0.00 |
| TRINITY_BAK00513 | predict  | Hordeum_vulgare     | 59.30 | 0.00 |
| TRINITY_PNH07928 | Methylat | Tetrabaena_socialis | 59.30 | 0.00 |
| TRINITY_XP_00940 | PREDICT  | Musa_acuminata      | 59.30 | 0.00 |
| TRINITY_XP_01389 | Mitotic  | Monoraphidium_negle | 59.30 | 0.00 |
| TRINITY_XP_02389 | 1,4-alf  | Quercus_suber       | 59.30 | 0.00 |
| TRINITY_EMS68525 | hypothet | Triticum_urartu     | 59.30 | 0.00 |
| TRINITY_XP_01945 | PREDICT  | Lupinus_angustifoli | 59.30 | 0.00 |
| TRINITY_XP_02438 | probable | Physcomitrella_pate | 59.30 | 0.00 |
| TRINITY_KMS64810 | hypothet | Beta_vulgaris       | 59.30 | 0.00 |
| TRINITY_PNW82795 | hypothet | Chlamydomonas_reinh | 59.30 | 0.00 |
| TRINITY_KXZ51114 | hypothet | Gonium_pectorale    | 59.30 | 0.00 |
| TRINITY_XP_01390 | putativ  | Monoraphidium_negle | 59.30 | 0.00 |
| TRINITY_XP_01390 | PKHD-ty  | Monoraphidium_negle | 59.30 | 0.00 |
| TRINITY_GAX72594 | hypothet | Chlamydomonas_eusti | 59.30 | 0.00 |
| TRINITY_XP_01587 | uncharac | Ziziphus_jujuba     | 59.30 | 0.00 |
| TRINITY_KXZ43041 | hypothet | Gonium_pectorale    | 59.30 | 0.00 |
| TRINITY_XP_01345 | uncharac | Medicago_truncatula | 59.30 | 0.00 |
| TRINITY_XP_00584 | hypothet | Chlorella_variabili | 59.30 | 0.00 |
| TRINITY_XP_01450 | vacuolar | Vigna_radiata       | 59.30 | 0.00 |
| TRINITY_EOY20322 | Small G  | Theobroma_cacao     | 59.30 | 0.00 |
| TRINITY_KXZ44840 | hypothet | Gonium_pectorale    | 59.30 | 0.00 |
| TRINITY_OAE29641 | hypothet | Marchantia_polymorp | 59.30 | 0.00 |
| TRINITY_ABR16828 | unknown  | Picea_sitchensis    | 59.30 | 0.00 |
| TRINITY_AWK67835 | MME2 [D  | Dunaliella_tertiole | 59.30 | 0.00 |
| TRINITY_XP_01027 | PREDICT  | Nelumbo_nucifera    | 59.30 | 0.00 |
| TRINITY_GAX79239 | hypothet | Chlamydomonas_eusti | 59.30 | 0.00 |
| TRINITY_GAX82487 | hypothet | Chlamydomonas_eusti | 59.30 | 0.00 |
| TRINITY_XP_02190 | protein  | Carica_papaya       | 59.30 | 0.00 |
| TRINITY_XP_00294 | hypothet | Volvox_carteri      | 59.30 | 0.00 |
| TRINITY_GAX78215 | hypothet | Chlamydomonas_eusti | 59.30 | 0.00 |
| TRINITY_PSC69773 | Peroxis  | Micractinium_conduc | 59.30 | 0.00 |
| TRINITY_GAQ84862 | peroxin  | Klebsormidium_niten | 59.30 | 0.00 |
| TRINITY_KXZ46716 | hypothet | Gonium_pectorale    | 59.30 | 0.00 |
| TRINITY_KXZ54717 | hypothet | Gonium_pectorale    | 59.30 | 0.00 |
| TRINITY_XP_00294 | hypothet | Volvox_carteri      | 59.30 | 0.00 |
| TRINITY_XP_00294 | hypothet | Volvox_carteri      | 59.30 | 0.00 |
| TRINITY_PNW77773 | hypothet | Chlamydomonas_reinh | 59.30 | 0.00 |
| TRINITY_GAQ88990 | MEKK anc | Klebsormidium_niten | 59.30 | 0.00 |
| TRINITY_GBF90551 | hypothet | Raphidocelis_subcap | 59.30 | 0.00 |
| TRINITY_RMZ52332 | hypothet | Auxenochlorella_pro | 59.30 | 0.00 |
| TRINITY_XP_00169 | predict  | Chlamydomonas_reinh | 59.30 | 0.00 |
| TRINITY_XP_00845 | PREDICT  | Cucumis_melo        | 59.30 | 0.00 |
| TRINITY_GAX73057 | hypothet | Chlamydomonas_eusti | 59.30 | 0.00 |
| TRINITY_XP_01246 | PREDICT  | Gossypium_raimondii | 59.20 | 0.00 |
| TRINITY_XP_00305 | CTP synt | Micromonas_pusilla  | 59.20 | 0.00 |
| TRINITY_PSC67348 | ATP:cob  | Micractinium_conduc | 59.20 | 0.00 |
| TRINITY_XP_02392 | 60S rib  | Quercus_suber       | 59.20 | 0.00 |
| TRINITY_XP_02794 | probable | Vigna_unguiculata   | 59.20 | 0.00 |
| TRINITY_XP_00585 | hypothet | Chlorella_variabili | 59.20 | 0.00 |



|                 |                             |       |      |
|-----------------|-----------------------------|-------|------|
| TRINITY_GAX8086 | hypothetChlamydomonas_eusti | 59.20 | 0.00 |
| TRINITY_PNH0396 | putativTetrabaena_socialis  | 59.20 | 0.00 |
| TRINITY_PNW8676 | hypothetChlamydomonas_reinh | 59.20 | 0.00 |
| TRINITY_KXZ5247 | hypothetGonium_pectorale    | 59.20 | 0.00 |
| TRINITY_GAX7670 | hypothetChlamydomonas_eusti | 59.20 | 0.00 |
| TRINITY_XP_0138 | ribosomeMonoraphidium_negle | 59.20 | 0.00 |
| TRINITY_XP_0029 | iron-sulVolvox_carteri      | 59.20 | 0.00 |
| TRINITY_XP_0016 | plastid Chlamydomonas_reinh | 59.20 | 0.00 |
| TRINITY_PRW5676 | valine--Chlorella_sorokinia | 59.20 | 0.00 |
| TRINITY_GAX7549 | hypothetChlamydomonas_eusti | 59.20 | 0.00 |
| TRINITY_KXZ4680 | hypothetGonium_pectorale    | 59.20 | 0.00 |
| TRINITY_PNH1289 | ATP-depeTetrabaena_socialis | 59.20 | 0.00 |
| TRINITY_GAX7867 | hypothetChlamydomonas_eusti | 59.20 | 0.00 |
| TRINITY_GAQ7894 | methylnKlebsormidium_niten  | 59.20 | 0.00 |
| TRINITY_XP_0216 | mannose-Hevea_brasiliensis  | 59.20 | 0.00 |
| TRINITY_XP_0016 | gamma tChlamydomonas_reinh  | 59.20 | 0.00 |
| TRINITY_AWK6783 | ACD [DurDunaliella_tertiole | 59.20 | 0.00 |
| TRINITY_XP_0172 | PREDICTHDaucus_carota       | 59.20 | 0.00 |
| TRINITY_KXZ4332 | hypothetGonium_pectorale    | 59.20 | 0.00 |
| TRINITY_KXZ5084 | hypothetGonium_pectorale    | 59.20 | 0.00 |
| TRINITY_RMZ5438 | hypothetAuxenochlorella_pro | 59.20 | 0.00 |
| TRINITY_PNH1061 | hypothetTetrabaena_socialis | 59.20 | 0.00 |
| TRINITY_GAQ9143 | Kinesin-Klebsormidium_niten | 59.20 | 0.00 |
| TRINITY_CAI8489 | putativMedicago_sativa      | 59.20 | 0.00 |
| TRINITY_XP_0036 | ras-relMedicago_truncatula  | 59.20 | 0.00 |
| TRINITY_PNW8270 | hypothetChlamydomonas_reinh | 59.20 | 0.00 |
| TRINITY_KXZ5281 | hypothetGonium_pectorale    | 59.20 | 0.00 |
| TRINITY_GAX8046 | hypothetChlamydomonas_eusti | 59.20 | 0.00 |
| TRINITY_GAX8127 | hypothetChlamydomonas_eusti | 59.20 | 0.00 |
| TRINITY_GAX7875 | hypothetChlamydomonas_eusti | 59.20 | 0.00 |
| TRINITY_GAX7937 | hypothetChlamydomonas_eusti | 59.20 | 0.00 |
| TRINITY_XP_0102 | PREDICTHNelumbo_nucifera    | 59.20 | 0.00 |
| TRINITY_PNW8276 | hypothetChlamydomonas_reinh | 59.20 | 0.00 |
| TRINITY_XP_0029 | histone Volvox_carteri      | 59.20 | 0.00 |
| TRINITY_GAQ8291 | Acyl-CoKlebsormidium_niten  | 59.20 | 0.00 |
| TRINITY_XP_0138 | NFX1-tyMonoraphidium_negle  | 59.20 | 0.00 |
| TRINITY_GAX7945 | hypothetChlamydomonas_eusti | 59.20 | 0    |
| TRINITY_XP_0029 | hypothetVolvox_carteri      | 59.20 | 0.00 |
| TRINITY_EEF2623 | conserveRicinus_communis    | 59.10 | 0.00 |
| TRINITY_XP_0229 | uncharaCucurbita_maxima     | 59.10 | 0.00 |
| TRINITY_XP_0106 | PREDICTHBeta_vulgaris       | 59.10 | 0.00 |
| TRINITY_XP_0029 | superoxiSelaginella_moellen | 59.10 | 0.00 |
| TRINITY_XP_0114 | Actin [Auxenochlorella_pro  | 59.10 | 0.00 |
| TRINITY_GBG7924 | hypothetChara_braunii       | 59.10 | 0.00 |
| TRINITY_RMZ5448 | hypothetAuxenochlorella_pro | 59.10 | 0.00 |
| TRINITY_PNW7573 | hypothetChlamydomonas_reinh | 59.10 | 0.00 |
| TRINITY_XP_0093 | PREDICTHPyrus_x_bretschneid | 59.10 | 0.00 |
| TRINITY_XP_0243 | threonylPhyscomitrella_pate | 59.10 | 0.00 |
| TRINITY_GAX7347 | hypothetChlamydomonas_eusti | 59.10 | 0.00 |
| TRINITY_XP_0239 | aldo-ketQuercus_suber       | 59.10 | 0.00 |
| TRINITY_PNH1293 | Mitogen-Tetrabaena_socialis | 59.10 | 0.00 |
| TRINITY_XP_0029 | hypothetVolvox_carteri      | 59.10 | 0.00 |
| TRINITY_XP_0217 | protein Chenopodium_quinoa  | 59.10 | 0.00 |
| TRINITY_GAX7412 | hypothetChlamydomonas_eusti | 59.10 | 0.00 |
| TRINITY_KXZ5525 | hypothetGonium_pectorale    | 59.10 | 0.00 |
| TRINITY_XP_0045 | signal rCicer_arietinum     | 59.10 | 0.00 |
| TRINITY_GAX7609 | hypothetChlamydomonas_eusti | 59.10 | 0.00 |
| TRINITY_PSC6969 | ATP-depeMicractinium_conduc | 59.10 | 0.00 |
| TRINITY_XP_0029 | hypothetVolvox_carteri      | 59.10 | 0.00 |
| TRINITY_XP_0016 | triose rChlamydomonas_reinh | 59.10 | 0.00 |
| TRINITY_PNW7528 | hypothetChlamydomonas_reinh | 59.10 | 0.00 |
| TRINITY_XP_0058 | hypothetChlorella_variabili | 59.10 | 0.00 |
| TRINITY_PNW8679 | hypothetChlamydomonas_reinh | 59.10 | 0.00 |
| TRINITY_YP_6656 | cytochrNephroselmis_olivac  | 59.10 | 0.00 |
| TRINITY_PRW5607 | GATA trChlorella_sorokinia  | 59.10 | 0.00 |
| TRINITY_XP_0029 | hypothetVolvox_carteri      | 59.10 | 0.00 |

|                  |                                          |       |      |
|------------------|------------------------------------------|-------|------|
| TRINITY_XP_00170 | acetyl- $\epsilon$ Chlamydomonas_reinh   | 59.10 | 0.00 |
| TRINITY_XP_00294 | hypothetVolvox_carteri                   | 59.10 | 0.00 |
| TRINITY_XP_00295 | hypothetVolvox_carteri                   | 59.10 | 0.00 |
| TRINITY_PNH1056  | Reticul $\epsilon$ Tetrabaena_socialis   | 59.10 | 0.00 |
| TRINITY_PRW4564  | (L-ascorb $\epsilon$ Chlorella_sorokinia | 59.10 | 0.00 |
| TRINITY_XP_00169 | hypothetChlamydomonas_reinh              | 59.10 | 0.00 |
| TRINITY_KZV1521  | petal d $\epsilon$ Dorcoceras_hygromet   | 59.10 | 0.00 |
| TRINITY_ABW8726  | ferritirChlamydomonas_reinh              | 59.10 | 0.00 |
| TRINITY_GBF9365  | hypothetRaphidocelis_subcap              | 59.10 | 0.00 |
| TRINITY_XP_00295 | hypothetVolvox_carteri                   | 59.10 | 0.00 |
| TRINITY_ACB2847  | polyprotAnanas_comosus                   | 59.10 | 0.00 |
| TRINITY_ABH1167  | actin, $\gamma$ Chara_contraria          | 59.10 | 0.00 |
| TRINITY_XP_02202 | NAD-dep $\epsilon$ Helianthus_annuus     | 59.10 | 0.00 |
| TRINITY_XP_00414 | PREDICT $\epsilon$ Cucumis_sativus       | 59.00 | 0.00 |
| TRINITY_XP_02389 | guanine Quercus_suber                    | 59.00 | 0.00 |
| TRINITY_BAJ9764  | predict $\epsilon$ Hordeum_vulgare       | 59.00 | 0.00 |
| TRINITY_XP_02643 | queuine Papaver_somniferum               | 59.00 | 0.00 |
| TRINITY_GBG6683  | hypothetChara_braunii                    | 59.00 | 0.00 |
| TRINITY_XP_02391 | E3 ubiq $\epsilon$ Quercus_suber         | 59.00 | 0.00 |
| TRINITY_XP_02438 | transcri $\epsilon$ Physcomitrella_pate  | 59.00 | 0.00 |
| TRINITY_XP_00169 | predict $\epsilon$ Chlamydomonas_reinh   | 59.00 | 0.00 |
| TRINITY_KMS6481  | (hypothetBeta_vulgaris                   | 59.00 | 0.00 |
| TRINITY_XP_00294 | hypothetVolvox_carteri                   | 59.00 | 0.00 |
| TRINITY_XP_00170 | (ribosom $\epsilon$ Chlamydomonas_reinh  | 59.00 | 0.00 |
| TRINITY_KXZ4589  | hypothetGonium_pectorale                 | 59.00 | 0.00 |
| TRINITY_XP_01926 | PREDICT $\epsilon$ Nicotiana_attenuata   | 59.00 | 0.00 |
| TRINITY_PNW7681  | hypothetChlamydomonas_reinh              | 59.00 | 0.00 |
| TRINITY_KXZ5284  | hypothetGonium_pectorale                 | 59.00 | 0.00 |
| TRINITY_GAX8245  | hypothetChlamydomonas_eusti              | 59.00 | 0.00 |
| TRINITY_KXZ5434  | hypothetGonium_pectorale                 | 59.00 | 0.00 |
| TRINITY_XP_00584 | hypothetChlorella_variabili              | 59.00 | 0.00 |
| TRINITY_GAX7732  | hypothetChlamydomonas_eusti              | 59.00 | 0.00 |
| TRINITY_KXZ4269  | hypothetGonium_pectorale                 | 59.00 | 0.00 |
| TRINITY_XP_02175 | uncharac $\epsilon$ Chenopodium_quinoa   | 59.00 | 0.00 |
| TRINITY_XP_00935 | PREDICT $\epsilon$ Pyrus_x_bretschneid   | 59.00 | 0.00 |
| TRINITY_KXZ4336  | (hypothetGonium_pectorale                | 59.00 | 0.00 |
| TRINITY_XP_00295 | hypothetVolvox_carteri                   | 59.00 | 0.00 |
| TRINITY_KXZ5400  | hypothetGonium_pectorale                 | 59.00 | 0.00 |
| TRINITY_AXF4155  | HLA3 pr $\epsilon$ Chlorella_sp._ArM00   | 59.00 | 0.00 |
| TRINITY_BAJ9461  | predict $\epsilon$ Hordeum_vulgare       | 59.00 | 0.00 |
| TRINITY_GAX7383  | hypothetChlamydomonas_eusti              | 59.00 | 0.00 |
| TRINITY_XP_00168 | predict $\epsilon$ Chlamydomonas_reinh   | 59.00 | 0.00 |
| TRINITY_KXZ5193  | hypothetGonium_pectorale                 | 59.00 | 0.00 |
| TRINITY_GAQ8105  | Nuclear Klebsormidium_niten              | 59.00 | 0.00 |
| TRINITY_GAX7645  | hypothetChlamydomonas_eusti              | 59.00 | 0.00 |
| TRINITY_KXZ5174  | hypothetGonium_pectorale                 | 59.00 | 0.00 |
| TRINITY_XP_00564 | FAD/NAD Coccoomyxa_subellips             | 59.00 | 0.00 |
| TRINITY_CDP0464  | unnamed Coffea_canephora                 | 59.00 | 0.00 |
| TRINITY_XP_00585 | hypothetChlorella_variabili              | 59.00 | 0.00 |
| TRINITY_XP_00295 | hypothetVolvox_carteri                   | 59.00 | 0.00 |
| TRINITY_GAX8224  | hypothetChlamydomonas_eusti              | 59.00 | 0.00 |
| TRINITY_GAX8519  | hypothetChlamydomonas_eusti              | 59.00 | 0.00 |
| TRINITY_ALM5499  | DEAD bo $\epsilon$ Chlamydomonas_sp._I   | 59.00 | 0.00 |
| TRINITY_XP_00169 | subunit Chlamydomonas_reinh              | 59.00 | 0.00 |
| TRINITY_XP_01285 | PREDICT $\epsilon$ Erythranthe_guttata   | 59.00 | 0.00 |
| TRINITY_PNW8531  | hypothetChlamydomonas_reinh              | 59.00 | 0.00 |
| TRINITY_PNW7496  | hypothetChlamydomonas_reinh              | 59.00 | 0.00 |
| TRINITY_KXZ4519  | hypothetGonium_pectorale                 | 59.00 | 0.00 |
| TRINITY_GAX8092  | hypothetChlamydomonas_eusti              | 59.00 | 0.00 |
| TRINITY_XP_00168 | predict $\epsilon$ Chlamydomonas_reinh   | 59.00 | 0.00 |
| TRINITY_KDO5298  | hypothetCitrus_sinensis                  | 59.00 | 0.00 |
| TRINITY_PNH0752  | hypothetTetrabaena_socialis              | 59.00 | 0.00 |
| TRINITY_PWA7909  | (MOB kin $\epsilon$ Artemisia_annua      | 59.00 | 0.00 |
| TRINITY_XP_01042 | PREDICT $\epsilon$ Camelina_sativa       | 59.00 | 0.00 |
| TRINITY_PNW8332  | hypothetChlamydomonas_reinh              | 59.00 | 0.00 |
| TRINITY_GAX8317  | hypothetChlamydomonas_eusti              | 59.00 | 0.00 |

|                  |                              |       |      |
|------------------|------------------------------|-------|------|
| TRINITY_XP_00286 | ABC trarArabidopsis_lyrata   | 58.90 | 0.00 |
| TRINITY_GAX80359 | hypothetChlamydomonas_eusti  | 58.90 | 0.00 |
| TRINITY_XP_00169 | flavoheChlamydomonas_reinh   | 58.90 | 0.00 |
| TRINITY_PTQ33581 | hypothetMarchantia_polymorp  | 58.90 | 0.00 |
| TRINITY_XP_02027 | 40S ribcAsparagus_official   | 58.90 | 0.00 |
| TRINITY_KXZ56009 | hypothetGonium_pectorale     | 58.90 | 0.00 |
| TRINITY_XP_00250 | predicteMicromonas_commoda   | 58.90 | 0.00 |
| TRINITY_PNW81170 | hypothetChlamydomonas_reinh  | 58.90 | 0.00 |
| TRINITY_XP_00141 | predicteOstreococcus_sp._'1  | 58.90 | 0.00 |
| TRINITY_GAX82541 | hypothetChlamydomonas_eusti  | 58.90 | 0.00 |
| TRINITY_PRW59519 | inositolChlorella_sorokinia  | 58.90 | 0.00 |
| TRINITY_PNW82209 | hypothetChlamydomonas_reinh  | 58.90 | 0.00 |
| TRINITY_XP_00979 | PREDICTINicotiana_sylvestri  | 58.90 | 0.00 |
| TRINITY_GAX78006 | hypothetChlamydomonas_eusti  | 58.90 | 0.00 |
| TRINITY_XP_00294 | hypothetVolvox_carteri       | 58.90 | 0.00 |
| TRINITY_GAX72628 | hypothetChlamydomonas_eusti  | 58.90 | 0.00 |
| TRINITY_XP_01390 | putativeMonoraphidium_negle  | 58.90 | 0.00 |
| TRINITY_GAX73296 | hypothetChlamydomonas_eusti  | 58.90 | 0.00 |
| TRINITY_PNH08442 | hypothetTetrabaena_socialis  | 58.90 | 0.00 |
| TRINITY_XP_00298 | actin-7 Selaginella_moellen  | 58.90 | 0.00 |
| TRINITY_GAX74942 | hypothetChlamydomonas_eusti  | 58.90 | 0.00 |
| TRINITY_GAX79829 | hypothetChlamydomonas_eusti  | 58.90 | 0.00 |
| TRINITY_PNW80462 | hypothetChlamydomonas_reinh  | 58.90 | 0.00 |
| TRINITY_PSC67003 | Gag-Pol Micractinium_conduc  | 58.90 | 0.00 |
| TRINITY_OAE21011 | hypothetMarchantia_polymorp  | 58.80 | 0.00 |
| TRINITY_XP_01562 | glycine-Oryza_sativa         | 58.80 | 0.00 |
| TRINITY_XP_00289 | SWI/SNF-Arabidopsis_lyrata   | 58.80 | 0.00 |
| TRINITY_XP_01389 | Casein lMonoraphidium_negle  | 58.80 | 0.00 |
| TRINITY_XP_00250 | predicteMicromonas_commoda   | 58.80 | 0.00 |
| TRINITY_XP_02388 | dynein lQuercus_suber        | 58.80 | 0.00 |
| TRINITY_RAL47891 | hypothetCuscuta_australis    | 58.80 | 0.00 |
| TRINITY_PHT29099 | hypothetCapsicum_baccatum    | 58.80 | 0.00 |
| TRINITY_GBG77773 | hypothetChara_braunii        | 58.80 | 0.00 |
| TRINITY_GAX75349 | hypothetChlamydomonas_eusti  | 58.80 | 0.00 |
| TRINITY_GAX85123 | hypothetChlamydomonas_eusti  | 58.80 | 0.00 |
| TRINITY_GBF88197 | hypothetRaphidocelis_subcap  | 58.80 | 0.00 |
| TRINITY_PNH11059 | Protein Tetrabaena_socialis  | 58.80 | 0.00 |
| TRINITY_XP_00299 | hypothetVolvox_carteri       | 58.80 | 0.00 |
| TRINITY_XP_01569 | RNA-binOryza_sativa          | 58.80 | 0.00 |
| TRINITY_XP_00170 | predicteChlamydomonas_reinh  | 58.80 | 0.00 |
| TRINITY_KXZ44739 | hypothetGonium_pectorale     | 58.80 | 0.00 |
| TRINITY_KXZ51688 | hypothetGonium_pectorale     | 58.80 | 0.00 |
| TRINITY_XP_00170 | predicteChlamydomonas_reinh  | 58.80 | 0.00 |
| TRINITY_KXZ53568 | hypothetGonium_pectorale     | 58.80 | 0.00 |
| TRINITY_KXZ47964 | hypothetGonium_pectorale     | 58.80 | 0.00 |
| TRINITY_XP_00299 | hypothetVolvox_carteri       | 58.80 | 0.00 |
| TRINITY_GAX73579 | hypothetChlamydomonas_eusti  | 58.80 | 0.00 |
| TRINITY_XP_00564 | putativeCoccomyxa_subellips  | 58.80 | 0.00 |
| TRINITY_GAX83512 | hypothetChlamydomonas_eusti  | 58.80 | 0.00 |
| TRINITY_GAX75511 | hypothetChlamydomonas_eusti  | 58.80 | 0.00 |
| TRINITY_GBF92187 | exonuclerRaphidocelis_subcap | 58.80 | 0.00 |
| TRINITY_XP_02057 | histone Phalaenopsis_equest  | 58.80 | 0.00 |
| TRINITY_GAX73738 | hypothetChlamydomonas_eusti  | 58.80 | 0.00 |
| TRINITY_GAX74189 | hypothetChlamydomonas_eusti  | 58.80 | 0.00 |
| TRINITY_GAX79940 | hypothetChlamydomonas_eusti  | 58.80 | 0.00 |
| TRINITY_XP_00170 | predicteChlamydomonas_reinh  | 58.80 | 0.00 |
| TRINITY_XP_00564 | NLI inteCoccomyxa_subellips  | 58.80 | 0.00 |
| TRINITY_XP_02213 | serine/tMomordica_charantia  | 58.80 | 0.00 |
| TRINITY_KZV47531 | hypothetDorcoceras_hygromet  | 58.80 | 0.00 |
| TRINITY_XP_00962 | PREDICTINicotiana_tomentosi  | 58.80 | 0.00 |
| TRINITY_GAX79494 | hypothetChlamydomonas_eusti  | 58.80 | 0    |
| TRINITY_XP_02391 | myosin tQuercus_suber        | 58.80 | 0.00 |
| TRINITY_PNW82420 | hypothetChlamydomonas_reinh  | 58.80 | 0.00 |
| TRINITY_GAX83682 | hypothetChlamydomonas_eusti  | 58.80 | 0.00 |
| TRINITY_XP_00299 | 1,4-alfVolvox_carteri        | 58.80 | 0.00 |
| TRINITY_PRW58679 | Intron-kChlorella_sorokinia  | 58.80 | 0.00 |

|                  |          |                     |       |      |
|------------------|----------|---------------------|-------|------|
| TRINITY_XP_02168 | tRNAse 1 | Hevea_brasiliensis  | 58.80 | 0.00 |
| TRINITY_PSC7361  | type I   | Micractinium_conduc | 58.80 | 0.00 |
| TRINITY_GAX7749  | hypothet | Chlamydomonas_eusti | 58.80 | 0.00 |
| TRINITY_XP_02389 | ubiquiti | Quercus_suber       | 58.80 | 0.00 |
| TRINITY_XP_00713 | hypothet | Phaseolus_vulgaris  | 58.70 | 0.00 |
| TRINITY_XP_02015 | small uk | Aegilops_tauschii   | 58.70 | 0.00 |
| TRINITY_XP_02014 | GTP-bin  | Aegilops_tauschii   | 58.70 | 0.00 |
| TRINITY_XP_01587 | ATP-dep  | Ziziphus_jujuba     | 58.70 | 0.00 |
| TRINITY_PTQ4268  | hypothet | Marchantia_polymorp | 58.70 | 0.00 |
| TRINITY_OAE2408  | hypothet | Marchantia_polymorp | 58.70 | 0.00 |
| TRINITY_XP_02388 | alpha-ac | Quercus_suber       | 58.70 | 0.00 |
| TRINITY_BAJ9999  | predict  | Hordeum_vulgare     | 58.70 | 0.00 |
| TRINITY_XP_0239  | myosin-1 | Quercus_suber       | 58.70 | 0.00 |
| TRINITY_GAX81752 | hypothet | Chlamydomonas_eusti | 58.70 | 0.00 |
| TRINITY_XP_01617 | ubiquiti | Arachis_ipaensis    | 58.70 | 0.00 |
| TRINITY_PNH0289  | hypothet | Tetrabaena_socialis | 58.70 | 0.00 |
| TRINITY_XP_01094 | PREDICTI | Elaeis_guineensis   | 58.70 | 0.00 |
| TRINITY_XP_0139  | phosphat | Monoraphidium_negle | 58.70 | 0.00 |
| TRINITY_XP_02298 | cyclin-c | Cucurbita_maxima    | 58.70 | 0.00 |
| TRINITY_GAX76471 | hypothet | Chlamydomonas_eusti | 58.70 | 0.00 |
| TRINITY_GAX72792 | hypothet | Chlamydomonas_eusti | 58.70 | 0.00 |
| TRINITY_PNH05795 | 2,3-bis  | Tetrabaena_socialis | 58.70 | 0.00 |
| TRINITY_XP_0139  | hypothet | Monoraphidium_negle | 58.70 | 0.00 |
| TRINITY_GAX83154 | hypothet | Chlamydomonas_eusti | 58.70 | 0.00 |
| TRINITY_GAX76513 | hypothet | Chlamydomonas_eusti | 58.70 | 0.00 |
| TRINITY_PNW7123  | hypothet | Chlamydomonas_reinh | 58.70 | 0.00 |
| TRINITY_GBG87427 | hypothet | Chara_braunii       | 58.70 | 0.00 |
| TRINITY_PNH01982 | Pre-mRN  | Tetrabaena_socialis | 58.70 | 0.00 |
| TRINITY_GAX7858  | hypothet | Chlamydomonas_eusti | 58.70 | 0.00 |
| TRINITY_XP_0017  | predict  | Chlamydomonas_reinh | 58.70 | 0.00 |
| TRINITY_XP_00295 | hypothet | Volvox_carteri      | 58.70 | 0.00 |
| TRINITY_XP_00584 | protein  | Chlorella_variabili | 58.70 | 0.00 |
| TRINITY_XP_00939 | PREDICTI | Musa_acuminata      | 58.70 | 0.00 |
| TRINITY_KXZ54523 | hypothet | Gonium_pectorale    | 58.70 | 0.00 |
| TRINITY_GAX83343 | hypothet | Chlamydomonas_eusti | 58.70 | 0.00 |
| TRINITY_XP_0017  | predict  | Chlamydomonas_reinh | 58.70 | 0.00 |
| TRINITY_GAX8624  | hypothet | Chlamydomonas_eusti | 58.70 | 0.00 |
| TRINITY_GAX83865 | hypothet | Chlamydomonas_eusti | 58.70 | 0.00 |
| TRINITY_GAX76079 | hypothet | Chlamydomonas_eusti | 58.70 | 0.00 |
| TRINITY_PNG93959 | hypothet | Tetrabaena_socialis | 58.70 | 0.00 |
| TRINITY_XP_02437 | cAMP-de  | Physcomitrella_pate | 58.60 | 0.00 |
| TRINITY_XP_0270  | short ir | Coffea_arabica      | 58.60 | 0.00 |
| TRINITY_XP_01389 | hypothet | Monoraphidium_negle | 58.60 | 0.00 |
| TRINITY_EEF25548 | beta-mar | Ricinus_communis    | 58.60 | 0.00 |
| TRINITY_OEL13774 | Myb-rel  | Dichanthelium_oligo | 58.60 | 0.00 |
| TRINITY_XP_01882 | PREDICTI | Juglans_regia       | 58.60 | 0.00 |
| TRINITY_GAX73788 | hypothet | Chlamydomonas_eusti | 58.60 | 0.00 |
| TRINITY_XP_01247 | PREDICTI | Gossypium_raimondii | 58.60 | 0.00 |
| TRINITY_XP_0277  | unchara  | Solanum_pennellii   | 58.60 | 0.00 |
| TRINITY_GAX78843 | hypothet | Chlamydomonas_eusti | 58.60 | 0.00 |
| TRINITY_PNH04499 | Transmen | Tetrabaena_socialis | 58.60 | 0.00 |
| TRINITY_GAX73514 | hypothet | Chlamydomonas_eusti | 58.60 | 0.00 |
| TRINITY_RWW9113  | hypothet | Ensete_ventricosum  | 58.60 | 0.00 |
| TRINITY_XP_00169 | predict  | Chlamydomonas_reinh | 58.60 | 0.00 |
| TRINITY_GAX81652 | hypothet | Chlamydomonas_eusti | 58.60 | 0.00 |
| TRINITY_GAX83052 | hypothet | Chlamydomonas_eusti | 58.60 | 0.00 |
| TRINITY_XP_02374 | ADP-rib  | Lactuca_sativa      | 58.60 | 0.00 |
| TRINITY_GAX72655 | hypothet | Chlamydomonas_eusti | 58.60 | 0.00 |
| TRINITY_XP_01884 | PREDICTI | Juglans_regia       | 58.60 | 0.00 |
| TRINITY_XP_00295 | hypothet | Volvox_carteri      | 58.60 | 0.00 |
| TRINITY_XP_00169 | 5-Formyl | Chlamydomonas_reinh | 58.60 | 0.00 |
| TRINITY_XP_00169 | RNA bin  | Chlamydomonas_reinh | 58.60 | 0.00 |
| TRINITY_XP_00294 | hypothet | Volvox_carteri      | 58.60 | 0.00 |
| TRINITY_KXZ45163 | hypothet | Gonium_pectorale    | 58.60 | 0.00 |
| TRINITY_XP_00295 | hypothet | Volvox_carteri      | 58.60 | 0.00 |
| TRINITY_XP_00294 | hypothet | Volvox_carteri      | 58.60 | 0.00 |

|                 |                             |       |      |
|-----------------|-----------------------------|-------|------|
| TRINITY_PNW8336 | hypothetChlamydomonas_reinh | 58.60 | 0.00 |
| TRINITY_PSC7288 | E3 ubiqMicractinium_conduc  | 58.60 | 0.00 |
| TRINITY_GAX7309 | hypothetChlamydomonas_eusti | 58.60 | 0.00 |
| TRINITY_GAX8220 | hypothetChlamydomonas_eusti | 58.60 | 0.00 |
| TRINITY_PNW7556 | hypothetChlamydomonas_reinh | 58.60 | 0.00 |
| TRINITY_XP_0239 | ras-likeQuercus_suber       | 58.60 | 0.00 |
| TRINITY_GAX7551 | hypothetChlamydomonas_eusti | 58.60 | 0.00 |
| TRINITY_PNW8344 | hypothetChlamydomonas_reinh | 58.60 | 0.00 |
| TRINITY_PNW8487 | hypothetChlamydomonas_reinh | 58.60 | 0.00 |
| TRINITY_PNW7509 | hypothetChlamydomonas_reinh | 58.60 | 0.00 |
| TRINITY_XP_0229 | transcriCucurbita_moschata  | 58.60 | 0.00 |
| TRINITY_GBF9628 | SNF2 fanRaphidocelis_subcap | 58.60 | 0.00 |
| TRINITY_AFK3634 | unknown Lotus_japonicus     | 58.50 | 0.00 |
| TRINITY_XP_0116 | inosine Amborella_trichopod | 58.50 | 0.00 |
| TRINITY_XP_0105 | PREDICTICamelina_sativa     | 58.50 | 0.00 |
| TRINITY_XP_0029 | nascent Selaginella_moellen | 58.50 | 0.00 |
| TRINITY_XP_0087 | diphthanPhoenix_dactylifera | 58.50 | 0.00 |
| TRINITY_KDD7549 | hypothetHelicosporidium_sp. | 58.50 | 0.00 |
| TRINITY_AAT7361 | calmodulDaucus_carota       | 58.50 | 0.00 |
| TRINITY_XP_0016 | cell diChlamydomonas_reinh  | 58.50 | 0.00 |
| TRINITY_XP_0017 | predicteChlamydomonas_reinh | 58.50 | 0.00 |
| TRINITY_KXZ4180 | hypothetGonium_pectorale    | 58.50 | 0.00 |
| TRINITY_GBF9755 | hypothetRaphidocelis_subcap | 58.50 | 0.00 |
| TRINITY_XP_0139 | trans-2-Monoraphidium_negle | 58.50 | 0.00 |
| TRINITY_BAK0277 | predicteHordeum_vulgare     | 58.50 | 0.00 |
| TRINITY_ACJ8550 | unknown Medicago_truncatula | 58.50 | 0.00 |
| TRINITY_PRW5605 | starch kChlorella_sorokinia | 58.50 | 0.00 |
| TRINITY_GBF9941 | peptidyRaphidocelis_subcap  | 58.50 | 0.00 |
| TRINITY_XP_0191 | PREDICTIIPomoea_nil         | 58.50 | 0.00 |
| TRINITY_KXZ5526 | hypothetGonium_pectorale    | 58.50 | 0.00 |
| TRINITY_GBF8793 | ATP syntRaphidocelis_subcap | 58.50 | 0.00 |
| TRINITY_XP_0058 | hypothetChlorella_variabili | 58.50 | 0.00 |
| TRINITY_PNW6960 | hypothetChlamydomonas_reinh | 58.50 | 0.00 |
| TRINITY_XP_0029 | hypothetVolvox_carteri      | 58.50 | 0.00 |
| TRINITY_PTQ4733 | hypothetMarchantia_polymorp | 58.50 | 0    |
| TRINITY_XP_0029 | hypothetVolvox_carteri      | 58.50 | 0.00 |
| TRINITY_PNW7646 | hypothetChlamydomonas_reinh | 58.50 | 0.00 |
| TRINITY_PRW5869 | DNA-dirChlorella_sorokinia  | 58.50 | 0.00 |
| TRINITY_XP_0016 | predicteChlamydomonas_reinh | 58.50 | 0.00 |
| TRINITY_GAX8459 | hypothetChlamydomonas_eusti | 58.50 | 0.00 |
| TRINITY_XP_0029 | hypothetVolvox_carteri      | 58.50 | 0.00 |
| TRINITY_GAX8301 | hypothetChlamydomonas_eusti | 58.50 | 0.00 |
| TRINITY_GAX7948 | hypothetChlamydomonas_eusti | 58.50 | 0.00 |
| TRINITY_XP_0029 | metacasVolvox_carteri       | 58.50 | 0.00 |
| TRINITY_XP_0217 | ABC trarChenopodium_quinoa  | 58.50 | 0.00 |
| TRINITY_GAX7305 | hypothetChlamydomonas_eusti | 58.50 | 0.00 |
| TRINITY_XP_0030 | predicteMicromonas_pusilla  | 58.50 | 0.00 |
| TRINITY_AFK3980 | unknown Medicago_truncatula | 58.50 | 0.00 |
| TRINITY_PNH0731 | putativeTetrabaena_socialis | 58.50 | 0.00 |
| TRINITY_XP_0239 | nicotinQuercus_suber        | 58.50 | 0.00 |
| TRINITY_GAX7854 | hypothetChlamydomonas_eusti | 58.50 | 0.00 |
| TRINITY_GAX7634 | hypothetChlamydomonas_eusti | 58.50 | 0.00 |
| TRINITY_EFJ1746 | hypothetSelaginella_moellen | 58.50 | 0.00 |
| TRINITY_RLM6636 | hypothetPanicum_miliaceum   | 58.50 | 0.00 |
| TRINITY_KXZ4736 | hypothetGonium_pectorale    | 58.50 | 0.00 |
| TRINITY_KXZ4677 | hypothetGonium_pectorale    | 58.50 | 0.00 |
| TRINITY_XP_0029 | hypothetVolvox_carteri      | 58.50 | 0.00 |
| TRINITY_PNW7421 | hypothetChlamydomonas_reinh | 58.50 | 0.00 |
| TRINITY_PNW8806 | hypothetChlamydomonas_reinh | 58.50 | 0.00 |
| TRINITY_XP_0017 | Fe-S oxiChlamydomonas_reinh | 58.50 | 0.00 |
| TRINITY_KXZ4738 | hypothetGonium_pectorale    | 58.50 | 0.00 |
| TRINITY_EEC7090 | hypothetOryza_sativa        | 58.50 | 0.00 |
| TRINITY_GAX8420 | hypothetChlamydomonas_eusti | 58.50 | 0.00 |
| TRINITY_XP_0029 | hypothetVolvox_carteri      | 58.50 | 0.00 |
| TRINITY_XP_0128 | PREDICTIErythranthe_guttata | 58.40 | 0.00 |
| TRINITY_XP_0042 | PREDICTIFragaria_vesca      | 58.40 | 0.00 |

|                  |           |                     |       |      |
|------------------|-----------|---------------------|-------|------|
| TRINITY_GAQ78926 | Dynein    | Klebsormidium_niten | 58.40 | 0.00 |
| TRINITY_BAJ93178 | predicte  | Hordeum_vulgare     | 58.40 | 0.00 |
| TRINITY_XP_01066 | PREDICTI  | Beta_vulgaris       | 58.40 | 0.00 |
| TRINITY_XP_00307 | P-loop    | Ostreococcus_tauri  | 58.40 | 0.00 |
| TRINITY_XP_00565 | UBC-like  | Coccomyxa_subellips | 58.40 | 0.00 |
| TRINITY_GBG92514 | hypothet  | Chara_braunii       | 58.40 | 0.00 |
| TRINITY_YP_00881 | apocyto   | Entransia_fimbriata | 58.40 | 0.00 |
| TRINITY_XP_00938 | PREDICTI  | Musa_acuminata      | 58.40 | 0.00 |
| TRINITY_AFC8882  | (actin 5- | Miscanthus_sinensis | 58.40 | 0.00 |
| TRINITY_GAX73599 | hypothet  | Chlamydomonas_eusti | 58.40 | 0.00 |
| TRINITY_BAK02778 | predicte  | Hordeum_vulgare     | 58.40 | 0.00 |
| TRINITY_XP_00169 | ATP-sul   | Chlamydomonas_reinh | 58.40 | 0.00 |
| TRINITY_GAX73901 | hypothet  | Chlamydomonas_eusti | 58.40 | 0.00 |
| TRINITY_PNW88755 | hypothet  | Chlamydomonas_reinh | 58.40 | 0.00 |
| TRINITY_XP_02286 | glycine-  | Olea_europaea       | 58.40 | 0.00 |
| TRINITY_XP_00294 | hypothet  | Volvox_carteri      | 58.40 | 0.00 |
| TRINITY_KXZ49284 | hypothet  | Gonium_pectorale    | 58.40 | 0.00 |
| TRINITY_BAJ99598 | predicte  | Hordeum_vulgare     | 58.40 | 0.00 |
| TRINITY_PNW85776 | hypothet  | Chlamydomonas_reinh | 58.40 | 0.00 |
| TRINITY_GAX74962 | hypothet  | Chlamydomonas_eusti | 58.40 | 0.00 |
| TRINITY_GAX78882 | hypothet  | Chlamydomonas_eusti | 58.40 | 0.00 |
| TRINITY_KXZ51009 | hypothet  | Gonium_pectorale    | 58.40 | 0.00 |
| TRINITY_GAX84057 | hypothet  | Chlamydomonas_eusti | 58.40 | 0.00 |
| TRINITY_GAX78702 | hypothet  | Chlamydomonas_eusti | 58.40 | 0.00 |
| TRINITY_KZV14808 | hypothet  | Dorcoceras_hygromet | 58.40 | 0.00 |
| TRINITY_GAX79168 | hypothet  | Chlamydomonas_eusti | 58.40 | 0.00 |
| TRINITY_XP_01245 | PREDICTI  | Gossypium_raimondii | 58.40 | 0.00 |
| TRINITY_PNW87753 | hypothet  | Chlamydomonas_reinh | 58.40 | 0.00 |
| TRINITY_GAQ83894 | Iron-su   | Klebsormidium_niten | 58.40 | 0.00 |
| TRINITY_KXZ43165 | hypothet  | Gonium_pectorale    | 58.40 | 0.00 |
| TRINITY_PNW86359 | hypothet  | Chlamydomonas_reinh | 58.40 | 0.00 |
| TRINITY_XP_00170 | (Qc-SNAR  | Chlamydomonas_reinh | 58.40 | 0.00 |
| TRINITY_GAX80912 | hypothet  | Chlamydomonas_eusti | 58.40 | 0.00 |
| TRINITY_GAX79338 | hypothet  | Chlamydomonas_eusti | 58.40 | 0.00 |
| TRINITY_GAX80125 | hypothet  | Chlamydomonas_eusti | 58.40 | 0.00 |
| TRINITY_XP_00169 | heat sh   | Chlamydomonas_reinh | 58.40 | 0.00 |
| TRINITY_PNW85106 | hypothet  | Chlamydomonas_reinh | 58.40 | 0    |
| TRINITY_XP_01390 | hypothet  | Monoraphidium_negle | 58.40 | 0.00 |
| TRINITY_GAQ93561 | hypothet  | Klebsormidium_niten | 58.40 | 0.00 |
| TRINITY_PNW84046 | hypothet  | Chlamydomonas_reinh | 58.40 | 0.00 |
| TRINITY_ABK24468 | unknown   | Picea_sitchensis    | 58.30 | 0.00 |
| TRINITY_XP_02389 | ubiquiti  | Quercus_suber       | 58.30 | 0.00 |
| TRINITY_XP_00960 | PREDICTI  | Nicotiana_tomentosi | 58.30 | 0.00 |
| TRINITY_GAX77074 | hypothet  | Chlamydomonas_eusti | 58.30 | 0.00 |
| TRINITY_RZC10931 | Protein   | Glycine_soja        | 58.30 | 0.00 |
| TRINITY_XP_00170 | predicte  | Chlamydomonas_reinh | 58.30 | 0.00 |
| TRINITY_KXZ49736 | hypothet  | Gonium_pectorale    | 58.30 | 0.00 |
| TRINITY_XP_00628 | 60S rib   | Capsella_rubella    | 58.30 | 0.00 |
| TRINITY_XP_00564 | cytosoli  | Coccomyxa_subellips | 58.30 | 0.00 |
| TRINITY_GAQ80589 | RIO-like  | Klebsormidium_niten | 58.30 | 0.00 |
| TRINITY_CAA87751 | Apocyto   | Tetraselmis_subcord | 58.30 | 0.00 |
| TRINITY_GAQ88954 | Putativ   | Klebsormidium_niten | 58.30 | 0.00 |
| TRINITY_XP_00294 | hypothet  | Volvox_carteri      | 58.30 | 0.00 |
| TRINITY_XP_01390 | (Prestal  | Monoraphidium_negle | 58.30 | 0.00 |
| TRINITY_XP_02165 | histone   | Hevea_brasiliensis  | 58.30 | 0.00 |
| TRINITY_OAE35429 | hypothet  | Marchantia_polymorp | 58.30 | 0.00 |
| TRINITY_GAX75759 | hypothet  | Chlamydomonas_eusti | 58.30 | 0.00 |
| TRINITY_PNH11664 | La-relat  | Tetrabaena_socialis | 58.30 | 0.00 |
| TRINITY_AAU00988 | trehalo   | Dunaliella_viridis  | 58.30 | 0.00 |
| TRINITY_GAX79061 | hypothet  | Chlamydomonas_eusti | 58.30 | 0.00 |
| TRINITY_XP_01390 | hypothet  | Monoraphidium_negle | 58.30 | 0.00 |
| TRINITY_GBG00417 | hypothet  | Raphidocelis_subcap | 58.30 | 0.00 |
| TRINITY_KXZ51294 | hypothet  | Gonium_pectorale    | 58.30 | 0.00 |
| TRINITY_PNH08310 | (Nucleoli | Tetrabaena_socialis | 58.30 | 0.00 |
| TRINITY_PNW74602 | hypothet  | Chlamydomonas_reinh | 58.30 | 0.00 |
| TRINITY_KCW66370 | hypothet  | Eucalyptus_grandis  | 58.30 | 0.00 |

|                  |                              |       |      |
|------------------|------------------------------|-------|------|
| TRINITY_GAX81113 | hypothetChlamydomonas_eusti  | 58.30 | 0.00 |
| TRINITY_XP_02287 | structurOlea_europaea        | 58.30 | 0.00 |
| TRINITY_AKS29686 | UV-B phcChlamydomonas_reinh  | 58.30 | 0.00 |
| TRINITY_GAX84181 | hypothetChlamydomonas_eusti  | 58.30 | 0.00 |
| TRINITY_XP_01389 | TPR repcMonoraphidium_negle  | 58.30 | 0.00 |
| TRINITY_GAX78313 | hypothetChlamydomonas_eusti  | 58.30 | 0.00 |
| TRINITY_PKA65128 | 60S ribcApostasia_shenzheni  | 58.30 | 0.00 |
| TRINITY_GAX78599 | hypothetChlamydomonas_eusti  | 58.30 | 0.00 |
| TRINITY_XP_00296 | 60S ribcSelaginella_moellen  | 58.30 | 0.00 |
| TRINITY_PNH10564 | ExonuclcTetrabaena_socialis  | 58.30 | 0.00 |
| TRINITY_KXZ52908 | hypothetGonium_pectorale     | 58.30 | 0.00 |
| TRINITY_GAX79647 | hypothetChlamydomonas_eusti  | 58.30 | 0.00 |
| TRINITY_PNW88348 | hypothetChlamydomonas_reinh  | 58.30 | 0.00 |
| TRINITY_XP_00169 | predictcChlamydomonas_reinh  | 58.30 | 0.00 |
| TRINITY_XP_00294 | hypothetVolvox_carteri       | 58.30 | 0.00 |
| TRINITY_XP_00170 | predictcChlamydomonas_reinh  | 58.30 | 0.00 |
| TRINITY_XP_02451 | beta-adcSelaginella_moellen  | 58.30 | 0.00 |
| TRINITY_XP_01889 | PREDICTcJuglans_regia        | 58.30 | 0.00 |
| TRINITY_XP_00299 | hypothetVolvox_carteri       | 58.30 | 0.00 |
| TRINITY_GAX77006 | hypothetChlamydomonas_eusti  | 58.30 | 0.00 |
| TRINITY_GAX81084 | hypothetChlamydomonas_eusti  | 58.30 | 0.00 |
| TRINITY_XP_01047 | PREDICTcCamelina_sativa      | 58.30 | 0.00 |
| TRINITY_XP_02388 | serine/tQuercus_suber        | 58.30 | 0.00 |
| TRINITY_GAQ90479 | KRAB-A cKlebsormidium_niten  | 58.30 | 0.00 |
| TRINITY_GAX85929 | hypothetChlamydomonas_eusti  | 58.30 | 0.00 |
| TRINITY_KXZ54954 | hypothetGonium_pectorale     | 58.30 | 0.00 |
| TRINITY_GBF93347 | hypothetRaphidocelis_subcap  | 58.30 | 0.00 |
| TRINITY_KXZ49198 | hypothetGonium_pectorale     | 58.30 | 0.00 |
| TRINITY_XP_00170 | (NADH:ubiChlamydomonas_reinh | 58.30 | 0.00 |
| TRINITY_PNH06589 | CytosolcTetrabaena_socialis  | 58.30 | 0.00 |
| TRINITY_GBG89529 | hypothetChara_braunii        | 58.30 | 0.00 |
| TRINITY_OAE29007 | hypothetMarchantia_polymorp  | 58.30 | 0.00 |
| TRINITY_XP_00299 | hypothetVolvox_carteri       | 58.30 | 0.00 |
| TRINITY_GBF97016 | hypothetRaphidocelis_subcap  | 58.30 | 0.00 |
| TRINITY_PNW87539 | hypothetChlamydomonas_reinh  | 58.30 | 0.00 |
| TRINITY_XP_01390 | (beta-ketMonoraphidium_negle | 58.20 | 0.00 |
| TRINITY_PSC75588 | family tMicractinium_conduc  | 58.20 | 0.00 |
| TRINITY_RWW90346 | hypothetEnsete_ventricosum   | 58.20 | 0.00 |
| TRINITY_XP_02219 | inositolMomordica_charantia  | 58.20 | 0.00 |
| TRINITY_PTQ30228 | hypothetMarchantia_polymorp  | 58.20 | 0.00 |
| TRINITY_BAK00439 | predictcHordeum_vulgare      | 58.20 | 0.00 |
| TRINITY_ACF79297 | unknown Zea_mays             | 58.20 | 0.00 |
| TRINITY_XP_02027 | 40S ribcAsparagus_officinal  | 58.20 | 0.00 |
| TRINITY_XP_02277 | ras-relcDurio_zibethinus     | 58.20 | 0.00 |
| TRINITY_KDO66124 | hypothetCitrus_sinensis      | 58.20 | 0.00 |
| TRINITY_GAX81891 | hypothetChlamydomonas_eusti  | 58.20 | 0.00 |
| TRINITY_XP_02439 | tRNase cPhyscomitrella_pate  | 58.20 | 0.00 |
| TRINITY_XP_00881 | WD-40 rcPhoenix_dactylifera  | 58.20 | 0.00 |
| TRINITY_XP_00589 | hypothetChlorella_variabili  | 58.20 | 0.00 |
| TRINITY_XP_00977 | PREDICTcNicotiana_sylvestri  | 58.20 | 0.00 |
| TRINITY_XP_00299 | hypothetVolvox_carteri       | 58.20 | 0.00 |
| TRINITY_PNW86501 | hypothetChlamydomonas_reinh  | 58.20 | 0.00 |
| TRINITY_XP_00299 | hypothetVolvox_carteri       | 58.20 | 0.00 |
| TRINITY_XP_00299 | hypothetVolvox_carteri       | 58.20 | 0.00 |
| TRINITY_XP_00169 | PsbB mRChlamydomonas_reinh   | 58.20 | 0.00 |
| TRINITY_PNW72321 | hypothetChlamydomonas_reinh  | 58.20 | 0.00 |
| TRINITY_GAX84632 | hypothetChlamydomonas_eusti  | 58.20 | 0.00 |
| TRINITY_XP_00589 | hypothetChlorella_variabili  | 58.20 | 0.00 |
| TRINITY_XP_00564 | eukaryotCoccomyxa_subellips  | 58.20 | 0.00 |
| TRINITY_GAX76263 | hypothetChlamydomonas_eusti  | 58.20 | 0.00 |
| TRINITY_XP_00299 | hypothetVolvox_carteri       | 58.20 | 0.00 |
| TRINITY_KXZ49867 | hypothetGonium_pectorale     | 58.20 | 0.00 |
| TRINITY_XP_00299 | isocitrvcVolvox_carteri      | 58.20 | 0.00 |
| TRINITY_XP_01006 | PREDICTcEucalyptus_grandis   | 58.20 | 0.00 |
| TRINITY_KXZ53251 | hypothetGonium_pectorale     | 58.20 | 0.00 |
| TRINITY_GAX74209 | hypothetChlamydomonas_eusti  | 58.20 | 0    |

|                  |                              |       |      |
|------------------|------------------------------|-------|------|
| TRINITY_GAX78095 | hypothetChlamydomonas_eusti  | 58.20 | 0.00 |
| TRINITY_PNW78081 | hypothetChlamydomonas_reinh  | 58.20 | 0.00 |
| TRINITY_PNW88586 | hypothetChlamydomonas_reinh  | 58.20 | 0.00 |
| TRINITY_XP_00305 | predicteMicromonas_pusilla   | 58.20 | 0.00 |
| TRINITY_PNW88685 | hypothetChlamydomonas_reinh  | 58.20 | 0.00 |
| TRINITY_GBF89565 | hypothetRaphidocelis_subcap  | 58.20 | 0.00 |
| TRINITY_GAX74712 | hypothetChlamydomonas_eusti  | 58.20 | 0.00 |
| TRINITY_XP_00564 | short-clCoccomyxa_subellips  | 58.20 | 0.00 |
| TRINITY_XP_0244  | (ABC trarPhyscomitrella_pate | 58.20 | 0.00 |
| TRINITY_CBI26879 | unnamed Vitis_vinifera       | 58.10 | 0.00 |
| TRINITY_XP_00295 | hypothetVolvox_carteri       | 58.10 | 0.00 |
| TRINITY_GAX77711 | hypothetChlamydomonas_eusti  | 58.10 | 0.00 |
| TRINITY_XP_01146 | PREDICTIFragaria_vesca       | 58.10 | 0.00 |
| TRINITY_OTG36529 | putativHelianthus_annuus     | 58.10 | 0.00 |
| TRINITY_XP_00295 | hypothetVolvox_carteri       | 58.10 | 0.00 |
| TRINITY_XP_02159 | obg-likManihot_esculenta     | 58.10 | 0.00 |
| TRINITY_GAX76701 | hypothetChlamydomonas_eusti  | 58.10 | 0.00 |
| TRINITY_XP_00249 | predicteMicromonas_commoda   | 58.10 | 0.00 |
| TRINITY_GAX79949 | hypothetChlamydomonas_eusti  | 58.10 | 0.00 |
| TRINITY_RYR27091 | hypothetArachis_hypogaea     | 58.10 | 0.00 |
| TRINITY_PSC74966 | 60S ribcMicractinium_conduc  | 58.10 | 0.00 |
| TRINITY_XP_00169 | predicteChlamydomonas_reinh  | 58.10 | 0.00 |
| TRINITY_ABR17816 | unknown Picea_sitchensis     | 58.10 | 0.00 |
| TRINITY_XP_00584 | hypothetChlorella_variabili  | 58.10 | 0.00 |
| TRINITY_PNW76637 | hypothetChlamydomonas_reinh  | 58.10 | 0.00 |
| TRINITY_OMO5606  | hypothetCorchorus_capsulari  | 58.10 | 0.00 |
| TRINITY_XP_00295 | hypothetVolvox_carteri       | 58.10 | 0.00 |
| TRINITY_XP_01010 | (splicinçMorus_notabilis     | 58.10 | 0.00 |
| TRINITY_GAX75292 | hypothetChlamydomonas_eusti  | 58.10 | 0.00 |
| TRINITY_PRW60266 | Serine tChlorella_sorokinia  | 58.10 | 0.00 |
| TRINITY_GAX85385 | hypothetChlamydomonas_eusti  | 58.10 | 0.00 |
| TRINITY_PNW82489 | hypothetChlamydomonas_reinh  | 58.10 | 0.00 |
| TRINITY_XP_0139  | (hypothetMonoraphidium_negle | 58.10 | 0.00 |
| TRINITY_PNH05887 | DehydroçTetrabaena_socialis  | 58.10 | 0.00 |
| TRINITY_PNW88768 | hypothetChlamydomonas_reinh  | 58.10 | 0.00 |
| TRINITY_XP_02292 | (ABC trarCucurbita_moschata  | 58.10 | 0.00 |
| TRINITY_ALL55223 | NER endcChlamydomonas_reinh  | 58.10 | 0.00 |
| TRINITY_GAX86246 | hypothetChlamydomonas_eusti  | 58.10 | 0.00 |
| TRINITY_PNW85217 | hypothetChlamydomonas_reinh  | 58.10 | 0.00 |
| TRINITY_XP_00564 | Pkinase-Coccomyxa_subellips  | 58.10 | 0.00 |
| TRINITY_XP_00295 | hypothetVolvox_carteri       | 58.10 | 0.00 |
| TRINITY_KHF99725 | E3 ubiqGossypium_arboreum    | 58.00 | 0.00 |
| TRINITY_XP_02173 | 40S ribcChenopodium_quinoa   | 58.00 | 0.00 |
| TRINITY_XP_00564 | hypothetCoccomyxa_subellips  | 58.00 | 0.00 |
| TRINITY_XP_00564 | MT-A70-cCoccomyxa_subellips  | 58.00 | 0.00 |
| TRINITY_XP_01066 | PREDICTIBeta_vulgaris        | 58.00 | 0.00 |
| TRINITY_XP_01285 | PREDICTIErythranthe_guttata  | 58.00 | 0.00 |
| TRINITY_KXZ52239 | hypothetGonium_pectorale     | 58.00 | 0.00 |
| TRINITY_GBG66831 | hypothetChara_braunii        | 58.00 | 0.00 |
| TRINITY_GAX80495 | hypothetChlamydomonas_eusti  | 58.00 | 0.00 |
| TRINITY_GAX83107 | hypothetChlamydomonas_eusti  | 58.00 | 0.00 |
| TRINITY_PNW70843 | hypothetChlamydomonas_reinh  | 58.00 | 0.00 |
| TRINITY_PNW83179 | hypothetChlamydomonas_reinh  | 58.00 | 0.00 |
| TRINITY_PTQ38945 | hypothetMarchantia_polymorp  | 58.00 | 0.00 |
| TRINITY_KXZ54244 | hypothetGonium_pectorale     | 58.00 | 0.00 |
| TRINITY_GAX7634  | (hypothetChlamydomonas_eusti | 58.00 | 0.00 |
| TRINITY_XP_00170 | (cytochrçChlamydomonas_reinh | 58.00 | 0.00 |
| TRINITY_PSC76702 | RNA exorMicractinium_conduc  | 58.00 | 0.00 |
| TRINITY_GAX7826  | (hypothetChlamydomonas_eusti | 58.00 | 0.00 |
| TRINITY_PNH1140  | (hypothetTetrabaena_socialis | 58.00 | 0.00 |
| TRINITY_PNW77193 | hypothetChlamydomonas_reinh  | 58.00 | 0.00 |
| TRINITY_XP_02391 | calcium/Quercus_suber        | 58.00 | 0.00 |
| TRINITY_XP_02436 | (citrate Physcomitrella_pate | 58.00 | 0.00 |
| TRINITY_XP_00170 | (ER DnaJ-Chlamydomonas_reinh | 58.00 | 0.00 |
| TRINITY_KXZ56674 | hypothetGonium_pectorale     | 58.00 | 0.00 |
| TRINITY_GAX85244 | hypothetChlamydomonas_eusti  | 58.00 | 0.00 |



|                  |                              |       |      |
|------------------|------------------------------|-------|------|
| TRINITY_KXZ54424 | hypothetGonium_pectorale     | 58.00 | 0.00 |
| TRINITY_XP_00169 | delta tıChlamydomonas_reinh  | 58.00 | 0.00 |
| TRINITY_GAX8148  | (hypothetChlamydomonas_eusti | 58.00 | 0.00 |
| TRINITY_XP_00295 | hypothetVolvox_carteri       | 58.00 | 0.00 |
| TRINITY_GBG61195 | hypothetChara_braunii        | 58.00 | 0.00 |
| TRINITY_XP_01146 | PREDICTIFragaria-vesca       | 58.00 | 0.00 |
| TRINITY_BAA25911 | actin [ıNannochloris_bacill  | 58.00 | 0.00 |
| TRINITY_KXZ47472 | hypothetGonium_pectorale     | 58.00 | 0.00 |
| TRINITY_GAX81088 | hypothetChlamydomonas_eusti  | 58.00 | 0.00 |
| TRINITY_GAX75715 | hypothetChlamydomonas_eusti  | 58.00 | 0.00 |
| TRINITY_GBG79838 | hypothetChara_braunii        | 58.00 | 0.00 |
| TRINITY_XP_00584 | hypothetChlorella_variabili  | 58.00 | 0.00 |
| TRINITY_GAQ91849 | cobalamıKlebsormidium_niten  | 58.00 | 0    |
| TRINITY_PNW87976 | hypothetChlamydomonas_reinh  | 58.00 | 0.00 |
| TRINITY_PNW77576 | hypothetChlamydomonas_reinh  | 58.00 | 0.00 |
| TRINITY_GAX83579 | hypothetChlamydomonas_eusti  | 58.00 | 0.00 |
| TRINITY_CAB71138 | heat shıDunaliella_salina    | 58.00 | 0.00 |
| TRINITY_XP_02438 | DEXH-boıPhyscomitrella_pate  | 58.00 | 0.00 |
| TRINITY_XP_01140 | 40S ribıAuxenochlorella_pro  | 58.00 | 0.00 |
| TRINITY_GAQ79877 | VacuolarıKlebsormidium_niten | 57.90 | 0.00 |
| TRINITY_GAQ92735 | PutativıKlebsormidium_niten  | 57.90 | 0.00 |
| TRINITY_NP_68936 | cytochrıChaetosphaeridium_g  | 57.90 | 0.00 |
| TRINITY_RAL52911 | hypothetCuscuta_australis    | 57.90 | 0.00 |
| TRINITY_XP_01649 | PREDICTINicotiana_tabacum    | 57.90 | 0.00 |
| TRINITY_XP_01066 | PREDICTIBeta_vulgaris        | 57.90 | 0.00 |
| TRINITY_XP_02392 | probabilıQuercus_suber       | 57.90 | 0.00 |
| TRINITY_XP_02438 | 40S ribıPhyscomitrella_pate  | 57.90 | 0.00 |
| TRINITY_XP_00564 | Rab5a GıCoccomyxa_subellips  | 57.90 | 0.00 |
| TRINITY_XP_02019 | V-type ıAegilops_tauschii    | 57.90 | 0.00 |
| TRINITY_GAQ91967 | hypothetKlebsormidium_niten  | 57.90 | 0.00 |
| TRINITY_XP_02388 | lipoyl ıQuercus_suber        | 57.90 | 0.00 |
| TRINITY_GBG66831 | hypothetChara_braunii        | 57.90 | 0.00 |
| TRINITY_XP_02374 | geranylıLactuca_sativa       | 57.90 | 0.00 |
| TRINITY_PSC69752 | 60S ribıMicractinium_conduc  | 57.90 | 0.00 |
| TRINITY_OIW11385 | hypothetLupinus_angustifoli  | 57.90 | 0.00 |
| TRINITY_XP_02437 | cAMP-deıPhyscomitrella_pate  | 57.90 | 0.00 |
| TRINITY_PPR83386 | hypothetGossypium_barbadens  | 57.90 | 0.00 |
| TRINITY_GAX74592 | hypothetChlamydomonas_eusti  | 57.90 | 0.00 |
| TRINITY_XP_00294 | hypothetVolvox_carteri       | 57.90 | 0.00 |
| TRINITY_GAX84624 | hypothetChlamydomonas_eusti  | 57.90 | 0.00 |
| TRINITY_GBG00079 | hypothetRaphidocelis_subcap  | 57.90 | 0.00 |
| TRINITY_PTQ3041  | (hypothetMarchantia_polymorp | 57.90 | 0.00 |
| TRINITY_XP_00170 | predictıChlamydomonas_reinh  | 57.90 | 0.00 |
| TRINITY_XP_00585 | hypothetChlorella_variabili  | 57.90 | 0.00 |
| TRINITY_ABR16887 | unknown Picea_sitchensis     | 57.90 | 0.00 |
| TRINITY_O04073.1 | RecName:Tetrademus_obliquu   | 57.90 | 0.00 |
| TRINITY_GBF99373 | hypothetRaphidocelis_subcap  | 57.90 | 0.00 |
| TRINITY_GAX81452 | hypothetChlamydomonas_eusti  | 57.90 | 0.00 |
| TRINITY_PRW59558 | ATPase ıChlorella_sorokinia  | 57.90 | 0.00 |
| TRINITY_XP_02390 | (aldo-ketQuercus_suber       | 57.90 | 0.00 |
| TRINITY_GBF89365 | hypothetRaphidocelis_subcap  | 57.90 | 0.00 |
| TRINITY_XP_02070 | (MAP3K eıDendrobium_catenatu | 57.90 | 0.00 |
| TRINITY_GAX78869 | hypothetChlamydomonas_eusti  | 57.90 | 0.00 |
| TRINITY_KXZ46070 | hypothetGonium_pectorale     | 57.90 | 0.00 |
| TRINITY_PNW88437 | hypothetChlamydomonas_reinh  | 57.90 | 0.00 |
| TRINITY_GAX79828 | hypothetChlamydomonas_eusti  | 57.90 | 0.00 |
| TRINITY_GAX79828 | hypothetChlamydomonas_eusti  | 57.90 | 0.00 |
| TRINITY_P54214.1 | RecName:Dunaliella_bioculat  | 57.90 | 0.00 |
| TRINITY_XP_02388 | geranylıQuercus_suber        | 57.90 | 0.00 |
| TRINITY_KXZ5284  | (hypothetGonium_pectorale    | 57.90 | 0.00 |
| TRINITY_GAX79863 | hypothetChlamydomonas_eusti  | 57.90 | 0    |
| TRINITY_XP_00295 | hypothetVolvox_carteri       | 57.90 | 0.00 |
| TRINITY_PNW81872 | hypothetChlamydomonas_reinh  | 57.90 | 0.00 |
| TRINITY_PNW87752 | hypothetChlamydomonas_reinh  | 57.90 | 0.00 |
| TRINITY_RYR63719 | hypothetArachis_hypogaea     | 57.90 | 0.00 |
| TRINITY_GAX79948 | hypothetChlamydomonas_eusti  | 57.90 | 0.00 |

|                  |           |                     |       |      |
|------------------|-----------|---------------------|-------|------|
| TRINITY_GAU11601 | hypothet  | Trifolium_subterran | 57.90 | 0.00 |
| TRINITY_GAX7968  | hypothet  | Chlamydomonas_eusti | 57.90 | 0.00 |
| TRINITY_EFJ0486  | hypothet  | Selaginella_moellen | 57.90 | 0.00 |
| TRINITY_GAQ8931  | (Dyneins  | Klebsormidium_niten | 57.90 | 0.00 |
| TRINITY_CDP0417  | unnamed   | Coffea_canephora    | 57.90 | 0.00 |
| TRINITY_ONK8191  | uncharac  | Asparagus_official  | 57.80 | 0.00 |
| TRINITY_KXZ5551  | hypothet  | Gonium_pectorale    | 57.80 | 0.00 |
| TRINITY_GAX7716  | hypothet  | Chlamydomonas_eusti | 57.80 | 0.00 |
| TRINITY_GAX7596  | hypothet  | Chlamydomonas_eusti | 57.80 | 0.00 |
| TRINITY_PNH1057  | Retrovir  | Tetrabaena_socialis | 57.80 | 0.00 |
| TRINITY_XP_0264  | WD repe   | Papaver_somniferum  | 57.80 | 0.00 |
| TRINITY_GAX7392  | hypothet  | Chlamydomonas_eusti | 57.80 | 0.00 |
| TRINITY_XP_0229  | putativ   | Cucurbita_moschata  | 57.80 | 0.00 |
| TRINITY_GAX7317  | hypothet  | Chlamydomonas_eusti | 57.80 | 0.00 |
| TRINITY_XP_0239  | (myosin-1 | Quercus_suber       | 57.80 | 0.00 |
| TRINITY_GBF8763  | hypothet  | Raphidocelis_subcap | 57.80 | 0.00 |
| TRINITY_PNH0769  | Methyl-(  | Tetrabaena_socialis | 57.80 | 0.00 |
| TRINITY_XP_0058  | hypothet  | Chlorella_variabili | 57.80 | 0.00 |
| TRINITY_XP_0056  | hypothet  | Coccomyxa_subellips | 57.80 | 0.00 |
| TRINITY_XP_0138  | hypothet  | Monoraphidium_negle | 57.80 | 0.00 |
| TRINITY_KXZ4923  | hypothet  | Gonium_pectorale    | 57.80 | 0.00 |
| TRINITY_KXZ4550  | hypothet  | Gonium_pectorale    | 57.80 | 0.00 |
| TRINITY_GAX7759  | hypothet  | Chlamydomonas_eusti | 57.80 | 0.00 |
| TRINITY_KXZ4949  | hypothet  | Gonium_pectorale    | 57.80 | 0.00 |
| TRINITY_PNW7425  | hypothet  | Chlamydomonas_reinh | 57.80 | 0.00 |
| TRINITY_PNW7811  | hypothet  | Chlamydomonas_reinh | 57.80 | 0.00 |
| TRINITY_PNW7350  | hypothet  | Chlamydomonas_reinh | 57.80 | 0.00 |
| TRINITY_XP_0029  | hypothet  | Volvox_carteri      | 57.80 | 0.00 |
| TRINITY_GAX7590  | hypothet  | Chlamydomonas_eusti | 57.80 | 0.00 |
| TRINITY_KZN0886  | hypothet  | Daucus_carota       | 57.80 | 0.00 |
| TRINITY_PSC7267  | Aldo ket  | Micractinium_conduc | 57.80 | 0.00 |
| TRINITY_XP_0056  | kinesin-  | Coccomyxa_subellips | 57.80 | 0.00 |
| TRINITY_KXZ4189  | hypothet  | Gonium_pectorale    | 57.80 | 0.00 |
| TRINITY_GAX7558  | hypothet  | Chlamydomonas_eusti | 57.80 | 0.00 |
| TRINITY_PIA4696  | hypothet  | Aquilegia_coerulea  | 57.80 | 0.00 |
| TRINITY_XP_0017  | (peptidy] | Chlamydomonas_reinh | 57.80 | 0.00 |
| TRINITY_XP_0029  | hypothet  | Volvox_carteri      | 57.80 | 0.00 |
| TRINITY_XP_0188  | PREDICTI  | Juglans_regia       | 57.80 | 0.00 |
| TRINITY_GBF9903  | hypothet  | Raphidocelis_subcap | 57.80 | 0.00 |
| TRINITY_GAQ7854  | Cytidin   | Klebsormidium_niten | 57.80 | 0.00 |
| TRINITY_GAX7854  | hypothet  | Chlamydomonas_eusti | 57.80 | 0.00 |
| TRINITY_XP_0064  | U11/U12   | Citrus_clementina   | 57.80 | 0.00 |
| TRINITY_GAQ9059  | DNA-dir   | Klebsormidium_niten | 57.80 | 0.00 |
| TRINITY_XP_0139  | hypothet  | Monoraphidium_negle | 57.80 | 0.00 |
| TRINITY_GAX7422  | hypothet  | Chlamydomonas_eusti | 57.80 | 0.00 |
| TRINITY_GAX8343  | hypothet  | Chlamydomonas_eusti | 57.80 | 0.00 |
| TRINITY_AAB8649  | calmodul  | Zea_mays            | 57.70 | 0.00 |
| TRINITY_RMZ5553  | hypothet  | Auxenochlorella_pro | 57.70 | 0.00 |
| TRINITY_XP_0064  | zinc fir  | Citrus_sinensis     | 57.70 | 0.00 |
| TRINITY_XP_0208  | tubulin   | Arabidopsis_lyrata  | 57.70 | 0.00 |
| TRINITY_OAE2770  | hypothet  | Marchantia_polymorp | 57.70 | 0.00 |
| TRINITY_XP_0025  | (SNF2 sup | Micromonas_commoda  | 57.70 | 0.00 |
| TRINITY_XP_0110  | ABC trar  | Sesamum_indicum     | 57.70 | 0.00 |
| TRINITY_XP_0075  | nucleoti  | Bathycoccus_prasinc | 57.70 | 0.00 |
| TRINITY_OUS4456  | alas pr   | Ostreococcus_tauri  | 57.70 | 0.00 |
| TRINITY_GBF9432  | hypothet  | Raphidocelis_subcap | 57.70 | 0.00 |
| TRINITY_GAX7690  | hypothet  | Chlamydomonas_eusti | 57.70 | 0.00 |
| TRINITY_EMS6059  | 140S rib  | Triticum_urartu     | 57.70 | 0.00 |
| TRINITY_XP_0239  | (myosin-1 | Quercus_suber       | 57.70 | 0.00 |
| TRINITY_XP_0056  | hypothet  | Coccomyxa_subellips | 57.70 | 0.00 |
| TRINITY_GAX8512  | hypothet  | Chlamydomonas_eusti | 57.70 | 0.00 |
| TRINITY_XP_0016  | predict   | Chlamydomonas_reinh | 57.70 | 0.00 |
| TRINITY_XP_0063  | PREDICTI  | Solanum_tuberosum   | 57.70 | 0.00 |
| TRINITY_KXZ5246  | hypothet  | Gonium_pectorale    | 57.70 | 0.00 |
| TRINITY_XP_0029  | prohibit  | Volvox_carteri      | 57.70 | 0.00 |
| TRINITY_XP_0100  | PREDICTI  | Eucalyptus_grandis  | 57.70 | 0.00 |

|                  |           |                     |       |      |
|------------------|-----------|---------------------|-------|------|
| TRINITY_XP_02439 | uncharac  | Physcomitrella_pate | 57.70 | 0.00 |
| TRINITY_PNW8449  | hypothet  | Chlamydomonas_reinh | 57.70 | 0.00 |
| TRINITY_XP_0017  | predicte  | Chlamydomonas_reinh | 57.70 | 0.00 |
| TRINITY_KXZ5325  | hypothet  | Gonium_pectorale    | 57.70 | 0.00 |
| TRINITY_XP_0017  | (phosphat | Chlamydomonas_reinh | 57.70 | 0.00 |
| TRINITY_XP_00938 | PREDICTI  | Musa_acuminata      | 57.70 | 0.00 |
| TRINITY_GAX77432 | hypothet  | Chlamydomonas_eusti | 57.70 | 0.00 |
| TRINITY_GAQ84976 | (Asparty] | Klebsormidium_niten | 57.70 | 0.00 |
| TRINITY_GAX72877 | hypothet  | Chlamydomonas_eusti | 57.70 | 0.00 |
| TRINITY_XP_00169 | R53.5-r   | Chlamydomonas_reinh | 57.70 | 0.00 |
| TRINITY_XP_00294 | pyruvate  | Volvox_carteri      | 57.70 | 0.00 |
| TRINITY_GBF90289 | kar3 ty   | Raphidocelis_subcap | 57.70 | 0.00 |
| TRINITY_GAX85698 | hypothet  | Chlamydomonas_eusti | 57.70 | 0.00 |
| TRINITY_XP_00564 | DEAD-don  | Coccomyxa_subellips | 57.70 | 0.00 |
| TRINITY_GBF8970  | (hypothet | Raphidocelis_subcap | 57.70 | 0.00 |
| TRINITY_GAX72637 | hypothet  | Chlamydomonas_eusti | 57.70 | 0.00 |
| TRINITY_XP_00937 | PREDICTI  | Pyrus_x_bretschneid | 57.70 | 0.00 |
| TRINITY_GAQ81312 | Molybdo   | Klebsormidium_niten | 57.70 | 0.00 |
| TRINITY_GAX83865 | hypothet  | Chlamydomonas_eusti | 57.70 | 0.00 |
| TRINITY_XP_00294 | hypothet  | Volvox_carteri      | 57.70 | 0.00 |
| TRINITY_GAX84316 | hypothet  | Chlamydomonas_eusti | 57.70 | 0.00 |
| TRINITY_PNW74021 | hypothet  | Chlamydomonas_reinh | 57.70 | 0.00 |
| TRINITY_PNW80462 | hypothet  | Chlamydomonas_reinh | 57.70 | 0.00 |
| TRINITY_XP_00169 | predicte  | Chlamydomonas_reinh | 57.70 | 0.00 |
| TRINITY_XP_00169 | acid ph   | Chlamydomonas_reinh | 57.70 | 0.00 |
| TRINITY_PNW89046 | hypothet  | Chlamydomonas_reinh | 57.70 | 0.00 |
| TRINITY_GAX79893 | hypothet  | Chlamydomonas_eusti | 57.70 | 0.00 |
| TRINITY_GAX85885 | hypothet  | Chlamydomonas_eusti | 57.70 | 0    |
| TRINITY_XP_0017  | (flagell  | Chlamydomonas_reinh | 57.70 | 0.00 |
| TRINITY_BAK02778 | predicte  | Hordeum_vulgare     | 57.70 | 0.00 |
| TRINITY_GAX77074 | hypothet  | Chlamydomonas_eusti | 57.70 | 0    |
| TRINITY_CAA49283 | gag,prot  | Volvox_carteri      | 57.70 | 0.00 |
| TRINITY_ABU52967 | hypothet  | Dunaliella_viridis  | 57.70 | 0.00 |
| TRINITY_BAK02449 | predicte  | Hordeum_vulgare     | 57.60 | 0.00 |
| TRINITY_PTQ29931 | hypothet  | Marchantia_polymorp | 57.60 | 0.00 |
| TRINITY_XP_02402 | mitogen-  | Morus_notabilis     | 57.60 | 0.00 |
| TRINITY_KFK42624 | hypothet  | Arabis_alpina       | 57.60 | 0.00 |
| TRINITY_XP_00169 | flagell   | Chlamydomonas_reinh | 57.60 | 0.00 |
| TRINITY_XP_00935 | PREDICTI  | Pyrus_x_bretschneid | 57.60 | 0.00 |
| TRINITY_XP_0239  | (hydroxy  | Quercus_suber       | 57.60 | 0.00 |
| TRINITY_XP_02437 | ras-rel   | Physcomitrella_pate | 57.60 | 0.00 |
| TRINITY_GAQ80881 | adaptor   | Klebsormidium_niten | 57.60 | 0.00 |
| TRINITY_XP_02024 | probable  | Asparagus_officinal | 57.60 | 0.00 |
| TRINITY_PRQ2606  | (putative | Rosa_chinensis      | 57.60 | 0.00 |
| TRINITY_XP_00295 | hypothet  | Volvox_carteri      | 57.60 | 0.00 |
| TRINITY_PNH02903 | Tubulin   | Tetrabaena_socialis | 57.60 | 0.00 |
| TRINITY_XP_00565 | hypothet  | Coccomyxa_subellips | 57.60 | 0.00 |
| TRINITY_PNW88483 | hypothet  | Chlamydomonas_reinh | 57.60 | 0.00 |
| TRINITY_XP_00169 | coiled-   | Chlamydomonas_reinh | 57.60 | 0.00 |
| TRINITY_PNW83851 | hypothet  | Chlamydomonas_reinh | 57.60 | 0.00 |
| TRINITY_KDD76408 | electror  | Helicosporidium_sp. | 57.60 | 0.00 |
| TRINITY_XP_01048 | PREDICTI  | Camelina_sativa     | 57.60 | 0.00 |
| TRINITY_GAX80038 | hypothet  | Chlamydomonas_eusti | 57.60 | 0.00 |
| TRINITY_GAU25035 | hypothet  | Trifolium_subterran | 57.60 | 0.00 |
| TRINITY_GAX73142 | hypothet  | Chlamydomonas_eusti | 57.60 | 0.00 |
| TRINITY_XP_01564 | calmodul  | Oryza_sativa        | 57.60 | 0.00 |
| TRINITY_XP_00958 | PREDICTI  | Nicotiana_tomentosi | 57.60 | 0.00 |
| TRINITY_PNW71577 | hypothet  | Chlamydomonas_reinh | 57.60 | 0.00 |
| TRINITY_PNW82458 | hypothet  | Chlamydomonas_reinh | 57.60 | 0.00 |
| TRINITY_KXZ56262 | hypothet  | Gonium_pectorale    | 57.60 | 0.00 |
| TRINITY_GAX79348 | hypothet  | Chlamydomonas_eusti | 57.60 | 0.00 |
| TRINITY_XP_00294 | hypothet  | Volvox_carteri      | 57.60 | 0.00 |
| TRINITY_PNW73943 | hypothet  | Chlamydomonas_reinh | 57.60 | 0.00 |
| TRINITY_GAX83701 | hypothet  | Chlamydomonas_eusti | 57.60 | 0.00 |
| TRINITY_GBG67744 | hypothet  | Chara_braunii       | 57.60 | 0.00 |
| TRINITY_XP_0045  | (pyropho  | Cicer_arietinum     | 57.60 | 0.00 |

|                                             |       |      |
|---------------------------------------------|-------|------|
| TRINITY_PNW7437(hypothetChlamydomonas_reinh | 57.60 | 0.00 |
| TRINITY_GAX7818(hypothetChlamydomonas_eusti | 57.60 | 0.00 |
| TRINITY_KXZ4801(hypothetGonium_pectorale    | 57.60 | 0.00 |
| TRINITY_GAX8060(hypothetChlamydomonas_eusti | 57.60 | 0.00 |
| TRINITY_GAX8230(hypothetChlamydomonas_eusti | 57.60 | 0    |
| TRINITY_GAX8624(hypothetChlamydomonas_eusti | 57.60 | 0.00 |
| TRINITY_XP_0025(predicteMicromonas_commoda  | 57.60 | 0.00 |
| TRINITY_XP_0029(hypothetVolvox_carteri      | 57.60 | 0.00 |
| TRINITY_GAQ9120(glutathiKlebsormidium_niten | 57.60 | 0.00 |
| TRINITY_EPS7223(hypothetGenlisea_aurea      | 57.50 | 0.00 |
| TRINITY_XP_0263(14-3-3 pPapaver_somniferum  | 57.50 | 0.00 |
| TRINITY_RMZ5446(hypothetAuxenochlorella_pro | 57.50 | 0.00 |
| TRINITY_XP_0029(DNA replVolvox_carteri      | 57.50 | 0.00 |
| TRINITY_XP_0030(predicteMicromonas_pusilla  | 57.50 | 0.00 |
| TRINITY_PRW3303(RNA-binChlorella_sorokinia  | 57.50 | 0.00 |
| TRINITY_XP_0238(cytosoliQuercus_suber       | 57.50 | 0.00 |
| TRINITY_XP_0029(hypothetVolvox_carteri      | 57.50 | 0.00 |
| TRINITY_XP_0029(hypothetVolvox_carteri      | 57.50 | 0.00 |
| TRINITY_GAX7995(hypothetChlamydomonas_eusti | 57.50 | 0.00 |
| TRINITY_GAX8055(hypothetChlamydomonas_eusti | 57.50 | 0.00 |
| TRINITY_PNW8901(hypothetChlamydomonas_reinh | 57.50 | 0.00 |
| TRINITY_GAX8065(hypothetChlamydomonas_eusti | 57.50 | 0.00 |
| TRINITY_GAX8443(hypothetChlamydomonas_eusti | 57.50 | 0.00 |
| TRINITY_KDD7281(hypothetHelicosporidium_sp. | 57.50 | 0.00 |
| TRINITY_GAX8081(hypothetChlamydomonas_eusti | 57.50 | 0.00 |
| TRINITY_GAX8439(hypothetChlamydomonas_eusti | 57.50 | 0.00 |
| TRINITY_XP_0110(signal pSesamum_indicum     | 57.50 | 0.00 |
| TRINITY_GAX8419(hypothetChlamydomonas_eusti | 57.50 | 0.00 |
| TRINITY_KXZ4861(hypothetGonium_pectorale    | 57.50 | 0.00 |
| TRINITY_XP_0029(hypothetVolvox_carteri      | 57.50 | 0.00 |
| TRINITY_GAX7294(hypothetChlamydomonas_eusti | 57.50 | 0.00 |
| TRINITY_XP_0017(predicteChlamydomonas_reinh | 57.50 | 0.00 |
| TRINITY_PNW8018(hypothetChlamydomonas_reinh | 57.50 | 0.00 |
| TRINITY_XP_0138(putativeMonoraphidium_negle | 57.50 | 0.00 |
| TRINITY_GAX8009(hypothetChlamydomonas_eusti | 57.50 | 0.00 |
| TRINITY_GAX7357(hypothetChlamydomonas_eusti | 57.50 | 0.00 |
| TRINITY_PRW5667(decarboChlorella_sorokinia  | 57.50 | 0.00 |
| TRINITY_GBF91111water diRaphidocelis_subcap | 57.50 | 0.00 |
| TRINITY_GAX8058(hypothetChlamydomonas_eusti | 57.50 | 0.00 |
| TRINITY_GAX7804(hypothetChlamydomonas_eusti | 57.50 | 0.00 |
| TRINITY_XP_0024(actin-3 Sorghum_bicolor     | 57.50 | 0.00 |
| TRINITY_XP_0016(ADP-ribChlamydomonas_reinh  | 57.50 | 0.00 |
| TRINITY_XP_00941(PREDICTIMusa_acuminata     | 57.50 | 0.00 |
| TRINITY_XP_01741(PREDICTIVigna_angularis    | 57.50 | 0.00 |
| TRINITY_KXZ5621(hypothetGonium_pectorale    | 57.50 | 0.00 |
| TRINITY_GAX7415(hypothetChlamydomonas_eusti | 57.50 | 0.00 |
| TRINITY_XP_0139(Signal pMonoraphidium_negle | 57.50 | 0.00 |
| TRINITY_PRW3930(zinc carChlorella_sorokinia | 57.50 | 0.00 |
| TRINITY_XP_0238(COBW donQuercus_suber       | 57.40 | 0.00 |
| TRINITY_XP_0206(ubiquitiDendrobium_catenatu | 57.40 | 0.00 |
| TRINITY_GAQ8798(PhosphatKlebsormidium_niten | 57.40 | 0.00 |
| TRINITY_XP_0110(probableSesamum_indicum     | 57.40 | 0.00 |
| TRINITY_GBF9899(cytochrRaphidocelis_subcap  | 57.40 | 0.00 |
| TRINITY_XP_0243(probablePhyscomitrella_pate | 57.40 | 0.00 |
| TRINITY_GBF9931(hypothetRaphidocelis_subcap | 57.40 | 0.00 |
| TRINITY_XP_0016(predicteChlamydomonas_reinh | 57.40 | 0.00 |
| TRINITY_KXZ4906(hypothetGonium_pectorale    | 57.40 | 0.00 |
| TRINITY_XP_0138(ERD4-relMonoraphidium_negle | 57.40 | 0.00 |
| TRINITY_XP_0029(hypothetVolvox_carteri      | 57.40 | 0.00 |
| TRINITY_PNW8460(hypothetChlamydomonas_reinh | 57.40 | 0.00 |
| TRINITY_XP_0243(U3 smallPhyscomitrella_pate | 57.40 | 0.00 |
| TRINITY_GAX7513(hypothetChlamydomonas_eusti | 57.40 | 0.00 |
| TRINITY_PRW5797(ATP-depeChlorella_sorokinia | 57.40 | 0.00 |
| TRINITY_XP_0025(elongatiMicromonas_commoda  | 57.40 | 0.00 |
| TRINITY_PRW6069(DNA damChlorella_sorokinia  | 57.40 | 0.00 |
| TRINITY_KXZ4334(hypothetGonium_pectorale    | 57.40 | 0.00 |

|                  |                               |       |      |
|------------------|-------------------------------|-------|------|
| TRINITY_XP_0239  | (aldo-ketQuercus_suber        | 57.40 | 0.00 |
| TRINITY_XP_0016  | 9FAD-depeChlamydomonas_reinh  | 57.40 | 0.00 |
| TRINITY_KXZ4230  | 8hypothetGonium_pectorale     | 57.40 | 0.00 |
| TRINITY_KVI0348  | 6GelsolirCynara_cardunculus   | 57.40 | 0.00 |
| TRINITY_OWM6501  | 3hypothetPunica_granatum      | 57.40 | 0.00 |
| TRINITY_KXZ5255  | 3hypothetGonium_pectorale     | 57.40 | 0.00 |
| TRINITY_GBG9044  | (hypothetChara_braunii        | 57.40 | 0.00 |
| TRINITY_GBF9744  | 9importirRaphidocelis_subcap  | 57.40 | 0.00 |
| TRINITY_GBF8911  | 5hypothetRaphidocelis_subcap  | 57.40 | 0.00 |
| TRINITY_XP_0016  | 9predicteChlamydomonas_reinh  | 57.40 | 0.00 |
| TRINITY_XP_0172  | 3PREDICTIFDaucus_carota       | 57.40 | 0.00 |
| TRINITY_PRW5987  | 1GDP-Man:Chlorella_sorokinia  | 57.40 | 0.00 |
| TRINITY_GAX7306  | 5hypothetChlamydomonas_eusti  | 57.40 | 0.00 |
| TRINITY_GAX7921  | 5hypothetChlamydomonas_eusti  | 57.40 | 0.00 |
| TRINITY_XP_0043  | (PREDICTIFragaria-vesca       | 57.40 | 0.00 |
| TRINITY_XP_0017  | (lipid-biChlamydomonas_reinh  | 57.40 | 0.00 |
| TRINITY_GAX7638  | 7hypothetChlamydomonas_eusti  | 57.40 | 0.00 |
| TRINITY_ERN1059  | 3hypothetAmborella_trichopod  | 57.40 | 0.00 |
| TRINITY_GAX8006  | 2hypothetChlamydomonas_eusti  | 57.40 | 0.00 |
| TRINITY_XP_0192  | 4PREDICTINicotiana_attenuata  | 57.40 | 0.00 |
| TRINITY_GAX7540  | 9hypothetChlamydomonas_eusti  | 57.40 | 0.00 |
| TRINITY_XP_0029  | 5hypothetVolvox_carteri       | 57.40 | 0.00 |
| TRINITY_GAX7626  | 1hypothetChlamydomonas_eusti  | 57.40 | 0.00 |
| TRINITY_PNW8155  | 1hypothetChlamydomonas_reinh  | 57.40 | 0.00 |
| TRINITY_XP_0139  | (hypothetMonoraphidium_negle  | 57.40 | 0.00 |
| TRINITY_GBG8457  | 7hypothetChara_braunii        | 57.40 | 0.00 |
| TRINITY_KXZ4245  | 9hypothetGonium_pectorale     | 57.40 | 0.00 |
| TRINITY_GAX8211  | (hypothetChlamydomonas_eusti  | 57.40 | 0.00 |
| TRINITY_XP_0016  | 9sar-typeChlamydomonas_reinh  | 57.30 | 0.00 |
| TRINITY_RLM5484  | 4shaggy-rPanicum_miliaceum    | 57.30 | 0.00 |
| TRINITY_KXZ5181  | 2hypothetGonium_pectorale     | 57.30 | 0.00 |
| TRINITY_XP_0025  | (predicteMicromonas_commoda   | 57.30 | 0.00 |
| TRINITY_PWA5060  | 6COX15/CtArtemisia_annua      | 57.30 | 0.00 |
| TRINITY_XP_0239  | (chorismæQuercus_suber        | 57.30 | 0.00 |
| TRINITY_EFJ3744  | 2hypothetSelaginella_moellen  | 57.30 | 0.00 |
| TRINITY_XP_0167  | 2PREDICTIFGossypium_hirsutum  | 57.30 | 0.00 |
| TRINITY_OMO6756  | 3hypothetCorchorus_capsulari  | 57.30 | 0.00 |
| TRINITY_PKU6731  | 3hypothetDendrobium_catenatu  | 57.30 | 0.00 |
| TRINITY_XP_0243  | 740S_ribcPhyscomitrella_pate  | 57.30 | 0.00 |
| TRINITY_GAX8082  | 7hypothetChlamydomonas_eusti  | 57.30 | 0.00 |
| TRINITY_PSC7221  | 350S_ribcMicractinium_conduc  | 57.30 | 0.00 |
| TRINITY_XP_0041  | 4PREDICTIFCucumis_sativus     | 57.30 | 0.00 |
| TRINITY_XP_0029  | 4hypothetVolvox_carteri       | 57.30 | 0.00 |
| TRINITY_GBF9041  | 1hypothetRaphidocelis_subcap  | 57.30 | 0.00 |
| TRINITY_XP_0139  | (6-phospPMonoraphidium_negle  | 57.30 | 0.00 |
| TRINITY_XP_0128  | 2PREDICTIFerythranthe_guttata | 57.30 | 0.00 |
| TRINITY_XP_0025  | (predicteMicromonas_commoda   | 57.30 | 0.00 |
| TRINITY_XP_0063  | 9aldehydEutrema_salsugineum   | 57.30 | 0.00 |
| TRINITY_PNW7923  | 4hypothetChlamydomonas_reinh  | 57.30 | 0.00 |
| TRINITY_XP_0138  | 9NifU-liMonoraphidium_negle   | 57.30 | 0.00 |
| TRINITY_XP_0016  | 9predicteChlamydomonas_reinh  | 57.30 | 0.00 |
| TRINITY_XP_0029  | 4hypothetVolvox_carteri       | 57.30 | 0.00 |
| TRINITY_XP_0016  | 8predicteChlamydomonas_reinh  | 57.30 | 0.00 |
| TRINITY_KFK3120  | 1hypothetArabis_alpina        | 57.30 | 0.00 |
| TRINITY_GBF9559  | 4hypothetRaphidocelis_subcap  | 57.30 | 0.00 |
| TRINITY_AXU9887  | 7hypothetBrassica_juncea      | 57.30 | 0.00 |
| TRINITY_GBF9458  | 2hypothetRaphidocelis_subcap  | 57.30 | 0.00 |
| TRINITY_XP_0138  | 9ethanolæMonoraphidium_negle  | 57.30 | 0.00 |
| TRINITY_GAX7408  | 4hypothetChlamydomonas_eusti  | 57.30 | 0.00 |
| TRINITY_GAX7283  | 2hypothetChlamydomonas_eusti  | 57.30 | 0.00 |
| TRINITY_XP_0016  | 9predicteChlamydomonas_reinh  | 57.30 | 0.00 |
| TRINITY_GAX8396  | (hypothetChlamydomonas_eusti  | 57.30 | 0.00 |
| TRINITY_XP_0243  | 9uncharacPhyscomitrella_pate  | 57.30 | 0.00 |
| TRINITY_P0C8M8.1 | RecName:Zea_mays              | 57.30 | 0.00 |
| TRINITY_PNW8001  | 2hypothetChlamydomonas_reinh  | 57.30 | 0.00 |
| TRINITY_RMZ5401  | 3hypothetAuxenochlorella_pro  | 57.30 | 0.00 |

|                                             |       |      |
|---------------------------------------------|-------|------|
| TRINITY_XP_02438general Physcomitrella_pate | 57.30 | 0.00 |
| TRINITY_GAX7823(hypothetChlamydomonas_eusti | 57.30 | 0.00 |
| TRINITY_PNW8067(hypothetChlamydomonas_reinh | 57.30 | 0.00 |
| TRINITY_GAQ80816Seryl-tFKlebsormidium_niten | 57.30 | 0.00 |
| TRINITY_GAX78187hypothetChlamydomonas_eusti | 57.30 | 0.00 |
| TRINITY_GAX84009hypothetChlamydomonas_eusti | 57.30 | 0.00 |
| TRINITY_XP_01917PREDICTFIpomoea_nil         | 57.30 | 0.00 |
| TRINITY_PNW83159hypothetChlamydomonas_reinh | 57.30 | 0.00 |
| TRINITY_GAX80679hypothetChlamydomonas_eusti | 57.30 | 0.00 |
| TRINITY_XP_0139(superoxiMonoraphidium_negle | 57.30 | 0.00 |
| TRINITY_PNW77176hypothetChlamydomonas_reinh | 57.30 | 0.00 |
| TRINITY_065315.1RecName:Coleochaete_scutata | 57.30 | 0.00 |
| TRINITY_XP_0228460S_ribcOlea_europaea       | 57.30 | 0.00 |
| TRINITY_XP_0025(predicteMicromonas_commoda  | 57.30 | 0.00 |
| TRINITY_GAQ8867920S_protKlebsormidium_niten | 57.20 | 0.00 |
| TRINITY_XP_0028640S_ribcArabidopsis_lyrata  | 57.20 | 0.00 |
| TRINITY_GAQ92608HypothetKlebsormidium_niten | 57.20 | 0.00 |
| TRINITY_XP_00169phosphorChlamydomonas_reinh | 57.20 | 0.00 |
| TRINITY_PSC70664Solute cMicractinium_conduc | 57.20 | 0.00 |
| TRINITY_GAX83879hypothetChlamydomonas_eusti | 57.20 | 0.00 |
| TRINITY_XP_00169predicteChlamydomonas_reinh | 57.20 | 0.00 |
| TRINITY_XP_00299hypothetVolvox_carteri      | 57.20 | 0.00 |
| TRINITY_GAQ79476ER_lumerKlebsormidium_niten | 57.20 | 0.00 |
| TRINITY_P0C8M8.1RecName:Zea_mays            | 57.20 | 0.00 |
| TRINITY_PNH01987Ankyrin-Tetrabaena_socialis | 57.20 | 0.00 |
| TRINITY_ABI94007mitochorDunaliella_salina   | 57.20 | 0.00 |
| TRINITY_KXZ56601hypothetGonium_pectorale    | 57.20 | 0.00 |
| TRINITY_XP_02391adenylatQuercus_suber       | 57.20 | 0.00 |
| TRINITY_XP_00294hypothetVolvox_carteri      | 57.20 | 0.00 |
| TRINITY_065315.1RecName:Coleochaete_scutata | 57.20 | 0.00 |
| TRINITY_PNW77599hypothetChlamydomonas_reinh | 57.20 | 0.00 |
| TRINITY_XP_01049PREDICTFCamelina_sativa     | 57.10 | 0.00 |
| TRINITY_XP_00564RNA_heliCoccomyxa_subellips | 57.10 | 0.00 |
| TRINITY_GBG76509hypothetChara_braunii       | 57.10 | 0.00 |
| TRINITY_KDD7443(hypothetHelicosporidium_sp. | 57.10 | 0.00 |
| TRINITY_PNW83574hypothetChlamydomonas_reinh | 57.10 | 0.00 |
| TRINITY_XP_0072(cyclin-lPrunus_persica      | 57.10 | 0.00 |
| TRINITY_XP_01139PeroxiAuxenochlorella_pro   | 57.10 | 0.00 |
| TRINITY_XP_02188zinc_firCarica_papaya       | 57.10 | 0.00 |
| TRINITY_XP_01724PREDICTFDaucus_carota       | 57.10 | 0.00 |
| TRINITY_XP_00309predicteMicromonas_pusilla  | 57.10 | 0.00 |
| TRINITY_KXZ45339hypothetGonium_pectorale    | 57.10 | 0.00 |
| TRINITY_PRW32897WD40_reChlorella_sorokinia  | 57.10 | 0.00 |
| TRINITY_XP_0257(cyclin-cArachis_hypogaea    | 57.10 | 0.00 |
| TRINITY_PSC72317DNA_poljMicractinium_conduc | 57.10 | 0.00 |
| TRINITY_KXZ42034hypothetGonium_pectorale    | 57.10 | 0.00 |
| TRINITY_XP_00299hypothetVolvox_carteri      | 57.10 | 0.00 |
| TRINITY_KXZ50642hypothetGonium_pectorale    | 57.10 | 0.00 |
| TRINITY_KNA15549hypothetSpinacia_oleracea   | 57.10 | 0.00 |
| TRINITY_NP_0013114-3-3 jNicotiana_tabacum   | 57.10 | 0.00 |
| TRINITY_GBF91191hypothetRaphidocelis_subcap | 57.10 | 0.00 |
| TRINITY_XP_00299hypothetVolvox_carteri      | 57.10 | 0.00 |
| TRINITY_XP_02161ABC_trarManihot_esculenta   | 57.10 | 0.00 |
| TRINITY_XP_00294hypothetVolvox_carteri      | 57.10 | 0.00 |
| TRINITY_PNW7856(hypothetChlamydomonas_reinh | 57.10 | 0.00 |
| TRINITY_ONK72114uncharaAsparagus_officinal  | 57.10 | 0.00 |
| TRINITY_XP_00294hypothetVolvox_carteri      | 57.10 | 0.00 |
| TRINITY_PIA49912hypothetAquilegia_coerulea  | 57.10 | 0.00 |
| TRINITY_GAX82862hypothetChlamydomonas_eusti | 57.10 | 0.00 |
| TRINITY_BAK02778predicteHordeum_vulgare     | 57.10 | 0.00 |
| TRINITY_GAX83134hypothetChlamydomonas_eusti | 57.10 | 0.00 |
| TRINITY_PPS16852hypothetGossypium_barbadens | 57.10 | 0.00 |
| TRINITY_KXZ52926hypothetGonium_pectorale    | 57.10 | 0.00 |
| TRINITY_PNW71219hypothetChlamydomonas_reinh | 57.10 | 0.00 |
| TRINITY_XP_00141predicteOstreococcus_sp._'1 | 57.10 | 0.00 |
| TRINITY_XP_0017(histone Chlamydomonas_reinh | 57.10 | 0.00 |

|                                             |       |      |
|---------------------------------------------|-------|------|
| TRINITY_GBG81743hypothetChara_braunii       | 57.10 | 0.00 |
| TRINITY_GAX76865hypothetChlamydomonas_eusti | 57.10 | 0.00 |
| TRINITY_ONI00231hypothetPrunus_persica      | 57.10 | 0.00 |
| TRINITY_XP_00295hypothetVolvox_carteri      | 57.10 | 0.00 |
| TRINITY_PNH04037hypothetTetrabaena_socialis | 57.10 | 0.00 |
| TRINITY_GAQ83676homeobo>Klebsormidium_niten | 57.10 | 0.00 |
| TRINITY_KCW85306hypothetEucalyptus_grandis  | 57.10 | 0.00 |
| TRINITY_GAX85699hypothetChlamydomonas_eusti | 57.10 | 0.00 |
| TRINITY_GBF93509hypothetRaphidocelis_subcap | 57.10 | 0.00 |
| TRINITY_XP_02391AMP deanQuercus_suber       | 57.10 | 0.00 |

|                  |                               |       |      |
|------------------|-------------------------------|-------|------|
| TRINITY_PNW83234 | hypothetChlamydomonas_reinh   | 57.10 | 0.00 |
| TRINITY_GAX75281 | hypothetChlamydomonas_eusti   | 57.10 | 0.00 |
| TRINITY_GBF94257 | 110 kDa Raphidocelis_subcap   | 57.10 | 0.00 |
| TRINITY_GAX81129 | hypothetChlamydomonas_eusti   | 57.10 | 0.00 |
| TRINITY_XP_00635 | PREDICTI Solanum_tuberosum    | 57.10 | 0.00 |
| TRINITY_XP_00308 | Tetratri Ostreococcus_tauri   | 57.10 | 0.00 |
| TRINITY_GAX7496  | (hypothetChlamydomonas_eusti  | 57.10 | 0.00 |
| TRINITY_GBF90319 | transcri Raphidocelis_subcap  | 57.10 | 0.00 |
| TRINITY_KXZ55944 | hypothetGonium_pectorale      | 57.10 | 0.00 |
| TRINITY_GBF93427 | type I r Raphidocelis_subcap  | 57.10 | 0.00 |
| TRINITY_XP_02387 | chorismæ Quercus_suber        | 57.10 | 0.00 |
| TRINITY_XP_00169 | predictæ Chlamydomonas_reinh  | 57.10 | 0.00 |
| TRINITY_GAX79493 | hypothetChlamydomonas_eusti   | 57.10 | 0.00 |
| TRINITY_RWR92799 | tRNA-bir Cinnamomum_micranth  | 57.10 | 0.00 |
| TRINITY_PNH02349 | Tubulin-Tetrabaena_socialis   | 57.10 | 0.00 |
| TRINITY_KXZ55923 | hypothetGonium_pectorale      | 57.10 | 0.00 |
| TRINITY_XP_00169 | predictæ Chlamydomonas_reinh  | 57.10 | 0.00 |
| TRINITY_GBG74473 | hypothetChara_braunii         | 57.10 | 0.00 |
| TRINITY_OAE27724 | hypothetMarchantia_polymorp   | 57.10 | 0.00 |
| TRINITY_GAQ8884  | (diaminoϕ Klebsormidium_niten | 57.10 | 0.00 |
| TRINITY_GAQ7919  | (DNA-diræ Klebsormidium_niten | 57.00 | 0.00 |
| TRINITY_XP_02199 | probablæ Helianthus_annuus    | 57.00 | 0.00 |
| TRINITY_XP_01027 | PREDICTI Nelumbo_nucifera     | 57.00 | 0.00 |
| TRINITY_OWM69611 | hypothetPunica_granatum       | 57.00 | 0.00 |
| TRINITY_KDD72183 | hypothetHelicosporidium_sp.   | 57.00 | 0.00 |
| TRINITY_GAX78817 | hypothetChlamydomonas_eusti   | 57.00 | 0.00 |
| TRINITY_GBG65322 | hypothetChara_braunii         | 57.00 | 0.00 |
| TRINITY_XP_01558 | unchara Ricinus_communis      | 57.00 | 0.00 |
| TRINITY_GBG75744 | hypothetChara_braunii         | 57.00 | 0.00 |
| TRINITY_ACQ8348  | (CBL-intæ Selaginella_moellen | 57.00 | 0.00 |
| TRINITY_XP_01208 | heparan-Jatropha_curcas       | 57.00 | 0.00 |
| TRINITY_ARO50091 | indolean Yamagishiella_unico  | 57.00 | 0.00 |
| TRINITY_XP_00295 | hypothetVolvox_carteri        | 57.00 | 0.00 |
| TRINITY_KXZ44043 | hypothetGonium_pectorale      | 57.00 | 0.00 |
| TRINITY_GAV76094 | UCH domæ Cephalotus_follicul  | 57.00 | 0.00 |
| TRINITY_XP_00294 | hypothetVolvox_carteri        | 57.00 | 0.00 |
| TRINITY_KXZ50598 | hypothetGonium_pectorale      | 57.00 | 0.00 |
| TRINITY_XP_02185 | succinat Spinacia_oleracea    | 57.00 | 0.00 |
| TRINITY_GAX7727  | (hypothetChlamydomonas_eusti  | 57.00 | 0.00 |
| TRINITY_PNW83144 | hypothetChlamydomonas_reinh   | 57.00 | 0.00 |
| TRINITY_XP_00295 | hypothetVolvox_carteri        | 57.00 | 0.00 |
| TRINITY_KXZ5226  | (hypothetGonium_pectorale     | 57.00 | 0.00 |
| TRINITY_NP_00123 | unchara Glycine_max           | 57.00 | 0.00 |
| TRINITY_KXZ42588 | hypothetGonium_pectorale      | 57.00 | 0.00 |
| TRINITY_XP_00295 | hypothetVolvox_carteri        | 57.00 | 0.00 |
| TRINITY_AML78291 | putativæ Pleurastrum_insigne  | 57.00 | 0.00 |
| TRINITY_PNW84886 | (hypothetChlamydomonas_reinh  | 57.00 | 0.00 |
| TRINITY_XP_00169 | predictæ Chlamydomonas_reinh  | 57.00 | 0.00 |
| TRINITY_PSC73497 | rRNA met Micractinium_conduc  | 57.00 | 0.00 |
| TRINITY_PNW82124 | hypothetChlamydomonas_reinh   | 57.00 | 0.00 |
| TRINITY_NP_00124 | malate c Glycine_max          | 57.00 | 0.00 |
| TRINITY_PNW85319 | hypothetChlamydomonas_reinh   | 57.00 | 0.00 |
| TRINITY_XP_00169 | general Chlamydomonas_reinh   | 57.00 | 0.00 |
| TRINITY_PNH06827 | Carbonyl Tetrabaena_socialis  | 57.00 | 0.00 |
| TRINITY_XP_00169 | predictæ Chlamydomonas_reinh  | 57.00 | 0.00 |
| TRINITY_GAX72555 | hypothetChlamydomonas_eusti   | 57.00 | 0.00 |
| TRINITY_XP_00294 | hypothetVolvox_carteri        | 57.00 | 0.00 |
| TRINITY_GBF95883 | hypothetRaphidocelis_subcap   | 57.00 | 0.00 |
| TRINITY_KXZ45466 | hypothetGonium_pectorale      | 57.00 | 0.00 |
| TRINITY_GAX74234 | hypothetChlamydomonas_eusti   | 57.00 | 0.00 |
| TRINITY_GBF99251 | polyprer Raphidocelis_subcap  | 57.00 | 0.00 |
| TRINITY_ABF57675 | chlorop Chlamydomonas_reinh   | 57.00 | 0.00 |
| TRINITY_GAX81923 | hypothetChlamydomonas_eusti   | 57.00 | 0.00 |
| TRINITY_EFJ04987 | hypothetSelaginella_moellen   | 57.00 | 0.00 |
| TRINITY_XP_00564 | ABC fami Coccomyxa_subellips  | 57.00 | 0.00 |
| TRINITY_PNW77853 | hypothetChlamydomonas_reinh   | 57.00 | 0.00 |



|                   |                             |       |      |
|-------------------|-----------------------------|-------|------|
| TRINITY_KXZ52654  | hypothetGonium_pectorale    | 57.00 | 0.00 |
| TRINITY_XP_01390  | CentrosMonoraphidium_negle  | 56.90 | 0.00 |
| TRINITY_XP_01004  | PREDICTIEucalyptus_grandis  | 56.90 | 0.00 |
| TRINITY_ADE77455  | unknown Picea_sitchensis    | 56.90 | 0.00 |
| TRINITY_RLN35216  | hypothetPanicum_miliaceum   | 56.90 | 0.00 |
| TRINITY_PTQ50103  | hypothetMarchantia_polymorp | 56.90 | 0.00 |
| TRINITY_ABK23787  | unknown Picea_sitchensis    | 56.90 | 0.00 |
| TRINITY_XP_00751  | predicteBathycoccus_prasinc | 56.90 | 0.00 |
| TRINITY_KXZ46637  | hypothetGonium_pectorale    | 56.90 | 0.00 |
| TRINITY_XP_02438  | putativePhyscomitrella_pate | 56.90 | 0.00 |
| TRINITY_GAX84594  | hypothetChlamydomonas_eusti | 56.90 | 0.00 |
| TRINITY_OAY82958  | NADH-cytAnanas_comosus      | 56.90 | 0.00 |
| TRINITY_XP_01146  | PREDICTIFragaria-vesca      | 56.90 | 0.00 |
| TRINITY_XP_01282  | PREDICTIErythranthe_guttata | 56.90 | 0.00 |
| TRINITY_XP_00169  | predicteChlamydomonas_reinh | 56.90 | 0.00 |
| TRINITY_XP_00294  | hypothetVolvox_carteri      | 56.90 | 0.00 |
| TRINITY_KXZ43041  | hypothetGonium_pectorale    | 56.90 | 0.00 |
| TRINITY_GBG87308  | hypothetChara_braunii       | 56.90 | 0.00 |
| TRINITY_GBF89375  | guanylatRaphidocelis_subcap | 56.90 | 0.00 |
| TRINITY_BAK02778  | predicteHordeum_vulgare     | 56.90 | 0.00 |
| TRINITY_PNH11885  | hypothetTetrabaena_socialis | 56.90 | 0.00 |
| TRINITY_GAQ92474  | ElectrorKlebsormidium_niten | 56.90 | 0.00 |
| TRINITY_XP_00564  | cytochrCoccomyxa_subellips  | 56.90 | 0.00 |
| TRINITY_GAX77679  | hypothetChlamydomonas_eusti | 56.90 | 0.00 |
| TRINITY_RYR23351  | hypothetArachis_hypogaea    | 56.90 | 0.00 |
| TRINITY_GBF90443  | hypothetRaphidocelis_subcap | 56.90 | 0.00 |
| TRINITY_PNH10384  | hypothetTetrabaena_socialis | 56.90 | 0.00 |
| TRINITY_GBF90935  | voltage-Raphidocelis_subcap | 56.90 | 0.00 |
| TRINITY_PNW72452  | hypothetChlamydomonas_reinh | 56.90 | 0.00 |
| TRINITY_XP_00169  | cytochrChlamydomonas_reinh  | 56.90 | 0.00 |
| TRINITY_RID81070  | hypothetBrassica_rapa       | 56.90 | 0.00 |
| TRINITY_XP_00295  | hypothetVolvox_carteri      | 56.90 | 0.00 |
| TRINITY_XP_00665  | PREDICTIOryza_brachyantha   | 56.90 | 0.00 |
| TRINITY_GBF91498  | hypothetRaphidocelis_subcap | 56.90 | 0.00 |
| TRINITY_XP_00751  | major faBathycoccus_prasinc | 56.90 | 0.00 |
| TRINITY_GBF92377  | disulficRaphidocelis_subcap | 56.90 | 0.00 |
| TRINITY_PNW78438  | hypothetChlamydomonas_reinh | 56.90 | 0.00 |
| TRINITY_RXH69554  | hypothetMalus_domestica     | 56.90 | 0.00 |
| TRINITY_KXZ51833  | hypothetGonium_pectorale    | 56.90 | 0.00 |
| TRINITY_XP_00295  | hypothetVolvox_carteri      | 56.90 | 0.00 |
| TRINITY_GAX83927  | hypothetChlamydomonas_eusti | 56.90 | 0.00 |
| TRINITY_GAX76162  | hypothetChlamydomonas_eusti | 56.90 | 0.00 |
| TRINITY_GAX79612  | hypothetChlamydomonas_eusti | 56.90 | 0.00 |
| TRINITY_GBF90169  | galactolRaphidocelis_subcap | 56.90 | 0.00 |
| TRINITY_PRW39388  | DNA gyrChlorella_sorokinia  | 56.90 | 0.00 |
| TRINITY_PNW78545  | hypothetChlamydomonas_reinh | 56.90 | 0.00 |
| TRINITY_GAX78046  | hypothetChlamydomonas_eusti | 56.90 | 0.00 |
| TRINITY_KXZ51758  | hypothetGonium_pectorale    | 56.90 | 0.00 |
| TRINITY_XP_00564  | eukaryotCoccomyxa_subellips | 56.90 | 0.00 |
| TRINITY_GBF87741  | hypothetRaphidocelis_subcap | 56.90 | 0.00 |
| TRINITY_PNW72222  | hypothetChlamydomonas_reinh | 56.90 | 0.00 |
| TRINITY_KXZ42934  | hypothetGonium_pectorale    | 56.90 | 0.00 |
| TRINITY_PRW44843  | prolyl eChlorella_sorokinia | 56.90 | 0.00 |
| TRINITY_EEF24733  | pterin-4Ricinus_communis    | 56.80 | 0.00 |
| TRINITY_XP_01655  | PREDICTICapsicum_annuum     | 56.80 | 0.00 |
| TRINITY_GBG66199  | hypothetChara_braunii       | 56.80 | 0.00 |
| TRINITY_XP_02389  | kinesin Quercus_suber       | 56.80 | 0.00 |
| TRINITY_GAQ92868  | polyaderKlebsormidium_niten | 56.80 | 0.00 |
| TRINITY_NP_194646 | -phosphArabidopsis_thalian  | 56.80 | 0.00 |
| TRINITY_RLN39766  | hypothetPanicum_miliaceum   | 56.80 | 0.00 |
| TRINITY_PRW60832  | chitinasChlorella_sorokinia | 56.80 | 0.00 |
| TRINITY_XP_00294  | hypothetVolvox_carteri      | 56.80 | 0.00 |
| TRINITY_BAK00960  | predicteHordeum_vulgare     | 56.80 | 0.00 |
| TRINITY_GAQ86826  | NADH:flKlebsormidium_niten  | 56.80 | 0.00 |
| TRINITY_XP_00297  | L-galactSelaginella_moellen | 56.80 | 0.00 |
| TRINITY_XP_00295  | hypothetVolvox_carteri      | 56.80 | 0.00 |

|                 |           |                     |       |      |
|-----------------|-----------|---------------------|-------|------|
| TRINITY_XP_0016 | predict   | Chlamydomonas_reinh | 56.80 | 0.00 |
| TRINITY_GAQ7787 | (U6 snRN  | Klebsormidium_niten | 56.80 | 0.00 |
| TRINITY_GAX7471 | hypothet  | Chlamydomonas_eusti | 56.80 | 0.00 |
| TRINITY_KXZ5015 | hypothet  | Gonium_pectorale    | 56.80 | 0.00 |
| TRINITY_XP_0017 | (histone  | Chlamydomonas_reinh | 56.80 | 0.00 |
| TRINITY_XP_0200 | probable  | Ananas_comosus      | 56.80 | 0.00 |
| TRINITY_PNH0525 | hypothet  | Tetrabaena_socialis | 56.80 | 0.00 |
| TRINITY_XP_0029 | hypothet  | Volvox_carteri      | 56.80 | 0.00 |
| TRINITY_PNW8189 | hypothet  | Chlamydomonas_reinh | 56.80 | 0.00 |
| TRINITY_GBF9657 | hypothet  | Raphidocelis_subcap | 56.80 | 0.00 |
| TRINITY_PNH1223 | Protein   | Tetrabaena_socialis | 56.80 | 0.00 |
| TRINITY_GAX8372 | hypothet  | Chlamydomonas_eusti | 56.80 | 0.00 |
| TRINITY_XP_0029 | hypothet  | Volvox_carteri      | 56.80 | 0.00 |
| TRINITY_KXZ5218 | hypothet  | Gonium_pectorale    | 56.80 | 0.00 |
| TRINITY_XP_0110 | isoleuci  | Sesamum_indicum     | 56.80 | 0.00 |
| TRINITY_XP_0104 | PREDICTI  | Camelina_sativa     | 56.80 | 0.00 |
| TRINITY_OWM7166 | hypothet  | Punica_granatum     | 56.80 | 0.00 |
| TRINITY_GAX7387 | hypothet  | Chlamydomonas_eusti | 56.80 | 0.00 |
| TRINITY_XP_0139 | (Putativ  | Monoraphidium_negle | 56.80 | 0.00 |
| TRINITY_GBG6087 | (hypothet | Chara_braunii       | 56.80 | 0.00 |
| TRINITY_GAX7665 | hypothet  | Chlamydomonas_eusti | 56.80 | 0.00 |
| TRINITY_GAX7381 | hypothet  | Chlamydomonas_eusti | 56.80 | 0.00 |
| TRINITY_PNW8725 | hypothet  | Chlamydomonas_reinh | 56.80 | 0.00 |
| TRINITY_XP_0017 | (predict  | Chlamydomonas_reinh | 56.80 | 0.00 |
| TRINITY_PNW8515 | hypothet  | Chlamydomonas_reinh | 56.80 | 0    |
| TRINITY_PNW7358 | hypothet  | Chlamydomonas_reinh | 56.80 | 0    |
| TRINITY_GAX8086 | hypothet  | Chlamydomonas_eusti | 56.80 | 0.00 |
| TRINITY_PNH1283 | Calcium-  | Tetrabaena_socialis | 56.80 | 0    |
| TRINITY_XP_0016 | predict   | Chlamydomonas_reinh | 56.80 | 0.00 |
| TRINITY_PNW8718 | hypothet  | Chlamydomonas_reinh | 56.80 | 0.00 |
| TRINITY_EOA3705 | hypothet  | Capsella_rubella    | 56.80 | 0.00 |
| TRINITY_XP_0030 | predict   | Micromonas_pusilla  | 56.70 | 0.00 |
| TRINITY_XP_0068 | ubiquiti  | Amborella_trichopod | 56.70 | 0.00 |
| TRINITY_GBG6681 | hypothet  | Chara_braunii       | 56.70 | 0.00 |
| TRINITY_XP_0249 | probable  | Ziziphus_jujuba     | 56.70 | 0.00 |
| TRINITY_XP_0244 | (uncharac | Physcomitrella_pate | 56.70 | 0.00 |
| TRINITY_PWA4778 | NAD(P)-   | Artemisia_annua     | 56.70 | 0.00 |
| TRINITY_XP_0042 | PREDICTI  | Fragaria-vesca      | 56.70 | 0.00 |
| TRINITY_AWK2409 | mitochor  | Chlamydomonas_sp._U | 56.70 | 0.00 |
| TRINITY_KMZ6229 | Replicat  | Zostera_marina      | 56.70 | 0.00 |
| TRINITY_XP_0217 | threonyl  | Chenopodium_quinoa  | 56.70 | 0.00 |
| TRINITY_KXZ5244 | hypothet  | Gonium_pectorale    | 56.70 | 0.00 |
| TRINITY_KZV1503 | (NAD-depe | Dorcoceras_hygromet | 56.70 | 0.00 |
| TRINITY_GAX8579 | hypothet  | Chlamydomonas_eusti | 56.70 | 0.00 |
| TRINITY_GBG7203 | hypothet  | Chara_braunii       | 56.70 | 0.00 |
| TRINITY_XP_0056 | P-loop    | Coccomyxa_subellips | 56.70 | 0.00 |
| TRINITY_PNH1208 | hypothet  | Tetrabaena_socialis | 56.70 | 0.00 |
| TRINITY_GAX7693 | hypothet  | Chlamydomonas_eusti | 56.70 | 0.00 |
| TRINITY_GAX8146 | hypothet  | Chlamydomonas_eusti | 56.70 | 0.00 |
| TRINITY_PRW4433 | Kanadapt  | Chlorella_sorokinia | 56.70 | 0.00 |
| TRINITY_GAX7868 | hypothet  | Chlamydomonas_eusti | 56.70 | 0.00 |
| TRINITY_XP_0097 | PREDICTI  | Nicotiana_sylvestri | 56.70 | 0.00 |
| TRINITY_GAX7305 | hypothet  | Chlamydomonas_eusti | 56.70 | 0.00 |
| TRINITY_XP_0101 | (protein  | Morus_notabilis     | 56.70 | 0.00 |
| TRINITY_XP_0029 | hypothet  | Volvox_carteri      | 56.70 | 0.00 |
| TRINITY_XP_0139 | (IMPACT   | Monoraphidium_negle | 56.70 | 0.00 |
| TRINITY_GAX7522 | hypothet  | Chlamydomonas_eusti | 56.70 | 0.00 |
| TRINITY_XP_0029 | hypothet  | Volvox_carteri      | 56.70 | 0.00 |
| TRINITY_GAX7411 | hypothet  | Chlamydomonas_eusti | 56.70 | 0.00 |
| TRINITY_XP_0239 | ras-rel   | Quercus_suber       | 56.70 | 0.00 |
| TRINITY_BAK0697 | (predict  | Hordeum_vulgare     | 56.70 | 0.00 |
| TRINITY_KXZ4806 | hypothet  | Gonium_pectorale    | 56.70 | 0.00 |
| TRINITY_KXZ4560 | hypothet  | Gonium_pectorale    | 56.70 | 0.00 |
| TRINITY_PNH1194 | JmjC don  | Tetrabaena_socialis | 56.70 | 0.00 |
| TRINITY_PNW8539 | hypothet  | Chlamydomonas_reinh | 56.70 | 0.00 |
| TRINITY_PNH1155 | 30S rib   | Tetrabaena_socialis | 56.70 | 0.00 |

|                  |                              |       |      |
|------------------|------------------------------|-------|------|
| TRINITY_XP_00295 | hypothetVolvox_carteri       | 56.70 | 0.00 |
| TRINITY_PNH0614  | hypothetTetrabaena_socialis  | 56.70 | 0.00 |
| TRINITY_PNW7788  | hypothetChlamydomonas_reinh  | 56.70 | 0.00 |
| TRINITY_XP_0030  | central Micromonas_pusilla   | 56.70 | 0.00 |
| TRINITY_XP_0243  | eukaryotPhyscomitrella_pate  | 56.70 | 0.00 |
| TRINITY_XP_00294 | hypothetVolvox_carteri       | 56.70 | 0.00 |
| TRINITY_XP_0063  | (DExH-bo)Capsella_rubella    | 56.70 | 0.00 |
| TRINITY_GAX77074 | hypothetChlamydomonas_eusti  | 56.70 | 0.00 |
| TRINITY_GBF97774 | hypothetRaphidocelis_subcap  | 56.70 | 0.00 |
| TRINITY_PNW8849  | hypothetChlamydomonas_reinh  | 56.70 | 0.00 |
| TRINITY_AML77961 | putativeDunaliella_salina    | 56.70 | 0.00 |
| TRINITY_KXZ4577  | (hypothetGonium_pectorale    | 56.70 | 0.00 |
| TRINITY_PNH0920  | Tiny macTetrabaena_socialis  | 56.70 | 0.00 |
| TRINITY_XP_0238  | septin lQuercus_suber        | 56.70 | 0.00 |
| TRINITY_XP_0113  | TranslocAuxenochlorella_pro  | 56.70 | 0.00 |
| TRINITY_ONK6448  | uncharacAsparagus_officinal  | 56.60 | 0.00 |
| TRINITY_XP_02374 | myosin-2Lactuca_sativa       | 56.60 | 0.00 |
| TRINITY_XP_0088  | (T-complePhoenix_dactylifera | 56.60 | 0.00 |
| TRINITY_OWM8856  | (hypothetPunica_granatum     | 56.60 | 0.00 |
| TRINITY_XP_0238  | actin-liQuercus_suber        | 56.60 | 0.00 |
| TRINITY_XP_0100  | PREDICTHEucalyptus_grandis   | 56.60 | 0.00 |
| TRINITY_XP_0102  | coiled-(Brachypodium_distac  | 56.60 | 0.00 |
| TRINITY_XP_0220  | imidazolHelianthus_annuus    | 56.60 | 0.00 |
| TRINITY_OVA0402  | ABC trarMacleaya_cordata     | 56.60 | 0.00 |
| TRINITY_XP_0128  | PREDICTHErythranthe_guttata  | 56.60 | 0.00 |
| TRINITY_ALM5500  | (DEAD bo)Chlamydomonas_sp._I | 56.60 | 0.00 |
| TRINITY_XP_0016  | hypothetChlamydomonas_reinh  | 56.60 | 0.00 |
| TRINITY_PNW8713  | hypothetChlamydomonas_reinh  | 56.60 | 0.00 |
| TRINITY_CAA1126  | polyubi(Nicotiana_tabacum    | 56.60 | 0.00 |
| TRINITY_KXZ5582  | (hypothetGonium_pectorale    | 56.60 | 0.00 |
| TRINITY_GAX7625  | hypothetChlamydomonas_eusti  | 56.60 | 0.00 |
| TRINITY_GAQ81671 | hypothetKlebsormidium_niten  | 56.60 | 0.00 |
| TRINITY_KXZ5624  | hypothetGonium_pectorale     | 56.60 | 0.00 |
| TRINITY_XP_0238  | non-specQuercus_suber        | 56.60 | 0.00 |
| TRINITY_XP_0238  | kinesin-Quercus_suber        | 56.60 | 0.00 |
| TRINITY_VDD4191  | (unnamed Brassica_oleracea   | 56.60 | 0.00 |
| TRINITY_GAX7924  | (hypothetChlamydomonas_eusti | 56.60 | 0.00 |
| TRINITY_PNW8166  | hypothetChlamydomonas_reinh  | 56.60 | 0.00 |
| TRINITY_PNW8578  | hypothetChlamydomonas_reinh  | 56.60 | 0.00 |
| TRINITY_XP_0016  | tail-spChlamydomonas_reinh   | 56.60 | 0.00 |
| TRINITY_XP_0016  | predictChlamydomonas_reinh   | 56.60 | 0.00 |
| TRINITY_GAX7299  | hypothetChlamydomonas_eusti  | 56.60 | 0.00 |
| TRINITY_GAX7314  | (hypothetChlamydomonas_eusti | 56.60 | 0.00 |
| TRINITY_GAX8522  | hypothetChlamydomonas_eusti  | 56.60 | 0.00 |
| TRINITY_XP_0017  | (predictChlamydomonas_reinh  | 56.60 | 0.00 |
| TRINITY_GAX8202  | hypothetChlamydomonas_eusti  | 56.60 | 0.00 |
| TRINITY_GAX7554  | hypothetChlamydomonas_eusti  | 56.60 | 0.00 |
| TRINITY_GAX8256  | (hypothetChlamydomonas_eusti | 56.60 | 0.00 |
| TRINITY_GBF8972  | ubiquitiRaphidocelis_subcap  | 56.60 | 0.00 |
| TRINITY_PNW8875  | hypothetChlamydomonas_reinh  | 56.60 | 0.00 |
| TRINITY_XP_0016  | uncoupliChlamydomonas_reinh  | 56.60 | 0.00 |
| TRINITY_XP_0238  | kinesin Quercus_suber        | 56.60 | 0.00 |
| TRINITY_XP_0056  | glutamatCoccomyxa_subellips  | 56.60 | 0.00 |
| TRINITY_KXZ5550  | hypothetGonium_pectorale     | 56.60 | 0.00 |
| TRINITY_RZC2446  | (EukaryotGlycine_soja        | 56.60 | 0.00 |
| TRINITY_XP_0058  | hypothetChlorella_variabili  | 56.50 | 0.00 |
| TRINITY_XP_0264  | cysteinePapaver_somniferum   | 56.50 | 0.00 |
| TRINITY_XP_0016  | predictChlamydomonas_reinh   | 56.50 | 0.00 |
| TRINITY_XP_0014  | predictOstreococcus_sp._'l   | 56.50 | 0.00 |
| TRINITY_XP_0029  | hypothetVolvox_carteri       | 56.50 | 0.00 |
| TRINITY_OMO6271  | hypothetCorchorus_capsulari  | 56.50 | 0.00 |
| TRINITY_XP_0028  | peptide Arabidopsis_lyrata   | 56.50 | 0.00 |
| TRINITY_XP_0029  | 40S ribSelaginella_moellen   | 56.50 | 0.00 |
| TRINITY_ACQ8348  | CBL-intSelaginella_moellen   | 56.50 | 0.00 |
| TRINITY_GBG7885  | hypothetChara_braunii        | 56.50 | 0.00 |
| TRINITY_XP_0068  | S-formylAmborella_trichopod  | 56.50 | 0.00 |

|                  |          |                     |       |      |
|------------------|----------|---------------------|-------|------|
| TRINITY_XP_00168 | LOW QUAI | Chlamydomonas_reinh | 56.50 | 0.00 |
| TRINITY_XP_00295 | hypothet | Volvox_carteri      | 56.50 | 0.00 |
| TRINITY_XP_00584 | hypothet | Chlorella_variabili | 56.50 | 0.00 |
| TRINITY_PNW85433 | hypothet | Chlamydomonas_reinh | 56.50 | 0.00 |
| TRINITY_EFJ13517 | hypothet | Selaginella_moellen | 56.50 | 0.00 |
| TRINITY_GAQ81781 | Rab fami | Klebsormidium_niten | 56.50 | 0.00 |
| TRINITY_XP_00665 | PREDICTI | Oryza_brachyantha   | 56.50 | 0.00 |
| TRINITY_PNW70701 | hypothet | Chlamydomonas_reinh | 56.50 | 0.00 |
| TRINITY_RLM73338 | uncharac | Panicum_miliaceum   | 56.50 | 0.00 |
| TRINITY_XP_01389 | insulysi | Monoraphidium_negle | 56.50 | 0.00 |
| TRINITY_PNW72913 | hypothet | Chlamydomonas_reinh | 56.50 | 0.00 |
| TRINITY_PNW87362 | hypothet | Chlamydomonas_reinh | 56.50 | 0.00 |
| TRINITY_GAQ81699 | Long-Cha | Klebsormidium_niten | 56.50 | 0.00 |
| TRINITY_XP_02437 | ABC trar | Physcomitrella_pate | 56.50 | 0.00 |
| TRINITY_GAX75632 | hypothet | Chlamydomonas_eusti | 56.50 | 0.00 |
| TRINITY_XP_01723 | PREDICTI | Daucus_carota       | 56.50 | 0.00 |
| TRINITY_XP_00170 | fructose | Chlamydomonas_reinh | 56.50 | 0.00 |
| TRINITY_ABR21759 | calmodul | Actinidia_deliciosa | 56.50 | 0.00 |
| TRINITY_XP_00629 | mitotic  | Capsella_rubella    | 56.50 | 0.00 |
| TRINITY_XP_01390 | hypothet | Monoraphidium_negle | 56.50 | 0.00 |
| TRINITY_XP_00565 | mitochor | Coccomyxa_subellips | 56.50 | 0.00 |
| TRINITY_KXZ49311 | hypothet | Gonium_pectorale    | 56.50 | 0.00 |
| TRINITY_GAQ81991 | fragment | Klebsormidium_niten | 56.50 | 0.00 |
| TRINITY_KXZ41898 | hypothet | Gonium_pectorale    | 56.50 | 0.00 |
| TRINITY_XP_00169 | predicte | Chlamydomonas_reinh | 56.50 | 0.00 |
| TRINITY_XP_00564 | DNA misn | Coccomyxa_subellips | 56.50 | 0.00 |
| TRINITY_GAQ78199 | ATP-depe | Klebsormidium_niten | 56.50 | 0.00 |
| TRINITY_XP_00564 | D-3-pho  | Coccomyxa_subellips | 56.50 | 0.00 |
| TRINITY_VDC74033 | unnamed  | Brassica_rapa       | 56.50 | 0.00 |
| TRINITY_KXZ44984 | hypothet | Gonium_pectorale    | 56.50 | 0.00 |
| TRINITY_KXZ53715 | hypothet | Gonium_pectorale    | 56.50 | 0.00 |
| TRINITY_GAX83190 | hypothet | Chlamydomonas_eusti | 56.50 | 0.00 |
| TRINITY_KXZ47610 | hypothet | Gonium_pectorale    | 56.50 | 0.00 |
| TRINITY_VDC89735 | unnamed  | Brassica_oleracea   | 56.50 | 0.00 |
| TRINITY_XP_00295 | programm | Volvox_carteri      | 56.50 | 0.00 |
| TRINITY_GAX84007 | hypothet | Chlamydomonas_eusti | 56.50 | 0.00 |
| TRINITY_GAX81652 | hypothet | Chlamydomonas_eusti | 56.50 | 0.00 |
| TRINITY_XP_00296 | vacuola  | Selaginella_moellen | 56.50 | 0.00 |
| TRINITY_GBF88338 | hypothet | Raphidocelis_subcap | 56.50 | 0.00 |
| TRINITY_GAX77264 | hypothet | Chlamydomonas_eusti | 56.50 | 0.00 |
| TRINITY_PON62434 | ER lumer | Trema_orientale     | 56.50 | 0.00 |
| TRINITY_XP_00250 | intrafla | Micromonas_commoda  | 56.50 | 0.00 |
| TRINITY_PNH08303 | NFX1-ty  | Tetrabaena_socialis | 56.50 | 0.00 |
| TRINITY_KXZ50009 | hypothet | Gonium_pectorale    | 56.50 | 0.00 |
| TRINITY_PNH09214 | Tiny mac | Tetrabaena_socialis | 56.50 | 0.00 |
| TRINITY_GAQ79048 | isocitr  | Klebsormidium_niten | 56.40 | 0.00 |
| TRINITY_XP_01054 | PREDICTI | Tarenaya_hasslerian | 56.40 | 0.00 |
| TRINITY_XP_02389 | aspartat | Quercus_suber       | 56.40 | 0.00 |
| TRINITY_XP_00839 | PREDICTI | Malus_domestica     | 56.40 | 0.00 |
| TRINITY_GBG60578 | hypothet | Chara_braunii       | 56.40 | 0.00 |
| TRINITY_ACN31553 | unknown  | Zea_mays            | 56.40 | 0.00 |
| TRINITY_XP_00564 | RNA-bin  | Coccomyxa_subellips | 56.40 | 0.00 |
| TRINITY_XP_02388 | glucose  | Quercus_suber       | 56.40 | 0.00 |
| TRINITY_GAX75948 | hypothet | Chlamydomonas_eusti | 56.40 | 0.00 |
| TRINITY_PNW84471 | hypothet | Chlamydomonas_reinh | 56.40 | 0.00 |
| TRINITY_XP_00169 | predicte | Chlamydomonas_reinh | 56.40 | 0.00 |
| TRINITY_GAX80391 | hypothet | Chlamydomonas_eusti | 56.40 | 0.00 |
| TRINITY_GAQ92471 | 60S aci  | Klebsormidium_niten | 56.40 | 0.00 |
| TRINITY_XP_00584 | hypothet | Chlorella_variabili | 56.40 | 0.00 |
| TRINITY_PNW86258 | hypothet | Chlamydomonas_reinh | 56.40 | 0.00 |
| TRINITY_XP_02167 | citrate  | Hevea_brasiliensis  | 56.40 | 0.00 |
| TRINITY_PNH07121 | AP-1 con | Tetrabaena_socialis | 56.40 | 0.00 |
| TRINITY_GAQ84635 | hypothet | Klebsormidium_niten | 56.40 | 0.00 |
| TRINITY_PNW74230 | hypothet | Chlamydomonas_reinh | 56.40 | 0.00 |
| TRINITY_OAE23984 | hypothet | Marchantia_polymorp | 56.40 | 0.00 |
| TRINITY_GBF93166 | hypothet | Raphidocelis_subcap | 56.40 | 0.00 |

|                  |                              |       |      |
|------------------|------------------------------|-------|------|
| TRINITY_PNW70692 | hypothetChlamydomonas_reinh  | 56.40 | 0.00 |
| TRINITY_KXZ50121 | hypothetGonium_pectorale     | 56.40 | 0.00 |
| TRINITY_GAX73638 | hypothetChlamydomonas_eusti  | 56.40 | 0.00 |
| TRINITY_GAX83739 | hypothetChlamydomonas_eusti  | 56.40 | 0.00 |
| TRINITY_XP_00295 | hypothetVolvox_carteri       | 56.40 | 0.00 |
| TRINITY_XP_00584 | hypothetChlorella_variabili  | 56.40 | 0.00 |
| TRINITY_XP_00359 | eukaryotMedicago_truncatula  | 56.40 | 0.00 |
| TRINITY_PNR27888 | hypothetPhyscomitrella_pate  | 56.40 | 0.00 |
| TRINITY_GAX75443 | hypothetChlamydomonas_eusti  | 56.40 | 0.00 |
| TRINITY_GAX81061 | hypothetChlamydomonas_eusti  | 56.40 | 0.00 |
| TRINITY_XP_00169 | predicteChlamydomonas_reinh  | 56.40 | 0.00 |
| TRINITY_GAX84863 | hypothetChlamydomonas_eusti  | 56.40 | 0.00 |
| TRINITY_XP_01724 | PREDICTIFragaria_carota      | 56.40 | 0.00 |
| TRINITY_GAX80611 | hypothetChlamydomonas_eusti  | 56.40 | 0    |
| TRINITY_OAE19924 | hypothetMarchantia_polymorp  | 56.40 | 0    |
| TRINITY_KMZ61679 | 3-ketoacZostera_marina       | 56.40 | 0.00 |
| TRINITY_KXZ55619 | hypothetGonium_pectorale     | 56.30 | 0.00 |
| TRINITY_GBF88226 | ATP-depeRaphidocelis_subcap  | 56.30 | 0.00 |
| TRINITY_GAX80542 | hypothetChlamydomonas_eusti  | 56.30 | 0.00 |
| TRINITY_XP_02088 | calcium-Arabidopsis_lyrata   | 56.30 | 0.00 |
| TRINITY_YP_00881 | apocytoeEntransia_fimbriata  | 56.30 | 0.00 |
| TRINITY_XP_00250 | predicteMicromonas_commoda   | 56.30 | 0.00 |
| TRINITY_XP_02390 | aldo-ketQuercus_suber        | 56.30 | 0.00 |
| TRINITY_XP_02390 | aldo-ketQuercus_suber        | 56.30 | 0.00 |
| TRINITY_BAJ11784 | dehydratCorchorus_olitorius  | 56.30 | 0.00 |
| TRINITY_XP_01389 | putativeMonoraphidium_negle  | 56.30 | 0.00 |
| TRINITY_PNW73103 | hypothetChlamydomonas_reinh  | 56.30 | 0.00 |
| TRINITY_XP_00230 | probablePopulus_trichocarpa  | 56.30 | 0.00 |
| TRINITY_XP_00169 | DnaJ-liChlamydomonas_reinh   | 56.30 | 0.00 |
| TRINITY_PNH02925 | TransmenTetrabaena_socialis  | 56.30 | 0.00 |
| TRINITY_KXZ45766 | hypothetGonium_pectorale     | 56.30 | 0.00 |
| TRINITY_XP_00294 | ABC trarVolvox_carteri       | 56.30 | 0.00 |
| TRINITY_PNH09207 | PeroxiereTetrabaena_socialis | 56.30 | 0.00 |
| TRINITY_KXZ40860 | hypothetGonium_pectorale     | 56.30 | 0.00 |
| TRINITY_KXZ54090 | hypothetGonium_pectorale     | 56.30 | 0.00 |
| TRINITY_KXZ56527 | hypothetGonium_pectorale     | 56.30 | 0.00 |
| TRINITY_KXZ54091 | hypothetGonium_pectorale     | 56.30 | 0.00 |
| TRINITY_XP_00639 | 60S acicEutrema_salsugineum  | 56.30 | 0.00 |
| TRINITY_PNW84342 | hypothetChlamydomonas_reinh  | 56.30 | 0.00 |
| TRINITY_XP_01390 | hypothetMonoraphidium_negle  | 56.30 | 0.00 |
| TRINITY_PNW82443 | hypothetChlamydomonas_reinh  | 56.30 | 0.00 |
| TRINITY_GAX79191 | hypothetChlamydomonas_eusti  | 56.30 | 0.00 |
| TRINITY_GAQ80913 | putativeKlebsormidium_niten  | 56.30 | 0.00 |
| TRINITY_KXZ50218 | hypothetGonium_pectorale     | 56.30 | 0.00 |
| TRINITY_XP_00170 | SM/Sec1-Chlamydomonas_reinh  | 56.30 | 0.00 |
| TRINITY_XP_02070 | structuDendrobium_catenatu   | 56.30 | 0.00 |
| TRINITY_GAX77257 | hypothetChlamydomonas_eusti  | 56.30 | 0.00 |
| TRINITY_PNW81764 | hypothetChlamydomonas_reinh  | 56.30 | 0.00 |
| TRINITY_PNH03788 | PhosphatTetrabaena_socialis  | 56.30 | 0.00 |
| TRINITY_XP_00295 | hypothetVolvox_carteri       | 56.30 | 0.00 |
| TRINITY_ACL28159 | hypothetDunaliella_viridis   | 56.30 | 0.00 |
| TRINITY_GAQ80026 | histone Klebsormidium_niten  | 56.30 | 0.00 |
| TRINITY_KXZ51271 | hypothetGonium_pectorale     | 56.30 | 0.00 |
| TRINITY_KXZ46854 | hypothetGonium_pectorale     | 56.30 | 0.00 |
| TRINITY_XP_00170 | high intChlamydomonas_reinh  | 56.30 | 0.00 |
| TRINITY_APW83743 | carotenDunaliella_salina     | 56.30 | 0.00 |
| TRINITY_KXZ46763 | hypothetGonium_pectorale     | 56.30 | 0.00 |
| TRINITY_XP_02068 | BEACH dcDendrobium_catenatu  | 56.20 | 0.00 |
| TRINITY_GAX76338 | hypothetChlamydomonas_eusti  | 56.20 | 0.00 |
| TRINITY_AES82275 | peptide Medicago_truncatula  | 56.20 | 0.00 |
| TRINITY_GBF98393 | hypothetRaphidocelis_subcap  | 56.20 | 0.00 |
| TRINITY_XP_02387 | GTP-binQuercus_suber         | 56.20 | 0.00 |
| TRINITY_GAX81752 | hypothetChlamydomonas_eusti  | 56.20 | 0.00 |
| TRINITY_GBG84789 | hypothetChara_braunii        | 56.20 | 0.00 |
| TRINITY_GAQ88742 | adenine Klebsormidium_niten  | 56.20 | 0.00 |
| TRINITY_XP_00430 | PREDICTIFragaria-vesca       | 56.20 | 0.00 |

|                  |            |                     |       |      |
|------------------|------------|---------------------|-------|------|
| TRINITY_XP_0238  | transal    | Quercus_suber       | 56.20 | 0.00 |
| TRINITY_OEL29011 | Dynamini   | Dichantherium_oligo | 56.20 | 0.00 |
| TRINITY_XP_0017  | (vacuolar) | Chlamydomonas_reinh | 56.20 | 0.00 |
| TRINITY_XP_0029  | hypothet   | Volvox_carteri      | 56.20 | 0.00 |
| TRINITY_ESR6269  | hypothet   | Citrus_clementina   | 56.20 | 0.00 |
| TRINITY_XP_0139  | (dual-sp   | Monoraphidium_negle | 56.20 | 0.00 |
| TRINITY_GBF9241  | RNA poly   | Raphidocelis_subcap | 56.20 | 0.00 |
| TRINITY_GAX8084  | hypothet   | Chlamydomonas_eusti | 56.20 | 0.00 |
| TRINITY_GAQ9018  | lysosom    | Klebsormidium_niten | 56.20 | 0.00 |
| TRINITY_XP_0056  | ornithir   | Coccomyxa_subellips | 56.20 | 0.00 |
| TRINITY_XP_0058  | hypothet   | Chlorella_variabili | 56.20 | 0.00 |
| TRINITY_PNW8093  | hypothet   | Chlamydomonas_reinh | 56.20 | 0.00 |
| TRINITY_OMO7877  | (hypothet  | Corchorus_capsulari | 56.20 | 0.00 |
| TRINITY_GAX8055  | hypothet   | Chlamydomonas_eusti | 56.20 | 0.00 |
| TRINITY_XP_0139  | (hydroxyn  | Monoraphidium_negle | 56.20 | 0.00 |
| TRINITY_GBF8855  | hypothet   | Raphidocelis_subcap | 56.20 | 0.00 |
| TRINITY_KXZ4738  | hypothet   | Gonium_pectorale    | 56.20 | 0.00 |
| TRINITY_KMZ6641  | putative   | Zostera_marina      | 56.20 | 0.00 |
| TRINITY_VDC9191  | unnamed    | Brassica_oleracea   | 56.20 | 0.00 |
| TRINITY_KXZ5314  | hypothet   | Gonium_pectorale    | 56.20 | 0.00 |
| TRINITY_GAX7395  | hypothet   | Chlamydomonas_eusti | 56.20 | 0.00 |
| TRINITY_XP_0105  | PREDICTI   | Tarenaya_hasslerian | 56.20 | 0.00 |
| TRINITY_PNW7291  | hypothet   | Chlamydomonas_reinh | 56.20 | 0.00 |
| TRINITY_PNW7926  | hypothet   | Chlamydomonas_reinh | 56.20 | 0.00 |
| TRINITY_GAX7977  | hypothet   | Chlamydomonas_eusti | 56.20 | 0.00 |
| TRINITY_XP_0138  | hypothet   | Monoraphidium_negle | 56.20 | 0.00 |
| TRINITY_XP_0238  | probable   | Quercus_suber       | 56.20 | 0.00 |
| TRINITY_XP_0016  | flagell    | Chlamydomonas_reinh | 56.20 | 0.00 |
| TRINITY_XP_0084  | PREDICTI   | Cucumis_melo        | 56.20 | 0.00 |
| TRINITY_XP_0030  | predict    | Micromonas_pusilla  | 56.20 | 0.00 |
| TRINITY_XP_0128  | PREDICTI   | Erythranthe_guttata | 56.20 | 0.00 |
| TRINITY_XP_0029  | hypothet   | Volvox_carteri      | 56.20 | 0.00 |
| TRINITY_GAQ8654  | (TCP-1/c   | Klebsormidium_niten | 56.20 | 0.00 |
| TRINITY_GAX8139  | hypothet   | Chlamydomonas_eusti | 56.20 | 0.00 |
| TRINITY_GBF9579  | hypothet   | Raphidocelis_subcap | 56.20 | 0.00 |
| TRINITY_PSC7186  | DEAD-bo    | Micractinium_conduc | 56.20 | 0.00 |
| TRINITY_GAX7995  | hypothet   | Chlamydomonas_eusti | 56.20 | 0.00 |
| TRINITY_XP_0271  | (unchara   | Coffea_eugenioides  | 56.20 | 0.00 |
| TRINITY_PRW3394  | acyl- d    | Chlorella_sorokinia | 56.20 | 0.00 |
| TRINITY_XP_0238  | acyl-Co    | Quercus_suber       | 56.20 | 0.00 |
| TRINITY_GAX8296  | hypothet   | Chlamydomonas_eusti | 56.20 | 0.00 |
| TRINITY_BAK0000  | (predict   | Hordeum_vulgare     | 56.20 | 0.00 |
| TRINITY_ONK6835  | (unchara   | Asparagus_officinal | 56.20 | 0.00 |
| TRINITY_BAJ9926  | (predict   | Hordeum_vulgare     | 56.20 | 0.00 |
| TRINITY_GAX8335  | hypothet   | Chlamydomonas_eusti | 56.20 | 0.00 |
| TRINITY_PNW8864  | hypothet   | Chlamydomonas_reinh | 56.20 | 0.00 |
| TRINITY_XP_0016  | predict    | Chlamydomonas_reinh | 56.20 | 0.00 |
| TRINITY_PRW6114  | mitogen-   | Chlorella_sorokinia | 56.20 | 0.00 |
| TRINITY_XP_0029  | hypothet   | Volvox_carteri      | 56.20 | 0.00 |
| TRINITY_KXZ4988  | hypothet   | Gonium_pectorale    | 56.20 | 0.00 |
| TRINITY_GAX7416  | hypothet   | Chlamydomonas_eusti | 56.20 | 0.00 |
| TRINITY_KXZ5401  | (hypothet  | Gonium_pectorale    | 56.20 | 0.00 |
| TRINITY_XP_0017  | (glyoxal   | Chlamydomonas_reinh | 56.20 | 0.00 |
| TRINITY_KXZ5000  | hypothet   | Gonium_pectorale    | 56.20 | 0.00 |
| TRINITY_PNW8531  | (hypothet  | Chlamydomonas_reinh | 56.20 | 0.00 |
| TRINITY_GAX8076  | hypothet   | Chlamydomonas_eusti | 56.20 | 0.00 |
| TRINITY_PSC7271  | IMPACT     | Micractinium_conduc | 56.20 | 0.00 |
| TRINITY_GAX8216  | hypothet   | Chlamydomonas_eusti | 56.20 | 0.00 |
| TRINITY_XP_0202  | DExH-bo    | Asparagus_officinal | 56.20 | 0.00 |
| TRINITY_GAX8100  | hypothet   | Chlamydomonas_eusti | 56.20 | 0.00 |
| TRINITY_GAX7849  | hypothet   | Chlamydomonas_eusti | 56.20 | 0.00 |
| TRINITY_XP_0139  | (hypothet  | Monoraphidium_negle | 56.10 | 0.00 |
| TRINITY_AHB0888  | (HD domai  | Suaeda_glauca       | 56.10 | 0.00 |
| TRINITY_XP_0238  | lactobac   | Quercus_suber       | 56.10 | 0.00 |
| TRINITY_EFJ1951  | hypothet   | Selaginella_moellen | 56.10 | 0.00 |
| TRINITY_OTF9730  | putative   | Helianthus_annuus   | 56.10 | 0.00 |

|                  |                              |       |      |
|------------------|------------------------------|-------|------|
| TRINITY_PWA49914 | Nascent Artemisia_annua      | 56.10 | 0.00 |
| TRINITY_XP_02438 | probable Physcomitrella_pate | 56.10 | 0.00 |
| TRINITY_XP_02387 | homoisoc Quercus_suber       | 56.10 | 0.00 |
| TRINITY_GAX83579 | hypothet Chlamydomonas_eusti | 56.10 | 0.00 |
| TRINITY_XP_00295 | hypothet Volvox_carteri      | 56.10 | 0.00 |
| TRINITY_GAX79313 | hypothet Chlamydomonas_eusti | 56.10 | 0.00 |
| TRINITY_GAX81461 | hypothet Chlamydomonas_eusti | 56.10 | 0.00 |
| TRINITY_GAQ81411 | Metallo Klebsormidium_niten  | 56.10 | 0.00 |
| TRINITY_GAX78157 | hypothet Chlamydomonas_eusti | 56.10 | 0.00 |
| TRINITY_XP_00295 | hypothet Volvox_carteri      | 56.10 | 0.00 |
| TRINITY_XP_01140 | Calvin c Auxenochlorella_pro | 56.10 | 0.00 |
| TRINITY_KXZ53775 | hypothet Gonium_pectorale    | 56.10 | 0.00 |
| TRINITY_GAQ79684 | peroxis Klebsormidium_niten  | 56.10 | 0.00 |
| TRINITY_BAJ93795 | predicte Hordeum_vulgare     | 56.10 | 0.00 |
| TRINITY_XP_00295 | hypothet Volvox_carteri      | 56.10 | 0.00 |
| TRINITY_KXZ55138 | hypothet Gonium_pectorale    | 56.10 | 0.00 |
| TRINITY_XP_00250 | predicte Micromonas_commoda  | 56.10 | 0.00 |
| TRINITY_KXZ53139 | hypothet Gonium_pectorale    | 56.10 | 0.00 |
| TRINITY_XP_00168 | DNA-dir Chlamydomonas_reinh  | 56.10 | 0.00 |
| TRINITY_GAX75591 | hypothet Chlamydomonas_eusti | 56.10 | 0.00 |
| TRINITY_XP_02010 | aspartat Ananas_comosus      | 56.10 | 0.00 |
| TRINITY_XP_00169 | predicte Chlamydomonas_reinh | 56.10 | 0.00 |
| TRINITY_XP_00295 | hypothet Volvox_carteri      | 56.10 | 0.00 |
| TRINITY_KXZ51825 | hypothet Gonium_pectorale    | 56.10 | 0.00 |
| TRINITY_PRW57963 | Thio red Chlorella_sorokinia | 56.10 | 0.00 |
| TRINITY_XP_00169 | 2-cys p Chlamydomonas_reinh  | 56.10 | 0.00 |
| TRINITY_KXZ44955 | hypothet Gonium_pectorale    | 56.10 | 0.00 |
| TRINITY_GAX75066 | hypothet Chlamydomonas_eusti | 56.10 | 0.00 |
| TRINITY_XP_02439 | 40S rib Physcomitrella_pate  | 56.10 | 0.00 |
| TRINITY_KXZ51733 | hypothet Gonium_pectorale    | 56.10 | 0.00 |
| TRINITY_GAX76258 | hypothet Chlamydomonas_eusti | 56.10 | 0.00 |
| TRINITY_XP_00169 | tRNA (u Chlamydomonas_reinh  | 56.10 | 0.00 |
| TRINITY_AEF13162 | acyl car Haematococcus_lacus | 56.10 | 0.00 |
| TRINITY_GAX75389 | hypothet Chlamydomonas_eusti | 56.10 | 0.00 |
| TRINITY_GAX83245 | hypothet Chlamydomonas_eusti | 56.10 | 0.00 |
| TRINITY_GAX82200 | hypothet Chlamydomonas_eusti | 56.10 | 0.00 |
| TRINITY_PNW79029 | hypothet Chlamydomonas_reinh | 56.10 | 0.00 |
| TRINITY_XP_01140 | hypothet Auxenochlorella_pro | 56.10 | 0.00 |
| TRINITY_XP_00169 | thiosul Chlamydomonas_reinh  | 56.10 | 0.00 |
| TRINITY_GAX81923 | hypothet Chlamydomonas_eusti | 56.10 | 0.00 |
| TRINITY_PNW86359 | hypothet Chlamydomonas_reinh | 56.10 | 0.00 |
| TRINITY_XP_00295 | hypothet Volvox_carteri      | 56.10 | 0.00 |
| TRINITY_BAK02254 | predicte Hordeum_vulgare     | 56.10 | 0.00 |
| TRINITY_PSC73672 | ferredo Micractinium_conduc  | 56.10 | 0.00 |
| TRINITY_GBF99614 | hypothet Raphidocelis_subcap | 56.10 | 0.00 |
| TRINITY_KXZ56762 | hypothet Gonium_pectorale    | 56.10 | 0.00 |
| TRINITY_RWR95274 | Ribosom Cinnamomum_micranth  | 56.00 | 0.00 |
| TRINITY_XP_00564 | acyl car Coccomyxa_subellips | 56.00 | 0.00 |
| TRINITY_XP_02439 | phosphat Physcomitrella_pate | 56.00 | 0.00 |
| TRINITY_XP_00564 | acetyl-(Coccomyxa_subellips  | 56.00 | 0.00 |
| TRINITY_RWR95530 | (DNA-dir Cinnamomum_micranth | 56.00 | 0.00 |
| TRINITY_BAJ94294 | predicte Hordeum_vulgare     | 56.00 | 0.00 |
| TRINITY_XP_01725 | PREDICTI Daucus_carota       | 56.00 | 0.00 |
| TRINITY_XP_01109 | malate c Sesamum_indicum     | 56.00 | 0.00 |
| TRINITY_PNH03558 | Armadil Tetra baena_socialis | 56.00 | 0.00 |
| TRINITY_AJQ19483 | 2-C-met Haematococcus_lacus  | 56.00 | 0.00 |
| TRINITY_OAE20355 | hypothet Marchantia_polymorp | 56.00 | 0.00 |
| TRINITY_XP_00295 | hypothet Volvox_carteri      | 56.00 | 0.00 |
| TRINITY_XP_02439 | 1,4-alp Physcomitrella_pate  | 56.00 | 0.00 |
| TRINITY_AGH30310 | (nitrate Chromochloris_zofin | 56.00 | 0.00 |
| TRINITY_GBG80885 | hypothet Chara_braunii       | 56.00 | 0.00 |
| TRINITY_KXZ46788 | hypothet Gonium_pectorale    | 56.00 | 0.00 |
| TRINITY_KXZ41650 | (hypothet Gonium_pectorale   | 56.00 | 0.00 |
| TRINITY_PWA73941 | duplicat Artemisia_annua     | 56.00 | 0.00 |
| TRINITY_GAX76835 | hypothet Chlamydomonas_eusti | 56.00 | 0.00 |
| TRINITY_GBF97643 | hypothet Raphidocelis_subcap | 56.00 | 0.00 |

|                 |                              |       |      |
|-----------------|------------------------------|-------|------|
| TRINITY_PNW7074 | hypothetChlamydomonas_reinh  | 56.00 | 0.00 |
| TRINITY_XP_0239 | ras-relaQuercus_suber        | 56.00 | 0.00 |
| TRINITY_GAX7348 | hypothetChlamydomonas_eusti  | 56.00 | 0.00 |
| TRINITY_GAX8427 | hypothetChlamydomonas_eusti  | 56.00 | 0.00 |
| TRINITY_BAK0524 | predicteHordeum_vulgare      | 56.00 | 0.00 |
| TRINITY_XP_0017 | predicteChlamydomonas_reinh  | 56.00 | 0.00 |
| TRINITY_XP_0029 | hypothetVolvox_carteri       | 56.00 | 0.00 |
| TRINITY_GAX7764 | hypothetChlamydomonas_eusti  | 56.00 | 0.00 |
| TRINITY_GBF8788 | hypothetRaphidocelis_subcap  | 56.00 | 0.00 |
| TRINITY_PNW7649 | hypothetChlamydomonas_reinh  | 56.00 | 0.00 |
| TRINITY_OMO5658 | Small GCorchorus_capsulari   | 56.00 | 0.00 |
| TRINITY_GAQ8325 | nucleotiKlebsormidium_niten  | 56.00 | 0.00 |
| TRINITY_XP_0029 | hypothetVolvox_carteri       | 56.00 | 0.00 |
| TRINITY_KXZ4607 | hypothetGonium_pectorale     | 56.00 | 0.00 |
| TRINITY_GAX8134 | hypothetChlamydomonas_eusti  | 56.00 | 0.00 |
| TRINITY_GAX8260 | hypothetChlamydomonas_eusti  | 56.00 | 0.00 |
| TRINITY_GAX8338 | hypothetChlamydomonas_eusti  | 56.00 | 0.00 |
| TRINITY_XP_0101 | transcriMorus_notabilis      | 56.00 | 0.00 |
| TRINITY_XP_0241 | DNA topcRosa_chinensis       | 56.00 | 0.00 |
| TRINITY_GAX7897 | hypothetChlamydomonas_eusti  | 56.00 | 0    |
| TRINITY_XP_0029 | hypothetVolvox_carteri       | 56.00 | 0.00 |
| TRINITY_GAX7277 | hypothetChlamydomonas_eusti  | 56.00 | 0.00 |
| TRINITY_KXZ4730 | hypothetGonium_pectorale     | 56.00 | 0.00 |
| TRINITY_ASQ4164 | lipase  Dunaliella_parva     | 56.00 | 0.00 |
| TRINITY_XP_0029 | hypothetVolvox_carteri       | 56.00 | 0.00 |
| TRINITY_XP_0243 | ubiquitiPhyscomitrella_pate  | 56.00 | 0.00 |
| TRINITY_GAX8323 | hypothetChlamydomonas_eusti  | 56.00 | 0.00 |
| TRINITY_XP_0016 | starch rChlamydomonas_reinh  | 56.00 | 0.00 |
| TRINITY_XP_0239 | ATP-depeQuercus_suber        | 56.00 | 0.00 |
| TRINITY_GAX8220 | hypothetChlamydomonas_eusti  | 56.00 | 0.00 |
| TRINITY_PNW8102 | hypothetChlamydomonas_reinh  | 56.00 | 0.00 |
| TRINITY_RWR7571 | transcriCinnamomum_micranth  | 56.00 | 0.00 |
| TRINITY_GAX8153 | hypothetChlamydomonas_eusti  | 56.00 | 0.00 |
| TRINITY_GBG9232 | hypothetChara_braunii        | 56.00 | 0.00 |
| TRINITY_BAK0277 | predicteHordeum_vulgare      | 56.00 | 0.00 |
| TRINITY_PNW7042 | hypothetChlamydomonas_reinh  | 56.00 | 0.00 |
| TRINITY_KXZ4659 | hypothetGonium_pectorale     | 56.00 | 0.00 |
| TRINITY_EPS7450 | hypothetGenlisea_aurea       | 56.00 | 0.00 |
| TRINITY_KXZ5618 | hypothetGonium_pectorale     | 56.00 | 0.00 |
| TRINITY_XP_0029 | 20S protVolvox_carteri       | 56.00 | 0.00 |
| TRINITY_XP_0058 | hypothetChlorella_variabili  | 56.00 | 0.00 |
| TRINITY_XP_0024 | E3 ubiqSorghum_bicolor       | 55.90 | 0.00 |
| TRINITY_XP_0056 | low-CO2-Coccomyxa_subellips  | 55.90 | 0.00 |
| TRINITY_PIN0892 | DiphthirHandroanthus_impeti  | 55.90 | 0.00 |
| TRINITY_XP_0025 | (KH domaiMicromonas_commoda  | 55.90 | 0.00 |
| TRINITY_XP_0016 | flagellaChlamydomonas_reinh  | 55.90 | 0.00 |
| TRINITY_XP_0266 | probablePhoenix_dactylifera  | 55.90 | 0.00 |
| TRINITY_XP_0217 | E3 ubiqChenopodium_quinoa    | 55.90 | 0.00 |
| TRINITY_KMS6524 | hypothetBeta_vulgaris        | 55.90 | 0.00 |
| TRINITY_GBF8822 | ATP-depeRaphidocelis_subcap  | 55.90 | 0.00 |
| TRINITY_AEM8927 | actin [Narcissus_tazetta     | 55.90 | 0.00 |
| TRINITY_PSC7583 | glutamirMicractinium_conduc  | 55.90 | 0.00 |
| TRINITY_GAX7588 | hypothetChlamydomonas_eusti  | 55.90 | 0.00 |
| TRINITY_KXZ5627 | hypothetGonium_pectorale     | 55.90 | 0.00 |
| TRINITY_XP_0029 | 26S protVolvox_carteri       | 55.90 | 0.00 |
| TRINITY_XP_0029 | hypothetVolvox_carteri       | 55.90 | 0.00 |
| TRINITY_PON4516 | ABC trarParasponia_anderson  | 55.90 | 0.00 |
| TRINITY_GAX7446 | hypothetChlamydomonas_eusti  | 55.90 | 0.00 |
| TRINITY_XP_0029 | hypothetVolvox_carteri       | 55.90 | 0.00 |
| TRINITY_XP_0029 | hypothetVolvox_carteri       | 55.90 | 0.00 |
| TRINITY_XP_0017 | (SM/Sec1-Chlamydomonas_reinh | 55.90 | 0.00 |
| TRINITY_OWM7818 | hypothetPunica_granatum      | 55.90 | 0.00 |
| TRINITY_KXZ4488 | hypothetGonium_pectorale     | 55.90 | 0.00 |
| TRINITY_KXZ5259 | hypothetGonium_pectorale     | 55.90 | 0.00 |
| TRINITY_PNH0747 | hypothetTetrabaena_socialis  | 55.90 | 0.00 |
| TRINITY_GAX8363 | hypothetChlamydomonas_eusti  | 55.90 | 0.00 |



|                  |                             |       |      |
|------------------|-----------------------------|-------|------|
| TRINITY_XP_02452 | asparagiSelaginella_moellen | 55.90 | 0.00 |
| TRINITY_XP_02438 | serine/Physcomitrella_pate  | 55.90 | 0.00 |
| TRINITY_KXZ5351  | hypothetGonium_pectorale    | 55.90 | 0.00 |
| TRINITY_XP_01389 | hypothetMonoraphidium_negle | 55.90 | 0.00 |
| TRINITY_GAQ91236 | hypothetKlebsormidium_niten | 55.90 | 0.00 |
| TRINITY_XP_00295 | hypothetVolvox_carteri      | 55.90 | 0.00 |
| TRINITY_XP_00294 | hypothetVolvox_carteri      | 55.90 | 0.00 |
| TRINITY_PNW8549  | hypothetChlamydomonas_reinh | 55.90 | 0.00 |
| TRINITY_XP_00564 | IsochoriCoccomyxa_subellips | 55.90 | 0.00 |
| TRINITY_GAX78198 | hypothetChlamydomonas_eusti | 55.90 | 0.00 |
| TRINITY_XP_00294 | hypothetVolvox_carteri      | 55.90 | 0.00 |
| TRINITY_KXZ41963 | hypothetGonium_pectorale    | 55.90 | 0.00 |
| TRINITY_GAX8401  | hypothetChlamydomonas_eusti | 55.90 | 0.00 |
| TRINITY_XP_00294 | hypothetVolvox_carteri      | 55.90 | 0.00 |
| TRINITY_GAX8220  | hypothetChlamydomonas_eusti | 55.90 | 0.00 |
| TRINITY_XP_00169 | dephospChlamydomonas_reinh  | 55.90 | 0.00 |
| TRINITY_ADQ0018  | glutathiChlamydomonas_sp._I | 55.90 | 0.00 |
| TRINITY_XP_00170 | DnaJ-liChlamydomonas_reinh  | 55.90 | 0.00 |
| TRINITY_KXZ5329  | hypothetGonium_pectorale    | 55.90 | 0.00 |
| TRINITY_XP_00169 | predicteChlamydomonas_reinh | 55.90 | 0.00 |
| TRINITY_GAX75518 | hypothetChlamydomonas_eusti | 55.90 | 0.00 |
| TRINITY_XP_02176 | ervatamiChenopodium_quinoa  | 55.90 | 0.00 |
| TRINITY_PNH03468 | TransmenTetrabaena_socialis | 55.90 | 0.00 |
| TRINITY_PRW33748 | transcriChlorella_sorokinia | 55.80 | 0.00 |
| TRINITY_GAQ79454 | DNA_topKlebsormidium_niten  | 55.80 | 0.00 |
| TRINITY_GAQ78364 | hypothetKlebsormidium_niten | 55.80 | 0.00 |
| TRINITY_XP_00431 | PREDICTIFragaria_vesca      | 55.80 | 0.00 |
| TRINITY_GAX76991 | hypothetChlamydomonas_eusti | 55.80 | 0.00 |
| TRINITY_GAX77888 | hypothetChlamydomonas_eusti | 55.80 | 0.00 |
| TRINITY_PIN21317 | FumarylHandroanthus_impeti  | 55.80 | 0.00 |
| TRINITY_BAA25911 | actin [Nannochloris_bacill  | 55.80 | 0.00 |
| TRINITY_XP_01390 | dual-spMonoraphidium_negle  | 55.80 | 0.00 |
| TRINITY_KMZ71281 | MultidriZostera_marina      | 55.80 | 0.00 |
| TRINITY_XP_00565 | pyruvateCoccomyxa_subellips | 55.80 | 0.00 |
| TRINITY_XP_00169 | Sec14p-Chlamydomonas_reinh  | 55.80 | 0.00 |
| TRINITY_O65353.1 | RecName:Helianthus_annuus   | 55.80 | 0.00 |
| TRINITY_XP_02173 | glycerolChenopodium_quinoa  | 55.80 | 0.00 |
| TRINITY_PSC76533 | NAD-depeMicractinium_conduc | 55.80 | 0.00 |
| TRINITY_BAJ97384 | predicteHordeum_vulgare     | 55.80 | 0.00 |
| TRINITY_GAQ77581 | ABC trarKlebsormidium_niten | 55.80 | 0.00 |
| TRINITY_GAX7406  | hypothetChlamydomonas_eusti | 55.80 | 0.00 |
| TRINITY_XP_02438 | protein Physcomitrella_pate | 55.80 | 0.00 |
| TRINITY_XP_00295 | hypothetVolvox_carteri      | 55.80 | 0.00 |
| TRINITY_XP_00169 | molybderChlamydomonas_reinh | 55.80 | 0.00 |
| TRINITY_XP_00295 | hypothetVolvox_carteri      | 55.80 | 0.00 |
| TRINITY_GAX8509  | hypothetChlamydomonas_eusti | 55.80 | 0.00 |
| TRINITY_PNH1056  | Zinc firTetrabaena_socialis | 55.80 | 0.00 |
| TRINITY_POC8M8.1 | RecName:Zea_mays            | 55.80 | 0.00 |
| TRINITY_GAQ89036 | DNA repKlebsormidium_niten  | 55.80 | 0.00 |
| TRINITY_GAX79978 | hypothetChlamydomonas_eusti | 55.80 | 0.00 |
| TRINITY_XP_02439 | AP-1 conPhyscomitrella_pate | 55.80 | 0.00 |
| TRINITY_PRW58557 | flagellaChlorella_sorokinia | 55.80 | 0.00 |
| TRINITY_XP_01915 | PREDICTFIpomoea_nil         | 55.80 | 0.00 |
| TRINITY_CAN62678 | hypothetVitis_vinifera      | 55.80 | 0.00 |
| TRINITY_GAX84556 | hypothetChlamydomonas_eusti | 55.80 | 0.00 |
| TRINITY_PNW78902 | hypothetChlamydomonas_reinh | 55.80 | 0.00 |
| TRINITY_XP_01139 | Desiccatauxenochlorella_pro | 55.80 | 0.00 |
| TRINITY_GAX77094 | hypothetChlamydomonas_eusti | 55.80 | 0.00 |
| TRINITY_XP_00142 | predicteOstreococcus_sp._'l | 55.80 | 0.00 |
| TRINITY_XP_00169 | NADH:ubiChlamydomonas_reinh | 55.80 | 0.00 |
| TRINITY_XP_01918 | PREDICTFIpomoea_nil         | 55.80 | 0.00 |
| TRINITY_PNW8260  | hypothetChlamydomonas_reinh | 55.80 | 0.00 |
| TRINITY_XP_00169 | predicteChlamydomonas_reinh | 55.80 | 0.00 |
| TRINITY_XP_00169 | ferrocheChlamydomonas_reinh | 55.80 | 0.00 |
| TRINITY_XP_00866 | cyclin-cZea_mays            | 55.80 | 0.00 |
| TRINITY_XP_01389 | hypothetMonoraphidium_negle | 55.80 | 0.00 |

|                      |                             |       |      |
|----------------------|-----------------------------|-------|------|
| TRINITY_GAX82651     | hypothetChlamydomonas_eusti | 55.80 | 0.00 |
| TRINITY_XP_002943'5' | -cycVolvox_carteri          | 55.80 | 0.00 |
| TRINITY_XP_00939     | PREDICTIMusa_acuminata      | 55.80 | 0.00 |
| TRINITY_XP_00294     | hypothetVolvox_carteri      | 55.80 | 0.00 |
| TRINITY_XP_00169     | predicteChlamydomonas_reinh | 55.80 | 0.00 |
| TRINITY_XP_00170     | predicteChlamydomonas_reinh | 55.80 | 0.00 |
| TRINITY_KXZ51478     | hypothetGonium_pectorale    | 55.80 | 0.00 |
| TRINITY_GAX74915     | hypothetChlamydomonas_eusti | 55.80 | 0.00 |
| TRINITY_BAJ98473     | predicteHordeum_vulgare     | 55.80 | 0.00 |
| TRINITY_GAX74903     | hypothetChlamydomonas_eusti | 55.80 | 0.00 |
| TRINITY_KXZ50750     | hypothetGonium_pectorale    | 55.80 | 0.00 |
| TRINITY_XP_01925     | PREDICTINicotiana_attenuata | 55.80 | 0.00 |
| TRINITY_XP_01025     | PREDICTINelumbo_nucifera    | 55.80 | 0.00 |
| TRINITY_BAJ92600     | predicteHordeum_vulgare     | 55.70 | 0.00 |
| TRINITY_XP_00226     | PREDICTIVitis_vinifera      | 55.70 | 0.00 |
| TRINITY_GBF90518     | hypothetRaphidocelis_subcap | 55.70 | 0.00 |
| TRINITY_RMZ56986     | hypothetAuxenochlorella_pro | 55.70 | 0.00 |
| TRINITY_XP_02373     | actin-7-Lactuca_sativa      | 55.70 | 0.00 |
| TRINITY_XP_00938     | PREDICTIMusa_acuminata      | 55.70 | 0.00 |
| TRINITY_GBG63616     | hypothetChara_braunii       | 55.70 | 0.00 |
| TRINITY_XP_00716     | hypothetPhaseolus_vulgaris  | 55.70 | 0.00 |
| TRINITY_EEC78702     | hypothetOryza_sativa        | 55.70 | 0.00 |
| TRINITY_GBF98458     | hypothetRaphidocelis_subcap | 55.70 | 0.00 |
| TRINITY_GAQ79787     | hypothetKlebsormidium_niten | 55.70 | 0.00 |
| TRINITY_GAX81580     | hypothetChlamydomonas_eusti | 55.70 | 0.00 |
| TRINITY_XP_01044     | PREDICTICamelina_sativa     | 55.70 | 0.00 |
| TRINITY_GAX74887     | hypothetChlamydomonas_eusti | 55.70 | 0.00 |
| TRINITY_RYR02552     | hypothetArachis_hypogaea    | 55.70 | 0.00 |
| TRINITY_PTQ33037     | hypothetMarchantia_polymorp | 55.70 | 0.00 |
| TRINITY_KZV15344     | hypothetDorcoceras_hygromet | 55.70 | 0.00 |
| TRINITY_GAQ84038     | AnaphaseKlebsormidium_niten | 55.70 | 0.00 |
| TRINITY_KXZ54933     | hypothetGonium_pectorale    | 55.70 | 0.00 |
| TRINITY_XP_00361     | alpha-mMedicago_truncatula  | 55.70 | 0.00 |
| TRINITY_XP_00565     | trypsin-Coccomyxa_subellips | 55.70 | 0.00 |
| TRINITY_XP_00684     | chaperonAmborella_trichopod | 55.70 | 0.00 |
| TRINITY_GAX85659     | hypothetChlamydomonas_eusti | 55.70 | 0.00 |
| TRINITY_PON48368     | hypothetParasponia_anderson | 55.70 | 0.00 |
| TRINITY_KXZ49505     | hypothetGonium_pectorale    | 55.70 | 0.00 |
| TRINITY_XP_00169     | dihydroChlamydomonas_reinh  | 55.70 | 0.00 |
| TRINITY_XP_00643     | ubiquitiCitrus_clementina   | 55.70 | 0.00 |
| TRINITY_XP_00295     | hypothetVolvox_carteri      | 55.70 | 0.00 |
| TRINITY_XP_00169     | predicteChlamydomonas_reinh | 55.70 | 0.00 |
| TRINITY_XP_00294     | hypothetVolvox_carteri      | 55.70 | 0.00 |
| TRINITY_PNH02787     | AnkycorkTetrabaena_socialis | 55.70 | 0.00 |
| TRINITY_GAX72572     | hypothetChlamydomonas_eusti | 55.70 | 0.00 |
| TRINITY_GAX74782     | hypothetChlamydomonas_eusti | 55.70 | 0.00 |
| TRINITY_PNH01094     | Ankyrin Tetrabaena_socialis | 55.70 | 0.00 |
| TRINITY_PNW80087     | hypothetChlamydomonas_reinh | 55.70 | 0.00 |
| TRINITY_GAX84646     | hypothetChlamydomonas_eusti | 55.70 | 0.00 |
| TRINITY_XP_00168     | predicteChlamydomonas_reinh | 55.70 | 0.00 |
| TRINITY_GAX75800     | hypothetChlamydomonas_eusti | 55.70 | 0.00 |
| TRINITY_OUS446445    | -aminolOstreococcus_tauri   | 55.70 | 0.00 |
| TRINITY_GAX73783     | hypothetChlamydomonas_eusti | 55.70 | 0.00 |
| TRINITY_GAX80782     | hypothetChlamydomonas_eusti | 55.70 | 0.00 |
| TRINITY_AFK42952     | unknown Lotus_japonicus     | 55.70 | 0.00 |
| TRINITY_GAX73815     | hypothetChlamydomonas_eusti | 55.70 | 0.00 |
| TRINITY_GAX79260     | hypothetChlamydomonas_eusti | 55.70 | 0.00 |
| TRINITY_GAX78605     | hypothetChlamydomonas_eusti | 55.70 | 0.00 |
| TRINITY_PNH11898     | Patatin Tetrabaena_socialis | 55.70 | 0.00 |
| TRINITY_PNH06305     | Omega-3 Tetrabaena_socialis | 55.70 | 0.00 |
| TRINITY_XP_00169     | flagellChlamydomonas_reinh  | 55.70 | 0.00 |
| TRINITY_XP_01722     | PREDICTIDaucus_carota       | 55.70 | 0.00 |
| TRINITY_PRW55925     | translatChlorella_sorokinia | 55.70 | 0.00 |
| TRINITY_PNW88956     | hypothetChlamydomonas_reinh | 55.70 | 0.00 |
| TRINITY_XP_00750     | ABC trarBathycoccus_prasinc | 55.70 | 0.00 |
| TRINITY_KXZ47900     | hypothetGonium_pectorale    | 55.70 | 0.00 |

|                  |                              |       |      |
|------------------|------------------------------|-------|------|
| TRINITY_PNW8105  | hypothetChlamydomonas_reinh  | 55.70 | 0.00 |
| TRINITY_GAX8043  | hypothetChlamydomonas_eusti  | 55.70 | 0.00 |
| TRINITY_GAX7691  | hypothetChlamydomonas_eusti  | 55.70 | 0.00 |
| TRINITY_XP_0102  | PREDICTINelumbo_nucifera     | 55.60 | 0.00 |
| TRINITY_GAQ84171 | UbiquitiKlebsormidium_niten  | 55.60 | 0.00 |
| TRINITY_PKI4065  | hypothetPunica_granatum      | 55.60 | 0.00 |
| TRINITY_BAJ9668  | predicteHordeum_vulgare      | 55.60 | 0.00 |
| TRINITY_XP_0030  | dynein lMicromonas_pusilla   | 55.60 | 0.00 |
| TRINITY_GAQ8798  | (PhosphatKlebsormidium_niten | 55.60 | 0.00 |
| TRINITY_XP_0056  | sterol cCoccomyxa_subellips  | 55.60 | 0.00 |
| TRINITY_GAQ9161  | alpha-1,Klebsormidium_niten  | 55.60 | 0.00 |
| TRINITY_XP_0029  | hypothetVolvox_carteri       | 55.60 | 0.00 |
| TRINITY_XP_0190  | PREDICTICamelina_sativa      | 55.60 | 0.00 |
| TRINITY_XP_0217  | tRNA-dilChenopodium_quinoa   | 55.60 | 0.00 |
| TRINITY_GAQ7902  | RegulatcKlebsormidium_niten  | 55.60 | 0.00 |
| TRINITY_XP_0220  | ABC trarHelianthus_annuus    | 55.60 | 0.00 |
| TRINITY_XP_0025  | (predicteMicromonas_commoda  | 55.60 | 0.00 |
| TRINITY_GAQ9115  | hypothetKlebsormidium_niten  | 55.60 | 0.00 |
| TRINITY_OTG3300  | (putativeHelianthus_annuus   | 55.60 | 0.00 |
| TRINITY_OWM7455  | hypothetPunica_granatum      | 55.60 | 0.00 |
| TRINITY_XP_0068  | ras-relaAmborella_trichopod  | 55.60 | 0.00 |
| TRINITY_XP_0025  | (glycosylMicromonas_commoda  | 55.60 | 0.00 |
| TRINITY_XP_0029  | hypothetVolvox_carteri       | 55.60 | 0.00 |
| TRINITY_KZV5487  | (wall-asDorcoceras_hygromet  | 55.60 | 0.00 |
| TRINITY_XP_0029  | hypothetVolvox_carteri       | 55.60 | 0.00 |
| TRINITY_GAX7986  | hypothetChlamydomonas_eusti  | 55.60 | 0.00 |
| TRINITY_PIA4655  | hypothetAquilegia_coerulea   | 55.60 | 0.00 |
| TRINITY_XP_0017  | (mitogen-Chlamydomonas_reinh | 55.60 | 0.00 |
| TRINITY_GAX7437  | hypothetChlamydomonas_eusti  | 55.60 | 0.00 |
| TRINITY_PNW7742  | hypothetChlamydomonas_reinh  | 55.60 | 0.00 |
| TRINITY_KXZ5340  | hypothetGonium_pectorale     | 55.60 | 0.00 |
| TRINITY_GAX7790  | hypothetChlamydomonas_eusti  | 55.60 | 0.00 |
| TRINITY_PNH0947  | (Purple eTetrabaena_socialis | 55.60 | 0.00 |
| TRINITY_KXZ4841  | hypothetGonium_pectorale     | 55.60 | 0.00 |
| TRINITY_PNH0766  | Serine/tTetrabaena_socialis  | 55.60 | 0.00 |
| TRINITY_XP_0056  | proteascCoccomyxa_subellips  | 55.60 | 0.00 |
| TRINITY_XP_0029  | hypothetVolvox_carteri       | 55.60 | 0.00 |
| TRINITY_GAX8466  | (hypothetChlamydomonas_eusti | 55.60 | 0.00 |
| TRINITY_PNW7969  | hypothetChlamydomonas_reinh  | 55.60 | 0.00 |
| TRINITY_PNW7481  | hypothetChlamydomonas_reinh  | 55.60 | 0.00 |
| TRINITY_KXZ4543  | hypothetGonium_pectorale     | 55.60 | 0.00 |
| TRINITY_XP_0238  | ribose-rQuercus_suber        | 55.60 | 0.00 |
| TRINITY_XP_0016  | 26S protChlamydomonas_reinh  | 55.60 | 0.00 |
| TRINITY_GAX7980  | hypothetChlamydomonas_eusti  | 55.60 | 0.00 |
| TRINITY_KXZ5410  | hypothetGonium_pectorale     | 55.60 | 0.00 |
| TRINITY_PNW8156  | hypothetChlamydomonas_reinh  | 55.60 | 0.00 |
| TRINITY_PNH0535  | hypothetTetrabaena_socialis  | 55.60 | 0.00 |
| TRINITY_PRQ5565  | (putativeRosa_chinensis      | 55.60 | 0.00 |
| TRINITY_PNH0806  | hypothetTetrabaena_socialis  | 55.60 | 0.00 |
| TRINITY_GAX7379  | hypothetChlamydomonas_eusti  | 55.60 | 0.00 |
| TRINITY_RWR8459  | actin [(Cinnamomum_micranth  | 55.60 | 0.00 |
| TRINITY_GAX7492  | hypothetChlamydomonas_eusti  | 55.60 | 0.00 |
| TRINITY_GAX8096  | (hypothetChlamydomonas_eusti | 55.60 | 0.00 |
| TRINITY_XP_0202  | DEXH-boCajanus_cajan         | 55.60 | 0.00 |
| TRINITY_GAX8153  | hypothetChlamydomonas_eusti  | 55.60 | 0.00 |
| TRINITY_XP_0016  | translocChlamydomonas_reinh  | 55.60 | 0.00 |
| TRINITY_GAX8144  | hypothetChlamydomonas_eusti  | 55.60 | 0.00 |
| TRINITY_XP_0030  | predicteMicromonas_pusilla   | 55.60 | 0.00 |
| TRINITY_KXZ5451  | hypothetGonium_pectorale     | 55.60 | 0.00 |
| TRINITY_XP_0016  | transcriChlamydomonas_reinh  | 55.60 | 0.00 |
| TRINITY_GBG9168  | (hypothetChara_braunii       | 55.60 | 0.00 |
| TRINITY_XP_0045  | serine cCicer_arietinum      | 55.60 | 0.00 |
| TRINITY_EOY2639  | (UncharacTheobroma_cacao     | 55.60 | 0.00 |
| TRINITY_XP_0029  | hypothetVolvox_carteri       | 55.60 | 0.00 |
| TRINITY_XP_0029  | hypothetVolvox_carteri       | 55.60 | 0.00 |
| TRINITY_XP_0030  | thioeredcMicromonas_pusilla  | 55.60 | 0.00 |

|                  |            |                     |       |      |
|------------------|------------|---------------------|-------|------|
| TRINITY_XP_00641 | DEAD-box   | Eutrema_salsugineur | 55.60 | 0.00 |
| TRINITY_GAX8390  | hypothet   | Chlamydomonas_eusti | 55.60 | 0.00 |
| TRINITY_KDO4039  | (hypothet  | Citrus_sinensis     | 55.60 | 0.00 |
| TRINITY_XP_0029  | hypothet   | Volvox_carteri      | 55.60 | 0.00 |
| TRINITY_PSC7581  | BRCA1-as   | Micractinium_conduc | 55.60 | 0.00 |
| TRINITY_ABF9495  | retrotr    | Oryza_sativa        | 55.60 | 0.00 |
| TRINITY_XP_0016  | SM/Sec1    | Chlamydomonas_reinh | 55.60 | 0.00 |
| TRINITY_GAX8138  | (hypothet  | Chlamydomonas_eusti | 55.60 | 0.00 |
| TRINITY_PNH0497  | (hypothet  | Tetrabaena_socialis | 55.60 | 0.00 |
| TRINITY_GAX8470  | hypothet   | Chlamydomonas_eusti | 55.60 | 0.00 |
| TRINITY_PNW7682  | hypothet   | Chlamydomonas_reinh | 55.60 | 0.00 |
| TRINITY_GAX7531  | hypothet   | Chlamydomonas_eusti | 55.60 | 0    |
| TRINITY_GAQ7760  | (haloacic  | Klebsormidium_niten | 55.60 | 0.00 |
| TRINITY_BAK0277  | predict    | Hordeum_vulgare     | 55.50 | 0.00 |
| TRINITY_XP_0029  | ribulos    | Selaginella_moellen | 55.50 | 0.00 |
| TRINITY_XP_0237  | S-formyl   | Lactuca_sativa      | 55.50 | 0.00 |
| TRINITY_AAO7355  | reverse-   | Chlamydomonas_reinh | 55.50 | 0.00 |
| TRINITY_BAU6158  | (eukaryot  | Gonium_pectorale    | 55.50 | 0.00 |
| TRINITY_GAX8107  | hypothet   | Chlamydomonas_eusti | 55.50 | 0.00 |
| TRINITY_OAE2398  | (hypothet  | Marchantia_polymorp | 55.50 | 0.00 |
| TRINITY_PNH0483  | (LL-diami  | Tetrabaena_socialis | 55.50 | 0.00 |
| TRINITY_PNH1105  | hypothet   | Tetrabaena_socialis | 55.50 | 0.00 |
| TRINITY_KXZ4534  | hypothet   | Gonium_pectorale    | 55.50 | 0.00 |
| TRINITY_XP_0016  | maltose    | Chlamydomonas_reinh | 55.50 | 0.00 |
| TRINITY_GAX7757  | hypothet   | Chlamydomonas_eusti | 55.50 | 0.00 |
| TRINITY_GAX7948  | hypothet   | Chlamydomonas_eusti | 55.50 | 0.00 |
| TRINITY_KXZ5562  | hypothet   | Gonium_pectorale    | 55.50 | 0.00 |
| TRINITY_PNW7222  | hypothet   | Chlamydomonas_reinh | 55.50 | 0.00 |
| TRINITY_XP_0239  | (ras-like  | Quercus_suber       | 55.50 | 0.00 |
| TRINITY_RMZ5563  | hypothet   | Auxenochlorella_pro | 55.50 | 0.00 |
| TRINITY_GAX7445  | hypothet   | Chlamydomonas_eusti | 55.50 | 0.00 |
| TRINITY_GAX8240  | hypothet   | Chlamydomonas_eusti | 55.50 | 0.00 |
| TRINITY_XP_0056  | hypothet   | Coccomyxa_subellips | 55.50 | 0.00 |
| TRINITY_XP_0228  | (E3 ubiq   | Olea_europaea       | 55.50 | 0.00 |
| TRINITY_XP_0024  | acyl-co    | Sorghum_bicolor     | 55.50 | 0.00 |
| TRINITY_GAX8611  | hypothet   | Chlamydomonas_eusti | 55.50 | 0.00 |
| TRINITY_XP_0017  | (3-phosp   | Chlamydomonas_reinh | 55.50 | 0.00 |
| TRINITY_GAX8383  | hypothet   | Chlamydomonas_eusti | 55.50 | 0.00 |
| TRINITY_XP_0239  | (ras-like  | Quercus_suber       | 55.50 | 0.00 |
| TRINITY_PNW7723  | hypothet   | Chlamydomonas_reinh | 55.50 | 0.00 |
| TRINITY_GAQ9031  | 120S prot  | Klebsormidium_niten | 55.50 | 0.00 |
| TRINITY_XP_0016  | voltage-   | Chlamydomonas_reinh | 55.50 | 0.00 |
| TRINITY_GAX8043  | hypothet   | Chlamydomonas_eusti | 55.50 | 0.00 |
| TRINITY_O65084   | .1RecName: | Picea_mariana       | 55.50 | 0.00 |
| TRINITY_XP_0273  | (eukaryot  | Abrus_precatorius   | 55.40 | 0.00 |
| TRINITY_XP_0238  | probable   | Quercus_suber       | 55.40 | 0.00 |
| TRINITY_GAQ8347  | (ubiquin   | Klebsormidium_niten | 55.40 | 0.00 |
| TRINITY_GAQ8713  | Ribonuc    | Klebsormidium_niten | 55.40 | 0.00 |
| TRINITY_AIU4943  | (translat  | Schrenkiella_parvul | 55.40 | 0.00 |
| TRINITY_PSC7496  | (60S rib   | Micractinium_conduc | 55.40 | 0.00 |
| TRINITY_BAJ8923  | predict    | Hordeum_vulgare     | 55.40 | 0.00 |
| TRINITY_GAX7502  | hypothet   | Chlamydomonas_eusti | 55.40 | 0.00 |
| TRINITY_XP_0056  | AAA-ATP    | Coccomyxa_subellips | 55.40 | 0.00 |
| TRINITY_PRW5758  | coatome    | Chlorella_sorokinia | 55.40 | 0.00 |
| TRINITY_KXZ4177  | hypothet   | Gonium_pectorale    | 55.40 | 0.00 |
| TRINITY_GAX7954  | (hypothet  | Chlamydomonas_eusti | 55.40 | 0.00 |
| TRINITY_ADI4692  | (MTM0417   | Volvox_carteri      | 55.40 | 0.00 |
| TRINITY_PNH0520  | Protein    | Tetrabaena_socialis | 55.40 | 0.00 |
| TRINITY_RVW7594  | (Nucleol   | Vitis_vinifera      | 55.40 | 0.00 |
| TRINITY_XP_0029  | hypothet   | Volvox_carteri      | 55.40 | 0.00 |
| TRINITY_KHN2807  | Serine/t   | Glycine_soja        | 55.40 | 0.00 |
| TRINITY_XP_0075  | (predict   | Bathycoccus_prasinc | 55.40 | 0.00 |
| TRINITY_VDD1348  | (unnamed   | Brassica_oleracea   | 55.40 | 0.00 |
| TRINITY_PNW7412  | hypothet   | Chlamydomonas_reinh | 55.40 | 0.00 |
| TRINITY_XP_0238  | probable   | Quercus_suber       | 55.40 | 0.00 |
| TRINITY_PNW8620  | hypothet   | Chlamydomonas_reinh | 55.40 | 0.00 |

|                  |            |                     |       |      |
|------------------|------------|---------------------|-------|------|
| TRINITY_XP_02436 | exonucle   | Physcomitrella_pate | 55.40 | 0.00 |
| TRINITY_KXZ4626  | hypothet   | Gonium_pectorale    | 55.40 | 0.00 |
| TRINITY_XP_00170 | sulfite    | Chlamydomonas_reinh | 55.40 | 0.00 |
| TRINITY_KXZ4702  | hypothet   | Gonium_pectorale    | 55.40 | 0.00 |
| TRINITY_XP_00142 | predicte   | Ostreococcus_sp._'1 | 55.40 | 0.00 |
| TRINITY_XP_00961 | PREDICTI   | Nicotiana_tomentosi | 55.40 | 0.00 |
| TRINITY_PSR9345  | Cleavage   | Actinidia_chinensis | 55.40 | 0.00 |
| TRINITY_XP_01461 | hydroxyn   | Glycine_max         | 55.40 | 0.00 |
| TRINITY_XP_01107 | ATP-depe   | Sesamum_indicum     | 55.40 | 0.00 |
| TRINITY_OAE2473  | hypothet   | Marchantia_polymorp | 55.40 | 0.00 |
| TRINITY_PNH0146  | hypothet   | Tetrabaena_socialis | 55.40 | 0.00 |
| TRINITY_XP_01389 | 2-oxodic   | Monoraphidium_negle | 55.40 | 0.00 |
| TRINITY_XP_00980 | (PREDICTI  | Nicotiana_sylvestri | 55.40 | 0.00 |
| TRINITY_XP_00430 | (PREDICTI  | Fragaria-vesca      | 55.40 | 0.00 |
| TRINITY_XP_00169 | DNA dam    | Chlamydomonas_reinh | 55.40 | 0.00 |
| TRINITY_PRW5708  | N-alpha-   | Chlorella_sorokinia | 55.40 | 0.00 |
| TRINITY_XP_01390 | hypothet   | Monoraphidium_negle | 55.40 | 0.00 |
| TRINITY_GAX7818  | hypothet   | Chlamydomonas_eusti | 55.40 | 0.00 |
| TRINITY_PRQ2958  | putative   | Rosa_chinensis      | 55.40 | 0.00 |
| TRINITY_AHA1536  | isopent    | Taraxacum_kok-saghy | 55.40 | 0.00 |
| TRINITY_GAX7530  | hypothet   | Chlamydomonas_eusti | 55.40 | 0.00 |
| TRINITY_XP_00169 | predicte   | Chlamydomonas_reinh | 55.40 | 0.00 |
| TRINITY_GAX8121  | hypothet   | Chlamydomonas_eusti | 55.40 | 0.00 |
| TRINITY_PRW4436  | DNA rep    | Chlorella_sorokinia | 55.40 | 0.00 |
| TRINITY_KXZ5212  | ARPC4 p    | Gonium_pectorale    | 55.40 | 0.00 |
| TRINITY_PNH0230  | hypothet   | Tetrabaena_socialis | 55.40 | 0.00 |
| TRINITY_XP_02198 | calcium-   | Helianthus_annuus   | 55.40 | 0.00 |
| TRINITY_GAX8387  | hypothet   | Chlamydomonas_eusti | 55.40 | 0.00 |
| TRINITY_KXZ5146  | hypothet   | Gonium_pectorale    | 55.40 | 0.00 |
| TRINITY_KVH9034  | Histone-   | Cynara_cardunculus  | 55.40 | 0.00 |
| TRINITY_GAX7658  | hypothet   | Chlamydomonas_eusti | 55.40 | 0.00 |
| TRINITY_XP_00169 | transcri   | Chlamydomonas_reinh | 55.40 | 0.00 |
| TRINITY_XP_00294 | hypothet   | Volvox_carteri      | 55.40 | 0.00 |
| TRINITY_GAX7788  | hypothet   | Chlamydomonas_eusti | 55.40 | 0.00 |
| TRINITY_GAQ7758  | ABC trar   | Klebsormidium_niten | 55.40 | 0.00 |
| TRINITY_XP_02387 | calcinei   | Quercus_suber       | 55.30 | 0.00 |
| TRINITY_XP_02436 | putative   | Physcomitrella_pate | 55.30 | 0.00 |
| TRINITY_PNR2956  | hypothet   | Physcomitrella_pate | 55.30 | 0.00 |
| TRINITY_GAX7492  | hypothet   | Chlamydomonas_eusti | 55.30 | 0.00 |
| TRINITY_OAE3085  | hypothet   | Marchantia_polymorp | 55.30 | 0.00 |
| TRINITY_XP_01945 | PREDICTI   | Lupinus_angustifoli | 55.30 | 0.00 |
| TRINITY_XP_01025 | PREDICTI   | Nelumbo_nucifera    | 55.30 | 0.00 |
| TRINITY_XP_02159 | 39S rib    | Manihot_esculenta   | 55.30 | 0.00 |
| TRINITY_XP_00142 | predicte   | Ostreococcus_sp._'1 | 55.30 | 0.00 |
| TRINITY_OAE3102  | hypothet   | Marchantia_polymorp | 55.30 | 0.00 |
| TRINITY_XP_00169 | predicte   | Chlamydomonas_reinh | 55.30 | 0.00 |
| TRINITY_GAX8411  | hypothet   | Chlamydomonas_eusti | 55.30 | 0.00 |
| TRINITY_POC8M8   | .1RecName: | Zea_mays            | 55.30 | 0.00 |
| TRINITY_KXZ5060  | hypothet   | Gonium_pectorale    | 55.30 | 0.00 |
| TRINITY_GAX8315  | hypothet   | Chlamydomonas_eusti | 55.30 | 0.00 |
| TRINITY_KXZ4473  | hypothet   | Gonium_pectorale    | 55.30 | 0.00 |
| TRINITY_ERN1059  | hypothet   | Amborella_trichopod | 55.30 | 0.00 |
| TRINITY_PRW6062  | ATPase /   | Chlorella_sorokinia | 55.30 | 0.00 |
| TRINITY_XP_00564 | pre-rRN    | Coccomyxa_subellips | 55.30 | 0.00 |
| TRINITY_RMZ5313  | hypothet   | Auxenochlorella_pro | 55.30 | 0.00 |
| TRINITY_GBG5896  | hypothet   | Chara_braunii       | 55.30 | 0.00 |
| TRINITY_XP_00294 | hypothet   | Volvox_carteri      | 55.30 | 0.00 |
| TRINITY_PNW8841  | hypothet   | Chlamydomonas_reinh | 55.30 | 0.00 |
| TRINITY_XP_02387 | glucose-   | Quercus_suber       | 55.30 | 0.00 |
| TRINITY_GAQ9356  | hypothet   | Klebsormidium_niten | 55.30 | 0.00 |
| TRINITY_GBF8870  | hypothet   | Raphidocelis_subcap | 55.30 | 0.00 |
| TRINITY_XP_00496 | GTP-bin    | Setaria_italica     | 55.30 | 0.00 |
| TRINITY_XP_02068 | DNA rep    | Dendrobium_catenatu | 55.30 | 0.00 |
| TRINITY_XP_00169 | predicte   | Chlamydomonas_reinh | 55.30 | 0.00 |
| TRINITY_GAX7529  | hypothet   | Chlamydomonas_eusti | 55.30 | 0.00 |
| TRINITY_XP_01389 | hypothet   | Monoraphidium_negle | 55.30 | 0.00 |

|                      |                             |       |      |
|----------------------|-----------------------------|-------|------|
| TRINITY_PNW77455     | hypothetChlamydomonas_reinh | 55.30 | 0.00 |
| TRINITY_GAX80554     | hypothetChlamydomonas_eusti | 55.30 | 0.00 |
| TRINITY_GAX79041     | hypothetChlamydomonas_eusti | 55.30 | 0.00 |
| TRINITY_XP_01618     | lon protArachis_ipaensis    | 55.30 | 0.00 |
| TRINITY_XP_02793     | DEAD-bo>Vigna_unguiculata   | 55.30 | 0.00 |
| TRINITY_PON91994     | RidA fanTrema_orientale     | 55.30 | 0.00 |
| TRINITY_PNW72762     | hypothetChlamydomonas_reinh | 55.30 | 0.00 |
| TRINITY_GAX74569     | hypothetChlamydomonas_eusti | 55.30 | 0.00 |
| TRINITY_KCW72373     | hypothetEucalyptus_grandis  | 55.30 | 0.00 |
| TRINITY_XP_002943'5' | -cycVolvox_carteri          | 55.30 | 0.00 |
| TRINITY_XP_02439     | serine/tPhyscomitrella_pate | 55.20 | 0.00 |
| TRINITY_GAX74920     | hypothetChlamydomonas_eusti | 55.20 | 0.00 |
| TRINITY_XP_02024     | phosphatAsparagus_officinal | 55.20 | 0.00 |
| TRINITY_XP_01139     | CysteineAuxenochlorella_pro | 55.20 | 0.00 |
| TRINITY_XP_00170     | protein Chlamydomonas_reinh | 55.20 | 0.00 |
| TRINITY_XP_00584     | hypothetChlorella_variabili | 55.20 | 0.00 |
| TRINITY_RAL48001     | hypothetCuscuta_australis   | 55.20 | 0.00 |
| TRINITY_XP_02389     | guanine Quercus_suber       | 55.20 | 0.00 |
| TRINITY_XP_01067     | PREDICTHBeta_vulgaris       | 55.20 | 0.00 |
| TRINITY_OAY32899     | hypothetManihot_esculenta   | 55.20 | 0.00 |
| TRINITY_GAQ91585     | RNA polyKlebsormidium_niten | 55.20 | 0.00 |
| TRINITY_RVX14879     | ABC trarVitis_vinifera      | 55.20 | 0.00 |
| TRINITY_XP_02392     | ras-relaQuercus_suber       | 55.20 | 0.00 |
| TRINITY_XP_00498     | methioniSetaria_italica     | 55.20 | 0.00 |
| TRINITY_GBG70223     | hypothetChara_braunii       | 55.20 | 0.00 |
| TRINITY_XP_02497     | 60S ribcCynara_cardunculus  | 55.20 | 0.00 |
| TRINITY_PNW83347     | hypothetChlamydomonas_reinh | 55.20 | 0.00 |
| TRINITY_OAE32338     | hypothetMarchantia_polymorp | 55.20 | 0.00 |
| TRINITY_XP_00564     | carbon-rCoccomyxa_subellips | 55.20 | 0.00 |
| TRINITY_PHU28465     | hypothetCapsicum_chinense   | 55.20 | 0.00 |
| TRINITY_PNW88273     | hypothetChlamydomonas_reinh | 55.20 | 0.00 |
| TRINITY_PNH05802     | MetalloTetrabaena_socialis  | 55.20 | 0.00 |
| TRINITY_GAX80691     | hypothetChlamydomonas_eusti | 55.20 | 0.00 |
| TRINITY_BAJ93233     | predicteHordeum_vulgare     | 55.20 | 0.00 |
| TRINITY_ALM54987     | DEAD bo>Chlamydomonas_sp._I | 55.20 | 0.00 |
| TRINITY_PSC75990     | 2-oxoisMicractinium_conduc  | 55.20 | 0.00 |
| TRINITY_GBF89156     | hypothetRaphidocelis_subcap | 55.20 | 0.00 |
| TRINITY_XP_02390     | ras-likeQuercus_suber       | 55.20 | 0.00 |
| TRINITY_KXZ46400     | hypothetGonium_pectorale    | 55.20 | 0.00 |
| TRINITY_PNH08087     | BTB/POZ Tetrabaena_socialis | 55.20 | 0.00 |
| TRINITY_GAX75709     | hypothetChlamydomonas_eusti | 55.20 | 0.00 |
| TRINITY_PNH04197     | hypothetTetrabaena_socialis | 55.20 | 0.00 |
| TRINITY_XP_00295     | hypothetVolvox_carteri      | 55.20 | 0.00 |
| TRINITY_GAX80119     | hypothetChlamydomonas_eusti | 55.20 | 0.00 |
| TRINITY_XP_01066     | PREDICTHBeta_vulgaris       | 55.20 | 0.00 |
| TRINITY_GAX72731     | hypothetChlamydomonas_eusti | 55.20 | 0.00 |
| TRINITY_RMZ56664     | hypothetAuxenochlorella_pro | 55.20 | 0.00 |
| TRINITY_GAX77354     | hypothetChlamydomonas_eusti | 55.20 | 0.00 |
| TRINITY_GAX79007     | hypothetChlamydomonas_eusti | 55.20 | 0.00 |
| TRINITY_KXZ55975     | hypothetGonium_pectorale    | 55.20 | 0.00 |
| TRINITY_KXZ56725     | hypothetGonium_pectorale    | 55.20 | 0.00 |
| TRINITY_PNW82618     | hypothetChlamydomonas_reinh | 55.20 | 0.00 |
| TRINITY_XP_00169     | predicteChlamydomonas_reinh | 55.20 | 0.00 |
| TRINITY_GBF94393     | importirRaphidocelis_subcap | 55.20 | 0.00 |
| TRINITY_GAQ82296     | hypothetKlebsormidium_niten | 55.20 | 0.00 |
| TRINITY_PNH11163     | Ankyrin Tetrabaena_socialis | 55.20 | 0.00 |
| TRINITY_XP_02718     | replicatCoffea_eugenioides  | 55.20 | 0.00 |
| TRINITY_GAX80542     | hypothetChlamydomonas_eusti | 55.20 | 0.00 |
| TRINITY_GAX73392     | hypothetChlamydomonas_eusti | 55.20 | 0.00 |
| TRINITY_KXZ45967     | hypothetGonium_pectorale    | 55.20 | 0.00 |
| TRINITY_PNH12009     | ArsenicTetrabaena_socialis  | 55.20 | 0.00 |
| TRINITY_XP_01282     | PREDICTHErythranthe_guttata | 55.20 | 0.00 |
| TRINITY_PNH07322     | Cell di\Tetrabaena_socialis | 55.20 | 0.00 |
| TRINITY_XP_02645     | DNA polyPapaver_somniferum  | 55.10 | 0.00 |
| TRINITY_GAQ85919     | 3-hydro>Klebsormidium_niten | 55.10 | 0.00 |
| TRINITY_XP_00250     | predicteMicromonas_commoda  | 55.10 | 0.00 |

|                                                   |       |      |
|---------------------------------------------------|-------|------|
| TRINITY_XP_00170(predicted)Chlamydomonas_reinh    | 55.10 | 0.00 |
| TRINITY_PNH09370(Cytochrome)Tetrabaena_socialis   | 55.10 | 0.00 |
| TRINITY_XP_00685(exosome)Amborella_trichopod      | 55.10 | 0.00 |
| TRINITY_ERN12390(hypothetical)Amborella_trichopod | 55.10 | 0.00 |
| TRINITY_GAQ82290(hypothetical)Klebsormidium_niten | 55.10 | 0.00 |
| TRINITY_XP_01284(PREDICTED)Erythranthe_guttata    | 55.10 | 0.00 |
| TRINITY_PIN07962(Protein)Handroanthus_impeti      | 55.10 | 0.00 |
| TRINITY_XP_02710(actin-1)Coffea_arabica           | 55.10 | 0.00 |
| TRINITY_XP_01240(PREDICTED)Gossypium_raimondii    | 55.10 | 0.00 |
| TRINITY_XP_00620(casein)Capsella_rubella          | 55.10 | 0.00 |

|                  |          |                     |       |      |
|------------------|----------|---------------------|-------|------|
| TRINITY_XP_00835 | PREDICTH | Malus_domestica     | 55.10 | 0.00 |
| TRINITY_BAK02284 | predicte | Hordeum_vulgare     | 55.10 | 0.00 |
| TRINITY_XP_01091 | PREDICTH | Elaeis_guineensis   | 55.10 | 0.00 |
| TRINITY_XP_01918 | PREDICTH | Ipomoea_nil         | 55.10 | 0.00 |
| TRINITY_GAX74886 | hypothet | Chlamydomonas_eusti | 55.10 | 0.00 |
| TRINITY_GAX78980 | hypothet | Chlamydomonas_eusti | 55.10 | 0.00 |
| TRINITY_GAX86058 | hypothet | Chlamydomonas_eusti | 55.10 | 0.00 |
| TRINITY_XP_01390 | hypothet | Monoraphidium_negle | 55.10 | 0.00 |
| TRINITY_XP_00751 | thymidir | Bathycoccus_prasinc | 55.10 | 0.00 |
| TRINITY_GAX78347 | hypothet | Chlamydomonas_eusti | 55.10 | 0.00 |
| TRINITY_GAX81726 | hypothet | Chlamydomonas_eusti | 55.10 | 0.00 |
| TRINITY_AAZ31073 | peroxis  | Medicago_sativa     | 55.10 | 0.00 |
| TRINITY_GAX73590 | hypothet | Chlamydomonas_eusti | 55.10 | 0.00 |
| TRINITY_GAQ81015 | glycyl-t | Klebsormidium_niten | 55.10 | 0.00 |
| TRINITY_GAX83956 | hypothet | Chlamydomonas_eusti | 55.10 | 0.00 |
| TRINITY_RAL45294 | hypothet | Cuscuta_australis   | 55.10 | 0.00 |
| TRINITY_XP_00295 | hypothet | Volvox_carteri      | 55.10 | 0.00 |
| TRINITY_XP_00169 | predicte | Chlamydomonas_reinh | 55.10 | 0.00 |
| TRINITY_GAX74150 | hypothet | Chlamydomonas_eusti | 55.10 | 0.00 |
| TRINITY_GAX77606 | hypothet | Chlamydomonas_eusti | 55.10 | 0.00 |
| TRINITY_KXZ46517 | hypothet | Gonium_pectorale    | 55.10 | 0.00 |
| TRINITY_AFK45219 | unknown  | Lotus_japonicus     | 55.10 | 0.00 |
| TRINITY_XP_00295 | ATP-ener | Volvox_carteri      | 55.10 | 0.00 |
| TRINITY_PNH09618 | hypothet | Tetrabaena_socialis | 55.10 | 0.00 |
| TRINITY_XP_01100 | PREDICTH | Populus_euphratica  | 55.10 | 0.00 |
| TRINITY_KXZ53453 | hypothet | Gonium_pectorale    | 55.10 | 0.00 |
| TRINITY_GAX73759 | hypothet | Chlamydomonas_eusti | 55.10 | 0.00 |
| TRINITY_GBF93441 | hypothet | Raphidocelis_subcap | 55.10 | 0.00 |
| TRINITY_GAX80191 | hypothet | Chlamydomonas_eusti | 55.10 | 0.00 |
| TRINITY_PNH06348 | Protein  | Tetrabaena_socialis | 55.10 | 0.00 |
| TRINITY_GAX82454 | hypothet | Chlamydomonas_eusti | 55.10 | 0.00 |
| TRINITY_PRW56740 | chromati | Chlorella_sorokinia | 55.10 | 0.00 |
| TRINITY_GBF94561 | aldo ket | Raphidocelis_subcap | 55.10 | 0.00 |
| TRINITY_XP_00878 | SURP anc | Phoenix_dactylifera | 55.10 | 0.00 |
| TRINITY_XP_02390 | kinesin  | Quercus_suber       | 55.10 | 0.00 |
| TRINITY_KXZ49867 | hypothet | Gonium_pectorale    | 55.10 | 0.00 |
| TRINITY_XP_00169 | ribofla  | Chlamydomonas_reinh | 55.10 | 0.00 |
| TRINITY_XP_02402 | protein  | Morus_notabilis     | 55.10 | 0.00 |
| TRINITY_KXZ44428 | hypothet | Gonium_pectorale    | 55.10 | 0.00 |
| TRINITY_PNW88063 | hypothet | Chlamydomonas_reinh | 55.10 | 0.00 |
| TRINITY_XP_00169 | predicte | Chlamydomonas_reinh | 55.10 | 0.00 |
| TRINITY_PNR61941 | hypothet | Physcomitrella_pate | 55.10 | 0.00 |
| TRINITY_XP_02389 | kinesin  | Quercus_suber       | 55.10 | 0.00 |
| TRINITY_GAQ79096 | 26S Prot | Klebsormidium_niten | 55.10 | 0.00 |
| TRINITY_RMZ54466 | hypothet | Auxenochlorella_pro | 55.00 | 0.00 |
| TRINITY_XP_00356 | inositol | Brachypodium_distac | 55.00 | 0.00 |
| TRINITY_XP_00295 | hypothet | Volvox_carteri      | 55.00 | 0.00 |
| TRINITY_GBG79350 | hypothet | Chara_braunii       | 55.00 | 0.00 |
| TRINITY_PHT98789 | putativ  | Capsicum_chinense   | 55.00 | 0.00 |
| TRINITY_GAX83570 | hypothet | Chlamydomonas_eusti | 55.00 | 0.00 |
| TRINITY_BAK01088 | predicte | Hordeum_vulgare     | 55.00 | 0.00 |
| TRINITY_GAX83798 | hypothet | Chlamydomonas_eusti | 55.00 | 0.00 |
| TRINITY_XP_00294 | ATM/ATR- | Volvox_carteri      | 55.00 | 0.00 |
| TRINITY_XP_00294 | hypothet | Volvox_carteri      | 55.00 | 0.00 |
| TRINITY_GAX77149 | hypothet | Chlamydomonas_eusti | 55.00 | 0.00 |
| TRINITY_KNA09875 | hypothet | Spinacia_oleracea   | 55.00 | 0.00 |
| TRINITY_PNW75795 | hypothet | Chlamydomonas_reinh | 55.00 | 0.00 |
| TRINITY_XP_00565 | Metallo- | Coccomyxa_subellips | 55.00 | 0.00 |
| TRINITY_XP_02438 | nuclear  | Physcomitrella_pate | 55.00 | 0.00 |
| TRINITY_XP_01618 | 60S rib  | Arachis_ipaensis    | 55.00 | 0.00 |
| TRINITY_GAV87318 | UQ_con c | Cephalotus_follicul | 55.00 | 0.00 |
| TRINITY_XP_00295 | thylakoi | Volvox_carteri      | 55.00 | 0.00 |
| TRINITY_GAX79982 | hypothet | Chlamydomonas_eusti | 55.00 | 0.00 |
| TRINITY_XP_00170 | mitochor | Chlamydomonas_reinh | 55.00 | 0.00 |
| TRINITY_GBG67432 | hypothet | Chara_braunii       | 55.00 | 0.00 |
| TRINITY_GAX80984 | hypothet | Chlamydomonas_eusti | 55.00 | 0.00 |



|                  |                             |       |      |
|------------------|-----------------------------|-------|------|
| TRINITY_XP_0270  | protein-Coffea_arabica      | 55.00 | 0.00 |
| TRINITY_XP_0017  | predicteChlamydomonas_reinh | 55.00 | 0.00 |
| TRINITY_PNW7810  | hypothetChlamydomonas_reinh | 55.00 | 0.00 |
| TRINITY_XP_0016  | methioniChlamydomonas_reinh | 55.00 | 0.00 |
| TRINITY_PSC6705  | RetrovirMicractinium_conduc | 55.00 | 0.00 |
| TRINITY_XP_0016  | predicteChlamydomonas_reinh | 55.00 | 0.00 |
| TRINITY_XP_0167  | PREDICTEGossypium_hirsutum  | 55.00 | 0.00 |
| TRINITY_ONM41231 | CytochrzZea_mays            | 55.00 | 0.00 |
| TRINITY_GAX7530  | hypothetChlamydomonas_eusti | 55.00 | 0.00 |
| TRINITY_PNW8566  | hypothetChlamydomonas_reinh | 55.00 | 0.00 |
| TRINITY_PRW2090  | OxidorecChlorella_sorokinia | 55.00 | 0.00 |
| TRINITY_GAX8227  | hypothetChlamydomonas_eusti | 55.00 | 0.00 |
| TRINITY_PSC6774  | E3 ubiqMicractinium_conduc  | 55.00 | 0.00 |
| TRINITY_RMZ5565  | hypothetAuxenochlorella_pro | 55.00 | 0.00 |
| TRINITY_GAX7813  | hypothetChlamydomonas_eusti | 55.00 | 0.00 |
| TRINITY_PRW20651 | DNA misnChlorella_sorokinia | 55.00 | 0.00 |
| TRINITY_KXZ5037  | hypothetGonium_pectorale    | 55.00 | 0.00 |
| TRINITY_XP_0243  | probablePhyscomitrella_pate | 55.00 | 0.00 |
| TRINITY_PRW5844  | isoleuciChlorella_sorokinia | 55.00 | 0    |
| TRINITY_GAX8496  | hypothetChlamydomonas_eusti | 55.00 | 0.00 |
| TRINITY_KXZ54091 | hypothetGonium_pectorale    | 55.00 | 0.00 |
| TRINITY_GAX8339  | hypothetChlamydomonas_eusti | 55.00 | 0.00 |
| TRINITY_AAD4434  | actin [IDunaliella_salina   | 55.00 | 0.00 |
| TRINITY_XP_0016  | sulfate Chlamydomonas_reinh | 55.00 | 0.00 |
| TRINITY_GAX8163  | hypothetChlamydomonas_eusti | 55.00 | 0.00 |
| TRINITY_KXZ5105  | hypothetGonium_pectorale    | 55.00 | 0.00 |
| TRINITY_GAX7287  | hypothetChlamydomonas_eusti | 55.00 | 0    |
| TRINITY_GAX8166  | hypothetChlamydomonas_eusti | 55.00 | 0.00 |
| TRINITY_GAX8047  | hypothetChlamydomonas_eusti | 55.00 | 0.00 |
| TRINITY_XP_0097  | PREDICTINicotiana_sylvestri | 54.90 | 0.00 |
| TRINITY_XP_0029  | hypothetVolvox_carteri      | 54.90 | 0.00 |
| TRINITY_KEH1554  | acyl-CoMedicago_truncatula  | 54.90 | 0.00 |
| TRINITY_XP_0104  | PREDICTICamelina_sativa     | 54.90 | 0.00 |
| TRINITY_XP_0093  | PREDICTIPyrus_x_bretschneid | 54.90 | 0.00 |
| TRINITY_PWZ32581 | hypothetZea_mays            | 54.90 | 0.00 |
| TRINITY_XP_0239  | nicotinQuercus_suber        | 54.90 | 0.00 |
| TRINITY_XP_0205  | GPI manrAmborella_trichopod | 54.90 | 0.00 |
| TRINITY_ABK23771 | unknown Picea_sitchensis    | 54.90 | 0.00 |
| TRINITY_GBG8802  | hypothetChara_braunii       | 54.90 | 0.00 |
| TRINITY_XP_0025  | predicteMicromonas_commoda  | 54.90 | 0.00 |
| TRINITY_KXZ4685  | hypothetGonium_pectorale    | 54.90 | 0.00 |
| TRINITY_KXZ4319  | hypothetGonium_pectorale    | 54.90 | 0.00 |
| TRINITY_XP_0192  | PREDICTINicotiana_attenuata | 54.90 | 0.00 |
| TRINITY_XP_0139  | 40S ribcMonoraphidium_negle | 54.90 | 0.00 |
| TRINITY_KXZ5512  | hypothetGonium_pectorale    | 54.90 | 0.00 |
| TRINITY_XP_0029  | hypothetVolvox_carteri      | 54.90 | 0.00 |
| TRINITY_GAX7595  | hypothetChlamydomonas_eusti | 54.90 | 0.00 |
| TRINITY_GAX7506  | hypothetChlamydomonas_eusti | 54.90 | 0.00 |
| TRINITY_KXZ4463  | hypothetGonium_pectorale    | 54.90 | 0.00 |
| TRINITY_GAX7493  | hypothetChlamydomonas_eusti | 54.90 | 0.00 |
| TRINITY_GBF9726  | hypothetRaphidocelis_subcap | 54.90 | 0.00 |
| TRINITY_PNH0329  | hypothetTetrabaena_socialis | 54.90 | 0.00 |
| TRINITY_XP_0150  | DNA misnSolanum_pennellii   | 54.90 | 0.00 |
| TRINITY_KXZ5544  | hypothetGonium_pectorale    | 54.90 | 0.00 |
| TRINITY_KDD7222  | G10-likeHelicosporidium_sp. | 54.90 | 0.00 |
| TRINITY_GAQ8636  | 6-phospKlebsormidium_niten  | 54.90 | 0.00 |
| TRINITY_GAX8519  | hypothetChlamydomonas_eusti | 54.90 | 0.00 |
| TRINITY_GAX8098  | hypothetChlamydomonas_eusti | 54.90 | 0.00 |
| TRINITY_GAX7391  | hypothetChlamydomonas_eusti | 54.90 | 0.00 |
| TRINITY_XP_0029  | hypothetVolvox_carteri      | 54.90 | 0.00 |
| TRINITY_BAK0047  | predicteHordeum_vulgare     | 54.90 | 0.00 |
| TRINITY_GAQ7953  | DNA damKlebsormidium_niten  | 54.90 | 0.00 |
| TRINITY_GBF9903  | hypothetRaphidocelis_subcap | 54.90 | 0.00 |
| TRINITY_XP_0016  | predicteChlamydomonas_reinh | 54.90 | 0.00 |
| TRINITY_XP_0139  | peptide-Monoraphidium_negle | 54.90 | 0.00 |
| TRINITY_CAA9816  | RAB5A [ILotus_japonicus     | 54.90 | 0.00 |

|                  |           |                     |       |      |
|------------------|-----------|---------------------|-------|------|
| TRINITY_XP_00249 | vacuolar  | Micromonas_commoda  | 54.90 | 0.00 |
| TRINITY_PTQ50073 | hypothet  | Marchantia_polymorp | 54.90 | 0.00 |
| TRINITY_PNW84871 | hypothet  | Chlamydomonas_reinh | 54.90 | 0.00 |
| TRINITY_XP_00297 | betaine   | Selaginella_moellen | 54.90 | 0.00 |
| TRINITY_PNW73664 | hypothet  | Chlamydomonas_reinh | 54.90 | 0.00 |
| TRINITY_GBF9082  | (hypothet | Raphidocelis_subcap | 54.90 | 0.00 |
| TRINITY_PNH06851 | GATA tr   | Tetrabaena_socialis | 54.90 | 0.00 |
| TRINITY_KXZ43319 | hypothet  | Gonium_pectorale    | 54.90 | 0.00 |
| TRINITY_PNW82739 | hypothet  | Chlamydomonas_reinh | 54.90 | 0.00 |
| TRINITY_GAQ78747 | Putative  | Klebsormidium_niten | 54.90 | 0.00 |
| TRINITY_KXZ53244 | hypothet  | Gonium_pectorale    | 54.90 | 0.00 |
| TRINITY_XP_00169 | guanylat  | Chlamydomonas_reinh | 54.90 | 0.00 |
| TRINITY_GAX72741 | hypothet  | Chlamydomonas_eusti | 54.90 | 0.00 |
| TRINITY_XP_0239  | (ras-like | Quercus_suber       | 54.90 | 0.00 |
| TRINITY_GAX73269 | hypothet  | Chlamydomonas_eusti | 54.90 | 0.00 |
| TRINITY_GAX79959 | hypothet  | Chlamydomonas_eusti | 54.90 | 0.00 |
| TRINITY_GAX80839 | hypothet  | Chlamydomonas_eusti | 54.90 | 0.00 |
| TRINITY_NP_00139 | Cyclin    | Arabidopsis_thalian | 54.90 | 0.00 |
| TRINITY_XP_02019 | anaphas   | Aegilops_tauschii   | 54.80 | 0.00 |
| TRINITY_XP_01569 | PREDICTI  | Oryza_brachyantha   | 54.80 | 0.00 |
| TRINITY_P51824.2 | RecName:  | Solanum_tuberosum   | 54.80 | 0.00 |
| TRINITY_XP_02437 | cAMP-dep  | Physcomitrella_pate | 54.80 | 0.00 |
| TRINITY_KMZ76111 | Ras-rel   | Zostera_marina      | 54.80 | 0.00 |
| TRINITY_XP_0244  | (type IV  | Physcomitrella_pate | 54.80 | 0.00 |
| TRINITY_XP_02439 | xylulos   | Physcomitrella_pate | 54.80 | 0.00 |
| TRINITY_XP_0025  | (predict  | Micromonas_commoda  | 54.80 | 0.00 |
| TRINITY_XP_00309 | predict   | Micromonas_pusilla  | 54.80 | 0.00 |
| TRINITY_OUS4725  | (P-loop   | Ostreococcus_tauri  | 54.80 | 0.00 |
| TRINITY_GAX78989 | hypothet  | Chlamydomonas_eusti | 54.80 | 0.00 |
| TRINITY_GAX72632 | hypothet  | Chlamydomonas_eusti | 54.80 | 0.00 |
| TRINITY_GAX73591 | hypothet  | Chlamydomonas_eusti | 54.80 | 0.00 |
| TRINITY_XP_00299 | hypothet  | Volvox_carteri      | 54.80 | 0.00 |
| TRINITY_KXZ45454 | hypothet  | Gonium_pectorale    | 54.80 | 0.00 |
| TRINITY_XP_02437 | ATP-bin   | Physcomitrella_pate | 54.80 | 0.00 |
| TRINITY_XP_02791 | LOW QUAI  | Vigna_unguiculata   | 54.80 | 0.00 |
| TRINITY_PRW57597 | Diphthar  | Chlorella_sorokinia | 54.80 | 0.00 |
| TRINITY_GAX80591 | hypothet  | Chlamydomonas_eusti | 54.80 | 0.00 |
| TRINITY_XP_01868 | PREDICTI  | Musa_acuminata      | 54.80 | 0.00 |
| TRINITY_GAQ89084 | Electror  | Klebsormidium_niten | 54.80 | 0.00 |
| TRINITY_XP_00294 | hypothet  | Volvox_carteri      | 54.80 | 0.00 |
| TRINITY_PTQ49307 | hypothet  | Marchantia_polymorp | 54.80 | 0.00 |
| TRINITY_XP_00564 | PTPA-don  | Coccomyxa_subellips | 54.80 | 0.00 |
| TRINITY_PNH04838 | Cyclin-   | Tetrabaena_socialis | 54.80 | 0.00 |
| TRINITY_PNW88982 | hypothet  | Chlamydomonas_reinh | 54.80 | 0.00 |
| TRINITY_PSR92819 | Cell di   | Actinidia_chinensis | 54.80 | 0.00 |
| TRINITY_KXZ4449  | (hypothet | Gonium_pectorale    | 54.80 | 0.00 |
| TRINITY_PNW7715  | (hypothet | Chlamydomonas_reinh | 54.80 | 0.00 |
| TRINITY_POC8M8.1 | RecName:  | Zea_mays            | 54.80 | 0.00 |
| TRINITY_GBG86589 | hypothet  | Chara_braunii       | 54.80 | 0.00 |
| TRINITY_XP_00169 | predict   | Chlamydomonas_reinh | 54.80 | 0.00 |
| TRINITY_GAX85698 | hypothet  | Chlamydomonas_eusti | 54.80 | 0.00 |
| TRINITY_XP_00294 | hypothet  | Volvox_carteri      | 54.80 | 0.00 |
| TRINITY_ANE10534 | carbonic  | Dunaliella_salina   | 54.80 | 0.00 |
| TRINITY_GAX77699 | hypothet  | Chlamydomonas_eusti | 54.80 | 0.00 |
| TRINITY_GAX85694 | hypothet  | Chlamydomonas_eusti | 54.80 | 0.00 |
| TRINITY_XP_01029 | CBL-int   | Brachypodium_distac | 54.80 | 0.00 |
| TRINITY_XP_00299 | hypothet  | Volvox_carteri      | 54.80 | 0.00 |
| TRINITY_GAX73547 | hypothet  | Chlamydomonas_eusti | 54.80 | 0.00 |
| TRINITY_GAX81946 | hypothet  | Chlamydomonas_eusti | 54.80 | 0.00 |
| TRINITY_GBF99906 | hypothet  | Raphidocelis_subcap | 54.80 | 0.00 |
| TRINITY_GAX7415  | (hypothet | Chlamydomonas_eusti | 54.80 | 0.00 |
| TRINITY_GAX73222 | hypothet  | Chlamydomonas_eusti | 54.80 | 0.00 |
| TRINITY_PNW73224 | hypothet  | Chlamydomonas_reinh | 54.70 | 0.00 |
| TRINITY_XP_01919 | PREDICTI  | Ipomoea_nil         | 54.70 | 0.00 |
| TRINITY_ESR53301 | hypothet  | Citrus_clementina   | 54.70 | 0.00 |
| TRINITY_GAQ79324 | malonyl-  | Klebsormidium_niten | 54.70 | 0.00 |

|                  |          |                     |       |      |
|------------------|----------|---------------------|-------|------|
| TRINITY_PON6631  | Coatome  | Trema_orientale     | 54.70 | 0.00 |
| TRINITY_XP_00584 | hypothet | Chlorella_variabili | 54.70 | 0.00 |
| TRINITY_XP_02392 | uncharac | Quercus_suber       | 54.70 | 0.00 |
| TRINITY_XP_02388 | SWI/SNF  | Quercus_suber       | 54.70 | 0.00 |
| TRINITY_EEF24733 | pterin-4 | Ricinus_communis    | 54.70 | 0.00 |
| TRINITY_GBF99186 | DNA misn | Raphidocelis_subcap | 54.70 | 0.00 |
| TRINITY_PWA38896 | dual sp  | Artemisia_annua     | 54.70 | 0.00 |
| TRINITY_PNW71185 | hypothet | Chlamydomonas_reinh | 54.70 | 0.00 |
| TRINITY_GAQ81675 | OTU-like | Klebsormidium_niten | 54.70 | 0.00 |
| TRINITY_GAX74027 | hypothet | Chlamydomonas_eusti | 54.70 | 0.00 |
| TRINITY_XP_02436 | probable | Physcomitrella_pate | 54.70 | 0.00 |
| TRINITY_ABK26321 | unknown  | Picea_sitchensis    | 54.70 | 0.00 |
| TRINITY_XP_00565 | AAA-ATP  | Coccomyxa_subellips | 54.70 | 0.00 |
| TRINITY_XP_00169 | predict  | Chlamydomonas_reinh | 54.70 | 0.00 |
| TRINITY_CCF17540 | RabE GTM | Micrasterias_dentic | 54.70 | 0.00 |
| TRINITY_EPS74505 | hypothet | Genlisea_aurea      | 54.70 | 0.00 |
| TRINITY_OWM67047 | hypothet | Punica_granatum     | 54.70 | 0.00 |
| TRINITY_GBF93265 | hypothet | Raphidocelis_subcap | 54.70 | 0.00 |
| TRINITY_PRW45012 | serine t | Chlorella_sorokinia | 54.70 | 0.00 |
| TRINITY_XP_00295 | hypothet | Volvox_carteri      | 54.70 | 0.00 |
| TRINITY_XP_01656 | PREDICTI | Capsicum_annuum     | 54.70 | 0.00 |
| TRINITY_PNW81005 | hypothet | Chlamydomonas_reinh | 54.70 | 0.00 |
| TRINITY_PNW77243 | hypothet | Chlamydomonas_reinh | 54.70 | 0.00 |
| TRINITY_XP_01389 | hypothet | Monoraphidium_negle | 54.70 | 0.00 |
| TRINITY_XP_01452 | ribosom  | Vigna_radiata       | 54.70 | 0.00 |
| TRINITY_XP_01846 | PREDICTI | Raphanus_sativus    | 54.70 | 0.00 |
| TRINITY_PRW33067 | glycolat | Chlorella_sorokinia | 54.70 | 0.00 |
| TRINITY_GAX80837 | hypothet | Chlamydomonas_eusti | 54.70 | 0.00 |
| TRINITY_AXU98877 | hypothet | Brassica_juncea     | 54.70 | 0.00 |
| TRINITY_XP_00170 | predict  | Chlamydomonas_reinh | 54.70 | 0.00 |
| TRINITY_GAX77635 | hypothet | Chlamydomonas_eusti | 54.70 | 0.00 |
| TRINITY_GAX78237 | hypothet | Chlamydomonas_eusti | 54.70 | 0.00 |
| TRINITY_KXZ53452 | hypothet | Gonium_pectorale    | 54.70 | 0.00 |
| TRINITY_GAX82705 | hypothet | Chlamydomonas_eusti | 54.70 | 0.00 |
| TRINITY_PNW70201 | hypothet | Chlamydomonas_reinh | 54.70 | 0.00 |
| TRINITY_PSC67974 | nucleol  | Micractinium_conduc | 54.70 | 0.00 |
| TRINITY_KXZ52074 | hypothet | Gonium_pectorale    | 54.70 | 0.00 |
| TRINITY_PNW82784 | hypothet | Chlamydomonas_reinh | 54.70 | 0.00 |
| TRINITY_PNH00072 | hypothet | Tetrabaena_socialis | 54.70 | 0.00 |
| TRINITY_XP_01023 | phosphat | Brachypodium_distac | 54.70 | 0.00 |
| TRINITY_PSC67067 | Retrovir | Micractinium_conduc | 54.70 | 0.00 |
| TRINITY_PNH11046 | Thiol-d  | Tetrabaena_socialis | 54.70 | 0.00 |
| TRINITY_GAQ84628 | putativ  | Klebsormidium_niten | 54.70 | 0.00 |
| TRINITY_XP_00294 | hypothet | Volvox_carteri      | 54.70 | 0.00 |
| TRINITY_KZV15216 | citrate  | Dorcoceras_hygromet | 54.70 | 0.00 |
| TRINITY_GAX75584 | hypothet | Chlamydomonas_eusti | 54.70 | 0.00 |
| TRINITY_PNW75538 | hypothet | Chlamydomonas_reinh | 54.70 | 0.00 |
| TRINITY_GAQ81772 | 26S prot | Klebsormidium_niten | 54.70 | 0.00 |
| TRINITY_KXZ55983 | hypothet | Gonium_pectorale    | 54.70 | 0.00 |
| TRINITY_XP_00169 | cytochr  | Chlamydomonas_reinh | 54.70 | 0.00 |
| TRINITY_PNW86247 | hypothet | Chlamydomonas_reinh | 54.70 | 0.00 |
| TRINITY_GAX80571 | hypothet | Chlamydomonas_eusti | 54.70 | 0.00 |
| TRINITY_OAY66306 | Oryzain  | Ananas_comosus      | 54.70 | 0.00 |
| TRINITY_GBG83673 | hypothet | Chara_braunii       | 54.70 | 0.00 |
| TRINITY_GAQ82709 | Dyneins  | Klebsormidium_niten | 54.70 | 0.00 |
| TRINITY_ACB28472 | polyprot | Ananas_comosus      | 54.70 | 0.00 |
| TRINITY_GAX84617 | hypothet | Chlamydomonas_eusti | 54.70 | 0.00 |
| TRINITY_XP_02058 | heterog  | Phalaenopsis_equest | 54.70 | 0.00 |
| TRINITY_KMZ62684 | Phosphol | Zostera_marina      | 54.70 | 0.00 |
| TRINITY_RLM79096 | transcri | Panicum_miliaceum   | 54.60 | 0.00 |
| TRINITY_XP_01006 | PREDICTI | Eucalyptus_grandis  | 54.60 | 0.00 |
| TRINITY_XP_02059 | polyubic | Phalaenopsis_equest | 54.60 | 0.00 |
| TRINITY_XP_01925 | PREDICTI | Nicotiana_attenuata | 54.60 | 0.00 |
| TRINITY_XP_00838 | PREDICTI | Malus_domestica     | 54.60 | 0.00 |
| TRINITY_PNH10165 | Serine   | Tetrabaena_socialis | 54.60 | 0.00 |
| TRINITY_XP_00170 | expansir | Chlamydomonas_reinh | 54.60 | 0.00 |

|                  |                             |       |      |
|------------------|-----------------------------|-------|------|
| TRINITY_GAX8369  | hypothetChlamydomonas_eusti | 54.60 | 0.00 |
| TRINITY_GBG59351 | hypothetChara_braunii       | 54.60 | 0.00 |
| TRINITY_XP_0238  | acyl-CoQQuercus_suber       | 54.60 | 0.00 |
| TRINITY_XP_0238  | GTP cyclQuercus_suber       | 54.60 | 0.00 |
| TRINITY_XP_0016  | homoseriChlamydomonas_reinh | 54.60 | 0.00 |
| TRINITY_KXZ5162  | hypothetGonium_pectorale    | 54.60 | 0.00 |
| TRINITY_GAX8536  | hypothetChlamydomonas_eusti | 54.60 | 0.00 |
| TRINITY_KXZ5645  | hypothetGonium_pectorale    | 54.60 | 0.00 |
| TRINITY_PNW7354  | hypothetChlamydomonas_reinh | 54.60 | 0.00 |
| TRINITY_PNW8071  | hypothetChlamydomonas_reinh | 54.60 | 0.00 |
| TRINITY_XP_0016  | cytochrChlamydomonas_reinh  | 54.60 | 0.00 |
| TRINITY_GAX7355  | hypothetChlamydomonas_eusti | 54.60 | 0.00 |
| TRINITY_PNW7220  | hypothetChlamydomonas_reinh | 54.60 | 0.00 |
| TRINITY_PNH09621 | RegulatTetrabaena_socialis  | 54.60 | 0.00 |
| TRINITY_OIW1138  | hypothetLupinus_angustifoli | 54.60 | 0.00 |
| TRINITY_XP_0041  | PREDICTICucumis_sativus     | 54.60 | 0.00 |
| TRINITY_KXZ5386  | hypothetGonium_pectorale    | 54.60 | 0.00 |
| TRINITY_XP_0068  | DEAD-boAmborella_trichopod  | 54.60 | 0.00 |
| TRINITY_GBF9091  | hypothetRaphidocelis_subcap | 54.60 | 0.00 |
| TRINITY_GAX7906  | hypothetChlamydomonas_eusti | 54.60 | 0.00 |
| TRINITY_KXZ5424  | hypothetGonium_pectorale    | 54.60 | 0.00 |
| TRINITY_KXZ5686  | hypothetGonium_pectorale    | 54.60 | 0.00 |
| TRINITY_BAK05241 | predictHordeum_vulgare      | 54.60 | 0.00 |
| TRINITY_XP_0138  | hypothetMonoraphidium_negle | 54.60 | 0.00 |
| TRINITY_PNW8318  | hypothetChlamydomonas_reinh | 54.60 | 0.00 |
| TRINITY_OAE2517  | hypothetMarchantia_polymorp | 54.60 | 0.00 |
| TRINITY_XP_0042  | PREDICTIFragaria_vesca      | 54.50 | 0.00 |
| TRINITY_GAQ8323  | hypothetKlebsormidium_niten | 54.50 | 0.00 |
| TRINITY_PIN2279  | Cyclin  Handroanthus_impeti | 54.50 | 0.00 |
| TRINITY_EPS7415  | hypothetGenlisea_aurea      | 54.50 | 0.00 |
| TRINITY_OVA0416  | MitochorMacleaya_cordata    | 54.50 | 0.00 |
| TRINITY_GBG6150  | hypothetChara_braunii       | 54.50 | 0.00 |
| TRINITY_XP_0016  | ATP-depChlamydomonas_reinh  | 54.50 | 0.00 |
| TRINITY_XP_0105  | PREDICTITarenaya_hasslerian | 54.50 | 0.00 |
| TRINITY_XP_0263  | probablePapaver_somniferum  | 54.50 | 0.00 |
| TRINITY_RWW9113  | hypothetEnsete_ventricosum  | 54.50 | 0.00 |
| TRINITY_GAX7396  | hypothetChlamydomonas_eusti | 54.50 | 0.00 |
| TRINITY_GAX7784  | hypothetChlamydomonas_eusti | 54.50 | 0.00 |
| TRINITY_GAX7750  | hypothetChlamydomonas_eusti | 54.50 | 0.00 |
| TRINITY_XP_0016  | predictChlamydomonas_reinh  | 54.50 | 0.00 |
| TRINITY_GBF96601 | hypothetRaphidocelis_subcap | 54.50 | 0.00 |
| TRINITY_GAX8431  | hypothetChlamydomonas_eusti | 54.50 | 0.00 |
| TRINITY_KDO6676  | hypothetCitrus_sinensis     | 54.50 | 0.00 |
| TRINITY_XP_0016  | voltage-Chlamydomonas_reinh | 54.50 | 0.00 |
| TRINITY_XP_0023  | xylulosPopulus_trichocarpa  | 54.50 | 0.00 |
| TRINITY_KXZ5025  | hypothetGonium_pectorale    | 54.50 | 0.00 |
| TRINITY_GBF9253  | hypothetRaphidocelis_subcap | 54.50 | 0.00 |
| TRINITY_XP_0191  | PREDICTI Ipomoea_nil        | 54.50 | 0.00 |
| TRINITY_KMS6524  | hypothetBeta_vulgaris       | 54.50 | 0.00 |
| TRINITY_GAX8091  | hypothetChlamydomonas_eusti | 54.50 | 0.00 |
| TRINITY_KXZ41301 | hypothetGonium_pectorale    | 54.50 | 0.00 |
| TRINITY_XP_0029  | hypothetVolvox_carteri      | 54.50 | 0.00 |
| TRINITY_XP_0238  | 40S ribQuercus_suber        | 54.50 | 0.00 |
| TRINITY_XP_0245  | ubiquitiSelaginella_moellen | 54.50 | 0.00 |
| TRINITY_XP_0029  | hypothetVolvox_carteri      | 54.50 | 0.00 |
| TRINITY_XP_0058  | hypothetChlorella_variabili | 54.50 | 0.00 |
| TRINITY_XP_0029  | hypothetVolvox_carteri      | 54.50 | 0.00 |
| TRINITY_XP_0058  | hypothetChlorella_variabili | 54.50 | 0.00 |
| TRINITY_PNW7064  | hypothetChlamydomonas_reinh | 54.50 | 0.00 |
| TRINITY_GAX7817  | hypothetChlamydomonas_eusti | 54.50 | 0.00 |
| TRINITY_GAX7326  | hypothetChlamydomonas_eusti | 54.50 | 0.00 |
| TRINITY_PNW8879  | hypothetChlamydomonas_reinh | 54.50 | 0.00 |
| TRINITY_GAX7362  | hypothetChlamydomonas_eusti | 54.50 | 0.00 |
| TRINITY_GAX7674  | hypothetChlamydomonas_eusti | 54.50 | 0.00 |
| TRINITY_GAX8226  | hypothetChlamydomonas_eusti | 54.50 | 0.00 |
| TRINITY_GAX7290  | hypothetChlamydomonas_eusti | 54.50 | 0.00 |

|                          |                        |       |      |
|--------------------------|------------------------|-------|------|
| TRINITY_RLM57969E3 ubiq  | Panicum_miliaceum      | 54.50 | 0.00 |
| TRINITY_XP_00565nucleoti | Coccomyxa_subellips    | 54.50 | 0.00 |
| TRINITY_KXZ47501hypothet | Gonium_pectorale       | 54.50 | 0.00 |
| TRINITY_PNW72102hypothet | Chlamydomonas_reinh    | 54.50 | 0.00 |
| TRINITY_RWR73681putativ  | Cinnamomum_micranth    | 54.50 | 0.00 |
| TRINITY_GAX85008hypothet | Chlamydomonas_eusti    | 54.50 | 0.00 |
| TRINITY_RQL81462hypothet | Brassica_cretica       | 54.50 | 0.00 |
| TRINITY_XP_00564hypothet | Coccomyxa_subellips    | 54.50 | 0.00 |
| TRINITY_CAI84899putativ  | Medicago_sativa        | 54.50 | 0.00 |
| TRINITY_XP_0258(nifU-li) | Panicum_hallii         | 54.50 | 0.00 |
| TRINITY_PNW73952hypothet | Chlamydomonas_reinh    | 54.50 | 0.00 |
| TRINITY_GAX82134hypothet | Chlamydomonas_eusti    | 54.50 | 0.00 |
| TRINITY_GAX76677hypothet | Chlamydomonas_eusti    | 54.50 | 0.00 |
| TRINITY_PNH04763Protein  | Tetrabaena_socialis    | 54.50 | 0.00 |
| TRINITY_XP_00295hypothet | Volvox_carteri         | 54.50 | 0.00 |
| TRINITY_GAX80212hypothet | Chlamydomonas_eusti    | 54.50 | 0.00 |
| TRINITY_PNW84435hypothet | Chlamydomonas_reinh    | 54.50 | 0.00 |
| TRINITY_GAX79886hypothet | Chlamydomonas_eusti    | 54.50 | 0    |
| TRINITY_AGB85039hypothet | Auxenochlorella_pro    | 54.50 | 0.00 |
| TRINITY_EFJ34935hypothet | Selaginella_moellen    | 54.40 | 0.00 |
| TRINITY_XP_00231CBL-int  | Populus_trichocarpa    | 54.40 | 0.00 |
| TRINITY_VDC60481unnamed  | Brassica_rapa          | 54.40 | 0.00 |
| TRINITY_GBF9163(alanine  | Raphidocelis_subcap    | 54.40 | 0.00 |
| TRINITY_GAQ78755NADH-cyt | Klebsormidium_niten    | 54.40 | 0.00 |
| TRINITY_XP_02391ATP-dep  | Quercus_suber          | 54.40 | 0.00 |
| TRINITY_GBG83125hypothet | Chara_braunii          | 54.40 | 0.00 |
| TRINITY_XP_02452kinesin- | Selaginella_moellen    | 54.40 | 0.00 |
| TRINITY_XP_0025(predict  | Micromonas_commoda     | 54.40 | 0.00 |
| TRINITY_KMS94501hypothet | Beta_vulgaris          | 54.40 | 0.00 |
| TRINITY_GAQ87476P-type   | Klebsormidium_niten    | 54.40 | 0.00 |
| TRINITY_GAX83512hypothet | Chlamydomonas_eusti    | 54.40 | 0.00 |
| TRINITY_KYP51015ABC trar | Cajanus_cajan          | 54.40 | 0.00 |
| TRINITY_BAJ93178predict  | Hordeum_vulgare        | 54.40 | 0.00 |
| TRINITY_GAX8361(hypothet | Chlamydomonas_eusti    | 54.40 | 0.00 |
| TRINITY_XP_00297probabl  | Selaginella_moellen    | 54.40 | 0.00 |
| TRINITY_KXZ51169hypothet | Gonium_pectorale       | 54.40 | 0.00 |
| TRINITY_XP_02273probabl  | Durio_zibethinus       | 54.40 | 0.00 |
| TRINITY_XP_0239(spermid  | Quercus_suber          | 54.40 | 0.00 |
| TRINITY_PNW84679hypothet | Chlamydomonas_reinh    | 54.40 | 0.00 |
| TRINITY_GAX76865hypothet | Chlamydomonas_eusti    | 54.40 | 0.00 |
| TRINITY_GAX72585hypothet | Chlamydomonas_eusti    | 54.40 | 0.00 |
| TRINITY_XP_00295hypothet | Volvox_carteri         | 54.40 | 0.00 |
| TRINITY_GAX78825hypothet | Chlamydomonas_eusti    | 54.40 | 0.00 |
| TRINITY_XP_0139(hypothet | Monoraphidium_negle    | 54.40 | 0.00 |
| TRINITY_XP_00294hypothet | Volvox_carteri         | 54.40 | 0.00 |
| TRINITY_KXZ43161hypothet | Gonium_pectorale       | 54.40 | 0.00 |
| TRINITY_PSC68894RNA met  | Micractinium_conduc    | 54.40 | 0.00 |
| TRINITY_GAX76066hypothet | Chlamydomonas_eusti    | 54.40 | 0.00 |
| TRINITY_PSC7284940S rib  | Micractinium_conduc    | 54.40 | 0.00 |
| TRINITY_KXZ42153hypothet | Gonium_pectorale       | 54.40 | 0.00 |
| TRINITY_XP_00169predict  | Chlamydomonas_reinh    | 54.40 | 0.00 |
| TRINITY_XP_00169predict  | Chlamydomonas_reinh    | 54.40 | 0.00 |
| TRINITY_PRW57254rael     | [ClChlorella_sorokinia | 54.40 | 0.00 |
| TRINITY_GAQ85021RNase L  | Klebsormidium_niten    | 54.40 | 0.00 |
| TRINITY_XP_00169dynein   | Chlamydomonas_reinh    | 54.40 | 0.00 |
| TRINITY_XP_00295heat sh  | Volvox_carteri         | 54.40 | 0.00 |
| TRINITY_KXZ47762hypothet | Gonium_pectorale       | 54.40 | 0.00 |
| TRINITY_GAX75026hypothet | Chlamydomonas_eusti    | 54.40 | 0.00 |
| TRINITY_KXZ56702hypothet | Gonium_pectorale       | 54.40 | 0.00 |
| TRINITY_XP_02283Alternat | Ostreococcus_tauri     | 54.40 | 0.00 |
| TRINITY_PNH06873hypothet | Tetrabaena_socialis    | 54.40 | 0.00 |
| TRINITY_XP_00169predict  | Chlamydomonas_reinh    | 54.40 | 0.00 |
| TRINITY_GBF97366hypothet | Raphidocelis_subcap    | 54.40 | 0.00 |
| TRINITY_PNW75945hypothet | Chlamydomonas_reinh    | 54.40 | 0.00 |
| TRINITY_GAX81164hypothet | Chlamydomonas_eusti    | 54.40 | 0.00 |
| TRINITY_GAX83862hypothet | Chlamydomonas_eusti    | 54.40 | 0.00 |

|                 |                              |       |      |
|-----------------|------------------------------|-------|------|
| TRINITY_PNR5544 | hypothetPhyscomitrella_pate  | 54.40 | 0.00 |
| TRINITY_PSC7622 | UPF0759 Micractinium_conduc  | 54.40 | 0.00 |
| TRINITY_EPS7471 | hypothetGenlisea_aurea       | 54.40 | 0.00 |
| TRINITY_XP_0058 | hypothetChlorella_variabili  | 54.40 | 0.00 |
| TRINITY_XP_0016 | predicteChlamydomonas_reinh  | 54.40 | 0.00 |
| TRINITY_XP_0029 | hypothetVolvox_carteri       | 54.40 | 0.00 |
| TRINITY_GAX8312 | hypothetChlamydomonas_eusti  | 54.40 | 0.00 |
| TRINITY_GAX7781 | hypothetChlamydomonas_eusti  | 54.40 | 0.00 |
| TRINITY_KXZ5122 | hypothetGonium_pectorale     | 54.40 | 0.00 |
| TRINITY_PRQ2955 | putativeRosa_chinensis       | 54.40 | 0.00 |
| TRINITY_GAX7379 | hypothetChlamydomonas_eusti  | 54.40 | 0.00 |
| TRINITY_XP_0029 | 43'5'-cycVolvox_carteri      | 54.40 | 0.00 |
| TRINITY_GAX7382 | hypothetChlamydomonas_eusti  | 54.40 | 0.00 |
| TRINITY_XP_0014 | predicteOstreococcus_sp._'1  | 54.40 | 0.00 |
| TRINITY_XP_0271 | proteasCoffea_arabica        | 54.30 | 0.00 |
| TRINITY_XP_0029 | hypothetVolvox_carteri       | 54.30 | 0.00 |
| TRINITY_XP_0209 | ABC trarArachis_ipaensis     | 54.30 | 0.00 |
| TRINITY_XP_0238 | phosphoçQuercus_suber        | 54.30 | 0.00 |
| TRINITY_PIN0870 | hypothetHandroanthus_impeti  | 54.30 | 0.00 |
| TRINITY_XP_0128 | PREDICTIErythranthe_guttata  | 54.30 | 0.00 |
| TRINITY_XP_0104 | PREDICTICamelina_sativa      | 54.30 | 0.00 |
| TRINITY_XP_0239 | ubiquitiQuercus_suber        | 54.30 | 0.00 |
| TRINITY_PRW1840 | glucosanChlorella_sorokinia  | 54.30 | 0.00 |
| TRINITY_XP_0066 | PREDICTIOryza_brachyantha    | 54.30 | 0.00 |
| TRINITY_CDY6360 | (BnaUnng(Brassica_napus      | 54.30 | 0.00 |
| TRINITY_KDD7517 | SNF2 fanHelicosporidium_sp.  | 54.30 | 0.00 |
| TRINITY_AXU9887 | hypothetBrassica_junceae     | 54.30 | 0.00 |
| TRINITY_ACF7937 | unknown Zea_mays             | 54.30 | 0.00 |
| TRINITY_XP_0105 | PREDICTITarenaya_hasslerian  | 54.30 | 0.00 |
| TRINITY_KZN0401 | (hypothetDaucus_carota       | 54.30 | 0.00 |
| TRINITY_GBF9872 | (cytochrçRaphidocelis_subcap | 54.30 | 0.00 |
| TRINITY_KRH1778 | (hypothetGlycine_max         | 54.30 | 0.00 |
| TRINITY_KXZ4200 | (hypothetGonium_pectorale    | 54.30 | 0.00 |
| TRINITY_GAX8137 | hypothetChlamydomonas_eusti  | 54.30 | 0.00 |
| TRINITY_XP_0056 | 4P25-alpçCoccomyxa_subellips | 54.30 | 0.00 |
| TRINITY_PNW7382 | (hypothetChlamydomonas_reinh | 54.30 | 0.00 |
| TRINITY_KXZ5133 | (hypothetGonium_pectorale    | 54.30 | 0.00 |
| TRINITY_AAO7355 | reverse-Chlamydomonas_reinh  | 54.30 | 0.00 |
| TRINITY_PRW6139 | 1dnaJ-liçChlorella_sorokinia | 54.30 | 0.00 |
| TRINITY_PRW5941 | 2RNA exorChlorella_sorokinia | 54.30 | 0.00 |
| TRINITY_PNW7970 | (hypothetChlamydomonas_reinh | 54.30 | 0.00 |
| TRINITY_ACF8176 | unknown Zea_mays             | 54.30 | 0.00 |
| TRINITY_BAK0277 | 8predicteHordeum_vulgare     | 54.30 | 0.00 |
| TRINITY_XP_0205 | 3serine/tAmborella_trichopod | 54.30 | 0.00 |
| TRINITY_PNW7018 | (hypothetChlamydomonas_reinh | 54.30 | 0.00 |
| TRINITY_YP_0094 | (hypothetHaematococcus_lacus | 54.30 | 0.00 |
| TRINITY_KXZ5544 | (ACK1 prçGonium_pectorale    | 54.30 | 0.00 |
| TRINITY_XP_0227 | 4ras-relçDurio_zibethinus    | 54.30 | 0.00 |
| TRINITY_GBF8769 | (hypothetRaphidocelis_subcap | 54.30 | 0.00 |
| TRINITY_EOY2678 | 1ATP binçTheobroma_cacao     | 54.30 | 0.00 |
| TRINITY_XP_0220 | 3ABC trarHelianthus_annuus   | 54.30 | 0.00 |
| TRINITY_XP_0029 | hypothetVolvox_carteri       | 54.30 | 0.00 |
| TRINITY_PNW8466 | 8hypothetChlamydomonas_reinh | 54.30 | 0.00 |
| TRINITY_XP_0029 | hypothetVolvox_carteri       | 54.30 | 0.00 |
| TRINITY_GAX7370 | 8hypothetChlamydomonas_eusti | 54.30 | 0.00 |
| TRINITY_KXZ5028 | (hypothetGonium_pectorale    | 54.30 | 0.00 |
| TRINITY_GAX7739 | (hypothetChlamydomonas_eusti | 54.30 | 0.00 |
| TRINITY_GAQ9180 | 2ATP-depçKlebsormidium_niten | 54.30 | 0.00 |
| TRINITY_XP_0238 | 8ubiquitiQuercus_suber       | 54.30 | 0.00 |
| TRINITY_GAX7542 | (hypothetChlamydomonas_eusti | 54.30 | 0.00 |
| TRINITY_XP_0098 | (PREDICTINicotiana_sylvestri | 54.30 | 0.00 |
| TRINITY_PNW7609 | 4hypothetChlamydomonas_reinh | 54.30 | 0.00 |
| TRINITY_GAX8564 | (hypothetChlamydomonas_eusti | 54.30 | 0.00 |
| TRINITY_KXZ5161 | 2hypothetGonium_pectorale    | 54.30 | 0.00 |
| TRINITY_GAX8153 | (hypothetChlamydomonas_eusti | 54.30 | 0.00 |
| TRINITY_GAX7787 | 1hypothetChlamydomonas_eusti | 54.30 | 0.00 |

|                  |           |                     |       |      |
|------------------|-----------|---------------------|-------|------|
| TRINITY_XP_00294 | hypothet  | Volvox_carteri      | 54.30 | 0.00 |
| TRINITY_GAX84605 | hypothet  | Chlamydomonas_eusti | 54.30 | 0.00 |
| TRINITY_GAX77008 | hypothet  | Chlamydomonas_eusti | 54.30 | 0.00 |
| TRINITY_GBF92133 | kinase    | Raphidocelis_subcap | 54.30 | 0.00 |
| TRINITY_GAQ85389 | clathrin  | Klebsormidium_niten | 54.30 | 0.00 |
| TRINITY_GAQ93588 | putativ   | Klebsormidium_niten | 54.30 | 0.00 |
| TRINITY_PKA55918 | 60S rib   | Apostasia_shenzheni | 54.30 | 0.00 |
| TRINITY_GAX75810 | hypothet  | Chlamydomonas_eusti | 54.20 | 0.00 |
| TRINITY_XP_02067 | peroxis   | Dendrobium_catenatu | 54.20 | 0.00 |
| TRINITY_XP_00838 | PREDICT   | Malus_domestica     | 54.20 | 0.00 |
| TRINITY_XP_00250 | predict   | Micromonas_commoda  | 54.20 | 0.00 |
| TRINITY_PVH66381 | hypothet  | Panicum_hallii      | 54.20 | 0.00 |
| TRINITY_OAE25968 | hypothet  | Marchantia_polymorp | 54.20 | 0.00 |
| TRINITY_XP_00295 | hypothet  | Volvox_carteri      | 54.20 | 0.00 |
| TRINITY_NP_00134 | ABC trar  | Zea_mays            | 54.20 | 0.00 |
| TRINITY_GAQ78994 | Replicat  | Klebsormidium_niten | 54.20 | 0.00 |
| TRINITY_KXZ48630 | hypothet  | Gonium_pectorale    | 54.20 | 0.00 |
| TRINITY_OWM76381 | hypothet  | Punica_granatum     | 54.20 | 0.00 |
| TRINITY_GAQ87274 | ABC trar  | Klebsormidium_niten | 54.20 | 0.00 |
| TRINITY_GAX73504 | hypothet  | Chlamydomonas_eusti | 54.20 | 0.00 |
| TRINITY_XP_01389 | hypothet  | Monoraphidium_negle | 54.20 | 0.00 |
| TRINITY_BAK02778 | predict   | Hordeum_vulgare     | 54.20 | 0.00 |
| TRINITY_XP_00169 | predict   | Chlamydomonas_reinh | 54.20 | 0.00 |
| TRINITY_XP_02437 | DNA dam   | Physcomitrella_pate | 54.20 | 0.00 |
| TRINITY_XP_02390 | probable  | Quercus_suber       | 54.20 | 0.00 |
| TRINITY_XP_00295 | hypothet  | Volvox_carteri      | 54.20 | 0.00 |
| TRINITY_XP_02185 | 60S rib   | Spinacia_oleracea   | 54.20 | 0.00 |
| TRINITY_XP_02392 | probable  | Quercus_suber       | 54.20 | 0.00 |
| TRINITY_GBF95179 | hypothet  | Raphidocelis_subcap | 54.20 | 0.00 |
| TRINITY_XP_02642 | ABC trar  | Papaver_somniferum  | 54.20 | 0.00 |
| TRINITY_XP_01390 | hypothet  | Monoraphidium_negle | 54.20 | 0.00 |
| TRINITY_XP_00295 | hypothet  | Volvox_carteri      | 54.20 | 0.00 |
| TRINITY_EFJ21285 | hypothet  | Selaginella_moellen | 54.20 | 0.00 |
| TRINITY_KXZ52088 | hypothet  | Gonium_pectorale    | 54.20 | 0.00 |
| TRINITY_XP_02453 | nascent   | Selaginella_moellen | 54.20 | 0.00 |
| TRINITY_XP_00564 | hypothet  | Coccomyxa_subellips | 54.20 | 0.00 |
| TRINITY_XP_00295 | hypothet  | Volvox_carteri      | 54.20 | 0.00 |
| TRINITY_GBF93167 | hypothet  | Raphidocelis_subcap | 54.20 | 0.00 |
| TRINITY_GAX77643 | hypothet  | Chlamydomonas_eusti | 54.20 | 0.00 |
| TRINITY_XP_00169 | adenylyl  | Chlamydomonas_reinh | 54.20 | 0.00 |
| TRINITY_XP_00170 | (ATM/ATR- | Chlamydomonas_reinh | 54.20 | 0.00 |
| TRINITY_KQJ95975 | hypothet  | Brachypodium_distac | 54.20 | 0.00 |
| TRINITY_GAX80078 | hypothet  | Chlamydomonas_eusti | 54.20 | 0.00 |
| TRINITY_KXZ51116 | hypothet  | Gonium_pectorale    | 54.20 | 0.00 |
| TRINITY_XP_02453 | tRNA ps   | Selaginella_moellen | 54.20 | 0.00 |
| TRINITY_GAX78096 | hypothet  | Chlamydomonas_eusti | 54.20 | 0.00 |
| TRINITY_XP_00169 | guanylat  | Chlamydomonas_reinh | 54.20 | 0.00 |
| TRINITY_GAX77871 | hypothet  | Chlamydomonas_eusti | 54.20 | 0.00 |
| TRINITY_XP_00169 | intrafl   | Chlamydomonas_reinh | 54.20 | 0.00 |
| TRINITY_GAX78176 | hypothet  | Chlamydomonas_eusti | 54.20 | 0.00 |
| TRINITY_PSC76533 | NAD-depe  | Micractinium_conduc | 54.20 | 0.00 |
| TRINITY_XP_02776 | uncharac  | Solanum_pennellii   | 54.20 | 0.00 |
| TRINITY_KXZ55522 | hypothet  | Gonium_pectorale    | 54.20 | 0.00 |
| TRINITY_EEF26602 | tRNA (5-  | Ricinus_communis    | 54.10 | 0.00 |
| TRINITY_EFJ33025 | hypothet  | Selaginella_moellen | 54.10 | 0.00 |
| TRINITY_EFH70169 | hypothet  | Arabidopsis_lyrata  | 54.10 | 0.00 |
| TRINITY_GBG64759 | hypothet  | Chara_braunii       | 54.10 | 0.00 |
| TRINITY_OEL16707 | 1,4-alf   | Dichanthelium_oligo | 54.10 | 0.00 |
| TRINITY_XP_00357 | isocitr   | Brachypodium_distac | 54.10 | 0.00 |
| TRINITY_XP_00250 | predict   | Micromonas_commoda  | 54.10 | 0.00 |
| TRINITY_EFJ21602 | hypothet  | Selaginella_moellen | 54.10 | 0.00 |
| TRINITY_PRQ41512 | putativ   | Rosa_chinensis      | 54.10 | 0.00 |
| TRINITY_GBF96202 | hypothet  | Raphidocelis_subcap | 54.10 | 0.00 |
| TRINITY_XP_00941 | PREDICT   | Musa_acuminata      | 54.10 | 0.00 |
| TRINITY_XP_02389 | short/b   | Quercus_suber       | 54.10 | 0.00 |
| TRINITY_PNW70032 | hypothet  | Chlamydomonas_reinh | 54.10 | 0.00 |

|                                              |       |      |
|----------------------------------------------|-------|------|
| TRINITY_XP_02496ubiquitinCynara_cardunculus  | 54.10 | 0.00 |
| TRINITY_BAK02778predicteHordeum_vulgare      | 54.10 | 0.00 |
| TRINITY_KXZ42076hypothetGonium_pectorale     | 54.10 | 0.00 |
| TRINITY_XP_00294hypothetVolvox_carteri       | 54.10 | 0.00 |
| TRINITY_PNW72602hypothetChlamydomonas_reinh  | 54.10 | 0.00 |
| TRINITY_XP_023904-aminokQuercus_suber        | 54.10 | 0.00 |
| TRINITY_XP_00170(sodium/Chlamydomonas_reinh  | 54.10 | 0.00 |
| TRINITY_KMZ63959GTP-binZostera_marina        | 54.10 | 0.00 |
| TRINITY_XP_00564hypothetCoccomyxa_subellips  | 54.10 | 0.00 |
| TRINITY_GAX76597hypothetChlamydomonas_eusti  | 54.10 | 0.00 |
| TRINITY_AKT95177zeaxantHaematococcus_lacus   | 54.10 | 0.00 |
| TRINITY_GAX85581hypothetChlamydomonas_eusti  | 54.10 | 0.00 |
| TRINITY_PNW75475hypothetChlamydomonas_reinh  | 54.10 | 0.00 |
| TRINITY_PNH12171hypothetTetrabaena_socialis  | 54.10 | 0.00 |
| TRINITY_GBG75466hypothetChara_braunii        | 54.10 | 0.00 |
| TRINITY_XP_00295hypothetVolvox_carteri       | 54.10 | 0.00 |
| TRINITY_KXZ51728hypothetGonium_pectorale     | 54.10 | 0.00 |
| TRINITY_GAX82634hypothetChlamydomonas_eusti  | 54.10 | 0.00 |
| TRINITY_XP_00294hypothetVolvox_carteri       | 54.10 | 0.00 |
| TRINITY_XP_00294flagellVolvox_carteri        | 54.10 | 0.00 |
| TRINITY_XP_00295hypothetVolvox_carteri       | 54.10 | 0.00 |
| TRINITY_GBF90569mitochorRaphidocelis_subcap  | 54.10 | 0.00 |
| TRINITY_KXZ45846hypothetGonium_pectorale     | 54.10 | 0.00 |
| TRINITY_GBF9760426S_protRaphidocelis_subcap  | 54.10 | 0.00 |
| TRINITY_GAX78034hypothetChlamydomonas_eusti  | 54.10 | 0.00 |
| TRINITY_PNH05716hypothetTetrabaena_socialis  | 54.10 | 0.00 |
| TRINITY_POC8M8.1RecName:Zea_mays             | 54.10 | 0.00 |
| TRINITY_XP_00169predicteChlamydomonas_reinh  | 54.10 | 0.00 |
| TRINITY_PNH04560(EthylenTetrabaena_socialis  | 54.10 | 0.00 |
| TRINITY_GAX84399hypothetChlamydomonas_eusti  | 54.10 | 0.00 |
| TRINITY_GAX7648(hypothetChlamydomonas_eusti  | 54.10 | 0.00 |
| TRINITY_XP_02389kinesin Quercus_suber        | 54.10 | 0.00 |
| TRINITY_GAX80914hypothetChlamydomonas_eusti  | 54.10 | 0.00 |
| TRINITY_KJB36869hypothetGossypium_raimondii  | 54.10 | 0.00 |
| TRINITY_PNW77667hypothetChlamydomonas_reinh  | 54.10 | 0.00 |
| TRINITY_GAX74234hypothetChlamydomonas_eusti  | 54.10 | 0.00 |
| TRINITY_XP_02642casein Papaver_somniferum    | 54.10 | 0.00 |
| TRINITY_GAX73813hypothetChlamydomonas_eusti  | 54.10 | 0.00 |
| TRINITY_XP_011082-oxoglSesamum_indicum       | 54.10 | 0    |
| TRINITY_XP_00295componerVolvox_carteri       | 54.10 | 0.00 |
| TRINITY_PNH08156(Protein Tetrabaena_socialis | 54.10 | 0.00 |
| TRINITY_GAX79955hypothetChlamydomonas_eusti  | 54.10 | 0.00 |
| TRINITY_PNW87119hypothetChlamydomonas_reinh  | 54.10 | 0.00 |
| TRINITY_KXZ53815hypothetGonium_pectorale     | 54.10 | 0.00 |
| TRINITY_XP_00169hypothetChlamydomonas_reinh  | 54.10 | 0.00 |
| TRINITY_PRW58628(chloropChlorella_sorokinia  | 54.10 | 0.00 |
| TRINITY_ART66851ATP binPhyllostachys_sp._K   | 54.00 | 0.00 |
| TRINITY_OAY82667MitochorAnanas_comosus       | 54.00 | 0.00 |
| TRINITY_XP_00843PREDICTHCucumis_melo         | 54.00 | 0.00 |
| TRINITY_EFJ32158hypothetSelaginella_moellen  | 54.00 | 0.00 |
| TRINITY_XP_00639tRNA (g)Eutrema_salsugineum  | 54.00 | 0.00 |
| TRINITY_XP_00295p300/CBIVolvox_carteri       | 54.00 | 0.00 |
| TRINITY_GAV6363(UCH domCephalotus_follicul   | 54.00 | 0.00 |
| TRINITY_OAE2926(hypothetMarchantia_polymorp  | 54.00 | 0.00 |
| TRINITY_GBF94205hypothetRaphidocelis_subcap  | 54.00 | 0.00 |
| TRINITY_XP_0025(radial Micromonas_commoda    | 54.00 | 0.00 |
| TRINITY_GAQ79764TryptopKlebsormidium_niten   | 54.00 | 0.00 |
| TRINITY_GAX82662hypothetChlamydomonas_eusti  | 54.00 | 0.00 |
| TRINITY_XP_00170(predicteChlamydomonas_reinh | 54.00 | 0.00 |
| TRINITY_KXZ52582hypothetGonium_pectorale     | 54.00 | 0.00 |
| TRINITY_XP_0025(radial Micromonas_commoda    | 54.00 | 0.00 |
| TRINITY_GAX86501hypothetChlamydomonas_eusti  | 54.00 | 0.00 |
| TRINITY_PRW3370(hypothetChlorella_sorokinia  | 54.00 | 0.00 |
| TRINITY_XP_00295hypothetVolvox_carteri       | 54.00 | 0.00 |
| TRINITY_GAX78157hypothetChlamydomonas_eusti  | 54.00 | 0.00 |
| TRINITY_PVH32284hypothetPanicum_hallii       | 54.00 | 0.00 |



|                  |                              |       |      |
|------------------|------------------------------|-------|------|
| TRINITY_XP_00295 | hypothetVolvox_carteri       | 54.00 | 0.00 |
| TRINITY_GAX78651 | hypothetChlamydomonas_eusti  | 54.00 | 0.00 |
| TRINITY_KXZ44943 | hypothetGonium_pectorale     | 54.00 | 0.00 |
| TRINITY_GBG61308 | hypothetChara_braunii        | 54.00 | 0.00 |
| TRINITY_GAX82673 | hypothetChlamydomonas_eusti  | 54.00 | 0.00 |
| TRINITY_KXZ44277 | hypothetGonium_pectorale     | 54.00 | 0.00 |
| TRINITY_PNW80720 | hypothetChlamydomonas_reinh  | 54.00 | 0.00 |
| TRINITY_XP_00295 | hypothetVolvox_carteri       | 54.00 | 0.00 |
| TRINITY_GAX73544 | hypothetChlamydomonas_eusti  | 54.00 | 0.00 |
| TRINITY_GBF88979 | hypothetRaphidocelis_subcap  | 54.00 | 0.00 |
| TRINITY_PNH07589 | LYR motiTetrabaena_socialis  | 54.00 | 0.00 |
| TRINITY_GAQ93561 | hypothetKlebsormidium_niten  | 54.00 | 0.00 |
| TRINITY_XP_02390 | aldo-ketQuercus_suber        | 54.00 | 0.00 |
| TRINITY_GAX85577 | hypothetChlamydomonas_eusti  | 54.00 | 0.00 |
| TRINITY_XP_02438 | DNA topcPhyscomitrella_pate  | 54.00 | 0.00 |
| TRINITY_KXZ56876 | hypothetGonium_pectorale     | 54.00 | 0.00 |
| TRINITY_KXZ52475 | hypothetGonium_pectorale     | 54.00 | 0.00 |
| TRINITY_GAX81164 | hypothetChlamydomonas_eusti  | 54.00 | 0.00 |
| TRINITY_GAX80212 | hypothetChlamydomonas_eusti  | 54.00 | 0.00 |
| TRINITY_PNW69613 | hypothetChlamydomonas_reinh  | 54.00 | 0.00 |
| TRINITY_GAX84389 | hypothetChlamydomonas_eusti  | 54.00 | 0.00 |
| TRINITY_XP_00294 | hypothetVolvox_carteri       | 54.00 | 0.00 |
| TRINITY_XP_00168 | intraflaChlamydomonas_reinh  | 54.00 | 0.00 |
| TRINITY_KXZ50024 | hypothetGonium_pectorale     | 54.00 | 0.00 |
| TRINITY_XP_00295 | moleculæVolvox_carteri       | 54.00 | 0.00 |
| TRINITY_XP_00565 | cobalamiCoccomyxa_subellips  | 54.00 | 0.00 |
| TRINITY_KXZ53253 | hypothetGonium_pectorale     | 54.00 | 0.00 |
| TRINITY_XP_00295 | hypothetVolvox_carteri       | 54.00 | 0.00 |
| TRINITY_PNW79521 | hypothetChlamydomonas_reinh  | 54.00 | 0.00 |
| TRINITY_XP_00295 | hypothetVolvox_carteri       | 54.00 | 0.00 |
| TRINITY_GAX78363 | hypothetChlamydomonas_eusti  | 54.00 | 0.00 |
| TRINITY_GAX80495 | hypothetChlamydomonas_eusti  | 54.00 | 0.00 |
| TRINITY_XP_01918 | PREDICTI Ipomoea_nil         | 54.00 | 0.00 |
| TRINITY_KXZ44832 | hypothetGonium_pectorale     | 54.00 | 0.00 |
| TRINITY_GAX77376 | hypothetChlamydomonas_eusti  | 54.00 | 0.00 |
| TRINITY_ABR17680 | unknown Picea_sitchensis     | 53.90 | 0.00 |
| TRINITY_XP_02499 | 60S ribcCynara_cardunculus   | 53.90 | 0.00 |
| TRINITY_AAG15839 | NADPH-dcPhelipanche_ramosa   | 53.90 | 0.00 |
| TRINITY_XP_01506 | dynein lSolanum_pennellii    | 53.90 | 0.00 |
| TRINITY_PSC69898 | sulfate Micractinium_conduc  | 53.90 | 0.00 |
| TRINITY_XP_00564 | hypothetCoccomyxa_subellips  | 53.90 | 0.00 |
| TRINITY_XP_02026 | ADP-ribcAsparagus_officinal  | 53.90 | 0.00 |
| TRINITY_ADA67931 | putativeWolffia_arrhiza      | 53.90 | 0.00 |
| TRINITY_XP_00682 | glutamirAmborella_trichopod  | 53.90 | 0.00 |
| TRINITY_XP_01942 | PREDICTI Lupinus_angustifoli | 53.90 | 0.00 |
| TRINITY_KXZ56224 | hypothetGonium_pectorale     | 53.90 | 0.00 |
| TRINITY_KXZ56385 | hypothetGonium_pectorale     | 53.90 | 0.00 |
| TRINITY_GAX72664 | hypothetChlamydomonas_eusti  | 53.90 | 0.00 |
| TRINITY_XP_00295 | hypothetVolvox_carteri       | 53.90 | 0.00 |
| TRINITY_GBG72803 | hypothetChara_braunii        | 53.90 | 0.00 |
| TRINITY_XP_00959 | PREDICTI Nicotiana_tomentosi | 53.90 | 0.00 |
| TRINITY_OWM63713 | hypothetPunica_granatum      | 53.90 | 0.00 |
| TRINITY_KXZ53629 | hypothetGonium_pectorale     | 53.90 | 0.00 |
| TRINITY_GAX82713 | hypothetChlamydomonas_eusti  | 53.90 | 0.00 |
| TRINITY_KXZ56257 | hypothetGonium_pectorale     | 53.90 | 0.00 |
| TRINITY_XP_01944 | PREDICTI Lupinus_angustifoli | 53.90 | 0.00 |
| TRINITY_KXZ45237 | hypothetGonium_pectorale     | 53.90 | 0.00 |
| TRINITY_XP_01162 | protein Amborella_trichopod  | 53.90 | 0.00 |
| TRINITY_GAX81362 | hypothetChlamydomonas_eusti  | 53.90 | 0.00 |
| TRINITY_PNW74677 | hypothetChlamydomonas_reinh  | 53.90 | 0.00 |
| TRINITY_XP_00564 | APG9-donCoccomyxa_subellips  | 53.90 | 0.00 |
| TRINITY_XP_02389 | peroxiscQuercus_suber        | 53.90 | 0.00 |
| TRINITY_GAX72672 | hypothetChlamydomonas_eusti  | 53.90 | 0.00 |
| TRINITY_GBF89736 | pheophoraphidocelis_subcap   | 53.90 | 0.00 |
| TRINITY_XP_00564 | purine cCoccomyxa_subellips  | 53.90 | 0.00 |
| TRINITY_GAX79630 | hypothetChlamydomonas_eusti  | 53.90 | 0.00 |

|                  |                              |       |      |
|------------------|------------------------------|-------|------|
| TRINITY_GBF97525 | hypothetRaphidocelis_subcap  | 53.90 | 0.00 |
| TRINITY_GAX79537 | hypothetChlamydomonas_eusti  | 53.90 | 0.00 |
| TRINITY_KXZ53056 | hypothetGonium_pectorale     | 53.90 | 0.00 |
| TRINITY_GAX81306 | hypothetChlamydomonas_eusti  | 53.90 | 0.00 |
| TRINITY_XP_0244  | (AP-1 conPhyscomitrella_pate | 53.80 | 0.00 |
| TRINITY_BAA25911 | actin [Nannochloris_bacill   | 53.80 | 0.00 |
| TRINITY_EPS73416 | hypothetGenlisea_aurea       | 53.80 | 0.00 |
| TRINITY_XP_00822 | PREDICTIPrunus_mume          | 53.80 | 0.00 |
| TRINITY_PNW78508 | hypothetChlamydomonas_reinh  | 53.80 | 0.00 |
| TRINITY_ESR56653 | hypothetCitrus_clementina    | 53.80 | 0.00 |
| TRINITY_XP_0239  | (serine/tQuercus_suber       | 53.80 | 0.00 |
| TRINITY_XP_0072  | (vacuolarPrunus_persica      | 53.80 | 0.00 |
| TRINITY_XP_0101  | (probableMorus_notabilis     | 53.80 | 0.00 |
| TRINITY_PNH11245 | ChaperonTetrabaena_socialis  | 53.80 | 0.00 |
| TRINITY_XP_0241  | (WD40 reRosa_chinensis       | 53.80 | 0.00 |
| TRINITY_ALD84318 | acetyl-(Morus_alba           | 53.80 | 0.00 |
| TRINITY_PNW83435 | hypothetChlamydomonas_reinh  | 53.80 | 0.00 |
| TRINITY_GAX8094  | (hypothetChlamydomonas_eusti | 53.80 | 0.00 |
| TRINITY_GAX73191 | hypothetChlamydomonas_eusti  | 53.80 | 0.00 |
| TRINITY_EOY27727 | RibosomTheobroma_cacao       | 53.80 | 0.00 |
| TRINITY_XP_0245  | histone Selaginella_moellen  | 53.80 | 0.00 |
| TRINITY_XP_00294 | hypothetVolvox_carteri       | 53.80 | 0.00 |
| TRINITY_PRW33296 | cytochrChlorella_sorokinia   | 53.80 | 0.00 |
| TRINITY_KXZ52397 | hypothetGonium_pectorale     | 53.80 | 0.00 |
| TRINITY_GAX80751 | hypothetChlamydomonas_eusti  | 53.80 | 0.00 |
| TRINITY_GAX80037 | hypothetChlamydomonas_eusti  | 53.80 | 0.00 |
| TRINITY_KXZ40924 | hypothetGonium_pectorale     | 53.80 | 0.00 |
| TRINITY_PNW88831 | hypothetChlamydomonas_reinh  | 53.80 | 0.00 |
| TRINITY_XP_02387 | uncharaQuercus_suber         | 53.80 | 0.00 |
| TRINITY_GAX82212 | hypothetChlamydomonas_eusti  | 53.80 | 0.00 |
| TRINITY_KXZ51919 | hypothetGonium_pectorale     | 53.80 | 0.00 |
| TRINITY_OUS42553 | hypothetOstreococcus_tauri   | 53.80 | 0.00 |
| TRINITY_XP_01942 | PREDICTILupinus_angustifoli  | 53.80 | 0.00 |
| TRINITY_PNW80137 | hypothetChlamydomonas_reinh  | 53.80 | 0.00 |
| TRINITY_XP_0017  | (predicteChlamydomonas_reinh | 53.80 | 0.00 |
| TRINITY_GAX80508 | hypothetChlamydomonas_eusti  | 53.80 | 0.00 |
| TRINITY_XP_00295 | hypothetVolvox_carteri       | 53.80 | 0.00 |
| TRINITY_PTQ35039 | hypothetMarchantia_polymorp  | 53.80 | 0.00 |
| TRINITY_RMZ5608  | (hypothetAuxenochlorella_pro | 53.80 | 0.00 |
| TRINITY_XP_00169 | predicteChlamydomonas_reinh  | 53.80 | 0.00 |
| TRINITY_PNW70755 | hypothetChlamydomonas_reinh  | 53.80 | 0.00 |
| TRINITY_GAX82652 | hypothetChlamydomonas_eusti  | 53.80 | 0.00 |
| TRINITY_XP_00297 | E3 ubiqSelaginella_moellen   | 53.80 | 0.00 |
| TRINITY_GAQ77627 | hypothetKlebsormidium_niten  | 53.80 | 0.00 |
| TRINITY_PNW74349 | hypothetChlamydomonas_reinh  | 53.80 | 0.00 |
| TRINITY_XP_00168 | predicteChlamydomonas_reinh  | 53.80 | 0.00 |
| TRINITY_GAQ81203 | DNA repIKlebsormidium_niten  | 53.80 | 0.00 |
| TRINITY_GAX82175 | hypothetChlamydomonas_eusti  | 53.80 | 0.00 |
| TRINITY_KXZ45671 | hypothetGonium_pectorale     | 53.80 | 0.00 |
| TRINITY_XP_00565 | DUF1313-Coccomyxa_subellips  | 53.80 | 0.00 |
| TRINITY_PNW83242 | hypothetChlamydomonas_reinh  | 53.80 | 0.00 |
| TRINITY_GAX84108 | hypothetChlamydomonas_eusti  | 53.80 | 0.00 |
| TRINITY_GAX76676 | hypothetChlamydomonas_eusti  | 53.80 | 0.00 |
| TRINITY_GAX75912 | hypothetChlamydomonas_eusti  | 53.80 | 0.00 |
| TRINITY_PNW72279 | hypothetChlamydomonas_reinh  | 53.80 | 0.00 |
| TRINITY_XP_0239  | (uncharaQuercus_suber        | 53.80 | 0.00 |
| TRINITY_PNW80482 | hypothetChlamydomonas_reinh  | 53.80 | 0.00 |
| TRINITY_XP_00584 | hypothetChlorella_variabili  | 53.80 | 0.00 |
| TRINITY_PNW7435  | (hypothetChlamydomonas_reinh | 53.80 | 0.00 |
| TRINITY_GAX73999 | hypothetChlamydomonas_eusti  | 53.80 | 0.00 |
| TRINITY_PNH1158  | (Serine/tTetrabaena_socialis | 53.80 | 0.00 |
| TRINITY_KXZ5129  | (hypothetGonium_pectorale    | 53.80 | 0.00 |
| TRINITY_XP_00415 | PREDICTICucumis_sativus      | 53.80 | 0.00 |
| TRINITY_GAX79705 | hypothetChlamydomonas_eusti  | 53.80 | 0.00 |
| TRINITY_KXZ53139 | hypothetGonium_pectorale     | 53.80 | 0.00 |
| TRINITY_KDD75499 | hypothetHelicosporidium_sp.  | 53.80 | 0.00 |

|                  |          |                     |       |      |
|------------------|----------|---------------------|-------|------|
| TRINITY_XP_0016  | major f  | Chlamydomonas_reinh | 53.80 | 0.00 |
| TRINITY_GAX78701 | hypothet | Chlamydomonas_eusti | 53.80 | 0.00 |
| TRINITY_GBF9928  | hypothet | Raphidocelis_subcap | 53.80 | 0.00 |
| TRINITY_PNW8406  | hypothet | Chlamydomonas_reinh | 53.80 | 0.00 |
| TRINITY_XP_0167  | PREDICTI | Gossypium_hirsutum  | 53.80 | 0.00 |
| TRINITY_GBF8889  | isochori | Raphidocelis_subcap | 53.80 | 0.00 |
| TRINITY_GAX7979  | hypothet | Chlamydomonas_eusti | 53.80 | 0.00 |
| TRINITY_RYR0657  | hypothet | Arachis_hypogaea    | 53.80 | 0.00 |
| TRINITY_XP_0025  | predict  | Micromonas_commoda  | 53.70 | 0.00 |
| TRINITY_XP_0219  | mitogen- | Helianthus_annuus   | 53.70 | 0.00 |
| TRINITY_XP_0093  | PREDICTI | Pyrus_x_bretschneid | 53.70 | 0.00 |
| TRINITY_XP_0218  | mitochor | Spinacia_oleracea   | 53.70 | 0.00 |
| TRINITY_EFJ1947  | hypothet | Selaginella_moellen | 53.70 | 0.00 |
| TRINITY_XP_0058  | hypothet | Chlorella_variabili | 53.70 | 0.00 |
| TRINITY_XP_0228  | Fatty ac | Ostreococcus_tauri  | 53.70 | 0.00 |
| TRINITY_XP_0030  | predict  | Micromonas_pusilla  | 53.70 | 0.00 |
| TRINITY_RLN0455  | hypothet | Panicum_miliaceum   | 53.70 | 0.00 |
| TRINITY_XP_0056  | hypothet | Coccomyxa_subellips | 53.70 | 0.00 |
| TRINITY_PNW7502  | hypothet | Chlamydomonas_reinh | 53.70 | 0.00 |
| TRINITY_XP_0016  | trehala  | Chlamydomonas_reinh | 53.70 | 0.00 |
| TRINITY_XP_0172  | PREDICTI | Daucus_carota       | 53.70 | 0.00 |
| TRINITY_KXZ4659  | hypothet | Gonium_pectorale    | 53.70 | 0.00 |
| TRINITY_XP_0201  | serine-- | Ananas_comosus      | 53.70 | 0.00 |
| TRINITY_GAQ7826  | putative | Klebsormidium_niten | 53.70 | 0.00 |
| TRINITY_GAX7856  | hypothet | Chlamydomonas_eusti | 53.70 | 0.00 |
| TRINITY_CAC9516  | RNA poly | Physcomitrella_pate | 53.70 | 0.00 |
| TRINITY_RWR8196  | proteas  | Cinnamomum_micranth | 53.70 | 0.00 |
| TRINITY_XP_0056  | hypothet | Coccomyxa_subellips | 53.70 | 0.00 |
| TRINITY_GAX7974  | hypothet | Chlamydomonas_eusti | 53.70 | 0.00 |
| TRINITY_XP_0237  | ubiquiti | Lactuca_sativa      | 53.70 | 0.00 |
| TRINITY_GAX8315  | hypothet | Chlamydomonas_eusti | 53.70 | 0.00 |
| TRINITY_GAX8216  | hypothet | Chlamydomonas_eusti | 53.70 | 0.00 |
| TRINITY_PSC7509  | SAM-depe | Micractinium_conduc | 53.70 | 0.00 |
| TRINITY_XP_0016  | flagell  | Chlamydomonas_reinh | 53.70 | 0.00 |
| TRINITY_OVA0016  | WD40 re  | Macleaya_cordata    | 53.70 | 0.00 |
| TRINITY_ACL1398  | NADPH d  | Dunaliella_salina   | 53.70 | 0.00 |
| TRINITY_XP_0016  | predict  | Chlamydomonas_reinh | 53.70 | 0.00 |
| TRINITY_XP_0147  | serine/t | Brachypodium_distac | 53.70 | 0.00 |
| TRINITY_KXZ4398  | hypothet | Gonium_pectorale    | 53.70 | 0.00 |
| TRINITY_GAX7502  | hypothet | Chlamydomonas_eusti | 53.70 | 0.00 |
| TRINITY_XP_0029  | hypothet | Volvox_carteri      | 53.70 | 0.00 |
| TRINITY_GAX8039  | hypothet | Chlamydomonas_eusti | 53.70 | 0.00 |
| TRINITY_XP_0025  | dynein k | Micromonas_commoda  | 53.70 | 0.00 |
| TRINITY_GBF9082  | hypothet | Raphidocelis_subcap | 53.70 | 0.00 |
| TRINITY_PNW7514  | hypothet | Chlamydomonas_reinh | 53.70 | 0.00 |
| TRINITY_BBC2847  | serine/t | Yamagishiella_unicc | 53.70 | 0.00 |
| TRINITY_GBF8943  | hypothet | Raphidocelis_subcap | 53.70 | 0.00 |
| TRINITY_KXZ5444  | hypothet | Gonium_pectorale    | 53.70 | 0.00 |
| TRINITY_PNH0513  | 3-ketoac | Tetrabaena_socialis | 53.70 | 0.00 |
| TRINITY_GAX7752  | hypothet | Chlamydomonas_eusti | 53.70 | 0.00 |
| TRINITY_PNW8079  | hypothet | Chlamydomonas_reinh | 53.70 | 0.00 |
| TRINITY_XP_0139  | cytochr  | Monoraphidium_negle | 53.70 | 0.00 |
| TRINITY_XP_0016  | aconitat | Chlamydomonas_reinh | 53.70 | 0.00 |
| TRINITY_KDD7378  | hypothet | Helicosporidium_sp. | 53.70 | 0.00 |
| TRINITY_XP_0066  | PREDICTI | Oryza_brachyantha   | 53.60 | 0.00 |
| TRINITY_XP_0100  | PREDICTI | Eucalyptus_grandis  | 53.60 | 0.00 |
| TRINITY_KXZ4901  | 2DHC3 pr | Gonium_pectorale    | 53.60 | 0.00 |
| TRINITY_OAE2582  | hypothet | Marchantia_polymorp | 53.60 | 0.00 |
| TRINITY_XP_0041  | PREDICTI | Cucumis_sativus     | 53.60 | 0.00 |
| TRINITY_GAQ8933  | transpor | Klebsormidium_niten | 53.60 | 0.00 |
| TRINITY_XP_0062  | CTD sma  | Capsella_rubella    | 53.60 | 0.00 |
| TRINITY_GAQ7902  | Regulat  | Klebsormidium_niten | 53.60 | 0.00 |
| TRINITY_KMS6524  | hypothet | Beta_vulgaris       | 53.60 | 0.00 |
| TRINITY_XP_0028  | cytochr  | Arabidopsis_lyrata  | 53.60 | 0.00 |
| TRINITY_GAQ8895  | Putativ  | Klebsormidium_niten | 53.60 | 0.00 |
| TRINITY_KMS6524  | hypothet | Beta_vulgaris       | 53.60 | 0.00 |

|                  |           |                     |       |      |
|------------------|-----------|---------------------|-------|------|
| TRINITY_GBF92665 | mitochor  | Raphidocelis_subcap | 53.60 | 0.00 |
| TRINITY_AEW90637 | KU80-li   | Pinus_sylvestris    | 53.60 | 0.00 |
| TRINITY_XP_02436 | uncharac  | Physcomitrella_pate | 53.60 | 0.00 |
| TRINITY_XP_02202 | serine/t  | Helianthus_annuus   | 53.60 | 0.00 |
| TRINITY_XP_00169 | flavin-c  | Chlamydomonas_reinh | 53.60 | 0.00 |
| TRINITY_XP_00169 | predicte  | Chlamydomonas_reinh | 53.60 | 0.00 |
| TRINITY_XP_01390 | hypothet  | Monoraphidium_negle | 53.60 | 0.00 |
| TRINITY_KZM84921 | hypothet  | Daucus_carota       | 53.60 | 0.00 |
| TRINITY_KYP53097 | Retrovir  | Cajanus_cajan       | 53.60 | 0.00 |
| TRINITY_GAX77995 | hypothet  | Chlamydomonas_eusti | 53.60 | 0.00 |
| TRINITY_BAJ86872 | predicte  | Hordeum_vulgare     | 53.60 | 0.00 |
| TRINITY_GAX84207 | hypothet  | Chlamydomonas_eusti | 53.60 | 0.00 |
| TRINITY_GAX85740 | hypothet  | Chlamydomonas_eusti | 53.60 | 0.00 |
| TRINITY_XP_00294 | hypothet  | Volvox_carteri      | 53.60 | 0.00 |
| TRINITY_XP_00294 | hypothet  | Volvox_carteri      | 53.60 | 0.00 |
| TRINITY_PNH07117 | Chloropl  | Tetrabaena_socialis | 53.60 | 0.00 |
| TRINITY_BAK00435 | predicte  | Hordeum_vulgare     | 53.60 | 0.00 |
| TRINITY_GAX72769 | hypothet  | Chlamydomonas_eusti | 53.60 | 0.00 |
| TRINITY_XP_00170 | predicte  | Chlamydomonas_reinh | 53.60 | 0.00 |
| TRINITY_XP_02098 | DNA-dir   | Arachis_duranensis  | 53.60 | 0.00 |
| TRINITY_XP_00170 | response  | Chlamydomonas_reinh | 53.60 | 0.00 |
| TRINITY_GAQ80195 | serine/t  | Klebsormidium_niten | 53.60 | 0.00 |
| TRINITY_XP_00294 | hypothet  | Volvox_carteri      | 53.60 | 0.00 |
| TRINITY_PRW45077 | HBS1 is   | Chlorella_sorokinia | 53.60 | 0.00 |
| TRINITY_XP_00170 | predicte  | Chlamydomonas_reinh | 53.60 | 0.00 |
| TRINITY_PNW73618 | hypothet  | Chlamydomonas_reinh | 53.60 | 0.00 |
| TRINITY_PRW59514 | Rab fami  | Chlorella_sorokinia | 53.60 | 0.00 |
| TRINITY_GAX73633 | hypothet  | Chlamydomonas_eusti | 53.60 | 0.00 |
| TRINITY_PNW77802 | hypothet  | Chlamydomonas_reinh | 53.60 | 0.00 |
| TRINITY_GAX81364 | hypothet  | Chlamydomonas_eusti | 53.60 | 0.00 |
| TRINITY_XP_00306 | predicte  | Micromonas_pusilla  | 53.60 | 0.00 |
| TRINITY_PRW59003 | thymidy   | Chlorella_sorokinia | 53.60 | 0.00 |
| TRINITY_XP_00295 | hypothet  | Volvox_carteri      | 53.60 | 0.00 |
| TRINITY_KXZ54063 | hypothet  | Gonium_pectorale    | 53.60 | 0.00 |
| TRINITY_GAX74557 | hypothet  | Chlamydomonas_eusti | 53.60 | 0.00 |
| TRINITY_XP_00424 | ethanol   | Solanum_lycopersicu | 53.60 | 0.00 |
| TRINITY_GAX78186 | hypothet  | Chlamydomonas_eusti | 53.60 | 0.00 |
| TRINITY_GAX84476 | hypothet  | Chlamydomonas_eusti | 53.60 | 0.00 |
| TRINITY_PNW87485 | hypothet  | Chlamydomonas_reinh | 53.60 | 0.00 |
| TRINITY_XP_01389 | hypothet  | Monoraphidium_negle | 53.60 | 0.00 |
| TRINITY_XP_00170 | (F1F0 AT) | Chlamydomonas_reinh | 53.60 | 0.00 |
| TRINITY_PNH05468 | hypothet  | Tetrabaena_socialis | 53.60 | 0.00 |
| TRINITY_GAX75297 | hypothet  | Chlamydomonas_eusti | 53.60 | 0.00 |
| TRINITY_PNW70441 | hypothet  | Chlamydomonas_reinh | 53.60 | 0    |
| TRINITY_PRW05739 | Gag-Pol   | Chlorella_sorokinia | 53.60 | 0.00 |
| TRINITY_GAQ89367 | putative  | Klebsormidium_niten | 53.60 | 0.00 |
| TRINITY_GAX82607 | hypothet  | Chlamydomonas_eusti | 53.60 | 0.00 |
| TRINITY_PNW76026 | hypothet  | Chlamydomonas_reinh | 53.60 | 0.00 |
| TRINITY_GAX74733 | hypothet  | Chlamydomonas_eusti | 53.60 | 0.00 |
| TRINITY_AXF41555 | HLA3 pr   | Chlorella_sp._ArM00 | 53.60 | 0.00 |
| TRINITY_GAQ80913 | putative  | Klebsormidium_niten | 53.60 | 0.00 |
| TRINITY_GAQ84757 | putative  | Klebsormidium_niten | 53.50 | 0.00 |
| TRINITY_XP_02088 | uncharac  | Arabidopsis_lyrata  | 53.50 | 0.00 |
| TRINITY_GAQ87230 | Dyneins   | Klebsormidium_niten | 53.50 | 0.00 |
| TRINITY_OAE26596 | hypothet  | Marchantia_polymorp | 53.50 | 0.00 |
| TRINITY_GAX74230 | hypothet  | Chlamydomonas_eusti | 53.50 | 0.00 |
| TRINITY_GAX84715 | hypothet  | Chlamydomonas_eusti | 53.50 | 0.00 |
| TRINITY_XP_00685 | ubiquiti  | Amborella_trichopod | 53.50 | 0.00 |
| TRINITY_XP_00169 | predicte  | Chlamydomonas_reinh | 53.50 | 0.00 |
| TRINITY_PNW83435 | hypothet  | Chlamydomonas_reinh | 53.50 | 0.00 |
| TRINITY_GBG70236 | hypothet  | Chara_braunii       | 53.50 | 0.00 |
| TRINITY_GAX75625 | hypothet  | Chlamydomonas_eusti | 53.50 | 0.00 |
| TRINITY_XP_01506 | E2F-ass   | Solanum_pennellii   | 53.50 | 0.00 |
| TRINITY_KZV14986 | hypothet  | Dorcoceras_hygromet | 53.50 | 0.00 |
| TRINITY_XP_00751 | chaperor  | Bathycoccus_prasinc | 53.50 | 0.00 |
| TRINITY_PNH01184 | Nif-spec  | Tetrabaena_socialis | 53.50 | 0.00 |

|                  |           |                     |       |      |
|------------------|-----------|---------------------|-------|------|
| TRINITY_XP_0025  | (predicte | Micromonas_commoda  | 53.50 | 0.00 |
| TRINITY_GAX7413  | (hypothet | Chlamydomonas_eusti | 53.50 | 0.00 |
| TRINITY_GBF9486  | (hypothet | Raphidocelis_subcap | 53.50 | 0.00 |
| TRINITY_XP_0238  | (non-spec | Quercus_suber       | 53.50 | 0.00 |
| TRINITY_XP_0138  | (hypothet | Monoraphidium_negle | 53.50 | 0.00 |
| TRINITY_GAX79931 | (hypothet | Chlamydomonas_eusti | 53.50 | 0.00 |
| TRINITY_XP_0029  | (hypothet | Volvox_carteri      | 53.50 | 0.00 |
| TRINITY_GAX7856  | (hypothet | Chlamydomonas_eusti | 53.50 | 0.00 |
| TRINITY_XP_0238  | (uncharac | Quercus_suber       | 53.50 | 0.00 |
| TRINITY_XP_0029  | (hypothet | Volvox_carteri      | 53.50 | 0.00 |
| TRINITY_PPS16311 | (hypothet | Gossypium_barbadens | 53.50 | 0.00 |
| TRINITY_XP_0029  | (hypothet | Volvox_carteri      | 53.50 | 0.00 |
| TRINITY_GAX7526  | (hypothet | Chlamydomonas_eusti | 53.50 | 0.00 |
| TRINITY_GAX72901 | (hypothet | Chlamydomonas_eusti | 53.50 | 0.00 |
| TRINITY_PNH12071 | Protein   | Tetrabaena_socialis | 53.50 | 0.00 |
| TRINITY_XP_0017  | (predicte | Chlamydomonas_reinh | 53.50 | 0.00 |
| TRINITY_AEZ49871 | FK506 bi  | Dunaliella_salina   | 53.50 | 0.00 |
| TRINITY_GAX8585  | (hypothet | Chlamydomonas_eusti | 53.50 | 0.00 |
| TRINITY_GAX8592  | (hypothet | Chlamydomonas_eusti | 53.50 | 0.00 |
| TRINITY_GAX7567  | (hypothet | Chlamydomonas_eusti | 53.50 | 0.00 |
| TRINITY_QBB2001  | E3 ubiq   | Ettlia_sp._YC001    | 53.50 | 0.00 |
| TRINITY_XP_0029  | (hypothet | Volvox_carteri      | 53.50 | 0.00 |
| TRINITY_PSC7355  | (DUF1295  | Micractinium_conduc | 53.50 | 0.00 |
| TRINITY_XP_0017  | (formate  | Chlamydomonas_reinh | 53.50 | 0.00 |
| TRINITY_PNH0915  | (Transcri | Tetrabaena_socialis | 53.50 | 0.00 |
| TRINITY_GAQ93561 | (hypothet | Klebsormidium_niten | 53.50 | 0.00 |
| TRINITY_XP_0128  | (PREDICTI | Erythranthe_guttata | 53.50 | 0.00 |
| TRINITY_OWM6547  | (hypothet | Punica_granatum     | 53.50 | 0.00 |
| TRINITY_GAX7649  | (hypothet | Chlamydomonas_eusti | 53.50 | 0.00 |
| TRINITY_GAX8238  | (hypothet | Chlamydomonas_eusti | 53.50 | 0.00 |
| TRINITY_GAX8049  | (hypothet | Chlamydomonas_eusti | 53.50 | 0.00 |
| TRINITY_XP_0120  | (tRNAse   | Jatropha_curcas     | 53.40 | 0.00 |
| TRINITY_GAQ9199  | (mitochor | Klebsormidium_niten | 53.40 | 0.00 |
| TRINITY_XP_0025  | (predicte | Micromonas_commoda  | 53.40 | 0.00 |
| TRINITY_OIW1599  | (hypothet | Lupinus_angustifoli | 53.40 | 0.00 |
| TRINITY_XP_0202  | (probable | Asparagus_officinal | 53.40 | 0.00 |
| TRINITY_PLY8260  | (hypothet | Lactuca_sativa      | 53.40 | 0.00 |
| TRINITY_XP_0029  | (hypothet | Volvox_carteri      | 53.40 | 0.00 |
| TRINITY_XP_0102  | (PREDICTI | Nelumbo_nucifera    | 53.40 | 0.00 |
| TRINITY_XP_0106  | (PREDICTI | Beta_vulgaris       | 53.40 | 0.00 |
| TRINITY_PHT3869  | (Long ch  | Capsicum_baccatum   | 53.40 | 0.00 |
| TRINITY_XP_0237  | (serine/t | Lactuca_sativa      | 53.40 | 0.00 |
| TRINITY_XP_0093  | (PREDICTI | Musa_acuminata      | 53.40 | 0.00 |
| TRINITY_XP_0240  | (uncharac | Eutrema_salsugineur | 53.40 | 0.00 |
| TRINITY_KXZ48331 | (hypothet | Gonium_pectorale    | 53.40 | 0.00 |
| TRINITY_PSC7208  | (P-type   | Micractinium_conduc | 53.40 | 0.00 |
| TRINITY_GAX80651 | (hypothet | Chlamydomonas_eusti | 53.40 | 0.00 |
| TRINITY_GAX7834  | (hypothet | Chlamydomonas_eusti | 53.40 | 0.00 |
| TRINITY_GAX7378  | (hypothet | Chlamydomonas_eusti | 53.40 | 0.00 |
| TRINITY_XP_0029  | (hypothet | Volvox_carteri      | 53.40 | 0.00 |
| TRINITY_GAX7397  | (hypothet | Chlamydomonas_eusti | 53.40 | 0.00 |
| TRINITY_GBF98161 | (hypothet | Raphidocelis_subcap | 53.40 | 0.00 |
| TRINITY_XP_0029  | (hypothet | Volvox_carteri      | 53.40 | 0.00 |
| TRINITY_XP_0238  | (triosepl | Quercus_suber       | 53.40 | 0.00 |
| TRINITY_GAX73921 | (hypothet | Chlamydomonas_eusti | 53.40 | 0.00 |
| TRINITY_GAX8418  | (hypothet | Chlamydomonas_eusti | 53.40 | 0.00 |
| TRINITY_XP_0243  | (galacto  | Physcomitrella_pate | 53.40 | 0.00 |
| TRINITY_GAX8127  | (hypothet | Chlamydomonas_eusti | 53.40 | 0.00 |
| TRINITY_APT69331 | (ATP-cit  | Dunaliella_tertiole | 53.40 | 0.00 |
| TRINITY_KXZ4676  | (hypothet | Gonium_pectorale    | 53.40 | 0.00 |
| TRINITY_PSC6780  | (ketopant | Micractinium_conduc | 53.40 | 0.00 |
| TRINITY_XP_0029  | (hypothet | Volvox_carteri      | 53.40 | 0.00 |
| TRINITY_GBF9630  | (hypothet | Raphidocelis_subcap | 53.40 | 0.00 |
| TRINITY_XP_0239  | (RNA cyti | Quercus_suber       | 53.40 | 0.00 |
| TRINITY_PNH1022  | (GATA tr  | Tetrabaena_socialis | 53.40 | 0.00 |
| TRINITY_EEC6696  | (hypothet | Oryza_sativa        | 53.40 | 0.00 |

|                  |                              |       |      |
|------------------|------------------------------|-------|------|
| TRINITY_GAX78077 | hypothetChlamydomonas_eusti  | 53.40 | 0.00 |
| TRINITY_GAX83739 | hypothetChlamydomonas_eusti  | 53.40 | 0.00 |
| TRINITY_GAX73372 | hypothetChlamydomonas_eusti  | 53.40 | 0.00 |
| TRINITY_PNW70415 | hypothetChlamydomonas_reinh  | 53.40 | 0.00 |
| TRINITY_GAX73110 | hypothetChlamydomonas_eusti  | 53.40 | 0.00 |
| TRINITY_GAX73543 | hypothetChlamydomonas_eusti  | 53.40 | 0.00 |
| TRINITY_PRW44560 | ribosomεChlorella_sorokinia  | 53.40 | 0.00 |
| TRINITY_XP_00584 | hypothetChlorella_variabili  | 53.40 | 0.00 |
| TRINITY_XP_00169 | predictεChlamydomonas_reinh  | 53.40 | 0.00 |
| TRINITY_GAX85342 | hypothetChlamydomonas_eusti  | 53.40 | 0.00 |
| TRINITY_GAX84035 | hypothetChlamydomonas_eusti  | 53.40 | 0.00 |
| TRINITY_RYQ89956 | hypothetArachis_hypogaea     | 53.40 | 0.00 |
| TRINITY_GAX76248 | hypothetChlamydomonas_eusti  | 53.40 | 0.00 |
| TRINITY_KXZ45344 | hypothetGonium_pectorale     | 53.40 | 0.00 |
| TRINITY_GAX81250 | hypothetChlamydomonas_eusti  | 53.40 | 0.00 |
| TRINITY_XP_00295 | hypothetVolvox_carteri       | 53.40 | 0.00 |
| TRINITY_XP_02387 | cytochrεQuercus_suber        | 53.30 | 0.00 |
| TRINITY_ABR17702 | unknown Picea_sitchensis     | 53.30 | 0.00 |
| TRINITY_RVX05712 | PolyubiciVitis_vinifera      | 53.30 | 0.00 |
| TRINITY_PKI68800 | hypothetPunica_granatum      | 53.30 | 0.00 |
| TRINITY_XP_01389 | DNA (cytMonoraphidium_negle  | 53.30 | 0.00 |
| TRINITY_GAX79951 | hypothetChlamydomonas_eusti  | 53.30 | 0.00 |
| TRINITY_XP_02436 | probableεPhyscomitrella_pate | 53.30 | 0.00 |
| TRINITY_GAQ84476 | (NAD(P)-]Klebsormidium_niten | 53.30 | 0.00 |
| TRINITY_GAQ87980 | (PhosphatKlebsormidium_niten | 53.30 | 0.00 |
| TRINITY_KXZ46351 | hypothetGonium_pectorale     | 53.30 | 0.00 |
| TRINITY_XP_02168 | uncharacHevea_brasiliensis   | 53.30 | 0.00 |
| TRINITY_XP_02069 | thymidy]Dendrobium_catenatu  | 53.30 | 0.00 |
| TRINITY_XP_02186 | activatiSpinacia_oleracea    | 53.30 | 0.00 |
| TRINITY_XP_01924 | PREDICTINicotiana_attenuata  | 53.30 | 0.00 |
| TRINITY_PNH10779 | ERI1 exεTetrabaena_socialis  | 53.30 | 0.00 |
| TRINITY_XP_02294 | coatomeiCucurbita_moschata   | 53.30 | 0.00 |
| TRINITY_BAK02778 | predictεHordeum_vulgare      | 53.30 | 0.00 |
| TRINITY_KXZ45677 | hypothetGonium_pectorale     | 53.30 | 0.00 |
| TRINITY_OEL14075 | Heptahel]Dichanthelium_oligo | 53.30 | 0.00 |
| TRINITY_OMO56882 | SNF2-re]Corchorus_capsulari  | 53.30 | 0.00 |
| TRINITY_XP_01946 | PREDICTFLupinus_angustifoli  | 53.30 | 0.00 |
| TRINITY_GAQ81557 | XanthineεKlebsormidium_niten | 53.30 | 0.00 |
| TRINITY_XP_00169 | small rεChlamydomonas_reinh  | 53.30 | 0.00 |
| TRINITY_GAX72970 | hypothetChlamydomonas_eusti  | 53.30 | 0.00 |
| TRINITY_XP_00913 | PREDICTHBrassica_rapa        | 53.30 | 0.00 |
| TRINITY_XP_00169 | methylytiChlamydomonas_reinh | 53.30 | 0.00 |
| TRINITY_GAX82236 | hypothetChlamydomonas_eusti  | 53.30 | 0.00 |
| TRINITY_XP_00940 | PREDICTHMusa_acuminata       | 53.30 | 0.00 |
| TRINITY_XP_00295 | hypothetVolvox_carteri       | 53.30 | 0.00 |
| TRINITY_XP_00295 | hypothetVolvox_carteri       | 53.30 | 0.00 |
| TRINITY_GAX85543 | hypothetChlamydomonas_eusti  | 53.30 | 0.00 |
| TRINITY_GAX73206 | hypothetChlamydomonas_eusti  | 53.30 | 0.00 |
| TRINITY_GAQ78682 | Kinesin-Klebsormidium_niten  | 53.30 | 0.00 |
| TRINITY_KXZ56700 | hypothetGonium_pectorale     | 53.30 | 0.00 |
| TRINITY_KXZ44016 | hypothetGonium_pectorale     | 53.30 | 0.00 |
| TRINITY_GAX75326 | hypothetChlamydomonas_eusti  | 53.30 | 0.00 |
| TRINITY_KXZ43192 | hypothetGonium_pectorale     | 53.30 | 0.00 |
| TRINITY_AAK70872 | pyruvatεChlamydomonas_reinh  | 53.30 | 0.00 |
| TRINITY_KXZ49360 | hypothetGonium_pectorale     | 53.30 | 0.00 |
| TRINITY_XP_01843 | PREDICTHRaphanus_sativus     | 53.30 | 0.00 |
| TRINITY_XP_00294 | hypothetVolvox_carteri       | 53.30 | 0.00 |
| TRINITY_XP_02436 | superoxiPhyscomitrella_pate  | 53.30 | 0.00 |
| TRINITY_XP_00294 | hypothetVolvox_carteri       | 53.30 | 0.00 |
| TRINITY_XP_00584 | hypothetChlorella_variabili  | 53.30 | 0.00 |
| TRINITY_GAX81197 | hypothetChlamydomonas_eusti  | 53.30 | 0.00 |
| TRINITY_XP_00244 | casein ]Sorghum_bicolor      | 53.30 | 0.00 |
| TRINITY_PNW84993 | hypothetChlamydomonas_reinh  | 53.30 | 0.00 |
| TRINITY_GBG81763 | hypothetChara_braunii        | 53.30 | 0.00 |
| TRINITY_PNW86554 | hypothetChlamydomonas_reinh  | 53.30 | 0.00 |
| TRINITY_GAX77432 | hypothetChlamydomonas_eusti  | 53.30 | 0.00 |

|                                             |       |      |
|---------------------------------------------|-------|------|
| TRINITY_PNW83142hypothetChlamydomonas_reinh | 53.30 | 0.00 |
| TRINITY_XP_00295hypothetVolvox_carteri      | 53.30 | 0.00 |
| TRINITY_GAX83899hypothetChlamydomonas_eusti | 53.30 | 0.00 |
| TRINITY_KXZ51622hypothetGonium_pectorale    | 53.30 | 0.00 |
| TRINITY_GAX80387hypothetChlamydomonas_eusti | 53.30 | 0    |
| TRINITY_XP_00564MT-A70  Coccomyxa_subellips | 53.30 | 0.00 |
| TRINITY_PTQ34569hypothetMarchantia_polymorp | 53.20 | 0.00 |
| TRINITY_XP_02733dual spAbrus_precatorius    | 53.20 | 0.00 |
| TRINITY_GAX77102hypothetChlamydomonas_eusti | 53.20 | 0.00 |
| TRINITY_YP_00931cytochrCPyramimonas_parkeae | 53.20 | 0.00 |

|                        |                              |       |      |
|------------------------|------------------------------|-------|------|
| TRINITY_KDD76101MT-A70 | {Helicosporidium_sp.         | 53.20 | 0.00 |
| TRINITY_XP_0270        | {nuclear Coffea_arabica      | 53.20 | 0.00 |
| TRINITY_GBG6110        | {hypothetChara_braunii       | 53.20 | 0.00 |
| TRINITY_XP_0030        | {predicteMicromonas_pusilla  | 53.20 | 0.00 |
| TRINITY_XP_0201        | {protein Aegilops_tauschii   | 53.20 | 0.00 |
| TRINITY_XP_0030        | {dihydroMicromonas_pusilla   | 53.20 | 0.00 |
| TRINITY_XP_0239        | {ras-relQuercus_suber        | 53.20 | 0.00 |
| TRINITY_GBG6826        | {hypothetChara_braunii       | 53.20 | 0.00 |
| TRINITY_XP_0016        | {predicteChlamydomonas_reinh | 53.20 | 0.00 |
| TRINITY_KXZ4973        | {hypothetGonium_pectorale    | 53.20 | 0.00 |
| TRINITY_KXZ5612        | {hypothetGonium_pectorale    | 53.20 | 0.00 |
| TRINITY_CAN6267        | {hypothetVitis_vinifera      | 53.20 | 0.00 |
| TRINITY_GAQ8145        | {hypothetKlebsormidium_niten | 53.20 | 0.00 |
| TRINITY_PNW8696        | {hypothetChlamydomonas_reinh | 53.20 | 0.00 |
| TRINITY_GAX7625        | {hypothetChlamydomonas_eusti | 53.20 | 0.00 |
| TRINITY_GAX8053        | {hypothetChlamydomonas_eusti | 53.20 | 0.00 |
| TRINITY_PNW7865        | {hypothetChlamydomonas_reinh | 53.20 | 0.00 |
| TRINITY_PNW7677        | {hypothetChlamydomonas_reinh | 53.20 | 0.00 |
| TRINITY_GAX7581        | {hypothetChlamydomonas_eusti | 53.20 | 0.00 |
| TRINITY_GAQ7991        | {ABC trarKlebsormidium_niten | 53.20 | 0.00 |
| TRINITY_GAX7531        | {hypothetChlamydomonas_eusti | 53.20 | 0.00 |
| TRINITY_XP_0241        | {plasma nRosa_chinensis      | 53.20 | 0.00 |
| TRINITY_PNH1206        | {hypothetTetrabaena_socialis | 53.20 | 0.00 |
| TRINITY_GAX8072        | {hypothetChlamydomonas_eusti | 53.20 | 0.00 |
| TRINITY_GAX7852        | {hypothetChlamydomonas_eusti | 53.20 | 0.00 |
| TRINITY_KXZ5311        | {hypothetGonium_pectorale    | 53.20 | 0.00 |
| TRINITY_GAQ8791        | {S-adenosKlebsormidium_niten | 53.20 | 0.00 |
| TRINITY_GAX8154        | {hypothetChlamydomonas_eusti | 53.20 | 0.00 |
| TRINITY_GAX7834        | {hypothetChlamydomonas_eusti | 53.20 | 0.00 |
| TRINITY_GAX7605        | {hypothetChlamydomonas_eusti | 53.20 | 0.00 |
| TRINITY_XP_0091        | {PREDICTIBrassica_rapa       | 53.20 | 0.00 |
| TRINITY_PSC6782        | {40S ribcMicractinium_conduc | 53.20 | 0.00 |
| TRINITY_GAV7858        | {RNA_pol_Cephalotus_follicul | 53.20 | 0.00 |
| TRINITY_RWW9113        | {hypothetEnsete_ventricosum  | 53.20 | 0.00 |
| TRINITY_XP_0014        | {predicteOstreococcus_sp._'1 | 53.20 | 0.00 |
| TRINITY_GAX7947        | {hypothetChlamydomonas_eusti | 53.20 | 0.00 |
| TRINITY_GAX8316        | {hypothetChlamydomonas_eusti | 53.20 | 0.00 |
| TRINITY_KXZ5465        | {hypothetGonium_pectorale    | 53.20 | 0.00 |
| TRINITY_GAX7274        | {hypothetChlamydomonas_eusti | 53.20 | 0.00 |
| TRINITY_PNH1006        | {AnaphasTetrabaena_socialis  | 53.20 | 0.00 |
| TRINITY_XP_0238        | {probableQuercus_suber       | 53.20 | 0.00 |
| TRINITY_KMZ6310        | {putativeZostera_marina      | 53.20 | 0.00 |
| TRINITY_XP_0238        | {1-phosphQuercus_suber       | 53.20 | 0.00 |
| TRINITY_GAX8245        | {hypothetChlamydomonas_eusti | 53.20 | 0.00 |
| TRINITY_GAX8515        | {hypothetChlamydomonas_eusti | 53.20 | 0.00 |
| TRINITY_PRW4564        | {OTU domChlorella_sorokinia  | 53.20 | 0.00 |
| TRINITY_XP_0016        | {guanylatChlamydomonas_reinh | 53.20 | 0.00 |
| TRINITY_XP_0029        | {hypothetVolvox_carteri      | 53.20 | 0.00 |
| TRINITY_GAX7918        | {hypothetChlamydomonas_eusti | 53.20 | 0.00 |
| TRINITY_GAX7466        | {hypothetChlamydomonas_eusti | 53.20 | 0.00 |
| TRINITY_XP_0016        | {eyespot Chlamydomonas_reinh | 53.20 | 0.00 |
| TRINITY_GAX8125        | {hypothetChlamydomonas_eusti | 53.20 | 0.00 |
| TRINITY_PNW7075        | {hypothetChlamydomonas_reinh | 53.20 | 0.00 |
| TRINITY_GAX8221        | {hypothetChlamydomonas_eusti | 53.20 | 0.00 |
| TRINITY_PRW5919        | {thioresChlorella_sorokinia  | 53.20 | 0.00 |
| TRINITY_OVA0901        | {RibosomMacleanya_cordata    | 53.20 | 0.00 |
| TRINITY_GAQ8270        | {Dyneins Klebsormidium_niten | 53.10 | 0.00 |
| TRINITY_XP_0029        | {hypothetVolvox_carteri      | 53.10 | 0.00 |
| TRINITY_GBG6526        | {Glycine Chara_braunii       | 53.10 | 0.00 |
| TRINITY_XP_0156        | {60S ribcOryza_sativa        | 53.10 | 0.00 |
| TRINITY_XP_0025        | {predicteMicromonas_commoda  | 53.10 | 0.00 |
| TRINITY_GAX8482        | {hypothetChlamydomonas_eusti | 53.10 | 0.00 |
| TRINITY_XP_0264        | {cyclin-cPapaver_somniferum  | 53.10 | 0.00 |
| TRINITY_PNW8004        | {hypothetChlamydomonas_reinh | 53.10 | 0.00 |
| TRINITY_GAX8503        | {hypothetChlamydomonas_eusti | 53.10 | 0.00 |
| TRINITY_PNW8884        | {hypothetChlamydomonas_reinh | 53.10 | 0.00 |



|                 |                             |       |      |
|-----------------|-----------------------------|-------|------|
| TRINITY_GAX7948 | hypothetChlamydomonas_eusti | 53.10 | 0.00 |
| TRINITY_BAK0228 | predicteHordeum_vulgare     | 53.10 | 0.00 |
| TRINITY_PRW5088 | intracelChlorella_sorokinia | 53.10 | 0.00 |
| TRINITY_GBG5927 | hypothetChara_braunii       | 53.10 | 0.00 |
| TRINITY_XP_0016 | predicteChlamydomonas_reinh | 53.10 | 0.00 |
| TRINITY_KNA1004 | hypothetSpinacia_oleracea   | 53.10 | 0.00 |
| TRINITY_PNW7631 | hypothetChlamydomonas_reinh | 53.10 | 0.00 |
| TRINITY_XP_0056 | acyl-CoACoccomyxa_subellips | 53.10 | 0.00 |
| TRINITY_GAX7617 | hypothetChlamydomonas_eusti | 53.10 | 0.00 |
| TRINITY_GAX7615 | hypothetChlamydomonas_eusti | 53.10 | 0.00 |
| TRINITY_PSC6941 | anaphaseMicractinium_conduc | 53.10 | 0.00 |
| TRINITY_XP_0016 | WD40 reChlamydomonas_reinh  | 53.10 | 0.00 |
| TRINITY_XP_0029 | hypothetVolvox_carteri      | 53.10 | 0.00 |
| TRINITY_BAK0302 | predicteHordeum_vulgare     | 53.10 | 0.00 |
| TRINITY_XP_0030 | flagellMicromonas_pusilla   | 53.10 | 0.00 |
| TRINITY_XP_0058 | hypothetChlorella_variabili | 53.10 | 0.00 |
| TRINITY_XP_0138 | hypothetMonoraphidium_negle | 53.10 | 0.00 |
| TRINITY_XP_0016 | predicteChlamydomonas_reinh | 53.10 | 0.00 |
| TRINITY_XP_0238 | serine/tQuercus_suber       | 53.10 | 0.00 |
| TRINITY_XP_0016 | phenylalChlamydomonas_reinh | 53.10 | 0.00 |
| TRINITY_XP_0029 | hypothetVolvox_carteri      | 53.10 | 0.00 |
| TRINITY_PSC7395 | 26S protMicractinium_conduc | 53.10 | 0.00 |
| TRINITY_BAK0277 | predicteHordeum_vulgare     | 53.10 | 0.00 |
| TRINITY_AAO7355 | reverse-Chlamydomonas_reinh | 53.10 | 0.00 |
| TRINITY_PWA5899 | phenylalArtemisia_annua     | 53.10 | 0.00 |
| TRINITY_GBF8823 | metal-niRaphidocelis_subcap | 53.10 | 0.00 |
| TRINITY_KXZ4786 | hypothetGonium_pectorale    | 53.10 | 0.00 |
| TRINITY_PNW7783 | hypothetChlamydomonas_reinh | 53.10 | 0.00 |
| TRINITY_XP_0016 | chromodChlamydomonas_reinh  | 53.10 | 0.00 |
| TRINITY_GBF9080 | hypothetRaphidocelis_subcap | 53.10 | 0.00 |
| TRINITY_XP_0029 | hypothetVolvox_carteri      | 53.10 | 0.00 |
| TRINITY_GAX7552 | hypothetChlamydomonas_eusti | 53.10 | 0.00 |
| TRINITY_PNH0697 | hypothetTetrabaena_socialis | 53.10 | 0.00 |
| TRINITY_GBF9986 | hypothetRaphidocelis_subcap | 53.10 | 0.00 |
| TRINITY_XP_0270 | SNF1-relCoffea_arabica      | 53.10 | 0.00 |
| TRINITY_GAQ8464 | hypothetKlebsormidium_niten | 53.10 | 0.00 |
| TRINITY_KXZ5388 | hypothetGonium_pectorale    | 53.10 | 0.00 |
| TRINITY_GAX7623 | hypothetChlamydomonas_eusti | 53.10 | 0.00 |
| TRINITY_PNW7006 | hypothetChlamydomonas_reinh | 53.10 | 0.00 |
| TRINITY_XP_0016 | actin-reChlamydomonas_reinh | 53.10 | 0.00 |
| TRINITY_PNW7133 | hypothetChlamydomonas_reinh | 53.10 | 0.00 |
| TRINITY_KXZ4215 | hypothetGonium_pectorale    | 53.10 | 0.00 |
| TRINITY_KXZ5313 | hypothetGonium_pectorale    | 53.10 | 0.00 |
| TRINITY_BAJ9847 | predicteHordeum_vulgare     | 53.10 | 0    |
| TRINITY_GAX8296 | hypothetChlamydomonas_eusti | 53.10 | 0.00 |
| TRINITY_GAX8261 | hypothetChlamydomonas_eusti | 53.10 | 0.00 |
| TRINITY_KXZ5146 | hypothetGonium_pectorale    | 53.10 | 0.00 |
| TRINITY_KXZ4389 | hypothetGonium_pectorale    | 53.10 | 0.00 |
| TRINITY_PNW8139 | hypothetChlamydomonas_reinh | 53.10 | 0.00 |
| TRINITY_GAX7720 | hypothetChlamydomonas_eusti | 53.10 | 0.00 |
| TRINITY_GAX7741 | hypothetChlamydomonas_eusti | 53.10 | 0.00 |
| TRINITY_GAQ8026 | thio-redKlebsormidium_niten | 53.10 | 0.00 |
| TRINITY_RID5177 | hypothetBrassica_rapa       | 53.10 | 0.00 |
| TRINITY_XP_0239 | argininQuercus_suber        | 53.10 | 0.00 |
| TRINITY_KMZ7358 | Serine--Zostera_marina      | 53.00 | 0.00 |
| TRINITY_XP_0093 | PREDICTIPyrus_x_bretschneid | 53.00 | 0.00 |
| TRINITY_XP_0243 | NAD-depePhyscomitrella_pate | 53.00 | 0.00 |
| TRINITY_GAQ8211 | hypothetKlebsormidium_niten | 53.00 | 0.00 |
| TRINITY_XP_0113 | ProteasAuxenochlorella_pro  | 53.00 | 0.00 |
| TRINITY_XP_0249 | uncharaCynara_cardunculus   | 53.00 | 0.00 |
| TRINITY_XP_0245 | 39S ribSelaginella_moellen  | 53.00 | 0.00 |
| TRINITY_XP_0029 | proteasSelaginella_moellen  | 53.00 | 0.00 |
| TRINITY_AAU9394 | thio-redHelicosporidium_sp. | 53.00 | 0.00 |
| TRINITY_GAQ7818 | 20S protKlebsormidium_niten | 53.00 | 0.00 |
| TRINITY_XP_0058 | hypothetChlorella_variabili | 53.00 | 0.00 |
| TRINITY_GAX8505 | hypothetChlamydomonas_eusti | 53.00 | 0.00 |

|                  |          |                     |       |      |
|------------------|----------|---------------------|-------|------|
| TRINITY_XP_00295 | hypothet | Volvox_carteri      | 53.00 | 0.00 |
| TRINITY_XP_02389 | 4-hydrox | Quercus_suber       | 53.00 | 0.00 |
| TRINITY_XP_02440 | (methylc | Physcomitrella_pate | 53.00 | 0.00 |
| TRINITY_XP_01361 | PREDICTI | Brassica_oleracea   | 53.00 | 0.00 |
| TRINITY_KXZ41741 | hypothet | Gonium_pectorale    | 53.00 | 0.00 |
| TRINITY_XP_00565 | pyruvat  | Coccomyxa_subellips | 53.00 | 0.00 |
| TRINITY_GAX75635 | hypothet | Chlamydomonas_eusti | 53.00 | 0.00 |
| TRINITY_GAX81005 | hypothet | Chlamydomonas_eusti | 53.00 | 0.00 |
| TRINITY_GAX74275 | hypothet | Chlamydomonas_eusti | 53.00 | 0.00 |
| TRINITY_GBF90454 | hypothet | Raphidocelis_subcap | 53.00 | 0.00 |
| TRINITY_XP_00584 | hypothet | Chlorella_variabili | 53.00 | 0.00 |
| TRINITY_KXZ50975 | hypothet | Gonium_pectorale    | 53.00 | 0.00 |
| TRINITY_GBF87867 | beta-ad  | Raphidocelis_subcap | 53.00 | 0.00 |
| TRINITY_PNW74676 | hypothet | Chlamydomonas_reinh | 53.00 | 0.00 |
| TRINITY_XP_00564 | RCC1/BLJ | Coccomyxa_subellips | 53.00 | 0.00 |
| TRINITY_XP_00295 | hypothet | Volvox_carteri      | 53.00 | 0.00 |
| TRINITY_GAX85082 | hypothet | Chlamydomonas_eusti | 53.00 | 0.00 |
| TRINITY_APW83744 | caroten  | Dunaliella_salina   | 53.00 | 0.00 |
| TRINITY_KXZ46522 | hypothet | Gonium_pectorale    | 53.00 | 0.00 |
| TRINITY_XP_02438 | PAN2-PAN | Physcomitrella_pate | 53.00 | 0.00 |
| TRINITY_XP_00305 | predict  | Micromonas_pusilla  | 53.00 | 0.00 |
| TRINITY_GAX73140 | hypothet | Chlamydomonas_eusti | 53.00 | 0.00 |
| TRINITY_PNW72916 | hypothet | Chlamydomonas_reinh | 53.00 | 0.00 |
| TRINITY_PNW70485 | hypothet | Chlamydomonas_reinh | 53.00 | 0.00 |
| TRINITY_XP_00169 | predict  | Chlamydomonas_reinh | 53.00 | 0.00 |
| TRINITY_XP_00294 | hypothet | Volvox_carteri      | 53.00 | 0.00 |
| TRINITY_GBF87502 | 50S rib  | Raphidocelis_subcap | 53.00 | 0.00 |
| TRINITY_PNW80525 | hypothet | Chlamydomonas_reinh | 53.00 | 0.00 |
| TRINITY_GAX79718 | hypothet | Chlamydomonas_eusti | 53.00 | 0.00 |
| TRINITY_GBF99162 | hypothet | Raphidocelis_subcap | 53.00 | 0.00 |
| TRINITY_GBF88408 | hypothet | Raphidocelis_subcap | 53.00 | 0.00 |
| TRINITY_GAX78230 | hypothet | Chlamydomonas_eusti | 53.00 | 0.00 |
| TRINITY_GAX74906 | hypothet | Chlamydomonas_eusti | 53.00 | 0.00 |
| TRINITY_GAX78694 | hypothet | Chlamydomonas_eusti | 53.00 | 0.00 |
| TRINITY_XP_00169 | flagell  | Chlamydomonas_reinh | 53.00 | 0    |
| TRINITY_XP_00305 | dpy-30   | Micromonas_pusilla  | 53.00 | 0.00 |
| TRINITY_XP_02067 | calmodul | Dendrobium_catenatu | 53.00 | 0.00 |
| TRINITY_XP_00565 | hypothet | Coccomyxa_subellips | 52.90 | 0.00 |
| TRINITY_XP_01104 | PREDICTI | Populus_euphratica  | 52.90 | 0.00 |
| TRINITY_XP_00296 | 60S rib  | Selaginella_moellen | 52.90 | 0.00 |
| TRINITY_XP_02388 | putativ  | Quercus_suber       | 52.90 | 0.00 |
| TRINITY_GBG59821 | hypothet | Chara_braunii       | 52.90 | 0.00 |
| TRINITY_XP_01587 | probabl  | Ziziphus_jujuba     | 52.90 | 0.00 |
| TRINITY_XP_00168 | peroxir  | Chlamydomonas_reinh | 52.90 | 0.00 |
| TRINITY_KCW55564 | hypothet | Eucalyptus_grandis  | 52.90 | 0.00 |
| TRINITY_PNR31432 | hypothet | Physcomitrella_pate | 52.90 | 0.00 |
| TRINITY_ESQ53580 | hypothet | Eutrema_salsugineur | 52.90 | 0.00 |
| TRINITY_KZV56239 | ATP synt | Dorcoceras_hygromet | 52.90 | 0.00 |
| TRINITY_OVA04022 | ABC trar | Macleaya_cordata    | 52.90 | 0.00 |
| TRINITY_XP_02735 | casein   | Abrus_precatorius   | 52.90 | 0.00 |
| TRINITY_GAQ87713 | alpha-2- | Klebsormidium_niten | 52.90 | 0.00 |
| TRINITY_GAQ86106 | Zinc fir | Klebsormidium_niten | 52.90 | 0.00 |
| TRINITY_CAI84893 | putativ  | Medicago_sativa     | 52.90 | 0.00 |
| TRINITY_KXZ55702 | hypothet | Gonium_pectorale    | 52.90 | 0.00 |
| TRINITY_XP_00639 | eukaryot | Eutrema_salsugineur | 52.90 | 0.00 |
| TRINITY_XP_01918 | PREDICTI | Ipomoea_nil         | 52.90 | 0.00 |
| TRINITY_PRW20803 | 60S rib  | Chlorella_sorokinia | 52.90 | 0.00 |
| TRINITY_GAX74132 | hypothet | Chlamydomonas_eusti | 52.90 | 0.00 |
| TRINITY_GBF89823 | hypothet | Raphidocelis_subcap | 52.90 | 0.00 |
| TRINITY_XP_00168 | LOW QUAI | Chlamydomonas_reinh | 52.90 | 0.00 |
| TRINITY_XP_00297 | GPN-loo  | Selaginella_moellen | 52.90 | 0.00 |
| TRINITY_GAX72657 | hypothet | Chlamydomonas_eusti | 52.90 | 0.00 |
| TRINITY_XP_00565 | hypothet | Coccomyxa_subellips | 52.90 | 0.00 |
| TRINITY_GAQ81454 | hypothet | Klebsormidium_niten | 52.90 | 0.00 |
| TRINITY_XP_00250 | bah-phd  | Micromonas_commoda  | 52.90 | 0.00 |
| TRINITY_XP_02454 | glycine  | Selaginella_moellen | 52.90 | 0.00 |

|                  |           |                     |       |      |
|------------------|-----------|---------------------|-------|------|
| TRINITY_GBF88184 | phosphat  | Raphidocelis_subcap | 52.90 | 0.00 |
| TRINITY_GAX82027 | hypothet  | Chlamydomonas_eusti | 52.90 | 0.00 |
| TRINITY_XP_00307 | Inosine   | Ostreococcus_tauri  | 52.90 | 0.00 |
| TRINITY_PNW78052 | hypothet  | Chlamydomonas_reinh | 52.90 | 0.00 |
| TRINITY_GAX78985 | hypothet  | Chlamydomonas_eusti | 52.90 | 0.00 |
| TRINITY_XP_00169 | aminoac   | Chlamydomonas_reinh | 52.90 | 0.00 |
| TRINITY_EOY16567 | Polynuc   | Theobroma_cacao     | 52.90 | 0.00 |
| TRINITY_XP_00634 | PREDICTE  | Solanum_tuberosum   | 52.90 | 0.00 |
| TRINITY_GAX7674  | (hypothet | Chlamydomonas_eusti | 52.90 | 0.00 |
| TRINITY_PNH12265 | Tiny mac  | Tetrabaena_socialis | 52.90 | 0.00 |
| TRINITY_RMZ54765 | hypothet  | Auxenochlorella_pro | 52.90 | 0.00 |
| TRINITY_XP_00169 | predicte  | Chlamydomonas_reinh | 52.90 | 0.00 |
| TRINITY_GBF94042 | hypothet  | Raphidocelis_subcap | 52.90 | 0.00 |
| TRINITY_GAX84653 | hypothet  | Chlamydomonas_eusti | 52.90 | 0.00 |
| TRINITY_XP_00564 | monodeh   | Coccomyxa_subellips | 52.90 | 0.00 |
| TRINITY_XP_02392 | ras-rel   | Quercus_suber       | 52.90 | 0.00 |
| TRINITY_GAX76757 | hypothet  | Chlamydomonas_eusti | 52.90 | 0.00 |
| TRINITY_XP_00294 | hypothet  | Volvox_carteri      | 52.90 | 0.00 |
| TRINITY_XP_02438 | protein   | Physcomitrella_pate | 52.90 | 0    |
| TRINITY_XP_00295 | hypothet  | Volvox_carteri      | 52.90 | 0.00 |
| TRINITY_GAX77679 | hypothet  | Chlamydomonas_eusti | 52.90 | 0.00 |
| TRINITY_PNH05407 | hypothet  | Tetrabaena_socialis | 52.90 | 0.00 |
| TRINITY_XP_00169 | predicte  | Chlamydomonas_reinh | 52.90 | 0.00 |
| TRINITY_PNW77273 | hypothet  | Chlamydomonas_reinh | 52.90 | 0.00 |
| TRINITY_XP_00169 | cyclin    | Chlamydomonas_reinh | 52.90 | 0.00 |
| TRINITY_XP_00170 | (MaoC-li  | Chlamydomonas_reinh | 52.90 | 0.00 |
| TRINITY_GAQ93053 | hypothet  | Klebsormidium_niten | 52.90 | 0.00 |
| TRINITY_GBF92968 | hypothet  | Raphidocelis_subcap | 52.90 | 0.00 |
| TRINITY_PNW87232 | hypothet  | Chlamydomonas_reinh | 52.90 | 0.00 |
| TRINITY_GAX76830 | (hypothet | Chlamydomonas_eusti | 52.90 | 0.00 |
| TRINITY_GAX74165 | hypothet  | Chlamydomonas_eusti | 52.90 | 0.00 |
| TRINITY_XP_00295 | 4-hydro   | Volvox_carteri      | 52.90 | 0.00 |
| TRINITY_GAX84385 | hypothet  | Chlamydomonas_eusti | 52.90 | 0.00 |
| TRINITY_ERN00634 | hypothet  | Amborella_trichopod | 52.90 | 0.00 |
| TRINITY_XP_00170 | (predicte | Chlamydomonas_reinh | 52.90 | 0.00 |
| TRINITY_GAX84081 | hypothet  | Chlamydomonas_eusti | 52.90 | 0.00 |
| TRINITY_GAX81638 | hypothet  | Chlamydomonas_eusti | 52.90 | 0.00 |
| TRINITY_GAX80284 | hypothet  | Chlamydomonas_eusti | 52.90 | 0.00 |
| TRINITY_GAX77988 | hypothet  | Chlamydomonas_eusti | 52.90 | 0.00 |
| TRINITY_KXZ45409 | hypothet  | Gonium_pectorale    | 52.90 | 0.00 |
| TRINITY_GAV85853 | Pkinase   | Cephalotus_follicul | 52.80 | 0.00 |
| TRINITY_ACX43954 | cysteine  | Brachiaria_hybrid_c | 52.80 | 0.00 |
| TRINITY_GAQ84169 | hypothet  | Klebsormidium_niten | 52.80 | 0.00 |
| TRINITY_PQM39568 | splicin   | Prunus_yedoensis    | 52.80 | 0.00 |
| TRINITY_RVX08721 | Transcri  | Vitis_vinifera      | 52.80 | 0.00 |
| TRINITY_PAN18198 | hypothet  | Panicum_hallii      | 52.80 | 0.00 |
| TRINITY_GAX82200 | (hypothet | Chlamydomonas_eusti | 52.80 | 0.00 |
| TRINITY_BAK00435 | predicte  | Hordeum_vulgare     | 52.80 | 0.00 |
| TRINITY_OIW11385 | hypothet  | Lupinus_angustifoli | 52.80 | 0.00 |
| TRINITY_XP_00169 | NADH:ub   | Chlamydomonas_reinh | 52.80 | 0.00 |
| TRINITY_BAK02778 | predicte  | Hordeum_vulgare     | 52.80 | 0.00 |
| TRINITY_XP_02392 | ras-rel   | Quercus_suber       | 52.80 | 0.00 |
| TRINITY_OAE33678 | hypothet  | Marchantia_polymorp | 52.80 | 0.00 |
| TRINITY_RMZ55925 | hypothet  | Auxenochlorella_pro | 52.80 | 0.00 |
| TRINITY_XP_02387 | protein   | Quercus_suber       | 52.80 | 0.00 |
| TRINITY_PNW84115 | hypothet  | Chlamydomonas_reinh | 52.80 | 0.00 |
| TRINITY_XP_02389 | guanine   | Quercus_suber       | 52.80 | 0.00 |
| TRINITY_XP_00294 | hypothet  | Volvox_carteri      | 52.80 | 0.00 |
| TRINITY_PNW73260 | (hypothet | Chlamydomonas_reinh | 52.80 | 0.00 |
| TRINITY_GAX77428 | hypothet  | Chlamydomonas_eusti | 52.80 | 0.00 |
| TRINITY_GAX73939 | hypothet  | Chlamydomonas_eusti | 52.80 | 0.00 |
| TRINITY_XP_00170 | (predicte | Chlamydomonas_reinh | 52.80 | 0.00 |
| TRINITY_PKA51934 | hypothet  | Apostasia_shenzheni | 52.80 | 0.00 |
| TRINITY_GAX77974 | hypothet  | Chlamydomonas_eusti | 52.80 | 0.00 |
| TRINITY_PNW78652 | hypothet  | Chlamydomonas_reinh | 52.80 | 0.00 |
| TRINITY_XP_00423 | alpha-m   | Solanum_lycopersicu | 52.80 | 0.00 |

|                   |                              |       |      |
|-------------------|------------------------------|-------|------|
| TRINITY_PNW75107  | hypothetChlamydomonas_reinh  | 52.80 | 0.00 |
| TRINITY_XP_00305  | predicteMicromonas_pusilla   | 52.80 | 0.00 |
| TRINITY_GAX82152  | hypothetChlamydomonas_eusti  | 52.80 | 0.00 |
| TRINITY_XP_0017   | (mitochorChlamydomonas_reinh | 52.80 | 0.00 |
| TRINITY_PTQ30844  | hypothetMarchantia_polymorp  | 52.80 | 0.00 |
| TRINITY_GAQ8806   | (methylcKlebsormidium_niten  | 52.80 | 0.00 |
| TRINITY_GAX77631  | hypothetChlamydomonas_eusti  | 52.80 | 0.00 |
| TRINITY_EPS74505  | hypothetGenlisea_aurea       | 52.80 | 0.00 |
| TRINITY_PNH06431  | TransmenTetrabaena_socialis  | 52.80 | 0.00 |
| TRINITY_XP_02389  | probableQuercus_suber        | 52.80 | 0.00 |
| TRINITY_XP_02199  | uncharacHelianthus_annuus    | 52.80 | 0.00 |
| TRINITY_XP_00585  | hypothetChlorella_variabili  | 52.80 | 0.00 |
| TRINITY_PNW78269  | hypothetChlamydomonas_reinh  | 52.80 | 0.00 |
| TRINITY_PNW81821  | hypothetChlamydomonas_reinh  | 52.80 | 0.00 |
| TRINITY_PRW60832  | chitinasChlorella_sorokinia  | 52.80 | 0.00 |
| TRINITY_XP_00295  | hypothetVolvox_carteri       | 52.80 | 0.00 |
| TRINITY_XP_00295  | eukaryotVolvox_carteri       | 52.80 | 0.00 |
| TRINITY_XP_01389  | hypothetMonoraphidium_negle  | 52.80 | 0.00 |
| TRINITY_GBF92499  | major fRaphidocelis_subcap   | 52.80 | 0.00 |
| TRINITY_GAQ90142  | PutativKlebsormidium_niten   | 52.80 | 0.00 |
| TRINITY_KXZ48051  | hypothetGonium_pectorale     | 52.80 | 0.00 |
| TRINITY_XP_02387  | serine/tQuercus_suber        | 52.80 | 0.00 |
| TRINITY_GAQ79718  | alpha-tKlebsormidium_niten   | 52.70 | 0.00 |
| TRINITY_GBG69603  | hypothetChara_braunii        | 52.70 | 0.00 |
| TRINITY_XP_02716  | ABC trarCoffea_eugenioides   | 52.70 | 0.00 |
| TRINITY_OAE24696  | hypothetMarchantia_polymorp  | 52.70 | 0.00 |
| TRINITY_EFH56348  | hypothetArabidopsis_lyrata   | 52.70 | 0.00 |
| TRINITY_GAX77888  | hypothetChlamydomonas_eusti  | 52.70 | 0.00 |
| TRINITY_BAJ99035  | predicteHordeum_vulgare      | 52.70 | 0.00 |
| TRINITY_XP_02438  | mediatorPhyscomitrella_pate  | 52.70 | 0.00 |
| TRINITY_XP_02189  | 60S acicCarica_papaya        | 52.70 | 0.00 |
| TRINITY_KZV2168   | (ABC trarDorcoceras_hygromet | 52.70 | 0.00 |
| TRINITY_XP_00295  | hypothetVolvox_carteri       | 52.70 | 0.00 |
| TRINITY_XP_0239   | (myosin-1Quercus_suber       | 52.70 | 0.00 |
| TRINITY_XP_02438  | OTU domPhyscomitrella_pate   | 52.70 | 0.00 |
| TRINITY_XP_02791  | DNA polyVigna_unguiculata    | 52.70 | 0.00 |
| TRINITY_KDD72661  | hypothetHelicosporidium_sp.  | 52.70 | 0.00 |
| TRINITY_QBG38065  | NADH deChlorosarcinopsis_e   | 52.70 | 0.00 |
| TRINITY_GAX80914  | hypothetChlamydomonas_eusti  | 52.70 | 0.00 |
| TRINITY_PNH05624  | hypothetTetrabaena_socialis  | 52.70 | 0.00 |
| TRINITY_XP_00295  | hypothetVolvox_carteri       | 52.70 | 0.00 |
| TRINITY_ACN40777  | unknown Picea_sitchensis     | 52.70 | 0.00 |
| TRINITY_BAK02778  | predicteHordeum_vulgare      | 52.70 | 0.00 |
| TRINITY_XP_00564  | RBP11-ljCoccomyxa_subellips  | 52.70 | 0.00 |
| TRINITY_XP_00295  | hypothetVolvox_carteri       | 52.70 | 0.00 |
| TRINITY_PSC71663  | Pre-mRN/Micractinium_conduc  | 52.70 | 0.00 |
| TRINITY_PRW34018  | trans-2-Chlorella_sorokinia  | 52.70 | 0.00 |
| TRINITY_GAX75731  | hypothetChlamydomonas_eusti  | 52.70 | 0.00 |
| TRINITY_XP_0271   | (probableCoffea_arabica      | 52.70 | 0.00 |
| TRINITY_XP_01053  | PREDICTHTarenaya_hasslerian  | 52.70 | 0.00 |
| TRINITY_GAX85168  | hypothetChlamydomonas_eusti  | 52.70 | 0.00 |
| TRINITY_XP_002316 | -phospPopulus_trichocarpa    | 52.70 | 0.00 |
| TRINITY_XP_02388  | ras-relQuercus_suber         | 52.70 | 0.00 |
| TRINITY_GAX77983  | hypothetChlamydomonas_eusti  | 52.70 | 0.00 |
| TRINITY_GAX83343  | hypothetChlamydomonas_eusti  | 52.70 | 0.00 |
| TRINITY_XP_00169  | beta tukChlamydomonas_reinh  | 52.70 | 0.00 |
| TRINITY_KXZ55513  | hypothetGonium_pectorale     | 52.70 | 0.00 |
| TRINITY_PRW61141  | mitogen-Chlorella_sorokinia  | 52.70 | 0.00 |
| TRINITY_RZC14159  | Tubulin Glycine_soja         | 52.70 | 0.00 |
| TRINITY_XP_0017   | (diacylg]Chlamydomonas_reinh | 52.70 | 0.00 |
| TRINITY_GAQ88245  | hypothetKlebsormidium_niten  | 52.70 | 0.00 |
| TRINITY_KXZ42056  | hypothetGonium_pectorale     | 52.70 | 0.00 |
| TRINITY_GAX74129  | hypothetChlamydomonas_eusti  | 52.70 | 0.00 |
| TRINITY_GAX76031  | hypothetChlamydomonas_eusti  | 52.70 | 0.00 |
| TRINITY_KXZ44686  | hypothetGonium_pectorale     | 52.70 | 0.00 |
| TRINITY_GAX73182  | hypothetChlamydomonas_eusti  | 52.70 | 0.00 |

|                   |          |                     |       |      |
|-------------------|----------|---------------------|-------|------|
| TRINITY_GAQ77823  | Nucleosi | Klebsormidium_niten | 52.70 | 0.00 |
| TRINITY_XP_00644  | notchle  | Citrus_clementina   | 52.70 | 0.00 |
| TRINITY_GAQ88260  | Ca2+ tr  | Klebsormidium_niten | 52.70 | 0.00 |
| TRINITY_GAX80278  | hypothet | Chlamydomonas_eusti | 52.70 | 0.00 |
| TRINITY_KXZ40924  | hypothet | Gonium_pectorale    | 52.70 | 0.00 |
| TRINITY_XP_00584  | hypothet | Chlorella_variabili | 52.70 | 0.00 |
| TRINITY_GAX82562  | hypothet | Chlamydomonas_eusti | 52.70 | 0.00 |
| TRINITY_GBF92769  | hypothet | Raphidocelis_subcap | 52.70 | 0.00 |
| TRINITY_GAX82705  | hypothet | Chlamydomonas_eusti | 52.70 | 0.00 |
| TRINITY_KXZ49935  | hypothet | Gonium_pectorale    | 52.70 | 0.00 |
| TRINITY_GAX85578  | hypothet | Chlamydomonas_eusti | 52.70 | 0.00 |
| TRINITY_GAX80918  | hypothet | Chlamydomonas_eusti | 52.70 | 0.00 |
| TRINITY_XP_00170  | predicte | Chlamydomonas_reinh | 52.70 | 0.00 |
| TRINITY_PNW78157  | hypothet | Chlamydomonas_reinh | 52.70 | 0.00 |
| TRINITY_ERN00581  | hypothet | Amborella_trichopod | 52.60 | 0.00 |
| TRINITY_XP_01389  | DNA (cyt | Monoraphidium_negle | 52.60 | 0.00 |
| TRINITY_RDX69773  | Actin-ir | Mucuna_pruriens     | 52.60 | 0.00 |
| TRINITY_XP_02390  | inorgani | Quercus_suber       | 52.60 | 0.00 |
| TRINITY_XP_01248  | PREDICTI | Gossypium_raimondii | 52.60 | 0.00 |
| TRINITY_XP_01389  | H/ACA ri | Monoraphidium_negle | 52.60 | 0.00 |
| TRINITY_XP_01561  | probable | Oryza_sativa        | 52.60 | 0.00 |
| TRINITY_KMS65245  | hypothet | Beta_vulgaris       | 52.60 | 0.00 |
| TRINITY_XP_00835  | PREDICTI | Malus_domestica     | 52.60 | 0.00 |
| TRINITY_XP_00584  | hypothet | Chlorella_variabili | 52.60 | 0.00 |
| TRINITY_PNW74230  | hypothet | Chlamydomonas_reinh | 52.60 | 0.00 |
| TRINITY_GAQ78464  | cyclophi | Klebsormidium_niten | 52.60 | 0.00 |
| TRINITY_XP_02015  | ribose-  | Aegilops_tauschii   | 52.60 | 0.00 |
| TRINITY_RZC13813  | ATP-depe | Glycine_soja        | 52.60 | 0.00 |
| TRINITY_XP_01069  | PREDICTI | Beta_vulgaris       | 52.60 | 0.00 |
| TRINITY_GBG92316  | hypothet | Chara_braunii       | 52.60 | 0.00 |
| TRINITY_GAQ88954  | Putative | Klebsormidium_niten | 52.60 | 0.00 |
| TRINITY_GAX79539  | hypothet | Chlamydomonas_eusti | 52.60 | 0.00 |
| TRINITY_ABD981652 | -succir  | Chlamydomonas_reinh | 52.60 | 0.00 |
| TRINITY_GAX79665  | hypothet | Chlamydomonas_eusti | 52.60 | 0.00 |
| TRINITY_XP_02172  | ubiquin  | Chenopodium_quinoa  | 52.60 | 0.00 |
| TRINITY_EPS74505  | hypothet | Genlisea_aurea      | 52.60 | 0.00 |
| TRINITY_KXZ49107  | hypothet | Gonium_pectorale    | 52.60 | 0.00 |
| TRINITY_GAX74112  | hypothet | Chlamydomonas_eusti | 52.60 | 0.00 |
| TRINITY_GAX82247  | hypothet | Chlamydomonas_eusti | 52.60 | 0.00 |
| TRINITY_XP_00938  | PREDICTI | Musa_acuminata      | 52.60 | 0.00 |
| TRINITY_XP_00169  | thylakoi | Chlamydomonas_reinh | 52.60 | 0.00 |
| TRINITY_GAX74971  | hypothet | Chlamydomonas_eusti | 52.60 | 0.00 |
| TRINITY_PNW73583  | hypothet | Chlamydomonas_reinh | 52.60 | 0.00 |
| TRINITY_XP_00751  | predicte | Bathycoccus_prasin  | 52.60 | 0.00 |
| TRINITY_GAX80044  | hypothet | Chlamydomonas_eusti | 52.60 | 0.00 |
| TRINITY_RYR22514  | hypothet | Arachis_hypogaea    | 52.60 | 0.00 |
| TRINITY_GBF93470  | hypothet | Raphidocelis_subcap | 52.60 | 0.00 |
| TRINITY_XP_00941  | PREDICTI | Musa_acuminata      | 52.60 | 0.00 |
| TRINITY_PON48973  | Splicin  | Parasponia_anderson | 52.60 | 0.00 |
| TRINITY_XP_01843  | PREDICTI | Raphanus_sativus    | 52.60 | 0.00 |
| TRINITY_XP_02273  | GTP-bin  | Durio_zibethinus    | 52.60 | 0.00 |
| TRINITY_XP_01390  | hypothet | Monoraphidium_negle | 52.60 | 0.00 |
| TRINITY_GAX85350  | hypothet | Chlamydomonas_eusti | 52.60 | 0.00 |
| TRINITY_XP_00584  | hypothet | Chlorella_variabili | 52.60 | 0.00 |
| TRINITY_GBG81344  | hypothet | Chara_braunii       | 52.60 | 0.00 |
| TRINITY_GAX76158  | hypothet | Chlamydomonas_eusti | 52.60 | 0.00 |
| TRINITY_GAX77022  | hypothet | Chlamydomonas_eusti | 52.60 | 0.00 |
| TRINITY_PNW81240  | hypothet | Chlamydomonas_reinh | 52.60 | 0.00 |
| TRINITY_XP_00584  | hypothet | Chlorella_variabili | 52.60 | 0.00 |
| TRINITY_PSC72213  | 50S rib  | Micractinium_conduc | 52.60 | 0.00 |
| TRINITY_XP_02496  | glutami  | Cynara_cardunculus  | 52.60 | 0.00 |
| TRINITY_PSC71668  | Phospho  | Micractinium_conduc | 52.60 | 0.00 |
| TRINITY_PNH00090  | putative | Tetrabaena_socialis | 52.60 | 0.00 |
| TRINITY_GBF97559  | hypothet | Raphidocelis_subcap | 52.60 | 0.00 |
| TRINITY_GAX83380  | hypothet | Chlamydomonas_eusti | 52.60 | 0.00 |
| TRINITY_GAX74493  | hypothet | Chlamydomonas_eusti | 52.60 | 0.00 |

|                   |          |                     |       |      |
|-------------------|----------|---------------------|-------|------|
| TRINITY_XP_01915  | PREDICTH | Ipomoea_nil         | 52.60 | 0.00 |
| TRINITY_XP_00584  | hypothet | Chlorella_variabili | 52.60 | 0.00 |
| TRINITY_KXZ51905  | hypothet | Gonium_pectorale    | 52.60 | 0.00 |
| TRINITY_EFJ26676  | hypothet | Selaginella_moellen | 52.50 | 0.00 |
| TRINITY_XP_021735 | '-3' e   | Chenopodium_quinoa  | 52.50 | 0.00 |
| TRINITY_XP_02018  | ribonucl | Aegilops_tauschii   | 52.50 | 0.00 |
| TRINITY_XP_00564  | NAD(P)-k | Coccomyxa_subellips | 52.50 | 0.00 |
| TRINITY_ABK22915  | unknown  | Picea_sitchensis    | 52.50 | 0.00 |
| TRINITY_KXZ46612  | hypothet | Gonium_pectorale    | 52.50 | 0.00 |
| TRINITY_XP_02387  | histidir | Quercus_suber       | 52.50 | 0.00 |
| TRINITY_PNR27151  | hypothet | Physcomitrella_pate | 52.50 | 0.00 |
| TRINITY_VDD12629  | unnamed  | Brassica_rapa       | 52.50 | 0.00 |
| TRINITY_BAJ91146  | predicte | Hordeum_vulgare     | 52.50 | 0.00 |
| TRINITY_XP_02390  | mitochor | Quercus_suber       | 52.50 | 0.00 |
| TRINITY_XP_00298  | 1,2-dih  | Selaginella_moellen | 52.50 | 0.00 |
| TRINITY_XP_01725  | PREDICTH | Daucus_carota       | 52.50 | 0.00 |
| TRINITY_GAX73698  | hypothet | Chlamydomonas_eusti | 52.50 | 0.00 |
| TRINITY_PRW58990  | carboxy- | Chlorella_sorokinia | 52.50 | 0.00 |
| TRINITY_PRW56094  | phosphat | Chlorella_sorokinia | 52.50 | 0.00 |
| TRINITY_PNH09730  | Trafficl | Tetrabaena_socialis | 52.50 | 0.00 |
| TRINITY_XP_02418  | microson | Rosa_chinensis      | 52.50 | 0.00 |
| TRINITY_XP_00305  | predicte | Micromonas_pusilla  | 52.50 | 0.00 |
| TRINITY_XP_02391  | exosome  | Quercus_suber       | 52.50 | 0.00 |
| TRINITY_PNW72006  | hypothet | Chlamydomonas_reinh | 52.50 | 0.00 |
| TRINITY_PNH11061  | hypothet | Tetrabaena_socialis | 52.50 | 0.00 |
| TRINITY_PNH02289  | Guanylat | Tetrabaena_socialis | 52.50 | 0.00 |
| TRINITY_OMO54877  | hypothet | Corchorus_capsulari | 52.50 | 0.00 |
| TRINITY_PNH10700  | hypothet | Tetrabaena_socialis | 52.50 | 0.00 |
| TRINITY_GAX86469  | hypothet | Chlamydomonas_eusti | 52.50 | 0.00 |
| TRINITY_PWA97656  | periodic | Artemisia_annua     | 52.50 | 0.00 |
| TRINITY_XP_00584  | hypothet | Chlorella_variabili | 52.50 | 0.00 |
| TRINITY_PRW56659  | Exodeoxy | Chlorella_sorokinia | 52.50 | 0.00 |
| TRINITY_POC8M8.1  | RecName: | Zea_mays            | 52.50 | 0.00 |
| TRINITY_ABI79071  | chloropl | Dunaliella_salina   | 52.50 | 0.00 |
| TRINITY_PRW60639  | isoform  | Chlorella_sorokinia | 52.50 | 0.00 |
| TRINITY_PNH10087  | hypothet | Tetrabaena_socialis | 52.50 | 0.00 |
| TRINITY_PNW69988  | hypothet | Chlamydomonas_reinh | 52.50 | 0.00 |
| TRINITY_GAX77231  | hypothet | Chlamydomonas_eusti | 52.50 | 0.00 |
| TRINITY_GBG87683  | hypothet | Chara_braunii       | 52.50 | 0.00 |
| TRINITY_XP_02283  | Thioered | Ostreococcus_tauri  | 52.50 | 0.00 |
| TRINITY_GBF99783  | hypothet | Raphidocelis_subcap | 52.50 | 0.00 |
| TRINITY_XP_00169  | peptidy  | Chlamydomonas_reinh | 52.50 | 0.00 |
| TRINITY_GAQ78688  | ubiquiti | Klebsormidium_niten | 52.50 | 0.00 |
| TRINITY_GAX72576  | hypothet | Chlamydomonas_eusti | 52.50 | 0.00 |
| TRINITY_GBF89702  | hypothet | Raphidocelis_subcap | 52.50 | 0.00 |
| TRINITY_GAX74597  | hypothet | Chlamydomonas_eusti | 52.50 | 0.00 |
| TRINITY_XP_02439  | uncharac | Physcomitrella_pate | 52.50 | 0.00 |
| TRINITY_KXZ53570  | hypothet | Gonium_pectorale    | 52.50 | 0.00 |
| TRINITY_XP_00628  | arginyl- | Capsella_rubella    | 52.50 | 0.00 |
| TRINITY_BAK00582  | predicte | Hordeum_vulgare     | 52.50 | 0.00 |
| TRINITY_GAQ93583  | putative | Klebsormidium_niten | 52.50 | 0.00 |
| TRINITY_XP_00294  | hypothet | Volvox_carteri      | 52.50 | 0.00 |
| TRINITY_GAX85699  | hypothet | Chlamydomonas_eusti | 52.50 | 0.00 |
| TRINITY_AAV83799  | putative | Chorispora_bungeana | 52.50 | 0.00 |
| TRINITY_XP_00226  | PREDICTH | Vitis_vinifera      | 52.40 | 0.00 |
| TRINITY_XP_02039  | heat sh  | Zea_mays            | 52.40 | 0.00 |
| TRINITY_XP_02793  | trifunct | Vigna_unguiculata   | 52.40 | 0.00 |
| TRINITY_XP_00296  | probable | Selaginella_moellen | 52.40 | 0.00 |
| TRINITY_GAQ88724  | putative | Klebsormidium_niten | 52.40 | 0.00 |
| TRINITY_XP_01389  | hypothet | Monoraphidium_negle | 52.40 | 0.00 |
| TRINITY_XP_00424  | 14 kDa   | Solanum_lycopersicu | 52.40 | 0.00 |
| TRINITY_GAQ80986  | Aldo/ket | Klebsormidium_niten | 52.40 | 0.00 |
| TRINITY_XP_00584  | hypothet | Chlorella_variabili | 52.40 | 0.00 |
| TRINITY_XP_00584  | hypothet | Chlorella_variabili | 52.40 | 0.00 |
| TRINITY_XP_02067  | 6-phosp  | Dendrobium_catenatu | 52.40 | 0.00 |
| TRINITY_XP_00306  | predicte | Micromonas_pusilla  | 52.40 | 0.00 |

|                  |          |                       |       |      |
|------------------|----------|-----------------------|-------|------|
| TRINITY_YP_7172  | cytochr  | Ostreococcus_tauri    | 52.40 | 0.00 |
| TRINITY_ONK6944  | uncharac | Asparagus_officinal   | 52.40 | 0.00 |
| TRINITY_XP_0124  | PREDICTI | Gossypium_raimondii   | 52.40 | 0.00 |
| TRINITY_KXZ5280  | hypothet | Gonium_pectorale      | 52.40 | 0.00 |
| TRINITY_KZV16704 | hypothet | Dorcoceras_hygromet   | 52.40 | 0.00 |
| TRINITY_XP_01024 | PREDICTI | Nelumbo_nucifera      | 52.40 | 0.00 |
| TRINITY_XP_00295 | hypothet | Volvox_carteri        | 52.40 | 0.00 |
| TRINITY_PSC69247 | aminotr  | Micractinium_conduc   | 52.40 | 0.00 |
| TRINITY_GAX83888 | hypothet | Chlamydomonas_eusti   | 52.40 | 0.00 |
| TRINITY_XP_00564 | alcohol  | Coccomyxa_subellips   | 52.40 | 0.00 |
| TRINITY_XP_01024 | PREDICTI | Nelumbo_nucifera      | 52.40 | 0.00 |
| TRINITY_XP_00750 | coatome  | Bathycoccus_prasinc   | 52.40 | 0.00 |
| TRINITY_PNW87231 | hypothet | Chlamydomonas_reinh   | 52.40 | 0.00 |
| TRINITY_GAX83214 | hypothet | Chlamydomonas_eusti   | 52.40 | 0.00 |
| TRINITY_EMS59303 | Plasma   | nTriticum_urartu      | 52.40 | 0.00 |
| TRINITY_XP_02706 | proteas  | Coffea_arabica        | 52.40 | 0.00 |
| TRINITY_BAK05241 | predict  | Hordeum_vulgare       | 52.40 | 0.00 |
| TRINITY_PRW58395 | PAB-dep  | Chlorella_sorokinia   | 52.40 | 0.00 |
| TRINITY_XP_02392 | DNA rep  | Quercus_suber         | 52.40 | 0.00 |
| TRINITY_XP_01010 | putativ  | Morus_notabilis       | 52.40 | 0.00 |
| TRINITY_PRW59422 | acyl-    | N-Chlorella_sorokinia | 52.40 | 0.00 |
| TRINITY_GAX82745 | hypothet | Chlamydomonas_eusti   | 52.40 | 0.00 |
| TRINITY_XP_01145 | PREDICTI | Fragaria_vesca        | 52.40 | 0.00 |
| TRINITY_GAX77530 | hypothet | Chlamydomonas_eusti   | 52.40 | 0.00 |
| TRINITY_XP_00170 | iron-su  | Chlamydomonas_reinh   | 52.40 | 0.00 |
| TRINITY_PTQ47315 | hypothet | Marchantia_polymorp   | 52.40 | 0.00 |
| TRINITY_KXZ54447 | hypothet | Gonium_pectorale      | 52.40 | 0.00 |
| TRINITY_XP_00937 | PREDICTI | Pyrus_x_bretschneid   | 52.40 | 0.00 |
| TRINITY_GBF90451 | choline- | Raphidocelis_subcap   | 52.40 | 0.00 |
| TRINITY_PNW77385 | hypothet | Chlamydomonas_reinh   | 52.40 | 0.00 |
| TRINITY_KDD75273 | hypothet | Helicosporidium_sp.   | 52.40 | 0.00 |
| TRINITY_XP_00295 | hypothet | Volvox_carteri        | 52.40 | 0.00 |
| TRINITY_GAX75172 | hypothet | Chlamydomonas_eusti   | 52.40 | 0.00 |
| TRINITY_XP_01390 | hypothet | Monoraphidium_negle   | 52.40 | 0.00 |
| TRINITY_XP_00295 | hypothet | Volvox_carteri        | 52.40 | 0.00 |
| TRINITY_PNW84074 | hypothet | Chlamydomonas_reinh   | 52.40 | 0.00 |
| TRINITY_GAQ93561 | hypothet | Klebsormidium_niten   | 52.40 | 0.00 |
| TRINITY_KXZ47369 | hypothet | Gonium_pectorale      | 52.40 | 0.00 |
| TRINITY_XP_00169 | mixed l  | Chlamydomonas_reinh   | 52.40 | 0.00 |
| TRINITY_XP_00250 | protein  | Micromonas_commoda    | 52.40 | 0.00 |
| TRINITY_GAX80343 | hypothet | Chlamydomonas_eusti   | 52.40 | 0.00 |
| TRINITY_XP_00169 | predict  | Chlamydomonas_reinh   | 52.40 | 0.00 |
| TRINITY_XP_00294 | hypothet | Volvox_carteri        | 52.40 | 0.00 |
| TRINITY_GAX81547 | hypothet | Chlamydomonas_eusti   | 52.40 | 0.00 |
| TRINITY_PNW78787 | hypothet | Chlamydomonas_reinh   | 52.40 | 0.00 |
| TRINITY_XP_02451 | sucrose  | Selaginella_moellen   | 52.40 | 0.00 |
| TRINITY_GAX73391 | hypothet | Chlamydomonas_eusti   | 52.40 | 0.00 |
| TRINITY_AAM61036 | contain  | sArabidopsis_thalian  | 52.30 | 0.00 |
| TRINITY_XP_00307 | Adenyly  | Ostreococcus_tauri    | 52.30 | 0.00 |
| TRINITY_XP_01069 | PREDICTI | Beta_vulgaris         | 52.30 | 0.00 |
| TRINITY_AAB86496 | calmodul | Zea_mays              | 52.30 | 0.00 |
| TRINITY_EEF26640 | conserve | Ricinus_communis      | 52.30 | 0.00 |
| TRINITY_GAX77236 | hypothet | Chlamydomonas_eusti   | 52.30 | 0.00 |
| TRINITY_GBF96670 | T-compl  | eRaphidocelis_subcap  | 52.30 | 0.00 |
| TRINITY_GAX78856 | hypothet | Chlamydomonas_eusti   | 52.30 | 0.00 |
| TRINITY_XP_00306 | predict  | Micromonas_pusilla    | 52.30 | 0.00 |
| TRINITY_XP_00658 | tip elor | Glycine_max           | 52.30 | 0.00 |
| TRINITY_XP_00295 | hypothet | Volvox_carteri        | 52.30 | 0.00 |
| TRINITY_XP_00295 | hypothet | Volvox_carteri        | 52.30 | 0.00 |
| TRINITY_XP_02017 | protein  | Aegilops_tauschii     | 52.30 | 0.00 |
| TRINITY_GBF97321 | hypothet | Raphidocelis_subcap   | 52.30 | 0.00 |
| TRINITY_XP_01943 | PREDICTI | Lupinus_angustifoli   | 52.30 | 0.00 |
| TRINITY_XP_00170 | predict  | Chlamydomonas_reinh   | 52.30 | 0.00 |
| TRINITY_PNW78560 | hypothet | Chlamydomonas_reinh   | 52.30 | 0.00 |
| TRINITY_XP_00295 | hypothet | Volvox_carteri        | 52.30 | 0.00 |
| TRINITY_GAQ81454 | hypothet | Klebsormidium_niten   | 52.30 | 0.00 |

|                  |          |                     |       |      |
|------------------|----------|---------------------|-------|------|
| TRINITY_XP_00564 | ATP-dep  | Coccomyxa_subellips | 52.30 | 0.00 |
| TRINITY_PSC7546  | very-lor | Micractinium_conduc | 52.30 | 0.00 |
| TRINITY_XP_0135  | PREDICTI | Brassica_oleracea   | 52.30 | 0.00 |
| TRINITY_NP_5649  | Protein  | Arabidopsis_thalian | 52.30 | 0.00 |
| TRINITY_XP_0243  | spliceo  | Physcomitrella_pate | 52.30 | 0.00 |
| TRINITY_XP_00564 | SPRY-don | Coccomyxa_subellips | 52.30 | 0.00 |
| TRINITY_PNW7802  | hypothet | Chlamydomonas_reinh | 52.30 | 0.00 |
| TRINITY_XP_00294 | hypothet | Volvox_carteri      | 52.30 | 0.00 |
| TRINITY_PNH1077  | hypothet | Tetrabaena_socialis | 52.30 | 0.00 |
| TRINITY_GAX8470  | hypothet | Chlamydomonas_eusti | 52.30 | 0.00 |
| TRINITY_XP_0016  | predicte | Chlamydomonas_reinh | 52.30 | 0.00 |
| TRINITY_KXZ4409  | hypothet | Gonium_pectorale    | 52.30 | 0.00 |
| TRINITY_GAX7417  | hypothet | Chlamydomonas_eusti | 52.30 | 0.00 |
| TRINITY_GBF8897  | hypothet | Raphidocelis_subcap | 52.30 | 0.00 |
| TRINITY_GAX7489  | hypothet | Chlamydomonas_eusti | 52.30 | 0.00 |
| TRINITY_XP_0029  | hypothet | Volvox_carteri      | 52.30 | 0.00 |
| TRINITY_GAX7415  | hypothet | Chlamydomonas_eusti | 52.30 | 0.00 |
| TRINITY_XP_0139  | hypothet | Monoraphidium_negle | 52.30 | 0.00 |
| TRINITY_XP_00231 | iron-sul | Populus_trichocarpa | 52.30 | 0.00 |
| TRINITY_PNW7654  | hypothet | Chlamydomonas_reinh | 52.30 | 0.00 |
| TRINITY_KXZ4329  | hypothet | Gonium_pectorale    | 52.30 | 0.00 |
| TRINITY_GAX8417  | hypothet | Chlamydomonas_eusti | 52.30 | 0.00 |
| TRINITY_GAX8592  | hypothet | Chlamydomonas_eusti | 52.30 | 0.00 |
| TRINITY_XP_00294 | hypothet | Volvox_carteri      | 52.30 | 0.00 |
| TRINITY_GAX7260  | hypothet | Chlamydomonas_eusti | 52.30 | 0.00 |
| TRINITY_BAK0145  | predicte | Hordeum_vulgare     | 52.30 | 0.00 |
| TRINITY_PNH1228  | WW domai | Tetrabaena_socialis | 52.30 | 0.00 |
| TRINITY_XP_0243  | uncharac | Physcomitrella_pate | 52.30 | 0.00 |
| TRINITY_GAX7829  | hypothet | Chlamydomonas_eusti | 52.30 | 0.00 |
| TRINITY_PNW7716  | hypothet | Chlamydomonas_reinh | 52.30 | 0.00 |
| TRINITY_XP_0029  | hypothet | Volvox_carteri      | 52.30 | 0.00 |
| TRINITY_PNW7375  | hypothet | Chlamydomonas_reinh | 52.30 | 0.00 |
| TRINITY_PNH0305  | hypothet | Tetrabaena_socialis | 52.30 | 0.00 |
| TRINITY_GAX7949  | hypothet | Chlamydomonas_eusti | 52.30 | 0.00 |
| TRINITY_KXZ4486  | hypothet | Gonium_pectorale    | 52.30 | 0    |
| TRINITY_PRW4461  | macroph  | Chlorella_sorokinia | 52.30 | 0.00 |
| TRINITY_XP_0029  | hypothet | Volvox_carteri      | 52.30 | 0.00 |
| TRINITY_XP_0218  | intron-k | Spinacia_oleracea   | 52.30 | 0.00 |
| TRINITY_XP_0239  | uncharac | Quercus_suber       | 52.30 | 0.00 |
| TRINITY_GAX7907  | hypothet | Chlamydomonas_eusti | 52.30 | 0.00 |
| TRINITY_KXZ4823  | hypothet | Gonium_pectorale    | 52.30 | 0.00 |
| TRINITY_PTQ3209  | hypothet | Marchantia_polymorp | 52.20 | 0.00 |
| TRINITY_PTQ3141  | hypothet | Marchantia_polymorp | 52.20 | 0.00 |
| TRINITY_RID5623  | hypothet | Brassica_rapa       | 52.20 | 0.00 |
| TRINITY_GAX7512  | hypothet | Chlamydomonas_eusti | 52.20 | 0.00 |
| TRINITY_XP_0227  | 60S rib  | Durio_zibethinus    | 52.20 | 0.00 |
| TRINITY_XP_0104  | PREDICTI | Camelina_sativa     | 52.20 | 0.00 |
| TRINITY_XP_00141 | predicte | Ostreococcus_sp._'1 | 52.20 | 0.00 |
| TRINITY_XP_00564 | DER1-don | Coccomyxa_subellips | 52.20 | 0.00 |
| TRINITY_GAQ8892  | hypothet | Klebsormidium_niten | 52.20 | 0.00 |
| TRINITY_AHI4990  | membran  | Lavandula_angustifo | 52.20 | 0.00 |
| TRINITY_PNW8816  | hypothet | Chlamydomonas_reinh | 52.20 | 0.00 |
| TRINITY_XP_0217  | cytochr  | Chenopodium_quinoa  | 52.20 | 0.00 |
| TRINITY_XP_0218  | phosphat | Carica_papaya       | 52.20 | 0.00 |
| TRINITY_XP_0216  | putativ  | Hevea_brasiliensis  | 52.20 | 0.00 |
| TRINITY_XP_0029  | hypothet | Volvox_carteri      | 52.20 | 0.00 |
| TRINITY_PUZ4445  | hypothet | Panicum_hallii      | 52.20 | 0.00 |
| TRINITY_XP_0084  | PREDICTI | Cucumis_melo        | 52.20 | 0.00 |
| TRINITY_PNH0132  | hypothet | Tetrabaena_socialis | 52.20 | 0.00 |
| TRINITY_XP_0016  | predicte | Chlamydomonas_reinh | 52.20 | 0.00 |
| TRINITY_XP_00141 | predicte | Ostreococcus_sp._'1 | 52.20 | 0.00 |
| TRINITY_PNW8676  | hypothet | Chlamydomonas_reinh | 52.20 | 0.00 |
| TRINITY_XP_0016  | flagell  | Chlamydomonas_reinh | 52.20 | 0.00 |
| TRINITY_GAX8636  | hypothet | Chlamydomonas_eusti | 52.20 | 0.00 |
| TRINITY_XP_0105  | PREDICTI | Tarenaya_hasslerian | 52.20 | 0.00 |
| TRINITY_GAX7504  | hypothet | Chlamydomonas_eusti | 52.20 | 0.00 |



|                  |                              |       |      |
|------------------|------------------------------|-------|------|
| TRINITY_XP_02026 | putativeAsparagus_officinal  | 52.20 | 0.00 |
| TRINITY_PNW78652 | hypothetChlamydomonas_reinh  | 52.20 | 0.00 |
| TRINITY_XP_02174 | ras-relChenopodium_quinoa    | 52.20 | 0.00 |
| TRINITY_PNW85233 | hypothetChlamydomonas_reinh  | 52.20 | 0.00 |
| TRINITY_XP_00169 | flagellChlamydomonas_reinh   | 52.20 | 0.00 |
| TRINITY_PNW71519 | hypothetChlamydomonas_reinh  | 52.20 | 0.00 |
| TRINITY_GBF92749 | carbohyRaphidocelis_subcap   | 52.20 | 0.00 |
| TRINITY_GAX74879 | hypothetChlamydomonas_eusti  | 52.20 | 0.00 |
| TRINITY_XP_00299 | dynein Selaginella_moellen   | 52.20 | 0.00 |
| TRINITY_GAX75109 | hypothetChlamydomonas_eusti  | 52.20 | 0.00 |
| TRINITY_PRW05928 | methionChlorella_sorokinia   | 52.20 | 0.00 |
| TRINITY_PNW88059 | hypothetChlamydomonas_reinh  | 52.20 | 0.00 |
| TRINITY_XP_01109 | DNA-dirSesamum_indicum       | 52.20 | 0    |
| TRINITY_XP_01139 | PutativeAuxenochlorella_pro  | 52.20 | 0.00 |
| TRINITY_XP_02199 | FH proteHelianthus_annuus    | 52.20 | 0.00 |
| TRINITY_PSC74242 | mitochorMicractinium_conduc  | 52.20 | 0.00 |
| TRINITY_GAX75385 | hypothetChlamydomonas_eusti  | 52.20 | 0.00 |
| TRINITY_GAQ93059 | hypothetKlebsormidium_niten  | 52.20 | 0.00 |
| TRINITY_PNW73523 | hypothetChlamydomonas_reinh  | 52.20 | 0.00 |
| TRINITY_GAX80006 | hypothetChlamydomonas_eusti  | 52.20 | 0.00 |
| TRINITY_PSC72785 | hypothetMicractinium_conduc  | 52.20 | 0.00 |
| TRINITY_XP_00295 | hypothetVolvox_carteri       | 52.20 | 0.00 |
| TRINITY_GAX72910 | hypothetChlamydomonas_eusti  | 52.20 | 0.00 |
| TRINITY_KXZ41938 | hypothetGonium_pectorale     | 52.20 | 0.00 |
| TRINITY_XP_01054 | PREDICTHTarenaya_hasslerian  | 52.20 | 0.00 |
| TRINITY_ALM54984 | DEAD boChlamydomonas_sp._I   | 52.20 | 0.00 |
| TRINITY_GAX74265 | hypothetChlamydomonas_eusti  | 52.20 | 0.00 |
| TRINITY_AAO73551 | reverse-Chlamydomonas_reinh  | 52.20 | 0.00 |
| TRINITY_PNH08309 | NFX1-tyTetrabaena_socialis   | 52.20 | 0.00 |
| TRINITY_BAK03542 | predicteHordeum_vulgare      | 52.20 | 0.00 |
| TRINITY_XP_02391 | myosin tQuercus_suber        | 52.10 | 0.00 |
| TRINITY_XP_01206 | chaperorJatropha_curcas      | 52.10 | 0.00 |
| TRINITY_AFK36347 | unknown Lotus_japonicus      | 52.10 | 0.00 |
| TRINITY_XP_02388 | transcriQuercus_suber        | 52.10 | 0.00 |
| TRINITY_XP_00169 | predicteChlamydomonas_reinh  | 52.10 | 0.00 |
| TRINITY_GAX75378 | hypothetChlamydomonas_eusti  | 52.10 | 0.00 |
| TRINITY_OMO66191 | hypothetCorchorus_capsulari  | 52.10 | 0.00 |
| TRINITY_XP_00941 | PREDICTHMusa_acuminata       | 52.10 | 0.00 |
| TRINITY_GBF96833 | archeasRaphidocelis_subcap   | 52.10 | 0.00 |
| TRINITY_XP_01003 | PREDICTHEucalyptus_grandis   | 52.10 | 0.00 |
| TRINITY_XP_00250 | predicteMicromonas_commoda   | 52.10 | 0.00 |
| TRINITY_XP_00306 | predicteMicromonas_pusilla   | 52.10 | 0.00 |
| TRINITY_GAQ79910 | ABC trarKlebsormidium_niten  | 52.10 | 0.00 |
| TRINITY_XP_02022 | agmatineCajanus_cajan        | 52.10 | 0.00 |
| TRINITY_XP_01010 | calcium-Morus_notabilis      | 52.10 | 0.00 |
| TRINITY_XP_00170 | (NimA-relChlamydomonas_reinh | 52.10 | 0.00 |
| TRINITY_GBF99376 | 3-hydroRaphidocelis_subcap   | 52.10 | 0.00 |
| TRINITY_GAQ79749 | ATP-depeKlebsormidium_niten  | 52.10 | 0.00 |
| TRINITY_GAX84227 | hypothetChlamydomonas_eusti  | 52.10 | 0.00 |
| TRINITY_GAX78319 | hypothetChlamydomonas_eusti  | 52.10 | 0.00 |
| TRINITY_XP_02390 | (NADPH o)Quercus_suber       | 52.10 | 0.00 |
| TRINITY_XP_02390 | (delta-anQuercus_suber       | 52.10 | 0.00 |
| TRINITY_GAX74136 | hypothetChlamydomonas_eusti  | 52.10 | 0.00 |
| TRINITY_GBF95769 | hypothetRaphidocelis_subcap  | 52.10 | 0.00 |
| TRINITY_GAX78079 | hypothetChlamydomonas_eusti  | 52.10 | 0.00 |
| TRINITY_XP_02439 | probablePhyscomitrella_pate  | 52.10 | 0.00 |
| TRINITY_XP_00294 | hypothetVolvox_carteri       | 52.10 | 0.00 |
| TRINITY_XP_00294 | hypothetVolvox_carteri       | 52.10 | 0.00 |
| TRINITY_GAX80212 | hypothetChlamydomonas_eusti  | 52.10 | 0.00 |
| TRINITY_XP_02452 | pre-mRN7Selaginella_moellen  | 52.10 | 0.00 |
| TRINITY_XP_00585 | hypothetChlorella_variabili  | 52.10 | 0.00 |
| TRINITY_XP_01390 | (beta-am)Monoraphidium_negle | 52.10 | 0.00 |
| TRINITY_XP_01284 | PREDICTHErythranthe_guttata  | 52.10 | 0.00 |
| TRINITY_KXZ53237 | hypothetGonium_pectorale     | 52.10 | 0.00 |
| TRINITY_XP_00169 | predicteChlamydomonas_reinh  | 52.10 | 0.00 |
| TRINITY_GAQ90785 | hypothetKlebsormidium_niten  | 52.10 | 0.00 |

|                                              |       |      |
|----------------------------------------------|-------|------|
| TRINITY_PNW7423(hypothetChlamydomonas_reinh  | 52.10 | 0.00 |
| TRINITY_PNW7768(hypothetChlamydomonas_reinh  | 52.10 | 0.00 |
| TRINITY_XP_02392(ras-rel;Quercus_suber       | 52.10 | 0.00 |
| TRINITY_XP_01284(PREDICTIERYthranthe_guttata | 52.10 | 0.00 |
| TRINITY_GAX8553(hypothetChlamydomonas_eusti  | 52.10 | 0.00 |
| TRINITY_KXZ5237(hypothetGonium_pectorale     | 52.10 | 0.00 |
| TRINITY_GAQ8903(hypothetKlebsormidium_niten  | 52.10 | 0.00 |
| TRINITY_XP_00911(PREDICTIBrassica_rapa       | 52.10 | 0.00 |
| TRINITY_GAX8459(hypothetChlamydomonas_eusti  | 52.10 | 0.00 |
| TRINITY_XP_01046(PREDICTICamelina_sativa     | 52.10 | 0.00 |
| TRINITY_EAZ01624(hypothetOryza_sativa        | 52.10 | 0.00 |
| TRINITY_BAK02778(predicteHordeum_vulgare     | 52.10 | 0.00 |
| TRINITY_GAX8063(hypothetChlamydomonas_eusti  | 52.10 | 0.00 |
| TRINITY_GAX7533(hypothetChlamydomonas_eusti  | 52.10 | 0.00 |
| TRINITY_XP_00169(superoxiChlamydomonas_reinh | 52.10 | 0.00 |
| TRINITY_PNW8233(hypothetChlamydomonas_reinh  | 52.10 | 0.00 |
| TRINITY_GAX8098(hypothetChlamydomonas_eusti  | 52.10 | 0.00 |
| TRINITY_GAX75254(hypothetChlamydomonas_eusti | 52.10 | 0.00 |
| TRINITY_PNW72614(hypothetChlamydomonas_reinh | 52.10 | 0.00 |
| TRINITY_PNW75304(hypothetChlamydomonas_reinh | 52.10 | 0.00 |
| TRINITY_XP_00170(expansirChlamydomonas_reinh | 52.10 | 0.00 |
| TRINITY_XP_00294(hypothetVolvox_carteri      | 52.10 | 0.00 |
| TRINITY_XP_02293(calcium-Cucurbita_moschata  | 52.10 | 0.00 |
| TRINITY_BAK02183(predicteHordeum_vulgare     | 52.10 | 0.00 |
| TRINITY_XP_00295(hypothetVolvox_carteri      | 52.10 | 0.00 |
| TRINITY_XP_00564(hypothetCoccomyxa_subellips | 52.10 | 0.00 |
| TRINITY_XP_00168(predicteChlamydomonas_reinh | 52.10 | 0.00 |
| TRINITY_PNW77353(hypothetChlamydomonas_reinh | 52.10 | 0.00 |
| TRINITY_GAX8166(hypothetChlamydomonas_eusti  | 52.10 | 0.00 |
| TRINITY_PNH10002(hypothetTetrabaena_socialis | 52.10 | 0.00 |
| TRINITY_XP_00169(predicteChlamydomonas_reinh | 52.10 | 0.00 |
| TRINITY_XP_00296(60S_rib;Selaginella_moellen | 52.00 | 0.00 |
| TRINITY_GBG72627(hypothetChara_braunii       | 52.00 | 0.00 |
| TRINITY_RDY09195(DNA_misnMucuna_pruriens     | 52.00 | 0.00 |
| TRINITY_PNW78442(hypothetChlamydomonas_reinh | 52.00 | 0.00 |
| TRINITY_KMZ70871(DNA-dir;Zostera_marina      | 52.00 | 0.00 |
| TRINITY_PKA56740(PutativeApostasia_shenzheni | 52.00 | 0.00 |
| TRINITY_PTQ27704(hypothetMarchantia_polymorp | 52.00 | 0.00 |
| TRINITY_XP_01941(PREDICTILupinus_angustifoli | 52.00 | 0.00 |
| TRINITY_XP_00295(hypothetVolvox_carteri      | 52.00 | 0.00 |
| TRINITY_XP_02097(uncharaArachis_ipaensis     | 52.00 | 0.00 |
| TRINITY_RWR88975(CytoplasCinnamomum_micranth | 52.00 | 0.00 |
| TRINITY_GAX74983(hypothetChlamydomonas_eusti | 52.00 | 0.00 |
| TRINITY_BAK02778(predicteHordeum_vulgare     | 52.00 | 0.00 |
| TRINITY_XP_02389(ferrocheQuercus_suber       | 52.00 | 0.00 |
| TRINITY_XP_02734(putativeAbrus_precatorius   | 52.00 | 0.00 |
| TRINITY_BAK02778(predicteHordeum_vulgare     | 52.00 | 0.00 |
| TRINITY_RXH67562(hypothetMalus_domestica     | 52.00 | 0.00 |
| TRINITY_GAQ89424(ankyrin Klebsormidium_niten | 52.00 | 0.00 |
| TRINITY_KXZ45166(hypothetGonium_pectorale    | 52.00 | 0.00 |
| TRINITY_KXZ47859(hypothetGonium_pectorale    | 52.00 | 0.00 |
| TRINITY_XP_02172(E3_ubiq;Chenopodium_quinoa  | 52.00 | 0.00 |
| TRINITY_GAQ84306(Histone Klebsormidium_niten | 52.00 | 0.00 |
| TRINITY_GAX85582(hypothetChlamydomonas_eusti | 52.00 | 0.00 |
| TRINITY_GAX72854(hypothetChlamydomonas_eusti | 52.00 | 0.00 |
| TRINITY_ABK21084(unknown Picea_sitchensis    | 52.00 | 0.00 |
| TRINITY_PNW75064(hypothetChlamydomonas_reinh | 52.00 | 0.00 |
| TRINITY_XP_01009(DEAD-bo;Morus_notabilis     | 52.00 | 0.00 |
| TRINITY_KEH16995(hypothetMedicago_truncatula | 52.00 | 0.00 |
| TRINITY_PNW73328(hypothetChlamydomonas_reinh | 52.00 | 0.00 |
| TRINITY_PRW44471(Peptide-Chlorella_sorokinia | 52.00 | 0.00 |
| TRINITY_ADE76067(unknown Picea_sitchensis    | 52.00 | 0.00 |
| TRINITY_XP_00169(predicteChlamydomonas_reinh | 52.00 | 0.00 |
| TRINITY_KXZ54468(hypothetGonium_pectorale    | 52.00 | 0.00 |
| TRINITY_GAX82703(hypothetChlamydomonas_eusti | 52.00 | 0.00 |
| TRINITY_PNH10818(putativeTetrabaena_socialis | 52.00 | 0.00 |

|                   |                             |       |      |
|-------------------|-----------------------------|-------|------|
| TRINITY_GAX79164  | hypothetChlamydomonas_eusti | 52.00 | 0.00 |
| TRINITY_XP_00565  | RCC1/BL1Coccomyxa_subellips | 52.00 | 0.00 |
| TRINITY_GAX83252  | hypothetChlamydomonas_eusti | 52.00 | 0.00 |
| TRINITY_GAX76227  | hypothetChlamydomonas_eusti | 52.00 | 0.00 |
| TRINITY_XP_00295  | hypothetVolvox_carteri      | 52.00 | 0.00 |
| TRINITY_GAX74276  | hypothetChlamydomonas_eusti | 52.00 | 0.00 |
| TRINITY_GAQ86331  | lysine-1Klebsormidium_niten | 52.00 | 0.00 |
| TRINITY_GAX77633  | hypothetChlamydomonas_eusti | 52.00 | 0.00 |
| TRINITY_XP_01389  | hypothetMonoraphidium_negle | 52.00 | 0.00 |
| TRINITY_GAX83466  | hypothetChlamydomonas_eusti | 52.00 | 0.00 |
| TRINITY_XP_00169  | predicteChlamydomonas_reinh | 52.00 | 0.00 |
| TRINITY_XP_00584  | hypothetChlorella_variabili | 51.90 | 0.00 |
| TRINITY_PWA53816  | mitochorArtemisia_annua     | 51.90 | 0.00 |
| TRINITY_GAQ77823  | NucleosiKlebsormidium_niten | 51.90 | 0.00 |
| TRINITY_XP_00637  | proteasPopulus_trichocarpa  | 51.90 | 0.00 |
| TRINITY_OAE33601  | hypothetMarchantia_polymorp | 51.90 | 0.00 |
| TRINITY_RXH89011  | hypothetMalus_domestica     | 51.90 | 0.00 |
| TRINITY_PNW79169  | hypothetChlamydomonas_reinh | 51.90 | 0.00 |
| TRINITY_PNH11343  | Protein Tetrabaena_socialis | 51.90 | 0.00 |
| TRINITY_GBF912782 | -phosphRaphidocelis_subcap  | 51.90 | 0.00 |
| TRINITY_KXZ48895  | hypothetGonium_pectorale    | 51.90 | 0.00 |
| TRINITY_NP_19491  | glutathiArabidopsis_thalian | 51.90 | 0.00 |
| TRINITY_GAX78269  | hypothetChlamydomonas_eusti | 51.90 | 0.00 |
| TRINITY_XP_02643  | importirPapaver_somniferum  | 51.90 | 0.00 |
| TRINITY_OAE27991  | hypothetMarchantia_polymorp | 51.90 | 0.00 |
| TRINITY_XP_00939  | PREDICTIMusa_acuminata      | 51.90 | 0.00 |
| TRINITY_ONK75457  | uncharacAsparagus_officinal | 51.90 | 0.00 |
| TRINITY_OAE21358  | hypothetMarchantia_polymorp | 51.90 | 0.00 |
| TRINITY_GAX83147  | hypothetChlamydomonas_eusti | 51.90 | 0.00 |
| TRINITY_XP_02388  | protein Quercus_suber       | 51.90 | 0.00 |
| TRINITY_XP_00564  | hypothetCoccomyxa_subellips | 51.90 | 0.00 |
| TRINITY_GAX80219  | hypothetChlamydomonas_eusti | 51.90 | 0.00 |
| TRINITY_GBF89971  | FAD depRaphidocelis_subcap  | 51.90 | 0.00 |
| TRINITY_XP_023894 | -hydroQuercus_suber         | 51.90 | 0.00 |
| TRINITY_OAE26017  | hypothetMarchantia_polymorp | 51.90 | 0.00 |
| TRINITY_KXZ42631  | hypothetGonium_pectorale    | 51.90 | 0.00 |
| TRINITY_GBF94089  | hypothetRaphidocelis_subcap | 51.90 | 0.00 |
| TRINITY_GAX81284  | hypothetChlamydomonas_eusti | 51.90 | 0.00 |
| TRINITY_GAX79983  | hypothetChlamydomonas_eusti | 51.90 | 0.00 |
| TRINITY_XP_01943  | PREDICTILupinus_angustifoli | 51.90 | 0.00 |
| TRINITY_PNH127443 | -oxo-5-Tetrabaena_socialis  | 51.90 | 0.00 |
| TRINITY_XP_02387  | acyl-CoQuercus_suber        | 51.90 | 0.00 |
| TRINITY_OAE35093  | hypothetMarchantia_polymorp | 51.90 | 0.00 |
| TRINITY_GAX85355  | hypothetChlamydomonas_eusti | 51.90 | 0.00 |
| TRINITY_GBF94991  | hypothetRaphidocelis_subcap | 51.90 | 0.00 |
| TRINITY_XP_00169  | ammoniumChlamydomonas_reinh | 51.90 | 0.00 |
| TRINITY_KXZ44494  | hypothetGonium_pectorale    | 51.90 | 0.00 |
| TRINITY_GBG59351  | hypothetChara_braunii       | 51.90 | 0.00 |
| TRINITY_PSC70561  | GlycosylMicractinium_conduc | 51.90 | 0.00 |
| TRINITY_GAX85075  | hypothetChlamydomonas_eusti | 51.90 | 0.00 |
| TRINITY_GAX84589  | hypothetChlamydomonas_eusti | 51.90 | 0.00 |
| TRINITY_XP_00584  | hypothetChlorella_variabili | 51.90 | 0.00 |
| TRINITY_KXZ42771  | hypothetGonium_pectorale    | 51.90 | 0.00 |
| TRINITY_GAX77261  | hypothetChlamydomonas_eusti | 51.90 | 0.00 |
| TRINITY_PTQ39897  | hypothetMarchantia_polymorp | 51.90 | 0.00 |
| TRINITY_PNW73571  | hypothetChlamydomonas_reinh | 51.90 | 0.00 |
| TRINITY_P0C8M8.1  | RecName:Zea_mays            | 51.90 | 0.00 |
| TRINITY_PNH07816  | putativeTetrabaena_socialis | 51.90 | 0.00 |
| TRINITY_XP_00584  | hypothetChlorella_variabili | 51.90 | 0.00 |
| TRINITY_GBG8581   | (hypothetChara_braunii      | 51.90 | 0.00 |
| TRINITY_KXZ47489  | hypothetGonium_pectorale    | 51.90 | 0.00 |
| TRINITY_BAJ86872  | predicteHordeum_vulgare     | 51.90 | 0.00 |
| TRINITY_VDD4660   | unnamed Brassica_oleracea   | 51.90 | 0.00 |
| TRINITY_GAX81341  | hypothetChlamydomonas_eusti | 51.90 | 0.00 |
| TRINITY_KXZ55981  | hypothetGonium_pectorale    | 51.90 | 0.00 |
| TRINITY_PNW80988  | hypothetChlamydomonas_reinh | 51.90 | 0.00 |

|                  |                             |       |      |
|------------------|-----------------------------|-------|------|
| TRINITY_XP_00170 | low-CO2-Chlamydomonas_reinh | 51.90 | 0.00 |
| TRINITY_GAX7836  | hypothetChlamydomonas_eusti | 51.90 | 0.00 |
| TRINITY_GAX8329  | hypothetChlamydomonas_eusti | 51.90 | 0.00 |
| TRINITY_XP_0029  | hypothetVolvox_carteri      | 51.90 | 0.00 |
| TRINITY_XP_0016  | predicteChlamydomonas_reinh | 51.90 | 0.00 |
| TRINITY_XP_0138  | hypothetMonoraphidium_negle | 51.90 | 0.00 |
| TRINITY_PNW7730  | hypothetChlamydomonas_reinh | 51.90 | 0.00 |
| TRINITY_PNW8488  | hypothetChlamydomonas_reinh | 51.90 | 0.00 |
| TRINITY_KXZ4189  | hypothetGonium_pectorale    | 51.90 | 0.00 |
| TRINITY_PNH1144  | Granule-Tetrabaena_socialis | 51.90 | 0.00 |
| TRINITY_GAX7608  | hypothetChlamydomonas_eusti | 51.90 | 0.00 |
| TRINITY_XP_0030  | dynein Micromonas_pusilla   | 51.90 | 0.00 |
| TRINITY_PKU8508  | putativeDendrobium_catenatu | 51.90 | 0.00 |
| TRINITY_XP_0217  | cytochrChenopodium_quinoa   | 51.90 | 0.00 |
| TRINITY_XP_0158  | uncharaZiziphus_jujuba      | 51.90 | 0.00 |
| TRINITY_XP_0244  | uncharaPhyscomitrella_pate  | 51.80 | 0.00 |
| TRINITY_GBG8668  | hypothetChara_braunii       | 51.80 | 0.00 |
| TRINITY_GAQ8965  | NADP-degKlebsormidium_niten | 51.80 | 0.00 |
| TRINITY_GAX8133  | hypothetChlamydomonas_eusti | 51.80 | 0.00 |
| TRINITY_KMZ6206  | E3 ubiqZostera_marina       | 51.80 | 0.00 |
| TRINITY_KXZ5072  | hypothetGonium_pectorale    | 51.80 | 0.00 |
| TRINITY_GAQ8805  | putativeKlebsormidium_niten | 51.80 | 0.00 |
| TRINITY_XP_0093  | PREDICTIPyrus_x_bretschneid | 51.80 | 0.00 |
| TRINITY_GBG7721  | hypothetChara_braunii       | 51.80 | 0.00 |
| TRINITY_PSC7553  | SUPPRESMicractinium_conduc  | 51.80 | 0.00 |
| TRINITY_GBG6143  | hypothetChara_braunii       | 51.80 | 0.00 |
| TRINITY_GBF9066  | hypothetRaphidocelis_subcap | 51.80 | 0.00 |
| TRINITY_KMS9327  | hypothetBeta_vulgaris       | 51.80 | 0.00 |
| TRINITY_OAY7668  | E3 ubiqAnanas_comosus       | 51.80 | 0.00 |
| TRINITY_PNW8734  | hypothetChlamydomonas_reinh | 51.80 | 0.00 |
| TRINITY_XP_0029  | hypothetVolvox_carteri      | 51.80 | 0.00 |
| TRINITY_RAL3746  | hypothetCuscuta_australis   | 51.80 | 0.00 |
| TRINITY_KXZ5374  | hypothetGonium_pectorale    | 51.80 | 0.00 |
| TRINITY_GAX7726  | hypothetChlamydomonas_eusti | 51.80 | 0.00 |
| TRINITY_BAJ9830  | predicteHordeum_vulgare     | 51.80 | 0.00 |
| TRINITY_GAX8569  | hypothetChlamydomonas_eusti | 51.80 | 0.00 |
| TRINITY_XP_0030  | predicteMicromonas_pusilla  | 51.80 | 0.00 |
| TRINITY_OAP1605  | DCD [ArArabidopsis_thalian  | 51.80 | 0.00 |
| TRINITY_GAX8584  | hypothetChlamydomonas_eusti | 51.80 | 0.00 |
| TRINITY_PNW8620  | hypothetChlamydomonas_reinh | 51.80 | 0.00 |
| TRINITY_KXZ4684  | hypothetGonium_pectorale    | 51.80 | 0.00 |
| TRINITY_PKU8666  | RNA-dirDendrobium_catenatu  | 51.80 | 0.00 |
| TRINITY_XP_0056  | TPR-likeCoccomyxa_subellips | 51.80 | 0.00 |
| TRINITY_GAX7982  | hypothetChlamydomonas_eusti | 51.80 | 0.00 |
| TRINITY_PSC7645  | nuclear Micractinium_conduc | 51.80 | 0.00 |
| TRINITY_PNW8310  | hypothetChlamydomonas_reinh | 51.80 | 0.00 |
| TRINITY_GAX8383  | hypothetChlamydomonas_eusti | 51.80 | 0.00 |
| TRINITY_XP_0138  | Protein Monoraphidium_negle | 51.80 | 0.00 |
| TRINITY_GAX7741  | hypothetChlamydomonas_eusti | 51.80 | 0.00 |
| TRINITY_KXZ4949  | hypothetGonium_pectorale    | 51.80 | 0.00 |
| TRINITY_GAX7558  | hypothetChlamydomonas_eusti | 51.80 | 0.00 |
| TRINITY_PNR4137  | hypothetPhyscomitrella_pate | 51.80 | 0.00 |
| TRINITY_GAX8226  | hypothetChlamydomonas_eusti | 51.80 | 0.00 |
| TRINITY_GAX8350  | hypothetChlamydomonas_eusti | 51.80 | 0.00 |
| TRINITY_PNW8322  | hypothetChlamydomonas_reinh | 51.80 | 0.00 |
| TRINITY_GAX8282  | hypothetChlamydomonas_eusti | 51.80 | 0.00 |
| TRINITY_GAX7995  | hypothetChlamydomonas_eusti | 51.80 | 0.00 |
| TRINITY_XP_0016  | flagellChlamydomonas_reinh  | 51.80 | 0.00 |
| TRINITY_GAX8469  | hypothetChlamydomonas_eusti | 51.80 | 0.00 |
| TRINITY_XP_0056  | aminotrCoccomyxa_subellips  | 51.80 | 0.00 |
| TRINITY_XP_0068  | actin-reAmborella_trichopod | 51.80 | 0.00 |
| TRINITY_XP_0238  | uncharaQuercus_suber        | 51.80 | 0.00 |
| TRINITY_XP_0138  | UncharaMonoraphidium_negle  | 51.80 | 0.00 |
| TRINITY_PNW8668  | hypothetChlamydomonas_reinh | 51.80 | 0    |
| TRINITY_ESR3845  | hypothetCitrus_clementina   | 51.80 | 0.00 |
| TRINITY_PNW8169  | hypothetChlamydomonas_reinh | 51.80 | 0.00 |

|                  |                             |       |      |
|------------------|-----------------------------|-------|------|
| TRINITY_PNH09397 | Purple εTetrabaena_socialis | 51.80 | 0.00 |
| TRINITY_KXZ51515 | hypothetGonium_pectorale    | 51.80 | 0.00 |
| TRINITY_XP_01285 | PREDICTErythranthe_guttata  | 51.80 | 0.00 |
| TRINITY_KXZ41329 | hypothetGonium_pectorale    | 51.80 | 0.00 |
| TRINITY_XP_00294 | hypothetVolvox_carteri      | 51.80 | 0.00 |
| TRINITY_GAX81831 | hypothetChlamydomonas_eusti | 51.80 | 0.00 |
| TRINITY_GAX84399 | hypothetChlamydomonas_eusti | 51.80 | 0.00 |
| TRINITY_XP_00250 | histone Micromonas_commoda  | 51.80 | 0.00 |
| TRINITY_GAX79236 | hypothetChlamydomonas_eusti | 51.80 | 0.00 |
| TRINITY_GAX83384 | hypothetChlamydomonas_eusti | 51.80 | 0.00 |
| TRINITY_GAQ87532 | dynein κKlebsormidium_niten | 51.80 | 0.00 |
| TRINITY_KXZ51619 | hypothetGonium_pectorale    | 51.80 | 0.00 |
| TRINITY_XP_00250 | predictεMicromonas_commoda  | 51.80 | 0.00 |
| TRINITY_GAX83067 | hypothetChlamydomonas_eusti | 51.80 | 0.00 |
| TRINITY_XP_02437 | RNA cytiPhyscomitrella_pate | 51.80 | 0.00 |
| TRINITY_GAX80469 | hypothetChlamydomonas_eusti | 51.80 | 0.00 |
| TRINITY_GAX74152 | hypothetChlamydomonas_eusti | 51.80 | 0.00 |
| TRINITY_RAL48034 | hypothetCuscuta_australis   | 51.80 | 0.00 |
| TRINITY_PNH05639 | ADP,ATP Tetrabaena_socialis | 51.80 | 0.00 |
| TRINITY_PNH09567 | C-factorTetrabaena_socialis | 51.80 | 0.00 |
| TRINITY_XP_01657 | PREDICTECapsicum_annuum     | 51.70 | 0.00 |
| TRINITY_OWM78707 | hypothetPunica_granatum     | 51.70 | 0.00 |
| TRINITY_XP_00308 | Exosome Ostreococcus_tauri  | 51.70 | 0.00 |
| TRINITY_XP_02300 | dual speCucurbita_maxima    | 51.70 | 0.00 |
| TRINITY_ABK23391 | unknown Picea_sitchensis    | 51.70 | 0.00 |
| TRINITY_XP_02387 | UDP-N-acQuercus_suber       | 51.70 | 0.00 |
| TRINITY_AES82275 | peptide Medicago_truncatula | 51.70 | 0.00 |
| TRINITY_XP_01026 | PREDICTINelumbo_nucifera    | 51.70 | 0.00 |
| TRINITY_XP_01108 | serine ρSesamum_indicum     | 51.70 | 0.00 |
| TRINITY_PNH04210 | hypothetTetrabaena_socialis | 51.70 | 0.00 |
| TRINITY_PNW85349 | hypothetChlamydomonas_reinh | 51.70 | 0.00 |
| TRINITY_XP_01389 | Dual speMonoraphidium_negle | 51.70 | 0.00 |
| TRINITY_XP_02389 | branchecQuercus_suber       | 51.70 | 0.00 |
| TRINITY_XP_00141 | predictεOstreococcus_sp._'1 | 51.70 | 0.00 |
| TRINITY_XP_00306 | flagellεMicromonas_pusilla  | 51.70 | 0.00 |
| TRINITY_XP_00295 | dynein ρVolvox_carteri      | 51.70 | 0.00 |
| TRINITY_GBF96668 | ABC trarRaphidocelis_subcap | 51.70 | 0.00 |
| TRINITY_XP_01586 | dnaJ honZiziphus_jujuba     | 51.70 | 0.00 |
| TRINITY_XP_01919 | PREDICTEIpomoea_nil         | 51.70 | 0.00 |
| TRINITY_PNW81005 | hypothetChlamydomonas_reinh | 51.70 | 0.00 |
| TRINITY_XP_00565 | nucleic Coccomyxa_subellips | 51.70 | 0.00 |
| TRINITY_GAX83166 | hypothetChlamydomonas_eusti | 51.70 | 0.00 |
| TRINITY_GAX74972 | hypothetChlamydomonas_eusti | 51.70 | 0.00 |
| TRINITY_PNW81170 | hypothetChlamydomonas_reinh | 51.70 | 0.00 |
| TRINITY_GBG71854 | hypothetChara_braunii       | 51.70 | 0.00 |
| TRINITY_XP_00168 | predictεChlamydomonas_reinh | 51.70 | 0.00 |
| TRINITY_KGN58657 | hypothetCucumis_sativus     | 51.70 | 0.00 |
| TRINITY_GAX79504 | hypothetChlamydomonas_eusti | 51.70 | 0.00 |
| TRINITY_GAX77925 | hypothetChlamydomonas_eusti | 51.70 | 0.00 |
| TRINITY_XP_00170 | high intChlamydomonas_reinh | 51.70 | 0.00 |
| TRINITY_XP_00169 | predictεChlamydomonas_reinh | 51.70 | 0.00 |
| TRINITY_XP_00294 | hypothetVolvox_carteri      | 51.70 | 0.00 |
| TRINITY_GAX86128 | hypothetChlamydomonas_eusti | 51.70 | 0.00 |
| TRINITY_PNH03659 | Tiny macTetrabaena_socialis | 51.70 | 0.00 |
| TRINITY_KXZ46950 | hypothetGonium_pectorale    | 51.70 | 0.00 |
| TRINITY_XP_01923 | PREDICTENicotiana_attenuata | 51.70 | 0.00 |
| TRINITY_XP_00564 | bifunctiCoccomyxa_subellips | 51.60 | 0.00 |
| TRINITY_XP_00751 | seryl-tfBathycoccus_prasinc | 51.60 | 0.00 |
| TRINITY_GBG83673 | hypothetChara_braunii       | 51.60 | 0.00 |
| TRINITY_GAX75981 | hypothetChlamydomonas_eusti | 51.60 | 0.00 |
| TRINITY_XP_02643 | nucleolεPapaver_somniferum  | 51.60 | 0.00 |
| TRINITY_GAQ85648 | Fragile Klebsormidium_niten | 51.60 | 0.00 |
| TRINITY_RMZ55863 | hypothetAuxenochlorella_pro | 51.60 | 0.00 |
| TRINITY_GAX79099 | hypothetChlamydomonas_eusti | 51.60 | 0.00 |
| TRINITY_XP_01207 | 26S protJatropha_curcas     | 51.60 | 0.00 |
| TRINITY_GAQ79375 | glutathiKlebsormidium_niten | 51.60 | 0.00 |

|                  |                                     |       |      |
|------------------|-------------------------------------|-------|------|
| TRINITY_PNW74831 | hypothetChlamydomonas_reinh         | 51.60 | 0.00 |
| TRINITY_GAX7496  | hypothetChlamydomonas_eusti         | 51.60 | 0.00 |
| TRINITY_XP_0138  | Coiled- <i>Monoraphidium_negle</i>  | 51.60 | 0.00 |
| TRINITY_PTQ4279  | hypothet <i>Marchantia_polymorp</i> | 51.60 | 0.00 |
| TRINITY_GBF9986  | kinesin- <i>Raphidocelis_subcap</i> | 51.60 | 0.00 |
| TRINITY_KXZ5455  | hypothet <i>Gonium_pectorale</i>    | 51.60 | 0.00 |
| TRINITY_EFJ2695  | hypothet <i>Selaginella_moellen</i> | 51.60 | 0.00 |
| TRINITY_RRT5634  | hypothet <i>Ensete_ventricosum</i>  | 51.60 | 0.00 |
| TRINITY_GAX7528  | hypothetChlamydomonas_eusti         | 51.60 | 0.00 |
| TRINITY_PNW8637  | hypothetChlamydomonas_reinh         | 51.60 | 0.00 |
| TRINITY_XP_0029  | hypothet <i>Volvox_carteri</i>      | 51.60 | 0.00 |
| TRINITY_OAE2513  | hypothet <i>Marchantia_polymorp</i> | 51.60 | 0.00 |
| TRINITY_XP_0105  | PREDICTF <i>Tarenaya_hasslerian</i> | 51.60 | 0.00 |
| TRINITY_XP_0238  | cystathi <i>Quercus_suber</i>       | 51.60 | 0.00 |
| TRINITY_GAX7763  | hypothetChlamydomonas_eusti         | 51.60 | 0.00 |
| TRINITY_KDP4623  | hypothet <i>Jatropha_curcas</i>     | 51.60 | 0.00 |
| TRINITY_PNW7163  | hypothetChlamydomonas_reinh         | 51.60 | 0.00 |
| TRINITY_XP_0029  | mitogen- <i>Selaginella_moellen</i> | 51.60 | 0.00 |
| TRINITY_GAX7674  | hypothetChlamydomonas_eusti         | 51.60 | 0.00 |
| TRINITY_XP_0124  | PREDICTFGossypium_raimondii         | 51.60 | 0.00 |
| TRINITY_GAQ9120  | glutathi <i>Klebsormidium_niten</i> | 51.60 | 0.00 |
| TRINITY_PNW8226  | hypothetChlamydomonas_reinh         | 51.60 | 0.00 |
| TRINITY_PRW5887  | P-ATPase <i>Chlorella_sorokinia</i> | 51.60 | 0.00 |
| TRINITY_PNW7226  | hypothetChlamydomonas_reinh         | 51.60 | 0.00 |
| TRINITY_XP_0029  | hypothet <i>Volvox_carteri</i>      | 51.60 | 0.00 |
| TRINITY_XP_0056  | hypothet <i>Coccomyxa_subellips</i> | 51.60 | 0.00 |
| TRINITY_GAX8509  | hypothetChlamydomonas_eusti         | 51.60 | 0.00 |
| TRINITY_XP_0035  | glutamy <i>Glycine_max</i>          | 51.60 | 0.00 |
| TRINITY_GAX7579  | hypothetChlamydomonas_eusti         | 51.60 | 0.00 |
| TRINITY_PWA5250  | Ubiquiti <i>Artemisia_annua</i>     | 51.60 | 0.00 |
| TRINITY_GAX7856  | hypothetChlamydomonas_eusti         | 51.60 | 0.00 |
| TRINITY_PNH1069  | hypothet <i>Tetrabaena_socialis</i> | 51.60 | 0.00 |
| TRINITY_GBF9082  | transier <i>Raphidocelis_subcap</i> | 51.60 | 0.00 |
| TRINITY_XP_0016  | predicteChlamydomonas_reinh         | 51.60 | 0.00 |
| TRINITY_GAX7675  | hypothetChlamydomonas_eusti         | 51.60 | 0.00 |
| TRINITY_XP_0025  | glutathi <i>Micromonas_commoda</i>  | 51.60 | 0.00 |
| TRINITY_XP_0016  | cationicChlamydomonas_reinh         | 51.60 | 0.00 |
| TRINITY_XP_0201  | 40S rib <i>Aegilops_tauschii</i>    | 51.60 | 0.00 |
| TRINITY_XP_0030  | Helicase <i>Ostreococcus_tauri</i>  | 51.60 | 0.00 |
| TRINITY_XP_0058  | hypothet <i>Chlorella_variabili</i> | 51.50 | 0.00 |
| TRINITY_XP_0241  | type IV <i>Rosa_chinensis</i>       | 51.50 | 0.00 |
| TRINITY_BAB6121  | P0460E0 <i>Oryza_sativa</i>         | 51.50 | 0.00 |
| TRINITY_OMO7888  | Ubiquiti <i>Corchorus_capsulari</i> | 51.50 | 0.00 |
| TRINITY_XP_0056  | protease <i>Coccomyxa_subellips</i> | 51.50 | 0.00 |
| TRINITY_GBF9013  | hypothet <i>Raphidocelis_subcap</i> | 51.50 | 0.00 |
| TRINITY_GAQ8017  | homogent <i>Klebsormidium_niten</i> | 51.50 | 0.00 |
| TRINITY_PTQ4674  | hypothet <i>Marchantia_polymorp</i> | 51.50 | 0.00 |
| TRINITY_KOM4028  | hypothet <i>Vigna_angularis</i>     | 51.50 | 0.00 |
| TRINITY_PHT2792  | hypothet <i>Capsicum_baccatum</i>   | 51.50 | 0.00 |
| TRINITY_PON5916  | Glycero <i>Parasponia_anderson</i>  | 51.50 | 0.00 |
| TRINITY_OAE2211  | hypothet <i>Marchantia_polymorp</i> | 51.50 | 0.00 |
| TRINITY_XP_0201  | putative <i>Aegilops_tauschii</i>   | 51.50 | 0.00 |
| TRINITY_PSC7100  | Glycopr <i>Micractinium_conduc</i>  | 51.50 | 0.00 |
| TRINITY_KZV3090  | transmen <i>Dorcoceras_hygromet</i> | 51.50 | 0.00 |
| TRINITY_GAX8149  | hypothetChlamydomonas_eusti         | 51.50 | 0.00 |
| TRINITY_EFJ2239  | hypothet <i>Selaginella_moellen</i> | 51.50 | 0.00 |
| TRINITY_XP_0029  | hypothet <i>Volvox_carteri</i>      | 51.50 | 0.00 |
| TRINITY_PNH1293  | hypothet <i>Tetrabaena_socialis</i> | 51.50 | 0.00 |
| TRINITY_XP_0116  | LOW QUAI <i>Amborella_trichopod</i> | 51.50 | 0.00 |
| TRINITY_PRW5920  | oxidorec <i>Chlorella_sorokinia</i> | 51.50 | 0.00 |
| TRINITY_PNW8850  | hypothetChlamydomonas_reinh         | 51.50 | 0.00 |
| TRINITY_XP_0016  | NADH:ubiChlamydomonas_reinh         | 51.50 | 0.00 |
| TRINITY_GAX8346  | hypothetChlamydomonas_eusti         | 51.50 | 0.00 |
| TRINITY_GBG8253  | hypothet <i>Chara_braunii</i>       | 51.50 | 0.00 |
| TRINITY_GAX7637  | hypothetChlamydomonas_eusti         | 51.50 | 0.00 |
| TRINITY_XP_0239  | eukaryot <i>Quercus_suber</i>       | 51.50 | 0.00 |

|                                               |       |      |
|-----------------------------------------------|-------|------|
| TRINITY_GAX7521(hypothetChlamydomonas_eusti   | 51.50 | 0.00 |
| TRINITY_XP_00169low CO2 Chlamydomonas_reinh   | 51.50 | 0.00 |
| TRINITY_XP_00170(flagellatChlamydomonas_reinh | 51.50 | 0.00 |
| TRINITY_PNW80473hypothetChlamydomonas_reinh   | 51.50 | 0.00 |
| TRINITY_KXZ43587hypothetGonium_pectorale      | 51.50 | 0.00 |
| TRINITY_NP_00134uncharacZea_mays              | 51.50 | 0.00 |
| TRINITY_XP_01069PREDICTIBeta_vulgaris         | 51.50 | 0.00 |
| TRINITY_PIA46755hypothetAquilegia_coerulea    | 51.50 | 0.00 |
| TRINITY_GBG00431hypothetRaphidocelis_subcap   | 51.50 | 0.00 |
| TRINITY_ALM54992DEAD bo>Chlamydomonas_sp._I   | 51.50 | 0.00 |

|                  |                              |       |      |
|------------------|------------------------------|-------|------|
| TRINITY_XP_02024 | SNF1-relAsparagus_officinal  | 51.50 | 0.00 |
| TRINITY_KXZ4927  | hypothetGonium_pectorale     | 51.50 | 0.00 |
| TRINITY_XP_0113  | 40S ribAuxenochlorella_pro   | 51.50 | 0.00 |
| TRINITY_XP_01104 | PREDICTIPopulus_euphratica   | 51.50 | 0.00 |
| TRINITY_PRW5890  | selenocChlorella_sorokinia   | 51.50 | 0.00 |
| TRINITY_GBG9304  | hypothetChara_braunii        | 51.50 | 0.00 |
| TRINITY_XP_00294 | acetyl-cVolvox_carteri       | 51.50 | 0.00 |
| TRINITY_GAX8439  | hypothetChlamydomonas_eusti  | 51.50 | 0.00 |
| TRINITY_PNH0695  | Proline Tetrabaena_socialis  | 51.50 | 0.00 |
| TRINITY_XP_0029  | hypothetVolvox_carteri       | 51.50 | 0.00 |
| TRINITY_XP_0017  | (plastid Chlamydomonas_reinh | 51.50 | 0.00 |
| TRINITY_GAX7900  | hypothetChlamydomonas_eusti  | 51.50 | 0.00 |
| TRINITY_KXZ4350  | hypothetGonium_pectorale     | 51.50 | 0.00 |
| TRINITY_XP_0239  | (profilin Quercus_suber      | 51.50 | 0.00 |
| TRINITY_GBG7521  | hypothetChara_braunii        | 51.50 | 0.00 |
| TRINITY_GAX7902  | hypothetChlamydomonas_eusti  | 51.50 | 0.00 |
| TRINITY_XP_0030  | Domain cOstreococcus_tauri   | 51.50 | 0.00 |
| TRINITY_GAX8456  | hypothetChlamydomonas_eusti  | 51.40 | 0.00 |
| TRINITY_RMZ5288  | hypothetAuxenochlorella_pro  | 51.40 | 0.00 |
| TRINITY_XP_0029  | hypothetVolvox_carteri       | 51.40 | 0.00 |
| TRINITY_XP_0194  | 1PREDICTILupinus_angustifoli | 51.40 | 0.00 |
| TRINITY_GBF8857  | (glyoxal Raphidocelis_subcap | 51.40 | 0.00 |
| TRINITY_XP_0113  | Malate sAuxenochlorella_pro  | 51.40 | 0.00 |
| TRINITY_VDC7283  | (unnamed Brassica_rapa       | 51.40 | 0.00 |
| TRINITY_XP_0029  | anaphaseSelaginella_moellen  | 51.40 | 0.00 |
| TRINITY_XP_0240  | mediatorMorus_notabilis      | 51.40 | 0.00 |
| TRINITY_PWA5381  | (mitochorArtemisia_annua     | 51.40 | 0.00 |
| TRINITY_EEF2746  | TartrateRicinus_communis     | 51.40 | 0.00 |
| TRINITY_XP_0025  | (hypothetMicromonas_commoda  | 51.40 | 0.00 |
| TRINITY_GBG6683  | 1hypothetChara_braunii       | 51.40 | 0.00 |
| TRINITY_XP_0102  | 7PREDICTINelumbo_nucifera    | 51.40 | 0.00 |
| TRINITY_GAX7635  | 8hypothetChlamydomonas_eusti | 51.40 | 0.00 |
| TRINITY_PNW7273  | 9hypothetChlamydomonas_reinh | 51.40 | 0.00 |
| TRINITY_PRW5837  | 5putativeChlorella_sorokinia | 51.40 | 0.00 |
| TRINITY_ACG2745  | (60 ribosZea_mays            | 51.40 | 0.00 |
| TRINITY_RAL4686  | 5hypothetCuscuta_australis   | 51.40 | 0.00 |
| TRINITY_GBF9114  | 8hypothetRaphidocelis_subcap | 51.40 | 0.00 |
| TRINITY_PIA6330  | 1hypothetAquilegia_coerulea  | 51.40 | 0.00 |
| TRINITY_PIA4211  | 8hypothetAquilegia_coerulea  | 51.40 | 0.00 |
| TRINITY_KXZ5516  | (hypothetGonium_pectorale    | 51.40 | 0.00 |
| TRINITY_XP_0056  | 5putativeCoccomyxa_subellips | 51.40 | 0.00 |
| TRINITY_XP_0093  | 5PREDICTIPyrus_x_bretschneid | 51.40 | 0.00 |
| TRINITY_XP_0191  | 8PREDICTIIpomoea_nil         | 51.40 | 0.00 |
| TRINITY_GAX8583  | 7hypothetChlamydomonas_eusti | 51.40 | 0.00 |
| TRINITY_KCW7583  | 7hypothetEucalyptus_grandis  | 51.40 | 0.00 |
| TRINITY_PVH3196  | 2hypothetPanicum_hallii      | 51.40 | 0.00 |
| TRINITY_XP_0218  | 8transcriCarica_papaya       | 51.40 | 0.00 |
| TRINITY_PNH0992  | 2Random sTetrabaena_socialis | 51.40 | 0.00 |
| TRINITY_XP_0245  | 2methylytSelaginella_moellen | 51.40 | 0.00 |
| TRINITY_GBF8855  | (tRNA psRaphidocelis_subcap  | 51.40 | 0.00 |
| TRINITY_ABR1649  | 4unknown Picea_sitchensis    | 51.40 | 0.00 |
| TRINITY_GAX8200  | 8hypothetChlamydomonas_eusti | 51.40 | 0.00 |
| TRINITY_PNW8859  | 3hypothetChlamydomonas_reinh | 51.40 | 0.00 |
| TRINITY_BAK0112  | 5predicteHordeum_vulgare     | 51.40 | 0.00 |
| TRINITY_GBF9481  | 8hypothetRaphidocelis_subcap | 51.40 | 0.00 |
| TRINITY_GAX7687  | (hypothetChlamydomonas_eusti | 51.40 | 0.00 |
| TRINITY_CAA4928  | 3gag,protVolvox_carteri      | 51.40 | 0.00 |
| TRINITY_PNW8071  | 5hypothetChlamydomonas_reinh | 51.40 | 0.00 |
| TRINITY_RWW9025  | 3hypothetEnsete_ventricosum  | 51.40 | 0.00 |
| TRINITY_XP_0164  | 9PREDICTINicotiana_tabacum   | 51.40 | 0.00 |
| TRINITY_XP_0029  | 4hypothetVolvox_carteri      | 51.40 | 0.00 |
| TRINITY_GBF9444  | 4flagellRaphidocelis_subcap  | 51.40 | 0.00 |
| TRINITY_PNW7640  | 8hypothetChlamydomonas_reinh | 51.40 | 0.00 |
| TRINITY_KXZ5641  | 1hypothetGonium_pectorale    | 51.40 | 0.00 |
| TRINITY_GBF8826  | 1rab3 GTIRaphidocelis_subcap | 51.40 | 0.00 |
| TRINITY_PNW8047  | 1hypothetChlamydomonas_reinh | 51.40 | 0.00 |



|                 |                             |       |      |
|-----------------|-----------------------------|-------|------|
| TRINITY_GAX7747 | hypothetChlamydomonas_eusti | 51.40 | 0.00 |
| TRINITY_XP_0029 | hypothetVolvox_carteri      | 51.40 | 0.00 |
| TRINITY_XP_0083 | PREDICTIMalus_domestica     | 51.40 | 0.00 |
| TRINITY_GAX8550 | hypothetChlamydomonas_eusti | 51.40 | 0.00 |
| TRINITY_GAX7708 | hypothetChlamydomonas_eusti | 51.40 | 0.00 |
| TRINITY_PNH1228 | WW domajTetrabaena_socialis | 51.40 | 0.00 |
| TRINITY_XP_0017 | predicteChlamydomonas_reinh | 51.40 | 0.00 |
| TRINITY_GBF8886 | chitinasRaphidocelis_subcap | 51.40 | 0.00 |
| TRINITY_GAX8100 | hypothetChlamydomonas_eusti | 51.40 | 0.00 |
| TRINITY_KDD7528 | AMP-binChelicosporidium_sp. | 51.40 | 0.00 |
| TRINITY_XP_0113 | hypothetAuxenochlorella_pro | 51.40 | 0.00 |
| TRINITY_KXZ5280 | hypothetGonium_pectorale    | 51.40 | 0.00 |
| TRINITY_ABH0932 | leucine Arachis_hypogaea    | 51.40 | 0.00 |
| TRINITY_KXZ4181 | hypothetGonium_pectorale    | 51.40 | 0.00 |
| TRINITY_GAQ9356 | hypothetKlebsormidium_niten | 51.40 | 0.00 |
| TRINITY_PNH0415 | hypothetTetrabaena_socialis | 51.40 | 0.00 |
| TRINITY_GAQ8492 | histone Klebsormidium_niten | 51.40 | 0.00 |
| TRINITY_XP_0239 | ATP-depeQuercus_suber       | 51.40 | 0.00 |
| TRINITY_OUS4916 | NUDIX hOstreococcus_tauri   | 51.30 | 0.00 |
| TRINITY_XP_0104 | PREDICTICamelina_sativa     | 51.30 | 0.00 |
| TRINITY_RWW9025 | hypothetEnsete_ventricosum  | 51.30 | 0.00 |
| TRINITY_BAJ9390 | predicteHordeum_vulgare     | 51.30 | 0.00 |
| TRINITY_XP_0014 | predicteOstreococcus_sp._'1 | 51.30 | 0.00 |
| TRINITY_GAX8225 | hypothetChlamydomonas_eusti | 51.30 | 0.00 |
| TRINITY_GBF9862 | beta-adRaphidocelis_subcap  | 51.30 | 0.00 |
| TRINITY_XP_0239 | AP-2 conQuercus_suber       | 51.30 | 0.00 |
| TRINITY_XP_0016 | predicteChlamydomonas_reinh | 51.30 | 0.00 |
| TRINITY_PRW3298 | erythronChlorella_sorokinia | 51.30 | 0.00 |
| TRINITY_PTQ4262 | hypothetMarchantia_polymorp | 51.30 | 0.00 |
| TRINITY_GAX8322 | hypothetChlamydomonas_eusti | 51.30 | 0.00 |
| TRINITY_XP_0016 | ammoniumChlamydomonas_reinh | 51.30 | 0.00 |
| TRINITY_XP_0151 | PREDICTISolanum_tuberosum   | 51.30 | 0.00 |
| TRINITY_XP_0106 | PREDICTIBeta_vulgaris       | 51.30 | 0.00 |
| TRINITY_XP_0025 | predicteMicromonas_commoda  | 51.30 | 0.00 |
| TRINITY_XP_0023 | imidazoPopulus_trichocarpa  | 51.30 | 0.00 |
| TRINITY_GAX8150 | hypothetChlamydomonas_eusti | 51.30 | 0.00 |
| TRINITY_PNH0853 | MethyltTetrabaena_socialis  | 51.30 | 0.00 |
| TRINITY_XP_0029 | hypothetVolvox_carteri      | 51.30 | 0.00 |
| TRINITY_XP_0022 | PREDICTIVitis_vinifera      | 51.30 | 0.00 |
| TRINITY_XP_0188 | PREDICTIJuglans_regia       | 51.30 | 0.00 |
| TRINITY_XP_0029 | exosome Selaginella_moellen | 51.30 | 0.00 |
| TRINITY_GBF9284 | hypothetRaphidocelis_subcap | 51.30 | 0.00 |
| TRINITY_KDD7669 | hypothetHelicosporidium_sp. | 51.30 | 0.00 |
| TRINITY_XP_0016 | predicteChlamydomonas_reinh | 51.30 | 0.00 |
| TRINITY_XP_0235 | DExH-boCucurbita_pepo       | 51.30 | 0.00 |
| TRINITY_XP_0202 | protein Cajanus_cajan       | 51.30 | 0.00 |
| TRINITY_GBG8840 | hypothetChara_braunii       | 51.30 | 0.00 |
| TRINITY_GAX7312 | hypothetChlamydomonas_eusti | 51.30 | 0.00 |
| TRINITY_XP_0030 | predicteMicromonas_pusilla  | 51.30 | 0.00 |
| TRINITY_RDY1237 | Serine/tMucuna_pruriens     | 51.30 | 0.00 |
| TRINITY_PNW7924 | hypothetChlamydomonas_reinh | 51.30 | 0.00 |
| TRINITY_GBF8911 | hypothetRaphidocelis_subcap | 51.30 | 0.00 |
| TRINITY_GAX8635 | hypothetChlamydomonas_eusti | 51.30 | 0.00 |
| TRINITY_XP_0191 | PREDICTIIPomoea_nil         | 51.30 | 0.00 |
| TRINITY_GAX8312 | hypothetChlamydomonas_eusti | 51.30 | 0.00 |
| TRINITY_XP_0219 | dihydroHelianthus_annuus    | 51.30 | 0.00 |
| TRINITY_KXZ4812 | hypothetGonium_pectorale    | 51.30 | 0.00 |
| TRINITY_KXZ5691 | hypothetGonium_pectorale    | 51.30 | 0.00 |
| TRINITY_XP_0016 | peroxireChlamydomonas_reinh | 51.30 | 0.00 |
| TRINITY_KXZ4582 | hypothetGonium_pectorale    | 51.30 | 0.00 |
| TRINITY_GAX8266 | hypothetChlamydomonas_eusti | 51.30 | 0.00 |
| TRINITY_XP_0030 | predicteMicromonas_pusilla  | 51.30 | 0.00 |
| TRINITY_XP_0029 | hypothetVolvox_carteri      | 51.30 | 0.00 |
| TRINITY_GAX7427 | hypothetChlamydomonas_eusti | 51.30 | 0.00 |
| TRINITY_GAX7302 | hypothetChlamydomonas_eusti | 51.30 | 0.00 |
| TRINITY_KXZ5425 | hypothetGonium_pectorale    | 51.30 | 0.00 |

|                 |                              |       |      |
|-----------------|------------------------------|-------|------|
| TRINITY_OTG2090 | putative Helianthus annuus   | 51.30 | 0.00 |
| TRINITY_GAX8483 | hypothet Chlamydomonas eusti | 51.30 | 0.00 |
| TRINITY_KXZ5420 | hypothet Gonium pectorale    | 51.30 | 0.00 |
| TRINITY_GAX7320 | hypothet Chlamydomonas eusti | 51.30 | 0.00 |
| TRINITY_PNW7310 | hypothet Chlamydomonas reinh | 51.30 | 0.00 |
| TRINITY_GBF9572 | hypothet Raphidocelis subcap | 51.30 | 0.00 |
| TRINITY_PNH1289 | hypothet Tetrabaena socialis | 51.30 | 0.00 |
| TRINITY_PNW7983 | hypothet Chlamydomonas reinh | 51.30 | 0.00 |
| TRINITY_GAX7353 | hypothet Chlamydomonas eusti | 51.30 | 0.00 |
| TRINITY_KDD7530 | fumble, Helicosporidium sp.  | 51.20 | 0.00 |
| TRINITY_GAQ7822 | Serine/t Klebsormidium niten | 51.20 | 0.00 |
| TRINITY_GBF9117 | hypothet Raphidocelis subcap | 51.20 | 0.00 |
| TRINITY_ABK2587 | unknown Picea sitchensis     | 51.20 | 0.00 |
| TRINITY_GAQ7758 | ABC trar Klebsormidium niten | 51.20 | 0.00 |
| TRINITY_XP_0228 | ras-rel Olea europaea        | 51.20 | 0.00 |
| TRINITY_GAQ8276 | Actin-r Klebsormidium niten  | 51.20 | 0.00 |
| TRINITY_GAQ8787 | Aromatic Klebsormidium niten | 51.20 | 0.00 |
| TRINITY_XP_0056 | putative Coccomyxa subellips | 51.20 | 0.00 |
| TRINITY_GAX8503 | hypothet Chlamydomonas eusti | 51.20 | 0.00 |
| TRINITY_EPS7450 | hypothet Genlisea aurea      | 51.20 | 0.00 |
| TRINITY_PNW8777 | hypothet Chlamydomonas reinh | 51.20 | 0.00 |
| TRINITY_GAQ8762 | Dyneins Klebsormidium niten  | 51.20 | 0    |
| TRINITY_XP_0114 | Glycerol Auxenochlorella pro | 51.20 | 0.00 |
| TRINITY_XP_0219 | probable Helianthus annuus   | 51.20 | 0.00 |
| TRINITY_OAE2772 | hypothet Marchantia polymorp | 51.20 | 0.00 |
| TRINITY_XP_0087 | uncharac Phoenix dactylifera | 51.20 | 0.00 |
| TRINITY_PNH1039 | Beta-fr Tetrabaena socialis  | 51.20 | 0.00 |
| TRINITY_XP_0205 | probable Phalaenopsis equest | 51.20 | 0.00 |
| TRINITY_AEU1103 | flagell Dunaliella salina    | 51.20 | 0.00 |
| TRINITY_PNW7419 | hypothet Chlamydomonas reinh | 51.20 | 0.00 |
| TRINITY_KZV1521 | citrate Dorcoceras hygromet  | 51.20 | 0.00 |
| TRINITY_XP_0016 | predicte Chlamydomonas reinh | 51.20 | 0.00 |
| TRINITY_GAX8418 | hypothet Chlamydomonas eusti | 51.20 | 0.00 |
| TRINITY_GAX8021 | hypothet Chlamydomonas eusti | 51.20 | 0.00 |
| TRINITY_CCF1754 | RabE GTI Micrasterias dentic | 51.20 | 0.00 |
| TRINITY_XP_0029 | hypothet Volvox carteri      | 51.20 | 0.00 |
| TRINITY_XP_0075 | predicte Bathycoccus prasinc | 51.20 | 0.00 |
| TRINITY_PNW7264 | hypothet Chlamydomonas reinh | 51.20 | 0.00 |
| TRINITY_PSC7691 | cupin s Micractinium conduc  | 51.20 | 0.00 |
| TRINITY_PNW7817 | hypothet Chlamydomonas reinh | 51.20 | 0.00 |
| TRINITY_PSC7135 | arsenite Micractinium conduc | 51.20 | 0.00 |
| TRINITY_XP_0279 | zinc fir Vigna unguiculata   | 51.20 | 0.00 |
| TRINITY_XP_0029 | traffic Selaginella moellen  | 51.20 | 0.00 |
| TRINITY_PNW7206 | hypothet Chlamydomonas reinh | 51.20 | 0.00 |
| TRINITY_GAQ9067 | hypothet Klebsormidium niten | 51.20 | 0.00 |
| TRINITY_XP_0029 | hypothet Volvox carteri      | 51.20 | 0.00 |
| TRINITY_BAJ9946 | predicte Hordeum vulgare     | 51.20 | 0.00 |
| TRINITY_XP_0058 | hypothet Chlorella variabili | 51.20 | 0.00 |
| TRINITY_XP_0263 | glycerol Papaver somniferum  | 51.20 | 0.00 |
| TRINITY_GAX8346 | hypothet Chlamydomonas eusti | 51.20 | 0.00 |
| TRINITY_PNH1213 | hypothet Tetrabaena socialis | 51.20 | 0.00 |
| TRINITY_XP_0041 | PREDICTI Cucumis sativus     | 51.20 | 0.00 |
| TRINITY_GAX8505 | hypothet Chlamydomonas eusti | 51.20 | 0.00 |
| TRINITY_XP_0029 | hypothet Volvox carteri      | 51.20 | 0.00 |
| TRINITY_XP_0029 | CF0 ATP Volvox carteri       | 51.20 | 0.00 |
| TRINITY_PRW5921 | tRNA (c) Chlorella sorokinia | 51.20 | 0.00 |
| TRINITY_XP_0056 | DNA/RNA Coccomyxa subellips  | 51.20 | 0.00 |
| TRINITY_KJB2409 | hypothet Gossypium raimondii | 51.20 | 0.00 |
| TRINITY_GAX7961 | hypothet Chlamydomonas eusti | 51.20 | 0.00 |
| TRINITY_PRW2081 | Altered Chlorella sorokinia  | 51.20 | 0.00 |
| TRINITY_GBF9444 | hypothet Raphidocelis subcap | 51.20 | 0.00 |
| TRINITY_XP_0174 | PREDICTI Vigna angularis     | 51.20 | 0.00 |
| TRINITY_GAX8386 | hypothet Chlamydomonas eusti | 51.20 | 0.00 |
| TRINITY_GAX7420 | hypothet Chlamydomonas eusti | 51.20 | 0.00 |
| TRINITY_BAJ9372 | predicte Hordeum vulgare     | 51.20 | 0.00 |
| TRINITY_GAX8056 | hypothet Chlamydomonas eusti | 51.20 | 0.00 |

|                  |                              |       |      |
|------------------|------------------------------|-------|------|
| TRINITY_XP_00294 | hypothetVolvox_carteri       | 51.20 | 0.00 |
| TRINITY_GAX7267  | hypothetChlamydomonas_eusti  | 51.20 | 0.00 |
| TRINITY_PNW8121  | hypothetChlamydomonas_reinh  | 51.20 | 0.00 |
| TRINITY_XP_0113  | hypothetAuxenochlorella_pro  | 51.20 | 0.00 |
| TRINITY_GAX82301 | hypothetChlamydomonas_eusti  | 51.20 | 0.00 |
| TRINITY_XP_0024  | predicteMicromonas_commoda   | 51.20 | 0.00 |
| TRINITY_KMS6524  | hypothetBeta_vulgaris        | 51.20 | 0.00 |
| TRINITY_PNH0613  | AdenylatTetrabaena_socialis  | 51.20 | 0.00 |
| TRINITY_KXZ5509  | hypothetGonium_pectorale     | 51.20 | 0.00 |
| TRINITY_XP_0025  | dynein çMicromonas_commoda   | 51.20 | 0.00 |
| TRINITY_KXZ5101  | hypothetGonium_pectorale     | 51.20 | 0    |
| TRINITY_PNH1225  | hypothetTetrabaena_socialis  | 51.20 | 0.00 |
| TRINITY_GAX7332  | hypothetChlamydomonas_eusti  | 51.20 | 0.00 |
| TRINITY_GAX8259  | hypothetChlamydomonas_eusti  | 51.20 | 0.00 |
| TRINITY_GBG8840  | hypothetChara_braunii        | 51.20 | 0.00 |
| TRINITY_GAX72841 | hypothetChlamydomonas_eusti  | 51.20 | 0.00 |
| TRINITY_GBG6857  | GlutamatChara_braunii        | 51.20 | 0.00 |
| TRINITY_GBF9142  | cytochrçRaphidocelis_subcap  | 51.20 | 0.00 |
| TRINITY_XP_0238  | kinesin Quercus_suber        | 51.20 | 0.00 |
| TRINITY_XP_0239  | replicatQuercus_suber        | 51.10 | 0.00 |
| TRINITY_XP_00751 | ribulosèBathycoccus_prasinç  | 51.10 | 0.00 |
| TRINITY_XP_0110  | UDP-N-acSesamum_indicum      | 51.10 | 0.00 |
| TRINITY_XP_0216  | RNA polyHevea_brasiliensis   | 51.10 | 0.00 |
| TRINITY_KFK2505  | d-lactatArabis_alpina        | 51.10 | 0.00 |
| TRINITY_PNY1424  | cationicTrifolium_pratense   | 51.10 | 0.00 |
| TRINITY_GBF9979  | 226S protRaphidocelis_subcap | 51.10 | 0.00 |
| TRINITY_RID6957  | hypothetBrassica_rapa        | 51.10 | 0.00 |
| TRINITY_GAX8018  | hypothetChlamydomonas_eusti  | 51.10 | 0.00 |
| TRINITY_PNW7826  | hypothetChlamydomonas_reinh  | 51.10 | 0.00 |
| TRINITY_ARO50091 | indoleanYamagishiella_unicc  | 51.10 | 0.00 |
| TRINITY_GBF9365  | hypothetRaphidocelis_subcap  | 51.10 | 0.00 |
| TRINITY_PNH0587  | InositolTetrabaena_socialis  | 51.10 | 0.00 |
| TRINITY_GAQ8191  | heat shkKlebsormidium_niten  | 51.10 | 0.00 |
| TRINITY_GAX7301  | hypothetChlamydomonas_eusti  | 51.10 | 0.00 |
| TRINITY_XP_0238  | transcriQuercus_suber        | 51.10 | 0.00 |
| TRINITY_GAX77611 | hypothetChlamydomonas_eusti  | 51.10 | 0.00 |
| TRINITY_GAX80391 | hypothetChlamydomonas_eusti  | 51.10 | 0.00 |
| TRINITY_XP_00564 | PhyH-donCoccomyxa_subellips  | 51.10 | 0.00 |
| TRINITY_PNW7380  | hypothetChlamydomonas_reinh  | 51.10 | 0.00 |
| TRINITY_XP_0109  | PREDICTIElaeis_guineensis    | 51.10 | 0.00 |
| TRINITY_XP_0093  | PREDICTIMusa_acuminata       | 51.10 | 0.00 |
| TRINITY_GAX8353  | hypothetChlamydomonas_eusti  | 51.10 | 0.00 |
| TRINITY_GAX8416  | hypothetChlamydomonas_eusti  | 51.10 | 0.00 |
| TRINITY_AQA2958  | retrovirZea_mays             | 51.10 | 0.00 |
| TRINITY_GAX8116  | hypothetChlamydomonas_eusti  | 51.10 | 0.00 |
| TRINITY_GAX8019  | hypothetChlamydomonas_eusti  | 51.10 | 0.00 |
| TRINITY_KDO5144  | hypothetCitrus_sinensis      | 51.10 | 0.00 |
| TRINITY_GAX7580  | hypothetChlamydomonas_eusti  | 51.10 | 0.00 |
| TRINITY_XP_0029  | hypothetVolvox_carteri       | 51.10 | 0.00 |
| TRINITY_PNW7130  | hypothetChlamydomonas_reinh  | 51.10 | 0.00 |
| TRINITY_XP_0029  | hypothetVolvox_carteri       | 51.10 | 0.00 |
| TRINITY_GAX7625  | hypothetChlamydomonas_eusti  | 51.10 | 0.00 |
| TRINITY_GBF8851  | ABC trarRaphidocelis_subcap  | 51.10 | 0.00 |
| TRINITY_GBF8851  | ABC trarRaphidocelis_subcap  | 51.10 | 0.00 |
| TRINITY_XP_0049  | heat shkSetaria_italica      | 51.10 | 0.00 |
| TRINITY_XP_0271  | putativeCoffea_arabica       | 51.10 | 0.00 |
| TRINITY_GAX7748  | hypothetChlamydomonas_eusti  | 51.10 | 0.00 |
| TRINITY_GAX8532  | hypothetChlamydomonas_eusti  | 51.10 | 0.00 |
| TRINITY_PNH1057  | RetrovirTetrabaena_socialis  | 51.10 | 0.00 |
| TRINITY_XP_0110  | PREDICTIPopulus_euphratica   | 51.10 | 0.00 |
| TRINITY_PNW7792  | hypothetChlamydomonas_reinh  | 51.10 | 0.00 |
| TRINITY_GAX77211 | hypothetChlamydomonas_eusti  | 51.10 | 0.00 |
| TRINITY_GAU2195  | hypothetTrifolium_subterran  | 51.10 | 0.00 |
| TRINITY_GBF8787  | sucrose Raphidocelis_subcap  | 51.10 | 0.00 |
| TRINITY_XP_0017  | glyoxal Chlamydomonas_reinh  | 51.10 | 0.00 |
| TRINITY_BAK0099  | predicteHordeum_vulgare      | 51.10 | 0.00 |

|                  |          |                     |       |      |
|------------------|----------|---------------------|-------|------|
| TRINITY_XP_00865 | cytochr  | Zea_mays            | 51.10 | 0.00 |
| TRINITY_PSC73882 | ABC trar | Micractinium_conduc | 51.10 | 0.00 |
| TRINITY_GAX85698 | hypothet | Chlamydomonas_eusti | 51.10 | 0.00 |
| TRINITY_GAQ88658 | Dyneins  | Klebsormidium_niten | 51.10 | 0.00 |
| TRINITY_KXZ48269 | hypothet | Gonium_pectorale    | 51.10 | 0.00 |
| TRINITY_KXZ40924 | hypothet | Gonium_pectorale    | 51.10 | 0.00 |
| TRINITY_PNH07816 | putativ  | Tetrabaena_socialis | 51.10 | 0.00 |
| TRINITY_OMO73136 | reverse  | Corchorus_capsulari | 51.10 | 0.00 |
| TRINITY_XP_01847 | PREDICTI | Raphanus_sativus    | 51.10 | 0.00 |
| TRINITY_XP_01389 | nucleosi | Monoraphidium_negle | 51.00 | 0.00 |
| TRINITY_XP_00141 | predict  | Ostreococcus_sp._'1 | 51.00 | 0.00 |
| TRINITY_XP_02440 | uncharac | Physcomitrella_pate | 51.00 | 0.00 |
| TRINITY_GBG62284 | hypothet | Chara_braunii       | 51.00 | 0.00 |
| TRINITY_XP_00297 | calmodul | Selaginella_moellen | 51.00 | 0.00 |
| TRINITY_XP_00305 | entriole | Micromonas_pusilla  | 51.00 | 0.00 |
| TRINITY_GBF88231 | alpha b  | Raphidocelis_subcap | 51.00 | 0.00 |
| TRINITY_XP_02390 | ras-like | Quercus_suber       | 51.00 | 0.00 |
| TRINITY_XP_02712 | tRNAse   | Coffea_arabica      | 51.00 | 0.00 |
| TRINITY_XP_02390 | LETM1 d  | Quercus_suber       | 51.00 | 0.00 |
| TRINITY_GBG80331 | hypothet | Chara_braunii       | 51.00 | 0.00 |
| TRINITY_XP_02173 | carnosir | Chenopodium_quinoa  | 51.00 | 0.00 |
| TRINITY_XP_00424 | putativ  | Solanum_lycopersicu | 51.00 | 0.00 |
| TRINITY_KXZ45964 | hypothet | Gonium_pectorale    | 51.00 | 0.00 |
| TRINITY_XP_02435 | mitochor | Physcomitrella_pate | 51.00 | 0.00 |
| TRINITY_NP_00134 | ABC trar | Zea_mays            | 51.00 | 0.00 |
| TRINITY_GAX77779 | hypothet | Chlamydomonas_eusti | 51.00 | 0.00 |
| TRINITY_XP_00169 | predict  | Chlamydomonas_reinh | 51.00 | 0.00 |
| TRINITY_PNH05981 | Ubiquin  | Tetrabaena_socialis | 51.00 | 0.00 |
| TRINITY_KXZ42805 | hypothet | Gonium_pectorale    | 51.00 | 0.00 |
| TRINITY_XP_01657 | PREDICTI | Capsicum_annuum     | 51.00 | 0.00 |
| TRINITY_GAX74027 | hypothet | Chlamydomonas_eusti | 51.00 | 0.00 |
| TRINITY_GBF95504 | transcri | Raphidocelis_subcap | 51.00 | 0.00 |
| TRINITY_PNW87886 | hypothet | Chlamydomonas_reinh | 51.00 | 0.00 |
| TRINITY_XP_00169 | predict  | Chlamydomonas_reinh | 51.00 | 0.00 |
| TRINITY_XP_00169 | predict  | Chlamydomonas_reinh | 51.00 | 0.00 |
| TRINITY_XP_00294 | hypothet | Volvox_carteri      | 51.00 | 0.00 |
| TRINITY_KXZ52752 | hypothet | Gonium_pectorale    | 51.00 | 0.00 |
| TRINITY_XP_02402 | LOW QUAI | Morus_notabilis     | 51.00 | 0.00 |
| TRINITY_PNW87389 | hypothet | Chlamydomonas_reinh | 51.00 | 0.00 |
| TRINITY_KXZ45775 | hypothet | Gonium_pectorale    | 51.00 | 0.00 |
| TRINITY_KXZ49323 | hypothet | Gonium_pectorale    | 51.00 | 0.00 |
| TRINITY_XP_01721 | PREDICTI | Daucus_carota       | 51.00 | 0.00 |
| TRINITY_GAX79874 | hypothet | Chlamydomonas_eusti | 51.00 | 0.00 |
| TRINITY_KXZ49585 | hypothet | Gonium_pectorale    | 51.00 | 0.00 |
| TRINITY_KXZ53403 | hypothet | Gonium_pectorale    | 51.00 | 0.00 |
| TRINITY_GAX73530 | hypothet | Chlamydomonas_eusti | 51.00 | 0.00 |
| TRINITY_GAX80482 | hypothet | Chlamydomonas_eusti | 51.00 | 0.00 |
| TRINITY_GAX80271 | hypothet | Chlamydomonas_eusti | 51.00 | 0.00 |
| TRINITY_RWR97491 | ras-rel  | Cinnamomum_micranth | 51.00 | 0.00 |
| TRINITY_GAX79596 | hypothet | Chlamydomonas_eusti | 51.00 | 0.00 |
| TRINITY_GAX82619 | hypothet | Chlamydomonas_eusti | 51.00 | 0.00 |
| TRINITY_XP_00170 | predict  | Chlamydomonas_reinh | 51.00 | 0.00 |
| TRINITY_GAX73447 | hypothet | Chlamydomonas_eusti | 51.00 | 0.00 |
| TRINITY_XP_00251 | RNA-bin  | Ricinus_communis    | 51.00 | 0.00 |
| TRINITY_RWR84219 | DNA heli | Cinnamomum_micranth | 50.90 | 0.00 |
| TRINITY_XP_00168 | predict  | Chlamydomonas_reinh | 50.90 | 0.00 |
| TRINITY_GAX85410 | hypothet | Chlamydomonas_eusti | 50.90 | 0.00 |
| TRINITY_XP_02644 | ras-rel  | Papaver_somniferum  | 50.90 | 0.00 |
| TRINITY_KZV42179 | hypothet | Dorcoceras_hygromet | 50.90 | 0.00 |
| TRINITY_XP_00564 | peptide  | Coccomyxa_subellips | 50.90 | 0.00 |
| TRINITY_XP_02284 | Ribosom  | Ostreococcus_tauri  | 50.90 | 0.00 |
| TRINITY_XP_01945 | PREDICTI | Lupinus_angustifoli | 50.90 | 0.00 |
| TRINITY_XP_02168 | E3 ubiq  | Hevea_brasiliensis  | 50.90 | 0.00 |
| TRINITY_AET02413 | hypothet | Medicago_truncatula | 50.90 | 0.00 |
| TRINITY_ONK65918 | uncharac | Asparagus_officinal | 50.90 | 0.00 |
| TRINITY_XP_00169 | regulat  | Chlamydomonas_reinh | 50.90 | 0.00 |

|                  |          |                     |       |      |
|------------------|----------|---------------------|-------|------|
| TRINITY_BAK02778 | predicte | Hordeum_vulgare     | 50.90 | 0.00 |
| TRINITY_XP_01917 | PREDICTE | Ipomoea_nil         | 50.90 | 0.00 |
| TRINITY_XP_00643 | ubiquiti | Citrus_clementina   | 50.90 | 0.00 |
| TRINITY_OAE25737 | hypothet | Marchantia_polymorp | 50.90 | 0.00 |
| TRINITY_PNW77390 | hypothet | Chlamydomonas_reinh | 50.90 | 0.00 |
| TRINITY_GAX84313 | hypothet | Chlamydomonas_eusti | 50.90 | 0.00 |
| TRINITY_KZV15208 | hypothet | Dorcoceras_hygromet | 50.90 | 0.00 |
| TRINITY_BAK02778 | predicte | Hordeum_vulgare     | 50.90 | 0.00 |
| TRINITY_XP_02387 | glycoger | Quercus_suber       | 50.90 | 0.00 |
| TRINITY_GAX75712 | hypothet | Chlamydomonas_eusti | 50.90 | 0.00 |
| TRINITY_KZV28007 | putative | Dorcoceras_hygromet | 50.90 | 0.00 |
| TRINITY_GAX73065 | hypothet | Chlamydomonas_eusti | 50.90 | 0.00 |
| TRINITY_XP_00939 | PREDICTE | Musa_acuminata      | 50.90 | 0.00 |
| TRINITY_PNH07693 | Initiati | Tetrabaena_socialis | 50.90 | 0.00 |
| TRINITY_XP_00584 | hypothet | Chlorella_variabili | 50.90 | 0.00 |
| TRINITY_GBG78309 | hypothet | Chara_braunii       | 50.90 | 0.00 |
| TRINITY_XP_02387 | serine/t | Quercus_suber       | 50.90 | 0.00 |
| TRINITY_GAX80922 | hypothet | Chlamydomonas_eusti | 50.90 | 0.00 |
| TRINITY_GAX82607 | hypothet | Chlamydomonas_eusti | 50.90 | 0.00 |
| TRINITY_GAX77432 | hypothet | Chlamydomonas_eusti | 50.90 | 0.00 |
| TRINITY_GAX73126 | hypothet | Chlamydomonas_eusti | 50.90 | 0.00 |
| TRINITY_PRW44967 | cysteine | Chlorella_sorokinia | 50.90 | 0.00 |
| TRINITY_XP_02197 | 26S prot | Helianthus_annuus   | 50.90 | 0.00 |
| TRINITY_OAE23085 | hypothet | Marchantia_polymorp | 50.90 | 0.00 |
| TRINITY_PRW20199 | formamic | Chlorella_sorokinia | 50.90 | 0.00 |
| TRINITY_GBG00126 | thioered | Raphidocelis_subcap | 50.90 | 0.00 |
| TRINITY_PNW87173 | hypothet | Chlamydomonas_reinh | 50.90 | 0.00 |
| TRINITY_XP_00170 | mitotic  | Chlamydomonas_reinh | 50.90 | 0.00 |
| TRINITY_GAX72720 | hypothet | Chlamydomonas_eusti | 50.90 | 0.00 |
| TRINITY_XP_00584 | hypothet | Chlorella_variabili | 50.90 | 0.00 |
| TRINITY_PTQ36361 | hypothet | Marchantia_polymorp | 50.90 | 0.00 |
| TRINITY_EOX91407 | Heat sh  | Theobroma_cacao     | 50.90 | 0.00 |
| TRINITY_XP_00294 | guanylyl | Volvox_carteri      | 50.90 | 0.00 |
| TRINITY_XP_00170 | predicte | Chlamydomonas_reinh | 50.90 | 0.00 |
| TRINITY_KXZ53340 | hypothet | Gonium_pectorale    | 50.90 | 0.00 |
| TRINITY_XP_02389 | kinesin  | Quercus_suber       | 50.90 | 0.00 |
| TRINITY_H3JU05.1 | RecName: | Chlamydomonas_reinh | 50.90 | 0.00 |
| TRINITY_PNW78132 | hypothet | Chlamydomonas_reinh | 50.90 | 0.00 |
| TRINITY_EOX97904 | DNA rep  | Theobroma_cacao     | 50.90 | 0.00 |
| TRINITY_GAQ83197 | Galacto  | Klebsormidium_niten | 50.80 | 0.00 |
| TRINITY_GBF98484 | hypothet | Raphidocelis_subcap | 50.80 | 0.00 |
| TRINITY_PWA60879 | CID dom  | Artemisia_annua     | 50.80 | 0.00 |
| TRINITY_KXZ45909 | DHC7 pr  | Gonium_pectorale    | 50.80 | 0.00 |
| TRINITY_GAQ83809 | Protein  | Klebsormidium_niten | 50.80 | 0.00 |
| TRINITY_GAX76060 | hypothet | Chlamydomonas_eusti | 50.80 | 0.00 |
| TRINITY_XP_01162 | protein  | Amborella_trichopod | 50.80 | 0.00 |
| TRINITY_XP_00142 | predicte | Ostreococcus_sp._'1 | 50.80 | 0.00 |
| TRINITY_XP_02373 | CAAX pr  | Lactuca_sativa      | 50.80 | 0.00 |
| TRINITY_PNR48081 | hypothet | Physcomitrella_pate | 50.80 | 0.00 |
| TRINITY_GAX81131 | hypothet | Chlamydomonas_eusti | 50.80 | 0.00 |
| TRINITY_XP_01005 | PREDICTE | Eucalyptus_grandis  | 50.80 | 0.00 |
| TRINITY_PIN21694 | Transcri | Handroanthus_impeti | 50.80 | 0.00 |
| TRINITY_XP_02027 | LOW QUAI | Asparagus_officinal | 50.80 | 0.00 |
| TRINITY_OAE20747 | hypothet | Marchantia_polymorp | 50.80 | 0.00 |
| TRINITY_XP_00170 | expansir | Chlamydomonas_reinh | 50.80 | 0.00 |
| TRINITY_GAX73749 | hypothet | Chlamydomonas_eusti | 50.80 | 0.00 |
| TRINITY_GAX77030 | hypothet | Chlamydomonas_eusti | 50.80 | 0.00 |
| TRINITY_KXZ51584 | hypothet | Gonium_pectorale    | 50.80 | 0.00 |
| TRINITY_XP_00497 | alpha-1, | Setaria_italica     | 50.80 | 0.00 |
| TRINITY_GAX84446 | hypothet | Chlamydomonas_eusti | 50.80 | 0.00 |
| TRINITY_XP_02435 | chromod  | Physcomitrella_pate | 50.80 | 0.00 |
| TRINITY_XP_00169 | predicte | Chlamydomonas_reinh | 50.80 | 0.00 |
| TRINITY_XP_01390 | putative | Monoraphidium_negle | 50.80 | 0.00 |
| TRINITY_XP_02390 | protein  | Quercus_suber       | 50.80 | 0.00 |
| TRINITY_GAX86058 | hypothet | Chlamydomonas_eusti | 50.80 | 0.00 |
| TRINITY_GBF87741 | hypothet | Raphidocelis_subcap | 50.80 | 0.00 |

|                  |                              |       |      |
|------------------|------------------------------|-------|------|
| TRINITY_XP_00585 | hypothetChlorella_variabili  | 50.80 | 0.00 |
| TRINITY_XP_01389 | hypothetMonoraphidium_negle  | 50.80 | 0.00 |
| TRINITY_PNW76788 | hypothetChlamydomonas_reinh  | 50.80 | 0.00 |
| TRINITY_PNW75892 | hypothetChlamydomonas_reinh  | 50.80 | 0.00 |
| TRINITY_XP_00246 | DExH-boSorghum_bicolor       | 50.80 | 0.00 |
| TRINITY_GAX75477 | hypothetChlamydomonas_eusti  | 50.80 | 0.00 |
| TRINITY_XP_01390 | Protein Monoraphidium_negle  | 50.80 | 0.00 |
| TRINITY_GAX83154 | hypothetChlamydomonas_eusti  | 50.80 | 0.00 |
| TRINITY_PNW81529 | hypothetChlamydomonas_reinh  | 50.80 | 0.00 |
| TRINITY_GAX83989 | hypothetChlamydomonas_eusti  | 50.80 | 0.00 |
| TRINITY_KXZ51691 | hypothetGonium_pectorale     | 50.80 | 0.00 |
| TRINITY_PNW74393 | hypothetChlamydomonas_reinh  | 50.80 | 0.00 |
| TRINITY_NP_00115 | dihydrocZea_mays             | 50.80 | 0.00 |
| TRINITY_XP_00170 | (ARF-likeChlamydomonas_reinh | 50.80 | 0.00 |
| TRINITY_OUS45216 | (FAD-contOstreococcus_tauri  | 50.80 | 0.00 |
| TRINITY_RID6288  | (hypothetBrassica_rapa       | 50.80 | 0.00 |
| TRINITY_XP_00298 | glutamatSelaginella_moellen  | 50.80 | 0.00 |
| TRINITY_PHU23325 | hypothetCapsicum_chinense    | 50.80 | 0.00 |
| TRINITY_GAX78881 | hypothetChlamydomonas_eusti  | 50.80 | 0.00 |
| TRINITY_XP_00295 | hypothetVolvox_carteri       | 50.80 | 0.00 |
| TRINITY_XP_02390 | (ras-likeQuercus_suber       | 50.80 | 0.00 |
| TRINITY_GAX75423 | hypothetChlamydomonas_eusti  | 50.80 | 0.00 |
| TRINITY_GAQ87816 | (sodium pKlebsormidium_niten | 50.80 | 0.00 |
| TRINITY_KXZ53953 | FAP91 pGonium_pectorale      | 50.80 | 0.00 |
| TRINITY_GAX73008 | hypothetChlamydomonas_eusti  | 50.80 | 0.00 |
| TRINITY_XP_02189 | nucleolCarica_papaya         | 50.80 | 0.00 |
| TRINITY_GBF89153 | Xaa-Pro Raphidocelis_subcap  | 50.80 | 0.00 |
| TRINITY_GAX82368 | hypothetChlamydomonas_eusti  | 50.80 | 0.00 |
| TRINITY_RLN0878  | (protein Panicum_miliaceum   | 50.80 | 0.00 |
| TRINITY_XP_01945 | PREDICTHLupinus_angustifoli  | 50.80 | 0.00 |
| TRINITY_PRW39353 | phosphoChlorella_sorokinia   | 50.80 | 0.00 |
| TRINITY_XP_00295 | hypothetVolvox_carteri       | 50.80 | 0.00 |
| TRINITY_PNH06288 | hypothetTetrabaena_socialis  | 50.80 | 0.00 |
| TRINITY_PSC67646 | (MAK16-liMicractinium_conduc | 50.80 | 0.00 |
| TRINITY_GAX75648 | hypothetChlamydomonas_eusti  | 50.80 | 0.00 |
| TRINITY_GBF91271 | hypothetRaphidocelis_subcap  | 50.80 | 0.00 |
| TRINITY_XP_00170 | (copper pChlamydomonas_reinh | 50.80 | 0.00 |
| TRINITY_KXZ55190 | (hypothetGonium_pectorale    | 50.80 | 0.00 |
| TRINITY_GAX85296 | hypothetChlamydomonas_eusti  | 50.80 | 0.00 |
| TRINITY_AAO73551 | reverse-Chlamydomonas_reinh  | 50.80 | 0.00 |
| TRINITY_KFK25830 | (hypothetArabis_alpina       | 50.80 | 0.00 |
| TRINITY_PTQ31414 | hypothetMarchantia_polymorp  | 50.70 | 0.00 |
| TRINITY_XP_02284 | histone Olea_europaea        | 50.70 | 0.00 |
| TRINITY_PPS08376 | hypothetGossypium_barbadens  | 50.70 | 0.00 |
| TRINITY_XP_02086 | UPF0235 Arabidopsis_lyrata   | 50.70 | 0.00 |
| TRINITY_GAX79008 | hypothetChlamydomonas_eusti  | 50.70 | 0.00 |
| TRINITY_XP_00565 | prolifeCoccomyxa_subellips   | 50.70 | 0.00 |
| TRINITY_XP_00415 | PREDICTHCucumis_sativus      | 50.70 | 0.00 |
| TRINITY_GAQ83828 | M-phase Klebsormidium_niten  | 50.70 | 0.00 |
| TRINITY_XP_01102 | PREDICTHPopulus_euphratica   | 50.70 | 0.00 |
| TRINITY_XP_00639 | nitrate Eutrema_salsugineur  | 50.70 | 0.00 |
| TRINITY_AAQ07255 | putativeOryza_sativa         | 50.70 | 0.00 |
| TRINITY_GBG72475 | hypothetChara_braunii        | 50.70 | 0.00 |
| TRINITY_XP_02288 | D-2-hydOlea_europaea         | 50.70 | 0.00 |
| TRINITY_XP_02293 | histidirCucurbita_moschata   | 50.70 | 0.00 |
| TRINITY_PRQ34925 | putativeRosa_chinensis       | 50.70 | 0.00 |
| TRINITY_KVH99051 | hypothetCynara_cardunculus   | 50.70 | 0.00 |
| TRINITY_XP_00305 | flagellMicromonas_pusilla    | 50.70 | 0.00 |
| TRINITY_PNH03659 | Tiny macTetrabaena_socialis  | 50.70 | 0.00 |
| TRINITY_GAQ86768 | hypothetKlebsormidium_niten  | 50.70 | 0.00 |
| TRINITY_EFJ10614 | hypothetSelaginella_moellen  | 50.70 | 0.00 |
| TRINITY_KYP66747 | U1 smallCajanus_cajan        | 50.70 | 0.00 |
| TRINITY_GAQ91212 | Calcium Klebsormidium_niten  | 50.70 | 0.00 |
| TRINITY_XP_00295 | hypothetVolvox_carteri       | 50.70 | 0.00 |
| TRINITY_XP_00169 | flagellChlamydomonas_reinh   | 50.70 | 0.00 |
| TRINITY_XP_00168 | predictChlamydomonas_reinh   | 50.70 | 0.00 |

|                  |                              |       |      |
|------------------|------------------------------|-------|------|
| TRINITY_AID2386  | vanillirGlechoma_hederacea   | 50.70 | 0.00 |
| TRINITY_PSS11301 | UDP-glucActinidia_chinensis  | 50.70 | 0.00 |
| TRINITY_XP_01092 | PREDICTIElaeis_guineensis    | 50.70 | 0.00 |
| TRINITY_ACF9852  | delta-1Chlorella_vulgaris    | 50.70 | 0.00 |
| TRINITY_PWA4367  | autophaçArtemisia_annua      | 50.70 | 0.00 |
| TRINITY_XP_0188  | PREDICTI Juglans_regia       | 50.70 | 0.00 |
| TRINITY_XP_0202  | serine/tAsparagus_officinal  | 50.70 | 0.00 |
| TRINITY_GAX8277  | hypothetChlamydomonas_eusti  | 50.70 | 0.00 |
| TRINITY_KXZ5051  | hypothetGonium_pectorale     | 50.70 | 0.00 |
| TRINITY_GAX8054  | hypothetChlamydomonas_eusti  | 50.70 | 0.00 |
| TRINITY_XP_0194  | PREDICTI Lupinus_angustifoli | 50.70 | 0.00 |
| TRINITY_KXZ4988  | hypothetGonium_pectorale     | 50.70 | 0.00 |
| TRINITY_XP_0139  | (Pre-rRN/Monoraphidium_negle | 50.70 | 0.00 |
| TRINITY_GAQ8199  | (Amino acKlebsormidium_niten | 50.70 | 0.00 |
| TRINITY_XP_0111  | (splicinçSesamum_indicum     | 50.70 | 0.00 |
| TRINITY_XP_0184  | PREDICTI Raphanus_sativus    | 50.70 | 0.00 |
| TRINITY_GAQ8559  | DNA-dirçKlebsormidium_niten  | 50.70 | 0.00 |
| TRINITY_KXZ5273  | hypothetGonium_pectorale     | 50.70 | 0.00 |
| TRINITY_XP_0029  | hypothetVolvox_carteri       | 50.70 | 0.00 |
| TRINITY_RZC2607  | 1NADPH--çGlycine_soja        | 50.70 | 0.00 |
| TRINITY_GAX8458  | hypothetChlamydomonas_eusti  | 50.70 | 0.00 |
| TRINITY_OUS4480  | putativçOstreococcus_tauri   | 50.70 | 0.00 |
| TRINITY_BAV5834  | GTP-binçUlva_partita         | 50.70 | 0.00 |
| TRINITY_BAK0112  | predictçHordeum_vulgare      | 50.70 | 0.00 |
| TRINITY_XP_0239  | (delta-1-Quercus_suber       | 50.70 | 0.00 |
| TRINITY_KXZ4687  | hypothetGonium_pectorale     | 50.70 | 0.00 |
| TRINITY_XP_0238  | tryptoplQuercus_suber        | 50.70 | 0.00 |
| TRINITY_NP_0012  | seed matGlycine_max          | 50.70 | 0.00 |
| TRINITY_GBG7449  | hypothetChara_braunii        | 50.70 | 0.00 |
| TRINITY_XP_0029  | hypothetVolvox_carteri       | 50.70 | 0.00 |
| TRINITY_GBF9907  | hypothetRaphidocelis_subcap  | 50.70 | 0.00 |
| TRINITY_XP_0056  | TPR-likeCoccomyxa_subellips  | 50.70 | 0.00 |
| TRINITY_XP_0029  | hypothetVolvox_carteri       | 50.70 | 0.00 |
| TRINITY_GAX8122  | hypothetChlamydomonas_eusti  | 50.70 | 0.00 |
| TRINITY_PNH1145  | EF-hand Tetrabaena_socialis  | 50.70 | 0.00 |
| TRINITY_GAX8469  | hypothetChlamydomonas_eusti  | 50.70 | 0.00 |
| TRINITY_YP_6656  | cytochrçNephroselmis_olivac  | 50.70 | 0.00 |
| TRINITY_EFJ0645  | hypothetSelaginella_moellen  | 50.70 | 0.00 |
| TRINITY_PNW7434  | hypothetChlamydomonas_reinh  | 50.70 | 0.00 |
| TRINITY_GAX7602  | hypothetChlamydomonas_eusti  | 50.70 | 0.00 |
| TRINITY_GAX7903  | hypothetChlamydomonas_eusti  | 50.70 | 0.00 |
| TRINITY_XP_0028  | putativçArabidopsis_lyrata   | 50.70 | 0.00 |
| TRINITY_XP_0113  | Uridine Auxenochlorella_pro  | 50.70 | 0.00 |
| TRINITY_PTQ4327  | hypothetMarchantia_polymorp  | 50.70 | 0.00 |
| TRINITY_XP_0097  | PREDICTI Nicotiana_sylvestri | 50.70 | 0.00 |
| TRINITY_PNH0794  | hypothetTetrabaena_socialis  | 50.70 | 0.00 |
| TRINITY_XP_0045  | (ATP-depçCicer_arietinum     | 50.70 | 0.00 |
| TRINITY_PNH0877  | (NEDD8 ulTetrabaena_socialis | 50.70 | 0.00 |
| TRINITY_GAQ8926  | hypothetKlebsormidium_niten  | 50.70 | 0.00 |
| TRINITY_GAX7662  | hypothetChlamydomonas_eusti  | 50.70 | 0.00 |
| TRINITY_OMO5699  | GlutareçCorchorus_capsulari  | 50.70 | 0.00 |
| TRINITY_GAX7840  | hypothetChlamydomonas_eusti  | 50.70 | 0.00 |
| TRINITY_XP_0030  | P-loop çOstreococcus_tauri   | 50.70 | 0.00 |
| TRINITY_XP_0138  | hypothetMonoraphidium_negle  | 50.70 | 0.00 |
| TRINITY_PNW7490  | hypothetChlamydomonas_reinh  | 50.70 | 0.00 |
| TRINITY_GAQ8798  | (PhosphatKlebsormidium_niten | 50.70 | 0.00 |
| TRINITY_GAX7827  | hypothetChlamydomonas_eusti  | 50.70 | 0.00 |
| TRINITY_GAX7370  | hypothetChlamydomonas_eusti  | 50.70 | 0.00 |
| TRINITY_PNH0830  | NFX1-tyçTetrabaena_socialis  | 50.70 | 0.00 |
| TRINITY_XP_0161  | ADP-ribçArachis_ipaensis     | 50.70 | 0.00 |
| TRINITY_EFJ2714  | hypothetSelaginella_moellen  | 50.60 | 0.00 |
| TRINITY_GAQ8673  | tripartiKlebsormidium_niten  | 50.60 | 0.00 |
| TRINITY_XP_0220  | (anaphasçHelianthus_annuus   | 50.60 | 0.00 |
| TRINITY_XP_0016  | predictçChlamydomonas_reinh  | 50.60 | 0.00 |
| TRINITY_XP_0164  | PREDICTI Nicotiana_tabacum   | 50.60 | 0.00 |
| TRINITY_XP_0104  | PREDICTI Camelina_sativa     | 50.60 | 0.00 |

|                                                 |       |      |
|-------------------------------------------------|-------|------|
| TRINITY_XP_0101(succinatMorus_notabilis         | 50.60 | 0.00 |
| TRINITY_XP_0264(nudC donPapaver_somniferum      | 50.60 | 0.00 |
| TRINITY_XP_0139(DEAD-bo>Monoraphidium_negle     | 50.60 | 0.00 |
| TRINITY_XP_0243(eukaryotPhyscomitrella_pate     | 50.60 | 0.00 |
| TRINITY_GAQ83082(Maltose Klebsormidium_niten    | 50.60 | 0.00 |
| TRINITY_XP_0238(pyruvateQuercus_suber           | 50.60 | 0.00 |
| TRINITY_PKA64308(Glycine-Apostasia_shenzheni    | 50.60 | 0.00 |
| TRINITY_XP_0029(hypothetVolvox_carteri          | 50.60 | 0.00 |
| TRINITY_KXZ4903(hypothetGonium_pectorale        | 50.60 | 0.00 |
| TRINITY_KXZ51554(hypothetGonium_pectorale       | 50.60 | 0.00 |
| TRINITY_EEF25513(conservetRicinus_communis      | 50.60 | 0.00 |
| TRINITY_PNW78101(hypothetChlamydomonas_reinh    | 50.60 | 0.00 |
| TRINITY_XP_00294(hypothetVolvox_carteri         | 50.60 | 0.00 |
| TRINITY_XP_02392(ras-relaQuercus_suber          | 50.60 | 0.00 |
| TRINITY_XP_00169(predicteChlamydomonas_reinh    | 50.60 | 0.00 |
| TRINITY_XP_0239(myosin-1Quercus_suber           | 50.60 | 0.00 |
| TRINITY_XP_02053(mitogen-Amborella_trichopod    | 50.60 | 0.00 |
| TRINITY_PNH10984(hypothetTetrabaena_socialis    | 50.60 | 0.00 |
| TRINITY_XP_0219(autophaçCarica_papaya           | 50.60 | 0.00 |
| TRINITY_PNH10419(WD repeaTetrabaena_socialis    | 50.60 | 0.00 |
| TRINITY_AFK33797(unknown Lotus_japonicus        | 50.60 | 0.00 |
| TRINITY_RLN36045(hypothetPanicum_miliaceum      | 50.60 | 0.00 |
| TRINITY_XP_01344(ras-relaMedicago_truncatula    | 50.60 | 0.00 |
| TRINITY_XP_00295(hypothetVolvox_carteri         | 50.60 | 0.00 |
| TRINITY_PNW85246(hypothetChlamydomonas_reinh    | 50.60 | 0.00 |
| TRINITY_PNW82707(hypothetChlamydomonas_reinh    | 50.60 | 0.00 |
| TRINITY_GAX77588(hypothetChlamydomonas_eusti    | 50.60 | 0.00 |
| TRINITY_NP_0013(uncharacZea_mays                | 50.60 | 0.00 |
| TRINITY_XP_00295(hypothetVolvox_carteri         | 50.60 | 0.00 |
| TRINITY_KXZ50975(hypothetGonium_pectorale       | 50.60 | 0.00 |
| TRINITY_XP_01451(DEXH-bo>Vigna_radiata          | 50.60 | 0.00 |
| TRINITY_GBF92286(hypothetRaphidocelis_subcap    | 50.60 | 0.00 |
| TRINITY_XP_02588(uncharacOryza_sativa           | 50.60 | 0.00 |
| TRINITY_GAX76222(hypothetChlamydomonas_eusti    | 50.60 | 0.00 |
| TRINITY_GAX84316(hypothetChlamydomonas_eusti    | 50.60 | 0.00 |
| TRINITY_KQJ90679(hypothetBrachypodium_distac    | 50.60 | 0.00 |
| TRINITY_PRW58352(ATP-binçChlorella_sorokinia    | 50.60 | 0.00 |
| TRINITY_XP_00295(hypothetVolvox_carteri         | 50.60 | 0.00 |
| TRINITY_XP_01919(PREDICTI Ipomoea_nil           | 50.60 | 0.00 |
| TRINITY_XP_00169(predicteChlamydomonas_reinh    | 50.60 | 0.00 |
| TRINITY_XP_00169(hypothetChlamydomonas_reinh    | 50.60 | 0.00 |
| TRINITY_XP_0139(ActivatçMonoraphidium_negle     | 50.60 | 0.00 |
| TRINITY_XP_02283(RudimentOstreococcus_tauri     | 50.60 | 0.00 |
| TRINITY_XP_02197(probableChelidonium_thalictrum | 50.60 | 0.00 |
| TRINITY_AHA93098(PLC protDunaliella_salina      | 50.60 | 0.00 |
| TRINITY_PNH08075(hypothetTetrabaena_socialis    | 50.60 | 0.00 |
| TRINITY_GAX81388(hypothetChlamydomonas_eusti    | 50.60 | 0.00 |
| TRINITY_PNH0405(putativetTetrabaena_socialis    | 50.60 | 0.00 |
| TRINITY_GAX8511(hypothetChlamydomonas_eusti     | 50.60 | 0.00 |
| TRINITY_XP_02184(serine/tSpinacia_oleracea      | 50.60 | 0.00 |
| TRINITY_GAX82702(hypothetChlamydomonas_eusti    | 50.60 | 0.00 |
| TRINITY_GAX7868(hypothetChlamydomonas_eusti     | 50.60 | 0.00 |
| TRINITY_GAX81576(hypothetChlamydomonas_eusti    | 50.60 | 0.00 |
| TRINITY_XP_02293(ras-relaCucurbita_moschata     | 50.60 | 0.00 |
| TRINITY_XP_01654(PREDICTICapsicum_annuum        | 50.60 | 0.00 |
| TRINITY_XP_01389(hypothetMonoraphidium_negle    | 50.60 | 0.00 |
| TRINITY_PRW59539(hypothetChlorella_sorokinia    | 50.60 | 0.00 |
| TRINITY_PNW80625(hypothetChlamydomonas_reinh    | 50.60 | 0.00 |
| TRINITY_GAX7568(hypothetChlamydomonas_eusti     | 50.60 | 0.00 |
| TRINITY_KXZ43165(hypothetGonium_pectorale       | 50.60 | 0.00 |
| TRINITY_XP_0139(inositolMonoraphidium_negle     | 50.60 | 0.00 |
| TRINITY_PNW82219(hypothetChlamydomonas_reinh    | 50.60 | 0.00 |
| TRINITY_PNW80534(hypothetChlamydomonas_reinh    | 50.60 | 0.00 |
| TRINITY_XP_0075(glutathiBathycoccus_prasinç     | 50.60 | 0.00 |
| TRINITY_OVA0044(DnaJ donMacleaya_cordata        | 50.60 | 0.00 |
| TRINITY_XP_0201(uncharacAnanas_comosus          | 50.60 | 0.00 |



|                  |                               |       |      |
|------------------|-------------------------------|-------|------|
| TRINITY_GAX7573  | hypothetChlamydomonas_eusti   | 50.60 | 0.00 |
| TRINITY_XP_0025  | (protein Micromonas_commoda   | 50.60 | 0.00 |
| TRINITY_XP_0239  | (myosin tQuercus_suber        | 50.50 | 0.00 |
| TRINITY_BAK0236  | predicteHordeum_vulgare       | 50.50 | 0.00 |
| TRINITY_VDC9824  | unnamed Brassica_oleracea     | 50.50 | 0.00 |
| TRINITY_XP_0017  | (YCII-relChlamydomonas_reinh  | 50.50 | 0.00 |
| TRINITY_XP_0100  | cell numMorus_notabilis       | 50.50 | 0.00 |
| TRINITY_AIU4948  | RNA heliDioscorea_oppositif   | 50.50 | 0.00 |
| TRINITY_XP_0120  | methylnJatropha_curcas        | 50.50 | 0.00 |
| TRINITY_XP_0191  | (PREDICTI Ipomoea_nil         | 50.50 | 0.00 |
| TRINITY_RAL4648  | hypothetCuscuta_australis     | 50.50 | 0.00 |
| TRINITY_GAX7471  | hypothetChlamydomonas_eusti   | 50.50 | 0.00 |
| TRINITY_XP_0083  | (PREDICTI Malus_domestica     | 50.50 | 0.00 |
| TRINITY_XP_0041  | (PREDICTI Cucumis_sativus     | 50.50 | 0.00 |
| TRINITY_PNH1286  | (MicrosonTetrabaena_socialis  | 50.50 | 0.00 |
| TRINITY_POC8M8.1 | RecName:Zea_mays              | 50.50 | 0.00 |
| TRINITY_XP_0145  | zingipajVigna_radiata         | 50.50 | 0.00 |
| TRINITY_GBF9091  | hypothetRaphidocelis_subcap   | 50.50 | 0.00 |
| TRINITY_PNH1250  | (hypothetTetrabaena_socialis  | 50.50 | 0.00 |
| TRINITY_GBF9379  | hypothetRaphidocelis_subcap   | 50.50 | 0.00 |
| TRINITY_PNW7973  | hypothetChlamydomonas_reinh   | 50.50 | 0.00 |
| TRINITY_GBG0010  | hypothetRaphidocelis_subcap   | 50.50 | 0.00 |
| TRINITY_XP_0016  | (predicteChlamydomonas_reinh  | 50.50 | 0.00 |
| TRINITY_GAX7456  | hypothetChlamydomonas_eusti   | 50.50 | 0.00 |
| TRINITY_GBF9529  | hypothetRaphidocelis_subcap   | 50.50 | 0.00 |
| TRINITY_PNW8397  | hypothetChlamydomonas_reinh   | 50.50 | 0.00 |
| TRINITY_GAX7411  | hypothetChlamydomonas_eusti   | 50.50 | 0.00 |
| TRINITY_PNH1169  | hypothetTetrabaena_socialis   | 50.50 | 0.00 |
| TRINITY_PNW7788  | hypothetChlamydomonas_reinh   | 50.50 | 0.00 |
| TRINITY_GAX7758  | hypothetChlamydomonas_eusti   | 50.50 | 0.00 |
| TRINITY_KXZ5488  | hypothetGonium_pectorale      | 50.50 | 0.00 |
| TRINITY_PNW7889  | hypothetChlamydomonas_reinh   | 50.50 | 0.00 |
| TRINITY_XP_0184  | (PREDICTI Raphanus_sativus    | 50.50 | 0.00 |
| TRINITY_GAX7517  | (hypothetChlamydomonas_eusti  | 50.50 | 0.00 |
| TRINITY_KZV4271  | mediatorDorcoceras_hygromet   | 50.50 | 0.00 |
| TRINITY_GAX7385  | hypothetChlamydomonas_eusti   | 50.50 | 0.00 |
| TRINITY_BAG1297  | (RHYTHM (Chlamydomonas_reinh  | 50.50 | 0.00 |
| TRINITY_GBG8251  | hypothetChara_braunii         | 50.50 | 0.00 |
| TRINITY_OAE2263  | (hypothetMarchantia_polymorp  | 50.50 | 0.00 |
| TRINITY_XP_0071  | (hypothetPhaseolus_vulgaris   | 50.50 | 0.00 |
| TRINITY_GAX8217  | hypothetChlamydomonas_eusti   | 50.50 | 0.00 |
| TRINITY_PRW5973  | (Acyl-coeChlorella_sorokinia  | 50.50 | 0.00 |
| TRINITY_GAX7450  | hypothetChlamydomonas_eusti   | 50.50 | 0.00 |
| TRINITY_KXZ5559  | (hypothetGonium_pectorale     | 50.50 | 0.00 |
| TRINITY_XP_0139  | (hypothetMonoraphidium_negle  | 50.50 | 0.00 |
| TRINITY_XP_0016  | (predicteChlamydomonas_reinh  | 50.50 | 0.00 |
| TRINITY_XP_0063  | (protein Capsella_rubella     | 50.50 | 0.00 |
| TRINITY_GBF9787  | hypothetRaphidocelis_subcap   | 50.50 | 0.00 |
| TRINITY_KXZ4547  | (hypothetGonium_pectorale     | 50.50 | 0.00 |
| TRINITY_GAX7487  | hypothetChlamydomonas_eusti   | 50.50 | 0.00 |
| TRINITY_GAX8554  | hypothetChlamydomonas_eusti   | 50.50 | 0.00 |
| TRINITY_GAX8220  | (hypothetChlamydomonas_eusti  | 50.50 | 0.00 |
| TRINITY_KXZ5199  | hypothetGonium_pectorale      | 50.50 | 0.00 |
| TRINITY_XP_0138  | (alpha-1, Monoraphidium_negle | 50.50 | 0.00 |
| TRINITY_AMN1485  | (putativNepenthes_mirabilis   | 50.40 | 0.00 |
| TRINITY_XP_0056  | (protein Coccomyxa_subellips  | 50.40 | 0.00 |
| TRINITY_XP_0239  | (mitochorQuercus_suber        | 50.40 | 0.00 |
| TRINITY_GBF9918  | (DNA misnRaphidocelis_subcap  | 50.40 | 0.00 |
| TRINITY_XP_0128  | (PREDICTI Erythranthe_guttata | 50.40 | 0.00 |
| TRINITY_BAG1218  | (Parkin-(Chlamydomonas_reinh  | 50.40 | 0.00 |
| TRINITY_KDD7549  | hypothetHelicosporidium_sp.   | 50.40 | 0.00 |
| TRINITY_XP_0106  | (PREDICTI Vitis_vinifera      | 50.40 | 0.00 |
| TRINITY_XP_0237  | (zinc firLactuca_sativa       | 50.40 | 0.00 |
| TRINITY_GBF9934  | hypothetRaphidocelis_subcap   | 50.40 | 0.00 |
| TRINITY_KXZ5668  | hypothetGonium_pectorale      | 50.40 | 0.00 |
| TRINITY_XP_0030  | (predicteMicromonas_pusilla   | 50.40 | 0.00 |

|                   |                              |       |      |
|-------------------|------------------------------|-------|------|
| TRINITY_XP_024510 | acetylSelaginella_moellen    | 50.40 | 0.00 |
| TRINITY_XP_00169  | predicteChlamydomonas_reinh  | 50.40 | 0.00 |
| TRINITY_GAX80857  | hypothetChlamydomonas_eusti  | 50.40 | 0.00 |
| TRINITY_PNW8702   | (hypothetChlamydomonas_reinh | 50.40 | 0.00 |
| TRINITY_XP_00308  | Protein-Ostreococcus_tauri   | 50.40 | 0.00 |
| TRINITY_XP_0139   | (Protein Monoraphidium_negle | 50.40 | 0.00 |
| TRINITY_XP_00585  | hypothetChlorella_variabili  | 50.40 | 0.00 |
| TRINITY_KXZ48541  | hypothetGonium_pectorale     | 50.40 | 0.00 |
| TRINITY_GAX76672  | hypothetChlamydomonas_eusti  | 50.40 | 0.00 |
| TRINITY_KXZ46366  | hypothetGonium_pectorale     | 50.40 | 0.00 |
| TRINITY_XP_00294  | hypothetVolvox_carteri       | 50.40 | 0.00 |
| TRINITY_XP_00294  | hypothetVolvox_carteri       | 50.40 | 0.00 |
| TRINITY_XP_00685  | endoplasAmborella_trichopod  | 50.40 | 0.00 |
| TRINITY_GBF90293  | hypothetRaphidocelis_subcap  | 50.40 | 0.00 |
| TRINITY_GAX77552  | hypothetChlamydomonas_eusti  | 50.40 | 0.00 |
| TRINITY_KXZ56031  | hypothetGonium_pectorale     | 50.40 | 0.00 |
| TRINITY_PNW71725  | hypothetChlamydomonas_reinh  | 50.40 | 0.00 |
| TRINITY_XP_00141  | predicteOstreococcus_sp._'l  | 50.40 | 0.00 |
| TRINITY_GAX74033  | hypothetChlamydomonas_eusti  | 50.40 | 0.00 |
| TRINITY_GAX85008  | hypothetChlamydomonas_eusti  | 50.40 | 0.00 |
| TRINITY_PNW81864  | hypothetChlamydomonas_reinh  | 50.40 | 0.00 |
| TRINITY_PNW8801   | (hypothetChlamydomonas_reinh | 50.40 | 0.00 |
| TRINITY_XP_00295  | hypothetVolvox_carteri       | 50.40 | 0.00 |
| TRINITY_KXZ51879  | hypothetGonium_pectorale     | 50.40 | 0.00 |
| TRINITY_XP_00584  | hypothetChlorella_variabili  | 50.40 | 0.00 |
| TRINITY_XP_01569  | PREDICTIOryza_brachyantha    | 50.40 | 0.00 |
| TRINITY_GAX81383  | hypothetChlamydomonas_eusti  | 50.40 | 0    |
| TRINITY_GAX85014  | hypothetChlamydomonas_eusti  | 50.40 | 0.00 |
| TRINITY_GAX83217  | hypothetChlamydomonas_eusti  | 50.40 | 0.00 |
| TRINITY_AAV71157  | PR46b [(Chlamydomonas_incer  | 50.40 | 0.00 |
| TRINITY_XP_00295  | hypothetVolvox_carteri       | 50.40 | 0.00 |
| TRINITY_GAX8374   | (hypothetChlamydomonas_eusti | 50.40 | 0.00 |
| TRINITY_XP_00295  | hypothetVolvox_carteri       | 50.40 | 0.00 |
| TRINITY_KZV15127  | hypothetDorcoceras_hygromet  | 50.40 | 0.00 |
| TRINITY_GAX80614  | hypothetChlamydomonas_eusti  | 50.40 | 0.00 |
| TRINITY_GBF93497  | hypothetRaphidocelis_subcap  | 50.40 | 0.00 |
| TRINITY_XP_02009  | leucine-Ananas_comosus       | 50.40 | 0    |
| TRINITY_XP_00297  | DEAD-boxSelaginella_moellen  | 50.40 | 0.00 |
| TRINITY_XP_02709  | serine/tCoffea_arabica       | 50.40 | 0.00 |
| TRINITY_BAK02778  | predicteHordeum_vulgare      | 50.40 | 0.00 |
| TRINITY_GAX85615  | hypothetChlamydomonas_eusti  | 50.40 | 0.00 |
| TRINITY_XP_0239   | (cytosineQuercus_suber       | 50.40 | 0.00 |
| TRINITY_XP_0017   | (COP-II cChlamydomonas_reinh | 50.40 | 0.00 |
| TRINITY_PIA61677  | hypothetAquilegia_coerulea   | 50.30 | 0.00 |
| TRINITY_EFJ32094  | hypothetSelaginella_moellen  | 50.30 | 0.00 |
| TRINITY_EFJ33766  | hypothetSelaginella_moellen  | 50.30 | 0.00 |
| TRINITY_GAQ80165  | hypothetKlebsormidium_niten  | 50.30 | 0.00 |
| TRINITY_XP_0239   | (ras-likeQuercus_suber       | 50.30 | 0.00 |
| TRINITY_XP_02389  | guanine Quercus_suber        | 50.30 | 0.00 |
| TRINITY_RWW90851  | hypothetEnsete_ventricosum   | 50.30 | 0.00 |
| TRINITY_AAB86496  | calmodulZea_mays             | 50.30 | 0.00 |
| TRINITY_KXZ44811  | hypothetGonium_pectorale     | 50.30 | 0.00 |
| TRINITY_PNW88309  | hypothetChlamydomonas_reinh  | 50.30 | 0.00 |
| TRINITY_XP_0239   | (uncharacQuercus_suber       | 50.30 | 0.00 |
| TRINITY_XP_00295  | hypothetVolvox_carteri       | 50.30 | 0.00 |
| TRINITY_XP_02171  | U4/U6.U5Chenopodium_quinoa   | 50.30 | 0.00 |
| TRINITY_OAE35093  | hypothetMarchantia_polymorp  | 50.30 | 0.00 |
| TRINITY_GBF94593  | metallo-Raphidocelis_subcap  | 50.30 | 0.00 |
| TRINITY_KFK32437  | hypothetArabis_alpina        | 50.30 | 0.00 |
| TRINITY_KXZ5103   | (hypothetGonium_pectorale    | 50.30 | 0.00 |
| TRINITY_GBF91539  | hypothetRaphidocelis_subcap  | 50.30 | 0.00 |
| TRINITY_GAX80482  | hypothetChlamydomonas_eusti  | 50.30 | 0.00 |
| TRINITY_GAX75501  | hypothetChlamydomonas_eusti  | 50.30 | 0.00 |
| TRINITY_XP_00295  | hypothetVolvox_carteri       | 50.30 | 0.00 |
| TRINITY_PNW88664  | hypothetChlamydomonas_reinh  | 50.30 | 0.00 |
| TRINITY_BAK03175  | predicteHordeum_vulgare      | 50.30 | 0.00 |

|                 |                             |       |      |
|-----------------|-----------------------------|-------|------|
| TRINITY_PTQ3503 | hypothetMarchantia_polymorp | 50.30 | 0.00 |
| TRINITY_XP_0058 | hypothetChlorella_variabili | 50.30 | 0.00 |
| TRINITY_XP_0056 | nucleotiCoccomyxa_subellips | 50.30 | 0.00 |
| TRINITY_XP_0016 | predicteChlamydomonas_reinh | 50.30 | 0.00 |
| TRINITY_XP_0029 | hypothetVolvox_carteri      | 50.30 | 0.00 |
| TRINITY_PNW8292 | hypothetChlamydomonas_reinh | 50.30 | 0.00 |
| TRINITY_KXZ5138 | hypothetGonium_pectorale    | 50.30 | 0.00 |
| TRINITY_XP_0029 | hypothetVolvox_carteri      | 50.30 | 0.00 |
| TRINITY_XP_0245 | casein }Selaginella_moellen | 50.30 | 0.00 |
| TRINITY_KMS6524 | hypothetBeta_vulgaris       | 50.30 | 0.00 |
| TRINITY_PTQ3528 | hypothetMarchantia_polymorp | 50.30 | 0.00 |
| TRINITY_PLY7658 | hypothetLactuca_sativa      | 50.30 | 0.00 |
| TRINITY_GAX8445 | hypothetChlamydomonas_eusti | 50.30 | 0.00 |
| TRINITY_PSC6755 | hypothetMicractinium_conduc | 50.30 | 0.00 |
| TRINITY_GAX8556 | hypothetChlamydomonas_eusti | 50.30 | 0.00 |
| TRINITY_KXZ4350 | hypothetGonium_pectorale    | 50.30 | 0.00 |
| TRINITY_GAX8213 | hypothetChlamydomonas_eusti | 50.30 | 0.00 |
| TRINITY_GAX8238 | hypothetChlamydomonas_eusti | 50.30 | 0.00 |
| TRINITY_EPS6992 | hypothetGenlisea_aurea      | 50.20 | 0.00 |
| TRINITY_XP_0056 | pyruvatCoccomyxa_subellips  | 50.20 | 0.00 |
| TRINITY_XP_0035 | COBW donBrachypodium_distac | 50.20 | 0.00 |
| TRINITY_GAQ8895 | PutativKlebsormidium_niten  | 50.20 | 0.00 |
| TRINITY_GAX7433 | hypothetChlamydomonas_eusti | 50.20 | 0.00 |
| TRINITY_GAX7860 | hypothetChlamydomonas_eusti | 50.20 | 0.00 |
| TRINITY_GAX7970 | hypothetChlamydomonas_eusti | 50.20 | 0.00 |
| TRINITY_PIA3764 | hypothetAquilegia_coerulea  | 50.20 | 0.00 |
| TRINITY_PNH0736 | hypothetTetrabaena_socialis | 50.20 | 0.00 |
| TRINITY_GAQ8654 | (TCP-1/cKlebsormidium_niten | 50.20 | 0.00 |
| TRINITY_BAK0277 | predicteHordeum_vulgare     | 50.20 | 0.00 |
| TRINITY_BAJ9890 | predicteHordeum_vulgare     | 50.20 | 0.00 |
| TRINITY_XP_0029 | hypothetVolvox_carteri      | 50.20 | 0.00 |
| TRINITY_XP_0016 | predicteChlamydomonas_reinh | 50.20 | 0.00 |
| TRINITY_GAQ8388 | CCR4-NO1Klebsormidium_niten | 50.20 | 0.00 |
| TRINITY_XP_0025 | (protein Micromonas_commoda | 50.20 | 0.00 |
| TRINITY_PNW8045 | hypothetChlamydomonas_reinh | 50.20 | 0.00 |
| TRINITY_GAX8359 | hypothetChlamydomonas_eusti | 50.20 | 0.00 |
| TRINITY_GAX7368 | hypothetChlamydomonas_eusti | 50.20 | 0.00 |
| TRINITY_PNH1298 | hypothetTetrabaena_socialis | 50.20 | 0.00 |
| TRINITY_KXZ4982 | hypothetGonium_pectorale    | 50.20 | 0.00 |
| TRINITY_PNW6978 | hypothetChlamydomonas_reinh | 50.20 | 0.00 |
| TRINITY_XP_0205 | serine/tPhalaenopsis_equest | 50.20 | 0.00 |
| TRINITY_GAX8408 | hypothetChlamydomonas_eusti | 50.20 | 0.00 |
| TRINITY_GAX7945 | hypothetChlamydomonas_eusti | 50.20 | 0.00 |
| TRINITY_GAQ8807 | adenyloKlebsormidium_niten  | 50.20 | 0.00 |
| TRINITY_XP_0029 | hexokinVolvox_carteri       | 50.20 | 0.00 |
| TRINITY_GBF9198 | hypothetRaphidocelis_subcap | 50.20 | 0.00 |
| TRINITY_GAX8461 | hypothetChlamydomonas_eusti | 50.20 | 0.00 |
| TRINITY_GBF8804 | histone Raphidocelis_subcap | 50.20 | 0.00 |
| TRINITY_XP_0016 | aldose-1Chlamydomonas_reinh | 50.20 | 0.00 |
| TRINITY_XP_0239 | (delta-1-Quercus_suber      | 50.20 | 0.00 |
| TRINITY_XP_0016 | predicteChlamydomonas_reinh | 50.20 | 0.00 |
| TRINITY_XP_0239 | (protein Quercus_suber      | 50.20 | 0.00 |
| TRINITY_KXZ5088 | hypothetGonium_pectorale    | 50.20 | 0.00 |
| TRINITY_KXZ5018 | NTR1 prGonium_pectorale     | 50.20 | 0.00 |
| TRINITY_GBF9124 | hypothetRaphidocelis_subcap | 50.20 | 0.00 |
| TRINITY_PNW8810 | hypothetChlamydomonas_reinh | 50.20 | 0.00 |
| TRINITY_GAX7689 | hypothetChlamydomonas_eusti | 50.20 | 0.00 |
| TRINITY_GAX8416 | hypothetChlamydomonas_eusti | 50.20 | 0    |
| TRINITY_GAX7402 | hypothetChlamydomonas_eusti | 50.20 | 0.00 |
| TRINITY_GAX8166 | hypothetChlamydomonas_eusti | 50.20 | 0.00 |
| TRINITY_PNW7601 | hypothetChlamydomonas_reinh | 50.20 | 0.00 |
| TRINITY_GAX8232 | hypothetChlamydomonas_eusti | 50.20 | 0.00 |
| TRINITY_GAX7306 | hypothetChlamydomonas_eusti | 50.20 | 0.00 |
| TRINITY_XP_0035 | isocitrBrachypodium_distac  | 50.10 | 0.00 |
| TRINITY_XP_0239 | (uroporpQuercus_suber       | 50.10 | 0.00 |
| TRINITY_XP_0238 | uncharacQuercus_suber       | 50.10 | 0.00 |

|                  |          |                     |       |      |
|------------------|----------|---------------------|-------|------|
| TRINITY_XP_01945 | PREDICTH | Lupinus_angustifoli | 50.10 | 0.00 |
| TRINITY_KXZ4839  | hypothet | Gonium_pectorale    | 50.10 | 0.00 |
| TRINITY_GAX8426  | hypothet | Chlamydomonas_eusti | 50.10 | 0.00 |
| TRINITY_KXZ4447  | hypothet | Gonium_pectorale    | 50.10 | 0.00 |
| TRINITY_PNW7610  | hypothet | Chlamydomonas_reinh | 50.10 | 0.00 |
| TRINITY_XP_0016  | subunit  | Chlamydomonas_reinh | 50.10 | 0.00 |
| TRINITY_GAX7731  | hypothet | Chlamydomonas_eusti | 50.10 | 0.00 |
| TRINITY_PNW7420  | hypothet | Chlamydomonas_reinh | 50.10 | 0.00 |
| TRINITY_XP_0238  | malate c | Quercus_suber       | 50.00 | 0.00 |
| TRINITY_XP_0238  | cytochr  | Quercus_suber       | 50.00 | 0.00 |
| TRINITY_GAQ7922  | hypothet | Klebsormidium_niten | 50.00 | 0.00 |
| TRINITY_KDD7659  | ABC trar | Helicosporidium_sp. | 50.00 | 0.00 |
| TRINITY_XP_0017  | predicte | Chlamydomonas_reinh | 50.00 | 0.00 |
| TRINITY_XP_0165  | PREDICTH | Capsicum_annuum     | 50.00 | 0.00 |
| TRINITY_GAX7770  | hypothet | Chlamydomonas_eusti | 50.00 | 0.00 |
| TRINITY_XP_0125  | ABC trar | Cicer_arietinum     | 50.00 | 0.00 |
| TRINITY_EMS5875  | Dihydro  | Triticum_urartu     | 50.00 | 0.00 |
| TRINITY_XP_0172  | PREDICTH | Daucus_carota       | 50.00 | 0.00 |
| TRINITY_OAE2668  | hypothet | Marchantia_polymorp | 50.00 | 0.00 |
| TRINITY_KZM9572  | hypothet | Daucus_carota       | 50.00 | 0.00 |
| TRINITY_EEC6955  | hypothet | Oryza_sativa        | 50.00 | 0.00 |
| TRINITY_RMZ5364  | hypothet | Auxenochlorella_pro | 50.00 | 0.00 |
| TRINITY_BAK0550  | predicte | Hordeum_vulgare     | 50.00 | 0.00 |
| TRINITY_XP_0056  | flagell  | Coccomyxa_subellips | 50.00 | 0.00 |
| TRINITY_GAX7451  | hypothet | Chlamydomonas_eusti | 50.00 | 0.00 |
| TRINITY_GAU4795  | hypothet | Trifolium_subterran | 50.00 | 0.00 |
| TRINITY_XP_0075  | ATP-dep  | Bathycoccus_prasinc | 50.00 | 0.00 |
| TRINITY_XP_0243  | probable | Physcomitrella_pate | 50.00 | 0.00 |
| TRINITY_XP_0106  | PREDICTH | Beta_vulgaris       | 50.00 | 0.00 |
| TRINITY_OEL1295  | Tubulin  | Dichanthelium_oligo | 50.00 | 0.00 |
| TRINITY_PNW7013  | hypothet | Chlamydomonas_reinh | 50.00 | 0.00 |
| TRINITY_P51824   | RecName: | Solanum_tuberosum   | 50.00 | 0.00 |
| TRINITY_XP_0190  | PREDICTH | Nelumbo_nucifera    | 50.00 | 0.00 |
| TRINITY_ABF0007  | chloropl | Capsicum_annuum     | 50.00 | 0.00 |
| TRINITY_XP_0156  | PREDICTH | Oryza_brachyantha   | 50.00 | 0.00 |
| TRINITY_XP_0093  | PREDICTH | Pyrus_x_bretschneid | 50.00 | 0.00 |
| TRINITY_PSC7428  | DNA-dir  | Micractinium_conduc | 50.00 | 0.00 |
| TRINITY_XP_0075  | predicte | Bathycoccus_prasinc | 50.00 | 0.00 |
| TRINITY_BAJ9317  | predicte | Hordeum_vulgare     | 50.00 | 0.00 |
| TRINITY_XP_0162  | protein  | Arachis_ipaensis    | 50.00 | 0.00 |
| TRINITY_GBF9672  | hypothet | Raphidocelis_subcap | 50.00 | 0.00 |
| TRINITY_XP_0116  | PREDICTH | Cucumis_sativus     | 50.00 | 0.00 |
| TRINITY_XP_0093  | PREDICTH | Pyrus_x_bretschneid | 50.00 | 0.00 |
| TRINITY_GBG8644  | hypothet | Chara_braunii       | 50.00 | 0.00 |
| TRINITY_AIA8853  | FGE-sulf | uncultured_Ostreocc | 50.00 | 0.00 |
| TRINITY_GAX7573  | hypothet | Chlamydomonas_eusti | 50.00 | 0.00 |
| TRINITY_OWM8259  | hypothet | Punica_granatum     | 50.00 | 0.00 |
| TRINITY_XP_0029  | unchara  | Selaginella_moellen | 50.00 | 0.00 |
| TRINITY_XP_0093  | PREDICTH | Pyrus_x_bretschneid | 50.00 | 0.00 |
| TRINITY_BAJ9884  | predicte | Hordeum_vulgare     | 50.00 | 0.00 |
| TRINITY_XP_0035  | 2-oxois  | Glycine_max         | 50.00 | 0.00 |
| TRINITY_XP_0016  | predicte | Chlamydomonas_reinh | 50.00 | 0.00 |
| TRINITY_CDP1137  | unnamed  | Coffea_canephora    | 50.00 | 0.00 |
| TRINITY_XP_0243  | mitochor | Physcomitrella_pate | 50.00 | 0.00 |
| TRINITY_XP_0279  | U1 smal  | Vigna_unguiculata   | 50.00 | 0.00 |
| TRINITY_KXZ4929  | hypothet | Gonium_pectorale    | 50.00 | 0.00 |
| TRINITY_XP_0064  | aminomet | Citrus_clementina   | 50.00 | 0.00 |
| TRINITY_GBF9502  | hypothet | Raphidocelis_subcap | 50.00 | 0.00 |
| TRINITY_XP_0239  | probable | Quercus_suber       | 50.00 | 0.00 |
| TRINITY_XP_0201  | serine/t | Ananas_comosus      | 50.00 | 0.00 |
| TRINITY_GAX8203  | hypothet | Chlamydomonas_eusti | 50.00 | 0.00 |
| TRINITY_GBF9085  | hypothet | Raphidocelis_subcap | 50.00 | 0.00 |
| TRINITY_GAQ8372  | vesicle- | Klebsormidium_niten | 50.00 | 0.00 |
| TRINITY_GBG7996  | hypothet | Chara_braunii       | 50.00 | 0.00 |
| TRINITY_ACN3155  | unknown  | Zea_mays            | 50.00 | 0.00 |
| TRINITY_XP_0228  | Tetratri | Ostreococcus_tauri  | 50.00 | 0.00 |

|                  |                              |       |      |
|------------------|------------------------------|-------|------|
| TRINITY_GAX79377 | hypothetChlamydomonas_eusti  | 50.00 | 0.00 |
| TRINITY_PLY73027 | hypothetLactuca_sativa       | 50.00 | 0.00 |
| TRINITY_XP_01389 | PhosphatMonoraphidium_negle  | 50.00 | 0.00 |
| TRINITY_GAX7576  | (hypothetChlamydomonas_eusti | 50.00 | 0.00 |
| TRINITY_XP_00305 | predicteMicromonas_pusilla   | 50.00 | 0.00 |
| TRINITY_XP_00169 | predicteChlamydomonas_reinh  | 50.00 | 0.00 |
| TRINITY_XP_00295 | hypothetVolvox_carteri       | 50.00 | 0.00 |
| TRINITY_XP_00306 | (flagellaeMicromonas_pusilla | 50.00 | 0.00 |
| TRINITY_XP_02022 | probableCajanus_cajan        | 50.00 | 0.00 |
| TRINITY_KXZ53116 | (hypothetGonium_pectorale    | 50.00 | 0.00 |
| TRINITY_PNW76637 | hypothetChlamydomonas_reinh  | 50.00 | 0.00 |
| TRINITY_ABR16144 | unknown Picea_sitchensis     | 50.00 | 0.00 |
| TRINITY_BAK00435 | predicteHordeum_vulgare      | 50.00 | 0.00 |
| TRINITY_PSC76533 | NAD-depMicractinium_conduc   | 50.00 | 0.00 |
| TRINITY_GAQ84468 | histidirKlebsormidium_niten  | 50.00 | 0.00 |
| TRINITY_XP_02389 | histone-Quercus_suber        | 50.00 | 0.00 |
| TRINITY_XP_00169 | predicteChlamydomonas_reinh  | 50.00 | 0.00 |
| TRINITY_GAQ85748 | (Sof1-li)Klebsormidium_niten | 50.00 | 0.00 |
| TRINITY_GAX78453 | hypothetChlamydomonas_eusti  | 50.00 | 0.00 |
| TRINITY_XP_00700 | (PREDICT)Theobroma_cacao     | 50.00 | 0.00 |
| TRINITY_XP_02389 | eukaryotQuercus_suber        | 50.00 | 0.00 |
| TRINITY_GAX75303 | hypothetChlamydomonas_eusti  | 50.00 | 0.00 |
| TRINITY_XP_00564 | isocitræCoccomyxa_subellips  | 50.00 | 0.00 |
| TRINITY_KXZ52415 | hypothetGonium_pectorale     | 50.00 | 0.00 |
| TRINITY_XP_01389 | PeroxiscMonoraphidium_negle  | 50.00 | 0.00 |
| TRINITY_GAQ92802 | hypothetKlebsormidium_niten  | 50.00 | 0.00 |
| TRINITY_XP_00584 | hypothetChlorella_variabili  | 50.00 | 0.00 |
| TRINITY_XP_02199 | serine/tHelianthus_annuus    | 50.00 | 0.00 |
| TRINITY_XP_01390 | (abc trarMonoraphidium_negle | 50.00 | 0.00 |
| TRINITY_GAX75087 | hypothetChlamydomonas_eusti  | 50.00 | 0.00 |
| TRINITY_PNH07672 | hypothetTetrabaena_socialis  | 50.00 | 0.00 |
| TRINITY_KXZ51363 | hypothetGonium_pectorale     | 50.00 | 0.00 |
| TRINITY_PNW80243 | hypothetChlamydomonas_reinh  | 50.00 | 0.00 |
| TRINITY_XP_02016 | (prohibit)Aegilops_tauschii  | 50.00 | 0.00 |
| TRINITY_GAQ80175 | hypothetKlebsormidium_niten  | 50.00 | 0.00 |
| TRINITY_VDD44417 | unnamed Brassica_oleracea    | 50.00 | 0.00 |
| TRINITY_GAX78192 | hypothetChlamydomonas_eusti  | 50.00 | 0.00 |
| TRINITY_EFJ07398 | hypothetSelaginella_moellen  | 50.00 | 0.00 |
| TRINITY_XP_00295 | hypothetVolvox_carteri       | 50.00 | 0.00 |
| TRINITY_GAX73042 | hypothetChlamydomonas_eusti  | 50.00 | 0.00 |
| TRINITY_XP_02162 | (ABC trarManihot_esculenta   | 50.00 | 0.00 |
| TRINITY_GAX82869 | hypothetChlamydomonas_eusti  | 50.00 | 0.00 |
| TRINITY_PNH03055 | Spindle Tetrabaena_socialis  | 50.00 | 0.00 |
| TRINITY_KXZ46446 | hypothetGonium_pectorale     | 50.00 | 0.00 |
| TRINITY_XP_01389 | glutathiMonoraphidium_negle  | 50.00 | 0.00 |
| TRINITY_KZV51417 | hypothetDorcoceras_hygromet  | 50.00 | 0.00 |
| TRINITY_KDD75357 | hypothetHelicosporidium_sp.  | 50.00 | 0.00 |
| TRINITY_XP_00295 | hypothetVolvox_carteri       | 50.00 | 0.00 |
| TRINITY_KXZ46159 | (DHC6 prcGonium_pectorale    | 50.00 | 0.00 |
| TRINITY_XP_00244 | serine/tSorghum_bicolor      | 50.00 | 0.00 |
| TRINITY_GAX83075 | hypothetChlamydomonas_eusti  | 50.00 | 0.00 |
| TRINITY_XP_00294 | hypothetVolvox_carteri       | 50.00 | 0.00 |
| TRINITY_KXZ44733 | hypothetGonium_pectorale     | 50.00 | 0.00 |
| TRINITY_KXZ44336 | hypothetGonium_pectorale     | 50.00 | 0.00 |
| TRINITY_KXZ46433 | hypothetGonium_pectorale     | 50.00 | 0.00 |
| TRINITY_GAX80288 | hypothetChlamydomonas_eusti  | 50.00 | 0.00 |
| TRINITY_KXZ52827 | hypothetGonium_pectorale     | 50.00 | 0.00 |
| TRINITY_KMZ59834 | putativeZostera_marina       | 50.00 | 0.00 |
| TRINITY_XP_02453 | dynein tSelaginella_moellen  | 50.00 | 0.00 |
| TRINITY_GAX72554 | hypothetChlamydomonas_eusti  | 50.00 | 0.00 |
| TRINITY_XP_00295 | (RWP-RK cVolvox_carteri      | 50.00 | 0.00 |
| TRINITY_KXZ47561 | hypothetGonium_pectorale     | 50.00 | 0.00 |
| TRINITY_XP_00295 | (SET and Volvox_carteri      | 50.00 | 0.00 |
| TRINITY_XP_01390 | (hypothetMonoraphidium_negle | 50.00 | 0.00 |
| TRINITY_ANA57061 | cytochrçPyramimonas_parkeae  | 50.00 | 0.00 |
| TRINITY_PRW55925 | translatChlorella_sorokinia  | 50.00 | 0.00 |

|                  |                              |       |      |
|------------------|------------------------------|-------|------|
| TRINITY_XP_00295 | hypothetVolvox_carteri       | 50.00 | 0.00 |
| TRINITY_XP_00751 | predicteBathycoccus_prasinc  | 50.00 | 0.00 |
| TRINITY_PKA63295 | HistidirApostasia_shenzheni  | 50.00 | 0.00 |
| TRINITY_AHF81484 | small G Mangifera_indica     | 50.00 | 0.00 |
| TRINITY_OVA19138 | TetratriMacleaya_cordata     | 50.00 | 0.00 |
| TRINITY_PRW45536 | light-haChlorella_sorokinia  | 50.00 | 0.00 |
| TRINITY_GAX74857 | hypothetChlamydomonas_eusti  | 50.00 | 0.00 |
| TRINITY_PNH06745 | putativetTetrabaena_socialis | 50.00 | 0.00 |
| TRINITY_XP_01389 | Golgi S Monoraphidium_negle  | 50.00 | 0.00 |
| TRINITY_PNW83135 | hypothetChlamydomonas_reinh  | 50.00 | 0.00 |
| TRINITY_XP_01915 | PREDICTFIpomoea_nil          | 50.00 | 0.00 |
| TRINITY_OAE35245 | hypothetMarchantia_polymorp  | 50.00 | 0.00 |
| TRINITY_PNW85663 | hypothetChlamydomonas_reinh  | 50.00 | 0.00 |
| TRINITY_XP_00169 | predicteChlamydomonas_reinh  | 50.00 | 0.00 |
| TRINITY_PNH03432 | hypothetTetrabaena_socialis  | 50.00 | 0.00 |
| TRINITY_XP_01389 | PeroxiscMonoraphidium_negle  | 50.00 | 0.00 |
| TRINITY_PNW73331 | hypothetChlamydomonas_reinh  | 50.00 | 0.00 |
| TRINITY_GAX83237 | hypothetChlamydomonas_eusti  | 50.00 | 0.00 |
| TRINITY_GBF88218 | CTD smalRaphidocelis_subcap  | 50.00 | 0.00 |
| TRINITY_GBG89007 | hypothetChara_braunii        | 50.00 | 0.00 |
| TRINITY_GAX72678 | hypothetChlamydomonas_eusti  | 50.00 | 0.00 |
| TRINITY_XP_02439 | huntingtPhyscomitrella_pate  | 50.00 | 0.00 |
| TRINITY_KFK30433 | hypothetArabis_alpina        | 50.00 | 0.00 |
| TRINITY_RID53662 | hypothetBrassica_rapa        | 50.00 | 0.00 |
| TRINITY_GAX84581 | hypothetChlamydomonas_eusti  | 50.00 | 0.00 |
| TRINITY_XP_00168 | prenylatChlamydomonas_reinh  | 50.00 | 0.00 |
| TRINITY_XP_01617 | tRNA psArachis_ipaensis      | 50.00 | 0.00 |
| TRINITY_GAX73055 | hypothetChlamydomonas_eusti  | 50.00 | 0.00 |
| TRINITY_XP_01884 | PREDICTFIJuglans_regia       | 50.00 | 0.00 |
| TRINITY_GAX73558 | hypothetChlamydomonas_eusti  | 50.00 | 0.00 |
| TRINITY_XP_02354 | 30S ribcCucurbita_pepo       | 50.00 | 0.00 |
| TRINITY_GAX81717 | hypothetChlamydomonas_eusti  | 50.00 | 0.00 |
| TRINITY_XP_00250 | (H+-or N2Micromonas_commoda  | 50.00 | 0.00 |
| TRINITY_XP_02437 | DNA-dirPhyscomitrella_pate   | 50.00 | 0.00 |
| TRINITY_PKA66764 | putativetApostasia_shenzheni | 50.00 | 0.00 |
| TRINITY_GAX76291 | hypothetChlamydomonas_eusti  | 50.00 | 0.00 |
| TRINITY_GBF93626 | hypothetRaphidocelis_subcap  | 50.00 | 0.00 |
| TRINITY_KXZ54967 | hypothetGonium_pectorale     | 50.00 | 0.00 |
| TRINITY_KXZ55858 | hypothetGonium_pectorale     | 50.00 | 0.00 |
| TRINITY_KFK36178 | hypothetArabis_alpina        | 50.00 | 0.00 |
| TRINITY_XP_00294 | hypothetVolvox_carteri       | 50.00 | 0.00 |
| TRINITY_GBG00283 | hypothetRaphidocelis_subcap  | 50.00 | 0.00 |
| TRINITY_XP_01915 | PREDICTFIpomoea_nil          | 50.00 | 0.00 |
| TRINITY_XP_01389 | enolase-Monoraphidium_negle  | 50.00 | 0.00 |
| TRINITY_GAX83104 | hypothetChlamydomonas_eusti  | 50.00 | 0.00 |
| TRINITY_KXZ49577 | hypothetGonium_pectorale     | 50.00 | 0.00 |
| TRINITY_XP_00245 | isocitrSorghum_bicolor       | 50.00 | 0.00 |
| TRINITY_KXZ50765 | hypothetGonium_pectorale     | 50.00 | 0.00 |
| TRINITY_ONK60784 | uncharacAsparagus_officinal  | 50.00 | 0.00 |
| TRINITY_PNW69850 | hypothetChlamydomonas_reinh  | 50.00 | 0.00 |
| TRINITY_RWR73664 | chaperorCinnamomum_micranth  | 50.00 | 0.00 |
| TRINITY_XP_02404 | histone-Citrus_clementina    | 50.00 | 0.00 |
| TRINITY_KXZ57020 | (MYO5 prcGonium_pectorale    | 50.00 | 0.00 |
| TRINITY_GAX78929 | hypothetChlamydomonas_eusti  | 50.00 | 0.00 |
| TRINITY_GBF99171 | hypothetRaphidocelis_subcap  | 50.00 | 0.00 |
| TRINITY_GAX74060 | hypothetChlamydomonas_eusti  | 50.00 | 0.00 |
| TRINITY_GBF97659 | carbonicRaphidocelis_subcap  | 50.00 | 0.00 |
| TRINITY_GAX82609 | hypothetChlamydomonas_eusti  | 50.00 | 0.00 |
| TRINITY_XP_02390 | aldo-ketQuercus_suber        | 50.00 | 0.00 |
| TRINITY_XP_00169 | predicteChlamydomonas_reinh  | 50.00 | 0.00 |
| TRINITY_GAX75503 | hypothetChlamydomonas_eusti  | 50.00 | 0.00 |
| TRINITY_XP_00565 | hypothetCoccomyxa_subellips  | 50.00 | 0.00 |
| TRINITY_XP_00169 | predicteChlamydomonas_reinh  | 50.00 | 0.00 |
| TRINITY_XP_02440 | galactolPhyscomitrella_pate  | 50.00 | 0.00 |
| TRINITY_PNH08460 | (dTDP-3-ATetrabaena_socialis | 50.00 | 0.00 |
| TRINITY_PNW86160 | hypothetChlamydomonas_reinh  | 50.00 | 0.00 |

|                                             |       |      |
|---------------------------------------------|-------|------|
| TRINITY_GAX7353{hypothetChlamydomonas_eusti | 50.00 | 0.00 |
| TRINITY_GAX7287{hypothetChlamydomonas_eusti | 50.00 | 0.00 |
| TRINITY_PNH1057{RetrovirTetrabaena_socialis | 50.00 | 0.00 |
| TRINITY_XP_0238{uncharacQuercus_suber       | 50.00 | 0.00 |
| TRINITY_GAX7605{hypothetChlamydomonas_eusti | 50.00 | 0.00 |
| TRINITY_GAX7389{hypothetChlamydomonas_eusti | 50.00 | 0.00 |
| TRINITY_PRW5095{DNA croChlorella_sorokinia  | 50.00 | 0.00 |
| TRINITY_GAQ8270{Dyneins Klebsormidium_niten | 50.00 | 0.00 |
| TRINITY_BAK0218{predicteHordeum_vulgare     | 50.00 | 0.00 |
| TRINITY_XP_0139{Dynein lMonoraphidium_negle | 50.00 | 0.00 |

|                  |           |                     |       |      |
|------------------|-----------|---------------------|-------|------|
| TRINITY_XP_01916 | PREDICTH  | Ipomoea_nil         | 50.00 | 0.00 |
| TRINITY_KXZ49631 | hypothet  | Gonium_pectorale    | 50.00 | 0.00 |
| TRINITY_XP_02390 | ras-like  | Quercus_suber       | 50.00 | 0.00 |
| TRINITY_XP_01023 | lysine-ε  | Brachypodium_distac | 50.00 | 0.00 |
| TRINITY_GAX82024 | hypothet  | Chlamydomonas_eusti | 50.00 | 0.00 |
| TRINITY_XP_01285 | PREDICTH  | Erythranthe_guttata | 50.00 | 0.00 |
| TRINITY_GAX76319 | hypothet  | Chlamydomonas_eusti | 50.00 | 0.00 |
| TRINITY_XP_00295 | hypothet  | Volvox_carteri      | 50.00 | 0.00 |
| TRINITY_XP_00647 | sm-like   | Citrus_sinensis     | 50.00 | 0.00 |
| TRINITY_XP_00294 | hypothet  | Volvox_carteri      | 50.00 | 0.00 |
| TRINITY_XP_00936 | PREDICTH  | Pyrus_x_bretschneid | 50.00 | 0.00 |
| TRINITY_XP_00169 | predictε  | Chlamydomonas_reinh | 50.00 | 0.00 |
| TRINITY_XP_00168 | predictε  | Chlamydomonas_reinh | 50.00 | 0.00 |
| TRINITY_KXZ42194 | hypothet  | Gonium_pectorale    | 50.00 | 0.00 |
| TRINITY_GAX84849 | hypothet  | Chlamydomonas_eusti | 50.00 | 0.00 |
| TRINITY_GBF92606 | SAL1_ph   | Raphidocelis_subcap | 50.00 | 0.00 |
| TRINITY_XP_01139 | DNA_pol   | Auxenochlorella_pro | 50.00 | 0.00 |
| TRINITY_GAX85929 | hypothet  | Chlamydomonas_eusti | 50.00 | 0.00 |
| TRINITY_GAQ93053 | hypothet  | Klebsormidium_niten | 50.00 | 0.00 |
| TRINITY_PNH06299 | Alpha-kε  | Tetrabaena_socialis | 50.00 | 0.00 |
| TRINITY_XP_00170 | (DNA met) | Chlamydomonas_reinh | 50.00 | 0.00 |
| TRINITY_PNW79026 | hypothet  | Chlamydomonas_reinh | 50.00 | 0.00 |
| TRINITY_XP_00169 | protein   | Chlamydomonas_reinh | 50.00 | 0.00 |
| TRINITY_XP_00295 | hypothet  | Volvox_carteri      | 50.00 | 0.00 |
| TRINITY_XP_02439 | omega-an  | Physcomitrella_pate | 50.00 | 0.00 |
| TRINITY_PNW77599 | hypothet  | Chlamydomonas_reinh | 50.00 | 0.00 |
| TRINITY_GAX85303 | hypothet  | Chlamydomonas_eusti | 50.00 | 0.00 |
| TRINITY_OAE34747 | hypothet  | Marchantia_polymorp | 50.00 | 0.00 |
| TRINITY_PTQ32331 | hypothet  | Marchantia_polymorp | 50.00 | 0.00 |
| TRINITY_XP_01107 | probableε | Sesamum_indicum     | 50.00 | 0.00 |
| TRINITY_GAQ81858 | DNA-dirε  | Klebsormidium_niten | 49.90 | 0.00 |
| TRINITY_XP_02389 | glutathi  | Quercus_suber       | 49.90 | 0.00 |
| TRINITY_ONI21561 | hypothet  | Prunus_persica      | 49.90 | 0.00 |
| TRINITY_BAJ86965 | predictε  | Hordeum_vulgare     | 49.90 | 0.00 |
| TRINITY_XP_00250 | (predictε | Micromonas_commoda  | 49.90 | 0.00 |
| TRINITY_XP_00294 | hypothet  | Volvox_carteri      | 49.90 | 0.00 |
| TRINITY_KXZ48552 | hypothet  | Gonium_pectorale    | 49.90 | 0.00 |
| TRINITY_KXZ55895 | hypothet  | Gonium_pectorale    | 49.90 | 0.00 |
| TRINITY_XP_00298 | 26S_prot  | Selaginella_moellen | 49.90 | 0.00 |
| TRINITY_XP_00295 | Kif19_tj  | Volvox_carteri      | 49.90 | 0.00 |
| TRINITY_GAX84436 | hypothet  | Chlamydomonas_eusti | 49.90 | 0.00 |
| TRINITY_KXZ50002 | hypothet  | Gonium_pectorale    | 49.90 | 0.00 |
| TRINITY_PSC72487 | Nucleolε  | Micractinium_conduc | 49.90 | 0.00 |
| TRINITY_KXZ56876 | hypothet  | Gonium_pectorale    | 49.90 | 0.00 |
| TRINITY_PTQ45765 | hypothet  | Marchantia_polymorp | 49.90 | 0.00 |
| TRINITY_GAX79212 | hypothet  | Chlamydomonas_eusti | 49.90 | 0.00 |
| TRINITY_PSC73262 | L-arabir  | Micractinium_conduc | 49.90 | 0.00 |
| TRINITY_PNW88384 | hypothet  | Chlamydomonas_reinh | 49.90 | 0.00 |
| TRINITY_GAX75784 | hypothet  | Chlamydomonas_eusti | 49.90 | 0.00 |
| TRINITY_XP_00170 | (predictε | Chlamydomonas_reinh | 49.90 | 0.00 |
| TRINITY_GAX73618 | hypothet  | Chlamydomonas_eusti | 49.90 | 0.00 |
| TRINITY_PNW84999 | hypothet  | Chlamydomonas_reinh | 49.90 | 0.00 |
| TRINITY_XP_00141 | predictε  | Ostreococcus_sp._'l | 49.90 | 0.00 |
| TRINITY_GBF87574 | NAD-depε  | Raphidocelis_subcap | 49.90 | 0.00 |
| TRINITY_GAX74239 | hypothet  | Chlamydomonas_eusti | 49.90 | 0.00 |
| TRINITY_XP_00295 | hypothet  | Volvox_carteri      | 49.90 | 0.00 |
| TRINITY_OAE25020 | (hypothet | Marchantia_polymorp | 49.90 | 0.00 |
| TRINITY_GAQ84476 | (NAD(P)-) | Klebsormidium_niten | 49.80 | 0.00 |
| TRINITY_XP_00414 | PREDICTH  | Cucumis_sativus     | 49.80 | 0.00 |
| TRINITY_XP_02363 | TP53-rec  | Capsella_rubella    | 49.80 | 0.00 |
| TRINITY_XP_01248 | PREDICTH  | Gossypium_raimondii | 49.80 | 0.00 |
| TRINITY_AXF41555 | HLA3_pr   | Chlorella_sp._ArM00 | 49.80 | 0.00 |
| TRINITY_XP_02171 | gamma_cε  | Chenopodium_quinoa  | 49.80 | 0.00 |
| TRINITY_PNH07339 | Mitochor  | Tetrabaena_socialis | 49.80 | 0.00 |
| TRINITY_XP_01389 | hypothet  | Monoraphidium_negle | 49.80 | 0.00 |
| TRINITY_PNW73482 | hypothet  | Chlamydomonas_reinh | 49.80 | 0.00 |



|                 |                              |       |      |
|-----------------|------------------------------|-------|------|
| TRINITY_XP_0243 | protein Physcomitrella_pate  | 49.80 | 0.00 |
| TRINITY_XP_0172 | PREDICTI Daucus_carota       | 49.80 | 0.00 |
| TRINITY_GAX7513 | hypothet Chlamydomonas_eusti | 49.80 | 0.00 |
| TRINITY_XP_0029 | eukaryot Volvox_carteri      | 49.80 | 0.00 |
| TRINITY_AID5143 | 3-hydro Astragalus_membrana  | 49.80 | 0.00 |
| TRINITY_XP_0025 | protein Micromonas_commoda   | 49.80 | 0.00 |
| TRINITY_XP_0029 | hypothet Volvox_carteri      | 49.80 | 0.00 |
| TRINITY_GAX7513 | hypothet Chlamydomonas_eusti | 49.80 | 0.00 |
| TRINITY_XP_0029 | hypothet Volvox_carteri      | 49.80 | 0.00 |
| TRINITY_GAX8241 | hypothet Chlamydomonas_eusti | 49.80 | 0.00 |
| TRINITY_PNW8057 | hypothet Chlamydomonas_reinh | 49.80 | 0.00 |
| TRINITY_GAX8482 | hypothet Chlamydomonas_eusti | 49.80 | 0.00 |
| TRINITY_PSC7371 | caroten Micractinium_conduc  | 49.80 | 0.00 |
| TRINITY_XP_0029 | hypothet Volvox_carteri      | 49.80 | 0.00 |
| TRINITY_GAX7393 | hypothet Chlamydomonas_eusti | 49.80 | 0.00 |
| TRINITY_XP_0029 | hypothet Volvox_carteri      | 49.80 | 0.00 |
| TRINITY_PNW7325 | hypothet Chlamydomonas_reinh | 49.80 | 0.00 |
| TRINITY_GAX7611 | hypothet Chlamydomonas_eusti | 49.80 | 0.00 |
| TRINITY_EPS7173 | hypothet Genlisea_aurea      | 49.80 | 0.00 |
| TRINITY_XP_0100 | senescer Morus_notabilis     | 49.80 | 0.00 |
| TRINITY_XP_0029 | hypothet Volvox_carteri      | 49.80 | 0.00 |
| TRINITY_PNW8526 | hypothet Chlamydomonas_reinh | 49.80 | 0.00 |
| TRINITY_BAK0043 | predicte Hordeum_vulgare     | 49.80 | 0.00 |
| TRINITY_GAX8008 | hypothet Chlamydomonas_eusti | 49.80 | 0.00 |
| TRINITY_GAX7945 | hypothet Chlamydomonas_eusti | 49.80 | 0.00 |
| TRINITY_GAX8166 | hypothet Chlamydomonas_eusti | 49.80 | 0.00 |
| TRINITY_OMO8247 | Calcinei Corchorus_olitorius | 49.70 | 0.00 |
| TRINITY_XP_0243 | coatomei Physcomitrella_pate | 49.70 | 0.00 |
| TRINITY_EFJ3376 | hypothet Selaginella_moellen | 49.70 | 0.00 |
| TRINITY_GBG6294 | hypothet Chara_braunii       | 49.70 | 0.00 |
| TRINITY_GBG6619 | hypothet Chara_braunii       | 49.70 | 0.00 |
| TRINITY_BAK0349 | predicte Hordeum_vulgare     | 49.70 | 0.00 |
| TRINITY_XP_0238 | eukaryot Quercus_suber       | 49.70 | 0.00 |
| TRINITY_PNW8574 | hypothet Chlamydomonas_reinh | 49.70 | 0.00 |
| TRINITY_XP_0239 | mitochor Quercus_suber       | 49.70 | 0.00 |
| TRINITY_KXZ4640 | hypothet Gonium_pectorale    | 49.70 | 0.00 |
| TRINITY_RLM7891 | putative Panicum_miliaceum   | 49.70 | 0.00 |
| TRINITY_GAQ8270 | Dyneins Klebsormidium_niten  | 49.70 | 0.00 |
| TRINITY_XP_0056 | hypothet Coccomyxa_subellips | 49.70 | 0.00 |
| TRINITY_XP_0109 | PREDICTI Elaeis_guineensis   | 49.70 | 0.00 |
| TRINITY_PNW7426 | hypothet Chlamydomonas_reinh | 49.70 | 0.00 |
| TRINITY_ABR1822 | unknown Picea_sitchensis     | 49.70 | 0.00 |
| TRINITY_BAV5834 | GTP-bin Ulva_partita         | 49.70 | 0.00 |
| TRINITY_RMZ5207 | hypothet Auxenochlorella_pro | 49.70 | 0.00 |
| TRINITY_PNW6999 | hypothet Chlamydomonas_reinh | 49.70 | 0.00 |
| TRINITY_XP_0056 | HAD-like Coccomyxa_subellips | 49.70 | 0.00 |
| TRINITY_PNW8624 | hypothet Chlamydomonas_reinh | 49.70 | 0.00 |
| TRINITY_XP_0029 | hypothet Volvox_carteri      | 49.70 | 0.00 |
| TRINITY_XP_0082 | PREDICTI Prunus_mume         | 49.70 | 0.00 |
| TRINITY_XP_0072 | eukaryot Prunus_persica      | 49.70 | 0.00 |
| TRINITY_XP_0016 | predicte Chlamydomonas_reinh | 49.70 | 0.00 |
| TRINITY_KXZ5683 | hypothet Gonium_pectorale    | 49.70 | 0.00 |
| TRINITY_XP_0035 | DNA top Medicago_truncatula  | 49.70 | 0.00 |
| TRINITY_XP_0110 | signal Sesamum_indicum       | 49.70 | 0.00 |
| TRINITY_PRW5958 | MYST-li Chlorella_sorokinia  | 49.70 | 0.00 |
| TRINITY_GAX7441 | hypothet Chlamydomonas_eusti | 49.70 | 0.00 |
| TRINITY_GAX8563 | hypothet Chlamydomonas_eusti | 49.70 | 0.00 |
| TRINITY_XP_0058 | hypothet Chlorella_variabili | 49.70 | 0.00 |
| TRINITY_GAX7279 | hypothet Chlamydomonas_eusti | 49.70 | 0.00 |
| TRINITY_KXZ5282 | hypothet Gonium_pectorale    | 49.70 | 0.00 |
| TRINITY_XP_0016 | guanylat Chlamydomonas_reinh | 49.70 | 0.00 |
| TRINITY_KXZ5272 | hypothet Gonium_pectorale    | 49.70 | 0.00 |
| TRINITY_ACG2716 | charged Zea_mays             | 49.70 | 0.00 |
| TRINITY_GAX7499 | hypothet Chlamydomonas_eusti | 49.70 | 0.00 |
| TRINITY_BAJ9390 | predicte Hordeum_vulgare     | 49.70 | 0.00 |
| TRINITY_XP_0016 | predicte Chlamydomonas_reinh | 49.70 | 0.00 |

|                  |          |                     |       |      |
|------------------|----------|---------------------|-------|------|
| TRINITY_XP_02392 | uncharac | Quercus_suber       | 49.70 | 0.00 |
| TRINITY_XP_02067 | probable | Dendrobium_catenatu | 49.70 | 0.00 |
| TRINITY_GAX8472  | hypothet | Chlamydomonas_eusti | 49.70 | 0.00 |
| TRINITY_XP_02392 | uncharac | Quercus_suber       | 49.70 | 0.00 |
| TRINITY_GAX8110  | hypothet | Chlamydomonas_eusti | 49.70 | 0.00 |
| TRINITY_XP_00168 | predicte | Chlamydomonas_reinh | 49.70 | 0.00 |
| TRINITY_GAQ8284  | Adaptor  | Klebsormidium_niten | 49.70 | 0.00 |
| TRINITY_XP_00941 | PREDICTI | Musa_acuminata      | 49.70 | 0.00 |
| TRINITY_KXZ4333  | hypothet | Gonium_pectorale    | 49.70 | 0.00 |
| TRINITY_XP_01847 | PREDICTI | Raphanus_sativus    | 49.70 | 0.00 |
| TRINITY_XP_00295 | hypothet | Volvox_carteri      | 49.70 | 0.00 |
| TRINITY_GAX7502  | hypothet | Chlamydomonas_eusti | 49.70 | 0.00 |
| TRINITY_XP_01390 | hypothet | Monoraphidium_negle | 49.70 | 0.00 |
| TRINITY_GAX8345  | hypothet | Chlamydomonas_eusti | 49.70 | 0.00 |
| TRINITY_XP_01646 | PREDICTI | Nicotiana_tabacum   | 49.60 | 0.00 |
| TRINITY_XP_00498 | telomer  | Setaria_italica     | 49.60 | 0.00 |
| TRINITY_GAQ8696  | eukaryot | Klebsormidium_niten | 49.60 | 0.00 |
| TRINITY_PWA3946  | ribosom  | Artemisia_annua     | 49.60 | 0.00 |
| TRINITY_XP_00362 | prohibit | Medicago_truncatula | 49.60 | 0.00 |
| TRINITY_GAQ8321  | Aminotr  | Klebsormidium_niten | 49.60 | 0.00 |
| TRINITY_EEF2753  | hydroxy  | Ricinus_communis    | 49.60 | 0.00 |
| TRINITY_PNW8446  | hypothet | Chlamydomonas_reinh | 49.60 | 0.00 |
| TRINITY_GBF9981  | hypothet | Raphidocelis_subcap | 49.60 | 0.00 |
| TRINITY_XP_00295 | hypothet | Volvox_carteri      | 49.60 | 0.00 |
| TRINITY_XP_00295 | hypothet | Volvox_carteri      | 49.60 | 0.00 |
| TRINITY_GAQ8808  | Heme A   | Klebsormidium_niten | 49.60 | 0.00 |
| TRINITY_GAX7880  | hypothet | Chlamydomonas_eusti | 49.60 | 0.00 |
| TRINITY_KXZ5199  | hypothet | Gonium_pectorale    | 49.60 | 0.00 |
| TRINITY_PNR3535  | hypothet | Physcomitrella_pate | 49.60 | 0.00 |
| TRINITY_GAX7980  | hypothet | Chlamydomonas_eusti | 49.60 | 0.00 |
| TRINITY_GAX7869  | hypothet | Chlamydomonas_eusti | 49.60 | 0.00 |
| TRINITY_CAA4928  | gag,prot | Volvox_carteri      | 49.60 | 0.00 |
| TRINITY_GAX7940  | hypothet | Chlamydomonas_eusti | 49.60 | 0.00 |
| TRINITY_GAX7422  | hypothet | Chlamydomonas_eusti | 49.60 | 0.00 |
| TRINITY_XP_00584 | hypothet | Chlorella_variabili | 49.60 | 0.00 |
| TRINITY_XP_02436 | probable | Physcomitrella_pate | 49.60 | 0.00 |
| TRINITY_XP_02435 | chromod  | Physcomitrella_pate | 49.60 | 0.00 |
| TRINITY_ESQ3511  | hypothet | Eutrema_salsugineur | 49.60 | 0.00 |
| TRINITY_GAX7928  | hypothet | Chlamydomonas_eusti | 49.60 | 0.00 |
| TRINITY_GAX7739  | hypothet | Chlamydomonas_eusti | 49.60 | 0.00 |
| TRINITY_GAX8522  | hypothet | Chlamydomonas_eusti | 49.60 | 0.00 |
| TRINITY_PNH1009  | Ran-bin  | Tetrabaena_socialis | 49.60 | 0.00 |
| TRINITY_GAX7364  | hypothet | Chlamydomonas_eusti | 49.60 | 0.00 |
| TRINITY_GBG7476  | hypothet | Chara_braunii       | 49.60 | 0.00 |
| TRINITY_GAX8439  | hypothet | Chlamydomonas_eusti | 49.60 | 0.00 |
| TRINITY_XP_00564 | hypothet | Coccomyxa_subellips | 49.60 | 0.00 |
| TRINITY_XP_02638 | structu  | Papaver_somniferum  | 49.60 | 0.00 |
| TRINITY_KXZ5245  | hypothet | Gonium_pectorale    | 49.60 | 0.00 |
| TRINITY_XP_00168 | predicte | Chlamydomonas_reinh | 49.60 | 0.00 |
| TRINITY_PNW7404  | hypothet | Chlamydomonas_reinh | 49.60 | 0.00 |
| TRINITY_KZV1503  | acetate- | Dorcoceras_hygromet | 49.60 | 0.00 |
| TRINITY_KXZ5409  | hypothet | Gonium_pectorale    | 49.60 | 0.00 |
| TRINITY_GBF8889  | hypothet | Raphidocelis_subcap | 49.60 | 0.00 |
| TRINITY_GAX8552  | hypothet | Chlamydomonas_eusti | 49.60 | 0.00 |
| TRINITY_GAX7330  | hypothet | Chlamydomonas_eusti | 49.60 | 0.00 |
| TRINITY_GAX8431  | hypothet | Chlamydomonas_eusti | 49.60 | 0.00 |
| TRINITY_XP_01045 | PREDICTI | Camelina_sativa     | 49.50 | 0.00 |
| TRINITY_GBG6619  | hypothet | Chara_braunii       | 49.50 | 0.00 |
| TRINITY_BAJ9409  | predicte | Hordeum_vulgare     | 49.50 | 0.00 |
| TRINITY_XP_02735 | CTP synt | Abrus_precatorius   | 49.50 | 0.00 |
| TRINITY_XP_00294 | hypothet | Volvox_carteri      | 49.50 | 0.00 |
| TRINITY_XP_00564 | hypothet | Coccomyxa_subellips | 49.50 | 0.00 |
| TRINITY_XP_02042 | probable | Prunus_persica      | 49.50 | 0.00 |
| TRINITY_XP_01919 | PREDICTI | Ipomoea_nil         | 49.50 | 0.00 |
| TRINITY_GAQ9162  | RNA-bin  | Klebsormidium_niten | 49.50 | 0.00 |
| TRINITY_XP_01248 | PREDICTI | Gossypium_raimondii | 49.50 | 0.00 |

|                 |           |                     |       |      |
|-----------------|-----------|---------------------|-------|------|
| TRINITY_XP_0062 | RNA-bin   | Capsella_rubella    | 49.50 | 0.00 |
| TRINITY_XP_0120 | ER lumer  | Jatropha_curcas     | 49.50 | 0.00 |
| TRINITY_XP_0029 | hypothet  | Volvox_carteri      | 49.50 | 0.00 |
| TRINITY_GAX7423 | (hypothet | Chlamydomonas_eusti | 49.50 | 0    |
| TRINITY_XP_0058 | hypothet  | Chlorella_variabili | 49.50 | 0.00 |
| TRINITY_OMO6071 | Uracil-I  | Corchorus_capsulari | 49.50 | 0.00 |
| TRINITY_BAK0277 | predicte  | Hordeum_vulgare     | 49.50 | 0.00 |
| TRINITY_GAX7949 | 2hypothet | Chlamydomonas_eusti | 49.50 | 0.00 |
| TRINITY_GAX8429 | 7hypothet | Chlamydomonas_eusti | 49.50 | 0.00 |
| TRINITY_XP_0058 | 4hypothet | Chlorella_variabili | 49.50 | 0.00 |
| TRINITY_KMZ7088 | 5Phosphoi | Zostera_marina      | 49.50 | 0.00 |
| TRINITY_GAX7788 | 5hypothet | Chlamydomonas_eusti | 49.50 | 0.00 |
| TRINITY_GAX8080 | 6hypothet | Chlamydomonas_eusti | 49.50 | 0.00 |
| TRINITY_XP_0271 | 1serine/  | Coffea_arabica      | 49.50 | 0.00 |
| TRINITY_XP_0025 | (predicte | Micromonas_commoda  | 49.50 | 0.00 |
| TRINITY_XP_0066 | (PREDICTI | Oryza_brachyantha   | 49.50 | 0.00 |
| TRINITY_XP_0014 | 1predicte | Ostreococcus_sp._'1 | 49.50 | 0.00 |
| TRINITY_XP_0016 | 9protein  | Chlamydomonas_reinh | 49.50 | 0.00 |
| TRINITY_GAX7454 | 8hypothet | Chlamydomonas_eusti | 49.50 | 0.00 |
| TRINITY_GAQ9157 | 7protein  | Klebsormidium_niten | 49.50 | 0.00 |
| TRINITY_PNH0800 | 5Soluble  | Tetrabaena_socialis | 49.50 | 0.00 |
| TRINITY_GAX8363 | 8hypothet | Chlamydomonas_eusti | 49.50 | 0.00 |
| TRINITY_XP_0029 | 4hypothet | Volvox_carteri      | 49.50 | 0.00 |
| TRINITY_GAX8218 | 7hypothet | Chlamydomonas_eusti | 49.50 | 0.00 |
| TRINITY_PNW8863 | 7hypothet | Chlamydomonas_reinh | 49.50 | 0.00 |
| TRINITY_GAX8395 | 6hypothet | Chlamydomonas_eusti | 49.50 | 0.00 |
| TRINITY_PRW2057 | (E3 ubiq  | Chlorella_sorokinia | 49.50 | 0.00 |
| TRINITY_PNH0786 | 4hypothet | Tetrabaena_socialis | 49.50 | 0.00 |
| TRINITY_PRW4569 | (glucosa  | Chlorella_sorokinia | 49.50 | 0.00 |
| TRINITY_BBC2842 | 4phospho  | Chlamydomonas_appla | 49.50 | 0.00 |
| TRINITY_XP_0017 | (predicte | Chlamydomonas_reinh | 49.50 | 0.00 |
| TRINITY_PRW1831 | 9NADPH-d  | Chlorella_sorokinia | 49.50 | 0.00 |
| TRINITY_GAX7260 | 9hypothet | Chlamydomonas_eusti | 49.50 | 0.00 |
| TRINITY_XP_0029 | 5hypothet | Volvox_carteri      | 49.50 | 0.00 |
| TRINITY_KXZ5258 | 6hypothet | Gonium_pectorale    | 49.50 | 0.00 |
| TRINITY_OAE3087 | 8hypothet | Marchantia_polymorp | 49.50 | 0.00 |
| TRINITY_GAX7501 | 4hypothet | Chlamydomonas_eusti | 49.50 | 0.00 |
| TRINITY_PRW5750 | 9transket | Chlorella_sorokinia | 49.50 | 0.00 |
| TRINITY_PKA6682 | (putative | Apostasia_shenzheni | 49.50 | 0.00 |
| TRINITY_PSC7476 | 9notchle  | Micractinium_conduc | 49.50 | 0.00 |
| TRINITY_GAX7990 | 8hypothet | Chlamydomonas_eusti | 49.50 | 0.00 |
| TRINITY_XP_0029 | 5hypothet | Volvox_carteri      | 49.50 | 0.00 |
| TRINITY_XP_0159 | 5transcri | Arachis_duranensis  | 49.50 | 0.00 |
| TRINITY_GAX8384 | 6hypothet | Chlamydomonas_eusti | 49.50 | 0.00 |
| TRINITY_GAX7500 | 7hypothet | Chlamydomonas_eusti | 49.50 | 0    |
| TRINITY_XP_0128 | 4PREDICTI | Erythranthe_guttata | 49.50 | 0.00 |
| TRINITY_XP_0029 | 5pyruvate | Volvox_carteri      | 49.50 | 0.00 |
| TRINITY_KXZ4189 | 8hypothet | Gonium_pectorale    | 49.50 | 0.00 |
| TRINITY_PNW7964 | 7hypothet | Chlamydomonas_reinh | 49.50 | 0.00 |
| TRINITY_GAX7298 | 4hypothet | Chlamydomonas_eusti | 49.50 | 0.00 |
| TRINITY_RWW9108 | 5hypothet | Ensete_ventricosum  | 49.50 | 0.00 |
| TRINITY_XP_0243 | 9probable | Physcomitrella_pate | 49.40 | 0.00 |
| TRINITY_XP_0165 | 7PREDICTI | Capsicum_annuum     | 49.40 | 0.00 |
| TRINITY_PRW5722 | (60S rib  | Chlorella_sorokinia | 49.40 | 0.00 |
| TRINITY_XP_0113 | 9Oxyster  | Auxenochlorella_pro | 49.40 | 0.00 |
| TRINITY_XP_0030 | 6ligase,  | Micromonas_pusilla  | 49.40 | 0.00 |
| TRINITY_PON5956 | 2Lysine n | Trema_orientale     | 49.40 | 0.00 |
| TRINITY_KDD7677 | 7hypothet | Helicosporidium_sp. | 49.40 | 0.00 |
| TRINITY_RXH8504 | 2hypothet | Malus_domestica     | 49.40 | 0.00 |
| TRINITY_GAX7303 | 2hypothet | Chlamydomonas_eusti | 49.40 | 0.00 |
| TRINITY_KXZ4949 | 8hypothet | Gonium_pectorale    | 49.40 | 0.00 |
| TRINITY_XP_0102 | 7PREDICTI | Nelumbo_nucifera    | 49.40 | 0.00 |
| TRINITY_XP_0158 | 7probable | Ziziphus_jujuba     | 49.40 | 0.00 |
| TRINITY_XP_0029 | 7probable | Selaginella_moellen | 49.40 | 0.00 |
| TRINITY_RCV2007 | 2hypothet | Setaria_italica     | 49.40 | 0.00 |
| TRINITY_XP_0235 | 4DNA mis  | Cucurbita_pepo      | 49.40 | 0.00 |

|                  |          |                          |       |      |
|------------------|----------|--------------------------|-------|------|
| TRINITY_GAQ88885 | NAD-dep  | Klebsormidium_niten      | 49.40 | 0.00 |
| TRINITY_XP_02431 | LOW      | QUAI Brachypodium_distac | 49.40 | 0.00 |
| TRINITY_GAX74335 | hypothet | Chlamydomonas_eusti      | 49.40 | 0.00 |
| TRINITY_GAX84225 | hypothet | Chlamydomonas_eusti      | 49.40 | 0.00 |
| TRINITY_KXZ43276 | hypothet | Gonium_pectorale         | 49.40 | 0.00 |
| TRINITY_XP_01390 | hypothet | Monoraphidium_negle      | 49.40 | 0.00 |
| TRINITY_XP_00295 | hypothet | Volvox_carteri           | 49.40 | 0.00 |
| TRINITY_OVA10135 | NUDIX    | h3 Macleaya_cordata      | 49.40 | 0.00 |
| TRINITY_GBF90195 | hypothet | Raphidocelis_subcap      | 49.40 | 0.00 |
| TRINITY_XP_00705 | PREDICTI | Theobroma_cacao          | 49.40 | 0.00 |
| TRINITY_GBG69372 | hypothet | Chara_braunii            | 49.40 | 0.00 |
| TRINITY_KXZ43415 | hypothet | Gonium_pectorale         | 49.40 | 0.00 |
| TRINITY_PNW81421 | hypothet | Chlamydomonas_reinh      | 49.40 | 0.00 |
| TRINITY_XP_00565 | Pkinase  | Coccomyxa_subellips      | 49.40 | 0.00 |
| TRINITY_GAX82978 | hypothet | Chlamydomonas_eusti      | 49.40 | 0.00 |
| TRINITY_XP_02438 | methioni | Physcomitrella_pate      | 49.40 | 0.00 |
| TRINITY_XP_00170 | predicte | Chlamydomonas_reinh      | 49.40 | 0.00 |
| TRINITY_GAX79845 | hypothet | Chlamydomonas_eusti      | 49.40 | 0.00 |
| TRINITY_GAX75995 | hypothet | Chlamydomonas_eusti      | 49.40 | 0.00 |
| TRINITY_ERN19185 | hypothet | Amborella_trichopod      | 49.40 | 0.00 |
| TRINITY_PNW71155 | hypothet | Chlamydomonas_reinh      | 49.40 | 0.00 |
| TRINITY_GBF87725 | hypothet | Raphidocelis_subcap      | 49.40 | 0.00 |
| TRINITY_XP_00295 | hypothet | Volvox_carteri           | 49.40 | 0.00 |
| TRINITY_XP_00564 | P-loop   | c Coccomyxa_subellips    | 49.40 | 0.00 |
| TRINITY_KXZ56095 | hypothet | Gonium_pectorale         | 49.40 | 0.00 |
| TRINITY_XP_01165 | PREDICTI | Cucumis_sativus          | 49.40 | 0.00 |
| TRINITY_KXZ42805 | hypothet | Gonium_pectorale         | 49.40 | 0.00 |
| TRINITY_XP_02705 | serine/t | Coffea_arabica           | 49.40 | 0.00 |
| TRINITY_RRT43806 | hypothet | Ensete_ventricosum       | 49.40 | 0.00 |
| TRINITY_PRW44445 | cathepsi | Chlorella_sorokinia      | 49.40 | 0.00 |
| TRINITY_KXZ42545 | hypothet | Gonium_pectorale         | 49.40 | 0.00 |
| TRINITY_BAK03025 | predicte | Hordeum_vulgare          | 49.40 | 0.00 |
| TRINITY_KZV15418 | phenyla  | Dorcoceras_hygromet      | 49.40 | 0.00 |
| TRINITY_XP_02392 | probable | Quercus_suber            | 49.40 | 0.00 |
| TRINITY_GAX83946 | hypothet | Chlamydomonas_eusti      | 49.40 | 0.00 |
| TRINITY_GAX82605 | hypothet | Chlamydomonas_eusti      | 49.40 | 0.00 |
| TRINITY_GAX75545 | hypothet | Chlamydomonas_eusti      | 49.40 | 0.00 |
| TRINITY_XP_00564 | S-adenos | Coccomyxa_subellips      | 49.40 | 0.00 |
| TRINITY_XP_00296 | uncharac | Selaginella_moellen      | 49.40 | 0.00 |
| TRINITY_GAX73140 | hypothet | Chlamydomonas_eusti      | 49.40 | 0.00 |
| TRINITY_GAX72715 | hypothet | Chlamydomonas_eusti      | 49.40 | 0.00 |
| TRINITY_PNW71465 | hypothet | Chlamydomonas_reinh      | 49.40 | 0.00 |
| TRINITY_XP_00250 | protein  | Micromonas_commoda       | 49.40 | 0.00 |
| TRINITY_GAX74084 | hypothet | Chlamydomonas_eusti      | 49.40 | 0.00 |
| TRINITY_PNW70925 | hypothet | Chlamydomonas_reinh      | 49.40 | 0.00 |
| TRINITY_PRW58255 | cytochr  | Chlorella_sorokinia      | 49.40 | 0.00 |
| TRINITY_XP_00645 | UPF0160  | Citrus_clementina        | 49.40 | 0.00 |
| TRINITY_GAQ80890 | WD domai | Klebsormidium_niten      | 49.40 | 0.00 |
| TRINITY_RQM04385 | hypothet | Brassica_cretica         | 49.40 | 0.00 |
| TRINITY_XP_01375 | ras-rel  | Brassica_napus           | 49.40 | 0.00 |
| TRINITY_GAX86341 | hypothet | Chlamydomonas_eusti      | 49.40 | 0.00 |
| TRINITY_PNW86875 | hypothet | Chlamydomonas_reinh      | 49.40 | 0.00 |
| TRINITY_GAX76778 | hypothet | Chlamydomonas_eusti      | 49.40 | 0.00 |
| TRINITY_GAX74905 | hypothet | Chlamydomonas_eusti      | 49.40 | 0.00 |
| TRINITY_PNH04995 | Cycloart | Tetrabaena_socialis      | 49.40 | 0.00 |
| TRINITY_PSC68460 | Transmen | Micractinium_conduc      | 49.40 | 0.00 |
| TRINITY_GAX75025 | hypothet | Chlamydomonas_eusti      | 49.40 | 0.00 |
| TRINITY_PNH10932 | Protein  | Tetrabaena_socialis      | 49.40 | 0.00 |
| TRINITY_XP_00865 | ABC trar | Zea_mays                 | 49.40 | 0.00 |
| TRINITY_XP_02175 | lysosom  | Chenopodium_quinoa       | 49.40 | 0.00 |
| TRINITY_GBG73988 | hypothet | Chara_braunii            | 49.40 | 0.00 |
| TRINITY_XP_02418 | zinc fir | Rosa_chinensis           | 49.30 | 0.00 |
| TRINITY_ALC78855 | MTP2h    | (r Sedum_alfredii        | 49.30 | 0.00 |
| TRINITY_OAE32031 | hypothet | Marchantia_polymorp      | 49.30 | 0.00 |
| TRINITY_XP_01882 | PREDICTI | Juglans_regia            | 49.30 | 0.00 |
| TRINITY_RLN30676 | E3 ubiq  | Panicum_miliaceum        | 49.30 | 0.00 |

|                  |                              |       |      |
|------------------|------------------------------|-------|------|
| TRINITY_PPD67813 | hypothetGossypium_barbadens  | 49.30 | 0.00 |
| TRINITY_XP_02059 | actin-rεPhalaenopsis_equest  | 49.30 | 0.00 |
| TRINITY_XP_02160 | serine/tManihot_esculenta    | 49.30 | 0.00 |
| TRINITY_CAI84893 | putativeMedicago_sativa      | 49.30 | 0.00 |
| TRINITY_XP_02057 | metal tεPhalaenopsis_equest  | 49.30 | 0.00 |
| TRINITY_XP_02709 | RNA-binεCoffea_arabica       | 49.30 | 0.00 |
| TRINITY_GAQ80986 | Aldo/ketKlebsormidium_niten  | 49.30 | 0.00 |
| TRINITY_AFK48145 | unknown Medicago_truncatula  | 49.30 | 0.00 |
| TRINITY_XP_00424 | mitochorSolanum_lycopersicu  | 49.30 | 0.00 |
| TRINITY_XP_00496 | ras-relεSetaria_italica      | 49.30 | 0.00 |
| TRINITY_XP_02439 | 60S ribεPhyscomitrella_pate  | 49.30 | 0.00 |
| TRINITY_XP_00935 | PREDICTIPyrus_x_bretschneid  | 49.30 | 0.00 |
| TRINITY_GBF95782 | hypothetRaphidocelis_subcap  | 49.30 | 0.00 |
| TRINITY_GAX83579 | hypothetChlamydomonas_eusti  | 49.30 | 0.00 |
| TRINITY_XP_02437 | ATP-binεPhyscomitrella_pate  | 49.30 | 0.00 |
| TRINITY_OAE27724 | hypothetMarchantia_polymorp  | 49.30 | 0.00 |
| TRINITY_PNW76823 | hypothetChlamydomonas_reinh  | 49.30 | 0.00 |
| TRINITY_XP_00295 | SET domεVolvox_carteri       | 49.30 | 0.00 |
| TRINITY_GBG78124 | hypothetChara_braunii        | 49.30 | 0.00 |
| TRINITY_BAU03701 | hypothetVigna_angularis      | 49.30 | 0.00 |
| TRINITY_KXZ42158 | hypothetGonium_pectorale     | 49.30 | 0.00 |
| TRINITY_GAX75802 | hypothetChlamydomonas_eusti  | 49.30 | 0.00 |
| TRINITY_GAX75729 | hypothetChlamydomonas_eusti  | 49.30 | 0.00 |
| TRINITY_PNW82022 | hypothetChlamydomonas_reinh  | 49.30 | 0.00 |
| TRINITY_XP_00170 | C-type εChlamydomonas_reinh  | 49.30 | 0.00 |
| TRINITY_XP_01656 | PREDICTICapsicum_annuum      | 49.30 | 0.00 |
| TRINITY_OAE27350 | hypothetMarchantia_polymorp  | 49.30 | 0.00 |
| TRINITY_ONM03192 | ProteascεZea_mays            | 49.30 | 0.00 |
| TRINITY_XP_00294 | hypothetVolvox_carteri       | 49.30 | 0.00 |
| TRINITY_PNH11042 | R3H and Tetrabaena_socialis  | 49.30 | 0.00 |
| TRINITY_XP_00169 | predictεChlamydomonas_reinh  | 49.30 | 0.00 |
| TRINITY_XP_02388 | probableεQuercus_suber       | 49.30 | 0.00 |
| TRINITY_XP_00169 | cryptoclChlamydomonas_reinh  | 49.30 | 0.00 |
| TRINITY_XP_02174 | probableεChenopodium_quinoa  | 49.30 | 0.00 |
| TRINITY_XP_01389 | hypothetMonoraphidium_negle  | 49.30 | 0.00 |
| TRINITY_GAX86663 | hypothetChlamydomonas_eusti  | 49.30 | 0.00 |
| TRINITY_XP_01389 | hypothetMonoraphidium_negle  | 49.30 | 0.00 |
| TRINITY_XP_00565 | hypothetCoccomyxa_subellips  | 49.30 | 0.00 |
| TRINITY_XP_00295 | hypothetVolvox_carteri       | 49.30 | 0.00 |
| TRINITY_BAJ93905 | predictεHordeum_vulgare      | 49.30 | 0.00 |
| TRINITY_GBF94538 | DNA replRaphidocelis_subcap  | 49.30 | 0.00 |
| TRINITY_GAX75994 | hypothetChlamydomonas_eusti  | 49.30 | 0.00 |
| TRINITY_PNW79099 | hypothetChlamydomonas_reinh  | 49.30 | 0.00 |
| TRINITY_GBF98140 | hypothetRaphidocelis_subcap  | 49.30 | 0.00 |
| TRINITY_XP_00564 | hypothetCoccomyxa_subellips  | 49.30 | 0.00 |
| TRINITY_PNW82472 | hypothetChlamydomonas_reinh  | 49.30 | 0.00 |
| TRINITY_GAX73917 | hypothetChlamydomonas_eusti  | 49.30 | 0.00 |
| TRINITY_GAQ82840 | Prolyl εKlebsormidium_niten  | 49.30 | 0.00 |
| TRINITY_GBF93239 | insulin-Raphidocelis_subcap  | 49.30 | 0.00 |
| TRINITY_PSC71292 | ATP-binεMicractinium_conduc  | 49.30 | 0.00 |
| TRINITY_GAX85229 | hypothetChlamydomonas_eusti  | 49.30 | 0.00 |
| TRINITY_NP_00130 | uncharacεZea_mays            | 49.30 | 0.00 |
| TRINITY_XP_02390 | structuiQuercus_suber        | 49.30 | 0.00 |
| TRINITY_OAE32232 | hypothetMarchantia_polymorp  | 49.30 | 0.00 |
| TRINITY_GAX79168 | hypothetChlamydomonas_eusti  | 49.30 | 0.00 |
| TRINITY_EFJ28716 | hypothetSelaginella_moellen  | 49.30 | 0.00 |
| TRINITY_OAE21040 | hypothetMarchantia_polymorp  | 49.30 | 0.00 |
| TRINITY_GAX73550 | hypothetChlamydomonas_eusti  | 49.30 | 0.00 |
| TRINITY_GAX77773 | hypothetChlamydomonas_eusti  | 49.30 | 0.00 |
| TRINITY_GAX78349 | hypothetChlamydomonas_eusti  | 49.30 | 0.00 |
| TRINITY_XP_02643 | calcium-Papaver_somniferum   | 49.30 | 0.00 |
| TRINITY_GAX72885 | hypothetChlamydomonas_eusti  | 49.30 | 0.00 |
| TRINITY_XP_02067 | homeoboεDendrobium_catenatu  | 49.30 | 0.00 |
| TRINITY_PNW88982 | hypothetChlamydomonas_reinh  | 49.30 | 0.00 |
| TRINITY_KDO43940 | hypothetCitrus_sinensis      | 49.30 | 0.00 |
| TRINITY_XP_00232 | probableεPopulus_trichocarpa | 49.30 | 0.00 |

|                 |           |                     |       |      |
|-----------------|-----------|---------------------|-------|------|
| TRINITY_OUS4836 | hypothet  | Ostreococcus_tauri  | 49.30 | 0.00 |
| TRINITY_XP_0098 | (PREDICTI | Nicotiana_sylvestri | 49.30 | 0.00 |
| TRINITY_OTG2048 | putativ   | Helianthus_annuus   | 49.20 | 0.00 |
| TRINITY_KHN2058 | COP9 si   | Glycine_soja        | 49.20 | 0.00 |
| TRINITY_XP_0191 | PREDICTI  | Ipomoea_nil         | 49.20 | 0.00 |
| TRINITY_GBG7296 | hypothet  | Chara_braunii       | 49.20 | 0.00 |
| TRINITY_XP_0238 | RNA-bin   | Quercus_suber       | 49.20 | 0.00 |
| TRINITY_KFK4273 | hypothet  | Arabis_alpina       | 49.20 | 0.00 |
| TRINITY_PRQ5311 | putativ   | Rosa_chinensis      | 49.20 | 0.00 |
| TRINITY_GAX7978 | hypothet  | Chlamydomonas_eusti | 49.20 | 0.00 |
| TRINITY_RLM6448 | 50S rib   | Panicum_miliaceum   | 49.20 | 0.00 |
| TRINITY_XP_0205 | dol-P-M   | Phalaenopsis_equest | 49.20 | 0.00 |
| TRINITY_XP_0238 | glycoger  | Quercus_suber       | 49.20 | 0.00 |
| TRINITY_XP_0016 | predict   | Chlamydomonas_reinh | 49.20 | 0.00 |
| TRINITY_GAX7479 | hypothet  | Chlamydomonas_eusti | 49.20 | 0.00 |
| TRINITY_PON4723 | Ubiquiti  | Parasponia_anderson | 49.20 | 0.00 |
| TRINITY_GAX7974 | hypothet  | Chlamydomonas_eusti | 49.20 | 0.00 |
| TRINITY_KDD7659 | hypothet  | Helicosporidium_sp. | 49.20 | 0.00 |
| TRINITY_XP_0014 | predict   | Ostreococcus_sp._'l | 49.20 | 0.00 |
| TRINITY_XP_0094 | (PREDICTI | Musa_acuminata      | 49.20 | 0.00 |
| TRINITY_XP_0056 | GRIM-19   | Coccomyxa_subellips | 49.20 | 0.00 |
| TRINITY_OAY4714 | hypothet  | Manihot_esculenta   | 49.20 | 0.00 |
| TRINITY_GBG6961 | hypothet  | Chara_braunii       | 49.20 | 0.00 |
| TRINITY_GAX7948 | hypothet  | Chlamydomonas_eusti | 49.20 | 0.00 |
| TRINITY_GAX7814 | hypothet  | Chlamydomonas_eusti | 49.20 | 0.00 |
| TRINITY_KXZ4202 | hypothet  | Gonium_pectorale    | 49.20 | 0.00 |
| TRINITY_ONK7360 | unchara   | Asparagus_officinal | 49.20 | 0.00 |
| TRINITY_GAX7412 | hypothet  | Chlamydomonas_eusti | 49.20 | 0.00 |
| TRINITY_XP_0201 | calcium-  | Aegilops_tauschii   | 49.20 | 0.00 |
| TRINITY_XP_0029 | cytochr   | Volvox_carteri      | 49.20 | 0.00 |
| TRINITY_XP_0016 | predict   | Chlamydomonas_reinh | 49.20 | 0.00 |
| TRINITY_PNW8574 | hypothet  | Chlamydomonas_reinh | 49.20 | 0.00 |
| TRINITY_XP_0056 | WD40 re   | Coccomyxa_subellips | 49.20 | 0.00 |
| TRINITY_XP_0206 | ubiquiti  | Dendrobium_catenatu | 49.20 | 0.00 |
| TRINITY_XP_0139 | (hypothet | Monoraphidium_negle | 49.20 | 0.00 |
| TRINITY_GAX7510 | hypothet  | Chlamydomonas_eusti | 49.20 | 0.00 |
| TRINITY_KXZ4998 | hypothet  | Gonium_pectorale    | 49.20 | 0.00 |
| TRINITY_XP_0016 | predict   | Chlamydomonas_reinh | 49.20 | 0.00 |
| TRINITY_PNW8190 | hypothet  | Chlamydomonas_reinh | 49.20 | 0.00 |
| TRINITY_GAX7860 | hypothet  | Chlamydomonas_eusti | 49.20 | 0.00 |
| TRINITY_GAX8166 | hypothet  | Chlamydomonas_eusti | 49.20 | 0.00 |
| TRINITY_CBU3041 | asparagi  | Polytomella_sp._Pri | 49.20 | 0.00 |
| TRINITY_KZV1503 | hypothet  | Dorcoceras_hygromet | 49.20 | 0.00 |
| TRINITY_RWW3170 | hypothet  | Ensete_ventricosum  | 49.20 | 0.00 |
| TRINITY_PNW8410 | hypothet  | Chlamydomonas_reinh | 49.20 | 0.00 |
| TRINITY_GAX7413 | (hypothet | Chlamydomonas_eusti | 49.20 | 0.00 |
| TRINITY_KXZ5151 | hypothet  | Gonium_pectorale    | 49.20 | 0.00 |
| TRINITY_XP_0082 | PREDICTI  | Prunus_mume         | 49.20 | 0.00 |
| TRINITY_GAX8540 | hypothet  | Chlamydomonas_eusti | 49.20 | 0.00 |
| TRINITY_PNH0286 | hypothet  | Tetrabaena_socialis | 49.20 | 0.00 |
| TRINITY_PNW7423 | (hypothet | Chlamydomonas_reinh | 49.20 | 0.00 |
| TRINITY_GAX8021 | hypothet  | Chlamydomonas_eusti | 49.20 | 0.00 |
| TRINITY_KXZ5110 | (hypothet | Gonium_pectorale    | 49.20 | 0.00 |
| TRINITY_PRW4505 | E3 ubiq   | Chlorella_sorokinia | 49.20 | 0.00 |
| TRINITY_CDY2302 | BnaC07g   | Brassica_napus      | 49.20 | 0.00 |
| TRINITY_GAX8268 | hypothet  | Chlamydomonas_eusti | 49.20 | 0.00 |
| TRINITY_PNW8485 | hypothet  | Chlamydomonas_reinh | 49.20 | 0.00 |
| TRINITY_GAX7493 | hypothet  | Chlamydomonas_eusti | 49.20 | 0.00 |
| TRINITY_KXZ4840 | hypothet  | Gonium_pectorale    | 49.20 | 0.00 |
| TRINITY_XP_0058 | hypothet  | Chlorella_variabili | 49.10 | 0.00 |
| TRINITY_PSC7466 | Serine t  | Micractinium_conduc | 49.10 | 0.00 |
| TRINITY_KFK3834 | hypothet  | Arabis_alpina       | 49.10 | 0.00 |
| TRINITY_OMO6070 | hypothet  | Corchorus_capsulari | 49.10 | 0.00 |
| TRINITY_XP_0161 | DNA-dir   | Arachis_ipaensis    | 49.10 | 0.00 |
| TRINITY_XP_0030 | unnamed   | Ostreococcus_tauri  | 49.10 | 0.00 |
| TRINITY_OUS4468 | glucose   | Ostreococcus_tauri  | 49.10 | 0.00 |

|                                             |       |      |
|---------------------------------------------|-------|------|
| TRINITY_PRW0585(decappirChlorella_sorokinia | 49.10 | 0.00 |
| TRINITY_OVA0582(GlutathMacleaya_cordata     | 49.10 | 0.00 |
| TRINITY_XP_0239(cras-likeQuercus_suber      | 49.10 | 0.00 |
| TRINITY_XP_0202740S_ribcAsparagus_officinal | 49.10 | 0.00 |
| TRINITY_XP_0139(dual-spεMonoraphidium_negle | 49.10 | 0.00 |
| TRINITY_GAX8065hypothetChlamydomonas_eusti  | 49.10 | 0.00 |
| TRINITY_XP_0029hypothetVolvox_carteri       | 49.10 | 0.00 |
| TRINITY_KXZ5320(hypothetGonium_pectorale    | 49.10 | 0.00 |
| TRINITY_GBG7673(hypothetChara_braunii       | 49.10 | 0.00 |
| TRINITY_PRW58254cytochrκChlorella_sorokinia | 49.10 | 0.00 |
| TRINITY_GAX7809hypothetChlamydomonas_eusti  | 49.10 | 0.00 |
| TRINITY_XP_0229thioredeCucurbita_moschata   | 49.10 | 0.00 |
| TRINITY_XP_0138Mannan εMonoraphidium_negle  | 49.10 | 0.00 |
| TRINITY_XP_0056WD40 reCoccomyxa_subellips   | 49.10 | 0.00 |
| TRINITY_PLY81791hypothetLactuca_sativa      | 49.10 | 0.00 |
| TRINITY_XP_0016predictεChlamydomonas_reinh  | 49.10 | 0.00 |
| TRINITY_GAX8151hypothetChlamydomonas_eusti  | 49.10 | 0.00 |
| TRINITY_GAX7395hypothetChlamydomonas_eusti  | 49.10 | 0.00 |
| TRINITY_XP_0029hypothetVolvox_carteri       | 49.10 | 0.00 |
| TRINITY_GAX7830(hypothetChlamydomonas_eusti | 49.10 | 0.00 |
| TRINITY_CAB7187P-glycoArabidopsis_thalian   | 49.10 | 0.00 |
| TRINITY_PNH0415hypothetTetrabaena_socialis  | 49.10 | 0.00 |
| TRINITY_XP_00824PREDICTIPrunus_mume         | 49.10 | 0.00 |
| TRINITY_XP_02392probableεQuercus_suber      | 49.10 | 0.00 |
| TRINITY_KXZ4490hypothetGonium_pectorale     | 49.10 | 0.00 |
| TRINITY_GAX7382hypothetChlamydomonas_eusti  | 49.10 | 0.00 |
| TRINITY_PWA8090PhosphofArtemisia_annua      | 49.10 | 0.00 |
| TRINITY_PNH0285Adenine/Tetrabaena_socialis  | 49.10 | 0.00 |
| TRINITY_GBG7303hypothetChara_braunii        | 49.10 | 0.00 |
| TRINITY_KXZ54222hypothetGonium_pectorale    | 49.10 | 0.00 |
| TRINITY_BAK0193predictεHordeum_vulgare      | 49.10 | 0.00 |
| TRINITY_GAQ8187326S_protKlebsormidium_niten | 49.10 | 0.00 |
| TRINITY_RXI0558(hypothetMalus_domestica     | 49.10 | 0.00 |
| TRINITY_GAX7836(hypothetChlamydomonas_eusti | 49.10 | 0.00 |
| TRINITY_PNW8504hypothetChlamydomonas_reinh  | 49.10 | 0.00 |
| TRINITY_PNW7744(hypothetChlamydomonas_reinh | 49.10 | 0.00 |
| TRINITY_GAX7413hypothetChlamydomonas_eusti  | 49.10 | 0.00 |
| TRINITY_XP_0029α-1,Volvox_carteri           | 49.10 | 0.00 |
| TRINITY_KXZ43502hypothetGonium_pectorale    | 49.10 | 0.00 |
| TRINITY_PNW7883hypothetChlamydomonas_reinh  | 49.10 | 0.00 |
| TRINITY_PNW7530hypothetChlamydomonas_reinh  | 49.10 | 0.00 |
| TRINITY_PNW7382hypothetChlamydomonas_reinh  | 49.10 | 0.00 |
| TRINITY_GAX79492hypothetChlamydomonas_eusti | 49.10 | 0.00 |
| TRINITY_GAX8400hypothetChlamydomonas_eusti  | 49.10 | 0.00 |
| TRINITY_GAX7624hypothetChlamydomonas_eusti  | 49.10 | 0.00 |
| TRINITY_GAX77872hypothetChlamydomonas_eusti | 49.10 | 0    |
| TRINITY_EPS5921(hypothetGenlisea_aurea      | 49.10 | 0.00 |
| TRINITY_KHG0862ChaperorGossypium_arboreum   | 49.00 | 0.00 |
| TRINITY_XP_0102PREDICTINelumbo_nucifera     | 49.00 | 0.00 |
| TRINITY_RYR42861hypothetArachis_hypogaea    | 49.00 | 0.00 |
| TRINITY_AGV5438tubulin Phaseolus_vulgaris   | 49.00 | 0.00 |
| TRINITY_XP_0217squamosaChenopodium_quinoa   | 49.00 | 0.00 |
| TRINITY_XP_0056flavin-εCoccomyxa_subellips  | 49.00 | 0.00 |
| TRINITY_GAX8071hypothetChlamydomonas_eusti  | 49.00 | 0.00 |
| TRINITY_XP_00362histone Medicago_truncatula | 49.00 | 0.00 |
| TRINITY_XP_02272E3_ubiquDurio_zibethinus    | 49.00 | 0.00 |
| TRINITY_GAQ8888NAD-depeKlebsormidium_niten  | 49.00 | 0.00 |
| TRINITY_XP_0029hypothetVolvox_carteri       | 49.00 | 0.00 |
| TRINITY_XP_0264(sorbitolPapaver_somniferum  | 49.00 | 0.00 |
| TRINITY_XP_0218prolyl εSpinacia_oleracea    | 49.00 | 0.00 |
| TRINITY_XP_0029hypothetVolvox_carteri       | 49.00 | 0.00 |
| TRINITY_GAQ7956valyl-tfKlebsormidium_niten  | 49.00 | 0.00 |
| TRINITY_PNH0312hypothetTetrabaena_socialis  | 49.00 | 0.00 |
| TRINITY_GAX8640hypothetChlamydomonas_eusti  | 49.00 | 0.00 |
| TRINITY_GAQ8456ATP_citKlebsormidium_niten   | 49.00 | 0.00 |
| TRINITY_GBF9073(nitrile Raphidocelis_subcap | 49.00 | 0.00 |

|                  |                             |       |      |
|------------------|-----------------------------|-------|------|
| TRINITY_GAX84034 | hypothetChlamydomonas_eusti | 49.00 | 0.00 |
| TRINITY_PNW70594 | hypothetChlamydomonas_reinh | 49.00 | 0.00 |
| TRINITY_GAQ81015 | glycyl-tKlebsormidium_niten | 49.00 | 0.00 |
| TRINITY_EFJ38368 | hypothetSelaginella_moellen | 49.00 | 0.00 |
| TRINITY_PNW85530 | hypothetChlamydomonas_reinh | 49.00 | 0.00 |
| TRINITY_OAE24965 | hypothetMarchantia_polymorp | 49.00 | 0.00 |
| TRINITY_GAQ80655 | hypothetKlebsormidium_niten | 49.00 | 0.00 |
| TRINITY_XP_02195 | pyrophosHelianthus_annuus   | 49.00 | 0.00 |
| TRINITY_XP_02392 | probableQuercus_suber       | 49.00 | 0.00 |
| TRINITY_XP_00295 | hypothetVolvox_carteri      | 49.00 | 0.00 |
| TRINITY_XP_00165 | predicteChlamydomonas_reinh | 49.00 | 0.00 |
| TRINITY_XP_00835 | PREDICTHMalus_domestica     | 49.00 | 0.00 |
| TRINITY_GAX82580 | hypothetChlamydomonas_eusti | 49.00 | 0.00 |
| TRINITY_XP_00295 | hypothetVolvox_carteri      | 49.00 | 0.00 |
| TRINITY_GAX80387 | hypothetChlamydomonas_eusti | 49.00 | 0.00 |
| TRINITY_XP_02287 | DNA-dirOlea_europaea        | 49.00 | 0.00 |
| TRINITY_GAX80630 | hypothetChlamydomonas_eusti | 49.00 | 0.00 |
| TRINITY_XP_01385 | nicotinMonoraphidium_negle  | 49.00 | 0.00 |
| TRINITY_GBG81344 | hypothetChara_braunii       | 49.00 | 0.00 |
| TRINITY_XP_00635 | protein Eutrema_salsugineur | 49.00 | 0.00 |
| TRINITY_PNW72795 | hypothetChlamydomonas_reinh | 49.00 | 0.00 |
| TRINITY_GAX73038 | hypothetChlamydomonas_eusti | 49.00 | 0.00 |
| TRINITY_XP_01095 | PREDICTHElaeis_guineensis   | 49.00 | 0.00 |
| TRINITY_KDD72661 | hypothetHelicosporidium_sp. | 49.00 | 0.00 |
| TRINITY_PIN01347 | GlutamiHandroanthus_impeti  | 49.00 | 0.00 |
| TRINITY_PNR30380 | hypothetPhyscomitrella_pate | 49.00 | 0.00 |
| TRINITY_KXZ44274 | hypothetGonium_pectorale    | 49.00 | 0.00 |
| TRINITY_XP_00295 | hybrid-cVolvox_carteri      | 49.00 | 0.00 |
| TRINITY_PNW80800 | hypothetChlamydomonas_reinh | 49.00 | 0.00 |
| TRINITY_GAX73578 | hypothetChlamydomonas_eusti | 49.00 | 0.00 |
| TRINITY_GAX72575 | hypothetChlamydomonas_eusti | 49.00 | 0.00 |
| TRINITY_PNW76451 | hypothetChlamydomonas_reinh | 49.00 | 0.00 |
| TRINITY_GAQ77581 | ABC trarKlebsormidium_niten | 49.00 | 0.00 |
| TRINITY_GAX73980 | hypothetChlamydomonas_eusti | 49.00 | 0.00 |
| TRINITY_AMK97820 | thio redHaematococcus_lacus | 49.00 | 0.00 |
| TRINITY_GAX81628 | hypothetChlamydomonas_eusti | 49.00 | 0.00 |
| TRINITY_GAX84395 | hypothetChlamydomonas_eusti | 49.00 | 0.00 |
| TRINITY_GBF98270 | hypothetRaphidocelis_subcap | 49.00 | 0.00 |
| TRINITY_GAX79184 | hypothetChlamydomonas_eusti | 49.00 | 0.00 |
| TRINITY_PNW82916 | hypothetChlamydomonas_reinh | 49.00 | 0.00 |
| TRINITY_PNW80042 | hypothetChlamydomonas_reinh | 49.00 | 0.00 |
| TRINITY_GAX72765 | hypothetChlamydomonas_eusti | 49.00 | 0.00 |
| TRINITY_GAX73611 | hypothetChlamydomonas_eusti | 49.00 | 0.00 |
| TRINITY_XP_00360 | tRNA (c)Medicago_truncatula | 49.00 | 0.00 |
| TRINITY_KXZ47715 | hypothetGonium_pectorale    | 49.00 | 0.00 |
| TRINITY_BAD25105 | unknown Oryza_sativa        | 48.90 | 0.00 |
| TRINITY_XP_02385 | protein Quercus_suber       | 48.90 | 0.00 |
| TRINITY_GAX76771 | hypothetChlamydomonas_eusti | 48.90 | 0.00 |
| TRINITY_PRW33945 | acyl- dChlorella_sorokinia  | 48.90 | 0.00 |
| TRINITY_XP_02570 | multiprArachis_hypogaea     | 48.90 | 0.00 |
| TRINITY_KZV15455 | hypothetDorcoceras_hygromet | 48.90 | 0.00 |
| TRINITY_BAJ96087 | predicteHordeum_vulgare     | 48.90 | 0.00 |
| TRINITY_XP_00955 | PREDICTHNicotiana_tomentosi | 48.90 | 0.00 |
| TRINITY_XP_02431 | WD repeBrachypodium_distac  | 48.90 | 0.00 |
| TRINITY_XP_01055 | PREDICTHTarenaya_hasslerian | 48.90 | 0.00 |
| TRINITY_GAQ89742 | Inward rKlebsormidium_niten | 48.90 | 0.00 |
| TRINITY_KXZ46958 | hypothetGonium_pectorale    | 48.90 | 0.00 |
| TRINITY_BAK02778 | predicteHordeum_vulgare     | 48.90 | 0.00 |
| TRINITY_GAX72582 | hypothetChlamydomonas_eusti | 48.90 | 0.00 |
| TRINITY_XP_02068 | probableDendrobium_catenatu | 48.90 | 0.00 |
| TRINITY_XP_01140 | G2/mitotAuxenochlorella_pro | 48.90 | 0.00 |
| TRINITY_KXZ51874 | hypothetGonium_pectorale    | 48.90 | 0.00 |
| TRINITY_GAX81314 | hypothetChlamydomonas_eusti | 48.90 | 0.00 |
| TRINITY_GAQ92281 | E3 ubiqKlebsormidium_niten  | 48.90 | 0.00 |
| TRINITY_PNW85860 | hypothetChlamydomonas_reinh | 48.90 | 0.00 |
| TRINITY_GBF89726 | hypothetRaphidocelis_subcap | 48.90 | 0.00 |



|                                             |       |      |
|---------------------------------------------|-------|------|
| TRINITY_GAX8076(hypothetChlamydomonas_eusti | 48.90 | 0.00 |
| TRINITY_PSC68284BifunctiMicractinium_conduc | 48.90 | 0.00 |
| TRINITY_GAX78477hypothetChlamydomonas_eusti | 48.90 | 0.00 |
| TRINITY_XP_00294hypothetVolvox_carteri      | 48.90 | 0.00 |
| TRINITY_GAX8383(hypothetChlamydomonas_eusti | 48.90 | 0.00 |
| TRINITY_XP_02387histidirQuercus_suber       | 48.90 | 0.00 |
| TRINITY_PIN27032CysteineHandroanthus_impeti | 48.90 | 0.00 |
| TRINITY_XP_00295hypothetVolvox_carteri      | 48.90 | 0.00 |
| TRINITY_XP_0025(predicteMicromonas_commoda  | 48.90 | 0.00 |
| TRINITY_XP_00413PREDICTICucumis_sativus     | 48.90 | 0.00 |
| TRINITY_GAX76787hypothetChlamydomonas_eusti | 48.90 | 0.00 |
| TRINITY_XP_02387lid2 conQuercus_suber       | 48.90 | 0.00 |
| TRINITY_GAX7909(hypothetChlamydomonas_eusti | 48.90 | 0.00 |
| TRINITY_GAX79657hypothetChlamydomonas_eusti | 48.90 | 0.00 |
| TRINITY_EEF27264nhl repRicinus_communis     | 48.90 | 0.00 |
| TRINITY_XP_00564Yip1-donCoccomyxa_subellips | 48.90 | 0.00 |
| TRINITY_GAX75807hypothetChlamydomonas_eusti | 48.90 | 0.00 |
| TRINITY_GAX80532hypothetChlamydomonas_eusti | 48.90 | 0.00 |
| TRINITY_EFJ17269hypothetSelaginella_moellen | 48.90 | 0.00 |
| TRINITY_XP_01389UncharacMonoraphidium_negle | 48.90 | 0.00 |
| TRINITY_GBF99031sec-indRaphidocelis_subcap  | 48.90 | 0.00 |
| TRINITY_EFJ14854hypothetSelaginella_moellen | 48.90 | 0.00 |
| TRINITY_XP_00294hypothetVolvox_carteri      | 48.90 | 0.00 |
| TRINITY_XP_00294hypothetVolvox_carteri      | 48.90 | 0.00 |
| TRINITY_GAQ88073NADH deKlebsormidium_niten  | 48.90 | 0.00 |
| TRINITY_BAF98914subunit Chlamydomonas_reinh | 48.90 | 0.00 |
| TRINITY_XP_00295hypothetVolvox_carteri      | 48.90 | 0.00 |
| TRINITY_XP_00564hypothetCoccomyxa_subellips | 48.90 | 0.00 |
| TRINITY_PNW85669hypothetChlamydomonas_reinh | 48.90 | 0.00 |
| TRINITY_PKA51951Myb-relApostasia_shenzheni  | 48.90 | 0.00 |
| TRINITY_XP_0075(unnamed Bathycoccus_prasinc | 48.90 | 0.00 |
| TRINITY_GAQ91059mannosylKlebsormidium_niten | 48.90 | 0.00 |
| TRINITY_GAX73093hypothetChlamydomonas_eusti | 48.90 | 0.00 |
| TRINITY_XP_02203traffickHelianthus_annuus   | 48.90 | 0.00 |
| TRINITY_GBF99992hypothetRaphidocelis_subcap | 48.90 | 0.00 |
| TRINITY_GAX76085hypothetChlamydomonas_eusti | 48.90 | 0.00 |
| TRINITY_GAX84316hypothetChlamydomonas_eusti | 48.90 | 0.00 |
| TRINITY_XP_00684NADH deAmborella_trichopod  | 48.90 | 0.00 |
| TRINITY_RZB85664ADP-ribGlycine_soja         | 48.90 | 0.00 |
| TRINITY_OMP13963hypothetCorchorus_olitorius | 48.80 | 0.00 |
| TRINITY_XP_00634PREDICTISolanum_tuberosum   | 48.80 | 0.00 |
| TRINITY_XP_02387uncharacQuercus_suber       | 48.80 | 0.00 |
| TRINITY_XP_02638probablePapaver_somniferum  | 48.80 | 0.00 |
| TRINITY_XP_0063(CWF19-ljCapsella_rubella    | 48.80 | 0.00 |
| TRINITY_XP_00913PREDICTIBrassica_rapa       | 48.80 | 0.00 |
| TRINITY_XP_02708protein Coffea_arabica      | 48.80 | 0.00 |
| TRINITY_XP_00141predicteOstreococcus_sp._'1 | 48.80 | 0.00 |
| TRINITY_XP_02391putativeQuercus_suber       | 48.80 | 0.00 |
| TRINITY_XP_02439probablePhyscomitrella_pate | 48.80 | 0.00 |
| TRINITY_GAQ80887mitochorKlebsormidium_niten | 48.80 | 0.00 |
| TRINITY_KXZ56581hypothetGonium_pectorale    | 48.80 | 0.00 |
| TRINITY_XP_00564SMAD/FH/Coccomyxa_subellips | 48.80 | 0.00 |
| TRINITY_BAK01936predicteHordeum_vulgare     | 48.80 | 0.00 |
| TRINITY_XP_02198protein Helianthus_annuus   | 48.80 | 0.00 |
| TRINITY_PKA64848hypothetApostasia_shenzheni | 48.80 | 0.00 |
| TRINITY_XP_01653PREDICTICapsicum_annuum     | 48.80 | 0.00 |
| TRINITY_PQQ2121(ABC trarPrunus_yedoensis    | 48.80 | 0.00 |
| TRINITY_XP_00564ras-domCoccomyxa_subellips  | 48.80 | 0.00 |
| TRINITY_OMO55048hypothetCorchorus_capsulari | 48.80 | 0.00 |
| TRINITY_KXZ45688hypothetGonium_pectorale    | 48.80 | 0.00 |
| TRINITY_KXZ53965hypothetGonium_pectorale    | 48.80 | 0.00 |
| TRINITY_XP_00169predicteChlamydomonas_reinh | 48.80 | 0.00 |
| TRINITY_GAX74139hypothetChlamydomonas_eusti | 48.80 | 0.00 |
| TRINITY_GAX82232hypothetChlamydomonas_eusti | 48.80 | 0.00 |
| TRINITY_PRW4564(L-ascorkChlorella_sorokinia | 48.80 | 0.00 |
| TRINITY_RVW26422Histone-Vitis_vinifera      | 48.80 | 0.00 |

|                  |          |                     |       |      |
|------------------|----------|---------------------|-------|------|
| TRINITY_PNH12872 | Serine   | Tetrabaena_socialis | 48.80 | 0.00 |
| TRINITY_GAX7751  | hypothet | Chlamydomonas_eusti | 48.80 | 0.00 |
| TRINITY_XP_00682 | protein  | Amborella_trichopod | 48.80 | 0.00 |
| TRINITY_XP_00169 | componer | Chlamydomonas_reinh | 48.80 | 0.00 |
| TRINITY_XP_02389 | sacchar  | Quercus_suber       | 48.80 | 0.00 |
| TRINITY_GBF90144 | hypothet | Raphidocelis_subcap | 48.80 | 0.00 |
| TRINITY_XP_00169 | predicte | Chlamydomonas_reinh | 48.80 | 0.00 |
| TRINITY_OAE25037 | hypothet | Marchantia_polymorp | 48.80 | 0.00 |
| TRINITY_XP_01389 | peptida  | Monoraphidium_negle | 48.80 | 0.00 |
| TRINITY_XP_01390 | hypothet | Monoraphidium_negle | 48.80 | 0.00 |
| TRINITY_KXZ43331 | hypothet | Gonium_pectorale    | 48.80 | 0.00 |
| TRINITY_XP_00169 | predicte | Chlamydomonas_reinh | 48.80 | 0.00 |
| TRINITY_GBF88391 | hypothet | Raphidocelis_subcap | 48.80 | 0.00 |
| TRINITY_GAX84288 | hypothet | Chlamydomonas_eusti | 48.80 | 0.00 |
| TRINITY_PRW58560 | cereblor | Chlorella_sorokinia | 48.80 | 0.00 |
| TRINITY_XP_00169 | predicte | Chlamydomonas_reinh | 48.80 | 0.00 |
| TRINITY_XP_01849 | PREDICTE | Raphanus_sativus    | 48.80 | 0.00 |
| TRINITY_XP_00250 | predicte | Micromonas_commoda  | 48.80 | 0.00 |
| TRINITY_GAX82378 | hypothet | Chlamydomonas_eusti | 48.80 | 0.00 |
| TRINITY_GAQ89310 | Dyneins  | Klebsormidium_niten | 48.80 | 0.00 |
| TRINITY_XP_02070 | dolicho  | Dendrobium_catenatu | 48.80 | 0.00 |
| TRINITY_GAX79069 | hypothet | Chlamydomonas_eusti | 48.80 | 0.00 |
| TRINITY_GAX78975 | hypothet | Chlamydomonas_eusti | 48.80 | 0.00 |
| TRINITY_PTQ41211 | hypothet | Marchantia_polymorp | 48.80 | 0.00 |
| TRINITY_XP_00565 | EMP/non  | Coccomyxa_subellips | 48.80 | 0.00 |
| TRINITY_CDL93051 | cytosoli | Micrasterias_rotata | 48.80 | 0.00 |
| TRINITY_PNH10132 | hypothet | Tetrabaena_socialis | 48.80 | 0.00 |
| TRINITY_XP_00290 | alpha-m  | Selaginella_moellen | 48.80 | 0.00 |
| TRINITY_GAQ82682 | Serine   | Klebsormidium_niten | 48.80 | 0.00 |
| TRINITY_XP_02387 | geranyl  | Quercus_suber       | 48.80 | 0.00 |
| TRINITY_XP_00169 | organic  | Chlamydomonas_reinh | 48.80 | 0.00 |
| TRINITY_GAX78653 | hypothet | Chlamydomonas_eusti | 48.80 | 0.00 |
| TRINITY_XP_00169 | predicte | Chlamydomonas_reinh | 48.80 | 0.00 |
| TRINITY_PNW74817 | hypothet | Chlamydomonas_reinh | 48.80 | 0.00 |
| TRINITY_BAK02238 | predicte | Hordeum_vulgare     | 48.80 | 0.00 |
| TRINITY_GAQ77622 | Myosin   | Klebsormidium_niten | 48.80 | 0.00 |
| TRINITY_GAX78655 | hypothet | Chlamydomonas_eusti | 48.80 | 0.00 |
| TRINITY_OVA20347 | Peptida  | Macleaya_cordata    | 48.80 | 0.00 |
| TRINITY_ACX43964 | cysteine | Brachiaria_hybrid_c | 48.80 | 0.00 |
| TRINITY_PRW44400 | translat | Chlorella_sorokinia | 48.80 | 0.00 |
| TRINITY_KXZ46904 | hypothet | Gonium_pectorale    | 48.80 | 0.00 |
| TRINITY_XP_02010 | MAP3K    | eAegilops_tauschii  | 48.70 | 0.00 |
| TRINITY_XP_02292 | oil body | Cucurbita_moschata  | 48.70 | 0.00 |
| TRINITY_PRW05850 | decappir | Chlorella_sorokinia | 48.70 | 0.00 |
| TRINITY_GAQ78388 | dephosp  | Klebsormidium_niten | 48.70 | 0.00 |
| TRINITY_XP_01390 | hypothet | Monoraphidium_negle | 48.70 | 0.00 |
| TRINITY_XP_00564 | glycosyl | Coccomyxa_subellips | 48.70 | 0.00 |
| TRINITY_GAQ83004 | hypothet | Klebsormidium_niten | 48.70 | 0.00 |
| TRINITY_GBG72963 | hypothet | Chara_braunii       | 48.70 | 0.00 |
| TRINITY_PNR31525 | hypothet | Physcomitrella_pate | 48.70 | 0.00 |
| TRINITY_PRW59019 | molybdat | Chlorella_sorokinia | 48.70 | 0.00 |
| TRINITY_XP_00169 | triacyl  | Chlamydomonas_reinh | 48.70 | 0.00 |
| TRINITY_XP_00169 | predicte | Chlamydomonas_reinh | 48.70 | 0.00 |
| TRINITY_GBF94190 | calcium  | Raphidocelis_subcap | 48.70 | 0.00 |
| TRINITY_GAX78900 | hypothet | Chlamydomonas_eusti | 48.70 | 0.00 |
| TRINITY_PHT78879 | Peroxis  | Capsicum_annuum     | 48.70 | 0.00 |
| TRINITY_XP_00169 | flagell  | Chlamydomonas_reinh | 48.70 | 0.00 |
| TRINITY_GAX78809 | hypothet | Chlamydomonas_eusti | 48.70 | 0.00 |
| TRINITY_GBG82059 | hypothet | Chara_braunii       | 48.70 | 0.00 |
| TRINITY_GAX73893 | hypothet | Chlamydomonas_eusti | 48.70 | 0.00 |
| TRINITY_XP_02389 | U3 small | Quercus_suber       | 48.70 | 0.00 |
| TRINITY_XP_00295 | hypothet | Volvox_carteri      | 48.70 | 0.00 |
| TRINITY_GAX74951 | hypothet | Chlamydomonas_eusti | 48.70 | 0.00 |
| TRINITY_XP_00585 | hypothet | Chlorella_variabili | 48.70 | 0.00 |
| TRINITY_GAX85524 | hypothet | Chlamydomonas_eusti | 48.70 | 0.00 |
| TRINITY_PSC70175 | zinc fir | Micractinium_conduc | 48.70 | 0.00 |

|                          |                              |       |      |
|--------------------------|------------------------------|-------|------|
| TRINITY_RWR8703(non-spec | Cinnamomum_micranth          | 48.70 | 0.00 |
| TRINITY_XP_00294         | hypothetVolvox_carteri       | 48.70 | 0.00 |
| TRINITY_GBG0045          | hypothetRaphidocelis_subcap  | 48.70 | 0.00 |
| TRINITY_XP_0238          | bifunctiQuercus_suber        | 48.70 | 0.00 |
| TRINITY_PNH0625          | Meiotic Tetrabaena_socialis  | 48.70 | 0.00 |
| TRINITY_PNH0576230S      | ribcTetrabaena_socialis      | 48.70 | 0.00 |
| TRINITY_PNW70672         | hypothetChlamydomonas_reinh  | 48.70 | 0.00 |
| TRINITY_GAX8389          | hypothetChlamydomonas_eusti  | 48.70 | 0.00 |
| TRINITY_GAX7519          | (hypothetChlamydomonas_eusti | 48.70 | 0.00 |
| TRINITY_GAQ8019          | serine/tKlebsormidium_niten  | 48.70 | 0.00 |
| TRINITY_PNW8734          | hypothetChlamydomonas_reinh  | 48.70 | 0.00 |
| TRINITY_RMZ5514          | hypothetAuxenochlorella_pro  | 48.70 | 0.00 |
| TRINITY_PNH09202         | Tiny macTetrabaena_socialis  | 48.70 | 0.00 |
| TRINITY_PNH09202         | Tiny macTetrabaena_socialis  | 48.70 | 0.00 |
| TRINITY_OAE2542          | hypothetMarchantia_polymorp  | 48.70 | 0.00 |
| TRINITY_XP_0239          | (ras-likeQuercus_suber       | 48.70 | 0.00 |
| TRINITY_XP_0138          | hypothetMonoraphidium_negle  | 48.70 | 0.00 |
| TRINITY_KXZ5143          | hypothetGonium_pectorale     | 48.70 | 0.00 |
| TRINITY_GAX8527          | hypothetChlamydomonas_eusti  | 48.70 | 0.00 |
| TRINITY_XP_0239          | (pentafurQuercus_suber       | 48.70 | 0.00 |
| TRINITY_GAX76281         | hypothetChlamydomonas_eusti  | 48.70 | 0.00 |
| TRINITY_AAQ1627          | histidirChlamydomonas_reinh  | 48.70 | 0.00 |
| TRINITY_GAQ8538          | clathrirKlebsormidium_niten  | 48.70 | 0.00 |
| TRINITY_PNW7766          | hypothetChlamydomonas_reinh  | 48.70 | 0.00 |
| TRINITY_XP_0017          | (predicteChlamydomonas_reinh | 48.70 | 0.00 |
| TRINITY_XP_0029          | mitochorSelaginella_moellen  | 48.60 | 0.00 |
| TRINITY_EFJ3127          | hypothetSelaginella_moellen  | 48.60 | 0.00 |
| TRINITY_XP_0030          | tRNA wykOstreococcus_tauri   | 48.60 | 0.00 |
| TRINITY_OAE29401         | hypothetMarchantia_polymorp  | 48.60 | 0.00 |
| TRINITY_XP_0165          | PREDICTFCapsicum_annuum      | 48.60 | 0.00 |
| TRINITY_EFJ1875          | hypothetSelaginella_moellen  | 48.60 | 0.00 |
| TRINITY_XP_0124          | PREDICTFGossypium_raimondii  | 48.60 | 0.00 |
| TRINITY_PSC73661         | dual speMicractinium_conduc  | 48.60 | 0.00 |
| TRINITY_CBI3445          | unnamed Vitis_vinifera       | 48.60 | 0.00 |
| TRINITY_XP_0084          | PREDICTFCucumis_melo         | 48.60 | 0.00 |
| TRINITY_OWM77521         | hypothetPunica_granatum      | 48.60 | 0.00 |
| TRINITY_XP_00564         | phosphorCoccomyxa_subellips  | 48.60 | 0.00 |
| TRINITY_XP_00141         | predicteOstreococcus_sp._'1  | 48.60 | 0.00 |
| TRINITY_XP_00564         | Sec7-donCoccomyxa_subellips  | 48.60 | 0.00 |
| TRINITY_RLN3121          | (ATP-depePanicum_miliaceum   | 48.60 | 0.00 |
| TRINITY_PPS08684         | hypothetGossypium_barbadens  | 48.60 | 0.00 |
| TRINITY_PHU1012          | hypothetCapsicum_chinense    | 48.60 | 0.00 |
| TRINITY_PHT2561          | Protein Capsicum_baccatum    | 48.60 | 0.00 |
| TRINITY_XP_02391         | cystathiQuercus_suber        | 48.60 | 0.00 |
| TRINITY_VDC86271         | unnamed Brassica_rapa        | 48.60 | 0.00 |
| TRINITY_PNW81691         | hypothetChlamydomonas_reinh  | 48.60 | 0.00 |
| TRINITY_PNH0950          | hypothetTetrabaena_socialis  | 48.60 | 0.00 |
| TRINITY_XP_01564         | actin-reOryza_sativa         | 48.60 | 0.00 |
| TRINITY_XP_02131         | molybdoSorghum_bicolor       | 48.60 | 0.00 |
| TRINITY_XP_0030          | (RNA binMicromonas_pusilla   | 48.60 | 0.00 |
| TRINITY_XP_00294         | hypothetVolvox_carteri       | 48.60 | 0.00 |
| TRINITY_XP_0029          | coatomeSelaginella_moellen   | 48.60 | 0.00 |
| TRINITY_XP_0049          | (mitochorSetaria_italica     | 48.60 | 0.00 |
| TRINITY_PNH0947          | (Purple eTetrabaena_socialis | 48.60 | 0.00 |
| TRINITY_GAX8321          | hypothetChlamydomonas_eusti  | 48.60 | 0.00 |
| TRINITY_GAX84032         | hypothetChlamydomonas_eusti  | 48.60 | 0.00 |
| TRINITY_GAX8561          | hypothetChlamydomonas_eusti  | 48.60 | 0.00 |
| TRINITY_AGT29604         | poly [AISolanum_tuberosum    | 48.60 | 0.00 |
| TRINITY_GAQ7843          | (ubiquitiKlebsormidium_niten | 48.60 | 0.00 |
| TRINITY_PNH0421          | (hypothetTetrabaena_socialis | 48.60 | 0.00 |
| TRINITY_KXZ5664          | hypothetGonium_pectorale     | 48.60 | 0.00 |
| TRINITY_GAQ8091          | hypothetKlebsormidium_niten  | 48.60 | 0.00 |
| TRINITY_PNW7617          | hypothetChlamydomonas_reinh  | 48.60 | 0.00 |
| TRINITY_PSC7047          | (tetratriMicractinium_conduc | 48.60 | 0.00 |
| TRINITY_GAX79232         | hypothetChlamydomonas_eusti  | 48.60 | 0.00 |
| TRINITY_PSC7639          | (F-box SMicractinium_conduc  | 48.60 | 0.00 |

|                  |           |                     |       |      |
|------------------|-----------|---------------------|-------|------|
| TRINITY_XP_02437 | exosome   | Physcomitrella_pate | 48.60 | 0.00 |
| TRINITY_XP_00169 | predicte  | Chlamydomonas_reinh | 48.60 | 0.00 |
| TRINITY_XP_02390 | probable  | Quercus_suber       | 48.60 | 0.00 |
| TRINITY_GAX76774 | hypothet  | Chlamydomonas_eusti | 48.60 | 0.00 |
| TRINITY_KXZ43033 | hypothet  | Gonium_pectorale    | 48.60 | 0.00 |
| TRINITY_RLM97733 | myb-rela  | Panicum_miliaceum   | 48.60 | 0.00 |
| TRINITY_XP_00415 | PREDICTE  | Cucumis_sativus     | 48.60 | 0.00 |
| TRINITY_EFJ24217 | hypothet  | Selaginella_moellen | 48.60 | 0.00 |
| TRINITY_KXZ44737 | hypothet  | Gonium_pectorale    | 48.60 | 0.00 |
| TRINITY_XP_00298 | uncharac  | Selaginella_moellen | 48.60 | 0.00 |
| TRINITY_PNW84444 | hypothet  | Chlamydomonas_reinh | 48.60 | 0.00 |
| TRINITY_GAX82427 | hypothet  | Chlamydomonas_eusti | 48.60 | 0.00 |
| TRINITY_GAX83702 | hypothet  | Chlamydomonas_eusti | 48.60 | 0.00 |
| TRINITY_XP_00295 | hypothet  | Volvox_carteri      | 48.60 | 0.00 |
| TRINITY_GBF97673 | aminoacy  | Raphidocelis_subcap | 48.60 | 0.00 |
| TRINITY_GAX80205 | hypothet  | Chlamydomonas_eusti | 48.60 | 0.00 |
| TRINITY_PNW81405 | hypothet  | Chlamydomonas_reinh | 48.60 | 0.00 |
| TRINITY_XP_02067 | protein   | Dendrobium_catenatu | 48.60 | 0.00 |
| TRINITY_GAX86214 | hypothet  | Chlamydomonas_eusti | 48.60 | 0.00 |
| TRINITY_XP_00295 | hypothet  | Volvox_carteri      | 48.60 | 0.00 |
| TRINITY_XP_00295 | hypothet  | Volvox_carteri      | 48.60 | 0.00 |
| TRINITY_GAQ78436 | ubiquiti  | Klebsormidium_niten | 48.60 | 0.00 |
| TRINITY_GAX85698 | hypothet  | Chlamydomonas_eusti | 48.60 | 0.00 |
| TRINITY_XP_01917 | PREDICTE  | Ipomoea_nil         | 48.60 | 0.00 |
| TRINITY_BAK02238 | predicte  | Hordeum_vulgare     | 48.60 | 0.00 |
| TRINITY_PSC71963 | acetyl-c  | Micractinium_conduc | 48.60 | 0.00 |
| TRINITY_PNW80297 | hypothet  | Chlamydomonas_reinh | 48.60 | 0.00 |
| TRINITY_PNW81243 | hypothet  | Chlamydomonas_reinh | 48.60 | 0.00 |
| TRINITY_GAX80494 | hypothet  | Chlamydomonas_eusti | 48.60 | 0.00 |
| TRINITY_OAE25978 | hypothet  | Marchantia_polymorp | 48.60 | 0.00 |
| TRINITY_KMT01539 | hypothet  | Beta_vulgaris       | 48.60 | 0.00 |
| TRINITY_XP_01208 | phospho   | Jatropha_curcas     | 48.50 | 0.00 |
| TRINITY_XP_00564 | acyl-Co   | Coccomyxa_subellips | 48.50 | 0.00 |
| TRINITY_PRW45343 | serine    | Chlorella_sorokinia | 48.50 | 0.00 |
| TRINITY_XP_00170 | predicte  | Chlamydomonas_reinh | 48.50 | 0.00 |
| TRINITY_PNH12051 | hypothet  | Tetrabaena_socialis | 48.50 | 0.00 |
| TRINITY_EFJ14942 | hypothet  | Selaginella_moellen | 48.50 | 0.00 |
| TRINITY_GAY42848 | hypothet  | Citrus_unshiu       | 48.50 | 0.00 |
| TRINITY_KDD77158 | hypothet  | Helicosporidium_sp. | 48.50 | 0.00 |
| TRINITY_P51824.2 | RecName:  | Solanum_tuberosum   | 48.50 | 0.00 |
| TRINITY_XP_00295 | flagell   | Volvox_carteri      | 48.50 | 0.00 |
| TRINITY_XP_02069 | chaperor  | Dendrobium_catenatu | 48.50 | 0.00 |
| TRINITY_XP_02189 | ABC trar  | Carica_papaya       | 48.50 | 0.00 |
| TRINITY_XP_00288 | coatome   | Arabidopsis_lyrata  | 48.50 | 0.00 |
| TRINITY_XP_00141 | predicte  | Ostreococcus_sp._'1 | 48.50 | 0.00 |
| TRINITY_XP_01067 | PREDICTE  | Beta_vulgaris       | 48.50 | 0.00 |
| TRINITY_XP_01725 | PREDICTE  | Daucus_carota       | 48.50 | 0.00 |
| TRINITY_KDO67472 | hypothet  | Citrus_sinensis     | 48.50 | 0.00 |
| TRINITY_GAX72846 | hypothet  | Chlamydomonas_eusti | 48.50 | 0.00 |
| TRINITY_GAX73830 | hypothet  | Chlamydomonas_eusti | 48.50 | 0.00 |
| TRINITY_XP_02390 | ras-like  | Quercus_suber       | 48.50 | 0.00 |
| TRINITY_GBG62526 | hypothet  | Chara_braunii       | 48.50 | 0.00 |
| TRINITY_KJB77734 | hypothet  | Gossypium_raimondii | 48.50 | 0.00 |
| TRINITY_GAX79754 | hypothet  | Chlamydomonas_eusti | 48.50 | 0.00 |
| TRINITY_XP_01041 | PREDICTE  | Camelina_sativa     | 48.50 | 0.00 |
| TRINITY_GAX82104 | hypothet  | Chlamydomonas_eusti | 48.50 | 0.00 |
| TRINITY_XP_00170 | flagell   | Chlamydomonas_reinh | 48.50 | 0.00 |
| TRINITY_GAX75460 | hypothet  | Chlamydomonas_eusti | 48.50 | 0.00 |
| TRINITY_CAA49283 | gag, prot | Volvox_carteri      | 48.50 | 0.00 |
| TRINITY_XP_00295 | hypothet  | Volvox_carteri      | 48.50 | 0.00 |
| TRINITY_GAX84000 | hypothet  | Chlamydomonas_eusti | 48.50 | 0.00 |
| TRINITY_XP_02436 | mannosyl  | Physcomitrella_pate | 48.50 | 0.00 |
| TRINITY_XP_02439 | serine/   | Physcomitrella_pate | 48.50 | 0.00 |
| TRINITY_GAQ89084 | Electror  | Klebsormidium_niten | 48.50 | 0.00 |
| TRINITY_XP_00169 | predicte  | Chlamydomonas_reinh | 48.50 | 0.00 |
| TRINITY_GAX85298 | hypothet  | Chlamydomonas_eusti | 48.50 | 0.00 |

|                   |                              |       |      |
|-------------------|------------------------------|-------|------|
| TRINITY_XP_00715  | hypothetPhaseolus_vulgaris   | 48.50 | 0.00 |
| TRINITY_PNW7455   | hypothetChlamydomonas_reinh  | 48.50 | 0.00 |
| TRINITY_PNW84232  | hypothetChlamydomonas_reinh  | 48.50 | 0.00 |
| TRINITY_VDD22902  | unnamed Brassica_oleracea    | 48.50 | 0.00 |
| TRINITY_GAX7546   | hypothetChlamydomonas_eusti  | 48.50 | 0.00 |
| TRINITY_GAX7474   | hypothetChlamydomonas_eusti  | 48.50 | 0.00 |
| TRINITY_XP_00584  | hypothetChlorella_variabili  | 48.50 | 0.00 |
| TRINITY_XP_0136   | (PREDICT)Brassica_oleracea   | 48.50 | 0.00 |
| TRINITY_GAX7828   | hypothetChlamydomonas_eusti  | 48.50 | 0.00 |
| TRINITY_GAX7387   | hypothetChlamydomonas_eusti  | 48.50 | 0.00 |
| TRINITY_PNW88594  | hypothetChlamydomonas_reinh  | 48.50 | 0.00 |
| TRINITY_PSC74561  | DNA rep;Micractinium_conduc  | 48.50 | 0.00 |
| TRINITY_XP_00644  | eukaryotCitrus_clementina    | 48.50 | 0.00 |
| TRINITY_PNW7793   | hypothetChlamydomonas_reinh  | 48.50 | 0.00 |
| TRINITY_PNW8013   | hypothetChlamydomonas_reinh  | 48.50 | 0.00 |
| TRINITY_GAX7788   | hypothetChlamydomonas_eusti  | 48.50 | 0.00 |
| TRINITY_GAX8181   | hypothetChlamydomonas_eusti  | 48.50 | 0.00 |
| TRINITY_GAX8166   | hypothetChlamydomonas_eusti  | 48.50 | 0.00 |
| TRINITY_GAX7737   | hypothetChlamydomonas_eusti  | 48.50 | 0.00 |
| TRINITY_XP_02387  | cAMP-dep;Quercus_suber       | 48.50 | 0.00 |
| TRINITY_XP_00294  | hypothetVolvox_carteri       | 48.50 | 0.00 |
| TRINITY_OAE19611  | hypothetMarchantia_polymorp  | 48.50 | 0.00 |
| TRINITY_XP_00424  | subtilis;Solanum_lycopersicu | 48.50 | 0.00 |
| TRINITY_GBF9059   | hypothetRaphidocelis_subcap  | 48.50 | 0.00 |
| TRINITY_XP_00715  | hypothetPhaseolus_vulgaris   | 48.50 | 0.00 |
| TRINITY_ABK22212  | unknown Picea_sitchensis     | 48.50 | 0.00 |
| TRINITY_XP_00634  | (PREDICT)Solanum_tuberosum   | 48.40 | 0.00 |
| TRINITY_YP_00881  | NADH de;Entransia_fimbriata  | 48.40 | 0.00 |
| TRINITY_XP_02214  | bifuncti;Momordica_charantia | 48.40 | 0.00 |
| TRINITY_GBG6364   | hypothetChara_braunii        | 48.40 | 0.00 |
| TRINITY_XP_00564  | hypothetCoccomyxa_subellips  | 48.40 | 0.00 |
| TRINITY_XP_0238   | probable;Quercus_suber       | 48.40 | 0.00 |
| TRINITY_XP_0075   | (predict)Bathycoccus_prasinc | 48.40 | 0.00 |
| TRINITY_XP_0208   | uncharac;Arabidopsis_lyrata  | 48.40 | 0.00 |
| TRINITY_GAX76092  | hypothetChlamydomonas_eusti  | 48.40 | 0.00 |
| TRINITY_KXZ43602  | hypothetGonium_pectorale     | 48.40 | 0.00 |
| TRINITY_XP_00665  | (PREDICT)Oryza_brachyantha   | 48.40 | 0.00 |
| TRINITY_XP_00564  | hypothetCoccomyxa_subellips  | 48.40 | 0.00 |
| TRINITY_AAQ64684  | NIMA-rel;Chlamydomonas_reinh | 48.40 | 0.00 |
| TRINITY_XP_00584  | hypothetChlorella_variabili  | 48.40 | 0.00 |
| TRINITY_XP_00294  | ADC synt;Volvox_carteri      | 48.40 | 0.00 |
| TRINITY_XP_0075   | (predict)Bathycoccus_prasinc | 48.40 | 0.00 |
| TRINITY_XP_00294  | hypothetVolvox_carteri       | 48.40 | 0.00 |
| TRINITY_XP_0017   | (flagell)Chlamydomonas_reinh | 48.40 | 0.00 |
| TRINITY_GAX81862  | hypothetChlamydomonas_eusti  | 48.40 | 0.00 |
| TRINITY_OMP0290   | ABC trar;Corchorus_olitorius | 48.40 | 0.00 |
| TRINITY_GAQ88124  | Putativ;Klebsormidium_niten  | 48.40 | 0.00 |
| TRINITY_PSC74742  | Methylc;Micractinium_conduc  | 48.40 | 0.00 |
| TRINITY_KHN1382   | (Putativ)Glycine_soja        | 48.40 | 0.00 |
| TRINITY_EEF245573 | -oxoacy;Ricinus_communis     | 48.40 | 0.00 |
| TRINITY_PTQ50244  | hypothetMarchantia_polymorp  | 48.40 | 0.00 |
| TRINITY_GBG6182   | hypothetChara_braunii        | 48.40 | 0.00 |
| TRINITY_XP_00294  | hypothetVolvox_carteri       | 48.40 | 0.00 |
| TRINITY_XP_0016   | global t;Chlamydomonas_reinh | 48.40 | 0.00 |
| TRINITY_PIA35127  | hypothetAquilegia_coerulea   | 48.40 | 0.00 |
| TRINITY_KMZ70017  | Zinc fir;Zostera_marina      | 48.40 | 0.00 |
| TRINITY_XP_0091   | (PREDICT)Brassica_rapa       | 48.40 | 0.00 |
| TRINITY_PNW74752  | hypothetChlamydomonas_reinh  | 48.40 | 0.00 |
| TRINITY_XP_02294  | serine/t;Cucurbita_moschata  | 48.40 | 0.00 |
| TRINITY_KXZ4811   | (hypothet)Gonium_pectorale   | 48.40 | 0.00 |
| TRINITY_CDO9996   | unnamed Coffea_canephora     | 48.40 | 0.00 |
| TRINITY_RID4819   | hypothetBrassica_rapa        | 48.40 | 0.00 |
| TRINITY_KXZ56257  | hypothetGonium_pectorale     | 48.40 | 0.00 |
| TRINITY_PNW86374  | hypothetChlamydomonas_reinh  | 48.40 | 0.00 |
| TRINITY_GAQ8511   | hypothetKlebsormidium_niten  | 48.40 | 0.00 |
| TRINITY_GAX7753   | hypothetChlamydomonas_eusti  | 48.40 | 0.00 |

|                 |          |                     |       |      |
|-----------------|----------|---------------------|-------|------|
| TRINITY_KHG2079 | Peroxis  | Gossypium_arboreum  | 48.40 | 0.00 |
| TRINITY_XP_0025 | dynein   | Micromonas_commoda  | 48.40 | 0.00 |
| TRINITY_XP_0243 | unchara  | Physcomitrella_pate | 48.40 | 0.00 |
| TRINITY_KXZ4792 | hypothet | Gonium_pectorale    | 48.40 | 0.00 |
| TRINITY_GAX7309 | hypothet | Chlamydomonas_eusti | 48.40 | 0.00 |
| TRINITY_KXZ5371 | hypothet | Gonium_pectorale    | 48.40 | 0.00 |
| TRINITY_XP_0097 | PREDICTI | Nicotiana_sylvestri | 48.40 | 0.00 |
| TRINITY_XP_0219 | unchara  | Helianthus_annuus   | 48.40 | 0.00 |
| TRINITY_GAX7308 | hypothet | Chlamydomonas_eusti | 48.40 | 0.00 |
| TRINITY_XP_0029 | hypothet | Volvox_carteri      | 48.40 | 0.00 |
| TRINITY_PNH0939 | Purple   | Tetrabaena_socialis | 48.40 | 0.00 |
| TRINITY_XP_0029 | RWP-RK   | Volvox_carteri      | 48.40 | 0.00 |
| TRINITY_EPS7352 | hypothet | Genlisea_aurea      | 48.40 | 0.00 |
| TRINITY_XP_0030 | predict  | Micromonas_pusilla  | 48.40 | 0.00 |
| TRINITY_XP_0138 | hypothet | Monoraphidium_negle | 48.40 | 0.00 |
| TRINITY_BBC2847 | serine/t | Yamagishiella_unicc | 48.40 | 0.00 |
| TRINITY_XP_0017 | flagell  | Chlamydomonas_reinh | 48.40 | 0.00 |
| TRINITY_GAX8139 | hypothet | Chlamydomonas_eusti | 48.40 | 0.00 |
| TRINITY_PNW8784 | hypothet | Chlamydomonas_reinh | 48.40 | 0.00 |
| TRINITY_PNH0492 | hypothet | Tetrabaena_socialis | 48.40 | 0.00 |
| TRINITY_KXZ5653 | hypothet | Gonium_pectorale    | 48.40 | 0.00 |
| TRINITY_PNH1181 | CDP-dia  | Tetrabaena_socialis | 48.40 | 0.00 |
| TRINITY_XP_0029 | hypothet | Volvox_carteri      | 48.40 | 0.00 |
| TRINITY_XP_0202 | ubiquiti | Asparagus_officinal | 48.40 | 0.00 |
| TRINITY_PNW7009 | hypothet | Chlamydomonas_reinh | 48.40 | 0.00 |
| TRINITY_KXZ5174 | hypothet | Gonium_pectorale    | 48.40 | 0.00 |
| TRINITY_PNW7970 | hypothet | Chlamydomonas_reinh | 48.40 | 0.00 |
| TRINITY_XP_0029 | hypothet | Volvox_carteri      | 48.40 | 0.00 |
| TRINITY_RWW8425 | hypothet | Ensete_ventricosum  | 48.40 | 0.00 |
| TRINITY_GBG8422 | hypothet | Chara_braunii       | 48.30 | 0.00 |
| TRINITY_XP_0200 | heavy m  | Ananas_comosus      | 48.30 | 0.00 |
| TRINITY_XP_0063 | PREDICTI | Solanum_tuberosum   | 48.30 | 0.00 |
| TRINITY_XP_0029 | hypothet | Volvox_carteri      | 48.30 | 0.00 |
| TRINITY_XP_0239 | probable | Quercus_suber       | 48.30 | 0.00 |
| TRINITY_XP_0029 | probable | Selaginella_moellen | 48.30 | 0.00 |
| TRINITY_XP_0043 | PREDICTI | Fragaria-vesca      | 48.30 | 0.00 |
| TRINITY_XP_0093 | PREDICTI | Musa_acuminata      | 48.30 | 0.00 |
| TRINITY_GBG6365 | hypothet | Chara_braunii       | 48.30 | 0.00 |
| TRINITY_XP_0158 | zinc fir | Ziziphus_jujuba     | 48.30 | 0.00 |
| TRINITY_XP_0056 | hypothet | Coccomyxa_subellips | 48.30 | 0.00 |
| TRINITY_PON6944 | Fructos  | Parasponia_anderson | 48.30 | 0.00 |
| TRINITY_PNW7937 | hypothet | Chlamydomonas_reinh | 48.30 | 0.00 |
| TRINITY_XP_0029 | hypothet | Volvox_carteri      | 48.30 | 0.00 |
| TRINITY_ERN0391 | hypothet | Amborella_trichopod | 48.30 | 0.00 |
| TRINITY_GAQ8021 | Band 7/  | Klebsormidium_niten | 48.30 | 0.00 |
| TRINITY_KXZ4988 | hypothet | Gonium_pectorale    | 48.30 | 0.00 |
| TRINITY_XP_0016 | predict  | Chlamydomonas_reinh | 48.30 | 0.00 |
| TRINITY_PSC7687 | Alpha-g  | Micractinium_conduc | 48.30 | 0.00 |
| TRINITY_XP_0243 | beta-gli | Physcomitrella_pate | 48.30 | 0.00 |
| TRINITY_XP_0237 | serine/t | Lactuca_sativa      | 48.30 | 0.00 |
| TRINITY_XP_0029 | methylst | Selaginella_moellen | 48.30 | 0.00 |
| TRINITY_XP_0016 | puf prot | Chlamydomonas_reinh | 48.30 | 0.00 |
| TRINITY_GAX8216 | hypothet | Chlamydomonas_eusti | 48.30 | 0.00 |
| TRINITY_XP_0110 | PREDICTI | Populus_euphratica  | 48.30 | 0.00 |
| TRINITY_XP_0029 | hypothet | Volvox_carteri      | 48.30 | 0.00 |
| TRINITY_XP_0205 | 54S rib  | Phalaenopsis_equest | 48.30 | 0.00 |
| TRINITY_EFJ1460 | hypothet | Selaginella_moellen | 48.30 | 0.00 |
| TRINITY_GAX8305 | hypothet | Chlamydomonas_eusti | 48.30 | 0.00 |
| TRINITY_GAX8554 | hypothet | Chlamydomonas_eusti | 48.30 | 0.00 |
| TRINITY_BAK0735 | predict  | Hordeum_vulgare     | 48.30 | 0.00 |
| TRINITY_XP_0227 | LIM dom  | Durio_zibethinus    | 48.30 | 0.00 |
| TRINITY_PTQ3482 | hypothet | Marchantia_polymorp | 48.30 | 0.00 |
| TRINITY_GAX7418 | hypothet | Chlamydomonas_eusti | 48.30 | 0.00 |
| TRINITY_PNH0393 | Expansir | Tetrabaena_socialis | 48.30 | 0.00 |
| TRINITY_GAX8254 | hypothet | Chlamydomonas_eusti | 48.30 | 0.00 |
| TRINITY_PRW5690 | fumarat  | Chlorella_sorokinia | 48.30 | 0.00 |

|                                             |       |      |
|---------------------------------------------|-------|------|
| TRINITY_GAQ82709Dyneins Klebsormidium_niten | 48.30 | 0    |
| TRINITY_EPS62861hypothetGenlisea_aurea      | 48.30 | 0.00 |
| TRINITY_PNW6970(hypothetChlamydomonas_reinh | 48.30 | 0.00 |
| TRINITY_PNW76258hypothetChlamydomonas_reinh | 48.30 | 0.00 |
| TRINITY_GAX73501hypothetChlamydomonas_eusti | 48.30 | 0.00 |
| TRINITY_BAJ94976predicteHordeum_vulgare     | 48.30 | 0.00 |
| TRINITY_XP_00169predicteChlamydomonas_reinh | 48.30 | 0.00 |
| TRINITY_PRW45485ABC trarChlorella_sorokinia | 48.30 | 0.00 |
| TRINITY_GBF95889hypothetRaphidocelis_subcap | 48.30 | 0.00 |
| TRINITY_XP_00294hypothetVolvox_carteri      | 48.30 | 0.00 |

|                  |                              |       |      |
|------------------|------------------------------|-------|------|
| TRINITY_XP_02263 | ABC trarVigna_radiata        | 48.30 | 0.00 |
| TRINITY_GAX8339  | hypothetChlamydomonas_eusti  | 48.30 | 0.00 |
| TRINITY_XP_0138  | hypothetMonoraphidium_negle  | 48.30 | 0.00 |
| TRINITY_GAX8063  | (hypothetChlamydomonas_eusti | 48.30 | 0.00 |
| TRINITY_XP_0029  | hypothetVolvox_carteri       | 48.30 | 0.00 |
| TRINITY_XP_0029  | hypothetVolvox_carteri       | 48.30 | 0.00 |
| TRINITY_GBG6886  | ChloridεChara_braunii        | 48.30 | 0.00 |
| TRINITY_GAX7285  | hypothetChlamydomonas_eusti  | 48.30 | 0.00 |
| TRINITY_XP_0017  | (protein Chlamydomonas_reinh | 48.30 | 0    |
| TRINITY_XP_0167  | PREDICTεGossypium_hirsutum   | 48.30 | 0.00 |
| TRINITY_GAX7432  | hypothetChlamydomonas_eusti  | 48.30 | 0.00 |
| TRINITY_GAQ8019  | serine/εKlebsormidium_niten  | 48.30 | 0.00 |
| TRINITY_EFJ0860  | hypothetSelaginella_moellen  | 48.20 | 0.00 |
| TRINITY_RZC2385  | AdenylatGlycine_soja         | 48.20 | 0.00 |
| TRINITY_GAQ8759  | G-patch Klebsormidium_niten  | 48.20 | 0.00 |
| TRINITY_PNR4433  | hypothetPhyscomitrella_pate  | 48.20 | 0.00 |
| TRINITY_XP_0025  | (predictεMicromonas_commoda  | 48.20 | 0.00 |
| TRINITY_XP_0239  | probableεQuercus_suber       | 48.20 | 0.00 |
| TRINITY_KXZ5173  | hypothetGonium_pectorale     | 48.20 | 0.00 |
| TRINITY_XP_0024  | vacuolaεSorghum_bicolor      | 48.20 | 0.00 |
| TRINITY_PRW0585  | (decappirChlorella_sorokinia | 48.20 | 0.00 |
| TRINITY_XP_0238  | ATP phoεQuercus_suber        | 48.20 | 0.00 |
| TRINITY_XP_0215  | cyclin-εManihot_esculenta    | 48.20 | 0.00 |
| TRINITY_GBG8367  | hypothetChara_braunii        | 48.20 | 0.00 |
| TRINITY_XP_0192  | PREDICTεNicotiana_attenuata  | 48.20 | 0.00 |
| TRINITY_KXZ5127  | hypothetGonium_pectorale     | 48.20 | 0.00 |
| TRINITY_XP_0245  | tetratriεSelaginella_moellen | 48.20 | 0.00 |
| TRINITY_XP_0056  | DUF185-εCoccomyxa_subellips  | 48.20 | 0.00 |
| TRINITY_PTQ3255  | hypothetMarchantia_polymorp  | 48.20 | 0.00 |
| TRINITY_XP_0167  | PREDICTεGossypium_hirsutum   | 48.20 | 0.00 |
| TRINITY_APX6448  | geranylεHaematococcus_lacus  | 48.20 | 0.00 |
| TRINITY_PSC7142  | (PKHD-tyεMicractinium_conduc | 48.20 | 0.00 |
| TRINITY_XP_0120  | {DDB1- arJatropha_curcas     | 48.20 | 0.00 |
| TRINITY_GAX8343  | hypothetChlamydomonas_eusti  | 48.20 | 0.00 |
| TRINITY_GAX8605  | hypothetChlamydomonas_eusti  | 48.20 | 0.00 |
| TRINITY_XP_0016  | (predictεChlamydomonas_reinh | 48.20 | 0.00 |
| TRINITY_XP_0273  | phosphatAbrus_precatorius    | 48.20 | 0.00 |
| TRINITY_XP_0105  | PREDICTεTarenaya_hasslerian  | 48.20 | 0.00 |
| TRINITY_GAX7887  | hypothetChlamydomonas_eusti  | 48.20 | 0.00 |
| TRINITY_OAY4928  | hypothetManihot_esculenta    | 48.20 | 0.00 |
| TRINITY_KXZ5051  | hypothetGonium_pectorale     | 48.20 | 0.00 |
| TRINITY_GAX8036  | hypothetChlamydomonas_eusti  | 48.20 | 0.00 |
| TRINITY_GBF9708  | hypothetRaphidocelis_subcap  | 48.20 | 0.00 |
| TRINITY_KHG1634  | (Lon protGossypium_arboreum  | 48.20 | 0.00 |
| TRINITY_GAX7959  | hypothetChlamydomonas_eusti  | 48.20 | 0.00 |
| TRINITY_XP_0237  | zinc firLactuca_sativa       | 48.20 | 0.00 |
| TRINITY_XP_0075  | (unnamed Bathycoccus_prasinc | 48.20 | 0.00 |
| TRINITY_GBF9466  | hypothetRaphidocelis_subcap  | 48.20 | 0.00 |
| TRINITY_GAX7783  | hypothetChlamydomonas_eusti  | 48.20 | 0.00 |
| TRINITY_ABH0932  | leucine Arachis_hypogaea     | 48.20 | 0.00 |
| TRINITY_GAX7644  | hypothetChlamydomonas_eusti  | 48.20 | 0.00 |
| TRINITY_BAK0277  | (predictεHordeum_vulgare     | 48.20 | 0.00 |
| TRINITY_ARO5009  | hypothetYamagishiella_unico  | 48.20 | 0.00 |
| TRINITY_XP_0029  | hypothetVolvox_carteri       | 48.20 | 0.00 |
| TRINITY_KXZ5653  | (hypothetGonium_pectorale    | 48.20 | 0.00 |
| TRINITY_AAD2215  | polyprotSorghum_bicolor      | 48.20 | 0.00 |
| TRINITY_GAQ8429  | α-mεKlebsormidium_niten      | 48.20 | 0.00 |
| TRINITY_PNW7478  | hypothetChlamydomonas_reinh  | 48.20 | 0.00 |
| TRINITY_GAX7910  | hypothetChlamydomonas_eusti  | 48.20 | 0.00 |
| TRINITY_KXZ4333  | hypothetGonium_pectorale     | 48.20 | 0.00 |
| TRINITY_KXZ4839  | hypothetGonium_pectorale     | 48.20 | 0.00 |
| TRINITY_GAX7389  | (hypothetChlamydomonas_eusti | 48.20 | 0.00 |
| TRINITY_XP_0241  | phosphoεRosa_chinensis       | 48.20 | 0.00 |
| TRINITY_PNH0363  | hypothetTetrabaena_socialis  | 48.20 | 0.00 |
| TRINITY_PNW8903  | hypothetChlamydomonas_reinh  | 48.20 | 0.00 |
| TRINITY_PNW8041  | (hypothetChlamydomonas_reinh | 48.20 | 0.00 |



|                                             |       |      |
|---------------------------------------------|-------|------|
| TRINITY_XP_0239(kinesin Quercus_suber       | 48.20 | 0.00 |
| TRINITY_KXZ4748(hypothetGonium_pectorale    | 48.20 | 0.00 |
| TRINITY_XP_0056(hypothetCoccomyxa_subellips | 48.20 | 0.00 |
| TRINITY_KXZ4131(hypothetGonium_pectorale    | 48.20 | 0.00 |
| TRINITY_GAX8097(hypothetChlamydomonas_eusti | 48.20 | 0.00 |
| TRINITY_GAX8235(hypothetChlamydomonas_eusti | 48.20 | 0.00 |
| TRINITY_XP_0139(hypothetMonoraphidium_negle | 48.20 | 0.00 |
| TRINITY_ERM9673(hypothetAmborella_trichopod | 48.20 | 0.00 |
| TRINITY_XP_0202(exosome Cajanus_cajan       | 48.20 | 0.00 |
| TRINITY_GAX8090(hypothetChlamydomonas_eusti | 48.20 | 0.00 |
| TRINITY_XP_0184(PREDICTIRaphanus_sativus    | 48.20 | 0.00 |
| TRINITY_PNW7865(hypothetChlamydomonas_reinh | 48.20 | 0.00 |
| TRINITY_KXZ4926(hypothetGonium_pectorale    | 48.20 | 0.00 |
| TRINITY_GBF9588(hypothetRaphidocelis_subcap | 48.20 | 0.00 |
| TRINITY_PNW7003(hypothetChlamydomonas_reinh | 48.20 | 0.00 |
| TRINITY_XP_0217(NEP1-intChenopodium_quinoa  | 48.10 | 0.00 |
| TRINITY_XP_0136(uridine Brassica_napus      | 48.10 | 0.00 |
| TRINITY_GAQ8223(Actin-rKlebsormidium_niten  | 48.10 | 0.00 |
| TRINITY_XP_0029(hypothetVolvox_carteri      | 48.10 | 0.00 |
| TRINITY_GAX8647(hypothetChlamydomonas_eusti | 48.10 | 0.00 |
| TRINITY_PLY7631(hypothetLactuca_sativa      | 48.10 | 0.00 |
| TRINITY_GAX7970(hypothetChlamydomonas_eusti | 48.10 | 0.00 |
| TRINITY_GAQ8019(serine/tKlebsormidium_niten | 48.10 | 0.00 |
| TRINITY_GBF9357(vacuolarRaphidocelis_subcap | 48.10 | 0.00 |
| TRINITY_GAX8510(hypothetChlamydomonas_eusti | 48.10 | 0.00 |
| TRINITY_EFJ1402(hypothetSelaginella_moellen | 48.10 | 0.00 |
| TRINITY_XP_0056(JmjC-donCoccomyxa_subellips | 48.10 | 0.00 |
| TRINITY_KXZ5473(hypothetGonium_pectorale    | 48.10 | 0.00 |
| TRINITY_XP_0029(mitochorVolvox_carteri      | 48.10 | 0.00 |
| TRINITY_XP_0030(predicteMicromonas_pusilla  | 48.10 | 0.00 |
| TRINITY_GAX7270(hypothetChlamydomonas_eusti | 48.10 | 0.00 |
| TRINITY_XP_0239(guanine Quercus_suber       | 48.10 | 0.00 |
| TRINITY_XP_0191(PREDICTIIPomoea_nil         | 48.10 | 0.00 |
| TRINITY_PNW7438(hypothetChlamydomonas_reinh | 48.10 | 0.00 |
| TRINITY_XP_0030(flagellMicromonas_pusilla   | 48.10 | 0.00 |
| TRINITY_XP_0239(succinatQuercus_suber       | 48.10 | 0.00 |
| TRINITY_PRW5724(acetyl- Chlorella_sorokinia | 48.10 | 0.00 |
| TRINITY_RAL5251(hypothetCuscuta_australis   | 48.10 | 0.00 |
| TRINITY_KXZ5009(hypothetGonium_pectorale    | 48.10 | 0.00 |
| TRINITY_XP_0029(hypothetVolvox_carteri      | 48.10 | 0.00 |
| TRINITY_GBF8748(hypothetRaphidocelis_subcap | 48.10 | 0.00 |
| TRINITY_GAX7841(hypothetChlamydomonas_eusti | 48.10 | 0.00 |
| TRINITY_GAX8457(hypothetChlamydomonas_eusti | 48.10 | 0.00 |
| TRINITY_GBF8863(cystathiRaphidocelis_subcap | 48.10 | 0.00 |
| TRINITY_EFJ0486(hypothetSelaginella_moellen | 48.10 | 0.00 |
| TRINITY_XP_0068(ribosomAmborella_trichopod  | 48.10 | 0.00 |
| TRINITY_XP_0016(predicteChlamydomonas_reinh | 48.10 | 0.00 |
| TRINITY_RQO9868(hypothetPopulus_trichocarpa | 48.10 | 0.00 |
| TRINITY_XP_0158(uncharaZiziphus_jujuba      | 48.10 | 0.00 |
| TRINITY_GBG6003(hypothetChara_braunii       | 48.10 | 0.00 |
| TRINITY_XP_0238(serine/tQuercus_suber       | 48.10 | 0.00 |
| TRINITY_XP_0056(aspartatCoccomyxa_subellips | 48.10 | 0.00 |
| TRINITY_XP_0238(cytosoliQuercus_suber       | 48.10 | 0.00 |
| TRINITY_BAA7858(hypothetChlamydomonas_sp._H | 48.10 | 0.00 |
| TRINITY_XP_0245(DEAD-boSelaginella_moellen  | 48.10 | 0.00 |
| TRINITY_RWR7465(class I\Cinnamomum_micranth | 48.10 | 0.00 |
| TRINITY_GAX8323(hypothetChlamydomonas_eusti | 48.10 | 0.00 |
| TRINITY_XP_0138(Serine/tMonoraphidium_negle | 48.10 | 0.00 |
| TRINITY_PNW8018(hypothetChlamydomonas_reinh | 48.10 | 0.00 |
| TRINITY_XP_0238(phosphoQuercus_suber        | 48.10 | 0.00 |
| TRINITY_XP_0093(PREDICTIMusa_acuminata      | 48.10 | 0.00 |
| TRINITY_XP_0030(dp-like Micromonas_pusilla  | 48.10 | 0.00 |
| TRINITY_XP_0245(zinc firSelaginella_moellen | 48.10 | 0.00 |
| TRINITY_GAX8238(hypothetChlamydomonas_eusti | 48.10 | 0.00 |
| TRINITY_PNW8874(hypothetChlamydomonas_reinh | 48.10 | 0.00 |
| TRINITY_PNW6993(hypothetChlamydomonas_reinh | 48.10 | 0.00 |

|                  |                              |       |      |
|------------------|------------------------------|-------|------|
| TRINITY_GAX82174 | hypothetChlamydomonas_eusti  | 48.10 | 0.00 |
| TRINITY_XP_0017  | (mitogen-Chlamydomonas_reinh | 48.10 | 0.00 |
| TRINITY_APW83744 | caroten<Dunaliella_salina    | 48.10 | 0.00 |
| TRINITY_XP_01055 | PREDICTITarenaya_hasslerian  | 48.10 | 0.00 |
| TRINITY_GAX8072  | (hypothetChlamydomonas_eusti | 48.10 | 0.00 |
| TRINITY_GAX8386  | (hypothetChlamydomonas_eusti | 48.10 | 0.00 |
| TRINITY_XP_00295 | hypothetVolvox_carteri       | 48.10 | 0.00 |
| TRINITY_GAX80055 | hypothetChlamydomonas_eusti  | 48.10 | 0.00 |
| TRINITY_GAX74581 | hypothetChlamydomonas_eusti  | 48.10 | 0.00 |
| TRINITY_KXZ41995 | hypothetGonium_pectorale     | 48.10 | 0.00 |
| TRINITY_KXZ44035 | hypothetGonium_pectorale     | 48.10 | 0.00 |
| TRINITY_XP_01385 | hypothetMonoraphidium_negle  | 48.10 | 0.00 |
| TRINITY_XP_02391 | AMP dea<Quercus_suber        | 48.10 | 0.00 |
| TRINITY_XP_0139  | (ATP syntMonoraphidium_negle | 48.10 | 0.00 |
| TRINITY_PNW71594 | hypothetChlamydomonas_reinh  | 48.10 | 0.00 |
| TRINITY_GAX84227 | hypothetChlamydomonas_eusti  | 48.10 | 0.00 |
| TRINITY_XP_01915 | PREDICTIIPomoea_nil          | 48.00 | 0.00 |
| TRINITY_XP_0139  | (Dynein-1Monoraphidium_negle | 48.00 | 0.00 |
| TRINITY_XP_01207 | probable<Jatropha_curcas     | 48.00 | 0.00 |
| TRINITY_PNW74711 | hypothetChlamydomonas_reinh  | 48.00 | 0.00 |
| TRINITY_PNR50835 | hypothetPhyscomitrella_pate  | 48.00 | 0.00 |
| TRINITY_GAQ7922  | (hypothetKlebsormidium_niten | 48.00 | 0.00 |
| TRINITY_PNH09202 | Tiny ma<Tetrabaena_socialis  | 48.00 | 0.00 |
| TRINITY_PSC70788 | (mitogen-Micractinium_conduc | 48.00 | 0.00 |
| TRINITY_XP_02372 | lariat <Lactuca_sativa       | 48.00 | 0.00 |
| TRINITY_XP_02452 | striate<Selaginella_moellen  | 48.00 | 0.00 |
| TRINITY_XP_02385 | zinc hon<Quercus_suber       | 48.00 | 0.00 |
| TRINITY_GAX81946 | hypothetChlamydomonas_eusti  | 48.00 | 0.00 |
| TRINITY_PNH11184 | MitochorTetrabaena_socialis  | 48.00 | 0.00 |
| TRINITY_XP_02436 | eukaryotPhyscomitrella_pate  | 48.00 | 0.00 |
| TRINITY_PNW8849  | (hypothetChlamydomonas_reinh | 48.00 | 0.00 |
| TRINITY_XP_01247 | PREDICTIGossypium_raimondii  | 48.00 | 0.00 |
| TRINITY_XP_00295 | hypothetVolvox_carteri       | 48.00 | 0.00 |
| TRINITY_XP_00363 | ras-rel<Medicago_truncatula  | 48.00 | 0.00 |
| TRINITY_XP_00295 | hypothetVolvox_carteri       | 48.00 | 0.00 |
| TRINITY_PSC73055 | ATP-dep<Micractinium_conduc  | 48.00 | 0.00 |
| TRINITY_XP_00361 | nucleol<Medicago_truncatula  | 48.00 | 0.00 |
| TRINITY_XP_00165 | DNA dam<Chlamydomonas_reinh  | 48.00 | 0.00 |
| TRINITY_BAK00435 | predict<Hordeum_vulgare      | 48.00 | 0.00 |
| TRINITY_KXZ47852 | hypothetGonium_pectorale     | 48.00 | 0.00 |
| TRINITY_KZV15216 | (citrate Dorcoceras_hygromet | 48.00 | 0.00 |
| TRINITY_XP_01645 | PREDICTINicotiana_tabacum    | 48.00 | 0.00 |
| TRINITY_GAQ8393  | (hypothetKlebsormidium_niten | 48.00 | 0.00 |
| TRINITY_XP_0139  | (oligope<Monoraphidium_negle | 48.00 | 0.00 |
| TRINITY_XP_00294 | hypothetVolvox_carteri       | 48.00 | 0.00 |
| TRINITY_GBF93826 | pre trarRaphidocelis_subcap  | 48.00 | 0.00 |
| TRINITY_KXZ51305 | hypothetGonium_pectorale     | 48.00 | 0.00 |
| TRINITY_GAX83518 | hypothetChlamydomonas_eusti  | 48.00 | 0.00 |
| TRINITY_XP_00822 | PREDICTIIPrunus_mume         | 48.00 | 0.00 |
| TRINITY_KXZ54084 | hypothetGonium_pectorale     | 48.00 | 0.00 |
| TRINITY_XP_01025 | PREDICTINelumbo_nucifera     | 48.00 | 0.00 |
| TRINITY_GAX75725 | hypothetChlamydomonas_eusti  | 48.00 | 0.00 |
| TRINITY_KXZ5571  | (hypothetGonium_pectorale    | 48.00 | 0.00 |
| TRINITY_XP_02391 | glutamat<Quercus_suber       | 48.00 | 0.00 |
| TRINITY_XP_00294 | fructos<Volvox_carteri       | 48.00 | 0.00 |
| TRINITY_GAX75937 | hypothetChlamydomonas_eusti  | 48.00 | 0.00 |
| TRINITY_XP_00565 | Shwachm<Coccomyxa_subellips  | 48.00 | 0.00 |
| TRINITY_XP_02213 | cycloeu<Momordica_charantia  | 48.00 | 0.00 |
| TRINITY_XP_00295 | kinesin-Volvox_carteri       | 48.00 | 0.00 |
| TRINITY_GAX80102 | hypothetChlamydomonas_eusti  | 48.00 | 0.00 |
| TRINITY_XP_02734 | ethanol<Abrus_precatorius    | 48.00 | 0.00 |
| TRINITY_XP_02385 | kinesin <Quercus_suber       | 48.00 | 0.00 |
| TRINITY_GAX79168 | hypothetChlamydomonas_eusti  | 48.00 | 0.00 |
| TRINITY_GAX74015 | hypothetChlamydomonas_eusti  | 48.00 | 0.00 |
| TRINITY_AMB19033 | actin, <Panax_ginseng        | 48.00 | 0.00 |
| TRINITY_KQK15295 | hypothetBrachypodium_distac  | 48.00 | 0.00 |

|                  |                              |       |      |
|------------------|------------------------------|-------|------|
| TRINITY_GAX8371  | hypothetChlamydomonas_eusti  | 48.00 | 0.00 |
| TRINITY_GAX7350  | hypothetChlamydomonas_eusti  | 48.00 | 0.00 |
| TRINITY_XP_00170 | flagellChlamydomonas_reinh   | 48.00 | 0.00 |
| TRINITY_XP_01052 | PREDICTITarenaya_hasslerian  | 48.00 | 0.00 |
| TRINITY_GAX7984  | hypothetChlamydomonas_eusti  | 48.00 | 0.00 |
| TRINITY_CAA4928  | gag,protVolvox_carteri       | 48.00 | 0.00 |
| TRINITY_PNR47922 | hypothetPhyscomitrella_pate  | 47.90 | 0.00 |
| TRINITY_OAY7023  | ABC trarAnanas_comosus       | 47.90 | 0.00 |
| TRINITY_XP_0106  | PREDICTIBeta_vulgaris        | 47.90 | 0.00 |
| TRINITY_XP_0206  | 60S ribcDendrobium_catenatu  | 47.90 | 0.00 |
| TRINITY_XP_00584 | hypothetChlorella_variabili  | 47.90 | 0.00 |
| TRINITY_XP_01091 | PREDICTIElaeis_guineensis    | 47.90 | 0.00 |
| TRINITY_XP_01101 | PREDICTIPopulus_euphratica   | 47.90 | 0.00 |
| TRINITY_GAX74182 | hypothetChlamydomonas_eusti  | 47.90 | 0.00 |
| TRINITY_GAX7797  | hypothetChlamydomonas_eusti  | 47.90 | 0.00 |
| TRINITY_GAQ8839  | PrefoldiKlebsormidium_niten  | 47.90 | 0.00 |
| TRINITY_BAK0043  | predicteHordeum_vulgare      | 47.90 | 0.00 |
| TRINITY_XP_0024  | ATP-depeSorghum_bicolor      | 47.90 | 0.00 |
| TRINITY_XP_0030  | PyridoxaOstreococcus_tauri   | 47.90 | 0.00 |
| TRINITY_GAQ8798  | PhosphatKlebsormidium_niten  | 47.90 | 0.00 |
| TRINITY_XP_0243  | eukaryotPhyscomitrella_pate  | 47.90 | 0.00 |
| TRINITY_GAX7633  | hypothetChlamydomonas_eusti  | 47.90 | 0.00 |
| TRINITY_GAQ9065  | GroES-liKlebsormidium_niten  | 47.90 | 0.00 |
| TRINITY_GAQ8253  | TranscriKlebsormidium_niten  | 47.90 | 0.00 |
| TRINITY_PNW8784  | hypothetChlamydomonas_reinh  | 47.90 | 0.00 |
| TRINITY_KXZ48071 | hypothetGonium_pectorale     | 47.90 | 0.00 |
| TRINITY_GAX8256  | hypothetChlamydomonas_eusti  | 47.90 | 0.00 |
| TRINITY_PNW73341 | hypothetChlamydomonas_reinh  | 47.90 | 0.00 |
| TRINITY_GAX79751 | hypothetChlamydomonas_eusti  | 47.90 | 0.00 |
| TRINITY_EPS7228  | hypothetGenlisea_aurea       | 47.90 | 0.00 |
| TRINITY_GAQ85381 | PutativeKlebsormidium_niten  | 47.90 | 0.00 |
| TRINITY_XP_00564 | hypothetCoccomyxa_subellips  | 47.90 | 0.00 |
| TRINITY_GAX83552 | hypothetChlamydomonas_eusti  | 47.90 | 0.00 |
| TRINITY_XP_02387 | protein Quercus_suber        | 47.90 | 0.00 |
| TRINITY_KXZ5282  | hypothetGonium_pectorale     | 47.90 | 0.00 |
| TRINITY_PNW71384 | hypothetChlamydomonas_reinh  | 47.90 | 0.00 |
| TRINITY_PNW7022  | hypothetChlamydomonas_reinh  | 47.90 | 0.00 |
| TRINITY_PNH10752 | putativeTetrabaena_socialis  | 47.90 | 0.00 |
| TRINITY_XP_02387 | phospho-Quercus_suber        | 47.90 | 0.00 |
| TRINITY_XP_00142 | predicteOstreococcus_sp._'1  | 47.90 | 0.00 |
| TRINITY_GAX80212 | hypothetChlamydomonas_eusti  | 47.90 | 0.00 |
| TRINITY_RAL51372 | hypothetCuscuta_australis    | 47.90 | 0.00 |
| TRINITY_XP_0025  | (methion)Micromonas_commoda  | 47.90 | 0.00 |
| TRINITY_XP_00170 | (superoxiChlamydomonas_reinh | 47.90 | 0.00 |
| TRINITY_BAJ9390  | predicteHordeum_vulgare      | 47.90 | 0.00 |
| TRINITY_XP_0029  | hypothetVolvox_carteri       | 47.90 | 0.00 |
| TRINITY_KXZ43032 | hypothetGonium_pectorale     | 47.90 | 0.00 |
| TRINITY_XP_01970 | PREDICTIElaeis_guineensis    | 47.90 | 0.00 |
| TRINITY_GAX8007  | hypothetChlamydomonas_eusti  | 47.90 | 0.00 |
| TRINITY_GAX8220  | hypothetChlamydomonas_eusti  | 47.90 | 0.00 |
| TRINITY_XP_0243  | PAN2-PAN Physcomitrella_pate | 47.90 | 0.00 |
| TRINITY_PNH05054 | hypothetTetrabaena_socialis  | 47.90 | 0.00 |
| TRINITY_PNW70961 | hypothetChlamydomonas_reinh  | 47.90 | 0.00 |
| TRINITY_GBF8951  | multidriRaphidocelis_subcap  | 47.90 | 0.00 |
| TRINITY_XP_01390 | dual-spMonoraphidium_negle   | 47.90 | 0.00 |
| TRINITY_AFK39751 | unknown Lotus_japonicus      | 47.90 | 0.00 |
| TRINITY_XP_0029  | hypothetVolvox_carteri       | 47.90 | 0.00 |
| TRINITY_GAX79051 | hypothetChlamydomonas_eusti  | 47.90 | 0.00 |
| TRINITY_GAX7465  | hypothetChlamydomonas_eusti  | 47.90 | 0.00 |
| TRINITY_GAX7369  | hypothetChlamydomonas_eusti  | 47.90 | 0.00 |
| TRINITY_KXZ4678  | hypothetGonium_pectorale     | 47.90 | 0.00 |
| TRINITY_KXZ5320  | hypothetGonium_pectorale     | 47.90 | 0.00 |
| TRINITY_PNW7082  | hypothetChlamydomonas_reinh  | 47.90 | 0.00 |
| TRINITY_PNW8847  | hypothetChlamydomonas_reinh  | 47.90 | 0.00 |
| TRINITY_BAK0277  | predicteHordeum_vulgare      | 47.90 | 0.00 |
| TRINITY_BAK0277  | predicteHordeum_vulgare      | 47.90 | 0.00 |

|                 |          |                     |       |      |
|-----------------|----------|---------------------|-------|------|
| TRINITY_KMZ7564 | Serine/t | Zostera_marina      | 47.90 | 0.00 |
| TRINITY_GAX8074 | hypothet | Chlamydomonas_eusti | 47.90 | 0.00 |
| TRINITY_GAX8484 | hypothet | Chlamydomonas_eusti | 47.90 | 0.00 |
| TRINITY_KNA0858 | hypothet | Spinacia_oleracea   | 47.90 | 0.00 |
| TRINITY_GAX7579 | hypothet | Chlamydomonas_eusti | 47.90 | 0.00 |
| TRINITY_GAQ9305 | hypothet | Klebsormidium_niten | 47.90 | 0.00 |
| TRINITY_XP_0139 | Putativ  | Monoraphidium_negle | 47.90 | 0.00 |
| TRINITY_GAX8570 | hypothet | Chlamydomonas_eusti | 47.80 | 0.00 |
| TRINITY_GAV8360 | Respons  | Cephalotus_follicul | 47.80 | 0.00 |
| TRINITY_PNH0231 | Leucine  | Tetrabaena_socialis | 47.80 | 0.00 |
| TRINITY_XP_0120 | serine/t | Jatropha_curcas     | 47.80 | 0.00 |
| TRINITY_XP_0202 | glycerol | Cajanus_cajan       | 47.80 | 0.00 |
| TRINITY_EPS6995 | hypothet | Genlisea_aurea      | 47.80 | 0.00 |
| TRINITY_AFK3519 | unknown  | Lotus_japonicus     | 47.80 | 0.00 |
| TRINITY_XP_0165 | PREDICTI | Capsicum_annuum     | 47.80 | 0.00 |
| TRINITY_GBG0049 | formate  | Raphidocelis_subcap | 47.80 | 0.00 |
| TRINITY_XP_0098 | PREDICTI | Nicotiana_sylvestri | 47.80 | 0.00 |
| TRINITY_XP_0239 | putativ  | Quercus_suber       | 47.80 | 0.00 |
| TRINITY_GBG8033 | hypothet | Chara_braunii       | 47.80 | 0.00 |
| TRINITY_XP_0241 | LOW QUAI | Rosa_chinensis      | 47.80 | 0.00 |
| TRINITY_KNA1649 | hypothet | Spinacia_oleracea   | 47.80 | 0.00 |
| TRINITY_XP_0239 | ras-lik  | Quercus_suber       | 47.80 | 0.00 |
| TRINITY_XP_0238 | uncharac | Quercus_suber       | 47.80 | 0.00 |
| TRINITY_PHT9950 | Protein  | Capsicum_chinense   | 47.80 | 0.00 |
| TRINITY_XP_0105 | PREDICTI | Tarenaya_hasslerian | 47.80 | 0.00 |
| TRINITY_PHT2702 | Protein  | Capsicum_baccatum   | 47.80 | 0.00 |
| TRINITY_XP_0273 | uncharac | Abrus_precatorius   | 47.80 | 0.00 |
| TRINITY_GAX7593 | hypothet | Chlamydomonas_eusti | 47.80 | 0.00 |
| TRINITY_RDX6862 | ABC trar | Mucuna_pruriens     | 47.80 | 0.00 |
| TRINITY_PNR4128 | hypothet | Physcomitrella_pate | 47.80 | 0.00 |
| TRINITY_GAX8607 | hypothet | Chlamydomonas_eusti | 47.80 | 0.00 |
| TRINITY_GAX8491 | hypothet | Chlamydomonas_eusti | 47.80 | 0.00 |
| TRINITY_XP_0239 | myosin-1 | Quercus_suber       | 47.80 | 0.00 |
| TRINITY_PNW8185 | hypothet | Chlamydomonas_reinh | 47.80 | 0.00 |
| TRINITY_GBF9104 | hypothet | Raphidocelis_subcap | 47.80 | 0.00 |
| TRINITY_PSC7127 | exodeoxy | Micractinium_conduc | 47.80 | 0.00 |
| TRINITY_PIA5906 | hypothet | Aquilegia_coerulea  | 47.80 | 0.00 |
| TRINITY_XP_0241 | transpor | Rosa_chinensis      | 47.80 | 0.00 |
| TRINITY_XP_0029 | hypothet | Volvox_carteri      | 47.80 | 0.00 |
| TRINITY_XP_0029 | hypothet | Volvox_carteri      | 47.80 | 0.00 |
| TRINITY_GAX8371 | hypothet | Chlamydomonas_eusti | 47.80 | 0.00 |
| TRINITY_GAX8075 | hypothet | Chlamydomonas_eusti | 47.80 | 0.00 |
| TRINITY_GBF9395 | signal p | Raphidocelis_subcap | 47.80 | 0.00 |
| TRINITY_XP_0016 | amino ac | Chlamydomonas_reinh | 47.80 | 0.00 |
| TRINITY_GBF9419 | calcium  | Raphidocelis_subcap | 47.80 | 0.00 |
| TRINITY_XP_0016 | low-CO2- | Chlamydomonas_reinh | 47.80 | 0.00 |
| TRINITY_GAX7837 | hypothet | Chlamydomonas_eusti | 47.80 | 0.00 |
| TRINITY_KXZ4506 | hypothet | Gonium_pectorale    | 47.80 | 0.00 |
| TRINITY_GAX8436 | hypothet | Chlamydomonas_eusti | 47.80 | 0.00 |
| TRINITY_KXZ5159 | hypothet | Gonium_pectorale    | 47.80 | 0.00 |
| TRINITY_XP_0029 | histone  | Volvox_carteri      | 47.80 | 0.00 |
| TRINITY_KXZ5576 | hypothet | Gonium_pectorale    | 47.80 | 0.00 |
| TRINITY_XP_0029 | hypothet | Volvox_carteri      | 47.80 | 0.00 |
| TRINITY_OAE3450 | hypothet | Marchantia_polymorp | 47.80 | 0.00 |
| TRINITY_XP_0056 | hypothet | Coccomyxa_subellips | 47.80 | 0.00 |
| TRINITY_PKA5227 | Metal tr | Apostasia_shenzheni | 47.80 | 0.00 |
| TRINITY_XP_0028 | elongat  | Arabidopsis_lyrata  | 47.80 | 0.00 |
| TRINITY_PRW5075 | Formylt  | Chlorella_sorokinia | 47.80 | 0.00 |
| TRINITY_XP_0017 | chlorop  | Chlamydomonas_reinh | 47.80 | 0.00 |
| TRINITY_XP_0239 | ER-deriv | Quercus_suber       | 47.80 | 0.00 |
| TRINITY_GAQ8006 | oligosac | Klebsormidium_niten | 47.80 | 0.00 |
| TRINITY_KXZ4748 | hypothet | Gonium_pectorale    | 47.80 | 0.00 |
| TRINITY_XP_0044 | uncharac | Cicer_arietinum     | 47.80 | 0.00 |
| TRINITY_XP_0030 | Major f  | Ostreococcus_tauri  | 47.80 | 0.00 |
| TRINITY_GAX8171 | hypothet | Chlamydomonas_eusti | 47.80 | 0.00 |
| TRINITY_PRW5955 | FAD synt | Chlorella_sorokinia | 47.80 | 0.00 |

|                 |                             |       |      |
|-----------------|-----------------------------|-------|------|
| TRINITY_PNW7730 | hypothetChlamydomonas_reinh | 47.80 | 0.00 |
| TRINITY_PNW7244 | hypothetChlamydomonas_reinh | 47.80 | 0.00 |
| TRINITY_GAX7493 | hypothetChlamydomonas_eusti | 47.80 | 0.00 |
| TRINITY_XP_0029 | hypothetVolvox_carteri      | 47.80 | 0.00 |
| TRINITY_GAX8374 | hypothetChlamydomonas_eusti | 47.80 | 0.00 |
| TRINITY_XP_0110 | PREDICTIPopulus_euphratica  | 47.80 | 0.00 |
| TRINITY_XP_0029 | hypothetVolvox_carteri      | 47.80 | 0.00 |
| TRINITY_GAX7389 | hypothetChlamydomonas_eusti | 47.80 | 0.00 |
| TRINITY_PRW6083 | chitinasChlorella_sorokinia | 47.80 | 0.00 |
| TRINITY_KXZ4791 | hypothetGonium_pectorale    | 47.80 | 0.00 |
| TRINITY_GAX8472 | hypothetChlamydomonas_eusti | 47.80 | 0.00 |
| TRINITY_GAX8439 | hypothetChlamydomonas_eusti | 47.80 | 0.00 |
| TRINITY_OWM7045 | hypothetPunica_granatum     | 47.80 | 0.00 |
| TRINITY_KXZ4788 | hypothetGonium_pectorale    | 47.80 | 0.00 |
| TRINITY_GBF9558 | hypothetRaphidocelis_subcap | 47.80 | 0.00 |
| TRINITY_PSC6926 | snurportMicractinium_conduc | 47.80 | 0.00 |
| TRINITY_GAQ8495 | hypothetKlebsormidium_niten | 47.80 | 0.00 |
| TRINITY_XP_0016 | predicteChlamydomonas_reinh | 47.80 | 0.00 |
| TRINITY_PNW8423 | hypothetChlamydomonas_reinh | 47.80 | 0.00 |
| TRINITY_XP_0029 | hypothetVolvox_carteri      | 47.80 | 0.00 |
| TRINITY_GAX7888 | hypothetChlamydomonas_eusti | 47.80 | 0.00 |
| TRINITY_PNW7968 | hypothetChlamydomonas_reinh | 47.80 | 0.00 |
| TRINITY_ESR6345 | hypothetCitrus_clementina   | 47.80 | 0.00 |
| TRINITY_GAX7940 | hypothetChlamydomonas_eusti | 47.80 | 0.00 |
| TRINITY_XP_0071 | hypothetPhaseolus_vulgaris  | 47.80 | 0.00 |
| TRINITY_XP_0116 | PREDICTICucumis_sativus     | 47.80 | 0.00 |
| TRINITY_XP_0134 | glutamirMedicago_truncatula | 47.70 | 0.00 |
| TRINITY_KDD7187 | acyl-CoHelicosporidium_sp.  | 47.70 | 0.00 |
| TRINITY_KGN5787 | hypothetCucumis_sativus     | 47.70 | 0.00 |
| TRINITY_XP_0167 | PREDICTIGossypium_hirsutum  | 47.70 | 0.00 |
| TRINITY_PRW5102 | ADP-ribChlorella_sorokinia  | 47.70 | 0.00 |
| TRINITY_AYK2756 | agamous-Morus_alba          | 47.70 | 0.00 |
| TRINITY_XP_0239 | ras-likeQuercus_suber       | 47.70 | 0.00 |
| TRINITY_XP_0228 | protein-Olea_europaea       | 47.70 | 0.00 |
| TRINITY_XP_0100 | PREDICTIEucalyptus_grandis  | 47.70 | 0.00 |
| TRINITY_KXZ4519 | hypothetGonium_pectorale    | 47.70 | 0.00 |
| TRINITY_XP_0084 | PREDICTICucumis_melo        | 47.70 | 0.00 |
| TRINITY_PHT2702 | Protein Capsicum_baccatum   | 47.70 | 0.00 |
| TRINITY_KXZ5456 | hypothetGonium_pectorale    | 47.70 | 0.00 |
| TRINITY_KXZ5518 | hypothetGonium_pectorale    | 47.70 | 0.00 |
| TRINITY_XP_0066 | PREDICTIOryza_brachyantha   | 47.70 | 0.00 |
| TRINITY_BAJ9866 | predicteHordeum_vulgare     | 47.70 | 0.00 |
| TRINITY_GAX7909 | hypothetChlamydomonas_eusti | 47.70 | 0.00 |
| TRINITY_XP_0213 | kinesin-Sorghum_bicolor     | 47.70 | 0.00 |
| TRINITY_PNH0688 | TransmenTetrabaena_socialis | 47.70 | 0.00 |
| TRINITY_XP_0029 | hypothetVolvox_carteri      | 47.70 | 0.00 |
| TRINITY_XP_0056 | pyruvateCoccomyxa_subellips | 47.70 | 0.00 |
| TRINITY_XP_0228 | Rieske iOstreococcus_tauri  | 47.70 | 0.00 |
| TRINITY_RWW9036 | hypothetEnsete_ventricosum  | 47.70 | 0.00 |
| TRINITY_GAX7733 | hypothetChlamydomonas_eusti | 47.70 | 0.00 |
| TRINITY_XP_0238 | kinesin Quercus_suber       | 47.70 | 0.00 |
| TRINITY_GAX7955 | hypothetChlamydomonas_eusti | 47.70 | 0.00 |
| TRINITY_GAX7621 | hypothetChlamydomonas_eusti | 47.70 | 0.00 |
| TRINITY_PRW6143 | pre-rRNChlorella_sorokinia  | 47.70 | 0.00 |
| TRINITY_XP_0029 | hypothetVolvox_carteri      | 47.70 | 0.00 |
| TRINITY_XP_0029 | hypothetVolvox_carteri      | 47.70 | 0.00 |
| TRINITY_KHG2386 | NADP-deGossypium_arboreum   | 47.70 | 0.00 |
| TRINITY_GAX8379 | hypothetChlamydomonas_eusti | 47.70 | 0.00 |
| TRINITY_OAE2923 | hypothetMarchantia_polymorp | 47.70 | 0.00 |
| TRINITY_XP_0240 | uncharacCitrus_clementina   | 47.70 | 0.00 |
| TRINITY_XP_0139 | NodulatiMonoraphidium_negle | 47.70 | 0.00 |
| TRINITY_GBF9000 | short-clRaphidocelis_subcap | 47.70 | 0.00 |
| TRINITY_KXZ5546 | hypothetGonium_pectorale    | 47.70 | 0.00 |
| TRINITY_PNW7526 | hypothetChlamydomonas_reinh | 47.70 | 0.00 |
| TRINITY_GAQ9254 | hypothetKlebsormidium_niten | 47.70 | 0.00 |
| TRINITY_GAX7292 | hypothetChlamydomonas_eusti | 47.70 | 0.00 |

|                 |                             |       |      |
|-----------------|-----------------------------|-------|------|
| TRINITY_VDC9663 | unnamed Brassica_rapa       | 47.70 | 0.00 |
| TRINITY_GAX8288 | hypothetChlamydomonas_eusti | 47.70 | 0.00 |
| TRINITY_GAQ8218 | jmjc donKlebsormidium_niten | 47.70 | 0.00 |
| TRINITY_XP_0029 | F-box pSelaginella_moellen  | 47.70 | 0.00 |
| TRINITY_PSC7399 | heme oxjMicractinium_conduc | 47.70 | 0.00 |
| TRINITY_EEF2383 | hypothetRicinus_communis    | 47.70 | 0.00 |
| TRINITY_GBF8909 | clavamirRaphidocelis_subcap | 47.70 | 0.00 |
| TRINITY_KXZ5302 | hypothetGonium_pectorale    | 47.70 | 0.00 |
| TRINITY_XP_0029 | hypothetVolvox_carteri      | 47.70 | 0.00 |
| TRINITY_PNH0593 | hypothetTetrabaena_socialis | 47.70 | 0.00 |
| TRINITY_BAK0302 | predicteHordeum_vulgare     | 47.70 | 0.00 |
| TRINITY_GAX8614 | hypothetChlamydomonas_eusti | 47.70 | 0.00 |
| TRINITY_PRW5819 | acetyl- Chlorella_sorokinia | 47.70 | 0.00 |
| TRINITY_XP_0238 | uncharacQuercus_suber       | 47.70 | 0.00 |
| TRINITY_RYR2416 | hypothetArachis_hypogaea    | 47.70 | 0.00 |
| TRINITY_RID8114 | hypothetBrassica_rapa       | 47.70 | 0.00 |
| TRINITY_GAX7688 | hypothetChlamydomonas_eusti | 47.70 | 0.00 |
| TRINITY_GAX8199 | hypothetChlamydomonas_eusti | 47.70 | 0.00 |
| TRINITY_GAX7273 | hypothetChlamydomonas_eusti | 47.70 | 0.00 |
| TRINITY_XP_0029 | hypothetVolvox_carteri      | 47.70 | 0.00 |
| TRINITY_GAX7983 | hypothetChlamydomonas_eusti | 47.70 | 0.00 |
| TRINITY_GAX7314 | hypothetChlamydomonas_eusti | 47.70 | 0.00 |
| TRINITY_XP_0216 | casein lManihot_esculenta   | 47.70 | 0.00 |
| TRINITY_XP_0156 | PREDICTFOryza_brachyantha   | 47.60 | 0.00 |
| TRINITY_XP_0243 | isoleuciPhyscomitrella_pate | 47.60 | 0.00 |
| TRINITY_XP_0201 | cell nunAegilops_tauschii   | 47.60 | 0.00 |
| TRINITY_GAQ8814 | OxidaticKlebsormidium_niten | 47.60 | 0.00 |
| TRINITY_XP_0200 | ubiquincAnanas_comosus      | 47.60 | 0.00 |
| TRINITY_XP_0227 | GRF1-intDurio_zibethinus    | 47.60 | 0.00 |
| TRINITY_NP_1970 | glucose-Arabidopsis_thalian | 47.60 | 0.00 |
| TRINITY_XP_0036 | PREDICTFVitis_vinifera      | 47.60 | 0.00 |
| TRINITY_GAX8389 | hypothetChlamydomonas_eusti | 47.60 | 0.00 |
| TRINITY_XP_0201 | choline-Ananas_comosus      | 47.60 | 0.00 |
| TRINITY_XP_0176 | PREDICTFGossypium_arboreum  | 47.60 | 0.00 |
| TRINITY_OAE2747 | hypothetMarchantia_polymorp | 47.60 | 0.00 |
| TRINITY_XP_0064 | ras-relaCitrus_clementina   | 47.60 | 0.00 |
| TRINITY_XP_0064 | putativeCitrus_sinensis     | 47.60 | 0.00 |
| TRINITY_GBG7211 | hypothetChara_braunii       | 47.60 | 0.00 |
| TRINITY_XP_0217 | fimbrin-Chenopodium_quinoa  | 47.60 | 0.00 |
| TRINITY_GBG4810 | hypothetChara_braunii       | 47.60 | 0.00 |
| TRINITY_GBG6183 | hypothetChara_braunii       | 47.60 | 0.00 |
| TRINITY_RLN1279 | uncharacPanicum_miliaceum   | 47.60 | 0.00 |
| TRINITY_XP_0241 | DCC famiRosa_chinensis      | 47.60 | 0.00 |
| TRINITY_OVA1868 | ClathrirMacleaya_cordata    | 47.60 | 0.00 |
| TRINITY_GAX7770 | hypothetChlamydomonas_eusti | 47.60 | 0.00 |
| TRINITY_GAX8120 | hypothetChlamydomonas_eusti | 47.60 | 0.00 |
| TRINITY_KXZ5043 | hypothetGonium_pectorale    | 47.60 | 0.00 |
| TRINITY_PNW7673 | hypothetChlamydomonas_reinh | 47.60 | 0.00 |
| TRINITY_XP_0029 | hypothetVolvox_carteri      | 47.60 | 0.00 |
| TRINITY_GAX7381 | hypothetChlamydomonas_eusti | 47.60 | 0.00 |
| TRINITY_XP_0192 | PREDICTFNicotiana_attenuata | 47.60 | 0.00 |
| TRINITY_XP_0016 | oxygen-εChlamydomonas_reinh | 47.60 | 0.00 |
| TRINITY_PNW8487 | hypothetChlamydomonas_reinh | 47.60 | 0.00 |
| TRINITY_GBG7546 | hypothetChara_braunii       | 47.60 | 0.00 |
| TRINITY_PNW6985 | hypothetChlamydomonas_reinh | 47.60 | 0.00 |
| TRINITY_XP_0206 | protein Dendrobium_catenatu | 47.60 | 0.00 |
| TRINITY_GAQ7864 | 4-coumarKlebsormidium_niten | 47.60 | 0.00 |
| TRINITY_PNH0354 | hypothetTetrabaena_socialis | 47.60 | 0.00 |
| TRINITY_GAX7938 | hypothetChlamydomonas_eusti | 47.60 | 0.00 |
| TRINITY_RMZ5531 | hypothetAuxenochlorella_pro | 47.60 | 0.00 |
| TRINITY_GAX8461 | hypothetChlamydomonas_eusti | 47.60 | 0.00 |
| TRINITY_GAX8013 | hypothetChlamydomonas_eusti | 47.60 | 0.00 |
| TRINITY_PNW7755 | hypothetChlamydomonas_reinh | 47.60 | 0.00 |
| TRINITY_KXZ5342 | hypothetGonium_pectorale    | 47.60 | 0.00 |
| TRINITY_XP_0257 | proteascPanicum_hallii      | 47.60 | 0.00 |
| TRINITY_GAX7886 | hypothetChlamydomonas_eusti | 47.60 | 0.00 |

|                  |                               |       |      |
|------------------|-------------------------------|-------|------|
| TRINITY_XP_00295 | hypothetVolvox_carteri        | 47.60 | 0.00 |
| TRINITY_GAX7429  | hypothetChlamydomonas_eusti   | 47.60 | 0.00 |
| TRINITY_XP_0044  | serine/tCicer_arietinum       | 47.60 | 0.00 |
| TRINITY_GAQ9087  | DipepticKlebsormidium_niten   | 47.60 | 0.00 |
| TRINITY_GAX8096  | hypothetChlamydomonas_eusti   | 47.60 | 0.00 |
| TRINITY_XP_0029  | hypothetVolvox_carteri        | 47.60 | 0.00 |
| TRINITY_PNW8117  | hypothetChlamydomonas_reinh   | 47.60 | 0.00 |
| TRINITY_PNW7499  | hypothetChlamydomonas_reinh   | 47.60 | 0.00 |
| TRINITY_GAX7624  | hypothetChlamydomonas_eusti   | 47.60 | 0.00 |
| TRINITY_PNW7829  | hypothetChlamydomonas_reinh   | 47.60 | 0.00 |
| TRINITY_XP_0191  | PREDICTFIpomoea_nil           | 47.60 | 0.00 |
| TRINITY_XP_0016  | predicteChlamydomonas_reinh   | 47.60 | 0.00 |
| TRINITY_XP_0029  | hypothetVolvox_carteri        | 47.60 | 0.00 |
| TRINITY_AFL7016  | actin [A]Agastache_rugosa     | 47.60 | 0.00 |
| TRINITY_GAX7299  | hypothetChlamydomonas_eusti   | 47.60 | 0.00 |
| TRINITY_XP_0243  | translatPhyscomitrella_pate   | 47.60 | 0.00 |
| TRINITY_XP_0075  | GTP-binC Bathycoccus_prasinoc | 47.60 | 0.00 |
| TRINITY_ABK2437  | unknown Picea_sitchensis      | 47.60 | 0.00 |
| TRINITY_KXZ5127  | hypothetGonium_pectorale      | 47.60 | 0.00 |
| TRINITY_GAX7255  | hypothetChlamydomonas_eusti   | 47.60 | 0.00 |
| TRINITY_GAX7956  | hypothetChlamydomonas_eusti   | 47.60 | 0.00 |
| TRINITY_PRW5744  | senescerChlorella_sorokinia   | 47.60 | 0.00 |
| TRINITY_XP_0166  | PREDICTFIgossypium_hirsutum   | 47.60 | 0.00 |
| TRINITY_GBG7399  | hypothetChara_braunii         | 47.60 | 0.00 |
| TRINITY_GAX7503  | hypothetChlamydomonas_eusti   | 47.60 | 0.00 |
| TRINITY_PKA5720  | PotassiiApostasia_shenzheni   | 47.50 | 0.00 |
| TRINITY_GAX7815  | hypothetChlamydomonas_eusti   | 47.50 | 0.00 |
| TRINITY_RWR9015  | nitrate Cinnamomum_micranth   | 47.50 | 0.00 |
| TRINITY_PNW7471  | hypothetChlamydomonas_reinh   | 47.50 | 0.00 |
| TRINITY_XP_0238  | elongatiQuercus_suber         | 47.50 | 0.00 |
| TRINITY_BAJ9000  | predicteHordeum_vulgare       | 47.50 | 0.00 |
| TRINITY_PNY1586  | 60S ribC Trifolium_pratense   | 47.50 | 0.00 |
| TRINITY_XP_0202  | tyrosyl-Asparagus_official    | 47.50 | 0.00 |
| TRINITY_PRW0585  | decappirChlorella_sorokinia   | 47.50 | 0.00 |
| TRINITY_ABK2455  | unknown Picea_sitchensis      | 47.50 | 0.00 |
| TRINITY_XP_0155  | 2-amino-Ricinus_communis      | 47.50 | 0.00 |
| TRINITY_EEF2753  | two-comRicinus_communis       | 47.50 | 0.00 |
| TRINITY_XP_0025  | predicteMicromonas_commoda    | 47.50 | 0.00 |
| TRINITY_GAQ7758  | ABC trarKlebsormidium_niten   | 47.50 | 0.00 |
| TRINITY_GBF9440  | hypothetRaphidocelis_subcap   | 47.50 | 0.00 |
| TRINITY_EPS7004  | hypothetGenlisea_aurea        | 47.50 | 0.00 |
| TRINITY_KXZ4702  | hypothetGonium_pectorale      | 47.50 | 0.00 |
| TRINITY_GAQ8895  | PutativeKlebsormidium_niten   | 47.50 | 0.00 |
| TRINITY_GBF9454  | dual spRaphidocelis_subcap    | 47.50 | 0.00 |
| TRINITY_GAX7488  | hypothetChlamydomonas_eusti   | 47.50 | 0.00 |
| TRINITY_BAK0075  | predicteHordeum_vulgare       | 47.50 | 0.00 |
| TRINITY_GAQ8524  | hypothetKlebsormidium_niten   | 47.50 | 0.00 |
| TRINITY_GAX7370  | hypothetChlamydomonas_eusti   | 47.50 | 0.00 |
| TRINITY_VDD4265  | unnamed Brassica_oleracea     | 47.50 | 0.00 |
| TRINITY_XP_0238  | serine/tQuercus_suber         | 47.50 | 0.00 |
| TRINITY_PTQ3464  | hypothetMarchantia_polymorp   | 47.50 | 0.00 |
| TRINITY_PRW5951  | diphthirChlorella_sorokinia   | 47.50 | 0.00 |
| TRINITY_KXZ4289  | hypothetGonium_pectorale      | 47.50 | 0.00 |
| TRINITY_XP_0192  | PREDICTFIpomoea_nil           | 47.50 | 0.00 |
| TRINITY_KXZ5486  | hypothetGonium_pectorale      | 47.50 | 0.00 |
| TRINITY_XP_0243  | protein Physcomitrella_pate   | 47.50 | 0.00 |
| TRINITY_GBF9482  | hypothetRaphidocelis_subcap   | 47.50 | 0.00 |
| TRINITY_GAX7754  | hypothetChlamydomonas_eusti   | 47.50 | 0.00 |
| TRINITY_XP_0243  | NAD-depePhyscomitrella_pate   | 47.50 | 0.00 |
| TRINITY_XP_0016  | predicteChlamydomonas_reinh   | 47.50 | 0.00 |
| TRINITY_AZI7089  | acyl-CoLobosphaera_incisa     | 47.50 | 0.00 |
| TRINITY_XP_0016  | predicteChlamydomonas_reinh   | 47.50 | 0.00 |
| TRINITY_XP_0216  | DNA- (apu)Hevea_brasiliensis  | 47.50 | 0.00 |
| TRINITY_XP_0109  | PREDICTFIelaeis_guineensis    | 47.50 | 0.00 |
| TRINITY_GAX7287  | hypothetChlamydomonas_eusti   | 47.50 | 0.00 |
| TRINITY_RDY0223  | Dual spMucuna_pruriens        | 47.50 | 0.00 |

|                   |                              |       |      |
|-------------------|------------------------------|-------|------|
| TRINITY_PRW58435  | mitotic Chlorella_sorokinia  | 47.50 | 0.00 |
| TRINITY_XP_02164  | ubiquitin Hevea_brasiliensis | 47.50 | 0.00 |
| TRINITY_GAX77229  | hypothet Chlamydomonas_eusti | 47.50 | 0.00 |
| TRINITY_XP_01068  | PREDICTI Beta_vulgaris       | 47.50 | 0.00 |
| TRINITY_XP_02390  | external Quercus_suber       | 47.50 | 0.00 |
| TRINITY_XP_02390  | ras-like Quercus_suber       | 47.50 | 0.00 |
| TRINITY_XP_00295  | hypothet Volvox_carteri      | 47.50 | 0.00 |
| TRINITY_GAX85946  | hypothet Chlamydomonas_eusti | 47.50 | 0.00 |
| TRINITY_GAX82259  | hypothet Chlamydomonas_eusti | 47.50 | 0.00 |
| TRINITY_BAK02869  | predicte Hordeum_vulgare     | 47.50 | 0.00 |
| TRINITY_BAK00435  | predicte Hordeum_vulgare     | 47.50 | 0.00 |
| TRINITY_GAQ812322 | 2-oxogl Klebsormidium_niten  | 47.50 | 0.00 |
| TRINITY_GBF87521  | hypothet Raphidocelis_subcap | 47.50 | 0.00 |
| TRINITY_PNW87504  | hypothet Chlamydomonas_reinh | 47.50 | 0.00 |
| TRINITY_PNW83110  | hypothet Chlamydomonas_reinh | 47.50 | 0.00 |
| TRINITY_XP_00295  | hypothet Volvox_carteri      | 47.50 | 0.00 |
| TRINITY_AHA93098  | PLC prot Dunaliella_salina   | 47.50 | 0.00 |
| TRINITY_XP_01588  | kanadapt Ziziphus_jujuba     | 47.50 | 0.00 |
| TRINITY_GBF93239  | insulin Raphidocelis_subcap  | 47.50 | 0.00 |
| TRINITY_GAX74598  | hypothet Chlamydomonas_eusti | 47.50 | 0.00 |
| TRINITY_OAE31318  | hypothet Marchantia_polymorp | 47.50 | 0.00 |
| TRINITY_XP_01390  | Vacuola Monoraphidium_negle  | 47.50 | 0.00 |
| TRINITY_KXZ54317  | hypothet Gonium_pectorale    | 47.50 | 0.00 |
| TRINITY_XP_00295  | hypothet Volvox_carteri      | 47.50 | 0.00 |
| TRINITY_GAQ89856  | putative Klebsormidium_niten | 47.50 | 0.00 |
| TRINITY_GAX73140  | hypothet Chlamydomonas_eusti | 47.50 | 0.00 |
| TRINITY_PRW39391  | hypothet Chlorella_sorokinia | 47.50 | 0.00 |
| TRINITY_XP_00250  | predicte Micromonas_commoda  | 47.40 | 0.00 |
| TRINITY_XP_00584  | hypothet Chlorella_variabili | 47.40 | 0.00 |
| TRINITY_PTQ42733  | hypothet Marchantia_polymorp | 47.40 | 0.00 |
| TRINITY_XP_00565  | thiorede Coccomyxa_subellips | 47.40 | 0.00 |
| TRINITY_XP_01054  | PREDICTI Tarenaya_hasslerian | 47.40 | 0.00 |
| TRINITY_AML30857  | axonema Marsilea_vestita     | 47.40 | 0.00 |
| TRINITY_XP_00294  | flagella Volvox_carteri      | 47.40 | 0.00 |
| TRINITY_BAD90690  | sigma1 Botryococcus_brauni   | 47.40 | 0.00 |
| TRINITY_RLM86767  | nuclear Panicum_miliaceum    | 47.40 | 0.00 |
| TRINITY_EPS65926  | hypothet Genlisea_aurea      | 47.40 | 0.00 |
| TRINITY_BAK02778  | predicte Hordeum_vulgare     | 47.40 | 0.00 |
| TRINITY_GAX81623  | hypothet Chlamydomonas_eusti | 47.40 | 0.00 |
| TRINITY_XP_00584  | hypothet Chlorella_variabili | 47.40 | 0.00 |
| TRINITY_XP_00141  | thiorede Ostreococcus_sp._'1 | 47.40 | 0.00 |
| TRINITY_XP_02387  | multifur Quercus_suber       | 47.40 | 0.00 |
| TRINITY_XP_01390  | calcium Monoraphidium_negle  | 47.40 | 0.00 |
| TRINITY_PSC68530  | 3,4-dih Micractinium_conduc  | 47.40 | 0.00 |
| TRINITY_PWA65220  | long-ch Artemisia_annua      | 47.40 | 0.00 |
| TRINITY_GAQ82935  | chorism Klebsormidium_niten  | 47.40 | 0.00 |
| TRINITY_GAX80959  | hypothet Chlamydomonas_eusti | 47.40 | 0.00 |
| TRINITY_GAX74864  | hypothet Chlamydomonas_eusti | 47.40 | 0.00 |
| TRINITY_BAK00754  | predicte Hordeum_vulgare     | 47.40 | 0.00 |
| TRINITY_GAX79721  | hypothet Chlamydomonas_eusti | 47.40 | 0.00 |
| TRINITY_GAX80938  | hypothet Chlamydomonas_eusti | 47.40 | 0.00 |
| TRINITY_GBG66199  | hypothet Chara_braunii       | 47.40 | 0.00 |
| TRINITY_GBG64759  | hypothet Chara_braunii       | 47.40 | 0.00 |
| TRINITY_GAX79109  | hypothet Chlamydomonas_eusti | 47.40 | 0.00 |
| TRINITY_XP_00295  | hypothet Volvox_carteri      | 47.40 | 0.00 |
| TRINITY_GAX80871  | hypothet Chlamydomonas_eusti | 47.40 | 0.00 |
| TRINITY_XP_00169  | predicte Chlamydomonas_reinh | 47.40 | 0.00 |
| TRINITY_XP_01725  | PREDICTI Daucus_carota       | 47.40 | 0.00 |
| TRINITY_RWW34345  | hypothet Ensete_ventricosum  | 47.40 | 0.00 |
| TRINITY_GAX75026  | hypothet Chlamydomonas_eusti | 47.40 | 0.00 |
| TRINITY_XP_00584  | hypothet Chlorella_variabili | 47.40 | 0.00 |
| TRINITY_XP_00169  | predicte Chlamydomonas_reinh | 47.40 | 0.00 |
| TRINITY_KHG02446  | hypothet Gossypium_arboreum  | 47.40 | 0.00 |
| TRINITY_XP_01024  | PREDICTI Nelumbo_nucifera    | 47.40 | 0.00 |
| TRINITY_XP_00294  | hypothet Volvox_carteri      | 47.40 | 0.00 |
| TRINITY_XP_00295  | hypothet Volvox_carteri      | 47.40 | 0.00 |



|                                             |       |      |
|---------------------------------------------|-------|------|
| TRINITY_PWZ0764(YlmG 2, Zea_mays            | 47.40 | 0.00 |
| TRINITY_KXZ5609(hypothetGonium_pectorale    | 47.40 | 0.00 |
| TRINITY_XP_0029(hypothetVolvox_carteri      | 47.40 | 0.00 |
| TRINITY_KXZ5550(hypothetGonium_pectorale    | 47.40 | 0.00 |
| TRINITY_XP_0016(predicteChlamydomonas_reinh | 47.40 | 0.00 |
| TRINITY_GAX7947(hypothetChlamydomonas_eusti | 47.40 | 0.00 |
| TRINITY_PNH0386(hypothetTetrabaena_socialis | 47.40 | 0.00 |
| TRINITY_XP_0056(prohibitCoccomyxa_subellips | 47.40 | 0.00 |
| TRINITY_KXZ5539(hypothetGonium_pectorale    | 47.40 | 0.00 |
| TRINITY_GAX7262(hypothetChlamydomonas_eusti | 47.40 | 0.00 |
| TRINITY_XP_0030(vacuolarMicromonas_pusilla  | 47.40 | 0.00 |
| TRINITY_GAQ8723(Dyneins Klebsormidium_niten | 47.40 | 0.00 |
| TRINITY_XP_0258(protein-Panicum_hallii      | 47.40 | 0.00 |
| TRINITY_ESQ3540(hypothetEutrema_salsugineur | 47.40 | 0.00 |
| TRINITY_PRW6001(protoporChlorella_sorokinia | 47.40 | 0.00 |
| TRINITY_PRW5699(DNA-3-meChlorella_sorokinia | 47.40 | 0.00 |
| TRINITY_XP_0279(hyperserVigna_unguiculata   | 47.40 | 0.00 |
| TRINITY_KXZ5647(hypothetGonium_pectorale    | 47.40 | 0.00 |
| TRINITY_KXZ5252(hypothetGonium_pectorale    | 47.40 | 0.00 |
| TRINITY_GAX7847(hypothetChlamydomonas_eusti | 47.40 | 0.00 |
| TRINITY_GAX7987(hypothetChlamydomonas_eusti | 47.40 | 0.00 |
| TRINITY_GAX7279(hypothetChlamydomonas_eusti | 47.40 | 0.00 |
| TRINITY_XP_0273(probableAbrus_precatorius   | 47.40 | 0.00 |
| TRINITY_XP_0239(activatiQuercus_suber       | 47.40 | 0.00 |
| TRINITY_XP_0243(uncharacPhyscomitrella_pate | 47.30 | 0.00 |
| TRINITY_AFK4559(unknown Medicago_truncatula | 47.30 | 0.00 |
| TRINITY_ADC4537(actin [(Cleistogenes_songor | 47.30 | 0.00 |
| TRINITY_PON6201(1,4-alfParasponia_anderson  | 47.30 | 0.00 |
| TRINITY_CAB4076(putativeArabidopsis_thalian | 47.30 | 0.00 |
| TRINITY_XP_0238(polyubicQuercus_suber       | 47.30 | 0.00 |
| TRINITY_XP_0243(uncharacPhyscomitrella_pate | 47.30 | 0.00 |
| TRINITY_XP_0093(PREDICTHMusa_acuminata      | 47.30 | 0.00 |
| TRINITY_XP_0056(sterol cCoccomyxa_subellips | 47.30 | 0.00 |
| TRINITY_XP_0239(ras-likeQuercus_suber       | 47.30 | 0.00 |
| TRINITY_KDD7467(hypothetHelicosporidium_sp. | 47.30 | 0.00 |
| TRINITY_PTQ2950(hypothetMarchantia_polymorp | 47.30 | 0.00 |
| TRINITY_PTQ3208(hypothetMarchantia_polymorp | 47.30 | 0.00 |
| TRINITY_XP_0094(PREDICTHMusa_acuminata      | 47.30 | 0.00 |
| TRINITY_XP_0025(predicteMicromonas_commoda  | 47.30 | 0.00 |
| TRINITY_GBF9099(ubiquitiRaphidocelis_subcap | 47.30 | 0.00 |
| TRINITY_XP_0238(uncharacQuercus_suber       | 47.30 | 0.00 |
| TRINITY_XP_0030(predicteMicromonas_pusilla  | 47.30 | 0.00 |
| TRINITY_XP_0206(probableDendrobium_catenatu | 47.30 | 0.00 |
| TRINITY_XP_0066(PREDICTHOryza_brachyantha   | 47.30 | 0.00 |
| TRINITY_XP_0035(cyclin-cBrachypodium_distac | 47.30 | 0.00 |
| TRINITY_XP_0165(PREDICTHCapsicum_annuum     | 47.30 | 0.00 |
| TRINITY_XP_0094(PREDICTHMusa_acuminata      | 47.30 | 0.00 |
| TRINITY_PLY9094(hypothetLactuca_sativa      | 47.30 | 0.00 |
| TRINITY_XP_0250(protein Ricinus_communis    | 47.30 | 0.00 |
| TRINITY_GAQ8019(serine/tKlebsormidium_niten | 47.30 | 0.00 |
| TRINITY_XP_0029(hypothetVolvox_carteri      | 47.30 | 0.00 |
| TRINITY_ALM5498(DEAD boChlamydomonas_sp._I  | 47.30 | 0.00 |
| TRINITY_PNW7501(hypothetChlamydomonas_reinh | 47.30 | 0.00 |
| TRINITY_BAK0236(predicteHordeum_vulgare     | 47.30 | 0.00 |
| TRINITY_XP_0016(flagellChlamydomonas_reinh  | 47.30 | 0.00 |
| TRINITY_KXZ5482(hypothetGonium_pectorale    | 47.30 | 0.00 |
| TRINITY_XP_0243(probablePhyscomitrella_pate | 47.30 | 0.00 |
| TRINITY_GAX7411(hypothetChlamydomonas_eusti | 47.30 | 0.00 |
| TRINITY_GAX7261(hypothetChlamydomonas_eusti | 47.30 | 0.00 |
| TRINITY_GAX8389(hypothetChlamydomonas_eusti | 47.30 | 0.00 |
| TRINITY_GAQ7784(Kinesin-Klebsormidium_niten | 47.30 | 0.00 |
| TRINITY_PNW8402(hypothetChlamydomonas_reinh | 47.30 | 0.00 |
| TRINITY_XP_0016(flagellChlamydomonas_reinh  | 47.30 | 0.00 |
| TRINITY_PNW7159(hypothetChlamydomonas_reinh | 47.30 | 0.00 |
| TRINITY_PNW7963(hypothetChlamydomonas_reinh | 47.30 | 0.00 |
| TRINITY_XP_0270(THO comCoffea_arabica       | 47.30 | 0.00 |

|                  |          |                     |       |      |
|------------------|----------|---------------------|-------|------|
| TRINITY_XP_00751 | predict  | Bathycoccus_prasin  | 47.30 | 0.00 |
| TRINITY_GAQ8437  | helicas  | Klebsormidium_niten | 47.30 | 0.00 |
| TRINITY_XP_0024  | predict  | Micromonas_commoda  | 47.30 | 0.00 |
| TRINITY_BAK0075  | predict  | Hordeum_vulgare     | 47.30 | 0.00 |
| TRINITY_GBF9872  | hypothet | Raphidocelis_subcap | 47.30 | 0.00 |
| TRINITY_GAX8261  | hypothet | Chlamydomonas_eusti | 47.30 | 0.00 |
| TRINITY_XP_0016  | predict  | Chlamydomonas_reinh | 47.30 | 0.00 |
| TRINITY_GAX8569  | hypothet | Chlamydomonas_eusti | 47.30 | 0.00 |
| TRINITY_GAX7266  | hypothet | Chlamydomonas_eusti | 47.30 | 0.00 |
| TRINITY_XP_0016  | DnaJ-li  | Chlamydomonas_reinh | 47.30 | 0.00 |
| TRINITY_RMZ5489  | hypothet | Auxenochlorella_pro | 47.30 | 0.00 |
| TRINITY_GAX7990  | hypothet | Chlamydomonas_eusti | 47.30 | 0.00 |
| TRINITY_PRW3370  | low-CO2  | Chlorella_sorokinia | 47.30 | 0.00 |
| TRINITY_XP_0016  | predict  | Chlamydomonas_reinh | 47.30 | 0.00 |
| TRINITY_GAX8066  | hypothet | Chlamydomonas_eusti | 47.30 | 0.00 |
| TRINITY_XP_0014  | P-ATPase | Ostreococcus_sp._'l | 47.30 | 0.00 |
| TRINITY_GAQ9033  | hypothet | Klebsormidium_niten | 47.30 | 0.00 |
| TRINITY_PNW7688  | hypothet | Chlamydomonas_reinh | 47.30 | 0.00 |
| TRINITY_XP_0017  | predict  | Chlamydomonas_reinh | 47.30 | 0.00 |
| TRINITY_GAX7372  | hypothet | Chlamydomonas_eusti | 47.30 | 0.00 |
| TRINITY_XP_0030  | predict  | Micromonas_pusilla  | 47.30 | 0.00 |
| TRINITY_OAE3359  | hypothet | Marchantia_polymorp | 47.30 | 0.00 |
| TRINITY_GAQ8106  | ATP-dep  | Klebsormidium_niten | 47.30 | 0.00 |
| TRINITY_GAX7320  | hypothet | Chlamydomonas_eusti | 47.30 | 0.00 |
| TRINITY_GAX7424  | hypothet | Chlamydomonas_eusti | 47.30 | 0.00 |
| TRINITY_GAQ8317  | hypothet | Klebsormidium_niten | 47.30 | 0.00 |
| TRINITY_PRW5859  | ADP-sug  | Chlorella_sorokinia | 47.30 | 0.00 |
| TRINITY_GAX7958  | hypothet | Chlamydomonas_eusti | 47.30 | 0.00 |
| TRINITY_GAX7625  | hypothet | Chlamydomonas_eusti | 47.30 | 0.00 |
| TRINITY_PNW6993  | hypothet | Chlamydomonas_reinh | 47.30 | 0.00 |
| TRINITY_GAX7540  | hypothet | Chlamydomonas_eusti | 47.30 | 0.00 |
| TRINITY_XP_0103  | troponin | Solanum_lycopersicu | 47.30 | 0.00 |
| TRINITY_PNH1156  | Cationic | Tetrabaena_socialis | 47.30 | 0.00 |
| TRINITY_XP_0029  | hypothet | Volvox_carteri      | 47.30 | 0.00 |
| TRINITY_YP_6656  | cytochr  | Nephroselmis_olivac | 47.30 | 0.00 |
| TRINITY_AAB8649  | calmodul | Zea_mays            | 47.30 | 0.00 |
| TRINITY_PWA6526  | P-glyco  | Artemisia_annua     | 47.30 | 0.00 |
| TRINITY_XP_0228  | casein   | Olea_europaea       | 47.30 | 0.00 |
| TRINITY_RAL4461  | hypothet | Cuscuta_australis   | 47.20 | 0.00 |
| TRINITY_XP_0191  | PREDICT  | Ipomoea_nil         | 47.20 | 0.00 |
| TRINITY_XP_0014  | F-ATPase | Ostreococcus_sp._'l | 47.20 | 0.00 |
| TRINITY_XP_0093  | PREDICT  | Musa_acuminata      | 47.20 | 0.00 |
| TRINITY_XP_0184  | PREDICT  | Pyrus_x_bretschneid | 47.20 | 0.00 |
| TRINITY_XP_0028  | uncharac | Arabidopsis_lyrata  | 47.20 | 0.00 |
| TRINITY_XP_0270  | pyridox  | Coffea_arabica      | 47.20 | 0.00 |
| TRINITY_XP_0191  | PREDICT  | Ipomoea_nil         | 47.20 | 0.00 |
| TRINITY_OMO5108  | Sugar/ir | Corchorus_capsulari | 47.20 | 0.00 |
| TRINITY_PSC7499  | mannose- | Micractinium_conduc | 47.20 | 0.00 |
| TRINITY_GBF9359  | hypothet | Raphidocelis_subcap | 47.20 | 0.00 |
| TRINITY_XP_0116  | regulati | Amborella_trichopod | 47.20 | 0.00 |
| TRINITY_XP_0238  | thiosul  | Quercus_suber       | 47.20 | 0.00 |
| TRINITY_AFK4603  | unknown  | Lotus_japonicus     | 47.20 | 0.00 |
| TRINITY_AAT7361  | calmodul | Daucus_carota       | 47.20 | 0.00 |
| TRINITY_PNH1270  | HEAT re  | Tetrabaena_socialis | 47.20 | 0.00 |
| TRINITY_PNW8446  | hypothet | Chlamydomonas_reinh | 47.20 | 0.00 |
| TRINITY_GAX8374  | hypothet | Chlamydomonas_eusti | 47.20 | 0.00 |
| TRINITY_XP_0207  | dual sp  | Dendrobium_catenatu | 47.20 | 0.00 |
| TRINITY_GBG7935  | hypothet | Chara_braunii       | 47.20 | 0.00 |
| TRINITY_GAX7646  | hypothet | Chlamydomonas_eusti | 47.20 | 0.00 |
| TRINITY_PNW7601  | hypothet | Chlamydomonas_reinh | 47.20 | 0.00 |
| TRINITY_GBF9465  | hypothet | Raphidocelis_subcap | 47.20 | 0.00 |
| TRINITY_XP_0025  | protein  | Micromonas_commoda  | 47.20 | 0.00 |
| TRINITY_PNW7774  | hypothet | Chlamydomonas_reinh | 47.20 | 0.00 |
| TRINITY_PWA5459  | MUTS-li  | Artemisia_annua     | 47.20 | 0.00 |
| TRINITY_GAX7939  | hypothet | Chlamydomonas_eusti | 47.20 | 0.00 |
| TRINITY_XP_0238  | putativ  | Quercus_suber       | 47.20 | 0.00 |

|                  |           |                     |       |      |
|------------------|-----------|---------------------|-------|------|
| TRINITY_XP_00294 | hypothet  | Volvox_carteri      | 47.20 | 0.00 |
| TRINITY_GAX8000  | hypothet  | Chlamydomonas_eusti | 47.20 | 0.00 |
| TRINITY_XP_01055 | PREDICTI  | Tarenaya_hasslerian | 47.20 | 0.00 |
| TRINITY_PNW8703  | hypothet  | Chlamydomonas_reinh | 47.20 | 0.00 |
| TRINITY_GBF9984  | hypothet  | Raphidocelis_subcap | 47.20 | 0.00 |
| TRINITY_GAX7563  | hypothet  | Chlamydomonas_eusti | 47.20 | 0.00 |
| TRINITY_GAX8377  | hypothet  | Chlamydomonas_eusti | 47.20 | 0.00 |
| TRINITY_PSC7597  | alpha-k   | Micractinium_conduc | 47.20 | 0.00 |
| TRINITY_OAE3569  | hypothet  | Marchantia_polymorp | 47.20 | 0.00 |
| TRINITY_GAX7339  | hypothet  | Chlamydomonas_eusti | 47.20 | 0.00 |
| TRINITY_BAJ9473  | predicte  | Hordeum_vulgare     | 47.20 | 0.00 |
| TRINITY_KXZ5452  | hypothet  | Gonium_pectorale    | 47.20 | 0.00 |
| TRINITY_GAX7985  | hypothet  | Chlamydomonas_eusti | 47.20 | 0.00 |
| TRINITY_KXZ4790  | hypothet  | Gonium_pectorale    | 47.20 | 0.00 |
| TRINITY_PNW7051  | hypothet  | Chlamydomonas_reinh | 47.20 | 0.00 |
| TRINITY_PNW7145  | hypothet  | Chlamydomonas_reinh | 47.20 | 0.00 |
| TRINITY_XP_01910 | PREDICTI  | Camelina_sativa     | 47.20 | 0.00 |
| TRINITY_PRW5727  | Nucleole  | Chlorella_sorokinia | 47.20 | 0.00 |
| TRINITY_GAX7918  | hypothet  | Chlamydomonas_eusti | 47.20 | 0.00 |
| TRINITY_PSC7638  | tubulin   | Micractinium_conduc | 47.20 | 0.00 |
| TRINITY_PNW8080  | hypothet  | Chlamydomonas_reinh | 47.20 | 0.00 |
| TRINITY_GAX7617  | hypothet  | Chlamydomonas_eusti | 47.20 | 0.00 |
| TRINITY_XP_00169 | flagell   | Chlamydomonas_reinh | 47.20 | 0    |
| TRINITY_GAX8020  | hypothet  | Chlamydomonas_eusti | 47.20 | 0.00 |
| TRINITY_OAE3505  | hypothet  | Marchantia_polymorp | 47.20 | 0.00 |
| TRINITY_KXZ4761  | hypothet  | Gonium_pectorale    | 47.20 | 0.00 |
| TRINITY_PNW7481  | hypothet  | Chlamydomonas_reinh | 47.20 | 0.00 |
| TRINITY_XP_01643 | PREDICTI  | Nicotiana_tabacum   | 47.20 | 0.00 |
| TRINITY_GAX8280  | hypothet  | Chlamydomonas_eusti | 47.20 | 0.00 |
| TRINITY_GAX8064  | hypothet  | Chlamydomonas_eusti | 47.20 | 0.00 |
| TRINITY_PNW7727  | hypothet  | Chlamydomonas_reinh | 47.20 | 0.00 |
| TRINITY_GAX8328  | hypothet  | Chlamydomonas_eusti | 47.20 | 0.00 |
| TRINITY_GBF9124  | hypothet  | Raphidocelis_subcap | 47.20 | 0.00 |
| TRINITY_GAX7489  | hypothet  | Chlamydomonas_eusti | 47.20 | 0.00 |
| TRINITY_KXZ4624  | hypothet  | Gonium_pectorale    | 47.20 | 0.00 |
| TRINITY_GAX7401  | hypothet  | Chlamydomonas_eusti | 47.20 | 0.00 |
| TRINITY_PNG9975  | hypothet  | Tetrabaena_socialis | 47.20 | 0.00 |
| TRINITY_GBG8367  | hypothet  | Chara_braunii       | 47.20 | 0.00 |
| TRINITY_XP_02199 | histone   | Helianthus_annuus   | 47.10 | 0.00 |
| TRINITY_XP_00169 | LOW QUAI  | Chlamydomonas_reinh | 47.10 | 0.00 |
| TRINITY_XP_02372 | ultravio  | Lactuca_sativa      | 47.10 | 0.00 |
| TRINITY_XP_01207 | coatome   | Jatropha_curcas     | 47.10 | 0.00 |
| TRINITY_RWR9465  | (NADH de  | Cinnamomum_micranth | 47.10 | 0.00 |
| TRINITY_XP_02164 | probable  | Hevea_brasiliensis  | 47.10 | 0.00 |
| TRINITY_GAQ8144  | (Hypothet | Klebsormidium_niten | 47.10 | 0.00 |
| TRINITY_XP_01048 | PREDICTI  | Camelina_sativa     | 47.10 | 0.00 |
| TRINITY_XP_00294 | hypothet  | Volvox_carteri      | 47.10 | 0.00 |
| TRINITY_GBG6648  | hypothet  | Chara_braunii       | 47.10 | 0.00 |
| TRINITY_XP_02439 | unchara   | Physcomitrella_pate | 47.10 | 0.00 |
| TRINITY_XP_00250 | (cytopla  | Micromonas_commoda  | 47.10 | 0.00 |
| TRINITY_PIN0928  | Thioered  | Handroanthus_impeti | 47.10 | 0.00 |
| TRINITY_XP_02375 | unchara   | Lactuca_sativa      | 47.10 | 0.00 |
| TRINITY_XP_00306 | dynein    | Micromonas_pusilla  | 47.10 | 0.00 |
| TRINITY_XP_02172 | transcri  | Chenopodium_quinoa  | 47.10 | 0.00 |
| TRINITY_XP_01724 | PREDICTI  | Daucus_carota       | 47.10 | 0.00 |
| TRINITY_EFJ1329  | hypothet  | Selaginella_moellen | 47.10 | 0.00 |
| TRINITY_KZM9218  | hypothet  | Daucus_carota       | 47.10 | 0.00 |
| TRINITY_XP_00250 | (FYVE zir | Micromonas_commoda  | 47.10 | 0.00 |
| TRINITY_EFJ2714  | hypothet  | Selaginella_moellen | 47.10 | 0.00 |
| TRINITY_KXZ4553  | hypothet  | Gonium_pectorale    | 47.10 | 0.00 |
| TRINITY_KZV3636  | calcium-  | Dorcoceras_hygromet | 47.10 | 0.00 |
| TRINITY_KXZ4119  | hypothet  | Gonium_pectorale    | 47.10 | 0.00 |
| TRINITY_XP_02294 | serine/   | Cucurbita_moschata  | 47.10 | 0.00 |
| TRINITY_XP_01054 | PREDICTI  | Tarenaya_hasslerian | 47.10 | 0.00 |
| TRINITY_ONK6262  | unchara   | Asparagus_officinal | 47.10 | 0.00 |
| TRINITY_PTQ4110  | hypothet  | Marchantia_polymorp | 47.10 | 0.00 |

|                 |          |                     |       |      |
|-----------------|----------|---------------------|-------|------|
| TRINITY_PRW2078 | Mitochor | Chlorella_sorokinia | 47.10 | 0.00 |
| TRINITY_XP_0016 | predict  | Chlamydomonas_reinh | 47.10 | 0.00 |
| TRINITY_PNW8854 | hypothet | Chlamydomonas_reinh | 47.10 | 0.00 |
| TRINITY_PNH0958 | Protein  | Tetrabaena_socialis | 47.10 | 0.00 |
| TRINITY_GAX7527 | hypothet | Chlamydomonas_eusti | 47.10 | 0.00 |
| TRINITY_XP_0184 | PREDICT  | Raphanus_sativus    | 47.10 | 0.00 |
| TRINITY_GAX7481 | hypothet | Chlamydomonas_eusti | 47.10 | 0.00 |
| TRINITY_OMO8757 | Ribosom  | Corchorus_capsulari | 47.10 | 0.00 |
| TRINITY_GAX7874 | hypothet | Chlamydomonas_eusti | 47.10 | 0.00 |
| TRINITY_KXZ5313 | hypothet | Gonium_pectorale    | 47.10 | 0.00 |
| TRINITY_GAX7326 | hypothet | Chlamydomonas_eusti | 47.10 | 0.00 |
| TRINITY_XP_0056 | hypothet | Coccomyxa_subellips | 47.10 | 0.00 |
| TRINITY_XP_0184 | PREDICT  | Raphanus_sativus    | 47.10 | 0.00 |
| TRINITY_XP_0029 | hypothet | Volvox_carteri      | 47.10 | 0.00 |
| TRINITY_KXZ5114 | hypothet | Gonium_pectorale    | 47.10 | 0.00 |
| TRINITY_XP_0029 | hypothet | Volvox_carteri      | 47.10 | 0.00 |
| TRINITY_PSC7627 | thiamin  | Micractinium_conduc | 47.10 | 0.00 |
| TRINITY_GAX8401 | hypothet | Chlamydomonas_eusti | 47.10 | 0.00 |
| TRINITY_XP_0056 | RNI-like | Coccomyxa_subellips | 47.10 | 0.00 |
| TRINITY_GAQ8255 | hypothet | Klebsormidium_niten | 47.10 | 0.00 |
| TRINITY_GAX8469 | hypothet | Chlamydomonas_eusti | 47.10 | 0.00 |
| TRINITY_XP_0138 | ZIP fami | Monoraphidium_negle | 47.10 | 0.00 |
| TRINITY_XP_0213 | unchara  | Sorghum_bicolor     | 47.10 | 0.00 |
| TRINITY_BAJ9847 | predict  | Hordeum_vulgare     | 47.10 | 0.00 |
| TRINITY_GAX7849 | hypothet | Chlamydomonas_eusti | 47.10 | 0.00 |
| TRINITY_XP_0029 | probable | Selaginella_moellen | 47.10 | 0.00 |
| TRINITY_XP_0029 | hypothet | Volvox_carteri      | 47.10 | 0.00 |
| TRINITY_GBF9464 | hypothet | Raphidocelis_subcap | 47.10 | 0.00 |
| TRINITY_GBF8951 | multidri | Raphidocelis_subcap | 47.10 | 0.00 |
| TRINITY_PNW8096 | hypothet | Chlamydomonas_reinh | 47.10 | 0.00 |
| TRINITY_EFJ1328 | hypothet | Selaginella_moellen | 47.10 | 0.00 |
| TRINITY_GAX8135 | hypothet | Chlamydomonas_eusti | 47.10 | 0.00 |
| TRINITY_KZV1501 | hypothet | Dorcoceras_hygromet | 47.10 | 0.00 |
| TRINITY_GAX8036 | hypothet | Chlamydomonas_eusti | 47.10 | 0.00 |
| TRINITY_GAX8588 | hypothet | Chlamydomonas_eusti | 47.10 | 0.00 |
| TRINITY_XP_0264 | betaine  | Papaver_somniferum  | 47.10 | 0.00 |
| TRINITY_PNW7103 | hypothet | Chlamydomonas_reinh | 47.10 | 0.00 |
| TRINITY_ALD8431 | acetyl-  | Morus_alba          | 47.10 | 0.00 |
| TRINITY_GAX7880 | hypothet | Chlamydomonas_eusti | 47.10 | 0.00 |
| TRINITY_GAX7815 | hypothet | Chlamydomonas_eusti | 47.10 | 0.00 |
| TRINITY_PNW7187 | hypothet | Chlamydomonas_reinh | 47.10 | 0.00 |
| TRINITY_KXZ4835 | hypothet | Gonium_pectorale    | 47.10 | 0.00 |
| TRINITY_GAX7527 | hypothet | Chlamydomonas_eusti | 47.10 | 0.00 |
| TRINITY_XP_0063 | PREDICT  | Solanum_tuberosum   | 47.10 | 0.00 |
| TRINITY_NP_0013 | unchara  | Zea_mays            | 47.10 | 0.00 |
| TRINITY_XP_0016 | phospho  | Chlamydomonas_reinh | 47.10 | 0.00 |
| TRINITY_GBG8367 | hypothet | Chara_braunii       | 47.10 | 0.00 |
| TRINITY_XP_0120 | unchara  | Jatropha_curcas     | 47.10 | 0.00 |
| TRINITY_PNG9978 | hypothet | Tetrabaena_socialis | 47.10 | 0.00 |
| TRINITY_GAQ7952 | hypothet | Klebsormidium_niten | 47.10 | 0.00 |
| TRINITY_GAQ8029 | calcium- | Klebsormidium_niten | 47.10 | 0.00 |
| TRINITY_ONK6028 | unchara  | Asparagus_officinal | 47.00 | 0.00 |
| TRINITY_EMS5726 | Serine   | Triticum_urartu     | 47.00 | 0.00 |
| TRINITY_XP_0075 | predict  | Bathycoccus_prasinc | 47.00 | 0.00 |
| TRINITY_XP_0128 | PREDICT  | Erythranthe_guttata | 47.00 | 0.00 |
| TRINITY_XP_0029 | calmodu  | Selaginella_moellen | 47.00 | 0.00 |
| TRINITY_GAQ8180 | Anaphas  | Klebsormidium_niten | 47.00 | 0.00 |
| TRINITY_XP_0217 | DEAD-bo  | Chenopodium_quinoa  | 47.00 | 0.00 |
| TRINITY_XP_0110 | probable | Sesamum_indicum     | 47.00 | 0.00 |
| TRINITY_VDD2974 | unnamed  | Brassica_oleracea   | 47.00 | 0.00 |
| TRINITY_XP_0068 | protein  | Amborella_trichopod | 47.00 | 0.00 |
| TRINITY_XP_0068 | probable | Amborella_trichopod | 47.00 | 0.00 |
| TRINITY_BAK0046 | predict  | Hordeum_vulgare     | 47.00 | 0.00 |
| TRINITY_XP_0190 | PREDICT  | Tarenaya_hasslerian | 47.00 | 0.00 |
| TRINITY_PTQ3673 | hypothet | Marchantia_polymorp | 47.00 | 0.00 |
| TRINITY_GBG6253 | hypothet | Chara_braunii       | 47.00 | 0.00 |

|                  |                              |       |      |
|------------------|------------------------------|-------|------|
| TRINITY_RXI09634 | hypothetMalus_domestica      | 47.00 | 0.00 |
| TRINITY_EPS65926 | hypothetGenlisea_aurea       | 47.00 | 0.00 |
| TRINITY_XP_01389 | malate cMonoraphidium_negle  | 47.00 | 0.00 |
| TRINITY_XP_02390 | (myosin-1)Quercus_suber      | 47.00 | 0.00 |
| TRINITY_PKI31644 | hypothetPunica_granatum      | 47.00 | 0.00 |
| TRINITY_XP_02437 | GDT1-li Physcomitrella_pate  | 47.00 | 0.00 |
| TRINITY_GAX82972 | hypothetChlamydomonas_eusti  | 47.00 | 0.00 |
| TRINITY_BAK03025 | predicteHordeum_vulgare      | 47.00 | 0.00 |
| TRINITY_PNH08303 | NFX1-ty Tetrabaena_socialis  | 47.00 | 0.00 |
| TRINITY_GAX75602 | hypothetChlamydomonas_eusti  | 47.00 | 0.00 |
| TRINITY_PSC76533 | NAD-depeMicractinium_conduc  | 47.00 | 0.00 |
| TRINITY_XP_00430 | PREDICTIFragaria-vesca       | 47.00 | 0.00 |
| TRINITY_PLY83289 | hypothetLactuca_sativa       | 47.00 | 0.00 |
| TRINITY_XP_00306 | predicteMicromonas_pusilla   | 47.00 | 0.00 |
| TRINITY_GAX80893 | hypothetChlamydomonas_eusti  | 47.00 | 0.00 |
| TRINITY_GAQ84607 | inosine-Klebsormidium_niten  | 47.00 | 0.00 |
| TRINITY_KXZ49254 | hypothetGonium_pectorale     | 47.00 | 0.00 |
| TRINITY_XP_00565 | hypothetCoccomyxa_subellips  | 47.00 | 0.00 |
| TRINITY_PNH10576 | Retrovir Tetrabaena_socialis | 47.00 | 0.00 |
| TRINITY_KXZ49627 | hypothetGonium_pectorale     | 47.00 | 0.00 |
| TRINITY_PNW71012 | hypothetChlamydomonas_reinh  | 47.00 | 0.00 |
| TRINITY_KZV52967 | calcium-Dorcoceras_hygromet  | 47.00 | 0.00 |
| TRINITY_GAX82924 | hypothetChlamydomonas_eusti  | 47.00 | 0.00 |
| TRINITY_GAX82239 | hypothetChlamydomonas_eusti  | 47.00 | 0.00 |
| TRINITY_XP_00564 | ras-relaCoccomyxa_subellips  | 47.00 | 0.00 |
| TRINITY_EOA38457 | hypothetCapsella_rubella     | 47.00 | 0.00 |
| TRINITY_XP_02718 | probableCicer_arietinum      | 47.00 | 0.00 |
| TRINITY_XP_01390 | hypothetMonoraphidium_negle  | 47.00 | 0.00 |
| TRINITY_GAX73020 | hypothetChlamydomonas_eusti  | 47.00 | 0.00 |
| TRINITY_PNH03830 | Retinol Tetrabaena_socialis  | 47.00 | 0.00 |
| TRINITY_GAQ87594 | WD40 re Klebsormidium_niten  | 47.00 | 0.00 |
| TRINITY_GAX79251 | hypothetChlamydomonas_eusti  | 47.00 | 0.00 |
| TRINITY_GAX76399 | hypothetChlamydomonas_eusti  | 47.00 | 0.00 |
| TRINITY_XP_02392 | SWI/SNF Quercus_suber        | 47.00 | 0.00 |
| TRINITY_XP_02375 | ATP-depeLactuca_sativa       | 47.00 | 0.00 |
| TRINITY_GAX75739 | hypothetChlamydomonas_eusti  | 47.00 | 0.00 |
| TRINITY_XP_00751 | major f Bathycoccus_prasinc  | 47.00 | 0.00 |
| TRINITY_PNW88263 | hypothetChlamydomonas_reinh  | 47.00 | 0.00 |
| TRINITY_XP_02499 | short-clCynara_cardunculus   | 47.00 | 0.00 |
| TRINITY_PNW70875 | hypothetChlamydomonas_reinh  | 47.00 | 0.00 |
| TRINITY_GAX75055 | hypothetChlamydomonas_eusti  | 47.00 | 0.00 |
| TRINITY_GAX73130 | hypothetChlamydomonas_eusti  | 47.00 | 0.00 |
| TRINITY_XP_00640 | (actin-2)Eutrema_salsugineum | 47.00 | 0.00 |
| TRINITY_PHT34503 | hypothetCapsicum_baccatum    | 47.00 | 0.00 |
| TRINITY_PNW83340 | hypothetChlamydomonas_reinh  | 47.00 | 0.00 |
| TRINITY_XP_01269 | putativeSetaria_italica      | 47.00 | 0.00 |
| TRINITY_EFJ32047 | hypothetSelaginella_moellen  | 47.00 | 0.00 |
| TRINITY_RAL38597 | hypothetCuscuta_australis    | 47.00 | 0.00 |
| TRINITY_GAX77988 | hypothetChlamydomonas_eusti  | 47.00 | 0.00 |
| TRINITY_GBG77886 | hypothetChara_braunii        | 47.00 | 0.00 |
| TRINITY_XP_01725 | PREDICTIFDaucus_carota       | 47.00 | 0.00 |
| TRINITY_GAX85236 | hypothetChlamydomonas_eusti  | 47.00 | 0.00 |
| TRINITY_PNW70670 | hypothetChlamydomonas_reinh  | 47.00 | 0.00 |
| TRINITY_KXZ50009 | hypothetGonium_pectorale     | 47.00 | 0.00 |
| TRINITY_GAX76369 | hypothetChlamydomonas_eusti  | 47.00 | 0.00 |
| TRINITY_XP_01284 | PREDICTIFerythranthe_guttata | 47.00 | 0.00 |
| TRINITY_PNH08753 | Dynein cTetrabaena_socialis  | 47.00 | 0.00 |
| TRINITY_GBF94802 | hypothetRaphidocelis_subcap  | 47.00 | 0.00 |
| TRINITY_XP_01045 | PREDICTIFCamelina_sativa     | 46.90 | 0.00 |
| TRINITY_XP_02390 | (ras-like)Quercus_suber      | 46.90 | 0.00 |
| TRINITY_XP_01741 | PREDICTIFVigna_angularis     | 46.90 | 0.00 |
| TRINITY_KMS93461 | hypothetBeta_vulgaris        | 46.90 | 0.00 |
| TRINITY_GAX77014 | hypothetChlamydomonas_eusti  | 46.90 | 0.00 |
| TRINITY_ABK95241 | unknown Populus_trichocarpa  | 46.90 | 0.00 |
| TRINITY_PKA48420 | hypothetApostasia_shenzheni  | 46.90 | 0.00 |
| TRINITY_GAQ79945 | PutativeKlebsormidium_niten  | 46.90 | 0.00 |

|                  |          |                     |       |      |
|------------------|----------|---------------------|-------|------|
| TRINITY_PNT61321 | hypothet | Brachypodium_distac | 46.90 | 0.00 |
| TRINITY_XP_0190  | PREDICTI | Camelina_sativa     | 46.90 | 0.00 |
| TRINITY_BAJ9457  | predict  | Hordeum_vulgare     | 46.90 | 0.00 |
| TRINITY_GBF9321  | ABC trar | Raphidocelis_subcap | 46.90 | 0.00 |
| TRINITY_GAQ8438  | hypothet | Klebsormidium_niten | 46.90 | 0.00 |
| TRINITY_XP_0016  | mitochor | Chlamydomonas_reinh | 46.90 | 0.00 |
| TRINITY_PKA4936  | Phosphol | Apostasia_shenzheni | 46.90 | 0.00 |
| TRINITY_PRW5845  | tRNA (g) | Chlorella_sorokinia | 46.90 | 0.00 |
| TRINITY_XP_0239  | ras-like | Quercus_suber       | 46.90 | 0.00 |
| TRINITY_GBG9235  | hypothet | Chara_braunii       | 46.90 | 0.00 |
| TRINITY_XP_0029  | hypothet | Volvox_carteri      | 46.90 | 0.00 |
| TRINITY_PNY0167  | ras-rel  | Trifolium_pratense  | 46.90 | 0.00 |
| TRINITY_PNW7526  | hypothet | Chlamydomonas_reinh | 46.90 | 0.00 |
| TRINITY_GAX8205  | hypothet | Chlamydomonas_eusti | 46.90 | 0.00 |
| TRINITY_XP_0029  | DNA-dir  | Selaginella_moellen | 46.90 | 0.00 |
| TRINITY_GAQ8123  | 2-oxogl  | Klebsormidium_niten | 46.90 | 0.00 |
| TRINITY_ANF0469  | omega-6  | Chlamydomonas_sp._I | 46.90 | 0.00 |
| TRINITY_XP_0209  | cell di  | Arachis_ipaensis    | 46.90 | 0.00 |
| TRINITY_KXZ5605  | hypothet | Gonium_pectorale    | 46.90 | 0.00 |
| TRINITY_XP_0194  | PREDICTI | Lupinus_angustifoli | 46.90 | 0.00 |
| TRINITY_XP_0110  | PREDICTI | Populus_euphratica  | 46.90 | 0.00 |
| TRINITY_XP_0227  | dehydro  | Durio_zibethinus    | 46.90 | 0.00 |
| TRINITY_GAX8389  | hypothet | Chlamydomonas_eusti | 46.90 | 0.00 |
| TRINITY_GAX7918  | hypothet | Chlamydomonas_eusti | 46.90 | 0.00 |
| TRINITY_RYR3709  | hypothet | Arachis_hypogaea    | 46.90 | 0.00 |
| TRINITY_XP_0056  | arad-li  | Coccomyxa_subellips | 46.90 | 0.00 |
| TRINITY_XP_0029  | hypothet | Volvox_carteri      | 46.90 | 0.00 |
| TRINITY_GAX8130  | hypothet | Chlamydomonas_eusti | 46.90 | 0.00 |
| TRINITY_PNW7290  | hypothet | Chlamydomonas_reinh | 46.90 | 0.00 |
| TRINITY_XP_0095  | PREDICTI | Nicotiana_tomentosi | 46.90 | 0.00 |
| TRINITY_GAX8209  | hypothet | Chlamydomonas_eusti | 46.90 | 0.00 |
| TRINITY_PRW3926  | acetola  | Chlorella_sorokinia | 46.90 | 0.00 |
| TRINITY_XP_0029  | hypothet | Volvox_carteri      | 46.90 | 0.00 |
| TRINITY_PRW5787  | Transpo  | Chlorella_sorokinia | 46.90 | 0.00 |
| TRINITY_ACH8758  | hypothet | Dunaliella_viridis  | 46.90 | 0.00 |
| TRINITY_XP_0029  | hypothet | Volvox_carteri      | 46.90 | 0.00 |
| TRINITY_OAY6262  | Importir | Ananas_comosus      | 46.90 | 0.00 |
| TRINITY_GAX8062  | hypothet | Chlamydomonas_eusti | 46.90 | 0.00 |
| TRINITY_GAX7888  | hypothet | Chlamydomonas_eusti | 46.90 | 0.00 |
| TRINITY_PLY8557  | hypothet | Lactuca_sativa      | 46.90 | 0.00 |
| TRINITY_GBG8576  | hypothet | Chara_braunii       | 46.90 | 0.00 |
| TRINITY_GAX7285  | hypothet | Chlamydomonas_eusti | 46.90 | 0.00 |
| TRINITY_XP_0226  | DEAD-bo  | Vigna_radiata       | 46.90 | 0.00 |
| TRINITY_XP_0238  | radical  | Quercus_suber       | 46.90 | 0.00 |
| TRINITY_PRW5844  | isoleuci | Chlorella_sorokinia | 46.90 | 0.00 |
| TRINITY_GAX7910  | hypothet | Chlamydomonas_eusti | 46.90 | 0.00 |
| TRINITY_XP_0110  | protein  | Sesamum_indicum     | 46.90 | 0.00 |
| TRINITY_XP_0056  | hypothet | Coccomyxa_subellips | 46.90 | 0.00 |
| TRINITY_KXZ5382  | hypothet | Gonium_pectorale    | 46.90 | 0.00 |
| TRINITY_GAX7575  | hypothet | Chlamydomonas_eusti | 46.90 | 0.00 |
| TRINITY_GAX8141  | hypothet | Chlamydomonas_eusti | 46.90 | 0.00 |
| TRINITY_PNW7206  | hypothet | Chlamydomonas_reinh | 46.90 | 0.00 |
| TRINITY_XP_0029  | hypothet | Volvox_carteri      | 46.90 | 0.00 |
| TRINITY_XP_0017  | transcri | Chlamydomonas_reinh | 46.90 | 0.00 |
| TRINITY_NP_0013  | ras-rel  | Solanum_lycopersicu | 46.90 | 0.00 |
| TRINITY_GAX7745  | hypothet | Chlamydomonas_eusti | 46.90 | 0.00 |
| TRINITY_GAX8150  | hypothet | Chlamydomonas_eusti | 46.90 | 0.00 |
| TRINITY_XP_0239  | unchara  | Quercus_suber       | 46.90 | 0.00 |
| TRINITY_OAE2605  | hypothet | Marchantia_polymorp | 46.90 | 0.00 |
| TRINITY_KXZ5683  | hypothet | Gonium_pectorale    | 46.90 | 0.00 |
| TRINITY_PNW8443  | hypothet | Chlamydomonas_reinh | 46.90 | 0.00 |
| TRINITY_RID4452  | hypothet | Brassica_rapa       | 46.90 | 0.00 |
| TRINITY_XP_0014  | predict  | Ostreococcus_sp._'1 | 46.90 | 0.00 |
| TRINITY_XP_0138  | dehydro  | Monoraphidium_negle | 46.90 | 0.00 |
| TRINITY_XP_0138  | Protein  | Monoraphidium_negle | 46.90 | 0.00 |
| TRINITY_XP_0056  | thiored  | Coccomyxa_subellips | 46.90 | 0.00 |

|                                             |       |      |
|---------------------------------------------|-------|------|
| TRINITY_GAX7440{hypothetChlamydomonas_eusti | 46.90 | 0.00 |
| TRINITY_XP_02391cAMP-deřQuercus_suber       | 46.80 | 0.00 |
| TRINITY_PTQ4621{hypothetMarchantia_polymorp | 46.80 | 0.00 |
| TRINITY_KDD7455(hypothetHelicosporidium_sp. | 46.80 | 0.00 |
| TRINITY_PIN1605{GTPase fHandroanthus_impeti | 46.80 | 0.00 |
| TRINITY_GAQ8206{phosphatKlebsormidium_niten | 46.80 | 0.00 |
| TRINITY_BAJ9541{predicteHordeum_vulgare     | 46.80 | 0.00 |
| TRINITY_GAQ9059{DNA-diręKlebsormidium_niten | 46.80 | 0.00 |
| TRINITY_XP_0238{uncharacQuercus_suber       | 46.80 | 0.00 |
| TRINITY_PKA49661Ras-relęApostasia_shenzheni | 46.80 | 0.00 |

|                  |                             |       |      |
|------------------|-----------------------------|-------|------|
| TRINITY_GAX78363 | hypothetChlamydomonas_eusti | 46.80 | 0.00 |
| TRINITY_XP_00584 | hypothetChlorella_variabili | 46.80 | 0.00 |
| TRINITY_XP_02052 | probableAmborella_trichopod | 46.80 | 0.00 |
| TRINITY_XP_01389 | malate cMonoraphidium_negle | 46.80 | 0.00 |
| TRINITY_GBG60376 | hypothetChara_braunii       | 46.80 | 0.00 |
| TRINITY_XP_02389 | store-ofQuercus_suber       | 46.80 | 0.00 |
| TRINITY_XP_00979 | PREDICTINicotiana_sylvestri | 46.80 | 0.00 |
| TRINITY_XP_00253 | serine/tRicinus_communis    | 46.80 | 0.00 |
| TRINITY_XP_02379 | nuclear Lactuca_sativa      | 46.80 | 0.00 |
| TRINITY_PNW83941 | hypothetChlamydomonas_reinh | 46.80 | 0.00 |
| TRINITY_XP_00169 | eukaryotChlamydomonas_reinh | 46.80 | 0.00 |
| TRINITY_GAX73149 | hypothetChlamydomonas_eusti | 46.80 | 0.00 |
| TRINITY_BAK00756 | predicteHordeum_vulgare     | 46.80 | 0.00 |
| TRINITY_RYR11507 | hypothetArachis_hypogaea    | 46.80 | 0.00 |
| TRINITY_XP_02389 | probableQuercus_suber       | 46.80 | 0.00 |
| TRINITY_XP_00564 | myocyte Coccomyxa_subellips | 46.80 | 0.00 |
| TRINITY_XP_01659 | PREDICTFCapsicum_annuum     | 46.80 | 0.00 |
| TRINITY_XP_00584 | hypothetChlorella_variabili | 46.80 | 0.00 |
| TRINITY_PSC73559 | DUF1295 Micractinium_conduc | 46.80 | 0.00 |
| TRINITY_XP_00428 | PREDICTIFragaria_vesca      | 46.80 | 0.00 |
| TRINITY_ABK23329 | unknown Picea_sitchensis    | 46.80 | 0.00 |
| TRINITY_PSC76394 | charged Micractinium_conduc | 46.80 | 0.00 |
| TRINITY_XP_01390 | hypothetMonoraphidium_negle | 46.80 | 0.00 |
| TRINITY_PNW77938 | hypothetChlamydomonas_reinh | 46.80 | 0.00 |
| TRINITY_GAX77989 | hypothetChlamydomonas_eusti | 46.80 | 0.00 |
| TRINITY_EPS68300 | hypothetGenlisea_aurea      | 46.80 | 0.00 |
| TRINITY_PWA54429 | DNA repArtemisia_annua      | 46.80 | 0.00 |
| TRINITY_XP_00584 | hypothetChlorella_variabili | 46.80 | 0.00 |
| TRINITY_XP_02419 | dual spRosa_chinensis       | 46.80 | 0.00 |
| TRINITY_XP_00664 | PREDICTFOryza_brachyantha   | 46.80 | 0.00 |
| TRINITY_XP_01051 | PREDICTFTarenaya_hasslerian | 46.80 | 0.00 |
| TRINITY_GAQ85610 | NucleoleKlebsormidium_niten | 46.80 | 0.00 |
| TRINITY_VDD11627 | unnamed Brassica_oleracea   | 46.80 | 0.00 |
| TRINITY_GAX75439 | hypothetChlamydomonas_eusti | 46.80 | 0.00 |
| TRINITY_GAX73131 | hypothetChlamydomonas_eusti | 46.80 | 0.00 |
| TRINITY_XP_00170 | predicteChlamydomonas_reinh | 46.80 | 0.00 |
| TRINITY_XP_00141 | predicteOstreococcus_sp._'1 | 46.80 | 0.00 |
| TRINITY_XP_02284 | Zinc firOstreococcus_tauri  | 46.80 | 0.00 |
| TRINITY_GAX73347 | hypothetChlamydomonas_eusti | 46.80 | 0.00 |
| TRINITY_KXZ44742 | hypothetGonium_pectorale    | 46.80 | 0.00 |
| TRINITY_GAX81169 | hypothetChlamydomonas_eusti | 46.80 | 0.00 |
| TRINITY_PNH11996 | hypothetTetrabaena_socialis | 46.80 | 0.00 |
| TRINITY_XP_00259 | uncharaRicinus_communis     | 46.80 | 0.00 |
| TRINITY_ABU52967 | hypothetDunaliella_viridis  | 46.80 | 0.00 |
| TRINITY_GAX77254 | hypothetChlamydomonas_eusti | 46.80 | 0.00 |
| TRINITY_XP_01247 | PREDICTFGossypium_raimondii | 46.80 | 0.00 |
| TRINITY_KXZ51677 | hypothetGonium_pectorale    | 46.80 | 0.00 |
| TRINITY_GAX82272 | hypothetChlamydomonas_eusti | 46.80 | 0.00 |
| TRINITY_PRW39172 | mismatchChlorella_sorokinia | 46.80 | 0.00 |
| TRINITY_KXZ45799 | hypothetGonium_pectorale    | 46.80 | 0.00 |
| TRINITY_GAX84046 | hypothetChlamydomonas_eusti | 46.80 | 0.00 |
| TRINITY_BAK02869 | predicteHordeum_vulgare     | 46.80 | 0.00 |
| TRINITY_GAX76096 | hypothetChlamydomonas_eusti | 46.80 | 0.00 |
| TRINITY_KXZ54933 | hypothetGonium_pectorale    | 46.80 | 0.00 |
| TRINITY_GAX80319 | hypothetChlamydomonas_eusti | 46.80 | 0.00 |
| TRINITY_KMZ63146 | Ras-relZostera_marina       | 46.80 | 0.00 |
| TRINITY_XP_02131 | SAC3 fanSorghum_bicolor     | 46.80 | 0.00 |
| TRINITY_XP_01389 | Histone-Monoraphidium_negle | 46.80 | 0.00 |
| TRINITY_GAX77719 | hypothetChlamydomonas_eusti | 46.80 | 0.00 |
| TRINITY_GAX82287 | hypothetChlamydomonas_eusti | 46.80 | 0.00 |
| TRINITY_GAX84467 | hypothetChlamydomonas_eusti | 46.80 | 0.00 |
| TRINITY_GAQ81666 | ABC trarKlebsormidium_niten | 46.80 | 0.00 |
| TRINITY_GAX81731 | hypothetChlamydomonas_eusti | 46.80 | 0.00 |
| TRINITY_XP_01917 | PREDICTFIpomoea_nil         | 46.80 | 0.00 |
| TRINITY_AML79306 | putativePrasinococcus_capsu | 46.80 | 0.00 |
| TRINITY_PRW32870 | IsochoriChlorella_sorokinia | 46.80 | 0.00 |



|                  |           |                     |       |      |
|------------------|-----------|---------------------|-------|------|
| TRINITY_XP_00564 | putative  | Coccomyxa_subellips | 46.70 | 0.00 |
| TRINITY_XP_00751 | DNA poly  | Bathycoccus_prasin  | 46.70 | 0.00 |
| TRINITY_XP_02438 | U6 small  | Physcomitrella_pate | 46.70 | 0.00 |
| TRINITY_GBG63801 | hypothet  | Chara_braunii       | 46.70 | 0.00 |
| TRINITY_XP_02018 | kinesin   | Aegilops_tauschii   | 46.70 | 0.00 |
| TRINITY_XP_02390 | phosphat  | Quercus_suber       | 46.70 | 0.00 |
| TRINITY_GAX7271  | (hypothet | Chlamydomonas_eusti | 46.70 | 0.00 |
| TRINITY_XP_02296 | rRNA bic  | Cucurbita_maxima    | 46.70 | 0.00 |
| TRINITY_XP_02387 | ATP-dep   | Quercus_suber       | 46.70 | 0.00 |
| TRINITY_ABK24911 | unknown   | Picea_sitchensis    | 46.70 | 0.00 |
| TRINITY_PKI7493  | (hypothet | Punica_granatum     | 46.70 | 0.00 |
| TRINITY_KXZ50895 | hypothet  | Gonium_pectorale    | 46.70 | 0.00 |
| TRINITY_XP_02438 | ABC trar  | Physcomitrella_pate | 46.70 | 0.00 |
| TRINITY_XP_02390 | (myosin-1 | Quercus_suber       | 46.70 | 0.00 |
| TRINITY_XP_02792 | FH prote  | Vigna_unguiculata   | 46.70 | 0.00 |
| TRINITY_KFK3842  | (hypothet | Arabis_alpina       | 46.70 | 0.00 |
| TRINITY_XP_00244 | 26S prot  | Sorghum_bicolor     | 46.70 | 0.00 |
| TRINITY_XP_02176 | (ubiquiti | Chenopodium_quinoa  | 46.70 | 0.00 |
| TRINITY_XP_02437 | protein   | Physcomitrella_pate | 46.70 | 0.00 |
| TRINITY_GBG82059 | hypothet  | Chara_braunii       | 46.70 | 0.00 |
| TRINITY_PTQ28366 | (hypothet | Marchantia_polymorp | 46.70 | 0.00 |
| TRINITY_PRW57605 | phosphat  | Chlorella_sorokinia | 46.70 | 0.00 |
| TRINITY_GAX75539 | hypothet  | Chlamydomonas_eusti | 46.70 | 0.00 |
| TRINITY_GBF92937 | hypothet  | Raphidocelis_subcap | 46.70 | 0.00 |
| TRINITY_XP_00141 | P-ATPase  | Ostreococcus_sp._'1 | 46.70 | 0.00 |
| TRINITY_PRW45690 | (glucosa  | Chlorella_sorokinia | 46.70 | 0.00 |
| TRINITY_XP_01389 | Importir  | Monoraphidium_negle | 46.70 | 0.00 |
| TRINITY_KXZ56392 | hypothet  | Gonium_pectorale    | 46.70 | 0.00 |
| TRINITY_GAX81550 | (hypothet | Chlamydomonas_eusti | 46.70 | 0.00 |
| TRINITY_XP_00584 | hypothet  | Chlorella_variabili | 46.70 | 0.00 |
| TRINITY_GAQ89245 | hypothet  | Klebsormidium_niten | 46.70 | 0.00 |
| TRINITY_XP_00250 | (ATP-bin  | Micromonas_commoda  | 46.70 | 0.00 |
| TRINITY_GAX82896 | hypothet  | Chlamydomonas_eusti | 46.70 | 0.00 |
| TRINITY_GAX84401 | hypothet  | Chlamydomonas_eusti | 46.70 | 0.00 |
| TRINITY_KXZ55653 | hypothet  | Gonium_pectorale    | 46.70 | 0.00 |
| TRINITY_CBI23123 | unnamed   | Vitis_vinifera      | 46.70 | 0.00 |
| TRINITY_GAX84889 | hypothet  | Chlamydomonas_eusti | 46.70 | 0.00 |
| TRINITY_XP_00251 | ABC trar  | Ricinus_communis    | 46.70 | 0.00 |
| TRINITY_ABK24145 | unknown   | Picea_sitchensis    | 46.70 | 0.00 |
| TRINITY_KXZ46904 | hypothet  | Gonium_pectorale    | 46.70 | 0.00 |
| TRINITY_XP_00169 | predict   | Chlamydomonas_reinh | 46.70 | 0.00 |
| TRINITY_XP_00169 | plastid   | Chlamydomonas_reinh | 46.70 | 0.00 |
| TRINITY_PNW78438 | hypothet  | Chlamydomonas_reinh | 46.70 | 0.00 |
| TRINITY_PNW70584 | hypothet  | Chlamydomonas_reinh | 46.70 | 0.00 |
| TRINITY_GAX79309 | hypothet  | Chlamydomonas_eusti | 46.70 | 0.00 |
| TRINITY_XP_00169 | predict   | Chlamydomonas_reinh | 46.70 | 0.00 |
| TRINITY_GAX78440 | (hypothet | Chlamydomonas_eusti | 46.70 | 0.00 |
| TRINITY_GAQ88998 | Rab fami  | Klebsormidium_niten | 46.70 | 0.00 |
| TRINITY_GAX76160 | (hypothet | Chlamydomonas_eusti | 46.70 | 0.00 |
| TRINITY_XP_02733 | ADP-rib   | Abrus_precatorius   | 46.70 | 0.00 |
| TRINITY_PNH12422 | hypothet  | Tetrabaena_socialis | 46.70 | 0.00 |
| TRINITY_PNW87948 | hypothet  | Chlamydomonas_reinh | 46.70 | 0.00 |
| TRINITY_PIN06738 | putative  | Handroanthus_impeti | 46.70 | 0.00 |
| TRINITY_GAQ85145 | hypothet  | Klebsormidium_niten | 46.70 | 0.00 |
| TRINITY_PNH06962 | Transpo   | Tetrabaena_socialis | 46.70 | 0.00 |
| TRINITY_CBL43004 | Na+/K+    | Riccia_fluitans     | 46.70 | 0.00 |
| TRINITY_XP_02453 | cAMP-de   | Selaginella_moellen | 46.70 | 0.00 |
| TRINITY_XP_02388 | ras-rel   | Quercus_suber       | 46.70 | 0.00 |
| TRINITY_GAX75602 | hypothet  | Chlamydomonas_eusti | 46.70 | 0.00 |
| TRINITY_KXZ49193 | hypothet  | Gonium_pectorale    | 46.70 | 0.00 |
| TRINITY_GAX78375 | hypothet  | Chlamydomonas_eusti | 46.70 | 0.00 |
| TRINITY_XP_02214 | multipl   | Momordica_charantia | 46.70 | 0.00 |
| TRINITY_XP_00294 | pathoger  | Volvox_carteri      | 46.70 | 0.00 |
| TRINITY_EFJ33416 | (hypothet | Selaginella_moellen | 46.70 | 0.00 |
| TRINITY_XP_02203 | fe-S cl   | Helianthus_annuus   | 46.70 | 0.00 |
| TRINITY_XP_02437 | probable  | Physcomitrella_pate | 46.70 | 0.00 |

|                                              |       |      |
|----------------------------------------------|-------|------|
| TRINITY_KXZ4923(hypothetGonium_pectorale     | 46.70 | 0.00 |
| TRINITY_PNH0981(hypothetTetrabaena_socialis  | 46.70 | 0.00 |
| TRINITY_XP_02452protein Selaginella_moellen  | 46.70 | 0.00 |
| TRINITY_KXZ4863(hypothetGonium_pectorale     | 46.70 | 0.00 |
| TRINITY_PNW8854(hypothetChlamydomonas_reinh  | 46.70 | 0.00 |
| TRINITY_VDD4722(unnamed Brassica_oleracea    | 46.60 | 0.00 |
| TRINITY_NP_0011(uncharacZea_mays             | 46.60 | 0.00 |
| TRINITY_BAS9358(Os05g03Oryza_sativa          | 46.60 | 0.00 |
| TRINITY_XP_0113(Malate A Auxenochlorella_pro | 46.60 | 0.00 |
| TRINITY_XP_0201(SUMO-actAegilops_tauschii    | 46.60 | 0.00 |
| TRINITY_XP_0029(spoke s Volvox_carteri       | 46.60 | 0.00 |
| TRINITY_GAX8509(hypothetChlamydomonas_eusti  | 46.60 | 0.00 |
| TRINITY_XP_0128(PREDICTIErythranthe_guttata  | 46.60 | 0.00 |
| TRINITY_XP_0025(predicteMicromonas_commoda   | 46.60 | 0.00 |
| TRINITY_PIN1149(Sensory Handroanthus_impeti  | 46.60 | 0.00 |
| TRINITY_XP_0271(nicotin Coffea_arabica       | 46.60 | 0.00 |
| TRINITY_XP_0016(predicteChlamydomonas_reinh  | 46.60 | 0.00 |
| TRINITY_GAQ8238(delta(3)Klebsormidium_niten  | 46.60 | 0.00 |
| TRINITY_GAX7920(hypothetChlamydomonas_eusti  | 46.60 | 0.00 |
| TRINITY_XP_0238(UDP-N-acQuercus_suber        | 46.60 | 0.00 |
| TRINITY_KMS6524(hypothetBeta_vulgaris        | 46.60 | 0.00 |
| TRINITY_GAX8316(hypothetChlamydomonas_eusti  | 46.60 | 0.00 |
| TRINITY_XP_0029(hypothetVolvox_carteri       | 46.60 | 0.00 |
| TRINITY_BAK0274(predicteHordeum_vulgare      | 46.60 | 0.00 |
| TRINITY_CAA9652(G proteiNicotiana_plumbagin  | 46.60 | 0.00 |
| TRINITY_GAX8127(hypothetChlamydomonas_eusti  | 46.60 | 0.00 |
| TRINITY_XP_0016(MATE efChlamydomonas_reinh   | 46.60 | 0.00 |
| TRINITY_GAX8036(hypothetChlamydomonas_eusti  | 46.60 | 0.00 |
| TRINITY_GBF9312(3-dehydRaphidocelis_subcap   | 46.60 | 0.00 |
| TRINITY_PNW7525(hypothetChlamydomonas_reinh  | 46.60 | 0.00 |
| TRINITY_XP_0238(metal rQuercus_suber         | 46.60 | 0.00 |
| TRINITY_XP_0029(hypothetVolvox_carteri       | 46.60 | 0.00 |
| TRINITY_KXZ5204(hypothetGonium_pectorale     | 46.60 | 0.00 |
| TRINITY_XP_0109(PREDICTIElaeis_guineensis    | 46.60 | 0.00 |
| TRINITY_XP_0174(PREDICTIVigna_angularis      | 46.60 | 0.00 |
| TRINITY_BAK0277(predicteHordeum_vulgare      | 46.60 | 0.00 |
| TRINITY_GBF9064(p-type aRaphidocelis_subcap  | 46.60 | 0.00 |
| TRINITY_XP_0217(nicotinChenopodium_quinoa    | 46.60 | 0.00 |
| TRINITY_XP_0029(uncharacSelaginella_moellen  | 46.60 | 0.00 |
| TRINITY_XP_0239(ribosomeQuercus_suber        | 46.60 | 0.00 |
| TRINITY_KXZ5320(hypothetGonium_pectorale     | 46.60 | 0.00 |
| TRINITY_PNH0747(hypothetTetrabaena_socialis  | 46.60 | 0.00 |
| TRINITY_XP_0063(PREDICTISolanum_tuberosum    | 46.60 | 0.00 |
| TRINITY_GAQ8191(N-acyl-Klebsormidium_niten   | 46.60 | 0.00 |
| TRINITY_GAQ9104(calcium-Klebsormidium_niten  | 46.60 | 0.00 |
| TRINITY_XP_0056(calcium-Coccomyxa_subellips  | 46.60 | 0.00 |
| TRINITY_KXZ5360(hypothetGonium_pectorale     | 46.60 | 0.00 |
| TRINITY_XP_0030(flagellMicromonas_pusilla    | 46.60 | 0.00 |
| TRINITY_GBF8978(hypothetRaphidocelis_subcap  | 46.60 | 0.00 |
| TRINITY_PNW7708(hypothetChlamydomonas_reinh  | 46.60 | 0.00 |
| TRINITY_GAQ7922(hypothetKlebsormidium_niten  | 46.60 | 0.00 |
| TRINITY_PSC6964(putativeMicractinium_conduc  | 46.60 | 0.00 |
| TRINITY_GAX8270(hypothetChlamydomonas_eusti  | 46.60 | 0.00 |
| TRINITY_GAX7763(hypothetChlamydomonas_eusti  | 46.60 | 0.00 |
| TRINITY_PNH1103(EndoglucTetrabaena_socialis  | 46.60 | 0.00 |
| TRINITY_XP_0022(PREDICTIVitis_vinifera       | 46.60 | 0.00 |
| TRINITY_XP_0239(ras-relQuercus_suber         | 46.60 | 0.00 |
| TRINITY_GBG8383(hypothetChara_braunii        | 46.60 | 0.00 |
| TRINITY_GBF9837(hypothetRaphidocelis_subcap  | 46.60 | 0.00 |
| TRINITY_GAX7295(hypothetChlamydomonas_eusti  | 46.60 | 0.00 |
| TRINITY_GBG8088(hypothetChara_braunii        | 46.60 | 0.00 |
| TRINITY_XP_0082(PREDICTIPrunus_mume          | 46.60 | 0.00 |
| TRINITY_XP_0029(hypothetVolvox_carteri       | 46.60 | 0.00 |
| TRINITY_GAX7486(hypothetChlamydomonas_eusti  | 46.60 | 0.00 |
| TRINITY_XP_0030(flagellMicromonas_pusilla    | 46.60 | 0.00 |
| TRINITY_XP_0243(aminoacjPhyscomitrella_pate  | 46.60 | 0.00 |

|                                             |       |      |
|---------------------------------------------|-------|------|
| TRINITY_PNW7878(hypothetChlamydomonas_reinh | 46.60 | 0.00 |
| TRINITY_PNW7744(hypothetChlamydomonas_reinh | 46.60 | 0.00 |
| TRINITY_PNW7374(hypothetChlamydomonas_reinh | 46.60 | 0.00 |
| TRINITY_GAQ81674cAMP cGMKlebsormidium_niten | 46.60 | 0.00 |
| TRINITY_XP_00634PREDICTISolanum_tuberosum   | 46.60 | 0.00 |
| TRINITY_GAQ91622RNA-bincklebsormidium_niten | 46.50 | 0.00 |
| TRINITY_XP_01045PREDICTICamelina_sativa     | 46.50 | 0.00 |
| TRINITY_OTF95159putativHelianthus_annuus    | 46.50 | 0.00 |
| TRINITY_XP_00169calcium-Chlamydomonas_reinh | 46.50 | 0.00 |
| TRINITY_XP_01282PREDICTIErythranthe_guttata | 46.50 | 0.00 |
| TRINITY_KNA1020(hypothetSpinacia_oleracea   | 46.50 | 0.00 |
| TRINITY_XP_00564allantoiCoccomyxa_subellips | 46.50 | 0.00 |
| TRINITY_PSS33242E3 ubiqActinidia_chinensis  | 46.50 | 0.00 |
| TRINITY_PNR4343(hypothetPhyscomitrella_pate | 46.50 | 0.00 |
| TRINITY_XP_00141predicteOstreococcus_sp._'l | 46.50 | 0.00 |
| TRINITY_GAX7616(hypothetChlamydomonas_eusti | 46.50 | 0.00 |
| TRINITY_GAX7752(hypothetChlamydomonas_eusti | 46.50 | 0.00 |
| TRINITY_PSS35678Actin-reActinidia_chinensis | 46.50 | 0.00 |
| TRINITY_PNW7044(hypothetChlamydomonas_reinh | 46.50 | 0.00 |
| TRINITY_XP_00169ATP syntChlamydomonas_reinh | 46.50 | 0.00 |
| TRINITY_XP_021668-hydroHevea_brasiliensis   | 46.50 | 0.00 |
| TRINITY_XP_00685glycerolAmborella_trichopod | 46.50 | 0.00 |
| TRINITY_GAX7875(hypothetChlamydomonas_eusti | 46.50 | 0.00 |
| TRINITY_XP_00169plastid Chlamydomonas_reinh | 46.50 | 0.00 |
| TRINITY_GAX7784(hypothetChlamydomonas_eusti | 46.50 | 0.00 |
| TRINITY_XP_02418chaperorRosa_chinensis      | 46.50 | 0.00 |
| TRINITY_XP_02173DNA-dirChenopodium_quinoa   | 46.50 | 0.00 |
| TRINITY_XP_02436glutamiPhyscomitrella_pate  | 46.50 | 0.00 |
| TRINITY_GAX76584hypothetChlamydomonas_eusti | 46.50 | 0.00 |
| TRINITY_GAX81159hypothetChlamydomonas_eusti | 46.50 | 0.00 |
| TRINITY_GAX74024hypothetChlamydomonas_eusti | 46.50 | 0.00 |
| TRINITY_KXZ42162hypothetGonium_pectorale    | 46.50 | 0.00 |
| TRINITY_XP_0139(subunit Monoraphidium_negle | 46.50 | 0.00 |
| TRINITY_GAX83867hypothetChlamydomonas_eusti | 46.50 | 0.00 |
| TRINITY_GBF94396rRNA metRaphidocelis_subcap | 46.50 | 0.00 |
| TRINITY_AEI61922MOSC donChlamydomonas_reinh | 46.50 | 0.00 |
| TRINITY_GAX80023hypothetChlamydomonas_eusti | 46.50 | 0.00 |
| TRINITY_PKA65389Beta-fruApostasia_shenzheni | 46.50 | 0.00 |
| TRINITY_GAQ81168hypothetKlebsormidium_niten | 46.50 | 0.00 |
| TRINITY_GBF97955hypothetRaphidocelis_subcap | 46.50 | 0.00 |
| TRINITY_GAX83934hypothetChlamydomonas_eusti | 46.50 | 0.00 |
| TRINITY_GAX73595hypothetChlamydomonas_eusti | 46.50 | 0.00 |
| TRINITY_KXZ5187(hypothetGonium_pectorale    | 46.50 | 0.00 |
| TRINITY_XP_01139hypothetAuxenochlorella_pro | 46.50 | 0.00 |
| TRINITY_GBF88717hypothetRaphidocelis_subcap | 46.50 | 0.00 |
| TRINITY_PWA79991sirtuin Artemisia_annua     | 46.50 | 0.00 |
| TRINITY_XP_00295hypothetVolvox_carteri      | 46.50 | 0.00 |
| TRINITY_PKA52215Serine/tApostasia_shenzheni | 46.50 | 0.00 |
| TRINITY_GAX82798hypothetChlamydomonas_eusti | 46.50 | 0.00 |
| TRINITY_GAQ83284autophacKlebsormidium_niten | 46.50 | 0.00 |
| TRINITY_GAQ87532dynein lKlebsormidium_niten | 46.50 | 0.00 |
| TRINITY_XP_02437ras-relaPhyscomitrella_pate | 46.50 | 0.00 |
| TRINITY_XP_00585hypothetChlorella_variabili | 46.50 | 0.00 |
| TRINITY_GAX75533hypothetChlamydomonas_eusti | 46.50 | 0.00 |
| TRINITY_ABU52967hypothetDunaliella_viridis  | 46.50 | 0.00 |
| TRINITY_GAX75901hypothetChlamydomonas_eusti | 46.50 | 0.00 |
| TRINITY_XP_00169predicteChlamydomonas_reinh | 46.50 | 0.00 |
| TRINITY_GAQ84882heat shKlebsormidium_niten  | 46.50 | 0.00 |
| TRINITY_XP_0239(aorsin-l)Quercus_suber      | 46.50 | 0.00 |
| TRINITY_KXZ44069hypothetGonium_pectorale    | 46.50 | 0.00 |
| TRINITY_KXZ51992hypothetGonium_pectorale    | 46.50 | 0.00 |
| TRINITY_GAX8220(hypothetChlamydomonas_eusti | 46.50 | 0.00 |
| TRINITY_PNW71494hypothetChlamydomonas_reinh | 46.50 | 0.00 |
| TRINITY_GAQ80759DNA topcKlebsormidium_niten | 46.50 | 0.00 |
| TRINITY_PNH06124ThioresKlebsormidium_niten  | 46.50 | 0.00 |
| TRINITY_PNH06124ThioresKlebsormidium_niten  | 46.50 | 0.00 |
| TRINITY_PNH06124ThioresKlebsormidium_niten  | 46.50 | 0.00 |
| TRINITY_PNW80146hypothetChlamydomonas_reinh | 46.50 | 0.00 |

|                 |                              |       |      |
|-----------------|------------------------------|-------|------|
| TRINITY_GAX8086 | hypothetChlamydomonas_eusti  | 46.50 | 0.00 |
| TRINITY_GAX8212 | hypothetChlamydomonas_eusti  | 46.50 | 0.00 |
| TRINITY_GAX7763 | hypothetChlamydomonas_eusti  | 46.50 | 0.00 |
| TRINITY_GAX8306 | hypothetChlamydomonas_eusti  | 46.50 | 0.00 |
| TRINITY_PNH1179 | UbiquitiTetrabaena_socialis  | 46.50 | 0.00 |
| TRINITY_XP_0138 | hypothetMonoraphidium_negle  | 46.50 | 0.00 |
| TRINITY_XP_0016 | predicteChlamydomonas_reinh  | 46.50 | 0.00 |
| TRINITY_XP_0016 | T-compleChlamydomonas_reinh  | 46.50 | 0.00 |
| TRINITY_GAX7859 | hypothetChlamydomonas_eusti  | 46.50 | 0.00 |
| TRINITY_GBF9870 | mitogen-Raphidocelis_subcap  | 46.50 | 0.00 |
| TRINITY_OAE2953 | hypothetMarchantia_polymorp  | 46.40 | 0.00 |
| TRINITY_XP_0212 | FGGY carHerrania_umbratica   | 46.40 | 0.00 |
| TRINITY_KNA0612 | hypothetSpinacia_oleracea    | 46.40 | 0.00 |
| TRINITY_XP_0058 | GTP-binChlorella_variabili   | 46.40 | 0.00 |
| TRINITY_XP_0158 | uncharacZiziphus_jujuba      | 46.40 | 0.00 |
| TRINITY_PNH0496 | hypothetTetrabaena_socialis  | 46.40 | 0.00 |
| TRINITY_EFJ1092 | hypothetSelaginella_moellen  | 46.40 | 0.00 |
| TRINITY_PKA5220 | Serine/tApostasia_shenzheni  | 46.40 | 0.00 |
| TRINITY_XP_0030 | predicteMicromonas_pusilla   | 46.40 | 0.00 |
| TRINITY_EYU4153 | hypothetErythranthe_guttata  | 46.40 | 0.00 |
| TRINITY_GAQ7941 | (Na+/H+ aKlebsormidium_niten | 46.40 | 0.00 |
| TRINITY_XP_0172 | PREDICTHDaucus_carota        | 46.40 | 0.00 |
| TRINITY_XP_0075 | predicteBathycoccus_prasinc  | 46.40 | 0.00 |
| TRINITY_KJB1825 | hypothetGossypium_raimondii  | 46.40 | 0.00 |
| TRINITY_XP_0217 | ras-relaChenopodium_quinoa   | 46.40 | 0.00 |
| TRINITY_XP_0238 | probableQuercus_suber        | 46.40 | 0.00 |
| TRINITY_XP_0025 | (short clMicromonas_commoda  | 46.40 | 0.00 |
| TRINITY_PNH0074 | hypothetTetrabaena_socialis  | 46.40 | 0.00 |
| TRINITY_GAQ9227 | hypothetKlebsormidium_niten  | 46.40 | 0.00 |
| TRINITY_GBG6254 | hypothetChara_braunii        | 46.40 | 0.00 |
| TRINITY_XP_0243 | BEACH dPhyscomitrella_pate   | 46.40 | 0.00 |
| TRINITY_GBG6619 | hypothetChara_braunii        | 46.40 | 0.00 |
| TRINITY_CAN7088 | hypothetVitis_vinifera       | 46.40 | 0.00 |
| TRINITY_XP_0238 | probableQuercus_suber        | 46.40 | 0.00 |
| TRINITY_GBG6857 | GlutamatChara_braunii        | 46.40 | 0.00 |
| TRINITY_PNH1104 | (Thiol-diTetrabaena_socialis | 46.40 | 0.00 |
| TRINITY_XP_0056 | xanthineCoccomyxa_subellips  | 46.40 | 0.00 |
| TRINITY_GAQ9137 | diphosphKlebsormidium_niten  | 46.40 | 0.00 |
| TRINITY_KXZ4729 | hypothetGonium_pectorale     | 46.40 | 0.00 |
| TRINITY_XP_0075 | (unnamed Bathycoccus_prasinc | 46.40 | 0.00 |
| TRINITY_GAQ7802 | (Six-hairKlebsormidium_niten | 46.40 | 0.00 |
| TRINITY_GAQ8828 | Tubulin-Klebsormidium_niten  | 46.40 | 0.00 |
| TRINITY_XP_0029 | hypothetVolvox_carteri       | 46.40 | 0.00 |
| TRINITY_XP_0109 | PREDICTHElaeis_guineensis    | 46.40 | 0.00 |
| TRINITY_BAJ9779 | predicteHordeum_vulgare      | 46.40 | 0.00 |
| TRINITY_GAX8423 | hypothetChlamydomonas_eusti  | 46.40 | 0.00 |
| TRINITY_OUS4456 | putativeOstreococcus_tauri   | 46.40 | 0.00 |
| TRINITY_GAX7302 | hypothetChlamydomonas_eusti  | 46.40 | 0.00 |
| TRINITY_KXZ5275 | hypothetGonium_pectorale     | 46.40 | 0.00 |
| TRINITY_XP_0220 | probableHelianthus_annuus    | 46.40 | 0.00 |
| TRINITY_PRW5611 | Nuclear Chlorella_sorokinia  | 46.40 | 0.00 |
| TRINITY_GAX8462 | hypothetChlamydomonas_eusti  | 46.40 | 0.00 |
| TRINITY_GAX7271 | hypothetChlamydomonas_eusti  | 46.40 | 0.00 |
| TRINITY_XP_0029 | NimA-relVolvox_carteri       | 46.40 | 0.00 |
| TRINITY_XP_0239 | tyrosineQuercus_suber        | 46.40 | 0.00 |
| TRINITY_XP_0029 | hypothetVolvox_carteri       | 46.40 | 0.00 |
| TRINITY_XP_0244 | protein Populus_trichocarpa  | 46.40 | 0.00 |
| TRINITY_GAX7548 | hypothetChlamydomonas_eusti  | 46.40 | 0.00 |
| TRINITY_PNW7718 | hypothetChlamydomonas_reinh  | 46.40 | 0.00 |
| TRINITY_KXZ4973 | hypothetGonium_pectorale     | 46.40 | 0.00 |
| TRINITY_XP_0263 | uncharacPapaver_somniferum   | 46.40 | 0.00 |
| TRINITY_KXZ5266 | ARPC2 pGonium_pectorale      | 46.40 | 0.00 |
| TRINITY_KXZ4998 | hypothetGonium_pectorale     | 46.40 | 0.00 |
| TRINITY_EPS7066 | hypothetGenlisea_aurea       | 46.40 | 0.00 |
| TRINITY_GAX8521 | hypothetChlamydomonas_eusti  | 46.40 | 0.00 |
| TRINITY_GAX8636 | hypothetChlamydomonas_eusti  | 46.40 | 0.00 |

|                  |          |                     |       |      |
|------------------|----------|---------------------|-------|------|
| TRINITY_XP_00305 | predict  | Micromonas_pusilla  | 46.40 | 0.00 |
| TRINITY_PNW76485 | hypothet | Chlamydomonas_reinh | 46.40 | 0.00 |
| TRINITY_XP_00564 | hypothet | Coccomyxa_subellips | 46.40 | 0.00 |
| TRINITY_XP_00935 | PREDICTF | Pyrus_x_bretschneid | 46.40 | 0.00 |
| TRINITY_GAX75428 | hypothet | Chlamydomonas_eusti | 46.40 | 0.00 |
| TRINITY_AHA42268 | putativ  | Chlamydomonas_reinh | 46.40 | 0.00 |
| TRINITY_XP_01722 | PREDICTF | Daucus_carota       | 46.40 | 0.00 |
| TRINITY_PNW74393 | hypothet | Chlamydomonas_reinh | 46.40 | 0.00 |
| TRINITY_PNW75650 | hypothet | Chlamydomonas_reinh | 46.40 | 0.00 |
| TRINITY_RAL41559 | hypothet | Cuscuta_australis   | 46.40 | 0.00 |
| TRINITY_XP_01108 | UPF0678  | Sesamum_indicum     | 46.30 | 0.00 |
| TRINITY_XP_02498 | tubulin  | Cynara_cardunculus  | 46.30 | 0.00 |
| TRINITY_XP_01002 | PREDICTF | Eucalyptus_grandis  | 46.30 | 0.00 |
| TRINITY_BAK00506 | predict  | Hordeum_vulgare     | 46.30 | 0.00 |
| TRINITY_PIN25923 | hypothet | Handroanthus_impeti | 46.30 | 0.00 |
| TRINITY_AIU48358 | pseudou  | Dioscorea_oppositif | 46.30 | 0.00 |
| TRINITY_EFJ16368 | hypothet | Selaginella_moellen | 46.30 | 0.00 |
| TRINITY_XP_00297 | calmodul | Selaginella_moellen | 46.30 | 0.00 |
| TRINITY_BAK02238 | predict  | Hordeum_vulgare     | 46.30 | 0.00 |
| TRINITY_XP_00249 | predict  | Micromonas_commoda  | 46.30 | 0.00 |
| TRINITY_XP_02387 | isopenic | Quercus_suber       | 46.30 | 0.00 |
| TRINITY_XP_02716 | serine   | Coffea_eugenioides  | 46.30 | 0.00 |
| TRINITY_XP_02643 | ras-rel  | Papaver_somniferum  | 46.30 | 0.00 |
| TRINITY_PSC73998 | ammonium | Micractinium_conduc | 46.30 | 0.00 |
| TRINITY_XP_02167 | beta-gl  | Hevea_brasiliensis  | 46.30 | 0.00 |
| TRINITY_GAX82963 | hypothet | Chlamydomonas_eusti | 46.30 | 0.00 |
| TRINITY_XP_01654 | PREDICTF | Capsicum_annuum     | 46.30 | 0.00 |
| TRINITY_PNW86118 | hypothet | Chlamydomonas_reinh | 46.30 | 0.00 |
| TRINITY_PNW78541 | hypothet | Chlamydomonas_reinh | 46.30 | 0.00 |
| TRINITY_XP_00295 | hypothet | Volvox_carteri      | 46.30 | 0.00 |
| TRINITY_GBF91043 | hypothet | Raphidocelis_subcap | 46.30 | 0.00 |
| TRINITY_XP_00295 | hypothet | Volvox_carteri      | 46.30 | 0.00 |
| TRINITY_GAX81279 | hypothet | Chlamydomonas_eusti | 46.30 | 0.00 |
| TRINITY_XP_00294 | hypothet | Volvox_carteri      | 46.30 | 0.00 |
| TRINITY_KXZ47851 | hypothet | Gonium_pectorale    | 46.30 | 0.00 |
| TRINITY_XP_02172 | splicin  | Chenopodium_quinoa  | 46.30 | 0.00 |
| TRINITY_GAX78220 | hypothet | Chlamydomonas_eusti | 46.30 | 0.00 |
| TRINITY_XP_00584 | hypothet | Chlorella_variabili | 46.30 | 0.00 |
| TRINITY_GAX85453 | hypothet | Chlamydomonas_eusti | 46.30 | 0.00 |
| TRINITY_ACF79297 | unknown  | Zea_mays            | 46.30 | 0.00 |
| TRINITY_PNW70261 | hypothet | Chlamydomonas_reinh | 46.30 | 0.00 |
| TRINITY_GAX73646 | hypothet | Chlamydomonas_eusti | 46.30 | 0.00 |
| TRINITY_XP_01918 | PREDICTF | Ipomoea_nil         | 46.30 | 0.00 |
| TRINITY_XP_02026 | ABC trar | Asparagus_officinal | 46.30 | 0.00 |
| TRINITY_AES59818 | ACT-like | Medicago_truncatula | 46.30 | 0.00 |
| TRINITY_GAX76789 | hypothet | Chlamydomonas_eusti | 46.30 | 0.00 |
| TRINITY_GAX77074 | hypothet | Chlamydomonas_eusti | 46.30 | 0.00 |
| TRINITY_XP_00685 | ABC trar | Amborella_trichopod | 46.30 | 0.00 |
| TRINITY_PNH11695 | hypothet | Tetrabaena_socialis | 46.30 | 0.00 |
| TRINITY_XP_00294 | hypothet | Volvox_carteri      | 46.30 | 0.00 |
| TRINITY_PNW74616 | hypothet | Chlamydomonas_reinh | 46.30 | 0.00 |
| TRINITY_GAX77362 | hypothet | Chlamydomonas_eusti | 46.30 | 0.00 |
| TRINITY_XP_01390 | Protein  | Monoraphidium_negle | 46.30 | 0.00 |
| TRINITY_GAX84222 | hypothet | Chlamydomonas_eusti | 46.30 | 0.00 |
| TRINITY_GBF91515 | hypothet | Raphidocelis_subcap | 46.30 | 0.00 |
| TRINITY_XP_01390 | DNA rep  | Monoraphidium_negle | 46.30 | 0.00 |
| TRINITY_BAJ86552 | predict  | Hordeum_vulgare     | 46.30 | 0.00 |
| TRINITY_GBF98918 | hypothet | Raphidocelis_subcap | 46.30 | 0.00 |
| TRINITY_XP_00170 | predict  | Chlamydomonas_reinh | 46.30 | 0.00 |
| TRINITY_GAX83419 | hypothet | Chlamydomonas_eusti | 46.30 | 0.00 |
| TRINITY_PNW70694 | hypothet | Chlamydomonas_reinh | 46.30 | 0.00 |
| TRINITY_XP_02024 | probabl  | Asparagus_officinal | 46.30 | 0.00 |
| TRINITY_PNW79818 | hypothet | Chlamydomonas_reinh | 46.30 | 0.00 |
| TRINITY_GAX81946 | hypothet | Chlamydomonas_eusti | 46.30 | 0.00 |
| TRINITY_XP_00170 | low-CO2  | Chlamydomonas_reinh | 46.30 | 0.00 |
| TRINITY_XP_02389 | lipase   | Quercus_suber       | 46.30 | 0.00 |

|                 |                              |       |      |
|-----------------|------------------------------|-------|------|
| TRINITY_GAQ8985 | putativeKlebsormidium_niten  | 46.30 | 0.00 |
| TRINITY_XP_0029 | protein Selaginella_moellen  | 46.30 | 0.00 |
| TRINITY_GAQ8019 | serine/tKlebsormidium_niten  | 46.30 | 0.00 |
| TRINITY_NP_0011 | chromatiArabidopsis_thalian  | 46.30 | 0.00 |
| TRINITY_KRH0048 | hypothetGlycine_max          | 46.20 | 0.00 |
| TRINITY_XP_0084 | PREDICTFCucumis_melo         | 46.20 | 0.00 |
| TRINITY_XP_0056 | putativeCoccomyxa_subellips  | 46.20 | 0.00 |
| TRINITY_XP_0156 | PREDICTFOryza_brachyantha    | 46.20 | 0.00 |
| TRINITY_XP_0128 | PREDICTFErythranthe_guttata  | 46.20 | 0.00 |
| TRINITY_PSC7305 | ATP-depeMicractinium_conduc  | 46.20 | 0.00 |
| TRINITY_XP_0014 | predicteOstreococcus_sp._'1  | 46.20 | 0.00 |
| TRINITY_KDP2666 | hypothetJatropha_curcas      | 46.20 | 0.00 |
| TRINITY_PNH0875 | Dynein cTetrabaena_socialis  | 46.20 | 0.00 |
| TRINITY_XP_0100 | tubulin-Morus_notabilis      | 46.20 | 0.00 |
| TRINITY_XP_0016 | predicteChlamydomonas_reinh  | 46.20 | 0.00 |
| TRINITY_GAQ7822 | Serine/tKlebsormidium_niten  | 46.20 | 0.00 |
| TRINITY_XP_0239 | ras-likeQuercus_suber        | 46.20 | 0.00 |
| TRINITY_XP_0241 | dual spRosa_chinensis        | 46.20 | 0.00 |
| TRINITY_CDL6798 | putativeOlea_europaea        | 46.20 | 0.00 |
| TRINITY_XP_0030 | Domain cOstreococcus_tauri   | 46.20 | 0.00 |
| TRINITY_PNR4563 | hypothetPhyscomitrella_pate  | 46.20 | 0.00 |
| TRINITY_XP_0029 | hypothetVolvox_carteri       | 46.20 | 0.00 |
| TRINITY_XP_0238 | translatQuercus_suber        | 46.20 | 0.00 |
| TRINITY_XP_0056 | hypothetCoccomyxa_subellips  | 46.20 | 0.00 |
| TRINITY_VDC6575 | unnamed Brassica_rapa        | 46.20 | 0.00 |
| TRINITY_XP_0063 | PREDICTFSolanum_tuberosum    | 46.20 | 0.00 |
| TRINITY_PNH0167 | hypothetTetrabaena_socialis  | 46.20 | 0.00 |
| TRINITY_XP_0029 | hypothetVolvox_carteri       | 46.20 | 0.00 |
| TRINITY_GAX7423 | hypothetChlamydomonas_eusti  | 46.20 | 0.00 |
| TRINITY_XP_0109 | PREDICTFElaeis_guineensis    | 46.20 | 0.00 |
| TRINITY_XP_0017 | (TPR protChlamydomonas_reinh | 46.20 | 0.00 |
| TRINITY_RWW9121 | hypothetEnsete_ventricosum   | 46.20 | 0.00 |
| TRINITY_XP_0128 | PREDICTFErythranthe_guttata  | 46.20 | 0.00 |
| TRINITY_XP_0174 | (PREDICTFVigna_angularis     | 46.20 | 0.00 |
| TRINITY_XP_0200 | serine/tAnanas_comosus       | 46.20 | 0.00 |
| TRINITY_XP_0238 | ADP-ribcQuercus_suber        | 46.20 | 0.00 |
| TRINITY_KXZ5628 | hypothetGonium_pectorale     | 46.20 | 0.00 |
| TRINITY_XP_0270 | poly [AICoffea_arabica       | 46.20 | 0.00 |
| TRINITY_XP_0228 | MAP3K eRolea_europaea        | 46.20 | 0.00 |
| TRINITY_GBF9594 | hypothetRaphidocelis_subcap  | 46.20 | 0.00 |
| TRINITY_PNW7335 | hypothetChlamydomonas_reinh  | 46.20 | 0.00 |
| TRINITY_BAL4652 | hypothetGentiana_scabra_x_G  | 46.20 | 0.00 |
| TRINITY_XP_0016 | ran-likeChlamydomonas_reinh  | 46.20 | 0.00 |
| TRINITY_XP_0058 | hypothetChlorella_variabili  | 46.20 | 0.00 |
| TRINITY_PNW7671 | hypothetChlamydomonas_reinh  | 46.20 | 0.00 |
| TRINITY_XP_0042 | PREDICTFFragaria_vesca       | 46.20 | 0.00 |
| TRINITY_GAX8507 | hypothetChlamydomonas_eusti  | 46.20 | 0.00 |
| TRINITY_GAX8061 | hypothetChlamydomonas_eusti  | 46.20 | 0.00 |
| TRINITY_GAX8328 | hypothetChlamydomonas_eusti  | 46.20 | 0.00 |
| TRINITY_GBF9067 | hypothetRaphidocelis_subcap  | 46.20 | 0.00 |
| TRINITY_XP_0270 | probableCoffea_arabica       | 46.20 | 0.00 |
| TRINITY_GAQ8369 | putativeKlebsormidium_niten  | 46.20 | 0.00 |
| TRINITY_XP_0264 | 1-phosphPapaver_somniferum   | 46.20 | 0.00 |
| TRINITY_XP_0029 | hypothetVolvox_carteri       | 46.20 | 0.00 |
| TRINITY_PRW6143 | pre-rRNChlorella_sorokinia   | 46.20 | 0.00 |
| TRINITY_GAX8430 | hypothetChlamydomonas_eusti  | 46.20 | 0.00 |
| TRINITY_KXZ5310 | hypothetGonium_pectorale     | 46.20 | 0.00 |
| TRINITY_KYP5182 | Protein Cajanus_cajan        | 46.20 | 0.00 |
| TRINITY_PRW5604 | multidriChlorella_sorokinia  | 46.20 | 0.00 |
| TRINITY_XP_0217 | probableChenopodium_quinoa   | 46.20 | 0.00 |
| TRINITY_OAE2250 | hypothetMarchantia_polymorp  | 46.20 | 0.00 |
| TRINITY_BAK0075 | (predicteHordeum_vulgare     | 46.20 | 0.00 |
| TRINITY_GAX7304 | hypothetChlamydomonas_eusti  | 46.20 | 0.00 |
| TRINITY_KXZ4438 | hypothetGonium_pectorale     | 46.20 | 0.00 |
| TRINITY_XP_0139 | (Aquapor)Monoraphidium_negle | 46.20 | 0.00 |
| TRINITY_XP_0030 | predicteMicromonas_pusilla   | 46.20 | 0.00 |

|                  |          |                     |       |      |
|------------------|----------|---------------------|-------|------|
| TRINITY_XP_01917 | PREDICTH | Ipomoea_nil         | 46.20 | 0.00 |
| TRINITY_PNW8631  | hypothet | Chlamydomonas_reinh | 46.20 | 0.00 |
| TRINITY_KXZ45627 | hypothet | Gonium_pectorale    | 46.20 | 0.00 |
| TRINITY_GAX73444 | hypothet | Chlamydomonas_eusti | 46.20 | 0.00 |
| TRINITY_GAX79285 | hypothet | Chlamydomonas_eusti | 46.20 | 0.00 |
| TRINITY_GAX72896 | hypothet | Chlamydomonas_eusti | 46.20 | 0.00 |
| TRINITY_GAX84712 | hypothet | Chlamydomonas_eusti | 46.20 | 0.00 |
| TRINITY_KXZ47868 | hypothet | Gonium_pectorale    | 46.20 | 0.00 |
| TRINITY_XP_00169 | predicte | Chlamydomonas_reinh | 46.20 | 0.00 |
| TRINITY_XP_02440 | cyclin-c | Physcomitrella_pate | 46.20 | 0.00 |
| TRINITY_XP_00414 | PREDICTH | Cucumis_sativus     | 46.20 | 0.00 |
| TRINITY_XP_02581 | ubiquiti | Panicum_hallii      | 46.20 | 0.00 |
| TRINITY_PSC73846 | ABC trar | Micractinium_conduc | 46.20 | 0.00 |
| TRINITY_PRW18345 | putativ  | Chlorella_sorokinia | 46.20 | 0.00 |
| TRINITY_XP_02451 | unchara  | Selaginella_moellen | 46.20 | 0.00 |
| TRINITY_KXZ41884 | hypothet | Gonium_pectorale    | 46.20 | 0.00 |
| TRINITY_RMZ5514  | hypothet | Auxenochlorella_pro | 46.20 | 0.00 |
| TRINITY_KXZ46839 | hypothet | Gonium_pectorale    | 46.20 | 0.00 |
| TRINITY_OAE32948 | hypothet | Marchantia_polymorp | 46.20 | 0.00 |
| TRINITY_PNH12265 | Tiny mac | Tetrabaena_socialis | 46.20 | 0.00 |
| TRINITY_XP_00629 | NADPH:q  | Capsella_rubella    | 46.20 | 0.00 |
| TRINITY_GAX7722  | hypothet | Chlamydomonas_eusti | 46.10 | 0.00 |
| TRINITY_KHG14509 | Histidir | Gossypium_arboreum  | 46.10 | 0.00 |
| TRINITY_Q40191.1 | RecName: | Lotus_japonicus     | 46.10 | 0.00 |
| TRINITY_XP_00939 | PREDICTH | Musa_acuminata      | 46.10 | 0.00 |
| TRINITY_XP_00823 | PREDICTH | Prunus_mume         | 46.10 | 0.00 |
| TRINITY_XP_01588 | auxin t  | Ziziphus_jujuba     | 46.10 | 0.00 |
| TRINITY_XP_02059 | LOW QUAI | Phalaenopsis_equest | 46.10 | 0.00 |
| TRINITY_GAX73776 | hypothet | Chlamydomonas_eusti | 46.10 | 0.00 |
| TRINITY_XP_00295 | hypothet | Volvox_carteri      | 46.10 | 0.00 |
| TRINITY_GAX84070 | hypothet | Chlamydomonas_eusti | 46.10 | 0.00 |
| TRINITY_XP_01004 | PREDICTH | Eucalyptus_grandis  | 46.10 | 0.00 |
| TRINITY_XP_01162 | ubiquiti | Amborella_trichopod | 46.10 | 0.00 |
| TRINITY_GAX76035 | hypothet | Chlamydomonas_eusti | 46.10 | 0.00 |
| TRINITY_XP_00584 | hypothet | Chlorella_variabili | 46.10 | 0.00 |
| TRINITY_GAX81532 | hypothet | Chlamydomonas_eusti | 46.10 | 0.00 |
| TRINITY_XP_00250 | predicte | Micromonas_commoda  | 46.10 | 0.00 |
| TRINITY_XP_00294 | hypothet | Volvox_carteri      | 46.10 | 0.00 |
| TRINITY_PNW88425 | hypothet | Chlamydomonas_reinh | 46.10 | 0.00 |
| TRINITY_GAQ79673 | geranyl  | Klebsormidium_niten | 46.10 | 0.00 |
| TRINITY_GAX80979 | hypothet | Chlamydomonas_eusti | 46.10 | 0.00 |
| TRINITY_KXZ46755 | hypothet | Gonium_pectorale    | 46.10 | 0.00 |
| TRINITY_PRW59038 | nudix h  | Chlorella_sorokinia | 46.10 | 0.00 |
| TRINITY_PSC67599 | Gag-Pol  | Micractinium_conduc | 46.10 | 0.00 |
| TRINITY_XP_00295 | hypothet | Volvox_carteri      | 46.10 | 0.00 |
| TRINITY_ABK26437 | unknown  | Picea_sitchensis    | 46.10 | 0.00 |
| TRINITY_GAX84819 | hypothet | Chlamydomonas_eusti | 46.10 | 0.00 |
| TRINITY_KZM93764 | hypothet | Daucus_carota       | 46.10 | 0.00 |
| TRINITY_GAQ89856 | putativ  | Klebsormidium_niten | 46.10 | 0.00 |
| TRINITY_XP_02387 | probable | Quercus_suber       | 46.10 | 0.00 |
| TRINITY_XP_01941 | PREDICTH | Lupinus_angustifoli | 46.10 | 0.00 |
| TRINITY_GAX74327 | hypothet | Chlamydomonas_eusti | 46.10 | 0.00 |
| TRINITY_XP_00294 | hypothet | Volvox_carteri      | 46.10 | 0.00 |
| TRINITY_GAX74871 | hypothet | Chlamydomonas_eusti | 46.10 | 0.00 |
| TRINITY_GAX82419 | hypothet | Chlamydomonas_eusti | 46.10 | 0.00 |
| TRINITY_RWW06726 | hypothet | Ensete_ventricosum  | 46.10 | 0.00 |
| TRINITY_GBG71046 | hypothet | Chara_braunii       | 46.10 | 0.00 |
| TRINITY_GAX79425 | hypothet | Chlamydomonas_eusti | 46.10 | 0.00 |
| TRINITY_XP_02054 | myosin-  | Sesamum_indicum     | 46.10 | 0.00 |
| TRINITY_XP_00879 | 1-phosp  | Phoenix_dactylifera | 46.10 | 0.00 |
| TRINITY_XP_02388 | ubiquiti | Quercus_suber       | 46.10 | 0.00 |
| TRINITY_XP_00294 | hypothet | Volvox_carteri      | 46.10 | 0.00 |
| TRINITY_XP_00294 | hypothet | Volvox_carteri      | 46.10 | 0.00 |
| TRINITY_PNW85599 | hypothet | Chlamydomonas_reinh | 46.10 | 0.00 |
| TRINITY_GAX74111 | hypothet | Chlamydomonas_eusti | 46.10 | 0.00 |
| TRINITY_XP_00169 | predicte | Chlamydomonas_reinh | 46.10 | 0.00 |

|                  |                              |       |      |
|------------------|------------------------------|-------|------|
| TRINITY_OTG04014 | putativεHelianthus_annuus    | 46.10 | 0.00 |
| TRINITY_XP_00565 | DNA/RNA Coccoomyxa_subellips | 46.10 | 0.00 |
| TRINITY_XP_00250 | pyruvatεMicromonas_commoda   | 46.10 | 0.00 |
| TRINITY_PNH04805 | hypothetTetrabaena_socialis  | 46.10 | 0.00 |
| TRINITY_DAA34893 | TPA_exp:Ostreococcus_sp._'l  | 46.10 | 0.00 |
| TRINITY_GAX82427 | hypothetChlamydomonas_eusti  | 46.10 | 0.00 |
| TRINITY_GAX76608 | hypothetChlamydomonas_eusti  | 46.10 | 0.00 |
| TRINITY_GAX81366 | hypothetChlamydomonas_eusti  | 46.10 | 0.00 |
| TRINITY_PUZ55071 | hypothetPanicum_hallii       | 46.10 | 0.00 |
| TRINITY_GAX77010 | hypothetChlamydomonas_eusti  | 46.10 | 0.00 |
| TRINITY_ACL28159 | hypothetDunaliella_viridis   | 46.10 | 0.00 |
| TRINITY_XP_02438 | serine/tPhyscomitrella_pate  | 46.10 | 0.00 |
| TRINITY_XP_02284 | UBA-likeOstreococcus_tauri   | 46.10 | 0.00 |
| TRINITY_KXZ48999 | hypothetGonium_pectorale     | 46.10 | 0.00 |
| TRINITY_OAE27724 | hypothetMarchantia_polymorp  | 46.10 | 0.00 |
| TRINITY_EPS65101 | hypothetGenlisea_aurea       | 46.10 | 0.00 |
| TRINITY_GAX75484 | hypothetChlamydomonas_eusti  | 46.10 | 0.00 |
| TRINITY_GAX76218 | hypothetChlamydomonas_eusti  | 46.10 | 0.00 |
| TRINITY_XP_00448 | transcriCicer_arietinum      | 46.00 | 0.00 |
| TRINITY_OIW07290 | hypothetLupinus_angustifoli  | 46.00 | 0.00 |
| TRINITY_ERM95185 | hypothetAmborella_trichopod  | 46.00 | 0.00 |
| TRINITY_PRW57533 | Ras-relεChlorella_sorokinia  | 46.00 | 0.00 |
| TRINITY_XP_01561 | glutathiOryza_sativa         | 46.00 | 0.00 |
| TRINITY_OVA14754 | Small G1Macleaya_cordata     | 46.00 | 0.00 |
| TRINITY_XP_01654 | PREDICTFCapsicum_annuum      | 46.00 | 0.00 |
| TRINITY_XP_02201 | serine/tHelianthus_annuus    | 46.00 | 0.00 |
| TRINITY_PVH47236 | hypothetPanicum_hallii       | 46.00 | 0.00 |
| TRINITY_OAY80294 | Heat shεAnanas_comosus       | 46.00 | 0.00 |
| TRINITY_XP_00935 | PREDICTFPyrus_x_bretschneid  | 46.00 | 0.00 |
| TRINITY_RMZ56992 | hypothetAuxenochlorella_pro  | 46.00 | 0.00 |
| TRINITY_GAQ91212 | Calcium Klebsormidium_niten  | 46.00 | 0.00 |
| TRINITY_PNH07996 | hypothetTetrabaena_socialis  | 46.00 | 0.00 |
| TRINITY_XP_02437 | NPC intiPhyscomitrella_pate  | 46.00 | 0.00 |
| TRINITY_OAY77860 | Signal εAnanas_comosus       | 46.00 | 0.00 |
| TRINITY_GAQ78644 | 4-coumarεKlebsormidium_niten | 46.00 | 0.00 |
| TRINITY_GAX75814 | hypothetChlamydomonas_eusti  | 46.00 | 0.00 |
| TRINITY_KXZ54859 | hypothetGonium_pectorale     | 46.00 | 0.00 |
| TRINITY_GAX84565 | hypothetChlamydomonas_eusti  | 46.00 | 0.00 |
| TRINITY_XP_02453 | calmodulSelaginella_moellen  | 46.00 | 0.00 |
| TRINITY_GAX73943 | hypothetChlamydomonas_eusti  | 46.00 | 0.00 |
| TRINITY_GAX73779 | hypothetChlamydomonas_eusti  | 46.00 | 0.00 |
| TRINITY_XP_00938 | PREDICTFMusa_acuminata       | 46.00 | 0.00 |
| TRINITY_KXZ46283 | hypothetGonium_pectorale     | 46.00 | 0.00 |
| TRINITY_RWW34630 | hypothetEnsete_ventricosum   | 46.00 | 0.00 |
| TRINITY_XP_00647 | bifunctiCitrus_sinensis      | 46.00 | 0.00 |
| TRINITY_XP_00297 | cleft liSelaginella_moellen  | 46.00 | 0.00 |
| TRINITY_GBF87526 | hypothetRaphidocelis_subcap  | 46.00 | 0.00 |
| TRINITY_XP_00295 | hypothetVolvox_carteri       | 46.00 | 0.00 |
| TRINITY_XP_00170 | predictεChlamydomonas_reinh  | 46.00 | 0.00 |
| TRINITY_PNW73818 | hypothetChlamydomonas_reinh  | 46.00 | 0.00 |
| TRINITY_XP_01761 | PREDICTFGossypium_arboreum   | 46.00 | 0.00 |
| TRINITY_GAX83997 | hypothetChlamydomonas_eusti  | 46.00 | 0.00 |
| TRINITY_PRW21061 | AMP-binεChlorella_sorokinia  | 46.00 | 0.00 |
| TRINITY_RZB43048 | Flap encGlycine_soja         | 46.00 | 0.00 |
| TRINITY_XP_00226 | PREDICTFVitis_vinifera       | 46.00 | 0.00 |
| TRINITY_KXZ42499 | hypothetGonium_pectorale     | 46.00 | 0.00 |
| TRINITY_OWM90366 | hypothetPunica_granatum      | 46.00 | 0.00 |
| TRINITY_GAQ83112 | pescadiεKlebsormidium_niten  | 46.00 | 0.00 |
| TRINITY_GAX82821 | hypothetChlamydomonas_eusti  | 46.00 | 0.00 |
| TRINITY_ABF95793 | Serine/tOryza_sativa         | 46.00 | 0.00 |
| TRINITY_GAQ93189 | hypothetKlebsormidium_niten  | 46.00 | 0.00 |
| TRINITY_KXZ43536 | hypothetGonium_pectorale     | 46.00 | 0.00 |
| TRINITY_KXZ48346 | hypothetGonium_pectorale     | 46.00 | 0.00 |
| TRINITY_GAX74691 | hypothetChlamydomonas_eusti  | 46.00 | 0.00 |
| TRINITY_XP_00294 | hypothetVolvox_carteri       | 46.00 | 0.00 |
| TRINITY_XP_02392 | fimbrin-Quercus_suber        | 46.00 | 0.00 |



|                 |                              |       |      |
|-----------------|------------------------------|-------|------|
| TRINITY_GBG8498 | hypothetChara_braunii        | 46.00 | 0.00 |
| TRINITY_GAQ9215 | hypothetKlebsormidium_niten  | 46.00 | 0.00 |
| TRINITY_PNH1180 | hypothetTetrabaena_socialis  | 46.00 | 0.00 |
| TRINITY_GAX8666 | hypothetChlamydomonas_eusti  | 46.00 | 0.00 |
| TRINITY_XP_0058 | hypothetChlorella_variabili  | 46.00 | 0.00 |
| TRINITY_XP_0029 | hypothetVolvox_carteri       | 46.00 | 0.00 |
| TRINITY_XP_0029 | trypsin Volvox_carteri       | 46.00 | 0.00 |
| TRINITY_GAX7534 | hypothetChlamydomonas_eusti  | 46.00 | 0.00 |
| TRINITY_XP_0030 | predicteMicromonas_pusilla   | 46.00 | 0.00 |
| TRINITY_XP_0025 | predicteMicromonas_commoda   | 45.90 | 0.00 |
| TRINITY_PNR2974 | hypothetPhyscomitrella_pate  | 45.90 | 0.00 |
| TRINITY_PNH0810 | hypothetTetrabaena_socialis  | 45.90 | 0.00 |
| TRINITY_XP_0220 | ras-relHelianthus_annuus     | 45.90 | 0.00 |
| TRINITY_XP_0273 | tubulin Abrus_precatorius    | 45.90 | 0.00 |
| TRINITY_XP_0239 | putativeQuercus_suber        | 45.90 | 0.00 |
| TRINITY_XP_0025 | predicteMicromonas_commoda   | 45.90 | 0.00 |
| TRINITY_XP_0114 | PREDICTIFragaria_vesca       | 45.90 | 0.00 |
| TRINITY_PRW5682 | oxidoreChlorella_sorokinia   | 45.90 | 0.00 |
| TRINITY_ESQ3075 | hypothetEutrema_salsugineur  | 45.90 | 0.00 |
| TRINITY_GBG7565 | hypothetChara_braunii        | 45.90 | 0.00 |
| TRINITY_GBG8866 | hypothetChara_braunii        | 45.90 | 0.00 |
| TRINITY_XP_0014 | predicteOstreococcus_sp._'1  | 45.90 | 0.00 |
| TRINITY_GBF9419 | calcium Raphidocelis_subcap  | 45.90 | 0.00 |
| TRINITY_XP_0068 | ubiquitiAmborella_trichopod  | 45.90 | 0.00 |
| TRINITY_GAQ7873 | alpha-anKlebsormidium_niten  | 45.90 | 0.00 |
| TRINITY_XP_0221 | switch Momordica_charantia   | 45.90 | 0.00 |
| TRINITY_XP_0068 | protein Amborella_trichopod  | 45.90 | 0.00 |
| TRINITY_GAQ8393 | glycerolKlebsormidium_niten  | 45.90 | 0.00 |
| TRINITY_XP_0029 | hypothetVolvox_carteri       | 45.90 | 0.00 |
| TRINITY_EFJ2081 | hypothetSelaginella_moellen  | 45.90 | 0.00 |
| TRINITY_PRW5882 | Pol [Ch]Chlorella_sorokinia  | 45.90 | 0.00 |
| TRINITY_VDD1023 | unnamed Brassica_rapa        | 45.90 | 0.00 |
| TRINITY_XP_0083 | PREDICTIMalus_domestica      | 45.90 | 0.00 |
| TRINITY_XP_0100 | PREDICTIEucalyptus_grandis   | 45.90 | 0.00 |
| TRINITY_XP_0016 | diacylgChlamydomonas_reinh   | 45.90 | 0.00 |
| TRINITY_KZV4647 | (protein Dorcoceras_hygromet | 45.90 | 0.00 |
| TRINITY_GBF9327 | hypothetRaphidocelis_subcap  | 45.90 | 0.00 |
| TRINITY_PSC7124 | WD repeMicractinium_conduc   | 45.90 | 0.00 |
| TRINITY_GAX7880 | hypothetChlamydomonas_eusti  | 45.90 | 0.00 |
| TRINITY_XP_0056 | hypothetCoccomyxa_subellips  | 45.90 | 0.00 |
| TRINITY_XP_0220 | N-glycoHelianthus_annuus     | 45.90 | 0.00 |
| TRINITY_PTQ3750 | hypothetMarchantia_polymorp  | 45.90 | 0.00 |
| TRINITY_XP_0022 | PREDICTIVitis_vinifera       | 45.90 | 0.00 |
| TRINITY_GAX7811 | hypothetChlamydomonas_eusti  | 45.90 | 0.00 |
| TRINITY_GAX7282 | hypothetChlamydomonas_eusti  | 45.90 | 0.00 |
| TRINITY_PNW7878 | hypothetChlamydomonas_reinh  | 45.90 | 0.00 |
| TRINITY_XP_0091 | PREDICTIBrassica_rapa        | 45.90 | 0.00 |
| TRINITY_XP_0029 | hypothetVolvox_carteri       | 45.90 | 0.00 |
| TRINITY_XP_0238 | protein Quercus_suber        | 45.90 | 0.00 |
| TRINITY_GAX7348 | hypothetChlamydomonas_eusti  | 45.90 | 0.00 |
| TRINITY_XP_0238 | uncharacQuercus_suber        | 45.90 | 0.00 |
| TRINITY_GAX7457 | hypothetChlamydomonas_eusti  | 45.90 | 0.00 |
| TRINITY_RID4227 | hypothetBrassica_rapa        | 45.90 | 0.00 |
| TRINITY_XP_0202 | uncharacCajanus_cajan        | 45.90 | 0.00 |
| TRINITY_GAQ8752 | cupin-dKlebsormidium_niten   | 45.90 | 0.00 |
| TRINITY_XP_0016 | predicteChlamydomonas_reinh  | 45.90 | 0.00 |
| TRINITY_PNW8263 | hypothetChlamydomonas_reinh  | 45.90 | 0.00 |
| TRINITY_XP_0156 | histone Oryza_sativa         | 45.90 | 0.00 |
| TRINITY_XP_0204 | ribosomePrunus_persica       | 45.90 | 0.00 |
| TRINITY_XP_0014 | predicteOstreococcus_sp._'1  | 45.90 | 0.00 |
| TRINITY_GAX7883 | hypothetChlamydomonas_eusti  | 45.90 | 0.00 |
| TRINITY_XP_0029 | hypothetVolvox_carteri       | 45.90 | 0.00 |
| TRINITY_GAX7761 | hypothetChlamydomonas_eusti  | 45.90 | 0.00 |
| TRINITY_GBF8992 | hypothetRaphidocelis_subcap  | 45.90 | 0.00 |
| TRINITY_GAQ8400 | intraflKlebsormidium_niten   | 45.90 | 0.00 |
| TRINITY_XP_0120 | long chJatropha_curcas       | 45.90 | 0.00 |

|                  |          |                     |       |      |
|------------------|----------|---------------------|-------|------|
| TRINITY_GAQ81095 | hypothet | Klebsormidium_niten | 45.90 | 0.00 |
| TRINITY_OAE27229 | hypothet | Marchantia_polymorp | 45.90 | 0.00 |
| TRINITY_PNW84319 | hypothet | Chlamydomonas_reinh | 45.90 | 0.00 |
| TRINITY_CAN70430 | hypothet | Vitis_vinifera      | 45.90 | 0.00 |
| TRINITY_GAX72686 | hypothet | Chlamydomonas_eusti | 45.90 | 0.00 |
| TRINITY_GAX82159 | hypothet | Chlamydomonas_eusti | 45.90 | 0.00 |
| TRINITY_GBG65480 | hypothet | Chara_braunii       | 45.90 | 0.00 |
| TRINITY_GAX85557 | hypothet | Chlamydomonas_eusti | 45.90 | 0.00 |
| TRINITY_PSC77027 | NUDIX_hj | Micractinium_conduc | 45.90 | 0.00 |
| TRINITY_PNW86549 | hypothet | Chlamydomonas_reinh | 45.90 | 0.00 |
| TRINITY_PNH12374 | Ferredo  | Tetrabaena_socialis | 45.90 | 0.00 |
| TRINITY_GAX79819 | hypothet | Chlamydomonas_eusti | 45.90 | 0.00 |
| TRINITY_GAX79190 | hypothet | Chlamydomonas_eusti | 45.90 | 0.00 |
| TRINITY_PSC67599 | Gag-Pol  | Micractinium_conduc | 45.90 | 0.00 |
| TRINITY_RMZ52549 | hypothet | Auxenochlorella_pro | 45.90 | 0.00 |
| TRINITY_GAX74082 | hypothet | Chlamydomonas_eusti | 45.90 | 0.00 |
| TRINITY_XP_00299 | small_Ar | Volvox_carteri      | 45.90 | 0.00 |
| TRINITY_XP_00294 | hypothet | Volvox_carteri      | 45.90 | 0.00 |
| TRINITY_GBG64632 | hypothet | Chara_braunii       | 45.90 | 0.00 |
| TRINITY_RHN39971 | putativ  | Medicago_truncatula | 45.90 | 0.00 |
| TRINITY_KXZ44309 | hypothet | Gonium_pectorale    | 45.90 | 0.00 |
| TRINITY_GAU26567 | hypothet | Trifolium_subterran | 45.90 | 0.00 |
| TRINITY_RZC82371 | hypothet | Papaver_somniferum  | 45.90 | 0.00 |
| TRINITY_XP_01919 | PREDICTI | Ipomoea_nil         | 45.80 | 0.00 |
| TRINITY_XP_00450 | ubiquiti | Cicer_arietinum     | 45.80 | 0.00 |
| TRINITY_XP_01009 | PREDICTI | Eucalyptus_grandis  | 45.80 | 0.00 |
| TRINITY_KJB81801 | hypothet | Gossypium_raimondii | 45.80 | 0.00 |
| TRINITY_XP_00308 | SET_dom  | Ostreococcus_tauri  | 45.80 | 0.00 |
| TRINITY_BAK02778 | predict  | Hordeum_vulgare     | 45.80 | 0.00 |
| TRINITY_RVX02654 | Retrovir | Vitis_vinifera      | 45.80 | 0.00 |
| TRINITY_GAQ86029 | Serine   | Klebsormidium_niten | 45.80 | 0.00 |
| TRINITY_XP_00250 | histone  | Ricinus_communis    | 45.80 | 0.00 |
| TRINITY_XP_01390 | hypothet | Monoraphidium_negle | 45.80 | 0.00 |
| TRINITY_XP_01926 | PREDICTI | Nicotiana_attenuata | 45.80 | 0.00 |
| TRINITY_GAU27451 | hypothet | Trifolium_subterran | 45.80 | 0.00 |
| TRINITY_GBG73999 | hypothet | Chara_braunii       | 45.80 | 0.00 |
| TRINITY_GAQ88896 | N-acetyl | Klebsormidium_niten | 45.80 | 0.00 |
| TRINITY_AIN39820 | hypothet | Zoysia_matrella     | 45.80 | 0.00 |
| TRINITY_OAY80406 | Glycine  | Ananas_comosus      | 45.80 | 0.00 |
| TRINITY_EFH67806 | predict  | Arabidopsis_lyrata  | 45.80 | 0.00 |
| TRINITY_GAQ87742 | Adenylat | Klebsormidium_niten | 45.80 | 0.00 |
| TRINITY_KZV15118 | ATP_bin  | Dorcoceras_hygromet | 45.80 | 0.00 |
| TRINITY_PNW71616 | hypothet | Chlamydomonas_reinh | 45.80 | 0.00 |
| TRINITY_CAD11676 | putativ  | Physcomitrella_pate | 45.80 | 0.00 |
| TRINITY_GAX74019 | hypothet | Chlamydomonas_eusti | 45.80 | 0.00 |
| TRINITY_XP_00297 | nudix_hj | Selaginella_moellen | 45.80 | 0.00 |
| TRINITY_PNW78732 | hypothet | Chlamydomonas_reinh | 45.80 | 0.00 |
| TRINITY_KXZ53982 | hypothet | Gonium_pectorale    | 45.80 | 0.00 |
| TRINITY_CAI84899 | putativ  | Medicago_sativa     | 45.80 | 0.00 |
| TRINITY_XP_01587 | protein  | Ziziphus_jujuba     | 45.80 | 0.00 |
| TRINITY_XP_00564 | palmito  | Coccomyxa_subellips | 45.80 | 0.00 |
| TRINITY_GAX78419 | hypothet | Chlamydomonas_eusti | 45.80 | 0.00 |
| TRINITY_GBF88347 | hypothet | Raphidocelis_subcap | 45.80 | 0.00 |
| TRINITY_POC8M8.1 | RecName: | Zea_mays            | 45.80 | 0.00 |
| TRINITY_GBG75466 | hypothet | Chara_braunii       | 45.80 | 0.00 |
| TRINITY_XP_00640 | dynamini | Eutrema_salsugineum | 45.80 | 0.00 |
| TRINITY_XP_02564 | serine/t | Arachis_hypogaea    | 45.80 | 0.00 |
| TRINITY_XP_00939 | PREDICTI | Pyrus_x_bretschneid | 45.80 | 0.00 |
| TRINITY_XP_02160 | DEAD-bo  | Manihot_esculenta   | 45.80 | 0.00 |
| TRINITY_XP_00294 | hypothet | Volvox_carteri      | 45.80 | 0.00 |
| TRINITY_PNW73739 | hypothet | Chlamydomonas_reinh | 45.80 | 0.00 |
| TRINITY_XP_01558 | condensi | Ricinus_communis    | 45.80 | 0.00 |
| TRINITY_KXZ46814 | hypothet | Gonium_pectorale    | 45.80 | 0.00 |
| TRINITY_PSC74368 | nucleoti | Micractinium_conduc | 45.80 | 0.00 |
| TRINITY_GBF97572 | hypothet | Raphidocelis_subcap | 45.80 | 0.00 |
| TRINITY_ERN13726 | hypothet | Amborella_trichopod | 45.80 | 0.00 |

|                                             |       |      |
|---------------------------------------------|-------|------|
| TRINITY_GBF8945830S_rib<Raphidocelis_subcap | 45.80 | 0.00 |
| TRINITY_GAX81928hypothetChlamydomonas_eusti | 45.80 | 0.00 |
| TRINITY_KXZ5286hypothetGonium_pectorale     | 45.80 | 0.00 |
| TRINITY_RRT80572hypothetEnsete_ventricosum  | 45.80 | 0.00 |
| TRINITY_GAQ81991fragmentKlebsormidium_niten | 45.80 | 0.00 |
| TRINITY_XP_02452cycloartSelaginella_moellen | 45.80 | 0.00 |
| TRINITY_GAX76414hypothetChlamydomonas_eusti | 45.80 | 0.00 |
| TRINITY_XP_02276serine<Durio_zibethinus     | 45.80 | 0.00 |
| TRINITY_PNW88404hypothetChlamydomonas_reinh | 45.80 | 0.00 |
| TRINITY_XP_00751SNF2_sujBathycoccus_prasinc | 45.80 | 0.00 |
| TRINITY_XP_01647PREDICTFNicotiana_tabacum   | 45.80 | 0.00 |
| TRINITY_PNW82091hypothetChlamydomonas_reinh | 45.80 | 0.00 |
| TRINITY_RID74221hypothetBrassica_rapa       | 45.80 | 0.00 |
| TRINITY_XP_00170predicteChlamydomonas_reinh | 45.80 | 0.00 |
| TRINITY_PNW71927hypothetChlamydomonas_reinh | 45.80 | 0.00 |
| TRINITY_XP_01389hypothetMonoraphidium_negle | 45.80 | 0.00 |
| TRINITY_XP_00294hypothetVolvox_carteri      | 45.80 | 0.00 |
| TRINITY_BAJ94575predicteHordeum_vulgare     | 45.80 | 0.00 |
| TRINITY_XP_01140AdenylylAuxenochlorella_pro | 45.80 | 0.00 |
| TRINITY_XP_00295hypothetVolvox_carteri      | 45.80 | 0.00 |
| TRINITY_KXZ56261hypothetGonium_pectorale    | 45.80 | 0.00 |
| TRINITY_XP_01366ubiquitiBrassica_napus      | 45.80 | 0.00 |
| TRINITY_XP_00633PREDICTFSolanum_tuberosum   | 45.80 | 0.00 |
| TRINITY_ABB90550putativeTriticum_aestivum   | 45.80 | 0.00 |
| TRINITY_GAX80953hypothetChlamydomonas_eusti | 45.80 | 0.00 |
| TRINITY_PNW87030hypothetChlamydomonas_reinh | 45.80 | 0.00 |
| TRINITY_PNW85726hypothetChlamydomonas_reinh | 45.80 | 0.00 |
| TRINITY_GAX80089hypothetChlamydomonas_eusti | 45.80 | 0.00 |
| TRINITY_GBF89102hypothetRaphidocelis_subcap | 45.80 | 0.00 |
| TRINITY_GAX82108hypothetChlamydomonas_eusti | 45.80 | 0.00 |
| TRINITY_XP_01023uncharaBrachypodium_distac  | 45.80 | 0.00 |
| TRINITY_XP_00170RNA_metChlamydomonas_reinh  | 45.80 | 0.00 |
| TRINITY_KXZ43615hypothetGonium_pectorale    | 45.80 | 0.00 |
| TRINITY_PSS30648Kinesin-Actinidia_chinensis | 45.80 | 0.00 |
| TRINITY_RAL39094hypothetCuscuta_australis   | 45.70 | 0.00 |
| TRINITY_PRW59015deoxyrikChlorella_sorokinia | 45.70 | 0.00 |
| TRINITY_OAE21288hypothetMarchantia_polymorp | 45.70 | 0.00 |
| TRINITY_XP_01722PREDICTFDaucus_carota       | 45.70 | 0.00 |
| TRINITY_GBF89518multidriRaphidocelis_subcap | 45.70 | 0.00 |
| TRINITY_GBG71933hypothetChara_braunii       | 45.70 | 0.00 |
| TRINITY_XP_01055PREDICTHTarenaya_hasslerian | 45.70 | 0.00 |
| TRINITY_XP_02733autophaçAbrus_precatorius   | 45.70 | 0.00 |
| TRINITY_XP_02200AP-4_conHelianthus_annuus   | 45.70 | 0.00 |
| TRINITY_GAQ80881adaptor Klebsormidium_niten | 45.70 | 0.00 |
| TRINITY_XP_02435probablePhyscomitrella_pate | 45.70 | 0.00 |
| TRINITY_GAQ88910peroxin Klebsormidium_niten | 45.70 | 0.00 |
| TRINITY_XP_00295hypothetVolvox_carteri      | 45.70 | 0.00 |
| TRINITY_GBF87741hypothetRaphidocelis_subcap | 45.70 | 0.00 |
| TRINITY_XP_02436RHOMBOIIPhyscomitrella_pate | 45.70 | 0.00 |
| TRINITY_XP_00414PREDICTFCucumis_sativus     | 45.70 | 0.00 |
| TRINITY_XP_02416chaperorRosa_chinensis      | 45.70 | 0.00 |
| TRINITY_GAQ8333017_beta-Klebsormidium_niten | 45.70 | 0.00 |
| TRINITY_XP_02387translatQuercus_suber       | 45.70 | 0.00 |
| TRINITY_XP_01594coiled-<Arachis_duranensis  | 45.70 | 0.00 |
| TRINITY_XP_00564CheY-liCoccomyxa_subellips  | 45.70 | 0.00 |
| TRINITY_KDP39315hypothetJatropha_curcas     | 45.70 | 0.00 |
| TRINITY_GAX85401hypothetChlamydomonas_eusti | 45.70 | 0.00 |
| TRINITY_XP_00253uncharaRicinus_communis     | 45.70 | 0.00 |
| TRINITY_RQL79285hypothetBrassica_cretica    | 45.70 | 0.00 |
| TRINITY_KXZ42548hypothetGonium_pectorale    | 45.70 | 0.00 |
| TRINITY_PSC76242multidriMicractinium_conduc | 45.70 | 0.00 |
| TRINITY_BAK00435predicteHordeum_vulgare     | 45.70 | 0.00 |
| TRINITY_XP_00941PREDICTFMusa_acuminata      | 45.70 | 0.00 |
| TRINITY_GAX84838hypothetChlamydomonas_eusti | 45.70 | 0.00 |
| TRINITY_XP_01389hypothetMonoraphidium_negle | 45.70 | 0.00 |
| TRINITY_AAT58837hypothetOryza_sativa        | 45.70 | 0.00 |

|                  |         |                             |                     |       |      |
|------------------|---------|-----------------------------|---------------------|-------|------|
| TRINITY_XP_00702 | PREDICT | Theobroma_cacao             | 45.70               | 0.00  |      |
| TRINITY_GAQ7822  | 5       | Serine/tKlebsormidium_niten | 45.70               | 0.00  |      |
| TRINITY_XP_0124  | 5       | PREDICT                     | Gossypium_raimondii | 45.70 | 0.00 |
| TRINITY_XP_0219  | 9       | probable                    | Helianthus_annuus   | 45.70 | 0.00 |
| TRINITY_GBG6874  | 8       | hypothet                    | Chara_braunii       | 45.70 | 0.00 |
| TRINITY_GAX8440  | 7       | hypothet                    | Chlamydomonas_eusti | 45.70 | 0.00 |
| TRINITY_GAQ8806  | 1       | Protein                     | Klebsormidium_niten | 45.70 | 0.00 |
| TRINITY_XP_0029  | 4       | hypothet                    | Volvox_carteri      | 45.70 | 0.00 |
| TRINITY_PTQ3557  | (       | hypothet                    | Marchantia_polymorp | 45.70 | 0.00 |
| TRINITY_BAK0286  | 9       | predict                     | Hordeum_vulgare     | 45.70 | 0.00 |
| TRINITY_XP_0029  | 4       | hypothet                    | Volvox_carteri      | 45.70 | 0.00 |
| TRINITY_PNW8107  | (       | hypothet                    | Chlamydomonas_reinh | 45.70 | 0.00 |
| TRINITY_XP_0029  | 5       | hypothet                    | Volvox_carteri      | 45.70 | 0.00 |
| TRINITY_XP_0120  | 8       | calcium-                    | Jatropha_curcas     | 45.70 | 0.00 |
| TRINITY_GAX7703  | 1       | hypothet                    | Chlamydomonas_eusti | 45.70 | 0.00 |
| TRINITY_XP_0083  | 4       | PREDICT                     | Malus_domestica     | 45.70 | 0.00 |
| TRINITY_RXH8982  | 3       | hypothet                    | Malus_domestica     | 45.70 | 0.00 |
| TRINITY_XP_0025  | 9       | unchara                     | Ricinus_communis    | 45.70 | 0.00 |
| TRINITY_GAX7849  | 2       | hypothet                    | Chlamydomonas_eusti | 45.70 | 0.00 |
| TRINITY_XP_0184  | 7       | PREDICT                     | Raphanus_sativus    | 45.70 | 0.00 |
| TRINITY_XP_0056  | 4       | hypothet                    | Coccomyxa_subellips | 45.70 | 0.00 |
| TRINITY_GAX7363  | 9       | hypothet                    | Chlamydomonas_eusti | 45.70 | 0.00 |
| TRINITY_KXZ5420  | 1       | hypothet                    | Gonium_pectorale    | 45.70 | 0.00 |
| TRINITY_GAX7321  | (       | hypothet                    | Chlamydomonas_eusti | 45.70 | 0.00 |
| TRINITY_GAQ7867  | 5       | tRNA-di                     | Klebsormidium_niten | 45.70 | 0.00 |
| TRINITY_GAX8327  | (       | hypothet                    | Chlamydomonas_eusti | 45.70 | 0.00 |
| TRINITY_GAQ9154  | (       | Zn2+ tr                     | Klebsormidium_niten | 45.70 | 0.00 |
| TRINITY_GAX7573  | (       | hypothet                    | Chlamydomonas_eusti | 45.70 | 0.00 |
| TRINITY_GAX7450  | (       | hypothet                    | Chlamydomonas_eusti | 45.70 | 0.00 |
| TRINITY_PNW7911  | (       | hypothet                    | Chlamydomonas_reinh | 45.70 | 0.00 |
| TRINITY_KXZ5537  | 8       | hypothet                    | Gonium_pectorale    | 45.70 | 0.00 |
| TRINITY_GBF9076  | 1       | ABC trar                    | Raphidocelis_subcap | 45.70 | 0.00 |
| TRINITY_XP_0017  | (       | predict                     | Chlamydomonas_reinh | 45.70 | 0.00 |
| TRINITY_KXZ4827  | 1       | hypothet                    | Gonium_pectorale    | 45.70 | 0.00 |
| TRINITY_CAA4928  | 3       | gag, prot                   | Volvox_carteri      | 45.70 | 0.00 |
| TRINITY_KXZ5114  | 7       | MYO2 pr                     | Gonium_pectorale    | 45.70 | 0.00 |
| TRINITY_XP_0045  | (       | traffic                     | Cicer_arietinum     | 45.70 | 0.00 |
| TRINITY_XP_0072  | 2       | N-alpha-                    | Prunus_persica      | 45.60 | 0.00 |
| TRINITY_PON5488  | 5       | Zinc fir                    | Trema_orientale     | 45.60 | 0.00 |
| TRINITY_OEL2560  | (       | putativ                     | Dichanthelium_oligo | 45.60 | 0.00 |
| TRINITY_BAK0283  | 7       | predict                     | Hordeum_vulgare     | 45.60 | 0.00 |
| TRINITY_XP_0042  | 9       | PREDICT                     | Fragaria_vesca      | 45.60 | 0.00 |
| TRINITY_XP_0025  | (       | predict                     | Micromonas_commoda  | 45.60 | 0.00 |
| TRINITY_PSS2421  | 9       | Beclin-1                    | Actinidia_chinensis | 45.60 | 0.00 |
| TRINITY_NP_0013  | 3       | NADH-ubi                    | Solanum_lycopersicu | 45.60 | 0.00 |
| TRINITY_XP_0244  | 3       | FH prote                    | Populus_trichocarpa | 45.60 | 0.00 |
| TRINITY_XP_0042  | 9       | PREDICT                     | Fragaria_vesca      | 45.60 | 0.00 |
| TRINITY_EFJ2642  | 5       | hypothet                    | Selaginella_moellen | 45.60 | 0.00 |
| TRINITY_OAE1874  | 5       | hypothet                    | Marchantia_polymorp | 45.60 | 0.00 |
| TRINITY_XP_0030  | 5       | predict                     | Micromonas_pusilla  | 45.60 | 0.00 |
| TRINITY_XP_0238  | 7       | peroxis                     | Quercus_suber       | 45.60 | 0.00 |
| TRINITY_XP_0218  | 8       | cationic                    | Carica_papaya       | 45.60 | 0.00 |
| TRINITY_XP_0056  | 4       | molybder                    | Coccomyxa_subellips | 45.60 | 0.00 |
| TRINITY_XP_0243  | 7       | DNA-dir                     | Physcomitrella_pate | 45.60 | 0.00 |
| TRINITY_PKA6589  | (       | putativ                     | Apostasia_shenzheni | 45.60 | 0.00 |
| TRINITY_EPS6491  | (       | hypothet                    | Genlisea_aurea      | 45.60 | 0.00 |
| TRINITY_OAE3217  | 2       | hypothet                    | Marchantia_polymorp | 45.60 | 0.00 |
| TRINITY_XP_0258  | (       | ATP-dep                     | Panicum_hallii      | 45.60 | 0.00 |
| TRINITY_PSC6961  | 1       | MYST-li                     | Micractinium_conduc | 45.60 | 0.00 |
| TRINITY_GAQ8142  | 4       | NLI int                     | Klebsormidium_niten | 45.60 | 0.00 |
| TRINITY_GBF8843  | 3       | hypothet                    | Raphidocelis_subcap | 45.60 | 0.00 |
| TRINITY_GAQ8199  | 1       | fragment                    | Klebsormidium_niten | 45.60 | 0.00 |
| TRINITY_OAE2006  | 8       | hypothet                    | Marchantia_polymorp | 45.60 | 0.00 |
| TRINITY_BAK0075  | (       | predict                     | Hordeum_vulgare     | 45.60 | 0.00 |
| TRINITY_GAX8286  | 1       | hypothet                    | Chlamydomonas_eusti | 45.60 | 0.00 |
| TRINITY_XP_0029  | 4       | hypothet                    | Volvox_carteri      | 45.60 | 0.00 |

|                  |          |                     |       |      |
|------------------|----------|---------------------|-------|------|
| TRINITY_XP_01023 | serine/t | Brachypodium_distac | 45.60 | 0.00 |
| TRINITY_XP_00169 | Hsp70 e  | Chlamydomonas_reinh | 45.60 | 0.00 |
| TRINITY_PTQ40975 | hypothet | Marchantia_polymorp | 45.60 | 0.00 |
| TRINITY_XP_00141 | predicte | Ostreococcus_sp._'l | 45.60 | 0.00 |
| TRINITY_GAX82386 | hypothet | Chlamydomonas_eusti | 45.60 | 0.00 |
| TRINITY_ERN03919 | hypothet | Amborella_trichopod | 45.60 | 0.00 |
| TRINITY_GAX79608 | hypothet | Chlamydomonas_eusti | 45.60 | 0.00 |
| TRINITY_XP_00295 | hypothet | Volvox_carteri      | 45.60 | 0.00 |
| TRINITY_PNW74534 | hypothet | Chlamydomonas_reinh | 45.60 | 0.00 |
| TRINITY_XP_00295 | hypothet | Volvox_carteri      | 45.60 | 0.00 |
| TRINITY_XP_01919 | PREDICTF | Ipomoea_nil         | 45.60 | 0.00 |
| TRINITY_GAQ92572 | catalas  | Klebsormidium_niten | 45.60 | 0.00 |
| TRINITY_XP_00169 | predicte | Chlamydomonas_reinh | 45.60 | 0.00 |
| TRINITY_GAX74298 | hypothet | Chlamydomonas_eusti | 45.60 | 0.00 |
| TRINITY_EFJ21599 | hypothet | Selaginella_moellen | 45.60 | 0.00 |
| TRINITY_XP_02167 | polyader | Hevea_brasiliensis  | 45.60 | 0.00 |
| TRINITY_XP_01942 | PREDICTF | Lupinus_angustifoli | 45.60 | 0.00 |
| TRINITY_GAQ88978 | cyclophi | Klebsormidium_niten | 45.60 | 0.00 |
| TRINITY_XP_00294 | componer | Volvox_carteri      | 45.60 | 0.00 |
| TRINITY_XP_00295 | hypothet | Volvox_carteri      | 45.60 | 0.00 |
| TRINITY_XP_00295 | hypothet | Volvox_carteri      | 45.60 | 0.00 |
| TRINITY_XP_02283 | NAD/GMP  | Ostreococcus_tauri  | 45.60 | 0.00 |
| TRINITY_PNW72441 | hypothet | Chlamydomonas_reinh | 45.60 | 0.00 |
| TRINITY_PKA61282 | Protein- | Apostasia_shenzheni | 45.60 | 0.00 |
| TRINITY_XP_00294 | hypothet | Volvox_carteri      | 45.60 | 0.00 |
| TRINITY_GAQ93561 | hypothet | Klebsormidium_niten | 45.60 | 0.00 |
| TRINITY_XP_00720 | transcri | Prunus_persica      | 45.60 | 0.00 |
| TRINITY_XP_01654 | PREDICTF | Capsicum_annuum     | 45.60 | 0.00 |
| TRINITY_GAX81110 | hypothet | Chlamydomonas_eusti | 45.60 | 0.00 |
| TRINITY_GAQ81024 | beta-cat | Klebsormidium_niten | 45.60 | 0.00 |
| TRINITY_GBF94335 | hypothet | Raphidocelis_subcap | 45.60 | 0.00 |
| TRINITY_GAX81666 | hypothet | Chlamydomonas_eusti | 45.60 | 0.00 |
| TRINITY_XP_00295 | hypothet | Volvox_carteri      | 45.60 | 0.00 |
| TRINITY_GAX79400 | hypothet | Chlamydomonas_eusti | 45.60 | 0.00 |
| TRINITY_PRW20465 | lysine-- | Chlorella_sorokinia | 45.60 | 0.00 |
| TRINITY_XP_00498 | uncharac | Setaria_italica     | 45.60 | 0.00 |
| TRINITY_XP_02392 | calcium/ | Quercus_suber       | 45.60 | 0.00 |
| TRINITY_XP_02186 | protein  | Spinacia_oleracea   | 45.60 | 0.00 |
| TRINITY_XP_02437 | transpor | Physcomitrella_pate | 45.50 | 0.00 |
| TRINITY_XP_00980 | PREDICTI | Nicotiana_sylvestri | 45.50 | 0.00 |
| TRINITY_XP_02498 | deSI-li  | Cynara_cardunculus  | 45.50 | 0.00 |
| TRINITY_EEF22673 | two-com  | Ricinus_communis    | 45.50 | 0.00 |
| TRINITY_GAV83945 | MCM dom  | Cephalotus_follicul | 45.50 | 0.00 |
| TRINITY_XP_02389 | probable | Quercus_suber       | 45.50 | 0.00 |
| TRINITY_XP_01569 | PREDICTF | Oryza_brachyantha   | 45.50 | 0.00 |
| TRINITY_XP_02203 | (+)-neon | Helianthus_annuus   | 45.50 | 0.00 |
| TRINITY_XP_02440 | adenine  | Physcomitrella_pate | 45.50 | 0.00 |
| TRINITY_XP_00683 | putativ  | Amborella_trichopod | 45.50 | 0.00 |
| TRINITY_VDD20602 | unnamed  | Brassica_oleracea   | 45.50 | 0.00 |
| TRINITY_XP_00880 | regulat  | Phoenix_dactylifera | 45.50 | 0.00 |
| TRINITY_GBF95510 | cytoplas | Raphidocelis_subcap | 45.50 | 0.00 |
| TRINITY_GAQ86724 | Nuclear  | Klebsormidium_niten | 45.50 | 0.00 |
| TRINITY_GAQ86355 | GTPase-  | Klebsormidium_niten | 45.50 | 0.00 |
| TRINITY_GAQ82787 | phospho  | Klebsormidium_niten | 45.50 | 0.00 |
| TRINITY_GAQ82250 | hypothet | Klebsormidium_niten | 45.50 | 0.00 |
| TRINITY_XP_02389 | glycoger | Quercus_suber       | 45.50 | 0.00 |
| TRINITY_GBG68482 | hypothet | Chara_braunii       | 45.50 | 0.00 |
| TRINITY_BAM11098 | ABC prot | Coptis_japonica     | 45.50 | 0.00 |
| TRINITY_XP_00294 | hypothet | Volvox_carteri      | 45.50 | 0.00 |
| TRINITY_XP_00565 | hypothet | Coccomyxa_subellips | 45.50 | 0.00 |
| TRINITY_OAY70810 | Ubiquiti | Ananas_comosus      | 45.50 | 0.00 |
| TRINITY_GAX75027 | hypothet | Chlamydomonas_eusti | 45.50 | 0.00 |
| TRINITY_XP_01919 | PREDICTF | Ipomoea_nil         | 45.50 | 0.00 |
| TRINITY_XP_00935 | PREDICTF | Pyrus_x_bretschneid | 45.50 | 0.00 |
| TRINITY_XP_02214 | probable | Momordica_charantia | 45.50 | 0.00 |
| TRINITY_YP_00881 | NADH del | Roya_obtusa         | 45.50 | 0.00 |

|                  |                              |       |      |
|------------------|------------------------------|-------|------|
| TRINITY_PIA43382 | hypothetAquilegia_coerulea   | 45.50 | 0.00 |
| TRINITY_GAX85978 | hypothetChlamydomonas_eusti  | 45.50 | 0.00 |
| TRINITY_XP_00564 | P25-alfCoccomyxa_subellips   | 45.50 | 0.00 |
| TRINITY_PNH04301 | putativeTetrabaena_socialis  | 45.50 | 0.00 |
| TRINITY_RWR83303 | Nop domCinnamomum_micranth   | 45.50 | 0.00 |
| TRINITY_XP_00169 | shikimatChlamydomonas_reinh  | 45.50 | 0.00 |
| TRINITY_XP_02257 | ubiquitiBrassica_napus       | 45.50 | 0.00 |
| TRINITY_PNW75532 | hypothetChlamydomonas_reinh  | 45.50 | 0.00 |
| TRINITY_XP_02452 | protein Selaginella_moellen  | 45.50 | 0.00 |
| TRINITY_PNH01704 | DigalactTetrabaena_socialis  | 45.50 | 0.00 |
| TRINITY_EFJ10528 | hypothetSelaginella_moellen  | 45.50 | 0.00 |
| TRINITY_PNH06934 | Dynein Tetrabaena_socialis   | 45.50 | 0.00 |
| TRINITY_EOY33035 | GeminiviTheobroma_cacao      | 45.50 | 0.00 |
| TRINITY_XP_01650 | (PREDICTINicotiana_tabacum   | 45.50 | 0.00 |
| TRINITY_KXZ55953 | hypothetGonium_pectorale     | 45.50 | 0.00 |
| TRINITY_AGW18228 | axonemaChlamydomonas_reinh   | 45.50 | 0.00 |
| TRINITY_GAX86225 | hypothetChlamydomonas_eusti  | 45.50 | 0.00 |
| TRINITY_GAQ91878 | DiacylgKlebsormidium_niten   | 45.50 | 0.00 |
| TRINITY_XP_02351 | FH proteCucurbita_pepo       | 45.50 | 0.00 |
| TRINITY_PSC72887 | E3 ubiqMicractinium_conduc   | 45.50 | 0.00 |
| TRINITY_GAX80121 | hypothetChlamydomonas_eusti  | 45.50 | 0.00 |
| TRINITY_PNW78592 | hypothetChlamydomonas_reinh  | 45.50 | 0.00 |
| TRINITY_XP_00170 | (ABC trarChlamydomonas_reinh | 45.50 | 0.00 |
| TRINITY_XP_02171 | protein Chenopodium_quinoa   | 45.50 | 0.00 |
| TRINITY_OAY79583 | JmjC donAnanas_comosus       | 45.50 | 0.00 |
| TRINITY_XP_01284 | PREDICTIErythranthe_guttata  | 45.50 | 0.00 |
| TRINITY_GAX74972 | hypothetChlamydomonas_eusti  | 45.50 | 0.00 |
| TRINITY_GAX73468 | hypothetChlamydomonas_eusti  | 45.50 | 0.00 |
| TRINITY_XP_00414 | PREDICTICucumis_sativus      | 45.50 | 0.00 |
| TRINITY_XP_02642 | ABC trarPapaver_somniferum   | 45.50 | 0.00 |
| TRINITY_XP_01919 | PREDICTIIPomoea_nil          | 45.50 | 0.00 |
| TRINITY_GAX84813 | hypothetChlamydomonas_eusti  | 45.50 | 0.00 |
| TRINITY_XP_02376 | (probableLactuca_sativa      | 45.50 | 0.00 |
| TRINITY_GAX80368 | hypothetChlamydomonas_eusti  | 45.50 | 0.00 |
| TRINITY_RMZ56974 | hypothetAuxenochlorella_pro  | 45.50 | 0.00 |
| TRINITY_GAQ92204 | hypothetKlebsormidium_niten  | 45.50 | 0.00 |
| TRINITY_AHG05844 | cold shcTriticum_aestivum    | 45.50 | 0.00 |
| TRINITY_XP_00295 | hypothetVolvox_carteri       | 45.50 | 0.00 |
| TRINITY_XP_02454 | coilin-1Selaginella_moellen  | 45.50 | 0.00 |
| TRINITY_XP_02440 | (deoxynucPhyscomitrella_pate | 45.50 | 0.00 |
| TRINITY_PNH04986 | hypothetTetrabaena_socialis  | 45.50 | 0.00 |
| TRINITY_PNW75220 | hypothetChlamydomonas_reinh  | 45.50 | 0.00 |
| TRINITY_XP_01596 | nucleoleArachis_duranensis   | 45.50 | 0.00 |
| TRINITY_PNW85362 | hypothetChlamydomonas_reinh  | 45.50 | 0.00 |
| TRINITY_KXZ51085 | hypothetGonium_pectorale     | 45.50 | 0.00 |
| TRINITY_KXZ54006 | hypothetGonium_pectorale     | 45.50 | 0.00 |
| TRINITY_GAX80195 | hypothetChlamydomonas_eusti  | 45.50 | 0.00 |
| TRINITY_PNW87768 | hypothetChlamydomonas_reinh  | 45.50 | 0.00 |
| TRINITY_GBF91936 | (thioredRaphidocelis_subcap  | 45.50 | 0.00 |
| TRINITY_GAX77318 | hypothetChlamydomonas_eusti  | 45.50 | 0.00 |
| TRINITY_GAQ89086 | (ATP-depKlebsormidium_niten  | 45.50 | 0.00 |
| TRINITY_EFJ34372 | hypothetSelaginella_moellen  | 45.50 | 0.00 |
| TRINITY_GAX77182 | hypothetChlamydomonas_eusti  | 45.50 | 0.00 |
| TRINITY_XP_00565 | tRNA guCoccomyxa_subellips   | 45.50 | 0.00 |
| TRINITY_XP_00250 | (predicteMicromonas_commoda  | 45.50 | 0.00 |
| TRINITY_PIN00081 | Anion eHandroanthus_impeti   | 45.50 | 0.00 |
| TRINITY_PNW80534 | hypothetChlamydomonas_reinh  | 45.50 | 0.00 |
| TRINITY_XP_01764 | PREDICTIGossypium_arboreum   | 45.50 | 0.00 |
| TRINITY_GAX82620 | hypothetChlamydomonas_eusti  | 45.50 | 0.00 |
| TRINITY_OAE35542 | hypothetMarchantia_polymorp  | 45.50 | 0.00 |
| TRINITY_NP_00114 | signal rZea_mays             | 45.50 | 0.00 |
| TRINITY_GAX77326 | hypothetChlamydomonas_eusti  | 45.50 | 0.00 |
| TRINITY_GAQ81501 | hypothetKlebsormidium_niten  | 45.50 | 0.00 |
| TRINITY_XP_00170 | (SIN3 conChlamydomonas_reinh | 45.50 | 0.00 |
| TRINITY_XP_02440 | (NADP-dePhyscomitrella_pate  | 45.40 | 0.00 |
| TRINITY_AFK09219 | calcium-Dunaliella_salina    | 45.40 | 0.00 |

|                                              |       |      |
|----------------------------------------------|-------|------|
| TRINITY_GAQ78393HSP70/HKlebsormidium_niten   | 45.40 | 0.00 |
| TRINITY_KFK29546hypothetArabis_alpina        | 45.40 | 0.00 |
| TRINITY_BAK02238predicteHordeum_vulgare      | 45.40 | 0.00 |
| TRINITY_GAQ89831hypothetKlebsormidium_niten  | 45.40 | 0.00 |
| TRINITY_KXZ42768hypothetGonium_pectorale     | 45.40 | 0.00 |
| TRINITY_GAX85194hypothetChlamydomonas_eusti  | 45.40 | 0.00 |
| TRINITY_XP_00935PREDICTE Pyrus_x_bretschneid | 45.40 | 0.00 |
| TRINITY_ABU52967hypothetDunaliella_viridis   | 45.40 | 0.00 |
| TRINITY_GAX73488hypothetChlamydomonas_eusti  | 45.40 | 0.00 |
| TRINITY_PHT27028Protein Capsicum_baccatum    | 45.40 | 0.00 |

|                                             |       |      |
|---------------------------------------------|-------|------|
| TRINITY_GAX8212(hypothetChlamydomonas_eusti | 45.40 | 0.00 |
| TRINITY_GAX8142(hypothetChlamydomonas_eusti | 45.40 | 0.00 |
| TRINITY_PNH1221(Beta-galTetrabaena_socialis | 45.40 | 0.00 |
| TRINITY_KMZ6412(IMP cyclZostera_marina      | 45.40 | 0.00 |
| TRINITY_XP_0139(Prestal)Monoraphidium_negle | 45.40 | 0.00 |
| TRINITY_GAX7956(hypothetChlamydomonas_eusti | 45.40 | 0.00 |
| TRINITY_PNW8460(hypothetChlamydomonas_reinh | 45.40 | 0.00 |
| TRINITY_XP_0243(BEACH d)Physcomitrella_pate | 45.40 | 0.00 |
| TRINITY_PNW7393(hypothetChlamydomonas_reinh | 45.40 | 0.00 |
| TRINITY_GAX8465(hypothetChlamydomonas_eusti | 45.40 | 0.00 |
| TRINITY_PNH0310(CalmodulTetrabaena_socialis | 45.40 | 0.00 |
| TRINITY_GAX7855(hypothetChlamydomonas_eusti | 45.40 | 0.00 |
| TRINITY_GAQ9101(gamma-g)Klebsormidium_niten | 45.40 | 0.00 |
| TRINITY_GAX7398(hypothetChlamydomonas_eusti | 45.40 | 0.00 |
| TRINITY_XP_0097(PREDICTINicotiana_sylvestri | 45.40 | 0.00 |
| TRINITY_XP_0124(PREDICTIGossypium_raimondii | 45.40 | 0.00 |
| TRINITY_GAQ7857(TranscriKlebsormidium_niten | 45.40 | 0.00 |
| TRINITY_GAQ8093(short c)Klebsormidium_niten | 45.40 | 0.00 |
| TRINITY_KXZ5615(hypothetGonium_pectorale    | 45.40 | 0.00 |
| TRINITY_XP_0102(PREDICTINelumbo_nucifera    | 45.40 | 0.00 |
| TRINITY_GAX8389(hypothetChlamydomonas_eusti | 45.40 | 0.00 |
| TRINITY_GAX7632(hypothetChlamydomonas_eusti | 45.40 | 0.00 |
| TRINITY_KXZ5306(hypothetGonium_pectorale    | 45.40 | 0.00 |
| TRINITY_XP_0244(protein Populus_trichocarpa | 45.40 | 0.00 |
| TRINITY_GAX8116(hypothetChlamydomonas_eusti | 45.40 | 0.00 |
| TRINITY_PNW8254(hypothetChlamydomonas_reinh | 45.40 | 0.00 |
| TRINITY_PNH0858(Adenine Tetrabaena_socialis | 45.40 | 0.00 |
| TRINITY_GAX7341(hypothetChlamydomonas_eusti | 45.40 | 0.00 |
| TRINITY_PNH1240(putativTetrabaena_socialis  | 45.40 | 0.00 |
| TRINITY_OAE2180(hypothetMarchantia_polymorp | 45.40 | 0.00 |
| TRINITY_GAX7684(hypothetChlamydomonas_eusti | 45.40 | 0.00 |
| TRINITY_KXZ4165(hypothetGonium_pectorale    | 45.40 | 0.00 |
| TRINITY_PNW7942(hypothetChlamydomonas_reinh | 45.40 | 0.00 |
| TRINITY_XP_0029(hybrid-(Volvox_carteri      | 45.40 | 0.00 |
| TRINITY_XP_0245(casein )Selaginella_moellen | 45.40 | 0.00 |
| TRINITY_XP_0030(predicteMicromonas_pusilla  | 45.30 | 0.00 |
| TRINITY_GAX8386(hypothetChlamydomonas_eusti | 45.30 | 0.00 |
| TRINITY_RLN1717(hypothetPanicum_miliaceum   | 45.30 | 0.00 |
| TRINITY_RMZ5555(hypothetAuxenochlorella_pro | 45.30 | 0.00 |
| TRINITY_GAX7350(hypothetChlamydomonas_eusti | 45.30 | 0.00 |
| TRINITY_XP_0279(ankyrin Vigna_unguiculata   | 45.30 | 0.00 |
| TRINITY_XP_0056(hypothetCoccomyxa_subellips | 45.30 | 0.00 |
| TRINITY_GAQ9143(Kinesin-Klebsormidium_niten | 45.30 | 0.00 |
| TRINITY_XP_0239(spindle Quercus_suber       | 45.30 | 0.00 |
| TRINITY_GAX8058(hypothetChlamydomonas_eusti | 45.30 | 0.00 |
| TRINITY_XP_0066(PREDICTIOryza_brachyantha   | 45.30 | 0.00 |
| TRINITY_XP_0167(PREDICTIGossypium_hirsutum  | 45.30 | 0.00 |
| TRINITY_XP_0245(protein Selaginella_moellen | 45.30 | 0.00 |
| TRINITY_XP_0243(calcium Physcomitrella_pate | 45.30 | 0.00 |
| TRINITY_XP_0202(peptidy)Cajanus_cajan       | 45.30 | 0.00 |
| TRINITY_PSR9343(TranscriActinidia_chinensis | 45.30 | 0.00 |
| TRINITY_OTF9970(putativHelianthus_annuus    | 45.30 | 0.00 |
| TRINITY_GAQ7978(Signal tKlebsormidium_niten | 45.30 | 0.00 |
| TRINITY_XP_0238(vacuolar)Quercus_suber      | 45.30 | 0.00 |
| TRINITY_XP_0245(geranyl)Selaginella_moellen | 45.30 | 0.00 |
| TRINITY_XP_0025(predicteMicromonas_commoda  | 45.30 | 0.00 |
| TRINITY_XP_0273(ABC trarAbrus_precatorius   | 45.30 | 0.00 |
| TRINITY_GAU3377(hypothetTrifolium_subterran | 45.30 | 0.00 |
| TRINITY_XP_0029(26S protSelaginella_moellen | 45.30 | 0.00 |
| TRINITY_GAQ8089(WD domaiKlebsormidium_niten | 45.30 | 0.00 |
| TRINITY_XP_0243(phytepsiPhyscomitrella_pate | 45.30 | 0.00 |
| TRINITY_BAJ9390(predicteHordeum_vulgare     | 45.30 | 0.00 |
| TRINITY_KFK36591(hypothetArabis_alpina      | 45.30 | 0.00 |
| TRINITY_XP_0188(PREDICTIJuglans_regia       | 45.30 | 0.00 |
| TRINITY_GBG9050(hypothetChara_braunii       | 45.30 | 0.00 |
| TRINITY_OVA1664(WD40 rejMacleaya_cordata    | 45.30 | 0.00 |



|                  |                              |       |      |
|------------------|------------------------------|-------|------|
| TRINITY_XP_00295 | hypothetVolvox_carteri       | 45.30 | 0.00 |
| TRINITY_AML7843  | (putativεBotryococcus_terrib | 45.30 | 0.00 |
| TRINITY_GBF89452 | hypothetRaphidocelis_subcap  | 45.30 | 0.00 |
| TRINITY_PNW77358 | hypothetChlamydomonas_reinh  | 45.30 | 0.00 |
| TRINITY_XP_02009 | 60S_ribcAnanas_comosus       | 45.30 | 0.00 |
| TRINITY_XP_02057 | SNW/SKI-Phalaenopsis_equest  | 45.30 | 0.00 |
| TRINITY_GBF95503 | hypothetRaphidocelis_subcap  | 45.30 | 0.00 |
| TRINITY_XP_02452 | PITH_donSelaginella_moellen  | 45.30 | 0.00 |
| TRINITY_XP_01595 | serine/tArachis_duranensis   | 45.30 | 0.00 |
| TRINITY_PIA51089 | hypothetAquilegia_coerulea   | 45.30 | 0.00 |
| TRINITY_XP_01053 | PREDICTFTarenaya_hasslerian  | 45.30 | 0.00 |
| TRINITY_XP_00295 | hypothetVolvox_carteri       | 45.30 | 0.00 |
| TRINITY_GAQ91495 | acyl-actKlebsormidium_niten  | 45.30 | 0.00 |
| TRINITY_GAX75103 | hypothetChlamydomonas_eusti  | 45.30 | 0.00 |
| TRINITY_XP_02438 | uncharacPhyscomitrella_pate  | 45.30 | 0.00 |
| TRINITY_KXZ44848 | hypothetGonium_pectorale     | 45.30 | 0.00 |
| TRINITY_PNH01419 | AttractiTetrabaena_socialis  | 45.30 | 0.00 |
| TRINITY_XP_00169 | flagellεChlamydomonas_reinh  | 45.30 | 0.00 |
| TRINITY_GAQ86788 | ARM_repεKlebsormidium_niten  | 45.30 | 0.00 |
| TRINITY_KXZ56707 | hypothetGonium_pectorale     | 45.30 | 0.00 |
| TRINITY_XP_01026 | PREDICTFNelumbo_nucifera     | 45.30 | 0.00 |
| TRINITY_KFK32163 | hypothetArabis_alpina        | 45.30 | 0.00 |
| TRINITY_GAX74866 | hypothetChlamydomonas_eusti  | 45.30 | 0.00 |
| TRINITY_XP_00294 | hypothetVolvox_carteri       | 45.30 | 0.00 |
| TRINITY_PSR92963 | RING-H2_Actinidia_chinensis  | 45.30 | 0.00 |
| TRINITY_GAX78744 | hypothetChlamydomonas_eusti  | 45.30 | 0.00 |
| TRINITY_XP_02390 | guanine_Quercus_suber        | 45.30 | 0.00 |
| TRINITY_GAQ88998 | Rab_famiKlebsormidium_niten  | 45.30 | 0.00 |
| TRINITY_PNH08734 | Pre-mRN/Tetrabaena_socialis  | 45.30 | 0.00 |
| TRINITY_XP_00295 | hypothetVolvox_carteri       | 45.30 | 0.00 |
| TRINITY_KXZ43915 | hypothetGonium_pectorale     | 45.30 | 0.00 |
| TRINITY_XP_00169 | predictεChlamydomonas_reinh  | 45.30 | 0.00 |
| TRINITY_XP_00308 | Small_G/Ostreococcus_tauri   | 45.30 | 0.00 |
| TRINITY_XP_00295 | hypothetVolvox_carteri       | 45.30 | 0.00 |
| TRINITY_GBF98918 | hypothetRaphidocelis_subcap  | 45.30 | 0.00 |
| TRINITY_XP_00298 | ultravivεSelaginella_moellen | 45.30 | 0.00 |
| TRINITY_GAX82209 | hypothetChlamydomonas_eusti  | 45.30 | 0.00 |
| TRINITY_XP_00879 | ABC_trarPhoenix_dactylifera  | 45.30 | 0.00 |
| TRINITY_PNW77595 | hypothetChlamydomonas_reinh  | 45.30 | 0.00 |
| TRINITY_XP_00940 | (PREDICTFMusa_acuminata      | 45.30 | 0    |
| TRINITY_XP_01389 | hypothetMonoraphidium_negle  | 45.30 | 0.00 |
| TRINITY_PNW85860 | (hypothetChlamydomonas_reinh | 45.30 | 0.00 |
| TRINITY_XP_01104 | PREDICTFPopulus_euphratica   | 45.30 | 0.00 |
| TRINITY_RYQ94556 | hypothetArachis_hypogaea     | 45.30 | 0.00 |
| TRINITY_XP_01140 | 5-oxoprεAuxenochlorella_pro  | 45.20 | 0.00 |
| TRINITY_XP_02391 | myosin_tQuercus_suber        | 45.20 | 0.00 |
| TRINITY_KFK40110 | (hypothetArabis_alpina       | 45.20 | 0.00 |
| TRINITY_XP_00141 | predictεOstreococcus_sp._'1  | 45.20 | 0.00 |
| TRINITY_XP_02495 | serine/εCitrus_sinensis      | 45.20 | 0.00 |
| TRINITY_OAY77099 | Protein_Ananas_comosus       | 45.20 | 0.00 |
| TRINITY_XP_02707 | histone_Coffea_arabica       | 45.20 | 0.00 |
| TRINITY_XP_02026 | CBL-intεAsparagus_officinal  | 45.20 | 0.00 |
| TRINITY_XP_01451 | dnaJ_proVigna_radiata        | 45.20 | 0.00 |
| TRINITY_GAQ80254 | Serine/TKlebsormidium_niten  | 45.20 | 0.00 |
| TRINITY_GAQ87870 | (AromaticKlebsormidium_niten | 45.20 | 0.00 |
| TRINITY_XP_00307 | HCaRG_[(Ostreococcus_tauri   | 45.20 | 0.00 |
| TRINITY_XP_00564 | L30e-li}Coccomyxa_subellips  | 45.20 | 0.00 |
| TRINITY_XP_02165 | subtilis}Hevea_brasiliensis  | 45.20 | 0.00 |
| TRINITY_XP_01915 | PREDICTFIpomoea_nil          | 45.20 | 0.00 |
| TRINITY_XP_02644 | phosphoεPapaver_somniferum   | 45.20 | 0.00 |
| TRINITY_XP_02438 | mitogen-Physcomitrella_pate  | 45.20 | 0.00 |
| TRINITY_PNW85197 | hypothetChlamydomonas_reinh  | 45.20 | 0.00 |
| TRINITY_GBF96487 | phosphoεRaphidocelis_subcap  | 45.20 | 0.00 |
| TRINITY_XP_02438 | mitogen-Physcomitrella_pate  | 45.20 | 0.00 |
| TRINITY_XP_02295 | FH_protεCucurbita_moschata   | 45.20 | 0.00 |
| TRINITY_OAE23440 | (hypothetMarchantia_polymorp | 45.20 | 0.00 |

|                  |                              |       |      |
|------------------|------------------------------|-------|------|
| TRINITY_KMS94337 | hypothetBeta_vulgaris        | 45.20 | 0.00 |
| TRINITY_BAK02778 | predicteHordeum_vulgare      | 45.20 | 0.00 |
| TRINITY_GAQ89194 | hypothetKlebsormidium_niten  | 45.20 | 0.00 |
| TRINITY_GAX83078 | hypothetChlamydomonas_eusti  | 45.20 | 0.00 |
| TRINITY_AII84869 | NADH deJungermannia_exsert   | 45.20 | 0.00 |
| TRINITY_PNY10515 | ABC trarTrifolium_pratense   | 45.20 | 0.00 |
| TRINITY_XP_02645 | probablePapaver_somniferum   | 45.20 | 0.00 |
| TRINITY_XP_00565 | uroporpCoccomyxa_subellips   | 45.20 | 0.00 |
| TRINITY_PNH11727 | tRNA wykTetrabaena_socialis  | 45.20 | 0.00 |
| TRINITY_GAX84372 | hypothetChlamydomonas_eusti  | 45.20 | 0.00 |
| TRINITY_OAE34143 | hypothetMarchantia_polymorp  | 45.20 | 0.00 |
| TRINITY_GAX83220 | hypothetChlamydomonas_eusti  | 45.20 | 0.00 |
| TRINITY_KXZ54156 | hypothetGonium_pectorale     | 45.20 | 0.00 |
| TRINITY_XP_00169 | Mg2+ trCChlamydomonas_reinh  | 45.20 | 0.00 |
| TRINITY_GAX80507 | hypothetChlamydomonas_eusti  | 45.20 | 0.00 |
| TRINITY_XP_00294 | hypothetVolvox_carteri       | 45.20 | 0.00 |
| TRINITY_PNH04952 | putativeTetrabaena_socialis  | 45.20 | 0.00 |
| TRINITY_GAX81768 | hypothetChlamydomonas_eusti  | 45.20 | 0.00 |
| TRINITY_XP_02440 | OTU domPhyscomitrella_pate   | 45.20 | 0.00 |
| TRINITY_GAX83841 | hypothetChlamydomonas_eusti  | 45.20 | 0.00 |
| TRINITY_GAQ87395 | Serine T̄Klebsormidium_niten | 45.20 | 0.00 |
| TRINITY_PNW71180 | hypothetChlamydomonas_reinh  | 45.20 | 0.00 |
| TRINITY_KXZ51732 | hypothetGonium_pectorale     | 45.20 | 0.00 |
| TRINITY_XP_00294 | hypothetVolvox_carteri       | 45.20 | 0.00 |
| TRINITY_RLM93338 | hypothetPanicum_miliaceum    | 45.20 | 0.00 |
| TRINITY_PNW76348 | hypothetChlamydomonas_reinh  | 45.20 | 0.00 |
| TRINITY_GAX81406 | hypothetChlamydomonas_eusti  | 45.20 | 0.00 |
| TRINITY_XP_02735 | pirin-liAbrus_precatorius    | 45.20 | 0.00 |
| TRINITY_XP_02387 | translatQuercus_suber        | 45.20 | 0.00 |
| TRINITY_XP_00295 | hypothetVolvox_carteri       | 45.20 | 0.00 |
| TRINITY_XP_00295 | hypothetVolvox_carteri       | 45.20 | 0.00 |
| TRINITY_PON43231 | ABC trarParasponia_anderson  | 45.20 | 0.00 |
| TRINITY_XP_00564 | hypothetCoccomyxa_subellips  | 45.20 | 0.00 |
| TRINITY_XP_00295 | hypothetVolvox_carteri       | 45.20 | 0.00 |
| TRINITY_XP_02177 | probableChenopodium_quinoa   | 45.20 | 0.00 |
| TRINITY_XP_00169 | predicteChlamydomonas_reinh  | 45.20 | 0.00 |
| TRINITY_XP_00295 | hypothetVolvox_carteri       | 45.20 | 0.00 |
| TRINITY_GAX83884 | hypothetChlamydomonas_eusti  | 45.20 | 0.00 |
| TRINITY_NP_00118 | dual speArabidopsis_thalian  | 45.20 | 0.00 |
| TRINITY_XP_00169 | poly(a) Chlamydomonas_reinh  | 45.20 | 0.00 |
| TRINITY_KXZ49991 | hypothetGonium_pectorale     | 45.20 | 0.00 |
| TRINITY_PNW80474 | hypothetChlamydomonas_reinh  | 45.20 | 0.00 |
| TRINITY_RWR95812 | pre-mRN̄Cinnamomum_micranth  | 45.20 | 0.00 |
| TRINITY_GAX83435 | hypothetChlamydomonas_eusti  | 45.20 | 0.00 |
| TRINITY_XP_00169 | KDEL recChlamydomonas_reinh  | 45.20 | 0.00 |
| TRINITY_ARO50106 | 20S protYamagishiella_unicc  | 45.20 | 0.00 |
| TRINITY_XP_00564 | NUC173-cCoccomyxa_subellips  | 45.20 | 0.00 |
| TRINITY_AAG44096 | cycloartAbies_magnifica      | 45.20 | 0.00 |
| TRINITY_KXZ49319 | hypothetGonium_pectorale     | 45.20 | 0.00 |
| TRINITY_GAQ80689 | Serine T̄Klebsormidium_niten | 45.20 | 0.00 |
| TRINITY_XP_02391 | dynamin-Quercus_suber        | 45.20 | 0.00 |
| TRINITY_XP_00250 | histone Micromonas_commoda   | 45.20 | 0.00 |
| TRINITY_PNW87491 | hypothetChlamydomonas_reinh  | 45.20 | 0.00 |
| TRINITY_GAX81848 | hypothetChlamydomonas_eusti  | 45.20 | 0.00 |
| TRINITY_XP_01092 | PREDICTHElaeis_guineensis    | 45.20 | 0.00 |
| TRINITY_KXZ56662 | hypothetGonium_pectorale     | 45.20 | 0.00 |
| TRINITY_PNH02817 | hypothetTetrabaena_socialis  | 45.20 | 0.00 |
| TRINITY_XP_00450 | pyrophosCicer_arietinum      | 45.20 | 0.00 |
| TRINITY_XP_00295 | hypothetVolvox_carteri       | 45.20 | 0.00 |
| TRINITY_XP_00751 | predicteBathycoccus_prasinc  | 45.20 | 0.00 |
| TRINITY_PRW45465 | pseudouChlorella_sorokinia   | 45.20 | 0.00 |
| TRINITY_XP_00169 | signal r̄Chlamydomonas_reinh | 45.20 | 0.00 |
| TRINITY_GAX80119 | hypothetChlamydomonas_eusti  | 45.20 | 0.00 |
| TRINITY_KXZ45953 | hypothetGonium_pectorale     | 45.20 | 0.00 |
| TRINITY_GAX83750 | hypothetChlamydomonas_eusti  | 45.20 | 0.00 |
| TRINITY_XP_00295 | hypothetVolvox_carteri       | 45.20 | 0.00 |

|                  |                             |       |      |
|------------------|-----------------------------|-------|------|
| TRINITY_XP_00564 | hypothetCoccomyxa_subellips | 45.20 | 0.00 |
| TRINITY_PNW79732 | hypothetChlamydomonas_reinh | 45.20 | 0.00 |
| TRINITY_PNW84232 | hypothetChlamydomonas_reinh | 45.20 | 0.00 |
| TRINITY_PNW80538 | hypothetChlamydomonas_reinh | 45.20 | 0.00 |
| TRINITY_XP_00306 | predicteMicromonas_pusilla  | 45.20 | 0.00 |
| TRINITY_XP_01165 | PREDICTFCucumis_sativus     | 45.20 | 0.00 |
| TRINITY_PRW56446 | ADP-ribcChlorella_sorokinia | 45.20 | 0.00 |
| TRINITY_XP_02390 | myosin tQuercus_suber       | 45.20 | 0.00 |
| TRINITY_EMS50007 | EnhanceiTriticum_urartu     | 45.10 | 0.00 |
| TRINITY_XP_02283 | CytochrOstreococcus_tauri   | 45.10 | 0.00 |
| TRINITY_OAE19924 | hypothetMarchantia_polymorp | 45.10 | 0.00 |
| TRINITY_XP_00584 | hypothetChlorella_variabili | 45.10 | 0.00 |
| TRINITY_PSC69984 | ubiquitiMicractinium_conduc | 45.10 | 0.00 |
| TRINITY_EPS71211 | glucose-Genlisea_aurea      | 45.10 | 0.00 |
| TRINITY_GAQ77772 | NicotinKlebsormidium_niten  | 45.10 | 0.00 |
| TRINITY_XP_02387 | phosphoQuercus_suber        | 45.10 | 0.00 |
| TRINITY_GAQ88359 | alpha/bKlebsormidium_niten  | 45.10 | 0.00 |
| TRINITY_XP_02390 | ras-likeQuercus_suber       | 45.10 | 0.00 |
| TRINITY_XP_02021 | glutamiCajanus_cajan        | 45.10 | 0.00 |
| TRINITY_XP_00665 | PREDICTFOryza_brachyantha   | 45.10 | 0.00 |
| TRINITY_GAX78918 | hypothetChlamydomonas_eusti | 45.10 | 0.00 |
| TRINITY_GAQ77852 | GTP-binKlebsormidium_niten  | 45.10 | 0.00 |
| TRINITY_PNH11983 | hypothetTetrabaena_socialis | 45.10 | 0.00 |
| TRINITY_XP_02275 | MOB kinDurio_zibethinus     | 45.10 | 0.00 |
| TRINITY_KXZ55534 | hypothetGonium_pectorale    | 45.10 | 0.00 |
| TRINITY_XP_00306 | predicteMicromonas_pusilla  | 45.10 | 0.00 |
| TRINITY_XP_00294 | hypothetVolvox_carteri      | 45.10 | 0.00 |
| TRINITY_KEH40092 | metalloMedicago_truncatula  | 45.10 | 0.00 |
| TRINITY_PNH03131 | Alpha-pTetrabaena_socialis  | 45.10 | 0.00 |
| TRINITY_XP_00169 | predicteChlamydomonas_reinh | 45.10 | 0.00 |
| TRINITY_GAX73865 | hypothetChlamydomonas_eusti | 45.10 | 0.00 |
| TRINITY_AYU70944 | sucrose Ginkgo_biloba       | 45.10 | 0.00 |
| TRINITY_XP_00170 | predicteChlamydomonas_reinh | 45.10 | 0.00 |
| TRINITY_XP_02402 | transcriMorus_notabilis     | 45.10 | 0.00 |
| TRINITY_BAG70978 | epsin N-Musa_balbisiana     | 45.10 | 0.00 |
| TRINITY_PRW57397 | eukaryotChlorella_sorokinia | 45.10 | 0.00 |
| TRINITY_ERN05630 | hypothetAmborella_trichopod | 45.10 | 0.00 |
| TRINITY_XP_02058 | serine/tPhalaenopsis_equest | 45.10 | 0.00 |
| TRINITY_CDM83910 | unnamed Triticum_aestivum   | 45.10 | 0.00 |
| TRINITY_XP_02020 | ribose-rCajanus_cajan       | 45.10 | 0.00 |
| TRINITY_GBF92086 | hypothetRaphidocelis_subcap | 45.10 | 0.00 |
| TRINITY_BAK01125 | predicteHordeum_vulgare     | 45.10 | 0.00 |
| TRINITY_XP_02438 | sensor rPhyscomitrella_pate | 45.10 | 0.00 |
| TRINITY_XP_00564 | Clc chlCoccomyxa_subellips  | 45.10 | 0.00 |
| TRINITY_RDX60395 | SenescerMucuna_pruriens     | 45.10 | 0.00 |
| TRINITY_GAX73359 | hypothetChlamydomonas_eusti | 45.10 | 0.00 |
| TRINITY_XP_00911 | PREDICTFBrassica_rapa       | 45.10 | 0.00 |
| TRINITY_XP_02390 | uncharacQuercus_suber       | 45.10 | 0.00 |
| TRINITY_GAX79717 | hypothetChlamydomonas_eusti | 45.10 | 0.00 |
| TRINITY_XP_00298 | phosphatSelaginella_moellen | 45.10 | 0.00 |
| TRINITY_RQL81690 | hypothetBrassica_cretica    | 45.10 | 0.00 |
| TRINITY_XP_02388 | structuQuercus_suber        | 45.10 | 0.00 |
| TRINITY_PNW78132 | hypothetChlamydomonas_reinh | 45.10 | 0.00 |
| TRINITY_XP_00169 | p53-indChlamydomonas_reinh  | 45.10 | 0.00 |
| TRINITY_PRW59023 | argininChlorella_sorokinia  | 45.10 | 0.00 |
| TRINITY_XP_00168 | potassiChlamydomonas_reinh  | 45.10 | 0.00 |
| TRINITY_GAX78753 | hypothetChlamydomonas_eusti | 45.10 | 0.00 |
| TRINITY_XP_00141 | predicteOstreococcus_sp._'l | 45.10 | 0.00 |
| TRINITY_GBF93736 | hypothetRaphidocelis_subcap | 45.10 | 0.00 |
| TRINITY_KXZ53291 | hypothetGonium_pectorale    | 45.10 | 0.00 |
| TRINITY_XP_01586 | galactoZiziphus_jujuba      | 45.10 | 0.00 |
| TRINITY_GAQ78747 | PutativKlebsormidium_niten  | 45.10 | 0.00 |
| TRINITY_PNH09193 | hypothetTetrabaena_socialis | 45.10 | 0.00 |
| TRINITY_AAV54188 | chloropHaematococcus_lacus  | 45.10 | 0.00 |
| TRINITY_XP_01390 | hypothetMonoraphidium_negle | 45.10 | 0.00 |
| TRINITY_XP_02390 | kinesin Quercus_suber       | 45.10 | 0.00 |

|                  |                              |       |      |
|------------------|------------------------------|-------|------|
| TRINITY_XP_00295 | hypothetVolvox_carteri       | 45.10 | 0.00 |
| TRINITY_PNW75161 | hypothetChlamydomonas_reinh  | 45.10 | 0.00 |
| TRINITY_EPS64534 | hypothetGenlisea_aurea       | 45.10 | 0.00 |
| TRINITY_XP_0075  | (predicteBathycoccus_prasinc | 45.10 | 0.00 |
| TRINITY_XP_02374 | autophaçLactuca_sativa       | 45.10 | 0.00 |
| TRINITY_XP_00628 | ras-relaCapsella_rubella     | 45.00 | 0.00 |
| TRINITY_XP_0025  | (fatty acMicromonas_commoda  | 45.00 | 0.00 |
| TRINITY_XP_02438 | H/ACA riPhyscomitrella_pate  | 45.00 | 0.00 |
| TRINITY_XP_02387 | acetamicQuercus_suber        | 45.00 | 0.00 |
| TRINITY_KXZ45555 | hypothetGonium_pectorale     | 45.00 | 0.00 |
| TRINITY_XP_02389 | LOW QUAIQuercus_suber        | 45.00 | 0.00 |
| TRINITY_ONM33382 | CTP syntZea_mays             | 45.00 | 0.00 |
| TRINITY_GAX7718  | (hypothetChlamydomonas_eusti | 45.00 | 0.00 |
| TRINITY_XP_02439 | serine/tPhyscomitrella_pate  | 45.00 | 0.00 |
| TRINITY_GAQ88885 | NAD-depeKlebsormidium_niten  | 45.00 | 0.00 |
| TRINITY_XP_00227 | PREDICTIVitis_vinifera       | 45.00 | 0.00 |
| TRINITY_GAQ85015 | ATP-depeKlebsormidium_niten  | 45.00 | 0.00 |
| TRINITY_XP_02389 | probableQuercus_suber        | 45.00 | 0.00 |
| TRINITY_ONK66039 | uncharacAsparagus_officinal  | 45.00 | 0.00 |
| TRINITY_OAO94309 | TAF5 [A]Arabidopsis_thalian  | 45.00 | 0.00 |
| TRINITY_KXZ55513 | hypothetGonium_pectorale     | 45.00 | 0.00 |
| TRINITY_XP_01284 | PREDICTIErythranthe_guttata  | 45.00 | 0.00 |
| TRINITY_PNH06372 | histone Tetrabaena_socialis  | 45.00 | 0.00 |
| TRINITY_XP_00664 | PREDICTIOryza_brachyantha    | 45.00 | 0.00 |
| TRINITY_XP_01882 | PREDICTIJuglans_regia        | 45.00 | 0.00 |
| TRINITY_KXZ5181  | (hypothetGonium_pectorale    | 45.00 | 0.00 |
| TRINITY_PTQ31328 | hypothetMarchantia_polymorp  | 45.00 | 0.00 |
| TRINITY_XP_00584 | expressèChlorella_variabili  | 45.00 | 0.00 |
| TRINITY_GBF91241 | hypothetRaphidocelis_subcap  | 45.00 | 0.00 |
| TRINITY_GAQ77818 | branchecKlebsormidium_niten  | 45.00 | 0.00 |
| TRINITY_GAX76876 | hypothetChlamydomonas_eusti  | 45.00 | 0.00 |
| TRINITY_XP_01026 | PREDICTINelumbo_nucifera     | 45.00 | 0.00 |
| TRINITY_XP_02388 | alpha-acQuercus_suber        | 45.00 | 0.00 |
| TRINITY_GBG61046 | hypothetChara_braunii        | 45.00 | 0.00 |
| TRINITY_XP_0139  | (hypothetMonoraphidium_negle | 45.00 | 0.00 |
| TRINITY_GBF90545 | zinc phcRaphidocelis_subcap  | 45.00 | 0.00 |
| TRINITY_XP_00564 | GBP-domæCoccomyxa_subellips  | 45.00 | 0.00 |
| TRINITY_XP_02437 | ATP-binçPhyscomitrella_pate  | 45.00 | 0.00 |
| TRINITY_KXZ54443 | hypothetGonium_pectorale     | 45.00 | 0.00 |
| TRINITY_PNH02844 | hypothetTetrabaena_socialis  | 45.00 | 0.00 |
| TRINITY_GBF9081  | (ubiquitiRaphidocelis_subcap | 45.00 | 0.00 |
| TRINITY_GAX75949 | hypothetChlamydomonas_eusti  | 45.00 | 0.00 |
| TRINITY_KXZ49339 | hypothetGonium_pectorale     | 45.00 | 0.00 |
| TRINITY_PNH06295 | ApocarotTetrabaena_socialis  | 45.00 | 0.00 |
| TRINITY_GAX81212 | hypothetChlamydomonas_eusti  | 45.00 | 0.00 |
| TRINITY_GAQ8396  | (hypothetKlebsormidium_niten | 45.00 | 0.00 |
| TRINITY_GAQ85616 | VPS45 væKlebsormidium_niten  | 45.00 | 0.00 |
| TRINITY_XP_00169 | plastid Chlamydomonas_reinh  | 45.00 | 0.00 |
| TRINITY_XP_02168 | GTP-binçHevea_brasiliensis   | 45.00 | 0.00 |
| TRINITY_XP_0096  | (PREDICTINicotiana_tomentosi | 45.00 | 0.00 |
| TRINITY_GAX72981 | hypothetChlamydomonas_eusti  | 45.00 | 0.00 |
| TRINITY_XP_01027 | PREDICTINelumbo_nucifera     | 45.00 | 0.00 |
| TRINITY_GAX86128 | hypothetChlamydomonas_eusti  | 45.00 | 0.00 |
| TRINITY_GAQ86264 | dehydroçKlebsormidium_niten  | 45.00 | 0.00 |
| TRINITY_PNW72245 | hypothetChlamydomonas_reinh  | 45.00 | 0.00 |
| TRINITY_XP_01389 | hypothetMonoraphidium_negle  | 45.00 | 0.00 |
| TRINITY_GBF94173 | hypothetRaphidocelis_subcap  | 45.00 | 0.00 |
| TRINITY_PNW82359 | hypothetChlamydomonas_reinh  | 45.00 | 0.00 |
| TRINITY_GAQ80925 | solute çKlebsormidium_niten  | 45.00 | 0.00 |
| TRINITY_XP_00294 | hypothetVolvox_carteri       | 45.00 | 0.00 |
| TRINITY_GAQ80621 | hypothetKlebsormidium_niten  | 45.00 | 0.00 |
| TRINITY_GAX83351 | hypothetChlamydomonas_eusti  | 45.00 | 0.00 |
| TRINITY_XP_01023 | transcriBrachypodium_distac  | 45.00 | 0.00 |
| TRINITY_XP_02387 | probableQuercus_suber        | 45.00 | 0.00 |
| TRINITY_KXZ40924 | hypothetGonium_pectorale     | 45.00 | 0.00 |
| TRINITY_XP_02387 | DNA repæQuercus_suber        | 45.00 | 0.00 |

|                  |                              |       |      |
|------------------|------------------------------|-------|------|
| TRINITY_GAX72591 | hypothetChlamydomonas_eusti  | 45.00 | 0.00 |
| TRINITY_XP_00295 | hypothetVolvox_carteri       | 45.00 | 0.00 |
| TRINITY_GAX7578  | hypothetChlamydomonas_eusti  | 45.00 | 0.00 |
| TRINITY_XP_0258  | (probablePanicum_hallii      | 45.00 | 0.00 |
| TRINITY_GAQ8865  | Dyneins Klebsormidium_niten  | 45.00 | 0    |
| TRINITY_KXZ5105  | hypothetGonium_pectorale     | 45.00 | 0.00 |
| TRINITY_OAE2406  | hypothetMarchantia_polymorp  | 45.00 | 0    |
| TRINITY_XP_00295 | hypothetVolvox_carteri       | 45.00 | 0.00 |
| TRINITY_XP_00294 | hypothetVolvox_carteri       | 44.90 | 0.00 |
| TRINITY_PIN1149  | Sensory Handroanthus_impeti  | 44.90 | 0.00 |
| TRINITY_AMD8267  | 4long chVernicia_fordii      | 44.90 | 0.00 |
| TRINITY_GAQ8635  | 4AAA-typeKlebsormidium_niten | 44.90 | 0.00 |
| TRINITY_PNW8612  | (hypothetChlamydomonas_reinh | 44.90 | 0.00 |
| TRINITY_BAK0050  | (predicteHordeum_vulgare     | 44.90 | 0.00 |
| TRINITY_XP_02641 | EEF1A 1Papaver_somniferum    | 44.90 | 0.00 |
| TRINITY_XP_0158  | (uncharaZiziphus_jujuba      | 44.90 | 0.00 |
| TRINITY_XP_0239  | 2serine/tQuercus_suber       | 44.90 | 0.00 |
| TRINITY_XP_0100  | 3PREDICTHEucalyptus_grandis  | 44.90 | 0.00 |
| TRINITY_XP_0218  | 2probablePrunus_avium        | 44.90 | 0.00 |
| TRINITY_XP_0191  | 7PREDICTHIpomoea_nil         | 44.90 | 0.00 |
| TRINITY_XP_0241  | (uncharaRosa_chinensis       | 44.90 | 0.00 |
| TRINITY_RWW9025  | hypothetEnsete_ventricosum   | 44.90 | 0.00 |
| TRINITY_OUS4467  | (putativeOstreococcus_tauri  | 44.90 | 0.00 |
| TRINITY_XP_0239  | (alpha,a)Quercus_suber       | 44.90 | 0.00 |
| TRINITY_XP_0016  | 9flavoheChlamydomonas_reinh  | 44.90 | 0.00 |
| TRINITY_POC8M8   | .1RecName:Zea_mays           | 44.90 | 0.00 |
| TRINITY_XP_0240  | (uncharaMorus_notabilis      | 44.90 | 0.00 |
| TRINITY_XP_0137  | 3ras-relaBrassica_napus      | 44.90 | 0.00 |
| TRINITY_PSC7114  | 9coatomeMicractinium_conduc  | 44.90 | 0.00 |
| TRINITY_XP_0270  | 9very-lorCoffea_arabica      | 44.90 | 0.00 |
| TRINITY_XP_0016  | 9plastid Chlamydomonas_reinh | 44.90 | 0.00 |
| TRINITY_XP_0138  | 9hypothetMonoraphidium_negle | 44.90 | 0.00 |
| TRINITY_XP_0017  | (nucleorChlamydomonas_reinh  | 44.90 | 0.00 |
| TRINITY_GBG6857  | 7GlutamatChara_braunii       | 44.90 | 0.00 |
| TRINITY_XP_0243  | (uncharaPhyscomitrella_pate  | 44.90 | 0.00 |
| TRINITY_PNW7793  | (hypothetChlamydomonas_reinh | 44.90 | 0.00 |
| TRINITY_XP_0238  | 7ras-relaQuercus_suber       | 44.90 | 0.00 |
| TRINITY_XP_0017  | (predicteChlamydomonas_reinh | 44.90 | 0.00 |
| TRINITY_GBF9190  | (gamma-tiRaphidocelis_subcap | 44.90 | 0.00 |
| TRINITY_XP_0243  | 5protein Physcomitrella_pate | 44.90 | 0.00 |
| TRINITY_GAX7605  | (hypothetChlamydomonas_eusti | 44.90 | 0.00 |
| TRINITY_PON4323  | 1ABC trarParasponia_anderson | 44.90 | 0.00 |
| TRINITY_KXZ5530  | 4hypothetGonium_pectorale    | 44.90 | 0.00 |
| TRINITY_PNW8596  | 2hypothetChlamydomonas_reinh | 44.90 | 0.00 |
| TRINITY_XP_0056  | 5RabGAP/1Coccomyxa_subellips | 44.90 | 0.00 |
| TRINITY_KXZ4950  | 4hypothetGonium_pectorale    | 44.90 | 0.00 |
| TRINITY_OAE3007  | 3hypothetMarchantia_polymorp | 44.90 | 0.00 |
| TRINITY_GAX8397  | 4hypothetChlamydomonas_eusti | 44.90 | 0.00 |
| TRINITY_XP_0238  | 9ubiquitiQuercus_suber       | 44.90 | 0.00 |
| TRINITY_PNW8884  | 3hypothetChlamydomonas_reinh | 44.90 | 0.00 |
| TRINITY_KXZ5275  | (hypothetGonium_pectorale    | 44.90 | 0.00 |
| TRINITY_PWA7601  | 7Arf GTPaArtemisia_annua     | 44.90 | 0.00 |
| TRINITY_XP_0238  | 7glutamatQuercus_suber       | 44.90 | 0.00 |
| TRINITY_EEF2536  | 13-hydroRicinus_communis     | 44.90 | 0.00 |
| TRINITY_GAX7750  | (hypothetChlamydomonas_eusti | 44.90 | 0.00 |
| TRINITY_GAQ8247  | 4hypothetKlebsormidium_niten | 44.90 | 0.00 |
| TRINITY_XP_00295 | hypothetVolvox_carteri       | 44.90 | 0.00 |
| TRINITY_XP_0025  | (uncharaRicinus_communis     | 44.90 | 0.00 |
| TRINITY_XP_0120  | 7probableJatropha_curcas     | 44.90 | 0.00 |
| TRINITY_GAQ8311  | 2pescadiKlebsormidium_niten  | 44.90 | 0.00 |
| TRINITY_XP_0106  | (PREDICTIBeta_vulgaris       | 44.90 | 0.00 |
| TRINITY_GAX8485  | 1hypothetChlamydomonas_eusti | 44.90 | 0.00 |
| TRINITY_GAX8592  | 9hypothetChlamydomonas_eusti | 44.90 | 0.00 |
| TRINITY_GBF8939  | (hypothetRaphidocelis_subcap | 44.90 | 0.00 |
| TRINITY_PNW8156  | (hypothetChlamydomonas_reinh | 44.90 | 0.00 |
| TRINITY_XP_0165  | (PREDICTICapsicum_annuum     | 44.90 | 0.00 |

|                                              |       |      |
|----------------------------------------------|-------|------|
| TRINITY_GBG6548(hypothetChara_braunii        | 44.90 | 0.00 |
| TRINITY_GAX7578(hypothetChlamydomonas_eusti  | 44.90 | 0.00 |
| TRINITY_GAX8574(hypothetChlamydomonas_eusti  | 44.90 | 0.00 |
| TRINITY_EFJ2446(hypothetSelaginella_moellen  | 44.90 | 0.00 |
| TRINITY_PNW7499(hypothetChlamydomonas_reinh  | 44.90 | 0.00 |
| TRINITY_XP_0201(uncharacAnanas_comosus       | 44.90 | 0.00 |
| TRINITY_KXZ4446(hypothetGonium_pectorale     | 44.90 | 0.00 |
| TRINITY_XP_0056(urea actCoccomyxa_subellips  | 44.90 | 0.00 |
| TRINITY_XP_0188(PREDICTI Juglans_regia       | 44.90 | 0.00 |
| TRINITY_XP_0036(uncharacMedicago_truncatula  | 44.90 | 0.00 |
| TRINITY_PNW8850(hypothetChlamydomonas_reinh  | 44.90 | 0.00 |
| TRINITY_ABU5296(hypothetDunaliella_viridis   | 44.90 | 0.00 |
| TRINITY_PNW7786(hypothetChlamydomonas_reinh  | 44.90 | 0.00 |
| TRINITY_KXG2977(hypothetSorghum_bicolor      | 44.90 | 0.00 |
| TRINITY_XP_0228(ER lumerOlea_europaea        | 44.90 | 0.00 |
| TRINITY_XP_0030(dpy-30 )Micromonas_pusilla   | 44.90 | 0.00 |
| TRINITY_KXZ4165(hypothetGonium_pectorale     | 44.90 | 0.00 |
| TRINITY_GAX7367(hypothetChlamydomonas_eusti  | 44.90 | 0.00 |
| TRINITY_XP_0068(protein Amborella_trichopod  | 44.90 | 0.00 |
| TRINITY_PNH0912(hypothetTetrabaena_socialis  | 44.90 | 0.00 |
| TRINITY_XP_0100(PREDICTI Eucalyptus_grandis  | 44.80 | 0.00 |
| TRINITY_PNR3798(hypothetPhyscomitrella_pate  | 44.80 | 0.00 |
| TRINITY_XP_0239(uncharacQuercus_suber        | 44.80 | 0.00 |
| TRINITY_GAQ8578(Cysteiny Klebsormidium_niten | 44.80 | 0.00 |
| TRINITY_XP_0188(PREDICTI Juglans_regia       | 44.80 | 0.00 |
| TRINITY_GBG6494(hypothetChara_braunii        | 44.80 | 0.00 |
| TRINITY_XP_0029(hypothetVolvox_carteri       | 44.80 | 0.00 |
| TRINITY_XP_0014(predicte Ostreococcus_sp._'1 | 44.80 | 0.00 |
| TRINITY_GAV5948(ADH_zinc Cephalotus_follicul | 44.80 | 0.00 |
| TRINITY_OAE2839(hypothetMarchantia_polymorp  | 44.80 | 0.00 |
| TRINITY_PIA3329(hypothetAquilegia_coerulea   | 44.80 | 0.00 |
| TRINITY_XP_0058(hypothetChlorella_variabili  | 44.80 | 0.00 |
| TRINITY_XP_0237(serine/t Lactuca_sativa      | 44.80 | 0.00 |
| TRINITY_XP_0110(ABC trar Sesamum_indicum     | 44.80 | 0.00 |
| TRINITY_XP_0239(fimbrin-Quercus_suber        | 44.80 | 0.00 |
| TRINITY_XP_0075(predicte Bathycoccus_prasinc | 44.80 | 0.00 |
| TRINITY_XP_0109(PREDICTI Elaeis_guineensis   | 44.80 | 0.00 |
| TRINITY_BAJ9385(predicte Hordeum_vulgare     | 44.80 | 0.00 |
| TRINITY_GAX8364(hypothetChlamydomonas_eusti  | 44.80 | 0.00 |
| TRINITY_VDD0534(unnamed Brassica_oleracea    | 44.80 | 0.00 |
| TRINITY_XP_0243(N-alpha-Physcomitrella_pate  | 44.80 | 0.00 |
| TRINITY_XP_0058(hypothetChlorella_variabili  | 44.80 | 0.00 |
| TRINITY_XP_0029(hypothetVolvox_carteri       | 44.80 | 0.00 |
| TRINITY_XP_0273(uncharacAbrus_precatorius    | 44.80 | 0.00 |
| TRINITY_PNW7973(hypothetChlamydomonas_reinh  | 44.80 | 0.00 |
| TRINITY_XP_0208(importir Arabidopsis_lyrata  | 44.80 | 0.00 |
| TRINITY_GAX8022(hypothetChlamydomonas_eusti  | 44.80 | 0.00 |
| TRINITY_GAX7714(hypothetChlamydomonas_eusti  | 44.80 | 0.00 |
| TRINITY_GAV8311(K_tetra Cephalotus_follicul  | 44.80 | 0.00 |
| TRINITY_OAE2889(hypothetMarchantia_polymorp  | 44.80 | 0.00 |
| TRINITY_GAX7562(hypothetChlamydomonas_eusti  | 44.80 | 0.00 |
| TRINITY_PRW5890(selenocj Chlorella_sorokinia | 44.80 | 0.00 |
| TRINITY_XP_0186(PREDICTI Musa_acuminata      | 44.80 | 0.00 |
| TRINITY_GAX8459(hypothetChlamydomonas_eusti  | 44.80 | 0.00 |
| TRINITY_KXZ5330(hypothetGonium_pectorale     | 44.80 | 0.00 |
| TRINITY_KHG2359(Serine/t Gossypium_arboreum  | 44.80 | 0.00 |
| TRINITY_GAX8114(hypothetChlamydomonas_eusti  | 44.80 | 0.00 |
| TRINITY_XP_0279(probable Vigna_unguiculata   | 44.80 | 0.00 |
| TRINITY_GBG5939(hypothetChara_braunii        | 44.80 | 0.00 |
| TRINITY_GAX8549(hypothetChlamydomonas_eusti  | 44.80 | 0.00 |
| TRINITY_PNH0870(hypothetTetrabaena_socialis  | 44.80 | 0.00 |
| TRINITY_GAX8498(hypothetChlamydomonas_eusti  | 44.80 | 0.00 |
| TRINITY_GBF8939(membranε Raphidocelis_subcap | 44.80 | 0.00 |
| TRINITY_XP_0139(hypothetMonoraphidium_negle  | 44.80 | 0.00 |
| TRINITY_XP_0093(PREDICTI Musa_acuminata      | 44.80 | 0.00 |
| TRINITY_XP_0239(phytoenε Quercus_suber       | 44.80 | 0.00 |

|                  |                              |       |      |
|------------------|------------------------------|-------|------|
| TRINITY_GBG64374 | hypothetChara_braunii        | 44.80 | 0.00 |
| TRINITY_XP_02391 | LOW QUAIQuercus_suber        | 44.80 | 0.00 |
| TRINITY_PNW81141 | hypothetChlamydomonas_reinh  | 44.80 | 0.00 |
| TRINITY_GAX80571 | hypothetChlamydomonas_eusti  | 44.80 | 0.00 |
| TRINITY_GAX74542 | hypothetChlamydomonas_eusti  | 44.80 | 0.00 |
| TRINITY_GAX86246 | hypothetChlamydomonas_eusti  | 44.80 | 0.00 |
| TRINITY_XP_01675 | PREDICTFGossypium_hirsutum   | 44.80 | 0.00 |
| TRINITY_GAX83263 | hypothetChlamydomonas_eusti  | 44.80 | 0.00 |
| TRINITY_KFK38038 | hypothetArabis_alpina        | 44.80 | 0.00 |
| TRINITY_XP_00938 | PREDICTFMusa_acuminata       | 44.80 | 0.00 |
| TRINITY_XP_02392 | probableQuercus_suber        | 44.80 | 0.00 |
| TRINITY_XP_01244 | PREDICTFGossypium_raimondii  | 44.80 | 0.00 |
| TRINITY_PNW82784 | hypothetChlamydomonas_reinh  | 44.80 | 0.00 |
| TRINITY_PNW73938 | hypothetChlamydomonas_reinh  | 44.80 | 0.00 |
| TRINITY_XP_00294 | hypothetVolvox_carteri       | 44.80 | 0.00 |
| TRINITY_PNW70692 | hypothetChlamydomonas_reinh  | 44.80 | 0.00 |
| TRINITY_XP_01140 | (SedoheptAuxenochlorella_pro | 44.80 | 0.00 |
| TRINITY_XP_00141 | predicteOstreococcus_sp._'1  | 44.80 | 0.00 |
| TRINITY_XP_00722 | GTP-binPrunus_persica        | 44.80 | 0.00 |
| TRINITY_XP_01655 | PREDICTFCapsicum_annuum      | 44.70 | 0.00 |
| TRINITY_XP_00941 | PREDICTFMusa_acuminata       | 44.70 | 0.00 |
| TRINITY_XP_01944 | PREDICTFLupinus_angustifoli  | 44.70 | 0.00 |
| TRINITY_XP_00451 | ras-relaCicer_arietinum      | 44.70 | 0.00 |
| TRINITY_XP_01847 | PREDICTFRaphanus_sativus     | 44.70 | 0.00 |
| TRINITY_RZC20511 | Short irGlycine_soja         | 44.70 | 0.00 |
| TRINITY_GAX77606 | hypothetChlamydomonas_eusti  | 44.70 | 0.00 |
| TRINITY_XP_00751 | predicteBathycoccus_prasinc  | 44.70 | 0.00 |
| TRINITY_XP_02272 | GTP-binDurio_zibethinus      | 44.70 | 0.00 |
| TRINITY_GAX75678 | hypothetChlamydomonas_eusti  | 44.70 | 0.00 |
| TRINITY_XP_02198 | E3 ubiqHelianthus_annuus     | 44.70 | 0.00 |
| TRINITY_GAQ84918 | hypothetKlebsormidium_niten  | 44.70 | 0.00 |
| TRINITY_GAQ83154 | hypothetKlebsormidium_niten  | 44.70 | 0.00 |
| TRINITY_PIN10055 | TyrosineHandroanthus_impeti  | 44.70 | 0.00 |
| TRINITY_XP_00294 | hypothetVolvox_carteri       | 44.70 | 0.00 |
| TRINITY_GAX78484 | hypothetChlamydomonas_eusti  | 44.70 | 0.00 |
| TRINITY_XP_02439 | N-alpha-Physcomitrella_pate  | 44.70 | 0.00 |
| TRINITY_GBG77128 | hypothetChara_braunii        | 44.70 | 0.00 |
| TRINITY_KXZ49542 | hypothetGonium_pectorale     | 44.70 | 0.00 |
| TRINITY_XP_01562 | sphingoOryza_sativa          | 44.70 | 0.00 |
| TRINITY_OAE26704 | hypothetMarchantia_polymorp  | 44.70 | 0.00 |
| TRINITY_PNW88560 | hypothetChlamydomonas_reinh  | 44.70 | 0.00 |
| TRINITY_GAQ91966 | hypothetKlebsormidium_niten  | 44.70 | 0.00 |
| TRINITY_XP_00684 | methytlAmborella_trichopod   | 44.70 | 0.00 |
| TRINITY_PWA83090 | pantoateArtemisia_annua      | 44.70 | 0.00 |
| TRINITY_KNA18888 | hypothetSpinacia_oleracea    | 44.70 | 0.00 |
| TRINITY_XP_01589 | bZIP trZiziphus_jujuba       | 44.70 | 0.00 |
| TRINITY_GBF88626 | hypothetRaphidocelis_subcap  | 44.70 | 0.00 |
| TRINITY_XP_00585 | hypothetChlorella_variabili  | 44.70 | 0.00 |
| TRINITY_KOM48596 | hypothetVigna_angularis      | 44.70 | 0.00 |
| TRINITY_XP_02189 | nudix hCarica_papaya         | 44.70 | 0.00 |
| TRINITY_PNW88668 | hypothetChlamydomonas_reinh  | 44.70 | 0.00 |
| TRINITY_PNW83037 | hypothetChlamydomonas_reinh  | 44.70 | 0.00 |
| TRINITY_GAX73184 | hypothetChlamydomonas_eusti  | 44.70 | 0.00 |
| TRINITY_GAX77898 | hypothetChlamydomonas_eusti  | 44.70 | 0.00 |
| TRINITY_PNH11786 | Heat shTetrabaena_socialis   | 44.70 | 0.00 |
| TRINITY_EOY19987 | GeminiviTheobroma_cacao      | 44.70 | 0.00 |
| TRINITY_PRW58166 | transferChlorella_sorokinia  | 44.70 | 0.00 |
| TRINITY_XP_02391 | ATP-depeQuercus_suber        | 44.70 | 0.00 |
| TRINITY_PNW77119 | hypothetChlamydomonas_reinh  | 44.70 | 0.00 |
| TRINITY_XP_02439 | putativePhyscomitrella_pate  | 44.70 | 0.00 |
| TRINITY_XP_02214 | DNA polyMomordica_charantia  | 44.70 | 0.00 |
| TRINITY_PNH08927 | hypothetTetrabaena_socialis  | 44.70 | 0.00 |
| TRINITY_PTQ50614 | hypothetMarchantia_polymorp  | 44.70 | 0.00 |
| TRINITY_XP_01389 | hypothetMonoraphidium_negle  | 44.70 | 0.00 |
| TRINITY_PNW82685 | hypothetChlamydomonas_reinh  | 44.70 | 0.00 |
| TRINITY_XP_01246 | PREDICTFGossypium_raimondii  | 44.70 | 0.00 |

|                  |           |                     |       |      |
|------------------|-----------|---------------------|-------|------|
| TRINITY_XP_02387 | acyl-CoA  | Quercus_suber       | 44.70 | 0.00 |
| TRINITY_EFJ1848  | hypothet  | Selaginella_moellen | 44.70 | 0.00 |
| TRINITY_GAX7749  | hypothet  | Chlamydomonas_eusti | 44.70 | 0.00 |
| TRINITY_PNW7718  | (hypothet | Chlamydomonas_reinh | 44.70 | 0.00 |
| TRINITY_KZN0975  | (hypothet | Daucus_carota       | 44.70 | 0.00 |
| TRINITY_XP_0056  | hypothet  | Coccomyxa_subellips | 44.70 | 0.00 |
| TRINITY_GAX7808  | (hypothet | Chlamydomonas_eusti | 44.70 | 0.00 |
| TRINITY_GBG8719  | hypothet  | Chara_braunii       | 44.70 | 0.00 |
| TRINITY_GAQ8588  | (tyrosin  | Klebsormidium_niten | 44.70 | 0.00 |
| TRINITY_XP_0016  | predict   | Chlamydomonas_reinh | 44.70 | 0.00 |
| TRINITY_XP_0202  | YLP moti  | Cajanus_cajan       | 44.70 | 0.00 |
| TRINITY_KXZ4881  | hypothet  | Gonium_pectorale    | 44.70 | 0.00 |
| TRINITY_GAX8432  | hypothet  | Chlamydomonas_eusti | 44.70 | 0.00 |
| TRINITY_GAX8085  | hypothet  | Chlamydomonas_eusti | 44.70 | 0.00 |
| TRINITY_BAK0219  | predict   | Hordeum_vulgare     | 44.70 | 0.00 |
| TRINITY_OAE3264  | hypothet  | Marchantia_polymorp | 44.70 | 0.00 |
| TRINITY_XP_0194  | PREDICTI  | Lupinus_angustifoli | 44.70 | 0.00 |
| TRINITY_GAX7945  | hypothet  | Chlamydomonas_eusti | 44.70 | 0.00 |
| TRINITY_GAX7272  | hypothet  | Chlamydomonas_eusti | 44.70 | 0.00 |
| TRINITY_PNW6970  | hypothet  | Chlamydomonas_reinh | 44.70 | 0.00 |
| TRINITY_GAX7714  | hypothet  | Chlamydomonas_eusti | 44.70 | 0.00 |
| TRINITY_GAX8402  | hypothet  | Chlamydomonas_eusti | 44.70 | 0.00 |
| TRINITY_PNH0786  | (hypothet | Tetrabaena_socialis | 44.70 | 0.00 |
| TRINITY_PNW7308  | hypothet  | Chlamydomonas_reinh | 44.70 | 0.00 |
| TRINITY_GAX7298  | hypothet  | Chlamydomonas_eusti | 44.70 | 0.00 |
| TRINITY_PNW8177  | hypothet  | Chlamydomonas_reinh | 44.70 | 0.00 |
| TRINITY_XP_0016  | predict   | Chlamydomonas_reinh | 44.70 | 0.00 |
| TRINITY_GAX8322  | (hypothet | Chlamydomonas_eusti | 44.60 | 0.00 |
| TRINITY_XP_0056  | pyropho   | Coccomyxa_subellips | 44.60 | 0.00 |
| TRINITY_PSS1387  | (Actin-r  | Actinidia_chinensis | 44.60 | 0.00 |
| TRINITY_XP_0271  | (kinesin  | Coffea_eugenioides  | 44.60 | 0.00 |
| TRINITY_PLY9583  | hypothet  | Lactuca_sativa      | 44.60 | 0.00 |
| TRINITY_XP_0243  | protein   | Physcomitrella_pate | 44.60 | 0.00 |
| TRINITY_XP_0176  | PREDICTI  | Gossypium_arboreum  | 44.60 | 0.00 |
| TRINITY_XP_0238  | elongati  | Quercus_suber       | 44.60 | 0.00 |
| TRINITY_OWM7183  | hypothet  | Punica_granatum     | 44.60 | 0.00 |
| TRINITY_PTQ3791  | hypothet  | Marchantia_polymorp | 44.60 | 0.00 |
| TRINITY_EEC7338  | hypothet  | Oryza_sativa        | 44.60 | 0.00 |
| TRINITY_XP_0025  | (predict  | Micromonas_commoda  | 44.60 | 0.00 |
| TRINITY_XP_0056  | metal-d   | Coccomyxa_subellips | 44.60 | 0.00 |
| TRINITY_GAQ8232  | phosphat  | Klebsormidium_niten | 44.60 | 0.00 |
| TRINITY_XP_0056  | hypothet  | Coccomyxa_subellips | 44.60 | 0.00 |
| TRINITY_XP_0238  | ras-rel   | Quercus_suber       | 44.60 | 0.00 |
| TRINITY_XP_0238  | cell di   | Quercus_suber       | 44.60 | 0.00 |
| TRINITY_PIN0443  | Cystathi  | Handroanthus_impeti | 44.60 | 0.00 |
| TRINITY_GAQ8527  | WD-40 r   | Klebsormidium_niten | 44.60 | 0.00 |
| TRINITY_OAE2954  | hypothet  | Marchantia_polymorp | 44.60 | 0.00 |
| TRINITY_XP_0075  | unnamed   | Bathycoccus_prasinc | 44.60 | 0.00 |
| TRINITY_GAQ7873  | alpha-an  | Klebsormidium_niten | 44.60 | 0.00 |
| TRINITY_XP_0104  | PREDICTI  | Camelina_sativa     | 44.60 | 0.00 |
| TRINITY_KDD7434  | (hypothet | Helicosporidium_sp. | 44.60 | 0.00 |
| TRINITY_XP_0105  | PREDICTI  | Tarenaya_hasslerian | 44.60 | 0.00 |
| TRINITY_AKD2801  | translat  | Morus_alba          | 44.60 | 0.00 |
| TRINITY_GAQ8424  | Class I   | Klebsormidium_niten | 44.60 | 0.00 |
| TRINITY_PHT5998  | Dual sp   | Capsicum_baccatum   | 44.60 | 0.00 |
| TRINITY_XP_0191  | PREDICTI  | Ipomoea_nil         | 44.60 | 0.00 |
| TRINITY_XP_0017  | (CDK inh  | Chlamydomonas_reinh | 44.60 | 0.00 |
| TRINITY_XP_0056  | zf-AN1-c  | Coccomyxa_subellips | 44.60 | 0.00 |
| TRINITY_XP_0106  | PREDICTI  | Beta_vulgaris       | 44.60 | 0.00 |
| TRINITY_XP_0139  | (Cell cy  | Monoraphidium_negle | 44.60 | 0.00 |
| TRINITY_GAX7900  | (hypothet | Chlamydomonas_eusti | 44.60 | 0.00 |
| TRINITY_EFJ2260  | hypothet  | Selaginella_moellen | 44.60 | 0.00 |
| TRINITY_P0C8M8.1 | RecName:  | Zea_mays            | 44.60 | 0.00 |
| TRINITY_KXZ4762  | hypothet  | Gonium_pectorale    | 44.60 | 0.00 |
| TRINITY_GAX7411  | hypothet  | Chlamydomonas_eusti | 44.60 | 0.00 |
| TRINITY_PNW8670  | hypothet  | Chlamydomonas_reinh | 44.60 | 0.00 |



|                  |                             |       |      |
|------------------|-----------------------------|-------|------|
| TRINITY_XP_00295 | hypothetVolvox_carteri      | 44.60 | 0.00 |
| TRINITY_GAX77809 | hypothetChlamydomonas_eusti | 44.60 | 0.00 |
| TRINITY_XP_00880 | DNA-dirPhoenix_dactylifera  | 44.60 | 0    |
| TRINITY_KXZ44418 | hypothetGonium_pectorale    | 44.60 | 0.00 |
| TRINITY_XP_01101 | PREDICTIPopulus_euphratica  | 44.60 | 0.00 |
| TRINITY_GAX79067 | hypothetChlamydomonas_eusti | 44.60 | 0.00 |
| TRINITY_GBG73474 | hypothetChara_braunii       | 44.60 | 0.00 |
| TRINITY_NP_85052 | MAPK phcArabidopsis_thalian | 44.60 | 0.00 |
| TRINITY_Q7XJ96.1 | RecName:Chlamydomonas_reinh | 44.60 | 0.00 |
| TRINITY_XP_01046 | PREDICTICamelina_sativa     | 44.60 | 0.00 |
| TRINITY_XP_00564 | Sec63-dCoccomyxa_subellips  | 44.60 | 0.00 |
| TRINITY_XP_01452 | ervatamiVigna_radiata       | 44.60 | 0.00 |
| TRINITY_GBF94188 | hypothetRaphidocelis_subcap | 44.60 | 0.00 |
| TRINITY_XP_00294 | hypothetVolvox_carteri      | 44.60 | 0.00 |
| TRINITY_GAX83358 | hypothetChlamydomonas_eusti | 44.60 | 0.00 |
| TRINITY_GAX81923 | hypothetChlamydomonas_eusti | 44.60 | 0.00 |
| TRINITY_GAX84289 | hypothetChlamydomonas_eusti | 44.60 | 0.00 |
| TRINITY_PRW33549 | thiosulfChlorella_sorokinia | 44.60 | 0.00 |
| TRINITY_KXZ56862 | hypothetGonium_pectorale    | 44.60 | 0.00 |
| TRINITY_OEL38809 | Serine/tDichanthelium_oligo | 44.60 | 0.00 |
| TRINITY_ADF43165 | 97782m  Chlamydomonas_reinh | 44.60 | 0.00 |
| TRINITY_PIN17324 | S-methylHandroanthus_impeti | 44.60 | 0.00 |
| TRINITY_XP_00306 | predicteMicromonas_pusilla  | 44.60 | 0.00 |
| TRINITY_XP_02390 | inorganiQuercus_suber       | 44.60 | 0.00 |
| TRINITY_XP_00295 | proline Volvox_carteri      | 44.60 | 0.00 |
| TRINITY_XP_02452 | phosphatSelaginella_moellen | 44.60 | 0.00 |
| TRINITY_XP_02640 | mitochorPapaver_somniferum  | 44.60 | 0.00 |
| TRINITY_PNH11052 | PhosphoTetrabaena_socialis  | 44.60 | 0.00 |
| TRINITY_PNH10793 | BifunctiTetrabaena_socialis | 44.60 | 0.00 |
| TRINITY_XP_00170 | RabGAP/Chlamydomonas_reinh  | 44.60 | 0.00 |
| TRINITY_PNH06283 | putativeTetrabaena_socialis | 44.60 | 0.00 |
| TRINITY_XP_02387 | uncharacQuercus_suber       | 44.60 | 0.00 |
| TRINITY_XP_00295 | hypothetVolvox_carteri      | 44.60 | 0.00 |
| TRINITY_XP_02389 | sorting Quercus_suber       | 44.60 | 0.00 |
| TRINITY_XP_01722 | PREDICTIDaucus_carota       | 44.60 | 0.00 |
| TRINITY_KXZ48718 | hypothetGonium_pectorale    | 44.60 | 0.00 |
| TRINITY_XP_00170 | predicteChlamydomonas_reinh | 44.60 | 0.00 |
| TRINITY_OAE27810 | hypothetMarchantia_polymorp | 44.60 | 0.00 |
| TRINITY_XP_00935 | PREDICTIPyrus_x_bretschneid | 44.60 | 0.00 |
| TRINITY_XP_00295 | hypothetVolvox_carteri      | 44.60 | 0.00 |
| TRINITY_XP_01390 | calcium/Monoraphidium_negle | 44.60 | 0.00 |
| TRINITY_PNW80254 | hypothetChlamydomonas_reinh | 44.60 | 0.00 |
| TRINITY_PPS08138 | hypothetGossypium_barbadens | 44.60 | 0.00 |
| TRINITY_GAX79335 | hypothetChlamydomonas_eusti | 44.60 | 0.00 |
| TRINITY_XP_00307 | TranslatOstreococcus_tauri  | 44.60 | 0.00 |
| TRINITY_PNH05203 | Endo-1,Tetrabaena_socialis  | 44.60 | 0.00 |
| TRINITY_XP_01724 | PREDICTIDaucus_carota       | 44.60 | 0.00 |
| TRINITY_GAX78078 | hypothetChlamydomonas_eusti | 44.60 | 0.00 |
| TRINITY_RVW11860 | TranspoVitis_vinifera       | 44.60 | 0.00 |
| TRINITY_GBG91496 | hypothetChara_braunii       | 44.60 | 0.00 |
| TRINITY_EYU45971 | hypothetErythranthe_guttata | 44.50 | 0.00 |
| TRINITY_XP_02437 | metal tPhyscomitrella_pate  | 44.50 | 0.00 |
| TRINITY_GBF90328 | hypothetRaphidocelis_subcap | 44.50 | 0.00 |
| TRINITY_RRT65770 | hypothetEnsete_ventricosum  | 44.50 | 0.00 |
| TRINITY_XP_02640 | haloacicPapaver_somniferum  | 44.50 | 0.00 |
| TRINITY_GAQ89310 | Dyneins Klebsormidium_niten | 44.50 | 0.00 |
| TRINITY_XP_02392 | eukaryotQuercus_suber       | 44.50 | 0.00 |
| TRINITY_GBF95304 | mitochorRaphidocelis_subcap | 44.50 | 0.00 |
| TRINITY_XP_01843 | PREDICTIRaphanus_sativus    | 44.50 | 0.00 |
| TRINITY_XP_00879 | AP-2 conPhoenix_dactylifera | 44.50 | 0.00 |
| TRINITY_GAX75433 | hypothetChlamydomonas_eusti | 44.50 | 0.00 |
| TRINITY_GBF89851 | hypothetRaphidocelis_subcap | 44.50 | 0.00 |
| TRINITY_GAX73106 | hypothetChlamydomonas_eusti | 44.50 | 0.00 |
| TRINITY_XP_02389 | 4-hydroQuercus_suber        | 44.50 | 0.00 |
| TRINITY_GAX73655 | hypothetChlamydomonas_eusti | 44.50 | 0.00 |
| TRINITY_GAX77309 | hypothetChlamydomonas_eusti | 44.50 | 0.00 |

|                  |           |                     |       |      |
|------------------|-----------|---------------------|-------|------|
| TRINITY_XP_02451 | protein   | Selaginella_moellen | 44.50 | 0.00 |
| TRINITY_OMO9557  | Crotonas  | Corchorus_capsulari | 44.50 | 0.00 |
| TRINITY_XP_0138  | hypothet  | Monoraphidium_negle | 44.50 | 0.00 |
| TRINITY_PNW8217  | hypothet  | Chlamydomonas_reinh | 44.50 | 0.00 |
| TRINITY_XP_0243  | pre-mRN   | Physcomitrella_pate | 44.50 | 0.00 |
| TRINITY_GAX7377  | hypothet  | Chlamydomonas_eusti | 44.50 | 0.00 |
| TRINITY_GAX8151  | hypothet  | Chlamydomonas_eusti | 44.50 | 0.00 |
| TRINITY_GAX7767  | hypothet  | Chlamydomonas_eusti | 44.50 | 0.00 |
| TRINITY_GAQ8357  | RNA lig   | Klebsormidium_niten | 44.50 | 0.00 |
| TRINITY_PNW7793  | hypothet  | Chlamydomonas_reinh | 44.50 | 0.00 |
| TRINITY_GBG5950  | hypothet  | Chara_braunii       | 44.50 | 0.00 |
| TRINITY_PTQ3559  | hypothet  | Marchantia_polymorp | 44.50 | 0.00 |
| TRINITY_KEH2974  | signal    | Medicago_truncatula | 44.50 | 0.00 |
| TRINITY_EFH6567  | hypothet  | Arabidopsis_lyrata  | 44.50 | 0.00 |
| TRINITY_KXZ5519  | hypothet  | Gonium_pectorale    | 44.50 | 0.00 |
| TRINITY_XP_0042  | PREDICTI  | Fragaria-vesca      | 44.50 | 0.00 |
| TRINITY_CAD4169  | OSJNBb0   | Oryza_sativa        | 44.50 | 0.00 |
| TRINITY_XP_0056  | hypothet  | Coccomyxa_subellips | 44.50 | 0.00 |
| TRINITY_PNW7569  | hypothet  | Chlamydomonas_reinh | 44.50 | 0.00 |
| TRINITY_PNW8508  | hypothet  | Chlamydomonas_reinh | 44.50 | 0.00 |
| TRINITY_XP_0082  | PREDICTI  | Prunus_mume         | 44.50 | 0.00 |
| TRINITY_XP_0243  | pirin-li  | Physcomitrella_pate | 44.50 | 0.00 |
| TRINITY_XP_0243  | unchara   | Physcomitrella_pate | 44.50 | 0.00 |
| TRINITY_KXZ5188  | hypothet  | Gonium_pectorale    | 44.50 | 0.00 |
| TRINITY_XP_0029  | hypothet  | Volvox_carteri      | 44.50 | 0.00 |
| TRINITY_XP_0243  | DCN1-li   | Physcomitrella_pate | 44.50 | 0.00 |
| TRINITY_XP_0058  | hypothet  | Chlorella_variabili | 44.50 | 0.00 |
| TRINITY_PNH0281  | Vam6/Vp   | Tetrabaena_socialis | 44.40 | 0.00 |
| TRINITY_RLN4056  | hypothet  | Panicum_miliaceum   | 44.40 | 0.00 |
| TRINITY_BAJ9779  | predict   | Hordeum_vulgare     | 44.40 | 0.00 |
| TRINITY_XP_0206  | phosphat  | Dendrobium_catenatu | 44.40 | 0.00 |
| TRINITY_BAK0274  | predict   | Hordeum_vulgare     | 44.40 | 0.00 |
| TRINITY_XP_0162  | beta-gal  | Arachis_ipaensis    | 44.40 | 0.00 |
| TRINITY_XP_0104  | PREDICTI  | Camelina_sativa     | 44.40 | 0.00 |
| TRINITY_XP_0043  | PREDICTI  | Fragaria-vesca      | 44.40 | 0.00 |
| TRINITY_OMO8536  | hypothet  | Corchorus_olitorius | 44.40 | 0.00 |
| TRINITY_PNH1226  | Tiny mac  | Tetrabaena_socialis | 44.40 | 0.00 |
| TRINITY_XP_0208  | peroxis   | Arabidopsis_lyrata  | 44.40 | 0.00 |
| TRINITY_XP_0243  | serine/t  | Physcomitrella_pate | 44.40 | 0.00 |
| TRINITY_XP_0114  | (Adenylyl | Auxenochlorella_pro | 44.40 | 0.00 |
| TRINITY_XP_0218  | importir  | Spinacia_oleracea   | 44.40 | 0.00 |
| TRINITY_XP_0106  | PREDICTI  | Beta_vulgaris       | 44.40 | 0.00 |
| TRINITY_RWW9084  | hypothet  | Ensete_ventricosum  | 44.40 | 0.00 |
| TRINITY_NP_0011  | caltract  | Zea_mays            | 44.40 | 0.00 |
| TRINITY_XP_0221  | calcium-  | Momordica_charantia | 44.40 | 0.00 |
| TRINITY_XP_0096  | PREDICTI  | Nicotiana_tomentosi | 44.40 | 0.00 |
| TRINITY_OMO6670  | hypothet  | Corchorus_capsulari | 44.40 | 0.00 |
| TRINITY_XP_0229  | glutamat  | Cucurbita_maxima    | 44.40 | 0.00 |
| TRINITY_GAQ9121  | Calcium   | Klebsormidium_niten | 44.40 | 0.00 |
| TRINITY_PNH1240  | putative  | Tetrabaena_socialis | 44.40 | 0.00 |
| TRINITY_BAK0075  | predict   | Hordeum_vulgare     | 44.40 | 0.00 |
| TRINITY_XP_0218  | GTP-bin   | Spinacia_oleracea   | 44.40 | 0.00 |
| TRINITY_XP_0016  | predict   | Chlamydomonas_reinh | 44.40 | 0.00 |
| TRINITY_KNA0354  | hypothet  | Spinacia_oleracea   | 44.40 | 0.00 |
| TRINITY_GAQ7880  | Transcri  | Klebsormidium_niten | 44.40 | 0.00 |
| TRINITY_XP_0056  | calcium-  | Coccomyxa_subellips | 44.40 | 0.00 |
| TRINITY_XP_0094  | PREDICTI  | Musa_acuminata      | 44.40 | 0.00 |
| TRINITY_XP_0016  | phospho   | Chlamydomonas_reinh | 44.40 | 0.00 |
| TRINITY_GAX7466  | hypothet  | Chlamydomonas_eusti | 44.40 | 0.00 |
| TRINITY_GAQ9177  | mitochor  | Klebsormidium_niten | 44.40 | 0.00 |
| TRINITY_KZV1531  | hypothet  | Dorcoceras_hygromet | 44.40 | 0.00 |
| TRINITY_XP_0124  | PREDICTI  | Gossypium_raimondii | 44.40 | 0.00 |
| TRINITY_GAX8597  | hypothet  | Chlamydomonas_eusti | 44.40 | 0.00 |
| TRINITY_XP_0075  | predict   | Bathycoccus_prasinc | 44.40 | 0.00 |
| TRINITY_RXH8537  | hypothet  | Malus_domestica     | 44.40 | 0.00 |
| TRINITY_KXZ4776  | hypothet  | Gonium_pectorale    | 44.40 | 0.00 |

|                  |          |                     |       |      |
|------------------|----------|---------------------|-------|------|
| TRINITY_XP_01102 | PREDICTI | Populus_euphratica  | 44.40 | 0.00 |
| TRINITY_XP_02390 | serine/t | Quercus_suber       | 44.40 | 0.00 |
| TRINITY_KXZ5536  | hypothet | Gonium_pectorale    | 44.40 | 0.00 |
| TRINITY_XP_02390 | probable | Quercus_suber       | 44.40 | 0.00 |
| TRINITY_XP_02436 | uncharac | Physcomitrella_pate | 44.40 | 0.00 |
| TRINITY_GAX75436 | hypothet | Chlamydomonas_eusti | 44.40 | 0.00 |
| TRINITY_XP_02392 | ubiquiti | Quercus_suber       | 44.40 | 0.00 |
| TRINITY_XP_02197 | probable | Helianthus_annuus   | 44.40 | 0.00 |
| TRINITY_KXZ4322  | hypothet | Gonium_pectorale    | 44.40 | 0.00 |
| TRINITY_XP_02387 | translat | Quercus_suber       | 44.40 | 0.00 |
| TRINITY_GAX78296 | hypothet | Chlamydomonas_eusti | 44.40 | 0.00 |
| TRINITY_PSC7504  | apoptoti | Micractinium_conduc | 44.40 | 0.00 |
| TRINITY_KXZ4838  | hypothet | Gonium_pectorale    | 44.40 | 0.00 |
| TRINITY_XP_00564 | snare-d  | Coccomyxa_subellips | 44.40 | 0.00 |
| TRINITY_XP_00169 | early li | Chlamydomonas_reinh | 44.40 | 0.00 |
| TRINITY_GAX80337 | hypothet | Chlamydomonas_eusti | 44.40 | 0.00 |
| TRINITY_XP_00295 | hypothet | Volvox_carteri      | 44.40 | 0.00 |
| TRINITY_PNH1023  | DEAD-bo  | Tetrabaena_socialis | 44.40 | 0.00 |
| TRINITY_GAX82607 | hypothet | Chlamydomonas_eusti | 44.40 | 0.00 |
| TRINITY_GAX77256 | hypothet | Chlamydomonas_eusti | 44.40 | 0.00 |
| TRINITY_PNH00992 | Phytoch  | Tetrabaena_socialis | 44.40 | 0.00 |
| TRINITY_KXZ4756  | hypothet | Gonium_pectorale    | 44.40 | 0.00 |
| TRINITY_XP_00169 | DEAD/DE  | Chlamydomonas_reinh | 44.40 | 0.00 |
| TRINITY_PNW8836  | hypothet | Chlamydomonas_reinh | 44.40 | 0.00 |
| TRINITY_GBG8982  | hypothet | Chara_braunii       | 44.40 | 0.00 |
| TRINITY_GAX85698 | hypothet | Chlamydomonas_eusti | 44.40 | 0.00 |
| TRINITY_GAX86124 | hypothet | Chlamydomonas_eusti | 44.40 | 0.00 |
| TRINITY_XP_00253 | uncharac | Ricinus_communis    | 44.40 | 0.00 |
| TRINITY_PNW8689  | hypothet | Chlamydomonas_reinh | 44.40 | 0.00 |
| TRINITY_GAX83179 | hypothet | Chlamydomonas_eusti | 44.40 | 0.00 |
| TRINITY_XP_01563 | importir | Oryza_sativa        | 44.40 | 0.00 |
| TRINITY_GAX7382  | hypothet | Chlamydomonas_eusti | 44.40 | 0.00 |
| TRINITY_GAQ8074  | phospho  | Klebsormidium_niten | 44.40 | 0.00 |
| TRINITY_GAX7752  | hypothet | Chlamydomonas_eusti | 44.40 | 0.00 |
| TRINITY_PNW8086  | hypothet | Chlamydomonas_reinh | 44.40 | 0.00 |
| TRINITY_GAX76821 | hypothet | Chlamydomonas_eusti | 44.40 | 0.00 |
| TRINITY_XP_02018 | ADP-rib  | Aegilops_tauschii   | 44.40 | 0.00 |
| TRINITY_OMO8837  | hypothet | Corchorus_capsulari | 44.40 | 0.00 |
| TRINITY_XP_02026 | RING-H2  | Asparagus_officinal | 44.30 | 0.00 |
| TRINITY_XP_00713 | hypothet | Phaseolus_vulgaris  | 44.30 | 0.00 |
| TRINITY_XP_00934 | PREDICTI | Pyrus_x_bretschneid | 44.30 | 0.00 |
| TRINITY_GAX7454  | hypothet | Chlamydomonas_eusti | 44.30 | 0.00 |
| TRINITY_GAQ89612 | enoyl-C  | Klebsormidium_niten | 44.30 | 0.00 |
| TRINITY_OAE3410  | hypothet | Marchantia_polymorp | 44.30 | 0.00 |
| TRINITY_GAQ82018 | Serine-t | Klebsormidium_niten | 44.30 | 0.00 |
| TRINITY_RAL4527  | hypothet | Cuscuta_australis   | 44.30 | 0.00 |
| TRINITY_XP_02388 | threonir | Quercus_suber       | 44.30 | 0.00 |
| TRINITY_GBG8776  | hypothet | Chara_braunii       | 44.30 | 0.00 |
| TRINITY_XP_00634 | PREDICTI | Solanum_tuberosum   | 44.30 | 0.00 |
| TRINITY_XP_02387 | cell di  | Quercus_suber       | 44.30 | 0.00 |
| TRINITY_XP_00295 | hypothet | Volvox_carteri      | 44.30 | 0.00 |
| TRINITY_XP_00298 | mitochor | Selaginella_moellen | 44.30 | 0.00 |
| TRINITY_XP_00249 | predict  | Micromonas_commoda  | 44.30 | 0.00 |
| TRINITY_XP_01618 | serine   | Arachis_ipaensis    | 44.30 | 0.00 |
| TRINITY_XP_00294 | hypothet | Volvox_carteri      | 44.30 | 0.00 |
| TRINITY_GBG77697 | hypothet | Chara_braunii       | 44.30 | 0.00 |
| TRINITY_XP_02451 | coatome  | Selaginella_moellen | 44.30 | 0.00 |
| TRINITY_PUZ7737  | hypothet | Panicum_hallii      | 44.30 | 0.00 |
| TRINITY_GAQ8019  | serine/t | Klebsormidium_niten | 44.30 | 0.00 |
| TRINITY_PNH0460  | hypothet | Tetrabaena_socialis | 44.30 | 0.00 |
| TRINITY_XP_00565 | hypothet | Coccomyxa_subellips | 44.30 | 0.00 |
| TRINITY_XP_00823 | PREDICTI | Prunus_mume         | 44.30 | 0.00 |
| TRINITY_GAX75992 | hypothet | Chlamydomonas_eusti | 44.30 | 0.00 |
| TRINITY_GAX77212 | hypothet | Chlamydomonas_eusti | 44.30 | 0.00 |
| TRINITY_GAX75221 | hypothet | Chlamydomonas_eusti | 44.30 | 0.00 |
| TRINITY_XP_00413 | PREDICTI | Cucumis_sativus     | 44.30 | 0.00 |

|                  |                               |       |      |
|------------------|-------------------------------|-------|------|
| TRINITY_GAX74807 | hypothetChlamydomonas_eusti   | 44.30 | 0.00 |
| TRINITY_GAX8378  | (hypothetChlamydomonas_eusti  | 44.30 | 0.00 |
| TRINITY_XP_0238  | {probableQuercus_suber        | 44.30 | 0.00 |
| TRINITY_XP_0035  | {serpin-2Brachypodium_distac  | 44.30 | 0.00 |
| TRINITY_GAX7725  | {hypothetChlamydomonas_eusti  | 44.30 | 0.00 |
| TRINITY_GAX7950  | {hypothetChlamydomonas_eusti  | 44.30 | 0.00 |
| TRINITY_PHT7881  | {AldehydeCapsicum_annuum      | 44.30 | 0.00 |
| TRINITY_XP_00141 | CDF famiOstreococcus_sp._'1   | 44.30 | 0.00 |
| TRINITY_PNW7343  | {hypothetChlamydomonas_reinh  | 44.30 | 0.00 |
| TRINITY_XP_0138  | {hypothetMonoraphidium_negle  | 44.30 | 0.00 |
| TRINITY_XP_0066  | {PREDICTIOryza_brachyantha    | 44.30 | 0.00 |
| TRINITY_XP_0029  | {hypothetVolvox_carteri       | 44.30 | 0.00 |
| TRINITY_GAX8266  | {hypothetChlamydomonas_eusti  | 44.30 | 0.00 |
| TRINITY_XP_0058  | {hypothetChlorella_variabili  | 44.30 | 0.00 |
| TRINITY_XP_0144  | {coatomeiVigna_radiata        | 44.30 | 0.00 |
| TRINITY_XP_0139  | (heme peiMonoraphidium_negle  | 44.30 | 0.00 |
| TRINITY_XP_0264  | (cyclin-cPapaver_somniferum   | 44.30 | 0.00 |
| TRINITY_PNG9983  | {hypothetTetrabaena_socialis  | 44.30 | 0.00 |
| TRINITY_GAX7745  | {hypothetChlamydomonas_eusti  | 44.30 | 0.00 |
| TRINITY_PNH0311  | (Peptidy]Tetrabaena_socialis  | 44.30 | 0.00 |
| TRINITY_GAX7856  | {hypothetChlamydomonas_eusti  | 44.30 | 0.00 |
| TRINITY_GAX7593  | (hypothetChlamydomonas_eusti  | 44.30 | 0.00 |
| TRINITY_OAO8909  | {hypothetArabidopsis_thalian  | 44.30 | 0.00 |
| TRINITY_KXZ4370  | {hypothetGonium_pectorale     | 44.30 | 0.00 |
| TRINITY_XP_0238  | {acyl-Co}Quercus_suber        | 44.30 | 0.00 |
| TRINITY_PNH0762  | {hypothetTetrabaena_socialis  | 44.30 | 0.00 |
| TRINITY_XP_0029  | {hypothetVolvox_carteri       | 44.30 | 0.00 |
| TRINITY_XP_0102  | {PREDICTINelumbo_nucifera     | 44.30 | 0.00 |
| TRINITY_RAL4052  | {hypothetCuscuta_australis    | 44.30 | 0.00 |
| TRINITY_XP_0270  | {phospho}Coffea_arabica       | 44.30 | 0.00 |
| TRINITY_PNH1265  | {putativeTetrabaena_socialis  | 44.30 | 0.00 |
| TRINITY_RWR7294  | {dnaJ sukCinnamomum_micranth  | 44.30 | 0.00 |
| TRINITY_PSC6940  | {symplesiMicractinium_conduc  | 44.30 | 0.00 |
| TRINITY_KXZ5474  | {hypothetGonium_pectorale     | 44.30 | 0.00 |
| TRINITY_XP_0120  | {ras-rel}Jatropha_curcas      | 44.30 | 0.00 |
| TRINITY_GAX8576  | (hypothetChlamydomonas_eusti  | 44.30 | 0.00 |
| TRINITY_XP_0029  | {hypothetVolvox_carteri       | 44.30 | 0.00 |
| TRINITY_KXZ4907  | (hypothetGonium_pectorale     | 44.30 | 0.00 |
| TRINITY_PNW8411  | {hypothetChlamydomonas_reinh  | 44.30 | 0.00 |
| TRINITY_PNW8195  | {hypothetChlamydomonas_reinh  | 44.30 | 0.00 |
| TRINITY_ADE7569  | (unknown Picea_sitchensis     | 44.30 | 0.00 |
| TRINITY_KXZ4901  | {hypothetGonium_pectorale     | 44.30 | 0.00 |
| TRINITY_XP_0245  | {cAMP-de}Selaginella_moellen  | 44.30 | 0.00 |
| TRINITY_PNH1127  | {MitochorTetrabaena_socialis  | 44.30 | 0.00 |
| TRINITY_KXZ5409  | {hypothetGonium_pectorale     | 44.30 | 0.00 |
| TRINITY_XP_00141 | {predicteOstreococcus_sp._'1  | 44.30 | 0.00 |
| TRINITY_XP_0029  | {hypothetVolvox_carteri       | 44.30 | 0.00 |
| TRINITY_GAX8182  | {hypothetChlamydomonas_eusti  | 44.30 | 0.00 |
| TRINITY_GAX8150  | {hypothetChlamydomonas_eusti  | 44.30 | 0.00 |
| TRINITY_XP_0016  | {mitogen Chlamydomonas_reinh  | 44.30 | 0.00 |
| TRINITY_KXZ5471  | {hypothetGonium_pectorale     | 44.30 | 0.00 |
| TRINITY_GBF9415  | {cytochr}Raphidocelis_subcap  | 44.30 | 0.00 |
| TRINITY_KZV1511  | {ATP bin}Dorcoceras_hygromet  | 44.20 | 0.00 |
| TRINITY_XP_0064  | (ABC trarEutrema_salsugineum  | 44.20 | 0.00 |
| TRINITY_OIW0110  | {hypothetLupinus_angustifoli  | 44.20 | 0.00 |
| TRINITY_XP_0245  | {unchara}Selaginella_moellen  | 44.20 | 0.00 |
| TRINITY_XP_0279  | {probableVigna_unguiculata    | 44.20 | 0.00 |
| TRINITY_KVH9006  | {Glutathi}Cynara_cardunculus  | 44.20 | 0.00 |
| TRINITY_XP_0243  | {ubiquiti}Physcomitrella_pate | 44.20 | 0.00 |
| TRINITY_XP_0043  | (PREDICTIFragaria_vesca       | 44.20 | 0.00 |
| TRINITY_XP_0243  | {serine/t}Physcomitrella_pate | 44.20 | 0.00 |
| TRINITY_XP_0064  | (very-lorEutrema_salsugineum  | 44.20 | 0.00 |
| TRINITY_XP_0245  | {protein Selaginella_moellen  | 44.20 | 0.00 |
| TRINITY_BAK0356  | (predicteHordeum_vulgare      | 44.20 | 0.00 |
| TRINITY_KYP7736  | {TranslatCajanus_cajan        | 44.20 | 0.00 |
| TRINITY_GAX8281  | {hypothetChlamydomonas_eusti  | 44.20 | 0.00 |

|                  |                       |                      |       |      |
|------------------|-----------------------|----------------------|-------|------|
| TRINITY_BAJ94575 | predict               | Hordeum_vulgare      | 44.20 | 0.00 |
| TRINITY_GAQ9004  | embryo                | Klebsormidium_niten  | 44.20 | 0.00 |
| TRINITY_XP_00295 | hypothet              | Volvox_carteri       | 44.20 | 0.00 |
| TRINITY_KMS6518  | hypothet              | Beta_vulgaris        | 44.20 | 0.00 |
| TRINITY_XP_0243  | ras-rel               | Physcomitrella_pate  | 44.20 | 0.00 |
| TRINITY_XP_0024  | ubiquiti              | Sorghum_bicolor      | 44.20 | 0.00 |
| TRINITY_NP_0011  | uncharac              | Zea_mays             | 44.20 | 0.00 |
| TRINITY_XP_0205  | ABC trar              | Phalaenopsis_equest  | 44.20 | 0.00 |
| TRINITY_PNW8567  | hypothet              | Chlamydomonas_reinh  | 44.20 | 0.00 |
| TRINITY_XP_0029  | eukaryot              | Volvox_carteri       | 44.20 | 0.00 |
| TRINITY_XP_0258  | probable              | Panicum_hallii       | 44.20 | 0.00 |
| TRINITY_XP_0245  | 17.4 kD               | Selaginella_moellen  | 44.20 | 0.00 |
| TRINITY_GAX7937  | hypothet              | Chlamydomonas_eusti  | 44.20 | 0.00 |
| TRINITY_KXZ4200  | hypothet              | Gonium_pectorale     | 44.20 | 0.00 |
| TRINITY_GAX8116  | hypothet              | Chlamydomonas_eusti  | 44.20 | 0.00 |
| TRINITY_XP_0228  | cyclin-c              | Olea_europaea        | 44.20 | 0.00 |
| TRINITY_XP_0025  | two-com               | Ricinus_communis     | 44.20 | 0.00 |
| TRINITY_GAQ8764  | Ribonucl              | Klebsormidium_niten  | 44.20 | 0.00 |
| TRINITY_KXZ4681  | hypothet              | Gonium_pectorale     | 44.20 | 0.00 |
| TRINITY_GAX7572  | hypothet              | Chlamydomonas_eusti  | 44.20 | 0.00 |
| TRINITY_GAX8301  | hypothet              | Chlamydomonas_eusti  | 44.20 | 0.00 |
| TRINITY_XP_0030  | hypothet              | Micromonas_pusilla   | 44.20 | 0.00 |
| TRINITY_PNW7750  | hypothet              | Chlamydomonas_reinh  | 44.20 | 0.00 |
| TRINITY_GAX8470  | hypothet              | Chlamydomonas_eusti  | 44.20 | 0.00 |
| TRINITY_EFJ2500  | hypothet              | Selaginella_moellen  | 44.20 | 0.00 |
| TRINITY_GAX7736  | hypothet              | Chlamydomonas_eusti  | 44.20 | 0.00 |
| TRINITY_KXZ4420  | hypothet              | Gonium_pectorale     | 44.20 | 0.00 |
| TRINITY_GAX7985  | hypothet              | Chlamydomonas_eusti  | 44.20 | 0.00 |
| TRINITY_KXZ5292  | hypothet              | Gonium_pectorale     | 44.20 | 0.00 |
| TRINITY_XP_0201  | putative              | Aegilops_tauschii    | 44.20 | 0.00 |
| TRINITY_XP_0243  | cAMP-de               | Physcomitrella_pate  | 44.20 | 0.00 |
| TRINITY_OWM9072  | hypothet              | Punica_granatum      | 44.20 | 0.00 |
| TRINITY_GAX8319  | hypothet              | Chlamydomonas_eusti  | 44.20 | 0.00 |
| TRINITY_GAX7637  | hypothet              | Chlamydomonas_eusti  | 44.20 | 0.00 |
| TRINITY_XP_0029  | cytoplas              | Volvox_carteri       | 44.20 | 0.00 |
| TRINITY_XP_0056  | threonyl              | Coccomyxa_subellips  | 44.20 | 0.00 |
| TRINITY_KXZ5387  | hypothet              | Gonium_pectorale     | 44.20 | 0.00 |
| TRINITY_XP_0083  | PREDICT               | Malus_domestica      | 44.20 | 0.00 |
| TRINITY_XP_0228  | SH3 dom               | Olea_europaea        | 44.20 | 0.00 |
| TRINITY_XP_0239  | (ATP-bin              | Quercus_suber        | 44.20 | 0.00 |
| TRINITY_PNW8806  | hypothet              | Chlamydomonas_reinh  | 44.20 | 0.00 |
| TRINITY_GAX7981  | hypothet              | Chlamydomonas_eusti  | 44.20 | 0.00 |
| TRINITY_XP_0016  | predict               | Chlamydomonas_reinh  | 44.20 | 0.00 |
| TRINITY_GAX8002  | hypothet              | Chlamydomonas_eusti  | 44.20 | 0.00 |
| TRINITY_PRW5703  | (glycosyl             | Chlorella_sorokinia  | 44.20 | 0.00 |
| TRINITY_GAX7303  | hypothet              | Chlamydomonas_eusti  | 44.20 | 0.00 |
| TRINITY_GBG0000  | hypothet              | Raphidocelis_subcap  | 44.20 | 0.00 |
| TRINITY_AKP0620  | glutathi              | Eurya_emarginata     | 44.20 | 0.00 |
| TRINITY_GAX7465  | hypothet              | Chlamydomonas_eusti  | 44.20 | 0.00 |
| TRINITY_XP_0139  | hypothet              | Monoraphidium_negle  | 44.20 | 0.00 |
| TRINITY_GAX8508  | hypothet              | Chlamydomonas_eusti  | 44.20 | 0.00 |
| TRINITY_GAX8124  | hypothet              | Chlamydomonas_eusti  | 44.20 | 0.00 |
| TRINITY_GAX7377  | hypothet              | Chlamydomonas_eusti  | 44.20 | 0.00 |
| TRINITY_PNH0963  | Protein               | Tetrabaena_socialis  | 44.20 | 0.00 |
| TRINITY_GAQ9305  | hypothet              | Klebsormidium_niten  | 44.20 | 0.00 |
| TRINITY_GAQ8534  | Ca <sup>2+</sup> -bir | Klebsormidium_niten  | 44.20 | 0.00 |
| TRINITY_XP_0029  | hypothet              | Volvox_carteri       | 44.20 | 0.00 |
| TRINITY_GBF9285  | hypothet              | Raphidocelis_subcap  | 44.20 | 0.00 |
| TRINITY_PRW4507  | family                | nChlorella_sorokinia | 44.20 | 0.00 |
| TRINITY_RID5971  | hypothet              | Brassica_rapa        | 44.20 | 0.00 |
| TRINITY_GAX8263  | hypothet              | Chlamydomonas_eusti  | 44.20 | 0.00 |
| TRINITY_KDD7315  | E1-E2 A               | Helicosporidium_sp.  | 44.20 | 0.00 |
| TRINITY_GAX8519  | hypothet              | Chlamydomonas_eusti  | 44.10 | 0.00 |
| TRINITY_XP_0068  | transcri              | Amborella_trichopod  | 44.10 | 0.00 |
| TRINITY_ONK7939  | uncharac              | Asparagus_officinal  | 44.10 | 0.00 |
| TRINITY_ERM9519  | hypothet              | Amborella_trichopod  | 44.10 | 0.00 |

|                   |          |                     |       |      |
|-------------------|----------|---------------------|-------|------|
| TRINITY_XP_02287  | acid bet | Olea_europaea       | 44.10 | 0.00 |
| TRINITY_XP_02438  | putative | Physcomitrella_pate | 44.10 | 0.00 |
| TRINITY_OAE31192  | hypothet | Marchantia_polymorp | 44.10 | 0.00 |
| TRINITY_XP_01925  | PREDICTE | Nicotiana_attenuata | 44.10 | 0.00 |
| TRINITY_XP_00823  | PREDICTE | Prunus_mume         | 44.10 | 0.00 |
| TRINITY_XP_02388  | serine/t | Quercus_suber       | 44.10 | 0.00 |
| TRINITY_GAQ78449  | Coatome  | Klebsormidium_niten | 44.10 | 0.00 |
| TRINITY_XP_02712  | uncharac | Coffea_arabica      | 44.10 | 0.00 |
| TRINITY_GAQ81348  | mitochor | Klebsormidium_niten | 44.10 | 0.00 |
| TRINITY_PIN056335 | '-AMP-   | Handroanthus_impeti | 44.10 | 0.00 |
| TRINITY_KXZ45909  | DHC7 pr  | Gonium_pectorale    | 44.10 | 0.00 |
| TRINITY_GAQ89783  | hypothet | Klebsormidium_niten | 44.10 | 0.00 |
| TRINITY_PTQ47112  | hypothet | Marchantia_polymorp | 44.10 | 0.00 |
| TRINITY_XP_02436  | uncharac | Physcomitrella_pate | 44.10 | 0.00 |
| TRINITY_PSC68578  | NUDIX d  | Micractinium_conduc | 44.10 | 0.00 |
| TRINITY_XP_02214  | protein  | Momordica_charantia | 44.10 | 0.00 |
| TRINITY_XP_00751  | predicte | Bathycoccus_prasinc | 44.10 | 0.00 |
| TRINITY_XP_01764  | PREDICTE | Gossypium_arboreum  | 44.10 | 0.00 |
| TRINITY_PNW80581  | hypothet | Chlamydomonas_reinh | 44.10 | 0.00 |
| TRINITY_XP_01943  | PREDICTE | Lupinus_angustifoli | 44.10 | 0.00 |
| TRINITY_XP_00665  | PREDICTE | Oryza_brachyantha   | 44.10 | 0.00 |
| TRINITY_KZV15033  | hypothet | Dorcoceras_hygromet | 44.10 | 0.00 |
| TRINITY_XP_01389  | hypothet | Monoraphidium_negle | 44.10 | 0.00 |
| TRINITY_XP_02068  | guanylat | Dendrobium_catenatu | 44.10 | 0.00 |
| TRINITY_XP_00295  | hypothet | Volvox_carteri      | 44.10 | 0.00 |
| TRINITY_GAX75620  | hypothet | Chlamydomonas_eusti | 44.10 | 0.00 |
| TRINITY_XP_02439  | monothic | Physcomitrella_pate | 44.10 | 0.00 |
| TRINITY_PNW75001  | hypothet | Chlamydomonas_reinh | 44.10 | 0.00 |
| TRINITY_XP_02453  | probable | Selaginella_moellen | 44.10 | 0.00 |
| TRINITY_XP_00169  | predicte | Chlamydomonas_reinh | 44.10 | 0.00 |
| TRINITY_PNW82627  | hypothet | Chlamydomonas_reinh | 44.10 | 0.00 |
| TRINITY_KXZ52413  | hypothet | Gonium_pectorale    | 44.10 | 0.00 |
| TRINITY_KXZ45697  | hypothet | Gonium_pectorale    | 44.10 | 0.00 |
| TRINITY_GAX75635  | hypothet | Chlamydomonas_eusti | 44.10 | 0.00 |
| TRINITY_XP_02719  | cysteine | Cicer_arietinum     | 44.10 | 0.00 |
| TRINITY_PNW84734  | hypothet | Chlamydomonas_reinh | 44.10 | 0.00 |
| TRINITY_GAX82546  | hypothet | Chlamydomonas_eusti | 44.10 | 0.00 |
| TRINITY_KXZ42029  | hypothet | Gonium_pectorale    | 44.10 | 0.00 |
| TRINITY_XP_00308  | WD40 re  | Ostreococcus_tauri  | 44.10 | 0.00 |
| TRINITY_RWR93988  | protein  | Cinnamomum_micranth | 44.10 | 0.00 |
| TRINITY_XP_00169  | predicte | Chlamydomonas_reinh | 44.10 | 0.00 |
| TRINITY_OMO90340  | Peptida  | Corchorus_olitorius | 44.10 | 0.00 |
| TRINITY_PNH05756  | putative | Tetrabaena_socialis | 44.10 | 0.00 |
| TRINITY_XP_00169  | flagell  | Chlamydomonas_reinh | 44.10 | 0.00 |
| TRINITY_GAX72887  | hypothet | Chlamydomonas_eusti | 44.10 | 0.00 |
| TRINITY_GAX76977  | hypothet | Chlamydomonas_eusti | 44.10 | 0.00 |
| TRINITY_PWA96904  | Protein  | Artemisia_annua     | 44.10 | 0.00 |
| TRINITY_GAX74552  | hypothet | Chlamydomonas_eusti | 44.10 | 0.00 |
| TRINITY_XP_02285  | alpha-g  | Olea_europaea       | 44.10 | 0.00 |
| TRINITY_XP_01284  | PREDICTE | Erythranthe_guttata | 44.10 | 0.00 |
| TRINITY_OIW09435  | hypothet | Lupinus_angustifoli | 44.10 | 0.00 |
| TRINITY_XP_00305  | thiored  | Micromonas_pusilla  | 44.00 | 0.00 |
| TRINITY_KXZ56792  | hypothet | Gonium_pectorale    | 44.00 | 0.00 |
| TRINITY_VDD24307  | unnamed  | Brassica_oleracea   | 44.00 | 0.00 |
| TRINITY_EEF27264  | nh1 rep  | Ricinus_communis    | 44.00 | 0.00 |
| TRINITY_XP_01094  | PREDICTE | Elaeis_guineensis   | 44.00 | 0.00 |
| TRINITY_XP_00294  | hypothet | Volvox_carteri      | 44.00 | 0.00 |
| TRINITY_EMS63369  | Nitrate  | Triticum_urartu     | 44.00 | 0.00 |
| TRINITY_EOY04722  | Carrot   | Theobroma_cacao     | 44.00 | 0.00 |
| TRINITY_GAQ79830  | dipeptic | Klebsormidium_niten | 44.00 | 0.00 |
| TRINITY_GAQ85561  | hypothet | Klebsormidium_niten | 44.00 | 0.00 |
| TRINITY_XP_02435  | cAMP-de  | Physcomitrella_pate | 44.00 | 0.00 |
| TRINITY_XP_02164  | ADP-rib  | Hevea_brasiliensis  | 44.00 | 0.00 |
| TRINITY_XP_02164  | indole-  | Hevea_brasiliensis  | 44.00 | 0.00 |
| TRINITY_RAL45204  | hypothet | Cuscuta_australis   | 44.00 | 0.00 |
| TRINITY_PSC69139  | spindle  | Micractinium_conduc | 44.00 | 0.00 |

|                                             |       |      |
|---------------------------------------------|-------|------|
| TRINITY_XP_02387probableQuercus_suber       | 44.00 | 0.00 |
| TRINITY_KXZ48956hypothetGonium_pectorale    | 44.00 | 0.00 |
| TRINITY_XP_0017(sulfite Chlamydomonas_reinh | 44.00 | 0.00 |
| TRINITY_ABK2476(unknown Picea_sitchensis    | 44.00 | 0.00 |
| TRINITY_XP_01656PREDICTICapsicum_annuum     | 44.00 | 0.00 |
| TRINITY_GAX83934hypothetChlamydomonas_eusti | 44.00 | 0.00 |
| TRINITY_XP_0017(predicteChlamydomonas_reinh | 44.00 | 0.00 |
| TRINITY_XP_00168rhodaneChlamydomonas_reinh  | 44.00 | 0.00 |
| TRINITY_ONK5916(uncharacAsparagus_officinal | 44.00 | 0.00 |
| TRINITY_PNW85595hypothetChlamydomonas_reinh | 44.00 | 0.00 |

|                 |                             |       |      |
|-----------------|-----------------------------|-------|------|
| TRINITY_KXZ5471 | hypothetGonium_pectorale    | 44.00 | 0.00 |
| TRINITY_GAX7546 | hypothetChlamydomonas_eusti | 44.00 | 0.00 |
| TRINITY_PNW7839 | hypothetChlamydomonas_reinh | 44.00 | 0.00 |
| TRINITY_GAQ8777 | MembraneKlebsormidium_niten | 44.00 | 0.00 |
| TRINITY_GAX7306 | hypothetChlamydomonas_eusti | 44.00 | 0.00 |
| TRINITY_GAX8498 | hypothetChlamydomonas_eusti | 44.00 | 0.00 |
| TRINITY_XP_0016 | predicteChlamydomonas_reinh | 44.00 | 0.00 |
| TRINITY_GAQ7981 | Sec23 pKlebsormidium_niten  | 44.00 | 0.00 |
| TRINITY_XP_0106 | PREDICTIBeta_vulgaris       | 44.00 | 0.00 |
| TRINITY_XP_0164 | PREDICTINicotiana_tabacum   | 44.00 | 0.00 |
| TRINITY_RAL5433 | hypothetCuscuta_australis   | 44.00 | 0.00 |
| TRINITY_GAX7286 | hypothetChlamydomonas_eusti | 44.00 | 0.00 |
| TRINITY_XP_0017 | flagellChlamydomonas_reinh  | 44.00 | 0.00 |
| TRINITY_XP_0029 | hypothetVolvox_carteri      | 44.00 | 0.00 |
| TRINITY_RMZ5377 | hypothetAuxenochlorella_pro | 44.00 | 0.00 |
| TRINITY_XP_0016 | predicteChlamydomonas_reinh | 44.00 | 0.00 |
| TRINITY_XP_0102 | E3 ubiqBrachypodium_distac  | 44.00 | 0.00 |
| TRINITY_GAX8459 | hypothetChlamydomonas_eusti | 44.00 | 0.00 |
| TRINITY_AAK9879 | BONZAI1 Arabidopsis_thalian | 44.00 | 0.00 |
| TRINITY_XP_0063 | 40S ribcPopulus_trichocarpa | 44.00 | 0.00 |
| TRINITY_XP_0016 | glycosylChlamydomonas_reinh | 44.00 | 0.00 |
| TRINITY_XP_0120 | chlorideJatropha_curcas     | 44.00 | 0.00 |
| TRINITY_XP_0029 | hypothetVolvox_carteri      | 44.00 | 0.00 |
| TRINITY_XP_0243 | cysteinePhyscomitrella_pate | 44.00 | 0.00 |
| TRINITY_XP_0158 | cysteineZiziphus_jujuba     | 44.00 | 0.00 |
| TRINITY_GBG6828 | hypothetChara_braunii       | 44.00 | 0.00 |
| TRINITY_XP_0110 | GPN-loopSesamum_indicum     | 44.00 | 0.00 |
| TRINITY_GAX7646 | hypothetChlamydomonas_eusti | 44.00 | 0.00 |
| TRINITY_XP_0243 | riboflaPhyscomitrella_pate  | 44.00 | 0.00 |
| TRINITY_GAX7502 | hypothetChlamydomonas_eusti | 44.00 | 0.00 |
| TRINITY_PSC7670 | hypothetMicractinium_conduc | 44.00 | 0.00 |
| TRINITY_XP_0056 | hypothetCoccomyxa_subellips | 44.00 | 0.00 |
| TRINITY_XP_0016 | predicteChlamydomonas_reinh | 44.00 | 0.00 |
| TRINITY_GBF9659 | hypothetRaphidocelis_subcap | 44.00 | 0.00 |
| TRINITY_GAQ8019 | serine/tKlebsormidium_niten | 44.00 | 0.00 |
| TRINITY_GAX7989 | hypothetChlamydomonas_eusti | 44.00 | 0.00 |
| TRINITY_GBG8742 | hypothetChara_braunii       | 44.00 | 0.00 |
| TRINITY_PSC7315 | aldehydeMicractinium_conduc | 44.00 | 0.00 |
| TRINITY_GAX7862 | hypothetChlamydomonas_eusti | 44.00 | 0.00 |
| TRINITY_GAQ8889 | aminopeKlebsormidium_niten  | 44.00 | 0.00 |
| TRINITY_XP_0072 | uncharacPrunus_persica      | 44.00 | 0.00 |
| TRINITY_XP_0029 | basal bVolvox_carteri       | 44.00 | 0.00 |
| TRINITY_GAX8037 | hypothetChlamydomonas_eusti | 44.00 | 0.00 |
| TRINITY_XP_0239 | kinesin Quercus_suber       | 44.00 | 0.00 |
| TRINITY_RID7149 | hypothetBrassica_rapa       | 44.00 | 0.00 |
| TRINITY_PNW8734 | hypothetChlamydomonas_reinh | 44.00 | 0.00 |
| TRINITY_XP_0174 | PREDICTIVigna_angularis     | 44.00 | 0.00 |
| TRINITY_BBA2722 | DYX1C1-Chlamydomonas_reinh  | 44.00 | 0.00 |
| TRINITY_XP_0029 | hypothetVolvox_carteri      | 44.00 | 0.00 |
| TRINITY_GAX7337 | hypothetChlamydomonas_eusti | 44.00 | 0.00 |
| TRINITY_XP_0056 | hypothetCoccomyxa_subellips | 44.00 | 0.00 |
| TRINITY_XP_0029 | hypothetVolvox_carteri      | 44.00 | 0.00 |
| TRINITY_XP_0138 | lysine lMonoraphidium_negle | 44.00 | 0.00 |
| TRINITY_GAX7574 | hypothetChlamydomonas_eusti | 44.00 | 0.00 |
| TRINITY_OAE1860 | hypothetMarchantia_polymorp | 44.00 | 0.00 |
| TRINITY_XP_0029 | RWP-RK cVolvox_carteri      | 44.00 | 0.00 |
| TRINITY_GAX7502 | hypothetChlamydomonas_eusti | 44.00 | 0.00 |
| TRINITY_KXZ4840 | hypothetGonium_pectorale    | 44.00 | 0.00 |
| TRINITY_XP_0056 | pseudouCoccomyxa_subellips  | 44.00 | 0.00 |
| TRINITY_GAX7292 | hypothetChlamydomonas_eusti | 44.00 | 0.00 |
| TRINITY_KMS9441 | hypothetBeta_vulgaris       | 44.00 | 0.00 |
| TRINITY_EEF2261 | conservR Ricinus_communis   | 44.00 | 0.00 |
| TRINITY_XP_0025 | dynein-1Micromonas_commoda  | 44.00 | 0.00 |
| TRINITY_PSC7422 | ADP-ribcMicractinium_conduc | 43.90 | 0.00 |
| TRINITY_PNW7228 | hypothetChlamydomonas_reinh | 43.90 | 0.00 |
| TRINITY_EOA3966 | hypothetCapsella_rubella    | 43.90 | 0.00 |



|                  |          |                     |       |      |
|------------------|----------|---------------------|-------|------|
| TRINITY_XP_01023 | VAMP-lib | Brachypodium_distac | 43.90 | 0.00 |
| TRINITY_RXH86951 | hypothet | Malus_domestica     | 43.90 | 0.00 |
| TRINITY_RMZ5547  | hypothet | Auxenochlorella_pro | 43.90 | 0.00 |
| TRINITY_XP_02202 | cell_nun | Helianthus_annuus   | 43.90 | 0.00 |
| TRINITY_XP_02391 | hypoxant | Quercus_suber       | 43.90 | 0.00 |
| TRINITY_XP_00170 | small_r  | Chlamydomonas_reinh | 43.90 | 0.00 |
| TRINITY_XP_00865 | uncharac | Zea_mays            | 43.90 | 0.00 |
| TRINITY_XP_01905 | PREDICTI | Nelumbo_nucifera    | 43.90 | 0.00 |
| TRINITY_RQL7594  | hypothet | Brassica_cretica    | 43.90 | 0.00 |
| TRINITY_RWR8891  | Methyltr | Cinnamomum_micranth | 43.90 | 0.00 |
| TRINITY_PSC6925  | ammonium | Micractinium_conduc | 43.90 | 0.00 |
| TRINITY_PNR2930  | hypothet | Physcomitrella_pate | 43.90 | 0.00 |
| TRINITY_PTQ32931 | hypothet | Marchantia_polymorp | 43.90 | 0.00 |
| TRINITY_OVA00162 | WD40_re  | Macleaya_cordata    | 43.90 | 0.00 |
| TRINITY_GBF9921  | hypothet | Raphidocelis_subcap | 43.90 | 0.00 |
| TRINITY_XP_00584 | hypothet | Chlorella_variabili | 43.90 | 0.00 |
| TRINITY_RWW9034  | hypothet | Ensete_ventricosum  | 43.90 | 0.00 |
| TRINITY_XP_02390 | histone- | Quercus_suber       | 43.90 | 0.00 |
| TRINITY_GAX78221 | hypothet | Chlamydomonas_eusti | 43.90 | 0.00 |
| TRINITY_PNH1190  | Phospho  | Tetrabaena_socialis | 43.90 | 0.00 |
| TRINITY_XP_02163 | non-spec | Manihot_esculenta   | 43.90 | 0.00 |
| TRINITY_PSC7639  | Jumonji  | Micractinium_conduc | 43.90 | 0.00 |
| TRINITY_OMO5302  | BTB/POZ- | Corchorus_olitorius | 43.90 | 0.00 |
| TRINITY_XP_01364 | dual_sp  | Brassica_napus      | 43.90 | 0.00 |
| TRINITY_KXZ55044 | hypothet | Gonium_pectorale    | 43.90 | 0.00 |
| TRINITY_PTQ35026 | hypothet | Marchantia_polymorp | 43.90 | 0.00 |
| TRINITY_GAX85194 | hypothet | Chlamydomonas_eusti | 43.90 | 0.00 |
| TRINITY_XP_02376 | protein  | Lactuca_sativa      | 43.90 | 0.00 |
| TRINITY_XP_00295 | hypothet | Volvox_carteri      | 43.90 | 0.00 |
| TRINITY_GAX81542 | hypothet | Chlamydomonas_eusti | 43.90 | 0.00 |
| TRINITY_XP_00295 | hypothet | Volvox_carteri      | 43.90 | 0.00 |
| TRINITY_XP_02391 | glutamat | Quercus_suber       | 43.90 | 0.00 |
| TRINITY_PTQ32004 | hypothet | Marchantia_polymorp | 43.90 | 0.00 |
| TRINITY_XP_00295 | hypothet | Volvox_carteri      | 43.90 | 0.00 |
| TRINITY_OVA16738 | Galacto  | Macleaya_cordata    | 43.90 | 0.00 |
| TRINITY_XP_00169 | EMP/non  | Chlamydomonas_reinh | 43.90 | 0.00 |
| TRINITY_KXZ46984 | hypothet | Gonium_pectorale    | 43.90 | 0.00 |
| TRINITY_XP_00298 | probabl  | Selaginella_moellen | 43.90 | 0.00 |
| TRINITY_GAX82633 | hypothet | Chlamydomonas_eusti | 43.90 | 0.00 |
| TRINITY_XP_00295 | hypothet | Volvox_carteri      | 43.90 | 0.00 |
| TRINITY_EFJ33304 | hypothet | Selaginella_moellen | 43.90 | 0.00 |
| TRINITY_PHT42375 | hypothet | Capsicum_baccatum   | 43.90 | 0.00 |
| TRINITY_XP_02189 | 26S_prot | Carica_papaya       | 43.90 | 0.00 |
| TRINITY_KXZ51476 | hypothet | Gonium_pectorale    | 43.90 | 0.00 |
| TRINITY_PNH0880  | ADP-rib  | Tetrabaena_socialis | 43.90 | 0.00 |
| TRINITY_XP_00564 | hypothet | Coccomyxa_subellips | 43.90 | 0.00 |
| TRINITY_XP_01101 | PREDICTI | Populus_euphratica  | 43.90 | 0.00 |
| TRINITY_XP_00564 | calcium- | Coccomyxa_subellips | 43.90 | 0.00 |
| TRINITY_GAX77177 | hypothet | Chlamydomonas_eusti | 43.90 | 0.00 |
| TRINITY_GAX83384 | hypothet | Chlamydomonas_eusti | 43.90 | 0.00 |
| TRINITY_XP_00170 | Zeta2-C  | Chlamydomonas_reinh | 43.90 | 0.00 |
| TRINITY_GBF87536 | hypothet | Raphidocelis_subcap | 43.90 | 0.00 |
| TRINITY_PNH11786 | Heat_sh  | Tetrabaena_socialis | 43.90 | 0.00 |
| TRINITY_XP_00141 | predict  | Ostreococcus_sp._'1 | 43.90 | 0.00 |
| TRINITY_GAX74121 | hypothet | Chlamydomonas_eusti | 43.90 | 0.00 |
| TRINITY_GAX83899 | hypothet | Chlamydomonas_eusti | 43.90 | 0.00 |
| TRINITY_PNW8534  | hypothet | Chlamydomonas_reinh | 43.90 | 0.00 |
| TRINITY_RYR67197 | hypothet | Arachis_hypogaea    | 43.90 | 0.00 |
| TRINITY_XP_00357 | 60S_rib  | Brachypodium_distac | 43.90 | 0.00 |
| TRINITY_BAJ9981  | predict  | Hordeum_vulgare     | 43.90 | 0.00 |
| TRINITY_EFH68274 | predict  | Arabidopsis_lyrata  | 43.80 | 0.00 |
| TRINITY_EFH4134  | glycosyl | Arabidopsis_lyrata  | 43.80 | 0.00 |
| TRINITY_XP_02453 | zinc_fir | Selaginella_moellen | 43.80 | 0.00 |
| TRINITY_RZB78944 | Phospho  | Glycine_soja        | 43.80 | 0.00 |
| TRINITY_EFJ21580 | hypothet | Selaginella_moellen | 43.80 | 0.00 |
| TRINITY_XP_02175 | CBL-int  | Chenopodium_quinoa  | 43.80 | 0.00 |

|                 |          |                     |       |      |
|-----------------|----------|---------------------|-------|------|
| TRINITY_XP_0270 | uncharac | Coffea_arabica      | 43.80 | 0.00 |
| TRINITY_GAX7530 | hypothet | Chlamydomonas_eusti | 43.80 | 0.00 |
| TRINITY_XP_0094 | PREDICTI | Musa_acuminata      | 43.80 | 0.00 |
| TRINITY_GAQ8477 | Sensory  | Klebsormidium_niten | 43.80 | 0.00 |
| TRINITY_XP_0028 | basic tr | Arabidopsis_lyrata  | 43.80 | 0.00 |
| TRINITY_XP_0058 | hypothet | Chlorella_variabili | 43.80 | 0.00 |
| TRINITY_XP_0029 | hypothet | Volvox_carteri      | 43.80 | 0.00 |
| TRINITY_KXZ4165 | hypothet | Gonium_pectorale    | 43.80 | 0.00 |
| TRINITY_KXZ4353 | hypothet | Gonium_pectorale    | 43.80 | 0.00 |
| TRINITY_PNW8839 | hypothet | Chlamydomonas_reinh | 43.80 | 0.00 |
| TRINITY_PNH1169 | hypothet | Tetrabaena_socialis | 43.80 | 0.00 |
| TRINITY_XP_0229 | 26S prot | Cucurbita_maxima    | 43.80 | 0.00 |
| TRINITY_GAQ9194 | hypothet | Klebsormidium_niten | 43.80 | 0.00 |
| TRINITY_GAQ8185 | DNA-dir  | Klebsormidium_niten | 43.80 | 0.00 |
| TRINITY_KXZ5613 | hypothet | Gonium_pectorale    | 43.80 | 0.00 |
| TRINITY_PSC7207 | L-isoas  | Micractinium_conduc | 43.80 | 0.00 |
| TRINITY_PNW8407 | hypothet | Chlamydomonas_reinh | 43.80 | 0.00 |
| TRINITY_XP_0227 | type IV  | Durio_zibethinus    | 43.80 | 0.00 |
| TRINITY_XP_0137 | ras-rel  | Brassica_napus      | 43.80 | 0.00 |
| TRINITY_XP_0239 | kynuren  | Quercus_suber       | 43.80 | 0.00 |
| TRINITY_BAX2519 | centros  | Chlamydomonas_reinh | 43.80 | 0.00 |
| TRINITY_XP_0016 | histone  | Chlamydomonas_reinh | 43.80 | 0.00 |
| TRINITY_XP_0100 | 17.5 kD  | Morus_notabilis     | 43.80 | 0.00 |
| TRINITY_RWW7997 | hypothet | Ensete_ventricosum  | 43.80 | 0.00 |
| TRINITY_EOY0582 | Autoinhi | Theobroma_cacao     | 43.80 | 0.00 |
| TRINITY_XP_0213 | regulat  | Sorghum_bicolor     | 43.80 | 0.00 |
| TRINITY_XP_0016 | predict  | Chlamydomonas_reinh | 43.80 | 0.00 |
| TRINITY_XP_0194 | PREDICTI | Lupinus_angustifoli | 43.80 | 0.00 |
| TRINITY_OTG2965 | putativ  | Helianthus_annuus   | 43.80 | 0.00 |
| TRINITY_PNH0484 | Peroxis  | Tetrabaena_socialis | 43.80 | 0.00 |
| TRINITY_KXZ5060 | hypothet | Gonium_pectorale    | 43.80 | 0.00 |
| TRINITY_GAX8071 | hypothet | Chlamydomonas_eusti | 43.80 | 0.00 |
| TRINITY_XP_0245 | U3 snoR  | Selaginella_moellen | 43.80 | 0.00 |
| TRINITY_PNW8040 | hypothet | Chlamydomonas_reinh | 43.80 | 0.00 |
| TRINITY_KXZ5696 | hypothet | Gonium_pectorale    | 43.80 | 0.00 |
| TRINITY_XP_0238 | protein  | Quercus_suber       | 43.80 | 0.00 |
| TRINITY_XP_0017 | componer | Chlamydomonas_reinh | 43.80 | 0.00 |
| TRINITY_XP_0084 | PREDICTI | Cucumis_melo        | 43.80 | 0.00 |
| TRINITY_PWA9380 | alcohol  | Artemisia_annua     | 43.80 | 0.00 |
| TRINITY_PSC6759 | Gag-Pol  | Micractinium_conduc | 43.80 | 0.00 |
| TRINITY_GAX7778 | hypothet | Chlamydomonas_eusti | 43.80 | 0.00 |
| TRINITY_XP_0029 | hypothet | Volvox_carteri      | 43.80 | 0.00 |
| TRINITY_XP_0042 | PREDICTI | Fragaria_vesca      | 43.80 | 0.00 |
| TRINITY_GAX8645 | hypothet | Chlamydomonas_eusti | 43.80 | 0.00 |
| TRINITY_GAQ8093 | short c  | Klebsormidium_niten | 43.80 | 0.00 |
| TRINITY_GAX7314 | hypothet | Chlamydomonas_eusti | 43.80 | 0.00 |
| TRINITY_GAX7401 | hypothet | Chlamydomonas_eusti | 43.80 | 0.00 |
| TRINITY_KMZ5923 | Regulat  | Zostera_marina      | 43.80 | 0.00 |
| TRINITY_GAX8156 | hypothet | Chlamydomonas_eusti | 43.80 | 0.00 |
| TRINITY_AES7312 | SNF1-re  | Medicago_truncatula | 43.80 | 0.00 |
| TRINITY_PNW7067 | hypothet | Chlamydomonas_reinh | 43.80 | 0.00 |
| TRINITY_XP_0139 | hypothet | Monoraphidium_negle | 43.80 | 0.00 |
| TRINITY_KMZ6047 | DNA cro  | Zostera_marina      | 43.80 | 0.00 |
| TRINITY_GAX8388 | hypothet | Chlamydomonas_eusti | 43.80 | 0.00 |
| TRINITY_XP_0029 | hypothet | Volvox_carteri      | 43.80 | 0.00 |
| TRINITY_PNH1129 | NifU-li  | Tetrabaena_socialis | 43.80 | 0.00 |
| TRINITY_GAQ8280 | Sec1 fan | Klebsormidium_niten | 43.80 | 0.00 |
| TRINITY_KDD7145 | protein  | Helicosporidium_sp. | 43.80 | 0.00 |
| TRINITY_XP_0058 | hypothet | Chlorella_variabili | 43.80 | 0.00 |
| TRINITY_XP_0025 | predict  | Micromonas_commoda  | 43.80 | 0.00 |
| TRINITY_PTQ3451 | hypothet | Marchantia_polymorp | 43.80 | 0.00 |
| TRINITY_GAX7773 | hypothet | Chlamydomonas_eusti | 43.80 | 0.00 |
| TRINITY_XP_0228 | phosphoi | Olea_europaea       | 43.80 | 0.00 |
| TRINITY_PNH1283 | hypothet | Tetrabaena_socialis | 43.80 | 0.00 |
| TRINITY_GAX7544 | hypothet | Chlamydomonas_eusti | 43.80 | 0.00 |
| TRINITY_GAX8337 | hypothet | Chlamydomonas_eusti | 43.80 | 0.00 |

|                  |                              |       |      |
|------------------|------------------------------|-------|------|
| TRINITY_KXZ42156 | hypothetGonium_pectorale     | 43.80 | 0.00 |
| TRINITY_KXZ4653  | hypothetGonium_pectorale     | 43.80 | 0.00 |
| TRINITY_XP_0114  | PREDICTIFragaria vesca       | 43.80 | 0.00 |
| TRINITY_XP_0191  | PREDICTFIpomoea_nil          | 43.80 | 0.00 |
| TRINITY_KXZ4595  | hypothetGonium_pectorale     | 43.80 | 0.00 |
| TRINITY_XP_0186  | PREDICTINicotiana_tomentosi  | 43.80 | 0.00 |
| TRINITY_OVA0205  | Alcohol Macleaya_cordata     | 43.80 | 0.00 |
| TRINITY_PNW8716  | hypothetChlamydomonas_reinh  | 43.80 | 0.00 |
| TRINITY_XP_0029  | RWP-RK cVolvox_carteri       | 43.80 | 0.00 |
| TRINITY_GAX7483  | hypothetChlamydomonas_eusti  | 43.80 | 0.00 |
| TRINITY_GAX7513  | hypothetChlamydomonas_eusti  | 43.80 | 0.00 |
| TRINITY_GAX7670  | hypothetChlamydomonas_eusti  | 43.80 | 0.00 |
| TRINITY_GAX7726  | hypothetChlamydomonas_eusti  | 43.80 | 0.00 |
| TRINITY_XP_0029  | flagellaVolvox_carteri       | 43.80 | 0.00 |
| TRINITY_KGN5877  | hypothetCucumis_sativus      | 43.80 | 0.00 |
| TRINITY_GAX8265  | hypothetChlamydomonas_eusti  | 43.80 | 0.00 |
| TRINITY_BAJ9847  | predicteHordeum_vulgare      | 43.80 | 0.00 |
| TRINITY_GAX8241  | hypothetChlamydomonas_eusti  | 43.80 | 0.00 |
| TRINITY_GBF9460  | hypothetRaphidocelis_subcap  | 43.80 | 0.00 |
| TRINITY_XP_0016  | predicteChlamydomonas_reinh  | 43.80 | 0.00 |
| TRINITY_GAX7735  | hypothetChlamydomonas_eusti  | 43.80 | 0    |
| TRINITY_KXZ5144  | hypothetGonium_pectorale     | 43.80 | 0.00 |
| TRINITY_GAX7886  | hypothetChlamydomonas_eusti  | 43.80 | 0.00 |
| TRINITY_GBF8774  | hypothetRaphidocelis_subcap  | 43.80 | 0.00 |
| TRINITY_XP_0158  | NADH--cZiziphus_jujuba       | 43.80 | 0.00 |
| TRINITY_XP_0029  | weel kirVolvox_carteri       | 43.70 | 0.00 |
| TRINITY_ESR3242  | hypothetCitrus_clementina    | 43.70 | 0.00 |
| TRINITY_GAX7455  | hypothetChlamydomonas_eusti  | 43.70 | 0.00 |
| TRINITY_GAQ9000  | Serine cKlebsormidium_niten  | 43.70 | 0.00 |
| TRINITY_ABR1774  | unknown Picea_sitchensis     | 43.70 | 0.00 |
| TRINITY_EFJ2455  | hypothetSelaginella_moellen  | 43.70 | 0.00 |
| TRINITY_GAQ8265  | RNA-binKlebsormidium_niten   | 43.70 | 0.00 |
| TRINITY_EEF2267  | two-compRicinus_communis     | 43.70 | 0.00 |
| TRINITY_KMZ5846  | CysteineZostera_marina       | 43.70 | 0.00 |
| TRINITY_GAX7711  | hypothetChlamydomonas_eusti  | 43.70 | 0.00 |
| TRINITY_XP_0029  | annexin Selaginella_moellen  | 43.70 | 0.00 |
| TRINITY_XP_0238  | cytochrQuercus_suber         | 43.70 | 0.00 |
| TRINITY_KXZ5438  | hypothetGonium_pectorale     | 43.70 | 0.00 |
| TRINITY_XP_0029  | hypothetVolvox_carteri       | 43.70 | 0.00 |
| TRINITY_XP_0064  | ubiquitiEutrema_salsugineur  | 43.70 | 0.00 |
| TRINITY_GBG7841  | hypothetChara_braunii        | 43.70 | 0.00 |
| TRINITY_XP_0172  | PREDICTIDaucus_carota        | 43.70 | 0.00 |
| TRINITY_XP_0056  | hypothetCoccomyxa_subellips  | 43.70 | 0.00 |
| TRINITY_XP_0139  | hypothetMonoraphidium_negle  | 43.70 | 0.00 |
| TRINITY_PNW7758  | hypothetChlamydomonas_reinh  | 43.70 | 0.00 |
| TRINITY_KXZ4178  | hypothetGonium_pectorale     | 43.70 | 0.00 |
| TRINITY_XP_0239  | metacasQuercus_suber         | 43.70 | 0.00 |
| TRINITY_GBF9482  | hypothetRaphidocelis_subcap  | 43.70 | 0.00 |
| TRINITY_GAV8244  | WD40 donCephalotus_follicul  | 43.70 | 0.00 |
| TRINITY_GAX8538  | hypothetChlamydomonas_eusti  | 43.70 | 0.00 |
| TRINITY_XP_0104  | PREDICTICamelina_sativa      | 43.70 | 0.00 |
| TRINITY_GBF9889  | hypothetRaphidocelis_subcap  | 43.70 | 0.00 |
| TRINITY_XP_0030  | predicteMicromonas_pusilla   | 43.70 | 0.00 |
| TRINITY_OUS4464  | aldolasOstreococcus_tauri    | 43.70 | 0.00 |
| TRINITY_BAK0277  | predicteHordeum_vulgare      | 43.70 | 0.00 |
| TRINITY_GAX8269  | hypothetChlamydomonas_eusti  | 43.70 | 0.00 |
| TRINITY_XP_0063  | probableCapsella_rubella     | 43.70 | 0.00 |
| TRINITY_PNW7228  | hypothetChlamydomonas_reinh  | 43.70 | 0.00 |
| TRINITY_PNW8199  | hypothetChlamydomonas_reinh  | 43.70 | 0.00 |
| TRINITY_PNH0891  | (E3 ubiqTetrabaena_socialis  | 43.70 | 0.00 |
| TRINITY_XP_0124  | PREDICTIGossypium_raimondii  | 43.70 | 0.00 |
| TRINITY_XP_0016  | predicteChlamydomonas_reinh  | 43.70 | 0.00 |
| TRINITY_PNH1272  | (GlycosylTetrabaena_socialis | 43.70 | 0.00 |
| TRINITY_GAX8297  | hypothetChlamydomonas_eusti  | 43.70 | 0.00 |
| TRINITY_GAX7600  | hypothetChlamydomonas_eusti  | 43.70 | 0.00 |
| TRINITY_PNH1269  | Protein Tetrabaena_socialis  | 43.70 | 0.00 |

|                  |                              |       |      |
|------------------|------------------------------|-------|------|
| TRINITY_GAX76885 | hypothetChlamydomonas_eusti  | 43.70 | 0.00 |
| TRINITY_PTQ48502 | hypothetMarchantia_polymorp  | 43.70 | 0.00 |
| TRINITY_XP_00295 | mitochorVolvox_carteri       | 43.70 | 0.00 |
| TRINITY_GBF91602 | hypothetRaphidocelis_subcap  | 43.70 | 0.00 |
| TRINITY_GAX76338 | hypothetChlamydomonas_eusti  | 43.70 | 0.00 |
| TRINITY_PTQ50329 | hypothetMarchantia_polymorp  | 43.70 | 0.00 |
| TRINITY_XP_00294 | hypothetVolvox_carteri       | 43.70 | 0.00 |
| TRINITY_GAX76258 | hypothetChlamydomonas_eusti  | 43.70 | 0.00 |
| TRINITY_XP_02010 | (probableAnanas_comosus      | 43.70 | 0.00 |
| TRINITY_GAX85499 | hypothetChlamydomonas_eusti  | 43.70 | 0.00 |
| TRINITY_KXZ44329 | hypothetGonium_pectorale     | 43.70 | 0.00 |
| TRINITY_XP_02390 | 116 kDa Quercus_suber        | 43.70 | 0.00 |
| TRINITY_GBG00536 | splicinçRaphidocelis_subcap  | 43.70 | 0.00 |
| TRINITY_EFJ12076 | hypothetSelaginella_moellen  | 43.70 | 0    |
| TRINITY_PNW83246 | hypothetChlamydomonas_reinh  | 43.70 | 0.00 |
| TRINITY_GAX78779 | hypothetChlamydomonas_eusti  | 43.70 | 0.00 |
| TRINITY_GAX84473 | hypothetChlamydomonas_eusti  | 43.70 | 0.00 |
| TRINITY_XP_00294 | hypothetVolvox_carteri       | 43.70 | 0.00 |
| TRINITY_XP_01092 | PREDICTHElaeis_guineensis    | 43.70 | 0.00 |
| TRINITY_RRT61418 | hypothetEnsete_ventricosum   | 43.70 | 0.00 |
| TRINITY_EFH64429 | hypothetArabidopsis_lyrata   | 43.70 | 0.00 |
| TRINITY_PON66862 | P-type 1Parasponia_anderson  | 43.70 | 0.00 |
| TRINITY_GAX84577 | hypothetChlamydomonas_eusti  | 43.70 | 0.00 |
| TRINITY_BAJ96688 | predictçHordeum_vulgare      | 43.70 | 0.00 |
| TRINITY_KXZ43318 | hypothetGonium_pectorale     | 43.70 | 0.00 |
| TRINITY_XP_00564 | acyl-CoACoccomyxa_subellips  | 43.70 | 0.00 |
| TRINITY_GAX81248 | hypothetChlamydomonas_eusti  | 43.70 | 0.00 |
| TRINITY_XP_00169 | predictçChlamydomonas_reinh  | 43.70 | 0.00 |
| TRINITY_XP_02020 | (uncharacCajanus_cajan       | 43.70 | 0.00 |
| TRINITY_GAX83671 | hypothetChlamydomonas_eusti  | 43.70 | 0.00 |
| TRINITY_GAX74531 | hypothetChlamydomonas_eusti  | 43.70 | 0.00 |
| TRINITY_GAX73349 | hypothetChlamydomonas_eusti  | 43.70 | 0.00 |
| TRINITY_XP_02392 | cytochrçQuercus_suber        | 43.60 | 0.00 |
| TRINITY_XP_01943 | PREDICTHLupinus_angustifoli  | 43.60 | 0.00 |
| TRINITY_EEF24422 | Outer mçRicinus_communis     | 43.60 | 0.00 |
| TRINITY_BAJ93178 | predictçHordeum_vulgare      | 43.60 | 0.00 |
| TRINITY_PSC76752 | general Micractinium_conduc  | 43.60 | 0.00 |
| TRINITY_XP_01139 | Protein Auxenochlorella_pro  | 43.60 | 0.00 |
| TRINITY_GAQ77897 | photolyçKlebsormidium_niten  | 43.60 | 0.00 |
| TRINITY_GAX73865 | hypothetChlamydomonas_eusti  | 43.60 | 0.00 |
| TRINITY_XP_02387 | probableQuercus_suber        | 43.60 | 0.00 |
| TRINITY_XP_01390 | hypothetMonoraphidium_negle  | 43.60 | 0.00 |
| TRINITY_PRW59141 | nad-depçChlorella_sorokinia  | 43.60 | 0.00 |
| TRINITY_XP_00355 | serine/tGlycine_max          | 43.60 | 0.00 |
| TRINITY_RID67927 | hypothetBrassica_rapa        | 43.60 | 0.00 |
| TRINITY_GAX85182 | hypothetChlamydomonas_eusti  | 43.60 | 0.00 |
| TRINITY_XP_01390 | (hypothetMonoraphidium_negle | 43.60 | 0.00 |
| TRINITY_XP_00169 | nucleolçChlamydomonas_reinh  | 43.60 | 0.00 |
| TRINITY_XP_02391 | multifurQuercus_suber        | 43.60 | 0.00 |
| TRINITY_AAC04265 | (S)-aderZea_mays             | 43.60 | 0.00 |
| TRINITY_XP_00294 | hypothetVolvox_carteri       | 43.60 | 0.00 |
| TRINITY_OVA03736 | RNA reccMacleaya_cordata     | 43.60 | 0.00 |
| TRINITY_XP_02707 | (uncharacCoffea_arabica      | 43.60 | 0.00 |
| TRINITY_GBG00184 | ATP-depçRaphidocelis_subcap  | 43.60 | 0.00 |
| TRINITY_GAX76420 | (hypothetChlamydomonas_eusti | 43.60 | 0.00 |
| TRINITY_GBG74219 | hypothetChara_braunii        | 43.60 | 0.00 |
| TRINITY_GBF92774 | hypothetRaphidocelis_subcap  | 43.60 | 0.00 |
| TRINITY_PTQ32922 | hypothetMarchantia_polymorp  | 43.60 | 0.00 |
| TRINITY_XP_00664 | PREDICTHOryza_brachyantha    | 43.60 | 0.00 |
| TRINITY_XP_00170 | (subunit Chlamydomonas_reinh | 43.60 | 0.00 |
| TRINITY_XP_00250 | (predictçMicromonas_commoda  | 43.60 | 0.00 |
| TRINITY_GAQ84132 | hypothetKlebsormidium_niten  | 43.60 | 0.00 |
| TRINITY_OAY62624 | ImportirAnanas_comosus       | 43.60 | 0.00 |
| TRINITY_GAQ87196 | hypothetKlebsormidium_niten  | 43.60 | 0.00 |
| TRINITY_GAQ81537 | hypothetKlebsormidium_niten  | 43.60 | 0.00 |
| TRINITY_KFK34228 | hypothetArabis_alpina        | 43.60 | 0.00 |

|                  |                               |       |      |
|------------------|-------------------------------|-------|------|
| TRINITY_KXZ55151 | hypothetGonium_pectorale      | 43.60 | 0.00 |
| TRINITY_GAX7281  | hypothetChlamydomonas_eusti   | 43.60 | 0.00 |
| TRINITY_PRW5832  | c transiChlorella_sorokinia   | 43.60 | 0.00 |
| TRINITY_XP_02452 | dynein iSelaginella_moellen   | 43.60 | 0.00 |
| TRINITY_GAQ8635  | GTPase-εKlebsormidium_niten   | 43.60 | 0.00 |
| TRINITY_PNH02564 | Protein Tetrabaena_socialis   | 43.60 | 0.00 |
| TRINITY_KMZ7496  | DNA polyZostera_marina        | 43.60 | 0.00 |
| TRINITY_GAQ8744  | (RhomboidKlebsormidium_niten  | 43.60 | 0.00 |
| TRINITY_GAX7742  | hypothetChlamydomonas_eusti   | 43.60 | 0.00 |
| TRINITY_GAX8392  | hypothetChlamydomonas_eusti   | 43.60 | 0.00 |
| TRINITY_XP_0017  | (tryptopIChlamydomonas_reinh  | 43.60 | 0.00 |
| TRINITY_PRW5753  | Ras-relεChlorella_sorokinia   | 43.60 | 0.00 |
| TRINITY_PTQ3454  | hypothetMarchantia_polymorp   | 43.60 | 0.00 |
| TRINITY_KXZ46794 | hypothetGonium_pectorale      | 43.60 | 0.00 |
| TRINITY_XP_0017  | (predictεChlamydomonas_reinh  | 43.60 | 0.00 |
| TRINITY_XP_0016  | εcarotenεChlamydomonas_reinh  | 43.60 | 0.00 |
| TRINITY_GBF8961  | hypothetRaphidocelis_subcap   | 43.60 | 0.00 |
| TRINITY_XP_00294 | hypothetVolvox_carteri        | 43.60 | 0.00 |
| TRINITY_XP_02644 | protein Papaver_somniferum    | 43.60 | 0.00 |
| TRINITY_PSC7334  | εtRNA wykMicractinium_conduc  | 43.60 | 0.00 |
| TRINITY_GAX7644  | hypothetChlamydomonas_eusti   | 43.60 | 0.00 |
| TRINITY_GAQ7908  | hypothetKlebsormidium_niten   | 43.60 | 0.00 |
| TRINITY_XP_0029  | hypothetVolvox_carteri        | 43.60 | 0.00 |
| TRINITY_XP_0104  | PREDICTFCamelina_sativa       | 43.60 | 0.00 |
| TRINITY_OAE3096  | hypothetMarchantia_polymorp   | 43.60 | 0.00 |
| TRINITY_KXZ5278  | hypothetGonium_pectorale      | 43.60 | 0.00 |
| TRINITY_GAX8179  | hypothetChlamydomonas_eusti   | 43.60 | 0.00 |
| TRINITY_KXZ5302  | εhypothetGonium_pectorale     | 43.60 | 0.00 |
| TRINITY_GAX8484  | hypothetChlamydomonas_eusti   | 43.60 | 0.00 |
| TRINITY_GAX8279  | hypothetChlamydomonas_eusti   | 43.60 | 0.00 |
| TRINITY_PNW8526  | hypothetChlamydomonas_reinh   | 43.60 | 0.00 |
| TRINITY_EFJ20694 | hypothetSelaginella_moellen   | 43.60 | 0.00 |
| TRINITY_OAE1901  | hypothetMarchantia_polymorp   | 43.60 | 0.00 |
| TRINITY_RXH8938  | hypothetMalus_domestica       | 43.60 | 0.00 |
| TRINITY_PNW8405  | hypothetChlamydomonas_reinh   | 43.60 | 0.00 |
| TRINITY_GAX8407  | hypothetChlamydomonas_eusti   | 43.60 | 0.00 |
| TRINITY_GAQ8357  | RNA ligεKlebsormidium_niten   | 43.60 | 0.00 |
| TRINITY_GBF9427  | dual-spεRaphidocelis_subcap   | 43.60 | 0.00 |
| TRINITY_XP_0025  | (predictεMicromonas_commoda   | 43.60 | 0.00 |
| TRINITY_NP_1943  | {chloroplArabidopsis_thalian  | 43.60 | 0.00 |
| TRINITY_GAX7490  | (hypothetChlamydomonas_eusti  | 43.60 | 0.00 |
| TRINITY_PRW0585  | copine-εChlorella_sorokinia   | 43.60 | 0.00 |
| TRINITY_BAK0236  | predictεHordeum_vulgare       | 43.60 | 0.00 |
| TRINITY_XP_0029  | hypothetVolvox_carteri        | 43.60 | 0.00 |
| TRINITY_XP_0104  | PREDICTFCamelina_sativa       | 43.60 | 0.00 |
| TRINITY_XP_0014  | predictεOstreococcus_sp._'1   | 43.60 | 0.00 |
| TRINITY_XP_0024  | εras-relεMicromonas_commoda   | 43.50 | 0.00 |
| TRINITY_XP_02164 | potassiHevea_brasiliensis     | 43.50 | 0.00 |
| TRINITY_PIN1220  | hypothetHandroanthus_impeti   | 43.50 | 0.00 |
| TRINITY_XP_0191  | PREDICTFIpomoea_nil           | 43.50 | 0.00 |
| TRINITY_XP_0205  | εuncharaεPhalaenopsis_equest  | 43.50 | 0.00 |
| TRINITY_GAQ8842  | εPutativeεKlebsormidium_niten | 43.50 | 0.00 |
| TRINITY_KCW5078  | hypothetEucalyptus_grandis    | 43.50 | 0.00 |
| TRINITY_GBG9229  | εhypothetChara_braunii        | 43.50 | 0.00 |
| TRINITY_XP_0239  | εprobableεQuercus_suber       | 43.50 | 0.00 |
| TRINITY_XP_0042  | εmajor fεSolanum_lycopersicu  | 43.50 | 0.00 |
| TRINITY_RWW9047  | hypothetEnsete_ventricosum    | 43.50 | 0.00 |
| TRINITY_XP_0243  | εMAPK/MAFPhyscomitrella_pate  | 43.50 | 0.00 |
| TRINITY_XP_0161  | εserine/tArachis_ipaensis     | 43.50 | 0.00 |
| TRINITY_PRW6043  | εATP-depεChlorella_sorokinia  | 43.50 | 0.00 |
| TRINITY_XP_0238  | actin cεQuercus_suber         | 43.50 | 0.00 |
| TRINITY_GBF9624  | εadenylatRaphidocelis_subcap  | 43.50 | 0.00 |
| TRINITY_XP_01054 | PREDICTFITarenaya_hasslerian  | 43.50 | 0.00 |
| TRINITY_GAX7555  | hypothetChlamydomonas_eusti   | 43.50 | 0.00 |
| TRINITY_XP_0228  | εATPase, Ostreococcus_tauri   | 43.50 | 0.00 |
| TRINITY_OEL3581  | εActin-1 Dichanthelium_oligo  | 43.50 | 0.00 |

|                  |           |                     |       |      |
|------------------|-----------|---------------------|-------|------|
| TRINITY_XP_00564 | ARM repε  | Coccomyxa_subellips | 43.50 | 0.00 |
| TRINITY_XP_00169 | predictε  | Chlamydomonas_reinh | 43.50 | 0.00 |
| TRINITY_GBF9958  | hypothet  | Raphidocelis_subcap | 43.50 | 0.00 |
| TRINITY_XP_0264  | RNA heli  | Papaver_somniferum  | 43.50 | 0.00 |
| TRINITY_GAQ8840  | RNA heli  | Klebsormidium_niten | 43.50 | 0.00 |
| TRINITY_XP_0066  | PREDICTI  | Oryza_brachyantha   | 43.50 | 0.00 |
| TRINITY_XP_0138  | hypothet  | Monoraphidium_negle | 43.50 | 0.00 |
| TRINITY_ABK2256  | unknown   | Picea_sitchensis    | 43.50 | 0.00 |
| TRINITY_XP_0243  | auxin-ir  | Physcomitrella_pate | 43.50 | 0.00 |
| TRINITY_XP_00584 | hypothet  | Chlorella_variabili | 43.50 | 0.00 |
| TRINITY_XP_0072  | (DNA rep) | Prunus_persica      | 43.50 | 0.00 |
| TRINITY_XP_0016  | glycosic  | Chlamydomonas_reinh | 43.50 | 0.00 |
| TRINITY_GAX8045  | hypothet  | Chlamydomonas_eusti | 43.50 | 0.00 |
| TRINITY_KXZ5697  | hypothet  | Gonium_pectorale    | 43.50 | 0.00 |
| TRINITY_PSR8540  | NAD-depε  | Actinidia_chinensis | 43.50 | 0.00 |
| TRINITY_GAX7777  | hypothet  | Chlamydomonas_eusti | 43.50 | 0.00 |
| TRINITY_PTQ4387  | hypothet  | Marchantia_polymorp | 43.50 | 0.00 |
| TRINITY_PIN1405  | hypothet  | Handroanthus_impeti | 43.50 | 0.00 |
| TRINITY_XP_0029  | hypothet  | Volvox_carteri      | 43.50 | 0.00 |
| TRINITY_GAX7884  | hypothet  | Chlamydomonas_eusti | 43.50 | 0.00 |
| TRINITY_GAX8546  | hypothet  | Chlamydomonas_eusti | 43.50 | 0.00 |
| TRINITY_XP_0218  | vacuola   | Spinacia_oleracea   | 43.50 | 0.00 |
| TRINITY_XP_0245  | N-termir  | Selaginella_moellen | 43.50 | 0.00 |
| TRINITY_PNW7589  | hypothet  | Chlamydomonas_reinh | 43.50 | 0.00 |
| TRINITY_XP_0029  | hypothet  | Volvox_carteri      | 43.50 | 0.00 |
| TRINITY_XP_00584 | hypothet  | Chlorella_variabili | 43.50 | 0.00 |
| TRINITY_KDD7125  | hypothet  | Helicosporidium_sp. | 43.50 | 0.00 |
| TRINITY_XP_0110  | polyader  | Sesamum_indicum     | 43.50 | 0.00 |
| TRINITY_PNH0827  | putativε  | Tetrabaena_socialis | 43.50 | 0.00 |
| TRINITY_XP_0097  | PREDICTI  | Nicotiana_sylvestri | 43.50 | 0.00 |
| TRINITY_XP_0239  | erythro   | Quercus_suber       | 43.50 | 0.00 |
| TRINITY_OAE2066  | hypothet  | Marchantia_polymorp | 43.50 | 0.00 |
| TRINITY_KXZ5546  | hypothet  | Gonium_pectorale    | 43.50 | 0.00 |
| TRINITY_GAX8353  | hypothet  | Chlamydomonas_eusti | 43.50 | 0.00 |
| TRINITY_GAX7806  | hypothet  | Chlamydomonas_eusti | 43.50 | 0.00 |
| TRINITY_XP_00564 | APG9-don  | Coccomyxa_subellips | 43.50 | 0.00 |
| TRINITY_GAX8194  | (hypothet | Chlamydomonas_eusti | 43.50 | 0.00 |
| TRINITY_GAX8499  | hypothet  | Chlamydomonas_eusti | 43.50 | 0.00 |
| TRINITY_PPR8444  | hypothet  | Gossypium_barbadens | 43.50 | 0.00 |
| TRINITY_GAX7361  | hypothet  | Chlamydomonas_eusti | 43.50 | 0.00 |
| TRINITY_GAX7571  | hypothet  | Chlamydomonas_eusti | 43.50 | 0.00 |
| TRINITY_GAX7787  | hypothet  | Chlamydomonas_eusti | 43.50 | 0.00 |
| TRINITY_XP_0229  | regulatε  | Cucurbita_moschata  | 43.50 | 0.00 |
| TRINITY_RMZ5237  | hypothet  | Auxenochlorella_pro | 43.50 | 0.00 |
| TRINITY_KVI0099  | D-tyros   | Cynara_cardunculus  | 43.40 | 0.00 |
| TRINITY_KXZ4202  | hypothet  | Gonium_pectorale    | 43.40 | 0.00 |
| TRINITY_XP_0024  | (DNA mis) | Sorghum_bicolor     | 43.40 | 0.00 |
| TRINITY_PRW5741  | (Adenyly) | Chlorella_sorokinia | 43.40 | 0.00 |
| TRINITY_XP_0237  | (cysteine | Lactuca_sativa      | 43.40 | 0.00 |
| TRINITY_KNA1793  | hypothet  | Spinacia_oleracea   | 43.40 | 0.00 |
| TRINITY_OVA1592  | hypothet  | Macleaya_cordata    | 43.40 | 0.00 |
| TRINITY_EOX9915  | 4-hydro   | Theobroma_cacao     | 43.40 | 0.00 |
| TRINITY_B8B7X6.1 | RecName:  | Oryza_sativa        | 43.40 | 0.00 |
| TRINITY_XP_0102  | ubiquiti  | Brachypodium_distac | 43.40 | 0.00 |
| TRINITY_XP_0279  | chaperor  | Vigna_unguiculata   | 43.40 | 0.00 |
| TRINITY_XP_0138  | Serine/   | Monoraphidium_negle | 43.40 | 0.00 |
| TRINITY_XP_0263  | isopente  | Papaver_somniferum  | 43.40 | 0.00 |
| TRINITY_KVH8888  | Bacteria  | Cynara_cardunculus  | 43.40 | 0.00 |
| TRINITY_XP_0239  | phosphol  | Quercus_suber       | 43.40 | 0.00 |
| TRINITY_XP_0219  | cullin-   | Helianthus_annuus   | 43.40 | 0.00 |
| TRINITY_GBF9526  | inosine   | Raphidocelis_subcap | 43.40 | 0.00 |
| TRINITY_XP_0029  | translir  | Selaginella_moellen | 43.40 | 0.00 |
| TRINITY_ONK6341  | uncharac  | Asparagus_officinal | 43.40 | 0.00 |
| TRINITY_XP_0243  | 3-phosp   | Physcomitrella_pate | 43.40 | 0.00 |
| TRINITY_XP_0063  | PREDICTI  | Solanum_tuberosum   | 43.40 | 0.00 |
| TRINITY_PNW7069  | hypothet  | Chlamydomonas_reinh | 43.40 | 0.00 |

|                  |                             |       |      |
|------------------|-----------------------------|-------|------|
| TRINITY_PNW82662 | hypothetChlamydomonas_reinh | 43.40 | 0.00 |
| TRINITY_XP_02058 | translatPhalaenopsis_equest | 43.40 | 0.00 |
| TRINITY_XP_02711 | uncharaCoffea_arabica       | 43.40 | 0.00 |
| TRINITY_GAQ87329 | stearoylKlebsormidium_niten | 43.40 | 0.00 |
| TRINITY_GAX75820 | hypothetChlamydomonas_eusti | 43.40 | 0.00 |
| TRINITY_GBG82332 | hypothetChara_braunii       | 43.40 | 0.00 |
| TRINITY_XP_00169 | predicteChlamydomonas_reinh | 43.40 | 0.00 |
| TRINITY_GBG77697 | hypothetChara_braunii       | 43.40 | 0.00 |
| TRINITY_XP_01390 | hypothetMonoraphidium_negle | 43.40 | 0.00 |
| TRINITY_KXZ49643 | hypothetGonium_pectorale    | 43.40 | 0.00 |
| TRINITY_BAJ99217 | predicteHordeum_vulgare     | 43.40 | 0.00 |
| TRINITY_XP_00751 | predicteBathycoccus_prasinc | 43.40 | 0.00 |
| TRINITY_XP_00294 | hypothetVolvox_carteri      | 43.40 | 0.00 |
| TRINITY_XP_00295 | hypothetVolvox_carteri      | 43.40 | 0.00 |
| TRINITY_KMZ69303 | CBL-inteZostera_marina      | 43.40 | 0.00 |
| TRINITY_XP_00584 | hypothetChlorella_variabili | 43.40 | 0.00 |
| TRINITY_GBG60178 | hypothetChara_braunii       | 43.40 | 0.00 |
| TRINITY_GAX84471 | hypothetChlamydomonas_eusti | 43.40 | 0.00 |
| TRINITY_RHN56561 | putativeMedicago_truncatula | 43.40 | 0.00 |
| TRINITY_XP_02436 | ABC trarPhyscomitrella_pate | 43.40 | 0.00 |
| TRINITY_KXZ47642 | hypothetGonium_pectorale    | 43.40 | 0.00 |
| TRINITY_GAX83638 | hypothetChlamydomonas_eusti | 43.40 | 0.00 |
| TRINITY_XP_00305 | predicteMicromonas_pusilla  | 43.40 | 0.00 |
| TRINITY_PNW81941 | hypothetChlamydomonas_reinh | 43.40 | 0.00 |
| TRINITY_XP_00497 | chaperorSetaria_italica     | 43.40 | 0.00 |
| TRINITY_XP_00714 | hypothetPhaseolus_vulgaris  | 43.40 | 0.00 |
| TRINITY_GBG74592 | hypothetChara_braunii       | 43.40 | 0.00 |
| TRINITY_XP_02388 | J domairQuercus_suber       | 43.40 | 0.00 |
| TRINITY_XP_01023 | transcriBrachypodium_distac | 43.40 | 0.00 |
| TRINITY_XP_00295 | hypothetVolvox_carteri      | 43.40 | 0.00 |
| TRINITY_XP_02059 | bifunctiPhalaenopsis_equest | 43.40 | 0.00 |
| TRINITY_GAX76007 | hypothetChlamydomonas_eusti | 43.40 | 0.00 |
| TRINITY_KFK30497 | hypothetArabis_alpina       | 43.40 | 0.00 |
| TRINITY_XP_02389 | serine/tQuercus_suber       | 43.40 | 0.00 |
| TRINITY_GAX84713 | hypothetChlamydomonas_eusti | 43.40 | 0.00 |
| TRINITY_XP_02392 | erythroQuercus_suber        | 43.40 | 0.00 |
| TRINITY_XP_02160 | glutathiManihot_esculenta   | 43.40 | 0.00 |
| TRINITY_GAX84615 | hypothetChlamydomonas_eusti | 43.40 | 0.00 |
| TRINITY_GAX84322 | hypothetChlamydomonas_eusti | 43.40 | 0.00 |
| TRINITY_XP_00294 | hypothetVolvox_carteri      | 43.40 | 0.00 |
| TRINITY_GAX84989 | hypothetChlamydomonas_eusti | 43.40 | 0.00 |
| TRINITY_XP_00294 | hypothetVolvox_carteri      | 43.40 | 0.00 |
| TRINITY_GAX78374 | hypothetChlamydomonas_eusti | 43.40 | 0.00 |
| TRINITY_GAX76114 | hypothetChlamydomonas_eusti | 43.40 | 0.00 |
| TRINITY_XP_02351 | protein Cucurbita_pepo      | 43.40 | 0.00 |
| TRINITY_GAX82333 | hypothetChlamydomonas_eusti | 43.40 | 0.00 |
| TRINITY_KXZ54730 | hypothetGonium_pectorale    | 43.40 | 0.00 |
| TRINITY_XP_01052 | PREDICTITarenaya_hasslerian | 43.40 | 0.00 |
| TRINITY_OAE24627 | hypothetMarchantia_polymorp | 43.40 | 0.00 |
| TRINITY_XP_01944 | PREDICTILupinus_angustifoli | 43.40 | 0.00 |
| TRINITY_KXZ53282 | hypothetGonium_pectorale    | 43.40 | 0.00 |
| TRINITY_GAX83285 | hypothetChlamydomonas_eusti | 43.40 | 0.00 |
| TRINITY_KXZ55127 | hypothetGonium_pectorale    | 43.40 | 0.00 |
| TRINITY_BAJ11784 | dehydratCorchorus_olitorius | 43.40 | 0.00 |
| TRINITY_EMS49126 | DihydrofTriticum_urartu     | 43.40 | 0.00 |
| TRINITY_XP_01594 | potassiiArachis_duranensis  | 43.30 | 0.00 |
| TRINITY_GAQ81758 | hypothetKlebsormidium_niten | 43.30 | 0.00 |
| TRINITY_GBG74265 | hypothetChara_braunii       | 43.30 | 0.00 |
| TRINITY_XP_00169 | predicteChlamydomonas_reinh | 43.30 | 0.00 |
| TRINITY_XP_02389 | cytochrQuercus_suber        | 43.30 | 0.00 |
| TRINITY_XP_01616 | serine/tArachis_ipaensis    | 43.30 | 0.00 |
| TRINITY_GBF97343 | hypothetRaphidocelis_subcap | 43.30 | 0.00 |
| TRINITY_KZM89369 | hypothetDaucus_carota       | 43.30 | 0.00 |
| TRINITY_PNW87730 | hypothetChlamydomonas_reinh | 43.30 | 0.00 |
| TRINITY_XP_00250 | predicteMicromonas_commoda  | 43.30 | 0.00 |
| TRINITY_GAQ78227 | Serine/tKlebsormidium_niten | 43.30 | 0.00 |

|                                              |       |      |
|----------------------------------------------|-------|------|
| TRINITY_PSC72404M-phase Micractinium_conduc  | 43.30 | 0.00 |
| TRINITY_XP_01917PREDICTI Ipomoea_nil         | 43.30 | 0.00 |
| TRINITY_NP_00133uncharac Zea_mays            | 43.30 | 0.00 |
| TRINITY_PNR30243hypothet Physcomitrella_pate | 43.30 | 0.00 |
| TRINITY_XP_02387probablε Quercus_suber       | 43.30 | 0.00 |
| TRINITY_XP_01847PREDICTI Raphanus_sativus    | 43.30 | 0.00 |
| TRINITY_XP_00715hypothet Phaseolus_vulgaris  | 43.30 | 0.00 |
| TRINITY_GAQ81758hypothet Klebsormidium_niten | 43.30 | 0.00 |
| TRINITY_XP_02389protein Quercus_suber        | 43.30 | 0.00 |
| TRINITY_XP_02436uncharac Physcomitrella_pate | 43.30 | 0.00 |
| TRINITY_GAX7492(hypothet Chlamydomonas_eusti | 43.30 | 0.00 |
| TRINITY_GBG59018hypothet Chara_braunii       | 43.30 | 0.00 |
| TRINITY_KXZ51963hypothet Gonium_pectorale    | 43.30 | 0.00 |
| TRINITY_GAX83635hypothet Chlamydomonas_eusti | 43.30 | 0.00 |
| TRINITY_PHT26544hypothet Capsicum_baccatum   | 43.30 | 0.00 |
| TRINITY_PNH02746Ferredo Tetrabaena_socialis  | 43.30 | 0.00 |
| TRINITY_GAX79006hypothet Chlamydomonas_eusti | 43.30 | 0.00 |
| TRINITY_XP_02435coatome Physcomitrella_pate  | 43.30 | 0.00 |
| TRINITY_XP_00976PREDICTI Nicotiana_sylvestri | 43.30 | 0.00 |
| TRINITY_GAX72603hypothet Chlamydomonas_eusti | 43.30 | 0.00 |
| TRINITY_KCW87525hypothet Eucalyptus_grandis  | 43.30 | 0.00 |
| TRINITY_NP_00131copper nMalus_domestica      | 43.30 | 0.00 |
| TRINITY_GAX81934hypothet Chlamydomonas_eusti | 43.30 | 0.00 |
| TRINITY_GAX75797hypothet Chlamydomonas_eusti | 43.30 | 0.00 |
| TRINITY_GBG85311hypothet Chara_braunii       | 43.30 | 0.00 |
| TRINITY_XP_02582nitrate Panicum_hallii       | 43.30 | 0.00 |
| TRINITY_PNW79525hypothet Chlamydomonas_reinh | 43.30 | 0.00 |
| TRINITY_KXZ55525hypothet Gonium_pectorale    | 43.30 | 0.00 |
| TRINITY_XP_02173ABC trarChenopodium_quinoa   | 43.30 | 0.00 |
| TRINITY_XP_01595lysosomε Arachis_duranensis  | 43.30 | 0.00 |
| TRINITY_RZC14116Eukaryot Glycine_soja        | 43.30 | 0.00 |
| TRINITY_XP_02353dynamin-Cucurbita_pepo       | 43.30 | 0.00 |
| TRINITY_XP_01389hypothet Monoraphidium_negle | 43.30 | 0.00 |
| TRINITY_XP_0139(hypothet Monoraphidium_negle | 43.30 | 0.00 |
| TRINITY_PNW81455hypothet Chlamydomonas_reinh | 43.30 | 0.00 |
| TRINITY_GBF91112hypothet Raphidocelis_subcap | 43.30 | 0.00 |
| TRINITY_GAX84933hypothet Chlamydomonas_eusti | 43.30 | 0.00 |
| TRINITY_XP_02376serine/t Lactuca_sativa      | 43.30 | 0.00 |
| TRINITY_PUZ58988hypothet Panicum_hallii      | 43.30 | 0.00 |
| TRINITY_PTQ31677hypothet Marchantia_polymorp | 43.30 | 0.00 |
| TRINITY_GAX8511(hypothet Chlamydomonas_eusti | 43.30 | 0.00 |
| TRINITY_PNW86426hypothet Chlamydomonas_reinh | 43.30 | 0.00 |
| TRINITY_GAX77863hypothet Chlamydomonas_eusti | 43.30 | 0.00 |
| TRINITY_RAL47735hypothet Cuscuta_australis   | 43.30 | 0.00 |
| TRINITY_KXZ50652hypothet Gonium_pectorale    | 43.30 | 0.00 |
| TRINITY_GAX82511hypothet Chlamydomonas_eusti | 43.30 | 0.00 |
| TRINITY_GAX81024hypothet Chlamydomonas_eusti | 43.30 | 0.00 |
| TRINITY_GAX81575hypothet Chlamydomonas_eusti | 43.30 | 0.00 |
| TRINITY_GAX84612hypothet Chlamydomonas_eusti | 43.30 | 0.00 |
| TRINITY_XP_0139(hypothet Monoraphidium_negle | 43.30 | 0.00 |
| TRINITY_XP_00294hypothet Volvox_carteri      | 43.30 | 0.00 |
| TRINITY_GAX74211hypothet Chlamydomonas_eusti | 43.30 | 0.00 |
| TRINITY_KXZ5390(hypothet Gonium_pectorale    | 43.30 | 0.00 |
| TRINITY_AAM45881multicox Chlamydomonas_reinh | 43.30 | 0.00 |
| TRINITY_GAX74997hypothet Chlamydomonas_eusti | 43.30 | 0    |
| TRINITY_GBG6548(hypothet Chara_braunii       | 43.30 | 0.00 |
| TRINITY_PNH06963Sperm fl Tetrabaena_socialis | 43.30 | 0.00 |
| TRINITY_XP_00169fibrocyc Chlamydomonas_reinh | 43.20 | 0.00 |
| TRINITY_XP_00306methylyt Micromonas_pusilla  | 43.20 | 0.00 |
| TRINITY_PPD97209hypothet Gossypium_barbadens | 43.20 | 0.00 |
| TRINITY_OWM63622hypothet Punica_granatum     | 43.20 | 0.00 |
| TRINITY_XP_02582recQ-mec Panicum_hallii      | 43.20 | 0.00 |
| TRINITY_OMO66068hypothet Corchorus_olitorius | 43.20 | 0.00 |
| TRINITY_GBG72475hypothet Chara_braunii       | 43.20 | 0.00 |
| TRINITY_XP_01042PREDICTI Camelina_sativa     | 43.20 | 0.00 |
| TRINITY_XP_0094(PREDICTI Musa_acuminata      | 43.20 | 0.00 |



|                  |                               |       |      |
|------------------|-------------------------------|-------|------|
| TRINITY_KXZ50132 | hypothetGonium_pectorale      | 43.20 | 0.00 |
| TRINITY_GAV8363  | E1-E2_A]Cephalotus_follicul   | 43.20 | 0.00 |
| TRINITY_OAE25067 | hypothetMarchantia_polymorp   | 43.20 | 0.00 |
| TRINITY_AGZ19352 | hypothetChlorella_sp._ArM00   | 43.20 | 0.00 |
| TRINITY_GAX8376  | hypothetChlamydomonas_eusti   | 43.20 | 0.00 |
| TRINITY_XP_0138  | hypothetMonoraphidium_negle   | 43.20 | 0.00 |
| TRINITY_XP_0030  | predicteMicromonas_pusilla    | 43.20 | 0.00 |
| TRINITY_EXC3489  | Metal t1Morus_notabilis       | 43.20 | 0.00 |
| TRINITY_XP_0194  | 2PREDICTH]Lupinus_angustifoli | 43.20 | 0.00 |
| TRINITY_GAQ7935  | 8Arginyl-Klebsormidium_niten  | 43.20 | 0.00 |
| TRINITY_PTQ4668  | 5hypothetMarchantia_polymorp  | 43.20 | 0.00 |
| TRINITY_XP_0030  | 5predicteMicromonas_pusilla   | 43.20 | 0.00 |
| TRINITY_GAX7599  | 2hypothetChlamydomonas_eusti  | 43.20 | 0.00 |
| TRINITY_XP_0264  | (ras-relaPapaver_somniferum   | 43.20 | 0.00 |
| TRINITY_KFK4029  | 5hypothetArabis_alpina        | 43.20 | 0.00 |
| TRINITY_PTQ4810  | (hypothetMarchantia_polymorp  | 43.20 | 0.00 |
| TRINITY_XP_0063  | 4PREDICTH]Solanum_tuberosum   | 43.20 | 0.00 |
| TRINITY_CAI8489  | 3putativeMedicago_sativa      | 43.20 | 0.00 |
| TRINITY_PSC6996  | metal t1Micractinium_conduc   | 43.20 | 0.00 |
| TRINITY_XP_0138  | hypothetMonoraphidium_negle   | 43.20 | 0.00 |
| TRINITY_GAX8307  | 5hypothetChlamydomonas_eusti  | 43.20 | 0.00 |
| TRINITY_XP_0064  | 3pre-mRN]Citrus_clementina    | 43.20 | 0.00 |
| TRINITY_XP_0016  | 3predicteChlamydomonas_reinh  | 43.20 | 0.00 |
| TRINITY_XP_0029  | 9uncharacSelaginella_moellen  | 43.20 | 0.00 |
| TRINITY_XP_0238  | 9non-specQuercus_suber        | 43.20 | 0.00 |
| TRINITY_XP_0029  | 5hypothetVolvox_carteri       | 43.20 | 0.00 |
| TRINITY_XP_0100  | 4PREDICTH]Eucalyptus_grandis  | 43.20 | 0.00 |
| TRINITY_GAX7399  | 2hypothetChlamydomonas_eusti  | 43.20 | 0.00 |
| TRINITY_XP_0243  | 7Fanconi Physcomitrella_pate  | 43.20 | 0.00 |
| TRINITY_PNW8313  | (hypothetChlamydomonas_reinh  | 43.20 | 0.00 |
| TRINITY_GBF9042  | 4prolyl eRaphidocelis_subcap  | 43.20 | 0.00 |
| TRINITY_GAX7634  | 8hypothetChlamydomonas_eusti  | 43.20 | 0.00 |
| TRINITY_GAX7934  | 8hypothetChlamydomonas_eusti  | 43.20 | 0.00 |
| TRINITY_XP_0238  | 7FYVE-tyxQuercus_suber        | 43.20 | 0.00 |
| TRINITY_EEF2753  | (hydroxyaRicinus_communis     | 43.20 | 0.00 |
| TRINITY_PKA6449  | (putativeApostasia_shenzheni  | 43.20 | 0.00 |
| TRINITY_XP_0056  | 4hypothetCoccomyxa_subellips  | 43.20 | 0.00 |
| TRINITY_XP_0016  | 3glycerolChlamydomonas_reinh  | 43.20 | 0.00 |
| TRINITY_PTQ4682  | 5hypothetMarchantia_polymorp  | 43.20 | 0.00 |
| TRINITY_RMZ5533  | 8hypothetAuxenochlorella_pro  | 43.20 | 0.00 |
| TRINITY_GAX8159  | (hypothetChlamydomonas_eusti  | 43.20 | 0.00 |
| TRINITY_GAX7564  | 9hypothetChlamydomonas_eusti  | 43.20 | 0.00 |
| TRINITY_PTQ2901  | 2hypothetMarchantia_polymorp  | 43.20 | 0.00 |
| TRINITY_KXZ4596  | (hypothetGonium_pectorale     | 43.20 | 0.00 |
| TRINITY_AEY8245  | 2FAP133  Chlamydomonas_reinh  | 43.20 | 0.00 |
| TRINITY_XP_0109  | 4PREDICTH]Elaeis_guineensis   | 43.20 | 0.00 |
| TRINITY_XP_0238  | 9flocculaxQuercus_suber       | 43.20 | 0.00 |
| TRINITY_XP_0239  | 2protein Quercus_suber        | 43.20 | 0.00 |
| TRINITY_XP_0035  | (putativeBrachypodium_distac  | 43.20 | 0.00 |
| TRINITY_GAX7789  | 1hypothetChlamydomonas_eusti  | 43.20 | 0.00 |
| TRINITY_OAE3251  | 1hypothetMarchantia_polymorp  | 43.20 | 0.00 |
| TRINITY_XP_0014  | 2predicteOstreococcus_sp._'1  | 43.20 | 0.00 |
| TRINITY_GAX7404  | (hypothetChlamydomonas_eusti  | 43.20 | 0.00 |
| TRINITY_XP_0029  | 5hypothetVolvox_carteri       | 43.20 | 0.00 |
| TRINITY_GAQ7881  | 9hypothetKlebsormidium_niten  | 43.20 | 0.00 |
| TRINITY_PNW7368  | 8hypothetChlamydomonas_reinh  | 43.20 | 0.00 |
| TRINITY_XP_0017  | (predicteChlamydomonas_reinh  | 43.20 | 0.00 |
| TRINITY_XP_0056  | 5Di-transCoccomyxa_subellips  | 43.20 | 0.00 |
| TRINITY_GAX8508  | 4hypothetChlamydomonas_eusti  | 43.20 | 0.00 |
| TRINITY_PNW8816  | 9hypothetChlamydomonas_reinh  | 43.20 | 0.00 |
| TRINITY_XP_0016  | 3predicteChlamydomonas_reinh  | 43.20 | 0.00 |
| TRINITY_GBF9195  | 9hypothetRaphidocelis_subcap  | 43.20 | 0.00 |
| TRINITY_XP_0172  | 3PREDICTH]Daucus_carota       | 43.10 | 0.00 |
| TRINITY_PON4130  | 4Tubulin-Parasponia_anderson  | 43.10 | 0.00 |
| TRINITY_XP_0271  | (DNA (cytCoffea_arabica       | 43.10 | 0.00 |
| TRINITY_KXZ4746  | 3hypothetGonium_pectorale     | 43.10 | 0.00 |

|                          |                             |       |      |
|--------------------------|-----------------------------|-------|------|
| TRINITY_XP_01389FKBP12-1 | Monoraphidium_negle         | 43.10 | 0.00 |
| TRINITY_XP_00751         | predicteBathycoccus_prasin  | 43.10 | 0.00 |
| TRINITY_XP_01090         | PREDICTHElaeis_guineensis   | 43.10 | 0.00 |
| TRINITY_GAQ83930         | hypothetKlebsormidium_niten | 43.10 | 0.00 |
| TRINITY_XP_01925         | PREDICTINicotiana_attenuata | 43.10 | 0.00 |
| TRINITY_XP_00935         | PREDICTIPyrus_x_bretschneid | 43.10 | 0.00 |
| TRINITY_PWA86140         | NAF domArtemisia_annua      | 43.10 | 0.00 |
| TRINITY_XP_01970         | PREDICTHElaeis_guineensis   | 43.10 | 0.00 |
| TRINITY_XP_00564         | hypothetCoccomyxa_subellips | 43.10 | 0.00 |
| TRINITY_XP_01344         | serine/tMedicago_truncatula | 43.10 | 0.00 |
| TRINITY_GBF91620         | hypothetRaphidocelis_subcap | 43.10 | 0.00 |
| TRINITY_EFH68060         | predicteArabidopsis_lyrata  | 43.10 | 0.00 |
| TRINITY_XP_02270         | calcium-Durio_zibethinus    | 43.10 | 0.00 |
| TRINITY_GAQ812322        | -oxoglKlebsormidium_niten   | 43.10 | 0.00 |
| TRINITY_XP_02641         | ras-relPapaver_somniferum   | 43.10 | 0.00 |
| TRINITY_XP_02020         | MMS19 nAsparagus_officinal  | 43.10 | 0.00 |
| TRINITY_GAX74981         | hypothetChlamydomonas_eusti | 43.10 | 0.00 |
| TRINITY_XP_01724         | PREDICTHDaucus_carota       | 43.10 | 0.00 |
| TRINITY_EPS68912         | hypothetGenlisea_aurea      | 43.10 | 0.00 |
| TRINITY_XP_00295         | hypothetVolvox_carteri      | 43.10 | 0.00 |
| TRINITY_GAQ80201         | protein Klebsormidium_niten | 43.10 | 0.00 |
| TRINITY_EFJ33690         | hypothetSelaginella_moellen | 43.10 | 0.00 |
| TRINITY_GAX81074         | hypothetChlamydomonas_eusti | 43.10 | 0.00 |
| TRINITY_OAE31740         | hypothetMarchantia_polymorp | 43.10 | 0.00 |
| TRINITY_XP_02380         | uncharacQuercus_suber       | 43.10 | 0.00 |
| TRINITY_XP_02375         | traB donLactuca_sativa      | 43.10 | 0.00 |
| TRINITY_PSC71430         | serine tMicractinium_conduc | 43.10 | 0.00 |
| TRINITY_ACH63220         | O-linkeRheum_australe       | 43.10 | 0.00 |
| TRINITY_XP_00170         | predicteChlamydomonas_reinh | 43.10 | 0.00 |
| TRINITY_GAX74480         | hypothetChlamydomonas_eusti | 43.10 | 0.00 |
| TRINITY_XP_02450         | zinc firSelaginella_moellen | 43.10 | 0.00 |
| TRINITY_GAX85031         | hypothetChlamydomonas_eusti | 43.10 | 0.00 |
| TRINITY_GAX85524         | hypothetChlamydomonas_eusti | 43.10 | 0.00 |
| TRINITY_XP_02430         | uncharacPhyscomitrella_pate | 43.10 | 0.00 |
| TRINITY_XP_00295         | RWP-RK cVolvox_carteri      | 43.10 | 0.00 |
| TRINITY_KXZ55100         | hypothetGonium_pectorale    | 43.10 | 0.00 |
| TRINITY_GAX72630         | hypothetChlamydomonas_eusti | 43.10 | 0.00 |
| TRINITY_XP_00300         | monovalcMicromonas_pusilla  | 43.10 | 0.00 |
| TRINITY_XP_00680         | thiorescAmborella_trichopod | 43.10 | 0.00 |
| TRINITY_KHG05570         | Protein Gossypium_arboreum  | 43.10 | 0.00 |
| TRINITY_GAX77870         | hypothetChlamydomonas_eusti | 43.10 | 0.00 |
| TRINITY_XP_00141         | predicteOstreococcus_sp._'1 | 43.10 | 0.00 |
| TRINITY_GAX80532         | hypothetChlamydomonas_eusti | 43.10 | 0.00 |
| TRINITY_KXZ44070         | hypothetGonium_pectorale    | 43.10 | 0.00 |
| TRINITY_XP_01940         | PREDICTHLupinus_angustifoli | 43.10 | 0.00 |
| TRINITY_XP_02391         | myosin tQuercus_suber       | 43.10 | 0.00 |
| TRINITY_GBG59274         | hypothetChara_braunii       | 43.10 | 0.00 |
| TRINITY_GAX76020         | hypothetChlamydomonas_eusti | 43.10 | 0.00 |
| TRINITY_GAQ81411         | MetalloKlebsormidium_niten  | 43.10 | 0.00 |
| TRINITY_PNH09214         | Tiny macTetrabaena_socialis | 43.10 | 0.00 |
| TRINITY_XP_00240         | uncharacSorghum_bicolor     | 43.10 | 0.00 |
| TRINITY_XP_00290         | hypothetVolvox_carteri      | 43.10 | 0.00 |
| TRINITY_KXZ55460         | hypothetGonium_pectorale    | 43.10 | 0.00 |
| TRINITY_PNH02550         | hypothetTetrabaena_socialis | 43.10 | 0.00 |
| TRINITY_GAQ82794         | thiol mKlebsormidium_niten  | 43.10 | 0.00 |
| TRINITY_XP_02380         | uncharacQuercus_suber       | 43.10 | 0.00 |
| TRINITY_GAX77482         | hypothetChlamydomonas_eusti | 43.10 | 0.00 |
| TRINITY_GAX85040         | hypothetChlamydomonas_eusti | 43.10 | 0.00 |
| TRINITY_PTQ30282         | hypothetMarchantia_polymorp | 43.10 | 0.00 |
| TRINITY_XP_00160         | peptidyChlamydomonas_reinh  | 43.10 | 0.00 |
| TRINITY_GBG59052         | hypothetChara_braunii       | 43.10 | 0.00 |
| TRINITY_GAX79300         | hypothetChlamydomonas_eusti | 43.10 | 0.00 |
| TRINITY_XP_02020         | lipid pAegilops_tauschii    | 43.10 | 0.00 |
| TRINITY_XP_00564         | hypothetCoccomyxa_subellips | 43.10 | 0.00 |
| TRINITY_XP_00564         | hypothetCoccomyxa_subellips | 43.10 | 0.00 |
| TRINITY_GAX73340         | hypothetChlamydomonas_eusti | 43.10 | 0.00 |

|                 |                              |       |      |
|-----------------|------------------------------|-------|------|
| TRINITY_GAX8120 | hypothetChlamydomonas_eusti  | 43.10 | 0.00 |
| TRINITY_XP_0136 | PREDICTIBrassica_oleracea    | 43.10 | 0.00 |
| TRINITY_XP_0184 | PREDICTIRaphanus_sativus     | 43.10 | 0.00 |
| TRINITY_XP_0239 | uncharaQuercus_suber         | 43.10 | 0.00 |
| TRINITY_KMS9340 | (hypothetBeta_vulgaris       | 43.00 | 0.00 |
| TRINITY_RWR8650 | GuanylatCinnamomum_micranth  | 43.00 | 0.00 |
| TRINITY_XP_0190 | PREDICTICamelina_sativa      | 43.00 | 0.00 |
| TRINITY_XP_0238 | catalasQuercus_suber         | 43.00 | 0.00 |
| TRINITY_XP_0105 | PREDICTITarenaya_hasslerian  | 43.00 | 0.00 |
| TRINITY_XP_0100 | PREDICTIEucalyptus_grandis   | 43.00 | 0.00 |
| TRINITY_ACY0039 | calmodulKnorringia_sibirica  | 43.00 | 0.00 |
| TRINITY_XP_0105 | PREDICTICamelina_sativa      | 43.00 | 0.00 |
| TRINITY_XP_0024 | carnosirSorghum_bicolor      | 43.00 | 0.00 |
| TRINITY_GAQ8191 | heat shKlebsormidium_niten   | 43.00 | 0.00 |
| TRINITY_BAJ9372 | predicteHordeum_vulgare      | 43.00 | 0.00 |
| TRINITY_XP_0201 | probableAegilops_tauschii    | 43.00 | 0.00 |
| TRINITY_XP_0105 | PREDICTITarenaya_hasslerian  | 43.00 | 0.00 |
| TRINITY_XP_0219 | U2 smallHelianthus_annuus    | 43.00 | 0.00 |
| TRINITY_XP_0227 | cinnamoDurio_zibethinus      | 43.00 | 0.00 |
| TRINITY_XP_0150 | lysosomSolanum_pennellii     | 43.00 | 0.00 |
| TRINITY_OAE3007 | hypothetMarchantia_polymorp  | 43.00 | 0.00 |
| TRINITY_XP_0216 | 17.3 kDaManihot_esculenta    | 43.00 | 0.00 |
| TRINITY_GAX7866 | hypothetChlamydomonas_eusti  | 43.00 | 0.00 |
| TRINITY_XP_0029 | annexin Selaginella_moellen  | 43.00 | 0.00 |
| TRINITY_XP_0029 | hypothetVolvox_carteri       | 43.00 | 0.00 |
| TRINITY_NP_0013 | 4-methylSolanum_lycopersicu  | 43.00 | 0.00 |
| TRINITY_GBF8851 | ABC trarRaphidocelis_subcap  | 43.00 | 0.00 |
| TRINITY_XP_0028 | SNF1-relArabidopsis_lyrata   | 43.00 | 0.00 |
| TRINITY_XP_0245 | uncharaSelaginella_moellen   | 43.00 | 0.00 |
| TRINITY_XP_0113 | RibosomeAuxenochlorella_pro  | 43.00 | 0.00 |
| TRINITY_XP_0206 | putativeDendrobium_catenatu  | 43.00 | 0.00 |
| TRINITY_XP_0066 | PREDICTIOryza_brachyantha    | 43.00 | 0.00 |
| TRINITY_XP_0029 | hypothetVolvox_carteri       | 43.00 | 0.00 |
| TRINITY_XP_0243 | ras-relPhyscomitrella_pate   | 43.00 | 0.00 |
| TRINITY_PNW7045 | hypothetChlamydomonas_reinh  | 43.00 | 0.00 |
| TRINITY_BAK0046 | predicteHordeum_vulgare      | 43.00 | 0.00 |
| TRINITY_GAQ8574 | GalactosKlebsormidium_niten  | 43.00 | 0.00 |
| TRINITY_XP_0239 | (myosin-1Quercus_suber       | 43.00 | 0.00 |
| TRINITY_XP_0014 | predicteOstreococcus_sp._'1  | 43.00 | 0.00 |
| TRINITY_XP_0244 | (elongatiPhyscomitrella_pate | 43.00 | 0.00 |
| TRINITY_XP_0239 | (kinesin-Quercus_suber       | 43.00 | 0.00 |
| TRINITY_XP_0093 | PREDICTIPyrus_x_bretschneid  | 43.00 | 0.00 |
| TRINITY_GAQ8796 | UbiquitiKlebsormidium_niten  | 43.00 | 0.00 |
| TRINITY_GAX7378 | (hypothetChlamydomonas_eusti | 43.00 | 0.00 |
| TRINITY_GBF9375 | polyribRaphidocelis_subcap   | 43.00 | 0.00 |
| TRINITY_XP_0025 | (cysteineMicromonas_commoda  | 43.00 | 0.00 |
| TRINITY_ADE7778 | unknown Picea_sitchensis     | 43.00 | 0.00 |
| TRINITY_GAX7354 | hypothetChlamydomonas_eusti  | 43.00 | 0.00 |
| TRINITY_GAX7409 | hypothetChlamydomonas_eusti  | 43.00 | 0.00 |
| TRINITY_GBG9231 | (hypothetChara_braunii       | 43.00 | 0.00 |
| TRINITY_PNH0914 | (hypothetTetrabaena_socialis | 43.00 | 0.00 |
| TRINITY_XP_0158 | mitochorZiziphus_jujuba      | 43.00 | 0.00 |
| TRINITY_XP_0029 | hypothetVolvox_carteri       | 43.00 | 0.00 |
| TRINITY_GBF8874 | iron-sulRaphidocelis_subcap  | 43.00 | 0.00 |
| TRINITY_CAI8489 | putativeMedicago_sativa      | 43.00 | 0.00 |
| TRINITY_GAQ8289 | ThiJ/PfKlebsormidium_niten   | 43.00 | 0.00 |
| TRINITY_GAQ7785 | S1 RNA kKlebsormidium_niten  | 43.00 | 0.00 |
| TRINITY_PNH0083 | (hypothetTetrabaena_socialis | 43.00 | 0.00 |
| TRINITY_GAX8033 | (hypothetChlamydomonas_eusti | 43.00 | 0.00 |
| TRINITY_XP_0270 | (hsp70-HCoffea_arabica       | 43.00 | 0.00 |
| TRINITY_GAX7716 | (hypothetChlamydomonas_eusti | 43.00 | 0.00 |
| TRINITY_PNW8008 | (hypothetChlamydomonas_reinh | 43.00 | 0.00 |
| TRINITY_GAX8095 | (hypothetChlamydomonas_eusti | 43.00 | 0.00 |
| TRINITY_GAX7593 | (hypothetChlamydomonas_eusti | 43.00 | 0.00 |
| TRINITY_KXZ5432 | (hypothetGonium_pectorale    | 43.00 | 0.00 |
| TRINITY_XP_0068 | probableAmborella_trichopod  | 43.00 | 0.00 |

|                  |          |                     |       |      |
|------------------|----------|---------------------|-------|------|
| TRINITY_XP_0104  | PREDICT  | Camelina_sativa     | 43.00 | 0.00 |
| TRINITY_RZB7007  | Pre-mRN  | Glycine_soja        | 43.00 | 0.00 |
| TRINITY_GAX83731 | hypothet | Chlamydomonas_eusti | 43.00 | 0.00 |
| TRINITY_KXZ4167  | hypothet | Gonium_pectorale    | 43.00 | 0.00 |
| TRINITY_XP_0239  | ras-like | Quercus_suber       | 43.00 | 0.00 |
| TRINITY_GBF99171 | hypothet | Raphidocelis_subcap | 43.00 | 0.00 |
| TRINITY_XP_0228  | poly [AI | Olea_europaea       | 43.00 | 0.00 |
| TRINITY_XP_0029  | hypothet | Volvox_carteri      | 43.00 | 0.00 |
| TRINITY_GAX7828  | hypothet | Chlamydomonas_eusti | 43.00 | 0.00 |
| TRINITY_GAQ7793  | NMD prot | Klebsormidium_niten | 43.00 | 0.00 |
| TRINITY_PNW8032  | hypothet | Chlamydomonas_reinh | 43.00 | 0.00 |
| TRINITY_XP_0016  | predict  | Chlamydomonas_reinh | 43.00 | 0.00 |
| TRINITY_OWM7161  | hypothet | Punica_granatum     | 43.00 | 0.00 |
| TRINITY_KXZ4385  | hypothet | Gonium_pectorale    | 43.00 | 0.00 |
| TRINITY_KXZ4919  | hypothet | Gonium_pectorale    | 43.00 | 0.00 |
| TRINITY_GAX8523  | hypothet | Chlamydomonas_eusti | 43.00 | 0.00 |
| TRINITY_PSC7410  | ubiquiti | Micractinium_conduc | 43.00 | 0.00 |
| TRINITY_GAX76051 | hypothet | Chlamydomonas_eusti | 43.00 | 0.00 |
| TRINITY_XP_0016  | uric aci | Chlamydomonas_reinh | 43.00 | 0.00 |
| TRINITY_GAX86251 | hypothet | Chlamydomonas_eusti | 43.00 | 0.00 |
| TRINITY_XP_00641 | cysteine | Eutrema_salsugineur | 43.00 | 0.00 |
| TRINITY_KXZ4131  | hypothet | Gonium_pectorale    | 43.00 | 0.00 |
| TRINITY_RXH8769  | hypothet | Malus_domestica     | 43.00 | 0.00 |
| TRINITY_XP_00564 | JmjC-don | Coccomyxa_subellips | 43.00 | 0.00 |
| TRINITY_PNH1229  | putativ  | Tetrabaena_socialis | 43.00 | 0.00 |
| TRINITY_GAX73064 | hypothet | Chlamydomonas_eusti | 43.00 | 0.00 |
| TRINITY_PSC7039  | Leukotri | Micractinium_conduc | 43.00 | 0.00 |
| TRINITY_PIN0974  | RNA pol  | Handroanthus_impeti | 42.90 | 0.00 |
| TRINITY_XP_0030  | predict  | Micromonas_pusilla  | 42.90 | 0.00 |
| TRINITY_GAX8511  | hypothet | Chlamydomonas_eusti | 42.90 | 0.00 |
| TRINITY_XP_0029  | brefeldi | Selaginella_moellen | 42.90 | 0.00 |
| TRINITY_XP_0106  | PREDICT  | Beta_vulgaris       | 42.90 | 0.00 |
| TRINITY_XP_0158  | LAG1 lor | Ziziphus_jujuba     | 42.90 | 0.00 |
| TRINITY_KXZ46834 | DHC5 pr  | Gonium_pectorale    | 42.90 | 0.00 |
| TRINITY_XP_0243  | adenylat | Physcomitrella_pate | 42.90 | 0.00 |
| TRINITY_GAQ8980  | Sensory  | Klebsormidium_niten | 42.90 | 0.00 |
| TRINITY_GAX7358  | hypothet | Chlamydomonas_eusti | 42.90 | 0.00 |
| TRINITY_PRW5753  | Ras-rel  | Chlorella_sorokinia | 42.90 | 0.00 |
| TRINITY_XP_0035  | E3 ubiq  | Brachypodium_distac | 42.90 | 0.00 |
| TRINITY_GBG6619  | hypothet | Chara_braunii       | 42.90 | 0.00 |
| TRINITY_XP_0228  | putativ  | Olea_europaea       | 42.90 | 0.00 |
| TRINITY_OAE1829  | hypothet | Marchantia_polymorp | 42.90 | 0.00 |
| TRINITY_GAQ9251  | hypothet | Klebsormidium_niten | 42.90 | 0.00 |
| TRINITY_NP_0011  | uncharac | Zea_mays            | 42.90 | 0.00 |
| TRINITY_XP_0066  | PREDICT  | Oryza_brachyantha   | 42.90 | 0.00 |
| TRINITY_RHN7016  | putativ  | Medicago_truncatula | 42.90 | 0.00 |
| TRINITY_GAQ8997  | two-com  | Klebsormidium_niten | 42.90 | 0.00 |
| TRINITY_XP_0238  | serine/t | Quercus_suber       | 42.90 | 0.00 |
| TRINITY_XP_0239  | hydroxyn | Quercus_suber       | 42.90 | 0.00 |
| TRINITY_XP_0086  | COMPASS- | Zea_mays            | 42.90 | 0.00 |
| TRINITY_XP_0094  | PREDICT  | Musa_acuminata      | 42.90 | 0.00 |
| TRINITY_KDD7483  | hypothet | Helicosporidium_sp. | 42.90 | 0.00 |
| TRINITY_GAQ8835  | alpha-sc | Klebsormidium_niten | 42.90 | 0.00 |
| TRINITY_XP_0227  | serine/t | Durio_zibethinus    | 42.90 | 0.00 |
| TRINITY_XP_0219  | stromal  | Helianthus_annuus   | 42.90 | 0.00 |
| TRINITY_XP_0202  | probable | Cajanus_cajan       | 42.90 | 0.00 |
| TRINITY_PRW5867  | Tetratri | Chlorella_sorokinia | 42.90 | 0.00 |
| TRINITY_OAE2318  | hypothet | Marchantia_polymorp | 42.90 | 0.00 |
| TRINITY_XP_0016  | peroxis  | Chlamydomonas_reinh | 42.90 | 0.00 |
| TRINITY_GAQ8578  | hypothet | Klebsormidium_niten | 42.90 | 0.00 |
| TRINITY_XP_0176  | PREDICT  | Gossypium_arboreum  | 42.90 | 0.00 |
| TRINITY_XP_0030  | predict  | Micromonas_pusilla  | 42.90 | 0.00 |
| TRINITY_GAQ8440  | Serine   | Klebsormidium_niten | 42.90 | 0.00 |
| TRINITY_RYR40254 | hypothet | Arachis_hypogaea    | 42.90 | 0.00 |
| TRINITY_GBF9985  | hypothet | Raphidocelis_subcap | 42.90 | 0.00 |
| TRINITY_PNW7171  | hypothet | Chlamydomonas_reinh | 42.90 | 0.00 |

|                  |                              |       |      |
|------------------|------------------------------|-------|------|
| TRINITY_XP_00294 | hypothetVolvox_carteri       | 42.90 | 0.00 |
| TRINITY_KXZ45684 | hypothetGonium_pectorale     | 42.90 | 0.00 |
| TRINITY_EMS59459 | PeriodicTriticum_urartu      | 42.90 | 0.00 |
| TRINITY_GAX77521 | hypothetChlamydomonas_eusti  | 42.90 | 0.00 |
| TRINITY_GAQ83684 | putativεKlebsormidium_niten  | 42.90 | 0.00 |
| TRINITY_RDX97312 | CBL-intεMucuna_pruriens      | 42.90 | 0.00 |
| TRINITY_XP_00170 | (predictεChlamydomonas_reinh | 42.90 | 0.00 |
| TRINITY_XP_00649 | splicinçCitrus_sinensis      | 42.90 | 0.00 |
| TRINITY_KDP34222 | hypothetJatropha_curcas      | 42.90 | 0.00 |
| TRINITY_XP_02451 | GPI manrSelaginella_moellen  | 42.90 | 0.00 |
| TRINITY_GAX77270 | (hypothetChlamydomonas_eusti | 42.90 | 0.00 |
| TRINITY_KXZ46894 | hypothetGonium_pectorale     | 42.90 | 0.00 |
| TRINITY_XP_01102 | PREDICTIPopulus_euphratica   | 42.90 | 0.00 |
| TRINITY_KXZ50483 | hypothetGonium_pectorale     | 42.90 | 0.00 |
| TRINITY_GAX81085 | hypothetChlamydomonas_eusti  | 42.90 | 0.00 |
| TRINITY_XP_02391 | ATP-depεQuercus_suber        | 42.90 | 0.00 |
| TRINITY_POO01798 | Guanine Trema_orientale      | 42.90 | 0.00 |
| TRINITY_XP_00878 | SEC1 fanPhoenix_dactylifera  | 42.90 | 0.00 |
| TRINITY_XP_00295 | hypothetVolvox_carteri       | 42.90 | 0.00 |
| TRINITY_GAQ82386 | (delta(3)Klebsormidium_niten | 42.90 | 0.00 |
| TRINITY_PNR46396 | (hypothetPhyscomitrella_pate | 42.90 | 0.00 |
| TRINITY_GAX85007 | hypothetChlamydomonas_eusti  | 42.90 | 0.00 |
| TRINITY_XP_01139 | AminometAuxenochlorella_pro  | 42.90 | 0.00 |
| TRINITY_XP_01389 | hypothetMonoraphidium_negle  | 42.90 | 0.00 |
| TRINITY_XP_02185 | diphospPSpinacia_oleracea    | 42.90 | 0.00 |
| TRINITY_GAX83799 | hypothetChlamydomonas_eusti  | 42.90 | 0.00 |
| TRINITY_XP_00142 | predictεOstreococcus_sp._'1  | 42.90 | 0.00 |
| TRINITY_KXZ47639 | hypothetGonium_pectorale     | 42.90 | 0.00 |
| TRINITY_XP_02390 | (ATP-depεQuercus_suber       | 42.90 | 0.00 |
| TRINITY_GAX79785 | hypothetChlamydomonas_eusti  | 42.90 | 0.00 |
| TRINITY_GAQ85170 | (DihydrocKlebsormidium_niten | 42.90 | 0.00 |
| TRINITY_PRW57200 | (metalloçChlorella_sorokinia | 42.90 | 0.00 |
| TRINITY_GAX84223 | hypothetChlamydomonas_eusti  | 42.90 | 0.00 |
| TRINITY_GAX76311 | hypothetChlamydomonas_eusti  | 42.90 | 0.00 |
| TRINITY_XP_00564 | hypothetCoccomyxa_subellips  | 42.90 | 0.00 |
| TRINITY_XP_01246 | (PREDICTIGossypium_raimondii | 42.90 | 0.00 |
| TRINITY_XP_02388 | bifunctiQuercus_suber        | 42.90 | 0.00 |
| TRINITY_KXZ51476 | (hypothetGonium_pectorale    | 42.90 | 0.00 |
| TRINITY_GAX74879 | hypothetChlamydomonas_eusti  | 42.90 | 0.00 |
| TRINITY_PNH07783 | RepresscTetrabaena_socialis  | 42.90 | 0.00 |
| TRINITY_PNW85554 | hypothetChlamydomonas_reinh  | 42.90 | 0.00 |
| TRINITY_XP_00245 | CBL-intεSorghum_bicolor      | 42.90 | 0.00 |
| TRINITY_KXZ53241 | hypothetGonium_pectorale     | 42.90 | 0.00 |
| TRINITY_XP_01052 | PREDICTITarenaya_hasslerian  | 42.90 | 0.00 |
| TRINITY_PTQ49925 | hypothetMarchantia_polymorp  | 42.90 | 0.00 |
| TRINITY_GBF89514 | hypothetRaphidocelis_subcap  | 42.90 | 0.00 |
| TRINITY_GAX84399 | hypothetChlamydomonas_eusti  | 42.90 | 0.00 |
| TRINITY_GBF89518 | multidriRaphidocelis_subcap  | 42.90 | 0.00 |
| TRINITY_XP_01389 | hypothetMonoraphidium_negle  | 42.90 | 0.00 |
| TRINITY_GBF94409 | hypothetRaphidocelis_subcap  | 42.90 | 0.00 |
| TRINITY_PNH02814 | Vam6/VpεTetrabaena_socialis  | 42.90 | 0.00 |
| TRINITY_KXZ52518 | hypothetGonium_pectorale     | 42.90 | 0.00 |
| TRINITY_XP_00169 | predictεChlamydomonas_reinh  | 42.90 | 0.00 |
| TRINITY_PON90270 | (TranscriTrema_orientale     | 42.90 | 0.00 |
| TRINITY_GAX82232 | hypothetChlamydomonas_eusti  | 42.90 | 0.00 |
| TRINITY_KXZ49462 | hypothetGonium_pectorale     | 42.90 | 0.00 |
| TRINITY_XP_02389 | cystathiQuercus_suber        | 42.90 | 0.00 |
| TRINITY_XP_01917 | PREDICTIIpomoea_nil          | 42.90 | 0.00 |
| TRINITY_PNH07479 | Leucine Tetrabaena_socialis  | 42.90 | 0.00 |
| TRINITY_GAX81466 | (hypothetChlamydomonas_eusti | 42.90 | 0.00 |
| TRINITY_KXZ47817 | hypothetGonium_pectorale     | 42.90 | 0.00 |
| TRINITY_GAX74599 | hypothetChlamydomonas_eusti  | 42.90 | 0.00 |
| TRINITY_PNH12265 | Tiny macTetrabaena_socialis  | 42.90 | 0.00 |
| TRINITY_GAX78221 | hypothetChlamydomonas_eusti  | 42.90 | 0.00 |
| TRINITY_GAX76823 | hypothetChlamydomonas_eusti  | 42.90 | 0.00 |
| TRINITY_GAX77102 | hypothetChlamydomonas_eusti  | 42.90 | 0.00 |

|                 |                              |       |      |
|-----------------|------------------------------|-------|------|
| TRINITY_GAX7739 | hypothetChlamydomonas_eusti  | 42.90 | 0.00 |
| TRINITY_PRW4518 | importirChlorella_sorokinia  | 42.90 | 0.00 |
| TRINITY_XP_0243 | uncharaPhyscomitrella_pate   | 42.90 | 0.00 |
| TRINITY_PNW8235 | hypothetChlamydomonas_reinh  | 42.90 | 0.00 |
| TRINITY_XP_0016 | glutathiChlamydomonas_reinh  | 42.90 | 0.00 |
| TRINITY_XP_0014 | predicteOstreococcus_sp._'l  | 42.90 | 0.00 |
| TRINITY_XP_0238 | coronin-Quercus_suber        | 42.90 | 0.00 |
| TRINITY_XP_0093 | PREDICTIMusa_acuminata       | 42.90 | 0.00 |
| TRINITY_ONM3180 | SuppresZea_mays              | 42.80 | 0.00 |
| TRINITY_ONM1167 | ADP-ribcZea_mays             | 42.80 | 0.00 |
| TRINITY_XP_0220 | NADPH:acHelianthus_annuus    | 42.80 | 0.00 |
| TRINITY_XP_0030 | predicteMicromonas_pusilla   | 42.80 | 0.00 |
| TRINITY_XP_0237 | carboxyLactuca_sativa        | 42.80 | 0.00 |
| TRINITY_XP_0238 | calcium-Quercus_suber        | 42.80 | 0.00 |
| TRINITY_XP_0228 | cation/IOlea_europaea        | 42.80 | 0.00 |
| TRINITY_GAX7742 | hypothetChlamydomonas_eusti  | 42.80 | 0.00 |
| TRINITY_KZV4358 | (serine/tDorcoceras_hygromet | 42.80 | 0.00 |
| TRINITY_XP_0139 | (3-methylMonoraphidium_negle | 42.80 | 0.00 |
| TRINITY_GAX7598 | hypothetChlamydomonas_eusti  | 42.80 | 0.00 |
| TRINITY_PRW5892 | esteraseChlorella_sorokinia  | 42.80 | 0.00 |
| TRINITY_GBG0030 | (hypothetRaphidocelis_subcap | 42.80 | 0.00 |
| TRINITY_PNW7889 | (hypothetChlamydomonas_reinh | 42.80 | 0.00 |
| TRINITY_XP_0075 | riboflaBathycoccus_prasinc   | 42.80 | 0.00 |
| TRINITY_GAX7423 | hypothetChlamydomonas_eusti  | 42.80 | 0.00 |
| TRINITY_PIN2510 | GTP-binHandroanthus_impeti   | 42.80 | 0.00 |
| TRINITY_XP_0016 | predicteChlamydomonas_reinh  | 42.80 | 0.00 |
| TRINITY_GAX7938 | hypothetChlamydomonas_eusti  | 42.80 | 0.00 |
| TRINITY_GAX8215 | (hypothetChlamydomonas_eusti | 42.80 | 0.00 |
| TRINITY_XP_0029 | probableSelaginella_moellen  | 42.80 | 0.00 |
| TRINITY_OIV9525 | hypothetLupinus_angustifoli  | 42.80 | 0.00 |
| TRINITY_PNW8599 | hypothetChlamydomonas_reinh  | 42.80 | 0.00 |
| TRINITY_OAE3354 | hypothetMarchantia_polymorp  | 42.80 | 0.00 |
| TRINITY_ALE1528 | CDK-likeChlamydomonas_reinh  | 42.80 | 0.00 |
| TRINITY_GAX8255 | (hypothetChlamydomonas_eusti | 42.80 | 0.00 |
| TRINITY_GAX8357 | hypothetChlamydomonas_eusti  | 42.80 | 0.00 |
| TRINITY_GAX7809 | hypothetChlamydomonas_eusti  | 42.80 | 0.00 |
| TRINITY_ATY3519 | actin [ Ixeridium_dentatum   | 42.80 | 0.00 |
| TRINITY_XP_0056 | threonylCoccomyxa_subellips  | 42.70 | 0.00 |
| TRINITY_GBG7153 | hypothetChara_braunii        | 42.70 | 0.00 |
| TRINITY_XP_0244 | (histidirPhyscomitrella_pate | 42.70 | 0.00 |
| TRINITY_XP_0124 | PREDICTIGossypium_raimondii  | 42.70 | 0.00 |
| TRINITY_XP_0029 | dynein  Selaginella_moellen  | 42.70 | 0.00 |
| TRINITY_GAQ8857 | enoyl-CcKlebsormidium_niten  | 42.70 | 0.00 |
| TRINITY_AFN8820 | haloacicPhaseolus_vulgaris   | 42.70 | 0.00 |
| TRINITY_GBF9708 | hypothetRaphidocelis_subcap  | 42.70 | 0.00 |
| TRINITY_GBG8414 | hypothetChara_braunii        | 42.70 | 0.00 |
| TRINITY_PNW8079 | hypothetChlamydomonas_reinh  | 42.70 | 0.00 |
| TRINITY_GAQ7922 | (hypothetKlebsormidium_niten | 42.70 | 0.00 |
| TRINITY_GBG6500 | hypothetChara_braunii        | 42.70 | 0.00 |
| TRINITY_PIA3664 | hypothetAquilegia_coerulea   | 42.70 | 0.00 |
| TRINITY_GAQ7815 | hypothetKlebsormidium_niten  | 42.70 | 0.00 |
| TRINITY_XP_0244 | (thimet cPhyscomitrella_pate | 42.70 | 0.00 |
| TRINITY_XP_0228 | MT-A70- Ostreococcus_tauri   | 42.70 | 0.00 |
| TRINITY_XP_0264 | EEF1A  Papaver_somniferum    | 42.70 | 0.00 |
| TRINITY_XP_0216 | serine/tHevea_brasiliensis   | 42.70 | 0.00 |
| TRINITY_GAQ9054 | UbiquitiKlebsormidium_niten  | 42.70 | 0.00 |
| TRINITY_RXI0063 | hypothetMalus_domestica      | 42.70 | 0.00 |
| TRINITY_XP_0221 | calcium-Momordica_charantia  | 42.70 | 0.00 |
| TRINITY_AES8925 | alpha-maMedicago_truncatula  | 42.70 | 0.00 |
| TRINITY_XP_0084 | PREDICTICucumis_melo         | 42.70 | 0.00 |
| TRINITY_XP_0228 | HelicasOstreococcus_tauri    | 42.70 | 0.00 |
| TRINITY_OAE3250 | hypothetMarchantia_polymorp  | 42.70 | 0.00 |
| TRINITY_RHN3848 | hypothetMedicago_truncatula  | 42.70 | 0.00 |
| TRINITY_GBG6960 | hypothetChara_braunii        | 42.70 | 0.00 |
| TRINITY_APO1583 | actin  Sesuvium_portulacas   | 42.70 | 0.00 |
| TRINITY_XP_0029 | ras-relaSelaginella_moellen  | 42.70 | 0.00 |

|                                             |       |      |
|---------------------------------------------|-------|------|
| TRINITY_XP_02272COP9 siçDurio_zibethinus    | 42.70 | 0.00 |
| TRINITY_GAX8170çhypothetChlamydomonas_eusti | 42.70 | 0.00 |
| TRINITY_PSC7339çribosomçMicractinium_conduc | 42.70 | 0.00 |
| TRINITY_GAX8130çhypothetChlamydomonas_eusti | 42.70 | 0.00 |
| TRINITY_GAX7340çhypothetChlamydomonas_eusti | 42.70 | 0.00 |
| TRINITY_XP_0029çNimA-relVolvox_carteri      | 42.70 | 0.00 |
| TRINITY_KXZ46441hypothetGonium_pectorale    | 42.70 | 0.00 |
| TRINITY_PWA6780çserine çArtemisia_annua     | 42.70 | 0.00 |
| TRINITY_XP_0243ç60S ribçPhyscomitrella_pate | 42.70 | 0.00 |
| TRINITY_GAQ8180çglycoprcKlebsormidium_niten | 42.70 | 0.00 |

|                  |                   |                     |       |      |
|------------------|-------------------|---------------------|-------|------|
| TRINITY_OEL32079 | Glycero           | Dichantheium_oligo  | 42.70 | 0.00 |
| TRINITY_KXZ47865 | hypothet          | Gonium_pectorale    | 42.70 | 0.00 |
| TRINITY_XP_00294 | hypothet          | Volvox_carteri      | 42.70 | 0.00 |
| TRINITY_GBF92723 | hypothet          | Raphidocelis_subcap | 42.70 | 0.00 |
| TRINITY_XP_01655 | PREDICTI          | Capsicum_annuum     | 42.70 | 0.00 |
| TRINITY_GBF89232 | DNA rep           | Raphidocelis_subcap | 42.70 | 0.00 |
| TRINITY_XP_00564 | protein           | Coccomyxa_subellips | 42.70 | 0.00 |
| TRINITY_XP_01108 | squalen           | Sesamum_indicum     | 42.70 | 0.00 |
| TRINITY_PNW70068 | hypothet          | Chlamydomonas_reinh | 42.70 | 0.00 |
| TRINITY_PNW89000 | hypothet          | Chlamydomonas_reinh | 42.70 | 0.00 |
| TRINITY_XP_02391 | N-acyl- $\gamma$  | Quercus_suber       | 42.70 | 0.00 |
| TRINITY_XP_00715 | hypothet          | Phaseolus_vulgaris  | 42.70 | 0.00 |
| TRINITY_AQK71573 | Transcri          | Zea_mays            | 42.70 | 0.00 |
| TRINITY_GAX84118 | hypothet          | Chlamydomonas_eusti | 42.70 | 0.00 |
| TRINITY_VDC60350 | unnamed           | Brassica_rapa       | 42.70 | 0.00 |
| TRINITY_RWR87709 | ABC trar          | Cinnamomum_micranth | 42.70 | 0.00 |
| TRINITY_RLM56339 | hypothet          | Panicum_miliaceum   | 42.70 | 0.00 |
| TRINITY_XP_00169 | predict           | Chlamydomonas_reinh | 42.70 | 0.00 |
| TRINITY_BAF14329 | Os04g030          | Oryza_sativa        | 42.70 | 0.00 |
| TRINITY_KXZ45198 | hypothet          | Gonium_pectorale    | 42.70 | 0.00 |
| TRINITY_GAX72932 | hypothet          | Chlamydomonas_eusti | 42.70 | 0.00 |
| TRINITY_GAX73181 | hypothet          | Chlamydomonas_eusti | 42.70 | 0.00 |
| TRINITY_ERM99023 | hypothet          | Amborella_trichopod | 42.70 | 0.00 |
| TRINITY_XP_01390 | hypothet          | Monoraphidium_negle | 42.70 | 0.00 |
| TRINITY_RAL53155 | hypothet          | Cuscuta_australis   | 42.70 | 0.00 |
| TRINITY_XP_00294 | hypothet          | Volvox_carteri      | 42.70 | 0.00 |
| TRINITY_KXZ44782 | SNAP34 $\gamma$   | Gonium_pectorale    | 42.70 | 0.00 |
| TRINITY_XP_01668 | PREDICTI          | Gossypium_hirsutum  | 42.70 | 0.00 |
| TRINITY_XP_00565 | P-loop $\epsilon$ | Coccomyxa_subellips | 42.70 | 0.00 |
| TRINITY_XP_00295 | hypothet          | Volvox_carteri      | 42.70 | 0.00 |
| TRINITY_XP_00250 | predict           | Micromonas_commoda  | 42.70 | 0.00 |
| TRINITY_PSC69635 | Myosin-1          | Micractinium_conduc | 42.70 | 0.00 |
| TRINITY_KXZ48376 | hypothet          | Gonium_pectorale    | 42.70 | 0.00 |
| TRINITY_XP_01390 | Molybdo $\gamma$  | Monoraphidium_negle | 42.70 | 0.00 |
| TRINITY_BAE98683 | hypothet          | Arabidopsis_thalian | 42.70 | 0.00 |
| TRINITY_PNH06268 | ALA-int           | Tetrabaena_socialis | 42.70 | 0.00 |
| TRINITY_XP_00685 | SNW/SKI-          | Amborella_trichopod | 42.70 | 0.00 |
| TRINITY_GBF94605 | hypothet          | Raphidocelis_subcap | 42.70 | 0.00 |
| TRINITY_XP_00305 | predict           | Micromonas_pusilla  | 42.70 | 0.00 |
| TRINITY_OMO74329 | hypothet          | Corchorus_capsulari | 42.70 | 0.00 |
| TRINITY_XP_00168 | predict           | Chlamydomonas_reinh | 42.70 | 0.00 |
| TRINITY_GAX77225 | hypothet          | Chlamydomonas_eusti | 42.70 | 0.00 |
| TRINITY_KXZ53363 | hypothet          | Gonium_pectorale    | 42.70 | 0.00 |
| TRINITY_KMS94413 | hypothet          | Beta_vulgaris       | 42.70 | 0.00 |
| TRINITY_PNH05717 | Regulat           | Tetrabaena_socialis | 42.70 | 0.00 |
| TRINITY_ADB85273 | putativ           | Phyllostachys_eduli | 42.70 | 0.00 |
| TRINITY_RAL51222 | hypothet          | Cuscuta_australis   | 42.70 | 0.00 |
| TRINITY_XP_00298 | uricase-          | Selaginella_moellen | 42.60 | 0.00 |
| TRINITY_PHT48811 | hypothet          | Capsicum_baccatum   | 42.60 | 0.00 |
| TRINITY_XP_02213 | probable          | Momordica_charantia | 42.60 | 0.00 |
| TRINITY_XP_02390 | NAD-dep           | Quercus_suber       | 42.60 | 0.00 |
| TRINITY_RWW90255 | hypothet          | Ensete_ventricosum  | 42.60 | 0.00 |
| TRINITY_EFJ09289 | hypothet          | Selaginella_moellen | 42.60 | 0.00 |
| TRINITY_XP_02388 | M-phase           | Quercus_suber       | 42.60 | 0.00 |
| TRINITY_XP_02438 | heterog           | Physcomitrella_pate | 42.60 | 0.00 |
| TRINITY_XP_00564 | iron h $\gamma$   | Coccomyxa_subellips | 42.60 | 0.00 |
| TRINITY_XP_00296 | tRNA (ac          | Selaginella_moellen | 42.60 | 0.00 |
| TRINITY_GAX79165 | hypothet          | Chlamydomonas_eusti | 42.60 | 0.00 |
| TRINITY_XP_02167 | delta(3,          | Hevea_brasiliensis  | 42.60 | 0.00 |
| TRINITY_XP_02391 | LOW QUAI          | Quercus_suber       | 42.60 | 0.00 |
| TRINITY_XP_00584 | hypothet          | Chlorella_variabili | 42.60 | 0.00 |
| TRINITY_XP_02644 | coatome           | Papaver_somniferum  | 42.60 | 0.00 |
| TRINITY_XP_00142 | predict           | Ostreococcus_sp._'1 | 42.60 | 0.00 |
| TRINITY_PRW59438 | 40S rib           | Chlorella_sorokinia | 42.60 | 0.00 |
| TRINITY_PNW81867 | hypothet          | Chlamydomonas_reinh | 42.60 | 0.00 |
| TRINITY_XP_00141 | predict           | Ostreococcus_sp._'1 | 42.60 | 0.00 |



|                  |            |                     |       |      |
|------------------|------------|---------------------|-------|------|
| TRINITY_PRW61571 | DNA gyr    | Chlorella_sorokinia | 42.60 | 0.00 |
| TRINITY_XP_01762 | PREDICT    | Gossypium_arboreum  | 42.60 | 0.00 |
| TRINITY_XP_00564 | hypothet   | Coccomyxa_subellips | 42.60 | 0.00 |
| TRINITY_PIM9944  | Thioredo   | Handroanthus_impeti | 42.60 | 0.00 |
| TRINITY_XP_02174 | alpha N    | Chenopodium_quinoa  | 42.60 | 0.00 |
| TRINITY_KXZ42876 | hypothet   | Gonium_pectorale    | 42.60 | 0.00 |
| TRINITY_XP_01146 | PREDICT    | Fragaria-vesca      | 42.60 | 0.00 |
| TRINITY_XP_00169 | predict    | Chlamydomonas_reinh | 42.60 | 0.00 |
| TRINITY_XP_00585 | hypothet   | Chlorella_variabili | 42.60 | 0.00 |
| TRINITY_XP_02067 | beta-he    | Dendrobium_catenatu | 42.60 | 0.00 |
| TRINITY_GAX72654 | hypothet   | Chlamydomonas_eusti | 42.60 | 0.00 |
| TRINITY_PTQ39208 | hypothet   | Marchantia_polymorp | 42.60 | 0.00 |
| TRINITY_GAX72991 | hypothet   | Chlamydomonas_eusti | 42.60 | 0.00 |
| TRINITY_KXZ4322  | hypothet   | Gonium_pectorale    | 42.60 | 0.00 |
| TRINITY_XP_00295 | hypothet   | Volvox_carteri      | 42.60 | 0.00 |
| TRINITY_XP_01669 | PREDICT    | Gossypium_hirsutum  | 42.60 | 0.00 |
| TRINITY_XP_00295 | hypothet   | Volvox_carteri      | 42.60 | 0.00 |
| TRINITY_XP_00170 | predict    | Chlamydomonas_reinh | 42.60 | 0.00 |
| TRINITY_PNW78755 | hypothet   | Chlamydomonas_reinh | 42.60 | 0.00 |
| TRINITY_XP_00295 | hypothet   | Volvox_carteri      | 42.60 | 0.00 |
| TRINITY_PRW32858 | putativ    | Chlorella_sorokinia | 42.60 | 0.00 |
| TRINITY_OAE30718 | hypothet   | Marchantia_polymorp | 42.60 | 0.00 |
| TRINITY_XP_02452 | glutathi   | Selaginella_moellen | 42.60 | 0.00 |
| TRINITY_KXZ42055 | hypothet   | Gonium_pectorale    | 42.60 | 0.00 |
| TRINITY_XP_00584 | hypothet   | Chlorella_variabili | 42.60 | 0.00 |
| TRINITY_XP_00307 | Armadill   | Ostreococcus_tauri  | 42.60 | 0.00 |
| TRINITY_PNW72222 | hypothet   | Chlamydomonas_reinh | 42.60 | 0.00 |
| TRINITY_AFK46404 | unknown    | Lotus_japonicus     | 42.60 | 0.00 |
| TRINITY_PNW85217 | hypothet   | Chlamydomonas_reinh | 42.60 | 0.00 |
| TRINITY_PNW83119 | hypothet   | Chlamydomonas_reinh | 42.60 | 0.00 |
| TRINITY_GAX75224 | hypothet   | Chlamydomonas_eusti | 42.60 | 0.00 |
| TRINITY_RIA04052 | hypothet   | Brassica_rapa       | 42.60 | 0.00 |
| TRINITY_PNW84407 | hypothet   | Chlamydomonas_reinh | 42.60 | 0.00 |
| TRINITY_ADE77744 | unknown    | Picea_sitchensis    | 42.60 | 0.00 |
| TRINITY_GBF88771 | hypothet   | Raphidocelis_subcap | 42.60 | 0.00 |
| TRINITY_XP_02391 | craniof    | Quercus_suber       | 42.60 | 0.00 |
| TRINITY_PKA59756 | Zinc fir   | Apostasia_shenzheni | 42.60 | 0.00 |
| TRINITY_XP_01390 | hypothet   | Monoraphidium_negle | 42.60 | 0.00 |
| TRINITY_PSC69947 | Zinc fir   | Micractinium_conduc | 42.60 | 0.00 |
| TRINITY_KDD72167 | hypothet   | Helicosporidium_sp. | 42.60 | 0.00 |
| TRINITY_KXZ46788 | hypothet   | Gonium_pectorale    | 42.60 | 0.00 |
| TRINITY_XP_02418 | calcium    | Rosa_chinensis      | 42.60 | 0.00 |
| TRINITY_XP_02390 | NAD-spec   | Quercus_suber       | 42.60 | 0.00 |
| TRINITY_XP_00935 | PREDICT    | Pyrus_x_bretschneid | 42.60 | 0.00 |
| TRINITY_GAX74051 | hypothet   | Chlamydomonas_eusti | 42.60 | 0.00 |
| TRINITY_OAY83555 | Pumilio    | Ananas_comosus      | 42.60 | 0.00 |
| TRINITY_XP_00142 | predict    | Ostreococcus_sp._'1 | 42.50 | 0.00 |
| TRINITY_XP_02706 | multiplr   | Coffea_arabica      | 42.50 | 0.00 |
| TRINITY_XP_02439 | tRNA (g)   | Physcomitrella_pate | 42.50 | 0.00 |
| TRINITY_XP_01915 | PREDICT    | Ipomoea_nil         | 42.50 | 0.00 |
| TRINITY_XP_02166 | COX ass    | Hevea_brasiliensis  | 42.50 | 0.00 |
| TRINITY_RID76515 | hypothet   | Brassica_rapa       | 42.50 | 0.00 |
| TRINITY_XP_02174 | ubiquiti   | Chenopodium_quinoa  | 42.50 | 0.00 |
| TRINITY_PRW20657 | SWI SNF    | Chlorella_sorokinia | 42.50 | 0.00 |
| TRINITY_CAJ27520 | (beclin 1) | Gossypium_raimondii | 42.50 | 0.00 |
| TRINITY_GAQ85783 | Cysteiny   | Klebsormidium_niten | 42.50 | 0.00 |
| TRINITY_RLN18442 | histone    | Panicum_miliaceum   | 42.50 | 0.00 |
| TRINITY_OMO68882 | hypothet   | Corchorus_olitorius | 42.50 | 0.00 |
| TRINITY_XP_01050 | PREDICT    | Camelina_sativa     | 42.50 | 0.00 |
| TRINITY_XP_00250 | predict    | Micromonas_commoda  | 42.50 | 0.00 |
| TRINITY_EEF25548 | beta-mar   | Ricinus_communis    | 42.50 | 0.00 |
| TRINITY_XP_02706 | meiotic    | Coffea_arabica      | 42.50 | 0.00 |
| TRINITY_GAX7770  | hypothet   | Chlamydomonas_eusti | 42.50 | 0.00 |
| TRINITY_XP_00939 | PREDICT    | Musa_acuminata      | 42.50 | 0.00 |
| TRINITY_PWA82410 | leucine    | Artemisia_annua     | 42.50 | 0.00 |
| TRINITY_KXZ52205 | hypothet   | Gonium_pectorale    | 42.50 | 0.00 |

|                  |           |                     |       |      |
|------------------|-----------|---------------------|-------|------|
| TRINITY_XP_02391 | protein   | Quercus_suber       | 42.50 | 0.00 |
| TRINITY_XP_00308 | Pyridoxa  | Ostreococcus_tauri  | 42.50 | 0.00 |
| TRINITY_GAX7527  | hypothet  | Chlamydomonas_eusti | 42.50 | 0.00 |
| TRINITY_PHT2654  | hypothet  | Capsicum_baccatum   | 42.50 | 0.00 |
| TRINITY_GAX7985  | hypothet  | Chlamydomonas_eusti | 42.50 | 0.00 |
| TRINITY_XP_00308 | AMP-depe  | Ostreococcus_tauri  | 42.50 | 0.00 |
| TRINITY_PNW8639  | hypothet  | Chlamydomonas_reinh | 42.50 | 0.00 |
| TRINITY_XP_0128  | PREDICTE  | Erythranthe_guttata | 42.50 | 0.00 |
| TRINITY_PNH0927  | Acidic ]  | Tetrabaena_socialis | 42.50 | 0.00 |
| TRINITY_XP_0243  | guanylat  | Physcomitrella_pate | 42.50 | 0.00 |
| TRINITY_PSC7398  | CAMK CAM  | Micractinium_conduc | 42.50 | 0.00 |
| TRINITY_ACJ3819  | chitina   | Malus_hupehensis    | 42.50 | 0.00 |
| TRINITY_GAQ8787  | Aromatic  | Klebsormidium_niten | 42.50 | 0.00 |
| TRINITY_XP_0017  | predicte  | Chlamydomonas_reinh | 42.50 | 0.00 |
| TRINITY_XP_0227  | U6 small  | Durio_zibethinus    | 42.50 | 0.00 |
| TRINITY_GAX7610  | hypothet  | Chlamydomonas_eusti | 42.50 | 0.00 |
| TRINITY_GAX7528  | hypothet  | Chlamydomonas_eusti | 42.50 | 0.00 |
| TRINITY_KXZ4239  | hypothet  | Gonium_pectorale    | 42.50 | 0.00 |
| TRINITY_XP_0030  | predicte  | Micromonas_pusilla  | 42.50 | 0.00 |
| TRINITY_KMS6516  | hypothet  | Beta_vulgaris       | 42.50 | 0.00 |
| TRINITY_NP_6893  | NADH de   | Chaetosphaeridium_g | 42.50 | 0.00 |
| TRINITY_GAX7872  | hypothet  | Chlamydomonas_eusti | 42.50 | 0.00 |
| TRINITY_GAX7872  | hypothet  | Chlamydomonas_eusti | 42.50 | 0.00 |
| TRINITY_XP_0086  | uncharac  | Zea_mays            | 42.50 | 0.00 |
| TRINITY_PNH0853  | hypothet  | Tetrabaena_socialis | 42.50 | 0.00 |
| TRINITY_XP_0042  | ubiquiti  | Solanum_lycopersicu | 42.50 | 0.00 |
| TRINITY_PKA5061  | Putativ   | Apostasia_shenzheni | 42.50 | 0.00 |
| TRINITY_XP_0128  | PREDICTE  | Erythranthe_guttata | 42.50 | 0.00 |
| TRINITY_XP_0096  | PREDICTE  | Nicotiana_tomentosi | 42.50 | 0.00 |
| TRINITY_XP_0227  | SNF1-re   | Durio_zibethinus    | 42.50 | 0.00 |
| TRINITY_XP_0016  | mitogen   | Chlamydomonas_reinh | 42.50 | 0.00 |
| TRINITY_XP_0136  | PREDICTE  | Brassica_oleracea   | 42.50 | 0.00 |
| TRINITY_XP_0238  | putativ   | Quercus_suber       | 42.50 | 0.00 |
| TRINITY_PNH0396  | Transcri  | Tetrabaena_socialis | 42.50 | 0.00 |
| TRINITY_GAX8321  | hypothet  | Chlamydomonas_eusti | 42.50 | 0.00 |
| TRINITY_XP_0138  | threonir  | Monoraphidium_negle | 42.50 | 0.00 |
| TRINITY_CAM9653  | 16.5 kD   | Aegilops_longissima | 42.50 | 0.00 |
| TRINITY_GAX7286  | hypothet  | Chlamydomonas_eusti | 42.50 | 0.00 |
| TRINITY_GAX8377  | hypothet  | Chlamydomonas_eusti | 42.50 | 0.00 |
| TRINITY_XP_0216  | serine/t  | Hevea_brasiliensis  | 42.50 | 0.00 |
| TRINITY_XP_0239  | probable  | Quercus_suber       | 42.50 | 0.00 |
| TRINITY_XP_0264  | ABC trar  | Papaver_somniferum  | 42.50 | 0.00 |
| TRINITY_PRW5943  | Apocarot  | Chlorella_sorokinia | 42.50 | 0.00 |
| TRINITY_XP_0075  | predicte  | Bathycoccus_prasinc | 42.50 | 0.00 |
| TRINITY_KXZ4322  | hypothet  | Gonium_pectorale    | 42.50 | 0.00 |
| TRINITY_XP_0029  | hypothet  | Volvox_carteri      | 42.50 | 0.00 |
| TRINITY_GAX7444  | hypothet  | Chlamydomonas_eusti | 42.50 | 0.00 |
| TRINITY_KXZ4823  | hypothet  | Gonium_pectorale    | 42.50 | 0.00 |
| TRINITY_OVA1147  | Synapto   | Macleaya_cordata    | 42.50 | 0.00 |
| TRINITY_XP_0014  | P-ATPase  | Ostreococcus_sp._'1 | 42.50 | 0.00 |
| TRINITY_XP_0029  | hypothet  | Volvox_carteri      | 42.50 | 0.00 |
| TRINITY_PNW8206  | hypothet  | Chlamydomonas_reinh | 42.50 | 0.00 |
| TRINITY_PNW7501  | hypothet  | Chlamydomonas_reinh | 42.50 | 0.00 |
| TRINITY_XP_0104  | PREDICTE  | Camelina_sativa     | 42.50 | 0.00 |
| TRINITY_XP_0165  | PREDICTE  | Capsicum_annuum     | 42.50 | 0.00 |
| TRINITY_XP_0243  | delta (3, | Physcomitrella_pate | 42.50 | 0.00 |
| TRINITY_OAE3206  | hypothet  | Marchantia_polymorp | 42.50 | 0.00 |
| TRINITY_KXZ4802  | TTL4 pr   | Gonium_pectorale    | 42.50 | 0.00 |
| TRINITY_XP_0188  | PREDICTE  | Juglans_regia       | 42.50 | 0.00 |
| TRINITY_PNW7418  | hypothet  | Chlamydomonas_reinh | 42.50 | 0.00 |
| TRINITY_PNW7056  | hypothet  | Chlamydomonas_reinh | 42.50 | 0.00 |
| TRINITY_XP_0139  | peptida   | Monoraphidium_negle | 42.50 | 0.00 |
| TRINITY_GBF9557  | hypothet  | Raphidocelis_subcap | 42.50 | 0.00 |
| TRINITY_PNW7046  | hypothet  | Chlamydomonas_reinh | 42.50 | 0.00 |
| TRINITY_XP_0016  | predicte  | Chlamydomonas_reinh | 42.50 | 0.00 |
| TRINITY_GAX7475  | hypothet  | Chlamydomonas_eusti | 42.50 | 0.00 |

|                 |           |                     |       |      |
|-----------------|-----------|---------------------|-------|------|
| TRINITY_XP_0139 | (hypothet | Monoraphidium_negle | 42.50 | 0.00 |
| TRINITY_KXZ5472 | (hypothet | Gonium_pectorale    | 42.50 | 0    |
| TRINITY_GBF9843 | (polyubiq | Raphidocelis_subcap | 42.50 | 0.00 |
| TRINITY_XP_0197 | (PREDICTE | Elaeis_guineensis   | 42.50 | 0.00 |
| TRINITY_XP_0134 | (DExH-bo  | Medicago_truncatula | 42.40 | 0.00 |
| TRINITY_XP_0063 | (phosphoc | Eutrema_salsugineur | 42.40 | 0.00 |
| TRINITY_RYR6375 | (hypothet | Arachis_hypogaea    | 42.40 | 0.00 |
| TRINITY_XP_0243 | (protein  | Physcomitrella_pate | 42.40 | 0.00 |
| TRINITY_PNR5077 | (hypothet | Physcomitrella_pate | 42.40 | 0.00 |
| TRINITY_GAQ8988 | (Transcri | Klebsormidium_niten | 42.40 | 0.00 |
| TRINITY_KXZ5384 | (hypothet | Gonium_pectorale    | 42.40 | 0.00 |
| TRINITY_XP_0243 | (nucleoli | Physcomitrella_pate | 42.40 | 0.00 |
| TRINITY_XP_0191 | (PREDICTE | Ipomoea_nil         | 42.40 | 0.00 |
| TRINITY_CBI3370 | (unnamed  | Vitis_vinifera      | 42.40 | 0.00 |
| TRINITY_KXZ5547 | (hypothet | Gonium_pectorale    | 42.40 | 0.00 |
| TRINITY_RWW3330 | (hypothet | Ensete_ventricosum  | 42.40 | 0.00 |
| TRINITY_EYU3836 | (hypothet | Erythranthe_guttata | 42.40 | 0.00 |
| TRINITY_AFK4638 | (unknown  | Lotus_japonicus     | 42.40 | 0.00 |
| TRINITY_XP_0161 | (high mok | Arachis_ipaensis    | 42.40 | 0.00 |
| TRINITY_AAT3804 | (putativ  | Oryza_sativa        | 42.40 | 0.00 |
| TRINITY_XP_0239 | (phosphol | Quercus_suber       | 42.40 | 0.00 |
| TRINITY_GAQ8894 | (Cytoplas | Klebsormidium_niten | 42.40 | 0.00 |
| TRINITY_RWW9047 | (hypothet | Ensete_ventricosum  | 42.40 | 0.00 |
| TRINITY_XP_0056 | (translat | Coccomyxa_subellips | 42.40 | 0.00 |
| TRINITY_AET0473 | (phosphat | Medicago_truncatula | 42.40 | 0.00 |
| TRINITY_GBG7003 | (hypothet | Chara_braunii       | 42.40 | 0.00 |
| TRINITY_PSC7078 | (mitogen- | Micractinium_conduc | 42.40 | 0.00 |
| TRINITY_XP_0207 | (AP-2 con | Dendrobium_catenatu | 42.40 | 0.00 |
| TRINITY_XP_0128 | (PREDICTE | Erythranthe_guttata | 42.40 | 0.00 |
| TRINITY_PNW7275 | (hypothet | Chlamydomonas_reinh | 42.40 | 0.00 |
| TRINITY_XP_0029 | (hypothet | Volvox_carteri      | 42.40 | 0.00 |
| TRINITY_PSC7632 | (interfer | Micractinium_conduc | 42.40 | 0.00 |
| TRINITY_BAE5369 | (CW80Cd4  | Chlamydomonas_sp._W | 42.40 | 0.00 |
| TRINITY_XP_0114 | (Upstream | Auxenochlorella_pro | 42.40 | 0.00 |
| TRINITY_VDD1622 | (unnamed  | Brassica_rapa       | 42.40 | 0.00 |
| TRINITY_PNW7037 | (hypothet | Chlamydomonas_reinh | 42.40 | 0.00 |
| TRINITY_GAX8105 | (hypothet | Chlamydomonas_eusti | 42.40 | 0.00 |
| TRINITY_PNH0892 | (hypothet | Tetrabaena_socialis | 42.40 | 0.00 |
| TRINITY_EFJ1566 | (hypothet | Selaginella_moellen | 42.40 | 0.00 |
| TRINITY_XP_0029 | (zinc tr  | Selaginella_moellen | 42.40 | 0.00 |
| TRINITY_KJB7631 | (hypothet | Gossypium_raimondii | 42.40 | 0.00 |
| TRINITY_XP_0228 | (casein l | Olea_europaea       | 42.40 | 0.00 |
| TRINITY_XP_0238 | (multidri | Quercus_suber       | 42.40 | 0.00 |
| TRINITY_KFK2777 | (hypothet | Arabis_alpina       | 42.40 | 0.00 |
| TRINITY_XP_0045 | (probabl  | Cicer_arietinum     | 42.40 | 0.00 |
| TRINITY_GAX8372 | (hypothet | Chlamydomonas_eusti | 42.40 | 0.00 |
| TRINITY_XP_0205 | (short-cl | Phalaenopsis_equest | 42.40 | 0.00 |
| TRINITY_GAX8056 | (hypothet | Chlamydomonas_eusti | 42.40 | 0.00 |
| TRINITY_GAX8277 | (hypothet | Chlamydomonas_eusti | 42.40 | 0.00 |
| TRINITY_XP_0100 | (PREDICTE | Eucalyptus_grandis  | 42.40 | 0.00 |
| TRINITY_GAX8186 | (hypothet | Chlamydomonas_eusti | 42.40 | 0.00 |
| TRINITY_GAX7976 | (hypothet | Chlamydomonas_eusti | 42.40 | 0.00 |
| TRINITY_XP_0239 | (non-hist | Quercus_suber       | 42.40 | 0.00 |
| TRINITY_XP_0273 | (probabl  | Abrus_precatorius   | 42.40 | 0.00 |
| TRINITY_PNH0540 | (hypothet | Tetrabaena_socialis | 42.40 | 0.00 |
| TRINITY_GBG8855 | (hypothet | Chara_braunii       | 42.40 | 0.00 |
| TRINITY_GBF9123 | (hypothet | Raphidocelis_subcap | 42.40 | 0.00 |
| TRINITY_XP_0029 | (hypothet | Volvox_carteri      | 42.40 | 0.00 |
| TRINITY_XP_0239 | (polyader | Quercus_suber       | 42.40 | 0.00 |
| TRINITY_GAQ7774 | (Translat | Klebsormidium_niten | 42.40 | 0.00 |
| TRINITY_GAX7611 | (hypothet | Chlamydomonas_eusti | 42.40 | 0.00 |
| TRINITY_XP_0029 | (hypothet | Volvox_carteri      | 42.40 | 0.00 |
| TRINITY_PNW8832 | (hypothet | Chlamydomonas_reinh | 42.40 | 0.00 |
| TRINITY_KXZ5253 | (hypothet | Gonium_pectorale    | 42.40 | 0.00 |
| TRINITY_GAX8086 | (hypothet | Chlamydomonas_eusti | 42.40 | 0.00 |
| TRINITY_PNW7885 | (hypothet | Chlamydomonas_reinh | 42.40 | 0.00 |

|                                             |       |      |
|---------------------------------------------|-------|------|
| TRINITY_PRW58771ABC trarChlorella_sorokinia | 42.40 | 0.00 |
| TRINITY_PNW7303(hypothetChlamydomonas_reinh | 42.40 | 0.00 |
| TRINITY_KXZ5426(hypothetGonium_pectorale    | 42.40 | 0.00 |
| TRINITY_XP_0239(ATP-depeQuercus_suber       | 42.40 | 0.00 |
| TRINITY_PNW88781hypothetChlamydomonas_reinh | 42.40 | 0.00 |
| TRINITY_GAX7884(hypothetChlamydomonas_eusti | 42.40 | 0.00 |
| TRINITY_XP_0029(hypothetVolvox_carteri      | 42.40 | 0.00 |
| TRINITY_PNH0356(hypothetTetrabaena_socialis | 42.40 | 0.00 |
| TRINITY_KFK4493(hypothetArabis_alpina       | 42.40 | 0.00 |
| TRINITY_KQK0957(hypothetBrachypodium_distac | 42.40 | 0.00 |
| TRINITY_VDC9323(unnamed Brassica_rapa       | 42.40 | 0.00 |
| TRINITY_GAX7486(hypothetChlamydomonas_eusti | 42.40 | 0.00 |
| TRINITY_BAJ9628(predicteHordeum_vulgare     | 42.40 | 0.00 |
| TRINITY_GAX82061hypothetChlamydomonas_eusti | 42.40 | 0.00 |
| TRINITY_XP_0106(PREDICTIBeta_vulgaris       | 42.40 | 0.00 |
| TRINITY_PRW3936senescerChlorella_sorokinia  | 42.40 | 0.00 |
| TRINITY_PNH0721(hypothetTetrabaena_socialis | 42.30 | 0.00 |
| TRINITY_XP_0025(predicteMicromonas_commoda  | 42.30 | 0.00 |
| TRINITY_XP_0056(PhospholCoccomyxa_subellips | 42.30 | 0.00 |
| TRINITY_PWA8898protein Artemisia_annua      | 42.30 | 0.00 |
| TRINITY_GBF9496(hypothetRaphidocelis_subcap | 42.30 | 0.00 |
| TRINITY_GAX7829(hypothetChlamydomonas_eusti | 42.30 | 0.00 |
| TRINITY_EFJ0545(hypothetSelaginella_moellen | 42.30 | 0.00 |
| TRINITY_XP_0239(phosphatQuercus_suber       | 42.30 | 0.00 |
| TRINITY_XP_0029(hypothetVolvox_carteri      | 42.30 | 0.00 |
| TRINITY_XP_0201(uncharacAnanas_comosus      | 42.30 | 0.00 |
| TRINITY_XP_0217(probableChenopodium_quinoa  | 42.30 | 0.00 |
| TRINITY_BAK0043(predicteHordeum_vulgare     | 42.30 | 0.00 |
| TRINITY_XP_01451protein Vigna_radiata       | 42.30 | 0.00 |
| TRINITY_OAE20281hypothetMarchantia_polymorp | 42.30 | 0.00 |
| TRINITY_KFK2634(hypothetArabis_alpina       | 42.30 | 0.00 |
| TRINITY_XP_0030(predicteMicromonas_pusilla  | 42.30 | 0.00 |
| TRINITY_KXZ4437(hypothetGonium_pectorale    | 42.30 | 0.00 |
| TRINITY_GAQ8282(TATA-boKlebsormidium_niten  | 42.30 | 0.00 |
| TRINITY_GAX7948(hypothetChlamydomonas_eusti | 42.30 | 0.00 |
| TRINITY_XP_0056(epocide Coccomyxa_subellips | 42.30 | 0.00 |
| TRINITY_XP_0106(PREDICTIBeta_vulgaris       | 42.30 | 0.00 |
| TRINITY_GAQ9014(hypothetKlebsormidium_niten | 42.30 | 0.00 |
| TRINITY_GAX7260(hypothetChlamydomonas_eusti | 42.30 | 0.00 |
| TRINITY_GAX8041(hypothetChlamydomonas_eusti | 42.30 | 0.00 |
| TRINITY_XP_0024(uncharacSorghum_bicolor     | 42.30 | 0.00 |
| TRINITY_GAQ8493(3'-5'-eKlebsormidium_niten  | 42.30 | 0.00 |
| TRINITY_XP_0017(predicteChlamydomonas_reinh | 42.30 | 0.00 |
| TRINITY_GAX8012(hypothetChlamydomonas_eusti | 42.30 | 0.00 |
| TRINITY_XP_0216(sodium/Manihot_esculenta    | 42.30 | 0.00 |
| TRINITY_XP_0200(LOW QUAIAnanas_comosus      | 42.30 | 0.00 |
| TRINITY_XP_0029(hypothetVolvox_carteri      | 42.30 | 0.00 |
| TRINITY_PWA5849(chromatiArtemisia_annua     | 42.30 | 0.00 |
| TRINITY_PNG99771hypothetTetrabaena_socialis | 42.30 | 0.00 |
| TRINITY_XP_0105(PREDICTITarenaya_hasslerian | 42.30 | 0.00 |
| TRINITY_GAX7864(hypothetChlamydomonas_eusti | 42.30 | 0.00 |
| TRINITY_KXZ5362(hypothetGonium_pectorale    | 42.30 | 0.00 |
| TRINITY_XP_0229(E3 ubiqCucurbita_maxima     | 42.30 | 0.00 |
| TRINITY_PNW85431hypothetChlamydomonas_reinh | 42.30 | 0.00 |
| TRINITY_GBG8422(hypothetChara_braunii       | 42.30 | 0.00 |
| TRINITY_GAX7785(hypothetChlamydomonas_eusti | 42.30 | 0.00 |
| TRINITY_GAX8203(hypothetChlamydomonas_eusti | 42.30 | 0.00 |
| TRINITY_NP_0012(U1 smallSolanum_lycopersicu | 42.30 | 0.00 |
| TRINITY_PNH04321GTPase cTetrabaena_socialis | 42.30 | 0.00 |
| TRINITY_GAX7682(hypothetChlamydomonas_eusti | 42.30 | 0.00 |
| TRINITY_GAX7686(hypothetChlamydomonas_eusti | 42.30 | 0.00 |
| TRINITY_GAX8258(hypothetChlamydomonas_eusti | 42.30 | 0.00 |
| TRINITY_PNW83304hypothetChlamydomonas_reinh | 42.30 | 0.00 |
| TRINITY_XP_0030(predicteMicromonas_pusilla  | 42.30 | 0.00 |
| TRINITY_XP_0029(hypothetVolvox_carteri      | 42.30 | 0.00 |
| TRINITY_GAQ8672(ABC trarKlebsormidium_niten | 42.30 | 0.00 |

|                     |          |                     |       |      |
|---------------------|----------|---------------------|-------|------|
| TRINITY_XP_02186    | thiosulf | Spinacia_oleracea   | 42.30 | 0.00 |
| TRINITY_PWA44289    | Zinc fir | Artemisia_annua     | 42.30 | 0.00 |
| TRINITY_XP_00295    | kinesin- | Volvox_carteri      | 42.30 | 0.00 |
| TRINITY_KEH29964    | serine c | Medicago_truncatula | 42.30 | 0.00 |
| TRINITY_KXZ49339    | hypothet | Gonium_pectorale    | 42.30 | 0.00 |
| TRINITY_XP_02451    | probabl  | Selaginella_moellen | 42.30 | 0.00 |
| TRINITY_GAQ92802    | hypothet | Klebsormidium_niten | 42.30 | 0.00 |
| TRINITY_KXZ47489    | hypothet | Gonium_pectorale    | 42.30 | 0.00 |
| TRINITY_GAX86069    | hypothet | Chlamydomonas_eusti | 42.30 | 0.00 |
| TRINITY_PNH08314    | Dolicho  | Tetrabaena_socialis | 42.30 | 0.00 |
| TRINITY_KCW83437    | hypothet | Eucalyptus_grandis  | 42.30 | 0.00 |
| TRINITY_XP_0239160S | rib      | Quercus_suber       | 42.30 | 0.00 |
| TRINITY_GBF90465    | hypothet | Raphidocelis_subcap | 42.30 | 0.00 |
| TRINITY_GAX72575    | hypothet | Chlamydomonas_eusti | 42.30 | 0.00 |
| TRINITY_KVH90641    | Alpha t  | Cynara_cardunculus  | 42.30 | 0.00 |
| TRINITY_XP_00295    | hypothet | Volvox_carteri      | 42.30 | 0.00 |
| TRINITY_PNH01484    | putativ  | Tetrabaena_socialis | 42.30 | 0.00 |
| TRINITY_PNW71392    | hypothet | Chlamydomonas_reinh | 42.30 | 0.00 |
| TRINITY_GBF88490    | hypothet | Raphidocelis_subcap | 42.30 | 0.00 |
| TRINITY_PRW58707    | multidr  | Chlorella_sorokinia | 42.30 | 0.00 |
| TRINITY_XP_00294    | hypothet | Volvox_carteri      | 42.30 | 0.00 |
| TRINITY_GAX76885    | hypothet | Chlamydomonas_eusti | 42.30 | 0.00 |
| TRINITY_PNW88988    | hypothet | Chlamydomonas_reinh | 42.30 | 0    |
| TRINITY_PNW85231    | hypothet | Chlamydomonas_reinh | 42.30 | 0.00 |
| TRINITY_XP_00564    | calcium- | Coccomyxa_subellips | 42.20 | 0.00 |
| TRINITY_XP_01023E3  | UFM1-    | Brachypodium_distac | 42.20 | 0.00 |
| TRINITY_RMZ57695    | hypothet | Auxenochlorella_pro | 42.20 | 0.00 |
| TRINITY_KMS93688    | hypothet | Beta_vulgaris       | 42.20 | 0.00 |
| TRINITY_XP_01270    | serine/t | Setaria_italica     | 42.20 | 0.00 |
| TRINITY_GAX75600    | hypothet | Chlamydomonas_eusti | 42.20 | 0.00 |
| TRINITY_XP_02438E3  | UFM1-    | Physcomitrella_pate | 42.20 | 0.00 |
| TRINITY_A8ISN6.2    | RecName: | Chlamydomonas_reinh | 42.20 | 0.00 |
| TRINITY_RXH88729    | hypothet | Malus_domestica     | 42.20 | 0.00 |
| TRINITY_XP_01165    | PREDICTE | Cucumis_sativus     | 42.20 | 0.00 |
| TRINITY_XP_02437    | transcri | Physcomitrella_pate | 42.20 | 0.00 |
| TRINITY_PNR53004    | hypothet | Physcomitrella_pate | 42.20 | 0.00 |
| TRINITY_XP_00585    | hypothet | Chlorella_variabili | 42.20 | 0.00 |
| TRINITY_XP_00628    | vacuola  | Capsella_rubella    | 42.20 | 0.00 |
| TRINITY_GAX81885    | hypothet | Chlamydomonas_eusti | 42.20 | 0.00 |
| TRINITY_GAX77727    | hypothet | Chlamydomonas_eusti | 42.20 | 0.00 |
| TRINITY_KXZ47521    | hypothet | Gonium_pectorale    | 42.20 | 0.00 |
| TRINITY_GBG42279    | hypothet | Chara_braunii       | 42.20 | 0.00 |
| TRINITY_XP_02454    | phosphat | Selaginella_moellen | 42.20 | 0.00 |
| TRINITY_XP_02271    | external | Durio_zibethinus    | 42.20 | 0.00 |
| TRINITY_XP_00703    | PREDICTE | Theobroma_cacao     | 42.20 | 0.00 |
| TRINITY_GAX83060    | hypothet | Chlamydomonas_eusti | 42.20 | 0.00 |
| TRINITY_GAQ80193    | serine/t | Klebsormidium_niten | 42.20 | 0.00 |
| TRINITY_XP_01245    | PREDICTE | Gossypium_raimondii | 42.20 | 0.00 |
| TRINITY_GAX81589    | hypothet | Chlamydomonas_eusti | 42.20 | 0.00 |
| TRINITY_GAQ80881    | adaptor  | Klebsormidium_niten | 42.20 | 0.00 |
| TRINITY_OAY74366    | Geranyl  | Ananas_comosus      | 42.20 | 0.00 |
| TRINITY_PON35914    | GPCR kir | Parasponia_anderson | 42.20 | 0.00 |
| TRINITY_GAQ84585    | histidir | Klebsormidium_niten | 42.20 | 0.00 |
| TRINITY_OAE23102    | hypothet | Marchantia_polymorp | 42.20 | 0.00 |
| TRINITY_XP_02390    | probabl  | Quercus_suber       | 42.20 | 0.00 |
| TRINITY_GAQ89640    | transcri | Klebsormidium_niten | 42.20 | 0.00 |
| TRINITY_XP_01165    | PREDICTE | Cucumis_sativus     | 42.20 | 0.00 |
| TRINITY_PSC69508    | Oxidorec | Micractinium_conduc | 42.20 | 0.00 |
| TRINITY_GAX84950    | hypothet | Chlamydomonas_eusti | 42.20 | 0.00 |
| TRINITY_GBF98117    | hypothet | Raphidocelis_subcap | 42.20 | 0.00 |
| TRINITY_PNW83380    | hypothet | Chlamydomonas_reinh | 42.20 | 0.00 |
| TRINITY_RWR94173    | Peptida  | Cinnamomum_micranth | 42.20 | 0.00 |
| TRINITY_XP_00687    | ABC trar | Amborella_trichopod | 42.20 | 0.00 |
| TRINITY_GBF939931   | -phosp   | Raphidocelis_subcap | 42.20 | 0.00 |
| TRINITY_KXZ46908    | hypothet | Gonium_pectorale    | 42.20 | 0.00 |
| TRINITY_GBG83999    | hypothet | Chara_braunii       | 42.20 | 0.00 |

|                  |           |                     |       |      |
|------------------|-----------|---------------------|-------|------|
| TRINITY_KHG12424 | hydrolase | Gossypium_arboreum  | 42.20 | 0.00 |
| TRINITY_XP_02417 | WD and t  | Rosa_chinensis      | 42.20 | 0.00 |
| TRINITY_PNH01468 | hypothet  | Tetrabaena_socialis | 42.20 | 0.00 |
| TRINITY_XP_00295 | hypothet  | Volvox_carteri      | 42.20 | 0.00 |
| TRINITY_KXZ50785 | hypothet  | Gonium_pectorale    | 42.20 | 0.00 |
| TRINITY_KXZ49981 | hypothet  | Gonium_pectorale    | 42.20 | 0.00 |
| TRINITY_GBG88559 | hypothet  | Chara_braunii       | 42.20 | 0.00 |
| TRINITY_XP_00295 | hypothet  | Volvox_carteri      | 42.20 | 0.00 |
| TRINITY_KXZ56405 | hypothet  | Gonium_pectorale    | 42.20 | 0.00 |
| TRINITY_XP_02438 | DNA mis   | Physcomitrella_pate | 42.20 | 0.00 |
| TRINITY_PLY69597 | hypothet  | Lactuca_sativa      | 42.20 | 0.00 |
| TRINITY_XP_02437 | probable  | Physcomitrella_pate | 42.20 | 0.00 |
| TRINITY_RXH69577 | hypothet  | Malus_domestica     | 42.20 | 0.00 |
| TRINITY_XP_02707 | WD40 re   | Coffea_arabica      | 42.20 | 0.00 |
| TRINITY_XP_02283 | Aminoacy  | Ostreococcus_tauri  | 42.20 | 0.00 |
| TRINITY_OAE27228 | hypothet  | Marchantia_polymorp | 42.20 | 0.00 |
| TRINITY_XP_00170 | predicte  | Chlamydomonas_reinh | 42.20 | 0.00 |
| TRINITY_XP_00294 | hypothet  | Volvox_carteri      | 42.20 | 0.00 |
| TRINITY_PNH12687 | hypothet  | Tetrabaena_socialis | 42.20 | 0.00 |
| TRINITY_GAX78656 | hypothet  | Chlamydomonas_eusti | 42.20 | 0.00 |
| TRINITY_GBG79173 | hypothet  | Chara_braunii       | 42.20 | 0.00 |
| TRINITY_XP_00959 | PREDICTI  | Nicotiana_tomentosi | 42.20 | 0.00 |
| TRINITY_PNW84702 | hypothet  | Chlamydomonas_reinh | 42.20 | 0.00 |
| TRINITY_RWW90255 | hypothet  | Ensete_ventricosum  | 42.20 | 0.00 |
| TRINITY_GAX74936 | hypothet  | Chlamydomonas_eusti | 42.20 | 0.00 |
| TRINITY_PNW79116 | hypothet  | Chlamydomonas_reinh | 42.20 | 0.00 |
| TRINITY_PWA79991 | sirtuin   | Artemisia_annua     | 42.10 | 0.00 |
| TRINITY_XP_00629 | putativ   | Capsella_rubella    | 42.10 | 0.00 |
| TRINITY_OUS42482 | glutami   | Ostreococcus_tauri  | 42.10 | 0.00 |
| TRINITY_XP_00666 | PREDICTI  | Oryza_brachyantha   | 42.10 | 0.00 |
| TRINITY_XP_02390 | ras-like  | Quercus_suber       | 42.10 | 0.00 |
| TRINITY_XP_02017 | BTB/POZ   | Aegilops_tauschii   | 42.10 | 0.00 |
| TRINITY_OVA00835 | Cytochr   | Macleaya_cordata    | 42.10 | 0.00 |
| TRINITY_RWW91007 | hypothet  | Ensete_ventricosum  | 42.10 | 0.00 |
| TRINITY_XP_01946 | PREDICTI  | Lupinus_angustifoli | 42.10 | 0.00 |
| TRINITY_ADE77854 | unknown   | Picea_sitchensis    | 42.10 | 0.00 |
| TRINITY_XP_01725 | PREDICTI  | Daucus_carota       | 42.10 | 0.00 |
| TRINITY_RYQ81864 | hypothet  | Arachis_hypogaea    | 42.10 | 0.00 |
| TRINITY_XP_00295 | hypothet  | Volvox_carteri      | 42.10 | 0.00 |
| TRINITY_KMS65245 | hypothet  | Beta_vulgaris       | 42.10 | 0.00 |
| TRINITY_XP_02437 | short-cl  | Physcomitrella_pate | 42.10 | 0.00 |
| TRINITY_XP_00495 | NADH de   | Setaria_italica     | 42.10 | 0.00 |
| TRINITY_XP_00584 | hypothet  | Chlorella_variabili | 42.10 | 0.00 |
| TRINITY_GBF98414 | hypothet  | Raphidocelis_subcap | 42.10 | 0.00 |
| TRINITY_XP_01023 | lanC-li   | Brachypodium_distac | 42.10 | 0.00 |
| TRINITY_OAE31800 | hypothet  | Marchantia_polymorp | 42.10 | 0.00 |
| TRINITY_EOY34600 | Mitochor  | Theobroma_cacao     | 42.10 | 0.00 |
| TRINITY_XP_00308 | Transcri  | Ostreococcus_tauri  | 42.10 | 0.00 |
| TRINITY_AET02413 | hypothet  | Medicago_truncatula | 42.10 | 0.00 |
| TRINITY_XP_02497 | long ch   | Cynara_cardunculus  | 42.10 | 0.00 |
| TRINITY_RCU61424 | hypothet  | Setaria_italica     | 42.10 | 0.00 |
| TRINITY_GAX73142 | hypothet  | Chlamydomonas_eusti | 42.10 | 0.00 |
| TRINITY_XP_00565 | peptida   | Coccomyxa_subellips | 42.10 | 0.00 |
| TRINITY_XP_02498 | heterog   | Cynara_cardunculus  | 42.10 | 0.00 |
| TRINITY_XP_01449 | ABC trar  | Vigna_radiata       | 42.10 | 0.00 |
| TRINITY_GAX80861 | hypothet  | Chlamydomonas_eusti | 42.10 | 0.00 |
| TRINITY_GAX76357 | hypothet  | Chlamydomonas_eusti | 42.10 | 0.00 |
| TRINITY_PTQ28846 | hypothet  | Marchantia_polymorp | 42.10 | 0.00 |
| TRINITY_OAE28792 | hypothet  | Marchantia_polymorp | 42.10 | 0.00 |
| TRINITY_XP_02390 | lon prot  | Quercus_suber       | 42.10 | 0.00 |
| TRINITY_GAX77368 | hypothet  | Chlamydomonas_eusti | 42.10 | 0.00 |
| TRINITY_KXZ55562 | hypothet  | Gonium_pectorale    | 42.10 | 0.00 |
| TRINITY_XP_02735 | probable  | Abrus_precatorius   | 42.10 | 0.00 |
| TRINITY_XP_02391 | protein   | Quercus_suber       | 42.10 | 0.00 |
| TRINITY_KXZ54593 | hypothet  | Gonium_pectorale    | 42.10 | 0.00 |
| TRINITY_XP_00169 | mitogen   | Chlamydomonas_reinh | 42.10 | 0.00 |

|                  |                               |       |      |
|------------------|-------------------------------|-------|------|
| TRINITY_RLM69424 | hypothetPanicum_miliaceum     | 42.10 | 0.00 |
| TRINITY_GBF93029 | hypothetRaphidocelis_subcap   | 42.10 | 0.00 |
| TRINITY_XP_01390 | hypothetMonoraphidium_negle   | 42.10 | 0.00 |
| TRINITY_GBF92257 | thio-redcRaphidocelis_subcap  | 42.10 | 0.00 |
| TRINITY_XP_02131 | phospho Sorghum_bicolor       | 42.10 | 0.00 |
| TRINITY_GBF99949 | hypothetRaphidocelis_subcap   | 42.10 | 0.00 |
| TRINITY_KXZ44063 | hypothetGonium_pectorale      | 42.10 | 0.00 |
| TRINITY_XP_01390 | (Sodium cMonoraphidium_negle  | 42.10 | 0.00 |
| TRINITY_XP_01918 | PREDICT Ipomoea_nil           | 42.10 | 0.00 |
| TRINITY_GAX73207 | hypothetChlamydomonas_eusti   | 42.10 | 0.00 |
| TRINITY_GAX72786 | hypothetChlamydomonas_eusti   | 42.10 | 0.00 |
| TRINITY_GAX84054 | hypothetChlamydomonas_eusti   | 42.10 | 0.00 |
| TRINITY_GAX75212 | hypothetChlamydomonas_eusti   | 42.10 | 0.00 |
| TRINITY_GAX82503 | hypothetChlamydomonas_eusti   | 42.10 | 0.00 |
| TRINITY_ADE76381 | unknown Picea_sitchensis      | 42.10 | 0.00 |
| TRINITY_GAX81523 | hypothetChlamydomonas_eusti   | 42.10 | 0.00 |
| TRINITY_GAX75618 | hypothetChlamydomonas_eusti   | 42.10 | 0.00 |
| TRINITY_XP_00564 | P-loop cCoccomyxa_subellips   | 42.10 | 0.00 |
| TRINITY_BBC28459 | predictcYamagishiella_unico   | 42.10 | 0.00 |
| TRINITY_GBF88516 | hypothetRaphidocelis_subcap   | 42.10 | 0.00 |
| TRINITY_XP_00169 | predictcChlamydomonas_reinh   | 42.10 | 0.00 |
| TRINITY_GAX77748 | hypothetChlamydomonas_eusti   | 42.10 | 0.00 |
| TRINITY_GAX77105 | hypothetChlamydomonas_eusti   | 42.10 | 0.00 |
| TRINITY_GAX83671 | hypothetChlamydomonas_eusti   | 42.10 | 0.00 |
| TRINITY_XP_00141 | predictcOstreococcus_sp._'l   | 42.10 | 0.00 |
| TRINITY_XP_02059 | serine/tPhalaenopsis_equest   | 42.10 | 0.00 |
| TRINITY_PNW78927 | hypothetChlamydomonas_reinh   | 42.10 | 0.00 |
| TRINITY_KXZ49410 | hypothetGonium_pectorale      | 42.10 | 0.00 |
| TRINITY_XP_02390 | dipepticQuercus_suber         | 42.10 | 0.00 |
| TRINITY_XP_02390 | GTP-bin Quercus_suber         | 42.00 | 0.00 |
| TRINITY_XP_00962 | PREDICT Nicotiana_tomentosi   | 42.00 | 0.00 |
| TRINITY_XP_00250 | predictcMicromonas_commoda    | 42.00 | 0.00 |
| TRINITY_RWW90255 | hypothetEnsete_ventricosum    | 42.00 | 0.00 |
| TRINITY_XP_00226 | PREDICT Vitis_vinifera        | 42.00 | 0.00 |
| TRINITY_XP_02644 | cell di Papaver_somniferum    | 42.00 | 0.00 |
| TRINITY_NP_00123 | unchara Glycine_max           | 42.00 | 0.00 |
| TRINITY_XP_00879 | flavin-c Phoenix_dactylifera  | 42.00 | 0.00 |
| TRINITY_XP_01363 | PREDICT Brassica_oleracea     | 42.00 | 0.00 |
| TRINITY_XP_01245 | PREDICT Gossypium_raimondii   | 42.00 | 0.00 |
| TRINITY_XP_02008 | unchara Ananas_comosus        | 42.00 | 0.00 |
| TRINITY_XP_00935 | PREDICT Pyrus_x_bretschneid   | 42.00 | 0.00 |
| TRINITY_ONM09725 | Serine/tZea_mays              | 42.00 | 0.00 |
| TRINITY_EFJ38356 | hypothetSelaginella_moellen   | 42.00 | 0.00 |
| TRINITY_XP_01140 | (Alkyl g Auxenochlorella_pro  | 42.00 | 0.00 |
| TRINITY_OAE29107 | hypothetMarchantia_polymorp   | 42.00 | 0.00 |
| TRINITY_GBG84318 | hypothetChara_braunii         | 42.00 | 0.00 |
| TRINITY_ABR21719 | calmodul Actinidia_kolomikta  | 42.00 | 0.00 |
| TRINITY_GBG89628 | hypothetChara_braunii         | 42.00 | 0.00 |
| TRINITY_XP_02375 | protein Lactuca_sativa        | 42.00 | 0.00 |
| TRINITY_XP_00294 | hypothetVolvox_carteri        | 42.00 | 0.00 |
| TRINITY_XP_00751 | aminophc Bathycoccus_prasinc  | 42.00 | 0.00 |
| TRINITY_GAX76816 | hypothetChlamydomonas_eusti   | 42.00 | 0.00 |
| TRINITY_XP_01564 | ras-relc Oryza_sativa         | 42.00 | 0.00 |
| TRINITY_XP_01052 | PREDICT Tarenaya_hasslerian   | 42.00 | 0.00 |
| TRINITY_KXZ48315 | hypothetGonium_pectorale      | 42.00 | 0.00 |
| TRINITY_GAQ80700 | (lactosyl Klebsormidium_niten | 42.00 | 0.00 |
| TRINITY_GAX85788 | hypothetChlamydomonas_eusti   | 42.00 | 0.00 |
| TRINITY_ERN18092 | hypothetAmborella_trichopod   | 42.00 | 0.00 |
| TRINITY_KXZ56905 | hypothetGonium_pectorale      | 42.00 | 0.00 |
| TRINITY_XP_00975 | PREDICT Nicotiana_sylvestri   | 42.00 | 0.00 |
| TRINITY_XP_02436 | (double- Physcomitrella_pate  | 42.00 | 0.00 |
| TRINITY_GAX76004 | hypothetChlamydomonas_eusti   | 42.00 | 0.00 |
| TRINITY_XP_00295 | hypothetVolvox_carteri        | 42.00 | 0.00 |
| TRINITY_PTQ45236 | hypothetMarchantia_polymorp   | 42.00 | 0.00 |
| TRINITY_XP_00565 | ADP,ATP Coccomyxa_subellips   | 42.00 | 0.00 |
| TRINITY_XP_00713 | hypothetPhaseolus_vulgaris    | 42.00 | 0.00 |

|                 |           |                     |       |      |
|-----------------|-----------|---------------------|-------|------|
| TRINITY_XP_0025 | predicte  | Micromonas_commoda  | 42.00 | 0.00 |
| TRINITY_XP_0217 | conserv   | Chenopodium_quinoa  | 42.00 | 0.00 |
| TRINITY_XP_0239 | probable  | Quercus_suber       | 42.00 | 0.00 |
| TRINITY_GAX8008 | hypothet  | Chlamydomonas_eusti | 42.00 | 0.00 |
| TRINITY_XP_0136 | PREDICTI  | Brassica_oleracea   | 42.00 | 0.00 |
| TRINITY_XP_0029 | hypothet  | Volvox_carteri      | 42.00 | 0.00 |
| TRINITY_XP_0029 | hypothet  | Volvox_carteri      | 42.00 | 0.00 |
| TRINITY_XP_0016 | predicte  | Chlamydomonas_reinh | 42.00 | 0.00 |
| TRINITY_XP_0221 | serine/t  | Momordica_charantia | 42.00 | 0.00 |
| TRINITY_GAX8058 | hypothet  | Chlamydomonas_eusti | 42.00 | 0.00 |
| TRINITY_OAE2715 | hypothet  | Marchantia_polymorp | 42.00 | 0.00 |
| TRINITY_KXZ4385 | hypothet  | Gonium_pectorale    | 42.00 | 0.00 |
| TRINITY_EFH5167 | predicte  | Arabidopsis_lyrata  | 42.00 | 0.00 |
| TRINITY_GAX7344 | hypothet  | Chlamydomonas_eusti | 42.00 | 0.00 |
| TRINITY_XP_0138 | hypothet  | Monoraphidium_negle | 42.00 | 0.00 |
| TRINITY_GAX7653 | hypothet  | Chlamydomonas_eusti | 42.00 | 0.00 |
| TRINITY_GAX7499 | hypothet  | Chlamydomonas_eusti | 42.00 | 0.00 |
| TRINITY_PNG9953 | hypothet  | Tetrabaena_socialis | 42.00 | 0.00 |
| TRINITY_XP_0087 | probable  | Phoenix_dactylifera | 42.00 | 0.00 |
| TRINITY_PNW8044 | hypothet  | Chlamydomonas_reinh | 42.00 | 0.00 |
| TRINITY_GAX7695 | hypothet  | Chlamydomonas_eusti | 42.00 | 0.00 |
| TRINITY_PNW8683 | hypothet  | Chlamydomonas_reinh | 42.00 | 0.00 |
| TRINITY_XP_0114 | (Cob(I) y | Auxenochlorella_pro | 42.00 | 0.00 |
| TRINITY_GAX7935 | hypothet  | Chlamydomonas_eusti | 42.00 | 0.00 |
| TRINITY_XP_0241 | nodal m   | Rosa_chinensis      | 42.00 | 0.00 |
| TRINITY_PNW8061 | hypothet  | Chlamydomonas_reinh | 42.00 | 0.00 |
| TRINITY_XP_0056 | hypothet  | Coccomyxa_subellips | 42.00 | 0.00 |
| TRINITY_PNW7900 | hypothet  | Chlamydomonas_reinh | 42.00 | 0.00 |
| TRINITY_GAX8080 | hypothet  | Chlamydomonas_eusti | 42.00 | 0.00 |
| TRINITY_PNW8810 | hypothet  | Chlamydomonas_reinh | 42.00 | 0.00 |
| TRINITY_GAX7734 | hypothet  | Chlamydomonas_eusti | 42.00 | 0.00 |
| TRINITY_GAX8012 | hypothet  | Chlamydomonas_eusti | 42.00 | 0.00 |
| TRINITY_PNW7834 | hypothet  | Chlamydomonas_reinh | 42.00 | 0.00 |
| TRINITY_GAX7636 | hypothet  | Chlamydomonas_eusti | 42.00 | 0.00 |
| TRINITY_GAX8489 | hypothet  | Chlamydomonas_eusti | 42.00 | 0.00 |
| TRINITY_XP_0239 | uncharac  | Quercus_suber       | 42.00 | 0.00 |
| TRINITY_XP_0188 | PREDICTI  | Juglans_regia       | 42.00 | 0.00 |
| TRINITY_NP_0011 | uncharac  | Zea_mays            | 41.90 | 0.00 |
| TRINITY_XP_0014 | predicte  | Ostreococcus_sp._'1 | 41.90 | 0.00 |
| TRINITY_ERN1242 | hypothet  | Amborella_trichopod | 41.90 | 0.00 |
| TRINITY_XP_0165 | PREDICTI  | Capsicum_annuum     | 41.90 | 0.00 |
| TRINITY_XP_0172 | PREDICTI  | Daucus_carota       | 41.90 | 0.00 |
| TRINITY_GAX7672 | hypothet  | Chlamydomonas_eusti | 41.90 | 0.00 |
| TRINITY_PKA5124 | E3 ubiq   | Apostasia_shenzheni | 41.90 | 0.00 |
| TRINITY_XP_0220 | ras-rel   | Helianthus_annuus   | 41.90 | 0.00 |
| TRINITY_XP_0279 | GDSL est  | Vigna_unguiculata   | 41.90 | 0.00 |
| TRINITY_XP_0017 | selenium  | Chlamydomonas_reinh | 41.90 | 0.00 |
| TRINITY_XP_0114 | PREDICTI  | Fragaria-vesca      | 41.90 | 0.00 |
| TRINITY_XP_0194 | PREDICTI  | Lupinus_angustifoli | 41.90 | 0.00 |
| TRINITY_XP_0240 | CBL-int   | Citrus_clementina   | 41.90 | 0.00 |
| TRINITY_AFK4375 | unknown   | Lotus_japonicus     | 41.90 | 0.00 |
| TRINITY_RAL5060 | hypothet  | Cuscuta_australis   | 41.90 | 0.00 |
| TRINITY_XP_0030 | predicte  | Micromonas_pusilla  | 41.90 | 0.00 |
| TRINITY_GBG8022 | hypothet  | Chara_braunii       | 41.90 | 0.00 |
| TRINITY_XP_0172 | PREDICTI  | Daucus_carota       | 41.90 | 0.00 |
| TRINITY_XP_0014 | predicte  | Ostreococcus_sp._'1 | 41.90 | 0.00 |
| TRINITY_XP_0245 | tRNA (g   | Selaginella_moellen | 41.90 | 0.00 |
| TRINITY_XP_0016 | copper r  | Chlamydomonas_reinh | 41.90 | 0.00 |
| TRINITY_XP_0058 | hypothet  | Chlorella_variabili | 41.90 | 0.00 |
| TRINITY_GAQ9171 | hypothet  | Klebsormidium_niten | 41.90 | 0.00 |
| TRINITY_GAX8100 | hypothet  | Chlamydomonas_eusti | 41.90 | 0.00 |
| TRINITY_XP_0030 | predicte  | Micromonas_pusilla  | 41.90 | 0.00 |
| TRINITY_XP_0128 | PREDICTI  | Erythranthe_guttata | 41.90 | 0.00 |
| TRINITY_AGC1314 | theta c   | Pinus_tabuliformis  | 41.90 | 0.00 |
| TRINITY_VDD4901 | unnamed   | Brassica_oleracea   | 41.90 | 0.00 |
| TRINITY_KXZ5702 | hypothet  | Gonium_pectorale    | 41.90 | 0.00 |



|                  |           |                     |       |      |
|------------------|-----------|---------------------|-------|------|
| TRINITY_XP_0243  | {beta-ad  | Physcomitrella_pate | 41.90 | 0.00 |
| TRINITY_GAQ7781  | {branch   | Klebsormidium_niten | 41.90 | 0.00 |
| TRINITY_XP_0258  | {unchara  | Panicum_hallii      | 41.90 | 0.00 |
| TRINITY_GAX85571 | {hypothet | Chlamydomonas_eusti | 41.90 | 0.00 |
| TRINITY_PNW85332 | {hypothet | Chlamydomonas_reinh | 41.90 | 0.00 |
| TRINITY_PNH08204 | {hypothet | Tetrabaena_socialis | 41.90 | 0.00 |
| TRINITY_EYU28876 | {hypothet | Erythranthe_guttata | 41.90 | 0.00 |
| TRINITY_GAQ82316 | {protein- | Klebsormidium_niten | 41.90 | 0.00 |
| TRINITY_GAX79599 | {hypothet | Chlamydomonas_eusti | 41.90 | 0.00 |
| TRINITY_XP_00169 | {uric aci | Chlamydomonas_reinh | 41.90 | 0.00 |
| TRINITY_XP_00294 | {subunit  | Volvox_carteri      | 41.90 | 0.00 |
| TRINITY_XP_02287 | {serine/t | Olea_europaea       | 41.90 | 0.00 |
| TRINITY_KZV06718 | {single-  | Dorcoceras_hygro    | 41.90 | 0.00 |
| TRINITY_XP_00256 | {predicte | Micromonas_commoda  | 41.90 | 0.00 |
| TRINITY_PSC69212 | {FAD-lin  | Micractinium_conduc | 41.90 | 0.00 |
| TRINITY_XP_02391 | {arginin  | Quercus_suber       | 41.90 | 0.00 |
| TRINITY_PNW84279 | {hypothet | Chlamydomonas_reinh | 41.90 | 0.00 |
| TRINITY_XP_01006 | {PREDICTE | Eucalyptus_grandis  | 41.90 | 0.00 |
| TRINITY_GAX75229 | {hypothet | Chlamydomonas_eusti | 41.90 | 0.00 |
| TRINITY_XP_02286 | {unchara  | Olea_europaea       | 41.90 | 0.00 |
| TRINITY_GAX75618 | {hypothet | Chlamydomonas_eusti | 41.90 | 0.00 |
| TRINITY_XP_01389 | {Esteras  | Monoraphidium_negle | 41.90 | 0.00 |
| TRINITY_GAX73429 | {hypothet | Chlamydomonas_eusti | 41.90 | 0.00 |
| TRINITY_ABU52967 | {hypothet | Dunaliella_viridis  | 41.90 | 0.00 |
| TRINITY_XP_01569 | {pirin-lj | Oryza_sativa        | 41.90 | 0.00 |
| TRINITY_XP_00669 | {PREDICTE | Oryza_brachyantha   | 41.90 | 0.00 |
| TRINITY_PTQ30759 | {hypothet | Marchantia_polymorp | 41.90 | 0.00 |
| TRINITY_XP_00564 | {Metallo- | Coccomyxa_subellips | 41.90 | 0.00 |
| TRINITY_GAX83888 | {hypothet | Chlamydomonas_eusti | 41.90 | 0.00 |
| TRINITY_XP_00299 | {hypothet | Volvox_carteri      | 41.90 | 0.00 |
| TRINITY_GAX79246 | {hypothet | Chlamydomonas_eusti | 41.90 | 0.00 |
| TRINITY_GAX80996 | {hypothet | Chlamydomonas_eusti | 41.90 | 0.00 |
| TRINITY_GAX82063 | {hypothet | Chlamydomonas_eusti | 41.90 | 0.00 |
| TRINITY_PKA61941 | {Ras-rel  | Apostasia_shenzheni | 41.90 | 0.00 |
| TRINITY_XP_02708 | {bifuncti | Coffea_arabica      | 41.90 | 0.00 |
| TRINITY_GBG77031 | {hypothet | Chara_braunii       | 41.90 | 0.00 |
| TRINITY_XP_00564 | {hypothet | Coccomyxa_subellips | 41.90 | 0.00 |
| TRINITY_XP_02163 | {serine/t | Hevea_brasiliensis  | 41.90 | 0.00 |
| TRINITY_EPS59216 | {hypothet | Genlisea_aurea      | 41.90 | 0.00 |
| TRINITY_XP_00176 | {predicte | Chlamydomonas_reinh | 41.90 | 0.00 |
| TRINITY_ABK25434 | {unknown  | Picea_sitchensis    | 41.80 | 0.00 |
| TRINITY_XP_01107 | {unchara  | Sesamum_indicum     | 41.80 | 0.00 |
| TRINITY_XP_02396 | {vacuola  | Quercus_suber       | 41.80 | 0.00 |
| TRINITY_XP_01066 | {PREDICTE | Beta_vulgaris       | 41.80 | 0.00 |
| TRINITY_GBF89791 | {hypothet | Raphidocelis_subcap | 41.80 | 0.00 |
| TRINITY_XP_02376 | {glycerol | Lactuca_sativa      | 41.80 | 0.00 |
| TRINITY_GAQ83868 | {hypothet | Klebsormidium_niten | 41.80 | 0.00 |
| TRINITY_OAE25086 | {hypothet | Marchantia_polymorp | 41.80 | 0.00 |
| TRINITY_XP_01066 | {PREDICTE | Beta_vulgaris       | 41.80 | 0.00 |
| TRINITY_PQQ10343 | {unchara  | Prunus_yedoensis    | 41.80 | 0.00 |
| TRINITY_GAX81779 | {hypothet | Chlamydomonas_eusti | 41.80 | 0.00 |
| TRINITY_KMZ61129 | {putative | Zostera_marina      | 41.80 | 0.00 |
| TRINITY_XP_02196 | {autopha  | Carica_papaya       | 41.80 | 0.00 |
| TRINITY_PKA62399 | {WD-40 r  | Apostasia_shenzheni | 41.80 | 0.00 |
| TRINITY_PTQ36916 | {hypothet | Marchantia_polymorp | 41.80 | 0.00 |
| TRINITY_GBF97606 | {acidsta  | Raphidocelis_subcap | 41.80 | 0.00 |
| TRINITY_PRW58189 | {mangan   | Chlorella_sorokinia | 41.80 | 0.00 |
| TRINITY_XP_01588 | {isoaspa  | Ziziphus_jujuba     | 41.80 | 0.00 |
| TRINITY_AZS64178 | {tubulin  | Hypericum_perforatu | 41.80 | 0.00 |
| TRINITY_GAQ88412 | {Phosphat | Klebsormidium_niten | 41.80 | 0.00 |
| TRINITY_XP_00849 | {PREDICTE | Cucumis_melo        | 41.80 | 0.00 |
| TRINITY_XP_02639 | {probable | Papaver_somniferum  | 41.80 | 0.00 |
| TRINITY_XP_01092 | {PREDICTE | Elaeis_guineensis   | 41.80 | 0.00 |
| TRINITY_XP_02387 | {ras-rel  | Quercus_suber       | 41.80 | 0.00 |
| TRINITY_GAX72726 | {hypothet | Chlamydomonas_eusti | 41.80 | 0.00 |
| TRINITY_RZB78237 | {Regulat  | Glycine_soja        | 41.80 | 0.00 |

|                                              |       |      |
|----------------------------------------------|-------|------|
| TRINITY_KXZ4165(hypothetGonium_pectorale     | 41.80 | 0.00 |
| TRINITY_PLY7766(hypothetLactuca_sativa       | 41.80 | 0.00 |
| TRINITY_XP_0219(serine/tHelianthus_annuus    | 41.80 | 0.00 |
| TRINITY_GAQ9054UbiquitinKlebsormidium_niten  | 41.80 | 0.00 |
| TRINITY_EFJ2488(hypothetSelaginella_moellen  | 41.80 | 0.00 |
| TRINITY_XP_0194(PREDICTILupinus_angustifoli  | 41.80 | 0.00 |
| TRINITY_XP_0191(PREDICTI Ipomoea_nil         | 41.80 | 0.00 |
| TRINITY_PRW3317(acyl- tChlorella_sorokinia   | 41.80 | 0.00 |
| TRINITY_RWW9036(hypothetEnsete_ventricosum   | 41.80 | 0.00 |
| TRINITY_XP_0030(predicteMicromonas_pusilla   | 41.80 | 0.00 |
| TRINITY_XP_0029(homeodonVolvox_carteri       | 41.80 | 0.00 |
| TRINITY_PNW8805(hypothetChlamydomonas_reinh  | 41.80 | 0.00 |
| TRINITY_XP_0166(PREDICTIGossypium_hirsutum   | 41.80 | 0.00 |
| TRINITY_XP_0016(CCR4-NOChlamydomonas_reinh   | 41.80 | 0.00 |
| TRINITY_XP_0139(FkbM fanMonoraphidium_negle  | 41.80 | 0.00 |
| TRINITY_XP_0029(tRNA 2'-Selaginella_moellen  | 41.80 | 0.00 |
| TRINITY_XP_0025(p-type tMicromonas_commoda   | 41.80 | 0.00 |
| TRINITY_XP_0029(hypothetVolvox_carteri       | 41.80 | 0.00 |
| TRINITY_PSC7036(BTB POZ Micractinium_conduc  | 41.80 | 0.00 |
| TRINITY_GBF9414(hypothetRaphidocelis_subcap  | 41.80 | 0.00 |
| TRINITY_GAX8057(hypothetChlamydomonas_eusti  | 41.80 | 0.00 |
| TRINITY_XP_0228(UBA-likeOstreococcus_tauri   | 41.80 | 0.00 |
| TRINITY_XP_0263(short-clPapaver_somniferum   | 41.80 | 0.00 |
| TRINITY_KZV1512(oxidorecDorcoceras_hygromet  | 41.80 | 0.00 |
| TRINITY_PNW7570(hypothetChlamydomonas_reinh  | 41.80 | 0.00 |
| TRINITY_PKA5595(hypothetApostasia_shenzheni  | 41.80 | 0.00 |
| TRINITY_XP_0219(cinnamojHelianthus_annuus    | 41.80 | 0.00 |
| TRINITY_GAX8575(hypothetChlamydomonas_eusti  | 41.80 | 0.00 |
| TRINITY_XP_0243(epidermPhyscomitrella_pate   | 41.80 | 0.00 |
| TRINITY_PNW8400(hypothetChlamydomonas_reinh  | 41.80 | 0.00 |
| TRINITY_PNW7525(hypothetChlamydomonas_reinh  | 41.80 | 0.00 |
| TRINITY_GAQ8941(Kinesin-Klebsormidium_niten  | 41.80 | 0.00 |
| TRINITY_XP_0025(predicteMicromonas_commoda   | 41.80 | 0.00 |
| TRINITY_XP_01361(PREDICTI Brassica_oleracea  | 41.80 | 0.00 |
| TRINITY_XP_0279(small g)Vigna_unguiculata    | 41.80 | 0.00 |
| TRINITY_XP_0243(PHD finPhyscomitrella_pate   | 41.80 | 0.00 |
| TRINITY_PNW70531(hypothetChlamydomonas_reinh | 41.80 | 0.00 |
| TRINITY_OAO8919(hypothetArabidopsis_thalian  | 41.80 | 0.00 |
| TRINITY_PNW7906(hypothetChlamydomonas_reinh  | 41.80 | 0.00 |
| TRINITY_PNW7174(hypothetChlamydomonas_reinh  | 41.80 | 0.00 |
| TRINITY_XP_0104(PREDICTICamelina_sativa      | 41.80 | 0.00 |
| TRINITY_XP_0029(hypothetVolvox_carteri       | 41.80 | 0.00 |
| TRINITY_GAQ8152(Vesicle Klebsormidium_niten  | 41.80 | 0.00 |
| TRINITY_XP_0016(SNF2 suChlamydomonas_reinh   | 41.80 | 0.00 |
| TRINITY_PNW8868(hypothetChlamydomonas_reinh  | 41.80 | 0.00 |
| TRINITY_PNW8327(hypothetChlamydomonas_reinh  | 41.80 | 0.00 |
| TRINITY_BAJ9689(predicteHordeum_vulgare      | 41.80 | 0.00 |
| TRINITY_BAV5831(hypothetUlva_partita         | 41.80 | 0.00 |
| TRINITY_GAX79901(hypothetChlamydomonas_eusti | 41.80 | 0.00 |
| TRINITY_XP_00564(alpha/bCoccomyxa_subellips  | 41.80 | 0.00 |
| TRINITY_XP_0017(predicteChlamydomonas_reinh  | 41.80 | 0.00 |
| TRINITY_XP_0016(predicteChlamydomonas_reinh  | 41.80 | 0.00 |
| TRINITY_GAX75054(hypothetChlamydomonas_eusti | 41.80 | 0.00 |
| TRINITY_GAX7950(hypothetChlamydomonas_eusti  | 41.80 | 0.00 |
| TRINITY_GBG6475(hypothetChara_braunii        | 41.80 | 0.00 |
| TRINITY_EFJ1467(hypothetSelaginella_moellen  | 41.80 | 0.00 |
| TRINITY_GAX86434(hypothetChlamydomonas_eusti | 41.80 | 0.00 |
| TRINITY_OMO8630(hypothetCorchorus_capsulari  | 41.80 | 0.00 |
| TRINITY_EEF2267(two-compRicinus_communis     | 41.80 | 0.00 |
| TRINITY_GBF9178(hypothetRaphidocelis_subcap  | 41.70 | 0.00 |
| TRINITY_PIA3303(hypothetAquilegia_coerulea   | 41.70 | 0.00 |
| TRINITY_XP_0016(predicteChlamydomonas_reinh  | 41.70 | 0.00 |
| TRINITY_PWA4260(RegulatArtemisia_annua       | 41.70 | 0.00 |
| TRINITY_XP_0217(serine/tChenopodium_quinoa   | 41.70 | 0.00 |
| TRINITY_GAX76821(hypothetChlamydomonas_eusti | 41.70 | 0.00 |
| TRINITY_EEF2487(acyl-Co/Ricinus_communis     | 41.70 | 0.00 |

|                  |          |                     |       |      |
|------------------|----------|---------------------|-------|------|
| TRINITY_GBF89551 | canalicu | Raphidocelis_subcap | 41.70 | 0.00 |
| TRINITY_GBF95911 | hypothet | Raphidocelis_subcap | 41.70 | 0.00 |
| TRINITY_XP_01762 | PREDICTI | Gossypium_arboreum  | 41.70 | 0.00 |
| TRINITY_XP_02388 | protein  | Quercus_suber       | 41.70 | 0.00 |
| TRINITY_XP_00245 | replicat | Sorghum_bicolor     | 41.70 | 0.00 |
| TRINITY_XP_02390 | ras-like | Quercus_suber       | 41.70 | 0.00 |
| TRINITY_XP_02388 | G2-speci | Quercus_suber       | 41.70 | 0.00 |
| TRINITY_XP_02390 | kinesin  | Quercus_suber       | 41.70 | 0.00 |
| TRINITY_XP_02455 | probable | Selaginella_moellen | 41.70 | 0.00 |
| TRINITY_BAJ97942 | predicte | Hordeum_vulgare     | 41.70 | 0.00 |
| TRINITY_RLN00706 | hypothet | Panicum_miliaceum   | 41.70 | 0.00 |
| TRINITY_GAX83919 | hypothet | Chlamydomonas_eusti | 41.70 | 0.00 |
| TRINITY_XP_00169 | predicte | Chlamydomonas_reinh | 41.70 | 0.00 |
| TRINITY_XP_00935 | PREDICTI | Pyrus_x_bretschneid | 41.70 | 0.00 |
| TRINITY_GAQ85191 | hypothet | Klebsormidium_niten | 41.70 | 0.00 |
| TRINITY_KXZ47713 | hypothet | Gonium_pectorale    | 41.70 | 0.00 |
| TRINITY_GAX76604 | hypothet | Chlamydomonas_eusti | 41.70 | 0.00 |
| TRINITY_GAQ80193 | serine/t | Klebsormidium_niten | 41.70 | 0.00 |
| TRINITY_XP_00245 | dynein   | Sorghum_bicolor     | 41.70 | 0.00 |
| TRINITY_XP_00294 | hypothet | Volvox_carteri      | 41.70 | 0.00 |
| TRINITY_PKI61591 | hypothet | Punica_granatum     | 41.70 | 0.00 |
| TRINITY_XP_02710 | cell di  | Coffea_arabica      | 41.70 | 0.00 |
| TRINITY_PHT26171 | Protein  | Capsicum_baccatum   | 41.70 | 0.00 |
| TRINITY_PRW56627 | denticle | Chlorella_sorokinia | 41.70 | 0.00 |
| TRINITY_GBG70034 | hypothet | Chara_braunii       | 41.70 | 0.00 |
| TRINITY_PIA41138 | hypothet | Aquilegia_coerulea  | 41.70 | 0.00 |
| TRINITY_PRW61409 | nifU ch  | Chlorella_sorokinia | 41.70 | 0.00 |
| TRINITY_GAX75051 | hypothet | Chlamydomonas_eusti | 41.70 | 0.00 |
| TRINITY_XP_00824 | PREDICTI | Prunus_mume         | 41.70 | 0.00 |
| TRINITY_GBF95064 | hypothet | Raphidocelis_subcap | 41.70 | 0.00 |
| TRINITY_PRW56187 | replicat | Chlorella_sorokinia | 41.70 | 0.00 |
| TRINITY_XP_01390 | Phosphat | Monoraphidium_negle | 41.70 | 0.00 |
| TRINITY_XP_02438 | transmen | Physcomitrella_pate | 41.70 | 0.00 |
| TRINITY_XP_02197 | uncharac | Helianthus_annuus   | 41.70 | 0.00 |
| TRINITY_GBF99403 | DNA rep  | Raphidocelis_subcap | 41.70 | 0.00 |
| TRINITY_XP_00169 | predicte | Chlamydomonas_reinh | 41.70 | 0.00 |
| TRINITY_XP_00294 | hypothet | Volvox_carteri      | 41.70 | 0.00 |
| TRINITY_XP_00430 | PREDICTI | Fragaria-vesca      | 41.70 | 0.00 |
| TRINITY_EFJ07491 | hypothet | Selaginella_moellen | 41.70 | 0.00 |
| TRINITY_ABK24816 | unknown  | Picea_sitchensis    | 41.70 | 0.00 |
| TRINITY_XP_02165 | transmen | Hevea_brasiliensis  | 41.70 | 0.00 |
| TRINITY_XP_02387 | uncharac | Quercus_suber       | 41.70 | 0.00 |
| TRINITY_XP_02391 | LOW QUAI | Quercus_suber       | 41.70 | 0.00 |
| TRINITY_GAV89160 | UCH dom  | Cephalotus_follicul | 41.70 | 0.00 |
| TRINITY_KXZ46245 | hypothet | Gonium_pectorale    | 41.70 | 0.00 |
| TRINITY_GAX86259 | hypothet | Chlamydomonas_eusti | 41.70 | 0.00 |
| TRINITY_PON95208 | GPCR kir | Trema_orientale     | 41.70 | 0.00 |
| TRINITY_GAX79261 | hypothet | Chlamydomonas_eusti | 41.70 | 0.00 |
| TRINITY_GAX81131 | hypothet | Chlamydomonas_eusti | 41.70 | 0.00 |
| TRINITY_KMS93624 | hypothet | Beta_vulgaris       | 41.70 | 0.00 |
| TRINITY_GBG00366 | hypothet | Raphidocelis_subcap | 41.70 | 0.00 |
| TRINITY_PNW83486 | hypothet | Chlamydomonas_reinh | 41.70 | 0.00 |
| TRINITY_GAX81785 | hypothet | Chlamydomonas_eusti | 41.70 | 0.00 |
| TRINITY_GAX76500 | hypothet | Chlamydomonas_eusti | 41.70 | 0.00 |
| TRINITY_EMS67478 | hypothet | Triticum_urartu     | 41.70 | 0.00 |
| TRINITY_KZN09756 | hypothet | Daucus_carota       | 41.70 | 0.00 |
| TRINITY_PNH04420 | Heme-bir | Tetrabaena_socialis | 41.70 | 0.00 |
| TRINITY_RWR77598 | ADP-rib  | Cinnamomum_micranth | 41.70 | 0.00 |
| TRINITY_GAX76290 | hypothet | Chlamydomonas_eusti | 41.70 | 0.00 |
| TRINITY_GBF87356 | K-stimul | Raphidocelis_subcap | 41.70 | 0.00 |
| TRINITY_GAX75664 | hypothet | Chlamydomonas_eusti | 41.70 | 0.00 |
| TRINITY_GAX75785 | hypothet | Chlamydomonas_eusti | 41.70 | 0.00 |
| TRINITY_XP_02439 | vacuolar | Physcomitrella_pate | 41.70 | 0.00 |
| TRINITY_XP_02297 | eukaryot | Cucurbita_maxima    | 41.70 | 0.00 |
| TRINITY_XP_02390 | replicat | Quercus_suber       | 41.70 | 0.00 |
| TRINITY_XP_00250 | predicte | Micromonas_commoda  | 41.70 | 0.00 |

|                 |          |                     |       |      |
|-----------------|----------|---------------------|-------|------|
| TRINITY_XP_0238 | probable | Quercus_suber       | 41.70 | 0.00 |
| TRINITY_XP_0139 | LanC-li  | Monoraphidium_negle | 41.70 | 0.00 |
| TRINITY_PNH0393 | Condensi | Tetrabaena_socialis | 41.70 | 0.00 |
| TRINITY_XP_0239 | dipeptic | Quercus_suber       | 41.70 | 0.00 |
| TRINITY_XP_0220 | uncharac | Helianthus_annuus   | 41.70 | 0.00 |
| TRINITY_XP_0014 | Ribosom  | Ostreococcus_sp._'1 | 41.70 | 0.00 |
| TRINITY_XP_0016 | predict  | Chlamydomonas_reinh | 41.70 | 0.00 |
| TRINITY_YP_0090 | NADH de  | Chlorotetraedron_in | 41.70 | 0.00 |
| TRINITY_XP_0158 | uncharac | Ziziphus_jujuba     | 41.70 | 0.00 |
| TRINITY_BAD9589 | Ser/Thr  | Lotus_japonicus     | 41.70 | 0.00 |
| TRINITY_XP_0075 | ribofla  | Bathycoccus_prasinc | 41.60 | 0.00 |
| TRINITY_GAQ9115 | Hypothet | Klebsormidium_niten | 41.60 | 0.00 |
| TRINITY_GBG6934 | hypothet | Chara_braunii       | 41.60 | 0.00 |
| TRINITY_RDX8694 | hypothet | Mucuna_pruriens     | 41.60 | 0.00 |
| TRINITY_XP_0238 | trehalo  | Quercus_suber       | 41.60 | 0.00 |
| TRINITY_GBG8507 | hypothet | Chara_braunii       | 41.60 | 0.00 |
| TRINITY_EFJ1044 | hypothet | Selaginella_moellen | 41.60 | 0.00 |
| TRINITY_XP_0206 | signal   | Dendrobium_catenatu | 41.60 | 0.00 |
| TRINITY_PRW6087 | Calcium  | Chlorella_sorokinia | 41.60 | 0.00 |
| TRINITY_XP_0024 | predict  | Micromonas_commoda  | 41.60 | 0.00 |
| TRINITY_XP_0205 | ABC trar | Phalaenopsis_equest | 41.60 | 0.00 |
| TRINITY_XP_0094 | PREDICTI | Musa_acuminata      | 41.60 | 0.00 |
| TRINITY_XP_0176 | PREDICTI | Gossypium_arboreum  | 41.60 | 0.00 |
| TRINITY_XP_0064 | E3 ubiq  | Eutrema_salsugineur | 41.60 | 0.00 |
| TRINITY_PRW5703 | UPF0544  | Chlorella_sorokinia | 41.60 | 0.00 |
| TRINITY_XP_0147 | eukaryot | Brachypodium_distac | 41.60 | 0.00 |
| TRINITY_GAX7303 | hypothet | Chlamydomonas_eusti | 41.60 | 0.00 |
| TRINITY_PNW8719 | hypothet | Chlamydomonas_reinh | 41.60 | 0.00 |
| TRINITY_XP_0156 | costars  | Oryza_sativa        | 41.60 | 0.00 |
| TRINITY_KXZ4165 | hypothet | Gonium_pectorale    | 41.60 | 0.00 |
| TRINITY_GAX8562 | hypothet | Chlamydomonas_eusti | 41.60 | 0.00 |
| TRINITY_GAX7398 | hypothet | Chlamydomonas_eusti | 41.60 | 0.00 |
| TRINITY_XP_0075 | predict  | Bathycoccus_prasinc | 41.60 | 0.00 |
| TRINITY_XP_0238 | guanine  | Quercus_suber       | 41.60 | 0.00 |
| TRINITY_KXZ4841 | hypothet | Gonium_pectorale    | 41.60 | 0.00 |
| TRINITY_XP_0016 | predict  | Chlamydomonas_reinh | 41.60 | 0.00 |
| TRINITY_GBG7734 | hypothet | Chara_braunii       | 41.60 | 0.00 |
| TRINITY_XP_0102 | PREDICTI | Nelumbo_nucifera    | 41.60 | 0.00 |
| TRINITY_GAX7562 | hypothet | Chlamydomonas_eusti | 41.60 | 0.00 |
| TRINITY_GAX8002 | hypothet | Chlamydomonas_eusti | 41.60 | 0.00 |
| TRINITY_GAX7468 | hypothet | Chlamydomonas_eusti | 41.60 | 0.00 |
| TRINITY_GAX7939 | hypothet | Chlamydomonas_eusti | 41.60 | 0.00 |
| TRINITY_XP_0029 | hypothet | Volvox_carteri      | 41.60 | 0.00 |
| TRINITY_XP_0042 | probable | Solanum_lycopersicu | 41.60 | 0.00 |
| TRINITY_GAQ7981 | Sec23 p  | Klebsormidium_niten | 41.60 | 0.00 |
| TRINITY_XP_0238 | LOW QUAI | Quercus_suber       | 41.60 | 0.00 |
| TRINITY_BAB9039 | ADP-rib  | Oryza_sativa        | 41.60 | 0.00 |
| TRINITY_EEF2734 | acylamir | Ricinus_communis    | 41.60 | 0.00 |
| TRINITY_GAQ8815 | Catalas  | Klebsormidium_niten | 41.60 | 0.00 |
| TRINITY_EFH4694 | PQ-loop  | Arabidopsis_lyrata  | 41.60 | 0.00 |
| TRINITY_CBI3729 | unnamed  | Vitis_vinifera      | 41.60 | 0.00 |
| TRINITY_XP_0206 | uncharac | Dendrobium_catenatu | 41.60 | 0.00 |
| TRINITY_XP_0138 | putativ  | Monoraphidium_negle | 41.60 | 0.00 |
| TRINITY_PNW8634 | hypothet | Chlamydomonas_reinh | 41.60 | 0.00 |
| TRINITY_CBN2077 | mitochor | Polytomella_sp._Pri | 41.60 | 0.00 |
| TRINITY_RWW9025 | hypothet | Ensete_ventricosum  | 41.60 | 0.00 |
| TRINITY_BAJ9390 | predict  | Hordeum_vulgare     | 41.60 | 0.00 |
| TRINITY_XP_0029 | hypothet | Volvox_carteri      | 41.60 | 0.00 |
| TRINITY_XP_0201 | ras-rel  | Ananas_comosus      | 41.60 | 0.00 |
| TRINITY_XP_0139 | hypothet | Monoraphidium_negle | 41.60 | 0.00 |
| TRINITY_XP_0064 | RING fir | Eutrema_salsugineur | 41.60 | 0.00 |
| TRINITY_XP_0110 | PREDICTI | Populus_euphratica  | 41.60 | 0.00 |
| TRINITY_XP_0042 | eukaryot | Solanum_lycopersicu | 41.60 | 0.00 |
| TRINITY_XP_0056 | calcium- | Coccomyxa_subellips | 41.60 | 0.00 |
| TRINITY_XP_0030 | flagell  | Micromonas_pusilla  | 41.60 | 0.00 |
| TRINITY_PNH1099 | hypothet | Tetrabaena_socialis | 41.60 | 0.00 |

|                 |           |                       |       |      |
|-----------------|-----------|-----------------------|-------|------|
| TRINITY_XP_0016 | predict   | Chlamydomonas_reinh   | 41.60 | 0.00 |
| TRINITY_XP_0217 | TBC1      | donChenopodium_quinoa | 41.60 | 0.00 |
| TRINITY_RVX0256 | (Beta-glu | Vitis_vinifera        | 41.60 | 0.00 |
| TRINITY_GAX8324 | hypothet  | Chlamydomonas_eusti   | 41.60 | 0.00 |
| TRINITY_XP_0191 | PREDICT   | Ipomoea_nil           | 41.60 | 0.00 |
| TRINITY_GAQ7959 | Insulin   | Klebsormidium_niten   | 41.60 | 0.00 |
| TRINITY_PNW8868 | hypothet  | Chlamydomonas_reinh   | 41.60 | 0.00 |
| TRINITY_XP_0029 | hypothet  | Volvox_carteri        | 41.60 | 0.00 |
| TRINITY_XP_0271 | uncharac  | Coffea_arabica        | 41.60 | 0.00 |
| TRINITY_KXZ5297 | DHC1      | prGonium_pectorale    | 41.60 | 0    |
| TRINITY_PRW5990 | histidy   | Chlorella_sorokinia   | 41.60 | 0.00 |
| TRINITY_XP_0029 | hypothet  | Volvox_carteri        | 41.60 | 0.00 |
| TRINITY_XP_0016 | predict   | Chlamydomonas_reinh   | 41.60 | 0.00 |
| TRINITY_XP_0063 | serine/   | Populus_trichocarpa   | 41.60 | 0.00 |
| TRINITY_OWM8583 | hypothet  | Punica_granatum       | 41.60 | 0.00 |
| TRINITY_PNH1057 | Retrovir  | Tetrabaena_socialis   | 41.60 | 0.00 |
| TRINITY_XP_0191 | PREDICT   | Ipomoea_nil           | 41.50 | 0.00 |
| TRINITY_EFJ2323 | hypothet  | Selaginella_moellen   | 41.50 | 0.00 |
| TRINITY_OMO7601 | hypothet  | Corchorus_olitorius   | 41.50 | 0.00 |
| TRINITY_XP_0138 | protein   | Monoraphidium_negle   | 41.50 | 0.00 |
| TRINITY_GAQ8900 | hypothet  | Klebsormidium_niten   | 41.50 | 0.00 |
| TRINITY_OTF8781 | putativ   | Helianthus_annuus     | 41.50 | 0.00 |
| TRINITY_XP_0058 | hypothet  | Chlorella_variabili   | 41.50 | 0.00 |
| TRINITY_GAQ7905 | ATP-depe  | Klebsormidium_niten   | 41.50 | 0.00 |
| TRINITY_XP_0016 | voltage-  | Chlamydomonas_reinh   | 41.50 | 0.00 |
| TRINITY_GAX7871 | hypothet  | Chlamydomonas_eusti   | 41.50 | 0.00 |
| TRINITY_XP_0200 | serine/   | Ananas_comosus        | 41.50 | 0.00 |
| TRINITY_OUS4782 | adenyly   | Ostreococcus_tauri    | 41.50 | 0.00 |
| TRINITY_GAQ7937 | glutathi  | Klebsormidium_niten   | 41.50 | 0.00 |
| TRINITY_XP_0245 | uncharac  | Selaginella_moellen   | 41.50 | 0.00 |
| TRINITY_XP_0058 | hypothet  | Chlorella_variabili   | 41.50 | 0.00 |
| TRINITY_XP_0243 | PAN2-PA   | Physcomitrella_pate   | 41.50 | 0.00 |
| TRINITY_GAX8146 | hypothet  | Chlamydomonas_eusti   | 41.50 | 0.00 |
| TRINITY_PTQ4957 | (hypothet | Marchantia_polymorp   | 41.50 | 0.00 |
| TRINITY_EFJ1247 | (hypothet | Selaginella_moellen   | 41.50 | 0.00 |
| TRINITY_GAX7759 | hypothet  | Chlamydomonas_eusti   | 41.50 | 0.00 |
| TRINITY_XP_0137 | uncharac  | Brassica_napus        | 41.50 | 0.00 |
| TRINITY_PNW8273 | hypothet  | Chlamydomonas_reinh   | 41.50 | 0.00 |
| TRINITY_ERN1614 | hypothet  | Amborella_trichopod   | 41.50 | 0.00 |
| TRINITY_XP_0110 | vignain-  | Sesamum_indicum       | 41.50 | 0.00 |
| TRINITY_GAX7765 | hypothet  | Chlamydomonas_eusti   | 41.50 | 0.00 |
| TRINITY_GBF9317 | histone-  | Raphidocelis_subcap   | 41.50 | 0.00 |
| TRINITY_XP_0042 | PREDICT   | Fragaria_vesca        | 41.50 | 0.00 |
| TRINITY_PNH0879 | hypothet  | Tetrabaena_socialis   | 41.50 | 0.00 |
| TRINITY_XP_0105 | (PREDICT  | Camelina_sativa       | 41.50 | 0.00 |
| TRINITY_GAQ9228 | hypothet  | Klebsormidium_niten   | 41.50 | 0.00 |
| TRINITY_GAX7347 | hypothet  | Chlamydomonas_eusti   | 41.50 | 0.00 |
| TRINITY_GAX7318 | (hypothet | Chlamydomonas_eusti   | 41.50 | 0.00 |
| TRINITY_PNW8781 | (hypothet | Chlamydomonas_reinh   | 41.50 | 0.00 |
| TRINITY_XP_0105 | PREDICT   | Tarenaya_hasslerian   | 41.50 | 0.00 |
| TRINITY_GAQ8585 | cytosoli  | Klebsormidium_niten   | 41.50 | 0.00 |
| TRINITY_XP_0172 | PREDICT   | Daucus_carota         | 41.50 | 0.00 |
| TRINITY_XP_0016 | predict   | Chlamydomonas_reinh   | 41.50 | 0.00 |
| TRINITY_XP_0238 | eukaryot  | Quercus_suber         | 41.50 | 0.00 |
| TRINITY_GAX7418 | hypothet  | Chlamydomonas_eusti   | 41.50 | 0.00 |
| TRINITY_VDD3240 | unnamed   | Brassica_oleracea     | 41.50 | 0.00 |
| TRINITY_GAX7540 | (hypothet | Chlamydomonas_eusti   | 41.50 | 0.00 |
| TRINITY_GAQ8369 | putativ   | Klebsormidium_niten   | 41.50 | 0.00 |
| TRINITY_OUS4587 | hypothet  | Ostreococcus_tauri    | 41.50 | 0.00 |
| TRINITY_GAX7733 | (hypothet | Chlamydomonas_eusti   | 41.50 | 0.00 |
| TRINITY_KXZ4664 | hypothet  | Gonium_pectorale      | 41.50 | 0.00 |
| TRINITY_GAQ8172 | Protein   | Klebsormidium_niten   | 41.50 | 0.00 |
| TRINITY_XP_0017 | (predict  | Chlamydomonas_reinh   | 41.50 | 0.00 |
| TRINITY_KXZ4943 | hypothet  | Gonium_pectorale      | 41.50 | 0.00 |
| TRINITY_XP_0071 | hypothet  | Phaseolus_vulgaris    | 41.50 | 0.00 |
| TRINITY_XP_0105 | PREDICT   | Tarenaya_hasslerian   | 41.50 | 0.00 |

|                  |          |                       |       |      |
|------------------|----------|-----------------------|-------|------|
| TRINITY_XP_01003 | PREDICTH | Eucalyptus_grandis    | 41.50 | 0.00 |
| TRINITY_GAX7377  | hypothet | Chlamydomonas_eusti   | 41.50 | 0.00 |
| TRINITY_XP_02436 | cAMP-dep | Physcomitrella_pate   | 41.50 | 0.00 |
| TRINITY_GAX7505  | hypothet | Chlamydomonas_eusti   | 41.50 | 0.00 |
| TRINITY_KXZ5199  | hypothet | Gonium_pectorale      | 41.50 | 0.00 |
| TRINITY_OAE3121  | hypothet | Marchantia_polymorp   | 41.50 | 0.00 |
| TRINITY_XP_00564 | protein  | Coccomyxa_subellips   | 41.50 | 0.00 |
| TRINITY_GAX7738  | hypothet | Chlamydomonas_eusti   | 41.50 | 0.00 |
| TRINITY_GBF9458  | hypothet | Raphidocelis_subcap   | 41.50 | 0.00 |
| TRINITY_GAX8265  | hypothet | Chlamydomonas_eusti   | 41.50 | 0.00 |
| TRINITY_KXZ5404  | hypothet | Gonium_pectorale      | 41.50 | 0.00 |
| TRINITY_KXZ4966  | hypothet | Gonium_pectorale      | 41.50 | 0.00 |
| TRINITY_XP_00295 | flagell  | Volvox_carteri        | 41.50 | 0.00 |
| TRINITY_XP_00169 | '3'-5'   | e>Chlamydomonas_reinh | 41.50 | 0.00 |
| TRINITY_GBF9133  | hypothet | Raphidocelis_subcap   | 41.50 | 0.00 |
| TRINITY_GAX8428  | hypothet | Chlamydomonas_eusti   | 41.50 | 0.00 |
| TRINITY_GAX8205  | hypothet | Chlamydomonas_eusti   | 41.50 | 0.00 |
| TRINITY_XP_01002 | PREDICTH | Eucalyptus_grandis    | 41.50 | 0.00 |
| TRINITY_KXZ5199  | hypothet | Gonium_pectorale      | 41.50 | 0.00 |
| TRINITY_OMO9204  | Diphthar | Corchorus_olitorius   | 41.50 | 0.00 |
| TRINITY_XP_00295 | Selenop  | Volvox_carteri        | 41.40 | 0.00 |
| TRINITY_BAJ9830  | predict  | Hordeum_vulgare       | 41.40 | 0.00 |
| TRINITY_XP_0138  | Guanylat | Monoraphidium_negle   | 41.40 | 0.00 |
| TRINITY_XP_00564 | Metallo- | Coccomyxa_subellips   | 41.40 | 0.00 |
| TRINITY_XP_02271 | importir | Durio_zibethinus      | 41.40 | 0.00 |
| TRINITY_RLM8035  | NADP-dep | Panicum_miliaceum     | 41.40 | 0.00 |
| TRINITY_XP_02452 | multidr  | Selaginella_moellen   | 41.40 | 0.00 |
| TRINITY_XP_02387 | mitochor | Quercus_suber         | 41.40 | 0.00 |
| TRINITY_XP_01917 | PREDICTH | Ipomoea_nil           | 41.40 | 0.00 |
| TRINITY_XP_02710 | F-box p  | Coffea_arabica        | 41.40 | 0.00 |
| TRINITY_XP_02392 | phosphol | Quercus_suber         | 41.40 | 0.00 |
| TRINITY_XP_02087 | 2-hydro  | Arabidopsis_lyrata    | 41.40 | 0.00 |
| TRINITY_XP_00713 | hypothet | Phaseolus_vulgaris    | 41.40 | 0.00 |
| TRINITY_OTG0253  | putativ  | Helianthus_annuus     | 41.40 | 0.00 |
| TRINITY_XP_02057 | ubiquiti | Phalaenopsis_equest   | 41.40 | 0.00 |
| TRINITY_XP_02436 | unchara  | Physcomitrella_pate   | 41.40 | 0.00 |
| TRINITY_XP_01027 | PREDICTH | Nelumbo_nucifera      | 41.40 | 0.00 |
| TRINITY_BAK0043  | predict  | Hordeum_vulgare       | 41.40 | 0.00 |
| TRINITY_XP_00564 | hypothet | Coccomyxa_subellips   | 41.40 | 0.00 |
| TRINITY_EFJ0735  | hypothet | Selaginella_moellen   | 41.40 | 0.00 |
| TRINITY_KXZ4840  | hypothet | Gonium_pectorale      | 41.40 | 0.00 |
| TRINITY_XP_01723 | PREDICTH | Daucus_carota         | 41.40 | 0.00 |
| TRINITY_XP_02026 | unchara  | Asparagus_officinal   | 41.40 | 0.00 |
| TRINITY_XP_01052 | PREDICTH | Tarenaya_hasslerian   | 41.40 | 0.00 |
| TRINITY_XP_00423 | protein  | Solanum_lycopersicu   | 41.40 | 0.00 |
| TRINITY_KXZ5561  | hypothet | Gonium_pectorale      | 41.40 | 0.00 |
| TRINITY_BAK0648  | predict  | Hordeum_vulgare       | 41.40 | 0.00 |
| TRINITY_GBG8482  | hypothet | Chara_braunii         | 41.40 | 0.00 |
| TRINITY_PNR3154  | hypothet | Physcomitrella_pate   | 41.40 | 0.00 |
| TRINITY_XP_02202 | adenylat | Helianthus_annuus     | 41.40 | 0.00 |
| TRINITY_GAX8186  | hypothet | Chlamydomonas_eusti   | 41.40 | 0.00 |
| TRINITY_PUZ4687  | hypothet | Panicum_hallii        | 41.40 | 0.00 |
| TRINITY_OAE2204  | hypothet | Marchantia_polymorp   | 41.40 | 0.00 |
| TRINITY_GBF9055  | hypothet | Raphidocelis_subcap   | 41.40 | 0.00 |
| TRINITY_GBF9111  | hypothet | Raphidocelis_subcap   | 41.40 | 0.00 |
| TRINITY_PNW7605  | hypothet | Chlamydomonas_reinh   | 41.40 | 0.00 |
| TRINITY_KXZ4822  | hypothet | Gonium_pectorale      | 41.40 | 0.00 |
| TRINITY_GAQ8924  | hypothet | Klebsormidium_niten   | 41.40 | 0.00 |
| TRINITY_XP_02436 | unchara  | Physcomitrella_pate   | 41.40 | 0.00 |
| TRINITY_EFJ1654  | hypothet | Selaginella_moellen   | 41.40 | 0.00 |
| TRINITY_PNW7274  | hypothet | Chlamydomonas_reinh   | 41.40 | 0.00 |
| TRINITY_XP_0219  | protein  | Helianthus_annuus     | 41.40 | 0.00 |
| TRINITY_PRW3914  | dnaJ-li  | Chlorella_sorokinia   | 41.40 | 0.00 |
| TRINITY_XP_00294 | hypothet | Volvox_carteri        | 41.40 | 0.00 |
| TRINITY_KXZ4933  | hypothet | Gonium_pectorale      | 41.40 | 0.00 |
| TRINITY_XP_0238  | inositol | Quercus_suber         | 41.40 | 0.00 |

|                                             |       |      |
|---------------------------------------------|-------|------|
| TRINITY_GBG7975(hypothetChara_braunii       | 41.40 | 0.00 |
| TRINITY_ADB77814actin, pUlva_intestinalis   | 41.40 | 0.00 |
| TRINITY_XP_02175RHOMBOIIChenopodium_quinoa  | 41.40 | 0.00 |
| TRINITY_GAX8069(hypothetChlamydomonas_eusti | 41.40 | 0.00 |
| TRINITY_GAX7798(hypothetChlamydomonas_eusti | 41.40 | 0.00 |
| TRINITY_NP_0011(uncharacZea_mays            | 41.40 | 0.00 |
| TRINITY_OWM8374(hypothetPunica_granatum     | 41.40 | 0.00 |
| TRINITY_GAX8482(hypothetChlamydomonas_eusti | 41.40 | 0.00 |
| TRINITY_GAX7578(hypothetChlamydomonas_eusti | 41.40 | 0.00 |
| TRINITY_XP_0029(hypothetVolvox_carteri      | 41.40 | 0.00 |

|                  |          |                     |       |      |
|------------------|----------|---------------------|-------|------|
| TRINITY_XP_00169 | puf prot | Chlamydomonas_reinh | 41.40 | 0.00 |
| TRINITY_KXZ5336  | hypothet | Gonium_pectorale    | 41.40 | 0.00 |
| TRINITY_EFJ21271 | hypothet | Selaginella_moellen | 41.40 | 0.00 |
| TRINITY_XP_00295 | componer | Volvox_carteri      | 41.40 | 0.00 |
| TRINITY_GAX7444  | hypothet | Chlamydomonas_eusti | 41.40 | 0.00 |
| TRINITY_KJB7044  | hypothet | Gossypium_raimondii | 41.40 | 0.00 |
| TRINITY_GAQ8430  | prefoldi | Klebsormidium_niten | 41.40 | 0.00 |
| TRINITY_XP_00565 | hydroxyn | Coccomyxa_subellips | 41.40 | 0.00 |
| TRINITY_PSC7046  | putativ  | Micractinium_conduc | 41.40 | 0.00 |
| TRINITY_KXZ4527  | hypothet | Gonium_pectorale    | 41.40 | 0.00 |
| TRINITY_GAX8655  | hypothet | Chlamydomonas_eusti | 41.40 | 0.00 |
| TRINITY_GAX7502  | hypothet | Chlamydomonas_eusti | 41.40 | 0.00 |
| TRINITY_XP_02127 | acyl-Co  | Herrania_umbratica  | 41.40 | 0.00 |
| TRINITY_KXZ4414  | hypothet | Gonium_pectorale    | 41.40 | 0.00 |
| TRINITY_GAX7710  | hypothet | Chlamydomonas_eusti | 41.40 | 0.00 |
| TRINITY_XP_00305 | predict  | Micromonas_pusilla  | 41.30 | 0.00 |
| TRINITY_XP_00750 | predict  | Bathycoccus_prasinc | 41.30 | 0.00 |
| TRINITY_KDD7636  | spermin  | Helicosporidium_sp. | 41.30 | 0.00 |
| TRINITY_XP_02058 | lipase   | Phalaenopsis_equest | 41.30 | 0.00 |
| TRINITY_GAV6737  | Ribosom  | Cephalotus_follicul | 41.30 | 0.00 |
| TRINITY_XP_00584 | hypothet | Chlorella_variabili | 41.30 | 0.00 |
| TRINITY_EEC7787  | hypothet | Oryza_sativa        | 41.30 | 0.00 |
| TRINITY_KXZ4400  | hypothet | Gonium_pectorale    | 41.30 | 0.00 |
| TRINITY_PNW7653  | hypothet | Chlamydomonas_reinh | 41.30 | 0.00 |
| TRINITY_XP_00751 | predict  | Bathycoccus_prasinc | 41.30 | 0.00 |
| TRINITY_GAX7763  | hypothet | Chlamydomonas_eusti | 41.30 | 0.00 |
| TRINITY_XP_02452 | enoyl-   | Selaginella_moellen | 41.30 | 0.00 |
| TRINITY_PNH0776  | hypothet | Tetrabaena_socialis | 41.30 | 0.00 |
| TRINITY_GAQ8039  | phosphat | Klebsormidium_niten | 41.30 | 0.00 |
| TRINITY_RAL5445  | hypothet | Cuscuta_australis   | 41.30 | 0.00 |
| TRINITY_ABW7168  | chymotrj | Hordeum_vulgare     | 41.30 | 0.00 |
| TRINITY_XP_02392 | erythro  | Quercus_suber       | 41.30 | 0.00 |
| TRINITY_XP_01915 | PREDICTI | Ipomoea_nil         | 41.30 | 0.00 |
| TRINITY_PNH0421  | hypothet | Tetrabaena_socialis | 41.30 | 0.00 |
| TRINITY_KZV1531  | beta-mar | Dorcoceras_hygromet | 41.30 | 0.00 |
| TRINITY_PNW7584  | hypothet | Chlamydomonas_reinh | 41.30 | 0.00 |
| TRINITY_KMZ5952  | Exosome  | Zostera_marina      | 41.30 | 0.00 |
| TRINITY_XP_00169 | soluble  | Chlamydomonas_reinh | 41.30 | 0.00 |
| TRINITY_XP_02453 | DNA top  | Selaginella_moellen | 41.30 | 0.00 |
| TRINITY_PNH0740  | hypothet | Tetrabaena_socialis | 41.30 | 0.00 |
| TRINITY_GAX8465  | hypothet | Chlamydomonas_eusti | 41.30 | 0.00 |
| TRINITY_ESQ2892  | hypothet | Eutrema_salsugineum | 41.30 | 0.00 |
| TRINITY_RMZ5770  | hypothet | Auxenochlorella_pro | 41.30 | 0.00 |
| TRINITY_GAX7671  | hypothet | Chlamydomonas_eusti | 41.30 | 0.00 |
| TRINITY_XP_01594 | GTP-bin  | Arachis_duranensis  | 41.30 | 0.00 |
| TRINITY_PRW4532  | copine-  | Chlorella_sorokinia | 41.30 | 0.00 |
| TRINITY_PNH0769  | Methyl-  | Tetrabaena_socialis | 41.30 | 0.00 |
| TRINITY_GAX7663  | hypothet | Chlamydomonas_eusti | 41.30 | 0.00 |
| TRINITY_XP_02284 | serine/  | Olea_europaea       | 41.30 | 0.00 |
| TRINITY_XP_02436 | peter P  | Physcomitrella_pate | 41.30 | 0.00 |
| TRINITY_XP_02299 | E3 ubiq  | Cucurbita_maxima    | 41.30 | 0.00 |
| TRINITY_PRW5917  | hypothet | Chlorella_sorokinia | 41.30 | 0.00 |
| TRINITY_GAX8258  | hypothet | Chlamydomonas_eusti | 41.30 | 0.00 |
| TRINITY_XP_00246 | actin-3  | Sorghum_bicolor     | 41.30 | 0.00 |
| TRINITY_PNH0116  | hypothet | Tetrabaena_socialis | 41.30 | 0.00 |
| TRINITY_XP_01389 | Dual sp  | Monoraphidium_negle | 41.30 | 0.00 |
| TRINITY_XP_00170 | predict  | Chlamydomonas_reinh | 41.30 | 0.00 |
| TRINITY_XP_00141 | predict  | Ostreococcus_sp._'1 | 41.30 | 0.00 |
| TRINITY_XP_02388 | fimbrin  | Quercus_suber       | 41.30 | 0.00 |
| TRINITY_PIA5462  | hypothet | Aquilegia_coerulea  | 41.30 | 0.00 |
| TRINITY_XP_00245 | probable | Sorghum_bicolor     | 41.30 | 0.00 |
| TRINITY_GAQ8773  | Ribosom  | Klebsormidium_niten | 41.30 | 0.00 |
| TRINITY_GAX8153  | hypothet | Chlamydomonas_eusti | 41.30 | 0.00 |
| TRINITY_GAX8520  | hypothet | Chlamydomonas_eusti | 41.30 | 0.00 |
| TRINITY_XP_00141 | TRAP1,   | Ostreococcus_sp._'1 | 41.30 | 0.00 |
| TRINITY_XP_00169 | protein  | Chlamydomonas_reinh | 41.30 | 0.00 |



|                  |                             |       |      |
|------------------|-----------------------------|-------|------|
| TRINITY_GAQ78227 | Serine/tKlebsormidium_niten | 41.30 | 0.00 |
| TRINITY_BAJ96894 | predicteHordeum_vulgare     | 41.30 | 0.00 |
| TRINITY_GAX73992 | hypothetChlamydomonas_eusti | 41.30 | 0.00 |
| TRINITY_XP_00306 | predicteMicromonas_pusilla  | 41.30 | 0.00 |
| TRINITY_GAX74807 | hypothetChlamydomonas_eusti | 41.30 | 0.00 |
| TRINITY_XP_02582 | protein Panicum_hallii      | 41.30 | 0.00 |
| TRINITY_GAX79893 | hypothetChlamydomonas_eusti | 41.30 | 0.00 |
| TRINITY_PNH12872 | Serine/tTetrabaena_socialis | 41.30 | 0.00 |
| TRINITY_XP_02374 | protein Lactuca_sativa      | 41.30 | 0.00 |
| TRINITY_XP_02057 | phosphatPhalaenopsis_equest | 41.20 | 0.00 |
| TRINITY_XP_01282 | PREDICTIErythranthe_guttata | 41.20 | 0.00 |
| TRINITY_GAQ83028 | hypothetKlebsormidium_niten | 41.20 | 0.00 |
| TRINITY_PSC69984 | ubiquitiMicractinium_conduc | 41.20 | 0.00 |
| TRINITY_RID42037 | hypothetBrassica_rapa       | 41.20 | 0.00 |
| TRINITY_XP_01024 | PREDICTINelumbo_nucifera    | 41.20 | 0.00 |
| TRINITY_XP_02640 | ras-relaPapaver_somniferum  | 41.20 | 0.00 |
| TRINITY_GBG00183 | hypothetRaphidocelis_subcap | 41.20 | 0.00 |
| TRINITY_XP_00429 | PREDICTIFragaria_vesca      | 41.20 | 0.00 |
| TRINITY_RWW84243 | hypothetEnsete_ventricosum  | 41.20 | 0.00 |
| TRINITY_XP_01207 | alpha-keJatropha_curcas     | 41.20 | 0.00 |
| TRINITY_GAQ78747 | PutativeKlebsormidium_niten | 41.20 | 0.00 |
| TRINITY_XP_01884 | PREDICTIJuglans_regia       | 41.20 | 0.00 |
| TRINITY_PRW20868 | cinnamy]Chlorella_sorokinia | 41.20 | 0.00 |
| TRINITY_XP_00305 | calcium-Micromonas_pusilla  | 41.20 | 0.00 |
| TRINITY_PNW84630 | hypothetChlamydomonas_reinh | 41.20 | 0.00 |
| TRINITY_XP_02498 | calcium-Cynara_cardunculus  | 41.20 | 0.00 |
| TRINITY_KRH35821 | hypothetGlycine_max         | 41.20 | 0.00 |
| TRINITY_RLN15429 | calcium-Panicum_miliaceum   | 41.20 | 0.00 |
| TRINITY_XP_01762 | PREDICTIGossypium_arboreum  | 41.20 | 0.00 |
| TRINITY_PNW79299 | hypothetChlamydomonas_reinh | 41.20 | 0.00 |
| TRINITY_XP_00307 | G-proteiOstreococcus_tauri  | 41.20 | 0.00 |
| TRINITY_PNW75763 | hypothetChlamydomonas_reinh | 41.20 | 0.00 |
| TRINITY_ESR57544 | hypothetCitrus_clementina   | 41.20 | 0.00 |
| TRINITY_ABR21719 | calmodulActinidia_kolomikta | 41.20 | 0.00 |
| TRINITY_GAX79409 | hypothetChlamydomonas_eusti | 41.20 | 0.00 |
| TRINITY_XP_01919 | PREDICTIIPomoea_nil         | 41.20 | 0.00 |
| TRINITY_XP_01093 | PREDICTIElaeis_guineensis   | 41.20 | 0.00 |
| TRINITY_GAX83510 | hypothetChlamydomonas_eusti | 41.20 | 0.00 |
| TRINITY_XP_01146 | PREDICTIFragaria_vesca      | 41.20 | 0.00 |
| TRINITY_XP_01653 | PREDICTICapsicum_annuum     | 41.20 | 0.00 |
| TRINITY_XP_02275 | calcium-Durio_zibethinus    | 41.20 | 0.00 |
| TRINITY_GAX74833 | hypothetChlamydomonas_eusti | 41.20 | 0.00 |
| TRINITY_KZV42214 | pseudouDorcoceras_hygromet  | 41.20 | 0.00 |
| TRINITY_PNW87472 | hypothetChlamydomonas_reinh | 41.20 | 0.00 |
| TRINITY_XP_02070 | uncharaDendrobium_catenatu  | 41.20 | 0.00 |
| TRINITY_PNW75717 | hypothetChlamydomonas_reinh | 41.20 | 0.00 |
| TRINITY_GAX82228 | hypothetChlamydomonas_eusti | 41.20 | 0.00 |
| TRINITY_XP_01245 | PREDICTIGossypium_raimondii | 41.20 | 0.00 |
| TRINITY_XP_02165 | RNA-binCHevea_brasiliensis  | 41.20 | 0.00 |
| TRINITY_XP_00287 | uncharaArabidopsis_lyrata   | 41.20 | 0.00 |
| TRINITY_P0C8M8.1 | RecName:Zea_mays            | 41.20 | 0.00 |
| TRINITY_KXZ43877 | hypothetGonium_pectorale    | 41.20 | 0.00 |
| TRINITY_OMO98802 | hypothetCorchorus_olitorius | 41.20 | 0.00 |
| TRINITY_GAX85017 | hypothetChlamydomonas_eusti | 41.20 | 0.00 |
| TRINITY_PNW74551 | hypothetChlamydomonas_reinh | 41.20 | 0.00 |
| TRINITY_GAX77536 | hypothetChlamydomonas_eusti | 41.20 | 0.00 |
| TRINITY_OIT02836 | kinesin Nicotiana_attenuata | 41.20 | 0.00 |
| TRINITY_XP_01844 | PREDICTIRaphanus_sativus    | 41.20 | 0.00 |
| TRINITY_XP_02453 | UDP-galaSelaginella_moellen | 41.20 | 0.00 |
| TRINITY_GAQ86524 | hypothetKlebsormidium_niten | 41.20 | 0.00 |
| TRINITY_XP_01162 | uncharaAmborella_trichopod  | 41.20 | 0.00 |
| TRINITY_OAE26586 | hypothetMarchantia_polymorp | 41.20 | 0.00 |
| TRINITY_XP_02498 | protein Cynara_cardunculus  | 41.20 | 0.00 |
| TRINITY_XP_00295 | hypothetVolvox_carteri      | 41.20 | 0.00 |
| TRINITY_PRW45049 | jmjC donChlorella_sorokinia | 41.20 | 0.00 |
| TRINITY_GAX84182 | hypothetChlamydomonas_eusti | 41.20 | 0.00 |

|                  |                              |       |      |
|------------------|------------------------------|-------|------|
| TRINITY_GAX85407 | hypothetChlamydomonas_eusti  | 41.20 | 0.00 |
| TRINITY_NP_00114 | ubiquitiZea_mays             | 41.20 | 0.00 |
| TRINITY_XP_02439 | luc7-liPhyscomitrella_pate   | 41.20 | 0.00 |
| TRINITY_GBF94151 | cytochrRaphidocelis_subcap   | 41.20 | 0.00 |
| TRINITY_PON40647 | Protein Parasponia_anderson  | 41.20 | 0.00 |
| TRINITY_BAK00435 | predicteHordeum_vulgare      | 41.20 | 0.00 |
| TRINITY_XP_02172 | ras-relChenopodium_quinoa    | 41.20 | 0.00 |
| TRINITY_EFJ07774 | hypothetSelaginella_moellen  | 41.20 | 0.00 |
| TRINITY_XP_00169 | amino acChlamydomonas_reinh  | 41.20 | 0.00 |
| TRINITY_XP_02454 | NFX1-tySelaginella_moellen   | 41.20 | 0.00 |
| TRINITY_KYP78624 | hypothetCajanus_cajan        | 41.20 | 0.00 |
| TRINITY_GAX81886 | hypothetChlamydomonas_eusti  | 41.20 | 0.00 |
| TRINITY_GAX84005 | hypothetChlamydomonas_eusti  | 41.20 | 0.00 |
| TRINITY_PRW45663 | MKI67 FChlorella_sorokinia   | 41.20 | 0.00 |
| TRINITY_XP_02643 | cyclin-IPapaver_somniferum   | 41.20 | 0.00 |
| TRINITY_GBF87594 | hypothetRaphidocelis_subcap  | 41.20 | 0.00 |
| TRINITY_XP_01848 | PREDICTIRaphanus_sativus     | 41.20 | 0.00 |
| TRINITY_XP_02388 | alpha-acQuercus_suber        | 41.20 | 0.00 |
| TRINITY_GAX80990 | hypothetChlamydomonas_eusti  | 41.20 | 0.00 |
| TRINITY_GAX84989 | hypothetChlamydomonas_eusti  | 41.20 | 0.00 |
| TRINITY_XP_00294 | hypothetVolvox_carteri       | 41.20 | 0.00 |
| TRINITY_XP_01139 | AlkylateAuxenochlorella_pro  | 41.20 | 0.00 |
| TRINITY_GAX75346 | hypothetChlamydomonas_eusti  | 41.20 | 0.00 |
| TRINITY_XP_02792 | serine/Vigna_unguiculata     | 41.20 | 0.00 |
| TRINITY_GAQ84838 | Alpha-kiKlebsormidium_niten  | 41.20 | 0.00 |
| TRINITY_KZV39289 | actin-7-Dorcoceras_hygromet  | 41.20 | 0.00 |
| TRINITY_XP_01389 | retinol Monoraphidium_negle  | 41.10 | 0.00 |
| TRINITY_OWM86410 | hypothetPunica_granatum      | 41.10 | 0.00 |
| TRINITY_XP_00250 | predicteMicromonas_commoda   | 41.10 | 0.00 |
| TRINITY_PKA58023 | DNA misnApostasia_shenzheni  | 41.10 | 0.00 |
| TRINITY_XP_00169 | predicteChlamydomonas_reinh  | 41.10 | 0.00 |
| TRINITY_GAQ85804 | Zinc firKlebsormidium_niten  | 41.10 | 0.00 |
| TRINITY_XP_01108 | carbon cSesamum_indicum      | 41.10 | 0.00 |
| TRINITY_XP_00250 | (glycosyl)Micromonas_commoda | 41.10 | 0.00 |
| TRINITY_BAJ99841 | predicteHordeum_vulgare      | 41.10 | 0.00 |
| TRINITY_XP_00564 | ATP-depeCoccomyxa_subellips  | 41.10 | 0.00 |
| TRINITY_XP_02172 | uncharaChenopodium_quinoa    | 41.10 | 0.00 |
| TRINITY_GAX76752 | hypothetChlamydomonas_eusti  | 41.10 | 0.00 |
| TRINITY_NP_56633 | ubiquitiArabidopsis_thalian  | 41.10 | 0.00 |
| TRINITY_XP_02439 | ER membPhyscomitrella_pate   | 41.10 | 0.00 |
| TRINITY_XP_02070 | (tyrosineDendrobium_catenatu | 41.10 | 0.00 |
| TRINITY_RWW90255 | hypothetEnsete_ventricosum   | 41.10 | 0.00 |
| TRINITY_GAQ81666 | ABC trarKlebsormidium_niten  | 41.10 | 0.00 |
| TRINITY_XP_01659 | PREDICTICapsicum_annuum      | 41.10 | 0.00 |
| TRINITY_OAE27701 | hypothetMarchantia_polymorp  | 41.10 | 0.00 |
| TRINITY_GAX80942 | hypothetChlamydomonas_eusti  | 41.10 | 0.00 |
| TRINITY_XP_00564 | DNA glyCoccomyxa_subellips   | 41.10 | 0.00 |
| TRINITY_XP_01883 | PREDICTIJuglans_regia        | 41.10 | 0.00 |
| TRINITY_XP_00867 | probableZea_mays             | 41.10 | 0.00 |
| TRINITY_XP_02175 | tRNA wykChenopodium_quinoa   | 41.10 | 0.00 |
| TRINITY_PNW81890 | hypothetChlamydomonas_reinh  | 41.10 | 0.00 |
| TRINITY_GAX74639 | hypothetChlamydomonas_eusti  | 41.10 | 0.00 |
| TRINITY_GAX73586 | hypothetChlamydomonas_eusti  | 41.10 | 0.00 |
| TRINITY_KXZ53990 | hypothetGonium_pectorale     | 41.10 | 0.00 |
| TRINITY_XP_01069 | PREDICTIBeta_vulgaris        | 41.10 | 0.00 |
| TRINITY_XP_02419 | uncharaRosa_chinensis        | 41.10 | 0.00 |
| TRINITY_PNG99231 | 60S ribcTetrabaena_socialis  | 41.10 | 0.00 |
| TRINITY_PNW88434 | hypothetChlamydomonas_reinh  | 41.10 | 0.00 |
| TRINITY_KXZ53291 | hypothetGonium_pectorale     | 41.10 | 0.00 |
| TRINITY_XP_01389 | hypothetMonoraphidium_negle  | 41.10 | 0.00 |
| TRINITY_RID60362 | hypothetBrassica_rapa        | 41.10 | 0.00 |
| TRINITY_XP_00290 | (peptidy)Selaginella_moellen | 41.10 | 0.00 |
| TRINITY_GAX79538 | hypothetChlamydomonas_eusti  | 41.10 | 0.00 |
| TRINITY_PRW59620 | (tyrosyl-Chlorella_sorokinia | 41.10 | 0.00 |
| TRINITY_PNW70335 | hypothetChlamydomonas_reinh  | 41.10 | 0.00 |
| TRINITY_GAX86359 | hypothetChlamydomonas_eusti  | 41.10 | 0.00 |

|                  |                              |       |      |
|------------------|------------------------------|-------|------|
| TRINITY_GAX80591 | hypothetChlamydomonas_eusti  | 41.10 | 0.00 |
| TRINITY_XP_0200  | temperatAnanas_comosus       | 41.10 | 0.00 |
| TRINITY_XP_0138  | UncharaMonoraphidium_negle   | 41.10 | 0.00 |
| TRINITY_XP_0029  | hypothetVolvox_carteri       | 41.10 | 0.00 |
| TRINITY_XP_0066  | PREDICTIOryza_brachyantha    | 41.10 | 0.00 |
| TRINITY_GAX8211  | hypothetChlamydomonas_eusti  | 41.10 | 0.00 |
| TRINITY_GAQ7836  | transcriKlebsormidium_niten  | 41.10 | 0.00 |
| TRINITY_XP_0243  | somethirPhyscomitrella_pate  | 41.10 | 0.00 |
| TRINITY_XP_0016  | predicteChlamydomonas_reinh  | 41.10 | 0.00 |
| TRINITY_XP_0029  | Mg2+ tr:Volvox_carteri       | 41.10 | 0.00 |
| TRINITY_AXR8531  | EF1.278 Sanionia_uncinata    | 41.10 | 0.00 |
| TRINITY_OMO8801  | hypothetCorchorus_capsulari  | 41.10 | 0.00 |
| TRINITY_XP_0029  | hypothetVolvox_carteri       | 41.10 | 0.00 |
| TRINITY_XP_0109  | PREDICTIElaeis_guineensis    | 41.10 | 0.00 |
| TRINITY_PWA6583  | ArmadillArtemisia_annua      | 41.10 | 0.00 |
| TRINITY_XP_0071  | hypothetPhaseolus_vulgaris   | 41.10 | 0.00 |
| TRINITY_GAX8210  | hypothetChlamydomonas_eusti  | 41.10 | 0.00 |
| TRINITY_GAQ8995  | hypothetKlebsormidium_niten  | 41.10 | 0.00 |
| TRINITY_RQL7862  | hypothetBrassica_cretica     | 41.10 | 0.00 |
| TRINITY_BAK0043  | predicteHordeum_vulgare      | 41.10 | 0.00 |
| TRINITY_BAK0219  | predicteHordeum_vulgare      | 41.10 | 0.00 |
| TRINITY_KXZ4568  | hypothetGonium_pectorale     | 41.10 | 0.00 |
| TRINITY_GAX7446  | hypothetChlamydomonas_eusti  | 41.10 | 0.00 |
| TRINITY_GAX8574  | hypothetChlamydomonas_eusti  | 41.10 | 0.00 |
| TRINITY_GAX7637  | hypothetChlamydomonas_eusti  | 41.10 | 0.00 |
| TRINITY_GAX7766  | hypothetChlamydomonas_eusti  | 41.10 | 0.00 |
| TRINITY_KXZ4300  | hypothetGonium_pectorale     | 41.10 | 0.00 |
| TRINITY_PNW7951  | hypothetChlamydomonas_reinh  | 41.10 | 0.00 |
| TRINITY_XP_0238  | probableQuercus_suber        | 41.10 | 0.00 |
| TRINITY_GAX8498  | hypothetChlamydomonas_eusti  | 41.10 | 0.00 |
| TRINITY_OAE2128  | hypothetMarchantia_polymorp  | 41.10 | 0.00 |
| TRINITY_XP_0093  | PREDICTIPyrus_x_bretschneid  | 41.10 | 0.00 |
| TRINITY_BAK0219  | predicteHordeum_vulgare      | 41.10 | 0.00 |
| TRINITY_XP_0029  | hypothetVolvox_carteri       | 41.10 | 0.00 |
| TRINITY_GAX7408  | hypothetChlamydomonas_eusti  | 41.10 | 0.00 |
| TRINITY_GAX8445  | hypothetChlamydomonas_eusti  | 41.10 | 0.00 |
| TRINITY_XP_0109  | PREDICTIElaeis_guineensis    | 41.10 | 0.00 |
| TRINITY_ABK4147  | catalaseHaematococcus_lacus  | 41.10 | 0.00 |
| TRINITY_KXZ5011  | hypothetGonium_pectorale     | 41.10 | 0.00 |
| TRINITY_GAQ8317  | (UDP-GlycKlebsormidium_niten | 41.10 | 0.00 |
| TRINITY_KXZ5199  | hypothetGonium_pectorale     | 41.10 | 0.00 |
| TRINITY_XP_0161  | G2/mitotArachis_ipaensis     | 41.10 | 0.00 |
| TRINITY_XP_0109  | PREDICTIElaeis_guineensis    | 41.10 | 0.00 |
| TRINITY_GAX8434  | hypothetChlamydomonas_eusti  | 41.10 | 0.00 |
| TRINITY_PNH0528  | ATP-depeTetrabaena_socialis  | 41.10 | 0.00 |
| TRINITY_XP_0104  | PREDICTICamelina_sativa      | 41.10 | 0.00 |
| TRINITY_XP_0109  | PREDICTIElaeis_guineensis    | 41.00 | 0.00 |
| TRINITY_XP_0042  | PREDICTIFragaria-vesca       | 41.00 | 0.00 |
| TRINITY_XP_0229  | calcium-Cucurbita_moschata   | 41.00 | 0.00 |
| TRINITY_KNA0344  | hypothetSpinacia_oleracea    | 41.00 | 0.00 |
| TRINITY_XP_0030  | AdenylylOstreococcus_tauri   | 41.00 | 0.00 |
| TRINITY_EFJ1230  | hypothetSelaginella_moellen  | 41.00 | 0.00 |
| TRINITY_XP_0025  | predicteMicromonas_commoda   | 41.00 | 0.00 |
| TRINITY_PIA5563  | hypothetAquilegia_coerulea   | 41.00 | 0.00 |
| TRINITY_GAX7531  | hypothetChlamydomonas_eusti  | 41.00 | 0.00 |
| TRINITY_XP_0024  | protein Sorghum_bicolor      | 41.00 | 0.00 |
| TRINITY_GAQ7965  | Signal tKlebsormidium_niten  | 41.00 | 0.00 |
| TRINITY_XP_0228  | TatD fanOstreococcus_tauri   | 41.00 | 0.00 |
| TRINITY_XP_0105  | PREDICTITarenaya_hasslerian  | 41.00 | 0.00 |
| TRINITY_RWW0460  | hypothetEnsete_ventricosum   | 41.00 | 0.00 |
| TRINITY_XP_0243  | xanthinePhyscomitrella_pate  | 41.00 | 0.00 |
| TRINITY_GAQ7861  | Amidase Klebsormidium_niten  | 41.00 | 0.00 |
| TRINITY_XP_0104  | PREDICTICamelina_sativa      | 41.00 | 0.00 |
| TRINITY_KXZ4817  | hypothetGonium_pectorale     | 41.00 | 0.00 |
| TRINITY_XP_0229  | low-temCucurbita_moschata    | 41.00 | 0.00 |
| TRINITY_XP_0271  | triacylCicer_arietinum       | 41.00 | 0.00 |

|                  |          |                     |       |      |
|------------------|----------|---------------------|-------|------|
| TRINITY_XP_01389 | zinc-met | Monoraphidium_negle | 41.00 | 0.00 |
| TRINITY_KDP21262 | hypothet | Jatropha_curcas     | 41.00 | 0.00 |
| TRINITY_XP_00169 | predicte | Chlamydomonas_reinh | 41.00 | 0.00 |
| TRINITY_GAX80565 | hypothet | Chlamydomonas_eusti | 41.00 | 0.00 |
| TRINITY_GAX80348 | hypothet | Chlamydomonas_eusti | 41.00 | 0.00 |
| TRINITY_PSC69251 | methylyt | Micractinium_conduc | 41.00 | 0.00 |
| TRINITY_EFJ30367 | hypothet | Selaginella_moellen | 41.00 | 0.00 |
| TRINITY_RLM92426 | phosphol | Panicum_miliaceum   | 41.00 | 0.00 |
| TRINITY_XP_00713 | hypothet | Phaseolus_vulgaris  | 41.00 | 0.00 |
| TRINITY_GAX75940 | hypothet | Chlamydomonas_eusti | 41.00 | 0.00 |
| TRINITY_EFJ13093 | hypothet | Selaginella_moellen | 41.00 | 0.00 |
| TRINITY_KZV17083 | putative | Dorcoceras_hygromet | 41.00 | 0.00 |
| TRINITY_GAV91327 | Pkinase  | Cephalotus_follicul | 41.00 | 0.00 |
| TRINITY_GAX80359 | hypothet | Chlamydomonas_eusti | 41.00 | 0.00 |
| TRINITY_XP_02419 | dual sp  | Rosa_chinensis      | 41.00 | 0.00 |
| TRINITY_XP_02665 | uncharac | Phoenix_dactylifera | 41.00 | 0.00 |
| TRINITY_PNW78446 | hypothet | Chlamydomonas_reinh | 41.00 | 0.00 |
| TRINITY_GAX86243 | hypothet | Chlamydomonas_eusti | 41.00 | 0.00 |
| TRINITY_P0C8M8.1 | RecName: | Zea_mays            | 41.00 | 0.00 |
| TRINITY_XP_01024 | uncharac | Brachypodium_distac | 41.00 | 0.00 |
| TRINITY_KXZ41591 | hypothet | Gonium_pectorale    | 41.00 | 0.00 |
| TRINITY_GAQ93207 | protein  | Klebsormidium_niten | 41.00 | 0.00 |
| TRINITY_XP_02010 | acyl-Co  | Ananas_comosus      | 41.00 | 0.00 |
| TRINITY_KZM86035 | hypothet | Daucus_carota       | 41.00 | 0.00 |
| TRINITY_XP_00295 | stricto  | Volvox_carteri      | 41.00 | 0.00 |
| TRINITY_GAX72982 | hypothet | Chlamydomonas_eusti | 41.00 | 0.00 |
| TRINITY_PSS11853 | ELMO don | Actinidia_chinensis | 41.00 | 0.00 |
| TRINITY_XP_01066 | PREDICTI | Vitis_vinifera      | 41.00 | 0.00 |
| TRINITY_PNW69910 | hypothet | Chlamydomonas_reinh | 41.00 | 0.00 |
| TRINITY_XP_00751 | unnamed  | Bathycoccus_prasinc | 41.00 | 0.00 |
| TRINITY_GBF94558 | hypothet | Raphidocelis_subcap | 41.00 | 0.00 |
| TRINITY_KXZ43998 | hypothet | Gonium_pectorale    | 41.00 | 0.00 |
| TRINITY_GBG00627 | hypothet | Raphidocelis_subcap | 41.00 | 0.00 |
| TRINITY_XP_00294 | hypothet | Volvox_carteri      | 41.00 | 0.00 |
| TRINITY_KMZ71014 | Calcium- | Zostera_marina      | 41.00 | 0.00 |
| TRINITY_XP_02176 | zinc fir | Chenopodium_quinoa  | 41.00 | 0.00 |
| TRINITY_GAX83985 | hypothet | Chlamydomonas_eusti | 41.00 | 0.00 |
| TRINITY_XP_00564 | cytochr  | Coccomyxa_subellips | 41.00 | 0.00 |
| TRINITY_PNW80448 | hypothet | Chlamydomonas_reinh | 41.00 | 0.00 |
| TRINITY_PRW60421 | RAP dom  | Chlorella_sorokinia | 41.00 | 0.00 |
| TRINITY_XP_00294 | hypothet | Volvox_carteri      | 41.00 | 0.00 |
| TRINITY_XP_00294 | omega-6- | Volvox_carteri      | 41.00 | 0.00 |
| TRINITY_XP_00564 | JmjC-don | Coccomyxa_subellips | 41.00 | 0.00 |
| TRINITY_GAX77889 | hypothet | Chlamydomonas_eusti | 41.00 | 0.00 |
| TRINITY_GAX77008 | hypothet | Chlamydomonas_eusti | 41.00 | 0.00 |
| TRINITY_PNW88477 | hypothet | Chlamydomonas_reinh | 41.00 | 0.00 |
| TRINITY_GBF94196 | calcium  | Raphidocelis_subcap | 41.00 | 0.00 |
| TRINITY_PRW55974 | Ca-trans | Chlorella_sorokinia | 41.00 | 0.00 |
| TRINITY_GAX76574 | hypothet | Chlamydomonas_eusti | 41.00 | 0.00 |
| TRINITY_KXZ49031 | hypothet | Gonium_pectorale    | 41.00 | 0.00 |
| TRINITY_XP_00294 | hypothet | Volvox_carteri      | 41.00 | 0.00 |
| TRINITY_XP_00299 | ubiquiti | Selaginella_moellen | 41.00 | 0.00 |
| TRINITY_GAX75601 | hypothet | Chlamydomonas_eusti | 41.00 | 0.00 |
| TRINITY_GAX77772 | hypothet | Chlamydomonas_eusti | 41.00 | 0.00 |
| TRINITY_GBF99801 | hypothet | Raphidocelis_subcap | 41.00 | 0.00 |
| TRINITY_GAX75027 | hypothet | Chlamydomonas_eusti | 41.00 | 0.00 |
| TRINITY_GAX84689 | hypothet | Chlamydomonas_eusti | 41.00 | 0.00 |
| TRINITY_XP_01109 | chaperor | Sesamum_indicum     | 41.00 | 0.00 |
| TRINITY_XP_01067 | PREDICTI | Beta_vulgaris       | 40.90 | 0.00 |
| TRINITY_XP_02128 | peroxir  | Herrania_umbratica  | 40.90 | 0.00 |
| TRINITY_PTQ38538 | hypothet | Marchantia_polymorp | 40.90 | 0.00 |
| TRINITY_XP_02708 | UMP-CMP  | Coffea_arabica      | 40.90 | 0.00 |
| TRINITY_XP_02172 | chaperor | Chenopodium_quinoa  | 40.90 | 0.00 |
| TRINITY_GAX82389 | hypothet | Chlamydomonas_eusti | 40.90 | 0.00 |
| TRINITY_XP_00844 | PREDICTI | Cucumis_melo        | 40.90 | 0.00 |
| TRINITY_XP_02387 | uncharac | Quercus_suber       | 40.90 | 0.00 |

|                                             |       |      |
|---------------------------------------------|-------|------|
| TRINITY_XP_0219011-beta-Carica_papaya       | 40.90 | 0.00 |
| TRINITY_XP_02445serine/tPopulus_trichocarpa | 40.90 | 0.00 |
| TRINITY_GAQ82787phosphoKlebsormidium_niten  | 40.90 | 0.00 |
| TRINITY_XP_01103PREDICTFPopulus_euphratica  | 40.90 | 0.00 |
| TRINITY_PRW33532E3 ubiqChlorella_sorokinia  | 40.90 | 0.00 |
| TRINITY_XP_01054PREDICTFTarenaya_hasslerian | 40.90 | 0.00 |
| TRINITY_KRG98334hypothetGlycine_max         | 40.90 | 0.00 |
| TRINITY_XP_02022calcium-Cajanus_cajan       | 40.90 | 0.00 |
| TRINITY_EFJ37347hypothetSelaginella_moellen | 40.90 | 0.00 |
| TRINITY_XP_02645ras-relaPapaver_somniferum  | 40.90 | 0.00 |
| TRINITY_XP_02416probableRosa_chinensis      | 40.90 | 0.00 |
| TRINITY_XP_01068PREDICTFBeta_vulgaris       | 40.90 | 0.00 |
| TRINITY_XP_02274nucleoliDurio_zibethinus    | 40.90 | 0.00 |
| TRINITY_GAX85123hypothetChlamydomonas_eusti | 40.90 | 0.00 |
| TRINITY_XP_02438sterol Physcomitrella_pate  | 40.90 | 0.00 |
| TRINITY_XP_02389cystathiQuercus_suber       | 40.90 | 0.00 |
| TRINITY_XP_02439carboxyPhyscomitrella_pate  | 40.90 | 0.00 |
| TRINITY_RWR76596serine/tCinnamomum_micranth | 40.90 | 0.00 |
| TRINITY_PRW32652TranscriChlorella_sorokinia | 40.90 | 0.00 |
| TRINITY_AEU0470(fatty acLobosphaera_incisa  | 40.90 | 0.00 |
| TRINITY_XP_00294hypothetVolvox_carteri      | 40.90 | 0.00 |
| TRINITY_GAX82595hypothetChlamydomonas_eusti | 40.90 | 0.00 |
| TRINITY_AIY62758carotenLycium_chinense      | 40.90 | 0.00 |
| TRINITY_GBF90261hypothetRaphidocelis_subcap | 40.90 | 0.00 |
| TRINITY_PSC72762ATP binMicractinium_conduc  | 40.90 | 0.00 |
| TRINITY_GAX81512hypothetChlamydomonas_eusti | 40.90 | 0.00 |
| TRINITY_XP_0042418.2 kDaSolanum_lycopersicu | 40.90 | 0.00 |
| TRINITY_OAE24415hypothetMarchantia_polymorp | 40.90 | 0.00 |
| TRINITY_GAQ90626hypothetKlebsormidium_niten | 40.90 | 0.00 |
| TRINITY_PKA62294ABC trarApostasia_shenzheni | 40.90 | 0.00 |
| TRINITY_RDX86666Serine/tMucuna_pruriens     | 40.90 | 0.00 |
| TRINITY_GAQ89183hypothetKlebsormidium_niten | 40.90 | 0.00 |
| TRINITY_XP_01507serine cSolanum_pennellii   | 40.90 | 0.00 |
| TRINITY_KDD73076hypothetHelicosporidium_sp. | 40.90 | 0.00 |
| TRINITY_XP_02183annexin Spinacia_oleracea   | 40.90 | 0.00 |
| TRINITY_GAX80692hypothetChlamydomonas_eusti | 40.90 | 0.00 |
| TRINITY_XP_01023zinc trBrachypodium_distac  | 40.90 | 0.00 |
| TRINITY_PNH01468hypothetTetrabaena_socialis | 40.90 | 0.00 |
| TRINITY_PNW78107hypothetChlamydomonas_reinh | 40.90 | 0.00 |
| TRINITY_KZM94798hypothetDaucus_carota       | 40.90 | 0.00 |
| TRINITY_XP_02437GTPase IPhyscomitrella_pate | 40.90 | 0.00 |
| TRINITY_XP_00835PREDICTFMalus_domestica     | 40.90 | 0.00 |
| TRINITY_PNW74976hypothetChlamydomonas_reinh | 40.90 | 0.00 |
| TRINITY_XP_01389hypothetMonoraphidium_negle | 40.90 | 0.00 |
| TRINITY_GAX83668hypothetChlamydomonas_eusti | 40.90 | 0.00 |
| TRINITY_PNH11148ChaperorTetrabaena_socialis | 40.90 | 0.00 |
| TRINITY_XP_02289ras-relaOlea_europaea       | 40.90 | 0.00 |
| TRINITY_XP_020424-alpha-Prunus_persica      | 40.90 | 0.00 |
| TRINITY_PIA55031hypothetAquilegia_coerulea  | 40.90 | 0.00 |
| TRINITY_XP_01389hypothetMonoraphidium_negle | 40.90 | 0.00 |
| TRINITY_GAX7906(hypothetChlamydomonas_eusti | 40.90 | 0.00 |
| TRINITY_KXZ54462hypothetGonium_pectorale    | 40.90 | 0.00 |
| TRINITY_GAX80707hypothetChlamydomonas_eusti | 40.90 | 0.00 |
| TRINITY_GAX85894hypothetChlamydomonas_eusti | 40.90 | 0.00 |
| TRINITY_KXZ42046hypothetGonium_pectorale    | 40.90 | 0.00 |
| TRINITY_KXZ54062hypothetGonium_pectorale    | 40.90 | 0.00 |
| TRINITY_XP_0139(hypothetMonoraphidium_negle | 40.90 | 0.00 |
| TRINITY_ABK25011unknown Picea_sitchensis    | 40.90 | 0.00 |
| TRINITY_XP_00169protein Chlamydomonas_reinh | 40.90 | 0.00 |
| TRINITY_XP_02492ADP-ribcZiziphus_jujuba     | 40.90 | 0.00 |
| TRINITY_GAX8539(hypothetChlamydomonas_eusti | 40.90 | 0.00 |
| TRINITY_XP_00294hypothetVolvox_carteri      | 40.90 | 0.00 |
| TRINITY_XP_02777omega-anSolanum_pennellii   | 40.90 | 0.00 |
| TRINITY_GAQ90378phosphatKlebsormidium_niten | 40.80 | 0.00 |
| TRINITY_GBF94175hypothetRaphidocelis_subcap | 40.80 | 0.00 |
| TRINITY_GAV80318SRR1 donCephalotus_follicul | 40.80 | 0.00 |

|                  |          |                     |       |      |
|------------------|----------|---------------------|-------|------|
| TRINITY_XP_01066 | PREDICTI | Beta_vulgaris       | 40.80 | 0.00 |
| TRINITY_KZV23764 | hypothet | Dorcoceras_hygromet | 40.80 | 0.00 |
| TRINITY_XP_02176 | WD repe  | Chenopodium_quinoa  | 40.80 | 0.00 |
| TRINITY_GAX82997 | hypothet | Chlamydomonas_eusti | 40.80 | 0.00 |
| TRINITY_XP_00959 | PREDICTI | Nicotiana_tomentosi | 40.80 | 0.00 |
| TRINITY_XP_01146 | PREDICTI | Fragaria_vesca      | 40.80 | 0.00 |
| TRINITY_XP_00256 | predicte | Micromonas_commoda  | 40.80 | 0.00 |
| TRINITY_KXZ47877 | hypothet | Gonium_pectorale    | 40.80 | 0.00 |
| TRINITY_BAJ85166 | predicte | Hordeum_vulgare     | 40.80 | 0.00 |
| TRINITY_XP_01247 | PREDICTI | Gossypium_raimondii | 40.80 | 0.00 |
| TRINITY_XP_02379 | protein  | Lactuca_sativa      | 40.80 | 0.00 |
| TRINITY_XP_00299 | Ca2+/H+  | Volvox_carteri      | 40.80 | 0.00 |
| TRINITY_GAX73142 | hypothet | Chlamydomonas_eusti | 40.80 | 0.00 |
| TRINITY_XP_00584 | hypothet | Chlorella_variabili | 40.80 | 0.00 |
| TRINITY_XP_00294 | hypothet | Volvox_carteri      | 40.80 | 0.00 |
| TRINITY_XP_00299 | RWP-RK c | Volvox_carteri      | 40.80 | 0.00 |
| TRINITY_XP_02198 | uncharac | Helianthus_annuus   | 40.80 | 0.00 |
| TRINITY_GBG75392 | hypothet | Chara_braunii       | 40.80 | 0.00 |
| TRINITY_XP_02396 | uncharac | Quercus_suber       | 40.80 | 0.00 |
| TRINITY_XP_00256 | predicte | Micromonas_commoda  | 40.80 | 0.00 |
| TRINITY_XP_02719 | uncharac | Cicer_arietinum     | 40.80 | 0.00 |
| TRINITY_NP_00114 | uncharac | Zea_mays            | 40.80 | 0.00 |
| TRINITY_PRW56549 | Endogluc | Chlorella_sorokinia | 40.80 | 0.00 |
| TRINITY_XP_00299 | hypothet | Volvox_carteri      | 40.80 | 0.00 |
| TRINITY_GAQ87236 | Dyneins  | Klebsormidium_niten | 40.80 | 0.00 |
| TRINITY_XP_02438 | transmen | Physcomitrella_pate | 40.80 | 0.00 |
| TRINITY_GAX76389 | hypothet | Chlamydomonas_eusti | 40.80 | 0.00 |
| TRINITY_XP_02462 | probable | Medicago_truncatula | 40.80 | 0.00 |
| TRINITY_GAQ82347 | hypothet | Klebsormidium_niten | 40.80 | 0.00 |
| TRINITY_XP_01389 | hypothet | Monoraphidium_negle | 40.80 | 0.00 |
| TRINITY_XP_00584 | hypothet | Chlorella_variabili | 40.80 | 0.00 |
| TRINITY_XP_02389 | serine c | Quercus_suber       | 40.80 | 0.00 |
| TRINITY_XP_00307 | Glycosic | Ostreococcus_tauri  | 40.80 | 0.00 |
| TRINITY_GBG70706 | hypothet | Chara_braunii       | 40.80 | 0.00 |
| TRINITY_XP_01059 | PREDICTI | Tarenaya_hasslerian | 40.80 | 0.00 |
| TRINITY_GAX73347 | hypothet | Chlamydomonas_eusti | 40.80 | 0.00 |
| TRINITY_ABK27019 | unknown  | Picea_sitchensis    | 40.80 | 0.00 |
| TRINITY_EMS55876 | RNA-bin  | Triticum_urartu     | 40.80 | 0.00 |
| TRINITY_GBF94846 | hypothet | Raphidocelis_subcap | 40.80 | 0.00 |
| TRINITY_GBF99149 | potassi  | Raphidocelis_subcap | 40.80 | 0.00 |
| TRINITY_OAE26857 | hypothet | Marchantia_polymorp | 40.80 | 0.00 |
| TRINITY_XP_02438 | protein- | Physcomitrella_pate | 40.80 | 0.00 |
| TRINITY_GAX82857 | hypothet | Chlamydomonas_eusti | 40.80 | 0.00 |
| TRINITY_GAX72822 | hypothet | Chlamydomonas_eusti | 40.80 | 0.00 |
| TRINITY_XP_02388 | alpha-ac | Quercus_suber       | 40.80 | 0.00 |
| TRINITY_KXZ47521 | hypothet | Gonium_pectorale    | 40.80 | 0.00 |
| TRINITY_XP_01004 | PREDICTI | Eucalyptus_grandis  | 40.80 | 0.00 |
| TRINITY_KXZ54157 | hypothet | Gonium_pectorale    | 40.80 | 0.00 |
| TRINITY_GAX82301 | hypothet | Chlamydomonas_eusti | 40.80 | 0.00 |
| TRINITY_OAE31731 | hypothet | Marchantia_polymorp | 40.80 | 0.00 |
| TRINITY_KXZ54508 | hypothet | Gonium_pectorale    | 40.80 | 0.00 |
| TRINITY_KXZ53031 | hypothet | Gonium_pectorale    | 40.80 | 0.00 |
| TRINITY_PIN05748 | Xanthin  | Handroanthus_impeti | 40.80 | 0.00 |
| TRINITY_XP_00689 | coatome  | Amborella_trichopod | 40.80 | 0.00 |
| TRINITY_GAX85766 | hypothet | Chlamydomonas_eusti | 40.80 | 0.00 |
| TRINITY_XP_01761 | PREDICTI | Gossypium_arboreum  | 40.80 | 0.00 |
| TRINITY_PNW73952 | hypothet | Chlamydomonas_reinh | 40.80 | 0.00 |
| TRINITY_XP_01106 | PREDICTI | Populus_euphratica  | 40.80 | 0.00 |
| TRINITY_GAX73897 | hypothet | Chlamydomonas_eusti | 40.80 | 0.00 |
| TRINITY_GAX80758 | hypothet | Chlamydomonas_eusti | 40.80 | 0.00 |
| TRINITY_PNW83139 | hypothet | Chlamydomonas_reinh | 40.80 | 0.00 |
| TRINITY_PNH12079 | hypothet | Tetrabaena_socialis | 40.80 | 0.00 |
| TRINITY_RZB60131 | Fimbrin- | Glycine_soja        | 40.80 | 0.00 |
| TRINITY_XP_00299 | hypothet | Volvox_carteri      | 40.80 | 0.00 |
| TRINITY_XP_00169 | predicte | Chlamydomonas_reinh | 40.80 | 0.00 |
| TRINITY_PNH08309 | NFX1-ty  | Tetrabaena_socialis | 40.80 | 0.00 |

|                  |                             |       |      |
|------------------|-----------------------------|-------|------|
| TRINITY_PLY6668  | hypothetLactuca_sativa      | 40.80 | 0.00 |
| TRINITY_GBF94162 | hypothetRaphidocelis_subcap | 40.80 | 0.00 |
| TRINITY_EFJ05604 | hypothetSelaginella_moellen | 40.70 | 0.00 |
| TRINITY_PRW57533 | Ras-relaChlorella_sorokinia | 40.70 | 0.00 |
| TRINITY_RXH85701 | hypothetMalus_domestica     | 40.70 | 0.00 |
| TRINITY_XP_01867 | PREDICTIMusa_acuminata      | 40.70 | 0.00 |
| TRINITY_XP_01924 | PREDICTINicotiana_attenuata | 40.70 | 0.00 |
| TRINITY_XP_01139 | Pre-mRN/Auxenochlorella_pro | 40.70 | 0.00 |
| TRINITY_AIU49879 | FMN-linLilium_brownii       | 40.70 | 0.00 |
| TRINITY_PNR47922 | hypothetPhyscomitrella_pate | 40.70 | 0.00 |
| TRINITY_XP_00585 | hypothetChlorella_variabili | 40.70 | 0.00 |
| TRINITY_XP_00497 | helicasSetaria_italica      | 40.70 | 0.00 |
| TRINITY_RMZ54296 | hypothetAuxenochlorella_pro | 40.70 | 0.00 |
| TRINITY_XP_01005 | PREDICTIEucalyptus_grandis  | 40.70 | 0.00 |
| TRINITY_ALJ53302 | polyubiqLuffa_aegyptiaca    | 40.70 | 0.00 |
| TRINITY_XP_00169 | transmenChlamydomonas_reinh | 40.70 | 0.00 |
| TRINITY_XP_01563 | crossoveOryza_sativa        | 40.70 | 0.00 |
| TRINITY_Q9FV11.1 | RecName:Petunia_x_hybrida   | 40.70 | 0.00 |
| TRINITY_XP_00637 | mannose-Populus_trichocarpa | 40.70 | 0.00 |
| TRINITY_VDD40743 | unnamed Brassica_oleracea   | 40.70 | 0.00 |
| TRINITY_XP_02019 | serine/tAegilops_tauschii   | 40.70 | 0.00 |
| TRINITY_XP_02172 | E3 ubiqChenopodium_quinoa   | 40.70 | 0.00 |
| TRINITY_OEL31145 | hypothetDichantheium_oligo  | 40.70 | 0.00 |
| TRINITY_PNR30276 | hypothetPhyscomitrella_pate | 40.70 | 0.00 |
| TRINITY_EFJ27872 | hypothetSelaginella_moellen | 40.70 | 0.00 |
| TRINITY_KXZ50431 | hypothetGonium_pectorale    | 40.70 | 0.00 |
| TRINITY_XP_00564 | hypothetCoccomyxa_subellips | 40.70 | 0.00 |
| TRINITY_GAQ78179 | malate tKlebsormidium_niten | 40.70 | 0.00 |
| TRINITY_AHV83603 | ROP5 [LcLotus_japonicus     | 40.70 | 0.00 |
| TRINITY_XP_01389 | TBC1 donMonoraphidium_negle | 40.70 | 0.00 |
| TRINITY_EPS63151 | hypothetGenlisea_aurea      | 40.70 | 0.00 |
| TRINITY_PNX75576 | flavonoITrifolium_pratense  | 40.70 | 0.00 |
| TRINITY_PSC75517 | nuclear Micractinium_conduc | 40.70 | 0.00 |
| TRINITY_XP_01848 | PREDICTIRaphanus_sativus    | 40.70 | 0.00 |
| TRINITY_EPS74225 | hypothetGenlisea_aurea      | 40.70 | 0.00 |
| TRINITY_GAX82126 | hypothetChlamydomonas_eusti | 40.70 | 0.00 |
| TRINITY_GBG61488 | hypothetChara_braunii       | 40.70 | 0.00 |
| TRINITY_GAX84246 | hypothetChlamydomonas_eusti | 40.70 | 0.00 |
| TRINITY_KXZ42644 | hypothetGonium_pectorale    | 40.70 | 0.00 |
| TRINITY_PSC72034 | plancitcMicractinium_conduc | 40.70 | 0.00 |
| TRINITY_PNW80448 | hypothetChlamydomonas_reinh | 40.70 | 0.00 |
| TRINITY_XP_02390 | ras-likeQuercus_suber       | 40.70 | 0.00 |
| TRINITY_XP_00628 | uncharacCapsella_rubella    | 40.70 | 0.00 |
| TRINITY_XP_00645 | beta-adcCitrus_clementina   | 40.70 | 0.00 |
| TRINITY_RLN43519 | uncharacPanicum_miliaceum   | 40.70 | 0.00 |
| TRINITY_XP_02202 | L-2-hydHelianthus_annuus    | 40.70 | 0.00 |
| TRINITY_GAX84732 | hypothetChlamydomonas_eusti | 40.70 | 0.00 |
| TRINITY_XP_02392 | ras-relaQuercus_suber       | 40.70 | 0.00 |
| TRINITY_GAQ79023 | Ataxin-3Klebsormidium_niten | 40.70 | 0.00 |
| TRINITY_GAQ86043 | Cyclic rKlebsormidium_niten | 40.70 | 0.00 |
| TRINITY_XP_00305 | predicteMicromonas_pusilla  | 40.70 | 0.00 |
| TRINITY_XP_01915 | PREDICTIIPomoea_nil         | 40.70 | 0.00 |
| TRINITY_GAX81758 | hypothetChlamydomonas_eusti | 40.70 | 0.00 |
| TRINITY_XP_02390 | dynein lQuercus_suber       | 40.70 | 0.00 |
| TRINITY_RLM60490 | cyclin-cPanicum_miliaceum   | 40.70 | 0.00 |
| TRINITY_XP_00584 | hypothetChlorella_variabili | 40.70 | 0.00 |
| TRINITY_XP_00307 | G-proteiOstreococcus_tauri  | 40.70 | 0.00 |
| TRINITY_XP_02387 | calcineiQuercus_suber       | 40.70 | 0.00 |
| TRINITY_GAQ84772 | Sensory Klebsormidium_niten | 40.70 | 0.00 |
| TRINITY_XP_02454 | dual spcSelaginella_moellen | 40.70 | 0.00 |
| TRINITY_KXZ49492 | hypothetGonium_pectorale    | 40.70 | 0.00 |
| TRINITY_BAK01911 | predicteHordeum_vulgare     | 40.70 | 0.00 |
| TRINITY_PNW71987 | hypothetChlamydomonas_reinh | 40.70 | 0.00 |
| TRINITY_PRW20689 | UbiquitiChlorella_sorokinia | 40.70 | 0.00 |
| TRINITY_XP_01594 | uncharacArachis_duranensis  | 40.70 | 0.00 |
| TRINITY_PRW60266 | Serine tChlorella_sorokinia | 40.70 | 0.00 |

|                  |          |                     |       |      |
|------------------|----------|---------------------|-------|------|
| TRINITY_XP_01390 | Photosyn | Monoraphidium_negle | 40.70 | 0.00 |
| TRINITY_PNW87190 | hypothet | Chlamydomonas_reinh | 40.70 | 0.00 |
| TRINITY_KXZ55500 | hypothet | Gonium_pectorale    | 40.70 | 0.00 |
| TRINITY_KXZ43370 | hypothet | Gonium_pectorale    | 40.70 | 0.00 |
| TRINITY_GAX77010 | hypothet | Chlamydomonas_eusti | 40.70 | 0.00 |
| TRINITY_RMZ52510 | hypothet | Auxenochlorella_pro | 40.70 | 0.00 |
| TRINITY_GAX83990 | hypothet | Chlamydomonas_eusti | 40.70 | 0.00 |
| TRINITY_GAX86450 | hypothet | Chlamydomonas_eusti | 40.70 | 0.00 |
| TRINITY_PSC70280 | Found ir | Micractinium_conduc | 40.70 | 0.00 |
| TRINITY_GAX72840 | hypothet | Chlamydomonas_eusti | 40.70 | 0.00 |
| TRINITY_GAX73560 | hypothet | Chlamydomonas_eusti | 40.70 | 0.00 |
| TRINITY_PNH02810 | Vam6/Vp  | Tetrabaena_socialis | 40.70 | 0.00 |
| TRINITY_XP_00840 | PREDICTI | Cucumis_melo        | 40.70 | 0.00 |
| TRINITY_XP_00660 | PREDICTI | Oryza_brachyantha   | 40.70 | 0.00 |
| TRINITY_GBF88890 | fatty ac | Raphidocelis_subcap | 40.70 | 0.00 |
| TRINITY_XP_00160 | FAB-like | Chlamydomonas_reinh | 40.70 | 0.00 |
| TRINITY_OVA14500 | Bromodon | Macleaya_cordata    | 40.70 | 0.00 |
| TRINITY_GAX75960 | hypothet | Chlamydomonas_eusti | 40.70 | 0.00 |
| TRINITY_KXZ44670 | hypothet | Gonium_pectorale    | 40.70 | 0.00 |
| TRINITY_OAE21050 | hypothet | Marchantia_polymorp | 40.70 | 0.00 |
| TRINITY_XP_01100 | PREDICTI | Populus_euphratica  | 40.70 | 0.00 |
| TRINITY_EPS72080 | hypothet | Genlisea_aurea      | 40.70 | 0.00 |
| TRINITY_KXZ48440 | hypothet | Gonium_pectorale    | 40.70 | 0.00 |
| TRINITY_BAK01090 | predicte | Hordeum_vulgare     | 40.70 | 0.00 |
| TRINITY_XP_00160 | gametol  | Chlamydomonas_reinh | 40.70 | 0.00 |
| TRINITY_XP_01040 | PREDICTI | Camelina_sativa     | 40.70 | 0.00 |
| TRINITY_GAX78970 | hypothet | Chlamydomonas_eusti | 40.70 | 0.00 |
| TRINITY_GAX76410 | hypothet | Chlamydomonas_eusti | 40.70 | 0.00 |
| TRINITY_GAX78590 | hypothet | Chlamydomonas_eusti | 40.70 | 0.00 |
| TRINITY_XP_00580 | hypothet | Chlorella_variabili | 40.60 | 0.00 |
| TRINITY_XP_02730 | DNA pol  | Abrus_precatorius   | 40.60 | 0.00 |
| TRINITY_GBF87890 | hypothet | Raphidocelis_subcap | 40.60 | 0.00 |
| TRINITY_XP_00880 | serine/t | Phoenix_dactylifera | 40.60 | 0.00 |
| TRINITY_XP_01090 | PREDICTI | Elaeis_guineensis   | 40.60 | 0.00 |
| TRINITY_XP_02380 | kinesin  | Quercus_suber       | 40.60 | 0.00 |
| TRINITY_GBF94600 | hypothet | Raphidocelis_subcap | 40.60 | 0.00 |
| TRINITY_PRW20770 | hypothet | Chlorella_sorokinia | 40.60 | 0.00 |
| TRINITY_RWW84240 | hypothet | Ensete_ventricosum  | 40.60 | 0.00 |
| TRINITY_RWR97230 | MaoC-li  | Cinnamomum_micranth | 40.60 | 0.00 |
| TRINITY_XP_01670 | PREDICTI | Gossypium_hirsutum  | 40.60 | 0.00 |
| TRINITY_RLM91330 | dual sp  | Panicum_miliaceum   | 40.60 | 0.00 |
| TRINITY_XP_01720 | PREDICTI | Daucus_carota       | 40.60 | 0.00 |
| TRINITY_XP_02390 | carrier  | Quercus_suber       | 40.60 | 0.00 |
| TRINITY_OMO69590 | hypothet | Corchorus_capsulari | 40.60 | 0.00 |
| TRINITY_XP_01620 | probable | Arachis_ipaensis    | 40.60 | 0.00 |
| TRINITY_XP_02130 | gamma-g  | Sorghum_bicolor     | 40.60 | 0.00 |
| TRINITY_OAE19940 | hypothet | Marchantia_polymorp | 40.60 | 0.00 |
| TRINITY_RZC59640 | hypothet | Papaver_somniferum  | 40.60 | 0.00 |
| TRINITY_XP_02640 | ABC trar | Papaver_somniferum  | 40.60 | 0.00 |
| TRINITY_XP_02390 | serine/t | Quercus_suber       | 40.60 | 0.00 |
| TRINITY_XP_02490 | DNA rep  | Cynara_cardunculus  | 40.60 | 0.00 |
| TRINITY_AAB39550 | nitrate  | Agrostemma_githago  | 40.60 | 0.00 |
| TRINITY_GAX82540 | hypothet | Chlamydomonas_eusti | 40.60 | 0.00 |
| TRINITY_RMZ57750 | hypothet | Auxenochlorella_pro | 40.60 | 0.00 |
| TRINITY_KZM87470 | hypothet | Daucus_carota       | 40.60 | 0.00 |
| TRINITY_EFJ27140 | hypothet | Selaginella_moellen | 40.60 | 0.00 |
| TRINITY_EEF23390 | conserve | Ricinus_communis    | 40.60 | 0.00 |
| TRINITY_XP_01090 | PREDICTI | Elaeis_guineensis   | 40.60 | 0.00 |
| TRINITY_XP_01380 | hypothet | Monoraphidium_negle | 40.60 | 0.00 |
| TRINITY_XP_01580 | peptidy  | Ziziphus_jujuba     | 40.60 | 0.00 |
| TRINITY_EFJ31600 | hypothet | Selaginella_moellen | 40.60 | 0.00 |
| TRINITY_GAX82740 | hypothet | Chlamydomonas_eusti | 40.60 | 0.00 |
| TRINITY_KXZ56970 | hypothet | Gonium_pectorale    | 40.60 | 0.00 |
| TRINITY_PSC69900 | SNF2 fan | Micractinium_conduc | 40.60 | 0.00 |
| TRINITY_GAX76680 | hypothet | Chlamydomonas_eusti | 40.60 | 0.00 |
| TRINITY_GAQ84320 | UDP-gal  | Klebsormidium_niten | 40.60 | 0.00 |



|                  |          |                     |       |      |
|------------------|----------|---------------------|-------|------|
| TRINITY_GAQ84391 | hypothet | Klebsormidium_niten | 40.60 | 0.00 |
| TRINITY_KXZ42764 | hypothet | Gonium_pectorale    | 40.60 | 0.00 |
| TRINITY_PNW81036 | hypothet | Chlamydomonas_reinh | 40.60 | 0.00 |
| TRINITY_RXI04098 | hypothet | Malus_domestica     | 40.60 | 0.00 |
| TRINITY_XP_01362 | PREDICTI | Brassica_oleracea   | 40.60 | 0.00 |
| TRINITY_PNW82298 | hypothet | Chlamydomonas_reinh | 40.60 | 0.00 |
| TRINITY_XP_02587 | E3 ubiq  | Oryza_sativa        | 40.60 | 0.00 |
| TRINITY_KXZ54830 | hypothet | Gonium_pectorale    | 40.60 | 0.00 |
| TRINITY_EFJ24728 | hypothet | Selaginella_moellen | 40.60 | 0.00 |
| TRINITY_KZV15418 | phenyla  | Dorcoceras_hygromet | 40.60 | 0.00 |
| TRINITY_ONM34962 | CDC5 prc | Zea_mays            | 40.60 | 0.00 |
| TRINITY_XP_02453 | dihydro  | Selaginella_moellen | 40.60 | 0.00 |
| TRINITY_KYP46581 | Lysine-ε | Cajanus_cajan       | 40.60 | 0.00 |
| TRINITY_GBF90642 | p-type ε | Raphidocelis_subcap | 40.60 | 0.00 |
| TRINITY_PNH12282 | WW domai | Tetrabaena_socialis | 40.60 | 0.00 |
| TRINITY_PNW88059 | hypothet | Chlamydomonas_reinh | 40.60 | 0.00 |
| TRINITY_AHA93098 | PLC prot | Dunaliella_salina   | 40.60 | 0.00 |
| TRINITY_OMO98251 | hypothet | Corchorus_capsulari | 40.60 | 0.00 |
| TRINITY_XP_02017 | RNA exor | Aegilops_tauschii   | 40.60 | 0.00 |
| TRINITY_XP_00295 | hypothet | Volvox_carteri      | 40.60 | 0.00 |
| TRINITY_GAX83217 | hypothet | Chlamydomonas_eusti | 40.60 | 0.00 |
| TRINITY_GBG71906 | hypothet | Chara_braunii       | 40.60 | 0.00 |
| TRINITY_XP_00294 | hypothet | Volvox_carteri      | 40.60 | 0.00 |
| TRINITY_XP_00170 | R-SNARE  | Chlamydomonas_reinh | 40.60 | 0.00 |
| TRINITY_GAX73215 | hypothet | Chlamydomonas_eusti | 40.60 | 0.00 |
| TRINITY_GBG88060 | hypothet | Chara_braunii       | 40.60 | 0.00 |
| TRINITY_PNW85451 | hypothet | Chlamydomonas_reinh | 40.60 | 0.00 |
| TRINITY_PNH06377 | Protein  | Tetrabaena_socialis | 40.60 | 0.00 |
| TRINITY_KXZ50182 | hypothet | Gonium_pectorale    | 40.60 | 0.00 |
| TRINITY_KXZ46819 | hypothet | Gonium_pectorale    | 40.60 | 0.00 |
| TRINITY_XP_00584 | hypothet | Chlorella_variabili | 40.60 | 0.00 |
| TRINITY_KXZ45354 | hypothet | Gonium_pectorale    | 40.60 | 0.00 |
| TRINITY_XP_00294 | hypothet | Volvox_carteri      | 40.60 | 0.00 |
| TRINITY_GBF98417 | peptidy  | Raphidocelis_subcap | 40.60 | 0.00 |
| TRINITY_PRW58587 | Beta-mar | Chlorella_sorokinia | 40.60 | 0.00 |
| TRINITY_KYP69564 | Snurport | Cajanus_cajan       | 40.60 | 0.00 |
| TRINITY_KXZ47565 | hypothet | Gonium_pectorale    | 40.60 | 0.00 |
| TRINITY_AEC13714 | acetoacε | Catharanthus_roseus | 40.60 | 0.00 |
| TRINITY_XP_01919 | PREDICTI | Ipomoea_nil         | 40.50 | 0.00 |
| TRINITY_PTQ27263 | hypothet | Marchantia_polymorp | 40.50 | 0.00 |
| TRINITY_GBG74470 | hypothet | Chara_braunii       | 40.50 | 0.00 |
| TRINITY_BAJ94575 | predictε | Hordeum_vulgare     | 40.50 | 0.00 |
| TRINITY_XP_00306 | predictε | Micromonas_pusilla  | 40.50 | 0.00 |
| TRINITY_XP_01026 | PREDICTI | Nelumbo_nucifera    | 40.50 | 0.00 |
| TRINITY_GAQ91577 | protein  | Klebsormidium_niten | 40.50 | 0.00 |
| TRINITY_GAQ87980 | Phosphat | Klebsormidium_niten | 40.50 | 0.00 |
| TRINITY_PNH04336 | MOXD1 1  | Tetrabaena_socialis | 40.50 | 0.00 |
| TRINITY_XP_01102 | PREDICTI | Populus_euphratica  | 40.50 | 0.00 |
| TRINITY_GAQ84649 | protein  | Klebsormidium_niten | 40.50 | 0.00 |
| TRINITY_OUS44632 | NADH:flε | Ostreococcus_tauri  | 40.50 | 0.00 |
| TRINITY_GAQ90547 | Ubiquiti | Klebsormidium_niten | 40.50 | 0.00 |
| TRINITY_CAN80633 | hypothet | Vitis_vinifera      | 40.50 | 0.00 |
| TRINITY_GAQ77938 | NMD prot | Klebsormidium_niten | 40.50 | 0.00 |
| TRINITY_EEF24160 | two-com  | Ricinus_communis    | 40.50 | 0.00 |
| TRINITY_XP_00295 | hypothet | Volvox_carteri      | 40.50 | 0.00 |
| TRINITY_KXZ55251 | hypothet | Gonium_pectorale    | 40.50 | 0.00 |
| TRINITY_PRQ16335 | putative | Rosa_chinensis      | 40.50 | 0.00 |
| TRINITY_GBG64331 | hypothet | Chara_braunii       | 40.50 | 0.00 |
| TRINITY_XP_00169 | ARF-like | Chlamydomonas_reinh | 40.50 | 0.00 |
| TRINITY_ACN87615 | kinase-] | Corylus_avellana    | 40.50 | 0.00 |
| TRINITY_GAQ77818 | branchε  | Klebsormidium_niten | 40.50 | 0.00 |
| TRINITY_GAX74462 | hypothet | Chlamydomonas_eusti | 40.50 | 0.00 |
| TRINITY_RCV28913 | hypothet | Setaria_italica     | 40.50 | 0.00 |
| TRINITY_GAX79454 | hypothet | Chlamydomonas_eusti | 40.50 | 0.00 |
| TRINITY_GAX76043 | hypothet | Chlamydomonas_eusti | 40.50 | 0.00 |
| TRINITY_XP_01848 | PREDICTI | Raphanus_sativus    | 40.50 | 0.00 |

|                  |          |                     |       |      |
|------------------|----------|---------------------|-------|------|
| TRINITY_CBI31471 | unnamed  | Vitis_vinifera      | 40.50 | 0.00 |
| TRINITY_PRW60753 | Zn2+-bir | Chlorella_sorokinia | 40.50 | 0.00 |
| TRINITY_OUS45186 | tRNA ps  | Ostreococcus_tauri  | 40.50 | 0.00 |
| TRINITY_PNH00238 | hypothet | Tetrabaena_socialis | 40.50 | 0.00 |
| TRINITY_RMZ56497 | hypothet | Auxenochlorella_pro | 40.50 | 0.00 |
| TRINITY_XP_02390 | ATP-bin  | Quercus_suber       | 40.50 | 0.00 |
| TRINITY_ONK72864 | uncharac | Asparagus_officinal | 40.50 | 0.00 |
| TRINITY_PTQ39063 | hypothet | Marchantia_polymorp | 40.50 | 0.00 |
| TRINITY_GAX76974 | hypothet | Chlamydomonas_eusti | 40.50 | 0.00 |
| TRINITY_GAX78406 | hypothet | Chlamydomonas_eusti | 40.50 | 0.00 |
| TRINITY_EYU37134 | hypothet | Erythranthe_guttata | 40.50 | 0.00 |
| TRINITY_XP_00250 | thio red | Micromonas_commoda  | 40.50 | 0.00 |
| TRINITY_GAX82526 | hypothet | Chlamydomonas_eusti | 40.50 | 0.00 |
| TRINITY_XP_00295 | hypothet | Volvox_carteri      | 40.50 | 0.00 |
| TRINITY_XP_01208 | bifuncti | Jatropha_curcas     | 40.50 | 0.00 |
| TRINITY_PRW61594 | F1F0 AT  | Chlorella_sorokinia | 40.50 | 0.00 |
| TRINITY_GAX73969 | hypothet | Chlamydomonas_eusti | 40.50 | 0.00 |
| TRINITY_PNW78971 | hypothet | Chlamydomonas_reinh | 40.50 | 0.00 |
| TRINITY_KRH28871 | hypothet | Glycine_max         | 40.50 | 0.00 |
| TRINITY_XP_02389 | uncharac | Quercus_suber       | 40.50 | 0.00 |
| TRINITY_XP_02418 | zinc fir | Rosa_chinensis      | 40.50 | 0.00 |
| TRINITY_GBF97537 | hypothet | Raphidocelis_subcap | 40.50 | 0.00 |
| TRINITY_XP_00565 | hypothet | Coccomyxa_subellips | 40.50 | 0.00 |
| TRINITY_GAV63713 | dCMP_cyt | Cephalotus_follicul | 40.50 | 0.00 |
| TRINITY_GAX79810 | hypothet | Chlamydomonas_eusti | 40.50 | 0.00 |
| TRINITY_XP_00565 | mitochor | Coccomyxa_subellips | 40.50 | 0.00 |
| TRINITY_GBF90134 | hypothet | Raphidocelis_subcap | 40.50 | 0.00 |
| TRINITY_GAX78598 | hypothet | Chlamydomonas_eusti | 40.50 | 0.00 |
| TRINITY_GAX73684 | hypothet | Chlamydomonas_eusti | 40.50 | 0.00 |
| TRINITY_XP_01867 | PREDICT  | Musa_acuminata      | 40.50 | 0.00 |
| TRINITY_GBF94351 | hypothet | Raphidocelis_subcap | 40.40 | 0.00 |
| TRINITY_KZM93243 | hypothet | Daucus_carota       | 40.40 | 0.00 |
| TRINITY_XP_02638 | CBL-int  | Papaver_somniferum  | 40.40 | 0.00 |
| TRINITY_XP_02007 | UDP-N-ac | Ananas_comosus      | 40.40 | 0.00 |
| TRINITY_XP_02419 | uncharac | Rosa_chinensis      | 40.40 | 0.00 |
| TRINITY_XP_02437 | uncharac | Physcomitrella_pate | 40.40 | 0.00 |
| TRINITY_XP_02580 | EEF1A 1j | Panicum_hallii      | 40.40 | 0.00 |
| TRINITY_XP_00305 | flagell  | Micromonas_pusilla  | 40.40 | 0.00 |
| TRINITY_XP_02437 | ABC trar | Physcomitrella_pate | 40.40 | 0.00 |
| TRINITY_XP_01208 | fimbrin- | Jatropha_curcas     | 40.40 | 0.00 |
| TRINITY_XP_00564 | UVB-resi | Coccomyxa_subellips | 40.40 | 0.00 |
| TRINITY_XP_01926 | PREDICT  | Nicotiana_attenuata | 40.40 | 0.00 |
| TRINITY_XP_00297 | uncharac | Selaginella_moellen | 40.40 | 0.00 |
| TRINITY_XP_00305 | predict  | Micromonas_pusilla  | 40.40 | 0.00 |
| TRINITY_XP_00295 | hypothet | Volvox_carteri      | 40.40 | 0.00 |
| TRINITY_PRW56030 | Repress  | Chlorella_sorokinia | 40.40 | 0.00 |
| TRINITY_KFK24898 | hypothet | Arabis_alpina       | 40.40 | 0.00 |
| TRINITY_RWR75970 | Beta-Ca  | Cinnamomum_micranth | 40.40 | 0.00 |
| TRINITY_GAQ86331 | lysine-1 | Klebsormidium_niten | 40.40 | 0.00 |
| TRINITY_GAX86504 | hypothet | Chlamydomonas_eusti | 40.40 | 0.00 |
| TRINITY_XP_02438 | transcri | Physcomitrella_pate | 40.40 | 0.00 |
| TRINITY_PNW72281 | hypothet | Chlamydomonas_reinh | 40.40 | 0.00 |
| TRINITY_PNW71999 | hypothet | Chlamydomonas_reinh | 40.40 | 0.00 |
| TRINITY_XP_00297 | IAA-alar | Selaginella_moellen | 40.40 | 0.00 |
| TRINITY_XP_01092 | PREDICT  | Elaeis_guineensis   | 40.40 | 0.00 |
| TRINITY_XP_02387 | GTP-bin  | Quercus_suber       | 40.40 | 0.00 |
| TRINITY_EFJ34004 | hypothet | Selaginella_moellen | 40.40 | 0.00 |
| TRINITY_XP_02024 | GPCR-tyr | Asparagus_officinal | 40.40 | 0.00 |
| TRINITY_GAX86112 | hypothet | Chlamydomonas_eusti | 40.40 | 0.00 |
| TRINITY_PNW76854 | hypothet | Chlamydomonas_reinh | 40.40 | 0.00 |
| TRINITY_BAK00435 | predict  | Hordeum_vulgare     | 40.40 | 0.00 |
| TRINITY_PON31454 | Methylt  | Parasponia_anderson | 40.40 | 0.00 |
| TRINITY_XP_02453 | ran guar | Selaginella_moellen | 40.40 | 0.00 |
| TRINITY_XP_02288 | uncharac | Olea_europaea       | 40.40 | 0.00 |
| TRINITY_KXZ53281 | hypothet | Gonium_pectorale    | 40.40 | 0.00 |
| TRINITY_RZR77526 | hypothet | Ensete_ventricosum  | 40.40 | 0.00 |

|                 |          |                      |       |      |
|-----------------|----------|----------------------|-------|------|
| TRINITY_BAJ9884 | predict  | Hordeum_vulgare      | 40.40 | 0.00 |
| TRINITY_XP_0029 | hypothet | Volvox_carteri       | 40.40 | 0.00 |
| TRINITY_GAQ7857 | elongat  | Klebsormidium_niten  | 40.40 | 0.00 |
| TRINITY_PRW4436 | Poly(A)  | Chlorella_sorokinia  | 40.40 | 0.00 |
| TRINITY_KXZ4844 | hypothet | Gonium_pectorale     | 40.40 | 0.00 |
| TRINITY_GAX7378 | hypothet | Chlamydomonas_eusti  | 40.40 | 0.00 |
| TRINITY_KXZ4645 | hypothet | Gonium_pectorale     | 40.40 | 0.00 |
| TRINITY_GAX8566 | hypothet | Chlamydomonas_eusti  | 40.40 | 0.00 |
| TRINITY_RMZ5570 | hypothet | Auxenochlorella_pro  | 40.40 | 0.00 |
| TRINITY_XP_0138 | hypothet | Monoraphidium_negle  | 40.40 | 0.00 |
| TRINITY_XP_0014 | predict  | Ostreococcus_sp._'l  | 40.40 | 0.00 |
| TRINITY_PNH1165 | Calcium  | Tetrabaena_socialis  | 40.40 | 0.00 |
| TRINITY_XP_0238 | pre-mRN  | Quercus_suber        | 40.40 | 0.00 |
| TRINITY_PNW8165 | hypothet | Chlamydomonas_reinh  | 40.40 | 0.00 |
| TRINITY_GAX7532 | hypothet | Chlamydomonas_eusti  | 40.40 | 0.00 |
| TRINITY_PNH0937 | Cytochr  | Tetrabaena_socialis  | 40.40 | 0.00 |
| TRINITY_GAX7345 | hypothet | Chlamydomonas_eusti  | 40.40 | 0.00 |
| TRINITY_OAE3416 | hypothet | Marchantia_polymorp  | 40.40 | 0.00 |
| TRINITY_XP_0016 | RWP-RK   | Chlamydomonas_reinh  | 40.40 | 0.00 |
| TRINITY_GAX7987 | hypothet | Chlamydomonas_eusti  | 40.40 | 0.00 |
| TRINITY_GAX7633 | hypothet | Chlamydomonas_eusti  | 40.40 | 0.00 |
| TRINITY_XP_0264 | ELMO     | Papaver_somniferum   | 40.40 | 0.00 |
| TRINITY_PNW7147 | hypothet | Chlamydomonas_reinh  | 40.40 | 0.00 |
| TRINITY_XP_0161 | unchara  | Arachis_ipaensis     | 40.40 | 0.00 |
| TRINITY_PNW7797 | hypothet | Chlamydomonas_reinh  | 40.40 | 0.00 |
| TRINITY_XP_0228 | NLI      | Ostreococcus_tauri   | 40.40 | 0.00 |
| TRINITY_XP_0114 | PREDICT  | Fragaria_vesca       | 40.40 | 0.00 |
| TRINITY_GAX7364 | hypothet | Chlamydomonas_eusti  | 40.40 | 0.00 |
| TRINITY_XP_0084 | PREDICT  | Cucumis_melo         | 40.40 | 0.00 |
| TRINITY_GAX8298 | hypothet | Chlamydomonas_eusti  | 40.40 | 0.00 |
| TRINITY_XP_0238 | eukaryot | Quercus_suber        | 40.40 | 0.00 |
| TRINITY_XP_0029 | hypothet | Volvox_carteri       | 40.40 | 0.00 |
| TRINITY_GAX7893 | hypothet | Chlamydomonas_eusti  | 40.40 | 0.00 |
| TRINITY_XP_0273 | putativ  | Abrus_precatorius    | 40.40 | 0.00 |
| TRINITY_XP_0029 | hypothet | Volvox_carteri       | 40.40 | 0.00 |
| TRINITY_GAX7946 | hypothet | Chlamydomonas_eusti  | 40.40 | 0.00 |
| TRINITY_XP_0058 | hypothet | Chlorella_variabili  | 40.40 | 0.00 |
| TRINITY_XP_0239 | ras-like | Quercus_suber        | 40.40 | 0.00 |
| TRINITY_XP_0258 | pre-rRN  | Panicum_hallii       | 40.40 | 0.00 |
| TRINITY_XP_0025 | predict  | Micromonas_commoda   | 40.40 | 0.00 |
| TRINITY_GBF9451 | hypothet | Raphidocelis_subcap  | 40.40 | 0.00 |
| TRINITY_XP_0243 | unchara  | Physcomitrella_pate  | 40.40 | 0.00 |
| TRINITY_XP_0243 | ATP-dep  | Physcomitrella_pate  | 40.40 | 0.00 |
| TRINITY_XP_0029 | hypothet | Volvox_carteri       | 40.40 | 0.00 |
| TRINITY_XP_0244 | serine/  | Physcomitrella_pate  | 40.40 | 0.00 |
| TRINITY_PNH0734 | Bifunct  | Tetrabaena_socialis  | 40.40 | 0.00 |
| TRINITY_PNH1169 | hypothet | Tetrabaena_socialis  | 40.40 | 0.00 |
| TRINITY_GBG7027 | hypothet | Chara_braunii        | 40.40 | 0.00 |
| TRINITY_GAX7875 | hypothet | Chlamydomonas_eusti  | 40.40 | 0.00 |
| TRINITY_GAX7612 | hypothet | Chlamydomonas_eusti  | 40.40 | 0.00 |
| TRINITY_PRW5979 | ubiquiti | Chlorella_sorokinia  | 40.40 | 0.00 |
| TRINITY_PRW4552 | dnaJ-li  | Chlorella_sorokinia  | 40.40 | 0.00 |
| TRINITY_PSC7564 | exocyst  | Micractinium_conduc  | 40.40 | 0.00 |
| TRINITY_PNW8443 | hypothet | Chlamydomonas_reinh  | 40.40 | 0.00 |
| TRINITY_GBG6905 | hypothet | Chara_braunii        | 40.40 | 0.00 |
| TRINITY_GBF9111 | hypothet | Raphidocelis_subcap  | 40.40 | 0.00 |
| TRINITY_XP_0029 | hypothet | Volvox_carteri       | 40.40 | 0.00 |
| TRINITY_XP_0138 | hypothet | Monoraphidium_negle  | 40.40 | 0.00 |
| TRINITY_XP_0167 | PREDICT  | Gossypium_hirsutum   | 40.40 | 0.00 |
| TRINITY_XP_0201 | unchara  | Aegilops_tauschii    | 40.40 | 0.00 |
| TRINITY_GAU4503 | hypothet | Trifolium_subterrann | 40.40 | 0.00 |
| TRINITY_XP_0238 | N-acyl-  | Quercus_suber        | 40.30 | 0.00 |
| TRINITY_ESR4742 | hypothet | Citrus_clementina    | 40.30 | 0.00 |
| TRINITY_PSC7275 | glutamy  | Micractinium_conduc  | 40.30 | 0.00 |
| TRINITY_RLN4160 | hypothet | Panicum_miliaceum    | 40.30 | 0.00 |
| TRINITY_XP_0279 | integrir | Vigna_unguiculata    | 40.30 | 0.00 |

|                  |            |                      |          |       |      |
|------------------|------------|----------------------|----------|-------|------|
| TRINITY_XP_01616 | LOW QUAI   | Arachis_             | ipaensis | 40.30 | 0.00 |
| TRINITY_GAQ7941  | (Na+/H+ )  | Klebsormidium_niten  |          | 40.30 | 0.00 |
| TRINITY_XP_00713 | hypothet   | Phaseolus_vulgaris   |          | 40.30 | 0.00 |
| TRINITY_EFJ2208  | (dolichyl) | Selaginella_moellen  |          | 40.30 | 0.00 |
| TRINITY_XP_00294 | hypothet   | Volvox_carteri       |          | 40.30 | 0.00 |
| TRINITY_GAX7580  | hypothet   | Chlamydomonas_eusti  |          | 40.30 | 0.00 |
| TRINITY_OWM8199  | hypothet   | Punica_granatum      |          | 40.30 | 0.00 |
| TRINITY_XP_02021 | TPR rep    | Cajanus_cajan        |          | 40.30 | 0.00 |
| TRINITY_GAX7739  | hypothet   | Chlamydomonas_eusti  |          | 40.30 | 0.00 |
| TRINITY_PIN0705  | (Molecul   | Handroanthus_impeti  |          | 40.30 | 0.00 |
| TRINITY_PIN0705  | (Molecul   | Handroanthus_impeti  |          | 40.30 | 0.00 |
| TRINITY_GAQ8372  | vesicle-   | Klebsormidium_niten  |          | 40.30 | 0.00 |
| TRINITY_RYR7299  | hypothet   | Arachis_hypogaea     |          | 40.30 | 0.00 |
| TRINITY_XP_0025  | (thioered  | Micromonas_commoda   |          | 40.30 | 0.00 |
| TRINITY_PNW7750  | hypothet   | Chlamydomonas_reinh  |          | 40.30 | 0.00 |
| TRINITY_PTQ4341  | hypothet   | Marchantia_polymorp  |          | 40.30 | 0.00 |
| TRINITY_XP_0016  | predict    | Chlamydomonas_reinh  |          | 40.30 | 0.00 |
| TRINITY_AMN1485  | serine     | (Nepenthes_mirabilis |          | 40.30 | 0.00 |
| TRINITY_XP_0219  | actin-r    | Helianthus_annuus    |          | 40.30 | 0.00 |
| TRINITY_XP_0271  | (protein   | Coffea_arabica       |          | 40.30 | 0.00 |
| TRINITY_GAX7348  | hypothet   | Chlamydomonas_eusti  |          | 40.30 | 0.00 |
| TRINITY_BAK0043  | predict    | Hordeum_vulgare      |          | 40.30 | 0.00 |
| TRINITY_XP_0063  | 40S rib    | Populus_trichocarpa  |          | 40.30 | 0.00 |
| TRINITY_PRW5800  | serine     | (Chlorella_sorokinia |          | 40.30 | 0.00 |
| TRINITY_GAX8199  | hypothet   | Chlamydomonas_eusti  |          | 40.30 | 0.00 |
| TRINITY_XP_0030  | predict    | Micromonas_pusilla   |          | 40.30 | 0.00 |
| TRINITY_GAX7499  | (hypothet  | Chlamydomonas_eusti  |          | 40.30 | 0.00 |
| TRINITY_XP_0201  | (short-cl  | Ananas_comosus       |          | 40.30 | 0.00 |
| TRINITY_XP_0155  | (unchara   | Ricinus_communis     |          | 40.30 | 0.00 |
| TRINITY_XP_0239  | vacuola    | Quercus_suber        |          | 40.30 | 0.00 |
| TRINITY_GBF9300  | hypothet   | Raphidocelis_subcap  |          | 40.30 | 0.00 |
| TRINITY_XP_0165  | PREDICTI   | Capsicum_annuum      |          | 40.30 | 0.00 |
| TRINITY_ERN1694  | hypothet   | Amborella_trichopod  |          | 40.30 | 0.00 |
| TRINITY_XP_0138  | ADP-rib    | Monoraphidium_negle  |          | 40.30 | 0.00 |
| TRINITY_GAX7872  | hypothet   | Chlamydomonas_eusti  |          | 40.30 | 0.00 |
| TRINITY_GBF9059  | hypothet   | Raphidocelis_subcap  |          | 40.30 | 0.00 |
| TRINITY_XP_0056  | ubiquiti   | Coccomyxa_subellips  |          | 40.30 | 0.00 |
| TRINITY_GAX8284  | hypothet   | Chlamydomonas_eusti  |          | 40.30 | 0.00 |
| TRINITY_KXZ4574  | (hypothet  | Gonium_pectorale     |          | 40.30 | 0.00 |
| TRINITY_PRW6160  | endopla    | (Chlorella_sorokinia |          | 40.30 | 0.00 |
| TRINITY_PTQ2890  | (hypothet  | Marchantia_polymorp  |          | 40.30 | 0.00 |
| TRINITY_BAJ9372  | predict    | Hordeum_vulgare      |          | 40.30 | 0.00 |
| TRINITY_KHG1546  | (1-phosp   | Gossypium_arboreum   |          | 40.30 | 0.00 |
| TRINITY_GAX7986  | hypothet   | Chlamydomonas_eusti  |          | 40.30 | 0.00 |
| TRINITY_KXZ4504  | hypothet   | Gonium_pectorale     |          | 40.30 | 0.00 |
| TRINITY_XP_0071  | hypothet   | Phaseolus_vulgaris   |          | 40.30 | 0.00 |
| TRINITY_PNW8565  | hypothet   | Chlamydomonas_reinh  |          | 40.30 | 0.00 |
| TRINITY_PSC6754  | (ribosom   | Micractinium_conduc  |          | 40.30 | 0.00 |
| TRINITY_XP_0249  | probable   | Ziziphus_jujuba      |          | 40.30 | 0.00 |
| TRINITY_XP_0156  | lankyrin   | Oryza_sativa         |          | 40.30 | 0.00 |
| TRINITY_GAX7875  | hypothet   | Chlamydomonas_eusti  |          | 40.30 | 0.00 |
| TRINITY_PNW8013  | hypothet   | Chlamydomonas_reinh  |          | 40.30 | 0.00 |
| TRINITY_PWA5803  | (hypothet  | Artemisia_annua      |          | 40.30 | 0.00 |
| TRINITY_GAX8658  | hypothet   | Chlamydomonas_eusti  |          | 40.30 | 0.00 |
| TRINITY_XP_0014  | predict    | Ostreococcus_sp._'1  |          | 40.30 | 0.00 |
| TRINITY_GAQ8098  | Anaphas    | Klebsormidium_niten  |          | 40.30 | 0.00 |
| TRINITY_XP_0239  | (ras-like  | Quercus_suber        |          | 40.20 | 0.00 |
| TRINITY_NP_0012  | putative   | Glycine_max          |          | 40.20 | 0.00 |
| TRINITY_XP_0176  | PREDICTI   | Gossypium_arboreum   |          | 40.20 | 0.00 |
| TRINITY_XP_0056  | RabGAP/    | Coccomyxa_subellips  |          | 40.20 | 0.00 |
| TRINITY_BAK0286  | predict    | Hordeum_vulgare      |          | 40.20 | 0.00 |
| TRINITY_GAX7674  | (hypothet  | Chlamydomonas_eusti  |          | 40.20 | 0.00 |
| TRINITY_GAQ8144  | (Hypothet  | Klebsormidium_niten  |          | 40.20 | 0.00 |
| TRINITY_XP_0271  | serine/    | Coffea_eugenioides   |          | 40.20 | 0.00 |
| TRINITY_PSC6943  | Acyl-bir   | Micractinium_conduc  |          | 40.20 | 0.00 |
| TRINITY_KZV2910  | sufE-li    | Dorcoceras_hygromet  |          | 40.20 | 0.00 |

|                  |          |                     |       |      |
|------------------|----------|---------------------|-------|------|
| TRINITY_XP_0086  | uncharac | Zea_mays            | 40.20 | 0.00 |
| TRINITY_XP_00141 | predicte | Ostreococcus_sp._'1 | 40.20 | 0.00 |
| TRINITY_XP_0243  | histidir | Physcomitrella_pate | 40.20 | 0.00 |
| TRINITY_XP_0041  | PREDICTE | Cucumis_sativus     | 40.20 | 0.00 |
| TRINITY_XP_0025  | E3 ubiq  | Ricinus_communis    | 40.20 | 0.00 |
| TRINITY_GAQ7885  | peptide  | Klebsormidium_niten | 40.20 | 0.00 |
| TRINITY_XP_0056  | hypothet | Coccomyxa_subellips | 40.20 | 0.00 |
| TRINITY_XP_0056  | sacchar  | Coccomyxa_subellips | 40.20 | 0.00 |
| TRINITY_XP_0014  | predicte | Ostreococcus_sp._'1 | 40.20 | 0.00 |
| TRINITY_XP_0238  | alpha-ac | Quercus_suber       | 40.20 | 0.00 |
| TRINITY_XP_0066  | PREDICTE | Oryza_brachyantha   | 40.20 | 0.00 |
| TRINITY_XP_0029  | hypothet | Volvox_carteri      | 40.20 | 0.00 |
| TRINITY_GAX8535  | hypothet | Chlamydomonas_eusti | 40.20 | 0.00 |
| TRINITY_PRW2065  | SWI SNF  | Chlorella_sorokinia | 40.20 | 0.00 |
| TRINITY_GAQ7884  | alpha-1, | Klebsormidium_niten | 40.20 | 0.00 |
| TRINITY_GBF9670  | sulfur   | Raphidocelis_subcap | 40.20 | 0.00 |
| TRINITY_GAX7922  | hypothet | Chlamydomonas_eusti | 40.20 | 0.00 |
| TRINITY_XP_0029  | hypothet | Volvox_carteri      | 40.20 | 0.00 |
| TRINITY_GAX8199  | hypothet | Chlamydomonas_eusti | 40.20 | 0.00 |
| TRINITY_XP_0239  | probable | Quercus_suber       | 40.20 | 0.00 |
| TRINITY_GAX8210  | hypothet | Chlamydomonas_eusti | 40.20 | 0.00 |
| TRINITY_XP_0138  | hypothet | Monoraphidium_negle | 40.20 | 0.00 |
| TRINITY_KDD7569  | hypothet | Helicosporidium_sp. | 40.20 | 0.00 |
| TRINITY_XP_0138  | Uncharac | Monoraphidium_negle | 40.20 | 0.00 |
| TRINITY_OAE3589  | hypothet | Marchantia_polymorp | 40.20 | 0.00 |
| TRINITY_XP_0158  | large p  | Ziziphus_jujuba     | 40.20 | 0.00 |
| TRINITY_XP_0139  | WD repe  | Monoraphidium_negle | 40.20 | 0.00 |
| TRINITY_OAE2897  | hypothet | Marchantia_polymorp | 40.20 | 0.00 |
| TRINITY_XP_0145  | ubiquiti | Vigna_radiata       | 40.20 | 0.00 |
| TRINITY_XP_0029  | molecul  | Volvox_carteri      | 40.20 | 0.00 |
| TRINITY_GAX7465  | hypothet | Chlamydomonas_eusti | 40.20 | 0.00 |
| TRINITY_GAX8058  | hypothet | Chlamydomonas_eusti | 40.20 | 0.00 |
| TRINITY_XP_0029  | hypothet | Volvox_carteri      | 40.20 | 0.00 |
| TRINITY_PIN0910  | putativ  | Handroanthus_impeti | 40.20 | 0.00 |
| TRINITY_BAJ9372  | predicte | Hordeum_vulgare     | 40.20 | 0.00 |
| TRINITY_GAQ8511  | hypothet | Klebsormidium_niten | 40.20 | 0.00 |
| TRINITY_PNH1169  | hypothet | Tetrabaena_socialis | 40.20 | 0.00 |
| TRINITY_XP_0106  | PREDICTE | Beta_vulgaris       | 40.20 | 0.00 |
| TRINITY_XP_0029  | hypothet | Volvox_carteri      | 40.20 | 0.00 |
| TRINITY_GAX7617  | hypothet | Chlamydomonas_eusti | 40.20 | 0.00 |
| TRINITY_GBF9254  | hypothet | Raphidocelis_subcap | 40.20 | 0.00 |
| TRINITY_GBG8032  | hypothet | Chara_braunii       | 40.20 | 0.00 |
| TRINITY_BAK0302  | predicte | Hordeum_vulgare     | 40.20 | 0.00 |
| TRINITY_PNH1226  | Tiny mac | Tetrabaena_socialis | 40.20 | 0.00 |
| TRINITY_XP_0016  | predicte | Chlamydomonas_reinh | 40.20 | 0.00 |
| TRINITY_XP_0238  | alpha-ac | Quercus_suber       | 40.20 | 0.00 |
| TRINITY_XP_0217  | ras-rel  | Chenopodium_quinoa  | 40.20 | 0.00 |
| TRINITY_EFJ3272  | hypothet | Selaginella_moellen | 40.20 | 0.00 |
| TRINITY_PSC6940  | symplek  | Micractinium_conduc | 40.20 | 0.00 |
| TRINITY_XP_0029  | hypothet | Volvox_carteri      | 40.20 | 0.00 |
| TRINITY_XP_0045  | heat str | Cicer_arietinum     | 40.20 | 0.00 |
| TRINITY_GBF8923  | DNA rep  | Raphidocelis_subcap | 40.20 | 0.00 |
| TRINITY_GAX7821  | hypothet | Chlamydomonas_eusti | 40.20 | 0.00 |
| TRINITY_KXZ5444  | hypothet | Gonium_pectorale    | 40.20 | 0.00 |
| TRINITY_GAQ8723  | Dyneins  | Klebsormidium_niten | 40.20 | 0.00 |
| TRINITY_OAE2443  | hypothet | Marchantia_polymorp | 40.20 | 0.00 |
| TRINITY_PRW5705  | guanyly  | Chlorella_sorokinia | 40.20 | 0.00 |
| TRINITY_XP_0279  | uncharac | Vigna_unguiculata   | 40.20 | 0.00 |
| TRINITY_PNW7973  | hypothet | Chlamydomonas_reinh | 40.20 | 0.00 |
| TRINITY_XP_0029  | hypothet | Volvox_carteri      | 40.20 | 0.00 |
| TRINITY_GAQ9315  | hypothet | Klebsormidium_niten | 40.20 | 0.00 |
| TRINITY_KXZ4803  | hypothet | Gonium_pectorale    | 40.20 | 0.00 |
| TRINITY_GAQ8931  | Dyneins  | Klebsormidium_niten | 40.20 | 0    |
| TRINITY_GAX8431  | hypothet | Chlamydomonas_eusti | 40.20 | 0.00 |
| TRINITY_XP_0025  | predicte | Micromonas_commoda  | 40.20 | 0.00 |
| TRINITY_GAQ9040  | multico  | Klebsormidium_niten | 40.10 | 0.00 |

|                  |                             |       |      |
|------------------|-----------------------------|-------|------|
| TRINITY_RRT72845 | hypothetEnsete_ventricosum  | 40.10 | 0.00 |
| TRINITY_XP_00305 | predicteMicromonas_pusilla  | 40.10 | 0.00 |
| TRINITY_KXZ51149 | hypothetGonium_pectorale    | 40.10 | 0.00 |
| TRINITY_OWM78516 | hypothetPunica_granatum     | 40.10 | 0.00 |
| TRINITY_GAX79832 | hypothetChlamydomonas_eusti | 40.10 | 0.00 |
| TRINITY_ADE76687 | unknown Picea_sitchensis    | 40.10 | 0.00 |
| TRINITY_XP_00879 | pathogerPhoenix_dactylifera | 40.10 | 0.00 |
| TRINITY_XP_02015 | phosphoAegilops_tauschii    | 40.10 | 0.00 |
| TRINITY_XP_00169 | predicteChlamydomonas_reinh | 40.10 | 0.00 |
| TRINITY_XP_00295 | hypothetVolvox_carteri      | 40.10 | 0.00 |
| TRINITY_BAJ99217 | predicteHordeum_vulgare     | 40.10 | 0.00 |
| TRINITY_XP_00584 | hypothetChlorella_variabili | 40.10 | 0.00 |
| TRINITY_XP_02389 | GTP-binCQuercus_suber       | 40.10 | 0.00 |
| TRINITY_GAX74714 | hypothetChlamydomonas_eusti | 40.10 | 0.00 |
| TRINITY_XP_02437 | glutathiPhyscomitrella_pate | 40.10 | 0.00 |
| TRINITY_GBF92296 | hypothetRaphidocelis_subcap | 40.10 | 0.00 |
| TRINITY_PTQ42579 | hypothetMarchantia_polymorp | 40.10 | 0.00 |
| TRINITY_GAX77149 | hypothetChlamydomonas_eusti | 40.10 | 0.00 |
| TRINITY_XP_00295 | hypothetVolvox_carteri      | 40.10 | 0.00 |
| TRINITY_KXZ51682 | hypothetGonium_pectorale    | 40.10 | 0.00 |
| TRINITY_GAX77550 | hypothetChlamydomonas_eusti | 40.10 | 0.00 |
| TRINITY_XP_00844 | PREDICTFCucumis_melo        | 40.10 | 0.00 |
| TRINITY_GAX80336 | hypothetChlamydomonas_eusti | 40.10 | 0.00 |
| TRINITY_GAX80218 | hypothetChlamydomonas_eusti | 40.10 | 0.00 |
| TRINITY_GAX81593 | hypothetChlamydomonas_eusti | 40.10 | 0.00 |
| TRINITY_XP_02439 | eukaryotPhyscomitrella_pate | 40.10 | 0.00 |
| TRINITY_KXZ47337 | hypothetGonium_pectorale    | 40.10 | 0.00 |
| TRINITY_XP_02436 | ribonuclPhyscomitrella_pate | 40.10 | 0.00 |
| TRINITY_PNW87397 | hypothetChlamydomonas_reinh | 40.10 | 0.00 |
| TRINITY_PRW44471 | Peptide-Chlorella_sorokinia | 40.10 | 0.00 |
| TRINITY_XP_01390 | hypothetMonoraphidium_negle | 40.10 | 0.00 |
| TRINITY_GBF99292 | ABC trarRaphidocelis_subcap | 40.10 | 0.00 |
| TRINITY_XP_00170 | high intChlamydomonas_reinh | 40.10 | 0.00 |
| TRINITY_PNW85082 | hypothetChlamydomonas_reinh | 40.10 | 0.00 |
| TRINITY_XP_00564 | NucleotiCoccomyxa_subellips | 40.10 | 0.00 |
| TRINITY_XP_00169 | phosphatChlamydomonas_reinh | 40.00 | 0.00 |
| TRINITY_PKA59756 | Zinc firApostasia_shenzheni | 40.00 | 0.00 |
| TRINITY_XP_02376 | ras-relaLactuca_sativa      | 40.00 | 0.00 |
| TRINITY_EEF27535 | two-comRicinus_communis     | 40.00 | 0.00 |
| TRINITY_EFH70792 | ubiquitiArabidopsis_lyrata  | 40.00 | 0.00 |
| TRINITY_PSR91479 | Mitogen-Actinidia_chinensis | 40.00 | 0.00 |
| TRINITY_XP_01090 | PREDICTHElaeis_guineensis   | 40.00 | 0.00 |
| TRINITY_PON91640 | CytochrCTrema_orientale     | 40.00 | 0.00 |
| TRINITY_XP_02017 | BTB/POZ Aegilops_tauschii   | 40.00 | 0.00 |
| TRINITY_XP_00250 | target cMicromonas_commoda  | 40.00 | 0.00 |
| TRINITY_XP_00169 | predicteChlamydomonas_reinh | 40.00 | 0.00 |
| TRINITY_PWA88159 | RING/U-kArtemisia_annua     | 40.00 | 0.00 |
| TRINITY_EPS74144 | hypothetGenlisea_aurea      | 40.00 | 0.00 |
| TRINITY_XP_00824 | PREDICTFPrunus_mume         | 40.00 | 0.00 |
| TRINITY_GAX77208 | hypothetChlamydomonas_eusti | 40.00 | 0.00 |
| TRINITY_KZV16597 | hypothetDorcoceras_hygromet | 40.00 | 0.00 |
| TRINITY_XP_02435 | uncharacPhyscomitrella_pate | 40.00 | 0.00 |
| TRINITY_GBG67291 | hypothetChara_braunii       | 40.00 | 0.00 |
| TRINITY_XP_00564 | hypothetCoccomyxa_subellips | 40.00 | 0.00 |
| TRINITY_XP_01206 | alpha-N-Jatropha_curcas     | 40.00 | 0.00 |
| TRINITY_XP_00721 | calcium-Prunus_persica      | 40.00 | 0.00 |
| TRINITY_GAX75954 | hypothetChlamydomonas_eusti | 40.00 | 0.00 |
| TRINITY_RAL43982 | hypothetCuscuta_australis   | 40.00 | 0.00 |
| TRINITY_GAX79227 | hypothetChlamydomonas_eusti | 40.00 | 0.00 |
| TRINITY_XP_00866 | beta-adZea_mays             | 40.00 | 0.00 |
| TRINITY_GAQ78735 | alpha-anKlebsormidium_niten | 40.00 | 0.00 |
| TRINITY_RVX01229 | Pol polyVitis_vinifera      | 40.00 | 0.00 |
| TRINITY_GBG59841 | hypothetChara_braunii       | 40.00 | 0.00 |
| TRINITY_XP_00306 | predicteMicromonas_pusilla  | 40.00 | 0.00 |
| TRINITY_XP_00979 | PREDICTFNicotiana_sylvestri | 40.00 | 0.00 |
| TRINITY_PNH12263 | hypothetTetrabaena_socialis | 40.00 | 0.00 |

|                  |          |                     |       |      |
|------------------|----------|---------------------|-------|------|
| TRINITY_XP_00294 | intrafl  | Volvox_carteri      | 40.00 | 0.00 |
| TRINITY_XP_00821 | PREDICT  | Prunus_mume         | 40.00 | 0.00 |
| TRINITY_XP_00880 | bZIP tr  | Phoenix_dactylifera | 40.00 | 0.00 |
| TRINITY_XP_00294 | hypothet | Volvox_carteri      | 40.00 | 0.00 |
| TRINITY_XP_01451 | ras-rel  | Vigna_radiata       | 40.00 | 0.00 |
| TRINITY_XP_00142 | predict  | Ostreococcus_sp._'1 | 40.00 | 0.00 |
| TRINITY_XP_02437 | regulat  | Physcomitrella_pate | 40.00 | 0.00 |
| TRINITY_GBG79985 | hypothet | Chara_braunii       | 40.00 | 0.00 |
| TRINITY_GAQ77656 | ATMRK s  | Klebsormidium_niten | 40.00 | 0.00 |
| TRINITY_XP_01587 | probable | Ziziphus_jujuba     | 40.00 | 0.00 |

|                  |                              |       |      |
|------------------|------------------------------|-------|------|
| TRINITY_GAX75994 | hypothetChlamydomonas_eusti  | 40.00 | 0.00 |
| TRINITY_AAY31019 | low photChlamydomonas_reinh  | 40.00 | 0.00 |
| TRINITY_XP_01243 | PREDICTFGossypium_raimondii  | 40.00 | 0.00 |
| TRINITY_XP_00564 | Metallo-Coccomyxa_subellips  | 40.00 | 0.00 |
| TRINITY_XP_02438 | probablePhyscomitrella_pate  | 40.00 | 0.00 |
| TRINITY_OWM7335  | (hypothetPunica_granatum     | 40.00 | 0.00 |
| TRINITY_GAX74187 | hypothetChlamydomonas_eusti  | 40.00 | 0.00 |
| TRINITY_XP_02498 | CTD smalCynara_cardunculus   | 40.00 | 0.00 |
| TRINITY_GAX83638 | hypothetChlamydomonas_eusti  | 40.00 | 0.00 |
| TRINITY_GBF95162 | hypothetRaphidocelis_subcap  | 40.00 | 0.00 |
| TRINITY_KXZ55276 | hypothetGonium_pectorale     | 40.00 | 0.00 |
| TRINITY_XP_01053 | PREDICTFTarenaya_hasslerian  | 40.00 | 0.00 |
| TRINITY_XP_02287 | histidirOlea_europaea        | 40.00 | 0.00 |
| TRINITY_XP_01139 | L-aminoAuxenochlorella_pro   | 40.00 | 0.00 |
| TRINITY_XP_00295 | hypothetVolvox_carteri       | 40.00 | 0.00 |
| TRINITY_XP_02172 | probableChenopodium_quinoa   | 40.00 | 0.00 |
| TRINITY_RWW01281 | hypothetEnsete_ventricosum   | 40.00 | 0.00 |
| TRINITY_EPS65926 | hypothetGenlisea_aurea       | 40.00 | 0.00 |
| TRINITY_XP_0025  | ankyrin Micromonas_commoda   | 40.00 | 0.00 |
| TRINITY_XP_02059 | tubulin-Phalaenopsis_equest  | 40.00 | 0.00 |
| TRINITY_GBG6354  | (hypothetChara_braunii       | 40.00 | 0.00 |
| TRINITY_GAQ83607 | hypothetKlebsormidium_niten  | 40.00 | 0.00 |
| TRINITY_VDD34005 | unnamed Brassica_oleracea    | 40.00 | 0.00 |
| TRINITY_OAE33678 | hypothetMarchantia_polymorp  | 40.00 | 0.00 |
| TRINITY_PNW82725 | hypothetChlamydomonas_reinh  | 40.00 | 0.00 |
| TRINITY_KXZ49014 | hypothetGonium_pectorale     | 40.00 | 0.00 |
| TRINITY_GBG7529  | (hypothetChara_braunii       | 40.00 | 0.00 |
| TRINITY_PNH05703 | hypothetTetrabaena_socialis  | 40.00 | 0.00 |
| TRINITY_GAX78477 | hypothetChlamydomonas_eusti  | 40.00 | 0.00 |
| TRINITY_XP_00564 | glycosicCoccomyxa_subellips  | 40.00 | 0.00 |
| TRINITY_PRW5694  | (meiotic Chlorella_sorokinia | 40.00 | 0.00 |
| TRINITY_GAX7423  | (hypothetChlamydomonas_eusti | 40.00 | 0.00 |
| TRINITY_XP_00295 | hypothetVolvox_carteri       | 40.00 | 0.00 |
| TRINITY_GAX85199 | hypothetChlamydomonas_eusti  | 40.00 | 0.00 |
| TRINITY_PNW7023  | (hypothetChlamydomonas_reinh | 40.00 | 0.00 |
| TRINITY_XP_00294 | hypothetVolvox_carteri       | 40.00 | 0.00 |
| TRINITY_XP_01941 | PREDICTFLupinus_angustifoli  | 40.00 | 0.00 |
| TRINITY_XP_00294 | mitochorVolvox_carteri       | 40.00 | 0.00 |
| TRINITY_GAX81125 | hypothetChlamydomonas_eusti  | 40.00 | 0.00 |
| TRINITY_XP_02389 | probableQuercus_suber        | 40.00 | 0.00 |
| TRINITY_EYU34376 | (hypothetErythranthe_guttata | 40.00 | 0.00 |
| TRINITY_XP_02027 | transcriAsparagus_officinal  | 40.00 | 0.00 |
| TRINITY_PHT37442 | TranscriCapsicum_baccatum    | 40.00 | 0.00 |
| TRINITY_XP_02391 | dual spQuercus_suber         | 40.00 | 0.00 |
| TRINITY_XP_00495 | cytochrSetaria_italica       | 40.00 | 0.00 |
| TRINITY_XP_01918 | PREDICTFIpomoea_nil          | 40.00 | 0.00 |
| TRINITY_PNW89088 | hypothetChlamydomonas_reinh  | 40.00 | 0.00 |
| TRINITY_GAQ79497 | Serine-tKlebsormidium_niten  | 40.00 | 0.00 |
| TRINITY_XP_02167 | uncharaHevea_brasiliensis    | 40.00 | 0.00 |
| TRINITY_XP_00564 | MT-A70-cCoccomyxa_subellips  | 40.00 | 0.00 |
| TRINITY_XP_00584 | hypothetChlorella_variabili  | 40.00 | 0.00 |
| TRINITY_XP_01762 | PREDICTFGossypium_arboreum   | 40.00 | 0.00 |
| TRINITY_XP_00294 | nitrogerVolvox_carteri       | 40.00 | 0.00 |
| TRINITY_GAX76561 | hypothetChlamydomonas_eusti  | 40.00 | 0.00 |
| TRINITY_ABH09321 | leucine Arachis_hypogaea     | 40.00 | 0.00 |
| TRINITY_PKA53662 | PeroxisApostasia_shenzheni   | 40.00 | 0.00 |
| TRINITY_XP_00584 | hypothetChlorella_variabili  | 40.00 | 0.00 |
| TRINITY_OAE31621 | hypothetMarchantia_polymorp  | 40.00 | 0.00 |
| TRINITY_KMT16705 | hypothetBeta_vulgaris        | 39.90 | 0.00 |
| TRINITY_RZB8933  | (ElongatGlycine_soja         | 39.90 | 0.00 |
| TRINITY_KXZ50265 | hypothetGonium_pectorale     | 39.90 | 0.00 |
| TRINITY_XP_02026 | (cyclin-(Asparagus_officinal | 39.90 | 0.00 |
| TRINITY_PKA59298 | hypothetApostasia_shenzheni  | 39.90 | 0.00 |
| TRINITY_PTQ44635 | hypothetMarchantia_polymorp  | 39.90 | 0.00 |
| TRINITY_PNR50021 | hypothetPhyscomitrella_pate  | 39.90 | 0.00 |
| TRINITY_XP_00643 | serine/tCitrus_clementina    | 39.90 | 0.00 |



|                 |                              |       |      |
|-----------------|------------------------------|-------|------|
| TRINITY_XP_0029 | hybrid εSelaginella_moellen  | 39.90 | 0.00 |
| TRINITY_XP_0042 | PREDICTIFragaria vesca       | 39.90 | 0.00 |
| TRINITY_XP_0200 | serine/tAnanas_comosus       | 39.90 | 0.00 |
| TRINITY_EFJ2220 | hypothetSelaginella_moellen  | 39.90 | 0.00 |
| TRINITY_GBG6612 | hypothetChara_braunii        | 39.90 | 0.00 |
| TRINITY_PPE0288 | hypothetGossypium_barbadens  | 39.90 | 0.00 |
| TRINITY_XP_0238 | saccharcQuercus_suber        | 39.90 | 0.00 |
| TRINITY_ERN0084 | hypothetAmborella_trichopod  | 39.90 | 0.00 |
| TRINITY_XP_0025 | predictεMicromonas_commoda   | 39.90 | 0.00 |
| TRINITY_GAX7836 | hypothetChlamydomonas_eusti  | 39.90 | 0.00 |
| TRINITY_ACU1779 | unknown Glycine_max          | 39.90 | 0.00 |
| TRINITY_GAX8025 | hypothetChlamydomonas_eusti  | 39.90 | 0.00 |
| TRINITY_GAQ8411 | splaryεKlebsormidium_niten   | 39.90 | 0.00 |
| TRINITY_XP_0029 | ubiquitiSelaginella_moellen  | 39.90 | 0.00 |
| TRINITY_PRW5738 | F-box orChlorella_sorokinia  | 39.90 | 0.00 |
| TRINITY_GAX8276 | hypothetChlamydomonas_eusti  | 39.90 | 0.00 |
| TRINITY_PNW8413 | hypothetChlamydomonas_reinh  | 39.90 | 0.00 |
| TRINITY_PNH0939 | Purple εTetrabaena_socialis  | 39.90 | 0.00 |
| TRINITY_EFJ3090 | hypothetSelaginella_moellen  | 39.90 | 0.00 |
| TRINITY_XP_0238 | porphobiQuercus_suber        | 39.90 | 0.00 |
| TRINITY_XP_0029 | hypothetVolvox_carteri       | 39.90 | 0.00 |
| TRINITY_KXZ4503 | hypothetGonium_pectorale     | 39.90 | 0.00 |
| TRINITY_RMZ5446 | hypothetAuxenochlorella_pro  | 39.90 | 0.00 |
| TRINITY_XP_0245 | protein Selaginella_moellen  | 39.90 | 0.00 |
| TRINITY_GAX7569 | hypothetChlamydomonas_eusti  | 39.90 | 0.00 |
| TRINITY_GAX8612 | hypothetChlamydomonas_eusti  | 39.90 | 0.00 |
| TRINITY_XP_0138 | hypothetMonoraphidium_negle  | 39.90 | 0.00 |
| TRINITY_XP_0138 | hypothetMonoraphidium_negle  | 39.90 | 0.00 |
| TRINITY_XP_0238 | ras-relεQuercus_suber        | 39.90 | 0.00 |
| TRINITY_PNW7252 | hypothetChlamydomonas_reinh  | 39.90 | 0.00 |
| TRINITY_KXZ5088 | hypothetGonium_pectorale     | 39.90 | 0.00 |
| TRINITY_KXZ4954 | hypothetGonium_pectorale     | 39.90 | 0.00 |
| TRINITY_GAX8151 | hypothetChlamydomonas_eusti  | 39.90 | 0.00 |
| TRINITY_XP_0202 | LOW QUAIAsparagus_officinal  | 39.90 | 0.00 |
| TRINITY_XP_0225 | uncharacBrassica_napus       | 39.90 | 0.00 |
| TRINITY_XP_0056 | hypothetCoccomyxa_subellips  | 39.90 | 0.00 |
| TRINITY_GAX7290 | hypothetChlamydomonas_eusti  | 39.90 | 0.00 |
| TRINITY_XP_0158 | PH, RCC1Ziziphus_jujuba      | 39.80 | 0.00 |
| TRINITY_PTQ3548 | hypothetMarchantia_polymorp  | 39.80 | 0.00 |
| TRINITY_XP_0239 | peroxidεQuercus_suber        | 39.80 | 0.00 |
| TRINITY_XP_0266 | EVI5-liPhoenix_dactylifera   | 39.80 | 0.00 |
| TRINITY_XP_0217 | transmenChenopodium_quinoa   | 39.80 | 0.00 |
| TRINITY_XP_0087 | dnaJ proPhoenix_dactylifera  | 39.80 | 0.00 |
| TRINITY_XP_0058 | hypothetChlorella_variabili  | 39.80 | 0.00 |
| TRINITY_GAQ9000 | Serine cKlebsormidium_niten  | 39.80 | 0.00 |
| TRINITY_KXZ4922 | hypothetGonium_pectorale     | 39.80 | 0.00 |
| TRINITY_XP_0137 | probableεBrassica_napus      | 39.80 | 0.00 |
| TRINITY_XP_0056 | hypothetCoccomyxa_subellips  | 39.80 | 0.00 |
| TRINITY_XP_0030 | ROK [OstOstreococcus_tauri   | 39.80 | 0.00 |
| TRINITY_PON5488 | Zinc firTrema_orientale      | 39.80 | 0.00 |
| TRINITY_KZV1389 | histidirDorcoceras_hygromet  | 39.80 | 0.00 |
| TRINITY_PRQ3407 | putativeεRosa_chinensis      | 39.80 | 0.00 |
| TRINITY_OMO8818 | RibosomεCorchorus_olitorius  | 39.80 | 0.00 |
| TRINITY_EEF2200 | two-comRicinus_communis      | 39.80 | 0.00 |
| TRINITY_GAX7763 | hypothetChlamydomonas_eusti  | 39.80 | 0.00 |
| TRINITY_XP_0238 | protein Quercus_suber        | 39.80 | 0.00 |
| TRINITY_BAK0167 | predictεHordeum_vulgare      | 39.80 | 0.00 |
| TRINITY_KXZ5694 | hypothetGonium_pectorale     | 39.80 | 0.00 |
| TRINITY_KDD7538 | hypothetHelicosporidium_sp.  | 39.80 | 0.00 |
| TRINITY_XP_0244 | (AP-2 conPhyscomitrella_pate | 39.80 | 0.00 |
| TRINITY_KXZ5575 | hypothetGonium_pectorale     | 39.80 | 0.00 |
| TRINITY_XP_0068 | C2 and (Amborella_trichopod  | 39.80 | 0.00 |
| TRINITY_XP_0029 | hypothetVolvox_carteri       | 39.80 | 0.00 |
| TRINITY_XP_0058 | hypothetChlorella_variabili  | 39.80 | 0.00 |
| TRINITY_XP_0165 | PREDICTIFCapsicum_annuum     | 39.80 | 0.00 |
| TRINITY_GAX7466 | hypothetChlamydomonas_eusti  | 39.80 | 0.00 |

|                 |           |                     |       |      |
|-----------------|-----------|---------------------|-------|------|
| TRINITY_XP_0087 | pre-mRN   | Phoenix_dactylifera | 39.80 | 0.00 |
| TRINITY_XP_0017 | predict   | Chlamydomonas_reinh | 39.80 | 0.00 |
| TRINITY_AIA2217 | 10HGO     | Gentiana_rigescens  | 39.80 | 0.00 |
| TRINITY_XP_0025 | predict   | Micromonas_commoda  | 39.80 | 0.00 |
| TRINITY_XP_0239 | callantoi | Quercus_suber       | 39.80 | 0.00 |
| TRINITY_GBF9963 | hypothet  | Raphidocelis_subcap | 39.80 | 0.00 |
| TRINITY_GAX8033 | hypothet  | Chlamydomonas_eusti | 39.80 | 0.00 |
| TRINITY_XP_0025 | predict   | Micromonas_commoda  | 39.80 | 0.00 |
| TRINITY_XP_0102 | PREDICTI  | Nelumbo_nucifera    | 39.80 | 0.00 |
| TRINITY_XP_0093 | PREDICTI  | Musa_acuminata      | 39.80 | 0.00 |
| TRINITY_XP_0243 | probable  | Physcomitrella_pate | 39.80 | 0.00 |
| TRINITY_XP_0194 | PREDICTI  | Lupinus_angustifoli | 39.80 | 0.00 |
| TRINITY_XP_0243 | protein   | Physcomitrella_pate | 39.80 | 0.00 |
| TRINITY_KZV2912 | heparan   | Dorcoceras_hygromet | 39.80 | 0.00 |
| TRINITY_XP_0016 | phosphat  | Chlamydomonas_reinh | 39.80 | 0.00 |
| TRINITY_BAK0075 | predict   | Hordeum_vulgare     | 39.80 | 0.00 |
| TRINITY_GAX8254 | hypothet  | Chlamydomonas_eusti | 39.80 | 0.00 |
| TRINITY_KDD7519 | hypothet  | Helicosporidium_sp. | 39.80 | 0.00 |
| TRINITY_GAX7444 | hypothet  | Chlamydomonas_eusti | 39.80 | 0.00 |
| TRINITY_BAK0112 | predict   | Hordeum_vulgare     | 39.80 | 0.00 |
| TRINITY_KXZ5341 | hypothet  | Gonium_pectorale    | 39.80 | 0.00 |
| TRINITY_GAX7826 | hypothet  | Chlamydomonas_eusti | 39.80 | 0.00 |
| TRINITY_KXZ5540 | hypothet  | Gonium_pectorale    | 39.80 | 0.00 |
| TRINITY_BAG1297 | RHYTHM    | Chlamydomonas_reinh | 39.80 | 0.00 |
| TRINITY_XP_0016 | predict   | Chlamydomonas_reinh | 39.80 | 0.00 |
| TRINITY_GAX7614 | hypothet  | Chlamydomonas_eusti | 39.80 | 0.00 |
| TRINITY_XP_0202 | ras-rel   | Asparagus_officinal | 39.80 | 0.00 |
| TRINITY_KXZ4910 | hypothet  | Gonium_pectorale    | 39.80 | 0.00 |
| TRINITY_GAX8562 | hypothet  | Chlamydomonas_eusti | 39.80 | 0.00 |
| TRINITY_XP_0105 | PREDICTI  | Tarenaya_hasslerian | 39.80 | 0.00 |
| TRINITY_XP_0192 | PREDICTI  | Nicotiana_attenuata | 39.80 | 0.00 |
| TRINITY_GAX7465 | hypothet  | Chlamydomonas_eusti | 39.80 | 0.00 |
| TRINITY_XP_0029 | hypothet  | Volvox_carteri      | 39.80 | 0.00 |
| TRINITY_GAQ8362 | HEAT re   | Klebsormidium_niten | 39.80 | 0.00 |
| TRINITY_BAK0075 | predict   | Hordeum_vulgare     | 39.80 | 0.00 |
| TRINITY_GAQ8371 | NADPH o   | Klebsormidium_niten | 39.80 | 0.00 |
| TRINITY_GAQ7861 | Mitochor  | Klebsormidium_niten | 39.80 | 0.00 |
| TRINITY_KYP7198 | CBL-int   | Cajanus_cajan       | 39.80 | 0.00 |
| TRINITY_PNH0830 | NFX1-ty   | Tetrabaena_socialis | 39.80 | 0.00 |
| TRINITY_XP_0217 | tyrosin   | Chenopodium_quinoa  | 39.80 | 0.00 |
| TRINITY_EEC6715 | hypothet  | Oryza_sativa        | 39.80 | 0.00 |
| TRINITY_GAX7459 | hypothet  | Chlamydomonas_eusti | 39.80 | 0.00 |
| TRINITY_PNW7201 | hypothet  | Chlamydomonas_reinh | 39.80 | 0.00 |
| TRINITY_ACG3855 | hypothet  | Zea_mays            | 39.80 | 0.00 |
| TRINITY_PNW7723 | hypothet  | Chlamydomonas_reinh | 39.80 | 0.00 |
| TRINITY_GAX7557 | hypothet  | Chlamydomonas_eusti | 39.80 | 0.00 |
| TRINITY_PWA5732 | Micro-fi  | Artemisia_annua     | 39.80 | 0.00 |
| TRINITY_PNW8812 | hypothet  | Chlamydomonas_reinh | 39.80 | 0.00 |
| TRINITY_XP_0202 | probable  | Asparagus_officinal | 39.80 | 0.00 |
| TRINITY_OAE3454 | hypothet  | Marchantia_polymorp | 39.80 | 0.00 |
| TRINITY_XP_0238 | probable  | Quercus_suber       | 39.80 | 0.00 |
| TRINITY_GBF9531 | hypothet  | Raphidocelis_subcap | 39.80 | 0.00 |
| TRINITY_XP_0016 | predict   | Chlamydomonas_reinh | 39.80 | 0.00 |
| TRINITY_GAX7314 | hypothet  | Chlamydomonas_eusti | 39.80 | 0.00 |
| TRINITY_XP_0216 | putativ   | Hevea_brasiliensis  | 39.80 | 0.00 |
| TRINITY_KHG2392 | Elongati  | Gossypium_arboreum  | 39.80 | 0.00 |
| TRINITY_XP_0228 | Small G   | Ostreococcus_tauri  | 39.80 | 0.00 |
| TRINITY_RYQ8943 | hypothet  | Arachis_hypogaea    | 39.80 | 0.00 |
| TRINITY_GAX7742 | hypothet  | Chlamydomonas_eusti | 39.80 | 0.00 |
| TRINITY_XP_0139 | hypothet  | Monoraphidium_negle | 39.80 | 0.00 |
| TRINITY_XP_0029 | hypothet  | Volvox_carteri      | 39.80 | 0.00 |
| TRINITY_XP_0241 | kinesin   | Rosa_chinensis      | 39.80 | 0.00 |
| TRINITY_OWM7264 | hypothet  | Punica_granatum     | 39.80 | 0.00 |
| TRINITY_CAA4928 | gag, prot | Volvox_carteri      | 39.80 | 0.00 |
| TRINITY_GBF9557 | hypothet  | Raphidocelis_subcap | 39.80 | 0.00 |
| TRINITY_GAX8213 | hypothet  | Chlamydomonas_eusti | 39.80 | 0.00 |

|                  |                              |       |      |
|------------------|------------------------------|-------|------|
| TRINITY_XP_00584 | hypothetChlorella_variabili  | 39.80 | 0.00 |
| TRINITY_GBF88985 | brefeldiRaphidocelis_subcap  | 39.80 | 0.00 |
| TRINITY_PNW79775 | hypothetChlamydomonas_reinh  | 39.80 | 0.00 |
| TRINITY_PNW76363 | hypothetChlamydomonas_reinh  | 39.80 | 0.00 |
| TRINITY_XP_01941 | PREDICTIHLupinus_angustifoli | 39.80 | 0.00 |
| TRINITY_CDY12069 | BnaC03gBrassica_napus        | 39.80 | 0.00 |
| TRINITY_XP_01667 | PREDICTIGossypium_hirsutum   | 39.80 | 0.00 |
| TRINITY_PRW58875 | UVR3 3-]Chlorella_sorokinia  | 39.70 | 0.00 |
| TRINITY_XP_0025  | (predicteMicromonas_commoda  | 39.70 | 0.00 |
| TRINITY_XP_00843 | PREDICTICucumis_melo         | 39.70 | 0.00 |
| TRINITY_XP_0025  | (predicteMicromonas_commoda  | 39.70 | 0.00 |
| TRINITY_XP_0088  | (anaphasePhoenix_dactylifera | 39.70 | 0.00 |
| TRINITY_OAY73583 | MethyltrAnanas_comosus       | 39.70 | 0.00 |
| TRINITY_XP_02388 | protein-Quercus_suber        | 39.70 | 0.00 |
| TRINITY_PRW59534 | MFS geneChlorella_sorokinia  | 39.70 | 0.00 |
| TRINITY_XP_01475 | phospho]Brachypodium_distac  | 39.70 | 0.00 |
| TRINITY_XP_0072  | (ribosomaPrunus_persica      | 39.70 | 0.00 |
| TRINITY_XP_02452 | probableSelaginella_moellen  | 39.70 | 0.00 |
| TRINITY_GAX80993 | hypothetChlamydomonas_eusti  | 39.70 | 0.00 |
| TRINITY_XP_02418 | translirRosa_chinensis       | 39.70 | 0.00 |
| TRINITY_XP_00685 | probableAmborella_trichopod  | 39.70 | 0.00 |
| TRINITY_OTF8484  | (putativeHelianthus_annuus   | 39.70 | 0.00 |
| TRINITY_RWW84243 | hypothetEnsete_ventricosum   | 39.70 | 0.00 |
| TRINITY_EFJ11461 | hypothetSelaginella_moellen  | 39.70 | 0.00 |
| TRINITY_XP_02389 | probableQuercus_suber        | 39.70 | 0.00 |
| TRINITY_XP_00298 | E3 ubiqSelaginella_moellen   | 39.70 | 0.00 |
| TRINITY_GAQ81618 | ABC trarKlebsormidium_niten  | 39.70 | 0.00 |
| TRINITY_GAQ86693 | hypothetKlebsormidium_niten  | 39.70 | 0.00 |
| TRINITY_GAX80832 | hypothetChlamydomonas_eusti  | 39.70 | 0.00 |
| TRINITY_RDY0135  | (putativeMucuna_pruriens     | 39.70 | 0.00 |
| TRINITY_XP_01506 | translatSolanum_pennellii    | 39.70 | 0.00 |
| TRINITY_XP_0264  | (serine/tPapaver_somniferum  | 39.70 | 0.00 |
| TRINITY_XP_00496 | kinesin-Setaria_italica      | 39.70 | 0.00 |
| TRINITY_XP_01507 | ras-relaSolanum_pennellii    | 39.70 | 0.00 |
| TRINITY_PTQ36094 | hypothetMarchantia_polymorp  | 39.70 | 0.00 |
| TRINITY_PNH05371 | HydrogerTetrabaena_socialis  | 39.70 | 0.00 |
| TRINITY_PNW76665 | hypothetChlamydomonas_reinh  | 39.70 | 0.00 |
| TRINITY_PNW77938 | hypothetChlamydomonas_reinh  | 39.70 | 0.00 |
| TRINITY_XP_02437 | DNA damaPhyscomitrella_pate  | 39.70 | 0.00 |
| TRINITY_PRW44423 | Peptidy]Chlorella_sorokinia  | 39.70 | 0.00 |
| TRINITY_XP_00449 | pirin-liCicer_arietinum      | 39.70 | 0.00 |
| TRINITY_GAU48409 | hypothetTrifolium_subterran  | 39.70 | 0.00 |
| TRINITY_EOY25135 | RNA-binTheobroma_cacao       | 39.70 | 0.00 |
| TRINITY_GAX79643 | hypothetChlamydomonas_eusti  | 39.70 | 0.00 |
| TRINITY_GAQ84085 | ABC AcylKlebsormidium_niten  | 39.70 | 0.00 |
| TRINITY_PSC69593 | Sucrose-Micractinium_conduc  | 39.70 | 0.00 |
| TRINITY_XP_02389 | branchpcQuercus_suber        | 39.70 | 0.00 |
| TRINITY_KXZ51309 | hypothetGonium_pectorale     | 39.70 | 0.00 |
| TRINITY_GAQ8976  | (mitochorKlebsormidium_niten | 39.70 | 0.00 |
| TRINITY_GBG71031 | hypothetChara_braunii        | 39.70 | 0.00 |
| TRINITY_PNW80496 | hypothetChlamydomonas_reinh  | 39.70 | 0.00 |
| TRINITY_KXZ44905 | hypothetGonium_pectorale     | 39.70 | 0.00 |
| TRINITY_GAX8523  | (hypothetChlamydomonas_eusti | 39.70 | 0.00 |
| TRINITY_XP_01047 | PREDICTICamelina_sativa      | 39.70 | 0.00 |
| TRINITY_GAX79184 | hypothetChlamydomonas_eusti  | 39.70 | 0.00 |
| TRINITY_PLY99793 | hypothetLactuca_sativa       | 39.70 | 0.00 |
| TRINITY_XP_02644 | intermecPapaver_somniferum   | 39.70 | 0.00 |
| TRINITY_XP_02164 | afadin- Hevea_brasiliensis   | 39.70 | 0.00 |
| TRINITY_CAA04763 | 95 kD baSpermatozopsis_simi  | 39.70 | 0.00 |
| TRINITY_XP_0139  | (Dynein ]Monoraphidium_negle | 39.70 | 0.00 |
| TRINITY_XP_01588 | ABC trarZiziphus_jujuba      | 39.70 | 0.00 |
| TRINITY_KXZ51993 | hypothetGonium_pectorale     | 39.70 | 0.00 |
| TRINITY_KXZ49213 | hypothetGonium_pectorale     | 39.70 | 0.00 |
| TRINITY_XP_00564 | hypothetCoccomyxa_subellips  | 39.70 | 0.00 |
| TRINITY_GBG84779 | hypothetChara_braunii        | 39.70 | 0.00 |
| TRINITY_PSC73715 | carotenMicractinium_conduc   | 39.70 | 0.00 |

|                 |           |                     |       |      |
|-----------------|-----------|---------------------|-------|------|
| TRINITY_XP_0016 | predict   | Chlamydomonas_reinh | 39.70 | 0.00 |
| TRINITY_KXZ4694 | hypothet  | Gonium_pectorale    | 39.70 | 0.00 |
| TRINITY_ONM5110 | Protein   | Zea_mays            | 39.70 | 0.00 |
| TRINITY_XP_0216 | multiple  | Manihot_esculenta   | 39.70 | 0.00 |
| TRINITY_XP_0029 | chromati  | Selaginella_moellen | 39.60 | 0.00 |
| TRINITY_RID5033 | hypothet  | Brassica_rapa       | 39.60 | 0.00 |
| TRINITY_EPS6977 | hypothet  | Genlisea_aurea      | 39.60 | 0.00 |
| TRINITY_ACG4585 | wheel-li  | Zea_mays            | 39.60 | 0.00 |
| TRINITY_XP_0220 | (DNA pol) | Helianthus_annuus   | 39.60 | 0.00 |
| TRINITY_GAX7423 | (hypothet | Chlamydomonas_eusti | 39.60 | 0.00 |
| TRINITY_YP_0094 | NADH-pl   | Asplenium_prolongat | 39.60 | 0.00 |
| TRINITY_KMZ6040 | Abhydrol  | Zostera_marina      | 39.60 | 0.00 |
| TRINITY_XP_0091 | PREDICTI  | Brassica_rapa       | 39.60 | 0.00 |
| TRINITY_XP_0165 | PREDICTI  | Nicotiana_tabacum   | 39.60 | 0.00 |
| TRINITY_XP_0056 | alpha/b   | Coccomyxa_subellips | 39.60 | 0.00 |
| TRINITY_XP_0056 | Metallo-  | Coccomyxa_subellips | 39.60 | 0.00 |
| TRINITY_XP_0229 | respirat  | Cucurbita_maxima    | 39.60 | 0.00 |
| TRINITY_XP_0056 | hypothet  | Coccomyxa_subellips | 39.60 | 0.00 |
| TRINITY_ABK2149 | unknown   | Picea_sitchensis    | 39.60 | 0.00 |
| TRINITY_XP_0064 | eukaryot  | Citrus_clementina   | 39.60 | 0.00 |
| TRINITY_XP_0056 | hypothet  | Coccomyxa_subellips | 39.60 | 0.00 |
| TRINITY_YP_6657 | NADH de   | Mesostigma_viride   | 39.60 | 0.00 |
| TRINITY_XP_0191 | PREDICTI  | Ipomoea_nil         | 39.60 | 0.00 |
| TRINITY_XP_0024 | predict   | Micromonas_commoda  | 39.60 | 0.00 |
| TRINITY_XP_0093 | PREDICTI  | Pyrus_x_bretschneid | 39.60 | 0.00 |
| TRINITY_XP_0068 | mannose-  | Amborella_trichopod | 39.60 | 0.00 |
| TRINITY_KZV3010 | hypothet  | Dorcoceras_hygromet | 39.60 | 0.00 |
| TRINITY_KXZ5422 | hypothet  | Gonium_pectorale    | 39.60 | 0.00 |
| TRINITY_XP_0058 | hypothet  | Chlorella_variabili | 39.60 | 0.00 |
| TRINITY_GAX8078 | hypothet  | Chlamydomonas_eusti | 39.60 | 0.00 |
| TRINITY_GAQ8232 | (Acyl-Co  | Klebsormidium_niten | 39.60 | 0.00 |
| TRINITY_PNH0830 | Leucine-  | Tetrabaena_socialis | 39.60 | 0.00 |
| TRINITY_GAQ8209 | hypothet  | Klebsormidium_niten | 39.60 | 0.00 |
| TRINITY_PNW8820 | hypothet  | Chlamydomonas_reinh | 39.60 | 0.00 |
| TRINITY_BAJ9701 | predict   | Hordeum_vulgare     | 39.60 | 0.00 |
| TRINITY_XP_0029 | hypothet  | Volvox_carteri      | 39.60 | 0.00 |
| TRINITY_PSC7535 | (putative | Micractinium_conduc | 39.60 | 0.00 |
| TRINITY_PNH0193 | hypothet  | Tetrabaena_socialis | 39.60 | 0.00 |
| TRINITY_EEE6198 | hypothet  | Oryza_sativa        | 39.60 | 0.00 |
| TRINITY_XP_0029 | protein   | Selaginella_moellen | 39.60 | 0.00 |
| TRINITY_KXZ5052 | hypothet  | Gonium_pectorale    | 39.60 | 0.00 |
| TRINITY_XP_0062 | transcri  | Capsella_rubella    | 39.60 | 0.00 |
| TRINITY_XP_0104 | PREDICTI  | Camelina_sativa     | 39.60 | 0.00 |
| TRINITY_XP_0202 | serine/t  | Asparagus_officinal | 39.60 | 0.00 |
| TRINITY_GAX8498 | hypothet  | Chlamydomonas_eusti | 39.60 | 0.00 |
| TRINITY_XP_0138 | hypothet  | Monoraphidium_negle | 39.60 | 0.00 |
| TRINITY_KXZ5451 | hypothet  | Gonium_pectorale    | 39.60 | 0.00 |
| TRINITY_XP_0227 | (calcium- | Durio_zibethinus    | 39.60 | 0.00 |
| TRINITY_XP_0056 | CDP-Eth   | Coccomyxa_subellips | 39.60 | 0.00 |
| TRINITY_RXH9768 | hypothet  | Malus_domestica     | 39.60 | 0.00 |
| TRINITY_XP_0237 | integrir  | Lactuca_sativa      | 39.60 | 0.00 |
| TRINITY_GBF9230 | hypothet  | Raphidocelis_subcap | 39.60 | 0.00 |
| TRINITY_GBF8771 | hypothet  | Raphidocelis_subcap | 39.60 | 0.00 |
| TRINITY_KXZ4183 | hypothet  | Gonium_pectorale    | 39.60 | 0.00 |
| TRINITY_XP_0017 | (predict  | Chlamydomonas_reinh | 39.60 | 0.00 |
| TRINITY_XP_0124 | PREDICTI  | Gossypium_raimondii | 39.60 | 0.00 |
| TRINITY_XP_0105 | PREDICTI  | Tarenaya_hasslerian | 39.60 | 0.00 |
| TRINITY_XP_0029 | uncharac  | Selaginella_moellen | 39.60 | 0.00 |
| TRINITY_PON9401 | Sirtuin   | Trema_orientale     | 39.60 | 0.00 |
| TRINITY_GAX7820 | hypothet  | Chlamydomonas_eusti | 39.60 | 0.00 |
| TRINITY_XP_0016 | predict   | Chlamydomonas_reinh | 39.60 | 0.00 |
| TRINITY_XP_0244 | (DEAD-bo  | Physcomitrella_pate | 39.60 | 0.00 |
| TRINITY_KMZ5842 | (SWI/SNF- | Zostera_marina      | 39.60 | 0.00 |
| TRINITY_PNW7547 | hypothet  | Chlamydomonas_reinh | 39.60 | 0.00 |
| TRINITY_XP_0025 | (predict  | Micromonas_commoda  | 39.60 | 0.00 |
| TRINITY_PNW7858 | hypothet  | Chlamydomonas_reinh | 39.60 | 0.00 |

|                  |                              |       |      |
|------------------|------------------------------|-------|------|
| TRINITY_PNW81857 | hypothetChlamydomonas_reinh  | 39.60 | 0.00 |
| TRINITY_XP_01451 | protein Vigna_radiata        | 39.60 | 0.00 |
| TRINITY_GAQ85119 | hypothetKlebsormidium_niten  | 39.60 | 0.00 |
| TRINITY_XP_00295 | amino acVolvox_carteri       | 39.60 | 0.00 |
| TRINITY_PNH1172  | (hypothetTetrabaena_socialis | 39.60 | 0.00 |
| TRINITY_GAX74293 | hypothetChlamydomonas_eusti  | 39.60 | 0.00 |
| TRINITY_GAX73659 | hypothetChlamydomonas_eusti  | 39.60 | 0.00 |
| TRINITY_PSC76624 | UPF0553 Micractinium_conduc  | 39.60 | 0.00 |
| TRINITY_EFJ28697 | hypothetSelaginella_moellen  | 39.60 | 0.00 |
| TRINITY_XP_00169 | predicteChlamydomonas_reinh  | 39.60 | 0.00 |
| TRINITY_PIA63024 | hypothetAquilegia_coerulea   | 39.60 | 0.00 |
| TRINITY_XP_01069 | PREDICTIBeta_vulgaris        | 39.60 | 0.00 |
| TRINITY_XP_0063  | (peptidy]Capsella_rubella    | 39.60 | 0.00 |
| TRINITY_GAQ78747 | PutativεKlebsormidium_niten  | 39.60 | 0.00 |
| TRINITY_GAQ79657 | hypothetKlebsormidium_niten  | 39.60 | 0.00 |
| TRINITY_GAX76369 | hypothetChlamydomonas_eusti  | 39.60 | 0.00 |
| TRINITY_EFH65391 | hypothetArabidopsis_lyrata   | 39.60 | 0.00 |
| TRINITY_XP_01206 | importirJatropha_curcas      | 39.60 | 0.00 |
| TRINITY_KXZ49573 | hypothetGonium_pectorale     | 39.60 | 0.00 |
| TRINITY_EFJ09552 | hypothetSelaginella_moellen  | 39.60 | 0.00 |
| TRINITY_KXZ44705 | hypothetGonium_pectorale     | 39.60 | 0.00 |
| TRINITY_GAX77582 | hypothetChlamydomonas_eusti  | 39.60 | 0.00 |
| TRINITY_KXZ55213 | hypothetGonium_pectorale     | 39.60 | 0.00 |
| TRINITY_XP_02391 | carbamo]Quercus_suber        | 39.60 | 0.00 |
| TRINITY_KXZ41584 | hypothetGonium_pectorale     | 39.60 | 0.00 |
| TRINITY_OMO87542 | hypothetCorchorus_capsulari  | 39.60 | 0.00 |
| TRINITY_GBF90642 | p-type εRaphidocelis_subcap  | 39.60 | 0.00 |
| TRINITY_PNH02871 | hypothetTetrabaena_socialis  | 39.60 | 0.00 |
| TRINITY_XP_01762 | PREDICTIGossypium_arboreum   | 39.60 | 0.00 |
| TRINITY_GAX85343 | hypothetChlamydomonas_eusti  | 39.60 | 0.00 |
| TRINITY_XP_00843 | PREDICTICucumis_melo         | 39.60 | 0.00 |
| TRINITY_PNH09927 | putativεTetrabaena_socialis  | 39.60 | 0.00 |
| TRINITY_PNH09403 | hypothetTetrabaena_socialis  | 39.60 | 0.00 |
| TRINITY_XP_01049 | PREDICTICamelina_sativa      | 39.60 | 0.00 |
| TRINITY_BAK02778 | predicteHordeum_vulgare      | 39.60 | 0.00 |
| TRINITY_GAX84397 | hypothetChlamydomonas_eusti  | 39.60 | 0.00 |
| TRINITY_XP_01596 | vesicle Arachis_duranensis   | 39.60 | 0.00 |
| TRINITY_XP_02437 | uncharacPhyscomitrella_pate  | 39.60 | 0.00 |
| TRINITY_RVW32157 | Protein Vitis_vinifera       | 39.50 | 0.00 |
| TRINITY_XP_01006 | PREDICTIEucalyptus_grandis   | 39.50 | 0.00 |
| TRINITY_XP_01916 | PREDICTHIpomoea_nil          | 39.50 | 0.00 |
| TRINITY_GAV8118  | (LacAB_r]Cephalotus_follicul | 39.50 | 0.00 |
| TRINITY_GBF95774 | hypothetRaphidocelis_subcap  | 39.50 | 0.00 |
| TRINITY_GAQ90409 | multico]Klebsormidium_niten  | 39.50 | 0.00 |
| TRINITY_XP_02492 | calcium-Ziziphus_jujuba      | 39.50 | 0.00 |
| TRINITY_RID46574 | hypothetBrassica_rapa        | 39.50 | 0.00 |
| TRINITY_XP_02188 | protein Carica_papaya        | 39.50 | 0.00 |
| TRINITY_PNX98881 | putativεTrifolium_pratense   | 39.50 | 0.00 |
| TRINITY_XP_02736 | (ATP-depεAbrus_precatorius   | 39.50 | 0.00 |
| TRINITY_OAE34754 | hypothetMarchantia_polymorp  | 39.50 | 0.00 |
| TRINITY_XP_00294 | hypothetVolvox_carteri       | 39.50 | 0.00 |
| TRINITY_XP_02204 | ARM REPIHelianthus_annuus    | 39.50 | 0.00 |
| TRINITY_CAI84893 | putativεMedicago_sativa      | 39.50 | 0.00 |
| TRINITY_XP_02197 | HEAT re]Helianthus_annuus    | 39.50 | 0.00 |
| TRINITY_NP_17349 | DNA-binεArabidopsis_thalian  | 39.50 | 0.00 |
| TRINITY_PNW73387 | hypothetChlamydomonas_reinh  | 39.50 | 0.00 |
| TRINITY_XP_02438 | mitochorPhyscomitrella_pate  | 39.50 | 0.00 |
| TRINITY_GAQ91655 | RUN and Klebsormidium_niten  | 39.50 | 0.00 |
| TRINITY_XP_0025  | (predicteMicromonas_commoda  | 39.50 | 0.00 |
| TRINITY_XP_02288 | cactin iOlea_europaea        | 39.50 | 0.00 |
| TRINITY_PNH1142  | (hypothetTetrabaena_socialis | 39.50 | 0.00 |
| TRINITY_GAX7594  | (hypothetChlamydomonas_eusti | 39.50 | 0.00 |
| TRINITY_GAX81855 | hypothetChlamydomonas_eusti  | 39.50 | 0.00 |
| TRINITY_EPS71756 | (alpha-g]Genlisea_aurea      | 39.50 | 0.00 |
| TRINITY_PRW58628 | chlorop]Chlorella_sorokinia  | 39.50 | 0.00 |
| TRINITY_PNW84479 | hypothetChlamydomonas_reinh  | 39.50 | 0.00 |

|                  |          |                     |       |      |
|------------------|----------|---------------------|-------|------|
| TRINITY_XP_02202 | pre-mRN  | Helianthus_annuus   | 39.50 | 0.00 |
| TRINITY_GAX8212  | hypothet | Chlamydomonas_eusti | 39.50 | 0.00 |
| TRINITY_KXZ4380  | hypothet | Gonium_pectorale    | 39.50 | 0.00 |
| TRINITY_GAX7616  | hypothet | Chlamydomonas_eusti | 39.50 | 0.00 |
| TRINITY_RLN1236  | LRR rec  | Panicum_miliaceum   | 39.50 | 0.00 |
| TRINITY_XP_02274 | calcium  | Durio_zibethinus    | 39.50 | 0.00 |
| TRINITY_KXZ4678  | hypothet | Gonium_pectorale    | 39.50 | 0.00 |
| TRINITY_GBF96741 | hypothet | Raphidocelis_subcap | 39.50 | 0.00 |
| TRINITY_GAQ8014  | GTPase   | Klebsormidium_niten | 39.50 | 0.00 |
| TRINITY_XP_0238  | 22.0 kD  | Quercus_suber       | 39.50 | 0.00 |
| TRINITY_GAV59961 | SNF2_N   | Cephalotus_follicul | 39.50 | 0.00 |
| TRINITY_KXZ4181  | hypothet | Gonium_pectorale    | 39.50 | 0.00 |
| TRINITY_KXZ4659  | hypothet | Gonium_pectorale    | 39.50 | 0.00 |
| TRINITY_KCW7333  | hypothet | Eucalyptus_grandis  | 39.50 | 0.00 |
| TRINITY_POC8M8.1 | RecName: | Zea_mays            | 39.50 | 0.00 |
| TRINITY_RCV3883  | hypothet | Setaria_italica     | 39.50 | 0.00 |
| TRINITY_PNW7730  | hypothet | Chlamydomonas_reinh | 39.50 | 0.00 |
| TRINITY_GAX7576  | hypothet | Chlamydomonas_eusti | 39.50 | 0.00 |
| TRINITY_GAX8300  | hypothet | Chlamydomonas_eusti | 39.50 | 0.00 |
| TRINITY_XP_0016  | predict  | Chlamydomonas_reinh | 39.50 | 0.00 |
| TRINITY_XP_0029  | hypothet | Volvox_carteri      | 39.50 | 0.00 |
| TRINITY_XP_0165  | PREDICT  | Capsicum_annuum     | 39.50 | 0.00 |
| TRINITY_XP_0025  | predict  | Micromonas_commoda  | 39.50 | 0.00 |
| TRINITY_XP_0029  | microtuk | Selaginella_moellen | 39.50 | 0.00 |
| TRINITY_GAX8498  | hypothet | Chlamydomonas_eusti | 39.50 | 0.00 |
| TRINITY_PNH1021  | Glucosic | Tetrabaena_socialis | 39.50 | 0.00 |
| TRINITY_XP_00451 | mitochor | Cicer_arietinum     | 39.50 | 0.00 |
| TRINITY_XP_01051 | PREDICT  | Tarenaya_hasslerian | 39.50 | 0.00 |
| TRINITY_GAX8441  | hypothet | Chlamydomonas_eusti | 39.50 | 0.00 |
| TRINITY_PNW7884  | hypothet | Chlamydomonas_reinh | 39.50 | 0.00 |
| TRINITY_XP_0237  | tRNA ps  | Lactuca_sativa      | 39.50 | 0.00 |
| TRINITY_GBF9064  | p-type   | Raphidocelis_subcap | 39.50 | 0.00 |
| TRINITY_GAX7464  | hypothet | Chlamydomonas_eusti | 39.50 | 0.00 |
| TRINITY_XP_0017  | predict  | Chlamydomonas_reinh | 39.50 | 0.00 |
| TRINITY_XP_0273  | eukaryot | Abrus_precatorius   | 39.50 | 0.00 |
| TRINITY_KXZ53281 | hypothet | Gonium_pectorale    | 39.50 | 0.00 |
| TRINITY_NP_0013  | uncharac | Zea_mays            | 39.40 | 0.00 |
| TRINITY_RWR7608  | (ADP-rib | Cinnamomum_micranth | 39.40 | 0.00 |
| TRINITY_XP_0072  | ABC trar | Prunus_persica      | 39.40 | 0.00 |
| TRINITY_XP_0030  | Plectin, | Ostreococcus_tauri  | 39.40 | 0.00 |
| TRINITY_PSC7639  | (Jumonji | Micractinium_conduc | 39.40 | 0.00 |
| TRINITY_XP_0244  | (serine/ | Physcomitrella_pate | 39.40 | 0.00 |
| TRINITY_XP_0217  | transcri | Chenopodium_quinoa  | 39.40 | 0.00 |
| TRINITY_XP_0045  | (CTD sma | Cicer_arietinum     | 39.40 | 0.00 |
| TRINITY_XP_0271  | (NADH de | Coffea_arabica      | 39.40 | 0.00 |
| TRINITY_XP_0025  | predict  | Micromonas_commoda  | 39.40 | 0.00 |
| TRINITY_GAQ89681 | hypothet | Klebsormidium_niten | 39.40 | 0.00 |
| TRINITY_OVA1939  | zinc fir | Macleaya_cordata    | 39.40 | 0.00 |
| TRINITY_XP_0205  | {DCN1-li | Phalaenopsis_equest | 39.40 | 0.00 |
| TRINITY_XP_0124  | PREDICT  | Gossypium_raimondii | 39.40 | 0.00 |
| TRINITY_XP_0243  | dual sp  | Physcomitrella_pate | 39.40 | 0.00 |
| TRINITY_XP_0172  | PREDICT  | Daucus_carota       | 39.40 | 0.00 |
| TRINITY_GAQ8534  | Ca2+-bir | Klebsormidium_niten | 39.40 | 0.00 |
| TRINITY_AFN4283  | intrafl  | Marsilea_vestita    | 39.40 | 0.00 |
| TRINITY_GAX8563  | hypothet | Chlamydomonas_eusti | 39.40 | 0.00 |
| TRINITY_PNW78521 | hypothet | Chlamydomonas_reinh | 39.40 | 0.00 |
| TRINITY_CDY1681  | BnaA09g  | (Brassica_napus     | 39.40 | 0.00 |
| TRINITY_XP_0139  | hypothet | Monoraphidium_negle | 39.40 | 0.00 |
| TRINITY_GAX7576  | hypothet | Chlamydomonas_eusti | 39.40 | 0.00 |
| TRINITY_PSC7520  | thiamin  | Micractinium_conduc | 39.40 | 0.00 |
| TRINITY_ABK2332  | unknown  | Picea_sitchensis    | 39.40 | 0.00 |
| TRINITY_KXZ4951  | hypothet | Gonium_pectorale    | 39.40 | 0.00 |
| TRINITY_XP_0064  | importir | Citrus_sinensis     | 39.40 | 0.00 |
| TRINITY_XP_0016  | predict  | Chlamydomonas_reinh | 39.40 | 0.00 |
| TRINITY_KDP3059  | hypothet | Jatropha_curcas     | 39.40 | 0.00 |
| TRINITY_PNW8129  | hypothet | Chlamydomonas_reinh | 39.40 | 0.00 |

|                          |                     |       |      |
|--------------------------|---------------------|-------|------|
| TRINITY_XP_0063(heat shc | Capsella_rubella    | 39.40 | 0.00 |
| TRINITY_XP_0029(protein  | Selaginella_moellen | 39.40 | 0.00 |
| TRINITY_GBG7026(hypothet | Chara_braunii       | 39.40 | 0.00 |
| TRINITY_GAX7542(hypothet | Chlamydomonas_eusti | 39.40 | 0.00 |
| TRINITY_KXZ4590(DHC7 prc | Gonium_pectorale    | 39.40 | 0.00 |
| TRINITY_PIA3564(hypothet | Aquilegia_coerulea  | 39.40 | 0.00 |
| TRINITY_EEF2298(glucosyl | Ricinus_communis    | 39.40 | 0.00 |
| TRINITY_XP_0056(ubiquiti | Coccomyxa_subellips | 39.40 | 0.00 |
| TRINITY_GAX8319(hypothet | Chlamydomonas_eusti | 39.40 | 0.00 |
| TRINITY_XP_0056(laminin  | Coccomyxa_subellips | 39.40 | 0.00 |
| TRINITY_GAQ8246(aldehyde | Klebsormidium_niten | 39.40 | 0.00 |
| TRINITY_KMZ5717(Acyl-Co  | Zostera_marina      | 39.40 | 0.00 |
| TRINITY_PNW8623(hypothet | Chlamydomonas_reinh | 39.40 | 0.00 |
| TRINITY_PSC7707(putativ  | Micractinium_conduc | 39.40 | 0.00 |
| TRINITY_GAX8022(hypothet | Chlamydomonas_eusti | 39.40 | 0.00 |
| TRINITY_XP_0226(protein  | Vigna_radiata       | 39.40 | 0.00 |
| TRINITY_XP_0100(PREDICTI | Eucalyptus_grandis  | 39.40 | 0.00 |
| TRINITY_ATB1973(putativ  | Calocedrus_decurren | 39.40 | 0.00 |
| TRINITY_XP_0025(predict  | Micromonas_commoda  | 39.40 | 0.00 |
| TRINITY_XP_0239(guanine  | Quercus_suber       | 39.40 | 0.00 |
| TRINITY_GBF9172(hypothet | Raphidocelis_subcap | 39.40 | 0.00 |
| TRINITY_XP_0062(uncharac | Capsella_rubella    | 39.40 | 0.00 |
| TRINITY_GAX7302(hypothet | Chlamydomonas_eusti | 39.40 | 0.00 |
| TRINITY_XP_0043(PREDICTI | Fragaria-vesca      | 39.40 | 0.00 |
| TRINITY_GAX7394(hypothet | Chlamydomonas_eusti | 39.40 | 0.00 |
| TRINITY_XP_0029(hypothet | Volvox_carteri      | 39.40 | 0.00 |
| TRINITY_PNW6988(hypothet | Chlamydomonas_reinh | 39.40 | 0.00 |
| TRINITY_PNW8058(hypothet | Chlamydomonas_reinh | 39.40 | 0.00 |
| TRINITY_XP_0167(PREDICTI | Gossypium_hirsutum  | 39.40 | 0.00 |
| TRINITY_PNH1161(hypothet | Tetrabaena_socialis | 39.40 | 0.00 |
| TRINITY_PTQ3094(hypothet | Marchantia_polymorp | 39.40 | 0.00 |
| TRINITY_KXZ4844(hypothet | Gonium_pectorale    | 39.40 | 0.00 |
| TRINITY_XP_0239(cras-lik | Quercus_suber       | 39.40 | 0.00 |
| TRINITY_PSS2679(Mannitol | Actinidia_chinensis | 39.40 | 0.00 |
| TRINITY_CBI3794(unnamed  | Vitis_vinifera      | 39.40 | 0.00 |
| TRINITY_GBF8765(ABC trar | Raphidocelis_subcap | 39.40 | 0.00 |
| TRINITY_EPS7086(hypothet | Genlisea_aurea      | 39.40 | 0.00 |
| TRINITY_XP_0029(hypothet | Volvox_carteri      | 39.40 | 0.00 |
| TRINITY_P0C8M8.1RecName: | Zea_mays            | 39.40 | 0.00 |
| TRINITY_PKA6280(Protein  | Apostasia_shenzheni | 39.40 | 0.00 |
| TRINITY_PSC7683(U3 small | Micractinium_conduc | 39.40 | 0.00 |
| TRINITY_GAX8167(hypothet | Chlamydomonas_eusti | 39.40 | 0.00 |
| TRINITY_XP_0238(peroxid  | Quercus_suber       | 39.40 | 0.00 |
| TRINITY_XP_0056(serine/t | Coccomyxa_subellips | 39.40 | 0.00 |
| TRINITY_PSC7125(transpor | Micractinium_conduc | 39.40 | 0.00 |
| TRINITY_XP_0102(PREDICTI | Nelumbo_nucifera    | 39.40 | 0.00 |
| TRINITY_XP_0124(PREDICTI | Gossypium_raimondii | 39.40 | 0.00 |
| TRINITY_XP_0088(vacuola  | Phoenix_dactylifera | 39.40 | 0.00 |
| TRINITY_GAX7517(hypothet | Chlamydomonas_eusti | 39.40 | 0.00 |
| TRINITY_CDM8581(unnamed  | Triticum_aestivum   | 39.30 | 0.00 |
| TRINITY_KXZ4854(hypothet | Gonium_pectorale    | 39.30 | 0.00 |
| TRINITY_EFJ1033(hypothet | Selaginella_moellen | 39.30 | 0.00 |
| TRINITY_GBG6841(hypothet | Chara_braunii       | 39.30 | 0.00 |
| TRINITY_PSC7632(inorgani | Micractinium_conduc | 39.30 | 0.00 |
| TRINITY_XP_0058(hypothet | Chlorella_variabili | 39.30 | 0.00 |
| TRINITY_PIM9699(hypothet | Handroanthus_impeti | 39.30 | 0.00 |
| TRINITY_ABK2507(unknown  | Picea_sitchensis    | 39.30 | 0.00 |
| TRINITY_XP_0093(PREDICTI | Pyrus_x_bretschneid | 39.30 | 0.00 |
| TRINITY_XP_0206(PITH don | Dendrobium_catenatu | 39.30 | 0.00 |
| TRINITY_XP_0124(PREDICTI | Gossypium_raimondii | 39.30 | 0.00 |
| TRINITY_PRW2086(cinnamy  | Chlorella_sorokinia | 39.30 | 0.00 |
| TRINITY_XP_0184(PREDICTI | Raphanus_sativus    | 39.30 | 0.00 |
| TRINITY_RLN0467(putativ  | Panicum_miliaceum   | 39.30 | 0.00 |
| TRINITY_XP_0064(cysteine | Citrus_sinensis     | 39.30 | 0.00 |
| TRINITY_XP_0029(uncharac | Selaginella_moellen | 39.30 | 0.00 |
| TRINITY_BAK0230(predict  | Hordeum_vulgare     | 39.30 | 0.00 |

|                                              |       |      |
|----------------------------------------------|-------|------|
| TRINITY_XP_00564AP endorCoccomyxa_subellips  | 39.30 | 0.00 |
| TRINITY_XP_0244(von Will)Physcomitrella_pate | 39.30 | 0.00 |
| TRINITY_XP_00295hypothetVolvox_carteri       | 39.30 | 0.00 |
| TRINITY_GBG75741hypothetChara_braunii        | 39.30 | 0.00 |
| TRINITY_XP_02283G-proteiOstreococcus_tauri   | 39.30 | 0.00 |
| TRINITY_GAU23288hypothetTrifolium_subterran  | 39.30 | 0.00 |
| TRINITY_XP_01653PREDICTFCapsicum_annuum      | 39.30 | 0.00 |
| TRINITY_XP_02435COP9 sicPhyscomitrella_pate  | 39.30 | 0.00 |
| TRINITY_GAX83928hypothetChlamydomonas_eusti  | 39.30 | 0.00 |
| TRINITY_KXZ45665hypothetGonium_pectorale     | 39.30 | 0.00 |
| TRINITY_EFJ24302hypothetSelaginella_moellen  | 39.30 | 0.00 |
| TRINITY_PNW82607hypothetChlamydomonas_reinh  | 39.30 | 0.00 |
| TRINITY_XP_01589probableZiziphus_jujuba      | 39.30 | 0.00 |
| TRINITY_KXZ54964hypothetGonium_pectorale     | 39.30 | 0.00 |
| TRINITY_XP_00295bola-liVolvox_carteri        | 39.30 | 0.00 |
| TRINITY_XP_02392guanine Quercus_suber        | 39.30 | 0.00 |
| TRINITY_XP_00294hypothetVolvox_carteri       | 39.30 | 0.00 |
| TRINITY_XP_02416probableRosa_chinensis       | 39.30 | 0.00 |
| TRINITY_GAX80807hypothetChlamydomonas_eusti  | 39.30 | 0.00 |
| TRINITY_XP_01283PREDICTIErythranthe_guttata  | 39.30 | 0.00 |
| TRINITY_KMZ56658putativeZostera_marina       | 39.30 | 0.00 |
| TRINITY_XP_01917PREDICTFIpomoea_nil          | 39.30 | 0.00 |
| TRINITY_GAX84108hypothetChlamydomonas_eusti  | 39.30 | 0.00 |
| TRINITY_PSC68266p21-carMicractinium_conduc   | 39.30 | 0.00 |
| TRINITY_PRW58406Rab8 -fChlorella_sorokinia   | 39.30 | 0.00 |
| TRINITY_KYP54995Sec14 cCajanus_cajan         | 39.30 | 0.00 |
| TRINITY_GBG86421hypothetChara_braunii        | 39.30 | 0.00 |
| TRINITY_XP_0098(PREDICTINicotiana_sylvestri  | 39.30 | 0.00 |
| TRINITY_XP_00244probableSorghum_bicolor      | 39.30 | 0.00 |
| TRINITY_XP_02644serine/tPapaver_somniferum   | 39.30 | 0.00 |
| TRINITY_XP_02390probableQuercus_suber        | 39.30 | 0.00 |
| TRINITY_XP_01909PREDICTICamelina_sativa      | 39.30 | 0.00 |
| TRINITY_GAX80485hypothetChlamydomonas_eusti  | 39.30 | 0.00 |
| TRINITY_PRW58566cereblorChlorella_sorokinia  | 39.30 | 0.00 |
| TRINITY_BAJ99671predicteHordeum_vulgare      | 39.30 | 0.00 |
| TRINITY_GAX83943hypothetChlamydomonas_eusti  | 39.30 | 0.00 |
| TRINITY_GAX80354hypothetChlamydomonas_eusti  | 39.30 | 0.00 |
| TRINITY_RWW9070(hypothetEnsete_ventricosum   | 39.30 | 0.00 |
| TRINITY_GAX83092hypothetChlamydomonas_eusti  | 39.30 | 0.00 |
| TRINITY_KXZ55505hypothetGonium_pectorale     | 39.30 | 0.00 |
| TRINITY_XP_00564sarcosirCoccomyxa_subellips  | 39.30 | 0.00 |
| TRINITY_PRW56587eukaryotChlorella_sorokinia  | 39.30 | 0.00 |
| TRINITY_XP_00429PREDICTIFragaria-vesca       | 39.30 | 0.00 |
| TRINITY_PNW84745hypothetChlamydomonas_reinh  | 39.30 | 0.00 |
| TRINITY_GAX80276hypothetChlamydomonas_eusti  | 39.30 | 0.00 |
| TRINITY_PNW88058hypothetChlamydomonas_reinh  | 39.30 | 0.00 |
| TRINITY_XP_01671PREDICTIGossypium_hirsutum   | 39.30 | 0.00 |
| TRINITY_PNH05638CarboxyTetrabaena_socialis   | 39.30 | 0.00 |
| TRINITY_KXZ46219hypothetGonium_pectorale     | 39.30 | 0.00 |
| TRINITY_XP_02388probableQuercus_suber        | 39.30 | 0.00 |
| TRINITY_GAX85011hypothetChlamydomonas_eusti  | 39.30 | 0.00 |
| TRINITY_XP_00169MAP kinChlamydomonas_reinh   | 39.30 | 0.00 |
| TRINITY_GAQ86878CysteineKlebsormidium_niten  | 39.30 | 0.00 |
| TRINITY_PSC72573acyl-actMicractinium_conduc  | 39.30 | 0.00 |
| TRINITY_GAX83689hypothetChlamydomonas_eusti  | 39.30 | 0.00 |
| TRINITY_PNH12265Tiny macTetrabaena_socialis  | 39.30 | 0.00 |
| TRINITY_EFJ33511hypothetSelaginella_moellen  | 39.30 | 0.00 |
| TRINITY_RWW91045hypothetEnsete_ventricosum   | 39.30 | 0.00 |
| TRINITY_XP_00751predicteBathycoccus_prasinc  | 39.20 | 0.00 |
| TRINITY_XP_00306predicteMicromonas_pusilla   | 39.20 | 0.00 |
| TRINITY_KXZ55562hypothetGonium_pectorale     | 39.20 | 0.00 |
| TRINITY_PIA5147(hypothetAquilegia_coerulea   | 39.20 | 0.00 |
| TRINITY_BAJ94575predicteHordeum_vulgare      | 39.20 | 0.00 |
| TRINITY_XP_00305flagellMicromonas_pusilla    | 39.20 | 0.00 |
| TRINITY_GAX72935hypothetChlamydomonas_eusti  | 39.20 | 0.00 |
| TRINITY_XP_01139Protein Auxenochlorella_pro  | 39.20 | 0.00 |



|                  |          |                     |       |      |
|------------------|----------|---------------------|-------|------|
| TRINITY_EOA13054 | hypothet | Capsella_rubella    | 39.20 | 0.00 |
| TRINITY_GBG77655 | hypothet | Chara_braunii       | 39.20 | 0.00 |
| TRINITY_PTQ27125 | hypothet | Marchantia_polymorp | 39.20 | 0.00 |
| TRINITY_AFK46385 | unknown  | Lotus_japonicus     | 39.20 | 0.00 |
| TRINITY_GAX82925 | hypothet | Chlamydomonas_eusti | 39.20 | 0.00 |
| TRINITY_XP_01358 | PREDICTI | Brassica_oleracea   | 39.20 | 0.00 |
| TRINITY_GAQ89861 | putativ  | Klebsormidium_niten | 39.20 | 0.00 |
| TRINITY_XP_00415 | PREDICTI | Cucumis_sativus     | 39.20 | 0.00 |
| TRINITY_XP_01025 | probable | Brachypodium_distac | 39.20 | 0.00 |
| TRINITY_GBG64495 | hypothet | Chara_braunii       | 39.20 | 0.00 |
| TRINITY_KXZ55244 | hypothet | Gonium_pectorale    | 39.20 | 0.00 |
| TRINITY_XP_01389 | triacyl  | Monoraphidium_negle | 39.20 | 0.00 |
| TRINITY_XP_00584 | hypothet | Chlorella_variabili | 39.20 | 0.00 |
| TRINITY_XP_02390 | altered  | Quercus_suber       | 39.20 | 0.00 |
| TRINITY_XP_02288 | serine/t | Olea_europaea       | 39.20 | 0.00 |
| TRINITY_XP_02175 | CBL-int  | Chenopodium_quinoa  | 39.20 | 0.00 |
| TRINITY_PNH04665 | putativ  | Tetrabaena_socialis | 39.20 | 0.00 |
| TRINITY_XP_00751 | predict  | Bathycoccus_prasinc | 39.20 | 0.00 |
| TRINITY_GAX79498 | hypothet | Chlamydomonas_eusti | 39.20 | 0.00 |
| TRINITY_EFJ18204 | hypothet | Selaginella_moellen | 39.20 | 0.00 |
| TRINITY_PKA60705 | RNA-dir  | Apostasia_shenzheni | 39.20 | 0.00 |
| TRINITY_GAQ88675 | 20S prot | Klebsormidium_niten | 39.20 | 0.00 |
| TRINITY_PTQ44584 | hypothet | Marchantia_polymorp | 39.20 | 0.00 |
| TRINITY_PTQ35386 | hypothet | Marchantia_polymorp | 39.20 | 0.00 |
| TRINITY_XP_00305 | serine/t | Micromonas_pusilla  | 39.20 | 0.00 |
| TRINITY_XP_00414 | PREDICTI | Cucumis_sativus     | 39.20 | 0.00 |
| TRINITY_XP_00296 | sphingo  | Selaginella_moellen | 39.20 | 0.00 |
| TRINITY_GAX72675 | hypothet | Chlamydomonas_eusti | 39.20 | 0.00 |
| TRINITY_KXZ45395 | hypothet | Gonium_pectorale    | 39.20 | 0.00 |
| TRINITY_XP_00935 | PREDICTI | Pyrus_x_bretschneid | 39.20 | 0.00 |
| TRINITY_XP_00935 | PREDICTI | Pyrus_x_bretschneid | 39.20 | 0.00 |
| TRINITY_KMZ64554 | Chaperon | Zostera_marina      | 39.20 | 0.00 |
| TRINITY_GAX84945 | hypothet | Chlamydomonas_eusti | 39.20 | 0.00 |
| TRINITY_XP_02391 | coronin  | Quercus_suber       | 39.20 | 0.00 |
| TRINITY_XP_00170 | COP-II c | Chlamydomonas_reinh | 39.20 | 0.00 |
| TRINITY_XP_01389 | WD repe  | Monoraphidium_negle | 39.20 | 0.00 |
| TRINITY_PNH10555 | Sulfhyd  | Tetrabaena_socialis | 39.20 | 0.00 |
| TRINITY_XP_01094 | PREDICTI | Elaeis_guineensis   | 39.20 | 0.00 |
| TRINITY_OWM82312 | hypothet | Punica_granatum     | 39.20 | 0.00 |
| TRINITY_PRW56046 | multidr  | Chlorella_sorokinia | 39.20 | 0.00 |
| TRINITY_XP_01390 | hypothet | Monoraphidium_negle | 39.20 | 0.00 |
| TRINITY_XP_02706 | serine/t | Coffea_arabica      | 39.20 | 0.00 |
| TRINITY_XP_00170 | predict  | Chlamydomonas_reinh | 39.20 | 0.00 |
| TRINITY_BAK02195 | predict  | Hordeum_vulgare     | 39.20 | 0.00 |
| TRINITY_GAQ82885 | ubiquiti | Klebsormidium_niten | 39.20 | 0.00 |
| TRINITY_XP_01045 | PREDICTI | Camelina_sativa     | 39.20 | 0.00 |
| TRINITY_PRW60348 | (1-3)-b  | Chlorella_sorokinia | 39.20 | 0.00 |
| TRINITY_XP_00935 | PREDICTI | Pyrus_x_bretschneid | 39.20 | 0.00 |
| TRINITY_GAX81335 | hypothet | Chlamydomonas_eusti | 39.20 | 0.00 |
| TRINITY_BAK02898 | predict  | Hordeum_vulgare     | 39.20 | 0.00 |
| TRINITY_XP_00295 | SC5D, C- | Volvox_carteri      | 39.20 | 0.00 |
| TRINITY_GAX73840 | hypothet | Chlamydomonas_eusti | 39.20 | 0.00 |
| TRINITY_XP_01389 | hypothet | Monoraphidium_negle | 39.20 | 0.00 |
| TRINITY_GAX73897 | hypothet | Chlamydomonas_eusti | 39.20 | 0.00 |
| TRINITY_GAX78897 | hypothet | Chlamydomonas_eusti | 39.20 | 0.00 |
| TRINITY_PUZ60208 | hypothet | Panicum_hallii      | 39.20 | 0.00 |
| TRINITY_PIA30981 | hypothet | Aquilegia_coerulea  | 39.20 | 0.00 |
| TRINITY_XP_02275 | cytidin  | Durio_zibethinus    | 39.20 | 0.00 |
| TRINITY_XP_02435 | ATP-depe | Physcomitrella_pate | 39.20 | 0.00 |
| TRINITY_PNW72145 | hypothet | Chlamydomonas_reinh | 39.20 | 0.00 |
| TRINITY_XP_00165 | ABC trar | Chlamydomonas_reinh | 39.20 | 0.00 |
| TRINITY_GAX76901 | hypothet | Chlamydomonas_eusti | 39.20 | 0.00 |
| TRINITY_GBF97836 | serine r | Raphidocelis_subcap | 39.20 | 0.00 |
| TRINITY_XP_00445 | mitochor | Cicer_arietinum     | 39.20 | 0.00 |
| TRINITY_PSC73215 | ubiquiti | Micractinium_conduc | 39.10 | 0.00 |
| TRINITY_GAX80205 | hypothet | Chlamydomonas_eusti | 39.10 | 0.00 |

|                  |           |                     |       |      |
|------------------|-----------|---------------------|-------|------|
| TRINITY_XP_00430 | PREDICTI  | Fragaria vesca      | 39.10 | 0.00 |
| TRINITY_XP_01207 | peroxis   | Jatropha curcas     | 39.10 | 0.00 |
| TRINITY_XP_01068 | PREDICTI  | Beta vulgaris       | 39.10 | 0.00 |
| TRINITY_XP_02417 | elicitor  | Rosa chinensis      | 39.10 | 0.00 |
| TRINITY_XP_02214 | nitrate   | Momordica charantia | 39.10 | 0.00 |
| TRINITY_XP_02777 | serine/t  | Solanum pennellii   | 39.10 | 0.00 |
| TRINITY_GBF92842 | hypothet  | Raphidocelis subcap | 39.10 | 0.00 |
| TRINITY_XP_00837 | PREDICTI  | Malus domestica     | 39.10 | 0.00 |
| TRINITY_PNW7640  | (hypothet | Chlamydomonas reinh | 39.10 | 0.00 |
| TRINITY_XP_00685 | zerumbor  | Amborella trichopod | 39.10 | 0.00 |
| TRINITY_XP_02439 | Down syr  | Physcomitrella pate | 39.10 | 0.00 |
| TRINITY_XP_01257 | protein   | Cicer arietinum     | 39.10 | 0.00 |
| TRINITY_KXZ55762 | hypothet  | Gonium pectorale    | 39.10 | 0.00 |
| TRINITY_EFJ09552 | hypothet  | Selaginella moellen | 39.10 | 0.00 |
| TRINITY_XP_02391 | carrier   | Quercus suber       | 39.10 | 0.00 |
| TRINITY_XP_00664 | PREDICTI  | Oryza brachyantha   | 39.10 | 0.00 |
| TRINITY_XP_00449 | kinesin-  | Cicer arietinum     | 39.10 | 0.00 |
| TRINITY_XP_01054 | PREDICTI  | Tarenaya hasslerian | 39.10 | 0.00 |
| TRINITY_XP_01670 | PREDICTI  | Gossypium hirsutum  | 39.10 | 0.00 |
| TRINITY_PKA56953 | putativ   | Apostasia shenzheni | 39.10 | 0.00 |
| TRINITY_AQK94735 | AGC (cA   | Zea mays            | 39.10 | 0.00 |
| TRINITY_PRW56164 | DNA poly  | Chlorella sorokinia | 39.10 | 0.00 |
| TRINITY_XP_00308 | Alpha-k   | Ostreococcus tauri  | 39.10 | 0.00 |
| TRINITY_GAX73032 | hypothet  | Chlamydomonas eusti | 39.10 | 0.00 |
| TRINITY_GBG72651 | hypothet  | Chara braunii       | 39.10 | 0.00 |
| TRINITY_KMZ65290 | putativ   | Zostera marina      | 39.10 | 0.00 |
| TRINITY_KXZ45802 | hypothet  | Gonium pectorale    | 39.10 | 0.00 |
| TRINITY_GAQ80895 | hypothet  | Klebsormidium niten | 39.10 | 0.00 |
| TRINITY_XP_02276 | calcium-  | Durio zibethinus    | 39.10 | 0.00 |
| TRINITY_XP_01587 | estradi   | Ziziphus jujuba     | 39.10 | 0.00 |
| TRINITY_XP_01657 | PREDICTI  | Capsicum annuum     | 39.10 | 0.00 |
| TRINITY_XP_01389 | hypothet  | Monoraphidium negle | 39.10 | 0.00 |
| TRINITY_OAE30089 | hypothet  | Marchantia polymorp | 39.10 | 0.00 |
| TRINITY_XP_00294 | molecul   | Volvox carteri      | 39.10 | 0.00 |
| TRINITY_KXZ54760 | (hypothet | Gonium pectorale    | 39.10 | 0.00 |
| TRINITY_GAX73059 | hypothet  | Chlamydomonas eusti | 39.10 | 0.00 |
| TRINITY_OAE34619 | hypothet  | Marchantia polymorp | 39.10 | 0.00 |
| TRINITY_XP_00642 | endochit  | Citrus clementina   | 39.10 | 0.00 |
| TRINITY_XP_02436 | serine/t  | Physcomitrella pate | 39.10 | 0.00 |
| TRINITY_GAX79929 | hypothet  | Chlamydomonas eusti | 39.10 | 0.00 |
| TRINITY_RAL45556 | (hypothet | Cuscuta australis   | 39.10 | 0.00 |
| TRINITY_GAX84948 | hypothet  | Chlamydomonas eusti | 39.10 | 0.00 |
| TRINITY_PNH04766 | (hypothet | Tetrabaena socialis | 39.10 | 0.00 |
| TRINITY_GAX86455 | hypothet  | Chlamydomonas eusti | 39.10 | 0.00 |
| TRINITY_XP_01390 | (hypothet | Monoraphidium negle | 39.10 | 0.00 |
| TRINITY_PNX96233 | inactiv   | Trifolium pratense  | 39.10 | 0.00 |
| TRINITY_XP_00170 | (predict  | Chlamydomonas reinh | 39.10 | 0.00 |
| TRINITY_PNH12452 | hypothet  | Tetrabaena socialis | 39.10 | 0.00 |
| TRINITY_KXZ48875 | hypothet  | Gonium pectorale    | 39.10 | 0.00 |
| TRINITY_XP_00295 | hypothet  | Volvox carteri      | 39.10 | 0.00 |
| TRINITY_XP_02391 | kinesin-  | Quercus suber       | 39.10 | 0.00 |
| TRINITY_XP_01069 | PREDICTI  | Beta vulgaris       | 39.10 | 0.00 |
| TRINITY_XP_00564 | Rhodane   | Coccomyxa subellips | 39.10 | 0.00 |
| TRINITY_EPS60171 | hypothet  | Genlisea aurea      | 39.10 | 0.00 |
| TRINITY_XP_00295 | hypothet  | Volvox carteri      | 39.10 | 0.00 |
| TRINITY_XP_02391 | coronin-  | Quercus suber       | 39.10 | 0.00 |
| TRINITY_XP_00169 | (predict  | Chlamydomonas reinh | 39.10 | 0.00 |
| TRINITY_GAX75915 | hypothet  | Chlamydomonas eusti | 39.10 | 0.00 |
| TRINITY_EAY88046 | (hypothet | Oryza sativa        | 39.10 | 0.00 |
| TRINITY_XP_01139 | FACT con  | Auxenochlorella pro | 39.10 | 0.00 |
| TRINITY_XP_01880 | PREDICTI  | Juglans regia       | 39.10 | 0.00 |
| TRINITY_XP_02438 | katanin   | Physcomitrella pate | 39.10 | 0.00 |
| TRINITY_XP_01065 | PREDICTI  | Vitis vinifera      | 39.10 | 0.00 |
| TRINITY_RAL53746 | (hypothet | Cuscuta australis   | 39.10 | 0.00 |
| TRINITY_GAX80697 | hypothet  | Chlamydomonas eusti | 39.10 | 0.00 |
| TRINITY_OTG19444 | putativ   | Helianthus annuus   | 39.10 | 0.00 |

|                  |          |                     |       |      |
|------------------|----------|---------------------|-------|------|
| TRINITY_XP_01025 | PREDICTI | Nelumbo_nucifera    | 39.10 | 0.00 |
| TRINITY_PRW4423  | WD40 re  | Chlorella_sorokinia | 39.10 | 0.00 |
| TRINITY_XP_00564 | hypothet | Coccomyxa_subellips | 39.10 | 0.00 |
| TRINITY_PWZ17754 | Phosphat | Zea_mays            | 39.10 | 0.00 |
| TRINITY_XP_00169 | predicte | Chlamydomonas_reinh | 39.10 | 0.00 |
| TRINITY_GAX76831 | hypothet | Chlamydomonas_eusti | 39.10 | 0.00 |
| TRINITY_XP_02392 | ubiquiti | Quercus_suber       | 39.10 | 0.00 |
| TRINITY_PNW75103 | hypothet | Chlamydomonas_reinh | 39.10 | 0.00 |
| TRINITY_PTQ38966 | hypothet | Marchantia_polymorp | 39.10 | 0.00 |
| TRINITY_GAX81632 | hypothet | Chlamydomonas_eusti | 39.10 | 0.00 |
| TRINITY_XP_00169 | predicte | Chlamydomonas_reinh | 39.10 | 0.00 |
| TRINITY_GBF92842 | hypothet | Raphidocelis_subcap | 39.10 | 0.00 |
| TRINITY_XP_00584 | hypothet | Chlorella_variabili | 39.00 | 0.00 |
| TRINITY_RDX67316 | putativ  | Mucuna_pruriens     | 39.00 | 0.00 |
| TRINITY_PNR39758 | hypothet | Physcomitrella_pate | 39.00 | 0.00 |
| TRINITY_PNY16266 | protein  | Trifolium_pratense  | 39.00 | 0.00 |
| TRINITY_XP_00867 | uncharac | Zea_mays            | 39.00 | 0.00 |
| TRINITY_XP_00249 | radical  | Micromonas_commoda  | 39.00 | 0.00 |
| TRINITY_EPS71418 | hypothet | Genlisea_aurea      | 39.00 | 0.00 |
| TRINITY_XP_00636 | PREDICTI | Solanum_tuberosum   | 39.00 | 0.00 |
| TRINITY_GAQ82857 | RNA poly | Klebsormidium_niten | 39.00 | 0.00 |
| TRINITY_XP_00938 | PREDICTI | Musa_acuminata      | 39.00 | 0.00 |
| TRINITY_XP_02390 | uncharac | Quercus_suber       | 39.00 | 0.00 |
| TRINITY_XP_01644 | PREDICTI | Nicotiana_tabacum   | 39.00 | 0.00 |
| TRINITY_GBF87640 | hypothet | Raphidocelis_subcap | 39.00 | 0.00 |
| TRINITY_XP_00414 | PREDICTI | Cucumis_sativus     | 39.00 | 0.00 |
| TRINITY_XP_00141 | predicte | Ostreococcus_sp._'1 | 39.00 | 0.00 |
| TRINITY_XP_00564 | hypothet | Coccomyxa_subellips | 39.00 | 0.00 |
| TRINITY_XP_01724 | PREDICTI | Daucus_carota       | 39.00 | 0.00 |
| TRINITY_GAX75954 | hypothet | Chlamydomonas_eusti | 39.00 | 0.00 |
| TRINITY_XP_02376 | ubiquiti | Lactuca_sativa      | 39.00 | 0.00 |
| TRINITY_KZM82369 | hypothet | Daucus_carota       | 39.00 | 0.00 |
| TRINITY_GAX75954 | hypothet | Chlamydomonas_eusti | 39.00 | 0.00 |
| TRINITY_XP_02733 | CBL-int  | Abrus_precatorius   | 39.00 | 0.00 |
| TRINITY_PRW58541 | disulfic | Chlorella_sorokinia | 39.00 | 0.00 |
| TRINITY_XP_02390 | uricase- | Quercus_suber       | 39.00 | 0.00 |
| TRINITY_XP_00169 | predicte | Chlamydomonas_reinh | 39.00 | 0.00 |
| TRINITY_XP_00564 | DUF500-  | Coccomyxa_subellips | 39.00 | 0.00 |
| TRINITY_AAC79104 | putativ  | Arabidopsis_thalian | 39.00 | 0.00 |
| TRINITY_GBF98898 | methyln  | Raphidocelis_subcap | 39.00 | 0.00 |
| TRINITY_KXZ49240 | hypothet | Gonium_pectorale    | 39.00 | 0.00 |
| TRINITY_XP_02296 | uncharac | Cucurbita_maxima    | 39.00 | 0.00 |
| TRINITY_XP_00451 | uncharac | Cicer_arietinum     | 39.00 | 0.00 |
| TRINITY_OAE24723 | hypothet | Marchantia_polymorp | 39.00 | 0.00 |
| TRINITY_GAX78023 | hypothet | Chlamydomonas_eusti | 39.00 | 0.00 |
| TRINITY_PNH12420 | Protein  | Tetrabaena_socialis | 39.00 | 0.00 |
| TRINITY_GAX84107 | hypothet | Chlamydomonas_eusti | 39.00 | 0.00 |
| TRINITY_KZV17117 | putativ  | Dorcoceras_hygromet | 39.00 | 0.00 |
| TRINITY_XP_02019 | serine/t | Aegilops_tauschii   | 39.00 | 0.00 |
| TRINITY_XP_01597 | long ch  | Arachis_duranensis  | 39.00 | 0.00 |
| TRINITY_PNW75650 | hypothet | Chlamydomonas_reinh | 39.00 | 0.00 |
| TRINITY_XP_00299 | hypothet | Volvox_carteri      | 39.00 | 0.00 |
| TRINITY_XP_00430 | PREDICTI | Fragaria_vesca      | 39.00 | 0.00 |
| TRINITY_XP_01368 | long ch  | Brassica_napus      | 39.00 | 0.00 |
| TRINITY_XP_00296 | 3-phosp  | Selaginella_moellen | 39.00 | 0.00 |
| TRINITY_PNH11652 | Calcium  | Tetrabaena_socialis | 39.00 | 0.00 |
| TRINITY_XP_00141 | predicte | Ostreococcus_sp._'1 | 39.00 | 0.00 |
| TRINITY_GAX78644 | hypothet | Chlamydomonas_eusti | 39.00 | 0.00 |
| TRINITY_XP_01051 | PREDICTI | Tarenaya_hasslerian | 39.00 | 0.00 |
| TRINITY_ACF87913 | unknown  | Zea_mays            | 39.00 | 0.00 |
| TRINITY_XP_00306 | predicte | Micromonas_pusilla  | 39.00 | 0.00 |
| TRINITY_XP_01006 | PREDICTI | Eucalyptus_grandis  | 39.00 | 0.00 |
| TRINITY_PNH09397 | Purple   | Tetrabaena_socialis | 39.00 | 0.00 |
| TRINITY_XP_01067 | PREDICTI | Beta_vulgaris       | 39.00 | 0.00 |
| TRINITY_XP_01908 | PREDICTI | Camelina_sativa     | 39.00 | 0.00 |
| TRINITY_GAX78232 | hypothet | Chlamydomonas_eusti | 39.00 | 0.00 |

|                 |                               |       |      |
|-----------------|-------------------------------|-------|------|
| TRINITY_GAX8070 | hypothetChlamydomonas_eusti   | 39.00 | 0.00 |
| TRINITY_PRW6034 | (1-3)-bChlorella_sorokinia    | 39.00 | 0.00 |
| TRINITY_XP_0245 | probableSelaginella_moellen   | 39.00 | 0.00 |
| TRINITY_GAX8130 | hypothetChlamydomonas_eusti   | 39.00 | 0.00 |
| TRINITY_XP_0179 | PREDICTTheobroma_cacao        | 39.00 | 0.00 |
| TRINITY_XP_0156 | protein-Oryza_sativa          | 39.00 | 0.00 |
| TRINITY_GAX8634 | hypothetChlamydomonas_eusti   | 39.00 | 0.00 |
| TRINITY_XP_0218 | dual spSpinacia_oleracea      | 39.00 | 0.00 |
| TRINITY_GAX7818 | hypothetChlamydomonas_eusti   | 39.00 | 0.00 |
| TRINITY_PNW8202 | hypothetChlamydomonas_reinh   | 39.00 | 0.00 |
| TRINITY_GAX7818 | hypothetChlamydomonas_eusti   | 39.00 | 0.00 |
| TRINITY_PNW7334 | hypothetChlamydomonas_reinh   | 39.00 | 0.00 |
| TRINITY_GAX7353 | hypothetChlamydomonas_eusti   | 39.00 | 0.00 |
| TRINITY_GAQ8280 | ChromodKlebsormidium_niten    | 39.00 | 0.00 |
| TRINITY_ATG2999 | CYP866A1Taxus_chinensis       | 39.00 | 0.00 |
| TRINITY_OMP0739 | hypothetCorchorus_olitorius   | 39.00 | 0.00 |
| TRINITY_CDP1769 | unnamed Coffea_canephora      | 38.90 | 0.00 |
| TRINITY_GAX7770 | hypothetChlamydomonas_eusti   | 38.90 | 0.00 |
| TRINITY_RAL4284 | hypothetCuscuta_australis     | 38.90 | 0.00 |
| TRINITY_KYP6920 | Serine/tCajanus_cajan         | 38.90 | 0.00 |
| TRINITY_EEF2536 | 13-hydroRicinus_communis      | 38.90 | 0.00 |
| TRINITY_XP_0167 | PREDICTGossypium_hirsutum     | 38.90 | 0.00 |
| TRINITY_BAJ9497 | predictHordeum_vulgare        | 38.90 | 0.00 |
| TRINITY_PUZ7155 | hypothetPanicum_hallii        | 38.90 | 0.00 |
| TRINITY_XP_0156 | protein Oryza_sativa          | 38.90 | 0.00 |
| TRINITY_GAX8607 | hypothetChlamydomonas_eusti   | 38.90 | 0.00 |
| TRINITY_EEC8259 | hypothetOryza_sativa          | 38.90 | 0.00 |
| TRINITY_KXZ5286 | hypothetGonium_pectorale      | 38.90 | 0.00 |
| TRINITY_XP_0056 | hypothetCoccomyxa_subellips   | 38.90 | 0.00 |
| TRINITY_KZV1488 | 1ThermostDorcoceras_hygromet  | 38.90 | 0.00 |
| TRINITY_XP_0075 | (alcohol Bathycoccus_prasinoc | 38.90 | 0.00 |
| TRINITY_XP_0110 | PREDICTPopulus_euphratica     | 38.90 | 0.00 |
| TRINITY_EEF2753 | two-compRicinus_communis      | 38.90 | 0.00 |
| TRINITY_XP_0064 | 1probableEutrema_salsugineur  | 38.90 | 0.00 |
| TRINITY_ACN5017 | dispropAnnona_cherimola       | 38.90 | 0.00 |
| TRINITY_OAE2507 | hypothetMarchantia_polymorp   | 38.90 | 0.00 |
| TRINITY_GAX7645 | hypothetChlamydomonas_eusti   | 38.90 | 0.00 |
| TRINITY_PSC7421 | (20S protMicractinium_conduc  | 38.90 | 0.00 |
| TRINITY_RRT3799 | hypothetEnsete_ventricosum    | 38.90 | 0.00 |
| TRINITY_GBG6964 | hypothetChara_braunii         | 38.90 | 0.00 |
| TRINITY_KXZ4640 | hypothetGonium_pectorale      | 38.90 | 0.00 |
| TRINITY_XP_0058 | hypothetChlorella_variabili   | 38.90 | 0.00 |
| TRINITY_KXZ5512 | hypothetGonium_pectorale      | 38.90 | 0.00 |
| TRINITY_PNH1024 | ChaperorTetrabaena_socialis   | 38.90 | 0.00 |
| TRINITY_XP_0124 | PREDICTGossypium_raimondii    | 38.90 | 0.00 |
| TRINITY_XP_0029 | signal Selaginella_moellen    | 38.90 | 0.00 |
| TRINITY_XP_0238 | tubulin Quercus_suber         | 38.90 | 0.00 |
| TRINITY_GAX8318 | hypothetChlamydomonas_eusti   | 38.90 | 0.00 |
| TRINITY_GAX8283 | hypothetChlamydomonas_eusti   | 38.90 | 0.00 |
| TRINITY_EFJ1003 | hypothetSelaginella_moellen   | 38.90 | 0.00 |
| TRINITY_XP_0273 | EEF1A lAbrus_precatorius      | 38.90 | 0.00 |
| TRINITY_XP_0200 | serine/tAnanas_comosus        | 38.90 | 0.00 |
| TRINITY_GAX8038 | hypothetChlamydomonas_eusti   | 38.90 | 0.00 |
| TRINITY_PNW7795 | hypothetChlamydomonas_reinh   | 38.90 | 0.00 |
| TRINITY_GAX7456 | hypothetChlamydomonas_eusti   | 38.90 | 0.00 |
| TRINITY_OAE2015 | hypothetMarchantia_polymorp   | 38.90 | 0.00 |
| TRINITY_GAX7943 | hypothetChlamydomonas_eusti   | 38.90 | 0.00 |
| TRINITY_XP_0206 | uncharaDendrobium_catenatu    | 38.90 | 0.00 |
| TRINITY_XP_0238 | uncharaQuercus_suber          | 38.90 | 0.00 |
| TRINITY_XP_0056 | ArfGap-cCoccomyxa_subellips   | 38.90 | 0.00 |
| TRINITY_PSC6706 | Gag-Pol Micractinium_conduc   | 38.90 | 0.00 |
| TRINITY_KXZ4249 | hypothetGonium_pectorale      | 38.90 | 0.00 |
| TRINITY_XP_0243 | myb-likePhyscomitrella_pate   | 38.90 | 0.00 |
| TRINITY_XP_0071 | 4hypothetPhaseolus_vulgaris   | 38.90 | 0.00 |
| TRINITY_KXZ4912 | hypothetGonium_pectorale      | 38.90 | 0.00 |
| TRINITY_GAX7500 | hypothetChlamydomonas_eusti   | 38.90 | 0.00 |

|                  |                             |       |      |
|------------------|-----------------------------|-------|------|
| TRINITY_XP_00169 | protein Chlamydomonas_reinh | 38.90 | 0.00 |
| TRINITY_XP_00294 | hypothetVolvox_carteri      | 38.90 | 0.00 |
| TRINITY_XP_02439 | ABC trarPhyscomitrella_pate | 38.90 | 0.00 |
| TRINITY_XP_02087 | E3 ubiqArabidopsis_lyrata   | 38.90 | 0.00 |
| TRINITY_GBG84821 | hypothetChara_braunii       | 38.90 | 0.00 |
| TRINITY_XP_01916 | PREDICTI Ipomoea_nil        | 38.90 | 0.00 |
| TRINITY_GAQ89011 | PutativεKlebsormidium_niten | 38.80 | 0.00 |
| TRINITY_BAF04650 | Os01g027Oryza_sativa        | 38.80 | 0.00 |
| TRINITY_XP_02068 | protein Dendrobium_catenatu | 38.80 | 0.00 |
| TRINITY_XP_00565 | translatCoccomyxa_subellips | 38.80 | 0.00 |
| TRINITY_XP_02255 | dual speBrassica_napus      | 38.80 | 0.00 |
| TRINITY_XP_01108 | 8-hydro>Sesamum_indicum     | 38.80 | 0.00 |
| TRINITY_XP_02213 | actin-dεMomordica_charantia | 38.80 | 0.00 |
| TRINITY_XP_02213 | actin-dεMomordica_charantia | 38.80 | 0.00 |
| TRINITY_KXZ49519 | hypothetGonium_pectorale    | 38.80 | 0.00 |
| TRINITY_KXZ49240 | hypothetGonium_pectorale    | 38.80 | 0.00 |
| TRINITY_XP_00751 | AMP deanBathycoccus_prasinc | 38.80 | 0.00 |
| TRINITY_EPS62777 | hypothetGenlisea_aurea      | 38.80 | 0.00 |
| TRINITY_VDC97471 | unnamed Brassica_rapa       | 38.80 | 0.00 |
| TRINITY_XP_02388 | uncharacQuercus_suber       | 38.80 | 0.00 |
| TRINITY_RRT79998 | hypothetEnsete_ventricosum  | 38.80 | 0.00 |
| TRINITY_XP_00295 | hypothetVolvox_carteri      | 38.80 | 0.00 |
| TRINITY_GAX79100 | hypothetChlamydomonas_eusti | 38.80 | 0.00 |
| TRINITY_GAX83833 | hypothetChlamydomonas_eusti | 38.80 | 0.00 |
| TRINITY_XP_00751 | predictεBathycoccus_prasinc | 38.80 | 0.00 |
| TRINITY_ACJ38195 | chitinasMalus_hupehensis    | 38.80 | 0.00 |
| TRINITY_KMZ63072 | Acyl-CoZostera_marina       | 38.80 | 0.00 |
| TRINITY_XP_00630 | phospholCapsella_rubella    | 38.80 | 0.00 |
| TRINITY_KMZ58900 | Protein Zostera_marina      | 38.80 | 0.00 |
| TRINITY_ACO87660 | protein Brachypodium_sylvat | 38.80 | 0.00 |
| TRINITY_XP_00141 | predictεOstreococcus_sp._'1 | 38.80 | 0.00 |
| TRINITY_XP_00360 | selT-liMedicago_truncatula  | 38.80 | 0.00 |
| TRINITY_GAX75461 | hypothetChlamydomonas_eusti | 38.80 | 0.00 |
| TRINITY_XP_02099 | ubiquitiArachis_duranensis  | 38.80 | 0.00 |
| TRINITY_OAE34501 | hypothetMarchantia_polymorp | 38.80 | 0.00 |
| TRINITY_XP_02203 | 60S aciHelianthus_annuus    | 38.80 | 0.00 |
| TRINITY_KXZ49814 | hypothetGonium_pectorale    | 38.80 | 0.00 |
| TRINITY_XP_00169 | histidirChlamydomonas_reinh | 38.80 | 0.00 |
| TRINITY_PWA57359 | 3'-5'-e>Artemisia_annua     | 38.80 | 0.00 |
| TRINITY_PNW75853 | hypothetChlamydomonas_reinh | 38.80 | 0.00 |
| TRINITY_XP_00168 | componerChlamydomonas_reinh | 38.80 | 0.00 |
| TRINITY_KXZ56449 | hypothetGonium_pectorale    | 38.80 | 0.00 |
| TRINITY_GAX83778 | hypothetChlamydomonas_eusti | 38.80 | 0.00 |
| TRINITY_GAX81186 | hypothetChlamydomonas_eusti | 38.80 | 0.00 |
| TRINITY_XP_00636 | PREDICTI Solanum_tuberosum  | 38.80 | 0.00 |
| TRINITY_PNW75861 | hypothetChlamydomonas_reinh | 38.80 | 0.00 |
| TRINITY_PKA55206 | DNA croεApostasia_shenzheni | 38.80 | 0.00 |
| TRINITY_KXZ42694 | hypothetGonium_pectorale    | 38.80 | 0.00 |
| TRINITY_GAX78191 | hypothetChlamydomonas_eusti | 38.80 | 0.00 |
| TRINITY_XP_00295 | hypothetVolvox_carteri      | 38.80 | 0.00 |
| TRINITY_XP_02283 | unnamed Ostreococcus_tauri  | 38.80 | 0.00 |
| TRINITY_XP_02189 | U3 smallCarica_papaya       | 38.80 | 0.00 |
| TRINITY_OUS44692 | hypothetOstreococcus_tauri  | 38.80 | 0.00 |
| TRINITY_GAQ82320 | Acyl-CoZKlebsormidium_niten | 38.80 | 0.00 |
| TRINITY_GAX81922 | hypothetChlamydomonas_eusti | 38.80 | 0.00 |
| TRINITY_KXZ47460 | hypothetGonium_pectorale    | 38.80 | 0.00 |
| TRINITY_BAK00269 | predictεHordeum_vulgare     | 38.80 | 0.00 |
| TRINITY_XP_02706 | choline Coffea_arabica      | 38.80 | 0.00 |
| TRINITY_XP_01390 | hypothetMonoraphidium_negle | 38.80 | 0.00 |
| TRINITY_PNW83574 | hypothetChlamydomonas_reinh | 38.80 | 0.00 |
| TRINITY_GAX79608 | hypothetChlamydomonas_eusti | 38.80 | 0.00 |
| TRINITY_KZV28802 | Rab5-intDorcoceras_hygromet | 38.80 | 0.00 |
| TRINITY_GAX72593 | hypothetChlamydomonas_eusti | 38.80 | 0.00 |
| TRINITY_XP_01389 | Cyclin-1Monoraphidium_negle | 38.80 | 0.00 |
| TRINITY_GAX79892 | hypothetChlamydomonas_eusti | 38.80 | 0.00 |
| TRINITY_PSC72510 | multidrMicractinium_conduc  | 38.80 | 0.00 |

|                  |                              |       |      |
|------------------|------------------------------|-------|------|
| TRINITY_PTQ32027 | hypothetMarchantia_polymorp  | 38.80 | 0.00 |
| TRINITY_GAX80864 | hypothetChlamydomonas_eusti  | 38.80 | 0.00 |
| TRINITY_GAX82445 | hypothetChlamydomonas_eusti  | 38.80 | 0.00 |
| TRINITY_GAX78363 | hypothetChlamydomonas_eusti  | 38.80 | 0.00 |
| TRINITY_EFJ14241 | hypothetSelaginella_moellen  | 38.80 | 0.00 |
| TRINITY_GBF87540 | serine pRaphidocelis_subcap  | 38.80 | 0.00 |
| TRINITY_XP_02190 | tRNA:m(4Carica_papaya        | 38.80 | 0.00 |
| TRINITY_XP_00141 | predicteOstreococcus_sp._'1  | 38.70 | 0.00 |
| TRINITY_XP_00940 | PREDICTHMusa_acuminata       | 38.70 | 0.00 |
| TRINITY_RWR90377 | protein Cinnamomum_micranth  | 38.70 | 0.00 |
| TRINITY_XP_01362 | PREDICTHBrassica_oleracea    | 38.70 | 0.00 |
| TRINITY_XP_02283 | HomoseriOstreococcus_tauri   | 38.70 | 0.00 |
| TRINITY_XP_02293 | WD repeaCucurbita_moschata   | 38.70 | 0.00 |
| TRINITY_XP_01587 | ATP-depeZiziphus_jujuba      | 38.70 | 0.00 |
| TRINITY_KZN06669 | hypothetDaucus_carota        | 38.70 | 0.00 |
| TRINITY_XP_01102 | PREDICTHPopulus_euphratica   | 38.70 | 0.00 |
| TRINITY_GAY34717 | hypothetCitrus_unshiu        | 38.70 | 0.00 |
| TRINITY_XP_00935 | PREDICTHPyrus_x_bretschneid  | 38.70 | 0.00 |
| TRINITY_GAU23001 | hypothetTrifolium_subterrann | 38.70 | 0.00 |
| TRINITY_RID61649 | hypothetBrassica_rapa        | 38.70 | 0.00 |
| TRINITY_EPS66885 | hypothetGenlisea_aurea       | 38.70 | 0.00 |
| TRINITY_XP_01094 | PREDICTHElaeis_guineensis    | 38.70 | 0.00 |
| TRINITY_XP_02172 | CBL-inteChenopodium_quinoa   | 38.70 | 0.00 |
| TRINITY_XP_02390 | mitochorQuercus_suber        | 38.70 | 0.00 |
| TRINITY_XP_01761 | PREDICTHGossypium_arboreum   | 38.70 | 0.00 |
| TRINITY_XP_00294 | hypothetVolvox_carteri       | 38.70 | 0.00 |
| TRINITY_KXZ52444 | hypothetGonium_pectorale     | 38.70 | 0.00 |
| TRINITY_GBF90642 | p-type aRaphidocelis_subcap  | 38.70 | 0.00 |
| TRINITY_GBG76731 | hypothetChara_braunii        | 38.70 | 0.00 |
| TRINITY_KDD77173 | hypothetHelicosporidium_sp.  | 38.70 | 0.00 |
| TRINITY_XP_00564 | hypothetCoccomyxa_subellips  | 38.70 | 0.00 |
| TRINITY_PWA86690 | serine/tArtemisia_annua      | 38.70 | 0.00 |
| TRINITY_PRW33716 | DNA ligaChlorella_sorokinia  | 38.70 | 0.00 |
| TRINITY_GBF97932 | hypothetRaphidocelis_subcap  | 38.70 | 0.00 |
| TRINITY_XP_01656 | PREDICTHCapsicum_annuum      | 38.70 | 0.00 |
| TRINITY_GAX75699 | hypothetChlamydomonas_eusti  | 38.70 | 0.00 |
| TRINITY_PRW58455 | guanylatChlorella_sorokinia  | 38.70 | 0.00 |
| TRINITY_PNW73097 | hypothetChlamydomonas_reinh  | 38.70 | 0.00 |
| TRINITY_XP_02392 | GPI ethaQuercus_suber        | 38.70 | 0.00 |
| TRINITY_XP_02168 | polyaderHevea_brasiliensis   | 38.70 | 0.00 |
| TRINITY_GAX81325 | hypothetChlamydomonas_eusti  | 38.70 | 0.00 |
| TRINITY_PNW83690 | hypothetChlamydomonas_reinh  | 38.70 | 0.00 |
| TRINITY_OAE25220 | hypothetMarchantia_polymorp  | 38.70 | 0.00 |
| TRINITY_XP_01847 | PREDICTHRaphanus_sativus     | 38.70 | 0.00 |
| TRINITY_PNW85977 | hypothetChlamydomonas_reinh  | 38.70 | 0.00 |
| TRINITY_KXZ50930 | hypothetGonium_pectorale     | 38.70 | 0.00 |
| TRINITY_PTQ38959 | hypothetMarchantia_polymorp  | 38.70 | 0.00 |
| TRINITY_PNH08711 | Protein Tetrabaena_socialis  | 38.70 | 0.00 |
| TRINITY_PRW60421 | RAP domaChlorella_sorokinia  | 38.70 | 0.00 |
| TRINITY_PWZ53892 | hypothetZea_mays             | 38.70 | 0.00 |
| TRINITY_XP_02057 | LOW QUAIPhalaenopsis_equest  | 38.70 | 0.00 |
| TRINITY_PNH10237 | hypothetTetrabaena_socialis  | 38.70 | 0.00 |
| TRINITY_PNW70704 | hypothetChlamydomonas_reinh  | 38.70 | 0.00 |
| TRINITY_GBF89861 | eukaryotRaphidocelis_subcap  | 38.70 | 0.00 |
| TRINITY_GAX75934 | hypothetChlamydomonas_eusti  | 38.70 | 0.00 |
| TRINITY_GAX76388 | hypothetChlamydomonas_eusti  | 38.70 | 0.00 |
| TRINITY_EFJ07477 | hypothetSelaginella_moellen  | 38.70 | 0.00 |
| TRINITY_OAY64017 | TBC1 donAnanas_comosus       | 38.70 | 0.00 |
| TRINITY_GAX80253 | hypothetChlamydomonas_eusti  | 38.70 | 0.00 |
| TRINITY_PNW84654 | hypothetChlamydomonas_reinh  | 38.70 | 0.00 |
| TRINITY_GAX81886 | hypothetChlamydomonas_eusti  | 38.70 | 0.00 |
| TRINITY_PNW80820 | hypothetChlamydomonas_reinh  | 38.70 | 0.00 |
| TRINITY_XP_00288 | short-clArabidopsis_lyrata   | 38.70 | 0.00 |
| TRINITY_XP_01283 | PREDICTHErythranthe_guttata  | 38.60 | 0.00 |
| TRINITY_XP_02735 | aldehydeAbrus_precatorius    | 38.60 | 0.00 |
| TRINITY_XP_01139 | hypothetAuxenochlorella_pro  | 38.60 | 0.00 |

|                  |          |                     |       |      |
|------------------|----------|---------------------|-------|------|
| TRINITY_XP_00449 | RNA pse  | Cicer_arietinum     | 38.60 | 0.00 |
| TRINITY_XP_00864 | BTB/POZ  | Zea_mays            | 38.60 | 0.00 |
| TRINITY_XP_01110 | ER memb  | Sesamum_indicum     | 38.60 | 0.00 |
| TRINITY_GAX80494 | hypothet | Chlamydomonas_eusti | 38.60 | 0.00 |
| TRINITY_ATB19844 | metallo  | Callitropsis_nootka | 38.60 | 0.00 |
| TRINITY_XP_01724 | PREDICTF | Daucus_carota       | 38.60 | 0.00 |
| TRINITY_BAK00435 | predict  | Hordeum_vulgare     | 38.60 | 0.00 |
| TRINITY_XP_00935 | PREDICTF | Pyrus_x_bretschneid | 38.60 | 0.00 |
| TRINITY_PNR3656  | hypothet | Physcomitrella_pate | 38.60 | 0.00 |
| TRINITY_XP_01165 | PREDICTF | Cucumis_sativus     | 38.60 | 0.00 |

|                  |           |                     |       |      |
|------------------|-----------|---------------------|-------|------|
| TRINITY_XP_00664 | PREDICTI  | Oryza_brachyantha   | 38.60 | 0.00 |
| TRINITY_XP_0220  | (probable | Helianthus_annuus   | 38.60 | 0.00 |
| TRINITY_XP_0200  | phospho   | Ananas_comosus      | 38.60 | 0.00 |
| TRINITY_XP_0016  | predicte  | Chlamydomonas_reinh | 38.60 | 0.00 |
| TRINITY_GBG8855  | hypothet  | Chara_braunii       | 38.60 | 0.00 |
| TRINITY_XP_0213  | rac-like  | Sorghum_bicolor     | 38.60 | 0.00 |
| TRINITY_XP_0243  | serine c  | Physcomitrella_pate | 38.60 | 0.00 |
| TRINITY_XP_0216  | RING-H2   | Hevea_brasiliensis  | 38.60 | 0.00 |
| TRINITY_XP_0191  | (PREDICTI | Beta_vulgaris       | 38.60 | 0.00 |
| TRINITY_PWA4422  | alanine-  | Artemisia_annua     | 38.60 | 0.00 |
| TRINITY_PNH0829  | Katanin   | Tetrabaena_socialis | 38.60 | 0.00 |
| TRINITY_XP_0238  | geranyl   | Quercus_suber       | 38.60 | 0.00 |
| TRINITY_XP_0206  | AP-4 con  | Dendrobium_catenatu | 38.60 | 0.00 |
| TRINITY_PSS3000  | Serine/t  | Actinidia_chinensis | 38.60 | 0.00 |
| TRINITY_XP_0017  | (predicte | Chlamydomonas_reinh | 38.60 | 0.00 |
| TRINITY_XP_0243  | PAN2-PAN  | Physcomitrella_pate | 38.60 | 0.00 |
| TRINITY_XP_0056  | hypothet  | Coccomyxa_subellips | 38.60 | 0.00 |
| TRINITY_KXZ5406  | hypothet  | Gonium_pectorale    | 38.60 | 0.00 |
| TRINITY_OAE3319  | hypothet  | Marchantia_polymorp | 38.60 | 0.00 |
| TRINITY_GAX7829  | hypothet  | Chlamydomonas_eusti | 38.60 | 0.00 |
| TRINITY_KZV1521  | petal d   | Dorcoceras_hygromet | 38.60 | 0.00 |
| TRINITY_BAJ9884  | predicte  | Hordeum_vulgare     | 38.60 | 0.00 |
| TRINITY_CDP0682  | (unnamed  | Coffea_canephora    | 38.60 | 0.00 |
| TRINITY_XP_0029  | hypothet  | Volvox_carteri      | 38.60 | 0.00 |
| TRINITY_GAX8404  | (hypothet | Chlamydomonas_eusti | 38.60 | 0.00 |
| TRINITY_GAX7553  | hypothet  | Chlamydomonas_eusti | 38.60 | 0.00 |
| TRINITY_XP_0244  | (probable | Physcomitrella_pate | 38.60 | 0.00 |
| TRINITY_XP_0030  | predicte  | Micromonas_pusilla  | 38.60 | 0.00 |
| TRINITY_XP_0172  | PREDICTI  | Daucus_carota       | 38.60 | 0.00 |
| TRINITY_XP_0017  | (predicte | Chlamydomonas_reinh | 38.60 | 0.00 |
| TRINITY_XP_0025  | ammonium  | Micromonas_commoda  | 38.60 | 0.00 |
| TRINITY_GBF9843  | hypothet  | Raphidocelis_subcap | 38.60 | 0.00 |
| TRINITY_XP_0188  | PREDICTI  | Juglans_regia       | 38.60 | 0.00 |
| TRINITY_PNW7694  | hypothet  | Chlamydomonas_reinh | 38.60 | 0.00 |
| TRINITY_XP_0184  | PREDICTI  | Raphanus_sativus    | 38.60 | 0.00 |
| TRINITY_KXZ4639  | hypothet  | Gonium_pectorale    | 38.60 | 0.00 |
| TRINITY_GAX7441  | (hypothet | Chlamydomonas_eusti | 38.60 | 0.00 |
| TRINITY_KXZ4933  | hypothet  | Gonium_pectorale    | 38.60 | 0.00 |
| TRINITY_XP_0094  | PREDICTI  | Musa_acuminata      | 38.60 | 0.00 |
| TRINITY_NP_1895  | high mok  | Arabidopsis_thalian | 38.60 | 0.00 |
| TRINITY_KXZ4474  | hypothet  | Gonium_pectorale    | 38.60 | 0.00 |
| TRINITY_XP_0016  | componer  | Chlamydomonas_reinh | 38.60 | 0.00 |
| TRINITY_XP_0134  | (FACT con | Medicago_truncatula | 38.60 | 0.00 |
| TRINITY_XP_0245  | uncharac  | Selaginella_moellen | 38.60 | 0.00 |
| TRINITY_XP_0139  | (WD-40 re | Monoraphidium_negle | 38.60 | 0.00 |
| TRINITY_XP_0208  | vesicle-  | Arabidopsis_lyrata  | 38.60 | 0.00 |
| TRINITY_XP_0025  | (predicte | Micromonas_commoda  | 38.60 | 0.00 |
| TRINITY_OVA1817  | Mini-ch   | Macleaya_cordata    | 38.60 | 0.00 |
| TRINITY_PNW7076  | hypothet  | Chlamydomonas_reinh | 38.60 | 0.00 |
| TRINITY_XP_0205  | protein   | Amborella_trichopod | 38.60 | 0.00 |
| TRINITY_OUS4953  | adenylat  | Ostreococcus_tauri  | 38.60 | 0.00 |
| TRINITY_XP_0243  | poly [AI  | Physcomitrella_pate | 38.60 | 0.00 |
| TRINITY_XP_0029  | hypothet  | Volvox_carteri      | 38.60 | 0.00 |
| TRINITY_KNA1683  | (hypothet | Spinacia_oleracea   | 38.60 | 0.00 |
| TRINITY_XP_0239  | putative  | Quercus_suber       | 38.60 | 0.00 |
| TRINITY_GAX8275  | hypothet  | Chlamydomonas_eusti | 38.60 | 0.00 |
| TRINITY_XP_0238  | uncharac  | Quercus_suber       | 38.60 | 0.00 |
| TRINITY_GAX8540  | (hypothet | Chlamydomonas_eusti | 38.60 | 0.00 |
| TRINITY_XP_0279  | (probable | Vigna_unguiculata   | 38.60 | 0.00 |
| TRINITY_PNH1128  | Amine o   | Tetrabaena_socialis | 38.60 | 0.00 |
| TRINITY_XP_0238  | protein   | Quercus_suber       | 38.60 | 0.00 |
| TRINITY_XP_0243  | ALA-inte  | Physcomitrella_pate | 38.60 | 0.00 |
| TRINITY_PNW7955  | hypothet  | Chlamydomonas_reinh | 38.60 | 0.00 |
| TRINITY_PNW7578  | hypothet  | Chlamydomonas_reinh | 38.60 | 0.00 |
| TRINITY_KFK4014  | hypothet  | Arabis_alpina       | 38.60 | 0.00 |
| TRINITY_PNH0765  | Spermat   | Tetrabaena_socialis | 38.60 | 0.00 |



|                  |           |                     |       |      |
|------------------|-----------|---------------------|-------|------|
| TRINITY_ADE7668  | unknown   | Picea_sitchensis    | 38.60 | 0.00 |
| TRINITY_KXZ5149  | hypothet  | Gonium_pectorale    | 38.60 | 0.00 |
| TRINITY_XP_02391 | cytoplas  | Quercus_suber       | 38.60 | 0.00 |
| TRINITY_GAX8187  | hypothet  | Chlamydomonas_eusti | 38.60 | 0.00 |
| TRINITY_XP_0201  | (calcine) | Ananas_comosus      | 38.50 | 0.00 |
| TRINITY_OIW1844  | hypothet  | Lupinus_angustifoli | 38.50 | 0.00 |
| TRINITY_XP_0167  | PREDICTE  | Gossypium_hirsutum  | 38.50 | 0.00 |
| TRINITY_BAK0286  | predicte  | Hordeum_vulgare     | 38.50 | 0.00 |
| TRINITY_XP_0029  | hypothet  | Volvox_carteri      | 38.50 | 0.00 |
| TRINITY_PRW3353  | E3 ubiq   | Chlorella_sorokinia | 38.50 | 0.00 |
| TRINITY_RLM8669  | (Serine/t | Panicum_miliaceum   | 38.50 | 0.00 |
| TRINITY_OAE2258  | hypothet  | Marchantia_polymorp | 38.50 | 0.00 |
| TRINITY_GBG6698  | hypothet  | Chara_braunii       | 38.50 | 0.00 |
| TRINITY_XP_0110  | uncharac  | Sesamum_indicum     | 38.50 | 0.00 |
| TRINITY_RQO9871  | hypothet  | Populus_trichocarpa | 38.50 | 0.00 |
| TRINITY_PRW6160  | lysozyme  | Chlorella_sorokinia | 38.50 | 0.00 |
| TRINITY_ESQ2998  | hypothet  | Eutrema_salsugineum | 38.50 | 0.00 |
| TRINITY_XP_0243  | glutathi  | Physcomitrella_pate | 38.50 | 0.00 |
| TRINITY_PNH0433  | (MOXD1 1  | Tetrabaena_socialis | 38.50 | 0.00 |
| TRINITY_GAQ8238  | (delta(3) | Klebsormidium_niten | 38.50 | 0.00 |
| TRINITY_XP_0029  | E3 ubiq   | Selaginella_moellen | 38.50 | 0.00 |
| TRINITY_GAV6491  | (YTH dom  | Cephalotus_follicul | 38.50 | 0.00 |
| TRINITY_BAK0043  | predicte  | Hordeum_vulgare     | 38.50 | 0.00 |
| TRINITY_AAS9246  | (Fe-super | Lotus_japonicus     | 38.50 | 0.00 |
| TRINITY_XP_0244  | (protein  | Physcomitrella_pate | 38.50 | 0.00 |
| TRINITY_XP_0137  | pectin    | Brassica_napus      | 38.50 | 0.00 |
| TRINITY_XP_0029  | hypothet  | Volvox_carteri      | 38.50 | 0.00 |
| TRINITY_XP_02391 | protein   | Quercus_suber       | 38.50 | 0.00 |
| TRINITY_CDP1798  | unnamed   | Coffea_canephora    | 38.50 | 0.00 |
| TRINITY_AFK4786  | unknown   | Medicago_truncatula | 38.50 | 0.00 |
| TRINITY_RDY0275  | hypothet  | Mucuna_pruriens     | 38.50 | 0.00 |
| TRINITY_BAJ9457  | predicte  | Hordeum_vulgare     | 38.50 | 0.00 |
| TRINITY_KXZ4437  | hypothet  | Gonium_pectorale    | 38.50 | 0.00 |
| TRINITY_XP_0042  | PREDICTE  | Fragaria_vesca      | 38.50 | 0.00 |
| TRINITY_XP_0029  | hypothet  | Volvox_carteri      | 38.50 | 0.00 |
| TRINITY_BAK0323  | predicte  | Hordeum_vulgare     | 38.50 | 0.00 |
| TRINITY_KXZ4594  | hypothet  | Gonium_pectorale    | 38.50 | 0.00 |
| TRINITY_PNH0808  | (BTB/POZ  | Tetrabaena_socialis | 38.50 | 0.00 |
| TRINITY_XP_0104  | PREDICTE  | Camelina_sativa     | 38.50 | 0.00 |
| TRINITY_GBG8139  | (hypothet | Chara_braunii       | 38.50 | 0.00 |
| TRINITY_EEF2753  | two-com   | Ricinus_communis    | 38.50 | 0.00 |
| TRINITY_KXZ4799  | hypothet  | Gonium_pectorale    | 38.50 | 0.00 |
| TRINITY_XP_0238  | leucine   | Quercus_suber       | 38.50 | 0.00 |
| TRINITY_PNW8645  | hypothet  | Chlamydomonas_reinh | 38.50 | 0.00 |
| TRINITY_XP_0086  | diacylg   | Zea_mays            | 38.50 | 0.00 |
| TRINITY_XP_0194  | PREDICTE  | Lupinus_angustifoli | 38.50 | 0.00 |
| TRINITY_GAQ7842  | hypothet  | Klebsormidium_niten | 38.50 | 0.00 |
| TRINITY_OUS4179  | hypothet  | Ostreococcus_tauri  | 38.50 | 0.00 |
| TRINITY_XP_02181 | pre-rRN   | Prunus_avium        | 38.50 | 0.00 |
| TRINITY_XP_0239  | (external | Quercus_suber       | 38.50 | 0.00 |
| TRINITY_XP_0243  | ras-rel   | Physcomitrella_pate | 38.50 | 0.00 |
| TRINITY_PNW7849  | hypothet  | Chlamydomonas_reinh | 38.50 | 0.00 |
| TRINITY_XP_0056  | mitochor  | Coccomyxa_subellips | 38.50 | 0.00 |
| TRINITY_GBF8936  | diacylg   | Raphidocelis_subcap | 38.50 | 0.00 |
| TRINITY_GAX7767  | (hypothet | Chlamydomonas_eusti | 38.50 | 0.00 |
| TRINITY_BAK0455  | predicte  | Hordeum_vulgare     | 38.50 | 0.00 |
| TRINITY_XP_0056  | Xaa-Pro   | Coccomyxa_subellips | 38.50 | 0.00 |
| TRINITY_XP_02391 | LOW QUAI  | Quercus_suber       | 38.50 | 0.00 |
| TRINITY_GAX8172  | hypothet  | Chlamydomonas_eusti | 38.50 | 0.00 |
| TRINITY_XP_02391 | N-acyl-   | Quercus_suber       | 38.50 | 0.00 |
| TRINITY_XP_01041 | PREDICTE  | Camelina_sativa     | 38.50 | 0.00 |
| TRINITY_KXZ5505  | hypothet  | Gonium_pectorale    | 38.50 | 0.00 |
| TRINITY_XP_0016  | componer  | Chlamydomonas_reinh | 38.50 | 0.00 |
| TRINITY_PSS2676  | Receptor  | Actinidia_chinensis | 38.50 | 0.00 |
| TRINITY_KXZ5031  | hypothet  | Gonium_pectorale    | 38.50 | 0.00 |
| TRINITY_KXZ4447  | hypothet  | Gonium_pectorale    | 38.50 | 0.00 |

|                 |                              |       |      |
|-----------------|------------------------------|-------|------|
| TRINITY_KXZ4755 | hypothetGonium_pectorale     | 38.50 | 0.00 |
| TRINITY_XP_0245 | probablSelaginella_moellen   | 38.50 | 0.00 |
| TRINITY_XP_0176 | PREDICTGossypium_arboreum    | 38.50 | 0.00 |
| TRINITY_GAX8345 | hypothetChlamydomonas_eusti  | 38.50 | 0.00 |
| TRINITY_XP_0016 | predictChlamydomonas_reinh   | 38.50 | 0.00 |
| TRINITY_XP_0266 | CTD smalPhoenix_dactylifera  | 38.50 | 0.00 |
| TRINITY_GAV8014 | Kelch_3 Cephalotus_follicul  | 38.50 | 0.00 |
| TRINITY_XP_0058 | hypothetChlorella_variabili  | 38.50 | 0.00 |
| TRINITY_PNW7983 | hypothetChlamydomonas_reinh  | 38.50 | 0.00 |
| TRINITY_XP_0029 | hypothetVolvox_carteri       | 38.50 | 0.00 |
| TRINITY_GBG7673 | hypothetChara_braunii        | 38.50 | 0.00 |
| TRINITY_GAX8129 | hypothetChlamydomonas_eusti  | 38.50 | 0.00 |
| TRINITY_KXZ4939 | hypothetGonium_pectorale     | 38.50 | 0.00 |
| TRINITY_GAX7448 | hypothetChlamydomonas_eusti  | 38.50 | 0.00 |
| TRINITY_XP_0220 | CBL-intHelianthus_annuus     | 38.50 | 0.00 |
| TRINITY_GAX8545 | hypothetChlamydomonas_eusti  | 38.50 | 0.00 |
| TRINITY_GAX7507 | hypothetChlamydomonas_eusti  | 38.50 | 0.00 |
| TRINITY_XP_0202 | uncharaAsparagus_officinal   | 38.50 | 0.00 |
| TRINITY_GAX8055 | hypothetChlamydomonas_eusti  | 38.50 | 0.00 |
| TRINITY_OIW0149 | hypothetLupinus_angustifoli  | 38.50 | 0.00 |
| TRINITY_XP_0229 | CTD smalCucurbita_moschata   | 38.50 | 0.00 |
| TRINITY_GAX8103 | hypothetChlamydomonas_eusti  | 38.50 | 0.00 |
| TRINITY_PNH1181 | Serine/tTetrabaena_socialis  | 38.50 | 0.00 |
| TRINITY_GAX7850 | hypothetChlamydomonas_eusti  | 38.50 | 0.00 |
| TRINITY_GAX8251 | hypothetChlamydomonas_eusti  | 38.50 | 0.00 |
| TRINITY_XP_0110 | 7-methylSesamum_indicum      | 38.40 | 0.00 |
| TRINITY_GBF8892 | translatRaphidocelis_subcap  | 38.40 | 0.00 |
| TRINITY_EFJ2815 | hypothetSelaginella_moellen  | 38.40 | 0.00 |
| TRINITY_PTQ5055 | hypothetMarchantia_polymorp  | 38.40 | 0.00 |
| TRINITY_GAX8530 | hypothetChlamydomonas_eusti  | 38.40 | 0.00 |
| TRINITY_PSS0620 | DnaJ prActinidia_chinensis   | 38.40 | 0.00 |
| TRINITY_XP_0114 | (VAMP-li)Auxenochlorella_pro | 38.40 | 0.00 |
| TRINITY_KMZ6550 | DedicatZostera_marina        | 38.40 | 0.00 |
| TRINITY_XP_0113 | hypothetAuxenochlorella_pro  | 38.40 | 0.00 |
| TRINITY_RXH7691 | hypothetMalus_domestica      | 38.40 | 0.00 |
| TRINITY_OAE3117 | hypothetMarchantia_polymorp  | 38.40 | 0.00 |
| TRINITY_XP_0206 | tyrosineDendrobium_catenatu  | 38.40 | 0.00 |
| TRINITY_GAX8194 | hypothetChlamydomonas_eusti  | 38.40 | 0.00 |
| TRINITY_PIA4605 | hypothetAquilegia_coerulea   | 38.40 | 0.00 |
| TRINITY_RDX8325 | (Sorting Mucuna_pruriens     | 38.40 | 0.00 |
| TRINITY_XP_0225 | endonuclBrassica_napus       | 38.40 | 0.00 |
| TRINITY_GAX8289 | hypothetChlamydomonas_eusti  | 38.40 | 0.00 |
| TRINITY_GAX7714 | hypothetChlamydomonas_eusti  | 38.40 | 0.00 |
| TRINITY_XP_0058 | hypothetChlorella_variabili  | 38.40 | 0.00 |
| TRINITY_PRW5837 | hypothetChlorella_sorokinia  | 38.40 | 0.00 |
| TRINITY_XP_0030 | predictMicromonas_pusilla    | 38.40 | 0.00 |
| TRINITY_PNW7874 | hypothetChlamydomonas_reinh  | 38.40 | 0.00 |
| TRINITY_GAX8564 | hypothetChlamydomonas_eusti  | 38.40 | 0.00 |
| TRINITY_OAY8236 | (ABC trarAnanas_comosus      | 38.40 | 0.00 |
| TRINITY_XP_0243 | putativePhyscomitrella_pate  | 38.40 | 0.00 |
| TRINITY_XP_0238 | pre-mRNQuercus_suber         | 38.40 | 0.00 |
| TRINITY_XP_0238 | serine/tQuercus_suber        | 38.40 | 0.00 |
| TRINITY_XP_0191 | PREDICTIpomoea_nil           | 38.40 | 0.00 |
| TRINITY_PWA4037 | GTP-binArtemisia_annua       | 38.40 | 0.00 |
| TRINITY_XP_0016 | predictChlamydomonas_reinh   | 38.40 | 0.00 |
| TRINITY_XP_0017 | (predictChlamydomonas_reinh  | 38.40 | 0.00 |
| TRINITY_XP_0240 | SNF1-relMorus_notabilis      | 38.40 | 0.00 |
| TRINITY_OTF9515 | putativeHelianthus_annuus    | 38.40 | 0.00 |
| TRINITY_PKU8351 | hypothetDendrobium_catenatu  | 38.40 | 0.00 |
| TRINITY_XP_0227 | coiled-(Durio_zibethinus     | 38.40 | 0.00 |
| TRINITY_PNW8474 | hypothetChlamydomonas_reinh  | 38.40 | 0.00 |
| TRINITY_KMZ5751 | (AlkylateZostera_marina      | 38.40 | 0.00 |
| TRINITY_CAA0411 | (cytochrHelianthus_tuberosu  | 38.40 | 0.00 |
| TRINITY_XP_0058 | hypothetChlorella_variabili  | 38.40 | 0.00 |
| TRINITY_KCW5779 | hypothetEucalyptus_grandis   | 38.40 | 0.00 |
| TRINITY_OAE1874 | hypothetMarchantia_polymorp  | 38.40 | 0.00 |

|                 |                              |       |      |
|-----------------|------------------------------|-------|------|
| TRINITY_GAX7373 | {hypothetChlamydomonas_eusti | 38.40 | 0.00 |
| TRINITY_KXZ4426 | {hypothetGonium_pectorale    | 38.40 | 0.00 |
| TRINITY_XP_0016 | {predicteChlamydomonas_reinh | 38.40 | 0.00 |
| TRINITY_XP_0088 | 1molybderPhoenix_dactylifera | 38.40 | 0.00 |
| TRINITY_GBF9506 | {hypothetRaphidocelis_subcap | 38.40 | 0.00 |
| TRINITY_KCW7583 | {hypothetEucalyptus_grandis  | 38.40 | 0.00 |
| TRINITY_XP_0188 | {PREDICTEJuglans_regia       | 38.40 | 0.00 |
| TRINITY_OWM7420 | {hypothetPunica_granatum     | 38.40 | 0.00 |
| TRINITY_PRW6037 | {Aldo ketChlorella_sorokinia | 38.40 | 0.00 |
| TRINITY_PIN0679 | 2TranscriHandroanthus_impeti | 38.40 | 0.00 |
| TRINITY_PNH0258 | {hypothetTetrabaena_socialis | 38.40 | 0.00 |
| TRINITY_PNW8683 | {hypothetChlamydomonas_reinh | 38.40 | 0.00 |
| TRINITY_XP_0049 | {phospho]Setaria_italica     | 38.40 | 0.00 |
| TRINITY_GAX7787 | 1hypothetChlamydomonas_eusti | 38.40 | 0.00 |
| TRINITY_PNW8291 | {hypothetChlamydomonas_reinh | 38.40 | 0.00 |
| TRINITY_GAX7955 | {hypothetChlamydomonas_eusti | 38.40 | 0.00 |
| TRINITY_GAX7689 | {hypothetChlamydomonas_eusti | 38.40 | 0.00 |
| TRINITY_XP_0257 | {NEDD8-aPanicum_hallii       | 38.40 | 0.00 |
| TRINITY_GAX7845 | 7hypothetChlamydomonas_eusti | 38.40 | 0.00 |
| TRINITY_GBF9848 | {sucrose Raphidocelis_subcap | 38.40 | 0.00 |
| TRINITY_XP_0093 | {PREDICTEMusa_acuminata      | 38.40 | 0.00 |
| TRINITY_XP_0014 | 2predicteOstreococcus_sp._'1 | 38.40 | 0.00 |
| TRINITY_XP_0266 | {purine-iPhoenix_dactylifera | 38.30 | 0.00 |
| TRINITY_ACJ3819 | {chitina:Malus_hupehensis    | 38.30 | 0.00 |
| TRINITY_EPS7284 | 2hypothetGenlisea_aurea      | 38.30 | 0.00 |
| TRINITY_XP_0238 | {probableQuercus_suber       | 38.30 | 0.00 |
| TRINITY_ESR3577 | 1hypothetCitrus_clementina   | 38.30 | 0.00 |
| TRINITY_PSC7039 | {elongatiMicractinium_conduc | 38.30 | 0.00 |
| TRINITY_GAX7827 | {hypothetChlamydomonas_eusti | 38.30 | 0.00 |
| TRINITY_EFJ0791 | {hypothetSelaginella_moellen | 38.30 | 0.00 |
| TRINITY_PTQ4567 | 2hypothetMarchantia_polymorp | 38.30 | 0.00 |
| TRINITY_BAJ9214 | {predicteHordeum_vulgare     | 38.30 | 0.00 |
| TRINITY_BAK0597 | 1predicteHordeum_vulgare     | 38.30 | 0.00 |
| TRINITY_XP_0239 | {uncharacQuercus_suber       | 38.30 | 0.00 |
| TRINITY_OAE3431 | {hypothetMarchantia_polymorp | 38.30 | 0.00 |
| TRINITY_OAE2429 | {hypothetMarchantia_polymorp | 38.30 | 0.00 |
| TRINITY_XP_0270 | {phospho]Coffea_arabica      | 38.30 | 0.00 |
| TRINITY_XP_0238 | {guanine Quercus_suber       | 38.30 | 0.00 |
| TRINITY_XP_0058 | {hypothetChlorella_variabili | 38.30 | 0.00 |
| TRINITY_GBF9626 | 2cysteineRaphidocelis_subcap | 38.30 | 0.00 |
| TRINITY_XP_0191 | {PREDICTEIpomoea_nil         | 38.30 | 0.00 |
| TRINITY_YP_0094 | {orf187 Bupleurum_falcatum   | 38.30 | 0.00 |
| TRINITY_KXZ4326 | 1hypothetGonium_pectorale    | 38.30 | 0.00 |
| TRINITY_XP_0030 | {voltage-Micromonas_pusilla  | 38.30 | 0.00 |
| TRINITY_GAX7778 | {hypothetChlamydomonas_eusti | 38.30 | 0.00 |
| TRINITY_GAX8510 | {hypothetChlamydomonas_eusti | 38.30 | 0.00 |
| TRINITY_BAJ9631 | {predicteHordeum_vulgare     | 38.30 | 0.00 |
| TRINITY_XP_0063 | {probableEutrema_salsugineum | 38.30 | 0.00 |
| TRINITY_XP_0202 | {probableCajanus_cajan       | 38.30 | 0.00 |
| TRINITY_PNW8566 | {hypothetChlamydomonas_reinh | 38.30 | 0.00 |
| TRINITY_GBG9163 | {hypothetChara_braunii       | 38.30 | 0.00 |
| TRINITY_ESR3926 | 7hypothetCitrus_clementina   | 38.30 | 0.00 |
| TRINITY_XP_0138 | {hypothetMonoraphidium_negle | 38.30 | 0.00 |
| TRINITY_PNW8002 | {hypothetChlamydomonas_reinh | 38.30 | 0.00 |
| TRINITY_GAX8099 | {hypothetChlamydomonas_eusti | 38.30 | 0.00 |
| TRINITY_GAX7814 | 7hypothetChlamydomonas_eusti | 38.30 | 0.00 |
| TRINITY_GAX8134 | {hypothetChlamydomonas_eusti | 38.30 | 0.00 |
| TRINITY_XP_0238 | {putativeQuercus_suber       | 38.30 | 0.00 |
| TRINITY_GAQ8331 | {acetyltrKlebsormidium_niten | 38.30 | 0.00 |
| TRINITY_GBF9419 | {calcium Raphidocelis_subcap | 38.30 | 0.00 |
| TRINITY_XP_0016 | {predicteChlamydomonas_reinh | 38.30 | 0.00 |
| TRINITY_XP_0238 | {beta-galQuercus_suber       | 38.30 | 0.00 |
| TRINITY_PSC7184 | {GlycosylMicractinium_conduc | 38.30 | 0.00 |
| TRINITY_XP_0243 | {uncharacPhyscomitrella_pate | 38.30 | 0.00 |
| TRINITY_KXZ4678 | 7hypothetGonium_pectorale    | 38.30 | 0.00 |
| TRINITY_KXZ4742 | 5hypothetGonium_pectorale    | 38.30 | 0.00 |

|                 |                             |       |      |
|-----------------|-----------------------------|-------|------|
| TRINITY_PNW7619 | hypothetChlamydomonas_reinh | 38.30 | 0.00 |
| TRINITY_XP_0279 | protein Vigna_unguiculata   | 38.30 | 0.00 |
| TRINITY_GAX7659 | hypothetChlamydomonas_eusti | 38.30 | 0.00 |
| TRINITY_GAX7975 | hypothetChlamydomonas_eusti | 38.30 | 0.00 |
| TRINITY_PNW8565 | hypothetChlamydomonas_reinh | 38.30 | 0.00 |
| TRINITY_GBF9761 | hypothetRaphidocelis_subcap | 38.30 | 0.00 |
| TRINITY_XP_0062 | elongatiCapsella_rubella    | 38.30 | 0.00 |
| TRINITY_XP_0016 | predicteChlamydomonas_reinh | 38.30 | 0.00 |
| TRINITY_KXZ4902 | hypothetGonium_pectorale    | 38.30 | 0.00 |
| TRINITY_PTQ3082 | hypothetMarchantia_polymorp | 38.30 | 0.00 |
| TRINITY_RLM9167 | CTD smalPanicum_miliaceum   | 38.30 | 0.00 |
| TRINITY_GAU2515 | hypothetTrifolium_subterran | 38.30 | 0.00 |
| TRINITY_GBF9416 | hypothetRaphidocelis_subcap | 38.30 | 0.00 |
| TRINITY_PNW7741 | hypothetChlamydomonas_reinh | 38.30 | 0.00 |
| TRINITY_XP_0068 | E3 ubiqAmborella_trichopod  | 38.30 | 0.00 |
| TRINITY_XP_0029 | serine/tSelaginella_moellen | 38.30 | 0.00 |
| TRINITY_XP_0243 | ABC trarPhyscomitrella_pate | 38.30 | 0.00 |
| TRINITY_GAX7648 | hypothetChlamydomonas_eusti | 38.30 | 0.00 |
| TRINITY_XP_0097 | PREDICTINicotiana_sylvestri | 38.30 | 0.00 |
| TRINITY_XP_0229 | autophaçCucurbita_moschata  | 38.30 | 0.00 |
| TRINITY_XP_0030 | predicteMicromonas_pusilla  | 38.30 | 0.00 |
| TRINITY_GAX7455 | hypothetChlamydomonas_eusti | 38.30 | 0.00 |
| TRINITY_BAJ9457 | predicteHordeum_vulgare     | 38.30 | 0.00 |
| TRINITY_XP_0083 | PREDICTIMalus_domestica     | 38.30 | 0.00 |
| TRINITY_XP_0238 | LOW QUAIQuercus_suber       | 38.30 | 0.00 |
| TRINITY_XP_0017 | predicteChlamydomonas_reinh | 38.30 | 0.00 |
| TRINITY_AAT9397 | unknown Oryza_sativa        | 38.30 | 0.00 |
| TRINITY_PRW5604 | multidriChlorella_sorokinia | 38.30 | 0.00 |
| TRINITY_GAQ8687 | CysteineKlebsormidium_niten | 38.30 | 0.00 |
| TRINITY_RWW9025 | hypothetEnsete_ventricosum  | 38.30 | 0.00 |
| TRINITY_GAX7369 | hypothetChlamydomonas_eusti | 38.30 | 0.00 |
| TRINITY_GAX7334 | hypothetChlamydomonas_eusti | 38.30 | 0.00 |
| TRINITY_YP_0028 | NADH delMicromonas_commoda  | 38.30 | 0.00 |
| TRINITY_PWZ2217 | putativeZea_mays            | 38.30 | 0.00 |
| TRINITY_XP_0230 | alpha caCucurbita_maxima    | 38.20 | 0.00 |
| TRINITY_XP_0202 | histone Asparagus_officinal | 38.20 | 0.00 |
| TRINITY_XP_0104 | PREDICTICamelina_sativa     | 38.20 | 0.00 |
| TRINITY_OVA0548 | GlycosylMacleaya_cordata    | 38.20 | 0.00 |
| TRINITY_XP_0066 | PREDICTIOryza_brachyantha   | 38.20 | 0.00 |
| TRINITY_XP_0237 | plant UILactuca_sativa      | 38.20 | 0.00 |
| TRINITY_GAQ7965 | Signal tKlebsormidium_niten | 38.20 | 0.00 |
| TRINITY_XP_0058 | hypothetChlorella_variabili | 38.20 | 0.00 |
| TRINITY_AAT5873 | putativeOryza_sativa        | 38.20 | 0.00 |
| TRINITY_PRW6125 | kinase  Chlorella_sorokinia | 38.20 | 0.00 |
| TRINITY_RWR7918 | cytochrCinnamomum_micranth  | 38.20 | 0.00 |
| TRINITY_XP_0206 | protein Dendrobium_catenatu | 38.20 | 0.00 |
| TRINITY_KCW7937 | hypothetEucalyptus_grandis  | 38.20 | 0.00 |
| TRINITY_OWM7052 | hypothetPunica_granatum     | 38.20 | 0.00 |
| TRINITY_PIA3054 | hypothetAquilegia_coerulea  | 38.20 | 0.00 |
| TRINITY_PNW8369 | hypothetChlamydomonas_reinh | 38.20 | 0.00 |
| TRINITY_XP_0243 | ribosomæPhyscomitrella_pate | 38.20 | 0.00 |
| TRINITY_BAK0230 | predicteHordeum_vulgare     | 38.20 | 0.00 |
| TRINITY_GBF9994 | hypothetRaphidocelis_subcap | 38.20 | 0.00 |
| TRINITY_OAE2748 | hypothetMarchantia_polymorp | 38.20 | 0.00 |
| TRINITY_PIA4255 | hypothetAquilegia_coerulea  | 38.20 | 0.00 |
| TRINITY_XP_0097 | PREDICTINicotiana_sylvestri | 38.20 | 0.00 |
| TRINITY_XP_0202 | probableAsparagus_officinal | 38.20 | 0.00 |
| TRINITY_GBG7211 | hypothetChara_braunii       | 38.20 | 0.00 |
| TRINITY_XP_0058 | expressèChlorella_variabili | 38.20 | 0.00 |
| TRINITY_PNW6966 | hypothetChlamydomonas_reinh | 38.20 | 0.00 |
| TRINITY_XP_0237 | probableLactuca_sativa      | 38.20 | 0.00 |
| TRINITY_XP_0239 | coronin-Quercus_suber       | 38.20 | 0.00 |
| TRINITY_GBG6449 | hypothetChara_braunii       | 38.20 | 0.00 |
| TRINITY_GAQ8825 | hypothetKlebsormidium_niten | 38.20 | 0.00 |
| TRINITY_KXZ5052 | hypothetGonium_pectorale    | 38.20 | 0.00 |
| TRINITY_KXZ5404 | hypothetGonium_pectorale    | 38.20 | 0.00 |

|                   |                             |       |      |
|-------------------|-----------------------------|-------|------|
| TRINITY_XP_00565  | hypothetCoccomyxa_subellips | 38.20 | 0.00 |
| TRINITY_XP_01449  | SCAN donVigna_radiata       | 38.20 | 0.00 |
| TRINITY_GAQ91337  | DEAD-boKlebsormidium_niten  | 38.20 | 0.00 |
| TRINITY_PSC67615  | glycosicMicractinium_conduc | 38.20 | 0.00 |
| TRINITY_GAQ88248  | kelch rKlebsormidium_niten  | 38.20 | 0.00 |
| TRINITY_XP_01068  | PREDICTIBeta_vulgaris       | 38.20 | 0.00 |
| TRINITY_GAQ82714  | Nucleic Klebsormidium_niten | 38.20 | 0.00 |
| TRINITY_BAJ99089  | predicteHordeum_vulgare     | 38.20 | 0.00 |
| TRINITY_KCW83437  | hypothetEucalyptus_grandis  | 38.20 | 0.00 |
| TRINITY_XP_00564  | alpha/bCoccomyxa_subellips  | 38.20 | 0.00 |
| TRINITY_GAX74990  | hypothetChlamydomonas_eusti | 38.20 | 0.00 |
| TRINITY_XP_00881  | protein Phoenix_dactylifera | 38.20 | 0.00 |
| TRINITY_GAX79557  | hypothetChlamydomonas_eusti | 38.20 | 0.00 |
| TRINITY_XP_02297  | oxysterCucurbita_maxima     | 38.20 | 0.00 |
| TRINITY_KDD731092 | 2-enoyl-Helicosporidium_sp. | 38.20 | 0.00 |
| TRINITY_VDD64799  | unnamed Brassica_oleracea   | 38.20 | 0.00 |
| TRINITY_XP_02017  | protein Aegilops_tauschii   | 38.20 | 0.00 |
| TRINITY_KXZ52826  | hypothetGonium_pectorale    | 38.20 | 0.00 |
| TRINITY_GBG85051  | hypothetChara_braunii       | 38.20 | 0.00 |
| TRINITY_XP_02389  | probableQuercus_suber       | 38.20 | 0.00 |
| TRINITY_GAX75372  | hypothetChlamydomonas_eusti | 38.20 | 0.00 |
| TRINITY_XP_02792  | putativeVigna_unguiculata   | 38.20 | 0.00 |
| TRINITY_GAX79076  | hypothetChlamydomonas_eusti | 38.20 | 0.00 |
| TRINITY_GBF89721  | hypothetRaphidocelis_subcap | 38.20 | 0.00 |
| TRINITY_GAX75082  | hypothetChlamydomonas_eusti | 38.20 | 0.00 |
| TRINITY_KZV14868  | Inosine-Dorcoceras_hygromet | 38.20 | 0.00 |
| TRINITY_KXZ48444  | hypothetGonium_pectorale    | 38.20 | 0.00 |
| TRINITY_EOY14138  | UncharacTheobroma_cacao     | 38.20 | 0.00 |
| TRINITY_XP_00168  | potassiChlamydomonas_reinh  | 38.20 | 0.00 |
| TRINITY_XP_02392  | ras-relQuercus_suber        | 38.20 | 0.00 |
| TRINITY_GBF97773  | hypothetRaphidocelis_subcap | 38.20 | 0.00 |
| TRINITY_PNW77758  | hypothetChlamydomonas_reinh | 38.20 | 0.00 |
| TRINITY_XP_00168  | DEAD/DE7Chlamydomonas_reinh | 38.20 | 0.00 |
| TRINITY_PTQ42993  | hypothetMarchantia_polymorp | 38.20 | 0.00 |
| TRINITY_KXZ55433  | hypothetGonium_pectorale    | 38.20 | 0.00 |
| TRINITY_XP_01881  | PREDICTIJuglans_regia       | 38.20 | 0.00 |
| TRINITY_PTQ27996  | hypothetMarchantia_polymorp | 38.20 | 0.00 |
| TRINITY_PNW84620  | hypothetChlamydomonas_reinh | 38.20 | 0.00 |
| TRINITY_GAX74303  | hypothetChlamydomonas_eusti | 38.20 | 0.00 |
| TRINITY_XP_00169  | voltage-Chlamydomonas_reinh | 38.20 | 0.00 |
| TRINITY_GAX80627  | hypothetChlamydomonas_eusti | 38.20 | 0.00 |
| TRINITY_KXZ52385  | hypothetGonium_pectorale    | 38.20 | 0.00 |
| TRINITY_GAX76516  | hypothetChlamydomonas_eusti | 38.20 | 0.00 |
| TRINITY_XP_00295  | hypothetVolvox_carteri      | 38.20 | 0.00 |
| TRINITY_PNW83574  | hypothetChlamydomonas_reinh | 38.20 | 0.00 |
| TRINITY_GAX79236  | hypothetChlamydomonas_eusti | 38.20 | 0.00 |
| TRINITY_XP_00296  | probableSelaginella_moellen | 38.20 | 0.00 |
| TRINITY_GAQ86878  | CysteineKlebsormidium_niten | 38.20 | 0.00 |
| TRINITY_XP_02438  | glutathiPhyscomitrella_pate | 38.20 | 0.00 |
| TRINITY_PNW79711  | hypothetChlamydomonas_reinh | 38.20 | 0.00 |
| TRINITY_XP_02391  | zinc trQuercus_suber        | 38.20 | 0.00 |
| TRINITY_GAQ92802  | hypothetKlebsormidium_niten | 38.20 | 0.00 |
| TRINITY_PNW78909  | hypothetChlamydomonas_reinh | 38.20 | 0.00 |
| TRINITY_PWA67705  | ubiquitiArtemisia_annua     | 38.20 | 0.00 |
| TRINITY_XP_01587  | uncharacZiziphus_jujuba     | 38.10 | 0.00 |
| TRINITY_OMO57177  | hypothetCorchorus_capsulari | 38.10 | 0.00 |
| TRINITY_EEF27535  | two-comRicinus_communis     | 38.10 | 0.00 |
| TRINITY_RDX64929  | Gamma-glMucuna_pruriens     | 38.10 | 0.00 |
| TRINITY_BBC28429  | cytoplasYamagishiella_unico | 38.10 | 0.00 |
| TRINITY_XP_02127  | uncharacHerrania_umbratica  | 38.10 | 0.00 |
| TRINITY_OAY64407  | PhosphatAnanas_comosus      | 38.10 | 0.00 |
| TRINITY_XP_00584  | hypothetChlorella_variabili | 38.10 | 0.00 |
| TRINITY_XP_02453  | phosphatSelaginella_moellen | 38.10 | 0.00 |
| TRINITY_EMS48749  | hypothetTriticum_urartu     | 38.10 | 0.00 |
| TRINITY_XP_02638  | endochitPapaver_somniferum  | 38.10 | 0.00 |
| TRINITY_XP_00170  | sulfite Chlamydomonas_reinh | 38.10 | 0.00 |

|                  |          |                     |       |      |
|------------------|----------|---------------------|-------|------|
| TRINITY_PSC75951 | putative | Micractinium_conduc | 38.10 | 0.00 |
| TRINITY_XP_00584 | hypothet | Chlorella_variabili | 38.10 | 0.00 |
| TRINITY_XP_02640 | short-cl | Papaver_somniferum  | 38.10 | 0.00 |
| TRINITY_XP_02440 | pre-mRN  | Physcomitrella_pate | 38.10 | 0.00 |
| TRINITY_XP_00308 | Alpha-k  | Ostreococcus_tauri  | 38.10 | 0.00 |
| TRINITY_XP_00564 | EF-hand  | Coccomyxa_subellips | 38.10 | 0.00 |
| TRINITY_XP_02190 | solute c | Carica_papaya       | 38.10 | 0.00 |
| TRINITY_XP_02387 | dipeptic | Quercus_suber       | 38.10 | 0.00 |
| TRINITY_GAX75940 | hypothet | Chlamydomonas_eusti | 38.10 | 0.00 |
| TRINITY_PNH01808 | hypothet | Tetrabaena_socialis | 38.10 | 0.00 |
| TRINITY_XP_02284 | phosphat | Olea_europaea       | 38.10 | 0.00 |
| TRINITY_YP_00942 | hypothet | Ulva_pertusa        | 38.10 | 0.00 |
| TRINITY_BAJ97253 | predicte | Hordeum_vulgare     | 38.10 | 0.00 |
| TRINITY_XP_00168 | predicte | Chlamydomonas_reinh | 38.10 | 0.00 |
| TRINITY_RLM54246 | hypothet | Panicum_miliaceum   | 38.10 | 0.00 |
| TRINITY_PNH05183 | Protein  | Tetrabaena_socialis | 38.10 | 0.00 |
| TRINITY_GAX80027 | hypothet | Chlamydomonas_eusti | 38.10 | 0.00 |
| TRINITY_GAX76333 | hypothet | Chlamydomonas_eusti | 38.10 | 0.00 |
| TRINITY_XP_01093 | PREDICTE | Elaeis_guineensis   | 38.10 | 0.00 |
| TRINITY_XP_01770 | beta-he  | Phoenix_dactylifera | 38.10 | 0.00 |
| TRINITY_PNH10190 | hypothet | Tetrabaena_socialis | 38.10 | 0.00 |
| TRINITY_GAQ77983 | RNA heli | Klebsormidium_niten | 38.10 | 0.00 |
| TRINITY_XP_00881 | SEC14 c  | Phoenix_dactylifera | 38.10 | 0.00 |
| TRINITY_XP_02288 | VAMP-li  | Olea_europaea       | 38.10 | 0.00 |
| TRINITY_KXZ41684 | hypothet | Gonium_pectorale    | 38.10 | 0.00 |
| TRINITY_XP_00169 | predicte | Chlamydomonas_reinh | 38.10 | 0.00 |
| TRINITY_GAX77044 | hypothet | Chlamydomonas_eusti | 38.10 | 0.00 |
| TRINITY_XP_02016 | phytepsi | Aegilops_tauschii   | 38.10 | 0.00 |
| TRINITY_XP_02388 | queuosir | Quercus_suber       | 38.10 | 0.00 |
| TRINITY_XP_00169 | predicte | Chlamydomonas_reinh | 38.10 | 0.00 |
| TRINITY_XP_00169 | predicte | Chlamydomonas_reinh | 38.10 | 0.00 |
| TRINITY_PRW56206 | DNA rep  | Chlorella_sorokinia | 38.10 | 0.00 |
| TRINITY_XP_00685 | serine/t | Amborella_trichopod | 38.10 | 0.00 |
| TRINITY_XP_02275 | phosphat | Durio_zibethinus    | 38.10 | 0.00 |
| TRINITY_PRW60276 | snRNA-ac | Chlorella_sorokinia | 38.10 | 0.00 |
| TRINITY_GAX73668 | hypothet | Chlamydomonas_eusti | 38.10 | 0.00 |
| TRINITY_GAQ90106 | E3 ubiq  | Klebsormidium_niten | 38.10 | 0.00 |
| TRINITY_RMZ57087 | hypothet | Auxenochlorella_pro | 38.10 | 0.00 |
| TRINITY_XP_00296 | protein  | Selaginella_moellen | 38.10 | 0.00 |
| TRINITY_XP_00295 | hypothet | Volvox_carteri      | 38.10 | 0.00 |
| TRINITY_GAX78102 | hypothet | Chlamydomonas_eusti | 38.10 | 0.00 |
| TRINITY_XP_00169 | predicte | Chlamydomonas_reinh | 38.10 | 0.00 |
| TRINITY_GAX86036 | hypothet | Chlamydomonas_eusti | 38.10 | 0.00 |
| TRINITY_GAX73684 | hypothet | Chlamydomonas_eusti | 38.10 | 0.00 |
| TRINITY_GAX77035 | hypothet | Chlamydomonas_eusti | 38.10 | 0.00 |
| TRINITY_XP_00628 | SNF1-rel | Capsella_rubella    | 38.10 | 0.00 |
| TRINITY_GAX77841 | hypothet | Chlamydomonas_eusti | 38.10 | 0.00 |
| TRINITY_RLN01048 | dual sp  | Panicum_miliaceum   | 38.10 | 0.00 |
| TRINITY_XP_02201 | serine/t | Helianthus_annuus   | 38.10 | 0.00 |
| TRINITY_PNW73208 | hypothet | Chlamydomonas_reinh | 38.10 | 0.00 |
| TRINITY_PRW20657 | SWI SNF- | Chlorella_sorokinia | 38.10 | 0.00 |
| TRINITY_PSS21723 | Protein  | Actinidia_chinensis | 38.10 | 0.00 |
| TRINITY_GAX73180 | hypothet | Chlamydomonas_eusti | 38.10 | 0.00 |
| TRINITY_PNH11786 | Heat sh  | Tetrabaena_socialis | 38.10 | 0.00 |
| TRINITY_PRW60150 | bifuncti | Chlorella_sorokinia | 38.10 | 0.00 |
| TRINITY_GAX78701 | hypothet | Chlamydomonas_eusti | 38.10 | 0.00 |
| TRINITY_XP_02389 | pentafur | Quercus_suber       | 38.10 | 0.00 |
| TRINITY_XP_00170 | centriol | Chlamydomonas_reinh | 38.10 | 0.00 |
| TRINITY_GAX78982 | hypothet | Chlamydomonas_eusti | 38.10 | 0    |
| TRINITY_GAX80142 | hypothet | Chlamydomonas_eusti | 38.10 | 0.00 |
| TRINITY_XP_02182 | uncharac | Prunus_avium        | 38.10 | 0.00 |
| TRINITY_XP_01945 | PREDICTE | Lupinus_angustifoli | 38.00 | 0.00 |
| TRINITY_XP_01025 | PREDICTE | Nelumbo_nucifera    | 38.00 | 0.00 |
| TRINITY_XP_01944 | PREDICTE | Lupinus_angustifoli | 38.00 | 0.00 |
| TRINITY_XP_01270 | serine/t | Setaria_italica     | 38.00 | 0.00 |
| TRINITY_XP_02027 | phosphol | Asparagus_officinal | 38.00 | 0.00 |

|                  |           |                     |       |      |
|------------------|-----------|---------------------|-------|------|
| TRINITY_XP_01011 | probable  | Morus_notabilis     | 38.00 | 0.00 |
| TRINITY_KXZ43451 | hypothet  | Gonium_pectorale    | 38.00 | 0.00 |
| TRINITY_XP_0258  | (serine c | Panicum_hallii      | 38.00 | 0.00 |
| TRINITY_OTF8484  | (putative | Helianthus_annuus   | 38.00 | 0.00 |
| TRINITY_XP_0191  | PREDICTI  | Ipomoea_nil         | 38.00 | 0.00 |
| TRINITY_OAE3001  | hypothet  | Marchantia_polymorp | 38.00 | 0.00 |
| TRINITY_EOA3410  | hypothet  | Capsella_rubella    | 38.00 | 0.00 |
| TRINITY_GAQ8632  | (major f  | Klebsormidium_niten | 38.00 | 0.00 |
| TRINITY_KEH2376  | ARM rep   | Medicago_truncatula | 38.00 | 0.00 |
| TRINITY_XP_0082  | PREDICTI  | Prunus_mume         | 38.00 | 0.00 |
| TRINITY_RXH9621  | hypothet  | Malus_domestica     | 38.00 | 0.00 |
| TRINITY_DAA7995  | TPA_inf:  | Chlamydomonas_reinh | 38.00 | 0.00 |
| TRINITY_GAX8523  | (hypothet | Chlamydomonas_eusti | 38.00 | 0.00 |
| TRINITY_XP_0030  | (predict  | Micromonas_pusilla  | 38.00 | 0.00 |
| TRINITY_XP_0030  | Cytochr   | Ostreococcus_tauri  | 38.00 | 0.00 |
| TRINITY_XP_0014  | (predict  | Ostreococcus_sp._'1 | 38.00 | 0.00 |
| TRINITY_OAE2003  | (hypothet | Marchantia_polymorp | 38.00 | 0.00 |
| TRINITY_PNW8679  | (hypothet | Chlamydomonas_reinh | 38.00 | 0.00 |
| TRINITY_PNW8385  | hypothet  | Chlamydomonas_reinh | 38.00 | 0.00 |
| TRINITY_BAJ9079  | (predict  | Hordeum_vulgare     | 38.00 | 0.00 |
| TRINITY_RMZ5349  | hypothet  | Auxenochlorella_pro | 38.00 | 0.00 |
| TRINITY_XP_0029  | hypothet  | Volvox_carteri      | 38.00 | 0.00 |
| TRINITY_XP_0243  | (putative | Physcomitrella_pate | 38.00 | 0.00 |
| TRINITY_AIU4942  | translat  | Aristolochia_tagala | 38.00 | 0.00 |
| TRINITY_KXZ5624  | hypothet  | Gonium_pectorale    | 38.00 | 0.00 |
| TRINITY_GBF9145  | hypothet  | Raphidocelis_subcap | 38.00 | 0.00 |
| TRINITY_KGN6463  | hypothet  | Cucumis_sativus     | 38.00 | 0.00 |
| TRINITY_RXH9440  | hypothet  | Malus_domestica     | 38.00 | 0.00 |
| TRINITY_GBF9734  | flagell   | Raphidocelis_subcap | 38.00 | 0.00 |
| TRINITY_XP_0029  | hypothet  | Volvox_carteri      | 38.00 | 0.00 |
| TRINITY_KXZ5618  | hypothet  | Gonium_pectorale    | 38.00 | 0.00 |
| TRINITY_XP_0063  | PREDICTI  | Solanum_tuberosum   | 38.00 | 0.00 |
| TRINITY_GAX7817  | hypothet  | Chlamydomonas_eusti | 38.00 | 0.00 |
| TRINITY_XP_0264  | protein   | Papaver_somniferum  | 38.00 | 0.00 |
| TRINITY_XP_0227  | (transpo  | Durio_zibethinus    | 38.00 | 0.00 |
| TRINITY_XP_0239  | unchara   | Quercus_suber       | 38.00 | 0.00 |
| TRINITY_GAX8451  | hypothet  | Chlamydomonas_eusti | 38.00 | 0.00 |
| TRINITY_GAX8329  | (hypothet | Chlamydomonas_eusti | 38.00 | 0.00 |
| TRINITY_XP_0016  | flagell   | Chlamydomonas_reinh | 38.00 | 0.00 |
| TRINITY_CBI3558  | unnamed   | Vitis_vinifera      | 38.00 | 0.00 |
| TRINITY_PSC7220  | ultravic  | Micractinium_conduc | 38.00 | 0.00 |
| TRINITY_XP_0158  | (probable | Ziziphus_jujuba     | 38.00 | 0.00 |
| TRINITY_XP_0174  | PREDICTI  | Vigna_angularis     | 38.00 | 0.00 |
| TRINITY_XP_0017  | (predict  | Chlamydomonas_reinh | 38.00 | 0.00 |
| TRINITY_PRW5781  | B Chain   | Chlorella_sorokinia | 38.00 | 0.00 |
| TRINITY_OAE1944  | (hypothet | Marchantia_polymorp | 38.00 | 0.00 |
| TRINITY_XP_0029  | hypothet  | Volvox_carteri      | 38.00 | 0.00 |
| TRINITY_PNW7984  | hypothet  | Chlamydomonas_reinh | 38.00 | 0.00 |
| TRINITY_XP_0239  | carrier   | Quercus_suber       | 38.00 | 0.00 |
| TRINITY_PTQ4358  | hypothet  | Marchantia_polymorp | 38.00 | 0.00 |
| TRINITY_EOY3167  | Calpain-  | Theobroma_cacao     | 38.00 | 0.00 |
| TRINITY_XP_0042  | acidic ]  | Solanum_lycopersicu | 38.00 | 0.00 |
| TRINITY_GAX7806  | (hypothet | Chlamydomonas_eusti | 38.00 | 0.00 |
| TRINITY_PRW6135  | AP2 dom   | Chlorella_sorokinia | 38.00 | 0.00 |
| TRINITY_RZB4932  | (Importir | Glycine_soja        | 38.00 | 0.00 |
| TRINITY_PNH0192  | (Glycosy] | Tetrabaena_socialis | 38.00 | 0.00 |
| TRINITY_XP_0110  | PREDICTI  | Populus_euphratica  | 38.00 | 0.00 |
| TRINITY_GAX8631  | (hypothet | Chlamydomonas_eusti | 38.00 | 0.00 |
| TRINITY_XP_0058  | hypothet  | Chlorella_variabili | 38.00 | 0.00 |
| TRINITY_GAX7668  | (hypothet | Chlamydomonas_eusti | 38.00 | 0.00 |
| TRINITY_XP_0174  | PREDICTI  | Vigna_angularis     | 38.00 | 0.00 |
| TRINITY_XP_0128  | PREDICTI  | Erythranthe_guttata | 38.00 | 0.00 |
| TRINITY_XP_0249  | AFG1-li   | Cynara_cardunculus  | 38.00 | 0.00 |
| TRINITY_KXZ4935  | hypothet  | Gonium_pectorale    | 38.00 | 0.00 |
| TRINITY_PNH0519  | Phosphat  | Tetrabaena_socialis | 38.00 | 0.00 |
| TRINITY_GAX7790  | hypothet  | Chlamydomonas_eusti | 38.00 | 0.00 |

|                                             |       |      |
|---------------------------------------------|-------|------|
| TRINITY_XP_0177(cyclin-1Phoenix_dactylifera | 38.00 | 0.00 |
| TRINITY_XP_0110(non-lys(Sesamum_indicum     | 38.00 | 0.00 |
| TRINITY_XP_0245(unchara(Selaginella_moellen | 38.00 | 0.00 |
| TRINITY_GAQ89551BTB/POZ Klebsormidium_niten | 37.90 | 0.00 |
| TRINITY_PTQ2785(hypothetMarchantia_polymorp | 37.90 | 0.00 |
| TRINITY_XP_0071(hypothetPhaseolus_vulgaris  | 37.90 | 0.00 |
| TRINITY_XP_0056(ClP/crCoccomyxa_subellips   | 37.90 | 0.00 |
| TRINITY_XP_0243(unchara(Physcomitrella_pate | 37.90 | 0.00 |
| TRINITY_XP_0243(protein Physcomitrella_pate | 37.90 | 0.00 |
| TRINITY_XP_0239(phosphatQuercus_suber       | 37.90 | 0.00 |
| TRINITY_XP_0056(SM/Sec1-Coccomyxa_subellips | 37.90 | 0.00 |
| TRINITY_XP_0216(syntaxirManihot_esculenta   | 37.90 | 0.00 |
| TRINITY_XP_0239(unchara(Quercus_suber       | 37.90 | 0.00 |
| TRINITY_XP_0239(protein Quercus_suber       | 37.90 | 0.00 |
| TRINITY_KXZ4282(hypothetGonium_pectorale    | 37.90 | 0.00 |
| TRINITY_OAE2795(hypothetMarchantia_polymorp | 37.90 | 0.00 |
| TRINITY_XP_0220(serine/tHelianthus_annuus   | 37.90 | 0.00 |
| TRINITY_XP_0229(ubiquitiCucurbita_moschata  | 37.90 | 0.00 |
| TRINITY_GAQ8660(peptida(Klebsormidium_niten | 37.90 | 0.00 |
| TRINITY_XP_0239(peroxid(Quercus_suber       | 37.90 | 0.00 |
| TRINITY_XP_0102(PREDICTINelumbo_nucifera    | 37.90 | 0.00 |
| TRINITY_XP_0212(serine/tHerrania_umbratica  | 37.90 | 0.00 |
| TRINITY_XP_0068(mannose-Amborella_trichopod | 37.90 | 0.00 |
| TRINITY_GAQ7902(Regulat(Klebsormidium_niten | 37.90 | 0.00 |
| TRINITY_XP_0042(PREDICTIFragaria-vesca      | 37.90 | 0.00 |
| TRINITY_XP_0205(unchara(Sesamum_indicum     | 37.90 | 0.00 |
| TRINITY_XP_0056(DnaJ-donCoccomyxa_subellips | 37.90 | 0.00 |
| TRINITY_XP_0124(PREDICTIGossypium_raimondii | 37.90 | 0.00 |
| TRINITY_GBG64331hypothetChara_braunii       | 37.90 | 0.00 |
| TRINITY_GBF9453(ABC trarRaphidocelis_subcap | 37.90 | 0.00 |
| TRINITY_GAX7676(hypothetChlamydomonas_eusti | 37.90 | 0.00 |
| TRINITY_GAQ8912(hypothetKlebsormidium_niten | 37.90 | 0.00 |
| TRINITY_XP_0025(ChlRe r(Micromonas_commoda  | 37.90 | 0.00 |
| TRINITY_XP_0238(eukaryotQuercus_suber       | 37.90 | 0.00 |
| TRINITY_XP_0229(protein Cucurbita_maxima    | 37.90 | 0.00 |
| TRINITY_XP_0083(PREDICTIMalus_domestica     | 37.90 | 0.00 |
| TRINITY_GAX7455(hypothetChlamydomonas_eusti | 37.90 | 0.00 |
| TRINITY_NP_0012(phospho(Glycine_max         | 37.90 | 0.00 |
| TRINITY_XP_0025(predicte(Micromonas_commoda | 37.90 | 0.00 |
| TRINITY_KXZ56352(hypothetGonium_pectorale   | 37.90 | 0.00 |
| TRINITY_XP_0029(hypothetVolvox_carteri      | 37.90 | 0.00 |
| TRINITY_BAJ9408(predicte(Hordeum_vulgare    | 37.90 | 0.00 |
| TRINITY_PNW8662(hypothetChlamydomonas_reinh | 37.90 | 0.00 |
| TRINITY_GAX8151(hypothetChlamydomonas_eusti | 37.90 | 0.00 |
| TRINITY_PNH08841Fibrocy(Tetrabaena_socialis | 37.90 | 0.00 |
| TRINITY_XP_0191(PREDICTI(Ipomoea_nil        | 37.90 | 0.00 |
| TRINITY_XP_0201(probable(Aegilops_tauschii  | 37.90 | 0.00 |
| TRINITY_GAX7408(hypothetChlamydomonas_eusti | 37.90 | 0.00 |
| TRINITY_GAQ8522(ornithirKlebsormidium_niten | 37.90 | 0.00 |
| TRINITY_XP_0097(PREDICTINicotiana_sylvestri | 37.90 | 0.00 |
| TRINITY_PNW87751hypothetChlamydomonas_reinh | 37.90 | 0.00 |
| TRINITY_KXZ5000(hypothetGonium_pectorale    | 37.90 | 0.00 |
| TRINITY_KXZ4454(hypothetGonium_pectorale    | 37.90 | 0.00 |
| TRINITY_KXZ4322(hypothetGonium_pectorale    | 37.90 | 0.00 |
| TRINITY_GBG6548(hypothetChara_braunii       | 37.90 | 0.00 |
| TRINITY_GAX7918(hypothetChlamydomonas_eusti | 37.90 | 0.00 |
| TRINITY_GBF88202hypothetRaphidocelis_subcap | 37.90 | 0.00 |
| TRINITY_CDY1402(BnaC02g(Brassica_napus      | 37.90 | 0.00 |
| TRINITY_GAX8024(hypothetChlamydomonas_eusti | 37.90 | 0.00 |
| TRINITY_XP_0144(+)-neonVigna_radiata        | 37.90 | 0.00 |
| TRINITY_PNW7852(hypothetChlamydomonas_reinh | 37.90 | 0.00 |
| TRINITY_GAX8386(hypothetChlamydomonas_eusti | 37.90 | 0.00 |
| TRINITY_XP_0110(fimbrin-Sesamum_indicum     | 37.90 | 0.00 |
| TRINITY_GAX7570(hypothetChlamydomonas_eusti | 37.90 | 0.00 |
| TRINITY_PTQ4978(hypothetMarchantia_polymorp | 37.90 | 0.00 |
| TRINITY_GAX74942hypothetChlamydomonas_eusti | 37.90 | 0.00 |



|                  |                  |                     |       |      |
|------------------|------------------|---------------------|-------|------|
| TRINITY_XP_00251 | aminopeptidase   | Ricinus communis    | 37.90 | 0.00 |
| TRINITY_XP_01389 | type I           | Monoraphidium negle | 37.90 | 0.00 |
| TRINITY_KXZ43799 | hypothetical     | Gonium pectorale    | 37.90 | 0.00 |
| TRINITY_ACZ37259 | Mn superoxide    | Chlamydomonas reinh | 37.90 | 0.00 |
| TRINITY_XP_00299 | hypothetical     | Volvox carteri      | 37.90 | 0.00 |
| TRINITY_ABK25936 | unknown          | Picea sitchensis    | 37.90 | 0.00 |
| TRINITY_XP_02459 | 5'-AMP-ase       | Selaginella moellen | 37.90 | 0.00 |
| TRINITY_GAX85472 | hypothetical     | Chlamydomonas eusti | 37.90 | 0.00 |
| TRINITY_XP_00564 | flag-tag         | Coccomyxa subellips | 37.90 | 0.00 |
| TRINITY_GAX80160 | hypothetical     | Chlamydomonas eusti | 37.90 | 0.00 |
| TRINITY_KXZ43981 | hypothetical     | Gonium pectorale    | 37.90 | 0.00 |
| TRINITY_PSC67376 | 54S ribosome     | Micractinium conduc | 37.80 | 0.00 |
| TRINITY_XP_01729 | PREDICTED        | Daucus carota       | 37.80 | 0.00 |
| TRINITY_XP_01507 | probable         | Solanum pennellii   | 37.80 | 0.00 |
| TRINITY_PNR47252 | hypothetical     | Physcomitrella pate | 37.80 | 0.00 |
| TRINITY_XP_02199 | uncharacterized  | Helianthus annuus   | 37.80 | 0.00 |
| TRINITY_XP_00423 | pathogen         | Solanum lycopersicu | 37.80 | 0.00 |
| TRINITY_VDD06629 | unnamed          | Brassica rapa       | 37.80 | 0.00 |
| TRINITY_GAQ77586 | Cyclic           | Klebsormidium niten | 37.80 | 0.00 |
| TRINITY_PRW60250 | serine/threonine | Chlorella sorokinia | 37.80 | 0.00 |
| TRINITY_XP_00838 | PREDICTED        | Malus domestica     | 37.80 | 0.00 |
| TRINITY_XP_01918 | PREDICTED        | Ipomoea nil         | 37.80 | 0.00 |
| TRINITY_KEH15439 | pyrrolin         | Medicago truncatula | 37.80 | 0.00 |
| TRINITY_XP_00822 | PREDICTED        | Prunus mume         | 37.80 | 0.00 |
| TRINITY_KXZ56699 | hypothetical     | Gonium pectorale    | 37.80 | 0.00 |
| TRINITY_XP_02391 | tRNA-dil         | Quercus suber       | 37.80 | 0.00 |
| TRINITY_RHN42010 | putative         | Medicago truncatula | 37.80 | 0.00 |
| TRINITY_XP_00298 | serine/threonine | Selaginella moellen | 37.80 | 0.00 |
| TRINITY_OAE23102 | hypothetical     | Marchantia polymorp | 37.80 | 0.00 |
| TRINITY_GAQ77832 | Protein          | Klebsormidium niten | 37.80 | 0.00 |
| TRINITY_XP_02189 | mitogen          | Carica papaya       | 37.80 | 0.00 |
| TRINITY_PNW78507 | hypothetical     | Chlamydomonas reinh | 37.80 | 0.00 |
| TRINITY_GAX85181 | hypothetical     | Chlamydomonas eusti | 37.80 | 0.00 |
| TRINITY_XP_00294 | hypothetical     | Volvox carteri      | 37.80 | 0.00 |
| TRINITY_PNW85198 | hypothetical     | Chlamydomonas reinh | 37.80 | 0.00 |
| TRINITY_PNH08433 | Nucleoprotein    | Tetrabaena socialis | 37.80 | 0.00 |
| TRINITY_GAX72771 | hypothetical     | Chlamydomonas eusti | 37.80 | 0.00 |
| TRINITY_GAX72899 | hypothetical     | Chlamydomonas eusti | 37.80 | 0.00 |
| TRINITY_PKA52271 | putative         | Apostasia shenzheni | 37.80 | 0.00 |
| TRINITY_PSS31562 | Serine/threonine | Actinidia chinensis | 37.80 | 0.00 |
| TRINITY_GBG79509 | hypothetical     | Chara braunii       | 37.80 | 0.00 |
| TRINITY_OIW04572 | hypothetical     | Lupinus angustifoli | 37.80 | 0.00 |
| TRINITY_XP_01569 | stomatid         | Oryza sativa        | 37.80 | 0.00 |
| TRINITY_XP_00169 | Rh protein       | Chlamydomonas reinh | 37.80 | 0.00 |
| TRINITY_PSC70357 | long chain       | Micractinium conduc | 37.80 | 0.00 |
| TRINITY_XP_01654 | PREDICTED        | Capsicum annuum     | 37.80 | 0.00 |
| TRINITY_PNW70396 | hypothetical     | Chlamydomonas reinh | 37.80 | 0.00 |
| TRINITY_PRQ15912 | putative         | Rosa chinensis      | 37.80 | 0.00 |
| TRINITY_XP_02086 | cyclin-c         | Arabidopsis lyrata  | 37.80 | 0.00 |
| TRINITY_KMZ63763 | ATPase           | Zostera marina      | 37.80 | 0.00 |
| TRINITY_GAX83762 | hypothetical     | Chlamydomonas eusti | 37.80 | 0.00 |
| TRINITY_PNW78721 | hypothetical     | Chlamydomonas reinh | 37.80 | 0.00 |
| TRINITY_GBG71047 | hypothetical     | Chara braunii       | 37.80 | 0.00 |
| TRINITY_PNW87752 | hypothetical     | Chlamydomonas reinh | 37.80 | 0.00 |
| TRINITY_GAX85174 | hypothetical     | Chlamydomonas eusti | 37.80 | 0.00 |
| TRINITY_XP_02438 | phosphatase      | Physcomitrella pate | 37.80 | 0.00 |
| TRINITY_XP_01670 | PREDICTED        | Gossypium hirsutum  | 37.80 | 0.00 |
| TRINITY_XP_01390 | hypothetical     | Monoraphidium negle | 37.80 | 0.00 |
| TRINITY_XP_00169 | voltage          | Chlamydomonas reinh | 37.80 | 0.00 |
| TRINITY_XP_02180 | dual specific    | Prunus avium        | 37.80 | 0.00 |
| TRINITY_XP_00361 | probable         | Medicago truncatula | 37.80 | 0.00 |
| TRINITY_XP_00564 | glutathione      | Coccomyxa subellips | 37.80 | 0.00 |
| TRINITY_PNH07526 | Leucine          | Tetrabaena socialis | 37.80 | 0.00 |
| TRINITY_PNW88443 | hypothetical     | Chlamydomonas reinh | 37.80 | 0.00 |
| TRINITY_GBF91504 | sulfur           | Raphidocelis subcap | 37.80 | 0.00 |
| TRINITY_XP_02708 | protease         | Coffea arabica      | 37.80 | 0.00 |

|                  |                             |       |      |
|------------------|-----------------------------|-------|------|
| TRINITY_GAX75737 | hypothetChlamydomonas_eusti | 37.80 | 0.00 |
| TRINITY_GAX76357 | hypothetChlamydomonas_eusti | 37.80 | 0.00 |
| TRINITY_XP_02438 | uncharacPhyscomitrella_pate | 37.80 | 0.00 |
| TRINITY_GAX83876 | hypothetChlamydomonas_eusti | 37.80 | 0.00 |
| TRINITY_PIA3416  | hypothetAquilegia_coerulea  | 37.80 | 0.00 |
| TRINITY_KMZ57538 | putativeZostera_marina      | 37.80 | 0.00 |
| TRINITY_XP_00422 | transmemSolanum_lycopersicu | 37.80 | 0.00 |
| TRINITY_GBF97615 | hypothetRaphidocelis_subcap | 37.80 | 0.00 |
| TRINITY_GAX85747 | hypothetChlamydomonas_eusti | 37.80 | 0.00 |
| TRINITY_XP_00297 | vesicle-Selaginella_moellen | 37.80 | 0.00 |
| TRINITY_XP_0025  | predicteMicromonas_commoda  | 37.80 | 0.00 |
| TRINITY_KHG14098 | LON peptGossypium_arboreum  | 37.70 | 0.00 |
| TRINITY_XP_0136  | PREDICTIBrassica_oleracea   | 37.70 | 0.00 |
| TRINITY_GAQ80325 | hypothetKlebsormidium_niten | 37.70 | 0.00 |
| TRINITY_XP_02388 | vacuolarQuercus_suber       | 37.70 | 0.00 |
| TRINITY_XP_02373 | elongatiLactuca_sativa      | 37.70 | 0.00 |
| TRINITY_XP_01941 | PREDICTILupinus_angustifoli | 37.70 | 0.00 |
| TRINITY_XP_02288 | ABC trarOstreococcus_tauri  | 37.70 | 0.00 |
| TRINITY_XP_01102 | PREDICTIPopulus_euphratica  | 37.70 | 0.00 |
| TRINITY_XP_02392 | uncharacQuercus_suber       | 37.70 | 0.00 |
| TRINITY_PNW8088  | hypothetChlamydomonas_reinh | 37.70 | 0.00 |
| TRINITY_XP_02376 | ubiquitiLactuca_sativa      | 37.70 | 0.00 |
| TRINITY_XP_01881 | PREDICTIJuglans_regia       | 37.70 | 0.00 |
| TRINITY_XP_01107 | V-type rSesamum_indicum     | 37.70 | 0.00 |
| TRINITY_PRQ28368 | putativeRosa_chinensis      | 37.70 | 0.00 |
| TRINITY_XP_02197 | 3-phosphHelianthus_annuus   | 37.70 | 0.00 |
| TRINITY_PNH00942 | Protein Tetrabaena_socialis | 37.70 | 0.00 |
| TRINITY_KXZ4409  | hypothetGonium_pectorale    | 37.70 | 0.00 |
| TRINITY_XP_01053 | PREDICTITarenaya_hasslerian | 37.70 | 0.00 |
| TRINITY_XP_02388 | ubiquitiQuercus_suber       | 37.70 | 0.00 |
| TRINITY_GAX76673 | hypothetChlamydomonas_eusti | 37.70 | 0.00 |
| TRINITY_XP_01943 | PREDICTILupinus_angustifoli | 37.70 | 0.00 |
| TRINITY_GAX74578 | hypothetChlamydomonas_eusti | 37.70 | 0.00 |
| TRINITY_XP_00169 | predicteChlamydomonas_reinh | 37.70 | 0.00 |
| TRINITY_XP_02388 | serine/tQuercus_suber       | 37.70 | 0.00 |
| TRINITY_GBF9198  | hypothetRaphidocelis_subcap | 37.70 | 0.00 |
| TRINITY_XP_00564 | hypothetCoccomyxa_subellips | 37.70 | 0.00 |
| TRINITY_PRW59625 | origin rChlorella_sorokinia | 37.70 | 0.00 |
| TRINITY_GAQ8595  | GTP-binKlebsormidium_niten  | 37.70 | 0.00 |
| TRINITY_PNW77501 | hypothetChlamydomonas_reinh | 37.70 | 0.00 |
| TRINITY_PPR93142 | hypothetGossypium_barbadens | 37.70 | 0.00 |
| TRINITY_XP_01882 | PREDICTIJuglans_regia       | 37.70 | 0.00 |
| TRINITY_XP_00245 | uncharacSorghum_bicolor     | 37.70 | 0.00 |
| TRINITY_XP_0075  | predicteBathycoccus_prasinc | 37.70 | 0.00 |
| TRINITY_RAL40691 | hypothetCuscuta_australis   | 37.70 | 0.00 |
| TRINITY_KXZ53926 | hypothetGonium_pectorale    | 37.70 | 0.00 |
| TRINITY_KXZ42829 | hypothetGonium_pectorale    | 37.70 | 0.00 |
| TRINITY_XP_00564 | DnaJ-donCoccomyxa_subellips | 37.70 | 0.00 |
| TRINITY_GAX7866  | hypothetChlamydomonas_eusti | 37.70 | 0.00 |
| TRINITY_PNW87948 | hypothetChlamydomonas_reinh | 37.70 | 0.00 |
| TRINITY_GAX80579 | hypothetChlamydomonas_eusti | 37.70 | 0.00 |
| TRINITY_GAX84392 | hypothetChlamydomonas_eusti | 37.70 | 0.00 |
| TRINITY_GAQ77558 | hypothetKlebsormidium_niten | 37.70 | 0.00 |
| TRINITY_PNH10159 | Aladin, Tetrabaena_socialis | 37.70 | 0.00 |
| TRINITY_GAX83171 | hypothetChlamydomonas_eusti | 37.70 | 0.00 |
| TRINITY_ACN27262 | unknown Zea_mays            | 37.70 | 0.00 |
| TRINITY_RWR89712 | cyclin-lCinnamomum_micranth | 37.70 | 0.00 |
| TRINITY_XP_01723 | PREDICTIDaucus_carota       | 37.70 | 0.00 |
| TRINITY_PNW85232 | hypothetChlamydomonas_reinh | 37.70 | 0.00 |
| TRINITY_XP_0094  | PREDICTIMusa_acuminata      | 37.70 | 0.00 |
| TRINITY_XP_02171 | SNF1-relChenopodium_quinoa  | 37.70 | 0.00 |
| TRINITY_XP_02059 | small GPhalaenopsis_equest  | 37.70 | 0.00 |
| TRINITY_GAX84352 | hypothetChlamydomonas_eusti | 37.70 | 0.00 |
| TRINITY_XP_01024 | PREDICTINelumbo_nucifera    | 37.70 | 0.00 |
| TRINITY_GAQ82931 | CalmodulKlebsormidium_niten | 37.70 | 0.00 |
| TRINITY_PSC73989 | CAMK CAMMicractinium_conduc | 37.70 | 0.00 |

|                    |          |                     |       |      |
|--------------------|----------|---------------------|-------|------|
| TRINITY_KHG05516   | Putative | Gossypium_arboreum  | 37.70 | 0.00 |
| TRINITY_KXZ47329   | hypothet | Gonium_pectorale    | 37.70 | 0.00 |
| TRINITY_PRW5896    | calcium- | Chlorella_sorokinia | 37.70 | 0.00 |
| TRINITY_KMZ57538   | putative | Zostera_marina      | 37.70 | 0.00 |
| TRINITY_GAX80176   | hypothet | Chlamydomonas_eusti | 37.70 | 0.00 |
| TRINITY_GAQ77586   | Cyclic r | Klebsormidium_niten | 37.70 | 0.00 |
| TRINITY_XP_01389   | hypothet | Monoraphidium_negle | 37.70 | 0.00 |
| TRINITY_KFK36612   | hypothet | Arabis_alpina       | 37.70 | 0.00 |
| TRINITY_XP_02638   | protein- | Papaver_somniferum  | 37.70 | 0.00 |
| TRINITY_GAX73620   | hypothet | Chlamydomonas_eusti | 37.70 | 0.00 |
| TRINITY_KXZ53966   | hypothet | Gonium_pectorale    | 37.70 | 0.00 |
| TRINITY_XP_00294   | guanylyl | Volvox_carteri      | 37.70 | 0.00 |
| TRINITY_KXZ57007   | hypothet | Gonium_pectorale    | 37.70 | 0.00 |
| TRINITY_XP_01850   | PREDICTE | Pyrus_x_bretschneid | 37.70 | 0.00 |
| TRINITY_XP_00431   | PREDICTE | Fragaria-vesca      | 37.60 | 0.00 |
| TRINITY_XP_00308   | RmlC-li  | Ostreococcus_tauri  | 37.60 | 0.00 |
| TRINITY_GAX74589   | hypothet | Chlamydomonas_eusti | 37.60 | 0.00 |
| TRINITY_KMZ57071   | SEC13-r  | Zostera_marina      | 37.60 | 0.00 |
| TRINITY_PNW82376   | hypothet | Chlamydomonas_reinh | 37.60 | 0.00 |
| TRINITY_XP_01742   | PREDICTE | Vigna_angularis     | 37.60 | 0.00 |
| TRINITY_GBF874215  | -formyl  | Raphidocelis_subcap | 37.60 | 0.00 |
| TRINITY_XP_00684   | phospho  | Amborella_trichopod | 37.60 | 0.00 |
| TRINITY_PIN00563   | Cytochr  | Handroanthus_impeti | 37.60 | 0.00 |
| TRINITY_XP_02388   | protein  | Quercus_suber       | 37.60 | 0.00 |
| TRINITY_GAX80917   | hypothet | Chlamydomonas_eusti | 37.60 | 0.00 |
| TRINITY_XP_02042   | NEDD8-s  | Prunus_persica      | 37.60 | 0.00 |
| TRINITY_XP_01725   | PREDICTE | Daucus_carota       | 37.60 | 0.00 |
| TRINITY_OWM66560   | hypothet | Punica_granatum     | 37.60 | 0.00 |
| TRINITY_RWR91357   | histidir | Cinnamomum_micranth | 37.60 | 0.00 |
| TRINITY_XP_00250   | predicte | Micromonas_commoda  | 37.60 | 0.00 |
| TRINITY_XP_00169   | pre-apo  | Chlamydomonas_reinh | 37.60 | 0.00 |
| TRINITY_XP_02419   | ubiquiti | Rosa_chinensis      | 37.60 | 0.00 |
| TRINITY_GAX73151   | hypothet | Chlamydomonas_eusti | 37.60 | 0.00 |
| TRINITY_GAQ91567   | hypothet | Klebsormidium_niten | 37.60 | 0.00 |
| TRINITY_XP_02009   | polyader | Ananas_comosus      | 37.60 | 0.00 |
| TRINITY_BAK02199   | predicte | Hordeum_vulgare     | 37.60 | 0.00 |
| TRINITY_OAY76547   | COP9 si  | Ananas_comosus      | 37.60 | 0.00 |
| TRINITY_PNW70378   | hypothet | Chlamydomonas_reinh | 37.60 | 0.00 |
| TRINITY_XP_02287   | DEAD-bo  | Olea_europaea       | 37.60 | 0.00 |
| TRINITY_KZN07019   | hypothet | Daucus_carota       | 37.60 | 0.00 |
| TRINITY_XP_00564   | hypothet | Coccomyxa_subellips | 37.60 | 0.00 |
| TRINITY_PNR35372   | hypothet | Physcomitrella_pate | 37.60 | 0.00 |
| TRINITY_XP_00939   | PREDICTE | Musa_acuminata      | 37.60 | 0.00 |
| TRINITY_XP_02283   | Serine-t | Ostreococcus_tauri  | 37.60 | 0.00 |
| TRINITY_XP_00249   | ribosome | Micromonas_commoda  | 37.60 | 0.00 |
| TRINITY_GAX74703   | hypothet | Chlamydomonas_eusti | 37.60 | 0.00 |
| TRINITY_PSS28605   | Sphingo  | Actinidia_chinensis | 37.60 | 0.00 |
| TRINITY_XP_02392   | deoxyrik | Quercus_suber       | 37.60 | 0.00 |
| TRINITY_GAQ81633   | cullin   | Klebsormidium_niten | 37.60 | 0.00 |
| TRINITY_XP_02053   | NADPH-de | Jatropha_curcas     | 37.60 | 0.00 |
| TRINITY_PON72686   | Endoplas | Parasponia_anderson | 37.60 | 0.00 |
| TRINITY_XP_0239160 | kDa      | Quercus_suber       | 37.60 | 0.00 |
| TRINITY_GAX73065   | hypothet | Chlamydomonas_eusti | 37.60 | 0.00 |
| TRINITY_XP_00751   | alpha-1, | Bathycoccus_prasin  | 37.60 | 0.00 |
| TRINITY_GAX75152   | hypothet | Chlamydomonas_eusti | 37.60 | 0.00 |
| TRINITY_XP_02437   | GDT1-li  | Physcomitrella_pate | 37.60 | 0.00 |
| TRINITY_EFJ31521   | hypothet | Selaginella_moellen | 37.60 | 0.00 |
| TRINITY_XP_02718   | LOW QUAI | Coffea_eugenoides   | 37.60 | 0.00 |
| TRINITY_GBF88857   | hypothet | Raphidocelis_subcap | 37.60 | 0.00 |
| TRINITY_EOA25476   | hypothet | Capsella_rubella    | 37.60 | 0.00 |
| TRINITY_XP_02387   | protein  | Quercus_suber       | 37.60 | 0.00 |
| TRINITY_PNH01250   | Calcium- | Tetrabaena_socialis | 37.60 | 0.00 |
| TRINITY_XP_01943   | PREDICTE | Lupinus_angustifoli | 37.60 | 0.00 |
| TRINITY_GAX82805   | hypothet | Chlamydomonas_eusti | 37.60 | 0.00 |
| TRINITY_GAX73347   | hypothet | Chlamydomonas_eusti | 37.60 | 0.00 |
| TRINITY_PNH07060   | Fibronec | Tetrabaena_socialis | 37.60 | 0.00 |

|                  |          |                     |       |      |
|------------------|----------|---------------------|-------|------|
| TRINITY_XP_00664 | PREDICTI | Oryza_brachyantha   | 37.60 | 0.00 |
| TRINITY_XP_01257 | serine/t | Cicer_arietinum     | 37.60 | 0.00 |
| TRINITY_GBF89792 | hypothet | Raphidocelis_subcap | 37.60 | 0.00 |
| TRINITY_GAX72689 | hypothet | Chlamydomonas_eusti | 37.60 | 0.00 |
| TRINITY_XP_00295 | hypothet | Volvox_carteri      | 37.60 | 0.00 |
| TRINITY_GAX82518 | hypothet | Chlamydomonas_eusti | 37.60 | 0.00 |
| TRINITY_GBG70502 | hypothet | Chara_braunii       | 37.60 | 0.00 |
| TRINITY_XP_01390 | hypothet | Monoraphidium_negle | 37.60 | 0.00 |
| TRINITY_PNW82735 | hypothet | Chlamydomonas_reinh | 37.60 | 0.00 |
| TRINITY_PVH47630 | hypothet | Panicum_hallii      | 37.60 | 0.00 |
| TRINITY_XP_02300 | serine/t | Cucurbita_maxima    | 37.60 | 0.00 |
| TRINITY_XP_00295 | hypothet | Volvox_carteri      | 37.60 | 0.00 |
| TRINITY_GAX74704 | hypothet | Chlamydomonas_eusti | 37.60 | 0.00 |
| TRINITY_KXZ55758 | hypothet | Gonium_pectorale    | 37.60 | 0.00 |
| TRINITY_GBG78109 | hypothet | Chara_braunii       | 37.60 | 0.00 |
| TRINITY_XP_01047 | PREDICTI | Camelina_sativa     | 37.60 | 0.00 |
| TRINITY_XP_00355 | probable | Brachypodium_distac | 37.60 | 0.00 |
| TRINITY_XP_02452 | uncharac | Selaginella_moellen | 37.60 | 0.00 |
| TRINITY_GBF90935 | voltage- | Raphidocelis_subcap | 37.60 | 0.00 |
| TRINITY_PNH04143 | 30S rib  | Tetrabaena_socialis | 37.60 | 0.00 |
| TRINITY_KXZ45430 | hypothet | Gonium_pectorale    | 37.60 | 0.00 |
| TRINITY_GBF92514 | hypothet | Raphidocelis_subcap | 37.60 | 0.00 |
| TRINITY_ADJ19186 | lysine } | Triticum_turgidum   | 37.60 | 0.00 |
| TRINITY_XP_00170 | flagell  | Chlamydomonas_reinh | 37.60 | 0.00 |
| TRINITY_PNH00238 | hypothet | Tetrabaena_socialis | 37.60 | 0.00 |
| TRINITY_XP_01562 | CBL-int  | Oryza_sativa        | 37.60 | 0.00 |
| TRINITY_XP_00249 | predict  | Micromonas_commoda  | 37.60 | 0.00 |
| TRINITY_XP_02200 | UDP-sug  | Helianthus_annuus   | 37.60 | 0.00 |
| TRINITY_XP_00294 | hypothet | Volvox_carteri      | 37.60 | 0.00 |
| TRINITY_XP_01885 | PREDICTI | Juglans_regia       | 37.60 | 0.00 |
| TRINITY_PNW86401 | hypothet | Chlamydomonas_reinh | 37.60 | 0.00 |
| TRINITY_XP_02733 | lipoamic | Abrus_precatorius   | 37.60 | 0.00 |
| TRINITY_GAX84471 | hypothet | Chlamydomonas_eusti | 37.60 | 0.00 |
| TRINITY_XP_02440 | elongati | Physcomitrella_pate | 37.60 | 0.00 |
| TRINITY_PNH03960 | ATP-bin  | Tetrabaena_socialis | 37.60 | 0.00 |
| TRINITY_XP_02014 | GTP-bin  | Aegilops_tauschii   | 37.60 | 0.00 |
| TRINITY_GAX81814 | hypothet | Chlamydomonas_eusti | 37.60 | 0.00 |
| TRINITY_PTQ36409 | hypothet | Marchantia_polymorp | 37.60 | 0.00 |
| TRINITY_GAX83352 | hypothet | Chlamydomonas_eusti | 37.60 | 0.00 |
| TRINITY_GAX78457 | hypothet | Chlamydomonas_eusti | 37.60 | 0.00 |
| TRINITY_OAE18089 | hypothet | Marchantia_polymorp | 37.60 | 0.00 |
| TRINITY_AAD22158 | polyprot | Sorghum_bicolor     | 37.60 | 0.00 |
| TRINITY_XP_01390 | cellulo  | Monoraphidium_negle | 37.60 | 0.00 |
| TRINITY_XP_00243 | calcium  | Sorghum_bicolor     | 37.60 | 0.00 |
| TRINITY_XP_02389 | glutarec | Quercus_suber       | 37.60 | 0.00 |
| TRINITY_GAQ80653 | Lysophos | Klebsormidium_niten | 37.50 | 0.00 |
| TRINITY_GAQ87383 | hypothet | Klebsormidium_niten | 37.50 | 0.00 |
| TRINITY_XP_02392 | ras-rel  | Quercus_suber       | 37.50 | 0.00 |
| TRINITY_GAQ80065 | hypothet | Klebsormidium_niten | 37.50 | 0.00 |
| TRINITY_PRW60250 | ser thr  | Chlorella_sorokinia | 37.50 | 0.00 |
| TRINITY_XP_00142 | predict  | Ostreococcus_sp._'l | 37.50 | 0.00 |
| TRINITY_GAX84953 | hypothet | Chlamydomonas_eusti | 37.50 | 0.00 |
| TRINITY_XP_00564 | SFT2-don | Coccomyxa_subellips | 37.50 | 0.00 |
| TRINITY_XP_01102 | PREDICTI | Populus_euphratica  | 37.50 | 0.00 |
| TRINITY_XP_01669 | PREDICTI | Gossypium_hirsutum  | 37.50 | 0.00 |
| TRINITY_KZV15325 | hypothet | Dorcoceras_hygromet | 37.50 | 0.00 |
| TRINITY_EPS72909 | pseudou  | Genlisea_aurea      | 37.50 | 0.00 |
| TRINITY_XP_02735 | synaptot | Abrus_precatorius   | 37.50 | 0.00 |
| TRINITY_BAJ99754 | predict  | Hordeum_vulgare     | 37.50 | 0.00 |
| TRINITY_PON64947 | Phytoch  | Parasponia_anderson | 37.50 | 0.00 |
| TRINITY_PSR85928 | SWR1-con | Actinidia_chinensis | 37.50 | 0.00 |
| TRINITY_XP_02588 | ras-rel  | Solanum_lycopersicu | 37.50 | 0.00 |
| TRINITY_OAE18507 | hypothet | Marchantia_polymorp | 37.50 | 0.00 |
| TRINITY_PWA32070 | Micro-fj | Artemisia_annua     | 37.50 | 0.00 |
| TRINITY_XP_02388 | glutamir | Quercus_suber       | 37.50 | 0.00 |
| TRINITY_XP_01025 | PREDICTI | Nelumbo_nucifera    | 37.50 | 0.00 |

|                 |                               |       |      |
|-----------------|-------------------------------|-------|------|
| TRINITY_GAX7341 | {hypothetChlamydomonas_eusti  | 37.50 | 0.00 |
| TRINITY_PNW7355 | {hypothetChlamydomonas_reinh  | 37.50 | 0.00 |
| TRINITY_GAQ9068 | {ubiquin                      | 37.50 | 0.00 |
| TRINITY_OMO8514 | {hypothetCorchorus_capsulari  | 37.50 | 0.00 |
| TRINITY_PIA2797 | {hypothetAquilegia_coerulea   | 37.50 | 0.00 |
| TRINITY_XP_0106 | {PREDICTI}Beta_vulgaris       | 37.50 | 0.00 |
| TRINITY_PRW4448 | {chitotri}Chlorella_sorokinia | 37.50 | 0.00 |
| TRINITY_XP_0066 | {PREDICTI}Oryza_brachyantha   | 37.50 | 0.00 |
| TRINITY_XP_0241 | {serpin-}Rosa_chinensis       | 37.50 | 0.00 |
| TRINITY_BAJ9694 | {predict}Hordeum_vulgare      | 37.50 | 0.00 |
| TRINITY_GAX7942 | {hypothetChlamydomonas_eusti  | 37.50 | 0.00 |
| TRINITY_GAX7953 | {hypothetChlamydomonas_eusti  | 37.50 | 0.00 |
| TRINITY_XP_0200 | {CBL-int}Ananas_comosus       | 37.50 | 0.00 |
| TRINITY_XP_0238 | {unchara}Quercus_suber        | 37.50 | 0.00 |
| TRINITY_XP_0243 | {serine/}Physcomitrella_pate  | 37.50 | 0.00 |
| TRINITY_GAQ7839 | {HSP70/H}Klebsormidium_niten  | 37.50 | 0.00 |
| TRINITY_XP_0014 | {predict}Ostreococcus_sp._'l  | 37.50 | 0.00 |
| TRINITY_PNW7736 | {hypothetChlamydomonas_reinh  | 37.50 | 0.00 |
| TRINITY_GBG6179 | {hypothetChara_braunii        | 37.50 | 0.00 |
| TRINITY_XP_0056 | {putativ}Coccomyxa_subellips  | 37.50 | 0.00 |
| TRINITY_BAK0036 | {predict}Hordeum_vulgare      | 37.50 | 0.00 |
| TRINITY_XP_0056 | {hypothetCoccomyxa_subellips  | 37.50 | 0.00 |
| TRINITY_XP_0165 | {PREDICTI}Capsicum_annuum     | 37.50 | 0.00 |
| TRINITY_XP_0025 | {predict}Micromonas_commoda   | 37.50 | 0.00 |
| TRINITY_PRW4512 | {tRNA (u}Chlorella_sorokinia  | 37.50 | 0.00 |
| TRINITY_XP_0042 | {acidic }Solanum_lycopersicu  | 37.50 | 0.00 |
| TRINITY_PNW7018 | {hypothetChlamydomonas_reinh  | 37.50 | 0.00 |
| TRINITY_XP_0202 | {xaa-Pro Asparagus_officinal  | 37.50 | 0.00 |
| TRINITY_XP_0042 | {PREDICTI}Fragaria_vesca      | 37.50 | 0.00 |
| TRINITY_ABK2437 | {unknown}Picea_sitchensis     | 37.50 | 0.00 |
| TRINITY_XP_0139 | {hypothetMonoraphidium_negle  | 37.50 | 0.00 |
| TRINITY_KXZ4879 | {hypothetGonium_pectorale     | 37.50 | 0.00 |
| TRINITY_XP_0243 | {unchara}Physcomitrella_pate  | 37.50 | 0.00 |
| TRINITY_PTQ4978 | {hypothetMarchantia_polymorp  | 37.50 | 0.00 |
| TRINITY_XP_0030 | {predict}Micromonas_pusilla   | 37.50 | 0.00 |
| TRINITY_KXZ4276 | {hypothetGonium_pectorale     | 37.50 | 0.00 |
| TRINITY_GAX8541 | {hypothetChlamydomonas_eusti  | 37.50 | 0.00 |
| TRINITY_XP_0238 | {NAD/NADI}Quercus_suber       | 37.50 | 0.00 |
| TRINITY_BAJ9694 | {predict}Hordeum_vulgare      | 37.50 | 0.00 |
| TRINITY_PRW2090 | {Oxidorec}Chlorella_sorokinia | 37.50 | 0.00 |
| TRINITY_GAQ8739 | {Serine }Klebsormidium_niten  | 37.50 | 0.00 |
| TRINITY_KXZ5249 | {hypothetGonium_pectorale     | 37.50 | 0.00 |
| TRINITY_PNW7532 | {hypothetChlamydomonas_reinh  | 37.50 | 0.00 |
| TRINITY_PNW7747 | {hypothetChlamydomonas_reinh  | 37.50 | 0.00 |
| TRINITY_BBC2842 | {hypothetYamagishiella_unico  | 37.50 | 0.00 |
| TRINITY_XP_0016 | {predict}Chlamydomonas_reinh  | 37.50 | 0.00 |
| TRINITY_PRW6156 | {Retrovir}Chlorella_sorokinia | 37.50 | 0.00 |
| TRINITY_XP_0151 | {PREDICTI}Solanum_tuberosum   | 37.50 | 0.00 |
| TRINITY_XP_0106 | {PREDICTI}Beta_vulgaris       | 37.40 | 0.00 |
| TRINITY_XP_0239 | {unchara}Quercus_suber        | 37.40 | 0.00 |
| TRINITY_ADR5168 | {phytoche}Pteris_vittata      | 37.40 | 0.00 |
| TRINITY_XP_0105 | {PREDICTI}Tarenaya_hasslerian | 37.40 | 0.00 |
| TRINITY_PSC7623 | {cyclin-}Micractinium_conduc  | 37.40 | 0.00 |
| TRINITY_XP_0029 | {Golgi a}Selaginella_moellen  | 37.40 | 0.00 |
| TRINITY_XP_0238 | {homoseri}Quercus_suber       | 37.40 | 0.00 |
| TRINITY_EPS6544 | {hypothetGenlisea_aurea       | 37.40 | 0.00 |
| TRINITY_XP_0023 | {splicin}Populus_trichocarpa  | 37.40 | 0.00 |
| TRINITY_XP_0202 | {unchara}Asparagus_officinal  | 37.40 | 0.00 |
| TRINITY_RLM8600 | {hypothetPanicum_miliaceum    | 37.40 | 0.00 |
| TRINITY_XP_0194 | {PREDICTI}Lupinus_angustifoli | 37.40 | 0.00 |
| TRINITY_XP_0273 | {CBL-int}Abrus_precatorius    | 37.40 | 0.00 |
| TRINITY_XP_0056 | {P-loop }Coccomyxa_subellips  | 37.40 | 0.00 |
| TRINITY_ONI3229 | {hypothetPrunus_persica       | 37.40 | 0.00 |
| TRINITY_KMZ6219 | {hypothetZostera_marina       | 37.40 | 0.00 |
| TRINITY_GBG9044 | {hypothetChara_braunii        | 37.40 | 0.00 |
| TRINITY_XP_0093 | {PREDICTI}Pyrus_x_bretschneid | 37.40 | 0.00 |

|                  |          |                     |                     |       |      |
|------------------|----------|---------------------|---------------------|-------|------|
| TRINITY_XP_0016  | predict  | Chlamydomonas_reinh | 37.40               | 0.00  |      |
| TRINITY_KDO69221 | hypothet | Citrus_sinensis     | 37.40               | 0.00  |      |
| TRINITY_XP_0228  | TatD     | Ostreococcus_tauri  | 37.40               | 0.00  |      |
| TRINITY_GAX7922  | hypothet | Chlamydomonas_eusti | 37.40               | 0.00  |      |
| TRINITY_KXZ4662  | hypothet | Gonium_pectorale    | 37.40               | 0.00  |      |
| TRINITY_GAU1625  | hypothet | Trifolium_subterran | 37.40               | 0.00  |      |
| TRINITY_PNW7414  | hypothet | Chlamydomonas_reinh | 37.40               | 0.00  |      |
| TRINITY_XP_0216  | ras-rel  | Manihot_esculenta   | 37.40               | 0.00  |      |
| TRINITY_GAQ87221 | CCR4-NO  | Klebsormidium_niten | 37.40               | 0.00  |      |
| TRINITY_EFJ2770  | hypothet | Selaginella_moellen | 37.40               | 0.00  |      |
| TRINITY_XP_0029  | hypothet | Volvox_carteri      | 37.40               | 0.00  |      |
| TRINITY_XP_0110  | PREDICT  | Populus_euphratica  | 37.40               | 0.00  |      |
| TRINITY_XP_0238  | alpha-ac | Quercus_suber       | 37.40               | 0.00  |      |
| TRINITY_XP_0241  | mitogen  | Rosa_chinensis      | 37.40               | 0.00  |      |
| TRINITY_XP_0071  | hypothet | Phaseolus_vulgaris  | 37.40               | 0.00  |      |
| TRINITY_GAX7929  | hypothet | Chlamydomonas_eusti | 37.40               | 0.00  |      |
| TRINITY_XP_0025  | predict  | Micromonas_commoda  | 37.40               | 0.00  |      |
| TRINITY_KMS9362  | hypothet | Beta_vulgaris       | 37.40               | 0.00  |      |
| TRINITY_GBF9686  | glucosic | Raphidocelis_subcap | 37.40               | 0.00  |      |
| TRINITY_PNH1169  | hypothet | Tetrabaena_socialis | 37.40               | 0.00  |      |
| TRINITY_XP_0237  | poly     | [AI]Lactuca_sativa  | 37.40               | 0.00  |      |
| TRINITY_XP_0215  | actin-r  | Manihot_esculenta   | 37.40               | 0.00  |      |
| TRINITY_PIA5972  | hypothet | Aquilegia_coerulea  | 37.40               | 0.00  |      |
| TRINITY_XP_0029  | hypothet | Volvox_carteri      | 37.40               | 0.00  |      |
| TRINITY_GAX7498  | hypothet | Chlamydomonas_eusti | 37.40               | 0.00  |      |
| TRINITY_XP_0029  | hypothet | Volvox_carteri      | 37.40               | 0.00  |      |
| TRINITY_XP_0056  | hypothet | Coccomyxa_subellips | 37.40               | 0.00  |      |
| TRINITY_XP_0110  | E3       | ubiq                | Sesamum_indicum     | 37.40 | 0.00 |
| TRINITY_PNH1190  | Phospho  | Tetrabaena_socialis | 37.40               | 0.00  |      |
| TRINITY_PNW8283  | hypothet | Chlamydomonas_reinh | 37.40               | 0.00  |      |
| TRINITY_XP_0058  | hypothet | Chlorella_variabili | 37.40               | 0.00  |      |
| TRINITY_KZV1541  | phenyla  | Dorcoceras_hygromet | 37.40               | 0.00  |      |
| TRINITY_BAK0191  | predict  | Hordeum_vulgare     | 37.40               | 0.00  |      |
| TRINITY_XP_0056  | putativ  | Coccomyxa_subellips | 37.40               | 0.00  |      |
| TRINITY_XP_0029  | hypothet | Volvox_carteri      | 37.40               | 0.00  |      |
| TRINITY_XP_0104  | PREDICT  | Camelina_sativa     | 37.40               | 0.00  |      |
| TRINITY_PRW3265  | Transcri | Chlorella_sorokinia | 37.40               | 0.00  |      |
| TRINITY_XP_0029  | RWP-RK   | c                   | Volvox_carteri      | 37.40 | 0.00 |
| TRINITY_XP_0014  | predict  | Ostreococcus_sp._'1 | 37.40               | 0.00  |      |
| TRINITY_KXZ5177  | hypothet | Gonium_pectorale    | 37.40               | 0.00  |      |
| TRINITY_GAX7402  | hypothet | Chlamydomonas_eusti | 37.40               | 0.00  |      |
| TRINITY_XP_0192  | PREDICT  | Nicotiana_attenuata | 37.40               | 0.00  |      |
| TRINITY_XP_0238  | inositol | Quercus_suber       | 37.40               | 0.00  |      |
| TRINITY_OAE1957  | hypothet | Marchantia_polymorp | 37.40               | 0.00  |      |
| TRINITY_XP_0025  | predict  | Micromonas_commoda  | 37.40               | 0.00  |      |
| TRINITY_GAX7304  | hypothet | Chlamydomonas_eusti | 37.40               | 0.00  |      |
| TRINITY_GAQ8216  | hypothet | Klebsormidium_niten | 37.40               | 0     |      |
| TRINITY_BAJ9457  | predict  | Hordeum_vulgare     | 37.40               | 0.00  |      |
| TRINITY_XP_0144  | ABC      | trar                | Vigna_radiata       | 37.40 | 0.00 |
| TRINITY_GAX7324  | hypothet | Chlamydomonas_eusti | 37.40               | 0.00  |      |
| TRINITY_GAQ9127  | etoposic | Klebsormidium_niten | 37.40               | 0.00  |      |
| TRINITY_ABU5296  | hypothet | Dunaliella_viridis  | 37.40               | 0.00  |      |
| TRINITY_GAU3053  | hypothet | Trifolium_subterran | 37.40               | 0.00  |      |
| TRINITY_ACY0631  | class    | I                   | Pseudotsuga_menzies | 37.40 | 0.00 |
| TRINITY_XP_0075  | predict  | Bathycoccus_prasinc | 37.30               | 0.00  |      |
| TRINITY_KMS9340  | hypothet | Beta_vulgaris       | 37.30               | 0.00  |      |
| TRINITY_XP_0084  | PREDICT  | Cucumis_melo        | 37.30               | 0.00  |      |
| TRINITY_KEH4374  | elongati | Medicago_truncatula | 37.30               | 0.00  |      |
| TRINITY_PON8492  | Dolichyl | Trema_orientale     | 37.30               | 0.00  |      |
| TRINITY_RMZ5763  | hypothet | Auxenochlorella_pro | 37.30               | 0.00  |      |
| TRINITY_EFJ2046  | hypothet | Selaginella_moellen | 37.30               | 0.00  |      |
| TRINITY_XP_0219  | GTP-bin  | c                   | Helianthus_annuus   | 37.30 | 0.00 |
| TRINITY_OIW0847  | hypothet | Lupinus_angustifoli | 37.30               | 0.00  |      |
| TRINITY_XP_0029  | gamma    | c                   | Selaginella_moellen | 37.30 | 0.00 |
| TRINITY_GAQ8700  | RNA      | pol                 | Klebsormidium_niten | 37.30 | 0.00 |
| TRINITY_GAX7813  | hypothet | Chlamydomonas_eusti | 37.30               | 0.00  |      |

|                  |          |                     |       |      |
|------------------|----------|---------------------|-------|------|
| TRINITY_KQK21465 | hypothet | Brachypodium_distac | 37.30 | 0.00 |
| TRINITY_XP_00414 | PREDICTF | Cucumis_sativus     | 37.30 | 0.00 |
| TRINITY_XP_01092 | PREDICTF | Elaeis_guineensis   | 37.30 | 0.00 |
| TRINITY_KHN39544 | Trans-2, | Glycine_soja        | 37.30 | 0.00 |
| TRINITY_GBF87537 | hypothet | Raphidocelis_subcap | 37.30 | 0.00 |
| TRINITY_XP_00933 | PREDICTF | Pyrus_x_bretschneid | 37.30 | 0.00 |
| TRINITY_GAX85581 | hypothet | Chlamydomonas_eusti | 37.30 | 0.00 |
| TRINITY_NP_00114 | peptide  | Zea_mays            | 37.30 | 0.00 |
| TRINITY_XP_00141 | predict  | Ostreococcus_sp._'1 | 37.30 | 0.00 |
| TRINITY_XP_00413 | PREDICTF | Cucumis_sativus     | 37.30 | 0.00 |

|                 |           |   |                     |       |      |
|-----------------|-----------|---|---------------------|-------|------|
| TRINITY_XP_0025 | (predict  | ε | Micromonas_commoda  | 37.30 | 0.00 |
| TRINITY_XP_0056 | MFS gen   | ε | Coccomyxa_subellips | 37.30 | 0.00 |
| TRINITY_OVA2030 | zinc fir  |   | Macleaya_cordata    | 37.30 | 0.00 |
| TRINITY_XP_0216 | fatty ac  |   | Hevea_brasiliensis  | 37.30 | 0.00 |
| TRINITY_XP_0218 | random s  |   | Spinacia_oleracea   | 37.30 | 0.00 |
| TRINITY_KXZ4844 | (hypothet |   | Gonium_pectorale    | 37.30 | 0.00 |
| TRINITY_XP_0200 | (probabl  | ε | Ananas_comosus      | 37.30 | 0.00 |
| TRINITY_PSR8627 | LEC14B    | γ | Actinidia_chinensis | 37.30 | 0.00 |
| TRINITY_XP_0139 | (leukotri |   | Monoraphidium_negle | 37.30 | 0.00 |
| TRINITY_GAX8028 | (hypothet |   | Chlamydomonas_eusti | 37.30 | 0.00 |
| TRINITY_XP_0239 | (unchara  |   | Quercus_suber       | 37.30 | 0.00 |
| TRINITY_XP_0056 | MFS gen   | ε | Coccomyxa_subellips | 37.30 | 0.00 |
| TRINITY_XP_0218 | protein   |   | Spinacia_oleracea   | 37.30 | 0.00 |
| TRINITY_XP_0017 | (DP1 trar |   | Chlamydomonas_reinh | 37.30 | 0.00 |
| TRINITY_RWW8424 | (hypothet |   | Ensete_ventricosum  | 37.30 | 0.00 |
| TRINITY_PNH0808 | BTB/POZ   |   | Tetrabaena_socialis | 37.30 | 0.00 |
| TRINITY_PRW5736 | glycosic  |   | Chlorella_sorokinia | 37.30 | 0.00 |
| TRINITY_PIA5154 | (hypothet |   | Aquilegia_coerulea  | 37.30 | 0.00 |
| TRINITY_BAJ9095 | (predict  | ε | Hordeum_vulgare     | 37.30 | 0.00 |
| TRINITY_GAX7511 | (hypothet |   | Chlamydomonas_eusti | 37.30 | 0.00 |
| TRINITY_EPS6438 | (hypothet |   | Genlisea_aurea      | 37.30 | 0.00 |
| TRINITY_GAX8350 | (hypothet |   | Chlamydomonas_eusti | 37.30 | 0.00 |
| TRINITY_GBF9057 | (nitrite  |   | Raphidocelis_subcap | 37.30 | 0.00 |
| TRINITY_GAX7891 | (hypothet |   | Chlamydomonas_eusti | 37.30 | 0.00 |
| TRINITY_KXZ5191 | (hypothet |   | Gonium_pectorale    | 37.30 | 0.00 |
| TRINITY_EEF2753 | two-com   | γ | Ricinus_communis    | 37.30 | 0.00 |
| TRINITY_OUS4796 | (hypothet |   | Ostreococcus_tauri  | 37.30 | 0.00 |
| TRINITY_XP_0237 | α-gl      |   | Lactuca_sativa      | 37.30 | 0.00 |
| TRINITY_XP_0124 | (PREDICT  |   | Gossypium_raimondii | 37.30 | 0.00 |
| TRINITY_KXZ4902 | (hypothet |   | Gonium_pectorale    | 37.30 | 0.00 |
| TRINITY_XP_0024 | (predict  | ε | Micromonas_commoda  | 37.30 | 0.00 |
| TRINITY_BAK0036 | (predict  | ε | Hordeum_vulgare     | 37.30 | 0.00 |
| TRINITY_GBG8470 | (hypothet |   | Chara_braunii       | 37.30 | 0.00 |
| TRINITY_GAX7976 | (hypothet |   | Chlamydomonas_eusti | 37.30 | 0.00 |
| TRINITY_XP_0228 | (ras-rel  | ε | Olea_europaea       | 37.30 | 0.00 |
| TRINITY_OAE1897 | (hypothet |   | Marchantia_polymorp | 37.30 | 0.00 |
| TRINITY_GAX8465 | (hypothet |   | Chlamydomonas_eusti | 37.30 | 0.00 |
| TRINITY_GAX8222 | (hypothet |   | Chlamydomonas_eusti | 37.30 | 0.00 |
| TRINITY_GAX8233 | (hypothet |   | Chlamydomonas_eusti | 37.30 | 0.00 |
| TRINITY_GAQ8664 | Zinc-fir  |   | Klebsormidium_niten | 37.30 | 0.00 |
| TRINITY_OIW2075 | (hypothet |   | Lupinus_angustifoli | 37.30 | 0.00 |
| TRINITY_XP_0042 | (PREDICT  |   | Fragaria_vesca      | 37.30 | 0.00 |
| TRINITY_EFH4948 | (hypothet |   | Arabidopsis_lyrata  | 37.30 | 0.00 |
| TRINITY_XP_0016 | amidase   |   | Chlamydomonas_reinh | 37.30 | 0.00 |
| TRINITY_GAX8225 | (hypothet |   | Chlamydomonas_eusti | 37.30 | 0.00 |
| TRINITY_XP_0191 | (PREDICT  |   | Ipomoea_nil         | 37.30 | 0.00 |
| TRINITY_GAQ8024 | (Dihydro  | γ | Klebsormidium_niten | 37.30 | 0.00 |
| TRINITY_ADE7668 | (unknown  |   | Picea_sitchensis    | 37.30 | 0.00 |
| TRINITY_XP_0138 | (hypothet |   | Monoraphidium_negle | 37.30 | 0.00 |
| TRINITY_XP_0243 | (unchara  |   | Physcomitrella_pate | 37.30 | 0.00 |
| TRINITY_KXZ4511 | (hypothet |   | Gonium_pectorale    | 37.30 | 0.00 |
| TRINITY_XP_0029 | (hypothet |   | Volvox_carteri      | 37.30 | 0.00 |
| TRINITY_XP_0110 | 8-hydro   | γ | Sesamum_indicum     | 37.30 | 0.00 |
| TRINITY_OAY7998 | (Serine/  | τ | Ananas_comosus      | 37.30 | 0.00 |
| TRINITY_GAX8591 | (hypothet |   | Chlamydomonas_eusti | 37.30 | 0.00 |
| TRINITY_XP_0042 | phospho   | γ | Solanum_lycopersicu | 37.30 | 0.00 |
| TRINITY_GAX7827 | (hypothet |   | Chlamydomonas_eusti | 37.30 | 0.00 |
| TRINITY_GAX7959 | (hypothet |   | Chlamydomonas_eusti | 37.30 | 0.00 |
| TRINITY_KXZ5210 | (hypothet |   | Gonium_pectorale    | 37.30 | 0.00 |
| TRINITY_GAX8430 | (hypothet |   | Chlamydomonas_eusti | 37.30 | 0.00 |
| TRINITY_AOV8590 | ABCC1,    | γ | Triticum_polonicum  | 37.30 | 0.00 |
| TRINITY_GAX7827 | (hypothet |   | Chlamydomonas_eusti | 37.30 | 0.00 |
| TRINITY_EFJ3405 | (hypothet |   | Selaginella_moellen | 37.20 | 0.00 |
| TRINITY_XP_0058 | (hypothet |   | Chlorella_variabili | 37.20 | 0.00 |
| TRINITY_XP_0139 | (nuclear  |   | Monoraphidium_negle | 37.20 | 0.00 |
| TRINITY_EPS7163 | (hypothet |   | Genlisea_aurea      | 37.20 | 0.00 |



|                                              |       |      |
|----------------------------------------------|-------|------|
| TRINITY_KMZ75125dolichylZostera_marina       | 37.20 | 0.00 |
| TRINITY_XP_01022serine/tBrachypodium_distac  | 37.20 | 0.00 |
| TRINITY_OMO84415Nicotin2Corchorus_olitorius  | 37.20 | 0.00 |
| TRINITY_OAO89105hypothetArabidopsis_thalian  | 37.20 | 0.00 |
| TRINITY_XP_0201(SWR1 conAnanas_comosus       | 37.20 | 0.00 |
| TRINITY_XP_01915PREDICTFIpomoea_nil          | 37.20 | 0.00 |
| TRINITY_XP_00286calcium-Arabidopsis_lyrata   | 37.20 | 0.00 |
| TRINITY_YP_00881NADH delRoya_obtusa          | 37.20 | 0.00 |
| TRINITY_XP_00933PREDICTFIPyrus_x_bretschneid | 37.20 | 0.00 |
| TRINITY_XP_01052PREDICTFITarenaya_hasslerian | 37.20 | 0.00 |
| TRINITY_XP_01011uridine Morus_notabilis      | 37.20 | 0.00 |
| TRINITY_XP_00751predicteBathycoccus_prasinc  | 37.20 | 0.00 |
| TRINITY_RMZ54148hypothetAuxenochlorella_pro  | 37.20 | 0.00 |
| TRINITY_GBG80526hypothetChara_braunii        | 37.20 | 0.00 |
| TRINITY_PRW4429(ABC trarChlorella_sorokinia  | 37.20 | 0.00 |
| TRINITY_XP_0110(PREDICTFIPopulus_euphratica  | 37.20 | 0.00 |
| TRINITY_BAK02195predicteHordeum_vulgare      | 37.20 | 0.00 |
| TRINITY_PRQ53111putativeRosa_chinensis       | 37.20 | 0.00 |
| TRINITY_GAQ82047hypothetKlebsormidium_niten  | 37.20 | 0.00 |
| TRINITY_XP_02389probableQuercus_suber        | 37.20 | 0.00 |
| TRINITY_XP_00295alpha-1,Volvox_carteri       | 37.20 | 0.00 |
| TRINITY_GAX75913hypothetChlamydomonas_eusti  | 37.20 | 0.00 |
| TRINITY_OAE27724hypothetMarchantia_polymorp  | 37.20 | 0.00 |
| TRINITY_GAX75591hypothetChlamydomonas_eusti  | 37.20 | 0.00 |
| TRINITY_XP_0025(predicteMicromonas_commoda   | 37.20 | 0.00 |
| TRINITY_EFJ3395(hypothetSelaginella_moellen  | 37.20 | 0.00 |
| TRINITY_XP_02173ABC trarChenopodium_quinoa   | 37.20 | 0.00 |
| TRINITY_NP_19881catalytiArabidopsis_thalian  | 37.20 | 0.00 |
| TRINITY_GAU17862hypothetTrifolium_subterran  | 37.20 | 0.00 |
| TRINITY_PNW73117hypothetChlamydomonas_reinh  | 37.20 | 0.00 |
| TRINITY_EMS47345UbiquitiTriticum_urartu      | 37.20 | 0.00 |
| TRINITY_XP_01942PREDICTFILupinus_angustifoli | 37.20 | 0.00 |
| TRINITY_XP_02389lipase 2Quercus_suber        | 37.20 | 0.00 |
| TRINITY_GBG73139hypothetChara_braunii        | 37.20 | 0.00 |
| TRINITY_GBG67752hypothetChara_braunii        | 37.20 | 0.00 |
| TRINITY_PTQ47054hypothetMarchantia_polymorp  | 37.20 | 0.00 |
| TRINITY_GAX78031hypothetChlamydomonas_eusti  | 37.20 | 0.00 |
| TRINITY_GAX7276(hypothetChlamydomonas_eusti  | 37.20 | 0.00 |
| TRINITY_XP_00414PREDICTFICucumis_sativus     | 37.20 | 0.00 |
| TRINITY_GAX79766hypothetChlamydomonas_eusti  | 37.20 | 0.00 |
| TRINITY_XP_00295hypothetVolvox_carteri       | 37.20 | 0.00 |
| TRINITY_XP_00169predicteChlamydomonas_reinh  | 37.20 | 0.00 |
| TRINITY_GAX83487hypothetChlamydomonas_eusti  | 37.20 | 0.00 |
| TRINITY_XP_00564hypothetCoccomyxa_subellips  | 37.20 | 0.00 |
| TRINITY_XP_01389E3 ubiqMonoraphidium_negle   | 37.20 | 0.00 |
| TRINITY_RWR90499Small G7Cinnamomum_micranth  | 37.20 | 0.00 |
| TRINITY_PNW88267hypothetChlamydomonas_reinh  | 37.20 | 0.00 |
| TRINITY_XP_0169(PREDICTFICucumis_melo        | 37.20 | 0.00 |
| TRINITY_PHU27807Serine/tCapsicum_chinense    | 37.20 | 0.00 |
| TRINITY_XP_01723PREDICTFIDaucus_carota       | 37.20 | 0.00 |
| TRINITY_GBF92388hypothetRaphidocelis_subcap  | 37.20 | 0.00 |
| TRINITY_PKA50232PeroxiscApostasia_shenzheni  | 37.20 | 0.00 |
| TRINITY_GAX73803hypothetChlamydomonas_eusti  | 37.20 | 0.00 |
| TRINITY_XP_02389cystathiQuercus_suber        | 37.20 | 0.00 |
| TRINITY_XP_02391stress 1Quercus_suber        | 37.20 | 0.00 |
| TRINITY_KXZ51119hypothetGonium_pectorale     | 37.20 | 0.00 |
| TRINITY_GAX85031hypothetChlamydomonas_eusti  | 37.20 | 0.00 |
| TRINITY_GBF89177hypothetRaphidocelis_subcap  | 37.20 | 0.00 |
| TRINITY_XP_02388dynein 1Quercus_suber        | 37.20 | 0.00 |
| TRINITY_XP_02198probableHelianthus_annuus    | 37.20 | 0.00 |
| TRINITY_GAX84351hypothetChlamydomonas_eusti  | 37.20 | 0.00 |
| TRINITY_GAX85245hypothetChlamydomonas_eusti  | 37.20 | 0.00 |
| TRINITY_XP_00565hypothetCoccomyxa_subellips  | 37.20 | 0.00 |
| TRINITY_XP_02439clusterεPhyscomitrella_pate  | 37.20 | 0.00 |
| TRINITY_GAQ8542(PutativeKlebsormidium_niten  | 37.20 | 0.00 |
| TRINITY_GAX75618hypothetChlamydomonas_eusti  | 37.20 | 0.00 |

|                  |                             |       |      |
|------------------|-----------------------------|-------|------|
| TRINITY_XP_00295 | hypothetVolvox_carteri      | 37.20 | 0.00 |
| TRINITY_BAK01258 | predicteHordeum_vulgare     | 37.20 | 0.00 |
| TRINITY_BAJ95708 | predicteHordeum_vulgare     | 37.20 | 0.00 |
| TRINITY_GBG76832 | hypothetChara_braunii       | 37.10 | 0.00 |
| TRINITY_XP_02215 | host celMomordica_charantia | 37.10 | 0.00 |
| TRINITY_PWA58081 | proteineArtemisia_annua     | 37.10 | 0.00 |
| TRINITY_EFJ35357 | hypothetSelaginella_moellen | 37.10 | 0.00 |
| TRINITY_XP_02128 | probableHerrania_umbratica  | 37.10 | 0.00 |
| TRINITY_BAJ93729 | predicteHordeum_vulgare     | 37.10 | 0.00 |
| TRINITY_XP_00585 | hypothetChlorella_variabili | 37.10 | 0.00 |
| TRINITY_XP_01208 | uncharacJatropha_curcas     | 37.10 | 0.00 |
| TRINITY_XP_01389 | DNA-binMonoraphidium_negle  | 37.10 | 0.00 |
| TRINITY_XP_00936 | PREDICTIPyrus_x_bretschneid | 37.10 | 0.00 |
| TRINITY_XP_02390 | endosomeQuercus_suber       | 37.10 | 0.00 |
| TRINITY_NP_00131 | ras-relNicotiana_tabacum    | 37.10 | 0.00 |
| TRINITY_GAQ88528 | hypothetKlebsormidium_niten | 37.10 | 0.00 |
| TRINITY_GAQ90570 | UncharacKlebsormidium_niten | 37.10 | 0.00 |
| TRINITY_XP_00634 | PREDICTISolanum_tuberosum   | 37.10 | 0.00 |
| TRINITY_XP_02387 | translatQuercus_suber       | 37.10 | 0.00 |
| TRINITY_XP_02058 | UTP:RNA Phalaenopsis_equest | 37.10 | 0.00 |
| TRINITY_NP_00118 | ARP protArabidopsis_thalian | 37.10 | 0.00 |
| TRINITY_XP_02185 | pyruvateSpinacia_oleracea   | 37.10 | 0.00 |
| TRINITY_XP_00305 | predicteMicromonas_pusilla  | 37.10 | 0.00 |
| TRINITY_BAK00435 | predicteHordeum_vulgare     | 37.10 | 0.00 |
| TRINITY_XP_01884 | PREDICTIJuglans_regia       | 37.10 | 0.00 |
| TRINITY_RWR89558 | vacuolarCinnamomum_micranth | 37.10 | 0.00 |
| TRINITY_GAX77920 | hypothetChlamydomonas_eusti | 37.10 | 0.00 |
| TRINITY_GAX81876 | hypothetChlamydomonas_eusti | 37.10 | 0.00 |
| TRINITY_GBG86214 | hypothetChara_braunii       | 37.10 | 0.00 |
| TRINITY_XP_00913 | PREDICTIBrassica_rapa       | 37.10 | 0.00 |
| TRINITY_XP_02437 | uncharacPhyscomitrella_pate | 37.10 | 0.00 |
| TRINITY_ABD63142 | RetrotrAsparagus_officinal  | 37.10 | 0.00 |
| TRINITY_XP_00169 | predicteChlamydomonas_reinh | 37.10 | 0.00 |
| TRINITY_GAX72799 | hypothetChlamydomonas_eusti | 37.10 | 0.00 |
| TRINITY_PSC69338 | CTD smaMicractinium_conduc  | 37.10 | 0.00 |
| TRINITY_GBF95790 | hypothetRaphidocelis_subcap | 37.10 | 0.00 |
| TRINITY_XP_00305 | predicteMicromonas_pusilla  | 37.10 | 0.00 |
| TRINITY_KCW77157 | hypothetEucalyptus_grandis  | 37.10 | 0.00 |
| TRINITY_XP_00250 | predicteMicromonas_commoda  | 37.10 | 0.00 |
| TRINITY_XP_00305 | glycosylMicromonas_pusilla  | 37.10 | 0.00 |
| TRINITY_PSC75656 | tyrosineMicractinium_conduc | 37.10 | 0.00 |
| TRINITY_GAQ84997 | NAD(P)-kKlebsormidium_niten | 37.10 | 0.00 |
| TRINITY_XP_00584 | hypothetChlorella_variabili | 37.10 | 0.00 |
| TRINITY_KXZ54380 | hypothetGonium_pectorale    | 37.10 | 0.00 |
| TRINITY_PTQ37010 | hypothetMarchantia_polymorp | 37.10 | 0.00 |
| TRINITY_GAX84348 | hypothetChlamydomonas_eusti | 37.10 | 0.00 |
| TRINITY_XP_00305 | predicteMicromonas_pusilla  | 37.10 | 0.00 |
| TRINITY_GAX83078 | hypothetChlamydomonas_eusti | 37.10 | 0.00 |
| TRINITY_XP_00294 | hypothetVolvox_carteri      | 37.10 | 0.00 |
| TRINITY_XP_01146 | PREDICTIFragaria_vesca      | 37.10 | 0.00 |
| TRINITY_XP_00169 | glycosylChlamydomonas_reinh | 37.10 | 0.00 |
| TRINITY_XP_02376 | ubiquitiLactuca_sativa      | 37.10 | 0.00 |
| TRINITY_OAE33041 | hypothetMarchantia_polymorp | 37.10 | 0.00 |
| TRINITY_PNH05957 | PhotosysTetrabaena_socialis | 37.10 | 0.00 |
| TRINITY_PNW80987 | hypothetChlamydomonas_reinh | 37.10 | 0.00 |
| TRINITY_GAX80032 | hypothetChlamydomonas_eusti | 37.10 | 0.00 |
| TRINITY_XP_01046 | PREDICTICamelina_sativa     | 37.10 | 0.00 |
| TRINITY_XP_02373 | peptidylLactuca_sativa      | 37.10 | 0.00 |
| TRINITY_XP_02130 | folylpolSorghum_bicolor     | 37.10 | 0.00 |
| TRINITY_PSC70981 | Sho1p iMicractinium_conduc  | 37.10 | 0.00 |
| TRINITY_GAX79760 | hypothetChlamydomonas_eusti | 37.10 | 0.00 |
| TRINITY_XP_00170 | carboxyeChlamydomonas_reinh | 37.10 | 0.00 |
| TRINITY_GAX74383 | hypothetChlamydomonas_eusti | 37.10 | 0.00 |
| TRINITY_XP_02019 | syntaxirAegilops_tauschii   | 37.10 | 0.00 |
| TRINITY_GBF91173 | hypothetRaphidocelis_subcap | 37.10 | 0.00 |
| TRINITY_PNH07987 | hypothetTetrabaena_socialis | 37.10 | 0.00 |

|                  |          |                     |       |      |
|------------------|----------|---------------------|-------|------|
| TRINITY_XP_00295 | hypothet | Volvox_carteri      | 37.10 | 0.00 |
| TRINITY_XP_00564 | hypothet | Coccomyxa_subellips | 37.10 | 0.00 |
| TRINITY_XP_01943 | PREDICTI | Lupinus_angustifoli | 37.10 | 0.00 |
| TRINITY_KXZ49225 | hypothet | Gonium_pectorale    | 37.10 | 0.00 |
| TRINITY_KXZ53291 | hypothet | Gonium_pectorale    | 37.10 | 0.00 |
| TRINITY_XP_02733 | ABC trar | Abrus_precatorius   | 37.10 | 0.00 |
| TRINITY_GAX76506 | hypothet | Chlamydomonas_eusti | 37.10 | 0.00 |
| TRINITY_GAX74423 | hypothet | Chlamydomonas_eusti | 37.10 | 0.00 |
| TRINITY_XP_01760 | PREDICTI | Gossypium_arboreum  | 37.10 | 0.00 |
| TRINITY_XP_00232 | NF-X1-tj | Populus_trichocarpa | 37.10 | 0.00 |
| TRINITY_GAX85525 | hypothet | Chlamydomonas_eusti | 37.10 | 0.00 |
| TRINITY_XP_02388 | putativ  | Quercus_suber       | 37.10 | 0.00 |
| TRINITY_BAJ94575 | predict  | Hordeum_vulgare     | 37.10 | 0.00 |
| TRINITY_GAX81803 | hypothet | Chlamydomonas_eusti | 37.10 | 0.00 |
| TRINITY_GAX73971 | hypothet | Chlamydomonas_eusti | 37.10 | 0.00 |
| TRINITY_GAX77382 | hypothet | Chlamydomonas_eusti | 37.10 | 0.00 |
| TRINITY_GAX78279 | hypothet | Chlamydomonas_eusti | 37.10 | 0.00 |
| TRINITY_AFK39808 | unknown  | Medicago_truncatula | 37.00 | 0.00 |
| TRINITY_XP_01941 | PREDICTI | Lupinus_angustifoli | 37.00 | 0.00 |
| TRINITY_PSC69119 | sorbosor | Micractinium_conduc | 37.00 | 0.00 |
| TRINITY_PWA97141 | cytochr  | Artemisia_annua     | 37.00 | 0.00 |
| TRINITY_KXZ47067 | hypothet | Gonium_pectorale    | 37.00 | 0.00 |
| TRINITY_BAJ98875 | predict  | Hordeum_vulgare     | 37.00 | 0.00 |
| TRINITY_VDC69291 | unnamed  | Brassica_rapa       | 37.00 | 0.00 |
| TRINITY_PKA57162 | hypothet | Apostasia_shenzheni | 37.00 | 0.00 |
| TRINITY_XP_00941 | PREDICTI | Musa_acuminata      | 37.00 | 0.00 |
| TRINITY_PPD81821 | hypothet | Gossypium_barbadens | 37.00 | 0.00 |
| TRINITY_XP_02452 | choline/ | Selaginella_moellen | 37.00 | 0.00 |
| TRINITY_XP_00170 | fructos  | Chlamydomonas_reinh | 37.00 | 0.00 |
| TRINITY_OAE27999 | hypothet | Marchantia_polymorp | 37.00 | 0.00 |
| TRINITY_AAT76665 | 5-alpha- | Pisum_sativum       | 37.00 | 0.00 |
| TRINITY_XP_02374 | extracel | Lactuca_sativa      | 37.00 | 0.00 |
| TRINITY_EYU23742 | hypothet | Erythranthe_guttata | 37.00 | 0.00 |
| TRINITY_GAQ77820 | Zinc-bir | Klebsormidium_niten | 37.00 | 0.00 |
| TRINITY_PWA82691 | sec7 don | Artemisia_annua     | 37.00 | 0.00 |
| TRINITY_XP_00294 | hypothet | Volvox_carteri      | 37.00 | 0.00 |
| TRINITY_ABK24916 | unknown  | Picea_sitchensis    | 37.00 | 0.00 |
| TRINITY_BAK02449 | predict  | Hordeum_vulgare     | 37.00 | 0.00 |
| TRINITY_PNW80815 | hypothet | Chlamydomonas_reinh | 37.00 | 0.00 |
| TRINITY_GAX76016 | hypothet | Chlamydomonas_eusti | 37.00 | 0.00 |
| TRINITY_XP_02581 | short-cl | Panicum_hallii      | 37.00 | 0.00 |
| TRINITY_XP_01725 | PREDICTI | Daucus_carota       | 37.00 | 0.00 |
| TRINITY_GAX84594 | hypothet | Chlamydomonas_eusti | 37.00 | 0.00 |
| TRINITY_EPS69397 | hypothet | Genlisea_aurea      | 37.00 | 0.00 |
| TRINITY_EPS72002 | hypothet | Genlisea_aurea      | 37.00 | 0.00 |
| TRINITY_XP_00169 | asparty  | Chlamydomonas_reinh | 37.00 | 0.00 |
| TRINITY_XP_01052 | PREDICTI | Tarenaya_hasslerian | 37.00 | 0.00 |
| TRINITY_GAX77857 | hypothet | Chlamydomonas_eusti | 37.00 | 0.00 |
| TRINITY_XP_02389 | GTP-bin  | Quercus_suber       | 37.00 | 0.00 |
| TRINITY_KYP47673 | Transcri | Cajanus_cajan       | 37.00 | 0.00 |
| TRINITY_XP_02439 | serine/t | Physcomitrella_pate | 37.00 | 0.00 |
| TRINITY_KXZ42552 | hypothet | Gonium_pectorale    | 37.00 | 0.00 |
| TRINITY_EPS59216 | hypothet | Genlisea_aurea      | 37.00 | 0.00 |
| TRINITY_GAX83675 | hypothet | Chlamydomonas_eusti | 37.00 | 0.00 |
| TRINITY_BAJ97828 | predict  | Hordeum_vulgare     | 37.00 | 0.00 |
| TRINITY_GAX76929 | hypothet | Chlamydomonas_eusti | 37.00 | 0.00 |
| TRINITY_PSC68783 | water di | Micractinium_conduc | 37.00 | 0.00 |
| TRINITY_XP_01043 | PREDICTI | Camelina_sativa     | 37.00 | 0.00 |
| TRINITY_XP_00295 | hypothet | Volvox_carteri      | 37.00 | 0.00 |
| TRINITY_GBG81164 | hypothet | Chara_braunii       | 37.00 | 0.00 |
| TRINITY_GAQ80029 | delta-an | Klebsormidium_niten | 37.00 | 0.00 |
| TRINITY_PIA51841 | hypothet | Aquilegia_coerulea  | 37.00 | 0.00 |
| TRINITY_XP_02387 | sodium/r | Quercus_suber       | 37.00 | 0.00 |
| TRINITY_ESR53902 | hypothet | Citrus_clementina   | 37.00 | 0.00 |
| TRINITY_XP_00295 | hypothet | Volvox_carteri      | 37.00 | 0.00 |
| TRINITY_XP_00834 | PREDICTI | Malus_domestica     | 37.00 | 0.00 |

|                  |          |                     |       |      |
|------------------|----------|---------------------|-------|------|
| TRINITY_XP_0238  | vacuolar | Quercus_suber       | 37.00 | 0.00 |
| TRINITY_GAQ8257  | hypothet | Klebsormidium_niten | 37.00 | 0.00 |
| TRINITY_KXZ5525  | hypothet | Gonium_pectorale    | 37.00 | 0.00 |
| TRINITY_KXZ56121 | hypothet | Gonium_pectorale    | 37.00 | 0.00 |
| TRINITY_XP_0229  | kelch-li | Cucurbita_moschata  | 37.00 | 0.00 |
| TRINITY_XP_0243  | ultravic | Physcomitrella_pate | 37.00 | 0.00 |
| TRINITY_XP_0030  | predicte | Micromonas_pusilla  | 37.00 | 0.00 |
| TRINITY_PSC6833  | sugar ki | Micractinium_conduc | 37.00 | 0.00 |
| TRINITY_PTQ2759  | hypothet | Marchantia_polymorp | 37.00 | 0.00 |
| TRINITY_GAX83164 | hypothet | Chlamydomonas_eusti | 37.00 | 0.00 |
| TRINITY_XP_0102  | PREDICTI | Nelumbo_nucifera    | 37.00 | 0.00 |
| TRINITY_GAX7926  | hypothet | Chlamydomonas_eusti | 37.00 | 0.00 |
| TRINITY_XP_00564 | hypothet | Coccomyxa_subellips | 37.00 | 0.00 |
| TRINITY_KXZ49814 | hypothet | Gonium_pectorale    | 37.00 | 0.00 |
| TRINITY_XP_0218  | long ch  | Spinacia_oleracea   | 37.00 | 0.00 |
| TRINITY_CAI8489  | putativ  | Medicago_sativa     | 37.00 | 0.00 |
| TRINITY_ACY0631  | class I  | Pseudotsuga_menzies | 37.00 | 0.00 |
| TRINITY_OWM6628  | hypothet | Punica_granatum     | 37.00 | 0.00 |
| TRINITY_GBG8341  | hypothet | Chara_braunii       | 37.00 | 0.00 |
| TRINITY_GAX7745  | hypothet | Chlamydomonas_eusti | 37.00 | 0.00 |
| TRINITY_PTQ4116  | hypothet | Marchantia_polymorp | 37.00 | 0.00 |
| TRINITY_GAX7497  | hypothet | Chlamydomonas_eusti | 37.00 | 0.00 |
| TRINITY_GAX82141 | hypothet | Chlamydomonas_eusti | 37.00 | 0.00 |
| TRINITY_XP_02791 | cytochr  | Vigna_unguiculata   | 37.00 | 0.00 |
| TRINITY_GAX7450  | hypothet | Chlamydomonas_eusti | 37.00 | 0.00 |
| TRINITY_XP_0243  | glutathi | Physcomitrella_pate | 37.00 | 0.00 |
| TRINITY_PNW76134 | hypothet | Chlamydomonas_reinh | 37.00 | 0.00 |
| TRINITY_XP_0087  | protein  | Phoenix_dactylifera | 37.00 | 0.00 |
| TRINITY_GAX78754 | hypothet | Chlamydomonas_eusti | 37.00 | 0.00 |
| TRINITY_XP_0045  | WD repe  | Cicer_arietinum     | 37.00 | 0.00 |
| TRINITY_GAX73634 | hypothet | Chlamydomonas_eusti | 37.00 | 0    |
| TRINITY_ADE7736  | unknown  | Picea_sitchensis    | 37.00 | 0.00 |
| TRINITY_XP_0030  | predicte | Micromonas_pusilla  | 37.00 | 0.00 |
| TRINITY_XP_0216  | autopha  | Hevea_brasiliensis  | 37.00 | 0.00 |
| TRINITY_XP_0017  | predicte | Chlamydomonas_reinh | 36.90 | 0.00 |
| TRINITY_XP_0213  | transcri | Sorghum_bicolor     | 36.90 | 0.00 |
| TRINITY_BAJ9782  | predicte | Hordeum_vulgare     | 36.90 | 0.00 |
| TRINITY_XP_00564 | Metallo- | Coccomyxa_subellips | 36.90 | 0.00 |
| TRINITY_XP_0238  | eIF-2-a  | Quercus_suber       | 36.90 | 0.00 |
| TRINITY_KDD7648  | sugar t  | Helicosporidium_sp. | 36.90 | 0.00 |
| TRINITY_XP_0029  | hypothet | Volvox_carteri      | 36.90 | 0.00 |
| TRINITY_XP_0120  | serine/t | Jatropha_curcas     | 36.90 | 0.00 |
| TRINITY_KHN43374 | G patch  | Glycine_soja        | 36.90 | 0.00 |
| TRINITY_OAE3257  | hypothet | Marchantia_polymorp | 36.90 | 0.00 |
| TRINITY_GAQ9160  | Beta-tu  | Klebsormidium_niten | 36.90 | 0.00 |
| TRINITY_XP_0116  | autopha  | Amborella_trichopod | 36.90 | 0.00 |
| TRINITY_PRW5819  | coatome  | Chlorella_sorokinia | 36.90 | 0.00 |
| TRINITY_RCU61424 | hypothet | Setaria_italica     | 36.90 | 0.00 |
| TRINITY_ERN1786  | hypothet | Amborella_trichopod | 36.90 | 0.00 |
| TRINITY_XP_0138  | tRNA ur  | Monoraphidium_negle | 36.90 | 0.00 |
| TRINITY_XP_0243  | ABC trar | Physcomitrella_pate | 36.90 | 0.00 |
| TRINITY_XP_0172  | PREDICTI | Daucus_carota       | 36.90 | 0.00 |
| TRINITY_PNW7452  | hypothet | Chlamydomonas_reinh | 36.90 | 0.00 |
| TRINITY_OAE18804 | hypothet | Marchantia_polymorp | 36.90 | 0.00 |
| TRINITY_RMZ5593  | hypothet | Auxenochlorella_pro | 36.90 | 0.00 |
| TRINITY_XP_0243  | unchara  | Physcomitrella_pate | 36.90 | 0.00 |
| TRINITY_XP_0105  | PREDICTI | Tarenaya_hasslerian | 36.90 | 0.00 |
| TRINITY_GAX7653  | hypothet | Chlamydomonas_eusti | 36.90 | 0.00 |
| TRINITY_OMO5717  | hypothet | Corchorus_capsulari | 36.90 | 0.00 |
| TRINITY_XP_00714 | hypothet | Phaseolus_vulgaris  | 36.90 | 0.00 |
| TRINITY_XP_0188  | PREDICTI | Juglans_regia       | 36.90 | 0.00 |
| TRINITY_XP_0016  | predicte | Chlamydomonas_reinh | 36.90 | 0.00 |
| TRINITY_XP_0058  | hypothet | Chlorella_variabili | 36.90 | 0.00 |
| TRINITY_XP_0105  | PREDICTI | Tarenaya_hasslerian | 36.90 | 0.00 |
| TRINITY_GAQ8054  | hypothet | Klebsormidium_niten | 36.90 | 0.00 |
| TRINITY_PRW5969  | ankyrin  | Chlorella_sorokinia | 36.90 | 0.00 |

|                  |                              |       |      |
|------------------|------------------------------|-------|------|
| TRINITY_PIA50433 | hypothetAquilegia_coerulea   | 36.90 | 0.00 |
| TRINITY_XP_00231 | phosphoçPopulus_trichocarpa  | 36.90 | 0.00 |
| TRINITY_GAQ82936 | ABC trarKlebsormidium_niten  | 36.90 | 0.00 |
| TRINITY_GAX83919 | hypothetChlamydomonas_eusti  | 36.90 | 0.00 |
| TRINITY_PTQ34859 | hypothetMarchantia_polymorp  | 36.90 | 0.00 |
| TRINITY_PNW74459 | hypothetChlamydomonas_reinh  | 36.90 | 0.00 |
| TRINITY_GAX76887 | hypothetChlamydomonas_eusti  | 36.90 | 0.00 |
| TRINITY_PNW73838 | hypothetChlamydomonas_reinh  | 36.90 | 0.00 |
| TRINITY_GBG78434 | hypothetChara_braunii        | 36.90 | 0.00 |
| TRINITY_PSS08453 | AsparticActinidia_chinensis  | 36.90 | 0.00 |
| TRINITY_XP_00585 | hypothetChlorella_variabili  | 36.90 | 0.00 |
| TRINITY_XP_00295 | hypothetVolvox_carteri       | 36.90 | 0.00 |
| TRINITY_RWR76596 | serine/tCinnamomum_micranth  | 36.90 | 0.00 |
| TRINITY_GAX85296 | hypothetChlamydomonas_eusti  | 36.90 | 0.00 |
| TRINITY_XP_02376 | mitochorLactuca_sativa       | 36.90 | 0.00 |
| TRINITY_XP_00980 | PREDICTINicotiana_sylvestri  | 36.90 | 0.00 |
| TRINITY_GAQ84320 | UDP-galçKlebsormidium_niten  | 36.90 | 0.00 |
| TRINITY_GAX76437 | hypothetChlamydomonas_eusti  | 36.90 | 0.00 |
| TRINITY_XP_00305 | predictçMicromonas_pusilla   | 36.90 | 0.00 |
| TRINITY_XP_00250 | predictçMicromonas_commoda   | 36.90 | 0.00 |
| TRINITY_XP_01558 | uncharaçRicinus_communis     | 36.90 | 0.00 |
| TRINITY_GAX85976 | hypothetChlamydomonas_eusti  | 36.90 | 0.00 |
| TRINITY_GAX81305 | hypothetChlamydomonas_eusti  | 36.90 | 0.00 |
| TRINITY_GAX74004 | hypothetChlamydomonas_eusti  | 36.90 | 0.00 |
| TRINITY_XP_01722 | PREDICTIDaucus_carota        | 36.90 | 0.00 |
| TRINITY_XP_00665 | PREDICTIOryza_brachyantha    | 36.90 | 0.00 |
| TRINITY_XP_02440 | cleavagçPhyscomitrella_pate  | 36.90 | 0.00 |
| TRINITY_GAX73356 | hypothetChlamydomonas_eusti  | 36.90 | 0.00 |
| TRINITY_OAE30370 | hypothetMarchantia_polymorp  | 36.90 | 0.00 |
| TRINITY_PNW72606 | hypothetChlamydomonas_reinh  | 36.90 | 0.00 |
| TRINITY_KXZ47140 | hypothetGonium_pectorale     | 36.90 | 0.00 |
| TRINITY_XP_00878 | luc7-liPhoenix_dactylifera   | 36.90 | 0.00 |
| TRINITY_GAX76824 | hypothetChlamydomonas_eusti  | 36.90 | 0.00 |
| TRINITY_PNW75450 | hypothetChlamydomonas_reinh  | 36.90 | 0.00 |
| TRINITY_XP_00295 | hypothetVolvox_carteri       | 36.90 | 0.00 |
| TRINITY_GAX79705 | hypothetChlamydomonas_eusti  | 36.90 | 0.00 |
| TRINITY_GAQ87550 | Leucyl-tKlebsormidium_niten  | 36.90 | 0.00 |
| TRINITY_GAX78783 | hypothetChlamydomonas_eusti  | 36.90 | 0.00 |
| TRINITY_PNW71405 | hypothetChlamydomonas_reinh  | 36.90 | 0.00 |
| TRINITY_GAX85698 | hypothetChlamydomonas_eusti  | 36.90 | 0.00 |
| TRINITY_GAQ82535 | hypothetKlebsormidium_niten  | 36.90 | 0.00 |
| TRINITY_BAJ94575 | predictçHordeum_vulgare      | 36.90 | 0.00 |
| TRINITY_PNH11410 | Mitogen-Tetrabaena_socialis  | 36.90 | 0.00 |
| TRINITY_XP_00294 | hypothetVolvox_carteri       | 36.90 | 0.00 |
| TRINITY_KXZ50485 | hypothetGonium_pectorale     | 36.90 | 0.00 |
| TRINITY_GAX80287 | hypothetChlamydomonas_eusti  | 36.90 | 0.00 |
| TRINITY_ONI17922 | hypothetPrunus_persica       | 36.90 | 0.00 |
| TRINITY_XP_00244 | ubiquitiSorghum_bicolor      | 36.90 | 0.00 |
| TRINITY_XP_00359 | purine-ıMedicago_truncatula  | 36.80 | 0.00 |
| TRINITY_AFG56098 | hypothetPinus_taeda          | 36.80 | 0.00 |
| TRINITY_XP_02164 | ras-relçHevea_brasiliensis   | 36.80 | 0.00 |
| TRINITY_XP_00169 | predictçChlamydomonas_reinh  | 36.80 | 0.00 |
| TRINITY_GBF93490 | hypothetRaphidocelis_subcap  | 36.80 | 0.00 |
| TRINITY_XP_00978 | PREDICTINicotiana_sylvestri  | 36.80 | 0.00 |
| TRINITY_XP_01373 | importirBrassica_napus       | 36.80 | 0.00 |
| TRINITY_PON81748 | PhosphoçTrema_orientale      | 36.80 | 0.00 |
| TRINITY_XP_02131 | rho GTPçSorghum_bicolor      | 36.80 | 0.00 |
| TRINITY_XP_01373 | phosphatBrassica_napus       | 36.80 | 0.00 |
| TRINITY_GAQ80201 | protein Klebsormidium_niten  | 36.80 | 0.00 |
| TRINITY_XP_00170 | (Snf1-li)Chlamydomonas_reinh | 36.80 | 0.00 |
| TRINITY_GAQ79882 | hypothetKlebsormidium_niten  | 36.80 | 0.00 |
| TRINITY_XP_01654 | PREDICTICapsicum_annuum      | 36.80 | 0.00 |
| TRINITY_XP_01649 | PREDICTINicotiana_tabacum    | 36.80 | 0.00 |
| TRINITY_PSS02999 | ReceptorActinidia_chinensis  | 36.80 | 0.00 |
| TRINITY_OAE34747 | hypothetMarchantia_polymorp  | 36.80 | 0.00 |
| TRINITY_EPS57580 | hypothetGenlisea_aurea       | 36.80 | 0.00 |

|                 |            |                     |       |      |
|-----------------|------------|---------------------|-------|------|
| TRINITY_XP_0114 | PREDICT    | Fragaria vesca      | 36.80 | 0.00 |
| TRINITY_GAX7575 | hypothet   | Chlamydomonas eusti | 36.80 | 0.00 |
| TRINITY_XP_0191 | PREDICT    | Ipomoea nil         | 36.80 | 0.00 |
| TRINITY_XP_0024 | neo-cal    | Sorghum bicolor     | 36.80 | 0.00 |
| TRINITY_GBG6166 | hypothet   | Chara braunii       | 36.80 | 0.00 |
| TRINITY_GAX8056 | hypothet   | Chlamydomonas eusti | 36.80 | 0.00 |
| TRINITY_ABK2228 | unknown    | Picea sitchensis    | 36.80 | 0.00 |
| TRINITY_XP_0239 | 160S rib   | Quercus suber       | 36.80 | 0.00 |
| TRINITY_PSC6870 | Transcri   | Micractinium conduc | 36.80 | 0.00 |
| TRINITY_XP_0029 | hypothet   | Volvox carteri      | 36.80 | 0.00 |
| TRINITY_GAX7770 | hypothet   | Chlamydomonas eusti | 36.80 | 0.00 |
| TRINITY_RLN2903 | transcri   | Panicum miliaceum   | 36.80 | 0.00 |
| TRINITY_NP_0013 | uncharac   | Zea mays            | 36.80 | 0.00 |
| TRINITY_XP_0100 | PREDICT    | Eucalyptus grandis  | 36.80 | 0.00 |
| TRINITY_XP_0030 | protofil   | Micromonas pusilla  | 36.80 | 0.00 |
| TRINITY_XP_0016 | transcri   | Chlamydomonas Reinh | 36.80 | 0.00 |
| TRINITY_RVW4277 | Pumilio-   | Vitis vinifera      | 36.80 | 0.00 |
| TRINITY_XP_0245 | kinesin-   | Selaginella moellen | 36.80 | 0.00 |
| TRINITY_XP_0029 | hypothet   | Volvox carteri      | 36.80 | 0.00 |
| TRINITY_KXZ5665 | hypothet   | Gonium pectorale    | 36.80 | 0.00 |
| TRINITY_GAQ8691 | Beta-tuk   | Klebsormidium niten | 36.80 | 0.00 |
| TRINITY_GAX7659 | hypothet   | Chlamydomonas eusti | 36.80 | 0.00 |
| TRINITY_GAX8018 | hypothet   | Chlamydomonas eusti | 36.80 | 0.00 |
| TRINITY_KXZ4441 | hypothet   | Gonium pectorale    | 36.80 | 0.00 |
| TRINITY_EOY0131 | CHASE d    | Theobroma cacao     | 36.80 | 0.00 |
| TRINITY_PSC6774 | E3 ubiq    | Micractinium conduc | 36.80 | 0.00 |
| TRINITY_GAQ8348 | phosphol   | Klebsormidium niten | 36.80 | 0.00 |
| TRINITY_GBG0030 | sulfur     | Raphidocelis subcap | 36.80 | 0.00 |
| TRINITY_GAX8258 | hypothet   | Chlamydomonas eusti | 36.80 | 0.00 |
| TRINITY_XP_0219 | cyclin-    | Carica papaya       | 36.80 | 0.00 |
| TRINITY_XP_0016 | potenti    | Chlamydomonas Reinh | 36.80 | 0.00 |
| TRINITY_PON7841 | Zinc fir   | Parasponia anderson | 36.80 | 0.00 |
| TRINITY_QAB4729 | CIPK [C    | Camellia sinensis   | 36.80 | 0.00 |
| TRINITY_GBF9599 | hypothet   | Raphidocelis subcap | 36.80 | 0.00 |
| TRINITY_PNW7464 | hypothet   | Chlamydomonas Reinh | 36.80 | 0.00 |
| TRINITY_XP_0056 | guanine    | Coccomyxa subellips | 36.80 | 0.00 |
| TRINITY_XP_0029 | hypothet   | Volvox carteri      | 36.80 | 0.00 |
| TRINITY_AES6409 | ABC trar   | Medicago truncatula | 36.80 | 0.00 |
| TRINITY_XP_0190 | PREDICT    | Camelina sativa     | 36.80 | 0.00 |
| TRINITY_EEF2234 | enterocl   | Ricinus communis    | 36.80 | 0.00 |
| TRINITY_POC8M8  | .1RecName: | Zea mays            | 36.80 | 0.00 |
| TRINITY_XP_0029 | hypothet   | Volvox carteri      | 36.80 | 0.00 |
| TRINITY_XP_0094 | PREDICT    | Musa acuminata      | 36.80 | 0.00 |
| TRINITY_XP_0096 | PREDICT    | Nicotiana tomentos  | 36.80 | 0.00 |
| TRINITY_GAQ8059 | (15-cis-   | Klebsormidium niten | 36.80 | 0.00 |
| TRINITY_KXZ5603 | hypothet   | Gonium pectorale    | 36.80 | 0.00 |
| TRINITY_OAE2909 | hypothet   | Marchantia polymorp | 36.80 | 0.00 |
| TRINITY_GAX8401 | hypothet   | Chlamydomonas eusti | 36.80 | 0.00 |
| TRINITY_GAX7907 | hypothet   | Chlamydomonas eusti | 36.80 | 0.00 |
| TRINITY_OTF8705 | putativ    | Helianthus annuus   | 36.80 | 0.00 |
| TRINITY_PUZ4082 | hypothet   | Panicum hallii      | 36.80 | 0.00 |
| TRINITY_PNW8279 | hypothet   | Chlamydomonas Reinh | 36.80 | 0.00 |
| TRINITY_PNW8370 | hypothet   | Chlamydomonas Reinh | 36.80 | 0.00 |
| TRINITY_GAX7918 | hypothet   | Chlamydomonas eusti | 36.80 | 0.00 |
| TRINITY_XP_0029 | hypothet   | Volvox carteri      | 36.80 | 0.00 |
| TRINITY_XP_0017 | predict    | Chlamydomonas Reinh | 36.80 | 0.00 |
| TRINITY_GAX8583 | hypothet   | Chlamydomonas eusti | 36.80 | 0.00 |
| TRINITY_XP_0091 | PREDICT    | Brassica rapa       | 36.80 | 0.00 |
| TRINITY_GBG8650 | hypothet   | Chara braunii       | 36.80 | 0.00 |
| TRINITY_ACA2413 | eukaryot   | Lolium temulentum   | 36.80 | 0.00 |
| TRINITY_XP_0071 | hypothet   | Phaseolus vulgaris  | 36.80 | 0.00 |
| TRINITY_XP_0030 | predict    | Micromonas pusilla  | 36.80 | 0.00 |
| TRINITY_XP_0243 | serine/    | Physcomitrella pate | 36.80 | 0.00 |
| TRINITY_GAQ8632 | major f    | Klebsormidium niten | 36.70 | 0.00 |
| TRINITY_GAV8615 | Syntaxir   | Cephalotus follicul | 36.70 | 0.00 |
| TRINITY_XP_0249 | phosphat   | Ziziphus jujuba     | 36.70 | 0.00 |

|                     |                              |       |      |
|---------------------|------------------------------|-------|------|
| TRINITY_PNW80425    | hypothetChlamydomonas_reinh  | 36.70 | 0.00 |
| TRINITY_GAX80882    | hypothetChlamydomonas_eusti  | 36.70 | 0.00 |
| TRINITY_RQL75474    | hypothetBrassica_cretica     | 36.70 | 0.00 |
| TRINITY_PLY91187    | hypothetLactuca_sativa       | 36.70 | 0.00 |
| TRINITY_XP_00941    | PREDICTMusa_acuminata        | 36.70 | 0.00 |
| TRINITY_XP_00639    | protein Eutrema_salsugineur  | 36.70 | 0.00 |
| TRINITY_XP_02390    | ras-likeQuercus_suber        | 36.70 | 0.00 |
| TRINITY_XP_02353    | ran-binCucurbita_pepo        | 36.70 | 0.00 |
| TRINITY_XP_01010    | (mitochorMorus_notabilis     | 36.70 | 0.00 |
| TRINITY_XP_0200826S | protAnanas_comosus           | 36.70 | 0.00 |
| TRINITY_GAQ79529    | hypothetKlebsormidium_niten  | 36.70 | 0.00 |
| TRINITY_GAX86698    | hypothetChlamydomonas_eusti  | 36.70 | 0.00 |
| TRINITY_GAX82659    | hypothetChlamydomonas_eusti  | 36.70 | 0.00 |
| TRINITY_XP_01722    | PREDICTFDaucus_carota        | 36.70 | 0.00 |
| TRINITY_XP_02059    | probablePhalaenopsis_equest  | 36.70 | 0.00 |
| TRINITY_PNW76680    | hypothetChlamydomonas_reinh  | 36.70 | 0.00 |
| TRINITY_XP_02177    | FACT conChenopodium_quinoa   | 36.70 | 0.00 |
| TRINITY_XP_02174    | uncharacChenopodium_quinoa   | 36.70 | 0.00 |
| TRINITY_XP_00305    | predicteMicromonas_pusilla   | 36.70 | 0.00 |
| TRINITY_XP_01593    | serine/tArachis_duranensis   | 36.70 | 0.00 |
| TRINITY_XP_00295    | hypothetVolvox_carteri       | 36.70 | 0.00 |
| TRINITY_XP_02388    | alpha-acQuercus_suber        | 36.70 | 0.00 |
| TRINITY_XP_02388    | alpha-acQuercus_suber        | 36.70 | 0.00 |
| TRINITY_KDD72868    | hypothetHelicosporidium_sp.  | 36.70 | 0.00 |
| TRINITY_XP_00565    | hypothetCoccomyxa_subellips  | 36.70 | 0.00 |
| TRINITY_OUS47939    | AmidinotOstreococcus_tauri   | 36.70 | 0.00 |
| TRINITY_XP_00939    | PREDICTMusa_acuminata        | 36.70 | 0.00 |
| TRINITY_PNY08488    | U3 smallTrifolium_pratense   | 36.70 | 0.00 |
| TRINITY_GAX81564    | hypothetChlamydomonas_eusti  | 36.70 | 0.00 |
| TRINITY_XP_02453    | serine/tSelaginella_moellen  | 36.70 | 0.00 |
| TRINITY_GAQ93508    | hypothetKlebsormidium_niten  | 36.70 | 0.00 |
| TRINITY_XP_02026    | probableAsparagus_officinal  | 36.70 | 0.00 |
| TRINITY_XP_02387    | DNA misnQuercus_suber        | 36.70 | 0.00 |
| TRINITY_OAE35195    | hypothetMarchantia_polymorp  | 36.70 | 0.00 |
| TRINITY_GAX76447    | hypothetChlamydomonas_eusti  | 36.70 | 0.00 |
| TRINITY_KCW83140    | (hypothetEucalyptus_grandis  | 36.70 | 0.00 |
| TRINITY_GAX81253    | hypothetChlamydomonas_eusti  | 36.70 | 0.00 |
| TRINITY_XP_00751    | predicteBathycoccus_prasinc  | 36.70 | 0.00 |
| TRINITY_EFJ36258    | hypothetSelaginella_moellen  | 36.70 | 0.00 |
| TRINITY_XP_01654    | PREDICTFCapsicum_annuum      | 36.70 | 0.00 |
| TRINITY_XP_00584    | hypothetChlorella_variabili  | 36.70 | 0.00 |
| TRINITY_XP_02439    | guanylatPhyscomitrella_pate  | 36.70 | 0.00 |
| TRINITY_XP_01389    | dynein lMonoraphidium_negle  | 36.70 | 0.00 |
| TRINITY_GAX84626    | hypothetChlamydomonas_eusti  | 36.70 | 0.00 |
| TRINITY_GAX77149    | hypothetChlamydomonas_eusti  | 36.70 | 0.00 |
| TRINITY_XP_02292    | SWI/SNF Cucurbita_moschata   | 36.70 | 0.00 |
| TRINITY_XP_00584    | hypothetChlorella_variabili  | 36.70 | 0.00 |
| TRINITY_GAX75250    | (hypothetChlamydomonas_eusti | 36.70 | 0.00 |
| TRINITY_XP_02184    | uncharacSpinacia_oleracea    | 36.70 | 0.00 |
| TRINITY_XP_02454    | NFX1-tyxSelaginella_moellen  | 36.70 | 0.00 |
| TRINITY_XP_01449    | (+)-neonVigna_radiata        | 36.70 | 0.00 |
| TRINITY_PNW76366    | hypothetChlamydomonas_reinh  | 36.70 | 0.00 |
| TRINITY_GAX75547    | hypothetChlamydomonas_eusti  | 36.70 | 0.00 |
| TRINITY_PNW70541    | hypothetChlamydomonas_reinh  | 36.70 | 0.00 |
| TRINITY_GBF97013    | hypothetRaphidocelis_subcap  | 36.70 | 0.00 |
| TRINITY_XP_02391    | protein Quercus_suber        | 36.70 | 0.00 |
| TRINITY_GAX79653    | hypothetChlamydomonas_eusti  | 36.70 | 0.00 |
| TRINITY_XP_01723    | PREDICTFDaucus_carota        | 36.70 | 0.00 |
| TRINITY_XP_00169    | predicteChlamydomonas_reinh  | 36.70 | 0.00 |
| TRINITY_GAX79240    | (hypothetChlamydomonas_eusti | 36.70 | 0.00 |
| TRINITY_XP_00169    | predicteChlamydomonas_reinh  | 36.70 | 0.00 |
| TRINITY_XP_00169    | protein Chlamydomonas_reinh  | 36.70 | 0.00 |
| TRINITY_GAX77753    | hypothetChlamydomonas_eusti  | 36.70 | 0.00 |
| TRINITY_PSR86278    | LEC14B rActinidia_chinensis  | 36.70 | 0.00 |
| TRINITY_GAX80192    | hypothetChlamydomonas_eusti  | 36.70 | 0.00 |
| TRINITY_XP_00168    | predicteChlamydomonas_reinh  | 36.70 | 0.00 |

|                  |            |                     |       |      |
|------------------|------------|---------------------|-------|------|
| TRINITY_GAQ81304 | hypothet   | Klebsormidium_niten | 36.60 | 0.00 |
| TRINITY_XP_02416 | probable   | Rosa_chinensis      | 36.60 | 0.00 |
| TRINITY_XP_02387 | probable   | Quercus_suber       | 36.60 | 0.00 |
| TRINITY_EEC74241 | hypothet   | Oryza_sativa        | 36.60 | 0.00 |
| TRINITY_XP_01617 | zinc fir   | Arachis_ipaensis    | 36.60 | 0.00 |
| TRINITY_PWA93605 | histidir   | Artemisia_annua     | 36.60 | 0.00 |
| TRINITY_XP_02129 | seven t    | Herrania_umbratica  | 36.60 | 0.00 |
| TRINITY_RWW90743 | hypothet   | Ensete_ventricosum  | 36.60 | 0.00 |
| TRINITY_ABK21750 | unknown    | Picea_sitchensis    | 36.60 | 0.00 |
| TRINITY_XP_01919 | PREDICTI   | Ipomoea_nil         | 36.60 | 0.00 |
| TRINITY_XP_02199 | ARM REPI   | Helianthus_annuus   | 36.60 | 0.00 |
| TRINITY_XP_02390 | tRNA-sp    | Quercus_suber       | 36.60 | 0.00 |
| TRINITY_XP_00844 | PREDICTI   | Cucumis_melo        | 36.60 | 0.00 |
| TRINITY_RWR90653 | Protein    | Cinnamomum_micranth | 36.60 | 0.00 |
| TRINITY_GAX76096 | hypothet   | Chlamydomonas_eusti | 36.60 | 0.00 |
| TRINITY_XP_00959 | PREDICTI   | Nicotiana_tomentosi | 36.60 | 0.00 |
| TRINITY_XP_00978 | PREDICTI   | Nicotiana_sylvestri | 36.60 | 0.00 |
| TRINITY_OAE26664 | hypothet   | Marchantia_polymorp | 36.60 | 0.00 |
| TRINITY_GAQ90295 | hypothet   | Klebsormidium_niten | 36.60 | 0.00 |
| TRINITY_XP_02070 | (V-type p  | Dendrobium_catenatu | 36.60 | 0.00 |
| TRINITY_GAQ84429 | hypothet   | Klebsormidium_niten | 36.60 | 0.00 |
| TRINITY_PRW58870 | (kynurenin | Chlorella_sorokinia | 36.60 | 0.00 |
| TRINITY_XP_02374 | protein-   | Lactuca_sativa      | 36.60 | 0.00 |
| TRINITY_XP_00296 | alkylate   | Selaginella_moellen | 36.60 | 0.00 |
| TRINITY_GAX84515 | hypothet   | Chlamydomonas_eusti | 36.60 | 0.00 |
| TRINITY_RLN00081 | E3 ubiq    | Panicum_miliaceum   | 36.60 | 0.00 |
| TRINITY_KMZ58499 | Polyubic   | Zostera_marina      | 36.60 | 0.00 |
| TRINITY_PRW59553 | anaphas    | Chlorella_sorokinia | 36.60 | 0.00 |
| TRINITY_GAQ93251 | E3 ubiq    | Klebsormidium_niten | 36.60 | 0.00 |
| TRINITY_KXZ56559 | hypothet   | Gonium_pectorale    | 36.60 | 0.00 |
| TRINITY_GAQ77732 | Leishmar   | Klebsormidium_niten | 36.60 | 0.00 |
| TRINITY_XP_02376 | uncharac   | Lactuca_sativa      | 36.60 | 0.00 |
| TRINITY_GBF99789 | 16S rRN    | Raphidocelis_subcap | 36.60 | 0.00 |
| TRINITY_GAX86251 | hypothet   | Chlamydomonas_eusti | 36.60 | 0.00 |
| TRINITY_VDD63531 | unnamed    | Brassica_oleracea   | 36.60 | 0.00 |
| TRINITY_RMZ54964 | hypothet   | Auxenochlorella_pro | 36.60 | 0.00 |
| TRINITY_XP_01068 | PREDICTI   | Beta_vulgaris       | 36.60 | 0.00 |
| TRINITY_XP_02021 | (+)-neon   | Cajanus_cajan       | 36.60 | 0.00 |
| TRINITY_GAX78060 | hypothet   | Chlamydomonas_eusti | 36.60 | 0.00 |
| TRINITY_GAX75570 | hypothet   | Chlamydomonas_eusti | 36.60 | 0.00 |
| TRINITY_XP_02440 | (transcri  | Physcomitrella_pate | 36.60 | 0.00 |
| TRINITY_XP_00170 | (predict   | Chlamydomonas_reinh | 36.60 | 0.00 |
| TRINITY_KXZ51309 | hypothet   | Gonium_pectorale    | 36.60 | 0.00 |
| TRINITY_RLN35419 | NADPH--    | Panicum_miliaceum   | 36.60 | 0.00 |
| TRINITY_GAX84849 | hypothet   | Chlamydomonas_eusti | 36.60 | 0.00 |
| TRINITY_PSS01701 | Regulati   | Actinidia_chinensis | 36.60 | 0.00 |
| TRINITY_NP_00131 | leukaryot  | Nicotiana_tabacum   | 36.60 | 0.00 |
| TRINITY_XP_01917 | PREDICTI   | Ipomoea_nil         | 36.60 | 0.00 |
| TRINITY_GBF91010 | hypothet   | Raphidocelis_subcap | 36.60 | 0.00 |
| TRINITY_KYP51515 | Sugar p    | Cajanus_cajan       | 36.60 | 0.00 |
| TRINITY_GBF89099 | hypothet   | Raphidocelis_subcap | 36.60 | 0.00 |
| TRINITY_XP_01589 | dnaJ hon   | Ziziphus_jujuba     | 36.60 | 0.00 |
| TRINITY_BAK02183 | predict    | Hordeum_vulgare     | 36.60 | 0.00 |
| TRINITY_RDX98778 | Ethylen    | Mucuna_pruriens     | 36.60 | 0.00 |
| TRINITY_PTQ38719 | hypothet   | Marchantia_polymorp | 36.60 | 0.00 |
| TRINITY_GAQ78735 | alpha-an   | Klebsormidium_niten | 36.60 | 0.00 |
| TRINITY_EFJ33309 | hypothet   | Selaginella_moellen | 36.60 | 0.00 |
| TRINITY_XP_00294 | hypothet   | Volvox_carteri      | 36.60 | 0.00 |
| TRINITY_XP_01146 | PREDICTI   | Fragaria_vesca      | 36.60 | 0.00 |
| TRINITY_GAU50862 | hypothet   | Trifolium_subterran | 36.60 | 0.00 |
| TRINITY_GAX84106 | hypothet   | Chlamydomonas_eusti | 36.60 | 0.00 |
| TRINITY_KXZ46095 | hypothet   | Gonium_pectorale    | 36.60 | 0.00 |
| TRINITY_GAX73762 | hypothet   | Chlamydomonas_eusti | 36.60 | 0.00 |
| TRINITY_GAX83254 | hypothet   | Chlamydomonas_eusti | 36.60 | 0.00 |
| TRINITY_GAX84740 | hypothet   | Chlamydomonas_eusti | 36.60 | 0.00 |
| TRINITY_KXZ55787 | hypothet   | Gonium_pectorale    | 36.60 | 0.00 |



|                 |                             |       |      |
|-----------------|-----------------------------|-------|------|
| TRINITY_PIA2542 | hypothetAquilegia_coerulea  | 36.60 | 0.00 |
| TRINITY_XP_0016 | predicteChlamydomonas_reinh | 36.60 | 0.00 |
| TRINITY_XP_0016 | predicteChlamydomonas_reinh | 36.60 | 0.00 |
| TRINITY_PNH1169 | hypothetTetrabaena_socialis | 36.60 | 0.00 |
| TRINITY_XP_0110 | cytochrSesamum_indicum      | 36.60 | 0.00 |
| TRINITY_XP_0243 | retinol Physcomitrella_pate | 36.60 | 0.00 |
| TRINITY_XP_0063 | enoyl-CcCapsella_rubella    | 36.50 | 0.00 |
| TRINITY_XP_0216 | alpha-gaManihot_esculenta   | 36.50 | 0.00 |
| TRINITY_XP_0075 | predicteBathycoccus_prasinc | 36.50 | 0.00 |
| TRINITY_OMP1004 | hypothetCorchorus_olitorius | 36.50 | 0.00 |
| TRINITY_AFN8985 | tyrosineRhodiola_crenulata  | 36.50 | 0.00 |
| TRINITY_XP_0156 | DNA-damOryza_sativa         | 36.50 | 0.00 |
| TRINITY_GAX8245 | hypothetChlamydomonas_eusti | 36.50 | 0.00 |
| TRINITY_OMO9884 | hypothetCorchorus_capsulari | 36.50 | 0.00 |
| TRINITY_XP_0205 | pre-mRNPhalaenopsis_equest  | 36.50 | 0.00 |
| TRINITY_XP_0243 | uncharaPhyscomitrella_pate  | 36.50 | 0.00 |
| TRINITY_RAL4622 | hypothetCuscuta_australis   | 36.50 | 0.00 |
| TRINITY_XP_0270 | adenine Coffea_arabica      | 36.50 | 0.00 |
| TRINITY_PSC7090 | pre-mRNMicractinium_conduc  | 36.50 | 0.00 |
| TRINITY_PNX9421 | putativeTrifolium_pratense  | 36.50 | 0.00 |
| TRINITY_PNW7717 | hypothetChlamydomonas_reinh | 36.50 | 0.00 |
| TRINITY_XP_0191 | PREDICTI Ipomoea_nil        | 36.50 | 0.00 |
| TRINITY_GBG7470 | hypothetChara_braunii       | 36.50 | 0.00 |
| TRINITY_EMS5024 | Nuclear Triticum_urartu     | 36.50 | 0.00 |
| TRINITY_GBG6155 | hypothetChara_braunii       | 36.50 | 0.00 |
| TRINITY_ADC4537 | actin [(Cleistogenes_songor | 36.50 | 0.00 |
| TRINITY_XP_0110 | PREDICTI Populus_euphratica | 36.50 | 0.00 |
| TRINITY_GBF9858 | hypothetRaphidocelis_subcap | 36.50 | 0.00 |
| TRINITY_XP_0243 | syntaxirPhyscomitrella_pate | 36.50 | 0.00 |
| TRINITY_PTQ2901 | hypothetMarchantia_polymorp | 36.50 | 0.00 |
| TRINITY_XP_0220 | mitogen-Helianthus_annuus   | 36.50 | 0.00 |
| TRINITY_RXI0625 | hypothetMalus_domestica     | 36.50 | 0.00 |
| TRINITY_RVW2326 | E3 ubiqVitis_vinifera       | 36.50 | 0.00 |
| TRINITY_GAQ7994 | PutativeKlebsormidium_niten | 36.50 | 0.00 |
| TRINITY_GAX7915 | hypothetChlamydomonas_eusti | 36.50 | 0.00 |
| TRINITY_GAX8018 | hypothetChlamydomonas_eusti | 36.50 | 0.00 |
| TRINITY_XP_0109 | PREDICTI Elaeis_guineensis  | 36.50 | 0.00 |
| TRINITY_KXZ5423 | hypothetGonium_pectorale    | 36.50 | 0.00 |
| TRINITY_XP_0062 | 2-(3-amCapsella_rubella     | 36.50 | 0.00 |
| TRINITY_KXZ4624 | hypothetGonium_pectorale    | 36.50 | 0.00 |
| TRINITY_XP_0056 | Pkinase-Coccomyxa_subellips | 36.50 | 0.00 |
| TRINITY_RWW9047 | hypothetEnsete_ventricosum  | 36.50 | 0.00 |
| TRINITY_XP_0042 | PREDICTI Fragaria_vesca     | 36.50 | 0.00 |
| TRINITY_EFJ2274 | hypothetSelaginella_moellen | 36.50 | 0.00 |
| TRINITY_KMZ7634 | putativeZostera_marina      | 36.50 | 0.00 |
| TRINITY_XP_0239 | bifunctiQuercus_suber       | 36.50 | 0.00 |
| TRINITY_EFJ1759 | hypothetSelaginella_moellen | 36.50 | 0.00 |
| TRINITY_PNW7441 | hypothetChlamydomonas_reinh | 36.50 | 0.00 |
| TRINITY_XP_0042 | pathogerSolanum_lycopersicu | 36.50 | 0.00 |
| TRINITY_XP_0058 | hypothetChlorella_variabili | 36.50 | 0.00 |
| TRINITY_PNW8754 | hypothetChlamydomonas_reinh | 36.50 | 0.00 |
| TRINITY_XP_0029 | hypothetVolvox_carteri      | 36.50 | 0.00 |
| TRINITY_PNH0455 | hypothetTetrabaena_socialis | 36.50 | 0.00 |
| TRINITY_XP_0238 | sodium/Quercus_suber        | 36.50 | 0.00 |
| TRINITY_PHT8407 | hypothetCapsicum_annuum     | 36.50 | 0.00 |
| TRINITY_CDY5875 | BnaCnngBrassica_napus       | 36.50 | 0.00 |
| TRINITY_EPS5790 | mitogen-Genlisea_aurea      | 36.50 | 0.00 |
| TRINITY_XP_0240 | serine/tMorus_notabilis     | 36.50 | 0.00 |
| TRINITY_XP_0139 | UncharaMonoraphidium_negle  | 36.50 | 0.00 |
| TRINITY_XP_0016 | RWP-RK tChlamydomonas_reinh | 36.50 | 0.00 |
| TRINITY_GAX7302 | hypothetChlamydomonas_eusti | 36.50 | 0.00 |
| TRINITY_XP_0029 | hypothetVolvox_carteri      | 36.50 | 0.00 |
| TRINITY_XP_0218 | uncharaSpinacia_oleracea    | 36.50 | 0.00 |
| TRINITY_KXZ4132 | hypothetGonium_pectorale    | 36.50 | 0.00 |
| TRINITY_XP_0113 | Protein Auxenochlorella_pro | 36.50 | 0.00 |
| TRINITY_XP_0056 | hypothetCoccomyxa_subellips | 36.50 | 0.00 |

|                    |                             |       |      |
|--------------------|-----------------------------|-------|------|
| TRINITY_GAX84137   | hypothetChlamydomonas_eusti | 36.50 | 0.00 |
| TRINITY_PNW77527   | hypothetChlamydomonas_reinh | 36.50 | 0.00 |
| TRINITY_VDD45001   | unnamed Brassica_oleracea   | 36.50 | 0.00 |
| TRINITY_GAX78754   | hypothetChlamydomonas_eusti | 36.50 | 0.00 |
| TRINITY_XP_00298E3 | ubiquSelaginella_moellen    | 36.50 | 0.00 |
| TRINITY_GBF94337   | hypothetRaphidocelis_subcap | 36.50 | 0.00 |
| TRINITY_PWA87491   | acyl-CoAArtemisia_annua     | 36.50 | 0.00 |
| TRINITY_GAQ87785   | ER-GolgiKlebsormidium_niten | 36.50 | 0.00 |
| TRINITY_KXZ55647   | hypothetGonium_pectorale    | 36.50 | 0.00 |
| TRINITY_XP_01003   | PREDICTHEucalyptus_grandis  | 36.40 | 0.00 |
| TRINITY_XP_02641   | elicitorPapaver_somniferum  | 36.40 | 0.00 |
| TRINITY_XP_00251   | purine-tRicinus_communis    | 36.40 | 0.00 |
| TRINITY_XP_00565   | hypothetCoccomyxa_subellips | 36.40 | 0.00 |
| TRINITY_OAE31917   | hypothetMarchantia_polymorp | 36.40 | 0.00 |
| TRINITY_XP_01146   | PREDICTIFragaria-vesca      | 36.40 | 0.00 |
| TRINITY_PHT35692   | hypothetCapsicum_baccatum   | 36.40 | 0.00 |
| TRINITY_XP_02445E3 | ubiquPopulus_trichocarpa    | 36.40 | 0.00 |
| TRINITY_ERM98344   | hypothetAmborella_trichopod | 36.40 | 0.00 |
| TRINITY_XP_00305   | predicteMicromonas_pusilla  | 36.40 | 0.00 |
| TRINITY_OIW15361   | hypothetLupinus_angustifoli | 36.40 | 0.00 |
| TRINITY_XP_02452   | phosphatSelaginella_moellen | 36.40 | 0.00 |
| TRINITY_XP_00244   | nuclear Sorghum_bicolor     | 36.40 | 0.00 |
| TRINITY_GAQ80764   | hypothetKlebsormidium_niten | 36.40 | 0.00 |
| TRINITY_XP_02392   | anthraniQuercus_suber       | 36.40 | 0.00 |
| TRINITY_PSC73006   | diaminoqMicractinium_conduc | 36.40 | 0.00 |
| TRINITY_XP_00295   | hypothetVolvox_carteri      | 36.40 | 0.00 |
| TRINITY_XP_02792   | putativeVigna_unguiculata   | 36.40 | 0.00 |
| TRINITY_XP_00297   | ESCRT-rSelaginella_moellen  | 36.40 | 0.00 |
| TRINITY_XP_00142   | predicteOstreococcus_sp._'l | 36.40 | 0.00 |
| TRINITY_GAX85947   | hypothetChlamydomonas_eusti | 36.40 | 0.00 |
| TRINITY_AXF41554   | CCP430 rChlorella_sp._ArM00 | 36.40 | 0.00 |
| TRINITY_XP_02067   | ras-relaDendrobium_catenatu | 36.40 | 0.00 |
| TRINITY_GAQ82363   | TelomerKlebsormidium_niten  | 36.40 | 0.00 |
| TRINITY_RWW91059   | hypothetEnsete_ventricosum  | 36.40 | 0.00 |
| TRINITY_GAQ84765   | hypothetKlebsormidium_niten | 36.40 | 0.00 |
| TRINITY_XP_00721   | low-tempPrunus_persica      | 36.40 | 0.00 |
| TRINITY_PWA41598   | BRCT donArtemisia_annua     | 36.40 | 0.00 |
| TRINITY_XP_01654   | PREDICTFCapsicum_annuum     | 36.40 | 0.00 |
| TRINITY_XP_02396   | probableQuercus_suber       | 36.40 | 0.00 |
| TRINITY_GAQ78212   | exopolyKlebsormidium_niten  | 36.40 | 0.00 |
| TRINITY_XP_00168   | predicteChlamydomonas_reinh | 36.40 | 0.00 |
| TRINITY_GAX81326   | hypothetChlamydomonas_eusti | 36.40 | 0.00 |
| TRINITY_XP_02296   | diphosphCucurbita_maxima    | 36.40 | 0.00 |
| TRINITY_XP_02284   | UBA-likeOstreococcus_tauri  | 36.40 | 0.00 |
| TRINITY_GBF93246   | hypothetRaphidocelis_subcap | 36.40 | 0.00 |
| TRINITY_RLN24754   | hypothetPanicum_miliaceum   | 36.40 | 0.00 |
| TRINITY_GAX76911   | hypothetChlamydomonas_eusti | 36.40 | 0.00 |
| TRINITY_XP_02392   | mitochorQuercus_suber       | 36.40 | 0.00 |
| TRINITY_XP_00564   | MFS geneCoccomyxa_subellips | 36.40 | 0.00 |
| TRINITY_XP_02058   | vacuolarPhalaenopsis_equest | 36.40 | 0.00 |
| TRINITY_KXZ54883   | hypothetGonium_pectorale    | 36.40 | 0.00 |
| TRINITY_XP_02396   | pumilio Quercus_suber       | 36.40 | 0.00 |
| TRINITY_AML78291   | putativePleurastrum_insigne | 36.40 | 0.00 |
| TRINITY_PIA50207   | hypothetAquilegia_coerulea  | 36.40 | 0.00 |
| TRINITY_GAX77506   | hypothetChlamydomonas_eusti | 36.40 | 0.00 |
| TRINITY_XP_02707   | KIN17-ljCoffea_arabica      | 36.40 | 0.00 |
| TRINITY_BAJ94121   | predicteHordeum_vulgare     | 36.40 | 0.00 |
| TRINITY_KXZ50009   | hypothetGonium_pectorale    | 36.40 | 0.00 |
| TRINITY_XP_01047   | PREDICTFCamelina_sativa     | 36.40 | 0.00 |
| TRINITY_XP_02388   | serine/tQuercus_suber       | 36.40 | 0.00 |
| TRINITY_POC8M8.1   | RecName:Zea_mays            | 36.40 | 0.00 |
| TRINITY_EFJ27865   | hypothetSelaginella_moellen | 36.40 | 0.00 |
| TRINITY_XP_01054   | PREDICTFTarenaya_hasslerian | 36.40 | 0.00 |
| TRINITY_XP_01674   | PREDICTFGossypium_hirsutum  | 36.40 | 0.00 |
| TRINITY_XP_00169   | hydroxyChlamydomonas_reinh  | 36.40 | 0.00 |
| TRINITY_PNH04613   | InositolTetrabaena_socialis | 36.40 | 0.00 |

|                 |                               |       |      |
|-----------------|-------------------------------|-------|------|
| TRINITY_XP_0238 | protein Quercus_suber         | 36.40 | 0.00 |
| TRINITY_GBG7039 | hypothet Chara_braunii        | 36.40 | 0.00 |
| TRINITY_GAX7958 | hypothet Chlamydomonas_eusti  | 36.40 | 0.00 |
| TRINITY_XP_0238 | probable Quercus_suber        | 36.40 | 0.00 |
| TRINITY_KXZ4729 | hypothet Gonium_pectorale     | 36.40 | 0.00 |
| TRINITY_PIN0277 | hypothet Handroanthus_impeti  | 36.40 | 0.00 |
| TRINITY_XP_0217 | DNA misn Chenopodium_quinoa   | 36.40 | 0.00 |
| TRINITY_XP_0028 | uncharac Arabidopsis_lyrata   | 36.40 | 0.00 |
| TRINITY_XP_0025 | calcinei Micromonas_commoda   | 36.40 | 0.00 |
| TRINITY_XP_0093 | PREDICTI Pyrus_x_bretschneid  | 36.40 | 0.00 |
| TRINITY_GAX7968 | hypothet Chlamydomonas_eusti  | 36.40 | 0.00 |
| TRINITY_KXZ4879 | hypothet Gonium_pectorale     | 36.40 | 0.00 |
| TRINITY_KXZ5109 | hypothet Gonium_pectorale     | 36.40 | 0.00 |
| TRINITY_PSR9879 | Charged Actinidia_chinensis   | 36.40 | 0.00 |
| TRINITY_XP_0244 | (ESF1 hon Physcomitrella_pate | 36.40 | 0.00 |
| TRINITY_XP_0238 | respirat Quercus_suber        | 36.40 | 0.00 |
| TRINITY_KXZ4437 | hypothet Gonium_pectorale     | 36.40 | 0.00 |
| TRINITY_GAQ8682 | Leishmar Klebsormidium_niten  | 36.40 | 0.00 |
| TRINITY_AJN0522 | serine t Piper_colubrinum     | 36.40 | 0.00 |
| TRINITY_GAQ7999 | Mediator Klebsormidium_niten  | 36.40 | 0.00 |
| TRINITY_GAX8144 | hypothet Chlamydomonas_eusti  | 36.40 | 0.00 |
| TRINITY_GAX7960 | hypothet Chlamydomonas_eusti  | 36.40 | 0.00 |
| TRINITY_OMO6141 | hypothet Corchorus_capsulari  | 36.40 | 0.00 |
| TRINITY_PNW7501 | hypothet Chlamydomonas_reinh  | 36.40 | 0.00 |
| TRINITY_GAX7747 | hypothet Chlamydomonas_eusti  | 36.40 | 0.00 |
| TRINITY_GAX8345 | hypothet Chlamydomonas_eusti  | 36.40 | 0.00 |
| TRINITY_PNW7136 | hypothet Chlamydomonas_reinh  | 36.40 | 0.00 |
| TRINITY_XP_0017 | (predicte Chlamydomonas_reinh | 36.40 | 0.00 |
| TRINITY_XP_0016 | (predicte Chlamydomonas_reinh | 36.40 | 0.00 |
| TRINITY_XP_0029 | hypothet Volvox_carteri       | 36.40 | 0.00 |
| TRINITY_GAX7367 | hypothet Chlamydomonas_eusti  | 36.40 | 0.00 |
| TRINITY_XP_0241 | zinc fir Rosa_chinensis       | 36.40 | 0.00 |
| TRINITY_PNH1024 | Chaperor Tetrabaena_socialis  | 36.40 | 0.00 |
| TRINITY_PNW8649 | hypothet Chlamydomonas_reinh  | 36.40 | 0.00 |
| TRINITY_XP_0056 | hypothet Coccomyxa_subellips  | 36.40 | 0.00 |
| TRINITY_XP_0091 | (PREDICTI Brassica_rapa       | 36.40 | 0.00 |
| TRINITY_GAX8254 | hypothet Chlamydomonas_eusti  | 36.40 | 0.00 |
| TRINITY_EFH5576 | multidri Arabidopsis_lyrata   | 36.40 | 0.00 |
| TRINITY_XP_0029 | hypothet Volvox_carteri       | 36.40 | 0.00 |
| TRINITY_XP_0139 | (cytochr Monoraphidium_negle  | 36.40 | 0.00 |
| TRINITY_PNW7938 | hypothet Chlamydomonas_reinh  | 36.40 | 0.00 |
| TRINITY_XP_0172 | (PREDICTI Daucus_carota       | 36.40 | 0.00 |
| TRINITY_KFK4213 | hypothet Arabis_alpina        | 36.40 | 0.00 |
| TRINITY_GAX7735 | hypothet Chlamydomonas_eusti  | 36.40 | 0.00 |
| TRINITY_GAX8505 | hypothet Chlamydomonas_eusti  | 36.40 | 0.00 |
| TRINITY_XP_0029 | hypothet Volvox_carteri       | 36.40 | 0.00 |
| TRINITY_XP_0029 | guanylyl Volvox_carteri       | 36.40 | 0.00 |
| TRINITY_XP_0105 | (PREDICTI Camelina_sativa     | 36.40 | 0.00 |
| TRINITY_EXB7493 | Histidir Morus_notabilis      | 36.40 | 0.00 |
| TRINITY_RXH9446 | hypothet Malus_domestica      | 36.40 | 0.00 |
| TRINITY_XP_0239 | carrier Quercus_suber         | 36.30 | 0.00 |
| TRINITY_PTQ2712 | hypothet Marchantia_polymorp  | 36.30 | 0.00 |
| TRINITY_XP_0017 | (protein Chlamydomonas_reinh  | 36.30 | 0.00 |
| TRINITY_XP_0056 | mitochor Coccomyxa_subellips  | 36.30 | 0.00 |
| TRINITY_CAA9007 | small G Pisum_sativum         | 36.30 | 0.00 |
| TRINITY_KXZ4873 | hypothet Gonium_pectorale     | 36.30 | 0.00 |
| TRINITY_XP_0030 | (predicte Micromonas_pusilla  | 36.30 | 0.00 |
| TRINITY_GAX7617 | hypothet Chlamydomonas_eusti  | 36.30 | 0.00 |
| TRINITY_XP_0147 | mitochor Brachypodium_distac  | 36.30 | 0.00 |
| TRINITY_XP_0228 | probable Olea_europaea        | 36.30 | 0.00 |
| TRINITY_ADE7742 | unknown Picea_sitchensis      | 36.30 | 0.00 |
| TRINITY_XP_0202 | LON pept Asparagus_officinal  | 36.30 | 0.00 |
| TRINITY_XP_0239 | protein Quercus_suber         | 36.30 | 0.00 |
| TRINITY_BAK0138 | (predicte Hordeum_vulgare     | 36.30 | 0.00 |
| TRINITY_XP_0025 | (flagell Micromonas_commoda   | 36.30 | 0.00 |
| TRINITY_GAX8070 | hypothet Chlamydomonas_eusti  | 36.30 | 0.00 |

|                                             |       |      |
|---------------------------------------------|-------|------|
| TRINITY_RAL5435(hypothetCuscuta_australis   | 36.30 | 0.00 |
| TRINITY_XP_00141predicteOstreococcus_sp._'1 | 36.30 | 0.00 |
| TRINITY_RYR7147(hypothetArachis_hypogaea    | 36.30 | 0.00 |
| TRINITY_GAQ7771HECT donKlebsormidium_niten  | 36.30 | 0.00 |
| TRINITY_RID7762(hypothetBrassica_rapa       | 36.30 | 0.00 |
| TRINITY_XP_0025(formate-Micromonas_commoda  | 36.30 | 0.00 |
| TRINITY_PLY8512(hypothetLactuca_sativa      | 36.30 | 0.00 |
| TRINITY_XP_0243(putativePhyscomitrella_pate | 36.30 | 0.00 |
| TRINITY_RYQ9573(hypothetArachis_hypogaea    | 36.30 | 0.00 |
| TRINITY_XP_0239(probableQuercus_suber       | 36.30 | 0.00 |
| TRINITY_GAX7335(hypothetChlamydomonas_eusti | 36.30 | 0.00 |
| TRINITY_XP_0025(predicteMicromonas_commoda  | 36.30 | 0.00 |
| TRINITY_XP_0205(periodicPhalaenopsis_equest | 36.30 | 0.00 |
| TRINITY_XP_0025(hypothetMicromonas_commoda  | 36.30 | 0.00 |
| TRINITY_XP_0264(poly [AIPapaver_somniferum  | 36.30 | 0.00 |
| TRINITY_XP_02391ran-binQuercus_suber        | 36.30 | 0.00 |
| TRINITY_XP_0245WD repeSelaginella_moellen   | 36.30 | 0.00 |
| TRINITY_RWR8613(methylstCinnamomum_micranth | 36.30 | 0.00 |
| TRINITY_XP_0016(fumarateChlamydomonas_reinh | 36.30 | 0.00 |
| TRINITY_PNH1169(hypothetTetrabaena_socialis | 36.30 | 0.00 |
| TRINITY_GAQ7949(long-acKlebsormidium_niten  | 36.30 | 0.00 |
| TRINITY_XP_0202(uncharacCajanus_cajan       | 36.30 | 0.00 |
| TRINITY_XP_0128(PREDICTIErythranthe_guttata | 36.30 | 0.00 |
| TRINITY_PNH1233(hypothetTetrabaena_socialis | 36.30 | 0.00 |
| TRINITY_XP_0025(predicteMicromonas_commoda  | 36.30 | 0.00 |
| TRINITY_XP_0029(hypothetVolvox_carteri      | 36.30 | 0.00 |
| TRINITY_PTQ3206(hypothetMarchantia_polymorp | 36.30 | 0.00 |
| TRINITY_OVA01004WD40 reMacleaya_cordata     | 36.30 | 0.00 |
| TRINITY_KXZ5594(hypothetGonium_pectorale    | 36.30 | 0.00 |
| TRINITY_XP_0030(glutamirMicromonas_pusilla  | 36.30 | 0.00 |
| TRINITY_XP_0139(hypothetMonoraphidium_negle | 36.30 | 0.00 |
| TRINITY_KXZ5153(hypothetGonium_pectorale    | 36.30 | 0.00 |
| TRINITY_GAX7787(hypothetChlamydomonas_eusti | 36.30 | 0.00 |
| TRINITY_GAX7868(hypothetChlamydomonas_eusti | 36.30 | 0.00 |
| TRINITY_GAX7272(hypothetChlamydomonas_eusti | 36.30 | 0.00 |
| TRINITY_GAX7561(hypothetChlamydomonas_eusti | 36.30 | 0.00 |
| TRINITY_GBF90831apyrase-Raphidocelis_subcap | 36.30 | 0.00 |
| TRINITY_XP_02202ubiquitiHelianthus_annuus   | 36.30 | 0.00 |
| TRINITY_XP_0110mediatorSesamum_indicum      | 36.30 | 0.00 |
| TRINITY_PRW39081putativeChlorella_sorokinia | 36.30 | 0.00 |
| TRINITY_GAX8431(hypothetChlamydomonas_eusti | 36.30 | 0.00 |
| TRINITY_PNW8057(hypothetChlamydomonas_reinh | 36.30 | 0.00 |
| TRINITY_XP_02391coronin-Quercus_suber       | 36.30 | 0.00 |
| TRINITY_GAX7666(hypothetChlamydomonas_eusti | 36.30 | 0.00 |
| TRINITY_XP_00584hypothetChlorella_variabili | 36.30 | 0.00 |
| TRINITY_KXZ4705(hypothetGonium_pectorale    | 36.30 | 0.00 |
| TRINITY_XP_0138GPI inoMonoraphidium_negle   | 36.30 | 0.00 |
| TRINITY_XP_0138(hypothetMonoraphidium_negle | 36.30 | 0.00 |
| TRINITY_PRW5599heat shChlorella_sorokinia   | 36.30 | 0.00 |
| TRINITY_XP_0144ABC trarVigna_radiata        | 36.30 | 0.00 |
| TRINITY_XP_00584hypothetChlorella_variabili | 36.30 | 0.00 |
| TRINITY_XP_0273C2 domaiAbrus_precatorius    | 36.20 | 0.00 |
| TRINITY_ABK2164(unknown Picea_sitchensis    | 36.20 | 0.00 |
| TRINITY_KXZ49814hypothetGonium_pectorale    | 36.20 | 0.00 |
| TRINITY_XP_0042(PREDICTIFragaria-vesca      | 36.20 | 0.00 |
| TRINITY_XP_0043(PREDICTIFragaria-vesca      | 36.20 | 0.00 |
| TRINITY_PNW8078(hypothetChlamydomonas_reinh | 36.20 | 0.00 |
| TRINITY_OWM8558(hypothetPunica_granatum     | 36.20 | 0.00 |
| TRINITY_XP_0120pre-rRNJatropha_curcas       | 36.20 | 0.00 |
| TRINITY_XP_02711mitochorCoffea_arabica      | 36.20 | 0.00 |
| TRINITY_XP_00751predicteBathycoccus_prasinc | 36.20 | 0.00 |
| TRINITY_XP_0156(PREDICTIOryza_brachyantha   | 36.20 | 0.00 |
| TRINITY_GAQ8731F-box arKlebsormidium_niten  | 36.20 | 0.00 |
| TRINITY_XP_0030(predicteMicromonas_pusilla  | 36.20 | 0.00 |
| TRINITY_PNR3642(hypothetPhyscomitrella_pate | 36.20 | 0.00 |
| TRINITY_GAQ88412PhosphatKlebsormidium_niten | 36.20 | 0.00 |

|                  |          |                         |                |       |      |
|------------------|----------|-------------------------|----------------|-------|------|
| TRINITY_XP_02162 | unchara  | Manihot_esculenta       | 36.20          | 0.00  |      |
| TRINITY_XP_00229 | ribosom  | Populus_trichocarpa     | 36.20          | 0.00  |      |
| TRINITY_GAQ87481 | putativ  | Klebsormidium_niten     | 36.20          | 0.00  |      |
| TRINITY_GAQ85233 | hypothet | Klebsormidium_niten     | 36.20          | 0.00  |      |
| TRINITY_EEC83485 | hypothet | Oryza_sativa            | 36.20          | 0.00  |      |
| TRINITY_XP_01139 | Gluconat | Auxenochlorella_pro     | 36.20          | 0.00  |      |
| TRINITY_PNW83851 | hypothet | Chlamydomonas_reinh     | 36.20          | 0.00  |      |
| TRINITY_RAL50799 | hypothet | Cuscuta_australis       | 36.20          | 0.00  |      |
| TRINITY_KXZ40924 | hypothet | Gonium_pectorale        | 36.20          | 0.00  |      |
| TRINITY_XP_00250 | predict  | Micromonas_commoda      | 36.20          | 0.00  |      |
| TRINITY_PNH04420 | Heme-bir | Tetrabaena_socialis     | 36.20          | 0.00  |      |
| TRINITY_XP_01068 | PREDICTI | Beta_vulgaris           | 36.20          | 0.00  |      |
| TRINITY_XP_00228 | PREDICTI | Vitis_vinifera          | 36.20          | 0.00  |      |
| TRINITY_XP_00294 | hypothet | Volvox_carteri          | 36.20          | 0.00  |      |
| TRINITY_XP_00414 | PREDICTI | Cucumis_sativus         | 36.20          | 0.00  |      |
| TRINITY_PSC71593 | tubulin  | Micractinium_conduc     | 36.20          | 0.00  |      |
| TRINITY_XP_00451 | serine   | Cicer_arietinum         | 36.20          | 0.00  |      |
| TRINITY_XP_02437 | acyl-co  | Physcomitrella_pate     | 36.20          | 0.00  |      |
| TRINITY_GBF99212 | hypothet | Raphidocelis_subcap     | 36.20          | 0.00  |      |
| TRINITY_XP_02388 | probable | Quercus_suber           | 36.20          | 0.00  |      |
| TRINITY_PTQ27799 | hypothet | Marchantia_polymorp     | 36.20          | 0.00  |      |
| TRINITY_PRW58839 | L-cystei | Chlorella_sorokinia     | 36.20          | 0.00  |      |
| TRINITY_XP_01044 | PREDICTI | Camelina_sativa         | 36.20          | 0.00  |      |
| TRINITY_XP_00230 | probable | Populus_trichocarpa     | 36.20          | 0.00  |      |
| TRINITY_GBF95018 | hypothet | Raphidocelis_subcap     | 36.20          | 0.00  |      |
| TRINITY_XP_00295 | hypothet | Volvox_carteri          | 36.20          | 0.00  |      |
| TRINITY_GAQ91376 | L-amino  | Klebsormidium_niten     | 36.20          | 0.00  |      |
| TRINITY_PSR99715 | COP9     | siçActinidia_chinensis  | 36.20          | 0.00  |      |
| TRINITY_XP_02437 | DNA rep  | Physcomitrella_pate     | 36.20          | 0.00  |      |
| TRINITY_XP_00142 | predict  | Ostreococcus_sp._'1     | 36.20          | 0.00  |      |
| TRINITY_XP_00430 | PREDICTI | Fragaria_vesca          | 36.20          | 0.00  |      |
| TRINITY_XP_00295 | hypothet | Volvox_carteri          | 36.20          | 0.00  |      |
| TRINITY_EOY06934 | ATP bin  | Theobroma_cacao         | 36.20          | 0.00  |      |
| TRINITY_ACH87585 | hypothet | Dunaliella_viridis      | 36.20          | 0.00  |      |
| TRINITY_GAX79090 | hypothet | Chlamydomonas_eusti     | 36.20          | 0.00  |      |
| TRINITY_GAQ89752 | hypothet | Klebsormidium_niten     | 36.20          | 0.00  |      |
| TRINITY_XP_00141 | predict  | Ostreococcus_sp._'1     | 36.20          | 0.00  |      |
| TRINITY_PNW84403 | hypothet | Chlamydomonas_reinh     | 36.20          | 0.00  |      |
| TRINITY_XP_00295 | hypothet | Volvox_carteri          | 36.20          | 0.00  |      |
| TRINITY_BAJ98875 | predict  | Hordeum_vulgare         | 36.20          | 0.00  |      |
| TRINITY_KXZ46180 | hypothet | Gonium_pectorale        | 36.20          | 0.00  |      |
| TRINITY_XP_02451 | tubulin  | Selaginella_moellen     | 36.20          | 0.00  |      |
| TRINITY_GAX84841 | hypothet | Chlamydomonas_eusti     | 36.20          | 0.00  |      |
| TRINITY_KXZ53106 | hypothet | Gonium_pectorale        | 36.20          | 0.00  |      |
| TRINITY_BAJ94575 | predict  | Hordeum_vulgare         | 36.20          | 0.00  |      |
| TRINITY_GBF92152 | peptidy  | Raphidocelis_subcap     | 36.20          | 0.00  |      |
| TRINITY_XP_01847 | PREDICTI | Raphanus_sativus        | 36.20          | 0.00  |      |
| TRINITY_GAX75360 | hypothet | Chlamydomonas_eusti     | 36.20          | 0.00  |      |
| TRINITY_XP_00294 | hypothet | Volvox_carteri          | 36.20          | 0.00  |      |
| TRINITY_XP_02437 | nucleol  | Physcomitrella_pate     | 36.20          | 0.00  |      |
| TRINITY_GAX77971 | hypothet | Chlamydomonas_eusti     | 36.20          | 0.00  |      |
| TRINITY_GBG71494 | hypothet | Chara_braunii           | 36.20          | 0.00  |      |
| TRINITY_GBF95933 | hypothet | Raphidocelis_subcap     | 36.20          | 0.00  |      |
| TRINITY_KXZ54601 | hypothet | Gonium_pectorale        | 36.20          | 0.00  |      |
| TRINITY_XP_00170 | predict  | Chlamydomonas_reinh     | 36.20          | 0.00  |      |
| TRINITY_GAX78303 | hypothet | Chlamydomonas_eusti     | 36.20          | 0.00  |      |
| TRINITY_XP_01941 | PREDICTI | Lupinus_angustifoli     | 36.20          | 0.00  |      |
| TRINITY_GAQ81618 | ABC      | trarKlebsormidium_niten | 36.20          | 0.00  |      |
| TRINITY_GAX85402 | hypothet | Chlamydomonas_eusti     | 36.20          | 0.00  |      |
| TRINITY_PIA31617 | hypothet | Aquilegia_coerulea      | 36.20          | 0.00  |      |
| TRINITY_GAX79901 | hypothet | Chlamydomonas_eusti     | 36.10          | 0.00  |      |
| TRINITY_XP_01284 | PREDICTI | Erythranthe_guttata     | 36.10          | 0.00  |      |
| TRINITY_XP_01365 | E3       | ubiqu                   | Brassica_napus | 36.10 | 0.00 |
| TRINITY_EFJ10024 | hypothet | Selaginella_moellen     | 36.10          | 0.00  |      |
| TRINITY_XP_01166 | PREDICTI | Cucumis_sativus         | 36.10          | 0.00  |      |
| TRINITY_XP_00250 | predict  | Micromonas_commoda      | 36.10          | 0.00  |      |

|                  |                              |       |      |
|------------------|------------------------------|-------|------|
| TRINITY_XP_00422 | protein Solanum_lycopersicu  | 36.10 | 0.00 |
| TRINITY_CDY58751 | BnaCnng Brassica_napus       | 36.10 | 0.00 |
| TRINITY_GBG6140  | hypothet Chara_braunii       | 36.10 | 0.00 |
| TRINITY_XP_0229  | phosphat Cucurbita_maxima    | 36.10 | 0.00 |
| TRINITY_RYQ9844  | hypothet Arachis_hypogaea    | 36.10 | 0.00 |
| TRINITY_XP_0030  | predicte Micromonas_pusilla  | 36.10 | 0.00 |
| TRINITY_XP_0025  | hypothet Micromonas_commoda  | 36.10 | 0.00 |
| TRINITY_NP_0013  | uncharac Zea_mays            | 36.10 | 0.00 |
| TRINITY_XP_0030  | mitochor Micromonas_pusilla  | 36.10 | 0.00 |
| TRINITY_KDD73274 | hypothet Helicosporidium_sp. | 36.10 | 0.00 |
| TRINITY_RAL47221 | hypothet Cuscuta_australis   | 36.10 | 0.00 |
| TRINITY_XP_0239  | probable Quercus_suber       | 36.10 | 0.00 |
| TRINITY_XP_0017  | predicte Chlamydomonas_reinh | 36.10 | 0.00 |
| TRINITY_PSC7166  | Pre-mRN Micractinium_conduc  | 36.10 | 0.00 |
| TRINITY_GAX8096  | hypothet Chlamydomonas_eusti | 36.10 | 0.00 |
| TRINITY_XP_00424 | phospho Solanum_lycopersicu  | 36.10 | 0.00 |
| TRINITY_XP_0071  | hypothet Phaseolus_vulgaris  | 36.10 | 0.00 |
| TRINITY_XP_0238  | repressi Quercus_suber       | 36.10 | 0.00 |
| TRINITY_XP_0202  | heptahel Aegilops_tauschii   | 36.10 | 0.00 |
| TRINITY_PTQ4114  | hypothet Marchantia_polymorp | 36.10 | 0.00 |
| TRINITY_OUS4793  | Amidinot Ostreococcus_tauri  | 36.10 | 0.00 |
| TRINITY_XP_0056  | hypothet Coccomyxa_subellips | 36.10 | 0.00 |
| TRINITY_KXZ4321  | hypothet Gonium_pectorale    | 36.10 | 0.00 |
| TRINITY_PRW2090  | Oxidorec Chlorella_sorokinia | 36.10 | 0.00 |
| TRINITY_KZV1512  | hypothet Dorcoceras_hygromet | 36.10 | 0.00 |
| TRINITY_PNW7536  | hypothet Chlamydomonas_reinh | 36.10 | 0.00 |
| TRINITY_XP_0245  | serine/t Selaginella_moellen | 36.10 | 0.00 |
| TRINITY_XP_0025  | dynein Micromonas_commoda    | 36.10 | 0.00 |
| TRINITY_XP_0238  | uncharac Quercus_suber       | 36.10 | 0.00 |
| TRINITY_XP_0243  | dihydroc Physcomitrella_pate | 36.10 | 0.00 |
| TRINITY_XP_0017  | predicte Chlamydomonas_reinh | 36.10 | 0.00 |
| TRINITY_XP_0016  | predicte Chlamydomonas_reinh | 36.10 | 0.00 |
| TRINITY_XP_0228  | pectin Olea_europaea         | 36.10 | 0.00 |
| TRINITY_BAK0240  | predicte Hordeum_vulgare     | 36.10 | 0.00 |
| TRINITY_XP_0238  | phosphat Quercus_suber       | 36.10 | 0.00 |
| TRINITY_XP_0056  | AAA-ATP Coccomyxa_subellips  | 36.10 | 0.00 |
| TRINITY_AQK6524  | hAT trar Zea_mays            | 36.10 | 0.00 |
| TRINITY_XP_0063  | PREDICTE Solanum_tuberosum   | 36.10 | 0.00 |
| TRINITY_RDY1141  | Weel-li Mucuna_pruriens      | 36.10 | 0.00 |
| TRINITY_XP_0105  | PREDICTE Tarenaya_hasslerian | 36.10 | 0.00 |
| TRINITY_KXZ4544  | hypothet Gonium_pectorale    | 36.10 | 0.00 |
| TRINITY_PSC71454 | CHY zin Micractinium_conduc  | 36.10 | 0.00 |
| TRINITY_XP_0215  | serine/t Manihot_esculenta   | 36.10 | 0.00 |
| TRINITY_KXZ56384 | hypothet Gonium_pectorale    | 36.10 | 0.00 |
| TRINITY_XP_00584 | hypothet Chlorella_variabili | 36.10 | 0.00 |
| TRINITY_PON7458  | Knotted Parasponia_anderson  | 36.10 | 0.00 |
| TRINITY_XP_0029  | hypothet Volvox_carteri      | 36.10 | 0.00 |
| TRINITY_XP_00294 | hypothet Volvox_carteri      | 36.10 | 0.00 |
| TRINITY_KXZ5410  | hypothet Gonium_pectorale    | 36.10 | 0.00 |
| TRINITY_XP_0064  | uncharac Citrus_sinensis     | 36.10 | 0.00 |
| TRINITY_GAQ88264 | mercapt Klebsormidium_niten  | 36.10 | 0.00 |
| TRINITY_GAX7924  | hypothet Chlamydomonas_eusti | 36.10 | 0.00 |
| TRINITY_PRW5923  | nucleoli Chlorella_sorokinia | 36.10 | 0.00 |
| TRINITY_PNW7758  | hypothet Chlamydomonas_reinh | 36.10 | 0.00 |
| TRINITY_XP_0063  | ubiquiti Eutrema_salsugineum | 36.10 | 0.00 |
| TRINITY_GAQ9054  | Ubiquiti Klebsormidium_niten | 36.10 | 0.00 |
| TRINITY_PNX7611  | calcium-Trifolium_pratense   | 36.10 | 0.00 |
| TRINITY_XP_0029  | hypothet Volvox_carteri      | 36.10 | 0.00 |
| TRINITY_KXZ4546  | hypothet Gonium_pectorale    | 36.10 | 0.00 |
| TRINITY_GAX7714  | hypothet Chlamydomonas_eusti | 36.10 | 0.00 |
| TRINITY_XP_0041  | PREDICTE Cucumis_sativus     | 36.10 | 0.00 |
| TRINITY_EFJ1301  | hypothet Selaginella_moellen | 36.10 | 0.00 |
| TRINITY_XP_0109  | PREDICTE Elaeis_guineensis   | 36.00 | 0.00 |
| TRINITY_XP_0239  | vacuolar Quercus_suber       | 36.00 | 0.00 |
| TRINITY_XP_0244  | calpain Physcomitrella_pate  | 36.00 | 0.00 |
| TRINITY_XP_0025  | predicte Micromonas_commoda  | 36.00 | 0.00 |

|                  |          |                     |       |      |
|------------------|----------|---------------------|-------|------|
| TRINITY_PRW60183 | DNA rep  | Chlorella_sorokinia | 36.00 | 0.00 |
| TRINITY_XP_01763 | PREDICT  | Gossypium_arboreum  | 36.00 | 0.00 |
| TRINITY_OAE33537 | hypothet | Marchantia_polymorp | 36.00 | 0.00 |
| TRINITY_KMZ73954 | putative | Zostera_marina      | 36.00 | 0.00 |
| TRINITY_RWR73142 | ubiquiti | Cinnamomum_micranth | 36.00 | 0.00 |
| TRINITY_XP_00703 | PREDICT  | Theobroma_cacao     | 36.00 | 0.00 |
| TRINITY_XP_01244 | PREDICT  | Gossypium_raimondii | 36.00 | 0.00 |
| TRINITY_OAE20072 | hypothet | Marchantia_polymorp | 36.00 | 0.00 |
| TRINITY_XP_00169 | predict  | Chlamydomonas_reinh | 36.00 | 0.00 |
| TRINITY_XP_02390 | peroxide | Quercus_suber       | 36.00 | 0.00 |

|                  |           |                      |       |      |
|------------------|-----------|----------------------|-------|------|
| TRINITY_XP_02390 | LOW QUAI  | Quercus_suber        | 36.00 | 0.00 |
| TRINITY_XP_02439 | solute c  | Physcomitrella_pate  | 36.00 | 0.00 |
| TRINITY_XP_02391 | protein   | Quercus_suber        | 36.00 | 0.00 |
| TRINITY_XP_01027 | PREDICTI  | Nelumbo_nucifera     | 36.00 | 0.00 |
| TRINITY_XP_01025 | PREDICTI  | Nelumbo_nucifera     | 36.00 | 0.00 |
| TRINITY_OWM8465  | (hypothet | Punica_granatum      | 36.00 | 0.00 |
| TRINITY_XP_02645 | CST com   | Papaver_somniferum   | 36.00 | 0.00 |
| TRINITY_GAQ87345 | delta14-  | Klebsormidium_niten  | 36.00 | 0.00 |
| TRINITY_XP_00245 | uncharac  | Sorghum_bicolor      | 36.00 | 0.00 |
| TRINITY_EFJ06773 | hypothet  | Selaginella_moellen  | 36.00 | 0.00 |
| TRINITY_ONK66536 | uncharac  | Asparagus_officinal  | 36.00 | 0.00 |
| TRINITY_GAX7771  | (hypothet | Chlamydomonas_eusti  | 36.00 | 0.00 |
| TRINITY_XP_01146 | PREDICTI  | Fragaria-vesca       | 36.00 | 0.00 |
| TRINITY_XP_00169 | predicte  | Chlamydomonas_reinh  | 36.00 | 0.00 |
| TRINITY_PIA47358 | hypothet  | Aquilegia_coerulea   | 36.00 | 0.00 |
| TRINITY_PHT33279 | Amino-a   | Capsicum_baccatum    | 36.00 | 0.00 |
| TRINITY_GAX79168 | hypothet  | Chlamydomonas_eusti  | 36.00 | 0.00 |
| TRINITY_RHN67555 | putative  | Medicago_truncatula  | 36.00 | 0.00 |
| TRINITY_KXZ44759 | hypothet  | Gonium_pectorale     | 36.00 | 0.00 |
| TRINITY_POC8M8.1 | RecName:  | Zea_mays             | 36.00 | 0.00 |
| TRINITY_KHG03153 | ADP-rib   | Gossypium_arboreum   | 36.00 | 0.00 |
| TRINITY_XP_01052 | PREDICTI  | Tarenaya_hasslerian  | 36.00 | 0.00 |
| TRINITY_GAX79942 | hypothet  | Chlamydomonas_eusti  | 36.00 | 0.00 |
| TRINITY_XP_02390 | ras-like  | Quercus_suber        | 36.00 | 0.00 |
| TRINITY_GAX83533 | hypothet  | Chlamydomonas_eusti  | 36.00 | 0.00 |
| TRINITY_XP_00751 | heat sh   | Bathycoccus_prasinoc | 36.00 | 0.00 |
| TRINITY_XP_00721 | transcri  | Prunus_persica       | 36.00 | 0.00 |
| TRINITY_XP_02710 | histidir  | Coffea_arabica       | 36.00 | 0.00 |
| TRINITY_PNW70765 | hypothet  | Chlamydomonas_reinh  | 36.00 | 0.00 |
| TRINITY_XP_01284 | PREDICTI  | Erythranthe_guttata  | 36.00 | 0.00 |
| TRINITY_EFJ19277 | hypothet  | Selaginella_moellen  | 36.00 | 0.00 |
| TRINITY_XP_00584 | hypothet  | Chlorella_variabili  | 36.00 | 0.00 |
| TRINITY_PSC71292 | ATP-bin   | Micractinium_conduc  | 36.00 | 0.00 |
| TRINITY_GAX74152 | hypothet  | Chlamydomonas_eusti  | 36.00 | 0.00 |
| TRINITY_EEC72361 | hypothet  | Oryza_sativa         | 36.00 | 0.00 |
| TRINITY_GAX81820 | hypothet  | Chlamydomonas_eusti  | 36.00 | 0.00 |
| TRINITY_XP_00451 | uncharac  | Cicer_arietinum      | 36.00 | 0.00 |
| TRINITY_GAX83253 | hypothet  | Chlamydomonas_eusti  | 36.00 | 0.00 |
| TRINITY_OMO50046 | hypothet  | Corchorus_capsulari  | 36.00 | 0.00 |
| TRINITY_XP_02718 | peptide-  | Cicer_arietinum      | 36.00 | 0.00 |
| TRINITY_PRW56865 | NADPH:q   | Chlorella_sorokinia  | 36.00 | 0.00 |
| TRINITY_RYR24167 | hypothet  | Arachis_hypogaea     | 36.00 | 0.00 |
| TRINITY_XP_02436 | uncharac  | Physcomitrella_pate  | 36.00 | 0.00 |
| TRINITY_XP_00169 | predicte  | Chlamydomonas_reinh  | 36.00 | 0.00 |
| TRINITY_XP_02159 | LON pept  | Manihot_esculenta    | 36.00 | 0.00 |
| TRINITY_XP_02186 | serine/t  | Spinacia_oleracea    | 36.00 | 0.00 |
| TRINITY_GAX80745 | hypothet  | Chlamydomonas_eusti  | 36.00 | 0.00 |
| TRINITY_GAX73285 | hypothet  | Chlamydomonas_eusti  | 36.00 | 0.00 |
| TRINITY_GAX77502 | hypothet  | Chlamydomonas_eusti  | 36.00 | 0.00 |
| TRINITY_XP_02644 | activat   | Papaver_somniferum   | 36.00 | 0.00 |
| TRINITY_GAX74701 | hypothet  | Chlamydomonas_eusti  | 36.00 | 0.00 |
| TRINITY_KZM83191 | hypothet  | Daucus_carota        | 36.00 | 0.00 |
| TRINITY_GAX84806 | hypothet  | Chlamydomonas_eusti  | 36.00 | 0.00 |
| TRINITY_PNW82916 | hypothet  | Chlamydomonas_reinh  | 36.00 | 0.00 |
| TRINITY_PSC69805 | phospho   | Micractinium_conduc  | 36.00 | 0.00 |
| TRINITY_ABQ44355 | polyprot  | Zea_mays             | 36.00 | 0.00 |
| TRINITY_XP_00939 | PREDICTI  | Musa_acuminata       | 36.00 | 0.00 |
| TRINITY_XP_00169 | selenop   | Chlamydomonas_reinh  | 36.00 | 0.00 |
| TRINITY_OAE20063 | hypothet  | Marchantia_polymorp  | 36.00 | 0.00 |
| TRINITY_XP_01049 | PREDICTI  | Camelina_sativa      | 35.90 | 0.00 |
| TRINITY_XP_02387 | eukaryot  | Quercus_suber        | 35.90 | 0.00 |
| TRINITY_PWA78540 | (ADP-rib  | Artemisia_annua      | 35.90 | 0.00 |
| TRINITY_XP_02373 | peroxis   | Lactuca_sativa       | 35.90 | 0.00 |
| TRINITY_XP_02014 | putative  | Aegilops_tauschii    | 35.90 | 0.00 |
| TRINITY_CAC48384 | ethylen   | Fragaria_x_ananassa  | 35.90 | 0.00 |
| TRINITY_XP_01139 | MON2-li   | Auxenochlorella_pro  | 35.90 | 0.00 |



|                  |                              |       |      |
|------------------|------------------------------|-------|------|
| TRINITY_PTQ48912 | hypothetMarchantia_polymorp  | 35.90 | 0.00 |
| TRINITY_XP_02388 | peroxidQuercus_suber         | 35.90 | 0.00 |
| TRINITY_XP_00867 | probableZea_mays             | 35.90 | 0.00 |
| TRINITY_PKA57931 | Golgin cApostasia_shenzheni  | 35.90 | 0.00 |
| TRINITY_XP_01564 | pathogerOryza_sativa         | 35.90 | 0.00 |
| TRINITY_XP_02439 | choline/Physcomitrella_pate  | 35.90 | 0.00 |
| TRINITY_XP_01915 | PREDICTFIpomoea_nil          | 35.90 | 0.00 |
| TRINITY_XP_01146 | PREDICTFIfragaria-vesca      | 35.90 | 0.00 |
| TRINITY_GAQ8798  | (PhosphatKlebsormidium_niten | 35.90 | 0.00 |
| TRINITY_XP_01067 | PREDICTFIbeta-vulgaris       | 35.90 | 0.00 |
| TRINITY_XP_02453 | poly(ADISelaginella_moellen  | 35.90 | 0.00 |
| TRINITY_BAJ9694  | predicteHordeum_vulgare      | 35.90 | 0.00 |
| TRINITY_XP_02096 | uncharacArachis_ipaensis     | 35.90 | 0.00 |
| TRINITY_XP_02276 | (CBL-inteDurio_zibethinus    | 35.90 | 0.00 |
| TRINITY_XP_02353 | ran-binCucurbita_pepo        | 35.90 | 0.00 |
| TRINITY_XP_00585 | hypothetChlorella_variabili  | 35.90 | 0.00 |
| TRINITY_ABR18298 | unknown Picea_sitchensis     | 35.90 | 0.00 |
| TRINITY_XP_02438 | splicinçPhyscomitrella_pate  | 35.90 | 0.00 |
| TRINITY_XP_02439 | quinone Physcomitrella_pate  | 35.90 | 0.00 |
| TRINITY_KXZ4153  | hypothetGonium_pectorale     | 35.90 | 0.00 |
| TRINITY_XP_00295 | flagellæVolvox_carteri       | 35.90 | 0.00 |
| TRINITY_GAX7374  | hypothetChlamydomonas_eusti  | 35.90 | 0.00 |
| TRINITY_XP_00299 | probableSelaginella_moellen  | 35.90 | 0.00 |
| TRINITY_XP_00431 | PREDICTFIfragaria-vesca      | 35.90 | 0.00 |
| TRINITY_ESR5882  | hypothetCitrus_clementina    | 35.90 | 0.00 |
| TRINITY_PSC69723 | U4 U6 snMicractinium_conduc  | 35.90 | 0.00 |
| TRINITY_PNW77233 | hypothetChlamydomonas_reinh  | 35.90 | 0.00 |
| TRINITY_EFH58875 | hypothetArabidopsis_lyrata   | 35.90 | 0.00 |
| TRINITY_PNW70381 | hypothetChlamydomonas_reinh  | 35.90 | 0.00 |
| TRINITY_GAX7255  | hypothetChlamydomonas_eusti  | 35.90 | 0.00 |
| TRINITY_XP_02184 | EVI5-liSpinacia_oleracea     | 35.90 | 0.00 |
| TRINITY_XP_00169 | glutarecChlamydomonas_reinh  | 35.90 | 0.00 |
| TRINITY_XP_00169 | predicteChlamydomonas_reinh  | 35.90 | 0.00 |
| TRINITY_XP_01944 | PREDICTFILupinus_angustifoli | 35.90 | 0.00 |
| TRINITY_GAQ80969 | M13 famiKlebsormidium_niten  | 35.90 | 0.00 |
| TRINITY_GAX7862  | hypothetChlamydomonas_eusti  | 35.90 | 0.00 |
| TRINITY_GAQ83102 | e3 ubiqKlebsormidium_niten   | 35.90 | 0.00 |
| TRINITY_GAQ8856  | hypothetKlebsormidium_niten  | 35.90 | 0.00 |
| TRINITY_VDC6340  | (unnamed Brassica_rapa       | 35.90 | 0.00 |
| TRINITY_GAQ87728 | cystinoçKlebsormidium_niten  | 35.90 | 0.00 |
| TRINITY_XP_02295 | putativæCucurbita_moschata   | 35.90 | 0.00 |
| TRINITY_PNH06663 | Bax inhjTetrabaena_socialis  | 35.90 | 0.00 |
| TRINITY_XP_01206 | pumilio Jatropha_curcas      | 35.90 | 0.00 |
| TRINITY_GBF95225 | hypothetRaphidocelis_subcap  | 35.90 | 0.00 |
| TRINITY_GAQ85206 | Pumilio Klebsormidium_niten  | 35.90 | 0.00 |
| TRINITY_XP_01847 | PREDICTFIRaphanus_sativus    | 35.90 | 0.00 |
| TRINITY_KXZ50882 | hypothetGonium_pectorale     | 35.90 | 0.00 |
| TRINITY_PNH11695 | hypothetTetrabaena_socialis  | 35.90 | 0.00 |
| TRINITY_XP_01284 | PREDICTFIErythranthe_guttata | 35.90 | 0.00 |
| TRINITY_XP_00448 | phosphoCicer_arietinum       | 35.90 | 0.00 |
| TRINITY_KXZ44327 | hypothetGonium_pectorale     | 35.90 | 0.00 |
| TRINITY_RID80244 | hypothetBrassica_rapa        | 35.90 | 0.00 |
| TRINITY_KXZ44986 | hypothetGonium_pectorale     | 35.90 | 0.00 |
| TRINITY_PNW88869 | hypothetChlamydomonas_reinh  | 35.90 | 0.00 |
| TRINITY_EMS62619 | ABC trarTriticum_urartu      | 35.90 | 0.00 |
| TRINITY_GAX72919 | hypothetChlamydomonas_eusti  | 35.90 | 0.00 |
| TRINITY_GAX85698 | hypothetChlamydomonas_eusti  | 35.90 | 0.00 |
| TRINITY_XP_02018 | BTB/POZ Aegilops_tauschii    | 35.80 | 0.00 |
| TRINITY_XP_01722 | PREDICTFIDaucus_carota       | 35.80 | 0.00 |
| TRINITY_XP_02295 | sulfite Cucurbita_moschata   | 35.80 | 0.00 |
| TRINITY_XP_02387 | oxysterçQuercus_suber        | 35.80 | 0.00 |
| TRINITY_PIA6310  | (hypothetAquilegia_coerulea  | 35.80 | 0.00 |
| TRINITY_XP_02666 | zinc firPhoenix_dactylifera  | 35.80 | 0.00 |
| TRINITY_XP_00751 | peptide Bathycoccus_prasinc  | 35.80 | 0.00 |
| TRINITY_GAX73857 | hypothetChlamydomonas_eusti  | 35.80 | 0.00 |
| TRINITY_XP_00584 | hypothetChlorella_variabili  | 35.80 | 0.00 |

|                 |                             |       |      |
|-----------------|-----------------------------|-------|------|
| TRINITY_GBG8341 | hypothetChara_braunii       | 35.80 | 0.00 |
| TRINITY_BAJ9782 | predicteHordeum_vulgare     | 35.80 | 0.00 |
| TRINITY_XP_0167 | PREDICTEGossypium_hirsutum  | 35.80 | 0.00 |
| TRINITY_XP_0156 | DEAD-boOryza_sativa         | 35.80 | 0.00 |
| TRINITY_PON9549 | Mitogen-Trema_orientale     | 35.80 | 0.00 |
| TRINITY_XP_0264 | protein-Papaver_somniferum  | 35.80 | 0.00 |
| TRINITY_PNX9187 | serine cTrifolium_pratense  | 35.80 | 0.00 |
| TRINITY_XP_0202 | uncharacCajanus_cajan       | 35.80 | 0.00 |
| TRINITY_EFJ1424 | hypothetSelaginella_moellen | 35.80 | 0.00 |
| TRINITY_ABU5296 | hypothetDunaliella_viridis  | 35.80 | 0.00 |
| TRINITY_PNW8871 | hypothetChlamydomonas_reinh | 35.80 | 0.00 |
| TRINITY_OAE2772 | hypothetMarchantia_polymorp | 35.80 | 0.00 |
| TRINITY_XP_0238 | uncharacQuercus_suber       | 35.80 | 0.00 |
| TRINITY_XP_0243 | plant UPhyscomitrella_pate  | 35.80 | 0.00 |
| TRINITY_RMZ5614 | hypothetAuxenochlorella_pro | 35.80 | 0.00 |
| TRINITY_PSC7691 | kinase fMicractinium_conduc | 35.80 | 0.00 |
| TRINITY_XP_0139 | translatMonoraphidium_negle | 35.80 | 0.00 |
| TRINITY_XP_0072 | enhancecPrunus_persica      | 35.80 | 0.00 |
| TRINITY_GAQ8097 | GTase-aKlebsormidium_niten  | 35.80 | 0.00 |
| TRINITY_XP_0036 | serine/tMedicago_truncatula | 35.80 | 0.00 |
| TRINITY_PQP9495 | phosphoiPrunus_yedoensis    | 35.80 | 0.00 |
| TRINITY_KXZ5530 | hypothetGonium_pectorale    | 35.80 | 0.00 |
| TRINITY_XP_0016 | predicteChlamydomonas_reinh | 35.80 | 0.00 |
| TRINITY_XP_0106 | PREDICTEBeta_vulgaris       | 35.80 | 0.00 |
| TRINITY_RDX7269 | hypothetMucuna_pruriens     | 35.80 | 0.00 |
| TRINITY_KXZ4297 | hypothetGonium_pectorale    | 35.80 | 0.00 |
| TRINITY_PRW6123 | cytochrChlorella_sorokinia  | 35.80 | 0.00 |
| TRINITY_KZV1512 | hypothetDorcoceras_hygromet | 35.80 | 0.00 |
| TRINITY_KXZ5656 | hypothetGonium_pectorale    | 35.80 | 0.00 |
| TRINITY_XP_0258 | pleckstPanicum_hallii       | 35.80 | 0.00 |
| TRINITY_XP_0025 | predicteMicromonas_commoda  | 35.80 | 0.00 |
| TRINITY_XP_0218 | EVI5-liCarica_papaya        | 35.80 | 0.00 |
| TRINITY_PRW5906 | secernirChlorella_sorokinia | 35.80 | 0.00 |
| TRINITY_KYP3719 | hypothetCajanus_cajan       | 35.80 | 0.00 |
| TRINITY_XP_0025 | phosphatRicinus_communis    | 35.80 | 0.00 |
| TRINITY_XP_0243 | programmPhyscomitrella_pate | 35.80 | 0.00 |
| TRINITY_XP_0072 | aldehydePrunus_persica      | 35.80 | 0.00 |
| TRINITY_GAX8092 | hypothetChlamydomonas_eusti | 35.80 | 0.00 |
| TRINITY_PSC6956 | glutathiMicractinium_conduc | 35.80 | 0.00 |
| TRINITY_GAX7413 | hypothetChlamydomonas_eusti | 35.80 | 0.00 |
| TRINITY_XP_0058 | hypothetChlorella_variabili | 35.80 | 0.00 |
| TRINITY_XP_0158 | uncharacZiziphus_jujuba     | 35.80 | 0.00 |
| TRINITY_GAX7515 | hypothetChlamydomonas_eusti | 35.80 | 0.00 |
| TRINITY_GAX8016 | hypothetChlamydomonas_eusti | 35.80 | 0.00 |
| TRINITY_GAX8150 | hypothetChlamydomonas_eusti | 35.80 | 0.00 |
| TRINITY_XP_0029 | hypothetVolvox_carteri      | 35.80 | 0.00 |
| TRINITY_RXH8247 | hypothetMalus_domestica     | 35.80 | 0.00 |
| TRINITY_GAX8345 | hypothetChlamydomonas_eusti | 35.80 | 0.00 |
| TRINITY_EFJ1204 | hypothetSelaginella_moellen | 35.80 | 0.00 |
| TRINITY_GAX7539 | hypothetChlamydomonas_eusti | 35.80 | 0.00 |
| TRINITY_GBG8242 | hypothetChara_braunii       | 35.80 | 0.00 |
| TRINITY_PNH1169 | hypothetTetrabaena_socialis | 35.80 | 0.00 |
| TRINITY_GAQ8531 | purple aKlebsormidium_niten | 35.80 | 0.00 |
| TRINITY_GAX7292 | hypothetChlamydomonas_eusti | 35.80 | 0.00 |
| TRINITY_PRW5816 | PAB-depChlorella_sorokinia  | 35.80 | 0.00 |
| TRINITY_XP_0216 | uncharacHevea_brasiliensis  | 35.80 | 0.00 |
| TRINITY_BAJ9585 | predicteHordeum_vulgare     | 35.80 | 0.00 |
| TRINITY_GAX7492 | hypothetChlamydomonas_eusti | 35.80 | 0.00 |
| TRINITY_PNW7534 | hypothetChlamydomonas_reinh | 35.80 | 0.00 |
| TRINITY_GAQ8047 | ChromatiKlebsormidium_niten | 35.80 | 0.00 |
| TRINITY_XP_0087 | cyclin-7Phoenix_dactylifera | 35.80 | 0.00 |
| TRINITY_XP_0191 | (PREDICTEBeta_vulgaris      | 35.80 | 0.00 |
| TRINITY_GAX7701 | hypothetChlamydomonas_eusti | 35.80 | 0.00 |
| TRINITY_BAJ9457 | predicteHordeum_vulgare     | 35.80 | 0.00 |
| TRINITY_PNW7452 | hypothetChlamydomonas_reinh | 35.80 | 0.00 |
| TRINITY_PPD9625 | hypothetGossypium_barbadens | 35.80 | 0.00 |

|                  |                             |       |      |
|------------------|-----------------------------|-------|------|
| TRINITY_RWR78441 | protein Cinnamomum_micranth | 35.70 | 0.00 |
| TRINITY_KZV3804  | F-box/FIDorcoceras_hygromet | 35.70 | 0.00 |
| TRINITY_BAK0043  | predicteHordeum_vulgare     | 35.70 | 0.00 |
| TRINITY_ABB1352  | target cChlamydomonas_reinh | 35.70 | 0.00 |
| TRINITY_OAY6599  | AbscisicAnanas_comosus      | 35.70 | 0.00 |
| TRINITY_PRW6118  | U3 smallChlorella_sorokinia | 35.70 | 0.00 |
| TRINITY_XP_0064  | actin-reCitrus_clementina   | 35.70 | 0.00 |
| TRINITY_XP_0104  | PREDICTFCamelina_sativa     | 35.70 | 0.00 |
| TRINITY_OTG3244  | putativeHelianthus_annuus   | 35.70 | 0.00 |
| TRINITY_XP_0049  | serine/tSetaria_italica     | 35.70 | 0.00 |
| TRINITY_KMS9419  | hypothetBeta_vulgaris       | 35.70 | 0.00 |
| TRINITY_XP_0172  | PREDICTFDaucus_carota       | 35.70 | 0.00 |
| TRINITY_XP_0243  | uncharacPhyscomitrella_pate | 35.70 | 0.00 |
| TRINITY_GAQ8835  | alpha-sKlebsormidium_niten  | 35.70 | 0.00 |
| TRINITY_PLY6511  | hypothetLactuca_sativa      | 35.70 | 0.00 |
| TRINITY_XP_0212  | conserveHerrania_umbratica  | 35.70 | 0.00 |
| TRINITY_XP_0245  | serine/tSelaginella_moellen | 35.70 | 0.00 |
| TRINITY_XP_0245  | probableSelaginella_moellen | 35.70 | 0.00 |
| TRINITY_GAX7965  | hypothetChlamydomonas_eusti | 35.70 | 0.00 |
| TRINITY_OAE2772  | hypothetMarchantia_polymorp | 35.70 | 0.00 |
| TRINITY_XP_0135  | PREDICTFBrassica_oleracea   | 35.70 | 0.00 |
| TRINITY_XP_0056  | Rab8/RakCoccomyxa_subellips | 35.70 | 0.00 |
| TRINITY_OAY7795  | ABC trarAnanas_comosus      | 35.70 | 0.00 |
| TRINITY_XP_0220  | cytochrHelianthus_annuus    | 35.70 | 0.00 |
| TRINITY_XP_0124  | PREDICTFGossypium_raimondii | 35.70 | 0.00 |
| TRINITY_OAE1812  | hypothetMarchantia_polymorp | 35.70 | 0.00 |
| TRINITY_XP_0035  | probableBrachypodium_distac | 35.70 | 0.00 |
| TRINITY_XP_0258  | ras-relPanicum_hallii       | 35.70 | 0.00 |
| TRINITY_XP_0106  | PREDICTFBeta_vulgaris       | 35.70 | 0.00 |
| TRINITY_XP_0100  | PREDICTFEucalyptus_grandis  | 35.70 | 0.00 |
| TRINITY_KRG9416  | hypothetGlycine_max         | 35.70 | 0.00 |
| TRINITY_XP_0110  | transmenSesamum_indicum     | 35.70 | 0.00 |
| TRINITY_XP_0104  | PREDICTFCamelina_sativa     | 35.70 | 0.00 |
| TRINITY_BAJ9984  | predicteHordeum_vulgare     | 35.70 | 0.00 |
| TRINITY_PWA9232  | BRCT donArtemisia_annua     | 35.70 | 0.00 |
| TRINITY_XP_0139  | hypothetMonoraphidium_negle | 35.70 | 0.00 |
| TRINITY_GAX7762  | hypothetChlamydomonas_eusti | 35.70 | 0.00 |
| TRINITY_GAX8473  | hypothetChlamydomonas_eusti | 35.70 | 0.00 |
| TRINITY_XP_0030  | DNA misnMicromonas_pusilla  | 35.70 | 0.00 |
| TRINITY_PNW7584  | hypothetChlamydomonas_reinh | 35.70 | 0.00 |
| TRINITY_PNW7724  | hypothetChlamydomonas_reinh | 35.70 | 0.00 |
| TRINITY_XP_0017  | Qb-SNARChlamydomonas_reinh  | 35.70 | 0.00 |
| TRINITY_XP_0056  | Pkinase-Coccomyxa_subellips | 35.70 | 0.00 |
| TRINITY_XP_0263  | E3 ubiqPapaver_somniferum   | 35.70 | 0.00 |
| TRINITY_GAX7345  | hypothetChlamydomonas_eusti | 35.70 | 0.00 |
| TRINITY_GBG7277  | hypothetChara_braunii       | 35.70 | 0.00 |
| TRINITY_KXZ5011  | hypothetGonium_pectorale    | 35.70 | 0.00 |
| TRINITY_XP_0205  | tubulin-Phalaenopsis_equest | 35.70 | 0.00 |
| TRINITY_KXZ4165  | hypothetGonium_pectorale    | 35.70 | 0.00 |
| TRINITY_GAQ8919  | PutativeKlebsormidium_niten | 35.70 | 0.00 |
| TRINITY_GAX7542  | hypothetChlamydomonas_eusti | 35.70 | 0.00 |
| TRINITY_PIA4834  | hypothetAquilegia_coerulea  | 35.70 | 0.00 |
| TRINITY_KXZ5460  | hypothetGonium_pectorale    | 35.70 | 0.00 |
| TRINITY_KXZ5199  | hypothetGonium_pectorale    | 35.70 | 0.00 |
| TRINITY_XP_0025  | 1brefeldiRicinus_communis   | 35.70 | 0.00 |
| TRINITY_GAX8304  | hypothetChlamydomonas_eusti | 35.70 | 0.00 |
| TRINITY_XP_0174  | PREDICTFVigna_angularis     | 35.70 | 0.00 |
| TRINITY_GAX8261  | hypothetChlamydomonas_eusti | 35.70 | 0.00 |
| TRINITY_GBF9588  | hypothetRaphidocelis_subcap | 35.70 | 0.00 |
| TRINITY_GAX7754  | hypothetChlamydomonas_eusti | 35.70 | 0.00 |
| TRINITY_XP_0243  | exonuclPhyscomitrella_pate  | 35.70 | 0.00 |
| TRINITY_XP_0066  | PREDICTFOryza_brachyantha   | 35.70 | 0.00 |
| TRINITY_XP_0102  | PREDICTFNelumbo_nucifera    | 35.70 | 0.00 |
| TRINITY_XP_0029  | hypothetVolvox_carteri      | 35.70 | 0.00 |
| TRINITY_PNW6984  | hypothetChlamydomonas_reinh | 35.70 | 0.00 |
| TRINITY_GAX7336  | hypothetChlamydomonas_eusti | 35.70 | 0.00 |

|                  |               |                     |       |      |
|------------------|---------------|---------------------|-------|------|
| TRINITY_XP_0258  | alkylate      | Oryza_sativa        | 35.70 | 0.00 |
| TRINITY_XP_0227  | calcium-Durio | zibethinus          | 35.60 | 0.00 |
| TRINITY_XP_00751 | predict       | Bathycoccus_prasinc | 35.60 | 0.00 |
| TRINITY_XP_0030  | Equilib       | Ostreococcus_tauri  | 35.60 | 0.00 |
| TRINITY_EEF2755  | conserve      | Ricinus_communis    | 35.60 | 0.00 |
| TRINITY_OWM9037  | hypothet      | Punica_granatum     | 35.60 | 0.00 |
| TRINITY_XP_0221  | plant-s       | Momordica_charantia | 35.60 | 0.00 |
| TRINITY_XP_0206  | 28 kDa        | Dendrobium_catenatu | 35.60 | 0.00 |
| TRINITY_PRW5951  | Rab fami      | Chlorella_sorokinia | 35.60 | 0.00 |
| TRINITY_EFJ1130  | hypothet      | Selaginella_moellen | 35.60 | 0.00 |
| TRINITY_GAQ8741  | hypothet      | Klebsormidium_niten | 35.60 | 0.00 |
| TRINITY_OAE2041  | hypothet      | Marchantia_polymorp | 35.60 | 0.00 |
| TRINITY_GAX7487  | hypothet      | Chlamydomonas_eusti | 35.60 | 0.00 |
| TRINITY_XP_0239  | uncharac      | Quercus_suber       | 35.60 | 0.00 |
| TRINITY_ESQ2959  | hypothet      | Eutrema_salsugineum | 35.60 | 0.00 |
| TRINITY_GAX8535  | hypothet      | Chlamydomonas_eusti | 35.60 | 0.00 |
| TRINITY_PRW5608  | TPR and       | Chlorella_sorokinia | 35.60 | 0.00 |
| TRINITY_XP_0029  | hypothet      | Volvox_carteri      | 35.60 | 0.00 |
| TRINITY_XP_0029  | hypothet      | Volvox_carteri      | 35.60 | 0.00 |
| TRINITY_RZC2025  | CCR4-NO       | Glycine_soja        | 35.60 | 0.00 |
| TRINITY_PNW7244  | hypothet      | Chlamydomonas_reinh | 35.60 | 0.00 |
| TRINITY_AHF5859  | proline       | Chrysanthemum_lavan | 35.60 | 0.00 |
| TRINITY_XP_0024  | catalyti      | Micromonas_commoda  | 35.60 | 0.00 |
| TRINITY_XP_0238  | membran       | Quercus_suber       | 35.60 | 0.00 |
| TRINITY_XP_0016  | predict       | Chlamydomonas_reinh | 35.60 | 0.00 |
| TRINITY_XP_0029  | hypothet      | Volvox_carteri      | 35.60 | 0.00 |
| TRINITY_GAQ8741  | hypothet      | Klebsormidium_niten | 35.60 | 0.00 |
| TRINITY_EMS5886  | hypothet      | Triticum_urartu     | 35.60 | 0.00 |
| TRINITY_OAE2496  | hypothet      | Marchantia_polymorp | 35.60 | 0.00 |
| TRINITY_GBG6335  | hypothet      | Chara_braunii       | 35.60 | 0.00 |
| TRINITY_GAX7306  | hypothet      | Chlamydomonas_eusti | 35.60 | 0.00 |
| TRINITY_GBF9683  | hypothet      | Raphidocelis_subcap | 35.60 | 0.00 |
| TRINITY_GBF9829  | hypothet      | Raphidocelis_subcap | 35.60 | 0.00 |
| TRINITY_XP_0243  | uncharac      | Physcomitrella_pate | 35.60 | 0.00 |
| TRINITY_XP_0113  | Protein       | Auxenochlorella_pro | 35.60 | 0.00 |
| TRINITY_PNW8631  | hypothet      | Chlamydomonas_reinh | 35.60 | 0.00 |
| TRINITY_KJB2912  | hypothet      | Gossypium_raimondii | 35.60 | 0.00 |
| TRINITY_XP_0017  | predict       | Chlamydomonas_reinh | 35.60 | 0.00 |
| TRINITY_KXZ4348  | hypothet      | Gonium_pectorale    | 35.60 | 0.00 |
| TRINITY_PNH1169  | hypothet      | Tetrabaena_socialis | 35.60 | 0.00 |
| TRINITY_KCW5391  | hypothet      | Eucalyptus_grandis  | 35.60 | 0.00 |
| TRINITY_XP_00751 | predict       | Bathycoccus_prasinc | 35.60 | 0.00 |
| TRINITY_XP_0029  | hypothet      | Volvox_carteri      | 35.60 | 0.00 |
| TRINITY_XP_0016  | RWP-RK        | Chlamydomonas_reinh | 35.60 | 0.00 |
| TRINITY_XP_0016  | predict       | Chlamydomonas_reinh | 35.60 | 0.00 |
| TRINITY_GBF9561  | guanylat      | Raphidocelis_subcap | 35.60 | 0.00 |
| TRINITY_GAX7480  | hypothet      | Chlamydomonas_eusti | 35.60 | 0.00 |
| TRINITY_KXZ5237  | hypothet      | Gonium_pectorale    | 35.60 | 0.00 |
| TRINITY_XP_0014  | predict       | Ostreococcus_sp._'1 | 35.60 | 0.00 |
| TRINITY_GAX7642  | hypothet      | Chlamydomonas_eusti | 35.60 | 0.00 |
| TRINITY_XP_0243  | diphthir      | Physcomitrella_pate | 35.60 | 0.00 |
| TRINITY_PNW7332  | hypothet      | Chlamydomonas_reinh | 35.60 | 0.00 |
| TRINITY_GAX8179  | hypothet      | Chlamydomonas_eusti | 35.60 | 0.00 |
| TRINITY_XP_0134  | zinc fir      | Medicago_truncatula | 35.60 | 0.00 |
| TRINITY_GAX7546  | hypothet      | Chlamydomonas_eusti | 35.60 | 0.00 |
| TRINITY_GAX7942  | hypothet      | Chlamydomonas_eusti | 35.60 | 0.00 |
| TRINITY_PSC6746  | hypothet      | Micractinium_conduc | 35.60 | 0.00 |
| TRINITY_GAX7627  | hypothet      | Chlamydomonas_eusti | 35.60 | 0.00 |
| TRINITY_GAQ8108  | hypothet      | Klebsormidium_niten | 35.60 | 0.00 |
| TRINITY_GAX7670  | hypothet      | Chlamydomonas_eusti | 35.60 | 0.00 |
| TRINITY_GAX7983  | hypothet      | Chlamydomonas_eusti | 35.60 | 0.00 |
| TRINITY_XP_0025  | predict       | Micromonas_commoda  | 35.50 | 0.00 |
| TRINITY_XP_0110  | PREDICTI      | Populus_euphratica  | 35.50 | 0.00 |
| TRINITY_XP_0075  | predict       | Bathycoccus_prasinc | 35.50 | 0.00 |
| TRINITY_AJR2238  | CBL-int       | Triticum_aestivum   | 35.50 | 0.00 |
| TRINITY_CBI3001  | unnamed       | Vitis_vinifera      | 35.50 | 0.00 |

|                 |            |                     |       |      |
|-----------------|------------|---------------------|-------|------|
| TRINITY_KMZ7409 | (Calmodul  | Zostera_marina      | 35.50 | 0.00 |
| TRINITY_EFJ1972 | 1hypothet  | Selaginella_moellen | 35.50 | 0.00 |
| TRINITY_XP_0209 | 9CBL-int   | Arachis_duranensis  | 35.50 | 0.00 |
| TRINITY_XP_0279 | (uncharac  | Vigna_unguiculata   | 35.50 | 0.00 |
| TRINITY_XP_0088 | 1uncharac  | Phoenix_dactylifera | 35.50 | 0.00 |
| TRINITY_OAE2597 | 1hypothet  | Marchantia_polymorp | 35.50 | 0.00 |
| TRINITY_PRW3402 | 3alpha b   | Chlorella_sorokinia | 35.50 | 0.00 |
| TRINITY_ESQ5007 | 1hypothet  | Eutrema_salsugineum | 35.50 | 0.00 |
| TRINITY_XP_0190 | 7PREDICTI  | Vitis_vinifera      | 35.50 | 0.00 |
| TRINITY_AIU4993 | 7carbohyc  | Magnolia_denudata   | 35.50 | 0.00 |
| TRINITY_XP_0109 | 1PREDICTI  | Elaeis_guineensis   | 35.50 | 0.00 |
| TRINITY_XP_0217 | 7-methyl   | Chenopodium_quinoa  | 35.50 | 0.00 |
| TRINITY_XP_0023 | (putative  | Populus_trichocarpa | 35.50 | 0.00 |
| TRINITY_XP_0238 | 8uncharac  | Quercus_suber       | 35.50 | 0.00 |
| TRINITY_XP_0066 | (PREDICTI  | Oryza_brachyantha   | 35.50 | 0.00 |
| TRINITY_XP_0243 | 8ubiquiti  | Physcomitrella_pate | 35.50 | 0.00 |
| TRINITY_GAQ8789 | 6calpain-  | Klebsormidium_niten | 35.50 | 0.00 |
| TRINITY_GAU4699 | 6hypothet  | Trifolium_subterran | 35.50 | 0.00 |
| TRINITY_PNW8524 | 3hypothet  | Chlamydomonas_reinh | 35.50 | 0.00 |
| TRINITY_PNH0873 | 3Adenylat  | Tetrabaena_socialis | 35.50 | 0.00 |
| TRINITY_XP_0029 | 9phosphat  | Selaginella_moellen | 35.50 | 0.00 |
| TRINITY_GAX8177 | 6hypothet  | Chlamydomonas_eusti | 35.50 | 0.00 |
| TRINITY_GBF9892 | 4appr-1-   | Raphidocelis_subcap | 35.50 | 0.00 |
| TRINITY_EPS7191 | 8calcium   | Genlisea_aurea      | 35.50 | 0.00 |
| TRINITY_XP_0217 | 4CTD sma   | Chenopodium_quinoa  | 35.50 | 0.00 |
| TRINITY_XP_0241 | 6E3 ubiq   | Rosa_chinensis      | 35.50 | 0.00 |
| TRINITY_KXZ4684 | 7TTL3 pr   | Gonium_pectorale    | 35.50 | 0.00 |
| TRINITY_XP_0206 | 7uncharac  | Dendrobium_catenatu | 35.50 | 0.00 |
| TRINITY_PTQ3924 | 2hypothet  | Marchantia_polymorp | 35.50 | 0.00 |
| TRINITY_PNW8633 | 4hypothet  | Chlamydomonas_reinh | 35.50 | 0.00 |
| TRINITY_XP_0044 | 8ABC trar  | Cicer_arietinum     | 35.50 | 0.00 |
| TRINITY_GAX7416 | 3hypothet  | Chlamydomonas_eusti | 35.50 | 0.00 |
| TRINITY_ERN1588 | 3hypothet  | Amborella_trichopod | 35.50 | 0.00 |
| TRINITY_XP_0216 | 7cinnamo   | Hevea_brasiliensis  | 35.50 | 0.00 |
| TRINITY_GAX8289 | 6hypothet  | Chlamydomonas_eusti | 35.50 | 0.00 |
| TRINITY_PNH1190 | 5Phospho   | Tetrabaena_socialis | 35.50 | 0.00 |
| TRINITY_GAX8066 | 5hypothet  | Chlamydomonas_eusti | 35.50 | 0.00 |
| TRINITY_KZV1544 | 5programm  | Dorcoceras_hygromet | 35.50 | 0.00 |
| TRINITY_GAX7261 | 3hypothet  | Chlamydomonas_eusti | 35.50 | 0.00 |
| TRINITY_XP_0238 | 9uncharac  | Quercus_suber       | 35.50 | 0.00 |
| TRINITY_PNW8754 | 1hypothet  | Chlamydomonas_reinh | 35.50 | 0.00 |
| TRINITY_XP_0187 | 1PREDICTI  | Eucalyptus_grandis  | 35.50 | 0.00 |
| TRINITY_OAE2023 | 7hypothet  | Marchantia_polymorp | 35.50 | 0.00 |
| TRINITY_XP_0016 | 9predict   | Chlamydomonas_reinh | 35.50 | 0.00 |
| TRINITY_XP_0016 | 9glycerol  | Chlamydomonas_reinh | 35.50 | 0.00 |
| TRINITY_GAX7767 | (hypothet  | Chlamydomonas_eusti | 35.50 | 0.00 |
| TRINITY_XP_0104 | 1PREDICTI  | Camelina_sativa     | 35.50 | 0.00 |
| TRINITY_XP_0218 | 4serine/t  | Spinacia_oleracea   | 35.50 | 0.00 |
| TRINITY_XP_0206 | 8serine/t  | Dendrobium_catenatu | 35.50 | 0.00 |
| TRINITY_P53385  | .1RecName: | Trifolium_repens    | 35.50 | 0.00 |
| TRINITY_XP_0029 | 8sodium t  | Selaginella_moellen | 35.50 | 0.00 |
| TRINITY_RWW8282 | 9hypothet  | Ensete_ventricosum  | 35.50 | 0.00 |
| TRINITY_OAY6870 | 9Chromos   | Ananas_comosus      | 35.50 | 0.00 |
| TRINITY_XP_0228 | 3Small G   | Ostreococcus_tauri  | 35.50 | 0.00 |
| TRINITY_KXZ4752 | 1hypothet  | Gonium_pectorale    | 35.50 | 0.00 |
| TRINITY_GAQ9002 | 2hypothet  | Klebsormidium_niten | 35.50 | 0.00 |
| TRINITY_GBG8296 | 2hypothet  | Chara_braunii       | 35.50 | 0.00 |
| TRINITY_GAX7919 | 2hypothet  | Chlamydomonas_eusti | 35.50 | 0.00 |
| TRINITY_XP_0150 | 6probable  | Solanum_pennellii   | 35.50 | 0.00 |
| TRINITY_GAX7977 | 5hypothet  | Chlamydomonas_eusti | 35.50 | 0.00 |
| TRINITY_KXZ5107 | 7hypothet  | Gonium_pectorale    | 35.50 | 0.00 |
| TRINITY_PNW7371 | 9hypothet  | Chlamydomonas_reinh | 35.50 | 0.00 |
| TRINITY_XP_0138 | 9hypothet  | Monoraphidium_negle | 35.50 | 0.00 |
| TRINITY_OWM6336 | 8hypothet  | Punica_granatum     | 35.50 | 0.00 |
| TRINITY_PNH1057 | 6Retrovir  | Tetrabaena_socialis | 35.50 | 0.00 |
| TRINITY_RLN1196 | 4elongati  | Panicum_miliaceum   | 35.50 | 0.00 |

|                  |                              |       |      |
|------------------|------------------------------|-------|------|
| TRINITY_GAX76741 | hypothetChlamydomonas_eusti  | 35.40 | 0.00 |
| TRINITY_OAE22291 | hypothetMarchantia_polymorp  | 35.40 | 0.00 |
| TRINITY_PSS31546 | TranscriActinidia_chinensis  | 35.40 | 0.00 |
| TRINITY_XP_01055 | PREDICTITarenaya_hasslerian  | 35.40 | 0.00 |
| TRINITY_KDD72733 | GTP-binChelicosporidium_sp.  | 35.40 | 0.00 |
| TRINITY_RLN30080 | calcium-Panicum_miliaceum    | 35.40 | 0.00 |
| TRINITY_KXZ42812 | hypothetGonium_pectorale     | 35.40 | 0.00 |
| TRINITY_GAQ80201 | protein Klebsormidium_niten  | 35.40 | 0.00 |
| TRINITY_XP_00750 | predicteBathycoccus_prasinc  | 35.40 | 0.00 |
| TRINITY_XP_02392 | probableQuercus_suber        | 35.40 | 0.00 |
| TRINITY_XP_00141 | predicteOstreococcus_sp._'1  | 35.40 | 0.00 |
| TRINITY_XP_02454 | MAPK/MAF Selaginella_moellen | 35.40 | 0.00 |
| TRINITY_XP_01284 | PREDICTIErythranthe_guttata  | 35.40 | 0.00 |
| TRINITY_GBG46512 | hypothetChara_braunii        | 35.40 | 0.00 |
| TRINITY_XP_00961 | PREDICTINicotiana_tomentosi  | 35.40 | 0.00 |
| TRINITY_EFJ20989 | hypothetSelaginella_moellen  | 35.40 | 0.00 |
| TRINITY_GAQ79529 | hypothetKlebsormidium_niten  | 35.40 | 0.00 |
| TRINITY_PNH07767 | hypothetTetrabaena_socialis  | 35.40 | 0.00 |
| TRINITY_XP_02174 | probableChenopodium_quinoa   | 35.40 | 0.00 |
| TRINITY_GBF97724 | hypothetRaphidocelis_subcap  | 35.40 | 0.00 |
| TRINITY_KXZ44435 | hypothetGonium_pectorale     | 35.40 | 0.00 |
| TRINITY_XP_02014 | transcriAegilops_tauschii    | 35.40 | 0.00 |
| TRINITY_XP_02438 | pheromorPhyscomitrella_pate  | 35.40 | 0.00 |
| TRINITY_XP_01920 | PREDICTIIPomoea_nil          | 35.40 | 0.00 |
| TRINITY_PNW74657 | hypothetChlamydomonas_reinh  | 35.40 | 0.00 |
| TRINITY_XP_00250 | predicteMicromonas_commoda   | 35.40 | 0.00 |
| TRINITY_XP_00170 | predicteChlamydomonas_reinh  | 35.40 | 0.00 |
| TRINITY_XP_00657 | tyrosyl-Glycine_max          | 35.40 | 0.00 |
| TRINITY_PSC73989 | CAMK CAMMicractinium_conduc  | 35.40 | 0.00 |
| TRINITY_XP_02388 | alpha-acQuercus_suber        | 35.40 | 0.00 |
| TRINITY_BAK02869 | predicteHordeum_vulgare      | 35.40 | 0.00 |
| TRINITY_XP_00636 | PREDICTISolanum_tuberosum    | 35.40 | 0.00 |
| TRINITY_KXZ50905 | hypothetGonium_pectorale     | 35.40 | 0.00 |
| TRINITY_PSC74291 | NAD(P)-kMicractinium_conduc  | 35.40 | 0.00 |
| TRINITY_PNH03126 | hypothetTetrabaena_socialis  | 35.40 | 0.00 |
| TRINITY_PNW71157 | hypothetChlamydomonas_reinh  | 35.40 | 0.00 |
| TRINITY_PNW77124 | hypothetChlamydomonas_reinh  | 35.40 | 0.00 |
| TRINITY_XP_00564 | hypothetCoccomyxa_subellips  | 35.40 | 0.00 |
| TRINITY_XP_02059 | plant UIPhalaenopsis_equest  | 35.40 | 0.00 |
| TRINITY_KCW65146 | hypothetEucalyptus_grandis   | 35.40 | 0.00 |
| TRINITY_GBG66666 | hypothetChara_braunii        | 35.40 | 0.00 |
| TRINITY_GAX82263 | hypothetChlamydomonas_eusti  | 35.40 | 0.00 |
| TRINITY_AEJ07934 | Xilon1 cZea_mays             | 35.40 | 0.00 |
| TRINITY_XP_02189 | RNA polyCarica_papaya        | 35.40 | 0.00 |
| TRINITY_GBG64059 | hypothetChara_braunii        | 35.40 | 0.00 |
| TRINITY_EFJ32833 | hypothetSelaginella_moellen  | 35.40 | 0.00 |
| TRINITY_ACN40292 | unknown Picea_sitchensis     | 35.40 | 0.00 |
| TRINITY_XP_02452 | pre-mRN/Selaginella_moellen  | 35.40 | 0.00 |
| TRINITY_EFJ19555 | glycosylSelaginella_moellen  | 35.40 | 0.00 |
| TRINITY_PNH00238 | hypothetTetrabaena_socialis  | 35.40 | 0.00 |
| TRINITY_XP_02068 | aldehydDendrobium_catenatu   | 35.40 | 0.00 |
| TRINITY_GAX82984 | hypothetChlamydomonas_eusti  | 35.40 | 0.00 |
| TRINITY_GAX80114 | hypothetChlamydomonas_eusti  | 35.40 | 0.00 |
| TRINITY_XP_02069 | phosphoDendrobium_catenatu   | 35.40 | 0.00 |
| TRINITY_GAQ83756 | Cyclin fKlebsormidium_niten  | 35.40 | 0.00 |
| TRINITY_XP_00939 | PREDICTIMusa_acuminata       | 35.40 | 0.00 |
| TRINITY_XP_02287 | ABC trarOlea_europaea        | 35.40 | 0.00 |
| TRINITY_XP_00169 | predicteChlamydomonas_reinh  | 35.40 | 0.00 |
| TRINITY_XP_02438 | Fanconi Physcomitrella_pate  | 35.40 | 0.00 |
| TRINITY_KXZ40924 | hypothetGonium_pectorale     | 35.40 | 0.00 |
| TRINITY_XP_02199 | 3-phosphHelianthus_annuus    | 35.40 | 0.00 |
| TRINITY_PNW74794 | hypothetChlamydomonas_reinh  | 35.40 | 0.00 |
| TRINITY_XP_00169 | predicteChlamydomonas_reinh  | 35.40 | 0.00 |
| TRINITY_KXZ56109 | hypothetGonium_pectorale     | 35.40 | 0.00 |
| TRINITY_GBG65685 | hypothetChara_braunii        | 35.40 | 0.00 |
| TRINITY_PSC69984 | ubiquitiMicractinium_conduc  | 35.30 | 0.00 |

|                   |          |                     |       |      |
|-------------------|----------|---------------------|-------|------|
| TRINITY_PRW34039  | caroten  | Chlorella_sorokinia | 35.30 | 0.00 |
| TRINITY_XP_00451  | kinesin  | Cicer_arietinum     | 35.30 | 0.00 |
| TRINITY_XP_0239   | uncharac | Quercus_suber       | 35.30 | 0.00 |
| TRINITY_GAQ81304  | hypothet | Klebsormidium_niten | 35.30 | 0.00 |
| TRINITY_XP_00666  | PREDICTI | Oryza_brachyantha   | 35.30 | 0.00 |
| TRINITY_XP_02735  | probable | Abrus_precatorius   | 35.30 | 0.00 |
| TRINITY_OAE30736  | hypothet | Marchantia_polymorp | 35.30 | 0.00 |
| TRINITY_GAQ78783  | hypothet | Klebsormidium_niten | 35.30 | 0.00 |
| TRINITY_XP_02287  | uncharac | Olea_europaea       | 35.30 | 0.00 |
| TRINITY_XP_01094  | PREDICTI | Elaeis_guineensis   | 35.30 | 0.00 |
| TRINITY_XP_00644  | protein  | Citrus_clementina   | 35.30 | 0.00 |
| TRINITY_XP_0017   | CTR typ  | Chlamydomonas_reinh | 35.30 | 0.00 |
| TRINITY_XP_02419  | GTP-bin  | Rosa_chinensis      | 35.30 | 0.00 |
| TRINITY_PKI39956  | hypothet | Punica_granatum     | 35.30 | 0.00 |
| TRINITY_KZV43575  | phospho  | Dorcoceras_hygromet | 35.30 | 0.00 |
| TRINITY_XP_01941  | PREDICTI | Lupinus_angustifoli | 35.30 | 0.00 |
| TRINITY_PIA57195  | hypothet | Aquilegia_coerulea  | 35.30 | 0.00 |
| TRINITY_XP_02452  | protein  | Selaginella_moellen | 35.30 | 0.00 |
| TRINITY_XP_0025   | dynein   | Micromonas_commoda  | 35.30 | 0.00 |
| TRINITY_EEF26419  | lipid A  | Ricinus_communis    | 35.30 | 0.00 |
| TRINITY_XP_01656  | PREDICTI | Capsicum_annuum     | 35.30 | 0.00 |
| TRINITY_GAQ84205  | Transmen | Klebsormidium_niten | 35.30 | 0.00 |
| TRINITY_XP_0017   | ABC trar | Chlamydomonas_reinh | 35.30 | 0.00 |
| TRINITY_KNA09296  | hypothet | Spinacia_oleracea   | 35.30 | 0.00 |
| TRINITY_XP_02087  | calcium  | Arabidopsis_lyrata  | 35.30 | 0.00 |
| TRINITY_XP_0239   | ras-like | Quercus_suber       | 35.30 | 0.00 |
| TRINITY_GAX81528  | hypothet | Chlamydomonas_eusti | 35.30 | 0.00 |
| TRINITY_GAX76082  | hypothet | Chlamydomonas_eusti | 35.30 | 0.00 |
| TRINITY_XP_02734  | uncharac | Abrus_precatorius   | 35.30 | 0.00 |
| TRINITY_XP_01041  | PREDICTI | Camelina_sativa     | 35.30 | 0.00 |
| TRINITY_GBF91551  | hypothet | Raphidocelis_subcap | 35.30 | 0.00 |
| TRINITY_XP_00305  | predict  | Micromonas_pusilla  | 35.30 | 0.00 |
| TRINITY_GBF94392  | lipase   | Raphidocelis_subcap | 35.30 | 0.00 |
| TRINITY_XP_00361  | cytosoli | Medicago_truncatula | 35.30 | 0.00 |
| TRINITY_KXZ49313  | PI3kina  | Gonium_pectorale    | 35.30 | 0.00 |
| TRINITY_GAX77149  | hypothet | Chlamydomonas_eusti | 35.30 | 0.00 |
| TRINITY_GAQ82047  | hypothet | Klebsormidium_niten | 35.30 | 0.00 |
| TRINITY_XP_02017  | protein  | Aegilops_tauschii   | 35.30 | 0.00 |
| TRINITY_PNW74664  | hypothet | Chlamydomonas_reinh | 35.30 | 0.00 |
| TRINITY_XP_0025   | predict  | Micromonas_commoda  | 35.30 | 0.00 |
| TRINITY_GAX85639  | hypothet | Chlamydomonas_eusti | 35.30 | 0.00 |
| TRINITY_KXZ49109  | hypothet | Gonium_pectorale    | 35.30 | 0.00 |
| TRINITY_GAX77871  | hypothet | Chlamydomonas_eusti | 35.30 | 0.00 |
| TRINITY_GBF87715  | hypothet | Raphidocelis_subcap | 35.30 | 0.00 |
| TRINITY_GAX74011  | hypothet | Chlamydomonas_eusti | 35.30 | 0.00 |
| TRINITY_XP_01365  | uncharac | Brassica_napus      | 35.30 | 0.00 |
| TRINITY_EOY180633 | 3-oxo-5- | Theobroma_cacao     | 35.30 | 0.00 |
| TRINITY_XP_02388  | alpha-ac | Quercus_suber       | 35.30 | 0.00 |
| TRINITY_XP_02712  | protein  | Coffea_arabica      | 35.30 | 0.00 |
| TRINITY_XP_00169  | predict  | Chlamydomonas_reinh | 35.30 | 0.00 |
| TRINITY_XP_0017   | predict  | Chlamydomonas_reinh | 35.30 | 0.00 |
| TRINITY_XP_00294  | hypothet | Volvox_carteri      | 35.30 | 0.00 |
| TRINITY_GAY34262  | hypothet | Citrus_unshiu       | 35.30 | 0.00 |
| TRINITY_GAQ80045  | Predict  | Klebsormidium_niten | 35.30 | 0.00 |
| TRINITY_KXZ52915  | hypothet | Gonium_pectorale    | 35.30 | 0.00 |
| TRINITY_PNW73272  | hypothet | Chlamydomonas_reinh | 35.30 | 0.00 |
| TRINITY_GBF92174  | hypothet | Raphidocelis_subcap | 35.30 | 0.00 |
| TRINITY_GAQ80671  | TOUSLED- | Klebsormidium_niten | 35.30 | 0.00 |
| TRINITY_KMS65235  | hypothet | Beta_vulgaris       | 35.30 | 0.00 |
| TRINITY_XP_00294  | hypothet | Volvox_carteri      | 35.30 | 0.00 |
| TRINITY_GAX83509  | hypothet | Chlamydomonas_eusti | 35.30 | 0.00 |
| TRINITY_GAQ77854  | protein  | Klebsormidium_niten | 35.30 | 0.00 |
| TRINITY_XP_02201  | transcri | Helianthus_annuus   | 35.30 | 0.00 |
| TRINITY_XP_02051  | ubiquiti | Amborella_trichopod | 35.30 | 0.00 |
| TRINITY_GAX79505  | hypothet | Chlamydomonas_eusti | 35.30 | 0.00 |
| TRINITY_XP_01005  | PREDICTI | Eucalyptus_grandis  | 35.30 | 0.00 |

|                 |                             |       |      |
|-----------------|-----------------------------|-------|------|
| TRINITY_KXZ5481 | hypothetGonium_pectorale    | 35.30 | 0.00 |
| TRINITY_PNW8764 | hypothetChlamydomonas_reinh | 35.30 | 0.00 |
| TRINITY_XP_0105 | PREDICTITarenaya_hasslerian | 35.30 | 0.00 |
| TRINITY_PNW8479 | hypothetChlamydomonas_reinh | 35.30 | 0.00 |
| TRINITY_XP_0017 | haloperChlamydomonas_reinh  | 35.30 | 0.00 |
| TRINITY_PNH0869 | CytoplasTetrabaena_socialis | 35.30 | 0.00 |
| TRINITY_GAX8207 | hypothetChlamydomonas_eusti | 35.30 | 0.00 |
| TRINITY_GAX7758 | hypothetChlamydomonas_eusti | 35.30 | 0.00 |
| TRINITY_GAX7939 | hypothetChlamydomonas_eusti | 35.30 | 0.00 |
| TRINITY_AOT8215 | defenderBotryococcus_brauni | 35.20 | 0.00 |
| TRINITY_XP_0239 | ras-relQuercus_suber        | 35.20 | 0.00 |
| TRINITY_KMZ5734 | Casein Zostera_marina       | 35.20 | 0.00 |
| TRINITY_EAY9103 | hypothetOryza_sativa        | 35.20 | 0.00 |
| TRINITY_PNX9503 | hypothetTrifolium_pratense  | 35.20 | 0.00 |
| TRINITY_PSC7503 | MORN reMicractinium_conduc  | 35.20 | 0.00 |
| TRINITY_OAY7417 | TransfoiAnanas_comosus      | 35.20 | 0.00 |
| TRINITY_XP_0237 | ras-relLactuca_sativa       | 35.20 | 0.00 |
| TRINITY_XP_0042 | probableSolanum_lycopersicu | 35.20 | 0.00 |
| TRINITY_XP_0066 | PREDICTIOryza_brachyantha   | 35.20 | 0.00 |
| TRINITY_KDD7334 | hypothetHelicosporidium_sp. | 35.20 | 0.00 |
| TRINITY_PKI6301 | hypothetPunica_granatum     | 35.20 | 0.00 |
| TRINITY_XP_0106 | PREDICTIBeta_vulgaris       | 35.20 | 0.00 |
| TRINITY_PIA2643 | hypothetAquilegia_coerulea  | 35.20 | 0.00 |
| TRINITY_PTQ3303 | hypothetMarchantia_polymorp | 35.20 | 0.00 |
| TRINITY_XP_0279 | serine/tVigna_unguiculata   | 35.20 | 0.00 |
| TRINITY_XP_0264 | pre-mRN/Papaver_somniferum  | 35.20 | 0.00 |
| TRINITY_XP_0228 | hsp70 nOlea_europaea        | 35.20 | 0.00 |
| TRINITY_XP_0017 | predictChlamydomonas_reinh  | 35.20 | 0.00 |
| TRINITY_XP_0113 | putativeAuxenochlorella_pro | 35.20 | 0.00 |
| TRINITY_PNW7033 | hypothetChlamydomonas_reinh | 35.20 | 0.00 |
| TRINITY_GAX8459 | hypothetChlamydomonas_eusti | 35.20 | 0.00 |
| TRINITY_GAQ9029 | hypothetKlebsormidium_niten | 35.20 | 0.00 |
| TRINITY_PNH1268 | ChloroplTetrabaena_socialis | 35.20 | 0.00 |
| TRINITY_XP_0279 | serine/tVigna_unguiculata   | 35.20 | 0.00 |
| TRINITY_PIN0879 | hypothetHandroanthus_impeti | 35.20 | 0.00 |
| TRINITY_GAX7701 | hypothetChlamydomonas_eusti | 35.20 | 0.00 |
| TRINITY_XP_0249 | triacylZiziphus_jujuba      | 35.20 | 0.00 |
| TRINITY_GAX7376 | hypothetChlamydomonas_eusti | 35.20 | 0.00 |
| TRINITY_XP_0263 | pathogerPapaver_somniferum  | 35.20 | 0.00 |
| TRINITY_XP_0029 | hypothetVolvox_carteri      | 35.20 | 0.00 |
| TRINITY_OAE2618 | hypothetMarchantia_polymorp | 35.20 | 0.00 |
| TRINITY_OAE2772 | hypothetMarchantia_polymorp | 35.20 | 0.00 |
| TRINITY_PTQ2712 | hypothetMarchantia_polymorp | 35.20 | 0.00 |
| TRINITY_OAE3199 | hypothetMarchantia_polymorp | 35.20 | 0.00 |
| TRINITY_GAX7599 | hypothetChlamydomonas_eusti | 35.20 | 0.00 |
| TRINITY_XP_0238 | dihydroQuercus_suber        | 35.20 | 0.00 |
| TRINITY_GAQ8593 | hypothetKlebsormidium_niten | 35.20 | 0.00 |
| TRINITY_KXZ4733 | hypothetGonium_pectorale    | 35.20 | 0.00 |
| TRINITY_XP_0238 | pheromorQuercus_suber       | 35.20 | 0.00 |
| TRINITY_XP_0159 | uncharaArachis_duranensis   | 35.20 | 0.00 |
| TRINITY_XP_0025 | predictMicromonas_commoda   | 35.20 | 0.00 |
| TRINITY_KXZ4398 | hypothetGonium_pectorale    | 35.20 | 0.00 |
| TRINITY_XP_0016 | predictChlamydomonas_reinh  | 35.20 | 0.00 |
| TRINITY_XP_0136 | uncharaBrassica_napus       | 35.20 | 0.00 |
| TRINITY_XP_0113 | Beta-heAuxenochlorella_pro  | 35.20 | 0.00 |
| TRINITY_XP_0239 | solute cQuercus_suber       | 35.20 | 0.00 |
| TRINITY_GBF9399 | 1-phospRaphidocelis_subcap  | 35.20 | 0.00 |
| TRINITY_GBG7005 | hypothetChara_braunii       | 35.20 | 0.00 |
| TRINITY_GAX7504 | hypothetChlamydomonas_eusti | 35.20 | 0.00 |
| TRINITY_XP_0029 | hypothetVolvox_carteri      | 35.20 | 0.00 |
| TRINITY_XP_0239 | ATP-bincQuercus_suber       | 35.20 | 0.00 |
| TRINITY_XP_0238 | serine/tQuercus_suber       | 35.20 | 0.00 |
| TRINITY_PNW8663 | hypothetChlamydomonas_reinh | 35.20 | 0.00 |
| TRINITY_PNH0800 | TrafficTetrabaena_socialis  | 35.20 | 0.00 |
| TRINITY_XP_0093 | PREDICTIPyrus_x_bretschneid | 35.20 | 0.00 |
| TRINITY_XP_0102 | PREDICTINelumbo_nucifera    | 35.20 | 0.00 |



|                  |          |                     |       |      |
|------------------|----------|---------------------|-------|------|
| TRINITY_ATA62862 | putative | Juniperus_phoenicea | 35.20 | 0.00 |
| TRINITY_XP_0139  | cytochr  | Monoraphidium_negle | 35.20 | 0.00 |
| TRINITY_XP_01145 | PREDICTI | Fragaria_vesca      | 35.20 | 0.00 |
| TRINITY_RLN04145 | putative | Panicum_miliaceum   | 35.20 | 0.00 |
| TRINITY_PNW7686  | hypothet | Chlamydomonas_reinh | 35.20 | 0.00 |
| TRINITY_XP_01882 | PREDICTI | Juglans_regia       | 35.20 | 0.00 |
| TRINITY_AAT85663 | polyuns  | Marchantia_polymorp | 35.20 | 0.00 |
| TRINITY_GAQ80676 | hypothet | Klebsormidium_niten | 35.20 | 0.00 |
| TRINITY_GAQ91048 | calcium- | Klebsormidium_niten | 35.20 | 0.00 |
| TRINITY_XP_02186 | uncharac | Spinacia_oleracea   | 35.20 | 0.00 |
| TRINITY_PWA79469 | trimeric | Artemisia_annua     | 35.20 | 0.00 |
| TRINITY_XP_02733 | uncharac | Abrus_precatorius   | 35.20 | 0.00 |
| TRINITY_XP_00297 | DNA rep  | Selaginella_moellen | 35.10 | 0.00 |
| TRINITY_EPS66356 | hypothet | Genlisea_aurea      | 35.10 | 0.00 |
| TRINITY_BAJ96636 | predicte | Hordeum_vulgare     | 35.10 | 0.00 |
| TRINITY_XP_00169 | NimA-re  | Chlamydomonas_reinh | 35.10 | 0.00 |
| TRINITY_GAQ81709 | hypothet | Klebsormidium_niten | 35.10 | 0.00 |
| TRINITY_XP_01027 | PREDICTI | Nelumbo_nucifera    | 35.10 | 0.00 |
| TRINITY_GAX76776 | hypothet | Chlamydomonas_eusti | 35.10 | 0.00 |
| TRINITY_ABR17254 | unknown  | Picea_sitchensis    | 35.10 | 0.00 |
| TRINITY_RWR71847 | biogene  | Cinnamomum_micranth | 35.10 | 0.00 |
| TRINITY_RWR94784 | ras-rel  | Cinnamomum_micranth | 35.10 | 0.00 |
| TRINITY_XP_02391 | rho-type | Quercus_suber       | 35.10 | 0.00 |
| TRINITY_KZV17546 | multidr  | Dorcoceras_hygromet | 35.10 | 0.00 |
| TRINITY_PLY75569 | hypothet | Lactuca_sativa      | 35.10 | 0.00 |
| TRINITY_EFJ31049 | hypothet | Selaginella_moellen | 35.10 | 0.00 |
| TRINITY_KFK32337 | hypothet | Arabis_alpina       | 35.10 | 0.00 |
| TRINITY_XP_00169 | flagell  | Chlamydomonas_reinh | 35.10 | 0.00 |
| TRINITY_PTQ30944 | hypothet | Marchantia_polymorp | 35.10 | 0.00 |
| TRINITY_GAQ78735 | alpha-an | Klebsormidium_niten | 35.10 | 0.00 |
| TRINITY_XP_00249 | predicte | Micromonas_commoda  | 35.10 | 0.00 |
| TRINITY_GAQ82062 | hypothet | Klebsormidium_niten | 35.10 | 0.00 |
| TRINITY_XP_00564 | hypothet | Coccomyxa_subellips | 35.10 | 0.00 |
| TRINITY_XP_00298 | monothic | Selaginella_moellen | 35.10 | 0.00 |
| TRINITY_XP_00938 | PREDICTI | Musa_acuminata      | 35.10 | 0.00 |
| TRINITY_PRW55899 | kinase   | Chlorella_sorokinia | 35.10 | 0.00 |
| TRINITY_PWA58081 | protein  | Artemisia_annua     | 35.10 | 0.00 |
| TRINITY_XP_01004 | PREDICTI | Eucalyptus_grandis  | 35.10 | 0.00 |
| TRINITY_PNH04000 | Proteas  | Tetrabaena_socialis | 35.10 | 0.00 |
| TRINITY_XP_02389 | uncharac | Quercus_suber       | 35.10 | 0.00 |
| TRINITY_XP_00294 | hypothet | Volvox_carteri      | 35.10 | 0.00 |
| TRINITY_XP_02016 | BTB/POZ  | Aegilops_tauschii   | 35.10 | 0.00 |
| TRINITY_EEF27535 | two-com  | Ricinus_communis    | 35.10 | 0.00 |
| TRINITY_KMZ60903 | CBL-int  | Zostera_marina      | 35.10 | 0.00 |
| TRINITY_GAQ82936 | ABC trar | Klebsormidium_niten | 35.10 | 0.00 |
| TRINITY_GAQ92507 | hypothet | Klebsormidium_niten | 35.10 | 0.00 |
| TRINITY_XP_00296 | SCY1-li  | Selaginella_moellen | 35.10 | 0.00 |
| TRINITY_GAX85783 | hypothet | Chlamydomonas_eusti | 35.10 | 0.00 |
| TRINITY_XP_01743 | PREDICTI | Vigna_angularis     | 35.10 | 0.00 |
| TRINITY_XP_00298 | serine/t | Selaginella_moellen | 35.10 | 0.00 |
| TRINITY_PSC73701 | NAD-dep  | Micractinium_conduc | 35.10 | 0.00 |
| TRINITY_XP_00715 | hypothet | Phaseolus_vulgaris  | 35.10 | 0.00 |
| TRINITY_XP_00169 | hypothet | Chlamydomonas_reinh | 35.10 | 0.00 |
| TRINITY_XP_02440 | transcri | Physcomitrella_pate | 35.10 | 0.00 |
| TRINITY_GBG82681 | hypothet | Chara_braunii       | 35.10 | 0.00 |
| TRINITY_XP_02391 | coronin- | Quercus_suber       | 35.10 | 0.00 |
| TRINITY_XP_02581 | serine/t | Panicum_hallii      | 35.10 | 0.00 |
| TRINITY_GAX74666 | hypothet | Chlamydomonas_eusti | 35.10 | 0.00 |
| TRINITY_GAQ81234 | Aminotr  | Klebsormidium_niten | 35.10 | 0.00 |
| TRINITY_XP_02057 | alkylat  | Phalaenopsis_equest | 35.10 | 0.00 |
| TRINITY_GAX77467 | hypothet | Chlamydomonas_eusti | 35.10 | 0.00 |
| TRINITY_GAX81076 | hypothet | Chlamydomonas_eusti | 35.10 | 0.00 |
| TRINITY_XP_00297 | protein  | Selaginella_moellen | 35.10 | 0.00 |
| TRINITY_BAK06922 | predicte | Hordeum_vulgare     | 35.10 | 0.00 |
| TRINITY_XP_01389 | hypothet | Monoraphidium_negle | 35.10 | 0.00 |
| TRINITY_XP_02389 | pre-mRN  | Quercus_suber       | 35.10 | 0.00 |

|                    |                              |       |      |
|--------------------|------------------------------|-------|------|
| TRINITY_GBF96504   | hypothetRaphidocelis_subcap  | 35.10 | 0.00 |
| TRINITY_XP_00628   | transcriCapsella_rubella     | 35.10 | 0.00 |
| TRINITY_XP_02718   | LOW QUAI Coffea_eugenioides  | 35.10 | 0.00 |
| TRINITY_PTQ36584   | hypothetMarchantia_polymorp  | 35.10 | 0.00 |
| TRINITY_KZV15279   | hypothetDorcoceras_hygromet  | 35.10 | 0.00 |
| TRINITY_PNW76789   | hypothetChlamydomonas_reinh  | 35.10 | 0.00 |
| TRINITY_PNH09773   | SulfatecTetrabaena_socialis  | 35.10 | 0.00 |
| TRINITY_PNH06788   | ChloroplTetrabaena_socialis  | 35.10 | 0.00 |
| TRINITY_XP_01848   | PREDICTH Raphanus_sativus    | 35.10 | 0.00 |
| TRINITY_XP_01918   | PREDICTH Ipomoea_nil         | 35.10 | 0.00 |
| TRINITY_XP_00880   | LOW QUAI Phoenix_dactylifera | 35.10 | 0.00 |
| TRINITY_XP_00295   | hypothetVolvox_carteri       | 35.10 | 0.00 |
| TRINITY_CBI29214   | unnamed Vitis_vinifera       | 35.10 | 0.00 |
| TRINITY_PTQ39778   | hypothetMarchantia_polymorp  | 35.10 | 0.00 |
| TRINITY_GAX84018   | hypothetChlamydomonas_eusti  | 35.10 | 0.00 |
| TRINITY_XP_00294   | hypothetVolvox_carteri       | 35.10 | 0.00 |
| TRINITY_PON78660   | Metallo-Parasponia_anderson  | 35.10 | 0.00 |
| TRINITY_KXZ56031   | hypothetGonium_pectorale     | 35.10 | 0.00 |
| TRINITY_XP_00294   | hypothetVolvox_carteri       | 35.10 | 0.00 |
| TRINITY_XP_01283   | PREDICTH Erythranthe_guttata | 35.00 | 0.00 |
| TRINITY_PTQ36683   | hypothetMarchantia_polymorp  | 35.00 | 0.00 |
| TRINITY_XP_01724   | PREDICTH Daucus_carota       | 35.00 | 0.00 |
| TRINITY_XP_00565   | putativcCoccomyxa_subellips  | 35.00 | 0.00 |
| TRINITY_GAX80280   | hypothetChlamydomonas_eusti  | 35.00 | 0.00 |
| TRINITY_KZV25292   | hypothetDorcoceras_hygromet  | 35.00 | 0.00 |
| TRINITY_XP_02390   | GTP-binC Quercus_suber       | 35.00 | 0.00 |
| TRINITY_NP_00131E3 | ubiqu Capsicum_annuum        | 35.00 | 0.00 |
| TRINITY_XP_00430   | PREDICTH Fragaria_vesca      | 35.00 | 0.00 |
| TRINITY_PNW84678   | hypothetChlamydomonas_reinh  | 35.00 | 0.00 |
| TRINITY_XP_00305   | predictcMicromonas_pusilla   | 35.00 | 0.00 |
| TRINITY_PRW50772   | Fanconi Chlorella_sorokinia  | 35.00 | 0.00 |
| TRINITY_GBG60729   | hypothetChara_braunii        | 35.00 | 0.00 |
| TRINITY_PNW70067   | hypothetChlamydomonas_reinh  | 35.00 | 0.00 |
| TRINITY_XP_02734   | probablecAbrus_precatorius   | 35.00 | 0.00 |
| TRINITY_XP_01389   | Histone Monoraphidium_negle  | 35.00 | 0.00 |
| TRINITY_GAX74044   | hypothetChlamydomonas_eusti  | 35.00 | 0.00 |
| TRINITY_RVW52073   | Stomatir Vitis_vinifera      | 35.00 | 0.00 |
| TRINITY_XP_00297   | mitochor Selaginella_moellen | 35.00 | 0.00 |
| TRINITY_GAQ85806   | phosphat Klebsormidium_niten | 35.00 | 0.00 |
| TRINITY_AAO73552   | putativcChlamydomonas_reinh  | 35.00 | 0.00 |
| TRINITY_GAX86120   | hypothetChlamydomonas_eusti  | 35.00 | 0.00 |
| TRINITY_OAE31294   | hypothetMarchantia_polymorp  | 35.00 | 0.00 |
| TRINITY_PNW87945   | hypothetChlamydomonas_reinh  | 35.00 | 0.00 |
| TRINITY_PRW58094   | GPN-loop Chlorella_sorokinia | 35.00 | 0.00 |
| TRINITY_XP_00294   | hypothetVolvox_carteri       | 35.00 | 0.00 |
| TRINITY_OAE32490   | hypothetMarchantia_polymorp  | 35.00 | 0.00 |
| TRINITY_XP_02436   | rRNA-prc Physcomitrella_pate | 35.00 | 0.00 |
| TRINITY_PKA46458   | hypothetApostasia_shenzheni  | 35.00 | 0.00 |
| TRINITY_GBF96838   | hypothetRaphidocelis_subcap  | 35.00 | 0.00 |
| TRINITY_XP_00295   | hypothetVolvox_carteri       | 35.00 | 0.00 |
| TRINITY_PNW82298   | hypothetChlamydomonas_reinh  | 35.00 | 0.00 |
| TRINITY_GAX83109   | hypothetChlamydomonas_eusti  | 35.00 | 0.00 |
| TRINITY_GAX79974   | hypothetChlamydomonas_eusti  | 35.00 | 0.00 |
| TRINITY_ACF87335   | unknown Zea_mays             | 35.00 | 0.00 |
| TRINITY_KMZ72055   | THUMP dc Zostera_marina      | 35.00 | 0.00 |
| TRINITY_XP_01067   | PREDICTH Beta_vulgaris       | 35.00 | 0.00 |
| TRINITY_XP_01724   | PREDICTH Daucus_carota       | 35.00 | 0.00 |
| TRINITY_XP_02638   | probablec Papaver_somniferum | 35.00 | 0.00 |
| TRINITY_GAX81772   | hypothetChlamydomonas_eusti  | 35.00 | 0.00 |
| TRINITY_PTQ28716   | hypothetMarchantia_polymorp  | 35.00 | 0.00 |
| TRINITY_GAX78082   | hypothetChlamydomonas_eusti  | 35.00 | 0.00 |
| TRINITY_XP_01048   | PREDICTH Camelina_sativa     | 35.00 | 0.00 |
| TRINITY_XP_00295   | hypothetVolvox_carteri       | 35.00 | 0.00 |
| TRINITY_EFJ27745   | hypothetSelaginella_moellen  | 35.00 | 0.00 |
| TRINITY_XP_00294   | hypothetVolvox_carteri       | 35.00 | 0.00 |
| TRINITY_AGT17129   | embryogc Saccharum_hybrid_cu | 35.00 | 0.00 |

|                  |                             |       |      |
|------------------|-----------------------------|-------|------|
| TRINITY_GAX82073 | hypothetChlamydomonas_eusti | 35.00 | 0.00 |
| TRINITY_GAX81956 | hypothetChlamydomonas_eusti | 35.00 | 0.00 |
| TRINITY_XP_01068 | PREDICTIBeta_vulgaris       | 35.00 | 0.00 |
| TRINITY_RMZ57019 | hypothetAuxenochlorella_pro | 35.00 | 0.00 |
| TRINITY_GAX79566 | hypothetChlamydomonas_eusti | 35.00 | 0.00 |
| TRINITY_GAX75472 | hypothetChlamydomonas_eusti | 35.00 | 0.00 |
| TRINITY_XP_02390 | peroxidεQuercus_suber       | 35.00 | 0.00 |
| TRINITY_XP_02024 | VAMP-li Asparagus_officinal | 35.00 | 0.00 |
| TRINITY_XP_01045 | PREDICTICamelina_sativa     | 35.00 | 0.00 |
| TRINITY_XP_02376 | dynamin-Lactuca_sativa      | 35.00 | 0.00 |
| TRINITY_GAX86141 | hypothetChlamydomonas_eusti | 35.00 | 0.00 |
| TRINITY_GAX74727 | hypothetChlamydomonas_eusti | 35.00 | 0.00 |
| TRINITY_XP_00295 | hypothetVolvox_carteri      | 35.00 | 0.00 |
| TRINITY_XP_02069 | importirDendrobium_catenatu | 35.00 | 0.00 |
| TRINITY_KDD75013 | LEM3/CDHelicosporidium_sp.  | 35.00 | 0.00 |
| TRINITY_KXZ51614 | hypothetGonium_pectorale    | 35.00 | 0.00 |
| TRINITY_XP_02492 | ADP-ribεZiziphus_jujuba     | 35.00 | 0.00 |
| TRINITY_PPR92750 | hypothetGossypium_barbadens | 35.00 | 0.00 |
| TRINITY_GAX77150 | hypothetChlamydomonas_eusti | 35.00 | 0.00 |
| TRINITY_GAQ92442 | hypothetKlebsormidium_niten | 35.00 | 0.00 |
| TRINITY_GAX84454 | hypothetChlamydomonas_eusti | 35.00 | 0.00 |
| TRINITY_PSC73563 | Hydroxy Micractinium_conduc | 34.90 | 0.00 |
| TRINITY_GAQ86025 | Serine  Klebsormidium_niten | 34.90 | 0.00 |
| TRINITY_XP_00634 | PREDICTISolanum_tuberosum   | 34.90 | 0.00 |
| TRINITY_XP_02642 | high mokPapaver_somniferum  | 34.90 | 0.00 |
| TRINITY_PRW56435 | transpo Chlorella_sorokinia | 34.90 | 0.00 |
| TRINITY_KNA03225 | hypothetSpinacia_oleracea   | 34.90 | 0.00 |
| TRINITY_PNW71091 | hypothetChlamydomonas_reinh | 34.90 | 0.00 |
| TRINITY_PRW32579 | Cycloeu Chlorella_sorokinia | 34.90 | 0.00 |
| TRINITY_XP_00298 | 2-oxogl Selaginella_moellen | 34.90 | 0.00 |
| TRINITY_XP_00933 | PREDICTIPyrus_x_bretschneid | 34.90 | 0.00 |
| TRINITY_PRW59853 | 5 -nuclεChlorella_sorokinia | 34.90 | 0.00 |
| TRINITY_PTQ31816 | hypothetMarchantia_polymorp | 34.90 | 0.00 |
| TRINITY_XP_02438 | glutathiPhyscomitrella_pate | 34.90 | 0.00 |
| TRINITY_GAQ80206 | hypothetKlebsormidium_niten | 34.90 | 0.00 |
| TRINITY_XP_02020 | (U-box dεCajanus_cajan      | 34.90 | 0.00 |
| TRINITY_XP_02436 | glutamatPhyscomitrella_pate | 34.90 | 0.00 |
| TRINITY_XP_02388 | probableεQuercus_suber      | 34.90 | 0.00 |
| TRINITY_XP_00250 | hypothetMicromonas_commoda  | 34.90 | 0.00 |
| TRINITY_GBF97256 | hypothetRaphidocelis_subcap | 34.90 | 0.00 |
| TRINITY_XP_02436 | tetratriPhyscomitrella_pate | 34.90 | 0.00 |
| TRINITY_XP_00359 | embryogεMedicago_truncatula | 34.90 | 0.00 |
| TRINITY_PSC68433 | phospho Micractinium_conduc | 34.90 | 0.00 |
| TRINITY_GAX73289 | hypothetChlamydomonas_eusti | 34.90 | 0.00 |
| TRINITY_GAX72962 | hypothetChlamydomonas_eusti | 34.90 | 0.00 |
| TRINITY_PNW84168 | hypothetChlamydomonas_reinh | 34.90 | 0.00 |
| TRINITY_BAJ93178 | predictεHordeum_vulgare     | 34.90 | 0.00 |
| TRINITY_GAQ81728 | Protein Klebsormidium_niten | 34.90 | 0.00 |
| TRINITY_XP_02392 | serine/tQuercus_suber       | 34.90 | 0.00 |
| TRINITY_XP_02417 | protein Rosa_chinensis      | 34.90 | 0.00 |
| TRINITY_PNW72736 | hypothetChlamydomonas_reinh | 34.90 | 0.00 |
| TRINITY_XP_00294 | hypothetVolvox_carteri      | 34.90 | 0.00 |
| TRINITY_XP_02391 | carrier Quercus_suber       | 34.90 | 0.00 |
| TRINITY_GAX80185 | hypothetChlamydomonas_eusti | 34.90 | 0.00 |
| TRINITY_RMZ54126 | hypothetAuxenochlorella_pro | 34.90 | 0.00 |
| TRINITY_XP_00413 | PREDICTICucumis_sativus     | 34.90 | 0.00 |
| TRINITY_KXZ55139 | hypothetGonium_pectorale    | 34.90 | 0.00 |
| TRINITY_KZV15445 | programmDorcoceras_hygromet | 34.90 | 0.00 |
| TRINITY_KGN60062 | hypothetCucumis_sativus     | 34.90 | 0.00 |
| TRINITY_GBG93061 | hypothetChara_braunii       | 34.90 | 0.00 |
| TRINITY_XP_02435 | uncharacPhyscomitrella_pate | 34.90 | 0.00 |
| TRINITY_KXZ45198 | hypothetGonium_pectorale    | 34.90 | 0.00 |
| TRINITY_KXZ55711 | DHC8 prεGonium_pectorale    | 34.90 | 0.00 |
| TRINITY_PNW78493 | hypothetChlamydomonas_reinh | 34.90 | 0.00 |
| TRINITY_XP_00938 | PREDICTIMusa_acuminata      | 34.90 | 0.00 |
| TRINITY_XP_00294 | hypothetVolvox_carteri      | 34.90 | 0.00 |

|                  |           |                     |       |      |
|------------------|-----------|---------------------|-------|------|
| TRINITY_PNH10445 | putative  | Tetrabaena_socialis | 34.90 | 0.00 |
| TRINITY_XP_01763 | PREDICTED | Gossypium_arboreum  | 34.90 | 0.00 |
| TRINITY_XP_02392 | cullin-1  | Quercus_suber       | 34.90 | 0.00 |
| TRINITY_BAJ96688 | predicte  | Hordeum_vulgare     | 34.90 | 0.00 |
| TRINITY_PTQ27624 | hypothet  | Marchantia_polymorp | 34.90 | 0.00 |
| TRINITY_XP_01390 | hypothet  | Monoraphidium_negle | 34.90 | 0.00 |
| TRINITY_XP_01368 | ras-rel   | Brassica_napus      | 34.90 | 0.00 |
| TRINITY_XP_01675 | PREDICTED | Gossypium_hirsutum  | 34.90 | 0.00 |
| TRINITY_GAX76742 | hypothet  | Chlamydomonas_eusti | 34.90 | 0.00 |
| TRINITY_XP_00169 | solaney   | Chlamydomonas_reinh | 34.90 | 0.00 |
| TRINITY_GAX81325 | hypothet  | Chlamydomonas_eusti | 34.90 | 0.00 |
| TRINITY_RVW70653 | Retrovir  | Vitis_vinifera      | 34.90 | 0.00 |
| TRINITY_GAX75393 | hypothet  | Chlamydomonas_eusti | 34.90 | 0.00 |
| TRINITY_PNW86099 | hypothet  | Chlamydomonas_reinh | 34.90 | 0.00 |
| TRINITY_AIU49038 | LOS4, p   | Illicium_henryi     | 34.90 | 0.00 |
| TRINITY_XP_02017 | U3 small  | Aegilops_tauschii   | 34.90 | 0.00 |
| TRINITY_GBG00107 | hypothet  | Raphidocelis_subcap | 34.90 | 0.00 |
| TRINITY_GAX77497 | hypothet  | Chlamydomonas_eusti | 34.90 | 0.00 |
| TRINITY_PRW56431 | Peptide   | Chlorella_sorokinia | 34.90 | 0.00 |
| TRINITY_PNH03819 | hypothet  | Tetrabaena_socialis | 34.90 | 0.00 |
| TRINITY_XP_01390 | hypothet  | Monoraphidium_negle | 34.90 | 0.00 |
| TRINITY_GAX76125 | hypothet  | Chlamydomonas_eusti | 34.90 | 0.00 |
| TRINITY_BAJ95402 | predicte  | Hordeum_vulgare     | 34.80 | 0.00 |
| TRINITY_XP_02130 | uncharac  | Sorghum_bicolor     | 34.80 | 0.00 |
| TRINITY_OAE25115 | hypothet  | Marchantia_polymorp | 34.80 | 0.00 |
| TRINITY_XP_02440 | protein   | Physcomitrella_pate | 34.80 | 0.00 |
| TRINITY_XP_01595 | LOW QUAI  | Arachis_duranensis  | 34.80 | 0.00 |
| TRINITY_PRW60250 | ser thr   | Chlorella_sorokinia | 34.80 | 0.00 |
| TRINITY_XP_02059 | LOW QUAI  | Phalaenopsis_equest | 34.80 | 0.00 |
| TRINITY_XP_01041 | PREDICTED | Camelina_sativa     | 34.80 | 0.00 |
| TRINITY_GBG92058 | hypothet  | Chara_braunii       | 34.80 | 0.00 |
| TRINITY_PHT83098 | hypothet  | Capsicum_annuum     | 34.80 | 0.00 |
| TRINITY_KXZ44781 | hypothet  | Gonium_pectorale    | 34.80 | 0.00 |
| TRINITY_GAQ87417 | hypothet  | Klebsormidium_niten | 34.80 | 0.00 |
| TRINITY_GAQ88885 | NAD-dep   | Klebsormidium_niten | 34.80 | 0.00 |
| TRINITY_PRW61158 | GTPase I  | Chlorella_sorokinia | 34.80 | 0.00 |
| TRINITY_ACO50733 | NADH de   | Micromonas_pusilla  | 34.80 | 0.00 |
| TRINITY_KXZ53246 | hypothet  | Gonium_pectorale    | 34.80 | 0.00 |
| TRINITY_GAQ80689 | Serine    | Klebsormidium_niten | 34.80 | 0.00 |
| TRINITY_XP_02068 | putative  | Dendrobium_catenatu | 34.80 | 0.00 |
| TRINITY_XP_01620 | synaptot  | Arachis_ipaensis    | 34.80 | 0.00 |
| TRINITY_XP_00294 | hypothet  | Volvox_carteri      | 34.80 | 0.00 |
| TRINITY_PRW59174 | calcium   | Chlorella_sorokinia | 34.80 | 0.00 |
| TRINITY_GAQ77713 | HECT don  | Klebsormidium_niten | 34.80 | 0.00 |
| TRINITY_PNW79650 | hypothet  | Chlamydomonas_reinh | 34.80 | 0.00 |
| TRINITY_PNH11697 | Bifuncti  | Tetrabaena_socialis | 34.80 | 0.00 |
| TRINITY_PRW60243 | charged   | Chlorella_sorokinia | 34.80 | 0.00 |
| TRINITY_XP_00169 | Qc-SNARE  | Chlamydomonas_reinh | 34.80 | 0.00 |
| TRINITY_OAE18657 | hypothet  | Marchantia_polymorp | 34.80 | 0.00 |
| TRINITY_GAQ86100 | cation    | Klebsormidium_niten | 34.80 | 0.00 |
| TRINITY_XP_00295 | hypothet  | Volvox_carteri      | 34.80 | 0.00 |
| TRINITY_XP_02173 | phosphol  | Chenopodium_quinoa  | 34.80 | 0.00 |
| TRINITY_BAJ93724 | predicte  | Hordeum_vulgare     | 34.80 | 0.00 |
| TRINITY_KXZ50586 | hypothet  | Gonium_pectorale    | 34.80 | 0.00 |
| TRINITY_XP_00141 | predicte  | Ostreococcus_sp._'1 | 34.80 | 0.00 |
| TRINITY_PIA36270 | hypothet  | Aquilegia_coerulea  | 34.80 | 0.00 |
| TRINITY_PRW56585 | Vacuolar  | Chlorella_sorokinia | 34.80 | 0.00 |
| TRINITY_XP_02295 | RNA-bin   | Cucurbita_moschata  | 34.80 | 0.00 |
| TRINITY_XP_01389 | F-box p   | Monoraphidium_negle | 34.80 | 0.00 |
| TRINITY_GAX77840 | hypothet  | Chlamydomonas_eusti | 34.80 | 0.00 |
| TRINITY_XP_00295 | hypothet  | Volvox_carteri      | 34.80 | 0.00 |
| TRINITY_XP_00635 | PREDICTED | Solanum_tuberosum   | 34.80 | 0.00 |
| TRINITY_BAK02517 | predicte  | Hordeum_vulgare     | 34.80 | 0.00 |
| TRINITY_XP_02295 | probable  | Cucurbita_moschata  | 34.80 | 0.00 |
| TRINITY_GAX77686 | hypothet  | Chlamydomonas_eusti | 34.80 | 0.00 |
| TRINITY_GAX75480 | hypothet  | Chlamydomonas_eusti | 34.80 | 0.00 |

|                                             |       |      |
|---------------------------------------------|-------|------|
| TRINITY_PIA5562(hypothetAquilegia_coerulea  | 34.80 | 0.00 |
| TRINITY_PNH1146(hypothetTetrabaena_socialis | 34.80 | 0.00 |
| TRINITY_AFK4767(unknown Medicago_truncatula | 34.80 | 0.00 |
| TRINITY_GAX8439(hypothetChlamydomonas_eusti | 34.80 | 0.00 |
| TRINITY_OAE1928(hypothetMarchantia_polymorp | 34.80 | 0.00 |
| TRINITY_XP_0029(hypothetVolvox_carteri      | 34.80 | 0.00 |
| TRINITY_XP_0016(predictChlamydomonas_reinh  | 34.80 | 0.00 |
| TRINITY_XP_0124(PREDICTGossypium_raimondii  | 34.80 | 0.00 |
| TRINITY_RWR8770(ABC trarCinnamomum_micranth | 34.80 | 0.00 |
| TRINITY_XP_0029(ATM/ATR-Volvox_carteri      | 34.80 | 0.00 |
| TRINITY_RWR9474(putativeCinnamomum_micranth | 34.80 | 0.00 |
| TRINITY_XP_0058(hypothetChlorella_variabili | 34.80 | 0.00 |
| TRINITY_XP_0238(uncharacQuercus_suber       | 34.80 | 0.00 |
| TRINITY_GAX8285(hypothetChlamydomonas_eusti | 34.80 | 0.00 |
| TRINITY_RYR1017(hypothetArachis_hypogaea    | 34.80 | 0.00 |
| TRINITY_PSC6944(arginineMicractinium_conduc | 34.80 | 0.00 |
| TRINITY_RID5033(hypothetBrassica_rapa       | 34.80 | 0.00 |
| TRINITY_XP_0056(DnaJ-donCoccomyxa_subellips | 34.80 | 0.00 |
| TRINITY_XP_0244(calpain-Physcomitrella_pate | 34.80 | 0.00 |
| TRINITY_RZC0066(Calcium-Glycine_soja        | 34.80 | 0.00 |
| TRINITY_XP_0028(pathogerArabidopsis_lyrata  | 34.80 | 0.00 |
| TRINITY_GAQ8096(M13 famiKlebsormidium_niten | 34.80 | 0.00 |
| TRINITY_PRW590015 -3 exChlorella_sorokinia  | 34.80 | 0.00 |
| TRINITY_RMZ5517(hypothetAuxenochlorella_pro | 34.80 | 0.00 |
| TRINITY_AIU4162(ABC trarHevea_brasiliensis  | 34.80 | 0.00 |
| TRINITY_OWM6383(hypothetPunica_granatum     | 34.70 | 0.00 |
| TRINITY_OAE2597(hypothetMarchantia_polymorp | 34.70 | 0.00 |
| TRINITY_XP_0257(serine/tPanicum_hallii      | 34.70 | 0.00 |
| TRINITY_OAE2957(hypothetMarchantia_polymorp | 34.70 | 0.00 |
| TRINITY_XP_0216(tetraketHevea_brasiliensis  | 34.70 | 0.00 |
| TRINITY_XP_0120(probableJatropha_curcas     | 34.70 | 0.00 |
| TRINITY_KXZ4302(hypothetGonium_pectorale    | 34.70 | 0.00 |
| TRINITY_XP_0239(DNA misnQuercus_suber       | 34.70 | 0.00 |
| TRINITY_AML7930(putativePrasinococcus_capsu | 34.70 | 0.00 |
| TRINITY_XP_0116(BTB/POZ Amborella_trichopod | 34.70 | 0.00 |
| TRINITY_GAQ9165(hypothetKlebsormidium_niten | 34.70 | 0.00 |
| TRINITY_XP_0156(mitochorOryza_sativa        | 34.70 | 0.00 |
| TRINITY_PSC7680(alpha bMicractinium_conduc  | 34.70 | 0.00 |
| TRINITY_PPD8108(hypothetGossypium_barbadens | 34.70 | 0.00 |
| TRINITY_EMS5136(WD and tTriticum_urartu     | 34.70 | 0.00 |
| TRINITY_GBG8825(hypothetChara_braunii       | 34.70 | 0.00 |
| TRINITY_XP_0024(histone-Sorghum_bicolor     | 34.70 | 0.00 |
| TRINITY_XP_0172(PREDICTDaucus_carota        | 34.70 | 0.00 |
| TRINITY_XP_0238(protein Quercus_suber       | 34.70 | 0.00 |
| TRINITY_XP_0202(rac-likeAsparagus_officinal | 34.70 | 0.00 |
| TRINITY_KJB4190(hypothetGossypium_raimondii | 34.70 | 0.00 |
| TRINITY_XP_0238(ubiquitiQuercus_suber       | 34.70 | 0.00 |
| TRINITY_XP_0228(calcineiOlea_europaea       | 34.70 | 0.00 |
| TRINITY_EFJ2052(hypothetSelaginella_moellen | 34.70 | 0.00 |
| TRINITY_GAQ8786(sphingonKlebsormidium_niten | 34.70 | 0.00 |
| TRINITY_RAL3909(hypothetCuscuta_australis   | 34.70 | 0.00 |
| TRINITY_PNH1266(Acyl-prTetrabaena_socialis  | 34.70 | 0.00 |
| TRINITY_XP_0030(AspartatMicromonas_pusilla  | 34.70 | 0.00 |
| TRINITY_PIN1367(Zuotin  Handroanthus_impeti | 34.70 | 0.00 |
| TRINITY_OAE2441(hypothetMarchantia_polymorp | 34.70 | 0.00 |
| TRINITY_XP_0243(serine/tPhyscomitrella_pate | 34.70 | 0.00 |
| TRINITY_XP_0014(predictOstreococcus_sp._'1  | 34.70 | 0.00 |
| TRINITY_XP_0238(alpha-acQuercus_suber       | 34.70 | 0.00 |
| TRINITY_EFJ3720(hypothetSelaginella_moellen | 34.70 | 0.00 |
| TRINITY_XP_0029(hypothetVolvox_carteri      | 34.70 | 0.00 |
| TRINITY_GAX8092(hypothetChlamydomonas_eusti | 34.70 | 0.00 |
| TRINITY_GAX7592(hypothetChlamydomonas_eusti | 34.70 | 0.00 |
| TRINITY_XP_0056(hypothetCoccomyxa_subellips | 34.70 | 0.00 |
| TRINITY_GAQ8635(exoriborKlebsormidium_niten | 34.70 | 0.00 |
| TRINITY_XP_0202(uncharacAsparagus_officinal | 34.70 | 0.00 |
| TRINITY_GBG5905(hypothetChara_braunii       | 34.70 | 0.00 |

|                  |          |                     |       |      |
|------------------|----------|---------------------|-------|------|
| TRINITY_GAX79861 | hypothet | Chlamydomonas_eusti | 34.70 | 0.00 |
| TRINITY_OAE2762  | hypothet | Marchantia_polymorp | 34.70 | 0.00 |
| TRINITY_XP_00231 | phosphoi | Populus_trichocarpa | 34.70 | 0.00 |
| TRINITY_XP_0029  | hypothet | Volvox_carteri      | 34.70 | 0.00 |
| TRINITY_OMO5889  | hypothet | Corchorus_capsulari | 34.70 | 0.00 |
| TRINITY_GAX7267  | hypothet | Chlamydomonas_eusti | 34.70 | 0.00 |
| TRINITY_OAE2555  | hypothet | Marchantia_polymorp | 34.70 | 0.00 |
| TRINITY_XP_0270  | mRNA-dec | Coffea_arabica      | 34.70 | 0.00 |
| TRINITY_XP_0068  | anaphas  | Amborella_trichopod | 34.70 | 0.00 |
| TRINITY_XP_0014  | predict  | Ostreococcus_sp._'1 | 34.70 | 0.00 |
| TRINITY_XP_0217  | ankyrin  | Chenopodium_quinoa  | 34.70 | 0.00 |
| TRINITY_XP_0238  | DNA_rep  | Quercus_suber       | 34.70 | 0.00 |
| TRINITY_XP_0243  | ATP-depe | Physcomitrella_pate | 34.70 | 0.00 |
| TRINITY_XP_0201  | protein  | Aegilops_tauschii   | 34.70 | 0.00 |
| TRINITY_PNW7758  | hypothet | Chlamydomonas_reinh | 34.70 | 0.00 |
| TRINITY_XP_0217  | CBL-int  | Chenopodium_quinoa  | 34.70 | 0.00 |
| TRINITY_VDD5784  | unnamed  | Brassica_oleracea   | 34.70 | 0.00 |
| TRINITY_PKA6656  | Serine/t | Apostasia_shenzheni | 34.70 | 0.00 |
| TRINITY_GAX7714  | hypothet | Chlamydomonas_eusti | 34.70 | 0.00 |
| TRINITY_GBF9459  | hypothet | Raphidocelis_subcap | 34.70 | 0.00 |
| TRINITY_XP_0029  | hypothet | Volvox_carteri      | 34.70 | 0.00 |
| TRINITY_XP_0138  | hypothet | Monoraphidium_negle | 34.70 | 0.00 |
| TRINITY_BAK0177  | predict  | Hordeum_vulgare     | 34.70 | 0.00 |
| TRINITY_XP_0238  | uncharac | Quercus_suber       | 34.70 | 0.00 |
| TRINITY_PRW6126  | DNAJ he  | Chlorella_sorokinia | 34.70 | 0.00 |
| TRINITY_GAX7450  | hypothet | Chlamydomonas_eusti | 34.70 | 0.00 |
| TRINITY_GBF9660  | hypothet | Raphidocelis_subcap | 34.70 | 0.00 |
| TRINITY_GAX7422  | hypothet | Chlamydomonas_eusti | 34.70 | 0.00 |
| TRINITY_PWA9317  | Protein  | Artemisia_annua     | 34.70 | 0.00 |
| TRINITY_KMZ5949  | E3 ubiq  | Zostera_marina      | 34.60 | 0.00 |
| TRINITY_XP_0243  | uncharac | Physcomitrella_pate | 34.60 | 0.00 |
| TRINITY_XP_0128  | PREDICTI | Erythranthe_guttata | 34.60 | 0.00 |
| TRINITY_GBF9293  | cytochr  | Raphidocelis_subcap | 34.60 | 0.00 |
| TRINITY_OAE3248  | hypothet | Marchantia_polymorp | 34.60 | 0.00 |
| TRINITY_PSC6993  | Copper l | Micractinium_conduc | 34.60 | 0.00 |
| TRINITY_GAX7865  | hypothet | Chlamydomonas_eusti | 34.60 | 0.00 |
| TRINITY_GBG9114  | hypothet | Chara_braunii       | 34.60 | 0.00 |
| TRINITY_XP_0104  | PREDICTI | Camelina_sativa     | 34.60 | 0.00 |
| TRINITY_GAX8389  | hypothet | Chlamydomonas_eusti | 34.60 | 0.00 |
| TRINITY_PLY9770  | hypothet | Lactuca_sativa      | 34.60 | 0.00 |
| TRINITY_XP_0217  | actin-7  | Chenopodium_quinoa  | 34.60 | 0.00 |
| TRINITY_XP_0075  | PHD trar | Bathycoccus_prasinc | 34.60 | 0.00 |
| TRINITY_XP_0172  | PREDICTI | Daucus_carota       | 34.60 | 0.00 |
| TRINITY_XP_0075  | predict  | Bathycoccus_prasinc | 34.60 | 0.00 |
| TRINITY_XP_0159  | peroxis  | Arachis_duranensis  | 34.60 | 0.00 |
| TRINITY_XP_0217  | probable | Chenopodium_quinoa  | 34.60 | 0.00 |
| TRINITY_XP_0058  | hypothet | Chlorella_variabili | 34.60 | 0.00 |
| TRINITY_PRW6126  | DNAJ he  | Chlorella_sorokinia | 34.60 | 0.00 |
| TRINITY_XP_0273  | very-lor | Abrus_precatorius   | 34.60 | 0.00 |
| TRINITY_OMO7319  | hypothet | Corchorus_capsulari | 34.60 | 0.00 |
| TRINITY_GAX8038  | hypothet | Chlamydomonas_eusti | 34.60 | 0.00 |
| TRINITY_PNW8427  | hypothet | Chlamydomonas_reinh | 34.60 | 0.00 |
| TRINITY_KXZ5407  | hypothet | Gonium_pectorale    | 34.60 | 0.00 |
| TRINITY_XP_0205  | LETM1 ar | Sesamum_indicum     | 34.60 | 0.00 |
| TRINITY_GBF9269  | hypothet | Raphidocelis_subcap | 34.60 | 0.00 |
| TRINITY_GAQ9104  | calcium  | Klebsormidium_niten | 34.60 | 0.00 |
| TRINITY_OWM6913  | hypothet | Punica_granatum     | 34.60 | 0.00 |
| TRINITY_BAK0219  | predict  | Hordeum_vulgare     | 34.60 | 0.00 |
| TRINITY_XP_0239  | cell di  | Quercus_suber       | 34.60 | 0.00 |
| TRINITY_GAX8457  | hypothet | Chlamydomonas_eusti | 34.60 | 0.00 |
| TRINITY_EFJ0963  | hypothet | Selaginella_moellen | 34.60 | 0.00 |
| TRINITY_GBF8810  | hypothet | Raphidocelis_subcap | 34.60 | 0.00 |
| TRINITY_XP_0029  | SCY1-li  | Selaginella_moellen | 34.60 | 0.00 |
| TRINITY_KXZ4840  | hypothet | Gonium_pectorale    | 34.60 | 0.00 |
| TRINITY_XP_0058  | hypothet | Chlorella_variabili | 34.60 | 0.00 |
| TRINITY_GAQ8989  | hypothet | Klebsormidium_niten | 34.60 | 0.00 |

|                          |                     |       |      |
|--------------------------|---------------------|-------|------|
| TRINITY_XP_00664PREDICTO | Oryza_brachyantha   | 34.60 | 0.00 |
| TRINITY_PNW7307(hypothet | Chlamydomonas_reinh | 34.60 | 0.00 |
| TRINITY_PNW6989(hypothet | Chlamydomonas_reinh | 34.60 | 0.00 |
| TRINITY_XP_0138(hypothet | Monoraphidium_negle | 34.60 | 0.00 |
| TRINITY_PTQ3629(hypothet | Marchantia_polymorp | 34.60 | 0.00 |
| TRINITY_PNR6013(hypothet | Physcomitrella_pate | 34.60 | 0.00 |
| TRINITY_KXZ5006(hypothet | Gonium_pectorale    | 34.60 | 0.00 |
| TRINITY_PNH1158(Serine/t | Tetrabaena_socialis | 34.60 | 0.00 |
| TRINITY_XP_0202(uncharac | Asparagus_officinal | 34.60 | 0.00 |
| TRINITY_GAX7327(hypothet | Chlamydomonas_eusti | 34.60 | 0.00 |

|                  |            |                     |       |      |
|------------------|------------|---------------------|-------|------|
| TRINITY_XP_00564 | alpha/beta | Coccomyxa_subellips | 34.60 | 0.00 |
| TRINITY_XP_0139  | hypothet   | Monoraphidium_negle | 34.60 | 0.00 |
| TRINITY_XP_00294 | hypothet   | Volvox_carteri      | 34.60 | 0.00 |
| TRINITY_XP_02454 | gem-assc   | Selaginella_moellen | 34.60 | 0.00 |
| TRINITY_GAX8281  | hypothet   | Chlamydomonas_eusti | 34.60 | 0.00 |
| TRINITY_GAX7463  | hypothet   | Chlamydomonas_eusti | 34.60 | 0.00 |
| TRINITY_GAX8373  | hypothet   | Chlamydomonas_eusti | 34.60 | 0.00 |
| TRINITY_GAX7595  | hypothet   | Chlamydomonas_eusti | 34.60 | 0.00 |
| TRINITY_BAJ9694  | predicte   | Hordeum_vulgare     | 34.60 | 0.00 |
| TRINITY_GAX7842  | hypothet   | Chlamydomonas_eusti | 34.60 | 0.00 |
| TRINITY_PWA8786  | multiple   | Artemisia_annua     | 34.60 | 0.00 |
| TRINITY_GBF9650  | hypothet   | Raphidocelis_subcap | 34.60 | 0.00 |
| TRINITY_GBG6428  | hypothet   | Chara_braunii       | 34.60 | 0.00 |
| TRINITY_GAX7670  | hypothet   | Chlamydomonas_eusti | 34.60 | 0.00 |
| TRINITY_GAX8191  | hypothet   | Chlamydomonas_eusti | 34.60 | 0.00 |
| TRINITY_XP_00295 | hypothet   | Volvox_carteri      | 34.60 | 0.00 |
| TRINITY_XP_0139  | putative   | Monoraphidium_negle | 34.60 | 0.00 |
| TRINITY_PNW7702  | hypothet   | Chlamydomonas_reinh | 34.60 | 0.00 |
| TRINITY_XP_0030  | predicte   | Micromonas_pusilla  | 34.60 | 0.00 |
| TRINITY_OAE2597  | hypothet   | Marchantia_polymorp | 34.50 | 0.00 |
| TRINITY_GAQ8237  | GTPase     | Klebsormidium_niten | 34.50 | 0.00 |
| TRINITY_RHN3997  | putative   | Medicago_truncatula | 34.50 | 0.00 |
| TRINITY_KXZ4330  | hypothet   | Gonium_pectorale    | 34.50 | 0.00 |
| TRINITY_XP_02172 | leucine    | Chenopodium_quinoa  | 34.50 | 0.00 |
| TRINITY_KDO6609  | hypothet   | Citrus_sinensis     | 34.50 | 0.00 |
| TRINITY_GAQ8194  | hypothet   | Klebsormidium_niten | 34.50 | 0.00 |
| TRINITY_PHT8550  | 26S prot   | Capsicum_annuum     | 34.50 | 0.00 |
| TRINITY_GAX7413  | hypothet   | Chlamydomonas_eusti | 34.50 | 0.00 |
| TRINITY_XP_0025  | predicte   | Micromonas_commoda  | 34.50 | 0.00 |
| TRINITY_EFJ3104  | hypothet   | Selaginella_moellen | 34.50 | 0.00 |
| TRINITY_XP_0104  | PREDICTE   | Camelina_sativa     | 34.50 | 0.00 |
| TRINITY_GAV6461  | PB1 dom    | Cephalotus_follicul | 34.50 | 0.00 |
| TRINITY_XP_0239  | uncharac   | Quercus_suber       | 34.50 | 0.00 |
| TRINITY_XP_02162 | lysosom    | Manihot_esculenta   | 34.50 | 0.00 |
| TRINITY_ADE7668  | unknown    | Picea_sitchensis    | 34.50 | 0.00 |
| TRINITY_XP_01091 | PREDICTE   | Elaeis_guineensis   | 34.50 | 0.00 |
| TRINITY_GBG8282  | hypothet   | Chara_braunii       | 34.50 | 0.00 |
| TRINITY_KXZ4138  | hypothet   | Gonium_pectorale    | 34.50 | 0.00 |
| TRINITY_KXZ4748  | hypothet   | Gonium_pectorale    | 34.50 | 0.00 |
| TRINITY_XP_0238  | probable   | Quercus_suber       | 34.50 | 0.00 |
| TRINITY_XP_02391 | protein    | Quercus_suber       | 34.50 | 0.00 |
| TRINITY_GAX8539  | hypothet   | Chlamydomonas_eusti | 34.50 | 0.00 |
| TRINITY_XP_00584 | hypothet   | Chlorella_variabili | 34.50 | 0.00 |
| TRINITY_XP_0091  | PREDICTE   | Brassica_rapa       | 34.50 | 0.00 |
| TRINITY_PNR5000  | hypothet   | Physcomitrella_pate | 34.50 | 0.00 |
| TRINITY_XP_0029  | cyclin-c   | Selaginella_moellen | 34.50 | 0.00 |
| TRINITY_XP_0016  | componer   | Chlamydomonas_reinh | 34.50 | 0.00 |
| TRINITY_GAX7930  | hypothet   | Chlamydomonas_eusti | 34.50 | 0.00 |
| TRINITY_XP_00961 | PREDICTE   | Nicotiana_tomentosi | 34.50 | 0.00 |
| TRINITY_XP_0166  | PREDICTE   | Gossypium_hirsutum  | 34.50 | 0.00 |
| TRINITY_GAX8351  | hypothet   | Chlamydomonas_eusti | 34.50 | 0.00 |
| TRINITY_XP_0244  | 11-beta    | Populus_trichocarpa | 34.50 | 0.00 |
| TRINITY_XP_0063  | uncharac   | Eutrema_salsugineur | 34.50 | 0.00 |
| TRINITY_XP_00141 | predicte   | Ostreococcus_sp._'1 | 34.50 | 0.00 |
| TRINITY_OEL3448  | hypothet   | Dichanthelium_oligo | 34.50 | 0.00 |
| TRINITY_XP_0042  | PREDICTE   | Fragaria_vesca      | 34.50 | 0.00 |
| TRINITY_KZV4685  | hypothet   | Dorcoceras_hygromet | 34.50 | 0.00 |
| TRINITY_GAX7757  | hypothet   | Chlamydomonas_eusti | 34.50 | 0.00 |
| TRINITY_GAX83734 | hypothet   | Chlamydomonas_eusti | 34.50 | 0.00 |
| TRINITY_XP_0030  | voltage    | Micromonas_pusilla  | 34.50 | 0.00 |
| TRINITY_XP_0125  | protein    | Cicer_arietinum     | 34.50 | 0.00 |
| TRINITY_XP_0158  | TLD dom    | Ziziphus_jujuba     | 34.50 | 0.00 |
| TRINITY_XP_0025  | predicte   | Micromonas_commoda  | 34.50 | 0.00 |
| TRINITY_OMO7495  | Zinc fir   | Corchorus_olitorius | 34.50 | 0.00 |
| TRINITY_KXZ4775  | hypothet   | Gonium_pectorale    | 34.50 | 0.00 |
| TRINITY_XP_0025  | predicte   | Micromonas_commoda  | 34.50 | 0.00 |



|                  |          |                     |       |      |
|------------------|----------|---------------------|-------|------|
| TRINITY_NP_00123 | phospho  | Glycine_max         | 34.50 | 0.00 |
| TRINITY_PNH12852 | hypothet | Tetrabaena_socialis | 34.50 | 0.00 |
| TRINITY_GAX80199 | hypothet | Chlamydomonas_eusti | 34.50 | 0.00 |
| TRINITY_XP_02581 | probable | Panicum_hallii      | 34.50 | 0.00 |
| TRINITY_XP_00170 | predict  | Chlamydomonas_reinh | 34.50 | 0.00 |
| TRINITY_GAQ90902 | hypothet | Klebsormidium_niten | 34.50 | 0.00 |
| TRINITY_GAX77149 | hypothet | Chlamydomonas_eusti | 34.50 | 0.00 |
| TRINITY_XP_00564 | DUF1740- | Coccomyxa_subellips | 34.50 | 0.00 |
| TRINITY_OWM66448 | hypothet | Punica_granatum     | 34.50 | 0.00 |
| TRINITY_KXZ50242 | hypothet | Gonium_pectorale    | 34.50 | 0.00 |
| TRINITY_CAA74646 | putative | Sorghum_bicolor     | 34.50 | 0.00 |
| TRINITY_NP_17273 | RHOMBOII | Arabidopsis_thalian | 34.50 | 0.00 |
| TRINITY_OAE30878 | hypothet | Marchantia_polymorp | 34.50 | 0.00 |
| TRINITY_GAX76948 | hypothet | Chlamydomonas_eusti | 34.50 | 0.00 |
| TRINITY_XP_00564 | HD-domai | Coccomyxa_subellips | 34.50 | 0.00 |
| TRINITY_GAX79021 | hypothet | Chlamydomonas_eusti | 34.50 | 0.00 |
| TRINITY_XP_00169 | predict  | Chlamydomonas_reinh | 34.50 | 0.00 |
| TRINITY_GAX75618 | hypothet | Chlamydomonas_eusti | 34.50 | 0.00 |
| TRINITY_KXZ51342 | hypothet | Gonium_pectorale    | 34.50 | 0.00 |
| TRINITY_XP_00170 | cytochr  | Chlamydomonas_reinh | 34.50 | 0.00 |
| TRINITY_XP_01918 | PREDICTH | Ipomoea_nil         | 34.40 | 0.00 |
| TRINITY_XP_00565 | vesicle- | Coccomyxa_subellips | 34.40 | 0.00 |
| TRINITY_XP_00228 | PREDICTH | Vitis_vinifera      | 34.40 | 0.00 |
| TRINITY_KMZ58530 | Ras-rel  | Zostera_marina      | 34.40 | 0.00 |
| TRINITY_XP_02390 | uncharac | Quercus_suber       | 34.40 | 0.00 |
| TRINITY_GAQ81947 | hypothet | Klebsormidium_niten | 34.40 | 0.00 |
| TRINITY_XP_01507 | bidirect | Solanum_pennellii   | 34.40 | 0.00 |
| TRINITY_GAQ87866 | sphingon | Klebsormidium_niten | 34.40 | 0.00 |
| TRINITY_XP_00141 | predict  | Ostreococcus_sp._'1 | 34.40 | 0.00 |
| TRINITY_XP_01944 | PREDICTH | Lupinus_angustifoli | 34.40 | 0.00 |
| TRINITY_XP_01032 | mRNA-ca  | Solanum_lycopersicu | 34.40 | 0.00 |
| TRINITY_PTQ30079 | hypothet | Marchantia_polymorp | 34.40 | 0.00 |
| TRINITY_PSC68725 | ubiquiti | Micractinium_conduc | 34.40 | 0.00 |
| TRINITY_PNR46824 | hypothet | Physcomitrella_pate | 34.40 | 0.00 |
| TRINITY_NP_17997 | Class I  | Arabidopsis_thalian | 34.40 | 0.00 |
| TRINITY_XP_00295 | hypothet | Volvox_carteri      | 34.40 | 0.00 |
| TRINITY_XP_01094 | PREDICTH | Elaeis_guineensis   | 34.40 | 0.00 |
| TRINITY_XP_01916 | PREDICTH | Ipomoea_nil         | 34.40 | 0.00 |
| TRINITY_XP_00141 | predict  | Ostreococcus_sp._'1 | 34.40 | 0.00 |
| TRINITY_GBF97446 | bifuncti | Raphidocelis_subcap | 34.40 | 0.00 |
| TRINITY_PRW05922 | melanot  | Chlorella_sorokinia | 34.40 | 0.00 |
| TRINITY_XP_00295 | hypothet | Volvox_carteri      | 34.40 | 0.00 |
| TRINITY_PPS10070 | hypothet | Gossypium_barbadens | 34.40 | 0.00 |
| TRINITY_PNH04196 | putative | Tetrabaena_socialis | 34.40 | 0.00 |
| TRINITY_CBI20751 | unnamed  | Vitis_vinifera      | 34.40 | 0.00 |
| TRINITY_OMO70040 | hypothet | Corchorus_capsulari | 34.40 | 0.00 |
| TRINITY_XP_02026 | beta-ad  | Asparagus_officinal | 34.40 | 0.00 |
| TRINITY_GAQ81728 | Protein  | Klebsormidium_niten | 34.40 | 0.00 |
| TRINITY_PNW85045 | hypothet | Chlamydomonas_reinh | 34.40 | 0.00 |
| TRINITY_GAX84082 | hypothet | Chlamydomonas_eusti | 34.40 | 0.00 |
| TRINITY_GAX78478 | hypothet | Chlamydomonas_eusti | 34.40 | 0.00 |
| TRINITY_GBF99180 | eukaryot | Raphidocelis_subcap | 34.40 | 0.00 |
| TRINITY_XP_00497 | ubiquiti | Setaria_italica     | 34.40 | 0.00 |
| TRINITY_RMZ52078 | hypothet | Auxenochlorella_pro | 34.40 | 0.00 |
| TRINITY_XP_02171 | ADP-rib  | Chenopodium_quinoa  | 34.40 | 0.00 |
| TRINITY_GBF94631 | peptidy  | Raphidocelis_subcap | 34.40 | 0.00 |
| TRINITY_VDD57322 | unnamed  | Brassica_oleracea   | 34.40 | 0.00 |
| TRINITY_OMP07783 | hypothet | Corchorus_olitorius | 34.40 | 0.00 |
| TRINITY_OAE35701 | hypothet | Marchantia_polymorp | 34.40 | 0.00 |
| TRINITY_PNW81355 | hypothet | Chlamydomonas_reinh | 34.40 | 0.00 |
| TRINITY_PWA78543 | Alkaline | Artemisia_annua     | 34.40 | 0.00 |
| TRINITY_KXZ43220 | hypothet | Gonium_pectorale    | 34.40 | 0.00 |
| TRINITY_XP_01139 | E3 ubiq  | Auxenochlorella_pro | 34.40 | 0.00 |
| TRINITY_GAX77327 | hypothet | Chlamydomonas_eusti | 34.40 | 0.00 |
| TRINITY_XP_02581 | pleckst  | Panicum_hallii      | 34.40 | 0.00 |
| TRINITY_XP_02088 | RNA-bin  | Arabidopsis_lyrata  | 34.40 | 0.00 |

|                  |            |                        |       |      |
|------------------|------------|------------------------|-------|------|
| TRINITY_XP_01066 | PREDICTIVE | Vitis_vinifera         | 34.40 | 0.00 |
| TRINITY_GBF91973 | methylyt   | Raphidocelis_subcap    | 34.40 | 0.00 |
| TRINITY_PNW77586 | hypothet   | Chlamydomonas_reinh    | 34.40 | 0.00 |
| TRINITY_GAX78232 | hypothet   | Chlamydomonas_eusti    | 34.40 | 0.00 |
| TRINITY_GAQ91048 | calcium    | Klebsormidium_niten    | 34.40 | 0.00 |
| TRINITY_XP_00294 | hypothet   | Volvox_carteri         | 34.40 | 0.00 |
| TRINITY_XP_00564 | hypothet   | Coccomyxa_subellips    | 34.40 | 0.00 |
| TRINITY_GAQ79408 | Prolyl     | Klebsormidium_niten    | 34.40 | 0.00 |
| TRINITY_KXZ41385 | hypothet   | Gonium_pectorale       | 34.40 | 0.00 |
| TRINITY_XP_00939 | PREDICTIVE | Musa_acuminata         | 34.40 | 0.00 |
| TRINITY_GAX78797 | hypothet   | Chlamydomonas_eusti    | 34.40 | 0.00 |
| TRINITY_PSC71405 | zinc       | phcMicractinium_conduc | 34.40 | 0.00 |
| TRINITY_XP_00295 | hypothet   | Volvox_carteri         | 34.40 | 0.00 |
| TRINITY_KXZ43867 | hypothet   | Gonium_pectorale       | 34.40 | 0.00 |
| TRINITY_XP_00295 | hypothet   | Volvox_carteri         | 34.40 | 0.00 |
| TRINITY_GBF90055 | hypothet   | Raphidocelis_subcap    | 34.40 | 0.00 |
| TRINITY_XP_02283 | TLDc       | [O:Ostreococcus_tauri  | 34.40 | 0.00 |
| TRINITY_XP_02642 | uncharac   | Papaver_somniferum     | 34.40 | 0.00 |
| TRINITY_GAX85402 | hypothet   | Chlamydomonas_eusti    | 34.40 | 0.00 |
| TRINITY_XP_00169 | predicte   | Chlamydomonas_reinh    | 34.40 | 0.00 |
| TRINITY_GAX83532 | hypothet   | Chlamydomonas_eusti    | 34.40 | 0.00 |
| TRINITY_XP_02161 | ras-rel    | Manihot_esculenta      | 34.30 | 0.00 |
| TRINITY_OEL34352 | Nucleos    | Dichanthelium_oligo    | 34.30 | 0.00 |
| TRINITY_AJR22386 | CBL-inte   | Triticum_aestivum      | 34.30 | 0.00 |
| TRINITY_XP_01100 | PREDICTIVE | Populus_euphratica     | 34.30 | 0.00 |
| TRINITY_BAT76333 | hypothet   | Vigna_angularis        | 34.30 | 0.00 |
| TRINITY_XP_02561 | mitochor   | Arachis_hypogaea       | 34.30 | 0.00 |
| TRINITY_XP_01595 | eukaryot   | Arachis_duranensis     | 34.30 | 0.00 |
| TRINITY_XP_00584 | hypothet   | Chlorella_variabili    | 34.30 | 0.00 |
| TRINITY_XP_02294 | uncharac   | Cucurbita_moschata     | 34.30 | 0.00 |
| TRINITY_XP_02387 | nitroger   | Quercus_suber          | 34.30 | 0.00 |
| TRINITY_PIA60094 | hypothet   | Aquilegia_coerulea     | 34.30 | 0.00 |
| TRINITY_RXH91446 | hypothet   | Malus_domestica        | 34.30 | 0.00 |
| TRINITY_XP_02793 | polyader   | Vigna_unguiculata      | 34.30 | 0.00 |
| TRINITY_RID66076 | hypothet   | Brassica_rapa          | 34.30 | 0.00 |
| TRINITY_GAQ88861 | hypothet   | Klebsormidium_niten    | 34.30 | 0.00 |
| TRINITY_XP_01109 | serine     | cSesamum_indicum       | 34.30 | 0.00 |
| TRINITY_XP_01588 | C2 and     | (Ziziphus_jujuba       | 34.30 | 0.00 |
| TRINITY_GAX74019 | hypothet   | Chlamydomonas_eusti    | 34.30 | 0.00 |
| TRINITY_OAE28567 | hypothet   | Marchantia_polymorp    | 34.30 | 0.00 |
| TRINITY_GAX82928 | hypothet   | Chlamydomonas_eusti    | 34.30 | 0.00 |
| TRINITY_XP_01915 | PREDICTIVE | Ipomoea_nil            | 34.30 | 0.00 |
| TRINITY_PNH03236 | putative   | Tetrabaena_socialis    | 34.30 | 0.00 |
| TRINITY_GAX75037 | hypothet   | Chlamydomonas_eusti    | 34.30 | 0.00 |
| TRINITY_XP_02167 | uncharac   | Hevea_brasiliensis     | 34.30 | 0.00 |
| TRINITY_GAX73443 | hypothet   | Chlamydomonas_eusti    | 34.30 | 0.00 |
| TRINITY_XP_00584 | hypothet   | Chlorella_variabili    | 34.30 | 0.00 |
| TRINITY_XP_00250 | predicte   | Micromonas_commoda     | 34.30 | 0.00 |
| TRINITY_XP_02387 | uncharac   | Quercus_suber          | 34.30 | 0.00 |
| TRINITY_XP_01005 | PREDICTIVE | Eucalyptus_grandis     | 34.30 | 0.00 |
| TRINITY_XP_00751 | predicte   | Bathycoccus_prasinc    | 34.30 | 0.00 |
| TRINITY_XP_00250 | predicte   | Micromonas_commoda     | 34.30 | 0.00 |
| TRINITY_KXZ46829 | hypothet   | Gonium_pectorale       | 34.30 | 0.00 |
| TRINITY_XP_00294 | hypothet   | Volvox_carteri         | 34.30 | 0.00 |
| TRINITY_PNW81296 | hypothet   | Chlamydomonas_reinh    | 34.30 | 0.00 |
| TRINITY_XP_01390 | molybder   | Monoraphidium_negle    | 34.30 | 0.00 |
| TRINITY_CDY43337 | BnaC04g2   | Brassica_napus         | 34.30 | 0.00 |
| TRINITY_ADU04612 | NADH del   | Mesostigma_viride      | 34.30 | 0.00 |
| TRINITY_XP_01587 | uncharac   | Ziziphus_jujuba        | 34.30 | 0.00 |
| TRINITY_KXZ55096 | hypothet   | Gonium_pectorale       | 34.30 | 0.00 |
| TRINITY_EFJ33766 | hypothet   | Selaginella_moellen    | 34.30 | 0.00 |
| TRINITY_GAX80100 | hypothet   | Chlamydomonas_eusti    | 34.30 | 0.00 |
| TRINITY_XP_02389 | H(+)/Cl    | Quercus_suber          | 34.30 | 0.00 |
| TRINITY_KDD75181 | hypothet   | Helicosporidium_sp.    | 34.30 | 0.00 |
| TRINITY_KCW87633 | hypothet   | Eucalyptus_grandis     | 34.30 | 0.00 |
| TRINITY_PTQ47780 | hypothet   | Marchantia_polymorp    | 34.30 | 0.00 |

|                  |                             |       |      |
|------------------|-----------------------------|-------|------|
| TRINITY_GBF91882 | hypothetRaphidocelis_subcap | 34.30 | 0.00 |
| TRINITY_OMO62505 | hypothetCorchorus_capsulari | 34.30 | 0.00 |
| TRINITY_XP_02388 | uncharacQuercus_suber       | 34.30 | 0.00 |
| TRINITY_XP_00422 | COP9 sicSolanum_lycopersicu | 34.30 | 0.00 |
| TRINITY_GAX76299 | hypothetChlamydomonas_eusti | 34.30 | 0.00 |
| TRINITY_GAX85521 | hypothetChlamydomonas_eusti | 34.30 | 0.00 |
| TRINITY_BAK01753 | predicteHordeum_vulgare     | 34.30 | 0.00 |
| TRINITY_XP_00306 | predicteMicromonas_pusilla  | 34.30 | 0.00 |
| TRINITY_AAV44205 | unknow rOryza_sativa        | 34.30 | 0.00 |
| TRINITY_EFJ33366 | hypothetSelaginella_moellen | 34.30 | 0.00 |
| TRINITY_RZC25114 | RNA-binGlycine_soja         | 34.30 | 0.00 |
| TRINITY_KXZ55275 | hypothetGonium_pectorale    | 34.30 | 0.00 |
| TRINITY_XP_02438 | serine/tPhyscomitrella_pate | 34.30 | 0.00 |
| TRINITY_XP_00564 | hypothetCoccomyxa_subellips | 34.30 | 0.00 |
| TRINITY_AVY91638 | cytosineSaccharum_hybrid_cu | 34.30 | 0.00 |
| TRINITY_GAQ77653 | ATMRK seKlebsormidium_niten | 34.30 | 0.00 |
| TRINITY_OEL14116 | BTB/POZ Dichanthelium_oligo | 34.30 | 0.00 |
| TRINITY_GAQ89753 | hypothetKlebsormidium_niten | 34.30 | 0.00 |
| TRINITY_XP_02306 | nuclear Cucurbita_maxima    | 34.30 | 0.00 |
| TRINITY_EFJ13715 | hypothetSelaginella_moellen | 34.30 | 0.00 |
| TRINITY_XP_00628 | translatCapsella_rubella    | 34.30 | 0.00 |
| TRINITY_XP_02403 | serine/tMorus_notabilis     | 34.30 | 0.00 |
| TRINITY_XP_02129 | transcriHerrania_umbratica  | 34.30 | 0.00 |
| TRINITY_KXZ56765 | hypothetGonium_pectorale    | 34.30 | 0.00 |
| TRINITY_XP_01396 | E3 ubiqMonoraphidium_negle  | 34.30 | 0.00 |
| TRINITY_PNW70994 | hypothetChlamydomonas_reinh | 34.30 | 0.00 |
| TRINITY_GAX77702 | hypothetChlamydomonas_eusti | 34.30 | 0.00 |
| TRINITY_GAX78636 | hypothetChlamydomonas_eusti | 34.30 | 0.00 |
| TRINITY_VDC99524 | unnamed Brassica_rapa       | 34.30 | 0.00 |
| TRINITY_GAX79231 | hypothetChlamydomonas_eusti | 34.30 | 0.00 |
| TRINITY_GAX83375 | hypothetChlamydomonas_eusti | 34.30 | 0.00 |
| TRINITY_XP_02392 | probableQuercus_suber       | 34.30 | 0.00 |
| TRINITY_XP_01741 | PREDICTIVigna_angularis     | 34.30 | 0.00 |
| TRINITY_GAX82124 | hypothetChlamydomonas_eusti | 34.30 | 0.00 |
| TRINITY_XP_02387 | probableQuercus_suber       | 34.30 | 0.00 |
| TRINITY_KXZ49466 | hypothetGonium_pectorale    | 34.30 | 0.00 |
| TRINITY_GAX72842 | hypothetChlamydomonas_eusti | 34.30 | 0.00 |
| TRINITY_PKA63668 | Nudix hApostasia_shenzheni  | 34.20 | 0.00 |
| TRINITY_PQM39426 | sodium-cPrunus_yedoensis    | 34.20 | 0.00 |
| TRINITY_XP_02387 | autophacQuercus_suber       | 34.20 | 0.00 |
| TRINITY_PWA74077 | alcohol Artemisia_annua     | 34.20 | 0.00 |
| TRINITY_XP_02087 | SEC1 fanArabidopsis_lyrata  | 34.20 | 0.00 |
| TRINITY_XP_00941 | PREDICTIMusa_acuminata      | 34.20 | 0.00 |
| TRINITY_XP_00636 | 14-3-3-JCapsella_rubella    | 34.20 | 0.00 |
| TRINITY_ONK73449 | uncharacAsparagus_officinal | 34.20 | 0.00 |
| TRINITY_VDC72783 | unnamed Brassica_rapa       | 34.20 | 0.00 |
| TRINITY_XP_00939 | PREDICTIMusa_acuminata      | 34.20 | 0.00 |
| TRINITY_GAQ91586 | 6-phospKlebsormidium_niten  | 34.20 | 0.00 |
| TRINITY_XP_00141 | predicteOstreococcus_sp._'1 | 34.20 | 0.00 |
| TRINITY_XP_01943 | PREDICTILupinus_angustifoli | 34.20 | 0.00 |
| TRINITY_XP_00256 | flagellMicromonas_commoda   | 34.20 | 0.00 |
| TRINITY_OAE27783 | hypothetMarchantia_polymorp | 34.20 | 0.00 |
| TRINITY_XP_00628 | short-clCapsella_rubella    | 34.20 | 0.00 |
| TRINITY_XP_00362 | ABC trarMedicago_truncatula | 34.20 | 0.00 |
| TRINITY_EEC71347 | hypothetOryza_sativa        | 34.20 | 0.00 |
| TRINITY_XP_02446 | uncharacPhyscomitrella_pate | 34.20 | 0.00 |
| TRINITY_CDY67484 | BnaCnngBrassica_napus       | 34.20 | 0.00 |
| TRINITY_XP_00306 | basal bcMicromonas_pusilla  | 34.20 | 0.00 |
| TRINITY_GAQ78241 | cytochrKlebsormidium_niten  | 34.20 | 0.00 |
| TRINITY_XP_00564 | DUF833-cCoccomyxa_subellips | 34.20 | 0.00 |
| TRINITY_XP_00256 | outer djMicromonas_commoda  | 34.20 | 0.00 |
| TRINITY_PNR45081 | hypothetPhyscomitrella_pate | 34.20 | 0.00 |
| TRINITY_GAX77354 | hypothetChlamydomonas_eusti | 34.20 | 0.00 |
| TRINITY_XP_02024 | trans-reAsparagus_officinal | 34.20 | 0.00 |
| TRINITY_XP_01848 | PREDICTIRaphanus_sativus    | 34.20 | 0.00 |
| TRINITY_XP_02719 | serine/tCicer_arietinum     | 34.20 | 0.00 |

|                  |          |                     |       |      |
|------------------|----------|---------------------|-------|------|
| TRINITY_XP_01764 | PREDICT  | Gossypium_arboreum  | 34.20 | 0.00 |
| TRINITY_XP_00297 | sphingo  | Selaginella_moellen | 34.20 | 0.00 |
| TRINITY_GAX80288 | hypothet | Chlamydomonas_eusti | 34.20 | 0.00 |
| TRINITY_GAX73983 | hypothet | Chlamydomonas_eusti | 34.20 | 0.00 |
| TRINITY_GAX82524 | hypothet | Chlamydomonas_eusti | 34.20 | 0.00 |
| TRINITY_KXZ55369 | hypothet | Gonium_pectorale    | 34.20 | 0.00 |
| TRINITY_PNH00402 | hypothet | Tetrabaena_socialis | 34.20 | 0.00 |
| TRINITY_PKA60957 | alcohol  | Apostasia_shenzheni | 34.20 | 0.00 |
| TRINITY_GAX85012 | hypothet | Chlamydomonas_eusti | 34.20 | 0.00 |
| TRINITY_KJB70285 | hypothet | Gossypium_raimondii | 34.20 | 0.00 |
| TRINITY_PRW59105 | iodothy  | Chlorella_sorokinia | 34.20 | 0.00 |
| TRINITY_GAX83386 | hypothet | Chlamydomonas_eusti | 34.20 | 0.00 |
| TRINITY_XP_02437 | probable | Physcomitrella_pate | 34.20 | 0.00 |
| TRINITY_XP_02186 | SNF1-rel | Spinacia_oleracea   | 34.20 | 0.00 |
| TRINITY_GAQ77713 | HECT don | Klebsormidium_niten | 34.20 | 0.00 |
| TRINITY_GAX78374 | hypothet | Chlamydomonas_eusti | 34.20 | 0.00 |
| TRINITY_XP_00169 | flagell  | Chlamydomonas_reinh | 34.20 | 0.00 |
| TRINITY_GAX75692 | hypothet | Chlamydomonas_eusti | 34.20 | 0.00 |
| TRINITY_PNX7974  | putativ  | Trifolium_pratense  | 34.20 | 0.00 |
| TRINITY_XP_01054 | PREDICT  | Tarenaya_hasslerian | 34.20 | 0.00 |
| TRINITY_GBF98601 | hypothet | Raphidocelis_subcap | 34.20 | 0.00 |
| TRINITY_CBI38863 | unnamed  | Vitis_vinifera      | 34.20 | 0.00 |
| TRINITY_XP_01390 | guanylat | Monoraphidium_negle | 34.20 | 0.00 |
| TRINITY_XP_00170 | predict  | Chlamydomonas_reinh | 34.20 | 0.00 |
| TRINITY_XP_01024 | PREDICT  | Nelumbo_nucifera    | 34.20 | 0.00 |
| TRINITY_XP_01595 | uncharac | Arachis_duranensis  | 34.20 | 0.00 |
| TRINITY_XP_00294 | hypothet | Volvox_carteri      | 34.20 | 0.00 |
| TRINITY_XP_00297 | protein  | Selaginella_moellen | 34.20 | 0.00 |
| TRINITY_PNW77306 | hypothet | Chlamydomonas_reinh | 34.20 | 0.00 |
| TRINITY_XP_00683 | uncharac | Amborella_trichopod | 34.20 | 0.00 |
| TRINITY_GAX83657 | hypothet | Chlamydomonas_eusti | 34.20 | 0.00 |
| TRINITY_GAX84849 | hypothet | Chlamydomonas_eusti | 34.20 | 0.00 |
| TRINITY_XP_00845 | PREDICT  | Cucumis_melo        | 34.20 | 0.00 |
| TRINITY_XP_00294 | hypothet | Volvox_carteri      | 34.20 | 0.00 |
| TRINITY_GAX77232 | hypothet | Chlamydomonas_eusti | 34.20 | 0.00 |
| TRINITY_KXZ43615 | hypothet | Gonium_pectorale    | 34.20 | 0.00 |
| TRINITY_GAV82588 | zf-DHHC  | Cephalotus_follicul | 34.20 | 0.00 |
| TRINITY_XP_02709 | V-type   | Coffea_arabica      | 34.20 | 0.00 |
| TRINITY_PNW78527 | hypothet | Chlamydomonas_reinh | 34.20 | 0.00 |
| TRINITY_XP_02009 | protein  | Ananas_comosus      | 34.20 | 0.00 |
| TRINITY_GAX80735 | hypothet | Chlamydomonas_eusti | 34.20 | 0.00 |
| TRINITY_PNG99787 | hypothet | Tetrabaena_socialis | 34.20 | 0.00 |
| TRINITY_AEP39605 | heat sh  | Haematococcus_lacus | 34.20 | 0.00 |
| TRINITY_GAX82662 | hypothet | Chlamydomonas_eusti | 34.20 | 0.00 |
| TRINITY_XP_00169 | predict  | Chlamydomonas_reinh | 34.20 | 0.00 |
| TRINITY_ONM39222 | hypothet | Zea_mays            | 34.20 | 0.00 |
| TRINITY_KYP64267 | Neurobe  | Cajanus_cajan       | 34.10 | 0.00 |
| TRINITY_BAA95359 | S-like   | Volvox_carteri      | 34.10 | 0.00 |
| TRINITY_EFJ25810 | hypothet | Selaginella_moellen | 34.10 | 0.00 |
| TRINITY_AML77083 | putativ  | Interfilum_paradoxu | 34.10 | 0.00 |
| TRINITY_XP_00296 | 3-phosp  | Selaginella_moellen | 34.10 | 0.00 |
| TRINITY_KZV18018 | hypothet | Dorcoceras_hygromet | 34.10 | 0.00 |
| TRINITY_XP_02057 | G patch  | Phalaenopsis_equest | 34.10 | 0.00 |
| TRINITY_XP_00169 | predict  | Chlamydomonas_reinh | 34.10 | 0.00 |
| TRINITY_KFK44002 | hypothet | Arabis_alpina       | 34.10 | 0.00 |
| TRINITY_XP_00584 | hypothet | Chlorella_variabili | 34.10 | 0.00 |
| TRINITY_XP_02440 | uncharac | Physcomitrella_pate | 34.10 | 0.00 |
| TRINITY_XP_02276 | lecithir | Durio_zibethinus    | 34.10 | 0.00 |
| TRINITY_XP_02283 | ABC trar | Ostreococcus_tauri  | 34.10 | 0.00 |
| TRINITY_GAX75393 | hypothet | Chlamydomonas_eusti | 34.10 | 0.00 |
| TRINITY_XP_00169 | predict  | Chlamydomonas_reinh | 34.10 | 0.00 |
| TRINITY_ESQ46946 | hypothet | Eutrema_salsugineum | 34.10 | 0.00 |
| TRINITY_KXZ54829 | hypothet | Gonium_pectorale    | 34.10 | 0.00 |
| TRINITY_PNR60001 | hypothet | Physcomitrella_pate | 34.10 | 0.00 |
| TRINITY_GAQ91212 | Calcium  | Klebsormidium_niten | 34.10 | 0.00 |
| TRINITY_XP_02392 | ras-rel  | Quercus_suber       | 34.10 | 0.00 |

|                  |                             |       |      |
|------------------|-----------------------------|-------|------|
| TRINITY_GAX77494 | hypothetChlamydomonas_eusti | 34.10 | 0.00 |
| TRINITY_OAE2790  | hypothetMarchantia_polymorp | 34.10 | 0.00 |
| TRINITY_GAX7555  | hypothetChlamydomonas_eusti | 34.10 | 0.00 |
| TRINITY_XP_01762 | PREDICTFGossypium_arboreum  | 34.10 | 0.00 |
| TRINITY_PTQ3120  | hypothetMarchantia_polymorp | 34.10 | 0.00 |
| TRINITY_GAX7480  | hypothetChlamydomonas_eusti | 34.10 | 0.00 |
| TRINITY_XP_01943 | PREDICTFLupinus_angustifoli | 34.10 | 0.00 |
| TRINITY_XP_02389 | wiskott-Quercus_suber       | 34.10 | 0.00 |
| TRINITY_OAE2146  | hypothetMarchantia_polymorp | 34.10 | 0.00 |
| TRINITY_PNH0292  | hypothetTetrabaena_socialis | 34.10 | 0.00 |
| TRINITY_XP_00295 | hypothetVolvox_carteri      | 34.10 | 0.00 |
| TRINITY_XP_02020 | uncharacCajanus_cajan       | 34.10 | 0.00 |
| TRINITY_XP_02352 | coiled-cCucurbita_pepo      | 34.10 | 0.00 |
| TRINITY_XP_00295 | hypothetVolvox_carteri      | 34.10 | 0.00 |
| TRINITY_XP_00294 | hypothetVolvox_carteri      | 34.10 | 0.00 |
| TRINITY_XP_02284 | RNA (C5-Ostreococcus_tauri  | 34.10 | 0.00 |
| TRINITY_KXZ5652  | hypothetGonium_pectorale    | 34.10 | 0.00 |
| TRINITY_GAQ8325  | GTP-binKlebsormidium_niten  | 34.10 | 0.00 |
| TRINITY_XP_02643 | probablePapaver_somniferum  | 34.10 | 0.00 |
| TRINITY_XP_02439 | nicalin-Physcomitrella_pate | 34.10 | 0.00 |
| TRINITY_XP_00585 | hypothetChlorella_variabili | 34.10 | 0.00 |
| TRINITY_GAX7393  | hypothetChlamydomonas_eusti | 34.10 | 0.00 |
| TRINITY_XP_02127 | uncharacHerrania_umbratica  | 34.10 | 0.00 |
| TRINITY_EFJ3299  | hypothetSelaginella_moellen | 34.10 | 0.00 |
| TRINITY_GAX7385  | hypothetChlamydomonas_eusti | 34.10 | 0.00 |
| TRINITY_XP_02453 | spindle Selaginella_moellen | 34.10 | 0.00 |
| TRINITY_OWM7893  | hypothetPunica_granatum     | 34.10 | 0.00 |
| TRINITY_XP_00751 | predicteBathycoccus_prasinc | 34.10 | 0.00 |
| TRINITY_XP_00295 | chaperorVolvox_carteri      | 34.10 | 0.00 |
| TRINITY_GAX8369  | hypothetChlamydomonas_eusti | 34.10 | 0.00 |
| TRINITY_GAX8033  | hypothetChlamydomonas_eusti | 34.10 | 0.00 |
| TRINITY_KXZ4987  | hypothetGonium_pectorale    | 34.10 | 0.00 |
| TRINITY_PSC6949  | MagnesiMicractinium_conduc  | 34.10 | 0.00 |
| TRINITY_XP_02451 | nucleoleSelaginella_moellen | 34.10 | 0.00 |
| TRINITY_XP_01945 | PREDICTFLupinus_angustifoli | 34.10 | 0.00 |
| TRINITY_XP_01051 | PREDICTFCamelina_sativa     | 34.10 | 0.00 |
| TRINITY_ACY0631  | class IIPseudotsuga_menzies | 34.10 | 0.00 |
| TRINITY_XP_02009 | peflin-lAnanas_comosus      | 34.10 | 0.00 |
| TRINITY_XP_02438 | uncharacPhyscomitrella_pate | 34.10 | 0.00 |
| TRINITY_PNW7228  | hypothetChlamydomonas_reinh | 34.10 | 0.00 |
| TRINITY_GAX8032  | hypothetChlamydomonas_eusti | 34.10 | 0.00 |
| TRINITY_PNH0145  | hypothetTetrabaena_socialis | 34.10 | 0.00 |
| TRINITY_XP_02167 | uncharacHevea_brasiliensis  | 34.10 | 0.00 |
| TRINITY_XP_02435 | CCR4-NO1Physcomitrella_pate | 34.10 | 0.00 |
| TRINITY_GBG8073  | hypothetChara_braunii       | 34.10 | 0.00 |
| TRINITY_GAX7879  | hypothetChlamydomonas_eusti | 34.10 | 0.00 |
| TRINITY_GAX7774  | hypothetChlamydomonas_eusti | 34.10 | 0.00 |
| TRINITY_GAX8463  | hypothetChlamydomonas_eusti | 34.10 | 0.00 |
| TRINITY_CDO9867  | unnamed Coffea_canephora    | 34.00 | 0.00 |
| TRINITY_XP_01847 | PREDICTFRaphanus_sativus    | 34.00 | 0.00 |
| TRINITY_XP_00250 | predicteMicromonas_commoda  | 34.00 | 0.00 |
| TRINITY_RXH9465  | hypothetMalus_domestica     | 34.00 | 0.00 |
| TRINITY_XP_02436 | embryogePhyscomitrella_pate | 34.00 | 0.00 |
| TRINITY_XP_01091 | PREDICTHElaeis_guineensis   | 34.00 | 0.00 |
| TRINITY_XP_02174 | ribonucIChenopodium_quinoa  | 34.00 | 0.00 |
| TRINITY_OVA1226  | TelomerMacleanya_cordata    | 34.00 | 0.00 |
| TRINITY_AIY6075  | rhomboidAlisma_plantago-aqu | 34.00 | 0.00 |
| TRINITY_XP_02390 | WD repeQuercus_suber        | 34.00 | 0.00 |
| TRINITY_XP_02437 | E3 ubiqPhyscomitrella_pate  | 34.00 | 0.00 |
| TRINITY_XP_00584 | hypothetChlorella_variabili | 34.00 | 0.00 |
| TRINITY_KDD7228  | NLI inteHelicosporidium_sp. | 34.00 | 0.00 |
| TRINITY_XP_00295 | eukaryotVolvox_carteri      | 34.00 | 0.00 |
| TRINITY_GAX7539  | hypothetChlamydomonas_eusti | 34.00 | 0.00 |
| TRINITY_XP_01915 | PREDICTFIpomoea_nil         | 34.00 | 0.00 |
| TRINITY_XP_02070 | nodal mDendrobium_catenatu  | 34.00 | 0.00 |
| TRINITY_GAX8337  | hypothetChlamydomonas_eusti | 34.00 | 0.00 |

|                  |          |                     |                     |       |      |
|------------------|----------|---------------------|---------------------|-------|------|
| TRINITY_XP_00169 | sodium/  | Chlamydomonas_reinh | 34.00               | 0.00  |      |
| TRINITY_KZV4720  | serine   | Dorcoceras_hygromet | 34.00               | 0.00  |      |
| TRINITY_XP_02161 | ABC      | Manihot_esculenta   | 34.00               | 0.00  |      |
| TRINITY_AAQ0725  | putative | Oryza_sativa        | 34.00               | 0.00  |      |
| TRINITY_PSC7462  | Phosphol | Micractinium_conduc | 34.00               | 0.00  |      |
| TRINITY_KDD7637  | pyridox  | Helicosporidium_sp. | 34.00               | 0.00  |      |
| TRINITY_XP_0243  | methylyt | Physcomitrella_pate | 34.00               | 0.00  |      |
| TRINITY_KXZ5101  | hypothet | Gonium_pectorale    | 34.00               | 0.00  |      |
| TRINITY_XP_0058  | hypothet | Chlorella_variabili | 34.00               | 0.00  |      |
| TRINITY_XP_0238  | uncharac | Quercus_suber       | 34.00               | 0.00  |      |
| TRINITY_XP_0200  | polyubic | Ananas_comosus      | 34.00               | 0.00  |      |
| TRINITY_GBG7998  | hypothet | Chara_braunii       | 34.00               | 0.00  |      |
| TRINITY_GAQ7773  | Leishmar | Klebsormidium_niten | 34.00               | 0.00  |      |
| TRINITY_KDP3961  | hypothet | Jatropha_curcas     | 34.00               | 0.00  |      |
| TRINITY_XP_0156  | guanylat | Oryza_sativa        | 34.00               | 0.00  |      |
| TRINITY_PON3309  | Ribopho  | Parasponia_anderson | 34.00               | 0.00  |      |
| TRINITY_XP_0221  | RNA      | poly                | Momordica_charantia | 34.00 | 0.00 |
| TRINITY_GAU3539  | hypothet | Trifolium_subterran | 34.00               | 0.00  |      |
| TRINITY_XP_0058  | hypothet | Chlorella_variabili | 34.00               | 0.00  |      |
| TRINITY_PNY1645  | sphingo  | Trifolium_pratense  | 34.00               | 0.00  |      |
| TRINITY_XP_0220  | metal    | tr                  | Helianthus_annuus   | 34.00 | 0.00 |
| TRINITY_XP_0016  | predict  | Chlamydomonas_reinh | 34.00               | 0.00  |      |
| TRINITY_GAX7764  | hypothet | Chlamydomonas_eusti | 34.00               | 0.00  |      |
| TRINITY_XP_0228  | casein   | l                   | Olea_europaea       | 34.00 | 0.00 |
| TRINITY_XP_0109  | PREDICTI | Elaeis_guineensis   | 34.00               | 0.00  |      |
| TRINITY_XP_0105  | PREDICTI | Camelina_sativa     | 34.00               | 0.00  |      |
| TRINITY_XP_0029  | hypothet | Volvox_carteri      | 34.00               | 0.00  |      |
| TRINITY_KXZ5325  | hypothet | Gonium_pectorale    | 34.00               | 0.00  |      |
| TRINITY_XP_0235  | phosphoi | Cucurbita_pepo      | 34.00               | 0.00  |      |
| TRINITY_GAQ8029  | calcium- | Klebsormidium_niten | 34.00               | 0.00  |      |
| TRINITY_XP_0217  | GPI      | trar                | Chenopodium_quinoa  | 34.00 | 0.00 |
| TRINITY_BAK0302  | predict  | Hordeum_vulgare     | 34.00               | 0.00  |      |
| TRINITY_GAX7857  | hypothet | Chlamydomonas_eusti | 34.00               | 0.00  |      |
| TRINITY_GBG6870  | hypothet | Chara_braunii       | 34.00               | 0.00  |      |
| TRINITY_GAQ8144  | Spc97 /  | Klebsormidium_niten | 34.00               | 0.00  |      |
| TRINITY_PNH0553  | Sulfate  | Tetrabaena_socialis | 34.00               | 0.00  |      |
| TRINITY_PON9946  | Phosphat | Trema_orientale     | 34.00               | 0.00  |      |
| TRINITY_GAX7655  | hypothet | Chlamydomonas_eusti | 34.00               | 0.00  |      |
| TRINITY_PSS3316  | Serine/t | Actinidia_chinensis | 34.00               | 0.00  |      |
| TRINITY_OAE3191  | hypothet | Marchantia_polymorp | 34.00               | 0.00  |      |
| TRINITY_GAX7505  | hypothet | Chlamydomonas_eusti | 34.00               | 0.00  |      |
| TRINITY_KVH9051  | (MORN    | mot                 | Cynara_cardunculus  | 34.00 | 0.00 |
| TRINITY_XP_0056  | AP2-dom  | Coccomyxa_subellips | 34.00               | 0.00  |      |
| TRINITY_KXZ5701  | hypothet | Gonium_pectorale    | 34.00               | 0.00  |      |
| TRINITY_XP_0016  | predict  | Chlamydomonas_reinh | 34.00               | 0.00  |      |
| TRINITY_XP_0056  | Rft-1-d  | Coccomyxa_subellips | 34.00               | 0.00  |      |
| TRINITY_XP_0029  | hypothet | Volvox_carteri      | 34.00               | 0.00  |      |
| TRINITY_GAQ8852  | hypothet | Klebsormidium_niten | 34.00               | 0.00  |      |
| TRINITY_XP_0279  | beta-he  | Vigna_unguiculata   | 34.00               | 0.00  |      |
| TRINITY_OAE3054  | hypothet | Marchantia_polymorp | 34.00               | 0.00  |      |
| TRINITY_XP_0058  | hypothet | Chlorella_variabili | 34.00               | 0.00  |      |
| TRINITY_XP_0016  | predict  | Chlamydomonas_reinh | 34.00               | 0.00  |      |
| TRINITY_XP_0036  | uncharac | Medicago_truncatula | 33.90               | 0.00  |      |
| TRINITY_XP_0200  | serine/t | Ananas_comosus      | 33.90               | 0.00  |      |
| TRINITY_GAX7735  | hypothet | Chlamydomonas_eusti | 33.90               | 0.00  |      |
| TRINITY_XP_0240  | tRNA:m   | (4                  | Morus_notabilis     | 33.90 | 0.00 |
| TRINITY_OAE3490  | hypothet | Marchantia_polymorp | 33.90               | 0.00  |      |
| TRINITY_XP_0172  | PREDICTI | Daucus_carota       | 33.90               | 0.00  |      |
| TRINITY_XP_0264  | uncharac | Papaver_somniferum  | 33.90               | 0.00  |      |
| TRINITY_XP_0194  | PREDICTI | Lupinus_angustifoli | 33.90               | 0.00  |      |
| TRINITY_EFJ2095  | hypothet | Selaginella_moellen | 33.90               | 0.00  |      |
| TRINITY_XP_0068  | uncharac | Amborella_trichopod | 33.90               | 0.00  |      |
| TRINITY_PIA6190  | hypothet | Aquilegia_coerulea  | 33.90               | 0.00  |      |
| TRINITY_XP_0184  | PREDICTI | Raphanus_sativus    | 33.90               | 0.00  |      |
| TRINITY_GAQ8961  | hypothet | Klebsormidium_niten | 33.90               | 0.00  |      |
| TRINITY_GBF9760  | acidstak | Raphidocelis_subcap | 33.90               | 0.00  |      |

|                  |           |                     |       |      |
|------------------|-----------|---------------------|-------|------|
| TRINITY_XP_01066 | PREDICTED | Beta_vulgaris       | 33.90 | 0.00 |
| TRINITY_XP_01920 | PREDICTED | Ipomoea_nil         | 33.90 | 0.00 |
| TRINITY_KZV15121 | protein   | Dorcoceras_hygromet | 33.90 | 0.00 |
| TRINITY_PSC76762 | phosphol  | Micractinium_conduc | 33.90 | 0.00 |
| TRINITY_GAQ79529 | hypothet  | Klebsormidium_niten | 33.90 | 0.00 |
| TRINITY_XP_02706 | cytochr   | Coffea_arabica      | 33.90 | 0.00 |
| TRINITY_XP_00977 | PREDICTED | Nicotiana_sylvestri | 33.90 | 0.00 |
| TRINITY_GAQ9014  | (hypothet | Klebsormidium_niten | 33.90 | 0.00 |
| TRINITY_GAX76357 | hypothet  | Chlamydomonas_eusti | 33.90 | 0.00 |
| TRINITY_GAQ87836 | RNA-bin   | Klebsormidium_niten | 33.90 | 0.00 |
| TRINITY_XP_00294 | hypothet  | Volvox_carteri      | 33.90 | 0.00 |
| TRINITY_GAQ88528 | hypothet  | Klebsormidium_niten | 33.90 | 0.00 |
| TRINITY_GAV82938 | RdRP don  | Cephalotus_follicul | 33.90 | 0.00 |
| TRINITY_OAE21302 | hypothet  | Marchantia_polymorp | 33.90 | 0.00 |
| TRINITY_XP_00244 | tRNA (ac  | Sorghum_bicolor     | 33.90 | 0.00 |
| TRINITY_XP_02792 | (+)-neon  | Vigna_unguiculata   | 33.90 | 0.00 |
| TRINITY_GAX81169 | hypothet  | Chlamydomonas_eusti | 33.90 | 0.00 |
| TRINITY_GBG72989 | hypothet  | Chara_braunii       | 33.90 | 0.00 |
| TRINITY_KXZ47488 | hypothet  | Gonium_pectorale    | 33.90 | 0.00 |
| TRINITY_KXZ55097 | hypothet  | Gonium_pectorale    | 33.90 | 0.00 |
| TRINITY_XP_02374 | phospho   | Lactuca_sativa      | 33.90 | 0.00 |
| TRINITY_GAX81809 | hypothet  | Chlamydomonas_eusti | 33.90 | 0.00 |
| TRINITY_XP_00564 | hypothet  | Coccomyxa_subellips | 33.90 | 0.00 |
| TRINITY_P0C8M8.1 | RecName:  | Zea_mays            | 33.90 | 0.00 |
| TRINITY_XP_02295 | purple    | Cucurbita_moschata  | 33.90 | 0.00 |
| TRINITY_PNW88875 | hypothet  | Chlamydomonas_reinh | 33.90 | 0.00 |
| TRINITY_GBG68238 | hypothet  | Chara_braunii       | 33.90 | 0.00 |
| TRINITY_GAQ92914 | hypothet  | Klebsormidium_niten | 33.90 | 0.00 |
| TRINITY_KXZ42878 | hypothet  | Gonium_pectorale    | 33.90 | 0.00 |
| TRINITY_XP_01670 | PREDICTED | Gossypium_hirsutum  | 33.90 | 0.00 |
| TRINITY_GAX82660 | (hypothet | Chlamydomonas_eusti | 33.90 | 0.00 |
| TRINITY_PNW72981 | hypothet  | Chlamydomonas_reinh | 33.90 | 0.00 |
| TRINITY_GAX73010 | (hypothet | Chlamydomonas_eusti | 33.90 | 0.00 |
| TRINITY_XP_00429 | PREDICTED | Fragaria_vesca      | 33.90 | 0.00 |
| TRINITY_XP_00250 | (predict  | Micromonas_commoda  | 33.90 | 0.00 |
| TRINITY_XP_00244 | calcium-  | Sorghum_bicolor     | 33.90 | 0.00 |
| TRINITY_XP_00294 | hypothet  | Volvox_carteri      | 33.90 | 0.00 |
| TRINITY_GAV57778 | Cyclin    | Cephalotus_follicul | 33.90 | 0.00 |
| TRINITY_PTQ32022 | hypothet  | Marchantia_polymorp | 33.90 | 0.00 |
| TRINITY_XP_00295 | hypothet  | Volvox_carteri      | 33.90 | 0.00 |
| TRINITY_PNW82605 | hypothet  | Chlamydomonas_reinh | 33.90 | 0.00 |
| TRINITY_GBF97638 | hypothet  | Raphidocelis_subcap | 33.90 | 0.00 |
| TRINITY_PNW70584 | hypothet  | Chlamydomonas_reinh | 33.90 | 0.00 |
| TRINITY_GAX79810 | (hypothet | Chlamydomonas_eusti | 33.90 | 0.00 |
| TRINITY_GAX77511 | hypothet  | Chlamydomonas_eusti | 33.90 | 0.00 |
| TRINITY_XP_01462 | pre-mRN   | Glycine_max         | 33.90 | 0.00 |
| TRINITY_XP_00169 | (predict  | Chlamydomonas_reinh | 33.90 | 0.00 |
| TRINITY_NP_00110 | (glossy   | Zea_mays            | 33.90 | 0.00 |
| TRINITY_GAX81995 | hypothet  | Chlamydomonas_eusti | 33.90 | 0.00 |
| TRINITY_XP_02375 | dehydro   | Lactuca_sativa      | 33.90 | 0.00 |
| TRINITY_XP_00170 | (flagell  | Chlamydomonas_reinh | 33.90 | 0.00 |
| TRINITY_XP_02089 | succinat  | Arabidopsis_lyrata  | 33.90 | 0.00 |
| TRINITY_XP_00169 | (predict  | Chlamydomonas_reinh | 33.90 | 0.00 |
| TRINITY_GAQ86060 | (hypothet | Klebsormidium_niten | 33.90 | 0.00 |
| TRINITY_XP_01563 | elicitor  | Oryza_sativa        | 33.90 | 0.00 |
| TRINITY_KXZ45571 | hypothet  | Gonium_pectorale    | 33.90 | 0.00 |
| TRINITY_NP_00133 | E2F-ass   | Zea_mays            | 33.90 | 0.00 |
| TRINITY_XP_02203 | serine/t  | Helianthus_annuus   | 33.90 | 0.00 |
| TRINITY_KXZ51586 | hypothet  | Gonium_pectorale    | 33.90 | 0.00 |
| TRINITY_GAX84515 | hypothet  | Chlamydomonas_eusti | 33.90 | 0.00 |
| TRINITY_XP_01103 | PREDICTED | Populus_euphratica  | 33.90 | 0.00 |
| TRINITY_XP_01092 | PREDICTED | Elaeis_guineensis   | 33.80 | 0.00 |
| TRINITY_PIN21311 | Dipeptic  | Handroanthus_impeti | 33.80 | 0.00 |
| TRINITY_XP_02388 | protein   | Quercus_suber       | 33.80 | 0.00 |
| TRINITY_AAQ07255 | putativ   | Oryza_sativa        | 33.80 | 0.00 |
| TRINITY_XP_00141 | DMT fam   | Ostreococcus_sp._'1 | 33.80 | 0.00 |

|                  |                              |       |      |
|------------------|------------------------------|-------|------|
| TRINITY_GBG73951 | hypothetChara_braunii        | 33.80 | 0.00 |
| TRINITY_KXZ4973  | hypothetGonium_pectorale     | 33.80 | 0.00 |
| TRINITY_EFJ3104  | hypothetSelaginella_moellen  | 33.80 | 0.00 |
| TRINITY_XP_0238  | leucine Quercus_suber        | 33.80 | 0.00 |
| TRINITY_OMO8650  | PeptidasCorchorus_olitorius  | 33.80 | 0.00 |
| TRINITY_XP_0109  | PREDICTHElaeis_guineensis    | 33.80 | 0.00 |
| TRINITY_XP_0029  | hypothetVolvox_carteri       | 33.80 | 0.00 |
| TRINITY_XP_0025  | (predicteMicromonas_commoda  | 33.80 | 0.00 |
| TRINITY_PWA4920  | thiol pArtemisia_annua       | 33.80 | 0.00 |
| TRINITY_XP_0017  | (protofilChlamydomonas_reinh | 33.80 | 0.00 |
| TRINITY_KXZ4348  | hypothetGonium_pectorale     | 33.80 | 0.00 |
| TRINITY_GBF9965  | (hypothetRaphidocelis_subcap | 33.80 | 0.00 |
| TRINITY_XP_0239  | (kynureninQuercus_suber      | 33.80 | 0.00 |
| TRINITY_GAX7762  | hypothetChlamydomonas_eusti  | 33.80 | 0.00 |
| TRINITY_GAQ8731  | F-box arKlebsormidium_niten  | 33.80 | 0.00 |
| TRINITY_GAU2924  | hypothetTrifolium_subterrann | 33.80 | 0.00 |
| TRINITY_PWA4829  | protein Artemisia_annua      | 33.80 | 0.00 |
| TRINITY_OAE2772  | hypothetMarchantia_polymorp  | 33.80 | 0.00 |
| TRINITY_GAX7875  | hypothetChlamydomonas_eusti  | 33.80 | 0.00 |
| TRINITY_XP_0238  | E3 ubiqQuercus_suber         | 33.80 | 0.00 |
| TRINITY_EOY2629  | Long-chTheobroma_cacao       | 33.80 | 0.00 |
| TRINITY_GAV8890  | Abhydro[Cephalotus_follicul  | 33.80 | 0.00 |
| TRINITY_XP_0150  | PH, RCC1Solanum_pennellii    | 33.80 | 0.00 |
| TRINITY_GBF9581  | hypothetRaphidocelis_subcap  | 33.80 | 0.00 |
| TRINITY_EFJ1806  | hypothetSelaginella_moellen  | 33.80 | 0.00 |
| TRINITY_XP_0016  | flagellChlamydomonas_reinh   | 33.80 | 0.00 |
| TRINITY_PNW8453  | hypothetChlamydomonas_reinh  | 33.80 | 0.00 |
| TRINITY_XP_0025  | (predicteMicromonas_commoda  | 33.80 | 0.00 |
| TRINITY_XP_0029  | hypothetVolvox_carteri       | 33.80 | 0.00 |
| TRINITY_XP_0029  | hypothetVolvox_carteri       | 33.80 | 0.00 |
| TRINITY_PKI6080  | hypothetPunica_granatum      | 33.80 | 0.00 |
| TRINITY_EFJ3502  | WD repeSelaginella_moellen   | 33.80 | 0.00 |
| TRINITY_KMS6540  | hypothetBeta_vulgaris        | 33.80 | 0.00 |
| TRINITY_XP_0025  | (Drug/MetMicromonas_commoda  | 33.80 | 0.00 |
| TRINITY_XP_0202  | 60S ribCajanus_cajan         | 33.80 | 0.00 |
| TRINITY_EPS6064  | (hypothetGenlisea_aurea      | 33.80 | 0.00 |
| TRINITY_XP_0105  | PREDICTHTarenaya_hasslerian  | 33.80 | 0.00 |
| TRINITY_GAX8465  | hypothetChlamydomonas_eusti  | 33.80 | 0.00 |
| TRINITY_GAQ8553  | (Nuclear Klebsormidium_niten | 33.80 | 0.00 |
| TRINITY_PNW8448  | hypothetChlamydomonas_reinh  | 33.80 | 0.00 |
| TRINITY_GBF9436  | hypothetRaphidocelis_subcap  | 33.80 | 0.00 |
| TRINITY_XP_0106  | PREDICTHVitis_vinifera       | 33.80 | 0.00 |
| TRINITY_XP_0245  | phosphatSelaginella_moellen  | 33.80 | 0.00 |
| TRINITY_PRW5874  | vacuolarChlorella_sorokinia  | 33.80 | 0.00 |
| TRINITY_XP_0194  | PREDICTHLupinus_angustifoli  | 33.80 | 0.00 |
| TRINITY_GAX7608  | hypothetChlamydomonas_eusti  | 33.80 | 0.00 |
| TRINITY_XP_0139  | (putativeMonoraphidium_negle | 33.80 | 0.00 |
| TRINITY_GAX7603  | hypothetChlamydomonas_eusti  | 33.80 | 0.00 |
| TRINITY_KXZ4429  | hypothetGonium_pectorale     | 33.80 | 0.00 |
| TRINITY_GAQ9019  | DEAD/DEKlebsormidium_niten   | 33.80 | 0.00 |
| TRINITY_XP_0239  | (L-2-amirQuercus_suber       | 33.80 | 0.00 |
| TRINITY_XP_0229  | ribonuclCucurbita_moschata   | 33.70 | 0.00 |
| TRINITY_RWR7865  | squamousCinnamomum_micranth  | 33.70 | 0.00 |
| TRINITY_GAX7531  | hypothetChlamydomonas_eusti  | 33.70 | 0.00 |
| TRINITY_OMO8352  | CondensiCorchorus_capsulari  | 33.70 | 0.00 |
| TRINITY_XP_0238  | guanine Quercus_suber        | 33.70 | 0.00 |
| TRINITY_XP_0114  | (Protein Auxenochlorella_pro | 33.70 | 0.00 |
| TRINITY_XP_0102  | lysophosBrachypodium_distac  | 33.70 | 0.00 |
| TRINITY_OAY8416  | (putativeAnanas_comosus      | 33.70 | 0.00 |
| TRINITY_XP_0016  | (predicteChlamydomonas_reinh | 33.70 | 0.00 |
| TRINITY_XP_0056  | hypothetCoccomyxa_subellips  | 33.70 | 0.00 |
| TRINITY_XP_0243  | (uncharacPhyscomitrella_pate | 33.70 | 0.00 |
| TRINITY_OUS4188  | (ankyrin Ostreococcus_tauri  | 33.70 | 0.00 |
| TRINITY_XP_0217  | sugar trChenopodium_quinoa   | 33.70 | 0.00 |
| TRINITY_OUS4833  | peptidasOstreococcus_tauri   | 33.70 | 0.00 |
| TRINITY_XP_0238  | leucine Quercus_suber        | 33.70 | 0.00 |



|                  |          |                     |       |      |
|------------------|----------|---------------------|-------|------|
| TRINITY_XP_00228 | PREDICT  | Vitis_vinifera      | 33.70 | 0.00 |
| TRINITY_BAJ94575 | predict  | Hordeum_vulgare     | 33.70 | 0.00 |
| TRINITY_AIT94139 | probable | Marsupiomonas_sp._N | 33.70 | 0.00 |
| TRINITY_XP_01055 | PREDICT  | Tarenaya_hasslerian | 33.70 | 0.00 |
| TRINITY_XP_02440 | uncharac | Physcomitrella_pate | 33.70 | 0.00 |
| TRINITY_GAX82126 | hypothet | Chlamydomonas_eusti | 33.70 | 0.00 |
| TRINITY_XP_00169 | predict  | Chlamydomonas_reinh | 33.70 | 0.00 |
| TRINITY_GAX72829 | hypothet | Chlamydomonas_eusti | 33.70 | 0.00 |
| TRINITY_GAX81059 | hypothet | Chlamydomonas_eusti | 33.70 | 0.00 |
| TRINITY_XP_02161 | uncharac | Manihot_esculenta   | 33.70 | 0.00 |
| TRINITY_KXZ52061 | hypothet | Gonium_pectorale    | 33.70 | 0.00 |
| TRINITY_XP_00295 | hypothet | Volvox_carteri      | 33.70 | 0.00 |
| TRINITY_XP_01054 | PREDICT  | Tarenaya_hasslerian | 33.70 | 0.00 |
| TRINITY_GAX80360 | hypothet | Chlamydomonas_eusti | 33.70 | 0.00 |
| TRINITY_GBF98142 | hypothet | Raphidocelis_subcap | 33.70 | 0.00 |
| TRINITY_XP_02388 | ras-rel  | Quercus_suber       | 33.70 | 0.00 |
| TRINITY_GAX82253 | hypothet | Chlamydomonas_eusti | 33.70 | 0.00 |
| TRINITY_GBG72173 | hypothet | Chara_braunii       | 33.70 | 0.00 |
| TRINITY_GAX80129 | hypothet | Chlamydomonas_eusti | 33.70 | 0.00 |
| TRINITY_XP_02199 | actin-d  | Helianthus_annuus   | 33.70 | 0.00 |
| TRINITY_XP_00169 | radial   | Chlamydomonas_reinh | 33.70 | 0.00 |
| TRINITY_GAV66326 | Pyr_red  | Cephalotus_follicul | 33.70 | 0.00 |
| TRINITY_XP_01139 | E3 ISG1  | Auxenochlorella_pro | 33.70 | 0.00 |
| TRINITY_GBF87987 | hypothet | Raphidocelis_subcap | 33.70 | 0.00 |
| TRINITY_GAQ80294 | calcium  | Klebsormidium_niten | 33.70 | 0.00 |
| TRINITY_PWA74912 | aspartic | Artemisia_annua     | 33.70 | 0.00 |
| TRINITY_XP_00252 | serine/t | Ricinus_communis    | 33.70 | 0.00 |
| TRINITY_XP_01867 | PREDICT  | Musa_acuminata      | 33.70 | 0.00 |
| TRINITY_GAQ82936 | ABC trar | Klebsormidium_niten | 33.70 | 0.00 |
| TRINITY_PWA94916 | C2 calci | Artemisia_annua     | 33.70 | 0.00 |
| TRINITY_GAU20147 | hypothet | Trifolium_subterran | 33.70 | 0.00 |
| TRINITY_PNW72745 | hypothet | Chlamydomonas_reinh | 33.70 | 0.00 |
| TRINITY_GAX84352 | hypothet | Chlamydomonas_eusti | 33.70 | 0.00 |
| TRINITY_GAQ81526 | Zinc fir | Klebsormidium_niten | 33.70 | 0.00 |
| TRINITY_PNW88549 | hypothet | Chlamydomonas_reinh | 33.70 | 0.00 |
| TRINITY_XP_00295 | hypothet | Volvox_carteri      | 33.70 | 0.00 |
| TRINITY_GAX84888 | hypothet | Chlamydomonas_eusti | 33.70 | 0.00 |
| TRINITY_KMZ57392 | Exosome  | Zostera_marina      | 33.70 | 0.00 |
| TRINITY_GAX75417 | hypothet | Chlamydomonas_eusti | 33.70 | 0.00 |
| TRINITY_XP_02639 | ABC trar | Papaver_somniferum  | 33.70 | 0.00 |
| TRINITY_XP_01283 | PREDICT  | Erythranthe_guttata | 33.60 | 0.00 |
| TRINITY_XP_02389 | PITH don | Quercus_suber       | 33.60 | 0.00 |
| TRINITY_XP_02171 | gamma c  | Chenopodium_quinoa  | 33.60 | 0.00 |
| TRINITY_PSC73951 | hypothet | Micractinium_conduc | 33.60 | 0.00 |
| TRINITY_PNH09427 | FGFR1 or | Tetrabaena_socialis | 33.60 | 0.00 |
| TRINITY_XP_01006 | PREDICT  | Eucalyptus_grandis  | 33.60 | 0.00 |
| TRINITY_XP_02017 | nitrile- | Aegilops_tauschii   | 33.60 | 0.00 |
| TRINITY_RAL39962 | hypothet | Cuscuta_australis   | 33.60 | 0.00 |
| TRINITY_PRW56764 | Golgi a  | Chlorella_sorokinia | 33.60 | 0.00 |
| TRINITY_XP_01284 | PREDICT  | Erythranthe_guttata | 33.60 | 0.00 |
| TRINITY_XP_00305 | predict  | Micromonas_pusilla  | 33.60 | 0.00 |
| TRINITY_PPS07213 | hypothet | Gossypium_barbadens | 33.60 | 0.00 |
| TRINITY_RZB55578 | CBL-int  | Glycine_soja        | 33.60 | 0.00 |
| TRINITY_XP_02127 | E3 ubiq  | Herrania_umbratica  | 33.60 | 0.00 |
| TRINITY_RLN09150 | CBL-int  | Panicum_miliaceum   | 33.60 | 0.00 |
| TRINITY_ONM41602 | CBL-int  | Zea_mays            | 33.60 | 0.00 |
| TRINITY_OMP00818 | Transcri | Corchorus_olitorius | 33.60 | 0.00 |
| TRINITY_XP_00497 | ATP-dep  | Setaria_italica     | 33.60 | 0.00 |
| TRINITY_BAJ96920 | predict  | Hordeum_vulgare     | 33.60 | 0.00 |
| TRINITY_XP_02392 | threonyl | Quercus_suber       | 33.60 | 0.00 |
| TRINITY_XP_02175 | lysosom  | Chenopodium_quinoa  | 33.60 | 0.00 |
| TRINITY_XP_01915 | PREDICT  | Ipomoea_nil         | 33.60 | 0.00 |
| TRINITY_XP_00431 | PREDICT  | Fragaria_vesca      | 33.60 | 0.00 |
| TRINITY_GBG91863 | hypothet | Chara_braunii       | 33.60 | 0.00 |
| TRINITY_GAQ90139 | hypothet | Klebsormidium_niten | 33.60 | 0.00 |
| TRINITY_XP_02130 | putativ  | Sorghum_bicolor     | 33.60 | 0.00 |

|                 |                                      |       |      |
|-----------------|--------------------------------------|-------|------|
| TRINITY_XP_0145 | (probable)Vigna_radiata              | 33.60 | 0.00 |
| TRINITY_XP_0238 | (uncharacterized)Quercus_suber       | 33.60 | 0.00 |
| TRINITY_PSC7360 | D-aspartateMicractinium_conduc       | 33.60 | 0.00 |
| TRINITY_XP_0243 | (uncharacterized)Physcomitrella_pate | 33.60 | 0.00 |
| TRINITY_XP_0036 | 1nucleoleMedicago_truncatula         | 33.60 | 0.00 |
| TRINITY_GAV6231 | 1Abhydro_Cephalotus_follicul         | 33.60 | 0.00 |
| TRINITY_XP_0243 | 7DNA replicationPhyscomitrella_pate  | 33.60 | 0.00 |
| TRINITY_GAQ7977 | 3nitric oxideKlebsormidium_niten     | 33.60 | 0.00 |
| TRINITY_XP_0239 | (nuclear)Quercus_suber               | 33.60 | 0.00 |
| TRINITY_XP_0176 | 1PREDICTEDGossypium_arboreum         | 33.60 | 0.00 |
| TRINITY_XP_0238 | (serine/threonine)Quercus_suber      | 33.60 | 0.00 |
| TRINITY_XP_0159 | (probable)Ziziphus_jujuba            | 33.60 | 0.00 |
| TRINITY_GAQ8091 | (Calcium)Klebsormidium_niten         | 33.60 | 0.00 |
| TRINITY_GAQ8789 | (calpain)Klebsormidium_niten         | 33.60 | 0.00 |
| TRINITY_XP_0238 | (dna)J-replicationQuercus_suber      | 33.60 | 0.00 |
| TRINITY_XP_0093 | (PREDICTED)Musa_acuminata            | 33.60 | 0.00 |
| TRINITY_GBG8928 | 7hypotheticalChara_braunii           | 33.60 | 0.00 |
| TRINITY_XP_0120 | (pollen-specific)Jatropha_curcas     | 33.60 | 0.00 |
| TRINITY_PNW7251 | (hypothetical)Chlamydomonas_reinh    | 33.60 | 0.00 |
| TRINITY_GAV8014 | 1Kelch_3 Cephalotus_follicul         | 33.60 | 0.00 |
| TRINITY_GAQ9163 | (Dna)J helicaseKlebsormidium_niten   | 33.60 | 0.00 |
| TRINITY_GAX8356 | (hypothetical)Chlamydomonas_eusti    | 33.60 | 0.00 |
| TRINITY_XP_0056 | 4hypotheticalCoccomyxa_subellips     | 33.60 | 0.00 |
| TRINITY_GBG6519 | (hypothetical)Chara_braunii          | 33.60 | 0.00 |
| TRINITY_PNW7181 | (hypothetical)Chlamydomonas_reinh    | 33.60 | 0.00 |
| TRINITY_PLY9704 | (hypothetical)Lactuca_sativa         | 33.60 | 0.00 |
| TRINITY_GAX8157 | (hypothetical)Chlamydomonas_eusti    | 33.60 | 0.00 |
| TRINITY_KXZ5393 | (hypothetical)Gonium_pectorale       | 33.60 | 0.00 |
| TRINITY_XP_0249 | (histidine)Cynara_cardunculus        | 33.60 | 0.00 |
| TRINITY_XP_0172 | 4PREDICTEDDaucus_carota              | 33.60 | 0.00 |
| TRINITY_PRW6063 | 4SCF ubiquitinChlorella_sorokinia    | 33.60 | 0.00 |
| TRINITY_XP_0271 | (protein)Coffea_arabica              | 33.60 | 0.00 |
| TRINITY_XP_0188 | 4PREDICTEDJuglans_regia              | 33.60 | 0.00 |
| TRINITY_XP_0238 | (uncharacterized)Quercus_suber       | 33.60 | 0.00 |
| TRINITY_KZN0873 | (hypothetical)Daucus_carota          | 33.60 | 0.00 |
| TRINITY_XP_0029 | (ultraviolet)Selaginella_moellen     | 33.60 | 0.00 |
| TRINITY_XP_0216 | (helicase)Hevea_brasiliensis         | 33.60 | 0.00 |
| TRINITY_EFJ2331 | 4hypotheticalSelaginella_moellen     | 33.60 | 0.00 |
| TRINITY_GAX7764 | (hypothetical)Chlamydomonas_eusti    | 33.60 | 0.00 |
| TRINITY_XP_0088 | (plant)CjPhoenix_dactylifera         | 33.60 | 0.00 |
| TRINITY_PNR2701 | 2hypotheticalPhyscomitrella_pate     | 33.60 | 0.00 |
| TRINITY_AAT0251 | (unknown)Chlamydomonas_reinh         | 33.60 | 0.00 |
| TRINITY_PSC7000 | 1DIS3-likeMicractinium_conduc        | 33.60 | 0.00 |
| TRINITY_RLN0555 | 2hypotheticalPanicum_miliaceum       | 33.60 | 0.00 |
| TRINITY_GAX8282 | (hypothetical)Chlamydomonas_eusti    | 33.60 | 0.00 |
| TRINITY_RQO9048 | 4hypotheticalPopulus_trichocarpa     | 33.60 | 0.00 |
| TRINITY_GAX8297 | 4hypotheticalChlamydomonas_eusti     | 33.60 | 0.00 |
| TRINITY_XP_0056 | 4S1-domainCoccomyxa_subellips        | 33.60 | 0.00 |
| TRINITY_GBF9358 | (hypothetical)Raphidocelis_subcap    | 33.60 | 0.00 |
| TRINITY_XP_0029 | 4hypotheticalVolvox_carteri          | 33.60 | 0.00 |
| TRINITY_XP_0243 | (uncharacterized)Physcomitrella_pate | 33.60 | 0.00 |
| TRINITY_XP_0063 | (uncharacterized)Eutrema_salsugineur | 33.60 | 0.00 |
| TRINITY_XP_0167 | 2PREDICTEDGossypium_hirsutum         | 33.60 | 0.00 |
| TRINITY_GAX7555 | (hypothetical)Chlamydomonas_eusti    | 33.60 | 0.00 |
| TRINITY_XP_0237 | (DNA replication)Lactuca_sativa      | 33.60 | 0.00 |
| TRINITY_XP_0238 | (E3 ubiquitin)Quercus_suber          | 33.60 | 0.00 |
| TRINITY_XP_0239 | (uncharacterized)Quercus_suber       | 33.60 | 0.00 |
| TRINITY_XP_0243 | (phosphate)Physcomitrella_pate       | 33.60 | 0.00 |
| TRINITY_GAX7970 | 2hypotheticalChlamydomonas_eusti     | 33.60 | 0.00 |
| TRINITY_GBF9182 | 4hypotheticalRaphidocelis_subcap     | 33.60 | 0.00 |
| TRINITY_GBF9624 | (adenylate)Raphidocelis_subcap       | 33.60 | 0.00 |
| TRINITY_PPD6701 | 4hypotheticalGossypium_barbadens     | 33.50 | 0.00 |
| TRINITY_XP_0243 | (haloacid)Physcomitrella_pate        | 33.50 | 0.00 |
| TRINITY_XP_0239 | (uncharacterized)Quercus_suber       | 33.50 | 0.00 |
| TRINITY_XP_0220 | (heat shock)Helianthus_annuus        | 33.50 | 0.00 |
| TRINITY_XP_0249 | (ras-related)Cynara_cardunculus      | 33.50 | 0.00 |

|                 |                                         |       |      |
|-----------------|-----------------------------------------|-------|------|
| TRINITY_OTG3433 | putative Helianthus_annuus              | 33.50 | 0.00 |
| TRINITY_XP_0238 | tripeptide Quercus_suber                | 33.50 | 0.00 |
| TRINITY_RXH6734 | hypothetical Malus_domestica            | 33.50 | 0.00 |
| TRINITY_XP_0025 | flagellin Micromonas_commoda            | 33.50 | 0.00 |
| TRINITY_EAZ0599 | hypothetical Oryza_sativa               | 33.50 | 0.00 |
| TRINITY_PRQ4933 | putative Rosa_chinensis                 | 33.50 | 0.00 |
| TRINITY_PIA4469 | hypothetical Aquilegia_coerulea         | 33.50 | 0.00 |
| TRINITY_XP_0235 | nuclear Cucurbita_pepo                  | 33.50 | 0.00 |
| TRINITY_OVA0734 | Protein Macleaya_cordata                | 33.50 | 0.00 |
| TRINITY_XP_0238 | probable Quercus_suber                  | 33.50 | 0.00 |
| TRINITY_GAX7431 | hypothetical Chlamydomonas_eusti        | 33.50 | 0.00 |
| TRINITY_OAE3098 | hypothetical Marchantia_polymorp        | 33.50 | 0.00 |
| TRINITY_PNW8863 | hypothetical Chlamydomonas_reinh        | 33.50 | 0.00 |
| TRINITY_XP_0243 | uncharacterized Physcomitrella_pate     | 33.50 | 0.00 |
| TRINITY_XP_0041 | PREDICTED Cucumis_sativus               | 33.50 | 0.00 |
| TRINITY_XP_0209 | CBL-integrase Arachis_duranensis        | 33.50 | 0.00 |
| TRINITY_XP_0029 | hypothetical Volvox_carteri             | 33.50 | 0.00 |
| TRINITY_GAQ8650 | eukaryotic Klebsormidium_niten          | 33.50 | 0.00 |
| TRINITY_XP_0139 | hypothetical Monoraphidium_negle        | 33.50 | 0.00 |
| TRINITY_GBF8922 | hypothetical Raphidocelis_subcap        | 33.50 | 0.00 |
| TRINITY_XP_0113 | putative Auxenochlorella_pro            | 33.50 | 0.00 |
| TRINITY_XP_0063 | transmembrane Capsella_rubella          | 33.50 | 0.00 |
| TRINITY_PKA4989 | hypothetical Apostasia_shenzheni        | 33.50 | 0.00 |
| TRINITY_NP_0013 | eukaryotic Nicotiana_tabacum            | 33.50 | 0.00 |
| TRINITY_GAX8533 | hypothetical Chlamydomonas_eusti        | 33.50 | 0.00 |
| TRINITY_GBG7574 | hypothetical Chara_braunii              | 33.50 | 0.00 |
| TRINITY_XP_0035 | dual specific Glycine_max               | 33.50 | 0.00 |
| TRINITY_XP_0110 | apoptosis Sesamum_indicum               | 33.50 | 0.00 |
| TRINITY_XP_0017 | predicted Chlamydomonas_reinh           | 33.50 | 0.00 |
| TRINITY_BAJ9497 | predicted Hordeum_vulgare               | 33.50 | 0.00 |
| TRINITY_XP_0243 | beta-1,3 Physcomitrella_pate            | 33.50 | 0.00 |
| TRINITY_GAX7945 | hypothetical Chlamydomonas_eusti        | 33.50 | 0.00 |
| TRINITY_XP_0056 | V0/A0 coccococcomyxa_subellips          | 33.50 | 0.00 |
| TRINITY_PSC6758 | type A microactinium_conduc             | 33.50 | 0.00 |
| TRINITY_GAQ8511 | hypothetical Klebsormidium_niten        | 33.50 | 0.00 |
| TRINITY_RWR7886 | importin Cinnamomum_micranth            | 33.50 | 0.00 |
| TRINITY_GAQ8068 | hypothetical Klebsormidium_niten        | 33.50 | 0.00 |
| TRINITY_GAX7729 | hypothetical Chlamydomonas_eusti        | 33.50 | 0.00 |
| TRINITY_XP_0014 | predicted Ostreococcus_sp._'l           | 33.50 | 0.00 |
| TRINITY_PRW0575 | phospholipase Chlorella_sorokinia       | 33.50 | 0.00 |
| TRINITY_PRW3297 | hypothetical Chlorella_sorokinia        | 33.50 | 0.00 |
| TRINITY_GAX7815 | hypothetical Chlamydomonas_eusti        | 33.50 | 0.00 |
| TRINITY_OAE2928 | hypothetical Marchantia_polymorp        | 33.50 | 0.00 |
| TRINITY_XP_0083 | PREDICTED Malus_domestica               | 33.50 | 0.00 |
| TRINITY_XP_0239 | tuberous Quercus_suber                  | 33.50 | 0.00 |
| TRINITY_EYU2599 | hypothetical Erythranthe_guttata        | 33.50 | 0.00 |
| TRINITY_KXZ4470 | hypothetical Gonium_pectorale           | 33.50 | 0.00 |
| TRINITY_GAX7317 | hypothetical Chlamydomonas_eusti        | 33.50 | 0.00 |
| TRINITY_GBG6927 | hypothetical Chara_braunii              | 33.50 | 0.00 |
| TRINITY_PPD8214 | hypothetical Gossypium_barbadens        | 33.50 | 0.00 |
| TRINITY_GAX7818 | hypothetical Chlamydomonas_eusti        | 33.50 | 0.00 |
| TRINITY_XP_0016 | predicted Chlamydomonas_reinh           | 33.50 | 0.00 |
| TRINITY_XP_0056 | hypothetical Coccomyxa_subellips        | 33.50 | 0.00 |
| TRINITY_PRW4519 | carboxylase Chlorella_sorokinia         | 33.40 | 0.00 |
| TRINITY_PIN1750 | Protein Handroanthus_impeti             | 33.40 | 0.00 |
| TRINITY_XP_0082 | PREDICTED Prunus_mume                   | 33.40 | 0.00 |
| TRINITY_AAV3108 | 1,2-diacetyl Euonymus_alatus            | 33.40 | 0.00 |
| TRINITY_XP_0029 | choline transporter Selaginella_moellen | 33.40 | 0.00 |
| TRINITY_EFJ2940 | hypothetical Selaginella_moellen        | 33.40 | 0.00 |
| TRINITY_BAK0119 | predicted Hordeum_vulgare               | 33.40 | 0.00 |
| TRINITY_GAQ7773 | Leishman Klebsormidium_niten            | 33.40 | 0.00 |
| TRINITY_GAX7270 | hypothetical Chlamydomonas_eusti        | 33.40 | 0.00 |
| TRINITY_PNW8504 | hypothetical Chlamydomonas_reinh        | 33.40 | 0.00 |
| TRINITY_GAX8467 | hypothetical Chlamydomonas_eusti        | 33.40 | 0.00 |
| TRINITY_XP_0029 | hypothetical Volvox_carteri             | 33.40 | 0.00 |
| TRINITY_GAX7282 | hypothetical Chlamydomonas_eusti        | 33.40 | 0.00 |

|                  |          |                     |       |      |
|------------------|----------|---------------------|-------|------|
| TRINITY_XP_00635 | PREDICT  | Solanum_tuberosum   | 33.40 | 0.00 |
| TRINITY_KDO81726 | hypothet | Citrus_sinensis     | 33.40 | 0.00 |
| TRINITY_XP_00169 | predict  | Chlamydomonas_reinh | 33.40 | 0.00 |
| TRINITY_XP_00685 | uncharac | Amborella_trichopod | 33.40 | 0.00 |
| TRINITY_GAX79694 | hypothet | Chlamydomonas_eusti | 33.40 | 0.00 |
| TRINITY_XP_00880 | transcri | Phoenix_dactylifera | 33.40 | 0.00 |
| TRINITY_XP_02285 | uncharac | Olea_europaea       | 33.40 | 0.00 |
| TRINITY_XP_02186 | putativ  | Spinacia_oleracea   | 33.40 | 0.00 |
| TRINITY_KXZ45697 | hypothet | Gonium_pectorale    | 33.40 | 0.00 |
| TRINITY_XP_02454 | DEAD-bo  | Selaginella_moellen | 33.40 | 0.00 |
| TRINITY_GAY44382 | hypothet | Citrus_unshiu       | 33.40 | 0.00 |
| TRINITY_GAX72663 | hypothet | Chlamydomonas_eusti | 33.40 | 0.00 |
| TRINITY_GBF94005 | MFS trar | Raphidocelis_subcap | 33.40 | 0.00 |
| TRINITY_PNR42031 | hypothet | Physcomitrella_pate | 33.30 | 0.00 |
| TRINITY_XP_02129 | macroph  | Herrania_umbratica  | 33.30 | 0.00 |
| TRINITY_XP_01588 | protein  | Ziziphus_jujuba     | 33.30 | 0.00 |
| TRINITY_BAJ96946 | predict  | Hordeum_vulgare     | 33.30 | 0.00 |
| TRINITY_XP_02059 | LOW QUAI | Phalaenopsis_equest | 33.30 | 0.00 |
| TRINITY_RLM91381 | hypothet | Panicum_miliaceum   | 33.30 | 0.00 |
| TRINITY_XP_02390 | elongat  | Quercus_suber       | 33.30 | 0.00 |
| TRINITY_XP_00634 | PREDICT  | Solanum_tuberosum   | 33.30 | 0.00 |
| TRINITY_XP_00250 | flagell  | Micromonas_commoda  | 33.30 | 0.00 |
| TRINITY_PIA39155 | hypothet | Aquilegia_coerulea  | 33.30 | 0.00 |
| TRINITY_XP_00141 | predict  | Ostreococcus_sp._'1 | 33.30 | 0.00 |
| TRINITY_GAX76680 | hypothet | Chlamydomonas_eusti | 33.30 | 0.00 |
| TRINITY_XP_02391 | uncharac | Quercus_suber       | 33.30 | 0.00 |
| TRINITY_XP_00564 | hypothet | Coccomyxa_subellips | 33.30 | 0.00 |
| TRINITY_XP_02645 | CBL-int  | Papaver_somniferum  | 33.30 | 0.00 |
| TRINITY_XP_00976 | PREDICT  | Nicotiana_sylvestri | 33.30 | 0.00 |
| TRINITY_XP_00306 | predict  | Micromonas_pusilla  | 33.30 | 0.00 |
| TRINITY_GBG74227 | hypothet | Chara_braunii       | 33.30 | 0.00 |
| TRINITY_XP_00564 | alpha/b  | Coccomyxa_subellips | 33.30 | 0.00 |
| TRINITY_XP_00641 | endonucl | Eutrema_salsugineur | 33.30 | 0.00 |
| TRINITY_XP_02390 | sphingon | Quercus_suber       | 33.30 | 0.00 |
| TRINITY_XP_02167 | ARF guar | Hevea_brasiliensis  | 33.30 | 0.00 |
| TRINITY_EOA14509 | hypothet | Capsella_rubella    | 33.30 | 0.00 |
| TRINITY_XP_00142 | predict  | Ostreococcus_sp._'1 | 33.30 | 0.00 |
| TRINITY_GAX77538 | hypothet | Chlamydomonas_eusti | 33.30 | 0.00 |
| TRINITY_PPR91250 | hypothet | Gossypium_barbadens | 33.30 | 0.00 |
| TRINITY_XP_01563 | DNA rep  | Oryza_sativa        | 33.30 | 0.00 |
| TRINITY_EFJ29489 | hypothet | Selaginella_moellen | 33.30 | 0.00 |
| TRINITY_BAJ88019 | predict  | Hordeum_vulgare     | 33.30 | 0.00 |
| TRINITY_RRT65836 | hypothet | Ensete_ventricosum  | 33.30 | 0.00 |
| TRINITY_OAE22058 | hypothet | Marchantia_polymorp | 33.30 | 0.00 |
| TRINITY_XP_00864 | protein  | Zea_mays            | 33.30 | 0.00 |
| TRINITY_XP_02580 | myosin-2 | Panicum_hallii      | 33.30 | 0.00 |
| TRINITY_OAE32074 | hypothet | Marchantia_polymorp | 33.30 | 0.00 |
| TRINITY_RID61715 | hypothet | Brassica_rapa       | 33.30 | 0.00 |
| TRINITY_GAX79760 | hypothet | Chlamydomonas_eusti | 33.30 | 0.00 |
| TRINITY_XP_00169 | predict  | Chlamydomonas_reinh | 33.30 | 0.00 |
| TRINITY_GAX73064 | hypothet | Chlamydomonas_eusti | 33.30 | 0.00 |
| TRINITY_GBG69057 | hypothet | Chara_braunii       | 33.30 | 0.00 |
| TRINITY_XP_01390 | hypothet | Monoraphidium_negle | 33.30 | 0.00 |
| TRINITY_XP_02735 | cystino  | Abrus_precatorius   | 33.30 | 0.00 |
| TRINITY_GBG59166 | hypothet | Chara_braunii       | 33.30 | 0.00 |
| TRINITY_XP_02271 | peroxis  | Durio_zibethinus    | 33.30 | 0.00 |
| TRINITY_XP_02439 | uncharac | Physcomitrella_pate | 33.30 | 0.00 |
| TRINITY_XP_01139 | Kelch-li | Auxenochlorella_pro | 33.30 | 0.00 |
| TRINITY_XP_02579 | probable | Panicum_hallii      | 33.30 | 0.00 |
| TRINITY_GBF99416 | hypothet | Raphidocelis_subcap | 33.30 | 0.00 |
| TRINITY_GBG62946 | hypothet | Chara_braunii       | 33.30 | 0.00 |
| TRINITY_AGT16210 | CIPK-li  | Saccharum_hybrid_cu | 33.30 | 0.00 |
| TRINITY_XP_01389 | hypothet | Monoraphidium_negle | 33.30 | 0.00 |
| TRINITY_XP_02009 | serine/t | Ananas_comosus      | 33.30 | 0.00 |
| TRINITY_XP_02201 | serine c | Helianthus_annuus   | 33.30 | 0.00 |
| TRINITY_PWA96831 | Peptida  | Artemisia_annua     | 33.30 | 0.00 |

|                 |          |                     |       |      |
|-----------------|----------|---------------------|-------|------|
| TRINITY_GAQ9276 | hypothet | Klebsormidium_niten | 33.30 | 0.00 |
| TRINITY_XP_0264 | mitotic  | Papaver_somniferum  | 33.30 | 0.00 |
| TRINITY_XP_0243 | putative | Physcomitrella_pate | 33.30 | 0.00 |
| TRINITY_GBG9136 | hypothet | Chara_braunii       | 33.30 | 0.00 |
| TRINITY_GAX8507 | hypothet | Chlamydomonas_eusti | 33.30 | 0.00 |
| TRINITY_GAX8414 | hypothet | Chlamydomonas_eusti | 33.30 | 0.00 |
| TRINITY_KHF9901 | Shaggy-1 | Gossypium_arboreum  | 33.30 | 0.00 |
| TRINITY_KZV1487 | hypothet | Dorcoceras_hygromet | 33.30 | 0.00 |
| TRINITY_XP_0153 | protein  | Citrus_sinensis     | 33.30 | 0.00 |
| TRINITY_XP_0105 | PREDICT  | Tarenaya_hasslerian | 33.30 | 0.00 |
| TRINITY_PTQ4164 | hypothet | Marchantia_polymorp | 33.30 | 0.00 |
| TRINITY_XP_0068 | BTB/POZ  | Amborella_trichopod | 33.30 | 0.00 |
| TRINITY_PRW3286 | retinol  | Chlorella_sorokinia | 33.30 | 0.00 |
| TRINITY_XP_0145 | elicitor | Vigna_radiata       | 33.30 | 0.00 |
| TRINITY_XP_0205 | CBL-int  | Sesamum_indicum     | 33.30 | 0.00 |
| TRINITY_XP_0188 | PREDICT  | Juglans_regia       | 33.30 | 0.00 |
| TRINITY_GBF9405 | hypothet | Raphidocelis_subcap | 33.30 | 0.00 |
| TRINITY_GAX8224 | hypothet | Chlamydomonas_eusti | 33.30 | 0.00 |
| TRINITY_XP_0155 | ethylen  | Ricinus_communis    | 33.30 | 0.00 |
| TRINITY_PSC7608 | serine   | Micractinium_conduc | 33.30 | 0.00 |
| TRINITY_KXZ4771 | hypothet | Gonium_pectorale    | 33.30 | 0.00 |
| TRINITY_XP_0238 | tyrosin  | Quercus_suber       | 33.30 | 0.00 |
| TRINITY_OAE2873 | hypothet | Marchantia_polymorp | 33.30 | 0.00 |
| TRINITY_GAX7510 | hypothet | Chlamydomonas_eusti | 33.30 | 0.00 |
| TRINITY_GAX8214 | hypothet | Chlamydomonas_eusti | 33.30 | 0.00 |
| TRINITY_KXZ4918 | hypothet | Gonium_pectorale    | 33.30 | 0.00 |
| TRINITY_OAE1874 | hypothet | Marchantia_polymorp | 33.30 | 0.00 |
| TRINITY_XP_0070 | PREDICT  | Theobroma_cacao     | 33.30 | 0.00 |
| TRINITY_GAX7745 | hypothet | Chlamydomonas_eusti | 33.30 | 0.00 |
| TRINITY_GAX7894 | hypothet | Chlamydomonas_eusti | 33.30 | 0.00 |
| TRINITY_PIA3915 | hypothet | Aquilegia_coerulea  | 33.30 | 0.00 |
| TRINITY_XP_0144 | uncharac | Vigna_radiata       | 33.30 | 0.00 |
| TRINITY_PNT7108 | hypothet | Brachypodium_distac | 33.30 | 0.00 |
| TRINITY_XP_0155 | V-type   | Ricinus_communis    | 33.30 | 0.00 |
| TRINITY_PSC7112 | serine   | Micractinium_conduc | 33.30 | 0.00 |
| TRINITY_XP_0243 | thyroid  | Physcomitrella_pate | 33.30 | 0.00 |
| TRINITY_XP_0243 | long ch  | Physcomitrella_pate | 33.30 | 0.00 |
| TRINITY_XP_0139 | hypothet | Monoraphidium_negle | 33.30 | 0.00 |
| TRINITY_XP_0239 | nuclear  | Quercus_suber       | 33.30 | 0.00 |
| TRINITY_BAJ9109 | predict  | Hordeum_vulgare     | 33.30 | 0.00 |
| TRINITY_PNH0930 | Glycolip | Tetrabaena_socialis | 33.30 | 0.00 |
| TRINITY_GAX7290 | hypothet | Chlamydomonas_eusti | 33.30 | 0.00 |
| TRINITY_KXZ5015 | hypothet | Gonium_pectorale    | 33.30 | 0.00 |
| TRINITY_XP_0229 | zinc fir | Cucurbita_moschata  | 33.30 | 0.00 |
| TRINITY_GBG6870 | hypothet | Chara_braunii       | 33.30 | 0.00 |
| TRINITY_XP_0016 | predict  | Chlamydomonas_reinh | 33.30 | 0.00 |
| TRINITY_GAQ8593 | hypothet | Klebsormidium_niten | 33.30 | 0.00 |
| TRINITY_KQK0377 | hypothet | Brachypodium_distac | 33.30 | 0.00 |
| TRINITY_GAX7980 | hypothet | Chlamydomonas_eusti | 33.30 | 0.00 |
| TRINITY_XP_0056 | WD40 re  | Coccomyxa_subellips | 33.30 | 0.00 |
| TRINITY_XP_0091 | PREDICT  | Brassica_rapa       | 33.30 | 0.00 |
| TRINITY_PNH1018 | Myelin   | Tetrabaena_socialis | 33.30 | 0.00 |
| TRINITY_PNH0052 | hypothet | Tetrabaena_socialis | 33.30 | 0.00 |
| TRINITY_GAX7276 | hypothet | Chlamydomonas_eusti | 33.30 | 0.00 |
| TRINITY_XP_0025 | glutath  | Ricinus_communis    | 33.30 | 0.00 |
| TRINITY_GAX7791 | hypothet | Chlamydomonas_eusti | 33.30 | 0.00 |
| TRINITY_GAX7441 | hypothet | Chlamydomonas_eusti | 33.30 | 0.00 |
| TRINITY_XP_0029 | hypothet | Volvox_carteri      | 33.30 | 0.00 |
| TRINITY_XP_0025 | predict  | Micromonas_commoda  | 33.20 | 0.00 |
| TRINITY_GAX7610 | hypothet | Chlamydomonas_eusti | 33.20 | 0.00 |
| TRINITY_PSC7162 | fungal   | Micractinium_conduc | 33.20 | 0.00 |
| TRINITY_XP_0071 | hypothet | Phaseolus_vulgaris  | 33.20 | 0.00 |
| TRINITY_XP_0216 | sulfite  | Manihot_esculenta   | 33.20 | 0.00 |
| TRINITY_OVA1464 | Tetratri | Macleaya_cordata    | 33.20 | 0.00 |
| TRINITY_XP_0245 | flagell  | Selaginella_moellen | 33.20 | 0.00 |
| TRINITY_XP_0227 | CBL-int  | Durio_zibethinus    | 33.20 | 0.00 |

|                  |                              |       |      |
|------------------|------------------------------|-------|------|
| TRINITY_GAX75815 | hypothetChlamydomonas_eusti  | 33.20 | 0.00 |
| TRINITY_XP_00141 | predicteOstreococcus_sp._'1  | 33.20 | 0.00 |
| TRINITY_ADE7759  | (unknown Picea_sitchensis    | 33.20 | 0.00 |
| TRINITY_XP_00844 | PREDICTFCucumis_melo         | 33.20 | 0.00 |
| TRINITY_XP_02436 | uncharacPhyscomitrella_pate  | 33.20 | 0.00 |
| TRINITY_XP_02127 | serine/tHerrania_umbratica   | 33.20 | 0.00 |
| TRINITY_XP_02389 | methylytQuercus_suber        | 33.20 | 0.00 |
| TRINITY_PNW79243 | hypothetChlamydomonas_reinh  | 33.20 | 0.00 |
| TRINITY_EFJ34954 | hypothetSelaginella_moellen  | 33.20 | 0.00 |
| TRINITY_BAJ94976 | predicteHordeum_vulgare      | 33.20 | 0.00 |
| TRINITY_XP_02436 | serine/tPhyscomitrella_pate  | 33.20 | 0.00 |
| TRINITY_XP_00169 | componerChlamydomonas_reinh  | 33.20 | 0.00 |
| TRINITY_PSC73189 | barwin-lMicractinium_conduc  | 33.20 | 0.00 |
| TRINITY_GAX80514 | hypothetChlamydomonas_eusti  | 33.20 | 0.00 |
| TRINITY_XP_00295 | hypothetVolvox_carteri       | 33.20 | 0.00 |
| TRINITY_XP_01390 | hypothetMonoraphidium_negle  | 33.20 | 0.00 |
| TRINITY_GAX81284 | hypothetChlamydomonas_eusti  | 33.20 | 0.00 |
| TRINITY_XP_01390 | Serine/ Monoraphidium_negle  | 33.20 | 0.00 |
| TRINITY_XP_00246 | 26S protSorghum_bicolor      | 33.20 | 0.00 |
| TRINITY_GAX78964 | hypothetChlamydomonas_eusti  | 33.20 | 0.00 |
| TRINITY_GAX75513 | hypothetChlamydomonas_eusti  | 33.20 | 0.00 |
| TRINITY_XP_02452 | phosphatSelaginella_moellen  | 33.20 | 0.00 |
| TRINITY_GAX79865 | hypothetChlamydomonas_eusti  | 33.20 | 0.00 |
| TRINITY_PRW58725 | putativeChlorella_sorokinia  | 33.20 | 0.00 |
| TRINITY_XP_02451 | E3 ubiqSelaginella_moellen   | 33.20 | 0.00 |
| TRINITY_XP_02387 | peroxiscQuercus_suber        | 33.20 | 0.00 |
| TRINITY_XP_00295 | hypothetVolvox_carteri       | 33.20 | 0.00 |
| TRINITY_XP_01868 | PREDICTFMusa_acuminata       | 33.20 | 0.00 |
| TRINITY_PKA59391 | putativeApostasia_shenzheni  | 33.20 | 0.00 |
| TRINITY_XP_01049 | PREDICTFCamelina_sativa      | 33.20 | 0.00 |
| TRINITY_GAX79856 | hypothetChlamydomonas_eusti  | 33.20 | 0.00 |
| TRINITY_KXZ47672 | hypothetGonium_pectorale     | 33.20 | 0.00 |
| TRINITY_ABR16149 | (unknown Picea_sitchensis    | 33.20 | 0.00 |
| TRINITY_XP_00585 | hypothetChlorella_variabili  | 33.20 | 0.00 |
| TRINITY_XP_00940 | (PREDICTFMusa_acuminata      | 33.10 | 0.00 |
| TRINITY_XP_01066 | (PREDICTFBeta_vulgaris       | 33.10 | 0.00 |
| TRINITY_XP_00306 | dihydroqMicromonas_pusilla   | 33.10 | 0.00 |
| TRINITY_XP_02436 | carbonylPhyscomitrella_pate  | 33.10 | 0.00 |
| TRINITY_OAE24892 | hypothetMarchantia_polymorp  | 33.10 | 0.00 |
| TRINITY_VDD20602 | unnamed Brassica_oleracea    | 33.10 | 0.00 |
| TRINITY_PIN11902 | putativeHandroanthus_impeti  | 33.10 | 0.00 |
| TRINITY_PRW56764 | Golgi aqChlorella_sorokinia  | 33.10 | 0.00 |
| TRINITY_XP_00169 | flagellcChlamydomonas_reinh  | 33.10 | 0.00 |
| TRINITY_OAE29281 | hypothetMarchantia_polymorp  | 33.10 | 0.00 |
| TRINITY_GAX77716 | hypothetChlamydomonas_eusti  | 33.10 | 0.00 |
| TRINITY_KYP7738  | (UPF0341-Cajanus_cajan       | 33.10 | 0.00 |
| TRINITY_GBF96988 | nucleoliRaphidocelis_subcap  | 33.10 | 0.00 |
| TRINITY_XP_00250 | (predicteMicromonas_commoda  | 33.10 | 0.00 |
| TRINITY_XP_00844 | PREDICTFCucumis_melo         | 33.10 | 0.00 |
| TRINITY_EFJ12042 | hypothetSelaginella_moellen  | 33.10 | 0.00 |
| TRINITY_XP_02463 | SNF1-relMedicago_truncatula  | 33.10 | 0.00 |
| TRINITY_PRW55936 | baculoviChlorella_sorokinia  | 33.10 | 0.00 |
| TRINITY_XP_00250 | (predicteMicromonas_commoda  | 33.10 | 0.00 |
| TRINITY_RQP02555 | hypothetPopulus_trichocarpa  | 33.10 | 0.00 |
| TRINITY_XP_00141 | predicteOstreococcus_sp._'1  | 33.10 | 0.00 |
| TRINITY_XP_02438 | snurportPhyscomitrella_pate  | 33.10 | 0.00 |
| TRINITY_GAX82950 | hypothetChlamydomonas_eusti  | 33.10 | 0.00 |
| TRINITY_XP_00356 | flavin-cBrachypodium_distac  | 33.10 | 0.00 |
| TRINITY_XP_02198 | CBL-inteHelianthus_annuus    | 33.10 | 0.00 |
| TRINITY_XP_02008 | chromatiAnanas_comosus       | 33.10 | 0.00 |
| TRINITY_PRW59743 | non-cancChlorella_sorokinia  | 33.10 | 0.00 |
| TRINITY_KXZ45198 | hypothetGonium_pectorale     | 33.10 | 0.00 |
| TRINITY_CAI99406 | P-type lFlabellia_petiolata  | 33.10 | 0.00 |
| TRINITY_XP_00640 | (syntaxirEutrema_salsugineur | 33.10 | 0.00 |
| TRINITY_XP_02389 | uncharacQuercus_suber        | 33.10 | 0.00 |
| TRINITY_KMZ61122 | CytokiniZostera_marina       | 33.10 | 0.00 |

|                                             |       |      |
|---------------------------------------------|-------|------|
| TRINITY_OAO89123hypothetArabidopsis_thalian | 33.10 | 0.00 |
| TRINITY_XP_00585hypothetChlorella_variabili | 33.10 | 0.00 |
| TRINITY_XP_00936PREDICTIPyrus_x_bretschneid | 33.10 | 0.00 |
| TRINITY_XP_00295hypothetVolvox_carteri      | 33.10 | 0.00 |
| TRINITY_XP_00703PREDICTITheobroma_cacao     | 33.10 | 0.00 |
| TRINITY_GAX74598hypothetChlamydomonas_eusti | 33.10 | 0.00 |
| TRINITY_XP_02435calcium Physcomitrella_pate | 33.10 | 0.00 |
| TRINITY_KXZ42796hypothetGonium_pectorale    | 33.10 | 0.00 |
| TRINITY_KXZ56559hypothetGonium_pectorale    | 33.10 | 0.00 |
| TRINITY_XP_01390hypothetMonoraphidium_negle | 33.10 | 0.00 |

|                 |                              |       |      |
|-----------------|------------------------------|-------|------|
| TRINITY_GAX8279 | hypothetChlamydomonas_eusti  | 33.10 | 0.00 |
| TRINITY_BAJ9372 | predicteHordeum_vulgare      | 33.10 | 0.00 |
| TRINITY_XP_0029 | hypothetVolvox_carteri       | 33.10 | 0.00 |
| TRINITY_XP_0206 | calmodulDendrobium_catenatu  | 33.10 | 0.00 |
| TRINITY_GAX8376 | hypothetChlamydomonas_eusti  | 33.10 | 0.00 |
| TRINITY_XP_0029 | hypothetVolvox_carteri       | 33.10 | 0.00 |
| TRINITY_XP_0245 | probableSelaginella_moellen  | 33.10 | 0.00 |
| TRINITY_XP_0217 | uncharacChenopodium_quinoa   | 33.10 | 0.00 |
| TRINITY_XP_0220 | nodal mcHelianthus_annuus    | 33.10 | 0.00 |
| TRINITY_XP_0017 | flagellacChlamydomonas_reinh | 33.10 | 0.00 |
| TRINITY_GAX7828 | hypothetChlamydomonas_eusti  | 33.10 | 0.00 |
| TRINITY_RXI0250 | hypothetMalus_domestica      | 33.10 | 0.00 |
| TRINITY_GAX7452 | hypothetChlamydomonas_eusti  | 33.10 | 0.00 |
| TRINITY_GAQ9313 | hypothetKlebsormidium_niten  | 33.10 | 0.00 |
| TRINITY_XP_0238 | cytochrCQuercus_suber        | 33.10 | 0.00 |
| TRINITY_XP_0030 | predicteMicromonas_pusilla   | 33.10 | 0.00 |
| TRINITY_XP_0172 | PREDICTFDaucus_carota        | 33.00 | 0.00 |
| TRINITY_GAX8352 | hypothetChlamydomonas_eusti  | 33.00 | 0.00 |
| TRINITY_XP_0243 | guanylatPhyscomitrella_pate  | 33.00 | 0.00 |
| TRINITY_XP_0238 | UBP9-birQuercus_suber        | 33.00 | 0.00 |
| TRINITY_XP_0238 | succinatQuercus_suber        | 33.00 | 0.00 |
| TRINITY_XP_0263 | BTB/POZ Papaver_somniferum   | 33.00 | 0.00 |
| TRINITY_XP_0024 | survivalSorghum_bicolor      | 33.00 | 0.00 |
| TRINITY_RCV0490 | hypothetSetaria_italica      | 33.00 | 0.00 |
| TRINITY_XP_0167 | PREDICTFGossypium_hirsutum   | 33.00 | 0.00 |
| TRINITY_XP_0138 | hypothetMonoraphidium_negle  | 33.00 | 0.00 |
| TRINITY_XP_0030 | zeaxantMicromonas_pusilla    | 33.00 | 0.00 |
| TRINITY_PTQ4186 | hypothetMarchantia_polymorp  | 33.00 | 0.00 |
| TRINITY_GAX7597 | hypothetChlamydomonas_eusti  | 33.00 | 0.00 |
| TRINITY_XP_0220 | RNA-binHelianthus_annuus     | 33.00 | 0.00 |
| TRINITY_GBF9821 | hypothetRaphidocelis_subcap  | 33.00 | 0.00 |
| TRINITY_XP_0237 | probableLactuca_sativa       | 33.00 | 0.00 |
| TRINITY_XP_0030 | zinc perMicromonas_pusilla   | 33.00 | 0.00 |
| TRINITY_XP_0244 | serine/tPhyscomitrella_pate  | 33.00 | 0.00 |
| TRINITY_PLY6726 | hypothetLactuca_sativa       | 33.00 | 0.00 |
| TRINITY_XP_0215 | endonucManihot_esculenta     | 33.00 | 0.00 |
| TRINITY_GAV6646 | Sterile Cephalotus_follicul  | 33.00 | 0.00 |
| TRINITY_GAX8134 | hypothetChlamydomonas_eusti  | 33.00 | 0.00 |
| TRINITY_KMZ7346 | Two poreZostera_marina       | 33.00 | 0.00 |
| TRINITY_EEC6766 | hypothetOryza_sativa         | 33.00 | 0.00 |
| TRINITY_XP_0139 | hypothetMonoraphidium_negle  | 33.00 | 0.00 |
| TRINITY_PPD6649 | hypothetGossypium_barbadens  | 33.00 | 0.00 |
| TRINITY_XP_0165 | PREDICTFCapsicum_annuum      | 33.00 | 0.00 |
| TRINITY_RWR8100 | NADH deCinnamomum_micranth   | 33.00 | 0.00 |
| TRINITY_XP_0029 | hypothetVolvox_carteri       | 33.00 | 0.00 |
| TRINITY_OWM8826 | hypothetPunica_granatum      | 33.00 | 0.00 |
| TRINITY_KXZ5641 | hypothetGonium_pectorale     | 33.00 | 0.00 |
| TRINITY_XP_0075 | ubiquitiBathycoccus_prasinc  | 33.00 | 0.00 |
| TRINITY_GAX7618 | hypothetChlamydomonas_eusti  | 33.00 | 0.00 |
| TRINITY_XP_0205 | glutathiPhalaenopsis_equest  | 33.00 | 0.00 |
| TRINITY_EEF2753 | two-comRicinus_communis      | 33.00 | 0.00 |
| TRINITY_XP_0062 | SNF1-relCapsella_rubella     | 33.00 | 0.00 |
| TRINITY_EYU2921 | hypothetErythranthe_guttata  | 33.00 | 0.00 |
| TRINITY_ADK8955 | spermidMarsilea_vestita      | 33.00 | 0.00 |
| TRINITY_PIA5751 | hypothetAquilegia_coerulea   | 33.00 | 0.00 |
| TRINITY_GBG6619 | hypothetChara_braunii        | 33.00 | 0.00 |
| TRINITY_XP_0029 | hypothetVolvox_carteri       | 33.00 | 0.00 |
| TRINITY_PHT4061 | GlyoxysCapsicum_baccatum     | 33.00 | 0.00 |
| TRINITY_BAK0302 | predicteHordeum_vulgare      | 33.00 | 0.00 |
| TRINITY_KXZ4643 | hypothetGonium_pectorale     | 33.00 | 0.00 |
| TRINITY_PTQ3519 | hypothetMarchantia_polymorp  | 33.00 | 0.00 |
| TRINITY_XP_0104 | PREDICTFCamelina_sativa      | 33.00 | 0.00 |
| TRINITY_KXZ5329 | hypothetGonium_pectorale     | 33.00 | 0.00 |
| TRINITY_GAX7452 | hypothetChlamydomonas_eusti  | 33.00 | 0.00 |
| TRINITY_XP_0227 | plant cDurio_zibethinus      | 33.00 | 0.00 |
| TRINITY_GAX7602 | hypothetChlamydomonas_eusti  | 33.00 | 0.00 |



|                  |                              |       |      |
|------------------|------------------------------|-------|------|
| TRINITY_KXZ47463 | hypothetGonium_pectorale     | 33.00 | 0.00 |
| TRINITY_OVA12789 | UbiquitiMacleaya_cordata     | 33.00 | 0.00 |
| TRINITY_KXZ51476 | hypothetGonium_pectorale     | 33.00 | 0.00 |
| TRINITY_PNH10932 | Protein Tetrabaena_socialis  | 33.00 | 0.00 |
| TRINITY_XP_0025  | (dynein )Micromonas_commoda  | 33.00 | 0.00 |
| TRINITY_XP_00665 | PREDICTIOryza_brachyantha    | 33.00 | 0.00 |
| TRINITY_KCW5499  | (hypothetEucalyptus_grandis  | 32.90 | 0.00 |
| TRINITY_XP_02172 | probableChenopodium_quinoa   | 32.90 | 0.00 |
| TRINITY_XP_02645 | putativePapaver_somniferum   | 32.90 | 0.00 |
| TRINITY_XP_00665 | PREDICTIOryza_brachyantha    | 32.90 | 0.00 |
| TRINITY_OAE20594 | hypothetMarchantia_polymorp  | 32.90 | 0.00 |
| TRINITY_XP_00565 | hypothetCoccomyxa_subellips  | 32.90 | 0.00 |
| TRINITY_XP_00249 | alpha-2 Micromonas_commoda   | 32.90 | 0.00 |
| TRINITY_XP_02176 | protein Chenopodium_quinoa   | 32.90 | 0.00 |
| TRINITY_GBF95241 | TKL kinRaphidocelis_subcap   | 32.90 | 0.00 |
| TRINITY_GBG63601 | hypothetChara_braunii        | 32.90 | 0.00 |
| TRINITY_XP_01920 | PREDICTIOpomoea_nil          | 32.90 | 0.00 |
| TRINITY_KMZ75388 | putativeZostera_marina       | 32.90 | 0.00 |
| TRINITY_GAQ87539 | hypothetKlebsormidium_niten  | 32.90 | 0.00 |
| TRINITY_PRW56285 | T-compleChlorella_sorokinia  | 32.90 | 0.00 |
| TRINITY_XP_00636 | PREDICTIOSolanum_tuberosum   | 32.90 | 0.00 |
| TRINITY_GBF90113 | hypothetRaphidocelis_subcap  | 32.90 | 0.00 |
| TRINITY_XP_02176 | DNA-dirChenopodium_quinoa    | 32.90 | 0.00 |
| TRINITY_XP_02419 | probableRosa_chinensis       | 32.90 | 0.00 |
| TRINITY_RAL54657 | hypothetCuscuta_australis    | 32.90 | 0.00 |
| TRINITY_XP_02436 | gamma-gPhyscomitrella_pate   | 32.90 | 0.00 |
| TRINITY_XP_00295 | hypothetVolvox_carteri       | 32.90 | 0.00 |
| TRINITY_OAO98862 | SMO1-2  Arabidopsis_thalian  | 32.90 | 0.00 |
| TRINITY_PNW8536  | (hypothetChlamydomonas_reinh | 32.90 | 0.00 |
| TRINITY_XP_02454 | transcriSelaginella_moellen  | 32.90 | 0.00 |
| TRINITY_RYR3698  | (hypothetArachis_hypogaea    | 32.90 | 0.00 |
| TRINITY_PNH00238 | hypothetTetrabaena_socialis  | 32.90 | 0.00 |
| TRINITY_GAX77617 | hypothetChlamydomonas_eusti  | 32.90 | 0.00 |
| TRINITY_RWR77919 | pathogerCinnamomum_micranth  | 32.90 | 0.00 |
| TRINITY_GAX84835 | hypothetChlamydomonas_eusti  | 32.90 | 0.00 |
| TRINITY_XP_00296 | gamma cSelaginella_moellen   | 32.90 | 0.00 |
| TRINITY_XP_00878 | uncharacPhoenix_dactylifera  | 32.90 | 0.00 |
| TRINITY_GAX76238 | hypothetChlamydomonas_eusti  | 32.90 | 0.00 |
| TRINITY_KZV14877 | hypothetDorcoceras_hygromet  | 32.90 | 0.00 |
| TRINITY_XP_01667 | PREDICTIOGossypium_hirsutum  | 32.90 | 0.00 |
| TRINITY_OAE31917 | hypothetMarchantia_polymorp  | 32.90 | 0.00 |
| TRINITY_GAX73248 | hypothetChlamydomonas_eusti  | 32.90 | 0.00 |
| TRINITY_XP_02452 | uncharacSelaginella_moellen  | 32.90 | 0.00 |
| TRINITY_XP_00838 | PREDICTIOMalus_domestica     | 32.90 | 0.00 |
| TRINITY_GAX74229 | hypothetChlamydomonas_eusti  | 32.90 | 0.00 |
| TRINITY_GAQ79924 | PutativeKlebsormidium_niten  | 32.90 | 0.00 |
| TRINITY_GBG74077 | hypothetChara_braunii        | 32.90 | 0.00 |
| TRINITY_PNH09815 | PeroxiscTetrabaena_socialis  | 32.90 | 0.00 |
| TRINITY_PRW58436 | anaphasChlorella_sorokinia   | 32.90 | 0.00 |
| TRINITY_XP_00305 | predicteMicromonas_pusilla   | 32.90 | 0.00 |
| TRINITY_XP_02793 | guanylatVigna_unguiculata    | 32.90 | 0.00 |
| TRINITY_GAX83697 | hypothetChlamydomonas_eusti  | 32.90 | 0.00 |
| TRINITY_GAX84285 | hypothetChlamydomonas_eusti  | 32.90 | 0.00 |
| TRINITY_XP_01052 | PREDICTIOtarenaya_hasslerian | 32.90 | 0.00 |
| TRINITY_OWM77237 | hypothetPunica_granatum      | 32.90 | 0.00 |
| TRINITY_GAX78878 | hypothetChlamydomonas_eusti  | 32.90 | 0.00 |
| TRINITY_XP_01067 | PREDICTIOBeta_vulgaris       | 32.90 | 0.00 |
| TRINITY_XP_01390 | PutativeMonoraphidium_negle  | 32.90 | 0.00 |
| TRINITY_XP_01917 | PREDICTIOpomoea_nil          | 32.80 | 0.00 |
| TRINITY_XP_01883 | PREDICTIOJuglans_regia       | 32.80 | 0.00 |
| TRINITY_XP_02437 | E3 ubiqPhyscomitrella_pate   | 32.80 | 0.00 |
| TRINITY_BAK00506 | predicteHordeum_vulgare      | 32.80 | 0.00 |
| TRINITY_XP_02439 | zinc firPhyscomitrella_pate  | 32.80 | 0.00 |
| TRINITY_XP_01006 | PREDICTIOEucalyptus_grandis  | 32.80 | 0.00 |
| TRINITY_PRW58161 | TBC1 donChlorella_sorokinia  | 32.80 | 0.00 |
| TRINITY_XP_02375 | uncharacLactuca_sativa       | 32.80 | 0.00 |

|                  |           |                     |       |      |
|------------------|-----------|---------------------|-------|------|
| TRINITY_XP_02283 | ABC trar  | Ostreococcus_tauri  | 32.80 | 0.00 |
| TRINITY_XP_01843 | PREDICTI  | Raphanus_sativus    | 32.80 | 0.00 |
| TRINITY_XP_02390 | probable  | Quercus_suber       | 32.80 | 0.00 |
| TRINITY_PNW7131  | (hypothet | Chlamydomonas_reinh | 32.80 | 0.00 |
| TRINITY_GAQ8931  | (hypothet | Klebsormidium_niten | 32.80 | 0.00 |
| TRINITY_XP_02058 | protein   | Phalaenopsis_equest | 32.80 | 0.00 |
| TRINITY_XP_02454 | choline,  | Selaginella_moellen | 32.80 | 0.00 |
| TRINITY_XP_02277 | 11-beta-  | Durio_zibethinus    | 32.80 | 0.00 |
| TRINITY_RDY0562  | (hypothet | Mucuna_pruriens     | 32.80 | 0.00 |
| TRINITY_XP_01026 | PREDICTI  | Nelumbo_nucifera    | 32.80 | 0.00 |
| TRINITY_GBG8323  | (hypothet | Chara_braunii       | 32.80 | 0.00 |
| TRINITY_XP_00565 | (hypothet | Coccomyxa_subellips | 32.80 | 0.00 |
| TRINITY_XP_00564 | GBP-dom   | Coccomyxa_subellips | 32.80 | 0.00 |
| TRINITY_GAX8413  | (hypothet | Chlamydomonas_eusti | 32.80 | 0.00 |
| TRINITY_PNR5511  | (hypothet | Physcomitrella_pate | 32.80 | 0.00 |
| TRINITY_ADE7731  | unknown   | Picea_sitchensis    | 32.80 | 0.00 |
| TRINITY_XP_02641 | ER memb   | Papaver_somniferum  | 32.80 | 0.00 |
| TRINITY_XP_00666 | PREDICTI  | Oryza_brachyantha   | 32.80 | 0.00 |
| TRINITY_PNH1169  | (hypothet | Tetrabaena_socialis | 32.80 | 0.00 |
| TRINITY_XP_02008 | uncharac  | Ananas_comosus      | 32.80 | 0.00 |
| TRINITY_OAY3338  | (hypothet | Manihot_esculenta   | 32.80 | 0.00 |
| TRINITY_EFJ3343  | (hypothet | Selaginella_moellen | 32.80 | 0.00 |
| TRINITY_GAX7476  | (hypothet | Chlamydomonas_eusti | 32.80 | 0.00 |
| TRINITY_RWW4448  | (hypothet | Ensete_ventricosum  | 32.80 | 0.00 |
| TRINITY_KDD7543  | 3-beta    | Helicosporidium_sp. | 32.80 | 0.00 |
| TRINITY_XP_02024 | SNF1-rel  | Asparagus_officinal | 32.80 | 0.00 |
| TRINITY_XP_01884 | PREDICTI  | Juglans_regia       | 32.80 | 0.00 |
| TRINITY_GAQ8170  | (hypothet | Klebsormidium_niten | 32.80 | 0.00 |
| TRINITY_GAQ8875  | (hypothet | Klebsormidium_niten | 32.80 | 0.00 |
| TRINITY_PLY7099  | (hypothet | Lactuca_sativa      | 32.80 | 0.00 |
| TRINITY_XP_01945 | PREDICTI  | Lupinus_angustifoli | 32.80 | 0.00 |
| TRINITY_XP_02009 | uncharac  | Ananas_comosus      | 32.80 | 0.00 |
| TRINITY_XP_02436 | actin-d   | Physcomitrella_pate | 32.80 | 0.00 |
| TRINITY_AFK4221  | unknown   | Medicago_truncatula | 32.80 | 0.00 |
| TRINITY_EFJ1806  | (hypothet | Selaginella_moellen | 32.80 | 0.00 |
| TRINITY_XP_01666 | PREDICTI  | Gossypium_hirsutum  | 32.80 | 0.00 |
| TRINITY_XP_00751 | thio-red  | Bathycoccus_prasinc | 32.80 | 0.00 |
| TRINITY_GAQ7771  | HECT don  | Klebsormidium_niten | 32.80 | 0.00 |
| TRINITY_XP_02640 | protein   | Papaver_somniferum  | 32.80 | 0.00 |
| TRINITY_XP_00250 | predict   | Micromonas_commoda  | 32.80 | 0.00 |
| TRINITY_XP_02387 | PQ-loop   | Quercus_suber       | 32.80 | 0.00 |
| TRINITY_XP_00585 | (hypothet | Chlorella_variabili | 32.80 | 0.00 |
| TRINITY_GAX8280  | (hypothet | Chlamydomonas_eusti | 32.80 | 0.00 |
| TRINITY_XP_02454 | uncharac  | Selaginella_moellen | 32.80 | 0.00 |
| TRINITY_RRT5311  | (hypothet | Ensete_ventricosum  | 32.80 | 0.00 |
| TRINITY_GAX8211  | (hypothet | Chlamydomonas_eusti | 32.80 | 0.00 |
| TRINITY_GAQ7878  | (hypothet | Klebsormidium_niten | 32.80 | 0.00 |
| TRINITY_VDD1622  | unnamed   | Brassica_rapa       | 32.80 | 0.00 |
| TRINITY_GAX7625  | (hypothet | Chlamydomonas_eusti | 32.80 | 0.00 |
| TRINITY_GAX8230  | (hypothet | Chlamydomonas_eusti | 32.80 | 0.00 |
| TRINITY_RWR8908  | (Peptida  | Cinnamomum_micranth | 32.80 | 0.00 |
| TRINITY_PNH1165  | Calcium,  | Tetrabaena_socialis | 32.80 | 0.00 |
| TRINITY_PNW8868  | (hypothet | Chlamydomonas_reinh | 32.80 | 0.00 |
| TRINITY_XP_02390 | oxyster   | Quercus_suber       | 32.80 | 0.00 |
| TRINITY_XP_02438 | purple    | Physcomitrella_pate | 32.80 | 0.00 |
| TRINITY_XP_02438 | probable  | Physcomitrella_pate | 32.80 | 0.00 |
| TRINITY_XP_02735 | putative  | Abrus_precatorius   | 32.80 | 0.00 |
| TRINITY_GAX7650  | (hypothet | Chlamydomonas_eusti | 32.80 | 0.00 |
| TRINITY_GAQ8454  | 3'-5'-e   | Klebsormidium_niten | 32.70 | 0.00 |
| TRINITY_XP_00565 | (hypothet | Coccomyxa_subellips | 32.70 | 0.00 |
| TRINITY_XP_00912 | PREDICTI  | Brassica_rapa       | 32.70 | 0.00 |
| TRINITY_PPD8915  | (hypothet | Gossypium_barbadens | 32.70 | 0.00 |
| TRINITY_XP_02018 | BTB/POZ   | Aegilops_tauschii   | 32.70 | 0.00 |
| TRINITY_XP_01722 | PREDICTI  | Daucus_carota       | 32.70 | 0.00 |
| TRINITY_BAF9574  | ethylen   | Physcomitrella_pate | 32.70 | 0.00 |
| TRINITY_XP_01092 | PREDICTI  | Elaeis_guineensis   | 32.70 | 0.00 |

|                  |          |                      |       |      |
|------------------|----------|----------------------|-------|------|
| TRINITY_RAL42333 | hypothet | Cuscuta_australis    | 32.70 | 0.00 |
| TRINITY_GAQ77732 | Leishmar | Klebsormidium_niten  | 32.70 | 0.00 |
| TRINITY_GBG90679 | hypothet | Chara_braunii        | 32.70 | 0.00 |
| TRINITY_XP_02391 | ATP-bin  | Quercus_suber        | 32.70 | 0.00 |
| TRINITY_GAQ83887 | CCR4-NO1 | Klebsormidium_niten  | 32.70 | 0.00 |
| TRINITY_KVI05274 | Nucleoti | Cynara_cardunculus   | 32.70 | 0.00 |
| TRINITY_XP_00713 | hypothet | Phaseolus_vulgaris   | 32.70 | 0.00 |
| TRINITY_XP_02162 | activat  | Manihot_esculenta    | 32.70 | 0.00 |
| TRINITY_KXZ51053 | hypothet | Gonium_pectorale     | 32.70 | 0.00 |
| TRINITY_XP_00294 | hypothet | Volvox_carteri       | 32.70 | 0.00 |
| TRINITY_XP_00751 | predicte | Bathycoccus_prasinoc | 32.70 | 0.00 |
| TRINITY_CDM85205 | unnamed  | Triticum_aestivum    | 32.70 | 0.00 |
| TRINITY_XP_02024 | UTP:RNA  | Asparagus_officinal  | 32.70 | 0.00 |
| TRINITY_XP_01656 | PREDICTE | Capsicum_annuum      | 32.70 | 0.00 |
| TRINITY_GAX73700 | hypothet | Chlamydomonas_eusti  | 32.70 | 0.00 |
| TRINITY_XP_02024 | major f  | Asparagus_officinal  | 32.70 | 0.00 |
| TRINITY_GAQ77643 | hypothet | Klebsormidium_niten  | 32.70 | 0.00 |
| TRINITY_XP_02643 | importir | Papaver_somniferum   | 32.70 | 0.00 |
| TRINITY_RMZ53807 | hypothet | Auxenochlorella_pro  | 32.70 | 0.00 |
| TRINITY_ONM07807 | Cox19-li | Zea_mays             | 32.70 | 0.00 |
| TRINITY_XP_01909 | PREDICTE | Camelina_sativa      | 32.70 | 0.00 |
| TRINITY_XP_02437 | heat sh  | Physcomitrella_pate  | 32.70 | 0.00 |
| TRINITY_GAX80690 | hypothet | Chlamydomonas_eusti  | 32.70 | 0.00 |
| TRINITY_GAX80909 | hypothet | Chlamydomonas_eusti  | 32.70 | 0.00 |
| TRINITY_XP_02188 | BRCA1-a  | Carica_papaya        | 32.70 | 0.00 |
| TRINITY_XP_00565 | hypothet | Coccomyxa_subellips  | 32.70 | 0.00 |
| TRINITY_ABJ91223 | CBL-int  | Populus_trichocarpa  | 32.70 | 0.00 |
| TRINITY_GAQ78720 | Notchle  | Klebsormidium_niten  | 32.70 | 0.00 |
| TRINITY_PIA61740 | hypothet | Aquilegia_coerulea   | 32.70 | 0.00 |
| TRINITY_GAX74185 | hypothet | Chlamydomonas_eusti  | 32.70 | 0.00 |
| TRINITY_XP_00498 | BTB/POZ  | Setaria_italica      | 32.70 | 0.00 |
| TRINITY_XP_01915 | PREDICTE | Ipomoea_nil          | 32.70 | 0.00 |
| TRINITY_GAQ89752 | hypothet | Klebsormidium_niten  | 32.70 | 0.00 |
| TRINITY_KXZ56197 | hypothet | Gonium_pectorale     | 32.70 | 0.00 |
| TRINITY_XP_02172 | aromatic | Chenopodium_quinoa   | 32.70 | 0.00 |
| TRINITY_RLN27910 | membran  | Panicum_miliaceum    | 32.70 | 0.00 |
| TRINITY_OMO81374 | hypothet | Corchorus_olitorius  | 32.70 | 0.00 |
| TRINITY_GAQ89753 | hypothet | Klebsormidium_niten  | 32.70 | 0.00 |
| TRINITY_PNW85111 | hypothet | Chlamydomonas_reinh  | 32.70 | 0.00 |
| TRINITY_GAQ79411 | carbonic | Klebsormidium_niten  | 32.70 | 0.00 |
| TRINITY_XP_00295 | hypothet | Volvox_carteri       | 32.70 | 0.00 |
| TRINITY_GAX78299 | hypothet | Chlamydomonas_eusti  | 32.70 | 0.00 |
| TRINITY_GAX83384 | hypothet | Chlamydomonas_eusti  | 32.70 | 0.00 |
| TRINITY_OMO62797 | Kelch r  | Corchorus_olitorius  | 32.70 | 0.00 |
| TRINITY_PNH03179 | hypothet | Tetrabaena_socialis  | 32.70 | 0.00 |
| TRINITY_XP_02389 | inositol | Quercus_suber        | 32.70 | 0.00 |
| TRINITY_XP_00564 | GTP-bin  | Coccomyxa_subellips  | 32.70 | 0.00 |
| TRINITY_KZV31707 | hypothet | Dorcoceras_hygromet  | 32.70 | 0.00 |
| TRINITY_XP_00294 | hypothet | Volvox_carteri       | 32.70 | 0.00 |
| TRINITY_XP_01922 | PREDICTE | Nicotiana_attenuata  | 32.70 | 0.00 |
| TRINITY_PNW84545 | hypothet | Chlamydomonas_reinh  | 32.70 | 0.00 |
| TRINITY_KZV14882 | penicill | Dorcoceras_hygromet  | 32.70 | 0.00 |
| TRINITY_XP_02390 | uncharac | Quercus_suber        | 32.70 | 0.00 |
| TRINITY_EYU38602 | hypothet | Erythranthe_guttata  | 32.70 | 0.00 |
| TRINITY_XP_01906 | ADP-rib  | Solanum_lycopersicu  | 32.70 | 0.00 |
| TRINITY_XP_00250 | predicte | Micromonas_commoda   | 32.70 | 0.00 |
| TRINITY_GAX83998 | hypothet | Chlamydomonas_eusti  | 32.70 | 0.00 |
| TRINITY_XP_02401 | ras-rel  | Morus_notabilis      | 32.60 | 0.00 |
| TRINITY_RRT72140 | hypothet | Ensete_ventricosum   | 32.60 | 0.00 |
| TRINITY_XP_02277 | sphingo  | Durio_zibethinus     | 32.60 | 0.00 |
| TRINITY_XP_02435 | uncharac | Physcomitrella_pate  | 32.60 | 0.00 |
| TRINITY_XP_01723 | PREDICTE | Daucus_carota        | 32.60 | 0.00 |
| TRINITY_XP_01616 | ultravic | Arachis_ipaensis     | 32.60 | 0.00 |
| TRINITY_XP_00867 | ABC trar | Zea_mays             | 32.60 | 0.00 |
| TRINITY_XP_01916 | PREDICTE | Ipomoea_nil          | 32.60 | 0.00 |
| TRINITY_PWZ53940 | Cation/c | Zea_mays             | 32.60 | 0.00 |

|                  |                              |       |      |
|------------------|------------------------------|-------|------|
| TRINITY_XP_00294 | hypothetVolvox_carteri       | 32.60 | 0.00 |
| TRINITY_OUS4384  | leucine-Ostreococcus_tauri   | 32.60 | 0.00 |
| TRINITY_OVA0714  | (PyridineMacleaya_cordata    | 32.60 | 0.00 |
| TRINITY_XP_01562 | CBL-inteOryza_sativa         | 32.60 | 0.00 |
| TRINITY_XP_00564 | NAD(P)-kCoccomyxa_subellips  | 32.60 | 0.00 |
| TRINITY_XP_0114  | (Epoxide Auxenochlorella_pro | 32.60 | 0.00 |
| TRINITY_GBG8825  | hypothetChara_braunii        | 32.60 | 0.00 |
| TRINITY_OAE2679  | hypothetMarchantia_polymorp  | 32.60 | 0.00 |
| TRINITY_GAX7499  | hypothetChlamydomonas_eusti  | 32.60 | 0.00 |
| TRINITY_XP_0238  | ran-binCQuercus_suber        | 32.60 | 0.00 |
| TRINITY_XP_0025  | (voltage-Micromonas_commoda  | 32.60 | 0.00 |
| TRINITY_XP_0228  | uncharaOlea_europaea         | 32.60 | 0.00 |
| TRINITY_XP_0243  | (gamma-g)Physcomitrella_pate | 32.60 | 0.00 |
| TRINITY_EPS5789  | hypothetGenlisea_aurea       | 32.60 | 0.00 |
| TRINITY_GAX7837  | hypothetChlamydomonas_eusti  | 32.60 | 0.00 |
| TRINITY_XP_0228  | ATP-depOlea_europaea         | 32.60 | 0.00 |
| TRINITY_EPS6488  | (hypothetGenlisea_aurea      | 32.60 | 0.00 |
| TRINITY_XP_0105  | PREDICTITarenaya_hasslerian  | 32.60 | 0.00 |
| TRINITY_XP_0114  | (hypothetAuxenochlorella_pro | 32.60 | 0.00 |
| TRINITY_XP_0105  | PREDICTITarenaya_hasslerian  | 32.60 | 0.00 |
| TRINITY_PNH0830  | NFX1-tyTetrabaena_socialis   | 32.60 | 0.00 |
| TRINITY_XP_0109  | PREDICTIElaeis_guineensis    | 32.60 | 0.00 |
| TRINITY_XP_0238  | saccharCQuercus_suber        | 32.60 | 0.00 |
| TRINITY_PRW2080  | glutamatChlorella_sorokinia  | 32.60 | 0.00 |
| TRINITY_XP_0245  | uncharaSelaginella_moellen   | 32.60 | 0.00 |
| TRINITY_XP_0239  | D-xyloCQuercus_suber         | 32.60 | 0.00 |
| TRINITY_XP_0058  | hypothetChlorella_variabili  | 32.60 | 0.00 |
| TRINITY_XP_0228  | C2 and COlea_europaea        | 32.60 | 0.00 |
| TRINITY_XP_0136  | PREDICTIBrassica_oleracea    | 32.60 | 0.00 |
| TRINITY_PWZ2081  | CBL-inteZea_mays             | 32.60 | 0.00 |
| TRINITY_XP_0113  | ImportirAuxenochlorella_pro  | 32.60 | 0.00 |
| TRINITY_XP_0239  | uncharaQuercus_suber         | 32.60 | 0.00 |
| TRINITY_GAX7784  | hypothetChlamydomonas_eusti  | 32.60 | 0.00 |
| TRINITY_XP_0029  | uncharaSelaginella_moellen   | 32.60 | 0.00 |
| TRINITY_XP_0025  | (predicteMicromonas_commoda  | 32.60 | 0.00 |
| TRINITY_PSC7016  | beta-asMitractinium_conduc   | 32.60 | 0.00 |
| TRINITY_GAX7496  | (hypothetChlamydomonas_eusti | 32.60 | 0.00 |
| TRINITY_XP_0029  | hypothetVolvox_carteri       | 32.60 | 0.00 |
| TRINITY_KXZ4729  | (hypothetGonium_pectorale    | 32.60 | 0.00 |
| TRINITY_PNY1315  | (sterol 1)Trifolium_pratense | 32.60 | 0.00 |
| TRINITY_RLM7383  | (BTB/POZ) Panicum_miliaceum  | 32.60 | 0.00 |
| TRINITY_PTQ3255  | (hypothetMarchantia_polymorp | 32.60 | 0.00 |
| TRINITY_GAX7492  | (hypothetChlamydomonas_eusti | 32.60 | 0.00 |
| TRINITY_XP_0029  | hypothetVolvox_carteri       | 32.60 | 0.00 |
| TRINITY_PNH1145  | MicrotukTetrabaena_socialis  | 32.60 | 0.00 |
| TRINITY_XP_0110  | (gamma-g)Sesamum_indicum     | 32.60 | 0.00 |
| TRINITY_XP_0029  | hypothetVolvox_carteri       | 32.60 | 0.00 |
| TRINITY_XP_0056  | hypothetCoccomyxa_subellips  | 32.60 | 0.00 |
| TRINITY_PPD8579  | hypothetGossypium_barbadens  | 32.60 | 0.00 |
| TRINITY_PSC7134  | putativeMitractinium_conduc  | 32.60 | 0.00 |
| TRINITY_XP_0245  | cAMP-deSelaginella_moellen   | 32.60 | 0.00 |
| TRINITY_XP_0017  | (flagellaChlamydomonas_reinh | 32.60 | 0.00 |
| TRINITY_XP_0014  | ZIP famiOstreococcus_sp._'1  | 32.60 | 0.00 |
| TRINITY_XP_0240  | serine/tMorus_notabilis      | 32.60 | 0.00 |
| TRINITY_XP_0017  | (predicteChlamydomonas_reinh | 32.60 | 0.00 |
| TRINITY_GAQ9158  | RNA polyKlebsormidium_niten  | 32.60 | 0.00 |
| TRINITY_GAX7507  | hypothetChlamydomonas_eusti  | 32.60 | 0.00 |
| TRINITY_PAN1388  | hypothetPanicum_hallii       | 32.60 | 0.00 |
| TRINITY_OAE1812  | (hypothetMarchantia_polymorp | 32.60 | 0.00 |
| TRINITY_XP_0094  | (PREDICTIMusa_acuminata      | 32.60 | 0.00 |
| TRINITY_XP_0245  | WASH conSelaginella_moellen  | 32.60 | 0.00 |
| TRINITY_XP_0056  | hypothetCoccomyxa_subellips  | 32.60 | 0.00 |
| TRINITY_XP_0110  | PREDICTIPopulus_euphratica   | 32.60 | 0.00 |
| TRINITY_ACR3889  | ubiquitiApopellia_endiviifc  | 32.50 | 0.00 |
| TRINITY_XP_0128  | PREDICTIErythranthe_guttata  | 32.50 | 0.00 |
| TRINITY_NP_1872  | importirArabidopsis_thalian  | 32.50 | 0.00 |

|                  |          |                     |       |      |
|------------------|----------|---------------------|-------|------|
| TRINITY_GAQ81971 | oxidorec | Klebsormidium_niten | 32.50 | 0.00 |
| TRINITY_AKM7674  | RNA-bin  | Pelargonium_x_horto | 32.50 | 0.00 |
| TRINITY_XP_0190  | PREDICT  | Camelina_sativa     | 32.50 | 0.00 |
| TRINITY_KXZ4567  | hypothet | Gonium_pectorale    | 32.50 | 0.00 |
| TRINITY_PNW7987  | hypothet | Chlamydomonas_reinh | 32.50 | 0.00 |
| TRINITY_XP_0256  | uncharac | Arachis_hypogaea    | 32.50 | 0.00 |
| TRINITY_RLM5576  | hypothet | Panicum_miliaceum   | 32.50 | 0.00 |
| TRINITY_PLY7589  | hypothet | Lactuca_sativa      | 32.50 | 0.00 |
| TRINITY_PRW5843  | anaphas  | Chlorella_sorokinia | 32.50 | 0.00 |
| TRINITY_BAB5608  | putative | Oryza_sativa        | 32.50 | 0.00 |
| TRINITY_GAQ8710  | cellulos | Klebsormidium_niten | 32.50 | 0.00 |
| TRINITY_EEF2262  | carbonic | Ricinus_communis    | 32.50 | 0.00 |
| TRINITY_OVA1265  | Protein  | Macleaya_cordata    | 32.50 | 0.00 |
| TRINITY_XP_0016  | predict  | Chlamydomonas_reinh | 32.50 | 0.00 |
| TRINITY_KHG1428  | putative | Gossypium_arboreum  | 32.50 | 0.00 |
| TRINITY_XP_0083  | PREDICT  | Malus_domestica     | 32.50 | 0.00 |
| TRINITY_GAX7969  | hypothet | Chlamydomonas_eusti | 32.50 | 0.00 |
| TRINITY_GAQ8152  | Vesicle  | Klebsormidium_niten | 32.50 | 0.00 |
| TRINITY_GBG6905  | hypothet | Chara_braunii       | 32.50 | 0.00 |
| TRINITY_XP_0271  | uncharac | Cicer_arietinum     | 32.50 | 0.00 |
| TRINITY_GAQ8673  | hypothet | Klebsormidium_niten | 32.50 | 0.00 |
| TRINITY_GAX7819  | hypothet | Chlamydomonas_eusti | 32.50 | 0.00 |
| TRINITY_XP_0100  | PREDICT  | Eucalyptus_grandis  | 32.50 | 0.00 |
| TRINITY_XP_0128  | PREDICT  | Erythranthe_guttata | 32.50 | 0.00 |
| TRINITY_PNW8254  | hypothet | Chlamydomonas_reinh | 32.50 | 0.00 |
| TRINITY_PIN1745  | WD40 re  | Handroanthus_impeti | 32.50 | 0.00 |
| TRINITY_XP_0186  | PREDICT  | Nicotiana_tomentosi | 32.50 | 0.00 |
| TRINITY_GBF8875  | hypothet | Raphidocelis_subcap | 32.50 | 0.00 |
| TRINITY_GBF9085  | DEAD-bo  | Raphidocelis_subcap | 32.50 | 0.00 |
| TRINITY_XP_0165  | PREDICT  | Capsicum_annuum     | 32.50 | 0.00 |
| TRINITY_PTQ3905  | hypothet | Marchantia_polymorp | 32.50 | 0.00 |
| TRINITY_PTQ2804  | hypothet | Marchantia_polymorp | 32.50 | 0.00 |
| TRINITY_OAE2948  | hypothet | Marchantia_polymorp | 32.50 | 0.00 |
| TRINITY_XP_0029  | hypothet | Volvox_carteri      | 32.50 | 0.00 |
| TRINITY_GAX8311  | hypothet | Chlamydomonas_eusti | 32.50 | 0.00 |
| TRINITY_XP_0023  | ultravic | Populus_trichocarpa | 32.50 | 0.00 |
| TRINITY_AML7829  | putative | Pleurastrum_insigne | 32.50 | 0.00 |
| TRINITY_GAX7635  | hypothet | Chlamydomonas_eusti | 32.50 | 0.00 |
| TRINITY_PNH0534  | hypothet | Tetrabaena_socialis | 32.50 | 0.00 |
| TRINITY_RWR8862  | HSP-int  | Cinnamomum_micranth | 32.50 | 0.00 |
| TRINITY_KYP4918  | Cytochr  | Cajanus_cajan       | 32.50 | 0.00 |
| TRINITY_XP_0235  | lysine-  | Cucurbita_pepo      | 32.50 | 0.00 |
| TRINITY_XP_0058  | hypothet | Chlorella_variabili | 32.50 | 0.00 |
| TRINITY_RXH8695  | hypothet | Malus_domestica     | 32.50 | 0.00 |
| TRINITY_XP_0064  | protein  | Citrus_clementina   | 32.50 | 0.00 |
| TRINITY_XP_0191  | PREDICT  | Ipomoea_nil         | 32.50 | 0.00 |
| TRINITY_XP_0029  | hypothet | Volvox_carteri      | 32.50 | 0.00 |
| TRINITY_XP_0245  | probabl  | Selaginella_moellen | 32.50 | 0.00 |
| TRINITY_BAK0043  | predict  | Hordeum_vulgare     | 32.50 | 0.00 |
| TRINITY_KMZ7365  | hypothet | Zostera_marina      | 32.50 | 0.00 |
| TRINITY_GAQ8320  | vacuola  | Klebsormidium_niten | 32.50 | 0.00 |
| TRINITY_XP_0029  | hypothet | Volvox_carteri      | 32.50 | 0.00 |
| TRINITY_XP_0030  | Peptida  | Ostreococcus_tauri  | 32.50 | 0.00 |
| TRINITY_XP_0192  | PREDICT  | Ipomoea_nil         | 32.50 | 0.00 |
| TRINITY_PTQ4067  | hypothet | Marchantia_polymorp | 32.50 | 0.00 |
| TRINITY_XP_0029  | hypothet | Volvox_carteri      | 32.50 | 0.00 |
| TRINITY_XP_0192  | PREDICT  | Nicotiana_attenuata | 32.50 | 0.00 |
| TRINITY_XP_0249  | vesicle  | Cynara_cardunculus  | 32.50 | 0.00 |
| TRINITY_XP_0036  | serine   | Medicago_truncatula | 32.40 | 0.00 |
| TRINITY_XP_0105  | PREDICT  | Tarenaya_hasslerian | 32.40 | 0.00 |
| TRINITY_XP_0017  | predict  | Chlamydomonas_reinh | 32.40 | 0.00 |
| TRINITY_PWA3241  | PDI-lik  | Artemisia_annua     | 32.40 | 0.00 |
| TRINITY_XP_0184  | PREDICT  | Raphanus_sativus    | 32.40 | 0.00 |
| TRINITY_XP_0094  | PREDICT  | Musa_acuminata      | 32.40 | 0.00 |
| TRINITY_XP_0241  | mitochor | Rosa_chinensis      | 32.40 | 0.00 |
| TRINITY_XP_0016  | componer | Chlamydomonas_reinh | 32.40 | 0.00 |

|                    |          |                     |       |      |
|--------------------|----------|---------------------|-------|------|
| TRINITY_XP_0212    | protein  | Herrania_umbratica  | 32.40 | 0.00 |
| TRINITY_XP_0172    | PREDICT  | Daucus_carota       | 32.40 | 0.00 |
| TRINITY_GAX85451   | hypothet | Chlamydomonas_eusti | 32.40 | 0.00 |
| TRINITY_XP_0110    | PREDICT  | Populus_euphratica  | 32.40 | 0.00 |
| TRINITY_XP_01091   | PREDICT  | Elaeis_guineensis   | 32.40 | 0.00 |
| TRINITY_PLY86912   | hypothet | Lactuca_sativa      | 32.40 | 0.00 |
| TRINITY_XP_0239    | uncharac | Quercus_suber       | 32.40 | 0.00 |
| TRINITY_EEF27535   | two-com  | Ricinus_communis    | 32.40 | 0.00 |
| TRINITY_XP_00642   | CBL-int  | Citrus_clementina   | 32.40 | 0.00 |
| TRINITY_PTQ2779    | hypothet | Marchantia_polymorp | 32.40 | 0.00 |
| TRINITY_XP_0264    | BTB/POZ  | Papaver_somniferum  | 32.40 | 0.00 |
| TRINITY_KXZ5265    | hypothet | Gonium_pectorale    | 32.40 | 0.00 |
| TRINITY_XP_0239160 | kDa      | Quercus_suber       | 32.40 | 0.00 |
| TRINITY_PSC6862    | acidstak | Micractinium_conduc | 32.40 | 0.00 |
| TRINITY_BAK0112    | predict  | Hordeum_vulgare     | 32.40 | 0.00 |
| TRINITY_XP_0239    | guanine  | Quercus_suber       | 32.40 | 0.00 |
| TRINITY_PNW7576    | hypothet | Chlamydomonas_reinh | 32.40 | 0.00 |
| TRINITY_XP_0025    | predict  | Micromonas_commoda  | 32.40 | 0.00 |
| TRINITY_GAQ7970    | hypothet | Klebsormidium_niten | 32.40 | 0.00 |
| TRINITY_XP_0238    | bifuncti | Quercus_suber       | 32.40 | 0.00 |
| TRINITY_XP_0025    | DEK_C d  | Micromonas_commoda  | 32.40 | 0.00 |
| TRINITY_XP_0120    | calcium- | Jatropha_curcas     | 32.40 | 0.00 |
| TRINITY_GBF9530    | mitochor | Raphidocelis_subcap | 32.40 | 0.00 |
| TRINITY_XP_0201    | DENN don | Ananas_comosus      | 32.40 | 0.00 |
| TRINITY_XP_0056    | hypothet | Coccomyxa_subellips | 32.40 | 0.00 |
| TRINITY_PRW4510    | inactive | Chlorella_sorokinia | 32.40 | 0.00 |
| TRINITY_XP_0025    | predict  | Micromonas_commoda  | 32.40 | 0.00 |
| TRINITY_GAX7986    | hypothet | Chlamydomonas_eusti | 32.40 | 0.00 |
| TRINITY_XP_0056    | hypothet | Coccomyxa_subellips | 32.40 | 0.00 |
| TRINITY_GAX8138    | hypothet | Chlamydomonas_eusti | 32.40 | 0.00 |
| TRINITY_RWR7878    | arginyl- | Cinnamomum_micranth | 32.40 | 0.00 |
| TRINITY_XP_0058    | hypothet | Chlorella_variabili | 32.40 | 0.00 |
| TRINITY_KXZ4377    | hypothet | Gonium_pectorale    | 32.40 | 0.00 |
| TRINITY_BAJ9457    | predict  | Hordeum_vulgare     | 32.40 | 0.00 |
| TRINITY_XP_0266    | probable | Phoenix_dactylifera | 32.40 | 0.00 |
| TRINITY_PNW8414    | hypothet | Chlamydomonas_reinh | 32.40 | 0.00 |
| TRINITY_XP_0216    | calcine  | Hevea_brasiliensis  | 32.40 | 0.00 |
| TRINITY_XP_0221    | WD repe  | Momordica_charantia | 32.40 | 0.00 |
| TRINITY_OUS4311    | '-nucl   | Ostreococcus_tauri  | 32.40 | 0.00 |
| TRINITY_XP_0205    | tubulin- | Phalaenopsis_equest | 32.40 | 0.00 |
| TRINITY_XP_0243    | ribonucl | Physcomitrella_pate | 32.40 | 0.00 |
| TRINITY_XP_0217    | probable | Chenopodium_quinoa  | 32.40 | 0.00 |
| TRINITY_XP_0217    | probable | Chenopodium_quinoa  | 32.40 | 0.00 |
| TRINITY_XP_0243    | THO com  | Physcomitrella_pate | 32.40 | 0.00 |
| TRINITY_XP_0221    | probable | Momordica_charantia | 32.40 | 0.00 |
| TRINITY_XP_0056    | hypothet | Coccomyxa_subellips | 32.40 | 0.00 |
| TRINITY_XP_01941   | PREDICT  | Lupinus_angustifoli | 32.40 | 0.00 |
| TRINITY_XP_0202    | leishmar | Cajanus_cajan       | 32.40 | 0.00 |
| TRINITY_XP_0151    | PREDICT  | Solanum_tuberosum   | 32.40 | 0.00 |
| TRINITY_XP_0191    | PREDICT  | Ipomoea_nil         | 32.40 | 0.00 |
| TRINITY_KZV15121   | protein  | Dorcoceras_hygro    | 32.40 | 0.00 |
| TRINITY_GAX8183    | hypothet | Chlamydomonas_eusti | 32.40 | 0.00 |
| TRINITY_KXZ5292    | hypothet | Gonium_pectorale    | 32.40 | 0.00 |
| TRINITY_KXZ5559    | hypothet | Gonium_pectorale    | 32.40 | 0.00 |
| TRINITY_XP_0056    | hypothet | Coccomyxa_subellips | 32.40 | 0.00 |
| TRINITY_XP_0165    | PREDICT  | Capsicum_annuum     | 32.30 | 0.00 |
| TRINITY_RQM0400    | hypothet | Brassica_cretica    | 32.30 | 0.00 |
| TRINITY_XP_0106    | PREDICT  | Beta_vulgaris       | 32.30 | 0.00 |
| TRINITY_XP_0192    | PREDICT  | Ipomoea_nil         | 32.30 | 0.00 |
| TRINITY_XP_0238    | uncharac | Quercus_suber       | 32.30 | 0.00 |
| TRINITY_XP_0056    | AMPKBI-  | Coccomyxa_subellips | 32.30 | 0.00 |
| TRINITY_XP_0029    | COP9 si  | Selaginella_moellen | 32.30 | 0.00 |
| TRINITY_EFH5772    | binding  | Arabidopsis_lyrata  | 32.30 | 0.00 |
| TRINITY_GAQ9014    | hypothet | Klebsormidium_niten | 32.30 | 0.00 |
| TRINITY_VDD3317    | unnamed  | Brassica_oleracea   | 32.30 | 0.00 |
| TRINITY_XP_0238    | delta(3, | Quercus_suber       | 32.30 | 0.00 |

|                  |                              |       |      |
|------------------|------------------------------|-------|------|
| TRINITY_XP_02439 | acyl-CoA Physcomitrella_pate | 32.30 | 0.00 |
| TRINITY_GAX7886  | hypothet Chlamydomonas_eusti | 32.30 | 0.00 |
| TRINITY_GAX7990  | hypothet Chlamydomonas_eusti | 32.30 | 0.00 |
| TRINITY_GAX8632  | hypothet Chlamydomonas_eusti | 32.30 | 0.00 |
| TRINITY_XP_02711 | phospho Coffea_arabica       | 32.30 | 0.00 |
| TRINITY_RLN3413  | synaptot Panicum_miliaceum   | 32.30 | 0.00 |
| TRINITY_XP_01665 | PREDICTI Prunus_mume         | 32.30 | 0.00 |
| TRINITY_KMZ5703  | Varicoso Zostera_marina      | 32.30 | 0.00 |
| TRINITY_PNW7829  | hypothet Chlamydomonas_reinh | 32.30 | 0.00 |
| TRINITY_GAQ8957  | Putative Klebsormidium_niten | 32.30 | 0.00 |
| TRINITY_AJT5957  | GABAT2 Veratrum_californic   | 32.30 | 0.00 |
| TRINITY_KZV1530  | alpha-an Dorcoceras_hygromet | 32.30 | 0.00 |
| TRINITY_GBF9111  | water di Raphidocelis_subcap | 32.30 | 0.00 |
| TRINITY_OMO6141  | Endoplas Corchorus_capsulari | 32.30 | 0.00 |
| TRINITY_GAX7289  | hypothet Chlamydomonas_eusti | 32.30 | 0.00 |
| TRINITY_XP_02271 | embryoge Durio_zibethinus    | 32.30 | 0.00 |
| TRINITY_GAX7824  | hypothet Chlamydomonas_eusti | 32.30 | 0.00 |
| TRINITY_PRW5999  | serine t Chlorella_sorokinia | 32.30 | 0.00 |
| TRINITY_ADE7614  | (unknown Picea_sitchensis    | 32.30 | 0.00 |
| TRINITY_XP_01917 | PREDICTI Ipomoea_nil         | 32.30 | 0.00 |
| TRINITY_GAX8467  | hypothet Chlamydomonas_eusti | 32.30 | 0.00 |
| TRINITY_XP_02391 | cytoplas Quercus_suber       | 32.30 | 0.00 |
| TRINITY_XP_01027 | PREDICTI Nelumbo_nucifera    | 32.30 | 0.00 |
| TRINITY_PTQ3300  | hypothet Marchantia_polymorp | 32.30 | 0.00 |
| TRINITY_XP_00424 | transcri Solanum_lycopersicu | 32.30 | 0.00 |
| TRINITY_OTG1237  | putative Helianthus_annuus   | 32.30 | 0.00 |
| TRINITY_PIA3722  | hypothet Aquilegia_coerulea  | 32.30 | 0.00 |
| TRINITY_XP_02452 | enoyl- [ Selaginella_moellen | 32.30 | 0.00 |
| TRINITY_XP_02163 | probable Hevea_brasiliensis  | 32.30 | 0.00 |
| TRINITY_XP_02497 | protein Cynara_cardunculus   | 32.30 | 0.00 |
| TRINITY_XP_01867 | PREDICTI Musa_acuminata      | 32.30 | 0.00 |
| TRINITY_GAX8398  | hypothet Chlamydomonas_eusti | 32.30 | 0.00 |
| TRINITY_XP_00430 | (PREDICTI Fragaria-vesca     | 32.30 | 0.00 |
| TRINITY_XP_00297 | intrafla Selaginella_moellen | 32.30 | 0.00 |
| TRINITY_XP_00169 | predicte Chlamydomonas_reinh | 32.30 | 0.00 |
| TRINITY_XP_02640 | kelch d Papaver_somniferum   | 32.30 | 0.00 |
| TRINITY_KCW6445  | hypothet Eucalyptus_grandis  | 32.30 | 0.00 |
| TRINITY_KMZ6527  | Deoxyhy Zostera_marina       | 32.30 | 0.00 |
| TRINITY_XP_02387 | calcium- Quercus_suber       | 32.30 | 0.00 |
| TRINITY_XP_02375 | nudix h Lactuca_sativa       | 32.30 | 0.00 |
| TRINITY_GAX8097  | hypothet Chlamydomonas_eusti | 32.30 | 0.00 |
| TRINITY_XP_02389 | uncharac Quercus_suber       | 32.30 | 0.00 |
| TRINITY_XP_02435 | probable Physcomitrella_pate | 32.30 | 0.00 |
| TRINITY_XP_00497 | BTB/POZ Setaria_italica      | 32.30 | 0.00 |
| TRINITY_PNW7854  | hypothet Chlamydomonas_reinh | 32.30 | 0.00 |
| TRINITY_XP_01047 | PREDICTI Camelina_sativa     | 32.30 | 0.00 |
| TRINITY_XP_00168 | tRNA (u Chlamydomonas_reinh  | 32.30 | 0.00 |
| TRINITY_GAX7881  | hypothet Chlamydomonas_eusti | 32.30 | 0.00 |
| TRINITY_GAX7563  | hypothet Chlamydomonas_eusti | 32.30 | 0.00 |
| TRINITY_GAX7652  | hypothet Chlamydomonas_eusti | 32.30 | 0.00 |
| TRINITY_GAX8439  | hypothet Chlamydomonas_eusti | 32.30 | 0.00 |
| TRINITY_PNW8762  | hypothet Chlamydomonas_reinh | 32.30 | 0.00 |
| TRINITY_AAD5163  | KNOX1 h Acetabularia_acetab  | 32.30 | 0.00 |
| TRINITY_XP_02463 | tobamovi Medicago_truncatula | 32.30 | 0.00 |
| TRINITY_XP_01915 | PREDICTI Ipomoea_nil         | 32.30 | 0.00 |
| TRINITY_PNH1155  | 230S rib Tetrabaena_socialis | 32.30 | 0.00 |
| TRINITY_GAX7591  | hypothet Chlamydomonas_eusti | 32.30 | 0.00 |
| TRINITY_GAX8113  | hypothet Chlamydomonas_eusti | 32.30 | 0.00 |
| TRINITY_PTQ3755  | hypothet Marchantia_polymorp | 32.30 | 0.00 |
| TRINITY_XP_01649 | PREDICTI Nicotiana_tabacum   | 32.30 | 0.00 |
| TRINITY_XP_02435 | ATP synt Physcomitrella_pate | 32.20 | 0.00 |
| TRINITY_XP_01846 | (PREDICTI Raphanus_sativus   | 32.20 | 0.00 |
| TRINITY_PNX9366  | ABC trar Trifolium_pratense  | 32.20 | 0.00 |
| TRINITY_EFJ3343  | hypothet Selaginella_moellen | 32.20 | 0.00 |
| TRINITY_XP_02445 | ABC trar Populus_trichocarpa | 32.20 | 0.00 |
| TRINITY_XP_02289 | tubulin-Olea_europaea        | 32.20 | 0.00 |

|                 |                              |       |      |
|-----------------|------------------------------|-------|------|
| TRINITY_PWA4330 | (protein Artemisia_annua     | 32.20 | 0.00 |
| TRINITY_EFJ0925 | hypothetSelaginella_moellen  | 32.20 | 0.00 |
| TRINITY_XP_0235 | ran-binCucurbita_pepo        | 32.20 | 0.00 |
| TRINITY_GAQ7952 | hypothetKlebsormidium_niten  | 32.20 | 0.00 |
| TRINITY_XP_0220 | serine cHelianthus_annuus    | 32.20 | 0.00 |
| TRINITY_XP_0042 | ran-binC Solanum_lycopersicu | 32.20 | 0.00 |
| TRINITY_GAQ8786 | sphingonKlebsormidium_niten  | 32.20 | 0.00 |
| TRINITY_XP_0029 | hypothetVolvox_carteri       | 32.20 | 0.00 |
| TRINITY_PWA8028 | SKP1/BTFArtemisia_annua      | 32.20 | 0.00 |
| TRINITY_PSC7251 | (multidruMicractinium_conduc | 32.20 | 0.00 |
| TRINITY_XP_0243 | ATP syntPhyscomitrella_pate  | 32.20 | 0.00 |
| TRINITY_XP_0124 | PREDICTIGossypium_raimondii  | 32.20 | 0.00 |
| TRINITY_XP_0138 | hypothetMonoraphidium_negle  | 32.20 | 0.00 |
| TRINITY_XP_0168 | PREDICTICucumis_melo         | 32.20 | 0.00 |
| TRINITY_GAX7735 | hypothetChlamydomonas_eusti  | 32.20 | 0.00 |
| TRINITY_GAX7417 | hypothetChlamydomonas_eusti  | 32.20 | 0.00 |
| TRINITY_PRW3381 | 4transcriChlorella_sorokinia | 32.20 | 0.00 |
| TRINITY_GAX8112 | 1hypothetChlamydomonas_eusti | 32.20 | 0.00 |
| TRINITY_GAX7377 | 6hypothetChlamydomonas_eusti | 32.20 | 0.00 |
| TRINITY_XP_0184 | 9PREDICTIRaphanus_sativus    | 32.20 | 0.00 |
| TRINITY_OIW2165 | 3hypothetLupinus_angustifoli | 32.20 | 0.00 |
| TRINITY_KXZ4627 | 1hypothetGonium_pectorale    | 32.20 | 0.00 |
| TRINITY_PNW8536 | (hypothetChlamydomonas_reinh | 32.20 | 0.00 |
| TRINITY_XP_0238 | 8transcriQuercus_suber       | 32.20 | 0.00 |
| TRINITY_OVA0836 | (CytochrMacleaya_cordata     | 32.20 | 0.00 |
| TRINITY_XP_0239 | 2protein Quercus_suber       | 32.20 | 0.00 |
| TRINITY_KEH4009 | 2metalloeMedicago_truncatula | 32.20 | 0.00 |
| TRINITY_GAX7608 | 3hypothetChlamydomonas_eusti | 32.20 | 0.00 |
| TRINITY_XP_0200 | 9uncharaAnanas_comosus       | 32.20 | 0.00 |
| TRINITY_PNW8077 | 8hypothetChlamydomonas_reinh | 32.20 | 0.00 |
| TRINITY_GAQ8842 | 6PutativeKlebsormidium_niten | 32.20 | 0.00 |
| TRINITY_XP_0239 | (myosin-1Quercus_suber       | 32.20 | 0.00 |
| TRINITY_BAJ9694 | 6predicteHordeum_vulgare     | 32.20 | 0.00 |
| TRINITY_GAX8351 | 8hypothetChlamydomonas_eusti | 32.20 | 0.00 |
| TRINITY_XP_0184 | 9PREDICTIRaphanus_sativus    | 32.20 | 0.00 |
| TRINITY_XP_0097 | 9PREDICTINicotiana_sylvestri | 32.20 | 0.00 |
| TRINITY_GAX8031 | (hypothetChlamydomonas_eusti | 32.20 | 0.00 |
| TRINITY_GBF9892 | 1serine rRaphidocelis_subcap | 32.20 | 0.00 |
| TRINITY_XP_0156 | 2uncharaOryza_sativa         | 32.20 | 0.00 |
| TRINITY_GAX8061 | 4hypothetChlamydomonas_eusti | 32.20 | 0.00 |
| TRINITY_GAX8439 | 5hypothetChlamydomonas_eusti | 32.20 | 0.00 |
| TRINITY_AJR2238 | 6CBL-inteTriticum_aestivum   | 32.20 | 0.00 |
| TRINITY_XP_0056 | 4hypothetCoccomyxa_subellips | 32.20 | 0.00 |
| TRINITY_XP_0029 | 4hypothetVolvox_carteri      | 32.20 | 0.00 |
| TRINITY_KXZ5566 | 7hypothetGonium_pectorale    | 32.20 | 0.00 |
| TRINITY_GAX7778 | 6hypothetChlamydomonas_eusti | 32.20 | 0.00 |
| TRINITY_GBG8341 | 9hypothetChara_braunii       | 32.20 | 0.00 |
| TRINITY_GAQ9153 | 4hypothetKlebsormidium_niten | 32.10 | 0.00 |
| TRINITY_GBF9737 | 1hypothetRaphidocelis_subcap | 32.10 | 0.00 |
| TRINITY_XP_0075 | 1predicteBathycoccus_prasinc | 32.10 | 0.00 |
| TRINITY_ADE7648 | 5unknown Picea_sitchensis    | 32.10 | 0.00 |
| TRINITY_XP_0238 | 7calcium-Quercus_suber       | 32.10 | 0.00 |
| TRINITY_GAQ8161 | 8ABC trarKlebsormidium_niten | 32.10 | 0.00 |
| TRINITY_RWW9088 | 8hypothetEnsete_ventricosum  | 32.10 | 0.00 |
| TRINITY_XP_0243 | 8alkalinPhyscomitrella_pate  | 32.10 | 0.00 |
| TRINITY_XP_0128 | 3PREDICTIErythranthe_guttata | 32.10 | 0.00 |
| TRINITY_EFJ0991 | 4hypothetSelaginella_moellen | 32.10 | 0.00 |
| TRINITY_PPR8930 | 5hypothetGossypium_barbadens | 32.10 | 0.00 |
| TRINITY_GAX7287 | 5hypothetChlamydomonas_eusti | 32.10 | 0.00 |
| TRINITY_XP_0264 | 5BTB/POZ Papaver_somniferum  | 32.10 | 0.00 |
| TRINITY_XP_0164 | 8PREDICTINicotiana_tabacum   | 32.10 | 0.00 |
| TRINITY_RWW9078 | 8hypothetEnsete_ventricosum  | 32.10 | 0.00 |
| TRINITY_GBF8754 | (serine rRaphidocelis_subcap | 32.10 | 0.00 |
| TRINITY_PNW7658 | 8hypothetChlamydomonas_reinh | 32.10 | 0.00 |
| TRINITY_PUZ4524 | 4hypothetPanicum_hallii      | 32.10 | 0.00 |
| TRINITY_XP_0138 | 9hypothetMonoraphidium_negle | 32.10 | 0.00 |



|                  |           |                      |       |      |
|------------------|-----------|----------------------|-------|------|
| TRINITY_XP_01725 | PREDICTH  | Daucus_carota        | 32.10 | 0.00 |
| TRINITY_XP_02439 | serine/t  | Physcomitrella_pate  | 32.10 | 0.00 |
| TRINITY_XP_00305 | predicte  | Micromonas_pusilla   | 32.10 | 0.00 |
| TRINITY_XP_01595 | C2 and (  | Arachis_duranensis   | 32.10 | 0.00 |
| TRINITY_XP_01146 | PREDICTH  | Fragaria_vesca       | 32.10 | 0.00 |
| TRINITY_XP_02719 | triacylc  | Cicer_arietinum      | 32.10 | 0.00 |
| TRINITY_OWM65262 | hypothet  | Punica_granatum      | 32.10 | 0.00 |
| TRINITY_BAK01536 | predicte  | Hordeum_vulgare      | 32.10 | 0.00 |
| TRINITY_XP_01941 | PREDICTH  | Lupinus_angustifoli  | 32.10 | 0.00 |
| TRINITY_XP_02057 | ubiquiti  | Phalaenopsis_equest  | 32.10 | 0.00 |
| TRINITY_KXZ56254 | hypothet  | Gonium_pectorale     | 32.10 | 0.00 |
| TRINITY_XP_02666 | pectin e  | Phoenix_dactylifera  | 32.10 | 0.00 |
| TRINITY_XP_01883 | PREDICTH  | Juglans_regia        | 32.10 | 0.00 |
| TRINITY_PTQ37558 | hypothet  | Marchantia_polymorp  | 32.10 | 0.00 |
| TRINITY_XP_02289 | ubiquiti  | Olea_europaea        | 32.10 | 0.00 |
| TRINITY_KJB24464 | hypothet  | Gossypium_raimondii  | 32.10 | 0.00 |
| TRINITY_KXZ48826 | hypothet  | Gonium_pectorale     | 32.10 | 0.00 |
| TRINITY_XP_00295 | hypothet  | Volvox_carteri       | 32.10 | 0.00 |
| TRINITY_GAX83502 | hypothet  | Chlamydomonas_eusti  | 32.10 | 0.00 |
| TRINITY_OUS44004 | hypothet  | Ostreococcus_tauri   | 32.10 | 0.00 |
| TRINITY_GAX76015 | hypothet  | Chlamydomonas_eusti  | 32.10 | 0.00 |
| TRINITY_PNH07438 | hypothet  | Tetrabaena_socialis  | 32.10 | 0.00 |
| TRINITY_XP_00169 | predicte  | Chlamydomonas_reinh  | 32.10 | 0.00 |
| TRINITY_AIF7352  | (WD40 prc | Volvox_ferrisii      | 32.10 | 0.00 |
| TRINITY_XP_02014 | GTPase-e  | Aegilops_tauschii    | 32.10 | 0.00 |
| TRINITY_XP_02199 | nudix h   | Helianthus_annuus    | 32.10 | 0.00 |
| TRINITY_GAQ77855 | S1 RNA k  | Klebsormidium_niten  | 32.10 | 0.00 |
| TRINITY_PNT39989 | hypothet  | Populus_trichocarpa  | 32.10 | 0.00 |
| TRINITY_XP_01247 | PREDICTH  | Gossypium_raimondii  | 32.10 | 0.00 |
| TRINITY_GAX83758 | hypothet  | Chlamydomonas_eusti  | 32.10 | 0.00 |
| TRINITY_XP_01562 | CBL-inte  | Oryza_sativa         | 32.10 | 0.00 |
| TRINITY_RWR78527 | EPS15 EF  | Cinnamomum_micranth  | 32.10 | 0.00 |
| TRINITY_GAX78297 | hypothet  | Chlamydomonas_eusti  | 32.10 | 0.00 |
| TRINITY_XP_00934 | PREDICTH  | Pyrus_x_bretschneid  | 32.10 | 0.00 |
| TRINITY_XP_01451 | SNF1-rel  | Vigna_radiata        | 32.10 | 0.00 |
| TRINITY_ACR09632 | chitinae  | Capsicum_chinense    | 32.10 | 0.00 |
| TRINITY_GAX77017 | hypothet  | Chlamydomonas_eusti  | 32.10 | 0.00 |
| TRINITY_RMZ5540  | hypothet  | Auxenochlorella_pro  | 32.10 | 0.00 |
| TRINITY_PSC68179 | Acyl-coe  | Micractinium_conduc  | 32.10 | 0.00 |
| TRINITY_BAK00769 | predicte  | Hordeum_vulgare      | 32.10 | 0.00 |
| TRINITY_XP_00565 | cysteine  | Coccomyxa_subellips  | 32.10 | 0.00 |
| TRINITY_XP_02390 | ras-like  | Quercus_suber        | 32.10 | 0.00 |
| TRINITY_GAX84105 | hypothet  | Chlamydomonas_eusti  | 32.10 | 0.00 |
| TRINITY_GBG91646 | hypothet  | Chara_braunii        | 32.10 | 0.00 |
| TRINITY_XP_02454 | E3 ubiq   | Selaginella_moellen  | 32.10 | 0.00 |
| TRINITY_XP_01507 | beta-he   | Solanum_pennellii    | 32.10 | 0.00 |
| TRINITY_XP_00170 | predicte  | Chlamydomonas_reinh  | 32.10 | 0.00 |
| TRINITY_GBF87540 | serine p  | Raphidocelis_subcap  | 32.10 | 0.00 |
| TRINITY_XP_00169 | predicte  | Chlamydomonas_reinh  | 32.10 | 0.00 |
| TRINITY_PNH04175 | Tiny mac  | Tetrabaena_socialis  | 32.10 | 0.00 |
| TRINITY_RWR92909 | hypothet  | Cinnamomum_micranth  | 32.00 | 0.00 |
| TRINITY_XP_00939 | PREDICTH  | Musa_acuminata       | 32.00 | 0.00 |
| TRINITY_XP_01100 | PREDICTH  | Populus_euphratica   | 32.00 | 0.00 |
| TRINITY_NP_18160 | (RING-fir | Arabidopsis_thalian  | 32.00 | 0.00 |
| TRINITY_XP_00357 | probable  | Brachypodium_distac  | 32.00 | 0.00 |
| TRINITY_ABK25616 | unknown   | Picea_sitchensis     | 32.00 | 0.00 |
| TRINITY_XP_00750 | predicte  | Bathycoccus_prasinoc | 32.00 | 0.00 |
| TRINITY_XP_02637 | DExH-bo   | Papaver_somniferum   | 32.00 | 0.00 |
| TRINITY_XP_00713 | hypothet  | Phaseolus_vulgaris   | 32.00 | 0.00 |
| TRINITY_XP_02387 | uncharac  | Quercus_suber        | 32.00 | 0.00 |
| TRINITY_XP_00960 | PREDICTH  | Nicotiana_tomentosi  | 32.00 | 0.00 |
| TRINITY_XP_00169 | glycoger  | Chlamydomonas_reinh  | 32.00 | 0.00 |
| TRINITY_XP_00565 | F1F0 AT   | Coccomyxa_subellips  | 32.00 | 0.00 |
| TRINITY_XP_02437 | phosphoi  | Physcomitrella_pate  | 32.00 | 0.00 |
| TRINITY_XP_02058 | BTB/POZ   | Phalaenopsis_equest  | 32.00 | 0.00 |
| TRINITY_XP_00880 | (methylst | Phoenix_dactylifera  | 32.00 | 0.00 |

|                         |                             |       |      |
|-------------------------|-----------------------------|-------|------|
| TRINITY_XP_00564eIF2A-d | Coccomyxa_subellips         | 32.00 | 0.00 |
| TRINITY_XP_0228         | uncharacOlea_europaea       | 32.00 | 0.00 |
| TRINITY_GAQ8456         | hypothetKlebsormidium_niten | 32.00 | 0.00 |
| TRINITY_EFJ2952         | hypothetSelaginella_moellen | 32.00 | 0.00 |
| TRINITY_PNW7308         | hypothetChlamydomonas_reinh | 32.00 | 0.00 |
| TRINITY_PNW8464         | hypothetChlamydomonas_reinh | 32.00 | 0.00 |
| TRINITY_XP_0243         | autocrirPhyscomitrella_pate | 32.00 | 0.00 |
| TRINITY_XP_0030         | predicteMicromonas_pusilla  | 32.00 | 0.00 |
| TRINITY_GAX8454         | hypothetChlamydomonas_eusti | 32.00 | 0.00 |
| TRINITY_XP_0238         | GTP-binQuercus_suber        | 32.00 | 0.00 |
| TRINITY_XP_0056         | NAD(P)-kCoccomyxa_subellips | 32.00 | 0.00 |
| TRINITY_XP_0105         | PREDICTHTarenaya_hasslerian | 32.00 | 0.00 |
| TRINITY_XP_0135         | PREDICTHBrassica_oleracea   | 32.00 | 0.00 |
| TRINITY_NP_0011         | putativeZea_mays            | 32.00 | 0.00 |
| TRINITY_GAX7278         | hypothetChlamydomonas_eusti | 32.00 | 0.00 |
| TRINITY_GAX7983         | hypothetChlamydomonas_eusti | 32.00 | 0.00 |
| TRINITY_GAX7733         | hypothetChlamydomonas_eusti | 32.00 | 0.00 |
| TRINITY_XP_0102         | lysophosBrachypodium_distac | 32.00 | 0.00 |
| TRINITY_GBF9478         | hypothetRaphidocelis_subcap | 32.00 | 0.00 |
| TRINITY_GAX7478         | hypothetChlamydomonas_eusti | 32.00 | 0.00 |
| TRINITY_XP_0155         | LOW QUAIRicinus_communis    | 32.00 | 0.00 |
| TRINITY_GAX8284         | hypothetChlamydomonas_eusti | 32.00 | 0.00 |
| TRINITY_XP_0238         | vacuolarQuercus_suber       | 32.00 | 0.00 |
| TRINITY_GAQ8815         | Pumilio Klebsormidium_niten | 32.00 | 0.00 |
| TRINITY_KNA0326         | hypothetSpinacia_oleracea   | 32.00 | 0.00 |
| TRINITY_XP_0043         | (PREDICTHFrangaria-vesca    | 32.00 | 0.00 |
| TRINITY_XP_0220         | uncharacHelianthus_annuus   | 32.00 | 0.00 |
| TRINITY_GAX7994         | hypothetChlamydomonas_eusti | 32.00 | 0.00 |
| TRINITY_XP_0191         | (PREDICTHIpomoea_nil        | 32.00 | 0.00 |
| TRINITY_XP_0145         | (ribonuc)Vigna_radiata      | 32.00 | 0.00 |
| TRINITY_XP_0264         | (C2 and (Papaver_somniferum | 32.00 | 0.00 |
| TRINITY_XP_0104         | (PREDICTHCamelina_sativa    | 32.00 | 0.00 |
| TRINITY_XP_0244         | E3 ubiqPopulus_trichocarpa  | 32.00 | 0.00 |
| TRINITY_PNH1270         | HEAT reTetrabaena_socialis  | 32.00 | 0.00 |
| TRINITY_CDY4210         | BnaA09g2Brassica_napus      | 32.00 | 0.00 |
| TRINITY_XP_0239         | (proteaseQuercus_suber      | 32.00 | 0.00 |
| TRINITY_KXZ5231         | hypothetGonium_pectorale    | 32.00 | 0.00 |
| TRINITY_GAX8597         | hypothetChlamydomonas_eusti | 32.00 | 0.00 |
| TRINITY_GAX8249         | hypothetChlamydomonas_eusti | 32.00 | 0.00 |
| TRINITY_XP_0042         | (PREDICTHFrangaria-vesca    | 32.00 | 0.00 |
| TRINITY_XP_0205         | serine/tPhalaenopsis_equest | 31.90 | 0.00 |
| TRINITY_XP_0271         | serine cCoffea_eugenioides  | 31.90 | 0.00 |
| TRINITY_XP_0243         | ras-relaPhyscomitrella_pate | 31.90 | 0.00 |
| TRINITY_XP_0028         | calmodulArabidopsis_lyrata  | 31.90 | 0.00 |
| TRINITY_OWM8153         | hypothetPunica_granatum     | 31.90 | 0.00 |
| TRINITY_GAQ8646         | putativeKlebsormidium_niten | 31.90 | 0.00 |
| TRINITY_XP_0029         | vacuolarSelaginella_moellen | 31.90 | 0.00 |
| TRINITY_XP_0156         | (PREDICTHOryza_brachyantha  | 31.90 | 0.00 |
| TRINITY_XP_0239         | queuine Quercus_suber       | 31.90 | 0.00 |
| TRINITY_XP_0200         | tRNA (acAnanas_comosus      | 31.90 | 0.00 |
| TRINITY_XP_0056         | EmopamiCoccomyxa_subellips  | 31.90 | 0.00 |
| TRINITY_PNY1086         | NAD kinTrifolium_pratense   | 31.90 | 0.00 |
| TRINITY_XP_0191         | (PREDICTHIpomoea_nil        | 31.90 | 0.00 |
| TRINITY_PRW4520         | WD repeChlorella_sorokinia  | 31.90 | 0.00 |
| TRINITY_KZV1605         | hypothetDorcoceras_hygromet | 31.90 | 0.00 |
| TRINITY_KXZ5059         | hypothetGonium_pectorale    | 31.90 | 0.00 |
| TRINITY_XP_0014         | predicteOstreococcus_sp._'1 | 31.90 | 0.00 |
| TRINITY_GAQ8969         | hypothetKlebsormidium_niten | 31.90 | 0.00 |
| TRINITY_GAX8412         | hypothetChlamydomonas_eusti | 31.90 | 0.00 |
| TRINITY_PWA7450         | ChaperorArtemisia_annua     | 31.90 | 0.00 |
| TRINITY_XP_0030         | predicteMicromonas_pusilla  | 31.90 | 0.00 |
| TRINITY_XP_0279         | calcineiVigna_unguiculata   | 31.90 | 0.00 |
| TRINITY_NP_0011         | uncharacZea_mays            | 31.90 | 0.00 |
| TRINITY_GAQ8008         | hypothetKlebsormidium_niten | 31.90 | 0.00 |
| TRINITY_BAJ8928         | predicteHordeum_vulgare     | 31.90 | 0.00 |
| TRINITY_XP_0159         | F-box prArachis_duranensis  | 31.90 | 0.00 |

|                                              |       |      |
|----------------------------------------------|-------|------|
| TRINITY_XP_0201(cinnamo)Ananas_comosus       | 31.90 | 0.00 |
| TRINITY_NP_0012(probable)Vitis_vinifera      | 31.90 | 0.00 |
| TRINITY_XP_0174(PREDICT)Vigna_angularis      | 31.90 | 0.00 |
| TRINITY_XP_0194(PREDICT)Lupinus_angustifoli  | 31.90 | 0.00 |
| TRINITY_PRW5633(nucleol)Chlorella_sorokinia  | 31.90 | 0.00 |
| TRINITY_KXZ4336(hypothetGonium_pectorale     | 31.90 | 0.00 |
| TRINITY_XP_0056(RNB-dom)Coccomyxa_subellips  | 31.90 | 0.00 |
| TRINITY_VDD4724(unnamed Brassica_oleracea    | 31.90 | 0.00 |
| TRINITY_GAQ8968(EukaryotKlebsormidium_niten  | 31.90 | 0.00 |
| TRINITY_XP_0239(endosom)Quercus_suber        | 31.90 | 0.00 |
| TRINITY_PIA5673(hypothetAquilegia_coerulea   | 31.90 | 0.00 |
| TRINITY_XP_0030(predict)Micromonas_pusilla   | 31.90 | 0.00 |
| TRINITY_KNA0701(hypothetSpinacia_oleracea    | 31.90 | 0.00 |
| TRINITY_EPS6771(hypothetGenlisea_aurea       | 31.90 | 0.00 |
| TRINITY_XP_0238(nuclear Quercus_suber        | 31.90 | 0.00 |
| TRINITY_KZV4221(Para-nitDorcoceras_hygromet  | 31.90 | 0.00 |
| TRINITY_XP_0058(hypothetChlorella_variabili  | 31.90 | 0.00 |
| TRINITY_XP_0056(TLD-dom)Coccomyxa_subellips  | 31.90 | 0.00 |
| TRINITY_XP_0216(probable)Hevea_brasiliensis  | 31.90 | 0.00 |
| TRINITY_XP_0029(hypothetVolvox_carteri       | 31.90 | 0.00 |
| TRINITY_GAX8118(hypothetChlamydomonas_eusti  | 31.90 | 0.00 |
| TRINITY_XP_0156(E3 ubiq)Oryza_sativa         | 31.90 | 0.00 |
| TRINITY_XP_0058(hypothetChlorella_variabili  | 31.90 | 0.00 |
| TRINITY_PWA5047(plant UF)Artemisia_annua     | 31.90 | 0.00 |
| TRINITY_GAU4455(hypothetTrifolium_subterran  | 31.90 | 0.00 |
| TRINITY_KXZ4582(hypothetGonium_pectorale     | 31.90 | 0.00 |
| TRINITY_KXZ4856(hypothetGonium_pectorale     | 31.90 | 0.00 |
| TRINITY_XP_0238(H(+)/Cl)Quercus_suber        | 31.90 | 0.00 |
| TRINITY_XP_0239(vacuola)Quercus_suber        | 31.90 | 0.00 |
| TRINITY_XP_0238(hydrola)Quercus_suber        | 31.90 | 0.00 |
| TRINITY_GAX8372(hypothetChlamydomonas_eusti  | 31.90 | 0.00 |
| TRINITY_PLY6708(hypothetLactuca_sativa       | 31.90 | 0.00 |
| TRINITY_PTQ3599(hypothetMarchantia_polymorp  | 31.90 | 0.00 |
| TRINITY_KXZ4357(hypothetGonium_pectorale     | 31.90 | 0.00 |
| TRINITY_XP_0217(condensi)Chenopodium_quinoa  | 31.90 | 0.00 |
| TRINITY_GBG7777(hypothetChara_braunii        | 31.90 | 0.00 |
| TRINITY_XP_0063(chaperon)Eutrema_salsugineum | 31.90 | 0.00 |
| TRINITY_XP_0238(SWI/SNF)Quercus_suber        | 31.90 | 0.00 |
| TRINITY_GAX7875(hypothetChlamydomonas_eusti  | 31.90 | 0.00 |
| TRINITY_PNT4881(hypothetPopulus_trichocarpa  | 31.90 | 0.00 |
| TRINITY_XP_0245(ABC trar)Selaginella_moellen | 31.90 | 0.00 |
| TRINITY_XP_0093(PREDICT)Musa_acuminata       | 31.90 | 0.00 |
| TRINITY_KXZ4971(hypothetGonium_pectorale     | 31.90 | 0.00 |
| TRINITY_GAX8313(hypothetChlamydomonas_eusti  | 31.90 | 0.00 |
| TRINITY_KMZ5872(putative)Zostera_marina      | 31.90 | 0.00 |
| TRINITY_XP_0093(PREDICT)Pyrus_x_bretschneid  | 31.90 | 0.00 |
| TRINITY_XP_0014(predict)Ostreococcus_sp._'1  | 31.80 | 0.00 |
| TRINITY_XP_0029(hypothetVolvox_carteri       | 31.80 | 0.00 |
| TRINITY_XP_0025(predict)Micromonas_commoda   | 31.80 | 0.00 |
| TRINITY_XP_0056(small r)Coccomyxa_subellips  | 31.80 | 0.00 |
| TRINITY_GAQ8852(hypothetKlebsormidium_niten  | 31.80 | 0.00 |
| TRINITY_XP_0207(5'-meth)Dendrobium_catenatu  | 31.80 | 0.00 |
| TRINITY_XP_0243(uncharac)Physcomitrella_pate | 31.80 | 0.00 |
| TRINITY_XP_0100(binding)Morus_notabilis      | 31.80 | 0.00 |
| TRINITY_XP_0045(carbon c)Cicer_arietinum     | 31.80 | 0.00 |
| TRINITY_KMZ6669(C-4 met)Zostera_marina       | 31.80 | 0.00 |
| TRINITY_XP_0238(geranyl)Quercus_suber        | 31.80 | 0.00 |
| TRINITY_KXZ5579(hypothetGonium_pectorale     | 31.80 | 0.00 |
| TRINITY_XP_0030(Glutathi)Ostreococcus_tauri  | 31.80 | 0.00 |
| TRINITY_PTQ2779(hypothetMarchantia_polymorp  | 31.80 | 0.00 |
| TRINITY_GAQ8682(Leishmar)Klebsormidium_niten | 31.80 | 0.00 |
| TRINITY_GBF8976(hypothetRaphidocelis_subcap  | 31.80 | 0.00 |
| TRINITY_KDD7675(hypothetHelicosporidium_sp.  | 31.80 | 0.00 |
| TRINITY_XP_0029(hypothetVolvox_carteri       | 31.80 | 0.00 |
| TRINITY_XP_0025(predict)Micromonas_commoda   | 31.80 | 0.00 |
| TRINITY_XP_0243(autocrir)Physcomitrella_pate | 31.80 | 0.00 |

|                  |          |                     |       |      |
|------------------|----------|---------------------|-------|------|
| TRINITY_XP_00169 | predicte | Chlamydomonas_reinh | 31.80 | 0.00 |
| TRINITY_PWA95992 | taxilin  | Artemisia_annua     | 31.80 | 0.00 |
| TRINITY_XP_01389 | leishmar | Monoraphidium_negle | 31.80 | 0.00 |
| TRINITY_GAQ86326 | major f  | Klebsormidium_niten | 31.80 | 0.00 |
| TRINITY_GBF87697 | hypothet | Raphidocelis_subcap | 31.80 | 0.00 |
| TRINITY_XP_02068 | CBL-inte | Dendrobium_catenatu | 31.80 | 0.00 |
| TRINITY_XP_00294 | PR-1 li  | Volvox_carteri      | 31.80 | 0.00 |
| TRINITY_XP_00295 | hypothet | Volvox_carteri      | 31.80 | 0.00 |
| TRINITY_KMZ63204 | putative | Zostera_marina      | 31.80 | 0.00 |
| TRINITY_XP_00358 | CBL-inte | Medicago_truncatula | 31.80 | 0.00 |
| TRINITY_XP_02023 | inositol | Cajanus_cajan       | 31.80 | 0.00 |
| TRINITY_CDY43337 | BnaC04g2 | Brassica_napus      | 31.80 | 0.00 |
| TRINITY_GAQ88067 | Iron tr  | Klebsormidium_niten | 31.80 | 0.00 |
| TRINITY_XP_00169 | BAH prot | Chlamydomonas_reinh | 31.80 | 0.00 |
| TRINITY_XP_02160 | uncharac | Manihot_esculenta   | 31.80 | 0.00 |
| TRINITY_GAX74319 | hypothet | Chlamydomonas_eusti | 31.80 | 0.00 |
| TRINITY_KXZ51653 | hypothet | Gonium_pectorale    | 31.80 | 0.00 |
| TRINITY_KXZ54625 | hypothet | Gonium_pectorale    | 31.80 | 0.00 |
| TRINITY_XP_00243 | calcium  | Sorghum_bicolor     | 31.80 | 0.00 |
| TRINITY_GAQ85937 | hypothet | Klebsormidium_niten | 31.80 | 0.00 |
| TRINITY_GAX74864 | hypothet | Chlamydomonas_eusti | 31.80 | 0.00 |
| TRINITY_VDD05088 | unnamed  | Brassica_rapa       | 31.80 | 0.00 |
| TRINITY_PNW79000 | hypothet | Chlamydomonas_reinh | 31.80 | 0.00 |
| TRINITY_PTQ40821 | hypothet | Marchantia_polymorp | 31.80 | 0.00 |
| TRINITY_XP_02388 | protein  | Quercus_suber       | 31.80 | 0.00 |
| TRINITY_XP_00307 | Methyltr | Ostreococcus_tauri  | 31.80 | 0.00 |
| TRINITY_RAL46952 | hypothet | Cuscuta_australis   | 31.80 | 0.00 |
| TRINITY_XP_02438 | apolipo  | Physcomitrella_pate | 31.80 | 0.00 |
| TRINITY_XP_02058 | serine/t | Phalaenopsis_equest | 31.80 | 0.00 |
| TRINITY_XP_01594 | ras-rel  | Arachis_duranensis  | 31.80 | 0.00 |
| TRINITY_PNW79267 | hypothet | Chlamydomonas_reinh | 31.80 | 0.00 |
| TRINITY_XP_01389 | hypothet | Monoraphidium_negle | 31.80 | 0.00 |
| TRINITY_GAQ77732 | Leishmar | Klebsormidium_niten | 31.80 | 0.00 |
| TRINITY_GAX74811 | hypothet | Chlamydomonas_eusti | 31.80 | 0.00 |
| TRINITY_XP_01048 | PREDICTE | Camelina_sativa     | 31.80 | 0.00 |
| TRINITY_XP_01052 | PREDICTE | Tarenaya_hasslerian | 31.80 | 0.00 |
| TRINITY_PRW57748 | nuclear  | Chlorella_sorokinia | 31.80 | 0.00 |
| TRINITY_PRW59937 | Oxyster  | Chlorella_sorokinia | 31.80 | 0.00 |
| TRINITY_PNW81974 | hypothet | Chlamydomonas_reinh | 31.80 | 0.00 |
| TRINITY_GAQ86072 | hypothet | Klebsormidium_niten | 31.80 | 0.00 |
| TRINITY_CAH67156 | H0717B12 | Oryza_sativa        | 31.80 | 0.00 |
| TRINITY_XP_02438 | ABC trar | Physcomitrella_pate | 31.80 | 0.00 |
| TRINITY_GAQ85333 | hypothet | Klebsormidium_niten | 31.80 | 0.00 |
| TRINITY_XP_00295 | hypothet | Volvox_carteri      | 31.80 | 0.00 |
| TRINITY_XP_02388 | ras-rel  | Quercus_suber       | 31.70 | 0.00 |
| TRINITY_XP_02285 | iron-sul | Olea_europaea       | 31.70 | 0.00 |
| TRINITY_PSC72300 | phospho  | Micractinium_conduc | 31.70 | 0.00 |
| TRINITY_OAE34583 | hypothet | Marchantia_polymorp | 31.70 | 0.00 |
| TRINITY_XP_02439 | putative | Physcomitrella_pate | 31.70 | 0.00 |
| TRINITY_XP_01907 | PREDICTE | Vitis_vinifera      | 31.70 | 0.00 |
| TRINITY_PRW59981 | putative | Chlorella_sorokinia | 31.70 | 0.00 |
| TRINITY_CAA67054 | calmodul | Capsicum_annuum     | 31.70 | 0.00 |
| TRINITY_GAX77983 | hypothet | Chlamydomonas_eusti | 31.70 | 0.00 |
| TRINITY_XP_01055 | PREDICTE | Tarenaya_hasslerian | 31.70 | 0.00 |
| TRINITY_EFJ11863 | hypothet | Selaginella_moellen | 31.70 | 0.00 |
| TRINITY_EEF22543 | conserv  | Ricinus_communis    | 31.70 | 0.00 |
| TRINITY_PRW18361 | Kelch d  | Chlorella_sorokinia | 31.70 | 0.00 |
| TRINITY_PNH07816 | putative | Tetrabaena_socialis | 31.70 | 0.00 |
| TRINITY_XP_01884 | PREDICTE | Juglans_regia       | 31.70 | 0.00 |
| TRINITY_BAK01536 | predicte | Hordeum_vulgare     | 31.70 | 0.00 |
| TRINITY_GAQ77713 | HECT don | Klebsormidium_niten | 31.70 | 0.00 |
| TRINITY_GAQ86824 | Leishmar | Klebsormidium_niten | 31.70 | 0.00 |
| TRINITY_ADB77804 | actin, r | Boergesenia_forbesi | 31.70 | 0.00 |
| TRINITY_GAV81970 | Asp dom  | Cephalotus_follicul | 31.70 | 0.00 |
| TRINITY_PUZ68611 | hypothet | Panicum_hallii      | 31.70 | 0.00 |
| TRINITY_XP_02009 | HVA22-li | Ananas_comosus      | 31.70 | 0.00 |

|                  |                                |       |      |
|------------------|--------------------------------|-------|------|
| TRINITY_PTQ40795 | hypothetMarchantia_polymorp    | 31.70 | 0.00 |
| TRINITY_GAQ82851 | hypothetKlebsormidium_niten    | 31.70 | 0.00 |
| TRINITY_GBG8722  | (hypothetChara_braunii         | 31.70 | 0.00 |
| TRINITY_XP_02791 | probableVigna_unguiculata      | 31.70 | 0.00 |
| TRINITY_GAQ8464  | protein Klebsormidium_niten    | 31.70 | 0.00 |
| TRINITY_GBF8922  | hypothetRaphidocelis_subcap    | 31.70 | 0.00 |
| TRINITY_XP_0202  | (LOW QUAIAsparagus_officinal   | 31.70 | 0.00 |
| TRINITY_ABK2382  | unknown Picea_sitchensis       | 31.70 | 0.00 |
| TRINITY_XP_0017  | (predicteChlamydomonas_reinh   | 31.70 | 0.00 |
| TRINITY_XP_0102  | ubiquitiBrachypodium_distac    | 31.70 | 0.00 |
| TRINITY_XP_0049  | (poly [AISetaria_italica       | 31.70 | 0.00 |
| TRINITY_KXZ47521 | hypothetGonium_pectorale       | 31.70 | 0.00 |
| TRINITY_XP_0220  | embryogeHelianthus_annuus      | 31.70 | 0.00 |
| TRINITY_PNT7108  | hypothetBrachypodium_distac    | 31.70 | 0.00 |
| TRINITY_XP_0058  | hypothetChlorella_variabili    | 31.70 | 0.00 |
| TRINITY_XP_0191  | PREDICTI Ipomoea_nil           | 31.70 | 0.00 |
| TRINITY_GAX8329  | hypothetChlamydomonas_eusti    | 31.70 | 0.00 |
| TRINITY_XP_0025  | (resistarMicromonas_commoda    | 31.70 | 0.00 |
| TRINITY_XP_0239  | endocytQuercus_suber           | 31.70 | 0.00 |
| TRINITY_GAQ8198  | Mitotic Klebsormidium_niten    | 31.70 | 0.00 |
| TRINITY_XP_0263  | HVA22-liPapaver_somniferum     | 31.70 | 0.00 |
| TRINITY_XP_0217  | phosphatChenopodium_quinoa     | 31.70 | 0.00 |
| TRINITY_GBG8733  | hypothetChara_braunii          | 31.70 | 0.00 |
| TRINITY_KXZ5655  | hypothetGonium_pectorale       | 31.70 | 0.00 |
| TRINITY_XP_0110  | PREDICTI Populus_euphratica    | 31.70 | 0.00 |
| TRINITY_XP_0245  | uncharacSelaginella_moellen    | 31.70 | 0.00 |
| TRINITY_GAX8138  | hypothetChlamydomonas_eusti    | 31.70 | 0.00 |
| TRINITY_XP_0056  | hypothetCoccomyxa_subellips    | 31.70 | 0.00 |
| TRINITY_GAX8597  | hypothetChlamydomonas_eusti    | 31.70 | 0.00 |
| TRINITY_XP_0238  | uncharacQuercus_suber          | 31.70 | 0.00 |
| TRINITY_XP_0139  | (VAMP-li) Monoraphidium_negle  | 31.70 | 0.00 |
| TRINITY_BAJ9457  | predicteHordeum_vulgare        | 31.70 | 0.00 |
| TRINITY_GAX7418  | hypothetChlamydomonas_eusti    | 31.70 | 0.00 |
| TRINITY_GAQ8872  | exopolyKlebsormidium_niten     | 31.70 | 0.00 |
| TRINITY_XP_0244  | (von Will) Physcomitrella_pate | 31.70 | 0.00 |
| TRINITY_KXZ4435  | (hypothetGonium_pectorale      | 31.70 | 0.00 |
| TRINITY_PSC7175  | (DNase I Micractinium_conduc   | 31.70 | 0.00 |
| TRINITY_PWA9122  | (protein Artemisia_annua       | 31.60 | 0.00 |
| TRINITY_GAQ7931  | cytochrKlebsormidium_niten     | 31.60 | 0.00 |
| TRINITY_ADE7563  | unknown Picea_sitchensis       | 31.60 | 0.00 |
| TRINITY_KFK30221 | hypothetArabis_alpina          | 31.60 | 0.00 |
| TRINITY_XP_0104  | (PREDICTI Camelina_sativa      | 31.60 | 0.00 |
| TRINITY_GAQ7849  | dual speKlebsormidium_niten    | 31.60 | 0.00 |
| TRINITY_XP_0238  | uncharacQuercus_suber          | 31.60 | 0.00 |
| TRINITY_KCW7145  | hypothetEucalyptus_grandis     | 31.60 | 0.00 |
| TRINITY_XP_0109  | (PREDICTI Elaeis_guineensis    | 31.60 | 0.00 |
| TRINITY_OAE3406  | hypothetMarchantia_polymorp    | 31.60 | 0.00 |
| TRINITY_AAF7456  | (hexose tNicotiana_tabacum     | 31.60 | 0.00 |
| TRINITY_XP_0238  | probableQuercus_suber          | 31.60 | 0.00 |
| TRINITY_XP_0064  | (aminopeCitrus_sinensis        | 31.60 | 0.00 |
| TRINITY_XP_0029  | hypothetVolvox_carteri         | 31.60 | 0.00 |
| TRINITY_PRW3379  | Zn-deperChlorella_sorokinia    | 31.60 | 0.00 |
| TRINITY_GAQ9238  | (hypothetKlebsormidium_niten   | 31.60 | 0.00 |
| TRINITY_NP_0013  | leukaryotNicotiana_tabacum     | 31.60 | 0.00 |
| TRINITY_XP_0243  | (Fanconi Physcomitrella_pate   | 31.60 | 0.00 |
| TRINITY_GAQ8716  | hypothetKlebsormidium_niten    | 31.60 | 0.00 |
| TRINITY_XP_0105  | (PREDICTI Tarenaya_hasslerian  | 31.60 | 0.00 |
| TRINITY_XP_0016  | (predicteChlamydomonas_reinh   | 31.60 | 0.00 |
| TRINITY_NP_5652  | (CHASE dArabidopsis_thalian    | 31.60 | 0.00 |
| TRINITY_RAL4558  | hypothetCuscuta_australis      | 31.60 | 0.00 |
| TRINITY_XP_0206  | (CBL-inteDendrobium_catenatu   | 31.60 | 0.00 |
| TRINITY_GAX8383  | hypothetChlamydomonas_eusti    | 31.60 | 0.00 |
| TRINITY_AAF8652  | (F21B7.2) Arabidopsis_thalian  | 31.60 | 0.00 |
| TRINITY_XP_0227  | uncharacDurio_zibethinus       | 31.60 | 0.00 |
| TRINITY_PRW3263  | (Peptidy) Chlorella_sorokinia  | 31.60 | 0.00 |
| TRINITY_PTQ4986  | hypothetMarchantia_polymorp    | 31.60 | 0.00 |

|                  |          |                     |       |      |
|------------------|----------|---------------------|-------|------|
| TRINITY_XP_02131 | bromodon | Sorghum_bicolor     | 31.60 | 0.00 |
| TRINITY_XP_00751 | alpha-1, | Bathycoccus_prasinc | 31.60 | 0.00 |
| TRINITY_CDY14741 | BnaC04g4 | Brassica_napus      | 31.60 | 0.00 |
| TRINITY_PTQ3895  | hypothet | Marchantia_polymorp | 31.60 | 0.00 |
| TRINITY_GBF9859  | hypothet | Raphidocelis_subcap | 31.60 | 0.00 |
| TRINITY_GBG0019  | hypothet | Raphidocelis_subcap | 31.60 | 0.00 |
| TRINITY_GAQ8017  | hypothet | Klebsormidium_niten | 31.60 | 0.00 |
| TRINITY_GAX7835  | hypothet | Chlamydomonas_eusti | 31.60 | 0.00 |
| TRINITY_EFJ3431  | hypothet | Selaginella_moellen | 31.60 | 0.00 |
| TRINITY_XP_0161  | uncharac | Arachis_ipaensis    | 31.60 | 0.00 |
| TRINITY_XP_0216  | oxyster  | Manihot_esculenta   | 31.60 | 0.00 |
| TRINITY_XP_0110  | nudix h  | Sesamum_indicum     | 31.60 | 0.00 |
| TRINITY_PNW8733  | hypothet | Chlamydomonas_reinh | 31.60 | 0.00 |
| TRINITY_KXZ4200  | hypothet | Gonium_pectorale    | 31.60 | 0.00 |
| TRINITY_GAX7872  | hypothet | Chlamydomonas_eusti | 31.60 | 0.00 |
| TRINITY_XP_0263  | nucleoli | Papaver_somniferum  | 31.60 | 0.00 |
| TRINITY_XP_00934 | PREDICTI | Pyrus_x_bretschneid | 31.60 | 0.00 |
| TRINITY_GAX7560  | hypothet | Chlamydomonas_eusti | 31.60 | 0.00 |
| TRINITY_KXZ4838  | hypothet | Gonium_pectorale    | 31.60 | 0.00 |
| TRINITY_OAE2957  | hypothet | Marchantia_polymorp | 31.60 | 0.00 |
| TRINITY_XP_0191  | PREDICTI | Ipomoea_nil         | 31.60 | 0.00 |
| TRINITY_GAX8465  | hypothet | Chlamydomonas_eusti | 31.60 | 0.00 |
| TRINITY_XP_0023  | probable | Populus_trichocarpa | 31.60 | 0.00 |
| TRINITY_XP_0017  | alpha-1, | Chlamydomonas_reinh | 31.60 | 0.00 |
| TRINITY_KXZ5358  | hypothet | Gonium_pectorale    | 31.60 | 0.00 |
| TRINITY_XP_0029  | hypothet | Volvox_carteri      | 31.60 | 0.00 |
| TRINITY_XP_0238  | uncharac | Quercus_suber       | 31.50 | 0.00 |
| TRINITY_XP_0100  | PREDICTI | Eucalyptus_grandis  | 31.50 | 0.00 |
| TRINITY_XP_0159  | vacuola  | Arachis_duranensis  | 31.50 | 0.00 |
| TRINITY_PTQ3902  | hypothet | Marchantia_polymorp | 31.50 | 0.00 |
| TRINITY_XP_0220  | zinc fir | Helianthus_annuus   | 31.50 | 0.00 |
| TRINITY_GBG8317  | hypothet | Chara_braunii       | 31.50 | 0.00 |
| TRINITY_XP_0106  | PREDICTI | Beta_vulgaris       | 31.50 | 0.00 |
| TRINITY_XP_0218  | binding  | Prunus_avium        | 31.50 | 0.00 |
| TRINITY_XP_0243  | serpin-  | Physcomitrella_pate | 31.50 | 0.00 |
| TRINITY_CAH6823  | H0306F0  | Oryza_sativa        | 31.50 | 0.00 |
| TRINITY_GAQ8383  | hypothet | Klebsormidium_niten | 31.50 | 0.00 |
| TRINITY_RWR8577  | Rhodane  | Cinnamomum_micranth | 31.50 | 0.00 |
| TRINITY_XP_0200  | indole-  | Ananas_comosus      | 31.50 | 0.00 |
| TRINITY_XP_0105  | PREDICTI | Tarenaya_hasslerian | 31.50 | 0.00 |
| TRINITY_XP_0068  | UV-stim  | Amborella_trichopod | 31.50 | 0.00 |
| TRINITY_XP_0064  | protein  | Eutrema_salsugineum | 31.50 | 0.00 |
| TRINITY_XP_0158  | uncharac | Ziziphus_jujuba     | 31.50 | 0.00 |
| TRINITY_GAX7604  | hypothet | Chlamydomonas_eusti | 31.50 | 0.00 |
| TRINITY_XP_0237  | ubiquiti | Lactuca_sativa      | 31.50 | 0.00 |
| TRINITY_XP_0238  | uncharac | Quercus_suber       | 31.50 | 0.00 |
| TRINITY_XP_0172  | PREDICTI | Daucus_carota       | 31.50 | 0.00 |
| TRINITY_XP_0194  | PREDICTI | Lupinus_angustifoli | 31.50 | 0.00 |
| TRINITY_XP_0014  | [Ostreoc | Ostreococcus_sp._'1 | 31.50 | 0.00 |
| TRINITY_GAX7595  | hypothet | Chlamydomonas_eusti | 31.50 | 0.00 |
| TRINITY_XP_0243  | uncharac | Physcomitrella_pate | 31.50 | 0.00 |
| TRINITY_ADE7643  | unknown  | Picea_sitchensis    | 31.50 | 0.00 |
| TRINITY_CDP1798  | unnamed  | Coffea_canephora    | 31.50 | 0.00 |
| TRINITY_BAK0153  | predict  | Hordeum_vulgare     | 31.50 | 0.00 |
| TRINITY_GBF9705  | hypothet | Raphidocelis_subcap | 31.50 | 0.00 |
| TRINITY_XP_0235  | LIMR fan | Cucurbita_pepo      | 31.50 | 0.00 |
| TRINITY_GAQ7855  | hypothet | Klebsormidium_niten | 31.50 | 0.00 |
| TRINITY_XP_0025  | predict  | Micromonas_commoda  | 31.50 | 0.00 |
| TRINITY_XP_0212  | serine/t | Herrania_umbratica  | 31.50 | 0.00 |
| TRINITY_KXZ5031  | hypothet | Gonium_pectorale    | 31.50 | 0.00 |
| TRINITY_GAQ8257  | hypothet | Klebsormidium_niten | 31.50 | 0.00 |
| TRINITY_XP_0147  | TIP41-lj | Brachypodium_distac | 31.50 | 0.00 |
| TRINITY_KYP4513  | hypothet | Cajanus_cajan       | 31.50 | 0.00 |
| TRINITY_GAX8451  | hypothet | Chlamydomonas_eusti | 31.50 | 0.00 |
| TRINITY_XP_0058  | hypothet | Chlorella_variabili | 31.50 | 0.00 |
| TRINITY_XP_0016  | predict  | Chlamydomonas_reinh | 31.50 | 0.00 |

|                                                |       |      |
|------------------------------------------------|-------|------|
| TRINITY_XP_01054{PREDICT{H}Tarenaya_hasslerian | 31.50 | 0.00 |
| TRINITY_GAX8163{hypothetChlamydomonas_eusti    | 31.50 | 0.00 |
| TRINITY_XP_0030{SNF2 supMicromonas_pusilla     | 31.50 | 0.00 |
| TRINITY_BAJ9694{predicteHordeum_vulgare        | 31.50 | 0.00 |
| TRINITY_PNW8850{hypothetChlamydomonas_reinh    | 31.50 | 0.00 |
| TRINITY_GAX7650{hypothetChlamydomonas_eusti    | 31.50 | 0.00 |
| TRINITY_XP_0239{protein Quercus_suber          | 31.50 | 0.00 |
| TRINITY_GAX8120{hypothetChlamydomonas_eusti    | 31.50 | 0.00 |
| TRINITY_XP_00844{PREDICT{H}Cucumis_melo        | 31.50 | 0.00 |
| TRINITY_PNH0225{VegetatiTetrabaena_socialis    | 31.50 | 0.00 |

|                  |                              |       |      |
|------------------|------------------------------|-------|------|
| TRINITY_XP_00714 | hypothetPhaseolus_vulgaris   | 31.50 | 0.00 |
| TRINITY_PNW86482 | hypothetChlamydomonas_reinh  | 31.50 | 0.00 |
| TRINITY_GBF97507 | hypothetRaphidocelis_subcap  | 31.50 | 0.00 |
| TRINITY_GAX84454 | hypothetChlamydomonas_eusti  | 31.50 | 0.00 |
| TRINITY_XP_00565 | hypothetCoccomyxa_subellips  | 31.50 | 0.00 |
| TRINITY_PNW78753 | hypothetChlamydomonas_reinh  | 31.50 | 0.00 |
| TRINITY_PTQ41656 | hypothetMarchantia_polymorp  | 31.50 | 0.00 |
| TRINITY_PRW61284 | Casein lChlorella_sorokinia  | 31.50 | 0.00 |
| TRINITY_KZV56815 | hypothetDorcoceras_hygromet  | 31.50 | 0.00 |
| TRINITY_XP_00306 | (glycosylMicromonas_pusilla  | 31.50 | 0.00 |
| TRINITY_XP_02182 | GTP-bin cPrunus_avium        | 31.50 | 0.00 |
| TRINITY_GAX81744 | hypothetChlamydomonas_eusti  | 31.50 | 0.00 |
| TRINITY_KXZ44759 | hypothetGonium_pectorale     | 31.50 | 0.00 |
| TRINITY_XP_01010 | (very-lorMorus_notabilis     | 31.50 | 0.00 |
| TRINITY_GAQ82532 | translatKlebsormidium_niten  | 31.50 | 0.00 |
| TRINITY_XP_02438 | alpha-t Physcomitrella_pate  | 31.50 | 0.00 |
| TRINITY_GAX74990 | hypothetChlamydomonas_eusti  | 31.50 | 0.00 |
| TRINITY_XP_01009 | uncharacMorus_notabilis      | 31.50 | 0.00 |
| TRINITY_XP_00978 | PREDICTINicotiana_sylvestri  | 31.40 | 0.00 |
| TRINITY_GAQ83828 | M-phase Klebsormidium_niten  | 31.40 | 0.00 |
| TRINITY_RRT72140 | (hypothetEnsete_ventricosum  | 31.40 | 0.00 |
| TRINITY_XP_01101 | PREDICTIPopulus_euphratica   | 31.40 | 0.00 |
| TRINITY_GBF96504 | hypothetRaphidocelis_subcap  | 31.40 | 0.00 |
| TRINITY_RWR79768 | protein Cinnamomum_micranth  | 31.40 | 0.00 |
| TRINITY_XP_01586 | uncharacZiziphus_jujuba      | 31.40 | 0.00 |
| TRINITY_GAQ79007 | hypothetKlebsormidium_niten  | 31.40 | 0.00 |
| TRINITY_XP_02388 | vacuolarQuercus_suber        | 31.40 | 0.00 |
| TRINITY_XP_02017 | chaperorAegilops_tauschii    | 31.40 | 0.00 |
| TRINITY_XP_00701 | PREDICTITheobroma_cacao      | 31.40 | 0.00 |
| TRINITY_XP_02008 | E3 ubiqAnanas_comosus        | 31.40 | 0.00 |
| TRINITY_XP_00308 | Protein-Ostreococcus_tauri   | 31.40 | 0.00 |
| TRINITY_XP_02392 | vacuolarQuercus_suber        | 31.40 | 0.00 |
| TRINITY_KNA07012 | hypothetSpinacia_oleracea    | 31.40 | 0.00 |
| TRINITY_XP_02389 | wiskott-Quercus_suber        | 31.40 | 0.00 |
| TRINITY_XP_02175 | ABC trarChenopodium_quinoa   | 31.40 | 0.00 |
| TRINITY_XP_00564 | CHR famiCoccomyxa_subellips  | 31.40 | 0.00 |
| TRINITY_GAQ90902 | hypothetKlebsormidium_niten  | 31.40 | 0.00 |
| TRINITY_XP_02389 | probableQuercus_suber        | 31.40 | 0.00 |
| TRINITY_XP_02439 | lysine-s Physcomitrella_pate | 31.40 | 0.00 |
| TRINITY_AGY48886 | MIP1.4a Nicotiana_benthamia  | 31.40 | 0.00 |
| TRINITY_XP_02023 | probableCajanus_cajan        | 31.40 | 0.00 |
| TRINITY_GAX75913 | hypothetChlamydomonas_eusti  | 31.40 | 0.00 |
| TRINITY_XP_00295 | hypothetVolvox_carteri       | 31.40 | 0.00 |
| TRINITY_XP_02436 | probablePhyscomitrella_pate  | 31.40 | 0.00 |
| TRINITY_GAX82756 | hypothetChlamydomonas_eusti  | 31.40 | 0.00 |
| TRINITY_GAX83819 | hypothetChlamydomonas_eusti  | 31.40 | 0.00 |
| TRINITY_NP_20140 | (PhosphoiArabidopsis_thalian | 31.40 | 0.00 |
| TRINITY_OWM65158 | hypothetPunica_granatum      | 31.40 | 0.00 |
| TRINITY_XP_02437 | probablePhyscomitrella_pate  | 31.40 | 0.00 |
| TRINITY_GAQ80862 | SANT/MykKlebsormidium_niten  | 31.40 | 0.00 |
| TRINITY_GAX75036 | hypothetChlamydomonas_eusti  | 31.40 | 0.00 |
| TRINITY_PRW58183 | ubiquitiChlorella_sorokinia  | 31.40 | 0.00 |
| TRINITY_OAE20521 | hypothetMarchantia_polymorp  | 31.40 | 0.00 |
| TRINITY_XP_00940 | (PREDICTIMusa_acuminata      | 31.40 | 0.00 |
| TRINITY_XP_00564 | hypothetCoccomyxa_subellips  | 31.40 | 0.00 |
| TRINITY_GAX75907 | hypothetChlamydomonas_eusti  | 31.40 | 0.00 |
| TRINITY_GAX82511 | hypothetChlamydomonas_eusti  | 31.40 | 0.00 |
| TRINITY_XP_00295 | hypothetVolvox_carteri       | 31.40 | 0.00 |
| TRINITY_OWM89049 | hypothetPunica_granatum      | 31.40 | 0.00 |
| TRINITY_XP_02453 | cullin-1Selaginella_moellen  | 31.40 | 0.00 |
| TRINITY_XP_00305 | major f Micromonas_pusilla   | 31.40 | 0.00 |
| TRINITY_XP_00170 | (predicteChlamydomonas_reinh | 31.40 | 0.00 |
| TRINITY_PNW76310 | (hypothetChlamydomonas_reinh | 31.40 | 0.00 |
| TRINITY_GAQ85930 | hypothetKlebsormidium_niten  | 31.40 | 0.00 |
| TRINITY_XP_00865 | uncharacZea_mays             | 31.40 | 0.00 |
| TRINITY_XP_00295 | hypothetVolvox_carteri       | 31.40 | 0.00 |



|                  |          |                     |       |      |
|------------------|----------|---------------------|-------|------|
| TRINITY_XP_00496 | uncharac | Setaria_italica     | 31.40 | 0.00 |
| TRINITY_BAJ9497  | predicte | Hordeum_vulgare     | 31.40 | 0.00 |
| TRINITY_OAP03182 | AT-ACS1  | Arabidopsis_thalian | 31.40 | 0.00 |
| TRINITY_PNH05297 | Type I   | Tetrabaena_socialis | 31.40 | 0.00 |
| TRINITY_OAE30812 | hypothet | Marchantia_polymorp | 31.40 | 0.00 |
| TRINITY_XP_01390 | putative | Monoraphidium_negle | 31.40 | 0.00 |
| TRINITY_GAX73471 | hypothet | Chlamydomonas_eusti | 31.40 | 0.00 |
| TRINITY_POO02164 | SNU66/S  | Trema_orientale     | 31.40 | 0.00 |
| TRINITY_PQP93370 | tRNA (g) | Prunus_yedoensis    | 31.40 | 0.00 |
| TRINITY_XP_00356 | lysophos | Brachypodium_distac | 31.40 | 0.00 |
| TRINITY_XP_01139 | hypothet | Auxenochlorella_pro | 31.40 | 0.00 |
| TRINITY_XP_00295 | hypothet | Volvox_carteri      | 31.40 | 0.00 |
| TRINITY_XP_00249 | predicte | Micromonas_commoda  | 31.40 | 0.00 |
| TRINITY_PNH08568 | hypothet | Tetrabaena_socialis | 31.40 | 0.00 |
| TRINITY_XP_00564 | hypothet | Coccomyxa_subellips | 31.40 | 0.00 |
| TRINITY_XP_00414 | PREDICTE | Cucumis_sativus     | 31.30 | 0.00 |
| TRINITY_XP_02188 | N-carban | Carica_papaya       | 31.30 | 0.00 |
| TRINITY_BAJ96946 | predicte | Hordeum_vulgare     | 31.30 | 0.00 |
| TRINITY_XP_02176 | cytokini | Chenopodium_quinoa  | 31.30 | 0.00 |
| TRINITY_XP_01055 | PREDICTE | Tarenaya_hasslerian | 31.30 | 0.00 |
| TRINITY_PIN12190 | putative | Handroanthus_impeti | 31.30 | 0.00 |
| TRINITY_PNR55113 | hypothet | Physcomitrella_pate | 31.30 | 0.00 |
| TRINITY_XP_02390 | uncharac | Quercus_suber       | 31.30 | 0.00 |
| TRINITY_GAX77578 | hypothet | Chlamydomonas_eusti | 31.30 | 0.00 |
| TRINITY_XP_02639 | endoplas | Papaver_somniferum  | 31.30 | 0.00 |
| TRINITY_GAX86259 | hypothet | Chlamydomonas_eusti | 31.30 | 0.00 |
| TRINITY_XP_00294 | hypothet | Volvox_carteri      | 31.30 | 0.00 |
| TRINITY_XP_00295 | hypothet | Volvox_carteri      | 31.30 | 0.00 |
| TRINITY_XP_00169 | actin [C | Chlamydomonas_reinh | 31.30 | 0.00 |
| TRINITY_KXZ46904 | hypothet | Gonium_pectorale    | 31.30 | 0.00 |
| TRINITY_PNW82798 | hypothet | Chlamydomonas_reinh | 31.30 | 0.00 |
| TRINITY_BAF15985 | Os04g064 | Oryza_sativa        | 31.30 | 0.00 |
| TRINITY_KJB44427 | hypothet | Gossypium_raimondii | 31.30 | 0.00 |
| TRINITY_PIA25461 | hypothet | Aquilegia_coerulea  | 31.30 | 0.00 |
| TRINITY_XP_00141 | predicte | Ostreococcus_sp._'1 | 31.30 | 0.00 |
| TRINITY_KXZ53841 | hypothet | Gonium_pectorale    | 31.30 | 0.00 |
| TRINITY_AEB71559 | CBL-inte | Solanum_chacoense   | 31.30 | 0.00 |
| TRINITY_RWR82603 | NADPH--  | Cinnamomum_micranth | 31.30 | 0.00 |
| TRINITY_XP_02165 | fatty ac | Hevea_brasiliensis  | 31.30 | 0.00 |
| TRINITY_PNW82480 | hypothet | Chlamydomonas_reinh | 31.30 | 0.00 |
| TRINITY_XP_00308 | Tetratri | Ostreococcus_tauri  | 31.30 | 0.00 |
| TRINITY_PTQ46728 | hypothet | Marchantia_polymorp | 31.30 | 0.00 |
| TRINITY_BAJ94089 | predicte | Hordeum_vulgare     | 31.30 | 0.00 |
| TRINITY_XP_02436 | programm | Physcomitrella_pate | 31.30 | 0.00 |
| TRINITY_PKI51826 | hypothet | Punica_granatum     | 31.30 | 0.00 |
| TRINITY_XP_01389 | hypothet | Monoraphidium_negle | 31.30 | 0.00 |
| TRINITY_ABY60733 | zygote-  | Chlamydomonas_reinh | 31.30 | 0.00 |
| TRINITY_XP_02451 | transmen | Selaginella_moellen | 31.30 | 0.00 |
| TRINITY_XP_00295 | hypothet | Volvox_carteri      | 31.30 | 0.00 |
| TRINITY_KXZ43942 | hypothet | Gonium_pectorale    | 31.30 | 0.00 |
| TRINITY_GAX82598 | hypothet | Chlamydomonas_eusti | 31.30 | 0.00 |
| TRINITY_XP_00250 | predicte | Micromonas_commoda  | 31.30 | 0.00 |
| TRINITY_XP_01048 | PREDICTE | Camelina_sativa     | 31.30 | 0.00 |
| TRINITY_EEE52420 | hypothet | Oryza_sativa        | 31.30 | 0.00 |
| TRINITY_GAX73673 | hypothet | Chlamydomonas_eusti | 31.30 | 0.00 |
| TRINITY_PNH09878 | Dopamin  | Tetrabaena_socialis | 31.30 | 0.00 |
| TRINITY_OAE18384 | hypothet | Marchantia_polymorp | 31.30 | 0.00 |
| TRINITY_PNW82037 | hypothet | Chlamydomonas_reinh | 31.30 | 0.00 |
| TRINITY_XP_00294 | hypothet | Volvox_carteri      | 31.30 | 0.00 |
| TRINITY_PRW58639 | hypothet | Chlorella_sorokinia | 31.30 | 0.00 |
| TRINITY_PWA75080 | ARM rep  | Artemisia_annua     | 31.30 | 0.00 |
| TRINITY_GAX78697 | hypothet | Chlamydomonas_eusti | 31.30 | 0.00 |
| TRINITY_ATB19754 | putative | Callitropsis_vietna | 31.30 | 0.00 |
| TRINITY_EPS72080 | hypothet | Genlisea_aurea      | 31.30 | 0.00 |
| TRINITY_XP_02375 | peptidy  | Lactuca_sativa      | 31.30 | 0.00 |
| TRINITY_GAQ84345 | cytoplas | Klebsormidium_niten | 31.30 | 0.00 |

|                  |           |                     |       |      |
|------------------|-----------|---------------------|-------|------|
| TRINITY_PWA97141 | cytochr   | Artemisia_annua     | 31.20 | 0.00 |
| TRINITY_XP_02285 | histidir  | Olea_europaea       | 31.20 | 0.00 |
| TRINITY_YP_00915 | H-trans   | Lobosphaera_incisa  | 31.20 | 0.00 |
| TRINITY_XP_01110 | (transcri | Sesamum_indicum     | 31.20 | 0.00 |
| TRINITY_GAQ88528 | hypothet  | Klebsormidium_niten | 31.20 | 0.00 |
| TRINITY_XP_00449 | E3 ubiq   | Cicer_arietinum     | 31.20 | 0.00 |
| TRINITY_OAE34542 | hypothet  | Marchantia_polymorp | 31.20 | 0.00 |
| TRINITY_GAX77793 | hypothet  | Chlamydomonas_eusti | 31.20 | 0.00 |
| TRINITY_XP_02390 | ras-lik   | Quercus_suber       | 31.20 | 0.00 |
| TRINITY_GAX73269 | hypothet  | Chlamydomonas_eusti | 31.20 | 0.00 |
| TRINITY_PTQ32660 | hypothet  | Marchantia_polymorp | 31.20 | 0.00 |
| TRINITY_XP_02283 | NADH de   | Ostreococcus_tauri  | 31.20 | 0.00 |
| TRINITY_XP_00980 | (PREDICTI | Nicotiana_sylvestri | 31.20 | 0.00 |
| TRINITY_XP_01450 | (traffic) | Vigna_radiata       | 31.20 | 0.00 |
| TRINITY_XP_00940 | (PREDICTI | Musa_acuminata      | 31.20 | 0.00 |
| TRINITY_GAX80849 | hypothet  | Chlamydomonas_eusti | 31.20 | 0.00 |
| TRINITY_XP_02176 | tRNA wy   | Chenopodium_quinoa  | 31.20 | 0.00 |
| TRINITY_KDD72284 | NLI int   | Helicosporidium_sp. | 31.20 | 0.00 |
| TRINITY_XP_02391 | CBP3-li   | Quercus_suber       | 31.20 | 0.00 |
| TRINITY_XP_01043 | (PREDICTI | Camelina_sativa     | 31.20 | 0.00 |
| TRINITY_XP_00141 | predict   | Ostreococcus_sp._'1 | 31.20 | 0.00 |
| TRINITY_OUS48899 | MET-10+   | Ostreococcus_tauri  | 31.20 | 0.00 |
| TRINITY_XP_00249 | vacuola   | Micromonas_commoda  | 31.20 | 0.00 |
| TRINITY_PRW61057 | 2-dehyd   | Chlorella_sorokinia | 31.20 | 0.00 |
| TRINITY_XP_01847 | (PREDICTI | Raphanus_sativus    | 31.20 | 0.00 |
| TRINITY_XP_02712 | serine/t  | Coffea_arabica      | 31.20 | 0.00 |
| TRINITY_XP_02645 | cytochr   | Papaver_somniferum  | 31.20 | 0.00 |
| TRINITY_GAQ77732 | Leishmar  | Klebsormidium_niten | 31.20 | 0.00 |
| TRINITY_XP_00295 | hypothet  | Volvox_carteri      | 31.20 | 0.00 |
| TRINITY_PNH07474 | hypothet  | Tetrabaena_socialis | 31.20 | 0.00 |
| TRINITY_XP_02289 | RING-H2   | Olea_europaea       | 31.20 | 0.00 |
| TRINITY_XP_00250 | (predict  | Micromonas_commoda  | 31.20 | 0.00 |
| TRINITY_XP_02389 | non-red   | Quercus_suber       | 31.20 | 0.00 |
| TRINITY_XP_01390 | (hypothet | Monoraphidium_negle | 31.20 | 0.00 |
| TRINITY_XP_02184 | ran-bin   | Spinacia_oleracea   | 31.20 | 0.00 |
| TRINITY_GAQ83768 | cytochr   | Klebsormidium_niten | 31.20 | 0.00 |
| TRINITY_KXZ47984 | hypothet  | Gonium_pectorale    | 31.20 | 0.00 |
| TRINITY_XP_01010 | (DNA rep  | Morus_notabilis     | 31.20 | 0.00 |
| TRINITY_XP_00429 | (PREDICTI | Fragaria_vesca      | 31.20 | 0.00 |
| TRINITY_XP_01847 | (PREDICTI | Raphanus_sativus    | 31.20 | 0.00 |
| TRINITY_XP_01283 | (PREDICTI | Erythranthe_guttata | 31.20 | 0.00 |
| TRINITY_XP_02579 | vacuola   | Panicum_hallii      | 31.20 | 0.00 |
| TRINITY_GBF90632 | hypothet  | Raphidocelis_subcap | 31.20 | 0.00 |
| TRINITY_XP_01390 | (hypothet | Monoraphidium_negle | 31.20 | 0.00 |
| TRINITY_GAV80141 | Kelch_3   | Cephalotus_follicul | 31.20 | 0.00 |
| TRINITY_GBF94053 | hypothet  | Raphidocelis_subcap | 31.20 | 0.00 |
| TRINITY_XP_00414 | (PREDICTI | Cucumis_sativus     | 31.20 | 0.00 |
| TRINITY_GAX80022 | hypothet  | Chlamydomonas_eusti | 31.20 | 0.00 |
| TRINITY_BAJ87274 | (predict  | Hordeum_vulgare     | 31.20 | 0.00 |
| TRINITY_BAJ96946 | (predict  | Hordeum_vulgare     | 31.20 | 0.00 |
| TRINITY_XP_00170 | (predict  | Chlamydomonas_reinh | 31.20 | 0.00 |
| TRINITY_GAX84676 | hypothet  | Chlamydomonas_eusti | 31.20 | 0.00 |
| TRINITY_XP_00584 | hypothet  | Chlorella_variabili | 31.20 | 0.00 |
| TRINITY_GAX81389 | hypothet  | Chlamydomonas_eusti | 31.20 | 0.00 |
| TRINITY_XP_02390 | (unchara  | Quercus_suber       | 31.20 | 0.00 |
| TRINITY_XP_00940 | (PREDICTI | Musa_acuminata      | 31.20 | 0.00 |
| TRINITY_RWW64082 | hypothet  | Ensete_ventricosum  | 31.20 | 0.00 |
| TRINITY_PSC67881 | prolyl    | Micractinium_conduc | 31.20 | 0.00 |
| TRINITY_XP_00250 | (predict  | Micromonas_commoda  | 31.20 | 0.00 |
| TRINITY_KXZ55623 | hypothet  | Gonium_pectorale    | 31.20 | 0.00 |
| TRINITY_GAQ84543 | hypothet  | Klebsormidium_niten | 31.20 | 0.00 |
| TRINITY_XP_02791 | (unchara  | Vigna_unguiculata   | 31.20 | 0.00 |
| TRINITY_XP_00294 | hypothet  | Volvox_carteri      | 31.20 | 0.00 |
| TRINITY_GAX76665 | hypothet  | Chlamydomonas_eusti | 31.20 | 0.00 |
| TRINITY_RWR72200 | (serine/t | Cinnamomum_micranth | 31.10 | 0.00 |
| TRINITY_KYP73084 | Ankyrin-  | Cajanus_cajan       | 31.10 | 0.00 |

|                 |                               |       |      |
|-----------------|-------------------------------|-------|------|
| TRINITY_XP_0063 | {uncharac}Populus_trichocarpa | 31.10 | 0.00 |
| TRINITY_XP_0075 | {ABC trar}Bathycoccus_prasinu | 31.10 | 0.00 |
| TRINITY_XP_0116 | {LOW QUAI}Amborella_trichopod | 31.10 | 0.00 |
| TRINITY_XP_0030 | {predicte}Micromonas_pusilla  | 31.10 | 0.00 |
| TRINITY_BAJ9550 | {predicte}Hordeum_vulgare     | 31.10 | 0.00 |
| TRINITY_PNW7472 | {hypothet}Chlamydomonas_reinh | 31.10 | 0.00 |
| TRINITY_GBF9687 | {hypothet}Raphidocelis_subcap | 31.10 | 0.00 |
| TRINITY_XP_0110 | {PREDICTE}Populus_euphratica  | 31.10 | 0.00 |
| TRINITY_EOY3132 | {Adenylat}Theobroma_cacao     | 31.10 | 0.00 |
| TRINITY_PRW4519 | {carboxyl}Chlorella_sorokinia | 31.10 | 0.00 |
| TRINITY_XP_0237 | {serine/t}Lactuca_sativa      | 31.10 | 0.00 |
| TRINITY_PRW0592 | {melanotr}Chlorella_sorokinia | 31.10 | 0.00 |
| TRINITY_EYU4160 | {hypothet}Erythranthe_guttata | 31.10 | 0.00 |
| TRINITY_PNR4419 | {hypothet}Physcomitrella_pate | 31.10 | 0.00 |
| TRINITY_GAQ7773 | {Leishmar}Klebsormidium_niten | 31.10 | 0.00 |
| TRINITY_XP_0220 | {serine/t}Helianthus_annuus   | 31.10 | 0.00 |
| TRINITY_XP_0016 | {predicte}Chlamydomonas_reinh | 31.10 | 0.00 |
| TRINITY_XP_0150 | {ribonucl}Solanum_pennellii   | 31.10 | 0.00 |
| TRINITY_XP_0245 | {probable}Selaginella_moellen | 31.10 | 0.00 |
| TRINITY_XP_0228 | {UBA-like}Ostreococcus_tauri  | 31.10 | 0.00 |
| TRINITY_XP_0029 | {hypothet}Volvox_carteri      | 31.10 | 0.00 |
| TRINITY_GBF9960 | {hypothet}Raphidocelis_subcap | 31.10 | 0.00 |
| TRINITY_EOY0891 | {Vps51/V}Theobroma_cacao      | 31.10 | 0.00 |
| TRINITY_XP_0097 | {PREDICTE}Nicotiana_sylvestri | 31.10 | 0.00 |
| TRINITY_GAX7665 | {hypothet}Chlamydomonas_eusti | 31.10 | 0.00 |
| TRINITY_XP_0202 | {uncharac}Aegilops_tauschii   | 31.10 | 0.00 |
| TRINITY_XP_0219 | {phosphat}Helianthus_annuus   | 31.10 | 0.00 |
| TRINITY_GAX8301 | {hypothet}Chlamydomonas_eusti | 31.10 | 0.00 |
| TRINITY_PNW7678 | {hypothet}Chlamydomonas_reinh | 31.10 | 0.00 |
| TRINITY_BAA9700 | {unnamed}Arabidopsis_thalian  | 31.10 | 0.00 |
| TRINITY_PRW5746 | {serine t}Chlorella_sorokinia | 31.10 | 0.00 |
| TRINITY_OWM6913 | {hypothet}Punica_granatum     | 31.10 | 0.00 |
| TRINITY_RXI0312 | {hypothet}Malus_domestica     | 31.10 | 0.00 |
| TRINITY_XP_0056 | {pectin l}Coccomyxa_subellips | 31.10 | 0.00 |
| TRINITY_PNH1006 | {Gamma-se}Tetrabaena_socialis | 31.10 | 0.00 |
| TRINITY_GAX8147 | {hypothet}Chlamydomonas_eusti | 31.10 | 0.00 |
| TRINITY_GAX8229 | {hypothet}Chlamydomonas_eusti | 31.10 | 0.00 |
| TRINITY_KXZ4949 | {hypothet}Gonium_pectorale    | 31.10 | 0.00 |
| TRINITY_GAX8539 | {hypothet}Chlamydomonas_eusti | 31.10 | 0.00 |
| TRINITY_XP_0014 | {predicte}Ostreococcus_sp._'l | 31.10 | 0.00 |
| TRINITY_GAX8297 | {hypothet}Chlamydomonas_eusti | 31.10 | 0.00 |
| TRINITY_XP_0264 | {actin-2-}Papaver_somniferum  | 31.00 | 0.00 |
| TRINITY_XP_0216 | {uncharac}Hevea_brasiliensis  | 31.00 | 0.00 |
| TRINITY_GAX8336 | {hypothet}Chlamydomonas_eusti | 31.00 | 0.00 |
| TRINITY_XP_0264 | {afadin-}Papaver_somniferum   | 31.00 | 0.00 |
| TRINITY_GAQ7960 | {WD repe}Klebsormidium_niten  | 31.00 | 0.00 |
| TRINITY_KDD7271 | {hypothet}Helicosporidium_sp. | 31.00 | 0.00 |
| TRINITY_XP_0220 | {aspartic}Helianthus_annuus   | 31.00 | 0.00 |
| TRINITY_XP_0109 | {PREDICTE}Elaeis_guineensis   | 31.00 | 0.00 |
| TRINITY_XP_0030 | {predicte}Micromonas_pusilla  | 31.00 | 0.00 |
| TRINITY_PHT3669 | {11-acylg}Capsicum_baccatum   | 31.00 | 0.00 |
| TRINITY_XP_0238 | {Niemann-}Quercus_suber       | 31.00 | 0.00 |
| TRINITY_ANE1053 | {carbonic}Dunaliella_salina   | 31.00 | 0.00 |
| TRINITY_XP_0239 | {erythro}Quercus_suber        | 31.00 | 0.00 |
| TRINITY_OMP0869 | {hypothet}Corchorus_olitorius | 31.00 | 0.00 |
| TRINITY_XP_0241 | {mediator}Rosa_chinensis      | 31.00 | 0.00 |
| TRINITY_XP_0016 | {aminotr}Chlamydomonas_reinh  | 31.00 | 0.00 |
| TRINITY_XP_0159 | {cytokini}Arachis_duranensis  | 31.00 | 0.00 |
| TRINITY_EFJ0568 | {hypothet}Selaginella_moellen | 31.00 | 0.00 |
| TRINITY_GAQ7773 | {Leishmar}Klebsormidium_niten | 31.00 | 0.00 |
| TRINITY_OAE2090 | {hypothet}Marchantia_polymorp | 31.00 | 0.00 |
| TRINITY_XP_0238 | {nuclear}Quercus_suber        | 31.00 | 0.00 |
| TRINITY_GAX7974 | {hypothet}Chlamydomonas_eusti | 31.00 | 0.00 |
| TRINITY_XP_0190 | {PREDICTE}Tarenaya_hasslerian | 31.00 | 0.00 |
| TRINITY_XP_0058 | {hypothet}Chlorella_variabili | 31.00 | 0.00 |
| TRINITY_XP_0084 | {PREDICTE}Cucumis_melo        | 31.00 | 0.00 |

|                 |           |                     |       |      |
|-----------------|-----------|---------------------|-------|------|
| TRINITY_GAQ8026 | vacuolar  | Klebsormidium_niten | 31.00 | 0.00 |
| TRINITY_GAX7517 | hypothet  | Chlamydomonas_eusti | 31.00 | 0.00 |
| TRINITY_GAX7877 | hypothet  | Chlamydomonas_eusti | 31.00 | 0.00 |
| TRINITY_XP_0239 | (uncharac | Quercus_suber       | 31.00 | 0.00 |
| TRINITY_PNG9913 | hypothet  | Tetrabaena_socialis | 31.00 | 0.00 |
| TRINITY_PWZ3768 | Fatty ac  | Zea_mays            | 31.00 | 0.00 |
| TRINITY_GAQ8623 | hypothet  | Klebsormidium_niten | 31.00 | 0.00 |
| TRINITY_GAQ7771 | HECT don  | Klebsormidium_niten | 31.00 | 0.00 |
| TRINITY_XP_0029 | hypothet  | Volvox_carteri      | 31.00 | 0.00 |
| TRINITY_XP_0028 | cluster   | Arabidopsis_lyrata  | 31.00 | 0.00 |
| TRINITY_XP_0139 | hypothet  | Monoraphidium_negle | 31.00 | 0.00 |
| TRINITY_XP_0218 | putative  | Prunus_avium        | 31.00 | 0.00 |
| TRINITY_PNH1230 | hypothet  | Tetrabaena_socialis | 31.00 | 0.00 |
| TRINITY_XP_0100 | PREDICTE  | Eucalyptus_grandis  | 31.00 | 0.00 |
| TRINITY_EFJ1681 | hypothet  | Selaginella_moellen | 31.00 | 0.00 |
| TRINITY_XP_0049 | (beta-he  | Setaria_italica     | 31.00 | 0.00 |
| TRINITY_EFJ2046 | hypothet  | Selaginella_moellen | 31.00 | 0.00 |
| TRINITY_BAJ9372 | predict   | Hordeum_vulgare     | 31.00 | 0.00 |
| TRINITY_XP_0239 | (uncharac | Quercus_suber       | 31.00 | 0.00 |
| TRINITY_GAX7565 | (hypothet | Chlamydomonas_eusti | 31.00 | 0.00 |
| TRINITY_RXH7384 | hypothet  | Malus_domestica     | 31.00 | 0.00 |
| TRINITY_OMO5953 | hypothet  | Corchorus_olitorius | 31.00 | 0.00 |
| TRINITY_GAX7756 | (hypothet | Chlamydomonas_eusti | 31.00 | 0.00 |
| TRINITY_RDX6556 | Sphingo   | Mucuna_pruriens     | 31.00 | 0.00 |
| TRINITY_XP_0238 | tripepti  | Quercus_suber       | 31.00 | 0.00 |
| TRINITY_GAX7553 | hypothet  | Chlamydomonas_eusti | 31.00 | 0.00 |
| TRINITY_GAX7579 | (hypothet | Chlamydomonas_eusti | 31.00 | 0.00 |
| TRINITY_XP_0228 | Methyltr  | Ostreococcus_tauri  | 31.00 | 0.00 |
| TRINITY_XP_0243 | choline   | Physcomitrella_pate | 31.00 | 0.00 |
| TRINITY_XP_0218 | EVI5-li   | Carica_papaya       | 31.00 | 0.00 |
| TRINITY_KXZ5265 | hypothet  | Gonium_pectorale    | 31.00 | 0.00 |
| TRINITY_XP_0239 | (probable | Quercus_suber       | 31.00 | 0.00 |
| TRINITY_GAX7831 | (hypothet | Chlamydomonas_eusti | 31.00 | 0.00 |
| TRINITY_XP_0202 | inositol  | Asparagus_officinal | 31.00 | 0.00 |
| TRINITY_XP_0016 | predict   | Chlamydomonas_reinh | 31.00 | 0.00 |
| TRINITY_XP_0239 | (cell di  | Quercus_suber       | 31.00 | 0.00 |
| TRINITY_EFJ1130 | (hypothet | Selaginella_moellen | 31.00 | 0.00 |
| TRINITY_XP_0041 | PREDICTE  | Cucumis_sativus     | 31.00 | 0.00 |
| TRINITY_PNW7580 | (hypothet | Chlamydomonas_reinh | 31.00 | 0.00 |
| TRINITY_PNH1040 | putative  | Tetrabaena_socialis | 31.00 | 0.00 |
| TRINITY_GAX8125 | hypothet  | Chlamydomonas_eusti | 31.00 | 0    |
| TRINITY_XP_0243 | (gamma-g  | Physcomitrella_pate | 31.00 | 0.00 |
| TRINITY_GAX7964 | hypothet  | Chlamydomonas_eusti | 31.00 | 0.00 |
| TRINITY_RZC0606 | Sister    | Glycine_soja        | 30.90 | 0.00 |
| TRINITY_XP_0025 | protein   | Ricinus_communis    | 30.90 | 0.00 |
| TRINITY_XP_0238 | ribonucl  | Quercus_suber       | 30.90 | 0.00 |
| TRINITY_PNH1209 | putative  | Tetrabaena_socialis | 30.90 | 0.00 |
| TRINITY_XP_0202 | putative  | Cajanus_cajan       | 30.90 | 0.00 |
| TRINITY_XP_0165 | PREDICTE  | Capsicum_annuum     | 30.90 | 0.00 |
| TRINITY_XP_0043 | (PREDICTE | Fragaria_vesca      | 30.90 | 0.00 |
| TRINITY_RWR9599 | exosome   | Cinnamomum_micranth | 30.90 | 0.00 |
| TRINITY_XP_0243 | phosphat  | Physcomitrella_pate | 30.90 | 0.00 |
| TRINITY_XP_0239 | (probable | Quercus_suber       | 30.90 | 0.00 |
| TRINITY_GAQ7773 | Leishmar  | Klebsormidium_niten | 30.90 | 0.00 |
| TRINITY_XP_0104 | PREDICTE  | Camelina_sativa     | 30.90 | 0.00 |
| TRINITY_XP_0228 | S15/NS1,  | Ostreococcus_tauri  | 30.90 | 0.00 |
| TRINITY_XP_0228 | guanine   | Olea_europaea       | 30.90 | 0.00 |
| TRINITY_KQK1835 | hypothet  | Brachypodium_distac | 30.90 | 0.00 |
| TRINITY_RVW3952 | (ABC trar | Vitis_vinifera      | 30.90 | 0.00 |
| TRINITY_XP_0042 | ATP-depe  | Solanum_lycopersicu | 30.90 | 0.00 |
| TRINITY_XP_0238 | ergothic  | Quercus_suber       | 30.90 | 0.00 |
| TRINITY_XP_0243 | (protein  | Physcomitrella_pate | 30.90 | 0.00 |
| TRINITY_GAX7694 | hypothet  | Chlamydomonas_eusti | 30.90 | 0.00 |
| TRINITY_PNW7677 | hypothet  | Chlamydomonas_reinh | 30.90 | 0.00 |
| TRINITY_XP_0244 | (WASH con | Physcomitrella_pate | 30.90 | 0.00 |
| TRINITY_EEF2376 | conserv   | Ricinus_communis    | 30.90 | 0.00 |

|                          |                               |       |      |
|--------------------------|-------------------------------|-------|------|
| TRINITY_XP_02391cAMP-dep | Quercus_suber                 | 30.90 | 0.00 |
| TRINITY_GBG6140          | hypothetChara_braunii         | 30.90 | 0.00 |
| TRINITY_GAX8215          | hypothetChlamydomonas_eusti   | 30.90 | 0.00 |
| TRINITY_GAX7701          | hypothetChlamydomonas_eusti   | 30.90 | 0.00 |
| TRINITY_XP_0244          | (von Will)Physcomitrella_pate | 30.90 | 0.00 |
| TRINITY_XP_0016          | predicteChlamydomonas_reinh   | 30.90 | 0.00 |
| TRINITY_XP_0066          | PREDICTEOryza_brachyantha     | 30.90 | 0.00 |
| TRINITY_PRW3927          | hypothetChlorella_sorokinia   | 30.90 | 0.00 |
| TRINITY_KDO3908          | hypothetCitrus_sinensis       | 30.90 | 0.00 |
| TRINITY_GAU2797          | hypothetTrifolium_subterran   | 30.90 | 0.00 |
| TRINITY_XP_0056          | EmopamiCoccomyxa_subellips    | 30.90 | 0.00 |
| TRINITY_XP_0110          | thioredeSesamum_indicum       | 30.90 | 0.00 |
| TRINITY_XP_0062          | sulfate Capsella_rubella      | 30.90 | 0.00 |
| TRINITY_GAX8297          | hypothetChlamydomonas_eusti   | 30.90 | 0.00 |
| TRINITY_XP_0030          | predicteMicromonas_pusilla    | 30.90 | 0.00 |
| TRINITY_XP_0056          | hypothetCoccomyxa_subellips   | 30.90 | 0.00 |
| TRINITY_EOY0820          | Purple eTheobroma_cacao       | 30.90 | 0.00 |
| TRINITY_OAE2524          | hypothetMarchantia_polymorp   | 30.90 | 0.00 |
| TRINITY_GAQ7842          | HypothetKlebsormidium_niten   | 30.90 | 0.00 |
| TRINITY_GAX7500          | hypothetChlamydomonas_eusti   | 30.90 | 0.00 |
| TRINITY_RXH9867          | hypothetMalus_domestica       | 30.90 | 0.00 |
| TRINITY_XP_0238          | vacuolarQuercus_suber         | 30.90 | 0.00 |
| TRINITY_GAX7545          | hypothetChlamydomonas_eusti   | 30.90 | 0.00 |
| TRINITY_XP_0056          | phosphatCoccomyxa_subellips   | 30.90 | 0.00 |
| TRINITY_PWA5677          | alpha/bArtemisia_annua        | 30.90 | 0.00 |
| TRINITY_XP_0239          | ATP-depQuercus_suber          | 30.90 | 0.00 |
| TRINITY_OAE1929          | hypothetMarchantia_polymorp   | 30.90 | 0.00 |
| TRINITY_XP_0029          | hypothetVolvox_carteri        | 30.90 | 0.00 |
| TRINITY_GAX8545          | hypothetChlamydomonas_eusti   | 30.90 | 0.00 |
| TRINITY_PNH0198          | Ankyrin-Tetrabaena_socialis   | 30.90 | 0.00 |
| TRINITY_KXZ4402          | hypothetGonium_pectorale      | 30.90 | 0.00 |
| TRINITY_PNW8070          | hypothetChlamydomonas_reinh   | 30.90 | 0.00 |
| TRINITY_GAX8068          | hypothetChlamydomonas_eusti   | 30.80 | 0.00 |
| TRINITY_XP_0243          | quinone Physcomitrella_pate   | 30.80 | 0.00 |
| TRINITY_XP_0030          | predicteMicromonas_pusilla    | 30.80 | 0.00 |
| TRINITY_OEL2227          | hypothetDichanthelium_oligo   | 30.80 | 0.00 |
| TRINITY_KMZ6794          | hypothetZostera_marina        | 30.80 | 0.00 |
| TRINITY_XP_0264          | ultravivPapaver_somniferum    | 30.80 | 0.00 |
| TRINITY_EPS5984          | hypothetGenlisea_aurea        | 30.80 | 0.00 |
| TRINITY_XP_0030          | predicteMicromonas_pusilla    | 30.80 | 0.00 |
| TRINITY_XP_0192          | PREDICTINicotiana_attenuata   | 30.80 | 0.00 |
| TRINITY_EPS6671          | hypothetGenlisea_aurea        | 30.80 | 0.00 |
| TRINITY_XP_0228          | UbiquitiOstreococcus_tauri    | 30.80 | 0.00 |
| TRINITY_OMP0244          | hypothetCorchorus_olitorius   | 30.80 | 0.00 |
| TRINITY_XP_0104          | PREDICTICamelina_sativa       | 30.80 | 0.00 |
| TRINITY_GAX7606          | hypothetChlamydomonas_eusti   | 30.80 | 0.00 |
| TRINITY_XP_0049          | (EKC/KEO)Setaria_italica      | 30.80 | 0.00 |
| TRINITY_XP_0096          | PREDICTINicotiana_tomentosi   | 30.80 | 0.00 |
| TRINITY_XP_0239          | (unchara)Quercus_suber        | 30.80 | 0.00 |
| TRINITY_RWR8397          | lysine-eCinnamomum_micranth   | 30.80 | 0.00 |
| TRINITY_XP_0155          | (unchara)Ricinus_communis     | 30.80 | 0.00 |
| TRINITY_PHT8468          | Serpin-2Capsicum_annuum       | 30.80 | 0.00 |
| TRINITY_GAX8523          | hypothetChlamydomonas_eusti   | 30.80 | 0.00 |
| TRINITY_GAX7375          | hypothetChlamydomonas_eusti   | 30.80 | 0.00 |
| TRINITY_PRW5855          | (DUF21 d)Chlorella_sorokinia  | 30.80 | 0.00 |
| TRINITY_XP_0056          | DnaJ-donCoccomyxa_subellips   | 30.80 | 0.00 |
| TRINITY_GAX7818          | hypothetChlamydomonas_eusti   | 30.80 | 0.00 |
| TRINITY_XP_0083          | PREDICTIMalus_domestica       | 30.80 | 0.00 |
| TRINITY_XP_0205          | immune-ePhalaenopsis_equest   | 30.80 | 0.00 |
| TRINITY_GBF9210          | hypothetRaphidocelis_subcap   | 30.80 | 0.00 |
| TRINITY_PTQ4072          | hypothetMarchantia_polymorp   | 30.80 | 0.00 |
| TRINITY_GAQ8290          | hypothetKlebsormidium_niten   | 30.80 | 0.00 |
| TRINITY_XP_0184          | PREDICTIRaphanus_sativus      | 30.80 | 0.00 |
| TRINITY_KXZ5395          | hypothetGonium_pectorale      | 30.80 | 0.00 |
| TRINITY_GAX7516          | hypothetChlamydomonas_eusti   | 30.80 | 0.00 |
| TRINITY_KXZ4302          | hypothetGonium_pectorale      | 30.80 | 0.00 |

|                  |            |                        |       |      |
|------------------|------------|------------------------|-------|------|
| TRINITY_GAQ79217 | putative   | Klebsormidium_niten    | 30.80 | 0.00 |
| TRINITY_PIM99944 | Protein    | Handroanthus_impeti    | 30.80 | 0.00 |
| TRINITY_AAV90623 | Rab7       | [C]Cenchrus_americanus | 30.80 | 0.00 |
| TRINITY_RWR85093 | phospho    | Cinnamomum_micranth    | 30.80 | 0.00 |
| TRINITY_XP_00243 | structur   | Sorghum_bicolor        | 30.80 | 0.00 |
| TRINITY_XP_00295 | hypothet   | Volvox_carteri         | 30.80 | 0.00 |
| TRINITY_KDD76966 | Proline    | Helicosporidium_sp.    | 30.80 | 0.00 |
| TRINITY_PKA57388 | hypothet   | Apostasia_shenzheni    | 30.80 | 0.00 |
| TRINITY_PNW77978 | hypothet   | Chlamydomonas_reinh    | 30.80 | 0.00 |
| TRINITY_RAL44676 | hypothet   | Cuscuta_australis      | 30.80 | 0.00 |
| TRINITY_NP_00127 | uncharac   | Glycine_max            | 30.80 | 0.00 |
| TRINITY_XP_01390 | (glycosyl) | Monoraphidium_negle    | 30.80 | 0.00 |
| TRINITY_PKA49277 | hypothet   | Apostasia_shenzheni    | 30.80 | 0.00 |
| TRINITY_GAQ92802 | hypothet   | Klebsormidium_niten    | 30.80 | 0.00 |
| TRINITY_XP_00250 | (predicte  | Micromonas_commoda     | 30.80 | 0.00 |
| TRINITY_XP_02453 | enoyl-     | [a]Selaginella_moellen | 30.70 | 0.00 |
| TRINITY_XP_02198 | CBL-inte   | Helianthus_annuus      | 30.70 | 0.00 |
| TRINITY_OAE25895 | hypothet   | Marchantia_polymorp    | 30.70 | 0.00 |
| TRINITY_XP_02292 | protein    | Cucurbita_moschata     | 30.70 | 0.00 |
| TRINITY_XP_02059 | serine/    | [a]Phalaenopsis_equest | 30.70 | 0.00 |
| TRINITY_PWA42002 | Sodium/    | [c]Artemisia_annua     | 30.70 | 0.00 |
| TRINITY_EFJ13952 | hypothet   | Selaginella_moellen    | 30.70 | 0.00 |
| TRINITY_XP_01364 | probable   | Brassica_napus         | 30.70 | 0.00 |
| TRINITY_RRT74059 | hypothet   | Ensete_ventricosum     | 30.70 | 0.00 |
| TRINITY_KDD74714 | subtila    | Helicosporidium_sp.    | 30.70 | 0.00 |
| TRINITY_PTQ33525 | hypothet   | Marchantia_polymorp    | 30.70 | 0.00 |
| TRINITY_GAX80737 | hypothet   | Chlamydomonas_eusti    | 30.70 | 0.00 |
| TRINITY_KXZ45094 | hypothet   | Gonium_pectorale       | 30.70 | 0.00 |
| TRINITY_XP_00246 | coatome    | Sorghum_bicolor        | 30.70 | 0.00 |
| TRINITY_XP_02389 | uncharac   | Quercus_suber          | 30.70 | 0.00 |
| TRINITY_KZV49385 | hypothet   | Dorcoceras_hygromet    | 30.70 | 0.00 |
| TRINITY_GAX74187 | hypothet   | Chlamydomonas_eusti    | 30.70 | 0.00 |
| TRINITY_GAQ81904 | SMT3/SUM   | Klebsormidium_niten    | 30.70 | 0.00 |
| TRINITY_GAX82254 | hypothet   | Chlamydomonas_eusti    | 30.70 | 0.00 |
| TRINITY_GBG59877 | hypothet   | Chara_braunii          | 30.70 | 0.00 |
| TRINITY_PNW86393 | hypothet   | Chlamydomonas_reinh    | 30.70 | 0.00 |
| TRINITY_GAQ86454 | hypothet   | Klebsormidium_niten    | 30.70 | 0.00 |
| TRINITY_XP_02388 | uncharac   | Quercus_suber          | 30.70 | 0.00 |
| TRINITY_XP_00169 | (predicte  | Chlamydomonas_reinh    | 30.70 | 0.00 |
| TRINITY_XP_02018 | patatin-   | Aegilops_tauschii      | 30.70 | 0.00 |
| TRINITY_XP_00585 | hypothet   | Chlorella_variabili    | 30.70 | 0.00 |
| TRINITY_OAE35335 | hypothet   | Marchantia_polymorp    | 30.70 | 0.00 |
| TRINITY_XP_01763 | PREDICTE   | Gossypium_arboreum     | 30.70 | 0.00 |
| TRINITY_PSC69212 | FAD-lin    | Micractinium_conduc    | 30.70 | 0.00 |
| TRINITY_XP_02129 | serine/    | tHerrania_umbratica    | 30.70 | 0.00 |
| TRINITY_KXZ43539 | hypothet   | Gonium_pectorale       | 30.70 | 0.00 |
| TRINITY_XP_01006 | PREDICTE   | Eucalyptus_grandis     | 30.70 | 0.00 |
| TRINITY_XP_00497 | aminope    | [x]Setaria_italica     | 30.70 | 0.00 |
| TRINITY_BAK05241 | (predicte  | Hordeum_vulgare        | 30.70 | 0.00 |
| TRINITY_XP_00450 | (protein   | Cicer_arietinum        | 30.70 | 0.00 |
| TRINITY_XP_02183 | branchp    | [c]Spinacia_oleracea   | 30.70 | 0.00 |
| TRINITY_XP_02283 | ABC trar   | Ostreococcus_tauri     | 30.70 | 0.00 |
| TRINITY_XP_00305 | (predicte  | Micromonas_pusilla     | 30.70 | 0.00 |
| TRINITY_PRW33222 | coatome    | Chlorella_sorokinia    | 30.70 | 0.00 |
| TRINITY_PWA98308 | Helicas    | [c]Artemisia_annua     | 30.70 | 0.00 |
| TRINITY_GBF90459 | peptida    | [c]Raphidocelis_subcap | 30.70 | 0.00 |
| TRINITY_XP_00295 | hypothet   | Volvox_carteri         | 30.70 | 0.00 |
| TRINITY_GAX73923 | hypothet   | Chlamydomonas_eusti    | 30.70 | 0.00 |
| TRINITY_XP_00169 | (predicte  | Chlamydomonas_reinh    | 30.70 | 0.00 |
| TRINITY_OMO73030 | (Serine    | [f]Corchorus_olitorius | 30.70 | 0.00 |
| TRINITY_XP_01673 | PREDICTE   | Gossypium_hirsutum     | 30.70 | 0.00 |
| TRINITY_GAQ84564 | type I     | [i]Klebsormidium_niten | 30.70 | 0.00 |
| TRINITY_XP_02390 | (vacuola   | Quercus_suber          | 30.70 | 0.00 |
| TRINITY_XP_02390 | (vacuola   | Quercus_suber          | 30.70 | 0.00 |
| TRINITY_XP_00169 | (predicte  | Chlamydomonas_reinh    | 30.70 | 0.00 |
| TRINITY_GAX75359 | hypothet   | Chlamydomonas_eusti    | 30.70 | 0.00 |

|                 |           |                     |       |      |
|-----------------|-----------|---------------------|-------|------|
| TRINITY_PLY7174 | hypothet  | Lactuca_sativa      | 30.70 | 0.00 |
| TRINITY_KXZ4873 | hypothet  | Gonium_pectorale    | 30.70 | 0.00 |
| TRINITY_XP_0244 | (BTB/POZ  | Physcomitrella_pate | 30.70 | 0.00 |
| TRINITY_GAX7636 | hypothet  | Chlamydomonas_eusti | 30.70 | 0.00 |
| TRINITY_KXZ4169 | hypothet  | Gonium_pectorale    | 30.70 | 0.00 |
| TRINITY_GAX8155 | hypothet  | Chlamydomonas_eusti | 30.70 | 0.00 |
| TRINITY_XP_0279 | peroxis   | Vigna_unguiculata   | 30.70 | 0.00 |
| TRINITY_GAX7484 | hypothet  | Chlamydomonas_eusti | 30.70 | 0.00 |
| TRINITY_GAX7726 | hypothet  | Chlamydomonas_eusti | 30.70 | 0.00 |
| TRINITY_XP_0239 | uncharac  | Quercus_suber       | 30.70 | 0.00 |
| TRINITY_XP_0029 | hypothet  | Volvox_carteri      | 30.70 | 0.00 |
| TRINITY_XP_0106 | PREDICTI  | Beta_vulgaris       | 30.70 | 0.00 |
| TRINITY_XP_0139 | hypothet  | Monoraphidium_negle | 30.70 | 0.00 |
| TRINITY_PNH0781 | putativ   | Tetrabaena_socialis | 30.70 | 0.00 |
| TRINITY_XP_0094 | (PREDICTI | Musa_acuminata      | 30.60 | 0.00 |
| TRINITY_XP_0056 | laminin   | Coccomyxa_subellips | 30.60 | 0.00 |
| TRINITY_XP_0025 | (predict  | Micromonas_commoda  | 30.60 | 0.00 |
| TRINITY_BAA9535 | S-like    | Volvox_carteri      | 30.60 | 0.00 |
| TRINITY_GAX7948 | hypothet  | Chlamydomonas_eusti | 30.60 | 0.00 |
| TRINITY_OTF9704 | putativ   | Helianthus_annuus   | 30.60 | 0.00 |
| TRINITY_XP_0238 | cell div  | Quercus_suber       | 30.60 | 0.00 |
| TRINITY_XP_0100 | PREDICTI  | Eucalyptus_grandis  | 30.60 | 0.00 |
| TRINITY_GAQ8111 | Zincin-]  | Klebsormidium_niten | 30.60 | 0.00 |
| TRINITY_GAQ8751 | hypothet  | Klebsormidium_niten | 30.60 | 0.00 |
| TRINITY_XP_0227 | coatome   | Durio_zibethinus    | 30.60 | 0.00 |
| TRINITY_XP_0056 | TBC-dom   | Coccomyxa_subellips | 30.60 | 0.00 |
| TRINITY_XP_0167 | PREDICTI  | Gossypium_hirsutum  | 30.60 | 0.00 |
| TRINITY_RAL5156 | hypothet  | Cuscuta_australis   | 30.60 | 0.00 |
| TRINITY_XP_0237 | cytochr   | Lactuca_sativa      | 30.60 | 0.00 |
| TRINITY_NP_0011 | putativ   | Zea_mays            | 30.60 | 0.00 |
| TRINITY_OAE2817 | hypothet  | Marchantia_polymorp | 30.60 | 0.00 |
| TRINITY_XP_0139 | hypothet  | Monoraphidium_negle | 30.60 | 0.00 |
| TRINITY_XP_0202 | WD repe   | Cajanus_cajan       | 30.60 | 0.00 |
| TRINITY_XP_0042 | PREDICTI  | Fragaria_vesca      | 30.60 | 0.00 |
| TRINITY_PRW5883 | L-cystei  | Chlorella_sorokinia | 30.60 | 0.00 |
| TRINITY_GAX7631 | hypothet  | Chlamydomonas_eusti | 30.60 | 0.00 |
| TRINITY_KXZ4638 | hypothet  | Gonium_pectorale    | 30.60 | 0.00 |
| TRINITY_AJR1677 | defecti   | Petunia_integrifoli | 30.60 | 0.00 |
| TRINITY_GAY3472 | hypothet  | Citrus_unshiu       | 30.60 | 0.00 |
| TRINITY_XP_0263 | ribonucl  | Papaver_somniferum  | 30.60 | 0.00 |
| TRINITY_XP_0087 | probabl   | Phoenix_dactylifera | 30.60 | 0.00 |
| TRINITY_GAX7416 | hypothet  | Chlamydomonas_eusti | 30.60 | 0.00 |
| TRINITY_PNW7065 | hypothet  | Chlamydomonas_reinh | 30.60 | 0.00 |
| TRINITY_OAE1974 | hypothet  | Marchantia_polymorp | 30.60 | 0.00 |
| TRINITY_XP_0216 | pumilio   | Hevea_brasiliensis  | 30.60 | 0.00 |
| TRINITY_XP_0216 | uncharac  | Hevea_brasiliensis  | 30.60 | 0.00 |
| TRINITY_GAX7644 | hypothet  | Chlamydomonas_eusti | 30.60 | 0.00 |
| TRINITY_XP_0084 | PREDICTI  | Cucumis_melo        | 30.60 | 0.00 |
| TRINITY_XP_0244 | (von Will | Physcomitrella_pate | 30.60 | 0.00 |
| TRINITY_BAK0109 | predict   | Hordeum_vulgare     | 30.60 | 0.00 |
| TRINITY_GAX7634 | hypothet  | Chlamydomonas_eusti | 30.60 | 0.00 |
| TRINITY_GAX7968 | hypothet  | Chlamydomonas_eusti | 30.60 | 0.00 |
| TRINITY_XP_0030 | Aminoac   | Ostreococcus_tauri  | 30.60 | 0.00 |
| TRINITY_XP_0219 | serpin-   | Helianthus_annuus   | 30.60 | 0.00 |
| TRINITY_XP_0238 | uncharac  | Quercus_suber       | 30.60 | 0.00 |
| TRINITY_XP_0042 | probabl   | Solanum_lycopersicu | 30.60 | 0.00 |
| TRINITY_XP_0238 | uncharac  | Quercus_suber       | 30.60 | 0.00 |
| TRINITY_PNW7631 | hypothet  | Chlamydomonas_reinh | 30.60 | 0.00 |
| TRINITY_GAX7950 | hypothet  | Chlamydomonas_eusti | 30.60 | 0.00 |
| TRINITY_RYR5998 | hypothet  | Arachis_hypogaea    | 30.60 | 0.00 |
| TRINITY_XP_0024 | probabl   | Sorghum_bicolor     | 30.60 | 0.00 |
| TRINITY_GAX8046 | hypothet  | Chlamydomonas_eusti | 30.60 | 0.00 |
| TRINITY_XP_0120 | actin [   | Jatropha_curcas     | 30.60 | 0.00 |
| TRINITY_XP_0244 | (E3 ubiq  | Physcomitrella_pate | 30.60 | 0.00 |
| TRINITY_XP_0016 | seryl-t   | Chlamydomonas_reinh | 30.60 | 0.00 |
| TRINITY_XP_0156 | PREDICTI  | Oryza_brachyantha   | 30.60 | 0.00 |

|                  |          |                     |       |      |
|------------------|----------|---------------------|-------|------|
| TRINITY_PSC76727 | Extende  | Micractinium_conduc | 30.60 | 0.00 |
| TRINITY_PIA26155 | hypothet | Aquilegia_coerulea  | 30.60 | 0.00 |
| TRINITY_XP_00169 | predicte | Chlamydomonas_reinh | 30.60 | 0.00 |
| TRINITY_GAX83010 | hypothet | Chlamydomonas_eusti | 30.60 | 0.00 |
| TRINITY_XP_02388 | vacuolar | Quercus_suber       | 30.60 | 0.00 |
| TRINITY_GAX80963 | hypothet | Chlamydomonas_eusti | 30.60 | 0.00 |
| TRINITY_XP_02645 | uncharac | Papaver_somniferum  | 30.50 | 0.00 |
| TRINITY_XP_01848 | PREDICTI | Raphanus_sativus    | 30.50 | 0.00 |
| TRINITY_GAQ84320 | UDP-gal  | Klebsormidium_niten | 30.50 | 0.00 |
| TRINITY_XP_01107 | WD repe  | Sesamum_indicum     | 30.50 | 0.00 |
| TRINITY_XP_02188 | protein  | Carica_papaya       | 30.50 | 0.00 |
| TRINITY_PIN04662 | Protein  | Handroanthus_impeti | 30.50 | 0.00 |
| TRINITY_XP_00498 | dual sp  | Setaria_italica     | 30.50 | 0.00 |
| TRINITY_XP_00639 | serine/t | Eutrema_salsugineur | 30.50 | 0.00 |
| TRINITY_GBG83722 | hypothet | Chara_braunii       | 30.50 | 0.00 |
| TRINITY_BAB71817 | hypothet | Marchantia_polymorp | 30.50 | 0.00 |
| TRINITY_XP_02492 | integrat | Ziziphus_jujuba     | 30.50 | 0.00 |
| TRINITY_XP_01069 | PREDICTI | Beta_vulgaris       | 30.50 | 0.00 |
| TRINITY_XP_01919 | PREDICTI | Ipomoea_nil         | 30.50 | 0.00 |
| TRINITY_BAK01125 | predicte | Hordeum_vulgare     | 30.50 | 0.00 |
| TRINITY_GAX80979 | hypothet | Chlamydomonas_eusti | 30.50 | 0.00 |
| TRINITY_BAU71124 | solute c | Parachlorella_kessl | 30.50 | 0.00 |
| TRINITY_XP_02391 | coronin- | Quercus_suber       | 30.50 | 0.00 |
| TRINITY_BAK02006 | predicte | Hordeum_vulgare     | 30.50 | 0.00 |
| TRINITY_XP_00250 | predicte | Micromonas_commoda  | 30.50 | 0.00 |
| TRINITY_XP_00253 | gamma-g  | Ricinus_communis    | 30.50 | 0.00 |
| TRINITY_XP_01650 | PREDICTI | Nicotiana_tabacum   | 30.50 | 0.00 |
| TRINITY_KXZ43400 | hypothet | Gonium_pectorale    | 30.50 | 0.00 |
| TRINITY_PPD90356 | hypothet | Gossypium_barbadens | 30.50 | 0.00 |
| TRINITY_XP_00246 | polygal  | Sorghum_bicolor     | 30.50 | 0.00 |
| TRINITY_XP_01006 | PREDICTI | Eucalyptus_grandis  | 30.50 | 0.00 |
| TRINITY_XP_02438 | uncharac | Physcomitrella_pate | 30.50 | 0.00 |
| TRINITY_KZV42210 | Para-nit | Dorcoceras_hygromet | 30.50 | 0.00 |
| TRINITY_PSC73662 | glucose- | Micractinium_conduc | 30.50 | 0.00 |
| TRINITY_GAX73782 | hypothet | Chlamydomonas_eusti | 30.50 | 0.00 |
| TRINITY_XP_00295 | hypothet | Volvox_carteri      | 30.50 | 0.00 |
| TRINITY_XP_02185 | putative | Spinacia_oleracea   | 30.50 | 0.00 |
| TRINITY_XP_00584 | hypothet | Chlorella_variabili | 30.50 | 0.00 |
| TRINITY_XP_01093 | PREDICTI | Elaeis_guineensis   | 30.50 | 0.00 |
| TRINITY_XP_02011 | E3 ubiq  | Ananas_comosus      | 30.50 | 0.00 |
| TRINITY_XP_01564 | ER membr | Oryza_sativa        | 30.50 | 0.00 |
| TRINITY_XP_01109 | tubulin- | Sesamum_indicum     | 30.50 | 0.00 |
| TRINITY_PTQ31605 | hypothet | Marchantia_polymorp | 30.50 | 0.00 |
| TRINITY_XP_00495 | transcri | Setaria_italica     | 30.50 | 0.00 |
| TRINITY_XP_01721 | PREDICTI | Daucus_carota       | 30.50 | 0.00 |
| TRINITY_XP_00716 | hypothet | Phaseolus_vulgaris  | 30.50 | 0.00 |
| TRINITY_XP_02391 | uncharac | Quercus_suber       | 30.50 | 0.00 |
| TRINITY_RQL76224 | hypothet | Brassica_cretica    | 30.50 | 0.00 |
| TRINITY_AAK63209 | C2H2 zir | Zea_mays            | 30.50 | 0.00 |
| TRINITY_XP_00169 | predicte | Chlamydomonas_reinh | 30.50 | 0.00 |
| TRINITY_OAE31917 | hypothet | Marchantia_polymorp | 30.50 | 0.00 |
| TRINITY_GBF96889 | hypothet | Raphidocelis_subcap | 30.50 | 0.00 |
| TRINITY_XP_00250 | predicte | Micromonas_commoda  | 30.50 | 0.00 |
| TRINITY_GBG60253 | hypothet | Chara_braunii       | 30.40 | 0.00 |
| TRINITY_XP_02437 | uncharac | Physcomitrella_pate | 30.40 | 0.00 |
| TRINITY_XP_00306 | predicte | Micromonas_pusilla  | 30.40 | 0.00 |
| TRINITY_XP_02284 | serine/t | Olea_europaea       | 30.40 | 0.00 |
| TRINITY_GAX84453 | hypothet | Chlamydomonas_eusti | 30.40 | 0.00 |
| TRINITY_XP_00288 | probable | Arabidopsis_lyrata  | 30.40 | 0.00 |
| TRINITY_GAQ80473 | hypothet | Klebsormidium_niten | 30.40 | 0.00 |
| TRINITY_GAV86171 | Metallox | Cephalotus_follicul | 30.40 | 0.00 |
| TRINITY_XP_02185 | peroxis  | Spinacia_oleracea   | 30.40 | 0.00 |
| TRINITY_XP_00169 | predicte | Chlamydomonas_reinh | 30.40 | 0.00 |
| TRINITY_PWA98374 | PDI-like | Artemisia_annua     | 30.40 | 0.00 |
| TRINITY_OAO89826 | RMV1 [A  | Arabidopsis_thalian | 30.40 | 0.00 |
| TRINITY_GAX79878 | hypothet | Chlamydomonas_eusti | 30.40 | 0.00 |



|                                              |       |      |
|----------------------------------------------|-------|------|
| TRINITY_GAX7878(hypothetChlamydomonas_eusti  | 30.40 | 0.00 |
| TRINITY_XP_0238(vacuolarQuercus_suber        | 30.40 | 0.00 |
| TRINITY_XP_0029(ultravioSelaginella_moellen  | 30.40 | 0.00 |
| TRINITY_RID5249(hypothetBrassica_rapa        | 30.40 | 0.00 |
| TRINITY_XP_0094(PREDICTIMusa_acuminata       | 30.40 | 0.00 |
| TRINITY_XP_0239(LOW QUAIQuercus_suber        | 30.40 | 0.00 |
| TRINITY_XP_0238(uncharacQuercus_suber        | 30.40 | 0.00 |
| TRINITY_RAL4405(hypothetCuscuta_australis    | 30.40 | 0.00 |
| TRINITY_XP_0120(5'-nuclεJatropha_curcas      | 30.40 | 0.00 |
| TRINITY_GAQ8632(major fεKlebsormidium_niten  | 30.40 | 0.00 |
| TRINITY_KXZ5329(hypothetGonium_pectorale     | 30.40 | 0.00 |
| TRINITY_KEH4009(metalloεMedicago_truncatula  | 30.40 | 0.00 |
| TRINITY_XP_0109(PREDICTIElaeis_guineensis    | 30.40 | 0.00 |
| TRINITY_PWA9587GalactosArtemisia_annua       | 30.40 | 0.00 |
| TRINITY_OEL2357(Kinesin-Dichantheium_oligo   | 30.40 | 0.00 |
| TRINITY_XP_0043(PREDICTIFragaria-vesca       | 30.40 | 0.00 |
| TRINITY_XP_0245(uncharacSelaginella_moellen  | 30.40 | 0.00 |
| TRINITY_XP_0239(beclin-1Quercus_suber        | 30.40 | 0.00 |
| TRINITY_XP_0238(5'-nuclεQuercus_suber        | 30.40 | 0.00 |
| TRINITY_GAX7839(hypothetChlamydomonas_eusti  | 30.40 | 0.00 |
| TRINITY_PLY6867(hypothetLactuca_sativa       | 30.40 | 0.00 |
| TRINITY_NP_0392(NADH deMarchantia_paleacea   | 30.40 | 0.00 |
| TRINITY_ERN1625(hypothetAmborella_trichopod  | 30.40 | 0.00 |
| TRINITY_GAX8429(hypothetChlamydomonas_eusti  | 30.40 | 0.00 |
| TRINITY_PRW2110(Phospho]Chlorella_sorokinia  | 30.40 | 0.00 |
| TRINITY_EFJ1978(hypothetSelaginella_moellen  | 30.40 | 0.00 |
| TRINITY_BAJ8945(predictεHordeum_vulgare      | 30.40 | 0.00 |
| TRINITY_GAX8292(hypothetChlamydomonas_eusti  | 30.40 | 0.00 |
| TRINITY_GAX7418(hypothetChlamydomonas_eusti  | 30.40 | 0.00 |
| TRINITY_KYP7030(Signal tCajanus_cajan        | 30.40 | 0.00 |
| TRINITY_PNW8195(hypothetChlamydomonas_reinh  | 30.40 | 0.00 |
| TRINITY_XP_0029(hypothetVolvox_carteri       | 30.40 | 0.00 |
| TRINITY_GBG7364(hypothetChara_braunii        | 30.40 | 0.00 |
| TRINITY_BAK0112(predictεHordeum_vulgare      | 30.40 | 0.00 |
| TRINITY_XP_0124(PREDICTIGossypium_raimondii  | 30.40 | 0.00 |
| TRINITY_PNW8309(hypothetChlamydomonas_reinh  | 30.40 | 0.00 |
| TRINITY_XP_0239(uncharacQuercus_suber        | 30.40 | 0.00 |
| TRINITY_GAX8362(hypothetChlamydomonas_eusti  | 30.40 | 0.00 |
| TRINITY_KMZ7153(putativeZostera_marina       | 30.40 | 0.00 |
| TRINITY_XP_0124(PREDICTIGossypium_raimondii  | 30.40 | 0.00 |
| TRINITY_GAX8277(hypothetChlamydomonas_eusti  | 30.40 | 0.00 |
| TRINITY_XP_0024(vacuolarSorghum_bicolor      | 30.40 | 0.00 |
| TRINITY_PWA5516(cytochrεArtemisia_annua      | 30.40 | 0.00 |
| TRINITY_PSC6949(MagnesiεMicractinium_conduc  | 30.40 | 0.00 |
| TRINITY_GAX7480(hypothetChlamydomonas_eusti  | 30.40 | 0.00 |
| TRINITY_PIN2036(Acyl-CoAHandroanthus_impeti  | 30.30 | 0.00 |
| TRINITY_RZC3030(Alpha-mεGlycine_soja         | 30.30 | 0.00 |
| TRINITY_AXR8532(UFD2 [SεSanionia_uncinata    | 30.30 | 0.00 |
| TRINITY_XP_0238(ceramideQuercus_suber        | 30.30 | 0.00 |
| TRINITY_ERM9799(hypothetAmborella_trichopod  | 30.30 | 0.00 |
| TRINITY_XP_0016(peptidy]Chlamydomonas_reinh  | 30.30 | 0.00 |
| TRINITY_GBF8822(cystathiRaphidocelis_subcap  | 30.30 | 0.00 |
| TRINITY_XP_0093(PREDICTIPyrus_x_bretschneid  | 30.30 | 0.00 |
| TRINITY_XP_0064(uncharacCitrus_sinensis      | 30.30 | 0.00 |
| TRINITY_XP_0237(alkylateLactuca_sativa       | 30.30 | 0.00 |
| TRINITY_XP_0239(rRNA metQuercus_suber        | 30.30 | 0.00 |
| TRINITY_XP_0166(PREDICTIPrunus_mume          | 30.30 | 0.00 |
| TRINITY_GAY5734(hypothetCitrus_unshiu        | 30.30 | 0.00 |
| TRINITY_XP_0106(PREDICTIBeta_vulgaris        | 30.30 | 0.00 |
| TRINITY_GAQ8511(hypothetKlebsormidium_niten  | 30.30 | 0.00 |
| TRINITY_XP_0093(PREDICTIPyrus_x_bretschneid  | 30.30 | 0.00 |
| TRINITY_XP_0029(hypothetVolvox_carteri       | 30.30 | 0.00 |
| TRINITY_PRW4511(rRNA pseuChlorella_sorokinia | 30.30 | 0.00 |
| TRINITY_GAX8276(hypothetChlamydomonas_eusti  | 30.30 | 0.00 |
| TRINITY_XP_0042(phosphoεSolanum_lycopersicu  | 30.30 | 0.00 |
| TRINITY_KXZ5120(hypothetGonium_pectorale     | 30.30 | 0.00 |

|                  |          |                     |       |      |
|------------------|----------|---------------------|-------|------|
| TRINITY_XP_00497 | protein  | Setaria_italica     | 30.30 | 0.00 |
| TRINITY_GAX7977  | hypothet | Chlamydomonas_eusti | 30.30 | 0.00 |
| TRINITY_XP_00294 | hypothet | Volvox_carteri      | 30.30 | 0.00 |
| TRINITY_RMZ5257  | hypothet | Auxenochlorella_pro | 30.30 | 0.00 |
| TRINITY_XP_00295 | hypothet | Volvox_carteri      | 30.30 | 0.00 |
| TRINITY_XP_00564 | hypothet | Coccomyxa_subellips | 30.30 | 0.00 |
| TRINITY_KFK4344  | hypothet | Arabis_alpina       | 30.30 | 0.00 |
| TRINITY_XP_0239  | indolean | Quercus_suber       | 30.30 | 0.00 |
| TRINITY_GAQ8852  | hypothet | Klebsormidium_niten | 30.30 | 0.00 |
| TRINITY_XP_00429 | PREDICTI | Fragaria-vesca      | 30.30 | 0.00 |
| TRINITY_XP_02438 | elongat  | Physcomitrella_pate | 30.30 | 0.00 |
| TRINITY_XP_01881 | PREDICTI | Juglans_regia       | 30.30 | 0.00 |
| TRINITY_XP_02027 | pathoger | Asparagus_officinal | 30.30 | 0.00 |
| TRINITY_KEH2760  | ACT-lik  | Medicago_truncatula | 30.30 | 0.00 |
| TRINITY_XP_01139 | putativ  | Auxenochlorella_pro | 30.30 | 0.00 |
| TRINITY_XP_00564 | hypothet | Coccomyxa_subellips | 30.30 | 0.00 |
| TRINITY_PNW7523  | hypothet | Chlamydomonas_reinh | 30.30 | 0.00 |
| TRINITY_PNY0885  | ribofla  | Trifolium_pratense  | 30.30 | 0.00 |
| TRINITY_KMZ7201  | Glyoxys  | Zostera_marina      | 30.30 | 0.00 |
| TRINITY_XP_0025  | resistar | Micromonas_commoda  | 30.30 | 0.00 |
| TRINITY_XP_02392 | probable | Quercus_suber       | 30.30 | 0.00 |
| TRINITY_XP_01942 | PREDICTI | Lupinus_angustifoli | 30.30 | 0.00 |
| TRINITY_XP_00294 | hypothet | Volvox_carteri      | 30.30 | 0.00 |
| TRINITY_KXZ46221 | hypothet | Gonium_pectorale    | 30.30 | 0.00 |
| TRINITY_GAX78062 | hypothet | Chlamydomonas_eusti | 30.30 | 0.00 |
| TRINITY_PNH0263  | hypothet | Tetrabaena_socialis | 30.30 | 0.00 |
| TRINITY_PTQ4197  | hypothet | Marchantia_polymorp | 30.30 | 0.00 |
| TRINITY_XP_00226 | PREDICTI | Vitis_vinifera      | 30.30 | 0.00 |
| TRINITY_XP_00565 | RabGAP/1 | Coccomyxa_subellips | 30.30 | 0.00 |
| TRINITY_XP_00169 | guanylat | Chlamydomonas_reinh | 30.30 | 0.00 |
| TRINITY_EEF2641  | lipid A  | Ricinus_communis    | 30.30 | 0.00 |
| TRINITY_XP_00644 | protein  | Citrus_clementina   | 30.30 | 0.00 |
| TRINITY_XP_02389 | oxyster  | Quercus_suber       | 30.30 | 0.00 |
| TRINITY_OAE2861  | hypothet | Marchantia_polymorp | 30.30 | 0.00 |
| TRINITY_GAX7266  | hypothet | Chlamydomonas_eusti | 30.30 | 0.00 |
| TRINITY_XP_00294 | hypothet | Volvox_carteri      | 30.30 | 0.00 |
| TRINITY_PRW1840  | vacuolar | Chlorella_sorokinia | 30.30 | 0.00 |
| TRINITY_KXZ4796  | hypothet | Gonium_pectorale    | 30.30 | 0.00 |
| TRINITY_GAX7905  | hypothet | Chlamydomonas_eusti | 30.30 | 0.00 |
| TRINITY_XP_0239  | dipeptic | Quercus_suber       | 30.20 | 0.00 |
| TRINITY_SAI7601  | ATP synt | Botryococcus_brauni | 30.20 | 0.00 |
| TRINITY_XP_00294 | hypothet | Volvox_carteri      | 30.20 | 0.00 |
| TRINITY_XP_00751 | mitochor | Bathycoccus_prasinc | 30.20 | 0.00 |
| TRINITY_XP_01048 | PREDICTI | Camelina_sativa     | 30.20 | 0.00 |
| TRINITY_PRW2090  | Oxidore  | Chlorella_sorokinia | 30.20 | 0.00 |
| TRINITY_XP_02058 | nuclear  | Phalaenopsis_equest | 30.20 | 0.00 |
| TRINITY_XP_02437 | unchara  | Physcomitrella_pate | 30.20 | 0.00 |
| TRINITY_GBF92971 | hypothet | Raphidocelis_subcap | 30.20 | 0.00 |
| TRINITY_XP_00634 | PREDICTI | Solanum_tuberosum   | 30.20 | 0.00 |
| TRINITY_XP_02732 | unchara  | Abrus_precatorius   | 30.20 | 0.00 |
| TRINITY_XP_02276 | CBL-int  | Durio_zibethinus    | 30.20 | 0.00 |
| TRINITY_XP_00495 | E3 ubiq  | Setaria_italica     | 30.20 | 0.00 |
| TRINITY_PON5157  | Glucosic | Parasponia_anderson | 30.20 | 0.00 |
| TRINITY_PRW4519  | carboxyl | Chlorella_sorokinia | 30.20 | 0.00 |
| TRINITY_PNW8555  | hypothet | Chlamydomonas_reinh | 30.20 | 0.00 |
| TRINITY_XP_02057 | ASC1-li  | Phalaenopsis_equest | 30.20 | 0.00 |
| TRINITY_GBG8386  | hypothet | Chara_braunii       | 30.20 | 0.00 |
| TRINITY_PON4598  | Cytoplas | Parasponia_anderson | 30.20 | 0.00 |
| TRINITY_XP_02711 | protein  | Coffea_arabica      | 30.20 | 0.00 |
| TRINITY_EFJ0959  | hypothet | Selaginella_moellen | 30.20 | 0.00 |
| TRINITY_XP_0017  | predict  | Chlamydomonas_reinh | 30.20 | 0.00 |
| TRINITY_KCW8113  | hypothet | Eucalyptus_grandis  | 30.20 | 0.00 |
| TRINITY_XP_00169 | predict  | Chlamydomonas_reinh | 30.20 | 0.00 |
| TRINITY_OMO75051 | hypothet | Corchorus_capsulari | 30.20 | 0.00 |
| TRINITY_PNW8810  | hypothet | Chlamydomonas_reinh | 30.20 | 0.00 |
| TRINITY_OAE2955  | hypothet | Marchantia_polymorp | 30.20 | 0.00 |

|                                              |       |      |
|----------------------------------------------|-------|------|
| TRINITY_GAX7485(hypothetChlamydomonas_eusti  | 30.20 | 0.00 |
| TRINITY_GAX8420(hypothetChlamydomonas_eusti  | 30.20 | 0.00 |
| TRINITY_PRW5855(lamidohecChlorella_sorokinia | 30.20 | 0.00 |
| TRINITY_XP_0100(PREDICTHEucalyptus_grandis   | 30.20 | 0.00 |
| TRINITY_KXZ4214(hypothetGonium_pectorale     | 30.20 | 0.00 |
| TRINITY_PNH1228(WW domajTetrabaena_socialis  | 30.20 | 0.00 |
| TRINITY_XP_0097(PREDICTINicotiana_sylvestri  | 30.20 | 0.00 |
| TRINITY_PNH0846(hypothetTetrabaena_socialis  | 30.20 | 0.00 |
| TRINITY_GBG7609(hypothetChara_braunii        | 30.20 | 0.00 |
| TRINITY_XP_0029(rRNA bicSelaginella_moellen  | 30.20 | 0.00 |
| TRINITY_KMZ7257(EukaryotZostera_marina       | 30.20 | 0.00 |
| TRINITY_XP_0068(F-box prAmborella_trichopod  | 30.20 | 0.00 |
| TRINITY_GAX7446(hypothetChlamydomonas_eusti  | 30.20 | 0.00 |
| TRINITY_OAE2275(hypothetMarchantia_polymorp  | 30.20 | 0.00 |
| TRINITY_PNW6984(hypothetChlamydomonas_reinh  | 30.20 | 0.00 |
| TRINITY_XP_0192(PREDICTINicotiana_attenuata  | 30.20 | 0.00 |
| TRINITY_GAQ8029(calcium-Klebsormidium_niten  | 30.20 | 0.00 |
| TRINITY_XP_0279(heat strVigna_unguiculata    | 30.20 | 0.00 |
| TRINITY_GAX7987(hypothetChlamydomonas_eusti  | 30.20 | 0.00 |
| TRINITY_GAX8495(hypothetChlamydomonas_eusti  | 30.20 | 0.00 |
| TRINITY_XP_0201(ALG-2 irAegilops_tauschii    | 30.20 | 0.00 |
| TRINITY_XP_0172(PREDICTIDaucus_carota        | 30.20 | 0.00 |
| TRINITY_XP_0029(hypothetVolvox_carteri       | 30.20 | 0.00 |
| TRINITY_KXZ4577(hypothetGonium_pectorale     | 30.20 | 0.00 |
| TRINITY_XP_0016(predicteChlamydomonas_reinh  | 30.20 | 0.00 |
| TRINITY_KZM9824(hypothetDaucus_carota        | 30.20 | 0.00 |
| TRINITY_XP_0106(PREDICTIBeta_vulgaris        | 30.20 | 0.00 |
| TRINITY_PNW8060(hypothetChlamydomonas_reinh  | 30.20 | 0.00 |
| TRINITY_GAX7768(hypothetChlamydomonas_eusti  | 30.20 | 0.00 |
| TRINITY_GAQ8542(PutativeKlebsormidium_niten  | 30.20 | 0.00 |
| TRINITY_GAX8259(hypothetChlamydomonas_eusti  | 30.20 | 0.00 |
| TRINITY_XP_0238(ankyrin Quercus_suber        | 30.20 | 0.00 |
| TRINITY_GAX7334(hypothetChlamydomonas_eusti  | 30.20 | 0.00 |
| TRINITY_GAQ9115(hypothetKlebsormidium_niten  | 30.20 | 0.00 |
| TRINITY_GAQ8825(hypothetKlebsormidium_niten  | 30.20 | 0.00 |
| TRINITY_XP_0238(DNA damQuercus_suber         | 30.20 | 0.00 |
| TRINITY_EFJ11981(hypothetSelaginella_moellen | 30.10 | 0.00 |
| TRINITY_PRW5686(NADPH:qrChlorella_sorokinia  | 30.10 | 0.00 |
| TRINITY_XP_0238(clusterQuercus_suber         | 30.10 | 0.00 |
| TRINITY_XP_0205(LOW QUAIPhalaenopsis_equest  | 30.10 | 0.00 |
| TRINITY_XP_0029(hypothetVolvox_carteri       | 30.10 | 0.00 |
| TRINITY_XP_0279(LOW QUAIVigna_unguiculata    | 30.10 | 0.00 |
| TRINITY_XP_0205(luncharaAmborella_trichopod  | 30.10 | 0.00 |
| TRINITY_OUS4211(hypothetOstreococcus_tauri   | 30.10 | 0.00 |
| TRINITY_XP_0194(PREDICTILupinus_angustifoli  | 30.10 | 0.00 |
| TRINITY_XP_0120(3-hydroJatropha_curcas       | 30.10 | 0.00 |
| TRINITY_OTF8549(putativeHelianthus_annuus    | 30.10 | 0.00 |
| TRINITY_EFJ2066(hypothetSelaginella_moellen  | 30.10 | 0.00 |
| TRINITY_OVA17621(WD40 rejMacleaya_cordata    | 30.10 | 0.00 |
| TRINITY_GAX7300(hypothetChlamydomonas_eusti  | 30.10 | 0.00 |
| TRINITY_XP_0097(PREDICTINicotiana_sylvestri  | 30.10 | 0.00 |
| TRINITY_KYP4756(DNA misnCajanus_cajan        | 30.10 | 0.00 |
| TRINITY_XP_0029(hypothetVolvox_carteri       | 30.10 | 0.00 |
| TRINITY_XP_0056(mitochorCoccomyxa_subellips  | 30.10 | 0.00 |
| TRINITY_KXZ4384(hypothetGonium_pectorale     | 30.10 | 0.00 |
| TRINITY_XP_0237(importirLactuca_sativa       | 30.10 | 0.00 |
| TRINITY_EFJ18204(hypothetSelaginella_moellen | 30.10 | 0.00 |
| TRINITY_XP_0191(PREDICTI Ipomoea_nil         | 30.10 | 0.00 |
| TRINITY_PSC7421(ubiquitiMicractinium_conduc  | 30.10 | 0.00 |
| TRINITY_GAX7381(hypothetChlamydomonas_eusti  | 30.10 | 0.00 |
| TRINITY_GAX8414(hypothetChlamydomonas_eusti  | 30.10 | 0.00 |
| TRINITY_XP_0082(PREDICTIPrunus_mume          | 30.10 | 0.00 |
| TRINITY_BAK0043(predicteHordeum_vulgare      | 30.10 | 0.00 |
| TRINITY_GAX7446(hypothetChlamydomonas_eusti  | 30.10 | 0.00 |
| TRINITY_RID7514(hypothetBrassica_rapa        | 30.10 | 0.00 |
| TRINITY_XP_0068(eukaryotAmborella_trichopod  | 30.10 | 0.00 |

|                  |          |                     |       |      |
|------------------|----------|---------------------|-------|------|
| TRINITY_XP_02375 | xanthoh  | Lactuca_sativa      | 30.10 | 0.00 |
| TRINITY_XP_02391 | uncharac | Quercus_suber       | 30.10 | 0.00 |
| TRINITY_RAL42474 | hypothet | Cuscuta_australis   | 30.10 | 0.00 |
| TRINITY_XP_00658 | tyrosine | Glycine_max         | 30.10 | 0.00 |
| TRINITY_XP_02390 | dynein   | Quercus_suber       | 30.10 | 0.00 |
| TRINITY_GAX78754 | hypothet | Chlamydomonas_eusti | 30.10 | 0.00 |
| TRINITY_PNW83528 | hypothet | Chlamydomonas_reinh | 30.10 | 0.00 |
| TRINITY_XP_01562 | mitochor | Oryza_sativa        | 30.10 | 0.00 |
| TRINITY_XP_00362 | uncharac | Medicago_truncatula | 30.10 | 0.00 |
| TRINITY_XP_00565 | galactos | Coccomyxa_subellips | 30.10 | 0.00 |
| TRINITY_GAX79307 | hypothet | Chlamydomonas_eusti | 30.10 | 0.00 |
| TRINITY_PNH04217 | Peroxisc | Tetrabaena_socialis | 30.10 | 0.00 |
| TRINITY_GAX77566 | hypothet | Chlamydomonas_eusti | 30.10 | 0.00 |
| TRINITY_GAX73472 | hypothet | Chlamydomonas_eusti | 30.10 | 0.00 |
| TRINITY_XP_00565 | 2-amino- | Coccomyxa_subellips | 30.10 | 0.00 |
| TRINITY_XP_00939 | PREDICTI | Musa_acuminata      | 30.10 | 0.00 |
| TRINITY_PSC68254 | putative | Micractinium_conduc | 30.10 | 0.00 |
| TRINITY_XP_01246 | PREDICTI | Gossypium_raimondii | 30.10 | 0.00 |
| TRINITY_XP_00976 | PREDICTI | Nicotiana_sylvestri | 30.10 | 0.00 |
| TRINITY_GAX81428 | hypothet | Chlamydomonas_eusti | 30.10 | 0.00 |
| TRINITY_GAX79960 | hypothet | Chlamydomonas_eusti | 30.10 | 0.00 |
| TRINITY_GAX72663 | hypothet | Chlamydomonas_eusti | 30.10 | 0.00 |
| TRINITY_GBF90051 | hypothet | Raphidocelis_subcap | 30.10 | 0.00 |
| TRINITY_PNH02682 | hypothet | Tetrabaena_socialis | 30.10 | 0.00 |
| TRINITY_PRW60866 | elongati | Chlorella_sorokinia | 30.00 | 0.00 |
| TRINITY_KXZ53950 | hypothet | Gonium_pectorale    | 30.00 | 0.00 |
| TRINITY_EFH51875 | BTB-POZ  | Arabidopsis_lyrata  | 30.00 | 0.00 |
| TRINITY_GBG64285 | hypothet | Chara_braunii       | 30.00 | 0.00 |
| TRINITY_XP_02026 | ultravic | Asparagus_officinal | 30.00 | 0.00 |
| TRINITY_PNR50839 | hypothet | Physcomitrella_pate | 30.00 | 0.00 |
| TRINITY_XP_02010 | ultravic | Ananas_comosus      | 30.00 | 0.00 |
| TRINITY_XP_00879 | uncharac | Phoenix_dactylifera | 30.00 | 0.00 |
| TRINITY_XP_02025 | arginyl- | Asparagus_officinal | 30.00 | 0.00 |
| TRINITY_PTQ35561 | hypothet | Marchantia_polymorp | 30.00 | 0.00 |
| TRINITY_XP_00170 | zinc-met | Chlamydomonas_reinh | 30.00 | 0.00 |
| TRINITY_EEC81236 | hypothet | Oryza_sativa        | 30.00 | 0.00 |
| TRINITY_GAQ89511 | hypothet | Klebsormidium_niten | 30.00 | 0.00 |
| TRINITY_XP_00305 | profilir | Micromonas_pusilla  | 30.00 | 0.00 |
| TRINITY_XP_00836 | PREDICTI | Malus_domestica     | 30.00 | 0.00 |
| TRINITY_GBF90269 | hypothet | Raphidocelis_subcap | 30.00 | 0.00 |
| TRINITY_GAQ77732 | Leishmar | Klebsormidium_niten | 30.00 | 0.00 |
| TRINITY_EPS73534 | calcium- | Genlisea_aurea      | 30.00 | 0.00 |
| TRINITY_XP_01389 | hypothet | Monoraphidium_negle | 30.00 | 0.00 |
| TRINITY_XP_01068 | PREDICTI | Beta_vulgaris       | 30.00 | 0.00 |
| TRINITY_GAQ81449 | hypothet | Klebsormidium_niten | 30.00 | 0.00 |
| TRINITY_XP_02436 | excitac  | Physcomitrella_pate | 30.00 | 0.00 |
| TRINITY_XP_00564 | hypothet | Coccomyxa_subellips | 30.00 | 0.00 |
| TRINITY_PSC75147 | general  | Micractinium_conduc | 30.00 | 0.00 |
| TRINITY_XP_01919 | PREDICTI | Ipomoea_nil         | 30.00 | 0.00 |
| TRINITY_XP_00170 | hypothet | Chlamydomonas_reinh | 30.00 | 0.00 |
| TRINITY_VDC89661 | unnamed  | Brassica_oleracea   | 30.00 | 0.00 |
| TRINITY_XP_00294 | hypothet | Volvox_carteri      | 30.00 | 0.00 |
| TRINITY_XP_00296 | replicat | Selaginella_moellen | 30.00 | 0.00 |
| TRINITY_XP_01449 | probable | Vigna_radiata       | 30.00 | 0.00 |
| TRINITY_PNH08303 | NFX1-tyr | Tetrabaena_socialis | 30.00 | 0.00 |
| TRINITY_XP_00307 | C2 calci | Ostreococcus_tauri  | 30.00 | 0.00 |
| TRINITY_ATB19735 | putative | Calocedrus_decurren | 30.00 | 0.00 |
| TRINITY_XP_01092 | PREDICTI | Elaeis_guineensis   | 30.00 | 0.00 |
| TRINITY_XP_01672 | PREDICTI | Gossypium_hirsutum  | 30.00 | 0.00 |
| TRINITY_XP_01068 | PREDICTI | Beta_vulgaris       | 30.00 | 0.00 |
| TRINITY_XP_00643 | probable | Citrus_clementina   | 30.00 | 0.00 |
| TRINITY_NP_00133 | uncharac | Zea_mays            | 30.00 | 0.00 |
| TRINITY_KXZ45760 | hypothet | Gonium_pectorale    | 30.00 | 0.00 |
| TRINITY_GAX74041 | hypothet | Chlamydomonas_eusti | 30.00 | 0.00 |
| TRINITY_XP_00169 | predicte | Chlamydomonas_reinh | 30.00 | 0.00 |
| TRINITY_KXZ46822 | hypothet | Gonium_pectorale    | 30.00 | 0.00 |

|                  |           |                     |       |      |
|------------------|-----------|---------------------|-------|------|
| TRINITY_XP_01067 | PREDICTI  | Beta_vulgaris       | 30.00 | 0.00 |
| TRINITY_NP_00131 | vesicle-  | Solanum_lycopersicu | 29.90 | 0.00 |
| TRINITY_PRW05851 | copine-   | Chlorella_sorokinia | 29.90 | 0.00 |
| TRINITY_GAQ81012 | hypothet  | Klebsormidium_niten | 29.90 | 0.00 |
| TRINITY_PNH06570 | (Succinat | Tetrabaena_socialis | 29.90 | 0.00 |
| TRINITY_XP_02014 | probable  | Aegilops_tauschii   | 29.90 | 0.00 |
| TRINITY_XP_00941 | PREDICTI  | Musa_acuminata      | 29.90 | 0.00 |
| TRINITY_XP_02437 | NEDD8 ul  | Physcomitrella_pate | 29.90 | 0.00 |
| TRINITY_XP_02388 | acetamic  | Quercus_suber       | 29.90 | 0.00 |
| TRINITY_XP_01010 | (RHOMBOII | Morus_notabilis     | 29.90 | 0.00 |
| TRINITY_GAU38579 | hypothet  | Trifolium_subterran | 29.90 | 0.00 |
| TRINITY_KMZ62385 | putative  | Zostera_marina      | 29.90 | 0.00 |
| TRINITY_XP_02452 | uncharac  | Selaginella_moellen | 29.90 | 0.00 |
| TRINITY_XP_02298 | probable  | Cucurbita_maxima    | 29.90 | 0.00 |
| TRINITY_GAQ82956 | tRNA int  | Klebsormidium_niten | 29.90 | 0.00 |
| TRINITY_OMO63919 | hypothet  | Corchorus_capsulari | 29.90 | 0.00 |
| TRINITY_XP_00295 | hypothet  | Volvox_carteri      | 29.90 | 0.00 |
| TRINITY_EYU38144 | hypothet  | Erythranthe_guttata | 29.90 | 0.00 |
| TRINITY_PTQ32493 | hypothet  | Marchantia_polymorp | 29.90 | 0.00 |
| TRINITY_XP_01926 | PREDICTI  | Nicotiana_attenuata | 29.90 | 0.00 |
| TRINITY_XP_02186 | peroxis   | Spinacia_oleracea   | 29.90 | 0.00 |
| TRINITY_AOS49624 | hypothet  | Davallia_tyermannii | 29.90 | 0.00 |
| TRINITY_XP_00170 | (zinc-met | Chlamydomonas_reinh | 29.90 | 0.00 |
| TRINITY_GBF96497 | hypothet  | Raphidocelis_subcap | 29.90 | 0.00 |
| TRINITY_PSC67808 | transcri  | Micractinium_conduc | 29.90 | 0.00 |
| TRINITY_GBG75357 | hypothet  | Chara_braunii       | 29.90 | 0.00 |
| TRINITY_GBF94211 | hypothet  | Raphidocelis_subcap | 29.90 | 0.00 |
| TRINITY_BAK07357 | predict   | Hordeum_vulgare     | 29.90 | 0.00 |
| TRINITY_EYU38100 | (hypothet | Erythranthe_guttata | 29.90 | 0.00 |
| TRINITY_ABK25130 | (unknown  | Picea_sitchensis    | 29.90 | 0.00 |
| TRINITY_CDY18671 | BnaA09g   | (Brassica_napus     | 29.90 | 0.00 |
| TRINITY_GBG89877 | hypothet  | Chara_braunii       | 29.90 | 0.00 |
| TRINITY_XP_01452 | uncharac  | Vigna_radiata       | 29.90 | 0.00 |
| TRINITY_XP_00430 | PREDICTI  | Fragaria_vesca      | 29.90 | 0.00 |
| TRINITY_KXZ56527 | hypothet  | Gonium_pectorale    | 29.90 | 0.00 |
| TRINITY_GAX74889 | hypothet  | Chlamydomonas_eusti | 29.90 | 0.00 |
| TRINITY_PSC73503 | vacuolar  | Micractinium_conduc | 29.90 | 0.00 |
| TRINITY_XP_02390 | (tripepti | Quercus_suber       | 29.90 | 0.00 |
| TRINITY_XP_01107 | ubiquiti  | Sesamum_indicum     | 29.90 | 0.00 |
| TRINITY_GAQ92968 | hypothet  | Klebsormidium_niten | 29.90 | 0.00 |
| TRINITY_GAX76616 | hypothet  | Chlamydomonas_eusti | 29.90 | 0.00 |
| TRINITY_GAX73617 | hypothet  | Chlamydomonas_eusti | 29.90 | 0.00 |
| TRINITY_GAX73770 | hypothet  | Chlamydomonas_eusti | 29.90 | 0.00 |
| TRINITY_XP_01102 | PREDICTI  | Populus_euphratica  | 29.90 | 0.00 |
| TRINITY_XP_02189 | polyader  | Carica_papaya       | 29.90 | 0.00 |
| TRINITY_XP_00295 | hypothet  | Volvox_carteri      | 29.90 | 0.00 |
| TRINITY_XP_01872 | PREDICTI  | Eucalyptus_grandis  | 29.90 | 0.00 |
| TRINITY_KDP25818 | hypothet  | Jatropha_curcas     | 29.90 | 0.00 |
| TRINITY_PIN19429 | Speckle-  | Handroanthus_impeti | 29.90 | 0.00 |
| TRINITY_XP_01068 | PREDICTI  | Beta_vulgaris       | 29.90 | 0.00 |
| TRINITY_XP_00295 | hypothet  | Volvox_carteri      | 29.90 | 0.00 |
| TRINITY_XP_00751 | predict   | Bathycoccus_prasinc | 29.90 | 0.00 |
| TRINITY_XP_01390 | (hypothet | Monoraphidium_negle | 29.90 | 0.00 |
| TRINITY_XP_00305 | predict   | Micromonas_pusilla  | 29.90 | 0.00 |
| TRINITY_XP_00751 | alpha-1,  | Bathycoccus_prasinc | 29.90 | 0.00 |
| TRINITY_XP_00169 | UNC-50 f  | Chlamydomonas_reinh | 29.90 | 0.00 |
| TRINITY_PQM42550 | (high mok | Prunus_yedoensis    | 29.90 | 0.00 |
| TRINITY_XP_00584 | hypothet  | Chlorella_variabili | 29.90 | 0.00 |
| TRINITY_PRW55936 | baculovi  | Chlorella_sorokinia | 29.90 | 0.00 |
| TRINITY_KXZ54618 | hypothet  | Gonium_pectorale    | 29.90 | 0.00 |
| TRINITY_GAX82191 | hypothet  | Chlamydomonas_eusti | 29.90 | 0.00 |
| TRINITY_PTQ33308 | hypothet  | Marchantia_polymorp | 29.90 | 0.00 |
| TRINITY_KXZ53750 | (hypothet | Gonium_pectorale    | 29.90 | 0.00 |
| TRINITY_PTQ43879 | hypothet  | Marchantia_polymorp | 29.90 | 0.00 |
| TRINITY_XP_00845 | PREDICTI  | Cucumis_melo        | 29.90 | 0.00 |
| TRINITY_GAX80759 | hypothet  | Chlamydomonas_eusti | 29.90 | 0.00 |

|                  |          |                     |       |      |
|------------------|----------|---------------------|-------|------|
| TRINITY_OAE27724 | hypothet | Marchantia_polymorp | 29.90 | 0.00 |
| TRINITY_GAX82187 | hypothet | Chlamydomonas_eusti | 29.90 | 0.00 |
| TRINITY_PTQ46215 | hypothet | Marchantia_polymorp | 29.80 | 0.00 |
| TRINITY_XP_00584 | hypothet | Chlorella_variabili | 29.80 | 0.00 |
| TRINITY_PNR55113 | hypothet | Physcomitrella_pate | 29.80 | 0.00 |
| TRINITY_XP_01283 | PREDICTI | Erythranthe_guttata | 29.80 | 0.00 |
| TRINITY_EFJ16813 | hypothet | Selaginella_moellen | 29.80 | 0.00 |
| TRINITY_XP_00250 | predicte | Micromonas_commoda  | 29.80 | 0.00 |
| TRINITY_XP_00837 | PREDICTI | Malus_domestica     | 29.80 | 0.00 |
| TRINITY_GAX81001 | hypothet | Chlamydomonas_eusti | 29.80 | 0.00 |
| TRINITY_KZV22230 | putative | Dorcoceras_hygromet | 29.80 | 0.00 |
| TRINITY_GBG90679 | hypothet | Chara_braunii       | 29.80 | 0.00 |
| TRINITY_GAQ89376 | Phosphat | Klebsormidium_niten | 29.80 | 0.00 |
| TRINITY_KXZ53291 | hypothet | Gonium_pectorale    | 29.80 | 0.00 |
| TRINITY_GAQ77732 | Leishmar | Klebsormidium_niten | 29.80 | 0.00 |
| TRINITY_GAX76582 | hypothet | Chlamydomonas_eusti | 29.80 | 0.00 |
| TRINITY_GAX78489 | hypothet | Chlamydomonas_eusti | 29.80 | 0.00 |
| TRINITY_GAQ85806 | phosphat | Klebsormidium_niten | 29.80 | 0.00 |
| TRINITY_PNW82936 | hypothet | Chlamydomonas_reinh | 29.80 | 0.00 |
| TRINITY_BAJ95858 | predicte | Hordeum_vulgare     | 29.80 | 0.00 |
| TRINITY_RLM60494 | putative | Panicum_miliaceum   | 29.80 | 0.00 |
| TRINITY_XP_00295 | kelch r  | Volvox_carteri      | 29.80 | 0.00 |
| TRINITY_XP_01389 | hypothet | Monoraphidium_negle | 29.80 | 0.00 |
| TRINITY_GAX77340 | hypothet | Chlamydomonas_eusti | 29.80 | 0.00 |
| TRINITY_RVW19295 | LRR rec  | Vitis_vinifera      | 29.80 | 0.00 |
| TRINITY_GAQ79529 | hypothet | Klebsormidium_niten | 29.80 | 0.00 |
| TRINITY_GAQ77623 | glycerol | Klebsormidium_niten | 29.80 | 0.00 |
| TRINITY_PNX94078 | hypothet | Trifolium_pratense  | 29.80 | 0.00 |
| TRINITY_XP_00250 | predicte | Micromonas_commoda  | 29.80 | 0.00 |
| TRINITY_GBG68282 | hypothet | Chara_braunii       | 29.80 | 0.00 |
| TRINITY_XP_00289 | serine c | Arabidopsis_lyrata  | 29.80 | 0.00 |
| TRINITY_XP_01025 | PREDICTI | Nelumbo_nucifera    | 29.80 | 0.00 |
| TRINITY_GBG80488 | hypothet | Chara_braunii       | 29.80 | 0.00 |
| TRINITY_XP_02438 | uncharac | Physcomitrella_pate | 29.80 | 0.00 |
| TRINITY_OAE31799 | hypothet | Marchantia_polymorp | 29.80 | 0.00 |
| TRINITY_GAX82980 | hypothet | Chlamydomonas_eusti | 29.80 | 0.00 |
| TRINITY_XP_01915 | PREDICTI | Ipomoea_nil         | 29.80 | 0.00 |
| TRINITY_PNW72071 | hypothet | Chlamydomonas_reinh | 29.80 | 0.00 |
| TRINITY_XP_00429 | PREDICTI | Fragaria_vesca      | 29.80 | 0.00 |
| TRINITY_XP_01970 | PREDICTI | Elaeis_guineensis   | 29.80 | 0.00 |
| TRINITY_XP_01390 | hypothet | Monoraphidium_negle | 29.80 | 0.00 |
| TRINITY_XP_00294 | hypothet | Volvox_carteri      | 29.80 | 0.00 |
| TRINITY_GAQ89127 | putative | Klebsormidium_niten | 29.80 | 0.00 |
| TRINITY_GAX84013 | hypothet | Chlamydomonas_eusti | 29.80 | 0.00 |
| TRINITY_PNW73070 | hypothet | Chlamydomonas_reinh | 29.80 | 0.00 |
| TRINITY_PNH09214 | Tiny mac | Tetrabaena_socialis | 29.80 | 0.00 |
| TRINITY_OTF87052 | putative | Helianthus_annuus   | 29.70 | 0.00 |
| TRINITY_XP_01025 | PREDICTI | Nelumbo_nucifera    | 29.70 | 0.00 |
| TRINITY_XP_00253 | exocyst  | Ricinus_communis    | 29.70 | 0.00 |
| TRINITY_GBF95569 | hypoxant | Raphidocelis_subcap | 29.70 | 0.00 |
| TRINITY_XP_00297 | tRNA-di  | Selaginella_moellen | 29.70 | 0.00 |
| TRINITY_GAQ81462 | Putative | Klebsormidium_niten | 29.70 | 0.00 |
| TRINITY_XP_02390 | uncharac | Quercus_suber       | 29.70 | 0.00 |
| TRINITY_XP_02088 | probable | Arabidopsis_lyrata  | 29.70 | 0.00 |
| TRINITY_XP_02024 | histone  | Asparagus_officinal | 29.70 | 0.00 |
| TRINITY_PIA45629 | hypothet | Aquilegia_coerulea  | 29.70 | 0.00 |
| TRINITY_XP_00306 | predicte | Micromonas_pusilla  | 29.70 | 0.00 |
| TRINITY_GAQ85694 | Targetir | Klebsormidium_niten | 29.70 | 0.00 |
| TRINITY_OAE30423 | hypothet | Marchantia_polymorp | 29.70 | 0.00 |
| TRINITY_VDD41569 | unnamed  | Brassica_oleracea   | 29.70 | 0.00 |
| TRINITY_XP_00295 | hypothet | Volvox_carteri      | 29.70 | 0.00 |
| TRINITY_XP_00169 | flagell  | Chlamydomonas_reinh | 29.70 | 0.00 |
| TRINITY_XP_00585 | hypothet | Chlorella_variabili | 29.70 | 0.00 |
| TRINITY_OMP04807 | hypothet | Corchorus_olitorius | 29.70 | 0.00 |
| TRINITY_XP_00141 | predicte | Ostreococcus_sp._'1 | 29.70 | 0.00 |
| TRINITY_XP_02387 | E3 ubiq  | Quercus_suber       | 29.70 | 0.00 |

|                                             |       |      |
|---------------------------------------------|-------|------|
| TRINITY_XP_0207(ras-rel;Dendrobium_catenatu | 29.70 | 0.00 |
| TRINITY_XP_0243(ABC trarPhyscomitrella_pate | 29.70 | 0.00 |
| TRINITY_PQM4255(high mokPrunus_yedoensis    | 29.70 | 0.00 |
| TRINITY_CAN81041hypothetVitis_vinifera      | 29.70 | 0.00 |
| TRINITY_XP_01761PREDICTIGossypium_arboreum  | 29.70 | 0.00 |
| TRINITY_RQL8713(hypothetBrassica_cretica    | 29.70 | 0.00 |
| TRINITY_XP_0029(hypothetVolvox_carteri      | 29.70 | 0.00 |
| TRINITY_XP_0205(ultravicAmborella_trichopod | 29.70 | 0.00 |
| TRINITY_RAL4492(hypothetCuscuta_australis   | 29.70 | 0.00 |
| TRINITY_XP_0263(LOW QUAI Papaver_somniferum | 29.70 | 0.00 |

|                                             |       |      |
|---------------------------------------------|-------|------|
| TRINITY_PRW5601(kinesin Chlorella_sorokinia | 29.70 | 0.00 |
| TRINITY_RRT4336(hypothetEnsete_ventricosum  | 29.70 | 0.00 |
| TRINITY_KFK30981hypothetArabis_alpina       | 29.70 | 0.00 |
| TRINITY_OAE3582hypothetMarchantia_polymorp  | 29.70 | 0.00 |
| TRINITY_XP_0016predicteChlamydomonas_reinh  | 29.70 | 0.00 |
| TRINITY_PNW7911hypothetChlamydomonas_reinh  | 29.70 | 0.00 |
| TRINITY_XP_0058hypothetChlorella_variabili  | 29.70 | 0.00 |
| TRINITY_XP_0249(ras-relaCynara_cardunculus  | 29.70 | 0.00 |
| TRINITY_XP_0029(monodehSelaginella_moellen  | 29.70 | 0.00 |
| TRINITY_GAX7557hypothetChlamydomonas_eusti  | 29.70 | 0.00 |
| TRINITY_BAJ9457predicteHordeum_vulgare      | 29.70 | 0.00 |
| TRINITY_XP_0029hypothetVolvox_carteri       | 29.70 | 0.00 |
| TRINITY_GAX8199hypothetChlamydomonas_eusti  | 29.70 | 0.00 |
| TRINITY_PTQ4804(hypothetMarchantia_polymorp | 29.70 | 0.00 |
| TRINITY_XP_0201(V-type rAegilops_tauschii   | 29.60 | 0.00 |
| TRINITY_XP_0063actin-rePopulus_trichocarpa  | 29.60 | 0.00 |
| TRINITY_XP_0104(PREDICTFCamelina_sativa     | 29.60 | 0.00 |
| TRINITY_XP_0202(cytokiniAsparagus_officinal | 29.60 | 0.00 |
| TRINITY_XP_0238threoninrQuercus_suber       | 29.60 | 0.00 |
| TRINITY_PTQ3088hypothetMarchantia_polymorp  | 29.60 | 0.00 |
| TRINITY_XP_0227(uncharaDurio_zibethinus     | 29.60 | 0.00 |
| TRINITY_XP_0043(PREDICTFFragaria-vesca      | 29.60 | 0.00 |
| TRINITY_XP_0161(ultravivArachis_ipaensis    | 29.60 | 0.00 |
| TRINITY_PNR5750hypothetPhyscomitrella_pate  | 29.60 | 0.00 |
| TRINITY_RAL3995hypothetCuscuta_australis    | 29.60 | 0.00 |
| TRINITY_AMO0273ATP syntChlorella_sp._KQ-20  | 29.60 | 0.00 |
| TRINITY_XP_0191(PREDICTFIpomoea_nil         | 29.60 | 0.00 |
| TRINITY_XP_0201(uncharaAnanas_comosus       | 29.60 | 0.00 |
| TRINITY_XP_0238(putativQuercus_suber        | 29.60 | 0.00 |
| TRINITY_PWA9448emp24/gArtemisia_annua       | 29.60 | 0.00 |
| TRINITY_XP_0176(PREDICTFGossypium_arboreum  | 29.60 | 0.00 |
| TRINITY_XP_0093(PREDICTFMusa_acuminata      | 29.60 | 0.00 |
| TRINITY_OMP0270UDP-glucCorchorus_capsulari  | 29.60 | 0.00 |
| TRINITY_EFJ2336hypothetSelaginella_moellen  | 29.60 | 0.00 |
| TRINITY_XP_0025(predicteMicromonas_commoda  | 29.60 | 0.00 |
| TRINITY_RZC88351hypothetPapaver_somniferum  | 29.60 | 0.00 |
| TRINITY_XP_02451WD and tSelaginella_moellen | 29.60 | 0.00 |
| TRINITY_GAX79352hypothetChlamydomonas_eusti | 29.60 | 0.00 |
| TRINITY_PRW5869(hypothetChlorella_sorokinia | 29.60 | 0.00 |
| TRINITY_KXZ4570hypothetGonium_pectorale     | 29.60 | 0.00 |
| TRINITY_XP_0068coiled-cAmborella_trichopod  | 29.60 | 0.00 |
| TRINITY_PNW7042hypothetChlamydomonas_reinh  | 29.60 | 0.00 |
| TRINITY_CDP0033unnamed Coffea_canephora     | 29.60 | 0.00 |
| TRINITY_PSC7292(hypothetMicractinium_conduc | 29.60 | 0.00 |
| TRINITY_PNS9888hypothetPopulus_trichocarpa  | 29.60 | 0.00 |
| TRINITY_GAQ8520Pumilio Klebsormidium_niten  | 29.60 | 0.00 |
| TRINITY_PTQ3752hypothetMarchantia_polymorp  | 29.60 | 0.00 |
| TRINITY_GAX8356hypothetChlamydomonas_eusti  | 29.60 | 0.00 |
| TRINITY_XP_0029hypothetVolvox_carteri       | 29.60 | 0.00 |
| TRINITY_PIA4118hypothetAquilegia_coerulea   | 29.60 | 0.00 |
| TRINITY_XP_0239(uncharaQuercus_suber        | 29.60 | 0.00 |
| TRINITY_PSC72722-oxoglMicractinium_conduc   | 29.60 | 0.00 |
| TRINITY_KHN4809(Serine/tGlycine_soja        | 29.60 | 0.00 |
| TRINITY_PKI72622hypothetPunica_granatum     | 29.60 | 0.00 |
| TRINITY_PNW7924hypothetChlamydomonas_reinh  | 29.60 | 0.00 |
| TRINITY_PNW8794hypothetChlamydomonas_reinh  | 29.60 | 0.00 |
| TRINITY_GAX8413hypothetChlamydomonas_eusti  | 29.60 | 0.00 |
| TRINITY_XP_0016predicteChlamydomonas_reinh  | 29.60 | 0.00 |
| TRINITY_PNH00691hypothetTetrabaena_socialis | 29.60 | 0.00 |
| TRINITY_GAX7875hypothetChlamydomonas_eusti  | 29.60 | 0.00 |
| TRINITY_CDY11054BnaA03g4Brassica_napus      | 29.60 | 0.00 |
| TRINITY_RAL3975hypothetCuscuta_australis    | 29.60 | 0.00 |
| TRINITY_GBG9164hypothetChara_braunii        | 29.60 | 0.00 |
| TRINITY_KXZ44078hypothetGonium_pectorale    | 29.60 | 0.00 |
| TRINITY_KXZ4377hypothetGonium_pectorale     | 29.60 | 0.00 |
| TRINITY_GAU15635hypothetTrifolium_subterran | 29.60 | 0.00 |



|                  |                              |       |      |
|------------------|------------------------------|-------|------|
| TRINITY_XP_00713 | hypothetPhaseolus_vulgaris   | 29.50 | 0.00 |
| TRINITY_PSC74911 | CysteinyMicractinium_conduc  | 29.50 | 0.00 |
| TRINITY_XP_02436 | pre-mRNPhyscomitrella_pate   | 29.50 | 0.00 |
| TRINITY_XP_02791 | probableVigna_unguiculata    | 29.50 | 0.00 |
| TRINITY_GAQ80659 | hypothetKlebsormidium_niten  | 29.50 | 0.00 |
| TRINITY_VDD48766 | unnamed Brassica_oleracea    | 29.50 | 0.00 |
| TRINITY_PSC72095 | outer dMicractinium_conduc   | 29.50 | 0.00 |
| TRINITY_XP_01945 | PREDICTHLupinus_angustifoli  | 29.50 | 0.00 |
| TRINITY_GAQ8383  | (hypothetKlebsormidium_niten | 29.50 | 0.00 |
| TRINITY_XP_02733 | amino aAbrus_precatorius     | 29.50 | 0.00 |
| TRINITY_XP_00714 | hypothetPhaseolus_vulgaris   | 29.50 | 0.00 |
| TRINITY_PTQ37898 | hypothetMarchantia_polymorp  | 29.50 | 0.00 |
| TRINITY_PTQ40828 | hypothetMarchantia_polymorp  | 29.50 | 0.00 |
| TRINITY_XP_02067 | BRCA1-A Dendrobium_catenatu  | 29.50 | 0.00 |
| TRINITY_OAE26308 | hypothetMarchantia_polymorp  | 29.50 | 0.00 |
| TRINITY_XP_01721 | PREDICTHDaucus_carota        | 29.50 | 0.00 |
| TRINITY_XP_00169 | predicteChlamydomonas_reinh  | 29.50 | 0.00 |
| TRINITY_XP_02058 | AP-2 conPhalaenopsis_equest  | 29.50 | 0.00 |
| TRINITY_XP_02437 | protein Physcomitrella_pate  | 29.50 | 0.00 |
| TRINITY_GAQ78534 | hypothetKlebsormidium_niten  | 29.50 | 0.00 |
| TRINITY_XP_02390 | kexin-liQuercus_suber        | 29.50 | 0.00 |
| TRINITY_XP_02452 | uncharacSelaginella_moellen  | 29.50 | 0.00 |
| TRINITY_GBF9836  | (saccharcRaphidocelis_subcap | 29.50 | 0.00 |
| TRINITY_XP_02444 | triacylcPopulus_trichocarpa  | 29.50 | 0.00 |
| TRINITY_GAQ91469 | NAD(P)-kKlebsormidium_niten  | 29.50 | 0.00 |
| TRINITY_PNW81407 | hypothetChlamydomonas_reinh  | 29.50 | 0.00 |
| TRINITY_XP_01450 | nucleoleVigna_radiata        | 29.50 | 0.00 |
| TRINITY_XP_01742 | PREDICTHVigna_angularis      | 29.50 | 0.00 |
| TRINITY_GAQ87539 | hypothetKlebsormidium_niten  | 29.50 | 0.00 |
| TRINITY_XP_02021 | vacuolarCajanus_cajan        | 29.50 | 0.00 |
| TRINITY_XP_02387 | uncharacQuercus_suber        | 29.50 | 0.00 |
| TRINITY_XP_02436 | uncharacPhyscomitrella_pate  | 29.50 | 0.00 |
| TRINITY_GAX7866  | (hypothetChlamydomonas_eusti | 29.50 | 0.00 |
| TRINITY_GBG65012 | hypothetChara_braunii        | 29.50 | 0.00 |
| TRINITY_XP_00250 | voltage-Micromonas_commoda   | 29.50 | 0.00 |
| TRINITY_GAX73347 | hypothetChlamydomonas_eusti  | 29.50 | 0.00 |
| TRINITY_XP_02173 | uncharacChenopodium_quinoa   | 29.50 | 0.00 |
| TRINITY_XP_00250 | predicteMicromonas_commoda   | 29.50 | 0.00 |
| TRINITY_PNW72222 | hypothetChlamydomonas_reinh  | 29.50 | 0.00 |
| TRINITY_GAX77753 | hypothetChlamydomonas_eusti  | 29.50 | 0.00 |
| TRINITY_XP_00978 | PREDICTHNicotiana_sylvestri  | 29.50 | 0.00 |
| TRINITY_PRW44991 | elongatiChlorella_sorokinia  | 29.50 | 0.00 |
| TRINITY_XP_00564 | WD40 reCoccomyxa_subellips   | 29.50 | 0.00 |
| TRINITY_BAJ96946 | predicteHordeum_vulgare      | 29.50 | 0.00 |
| TRINITY_KXZ50182 | hypothetGonium_pectorale     | 29.50 | 0.00 |
| TRINITY_BAK03025 | predicteHordeum_vulgare      | 29.50 | 0.00 |
| TRINITY_GAX73495 | hypothetChlamydomonas_eusti  | 29.50 | 0.00 |
| TRINITY_XP_02439 | uncharacPhyscomitrella_pate  | 29.50 | 0.00 |
| TRINITY_KXZ48083 | hypothetGonium_pectorale     | 29.50 | 0.00 |
| TRINITY_GBG74077 | hypothetChara_braunii        | 29.50 | 0.00 |
| TRINITY_XP_02058 | uncharacPhalaenopsis_equest  | 29.50 | 0.00 |
| TRINITY_PHU00009 | hypothetCapsicum_chinense    | 29.50 | 0.00 |
| TRINITY_XP_00295 | hypothetVolvox_carteri       | 29.50 | 0.00 |
| TRINITY_OAE30423 | hypothetMarchantia_polymorp  | 29.40 | 0.00 |
| TRINITY_KXZ44835 | hypothetGonium_pectorale     | 29.40 | 0.00 |
| TRINITY_XP_01109 | elicitorSesamum_indicum      | 29.40 | 0.00 |
| TRINITY_ABK22059 | unknown Picea_sitichensis    | 29.40 | 0.00 |
| TRINITY_XP_02390 | cell diQuercus_suber         | 29.40 | 0.00 |
| TRINITY_XP_00628 | mitochorCapsella_rubella     | 29.40 | 0.00 |
| TRINITY_XP_02131 | random sSorghum_bicolor      | 29.40 | 0.00 |
| TRINITY_PNH07816 | putativeTetrabaena_socialis  | 29.40 | 0.00 |
| TRINITY_XP_01090 | PREDICTHElaeis_guineensis    | 29.40 | 0.00 |
| TRINITY_ERN17537 | hypothetAmborella_trichopod  | 29.40 | 0.00 |
| TRINITY_XP_01104 | PREDICTHPopulus_euphratica   | 29.40 | 0.00 |
| TRINITY_XP_02402 | protein Morus_notabilis      | 29.40 | 0.00 |
| TRINITY_RCW19319 | hypothetGlycine_max          | 29.40 | 0.00 |

|                 |          |                       |       |      |
|-----------------|----------|-----------------------|-------|------|
| TRINITY_XP_0238 | dihydro  | Quercus_suber         | 29.40 | 0.00 |
| TRINITY_OAE2242 | hypothet | Marchantia_polymorp   | 29.40 | 0.00 |
| TRINITY_XP_0041 | PREDICTI | Cucumis_sativus       | 29.40 | 0.00 |
| TRINITY_KZV5269 | hypothet | Dorcoceras_hygromet   | 29.40 | 0.00 |
| TRINITY_GAX8411 | hypothet | Chlamydomonas_eusti   | 29.40 | 0.00 |
| TRINITY_GAQ8885 | purple   | Klebsormidium_niten   | 29.40 | 0.00 |
| TRINITY_BAA2284 | HCR2     | [A]Alvikia_littoralis | 29.40 | 0.00 |
| TRINITY_XP_0025 | flagell  | Micromonas_commoda    | 29.40 | 0.00 |
| TRINITY_XP_0245 | enoyl-   | Selaginella_moellen   | 29.40 | 0.00 |
| TRINITY_XP_0249 | lipid d  | Cynara_cardunculus    | 29.40 | 0.00 |
| TRINITY_NP_0013 | Protein  | Arabidopsis_thalian   | 29.40 | 0.00 |
| TRINITY_KXZ4394 | hypothet | Gonium_pectorale      | 29.40 | 0.00 |
| TRINITY_GAX8398 | hypothet | Chlamydomonas_eusti   | 29.40 | 0.00 |
| TRINITY_XP_0235 | unchara  | Cucurbita_pepo        | 29.40 | 0.00 |
| TRINITY_XP_0029 | unchara  | Selaginella_moellen   | 29.40 | 0.00 |
| TRINITY_KXZ5654 | hypothet | Gonium_pectorale      | 29.40 | 0.00 |
| TRINITY_XP_0239 | protein  | Quercus_suber         | 29.40 | 0.00 |
| TRINITY_ONK6332 | unchara  | Asparagus_officinal   | 29.40 | 0.00 |
| TRINITY_AML7921 | putative | Volvox_aureus         | 29.40 | 0.00 |
| TRINITY_NP_0011 | transpar | Zea_mays              | 29.40 | 0.00 |
| TRINITY_GAX7449 | hypothet | Chlamydomonas_eusti   | 29.40 | 0.00 |
| TRINITY_KYP4846 | hypothet | Cajanus_cajan         | 29.40 | 0.00 |
| TRINITY_GAX8133 | hypothet | Chlamydomonas_eusti   | 29.40 | 0.00 |
| TRINITY_KMZ6239 | Major f  | Zostera_marina        | 29.40 | 0.00 |
| TRINITY_XP_0025 | predicte | Micromonas_commoda    | 29.40 | 0.00 |
| TRINITY_XP_0217 | alanine- | Chenopodium_quinoa    | 29.40 | 0.00 |
| TRINITY_XP_0239 | unchara  | Quercus_suber         | 29.40 | 0.00 |
| TRINITY_XP_0239 | unchara  | Quercus_suber         | 29.40 | 0.00 |
| TRINITY_PRW5620 | DNA rep  | Chlorella_sorokinia   | 29.40 | 0.00 |
| TRINITY_XP_0016 | predicte | Chlamydomonas_reinh   | 29.40 | 0.00 |
| TRINITY_KXG3245 | hypothet | Sorghum_bicolor       | 29.40 | 0.00 |
| TRINITY_PKA6188 | Elongat  | Apostasia_shenzheni   | 29.40 | 0.00 |
| TRINITY_PTQ3023 | hypothet | Marchantia_polymorp   | 29.40 | 0.00 |
| TRINITY_XP_0102 | heptahel | Brachypodium_distac   | 29.40 | 0.00 |
| TRINITY_PNW7691 | hypothet | Chlamydomonas_reinh   | 29.40 | 0.00 |
| TRINITY_PNW7310 | hypothet | Chlamydomonas_reinh   | 29.40 | 0.00 |
| TRINITY_XP_0188 | PREDICTI | Juglans_regia         | 29.40 | 0.00 |
| TRINITY_KXZ5472 | hypothet | Gonium_pectorale      | 29.40 | 0.00 |
| TRINITY_GAX7334 | hypothet | Chlamydomonas_eusti   | 29.40 | 0.00 |
| TRINITY_PRW2087 | U3 small | Chlorella_sorokinia   | 29.40 | 0.00 |
| TRINITY_XP_0237 | formin-  | Lactuca_sativa        | 29.40 | 0.00 |
| TRINITY_NP_0011 | unchara  | Zea_mays              | 29.40 | 0.00 |
| TRINITY_PSR8671 | Rab5-int | Actinidia_chinensis   | 29.40 | 0.00 |
| TRINITY_XP_0139 | Dynein   | Monoraphidium_negle   | 29.30 | 0.00 |
| TRINITY_XP_0204 | unchara  | Zea_mays              | 29.30 | 0.00 |
| TRINITY_XP_0049 | lipase   | Setaria_italica       | 29.30 | 0.00 |
| TRINITY_XP_0096 | PREDICTI | Nicotiana_tomentosi   | 29.30 | 0.00 |
| TRINITY_BAJ9694 | predicte | Hordeum_vulgare       | 29.30 | 0.00 |
| TRINITY_PIA3041 | hypothet | Aquilegia_coerulea    | 29.30 | 0.00 |
| TRINITY_RMZ5560 | hypothet | Auxenochlorella_pro   | 29.30 | 0.00 |
| TRINITY_XP_0153 | DNA oxi  | Citrus_sinensis       | 29.30 | 0.00 |
| TRINITY_EEF2564 | NAD(P)H  | Ricinus_communis      | 29.30 | 0.00 |
| TRINITY_GAX7570 | hypothet | Chlamydomonas_eusti   | 29.30 | 0.00 |
| TRINITY_XP_0136 | phospho  | Brassica_napus        | 29.30 | 0.00 |
| TRINITY_XP_0191 | PREDICTI | Ipomoea_nil           | 29.30 | 0.00 |
| TRINITY_XP_0016 | predicte | Chlamydomonas_reinh   | 29.30 | 0.00 |
| TRINITY_GAQ8029 | calcium- | Klebsormidium_niten   | 29.30 | 0.00 |
| TRINITY_GAQ8432 | UDP-gal  | Klebsormidium_niten   | 29.30 | 0.00 |
| TRINITY_YP_6656 | NADH de  | Nephroselmis_olivac   | 29.30 | 0.00 |
| TRINITY_XP_0202 | probable | Cajanus_cajan         | 29.30 | 0.00 |
| TRINITY_KXZ5387 | hypothet | Gonium_pectorale      | 29.30 | 0.00 |
| TRINITY_XP_0124 | PREDICTI | Gossypium_raimondii   | 29.30 | 0.00 |
| TRINITY_GAX7732 | hypothet | Chlamydomonas_eusti   | 29.30 | 0.00 |
| TRINITY_XP_0014 | predicte | Ostreococcus_sp._'l   | 29.30 | 0.00 |
| TRINITY_RYQ8718 | hypothet | Arachis_hypogaea      | 29.30 | 0.00 |
| TRINITY_BAJ9585 | predicte | Hordeum_vulgare       | 29.30 | 0.00 |

|                  |                              |       |      |
|------------------|------------------------------|-------|------|
| TRINITY_XP_0239  | (calcium,Quercus_suber       | 29.30 | 0.00 |
| TRINITY_Q43492   | .2RecName:Hordeum_vulgare    | 29.30 | 0.00 |
| TRINITY_XP_00231 | sorbitolPopulus_trichocarpa  | 29.30 | 0.00 |
| TRINITY_GBF8969  | PKHD-tyRaphidocelis_subcap   | 29.30 | 0.00 |
| TRINITY_XP_0029  | hypothetVolvox_carteri       | 29.30 | 0.00 |
| TRINITY_XP_0110  | PREDICTIPopulus_euphratica   | 29.30 | 0.00 |
| TRINITY_GAX8082  | (hypothetChlamydomonas_eusti | 29.30 | 0.00 |
| TRINITY_XP_0137  | pumilio Brassica_napus       | 29.30 | 0.00 |
| TRINITY_XP_0030  | predicteMicromonas_pusilla   | 29.30 | 0.00 |
| TRINITY_GAX8052  | (hypothetChlamydomonas_eusti | 29.30 | 0.00 |
| TRINITY_GAX8486  | 1hypothetChlamydomonas_eusti | 29.30 | 0.00 |
| TRINITY_XP_0243  | ankyrin Physcomitrella_pate  | 29.30 | 0.00 |
| TRINITY_RWR7736  | 8subtilisCinnamomum_micranth | 29.30 | 0.00 |
| TRINITY_XP_0056  | 4alpha/bCoccomyxa_subellips  | 29.30 | 0.00 |
| TRINITY_GAX7406  | 1hypothetChlamydomonas_eusti | 29.30 | 0.00 |
| TRINITY_XP_0238  | 8vacuolarQuercus_suber       | 29.30 | 0.00 |
| TRINITY_EFJ0959  | 9hypothetSelaginella_moellen | 29.30 | 0.00 |
| TRINITY_KXZ4211  | (hypothetGonium_pectorale    | 29.30 | 0.00 |
| TRINITY_PNW8618  | 4hypothetChlamydomonas_reinh | 29.30 | 0.00 |
| TRINITY_XP_0072  | 1elicitorPrunus_persica      | 29.30 | 0.00 |
| TRINITY_XP_0088  | (derlin-1Phoenix_dactylifera | 29.30 | 0.00 |
| TRINITY_GAX7309  | 5hypothetChlamydomonas_eusti | 29.30 | 0.00 |
| TRINITY_XP_0105  | 5PREDICTITarenaya_hasslerian | 29.30 | 0.00 |
| TRINITY_EFJ3104  | (hypothetSelaginella_moellen | 29.30 | 0.00 |
| TRINITY_XP_0058  | 4hypothetChlorella_variabili | 29.30 | 0.00 |
| TRINITY_PNW7414  | 9hypothetChlamydomonas_reinh | 29.30 | 0.00 |
| TRINITY_PRW5679  | 3PentatriChlorella_sorokinia | 29.30 | 0.00 |
| TRINITY_XP_0104  | 7PREDICTICamelina_sativa     | 29.30 | 0.00 |
| TRINITY_GAX8411  | 2hypothetChlamydomonas_eusti | 29.30 | 0.00 |
| TRINITY_XP_0056  | 4hypothetCoccomyxa_subellips | 29.30 | 0.00 |
| TRINITY_PNW8854  | 9hypothetChlamydomonas_reinh | 29.30 | 0.00 |
| TRINITY_GAX7894  | 1hypothetChlamydomonas_eusti | 29.30 | 0.00 |
| TRINITY_XP_0145  | 1cyprosirVigna_radiata       | 29.20 | 0.00 |
| TRINITY_XP_0202  | 4major fAsparagus_officinal  | 29.20 | 0.00 |
| TRINITY_XP_0029  | 5hypothetVolvox_carteri      | 29.20 | 0.00 |
| TRINITY_GAQ9235  | (mitogen-Klebsormidium_niten | 29.20 | 0.00 |
| TRINITY_RXH7298  | 2hypothetMalus_domestica     | 29.20 | 0.00 |
| TRINITY_XP_0155  | 7asparticRicinus_communis    | 29.20 | 0.00 |
| TRINITY_RWR8047  | 2nardilyCinnamomum_micranth  | 29.20 | 0.00 |
| TRINITY_GBG8463  | 7hypothetChara_braunii       | 29.20 | 0.00 |
| TRINITY_AAM3365  | 2mastigorChlamydomonas_reinh | 29.20 | 0.00 |
| TRINITY_KZV1647  | 5hypothetDorcoceras_hygromet | 29.20 | 0.00 |
| TRINITY_RDY1206  | 3hypothetMucuna_pruriens     | 29.20 | 0.00 |
| TRINITY_GAX8645  | 1hypothetChlamydomonas_eusti | 29.20 | 0.00 |
| TRINITY_XP_0229  | 2transcriCucurbita_moschata  | 29.20 | 0.00 |
| TRINITY_XP_0029  | 5hypothetVolvox_carteri      | 29.20 | 0.00 |
| TRINITY_XP_0128  | 3PREDICTIErythranthe_guttata | 29.20 | 0.00 |
| TRINITY_XP_0243  | 8methylytPhyscomitrella_pate | 29.20 | 0.00 |
| TRINITY_GBF9705  | 4hypothetRaphidocelis_subcap | 29.20 | 0.00 |
| TRINITY_XP_0201  | 9probableAegilops_tauschii   | 29.20 | 0.00 |
| TRINITY_XP_0273  | (SNF1-relAbrus_precatorius   | 29.20 | 0.00 |
| TRINITY_GBG8498  | (hypothetChara_braunii       | 29.20 | 0.00 |
| TRINITY_XP_0128  | 3PREDICTIErythranthe_guttata | 29.20 | 0.00 |
| TRINITY_XP_0035  | 3suppresGlycine_max          | 29.20 | 0.00 |
| TRINITY_XP_0042  | 3ras-relSolanum_lycopersicu  | 29.20 | 0.00 |
| TRINITY_XP_0161  | 8vacuolarArachis_ipaensis    | 29.20 | 0.00 |
| TRINITY_XP_0238  | 8protein Quercus_suber       | 29.20 | 0.00 |
| TRINITY_GAX8169  | (hypothetChlamydomonas_eusti | 29.20 | 0.00 |
| TRINITY_GAX7472  | 4hypothetChlamydomonas_eusti | 29.20 | 0.00 |
| TRINITY_PNW8247  | 7hypothetChlamydomonas_reinh | 29.20 | 0.00 |
| TRINITY_XP_0025  | (predicteMicromonas_commoda  | 29.20 | 0.00 |
| TRINITY_GAX7620  | 7hypothetChlamydomonas_eusti | 29.20 | 0.00 |
| TRINITY_GAX7884  | 1hypothetChlamydomonas_eusti | 29.20 | 0.00 |
| TRINITY_KXZ4316  | 3hypothetGonium_pectorale    | 29.20 | 0.00 |
| TRINITY_RWR7684  | 1putativeCinnamomum_micranth | 29.20 | 0.00 |
| TRINITY_XP_0056  | 4putativeCoccomyxa_subellips | 29.20 | 0.00 |

|                  |                              |       |      |
|------------------|------------------------------|-------|------|
| TRINITY_OUS4267  | {hypothetOstreococcus_tauri  | 29.20 | 0.00 |
| TRINITY_XP_0264  | {probablePapaver_somniferum  | 29.20 | 0.00 |
| TRINITY_XP_0202  | (BTB/POZ Aegilops_tauschii   | 29.20 | 0.00 |
| TRINITY_KZV4221  | (Para-nitDorcoceras_hygromet | 29.20 | 0.00 |
| TRINITY_XP_0095  | {PREDICTINicotiana_tomentosi | 29.20 | 0.00 |
| TRINITY_XP_0025  | (predicteMicromonas_commoda  | 29.20 | 0.00 |
| TRINITY_KXZ5015  | {hypothetGonium_pectorale    | 29.20 | 0.00 |
| TRINITY_XP_0229  | {geraniolCucurbita_moschata  | 29.20 | 0.00 |
| TRINITY_XP_0243  | {von WillPhyscomitrella_pate | 29.20 | 0.00 |
| TRINITY_RLN0109  | {eukaryotPanicum_miliaceum   | 29.20 | 0.00 |
| TRINITY_XP_0094  | (PREDICTFMusa_acuminata      | 29.20 | 0.00 |
| TRINITY_XP_0056  | {WD40 reCoccomyxa_subellips  | 29.10 | 0.00 |
| TRINITY_XP_0271  | {probableCoffea_eugenioides  | 29.10 | 0.00 |
| TRINITY_XP_0216  | {CBL-inteManihot_esculenta   | 29.10 | 0.00 |
| TRINITY_EPS6524  | {hypothetGenlisea_aurea      | 29.10 | 0.00 |
| TRINITY_POC8M8.1 | RecName:Zea_mays             | 29.10 | 0.00 |
| TRINITY_XP_0239  | (acyl-prcQuercus_suber       | 29.10 | 0.00 |
| TRINITY_XP_0105  | {PREDICTHTarenaya_hasslerian | 29.10 | 0.00 |
| TRINITY_PNY0946  | {putativeTrifolium_pratense  | 29.10 | 0.00 |
| TRINITY_XP_0238  | cell di\Quercus_suber        | 29.10 | 0.00 |
| TRINITY_GAX7666  | {hypothetChlamydomonas_eusti | 29.10 | 0.00 |
| TRINITY_XP_0100  | (PREDICTHEucalyptus_grandis  | 29.10 | 0.00 |
| TRINITY_XP_0014  | {predicteOstreococcus_sp._'1 | 29.10 | 0.00 |
| TRINITY_XP_0029  | {hypothetVolvox_carteri      | 29.10 | 0.00 |
| TRINITY_XP_0266  | {ATP-depePhoenix_dactylifera | 29.10 | 0.00 |
| TRINITY_PSC7130  | {mitochorMicractinium_conduc | 29.10 | 0.00 |
| TRINITY_GAU1451  | {hypothetTrifolium_subterran | 29.10 | 0.00 |
| TRINITY_GAX7666  | {hypothetChlamydomonas_eusti | 29.10 | 0.00 |
| TRINITY_XP_0109  | {PREDICTHElaeis_guineensis   | 29.10 | 0.00 |
| TRINITY_AES9460  | {eukaryotMedicago_truncatula | 29.10 | 0.00 |
| TRINITY_EFJ3778  | {hypothetSelaginella_moellen | 29.10 | 0.00 |
| TRINITY_XP_0237  | {probableLactuca_sativa      | 29.10 | 0.00 |
| TRINITY_GAX7467  | {hypothetChlamydomonas_eusti | 29.10 | 0.00 |
| TRINITY_PNW8845  | {hypothetChlamydomonas_reinh | 29.10 | 0.00 |
| TRINITY_XP_0239  | {thiol-sqQuercus_suber       | 29.10 | 0.00 |
| TRINITY_PHT5215  | {hypothetCapsicum_baccatum   | 29.10 | 0.00 |
| TRINITY_XP_0139  | {hypothetMonoraphidium_negle | 29.10 | 0.00 |
| TRINITY_XP_0237  | {uncharaLactuca_sativa       | 29.10 | 0.00 |
| TRINITY_XP_0245  | {retinobSelaginella_moellen  | 29.10 | 0.00 |
| TRINITY_XP_0239  | {tuberousQuercus_suber       | 29.10 | 0.00 |
| TRINITY_XP_0244  | {uncharaPhyscomitrella_pate  | 29.10 | 0.00 |
| TRINITY_XP_0227  | {heparan-Durio_zibethinus    | 29.10 | 0.00 |
| TRINITY_PNH1150  | (GlycosylTetrabaena_socialis | 29.10 | 0.00 |
| TRINITY_PNH0738  | (Histone-Tetrabaena_socialis | 29.10 | 0.00 |
| TRINITY_XP_0064  | {ABC trarCitrus_clementina   | 29.10 | 0.00 |
| TRINITY_XP_0206  | {mediatorDendrobium_catenatu | 29.10 | 0.00 |
| TRINITY_XP_0206  | {uncharaDendrobium_catenatu  | 29.10 | 0.00 |
| TRINITY_XP_0045  | {oxysterCicer_arietinum      | 29.10 | 0.00 |
| TRINITY_GAX8391  | {hypothetChlamydomonas_eusti | 29.10 | 0.00 |
| TRINITY_GAX7618  | {hypothetChlamydomonas_eusti | 29.10 | 0.00 |
| TRINITY_PRW5657  | {peptidaChlorella_sorokinia  | 29.10 | 0.00 |
| TRINITY_PNH1279  | {putativeTetrabaena_socialis | 29.10 | 0.00 |
| TRINITY_GAX7401  | {hypothetChlamydomonas_eusti | 29.10 | 0.00 |
| TRINITY_XP_0174  | {PREDICTHVigna_angularis     | 29.10 | 0.00 |
| TRINITY_VDD5198  | {unnamed Brassica_oleracea   | 29.10 | 0.00 |
| TRINITY_PSC7053  | {pumilio-Micractinium_conduc | 29.10 | 0.00 |
| TRINITY_XP_0138  | {zinc firMonoraphidium_negle | 29.10 | 0.00 |
| TRINITY_GAX7691  | {hypothetChlamydomonas_eusti | 29.10 | 0.00 |
| TRINITY_GAX7517  | {hypothetChlamydomonas_eusti | 29.10 | 0.00 |
| TRINITY_PNW7463  | {hypothetChlamydomonas_reinh | 29.10 | 0.00 |
| TRINITY_XP_0239  | {uncharaQuercus_suber        | 29.10 | 0.00 |
| TRINITY_XP_0237  | {probableLactuca_sativa      | 29.10 | 0.00 |
| TRINITY_XP_0110  | {PREDICTHPopulus_euphratica  | 29.10 | 0.00 |
| TRINITY_XP_0102  | {PREDICTHNelumbo_nucifera    | 29.10 | 0.00 |
| TRINITY_GAX7381  | {hypothetChlamydomonas_eusti | 29.10 | 0.00 |
| TRINITY_GAX7757  | {hypothetChlamydomonas_eusti | 29.10 | 0.00 |

|                    |          |                      |       |      |
|--------------------|----------|----------------------|-------|------|
| TRINITY_XP_00295   | hypothet | Volvox_carteri       | 29.10 | 0.00 |
| TRINITY_PNH12265   | Tiny mac | Tetrabaena_socialis  | 29.10 | 0.00 |
| TRINITY_GAQ85117   | hypothet | Klebsormidium_niten  | 29.00 | 0.00 |
| TRINITY_XP_00751   | predicte | Bathycoccus_prasinoc | 29.00 | 0.00 |
| TRINITY_XP_01139   | Oxyster  | Auxenochlorella_pro  | 29.00 | 0.00 |
| TRINITY_RLM6046170 | kDa p    | Panicum_miliaceum    | 29.00 | 0.00 |
| TRINITY_XP_00585   | hypothet | Chlorella_variabili  | 29.00 | 0.00 |
| TRINITY_GBG70448   | hypothet | Chara_braunii        | 29.00 | 0.00 |
| TRINITY_XP_02297   | uncharac | Cucurbita_maxima     | 29.00 | 0.00 |
| TRINITY_XP_02437   | uncharac | Physcomitrella_pate  | 29.00 | 0.00 |
| TRINITY_PTQ27799   | hypothet | Marchantia_polymorp  | 29.00 | 0.00 |
| TRINITY_XP_02453   | uncharac | Selaginella_moellen  | 29.00 | 0.00 |
| TRINITY_GAQ83394   | inositol | Klebsormidium_niten  | 29.00 | 0.00 |
| TRINITY_RAL39532   | hypothet | Cuscuta_australis    | 29.00 | 0.00 |
| TRINITY_XP_02374   | probable | Lactuca_sativa       | 29.00 | 0.00 |
| TRINITY_XP_00141   | VIC fami | Ostreococcus_sp._'l  | 29.00 | 0.00 |
| TRINITY_PRW61037   | SUMO-act | Chlorella_sorokinia  | 29.00 | 0.00 |
| TRINITY_XP_00430   | PREDICTI | Fragaria_vesca       | 29.00 | 0.00 |
| TRINITY_GAQ84320   | UDP-gal  | Klebsormidium_niten  | 29.00 | 0.00 |
| TRINITY_XP_01346   | putativ  | Medicago_truncatula  | 29.00 | 0.00 |
| TRINITY_PNW72631   | hypothet | Chlamydomonas_reinh  | 29.00 | 0.00 |
| TRINITY_OAE23249   | hypothet | Marchantia_polymorp  | 29.00 | 0.00 |
| TRINITY_XP_00305   | predicte | Micromonas_pusilla   | 29.00 | 0.00 |
| TRINITY_XP_00360   | F-box p  | Medicago_truncatula  | 29.00 | 0.00 |
| TRINITY_PNR28420   | hypothet | Physcomitrella_pate  | 29.00 | 0.00 |
| TRINITY_KFK33156   | hypothet | Arabis_alpina        | 29.00 | 0.00 |
| TRINITY_BAK00797   | predicte | Hordeum_vulgare      | 29.00 | 0.00 |
| TRINITY_XP_01909   | PREDICTI | Camelina_sativa      | 29.00 | 0.00 |
| TRINITY_XP_02419   | probable | Rosa_chinensis       | 29.00 | 0.00 |
| TRINITY_XP_01742   | PREDICTI | Vigna_angularis      | 29.00 | 0.00 |
| TRINITY_RWR86483   | 14-3-3-J | Cinnamomum_micranth  | 29.00 | 0.00 |
| TRINITY_GAQ84224   | hypothet | Klebsormidium_niten  | 29.00 | 0.00 |
| TRINITY_CDY67315   | BnaCnng  | Brassica_napus       | 29.00 | 0.00 |
| TRINITY_XP_02387   | histidir | Quercus_suber        | 29.00 | 0.00 |
| TRINITY_OAE19212   | hypothet | Marchantia_polymorp  | 29.00 | 0.00 |
| TRINITY_XP_00584   | hypothet | Chlorella_variabili  | 29.00 | 0.00 |
| TRINITY_XP_02452   | DNA pol  | Selaginella_moellen  | 29.00 | 0.00 |
| TRINITY_BAJ90795   | predicte | Hordeum_vulgare      | 29.00 | 0.00 |
| TRINITY_GAX72899   | hypothet | Chlamydomonas_eusti  | 29.00 | 0.00 |
| TRINITY_KZM88819   | hypothet | Daucus_carota        | 29.00 | 0.00 |
| TRINITY_KMZ76438   | Beta-fru | Zostera_marina       | 29.00 | 0.00 |
| TRINITY_XP_00250   | predicte | Micromonas_commoda   | 29.00 | 0.00 |
| TRINITY_XP_02067   | protein  | Dendrobium_catenatu  | 29.00 | 0.00 |
| TRINITY_XP_02790   | serine/t | Vigna_unguiculata    | 29.00 | 0.00 |
| TRINITY_XP_01452   | vacuolar | Vigna_radiata        | 29.00 | 0.00 |
| TRINITY_PNH13009   | Peroxyru | Tetrabaena_socialis  | 28.90 | 0.00 |
| TRINITY_XP_00298   | ribosom  | Selaginella_moellen  | 28.90 | 0.00 |
| TRINITY_XP_01067   | PREDICTI | Beta_vulgaris        | 28.90 | 0.00 |
| TRINITY_OAY66327   | Calcium- | Ananas_comosus       | 28.90 | 0.00 |
| TRINITY_XP_00226   | PREDICTI | Vitis_vinifera       | 28.90 | 0.00 |
| TRINITY_NP_00132   | Transduc | Arabidopsis_thalian  | 28.90 | 0.00 |
| TRINITY_XP_01941   | PREDICTI | Lupinus_angustifoli  | 28.90 | 0.00 |
| TRINITY_PNR34217   | hypothet | Physcomitrella_pate  | 28.90 | 0.00 |
| TRINITY_GAQ83723   | vesicle- | Klebsormidium_niten  | 28.90 | 0.00 |
| TRINITY_XP_00565   | TPR-lik  | Coccomyxa_subellips  | 28.90 | 0.00 |
| TRINITY_XP_00250   | predicte | Micromonas_commoda   | 28.90 | 0.00 |
| TRINITY_OAE32122   | hypothet | Marchantia_polymorp  | 28.90 | 0.00 |
| TRINITY_XP_02436   | protein  | Physcomitrella_pate  | 28.90 | 0.00 |
| TRINITY_XP_00844   | PREDICTI | Cucumis_melo         | 28.90 | 0.00 |
| TRINITY_XP_02392   | tip elor | Quercus_suber        | 28.90 | 0.00 |
| TRINITY_XP_00295   | hypothet | Volvox_carteri       | 28.90 | 0.00 |
| TRINITY_XP_00751   | predicte | Bathycoccus_prasinoc | 28.90 | 0.00 |
| TRINITY_GBG59286   | hypothet | Chara_braunii        | 28.90 | 0.00 |
| TRINITY_XP_02022   | cell di  | Cajanus_cajan        | 28.90 | 0.00 |
| TRINITY_XP_01872   | PREDICTI | Eucalyptus_grandis   | 28.90 | 0.00 |
| TRINITY_PNW80411   | hypothet | Chlamydomonas_reinh  | 28.90 | 0.00 |

|                 |          |                     |       |      |
|-----------------|----------|---------------------|-------|------|
| TRINITY_PNH0786 | hypothet | Tetrabaena_socialis | 28.90 | 0.00 |
| TRINITY_XP_0093 | PREDICTI | Musa_acuminata      | 28.90 | 0.00 |
| TRINITY_EMS5845 | hypothet | Triticum_urartu     | 28.90 | 0.00 |
| TRINITY_XP_0249 | elicitor | Cynara_cardunculus  | 28.90 | 0.00 |
| TRINITY_XP_0243 | oxidatic | Physcomitrella_pate | 28.90 | 0.00 |
| TRINITY_XP_0238 | putative | Quercus_suber       | 28.90 | 0.00 |
| TRINITY_XP_0271 | peroxis  | Coffea_arabica      | 28.90 | 0.00 |
| TRINITY_XP_0174 | PREDICTI | Vigna_angularis     | 28.90 | 0.00 |
| TRINITY_GAX8228 | hypothet | Chlamydomonas_eusti | 28.90 | 0.00 |
| TRINITY_XP_0029 | hypothet | Volvox_carteri      | 28.90 | 0.00 |
| TRINITY_GBG9183 | hypothet | Chara_braunii       | 28.90 | 0.00 |
| TRINITY_GAX7477 | hypothet | Chlamydomonas_eusti | 28.90 | 0.00 |
| TRINITY_XP_0238 | eIF-2-al | Quercus_suber       | 28.90 | 0.00 |
| TRINITY_GAX8104 | hypothet | Chlamydomonas_eusti | 28.90 | 0.00 |
| TRINITY_PNW7980 | hypothet | Chlamydomonas_reinh | 28.90 | 0.00 |
| TRINITY_XP_0016 | aromatic | Chlamydomonas_reinh | 28.90 | 0.00 |
| TRINITY_ONK6616 | uncharac | Asparagus_officinal | 28.90 | 0.00 |
| TRINITY_XP_0228 | prostami | Olea_europaea       | 28.90 | 0.00 |
| TRINITY_EFJ1324 | hypothet | Selaginella_moellen | 28.90 | 0.00 |
| TRINITY_XP_0029 | hypothet | Volvox_carteri      | 28.90 | 0.00 |
| TRINITY_PTQ3755 | hypothet | Marchantia_polymorp | 28.90 | 0.00 |
| TRINITY_XP_0056 | CBS-dom  | Coccomyxa_subellips | 28.90 | 0.00 |
| TRINITY_OMO6644 | hypothet | Corchorus_capsulari | 28.90 | 0.00 |
| TRINITY_KXZ4543 | hypothet | Gonium_pectorale    | 28.90 | 0.00 |
| TRINITY_KXZ4168 | hypothet | Gonium_pectorale    | 28.90 | 0.00 |
| TRINITY_XP_0245 | cysteine | Selaginella_moellen | 28.80 | 0.00 |
| TRINITY_KFK3518 | hypothet | Arabis_alpina       | 28.80 | 0.00 |
| TRINITY_EFJ1381 | hypothet | Selaginella_moellen | 28.80 | 0.00 |
| TRINITY_XP_0172 | PREDICTI | Daucus_carota       | 28.80 | 0.00 |
| TRINITY_XP_0238 | uncharac | Quercus_suber       | 28.80 | 0.00 |
| TRINITY_OAE2065 | hypothet | Marchantia_polymorp | 28.80 | 0.00 |
| TRINITY_XP_0264 | ras-rel  | Papaver_somniferum  | 28.80 | 0.00 |
| TRINITY_XP_0238 | aurofus  | Quercus_suber       | 28.80 | 0.00 |
| TRINITY_XP_0056 | IBR-dom  | Coccomyxa_subellips | 28.80 | 0.00 |
| TRINITY_XP_0016 | predict  | Chlamydomonas_reinh | 28.80 | 0.00 |
| TRINITY_XP_0106 | PREDICTI | Beta_vulgaris       | 28.80 | 0.00 |
| TRINITY_XP_0218 | translat | Prunus_avium        | 28.80 | 0.00 |
| TRINITY_CDP0389 | unnamed  | Coffea_canephora    | 28.80 | 0.00 |
| TRINITY_XP_0042 | glycosyl | Solanum_lycopersicu | 28.80 | 0.00 |
| TRINITY_XP_0239 | uncharac | Quercus_suber       | 28.80 | 0.00 |
| TRINITY_XP_0016 | predict  | Chlamydomonas_reinh | 28.80 | 0.00 |
| TRINITY_XP_0064 | cytoplas | Eutrema_salsugineum | 28.80 | 0.00 |
| TRINITY_GAX7458 | hypothet | Chlamydomonas_eusti | 28.80 | 0.00 |
| TRINITY_OAY3962 | hypothet | Manihot_esculenta   | 28.80 | 0.00 |
| TRINITY_XP_0030 | mRNA ca  | Ostreococcus_tauri  | 28.80 | 0.00 |
| TRINITY_XP_0164 | PREDICTI | Nicotiana_tabacum   | 28.80 | 0.00 |
| TRINITY_GAX7329 | hypothet | Chlamydomonas_eusti | 28.80 | 0.00 |
| TRINITY_XP_0239 | probable | Quercus_suber       | 28.80 | 0.00 |
| TRINITY_XP_0017 | flagell  | Chlamydomonas_reinh | 28.80 | 0.00 |
| TRINITY_XP_0041 | PREDICTI | Cucumis_sativus     | 28.80 | 0.00 |
| TRINITY_GAX7600 | hypothet | Chlamydomonas_eusti | 28.80 | 0.00 |
| TRINITY_XP_0056 | NAD(P)-k | Coccomyxa_subellips | 28.80 | 0.00 |
| TRINITY_GAX7701 | hypothet | Chlamydomonas_eusti | 28.80 | 0.00 |
| TRINITY_KXZ4728 | hypothet | Gonium_pectorale    | 28.80 | 0.00 |
| TRINITY_XP_0238 | E3 ubiq  | Quercus_suber       | 28.80 | 0.00 |
| TRINITY_GAQ8368 | hypothet | Klebsormidium_niten | 28.80 | 0.00 |
| TRINITY_PNW7012 | hypothet | Chlamydomonas_reinh | 28.80 | 0.00 |
| TRINITY_PHU0149 | hypothet | Capsicum_chinense   | 28.80 | 0.00 |
| TRINITY_PRQ3184 | putative | Rosa_chinensis      | 28.80 | 0.00 |
| TRINITY_PNW8193 | hypothet | Chlamydomonas_reinh | 28.80 | 0.00 |
| TRINITY_XP_0071 | hypothet | Phaseolus_vulgaris  | 28.80 | 0.00 |
| TRINITY_BAB1810 | cyclic r | Chlamydomonas_reinh | 28.80 | 0.00 |
| TRINITY_GAX7787 | hypothet | Chlamydomonas_eusti | 28.80 | 0.00 |
| TRINITY_GAX7979 | hypothet | Chlamydomonas_eusti | 28.80 | 0.00 |
| TRINITY_XP_0056 | hypothet | Coccomyxa_subellips | 28.80 | 0.00 |
| TRINITY_XP_0239 | paxillir | Quercus_suber       | 28.80 | 0.00 |

|                  |          |                     |       |      |
|------------------|----------|---------------------|-------|------|
| TRINITY_GAX80532 | hypothet | Chlamydomonas_eusti | 28.80 | 0.00 |
| TRINITY_GAX8368  | hypothet | Chlamydomonas_eusti | 28.80 | 0.00 |
| TRINITY_XP_01069 | PREDICTI | Beta_vulgaris       | 28.80 | 0.00 |
| TRINITY_PIN0576  | hypothet | Handroanthus_impeti | 28.80 | 0.00 |
| TRINITY_PUZ4341  | hypothet | Panicum_hallii      | 28.80 | 0.00 |
| TRINITY_XP_00294 | hypothet | Volvox_carteri      | 28.80 | 0.00 |
| TRINITY_XP_01027 | PREDICTI | Nelumbo_nucifera    | 28.80 | 0.00 |
| TRINITY_GAX83361 | hypothet | Chlamydomonas_eusti | 28.80 | 0.00 |
| TRINITY_KXZ5566  | hypothet | Gonium_pectorale    | 28.80 | 0.00 |
| TRINITY_PON40532 | Fumarate | Parasponia_anderson | 28.70 | 0.00 |
| TRINITY_KMZ67992 | LMBR1-li | Zostera_marina      | 28.70 | 0.00 |
| TRINITY_XP_0139  | putative | Monoraphidium_negle | 28.70 | 0.00 |
| TRINITY_XP_01594 | probable | Arachis_duranensis  | 28.70 | 0.00 |
| TRINITY_XP_01743 | PREDICTI | Vigna_angularis     | 28.70 | 0.00 |
| TRINITY_XP_02353 | vacuolar | Cucurbita_pepo      | 28.70 | 0.00 |
| TRINITY_GBF92574 | hypothet | Raphidocelis_subcap | 28.70 | 0.00 |
| TRINITY_XP_02387 | geranyl  | Quercus_suber       | 28.70 | 0.00 |
| TRINITY_XP_00864 | thiamin  | Zea_mays            | 28.70 | 0.00 |
| TRINITY_XP_02581 | UPF0587  | Panicum_hallii      | 28.70 | 0.00 |
| TRINITY_ABR18287 | unknown  | Picea_sitchensis    | 28.70 | 0.00 |
| TRINITY_XP_02198 | calcium  | Helianthus_annuus   | 28.70 | 0.00 |
| TRINITY_XP_02452 | protein  | Selaginella_moellen | 28.70 | 0.00 |
| TRINITY_GAX73151 | hypothet | Chlamydomonas_eusti | 28.70 | 0.00 |
| TRINITY_ABD52325 | mitochor | Amaranthus_tubercul | 28.70 | 0.00 |
| TRINITY_XP_0017  | predicte | Chlamydomonas_reinh | 28.70 | 0.00 |
| TRINITY_KMZ70968 | hypothet | Zostera_marina      | 28.70 | 0.00 |
| TRINITY_GBF88192 | hypothet | Raphidocelis_subcap | 28.70 | 0.00 |
| TRINITY_XP_01041 | PREDICTI | Camelina_sativa     | 28.70 | 0.00 |
| TRINITY_XP_00713 | hypothet | Phaseolus_vulgaris  | 28.70 | 0.00 |
| TRINITY_GAQ87539 | hypothet | Klebsormidium_niten | 28.70 | 0.00 |
| TRINITY_XP_02436 | protein  | Physcomitrella_pate | 28.70 | 0.00 |
| TRINITY_PNW85671 | hypothet | Chlamydomonas_reinh | 28.70 | 0.00 |
| TRINITY_KMS93578 | hypothet | Beta_vulgaris       | 28.70 | 0.00 |
| TRINITY_GAQ83334 | translat | Klebsormidium_niten | 28.70 | 0.00 |
| TRINITY_BAK00002 | predicte | Hordeum_vulgare     | 28.70 | 0.00 |
| TRINITY_XP_00564 | phosphat | Coccomyxa_subellips | 28.70 | 0.00 |
| TRINITY_RWW9024  | hypothet | Ensete_ventricosum  | 28.70 | 0.00 |
| TRINITY_GBF91567 | hypothet | Raphidocelis_subcap | 28.70 | 0.00 |
| TRINITY_XP_02375 | serine   | Lactuca_sativa      | 28.70 | 0.00 |
| TRINITY_GAX79654 | hypothet | Chlamydomonas_eusti | 28.70 | 0.00 |
| TRINITY_RLM59005 | patatin  | Panicum_miliaceum   | 28.70 | 0.00 |
| TRINITY_OEL37612 | CBL-inte | Dichanthelium_oligo | 28.70 | 0.00 |
| TRINITY_ABU52967 | hypothet | Dunaliella_viridis  | 28.70 | 0.00 |
| TRINITY_XP_0017  | hypothet | Chlamydomonas_reinh | 28.70 | 0.00 |
| TRINITY_GAX75196 | hypothet | Chlamydomonas_eusti | 28.70 | 0.00 |
| TRINITY_XP_02052 | RWD dom  | Amborella_trichopod | 28.70 | 0.00 |
| TRINITY_GAX8031  | hypothet | Chlamydomonas_eusti | 28.70 | 0.00 |
| TRINITY_XP_0025  | predicte | Micromonas_commoda  | 28.70 | 0.00 |
| TRINITY_XP_01389 | ERD4-re  | Monoraphidium_negle | 28.70 | 0.00 |
| TRINITY_PNH12261 | Tiny mac | Tetrabaena_socialis | 28.70 | 0.00 |
| TRINITY_GAX73388 | hypothet | Chlamydomonas_eusti | 28.70 | 0.00 |
| TRINITY_XP_0025  | predicte | Micromonas_commoda  | 28.70 | 0.00 |
| TRINITY_XP_00295 | hypothet | Volvox_carteri      | 28.70 | 0.00 |
| TRINITY_XP_00294 | structur | Volvox_carteri      | 28.70 | 0.00 |
| TRINITY_GAX7962  | hypothet | Chlamydomonas_eusti | 28.70 | 0.00 |
| TRINITY_KXZ55911 | hypothet | Gonium_pectorale    | 28.70 | 0.00 |
| TRINITY_GAQ89183 | hypothet | Klebsormidium_niten | 28.70 | 0.00 |
| TRINITY_XP_01024 | PREDICTI | Nelumbo_nucifera    | 28.60 | 0.00 |
| TRINITY_OEL24868 | Acyl-Co  | Dichanthelium_oligo | 28.60 | 0.00 |
| TRINITY_OMP03068 | hypothet | Corchorus_capsulari | 28.60 | 0.00 |
| TRINITY_XP_02645 | BTB/POZ  | Papaver_somniferum  | 28.60 | 0.00 |
| TRINITY_XP_01725 | PREDICTI | Daucus_carota       | 28.60 | 0.00 |
| TRINITY_XP_00169 | predicte | Chlamydomonas_reinh | 28.60 | 0.00 |
| TRINITY_XP_00356 | uncharac | Brachypodium_distac | 28.60 | 0.00 |
| TRINITY_AAM77646 | hypothet | Arabidopsis_thalian | 28.60 | 0.00 |
| TRINITY_XP_02175 | actin-re | Chenopodium_quinoa  | 28.60 | 0.00 |

|                   |          |                     |       |      |
|-------------------|----------|---------------------|-------|------|
| TRINITY_EEC7691   | hypothet | Oryza_sativa        | 28.60 | 0.00 |
| TRINITY_XP_00584  | hypothet | Chlorella_variabili | 28.60 | 0.00 |
| TRINITY_GAQ80064  | DNA rep  | Klebsormidium_niten | 28.60 | 0.00 |
| TRINITY_XP_02562  | cytokini | Arachis_hypogaea    | 28.60 | 0.00 |
| TRINITY_XP_01389  | hypothet | Monoraphidium_negle | 28.60 | 0.00 |
| TRINITY_GAQ91283  | hypothet | Klebsormidium_niten | 28.60 | 0.00 |
| TRINITY_XP_01139  | Protein  | Auxenochlorella_pro | 28.60 | 0.00 |
| TRINITY_PNH02015  | ARM REP  | Tetrabaena_socialis | 28.60 | 0.00 |
| TRINITY_XP_00666  | PREDICT  | Oryza_brachyantha   | 28.60 | 0.00 |
| TRINITY_XP_02452  | DNA rep  | Selaginella_moellen | 28.60 | 0.00 |
| TRINITY_XP_00564  | RNA 3'-t | Coccomyxa_subellips | 28.60 | 0.00 |
| TRINITY_GAQ91345  | Glycine  | Klebsormidium_niten | 28.60 | 0.00 |
| TRINITY_XP_01919  | PREDICT  | Ipomoea_nil         | 28.60 | 0.00 |
| TRINITY_XP_00751  | predict  | Bathycoccus_prasinc | 28.60 | 0.00 |
| TRINITY_XP_00294  | hypothet | Volvox_carteri      | 28.60 | 0.00 |
| TRINITY_OAE18446  | hypothet | Marchantia_polymorp | 28.60 | 0.00 |
| TRINITY_XP_02388  | vacuolar | Quercus_suber       | 28.60 | 0.00 |
| TRINITY_AAV59307  | putative | Oryza_sativa        | 28.60 | 0.00 |
| TRINITY_XP_00644  | probable | Citrus_clementina   | 28.60 | 0.00 |
| TRINITY_GAQ84494  | cytochr  | Klebsormidium_niten | 28.60 | 0.00 |
| TRINITY_XP_01027  | PREDICT  | Nelumbo_nucifera    | 28.60 | 0.00 |
| TRINITY_XP_02438  | uncharac | Physcomitrella_pate | 28.60 | 0.00 |
| TRINITY_XP_00751  | predict  | Bathycoccus_prasinc | 28.60 | 0.00 |
| TRINITY_KCW84173  | hypothet | Eucalyptus_grandis  | 28.60 | 0.00 |
| TRINITY_GAX76741  | hypothet | Chlamydomonas_eusti | 28.60 | 0.00 |
| TRINITY_PNH01725  | hypothet | Tetrabaena_socialis | 28.60 | 0.00 |
| TRINITY_GAX76994  | hypothet | Chlamydomonas_eusti | 28.60 | 0.00 |
| TRINITY_GAQ88796  | RNA poly | Klebsormidium_niten | 28.60 | 0.00 |
| TRINITY_OEL16059  | BTB/POZ  | Dichanthelium_oligo | 28.60 | 0.00 |
| TRINITY_XP_00168  | predict  | Chlamydomonas_reinh | 28.60 | 0.00 |
| TRINITY_GAX73538  | hypothet | Chlamydomonas_eusti | 28.60 | 0.00 |
| TRINITY_XP_02184  | ran-bin  | Spinacia_oleracea   | 28.60 | 0.00 |
| TRINITY_KXZ43973  | hypothet | Gonium_pectorale    | 28.60 | 0.00 |
| TRINITY_GAX74313  | hypothet | Chlamydomonas_eusti | 28.60 | 0.00 |
| TRINITY_XP_01564  | LMBR1 dc | Oryza_sativa        | 28.60 | 0.00 |
| TRINITY_XP_02641  | E3 ubiq  | Papaver_somniferum  | 28.60 | 0.00 |
| TRINITY_XP_00169  | predict  | Chlamydomonas_reinh | 28.50 | 0.00 |
| TRINITY_XP_02353  | polyader | Cucurbita_pepo      | 28.50 | 0.00 |
| TRINITY_RWR80977  | calmodul | Cinnamomum_micranth | 28.50 | 0.00 |
| TRINITY_OIV99723  | hypothet | Lupinus_angustifoli | 28.50 | 0.00 |
| TRINITY_XP_00935  | PREDICT  | Pyrus_x_bretschneid | 28.50 | 0.00 |
| TRINITY_PTQ41187  | hypothet | Marchantia_polymorp | 28.50 | 0.00 |
| TRINITY_XP_00256  | predict  | Micromonas_commoda  | 28.50 | 0.00 |
| TRINITY_XP_01917  | PREDICT  | Ipomoea_nil         | 28.50 | 0.00 |
| TRINITY_XP_02185  | transcri | Spinacia_oleracea   | 28.50 | 0.00 |
| TRINITY_XP_00751  | alpha-1, | Bathycoccus_prasinc | 28.50 | 0.00 |
| TRINITY_XP_00751  | unnamed  | Bathycoccus_prasinc | 28.50 | 0.00 |
| TRINITY_GAQ78167  | hypothet | Klebsormidium_niten | 28.50 | 0.00 |
| TRINITY_XP_02163  | cytochr  | Hevea_brasiliensis  | 28.50 | 0.00 |
| TRINITY_GAQ89752  | hypothet | Klebsormidium_niten | 28.50 | 0.00 |
| TRINITY_XP_02396  | aorsin-l | Quercus_suber       | 28.50 | 0.00 |
| TRINITY_KDD76966  | Proline  | Helicosporidium_sp. | 28.50 | 0.00 |
| TRINITY_KXZ50588  | hypothet | Gonium_pectorale    | 28.50 | 0.00 |
| TRINITY_XP_022711 | -phosph  | Durio_zibethinus    | 28.50 | 0.00 |
| TRINITY_PTQ44579  | hypothet | Marchantia_polymorp | 28.50 | 0.00 |
| TRINITY_XP_00294  | hypothet | Volvox_carteri      | 28.50 | 0.00 |
| TRINITY_GAX78465  | hypothet | Chlamydomonas_eusti | 28.50 | 0.00 |
| TRINITY_XP_00584  | hypothet | Chlorella_variabili | 28.50 | 0.00 |
| TRINITY_XP_02402  | PH, RCC  | Morus_notabilis     | 28.50 | 0.00 |
| TRINITY_GAX74414  | hypothet | Chlamydomonas_eusti | 28.50 | 0.00 |
| TRINITY_GAQ77979  | hypothet | Klebsormidium_niten | 28.50 | 0.00 |
| TRINITY_XP_00256  | predict  | Micromonas_commoda  | 28.50 | 0.00 |
| TRINITY_XP_00169  | guanylat | Chlamydomonas_reinh | 28.50 | 0.00 |
| TRINITY_KHG30389  | EVI5-li  | Gossypium_arboreum  | 28.50 | 0.00 |
| TRINITY_OWM62936  | hypothet | Punica_granatum     | 28.50 | 0.00 |
| TRINITY_PNW79803  | hypothet | Chlamydomonas_reinh | 28.50 | 0.00 |



|                          |                         |       |      |
|--------------------------|-------------------------|-------|------|
| TRINITY_XP_02453platelet | Selaginella_moellen     | 28.50 | 0.00 |
| TRINITY_XP_02353BTB/POZ  | Cucurbita_pepo          | 28.50 | 0.00 |
| TRINITY_GAX77363hypothet | Chlamydomonas_eusti     | 28.50 | 0.00 |
| TRINITY_GAX85083hypothet | Chlamydomonas_eusti     | 28.50 | 0.00 |
| TRINITY_KXZ44382hypothet | Gonium_pectorale        | 28.50 | 0.00 |
| TRINITY_XP_00583hypothet | Chlorella_variabili     | 28.50 | 0.00 |
| TRINITY_PSC67593Gag-Pol  | Micractinium_conduc     | 28.50 | 0.00 |
| TRINITY_XP_02643myosin-6 | Papaver_somniferum      | 28.50 | 0.00 |
| TRINITY_PNW77234hypothet | Chlamydomonas_reinh     | 28.50 | 0.00 |
| TRINITY_PNW78788hypothet | Chlamydomonas_reinh     | 28.50 | 0.00 |
| TRINITY_PNW74393hypothet | Chlamydomonas_reinh     | 28.50 | 0.00 |
| TRINITY_KDP23404hypothet | Jatropha_curcas         | 28.40 | 0.00 |
| TRINITY_XP_00142predicte | Ostreococcus_sp._'1     | 28.40 | 0.00 |
| TRINITY_XP_01923PREDICTI | Nicotiana_attenuata     | 28.40 | 0.00 |
| TRINITY_XP_02283polyol   | Olea_europaea           | 28.40 | 0.00 |
| TRINITY_EPS73373hypothet | Genlisea_aurea          | 28.40 | 0.00 |
| TRINITY_XP_00583hypothet | Chlorella_variabili     | 28.40 | 0.00 |
| TRINITY_XP_02446sorting  | Populus_trichocarpa     | 28.40 | 0.00 |
| TRINITY_XP_01910PREDICTI | Beta_vulgaris           | 28.40 | 0.00 |
| TRINITY_GAQ83933glycerol | Klebsormidium_niten     | 28.40 | 0.00 |
| TRINITY_XP_02003uncharac | Ananas_comosus          | 28.40 | 0.00 |
| TRINITY_XP_00448gamma-sc | Cicer_arietinum         | 28.40 | 0.00 |
| TRINITY_XP_02454probable | Selaginella_moellen     | 28.40 | 0.00 |
| TRINITY_GAQ91271etoposic | Klebsormidium_niten     | 28.40 | 0.00 |
| TRINITY_KMZ70092Ethanol  | Zostera_marina          | 28.40 | 0.00 |
| TRINITY_KYP36096Ankyrin  | Cajanus_cajan           | 28.40 | 0.00 |
| TRINITY_XP_02453uncharac | Selaginella_moellen     | 28.40 | 0.00 |
| TRINITY_XP_00413PREDICTI | Cucumis_sativus         | 28.40 | 0.00 |
| TRINITY_PRW59103iodothy  | Chlorella_sorokinia     | 28.40 | 0.00 |
| TRINITY_OIW18783hypothet | Lupinus_angustifoli     | 28.40 | 0.00 |
| TRINITY_PNW88183hypothet | Chlamydomonas_reinh     | 28.40 | 0.00 |
| TRINITY_XP_00878histone- | Phoenix_dactylifera     | 28.40 | 0.00 |
| TRINITY_XP_02703paired   | Coffea_arabica          | 28.40 | 0.00 |
| TRINITY_XP_02493zeaxant  | Cynara_cardunculus      | 28.40 | 0.00 |
| TRINITY_XP_02013ASC1-li  | Aegilops_tauschii       | 28.40 | 0.00 |
| TRINITY_XP_00423F-box    | Solanum_lycopersicu     | 28.40 | 0.00 |
| TRINITY_PSR86813Calcium- | Actinidia_chinensis     | 28.40 | 0.00 |
| TRINITY_XP_02390cell     | Quercus_suber           | 28.40 | 0.00 |
| TRINITY_XP_00293hypothet | Volvox_carteri          | 28.40 | 0.00 |
| TRINITY_XP_02790DNA      | croVigna_unguiculata    | 28.40 | 0.00 |
| TRINITY_XP_00843PREDICTI | Cucumis_melo            | 28.40 | 0.00 |
| TRINITY_PRW58823Pol      | [Ch]Chlorella_sorokinia | 28.40 | 0.00 |
| TRINITY_GBF88333hypothet | Raphidocelis_subcap     | 28.40 | 0.00 |
| TRINITY_KZM98893hypothet | Daucus_carota           | 28.40 | 0.00 |
| TRINITY_KDD75493hypothet | Helicosporidium_sp.     | 28.40 | 0.00 |
| TRINITY_GAQ83084hypothet | Klebsormidium_niten     | 28.40 | 0.00 |
| TRINITY_XP_00833PREDICTI | Malus_domestica         | 28.40 | 0.00 |
| TRINITY_XP_00308DENN     | donOstreococcus_tauri   | 28.40 | 0.00 |
| TRINITY_XP_00306predicte | Micromonas_pusilla      | 28.40 | 0.00 |
| TRINITY_XP_02402putative | Morus_notabilis         | 28.40 | 0.00 |
| TRINITY_XP_00303predicte | Micromonas_pusilla      | 28.40 | 0.00 |
| TRINITY_XP_02292transcri | Cucurbita_moschata      | 28.40 | 0.00 |
| TRINITY_EMS63333Tubulin- | Triticum_urartu         | 28.40 | 0.00 |
| TRINITY_XP_01923PREDICTI | Nicotiana_attenuata     | 28.40 | 0.00 |
| TRINITY_BAJ96946predicte | Hordeum_vulgare         | 28.40 | 0.00 |
| TRINITY_XP_02200glutathi | Helianthus_annuus       | 28.40 | 0.00 |
| TRINITY_XP_00933PREDICTI | Musa_acuminata          | 28.40 | 0.00 |
| TRINITY_KXZ55663hypothet | Gonium_pectorale        | 28.40 | 0.00 |
| TRINITY_KXZ44743hypothet | Gonium_pectorale        | 28.40 | 0.00 |
| TRINITY_GAX82113hypothet | Chlamydomonas_eusti     | 28.40 | 0.00 |
| TRINITY_XP_02563flavin-c | Arachis_hypogaea        | 28.30 | 0.00 |
| TRINITY_GBG86742hypothet | Chara_braunii           | 28.30 | 0.00 |
| TRINITY_PSC68021serine   | tMicractinium_conduc    | 28.30 | 0.00 |
| TRINITY_GAX77541hypothet | Chlamydomonas_eusti     | 28.30 | 0.00 |
| TRINITY_KXZ52652hypothet | Gonium_pectorale        | 28.30 | 0.00 |
| TRINITY_ASU47403ethylen  | ePaeonia_suffruticos    | 28.30 | 0.00 |

|                 |                               |       |      |
|-----------------|-------------------------------|-------|------|
| TRINITY_EFJ0560 | hypothetSelaginella_moellen   | 28.30 | 0.00 |
| TRINITY_XP_0238 | non-rediQuercus_suber         | 28.30 | 0.00 |
| TRINITY_GAX8118 | hypothetChlamydomonas_eusti   | 28.30 | 0.00 |
| TRINITY_PIA3041 | hypothetAquilegia_coerulea    | 28.30 | 0.00 |
| TRINITY_XP_0206 | polypyriDendrobium_catenatu   | 28.30 | 0.00 |
| TRINITY_XP_0244 | (von Will)Physcomitrella_pate | 28.30 | 0.00 |
| TRINITY_XP_0243 | lysine-εPhyscomitrella_pate   | 28.30 | 0.00 |
| TRINITY_XP_0025 | (calcium-Micromonas_commoda   | 28.30 | 0.00 |
| TRINITY_XP_0238 | {dihydro}Quercus_suber        | 28.30 | 0.00 |
| TRINITY_PRW4450 | major fεChlorella_sorokinia   | 28.30 | 0.00 |
| TRINITY_KXZ4625 | hypothetGonium_pectorale      | 28.30 | 0.00 |
| TRINITY_RQM0337 | hypothetBrassica_cretica      | 28.30 | 0.00 |
| TRINITY_XP_0072 | (ras-relεPrunus_persica       | 28.30 | 0.00 |
| TRINITY_GAX7389 | hypothetChlamydomonas_eusti   | 28.30 | 0.00 |
| TRINITY_PNW7319 | hypothetChlamydomonas_reinh   | 28.30 | 0.00 |
| TRINITY_XP_0238 | repressiQuercus_suber         | 28.30 | 0.00 |
| TRINITY_XP_0239 | U5 smallQuercus_suber         | 28.30 | 0.00 |
| TRINITY_XP_0184 | PREDICTIRaphanus_sativus      | 28.30 | 0.00 |
| TRINITY_XP_0096 | (PREDICTINicotiana_tomentosi  | 28.30 | 0.00 |
| TRINITY_PAN4968 | (hypothetPanicum_hallii       | 28.30 | 0.00 |
| TRINITY_XP_0238 | {indolean}Quercus_suber       | 28.30 | 0.00 |
| TRINITY_GAX8569 | hypothetChlamydomonas_eusti   | 28.30 | 0.00 |
| TRINITY_XP_0104 | {PREDICTICamelina_sativa      | 28.30 | 0.00 |
| TRINITY_XP_0103 | serine iSolanum_lycopersicu   | 28.30 | 0.00 |
| TRINITY_GAX7517 | hypothetChlamydomonas_eusti   | 28.30 | 0.00 |
| TRINITY_PNW7532 | (hypothetChlamydomonas_reinh  | 28.30 | 0.00 |
| TRINITY_XP_0029 | coatomeiSelaginella_moellen   | 28.30 | 0.00 |
| TRINITY_XP_0238 | {DSC E3 i}Quercus_suber       | 28.30 | 0.00 |
| TRINITY_XP_0025 | (predictεMicromonas_commoda   | 28.30 | 0.00 |
| TRINITY_PNW6984 | (hypothetChlamydomonas_reinh  | 28.30 | 0.00 |
| TRINITY_GAX8337 | hypothetChlamydomonas_eusti   | 28.30 | 0.00 |
| TRINITY_XP_0238 | E3 ubiqQuercus_suber          | 28.20 | 0.00 |
| TRINITY_XP_0279 | calcium-Vigna_unguiculata     | 28.20 | 0.00 |
| TRINITY_XP_0100 | {PREDICTIEucalyptus_grandis   | 28.20 | 0.00 |
| TRINITY_XP_0172 | {PREDICTIDaucus_carota        | 28.20 | 0.00 |
| TRINITY_XP_0200 | {putative}Ananas_comosus      | 28.20 | 0.00 |
| TRINITY_OTG1563 | {putative}Helianthus_annuus   | 28.20 | 0.00 |
| TRINITY_XP_0030 | (predictεMicromonas_pusilla   | 28.20 | 0.00 |
| TRINITY_XP_0072 | (reticulεPrunus_persica       | 28.20 | 0.00 |
| TRINITY_PNW8311 | (hypothetChlamydomonas_reinh  | 28.20 | 0.00 |
| TRINITY_KXZ4620 | hypothetGonium_pectorale      | 28.20 | 0.00 |
| TRINITY_PNW8427 | (hypothetChlamydomonas_reinh  | 28.20 | 0.00 |
| TRINITY_OMO9715 | (hypothetCorchorus_olitorius  | 28.20 | 0.00 |
| TRINITY_XP_0263 | {cation/}Papaver_somniferum   | 28.20 | 0.00 |
| TRINITY_KYP6027 | {putative}Cajanus_cajan       | 28.20 | 0.00 |
| TRINITY_KMZ7291 | {vacuolar}Zostera_marina      | 28.20 | 0.00 |
| TRINITY_GAX8411 | hypothetChlamydomonas_eusti   | 28.20 | 0.00 |
| TRINITY_XP_0036 | (eukaryotMedicago_truncatula  | 28.20 | 0.00 |
| TRINITY_KXZ4844 | hypothetGonium_pectorale      | 28.20 | 0.00 |
| TRINITY_GAQ8215 | hypothetKlebsormidium_niten   | 28.20 | 0.00 |
| TRINITY_XP_0201 | {uncharac}Aegilops_tauschii   | 28.20 | 0.00 |
| TRINITY_XP_0025 | (predictεMicromonas_commoda   | 28.20 | 0.00 |
| TRINITY_XP_0216 | {mitochor}Hevea_brasiliensis  | 28.20 | 0.00 |
| TRINITY_RLN4056 | (hypothetPanicum_miliaceum    | 28.20 | 0.00 |
| TRINITY_GBF9832 | (hypothetRaphidocelis_subcap  | 28.20 | 0.00 |
| TRINITY_GAQ8879 | {RNA poly}Klebsormidium_niten | 28.20 | 0.00 |
| TRINITY_GAX8497 | (hypothetChlamydomonas_eusti  | 28.20 | 0.00 |
| TRINITY_XP_0062 | {phosphat}Capsella_rubella    | 28.20 | 0.00 |
| TRINITY_XP_0190 | {PREDICTICamelina_sativa      | 28.20 | 0.00 |
| TRINITY_RCV2951 | (hypothetSetaria_italica      | 28.20 | 0.00 |
| TRINITY_XP_0216 | {vacuolar}Hevea_brasiliensis  | 28.20 | 0.00 |
| TRINITY_XP_0029 | {hypothet}Volvox_carteri      | 28.20 | 0.00 |
| TRINITY_PNH0942 | {FGFR1 or}Tetrabaena_socialis | 28.20 | 0.00 |
| TRINITY_XP_0236 | {ecotropi}Capsella_rubella    | 28.20 | 0.00 |
| TRINITY_XP_0016 | {oligoenc}Chlamydomonas_reinh | 28.20 | 0.00 |
| TRINITY_ABU5296 | hypothetDunaliella_viridis    | 28.20 | 0.00 |

|                      |                              |       |      |
|----------------------|------------------------------|-------|------|
| TRINITY_GAX82041     | hypothetChlamydomonas_eusti  | 28.20 | 0.00 |
| TRINITY_OAE2258      | hypothetMarchantia_polymorp  | 28.20 | 0.00 |
| TRINITY_GAX85354     | hypothetChlamydomonas_eusti  | 28.20 | 0.00 |
| TRINITY_XP_00294     | hypothetVolvox_carteri       | 28.20 | 0.00 |
| TRINITY_GBG89162     | hypothetChara_braunii        | 28.20 | 0.00 |
| TRINITY_XP_00295     | hypothetVolvox_carteri       | 28.20 | 0.00 |
| TRINITY_EPS66064     | hypothetGenlisea_aurea       | 28.10 | 0.00 |
| TRINITY_PRW5787      | zinc firChlorella_sorokinia  | 28.10 | 0.00 |
| TRINITY_XP_02375     | probableLactuca_sativa       | 28.10 | 0.00 |
| TRINITY_PKA65131     | PutativeApostasia_shenzheni  | 28.10 | 0.00 |
| TRINITY_XP_0239126S  | protQuercus_suber            | 28.10 | 0.00 |
| TRINITY_XP_00414     | PREDICTFCucumis_sativus      | 28.10 | 0.00 |
| TRINITY_GAX80053     | hypothetChlamydomonas_eusti  | 28.10 | 0.00 |
| TRINITY_RMZ52501     | hypothetAuxenochlorella_pro  | 28.10 | 0.00 |
| TRINITY_XP_01561     | acylamirOryza_sativa         | 28.10 | 0.00 |
| TRINITY_XP_00751     | predicteBathycoccus_prasinc  | 28.10 | 0.00 |
| TRINITY_GAX82125     | hypothetChlamydomonas_eusti  | 28.10 | 0.00 |
| TRINITY_PTQ37558     | hypothetMarchantia_polymorp  | 28.10 | 0.00 |
| TRINITY_XP_02416     | villin-1Rosa_chinensis       | 28.10 | 0.00 |
| TRINITY_OAE26318     | hypothetMarchantia_polymorp  | 28.10 | 0.00 |
| TRINITY_XP_00939     | PREDICTFMusa_acuminata       | 28.10 | 0.00 |
| TRINITY_XP_00644     | cation/cCitrus_clementina    | 28.10 | 0.00 |
| TRINITY_PNT15523     | hypothetPopulus_trichocarpa  | 28.10 | 0.00 |
| TRINITY_EYU34958     | hypothetErythranthe_guttata  | 28.10 | 0.00 |
| TRINITY_XP_00685     | protein Amborella_trichopod  | 28.10 | 0.00 |
| TRINITY_ONK66169     | uncharacAsparagus_officinal  | 28.10 | 0.00 |
| TRINITY_PRW20228     | AGC PKA Chlorella_sorokinia  | 28.10 | 0.00 |
| TRINITY_XP_00428     | PREDICTIFragaria_vesca       | 28.10 | 0.00 |
| TRINITY_EEF24282     | ExtracelRicinus_communis     | 28.10 | 0.00 |
| TRINITY_XP_02372     | elicitorLactuca_sativa       | 28.10 | 0.00 |
| TRINITY_XP_02389     | non-redQuercus_suber         | 28.10 | 0.00 |
| TRINITY_PNW72997     | hypothetChlamydomonas_reinh  | 28.10 | 0.00 |
| TRINITY_GAX7787      | (hypothetChlamydomonas_eusti | 28.10 | 0.00 |
| TRINITY_XP_00585     | hypothetChlorella_variabili  | 28.10 | 0.00 |
| TRINITY_XP_0017      | (predicteChlamydomonas_reinh | 28.10 | 0.00 |
| TRINITY_XP_00634     | PREDICTISolanum_tuberosum    | 28.00 | 0.00 |
| TRINITY_GAX7666      | hypothetChlamydomonas_eusti  | 28.00 | 0.00 |
| TRINITY_XP_00751     | predicteBathycoccus_prasinc  | 28.00 | 0.00 |
| TRINITY_XP_01884     | PREDICTIJuglans_regia        | 28.00 | 0.00 |
| TRINITY_ASR73784     | acyl-Co2Camellia_sinensis    | 28.00 | 0.00 |
| TRINITY_XP_02391a    | orsin-1Quercus_suber         | 28.00 | 0.00 |
| TRINITY_GAQ79022     | PolypyriKlebsormidium_niten  | 28.00 | 0.00 |
| TRINITY_XP_02391rho1 | gu2Quercus_suber             | 28.00 | 0.00 |
| TRINITY_XP_02391TPR  | repeQuercus_suber            | 28.00 | 0.00 |
| TRINITY_XP_00936     | PREDICTIPyrus_x_bretschneid  | 28.00 | 0.00 |
| TRINITY_XP_00228     | PREDICTIVitis_vinifera       | 28.00 | 0.00 |
| TRINITY_GAQ84494     | cytochrKlebsormidium_niten   | 28.00 | 0.00 |
| TRINITY_OAY77034     | Beta-gluAnanas_comosus       | 28.00 | 0.00 |
| TRINITY_XP_02277     | equilibiDurio_zibethinus     | 28.00 | 0.00 |
| TRINITY_OAE29887     | hypothetMarchantia_polymorp  | 28.00 | 0.00 |
| TRINITY_RLN24591     | ras-rel2Panicum_miliaceum    | 28.00 | 0.00 |
| TRINITY_BAJ90999     | predicteHordeum_vulgare      | 28.00 | 0.00 |
| TRINITY_GAX83561     | hypothetChlamydomonas_eusti  | 28.00 | 0.00 |
| TRINITY_XP_02389     | receptorQuercus_suber        | 28.00 | 0.00 |
| TRINITY_XP_01723     | PREDICTIDaucus_carota        | 28.00 | 0.00 |
| TRINITY_XP_02643     | serine/tPapaver_somniferum   | 28.00 | 0.00 |
| TRINITY_XP_02387     | uncharacQuercus_suber        | 28.00 | 0.00 |
| TRINITY_XP_00294     | basal bcVolvox_carteri       | 28.00 | 0.00 |
| TRINITY_KMZ61468     | putativeZostera_marina       | 28.00 | 0.00 |
| TRINITY_GAX80288     | hypothetChlamydomonas_eusti  | 28.00 | 0.00 |
| TRINITY_PNW86843     | hypothetChlamydomonas_reinh  | 28.00 | 0.00 |
| TRINITY_BAK01427     | predicteHordeum_vulgare      | 28.00 | 0.00 |
| TRINITY_BAJ87587     | predicteHordeum_vulgare      | 28.00 | 0.00 |
| TRINITY_GAX76016     | hypothetChlamydomonas_eusti  | 28.00 | 0.00 |
| TRINITY_XP_02389     | tripeptiQuercus_suber        | 28.00 | 0.00 |
| TRINITY_XP_00141     | predicteOstreococcus_sp._'1  | 28.00 | 0.00 |

|                  |           |                     |       |      |
|------------------|-----------|---------------------|-------|------|
| TRINITY_XP_00424 | synaptot  | Solanum_lycopersicu | 28.00 | 0.00 |
| TRINITY_GAX7351  | hypothet  | Chlamydomonas_eusti | 28.00 | 0.00 |
| TRINITY_GAX7586  | hypothet  | Chlamydomonas_eusti | 28.00 | 0.00 |
| TRINITY_XP_0139  | hypothet  | Monoraphidium_negle | 28.00 | 0.00 |
| TRINITY_XP_0243  | probable  | Physcomitrella_pate | 28.00 | 0.00 |
| TRINITY_XP_00751 | predicte  | Bathycoccus_prasinc | 28.00 | 0.00 |
| TRINITY_GAY38172 | hypothet  | Citrus_unshiu       | 28.00 | 0.00 |
| TRINITY_XP_0244  | (B3 domai | Physcomitrella_pate | 28.00 | 0.00 |
| TRINITY_XP_0029  | hypothet  | Volvox_carteri      | 28.00 | 0.00 |
| TRINITY_GAQ9115  | hypothet  | Klebsormidium_niten | 28.00 | 0.00 |
| TRINITY_GAQ8144  | hypothet  | Klebsormidium_niten | 28.00 | 0.00 |
| TRINITY_XP_0166  | PREDICTI  | Gossypium_hirsutum  | 28.00 | 0.00 |
| TRINITY_XP_00751 | predicte  | Bathycoccus_prasinc | 27.90 | 0.00 |
| TRINITY_XP_0102  | PREDICTI  | Nelumbo_nucifera    | 27.90 | 0.00 |
| TRINITY_CAA7070  | Kap alp   | Arabidopsis_thalian | 27.90 | 0.00 |
| TRINITY_XP_0205  | lysine-   | Phalaenopsis_equest | 27.90 | 0.00 |
| TRINITY_GBF9435  | (alpha b  | Raphidocelis_subcap | 27.90 | 0.00 |
| TRINITY_PNW8058  | hypothet  | Chlamydomonas_reinh | 27.90 | 0.00 |
| TRINITY_XP_0100  | PREDICTI  | Eucalyptus_grandis  | 27.90 | 0.00 |
| TRINITY_EPS7322  | hypothet  | Genlisea_aurea      | 27.90 | 0.00 |
| TRINITY_KXZ4684  | TTL3 pr   | Gonium_pectorale    | 27.90 | 0.00 |
| TRINITY_PNH0606  | hypothet  | Tetrabaena_socialis | 27.90 | 0.00 |
| TRINITY_XP_0238  | fascicli  | Quercus_suber       | 27.90 | 0.00 |
| TRINITY_GAQ8261  | (RNA pol  | Klebsormidium_niten | 27.90 | 0.00 |
| TRINITY_NP_0011  | uncharac  | Zea_mays            | 27.90 | 0.00 |
| TRINITY_GAQ8957  | Putative  | Klebsormidium_niten | 27.90 | 0.00 |
| TRINITY_GBG7281  | hypothet  | Chara_braunii       | 27.90 | 0.00 |
| TRINITY_NP_0011  | uncharac  | Zea_mays            | 27.90 | 0.00 |
| TRINITY_PKA5855  | hypothet  | Apostasia_shenzheni | 27.90 | 0.00 |
| TRINITY_XP_0258  | 27-dehyd  | Panicum_hallii      | 27.90 | 0.00 |
| TRINITY_XP_0239  | uncharac  | Quercus_suber       | 27.90 | 0.00 |
| TRINITY_GAX8411  | hypothet  | Chlamydomonas_eusti | 27.90 | 0.00 |
| TRINITY_XP_0105  | PREDICTI  | Tarenaya_hasslerian | 27.90 | 0.00 |
| TRINITY_XP_0030  | predicte  | Micromonas_pusilla  | 27.90 | 0.00 |
| TRINITY_XP_0194  | PREDICTI  | Lupinus_angustifoli | 27.90 | 0.00 |
| TRINITY_PNW8841  | hypothet  | Chlamydomonas_reinh | 27.90 | 0.00 |
| TRINITY_BAJ9694  | predicte  | Hordeum_vulgare     | 27.90 | 0.00 |
| TRINITY_CBI3339  | unnamed   | Vitis_vinifera      | 27.90 | 0.00 |
| TRINITY_GAX7817  | hypothet  | Chlamydomonas_eusti | 27.90 | 0.00 |
| TRINITY_GAX8545  | hypothet  | Chlamydomonas_eusti | 27.90 | 0.00 |
| TRINITY_PSC7251  | (multidr  | Micractinium_conduc | 27.90 | 0.00 |
| TRINITY_KXZ5105  | hypothet  | Gonium_pectorale    | 27.90 | 0.00 |
| TRINITY_GBF9890  | hypothet  | Raphidocelis_subcap | 27.90 | 0.00 |
| TRINITY_XP_0025  | predicte  | Micromonas_commoda  | 27.90 | 0.00 |
| TRINITY_GAQ8185  | caroten   | Klebsormidium_niten | 27.90 | 0.00 |
| TRINITY_GBG6916  | hypothet  | Chara_braunii       | 27.90 | 0.00 |
| TRINITY_XP_0029  | hypothet  | Volvox_carteri      | 27.90 | 0.00 |
| TRINITY_XP_0158  | uncharac  | Ziziphus_jujuba     | 27.80 | 0.00 |
| TRINITY_KXZ5512  | hypothet  | Gonium_pectorale    | 27.80 | 0.00 |
| TRINITY_XP_0025  | predicte  | Micromonas_commoda  | 27.80 | 0.00 |
| TRINITY_GAQ9003  | U3 smal   | Klebsormidium_niten | 27.80 | 0.00 |
| TRINITY_GAQ8151  | hypothet  | Klebsormidium_niten | 27.80 | 0.00 |
| TRINITY_PRW3289  | SDA1 [C   | Chlorella_sorokinia | 27.80 | 0.00 |
| TRINITY_XP_0035  | (asparty  | Brachypodium_distac | 27.80 | 0.00 |
| TRINITY_GBG7069  | hypothet  | Chara_braunii       | 27.80 | 0.00 |
| TRINITY_XP_0228  | Saposin-  | Ostreococcus_tauri  | 27.80 | 0.00 |
| TRINITY_GAQ7773  | Leishmar  | Klebsormidium_niten | 27.80 | 0.00 |
| TRINITY_GAX7861  | hypothet  | Chlamydomonas_eusti | 27.80 | 0.00 |
| TRINITY_GAX7925  | hypothet  | Chlamydomonas_eusti | 27.80 | 0.00 |
| TRINITY_BAX0357  | galacto   | Hyoscyamus_albus    | 27.80 | 0.00 |
| TRINITY_GAX7299  | hypothet  | Chlamydomonas_eusti | 27.80 | 0.00 |
| TRINITY_XP_0184  | PREDICTI  | Raphanus_sativus    | 27.80 | 0.00 |
| TRINITY_RLN1785  | aspartat  | Panicum_miliaceum   | 27.80 | 0.00 |
| TRINITY_XP_0217  | uncharac  | Chenopodium_quinoa  | 27.80 | 0.00 |
| TRINITY_XP_0217  | probable  | Chenopodium_quinoa  | 27.80 | 0.00 |
| TRINITY_XP_0228  | Erv1/Al   | Ostreococcus_tauri  | 27.80 | 0.00 |

|                 |                 |                           |       |      |
|-----------------|-----------------|---------------------------|-------|------|
| TRINITY_XP_0200 | aspartic        | Ananas_comosus            | 27.80 | 0.00 |
| TRINITY_OUS4872 | ribonucleo      | Ostreococcus_tauri        | 27.80 | 0.00 |
| TRINITY_OAE1911 | hypothetical    | Marchantia_polymorpha     | 27.80 | 0.00 |
| TRINITY_KGN4705 | Ubiquitin       | Cucumis_sativus           | 27.80 | 0.00 |
| TRINITY_RDX9032 | Protein         | Mucuna_pruriens           | 27.80 | 0.00 |
| TRINITY_XP_0056 | galactose       | Coccomyxa_subellipsoides  | 27.80 | 0.00 |
| TRINITY_NP_0013 | uncharacterized | Zea_mays                  | 27.80 | 0.00 |
| TRINITY_XP_0056 | alpha/beta      | Coccomyxa_subellipsoides  | 27.80 | 0.00 |
| TRINITY_EFJ1537 | hypothetical    | Selaginella_moellenbergii | 27.80 | 0.00 |
| TRINITY_XP_0202 | 11-oxo-         | Cajanus_cajan             | 27.80 | 0.00 |
| TRINITY_GAX7494 | hypothetical    | Chlamydomonas_eustichii   | 27.80 | 0.00 |
| TRINITY_PNW7182 | hypothetical    | Chlamydomonas_reinhardtii | 27.80 | 0.00 |
| TRINITY_XP_0138 | hypothetical    | Monoraphidium_neglectum   | 27.80 | 0.00 |
| TRINITY_PNX9255 | eukaryotic      | Trifolium_pratense        | 27.80 | 0.00 |
| TRINITY_PNH1226 | Tiny mac        | Tetrabaena_socialis       | 27.80 | 0.00 |
| TRINITY_XP_0245 | RING            | Selaginella_moellenbergii | 27.70 | 0.00 |
| TRINITY_XP_0202 | putative        | Cajanus_cajan             | 27.70 | 0.00 |
| TRINITY_XP_0110 | PREDICTED       | Populus_euphratica        | 27.70 | 0.00 |
| TRINITY_RID4471 | hypothetical    | Brassica_rapa             | 27.70 | 0.00 |
| TRINITY_XP_0238 | eIF-2- $\alpha$ | Quercus_suber             | 27.70 | 0.00 |
| TRINITY_OAY6684 | TOM1-li         | Ananas_comosus            | 27.70 | 0.00 |
| TRINITY_XP_0029 | extracellular   | Volvox_carteri            | 27.70 | 0.00 |
| TRINITY_XP_0138 | hypothetical    | Monoraphidium_neglectum   | 27.70 | 0.00 |
| TRINITY_GAX7391 | hypothetical    | Chlamydomonas_eustichii   | 27.70 | 0.00 |
| TRINITY_GAX8061 | hypothetical    | Chlamydomonas_eustichii   | 27.70 | 0.00 |
| TRINITY_KXZ4648 | hypothetical    | Gonium_pectorale          | 27.70 | 0.00 |
| TRINITY_XP_0100 | mitochondrial   | Morus_notabilis           | 27.70 | 0.00 |
| TRINITY_GAQ8773 | hypothetical    | Klebsormidium_nitens      | 27.70 | 0.00 |
| TRINITY_GAX7331 | hypothetical    | Chlamydomonas_eustichii   | 27.70 | 0.00 |
| TRINITY_XP_0188 | PREDICTED       | Juglans_regia             | 27.70 | 0.00 |
| TRINITY_KXZ5566 | hypothetical    | Gonium_pectorale          | 27.70 | 0.00 |
| TRINITY_EPS6414 | hypothetical    | Genlisea_aurea            | 27.70 | 0.00 |
| TRINITY_KXZ5031 | hypothetical    | Gonium_pectorale          | 27.70 | 0.00 |
| TRINITY_XP_0049 | RPA-int         | Setaria_italica           | 27.70 | 0.00 |
| TRINITY_XP_0243 | histone         | Physcomitrella_pate       | 27.70 | 0.00 |
| TRINITY_XP_0243 | cationic        | Physcomitrella_pate       | 27.70 | 0.00 |
| TRINITY_XP_0245 | uncharacterized | Selaginella_moellenbergii | 27.70 | 0.00 |
| TRINITY_AAM3365 | mastigon        | Chlamydomonas_reinhardtii | 27.70 | 0.00 |
| TRINITY_GAX7271 | hypothetical    | Chlamydomonas_eustichii   | 27.70 | 0.00 |
| TRINITY_PNW7076 | hypothetical    | Chlamydomonas_reinhardtii | 27.70 | 0.00 |
| TRINITY_XP_0022 | PREDICTED       | Vitis_vinifera            | 27.60 | 0.00 |
| TRINITY_XP_0084 | PREDICTED       | Cucumis_melo              | 27.60 | 0.00 |
| TRINITY_GAQ8525 | Mitotic         | Klebsormidium_nitens      | 27.60 | 0.00 |
| TRINITY_BAJ9878 | predicted       | Hordeum_vulgare           | 27.60 | 0.00 |
| TRINITY_KVH9317 | CHASE-li        | Cynara_cardunculus        | 27.60 | 0.00 |
| TRINITY_XP_0236 | cross-over      | Capsella_rubella          | 27.60 | 0.00 |
| TRINITY_XP_0105 | PREDICTED       | Tarenaya_hassleriana      | 27.60 | 0.00 |
| TRINITY_PNH0774 | Calcium         | Tetrabaena_socialis       | 27.60 | 0.00 |
| TRINITY_GAQ8477 | Sensory         | Klebsormidium_nitens      | 27.60 | 0.00 |
| TRINITY_XP_0243 | histidine       | Physcomitrella_pate       | 27.60 | 0.00 |
| TRINITY_PTQ3267 | hypothetical    | Marchantia_polymorpha     | 27.60 | 0.00 |
| TRINITY_GAQ8319 | Cysteine        | Klebsormidium_nitens      | 27.60 | 0.00 |
| TRINITY_GAX7928 | hypothetical    | Chlamydomonas_eustichii   | 27.60 | 0.00 |
| TRINITY_XP_0238 | tRNA            | Quercus_suber             | 27.60 | 0.00 |
| TRINITY_XP_0243 | syntaxis        | Physcomitrella_pate       | 27.60 | 0.00 |
| TRINITY_XP_0238 | tryptophan      | Quercus_suber             | 27.60 | 0.00 |
| TRINITY_XP_0202 | cullin-         | Asparagus_officinalis     | 27.60 | 0.00 |
| TRINITY_GAQ7773 | Leishman        | Klebsormidium_nitens      | 27.60 | 0.00 |
| TRINITY_XP_0245 | protein         | Selaginella_moellenbergii | 27.60 | 0.00 |
| TRINITY_KXZ4772 | hypothetical    | Gonium_pectorale          | 27.60 | 0.00 |
| TRINITY_PIN1964 | Exocyst         | Handroanthus_impetigera   | 27.60 | 0.00 |
| TRINITY_GAX8255 | hypothetical    | Chlamydomonas_eustichii   | 27.60 | 0.00 |
| TRINITY_VDD0982 | unnamed         | Brassica_oleracea         | 27.60 | 0.00 |
| TRINITY_XP_0025 | predicted       | Micromonas_commoda        | 27.60 | 0.00 |
| TRINITY_KXZ5180 | hypothetical    | Gonium_pectorale          | 27.60 | 0.00 |
| TRINITY_XP_0097 | PREDICTED       | Nicotiana_sylvestris      | 27.60 | 0.00 |

|                  |          |                     |       |      |
|------------------|----------|---------------------|-------|------|
| TRINITY_XP_01043 | PREDICTI | Camelina_sativa     | 27.60 | 0.00 |
| TRINITY_XP_02391 | laorsin- | Quercus_suber       | 27.60 | 0.00 |
| TRINITY_XP_01917 | PREDICTI | Ipomoea_nil         | 27.60 | 0.00 |
| TRINITY_PRW58651 | myb_fami | Chlorella_sorokinia | 27.60 | 0.00 |
| TRINITY_GAQ77985 | proteas  | Klebsormidium_niten | 27.60 | 0.00 |
| TRINITY_XP_02387 | uncharac | Quercus_suber       | 27.60 | 0.00 |
| TRINITY_GAX86357 | hypothet | Chlamydomonas_eusti | 27.60 | 0.00 |
| TRINITY_XP_00250 | high-mol | Micromonas_commoda  | 27.60 | 0.00 |
| TRINITY_XP_02436 | uncharac | Physcomitrella_pate | 27.60 | 0.00 |
| TRINITY_XP_01257 | calcinei | Cicer_arietinum     | 27.60 | 0.00 |
| TRINITY_GAX82820 | hypothet | Chlamydomonas_eusti | 27.60 | 0.00 |
| TRINITY_BAJ96946 | predicte | Hordeum_vulgare     | 27.60 | 0.00 |
| TRINITY_EFJ06480 | hypothet | Selaginella_moellen | 27.60 | 0.00 |
| TRINITY_XP_02020 | CDK5RAP3 | Cajanus_cajan       | 27.60 | 0.00 |
| TRINITY_XP_01102 | PREDICTI | Populus_euphratica  | 27.50 | 0.00 |
| TRINITY_GAQ84563 | hypothet | Klebsormidium_niten | 27.50 | 0.00 |
| TRINITY_XP_01053 | PREDICTI | Tarenaya_hasslerian | 27.50 | 0.00 |
| TRINITY_KZM98720 | hypothet | Daucus_carota       | 27.50 | 0.00 |
| TRINITY_RMZ53409 | hypothet | Auxenochlorella_pro | 27.50 | 0.00 |
| TRINITY_XP_00295 | hypothet | Volvox_carteri      | 27.50 | 0.00 |
| TRINITY_XP_01346 | quinone  | Medicago_truncatula | 27.50 | 0.00 |
| TRINITY_XP_00295 | hypothet | Volvox_carteri      | 27.50 | 0.00 |
| TRINITY_PSC73625 | FAM98A   | Micractinium_conduc | 27.50 | 0.00 |
| TRINITY_PIA52512 | hypothet | Aquilegia_coerulea  | 27.50 | 0.00 |
| TRINITY_XP_00170 | carbonic | Chlamydomonas_reinh | 27.50 | 0.00 |
| TRINITY_OAE27228 | hypothet | Marchantia_polymorp | 27.50 | 0.00 |
| TRINITY_BAS01260 | syntaxir | Marchantia_polymorp | 27.50 | 0.00 |
| TRINITY_GAX82300 | hypothet | Chlamydomonas_eusti | 27.50 | 0.00 |
| TRINITY_XP_00497 | tropinor | Setaria_italica     | 27.50 | 0.00 |
| TRINITY_XP_02791 | uncharac | Vigna_unguiculata   | 27.50 | 0.00 |
| TRINITY_XP_00169 | predicte | Chlamydomonas_reinh | 27.50 | 0.00 |
| TRINITY_XP_00938 | PREDICTI | Musa_acuminata      | 27.50 | 0.00 |
| TRINITY_GAX80585 | hypothet | Chlamydomonas_eusti | 27.50 | 0.00 |
| TRINITY_XP_01051 | PREDICTI | Camelina_sativa     | 27.50 | 0.00 |
| TRINITY_NP_00114 | uncharac | Zea_mays            | 27.50 | 0.00 |
| TRINITY_GAQ84494 | cytochr  | Klebsormidium_niten | 27.50 | 0.00 |
| TRINITY_XP_02391 | vacuolar | Quercus_suber       | 27.50 | 0.00 |
| TRINITY_XP_02435 | 26S_prot | Physcomitrella_pate | 27.50 | 0.00 |
| TRINITY_XP_01027 | PREDICTI | Nelumbo_nucifera    | 27.50 | 0.00 |
| TRINITY_GAX82199 | hypothet | Chlamydomonas_eusti | 27.50 | 0.00 |
| TRINITY_XP_00295 | hypothet | Volvox_carteri      | 27.50 | 0.00 |
| TRINITY_XP_00250 | predicte | Micromonas_commoda  | 27.50 | 0.00 |
| TRINITY_XP_00228 | PREDICTI | Vitis_vinifera      | 27.50 | 0.00 |
| TRINITY_OAE25387 | hypothet | Marchantia_polymorp | 27.40 | 0.00 |
| TRINITY_XP_00941 | PREDICTI | Musa_acuminata      | 27.40 | 0.00 |
| TRINITY_XP_00941 | PREDICTI | Musa_acuminata      | 27.40 | 0.00 |
| TRINITY_GAQ83008 | WD40_re  | Klebsormidium_niten | 27.40 | 0.00 |
| TRINITY_GBG70236 | hypothet | Chara_braunii       | 27.40 | 0.00 |
| TRINITY_XP_01165 | PREDICTI | Cucumis_sativus     | 27.40 | 0.00 |
| TRINITY_XP_02453 | histone- | Selaginella_moellen | 27.40 | 0.00 |
| TRINITY_XP_00295 | hypothet | Volvox_carteri      | 27.40 | 0.00 |
| TRINITY_RDX89867 | Random   | Mucuna_pruriens     | 27.40 | 0.00 |
| TRINITY_GAX77605 | hypothet | Chlamydomonas_eusti | 27.40 | 0.00 |
| TRINITY_GAQ85685 | putativ  | Klebsormidium_niten | 27.40 | 0.00 |
| TRINITY_XP_00251 | actin    | Ricinus_communis    | 27.40 | 0.00 |
| TRINITY_GAX74326 | hypothet | Chlamydomonas_eusti | 27.40 | 0.00 |
| TRINITY_PTQ37841 | hypothet | Marchantia_polymorp | 27.40 | 0.00 |
| TRINITY_XP_02057 | uncharac | Phalaenopsis_equest | 27.40 | 0.00 |
| TRINITY_EEC73649 | hypothet | Oryza_sativa        | 27.40 | 0.00 |
| TRINITY_XP_01283 | PREDICTI | Erythranthe_guttata | 27.40 | 0.00 |
| TRINITY_PON82811 | Transmen | Trema_orientale     | 27.40 | 0.00 |
| TRINITY_XP_02790 | seed_lir | Vigna_unguiculata   | 27.40 | 0.00 |
| TRINITY_GAX76292 | hypothet | Chlamydomonas_eusti | 27.40 | 0.00 |
| TRINITY_XP_02453 | platelet | Selaginella_moellen | 27.40 | 0.00 |
| TRINITY_XP_01719 | PREDICTI | Malus_domestica     | 27.40 | 0.00 |
| TRINITY_KVH94931 | Ankyrin  | Cynara_cardunculus  | 27.40 | 0.00 |

|                         |                              |       |      |
|-------------------------|------------------------------|-------|------|
| TRINITY_XP_01593PP2A re | Arachis_duranensis           | 27.40 | 0.00 |
| TRINITY_XP_02388        | tyrosin Quercus_suber        | 27.40 | 0.00 |
| TRINITY_XP_01905        | PREDICT Tarenaya_hasslerian  | 27.40 | 0.00 |
| TRINITY_XP_02097        | uncharac Arachis_ipaensis    | 27.40 | 0.00 |
| TRINITY_XP_01390        | hypothet Monoraphidium_negle | 27.40 | 0.00 |
| TRINITY_XP_00584        | hypothet Chlorella_variabili | 27.40 | 0.00 |
| TRINITY_XP_00450        | uncharac Cicer_arietinum     | 27.40 | 0.00 |
| TRINITY_XP_02438        | probable Physcomitrella_pate | 27.40 | 0.00 |
| TRINITY_XP_01587        | interfer Ziziphus_jujuba     | 27.40 | 0.00 |
| TRINITY_XP_02023        | poly(A)-Cajanus_cajan        | 27.40 | 0.00 |

|                                                |       |      |
|------------------------------------------------|-------|------|
| TRINITY_GAX8016(hypothetChlamydomonas_eusti    | 27.40 | 0.00 |
| TRINITY_KXZ4886(hypothetGonium_pectorale       | 27.40 | 0.00 |
| TRINITY_XP_0205(probablePhalaenopsis_equest    | 27.40 | 0.00 |
| TRINITY_RWR9529(F-actin-Cinnamomum_micranth    | 27.40 | 0.00 |
| TRINITY_GAX8016(hypothetChlamydomonas_eusti    | 27.40 | 0.00 |
| TRINITY_XP_0029(hypothetVolvox_carteri         | 27.40 | 0.00 |
| TRINITY_GAX8028(hypothetChlamydomonas_eusti    | 27.40 | 0.00 |
| TRINITY_PNW8601(hypothetChlamydomonas_reinh    | 27.40 | 0.00 |
| TRINITY_GBG9340(hypothetChara_braunii          | 27.40 | 0.00 |
| TRINITY_XP_0239(cytoplasmQuercus_suber         | 27.40 | 0.00 |
| TRINITY_XP_0243(alpha-x)Physcomitrella_pate    | 27.30 | 0.00 |
| TRINITY_XP_0239(vacuolarQuercus_suber          | 27.30 | 0.00 |
| TRINITY_XP_0249(uncharacterCynara_cardunculus  | 27.30 | 0.00 |
| TRINITY_XP_0249(probableCynara_cardunculus     | 27.30 | 0.00 |
| TRINITY_XP_0042(Fanconi Solanum_lycopersicu    | 27.30 | 0.00 |
| TRINITY_XP_0264(coiled-CPapaver_somniferum     | 27.30 | 0.00 |
| TRINITY_KMS9355(hypothetBeta_vulgaris          | 27.30 | 0.00 |
| TRINITY_XP_0238(mitochondrQuercus_suber        | 27.30 | 0.00 |
| TRINITY_XP_0030(TranslatOstreococcus_tauri     | 27.30 | 0.00 |
| TRINITY_BAJ8945(predictorHordeum_vulgare       | 27.30 | 0.00 |
| TRINITY_GAQ8860(hypothetKlebsormidium_niten    | 27.30 | 0.00 |
| TRINITY_XP_0167(PREDICTIGossypium_hirsutum     | 27.30 | 0.00 |
| TRINITY_XP_0184(PREDICTIRaphanus_sativus       | 27.30 | 0.00 |
| TRINITY_RWR7859(putativeCinnamomum_micranth    | 27.30 | 0.00 |
| TRINITY_EFJ2488(hypothetSelaginella_moellen    | 27.30 | 0.00 |
| TRINITY_RYQ8223(hypothetArachis_hypogaea       | 27.30 | 0.00 |
| TRINITY_XP_0150(hydroxySolanum_pennellii       | 27.30 | 0.00 |
| TRINITY_XP_0056(SM/Sec1-Coccomyxa_subellips    | 27.30 | 0.00 |
| TRINITY_BAT9835(hypothetVigna_angularis        | 27.30 | 0.00 |
| TRINITY_PSC7145(spindle Micractinium_conduc    | 27.30 | 0.00 |
| TRINITY_XP_0025(predictorMicromonas_commoda    | 27.30 | 0.00 |
| TRINITY_PTQ3267(hypothetMarchantia_polymorp    | 27.30 | 0.00 |
| TRINITY_XP_0184(PREDICTIRaphanus_sativus       | 27.30 | 0.00 |
| TRINITY_GBG6920(hypothetChara_braunii          | 27.30 | 0.00 |
| TRINITY_XP_0270(extractCoffea_arabica          | 27.30 | 0.00 |
| TRINITY_XP_0022(PREDICTIVitis_vinifera         | 27.30 | 0.00 |
| TRINITY_PIN0102(KaryophyllHandroanthus_impeti  | 27.30 | 0.00 |
| TRINITY_XP_0239(probableQuercus_suber          | 27.30 | 0.00 |
| TRINITY_GAX8132(hypothetChlamydomonas_eusti    | 27.20 | 0.00 |
| TRINITY_XP_0106(PREDICTIBeta_vulgaris          | 27.20 | 0.00 |
| TRINITY_XP_0128(PREDICTIErythranthe_guttata    | 27.20 | 0.00 |
| TRINITY_GAQ8083(deoxyribKlebsormidium_niten    | 27.20 | 0.00 |
| TRINITY_XP_0075(predictorBathycoccus_prasinoc  | 27.20 | 0.00 |
| TRINITY_XP_0014(IISP fanOstreococcus_sp._'l    | 27.20 | 0.00 |
| TRINITY_XP_0270(probableCoffea_arabica         | 27.20 | 0.00 |
| TRINITY_PNR4686(hypothetPhyscomitrella_pate    | 27.20 | 0.00 |
| TRINITY_PTQ5024(hypothetMarchantia_polymorp    | 27.20 | 0.00 |
| TRINITY_XP_0025(Ca2+:CatMicromonas_commoda     | 27.20 | 0.00 |
| TRINITY_XP_0229(asparticCucurbita_maxima       | 27.20 | 0.00 |
| TRINITY_XP_0172(PREDICTIDaucus_carota          | 27.20 | 0.00 |
| TRINITY_OAY5709(hypothetManihot_esculenta      | 27.20 | 0.00 |
| TRINITY_GAX8411(hypothetChlamydomonas_eusti    | 27.20 | 0.00 |
| TRINITY_XP_0025(flagellarMicromonas_commoda    | 27.20 | 0.00 |
| TRINITY_XP_0229(amino acidCucurbita_maxima     | 27.20 | 0.00 |
| TRINITY_XP_0030(choline Micromonas_pusilla     | 27.20 | 0.00 |
| TRINITY_XP_0245(uncharacterSelaginella_moellen | 27.20 | 0.00 |
| TRINITY_XP_0245(probableSelaginella_moellen    | 27.20 | 0.00 |
| TRINITY_GAX8545(hypothetChlamydomonas_eusti    | 27.20 | 0.00 |
| TRINITY_XP_0226(uncharacterVigna_radiata       | 27.20 | 0.00 |
| TRINITY_GAX8312(hypothetChlamydomonas_eusti    | 27.20 | 0.00 |
| TRINITY_RWR7623(THO complexCinnamomum_micranth | 27.20 | 0.00 |
| TRINITY_GAX8635(hypothetChlamydomonas_eusti    | 27.20 | 0.00 |
| TRINITY_XP_0029(hypothetVolvox_carteri         | 27.20 | 0.00 |
| TRINITY_KXZ4986(hypothetGonium_pectorale       | 27.20 | 0.00 |
| TRINITY_PNH0069(hypothetTetrabaena_socialis    | 27.20 | 0.00 |
| TRINITY_KMZ6181(hypothetZostera_marina         | 27.20 | 0.00 |



|                  |           |                     |       |      |
|------------------|-----------|---------------------|-------|------|
| TRINITY_XP_01944 | PREDICTH  | Lupinus_angustifoli | 27.20 | 0.00 |
| TRINITY_GAX7344  | hypothet  | Chlamydomonas_eusti | 27.20 | 0.00 |
| TRINITY_XP_01945 | PREDICTH  | Lupinus_angustifoli | 27.20 | 0.00 |
| TRINITY_GAQ9061  | pre-mRN   | Klebsormidium_niten | 27.10 | 0.00 |
| TRINITY_XP_00294 | hypothet  | Volvox_carteri      | 27.10 | 0.00 |
| TRINITY_GBG8987  | hypothet  | Chara_braunii       | 27.10 | 0.00 |
| TRINITY_GBG7671  | hypothet  | Chara_braunii       | 27.10 | 0.00 |
| TRINITY_XP_01507 | elongat   | Solanum_pennellii   | 27.10 | 0.00 |
| TRINITY_GAQ9128  | hypothet  | Klebsormidium_niten | 27.10 | 0.00 |
| TRINITY_PSC7272  | 2-oxogl   | Micractinium_conduc | 27.10 | 0.00 |
| TRINITY_RAL4350  | hypothet  | Cuscuta_australis   | 27.10 | 0.00 |
| TRINITY_XP_0271  | (putativ  | Coffea_arabica      | 27.10 | 0.00 |
| TRINITY_EFJ3404  | (hypothet | Selaginella_moellen | 27.10 | 0.00 |
| TRINITY_PNH0498  | Shaggy-r  | Tetrabaena_socialis | 27.10 | 0.00 |
| TRINITY_XP_0217  | phospho   | Chenopodium_quinoa  | 27.10 | 0.00 |
| TRINITY_XP_00231 | PP2A re   | Populus_trichocarpa | 27.10 | 0.00 |
| TRINITY_GAQ8804  | Zinc fir  | Klebsormidium_niten | 27.10 | 0.00 |
| TRINITY_XP_0243  | unchara   | Physcomitrella_pate | 27.10 | 0.00 |
| TRINITY_EEF2629  | alpha-x   | Ricinus_communis    | 27.10 | 0.00 |
| TRINITY_BAN5814  | (putativ  | Hyoscyamus_albus    | 27.10 | 0.00 |
| TRINITY_XP_0243  | (synaptot | Physcomitrella_pate | 27.10 | 0.00 |
| TRINITY_XP_02041 | unchara   | Prunus_persica      | 27.10 | 0.00 |
| TRINITY_PNR3731  | hypothet  | Physcomitrella_pate | 27.10 | 0.00 |
| TRINITY_XP_0029  | G-protei  | Selaginella_moellen | 27.10 | 0.00 |
| TRINITY_PTQ4773  | hypothet  | Marchantia_polymorp | 27.10 | 0.00 |
| TRINITY_GAQ8753  | hypothet  | Klebsormidium_niten | 27.10 | 0.00 |
| TRINITY_XP_0218  | lysopho   | Spinacia_oleracea   | 27.10 | 0.00 |
| TRINITY_XP_0113  | Syntaxir  | Auxenochlorella_pro | 27.10 | 0.00 |
| TRINITY_XP_0063  | (PREDICTH | Solanum_tuberosum   | 27.10 | 0.00 |
| TRINITY_XP_0229  | lipase-   | Cucurbita_maxima    | 27.10 | 0.00 |
| TRINITY_OAE2115  | hypothet  | Marchantia_polymorp | 27.10 | 0.00 |
| TRINITY_GAX8058  | hypothet  | Chlamydomonas_eusti | 27.10 | 0.00 |
| TRINITY_AHG2954  | (ats1, p  | Pyramimonas_parkeae | 27.10 | 0.00 |
| TRINITY_EAY7938  | (hypothet | Oryza_sativa        | 27.00 | 0.00 |
| TRINITY_PRW5107  | Platelet  | Chlorella_sorokinia | 27.00 | 0.00 |
| TRINITY_XP_0035  | probable  | Glycine_max         | 27.00 | 0.00 |
| TRINITY_PTQ4567  | hypothet  | Marchantia_polymorp | 27.00 | 0.00 |
| TRINITY_GAX7562  | hypothet  | Chlamydomonas_eusti | 27.00 | 0.00 |
| TRINITY_GAX7776  | hypothet  | Chlamydomonas_eusti | 27.00 | 0.00 |
| TRINITY_XP_0238  | protein   | Quercus_suber       | 27.00 | 0.00 |
| TRINITY_PTQ4669  | (hypothet | Marchantia_polymorp | 27.00 | 0.00 |
| TRINITY_KFK2909  | hypothet  | Arabis_alpina       | 27.00 | 0.00 |
| TRINITY_PNW7337  | hypothet  | Chlamydomonas_reinh | 27.00 | 0.00 |
| TRINITY_XP_0239  | rho-type  | Quercus_suber       | 27.00 | 0.00 |
| TRINITY_EXB8225  | Casein    | Morus_notabilis     | 27.00 | 0.00 |
| TRINITY_GAU2303  | hypothet  | Trifolium_subterran | 27.00 | 0.00 |
| TRINITY_OAE3436  | (hypothet | Marchantia_polymorp | 27.00 | 0.00 |
| TRINITY_GAQ8842  | mRNA ca   | Klebsormidium_niten | 27.00 | 0.00 |
| TRINITY_XP_0205  | WD repe   | Phalaenopsis_equest | 27.00 | 0.00 |
| TRINITY_XP_0029  | hypothet  | Volvox_carteri      | 27.00 | 0.00 |
| TRINITY_PNW8588  | hypothet  | Chlamydomonas_reinh | 27.00 | 0.00 |
| TRINITY_GAX8335  | hypothet  | Chlamydomonas_eusti | 27.00 | 0.00 |
| TRINITY_PNY0554  | putativ   | Trifolium_pratense  | 27.00 | 0.00 |
| TRINITY_XP_0243  | amino ac  | Physcomitrella_pate | 27.00 | 0.00 |
| TRINITY_XP_0273  | aspartic  | Abrus_precatorius   | 27.00 | 0.00 |
| TRINITY_XP_0202  | Down syr  | Asparagus_officinal | 27.00 | 0.00 |
| TRINITY_XP_0245  | poly [A]  | Selaginella_moellen | 27.00 | 0.00 |
| TRINITY_PRW4506  | HD-domai  | Chlorella_sorokinia | 26.90 | 0.00 |
| TRINITY_XP_0029  | hypothet  | Volvox_carteri      | 26.90 | 0.00 |
| TRINITY_KXZ4261  | (hypothet | Gonium_pectorale    | 26.90 | 0.00 |
| TRINITY_XP_0138  | sulfide   | Monoraphidium_negle | 26.90 | 0.00 |
| TRINITY_XP_0029  | acyl-Co   | Selaginella_moellen | 26.90 | 0.00 |
| TRINITY_XP_0239  | L-pipecc  | Quercus_suber       | 26.90 | 0.00 |
| TRINITY_XP_0056  | CBS-dom   | Coccomyxa_subellips | 26.90 | 0.00 |
| TRINITY_XP_0238  | fascicli  | Quercus_suber       | 26.90 | 0.00 |
| TRINITY_OAE2990  | hypothet  | Marchantia_polymorp | 26.90 | 0.00 |

|                  |          |                     |       |      |
|------------------|----------|---------------------|-------|------|
| TRINITY_RVX21428 | Ultravio | Vitis_vinifera      | 26.90 | 0.00 |
| TRINITY_PSC7399  | heme oxy | Micractinium_conduc | 26.90 | 0.00 |
| TRINITY_XP_02025 | putative | Asparagus_official  | 26.90 | 0.00 |
| TRINITY_GAX73423 | hypothet | Chlamydomonas_eusti | 26.90 | 0.00 |
| TRINITY_XP_01847 | PREDICTI | Raphanus_sativus    | 26.90 | 0.00 |
| TRINITY_PTQ48620 | hypothet | Marchantia_polymorp | 26.90 | 0.00 |
| TRINITY_XP_02388 | protein  | Quercus_suber       | 26.90 | 0.00 |
| TRINITY_XP_02294 | centrom  | Cucurbita_moschata  | 26.90 | 0.00 |
| TRINITY_GAQ83768 | cytochr  | Klebsormidium_niten | 26.90 | 0.00 |
| TRINITY_GAX84471 | hypothet | Chlamydomonas_eusti | 26.90 | 0.00 |
| TRINITY_XP_02168 | vacuola  | Hevea_brasiliensis  | 26.90 | 0.00 |
| TRINITY_KMZ59713 | hypothet | Zostera_marina      | 26.90 | 0.00 |
| TRINITY_XP_00751 | predict  | Bathycoccus_prasinc | 26.90 | 0.00 |
| TRINITY_XP_01109 | protein  | Sesamum_indicum     | 26.90 | 0.00 |
| TRINITY_GAQ81445 | hypothet | Klebsormidium_niten | 26.90 | 0.00 |
| TRINITY_PNW80411 | hypothet | Chlamydomonas_reinh | 26.90 | 0.00 |
| TRINITY_PRW58317 | deoxyri  | Chlorella_sorokinia | 26.90 | 0.00 |
| TRINITY_XP_01139 | hypothet | Auxenochlorella_pro | 26.90 | 0.00 |
| TRINITY_XP_00306 | predict  | Micromonas_pusilla  | 26.90 | 0.00 |
| TRINITY_XP_02439 | importir | Physcomitrella_pate | 26.90 | 0.00 |
| TRINITY_GAX76495 | hypothet | Chlamydomonas_eusti | 26.90 | 0.00 |
| TRINITY_GAX72739 | hypothet | Chlamydomonas_eusti | 26.90 | 0.00 |
| TRINITY_XP_02283 | Patatin  | Ostreococcus_tauri  | 26.90 | 0.00 |
| TRINITY_GAQ88194 | alkaline | Klebsormidium_niten | 26.90 | 0.00 |
| TRINITY_GAX76189 | hypothet | Chlamydomonas_eusti | 26.80 | 0.00 |
| TRINITY_XP_02387 | uncharac | Quercus_suber       | 26.80 | 0.00 |
| TRINITY_PSR98047 | Phosphat | Actinidia_chinensis | 26.80 | 0.00 |
| TRINITY_RAL36928 | hypothet | Cuscuta_australis   | 26.80 | 0.00 |
| TRINITY_XP_00722 | ARF guar | Prunus_persica      | 26.80 | 0.00 |
| TRINITY_KXZ45346 | hypothet | Gonium_pectorale    | 26.80 | 0.00 |
| TRINITY_XP_02437 | DNA rep  | Physcomitrella_pate | 26.80 | 0.00 |
| TRINITY_XP_02283 | Putative | Ostreococcus_tauri  | 26.80 | 0.00 |
| TRINITY_XP_02057 | sucrose  | Phalaenopsis_equest | 26.80 | 0.00 |
| TRINITY_GBF91724 | shaggy-1 | Raphidocelis_subcap | 26.80 | 0.00 |
| TRINITY_XP_02052 | uncharac | Amborella_trichopod | 26.80 | 0.00 |
| TRINITY_XP_01054 | PREDICTI | Tarenaya_hasslerian | 26.80 | 0.00 |
| TRINITY_BAJ95858 | predict  | Hordeum_vulgare     | 26.80 | 0.00 |
| TRINITY_AAC49376 | GmCK3p,  | Glycine_max         | 26.80 | 0.00 |
| TRINITY_XP_01042 | PREDICTI | Camelina_sativa     | 26.80 | 0.00 |
| TRINITY_RWR91627 | transket | Cinnamomum_micranth | 26.80 | 0.00 |
| TRINITY_XP_00169 | predict  | Chlamydomonas_reinh | 26.80 | 0.00 |
| TRINITY_GAQ78880 | hypothet | Klebsormidium_niten | 26.80 | 0.00 |
| TRINITY_EEE54332 | hypothet | Oryza_sativa        | 26.80 | 0.00 |
| TRINITY_XP_00564 | CBS-dom  | Coccomyxa_subellips | 26.80 | 0.00 |
| TRINITY_GAQ89183 | hypothet | Klebsormidium_niten | 26.80 | 0.00 |
| TRINITY_GAX78964 | hypothet | Chlamydomonas_eusti | 26.80 | 0.00 |
| TRINITY_XP_00564 | hypothet | Coccomyxa_subellips | 26.80 | 0.00 |
| TRINITY_GBF93271 | hypothet | Raphidocelis_subcap | 26.80 | 0.00 |
| TRINITY_GAX78757 | hypothet | Chlamydomonas_eusti | 26.80 | 0.00 |
| TRINITY_KXZ52774 | hypothet | Gonium_pectorale    | 26.80 | 0.00 |
| TRINITY_XP_02638 | ubiquiti | Papaver_somniferum  | 26.80 | 0.00 |
| TRINITY_XP_02391 | vacuola  | Quercus_suber       | 26.80 | 0.00 |
| TRINITY_KGN46566 | hypothet | Cucumis_sativus     | 26.80 | 0.00 |
| TRINITY_XP_00721 | protein  | Prunus_persica      | 26.80 | 0.00 |
| TRINITY_GAX80467 | hypothet | Chlamydomonas_eusti | 26.80 | 0.00 |
| TRINITY_EEC79094 | hypothet | Oryza_sativa        | 26.80 | 0.00 |
| TRINITY_PWA91137 | regulat  | Artemisia_annua     | 26.80 | 0.00 |
| TRINITY_GAX73385 | hypothet | Chlamydomonas_eusti | 26.80 | 0.00 |
| TRINITY_XP_02390 | reducin  | Quercus_suber       | 26.80 | 0.00 |
| TRINITY_PRW57008 | vacuola  | Chlorella_sorokinia | 26.70 | 0.00 |
| TRINITY_XP_01970 | PREDICTI | Elaeis_guineensis   | 26.70 | 0.00 |
| TRINITY_XP_00169 | subunit  | Chlamydomonas_reinh | 26.70 | 0.00 |
| TRINITY_XP_00935 | PREDICTI | Pyrus_x_bretschneid | 26.70 | 0.00 |
| TRINITY_XP_02453 | protein  | Selaginella_moellen | 26.70 | 0.00 |
| TRINITY_XP_00169 | flagell  | Chlamydomonas_reinh | 26.70 | 0.00 |
| TRINITY_XP_02024 | probable | Cajanus_cajan       | 26.70 | 0.00 |

|                  |           |                     |       |      |
|------------------|-----------|---------------------|-------|------|
| TRINITY_XP_02454 | uncharac  | Selaginella_moellen | 26.70 | 0.00 |
| TRINITY_XP_01724 | PREDICTI  | Daucus_carota       | 26.70 | 0.00 |
| TRINITY_XP_02496 | elicitor  | Cynara_cardunculus  | 26.70 | 0.00 |
| TRINITY_ESQ4334  | hypothet  | Eutrema_salsugineur | 26.70 | 0.00 |
| TRINITY_XP_01945 | PREDICTI  | Lupinus_angustifoli | 26.70 | 0.00 |
| TRINITY_GAQ8528  | Inositol  | Klebsormidium_niten | 26.70 | 0.00 |
| TRINITY_XP_02437 | ADP-rib   | Physcomitrella_pate | 26.70 | 0.00 |
| TRINITY_BAS0126  | (syntaxir | Marchantia_polymorp | 26.70 | 0.00 |
| TRINITY_XP_00294 | hypothet  | Volvox_carteri      | 26.70 | 0.00 |
| TRINITY_XP_02129 | topless-  | Herrania_umbratica  | 26.70 | 0.00 |
| TRINITY_GBF9379  | hypothet  | Raphidocelis_subcap | 26.70 | 0.00 |
| TRINITY_PNW7304  | hypothet  | Chlamydomonas_reinh | 26.70 | 0.00 |
| TRINITY_RZC0356  | Sulfite   | Glycine_soja        | 26.70 | 0.00 |
| TRINITY_XP_02068 | immune-   | Dendrobium_catenatu | 26.70 | 0.00 |
| TRINITY_GAX8548  | hypothet  | Chlamydomonas_eusti | 26.70 | 0.00 |
| TRINITY_KZV2810  | calmodul  | Dorcoceras_hygromet | 26.70 | 0.00 |
| TRINITY_PAN3587  | hypothet  | Panicum_hallii      | 26.60 | 0.00 |
| TRINITY_XP_02709 | E3 ubiq   | Coffea_arabica      | 26.60 | 0.00 |
| TRINITY_XP_02284 | Armadill  | Ostreococcus_tauri  | 26.60 | 0.00 |
| TRINITY_OTG3118  | putativ   | Helianthus_annuus   | 26.60 | 0.00 |
| TRINITY_GAQ8376  | cytochr   | Klebsormidium_niten | 26.60 | 0.00 |
| TRINITY_KJB1944  | (hypothet | Gossypium_raimondii | 26.60 | 0.00 |
| TRINITY_XP_00564 | hypothet  | Coccomyxa_subellips | 26.60 | 0.00 |
| TRINITY_GAX7313  | hypothet  | Chlamydomonas_eusti | 26.60 | 0.00 |
| TRINITY_XP_01139 | Eukaryot  | Auxenochlorella_pro | 26.60 | 0.00 |
| TRINITY_XP_02439 | SNARE-ir  | Physcomitrella_pate | 26.60 | 0.00 |
| TRINITY_XP_02439 | amino ac  | Physcomitrella_pate | 26.60 | 0.00 |
| TRINITY_XP_00298 | uncharac  | Selaginella_moellen | 26.60 | 0.00 |
| TRINITY_BAJ9694  | (predict  | Hordeum_vulgare     | 26.60 | 0.00 |
| TRINITY_XP_01844 | PREDICTI  | Raphanus_sativus    | 26.60 | 0.00 |
| TRINITY_XP_02439 | cyclin-   | Physcomitrella_pate | 26.60 | 0.00 |
| TRINITY_XP_02174 | syntaxir  | Chenopodium_quinoa  | 26.60 | 0.00 |
| TRINITY_XP_01091 | PREDICTI  | Elaeis_guineensis   | 26.60 | 0.00 |
| TRINITY_GAQ8912  | putativ   | Klebsormidium_niten | 26.60 | 0.00 |
| TRINITY_KYP3878  | Retrovir  | Cajanus_cajan       | 26.60 | 0.00 |
| TRINITY_XP_01027 | PREDICTI  | Nelumbo_nucifera    | 26.60 | 0.00 |
| TRINITY_GAX7891  | hypothet  | Chlamydomonas_eusti | 26.50 | 0.00 |
| TRINITY_XP_00249 | predict   | Micromonas_commoda  | 26.50 | 0.00 |
| TRINITY_XP_00584 | hypothet  | Chlorella_variabili | 26.50 | 0.00 |
| TRINITY_XP_00305 | flagell   | Micromonas_pusilla  | 26.50 | 0.00 |
| TRINITY_XP_00250 | (zinc pe  | Micromonas_commoda  | 26.50 | 0.00 |
| TRINITY_XP_01345 | exportir  | Medicago_truncatula | 26.50 | 0.00 |
| TRINITY_GAQ8682  | Leishmar  | Klebsormidium_niten | 26.50 | 0.00 |
| TRINITY_XP_02390 | uncharac  | Quercus_suber       | 26.50 | 0.00 |
| TRINITY_PIA4107  | hypothet  | Aquilegia_coerulea  | 26.50 | 0.00 |
| TRINITY_PTQ3064  | hypothet  | Marchantia_polymorp | 26.50 | 0.00 |
| TRINITY_XP_02391 | peroxis   | Quercus_suber       | 26.50 | 0.00 |
| TRINITY_GAQ8006  | interfer  | Klebsormidium_niten | 26.50 | 0.00 |
| TRINITY_XP_00306 | (predict  | Micromonas_pusilla  | 26.50 | 0.00 |
| TRINITY_XP_01722 | PREDICTI  | Daucus_carota       | 26.50 | 0.00 |
| TRINITY_PNH0023  | hypothet  | Tetrabaena_socialis | 26.50 | 0.00 |
| TRINITY_GAX7587  | hypothet  | Chlamydomonas_eusti | 26.50 | 0.00 |
| TRINITY_XP_01506 | alpha-di  | Solanum_pennellii   | 26.50 | 0.00 |
| TRINITY_XP_02190 | (piezo-t) | Carica_papaya       | 26.50 | 0.00 |
| TRINITY_XP_01619 | DNA top   | Arachis_ipaensis    | 26.50 | 0.00 |
| TRINITY_XP_02391 | 1-phosp   | Quercus_suber       | 26.50 | 0.00 |
| TRINITY_XP_01667 | PREDICTI  | Gossypium_hirsutum  | 26.50 | 0.00 |
| TRINITY_XP_00250 | (predict  | Micromonas_commoda  | 26.50 | 0.00 |
| TRINITY_GAQ8632  | (major f  | Klebsormidium_niten | 26.40 | 0.00 |
| TRINITY_OAE2451  | hypothet  | Marchantia_polymorp | 26.40 | 0.00 |
| TRINITY_XP_02165 | endopla   | Hevea_brasiliensis  | 26.40 | 0.00 |
| TRINITY_XP_02388 | beta-1,   | Quercus_suber       | 26.40 | 0.00 |
| TRINITY_PSC7661  | hypothet  | Micractinium_conduc | 26.40 | 0.00 |
| TRINITY_XP_01885 | PREDICTI  | Juglans_regia       | 26.40 | 0.00 |
| TRINITY_XP_02024 | calcium-  | Asparagus_officinal | 26.40 | 0.00 |
| TRINITY_GAX8598  | hypothet  | Chlamydomonas_eusti | 26.40 | 0.00 |

|                 |                               |       |      |
|-----------------|-------------------------------|-------|------|
| TRINITY_PIA4425 | {hypothetAquilegia_coerulea   | 26.40 | 0.00 |
| TRINITY_GBF8792 | {importirRaphidocelis_subcap  | 26.40 | 0.00 |
| TRINITY_XP_0243 | {nicotiarPhyscomitrella_pate  | 26.40 | 0.00 |
| TRINITY_GBG6236 | {hypothetChara_braunii        | 26.40 | 0.00 |
| TRINITY_PTQ2834 | {hypothetMarchantia_polymorp  | 26.40 | 0.00 |
| TRINITY_XP_0258 | {importirPanicum_hallii       | 26.40 | 0.00 |
| TRINITY_GAX7335 | {hypothetChlamydomonas_eusti  | 26.40 | 0.00 |
| TRINITY_XP_0104 | {PREDICTICamelina_sativa      | 26.40 | 0.00 |
| TRINITY_XP_0246 | {cyclin-1Medicago_truncatula  | 26.40 | 0.00 |
| TRINITY_PNW8453 | {hypothetChlamydomonas_reinh  | 26.40 | 0.00 |
| TRINITY_EYU2626 | {hypothetErythranthe_guttata  | 26.40 | 0.00 |
| TRINITY_XP_0164 | {PREDICTINicotiana_tabacum    | 26.40 | 0.00 |
| TRINITY_XP_0066 | {PREDICTIOryza_brachyantha    | 26.40 | 0.00 |
| TRINITY_ONI3318 | {hypothetPrunus_persica       | 26.40 | 0.00 |
| TRINITY_RYR2447 | {hypothetArachis_hypogaea     | 26.40 | 0.00 |
| TRINITY_PNW7259 | {hypothetChlamydomonas_reinh  | 26.40 | 0.00 |
| TRINITY_XP_0017 | {E1-E2 A}Chlamydomonas_reinh  | 26.40 | 0.00 |
| TRINITY_XP_0058 | {hypothetChlorella_variabili  | 26.40 | 0.00 |
| TRINITY_PNW7311 | {hypothetChlamydomonas_reinh  | 26.40 | 0.00 |
| TRINITY_XP_0147 | {transmenBrachypodium_distac  | 26.30 | 0.00 |
| TRINITY_XP_0025 | {predicteMicromonas_commoda   | 26.30 | 0.00 |
| TRINITY_KXZ4917 | {hypothetGonium_pectorale     | 26.30 | 0.00 |
| TRINITY_XP_0243 | {SET dom}Physcomitrella_pate  | 26.30 | 0.00 |
| TRINITY_XP_0202 | {cyclase-Asparagus_officinal  | 26.30 | 0.00 |
| TRINITY_GAQ8669 | {hypothetKlebsormidium_niten  | 26.30 | 0.00 |
| TRINITY_XP_0166 | {PREDICTIPrunus_mume          | 26.30 | 0.00 |
| TRINITY_GBG6781 | {hypothetChara_braunii        | 26.30 | 0.00 |
| TRINITY_XP_0228 | {SCY1-li}Olea_europaea        | 26.30 | 0.00 |
| TRINITY_GAQ8608 | {Zinc fir}Klebsormidium_niten | 26.30 | 0.00 |
| TRINITY_PON8451 | {Ubiquiti}Trema_orientale     | 26.30 | 0.00 |
| TRINITY_GAX7872 | {hypothetChlamydomonas_eusti  | 26.30 | 0.00 |
| TRINITY_KMZ6580 | {hypothetZostera_marina       | 26.30 | 0.00 |
| TRINITY_RYR2251 | {hypothetArachis_hypogaea     | 26.30 | 0.00 |
| TRINITY_OAE2726 | {hypothetMarchantia_polymorp  | 26.30 | 0.00 |
| TRINITY_AAC4937 | {GmCK3p, Glycine_max          | 26.30 | 0.00 |
| TRINITY_XP_0134 | {unchara}Medicago_truncatula  | 26.30 | 0.00 |
| TRINITY_XP_0273 | {cluster}Abrus_precatorius    | 26.30 | 0.00 |
| TRINITY_XP_0124 | {PREDICTIGossypium_raimondii  | 26.30 | 0.00 |
| TRINITY_BAK0073 | {predicteHordeum_vulgare      | 26.30 | 0.00 |
| TRINITY_XP_0030 | {predicteMicromonas_pusilla   | 26.30 | 0.00 |
| TRINITY_GAQ9234 | {Sas10/U}Klebsormidium_niten  | 26.30 | 0.00 |
| TRINITY_PHT4849 | {Structur}Capsicum_baccatum   | 26.30 | 0.00 |
| TRINITY_XP_0029 | {hypothetVolvox_carteri       | 26.30 | 0.00 |
| TRINITY_GAX7441 | {hypothetChlamydomonas_eusti  | 26.30 | 0.00 |
| TRINITY_GAQ7964 | {hypothetKlebsormidium_niten  | 26.30 | 0.00 |
| TRINITY_XP_0188 | {PREDICTIJuglans_regia        | 26.30 | 0.00 |
| TRINITY_XP_0056 | {hypothetCoccomyxa_subellips  | 26.30 | 0.00 |
| TRINITY_XP_0025 | {zinc pe}Micromonas_commoda   | 26.20 | 0.00 |
| TRINITY_XP_0145 | {protein Vigna_radiata        | 26.20 | 0.00 |
| TRINITY_XP_0150 | {cationic}Solanum_pennellii   | 26.20 | 0.00 |
| TRINITY_PRW5860 | {alkalin}Chlorella_sorokinia  | 26.20 | 0.00 |
| TRINITY_GAX8375 | {hypothetChlamydomonas_eusti  | 26.20 | 0.00 |
| TRINITY_XP_0068 | {phospho}Amborella_trichopod  | 26.20 | 0.00 |
| TRINITY_XP_0238 | {ras-rel}Quercus_suber        | 26.20 | 0.00 |
| TRINITY_XP_0239 | {ribosom}Quercus_suber        | 26.20 | 0.00 |
| TRINITY_EPS7152 | {hypothetGenlisea_aurea       | 26.20 | 0.00 |
| TRINITY_KZV1541 | {penicill}Dorcoceras_hygromet | 26.20 | 0.00 |
| TRINITY_XP_0202 | {cytochr}Cajanus_cajan        | 26.20 | 0.00 |
| TRINITY_XP_0134 | {sulfite}Medicago_truncatula  | 26.20 | 0.00 |
| TRINITY_XP_0064 | {TOM1-li}Eutrema_salsugineur  | 26.20 | 0.00 |
| TRINITY_PNH0433 | {MOXD1 1}Tetrabaena_socialis  | 26.20 | 0.00 |
| TRINITY_PTQ3267 | {hypothetMarchantia_polymorp  | 26.20 | 0.00 |
| TRINITY_ABR1638 | {unknown}Picea_sitchensis     | 26.20 | 0.00 |
| TRINITY_XP_0239 | {RHO GTP}Quercus_suber        | 26.20 | 0.00 |
| TRINITY_XP_0110 | {PREDICTI}Populus_euphratica  | 26.20 | 0.00 |
| TRINITY_PON9045 | {Voltage}Trema_orientale      | 26.20 | 0.00 |

|                  |           |                     |       |      |
|------------------|-----------|---------------------|-------|------|
| TRINITY_XP_02791 | pyruvate  | Vigna_unguiculata   | 26.20 | 0.00 |
| TRINITY_XP_00498 | cytochr   | Setaria_italica     | 26.20 | 0.00 |
| TRINITY_BAD3449  | Gag-Pol   | Ipomoea_batatas     | 26.20 | 0.00 |
| TRINITY_XP_01257 | protein   | Cicer_arietinum     | 26.10 | 0.00 |
| TRINITY_GAX7624  | hypothet  | Chlamydomonas_eusti | 26.10 | 0.00 |
| TRINITY_XP_02439 | choline   | Physcomitrella_pate | 26.10 | 0.00 |
| TRINITY_GBG8236  | hypothet  | Chara_braunii       | 26.10 | 0.00 |
| TRINITY_GAQ8416  | (Nodal mc | Klebsormidium_niten | 26.10 | 0.00 |
| TRINITY_XP_00938 | PREDICTI  | Musa_acuminata      | 26.10 | 0.00 |
| TRINITY_XP_02387 | probable  | Quercus_suber       | 26.10 | 0.00 |
| TRINITY_GBG7699  | hypothet  | Chara_braunii       | 26.10 | 0.00 |
| TRINITY_KJB5982  | hypothet  | Gossypium_raimondii | 26.10 | 0.00 |
| TRINITY_XP_02271 | SCY1-li   | Durio_zibethinus    | 26.10 | 0.00 |
| TRINITY_EFJ1056  | hypothet  | Selaginella_moellen | 26.10 | 0.00 |
| TRINITY_XP_00839 | PREDICTI  | Malus_domestica     | 26.10 | 0.00 |
| TRINITY_XP_01067 | PREDICTI  | Beta_vulgaris       | 26.10 | 0.00 |
| TRINITY_XP_02389 | putative  | Quercus_suber       | 26.10 | 0.00 |
| TRINITY_XP_02496 | acyl-Co   | Cynara_cardunculus  | 26.10 | 0.00 |
| TRINITY_RWR7545  | serine/t  | Cinnamomum_micranth | 26.10 | 0.00 |
| TRINITY_CAB7247  | putative  | Arabidopsis_thalian | 26.10 | 0.00 |
| TRINITY_GAQ8159  | Cation    | Klebsormidium_niten | 26.10 | 0.00 |
| TRINITY_XP_02390 | phosphat  | Quercus_suber       | 26.10 | 0.00 |
| TRINITY_GAX8374  | hypothet  | Chlamydomonas_eusti | 26.10 | 0.00 |
| TRINITY_GBG6890  | hypothet  | Chara_braunii       | 26.10 | 0.00 |
| TRINITY_XP_02417 | TOM1-li   | Rosa_chinensis      | 26.10 | 0.00 |
| TRINITY_PTQ4426  | hypothet  | Marchantia_polymorp | 26.10 | 0.00 |
| TRINITY_PSC7220  | ultravic  | Micractinium_conduc | 26.10 | 0.00 |
| TRINITY_EFJ2072  | hypothet  | Selaginella_moellen | 26.10 | 0.00 |
| TRINITY_PRW5776  | (DEAD DE  | Chlorella_sorokinia | 26.10 | 0.00 |
| TRINITY_GAQ8372  | vesicle-  | Klebsormidium_niten | 26.10 | 0.00 |
| TRINITY_XP_02493 | 11-beta-  | Ziziphus_jujuba     | 26.00 | 0.00 |
| TRINITY_XP_00297 | mitochor  | Selaginella_moellen | 26.00 | 0.00 |
| TRINITY_XP_02059 | LOW QUAI  | Phalaenopsis_equest | 26.00 | 0.00 |
| TRINITY_XP_01922 | PREDICTI  | Nicotiana_attenuata | 26.00 | 0.00 |
| TRINITY_XP_01673 | PREDICTI  | Gossypium_hirsutum  | 26.00 | 0.00 |
| TRINITY_GBG8205  | hypothet  | Chara_braunii       | 26.00 | 0.00 |
| TRINITY_XP_01569 | PREDICTI  | Oryza_brachyantha   | 26.00 | 0.00 |
| TRINITY_XP_00713 | hypothet  | Phaseolus_vulgaris  | 26.00 | 0.00 |
| TRINITY_XP_01723 | PREDICTI  | Daucus_carota       | 26.00 | 0.00 |
| TRINITY_XP_00251 | mechano   | Ricinus_communis    | 26.00 | 0.00 |
| TRINITY_XP_00940 | (PREDICTI | Musa_acuminata      | 26.00 | 0.00 |
| TRINITY_XP_02639 | calcium-  | Papaver_somniferum  | 26.00 | 0.00 |
| TRINITY_XP_00226 | PREDICTI  | Vitis_vinifera      | 26.00 | 0.00 |
| TRINITY_GAX8118  | hypothet  | Chlamydomonas_eusti | 26.00 | 0.00 |
| TRINITY_OAY7554  | Calmodul  | Ananas_comosus      | 26.00 | 0.00 |
| TRINITY_XP_00565 | hypothet  | Coccomyxa_subellips | 26.00 | 0.00 |
| TRINITY_XP_02390 | (uncharac | Quercus_suber       | 26.00 | 0.00 |
| TRINITY_PIM9994  | Cytochr   | Handroanthus_impeti | 26.00 | 0.00 |
| TRINITY_PNH0268  | AP2-like  | Tetrabaena_socialis | 26.00 | 0.00 |
| TRINITY_BAI6794  | tubulin   | Chlamydomonas_reinh | 26.00 | 0.00 |
| TRINITY_XP_00564 | concana   | Coccomyxa_subellips | 26.00 | 0.00 |
| TRINITY_XP_02454 | probable  | Selaginella_moellen | 26.00 | 0.00 |
| TRINITY_XP_00940 | (PREDICTI | Musa_acuminata      | 26.00 | 0.00 |
| TRINITY_XP_00564 | hypothet  | Coccomyxa_subellips | 26.00 | 0.00 |
| TRINITY_XP_00250 | predict   | Micromonas_commoda  | 26.00 | 0.00 |
| TRINITY_PNW7498  | hypothet  | Chlamydomonas_reinh | 26.00 | 0.00 |
| TRINITY_PNW7844  | hypothet  | Chlamydomonas_reinh | 26.00 | 0.00 |
| TRINITY_XP_00751 | predict   | Bathycoccus_prasinc | 25.90 | 0.00 |
| TRINITY_BAJ9908  | predict   | Hordeum_vulgare     | 25.90 | 0.00 |
| TRINITY_KMZ6579  | Translat  | Zostera_marina      | 25.90 | 0.00 |
| TRINITY_XP_00935 | PREDICTI  | Pyrus_x_bretschneid | 25.90 | 0.00 |
| TRINITY_PSC6969  | Transduc  | Micractinium_conduc | 25.90 | 0.00 |
| TRINITY_OAE3262  | hypothet  | Marchantia_polymorp | 25.90 | 0.00 |
| TRINITY_CBI2319  | (unnamed  | Vitis_vinifera      | 25.90 | 0.00 |
| TRINITY_XP_00449 | exonucl   | Cicer_arietinum     | 25.90 | 0.00 |
| TRINITY_GAQ8661  | Mitochor  | Klebsormidium_niten | 25.90 | 0.00 |

|                 |                              |       |      |
|-----------------|------------------------------|-------|------|
| TRINITY_KXZ5601 | hypothetGonium_pectorale     | 25.90 | 0.00 |
| TRINITY_XP_0228 | heparan-Olea_europaea        | 25.90 | 0.00 |
| TRINITY_OMO8904 | (hypothetCorchorus_capsulari | 25.90 | 0.00 |
| TRINITY_XP_0024 | SPX domSorghum_bicolor       | 25.90 | 0.00 |
| TRINITY_XP_0030 | unnamed Ostreococcus_tauri   | 25.90 | 0.00 |
| TRINITY_XP_0172 | PREDICTHDaucus_carota        | 25.90 | 0.00 |
| TRINITY_GAQ9251 | hypothetKlebsormidium_niten  | 25.90 | 0.00 |
| TRINITY_GAX7310 | hypothetChlamydomonas_eusti  | 25.90 | 0.00 |
| TRINITY_XP_0016 | predicteChlamydomonas_reinh  | 25.90 | 0.00 |
| TRINITY_XP_0030 | predicteMicromonas_pusilla   | 25.90 | 0.00 |
| TRINITY_GAX7413 | hypothetChlamydomonas_eusti  | 25.90 | 0.00 |
| TRINITY_PIA5430 | hypothetAquilegia_coerulea   | 25.90 | 0.00 |
| TRINITY_GAQ8957 | PutativeKlebsormidium_niten  | 25.90 | 0.00 |
| TRINITY_KXZ4320 | hypothetGonium_pectorale     | 25.80 | 0.00 |
| TRINITY_XP_0229 | sugar trCucurbita_maxima     | 25.80 | 0.00 |
| TRINITY_OWM8025 | (hypothetPunica_granatum     | 25.80 | 0.00 |
| TRINITY_PSC7662 | wd g-betMicractinium_conduc  | 25.80 | 0.00 |
| TRINITY_XP_0106 | PREDICTHBeta_vulgaris        | 25.80 | 0.00 |
| TRINITY_PTQ5063 | hypothetMarchantia_polymorp  | 25.80 | 0.00 |
| TRINITY_XP_0016 | flagellChlamydomonas_reinh   | 25.80 | 0.00 |
| TRINITY_GAQ9220 | (RibonucKlebsormidium_niten  | 25.80 | 0.00 |
| TRINITY_GBF9157 | leishmarRaphidocelis_subcap  | 25.80 | 0.00 |
| TRINITY_XP_0094 | PREDICTHMusa_acuminata       | 25.80 | 0.00 |
| TRINITY_AES9460 | eukaryotMedicago_truncatula  | 25.80 | 0.00 |
| TRINITY_PIA5527 | hypothetAquilegia_coerulea   | 25.80 | 0.00 |
| TRINITY_KXZ4519 | hypothetGonium_pectorale     | 25.80 | 0.00 |
| TRINITY_XP_0071 | hypothetPhaseolus_vulgaris   | 25.80 | 0.00 |
| TRINITY_XP_0238 | adenosirQuercus_suber        | 25.80 | 0.00 |
| TRINITY_XP_0271 | (protein Coffea_eugenioides  | 25.80 | 0.00 |
| TRINITY_GAQ9205 | hypothetKlebsormidium_niten  | 25.80 | 0.00 |
| TRINITY_XP_0125 | phosphatCicer_arietinum      | 25.80 | 0.00 |
| TRINITY_GBG8052 | (hypothetChara_braunii       | 25.80 | 0.00 |
| TRINITY_XP_0139 | (hypothetMonoraphidium_negle | 25.80 | 0.00 |
| TRINITY_XP_0202 | cytochrAsparagus_officinal   | 25.80 | 0.00 |
| TRINITY_GAX7405 | hypothetChlamydomonas_eusti  | 25.80 | 0.00 |
| TRINITY_XP_0096 | (PREDICTHNicotiana_tomentosi | 25.80 | 0.00 |
| TRINITY_PNR3728 | hypothetPhyscomitrella_pate  | 25.80 | 0.00 |
| TRINITY_XP_0238 | putativeQuercus_suber        | 25.80 | 0.00 |
| TRINITY_XP_0103 | transcriSolanum_lycopersicu  | 25.80 | 0.00 |
| TRINITY_XP_0245 | 2-hydroSelaginella_moellen   | 25.80 | 0.00 |
| TRINITY_XP_0106 | (PREDICTHVitis_vinifera      | 25.80 | 0.00 |
| TRINITY_XP_0239 | GTPase-Quercus_suber         | 25.80 | 0.00 |
| TRINITY_KXZ4284 | hypothetGonium_pectorale     | 25.80 | 0.00 |
| TRINITY_GAQ8542 | (PutativeKlebsormidium_niten | 25.70 | 0.00 |
| TRINITY_XP_0110 | 3-oxo-5-Sesamum_indicum      | 25.70 | 0.00 |
| TRINITY_XP_0188 | (PREDICTHJuglans_regia       | 25.70 | 0.00 |
| TRINITY_BAJ9319 | predicteHordeum_vulgare      | 25.70 | 0.00 |
| TRINITY_GAQ8449 | cytochrKlebsormidium_niten   | 25.70 | 0.00 |
| TRINITY_EFJ1510 | hypothetSelaginella_moellen  | 25.70 | 0.00 |
| TRINITY_XP_0025 | (selenideMicromonas_commoda  | 25.70 | 0.00 |
| TRINITY_XP_0025 | (8-amino-Micromonas_commoda  | 25.70 | 0.00 |
| TRINITY_XP_0110 | (PREDICTHPopulus_euphratica  | 25.70 | 0.00 |
| TRINITY_ERN0600 | hypothetAmborella_trichopod  | 25.70 | 0.00 |
| TRINITY_OWM7028 | 1hypothetPunica_granatum     | 25.70 | 0.00 |
| TRINITY_XP_0241 | protein Rosa_chinensis       | 25.70 | 0.00 |
| TRINITY_XP_0030 | tRNA (g)Ostreococcus_tauri   | 25.70 | 0.00 |
| TRINITY_XP_0238 | 1-phosphQuercus_suber        | 25.70 | 0.00 |
| TRINITY_GAQ8302 | hypothetKlebsormidium_niten  | 25.70 | 0.00 |
| TRINITY_GAX8022 | hypothetChlamydomonas_eusti  | 25.70 | 0.00 |
| TRINITY_XP_0205 | uncharaPhalaenopsis_equest   | 25.70 | 0.00 |
| TRINITY_BAJ9585 | predicteHordeum_vulgare      | 25.70 | 0.00 |
| TRINITY_OAY7181 | Ankyrin-Ananas_comosus       | 25.70 | 0.00 |
| TRINITY_XP_0244 | protein Populus_trichocarpa  | 25.70 | 0.00 |
| TRINITY_PTQ4936 | 2hypothetMarchantia_polymorp | 25.70 | 0.00 |
| TRINITY_XP_0156 | PREDICTHOryza_brachyantha    | 25.70 | 0.00 |
| TRINITY_XP_0279 | 1phosphoVigna_unguiculata    | 25.70 | 0.00 |

|                 |           |                     |       |      |
|-----------------|-----------|---------------------|-------|------|
| TRINITY_XP_0238 | uncharac  | Quercus_suber       | 25.70 | 0.00 |
| TRINITY_PIA5074 | hypothet  | Aquilegia_coerulea  | 25.70 | 0.00 |
| TRINITY_OAE3319 | (hypothet | Marchantia_polymorp | 25.70 | 0.00 |
| TRINITY_XP_0063 | (PREDICTI | Solanum_tuberosum   | 25.70 | 0.00 |
| TRINITY_XP_0016 | predicte  | Chlamydomonas_reinh | 25.70 | 0.00 |
| TRINITY_XP_0191 | PREDICTI  | Ipomoea_nil         | 25.70 | 0.00 |
| TRINITY_GAX7334 | hypothet  | Chlamydomonas_eusti | 25.70 | 0.00 |
| TRINITY_OUS4375 | hypothet  | Ostreococcus_tauri  | 25.70 | 0.00 |
| TRINITY_BAJ9457 | predicte  | Hordeum_vulgare     | 25.60 | 0.00 |
| TRINITY_NP_0013 | uncharac  | Zea_mays            | 25.60 | 0.00 |
| TRINITY_XP_0245 | probable  | Selaginella_moellen | 25.60 | 0.00 |
| TRINITY_GAQ7853 | ARM rep   | Klebsormidium_niten | 25.60 | 0.00 |
| TRINITY_GAQ9014 | Putative  | Klebsormidium_niten | 25.60 | 0.00 |
| TRINITY_XP_0035 | cytopla   | Glycine_max         | 25.60 | 0.00 |
| TRINITY_GAX8118 | hypothet  | Chlamydomonas_eusti | 25.60 | 0.00 |
| TRINITY_GAQ8044 | hypothet  | Klebsormidium_niten | 25.60 | 0.00 |
| TRINITY_RZR8506 | hypothet  | Ensete_ventricosum  | 25.60 | 0.00 |
| TRINITY_AFO8408 | sucrose   | Actinidia_deliciosa | 25.60 | 0.00 |
| TRINITY_KFK2549 | hypothet  | Arabis_alpina       | 25.60 | 0.00 |
| TRINITY_RXH9191 | hypothet  | Malus_domestica     | 25.60 | 0.00 |
| TRINITY_BAI6794 | tubulin   | Chlamydomonas_reinh | 25.60 | 0.00 |
| TRINITY_XP_0102 | PREDICTI  | Nelumbo_nucifera    | 25.60 | 0.00 |
| TRINITY_XP_0239 | low affi  | Quercus_suber       | 25.60 | 0.00 |
| TRINITY_GAQ8124 | hypothet  | Klebsormidium_niten | 25.60 | 0.00 |
| TRINITY_XP_0120 | tRNAse    | Jatropha_curcas     | 25.60 | 0.00 |
| TRINITY_XP_0096 | PREDICTI  | Nicotiana_tomentosi | 25.60 | 0.00 |
| TRINITY_NP_0013 | two por   | Nicotiana_tabacum   | 25.60 | 0.00 |
| TRINITY_BAJ9694 | predicte  | Hordeum_vulgare     | 25.60 | 0.00 |
| TRINITY_GAX8496 | hypothet  | Chlamydomonas_eusti | 25.60 | 0.00 |
| TRINITY_OTG2536 | putative  | Helianthus_annuus   | 25.60 | 0.00 |
| TRINITY_XP_0227 | uncharac  | Durio_zibethinus    | 25.60 | 0.00 |
| TRINITY_KXZ4822 | hypothet  | Gonium_pectorale    | 25.60 | 0.00 |
| TRINITY_GAV5921 | Sec6 don  | Cephalotus_follicul | 25.60 | 0.00 |
| TRINITY_XP_0029 | hypothet  | Volvox_carteri      | 25.60 | 0.00 |
| TRINITY_KZV4209 | nicotin   | Dorcoceras_hygromet | 25.50 | 0.00 |
| TRINITY_GAX8461 | hypothet  | Chlamydomonas_eusti | 25.50 | 0.00 |
| TRINITY_XP_0264 | (cytochr  | Papaver_somniferum  | 25.50 | 0.00 |
| TRINITY_CDM8690 | (unnamed  | Triticum_aestivum   | 25.50 | 0.00 |
| TRINITY_RDX6560 | Acid bet  | Mucuna_pruriens     | 25.50 | 0.00 |
| TRINITY_XP_0271 | tip elor  | Cicer_arietinum     | 25.50 | 0.00 |
| TRINITY_KDP4090 | (hypothet | Jatropha_curcas     | 25.50 | 0.00 |
| TRINITY_NP_0011 | SH2 dom   | Arabidopsis_thalian | 25.50 | 0.00 |
| TRINITY_XP_0016 | predicte  | Chlamydomonas_reinh | 25.50 | 0.00 |
| TRINITY_RVX1717 | Retrovir  | Vitis_vinifera      | 25.50 | 0.00 |
| TRINITY_XP_0030 | predicte  | Micromonas_pusilla  | 25.50 | 0.00 |
| TRINITY_GAX8052 | hypothet  | Chlamydomonas_eusti | 25.50 | 0.00 |
| TRINITY_GAX8016 | hypothet  | Chlamydomonas_eusti | 25.50 | 0.00 |
| TRINITY_XP_0024 | cullin-   | Sorghum_bicolor     | 25.50 | 0.00 |
| TRINITY_XP_0042 | (PREDICTI | Fragaria_vesca      | 25.40 | 0.00 |
| TRINITY_GAQ8293 | prefoldi  | Klebsormidium_niten | 25.40 | 0.00 |
| TRINITY_XP_0237 | ELMO don  | Lactuca_sativa      | 25.40 | 0.00 |
| TRINITY_GBF9764 | hypothet  | Raphidocelis_subcap | 25.40 | 0.00 |
| TRINITY_XP_0058 | hypothet  | Chlorella_variabili | 25.40 | 0.00 |
| TRINITY_PIA3220 | hypothet  | Aquilegia_coerulea  | 25.40 | 0.00 |
| TRINITY_RAL5341 | hypothet  | Cuscuta_australis   | 25.40 | 0.00 |
| TRINITY_XP_0058 | hypothet  | Chlorella_variabili | 25.40 | 0.00 |
| TRINITY_KXZ5596 | hypothet  | Gonium_pectorale    | 25.40 | 0.00 |
| TRINITY_GAY5680 | hypothet  | Citrus_unshiu       | 25.40 | 0.00 |
| TRINITY_NP_0011 | uncharac  | Zea_mays            | 25.40 | 0.00 |
| TRINITY_XP_0225 | ATP-dep   | Brassica_napus      | 25.40 | 0.00 |
| TRINITY_XP_0049 | putative  | Setaria_italica     | 25.40 | 0.00 |
| TRINITY_XP_0218 | poly(A)-  | Spinacia_oleracea   | 25.40 | 0.00 |
| TRINITY_XP_0239 | GTPase-   | Quercus_suber       | 25.40 | 0.00 |
| TRINITY_BBE4939 | squalene  | Polystichum_makinoi | 25.40 | 0.00 |
| TRINITY_GAX8016 | (hypothet | Chlamydomonas_eusti | 25.40 | 0.00 |
| TRINITY_XP_0025 | (choline  | Micromonas_commoda  | 25.40 | 0.00 |

|                   |                              |       |      |
|-------------------|------------------------------|-------|------|
| TRINITY_KXZ5229   | hypothetGonium_pectorale     | 25.40 | 0.00 |
| TRINITY_XP_0243   | protein Physcomitrella_pate  | 25.40 | 0.00 |
| TRINITY_PTQ3670   | hypothetMarchantia_polymorp  | 25.40 | 0.00 |
| TRINITY_AIU4929   | AT2G1841Sarcandra_glabra     | 25.40 | 0.00 |
| TRINITY_PNH1295   | A disintTetrabaena_socialis  | 25.40 | 0.00 |
| TRINITY_XP_002515 | '-nuclerRicinus_communis     | 25.30 | 0.00 |
| TRINITY_GBG9158   | hypothetChara_braunii        | 25.30 | 0.00 |
| TRINITY_XP_0245   | nucleolaSelaginella_moellen  | 25.30 | 0.00 |
| TRINITY_XP_0200   | syntaxirAnanas_comosus       | 25.30 | 0.00 |
| TRINITY_NP_5682   | calmodulArabidopsis_thalian  | 25.30 | 0.00 |
| TRINITY_XP_0042   | uncharacSolanum_lycopersicu  | 25.30 | 0.00 |
| TRINITY_XP_0237   | calcium-Lactuca_sativa       | 25.30 | 0.00 |
| TRINITY_KXZ4330   | hypothetGonium_pectorale     | 25.30 | 0.00 |
| TRINITY_XP_0241   | transcriRosa_chinensis       | 25.30 | 0.00 |
| TRINITY_XP_0237   | protein Lactuca_sativa       | 25.30 | 0.00 |
| TRINITY_XP_0056   | hypothetCoccomyxa_subellips  | 25.30 | 0.00 |
| TRINITY_XP_0208   | putativeArabidopsis_lyrata   | 25.30 | 0.00 |
| TRINITY_GAX7881   | hypothetChlamydomonas_eusti  | 25.30 | 0.00 |
| TRINITY_RYR2251   | hypothetArachis_hypogaea     | 25.30 | 0.00 |
| TRINITY_PTQ4483   | hypothetMarchantia_polymorp  | 25.30 | 0.00 |
| TRINITY_XP_0159   | ras-relaArachis_duranensis   | 25.30 | 0.00 |
| TRINITY_XP_0068   | protein Amborella_trichopod  | 25.30 | 0.00 |
| TRINITY_RAL4839   | hypothetCuscuta_australis    | 25.30 | 0.00 |
| TRINITY_GBF9955   | hypothetRaphidocelis_subcap  | 25.30 | 0.00 |
| TRINITY_XP_0066   | PREDICTIOryza_brachyantha    | 25.30 | 0.00 |
| TRINITY_XP_0238   | protein Quercus_suber        | 25.30 | 0.00 |
| TRINITY_GAX7967   | hypothetChlamydomonas_eusti  | 25.30 | 0.00 |
| TRINITY_ONI3142   | hypothetPrunus_persica       | 25.20 | 0.00 |
| TRINITY_XP_0184   | PREDICTIRaphanus_sativus     | 25.20 | 0.00 |
| TRINITY_BAK0692   | predicteHordeum_vulgare      | 25.20 | 0.00 |
| TRINITY_XP_0228   | 1,3-betaOstreococcus_tauri   | 25.20 | 0.00 |
| TRINITY_PNR3636   | hypothetPhyscomitrella_pate  | 25.20 | 0.00 |
| TRINITY_KDP4068   | hypothetJatropha_curcas      | 25.20 | 0.00 |
| TRINITY_OAE2910   | hypothetMarchantia_polymorp  | 25.20 | 0.00 |
| TRINITY_XP_0205   | protein Amborella_trichopod  | 25.20 | 0.00 |
| TRINITY_XP_0245   | dynamin-Selaginella_moellen  | 25.20 | 0.00 |
| TRINITY_GAQ7801   | hypothetKlebsormidium_niten  | 25.20 | 0.00 |
| TRINITY_PNH0921   | Tiny macTetrabaena_socialis  | 25.20 | 0.00 |
| TRINITY_PKA6398   | Protein Apostasia_shenzheni  | 25.20 | 0.00 |
| TRINITY_XP_0202   | ubiquitiAsparagus_officinal  | 25.20 | 0.00 |
| TRINITY_OTG1794   | putativeHelianthus_annuus    | 25.10 | 0.00 |
| TRINITY_XP_0110   | SEC12-ljSesamum_indicum      | 25.10 | 0.00 |
| TRINITY_XP_0094   | PREDICTIMusa_acuminata       | 25.10 | 0.00 |
| TRINITY_XP_0239   | (vacuolar)Quercus_suber      | 25.10 | 0.00 |
| TRINITY_AFK3511   | unknown Medicago_truncatula  | 25.10 | 0.00 |
| TRINITY_XP_0205   | WD repePhalaenopsis_equest   | 25.10 | 0.00 |
| TRINITY_XP_0166   | PREDICTIGossypium_hirsutum   | 25.10 | 0.00 |
| TRINITY_XP_0273   | ultravivAbrus_precatorius    | 25.10 | 0.00 |
| TRINITY_OAE2772   | hypothetMarchantia_polymorp  | 25.10 | 0.00 |
| TRINITY_XP_0174   | PREDICTIVigna_angularis      | 25.10 | 0.00 |
| TRINITY_XP_0229   | protein Cucurbita_moschata   | 25.10 | 0.00 |
| TRINITY_XP_0110   | PREDICTIPopulus_euphratica   | 25.10 | 0.00 |
| TRINITY_GBG8204   | hypothetChara_braunii        | 25.10 | 0.00 |
| TRINITY_PRW5993   | sterol 1Chlorella_sorokinia  | 25.10 | 0.00 |
| TRINITY_EFJ2945   | hypothetSelaginella_moellen  | 25.10 | 0.00 |
| TRINITY_GAX7285   | hypothetChlamydomonas_eusti  | 25.10 | 0.00 |
| TRINITY_GBF9841   | hypothetRaphidocelis_subcap  | 25.10 | 0.00 |
| TRINITY_XP_0213   | (alpha-L-Sorghum_bicolor     | 25.10 | 0.00 |
| TRINITY_XP_0279   | (cytochr)Vigna_unguiculata   | 25.10 | 0.00 |
| TRINITY_XP_0066   | PREDICTIOryza_brachyantha    | 25.10 | 0.00 |
| TRINITY_PNW7691   | (hypothetChlamydomonas_reinh | 25.10 | 0.00 |
| TRINITY_XP_0066   | PREDICTIOryza_brachyantha    | 25.00 | 0.00 |
| TRINITY_PKU7185   | (CalmodulDendrobium_catenatu | 25.00 | 0.00 |
| TRINITY_KMS9427   | hypothetBeta_vulgaris        | 25.00 | 0.00 |
| TRINITY_XP_0101   | (probableMorus_notabilis     | 25.00 | 0.00 |
| TRINITY_GAX8147   | hypothetChlamydomonas_eusti  | 25.00 | 0.00 |



|                  |                              |       |      |
|------------------|------------------------------|-------|------|
| TRINITY_GAX79702 | hypothetChlamydomonas_eusti  | 25.00 | 0.00 |
| TRINITY_EYU37994 | hypothetErythranthe_guttata  | 25.00 | 0.00 |
| TRINITY_GAQ81449 | hypothetKlebsormidium_niten  | 25.00 | 0.00 |
| TRINITY_XP_02018 | transmenAegilops_tauschii    | 25.00 | 0.00 |
| TRINITY_KFK3556  | hypothetArabis_alpina        | 25.00 | 0.00 |
| TRINITY_PTQ39897 | hypothetMarchantia_polymorp  | 25.00 | 0.00 |
| TRINITY_GBF97643 | hypothetRaphidocelis_subcap  | 25.00 | 0.00 |
| TRINITY_XP_00306 | predicteMicromonas_pusilla   | 25.00 | 0.00 |
| TRINITY_RXH79113 | hypothetMalus_domestica      | 25.00 | 0.00 |
| TRINITY_GAQ90256 | hypothetKlebsormidium_niten  | 25.00 | 0.00 |
| TRINITY_XP_00169 | predicteChlamydomonas_reinh  | 25.00 | 0.00 |
| TRINITY_GAX76579 | hypothetChlamydomonas_eusti  | 25.00 | 0.00 |
| TRINITY_XP_02387 | von WillQuercus_suber        | 25.00 | 0.00 |
| TRINITY_PNW70905 | hypothetChlamydomonas_reinh  | 25.00 | 0.00 |
| TRINITY_XP_02020 | homocystCajanus_cajan        | 25.00 | 0.00 |
| TRINITY_XP_02375 | importirLactuca_sativa       | 25.00 | 0.00 |
| TRINITY_XP_01108 | proteine Sesamum_indicum     | 24.90 | 0.00 |
| TRINITY_RWR9253  | presequCinnamomum_micranth   | 24.90 | 0.00 |
| TRINITY_XP_02451 | neutral Selaginella_moellen  | 24.90 | 0.00 |
| TRINITY_XP_02283 | G-patch Ostreococcus_tauri   | 24.90 | 0.00 |
| TRINITY_XP_01617 | DNA repArachis_ipaensis      | 24.90 | 0.00 |
| TRINITY_XP_02039 | leucine Zea_mays             | 24.90 | 0.00 |
| TRINITY_BAK01751 | predicteHordeum_vulgare      | 24.90 | 0.00 |
| TRINITY_OAE25787 | hypothetMarchantia_polymorp  | 24.90 | 0.00 |
| TRINITY_ABB4538  | (diacylg)Oryza_sativa        | 24.90 | 0.00 |
| TRINITY_XP_02390 | tuberousQuercus_suber        | 24.90 | 0.00 |
| TRINITY_XP_02707 | SNF1-relCoffea_arabica       | 24.90 | 0.00 |
| TRINITY_PHT70348 | DynamineCapsicum_annuum      | 24.90 | 0.00 |
| TRINITY_XP_00250 | predicteMicromonas_commoda   | 24.90 | 0.00 |
| TRINITY_A2YFR6.1 | RecName:Oryza_sativa         | 24.90 | 0.00 |
| TRINITY_XP_02582 | UBX domPanicum_hallii        | 24.80 | 0.00 |
| TRINITY_XP_02437 | ethylenPhyscomitrella_pate   | 24.80 | 0.00 |
| TRINITY_GAX85222 | hypothetChlamydomonas_eusti  | 24.80 | 0.00 |
| TRINITY_KEH18995 | shrunkMedicago_truncatula    | 24.80 | 0.00 |
| TRINITY_OAE29674 | hypothetMarchantia_polymorp  | 24.80 | 0.00 |
| TRINITY_XP_02086 | importirArabidopsis_lyrata   | 24.80 | 0.00 |
| TRINITY_XP_00751 | predicteBathycoccus_prasinc  | 24.80 | 0.00 |
| TRINITY_GAQ87539 | hypothetKlebsormidium_niten  | 24.80 | 0.00 |
| TRINITY_XP_00584 | hypothetChlorella_variabili  | 24.80 | 0.00 |
| TRINITY_XP_02390 | (LOW QUAI)Quercus_suber      | 24.80 | 0.00 |
| TRINITY_XP_02027 | EVI5-liAsparagus_officinal   | 24.80 | 0.00 |
| TRINITY_XP_01390 | hypothetMonoraphidium_negle  | 24.80 | 0.00 |
| TRINITY_GAX77365 | hypothetChlamydomonas_eusti  | 24.80 | 0.00 |
| TRINITY_PNW75381 | hypothetChlamydomonas_reinh  | 24.80 | 0.00 |
| TRINITY_KXZ55666 | hypothetGonium_pectorale     | 24.80 | 0.00 |
| TRINITY_XP_00169 | predicteChlamydomonas_reinh  | 24.70 | 0.00 |
| TRINITY_XP_01946 | PREDICTHLupinus_angustifoli  | 24.70 | 0.00 |
| TRINITY_XP_00141 | predicteOstreococcus_sp._'1  | 24.70 | 0.00 |
| TRINITY_XP_01052 | PREDICTHTarenaya_hasslerian  | 24.70 | 0.00 |
| TRINITY_KXZ47726 | hypothetGonium_pectorale     | 24.70 | 0.00 |
| TRINITY_RMZ55363 | hypothetAuxenochlorella_pro  | 24.70 | 0.00 |
| TRINITY_RMZ5514  | (hypothetAuxenochlorella_pro | 24.70 | 0.00 |
| TRINITY_XP_00305 | predicteMicromonas_pusilla   | 24.60 | 0.00 |
| TRINITY_PNW79071 | hypothetChlamydomonas_reinh  | 24.60 | 0.00 |
| TRINITY_XP_0240  | (phospho)Eutrema_salsugineum | 24.60 | 0.00 |
| TRINITY_PNH00477 | hypothetTetrabaena_socialis  | 24.60 | 0.00 |
| TRINITY_XP_02438 | von WillPhyscomitrella_pate  | 24.60 | 0.00 |
| TRINITY_XP_00169 | predicteChlamydomonas_reinh  | 24.60 | 0.00 |
| TRINITY_XP_00657 | uncharacGlycine_max          | 24.60 | 0.00 |
| TRINITY_GAQ84341 | transcriKlebsormidium_niten  | 24.60 | 0.00 |
| TRINITY_EFJ18448 | hypothetSelaginella_moellen  | 24.60 | 0.00 |
| TRINITY_PWA43769 | ArmadillArtemisia_annua      | 24.60 | 0.00 |
| TRINITY_XP_00250 | predicteMicromonas_commoda   | 24.60 | 0.00 |
| TRINITY_NP_00131 | elongatiGossypium_hirsutum   | 24.60 | 0.00 |
| TRINITY_XP_00250 | predicteMicromonas_commoda   | 24.50 | 0.00 |
| TRINITY_KRH73926 | hypothetGlycine_max          | 24.50 | 0.00 |

|                  |              |                     |       |      |
|------------------|--------------|---------------------|-------|------|
| TRINITY_XP_00720 | L-2-hydroxy  | Prunus_persica      | 24.50 | 0.00 |
| TRINITY_EEE6370  | hypothetical | Oryza_sativa        | 24.50 | 0.00 |
| TRINITY_XP_01561 | pre-mRNA     | Oryza_sativa        | 24.50 | 0.00 |
| TRINITY_XP_02182 | ABC trans    | Prunus_avium        | 24.50 | 0.00 |
| TRINITY_RLN4070  | hypothetical | Panicum_miliaceum   | 24.50 | 0.00 |
| TRINITY_XP_01066 | PREDICTED    | Beta_vulgaris       | 24.50 | 0.00 |
| TRINITY_PNW7167  | hypothetical | Chlamydomonas_reinh | 24.50 | 0.00 |
| TRINITY_XP_01616 | protein      | Arachis_ipaensis    | 24.50 | 0.00 |
| TRINITY_XP_02388 | RNA poly     | Quercus_suber       | 24.50 | 0.00 |
| TRINITY_XP_00940 | PREDICTED    | Musa_acuminata      | 24.50 | 0.00 |
| TRINITY_GAX7636  | hypothetical | Chlamydomonas_eusti | 24.50 | 0.00 |
| TRINITY_XP_00362 | mitochondr   | Medicago_truncatula | 24.40 | 0.00 |
| TRINITY_PNR5773  | hypothetical | Physcomitrella_pate | 24.40 | 0.00 |
| TRINITY_XP_00294 | hypothetical | Volvox_carteri      | 24.40 | 0.00 |
| TRINITY_XP_00751 | predicted    | Bathycoccus_prasin  | 24.40 | 0.00 |
| TRINITY_XP_00250 | predicted    | Micromonas_commoda  | 24.40 | 0.00 |
| TRINITY_PWA7447  | organic      | Artemisia_annua     | 24.40 | 0.00 |
| TRINITY_EPS7053  | hypothetical | Genlisea_aurea      | 24.40 | 0.00 |
| TRINITY_GAX8125  | hypothetical | Chlamydomonas_eusti | 24.40 | 0.00 |
| TRINITY_CDP1355  | unnamed      | Coffea_canephora    | 24.40 | 0.00 |
| TRINITY_XP_02163 | uncharacter  | Hevea_brasiliensis  | 24.40 | 0.00 |
| TRINITY_KXZ5030  | hypothetical | Gonium_pectorale    | 24.40 | 0.00 |
| TRINITY_XP_02016 | obtusifol    | Aegilops_tauschii   | 24.40 | 0.00 |
| TRINITY_XP_00360 | calcium      | Medicago_truncatula | 24.40 | 0.00 |
| TRINITY_XP_00295 | hypothetical | Volvox_carteri      | 24.40 | 0.00 |
| TRINITY_GBG7461  | hypothetical | Chara_braunii       | 24.30 | 0.00 |
| TRINITY_KXZ4275  | hypothetical | Gonium_pectorale    | 24.30 | 0.00 |
| TRINITY_KXZ4856  | hypothetical | Gonium_pectorale    | 24.30 | 0.00 |
| TRINITY_PRW6044  | pathogen     | Chlorella_sorokinia | 24.30 | 0.00 |
| TRINITY_RAL5397  | hypothetical | Cuscuta_australis   | 24.30 | 0.00 |
| TRINITY_GAQ8019  | serine/th    | Klebsormidium_niten | 24.30 | 0.00 |
| TRINITY_XP_02462 | uncharacter  | Medicago_truncatula | 24.30 | 0.00 |
| TRINITY_XP_02387 | tripeptide   | Quercus_suber       | 24.30 | 0.00 |
| TRINITY_XP_00664 | PREDICTED    | Oryza_brachyantha   | 24.30 | 0.00 |
| TRINITY_XP_02582 | patatin-     | Panicum_hallii      | 24.30 | 0.00 |
| TRINITY_KXZ4994  | hypothetical | Gonium_pectorale    | 24.30 | 0.00 |
| TRINITY_KRH4875  | hypothetical | Glycine_max         | 24.30 | 0.00 |
| TRINITY_BAS3104  | hypothetical | Klebsormidium_flacc | 24.30 | 0.00 |
| TRINITY_XP_01025 | PREDICTED    | Nelumbo_nucifera    | 24.30 | 0.00 |
| TRINITY_XP_02791 | 2-amino-     | Vigna_unguiculata   | 24.30 | 0.00 |
| TRINITY_KVI0637  | Major f      | Cynara_cardunculus  | 24.30 | 0.00 |
| TRINITY_XP_01107 | uncharacter  | Sesamum_indicum     | 24.30 | 0.00 |
| TRINITY_XP_01390 | hypothetical | Monoraphidium_negle | 24.30 | 0.00 |
| TRINITY_XP_00430 | PREDICTED    | Fragaria_vesca      | 24.30 | 0.00 |
| TRINITY_XP_02376 | protein      | Lactuca_sativa      | 24.30 | 0.00 |
| TRINITY_GAX7285  | hypothetical | Chlamydomonas_eusti | 24.30 | 0.00 |
| TRINITY_PSC7039  | Leukotri     | Micractinium_conduc | 24.30 | 0.00 |
| TRINITY_XP_00230 | importin     | Populus_trichocarpa | 24.30 | 0.00 |
| TRINITY_GAQ8473  | Cysteine     | Klebsormidium_niten | 24.20 | 0.00 |
| TRINITY_XP_02437 | platelet     | Physcomitrella_pate | 24.20 | 0.00 |
| TRINITY_XP_00295 | hypothetical | Volvox_carteri      | 24.20 | 0.00 |
| TRINITY_XP_01943 | PREDICTED    | Lupinus_angustifoli | 24.20 | 0.00 |
| TRINITY_XP_00584 | hypothetical | Chlorella_variabili | 24.20 | 0.00 |
| TRINITY_XP_02453 | retinobla    | Selaginella_moellen | 24.20 | 0.00 |
| TRINITY_XP_00141 | MFS fami     | Ostreococcus_sp._'1 | 24.20 | 0.00 |
| TRINITY_OAE2688  | hypothetical | Marchantia_polymorp | 24.20 | 0.00 |
| TRINITY_XP_02018 | organic      | Aegilops_tauschii   | 24.20 | 0.00 |
| TRINITY_GAQ9169  | HCP-like     | Klebsormidium_niten | 24.20 | 0.00 |
| TRINITY_XP_00251 | polyadep     | Ricinus_communis    | 24.20 | 0.00 |
| TRINITY_XP_00168 | predicted    | Chlamydomonas_reinh | 24.20 | 0.00 |
| TRINITY_EFJ2153  | hypothetical | Selaginella_moellen | 24.10 | 0.00 |
| TRINITY_EFJ3848  | hypothetical | Selaginella_moellen | 24.10 | 0.00 |
| TRINITY_PHT5402  | hypothetical | Capsicum_baccatum   | 24.10 | 0.00 |
| TRINITY_XP_01285 | PREDICTED    | Erythranthe_guttata | 24.10 | 0.00 |
| TRINITY_XP_02387 | uncharacter  | Quercus_suber       | 24.10 | 0.00 |
| TRINITY_RYR2251  | hypothetical | Arachis_hypogaea    | 24.10 | 0.00 |

|                  |          |                      |       |      |
|------------------|----------|----------------------|-------|------|
| TRINITY_ONK56204 | uncharac | Asparagus_officinal  | 24.10 | 0.00 |
| TRINITY_GAQ85744 | hypothet | Klebsormidium_niten  | 24.10 | 0.00 |
| TRINITY_XP_01724 | PREDICTI | Daucus_carota        | 24.10 | 0.00 |
| TRINITY_XP_00306 | predicte | Micromonas_pusilla   | 24.10 | 0.00 |
| TRINITY_XP_00307 | Amino ac | Ostreococcus_tauri   | 24.10 | 0.00 |
| TRINITY_XP_01068 | PREDICTI | Beta_vulgaris        | 24.10 | 0.00 |
| TRINITY_XP_00910 | PREDICTI | Brassica_rapa        | 24.10 | 0.00 |
| TRINITY_BAJ95858 | predicte | Hordeum_vulgare      | 24.10 | 0.00 |
| TRINITY_KXZ46217 | hypothet | Gonium_pectorale     | 24.10 | 0.00 |
| TRINITY_XP_02128 | alanine- | Herrania_umbratica   | 24.10 | 0.00 |
| TRINITY_GBG85996 | hypothet | Chara_braunii        | 24.10 | 0.00 |
| TRINITY_KMZ63281 | Alkaline | Zostera_marina       | 24.00 | 0.00 |
| TRINITY_XP_02027 | pentatri | Asparagus_officinal  | 24.00 | 0.00 |
| TRINITY_XP_00295 | hypothet | Volvox_carteri       | 24.00 | 0.00 |
| TRINITY_PWA49533 | heavy m  | Artemisia_annua      | 24.00 | 0.00 |
| TRINITY_XP_01042 | PREDICTI | Camelina_sativa      | 24.00 | 0.00 |
| TRINITY_GAX78841 | hypothet | Chlamydomonas_eusti  | 24.00 | 0.00 |
| TRINITY_XP_00305 | predicte | Micromonas_pusilla   | 24.00 | 0.00 |
| TRINITY_OAE22546 | hypothet | Marchantia_polymorp  | 24.00 | 0.00 |
| TRINITY_XP_01675 | PREDICTI | Gossypium_hirsutum   | 24.00 | 0.00 |
| TRINITY_XP_02283 | Amino ac | Ostreococcus_tauri   | 23.90 | 0.00 |
| TRINITY_XP_00142 | predicte | Ostreococcus_sp._'1  | 23.90 | 0.00 |
| TRINITY_XP_00639 | RNA pol  | Eutrema_salsugineum  | 23.90 | 0.00 |
| TRINITY_KYP59504 | Histone- | Cajanus_cajan        | 23.90 | 0.00 |
| TRINITY_CDY40108 | BnaC02g  | (Brassica_napus      | 23.90 | 0.00 |
| TRINITY_XP_00682 | DNA dam  | Amborella_trichopod  | 23.90 | 0.00 |
| TRINITY_XP_00305 | predicte | Micromonas_pusilla   | 23.90 | 0.00 |
| TRINITY_XP_00296 | RINT1-li | Selaginella_moellen  | 23.90 | 0.00 |
| TRINITY_XP_02185 | traffic  | Spinacia_oleracea    | 23.90 | 0.00 |
| TRINITY_XP_01346 | ent-kau  | Medicago_truncatula  | 23.90 | 0.00 |
| TRINITY_KFK43435 | hypothet | Arabis_alpina        | 23.90 | 0.00 |
| TRINITY_GAX83104 | hypothet | Chlamydomonas_eusti  | 23.90 | 0.00 |
| TRINITY_GBF95401 | helicas  | Raphidocelis_subcap  | 23.90 | 0.00 |
| TRINITY_XP_00911 | PREDICTI | Brassica_rapa        | 23.90 | 0.00 |
| TRINITY_XP_00294 | Qb-SNAR  | Volvox_carteri       | 23.90 | 0.00 |
| TRINITY_PWA43260 | protein  | Artemisia_annua      | 23.80 | 0.00 |
| TRINITY_EFH68419 | Serine/t | Arabidopsis_lyrata   | 23.80 | 0.00 |
| TRINITY_XP_02462 | uncharac | Medicago_truncatula  | 23.80 | 0.00 |
| TRINITY_PWA40096 | Concana  | Artemisia_annua      | 23.80 | 0.00 |
| TRINITY_XP_02641 | SNF1-rel | Papaver_somniferum   | 23.80 | 0.00 |
| TRINITY_XP_02186 | protein  | Spinacia_oleracea    | 23.80 | 0.00 |
| TRINITY_AYM32740 | DNA pol  | Silene_vulgaris      | 23.80 | 0.00 |
| TRINITY_KEH27917 | LAG1 lor | Medicago_truncatula  | 23.80 | 0.00 |
| TRINITY_XP_00294 | hypothet | Volvox_carteri       | 23.80 | 0.00 |
| TRINITY_XP_00751 | polycyst | Bathycoccus_prasinoc | 23.80 | 0.00 |
| TRINITY_PRW61566 | Retrovir | Chlorella_sorokinia  | 23.80 | 0.00 |
| TRINITY_XP_00449 | ribosom  | Cicer_arietinum      | 23.80 | 0.00 |
| TRINITY_XP_02437 | EVI5-li  | Physcomitrella_pate  | 23.80 | 0.00 |
| TRINITY_XP_02454 | eukaryot | Selaginella_moellen  | 23.80 | 0.00 |
| TRINITY_XP_02388 | rhol gu  | Quercus_suber        | 23.80 | 0.00 |
| TRINITY_KZV47137 | cation/c | Dorcoceras_hygromet  | 23.80 | 0.00 |
| TRINITY_PNW83063 | hypothet | Chlamydomonas_reinh  | 23.80 | 0.00 |
| TRINITY_XP_00250 | adenylat | Micromonas_commoda   | 23.70 | 0.00 |
| TRINITY_ONL92576 | transcri | Zea_mays             | 23.70 | 0.00 |
| TRINITY_XP_00646 | protein  | Citrus_sinensis      | 23.70 | 0.00 |
| TRINITY_PIA53510 | hypothet | Aquilegia_coerulea   | 23.70 | 0.00 |
| TRINITY_ALM54988 | DEAD bo  | Chlamydomonas_sp._I  | 23.70 | 0.00 |
| TRINITY_EMS68116 | Obtusif  | Triticum_urartu      | 23.70 | 0.00 |
| TRINITY_XP_02283 | RNA pol  | Ostreococcus_tauri   | 23.70 | 0.00 |
| TRINITY_XP_00430 | PREDICTI | Fragaria_vesca       | 23.70 | 0.00 |
| TRINITY_XP_01587 | uncharac | Ziziphus_jujuba      | 23.70 | 0.00 |
| TRINITY_XP_00141 | predicte | Ostreococcus_sp._'1  | 23.70 | 0.00 |
| TRINITY_XP_00308 | Twin-ar  | Ostreococcus_tauri   | 23.70 | 0.00 |
| TRINITY_XP_02437 | cilia-   | Physcomitrella_pate  | 23.70 | 0.00 |
| TRINITY_XP_01723 | PREDICTI | Daucus_carota        | 23.60 | 0.00 |
| TRINITY_XP_01883 | PREDICTI | Juglans_regia        | 23.60 | 0.00 |

|                  |          |                     |       |      |
|------------------|----------|---------------------|-------|------|
| TRINITY_XP_00296 | uncharac | Selaginella_moellen | 23.60 | 0.00 |
| TRINITY_XP_00425 | signal   | Solanum_lycopersicu | 23.60 | 0.00 |
| TRINITY_XP_01916 | PREDICTI | Ipomoea_nil         | 23.60 | 0.00 |
| TRINITY_XP_01885 | PREDICTI | Juglans_regia       | 23.60 | 0.00 |
| TRINITY_XP_00834 | PREDICTI | Malus_domestica     | 23.60 | 0.00 |
| TRINITY_XP_02501 | LOW QUAI | Ricinus_communis    | 23.60 | 0.00 |
| TRINITY_XP_02390 | uncharac | Quercus_suber       | 23.60 | 0.00 |
| TRINITY_NP_18164 | Calcium- | Arabidopsis_thalian | 23.60 | 0.00 |
| TRINITY_XP_01145 | PREDICTI | Fragaria vesca      | 23.50 | 0.00 |
| TRINITY_XP_00307 | Insulin- | Ostreococcus_tauri  | 23.50 | 0.00 |
| TRINITY_XP_02736 | fatty ac | Abrus_precatorius   | 23.50 | 0.00 |
| TRINITY_XP_02390 | vacuolar | Quercus_suber       | 23.50 | 0.00 |
| TRINITY_KXZ5294  | hypothet | Gonium_pectorale    | 23.50 | 0.00 |
| TRINITY_GAQ8383  | RAN GTP  | Klebsormidium_niten | 23.50 | 0.00 |
| TRINITY_XP_02388 | probable | Quercus_suber       | 23.50 | 0.00 |
| TRINITY_OAE3505  | hypothet | Marchantia_polymorp | 23.50 | 0.00 |
| TRINITY_GAX7270  | hypothet | Chlamydomonas_eusti | 23.50 | 0.00 |
| TRINITY_XP_00496 | UNC93-li | Setaria_italica     | 23.50 | 0.00 |
| TRINITY_PRW6030  | Mitochor | Chlorella_sorokinia | 23.50 | 0.00 |
| TRINITY_XP_00584 | hypothet | Chlorella_variabili | 23.40 | 0.00 |
| TRINITY_XP_01882 | PREDICTI | Juglans_regia       | 23.40 | 0.00 |
| TRINITY_XP_01723 | PREDICTI | Daucus_carota       | 23.40 | 0.00 |
| TRINITY_PKI7856  | hypothet | Punica_granatum     | 23.40 | 0.00 |
| TRINITY_XP_00353 | phosphat | Glycine_max         | 23.40 | 0.00 |
| TRINITY_PKA5568  | hypothet | Apostasia_shenzheni | 23.40 | 0.00 |
| TRINITY_XP_02436 | RNA poly | Physcomitrella_pate | 23.40 | 0.00 |
| TRINITY_GAQ7914  | major f  | Klebsormidium_niten | 23.40 | 0.00 |
| TRINITY_GAQ8476  | hypothet | Klebsormidium_niten | 23.40 | 0.00 |
| TRINITY_PNW7907  | hypothet | Chlamydomonas_reinh | 23.40 | 0.00 |
| TRINITY_GAX8583  | hypothet | Chlamydomonas_eusti | 23.40 | 0.00 |
| TRINITY_XP_00295 | hypothet | Volvox_carteri      | 23.40 | 0.00 |
| TRINITY_XP_00913 | PREDICTI | Brassica_rapa       | 23.30 | 0.00 |
| TRINITY_PTQ4308  | hypothet | Marchantia_polymorp | 23.30 | 0.00 |
| TRINITY_CDO9704  | unnamed  | Coffea_canephora    | 23.30 | 0.00 |
| TRINITY_XP_00683 | protein  | Amborella_trichopod | 23.30 | 0.00 |
| TRINITY_XP_00294 | hypothet | Volvox_carteri      | 23.30 | 0.00 |
| TRINITY_GAX7986  | hypothet | Chlamydomonas_eusti | 23.30 | 0.00 |
| TRINITY_XP_00305 | predicte | Micromonas_pusilla  | 23.30 | 0.00 |
| TRINITY_EFJ1377  | hypothet | Selaginella_moellen | 23.30 | 0.00 |
| TRINITY_PNH0238  | hypothet | Tetrabaena_socialis | 23.30 | 0.00 |
| TRINITY_XP_02451 | probable | Selaginella_moellen | 23.30 | 0.00 |
| TRINITY_XP_00169 | Qa-SNAR  | Chlamydomonas_reinh | 23.30 | 0.00 |
| TRINITY_KXZ5058  | hypothet | Gonium_pectorale    | 23.30 | 0.00 |
| TRINITY_GAQ7992  | Putative | Klebsormidium_niten | 23.20 | 0.00 |
| TRINITY_XP_00845 | PREDICTI | Cucumis_melo        | 23.20 | 0.00 |
| TRINITY_XP_00912 | PREDICTI | Brassica_rapa       | 23.20 | 0.00 |
| TRINITY_XP_01558 | heparan- | Ricinus_communis    | 23.20 | 0.00 |
| TRINITY_GAX8053  | hypothet | Chlamydomonas_eusti | 23.20 | 0.00 |
| TRINITY_OAE2524  | hypothet | Marchantia_polymorp | 23.20 | 0.00 |
| TRINITY_XP_02292 | gamma-s  | Cucurbita_moschata  | 23.20 | 0.00 |
| TRINITY_XP_01208 | uncharac | Jatropha_curcas     | 23.20 | 0.00 |
| TRINITY_RVW1784  | F-box p  | Vitis_vinifera      | 23.20 | 0.00 |
| TRINITY_EEE6639  | hypothet | Oryza_sativa        | 23.20 | 0.00 |
| TRINITY_PNW8751  | hypothet | Chlamydomonas_reinh | 23.20 | 0.00 |
| TRINITY_XP_01586 | cytochr  | Ziziphus_jujuba     | 23.10 | 0.00 |
| TRINITY_GAX8557  | hypothet | Chlamydomonas_eusti | 23.10 | 0.00 |
| TRINITY_GAQ9169  | HCP-like | Klebsormidium_niten | 23.10 | 0.00 |
| TRINITY_XP_02162 | uncharac | Manihot_esculenta   | 23.10 | 0.00 |
| TRINITY_GAX7821  | hypothet | Chlamydomonas_eusti | 23.10 | 0.00 |
| TRINITY_GAX7691  | hypothet | Chlamydomonas_eusti | 23.10 | 0.00 |
| TRINITY_XP_02391 | importir | Quercus_suber       | 23.00 | 0.00 |
| TRINITY_XP_02163 | transpor | Hevea_brasiliensis  | 23.00 | 0.00 |
| TRINITY_XP_02452 | uncharac | Selaginella_moellen | 23.00 | 0.00 |
| TRINITY_XP_01588 | activati | Ziziphus_jujuba     | 23.00 | 0.00 |
| TRINITY_AJE2937  | putative | Coffea_canephora    | 23.00 | 0.00 |
| TRINITY_XP_01100 | PREDICTI | Populus_euphratica  | 23.00 | 0.00 |

|                  |                              |       |      |
|------------------|------------------------------|-------|------|
| TRINITY_GBG60121 | hypothetChara_braunii        | 23.00 | 0.00 |
| TRINITY_XP_02392 | ras GTPQuercus_suber         | 23.00 | 0.00 |
| TRINITY_KXZ5030  | hypothetGonium_pectorale     | 23.00 | 0.00 |
| TRINITY_XP_0159  | DNA-dirArachis_duranensis    | 22.90 | 0.00 |
| TRINITY_ABK2399  | unknown Picea_sitchensis     | 22.90 | 0.00 |
| TRINITY_XP_0243  | uncharacPhyscomitrella_pate  | 22.90 | 0.00 |
| TRINITY_GAX8049  | hypothetChlamydomonas_eusti  | 22.90 | 0.00 |
| TRINITY_KXZ5645  | hypothetGonium_pectorale     | 22.90 | 0.00 |
| TRINITY_XP_0264  | putativPapaver_somniferum    | 22.90 | 0.00 |
| TRINITY_BAJ9694  | predictHordeum_vulgare       | 22.90 | 0.00 |
| TRINITY_XP_0256  | pyruvateArachis_hypogaea     | 22.90 | 0.00 |
| TRINITY_XP_0044  | importirCicer_arietinum      | 22.90 | 0.00 |
| TRINITY_PON3720  | EndonuclParasponia_anderson  | 22.80 | 0.00 |
| TRINITY_XP_0030  | predictMicromonas_pusilla    | 22.80 | 0.00 |
| TRINITY_GAV8015  | RibophorCephalotus_follicul  | 22.80 | 0.00 |
| TRINITY_XP_0075  | peptidaBathycoccus_prasinc   | 22.80 | 0.00 |
| TRINITY_EEF2753  | two-comRicinus_communis      | 22.70 | 0.00 |
| TRINITY_BAK0175  | predictHordeum_vulgare       | 22.70 | 0.00 |
| TRINITY_ABR1713  | unknown Picea_sitchensis     | 22.70 | 0.00 |
| TRINITY_XP_0162  | sodium-cArachis_ipaensis     | 22.70 | 0.00 |
| TRINITY_RZB4594  | Alpha-diGlycine_soja         | 22.70 | 0.00 |
| TRINITY_XP_0064  | (EIN3-birEutrema_salsugineum | 22.70 | 0.00 |
| TRINITY_XP_0114  | PREDICTIFragaria-vesca       | 22.70 | 0.00 |
| TRINITY_XP_0243  | carbon cPhyscomitrella_pate  | 22.60 | 0.00 |
| TRINITY_BAJ9680  | predictHordeum_vulgare       | 22.60 | 0.00 |
| TRINITY_XP_0093  | PREDICTIMusa_acuminata       | 22.60 | 0.00 |
| TRINITY_XP_0100  | PREDICTIEucalyptus_grandis   | 22.60 | 0.00 |
| TRINITY_XP_0205  | BTB/POZ Phalaenopsis_equest  | 22.60 | 0.00 |
| TRINITY_RLN4140  | hypothetPanicum_miliaceum    | 22.60 | 0.00 |
| TRINITY_PRW3914  | (kinase cChlorella_sorokinia | 22.60 | 0.00 |
| TRINITY_GBG6786  | hypothetChara_braunii        | 22.60 | 0.00 |
| TRINITY_PNH0921  | Tiny macTetrabaena_socialis  | 22.60 | 0.00 |
| TRINITY_GAQ7900  | hypothetKlebsormidium_niten  | 22.50 | 0.00 |
| TRINITY_GBF9877  | hypothetRaphidocelis_subcap  | 22.50 | 0.00 |
| TRINITY_XP_0030  | predictMicromonas_pusilla    | 22.50 | 0.00 |
| TRINITY_XP_0192  | PREDICTINicotiana_attenuata  | 22.50 | 0.00 |
| TRINITY_OAY6320  | COP9 siçAnanas_comosus       | 22.50 | 0.00 |
| TRINITY_GAX7441  | hypothetChlamydomonas_eusti  | 22.50 | 0.00 |
| TRINITY_XP_0024  | alpha-2 Micromonas_commoda   | 22.40 | 0.00 |
| TRINITY_XP_0238  | DNA repQuercus_suber         | 22.40 | 0.00 |
| TRINITY_PSC7065  | actin-rMicractinium_conduc   | 22.40 | 0.00 |
| TRINITY_PRW3914  | (kinase cChlorella_sorokinia | 22.40 | 0.00 |
| TRINITY_KYP6025  | putativCajanus_cajan         | 22.40 | 0.00 |
| TRINITY_XP_0237  | brefeldiLactuca_sativa       | 22.40 | 0.00 |
| TRINITY_RQL9347  | hypothetBrassica_cretica     | 22.30 | 0.00 |
| TRINITY_XP_0259  | serine/tGlycine_max          | 22.30 | 0.00 |
| TRINITY_PSC7642  | WD40 reMicractinium_conduc   | 22.20 | 0.00 |
| TRINITY_CAN6103  | hypothetVitis_vinifera       | 22.20 | 0.00 |
| TRINITY_XP_0104  | PREDICTICamelina_sativa      | 22.20 | 0.00 |
| TRINITY_XP_0029  | hypothetVolvox_carteri       | 22.10 | 0.00 |
| TRINITY_XP_0030  | predictMicromonas_pusilla    | 22.10 | 0.00 |
| TRINITY_GAQ7930  | hypothetKlebsormidium_niten  | 22.10 | 0.00 |
| TRINITY_ABR1782  | unknown Picea_sitchensis     | 22.10 | 0.00 |
| TRINITY_XP_0100  | PREDICTIEucalyptus_grandis   | 22.10 | 0.00 |
| TRINITY_XP_0023  | importirPopulus_trichocarpa  | 22.10 | 0.00 |
| TRINITY_XP_0068  | probableAmborella_trichopod  | 22.10 | 0.00 |
| TRINITY_XP_0100  | PREDICTIEucalyptus_grandis   | 22.10 | 0.00 |
| TRINITY_KZV4713  | cation/cDorcoceras_hygromet  | 22.10 | 0.00 |
| TRINITY_XP_0239  | PX domaiQuercus_suber        | 22.10 | 0.00 |
| TRINITY_GBG9029  | hypothetChara_braunii        | 22.00 | 0.00 |
| TRINITY_GAU2596  | hypothetTrifolium_subterran  | 22.00 | 0.00 |
| TRINITY_GAX7376  | hypothetChlamydomonas_eusti  | 22.00 | 0.00 |
| TRINITY_XP_0191  | PREDICTI Ipomoea_nil         | 21.90 | 0.00 |
| TRINITY_XP_0075  | predictBathycoccus_prasinc   | 21.90 | 0.00 |
| TRINITY_XP_0228  | beta-gliOlea_europaea        | 21.80 | 0.00 |
| TRINITY_PNW8420  | hypothetChlamydomonas_reinh  | 21.80 | 0.00 |

|                  |                             |       |      |
|------------------|-----------------------------|-------|------|
| TRINITY_OAE27533 | hypothetMarchantia_polymorp | 21.80 | 0.00 |
| TRINITY_RWR79461 | hypothetCinnamomum_micranth | 21.80 | 0.00 |
| TRINITY_KDD75286 | hypothetHelicosporidium_sp. | 21.80 | 0.00 |
| TRINITY_KHG27275 | EquilibGossypium_arboreum   | 21.80 | 0.00 |
| TRINITY_RMZ53223 | hypothetAuxenochlorella_pro | 21.80 | 0.00 |
| TRINITY_GBG76716 | hypothetChara_braunii       | 21.70 | 0.00 |
| TRINITY_XP_01053 | PREDICTITarenaya_hasslerian | 21.70 | 0.00 |
| TRINITY_PNY01822 | WD repeaTrifolium_pratense  | 21.60 | 0.00 |
| TRINITY_EAZ26064 | hypothetOryza_sativa        | 21.60 | 0.00 |
| TRINITY_GAX74708 | hypothetChlamydomonas_eusti | 21.50 | 0.00 |
| TRINITY_XP_00169 | intraflaChlamydomonas_reinh | 21.40 | 0.00 |
| TRINITY_KZM87265 | hypothetDaucus_carota       | 21.30 | 0.00 |
| TRINITY_XP_02169 | SNF1-relHevea_brasiliensis  | 21.30 | 0.00 |
| TRINITY_GAQ91638 | DnaJ heaKlebsormidium_niten | 21.30 | 0.00 |
| TRINITY_XP_02168 | E3 ubiqHevea_brasiliensis   | 21.30 | 0.00 |
| TRINITY_XP_02390 | 5'-AMP-aQuercus_suber       | 21.20 | 0.00 |
| TRINITY_EOX94415 | RibophorTheobroma_cacao     | 21.20 | 0.00 |
| TRINITY_GAX73349 | hypothetChlamydomonas_eusti | 21.20 | 0.00 |
| TRINITY_XP_02375 | syndetirLactuca_sativa      | 21.20 | 0.00 |
| TRINITY_XP_00307 | Amino acOstreococcus_tauri  | 21.10 | 0.00 |
| TRINITY_PRW58586 | glucurorChlorella_sorokinia | 21.10 | 0.00 |
| TRINITY_RQL92630 | hypothetBrassica_cretica    | 21.00 | 0.00 |
| TRINITY_GAQ81405 | hypothetKlebsormidium_niten | 21.00 | 0.00 |
| TRINITY_XP_01107 | beta-gluSesamum_indicum     | 20.90 | 0.00 |
| TRINITY_XP_01147 | PREDICTIFragaria-vesca      | 20.90 | 0.00 |
| TRINITY_XP_00584 | hypothetChlorella_variabili | 20.90 | 0.00 |
| TRINITY_XP_02390 | uncharacQuercus_suber       | 20.90 | 0.00 |
| TRINITY_KXZ50583 | hypothetGonium_pectorale    | 20.90 | 0.00 |
| TRINITY_GBF87488 | sorting Raphidocelis_subcap | 20.90 | 0.00 |
| TRINITY_XP_02736 | polypyriAbrus_precatorius   | 20.80 | 0.00 |
| TRINITY_RQL92630 | hypothetBrassica_cretica    | 20.80 | 0.00 |
| TRINITY_XP_02277 | pentatriDurio_zibethinus    | 20.80 | 0.00 |
| TRINITY_GBG67933 | hypothetChara_braunii       | 20.80 | 0.00 |
| TRINITY_GAV78730 | RRM_5 dcCephalotus_follicul | 20.80 | 0.00 |
| TRINITY_XP_00429 | PREDICTIFragaria-vesca      | 20.70 | 0.00 |
| TRINITY_XP_00934 | PREDICTIPyrus_x_bretschneid | 20.60 | 0.00 |
| TRINITY_XP_02392 | ras GTPaQuercus_suber       | 20.60 | 0.00 |
| TRINITY_XP_01725 | PREDICTIDaucus_carota       | 20.50 | 0.00 |
| TRINITY_XP_02452 | importirSelaginella_moellen | 20.50 | 0.00 |
| TRINITY_RAL44982 | hypothetCuscuta_australis   | 20.50 | 0.00 |
| TRINITY_XP_02190 | (SNF1-relCarica_papaya      | 20.30 | 0.00 |
| TRINITY_ERN05728 | hypothetAmborella_trichopod | 20.20 | 0.00 |
