# Supplementary material for: Transcriptome Analysis of the Accumulation of Astaxanthin in Haematococcus pluvialis Treated with White and Blue Lights as well as Salicylic Acid
Source: Hindawi journal article supplement (doi:10.1155/2022/4827595), 2022-01-01
Supplement: f5 [file 4827595.f5.pdf]

| Query              | Pfam_hit        | Pfam_description    | Pfam_identity | Pfam_evalue |
|--------------------|-----------------|---------------------|---------------|-------------|
| TRINITY_G3RL79     | GORGO/46-117    | G3RL79.1 PF00538.17 | 100.00        | 0.00        |
| TRINITY_F5GY11     | HUMAN/7-180     | F5GY11.1 PF01852.17 | 100.00        | 0.00        |
| TRINITY_B5APV0     | PIG/10-151      | B5APV0.1 PF04699.12 | 100.00        | 0.00        |
| TRINITY_G3V4X6     | HUMAN/21-91     | G3V4X6.1 PF00076.20 | 100.00        | 0.00        |
| TRINITY_K7ES79     | HUMAN/7-59      | K7ES79.1 PF10251.7; | 100.00        | 0.00        |
| TRINITY_F7A064     | MONDO/5-148     | F7A064.2 PF04756.11 | 100.00        | 0.00        |
| TRINITY_SAMP       | MOUSE/27-220    | P12246.2 PF00354.15 | 100.00        | 0.00        |
| TRINITY_S9XXD8     | 9CETA/75-183    | S9XXD8.1 PF03143.15 | 100.00        | 0.00        |
| TRINITY_H0XMX2     | OTOGA/1-98      | H0XMX2.1 PF01133.15 | 100.00        | 0.00        |
| TRINITY_M3WEJ8     | FELCA/453-607   | M3WEJ8.1 PF09316.8; | 100.00        | 0.00        |
| TRINITY_G3NEV3     | GASAC/89-756    | G3NEV3.1 PF00063.19 | 100.00        | 0.00        |
| TRINITY_CX6B1      | MOUSE/19-83     | P56391.2 PF02297.15 | 100.00        | 0.00        |
| TRINITY_CX6B1      | HUMAN/19-83     | P14854.2 PF02297.15 | 100.00        | 0.00        |
| TRINITY_I3L505     | HUMAN/9-68      | I3L505.1 PF00550.23 | 100.00        | 0.00        |
| TRINITY_G3TKW3     | LOXAF/10-66     | G3TKW3.1 PF00412.20 | 100.00        | 0.00        |
| TRINITY_F7IN08     | CALJA/38-180    | F7IN08.1 PF13589.4; | 100.00        | 0.00        |
| TRINITY_L5LTN0     | MYODS/23-100    | L5LTN0.1 PF00935.17 | 100.00        | 0.00        |
| TRINITY_PZP        | MOUSE/1395-1482 | Q61838.3 PF07677.12 | 100.00        | 0.00        |
| TRINITY_F7HPI2     | MACMU/91-154    | F7HPI2.1 PF17136.2; | 100.00        | 0.00        |
| TRINITY_H9H5K1     | MACMU/1-60      | H9H5K1.1 PF08069.10 | 100.00        | 0.00        |
| TRINITY_BCAM       | MOUSE/357-438   | Q9R069.1 PF13895.4; | 100.00        | 0.00        |
| TRINITY_RNT2       | MOUSE/41-217    | Q9CQ01.1 PF00445.16 | 100.00        | 0.00        |
| TRINITY_A2ZJY0     | ORYSI/12-165    | A2ZJY0.1 PF02605.13 | 100.00        | 0.00        |
| TRINITY_G3ILI3     | CRIGR/248-444   | G3ILI3.1 PF00587.23 | 100.00        | 0.00        |
| TRINITY_Q549D0     | MOUSE/10-230    | Q549D0.1 PF00335.18 | 100.00        | 0.00        |
| TRINITY_F7HVS5     | CALJA/27-103    | F7HVS5.1 PF15477.4; | 100.00        | 0.00        |
| TRINITY_ECHP       | MOUSE/297-471   | Q9DBM2.4 PF02737.16 | 100.00        | 0.00        |
| TRINITY_F1PM36     | CANLF/72-349    | F1PM36.2 PF00009.25 | 100.00        | 0.00        |
| TRINITY_A0A0A0MSK8 | HUMAN/216-291   | A0A0A0MSK8.1 PF0527 | 100.00        | 0.00        |
| TRINITY_F7BSJ5     | CALJA/19-378    | F7BSJ5.1 PF01384.18 | 100.00        | 0.00        |
| TRINITY_F6S9T4     | CALJA/1-194     | F6S9T4.1 PF05805.10 | 100.00        | 0.00        |
| TRINITY_H0XHG1     | OTOGA/55-154    | H0XHG1.1 PF03311.12 | 100.00        | 0.00        |
| TRINITY_M7ZE25     | TRIUVA/85-215   | M7ZE25.1 PF05479.9; | 100.00        | 0.00        |
| TRINITY_AMBP       | MOUSE/229-281   | Q07456.2 PF00014.21 | 100.00        | 0.00        |
| TRINITY_AMBP       | MOUSE/40-185    | Q07456.2 PF00061.21 | 100.00        | 0.00        |
| TRINITY_E9QAD6     | MOUSE/1-92      | E9QAD6.7 PF05511.9; | 100.00        | 0.00        |
| TRINITY_M3Z3C9     | MUSPF/131-264   | M3Z3C9.1 PF04042.14 | 100.00        | 0.00        |
| TRINITY_H3BUY0     | HUMAN/10-105    | H3BUY0.1 PF00829.19 | 100.00        | 0.00        |
| TRINITY_I3MWD9     | ICTTR/201-270   | I3MWD9.1 PF00076.20 | 100.00        | 0.00        |
| TRINITY_H2NEP2     | PONAB/105-188   | H2NEP2.1 PF00189.18 | 100.00        | 0.00        |
| TRINITY_H2PV47     | PONAB/14-145    | H2PV47.1 PF00583.23 | 100.00        | 0.00        |
| TRINITY_G3HKP3     | CRIGR/95-280    | G3HKP3.1 PF05193.19 | 100.00        | 0.00        |
| TRINITY_G3UYY2     | MOUSE/57-410    | G3UYY2.1 PF05694.9; | 100.00        | 0.00        |
| TRINITY_A0A0R4J0X5 | MOUSE/46-410    | A0A0R4J0X5.1 PF0007 | 100.00        | 0.00        |
| TRINITY_H2RDP4     | PANTR/47-456    | H2RDP4.1 PF03345.12 | 100.00        | 0.00        |
| TRINITY_Q5EEY3     | RAT/13-172      | Q5EEY3.1 PF00503.18 | 100.00        | 0.00        |
| TRINITY_HCDH       | MOUSE/29-214    | Q61425.2 PF02737.16 | 100.00        | 0.00        |
| TRINITY_E9PM14     | HUMAN/7-105     | E9PM14.1 PF06374.9; | 100.00        | 0.00        |
| TRINITY_J9NYN2     | CANLF/10-66     | J9NYN2.1 PF00412.20 | 100.00        | 0.00        |
| TRINITY_Q5SZE1     | HUMAN/132-304   | Q5SZE1.2 PF03798.14 | 100.00        | 0.00        |
| TRINITY_L5JQI7     | PTEAL/54-212    | L5JQI7.1 PF06703.9; | 100.00        | 0.00        |
| TRINITY_Q548X8     | MOUSE/86-130    | Q548X8.1 PF00095.19 | 100.00        | 0.00        |
| TRINITY_H0Y5V3     | HUMAN/43-231    | H0Y5V3.2 PF02492.17 | 100.00        | 0.00        |
| TRINITY_H2PDB8     | PONAB/56-161    | H2PDB8.2 PF07679.14 | 100.00        | 0.00        |
| TRINITY_U3JNI8     | FICAL/14-98     | U3JNI8.1 PF00030.17 | 100.00        | 0.00        |
| TRINITY_G3UWP5     | MOUSE/66-192    | G3UWP5.1 PF07731.12 | 100.00        | 0.00        |
| TRINITY_R4GLP9     | CHICK/2-146     | R4GLP9.1 PF05808.9; | 100.00        | 0.00        |
| TRINITY_H0Y8L3     | HUMAN/104-218   | H0Y8L3.1 PF02469.20 | 100.00        | 0.00        |
| TRINITY_H0W268     | CAVPO/15-120    | H0W268.1 PF02991.14 | 100.00        | 0.00        |
| TRINITY_G3TA84     | LOXAF/2-182     | G3TA84.1 PF00227.24 | 100.00        | 0.00        |
| TRINITY_I3L3X7     | HUMAN/28-100    | I3L3X7.1 PF00227.24 | 100.00        | 0.00        |
| TRINITY_G1PPD8     | MYOLU/37-149    | G1PPD8.1 PF01398.19 | 100.00        | 0.00        |
| TRINITY_A0A091E506 | FUKDA/6-83      | A0A091E506.1 PF0172 | 100.00        | 0.00        |
| TRINITY_H2NWX7     | PONAB/6-105     | H2NWX7.1 PF03920.13 | 100.00        | 0.00        |
| TRINITY_H2NWX7     | PONAB/6-105     | H2NWX7.1 PF03920.13 | 100.00        | 0.00        |
| TRINITY_H2NXT2     | PONAB/616-875   | H2NXT2.1 PF00069.23 | 100.00        | 0.00        |
| TRINITY_E9PKV2     | HUMAN/58-102    | E9PKV2.1 PF01196.17 | 100.00        | 0.00        |
| TRINITY_L5M7Y0     | MYODS/228-371   | L5M7Y0.1 PF00022.17 | 100.00        | 0.00        |

|                                  |                     |        |      |
|----------------------------------|---------------------|--------|------|
| TRINITY_R4GFH1_CHICK/21-262      | R4GFH1.1 PF15237.4; | 100.00 | 0.00 |
| TRINITY_G3WTB6_SARHA/7-144       | G3WTB6.1 PF00179.24 | 100.00 | 0.00 |
| TRINITY_F1NJT3_CHICK/616-697     | F1NJT3.1 PF00041.19 | 100.00 | 0.00 |
| TRINITY_F7B5X8_MACMU/75-289      | F7B5X8.1 PF01564.15 | 100.00 | 0.00 |
| TRINITY_A0A096N120_PAPAN/1-167   | A0A096N120.1 PF0585 | 100.00 | 0.00 |
| TRINITY_F162A_MOUSE/13-154       | Q9D6U8.1 PF06388.9; | 100.00 | 0.00 |
| TRINITY_F8W7Q4_HUMAN/3-143       | F8W7Q4.1 PF06388.9; | 100.00 | 0.00 |
| TRINITY_H2QFH9_PANTR/4-66        | H2QFH9.1 PF00240.21 | 100.00 | 0.00 |
| TRINITY_F5GWF6_HUMAN/35-525      | F5GWF6.2 PF00118.22 | 100.00 | 0.00 |
| TRINITY_D3Z2F8_MOUSE/3-158       | D3Z2F8.1 PF04062.12 | 100.00 | 0.00 |
| TRINITY_COX7C_GORGO/1-62         | P61638.1 PF02935.14 | 100.00 | 0.00 |
| TRINITY_M3ZLY8_XIPMA/2389-2535   | M3ZLY8.1 PF01608.15 | 100.00 | 0.00 |
| TRINITY_H2PHY9_PONAB/172-234     | H2PHY9.1 PF08157.9; | 100.00 | 0.00 |
| TRINITY_A0A0G2JSP8_RAT/120-367   | A0A0G2JSP8.1 PF0021 | 100.00 | 0.00 |
| TRINITY_A0A0G2JSP8_RAT/120-367   | A0A0G2JSP8.1 PF0021 | 100.00 | 0.00 |
| TRINITY_FETUA_MOUSE/149-239      | P29699.1 PF00031.19 | 100.00 | 0.00 |
| TRINITY_G1S4R1_NOMLE/186-327     | G1S4R1.1 PF10075.7; | 100.00 | 0.00 |
| TRINITY_F1NJT4_CHICK/1575-1655   | F1NJT4.2 PF00041.19 | 100.00 | 0.00 |
| TRINITY_G3S6Y7_GORGO/199-323     | G3S6Y7.1 PF03770.14 | 100.00 | 0.00 |
| TRINITY_A0A0A0KW25_CUCSA/102-181 | A0A0A0KW25.1 PF0034 | 100.00 | 0.00 |
| TRINITY_F7DGD8_MACMU/19-97       | F7DGD8.1 PF01423.20 | 100.00 | 0.00 |
| TRINITY_THIL_MOUSE/39-296        | Q8QZT1.1 PF00108.21 | 100.00 | 0.00 |
| TRINITY_L5LKN3_MYODS/5-103       | L5LKN3.1 PF03669.11 | 100.00 | 0.00 |
| TRINITY_USMG5_MOUSE/1-51         | Q78IK2.1 PF14960.4; | 100.00 | 0.00 |
| TRINITY_M3ZAZ1_NOMLE/17-114      | M3ZAZ1.1 PF00428.17 | 100.00 | 0.00 |
| TRINITY_G3RZ96_GORGO/653-744     | G3RZ96.1 PF03129.18 | 100.00 | 0.00 |
| TRINITY_D6RIL6_MOUSE/45-249      | D6RIL6.1 PF00180.18 | 100.00 | 0.00 |
| TRINITY_B1AHL2_HUMAN/394-435     | B1AHL2.1 PF07645.13 | 100.00 | 0.00 |
| TRINITY_G3RS10_GORGO/133-470     | G3RS10.1 PF07992.12 | 100.00 | 0.00 |
| TRINITY_F6TEH0_CALJA/109-163     | F6TEH0.1 PF00010.24 | 100.00 | 0.00 |
| TRINITY_G5BXT5_HETGA/8-114       | G5BXT5.1 PF00179.24 | 100.00 | 0.00 |
| TRINITY_Q5SYQ7_HUMAN/29-203      | Q5SYQ7.1 PF00171.20 | 100.00 | 0.00 |
| TRINITY_W0L7Y8_9ENTR/10-203      | W0L7Y8.1 PF00009.25 | 100.00 | 0.00 |
| TRINITY_H0Z6P7_TAEGU/9-406       | H0Z6P7.1 PF00162.17 | 100.00 | 0.00 |
| TRINITY_L5LY13_MYODS/82-282      | L5LY13.1 PF03388.11 | 100.00 | 0.00 |
| TRINITY_H0YAH8_HUMAN/1-43        | H0YAH8.1 PF02469.20 | 100.00 | 0.00 |
| TRINITY_W5NHJ2_LEPOC/22-154      | W5NHJ2.1 PF00380.17 | 100.00 | 0.00 |
| TRINITY_D2I822_AILME/2430-2519   | D2I822.1 PF00630.17 | 100.00 | 0.00 |
| TRINITY_H0YZT3_TAEGU/189-305     | H0YZT3.1 PF01873.15 | 100.00 | 0.00 |
| TRINITY_H0YZT3_TAEGU/189-305     | H0YZT3.1 PF01873.15 | 100.00 | 0.00 |
| TRINITY_A0A0D9QYQ0_CHLSB/23-547  | A0A0D9QYQ0.1 PF0013 | 100.00 | 0.00 |
| TRINITY_PGS2_HUMAN/150-218       | P07585.1 PF13855.4; | 100.00 | 0.00 |
| TRINITY_G1NQC5_MELGA/25-137      | G1NQC5.1 PF05348.9; | 100.00 | 0.00 |
| TRINITY_G1RJR7_NOMLE/3-183       | G1RJR7.1 PF00227.24 | 100.00 | 0.00 |
| TRINITY_Q804W0_DANRE/41-108      | Q804W0.1 PF13499.4; | 100.00 | 0.00 |
| TRINITY_CP4AE_MOUSE/51-503       | O35728.1 PF00067.20 | 100.00 | 0.00 |
| TRINITY_H0WAW0_CAVPO/10-74       | H0WAW0.1 PF00808.21 | 100.00 | 0.00 |
| TRINITY_F7HDP5_CALJA/34-173      | F7HDP5.1 PF00179.24 | 100.00 | 0.00 |
| TRINITY_F1NJT4_CHICK/1847-1927   | F1NJT4.2 PF00041.19 | 100.00 | 0.00 |
| TRINITY_A0A0D9RJC0_CHLSB/28-535  | A0A0D9RJC0.1 PF0011 | 100.00 | 0.00 |
| TRINITY_U3JN11_FICAL/171-263     | U3JN11.1 PF00153.25 | 100.00 | 0.00 |
| TRINITY_F6RMI8_HORSE/171-325     | F6RMI8.1 PF08648.10 | 100.00 | 0.00 |
| TRINITY_Q3UEN8_MOUSE/38-494      | Q3UEN8.1 PF00067.20 | 100.00 | 0.00 |
| TRINITY_Q3UEN8_MOUSE/38-494      | Q3UEN8.1 PF00067.20 | 100.00 | 0.00 |
| TRINITY_HEMO_MOUSE/187-232       | Q91X72.2 PF00045.17 | 100.00 | 0.00 |
| TRINITY_HEMO_RAT/97-140          | P20059.3 PF00045.17 | 100.00 | 0.00 |
| TRINITY_A4_HUMAN/31-131          | P05067.3 PF02177.14 | 100.00 | 0.00 |
| TRINITY_M3W1X5_FELCA/11-113      | M3W1X5.1 PF14974.4; | 100.00 | 0.00 |
| TRINITY_M3W1X5_FELCA/11-113      | M3W1X5.1 PF14974.4; | 100.00 | 0.00 |
| TRINITY_G3NYQ9_GASAC/8-191       | G3NYQ9.1 PF01214.16 | 100.00 | 0.00 |
| TRINITY_G3H853_CRIGR/273-360     | G3H853.1 PF00027.27 | 100.00 | 0.00 |
| TRINITY_PP4C_HUMAN/47-242        | P60510.1 PF00149.26 | 100.00 | 0.00 |
| TRINITY_M0R1T5_HUMAN/1-164       | M0R1T5.1 PF03357.19 | 100.00 | 0.00 |
| TRINITY_G1P4C9_MYOLU/5-44        | G1P4C9.1 PF01023.17 | 100.00 | 0.00 |
| TRINITY_SMD3_HUMAN/8-73          | P62318.1 PF01423.20 | 100.00 | 0.00 |
| TRINITY_H0WRZ4_OTOGA/107-300     | H0WRZ4.1 PF01556.16 | 100.00 | 0.00 |
| TRINITY_G1TVQ3_RABIT/3-93        | G1TVQ3.1 PF03259.15 | 100.00 | 0.00 |
| TRINITY_I3L3K5_HUMAN/27-196      | I3L3K5.1 PF03031.16 | 100.00 | 0.00 |
| TRINITY_HPPD_MOUSE/180-335       | P49429.3 PF00903.23 | 100.00 | 0.00 |

|                                  |                     |        |      |
|----------------------------------|---------------------|--------|------|
| TRINITY_F7G9F5_MONDO/95-128      | F7G9F5.2 PF16211.3; | 100.00 | 0.00 |
| TRINITY_B7Z4C8_HUMAN/19-100      | B7Z4C8.1 PF01198.17 | 100.00 | 0.00 |
| TRINITY_B7Z4C8_HUMAN/19-100      | B7Z4C8.1 PF01198.17 | 100.00 | 0.00 |
| TRINITY_H3BJQ7_MOUSE/56-210      | H3BJQ7.1 PF08534.8; | 100.00 | 0.00 |
| TRINITY_RBM39_HUMAN/341-442      | Q14498.2 PF15519.4; | 100.00 | 0.00 |
| TRINITY_A0A0U1RQH7_HUMAN/99-169  | A0A0U1RQH7.1 PF0007 | 100.00 | 0.00 |
| TRINITY_RL18A_BOVIN/7-130        | Q3T003.1 PF01775.15 | 100.00 | 0.00 |
| TRINITY_RL18A_BOVIN/7-130        | Q3T003.1 PF01775.15 | 100.00 | 0.00 |
| TRINITY_A2A848_MOUSE/443-623     | A2A848.1 PF01756.17 | 100.00 | 0.00 |
| TRINITY_CP2CT_MOUSE/30-487       | Q64458.2 PF00067.20 | 100.00 | 0.00 |
| TRINITY_A0A0D9RIQ2_CHLSB/227-299 | A0A0D9RIQ2.1 PF0456 | 100.00 | 0.00 |
| TRINITY_H2R2G1_PANTR/35-615      | H2R2G1.1 PF03999.10 | 100.00 | 0.00 |
| TRINITY_A0A091E6T2_FUKDA/85-122  | A0A091E6T2.1 PF1027 | 100.00 | 0.00 |
| TRINITY_M3XM19_MUSPF/109-368     | M3XM19.1 PF01564.15 | 100.00 | 0.00 |
| TRINITY_E2RFC7_CANLF/2-244       | E2RFC7.1 PF10036.7; | 100.00 | 0.00 |
| TRINITY_E6WFD0_PANSA/4-69        | E6WFD0.1 PF00313.20 | 100.00 | 0.00 |
| TRINITY_Q91VB8_MOUSE/7-107       | Q91VB8.1 PF00042.20 | 100.00 | 0.00 |
| TRINITY_G1U007_RABIT/16-143      | G1U007.1 PF00134.21 | 100.00 | 0.00 |
| TRINITY_A0A0N4SVE0_MOUSE/26-209  | A0A0N4SVE0.1 PF0101 | 100.00 | 0.00 |
| TRINITY_A0A067LBG5_JATCU/18-243  | A0A067LBG5.1 PF0024 | 100.00 | 0.00 |
| TRINITY_H2NCG8_PONAB/153-239     | H2NCG8.1 PF00335.18 | 100.00 | 0.00 |
| TRINITY_A0A0A0L4W3_CUCSA/62-154  | A0A0A0L4W3.1 PF0124 | 100.00 | 0.00 |
| TRINITY_A0A0P7THG7_9TELE/300-367 | A0A0P7THG7.1 PF0000 | 100.00 | 0.00 |
| TRINITY_H0VI16_CAVPO/1-74        | H0VI16.1 PF00240.21 | 100.00 | 0.00 |
| TRINITY_A0A0P7WJQ7_9TELE/172-305 | A0A0P7WJQ7.1 PF0000 | 100.00 | 0.00 |
| TRINITY_RL39_HUMAN/9-50          | P62891.2 PF00832.18 | 100.00 | 0.00 |
| TRINITY_H3BJT2_MOUSE/19-113      | H3BJT2.1 PF00086.16 | 100.00 | 0.00 |
| TRINITY_A0A0G2JGM6_MOUSE/54-118  | A0A0G2JGM6.1 PF0916 | 100.00 | 0.00 |
| TRINITY_H2N6A0_PONAB/757-788     | H2N6A0.2 PF12901.5; | 100.00 | 0.00 |
| TRINITY_I3N616 ICTTR/10-94       | I3N616.1 PF00855.15 | 100.00 | 0.00 |
| TRINITY_G1LLX4_AILME/564-609     | G1LLX4.1 PF00628.27 | 100.00 | 0.00 |
| TRINITY_H2QR05_PANTR/300-418     | H2QR05.1 PF02984.17 | 100.00 | 0.00 |
| TRINITY_G1RH69_NOMLE/10-52       | G1RH69.1 PF01023.17 | 100.00 | 0.00 |
| TRINITY_C5YBI0_SORBI/14-343      | C5YBI0.1 PF01536.14 | 100.00 | 0.00 |
| TRINITY_H2QV39_PANTR/45-83       | H2QV39.1 PF00400.30 | 100.00 | 0.00 |
| TRINITY_K7EQR7_HUMAN/8-78        | K7EQR7.1 PF00076.20 | 100.00 | 0.00 |
| TRINITY_ITB1_HUMAN/640-728       | P05556.2 PF07965.10 | 100.00 | 0.00 |
| TRINITY_F7GR58_CALJA/5-143       | F7GR58.1 PF00025.19 | 100.00 | 0.00 |
| TRINITY_F8WD96_HUMAN/78-276      | F8WD96.1 PF00026.21 | 100.00 | 0.00 |
| TRINITY_G1RG90_NOMLE/368-452     | G1RG90.1 PF09173.9; | 100.00 | 0.00 |
| TRINITY_E1BIB4_BOVIN/355-479     | E1BIB4.2 PF13893.4; | 100.00 | 0.00 |
| TRINITY_F7G013_ORNAN/1-53        | F7G013.1 PF01907.17 | 100.00 | 0.00 |
| TRINITY_A0A0E0A8W0_9ORYZ/123-306 | A0A0E0A8W0.1 PF0050 | 100.00 | 0.00 |
| TRINITY_A0A093DM08_CHAPE/20-114  | A0A093DM08.1 PF0033 | 100.00 | 0.00 |
| TRINITY_G1PSJ7_MYOLU/1-157       | G1PSJ7.1 PF12850.5; | 100.00 | 0.00 |
| TRINITY_H2QSV7_PANTR/18-212      | H2QSV7.1 PF00687.19 | 100.00 | 0.00 |
| TRINITY_F6QC10_CALJA/247-359     | F6QC10.1 PF13012.4; | 100.00 | 0.00 |
| TRINITY_COX8A_MOUSE/26-68        | Q64445.1 PF02285.13 | 100.00 | 0.00 |
| TRINITY_L5M755_MYODS/142-226     | L5M755.1 PF00736.17 | 100.00 | 0.00 |
| TRINITY_NDUS5_PANTR/1-96         | Q0MQH4.3 PF10200.7; | 100.00 | 0.00 |
| TRINITY_G3SIR0_GORGO/26-148      | G3SIR0.1 PF00787.22 | 100.00 | 0.00 |
| TRINITY_A0A0D9RKH7_CHLSB/54-148  | A0A0D9RKH7.1 PF0222 | 100.00 | 0.00 |
| TRINITY_G3I5Q4_CRIGR/499-567     | G3I5Q4.1 PF00076.20 | 100.00 | 0.00 |
| TRINITY_H3BJZ9_MOUSE/217-328     | H3BJZ9.1 PF02803.16 | 100.00 | 0.00 |
| TRINITY_H2M7W2_ORYLA/32-84       | H2M7W2.1 PF13833.4; | 100.00 | 0.00 |
| TRINITY_A0A0H2UI42_RAT/86-136    | A0A0H2UI42.1 PF0032 | 100.00 | 0.00 |
| TRINITY_E1BS_ADE02/1-135         | P03247.2 PF01691.14 | 100.00 | 0.00 |
| TRINITY_F2Z4Z8_PIG/143-181       | F2Z4Z8.2 PF00400.30 | 100.00 | 0.00 |
| TRINITY_H2PGJ8_PONAB/3-185       | H2PGJ8.1 PF01459.20 | 100.00 | 0.00 |
| TRINITY_G1NTC8_MYOLU/1-96        | G1NTC8.1 PF01199.16 | 100.00 | 0.00 |
| TRINITY_HG2A_MOUSE/1-112         | P04441.3 PF09307.8; | 100.00 | 0.00 |
| TRINITY_H2P9V3_PONAB/17-82       | H2P9V3.1 PF01246.18 | 100.00 | 0.00 |
| TRINITY_H2P9V3_PONAB/17-82       | H2P9V3.1 PF01246.18 | 100.00 | 0.00 |
| TRINITY_H2P9V3_PONAB/17-82       | H2P9V3.1 PF01246.18 | 100.00 | 0.00 |
| TRINITY_AL1A1_MOUSE/29-492       | P24549.5 PF00171.20 | 100.00 | 0.00 |
| TRINITY_AL1A1_MOUSE/29-492       | P24549.5 PF00171.20 | 100.00 | 0.00 |
| TRINITY_H0YED6_HUMAN/1-249       | H0YED6.1 PF06409.9; | 100.00 | 0.00 |
| TRINITY_ACADL_MOUSE/54-165       | P51174.2 PF02771.14 | 100.00 | 0.00 |
| TRINITY_G3RQY0_GORGO/25-107      | G3RQY0.1 PF07654.13 | 100.00 | 0.00 |

|                                    |              |            |        |      |
|------------------------------------|--------------|------------|--------|------|
| TRINITY_M7AQ77_CHEMY/82-163        | M7AQ77.1     | PF07679.14 | 100.00 | 0.00 |
| TRINITY_RL27_BOVIN/52-136          | P61356.2     | PF01777.16 | 100.00 | 0.00 |
| TRINITY_RL27_BOVIN/52-136          | P61356.2     | PF01777.16 | 100.00 | 0.00 |
| TRINITY_RL27_BOVIN/52-136          | P61356.2     | PF01777.16 | 100.00 | 0.00 |
| TRINITY_F7HMJ4_CALJA/5-178         | F7HMJ4.1     | PF00071.20 | 100.00 | 0.00 |
| TRINITY_L5MEY5_MYODS/26-121        | L5MEY5.1     | PF03501.13 | 100.00 | 0.00 |
| TRINITY_F6YIK2_HORSE/12-87         | F6YIK2.1     | PF00347.21 | 100.00 | 0.00 |
| TRINITY_G3THP4_LOXAF/2-67          | G3THP4.1     | PF03931.13 | 100.00 | 0.00 |
| TRINITY_A0DTL7_PARTE/135-189       | A0DTL7.1     | PF12838.5; | 100.00 | 0.00 |
| TRINITY_D2I822_AILME/2430-2519     | D2I822.1     | PF00630.17 | 100.00 | 0.00 |
| TRINITY_H2R2G1_PANTR/35-615        | H2R2G1.1     | PF03999.10 | 100.00 | 0.00 |
| TRINITY_A0A087WVA0_HUMAN/1287-1352 | A0A087WVA0.1 | PF0675     | 100.00 | 0.00 |
| TRINITY_G3RMT1_GORGO/8-122         | G3RMT1.1     | PF16906.3; | 100.00 | 0.00 |
| TRINITY_G3RMT1_GORGO/8-122         | G3RMT1.1     | PF16906.3; | 100.00 | 0.00 |
| TRINITY_G3RMT1_GORGO/8-122         | G3RMT1.1     | PF16906.3; | 100.00 | 0.00 |
| TRINITY_F2Z3T9_RAT/399-460         | F2Z3T9.1     | PF00076.20 | 100.00 | 0.00 |
| TRINITY_A0A078D2I6_BRANA/5-177     | A0A078D2I6.1 | PF0002     | 100.00 | 0.00 |
| TRINITY_A0A0P7TIS5_9TELE/50-201    | A0A0P7TIS5.1 | PF0017     | 100.00 | 0.00 |
| TRINITY_GAG_XMRV6/224-434          | Q27ID9.1     | PF02093.14 | 100.00 | 0.00 |
| TRINITY_POL_XMRV6/758-930          | A1Z651.1     | PF00078.25 | 100.00 | 0.00 |
| TRINITY_L5LTN0_MYODS/23-100        | L5LTN0.1     | PF00935.17 | 100.00 | 0.00 |
| TRINITY_L5LTN0_MYODS/23-100        | L5LTN0.1     | PF00935.17 | 100.00 | 0.00 |
| TRINITY_R4G9A5_ANOCA/12-65         | R4G9A5.1     | PF00584.18 | 100.00 | 0.00 |
| TRINITY_F7EK10_MACMU/8-102         | F7EK10.1     | PF01248.24 | 100.00 | 0.00 |
| TRINITY_LEG3_MOUSE/131-261         | P16110.3     | PF00337.20 | 100.00 | 0.00 |
| TRINITY_G3X1G4_SARHA/19-112        | G3X1G4.1     | PF00300.20 | 100.00 | 0.00 |
| TRINITY_W5MUG1_LEPOC/12-106        | W5MUG1.1     | PF01248.24 | 100.00 | 0.00 |
| TRINITY_W5MUG1_LEPOC/12-106        | W5MUG1.1     | PF01248.24 | 100.00 | 0.00 |
| TRINITY_C3YW48_BRAFL/174-284       | C3YW48.1     | PF03953.15 | 100.00 | 0.00 |
| TRINITY_ATP5L_MOUSE/10-102         | Q9CPQ8.1     | PF04718.13 | 100.00 | 0.00 |
| TRINITY_G1L912_AILME/106-333       | G1L912.1     | PF04045.12 | 100.00 | 0.00 |
| TRINITY_L8YGF1_TUPCH/18-81         | L8YGF1.1     | PF00076.20 | 100.00 | 0.00 |
| TRINITY_Q3UKV9_MOUSE/24-90         | Q3UKV9.1     | PF01099.15 | 100.00 | 0.00 |
| TRINITY_Q6P8P8_MOUSE/96-192        | Q6P8P8.1     | PF04089.12 | 100.00 | 0.00 |
| TRINITY_Q3UBS3_MOUSE/103-340       | Q3UBS3.1     | PF00089.24 | 100.00 | 0.00 |
| TRINITY_FIBA_MOUSE/392-457         | E9PV24.1     | PF12160.6; | 100.00 | 0.00 |
| TRINITY_Q546G4_MOUSE/30-202        | Q546G4.1     | PF00273.18 | 100.00 | 0.00 |
| TRINITY_A0A096NPT5_PAPAN/107-178   | A0A096NPT5.1 | PF0007     | 100.00 | 0.00 |
| TRINITY_F7G013_ORNAN/1-53          | F7G013.1     | PF01907.17 | 100.00 | 0.00 |
| TRINITY_F7G013_ORNAN/1-53          | F7G013.1     | PF01907.17 | 100.00 | 0.00 |
| TRINITY_SAA3_MOUSE/22-122          | P04918.1     | PF00277.16 | 100.00 | 0.00 |
| TRINITY_G1SHK7_RABIT/1-88          | G1SHK7.1     | PF16672.3; | 100.00 | 0.00 |
| TRINITY_U3KGV4_FICAL/17-124        | U3KGV4.1     | PF01655.16 | 100.00 | 0.00 |
| TRINITY_F6YS48_MACMU/6-93          | F6YS48.1     | PF00630.17 | 100.00 | 0.00 |
| TRINITY_G3RMM9_GORGO/11-151        | G3RMM9.1     | PF00241.18 | 100.00 | 0.00 |
| TRINITY_OSTP_RAT/251-317           | P08721.2     | PF00865.16 | 100.00 | 0.00 |
| TRINITY_APOH_MOUSE/261-345         | Q01339.1     | PF09014.8; | 100.00 | 0.00 |
| TRINITY_U3K6L2_FICAL/41-97         | U3K6L2.1     | PF01849.16 | 100.00 | 0.00 |
| TRINITY_F6V795_HORSE/5-118         | F6V795.1     | PF06320.11 | 100.00 | 0.00 |
| TRINITY_H2NEP2_PONAB/105-188       | H2NEP2.1     | PF00189.18 | 100.00 | 0.00 |
| TRINITY_G1LSC2_AILME/16-112        | G1LSC2.1     | PF03645.11 | 100.00 | 0.00 |
| TRINITY_H2NEP2_PONAB/105-188       | H2NEP2.1     | PF00189.18 | 100.00 | 0.00 |
| TRINITY_H2NEP2_PONAB/105-188       | H2NEP2.1     | PF00189.18 | 100.00 | 0.00 |
| TRINITY_A0A0D9RFF7_CHLSB/95-169    | A0A0D9RFF7.1 | PF0090     | 100.00 | 0.00 |
| TRINITY_A0A0D9RFF7_CHLSB/95-169    | A0A0D9RFF7.1 | PF0090     | 100.00 | 0.00 |
| TRINITY_G7PFI0_MACFA/5-305         | G7PFI0.1     | PF00009.25 | 100.00 | 0.00 |
| TRINITY_A0A067K9W4_JATCU/5-205     | A0A067K9W4.1 | PF0000     | 100.00 | 0.00 |
| TRINITY_M4AKG1_XIPMA/171-242       | M4AKG1.1     | PF03719.13 | 100.00 | 0.00 |
| TRINITY_M4AKG1_XIPMA/171-242       | M4AKG1.1     | PF03719.13 | 100.00 | 0.00 |
| TRINITY_M4AKG1_XIPMA/171-242       | M4AKG1.1     | PF03719.13 | 100.00 | 0.00 |
| TRINITY_IGEB_MOUSE/236-426         | P03975.1     | PF00607.18 | 100.00 | 0.00 |
| TRINITY_M4AKG1_XIPMA/171-242       | M4AKG1.1     | PF03719.13 | 100.00 | 0.00 |
| TRINITY_F9W6J4_TRYCI/477-606       | F9W6J4.1     | PF00075.22 | 100.00 | 0.00 |
| TRINITY_F6U187_HORSE/186-405       | F6U187.1     | PF00006.23 | 100.00 | 0.00 |
| TRINITY_H2QR48_PANTR/9-95          | H2QR48.1     | PF02970.14 | 100.00 | 0.00 |
| TRINITY_F6PUM4_MACMU/541-672       | F6PUM4.1     | PF09733.7; | 100.00 | 0.00 |
| TRINITY_G2HGS6_PANTR/257-780       | G2HGS6.1     | PF00183.16 | 100.00 | 0.00 |
| TRINITY_F6UYZ4_MONDO/3-146         | F6UYZ4.2     | PF01280.18 | 100.00 | 0.00 |
| TRINITY_F6UYZ4_MONDO/3-146         | F6UYZ4.2     | PF01280.18 | 100.00 | 0.00 |

|                                  |                     |        |      |
|----------------------------------|---------------------|--------|------|
| TRINITY_RL5_BOVIN/14-176         | Q58DW5.3 PF17144.2; | 100.00 | 0.00 |
| TRINITY_G1SFR8_RABIT/16-111      | G1SFR8.1 PF01248.24 | 100.00 | 0.00 |
| TRINITY_A0A0A6YW77_MOUSE/134-271 | A0A0A6YW77.1 PF0006 | 100.00 | 0.00 |
| TRINITY_A0A093DM08_CHAPE/20-114  | A0A093DM08.1 PF0033 | 100.00 | 0.00 |
| TRINITY_A9V2B9_MONBE/227-497     | A9V2B9.1 PF13598.4; | 100.00 | 0.00 |
| TRINITY_A9V2B9_MONBE/227-497     | A9V2B9.1 PF13598.4; | 100.00 | 0.00 |
| TRINITY_HMCS2_MOUSE/224-506      | P54869.2 PF08540.8; | 100.00 | 0.00 |
| TRINITY_A0A0G4IGV5_PLABS/15-86   | A0A0G4IGV5.1 PF0024 | 100.00 | 0.00 |
| TRINITY_G7PCE3_MACFA/80-329      | G7PCE3.1 PF00112.21 | 100.00 | 0.00 |
| TRINITY_H2R8D1_PANTR/200-266     | H2R8D1.1 PF00191.18 | 100.00 | 0.00 |
| TRINITY_C6TD73_SOYBN/65-232      | C6TD73.1 PF00504.19 | 100.00 | 0.00 |
| TRINITY_V7C1G4_PHAVU/2-60        | V7C1G4.1 PF00504.19 | 100.00 | 0.00 |
| TRINITY_A0A0L6ULP7_9BASI/85-157  | A0A0L6ULP7.1 PF0024 | 100.00 | 0.00 |
| TRINITY_A0A0G4IGV5_PLABS/15-86   | A0A0G4IGV5.1 PF0024 | 100.00 | 0.00 |
| TRINITY_G3RX79_GORGO/70-324      | G3RX79.1 PF04921.12 | 100.00 | 0.00 |
| TRINITY_HMGB1_HORSE/6-78         | Q08IE6.3 PF09011.8; | 100.00 | 0.00 |
| TRINITY_INMT_MOUSE/1-260         | P40936.1 PF01234.15 | 100.00 | 0.00 |
| TRINITY_PDIA3_MOUSE/164-355      | P27773.2 PF13848.4; | 100.00 | 0.00 |
| TRINITY_F7ALA4_CALJA/16-106      | F7ALA4.1 PF00085.18 | 100.00 | 0.00 |
| TRINITY_F7AUW2_HORSE/7-613       | F7AUW2.1 PF00012.18 | 100.00 | 0.00 |
| TRINITY_GRP78 ICTTR/30-636       | Q3S4T7.1 PF00012.18 | 100.00 | 0.00 |
| TRINITY_K4A861_SETIT/222-535     | K4A861.1 PF01293.18 | 100.00 | 0.00 |
| TRINITY_A0A096MQE4_PAPAN/39-155  | A0A096MQE4.1 PF0536 | 100.00 | 0.00 |
| TRINITY_F7AUW2_HORSE/7-613       | F7AUW2.1 PF00012.18 | 100.00 | 0.00 |
| TRINITY_G1RY49_NOMLE/118-289     | G1RY49.1 PF00270.27 | 100.00 | 0.00 |
| TRINITY_G7PQQ4_MACFA/151-381     | G7PQQ4.1 PF02854.17 | 100.00 | 0.00 |
| TRINITY_G1M7U8_AILME/876-954     | G1M7U8.1 PF02020.16 | 100.00 | 0.00 |
| TRINITY_G7PQQ4_MACFA/151-381     | G7PQQ4.1 PF02854.17 | 100.00 | 0.00 |
| TRINITY_A0A0G4IGV5_PLABS/15-86   | A0A0G4IGV5.1 PF0024 | 100.00 | 0.00 |
| TRINITY_A0A0G4IGV5_PLABS/15-86   | A0A0G4IGV5.1 PF0024 | 100.00 | 0.00 |
| TRINITY_G1S9L1_NOMLE/1-38        | G1S9L1.1 PF04419.12 | 100.00 | 0.00 |
| TRINITY_H2P181_PONAB/37-132      | H2P181.1 PF00031.19 | 100.00 | 0.00 |
| TRINITY_FABPL_MOUSE/4-127        | P12710.2 PF00061.21 | 100.00 | 0.00 |
| TRINITY_F2Z3Q5_HUMAN/45-104      | F2Z3Q5.1 PF07970.10 | 100.00 | 0.00 |
| TRINITY_G3QNU5_GORGO/309-377     | G3QNU5.1 PF00076.20 | 100.00 | 0.00 |
| TRINITY_G1PQS7_MYOLU/16-221      | G1PQS7.1 PF01015.16 | 100.00 | 0.00 |
| TRINITY_G1PQS7_MYOLU/16-221      | G1PQS7.1 PF01015.16 | 100.00 | 0.00 |
| TRINITY_B7NZC3_RABIT/5-238       | B7NZC3.1 PF00009.25 | 100.00 | 0.00 |
| TRINITY_B7NZC3_RABIT/5-238       | B7NZC3.1 PF00009.25 | 100.00 | 0.00 |
| TRINITY_F1Q1K6_CANLF/114-183     | F1Q1K6.2 PF00076.20 | 100.00 | 0.00 |
| TRINITY_CKS2_HUMAN/6-73          | P33552.1 PF01111.17 | 100.00 | 0.00 |
| TRINITY_F1NJT3_CHICK/2201-2277   | F1NJT3.1 PF00041.19 | 100.00 | 0.00 |
| TRINITY_E9Q035_MOUSE/346-668     | E9Q035.1 PF00405.15 | 100.00 | 0.00 |
| TRINITY_W5PSW9_SHEEP/97-234      | W5PSW9.1 PF03947.16 | 100.00 | 0.00 |
| TRINITY_W5PSW9_SHEEP/97-234      | W5PSW9.1 PF03947.16 | 100.00 | 0.00 |
| TRINITY_V9FDA4_PHYPR/18-99       | V9FDA4.1 PF15511.4; | 100.00 | 0.00 |
| TRINITY_V9FDA4_PHYPR/18-99       | V9FDA4.1 PF15511.4; | 100.00 | 0.00 |
| TRINITY_G1TRM4_RABIT/75-144      | G1TRM4.1 PF00366.18 | 100.00 | 0.00 |
| TRINITY_G1TRM4_RABIT/75-144      | G1TRM4.1 PF00366.18 | 100.00 | 0.00 |
| TRINITY_PETD_CHLRE/65-158        | P23230.1 PF00032.15 | 100.00 | 0.00 |
| TRINITY_S9YV02_9CETA/358-560     | S9YV02.1 PF00009.25 | 100.00 | 0.00 |
| TRINITY_ALDR_HUMAN/15-294        | P15121.3 PF00248.19 | 100.00 | 0.00 |
| TRINITY_A0A075B5P2_MOUSE/6-94    | A0A075B5P2.1 PF0765 | 100.00 | 0.00 |
| TRINITY_L9KY99_TUPCH/5-130       | L9KY99.1 PF00410.17 | 100.00 | 0.00 |
| TRINITY_L9KY99_TUPCH/5-130       | L9KY99.1 PF00410.17 | 100.00 | 0.00 |
| TRINITY_F6YP53_CALJA/5-106       | F6YP53.1 PF00466.18 | 100.00 | 0.00 |
| TRINITY_F6YP53_CALJA/5-106       | F6YP53.1 PF00466.18 | 100.00 | 0.00 |
| TRINITY_H2P488_PONAB/431-515     | H2P488.1 PF05091.10 | 100.00 | 0.00 |
| TRINITY_L7N0B2_CANLF/263-392     | L7N0B2.1 PF03953.15 | 100.00 | 0.00 |
| TRINITY_C3YW48_BRAFL/174-284     | C3YW48.1 PF03953.15 | 100.00 | 0.00 |
| TRINITY_F7ID26_CALJA/33-108      | F7ID26.1 PF01423.20 | 100.00 | 0.00 |
| TRINITY_W5PHW0_SHEEP/191-713     | W5PHW0.1 PF00183.16 | 100.00 | 0.00 |
| TRINITY_F1PM36_CANLF/72-349      | F1PM36.2 PF00009.25 | 100.00 | 0.00 |
| TRINITY_G3R288_GORGO/157-314     | G3R288.1 PF02800.18 | 100.00 | 0.00 |
| TRINITY_NDUB1_MOUSE/1-57         | P0DN34.1 PF08040.9; | 100.00 | 0.00 |
| TRINITY_F1NH87_CHICK/1-95        | F1NH87.1 PF00044.22 | 100.00 | 0.00 |
| TRINITY_D8TT41_VOLCA/30-634      | D8TT41.1 PF00012.18 | 100.00 | 0.00 |
| TRINITY_A0A087WP98_MOUSE/2-51    | A0A087WP98.1 PF0324 | 100.00 | 0.00 |
| TRINITY_M3WAB9_FELCA/110-175     | M3WAB9.1 PF00076.20 | 100.00 | 0.00 |

|                                  |              |            |        |      |
|----------------------------------|--------------|------------|--------|------|
| TRINITY_G5B0K5_HETGA/23-177      | G5B0K5.1     | PF00071.20 | 100.00 | 0.00 |
| TRINITY_G3RDP2_GORGO/75-371      | G3RDP2.1     | PF00648.19 | 100.00 | 0.00 |
| TRINITY_CD9_MOUSE/10-218         | P40240.2     | PF00335.18 | 100.00 | 0.00 |
| TRINITY_H0V674_CAVPO/5-283       | H0V674.1     | PF01213.17 | 100.00 | 0.00 |
| TRINITY_S9XHQ6_9CETA/9-194       | S9XHQ6.1     | PF01105.22 | 100.00 | 0.00 |
| TRINITY_L5LRD5_MYODS/242-351     | L5LRD5.1     | PF00271.29 | 100.00 | 0.00 |
| TRINITY_RL6_HUMAN/181-288        | Q02878.3     | PF01159.17 | 100.00 | 0.00 |
| TRINITY_Q3UCH0_MOUSE/189-296     | Q3UCH0.1     | PF01159.17 | 100.00 | 0.00 |
| TRINITY_A0A0A0KAJ9_CUCSA/1-370   | A0A0A0KAJ9.1 | PF0029     | 100.00 | 0.00 |
| TRINITY_B9SHX2_RICCO/28-293      | B9SHX2.1     | PF00124.17 | 100.00 | 0.00 |
| TRINITY_K3Z2Q6_SETIT/28-329      | K3Z2Q6.1     | PF00124.17 | 100.00 | 0.00 |
| TRINITY_H0XAT6_OTOGA/83-150      | H0XAT6.1     | PF01287.18 | 100.00 | 0.00 |
| TRINITY_H2PXL0_PONAB/5-70        | H2PXL0.1     | PF01423.20 | 100.00 | 0.00 |
| TRINITY_A0A0G4IGV5_PLABS/15-86   | A0A0G4IGV5.1 | PF0024     | 100.00 | 0.00 |
| TRINITY_G3RCC0_GORGO/1-436       | G3RCC0.1     | PF00996.16 | 100.00 | 0.00 |
| TRINITY_H9H7J0_MONDO/585-641     | H9H7J0.2     | PF01849.16 | 100.00 | 0.00 |
| TRINITY_G3NI20_GASAC/296-364     | G3NI20.1     | PF00076.20 | 100.00 | 0.00 |
| TRINITY_LEG1_MOUSE/5-134         | P16045.3     | PF00337.20 | 100.00 | 0.00 |
| TRINITY_H2QBR4_PANTR/8-187       | H2QBR4.1     | PF01294.16 | 100.00 | 0.00 |
| TRINITY_H2PUE2_PONAB/191-233     | H2PUE2.2     | PF00400.30 | 100.00 | 0.00 |
| TRINITY_E1A_ADE02/1-289          | P03254.1     | PF02703.12 | 100.00 | 0.00 |
| TRINITY_F6RQK7_HORSE/5-62        | F6RQK7.1     | PF05160.11 | 100.00 | 0.00 |
| TRINITY_A0A091CUE5_FUKDA/106-143 | A0A091CUE5.1 | PF0622     | 100.00 | 0.00 |
| TRINITY_H0ZBH5_TAEGU/1-124       | H0ZBH5.1     | PF01201.20 | 100.00 | 0.00 |
| TRINITY_NDUAA_MOUSE/60-287       | Q99LC3.1     | PF01712.17 | 100.00 | 0.00 |
| TRINITY_NDUAA_PANTR/60-287       | Q0MQB7.1     | PF01712.17 | 100.00 | 0.00 |
| TRINITY_Q3TX21_MOUSE/281-374     | Q3TX21.1     | PF00007.20 | 100.00 | 0.00 |
| TRINITY_G1TF14_RABIT/3-41        | G1TF14.1     | PF01290.18 | 100.00 | 0.00 |
| TRINITY_G3W6H2_SARHA/91-390      | G3W6H2.1     | PF00557.22 | 100.00 | 0.00 |
| TRINITY_HMGB1_PAPAN/95-163       | A9RA84.1     | PF00505.17 | 100.00 | 0.00 |
| TRINITY_RL39_HUMAN/9-50          | P62891.2     | PF00832.18 | 100.00 | 0.00 |
| TRINITY_RL39_HUMAN/9-50          | P62891.2     | PF00832.18 | 100.00 | 0.00 |
| TRINITY_H2PDR8_PONAB/150-219     | H2PDR8.1     | PF00076.20 | 100.00 | 0.00 |
| TRINITY_F7FMB4_MACMU/7-96        | F7FMB4.1     | PF12926.5; | 100.00 | 0.00 |
| TRINITY_M3W902_FELCA/7-72        | M3W902.1     | PF01423.20 | 100.00 | 0.00 |
| TRINITY_A8JFE2_CHLRE/94-156      | A8JFE2.1     | PF00137.19 | 100.00 | 0.00 |
| TRINITY_A8JFE2_CHLRE/94-156      | A8JFE2.1     | PF00137.19 | 100.00 | 0.00 |
| TRINITY_E9Q5L2_MOUSE/762-925     | E9Q5L2.1     | PF06668.10 | 100.00 | 0.00 |
| TRINITY_ECHP_MOUSE/614-710       | Q9DBM2.4     | PF00725.20 | 100.00 | 0.00 |
| TRINITY_D8UHM6_VOLCA/586-795     | D8UHM6.1     | PF00149.26 | 100.00 | 0.00 |
| TRINITY_Q8T8P2_DICDI/364-491     | Q8T8P2.1     | PF00005.25 | 100.00 | 0.00 |
| TRINITY_CP2F2_MOUSE/31-488       | P33267.1     | PF00067.20 | 100.00 | 0.00 |
| TRINITY_CAPP1_MAIZE/167-970      | P04711.2     | PF00311.15 | 100.00 | 0.00 |
| TRINITY_CXL15_MOUSE/28-86        | Q9WVL7.1     | PF00048.18 | 100.00 | 0.00 |
| TRINITY_G1LL23_AILME/28-81       | G1LL23.1     | PF01667.15 | 100.00 | 0.00 |
| TRINITY_A0DTL7_PARTE/135-189     | A0DTL7.1     | PF12838.5; | 100.00 | 0.00 |
| TRINITY_H0WK33_OTOGA/530-965     | H0WK33.1     | PF03378.13 | 100.00 | 0.00 |
| TRINITY_NDUB3_MOUSE/48-104       | Q9CQZ6.1     | PF08122.10 | 100.00 | 0.00 |
| TRINITY_A9V2B9_MONBE/227-497     | A9V2B9.1     | PF13598.4; | 100.00 | 0.00 |
| TRINITY_ACTG_EMENI/2-375         | P20359.2     | PF00022.17 | 100.00 | 0.00 |
| TRINITY_ACTG_EMENI/2-375         | P20359.2     | PF00022.17 | 100.00 | 0.00 |
| TRINITY_A0A096T531_MAIZE/104-344 | A0A096T531.1 | PF0132     | 100.00 | 0.00 |
| TRINITY_IGKC_HUMAN/5-93          | P01834.1     | PF07654.13 | 100.00 | 0.00 |
| TRINITY_F7HJT3_CALJA/1-210       | F7HJT3.1     | PF00244.18 | 100.00 | 0.00 |
| TRINITY_TYB4_PIG/3-41            | Q95274.3     | PF01290.18 | 100.00 | 0.00 |
| TRINITY_W5P0L8_SHEEP/639-742     | W5P0L8.1     | PF00435.19 | 100.00 | 0.00 |
| TRINITY_D8U1V2_VOLCA/50-218      | D8U1V2.1     | PF00504.19 | 100.00 | 0.00 |
| TRINITY_D8UHM6_VOLCA/586-795     | D8UHM6.1     | PF00149.26 | 100.00 | 0.00 |
| TRINITY_A9U2Q2_PHYPA/17-739      | A9U2Q2.1     | PF03030.14 | 100.00 | 0.00 |
| TRINITY_S4R239_MOUSE/66-103      | S4R239.1     | PF05184.13 | 100.00 | 0.00 |
| TRINITY_S4R2L6_MOUSE/306-339     | S4R2L6.1     | PF03489.15 | 100.00 | 0.00 |
| TRINITY_BP1A1_MOUSE/83-256       | P97361.3     | PF01273.23 | 100.00 | 0.00 |
| TRINITY_MLP3A_HUMAN/15-120       | Q9H492.2     | PF02991.14 | 100.00 | 0.00 |
| TRINITY_CRBB2_CHICK/18-100       | Q05714.2     | PF00030.17 | 100.00 | 0.00 |
| TRINITY_A0A093DM08_CHAPE/20-114  | A0A093DM08.1 | PF0033     | 100.00 | 0.00 |
| TRINITY_VIME_MOUSE/6-101         | P20152.3     | PF04732.12 | 100.00 | 0.00 |
| TRINITY_D3YUE2_MOUSE/378-482     | D3YUE2.1     | PF01759.19 | 100.00 | 0.00 |
| TRINITY_S9XHD7_9CETA/1601-1813   | S9XHD7.1     | PF04054.13 | 100.00 | 0.00 |
| TRINITY_E1BW78_CHICK/5-74        | E1BW78.2     | PF02937.13 | 100.00 | 0.00 |

|                                  |              |            |        |      |
|----------------------------------|--------------|------------|--------|------|
| TRINITY_NDUB2_HUMAN/37-104       | O95178.1     | PF14813.4; | 100.00 | 0.00 |
| TRINITY_ATP5I_MOUSE/2-69         | Q06185.2     | PF05680.10 | 100.00 | 0.00 |
| TRINITY_CD36_MOUSE/14-463        | Q08857.2     | PF01130.19 | 100.00 | 0.00 |
| TRINITY_MOR547_RAT/27-87         | MOR547.1     | PF04691.10 | 100.00 | 0.00 |
| TRINITY_R4GH93_CHICK/10-52       | R4GH93.1     | PF01023.17 | 100.00 | 0.00 |
| TRINITY_E1C2Y5_CHICK/30-87       | E1C2Y5.1     | PF00048.18 | 100.00 | 0.00 |
| TRINITY_E5RIM2_HUMAN/34-197      | E5RIM2.1     | PF03096.12 | 100.00 | 0.00 |
| TRINITY_Q5ZL96_CHICK/5-160       | Q5ZL96.1     | PF13238.4; | 100.00 | 0.00 |
| TRINITY_A0A061GBH7_THECC/240-474 | A0A061GBH7.1 | PF0145     | 100.00 | 0.00 |
| TRINITY_L5K196_PTEAL/449-501     | L5K196.1     | PF13833.4; | 100.00 | 0.00 |
| TRINITY_CX6A2_MOUSE/10-90        | P43023.2     | PF02046.13 | 100.00 | 0.00 |
| TRINITY_G3SH69_GORGO/24-117      | G3SH69.1     | PF00236.16 | 100.00 | 0.00 |
| TRINITY_I3MGJ2 ICTTR/24-139      | I3MGJ2.1     | PF00307.29 | 100.00 | 0.00 |
| TRINITY_F6UPR5_CALJA/74-352      | F6UPR5.1     | PF00464.17 | 100.00 | 0.00 |
| TRINITY_ATX10_PONAB/371-468      | Q5RE06.1     | PF09759.7; | 100.00 | 0.00 |
| TRINITY_SG3A2_MOUSE/30-98        | Q920H1.1     | PF01099.15 | 100.00 | 0.00 |
| TRINITY_H2NVE2_PONAB/39-168      | H2NVE2.2     | PF00735.16 | 100.00 | 0.00 |
| TRINITY_A0A0A6YWV4_MOUSE/9-99    | A0A0A6YWV4.1 | PF0765     | 100.00 | 0.00 |
| TRINITY_Q792A4_MOUSE/24-76       | Q792A4.1     | PF02238.13 | 100.00 | 0.00 |
| TRINITY_Q5M9K1_MOUSE/32-139      | Q5M9K1.1     | PF00576.19 | 100.00 | 0.00 |
| TRINITY_H2QBN5_PANTR/30-168      | H2QBN5.1     | PF02936.12 | 100.00 | 0.00 |
| TRINITY_NDUA1_HUMAN/2-56         | O15239.1     | PF15879.3; | 100.00 | 0.00 |
| TRINITY_Q3UP42_MOUSE/9-51        | Q3UP42.1     | PF01023.17 | 100.00 | 0.00 |
| TRINITY_THIM_MOUSE/7-266         | Q8BWT1.3     | PF00108.21 | 100.00 | 0.00 |
| TRINITY_HG2A_HUMAN/17-129        | P04233.3     | PF09307.8; | 100.00 | 0.00 |
| TRINITY_H2PLJ1_PONAB/12-90       | H2PLJ1.1     | PF10206.7; | 100.00 | 0.00 |
| TRINITY_B4F8P6_MAIZE/352-605     | B4F8P6.1     | PF03949.13 | 100.00 | 0.00 |
| TRINITY_G1RJV7_NOMLE/26-333      | G1RJV7.1     | PF00365.18 | 100.00 | 0.00 |
| TRINITY_H0WVZ0_OTOGA/333-390     | H0WVZ0.1     | PF00412.20 | 100.00 | 0.00 |
| TRINITY_F1SL58_PIG/19-338        | F1SL58.2     | PF04912.12 | 100.00 | 0.00 |
| TRINITY_B6SUC4_MAIZE/56-238      | B6SUC4.1     | PF00504.19 | 100.00 | 0.00 |
| TRINITY_APOA2_MOUSE/24-98        | P09813.2     | PF04711.11 | 100.00 | 0.00 |
| TRINITY_F6WVD1_HORSE/7-68        | F6WVD1.1     | PF01200.16 | 100.00 | 0.00 |
| TRINITY_F6WVD1_HORSE/7-68        | F6WVD1.1     | PF01200.16 | 100.00 | 0.00 |
| TRINITY_F6TZ17_MACMU/13-123      | F6TZ17.1     | PF02466.17 | 100.00 | 0.00 |
| TRINITY_G5B2Q8_HETGA/465-594     | G5B2Q8.1     | PF14721.4; | 100.00 | 0.00 |
| TRINITY_CAPP1_MAIZE/167-970      | P04711.2     | PF00311.15 | 100.00 | 0.00 |
| TRINITY_VTDB_MOUSE/218-385       | P21614.2     | PF00273.18 | 100.00 | 0.00 |
| TRINITY_PCKA_MAIZE/145-612       | Q9SLZ0.1     | PF01293.18 | 100.00 | 0.00 |
| TRINITY_H0YC35_HUMAN/1-284       | H0YC35.1     | PF01093.15 | 100.00 | 0.00 |
| TRINITY_ATPK_MOUSE/6-84          | P56135.3     | PF10206.7; | 100.00 | 0.00 |
| TRINITY_K3Z2Q6_SETIT/28-329      | K3Z2Q6.1     | PF00124.17 | 100.00 | 0.00 |
| TRINITY_G1QGN9_NOMLE/633-827     | G1QGN9.2     | PF05010.12 | 100.00 | 0.00 |
| TRINITY_OLA1_BOVIN/305-388       | Q2HJ33.1     | PF06071.11 | 100.00 | 0.00 |
| TRINITY_B6SQV5_MAIZE/32-127      | B6SQV5.1     | PF04725.10 | 100.00 | 0.00 |
| TRINITY_FGL1_MOUSE/81-307        | Q71KU9.2     | PF00147.16 | 100.00 | 0.00 |
| TRINITY_E9PV44_MOUSE/1-69        | E9PV44.1     | PF04568.10 | 100.00 | 0.00 |
| TRINITY_CP2CT_MOUSE/30-487       | Q64458.2     | PF00067.20 | 100.00 | 0.00 |
| TRINITY_E9Q4M7_MOUSE/32-98       | E9Q4M7.2     | PF07546.11 | 100.00 | 0.00 |
| TRINITY_G1MZP6_MELGA/1-55        | G1MZP6.1     | PF00525.16 | 100.00 | 0.00 |
| TRINITY_NLTP_MOUSE/437-539       | P32020.3     | PF02036.15 | 100.00 | 0.00 |
| TRINITY_PPDPF_HUMAN/1-110        | Q9H3Y8.1     | PF15060.4; | 100.00 | 0.00 |
| TRINITY_A0A0R4IJT8_DANRE/39-529  | A0A0R4IJT8.1 | PF0011     | 100.00 | 0.00 |
| TRINITY_A0A093DIW8_CHAPE/21-702  | A0A093DIW8.1 | PF0006     | 100.00 | 0.00 |
| TRINITY_M3WDW3_FELCA/115-184     | M3WDW3.1     | PF00076.20 | 100.00 | 0.00 |
| TRINITY_G3RV56_GORGO/258-343     | G3RV56.1     | PF08542.9; | 100.00 | 0.00 |
| TRINITY_G3TGB1_LOXAF/57-276      | G3TGB1.1     | PF00149.26 | 100.00 | 0.00 |
| TRINITY_PGS1_RABIT/48-107        | O46377.1     | PF13855.4; | 100.00 | 0.00 |
| TRINITY_ANRE_MOUSE/19-121        | P61110.1     | PF15222.4; | 100.00 | 0.00 |
| TRINITY_E1C440_CHICK/681-731     | E1C440.2     | PF10515.7; | 100.00 | 0.00 |
| TRINITY_ASSY_HUMAN/8-403         | P00966.2     | PF00764.17 | 100.00 | 0.00 |
| TRINITY_T4S1_MOUSE/1-194         | Q64302.1     | PF05805.10 | 100.00 | 0.00 |
| TRINITY_F7AUW2_HORSE/7-613       | F7AUW2.1     | PF00012.18 | 99.70  | 0.00 |
| TRINITY_TPIS_PONAB/7-245         | Q5R928.1     | PF00121.16 | 99.60  | 0.00 |
| TRINITY_A0A0D9R9Y5_CHLSB/39-529  | A0A0D9R9Y5.1 | PF0011     | 99.50  | 0.00 |
| TRINITY_E1B55_ADE02/110-492      | P03244.2     | PF01696.15 | 99.50  | 0.00 |
| TRINITY_F2Q9A3_PIG/7-163         | F2Q9A3.1     | PF00160.19 | 99.40  | 0.00 |
| TRINITY_GRP78 ICTTR/30-636       | Q3S4T7.1     | PF00012.18 | 99.40  | 0.00 |
| TRINITY_F6TD92_MACMU/1-168       | F6TD92.1     | PF00838.15 | 99.40  | 0.00 |

|                                  |              |            |       |      |
|----------------------------------|--------------|------------|-------|------|
| TRINITY_G3X9L6_MOUSE/3-154       | G3X9L6.1     | PF05873.10 | 99.30 | 0.00 |
| TRINITY_A1AG1_MOUSE/41-181       | Q60590.1     | PF00061.21 | 99.30 | 0.00 |
| TRINITY_M3YA62_MUSPF/154-401     | M3YA62.1     | PF00217.17 | 99.30 | 0.00 |
| TRINITY_L5KVY8_PTEAL/1-137       | L5KVY8.1     | PF00179.24 | 99.30 | 0.00 |
| TRINITY_U6M5D0_EIMMA/34-255      | U6M5D0.1     | PF01353.20 | 99.30 | 0.00 |
| TRINITY_FRIL1_MOUSE/14-155       | P29391.2     | PF00210.22 | 99.30 | 0.00 |
| TRINITY_RET4_RAT/39-185          | P04916.1     | PF00061.21 | 99.30 | 0.00 |
| TRINITY_A0A096NG97_PAPAN/18-159  | A0A096NG97.1 | PF0021     | 99.30 | 0.00 |
| TRINITY_H0ZQ12_TAEGU/1-160       | H0ZQ12.1     | PF00838.15 | 99.30 | 0.00 |
| TRINITY_G1NIT7_MELGA/6-134       | G1NIT7.1     | PF00337.20 | 99.20 | 0.00 |
| TRINITY_MOR5K9_RAT/13-141        | MOR5K9.1     | PF00416.20 | 99.20 | 0.00 |
| TRINITY_MOR5K9_RAT/13-141        | MOR5K9.1     | PF00416.20 | 99.20 | 0.00 |
| TRINITY_M3XQI1_MUSPF/22-154      | M3XQI1.1     | PF00237.17 | 99.20 | 0.00 |
| TRINITY_F6XWI2_MACMU/41-255      | F6XWI2.1     | PF03731.13 | 99.20 | 0.00 |
| TRINITY_W5PSW9_SHEEP/97-234      | W5PSW9.1     | PF03947.16 | 99.20 | 0.00 |
| TRINITY_L9KY99_TUPCH/5-130       | L9KY99.1     | PF00410.17 | 99.20 | 0.00 |
| TRINITY_H2QBR4_PANTR/8-187       | H2QBR4.1     | PF01294.16 | 99.20 | 0.00 |
| TRINITY_G1PWJ3_MYOLU/28-150      | G1PWJ3.1     | PF02996.15 | 99.20 | 0.00 |
| TRINITY_EFTU_RAT/55-249          | P85834.1     | PF00009.25 | 99.10 | 0.00 |
| TRINITY_U3IHY7_ANAPL/25-161      | U3IHY7.1     | PF00210.22 | 99.10 | 0.00 |
| TRINITY_H2P3T5_PONAB/2-115       | H2P3T5.1     | PF01187.16 | 99.10 | 0.00 |
| TRINITY_H2R1B6_PANTR/5-118       | H2R1B6.1     | PF00572.16 | 99.10 | 0.00 |
| TRINITY_M3ZZZ0_XIPMA/8-121       | M3ZZZ0.1     | PF00572.16 | 99.00 | 0.00 |
| TRINITY_G1NTC8_MYOLU/1-96        | G1NTC8.1     | PF01199.16 | 99.00 | 0.00 |
| TRINITY_L5MEY5_MYODS/26-121      | L5MEY5.1     | PF03501.13 | 99.00 | 0.00 |
| TRINITY_H2ZUX4_LATCH/581-734     | H2ZUX4.1     | PF00022.17 | 99.00 | 0.00 |
| TRINITY_H0Z1N0_TAEGU/1-124       | H0Z1N0.1     | PF01092.17 | 99.00 | 0.00 |
| TRINITY_M4AL71_XIPMA/2-376       | M4AL71.1     | PF00022.17 | 99.00 | 0.00 |
| TRINITY_EIF3L_XENTR/150-548      | Q6P878.1     | PF10255.7; | 99.00 | 0.00 |
| TRINITY_F7DD44_MONDO/67-165      | F7DD44.2     | PF00673.19 | 99.00 | 0.00 |
| TRINITY_D4A771_RAT/5-104         | D4A771.1     | PF01247.16 | 99.00 | 0.00 |
| TRINITY_H2PNG6_PONAB/8-109       | H2PNG6.1     | PF01990.15 | 98.90 | 0.00 |
| TRINITY_A0A0D9RE68_CHLSB/24-326  | A0A0D9RE68.1 | PF0092     | 98.90 | 0.00 |
| TRINITY_G1M6P5_AILME/22-113      | G1M6P5.1     | PF00428.17 | 98.90 | 0.00 |
| TRINITY_F7EK10_MACMU/8-102       | F7EK10.1     | PF01248.24 | 98.90 | 0.00 |
| TRINITY_M3XXR0_MUSPF/2-188       | M3XXR0.1     | PF17135.2; | 98.90 | 0.00 |
| TRINITY_G3I2I9_CRIGR/1-375       | G3I2I9.1     | PF00297.20 | 98.90 | 0.00 |
| TRINITY_G7NTL1_MACFA/283-375     | G7NTL1.1     | PF00007.20 | 98.90 | 0.00 |
| TRINITY_A0A0A0KN28_CUCSA/47-151  | A0A0A0KN28.1 | PF0041     | 98.80 | 0.00 |
| TRINITY_M4AHJ8_XIPMA/43-128      | M4AHJ8.1     | PF00203.19 | 98.80 | 0.00 |
| TRINITY_PSBQ1_MAIZE/17-217       | Q41048.1     | PF05757.9; | 98.80 | 0.00 |
| TRINITY_MOYJF4_HORVD/1-185       | MOYJF4.1     | PF00091.23 | 98.80 | 0.00 |
| TRINITY_F7HUZ7_CALJA/70-149      | F7HUZ7.1     | PF00312.20 | 98.80 | 0.00 |
| TRINITY_F7HUZ7_CALJA/70-149      | F7HUZ7.1     | PF00312.20 | 98.80 | 0.00 |
| TRINITY_G3IMP5_CRIGR/132-269     | G3IMP5.1     | PF03096.12 | 98.80 | 0.00 |
| TRINITY_L5M755_MYODS/142-226     | L5M755.1     | PF00736.17 | 98.80 | 0.00 |
| TRINITY_B2MG_MOUSE/25-107        | P01887.2     | PF07654.13 | 98.80 | 0.00 |
| TRINITY_COX3_DANRE/6-261         | Q9MIY4.1     | PF00510.16 | 98.80 | 0.00 |
| TRINITY_J9PA46_CANLF/65-309      | J9PA46.1     | PF03372.21 | 98.80 | 0.00 |
| TRINITY_G3UPT8_MELGA/1-557       | G3UPT8.1     | PF05817.12 | 98.80 | 0.00 |
| TRINITY_F7FZB5_MONDO/57-243      | F7FZB5.1     | PF00149.26 | 98.80 | 0.00 |
| TRINITY_G3SJE0_GORGO/59-488      | G3SJE0.1     | PF13520.4; | 98.80 | 0.00 |
| TRINITY_A0A0D2T6A5_GOSRA/46-177  | A0A0D2T6A5.1 | PF0012     | 98.80 | 0.00 |
| TRINITY_A0A0P7UH33_9TELE/3-126   | A0A0P7UH33.1 | PF0177     | 98.80 | 0.00 |
| TRINITY_G3H5D5_CRIGR/35-115      | G3H5D5.1     | PF00887.17 | 98.80 | 0.00 |
| TRINITY_D8UC08_VOLCA/219-349     | D8UC08.1     | PF00004.27 | 98.80 | 0.00 |
| TRINITY_A0A0A0LII5_CUCSA/157-331 | A0A0A0LII5.1 | PF0286     | 98.80 | 0.00 |
| TRINITY_M3XNU4_MUSPF/47-141      | M3XNU4.1     | PF01248.24 | 98.70 | 0.00 |
| TRINITY_G3SUA8_LOXAF/1-231       | G3SUA8.1     | PF04889.10 | 98.70 | 0.00 |
| TRINITY_G7P3C6_MACFA/87-182      | G7P3C6.1     | PF00153.25 | 98.70 | 0.00 |
| TRINITY_F7BCF7_HORSE/368-446     | F7BCF7.1     | PF00076.20 | 98.70 | 0.00 |
| TRINITY_F6YIK2_HORSE/12-87       | F6YIK2.1     | PF00347.21 | 98.70 | 0.00 |
| TRINITY_G3RMT1_GORGO/8-122       | G3RMT1.1     | PF16906.3; | 98.70 | 0.00 |
| TRINITY_LY6A_MOUSE/29-105        | P05533.1     | PF00021.19 | 98.70 | 0.00 |
| TRINITY_A0A0P7TIS5_9TELE/50-201  | A0A0P7TIS5.1 | PF0017     | 98.70 | 0.00 |
| TRINITY_A0A0P7TIS5_9TELE/50-201  | A0A0P7TIS5.1 | PF0017     | 98.70 | 0.00 |
| TRINITY_L5LTN0_MYODS/23-100      | L5LTN0.1     | PF00935.17 | 98.70 | 0.00 |
| TRINITY_L7MZL4_ANOCA/27-103      | L7MZL4.1     | PF01253.20 | 98.70 | 0.00 |
| TRINITY_Q7R952_PLAYO/98-199      | Q7R952.1     | PF00665.24 | 98.70 | 0.00 |



|                                   |                     |       |      |
|-----------------------------------|---------------------|-------|------|
| TRINITY_G7Q217_MACFA/12-166       | G7Q217.1 PF00252.16 | 98.70 | 0.00 |
| TRINITY_G7Q217_MACFA/12-166       | G7Q217.1 PF00252.16 | 98.70 | 0.00 |
| TRINITY_G3IA94_CRIGR/92-168       | G3IA94.1 PF08976.9; | 98.70 | 0.00 |
| TRINITY_A0A096QE22_MAIZE/258-391  | A0A096QE22.1 PF0000 | 98.70 | 0.00 |
| TRINITY_G3RMI7_GORGO/58-144       | G3RMI7.1 PF12643.5; | 98.70 | 0.00 |
| TRINITY_A2A8T1_MOUSE/51-504       | A2A8T1.1 PF00067.20 | 98.70 | 0.00 |
| TRINITY_F6WA72_MACMU/10-156       | F6WA72.1 PF03073.13 | 98.70 | 0.00 |
| TRINITY_H2QYU1_PANTR/1-79         | H2QYU1.1 PF05392.9; | 98.70 | 0.00 |
| TRINITY_G3RM14_GORGO/251-598      | G3RM14.1 PF00155.19 | 98.60 | 0.00 |
| TRINITY_V8PGM8_OPHHA/114-283      | V8PGM8.1 PF00270.27 | 98.60 | 0.00 |
| TRINITY_A0A067EX57_CITSI/59-220   | A0A067EX57.1 PF0050 | 98.60 | 0.00 |
| TRINITY_K4CL74_SOLLC/605-715      | K4CL74.1 PF03764.16 | 98.60 | 0.00 |
| TRINITY_F6YZP7_HORSE/813-944      | F6YZP7.1 PF14806.4; | 98.60 | 0.00 |
| TRINITY_M0SVE5_MUSAM/148-297      | M0SVE5.1 PF00485.16 | 98.60 | 0.00 |
| TRINITY_A0A0P7V782_9TELE/147-328  | A0A0P7V782.1 PF0139 | 98.60 | 0.00 |
| TRINITY_G3RMM9_GORGO/11-151       | G3RMM9.1 PF00241.18 | 98.60 | 0.00 |
| TRINITY_U5DGY2_AMBTC/84-465       | U5DGY2.1 PF00162.17 | 98.60 | 0.00 |
| TRINITY_A0A0A0MXP7_PONAB/14-155   | A0A0A0MXP7.1 PF0021 | 98.60 | 0.00 |
| TRINITY_F7AEF4_MACMU/42-111       | F7AEF4.1 PF00298.17 | 98.60 | 0.00 |
| TRINITY_F7AEF4_MACMU/42-111       | F7AEF4.1 PF00298.17 | 98.60 | 0.00 |
| TRINITY_RA1L2_HUMAN/107-178       | Q32P51.2 PF00076.20 | 98.60 | 0.00 |
| TRINITY_G3TK94_LOXAF/138-382      | G3TK94.1 PF00362.16 | 98.60 | 0.00 |
| TRINITY_ATPA_CHLRE/150-365        | P26526.3 PF00006.23 | 98.60 | 0.00 |
| TRINITY_A0A091DQJ6_FUKDA/193-262  | A0A091DQJ6.1 PF0007 | 98.60 | 0.00 |
| TRINITY_MUP6_MOUSE/34-173         | P02762.2 PF00061.21 | 98.60 | 0.00 |
| TRINITY_A0A0B2VWK9_TOXCA/3-379    | A0A0B2VWK9.1 PF0002 | 98.60 | 0.00 |
| TRINITY_H0VEY6_CAVPO/29-111       | H0VEY6.1 PF04683.11 | 98.60 | 0.00 |
| TRINITY_H2NXP8_PONAB/31-242       | H2NXP8.1 PF01351.16 | 98.60 | 0.00 |
| TRINITY_OCAD1_PONAB/23-109        | Q5RD48.1 PF07051.9; | 98.60 | 0.00 |
| TRINITY_A0A078EE19_BRANA/13-361   | A0A078EE19.1 PF0107 | 98.50 | 0.00 |
| TRINITY_F7IEY6_CALJA/62-241       | F7IEY6.1 PF09439.8; | 98.50 | 0.00 |
| TRINITY_M3ZZZ0_XIPMA/8-121        | M3ZZZ0.1 PF00572.16 | 98.50 | 0.00 |
| TRINITY_A0A087X0J4_HUMAN/1-131    | A0A087X0J4.1 PF0527 | 98.50 | 0.00 |
| TRINITY_E7ERK6_HUMAN/30-204       | E7ERK6.1 PF01093.15 | 98.50 | 0.00 |
| TRINITY_F6SKX4_HORSE/4-77         | F6SKX4.1 PF09032.9; | 98.50 | 0.00 |
| TRINITY_F6VCK9_MACMU/151-261      | F6VCK9.1 PF00355.24 | 98.50 | 0.00 |
| TRINITY_F7HUZ7_CALJA/70-149       | F7HUZ7.1 PF00312.20 | 98.50 | 0.00 |
| TRINITY_G3P017_GASAC/29-225       | G3P017.1 PF00687.19 | 98.50 | 0.00 |
| TRINITY_A0A0P7UES3_9TELE/23-149   | A0A0P7UES3.1 PF0007 | 98.50 | 0.00 |
| TRINITY_I3MLN0 ICTTR/12-183       | I3MLN0.1 PF07074.10 | 98.50 | 0.00 |
| TRINITY_L5MI42_MYODS/11-201       | L5MI42.1 PF02115.15 | 98.50 | 0.00 |
| TRINITY_F6UZP9_MACMU/774-938      | F6UZP9.1 PF02453.15 | 98.50 | 0.00 |
| TRINITY_G5AMB0_HETGA/863-929      | G5AMB0.1 PF08726.8; | 98.50 | 0.00 |
| TRINITY_G1RWQ5_NOMLE/8-142        | G1RWQ5.1 PF00578.19 | 98.50 | 0.00 |
| TRINITY_M3XQI1_MUSPF/22-154       | M3XQI1.1 PF00237.17 | 98.50 | 0.00 |
| TRINITY_W5NHJ2_LEPOC/22-154       | W5NHJ2.1 PF00380.17 | 98.50 | 0.00 |
| TRINITY_A0A067F1H7_CITSI/37-101   | A0A067F1H7.1 PF1349 | 98.50 | 0.00 |
| TRINITY_I1R765_ORYGL/23-136       | I1R765.1 PF02788.14 | 98.50 | 0.00 |
| TRINITY_L5M568_MYODS/476-543      | L5M568.1 PF00658.16 | 98.50 | 0.00 |
| TRINITY_H0ZBH5_TAEGU/1-124        | H0ZBH5.1 PF01201.20 | 98.50 | 0.00 |
| TRINITY_W5NHJ2_LEPOC/22-154       | W5NHJ2.1 PF00380.17 | 98.50 | 0.00 |
| TRINITY_A0A0D9S2M2_CHLSB/17-83    | A0A0D9S2M2.1 PF1026 | 98.40 | 0.00 |
| TRINITY_F7BGS8_HORSE/1542-1633    | F7BGS8.1 PF00630.17 | 98.40 | 0.00 |
| TRINITY_RPB1C_HUMAN/29-103        | Q9H1A7.1 PF13656.4; | 98.40 | 0.00 |
| TRINITY_M3WS54_FELCA/477-588      | M3WS54.1 PF00435.19 | 98.40 | 0.00 |
| TRINITY_H0Z1N0_TAEGU/1-124        | H0Z1N0.1 PF01092.17 | 98.40 | 0.00 |
| TRINITY_H0Z1N0_TAEGU/1-124        | H0Z1N0.1 PF01092.17 | 98.40 | 0.00 |
| TRINITY_G3PZS2_GASAC/74-143       | G3PZS2.1 PF00298.17 | 98.40 | 0.00 |
| TRINITY_G7NV07_MACFA/28-91        | G7NV07.1 PF02320.14 | 98.40 | 0.00 |
| TRINITY_D3ZE63_RAT/2-115          | D3ZE63.1 PF01187.16 | 98.40 | 0.00 |
| TRINITY_D8UE88_VOLCA/81-358       | D8UE88.1 PF13292.4; | 98.40 | 0.00 |
| TRINITY_A0A0A0LH25_CU CSA/269-577 | A0A0A0LH25.1 PF0088 | 98.40 | 0.00 |
| TRINITY_V7C1G4_PHAVU/2-60         | V7C1G4.1 PF00504.19 | 98.30 | 0.00 |
| TRINITY_G3RMT1_GORGO/8-122        | G3RMT1.1 PF16906.3; | 98.30 | 0.00 |
| TRINITY_H9H3Z5_MACMU/352-419      | H9H3Z5.1 PF00076.20 | 98.30 | 0.00 |
| TRINITY_A0A091D8G1_FUKDA/75-132   | A0A091D8G1.1 PF0475 | 98.30 | 0.00 |
| TRINITY_T1G5M3_HELRO/18-99        | T1G5M3.1 PF15511.4; | 98.30 | 0.00 |
| TRINITY_C6SY38_SOYBN/27-103       | C6SY38.1 PF01253.20 | 98.30 | 0.00 |
| TRINITY_E1ZPD3_CHLVA/47-106       | E1ZPD3.1 PF12678.5; | 98.30 | 0.00 |

|                                  |              |            |       |      |
|----------------------------------|--------------|------------|-------|------|
| TRINITY_J3QL01_HUMAN/2-67        | J3QL01.1     | PF01781.16 | 98.30 | 0.00 |
| TRINITY_W5QC41_SHEEP/76-431      | W5QC41.1     | PF00224.19 | 98.30 | 0.00 |
| TRINITY_D8U1P4_VOLCA/539-653     | D8U1P4.1     | PF00072.22 | 98.30 | 0.00 |
| TRINITY_F1ML34_BOVIN/120-332     | F1ML34.2     | PF09325.8; | 98.30 | 0.00 |
| TRINITY_G1RGJ9_NOMLE/20-85       | G1RGJ9.2     | PF00191.18 | 98.20 | 0.00 |
| TRINITY_G3HWI4_CRIGR/37-255      | G3HWI4.1     | PF02167.13 | 98.20 | 0.00 |
| TRINITY_A4HU11_LEIIN/209-280     | A4HU11.2     | PF00240.21 | 98.20 | 0.00 |
| TRINITY_G3QF51_GORGO/160-365     | G3QF51.1     | PF00022.17 | 98.20 | 0.00 |
| TRINITY_G3H5C9_CRIGR/28-82       | G3H5C9.1     | PF01667.15 | 98.20 | 0.00 |
| TRINITY_L9KY99_TUPCH/5-130       | L9KY99.1     | PF00410.17 | 98.20 | 0.00 |
| TRINITY_D8TRN2_VOLCA/650-880     | D8TRN2.1     | PF12774.5; | 98.20 | 0.00 |
| TRINITY_ALDR_RAT/13-294          | P07943.3     | PF00248.19 | 98.20 | 0.00 |
| TRINITY_G3H5C9_CRIGR/28-82       | G3H5C9.1     | PF01667.15 | 98.20 | 0.00 |
| TRINITY_A0A0D9QVZ4_CHLSB/36-211  | A0A0D9QVZ4.1 | PF0302     | 98.20 | 0.00 |
| TRINITY_H9GP74_ANOCA/21-88       | H9GP74.1     | PF13417.4; | 98.10 | 0.00 |
| TRINITY_M3ZAZ1_NOMLE/17-114      | M3ZAZ1.1     | PF00428.17 | 98.10 | 0.00 |
| TRINITY_L9JWV9_TUPCH/67-127      | L9JWV9.1     | PF05871.10 | 98.10 | 0.00 |
| TRINITY_F1PBH2_CANLF/1-558       | F1PBH2.2     | PF05817.12 | 98.10 | 0.00 |
| TRINITY_A0A0B0NIH5_GOSAR/59-258  | A0A0B0NIH5.1 | PF0083     | 98.10 | 0.00 |
| TRINITY_F7BQY8_CALJA/102-410     | F7BQY8.1     | PF00038.19 | 98.10 | 0.00 |
| TRINITY_A0A0D2N2G9_GOSRA/4-73    | A0A0D2N2G9.1 | PF0024     | 98.10 | 0.00 |
| TRINITY_M7AY47_CHEMY/29-139      | M7AY47.1     | PF00411.17 | 98.10 | 0.00 |
| TRINITY_G1TVL1_RABIT/275-381     | G1TVL1.1     | PF00647.17 | 98.10 | 0.00 |
| TRINITY_G3HYE0_CRIGR/503-663     | G3HYE0.1     | PF00850.17 | 98.10 | 0.00 |
| TRINITY_G3NUM7_GASAC/5-110       | G3NUM7.1     | PF03297.13 | 98.00 | 0.00 |
| TRINITY_R4GHB8_CHICK/261-313     | R4GHB8.1     | PF10531.7; | 98.00 | 0.00 |
| TRINITY_A0A0A0KH05_CUCSA/438-554 | A0A0A0KH05.1 | PF0376     | 98.00 | 0.00 |
| TRINITY_G5C2A0_HETGA/3-52        | G5C2A0.1     | PF04135.10 | 98.00 | 0.00 |
| TRINITY_D4A771_RAT/5-104         | D4A771.1     | PF01247.16 | 98.00 | 0.00 |
| TRINITY_M3Z9M8_NOMLE/8-106       | M3Z9M8.1     | PF02271.14 | 98.00 | 0.00 |
| TRINITY_H2ZUX4_LATCH/581-734     | H2ZUX4.1     | PF00022.17 | 98.00 | 0.00 |
| TRINITY_HA12_MOUSE/25-203        | P01900.1     | PF00129.16 | 98.00 | 0.00 |
| TRINITY_F7I6G6_CALJA/17-116      | F7I6G6.1     | PF03066.13 | 98.00 | 0.00 |
| TRINITY_F7I6G6_CALJA/17-116      | F7I6G6.1     | PF03066.13 | 98.00 | 0.00 |
| TRINITY_A0A0A6YY34_MOUSE/1-71    | A0A0A6YY34.1 | PF0025     | 98.00 | 0.00 |
| TRINITY_G3VTA9_SARHA/6-55        | G3VTA9.1     | PF00253.19 | 98.00 | 0.00 |
| TRINITY_G3VTA9_SARHA/6-55        | G3VTA9.1     | PF00253.19 | 98.00 | 0.00 |
| TRINITY_M3XDW2_FELCA/6-204       | M3XDW2.1     | PF01088.19 | 97.90 | 0.00 |
| TRINITY_E0CQ75_VITVI/216-332     | E0CQ75.1     | PF00175.19 | 97.90 | 0.00 |
| TRINITY_A4XS71_PSEMY/104-200     | A4XS71.1     | PF00691.18 | 97.90 | 0.00 |
| TRINITY_CO1A1_BOVIN/1226-1462    | P02453.3     | PF01410.16 | 97.90 | 0.00 |
| TRINITY_H3BW39_TETNG/360-490     | H3BW39.1     | PF00012.18 | 97.90 | 0.00 |
| TRINITY_D8TM26_VOLCA/141-457     | D8TM26.1     | PF00291.23 | 97.90 | 0.00 |
| TRINITY_U3IV89_ANAPL/366-728     | U3IV89.1     | PF00702.24 | 97.90 | 0.00 |
| TRINITY_B9TH38_RICCO/1-189       | B9TH38.1     | PF00702.24 | 97.90 | 0.00 |
| TRINITY_A0A0G4IGV5_PLABS/15-86   | A0A0G4IGV5.1 | PF0024     | 97.90 | 0.00 |
| TRINITY_W5MUG1_LEPOC/12-106      | W5MUG1.1     | PF01248.24 | 97.90 | 0.00 |
| TRINITY_Q28EQ0_XENTR/6-122       | Q28EQ0.1     | PF06495.9; | 97.80 | 0.00 |
| TRINITY_G1M6P5_AILME/22-113      | G1M6P5.1     | PF00428.17 | 97.80 | 0.00 |
| TRINITY_A0A0A0LHZ4_CUCSA/124-191 | A0A0A0LHZ4.1 | PF0054     | 97.80 | 0.00 |
| TRINITY_H0W4B9_CAVPO/5-142       | H0W4B9.1     | PF00179.24 | 97.80 | 0.00 |
| TRINITY_R0I9P3_9BRAS/205-338     | R0I9P3.1     | PF00004.27 | 97.80 | 0.00 |
| TRINITY_H2QBR4_PANTR/8-187       | H2QBR4.1     | PF01294.16 | 97.80 | 0.00 |
| TRINITY_A9PHA0_POPTR/48-292      | A9PHA0.1     | PF00141.21 | 97.80 | 0.00 |
| TRINITY_H0YSG2_TAEGU/99-167      | H0YSG2.1     | PF00076.20 | 97.80 | 0.00 |
| TRINITY_B4F8L7_MAIZE/241-398     | B4F8L7.1     | PF02800.18 | 97.70 | 0.00 |
| TRINITY_G5ASK3_HETGA/1066-1145   | G5ASK3.1     | PF16294.3; | 97.70 | 0.00 |
| TRINITY_A0A0A0K7Z3_CUCSA/57-231  | A0A0A0K7Z3.1 | PF0021     | 97.70 | 0.00 |
| TRINITY_F6PJT9_CALJA/48-116      | F6PJT9.1     | PF00047.23 | 97.70 | 0.00 |
| TRINITY_F1PBH2_CANLF/1-558       | F1PBH2.2     | PF05817.12 | 97.70 | 0.00 |
| TRINITY_A0A0P7UM42_9TELE/16-192  | A0A0P7UM42.1 | PF0014     | 97.70 | 0.00 |
| TRINITY_H2QF02_PANTR/17-361      | H2QF02.1     | PF00009.25 | 97.70 | 0.00 |
| TRINITY_G1PHQ0_MYOLU/70-419      | G1PHQ0.1     | PF00274.17 | 97.70 | 0.00 |
| TRINITY_A0A0B2VWK9_TOXCA/3-379   | A0A0B2VWK9.1 | PF0002     | 97.70 | 0.00 |
| TRINITY_B9GFK3_POPTR/114-208     | B9GFK3.1     | PF00338.20 | 97.70 | 0.00 |
| TRINITY_A0A0D2T6A5_GOSRA/46-177  | A0A0D2T6A5.1 | PF0012     | 97.70 | 0.00 |
| TRINITY_M3W4Z9_FELCA/478-521     | M3W4Z9.1     | PF00045.17 | 97.70 | 0.00 |
| TRINITY_L5KE65_PTEAL/473-1091    | L5KE65.1     | PF01268.17 | 97.60 | 0.00 |
| TRINITY_G1KRM6_ANOCA/120-176     | G1KRM6.1     | PF00412.20 | 97.60 | 0.00 |

|                                 |              |            |       |      |
|---------------------------------|--------------|------------|-------|------|
| TRINITY_HEMO_RAT/306-347        | P20059.3     | PF00045.17 | 97.60 | 0.00 |
| TRINITY_G3HCL6_CRIGR/1025-1249  | G3HCL6.1     | PF07678.12 | 97.60 | 0.00 |
| TRINITY_MORF02_MUSAM/1-152      | MORF02.1     | PF00009.25 | 97.60 | 0.00 |
| TRINITY_G7PIU2_MACFA/24-107     | G7PIU2.1     | PF02046.13 | 97.60 | 0.00 |
| TRINITY_A9TYS8_PHYPA/8-96       | A9TYS8.1     | PF00125.22 | 97.60 | 0.00 |
| TRINITY_F6Y6B1_CALJA/7-215      | F6Y6B1.1     | PF10500.7; | 97.60 | 0.00 |
| TRINITY_V9FDA4_PHYPR/18-99      | V9FDA4.1     | PF15511.4; | 97.60 | 0.00 |
| TRINITY_V9FDA4_PHYPR/18-99      | V9FDA4.1     | PF15511.4; | 97.60 | 0.00 |
| TRINITY_V9FDA4_PHYPR/18-99      | V9FDA4.1     | PF15511.4; | 97.60 | 0.00 |
| TRINITY_A7YY10_DANRE/4-88       | A7YY10.1     | PF01780.17 | 97.60 | 0.00 |
| TRINITY_M3YML1_MUSPF/345-387    | M3YML1.1     | PF16300.3; | 97.60 | 0.00 |
| TRINITY_A2A8T1_MOUSE/51-504     | A2A8T1.1     | PF00067.20 | 97.50 | 0.00 |
| TRINITY_K1Q9R2_CRAGI/1-107      | K1Q9R2.1     | PF00004.27 | 97.50 | 0.00 |
| TRINITY_A0A0A0LHJ8_CUCSA/59-212 | A0A0A0LHJ8.1 | PF0260     | 97.50 | 0.00 |
| TRINITY_G3P1S2_GASAC/24-102     | G3P1S2.1     | PF01282.17 | 97.50 | 0.00 |
| TRINITY_D8UDD4_VOLCA/254-660    | D8UDD4.1     | PF08083.9; | 97.50 | 0.00 |
| TRINITY_A0A0D9RJC0_CHLSB/28-535 | A0A0D9RJC0.1 | PF0011     | 97.50 | 0.00 |
| TRINITY_F6VPL0_MACMU/3-42       | F6VPL0.1     | PF01779.15 | 97.50 | 0.00 |
| TRINITY_G7PUZ7_MACFA/251-352    | G7PUZ7.1     | PF00153.25 | 97.50 | 0.00 |
| TRINITY_D3ZSE0_RAT/1-80         | D3ZSE0.1     | PF01249.16 | 97.50 | 0.00 |
| TRINITY_F1P975_CANLF/510-569    | F1P975.2     | PF13833.4; | 97.40 | 0.00 |
| TRINITY_G5BZ40_HETGA/57-353     | G5BZ40.1     | PF00676.18 | 97.40 | 0.00 |
| TRINITY_A0A067F640_CITSI/78-358 | A0A067F640.1 | PF0016     | 97.40 | 0.00 |
| TRINITY_D8UHM6_VOLCA/586-795    | D8UHM6.1     | PF00149.26 | 97.40 | 0.00 |
| TRINITY_F6Z5G8_MONDO/2136-2173  | F6Z5G8.2     | PF00039.16 | 97.40 | 0.00 |
| TRINITY_A0A0B2VWK9_TOXCA/3-379  | A0A0B2VWK9.1 | PF0002     | 97.40 | 0.00 |
| TRINITY_A0A087SRQ1_AUXPR/82-562 | A0A087SRQ1.1 | PF0321     | 97.40 | 0.00 |
| TRINITY_D8TPX8_VOLCA/54-249     | D8TPX8.1     | PF00149.26 | 97.40 | 0.00 |
| TRINITY_A8J1K0_CHLRE/37-850     | A8J1K0.1     | PF01496.17 | 97.40 | 0.00 |
| TRINITY_F1A084_DICPU/5-178      | F1A084.1     | PF00071.20 | 97.40 | 0.00 |
| TRINITY_H2R1B6_PANTR/5-118      | H2R1B6.1     | PF00572.16 | 97.40 | 0.00 |
| TRINITY_C1E7K7_MICSR/4-377      | C1E7K7.1     | PF00022.17 | 97.40 | 0.00 |
| TRINITY_A0A096NZS4_PAPAN/59-171 | A0A096NZS4.1 | PF0086     | 97.30 | 0.00 |
| TRINITY_H9GBF8_ANOCA/8-116      | H9GBF8.2     | PF08662.9; | 97.30 | 0.00 |
| TRINITY_SPTB2_HUMAN/2198-2307   | Q01082.2     | PF00169.27 | 97.30 | 0.00 |
| TRINITY_L5MI42_MYODS/11-201     | L5MI42.1     | PF02115.15 | 97.30 | 0.00 |
| TRINITY_A0A061E6G2_THECC/61-461 | A0A061E6G2.1 | PF0015     | 97.30 | 0.00 |
| TRINITY_A0A0D3E2U4_BRAOL/10-357 | A0A0D3E2U4.1 | PF0026     | 97.30 | 0.00 |
| TRINITY_M3XXR0_MUSPF/2-188      | M3XXR0.1     | PF17135.2; | 97.30 | 0.00 |
| TRINITY_H2PQL6_PONAB/1-52       | H2PQL6.1     | PF04272.12 | 97.30 | 0.00 |
| TRINITY_E3M3Z3_CAERE/46-173     | E3M3Z3.1     | PF00125.22 | 97.30 | 0.00 |
| TRINITY_E3M3Z3_CAERE/46-173     | E3M3Z3.1     | PF00125.22 | 97.30 | 0.00 |
| TRINITY_Q8UWG7_CHICK/45-105     | Q8UWG7.1     | PF03868.13 | 97.30 | 0.00 |
| TRINITY_A0A0R4J0X5_MOUSE/46-410 | A0A0R4J0X5.1 | PF0007     | 97.30 | 0.00 |
| TRINITY_G1NI74_MELGA/12-87      | G1NI74.1     | PF00347.21 | 97.30 | 0.00 |
| TRINITY_A8GCL8_SERP5/232-328    | A8GCL8.1     | PF00691.18 | 97.20 | 0.00 |
| TRINITY_H2MYQ5_ORYLA/19-127     | H2MYQ5.1     | PF01776.15 | 97.20 | 0.00 |
| TRINITY_M4A568_XIPMA/12-87      | M4A568.1     | PF00347.21 | 97.20 | 0.00 |
| TRINITY_A4HU11_LEIIN/209-280    | A4HU11.2     | PF00240.21 | 97.20 | 0.00 |
| TRINITY_M7C0E7_CHEMY/15-364     | M7C0E7.1     | PF00274.17 | 97.20 | 0.00 |
| TRINITY_A4HU11_LEIIN/209-280    | A4HU11.2     | PF00240.21 | 97.20 | 0.00 |
| TRINITY_A4HU11_LEIIN/209-280    | A4HU11.2     | PF00240.21 | 97.20 | 0.00 |
| TRINITY_D8UJB9_VOLCA/2-55       | D8UJB9.1     | PF00504.19 | 97.20 | 0.00 |
| TRINITY_H2LDR4_ORYLA/18-89      | H2LDR4.1     | PF11976.6; | 97.20 | 0.00 |
| TRINITY_F6YAF9_ORNAN/151-288    | F6YAF9.1     | PF10591.7; | 97.20 | 0.00 |
| TRINITY_A4HU11_LEIIN/209-280    | A4HU11.2     | PF00240.21 | 97.20 | 0.00 |
| TRINITY_D8UDE0_VOLCA/442-555    | D8UDE0.1     | PF02852.20 | 97.20 | 0.00 |
| TRINITY_W5MIL4_LEPOC/2-191      | W5MIL4.1     | PF00827.15 | 97.10 | 0.00 |
| TRINITY_L5MAB4_MYODS/4-73       | L5MAB4.1     | PF00240.21 | 97.10 | 0.00 |
| TRINITY_L5MAB4_MYODS/4-73       | L5MAB4.1     | PF00240.21 | 97.10 | 0.00 |
| TRINITY_Q0IIA3_BOVIN/89-122     | Q0IIA3.1     | PF13405.4; | 97.10 | 0.00 |
| TRINITY_V8P9W0_OPHHA/423-500    | V8P9W0.1     | PF00630.17 | 97.10 | 0.00 |
| TRINITY_S9WF89_9CETA/747-1243   | S9WF89.1     | PF00343.18 | 97.10 | 0.00 |
| TRINITY_A0A0A0K7N4_CUCSA/48-220 | A0A0A0K7N4.1 | PF0050     | 97.10 | 0.00 |
| TRINITY_A0A0A0KTG0_CUCSA/59-127 | A0A0A0KTG0.1 | PF0267     | 97.10 | 0.00 |
| TRINITY_H2MYQ5_ORYLA/19-127     | H2MYQ5.1     | PF01776.15 | 97.10 | 0.00 |
| TRINITY_F7GDB5_CALJA/110-421    | F7GDB5.1     | PF00038.19 | 97.10 | 0.00 |
| TRINITY_V8NNL1_OPHHA/28-271     | V8NNL1.1     | PF00573.20 | 97.10 | 0.00 |
| TRINITY_F6X099_ORNAN/196-725    | F6X099.1     | PF00183.16 | 97.10 | 0.00 |

|                                  |                     |       |      |
|----------------------------------|---------------------|-------|------|
| TRINITY_H2RQJ9_TAKRU/278-345     | H2RQJ9.1 PF00076.20 | 97.10 | 0.00 |
| TRINITY_G7PPJ2_MACFA/3-72        | G7PPJ2.1 PF00240.21 | 97.10 | 0.00 |
| TRINITY_G7PPJ2_MACFA/3-72        | G7PPJ2.1 PF00240.21 | 97.10 | 0.00 |
| TRINITY_G1PQS7_MYOLU/16-221      | G1PQS7.1 PF01015.16 | 97.10 | 0.00 |
| TRINITY_B5SNM5_OTOGA/1-34        | B5SNM5.1 PF10215.7; | 97.10 | 0.00 |
| TRINITY_RL11_SERP5/72-140        | A8G8E3.1 PF00298.17 | 97.10 | 0.00 |
| TRINITY_A7LGV1_CHLRE/13-336      | A7LGV1.1 PF00225.21 | 97.10 | 0.00 |
| TRINITY_A0A0R4J0X5_MOUSE/46-410  | A0A0R4J0X5.1 PF0007 | 97.10 | 0.00 |
| TRINITY_A8HN02_CHLRE/89-380      | A8HN02.1 PF03151.14 | 97.10 | 0.00 |
| TRINITY_A8J9W4_CHLRE/107-254     | A8J9W4.1 PF00069.23 | 97.10 | 0.00 |
| TRINITY_D7UAI8_VITVI/2-38        | D7UAI8.1 PF05627.9; | 97.10 | 0.00 |
| TRINITY_A0A0A0KZ66_CUCSA/60-278  | A0A0A0KZ66.1 PF0137 | 97.00 | 0.00 |
| TRINITY_G1P4R8_MYOLU/332-406     | G1P4R8.1 PF13620.4; | 97.00 | 0.00 |
| TRINITY_C5XVB4_SORBI/4-88        | C5XVB4.1 PF01780.17 | 97.00 | 0.00 |
| TRINITY_H2RBF9_PANTR/73-291      | H2RBF9.1 PF06413.9; | 97.00 | 0.00 |
| TRINITY_A0A096NJ44_PAPAN/57-425  | A0A096NJ44.1 PF0015 | 97.00 | 0.00 |
| TRINITY_A0A0D2N2G9_GOSRA/4-73    | A0A0D2N2G9.1 PF0024 | 97.00 | 0.00 |
| TRINITY_A0A0P7XD74_9TELE/8-73    | A0A0P7XD74.1 PF0142 | 97.00 | 0.00 |
| TRINITY_A0A0R4J0I1_MOUSE/50-417  | A0A0R4J0I1.1 PF0007 | 97.00 | 0.00 |
| TRINITY_A0A096M3R4_POEFO/19-124  | A0A096M3R4.1 PF0030 | 97.00 | 0.00 |
| TRINITY_G7PL40_MACFA/47-552      | G7PL40.1 PF00118.22 | 97.00 | 0.00 |
| TRINITY_F7ANH3_CALJA/45-388      | F7ANH3.1 PF00079.18 | 97.00 | 0.00 |
| TRINITY_G3RF20_GORGO/38-156      | G3RF20.1 PF06487.10 | 97.00 | 0.00 |
| TRINITY_U3JH28_FICAL/63-162      | U3JH28.1 PF00011.19 | 97.00 | 0.00 |
| TRINITY_M4DCR8_BRARP/4-92        | M4DCR8.1 PF00125.22 | 97.00 | 0.00 |
| TRINITY_K4C9L4_SOLLC/518-651     | K4C9L4.1 PF00004.27 | 97.00 | 0.00 |
| TRINITY_A0A0D9RGN3_CHLSB/84-165  | A0A0D9RGN3.1 PF0018 | 97.00 | 0.00 |
| TRINITY_G3S6B4_GORGO/11-78       | G3S6B4.1 PF06522.9; | 97.00 | 0.00 |
| TRINITY_A0A096N8T4_PAPAN/56-462  | A0A096N8T4.1 PF0160 | 97.00 | 0.00 |
| TRINITY_A0A0D9R7L0_CHLSB/1-69    | A0A0D9R7L0.1 PF0980 | 97.00 | 0.00 |
| TRINITY_G3UCE6_LOXAF/569-663     | G3UCE6.1 PF03129.18 | 96.90 | 0.00 |
| TRINITY_A0A0A0MSS8_HUMAN/18-301  | A0A0A0MSS8.1 PF0024 | 96.90 | 0.00 |
| TRINITY_A0A0E0ALT2_9ORYZ/67-234  | A0A0E0ALT2.1 PF0050 | 96.90 | 0.00 |
| TRINITY_H2QSV7_PANTR/18-212      | H2QSV7.1 PF00687.19 | 96.90 | 0.00 |
| TRINITY_F6VK43_ORNAN/165-196     | F6VK43.1 PF00641.16 | 96.90 | 0.00 |
| TRINITY_H0VS47_CAVPO/1-226       | H0VS47.1 PF00285.19 | 96.90 | 0.00 |
| TRINITY_COX5A_PAPAN/45-147       | B0VYX8.1 PF02284.14 | 96.90 | 0.00 |
| TRINITY_M1CHF5_SOLTU/116-222     | M1CHF5.1 PF01245.18 | 96.90 | 0.00 |
| TRINITY_G1MR67_MELGA/12-251      | G1MR67.2 PF00180.18 | 96.90 | 0.00 |
| TRINITY_CB22_MAIZE/65-232        | P06671.1 PF00504.19 | 96.90 | 0.00 |
| TRINITY_C5MHS9_CANTT/231-297     | C5MHS9.1 PF00240.21 | 96.90 | 0.00 |
| TRINITY_G1TLE3_RABIT/9-403       | G1TLE3.2 PF00162.17 | 96.90 | 0.00 |
| TRINITY_A0A0A0K812_CUCSA/22-267  | A0A0A0K812.1 PF0150 | 96.90 | 0.00 |
| TRINITY_A0A075ARL7_9FUNG/3-136   | A0A075ARL7.1 PF0009 | 96.90 | 0.00 |
| TRINITY_R4GNK3_RAT/4-103         | R4GNK3.1 PF00085.18 | 96.90 | 0.00 |
| TRINITY_G1QW63_NOMLE/45-179      | G1QW63.2 PF01124.16 | 96.90 | 0.00 |
| TRINITY_F7DRD0_XENTR/11-84       | F7DRD0.1 PF01423.20 | 96.80 | 0.00 |
| TRINITY_A0A022RAK2_ERYGU/82-222  | A0A022RAK2.1 PF0008 | 96.80 | 0.00 |
| TRINITY_A0A0B0NIH5_GOSAR/59-258  | A0A0B0NIH5.1 PF0083 | 96.80 | 0.00 |
| TRINITY_G3VWC6_SARHA/595-698     | G3VWC6.1 PF00435.19 | 96.80 | 0.00 |
| TRINITY_E1ZE03_CHLVA/44-639      | E1ZE03.1 PF00012.18 | 96.80 | 0.00 |
| TRINITY_B3RIQ7_TRIAD/50-112      | B3RIQ7.1 PF00137.19 | 96.80 | 0.00 |
| TRINITY_A0A0K9PG33_ZOSMR/608-680 | A0A0K9PG33.1 PF0000 | 96.80 | 0.00 |
| TRINITY_F6PNM7_HORSE/36-255      | F6PNM7.1 PF03731.13 | 96.80 | 0.00 |
| TRINITY_B3RIQ7_TRIAD/50-112      | B3RIQ7.1 PF00137.19 | 96.80 | 0.00 |
| TRINITY_B3RIQ7_TRIAD/50-112      | B3RIQ7.1 PF00137.19 | 96.80 | 0.00 |
| TRINITY_W5M5B4_LEPOC/1-188       | W5M5B4.1 PF01201.20 | 96.80 | 0.00 |
| TRINITY_W5M5B4_LEPOC/1-188       | W5M5B4.1 PF01201.20 | 96.80 | 0.00 |
| TRINITY_H2QLK6_PANTR/1691-1866   | H2QLK6.1 PF01576.17 | 96.80 | 0.00 |
| TRINITY_C1FFH7_MICSR/896-1009    | C1FFH7.1 PF00271.29 | 96.80 | 0.00 |
| TRINITY_F6WVD1_HORSE/7-68        | F6WVD1.1 PF01200.16 | 96.80 | 0.00 |
| TRINITY_W5PUB0_SHEEP/107-140     | W5PUB0.1 PF06747.11 | 96.80 | 0.00 |
| TRINITY_F7FIK4_CALJA/290-331     | F7FIK4.1 PF00396.16 | 96.80 | 0.00 |
| TRINITY_F6QBE9_CALJA/1-100       | F6QBE9.1 PF15679.3; | 96.80 | 0.00 |
| TRINITY_A0A078IWH5_BRANA/48-178  | A0A078IWH5.1 PF0017 | 96.70 | 0.00 |
| TRINITY_A0A0B0NIH5_GOSAR/59-258  | A0A0B0NIH5.1 PF0083 | 96.70 | 0.00 |
| TRINITY_K7J528_NASVI/11-101      | K7J528.1 PF00125.22 | 96.70 | 0.00 |
| TRINITY_A0A0R4J0I1_MOUSE/50-417  | A0A0R4J0I1.1 PF0007 | 96.70 | 0.00 |
| TRINITY_H2MYQ5_ORYLA/19-127      | H2MYQ5.1 PF01776.15 | 96.70 | 0.00 |

|                                  |                     |       |      |
|----------------------------------|---------------------|-------|------|
| TRINITY_S1N2X0_9ENTE/57-222      | S1N2X0.1 PF13481.4; | 96.70 | 0.00 |
| TRINITY_R1F0V7_EMIHU/59-255      | R1F0V7.1 PF00091.23 | 96.70 | 0.00 |
| TRINITY_A0A0D2T6A5_GOSRA/46-177  | A0A0D2T6A5.1 PF0012 | 96.70 | 0.00 |
| TRINITY_D8UI03_VOLCA/42-637      | D8UI03.1 PF00012.18 | 96.70 | 0.00 |
| TRINITY_Q7GTU4_CHICK/15-161      | Q7GTU4.1 PF00499.18 | 96.70 | 0.00 |
| TRINITY_G3HDE3_CRIGR/11-71       | G3HDE3.1 PF02251.16 | 96.70 | 0.00 |
| TRINITY_G1SP54_RABIT/465-608     | G1SP54.1 PF09127.9; | 96.70 | 0.00 |
| TRINITY_G7PSM9_MACFA/114-332     | G7PSM9.1 PF00112.21 | 96.70 | 0.00 |
| TRINITY_H2PKA0_PONAB/1-88        | H2PKA0.1 PF15510.4; | 96.70 | 0.00 |
| TRINITY_A0A0A0KTF7_CUCSA/5-63    | A0A0A0KTF7.1 PF0040 | 96.60 | 0.00 |
| TRINITY_F7EK10_MACMU/8-102       | F7EK10.1 PF01248.24 | 96.60 | 0.00 |
| TRINITY_M7BIM0_CHEMY/246-347     | M7BIM0.1 PF01399.25 | 96.60 | 0.00 |
| TRINITY_V4U239_9ROSI/24-484      | V4U239.1 PF00171.20 | 96.60 | 0.00 |
| TRINITY_A0A0D2T6A5_GOSRA/46-177  | A0A0D2T6A5.1 PF0012 | 96.60 | 0.00 |
| TRINITY_A0A0A0KF04_CUCSA/11-355  | A0A0A0KF04.1 PF0026 | 96.60 | 0.00 |
| TRINITY_H0Z1N0_TAEGU/1-124       | H0Z1N0.1 PF01092.17 | 96.60 | 0.00 |
| TRINITY_A0A067F1H7_CITSI/37-101  | A0A067F1H7.1 PF1349 | 96.60 | 0.00 |
| TRINITY_D8TW30_VOLCA/1-104       | D8TW30.1 PF03660.12 | 96.60 | 0.00 |
| TRINITY_A8IVW9_CHLRE/30-148      | A8IVW9.1 PF01873.15 | 96.60 | 0.00 |
| TRINITY_K3ZXD9_SETIT/116-174     | K3ZXD9.1 PF02427.15 | 96.60 | 0.00 |
| TRINITY_H0Y009_OTOGA/4-61        | H0Y009.1 PF00412.20 | 96.60 | 0.00 |
| TRINITY_A7YY10_DANRE/4-88        | A7YY10.1 PF01780.17 | 96.50 | 0.00 |
| TRINITY_A7YY10_DANRE/4-88        | A7YY10.1 PF01780.17 | 96.50 | 0.00 |
| TRINITY_SODC_RAT/9-150           | P07632.2 PF00080.18 | 96.50 | 0.00 |
| TRINITY_T1NAL0_TRIUA/39-132      | T1NAL0.1 PF15511.4; | 96.50 | 0.00 |
| TRINITY_A0A022RV28_ERYGU/89-313  | A0A022RV28.1 PF0012 | 96.50 | 0.00 |
| TRINITY_D8TUD2_VOLCA/222-448     | D8TUD2.1 PF00006.23 | 96.50 | 0.00 |
| TRINITY_G4VCP4_SCHMA/79-149      | G4VCP4.1 PF00240.21 | 96.50 | 0.00 |
| TRINITY_L9L693_TUPCH/352-607     | L9L693.1 PF00118.22 | 96.50 | 0.00 |
| TRINITY_Q6S9I0_MOUSE/265-359     | Q6S9I0.1 PF00031.19 | 96.50 | 0.00 |
| TRINITY_A8GCJ4_SERP5/28-369      | A8GCJ4.1 PF00267.19 | 96.50 | 0.00 |
| TRINITY_A0A0A0KZ66_CUCSA/60-278  | A0A0A0KZ66.1 PF0137 | 96.40 | 0.00 |
| TRINITY_G1MGJ0_AILME/27-134      | G1MGJ0.1 PF00085.18 | 96.40 | 0.00 |
| TRINITY_T0NMM6_9CETA/12-70       | T0NMM6.1 PF01847.14 | 96.40 | 0.00 |
| TRINITY_Q96399_CUCSA/11-226      | Q96399.1 PF00141.21 | 96.40 | 0.00 |
| TRINITY_A0A0A0LAW4_CUCSA/7-144   | A0A0A0LAW4.1 PF0324 | 96.40 | 0.00 |
| TRINITY_A0A0A0LUC2_CUCSA/32-231  | A0A0A0LUC2.1 PF0575 | 96.40 | 0.00 |
| TRINITY_Q4SRW2_TETNG/43-136      | Q4SRW2.1 PF01158.16 | 96.40 | 0.00 |
| TRINITY_A7RIF0_NEMVE/31-523      | A7RIF0.1 PF00118.22 | 96.40 | 0.00 |
| TRINITY_IF4G2_RABIT/544-657      | P79398.1 PF02847.15 | 96.40 | 0.00 |
| TRINITY_A0A067EMC5_CITSI/162-298 | A0A067EMC5.1 PF0000 | 96.40 | 0.00 |
| TRINITY_D8U7W6_VOLCA/1473-1703   | D8U7W6.1 PF12774.5; | 96.40 | 0.00 |
| TRINITY_G1M1K7_AILME/535-899     | G1M1K7.1 PF00503.18 | 96.40 | 0.00 |
| TRINITY_W5P5T8_SHEEP/1-171       | W5P5T8.1 PF01251.16 | 96.40 | 0.00 |
| TRINITY_F7FFN3_MACMU/106-250     | F7FFN3.1 PF02252.16 | 96.40 | 0.00 |
| TRINITY_D8TSK6_VOLCA/99-334      | D8TSK6.1 PF04884.12 | 96.40 | 0.00 |
| TRINITY_D8TL86_VOLCA/577-686     | D8TL86.1 PF00153.25 | 96.40 | 0.00 |
| TRINITY_UCP2_BOVIN/112-208       | Q3SZI5.1 PF00153.25 | 96.40 | 0.00 |
| TRINITY_A8I2W2_CHLRE/20-271      | A8I2W2.1 PF00378.18 | 96.40 | 0.00 |
| TRINITY_A8J0A5_CHLRE/308-363     | A8J0A5.1 PF13513.4; | 96.40 | 0.00 |
| TRINITY_A0A0A0L215_CUCSA/81-499  | A0A0A0L215.1 PF0137 | 96.40 | 0.00 |
| TRINITY_A0A0A0LT87_CUCSA/120-203 | A0A0A0LT87.1 PF1454 | 96.40 | 0.00 |
| TRINITY_E1B8G4_BOVIN/8-142       | E1B8G4.2 PF00164.23 | 96.30 | 0.00 |
| TRINITY_E1B8G4_BOVIN/8-142       | E1B8G4.2 PF00164.23 | 96.30 | 0.00 |
| TRINITY_I3MP66 ICTTR/445-498     | I3MP66.1 PF00050.19 | 96.30 | 0.00 |
| TRINITY_M5WHJ3_PRUPE/57-228      | M5WHJ3.1 PF02507.13 | 96.30 | 0.00 |
| TRINITY_A0A078IWH5_BRANA/48-178  | A0A078IWH5.1 PF0017 | 96.30 | 0.00 |
| TRINITY_F6STS3_HORSE/21-76       | F6STS3.1 PF12678.5; | 96.30 | 0.00 |
| TRINITY_H2NIV0_PONAB/5-139       | H2NIV0.1 PF00334.17 | 96.30 | 0.00 |
| TRINITY_V7CDA9_PHAVU/215-331     | V7CDA9.1 PF00175.19 | 96.30 | 0.00 |
| TRINITY_G3NDY7_GASAC/17-124      | G3NDY7.1 PF01655.16 | 96.30 | 0.00 |
| TRINITY_A4HU11_LEIIN/209-280     | A4HU11.2 PF00240.21 | 96.30 | 0.00 |
| TRINITY_C1E7K7_MICSR/4-377       | C1E7K7.1 PF00022.17 | 96.30 | 0.00 |
| TRINITY_PETN_CHLRE/8-35          | P0C1D4.2 PF03742.12 | 96.30 | 0.00 |
| TRINITY_F7G013_ORNAN/1-53        | F7G013.1 PF01907.17 | 96.20 | 0.00 |
| TRINITY_H0XY96_OTOGA/56-175      | H0XY96.1 PF12353.6; | 96.20 | 0.00 |
| TRINITY_A0A078I4J7_BRANA/809-889 | A0A078I4J7.1 PF1043 | 96.20 | 0.00 |
| TRINITY_H2R2N7_PANTR/87-768      | H2R2N7.1 PF00063.19 | 96.20 | 0.00 |
| TRINITY_K4CHE1_SOLLC/26-102      | K4CHE1.1 PF01253.20 | 96.20 | 0.00 |

|                                    |              |            |       |      |
|------------------------------------|--------------|------------|-------|------|
| TRINITY_E2RSI5_CANLF/58-205        | E2RSI5.2     | PF00675.18 | 96.20 | 0.00 |
| TRINITY_W5KPP6_ASTMX/1-375         | W5KPP6.1     | PF00297.20 | 96.20 | 0.00 |
| TRINITY_A8JDN1_CHLRE/47-242        | A8JDN1.1     | PF00149.26 | 96.20 | 0.00 |
| TRINITY_U3KDZ5_FICAL/31-121        | U3KDZ5.1     | PF13499.4; | 96.20 | 0.00 |
| TRINITY_A0A0C4BF04_WHEAT/1-57      | A0A0C4BF04.1 | PF0042     | 96.20 | 0.00 |
| TRINITY_G7PFD7_MACFA/2-131         | G7PFD7.1     | PF00337.20 | 96.20 | 0.00 |
| TRINITY_G0R1A4_ICHMG/23-114        | G0R1A4.1     | PF15511.4; | 96.20 | 0.00 |
| TRINITY_D8UIY5_VOLCA/224-471       | D8UIY5.1     | PF02074.13 | 96.20 | 0.00 |
| TRINITY_G3H5P2_CRIGR/101-158       | G3H5P2.1     | PF00412.20 | 96.10 | 0.00 |
| TRINITY_G1R7H0_NOMLE/3-157         | G1R7H0.1     | PF03079.12 | 96.10 | 0.00 |
| TRINITY_U3K9V4_FICAL/115-310       | U3K9V4.1     | PF13848.4; | 96.10 | 0.00 |
| TRINITY_RBL_CHLRE/154-462          | P00877.1     | PF00016.18 | 96.10 | 0.00 |
| TRINITY_M0SPM5_MUSAM/73-205        | M0SPM5.1     | PF02531.14 | 96.10 | 0.00 |
| TRINITY_A0A087SGZ4_AUXPR/391-442   | A0A087SGZ4.1 | PF0084     | 96.10 | 0.00 |
| TRINITY_B3RKR4_TRIAD/3-376         | B3RKR4.1     | PF00022.17 | 96.10 | 0.00 |
| TRINITY_H0X010_OTOGA/2-104         | H0X010.1     | PF00085.18 | 96.10 | 0.00 |
| TRINITY_A0A0A0LNS8_CUCSA/321-391   | A0A0A0LNS8.1 | PF0007     | 96.00 | 0.00 |
| TRINITY_F6VFT5_XENTR/28-216        | F6VFT5.1     | PF00227.24 | 96.00 | 0.00 |
| TRINITY_LT_SV40/265-699            | P03070.2     | PF06431.9; | 96.00 | 0.00 |
| TRINITY_VATG1_HUMAN/3-107          | O75348.3     | PF03179.13 | 96.00 | 0.00 |
| TRINITY_E2QZV2_CANLF/191-379       | E2QZV2.2     | PF09756.7; | 96.00 | 0.00 |
| TRINITY_R8BT89_TOGMI/373-570       | R8BT89.1     | PF00587.23 | 96.00 | 0.00 |
| TRINITY_H2S7F0_TAKRU/5-104         | H2S7F0.1     | PF01247.16 | 96.00 | 0.00 |
| TRINITY_L9L3I8_TUPCH/26-170        | L9L3I8.1     | PF10208.7; | 95.90 | 0.00 |
| TRINITY_A0A0A0LHJ8_CUCSA/59-212    | A0A0A0LHJ8.1 | PF0260     | 95.90 | 0.00 |
| TRINITY_A0A0A0KXH3_CUCSA/40-137    | A0A0A0KXH3.1 | PF0472     | 95.90 | 0.00 |
| TRINITY_PDCD5_MOUSE/9-114          | P56812.3     | PF01984.18 | 95.90 | 0.00 |
| TRINITY_V4BUJ1_LOTGI/38-643        | V4BUJ1.1     | PF00012.18 | 95.90 | 0.00 |
| TRINITY_E9PKZ0_HUMAN/11-90         | E9PKZ0.1     | PF00181.21 | 95.90 | 0.00 |
| TRINITY_RPAC2_BOVIN/39-113         | Q1RMG8.1     | PF13656.4; | 95.90 | 0.00 |
| TRINITY_D8TQT3_VOLCA/16-138        | D8TQT3.1     | PF03463.13 | 95.90 | 0.00 |
| TRINITY_W4Z8Z2_STRPU/152-277       | W4Z8Z2.1     | PF00091.23 | 95.90 | 0.00 |
| TRINITY_G1R5J2_NOMLE/42-98         | G1R5J2.1     | PF08122.10 | 95.90 | 0.00 |
| TRINITY_B4FPT8_MAIZE/12-166        | B4FPT8.1     | PF00252.16 | 95.80 | 0.00 |
| TRINITY_G1Q4U0_MYOLU/4-99          | G1Q4U0.1     | PF01158.16 | 95.80 | 0.00 |
| TRINITY_G1Q4U0_MYOLU/4-99          | G1Q4U0.1     | PF01158.16 | 95.80 | 0.00 |
| TRINITY_W5MIL4_LEPOC/2-191         | W5MIL4.1     | PF00827.15 | 95.80 | 0.00 |
| TRINITY_L5LZ73_MYODS/202-297       | L5LZ73.1     | PF00153.25 | 95.80 | 0.00 |
| TRINITY_T1NAL0_TRIUA/39-132        | T1NAL0.1     | PF15511.4; | 95.80 | 0.00 |
| TRINITY_T1NAL0_TRIUA/39-132        | T1NAL0.1     | PF15511.4; | 95.80 | 0.00 |
| TRINITY_A0A0P7UBW1_9TELE/13-153    | A0A0P7UBW1.1 | PF0007     | 95.80 | 0.00 |
| TRINITY_A8JGV6_CHLRE/11-235        | A8JGV6.1     | PF00244.18 | 95.80 | 0.00 |
| TRINITY_A0A096NG97_PAPAN/18-159    | A0A096NG97.1 | PF0021     | 95.80 | 0.00 |
| TRINITY_D4A771_RAT/5-104           | D4A771.1     | PF01247.16 | 95.80 | 0.00 |
| TRINITY_A8JGC8_CHLRE/114-229       | A8JGC8.1     | PF02770.17 | 95.80 | 0.00 |
| TRINITY_W5MIL4_LEPOC/2-191         | W5MIL4.1     | PF00827.15 | 95.70 | 0.00 |
| TRINITY_G3UYY2_MOUSE/57-410        | G3UYY2.1     | PF05694.9; | 95.70 | 0.00 |
| TRINITY_A0A068Z9R6_9ENTR/48-231    | A0A068Z9R6.1 | PF0138     | 95.70 | 0.00 |
| TRINITY_E1C2S1_CHICK/2383-2529     | E1C2S1.2     | PF01608.15 | 95.70 | 0.00 |
| TRINITY_A0A0K9P3Y3_ZOSMR/71-507    | A0A0K9P3Y3.1 | PF0147     | 95.70 | 0.00 |
| TRINITY_H9H0U7_MELGA/1-103         | H9H0U7.1     | PF00503.18 | 95.70 | 0.00 |
| TRINITY_CO3_RAT/1051-1284          | P01026.3     | PF07678.12 | 95.70 | 0.00 |
| TRINITY_G1PLV4_MYOLU/98-167        | G1PLV4.1     | PF00076.20 | 95.70 | 0.00 |
| TRINITY_F6TEX7_HORSE/185-258       | F6TEX7.1     | PF13534.4; | 95.70 | 0.00 |
| TRINITY_L1IEU9_GUIETH/3-212        | L1IEU9.1     | PF00091.23 | 95.70 | 0.00 |
| TRINITY_A0A067DN09_CITSI/76-235    | A0A067DN09.1 | PF0012     | 95.70 | 0.00 |
| TRINITY_A0A077ZVL1_STYLE/1856-2091 | A0A077ZVL1.1 | PF1277     | 95.70 | 0.00 |
| TRINITY_I7LXR5_TETTS/41-162        | I7LXR5.1     | PF00004.27 | 95.70 | 0.00 |
| TRINITY_K4BFU1_SOLLC/124-171       | K4BFU1.1     | PF04839.11 | 95.70 | 0.00 |
| TRINITY_D8QT27_SELML/18-399        | D8QT27.1     | PF00199.17 | 95.70 | 0.00 |
| TRINITY_L5MEY5_MYODS/26-121        | L5MEY5.1     | PF03501.13 | 95.70 | 0.00 |
| TRINITY_S9WBV3_9CETA/6-245         | S9WBV3.1     | PF00899.19 | 95.70 | 0.00 |
| TRINITY_B6DYQ4_RAT/16-150          | B6DYQ4.1     | PF01124.16 | 95.60 | 0.00 |
| TRINITY_A0A0D2S4P7_GOSRA/19-152    | A0A0D2S4P7.1 | PF0023     | 95.60 | 0.00 |
| TRINITY_A0A0A0KV36_CUCSA/105-177   | A0A0A0KV36.1 | PF0294     | 95.60 | 0.00 |
| TRINITY_G3SE29_GORGO/4-163         | G3SE29.1     | PF00261.18 | 95.60 | 0.00 |
| TRINITY_A0A0B2VWK9_TOXCA/3-379     | A0A0B2VWK9.1 | PF0002     | 95.60 | 0.00 |
| TRINITY_A0A067DVK1_CITSI/45-478    | A0A067DVK1.1 | PF0799     | 95.60 | 0.00 |
| TRINITY_G3R288_GORGO/157-314       | G3R288.1     | PF02800.18 | 95.60 | 0.00 |

|                                   |                     |       |      |
|-----------------------------------|---------------------|-------|------|
| TRINITY_F1PCH3_CANLF/142-427      | F1PCH3.2 PF00113.20 | 95.60 | 0.00 |
| TRINITY_A0BNX9_PARTE/3-187        | A0BNX9.1 PF00091.23 | 95.60 | 0.00 |
| TRINITY_D8TZ23_VOLCA/810-916      | D8TZ23.1 PF06421.10 | 95.60 | 0.00 |
| TRINITY_F6UHG8_HORSE/39-219       | F6UHG8.1 PF03997.10 | 95.50 | 0.00 |
| TRINITY_A0A096MP41_PAPAN/24-209   | A0A096MP41.1 PF0062 | 95.50 | 0.00 |
| TRINITY_G3IA94_CRIGR/92-168       | G3IA94.1 PF08976.9; | 95.50 | 0.00 |
| TRINITY_F1NYJ1_CHICK/132-352      | F1NYJ1.2 PF00112.21 | 95.50 | 0.00 |
| TRINITY_J9P098_CANLF/23-89        | J9P098.1 PF01423.20 | 95.50 | 0.00 |
| TRINITY_EIF3L_XENTR/150-548       | Q6P878.1 PF10255.7; | 95.50 | 0.00 |
| TRINITY_A0A0A0LG06_CUCSA/156-541  | A0A0A0LG06.1 PF0105 | 95.50 | 0.00 |
| TRINITY_V8NNL1_OPHHA/28-271       | V8NNL1.1 PF00573.20 | 95.50 | 0.00 |
| TRINITY_F2Q9A3_PIG/7-163          | F2Q9A3.1 PF00160.19 | 95.50 | 0.00 |
| TRINITY_M3YFZ4_MUSPF/399-551      | M3YFZ4.1 PF02910.18 | 95.50 | 0.00 |
| TRINITY_H2QHY6_PANTR/46-120       | H2QHY6.1 PF01929.15 | 95.50 | 0.00 |
| TRINITY_H0X6J1_OTOGA/2-68         | H0X6J1.1 PF05680.10 | 95.50 | 0.00 |
| TRINITY_G3GXQ3_CRIGR/363-542      | G3GXQ3.1 PF02737.16 | 95.40 | 0.00 |
| TRINITY_S9WTM8_9CETA/46-170       | S9WTM8.1 PF02747.13 | 95.40 | 0.00 |
| TRINITY_A0A022PSH7_ERYGU/244-1363 | A0A022PSH7.1 PF0251 | 95.40 | 0.00 |
| TRINITY_B9HA54_POPTR/51-129       | B9HA54.1 PF01241.16 | 95.40 | 0.00 |
| TRINITY_QCR6_RAT/26-89            | Q5M9I5.1 PF02320.14 | 95.30 | 0.00 |
| TRINITY_M4AHJ8_XIPMA/43-128       | M4AHJ8.1 PF00203.19 | 95.30 | 0.00 |
| TRINITY_M4AHJ8_XIPMA/43-128       | M4AHJ8.1 PF00203.19 | 95.30 | 0.00 |
| TRINITY_RL27_BOVIN/52-136         | P61356.2 PF01777.16 | 95.30 | 0.00 |
| TRINITY_G1TMV1_RABIT/24-151       | G1TMV1.1 PF00241.18 | 95.30 | 0.00 |
| TRINITY_A0A067FSK7_CITSI/152-299  | A0A067FSK7.1 PF0000 | 95.30 | 0.00 |
| TRINITY_Q6PBZ1_DANRE/122-216      | Q6PBZ1.1 PF01248.24 | 95.30 | 0.00 |
| TRINITY_A0A078AUW2_STYLE/5-93     | A0A078AUW2.1 PF0012 | 95.30 | 0.00 |
| TRINITY_U3IV89_ANAPL/366-728      | U3IV89.1 PF00702.24 | 95.30 | 0.00 |
| TRINITY_A0A0A0L4M8_CUCSA/48-109   | A0A0A0L4M8.1 PF0907 | 95.20 | 0.00 |
| TRINITY_M4AWY7_XIPMA/258-469      | M4AWY7.1 PF00112.21 | 95.20 | 0.00 |
| TRINITY_G5ASL9_HETGA/87-646       | G5ASL9.1 PF00063.19 | 95.20 | 0.00 |
| TRINITY_A0A0D2S420_GOSRA/148-443  | A0A0D2S420.1 PF0011 | 95.20 | 0.00 |
| TRINITY_A0A022RGL6_ERYGU/67-245   | A0A022RGL6.1 PF0050 | 95.20 | 0.00 |
| TRINITY_B9RD45_RICCO/6-154        | B9RD45.1 PF00056.21 | 95.20 | 0.00 |

|                                  |                     |       |      |
|----------------------------------|---------------------|-------|------|
| TRINITY_A0A088AN14_APIME/50-115  | A0A088AN14.1 PF0393 | 95.20 | 0.00 |
| TRINITY_POL_MLVMS/1340-1441      | P03355.4 PF16721.3; | 95.20 | 0.00 |
| TRINITY_F6TD92_MACMU/1-168       | F6TD92.1 PF00838.15 | 95.20 | 0.00 |
| TRINITY_A8JHQ7_CHLRE/10-171      | A8JHQ7.1 PF00071.20 | 95.20 | 0.00 |
| TRINITY_R0JLZ8_ANAPL/2-115       | R0JLZ8.1 PF01187.16 | 95.20 | 0.00 |
| TRINITY_D8U1K6_VOLCA/789-919     | D8U1K6.1 PF00004.27 | 95.20 | 0.00 |
| TRINITY_B4ID84_DROSE/5-88        | B4ID84.1 PF01221.16 | 95.20 | 0.00 |
| TRINITY_E1ZSB3_CHLVA/11-74       | E1ZSB3.1 PF13499.4; | 95.20 | 0.00 |
| TRINITY_A0A0A0L6C0_CUCSA/11-226  | A0A0A0L6C0.1 PF0564 | 95.20 | 0.00 |
| TRINITY_Q84LQ5_SORBI/161-342     | Q84LQ5.1 PF00390.17 | 95.20 | 0.00 |
| TRINITY_G3V8V1_RAT/306-347       | G3V8V1.1 PF00396.16 | 95.20 | 0.00 |
| TRINITY_ATP6_CHICK/18-224        | P14092.1 PF00119.18 | 95.10 | 0.00 |
| TRINITY_G3UYY2_MOUSE/57-410      | G3UYY2.1 PF05694.9; | 95.10 | 0.00 |
| TRINITY_H3BI72_LATCH/4-133       | H3BI72.1 PF01912.16 | 95.10 | 0.00 |
| TRINITY_A0A096NQK6_PAPAN/193-463 | A0A096NQK6.1 PF0034 | 95.10 | 0.00 |
| TRINITY_ACTN2_CHICK/284-394      | P20111.1 PF00435.19 | 95.10 | 0.00 |
| TRINITY_D8TSR8_VOLCA/68-251      | D8TSR8.1 PF00504.19 | 95.10 | 0.00 |
| TRINITY_D8U1R3_VOLCA/806-886     | D8U1R3.1 PF10431.7; | 95.10 | 0.00 |
| TRINITY_V9FDA4_PHYPR/18-99       | V9FDA4.1 PF15511.4; | 95.10 | 0.00 |
| TRINITY_L1IEU9_GUIITH/3-212      | L1IEU9.1 PF00091.23 | 95.10 | 0.00 |
| TRINITY_D8U7C0_VOLCA/84-372      | D8U7C0.1 PF01370.19 | 95.10 | 0.00 |
| TRINITY_A8I175_CHLRE/238-379     | A8I175.1 PF00004.27 | 95.10 | 0.00 |
| TRINITY_A0A067EH05_CITSI/1-394   | A0A067EH05.1 PF0011 | 95.10 | 0.00 |
| TRINITY_H2LCX2_ORYLA/101-168     | H2LCX2.1 PF00076.20 | 95.10 | 0.00 |
| TRINITY_F7HUG3_MACMU/11-111      | F7HUG3.1 PF03297.13 | 95.00 | 0.00 |
| TRINITY_COX5B_RAT/7-128          | P12075.2 PF01215.17 | 95.00 | 0.00 |
| TRINITY_A7YY10_DANRE/4-88        | A7YY10.1 PF01780.17 | 95.00 | 0.00 |
| TRINITY_M5Y333_PRUPE/3-42        | M5Y333.1 PF01779.15 | 95.00 | 0.00 |
| TRINITY_K3Z2Q6_SETIT/28-329      | K3Z2Q6.1 PF00124.17 | 95.00 | 0.00 |
| TRINITY_A0A0B2VWK9_TOXCA/3-379   | A0A0B2VWK9.1 PF0002 | 95.00 | 0.00 |
| TRINITY_A0A0D3F687_9ORYZ/19-78   | A0A0D3F687.1 PF0013 | 95.00 | 0.00 |
| TRINITY_J9FW75_9SPIT/261-382     | J9FW75.1 PF03953.15 | 95.00 | 0.00 |
| TRINITY_J3N2K8_ORYBR/25-86       | J3N2K8.1 PF01200.16 | 95.00 | 0.00 |
| TRINITY_A0A0E0PRJ8_ORYRU/753-911 | A0A0E0PRJ8.1 PF0007 | 95.00 | 0.00 |
| TRINITY_E1ZBK2_CHLVA/5-250       | E1ZBK2.1 PF00009.25 | 95.00 | 0.00 |
| TRINITY_A0CPD4_PARTE/151-369     | A0CPD4.1 PF00006.23 | 95.00 | 0.00 |
| TRINITY_D8TP98_VOLCA/80-363      | D8TP98.1 PF00069.23 | 95.00 | 0.00 |
| TRINITY_F6VPL0_MACMU/3-42        | F6VPL0.1 PF01779.15 | 95.00 | 0.00 |
| TRINITY_D3FF62_CONWI/28-99       | D3FF62.1 PF00240.21 | 95.00 | 0.00 |
| TRINITY_D8UII1_VOLCA/1129-1247   | D8UII1.1 PF13863.4; | 95.00 | 0.00 |
| TRINITY_D8U1R3_VOLCA/621-800     | D8U1R3.1 PF07724.12 | 95.00 | 0.00 |
| TRINITY_A0A093BLW0_CHAPE/1-95    | A0A093BLW0.1 PF0008 | 95.00 | 0.00 |
| TRINITY_F7EX57_CALJA/231-380     | F7EX57.1 PF00441.22 | 95.00 | 0.00 |
| TRINITY_RBM42_DANRE/305-375      | Q6DRG1.2 PF00076.20 | 94.90 | 0.00 |
| TRINITY_A0A0D2ZPE9_BRAOL/222-378 | A0A0D2ZPE9.1 PF0280 | 94.90 | 0.00 |
| TRINITY_G3JHC2_CORMM/44-102      | G3JHC2.1 PF12678.5; | 94.90 | 0.00 |
| TRINITY_A0A087SS30_AUXPR/289-426 | A0A087SS30.1 PF0000 | 94.90 | 0.00 |
| TRINITY_A4HU11_LEIIN/209-280     | A4HU11.2 PF00240.21 | 94.90 | 0.00 |
| TRINITY_G1PYK6_MYOLU/29-147      | G1PYK6.1 PF00411.17 | 94.90 | 0.00 |
| TRINITY_G1PYK6_MYOLU/29-147      | G1PYK6.1 PF00411.17 | 94.90 | 0.00 |
| TRINITY_RL18A_BOVIN/7-130        | Q3T003.1 PF01775.15 | 94.90 | 0.00 |
| TRINITY_G0R1A4_ICHMG/23-114      | G0R1A4.1 PF15511.4; | 94.90 | 0.00 |
| TRINITY_V8N9Z2_OPHHA/1-80        | V8N9Z2.1 PF01249.16 | 94.90 | 0.00 |
| TRINITY_M5VMG6_PRUPE/455-581     | M5VMG6.1 PF01077.20 | 94.90 | 0.00 |
| TRINITY_G3TN32_LOXAF/277-342     | G3TN32.1 PF00191.18 | 94.90 | 0.00 |
| TRINITY_MYPC_RAT/1067-1151       | P56741.2 PF00041.19 | 94.90 | 0.00 |
| TRINITY_G1Q784_MYOLU/41-148      | G1Q784.1 PF13085.4; | 94.80 | 0.00 |
| TRINITY_A0A024WRW2_PLAFA/3-212   | A0A024WRW2.1 PF0009 | 94.80 | 0.00 |
| TRINITY_D8U5B3_VOLCA/587-644     | D8U5B3.1 PF00839.15 | 94.80 | 0.00 |
| TRINITY_E1B8G4_BOVIN/8-142       | E1B8G4.2 PF00164.23 | 94.80 | 0.00 |
| TRINITY_D3ZN79_RAT/7-63          | D3ZN79.1 PF00831.21 | 94.70 | 0.00 |



|                                  |                     |       |      |
|----------------------------------|---------------------|-------|------|
| TRINITY_D3ZN79_RAT/7-63          | D3ZN79.1 PF00831.21 | 94.70 | 0.00 |
| TRINITY_W5K8M5_ASTMX/444-522     | W5K8M5.1 PF13893.4; | 94.70 | 0.00 |
| TRINITY_A0A0D3DHL1_BRAOL/45-257  | A0A0D3DHL1.1 PF0159 | 94.70 | 0.00 |
| TRINITY_W9SP37_9ROSA/96-288      | W9SP37.1 PF13419.4; | 94.70 | 0.00 |
| TRINITY_G1N3Z1_MELGA/6-179       | G1N3Z1.1 PF00025.19 | 94.70 | 0.00 |
| TRINITY_A0A0D2T6A5_GOSRA/46-177  | A0A0D2T6A5.1 PF0012 | 94.70 | 0.00 |
| TRINITY_L8H9R9_ACACA/411-532     | L8H9R9.1 PF00004.27 | 94.70 | 0.00 |
| TRINITY_A8IM74_CHLRE/17-92       | A8IM74.1 PF00935.17 | 94.70 | 0.00 |
| TRINITY_Q96550_CHLRE/212-435     | Q96550.1 PF00006.23 | 94.70 | 0.00 |
| TRINITY_A8I339_CHLRE/243-280     | A8I339.1 PF00400.30 | 94.70 | 0.00 |
| TRINITY_A8I339_CHLRE/243-280     | A8I339.1 PF00400.30 | 94.70 | 0.00 |
| TRINITY_M3WCB9_FELCA/3-167       | M3WCB9.1 PF09470.8; | 94.60 | 0.00 |
| TRINITY_A0A0A0L4W3_CUCSA/62-154  | A0A0A0L4W3.1 PF0124 | 94.60 | 0.00 |
| TRINITY_A0A022RGL6_ERYGU/67-245  | A0A022RGL6.1 PF0050 | 94.60 | 0.00 |
| TRINITY_CB22_MAIZE/65-232        | P06671.1 PF00504.19 | 94.60 | 0.00 |
| TRINITY_Q231U8_TETTS/387-428     | Q231U8.1 PF13414.4; | 94.60 | 0.00 |
| TRINITY_I0Z842_9CHLO/17-489      | I0Z842.1 PF05761.12 | 94.60 | 0.00 |
| TRINITY_B9GL51_POPTR/6-330       | B9GL51.2 PF16363.3; | 94.60 | 0.00 |
| TRINITY_W5LGK8_ASTMX/193-262     | W5LGK8.1 PF00076.20 | 94.60 | 0.00 |
| TRINITY_D8TT53_VOLCA/164-293     | D8TT53.1 PF00004.27 | 94.60 | 0.00 |
| TRINITY_NENF_MOUSE/47-143        | Q9CQ45.1 PF00173.26 | 94.50 | 0.00 |
| TRINITY_Q5XFV4_RAT/6-132         | Q5XFV4.1 PF00061.21 | 94.50 | 0.00 |
| TRINITY_I3MAW3 ICTTR/6-395       | I3MAW3.1 PF03036.14 | 94.40 | 0.00 |
| TRINITY_RT21_BOVIN/11-64         | P82920.3 PF01165.18 | 94.40 | 0.00 |
| TRINITY_K4BVV2_SOLLC/483-697     | K4BVV2.1 PF01434.16 | 94.40 | 0.00 |
| TRINITY_I3KGW5_ORENI/24-166      | I3KGW5.1 PF01090.17 | 94.40 | 0.00 |
| TRINITY_F1PXY4_CANLF/62-151      | F1PXY4.2 PF00153.25 | 94.40 | 0.00 |
| TRINITY_U3KGV4_FICAL/17-124      | U3KGV4.1 PF01655.16 | 94.40 | 0.00 |
| TRINITY_A4HU11_LEIIN/209-280     | A4HU11.2 PF00240.21 | 94.40 | 0.00 |
| TRINITY_A4HU11_LEIIN/209-280     | A4HU11.2 PF00240.21 | 94.40 | 0.00 |
| TRINITY_A4HU11_LEIIN/209-280     | A4HU11.2 PF00240.21 | 94.40 | 0.00 |
| TRINITY_A4HU11_LEIIN/209-280     | A4HU11.2 PF00240.21 | 94.40 | 0.00 |
| TRINITY_A4HU11_LEIIN/209-280     | A4HU11.2 PF00240.21 | 94.40 | 0.00 |
| TRINITY_A0A067F7U2_CITSI/267-400 | A0A067F7U2.1 PF0000 | 94.40 | 0.00 |
| TRINITY_D8UCX2_VOLCA/54-221      | D8UCX2.1 PF00504.19 | 94.40 | 0.00 |
| TRINITY_D8U4Q2_VOLCA/144-214     | D8U4Q2.1 PF02325.15 | 94.40 | 0.00 |
| TRINITY_A4HU11_LEIIN/209-280     | A4HU11.2 PF00240.21 | 94.40 | 0.00 |
| TRINITY_I0YZ00_9CHLO/56-109      | I0YZ00.1 PF01192.20 | 94.40 | 0.00 |
| TRINITY_G1QDM7_MYOLU/51-104      | G1QDM7.1 PF01192.20 | 94.40 | 0.00 |
| TRINITY_A4HU11_LEIIN/209-280     | A4HU11.2 PF00240.21 | 94.40 | 0.00 |
| TRINITY_A4HU11_LEIIN/209-280     | A4HU11.2 PF00240.21 | 94.40 | 0.00 |
| TRINITY_A4HU11_LEIIN/209-280     | A4HU11.2 PF00240.21 | 94.40 | 0.00 |
| TRINITY_I0Z930_9CHLO/134-373     | I0Z930.1 PF01063.17 | 94.40 | 0.00 |
| TRINITY_I1I8C1_BRADI/184-698     | I1I8C1.1 PF00183.16 | 94.40 | 0.00 |
| TRINITY_A8J4U2_CHLRE/5-255       | A8J4U2.1 PF00069.23 | 94.40 | 0.00 |
| TRINITY_A0A0A0L7F8_CUCSA/7-334   | A0A0A0L7F8.1 PF0153 | 94.40 | 0.00 |
| TRINITY_G3S832_GORGO/1-107       | G3S832.1 PF01283.17 | 94.40 | 0.00 |
| TRINITY_G3PM62_GASAC/6-77        | G3PM62.1 PF16205.3; | 94.40 | 0.00 |
| TRINITY_K4B1Z2_SOLLC/287-348     | K4B1Z2.1 PF12796.5; | 94.30 | 0.00 |
| TRINITY_A0A0P7UBW1_9TELE/13-153  | A0A0P7UBW1.1 PF0007 | 94.30 | 0.00 |
| TRINITY_A0A059CKD9_EUCGR/85-154  | A0A059CKD9.1 PF0128 | 94.30 | 0.00 |
| TRINITY_F7FAM8_ORNAN/92-189      | F7FAM8.1 PF02770.17 | 94.30 | 0.00 |
| TRINITY_A0A0A0M1E9_CUCSA/541-641 | A0A0A0M1E9.1 PF0815 | 94.30 | 0.00 |
| TRINITY_J9JUK1_ACYPI/24-182      | J9JUK1.1 PF00071.20 | 94.30 | 0.00 |
| TRINITY_D8TUE4_VOLCA/239-343     | D8TUE4.1 PF14748.4; | 94.30 | 0.00 |
| TRINITY_A8JB67_CHLRE/42-130      | A8JB67.1 PF01248.24 | 94.30 | 0.00 |
| TRINITY_I3KA95_ORENI/133-501     | I3KA95.1 PF00079.18 | 94.30 | 0.00 |
| TRINITY_A8JHV0_CHLRE/5-92        | A8JHV0.1 PF16561.3; | 94.30 | 0.00 |
| TRINITY_EFTU_CHLRE/10-212        | P17746.1 PF00009.25 | 94.30 | 0.00 |
| TRINITY_X6M4L5_RETFI/6-65        | X6M4L5.1 PF04193.12 | 94.30 | 0.00 |
| TRINITY_D8UDD4_VOLCA/254-660     | D8UDD4.1 PF08083.9; | 94.30 | 0.00 |

|                                  |                     |       |      |
|----------------------------------|---------------------|-------|------|
| TRINITY_A0A0E0PCG8_ORYRU/10-121  | A0A0E0PCG8.1 PF0025 | 94.30 | 0.00 |
| TRINITY_H0YJT9_HUMAN/49-234      | H0YJT9.1 PF03096.12 | 94.20 | 0.00 |
| TRINITY_M3XXR0_MUSPF/2-188       | M3XXR0.1 PF17135.2; | 94.20 | 0.00 |
| TRINITY_M3YPC3_MUSPF/58-404      | M3YPC3.1 PF01208.15 | 94.20 | 0.00 |
| TRINITY_I0Z680_9CHLO/82-215      | I0Z680.1 PF02915.15 | 94.20 | 0.00 |
| TRINITY_M4DCR8_BRARP/4-92        | M4DCR8.1 PF00125.22 | 94.20 | 0.00 |
| TRINITY_A0A0A0LI67_CUCSA/41-161  | A0A0A0LI67.1 PF0159 | 94.20 | 0.00 |
| TRINITY_G3S832_GORGO/1-107       | G3S832.1 PF01283.17 | 94.20 | 0.00 |
| TRINITY_V4SL90_9ROSI/35-270      | V4SL90.1 PF00230.18 | 94.10 | 0.00 |
| TRINITY_PSBC_CHLRE/19-460        | P10898.1 PF00421.17 | 94.10 | 0.00 |
| TRINITY_G3U9M4_LOXAF/290-364     | G3U9M4.1 PF08564.8; | 94.10 | 0.00 |
| TRINITY_S8C602_9LAMI/1-50        | S8C602.1 PF08132.9; | 94.10 | 0.00 |
| TRINITY_C1E7K7_MICSR/4-377       | C1E7K7.1 PF00022.17 | 94.10 | 0.00 |
| TRINITY_A8IYM0_CHLRE/156-461     | A8IYM0.1 PF00365.18 | 94.10 | 0.00 |
| TRINITY_D8TRN2_VOLCA/650-880     | D8TRN2.1 PF12774.5; | 94.10 | 0.00 |
| TRINITY_G3NG58_GASAC/2-69        | G3NG58.1 PF01781.16 | 94.10 | 0.00 |
| TRINITY_U3JJK9_FICAL/8-187       | U3JJK9.1 PF01294.16 | 94.10 | 0.00 |
| TRINITY_F7D978_ORNAN/13-75       | F7D978.1 PF00035.24 | 94.10 | 0.00 |
| TRINITY_I3MZP8_ICTTR/13-253      | I3MZP8.1 PF03998.11 | 94.10 | 0.00 |
| TRINITY_G3TEH2_LOXAF/278-427     | G3TEH2.1 PF00441.22 | 94.00 | 0.00 |
| TRINITY_A0A0D2WJE0_CAPO3/24-1290 | A0A0D2WJE0.1 PF0246 | 94.00 | 0.00 |
| TRINITY_H2LK88_ORYLA/5-120       | H2LK88.1 PF01778.15 | 94.00 | 0.00 |
| TRINITY_A0A078IS30_BRANA/9-618   | A0A078IS30.1 PF0001 | 94.00 | 0.00 |
| TRINITY_M3XQI1_MUSPF/22-154      | M3XQI1.1 PF00237.17 | 94.00 | 0.00 |
| TRINITY_A0A077ZMR8_STYLE/232-365 | A0A077ZMR8.1 PF0000 | 94.00 | 0.00 |
| TRINITY_B4ID84_DROSE/5-88        | B4ID84.1 PF01221.16 | 94.00 | 0.00 |
| TRINITY_Q6DF03_XENTR/47-542      | Q6DF03.1 PF00118.22 | 94.00 | 0.00 |
| TRINITY_M7BM18_CHEMY/38-279      | M7BM18.1 PF00224.19 | 94.00 | 0.00 |
| TRINITY_D8TSY5_VOLCA/481-711     | D8TSY5.1 PF12774.5; | 94.00 | 0.00 |
| TRINITY_A0A0A0LGH3_CUCSA/70-226  | A0A0A0LGH3.1 PF0853 | 94.00 | 0.00 |
| TRINITY_F6S9T4_CALJA/1-194       | F6S9T4.1 PF05805.10 | 93.90 | 0.00 |
| TRINITY_A0A067JHW3_JATCU/4-139   | A0A067JHW3.1 PF0395 | 93.90 | 0.00 |
| TRINITY_M4CX64_BRARP/472-560     | M4CX64.1 PF00679.22 | 93.90 | 0.00 |
| TRINITY_H2USG6_TAKRU/3-189       | H2USG6.1 PF17135.2; | 93.90 | 0.00 |
| TRINITY_M0R983_RAT/14-242        | M0R983.1 PF13561.4; | 93.90 | 0.00 |
| TRINITY_A0A067FSK7_CITSI/152-299 | A0A067FSK7.1 PF0000 | 93.90 | 0.00 |
| TRINITY_S9X3R9_9CETA/7-191       | S9X3R9.1 PF01251.16 | 93.90 | 0.00 |
| TRINITY_S9X3R9_9CETA/7-191       | S9X3R9.1 PF01251.16 | 93.90 | 0.00 |
| TRINITY_A8J6T1_CHLRE/139-200     | A8J6T1.1 PF00957.19 | 93.90 | 0.00 |
| TRINITY_D8TKM7_VOLCA/539-587     | D8TKM7.1 PF02042.13 | 93.90 | 0.00 |
| TRINITY_A8I2Z6_CHLRE/31-214      | A8I2Z6.1 PF10274.7; | 93.90 | 0.00 |
| TRINITY_D8TZU3_VOLCA/134-281     | D8TZU3.1 PF00004.27 | 93.90 | 0.00 |
| TRINITY_E1ZGU1_CHLVA/5-70        | E1ZGU1.1 PF00808.21 | 93.90 | 0.00 |
| TRINITY_A0D6B2_PARTE/1-101       | A0D6B2.1 PF00125.22 | 93.90 | 0.00 |
| TRINITY_A0BQ95_PARTE/28-93       | A0BQ95.1 PF00808.21 | 93.90 | 0.00 |
| TRINITY_A0BQ95_PARTE/28-93       | A0BQ95.1 PF00808.21 | 93.90 | 0.00 |
| TRINITY_H2ZAU4_CIOSA/5-242       | H2ZAU4.1 PF00022.17 | 93.90 | 0.00 |
| TRINITY_A8JDH8_CHLRE/1129-1278   | A8JDH8.1 PF12774.5; | 93.90 | 0.00 |
| TRINITY_H0V077_CAVPO/420-467     | H0V077.1 PF00045.17 | 93.80 | 0.00 |
| TRINITY_A0A0D9VP32_9ORYZ/78-181  | A0A0D9VP32.1 PF0004 | 93.80 | 0.00 |
| TRINITY_B0BMH7_XENTR/142-432     | B0BMH7.1 PF00113.20 | 93.80 | 0.00 |
| TRINITY_Q76L11_CHICK/4-114       | Q76L11.1 PF00507.17 | 93.80 | 0.00 |
| TRINITY_A0A059CCR0_EUCGR/12-121  | A0A059CCR0.1 PF0041 | 93.80 | 0.00 |
| TRINITY_M0R601_RAT/3-50          | M0R601.2 PF04627.11 | 93.80 | 0.00 |
| TRINITY_H0WWF4_OTOGA/105-201     | H0WWF4.1 PF14497.4; | 93.80 | 0.00 |
| TRINITY_H0XHY4_OTOGA/3-99        | H0XHY4.1 PF01157.16 | 93.80 | 0.00 |
| TRINITY_A0A0A0LUC2_CUCSA/32-231  | A0A0A0LUC2.1 PF0575 | 93.80 | 0.00 |
| TRINITY_G1SEL8_RABIT/3-50        | G1SEL8.1 PF04627.11 | 93.80 | 0.00 |
| TRINITY_L8GW23_ACACA/109-156     | L8GW23.1 PF01466.17 | 93.80 | 0.00 |
| TRINITY_G3PUN8_GASAC/99-178      | G3PUN8.1 PF00347.21 | 93.80 | 0.00 |
| TRINITY_Q94SG9_GASAC/258-359     | Q94SG9.1 PF00032.15 | 93.80 | 0.00 |

|                                  |              |            |       |      |
|----------------------------------|--------------|------------|-------|------|
| TRINITY_QCR8_RAT/4-79            | Q7TQ16.1     | PF02939.14 | 93.80 | 0.00 |
| TRINITY_W5F886_WHEAT/120-167     | W5F886.1     | PF01466.17 | 93.80 | 0.00 |
| TRINITY_D8TKQ0_VOLCA/40-167      | D8TKQ0.1     | PF00004.27 | 93.80 | 0.00 |
| TRINITY_G3W7E3_SARHA/117-211     | G3W7E3.1     | PF04800.10 | 93.80 | 0.00 |
| TRINITY_F7FZ45_MONDO/7-163       | F7FZ45.1     | PF00160.19 | 93.80 | 0.00 |
| TRINITY_A0A087SI34_AUXPR/663-868 | A0A087SI34.1 | PF0058     | 93.80 | 0.00 |
| TRINITY_A0A0R4IZM7_DANRE/23-263  | A0A0R4IZM7.1 | PF0026     | 93.80 | 0.00 |
| TRINITY_E6WHM1_PANSA/3-101       | E6WHM1.1     | PF00466.18 | 93.80 | 0.00 |
| TRINITY_G3H NJ3_CRIGR/29-445     | G3H NJ3.1    | PF01093.15 | 93.80 | 0.00 |
| TRINITY_L9JB67_TUPCH/58-136      | L9JB67.1     | PF01282.17 | 93.70 | 0.00 |
| TRINITY_L9JB67_TUPCH/58-136      | L9JB67.1     | PF01282.17 | 93.70 | 0.00 |
| TRINITY_F7I4U3_CALJA/222-574     | F7I4U3.1     | PF00152.18 | 93.70 | 0.00 |
| TRINITY_L9JB67_TUPCH/58-136      | L9JB67.1     | PF01282.17 | 93.70 | 0.00 |
| TRINITY_M3YFZ4_MUSPF/399-551     | M3YFZ4.1     | PF02910.18 | 93.70 | 0.00 |
| TRINITY_A8I4H4_CHLRE/32-94       | A8I4H4.1     | PF01176.17 | 93.70 | 0.00 |
| TRINITY_G3H8L7_CRIGR/22-183      | G3H8L7.1     | PF00071.20 | 93.70 | 0.00 |
| TRINITY_FABPH_RAT/6-132          | P07483.2     | PF00061.21 | 93.70 | 0.00 |
| TRINITY_A8J8M9_CHLRE/23-117      | A8J8M9.1     | PF00338.20 | 93.70 | 0.00 |
| TRINITY_Q6V9B0_CHLRE/38-148      | Q6V9B0.1     | PF01058.20 | 93.70 | 0.00 |
| TRINITY_POL_MLVMS/1445-1560      | P03355.4     | PF00665.24 | 93.60 | 0.00 |
| TRINITY_M5Y9Z3_PRUPE/87-375      | M5Y9Z3.1     | PF00291.23 | 93.60 | 0.00 |
| TRINITY_GPX1_RABIT/13-127        | P11909.2     | PF00255.17 | 93.60 | 0.00 |
| TRINITY_F6ZUW6_CALJA/8-100       | F6ZUW6.1     | PF00166.19 | 93.50 | 0.00 |
| TRINITY_A0A078BXA8_BRANA/111-207 | A0A078BXA8.1 | PF0119     | 93.50 | 0.00 |
| TRINITY_J9J1V2_9SPIT/5-143       | J9J1V2.1     | PF00179.24 | 93.50 | 0.00 |
| TRINITY_COX41_RAT/30-168         | P10888.1     | PF02936.12 | 93.50 | 0.00 |
| TRINITY_Q23JY6_TETTS/610-893     | Q23JY6.2     | PF00481.19 | 93.50 | 0.00 |
| TRINITY_G1TAJ3_RABIT/163-331     | G1TAJ3.1     | PF02866.16 | 93.50 | 0.00 |
| TRINITY_H0VN18_CAVPO/2-140       | H0VN18.1     | PF00235.17 | 93.50 | 0.00 |
| TRINITY_L9LE99_TUPCH/40-207      | L9LE99.1     | PF00270.27 | 93.50 | 0.00 |
| TRINITY_D8U1V2_VOLCA/50-218      | D8U1V2.1     | PF00504.19 | 93.50 | 0.00 |
| TRINITY_D8U7W6_VOLCA/1473-1703   | D8U7W6.1     | PF12774.5; | 93.50 | 0.00 |
| TRINITY_A0A094CTC8_9PEZI/28-146  | A0A094CTC8.1 | PF0041     | 93.50 | 0.00 |
| TRINITY_L5LRC3_MYODS/155-445     | L5LRC3.1     | PF00113.20 | 93.50 | 0.00 |
| TRINITY_A8I4F6_CHLRE/84-227      | A8I4F6.1     | PF00475.16 | 93.50 | 0.00 |
| TRINITY_D8U1V2_VOLCA/50-218      | D8U1V2.1     | PF00504.19 | 93.50 | 0.00 |
| TRINITY_K5YKK7_9PSED/11-75       | K5YKK7.1     | PF01668.16 | 93.50 | 0.00 |
| TRINITY_A0A061E5Y0_THECC/92-252  | A0A061E5Y0.1 | PF0016     | 93.40 | 0.00 |
| TRINITY_TM100_RAT/1-133          | Q569C0.1     | PF16311.3; | 93.40 | 0.00 |
| TRINITY_V7BFF7_PHAVU/72-305      | V7BFF7.1     | PF01946.15 | 93.40 | 0.00 |
| TRINITY_V4TB21_9ROSI/54-161      | V4TB21.1     | PF01655.16 | 93.40 | 0.00 |
| TRINITY_M4AK76_XIPMA/95-169      | M4AK76.1     | PF00900.18 | 93.40 | 0.00 |
| TRINITY_L8H4F8_ACACA/1-130       | L8H4F8.1     | PF00125.22 | 93.40 | 0.00 |
| TRINITY_W5JTF2_ANODA/105-287     | W5JTF2.1     | PF00022.17 | 93.40 | 0.00 |
| TRINITY_A0A087SCD3_AUXPR/7-162   | A0A087SCD3.1 | PF0007     | 93.40 | 0.00 |
| TRINITY_A1SZ00_PSYIN/273-347     | A1SZ00.1     | PF00575.21 | 93.30 | 0.00 |
| TRINITY_H2UAE0_TAKRU/46-120      | H2UAE0.1     | PF01929.15 | 93.30 | 0.00 |
| TRINITY_POL_XMRV6/1173-1318      | A1Z651.1     | PF00075.22 | 93.30 | 0.00 |
| TRINITY_H2L7Q5_ORYLA/1-119       | H2L7Q5.1     | PF00833.16 | 93.30 | 0.00 |
| TRINITY_H2L7Q5_ORYLA/1-119       | H2L7Q5.1     | PF00833.16 | 93.30 | 0.00 |
| TRINITY_A4ZYQ6_SOLLC/154-253     | A4ZYQ6.1     | PF03171.18 | 93.30 | 0.00 |
| TRINITY_A0A0D2TQ56_GOSRA/8-171   | A0A0D2TQ56.1 | PF0016     | 93.30 | 0.00 |
| TRINITY_Q7JCY9_MOUSE/14-223      | Q7JCY9.1     | PF00119.18 | 93.30 | 0.00 |
| TRINITY_A0A0D9X9G6_9ORYZ/11-357  | A0A0D9X9G6.1 | PF0026     | 93.30 | 0.00 |
| TRINITY_B9RCE0_RICCO/440-822     | B9RCE0.1     | PF11940.6; | 93.30 | 0.00 |
| TRINITY_D8RBB7_SELML/307-489     | D8RBB7.1     | PF04055.19 | 93.30 | 0.00 |
| TRINITY_I0Z4M5_9CHLO/3-60        | I0Z4M5.1     | PF04758.12 | 93.30 | 0.00 |
| TRINITY_A8J6V1_CHLRE/43-381      | A8J6V1.1     | PF00180.18 | 93.30 | 0.00 |
| TRINITY_V4TDA4_9ROSI/7-102       | V4TDA4.1     | PF01158.16 | 93.20 | 0.00 |
| TRINITY_M3WL90_FELCA/1230-1465   | M3WL90.1     | PF01410.16 | 93.20 | 0.00 |
| TRINITY_CYB5_BOVIN/13-85         | P00171.3     | PF00173.26 | 93.20 | 0.00 |

|                                  |                     |       |      |
|----------------------------------|---------------------|-------|------|
| TRINITY_A8I3K8_CHLRE/124-290     | A8I3K8.1 PF04055.19 | 93.20 | 0.00 |
| TRINITY_PSBB_CHLRE/1-500         | P37255.1 PF00421.17 | 93.20 | 0.00 |
| TRINITY_Q4T4T6_TETNG/14-155      | Q4T4T6.1 PF00210.22 | 93.20 | 0.00 |
| TRINITY_K4B7P1_SOLLC/96-331      | K4B7P1.1 PF00112.21 | 93.10 | 0.00 |
| TRINITY_D7SN77_VITVI/673-993     | D7SN77.1 PF02171.15 | 93.10 | 0.00 |
| TRINITY_A0A0A0KFM1_CUCSA/42-171  | A0A0A0KFM1.1 PF0547 | 93.10 | 0.00 |
| TRINITY_W9QHC5_9ROSA/44-274      | W9QHC5.1 PF00230.18 | 93.10 | 0.00 |
| TRINITY_I1I505_BRADI/3-74        | I1I505.1 PF00240.21 | 93.10 | 0.00 |
| TRINITY_I1I505_BRADI/3-74        | I1I505.1 PF00240.21 | 93.10 | 0.00 |
| TRINITY_POL_XMRV6/1338-1439      | A1Z651.1 PF16721.3; | 93.10 | 0.00 |
| TRINITY_I1I505_BRADI/3-74        | I1I505.1 PF00240.21 | 93.10 | 0.00 |
| TRINITY_I1I505_BRADI/3-74        | I1I505.1 PF00240.21 | 93.10 | 0.00 |
| TRINITY_I1I505_BRADI/3-74        | I1I505.1 PF00240.21 | 93.10 | 0.00 |
| TRINITY_A0A0A0LD02_CUCSA/156-315 | A0A0A0LD02.1 PF0048 | 93.10 | 0.00 |
| TRINITY_Q4T4T6_TETNG/14-155      | Q4T4T6.1 PF00210.22 | 93.10 | 0.00 |
| TRINITY_J9G0L1_9SPIT/1308-1538   | J9G0L1.1 PF12774.5; | 93.10 | 0.00 |
| TRINITY_M7BGH9_CHEMY/41-136      | M7BGH9.1 PF00428.17 | 93.10 | 0.00 |
| TRINITY_Q23QN9_TETTS/1894-2035   | Q23QN9.3 PF07728.12 | 93.00 | 0.00 |
| TRINITY_A0A0A0LJ63_CUCSA/53-397  | A0A0A0LJ63.1 PF0027 | 93.00 | 0.00 |
| TRINITY_G3HC29_CRIGR/5-47        | G3HC29.1 PF01023.17 | 93.00 | 0.00 |
| TRINITY_S10AB_RAT/5-47           | Q6B345.1 PF01023.17 | 93.00 | 0.00 |
| TRINITY_D3ZN79_RAT/7-63          | D3ZN79.1 PF00831.21 | 93.00 | 0.00 |
| TRINITY_Q88M03_PSEPK/35-105      | Q88M03.1 PF00575.21 | 93.00 | 0.00 |
| TRINITY_M0T2W8_MUSAM/84-464      | M0T2W8.1 PF00162.17 | 93.00 | 0.00 |
| TRINITY_Q22BJ7_TETTS/366-422     | Q22BJ7.2 PF01485.19 | 93.00 | 0.00 |
| TRINITY_H0YWU1_TAEGU/27-83       | H0YWU1.1 PF03946.12 | 93.00 | 0.00 |
| TRINITY_A0A0P7Y4Y7_9TELE/114-175 | A0A0P7Y4Y7.1 PF0103 | 93.00 | 0.00 |
| TRINITY_A8JDN3_CHLRE/50-236      | A8JDN3.1 PF10211.7; | 93.00 | 0.00 |
| TRINITY_D8UCX2_VOLCA/54-221      | D8UCX2.1 PF00504.19 | 93.00 | 0.00 |
| TRINITY_A0A087SJA2_AUXPR/5-146   | A0A087SJA2.1 PF0016 | 93.00 | 0.00 |
| TRINITY_F0IGB2_9FLAO/54-124      | F0IGB2.1 PF04542.12 | 93.00 | 0.00 |
| TRINITY_A0A0G2KAQ5_RAT/1-264     | A0A0G2KAQ5.1 PF0555 | 93.00 | 0.00 |
| TRINITY_D8UGK6_VOLCA/377-504     | D8UGK6.1 PF02887.14 | 93.00 | 0.00 |
| TRINITY_D8TYR4_VOLCA/520-670     | D8TYR4.1 PF00160.19 | 93.00 | 0.00 |
| TRINITY_M3WEJ8_FELCA/453-607     | M3WEJ8.1 PF09316.8; | 92.90 | 0.00 |
| TRINITY_A0A078HSG2_BRANA/78-138  | A0A078HSG2.1 PF0163 | 92.90 | 0.00 |
| TRINITY_K4D2K3_SOLLC/87-277      | K4D2K3.1 PF13419.4; | 92.90 | 0.00 |
| TRINITY_K4CY74_SOLLC/111-399     | K4CY74.1 PF03151.14 | 92.90 | 0.00 |
| TRINITY_E1ZBK2_CHLVA/352-461     | E1ZBK2.1 PF03143.15 | 92.90 | 0.00 |
| TRINITY_H2AV_TETTS/17-104        | P08992.2 PF00125.22 | 92.90 | 0.00 |
| TRINITY_PPX3_PARTE/46-241        | A0C1E4.1 PF00149.26 | 92.90 | 0.00 |
| TRINITY_B4ID84_DROSE/5-88        | B4ID84.1 PF01221.16 | 92.90 | 0.00 |
| TRINITY_D8UIE7_VOLCA/49-105      | D8UIE7.1 PF01849.16 | 92.90 | 0.00 |
| TRINITY_D8TZD4_VOLCA/92-119      | D8TZD4.1 PF01239.20 | 92.90 | 0.00 |
| TRINITY_W6UTT4_ECHGR/105-314     | W6UTT4.1 PF00091.23 | 92.90 | 0.00 |
| TRINITY_K3Z3V7_SETIT/480-828     | K3Z3V7.1 PF02896.16 | 92.90 | 0.00 |
| TRINITY_C1E9Z7_MICSR/4-73        | C1E9Z7.1 PF00240.21 | 92.90 | 0.00 |
| TRINITY_CYB6_CHLRE/21-210        | Q00471.1 PF00033.17 | 92.90 | 0.00 |
| TRINITY_L9L2M7_TUPCH/1-213       | L9L2M7.1 PF01201.20 | 92.80 | 0.00 |
| TRINITY_K4BPD2_SOLLC/121-342     | K4BPD2.1 PF01556.16 | 92.80 | 0.00 |
| TRINITY_M0SBM9_MUSAM/63-245      | M0SBM9.1 PF00504.19 | 92.80 | 0.00 |
| TRINITY_D8TNJ7_VOLCA/63-244      | D8TNJ7.1 PF00574.21 | 92.80 | 0.00 |
| TRINITY_A8IED9_CHLRE/276-349     | A8IED9.1 PF01472.18 | 92.80 | 0.00 |
| TRINITY_D8TSX4_VOLCA/66-247      | D8TSX4.1 PF00574.21 | 92.80 | 0.00 |
| TRINITY_F6ZUK7_MACMU/15-305      | F6ZUK7.1 PF15302.4; | 92.80 | 0.00 |
| TRINITY_G3SAL4_GORGO/12-187      | G3SAL4.1 PF03357.19 | 92.70 | 0.00 |
| TRINITY_A0A0D2QID2_GOSRA/148-348 | A0A0D2QID2.1 PF0011 | 92.70 | 0.00 |
| TRINITY_A0A0B0NFV8_GOSAR/97-330  | A0A0B0NFV8.1 PF0171 | 92.70 | 0.00 |
| TRINITY_A0A078FRB1_BRANA/142-225 | A0A078FRB1.1 PF0018 | 92.70 | 0.00 |
| TRINITY_D8TLE3_VOLCA/7-618       | D8TLE3.1 PF00012.18 | 92.70 | 0.00 |
| TRINITY_A8IEF7_CHLRE/166-398     | A8IEF7.1 PF01786.15 | 92.70 | 0.00 |

|                                  |                     |       |      |
|----------------------------------|---------------------|-------|------|
| TRINITY_A8J576_CHLRE/30-84       | A8J576.1 PF01667.15 | 92.70 | 0.00 |
| TRINITY_A0A0B2VWK9_TOXCA/3-379   | A0A0B2VWK9.1 PF0002 | 92.70 | 0.00 |
| TRINITY_A0A059BPK8_EUCGR/13-332  | A0A059BPK8.1 PF0107 | 92.60 | 0.00 |
| TRINITY_A0A0D9RER4_CHLSB/5-61    | A0A0D9RER4.1 PF0040 | 92.60 | 0.00 |
| TRINITY_F7G4E6_MONDO/1812-2123   | F7G4E6.1 PF02889.14 | 92.60 | 0.00 |
| TRINITY_K4AXN3_SOLLC/2-226       | K4AXN3.1 PF12481.6; | 92.60 | 0.00 |
| TRINITY_A0A0D9SD52_CHLSB/54-121  | A0A0D9SD52.1 PF0450 | 92.60 | 0.00 |
| TRINITY_I7MHZ8_TETTS/193-219     | I7MHZ8.2 PF00641.16 | 92.60 | 0.00 |
| TRINITY_H0Y009_OTOGA/4-61        | H0Y009.1 PF00412.20 | 92.60 | 0.00 |
| TRINITY_E1Z7R6_CHLVA/686-715     | E1Z7R6.1 PF00641.16 | 92.60 | 0.00 |
| TRINITY_A0A0A0KHT4_CUCSA/362-461 | A0A0A0KHT4.1 PF0008 | 92.60 | 0.00 |
| TRINITY_A0E561_PARTE/79-379      | A0E561.1 PF03133.13 | 92.60 | 0.00 |
| TRINITY_D8TP13_VOLCA/1-259       | D8TP13.1 PF01201.20 | 92.60 | 0.00 |
| TRINITY_D8TTD9_VOLCA/56-452      | D8TTD9.1 PF00890.22 | 92.60 | 0.00 |
| TRINITY_A8II71_CHLRE/20-411      | A8II71.1 PF06068.11 | 92.60 | 0.00 |
| TRINITY_D8TME4_VOLCA/86-178      | D8TME4.1 PF00355.24 | 92.60 | 0.00 |
| TRINITY_D8SB57_SELML/11-37       | D8SB57.1 PF00642.22 | 92.60 | 0.00 |
| TRINITY_G5C229_HETGA/7-130       | G5C229.1 PF05615.11 | 92.60 | 0.00 |
| TRINITY_G3NG58_GASAC/2-69        | G3NG58.1 PF01781.16 | 92.60 | 0.00 |
| TRINITY_D8UBV4_VOLCA/12-65       | D8UBV4.1 PF00584.18 | 92.60 | 0.00 |
| TRINITY_NLPD_PSEAE/195-290       | P45682.1 PF01551.20 | 92.60 | 0.00 |
| TRINITY_L5KK36_PTEAL/499-829     | L5KK36.1 PF12036.6; | 92.50 | 0.00 |
| TRINITY_E2RKW9_CANLF/192-258     | E2RKW9.2 PF00191.18 | 92.50 | 0.00 |
| TRINITY_A0DYC6_PARTE/574-750     | A0DYC6.1 PF13870.4; | 92.50 | 0.00 |
| TRINITY_CYB_HUMAN/18-204         | P00156.2 PF00033.17 | 92.50 | 0.00 |
| TRINITY_V8NDK0_OPHHA/202-296     | V8NDK0.1 PF16122.3; | 92.50 | 0.00 |
| TRINITY_D8TVB8_VOLCA/3-42        | D8TVB8.1 PF01779.15 | 92.50 | 0.00 |
| TRINITY_T0NQQ8_9CETA/120-410     | T0NQQ8.1 PF00113.20 | 92.50 | 0.00 |
| TRINITY_R0I9P3_9BRAS/205-338     | R0I9P3.1 PF00004.27 | 92.50 | 0.00 |
| TRINITY_B0WJZ3_CULQU/85-125      | B0WJZ3.1 PF00400.30 | 92.50 | 0.00 |
| TRINITY_A0A0K0D2L7_ANGCA/7-170   | A0A0K0D2L7.1 PF0016 | 92.50 | 0.00 |
| TRINITY_A0A0F7TIL7_9EURO/203-336 | A0A0F7TIL7.1 PF0000 | 92.50 | 0.00 |
| TRINITY_A0A096QE22_MAIZE/258-391 | A0A096QE22.1 PF0000 | 92.50 | 0.00 |
| TRINITY_L1IB53_GUITH/507-640     | L1IB53.1 PF00004.27 | 92.50 | 0.00 |
| TRINITY_A0DM44_PARTE/173-306     | A0DM44.1 PF00004.27 | 92.50 | 0.00 |
| TRINITY_E1ZP98_CHLVA/97-149      | E1ZP98.1 PF02861.18 | 92.50 | 0.00 |
| TRINITY_Q6PBJ9_DANRE/17-114      | Q6PBJ9.1 PF00428.17 | 92.50 | 0.00 |
| TRINITY_A0A0G2JY64_RAT/1-107     | A0A0G2JY64.1 PF0128 | 92.50 | 0.00 |
| TRINITY_A0A0A0KM69_CUCSA/96-241  | A0A0A0KM69.1 PF0021 | 92.40 | 0.00 |
| TRINITY_IF4G2_RABIT/544-657      | P79398.1 PF02847.15 | 92.40 | 0.00 |
| TRINITY_F6WXR1_MONDO/47-126      | F6WXR1.1 PF00313.20 | 92.40 | 0.00 |
| TRINITY_M7ZS43_TRIUA/18-164      | M7ZS43.1 PF00025.19 | 92.40 | 0.00 |
| TRINITY_Q96550_CHLRE/212-435     | Q96550.1 PF00006.23 | 92.40 | 0.00 |
| TRINITY_A8I5J8_CHLRE/112-334     | A8I5J8.1 PF01063.17 | 92.40 | 0.00 |
| TRINITY_A5D984_BOVIN/410-528     | A5D984.1 PF02887.14 | 92.40 | 0.00 |
| TRINITY_CP2E1_RAT/33-489         | P05182.4 PF00067.20 | 92.40 | 0.00 |
| TRINITY_A0A0A0MU43_PAPAN/1-55    | A0A0A0MU43.1 PF0899 | 92.30 | 0.00 |
| TRINITY_A0A0D3FDE6_9ORYZ/18-399  | A0A0D3FDE6.1 PF0019 | 92.30 | 0.00 |
| TRINITY_L8HK22_ACACA/54-249      | L8HK22.1 PF00149.26 | 92.30 | 0.00 |
| TRINITY_S10A6_RABIT/5-43         | P30801.2 PF01023.17 | 92.30 | 0.00 |
| TRINITY_M1BV08_SOLTU/45-274      | M1BV08.1 PF00230.18 | 92.30 | 0.00 |
| TRINITY_SODC_CALJA/9-150         | Q8HXP8.3 PF00080.18 | 92.30 | 0.00 |
| TRINITY_G3ICC6_CRIGR/7-183       | G3ICC6.1 PF00244.18 | 92.30 | 0.00 |
| TRINITY_A0A087SQT0_AUXPR/413-546 | A0A087SQT0.1 PF0291 | 92.30 | 0.00 |
| TRINITY_A8JG07_CHLRE/219-371     | A8JG07.1 PF00733.19 | 92.30 | 0.00 |
| TRINITY_A8IZK3_CHLRE/12-166      | A8IZK3.1 PF00252.16 | 92.30 | 0.00 |
| TRINITY_A8JDL8_CHLRE/10-207      | A8JDL8.1 PF00106.23 | 92.30 | 0.00 |
| TRINITY_A0A078CAC2_BRANA/90-211  | A0A078CAC2.1 PF0038 | 92.30 | 0.00 |
| TRINITY_NU2M_CHICK/23-289        | P18937.1 PF00361.18 | 92.20 | 0.00 |
| TRINITY_D8TM24_VOLCA/202-332     | D8TM24.1 PF00004.27 | 92.20 | 0.00 |
| TRINITY_A0A087SHS8_AUXPR/40-206  | A0A087SHS8.1 PF0027 | 92.20 | 0.00 |

|                                  |                     |       |      |
|----------------------------------|---------------------|-------|------|
| TRINITY_V4B5Y6_LOTGI/4-136       | V4B5Y6.1 PF02966.14 | 92.20 | 0.00 |
| TRINITY_A0A0D2PY75_GOSRA/6-56    | A0A0D2PY75.1 PF0025 | 92.20 | 0.00 |
| TRINITY_A8JF93_CHLRE/567-861     | A8JF93.1 PF00069.23 | 92.20 | 0.00 |
| TRINITY_A0A0B0MY3_GOSAR/1-191    | A0A0B0MY3.1 PF0000  | 92.20 | 0.00 |
| TRINITY_M4BI31_HYAAE/430-836     | M4BI31.1 PF08083.9; | 92.10 | 0.00 |
| TRINITY_A0A0A0LIL7_CUCSA/85-122  | A0A0A0LIL7.1 PF0659 | 92.10 | 0.00 |
| TRINITY_A0A0K9PW16_ZOSMR/64-231  | A0A0K9PW16.1 PF0050 | 92.10 | 0.00 |
| TRINITY_GRP78 ICTTR/30-636       | Q3S4T7.1 PF00012.18 | 92.10 | 0.00 |
| TRINITY_A8J2L7_CHLRE/18-83       | A8J2L7.1 PF01423.20 | 92.10 | 0.00 |
| TRINITY_H0X981_OTOGA/3-41        | H0X981.1 PF01290.18 | 92.10 | 0.00 |
| TRINITY_Q9FPR7_CHLRE/85-235      | Q9FPR7.1 PF05201.13 | 92.10 | 0.00 |
| TRINITY_MT1_MAIZE/1-76           | P30571.1 PF01439.16 | 92.10 | 0.00 |
| TRINITY_G3HQV4_CRIGR/1-239       | G3HQV4.1 PF00108.21 | 92.00 | 0.00 |
| TRINITY_TNNT2_RABIT/107-243      | P09741.3 PF00992.18 | 92.00 | 0.00 |
| TRINITY_A0A087XF96_POEFO/12-187  | A0A087XF96.1 PF0707 | 92.00 | 0.00 |
| TRINITY_A0A067LAI0_JATCU/54-452  | A0A067LAI0.1 PF0046 | 92.00 | 0.00 |
| TRINITY_J9J1V2_9SPIT/5-143       | J9J1V2.1 PF00179.24 | 92.00 | 0.00 |
| TRINITY_M3ZLS7_XIPMA/80-191      | M3ZLS7.1 PF00059.19 | 92.00 | 0.00 |
| TRINITY_U3KDZ5_FICAL/31-121      | U3KDZ5.1 PF13499.4; | 92.00 | 0.00 |
| TRINITY_I0Z6P1_9CHLO/3-77        | I0Z6P1.1 PF03671.12 | 92.00 | 0.00 |
| TRINITY_T0QGI5_9STRA/83-121      | T0QGI5.1 PF01096.16 | 92.00 | 0.00 |
| TRINITY_A8IE95_CHLRE/299-348     | A8IE95.1 PF13920.4; | 92.00 | 0.00 |
| TRINITY_D8U524_VOLCA/56-156      | D8U524.1 PF14772.4; | 92.00 | 0.00 |
| TRINITY_NU3M_MOUSE/13-113        | P03899.3 PF00507.17 | 92.00 | 0.00 |
| TRINITY_F7EPH9_ORNAN/96-158      | F7EPH9.2 PF02935.14 | 91.90 | 0.00 |
| TRINITY_G3NMQ4_GASAC/274-360     | G3NMQ4.1 PF14374.4; | 91.90 | 0.00 |
| TRINITY_A0A078AUW2_STYLE/5-93    | A0A078AUW2.1 PF0012 | 91.90 | 0.00 |
| TRINITY_D8TGX0_VOLCA/2751-2972   | D8TGX0.1 PF12781.5; | 91.90 | 0.00 |
| TRINITY_A8HPW8_CHLRE/149-319     | A8HPW8.1 PF00270.27 | 91.90 | 0.00 |
| TRINITY_D8UHM6_VOLCA/586-795     | D8UHM6.1 PF00149.26 | 91.90 | 0.00 |
| TRINITY_A8J336_CHLRE/1680-1932   | A8J336.1 PF12774.5; | 91.90 | 0.00 |
| TRINITY_M5XDP6_PRUPE/116-200     | M5XDP6.1 PF14159.4; | 91.80 | 0.00 |
| TRINITY_A0A0G2QC06_RAT/25-333    | A0A0G2QC06.1 PF0040 | 91.80 | 0.00 |
| TRINITY_A0A075B1U4_9FUNG/51-246  | A0A075B1U4.1 PF0014 | 91.80 | 0.00 |
| TRINITY_A0A087SA88_AUXPR/261-382 | A0A087SA88.1 PF0395 | 91.80 | 0.00 |
| TRINITY_A0A0D2PQ59_GOSRA/198-375 | A0A0D2PQ59.1 PF0073 | 91.80 | 0.00 |
| TRINITY_A0A061FNF4_THECC/4-359   | A0A061FNF4.1 PF0002 | 91.80 | 0.00 |
| TRINITY_D8TLE3_VOLCA/7-618       | D8TLE3.1 PF00012.18 | 91.80 | 0.00 |
| TRINITY_A0A0B2VWK9_TOXCA/3-379   | A0A0B2VWK9.1 PF0002 | 91.80 | 0.00 |
| TRINITY_D8TKM7_VOLCA/539-587     | D8TKM7.1 PF02042.13 | 91.80 | 0.00 |
| TRINITY_A0A0D9YNU9_9ORYZ/177-310 | A0A0D9YNU9.1 PF0000 | 91.80 | 0.00 |
| TRINITY_D8TRN2_VOLCA/650-880     | D8TRN2.1 PF12774.5; | 91.80 | 0.00 |
| TRINITY_G3RDU2_GORGO/237-489     | G3RDU2.1 PF00147.16 | 91.70 | 0.00 |
| TRINITY_A0A096NJ44_PAPAN/57-425  | A0A096NJ44.1 PF0015 | 91.70 | 0.00 |
| TRINITY_I2GDG2_9BACT/157-192     | I2GDG2.1 PF00132.22 | 91.70 | 0.00 |
| TRINITY_I1I505_BRADI/3-74        | I1I505.1 PF00240.21 | 91.70 | 0.00 |
| TRINITY_I0Z900_9CHLO/1-105       | I0Z900.1 PF01283.17 | 91.70 | 0.00 |
| TRINITY_F4PA54_BATDJ/8-55        | F4PA54.1 PF00319.16 | 91.70 | 0.00 |
| TRINITY_D8UI03_VOLCA/42-637      | D8UI03.1 PF00012.18 | 91.70 | 0.00 |
| TRINITY_G0R1A3_ICHMG/15-146      | G0R1A3.1 PF00125.22 | 91.70 | 0.00 |
| TRINITY_E1Z3L7_CHLVA/246-388     | E1Z3L7.1 PF00004.27 | 91.70 | 0.00 |
| TRINITY_A0DN76_PARTE/2168-2307   | A0DN76.1 PF07728.12 | 91.70 | 0.00 |
| TRINITY_A0A072V649_MEDTR/88-243  | A0A072V649.1 PF0178 | 91.70 | 0.00 |
| TRINITY_MYG_RAT/7-113            | Q9QZ76.3 PF00042.20 | 91.60 | 0.00 |
| TRINITY_Q7TQ70_RAT/50-192        | Q7TQ70.1 PF08702.8; | 91.60 | 0.00 |
| TRINITY_Q9MD82_MOUSE/134-419     | Q9MD82.1 PF00361.18 | 91.60 | 0.00 |
| TRINITY_FABP5_RAT/8-134          | P55053.3 PF00061.21 | 91.60 | 0.00 |
| TRINITY_A0BZX6_PARTE/224-448     | A0BZX6.1 PF00006.23 | 91.60 | 0.00 |
| TRINITY_D8TWM9_VOLCA/678-883     | D8TWM9.1 PF07724.12 | 91.60 | 0.00 |
| TRINITY_F6TKI4_ORNAN/46-120      | F6TKI4.1 PF01929.15 | 91.50 | 0.00 |
| TRINITY_B9HEA7_POPTR/2-78        | B9HEA7.1 PF14705.4; | 91.50 | 0.00 |

|                                  |                     |       |      |
|----------------------------------|---------------------|-------|------|
| TRINITY_A0A0A0KRY8_CUCSA/191-283 | A0A0A0KRY8.1 PF1420 | 91.50 | 0.00 |
| TRINITY_Q9XF12_SOLTU/7-170       | Q9XF12.1 PF00160.19 | 91.50 | 0.00 |
| TRINITY_A0A0G2JY66_RAT/22-544    | A0A0G2JY66.1 PF0013 | 91.50 | 0.00 |
| TRINITY_QCR8_RAT/4-79            | Q7TQ16.1 PF02939.14 | 91.50 | 0.00 |
| TRINITY_X0KQC1_FUSOX/12-121      | X0KQC1.1 PF00411.17 | 91.50 | 0.00 |
| TRINITY_D8THK6_VOLCA/55-335      | D8THK6.1 PF00682.17 | 91.50 | 0.00 |
| TRINITY_A8ICV4_CHLRE/37-96       | A8ICV4.1 PF02427.15 | 91.50 | 0.00 |
| TRINITY_A0DQI4_PARTE/1027-1259   | A0DQI4.1 PF12774.5; | 91.50 | 0.00 |
| TRINITY_A5ASF9_VITVI/1-131       | A5ASF9.1 PF00235.17 | 91.50 | 0.00 |
| TRINITY_I3LWM8 ICTTR/419-453     | I3LWM8.1 PF15880.3; | 91.40 | 0.00 |
| TRINITY_A0A061DHH4_THECC/3-37    | A0A061DHH4.1 PF0441 | 91.40 | 0.00 |
| TRINITY_H9H5V6_MONDO/5-120       | H9H5V6.1 PF01778.15 | 91.40 | 0.00 |
| TRINITY_H9H5V6_MONDO/5-120       | H9H5V6.1 PF01778.15 | 91.40 | 0.00 |
| TRINITY_W1PPQ1_ AMBTC/65-262     | W1PPQ1.1 PF00504.19 | 91.40 | 0.00 |
| TRINITY_B7FM94_MEDTR/85-154      | B7FM94.1 PF01287.18 | 91.40 | 0.00 |
| TRINITY_A0A0G2JSW3_RAT/8-112     | A0A0G2JSW3.1 PF0004 | 91.40 | 0.00 |
| TRINITY_NU4M_HUMAN/112-403       | P03905.1 PF00361.18 | 91.40 | 0.00 |
| TRINITY_LYZ1_MOUSE/19-146        | P17897.1 PF00062.18 | 91.40 | 0.00 |
| TRINITY_A0A087Y8Q1_POEFO/134-502 | A0A087Y8Q1.2 PF0007 | 91.40 | 0.00 |
| TRINITY_D8U1V2_VOLCA/50-218      | D8U1V2.1 PF00504.19 | 91.40 | 0.00 |
| TRINITY_I0Z7H9_9CHLO/17-285      | I0Z7H9.1 PF00069.23 | 91.40 | 0.00 |
| TRINITY_D8TKP3_VOLCA/332-655     | D8TKP3.1 PF00493.21 | 91.40 | 0.00 |
| TRINITY_A0A0A0LRJ5_CUCSA/304-396 | A0A0A0LRJ5.1 PF0866 | 91.40 | 0.00 |
| TRINITY_K4B0V2_SOLLC/532-861     | K4B0V2.1 PF00305.17 | 91.30 | 0.00 |
| TRINITY_M0SPM5_MUSAM/73-205      | M0SPM5.1 PF02531.14 | 91.30 | 0.00 |
| TRINITY_A0A0M0JFA6_9EUKA/1-104   | A0A0M0JFA6.1 PF0366 | 91.30 | 0.00 |
| TRINITY_G3H0L9_CRIGR/80-329      | G3H0L9.1 PF00112.21 | 91.30 | 0.00 |
| TRINITY_F1PP57_CANLF/11-79       | F1PP57.2 PF06522.9; | 91.30 | 0.00 |
| TRINITY_G5CAD0_HETGA/29-214      | G5CAD0.1 PF00850.17 | 91.20 | 0.00 |
| TRINITY_M1A4X3_SOLTU/45-274      | M1A4X3.1 PF00230.18 | 91.20 | 0.00 |
| TRINITY_F4PT70_DICFS/108-466     | F4PT70.1 PF00128.22 | 91.20 | 0.00 |
| TRINITY_M1CSI8_SOLTU/8-617       | M1CSI8.1 PF00012.18 | 91.20 | 0.00 |
| TRINITY_A0A0A0L7F8_CUCSA/7-334   | A0A0A0L7F8.1 PF0153 | 91.20 | 0.00 |
| TRINITY_O22578_VOLCA/97-266      | O22578.1 PF02776.16 | 91.20 | 0.00 |
| TRINITY_I0Z6L9_9CHLO/1788-2022   | I0Z6L9.1 PF12774.5; | 91.20 | 0.00 |
| TRINITY_D8TQE1_VOLCA/778-879     | D8TQE1.1 PF13676.4; | 91.20 | 0.00 |
| TRINITY_A8IAC7_CHLRE/1074-1288   | A8IAC7.1 PF00009.25 | 91.20 | 0.00 |
| TRINITY_G0QLT6_ICHMG/132-333     | G0QLT6.1 PF00112.21 | 91.20 | 0.00 |
| TRINITY_H2RKP1_TAKRU/1-80        | H2RKP1.1 PF01249.16 | 91.20 | 0.00 |
| TRINITY_A0A061FNG9_THECC/55-211  | A0A061FNG9.1 PF0050 | 91.10 | 0.00 |
| TRINITY_SAA2_MOUSE/22-122        | P05367.1 PF00277.16 | 91.10 | 0.00 |
| TRINITY_G1NZD3_MYOLU/16-125      | G1NZD3.1 PF01248.24 | 91.10 | 0.00 |
| TRINITY_G1NZD3_MYOLU/16-125      | G1NZD3.1 PF01248.24 | 91.10 | 0.00 |
| TRINITY_A8J8T7_CHLRE/374-658     | A8J8T7.1 PF00069.23 | 91.10 | 0.00 |
| TRINITY_A8IZI2_CHLRE/11-100      | A8IZI2.1 PF00447.15 | 91.10 | 0.00 |
| TRINITY_D8U2D8_VOLCA/26-126      | D8U2D8.1 PF02678.14 | 91.10 | 0.00 |
| TRINITY_A0A0J8BN64_BETVU/71-310  | A0A0J8BN64.1 PF0012 | 91.00 | 0.00 |
| TRINITY_COX3_TETNG/6-261         | Q4JQI1.1 PF00510.16 | 91.00 | 0.00 |
| TRINITY_A0A067NJE7_PLEOS/48-158  | A0A067NJE7.1 PF0105 | 91.00 | 0.00 |
| TRINITY_A0A0D9YNU9_9ORYZ/177-310 | A0A0D9YNU9.1 PF0000 | 91.00 | 0.00 |
| TRINITY_A0A077ZMR8_STYLE/232-365 | A0A077ZMR8.1 PF0000 | 91.00 | 0.00 |
| TRINITY_I0YZL1_9CHLO/41-196      | I0YZL1.1 PF00177.19 | 91.00 | 0.00 |
| TRINITY_A0A0E0PU53_ORYRU/199-332 | A0A0E0PU53.1 PF0000 | 91.00 | 0.00 |
| TRINITY_G0QVF4_ICHMG/209-342     | G0QVF4.1 PF00004.27 | 91.00 | 0.00 |
| TRINITY_F0ZNF3_DICPU/193-326     | F0ZNF3.1 PF00004.27 | 91.00 | 0.00 |
| TRINITY_G6D595_DANPL/10-142      | G6D595.1 PF00163.17 | 91.00 | 0.00 |
| TRINITY_I0YZT8_9CHLO/82-214      | I0YZT8.1 PF00004.27 | 91.00 | 0.00 |
| TRINITY_A0CUJ6_PARTE/172-305     | A0CUJ6.1 PF00004.27 | 91.00 | 0.00 |
| TRINITY_D8TK99_VOLCA/5-264       | D8TK99.1 PF00069.23 | 91.00 | 0.00 |
| TRINITY_H2M1Q0_ORYLA/264-492     | H2M1Q0.1 PF01823.17 | 91.00 | 0.00 |
| TRINITY_I3KPH0_ORENI/20-237      | I3KPH0.1 PF00147.16 | 90.90 | 0.00 |

|                                  |              |            |       |      |
|----------------------------------|--------------|------------|-------|------|
| TRINITY_SEPP1_RAT/23-248         | P25236.2     | PF04592.12 | 90.90 | 0.00 |
| TRINITY_A8J1Q8_CHLRE/9-74        | A8J1Q8.1     | PF01106.15 | 90.90 | 0.00 |
| TRINITY_Q4S0J2_TETNG/65-141      | Q4S0J2.1     | PF00076.20 | 90.90 | 0.00 |
| TRINITY_D8TSX4_VOLCA/66-247      | D8TSX4.1     | PF00574.21 | 90.90 | 0.00 |
| TRINITY_V4SU74_9ROSI/165-197     | V4SU74.1     | PF06298.9; | 90.90 | 0.00 |
| TRINITY_A8IWK2_CHLRE/38-139      | A8IWK2.1     | PF02943.13 | 90.90 | 0.00 |
| TRINITY_A8HYG8_CHLRE/42-152      | A8HYG8.1     | PF00694.17 | 90.90 | 0.00 |
| TRINITY_A0A067KAE2_JATCU/632-743 | A0A067KAE2.1 | PF0278     | 90.90 | 0.00 |
| TRINITY_A0A0A0LAK4_CUCSA/1-76    | A0A0A0LAK4.1 | PF0143     | 90.80 | 0.00 |
| TRINITY_Q23QN9_TETTS/1577-1811   | Q23QN9.3     | PF12774.5; | 90.80 | 0.00 |
| TRINITY_A0A067KRB0_JATCU/18-272  | A0A067KRB0.1 | PF0006     | 90.80 | 0.00 |
| TRINITY_F1NI02_CHICK/10-304      | F1NI02.1     | PF00206.18 | 90.80 | 0.00 |
| TRINITY_I3JB49_ORENI/739-828     | I3JB49.1     | PF00679.22 | 90.80 | 0.00 |
| TRINITY_B4MUC5_DROWI/1-185       | B4MUC5.1     | PF05018.11 | 90.80 | 0.00 |
| TRINITY_A0DN20_PARTE/59-254      | A0DN20.1     | PF00149.26 | 90.80 | 0.00 |
| TRINITY_A8JGT9_CHLRE/34-185      | A8JGT9.1     | PF00270.27 | 90.80 | 0.00 |
| TRINITY_H3C991_TETNG/1-108       | H3C991.1     | PF15060.4; | 90.70 | 0.00 |
| TRINITY_H9GT67_ANOCA/1-121       | H9GT67.1     | PF00183.16 | 90.70 | 0.00 |
| TRINITY_A0A059CJ54_EUCGR/634-745 | A0A059CJ54.1 | PF0278     | 90.70 | 0.00 |
| TRINITY_K4BY59_SOLLC/61-461      | K4BY59.1     | PF00155.19 | 90.70 | 0.00 |
| TRINITY_A8IV40_CHLRE/38-112      | A8IV40.1     | PF00111.25 | 90.70 | 0.00 |
| TRINITY_I0Z5P9_9CHLO/186-228     | I0Z5P9.1     | PF13639.4; | 90.70 | 0.00 |
| TRINITY_D8TRQ6_VOLCA/46-142      | D8TRQ6.1     | PF00004.27 | 90.70 | 0.00 |
| TRINITY_D8UDZ4_VOLCA/41-219      | D8UDZ4.1     | PF00406.20 | 90.70 | 0.00 |
| TRINITY_W5JTF2_ANODA/105-287     | W5JTF2.1     | PF00022.17 | 90.70 | 0.00 |
| TRINITY_A0A059CRL9_EUCGR/25-483  | A0A059CRL9.1 | PF0017     | 90.60 | 0.00 |
| TRINITY_A0A0D9Y7Q4_9ORYZ/41-103  | A0A0D9Y7Q4.1 | PF1283     | 90.60 | 0.00 |
| TRINITY_L9KQV0_TUPCH/347-411     | L9KQV0.1     | PF00327.18 | 90.60 | 0.00 |
| TRINITY_L9KQV0_TUPCH/347-411     | L9KQV0.1     | PF00327.18 | 90.60 | 0.00 |
| TRINITY_L5JWI9_PTEAL/176-305     | L5JWI9.1     | PF00271.29 | 90.60 | 0.00 |
| TRINITY_A0A0K9PFT4_ZOSMR/197-265 | A0A0K9PFT4.1 | PF0110     | 90.60 | 0.00 |
| TRINITY_K5WBW0_PHACS/168-441     | K5WBW0.1     | PF01189.15 | 90.60 | 0.00 |
| TRINITY_M1D0L4_SOLTU/3-214       | M1D0L4.1     | PF00091.23 | 90.60 | 0.00 |
| TRINITY_D8UE88_VOLCA/81-358      | D8UE88.1     | PF13292.4; | 90.60 | 0.00 |
| TRINITY_D8TV61_VOLCA/7-133       | D8TV61.1     | PF07977.11 | 90.60 | 0.00 |
| TRINITY_C1E7K7_MICSR/4-377       | C1E7K7.1     | PF00022.17 | 90.60 | 0.00 |
| TRINITY_D8TXK9_VOLCA/940-1129    | D8TXK9.1     | PF07059.10 | 90.60 | 0.00 |
| TRINITY_H2T4S6_TAKRU/22-148      | H2T4S6.1     | PF14651.4; | 90.50 | 0.00 |
| TRINITY_A0A067KHP2_JATCU/204-278 | A0A067KHP2.1 | PF1324     | 90.50 | 0.00 |
| TRINITY_E2RSI5_CANLF/58-205      | E2RSI5.2     | PF00675.18 | 90.50 | 0.00 |
| TRINITY_A0A078AUW2_STYLE/5-93    | A0A078AUW2.1 | PF0012     | 90.50 | 0.00 |
| TRINITY_A8JG03_CHLRE/50-478      | A8JG03.1     | PF00330.18 | 90.50 | 0.00 |
| TRINITY_A0A067G8J6_CITSI/1-130   | A0A067G8J6.1 | PF0083     | 90.40 | 0.00 |
| TRINITY_B3RPL6_TRIAD/15-135      | B3RPL6.1     | PF00238.17 | 90.40 | 0.00 |
| TRINITY_A0BGV0_PARTE/13-330      | A0BGV0.1     | PF00225.21 | 90.40 | 0.00 |
| TRINITY_G7PXQ3_MACFA/787-996     | G7PXQ3.1     | PF00689.19 | 90.40 | 0.00 |
| TRINITY_D8TJ87_VOLCA/1503-1555   | D8TJ87.1     | PF00847.18 | 90.40 | 0.00 |
| TRINITY_Q9S807_CHLRE/189-240     | Q9S807.1     | PF00249.29 | 90.40 | 0.00 |
| TRINITY_A8IDM5_CHLRE/58-130      | A8IDM5.1     | PF04564.13 | 90.40 | 0.00 |
| TRINITY_D8TTF2_VOLCA/544-720     | D8TTF2.1     | PF13307.4; | 90.40 | 0.00 |
| TRINITY_A8IVW3_CHLRE/152-558     | A8IVW3.1     | PF00962.20 | 90.40 | 0.00 |
| TRINITY_V4KUH4_EUTSA/48-219      | V4KUH4.1     | PF02507.13 | 90.30 | 0.00 |
| TRINITY_A0A0A0KZG4_CUCSA/303-466 | A0A0A0KZG4.1 | PF0357     | 90.30 | 0.00 |
| TRINITY_A0A0G2KAQ5_RAT/1-264     | A0A0G2KAQ5.1 | PF0555     | 90.30 | 0.00 |
| TRINITY_B4MUC5_DROWI/1-185       | B4MUC5.1     | PF05018.11 | 90.30 | 0.00 |
| TRINITY_E1Z8J7_CHLVA/1-96        | E1Z8J7.1     | PF00125.22 | 90.30 | 0.00 |
| TRINITY_D8TTR5_VOLCA/8-69        | D8TTR5.1     | PF02320.14 | 90.30 | 0.00 |
| TRINITY_I0Z1F8_9CHLO/53-248      | I0Z1F8.1     | PF00149.26 | 90.30 | 0.00 |
| TRINITY_A8IRQ5_CHLRE/1584-1704   | A8IRQ5.1     | PF00271.29 | 90.30 | 0.00 |
| TRINITY_D8TPK3_VOLCA/16-177      | D8TPK3.1     | PF01734.20 | 90.30 | 0.00 |
| TRINITY_E1Z342_CHLVA/8-214       | E1Z342.1     | PF01680.15 | 90.30 | 0.00 |



|                                    |              |            |       |      |
|------------------------------------|--------------|------------|-------|------|
| TRINITY_I7MF81_TETTS/221-354       | I7MF81.1     | PF00004.27 | 90.30 | 0.00 |
| TRINITY_A8J646_CHLRE/72-215        | A8J646.1     | PF03255.12 | 90.30 | 0.00 |
| TRINITY_I0YQM7_9CHLO/2-69          | I0YQM7.1     | PF01781.16 | 90.30 | 0.00 |
| TRINITY_D8TZA1_VOLCA/137-270       | D8TZA1.1     | PF02915.15 | 90.30 | 0.00 |
| TRINITY_G3PRZ3_GASAC/46-86         | G3PRZ3.1     | PF00594.18 | 90.20 | 0.00 |
| TRINITY_A0A0A0LE99_CUCSA/68-166    | A0A0A0LE99.1 | PF0012     | 90.20 | 0.00 |
| TRINITY_M5VP59_PRUPE/88-148        | M5VP59.1     | PF02427.15 | 90.20 | 0.00 |
| TRINITY_F1RWV4_PIG/22-141          | F1RWV4.2     | PF10183.7; | 90.20 | 0.00 |
| TRINITY_I7ML74_TETTS/4924-5082     | I7ML74.2     | PF00179.24 | 90.20 | 0.00 |
| TRINITY_G1TNA5_RABIT/24-484        | G1TNA5.2     | PF00171.20 | 90.20 | 0.00 |
| TRINITY_F1P1D5_CHICK/838-1919      | F1P1D5.2     | PF01576.17 | 90.20 | 0.00 |
| TRINITY_G3PA1_ARATH/62-165         | P25856.3     | PF00044.22 | 90.20 | 0.00 |
| TRINITY_M3YFZ4_MUSPF/399-551       | M3YFZ4.1     | PF02910.18 | 90.20 | 0.00 |
| TRINITY_Q22NW7_TETTS/437-569       | Q22NW7.1     | PF00004.27 | 90.20 | 0.00 |
| TRINITY_D8TS50_VOLCA/105-300       | D8TS50.1     | PF00448.20 | 90.20 | 0.00 |
| TRINITY_F0ZT81_DICPU/1933-2183     | F0ZT81.1     | PF00454.25 | 90.20 | 0.00 |
| TRINITY_A8JD99_CHLRE/45-85         | A8JD99.1     | PF00400.30 | 90.20 | 0.00 |
| TRINITY_F0VGJ4_NEOCL/156-288       | F0VGJ4.1     | PF00004.27 | 90.20 | 0.00 |
| TRINITY_A4RZA4_OSTLU/27-279        | A4RZA4.1     | PF00069.23 | 90.20 | 0.00 |
| TRINITY_D8TXK9_VOLCA/940-1129      | D8TXK9.1     | PF07059.10 | 90.20 | 0.00 |
| TRINITY_A0A0A0KVC0_CUCSA/90-262    | A0A0A0KVC0.1 | PF0178     | 90.10 | 0.00 |
| TRINITY_Q7JCY6_MOUSE/112-403       | Q7JCY6.1     | PF00361.18 | 90.10 | 0.00 |
| TRINITY_A8JEW4_CHLRE/29-213        | A8JEW4.1     | PF00227.24 | 90.10 | 0.00 |
| TRINITY_A8J5R1_CHLRE/19-89         | A8J5R1.1     | PF12265.6; | 90.10 | 0.00 |
| TRINITY_A0A0J7KRI5_LASNI/1798-2027 | A0A0J7KRI5.1 | PF1213     | 90.10 | 0.00 |
| TRINITY_D8UDW8_VOLCA/449-599       | D8UDW8.1     | PF00270.27 | 90.10 | 0.00 |
| TRINITY_G3N9H8_GASAC/5-85          | G3N9H8.1     | PF00887.17 | 90.10 | 0.00 |
| TRINITY_A8IHF4_CHLRE/27-285        | A8IHF4.1     | PF00069.23 | 90.10 | 0.00 |
| TRINITY_B9HFI4_POPTR/52-396        | B9HFI4.1     | PF00274.17 | 90.00 | 0.00 |
| TRINITY_A0BQZ8_PARTE/123-182       | A0BQZ8.1     | PF00137.19 | 90.00 | 0.00 |
| TRINITY_A0A078CCC6_BRANA/617-728   | A0A078CCC6.1 | PF0278     | 90.00 | 0.00 |
| TRINITY_B3RPL6_TRIAD/15-135        | B3RPL6.1     | PF00238.17 | 90.00 | 0.00 |
| TRINITY_B3RPL6_TRIAD/15-135        | B3RPL6.1     | PF00238.17 | 90.00 | 0.00 |
| TRINITY_B3RPL6_TRIAD/15-135        | B3RPL6.1     | PF00238.17 | 90.00 | 0.00 |
| TRINITY_A0A067R0U6_ZOONE/121-338   | A0A067R0U6.1 | PF0011     | 90.00 | 0.00 |
| TRINITY_A0A0D2RCT0_GOSRA/461-583   | A0A0D2RCT0.1 | PF0001     | 90.00 | 0.00 |
| TRINITY_A0A087ST59_AUXPR/1-177     | A0A087ST59.1 | PF0372     | 90.00 | 0.00 |
| TRINITY_D8U7J1_VOLCA/93-463        | D8U7J1.1     | PF00285.19 | 90.00 | 0.00 |
| TRINITY_I0Z6X0_9CHLO/70-149        | I0Z6X0.1     | PF00312.20 | 90.00 | 0.00 |
| TRINITY_D8TUF6_VOLCA/1-78          | D8TUF6.1     | PF13086.4; | 90.00 | 0.00 |
| TRINITY_L8GUL2_ACACA/162-264       | L8GUL2.1     | PF13271.4; | 90.00 | 0.00 |
| TRINITY_Q8WBA9_CRIGR/95-214        | Q8WBA9.1     | PF00116.18 | 90.00 | 0.00 |
| TRINITY_D8TXK9_VOLCA/940-1129      | D8TXK9.1     | PF07059.10 | 90.00 | 0.00 |
| TRINITY_C1MQU0_MICPC/100-429       | C1MQU0.1     | PF00291.23 | 90.00 | 0.00 |
| TRINITY_D8TZ51_VOLCA/86-293        | D8TZ51.1     | PF04055.19 | 90.00 | 0.00 |
| TRINITY_G3NRQ4_GASAC/18-307        | G3NRQ4.1     | PF02574.14 | 90.00 | 0.00 |
| TRINITY_D8TPH8_VOLCA/443-483       | D8TPH8.1     | PF00400.30 | 90.00 | 0.00 |
| TRINITY_A8IK98_CHLRE/902-1013      | A8IK98.1     | PF09111.8; | 90.00 | 0.00 |
| TRINITY_D8U455_VOLCA/119-328       | D8U455.1     | PF01039.20 | 90.00 | 0.00 |
| TRINITY_H2UZK3_TAKRU/43-171        | H2UZK3.1     | PF00386.19 | 89.90 | 0.00 |
| TRINITY_D8TR40_VOLCA/7-265         | D8TR40.1     | PF00069.23 | 89.90 | 0.00 |
| TRINITY_I0YV56_9CHLO/97-234        | I0YV56.1     | PF03947.16 | 89.90 | 0.00 |
| TRINITY_S9Y661_9CETA/4-112         | S9Y661.1     | PF03297.13 | 89.90 | 0.00 |
| TRINITY_S9Y661_9CETA/4-112         | S9Y661.1     | PF03297.13 | 89.90 | 0.00 |
| TRINITY_D8UI03_VOLCA/42-637        | D8UI03.1     | PF00012.18 | 89.90 | 0.00 |
| TRINITY_D8UE17_VOLCA/9-77          | D8UE17.1     | PF00076.20 | 89.90 | 0.00 |
| TRINITY_A0A087XAX0_POEFO/563-785   | A0A087XAX0.2 | PF0008     | 89.80 | 0.00 |
| TRINITY_Q7H115_RAT/6-261           | Q7H115.1     | PF00510.16 | 89.80 | 0.00 |
| TRINITY_D8TN93_VOLCA/54-268        | D8TN93.1     | PF01656.21 | 89.80 | 0.00 |
| TRINITY_D2VQU5_NAEGR/47-242        | D2VQU5.1     | PF00149.26 | 89.80 | 0.00 |
| TRINITY_D8U7P9_VOLCA/335-461       | D8U7P9.1     | PF00004.27 | 89.80 | 0.00 |

|                                  |              |            |       |      |
|----------------------------------|--------------|------------|-------|------|
| TRINITY_A8IMN5_CHLRE/273-450     | A8IMN5.1     | PF00117.26 | 89.80 | 0.00 |
| TRINITY_Q65Z16_CHLRE/138-186     | Q65Z16.1     | PF00010.24 | 89.80 | 0.00 |
| TRINITY_A8IU73_CHLRE/235-452     | A8IU73.1     | PF01786.15 | 89.80 | 0.00 |
| TRINITY_F0ZFE1_DICPU/808-922     | F0ZFE1.1     | PF00271.29 | 89.80 | 0.00 |
| TRINITY_M1D577_SOLTU/10-557      | M1D577.1     | PF01268.17 | 89.70 | 0.00 |
| TRINITY_D8U2T6_VOLCA/81-168      | D8U2T6.1     | PF12159.6; | 89.70 | 0.00 |
| TRINITY_A8IDD8_CHLRE/6-73        | A8IDD8.1     | PF01111.17 | 89.70 | 0.00 |
| TRINITY_D8TQ61_VOLCA/95-253      | D8TQ61.1     | PF00730.23 | 89.70 | 0.00 |
| TRINITY_B4MUC5_DROWI/1-185       | B4MUC5.1     | PF05018.11 | 89.70 | 0.00 |
| TRINITY_A9XBD9_MELGA/11-312      | A9XBD9.1     | PF00146.19 | 89.70 | 0.00 |
| TRINITY_A0A078ATG3_STYLE/388-562 | A0A078ATG3.1 | PF0151     | 89.70 | 0.00 |
| TRINITY_D8UIN9_VOLCA/2094-2451   | D8UIN9.1     | PF00224.19 | 89.70 | 0.00 |
| TRINITY_A0A0C4BF04_WHEAT/1-57    | A0A0C4BF04.1 | PF0042     | 89.70 | 0.00 |
| TRINITY_D8U2B6_VOLCA/139-206     | D8U2B6.1     | PF00013.27 | 89.70 | 0.00 |
| TRINITY_A8J236_CHLRE/31-178      | A8J236.1     | PF00994.22 | 89.70 | 0.00 |
| TRINITY_D8U261_VOLCA/199-237     | D8U261.1     | PF00400.30 | 89.70 | 0.00 |
| TRINITY_D8TXE1_VOLCA/535-669     | D8TXE1.1     | PF00004.27 | 89.70 | 0.00 |
| TRINITY_G0QLK7_ICHMG/233-271     | G0QLK7.1     | PF00400.30 | 89.70 | 0.00 |
| TRINITY_A8JEQ4_CHLRE/455-493     | A8JEQ4.1     | PF00400.30 | 89.70 | 0.00 |
| TRINITY_A8JCU1_CHLRE/33-71       | A8JCU1.1     | PF00400.30 | 89.70 | 0.00 |
| TRINITY_D8U9G8_VOLCA/63-351      | D8U9G8.1     | PF00069.23 | 89.70 | 0.00 |
| TRINITY_M0YRV8_HORVD/7-107       | M0YRV8.1     | PF00044.22 | 89.60 | 0.00 |
| TRINITY_A0A0A0KVC0_CUCSA/90-262  | A0A0A0KVC0.1 | PF0178     | 89.60 | 0.00 |
| TRINITY_G3RK79_GORGO/19-133      | G3RK79.1     | PF00318.18 | 89.60 | 0.00 |
| TRINITY_G3RK79_GORGO/19-133      | G3RK79.1     | PF00318.18 | 89.60 | 0.00 |
| TRINITY_F6HBE6_VITVI/138-329     | F6HBE6.1     | PF00687.19 | 89.60 | 0.00 |
| TRINITY_C1FIS7_MICSR/1373-1603   | C1FIS7.1     | PF12774.5; | 89.60 | 0.00 |
| TRINITY_D8TR37_VOLCA/4-286       | D8TR37.1     | PF00069.23 | 89.60 | 0.00 |
| TRINITY_K4D1X7_SOLLC/2-115       | K4D1X7.1     | PF01187.16 | 89.60 | 0.00 |
| TRINITY_F6U187_HORSE/186-405     | F6U187.1     | PF00006.23 | 89.60 | 0.00 |
| TRINITY_A8JDN6_CHLRE/158-224     | A8JDN6.1     | PF00076.20 | 89.60 | 0.00 |
| TRINITY_D8U8H5_VOLCA/359-460     | D8U8H5.1     | PF13646.4; | 89.60 | 0.00 |
| TRINITY_D8UDK7_VOLCA/14-415      | D8UDK7.1     | PF06068.11 | 89.60 | 0.00 |
| TRINITY_A0A0A0LNS8_CUCSA/227-297 | A0A0A0LNS8.1 | PF0007     | 89.50 | 0.00 |
| TRINITY_G0QUJ4_ICHMG/9-139       | G0QUJ4.1     | PF00004.27 | 89.50 | 0.00 |
| TRINITY_D8UD37_VOLCA/4-41        | D8UD37.1     | PF00400.30 | 89.50 | 0.00 |
| TRINITY_I0Z8B0_9CHLO/1-146       | I0Z8B0.1     | PF01125.15 | 89.50 | 0.00 |
| TRINITY_CONS_ARATH/306-349       | Q39057.1     | PF06203.12 | 89.50 | 0.00 |
| TRINITY_A8JFB1_CHLRE/43-255      | A8JFB1.1     | PF01379.18 | 89.50 | 0.00 |
| TRINITY_PSAA_OSTTA/35-745        | Q0P3K1.1     | PF00223.17 | 89.50 | 0    |
| TRINITY_M5WHJ0_PRUPE/43-529      | M5WHJ0.1     | PF00939.17 | 89.40 | 0.00 |
| TRINITY_H0YK49_HUMAN/3-94        | H0YK49.1     | PF01012.19 | 89.40 | 0.00 |
| TRINITY_U6M5D0_EIMMA/34-255      | U6M5D0.1     | PF01353.20 | 89.40 | 0.00 |
| TRINITY_D8UH40_VOLCA/4-88        | D8UH40.1     | PF01780.17 | 89.40 | 0.00 |
| TRINITY_A0E1Y7_PARTE/546-611     | A0E1Y7.1     | PF00659.16 | 89.40 | 0.00 |
| TRINITY_D8UF54_VOLCA/157-365     | D8UF54.1     | PF02786.15 | 89.40 | 0.00 |
| TRINITY_D8TJW5_VOLCA/51-238      | D8TJW5.1     | PF00574.21 | 89.40 | 0.00 |
| TRINITY_A8JCS9_CHLRE/4-69        | A8JCS9.1     | PF03931.13 | 89.40 | 0.00 |
| TRINITY_A8IYU6_CHLRE/15-276      | A8IYU6.1     | PF04078.11 | 89.40 | 0.00 |
| TRINITY_D8TP73_VOLCA/50-337      | D8TP73.1     | PF00069.23 | 89.40 | 0.00 |
| TRINITY_A0A0A0L3C6_CUCSA/421-486 | A0A0A0L3C6.1 | PF0662     | 89.40 | 0.00 |
| TRINITY_C0HIK4_MAIZE/38-197      | C0HIK4.1     | PF00484.17 | 89.40 | 0.00 |
| TRINITY_G0QJ15_ICHMG/1-104       | G0QJ15.1     | PF03660.12 | 89.30 | 0.00 |
| TRINITY_A8HMC0_CHLRE/261-336     | A8HMC0.1     | PF00262.16 | 89.30 | 0.00 |
| TRINITY_L8GWF5_ACACA/44-239      | L8GWF5.1     | PF00149.26 | 89.30 | 0.00 |
| TRINITY_B3RJ13_TRIAD/149-287     | B3RJ13.1     | PF00004.27 | 89.30 | 0.00 |
| TRINITY_A8J8P5_CHLRE/4-283       | A8J8P5.1     | PF00069.23 | 89.30 | 0.00 |
| TRINITY_A8J463_CHLRE/170-432     | A8J463.1     | PF01761.18 | 89.30 | 0.00 |
| TRINITY_D8U050_VOLCA/128-492     | D8U050.1     | PF07690.14 | 89.30 | 0.00 |
| TRINITY_D8U4D0_VOLCA/72-192      | D8U4D0.1     | PF00004.27 | 89.30 | 0.00 |
| TRINITY_G3PLD2_GASAC/44-236      | G3PLD2.1     | PF00106.23 | 89.20 | 0.00 |

|                                  |              |            |       |      |
|----------------------------------|--------------|------------|-------|------|
| TRINITY_I0Z1F8_9CHLO/53-248      | I0Z1F8.1     | PF00149.26 | 89.20 | 0.00 |
| TRINITY_E1ZEE3_CHLVA/49-214      | E1ZEE3.1     | PF04055.19 | 89.20 | 0.00 |
| TRINITY_A8J834_CHLRE/11-75       | A8J834.1     | PF01423.20 | 89.20 | 0.00 |
| TRINITY_D8U0F1_VOLCA/204-242     | D8U0F1.1     | PF00400.30 | 89.20 | 0.00 |
| TRINITY_G0QK34_ICHMG/408-472     | G0QK34.1     | PF00808.21 | 89.20 | 0.00 |
| TRINITY_Q5BKM2_XENTR/24-139      | Q5BKM2.1     | PF00307.29 | 89.20 | 0.00 |
| TRINITY_D8TK99_VOLCA/5-264       | D8TK99.1     | PF00069.23 | 89.20 | 0.00 |
| TRINITY_A8J063_CHLRE/819-1225    | A8J063.1     | PF08393.11 | 89.20 | 0.00 |
| TRINITY_I0ZAR7_9CHLO/6-129       | I0ZAR7.1     | PF01775.15 | 89.20 | 0.00 |
| TRINITY_A8J1M5_CHLRE/2842-3109   | A8J1M5.1     | PF12780.5; | 89.20 | 0.00 |
| TRINITY_A9XBE2_MELGA/94-213      | A9XBE2.1     | PF00116.18 | 89.20 | 0.00 |
| TRINITY_G1TBU9_RABIT/273-395     | G1TBU9.1     | PF02803.16 | 89.20 | 0.00 |
| TRINITY_M7BKA0_CHEMY/333-438     | M7BKA0.1     | PF00085.18 | 89.10 | 0.00 |
| TRINITY_A0A0A0KDR1_CUCSA/2-226   | A0A0A0KDR1.1 | PF1248     | 89.10 | 0.00 |
| TRINITY_C3UVK6_PAPAN/95-214      | C3UVK6.1     | PF00116.18 | 89.10 | 0.00 |
| TRINITY_K4B3H9_SOLLC/8-78        | K4B3H9.1     | PF00076.20 | 89.10 | 0.00 |
| TRINITY_D3AWF9_POLPA/277-448     | D3AWF9.1     | PF00270.27 | 89.10 | 0.00 |
| TRINITY_H0XX22_OTOGA/11-231      | H0XX22.1     | PF00244.18 | 89.10 | 0.00 |
| TRINITY_D8UC16_VOLCA/69-480      | D8UC16.1     | PF01603.18 | 89.10 | 0.00 |
| TRINITY_D8U1W9_VOLCA/67-112      | D8U1W9.1     | PF00249.29 | 89.10 | 0.00 |
| TRINITY_A8JJA7_CHLRE/56-157      | A8JJA7.1     | PF05670.11 | 89.10 | 0.00 |
| TRINITY_D8UHL8_VOLCA/145-256     | D8UHL8.1     | PF00355.24 | 89.10 | 0.00 |
| TRINITY_E1Z9H5_CHLVA/152-279     | E1Z9H5.1     | PF07728.12 | 89.10 | 0.00 |
| TRINITY_D8UFS7_VOLCA/20-140      | D8UFS7.1     | PF00238.17 | 89.10 | 0.00 |
| TRINITY_E1Z7U1_CHLVA/98-225      | E1Z7U1.1     | PF07728.12 | 89.10 | 0.00 |
| TRINITY_A8HUE0_CHLRE/4-204       | A8HUE0.1     | PF01912.16 | 89.10 | 0.00 |
| TRINITY_CTL2B_MOUSE/16-75        | P12400.2     | PF08246.10 | 89.10 | 0.00 |
| TRINITY_A8HMQ7_CHLRE/38-278      | A8HMQ7.1     | PF00398.18 | 89.00 | 0.00 |
| TRINITY_D8TZX7_VOLCA/742-874     | D8TZX7.1     | PF04153.16 | 89.00 | 0.00 |
| TRINITY_V4MN77_EUTSA/334-504     | V4MN77.1     | PF00004.27 | 89.00 | 0.00 |
| TRINITY_F6TTJ6_XENTR/319-345     | F6TTJ6.1     | PF13912.4; | 88.90 | 0.00 |
| TRINITY_D8UHE6_VOLCA/1187-1213   | D8UHE6.1     | PF00642.22 | 88.90 | 0.00 |
| TRINITY_A8HME4_CHLRE/171-242     | A8HME4.1     | PF03719.13 | 88.90 | 0.00 |
| TRINITY_I7MHZ8_TETTS/193-219     | I7MHZ8.2     | PF00641.16 | 88.90 | 0.00 |
| TRINITY_G0R1A4_ICHMG/23-114      | G0R1A4.1     | PF15511.4; | 88.90 | 0.00 |
| TRINITY_A8HY93_CHLRE/120-191     | A8HY93.1     | PF00076.20 | 88.90 | 0.00 |
| TRINITY_A8HS14_CHLRE/72-351      | A8HS14.1     | PF00483.21 | 88.90 | 0.00 |
| TRINITY_D8UBQ8_VOLCA/81-359      | D8UBQ8.1     | PF00483.21 | 88.90 | 0.00 |
| TRINITY_RS3A_CHLRE/15-221        | A8HS48.1     | PF01015.16 | 88.90 | 0.00 |
| TRINITY_A8HQ63_CHLRE/1148-1210   | A8HQ63.1     | PF13812.4; | 88.90 | 0.00 |
| TRINITY_I7MA05_TETTS/930-1324    | I7MA05.1     | PF02463.17 | 88.90 | 0.00 |
| TRINITY_D8U3G1_VOLCA/9-261       | D8U3G1.1     | PF00069.23 | 88.90 | 0.00 |
| TRINITY_D8TZJ7_VOLCA/599-781     | D8TZJ7.1     | PF07724.12 | 88.90 | 0.00 |
| TRINITY_A0A0A0L4Q3_CUCSA/352-462 | A0A0A0L4Q3.1 | PF0285     | 88.90 | 0.00 |
| TRINITY_D8U1V2_VOLCA/50-218      | D8U1V2.1     | PF00504.19 | 88.90 | 0.00 |
| TRINITY_A0A0D2SDW8_GOSRA/41-138  | A0A0D2SDW8.1 | PF0472     | 88.80 | 0.00 |
| TRINITY_G3PXC5_GASAC/167-408     | G3PXC5.1     | PF00147.16 | 88.80 | 0.00 |
| TRINITY_G1QC71_MYOLU/1-157       | G1QC71.1     | PF01410.16 | 88.80 | 0.00 |
| TRINITY_A8II51_CHLRE/79-194      | A8II51.1     | PF13640.4; | 88.80 | 0.00 |
| TRINITY_D8TPJ2_VOLCA/104-278     | D8TPJ2.1     | PF01512.15 | 88.80 | 0.00 |
| TRINITY_V7ADT7_PHAVU/141-332     | V7ADT7.1     | PF00687.19 | 88.70 | 0.00 |
| TRINITY_D8UBW6_VOLCA/43-243      | D8UBW6.1     | PF01078.19 | 88.70 | 0.00 |
| TRINITY_D8TT41_VOLCA/30-634      | D8TT41.1     | PF00012.18 | 88.70 | 0.00 |
| TRINITY_G1RXI8_NOMLE/5-239       | G1RXI8.1     | PF03957.11 | 88.70 | 0.00 |
| TRINITY_D8TPS0_VOLCA/28-217      | D8TPS0.1     | PF00227.24 | 88.70 | 0.00 |
| TRINITY_I0YNP8_9CHLO/54-249      | I0YNP8.1     | PF00149.26 | 88.70 | 0.00 |
| TRINITY_D8TV86_VOLCA/43-433      | D8TV86.1     | PF00764.17 | 88.70 | 0.00 |
| TRINITY_D8TLV0_VOLCA/71-352      | D8TLV0.1     | PF00696.26 | 88.70 | 0.00 |
| TRINITY_D8TVM9_VOLCA/542-619     | D8TVM9.1     | PF00041.19 | 88.70 | 0.00 |
| TRINITY_D8U9H4_VOLCA/17-113      | D8U9H4.1     | PF03645.11 | 88.70 | 0.00 |
| TRINITY_L9JAS9_TUPCH/5-153       | L9JAS9.1     | PF05255.9; | 88.70 | 0.00 |

|                                  |                     |       |      |
|----------------------------------|---------------------|-------|------|
| TRINITY_J9IKG6_9SPIT/91-160      | J9IKG6.1 PF13499.4; | 88.60 | 0.00 |
| TRINITY_K4C8Q1_SOLLC/79-345      | K4C8Q1.1 PF00009.25 | 88.60 | 0.00 |
| TRINITY_A0A0D3B7Z7_BRAOL/1-206   | A0A0D3B7Z7.1 PF0023 | 88.60 | 0.00 |
| TRINITY_HOP_PIG/6-60             | Q8MJD6.1 PF00046.27 | 88.60 | 0.00 |
| TRINITY_I3JNN4_ORENI/944-1066    | I3JNN4.1 PF07731.12 | 88.60 | 0.00 |
| TRINITY_D8U5G1_VOLCA/71-166      | D8U5G1.1 PF01588.18 | 88.60 | 0.00 |
| TRINITY_F4PJV4_DICFS/105-265     | F4PJV4.1 PF00071.20 | 88.60 | 0.00 |
| TRINITY_K9ZI44_ANACC/27-325      | K9ZI44.1 PF00124.17 | 88.60 | 0.00 |
| TRINITY_A0A0A0LZ00_CUCSA/480-628 | A0A0A0LZ00.1 PF0018 | 88.60 | 0.00 |
| TRINITY_D8U4T8_VOLCA/39-168      | D8U4T8.1 PF08240.10 | 88.60 | 0.00 |
| TRINITY_A8J3G2_CHLRE/137-307     | A8J3G2.1 PF10520.7; | 88.60 | 0.00 |
| TRINITY_D8TZH6_VOLCA/22-283      | D8TZH6.1 PF00233.17 | 88.60 | 0.00 |
| TRINITY_G0SUD9_RHOG2/12-336      | G0SUD9.1 PF00225.21 | 88.60 | 0.00 |
| TRINITY_E1Zaq7_CHLVA/229-423     | E1Zaq7.1 PF01747.15 | 88.60 | 0.00 |
| TRINITY_A8II54_CHLRE/359-510     | A8II54.1 PF00005.25 | 88.60 | 0.00 |
| TRINITY_A8J6C7_CHLRE/445-655     | A8J6C7.1 PF01434.16 | 88.60 | 0.00 |
| TRINITY_A8JEP8_CHLRE/290-333     | A8JEP8.1 PF13639.4; | 88.60 | 0.00 |
| TRINITY_M0U469_MUSAM/40-141      | M0U469.1 PF02943.13 | 88.60 | 0.00 |
| TRINITY_A0A0A0K738_CUCSA/57-403  | A0A0A0K738.1 PF0027 | 88.50 | 0.00 |
| TRINITY_A0A067K4A7_JATCU/4-107   | A0A067K4A7.1 PF0004 | 88.50 | 0.00 |
| TRINITY_D8U3K8_VOLCA/43-175      | D8U3K8.1 PF02531.14 | 88.50 | 0.00 |
| TRINITY_A8IGK7_CHLRE/465-500     | A8IGK7.1 PF00320.25 | 88.50 | 0.00 |
| TRINITY_J9JB18_9SPIT/620-757     | J9JB18.1 PF00271.29 | 88.50 | 0.00 |
| TRINITY_L0AWE3_THEEQ/51-246      | L0AWE3.1 PF00149.26 | 88.50 | 0.00 |
| TRINITY_A8HMH7_CHLRE/403-577     | A8HMH7.1 PF00488.19 | 88.50 | 0.00 |
| TRINITY_Q9FE86_CHLRE/46-178      | Q9FE86.1 PF00578.19 | 88.50 | 0.00 |
| TRINITY_A8HP84_CHLRE/195-351     | A8HP84.1 PF02800.18 | 88.50 | 0.00 |
| TRINITY_D8TSK6_VOLCA/99-334      | D8TSK6.1 PF04884.12 | 88.50 | 0.00 |
| TRINITY_I7ML74_TETTS/4924-5082   | I7ML74.2 PF00179.24 | 88.50 | 0.00 |
| TRINITY_A0A0P7UM42_9TELE/16-192  | A0A0P7UM42.1 PF0014 | 88.50 | 0.00 |
| TRINITY_D8TMB5_VOLCA/111-375     | D8TMB5.1 PF00069.23 | 88.50 | 0.00 |
| TRINITY_A8JGB0_CHLRE/102-444     | A8JGB0.1 PF02374.13 | 88.50 | 0.00 |
| TRINITY_D8U0B6_VOLCA/1-312       | D8U0B6.1 PF01916.15 | 88.50 | 0.00 |
| TRINITY_D8TGX0_VOLCA/2112-2380   | D8TGX0.1 PF12780.5; | 88.50 | 0.00 |
| TRINITY_A0A059LQJ1_9CHLO/20-72   | A0A059LQJ1.1 PF0084 | 88.50 | 0.00 |
| TRINITY_D8UHW6_VOLCA/966-1338    | D8UHW6.1 PF01645.15 | 88.50 | 0.00 |
| TRINITY_A0A078EX89_BRANA/18-356  | A0A078EX89.1 PF0038 | 88.40 | 0.00 |
| TRINITY_ESTD_HUMAN/23-275        | P10768.2 PF00756.18 | 88.40 | 0.00 |
| TRINITY_COX1_TETNG/14-460        | Q4JQI5.1 PF00115.18 | 88.40 | 0.00 |
| TRINITY_A0A078AUP9_STYLE/47-242  | A0A078AUP9.1 PF0014 | 88.40 | 0.00 |
| TRINITY_D8UA83_VOLCA/10-199      | D8UA83.1 PF04511.13 | 88.40 | 0.00 |
| TRINITY_A8I8Z4_CHLRE/90-280      | A8I8Z4.1 PF00687.19 | 88.40 | 0.00 |
| TRINITY_D8UD94_VOLCA/31-142      | D8UD94.1 PF01398.19 | 88.40 | 0.00 |
| TRINITY_D8TNL4_VOLCA/39-305      | D8TNL4.1 PF00218.19 | 88.40 | 0.00 |
| TRINITY_G0QVY0_ICHMG/15-74       | G0QVY0.1 PF00137.19 | 88.30 | 0.00 |
| TRINITY_A0A0D3FG20_9ORYZ/20-114  | A0A0D3FG20.1 PF0124 | 88.30 | 0.00 |
| TRINITY_PPX3_PARTE/46-241        | A0C1E4.1 PF00149.26 | 88.30 | 0.00 |
| TRINITY_A0DN20_PARTE/59-254      | A0DN20.1 PF00149.26 | 88.30 | 0.00 |
| TRINITY_D8TI03_VOLCA/117-294     | D8TI03.1 PF00800.16 | 88.30 | 0.00 |
| TRINITY_D8UAD0_VOLCA/191-338     | D8UAD0.1 PF00004.27 | 88.30 | 0.00 |
| TRINITY_D8TIT2_VOLCA/124-335     | D8TIT2.1 PF02405.14 | 88.30 | 0.00 |
| TRINITY_Q8HLX2_ORYLA/95-214      | Q8HLX2.1 PF00116.18 | 88.30 | 0.00 |
| TRINITY_D8U1H5_VOLCA/12-199      | D8U1H5.1 PF01145.23 | 88.30 | 0.00 |
| TRINITY_A0A078EX89_BRANA/18-356  | A0A078EX89.1 PF0038 | 88.30 | 0.00 |
| TRINITY_F6X8Y4_MONDO/7-131       | F6X8Y4.1 PF06212.10 | 88.20 | 0.00 |
| TRINITY_Q3SEC5_PARTE/16-270      | Q3SEC5.1 PF00069.23 | 88.20 | 0.00 |
| TRINITY_F1P5V2_CHICK/1-375       | F1P5V2.2 PF00297.20 | 88.20 | 0.00 |
| TRINITY_A0A0D2ND66_GOSRA/3-237   | A0A0D2ND66.1 PF0000 | 88.20 | 0.00 |
| TRINITY_G2HGS6_PANTR/257-780     | G2HGS6.1 PF00183.16 | 88.20 | 0.00 |
| TRINITY_D8TSD9_VOLCA/1-76        | D8TSD9.1 PF01926.21 | 88.20 | 0.00 |
| TRINITY_A0A0M3K0T4_ANISI/271-353 | A0A0M3K0T4.1 PF0046 | 88.20 | 0.00 |

|                                    |                     |       |      |
|------------------------------------|---------------------|-------|------|
| TRINITY_D8TLR9_VOLCA/72-156        | D8TLR9.1 PF16561.3; | 88.20 | 0.00 |
| TRINITY_D8ULS6_VOLCA/67-321        | D8ULS6.1 PF01636.21 | 88.20 | 0.00 |
| TRINITY_A8J1K0_CHLRE/37-850        | A8J1K0.1 PF01496.17 | 88.20 | 0.00 |
| TRINITY_A8INY3_CHLRE/4-215         | A8INY3.1 PF00091.23 | 88.20 | 0.00 |
| TRINITY_Q695H0_CHLRE/703-962       | Q695H0.1 PF00069.23 | 88.20 | 0.00 |
| TRINITY_J9IAN9_9SPIT/1140-1273     | J9IAN9.1 PF10597.7; | 88.20 | 0.00 |
| TRINITY_A0A0P7VDE8_9TELE/7-132     | A0A0P7VDE8.1 PF0006 | 88.10 | 0.00 |
| TRINITY_D3BKC8_POLPA/353-519       | D3BKC8.1 PF00623.18 | 88.10 | 0.00 |
| TRINITY_R1E4U8_EMIHU/1-59          | R1E4U8.1 PF01194.15 | 88.10 | 0.00 |
| TRINITY_C5XW23_SORBI/48-277        | C5XW23.1 PF00230.18 | 88.10 | 0.00 |
| TRINITY_D8TIA7_VOLCA/10-137        | D8TIA7.1 PF00125.22 | 88.10 | 0.00 |
| TRINITY_R1FJW2_EMIHU/3-75          | R1FJW2.1 PF13499.4; | 88.10 | 0.00 |
| TRINITY_D8TUF3_VOLCA/1145-1203     | D8TUF3.1 PF14599.4; | 88.10 | 0.00 |
| TRINITY_L5L525_PTEAL/240-323       | L5L525.1 PF00766.17 | 88.10 | 0.00 |
| TRINITY_PRS8B_ARATH/198-332        | Q94BQ2.1 PF00004.27 | 88.10 | 0.00 |
| TRINITY_D8UDZ0_VOLCA/36-283        | D8UDZ0.1 PF00977.19 | 88.10 | 0.00 |
| TRINITY_A0E1Y7_PARTE/546-611       | A0E1Y7.1 PF00659.16 | 88.10 | 0.00 |
| TRINITY_D8U867_VOLCA/249-377       | D8U867.1 PF01080.15 | 88.10 | 0.00 |
| TRINITY_A0A0A0K996_CUCSA/1-100     | A0A0A0K996.1 PF0324 | 88.00 | 0.00 |
| TRINITY_K7ISA7_NASVI/4-78          | K7ISA7.1 PF03671.12 | 88.00 | 0.00 |
| TRINITY_I3NEG2 ICTTR/7-98          | I3NEG2.1 PF13499.4; | 88.00 | 0.00 |
| TRINITY_A0DN29_PARTE/563-813       | A0DN29.1 PF00454.25 | 88.00 | 0.00 |
| TRINITY_Q22NW7_TETTS/437-569       | Q22NW7.1 PF00004.27 | 88.00 | 0.00 |
| TRINITY_A0A0P7USS3_9TELE/192-283   | A0A0P7USS3.1 PF1420 | 88.00 | 0.00 |
| TRINITY_A9TWG4_PHYPA/100-199       | A9TWG4.1 PF00153.25 | 88.00 | 0.00 |
| TRINITY_D8TK62_VOLCA/157-248       | D8TK62.1 PF00153.25 | 88.00 | 0.00 |
| TRINITY_D8UIA3_VOLCA/333-466       | D8UIA3.1 PF00004.27 | 88.00 | 0.00 |
| TRINITY_I7LXT6_TETTS/73-325        | I7LXT6.2 PF00069.23 | 87.90 | 0.00 |
| TRINITY_A0A0C4BF04_WHEAT/1-57      | A0A0C4BF04.1 PF0042 | 87.90 | 0.00 |
| TRINITY_A0DHL1_PARTE/171-388       | A0DHL1.1 PF00006.23 | 87.90 | 0.00 |
| TRINITY_A8JF84_CHLRE/1-66          | A8JF84.1 PF01423.20 | 87.90 | 0.00 |
| TRINITY_D8TY11_VOLCA/9-66          | D8TY11.1 PF03946.12 | 87.90 | 0.00 |
| TRINITY_Q9FNS5_CHLRE/71-219        | Q9FNS5.2 PF00056.21 | 87.90 | 0.00 |
| TRINITY_I0YR35_9CHLO/282-398       | I0YR35.1 PF02373.20 | 87.90 | 0.00 |
| TRINITY_M0SVG7_MUSAM/12-129        | M0SVG7.1 PF00583.23 | 87.90 | 0.00 |
| TRINITY_NU3M_PANTR/14-113          | Q9T9V8.1 PF00507.17 | 87.90 | 0.00 |
| TRINITY_H0WIL4_OTOGA/1-191         | H0WIL4.1 PF05805.10 | 87.90 | 0.00 |
| TRINITY_A0A0D3FDE6_9ORYZ/18-399    | A0A0D3FDE6.1 PF0019 | 87.80 | 0.00 |
| TRINITY_G3H239_CRIGR/250-578       | G3H239.1 PF00702.24 | 87.80 | 0.00 |
| TRINITY_I0YWP9_9CHLO/9-50          | I0YWP9.1 PF00832.18 | 87.80 | 0.00 |
| TRINITY_G0R640_ICHMG/538-830       | G0R640.1 PF00176.21 | 87.80 | 0.00 |
| TRINITY_A8HX04_CHLRE/200-273       | A8HX04.1 PF13534.4; | 87.80 | 0.00 |
| TRINITY_D8TQC6_VOLCA/13-173        | D8TQC6.1 PF00071.20 | 87.80 | 0.00 |
| TRINITY_D8TR15_VOLCA/33-180        | D8TR15.1 PF00005.25 | 87.80 | 0.00 |
| TRINITY_A8J8S4_CHLRE/235-305       | A8J8S4.1 PF00076.20 | 87.80 | 0.00 |
| TRINITY_A8IKB7_CHLRE/113-377       | A8IKB7.1 PF02548.13 | 87.80 | 0.00 |
| TRINITY_D8TV21_VOLCA/63-250        | D8TV21.1 PF00574.21 | 87.80 | 0.00 |
| TRINITY_K4CH79_SOLLC/101-165       | K4CH79.1 PF17136.2; | 87.70 | 0.00 |
| TRINITY_I1CFD8_RHIO9/1968-2218     | I1CFD8.1 PF00454.25 | 87.70 | 0.00 |
| TRINITY_D8UA83_VOLCA/10-199        | D8UA83.1 PF04511.13 | 87.70 | 0.00 |
| TRINITY_D8TY74_VOLCA/1-228         | D8TY74.1 PF00696.26 | 87.70 | 0.00 |
| TRINITY_A0A022QM18_ERYGU/141-356   | A0A022QM18.1 PF0011 | 87.60 | 0.00 |
| TRINITY_COX3_TETNG/6-261           | Q4JQI1.1 PF00510.16 | 87.60 | 0.00 |
| TRINITY_G0R1A3_ICHMG/15-146        | G0R1A3.1 PF00125.22 | 87.60 | 0.00 |
| TRINITY_I3K9D6_ORENI/259-508       | I3K9D6.1 PF00147.16 | 87.60 | 0.00 |
| TRINITY_A8J3T9_CHLRE/82-178        | A8J3T9.1 PF04900.10 | 87.60 | 0.00 |
| TRINITY_A0A087SHA0_AUXPR/2088-2338 | A0A087SHA0.1 PF0045 | 87.60 | 0.00 |
| TRINITY_L8GPL0_ACACA/13-116        | L8GPL0.1 PF02991.14 | 87.60 | 0.00 |
| TRINITY_G0R4Q5_ICHMG/82-212        | G0R4Q5.1 PF00004.27 | 87.50 | 0.00 |
| TRINITY_G3PUE8_GASAC/3-98          | G3PUE8.1 PF00031.19 | 87.50 | 0.00 |
| TRINITY_COX3_PONAB/6-261           | P92696.1 PF00510.16 | 87.50 | 0.00 |

|                                  |              |            |       |      |
|----------------------------------|--------------|------------|-------|------|
| TRINITY_Q24FD5_TETTS/644-902     | Q24FD5.2     | PF00069.23 | 87.50 | 0.00 |
| TRINITY_A0A078A3T6_STYLE/165-275 | A0A078A3T6.1 | PF0277     | 87.50 | 0.00 |
| TRINITY_E1ZTK8_CHLVA/117-212     | E1ZTK8.1     | PF01248.24 | 87.50 | 0.00 |
| TRINITY_F4JRR2_ARATH/858-989     | F4JRR2.1     | PF00004.27 | 87.50 | 0.00 |
| TRINITY_A8J6C7_CHLRE/445-655     | A8J6C7.1     | PF01434.16 | 87.50 | 0.00 |
| TRINITY_B9GGM5_POPTR/108-155     | B9GGM5.1     | PF00249.29 | 87.50 | 0.00 |
| TRINITY_A8IRR6_CHLRE/8-178       | A8IRR6.1     | PF03357.19 | 87.50 | 0.00 |
| TRINITY_A0BGV0_PARTE/13-330      | A0BGV0.1     | PF00225.21 | 87.50 | 0.00 |
| TRINITY_D8TV46_VOLCA/84-259      | D8TV46.1     | PF06026.12 | 87.50 | 0.00 |
| TRINITY_A7SY88_NEMVE/13-94       | A7SY88.1     | PF00254.26 | 87.50 | 0.00 |
| TRINITY_A8J282_CHLRE/56-219      | A8J282.1     | PF00160.19 | 87.50 | 0.00 |
| TRINITY_A8JHR9_CHLRE/189-346     | A8JHR9.1     | PF02800.18 | 87.50 | 0.00 |
| TRINITY_A0A087G6J3_ARAAL/21-88   | A0A087G6J3.1 | PF0007     | 87.50 | 0.00 |
| TRINITY_A8IXE0_CHLRE/12-482      | A8IXE0.1     | PF05221.15 | 87.50 | 0.00 |
| TRINITY_A0A0D2ND66_GOSRA/3-237   | A0A0D2ND66.1 | PF0000     | 87.40 | 0.00 |
| TRINITY_A0A0G2JSG4_PONAB/132-417 | A0A0G2JSG4.1 | PF0036     | 87.40 | 0.00 |
| TRINITY_A8I1A7_CHLRE/57-238      | A8I1A7.1     | PF00227.24 | 87.40 | 0.00 |
| TRINITY_I0YQE6_9CHLO/136-317     | I0YQE6.1     | PF04055.19 | 87.40 | 0.00 |
| TRINITY_A8J8R7_CHLRE/15-93       | A8J8R7.1     | PF01423.20 | 87.30 | 0.00 |
| TRINITY_S9XEV4_9CETA/20-102      | S9XEV4.1     | PF15511.4; | 87.30 | 0.00 |
| TRINITY_A8IED9_CHLRE/86-203      | A8IED9.1     | PF01509.16 | 87.30 | 0.00 |
| TRINITY_A4RY33_OSTLU/22-139      | A4RY33.1     | PF00917.24 | 87.30 | 0.00 |
| TRINITY_A8J6H1_CHLRE/25-182      | A8J6H1.1     | PF00071.20 | 87.30 | 0.00 |
| TRINITY_D8TKY6_VOLCA/5-130       | D8TKY6.1     | PF00410.17 | 87.30 | 0.00 |
| TRINITY_D8TII3_VOLCA/37-178      | D8TII3.1     | PF02878.14 | 87.30 | 0.00 |
| TRINITY_Q4VSM4_ENTHI/149-376     | Q4VSM4.1     | PF00006.23 | 87.30 | 0.00 |
| TRINITY_B6AA62_CRYMR/283-321     | B6AA62.1     | PF01096.16 | 87.20 | 0.00 |
| TRINITY_D3BPS9_POLPA/6-54        | D3BPS9.1     | PF02042.13 | 87.20 | 0.00 |
| TRINITY_I0Z5M2_9CHLO/94-172      | I0Z5M2.1     | PF01472.18 | 87.20 | 0.00 |
| TRINITY_SULP2_CHLRE/167-362      | Q6QJE2.1     | PF00528.20 | 87.20 | 0.00 |
| TRINITY_Q9SWQ6_CHLRE/6-99        | Q9SWQ6.1     | PF03259.15 | 87.20 | 0.00 |
| TRINITY_E1ZNN0_CHLVA/86-426      | E1ZNN0.1     | PF01494.17 | 87.20 | 0.00 |
| TRINITY_W5QHB4_SHEEP/377-415     | W5QHB4.1     | PF00400.30 | 87.20 | 0.00 |
| TRINITY_D8TJW5_VOLCA/51-238      | D8TJW5.1     | PF00574.21 | 87.20 | 0.00 |
| TRINITY_D8UIJ8_VOLCA/100-207     | D8UIJ8.1     | PF02777.16 | 87.20 | 0.00 |
| TRINITY_F6GXM7_VITVI/49-134      | F6GXM7.1     | PF00203.19 | 87.20 | 0.00 |
| TRINITY_D8UDU8_VOLCA/4-90        | D8UDU8.1     | PF00125.22 | 87.20 | 0.00 |
| TRINITY_D8TNB7_VOLCA/1-175       | D8TNB7.1     | PF08235.11 | 87.20 | 0.00 |
| TRINITY_KAD1_HUMAN/13-169        | P00568.3     | PF00406.20 | 87.10 | 0.00 |
| TRINITY_G5BBC6_HETGA/71-178      | G5BBC6.1     | PF02100.15 | 87.10 | 0.00 |
| TRINITY_F4P7D3_BATDJ/1985-2235   | F4P7D3.1     | PF00454.25 | 87.10 | 0.00 |
| TRINITY_I3JN34_ORENI/202-307     | I3JN34.1     | PF16122.3; | 87.10 | 0.00 |
| TRINITY_Q8HID1_RAT/4-305         | Q8HID1.1     | PF00146.19 | 87.10 | 0.00 |
| TRINITY_A8J7J2_CHLRE/40-534      | A8J7J2.1     | PF00118.22 | 87.10 | 0.00 |
| TRINITY_C1MPP7_MICPC/194-1278    | C1MPP7.1     | PF02514.14 | 87.10 | 0.00 |
| TRINITY_I7LTY1_TETTS/166-289     | I7LTY1.1     | PF00549.17 | 87.10 | 0.00 |
| TRINITY_D8U3Z9_VOLCA/23-116      | D8U3Z9.1     | PF00572.16 | 87.10 | 0.00 |
| TRINITY_D8U772_VOLCA/53-247      | D8U772.1     | PF01171.18 | 87.10 | 0.00 |
| TRINITY_H34_TETTS/1-132          | Q22RG7.1     | PF00125.22 | 87.10 | 0.00 |
| TRINITY_D8U7Q0_VOLCA/2395-2426   | D8U7Q0.1     | PF02260.18 | 87.10 | 0.00 |
| TRINITY_D8TTG5_VOLCA/143-328     | D8TTG5.1     | PF04802.13 | 87.10 | 0.00 |
| TRINITY_I3J359_ORENI/61-188      | I3J359.1     | PF00061.21 | 87.00 | 0.00 |
| TRINITY_Q94SI1_GASAC/10-311      | Q94SI1.1     | PF00146.19 | 87.00 | 0.00 |
| TRINITY_D8U458_VOLCA/46-299      | D8U458.1     | PF00348.15 | 87.00 | 0.00 |
| TRINITY_I7LX18_TETTS/11-362      | I7LX18.1     | PF00285.19 | 87.00 | 0.00 |
| TRINITY_A9XBE8_MELGA/112-403     | A9XBE8.1     | PF00361.18 | 87.00 | 0.00 |
| TRINITY_F6X6V7_XENTR/651-838     | F6X6V7.1     | PF00488.19 | 87.00 | 0.00 |
| TRINITY_I1JHS3_SOYBN/60-105      | I1JHS3.1     | PF00249.29 | 87.00 | 0.00 |
| TRINITY_A8IJV1_CHLRE/241-351     | A8IJV1.1     | PF00271.29 | 87.00 | 0.00 |
| TRINITY_D8TTQ7_VOLCA/53-350      | D8TTQ7.1     | PF00698.19 | 87.00 | 0.00 |
| TRINITY_A8J795_CHLRE/1-217       | A8J795.1     | PF14713.4; | 87.00 | 0.00 |

|                                  |                     |       |      |
|----------------------------------|---------------------|-------|------|
| TRINITY_A0A068SAQ1_9FUNG/6-143   | A0A068SAQ1.1 PF0017 | 87.00 | 0.00 |
| TRINITY_Q6V9A8_CHLRE/197-467     | Q6V9A8.1 PF00346.17 | 87.00 | 0.00 |
| TRINITY_M4AKT4_XIPMA/10-146      | M4AKT4.1 PF01090.17 | 86.90 | 0.00 |
| TRINITY_A0A096SBF4_MAIZE/68-128  | A0A096SBF4.1 PF0907 | 86.90 | 0.00 |
| TRINITY_V4N6Q8_EUTSA/185-283     | V4N6Q8.1 PF00153.25 | 86.90 | 0.00 |
| TRINITY_L8GW25_ACACA/462-582     | L8GW25.1 PF00004.27 | 86.90 | 0.00 |
| TRINITY_D8U0E2_VOLCA/388-547     | D8U0E2.1 PF09239.9; | 86.90 | 0.00 |
| TRINITY_D8TSY5_VOLCA/2163-2385   | D8TSY5.1 PF12781.5; | 86.90 | 0.00 |
| TRINITY_G3N599_GASAC/369-596     | G3N599.1 PF00089.24 | 86.80 | 0.00 |
| TRINITY_A0A0J9YUB0_MOUSE/1-87    | A0A0J9YUB0.1 PF0048 | 86.80 | 0.00 |
| TRINITY_A0A087SQA3_AUXPR/18-83   | A0A087SQA3.1 PF0124 | 86.80 | 0.00 |
| TRINITY_I0YNB1_9CHLO/84-235      | I0YNB1.1 PF00270.27 | 86.80 | 0.00 |
| TRINITY_A8J924_CHLRE/124-212     | A8J924.1 PF00957.19 | 86.80 | 0.00 |
| TRINITY_A8HMQ1_CHLRE/72-518      | A8HMQ1.1 PF00330.18 | 86.80 | 0.00 |
| TRINITY_D8U1F3_VOLCA/56-419      | D8U1F3.1 PF00155.19 | 86.80 | 0.00 |
| TRINITY_A0A067JX33_JATCU/90-265  | A0A067JX33.1 PF1330 | 86.70 | 0.00 |
| TRINITY_COX1_TETNG/14-460        | Q4JQI5.1 PF00115.18 | 86.70 | 0.00 |
| TRINITY_G3H5I7_CRIGR/174-428     | G3H5I7.1 PF00147.16 | 86.70 | 0.00 |
| TRINITY_D8UC17_VOLCA/28-143      | D8UC17.1 PF04410.12 | 86.70 | 0.00 |
| TRINITY_A8J1G8_CHLRE/1-128       | A8J1G8.1 PF01092.17 | 86.70 | 0.00 |
| TRINITY_A8IZU0_CHLRE/1-580       | A8IZU0.1 PF00012.18 | 86.70 | 0.00 |
| TRINITY_A8JDP6_CHLRE/44-148      | A8JDP6.1 PF00416.20 | 86.70 | 0.00 |
| TRINITY_A0A059A8J9_EUCGR/8-103   | A0A059A8J9.1 PF0016 | 86.70 | 0.00 |
| TRINITY_D8TUY8_VOLCA/54-331      | D8TUY8.1 PF02091.13 | 86.70 | 0.00 |
| TRINITY_D8U7G0_VOLCA/150-194     | D8U7G0.1 PF14237.4; | 86.70 | 0.00 |
| TRINITY_I3K3J8_ORENI/921-1100    | I3K3J8.1 PF07678.12 | 86.60 | 0.00 |
| TRINITY_A0A087SMB5_AUXPR/365-655 | A0A087SMB5.1 PF0017 | 86.60 | 0.00 |
| TRINITY_A8J282_CHLRE/56-219      | A8J282.1 PF00160.19 | 86.60 | 0.00 |
| TRINITY_A8IPI7_CHLRE/50-384      | A8IPI7.1 PF00389.28 | 86.60 | 0.00 |
| TRINITY_D8U6J2_VOLCA/7-178       | D8U6J2.1 PF00270.27 | 86.60 | 0.00 |
| TRINITY_W5MUS3_LEPOC/577-614     | W5MUS3.1 PF00400.30 | 86.50 | 0.00 |
| TRINITY_A0A077ZNX5_STYLE/95-246  | A0A077ZNX5.1 PF0808 | 86.50 | 0.00 |
| TRINITY_A0A0E9NKU1_9ASCO/134-175 | A0A0E9NKU1.1 PF0166 | 86.50 | 0.00 |
| TRINITY_A8JAP8_CHLRE/26-124      | A8JAP8.1 PF00169.27 | 86.50 | 0.00 |
| TRINITY_A0C195_PARTE/19-56       | A0C195.1 PF02197.15 | 86.50 | 0.00 |
| TRINITY_Q9MD59_MOUSE/23-289      | Q9MD59.1 PF00361.18 | 86.50 | 0.00 |
| TRINITY_M0U837_MUSAM/336-468     | M0U837.1 PF00005.25 | 86.50 | 0.00 |
| TRINITY_A8IVQ7_CHLRE/22-186      | A8IVQ7.1 PF00160.19 | 86.50 | 0.00 |
| TRINITY_I7MDR8_TETTS/76-329      | I7MDR8.1 PF08423.9; | 86.50 | 0.00 |
| TRINITY_A8IX54_CHLRE/271-486     | A8IX54.1 PF05762.12 | 86.50 | 0.00 |
| TRINITY_A8IT48_CHLRE/123-211     | A8IT48.1 PF00957.19 | 86.50 | 0.00 |
| TRINITY_Q944M9_CHLRE/32-158      | Q944M9.1 PF01592.14 | 86.50 | 0.00 |
| TRINITY_D8UIF0_VOLCA/2-231       | D8UIF0.1 PF04981.11 | 86.50 | 0.00 |
| TRINITY_A0A061D9F1_BABBI/1-38    | A0A061D9F1.1 PF0622 | 86.50 | 0.00 |
| TRINITY_Q8W4V3_CHLRE/61-460      | Q8W4V3.1 PF00464.17 | 86.50 | 0.00 |
| TRINITY_A0A087SEI7_AUXPR/596-725 | A0A087SEI7.1 PF0000 | 86.50 | 0.00 |
| TRINITY_S9WFR9_9CETA/1-120       | S9WFR9.1 PF00992.18 | 86.50 | 0.00 |
| TRINITY_V7D0Z7_PHAVU/61-131      | V7D0Z7.1 PF02672.13 | 86.40 | 0.00 |
| TRINITY_C1E7K7_MICSR/4-377       | C1E7K7.1 PF00022.17 | 86.40 | 0.00 |
| TRINITY_L1J975_GUIITH/2190-2311  | L1J975.1 PF08084.9; | 86.40 | 0.00 |
| TRINITY_W4XGW2_STRPU/51-248      | W4XGW2.1 PF01171.18 | 86.40 | 0.00 |
| TRINITY_D8TZE6_VOLCA/59-216      | D8TZE6.1 PF00005.25 | 86.40 | 0.00 |
| TRINITY_A0A0D2T6A5_GOSRA/46-177  | A0A0D2T6A5.1 PF0012 | 86.40 | 0.00 |
| TRINITY_A8HPS2_CHLRE/32-274      | A8HPS2.1 PF01370.19 | 86.40 | 0.00 |
| TRINITY_J9IET5_9SPIT/50-247      | J9IET5.1 PF01171.18 | 86.40 | 0.00 |
| TRINITY_D8U8V9_VOLCA/44-395      | D8U8V9.1 PF00180.18 | 86.40 | 0.00 |
| TRINITY_A0E1Y7_PARTE/546-611     | A0E1Y7.1 PF00659.16 | 86.40 | 0.00 |
| TRINITY_D8UI40_VOLCA/118-183     | D8UI40.1 PF00288.24 | 86.40 | 0.00 |
| TRINITY_D8U8F2_VOLCA/1654-1922   | D8U8F2.1 PF12780.5; | 86.40 | 0.00 |
| TRINITY_C1EFJ8_MICSR/128-280     | C1EFJ8.1 PF13365.4; | 86.40 | 0.00 |
| TRINITY_A8JA79_CHLRE/25-184      | A8JA79.1 PF00069.23 | 86.40 | 0.00 |

|                                 |                     |       |      |
|---------------------------------|---------------------|-------|------|
| TRINITY_H3C6N1_TETNG/30-217     | H3C6N1.1 PF06668.10 | 86.30 | 0.00 |
| TRINITY_U3IP28_ANAPL/102-154    | U3IP28.1 PF00013.27 | 86.30 | 0.00 |
| TRINITY_W7HS64_9PEZI/130-229    | W7HS64.1 PF00307.29 | 86.30 | 0.00 |
| TRINITY_D8U148_VOLCA/297-348    | D8U148.1 PF00847.18 | 86.30 | 0.00 |
| TRINITY_F4PKY3_DICFS/231-456    | F4PKY3.1 PF00006.23 | 86.30 | 0.00 |
| TRINITY_I0ZAR7_9CHLO/6-129      | I0ZAR7.1 PF01775.15 | 86.30 | 0.00 |
| TRINITY_A4VDG5_TETTS/317-447    | A4VDG5.2 PF00004.27 | 86.30 | 0.00 |
| TRINITY_D8TLB0_VOLCA/190-695    | D8TLB0.1 PF00183.16 | 86.30 | 0.00 |
| TRINITY_I3JKE7_ORENI/148-288    | I3JKE7.1 PF01014.16 | 86.20 | 0.00 |
| TRINITY_A0A0A0K7Z3_CUCSA/57-231 | A0A0A0K7Z3.1 PF0021 | 86.20 | 0.00 |
| TRINITY_L9KQV0_TUPCH/347-411    | L9KQV0.1 PF00327.18 | 86.20 | 0.00 |
| TRINITY_L1LBY9_THEEQ/5-142      | L1LBY9.1 PF00179.24 | 86.20 | 0.00 |
| TRINITY_Q22MC3_TETTS/176-305    | Q22MC3.2 PF00004.27 | 86.20 | 0.00 |
| TRINITY_G0QVV1_ICHMG/11-394     | G0QVV1.1 PF00199.17 | 86.20 | 0.00 |
| TRINITY_D8U3K8_VOLCA/43-175     | D8U3K8.1 PF02531.14 | 86.20 | 0.00 |
| TRINITY_Q22YY0_TETTS/3-176      | Q22YY0.2 PF00025.19 | 86.20 | 0.00 |
| TRINITY_E1Z606_CHLVA/55-218     | E1Z606.1 PF00504.19 | 86.20 | 0.00 |
| TRINITY_G0QLJ0_ICHMG/34-150     | G0QLJ0.1 PF00271.29 | 86.20 | 0.00 |
| TRINITY_D8TLD6_VOLCA/1883-2121  | D8TLD6.1 PF00809.20 | 86.20 | 0.00 |
| TRINITY_D8THR5_VOLCA/234-422    | D8THR5.1 PF01163.20 | 86.20 | 0.00 |
| TRINITY_G0R1I5_ICHMG/26-90      | G0R1I5.1 PF13499.4; | 86.20 | 0.00 |
| TRINITY_G0R1I5_ICHMG/26-90      | G0R1I5.1 PF13499.4; | 86.20 | 0.00 |
| TRINITY_A8J955_CHLRE/778-1101   | A8J955.1 PF00225.21 | 86.20 | 0.00 |
| TRINITY_A8J2Z6_CHLRE/38-393     | A8J2Z6.1 PF01264.19 | 86.20 | 0.00 |



|                                    |                     |       |      |
|------------------------------------|---------------------|-------|------|
| TRINITY_1A03_GORGO/25-203          | P30377.1 PF00129.16 | 86.20 | 0.00 |
| TRINITY_E1ZBK2_CHLVA/352-461       | E1ZBK2.1 PF03143.15 | 86.20 | 0.00 |
| TRINITY_B2VY78_PYRTR/382-413       | B2VY78.1 PF16503.3; | 86.20 | 0.00 |
| TRINITY_COX1_TETNG/14-460          | Q4JQI5.1 PF00115.18 | 86.10 | 0.00 |
| TRINITY_A0C1B9_PARTE/591-787       | A0C1B9.1 PF13087.4; | 86.10 | 0.00 |
| TRINITY_I3MMA5 ICTTR/25-347        | I3MMA5.1 PF00405.15 | 86.10 | 0.00 |
| TRINITY_L8HIH2_ACACA/30-238        | L8HIH2.1 PF04055.19 | 86.10 | 0.00 |
| TRINITY_A0A0M3HES0_PANTR/23-289    | A0A0M3HES0.1 PF0036 | 86.10 | 0.00 |
| TRINITY_I0YRI9_9CHLO/53-188        | I0YRI9.1 PF00004.27 | 86.10 | 0.00 |
| TRINITY_D4AMJ9_ARTBC/81-137        | D4AMJ9.1 PF00352.19 | 86.10 | 0.00 |
| TRINITY_R1FJW2_EMIHU/3-75          | R1FJW2.1 PF13499.4; | 86.10 | 0.00 |
| TRINITY_A8JFK6_CHLRE/147-182       | A8JFK6.1 PF00132.22 | 86.10 | 0.00 |
| TRINITY_A8JFP1_CHLRE/2267-2971     | A8JFP1.1 PF03028.13 | 86.10 | 0    |
| TRINITY_D8U5P9_VOLCA/16-143        | D8U5P9.1 PF00270.27 | 86.10 | 0.00 |
| TRINITY_A0A0C4BF04_WHEAT/1-57      | A0A0C4BF04.1 PF0042 | 86.10 | 0.00 |
| TRINITY_A0A078B9W6_STYLE/1811-2043 | A0A078B9W6.1 PF1277 | 86.10 | 0.00 |
| TRINITY_RR4_CHLRE/3-109            | P48270.1 PF00163.17 | 86.00 | 0.00 |
| TRINITY_D8TWU0_VOLCA/4-176         | D8TWU0.1 PF00025.19 | 86.00 | 0.00 |
| TRINITY_CFA52_CHLRE/47-89          | A8ILK1.1 PF00400.30 | 86.00 | 0.00 |
| TRINITY_D8U6Y1_VOLCA/19-310        | D8U6Y1.1 PF00069.23 | 86.00 | 0.00 |
| TRINITY_A8HUP5_CHLRE/61-235        | A8HUP5.1 PF01853.16 | 86.00 | 0.00 |
| TRINITY_I0YLK3_9CHLO/155-290       | I0YLK3.1 PF00549.17 | 86.00 | 0.00 |
| TRINITY_A8J1U1_CHLRE/30-185        | A8J1U1.1 PF02518.24 | 85.90 | 0.00 |
| TRINITY_METK_CHLRE/243-385         | A8HYU5.1 PF02773.14 | 85.90 | 0.00 |
| TRINITY_A8ILJ9_CHLRE/59-200        | A8ILJ9.1 PF02729.19 | 85.90 | 0.00 |
| TRINITY_D8U5K5_VOLCA/67-406        | D8U5K5.1 PF00282.17 | 85.90 | 0.00 |
| TRINITY_Q4XXN0_PLACH/10-74         | Q4XXN0.1 PF13499.4; | 85.90 | 0.00 |
| TRINITY_I0Z723_9CHLO/8-238         | I0Z723.1 PF01269.15 | 85.90 | 0.00 |
| TRINITY_A8IJK3_CHLRE/10-175        | A8IJK3.1 PF03371.13 | 85.90 | 0.00 |
| TRINITY_D8TKB5_VOLCA/35-538        | D8TKB5.1 PF01602.18 | 85.90 | 0.00 |
| TRINITY_D8TH65_VOLCA/254-559       | D8TH65.1 PF00749.19 | 85.90 | 0.00 |
| TRINITY_A8IRT6_CHLRE/227-416       | A8IRT6.1 PF00587.23 | 85.90 | 0.00 |
| TRINITY_I7M6E0_TETTS/153-378       | I7M6E0.2 PF00006.23 | 85.80 | 0.00 |
| TRINITY_W9S1N3_9ROSA/135-360       | W9S1N3.1 PF00112.21 | 85.80 | 0.00 |
| TRINITY_G3RRH4_GORGO/4-305         | G3RRH4.1 PF00146.19 | 85.80 | 0.00 |
| TRINITY_A8J1M5_CHLRE/2495-2760     | A8J1M5.1 PF12775.5; | 85.80 | 0.00 |
| TRINITY_I0Z3D7_9CHLO/8-145         | I0Z3D7.1 PF00179.24 | 85.80 | 0.00 |
| TRINITY_A8IZ29_CHLRE/9-270         | A8IZ29.1 PF00069.23 | 85.80 | 0.00 |
| TRINITY_D8U9R8_VOLCA/28-210        | D8U9R8.1 PF00227.24 | 85.80 | 0.00 |
| TRINITY_A8HP25_CHLRE/47-243        | A8HP25.1 PF01435.16 | 85.80 | 0.00 |
| TRINITY_A0A087Y5N8_POEFO/731-917   | A0A087Y5N8.2 PF0666 | 85.70 | 0.00 |
| TRINITY_A0A087SL21_AUXPR/78-127    | A0A087SL21.1 PF0102 | 85.70 | 0.00 |
| TRINITY_D8TR78_VOLCA/80-154        | D8TR78.1 PF02617.15 | 85.70 | 0.00 |
| TRINITY_A0A0C4BF04_WHEAT/1-57      | A0A0C4BF04.1 PF0042 | 85.70 | 0.00 |
| TRINITY_Q229R5_TETTS/53-249        | Q229R5.1 PF00149.26 | 85.70 | 0.00 |
| TRINITY_A8J8S4_CHLRE/235-305       | A8J8S4.1 PF00076.20 | 85.70 | 0.00 |
| TRINITY_L8GP31_ACACA/22-272        | L8GP31.1 PF00069.23 | 85.70 | 0.00 |
| TRINITY_V8NKP1_OPHHA/13-58         | V8NKP1.1 PF00253.19 | 85.70 | 0.00 |
| TRINITY_I7M4K4_TETTS/553-594       | I7M4K4.1 PF06203.12 | 85.70 | 0.00 |
| TRINITY_A8J1X7_CHLRE/48-89         | A8J1X7.1 PF05186.11 | 85.70 | 0.00 |
| TRINITY_D8TN53_VOLCA/184-476       | D8TN53.1 PF00113.20 | 85.70 | 0.00 |
| TRINITY_D8TIC0_VOLCA/100-143       | D8TIC0.1 PF01599.17 | 85.70 | 0.00 |
| TRINITY_A0A087SNW4_AUXPR/143-177   | A0A087SNW4.1 PF0080 | 85.70 | 0.00 |
| TRINITY_L8GWH4_ACACA/172-255       | L8GWH4.1 PF00352.19 | 85.70 | 0.00 |
| TRINITY_A8IAT4_CHLRE/78-259        | A8IAT4.1 PF07991.10 | 85.70 | 0.00 |
| TRINITY_D8UEE8_VOLCA/616-650       | D8UEE8.1 PF00320.25 | 85.70 | 0.00 |
| TRINITY_A8I6Z0_CHLRE/171-226       | A8I6Z0.1 PF13370.4; | 85.70 | 0.00 |
| TRINITY_A8IWN3_CHLRE/1-184         | A8IWN3.1 PF00248.19 | 85.70 | 0.00 |
| TRINITY_A0D7P1_PARTE/26-628        | A0D7P1.1 PF00012.18 | 85.70 | 0.00 |
| TRINITY_D8THY1_VOLCA/170-472       | D8THY1.1 PF00365.18 | 85.70 | 0.00 |
| TRINITY_Q22C26_TETTS/11-618        | Q22C26.1 PF00012.18 | 85.70 | 0.00 |

|                                    |              |            |       |      |
|------------------------------------|--------------|------------|-------|------|
| TRINITY_D8TNW2_VOLCA/70-451        | D8TNW2.1     | PF07517.12 | 85.70 | 0.00 |
| TRINITY_D8UAE3_VOLCA/85-246        | D8UAE3.1     | PF00091.23 | 85.70 | 0.00 |
| TRINITY_A0DQI4_PARTE/1027-1259     | A0DQI4.1     | PF12774.5; | 85.70 | 0.00 |
| TRINITY_Q1AL73_CHLSB/14-460        | Q1AL73.1     | PF00115.18 | 85.60 | 0.00 |
| TRINITY_K3XYF0_SETIT/47-242        | K3XYF0.1     | PF00149.26 | 85.60 | 0.00 |
| TRINITY_D8UG79_VOLCA/1109-1205     | D8UG79.1     | PF04059.10 | 85.60 | 0.00 |
| TRINITY_D8TXI3_VOLCA/14-304        | D8TXI3.1     | PF00069.23 | 85.60 | 0.00 |
| TRINITY_Q2VIY5_CHLRE/20-116        | Q2VIY5.1     | PF03645.11 | 85.60 | 0.00 |
| TRINITY_D8U4Q8_VOLCA/37-227        | D8U4Q8.1     | PF01145.23 | 85.60 | 0.00 |
| TRINITY_I7MJ63_TETTS/11-618        | I7MJ63.1     | PF00012.18 | 85.60 | 0.00 |
| TRINITY_A0A0E0LPA6_ORYPU/816-1223  | A0A0E0LPA6.1 | PF0164     | 85.60 | 0.00 |
| TRINITY_B3MU37_DROAN/4-136         | B3MU37.1     | PF02966.14 | 85.60 | 0.00 |
| TRINITY_F0NXV5_WEEVC/279-362       | F0NXV5.1     | PF06071.11 | 85.50 | 0.00 |
| TRINITY_Q1AL73_CHLSB/14-460        | Q1AL73.1     | PF00115.18 | 85.50 | 0.00 |
| TRINITY_L8H9R9_ACACA/411-532       | L8H9R9.1     | PF00004.27 | 85.50 | 0.00 |
| TRINITY_H2S6P8_TAKRU/137-591       | H2S6P8.1     | PF00654.18 | 85.50 | 0.00 |
| TRINITY_A0A022RWC8_ERYGU/7-335     | A0A022RWC8.1 | PF0153     | 85.50 | 0.00 |
| TRINITY_A0A022RUE4_ERYGU/32-494    | A0A022RUE4.1 | PF0017     | 85.50 | 0.00 |
| TRINITY_D8U6J5_VOLCA/46-261        | D8U6J5.1     | PF07722.11 | 85.50 | 0.00 |
| TRINITY_A8HXM5_CHLRE/38-220        | A8HXM5.1     | PF02854.17 | 85.50 | 0.00 |
| TRINITY_D8TKY9_VOLCA/30-526        | D8TKY9.1     | PF00118.22 | 85.50 | 0.00 |
| TRINITY_E1ZHQ0_CHLVA/130-191       | E1ZHQ0.1     | PF04406.12 | 85.50 | 0.00 |
| TRINITY_G0QVU1_ICHMG/165-205       | G0QVU1.1     | PF00400.30 | 85.40 | 0.00 |
| TRINITY_D8TNS7_VOLCA/60-317        | D8TNS7.1     | PF00069.23 | 85.40 | 0.00 |
| TRINITY_I7MDR8_TETTS/76-329        | I7MDR8.1     | PF08423.9; | 85.40 | 0.00 |
| TRINITY_A8II51_CHLRE/79-194        | A8II51.1     | PF13640.4; | 85.40 | 0.00 |
| TRINITY_J9J844_9SPIT/63-315        | J9J844.1     | PF00069.23 | 85.40 | 0.00 |
| TRINITY_D8TH71_VOLCA/349-485       | D8TH71.1     | PF01926.21 | 85.40 | 0.00 |
| TRINITY_Q6VPQ2_CHLRE/114-209       | Q6VPQ2.1     | PF08241.10 | 85.40 | 0.00 |
| TRINITY_D8TKA7_VOLCA/50-555        | D8TKA7.1     | PF00118.22 | 85.40 | 0.00 |
| TRINITY_A0A0A0KKI5_CUCSA/1042-1193 | A0A0A0KKI5.1 | PF0000     | 85.40 | 0.00 |
| TRINITY_A8JIR0_CHLRE/663-867       | A8JIR0.1     | PF02786.15 | 85.40 | 0.00 |
| TRINITY_Q23DJ9_TETTS/19-409        | Q23DJ9.1     | PF06068.11 | 85.40 | 0.00 |
| TRINITY_K7KEX4_SOYBN/167-222       | K7KEX4.1     | PF03763.11 | 85.30 | 0.00 |
| TRINITY_A0A0G4EDU2_9ALVE/16-83     | A0A0G4EDU2.1 | PF0007     | 85.30 | 0.00 |
| TRINITY_M7SQA8_EUTLA/156-313       | M7SQA8.1     | PF02800.18 | 85.30 | 0.00 |
| TRINITY_A8J8S4_CHLRE/93-160        | A8J8S4.1     | PF00076.20 | 85.30 | 0.00 |
| TRINITY_CDC37_RAT/1-164            | Q63692.2     | PF03234.12 | 85.30 | 0.00 |
| TRINITY_Q84U22_CHLRE/46-233        | Q84U22.1     | PF00573.20 | 85.30 | 0.00 |
| TRINITY_A8JGT9_CHLRE/34-185        | A8JGT9.1     | PF00270.27 | 85.30 | 0.00 |
| TRINITY_G0R0N9_ICHMG/20-230        | G0R0N9.1     | PF04055.19 | 85.30 | 0.00 |
| TRINITY_A8ICF1_CHLRE/16-301        | A8ICF1.1     | PF01212.19 | 85.30 | 0.00 |
| TRINITY_D8UFM9_VOLCA/59-361        | D8UFM9.1     | PF00069.23 | 85.30 | 0.00 |
| TRINITY_D8UEB9_VOLCA/1-192         | D8UEB9.1     | PF03721.12 | 85.30 | 0.00 |
| TRINITY_A8IVF2_CHLRE/123-156       | A8IVF2.1     | PF00515.26 | 85.30 | 0.00 |
| TRINITY_F6HK77_VITVI/53-127        | F6HK77.1     | PF00111.25 | 85.30 | 0.00 |
| TRINITY_A0A059C9R8_EUCGR/40-85     | A0A059C9R8.1 | PF0040     | 85.20 | 0.00 |
| TRINITY_M1ADH3_SOLTU/299-359       | M1ADH3.1     | PF03822.12 | 85.20 | 0.00 |
| TRINITY_U5FMG5_POPTR/187-342       | U5FMG5.1     | PF02800.18 | 85.20 | 0.00 |
| TRINITY_I3MYE1 ICTTR/21-309        | I3MYE1.1     | PF00865.16 | 85.20 | 0.00 |
| TRINITY_A9PD27_POPTR/4-84          | A9PD27.1     | PF00887.17 | 85.20 | 0.00 |
| TRINITY_E1ZDK7_CHLVA/305-332       | E1ZDK7.1     | PF01239.20 | 85.20 | 0.00 |
| TRINITY_E0VF66_PEDHC/55-108        | E0VF66.1     | PF01192.20 | 85.20 | 0.00 |
| TRINITY_A0DDZ2_PARTE/53-248        | A0DDZ2.1     | PF00149.26 | 85.20 | 0.00 |
| TRINITY_D8TWR6_VOLCA/213-543       | D8TWR6.1     | PF01808.16 | 85.20 | 0.00 |
| TRINITY_D8TIB5_VOLCA/323-533       | D8TIB5.1     | PF01189.15 | 85.20 | 0.00 |
| TRINITY_A0DN20_PARTE/59-254        | A0DN20.1     | PF00149.26 | 85.20 | 0.00 |
| TRINITY_DRC3_CHLRE/68-218          | A8IVX2.1     | PF14580.4; | 85.20 | 0.00 |
| TRINITY_L8H9R9_ACACA/411-532       | L8H9R9.1     | PF00004.27 | 85.20 | 0.00 |
| TRINITY_M3Z1A3_MUSPF/155-208       | M3Z1A3.1     | PF00013.27 | 85.20 | 0.00 |
| TRINITY_A0A0N5DF24_TRIMR/12-173    | A0A0N5DF24.1 | PF0007     | 85.20 | 0.00 |

|                                  |                     |       |      |
|----------------------------------|---------------------|-------|------|
| TRINITY_A0A0G2K8Q1_RAT/22-90     | A0A0G2K8Q1.1 PF0577 | 85.10 | 0.00 |
| TRINITY_A0A078B606_STYLE/511-644 | A0A078B606.1 PF0000 | 85.10 | 0.00 |
| TRINITY_D8TWX0_VOLCA/13-81       | D8TWX0.1 PF01423.20 | 85.10 | 0.00 |
| TRINITY_D8TUG4_VOLCA/65-460      | D8TUG4.1 PF00202.19 | 85.10 | 0.00 |
| TRINITY_A8IMV2_CHLRE/138-586     | A8IMV2.1 PF01373.15 | 85.10 | 0.00 |
| TRINITY_D8U0G5_VOLCA/9-55        | D8U0G5.1 PF00471.18 | 85.10 | 0.00 |
| TRINITY_I0YR29_9CHLO/95-516      | I0YR29.1 PF01964.16 | 85.10 | 0.00 |
| TRINITY_L8GW25_ACACA/462-582     | L8GW25.1 PF00004.27 | 85.10 | 0.00 |
| TRINITY_D8TL59_VOLCA/3854-4560   | D8TL59.1 PF03028.13 | 85.10 | 0    |
| TRINITY_K0SL03_THAOC/17-64       | K0SL03.1 PF01466.17 | 85.10 | 0.00 |
| TRINITY_RSSA_CHLRE/13-113        | A8IB25.1 PF00318.18 | 85.10 | 0.00 |
| TRINITY_A0A087SEJ0_AUXPR/164-389 | A0A087SEJ0.1 PF0000 | 85.10 | 0.00 |
| TRINITY_D8UCM0_VOLCA/35-314      | D8UCM0.1 PF05681.12 | 85.10 | 0.00 |
| TRINITY_A8I7P5_CHLRE/260-1381    | A8I7P5.1 PF02514.14 | 85.10 | 0    |
| TRINITY_Q233N6_TETTS/33-289      | Q233N6.2 PF00069.23 | 85.00 | 0.00 |
| TRINITY_NUOI_LEGPH/62-117        | Q5ZRU6.1 PF13237.4; | 85.00 | 0.00 |
| TRINITY_COX1_TETNG/14-460        | Q4JQI5.1 PF00115.18 | 85.00 | 0.00 |
| TRINITY_J9F4M2_9SPIT/6-613       | J9F4M2.1 PF00012.18 | 85.00 | 0.00 |
| TRINITY_I0YVG4_9CHLO/65-231      | I0YVG4.1 PF00270.27 | 85.00 | 0.00 |
| TRINITY_D8TSH4_VOLCA/33-219      | D8TSH4.1 PF00406.20 | 85.00 | 0.00 |
| TRINITY_Q2HZ21_CHLRE/191-266     | Q2HZ21.1 PF00111.25 | 85.00 | 0.00 |
| TRINITY_A8IA39_CHLRE/24-297      | A8IA39.1 PF00009.25 | 85.00 | 0.00 |
| TRINITY_D8U105_VOLCA/3812-4513   | D8U105.1 PF03028.13 | 85.00 | 0.00 |
| TRINITY_D8U8K4_VOLCA/2780-3052   | D8U8K4.1 PF12780.5; | 85.00 | 0.00 |
| TRINITY_F0ZD36_DICPU/3594-3814   | F0ZD36.1 PF12781.5; | 84.90 | 0.00 |
| TRINITY_G0R293_ICHMG/5-142       | G0R293.1 PF00179.24 | 84.90 | 0.00 |
| TRINITY_G0R293_ICHMG/5-142       | G0R293.1 PF00179.24 | 84.90 | 0.00 |
| TRINITY_Q3SDI8_PARTE/14-172      | Q3SDI8.1 PF00071.20 | 84.90 | 0.00 |
| TRINITY_J9J3W2_9SPIT/62-136      | J9J3W2.1 PF13921.4; | 84.90 | 0.00 |
| TRINITY_B5G4T9_CUCSA/25-766      | B5G4T9.1 PF05691.10 | 84.90 | 0.00 |
| TRINITY_D8UJ34_VOLCA/5-275       | D8UJ34.1 PF06418.12 | 84.90 | 0.00 |
| TRINITY_W5FF67_WHEAT/1-334       | W5FF67.1 PF00012.18 | 84.80 | 0.00 |
| TRINITY_A0A074SBD1_9HOMO/2-375   | A0A074SBD1.1 PF0002 | 84.80 | 0.00 |
| TRINITY_D8TTA1_VOLCA/184-262     | D8TTA1.1 PF02148.17 | 84.80 | 0.00 |
| TRINITY_D8UCI9_VOLCA/73-289      | D8UCI9.1 PF00230.18 | 84.80 | 0.00 |
| TRINITY_H3BH26_LATCH/745-813     | H3BH26.1 PF13499.4; | 84.80 | 0.00 |
| TRINITY_A8J239_CHLRE/9-58        | A8J239.1 PF03939.11 | 84.80 | 0.00 |
| TRINITY_I0YT55_9CHLO/2-191       | I0YT55.1 PF00827.15 | 84.80 | 0.00 |
| TRINITY_A8IXF1_CHLRE/150-366     | A8IXF1.1 PF01747.15 | 84.80 | 0.00 |
| TRINITY_I7M9J2_TETTS/1863-2094   | I7M9J2.1 PF12774.5; | 84.80 | 0.00 |
| TRINITY_E4WQH8_OIKDI/91-124      | E4WQH8.1 PF16211.3; | 84.80 | 0.00 |
| TRINITY_D8U602_VOLCA/225-402     | D8U602.1 PF00587.23 | 84.80 | 0.00 |
| TRINITY_H3CR06_TETNG/259-485     | H3CR06.1 PF01823.17 | 84.80 | 0.00 |
| TRINITY_A0A022RNE1_ERYGU/178-211 | A0A022RNE1.1 PF0348 | 84.80 | 0.00 |
| TRINITY_I7MAH0_TETTS/182-498     | I7MAH0.2 PF00225.21 | 84.80 | 0.00 |
| TRINITY_A0A022R9J9_ERYGU/2-169   | A0A022R9J9.1 PF1487 | 84.70 | 0.00 |
| TRINITY_D8U4D9_VOLCA/38-135      | D8U4D9.1 PF03645.11 | 84.70 | 0.00 |
| TRINITY_A0A0N4ZJP5_PARTI/3-212   | A0A0N4ZJP5.1 PF0009 | 84.70 | 0.00 |
| TRINITY_D8TZN4_VOLCA/3-146       | D8TZN4.1 PF01280.18 | 84.70 | 0.00 |
| TRINITY_A0A0P7VZ44_9TELE/155-312 | A0A0P7VZ44.1 PF0280 | 84.70 | 0.00 |
| TRINITY_A0DN20_PARTE/59-254      | A0DN20.1 PF00149.26 | 84.70 | 0.00 |
| TRINITY_E1ZQX5_CHLVA/216-755     | E1ZQX5.1 PF02867.13 | 84.70 | 0.00 |
| TRINITY_D8TT68_VOLCA/237-400     | D8TT68.1 PF01554.16 | 84.70 | 0.00 |
| TRINITY_A8HST2_CHLRE/1-460       | A8HST2.1 PF05761.12 | 84.70 | 0.00 |
| TRINITY_D8STQ6_SELML/100-164     | D8STQ6.1 PF13499.4; | 84.60 | 0.00 |
| TRINITY_Q23DE7_TETTS/476-808     | Q23DE7.1 PF00773.17 | 84.60 | 0.00 |
| TRINITY_Q6V502_CHLRE/181-277     | Q6V502.1 PF00507.17 | 84.60 | 0.00 |
| TRINITY_G0R4L1_ICHMG/394-433     | G0R4L1.1 PF00400.30 | 84.60 | 0.00 |
| TRINITY_D8TS73_VOLCA/76-176      | D8TS73.1 PF00829.19 | 84.60 | 0.00 |
| TRINITY_T0QGI5_9STRA/83-121      | T0QGI5.1 PF01096.16 | 84.60 | 0.00 |
| TRINITY_D8UKG8_VOLCA/2-27        | D8UKG8.1 PF00642.22 | 84.60 | 0.00 |

|                                    |              |            |       |      |
|------------------------------------|--------------|------------|-------|------|
| TRINITY_I0YUS7_9CHLO/717-842       | I0YUS7.1     | PF00271.29 | 84.60 | 0.00 |
| TRINITY_I0YS26_9CHLO/99-190        | I0YS26.1     | PF00686.17 | 84.60 | 0.00 |
| TRINITY_G3PKN9_GASAC/78-171        | G3PKN9.1     | PF00217.17 | 84.60 | 0.00 |
| TRINITY_ROMHK8_NOSB1/42-237        | ROMHK8.1     | PF00149.26 | 84.60 | 0.00 |
| TRINITY_F4QBR0_DICFS/571-1176      | F4QBR0.1     | PF00012.18 | 84.60 | 0.00 |
| TRINITY_D8U5J7_VOLCA/107-371       | D8U5J7.1     | PF00487.22 | 84.60 | 0.00 |
| TRINITY_D8TW10_VOLCA/76-386        | D8TW10.1     | PF00676.18 | 84.60 | 0.00 |
| TRINITY_D8U4A4_VOLCA/176-409       | D8U4A4.1     | PF01798.16 | 84.60 | 0.00 |
| TRINITY_A8IV17_CHLRE/6-83          | A8IV17.1     | PF07189.9; | 84.60 | 0.00 |
| TRINITY_A0A078AD66_STYLE/99-125    | A0A078AD66.1 | PF0064     | 84.60 | 0.00 |
| TRINITY_D8U148_VOLCA/297-348       | D8U148.1     | PF00847.18 | 84.60 | 0.00 |
| TRINITY_A0A0G4FBC1_9ALVE/1551-1781 | A0A0G4FBC1.1 | PF1277     | 84.60 | 0.00 |
| TRINITY_D8TNM7_VOLCA/1-119         | D8TNM7.1     | PF00833.16 | 84.50 | 0.00 |
| TRINITY_A8I980_CHLRE/57-385        | A8I980.1     | PF00490.19 | 84.50 | 0.00 |
| TRINITY_D8U105_VOLCA/2459-2729     | D8U105.1     | PF12775.5; | 84.50 | 0.00 |
| TRINITY_C1MTS7_MICPC/1754-1900     | C1MTS7.1     | PF07728.12 | 84.50 | 0.00 |
| TRINITY_A0A0D2TSB0_GOSRA/10-80     | A0A0D2TSB0.1 | PF0007     | 84.50 | 0.00 |
| TRINITY_A8IQB8_CHLRE/65-395        | A8IQB8.1     | PF03405.12 | 84.50 | 0.00 |
| TRINITY_L1J975_GUITH/373-779       | L1J975.1     | PF08083.9; | 84.50 | 0.00 |
| TRINITY_NU4M_TETNG/114-405         | Q4JQH8.1     | PF00361.18 | 84.40 | 0.00 |
| TRINITY_M1BV08_SOLTU/45-274        | M1BV08.1     | PF00230.18 | 84.40 | 0.00 |
| TRINITY_A1YIP5_XIPMA/18-204        | A1YIP5.1     | PF00033.17 | 84.40 | 0.00 |
| TRINITY_NBEA_CAEEL/1830-2106       | Q19317.3     | PF02138.16 | 84.40 | 0.00 |
| TRINITY_D8THQ0_VOLCA/4-99          | D8THQ0.1     | PF01157.16 | 84.40 | 0.00 |
| TRINITY_D8TS41_VOLCA/87-348        | D8TS41.1     | PF01040.16 | 84.40 | 0.00 |
| TRINITY_L8H9R9_ACACA/411-532       | L8H9R9.1     | PF00004.27 | 84.40 | 0.00 |
| TRINITY_D8TJ87_VOLCA/1589-1639     | D8TJ87.1     | PF00847.18 | 84.40 | 0.00 |
| TRINITY_D8UAM0_VOLCA/836-924       | D8UAM0.1     | PF08512.10 | 84.40 | 0.00 |
| TRINITY_A0DRI8_PARTE/1-143         | A0DRI8.1     | PF01217.18 | 84.40 | 0.00 |
| TRINITY_A8J933_CHLRE/64-454        | A8J933.1     | PF00202.19 | 84.40 | 0.00 |
| TRINITY_D8UIW1_VOLCA/41-264        | D8UIW1.1     | PF13460.4; | 84.40 | 0.00 |
| TRINITY_I1BLY1_RHIO9/326-360       | I1BLY1.1     | PF00806.17 | 84.40 | 0.00 |
| TRINITY_A0A087SP99_AUXPR/16-273    | A0A087SP99.1 | PF0337     | 84.40 | 0.00 |
| TRINITY_D8U3K7_VOLCA/43-340        | D8U3K7.1     | PF00579.23 | 84.40 | 0.00 |
| TRINITY_D8U394_VOLCA/10-73         | D8U394.1     | PF00226.29 | 84.40 | 0.00 |
| TRINITY_A8JG07_CHLRE/48-170        | A8JG07.1     | PF13537.4; | 84.40 | 0.00 |
| TRINITY_Q22P63_TETTS/283-414       | Q22P63.2     | PF00004.27 | 84.30 | 0.00 |
| TRINITY_L8H8Q1_ACACA/224-401       | L8H8Q1.1     | PF01853.16 | 84.30 | 0.00 |
| TRINITY_D8UGV3_VOLCA/80-368        | D8UGV3.1     | PF01062.19 | 84.30 | 0.00 |
| TRINITY_D8UCI9_VOLCA/73-289        | D8UCI9.1     | PF00230.18 | 84.30 | 0.00 |
| TRINITY_A8I5X7_CHLRE/198-285       | A8I5X7.1     | PF00153.25 | 84.30 | 0.00 |
| TRINITY_K1PWD4_CRAGI/494-626       | K1PWD4.1     | PF00004.27 | 84.30 | 0.00 |
| TRINITY_D8U346_VOLCA/654-723       | D8U346.1     | PF00076.20 | 84.30 | 0.00 |
| TRINITY_D8U5N9_VOLCA/490-623       | D8U5N9.1     | PF00005.25 | 84.30 | 0.00 |
| TRINITY_A4VDG5_TETTS/317-447       | A4VDG5.2     | PF00004.27 | 84.30 | 0.00 |
| TRINITY_D8UJ31_VOLCA/60-237        | D8UJ31.1     | PF00587.23 | 84.30 | 0.00 |
| TRINITY_D8UI03_VOLCA/42-637        | D8UI03.1     | PF00012.18 | 84.30 | 0.00 |
| TRINITY_H2T398_TAKRU/20-237        | H2T398.1     | PF00147.16 | 84.20 | 0.00 |
| TRINITY_I7LXE3_TETTS/981-1239      | I7LXE3.2     | PF00069.23 | 84.20 | 0.00 |
| TRINITY_A8ICK6_CHLRE/46-171        | A8ICK6.1     | PF00578.19 | 84.20 | 0.00 |
| TRINITY_Q240K0_TETTS/222-351       | Q240K0.1     | PF00004.27 | 84.20 | 0.00 |
| TRINITY_A0A0C4BF04_WHEAT/1-57      | A0A0C4BF04.1 | PF0042     | 84.20 | 0.00 |
| TRINITY_A8JFP4_CHLRE/222-560       | A8JFP4.1     | PF03372.21 | 84.20 | 0.00 |
| TRINITY_D8TJN9_VOLCA/7-63          | D8TJN9.1     | PF00831.21 | 84.20 | 0.00 |
| TRINITY_A0A0N4VLJ8_ENTVE/2-54      | A0A0N4VLJ8.1 | PF0190     | 84.20 | 0.00 |
| TRINITY_A0DN20_PARTE/59-254        | A0DN20.1     | PF00149.26 | 84.20 | 0.00 |
| TRINITY_G0QK69_ICHMG/550-609       | G0QK69.1     | PF14775.4; | 84.20 | 0.00 |
| TRINITY_D8UD98_VOLCA/79-316        | D8UD98.1     | PF00696.26 | 84.20 | 0.00 |
| TRINITY_Q22GC3_TETTS/35-213        | Q22GC3.2     | PF02779.22 | 84.20 | 0.00 |
| TRINITY_A8I7J8_CHLRE/1-142         | A8I7J8.1     | PF01217.18 | 84.20 | 0.00 |
| TRINITY_L8GTU3_ACACA/71-222        | L8GTU3.1     | PF00270.27 | 84.20 | 0.00 |

|                                   |                     |       |      |
|-----------------------------------|---------------------|-------|------|
| TRINITY_B7KET3_CYAP7/17-206       | B7KET3.1 PF01078.19 | 84.20 | 0.00 |
| TRINITY_A0DN20_PARTE/59-254       | A0DN20.1 PF00149.26 | 84.20 | 0.00 |
| TRINITY_A0EA59_PARTE/58-385       | A0EA59.1 PF00225.21 | 84.20 | 0.00 |
| TRINITY_A0A087SMB5_AUXPR/919-1032 | A0A087SMB5.1 PF0027 | 84.20 | 0.00 |
| TRINITY_A8IBR6_CHLRE/5-397        | A8IBR6.1 PF01134.20 | 84.20 | 0.00 |
| TRINITY_D8TWP9_VOLCA/1-107        | D8TWP9.1 PF01491.14 | 84.20 | 0.00 |
| TRINITY_D8U1I4_VOLCA/34-292       | D8U1I4.1 PF00069.23 | 84.20 | 0.00 |
| TRINITY_U9U289_RHIID/1145-1338    | U9U289.1 PF13087.4; | 84.10 | 0.00 |
| TRINITY_A8J8T9_CHLRE/254-460      | A8J8T9.1 PF07724.12 | 84.10 | 0.00 |
| TRINITY_A8J856_CHLRE/7-148        | A8J856.1 PF00179.24 | 84.10 | 0.00 |
| TRINITY_A0A087SQB6_AUXPR/6-118    | A0A087SQB6.1 PF0177 | 84.10 | 0.00 |
| TRINITY_U7PX74_SPOS1/97-178       | U7PX74.1 PF00352.19 | 84.10 | 0.00 |
| TRINITY_D8TSR8_VOLCA/68-251       | D8TSR8.1 PF00504.19 | 84.10 | 0.00 |
| TRINITY_W5KUA0_ASTMX/113-181      | W5KUA0.1 PF00050.19 | 84.10 | 0.00 |
| TRINITY_C1FDC1_MICSR/161-407      | C1FDC1.1 PF01136.17 | 84.10 | 0.00 |
| TRINITY_D8TQA9_VOLCA/68-111       | D8TQA9.1 PF00432.19 | 84.10 | 0.00 |
| TRINITY_Q6J213_CHLRE/83-523       | Q6J213.1 PF01593.22 | 84.10 | 0.00 |
| TRINITY_D8U303_VOLCA/63-392       | D8U303.1 PF00069.23 | 84.10 | 0.00 |
| TRINITY_I7M962_TETTS/71-323       | I7M962.2 PF00069.23 | 84.10 | 0.00 |
| TRINITY_D8U5Q2_VOLCA/457-644      | D8U5Q2.1 PF00488.19 | 84.10 | 0.00 |
| TRINITY_D8TR19_VOLCA/121-252      | D8TR19.1 PF00004.27 | 84.10 | 0.00 |
| TRINITY_Q248H8_TETTS/1944-2174    | Q248H8.1 PF12774.5; | 84.10 | 0.00 |
| TRINITY_F6VZW7_CALJA/62-322       | F6VZW7.1 PF00378.18 | 84.00 | 0.00 |
| TRINITY_A0A0D1C1G0_USTMA/616-775  | A0A0D1C1G0.1 PF0027 | 84.00 | 0.00 |
| TRINITY_E1Z972_CHLVA/57-265       | E1Z972.1 PF00902.16 | 84.00 | 0.00 |
| TRINITY_D8TW13_VOLCA/585-635      | D8TW13.1 PF00847.18 | 84.00 | 0.00 |
| TRINITY_Q9ZSM9_CHLRE/23-285       | Q9ZSM9.1 PF00069.23 | 84.00 | 0.00 |
| TRINITY_A8JFF7_CHLRE/174-248      | A8JFF7.1 PF01169.17 | 84.00 | 0.00 |
| TRINITY_A8J0E4_CHLRE/58-290       | A8J0E4.1 PF01716.16 | 84.00 | 0.00 |
| TRINITY_A8IBS4_CHLRE/250-480      | A8IBS4.1 PF00069.23 | 84.00 | 0.00 |
| TRINITY_A8HP28_CHLRE/42-229       | A8HP28.1 PF00117.26 | 84.00 | 0.00 |
| TRINITY_A8JH35_CHLRE/53-199       | A8JH35.1 PF13365.4; | 84.00 | 0.00 |
| TRINITY_D8TMC4_VOLCA/861-948      | D8TMC4.1 PF00679.22 | 84.00 | 0.00 |
| TRINITY_D8M985_BLAHO/78-127       | D8M985.1 PF01020.15 | 84.00 | 0.00 |
| TRINITY_D8M985_BLAHO/78-127       | D8M985.1 PF01020.15 | 84.00 | 0.00 |
| TRINITY_M4AL71_XIPMA/2-376        | M4AL71.1 PF00022.17 | 84.00 | 0.00 |
| TRINITY_A0A0D9WZB4_9ORYZ/74-294   | A0A0D9WZB4.1 PF0150 | 84.00 | 0.00 |
| TRINITY_DCOR_CHICK/34-267         | P27118.1 PF02784.14 | 83.90 | 0.00 |
| TRINITY_A0A0A1NEL1_9FUNG/19-112   | A0A0A1NEL1.1 PF0124 | 83.90 | 0.00 |
| TRINITY_A0A087XB41_POEFO/15-364   | A0A087XB41.1 PF0027 | 83.90 | 0.00 |
| TRINITY_Q3SDY2_PARTE/16-270       | Q3SDY2.1 PF00069.23 | 83.90 | 0.00 |
| TRINITY_D8TZD3_VOLCA/82-391       | D8TZD3.1 PF03320.11 | 83.90 | 0.00 |
| TRINITY_A0A061F6M9_THECC/11-124   | A0A061F6M9.1 PF0233 | 83.90 | 0.00 |
| TRINITY_A8J8B3_CHLRE/34-155       | A8J8B3.1 PF01678.17 | 83.90 | 0.00 |
| TRINITY_H2SPL5_TAKRU/365-613      | H2SPL5.1 PF00089.24 | 83.90 | 0.00 |
| TRINITY_A8I972_CHLRE/729-901      | A8I972.1 PF07724.12 | 83.90 | 0.00 |
| TRINITY_I0YMI8_9CHLO/391-532      | I0YMI8.1 PF00637.18 | 83.90 | 0.00 |
| TRINITY_E1Z4F7_CHLVA/133-410      | E1Z4F7.1 PF01494.17 | 83.90 | 0.00 |
| TRINITY_I3JNZ6_ORENI/13-146       | I3JNZ6.1 PF01124.16 | 83.80 | 0.00 |
| TRINITY_C6T9R8_SOYBN/244-401      | C6T9R8.1 PF02800.18 | 83.80 | 0.00 |
| TRINITY_A0A078IUM5_BRANA/135-325  | A0A078IUM5.1 PF0068 | 83.80 | 0.00 |
| TRINITY_J9ETJ6_9SPIT/34-321       | J9ETJ6.1 PF00069.23 | 83.80 | 0.00 |
| TRINITY_A8HMC0_CHLRE/22-264       | A8HMC0.1 PF00262.16 | 83.80 | 0.00 |
| TRINITY_I0Z2E4_9CHLO/16-194       | I0Z2E4.1 PF00270.27 | 83.80 | 0.00 |
| TRINITY_A8I9D7_CHLRE/561-758      | A8I9D7.1 PF13087.4; | 83.80 | 0.00 |
| TRINITY_D8U239_VOLCA/807-905      | D8U239.1 PF12796.5; | 83.80 | 0.00 |
| TRINITY_D8UD58_VOLCA/3-178        | D8UD58.1 PF01105.22 | 83.80 | 0.00 |
| TRINITY_A8HQG8_CHLRE/150-407      | A8HQG8.1 PF00481.19 | 83.80 | 0.00 |
| TRINITY_E1ZBA8_CHLVA/153-189      | E1ZBA8.1 PF03638.13 | 83.80 | 0.00 |
| TRINITY_A0A0D3DUG5_BRAOL/129-428  | A0A0D3DUG5.1 PF0055 | 83.80 | 0.00 |
| TRINITY_A0E9G8_PARTE/8-75         | A0E9G8.1 PF01111.17 | 83.80 | 0.00 |

|                                  |              |            |       |      |
|----------------------------------|--------------|------------|-------|------|
| TRINITY_D8UH33_VOLCA/82-118      | D8UH33.1     | PF00400.30 | 83.80 | 0.00 |
| TRINITY_A8J236_CHLRE/31-178      | A8J236.1     | PF00994.22 | 83.80 | 0.00 |
| TRINITY_D8TLJ6_VOLCA/4-294       | D8TLJ6.1     | PF00069.23 | 83.80 | 0.00 |
| TRINITY_D8U1L9_VOLCA/159-275     | D8U1L9.1     | PF01926.21 | 83.80 | 0.00 |
| TRINITY_Q2VZC8_MAGSA/26-510      | Q2VZC8.1     | PF01039.20 | 83.80 | 0.00 |
| TRINITY_A8HW48_CHLRE/10-108      | A8HW48.1     | PF00153.25 | 83.80 | 0.00 |
| TRINITY_B9H5A1_POPTR/60-257      | B9H5A1.2     | PF01171.18 | 83.80 | 0.00 |
| TRINITY_A8IYM0_CHLRE/156-461     | A8IYM0.1     | PF00365.18 | 83.80 | 0.00 |
| TRINITY_D8U6F9_VOLCA/1848-1955   | D8U6F9.1     | PF01326.17 | 83.80 | 0.00 |
| TRINITY_D8UFR9_VOLCA/717-924     | D8UFR9.1     | PF00481.19 | 83.80 | 0.00 |
| TRINITY_G5BQ42_HETGA/19-112      | G5BQ42.1     | PF12265.6; | 83.70 | 0.00 |
| TRINITY_D8TWE9_VOLCA/37-86       | D8TWE9.1     | PF00847.18 | 83.70 | 0.00 |
| TRINITY_P93106_CHLRE/182-347     | P93106.1     | PF02866.16 | 83.70 | 0.00 |
| TRINITY_D8UB15_VOLCA/264-324     | D8UB15.1     | PF03105.17 | 83.70 | 0.00 |
| TRINITY_D8U684_VOLCA/90-267      | D8U684.1     | PF00719.17 | 83.70 | 0.00 |
| TRINITY_D8U556_VOLCA/57-406      | D8U556.1     | PF00266.17 | 83.70 | 0.00 |
| TRINITY_A8IX80_CHLRE/79-600      | A8IX80.1     | PF00920.19 | 83.70 | 0.00 |
| TRINITY_A8IYR7_CHLRE/1-99        | A8IYR7.1     | PF00383.21 | 83.70 | 0.00 |
| TRINITY_D8TQ33_VOLCA/623-831     | D8TQ33.1     | PF00924.16 | 83.70 | 0.00 |
| TRINITY_D8UIN5_VOLCA/335-512     | D8UIN5.1     | PF01853.16 | 83.70 | 0.00 |
| TRINITY_Q3SDI8_PARTE/14-172      | Q3SDI8.1     | PF00071.20 | 83.60 | 0.00 |
| TRINITY_I7M1Z0_TETTS/100-295     | I7M1Z0.1     | PF00448.20 | 83.60 | 0.00 |
| TRINITY_Q22F12_TETTS/2057-2327   | Q22F12.2     | PF12775.5; | 83.60 | 0.00 |
| TRINITY_D8UDW8_VOLCA/692-831     | D8UDW8.1     | PF00271.29 | 83.60 | 0.00 |
| TRINITY_E9GBJ8_DAPPU/35-163      | E9GBJ8.1     | PF08240.10 | 83.60 | 0.00 |
| TRINITY_A8JDA5_CHLRE/11-126      | A8JDA5.1     | PF01412.16 | 83.60 | 0.00 |
| TRINITY_A0A0D2S1I5_GOSRA/100-245 | A0A0D2S1I5.1 | PF0000     | 83.60 | 0.00 |
| TRINITY_Q8LRU3_CHLRE/4-223       | Q8LRU3.1     | PF00091.23 | 83.60 | 0.00 |
| TRINITY_A8J4Q7_CHLRE/74-189      | A8J4Q7.1     | PF13806.4; | 83.60 | 0.00 |
| TRINITY_DC2L1_CHLRE/43-159       | Q7XA07.1     | PF08477.11 | 83.60 | 0.00 |
| TRINITY_L8HGI6_ACACA/131-203     | L8HGI6.1     | PF01191.17 | 83.60 | 0.00 |
| TRINITY_L5K2L6_PTEAL/7-264       | L5K2L6.1     | PF01180.19 | 83.60 | 0.00 |
| TRINITY_A8JCY4_CHLRE/40-377      | A8JCY4.1     | PF00274.17 | 83.60 | 0.00 |
| TRINITY_A8IRV0_CHLRE/377-444     | A8IRV0.1     | PF13432.4; | 83.60 | 0.00 |
| TRINITY_Q75VY8_CHLRE/41-205      | Q75VY8.1     | PF00504.19 | 83.60 | 0.00 |
| TRINITY_A8J0X7_CHLRE/68-433      | A8J0X7.1     | PF00266.17 | 83.60 | 0.00 |
| TRINITY_A8ICS4_CHLRE/173-343     | A8ICS4.1     | PF00270.27 | 83.60 | 0.00 |
| TRINITY_Q3SDY2_PARTE/16-270      | Q3SDY2.1     | PF00069.23 | 83.50 | 0.00 |
| TRINITY_V4U7H7_9ROSI/1-89        | V4U7H7.1     | PF01434.16 | 83.50 | 0.00 |
| TRINITY_G4ZB41_PHYSP/21-141      | G4ZB41.1     | PF00238.17 | 83.50 | 0.00 |
| TRINITY_D8TJ80_VOLCA/167-396     | D8TJ80.1     | PF01798.16 | 83.50 | 0.00 |
| TRINITY_A8IBY2_CHLRE/168-349     | A8IBY2.1     | PF00270.27 | 83.50 | 0.00 |
| TRINITY_D8U2B5_VOLCA/102-199     | D8U2B5.1     | PF00153.25 | 83.50 | 0.00 |
| TRINITY_Q41641_VOLCA/200-315     | Q41641.1     | PF00175.19 | 83.50 | 0.00 |
| TRINITY_Q6QJE1_CHLRE/131-273     | Q6QJE1.1     | PF00005.25 | 83.50 | 0.00 |
| TRINITY_A0A0A0KR46_CUCSA/71-179  | A0A0A0KR46.1 | PF0010     | 83.50 | 0.00 |
| TRINITY_A8IBY2_CHLRE/168-349     | A8IBY2.1     | PF00270.27 | 83.50 | 0.00 |
| TRINITY_A8HVQ1_CHLRE/1-188       | A8HVQ1.1     | PF01201.20 | 83.50 | 0.00 |
| TRINITY_I0YMX9_9CHLO/58-221      | I0YMX9.1     | PF04055.19 | 83.50 | 0.00 |
| TRINITY_D8TNN2_VOLCA/238-334     | D8TNN2.1     | PF07109.9; | 83.50 | 0.00 |
| TRINITY_D8UC50_VOLCA/133-380     | D8UC50.1     | PF00120.22 | 83.40 | 0.00 |
| TRINITY_D8TJK2_VOLCA/852-1116    | D8TJK2.1     | PF02913.17 | 83.40 | 0.00 |
| TRINITY_D8TH19_VOLCA/4-256       | D8TH19.1     | PF00069.23 | 83.40 | 0.00 |
| TRINITY_G0QJ15_ICHMG/1-104       | G0QJ15.1     | PF03660.12 | 83.30 | 0.00 |
| TRINITY_B9H869_POPTR/5-70        | B9H869.1     | PF01423.20 | 83.30 | 0.00 |
| TRINITY_L8HJG6_ACACA/1-66        | L8HJG6.1     | PF01246.18 | 83.30 | 0.00 |
| TRINITY_G0QVY0_ICHMG/92-151      | G0QVY0.1     | PF00137.19 | 83.30 | 0.00 |
| TRINITY_G2IVL3_PSEUL/3-119       | G2IVL3.1     | PF02678.14 | 83.30 | 0.00 |
| TRINITY_A0A0C4BF04_WHEAT/1-57    | A0A0C4BF04.1 | PF0042     | 83.30 | 0.00 |
| TRINITY_D8TXT2_VOLCA/30-122      | D8TXT2.1     | PF01329.17 | 83.30 | 0.00 |
| TRINITY_I0YYT0_9CHLO/28-209      | I0YYT0.1     | PF00227.24 | 83.30 | 0.00 |

|                                  |              |            |       |      |
|----------------------------------|--------------|------------|-------|------|
| TRINITY_H2MFG8_ORYLA/207-262     | H2MFG8.1     | PF00084.18 | 83.30 | 0.00 |
| TRINITY_L8H946_ACACA/11-172      | L8H946.1     | PF00071.20 | 83.30 | 0.00 |
| TRINITY_A8J8L3_CHLRE/10-81       | A8J8L3.1     | PF00173.26 | 83.30 | 0.00 |
| TRINITY_D8U6J6_VOLCA/71-117      | D8U6J6.1     | PF00301.18 | 83.30 | 0.00 |
| TRINITY_A8JID6_CHLRE/76-553      | A8JID6.1     | PF03219.12 | 83.30 | 0.00 |
| TRINITY_D8TWW0_VOLCA/346-387     | D8TWW0.1     | PF00400.30 | 83.30 | 0.00 |
| TRINITY_A8J8I4_CHLRE/47-327      | A8J8I4.1     | PF00069.23 | 83.30 | 0.00 |
| TRINITY_I0YRK9_9CHLO/3-162       | I0YRK9.1     | PF01734.20 | 83.30 | 0.00 |
| TRINITY_A0A087SJD8_AUXPR/7-268   | A0A087SJD8.1 | PF0014     | 83.30 | 0.00 |
| TRINITY_I0YJ54_9CHLO/13-175      | I0YJ54.1     | PF00071.20 | 83.30 | 0.00 |
| TRINITY_D8TSW4_VOLCA/28-79       | D8TSW4.1     | PF05047.14 | 83.30 | 0.00 |
| TRINITY_K9UHQ5_9CHRO/8-726       | K9UHQ5.1     | PF00223.17 | 83.30 | 0    |
| TRINITY_I0Z4C2_9CHLO/18-311      | I0Z4C2.1     | PF07992.12 | 83.30 | 0.00 |
| TRINITY_D8TY18_VOLCA/1-283       | D8TY18.1     | PF00128.22 | 83.30 | 0.00 |
| TRINITY_D8UFY8_VOLCA/167-203     | D8UFY8.1     | PF00400.30 | 83.30 | 0.00 |
| TRINITY_A8J5T5_CHLRE/1176-1312   | A8J5T5.1     | PF07304.9; | 83.30 | 0.00 |
| TRINITY_D8U425_VOLCA/27-321      | D8U425.1     | PF00579.23 | 83.30 | 0.00 |
| TRINITY_G0QQR7_ICHMG/565-788     | G0QQR7.1     | PF00149.26 | 83.30 | 0.00 |
| TRINITY_A8JD38_CHLRE/263-591     | A8JD38.1     | PF01179.18 | 83.30 | 0.00 |
| TRINITY_A0A059LSQ0_9CHLO/402-533 | A0A059LSQ0.1 | PF0000     | 83.30 | 0.00 |
| TRINITY_A8JEV0_CHLRE/9-145       | A8JEV0.1     | PF00179.24 | 83.30 | 0.00 |
| TRINITY_D8TGX0_VOLCA/2112-2380   | D8TGX0.1     | PF12780.5; | 83.30 | 0.00 |
| TRINITY_A8IV22_CHLRE/1629-1900   | A8IV22.1     | PF12775.5; | 83.30 | 0.00 |
| TRINITY_U5GTV8_POPTR/134-247     | U5GTV8.1     | PF02770.17 | 83.30 | 0.00 |
| TRINITY_I3KSH1_ORENI/53-153      | I3KSH1.1     | PF01551.20 | 83.20 | 0.00 |
| TRINITY_I7MG82_TETTS/90-413      | I7MG82.2     | PF00225.21 | 83.20 | 0.00 |
| TRINITY_A8I1Q9_CHLRE/4-259       | A8I1Q9.1     | PF00069.23 | 83.20 | 0.00 |
| TRINITY_D8U848_VOLCA/22-165      | D8U848.1     | PF00056.21 | 83.20 | 0.00 |
| TRINITY_D8TRJ8_VOLCA/7-191       | D8TRJ8.1     | PF00025.19 | 83.20 | 0.00 |
| TRINITY_A8I3T3_CHLRE/33-204      | A8I3T3.1     | PF03637.15 | 83.20 | 0.00 |
| TRINITY_E2B3F6_HARSA/38-132      | E2B3F6.1     | PF00338.20 | 83.20 | 0.00 |
| TRINITY_A8HVM3_CHLRE/412-558     | A8HVM3.1     | PF00587.23 | 83.20 | 0.00 |
| TRINITY_Q6VTH1_CHLRE/660-810     | Q6VTH1.1     | PF00005.25 | 83.20 | 0.00 |
| TRINITY_D8UEF1_VOLCA/38-210      | D8UEF1.1     | PF00213.16 | 83.20 | 0.00 |
| TRINITY_D8TRV6_VOLCA/279-993     | D8TRV6.1     | PF00343.18 | 83.20 | 0    |
| TRINITY_A0A022RWV0_ERYGU/192-356 | A0A022RWV0.1 | PF0286     | 83.10 | 0.00 |
| TRINITY_I7M317_TETTS/63-246      | I7M317.1     | PF10274.7; | 83.10 | 0.00 |
| TRINITY_A0A074SSQ8_HAMHA/28-92   | A0A074SSQ8.1 | PF1349     | 83.10 | 0.00 |
| TRINITY_A0A074SSQ8_HAMHA/28-92   | A0A074SSQ8.1 | PF1349     | 83.10 | 0.00 |
| TRINITY_F4PTT9_DICFS/32-203      | F4PTT9.1     | PF03637.15 | 83.10 | 0.00 |
| TRINITY_Q22MC3_TETTS/176-305     | Q22MC3.2     | PF00004.27 | 83.10 | 0.00 |
| TRINITY_D8R512_SELML/19-85       | D8R512.1     | PF01423.20 | 83.10 | 0.00 |
| TRINITY_D8TPA3_VOLCA/158-317     | D8TPA3.1     | PF01210.21 | 83.10 | 0.00 |
| TRINITY_W5Q6E7_SHEEP/39-245      | W5Q6E7.1     | PF00009.25 | 83.10 | 0.00 |
| TRINITY_D8TPM9_VOLCA/13-107      | D8TPM9.1     | PF01248.24 | 83.10 | 0.00 |
| TRINITY_D8TQG6_VOLCA/33-138      | D8TQG6.1     | PF00116.18 | 83.10 | 0.00 |
| TRINITY_A8JDW2_CHLRE/95-212      | A8JDW2.1     | PF04536.12 | 83.10 | 0.00 |
| TRINITY_I7M491_TETTS/56-185      | I7M491.1     | PF00134.21 | 83.10 | 0.00 |
| TRINITY_H0WZK7_OTOGA/180-497     | H0WZK7.1     | PF00728.20 | 83.10 | 0.00 |
| TRINITY_A8IZV8_CHLRE/1-142       | A8IZV8.1     | PF01217.18 | 83.10 | 0.00 |
| TRINITY_A8IZE7_CHLRE/354-483     | A8IZE7.1     | PF01380.20 | 83.10 | 0.00 |
| TRINITY_A0D281_PARTE/96-237      | A0D281.1     | PF07717.14 | 83.00 | 0.00 |
| TRINITY_A8JH12_CHLRE/1-129       | A8JH12.1     | PF00334.17 | 83.00 | 0.00 |
| TRINITY_D8UHK4_VOLCA/936-1344    | D8UHK4.1     | PF02901.13 | 83.00 | 0.00 |
| TRINITY_ALFC_CHLRE/33-377        | Q42690.2     | PF00274.17 | 83.00 | 0.00 |
| TRINITY_A8J0I0_CHLRE/22-263      | A8J0I0.1     | PF00573.20 | 83.00 | 0.00 |
| TRINITY_A8JE85_CHLRE/1-165       | A8JE85.1     | PF04502.11 | 83.00 | 0.00 |
| TRINITY_A8JDH8_CHLRE/1697-1852   | A8JDH8.1     | PF12775.5; | 83.00 | 0.00 |
| TRINITY_F0ZQ39_DICPU/536-700     | F0ZQ39.1     | PF07724.12 | 83.00 | 0.00 |
| TRINITY_C1FIS7_MICSR/1373-1603   | C1FIS7.1     | PF12774.5; | 83.00 | 0.00 |
| TRINITY_C1E0R4_MICSR/3145-3366   | C1E0R4.1     | PF12781.5; | 83.00 | 0.00 |

|                                 |                     |       |      |
|---------------------------------|---------------------|-------|------|
| TRINITY_C1E9Z7_MICSR/4-73       | C1E9Z7.1 PF00240.21 | 83.00 | 0.00 |
| TRINITY_A0A077ZWC4_STYLE/46-188 | A0A077ZWC4.1 PF0058 | 82.90 | 0.00 |
| TRINITY_E8RSH0_ASTEC/64-174     | E8RSH0.1 PF01058.20 | 82.90 | 0.00 |
| TRINITY_A9SLZ5_PHYPA/42-82      | A9SLZ5.1 PF00400.30 | 82.90 | 0.00 |
| TRINITY_L1IT40_GUIITH/528-609   | L1IT40.1 PF00005.25 | 82.90 | 0.00 |
| TRINITY_D8TIC8_VOLCA/15-143     | D8TIC8.1 PF00416.20 | 82.90 | 0.00 |
| TRINITY_A8HQ42_CHLRE/53-87      | A8HQ42.1 PF00320.25 | 82.90 | 0.00 |
| TRINITY_Q24HK6_TETTS/40-325     | Q24HK6.2 PF00069.23 | 82.90 | 0.00 |
| TRINITY_D8TPZ8_VOLCA/37-142     | D8TPZ8.1 PF00085.18 | 82.90 | 0.00 |
| TRINITY_A8HWM1_CHLRE/550-584    | A8HWM1.1 PF00320.25 | 82.90 | 0.00 |
| TRINITY_A8JG07_CHLRE/219-371    | A8JG07.1 PF00733.19 | 82.90 | 0.00 |
| TRINITY_D8U3Y9_VOLCA/216-326    | D8U3Y9.1 PF01926.21 | 82.90 | 0.00 |
| TRINITY_A8JDY6_CHLRE/296-407    | A8JDY6.1 PF00004.27 | 82.90 | 0.00 |
| TRINITY_D8TYN2_VOLCA/14-312     | D8TYN2.1 PF01593.22 | 82.90 | 0.00 |
| TRINITY_D8TTY1_VOLCA/522-604    | D8TTY1.1 PF04232.10 | 82.90 | 0.00 |
| TRINITY_A8J6A7_CHLRE/70-251     | A8J6A7.1 PF01507.17 | 82.90 | 0.00 |
| TRINITY_D8TM85_VOLCA/1-134      | D8TM85.1 PF00125.22 | 82.90 | 0.00 |
| TRINITY_I0YXS6_9CHLO/40-191     | I0YXS6.1 PF14538.4; | 82.90 | 0.00 |
| TRINITY_A0A0A0LUC2_CUCSA/32-231 | A0A0A0LUC2.1 PF0575 | 82.80 | 0.00 |
| TRINITY_D8TUP1_VOLCA/244-467    | D8TUP1.1 PF00198.21 | 82.80 | 0.00 |
| TRINITY_L8HBF0_ACACA/20-205     | L8HBF0.1 PF16661.3; | 82.80 | 0.00 |
| TRINITY_M2Y563_GALSU/5-612      | M2Y563.1 PF00012.18 | 82.80 | 0.00 |
| TRINITY_L5K105_PTEAL/5-361      | L5K105.1 PF00009.25 | 82.80 | 0.00 |
| TRINITY_A0A087SET3_AUXPR/66-164 | A0A087SET3.1 PF0067 | 82.80 | 0.00 |
| TRINITY_D8TY17_VOLCA/76-176     | D8TY17.1 PF14772.4; | 82.80 | 0.00 |
| TRINITY_A8J3Q6_CHLRE/61-217     | A8J3Q6.1 PF01583.18 | 82.80 | 0.00 |
| TRINITY_CCR1_MAIZE/36-291       | P0C8M8.1 PF00069.23 | 82.80 | 0.00 |
| TRINITY_E1Z1Z9_CHLVA/129-187    | E1Z1Z9.1 PF00288.24 | 82.80 | 0.00 |
| TRINITY_D8TS23_VOLCA/1180-1488  | D8TS23.1 PF13086.4; | 82.80 | 0.00 |
| TRINITY_I7M2W8_TETTS/134-424    | I7M2W8.2 PF00069.23 | 82.80 | 0.00 |
| TRINITY_A4SAL7_OSTLU/51-446     | A4SAL7.1 PF00890.22 | 82.80 | 0.00 |
| TRINITY_A8J6B1_CHLRE/63-155     | A8J6B1.1 PF16531.3; | 82.80 | 0.00 |
| TRINITY_D8UAY5_VOLCA/11-407     | D8UAY5.1 PF01053.18 | 82.80 | 0.00 |
| TRINITY_A8JFR3_CHLRE/124-216    | A8JFR3.1 PF12894.5; | 82.80 | 0.00 |
| TRINITY_I3MAK6 ICTTR/1-58       | I3MAK6.1 PF08039.9; | 82.80 | 0.00 |
| TRINITY_Q23KE9_TETTS/6-80       | Q23KE9.1 PF03671.12 | 82.70 | 0.00 |
| TRINITY_G0QTM5_ICHMG/183-312    | G0QTM5.1 PF00004.27 | 82.70 | 0.00 |
| TRINITY_A8JF35_CHLRE/233-544    | A8JF35.1 PF00749.19 | 82.70 | 0.00 |
| TRINITY_D8U6Z7_VOLCA/40-340     | D8U6Z7.1 PF00069.23 | 82.70 | 0.00 |
| TRINITY_D8TRT7_VOLCA/572-667    | D8TRT7.1 PF12796.5; | 82.70 | 0.00 |
| TRINITY_E1Z8B3_CHLVA/25-324     | E1Z8B3.1 PF00557.22 | 82.70 | 0.00 |
| TRINITY_E1Z1V8_CHLVA/12-192     | E1Z1V8.1 PF04321.15 | 82.70 | 0.00 |
| TRINITY_A8I629_CHLRE/36-353     | A8I629.1 PF00749.19 | 82.70 | 0.00 |
| TRINITY_A8J5U1_CHLRE/87-377     | A8J5U1.1 PF00579.23 | 82.70 | 0.00 |
| TRINITY_I0YV56_9CHLO/97-234     | I0YV56.1 PF03947.16 | 82.70 | 0.00 |
| TRINITY_A8HQ21_CHLRE/63-562     | A8HQ21.1 PF02990.14 | 82.70 | 0.00 |
| TRINITY_D8U5Y2_VOLCA/348-477    | D8U5Y2.1 PF07728.12 | 82.70 | 0.00 |
| TRINITY_H3AVQ3_LATCH/6-99       | H3AVQ3.1 PF01329.17 | 82.60 | 0.00 |
| TRINITY_E1Z9Y1_CHLVA/87-258     | E1Z9Y1.1 PF00270.27 | 82.60 | 0.00 |
| TRINITY_I0Z4A3_9CHLO/67-238     | I0Z4A3.1 PF00270.27 | 82.60 | 0.00 |
| TRINITY_W1NKM0_AMBTC/30-75      | W1NKM0.1 PF00249.29 | 82.60 | 0.00 |
| TRINITY_V4B2P9_LOTGI/634-783    | V4B2P9.1 PF07717.14 | 82.60 | 0.00 |
| TRINITY_A0A061E963_THECC/10-335 | A0A061E963.1 PF0153 | 82.60 | 0.00 |
| TRINITY_D8TSR8_VOLCA/68-251     | D8TSR8.1 PF00504.19 | 82.60 | 0.00 |
| TRINITY_A0CZ26_PARTE/38-173     | A0CZ26.1 PF07728.12 | 82.60 | 0.00 |
| TRINITY_A9RUJ1_PHYPA/231-300    | A9RUJ1.1 PF07883.9; | 82.60 | 0.00 |
| TRINITY_A8I982_CHLRE/2-191      | A8I982.1 PF00827.15 | 82.60 | 0.00 |
| TRINITY_D8TKY7_VOLCA/129-300    | D8TKY7.1 PF13522.4; | 82.60 | 0.00 |
| TRINITY_A8HN92_CHLRE/243-462    | A8HN92.1 PF00215.22 | 82.60 | 0.00 |
| TRINITY_D8THW4_VOLCA/5-250      | D8THW4.1 PF00009.25 | 82.60 | 0.00 |
| TRINITY_M4EX21_BRARP/977-1108   | M4EX21.1 PF00004.27 | 82.60 | 0.00 |



|                                    |              |            |       |      |
|------------------------------------|--------------|------------|-------|------|
| TRINITY_I0Z891_9CHLO/1-317         | I0Z891.1     | PF07992.12 | 82.60 | 0.00 |
| TRINITY_G1NHDO_MELGA/86-213        | G1NHDO.2     | PF04774.13 | 82.50 | 0.00 |
| TRINITY_A0A0B0NLB6_GOSAR/4-84      | A0A0B0NLB6.1 | PF00088    | 82.50 | 0.00 |
| TRINITY_F0XVD2_AURAN/21-77         | F0XVD2.1     | PF08207.10 | 82.50 | 0.00 |
| TRINITY_D8SVX9_SELML/23-119        | D8SVX9.1     | PF02678.14 | 82.50 | 0.00 |
| TRINITY_D8TK99_VOLCA/5-264         | D8TK99.1     | PF00069.23 | 82.50 | 0.00 |
| TRINITY_E1Z8R1_CHLVA/55-111        | E1Z8R1.1     | PF00886.17 | 82.50 | 0.00 |
| TRINITY_G3H8L7_CRIGR/22-183        | G3H8L7.1     | PF00071.20 | 82.50 | 0.00 |
| TRINITY_A0A0B2VM41_TOXCA/6-611     | A0A0B2VM41.1 | PF0001     | 82.50 | 0.00 |
| TRINITY_D8TJ34_VOLCA/10-443        | D8TJ34.1     | PF04209.11 | 82.50 | 0.00 |
| TRINITY_E1ZSY5_CHLVA/84-144        | E1ZSY5.1     | PF01381.20 | 82.50 | 0.00 |
| TRINITY_A8ISP7_CHLRE/3-65          | A8ISP7.1     | PF01176.17 | 82.50 | 0.00 |
| TRINITY_H2TQQ7_TAKRU/1040-1270     | H2TQQ7.1     | PF07678.12 | 82.50 | 0.00 |
| TRINITY_T1IWV5_STRMM/90-186        | T1IWV5.1     | PF04900.10 | 82.50 | 0.00 |
| TRINITY_D8U8D1_VOLCA/1822-1862     | D8U8D1.1     | PF01465.18 | 82.50 | 0.00 |
| TRINITY_L8GSE6_ACACA/5-142         | L8GSE6.1     | PF00179.24 | 82.50 | 0.00 |
| TRINITY_V4N6Q8_EUTSA/185-283       | V4N6Q8.1     | PF00153.25 | 82.50 | 0.00 |
| TRINITY_A8JCY4_CHLRE/40-377        | A8JCY4.1     | PF00274.17 | 82.50 | 0.00 |
| TRINITY_A8IA77_CHLRE/87-390        | A8IA77.1     | PF04107.11 | 82.50 | 0.00 |
| TRINITY_A0A0B2VWK9_TOXCA/3-379     | A0A0B2VWK9.1 | PF0002     | 82.50 | 0.00 |
| TRINITY_A8HXR2_CHLRE/224-293       | A8HXR2.1     | PF03144.23 | 82.50 | 0.00 |
| TRINITY_D8UHI3_VOLCA/791-830       | D8UHI3.1     | PF00400.30 | 82.50 | 0.00 |
| TRINITY_A0A078ARV8_STYLE/1404-1634 | A0A078ARV8.1 | PF1277     | 82.50 | 0.00 |
| TRINITY_G3NTN6_GASAC/1-127         | G3NTN6.1     | PF14651.4; | 82.40 | 0.00 |
| TRINITY_D8U526_VOLCA/675-725       | D8U526.1     | PF00249.29 | 82.40 | 0.00 |
| TRINITY_B3RK37_TRIAD/426-460       | B3RK37.1     | PF00066.15 | 82.40 | 0.00 |
| TRINITY_Q7CG93_YERPE/8-147         | Q7CG93.1     | PF05638.10 | 82.40 | 0.00 |
| TRINITY_A0A058ZDS7_9EUKA/266-414   | A0A058ZDS7.1 | PF0044     | 82.40 | 0.00 |
| TRINITY_D8TYV7_VOLCA/69-451        | D8TYV7.1     | PF00162.17 | 82.40 | 0.00 |
| TRINITY_D8U419_VOLCA/199-357       | D8U419.1     | PF02774.16 | 82.40 | 0.00 |
| TRINITY_D8THU8_VOLCA/20-213        | D8THU8.1     | PF09366.8; | 82.40 | 0.00 |
| TRINITY_D8UIX5_VOLCA/108-320       | D8UIX5.1     | PF02190.14 | 82.40 | 0.00 |
| TRINITY_D8UHM3_VOLCA/170-329       | D8UHM3.1     | PF02731.13 | 82.40 | 0.00 |
| TRINITY_D8TJB2_VOLCA/33-542        | D8TJB2.1     | PF00118.22 | 82.40 | 0.00 |
| TRINITY_D8U7E0_VOLCA/85-160        | D8U7E0.1     | PF07444.9; | 82.40 | 0.00 |
| TRINITY_A9U381_PHYPA/155-222       | A9U381.1     | PF00462.22 | 82.40 | 0.00 |
| TRINITY_C1N2E9_MICPC/1-67          | C1N2E9.1     | PF02325.15 | 82.40 | 0.00 |
| TRINITY_I0YRZ2_9CHLO/5-72          | I0YRZ2.1     | PF01423.20 | 82.40 | 0.00 |
| TRINITY_I0J182_9ORYZ/7-170         | I0J182.1     | PF00160.19 | 82.40 | 0.00 |
| TRINITY_E1Z3X9_CHLVA/250-317       | E1Z3X9.1     | PF01485.19 | 82.40 | 0.00 |
| TRINITY_L8HCL2_ACACA/4-88          | L8HCL2.1     | PF01780.17 | 82.40 | 0.00 |
| TRINITY_A8HSJ3_CHLRE/66-324        | A8HSJ3.1     | PF00069.23 | 82.40 | 0.00 |
| TRINITY_A8I2V5_CHLRE/11-180        | A8I2V5.1     | PF03031.16 | 82.40 | 0.00 |
| TRINITY_J9HRP7_9SPIT/567-697       | J9HRP7.1     | PF00004.27 | 82.40 | 0.00 |
| TRINITY_M1BFN4_SOLTU/162-322       | M1BFN4.1     | PF00078.25 | 82.40 | 0.00 |
| TRINITY_A0A0G4F730_9ALVE/203-338   | A0A0G4F730.1 | PF0000     | 82.40 | 0.00 |
| TRINITY_K4B790_SOLLC/10-78         | K4B790.1     | PF06522.9; | 82.30 | 0.00 |
| TRINITY_D8U7R9_VOLCA/21-206        | D8U7R9.1     | PF01728.17 | 82.30 | 0.00 |
| TRINITY_L8GQF1_ACACA/612-741       | L8GQF1.1     | PF13086.4; | 82.30 | 0.00 |
| TRINITY_E1ZKW0_CHLVA/235-347       | E1ZKW0.1     | PF00271.29 | 82.30 | 0.00 |
| TRINITY_D8TKH8_VOLCA/19-197        | D8TKH8.1     | PF02779.22 | 82.30 | 0.00 |
| TRINITY_A8J507_CHLRE/124-185       | A8J507.1     | PF00226.29 | 82.30 | 0.00 |
| TRINITY_A8IZ79_CHLRE/73-247        | A8IZ79.1     | PF16166.3; | 82.30 | 0.00 |
| TRINITY_D7L8A8_ARALL/361-535       | D7L8A8.1     | PF00270.27 | 82.30 | 0.00 |
| TRINITY_I0Z7A5_9CHLO/134-364       | I0Z7A5.1     | PF00198.21 | 82.30 | 0.00 |
| TRINITY_I7LXE3_TETTS/981-1239      | I7LXE3.2     | PF00069.23 | 82.20 | 0.00 |
| TRINITY_W8F233_9BACT/10-269        | W8F233.1     | PF00795.20 | 82.20 | 0.00 |
| TRINITY_A8IKZ2_CHLRE/2-187         | A8IKZ2.1     | PF17135.2; | 82.20 | 0.00 |
| TRINITY_D3BR60_POLPA/271-389       | D3BR60.1     | PF10996.6; | 82.20 | 0.00 |
| TRINITY_I7MIQ7_TETTS/80-231        | I7MIQ7.1     | PF00005.25 | 82.20 | 0.00 |
| TRINITY_A8IZW6_CHLRE/85-202        | A8IZW6.1     | PF13793.4; | 82.20 | 0.00 |

|                                 |              |            |       |      |
|---------------------------------|--------------|------------|-------|------|
| TRINITY_I7MA96_TETTS/697-955    | I7MA96.1     | PF00069.23 | 82.20 | 0.00 |
| TRINITY_DYHC2_CHLRE/269-725     | Q9SMH5.2     | PF08385.10 | 82.20 | 0.00 |
| TRINITY_F0ZT81_DICPU/1933-2183  | F0ZT81.1     | PF00454.25 | 82.20 | 0.00 |
| TRINITY_D8TTF3_VOLCA/31-178     | D8TTF3.1     | PF00156.25 | 82.20 | 0.00 |
| TRINITY_D8TSK6_VOLCA/99-334     | D8TSK6.1     | PF04884.12 | 82.20 | 0.00 |
| TRINITY_A8JID6_CHLRE/76-553     | A8JID6.1     | PF03219.12 | 82.20 | 0.00 |
| TRINITY_A8IS14_CHLRE/97-427     | A8IS14.1     | PF00344.18 | 82.20 | 0.00 |
| TRINITY_W7XBY2_TETTS/200-272    | W7XBY2.1     | PF00317.19 | 82.20 | 0.00 |
| TRINITY_D6X1Y7_TRICA/282-433    | D6X1Y7.1     | PF00160.19 | 82.20 | 0.00 |
| TRINITY_A8IC95_CHLRE/519-881    | A8IC95.1     | PF02896.16 | 82.20 | 0.00 |
| TRINITY_D8TUL0_VOLCA/18-146     | D8TUL0.1     | PF04857.18 | 82.20 | 0.00 |
| TRINITY_A8HX70_CHLRE/175-478    | A8HX70.1     | PF00365.18 | 82.20 | 0.00 |
| TRINITY_D8TWX6_VOLCA/34-164     | D8TWX6.1     | PF01467.24 | 82.20 | 0.00 |
| TRINITY_Q9AU05_CHLRE/145-232    | Q9AU05.1     | PF02790.13 | 82.20 | 0.00 |
| TRINITY_A0EGX1_PARTE/32-77      | A0EGX1.1     | PF00249.29 | 82.20 | 0.00 |
| TRINITY_D8U8F5_VOLCA/8-541      | D8U8F5.1     | PF01602.18 | 82.20 | 0.00 |
| TRINITY_A8J015_CHLRE/55-285     | A8J015.1     | PF00487.22 | 82.20 | 0.00 |
| TRINITY_V8NPK8_OPHHA/4-98       | V8NPK8.1     | PF00255.17 | 82.10 | 0.00 |
| TRINITY_I7MMG8_TETTS/8-169      | I7MMG8.1     | PF00071.20 | 82.10 | 0.00 |
| TRINITY_R1FJW2_EMIHU/3-75       | R1FJW2.1     | PF13499.4; | 82.10 | 0.00 |
| TRINITY_D8U2Q4_VOLCA/55-171     | D8U2Q4.1     | PF13793.4; | 82.10 | 0.00 |
| TRINITY_I7MMG8_TETTS/8-169      | I7MMG8.1     | PF00071.20 | 82.10 | 0.00 |
| TRINITY_Q22ZH2_TETTS/394-433    | Q22ZH2.1     | PF00400.30 | 82.10 | 0.00 |
| TRINITY_A0A0D2W168_CAPO3/23-192 | A0A0D2W168.1 | PF0007     | 82.10 | 0.00 |
| TRINITY_J9EM83_9SPIT/2083-2229  | J9EM83.1     | PF07728.12 | 82.10 | 0.00 |
| TRINITY_G0QXJ5_ICHMG/145-200    | G0QXJ5.1     | PF13418.4; | 82.10 | 0.00 |
| TRINITY_A8IQ53_CHLRE/2-175      | A8IQ53.1     | PF01184.17 | 82.10 | 0.00 |
| TRINITY_A8HXD8_CHLRE/76-155     | A8HXD8.1     | PF13417.4; | 82.10 | 0.00 |
| TRINITY_D8UID5_VOLCA/1-40       | D8UID5.1     | PF06203.12 | 82.10 | 0.00 |
| TRINITY_A8IJP9_CHLRE/151-256    | A8IJP9.1     | PF13640.4; | 82.10 | 0.00 |
| TRINITY_A0A022QEC8_ERYGU/82-317 | A0A022QEC8.1 | PF1356     | 82.10 | 0.00 |
| TRINITY_I4Y8U9_WALMC/106-438    | I4Y8U9.1     | PF00069.23 | 82.10 | 0.00 |
| TRINITY_Q234I5_TETTS/11-618     | Q234I5.1     | PF00012.18 | 82.10 | 0.00 |
| TRINITY_D8TRZ2_VOLCA/509-630    | D8TRZ2.1     | PF03109.14 | 82.10 | 0.00 |
| TRINITY_L8H0I9_ACACA/149-226    | L8H0I9.1     | PF01883.17 | 82.10 | 0.00 |
| TRINITY_G3AEY0_SPAPN/798-1287   | G3AEY0.1     | PF00940.17 | 82.10 | 0.00 |
| TRINITY_I7LV38_TETTS/14-414     | I7LV38.1     | PF06068.11 | 82.10 | 0.00 |
| TRINITY_A8JDY0_CHLRE/19-363     | A8JDY0.1     | PF00224.19 | 82.10 | 0.00 |
| TRINITY_D8U9Q4_VOLCA/207-245    | D8U9Q4.1     | PF00400.30 | 82.10 | 0.00 |
| TRINITY_A8JHU7_CHLRE/2550-2822  | A8JHU7.1     | PF12775.5; | 82.10 | 0.00 |
| TRINITY_G3PS60_GASAC/17-104     | G3PS60.1     | PF00428.17 | 82.00 | 0.00 |
| TRINITY_E8RSH0_ASTEC/64-174     | E8RSH0.1     | PF01058.20 | 82.00 | 0.00 |
| TRINITY_W1Q9H4_OGAPD/48-245     | W1Q9H4.1     | PF00149.26 | 82.00 | 0.00 |
| TRINITY_G0R338_ICHMG/5-176      | G0R338.1     | PF00025.19 | 82.00 | 0.00 |
| TRINITY_G0R338_ICHMG/5-176      | G0R338.1     | PF00025.19 | 82.00 | 0.00 |
| TRINITY_G0R338_ICHMG/5-176      | G0R338.1     | PF00025.19 | 82.00 | 0.00 |
| TRINITY_D8TSB4_VOLCA/10-142     | D8TSB4.1     | PF00380.17 | 82.00 | 0.00 |
| TRINITY_D8U1I4_VOLCA/34-292     | D8U1I4.1     | PF00069.23 | 82.00 | 0.00 |
| TRINITY_D8UJB1_VOLCA/3-238      | D8UJB1.1     | PF00463.19 | 82.00 | 0.00 |
| TRINITY_A8IKK2_CHLRE/89-210     | A8IKK2.1     | PF05542.9; | 82.00 | 0.00 |
| TRINITY_G0QMQ9_ICHMG/30-285     | G0QMQ9.1     | PF00069.23 | 82.00 | 0.00 |
| TRINITY_E1ZQ07_CHLVA/11-271     | E1ZQ07.1     | PF00899.19 | 82.00 | 0.00 |
| TRINITY_D8TQN3_VOLCA/192-374    | D8TQN3.1     | PF01077.20 | 82.00 | 0.00 |
| TRINITY_D8UA51_VOLCA/129-220    | D8UA51.1     | PF00153.25 | 82.00 | 0.00 |
| TRINITY_A8J063_CHLRE/3352-4065  | A8J063.1     | PF03028.13 | 82.00 | 0.00 |
| TRINITY_A0A087SEC8_AUXPR/36-432 | A0A087SEC8.1 | PF0089     | 82.00 | 0.00 |
| TRINITY_H0V7Z8_CAVPO/523-660    | H0V7Z8.1     | PF00748.17 | 82.00 | 0.00 |
| TRINITY_J9IEB5_9SPIT/3-74       | J9IEB5.1     | PF00240.21 | 81.90 | 0.00 |
| TRINITY_Q22B43_TETTS/7-144      | Q22B43.2     | PF00179.24 | 81.90 | 0.00 |
| TRINITY_H3CZ55_TETNG/1-146      | H3CZ55.1     | PF01429.17 | 81.90 | 0.00 |
| TRINITY_A0CRG1_PARTE/30-317     | A0CRG1.1     | PF00069.23 | 81.90 | 0.00 |

|                                  |              |            |       |      |
|----------------------------------|--------------|------------|-------|------|
| TRINITY_A8HVE6_CHLRE/210-429     | A8HVE6.1     | PF02138.16 | 81.90 | 0.00 |
| TRINITY_A8JBC9_CHLRE/56-551      | A8JBC9.1     | PF02990.14 | 81.90 | 0.00 |
| TRINITY_A8I9B0_CHLRE/60-311      | A8I9B0.1     | PF00378.18 | 81.90 | 0.00 |
| TRINITY_D8TGZ9_VOLCA/33-210      | D8TGZ9.1     | PF02779.22 | 81.90 | 0.00 |
| TRINITY_A8IME8_CHLRE/59-180      | A8IME8.1     | PF02657.13 | 81.90 | 0.00 |
| TRINITY_D8U6R9_VOLCA/23-342      | D8U6R9.1     | PF13393.4; | 81.90 | 0.00 |
| TRINITY_D8U105_VOLCA/3812-4513   | D8U105.1     | PF03028.13 | 81.90 | 0.00 |
| TRINITY_D8U1V6_VOLCA/36-163      | D8U1V6.1     | PF01553.19 | 81.90 | 0.00 |
| TRINITY_I1I505_BRADI/3-74        | I1I505.1     | PF00240.21 | 81.90 | 0.00 |
| TRINITY_D8TT62_VOLCA/15-98       | D8TT62.1     | PF02195.16 | 81.90 | 0.00 |
| TRINITY_R4XHB2_TAPDE/18-493      | R4XHB2.1     | PF03155.13 | 81.80 | 0.00 |
| TRINITY_M0ZQ44_SOLTU/158-223     | M0ZQ44.1     | PF01529.18 | 81.80 | 0.00 |
| TRINITY_A0A067MUJ0_9HOMO/48-517  | A0A067MUJ0.1 | PF0129     | 81.80 | 0.00 |
| TRINITY_D8R071_SELML/400-560     | D8R071.1     | PF00270.27 | 81.80 | 0.00 |
| TRINITY_Q24HK6_TETTS/40-325      | Q24HK6.2     | PF00069.23 | 81.80 | 0.00 |
| TRINITY_A8JHU6_CHLRE/79-333      | A8JHU6.1     | PF00348.15 | 81.80 | 0.00 |
| TRINITY_A0A0B0PX49_GOSAR/4-58    | A0A0B0PX49.1 | PF0520     | 81.80 | 0.00 |
| TRINITY_D8UCV1_VOLCA/7-83        | D8UCV1.1     | PF01423.20 | 81.80 | 0.00 |
| TRINITY_D8TUY4_VOLCA/175-207     | D8TUY4.1     | PF00023.28 | 81.80 | 0.00 |
| TRINITY_A0A078BA60_STYLE/56-451  | A0A078BA60.1 | PF0089     | 81.80 | 0.00 |
| TRINITY_I0Z282_9CHLO/43-174      | I0Z282.1     | PF00004.27 | 81.80 | 0.00 |
| TRINITY_Q23TW8_TETTS/466-626     | Q23TW8.2     | PF05063.12 | 81.80 | 0.00 |
| TRINITY_G7E302_MIXOS/5-177       | G7E302.1     | PF00163.17 | 81.80 | 0.00 |
| TRINITY_E4WQH8_OIKDI/91-124      | E4WQH8.1     | PF16211.3; | 81.80 | 0.00 |
| TRINITY_A8J605_CHLRE/116-269     | A8J605.1     | PF13883.4; | 81.80 | 0.00 |
| TRINITY_I0Z7A6_9CHLO/48-210      | I0Z7A6.1     | PF00504.19 | 81.80 | 0.00 |
| TRINITY_A8JIK2_CHLRE/145-177     | A8JIK2.1     | PF08209.9; | 81.80 | 0.00 |
| TRINITY_A8J082_CHLRE/38-315      | A8J082.1     | PF07651.14 | 81.80 | 0.00 |
| TRINITY_D8TQJ1_VOLCA/374-494     | D8TQJ1.1     | PF02852.20 | 81.80 | 0.00 |
| TRINITY_A8HN02_CHLRE/89-380      | A8HN02.1     | PF03151.14 | 81.80 | 0.00 |
| TRINITY_W4XSP0_STRPU/530-678     | W4XSP0.1     | PF00005.25 | 81.80 | 0.00 |
| TRINITY_H2ZTY4_LATCH/445-478     | H2ZTY4.1     | PF01422.15 | 81.80 | 0.00 |
| TRINITY_A9RMZ2_PHYPA/19-84       | A9RMZ2.1     | PF01918.19 | 81.80 | 0.00 |
| TRINITY_D7FRY4_ECTSI/164-585     | D7FRY4.1     | PF01964.16 | 81.80 | 0.00 |
| TRINITY_A8IUF0_CHLRE/3102-3438   | A8IUF0.1     | PF12777.5; | 81.80 | 0.00 |
| TRINITY_D8U7P6_VOLCA/2512-2779   | D8U7P6.1     | PF12780.5; | 81.80 | 0.00 |
| TRINITY_A8ISE0_CHLRE/683-777     | A8ISE0.1     | PF00004.27 | 81.70 | 0.00 |
| TRINITY_A0BZZ4_PARTE/21-91       | A0BZZ4.1     | PF00076.20 | 81.70 | 0.00 |
| TRINITY_G0R0B5_ICHMG/45-346      | G0R0B5.1     | PF03133.13 | 81.70 | 0.00 |
| TRINITY_E3T5C1_CROVB/3-74        | E3T5C1.1     | PF00240.21 | 81.70 | 0.00 |
| TRINITY_F2E9J3_HORVD/38-108      | F2E9J3.1     | PF00076.20 | 81.70 | 0.00 |
| TRINITY_A8JGX0_CHLRE/17-261      | A8JGX0.1     | PF01564.15 | 81.70 | 0.00 |
| TRINITY_A8IY81_CHLRE/272-383     | A8IY81.1     | PF00012.18 | 81.70 | 0.00 |
| TRINITY_D8U7Y0_VOLCA/201-343     | D8U7Y0.1     | PF07479.12 | 81.70 | 0.00 |
| TRINITY_I0Z604_9CHLO/123-286     | I0Z604.1     | PF03483.15 | 81.70 | 0.00 |
| TRINITY_A8IEE5_CHLRE/59-347      | A8IEE5.1     | PF00291.23 | 81.70 | 0.00 |
| TRINITY_A0A068S968_9FUNG/271-412 | A0A068S968.1 | PF0000     | 81.70 | 0.00 |
| TRINITY_A8HRV5_CHLRE/9-80        | A8HRV5.1     | PF00076.20 | 81.70 | 0.00 |
| TRINITY_D8U459_VOLCA/3934-4647   | D8U459.1     | PF03028.13 | 81.70 | 0    |
| TRINITY_D3BML8_POLPA/780-958     | D3BML8.1     | PF02779.22 | 81.60 | 0.00 |
| TRINITY_A8HMX2_CHLRE/97-689      | A8HMX2.1     | PF02901.13 | 81.60 | 0.00 |
| TRINITY_I7MHK8_TETTS/244-385     | I7MHK8.1     | PF02773.14 | 81.60 | 0.00 |
| TRINITY_D8U553_VOLCA/3-176       | D8U553.1     | PF00025.19 | 81.60 | 0.00 |
| TRINITY_L8GIX6_ACACA/63-236      | L8GIX6.1     | PF01512.15 | 81.60 | 0.00 |
| TRINITY_I7M1K4_TETTS/30-285      | I7M1K4.1     | PF00069.23 | 81.60 | 0.00 |
| TRINITY_D8U4L6_VOLCA/1038-1075   | D8U4L6.1     | PF06596.9; | 81.60 | 0.00 |
| TRINITY_A8J2T5_CHLRE/13-90       | A8J2T5.1     | PF03061.20 | 81.60 | 0.00 |
| TRINITY_M0S879_MUSAM/54-249      | M0S879.1     | PF00149.26 | 81.60 | 0.00 |
| TRINITY_A0A087SIS7_AUXPR/115-152 | A0A087SIS7.1 | PF0363     | 81.60 | 0.00 |
| TRINITY_M0TRI3_MUSAM/8-121       | M0TRI3.1     | PF16906.3; | 81.60 | 0.00 |
| TRINITY_W5JLT4_ANODA/1951-2064   | W5JLT4.1     | PF00271.29 | 81.60 | 0.00 |

|                                  |                     |       |      |
|----------------------------------|---------------------|-------|------|
| TRINITY_A0A096P9N6_OSTTA/415-452 | A0A096P9N6.1 PF0062 | 81.60 | 0.00 |
| TRINITY_A8HMC4_CHLRE/105-371     | A8HMC4.1 PF00487.22 | 81.60 | 0.00 |
| TRINITY_A0D3A2_PARTE/89-647      | A0D3A2.1 PF01175.16 | 81.60 | 0.00 |
| TRINITY_D8U5R4_VOLCA/23-96       | D8U5R4.1 PF00076.20 | 81.60 | 0.00 |
| TRINITY_G0QQT8_ICHMG/33-151      | G0QQT8.1 PF00411.17 | 81.50 | 0.00 |
| TRINITY_I0Z847_9CHLO/542-718     | I0Z847.1 PF13307.4; | 81.50 | 0.00 |
| TRINITY_A0A078AUP9_STYLE/47-242  | A0A078AUP9.1 PF0014 | 81.50 | 0.00 |
| TRINITY_J9J3Q5_9SPIT/1074-1171   | J9J3Q5.1 PF13646.4; | 81.50 | 0.00 |
| TRINITY_D8TNM0_VOLCA/732-959     | D8TNM0.1 PF00889.17 | 81.50 | 0.00 |
| TRINITY_D3BG64_POLPA/3687-3964   | D3BG64.1 PF00454.25 | 81.50 | 0.00 |
| TRINITY_D8RPX7_SELML/10-74       | D8RPX7.1 PF01423.20 | 81.50 | 0.00 |
| TRINITY_A0A059AI06_EUCGR/56-358  | A0A059AI06.1 PF0799 | 81.50 | 0.00 |
| TRINITY_D8TL84_VOLCA/15-209      | D8TL84.1 PF01813.15 | 81.50 | 0.00 |
| TRINITY_D8TGV2_VOLCA/203-294     | D8TGV2.1 PF00153.25 | 81.50 | 0.00 |
| TRINITY_A8I972_CHLRE/729-901     | A8I972.1 PF07724.12 | 81.50 | 0.00 |
| TRINITY_D8UFN6_VOLCA/191-315     | D8UFN6.1 PF00241.18 | 81.50 | 0.00 |
| TRINITY_D8THN9_VOLCA/231-404     | D8THN9.1 PF04055.19 | 81.50 | 0.00 |
| TRINITY_A8J9S7_CHLRE/76-471      | A8J9S7.1 PF00180.18 | 81.50 | 0.00 |
| TRINITY_D8UJ87_VOLCA/13-309      | D8UJ87.1 PF00009.25 | 81.50 | 0.00 |
| TRINITY_D3BL86_POLPA/20-181      | D3BL86.1 PF00071.20 | 81.50 | 0.00 |
| TRINITY_D8TZ99_VOLCA/294-358     | D8TZ99.1 PF13499.4; | 81.50 | 0.00 |
| TRINITY_A8J758_CHLRE/166-360     | A8J758.1 PF00448.20 | 81.50 | 0.00 |
| TRINITY_A0A0A0LNL8_CUCSA/1-153   | A0A0A0LNL8.1 PF0040 | 81.40 | 0.00 |
| TRINITY_Q23DZ8_TETTS/171-267     | Q23DZ8.2 PF04900.10 | 81.40 | 0.00 |
| TRINITY_Q9FXT7_CHLRE/58-346      | Q9FXT7.2 PF00069.23 | 81.40 | 0.00 |
| TRINITY_I0YV74_9CHLO/205-486     | I0YV74.1 PF01409.18 | 81.40 | 0.00 |
| TRINITY_A8JBE4_CHLRE/65-161      | A8JBE4.1 PF12755.5; | 81.40 | 0.00 |
| TRINITY_G3P5J3_GASAC/87-458      | G3P5J3.1 PF00079.18 | 81.40 | 0.00 |
| TRINITY_B2U8M9_RALPJ/281-391     | B2U8M9.1 PF00271.29 | 81.40 | 0.00 |
| TRINITY_I0YQE6_9CHLO/136-317     | I0YQE6.1 PF04055.19 | 81.40 | 0.00 |
| TRINITY_D8TQK5_VOLCA/45-211      | D8TQK5.1 PF00504.19 | 81.40 | 0.00 |
| TRINITY_T0S5Y6_9STRA/243-565     | T0S5Y6.1 PF00152.18 | 81.40 | 0.00 |
| TRINITY_D8UAL1_VOLCA/25-320      | D8UAL1.1 PF00850.17 | 81.40 | 0.00 |
| TRINITY_D8TYS1_VOLCA/90-261      | D8TYS1.1 PF04427.16 | 81.40 | 0.00 |
| TRINITY_A8IT25_CHLRE/55-221      | A8IT25.1 PF00270.27 | 81.40 | 0.00 |
| TRINITY_A8J5T0_CHLRE/12-111      | A8J5T0.1 PF00034.19 | 81.40 | 0.00 |
| TRINITY_D8TGX0_VOLCA/3111-3458   | D8TGX0.1 PF03028.13 | 81.40 | 0.00 |
| TRINITY_Q237I3_TETTS/916-1130    | Q237I3.3 PF00454.25 | 81.30 | 0.00 |
| TRINITY_A0A059BWI6_EUCGR/53-161  | A0A059BWI6.1 PF0050 | 81.30 | 0.00 |
| TRINITY_I7MFA4_TETTS/258-407     | I7MFA4.1 PF00441.22 | 81.30 | 0.00 |
| TRINITY_L1IQG0_GUIITH/248-387    | L1IQG0.1 PF02773.14 | 81.30 | 0.00 |
| TRINITY_D8U6W2_VOLCA/98-313      | D8U6W2.1 PF01866.15 | 81.30 | 0.00 |
| TRINITY_E1ZQW9_CHLVA/398-553     | E1ZQW9.1 PF00106.23 | 81.30 | 0.00 |
| TRINITY_A8IHF4_CHLRE/27-285      | A8IHF4.1 PF00069.23 | 81.30 | 0.00 |
| TRINITY_I3K9D2_ORENI/40-182      | I3K9D2.1 PF08702.8; | 81.30 | 0.00 |
| TRINITY_A8IBN0_CHLRE/112-364     | A8IBN0.1 PF00591.19 | 81.30 | 0.00 |
| TRINITY_L8GGD8_ACACA/60-491      | L8GGD8.1 PF00330.18 | 81.30 | 0.00 |
| TRINITY_Q2VA40_CHLRE/141-865     | Q2VA40.1 PF00343.18 | 81.30 | 0    |
| TRINITY_I0YW71_9CHLO/295-460     | I0YW71.1 PF00441.22 | 81.30 | 0.00 |
| TRINITY_D8U6E0_VOLCA/780-945     | D8U6E0.1 PF00326.19 | 81.30 | 0.00 |
| TRINITY_Q23RV4_TETTS/6-262       | Q23RV4.2 PF00069.23 | 81.30 | 0.00 |
| TRINITY_A8J7F6_CHLRE/189-415     | A8J7F6.1 PF00198.21 | 81.30 | 0.00 |
| TRINITY_D3BGP2_POLPA/71-119      | D3BGP2.1 PF02751.12 | 81.20 | 0.00 |
| TRINITY_V4TUF1_9ROSI/17-82       | V4TUF1.1 PF01423.20 | 81.20 | 0.00 |
| TRINITY_L8HHU3_ACACA/70-149      | L8HHU3.1 PF00312.20 | 81.20 | 0.00 |
| TRINITY_A0A078BB17_STYLE/30-281  | A0A078BB17.1 PF0006 | 81.20 | 0.00 |
| TRINITY_H2KQ45_CLOSI/93-730      | H2KQ45.1 PF00133.20 | 81.20 | 0.00 |
| TRINITY_L5K105_PTEAL/5-361       | L5K105.1 PF00009.25 | 81.20 | 0.00 |
| TRINITY_I0YXJ4_9CHLO/6-427       | I0YXJ4.1 PF00275.18 | 81.20 | 0.00 |
| TRINITY_D8U105_VOLCA/3451-3673   | D8U105.1 PF12781.5; | 81.20 | 0.00 |
| TRINITY_D8TR42_VOLCA/24-332      | D8TR42.1 PF01180.19 | 81.20 | 0.00 |

|                                   |              |            |       |      |
|-----------------------------------|--------------|------------|-------|------|
| TRINITY_A8HMH4_CHLRE/20-281       | A8HMH4.1     | PF00069.23 | 81.20 | 0.00 |
| TRINITY_I0Z4F7_9CHLO/47-479       | I0Z4F7.1     | PF00083.22 | 81.20 | 0.00 |
| TRINITY_E1ZJ29_CHLVA/40-443       | E1ZJ29.1     | PF01704.16 | 81.20 | 0.00 |
| TRINITY_G7I3M2_MEDTR/57-271       | G7I3M2.1     | PF10609.7; | 81.20 | 0.00 |
| TRINITY_D8TM81_VOLCA/17-635       | D8TM81.1     | PF01268.17 | 81.20 | 0.00 |
| TRINITY_A8J1X8_CHLRE/220-540      | A8J1X8.1     | PF00152.18 | 81.20 | 0.00 |
| TRINITY_A8J7D3_CHLRE/129-245      | A8J7D3.1     | PF13640.4; | 81.20 | 0.00 |
| TRINITY_D8UBA1_VOLCA/246-322      | D8UBA1.1     | PF13242.4; | 81.20 | 0.00 |
| TRINITY_A8JET6_CHLRE/2-50         | A8JET6.1     | PF12678.5; | 81.20 | 0.00 |
| TRINITY_A8HYM8_CHLRE/69-313       | A8HYM8.1     | PF01564.15 | 81.20 | 0.00 |
| TRINITY_D8TRN2_VOLCA/1684-1952    | D8TRN2.1     | PF12780.5; | 81.20 | 0.00 |
| TRINITY_K3XZA2_SETIT/49-212       | K3XZA2.1     | PF00160.19 | 81.10 | 0.00 |
| TRINITY_E1ZBA8_CHLVA/229-266      | E1ZBA8.1     | PF03638.13 | 81.10 | 0.00 |
| TRINITY_L1JC58_GUIITH/10-104      | L1JC58.1     | PF01248.24 | 81.10 | 0.00 |
| TRINITY_A0A078L4N2_9GAMM/92-465   | A0A078L4N2.1 | PF0154     | 81.10 | 0.00 |
| TRINITY_A0D8A1_PARTE/9-283        | A0D8A1.1     | PF00069.23 | 81.10 | 0.00 |
| TRINITY_I0YQV6_9CHLO/231-344      | I0YQV6.1     | PF00271.29 | 81.10 | 0.00 |
| TRINITY_I0YZ44_9CHLO/240-402      | I0YZ44.1     | PF03572.16 | 81.10 | 0.00 |
| TRINITY_D8U9J6_VOLCA/163-268      | D8U9J6.1     | PF01159.17 | 81.10 | 0.00 |
| TRINITY_D8TZ17_VOLCA/10-83        | D8TZ17.1     | PF01423.20 | 81.10 | 0.00 |
| TRINITY_I0YN31_9CHLO/2-190        | I0YN31.1     | PF02492.17 | 81.10 | 0.00 |
| TRINITY_D8UA83_VOLCA/10-199       | D8UA83.1     | PF04511.13 | 81.10 | 0.00 |
| TRINITY_D8U2G8_VOLCA/79-404       | D8U2G8.1     | PF00155.19 | 81.10 | 0.00 |
| TRINITY_D8TP05_VOLCA/1-283        | D8TP05.1     | PF03151.14 | 81.10 | 0.00 |
| TRINITY_J9J3W2_9SPIT/62-136       | J9J3W2.1     | PF13921.4; | 81.10 | 0.00 |
| TRINITY_D8UDE1_VOLCA/6-201        | D8UDE1.1     | PF00596.19 | 81.10 | 0.00 |
| TRINITY_A0A087SNR2_AUXPR/933-1107 | A0A087SNR2.1 | PF0771     | 81.10 | 0.00 |
| TRINITY_A0A058ZCL3_9EUKA/111-205  | A0A058ZCL3.1 | PF0835     | 81.10 | 0.00 |
| TRINITY_A8HTA8_CHLRE/94-167       | A8HTA8.1     | PF01502.16 | 81.10 | 0.00 |
| TRINITY_E1ZT56_CHLVA/160-286      | E1ZT56.1     | PF04037.11 | 81.10 | 0.00 |
| TRINITY_A8HU66_CHLRE/628-764      | A8HU66.1     | PF13692.4; | 81.10 | 0.00 |
| TRINITY_D8U6I5_VOLCA/93-564       | D8U6I5.1     | PF01593.22 | 81.10 | 0.00 |
| TRINITY_I7MA96_TETTS/697-955      | I7MA96.1     | PF00069.23 | 81.10 | 0.00 |
| TRINITY_A0D3Z3_PARTE/470-617      | A0D3Z3.1     | PF00004.27 | 81.10 | 0.00 |
| TRINITY_Q24BY8_TETTS/76-334       | Q24BY8.2     | PF00069.23 | 81.10 | 0.00 |
| TRINITY_Q230V5_TETTS/10-142       | Q230V5.2     | PF00164.23 | 81.10 | 0.00 |
| TRINITY_D8U7P6_VOLCA/3595-4325    | D8U7P6.1     | PF03028.13 | 81.10 | 0    |
| TRINITY_D8UA93_VOLCA/87-305       | D8UA93.1     | PF02167.13 | 81.10 | 0.00 |
| TRINITY_I3N4U7 ICTTR/1-231        | I3N4U7.1     | PF01086.15 | 81.10 | 0.00 |
| TRINITY_A0DM47_PARTE/17-70        | A0DM47.1     | PF00584.18 | 81.00 | 0.00 |
| TRINITY_G0R5N9_ICHMG/540-773      | G0R5N9.1     | PF00211.18 | 81.00 | 0.00 |
| TRINITY_A4ZYQ6_SOLLIC/4-116       | A4ZYQ6.1     | PF14226.4; | 81.00 | 0.00 |
| TRINITY_C1E8P1_MICSR/77-432       | C1E8P1.1     | PF00224.19 | 81.00 | 0.00 |
| TRINITY_E1Z8S9_CHLVA/74-231       | E1Z8S9.1     | PF01257.17 | 81.00 | 0.00 |
| TRINITY_D8TSZ4_VOLCA/47-423       | D8TSZ4.1     | PF07690.14 | 81.00 | 0.00 |
| TRINITY_A8J2J7_CHLRE/38-313       | A8J2J7.1     | PF06098.9; | 81.00 | 0.00 |
| TRINITY_F0ZS91_DICPU/16-283       | F0ZS91.1     | PF00268.19 | 81.00 | 0.00 |
| TRINITY_A8HP55_CHLRE/14-176       | A8HP55.1     | PF17144.2; | 81.00 | 0.00 |
| TRINITY_A8IGM2_CHLRE/69-532       | A8IGM2.1     | PF02127.13 | 81.00 | 0.00 |
| TRINITY_A7SZE7_NEMVE/170-316      | A7SZE7.1     | PF00004.27 | 81.00 | 0.00 |
| TRINITY_A0A078B4I2_STYLE/807-896  | A0A078B4I2.1 | PF0440     | 81.00 | 0.00 |
| TRINITY_D2VN06_NAEGR/1846-2096    | D2VN06.1     | PF00454.25 | 81.00 | 0.00 |
| TRINITY_A0E3I8_PARTE/46-110       | A0E3I8.1     | PF02319.18 | 81.00 | 0.00 |
| TRINITY_A8I9L6_CHLRE/481-524      | A8I9L6.1     | PF06203.12 | 81.00 | 0.00 |
| TRINITY_C1MLT3_MICPC/8-189        | C1MLT3.1     | PF01251.16 | 81.00 | 0.00 |
| TRINITY_A8J1W1_CHLRE/101-346      | A8J1W1.1     | PF02153.15 | 81.00 | 0.00 |
| TRINITY_E1Z2D1_CHLVA/116-358      | E1Z2D1.1     | PF10609.7; | 81.00 | 0.00 |
| TRINITY_A8JJ58_CHLRE/3-65         | A8JJ58.1     | PF01246.18 | 81.00 | 0.00 |
| TRINITY_D8TWH4_VOLCA/198-328      | D8TWH4.1     | PF04116.11 | 81.00 | 0.00 |
| TRINITY_A8II27_CHLRE/82-353       | A8II27.1     | PF00481.19 | 81.00 | 0.00 |
| TRINITY_I0YM36_9CHLO/389-499      | I0YM36.1     | PF00271.29 | 81.00 | 0.00 |

|                                  |              |            |       |      |
|----------------------------------|--------------|------------|-------|------|
| TRINITY_D8UHD0_VOLCA/68-343      | D8UHD0.1     | PF00009.25 | 81.00 | 0.00 |
| TRINITY_A0CSV7_PARTE/8-75        | A0CSV7.1     | PF01111.17 | 80.90 | 0.00 |
| TRINITY_A0A0P7UUX0_9TELE/93-232  | A0A0P7UUX0.1 | PF0057     | 80.90 | 0.00 |
| TRINITY_I7M317_TETTS/63-246      | I7M317.1     | PF10274.7; | 80.90 | 0.00 |
| TRINITY_D8TZQ9_VOLCA/142-279     | D8TZQ9.1     | PF13365.4; | 80.90 | 0.00 |
| TRINITY_I0Z0S3_9CHLO/1-196       | I0Z0S3.1     | PF01201.20 | 80.90 | 0.00 |
| TRINITY_I7MHK8_TETTS/244-385     | I7MHK8.1     | PF02773.14 | 80.90 | 0.00 |
| TRINITY_Q230X9_TETTS/859-1272    | Q230X9.2     | PF08393.11 | 80.90 | 0.00 |
| TRINITY_K3WWU1_PYTUL/688-1128    | K3WWU1.1     | PF05577.10 | 80.90 | 0.00 |
| TRINITY_D8U1J1_VOLCA/76-126      | D8U1J1.1     | PF00847.18 | 80.90 | 0.00 |
| TRINITY_I7LZN5_TETTS/2-176       | I7LZN5.2     | PF01154.15 | 80.90 | 0.00 |
| TRINITY_D8UCC9_VOLCA/42-157      | D8UCC9.1     | PF01118.22 | 80.90 | 0.00 |
| TRINITY_A8ILS2_CHLRE/1-120       | A8ILS2.1     | PF04133.12 | 80.90 | 0.00 |
| TRINITY_F0ZAV4_DICPU/115-266     | F0ZAV4.1     | PF14538.4; | 80.90 | 0.00 |
| TRINITY_M5VSA1_PRUPE/108-155     | M5VSA1.1     | PF01466.17 | 80.90 | 0.00 |
| TRINITY_D8TMI8_VOLCA/5-161       | D8TMI8.1     | PF00106.23 | 80.90 | 0.00 |
| TRINITY_I7M490_TETTS/13-195      | I7M490.2     | PF01214.16 | 80.90 | 0.00 |
| TRINITY_G0R0V1_ICHMG/15-209      | G0R0V1.1     | PF00687.19 | 80.80 | 0.00 |
| TRINITY_A4S2L7_OSTLU/50-230      | A4S2L7.1     | PF02146.15 | 80.80 | 0.00 |
| TRINITY_L8HE96_ACACA/156-285     | L8HE96.1     | PF00004.27 | 80.80 | 0.00 |
| TRINITY_D8TNT2_VOLCA/1-125       | D8TNT2.1     | PF00705.16 | 80.80 | 0.00 |
| TRINITY_I0YIQ0_9CHLO/7-69        | I0YIQ0.1     | PF01423.20 | 80.80 | 0.00 |
| TRINITY_A8JAG1_CHLRE/62-407      | A8JAG1.1     | PF01494.17 | 80.80 | 0.00 |
| TRINITY_A8J7E4_CHLRE/9-227       | A8J7E4.1     | PF00009.25 | 80.80 | 0.00 |
| TRINITY_D8THH6_VOLCA/51-306      | D8THH6.1     | PF00108.21 | 80.80 | 0.00 |
| TRINITY_A8JG07_CHLRE/48-170      | A8JG07.1     | PF13537.4; | 80.80 | 0.00 |
| TRINITY_J9ITR7_9SPIT/200-226     | J9ITR7.1     | PF00642.22 | 80.80 | 0.00 |
| TRINITY_J9ITR7_9SPIT/200-226     | J9ITR7.1     | PF00642.22 | 80.80 | 0.00 |
| TRINITY_D8TWM5_VOLCA/25-651      | D8TWM5.1     | PF00133.20 | 80.80 | 0.00 |
| TRINITY_L8GW25_ACACA/462-582     | L8GW25.1     | PF00004.27 | 80.80 | 0.00 |
| TRINITY_A8JDQ7_CHLRE/375-660     | A8JDQ7.1     | PF00069.23 | 80.80 | 0.00 |
| TRINITY_A0A068S496_9FUNG/66-248  | A0A068S496.1 | PF0022     | 80.70 | 0.00 |
| TRINITY_H2MPL0_ORYLA/24-329      | H2MPL0.1     | PF00405.15 | 80.70 | 0.00 |
| TRINITY_A0A0D2T6A5_GOSRA/46-177  | A0A0D2T6A5.1 | PF0012     | 80.70 | 0.00 |
| TRINITY_A8II42_CHLRE/31-524      | A8II42.1     | PF00118.22 | 80.70 | 0.00 |
| TRINITY_A8I2Z6_CHLRE/31-214      | A8I2Z6.1     | PF10274.7; | 80.70 | 0.00 |
| TRINITY_A8IG95_CHLRE/188-279     | A8IG95.1     | PF00153.25 | 80.70 | 0.00 |
| TRINITY_D8TYR4_VOLCA/520-670     | D8TYR4.1     | PF00160.19 | 80.70 | 0.00 |
| TRINITY_A8IG39_CHLRE/29-85       | A8IG39.1     | PF13920.4; | 80.70 | 0.00 |
| TRINITY_B9GQE7_POPTR/27-285      | B9GQE7.1     | PF00704.26 | 80.60 | 0.00 |
| TRINITY_G7P1S1_MACFA/437-567     | G7P1S1.1     | PF00004.27 | 80.60 | 0.00 |
| TRINITY_A0A087GB61_ARAAL/187-373 | A0A087GB61.1 | PF1626     | 80.60 | 0.00 |
| TRINITY_A4HU11_LEIIN/209-280     | A4HU11.2     | PF00240.21 | 80.60 | 0.00 |
| TRINITY_Q3SE81_PARTE/5-59        | Q3SE81.1     | PF05207.11 | 80.60 | 0.00 |
| TRINITY_A8I3K3_CHLRE/264-300     | A8I3K3.1     | PF00400.30 | 80.60 | 0.00 |
| TRINITY_A8IUW5_CHLRE/92-128      | A8IUW5.1     | PF06803.10 | 80.60 | 0.00 |
| TRINITY_CCR1_MAIZE/36-291        | P0C8M8.1     | PF00069.23 | 80.60 | 0.00 |
| TRINITY_D8TQ02_VOLCA/410-543     | D8TQ02.1     | PF00271.29 | 80.60 | 0.00 |
| TRINITY_A8IFM3_CHLRE/1-128       | A8IFM3.1     | PF00005.25 | 80.60 | 0.00 |
| TRINITY_D8TW46_VOLCA/2-156       | D8TW46.1     | PF00160.19 | 80.60 | 0.00 |
| TRINITY_A8ISU1_CHLRE/27-279      | A8ISU1.1     | PF00069.23 | 80.60 | 0.00 |
| TRINITY_A8I9R1_CHLRE/126-419     | A8I9R1.1     | PF00291.23 | 80.60 | 0.00 |
| TRINITY_A8HR79_CHLRE/44-247      | A8HR79.1     | PF11264.6; | 80.60 | 0.00 |
| TRINITY_I0YK21_9CHLO/195-355     | I0YK21.1     | PF00350.21 | 80.60 | 0.00 |
| TRINITY_T0Q7Y3_9STRA/23-90       | T0Q7Y3.1     | PF00076.20 | 80.60 | 0.00 |
| TRINITY_D8UCI1_VOLCA/284-350     | D8UCI1.1     | PF13432.4; | 80.60 | 0.00 |
| TRINITY_G0R532_ICHMG/920-1260    | G0R532.1     | PF00443.27 | 80.60 | 0.00 |
| TRINITY_CLH2_ORYSJ/1288-1433     | Q2QYW2.1     | PF00637.18 | 80.60 | 0.00 |
| TRINITY_A8J760_CHLRE/2-161       | A8J760.1     | PF00160.19 | 80.60 | 0.00 |
| TRINITY_F4PA68_BATDJ/23-64       | F4PA68.1     | PF00832.18 | 80.50 | 0.00 |
| TRINITY_F4PA68_BATDJ/23-64       | F4PA68.1     | PF00832.18 | 80.50 | 0.00 |

|                                  |                      |       |      |
|----------------------------------|----------------------|-------|------|
| TRINITY_A0A075B209_9FUNG/263-414 | A0A075B209.1 PF0027  | 80.50 | 0.00 |
| TRINITY_E1Z4X7_CHLVA/42-439      | E1Z4X7.1 PF00155.19  | 80.50 | 0.00 |
| TRINITY_D8UJ10_VOLCA/159-332     | D8UJ10.1 PF00270.27  | 80.50 | 0.00 |
| TRINITY_I7M416_TETTS/67-333      | I7M416.1 PF00268.19  | 80.50 | 0.00 |
| TRINITY_K3XYF0_SETIT/47-242      | K3XYF0.1 PF00149.26  | 80.50 | 0.00 |
| TRINITY_E1ZME9_CHLVA/252-386     | E1ZME9.1 PF02518.24  | 80.50 | 0.00 |
| TRINITY_G0QY93_ICHMG/11-206      | G0QY93.1 PF00149.26  | 80.50 | 0.00 |
| TRINITY_A0C7Z2_PARTE/19-59       | A0C7Z2.1 PF00097.23  | 80.50 | 0.00 |
| TRINITY_D8U454_VOLCA/174-337     | D8U454.1 PF02866.16  | 80.50 | 0.00 |
| TRINITY_A8JIN8_CHLRE/110-448     | A8JIN8.1 PF01546.26  | 80.50 | 0.00 |
| TRINITY_A8IN76_CHLRE/1169-1379   | A8IN76.1 PF00454.25  | 80.50 | 0.00 |
| TRINITY_D8UGN1_VOLCA/338-770     | D8UGN1.1 PF04053.12  | 80.50 | 0.00 |
| TRINITY_A8J5Z8_CHLRE/55-516      | A8J5Z8.1 PF00171.20  | 80.50 | 0.00 |
| TRINITY_D8UB79_VOLCA/85-551      | D8UB79.1 PF00939.17  | 80.50 | 0.00 |
| TRINITY_I0YYL9_9CHLO/377-418     | I0YYL9.1 PF00400.30  | 80.50 | 0.00 |
| TRINITY_D8TJG5_VOLCA/52-487      | D8TJG5.1 PF01474.14  | 80.50 | 0.00 |
| TRINITY_I0Z2A7_9CHLO/114-589     | I0Z2A7.1 PF01293.18  | 80.50 | 0.00 |
| TRINITY_D8TQJ5_VOLCA/85-663      | D8TQJ5.1 PF01411.17  | 80.50 | 0.00 |
| TRINITY_D8U961_VOLCA/31-279      | D8U961.1 PF00487.22  | 80.50 | 0.00 |
| TRINITY_A0C963_PARTE/227-297     | A0C963.1 PF00076.20  | 80.40 | 0.00 |
| TRINITY_A0CJS0_PARTE/128-311     | A0CJS0.1 PF10274.7;  | 80.40 | 0.00 |
| TRINITY_A0A0D2WYE3_CAPO3/196-251 | A0A0D2WYE3.1 PF0204  | 80.40 | 0.00 |
| TRINITY_D8U0B1_VOLCA/355-464     | D8U0B1.1 PF00271.29  | 80.40 | 0.00 |
| TRINITY_A0BLS3_PARTE/98-348      | A0BLS3.1 PF00012.18  | 80.40 | 0.00 |
| TRINITY_A8J9S9_CHLRE/9-334       | A8J9S9.1 PF16363.3;  | 80.40 | 0.00 |
| TRINITY_D8TJT9_VOLCA/206-373     | D8TJT9.1 PF02882.17  | 80.40 | 0.00 |
| TRINITY_D8TVA7_VOLCA/191-460     | D8TVA7.1 PF04095.14  | 80.40 | 0.00 |
| TRINITY_CCR1_MAIZE/36-291        | P0C8M8.1 PF00069.23  | 80.40 | 0.00 |
| TRINITY_A8HSI6_CHLRE/10-133      | A8HSI6.1 PF04628.11  | 80.40 | 0.00 |
| TRINITY_D8U105_VOLCA/201-765     | D8U105.1 PF08385.10  | 80.40 | 0.00 |
| TRINITY_D0MVU0_PHYIT/128-254     | D0MVU0.1 PF13401.4;  | 80.40 | 0.00 |
| TRINITY_D8TXL7_VOLCA/1-353       | D8TXL7.1 PF00999.19  | 80.40 | 0.00 |
| TRINITY_A8HXG5_CHLRE/9-120       | A8HXG5.1 PF04725.10  | 80.40 | 0.00 |
| TRINITY_A8ISN7_CHLRE/59-260      | A8ISN7.1 PF06862.10  | 80.40 | 0.00 |
| TRINITY_A4RWN5_OSTLU/13-58       | A4RWN5.1 PF00249.29  | 80.40 | 0.00 |
| TRINITY_A0D2P6_PARTE/10-80       | A0D2P6.1 PF11976.6;  | 80.30 | 0.00 |
| TRINITY_A0A0D2SQL4_GOSRA/11-138  | A0A0D2SQL4.1 PF0165  | 80.30 | 0.00 |
| TRINITY_D8TVN2_VOLCA/11-127      | D8TVN2.1 PF00583.23  | 80.30 | 0.00 |
| TRINITY_A8I0E2_CHLRE/13-78       | A8I0E2.1 PF01423.20  | 80.30 | 0.00 |
| TRINITY_D8TJU9_VOLCA/121-523     | D8TJU9.1 PF00202.19  | 80.30 | 0.00 |
| TRINITY_D8TV85_VOLCA/114-189     | D8TV85.1 PF00347.21  | 80.30 | 0.00 |
| TRINITY_A8HS40_CHLRE/377-576     | A8HS40.1 PF01434.16  | 80.30 | 0.00 |
| TRINITY_A8JD57_CHLRE/4-264       | A8JD57.1 PF00069.23  | 80.30 | 0.00 |
| TRINITY_D8TIY1_VOLCA/66-126      | D8TIY1.1 PF00226.29  | 80.30 | 0.00 |
| TRINITY_A0C160_PARTE/124-184     | A0C160.1 PF13921.4;  | 80.30 | 0.00 |
| TRINITY_A8IC93_CHLRE/350-587     | A8IC93.1 PF00122.18  | 80.30 | 0.00 |
| TRINITY_D8UJ71_VOLCA/128-336     | D8UJ71.1 PF00696.26  | 80.30 | 0.00 |
| TRINITY_D8UJI7_VOLCA/128-574     | D8UJI7.1 PF00067.20  | 80.30 | 0.00 |
| TRINITY_A0A068S2Z4_9FUNG/67-138  | A0A068S2Z4.1 PF0036  | 80.30 | 0.00 |
| TRINITY_Q5Z816_ORYSJ/21-147      | Q5Z816.1 PF01398.19  | 80.30 | 0.00 |
| TRINITY_D8U0U0_VOLCA/56-133      | D8U0U0.1 PF02470.18  | 80.30 | 0.00 |
| TRINITY_A8IJK9_CHLRE/110-170     | A8IJK9.1 PF00839.15  | 80.30 | 0.00 |
| TRINITY_I0Y LH8_9CHLO/371-639    | I0Y LH8.1 PF00128.22 | 80.30 | 0.00 |
| TRINITY_J7KJQ3_CUCSA/91-250      | J7KJQ3.1 PF01699.22  | 80.20 | 0.00 |
| TRINITY_G3HPC9_CRIGR/75-286      | G3HPC9.1 PF01442.16  | 80.20 | 0.00 |
| TRINITY_D8U9J6_VOLCA/163-268     | D8U9J6.1 PF01159.17  | 80.20 | 0.00 |
| TRINITY_I7MMG7_TETTS/4-265       | I7MMG7.1 PF00069.23  | 80.20 | 0.00 |
| TRINITY_Q3SDL5_PARTE/12-173      | Q3SDL5.1 PF00071.20  | 80.20 | 0.00 |
| TRINITY_D8TY97_VOLCA/1017-1137   | D8TY97.1 PF00271.29  | 80.20 | 0.00 |
| TRINITY_D8UGK6_VOLCA/18-362      | D8UGK6.1 PF00224.19  | 80.20 | 0.00 |
| TRINITY_D8TJY2_VOLCA/214-457     | D8TJY2.1 PF08323.9;  | 80.20 | 0.00 |

|                                    |              |            |       |      |
|------------------------------------|--------------|------------|-------|------|
| TRINITY_I0YTF8_9CHLO/16-117        | I0YTF8.1     | PF06047.9; | 80.20 | 0.00 |
| TRINITY_A8JJ39_CHLRE/244-948       | A8JJ39.1     | PF03028.13 | 80.20 | 0.00 |
| TRINITY_D8UBX0_VOLCA/59-219        | D8UBX0.1     | PF10436.7; | 80.20 | 0.00 |
| TRINITY_I0YWV0_9CHLO/22-317        | I0YWV0.1     | PF00206.18 | 80.20 | 0.00 |
| TRINITY_D8U2A7_VOLCA/24-316        | D8U2A7.1     | PF00850.17 | 80.20 | 0.00 |
| TRINITY_D8TJ97_VOLCA/1128-1233     | D8TJ97.1     | PF03912.12 | 80.20 | 0.00 |
| TRINITY_A8IWA1_CHLRE/6-256         | A8IWA1.1     | PF00069.23 | 80.20 | 0.00 |
| TRINITY_D8TM85_VOLCA/1-134         | D8TM85.1     | PF00125.22 | 80.20 | 0.00 |
| TRINITY_A8JFI9_CHLRE/69-288        | A8JFI9.1     | PF01940.14 | 80.20 | 0.00 |
| TRINITY_Q22Z01_TETTS/63-210        | Q22Z01.2     | PF00005.25 | 80.10 | 0.00 |
| TRINITY_Q8HC78_ORYLA/88-253        | Q8HC78.1     | PF13631.4; | 80.10 | 0.00 |
| TRINITY_L8GSP6_ACACA/24-185        | L8GSP6.1     | PF00071.20 | 80.10 | 0.00 |
| TRINITY_L8GI40_ACACA/53-338        | L8GI40.1     | PF00069.23 | 80.10 | 0.00 |
| TRINITY_I0YZL1_9CHLO/41-196        | I0YZL1.1     | PF00177.19 | 80.10 | 0.00 |
| TRINITY_A8J5V8_CHLRE/42-223        | A8J5V8.1     | PF00574.21 | 80.10 | 0.00 |
| TRINITY_G7E302_MIXOS/5-177         | G7E302.1     | PF00163.17 | 80.10 | 0.00 |
| TRINITY_G7E302_MIXOS/5-177         | G7E302.1     | PF00163.17 | 80.10 | 0.00 |
| TRINITY_E2BY81_HARSA/5-166         | E2BY81.1     | PF00071.20 | 80.10 | 0.00 |
| TRINITY_A8J233_CHLRE/533-721       | A8J233.1     | PF08323.9; | 80.10 | 0.00 |
| TRINITY_B0XCU4_CULQU/79-178        | B0XCU4.1     | PF13012.4; | 80.00 | 0.00 |
| TRINITY_W7XI20_TETTS/141-304       | W7XI20.1     | PF05118.13 | 80.00 | 0.00 |
| TRINITY_A0A078AY45_STYLE/121-266   | A0A078AY45.1 | PF0078     | 80.00 | 0.00 |
| TRINITY_G5C260_HETGA/95-194        | G5C260.1     | PF01092.17 | 80.00 | 0.00 |
| TRINITY_J9JCA5_9SPIT/125-339       | J9JCA5.1     | PF00112.21 | 80.00 | 0.00 |
| TRINITY_V4T5X4_9ROSI/18-400        | V4T5X4.1     | PF00199.17 | 80.00 | 0.00 |
| TRINITY_D8TQ63_VOLCA/33-344        | D8TQ63.1     | PF01406.17 | 80.00 | 0.00 |
| TRINITY_B6JZU2_SCHJY/70-149        | B6JZU2.1     | PF00312.20 | 80.00 | 0.00 |
| TRINITY_Q8LLV9_CHLRE/7-125         | Q8LLV9.1     | PF14931.4; | 80.00 | 0.00 |
| TRINITY_Q22FZ7_TETTS/267-312       | Q22FZ7.2     | PF00249.29 | 80.00 | 0.00 |
| TRINITY_D8TY17_VOLCA/592-651       | D8TY17.1     | PF14775.4; | 80.00 | 0.00 |
| TRINITY_A8JDZ5_CHLRE/12-188        | A8JDZ5.1     | PF02492.17 | 80.00 | 0.00 |
| TRINITY_A8JHA6_CHLRE/288-368       | A8JHA6.1     | PF05002.13 | 80.00 | 0.00 |
| TRINITY_A8HNE3_CHLRE/3-84          | A8HNE3.1     | PF13418.4; | 80.00 | 0.00 |
| TRINITY_D8TJ43_VOLCA/761-1018      | D8TJ43.1     | PF00860.18 | 80.00 | 0.00 |
| TRINITY_A8ISR9_CHLRE/1482-1562     | A8ISR9.1     | PF00355.24 | 80.00 | 0.00 |
| TRINITY_RTCB_MICSR/76-513          | C1E9Y5.1     | PF01139.15 | 80.00 | 0.00 |
| TRINITY_Q22W82_TETTS/189-703       | Q22W82.1     | PF00183.16 | 80.00 | 0.00 |
| TRINITY_A8HZ94_CHLRE/348-474       | A8HZ94.1     | PF01529.18 | 80.00 | 0.00 |
| TRINITY_A8I923_CHLRE/9-53          | A8I923.1     | PF04851.13 | 80.00 | 0.00 |
| TRINITY_D8U3U0_VOLCA/167-326       | D8U3U0.1     | PF02800.18 | 80.00 | 0.00 |
| TRINITY_A9STB1_PHYPA/391-767       | A9STB1.1     | PF00632.23 | 80.00 | 0.00 |
| TRINITY_A8J6L8_CHLRE/50-117        | A8J6L8.1     | PF12265.6; | 80.00 | 0.00 |
| TRINITY_M5G5C9_DACSP/14-101        | M5G5C9.1     | PF01172.16 | 80.00 | 0.00 |
| TRINITY_A8I2Y6_CHLRE/11-265        | A8I2Y6.1     | PF00069.23 | 80.00 | 0.00 |
| TRINITY_A8J2I0_CHLRE/322-387       | A8J2I0.1     | PF00076.20 | 80.00 | 0.00 |
| TRINITY_E1ZM02_CHLVA/424-457       | E1ZM02.1     | PF00320.25 | 80.00 | 0.00 |
| TRINITY_D8TTR8_VOLCA/511-575       | D8TTR8.1     | PF00333.18 | 80.00 | 0.00 |
| TRINITY_L1K0C3_GUITH/211-380       | L1K0C3.1     | PF00270.27 | 80.00 | 0.00 |
| TRINITY_A0A0D2WMI0_CAPO3/1822-2191 | A0A0D2WMI0.1 | PF0044     | 80.00 | 0.00 |
| TRINITY_A8HP34_CHLRE/80-131        | A8HP34.1     | PF00847.18 | 80.00 | 0.00 |
| TRINITY_A8JFJ4_CHLRE/5-302         | A8JFJ4.1     | PF00248.19 | 80.00 | 0.00 |
| TRINITY_C1MW35_MICPC/52-81         | C1MW35.1     | PF00397.24 | 80.00 | 0.00 |
| TRINITY_W4FG10_9STRA/195-296       | W4FG10.1     | PF00106.23 | 80.00 | 0.00 |
| TRINITY_D8UDB9_VOLCA/93-250        | D8UDB9.1     | PF14580.4; | 80.00 | 0.00 |
| TRINITY_W5E4P6_WHEAT/293-485       | W5E4P6.1     | PF13087.4; | 80.00 | 0.00 |
| TRINITY_A8HX70_CHLRE/175-478       | A8HX70.1     | PF00365.18 | 80.00 | 0.00 |
| TRINITY_R1C1A7_EMIHU/23-281        | R1C1A7.1     | PF04078.11 | 80.00 | 0.00 |
| TRINITY_A8HNC0_CHLRE/92-335        | A8HNC0.1     | PF02784.14 | 80.00 | 0.00 |
| TRINITY_A8HYE1_CHLRE/47-92         | A8HYE1.1     | PF00319.16 | 80.00 | 0.00 |
| TRINITY_D8TKN4_VOLCA/2144-2253     | D8TKN4.1     | PF01477.21 | 80.00 | 0.00 |
| TRINITY_D8TNB7_VOLCA/1-175         | D8TNB7.1     | PF08235.11 | 80.00 | 0.00 |



|                                 |                     |       |      |
|---------------------------------|---------------------|-------|------|
| TRINITY_D8U5N1_VOLCA/45-382     | D8U5N1.1 PF00155.19 | 80.00 | 0.00 |
| TRINITY_D8U796_VOLCA/81-170     | D8U796.1 PF00153.25 | 80.00 | 0.00 |
| TRINITY_Q23YD4_TETTS/543-688    | Q23YD4.2 PF00005.25 | 80.00 | 0.00 |
| TRINITY_A0A0E9NEH2_9ASCO/48-379 | A0A0E9NEH2.1 PF0020 | 79.90 | 0.00 |
| TRINITY_A8J5P7_CHLRE/222-410    | A8J5P7.1 PF05193.19 | 79.90 | 0.00 |
| TRINITY_D8TZ96_VOLCA/167-360    | D8TZ96.1 PF00528.20 | 79.90 | 0.00 |
| TRINITY_A8JIJ6_CHLRE/8-182      | A8JIJ6.1 PF01595.18 | 79.90 | 0.00 |
| TRINITY_D8U4Q9_VOLCA/42-434     | D8U4Q9.1 PF09334.9; | 79.90 | 0.00 |
| TRINITY_A8JEU8_CHLRE/26-190     | A8JEU8.1 PF00005.25 | 79.90 | 0.00 |
| TRINITY_A8JDK4_CHLRE/36-199     | A8JDK4.1 PF00091.23 | 79.90 | 0.00 |
| TRINITY_D8TLJ7_VOLCA/75-601     | D8TLJ7.1 PF10433.7; | 79.90 | 0.00 |
| TRINITY_D8U5M8_VOLCA/537-670    | D8U5M8.1 PF00454.25 | 79.90 | 0.00 |
| TRINITY_A8HMX2_CHLRE/97-689     | A8HMX2.1 PF02901.13 | 79.90 | 0.00 |
| TRINITY_D8TIC8_VOLCA/15-143     | D8TIC8.1 PF00416.20 | 79.80 | 0.00 |
| TRINITY_D8TTE0_VOLCA/103-388    | D8TTE0.1 PF00069.23 | 79.80 | 0.00 |
| TRINITY_E1ZSL7_CHLVA/153-376    | E1ZSL7.1 PF07298.9; | 79.80 | 0.00 |
| TRINITY_C4Y0F4_CLAL4/385-494    | C4Y0F4.1 PF02852.20 | 79.80 | 0.00 |
| TRINITY_D8U4Q1_VOLCA/54-389     | D8U4Q1.1 PF00456.19 | 79.80 | 0.00 |
| TRINITY_E4WYV9_OIKDI/12-104     | E4WYV9.1 PF00254.26 | 79.80 | 0.00 |
| TRINITY_D8UF47_VOLCA/128-336    | D8UF47.1 PF02786.15 | 79.80 | 0.00 |
| TRINITY_D8U5K1_VOLCA/20-262     | D8U5K1.1 PF00262.16 | 79.80 | 0.00 |
| TRINITY_RBS0_SOLTU/70-178       | P10647.1 PF00101.18 | 79.80 | 0.00 |
| TRINITY_D8TJS9_VOLCA/99-464     | D8TJS9.1 PF00155.19 | 79.80 | 0.00 |
| TRINITY_T1L205_TETUR/246-439    | T1L205.1 PF13087.4; | 79.80 | 0.00 |

|                                  |              |            |       |      |
|----------------------------------|--------------|------------|-------|------|
| TRINITY_D8UEF2_VOLCA/54-237      | D8UEF2.1     | PF00504.19 | 79.80 | 0.00 |
| TRINITY_A0D0A0_PARTE/1-59        | A0D0A0.1     | PF01194.15 | 79.70 | 0.00 |
| TRINITY_J9HR66_9SPIT/678-1055    | J9HR66.1     | PF00562.26 | 79.70 | 0.00 |
| TRINITY_U9U1U0_RHIID/17-315      | U9U1U0.1     | PF00248.19 | 79.70 | 0.00 |
| TRINITY_D8UD42_VOLCA/5-141       | D8UD42.1     | PF00578.19 | 79.70 | 0.00 |
| TRINITY_A0A0M0JU91_9EUKA/180-253 | A0A0M0JU91.1 | PF0038     | 79.70 | 0.00 |
| TRINITY_D8TXC5_VOLCA/44-118      | D8TXC5.1     | PF00111.25 | 79.70 | 0.00 |
| TRINITY_Q4VKB4_CHLRE/119-229     | Q4VKB4.1     | PF00487.22 | 79.70 | 0.00 |
| TRINITY_D8THF5_VOLCA/15-73       | D8THF5.1     | PF03946.12 | 79.70 | 0.00 |
| TRINITY_G0QVV1_ICHMG/11-394      | G0QVV1.1     | PF00199.17 | 79.70 | 0.00 |
| TRINITY_A0A015JQR0_9GLOM/33-111  | A0A015JQR0.1 | PF0142     | 79.70 | 0.00 |
| TRINITY_A8JGJ4_CHLRE/324-589     | A8JGJ4.1     | PF00069.23 | 79.70 | 0.00 |
| TRINITY_R1BXE3_EMIHU/7-213       | R1BXE3.1     | PF01680.15 | 79.70 | 0.00 |
| TRINITY_A8IHL3_CHLRE/124-246     | A8IHL3.1     | PF00329.17 | 79.70 | 0.00 |
| TRINITY_D8TPH7_VOLCA/96-190      | D8TPH7.1     | PF00887.17 | 79.70 | 0.00 |
| TRINITY_D8U949_VOLCA/297-418     | D8U949.1     | PF01926.21 | 79.70 | 0.00 |
| TRINITY_D8UBI5_VOLCA/7-202       | D8UBI5.1     | PF01174.17 | 79.70 | 0.00 |
| TRINITY_I4MUM8_9BURK/78-146      | I4MUM8.1     | PF02560.12 | 79.70 | 0.00 |
| TRINITY_A0EGB9_PARTE/32-287      | A0EGB9.1     | PF00069.23 | 79.70 | 0.00 |
| TRINITY_D8TJA7_VOLCA/116-184     | D8TJA7.1     | PF00076.20 | 79.70 | 0.00 |
| TRINITY_D8U638_VOLCA/106-284     | D8U638.1     | PF01163.20 | 79.70 | 0.00 |
| TRINITY_Q22T05_TETTS/33-102      | Q22T05.2     | PF13499.4; | 79.70 | 0.00 |
| TRINITY_Q22GC0_TETTS/259-427     | Q22GC0.3     | PF05063.12 | 79.60 | 0.00 |
| TRINITY_A8ILP2_CHLRE/73-166      | A8ILP2.1     | PF10674.7; | 79.60 | 0.00 |
| TRINITY_G0QRK4_ICHMG/34-87       | G0QRK4.1     | PF00013.27 | 79.60 | 0.00 |
| TRINITY_A8J8U1_CHLRE/4-117       | A8J8U1.1     | PF13519.4; | 79.60 | 0.00 |
| TRINITY_I3IVP4_ORENI/91-461      | I3IVP4.1     | PF00079.18 | 79.60 | 0.00 |
| TRINITY_Q7X7A7_CHLRE/13-236      | Q7X7A7.1     | PF00244.18 | 79.60 | 0.00 |
| TRINITY_D8TWE9_VOLCA/37-86       | D8TWE9.1     | PF00847.18 | 79.60 | 0.00 |
| TRINITY_A0A078AIG8_STYLE/34-284  | A0A078AIG8.1 | PF0006     | 79.60 | 0.00 |
| TRINITY_B9R7I0_RICCO/93-145      | B9R7I0.1     | PF13921.4; | 79.60 | 0.00 |
| TRINITY_D3B847_POLPA/531-837     | D3B847.1     | PF01180.19 | 79.60 | 0.00 |
| TRINITY_D8THH0_VOLCA/35-423      | D8THH0.1     | PF04137.13 | 79.60 | 0.00 |
| TRINITY_A8I0V1_CHLRE/57-346      | A8I0V1.1     | PF00696.26 | 79.60 | 0.00 |
| TRINITY_Q3SDL5_PARTE/12-173      | Q3SDL5.1     | PF00071.20 | 79.60 | 0.00 |
| TRINITY_T1IN01_STRMM/160-213     | T1IN01.1     | PF00013.27 | 79.60 | 0.00 |
| TRINITY_D8TI21_VOLCA/104-201     | D8TI21.1     | PF00153.25 | 79.60 | 0.00 |
| TRINITY_A8JFG3_CHLRE/16-353      | A8JFG3.1     | PF00225.21 | 79.60 | 0.00 |
| TRINITY_A8JBB8_CHLRE/327-420     | A8JBB8.1     | PF01926.21 | 79.60 | 0.00 |
| TRINITY_D8TP57_VOLCA/83-523      | D8TP57.1     | PF01593.22 | 79.60 | 0.00 |
| TRINITY_A0D389_PARTE/1494-1652   | A0D389.1     | PF00179.24 | 79.50 | 0.00 |
| TRINITY_G0QMD1_ICHMG/4-286       | G0QMD1.1     | PF00069.23 | 79.50 | 0.00 |
| TRINITY_M7XBH8_RHOT1/80-182      | M7XBH8.1     | PF08576.8; | 79.50 | 0.00 |
| TRINITY_L9L401_TUPCH/11-101      | L9L401.1     | PF16122.3; | 79.50 | 0.00 |
| TRINITY_Q24F10_TETTS/11-394      | Q24F10.2     | PF00199.17 | 79.50 | 0.00 |
| TRINITY_L8HHV0_ACACA/268-340     | L8HHV0.1     | PF01485.19 | 79.50 | 0.00 |
| TRINITY_E9HFT7_DAPPU/108-146     | E9HFT7.1     | PF00400.30 | 79.50 | 0.00 |
| TRINITY_K1QG22_CRAGI/7-612       | K1QG22.1     | PF00012.18 | 79.50 | 0.00 |
| TRINITY_D8TUC0_VOLCA/231-593     | D8TUC0.1     | PF09359.8; | 79.50 | 0.00 |
| TRINITY_I0HYJ0_CALAS/264-416     | I0HYJ0.1     | PF13336.4; | 79.50 | 0.00 |
| TRINITY_F0ZA78_DICPU/90-206      | F0ZA78.1     | PF00692.17 | 79.50 | 0.00 |
| TRINITY_A0BMZ0_PARTE/208-296     | A0BMZ0.1     | PF00153.25 | 79.50 | 0.00 |
| TRINITY_A0A0G4IJU7_PLABS/245-283 | A0A0G4IJU7.1 | PF0040     | 79.50 | 0.00 |
| TRINITY_A8JDK0_CHLRE/6-78        | A8JDK0.1     | PF15906.3; | 79.50 | 0.00 |
| TRINITY_Q54WP9_DICDI/197-235     | Q54WP9.1     | PF00400.30 | 79.50 | 0.00 |
| TRINITY_D8TSR3_VOLCA/221-391     | D8TSR3.1     | PF10520.7; | 79.50 | 0.00 |
| TRINITY_Q22XT4_TETTS/475-635     | Q22XT4.1     | PF08662.9; | 79.50 | 0.00 |
| TRINITY_A8J7C8_CHLRE/230-580     | A8J7C8.1     | PF00152.18 | 79.50 | 0.00 |
| TRINITY_A8HMQ7_CHLRE/83-374      | A8HMQ7.1     | PF07992.12 | 79.50 | 0.00 |
| TRINITY_D8UGM2_VOLCA/23-242      | D8UGM2.1     | PF14234.4; | 79.50 | 0.00 |
| TRINITY_A8J876_CHLRE/179-295     | A8J876.1     | PF00270.27 | 79.50 | 0.00 |

|                                  |              |            |       |      |
|----------------------------------|--------------|------------|-------|------|
| TRINITY_I7M9M6_TETTS/1-66        | I7M9M6.1     | PF01246.18 | 79.40 | 0.00 |
| TRINITY_L8GRV5_ACACA/10-232      | L8GRV5.1     | PF00244.18 | 79.40 | 0.00 |
| TRINITY_Q6UKY4_CHLRE/54-121      | Q6UKY4.1     | PF00550.23 | 79.40 | 0.00 |
| TRINITY_E1Z857_CHLVA/95-169      | E1Z857.1     | PF00900.18 | 79.40 | 0.00 |
| TRINITY_A0A0B2VWK9_TOXCA/3-379   | A0A0B2VWK9.1 | PF0002     | 79.40 | 0.00 |
| TRINITY_A0CSV7_PARTE/8-75        | A0CSV7.1     | PF01111.17 | 79.40 | 0.00 |
| TRINITY_D8TVL1_VOLCA/2020-2517   | D8TVL1.1     | PF00443.27 | 79.40 | 0.00 |
| TRINITY_A8I3W3_CHLRE/45-321      | A8I3W3.1     | PF00701.20 | 79.40 | 0.00 |
| TRINITY_D8TJU4_VOLCA/48-144      | D8TJU4.1     | PF00127.18 | 79.40 | 0.00 |
| TRINITY_L1JBT9_GUITH/1-408       | L1JBT9.1     | PF00474.15 | 79.40 | 0.00 |
| TRINITY_I7M280_TETTS/444-558     | I7M280.2     | PF00271.29 | 79.40 | 0.00 |
| TRINITY_Q23DR0_TETTS/3463-3683   | Q23DR0.2     | PF12781.5; | 79.40 | 0.00 |
| TRINITY_D8U2R0_VOLCA/13-111      | D8U2R0.1     | PF03226.12 | 79.40 | 0.00 |
| TRINITY_A0A075AMU6_9FUNG/696-926 | A0A075AMU6.1 | PF0000     | 79.40 | 0.00 |
| TRINITY_A8ISK5_CHLRE/26-155      | A8ISK5.1     | PF00692.17 | 79.30 | 0.00 |
| TRINITY_H9G7K1_ANOCA/1-175       | H9G7K1.1     | PF03657.11 | 79.30 | 0.00 |
| TRINITY_A8IKV5_CHLRE/91-356      | A8IKV5.1     | PF00348.15 | 79.30 | 0.00 |
| TRINITY_F4PL27_DICFS/55-204      | F4PL27.1     | PF00005.25 | 79.30 | 0.00 |
| TRINITY_A8JBA2_CHLRE/102-475     | A8JBA2.1     | PF07690.14 | 79.30 | 0.00 |
| TRINITY_A8JF47_CHLRE/300-389     | A8JF47.1     | PF00153.25 | 79.30 | 0.00 |
| TRINITY_A8J073_CHLRE/5-146       | A8J073.1     | PF02792.12 | 79.30 | 0.00 |
| TRINITY_A8I1R6_CHLRE/74-190      | A8I1R6.1     | PF00903.23 | 79.30 | 0.00 |
| TRINITY_A8J8V5_CHLRE/3-116       | A8J8V5.1     | PF01398.19 | 79.30 | 0.00 |
| TRINITY_J0XGN0_LOALO/211-239     | J0XGN0.1     | PF01436.19 | 79.30 | 0.00 |
| TRINITY_A0A0G4FW13_9ALVE/156-200 | A0A0G4FW13.1 | PF1363     | 79.30 | 0.00 |
| TRINITY_A8J0P9_CHLRE/8-152       | A8J0P9.1     | PF00179.24 | 79.30 | 0.00 |
| TRINITY_A8IV22_CHLRE/2986-3540   | A8IV22.1     | PF03028.13 | 79.30 | 0.00 |
| TRINITY_A8JD57_CHLRE/4-264       | A8JD57.1     | PF00069.23 | 79.30 | 0.00 |
| TRINITY_A0A0K9PRK9_ZOSMR/90-295  | A0A0K9PRK9.1 | PF1308     | 79.30 | 0.00 |
| TRINITY_A0EEF5_PARTE/29-120      | A0EEF5.1     | PF00447.15 | 79.30 | 0.00 |
| TRINITY_H3EDZ8_PRIIPA/7-170      | H3EDZ8.1     | PF00160.19 | 79.30 | 0.00 |
| TRINITY_I1MZC1_SOYBN/304-468     | I1MZC1.2     | PF08662.9; | 79.30 | 0.00 |
| TRINITY_D8TYB6_VOLCA/31-225      | D8TYB6.1     | PF00926.17 | 79.30 | 0.00 |
| TRINITY_C0HHR1_MAIZE/337-528     | C0HHR1.1     | PF00270.27 | 79.30 | 0.00 |
| TRINITY_I7MLX5_TETTS/12-131      | I7MLX5.1     | PF00583.23 | 79.30 | 0.00 |
| TRINITY_I0YWB4_9CHLO/16-484      | I0YWB4.1     | PF01602.18 | 79.30 | 0.00 |
| TRINITY_A8HWS8_CHLRE/35-94       | A8HWS8.1     | PF00830.17 | 79.30 | 0.00 |
| TRINITY_M2XL41_GALSU/5-130       | M2XL41.1     | PF00410.17 | 79.20 | 0.00 |
| TRINITY_D8UFG8_VOLCA/50-168      | D8UFG8.1     | PF01042.19 | 79.20 | 0.00 |
| TRINITY_A8J2G4_CHLRE/15-122      | A8J2G4.1     | PF01655.16 | 79.20 | 0.00 |
| TRINITY_L8GYZ5_ACACA/65-112      | L8GYZ5.1     | PF00319.16 | 79.20 | 0.00 |
| TRINITY_A0E3B2_PARTE/312-359     | A0E3B2.1     | PF00400.30 | 79.20 | 0.00 |
| TRINITY_H2KQ92_CLOSI/161-232     | H2KQ92.1     | PF03719.13 | 79.20 | 0.00 |
| TRINITY_A8IJJ8_CHLRE/185-357     | A8IJJ8.1     | PF02222.20 | 79.20 | 0.00 |
| TRINITY_A8J032_CHLRE/151-204     | A8J032.1     | PF13415.4; | 79.20 | 0.00 |
| TRINITY_D8TW13_VOLCA/585-635     | D8TW13.1     | PF00847.18 | 79.20 | 0.00 |
| TRINITY_D8U5K1_VOLCA/20-262      | D8U5K1.1     | PF00262.16 | 79.20 | 0.00 |
| TRINITY_D8TJI5_VOLCA/29-431      | D8TJI5.1     | PF00464.17 | 79.20 | 0.00 |
| TRINITY_L1INW0_GUITH/3-74        | L1INW0.1     | PF00240.21 | 79.20 | 0.00 |
| TRINITY_A0A087X9F3_POEFO/403-631 | A0A087X9F3.2 | PF0008     | 79.10 | 0.00 |
| TRINITY_A0DSX8_PARTE/29-200      | A0DSX8.1     | PF03637.15 | 79.10 | 0.00 |
| TRINITY_C6SYH7_SOYBN/19-85       | C6SYH7.1     | PF01423.20 | 79.10 | 0.00 |
| TRINITY_Q235C4_TETTS/81-281      | Q235C4.2     | PF00149.26 | 79.10 | 0.00 |
| TRINITY_G0QZY1_ICHMG/82-282      | G0QZY1.1     | PF00149.26 | 79.10 | 0.00 |
| TRINITY_L8H109_ACACA/6-140       | L8H109.1     | PF00164.23 | 79.10 | 0.00 |
| TRINITY_R1F613_EMIHU/4-105       | R1F613.1     | PF00009.25 | 79.10 | 0.00 |
| TRINITY_D8UK47_VOLCA/1-286       | D8UK47.1     | PF03151.14 | 79.10 | 0.00 |
| TRINITY_A0A087SU54_AUXPR/193-346 | A0A087SU54.1 | PF0218     | 79.10 | 0.00 |
| TRINITY_Q4SCH8_TETNG/32-122      | Q4SCH8.1     | PF13233.4; | 79.10 | 0.00 |
| TRINITY_A0A078AVM5_STYLE/320-363 | A0A078AVM5.1 | PF0056     | 79.10 | 0.00 |
| TRINITY_Q27GW2_TAEGU/6-261       | Q27GW2.1     | PF00510.16 | 79.10 | 0.00 |

|                                  |              |            |       |      |
|----------------------------------|--------------|------------|-------|------|
| TRINITY_Q23DN8_TETTS/448-708     | Q23DN8.2     | PF00069.23 | 79.10 | 0.00 |
| TRINITY_A8HTG4_CHLRE/160-250     | A8HTG4.1     | PF00254.26 | 79.10 | 0.00 |
| TRINITY_D8TMW6_VOLCA/26-233      | D8TMW6.1     | PF00566.16 | 79.10 | 0.00 |
| TRINITY_D8TTJ7_VOLCA/82-358      | D8TTJ7.1     | PF06485.9; | 79.10 | 0.00 |
| TRINITY_D8UDC0_VOLCA/413-856     | D8UDC0.1     | PF00136.19 | 79.10 | 0.00 |
| TRINITY_A8IVV9_CHLRE/238-371     | A8IVV9.1     | PF00258.23 | 79.10 | 0.00 |
| TRINITY_D8U144_VOLCA/1279-1546   | D8U144.1     | PF12780.5; | 79.10 | 0.00 |
| TRINITY_E1Z257_CHLVA/49-201      | E1Z257.1     | PF00293.26 | 79.10 | 0.00 |
| TRINITY_S8DQK5_9LAMI/94-308      | S8DQK5.1     | PF00112.21 | 79.00 | 0.00 |
| TRINITY_A0A067M4U7_9HOMO/12-132  | A0A067M4U7.1 | PF0164     | 79.00 | 0.00 |
| TRINITY_A0A075AZ01_9FUNG/2-191   | A0A075AZ01.1 | PF0082     | 79.00 | 0.00 |
| TRINITY_D8U965_VOLCA/235-359     | D8U965.1     | PF00293.26 | 79.00 | 0.00 |
| TRINITY_L8H9J2_ACACA/952-1127    | L8H9J2.1     | PF07717.14 | 79.00 | 0.00 |
| TRINITY_H2MRT2_ORYLA/669-855     | H2MRT2.1     | PF06668.10 | 78.90 | 0.00 |
| TRINITY_A0A077ZNX5_STYLE/437-843 | A0A077ZNX5.1 | PF0808     | 78.90 | 0.00 |
| TRINITY_A0DJM8_PARTE/67-104      | A0DJM8.1     | PF09360.8; | 78.90 | 0.00 |
| TRINITY_V4BQF1_LOTGI/175-215     | V4BQF1.1     | PF00400.30 | 78.90 | 0.00 |
| TRINITY_D8TTE7_VOLCA/32-219      | D8TTE7.1     | PF00227.24 | 78.90 | 0.00 |
| TRINITY_I7MHK8_TETTS/244-385     | I7MHK8.1     | PF02773.14 | 78.90 | 0.00 |
| TRINITY_T1G269_HELRO/148-280     | T1G269.1     | PF03464.13 | 78.90 | 0.00 |
| TRINITY_C5LBM1_PERM5/36-106      | C5LBM1.1     | PF00076.20 | 78.90 | 0.00 |
| TRINITY_ABCH2_DICDI/58-209       | Q8T664.1     | PF00005.25 | 78.90 | 0.00 |
| TRINITY_E3T5C1_CROVB/3-74        | E3T5C1.1     | PF00240.21 | 78.90 | 0.00 |
| TRINITY_A0A059LMI3_9CHLO/7-112   | A0A059LMI3.1 | PF0038     | 78.90 | 0.00 |
| TRINITY_A8IRK4_CHLRE/68-247      | A8IRK4.1     | PF00316.18 | 78.90 | 0.00 |
| TRINITY_D3LUB1_9FIRM/225-389     | D3LUB1.1     | PF00278.20 | 78.90 | 0.00 |
| TRINITY_A0A077ZY01_STYLE/5-283   | A0A077ZY01.1 | PF0006     | 78.90 | 0.00 |
| TRINITY_A0C6S9_PARTE/9-150       | A0C6S9.1     | PF02792.12 | 78.90 | 0.00 |
| TRINITY_Q247W8_TETTS/1117-1244   | Q247W8.2     | PF00069.23 | 78.90 | 0.00 |
| TRINITY_B3MU37_DROAN/4-136       | B3MU37.1     | PF02966.14 | 78.90 | 0.00 |
| TRINITY_I7M0D5_TETTS/4-286       | I7M0D5.2     | PF00069.23 | 78.90 | 0.00 |
| TRINITY_Q22XT4_TETTS/475-635     | Q22XT4.1     | PF08662.9; | 78.90 | 0.00 |
| TRINITY_D8UF46_VOLCA/295-494     | D8UF46.1     | PF03441.12 | 78.90 | 0.00 |
| TRINITY_L8GKJ8_ACACA/14-84       | L8GKJ8.1     | PF00076.20 | 78.90 | 0.00 |
| TRINITY_D8U5N8_VOLCA/270-308     | D8U5N8.1     | PF00400.30 | 78.90 | 0.00 |
| TRINITY_A8HVU9_CHLRE/18-546      | A8HVU9.1     | PF01676.16 | 78.90 | 0.00 |
| TRINITY_I7M1K4_TETTS/30-285      | I7M1K4.1     | PF00069.23 | 78.90 | 0.00 |
| TRINITY_Q240X8_TETTS/533-757     | Q240X8.2     | PF00149.26 | 78.90 | 0.00 |
| TRINITY_D8U105_VOLCA/1269-1674   | D8U105.1     | PF08393.11 | 78.90 | 0.00 |
| TRINITY_I0YU70_9CHLO/4-458       | I0YU70.1     | PF00982.19 | 78.90 | 0.00 |
| TRINITY_J9IVJ5_9SPIT/452-505     | J9IVJ5.1     | PF13821.4; | 78.90 | 0.00 |
| TRINITY_D8UKB1_VOLCA/988-1273    | D8UKB1.1     | PF03133.13 | 78.90 | 0.00 |
| TRINITY_D8U8K4_VOLCA/199-750     | D8U8K4.1     | PF08385.10 | 78.90 | 0.00 |
| TRINITY_D8UIG2_VOLCA/332-549     | D8UIG2.1     | PF00557.22 | 78.90 | 0.00 |
| TRINITY_D8U1K8_VOLCA/108-374     | D8U1K8.1     | PF00664.21 | 78.90 | 0.00 |
| TRINITY_A8IZE7_CHLRE/525-659     | A8IZE7.1     | PF01380.20 | 78.90 | 0.00 |
| TRINITY_D8U4L6_VOLCA/1038-1075   | D8U4L6.1     | PF06596.9; | 78.90 | 0.00 |
| TRINITY_Q22UL2_TETTS/160-319     | Q22UL2.1     | PF02800.18 | 78.80 | 0.00 |
| TRINITY_G0QXI7_ICHMG/211-314     | G0QXI7.1     | PF03133.13 | 78.80 | 0.00 |
| TRINITY_L8HAC7_ACACA/15-184      | L8HAC7.1     | PF00071.20 | 78.80 | 0.00 |
| TRINITY_D8TMT4_VOLCA/58-161      | D8TMT4.1     | PF08241.10 | 78.80 | 0.00 |
| TRINITY_A0A087SF84_AUXPR/359-554 | A0A087SF84.1 | PF0022     | 78.80 | 0.00 |
| TRINITY_M3ZWP6_XIPMA/261-348     | M3ZWP6.1     | PF09014.8; | 78.80 | 0.00 |
| TRINITY_A8IGD6_CHLRE/40-206      | A8IGD6.1     | PF03193.14 | 78.80 | 0.00 |
| TRINITY_A8IGD6_CHLRE/40-206      | A8IGD6.1     | PF03193.14 | 78.80 | 0.00 |
| TRINITY_A9T9B7_PHYPA/138-500     | A9T9B7.1     | PF07690.14 | 78.80 | 0.00 |
| TRINITY_A0DEE1_PARTE/205-289     | A0DEE1.1     | PF00766.17 | 78.80 | 0.00 |
| TRINITY_A8IC88_CHLRE/107-224     | A8IC88.1     | PF13640.4; | 78.80 | 0.00 |
| TRINITY_A8ITV3_CHLRE/37-177      | A8ITV3.1     | PF00504.19 | 78.80 | 0.00 |
| TRINITY_A8ITV3_CHLRE/37-177      | A8ITV3.1     | PF00504.19 | 78.80 | 0.00 |
| TRINITY_A8J6P9_CHLRE/60-111      | A8J6P9.1     | PF00253.19 | 78.80 | 0.00 |

|                                 |              |            |       |      |
|---------------------------------|--------------|------------|-------|------|
| TRINITY_C1E5A6_MICSR/30-340     | C1E5A6.1     | PF00814.23 | 78.80 | 0.00 |
| TRINITY_Q9FNS5_CHLRE/71-219     | Q9FNS5.2     | PF00056.21 | 78.80 | 0.00 |
| TRINITY_D8TZ80_VOLCA/552-683    | D8TZ80.1     | PF00004.27 | 78.80 | 0.00 |
| TRINITY_D8TVR1_VOLCA/102-271    | D8TVR1.1     | PF02866.16 | 78.80 | 0.00 |
| TRINITY_A0A068S232_9FUNG/48-162 | A0A068S232.1 | PF0139     | 78.80 | 0.00 |
| TRINITY_A8JCQ8_CHLRE/128-575    | A8JCQ8.1     | PF00501.26 | 78.80 | 0.00 |
| TRINITY_A8JHB4_CHLRE/27-450     | A8JHB4.1     | PF00310.19 | 78.80 | 0.00 |
| TRINITY_A8HWI6_CHLRE/5-189      | A8HWI6.1     | PF00227.24 | 78.80 | 0.00 |
| TRINITY_D8UC43_VOLCA/47-387     | D8UC43.1     | PF01208.15 | 78.80 | 0.00 |
| TRINITY_D8TK54_VOLCA/171-394    | D8TK54.1     | PF01786.15 | 78.80 | 0.00 |
| TRINITY_A0A067LGR7_JATCU/96-526 | A0A067LGR7.1 | PF0085     | 78.70 | 0.00 |
| TRINITY_G0R2E2_ICHMG/1-217      | G0R2E2.1     | PF00069.23 | 78.70 | 0.00 |
| TRINITY_G3P285_GASAC/259-398    | G3P285.1     | PF01794.17 | 78.70 | 0.00 |
| TRINITY_G3NMY8_GASAC/1113-1201  | G3NMY8.1     | PF07677.12 | 78.70 | 0.00 |
| TRINITY_F4Q6S2_DICFS/285-332    | F4Q6S2.1     | PF02042.13 | 78.70 | 0.00 |
| TRINITY_D8UEU8_VOLCA/4-164      | D8UEU8.1     | PF07162.9; | 78.70 | 0.00 |
| TRINITY_D8U432_VOLCA/29-347     | D8U432.1     | PF00899.19 | 78.70 | 0.00 |
| TRINITY_L8H3I3_ACACA/86-340     | L8H3I3.1     | PF08423.9; | 78.70 | 0.00 |
| TRINITY_L1JTT7_GUIITH/13-303    | L1JTT7.1     | PF00069.23 | 78.70 | 0.00 |
| TRINITY_Q22GZ5_TETTS/22-280     | Q22GZ5.3     | PF00069.23 | 78.70 | 0.00 |
| TRINITY_A0A078AUP9_STYLE/47-242 | A0A078AUP9.1 | PF0014     | 78.70 | 0.00 |
| TRINITY_A0CVD7_PARTE/716-762    | A0CVD7.1     | PF00400.30 | 78.70 | 0.00 |
| TRINITY_A0BWV5_PARTE/13-191     | A0BWV5.1     | PF02779.22 | 78.70 | 0.00 |
| TRINITY_Q24CB9_TETTS/192-468    | Q24CB9.1     | PF08634.8; | 78.70 | 0.00 |
| TRINITY_A8HRZ4_CHLRE/83-157     | A8HRZ4.1     | PF01215.17 | 78.70 | 0.00 |
| TRINITY_E1ZEE7_CHLVA/19-66      | E1ZEE7.1     | PF13637.4; | 78.70 | 0.00 |
| TRINITY_A0A0A0L764_CUCSA/57-131 | A0A0A0L764.1 | PF0011     | 78.70 | 0.00 |
| TRINITY_D8TKE7_VOLCA/124-297    | D8TKE7.1     | PF00270.27 | 78.70 | 0.00 |
| TRINITY_M0RS96_MUSAM/58-188     | M0RS96.1     | PF01467.24 | 78.70 | 0.00 |
| TRINITY_H2R700_PANTR/122-413    | H2R700.1     | PF00850.17 | 78.70 | 0.00 |
| TRINITY_Q6Q242_CHLRE/87-341     | Q6Q242.1     | PF08423.9; | 78.70 | 0.00 |
| TRINITY_D8TRD4_VOLCA/130-335    | D8TRD4.1     | PF00753.25 | 78.70 | 0.00 |
| TRINITY_D8UB22_VOLCA/201-483    | D8UB22.1     | PF00303.17 | 78.70 | 0.00 |
| TRINITY_D8UDT3_VOLCA/121-255    | D8UDT3.1     | PF00254.26 | 78.70 | 0.00 |
| TRINITY_D8U4X7_VOLCA/4-295      | D8U4X7.1     | PF05653.12 | 78.70 | 0.00 |
| TRINITY_A0CP41_PARTE/49-236     | A0CP41.1     | PF10211.7; | 78.70 | 0.00 |
| TRINITY_Q22XN2_TETTS/43-220     | Q22XN2.1     | PF02146.15 | 78.60 | 0.00 |
| TRINITY_S8CD37_9LAMI/458-616    | S8CD37.1     | PF02769.20 | 78.60 | 0.00 |
| TRINITY_A0A087SF33_AUXPR/5-71   | A0A087SF33.1 | PF0142     | 78.60 | 0.00 |
| TRINITY_G0QZY1_ICHMG/82-282     | G0QZY1.1     | PF00149.26 | 78.60 | 0.00 |
| TRINITY_D8U9S6_VOLCA/313-473    | D8U9S6.1     | PF00270.27 | 78.60 | 0.00 |
| TRINITY_D8U4F1_VOLCA/2-252      | D8U4F1.1     | PF01265.15 | 78.60 | 0.00 |
| TRINITY_ARL3_CHLRE/3-176        | A8ISN6.2     | PF00025.19 | 78.60 | 0.00 |
| TRINITY_A8J2Q0_CHLRE/7-70       | A8J2Q0.1     | PF13499.4; | 78.60 | 0.00 |
| TRINITY_D8U2G0_VOLCA/149-253    | D8U2G0.1     | PF00639.19 | 78.60 | 0.00 |
| TRINITY_A8INI6_CHLRE/46-246     | A8INI6.1     | PF01728.17 | 78.60 | 0.00 |
| TRINITY_W9QWG9_9ROSA/873-975    | W9QWG9.1     | PF05187.11 | 78.60 | 0.00 |
| TRINITY_D8U5I0_VOLCA/499-857    | D8U5I0.1     | PF00654.18 | 78.60 | 0.00 |
| TRINITY_I3K9D2_ORENI/434-667    | I3K9D2.1     | PF00147.16 | 78.60 | 0.00 |
| TRINITY_D8UAK0_VOLCA/1-437      | D8UAK0.1     | PF00996.16 | 78.60 | 0.00 |
| TRINITY_A0A0D2U5B7_CAPO3/9-50   | A0A0D2U5B7.1 | PF0083     | 78.60 | 0.00 |
| TRINITY_A0A059LFD6_9CHLO/1-99   | A0A059LFD6.1 | PF0075     | 78.60 | 0.00 |
| TRINITY_E1Z6L6_CHLVA/245-426    | E1Z6L6.1     | PF00270.27 | 78.60 | 0.00 |
| TRINITY_A8I3C6_CHLRE/191-368    | A8I3C6.1     | PF00504.19 | 78.60 | 0.00 |
| TRINITY_A8HPZ8_CHLRE/149-557    | A8HPZ8.1     | PF01432.18 | 78.60 | 0.00 |
| TRINITY_A8J7I6_CHLRE/28-195     | A8J7I6.1     | PF03420.11 | 78.60 | 0.00 |
| TRINITY_D8U9G8_VOLCA/63-351     | D8U9G8.1     | PF00069.23 | 78.60 | 0.00 |
| TRINITY_RSP2_CHLRE/8-49         | Q6UBQ3.1     | PF05186.11 | 78.60 | 0.00 |
| TRINITY_D8TR40_VOLCA/7-265      | D8TR40.1     | PF00069.23 | 78.60 | 0.00 |
| TRINITY_J9IIV2_9SPIT/39-80      | J9IIV2.1     | PF05186.11 | 78.60 | 0.00 |
| TRINITY_J9EW47_9SPIT/841-1143   | J9EW47.1     | PF00176.21 | 78.50 | 0.00 |

|                                  |              |            |       |      |
|----------------------------------|--------------|------------|-------|------|
| TRINITY_D8U4F8_VOLCA/24-200      | D8U4F8.1     | PF01728.17 | 78.50 | 0.00 |
| TRINITY_D8THR4_VOLCA/73-174      | D8THR4.1     | PF00237.17 | 78.50 | 0.00 |
| TRINITY_A0E956_PARTE/98-269      | A0E956.1     | PF00270.27 | 78.50 | 0.00 |
| TRINITY_G5C1N0_HETGA/39-137      | G5C1N0.1     | PF00276.18 | 78.50 | 0.00 |
| TRINITY_G5C1N0_HETGA/39-137      | G5C1N0.1     | PF00276.18 | 78.50 | 0.00 |
| TRINITY_G0QMQ9_ICHMG/30-285      | G0QMQ9.1     | PF00069.23 | 78.50 | 0.00 |
| TRINITY_L8GG56_ACACA/6-615       | L8GG56.1     | PF00012.18 | 78.50 | 0.00 |
| TRINITY_A8JIA7_CHLRE/141-205     | A8JIA7.1     | PF00462.22 | 78.50 | 0.00 |
| TRINITY_D8TJI4_VOLCA/127-194     | D8TJI4.1     | PF00542.17 | 78.50 | 0.00 |
| TRINITY_D8U506_VOLCA/14-279      | D8U506.1     | PF10234.7; | 78.50 | 0.00 |
| TRINITY_A0A087SQR6_AUXPR/26-169  | A0A087SQR6.1 | PF0272     | 78.50 | 0.00 |
| TRINITY_M5WZQ0_PRUPE/537-711     | M5WZQ0.1     | PF00270.27 | 78.50 | 0.00 |
| TRINITY_A0A0D2U3Q1_CAPO3/577-723 | A0A0D2U3Q1.1 | PF0063     | 78.50 | 0.00 |
| TRINITY_D8U402_VOLCA/85-470      | D8U402.1     | PF01053.18 | 78.50 | 0.00 |
| TRINITY_A8J1X8_CHLRE/220-540     | A8J1X8.1     | PF00152.18 | 78.50 | 0.00 |
| TRINITY_A8HNG4_CHLRE/29-172      | A8HNG4.1     | PF00810.16 | 78.50 | 0.00 |
| TRINITY_E1Z5U7_CHLVA/169-492     | E1Z5U7.1     | PF02445.14 | 78.50 | 0.00 |
| TRINITY_D8S4V0_SELML/2-136       | D8S4V0.1     | PF00334.17 | 78.50 | 0.00 |
| TRINITY_I0YUV4_9CHLO/265-351     | I0YUV4.1     | PF08542.9; | 78.50 | 0.00 |
| TRINITY_A8J336_CHLRE/1141-1550   | A8J336.1     | PF08393.11 | 78.50 | 0.00 |
| TRINITY_G5C1N0_HETGA/39-137      | G5C1N0.1     | PF00276.18 | 78.50 | 0.00 |
| TRINITY_M0ZZP3_SOLTU/47-121      | M0ZZP3.1     | PF00111.25 | 78.40 | 0.00 |
| TRINITY_A8HU20_CHLRE/6-257       | A8HU20.1     | PF00069.23 | 78.40 | 0.00 |
| TRINITY_D0LH24_HALO1/11-135      | D0LH24.1     | PF02915.15 | 78.40 | 0.00 |
| TRINITY_D8TT10_VOLCA/33-270      | D8TT10.1     | PF13561.4; | 78.40 | 0.00 |
| TRINITY_Q3SD32_PARTE/10-176      | Q3SD32.1     | PF00071.20 | 78.40 | 0.00 |
| TRINITY_I0YYF9_9CHLO/476-527     | I0YYF9.1     | PF12801.5; | 78.40 | 0.00 |
| TRINITY_F0Y3G2_AURAN/97-212      | F0Y3G2.1     | PF01509.16 | 78.40 | 0.00 |
| TRINITY_V7BE91_PHAVU/88-552      | V7BE91.1     | PF00501.26 | 78.40 | 0.00 |
| TRINITY_Q3SEA7_PARTE/155-448     | Q3SEA7.1     | PF00113.20 | 78.40 | 0.00 |
| TRINITY_A4VDB5_TETTS/67-400      | A4VDB5.2     | PF00225.21 | 78.40 | 0.00 |
| TRINITY_D8TIK7_VOLCA/420-560     | D8TIK7.1     | PF04784.12 | 78.40 | 0.00 |
| TRINITY_A0A078FZF9_BRANA/30-122  | A0A078FZF9.1 | PF0024     | 78.40 | 0.00 |
| TRINITY_D8TUW1_VOLCA/298-409     | D8TUW1.1     | PF00271.29 | 78.40 | 0.00 |
| TRINITY_D8TRN2_VOLCA/120-524     | D8TRN2.1     | PF08393.11 | 78.40 | 0.00 |
| TRINITY_A8IDU2_CHLRE/877-1024    | A8IDU2.1     | PF03330.16 | 78.40 | 0.00 |
| TRINITY_A8JI25_CHLRE/1010-1316   | A8JI25.1     | PF02889.14 | 78.40 | 0.00 |
| TRINITY_A0A078B908_STYLE/61-227  | A0A078B908.1 | PF0027     | 78.40 | 0.00 |
| TRINITY_I0Z4H9_9CHLO/20-93       | I0Z4H9.1     | PF05066.11 | 78.40 | 0.00 |
| TRINITY_I0YI54_9CHLO/262-456     | I0YI54.1     | PF02786.15 | 78.40 | 0.00 |
| TRINITY_D8TW33_VOLCA/256-307     | D8TW33.1     | PF05739.17 | 78.40 | 0.00 |
| TRINITY_V4AVB2_LOTGI/9-91        | V4AVB2.1     | PF02319.18 | 78.40 | 0.00 |
| TRINITY_A8I702_CHLRE/1-254       | A8I702.1     | PF08392.10 | 78.40 | 0.00 |
| TRINITY_D8TV96_VOLCA/405-705     | D8TV96.1     | PF00069.23 | 78.40 | 0.00 |
| TRINITY_D8TL75_VOLCA/715-913     | D8TL75.1     | PF00742.17 | 78.40 | 0.00 |
| TRINITY_D8U8F2_VOLCA/2665-3369   | D8U8F2.1     | PF03028.13 | 78.40 | 0.00 |
| TRINITY_A0DN76_PARTE/190-761     | A0DN76.1     | PF08385.10 | 78.30 | 0.00 |
| TRINITY_D8UCQ9_VOLCA/86-148      | D8UCQ9.1     | PF00226.29 | 78.30 | 0.00 |
| TRINITY_A0CJS0_PARTE/128-311     | A0CJS0.1     | PF10274.7; | 78.30 | 0.00 |
| TRINITY_A8JID6_CHLRE/76-553      | A8JID6.1     | PF03219.12 | 78.30 | 0.00 |
| TRINITY_Q22B78_TETTS/72-140      | Q22B78.1     | PF00366.18 | 78.30 | 0.00 |
| TRINITY_Q23YD7_TETTS/956-1005    | Q23YD7.2     | PF13920.4; | 78.30 | 0.00 |
| TRINITY_A8IK98_CHLRE/74-458      | A8IK98.1     | PF00176.21 | 78.30 | 0.00 |
| TRINITY_A8I3H2_CHLRE/1028-1073   | A8I3H2.1     | PF13920.4; | 78.30 | 0.00 |
| TRINITY_G0QPJ7_ICHMG/85-154      | G0QPJ7.1     | PF13499.4; | 78.30 | 0.00 |
| TRINITY_A8HYD5_CHLRE/39-159      | A8HYD5.1     | PF01597.17 | 78.30 | 0.00 |
| TRINITY_D8TMT3_VOLCA/73-165      | D8TMT3.1     | PF00254.26 | 78.30 | 0.00 |
| TRINITY_W8ET04_9BACT/216-743     | W8ET04.1     | PF02867.13 | 78.30 | 0.00 |
| TRINITY_C1MHN6_MICPC/12-80       | C1MHN6.1     | PF01423.20 | 78.30 | 0.00 |
| TRINITY_A8JF79_CHLRE/207-326     | A8JF79.1     | PF01926.21 | 78.30 | 0.00 |
| TRINITY_A8J063_CHLRE/2338-2608   | A8J063.1     | PF12780.5; | 78.30 | 0.00 |

|                                  |              |            |       |      |
|----------------------------------|--------------|------------|-------|------|
| TRINITY_D8TIE7_VOLCA/109-200     | D8TIE7.1     | PF00153.25 | 78.30 | 0.00 |
| TRINITY_I7MJG2_TETTS/1-142       | I7MJG2.1     | PF01217.18 | 78.20 | 0.00 |
| TRINITY_D8TRK3_VOLCA/46-386      | D8TRK3.1     | PF01208.15 | 78.20 | 0.00 |
| TRINITY_D8TGZ0_VOLCA/1-268       | D8TGZ0.1     | PF06732.9; | 78.20 | 0.00 |
| TRINITY_Q22BR5_TETTS/56-213      | Q22BR5.3     | PF00071.20 | 78.20 | 0.00 |
| TRINITY_A8IRU0_CHLRE/5-311       | A8IRU0.1     | PF02535.20 | 78.20 | 0.00 |
| TRINITY_D8U584_VOLCA/45-218      | D8U584.1     | PF03092.14 | 78.20 | 0.00 |
| TRINITY_Q23MC3_TETTS/274-362     | Q23MC3.2     | PF13499.4; | 78.20 | 0.00 |
| TRINITY_A8J6V5_CHLRE/201-406     | A8J6V5.1     | PF01872.15 | 78.20 | 0.00 |
| TRINITY_D8U298_VOLCA/104-201     | D8U298.1     | PF00254.26 | 78.20 | 0.00 |
| TRINITY_E1ZK76_CHLVA/225-502     | E1ZK76.1     | PF00425.16 | 78.20 | 0.00 |
| TRINITY_M1CWT7_SOLTU/7-120       | M1CWT7.1     | PF05564.10 | 78.10 | 0.00 |
| TRINITY_Q22BJ8_TETTS/71-135      | Q22BJ8.1     | PF02319.18 | 78.10 | 0.00 |
| TRINITY_Q23DE7_TETTS/476-808     | Q23DE7.1     | PF00773.17 | 78.10 | 0.00 |
| TRINITY_A0A0D2UQH2_CAPO3/305-337 | A0A0D2UQH2.1 | PF0040     | 78.10 | 0.00 |
| TRINITY_ERK2_DICDI/14-304        | Q54QB1.1     | PF00069.23 | 78.10 | 0.00 |
| TRINITY_A8IA03_CHLRE/16-271      | A8IA03.1     | PF00069.23 | 78.10 | 0.00 |
| TRINITY_C1N1E2_MICPC/2-69        | C1N1E2.1     | PF01781.16 | 78.10 | 0.00 |
| TRINITY_D8TK59_VOLCA/100-237     | D8TK59.1     | PF11371.6; | 78.10 | 0.00 |
| TRINITY_D8U8N7_VOLCA/113-236     | D8U8N7.1     | PF01398.19 | 78.10 | 0.00 |
| TRINITY_A8ITN4_CHLRE/17-48       | A8ITN4.1     | PF03604.11 | 78.10 | 0.00 |
| TRINITY_A9S6B6_PHYPA/102-247     | A9S6B6.1     | PF00210.22 | 78.10 | 0.00 |
| TRINITY_D8UJB1_VOLCA/236-413     | D8UJB1.1     | PF00463.19 | 78.10 | 0.00 |
| TRINITY_D8TLJ9_VOLCA/109-448     | D8TLJ9.1     | PF02401.16 | 78.10 | 0.00 |
| TRINITY_IF6_TETTS/4-204          | Q245F2.1     | PF01912.16 | 78.10 | 0.00 |
| TRINITY_A0A087SRR6_AUXPR/74-458  | A0A087SRR6.1 | PF0046     | 78.10 | 0.00 |
| TRINITY_G0QZY1_ICHMG/82-282      | G0QZY1.1     | PF00149.26 | 78.10 | 0.00 |
| TRINITY_A0A022R695_ERYGU/119-408 | A0A022R695.1 | PF0006     | 78.10 | 0.00 |
| TRINITY_A0A060SKG4_PYCCI/750-782 | A0A060SKG4.1 | PF0185     | 78.10 | 0.00 |
| TRINITY_D8U552_VOLCA/128-397     | D8U552.1     | PF00009.25 | 78.10 | 0.00 |
| TRINITY_A8IVM9_CHLRE/82-510      | A8IVM9.1     | PF02347.14 | 78.10 | 0.00 |
| TRINITY_I7M490_TETTS/13-195      | I7M490.2     | PF01214.16 | 78.10 | 0.00 |
| TRINITY_A8IRU2_CHLRE/1046-1118   | A8IRU2.1     | PF02135.14 | 78.10 | 0.00 |
| TRINITY_I0YKR7_9CHLO/86-150      | I0YKR7.1     | PF00462.22 | 78.10 | 0.00 |
| TRINITY_D8UJD9_VOLCA/37-534      | D8UJD9.1     | PF00118.22 | 78.10 | 0.00 |
| TRINITY_K4CP64_SOLLC/29-227      | K4CP64.1     | PF00314.15 | 78.00 | 0.00 |
| TRINITY_G0QYX8_ICHMG/137-263     | G0QYX8.1     | PF04037.11 | 78.00 | 0.00 |
| TRINITY_C1M2T9_SCHMA/1-81        | C1M2T9.2     | PF00077.18 | 78.00 | 0.00 |
| TRINITY_E1ZP27_CHLVA/687-1184    | E1ZP27.1     | PF00136.19 | 78.00 | 0.00 |
| TRINITY_J9I560_9SPIT/4-261       | J9I560.1     | PF00069.23 | 78.00 | 0.00 |
| TRINITY_A8JBP5_CHLRE/14-117      | A8JBP5.1     | PF00153.25 | 78.00 | 0.00 |
| TRINITY_I0YMS5_9CHLO/72-517      | I0YMS5.1     | PF08801.9; | 78.00 | 0.00 |
| TRINITY_F1A2J8_DICPU/141-248     | F1A2J8.1     | PF11380.6; | 78.00 | 0.00 |
| TRINITY_A0DGG3_PARTE/16-124      | A0DGG3.1     | PF01655.16 | 78.00 | 0.00 |
| TRINITY_A8IZM3_CHLRE/15-118      | A8IZM3.1     | PF04178.10 | 78.00 | 0.00 |
| TRINITY_I7MA96_TETTS/697-955     | I7MA96.1     | PF00069.23 | 78.00 | 0.00 |
| TRINITY_L8HB18_ACACA/915-1031    | L8HB18.1     | PF02518.24 | 78.00 | 0.00 |
| TRINITY_D8U9R9_VOLCA/298-402     | D8U9R9.1     | PF01399.25 | 78.00 | 0.00 |
| TRINITY_A8J0E4_CHLRE/58-290      | A8J0E4.1     | PF01716.16 | 78.00 | 0.00 |
| TRINITY_A0A072W136_MEDTR/465-514 | A0A072W136.1 | PF0184     | 78.00 | 0.00 |
| TRINITY_Q6BGF1_PARTE/393-606     | Q6BGF1.1     | PF07859.11 | 78.00 | 0.00 |
| TRINITY_D8UKQ0_VOLCA/3-52        | D8UKQ0.1     | PF04135.10 | 78.00 | 0.00 |
| TRINITY_E1Z7M6_CHLVA/19-145      | E1Z7M6.1     | PF00134.21 | 78.00 | 0.00 |
| TRINITY_L8GNZ7_ACACA/132-341     | L8GNZ7.1     | PF02786.15 | 78.00 | 0.00 |
| TRINITY_D3BED6_POLPA/317-420     | D3BED6.1     | PF04191.11 | 78.00 | 0.00 |
| TRINITY_D8TL96_VOLCA/131-458     | D8TL96.1     | PF00225.21 | 78.00 | 0.00 |
| TRINITY_D8TGX0_VOLCA/3455-3807   | D8TGX0.1     | PF03028.13 | 78.00 | 0.00 |
| TRINITY_D8UEQ7_VOLCA/74-205      | D8UEQ7.1     | PF00430.16 | 78.00 | 0.00 |
| TRINITY_L8GKP4_ACACA/9-182       | L8GKP4.1     | PF00025.19 | 78.00 | 0.00 |
| TRINITY_A8JCK1_CHLRE/44-293      | A8JCK1.1     | PF00109.24 | 78.00 | 0.00 |
| TRINITY_I1G401_AMPQE/41-90       | I1G401.1     | PF04135.10 | 78.00 | 0.00 |

|                                  |              |            |       |      |
|----------------------------------|--------------|------------|-------|------|
| TRINITY_I7M8W6_TETTS/24-336      | I7M8W6.1     | PF00850.17 | 77.90 | 0.00 |
| TRINITY_A0BLS3_PARTE/98-348      | A0BLS3.1     | PF00012.18 | 77.90 | 0.00 |
| TRINITY_D2VBJ0_NAEGR/31-212      | D2VBJ0.1     | PF00227.24 | 77.90 | 0.00 |
| TRINITY_C3XQ45_BRAFL/27-200      | C3XQ45.1     | PF04055.19 | 77.90 | 0.00 |
| TRINITY_E1ZRE9_CHLVA/65-132      | E1ZRE9.1     | PF08606.9; | 77.90 | 0.00 |
| TRINITY_A8J3B5_CHLRE/12-175      | A8J3B5.1     | PF07162.9; | 77.90 | 0.00 |
| TRINITY_A9RG89_PHYPA/2-191       | A9RG89.1     | PF00827.15 | 77.90 | 0.00 |
| TRINITY_D8U582_VOLCA/34-431      | D8U582.1     | PF01960.16 | 77.90 | 0.00 |
| TRINITY_A8JD41_CHLRE/76-172      | A8JD41.1     | PF11460.6; | 77.90 | 0.00 |
| TRINITY_D8TJA9_VOLCA/41-757      | D8TJA9.1     | PF05879.10 | 77.90 | 0.00 |
| TRINITY_Q22UG4_TETTS/45-302      | Q22UG4.1     | PF00899.19 | 77.90 | 0.00 |
| TRINITY_A0A078AG04_STYLE/8-75    | A0A078AG04.1 | PF0111     | 77.90 | 0.00 |
| TRINITY_A8J0N1_CHLRE/179-359     | A8J0N1.1     | PF11891.6; | 77.90 | 0.00 |
| TRINITY_D8TJA5_VOLCA/53-597      | D8TJA5.1     | PF02990.14 | 77.90 | 0.00 |
| TRINITY_D8U702_VOLCA/48-293      | D8U702.1     | PF07714.15 | 77.90 | 0.00 |
| TRINITY_D8TJK0_VOLCA/116-341     | D8TJK0.1     | PF03407.14 | 77.90 | 0.00 |
| TRINITY_D8TXN0_VOLCA/8-251       | D8TXN0.1     | PF03029.15 | 77.90 | 0.00 |
| TRINITY_D8TWW9_VOLCA/964-1103    | D8TWW9.1     | PF07766.11 | 77.90 | 0.00 |
| TRINITY_D8UHG2_VOLCA/134-264     | D8UHG2.1     | PF00648.19 | 77.90 | 0.00 |
| TRINITY_Q9SNV7_CHLRE/301-445     | Q9SNV7.1     | PF00004.27 | 77.90 | 0.00 |
| TRINITY_D8UA15_VOLCA/77-144      | D8UA15.1     | PF02416.14 | 77.90 | 0.00 |
| TRINITY_A8JF47_CHLRE/300-389     | A8JF47.1     | PF00153.25 | 77.90 | 0.00 |
| TRINITY_J9GB80_9SPIT/69-225      | J9GB80.1     | PF12146.6; | 77.80 | 0.00 |
| TRINITY_W7XI20_TETTS/141-304     | W7XI20.1     | PF05118.13 | 77.80 | 0.00 |
| TRINITY_G1K265_CANLF/19-146      | G1K265.1     | PF00062.18 | 77.80 | 0.00 |
| TRINITY_F0VG80_NEOCL/32-94       | F0VG80.1     | PF01176.17 | 77.80 | 0.00 |
| TRINITY_R1FJW2_EMIHU/3-75        | R1FJW2.1     | PF13499.4; | 77.80 | 0.00 |
| TRINITY_D3BI40_POLPA/29-280      | D3BI40.1     | PF00398.18 | 77.80 | 0.00 |
| TRINITY_A0A067CLG0_SAPPC/220-264 | A0A067CLG0.1 | PF0040     | 77.80 | 0.00 |
| TRINITY_D8TVR5_VOLCA/136-250     | D8TVR5.1     | PF00164.23 | 77.80 | 0.00 |
| TRINITY_W5KCF3_ASTMX/94-120      | W5KCF3.1     | PF07974.11 | 77.80 | 0.00 |
| TRINITY_A8HS59_CHLRE/19-153      | A8HS59.1     | PF00237.17 | 77.80 | 0.00 |
| TRINITY_A8HMS2_CHLRE/493-591     | A8HMS2.1     | PF08417.10 | 77.80 | 0.00 |
| TRINITY_A8J2A5_CHLRE/185-273     | A8J2A5.1     | PF00153.25 | 77.80 | 0.00 |
| TRINITY_A8IIJ6_CHLRE/68-1078     | A8IIJ6.1     | PF02463.17 | 77.80 | 0.00 |
| TRINITY_A0A0G4EHW8_9ALVE/46-108  | A0A0G4EHW8.1 | PF0184     | 77.80 | 0.00 |
| TRINITY_D8U352_VOLCA/483-540     | D8U352.1     | PF07683.12 | 77.80 | 0.00 |
| TRINITY_A0A0G4J440_PLABS/4-216   | A0A0G4J440.1 | PF0009     | 77.80 | 0.00 |
| TRINITY_F7DC37_XENTR/13-192      | F7DC37.1     | PF00009.25 | 77.80 | 0.00 |
| TRINITY_A8J4P9_CHLRE/106-285     | A8J4P9.1     | PF00174.17 | 77.80 | 0.00 |
| TRINITY_D8TQ33_VOLCA/623-831     | D8TQ33.1     | PF00924.16 | 77.80 | 0.00 |
| TRINITY_I7MHZ8_TETTS/193-219     | I7MHZ8.2     | PF00641.16 | 77.80 | 0.00 |
| TRINITY_D8TH31_VOLCA/617-688     | D8TH31.1     | PF04564.13 | 77.80 | 0.00 |
| TRINITY_D8UIJ8_VOLCA/100-207     | D8UIJ8.1     | PF02777.16 | 77.80 | 0.00 |
| TRINITY_A8J0U5_CHLRE/110-307     | A8J0U5.1     | PF00696.26 | 77.80 | 0.00 |
| TRINITY_D8U5H7_VOLCA/6-339       | D8U5H7.1     | PF00225.21 | 77.80 | 0.00 |
| TRINITY_A8IQT7_CHLRE/9-103       | A8IQT7.1     | PF01230.21 | 77.80 | 0.00 |
| TRINITY_A0A0N0JZT4_9SPHN/9-246   | A0A0N0JZT4.1 | PF0631     | 77.80 | 0.00 |
| TRINITY_A8IZW8_CHLRE/9-89        | A8IZW8.1     | PF01722.16 | 77.80 | 0.00 |
| TRINITY_R1DHZ4_EMIHU/98-166      | R1DHZ4.1     | PF00076.20 | 77.80 | 0.00 |
| TRINITY_D8UGM1_VOLCA/330-419     | D8UGM1.1     | PF11715.6; | 77.80 | 0.00 |
| TRINITY_A8J6C7_CHLRE/445-655     | A8J6C7.1     | PF01434.16 | 77.80 | 0.00 |
| TRINITY_A8I8D2_CHLRE/105-225     | A8I8D2.1     | PF13640.4; | 77.80 | 0.00 |
| TRINITY_D8UBP7_VOLCA/46-407      | D8UBP7.1     | PF00225.21 | 77.80 | 0.00 |
| TRINITY_L8GRI5_ACACA/69-274      | L8GRI5.1     | PF14681.4; | 77.70 | 0.00 |
| TRINITY_A8JHW4_CHLRE/9-147       | A8JHW4.1     | PF00179.24 | 77.70 | 0.00 |
| TRINITY_C3YQF4_BRAFL/20-294      | C3YQF4.1     | PF00682.17 | 77.70 | 0.00 |
| TRINITY_R4X8G3_TAPDE/22-366      | R4X8G3.1     | PF00884.21 | 77.70 | 0.00 |
| TRINITY_M5WAG6_PRUPE/2-191       | M5WAG6.1     | PF00827.15 | 77.70 | 0.00 |
| TRINITY_D8UGN1_VOLCA/816-1223    | D8UGN1.1     | PF06957.9; | 77.70 | 0.00 |
| TRINITY_A0A078AUP9_STYLE/47-242  | A0A078AUP9.1 | PF0014     | 77.70 | 0.00 |



|                                  |              |            |       |      |
|----------------------------------|--------------|------------|-------|------|
| TRINITY_A8I311_CHLRE/4-113       | A8I311.1     | PF03650.11 | 77.70 | 0.00 |
| TRINITY_E1Z3T4_CHLVA/233-526     | E1Z3T4.1     | PF00977.19 | 77.70 | 0.00 |
| TRINITY_D8TSY5_VOLCA/2523-3232   | D8TSY5.1     | PF03028.13 | 77.70 | 0.00 |
| TRINITY_H2SQV4_TAKRU/30-137      | H2SQV4.1     | PF00576.19 | 77.60 | 0.00 |
| TRINITY_A0A078AB47_STYLE/144-465 | A0A078AB47.1 | PF0064     | 77.60 | 0.00 |
| TRINITY_G5C1N0_HETGA/39-137      | G5C1N0.1     | PF00276.18 | 77.60 | 0.00 |
| TRINITY_I7MFR0_TETTS/5-80        | I7MFR0.1     | PF01423.20 | 77.60 | 0.00 |
| TRINITY_W5LAM7_ASTMX/226-330     | W5LAM7.1     | PF00042.20 | 77.60 | 0.00 |
| TRINITY_G3I8F7_CRIGR/82-393      | G3I8F7.1     | PF00038.19 | 77.60 | 0.00 |
| TRINITY_IF6_TETTS/4-204          | Q245F2.1     | PF01912.16 | 77.60 | 0.00 |
| TRINITY_I7M274_TETTS/211-384     | I7M274.2     | PF04055.19 | 77.60 | 0.00 |
| TRINITY_D8QU58_SELML/11-233      | D8QU58.1     | PF00244.18 | 77.60 | 0.00 |
| TRINITY_F0ZPW4_DICPU/4-230       | F0ZPW4.1     | PF04670.10 | 77.60 | 0.00 |
| TRINITY_L8HHR2_ACACA/1-660       | L8HHR2.1     | PF00063.19 | 77.60 | 0.00 |
| TRINITY_A8IE29_CHLRE/43-319      | A8IE29.1     | PF00494.17 | 77.60 | 0.00 |
| TRINITY_A0A0F4JLE5_9ACTN/315-372 | A0A0F4JLE5.1 | PF0067     | 77.60 | 0.00 |
| TRINITY_D8U3H0_VOLCA/426-550     | D8U3H0.1     | PF01624.18 | 77.60 | 0.00 |
| TRINITY_E1Z2Y2_CHLVA/150-352     | E1Z2Y2.1     | PF13561.4; | 77.60 | 0.00 |
| TRINITY_D8THH0_VOLCA/35-423      | D8THH0.1     | PF04137.13 | 77.60 | 0.00 |
| TRINITY_A8J3M3_CHLRE/633-784     | A8J3M3.1     | PF00441.22 | 77.60 | 0.00 |
| TRINITY_F4QA18_DICFS/63-236      | F4QA18.1     | PF00071.20 | 77.60 | 0.00 |
| TRINITY_D3BG38_POLPA/598-767     | D3BG38.1     | PF07724.12 | 77.60 | 0.00 |
| TRINITY_NVL_DICDI/603-736        | Q54SY2.1     | PF00004.27 | 77.60 | 0.00 |
| TRINITY_D8U895_VOLCA/50-293      | D8U895.1     | PF01409.18 | 77.60 | 0.00 |
| TRINITY_D8THC9_VOLCA/332-462     | D8THC9.1     | PF00004.27 | 77.60 | 0.00 |
| TRINITY_D8TNS4_VOLCA/81-459      | D8TNS4.1     | PF00285.19 | 77.60 | 0.00 |
| TRINITY_A0A0M8YG60_9ACTN/194-252 | A0A0M8YG60.1 | PF0067     | 77.60 | 0.00 |
| TRINITY_A0A0M8YG60_9ACTN/194-252 | A0A0M8YG60.1 | PF0067     | 77.60 | 0.00 |
| TRINITY_A8I0M0_CHLRE/350-501     | A8I0M0.1     | PF00160.19 | 77.60 | 0.00 |
| TRINITY_D8TWQ0_VOLCA/4-293       | D8TWQ0.1     | PF00069.23 | 77.60 | 0.00 |
| TRINITY_A8JB97_CHLRE/128-243     | A8JB97.1     | PF02770.17 | 77.60 | 0.00 |
| TRINITY_Q9FNS5_CHLRE/222-394     | Q9FNS5.2     | PF02866.16 | 77.60 | 0.00 |
| TRINITY_L8H3Q7_ACACA/13-83       | L8H3Q7.1     | PF00076.20 | 77.50 | 0.00 |
| TRINITY_E1Z6A7_CHLVA/6-94        | E1Z6A7.1     | PF10693.7; | 77.50 | 0.00 |
| TRINITY_L8HAX2_ACACA/110-468     | L8HAX2.1     | PF00128.22 | 77.50 | 0.00 |
| TRINITY_A8IW09_CHLRE/104-199     | A8IW09.1     | PF00254.26 | 77.50 | 0.00 |
| TRINITY_L1JHZ5_GUITH/4-287       | L1JHZ5.1     | PF00069.23 | 77.50 | 0.00 |
| TRINITY_Q84X75_CHLRE/86-321      | Q84X75.1     | PF13561.4; | 77.50 | 0.00 |
| TRINITY_L8GLD6_ACACA/908-1049    | L8GLD6.1     | PF00004.27 | 77.50 | 0.00 |
| TRINITY_A0CW82_PARTE/237-374     | A0CW82.1     | PF00334.17 | 77.50 | 0.00 |
| TRINITY_Q3SD87_PARTE/6-613       | Q3SD87.1     | PF00012.18 | 77.50 | 0.00 |
| TRINITY_A8HSB7_CHLRE/6-257       | A8HSB7.1     | PF00069.23 | 77.50 | 0.00 |
| TRINITY_G0QK16_ICHMG/92-301      | G0QK16.1     | PF02786.15 | 77.50 | 0.00 |
| TRINITY_I0Z5H1_9CHLO/149-188     | I0Z5H1.1     | PF00400.30 | 77.50 | 0.00 |
| TRINITY_A0A099NYT5_PICKU/5-177   | A0A099NYT5.1 | PF0002     | 77.50 | 0.00 |
| TRINITY_A0CJF4_PARTE/1-142       | A0CJF4.1     | PF01217.18 | 77.50 | 0.00 |
| TRINITY_A8I3X6_CHLRE/2565-3295   | A8I3X6.1     | PF03028.13 | 77.50 | 0.00 |
| TRINITY_I7MIS2_TETTS/15-160      | I7MIS2.2     | PF00179.24 | 77.40 | 0.00 |
| TRINITY_A8JHU7_CHLRE/3186-3525   | A8JHU7.1     | PF12777.5; | 77.40 | 0.00 |
| TRINITY_F7DLT4_XENTR/97-236      | F7DLT4.1     | PF01565.21 | 77.40 | 0.00 |
| TRINITY_A7SWF7_NEMVE/319-432     | A7SWF7.1     | PF00271.29 | 77.40 | 0.00 |
| TRINITY_L8HJG0_ACACA/21-206      | L8HJG0.1     | PF01728.17 | 77.40 | 0.00 |
| TRINITY_I0YKX7_9CHLO/155-269     | I0YKX7.1     | PF00504.19 | 77.40 | 0.00 |
| TRINITY_ENV_XMRV6/21-615         | Q27ID8.1     | PF00429.17 | 77.40 | 0.00 |
| TRINITY_A0EE13_PARTE/19-311      | A0EE13.1     | PF00069.23 | 77.40 | 0.00 |
| TRINITY_C3YQF4_BRAFL/20-294      | C3YQF4.1     | PF00682.17 | 77.40 | 0.00 |
| TRINITY_D8TRR8_VOLCA/35-118      | D8TRR8.1     | PF13774.4; | 77.40 | 0.00 |
| TRINITY_D8TWJ2_VOLCA/29-194      | D8TWJ2.1     | PF03190.13 | 77.40 | 0.00 |
| TRINITY_A8HX77_CHLRE/10-172      | A8HX77.1     | PF00071.20 | 77.40 | 0.00 |
| TRINITY_A8J8P6_CHLRE/148-236     | A8J8P6.1     | PF13225.4; | 77.40 | 0.00 |
| TRINITY_D8TSD5_VOLCA/46-204      | D8TSD5.1     | PF03737.13 | 77.40 | 0.00 |

|                                  |              |            |       |      |
|----------------------------------|--------------|------------|-------|------|
| TRINITY_Q4VKB4_CHLRE/119-229     | Q4VKB4.1     | PF00487.22 | 77.40 | 0.00 |
| TRINITY_A0D389_PARTE/1494-1652   | A0D389.1     | PF00179.24 | 77.40 | 0.00 |
| TRINITY_E1ZGV8_CHLVA/118-161     | E1ZGV8.1     | PF14634.4; | 77.40 | 0.00 |
| TRINITY_B9SMB4_RICCO/1034-1192   | B9SMB4.1     | PF07717.14 | 77.40 | 0.00 |
| TRINITY_M5EDE1_MALS4/87-196      | M5EDE1.1     | PF08242.10 | 77.40 | 0.00 |
| TRINITY_A0A087SCP9_AUXPR/199-389 | A0A087SCP9.1 | PF0163     | 77.40 | 0.00 |
| TRINITY_D8TSY5_VOLCA/1513-1777   | D8TSY5.1     | PF12780.5; | 77.40 | 0.00 |
| TRINITY_A8JCQ8_CHLRE/128-575     | A8JCQ8.1     | PF00501.26 | 77.40 | 0.00 |
| TRINITY_D8U8Q0_VOLCA/72-213      | D8U8Q0.1     | PF05981.10 | 77.40 | 0.00 |
| TRINITY_D2R9J4_PIRSD/426-749     | D2R9J4.1     | PF01717.16 | 77.40 | 0.00 |
| TRINITY_DRC7_CHLRE/349-401       | A8JAM0.1     | PF13418.4; | 77.40 | 0.00 |
| TRINITY_I0YUW3_9CHLO/17-344      | I0YUW3.1     | PF00009.25 | 77.40 | 0.00 |
| TRINITY_A0BKT3_PARTE/6-401       | A0BKT3.1     | PF00180.18 | 77.30 | 0.00 |
| TRINITY_K3XYF0_SETIT/47-242      | K3XYF0.1     | PF00149.26 | 77.30 | 0.00 |
| TRINITY_D8TPT6_VOLCA/374-448     | D8TPT6.1     | PF03110.12 | 77.30 | 0.00 |
| TRINITY_A0A022QS20_ERYGU/21-601  | A0A022QS20.1 | PF0251     | 77.30 | 0.00 |
| TRINITY_D8UBE7_VOLCA/20-150      | D8UBE7.1     | PF01590.24 | 77.30 | 0.00 |
| TRINITY_D8UB59_VOLCA/11-326      | D8UB59.1     | PF03151.14 | 77.30 | 0.00 |
| TRINITY_D8UF24_VOLCA/49-303      | D8UF24.1     | PF01571.19 | 77.30 | 0.00 |
| TRINITY_D8U9G9_VOLCA/27-224      | D8U9G9.1     | PF03587.12 | 77.30 | 0.00 |
| TRINITY_E1FZR6_LOALO/5-178       | E1FZR6.2     | PF00071.20 | 77.30 | 0.00 |
| TRINITY_A8IS88_CHLRE/409-505     | A8IS88.1     | PF07683.12 | 77.30 | 0.00 |
| TRINITY_A8JE84_CHLRE/107-213     | A8JE84.1     | PF04367.11 | 77.30 | 0.00 |
| TRINITY_Q22T92_TETTS/412-618     | Q22T92.1     | PF00448.20 | 77.30 | 0.00 |
| TRINITY_D8TZ80_VOLCA/552-683     | D8TZ80.1     | PF00004.27 | 77.30 | 0.00 |
| TRINITY_I0YRG7_9CHLO/240-386     | I0YRG7.1     | PF00441.22 | 77.30 | 0.00 |
| TRINITY_D8UBV1_VOLCA/61-192      | D8UBV1.1     | PF00782.18 | 77.30 | 0.00 |
| TRINITY_D8TWV0_VOLCA/249-578     | D8TWV0.1     | PF00676.18 | 77.30 | 0.00 |
| TRINITY_D8UH93_VOLCA/209-296     | D8UH93.1     | PF00153.25 | 77.30 | 0.00 |
| TRINITY_L8GSG1_ACACA/9-65        | L8GSG1.1     | PF00412.20 | 77.20 | 0.00 |
| TRINITY_Q229R5_TETTS/53-249      | Q229R5.1     | PF00149.26 | 77.20 | 0.00 |
| TRINITY_T1IG80_RHOPR/112-327     | T1IG80.1     | PF00112.21 | 77.20 | 0.00 |
| TRINITY_A0C4G5_PARTE/13-301      | A0C4G5.1     | PF00069.23 | 77.20 | 0.00 |
| TRINITY_A8HR70_CHLRE/53-293      | A8HR70.1     | PF07992.12 | 77.20 | 0.00 |
| TRINITY_D8UIE7_VOLCA/49-105      | D8UIE7.1     | PF01849.16 | 77.20 | 0.00 |
| TRINITY_D8TKH5_VOLCA/385-739     | D8TKH5.1     | PF03016.13 | 77.20 | 0.00 |
| TRINITY_E1ZQD5_CHLVA/445-541     | E1ZQD5.1     | PF00271.29 | 77.20 | 0.00 |
| TRINITY_A8I4C2_CHLRE/272-455     | A8I4C2.1     | PF07970.10 | 77.20 | 0.00 |
| TRINITY_H2WL12_CAEJA/163-320     | H2WL12.2     | PF02800.18 | 77.20 | 0.00 |
| TRINITY_I0YSN7_9CHLO/8-121       | I0YSN7.1     | PF16906.3; | 77.20 | 0.00 |
| TRINITY_D8U1W1_VOLCA/105-319     | D8U1W1.1     | PF00590.18 | 77.20 | 0.00 |
| TRINITY_A8IID7_CHLRE/10-66       | A8IID7.1     | PF05383.15 | 77.20 | 0.00 |
| TRINITY_A8HQS1_CHLRE/2-471       | A8HQS1.1     | PF00171.20 | 77.20 | 0.00 |
| TRINITY_D8TWM5_VOLCA/25-651      | D8TWM5.1     | PF00133.20 | 77.20 | 0.00 |
| TRINITY_A0C460_PARTE/18-360      | A0C460.1     | PF07992.12 | 77.10 | 0.00 |
| TRINITY_M1BIS3_SOLTU/3-146       | M1BIS3.1     | PF01280.18 | 77.10 | 0.00 |
| TRINITY_L1JLA4_GUIITH/13-82      | L1JLA4.1     | PF01423.20 | 77.10 | 0.00 |
| TRINITY_D8U423_VOLCA/1-108       | D8U423.1     | PF00752.15 | 77.10 | 0.00 |
| TRINITY_V3ZNN7_LOTGI/92-552      | V3ZNN7.1     | PF00501.26 | 77.10 | 0.00 |
| TRINITY_A0A0D9VUL1_9ORYZ/7-183   | A0A0D9VUL1.1 | PF0016     | 77.10 | 0.00 |
| TRINITY_D8TIC8_VOLCA/15-143      | D8TIC8.1     | PF00416.20 | 77.10 | 0.00 |
| TRINITY_D8U5F4_VOLCA/15-132      | D8U5F4.1     | PF01894.15 | 77.10 | 0.00 |
| TRINITY_D8U9Z9_VOLCA/12-172      | D8U9Z9.1     | PF03248.11 | 77.10 | 0.00 |
| TRINITY_G0QZY5_ICHMG/317-510     | G0QZY5.1     | PF00122.18 | 77.10 | 0.00 |
| TRINITY_D8U8Z5_VOLCA/2-189       | D8U8Z5.1     | PF05023.12 | 77.10 | 0.00 |
| TRINITY_A9SYE1_PHYPA/28-246      | A9SYE1.1     | PF03332.11 | 77.10 | 0.00 |
| TRINITY_A8ITC4_CHLRE/117-174     | A8ITC4.1     | PF03106.13 | 77.10 | 0.00 |
| TRINITY_C7PC87_CHIPD/216-737     | C7PC87.1     | PF02867.13 | 77.10 | 0.00 |
| TRINITY_Q23YQ6_TETTS/11-294      | Q23YQ6.2     | PF00069.23 | 77.10 | 0.00 |
| TRINITY_D8UJ04_VOLCA/181-416     | D8UJ04.1     | PF02784.14 | 77.10 | 0.00 |
| TRINITY_D8TJQ8_VOLCA/18-148      | D8TJQ8.1     | PF01138.19 | 77.10 | 0.00 |

|                                    |              |            |       |      |
|------------------------------------|--------------|------------|-------|------|
| TRINITY_D8UFM7_VOLCA/27-322        | D8UFM7.1     | PF00676.18 | 77.10 | 0.00 |
| TRINITY_F0ZKW9_DICPU/428-462       | F0ZKW9.1     | PF00320.25 | 77.10 | 0.00 |
| TRINITY_F2UG01_SALR5/39-88         | F2UG01.1     | PF10509.7; | 77.10 | 0.00 |
| TRINITY_Q22GZ5_TETTS/22-280        | Q22GZ5.3     | PF00069.23 | 77.10 | 0.00 |
| TRINITY_Q22GZ5_TETTS/22-280        | Q22GZ5.3     | PF00069.23 | 77.10 | 0.00 |
| TRINITY_L8GEU6_ACACA/8-121         | L8GEU6.1     | PF01398.19 | 77.10 | 0.00 |
| TRINITY_A0A087SC77_AUXPR/518-566   | A0A087SC77.1 | PF1392     | 77.10 | 0.00 |
| TRINITY_G0R442_ICHMG/8-260         | G0R442.1     | PF00069.23 | 77.10 | 0.00 |
| TRINITY_D8U242_VOLCA/4-260         | D8U242.1     | PF00069.23 | 77.10 | 0.00 |
| TRINITY_A8JGJ4_CHLRE/324-589       | A8JGJ4.1     | PF00069.23 | 77.10 | 0.00 |
| TRINITY_A8JCF0_CHLRE/439-785       | A8JCF0.1     | PF00493.21 | 77.10 | 0.00 |
| TRINITY_A8HYE1_CHLRE/47-92         | A8HYE1.1     | PF00319.16 | 77.10 | 0.00 |
| TRINITY_A8ISA6_CHLRE/1125-1393     | A8ISA6.1     | PF12775.5; | 77.10 | 0.00 |
| TRINITY_A8IZ65_CHLRE/1-328         | A8IZ65.1     | PF00069.23 | 77.10 | 0.00 |
| TRINITY_D8TLE6_VOLCA/14-651        | D8TLE6.1     | PF00888.20 | 77.10 | 0.00 |
| TRINITY_Q24IM5_TETTS/56-282        | Q24IM5.2     | PF02167.13 | 77.10 | 0.00 |
| TRINITY_M0TMY2_MUSAM/144-235       | M0TMY2.1     | PF13499.4; | 77.00 | 0.00 |
| TRINITY_A0BRW1_PARTE/570-819       | A0BRW1.1     | PF07714.15 | 77.00 | 0.00 |
| TRINITY_X6LPL6_RETFI/63-180        | X6LPL6.1     | PF00271.29 | 77.00 | 0.00 |
| TRINITY_G0R088_ICHMG/41-328        | G0R088.1     | PF00069.23 | 77.00 | 0.00 |
| TRINITY_G4TRT7_PIRID/13-103        | G4TRT7.1     | PF00125.22 | 77.00 | 0.00 |
| TRINITY_L8GMP5_ACACA/121-288       | L8GMP5.1     | PF05063.12 | 77.00 | 0.00 |
| TRINITY_A8HP58_CHLRE/36-138        | A8HP58.1     | PF00085.18 | 77.00 | 0.00 |
| TRINITY_F4PTS1_DICFS/797-935       | F4PTS1.1     | PF00271.29 | 77.00 | 0.00 |
| TRINITY_I0Z2P7_9CHLO/20-284        | I0Z2P7.1     | PF00268.19 | 77.00 | 0.00 |
| TRINITY_A8JCJ9_CHLRE/432-566       | A8JCJ9.1     | PF00005.25 | 77.00 | 0.00 |
| TRINITY_A8J286_CHLRE/100-222       | A8J286.1     | PF00293.26 | 77.00 | 0.00 |
| TRINITY_A8IWQ7_CHLRE/13-138        | A8IWQ7.1     | PF01641.16 | 77.00 | 0.00 |
| TRINITY_D8TNU1_VOLCA/13-146        | D8TNU1.1     | PF04061.12 | 77.00 | 0.00 |
| TRINITY_I0YLK3_9CHLO/155-290       | I0YLK3.1     | PF00549.17 | 77.00 | 0.00 |
| TRINITY_D8U6M8_VOLCA/25-206        | D8U6M8.1     | PF01105.22 | 77.00 | 0.00 |
| TRINITY_A8HWK6_CHLRE/1-239         | A8HWK6.1     | PF03029.15 | 77.00 | 0.00 |
| TRINITY_A0A077ZY60_STYLE/6352-6887 | A0A077ZY60.1 | PF00089    | 77.00 | 0.00 |
| TRINITY_D8UIG4_VOLCA/308-609       | D8UIG4.1     | PF10637.7; | 77.00 | 0.00 |
| TRINITY_I0Z5Q6_9CHLO/192-252       | I0Z5Q6.1     | PF03987.13 | 77.00 | 0.00 |
| TRINITY_A8J1B8_CHLRE/7-119         | A8J1B8.1     | PF01412.16 | 77.00 | 0.00 |
| TRINITY_D8U5C4_VOLCA/126-200       | D8U5C4.1     | PF00400.30 | 77.00 | 0.00 |
| TRINITY_E1ZGX8_CHLVA/47-144        | E1ZGX8.1     | PF13649.4; | 77.00 | 0.00 |
| TRINITY_I7ML77_TETTS/37-532        | I7ML77.2     | PF00118.22 | 77.00 | 0.00 |
| TRINITY_B6AFJ7_CRYMR/406-632       | B6AFJ7.1     | PF00587.23 | 76.90 | 0.00 |
| TRINITY_A0A078AVA8_STYLE/23-100    | A0A078AVA8.1 | PF0142     | 76.90 | 0.00 |
| TRINITY_A0A0N0VDQ6_9TRYP/66-95     | A0A0N0VDQ6.1 | PF0039     | 76.90 | 0.00 |
| TRINITY_Q22UW8_TETTS/5-177         | Q22UW8.2     | PF00025.19 | 76.90 | 0.00 |
| TRINITY_G0QX06_ICHMG/22-142        | G0QX06.1     | PF00238.17 | 76.90 | 0.00 |
| TRINITY_G0QIW1_ICHMG/26-90         | G0QIW1.1     | PF13499.4; | 76.90 | 0.00 |
| TRINITY_G0R0B5_ICHMG/45-346        | G0R0B5.1     | PF03133.13 | 76.90 | 0.00 |
| TRINITY_Q240K0_TETTS/222-351       | Q240K0.1     | PF00004.27 | 76.90 | 0.00 |
| TRINITY_K1R1B5_CRAGI/204-242       | K1R1B5.1     | PF00400.30 | 76.90 | 0.00 |
| TRINITY_A0BZY6_PARTE/125-176       | A0BZY6.1     | PF01805.18 | 76.90 | 0.00 |
| TRINITY_D8U4H3_VOLCA/13-347        | D8U4H3.1     | PF00225.21 | 76.90 | 0.00 |
| TRINITY_A0A0Q9WFX2_DROVI/329-367   | A0A0Q9WFX2.1 | PF0040     | 76.90 | 0.00 |
| TRINITY_Q6DN05_CHLRE/283-659       | Q6DN05.1     | PF11899.6; | 76.90 | 0.00 |
| TRINITY_A8IZW5_CHLRE/26-133        | A8IZW5.1     | PF00638.16 | 76.90 | 0.00 |
| TRINITY_D8TS39_VOLCA/55-405        | D8TS39.1     | PF00266.17 | 76.90 | 0.00 |
| TRINITY_D8TPF5_VOLCA/5-177         | D8TPF5.1     | PF00025.19 | 76.90 | 0.00 |
| TRINITY_I0Z2K1_9CHLO/72-136        | I0Z2K1.1     | PF00462.22 | 76.90 | 0.00 |
| TRINITY_G0QQR7_ICHMG/565-788       | G0QQR7.1     | PF00149.26 | 76.90 | 0.00 |
| TRINITY_A8IV98_CHLRE/12-185        | A8IV98.1     | PF00270.27 | 76.90 | 0.00 |
| TRINITY_I1E6H0_AMPQE/52-122        | I1E6H0.1     | PF00076.20 | 76.90 | 0.00 |
| TRINITY_A0A058ZDS7_9EUKA/266-414   | A0A058ZDS7.1 | PF0044     | 76.90 | 0.00 |
| TRINITY_A8HNX7_CHLRE/110-174       | A8HNX7.1     | PF13499.4; | 76.90 | 0.00 |

|                                  |              |            |       |      |
|----------------------------------|--------------|------------|-------|------|
| TRINITY_Q84UB2_CHLRE/13-201      | Q84UB2.1     | PF00117.26 | 76.90 | 0.00 |
| TRINITY_D8U9X3_VOLCA/116-609     | D8U9X3.1     | PF00067.20 | 76.90 | 0.00 |
| TRINITY_D8UF52_VOLCA/60-419      | D8UF52.1     | PF02274.15 | 76.90 | 0.00 |
| TRINITY_I0YR35_9CHLO/282-398     | I0YR35.1     | PF02373.20 | 76.90 | 0.00 |
| TRINITY_D8TQ16_VOLCA/99-254      | D8TQ16.1     | PF14566.4; | 76.90 | 0.00 |
| TRINITY_E1ZQQ3_CHLVA/47-298      | E1ZQQ3.1     | PF00109.24 | 76.90 | 0.00 |
| TRINITY_A0A078AVA8_STYLE/23-100  | A0A078AVA8.1 | PF0142     | 76.90 | 0.00 |
| TRINITY_Q230X9_TETTS/859-1272    | Q230X9.2     | PF08393.11 | 76.80 | 0.00 |
| TRINITY_L8GNF0_ACACA/4-155       | L8GNF0.1     | PF00160.19 | 76.80 | 0.00 |
| TRINITY_D8T1I5_SELML/13-265      | D8T1I5.1     | PF07714.15 | 76.80 | 0.00 |
| TRINITY_Q9FNS5_CHLRE/222-394     | Q9FNS5.2     | PF02866.16 | 76.80 | 0.00 |
| TRINITY_A0A0D2S7C8_GOSRA/11-92   | A0A0D2S7C8.1 | PF0119     | 76.80 | 0.00 |
| TRINITY_A8HWY9_CHLRE/4-85        | A8HWY9.1     | PF00076.20 | 76.80 | 0.00 |
| TRINITY_V9FDA4_PHYPR/18-99       | V9FDA4.1     | PF15511.4; | 76.80 | 0.00 |
| TRINITY_A8IJE8_CHLRE/219-330     | A8IJE8.1     | PF00271.29 | 76.80 | 0.00 |
| TRINITY_A0C4G5_PARTE/13-301      | A0C4G5.1     | PF00069.23 | 76.80 | 0.00 |
| TRINITY_A8IX41_CHLRE/50-316      | A8IX41.1     | PF00348.15 | 76.80 | 0.00 |
| TRINITY_A0A095ET61_CRYGA/8-69    | A0A095ET61.1 | PF0120     | 76.80 | 0.00 |
| TRINITY_D8TZS1_VOLCA/168-450     | D8TZS1.1     | PF00928.19 | 76.80 | 0.00 |
| TRINITY_D8UI61_VOLCA/124-252     | D8UI61.1     | PF01926.21 | 76.80 | 0.00 |
| TRINITY_Q8GV23_CHLRE/172-240     | Q8GV23.2     | PF00076.20 | 76.80 | 0.00 |
| TRINITY_D8TIC7_VOLCA/60-159      | D8TIC7.1     | PF01230.21 | 76.80 | 0.00 |
| TRINITY_T1FMH1_HELRO/101-156     | T1FMH1.1     | PF00288.24 | 76.80 | 0.00 |
| TRINITY_L8H292_ACACA/97-234      | L8H292.1     | PF03947.16 | 76.80 | 0.00 |
| TRINITY_G0R1B4_ICHMG/8-259       | G0R1B4.1     | PF00069.23 | 76.80 | 0.00 |
| TRINITY_G0QUB8_ICHMG/510-575     | G0QUB8.1     | PF00659.16 | 76.80 | 0.00 |
| TRINITY_D8UKJ5_VOLCA/169-433     | D8UKJ5.1     | PF00069.23 | 76.80 | 0.00 |
| TRINITY_D8TRG5_VOLCA/311-495     | D8TRG5.1     | PF02737.16 | 76.80 | 0.00 |
| TRINITY_A9TV53_PHYPA/249-398     | A9TV53.1     | PF00005.25 | 76.80 | 0.00 |
| TRINITY_A0A078ATE7_STYLE/90-132  | A0A078ATE7.1 | PF0184     | 76.70 | 0.00 |
| TRINITY_Q8HQM8_LEPOC/14-224      | Q8HQM8.1     | PF00119.18 | 76.70 | 0.00 |
| TRINITY_G3NMP4_GASAC/39-401      | G3NMP4.1     | PF00079.18 | 76.70 | 0.00 |
| TRINITY_A0A0D3F687_9ORYZ/19-78   | A0A0D3F687.1 | PF0013     | 76.70 | 0.00 |
| TRINITY_I7MMG7_TETTS/4-265       | I7MMG7.1     | PF00069.23 | 76.70 | 0.00 |
| TRINITY_D8U5Y2_VOLCA/2458-2558   | D8U5Y2.1     | PF07728.12 | 76.70 | 0.00 |
| TRINITY_A8IQE3_CHLRE/44-120      | A8IQE3.1     | PF01929.15 | 76.70 | 0.00 |
| TRINITY_G1R190_NOMLE/177-520     | G1R190.1     | PF12631.5; | 76.70 | 0.00 |
| TRINITY_T0R7J0_9STRA/183-466     | T0R7J0.1     | PF00303.17 | 76.70 | 0.00 |
| TRINITY_D8UIB6_VOLCA/245-417     | D8UIB6.1     | PF00160.19 | 76.70 | 0.00 |
| TRINITY_A8J805_CHLRE/1-86        | A8J805.1     | PF03871.12 | 76.70 | 0.00 |
| TRINITY_A8J9T6_CHLRE/99-204      | A8J9T6.1     | PF01903.15 | 76.70 | 0.00 |
| TRINITY_L8GTU7_ACACA/11-186      | L8GTU7.1     | PF01725.14 | 76.70 | 0.00 |
| TRINITY_I0Z594_9CHLO/787-1217    | I0Z594.1     | PF02514.14 | 76.70 | 0.00 |
| TRINITY_D8U4H1_VOLCA/23-228      | D8U4H1.1     | PF01926.21 | 76.70 | 0.00 |
| TRINITY_U9T7M3_RHIID/51-209      | U9T7M3.1     | PF00441.22 | 76.70 | 0.00 |
| TRINITY_A8IRP4_CHLRE/21-110      | A8IRP4.1     | PF01221.16 | 76.70 | 0.00 |
| TRINITY_A0A0G4FEP8_9ALVE/497-648 | A0A0G4FEP8.1 | PF0016     | 76.70 | 0.00 |
| TRINITY_D8TR38_VOLCA/281-452     | D8TR38.1     | PF13535.4; | 76.70 | 0.00 |
| TRINITY_D8TUT6_VOLCA/541-613     | D8TUT6.1     | PF04818.11 | 76.70 | 0.00 |
| TRINITY_D8TY83_VOLCA/1-61        | D8TY83.1     | PF01809.16 | 76.70 | 0.00 |
| TRINITY_E1ZDA6_CHLVA/103-407     | E1ZDA6.1     | PF13249.4; | 76.70 | 0.00 |
| TRINITY_D8U3I9_VOLCA/67-225      | D8U3I9.1     | PF00005.25 | 76.70 | 0.00 |
| TRINITY_E1ZG99_CHLVA/288-324     | E1ZG99.1     | PF00400.30 | 76.70 | 0.00 |
| TRINITY_D8U8H2_VOLCA/795-1749    | D8U8H2.1     | PF02514.14 | 76.70 | 0.00 |
| TRINITY_A8JES3_CHLRE/59-192      | A8JES3.1     | PF01565.21 | 76.70 | 0.00 |
| TRINITY_A8HYY7_CHLRE/43-300      | A8HYY7.1     | PF00069.23 | 76.70 | 0.00 |
| TRINITY_D8U4V3_VOLCA/737-1265    | D8U4V3.1     | PF02738.16 | 76.70 | 0.00 |
| TRINITY_A0BII3_PARTE/8-68        | A0BII3.1     | PF01200.16 | 76.70 | 0.00 |
| TRINITY_G0QZY1_ICHMG/82-282      | G0QZY1.1     | PF00149.26 | 76.60 | 0.00 |
| TRINITY_A8HUE0_CHLRE/4-204       | A8HUE0.1     | PF01912.16 | 76.60 | 0.00 |
| TRINITY_I3J4H8_ORENI/18-261      | I3J4H8.1     | PF00089.24 | 76.60 | 0.00 |

|                                  |              |            |       |      |
|----------------------------------|--------------|------------|-------|------|
| TRINITY_A8J599_CHLRE/1-258       | A8J599.1     | PF00290.18 | 76.60 | 0.00 |
| TRINITY_E5SFT9_TRISP/12-88       | E5SFT9.1     | PF00753.25 | 76.60 | 0.00 |
| TRINITY_A8ILX2_CHLRE/10-178      | A8ILX2.1     | PF00071.20 | 76.60 | 0.00 |
| TRINITY_A8IWK9_CHLRE/41-219      | A8IWK9.1     | PF02779.22 | 76.60 | 0.00 |
| TRINITY_D8TLU9_VOLCA/60-150      | D8TLU9.1     | PF02575.14 | 76.60 | 0.00 |
| TRINITY_D8TWC4_VOLCA/5-141       | D8TWC4.1     | PF00334.17 | 76.60 | 0.00 |
| TRINITY_Q22BJ8_TETTS/71-135      | Q22BJ8.1     | PF02319.18 | 76.60 | 0.00 |
| TRINITY_D8TIX5_VOLCA/233-373     | D8TIX5.1     | PF00334.17 | 76.60 | 0.00 |
| TRINITY_D8TIG9_VOLCA/366-536     | D8TIG9.1     | PF00069.23 | 76.60 | 0.00 |
| TRINITY_Q6UPR4_CHLRE/11-266      | Q6UPR4.1     | PF00069.23 | 76.60 | 0.00 |
| TRINITY_L8GGD8_ACACA/60-491      | L8GGD8.1     | PF00330.18 | 76.60 | 0.00 |
| TRINITY_I7MD55_TETTS/531-788     | I7MD55.2     | PF00069.23 | 76.60 | 0.00 |
| TRINITY_A8IQ05_CHLRE/30-238      | A8IQ05.1     | PF08442.8; | 76.60 | 0.00 |
| TRINITY_K8Z0E9_9STRA/3-376       | K8Z0E9.1     | PF00022.17 | 76.60 | 0.00 |
| TRINITY_A8I9T2_CHLRE/11-335      | A8I9T2.1     | PF00225.21 | 76.60 | 0.00 |
| TRINITY_A0CNJ8_PARTE/131-199     | A0CNJ8.1     | PF01106.15 | 76.50 | 0.00 |
| TRINITY_A0CNJ8_PARTE/131-199     | A0CNJ8.1     | PF01106.15 | 76.50 | 0.00 |
| TRINITY_G0QSG1_ICHMG/5-55        | G0QSG1.1     | PF00253.19 | 76.50 | 0.00 |
| TRINITY_A0A0N1J4Z6_9TRYP/9-151   | A0A0N1J4Z6.1 | PF0005     | 76.50 | 0.00 |
| TRINITY_A4RUI2_OSTLU/224-344     | A4RUI2.1     | PF08443.9; | 76.50 | 0.00 |
| TRINITY_D8U6J5_VOLCA/46-261      | D8U6J5.1     | PF07722.11 | 76.50 | 0.00 |
| TRINITY_A8J4P1_CHLRE/462-577     | A8J4P1.1     | PF01077.20 | 76.50 | 0.00 |
| TRINITY_D8U306_VOLCA/17-305      | D8U306.1     | PF03151.14 | 76.50 | 0.00 |
| TRINITY_D8TP48_VOLCA/38-177      | D8TP48.1     | PF00504.19 | 76.50 | 0.00 |
| TRINITY_D8UEE2_VOLCA/1087-1274   | D8UEE2.1     | PF00211.18 | 76.50 | 0.00 |
| TRINITY_D8U166_VOLCA/32-148      | D8U166.1     | PF00583.23 | 76.50 | 0.00 |
| TRINITY_I7M985_TETTS/75-236      | I7M985.2     | PF00071.20 | 76.50 | 0.00 |
| TRINITY_D8UAR0_VOLCA/58-357      | D8UAR0.1     | PF00676.18 | 76.50 | 0.00 |
| TRINITY_I4VNC1_9GAMM/20-121      | I4VNC1.1     | PF02678.14 | 76.50 | 0.00 |
| TRINITY_I0Z7U0_9CHLO/75-417      | I0Z7U0.1     | PF00155.19 | 76.50 | 0.00 |
| TRINITY_A0A059LFB7_9CHLO/326-378 | A0A059LFB7.1 | PF0084     | 76.50 | 0.00 |
| TRINITY_D8TRA0_VOLCA/161-328     | D8TRA0.1     | PF02882.17 | 76.50 | 0.00 |
| TRINITY_D8TYL0_VOLCA/24-429      | D8TYL0.1     | PF00815.18 | 76.50 | 0.00 |
| TRINITY_M2XNT1_GALSU/32-204      | M2XNT1.1     | PF00227.24 | 76.50 | 0.00 |
| TRINITY_D8U638_VOLCA/106-284     | D8U638.1     | PF01163.20 | 76.50 | 0.00 |
| TRINITY_D8U877_VOLCA/429-566     | D8U877.1     | PF03133.13 | 76.50 | 0.00 |
| TRINITY_E1ZGF1_CHLVA/201-497     | E1ZGF1.1     | PF02781.14 | 76.50 | 0.00 |
| TRINITY_D8TPX3_VOLCA/433-615     | D8TPX3.1     | PF01369.18 | 76.50 | 0.00 |
| TRINITY_A0A0D2R821_GOSRA/25-263  | A0A0D2R821.1 | PF0150     | 76.50 | 0.00 |
| TRINITY_A0D4P4_PARTE/26-312      | A0D4P4.1     | PF01256.15 | 76.50 | 0.00 |
| TRINITY_I3K6P5_ORENI/355-431     | I3K6P5.1     | PF14478.4; | 76.40 | 0.00 |
| TRINITY_F7IT74_CALJA/2-372       | F7IT74.1     | PF00022.17 | 76.40 | 0.00 |
| TRINITY_R1FLF2_EMIHU/43-137      | R1FLF2.1     | PF01248.24 | 76.40 | 0.00 |
| TRINITY_I7M0D5_TETTS/4-286       | I7M0D5.2     | PF00069.23 | 76.40 | 0.00 |
| TRINITY_D8THD0_VOLCA/31-170      | D8THD0.1     | PF01743.18 | 76.40 | 0.00 |
| TRINITY_A9TJ83_PHYPA/70-219      | A9TJ83.1     | PF00675.18 | 76.40 | 0.00 |
| TRINITY_A8HN23_CHLRE/7-146       | A8HN23.1     | PF00179.24 | 76.40 | 0.00 |
| TRINITY_L8GYL0_ACACA/10-208      | L8GYL0.1     | PF00106.23 | 76.40 | 0.00 |
| TRINITY_F4PJ23_DICFS/87-365      | F4PJ23.1     | PF00795.20 | 76.40 | 0.00 |
| TRINITY_D8U986_VOLCA/307-378     | D8U986.1     | PF00575.21 | 76.40 | 0.00 |
| TRINITY_D8TTM8_VOLCA/232-379     | D8TTM8.1     | PF04280.13 | 76.40 | 0.00 |
| TRINITY_D8TI16_VOLCA/38-358      | D8TI16.1     | PF00231.17 | 76.40 | 0.00 |
| TRINITY_A8IVN2_CHLRE/121-243     | A8IVN2.1     | PF00254.26 | 76.40 | 0.00 |
| TRINITY_A8IW49_CHLRE/70-357      | A8IW49.1     | PF01326.17 | 76.40 | 0.00 |
| TRINITY_D8UBC2_VOLCA/92-232      | D8UBC2.1     | PF00588.17 | 76.40 | 0.00 |
| TRINITY_D8TV35_VOLCA/36-170      | D8TV35.1     | PF00293.26 | 76.40 | 0.00 |
| TRINITY_A8JEP1_CHLRE/46-106      | A8JEP1.1     | PF01632.17 | 76.40 | 0.00 |
| TRINITY_A0A0N5DF24_TRIMR/12-173  | A0A0N5DF24.1 | PF0007     | 76.40 | 0.00 |
| TRINITY_D8TVU0_VOLCA/499-857     | D8TVU0.1     | PF02896.16 | 76.40 | 0.00 |
| TRINITY_A8ISA6_CHLRE/1125-1393   | A8ISA6.1     | PF12775.5; | 76.40 | 0.00 |
| TRINITY_S9XF47_9CETA/18-125      | S9XF47.1     | PF02466.17 | 76.40 | 0.00 |

|                                  |              |            |       |      |
|----------------------------------|--------------|------------|-------|------|
| TRINITY_E1ZGU4_CHLVA/29-104      | E1ZGU4.1     | PF00935.17 | 76.30 | 0.00 |
| TRINITY_G5AVB9_HETGA/45-142      | G5AVB9.1     | PF05300.9; | 76.30 | 0.00 |
| TRINITY_L8HI18_ACACA/1-38        | L8HI18.1     | PF06220.10 | 76.30 | 0.00 |
| TRINITY_A8J2R7_CHLRE/2-241       | A8J2R7.1     | PF13714.4; | 76.30 | 0.00 |
| TRINITY_D8U3E0_VOLCA/2-238       | D8U3E0.1     | PF00590.18 | 76.30 | 0.00 |
| TRINITY_L8GVB5_ACACA/24-212      | L8GVB5.1     | PF13869.4; | 76.30 | 0.00 |
| TRINITY_C1E342_MICSR/2-60        | C1E342.1     | PF13921.4; | 76.30 | 0.00 |
| TRINITY_I1FRI7_AMPQE/5-178       | I1FRI7.1     | PF00071.20 | 76.30 | 0.00 |
| TRINITY_J9EWA0_9SPIT/4-255       | J9EWA0.1     | PF00069.23 | 76.30 | 0.00 |
| TRINITY_W8EXB1_9BACT/43-393      | W8EXB1.1     | PF00155.19 | 76.30 | 0.00 |
| TRINITY_A8I4Q7_CHLRE/4-177       | A8I4Q7.1     | PF00025.19 | 76.30 | 0.00 |
| TRINITY_D8U7W0_VOLCA/188-291     | D8U7W0.1     | PF08241.10 | 76.30 | 0.00 |
| TRINITY_A8HPT4_CHLRE/518-732     | A8HPT4.1     | PF01434.16 | 76.30 | 0.00 |
| TRINITY_A8IS66_CHLRE/157-216     | A8IS66.1     | PF04117.10 | 76.30 | 0.00 |
| TRINITY_E1ZPD8_CHLVA/677-1060    | E1ZPD8.1     | PF00562.26 | 76.30 | 0.00 |
| TRINITY_F0ZMF1_DICPU/9-531       | F0ZMF1.1     | PF01602.18 | 76.30 | 0.00 |
| TRINITY_A8ITU7_CHLRE/41-352      | A8ITU7.1     | PF00389.28 | 76.30 | 0.00 |
| TRINITY_A0CWH0_PARTE/374-647     | A0CWH0.1     | PF12780.5; | 76.30 | 0.00 |
| TRINITY_D8TRK3_VOLCA/46-386      | D8TRK3.1     | PF01208.15 | 76.30 | 0.00 |
| TRINITY_D8U934_VOLCA/3-96        | D8U934.1     | PF03501.13 | 76.30 | 0.00 |
| TRINITY_D7TZR0_VITVI/54-112      | D7TZR0.1     | PF12678.5; | 76.30 | 0.00 |
| TRINITY_D7TZR0_VITVI/54-112      | D7TZR0.1     | PF12678.5; | 76.30 | 0.00 |
| TRINITY_A8JFT4_CHLRE/24-412      | A8JFT4.1     | PF00162.17 | 76.30 | 0.00 |
| TRINITY_D8TIT4_VOLCA/17-171      | D8TIT4.1     | PF14580.4; | 76.30 | 0.00 |
| TRINITY_A0A0G4EX02_9ALVE/207-341 | A0A0G4EX02.1 | PF0033     | 76.30 | 0.00 |
| TRINITY_B4GHX2_DROPE/12-232      | B4GHX2.1     | PF00244.18 | 76.30 | 0.00 |
| TRINITY_D8UKL0_VOLCA/70-414      | D8UKL0.1     | PF02374.13 | 76.30 | 0.00 |
| TRINITY_A8IND8_CHLRE/519-556     | A8IND8.1     | PF00400.30 | 76.30 | 0.00 |
| TRINITY_W0SBT4_9RHOO/9-264       | W0SBT4.1     | PF00378.18 | 76.30 | 0.00 |
| TRINITY_E1ZPG6_CHLVA/203-291     | E1ZPG6.1     | PF05706.10 | 76.30 | 0.00 |
| TRINITY_M0ZX54_SOLTU/141-203     | M0ZX54.1     | PF00403.24 | 76.20 | 0.00 |
| TRINITY_D8TXY7_VOLCA/1011-1403   | D8TXY7.1     | PF00176.21 | 76.20 | 0.00 |
| TRINITY_M2XL41_GALSU/5-130       | M2XL41.1     | PF00410.17 | 76.20 | 0.00 |
| TRINITY_C3Y8A7_BRAFL/261-303     | C3Y8A7.1     | PF00400.30 | 76.20 | 0.00 |
| TRINITY_Q234J0_TETTS/316-420     | Q234J0.2     | PF00271.29 | 76.20 | 0.00 |
| TRINITY_L8GV49_ACACA/58-474      | L8GV49.1     | PF13520.4; | 76.20 | 0.00 |
| TRINITY_B2WIM4_PYRTR/6-216       | B2WIM4.1     | PF00091.23 | 76.20 | 0.00 |
| TRINITY_D8UCZ9_VOLCA/61-318      | D8UCZ9.1     | PF00795.20 | 76.20 | 0.00 |
| TRINITY_A8JJ39_CHLRE/244-948     | A8JJ39.1     | PF03028.13 | 76.20 | 0.00 |
| TRINITY_A8JBN7_CHLRE/43-209      | A8JBN7.1     | PF00270.27 | 76.20 | 0.00 |
| TRINITY_D8UEF3_VOLCA/334-375     | D8UEF3.1     | PF13445.4; | 76.20 | 0.00 |
| TRINITY_L8GRZ9_ACACA/142-435     | L8GRZ9.1     | PF00113.20 | 76.20 | 0.00 |
| TRINITY_F1A2W8_DICPU/72-134      | F1A2W8.1     | PF01485.19 | 76.20 | 0.00 |
| TRINITY_A8I2G3_CHLRE/18-202      | A8I2G3.1     | PF04427.16 | 76.20 | 0.00 |
| TRINITY_A8IA89_CHLRE/65-459      | A8IA89.1     | PF00815.18 | 76.20 | 0.00 |
| TRINITY_A8JCV0_CHLRE/49-298      | A8JCV0.1     | PF01406.17 | 76.20 | 0.00 |
| TRINITY_A8JGD1_CHLRE/214-448     | A8JGD1.1     | PF00208.19 | 76.20 | 0.00 |
| TRINITY_A0A078AD32_STYLE/224-475 | A0A078AD32.1 | PF0006     | 76.20 | 0.00 |
| TRINITY_A8HQ52_CHLRE/508-594     | A8HQ52.1     | PF14874.4; | 76.20 | 0.00 |
| TRINITY_I7MK75_TETTS/365-471     | I7MK75.1     | PF01926.21 | 76.20 | 0.00 |
| TRINITY_D8U4M5_VOLCA/265-345     | D8U4M5.1     | PF08544.11 | 76.20 | 0.00 |
| TRINITY_E1AXT4_SOLTU/503-586     | E1AXT4.1     | PF08244.10 | 76.20 | 0.00 |
| TRINITY_Q7G6A5_ORYSJ/539-699     | Q7G6A5.1     | PF00078.25 | 76.20 | 0.00 |
| TRINITY_D8UEQ7_VOLCA/74-205      | D8UEQ7.1     | PF00430.16 | 76.20 | 0.00 |
| TRINITY_D8U7H4_VOLCA/6-301       | D8U7H4.1     | PF02219.15 | 76.20 | 0.00 |
| TRINITY_A8I263_CHLRE/54-421      | A8I263.1     | PF00155.19 | 76.20 | 0.00 |
| TRINITY_D8TGV1_VOLCA/625-668     | D8TGV1.1     | PF06203.12 | 76.20 | 0.00 |
| TRINITY_D8U4B1_VOLCA/1-175       | D8U4B1.1     | PF03657.11 | 76.20 | 0.00 |
| TRINITY_D8TU13_VOLCA/649-861     | D8TU13.1     | PF04192.10 | 76.20 | 0.00 |
| TRINITY_A0DSX8_PARTE/29-200      | A0DSX8.1     | PF03637.15 | 76.20 | 0.00 |
| TRINITY_B5DNJ2_DROPS/2-103       | B5DNJ2.1     | PF00125.22 | 76.10 | 0.00 |

|                                  |                     |       |      |
|----------------------------------|---------------------|-------|------|
| TRINITY_K5VRE2_PHACS/69-290      | K5VRE2.1 PF12708.5; | 76.10 | 0.00 |
| TRINITY_A8JFI9_CHLRE/69-288      | A8JFI9.1 PF01940.14 | 76.10 | 0.00 |
| TRINITY_M4ANS3_XIPMA/340-670     | M4ANS3.1 PF00405.15 | 76.10 | 0.00 |
| TRINITY_D3BP99_POLPA/174-329     | D3BP99.1 PF00903.23 | 76.10 | 0.00 |
| TRINITY_A0A015LRD9_9GLOM/3-430   | A0A015LRD9.1 PF0522 | 76.10 | 0.00 |
| TRINITY_Q23YD7_TETTS/956-1005    | Q23YD7.2 PF13920.4; | 76.10 | 0.00 |
| TRINITY_A8I818_CHLRE/8-120       | A8I818.1 PF04502.11 | 76.10 | 0.00 |
| TRINITY_J9J908_9SPIT/40-295      | J9J908.1 PF00069.23 | 76.10 | 0.00 |
| TRINITY_A0A0M0J786_9EUKA/14-143  | A0A0M0J786.1 PF0069 | 76.10 | 0.00 |
| TRINITY_D8TZS1_VOLCA/168-450     | D8TZS1.1 PF00928.19 | 76.10 | 0.00 |
| TRINITY_D8U6R7_VOLCA/9-163       | D8U6R7.1 PF08694.9; | 76.10 | 0.00 |
| TRINITY_A8ING4_CHLRE/129-210     | A8ING4.1 PF00173.26 | 76.10 | 0.00 |
| TRINITY_E1Z4U0_CHLVA/313-482     | E1Z4U0.1 PF00587.23 | 76.10 | 0.00 |
| TRINITY_D8M6A4_BLAHO/3-74        | D8M6A4.1 PF00240.21 | 76.10 | 0.00 |
| TRINITY_A0C4G5_PARTE/13-301      | A0C4G5.1 PF00069.23 | 76.10 | 0.00 |
| TRINITY_E1Z8Y9_CHLVA/43-348      | E1Z8Y9.1 PF00206.18 | 76.10 | 0.00 |
| TRINITY_D8TSZ1_VOLCA/11-476      | D8TSZ1.1 PF00171.20 | 76.10 | 0.00 |
| TRINITY_M1AQS2_SOLTU/173-845     | M1AQS2.1 PF00305.17 | 76.10 | 0.00 |
| TRINITY_E1ZIK2_CHLVA/502-660     | E1ZIK2.1 PF00005.25 | 76.10 | 0.00 |
| TRINITY_D8U219_VOLCA/225-500     | D8U219.1 PF01031.18 | 76.10 | 0.00 |
| TRINITY_Q24IL9_TETTS/1333-1477   | Q24IL9.2 PF00005.25 | 76.10 | 0.00 |
| TRINITY_A9UP30_MONBE/304-428     | A9UP30.1 PF10155.7; | 76.00 | 0.00 |
| TRINITY_D8UGT4_VOLCA/12-87       | D8UGT4.1 PF02656.13 | 76.00 | 0.00 |
| TRINITY_D8TSY5_VOLCA/2523-3232   | D8TSY5.1 PF03028.13 | 76.00 | 0.00 |
| TRINITY_Q6UP32_CHLRE/19-136      | Q6UP32.1 PF06212.10 | 76.00 | 0.00 |
| TRINITY_G0QS48_ICHMG/679-1134    | G0QS48.1 PF00521.18 | 76.00 | 0.00 |
| TRINITY_A8HQF3_CHLRE/474-628     | A8HQF3.1 PF00406.20 | 76.00 | 0.00 |
| TRINITY_M4B726_HYAAE/14-415      | M4B726.1 PF06068.11 | 76.00 | 0.00 |
| TRINITY_F4QCM9_DICFS/35-305      | F4QCM9.1 PF06418.12 | 76.00 | 0.00 |
| TRINITY_D8TX08_VOLCA/83-228      | D8TX08.1 PF00210.22 | 76.00 | 0.00 |
| TRINITY_D8TW41_VOLCA/100-374     | D8TW41.1 PF08491.8; | 76.00 | 0.00 |
| TRINITY_G1U3X6_RABIT/1-186       | G1U3X6.1 PF00149.26 | 76.00 | 0.00 |
| TRINITY_A0D8A1_PARTE/9-283       | A0D8A1.1 PF00069.23 | 76.00 | 0.00 |
| TRINITY_A0A078A7I6_STYLE/615-789 | A0A078A7I6.1 PF0027 | 76.00 | 0.00 |
| TRINITY_D8TV94_VOLCA/34-289      | D8TV94.1 PF00069.23 | 76.00 | 0.00 |
| TRINITY_D8UFG9_VOLCA/1-363       | D8UFG9.1 PF01053.18 | 76.00 | 0.00 |
| TRINITY_D8TKP3_VOLCA/332-655     | D8TKP3.1 PF00493.21 | 76.00 | 0.00 |
| TRINITY_CLH2_ORYSJ/1288-1433     | Q2QYW2.1 PF00637.18 | 76.00 | 0.00 |
| TRINITY_A0A0M0JVC1_9EUKA/11-89   | A0A0M0JVC1.1 PF0142 | 75.90 | 0.00 |
| TRINITY_A0A078BCR6_STYLE/356-465 | A0A078BCR6.1 PF0027 | 75.90 | 0.00 |
| TRINITY_C0ZND5_RHOE4/8-137       | C0ZND5.1 PF07080.9; | 75.90 | 0.00 |
| TRINITY_A0DJ53_PARTE/197-334     | A0DJ53.1 PF00004.27 | 75.90 | 0.00 |
| TRINITY_A0EGT3_PARTE/436-493     | A0EGT3.1 PF12678.5; | 75.90 | 0.00 |
| TRINITY_D8TSZ5_VOLCA/22-132      | D8TSZ5.1 PF03099.17 | 75.90 | 0.00 |
| TRINITY_D8TRG6_VOLCA/25-136      | D8TRG6.1 PF02771.14 | 75.90 | 0.00 |
| TRINITY_A8IYS1_CHLRE/103-187     | A8IYS1.1 PF03948.12 | 75.90 | 0.00 |
| TRINITY_I0YZ68_9CHLO/57-510      | I0YZ68.1 PF00067.20 | 75.90 | 0.00 |
| TRINITY_D8U8F2_VOLCA/90-504      | D8U8F2.1 PF08393.11 | 75.90 | 0.00 |
| TRINITY_J9IGQ2_9SPIT/61-567      | J9IGQ2.1 PF00330.18 | 75.90 | 0.00 |
| TRINITY_D8U1Y7_VOLCA/234-391     | D8U1Y7.1 PF04432.11 | 75.90 | 0.00 |
| TRINITY_A8ITV3_CHLRE/37-177      | A8ITV3.1 PF00504.19 | 75.90 | 0.00 |
| TRINITY_A8I2Y6_CHLRE/11-265      | A8I2Y6.1 PF00069.23 | 75.90 | 0.00 |
| TRINITY_D8U3R3_VOLCA/60-256      | D8U3R3.1 PF00149.26 | 75.90 | 0.00 |
| TRINITY_Q2HZ24_CHLRE/64-143      | Q2HZ24.1 PF00111.25 | 75.90 | 0.00 |
| TRINITY_A0A075ASD4_9FUNG/87-203  | A0A075ASD4.1 PF0150 | 75.90 | 0.00 |
| TRINITY_A8HXL0_CHLRE/18-320      | A8HXL0.1 PF08449.9; | 75.90 | 0.00 |
| TRINITY_D8TRA1_VOLCA/2-140       | D8TRA1.1 PF05903.12 | 75.90 | 0.00 |
| TRINITY_D8U988_VOLCA/273-500     | D8U988.1 PF04172.14 | 75.90 | 0.00 |
| TRINITY_A0A0D2VXG2_CAPO3/659-863 | A0A0D2VXG2.1 PF0278 | 75.90 | 0.00 |
| TRINITY_G0R4M5_ICHMG/51-307      | G0R4M5.1 PF00481.19 | 75.90 | 0.00 |
| TRINITY_D8RNT4_SELML/251-418     | D8RNT4.1 PF00009.25 | 75.90 | 0.00 |

|                                  |              |            |       |      |
|----------------------------------|--------------|------------|-------|------|
| TRINITY_H2RPI2_TAKRU/18-127      | H2RPI2.1     | PF00059.19 | 75.90 | 0.00 |
| TRINITY_Q229D4_TETTS/255-368     | Q229D4.2     | PF00128.22 | 75.80 | 0.00 |
| TRINITY_A7SI02_NEMVE/42-268      | A7SI02.1     | PF04670.10 | 75.80 | 0.00 |
| TRINITY_D3AXY2_POLPA/180-413     | D3AXY2.1     | PF01702.16 | 75.80 | 0.00 |
| TRINITY_I7MGP0_TETTS/37-294      | I7MGP0.2     | PF00069.23 | 75.80 | 0.00 |
| TRINITY_F1A0B5_DICPU/3-610       | F1A0B5.1     | PF00012.18 | 75.80 | 0.00 |
| TRINITY_F4NU28_BATDJ/37-541      | F4NU28.1     | PF12070.6; | 75.80 | 0.00 |
| TRINITY_A0BIC4_PARTE/12-166      | A0BIC4.1     | PF00252.16 | 75.80 | 0.00 |
| TRINITY_I0Z468_9CHLO/23-220      | I0Z468.1     | PF13460.4; | 75.80 | 0.00 |
| TRINITY_F4QED8_DICFS/130-220     | F4QED8.1     | PF13640.4; | 75.80 | 0.00 |
| TRINITY_H2T8S7_TAKRU/1125-1273   | H2T8S7.1     | PF00005.25 | 75.80 | 0.00 |
| TRINITY_I7M4M7_TETTS/184-245     | I7M4M7.1     | PF00333.18 | 75.80 | 0.00 |
| TRINITY_A8J3Y2_CHLRE/3-98        | A8J3Y2.1     | PF01588.18 | 75.80 | 0.00 |
| TRINITY_C1MT80_MICPC/15-105      | C1MT80.1     | PF00254.26 | 75.80 | 0.00 |
| TRINITY_D8TWF1_VOLCA/136-314     | D8TWF1.1     | PF00953.19 | 75.80 | 0.00 |
| TRINITY_A0CVB3_PARTE/54-148      | A0CVB3.1     | PF01248.24 | 75.80 | 0.00 |
| TRINITY_D8U5S6_VOLCA/155-429     | D8U5S6.1     | PF00487.22 | 75.80 | 0.00 |
| TRINITY_G0QR65_ICHMG/31-179      | G0QR65.1     | PF00056.21 | 75.80 | 0.00 |
| TRINITY_A8IN92_CHLRE/84-145      | A8IN92.1     | PF02297.15 | 75.80 | 0.00 |
| TRINITY_A9TAW8_PHYPA/108-286     | A9TAW8.1     | PF02390.15 | 75.80 | 0.00 |
| TRINITY_G0QM09_ICHMG/30-285      | G0QM09.1     | PF00069.23 | 75.80 | 0.00 |
| TRINITY_I7M1K4_TETTS/571-636     | I7M1K4.1     | PF00659.16 | 75.80 | 0.00 |
| TRINITY_A8JGJ4_CHLRE/324-589     | A8JGJ4.1     | PF00069.23 | 75.80 | 0.00 |
| TRINITY_A8IYM0_CHLRE/156-461     | A8IYM0.1     | PF00365.18 | 75.80 | 0.00 |
| TRINITY_D8TUH9_VOLCA/43-166      | D8TUH9.1     | PF00782.18 | 75.80 | 0.00 |
| TRINITY_D8TKZ3_VOLCA/45-224      | D8TKZ3.1     | PF01300.16 | 75.80 | 0.00 |
| TRINITY_E1ZCY8_CHLVA/152-300     | E1ZCY8.1     | PF00004.27 | 75.80 | 0.00 |
| TRINITY_G3P746_GASAC/463-714     | G3P746.1     | PF00089.24 | 75.70 | 0.00 |
| TRINITY_I7LZU3_TETTS/215-299     | I7LZU3.1     | PF04433.15 | 75.70 | 0.00 |
| TRINITY_A0A077ZRC7_STYLE/176-249 | A0A077ZRC7.1 | PF0038     | 75.70 | 0.00 |
| TRINITY_L8HE18_ACACA/7-180       | L8HE18.1     | PF00071.20 | 75.70 | 0.00 |
| TRINITY_B7P363_IXOSC/6-160       | B7P363.1     | PF08694.9; | 75.70 | 0.00 |
| TRINITY_K3XF99_SETIT/554-612     | K3XF99.1     | PF08492.10 | 75.70 | 0.00 |
| TRINITY_A8IUV7_CHLRE/7-197       | A8IUV7.1     | PF01294.16 | 75.70 | 0.00 |
| TRINITY_A4XEZ9_NOVAD/8-304       | A4XEZ9.1     | PF00732.17 | 75.70 | 0.00 |
| TRINITY_A8HUW4_CHLRE/288-362     | A8HUW4.1     | PF00454.25 | 75.70 | 0.00 |
| TRINITY_G0QW25_ICHMG/9-148       | G0QW25.1     | PF00179.24 | 75.70 | 0.00 |
| TRINITY_V4SC53_9ROSI/29-634      | V4SC53.1     | PF00012.18 | 75.70 | 0.00 |
| TRINITY_I1FRI7_AMPQE/5-178       | I1FRI7.1     | PF00071.20 | 75.70 | 0.00 |
| TRINITY_D8TX39_VOLCA/119-281     | D8TX39.1     | PF04055.19 | 75.70 | 0.00 |
| TRINITY_D8UJC6_VOLCA/308-381     | D8UJC6.1     | PF14360.4; | 75.70 | 0.00 |
| TRINITY_E1ZFZ0_CHLVA/25-169      | E1ZFZ0.1     | PF00903.23 | 75.70 | 0.00 |
| TRINITY_HELCL_DICDI/553-735      | Q55CI8.1     | PF00270.27 | 75.70 | 0.00 |
| TRINITY_D8TXJ3_VOLCA/100-289     | D8TXJ3.1     | PF04427.16 | 75.70 | 0.00 |
| TRINITY_A8J3F9_CHLRE/2-235       | A8J3F9.1     | PF00483.21 | 75.70 | 0.00 |
| TRINITY_A0A0E0M8B7_ORYPU/856-992 | A0A0E0M8B7.1 | PF0772     | 75.70 | 0.00 |
| TRINITY_I0YM50_9CHLO/67-252      | I0YM50.1     | PF00350.21 | 75.70 | 0.00 |
| TRINITY_A8J921_CHLRE/1156-1265   | A8J921.1     | PF04679.13 | 75.70 | 0.00 |
| TRINITY_E1ZSN6_CHLVA/219-424     | E1ZSN6.1     | PF01189.15 | 75.70 | 0.00 |
| TRINITY_T1J8J3_STRMM/220-397     | T1J8J3.1     | PF16114.3; | 75.70 | 0.00 |
| TRINITY_A8JCR6_CHLRE/402-475     | A8JCR6.1     | PF10369.7; | 75.70 | 0.00 |
| TRINITY_A0A0A0K487_CUCSA/26-486  | A0A0A0K487.1 | PF0008     | 75.70 | 0.00 |
| TRINITY_H1YIQ7_9SPHI/5-125       | H1YIQ7.1     | PF01678.17 | 75.70 | 0.00 |
| TRINITY_G6FQG6_9CYAN/32-122      | G6FQG6.1     | PF04828.12 | 75.60 | 0.00 |
| TRINITY_A0A059ACX2_EUCGR/217-885 | A0A059ACX2.1 | PF0030     | 75.60 | 0.00 |
| TRINITY_H9G6B0_ANOCA/135-193     | H9G6B0.2     | PF13921.4; | 75.60 | 0.00 |
| TRINITY_I1KVB3_SOYBN/319-519     | I1KVB3.2     | PF03441.12 | 75.60 | 0.00 |
| TRINITY_Q23U84_TETTS/23-120      | Q23U84.1     | PF02678.14 | 75.60 | 0.00 |
| TRINITY_I1G7J1_AMPQE/19-190      | I1G7J1.1     | PF00535.24 | 75.60 | 0.00 |
| TRINITY_A0EGX1_PARTE/32-77       | A0EGX1.1     | PF00249.29 | 75.60 | 0.00 |
| TRINITY_F4PX79_DICFS/6-241       | F4PX79.1     | PF01115.15 | 75.60 | 0.00 |



|                                    |              |            |       |      |
|------------------------------------|--------------|------------|-------|------|
| TRINITY_W2Q1K5_PHYPN/251-447       | W2Q1K5.1     | PF00149.26 | 75.60 | 0.00 |
| TRINITY_I7LVE7_TETTS/507-549       | I7LVE7.1     | PF06203.12 | 75.60 | 0.00 |
| TRINITY_D8UIX5_VOLCA/682-891       | D8UIX5.1     | PF05362.11 | 75.60 | 0.00 |
| TRINITY_D8U1A7_VOLCA/64-292        | D8U1A7.1     | PF01063.17 | 75.60 | 0.00 |
| TRINITY_A9UV86_MONBE/39-341        | A9UV86.1     | PF01916.15 | 75.60 | 0.00 |
| TRINITY_D8TKX0_VOLCA/10-138        | D8TKX0.1     | PF00179.24 | 75.60 | 0.00 |
| TRINITY_D8U0I3_VOLCA/1-208         | D8U0I3.1     | PF01591.16 | 75.60 | 0.00 |
| TRINITY_A8HPW5_CHLRE/282-345       | A8HPW5.1     | PF13432.4; | 75.60 | 0.00 |
| TRINITY_A8J5W8_CHLRE/385-462       | A8J5W8.1     | PF00533.24 | 75.60 | 0.00 |
| TRINITY_E1ZKB0_CHLVA/3-85          | E1ZKB0.1     | PF12861.5; | 75.60 | 0.00 |
| TRINITY_D8U697_VOLCA/106-335       | D8U697.1     | PF01798.16 | 75.60 | 0.00 |
| TRINITY_D8U4I5_VOLCA/433-551       | D8U4I5.1     | PF02880.14 | 75.60 | 0.00 |
| TRINITY_A0C997_PARTE/746-831       | A0C997.1     | PF05002.13 | 75.60 | 0.00 |
| TRINITY_P93664_CHLRE/45-210        | P93664.1     | PF00504.19 | 75.60 | 0.00 |
| TRINITY_D8UA87_VOLCA/31-116        | D8UA87.1     | PF14560.4; | 75.60 | 0.00 |
| TRINITY_A9V2B9_MONBE/227-497       | A9V2B9.1     | PF13598.4; | 75.60 | 0.00 |
| TRINITY_A8HTQ6_CHLRE/420-597       | A8HTQ6.1     | PF00534.18 | 75.60 | 0.00 |
| TRINITY_A8HPZ8_CHLRE/149-557       | A8HPZ8.1     | PF01432.18 | 75.60 | 0.00 |
| TRINITY_A8J9S8_CHLRE/93-225        | A8J9S8.1     | PF01138.19 | 75.60 | 0.00 |
| TRINITY_C1E5T3_MICSR/260-304       | C1E5T3.1     | PF00432.19 | 75.60 | 0.00 |
| TRINITY_A8HVE0_CHLRE/77-289        | A8HVE0.1     | PF07722.11 | 75.60 | 0.00 |
| TRINITY_Q24IL9_TETTS/1333-1477     | Q24IL9.2     | PF00005.25 | 75.60 | 0.00 |
| TRINITY_G0QWM3_ICHMG/44-239        | G0QWM3.1     | PF00149.26 | 75.60 | 0.00 |
| TRINITY_D8U4H3_VOLCA/13-347        | D8U4H3.1     | PF00225.21 | 75.60 | 0.00 |
| TRINITY_Q24HK9_TETTS/22-280        | Q24HK9.3     | PF00069.23 | 75.60 | 0.00 |
| TRINITY_A0A0H4VV80_9BACT/19-171    | A0A0H4VV80.1 | PF0071     | 75.50 | 0.00 |
| TRINITY_D7TIM9_VITVI/17-69         | D7TIM9.1     | PF09713.8; | 75.50 | 0.00 |
| TRINITY_A0C3G9_PARTE/1-172         | A0C3G9.1     | PF05063.12 | 75.50 | 0.00 |
| TRINITY_A0A0M0JC73_9EUKA/85-238    | A0A0M0JC73.1 | PF0000     | 75.50 | 0.00 |
| TRINITY_A0BX73_PARTE/218-318       | A0BX73.1     | PF00153.25 | 75.50 | 0.00 |
| TRINITY_A8JEL2_CHLRE/7-186         | A8JEL2.1     | PF01725.14 | 75.50 | 0.00 |
| TRINITY_L8HH61_ACACA/28-215        | L8HH61.1     | PF00227.24 | 75.50 | 0.00 |
| TRINITY_F1RYD2_PIG/14-120          | F1RYD2.2     | PF04538.10 | 75.50 | 0.00 |
| TRINITY_D8UAM0_VOLCA/1269-1323     | D8UAM0.1     | PF04083.14 | 75.50 | 0.00 |
| TRINITY_D3B6Z8_POLPA/513-595       | D3B6Z8.1     | PF13965.4; | 75.50 | 0.00 |
| TRINITY_W1NRE8_AMBTC/73-524        | W1NRE8.1     | PF01425.19 | 75.50 | 0.00 |
| TRINITY_O24451_CHLRE/244-338       | O24451.1     | PF00153.25 | 75.50 | 0.00 |
| TRINITY_A8JH01_CHLRE/228-534       | A8JH01.1     | PF01968.16 | 75.50 | 0.00 |
| TRINITY_A0A087XHI0_POEFO/37-89     | A0A087XHI0.1 | PF0644     | 75.50 | 0.00 |
| TRINITY_A8J875_CHLRE/1-139         | A8J875.1     | PF00588.17 | 75.50 | 0.00 |
| TRINITY_A8ISN1_CHLRE/11-205        | A8ISN1.1     | PF11539.6; | 75.50 | 0.00 |
| TRINITY_A8J2U2_CHLRE/141-287       | A8J2U2.1     | PF04884.12 | 75.50 | 0.00 |
| TRINITY_C1EBY8_MICSR/14-108        | C1EBY8.1     | PF00125.22 | 75.50 | 0.00 |
| TRINITY_D8TRB6_VOLCA/114-319       | D8TRB6.1     | PF03741.14 | 75.50 | 0.00 |
| TRINITY_E1Z3E2_CHLVA/59-108        | E1Z3E2.1     | PF13920.4; | 75.50 | 0.00 |
| TRINITY_J9HIS0_9SPIT/571-794       | J9HIS0.1     | PF00246.22 | 75.50 | 0.00 |
| TRINITY_A0A087SEE1_AUXPR/1-254     | A0A087SEE1.1 | PF0315     | 75.50 | 0.00 |
| TRINITY_D8TSV4_VOLCA/211-455       | D8TSV4.1     | PF04577.12 | 75.50 | 0.00 |
| TRINITY_D8TXR9_VOLCA/16-116        | D8TXR9.1     | PF00153.25 | 75.50 | 0.00 |
| TRINITY_A0A0D2VS83_CAPO3/3068-3348 | A0A0D2VS83.1 | PF0213     | 75.50 | 0.00 |
| TRINITY_A8HZ73_CHLRE/59-189        | A8HZ73.1     | PF00004.27 | 75.50 | 0.00 |
| TRINITY_M4BMA1_HYAAE/108-159       | M4BMA1.1     | PF00400.30 | 75.50 | 0.00 |
| TRINITY_J9HVB4_9SPIT/36-297        | J9HVB4.1     | PF02263.17 | 75.40 | 0.00 |
| TRINITY_Q4RZF0_TETNG/46-171        | Q4RZF0.1     | PF00062.18 | 75.40 | 0.00 |
| TRINITY_L8HKH2_ACACA/7-148         | L8HKH2.1     | PF02792.12 | 75.40 | 0.00 |
| TRINITY_F1A4Z4_DICPU/29-207        | F1A4Z4.1     | PF02779.22 | 75.40 | 0.00 |
| TRINITY_G0R0Y0_ICHMG/1-155         | G0R0Y0.1     | PF04729.11 | 75.40 | 0.00 |
| TRINITY_A0A087SNS0_AUXPR/84-161    | A0A087SNS0.1 | PF0125     | 75.40 | 0.00 |
| TRINITY_D8U4U2_VOLCA/17-73         | D8U4U2.1     | PF00076.20 | 75.40 | 0.00 |
| TRINITY_I7MHN4_TETTS/205-383       | I7MHN4.2     | PF00069.23 | 75.40 | 0.00 |
| TRINITY_I0Z3Y1_9CHLO/595-662       | I0Z3Y1.1     | PF00658.16 | 75.40 | 0.00 |

|                                  |                     |       |      |
|----------------------------------|---------------------|-------|------|
| TRINITY_Q23YJ0_TETTS/28-372      | Q23YJ0.1 PF16499.3; | 75.40 | 0.00 |
| TRINITY_A0A0A1NY27_9FUNG/482-615 | A0A0A1NY27.1 PF0000 | 75.40 | 0.00 |
| TRINITY_Q245E7_TETTS/76-189      | Q245E7.2 PF00572.16 | 75.40 | 0.00 |
| TRINITY_D8U1L8_VOLCA/197-355     | D8U1L8.1 PF02582.12 | 75.40 | 0.00 |
| TRINITY_K3WS96_PYTUL/7-71        | K3WS96.1 PF01423.20 | 75.40 | 0.00 |
| TRINITY_A8J0V0_CHLRE/67-183      | A8J0V0.1 PF02033.16 | 75.40 | 0.00 |
| TRINITY_A8J6V1_CHLRE/43-381      | A8J6V1.1 PF00180.18 | 75.40 | 0.00 |
| TRINITY_A8J2A7_CHLRE/355-468     | A8J2A7.1 PF08241.10 | 75.40 | 0.00 |
| TRINITY_A8HZG4_CHLRE/44-193      | A8HZG4.1 PF00650.18 | 75.40 | 0.00 |
| TRINITY_G0R207_ICHMG/11-210      | G0R207.1 PF00106.23 | 75.40 | 0.00 |
| TRINITY_D8U4N3_VOLCA/87-204      | D8U4N3.1 PF13640.4; | 75.40 | 0.00 |
| TRINITY_L8H2N3_ACACA/58-547      | L8H2N3.1 PF02990.14 | 75.40 | 0.00 |
| TRINITY_G0QNL1_ICHMG/140-204     | G0QNL1.1 PF02319.18 | 75.40 | 0.00 |
| TRINITY_J9IKD3_9SPIT/98-195      | J9IKD3.1 PF02678.14 | 75.40 | 0.00 |
| TRINITY_I0Z203_9CHLO/625-693     | I0Z203.1 PF05066.11 | 75.40 | 0.00 |
| TRINITY_D8UI14_VOLCA/133-315     | D8UI14.1 PF00390.17 | 75.40 | 0.00 |
| TRINITY_A8JI60_CHLRE/78-408      | A8JI60.1 PF07992.12 | 75.40 | 0.00 |
| TRINITY_A8ID17_CHLRE/21-404      | A8ID17.1 PF00225.21 | 75.40 | 0.00 |
| TRINITY_A8J1C1_CHLRE/443-962     | A8J1C1.1 PF00899.19 | 75.40 | 0.00 |
| TRINITY_A0A0D2VU79_GOSRA/16-132  | A0A0D2VU79.1 PF0534 | 75.40 | 0.00 |
| TRINITY_Q3SD60_PARTE/9-170       | Q3SD60.1 PF00071.20 | 75.30 | 0.00 |
| TRINITY_A0A078AXW8_STYLE/449-814 | A0A078AXW8.1 PF0049 | 75.30 | 0.00 |
| TRINITY_A0A0B0NZY7_GOSAR/4-219   | A0A0B0NZY7.1 PF0002 | 75.30 | 0.00 |
| TRINITY_G7IKP7_MEDTR/296-491     | G7IKP7.2 PF10596.7; | 75.30 | 0.00 |

|                                  |              |            |       |      |
|----------------------------------|--------------|------------|-------|------|
| TRINITY_A7STE6_NEMVE/3-176       | A7STE6.1     | PF00025.19 | 75.30 | 0.00 |
| TRINITY_Q22AX6_TETTS/547-627     | Q22AX6.2     | PF12895.5; | 75.30 | 0.00 |
| TRINITY_A4S6E6_OSTLU/13-171      | A4S6E6.1     | PF00071.20 | 75.30 | 0.00 |
| TRINITY_A0D8A1_PARTE/9-283       | A0D8A1.1     | PF00069.23 | 75.30 | 0.00 |
| TRINITY_A8IV98_CHLRE/12-185      | A8IV98.1     | PF00270.27 | 75.30 | 0.00 |
| TRINITY_E1ZLA8_CHLVA/543-623     | E1ZLA8.1     | PF13193.4; | 75.30 | 0.00 |
| TRINITY_D8UEM2_VOLCA/42-134      | D8UEM2.1     | PF00254.26 | 75.30 | 0.00 |
| TRINITY_A8HYL9_CHLRE/331-803     | A8HYL9.1     | PF00939.17 | 75.30 | 0.00 |
| TRINITY_E1ZQN2_CHLVA/1-80        | E1ZQN2.1     | PF00153.25 | 75.30 | 0.00 |
| TRINITY_D8U9S9_VOLCA/599-793     | D8U9S9.1     | PF00211.18 | 75.30 | 0.00 |
| TRINITY_A8HUS6_CHLRE/825-1086    | A8HUS6.1     | PF00756.18 | 75.30 | 0.00 |
| TRINITY_A0A078ALR3_STYLE/13-94   | A0A078ALR3.1 | PF0119     | 75.30 | 0.00 |
| TRINITY_A8JDL5_CHLRE/42-199      | A8JDL5.1     | PF00160.19 | 75.30 | 0.00 |
| TRINITY_I0YYI2_9CHLO/35-113      | I0YYI2.1     | PF00013.27 | 75.30 | 0.00 |
| TRINITY_A8HYM2_CHLRE/1-109       | A8HYM2.1     | PF01873.15 | 75.30 | 0.00 |
| TRINITY_E1ZRS1_CHLVA/4-340       | E1ZRS1.1     | PF03214.11 | 75.30 | 0.00 |
| TRINITY_I0Z5Q1_9CHLO/68-237      | I0Z5Q1.1     | PF00270.27 | 75.30 | 0.00 |
| TRINITY_A8JDX8_CHLRE/570-937     | A8JDX8.1     | PF00224.19 | 75.30 | 0.00 |
| TRINITY_A8ISQ5_CHLRE/2275-2409   | A8ISQ5.1     | PF00004.27 | 75.30 | 0.00 |
| TRINITY_I0Z7K3_9CHLO/694-887     | I0Z7K3.1     | PF13844.4; | 75.30 | 0.00 |
| TRINITY_D8TV66_VOLCA/112-305     | D8TV66.1     | PF07910.11 | 75.30 | 0.00 |
| TRINITY_D8TJV1_VOLCA/64-213      | D8TJV1.1     | PF13401.4; | 75.30 | 0.00 |
| TRINITY_A8J063_CHLRE/3352-4065   | A8J063.1     | PF03028.13 | 75.30 | 0.00 |
| TRINITY_D8UEF2_VOLCA/54-237      | D8UEF2.1     | PF00504.19 | 75.30 | 0.00 |
| TRINITY_E9NPS9_9CHLO/22-449      | E9NPS9.1     | PF00148.17 | 75.30 | 0.00 |
| TRINITY_V3ZIU2_LOTGI/248-550     | V3ZIU2.1     | PF01968.16 | 75.20 | 0.00 |
| TRINITY_F7AX64_CALJA/58-219      | F7AX64.1     | PF00071.20 | 75.20 | 0.00 |
| TRINITY_G0QVK1_ICHMG/8-402       | G0QVK1.1     | PF00180.18 | 75.20 | 0.00 |
| TRINITY_H2YYX9_CIOSA/52-184      | H2YYX9.1     | PF04116.11 | 75.20 | 0.00 |
| TRINITY_I7M7Z9_TETTS/616-760     | I7M7Z9.1     | PF00005.25 | 75.20 | 0.00 |
| TRINITY_G0QJ62_ICHMG/5-158       | G0QJ62.1     | PF08694.9; | 75.20 | 0.00 |
| TRINITY_I7LXC5_TETTS/178-436     | I7LXC5.2     | PF00069.23 | 75.20 | 0.00 |
| TRINITY_C1MJ87_MICPC/531-707     | C1MJ87.1     | PF13307.4; | 75.20 | 0.00 |
| TRINITY_Q241B6_TETTS/1199-1363   | Q241B6.2     | PF03031.16 | 75.20 | 0.00 |
| TRINITY_A0D7P1_PARTE/26-628      | A0D7P1.1     | PF00012.18 | 75.20 | 0.00 |
| TRINITY_A9RII8_PHYPA/238-353     | A9RII8.1     | PF00004.27 | 75.20 | 0.00 |
| TRINITY_D3B730_POLPA/591-823     | D3B730.1     | PF01145.23 | 75.20 | 0.00 |
| TRINITY_F4PMV2_DICFS/89-458      | F4PMV2.1     | PF00285.19 | 75.20 | 0.00 |
| TRINITY_D8TIW6_VOLCA/23-485      | D8TIW6.1     | PF00171.20 | 75.20 | 0.00 |
| TRINITY_I1NBE6_SOYBN/60-224      | I1NBE6.1     | PF00270.27 | 75.20 | 0.00 |
| TRINITY_A8J3N8_CHLRE/21-579      | A8J3N8.1     | PF01602.18 | 75.20 | 0.00 |
| TRINITY_A8IQM3_CHLRE/52-382      | A8IQM3.1     | PF03133.13 | 75.20 | 0.00 |
| TRINITY_D8TLN4_VOLCA/325-501     | D8TLN4.1     | PF11931.6; | 75.20 | 0.00 |
| TRINITY_A0A087STB9_AUXPR/309-471 | A0A087STB9.1 | PF0044     | 75.20 | 0.00 |
| TRINITY_A8ISQ8_CHLRE/1-122       | A8ISQ8.1     | PF00004.27 | 75.20 | 0.00 |
| TRINITY_L8H6M4_ACACA/340-668     | L8H6M4.1     | PF00291.23 | 75.10 | 0.00 |
| TRINITY_E1Z5T2_CHLVA/130-322     | E1Z5T2.1     | PF01071.17 | 75.10 | 0.00 |
| TRINITY_A8I469_CHLRE/47-260      | A8I469.1     | PF03619.14 | 75.10 | 0.00 |
| TRINITY_D8TVU1_VOLCA/240-780     | D8TVU1.1     | PF01411.17 | 75.10 | 0.00 |
| TRINITY_A0DIN0_PARTE/9-195       | A0DIN0.1     | PF03256.14 | 75.00 | 0.00 |
| TRINITY_G4NB93_MAGO7/2-131       | G4NB93.1     | PF00179.24 | 75.00 | 0.00 |
| TRINITY_Q22DN2_TETTS/565-703     | Q22DN2.1     | PF00004.27 | 75.00 | 0.00 |
| TRINITY_A0A077Z0G9_TRITR/23-130  | A0A077Z0G9.1 | PF0058     | 75.00 | 0.00 |
| TRINITY_L8HHX5_ACACA/8-250       | L8HHX5.1     | PF00454.25 | 75.00 | 0.00 |
| TRINITY_K1QIK0_CRAGI/470-596     | K1QIK0.1     | PF00271.29 | 75.00 | 0.00 |
| TRINITY_A0A0J8BJB0_BETVU/262-392 | A0A0J8BJB0.1 | PF0000     | 75.00 | 0.00 |
| TRINITY_A0E7M3_PARTE/77-115      | A0E7M3.1     | PF01096.16 | 75.00 | 0.00 |
| TRINITY_I7MCG1_TETTS/113-177     | I7MCG1.1     | PF13499.4; | 75.00 | 0.00 |
| TRINITY_A9UFY1_VITVI/1-78        | A9UFY1.1     | PF01439.16 | 75.00 | 0.00 |
| TRINITY_F4PSK6_DICFS/2895-3184   | F4PSK6.1     | PF12780.5; | 75.00 | 0.00 |
| TRINITY_D5GEP6_TUBMM/30-69       | D5GEP6.1     | PF05920.9; | 75.00 | 0.00 |

|                                  |                     |       |      |
|----------------------------------|---------------------|-------|------|
| TRINITY_A0CJS0_PARTE/128-311     | A0CJS0.1 PF10274.7; | 75.00 | 0.00 |
| TRINITY_D7FRF0_ECTSI/508-545     | D7FRF0.1 PF03638.13 | 75.00 | 0.00 |
| TRINITY_F0ZEC6_DICPU/169-248     | F0ZEC6.1 PF05093.11 | 75.00 | 0.00 |
| TRINITY_A0A087SJR8_AUXPR/1-94    | A0A087SJR8.1 PF0119 | 75.00 | 0.00 |
| TRINITY_A9SBZ9_PHYPA/193-324     | A9SBZ9.1 PF00004.27 | 75.00 | 0.00 |
| TRINITY_A5DZ68_LODEL/36-147      | A5DZ68.1 PF00355.24 | 75.00 | 0.00 |
| TRINITY_I0YMB4_9CHLO/135-172     | I0YMB4.1 PF01428.14 | 75.00 | 0.00 |
| TRINITY_A0A087YN06_POEFO/122-182 | A0A087YN06.2 PF1385 | 75.00 | 0.00 |
| TRINITY_G7LGQ6_MEDTR/160-317     | G7LGQ6.2 PF13481.4; | 75.00 | 0.00 |
| TRINITY_D8UIB3_VOLCA/764-970     | D8UIB3.1 PF08214.9; | 75.00 | 0.00 |
| TRINITY_Q241P5_TETTS/77-120      | Q241P5.1 PF00432.19 | 75.00 | 0.00 |
| TRINITY_A0A059LHG8_9CHLO/1-220   | A0A059LHG8.1 PF1356 | 75.00 | 0.00 |
| TRINITY_A8J8C0_CHLRE/51-194      | A8J8C0.1 PF06799.9; | 75.00 | 0.00 |
| TRINITY_D8UIB7_VOLCA/15-77       | D8UIB7.1 PF02953.13 | 75.00 | 0.00 |
| TRINITY_Q22C41_TETTS/46-301      | Q22C41.2 PF00069.23 | 75.00 | 0.00 |
| TRINITY_D8TVP4_VOLCA/24-342      | D8TVP4.1 PF00294.22 | 75.00 | 0.00 |
| TRINITY_D8TW00_VOLCA/426-561     | D8TW00.1 PF00005.25 | 75.00 | 0.00 |
| TRINITY_A8HXG5_CHLRE/9-120       | A8HXG5.1 PF04725.10 | 75.00 | 0.00 |
| TRINITY_A0DM52_PARTE/64-171      | A0DM52.1 PF13085.4; | 75.00 | 0.00 |
| TRINITY_Q22AV9_TETTS/108-191     | Q22AV9.3 PF00189.18 | 75.00 | 0.00 |
| TRINITY_A8I8Z1_CHLRE/75-214      | A8I8Z1.1 PF00885.17 | 75.00 | 0.00 |
| TRINITY_E1Z3R4_CHLVA/40-76       | E1Z3R4.1 PF00301.18 | 75.00 | 0.00 |
| TRINITY_D8UDF4_VOLCA/15-102      | D8UDF4.1 PF01172.16 | 75.00 | 0.00 |
| TRINITY_T1EEY3_HELRO/12-76       | T1EEY3.1 PF13499.4; | 75.00 | 0.00 |
| TRINITY_A8JI10_CHLRE/2-116       | A8JI10.1 PF01981.14 | 75.00 | 0.00 |
| TRINITY_D8TR30_VOLCA/194-314     | D8TR30.1 PF03109.14 | 75.00 | 0.00 |
| TRINITY_A0CLB3_PARTE/139-190     | A0CLB3.1 PF13415.4; | 75.00 | 0.00 |
| TRINITY_D8U1I4_VOLCA/34-292      | D8U1I4.1 PF00069.23 | 75.00 | 0.00 |
| TRINITY_D8TJ66_VOLCA/196-251     | D8TJ66.1 PF00415.16 | 75.00 | 0.00 |
| TRINITY_W1NXB9_AMBTC/258-407     | W1NXB9.1 PF00441.22 | 75.00 | 0.00 |
| TRINITY_A8JCQ6_CHLRE/38-110      | A8JCQ6.1 PF05022.10 | 75.00 | 0.00 |
| TRINITY_K9T4C4_9CYAN/507-830     | K9T4C4.1 PF02896.16 | 75.00 | 0.00 |
| TRINITY_A8I1P7_CHLRE/40-217      | A8I1P7.1 PF08648.10 | 75.00 | 0.00 |
| TRINITY_D8THB0_VOLCA/261-500     | D8THB0.1 PF00814.23 | 75.00 | 0.00 |
| TRINITY_W5F886_WHEAT/120-167     | W5F886.1 PF01466.17 | 75.00 | 0.00 |
| TRINITY_D8TY64_VOLCA/74-307      | D8TY64.1 PF00270.27 | 75.00 | 0.00 |
| TRINITY_D8TZ40_VOLCA/1-297       | D8TZ40.1 PF04997.10 | 75.00 | 0.00 |
| TRINITY_D8U3B6_VOLCA/1-119       | D8U3B6.1 PF06991.9; | 75.00 | 0.00 |
| TRINITY_D8UFR3_VOLCA/25-120      | D8UFR3.1 PF01248.24 | 75.00 | 0.00 |
| TRINITY_L5KKQ1_PTEAL/2440-3138   | L5KKQ1.1 PF03028.13 | 75.00 | 0.00 |
| TRINITY_E1Z299_CHLVA/24-373      | E1Z299.1 PF04371.13 | 75.00 | 0.00 |
| TRINITY_E1ZI46_CHLVA/12-125      | E1ZI46.1 PF02338.17 | 75.00 | 0.00 |
| TRINITY_A8IHF2_CHLRE/77-270      | A8IHF2.1 PF12146.6; | 75.00 | 0.00 |
| TRINITY_A8HNN6_CHLRE/41-220      | A8HNN6.1 PF12710.5; | 75.00 | 0.00 |
| TRINITY_D8TZE9_VOLCA/31-143      | D8TZE9.1 PF09430.8; | 75.00 | 0.00 |
| TRINITY_D8UJV3_VOLCA/399-442     | D8UJV3.1 PF13639.4; | 75.00 | 0.00 |
| TRINITY_A0A0K0D2L7_ANGCA/7-170   | A0A0K0D2L7.1 PF0016 | 75.00 | 0.00 |
| TRINITY_M1VGQ3_CYAME/65-161      | M1VGQ3.1 PF02678.14 | 75.00 | 0.00 |
| TRINITY_A0A0E9NLA7_9ASCO/465-503 | A0A0E9NLA7.1 PF0040 | 75.00 | 0.00 |
| TRINITY_A9TA03_PHYPA/319-420     | A9TA03.1 PF13499.4; | 75.00 | 0.00 |
| TRINITY_D8TS74_VOLCA/68-345      | D8TS74.1 PF03982.11 | 75.00 | 0.00 |
| TRINITY_D8U8W1_VOLCA/276-479     | D8U8W1.1 PF01068.19 | 75.00 | 0.00 |
| TRINITY_E1ZH40_CHLVA/421-558     | E1ZH40.1 PF02910.18 | 75.00 | 0.00 |
| TRINITY_A8HYQ1_CHLRE/25-184      | A8HYQ1.1 PF01233.17 | 75.00 | 0.00 |
| TRINITY_A0BH68_PARTE/9-286       | A0BH68.1 PF00069.23 | 75.00 | 0.00 |
| TRINITY_Q22DR0_TETTS/17-338      | Q22DR0.2 PF00009.25 | 75.00 | 0.00 |
| TRINITY_D8U7P6_VOLCA/2512-2779   | D8U7P6.1 PF12780.5; | 75.00 | 0.00 |
| TRINITY_D8TM29_VOLCA/67-234      | D8TM29.1 PF00504.19 | 75.00 | 0.00 |
| TRINITY_D8UF95_VOLCA/53-225      | D8UF95.1 PF04055.19 | 75.00 | 0.00 |
| TRINITY_D8TIK5_VOLCA/329-452     | D8TIK5.1 PF03720.13 | 75.00 | 0.00 |
| TRINITY_A0D9S1_PARTE/381-707     | A0D9S1.1 PF00176.21 | 75.00 | 0.00 |

|                                  |              |            |       |      |
|----------------------------------|--------------|------------|-------|------|
| TRINITY_J9JC92_9SPIT/14-110      | J9JC92.1     | PF06294.9; | 75.00 | 0.00 |
| TRINITY_C1KRG0_MICSR/128-417     | C1KRG0.1     | PF00361.18 | 75.00 | 0.00 |
| TRINITY_D2UXF6_NAEGR/45-227      | D2UXF6.1     | PF00227.24 | 74.90 | 0.00 |
| TRINITY_A8IWQ2_CHLRE/123-328     | A8IWQ2.1     | PF00566.16 | 74.90 | 0.00 |
| TRINITY_D7FR97_ECTSI/1-259       | D7FR97.1     | PF01201.20 | 74.90 | 0.00 |
| TRINITY_L8GWF5_ACACA/44-239      | L8GWF5.1     | PF00149.26 | 74.90 | 0.00 |
| TRINITY_Q22T35_TETTS/4-288       | Q22T35.2     | PF00069.23 | 74.90 | 0.00 |
| TRINITY_Q22A40_TETTS/44-239      | Q22A40.1     | PF00149.26 | 74.90 | 0.00 |
| TRINITY_Q22C41_TETTS/46-301      | Q22C41.2     | PF00069.23 | 74.90 | 0.00 |
| TRINITY_D8U8C2_VOLCA/29-358      | D8U8C2.1     | PF07992.12 | 74.90 | 0.00 |
| TRINITY_A8JGX1_CHLRE/153-390     | A8JGX1.1     | PF01702.16 | 74.90 | 0.00 |
| TRINITY_D8U5N9_VOLCA/157-326     | D8U5N9.1     | PF00005.25 | 74.90 | 0.00 |
| TRINITY_A8HZZ4_CHLRE/109-509     | A8HZZ4.1     | PF00155.19 | 74.90 | 0.00 |
| TRINITY_D8TT90_VOLCA/105-315     | D8TT90.1     | PF02096.18 | 74.90 | 0.00 |
| TRINITY_U4U808_DENPD/10-213      | U4U808.1     | PF00106.23 | 74.80 | 0.00 |
| TRINITY_Q229U9_TETTS/47-305      | Q229U9.2     | PF00069.23 | 74.80 | 0.00 |
| TRINITY_D8TNY1_VOLCA/72-191      | D8TNY1.1     | PF00622.26 | 74.80 | 0.00 |
| TRINITY_D8UB59_VOLCA/11-326      | D8UB59.1     | PF03151.14 | 74.80 | 0.00 |
| TRINITY_I3KFH3_ORENI/512-716     | I3KFH3.1     | PF02786.15 | 74.80 | 0.00 |
| TRINITY_D8TXZ1_VOLCA/127-249     | D8TXZ1.1     | PF07541.10 | 74.80 | 0.00 |
| TRINITY_D8TQS7_VOLCA/109-309     | D8TQS7.1     | PF01812.18 | 74.80 | 0.00 |
| TRINITY_D8U428_VOLCA/222-371     | D8U428.1     | PF00005.25 | 74.80 | 0.00 |
| TRINITY_D2VEP3_NAEGR/22-152      | D2VEP3.1     | PF01138.19 | 74.80 | 0.00 |
| TRINITY_Q3SEA9_PARTE/47-550      | Q3SEA9.1     | PF00118.22 | 74.80 | 0.00 |
| TRINITY_G0QTY4_ICHMG/126-725     | G0QTY4.1     | PF00012.18 | 74.80 | 0.00 |
| TRINITY_D8U437_VOLCA/2317-2440   | D8U437.1     | PF01769.14 | 74.80 | 0.00 |
| TRINITY_A8JGP9_CHLRE/57-171      | A8JGP9.1     | PF00101.18 | 74.80 | 0.00 |
| TRINITY_A0A0K9NW20_ZOSMR/209-321 | A0A0K9NW20.1 | PF0844     | 74.80 | 0.00 |
| TRINITY_A8J1T4_CHLRE/38-363      | A8J1T4.1     | PF07992.12 | 74.80 | 0.00 |
| TRINITY_D8U4E6_VOLCA/258-549     | D8U4E6.1     | PF00393.17 | 74.80 | 0.00 |
| TRINITY_J9HW86_9SPIT/36-291      | J9HW86.1     | PF00069.23 | 74.80 | 0.00 |
| TRINITY_D8UJ68_VOLCA/5-122       | D8UJ68.1     | PF00072.22 | 74.80 | 0.00 |
| TRINITY_A8J5D8_CHLRE/5-419       | A8J5D8.1     | PF01676.16 | 74.80 | 0.00 |
| TRINITY_E9GFP0_DAPPU/8-159       | E9GFP0.1     | PF00179.24 | 74.70 | 0.00 |
| TRINITY_I7ML63_TETTS/2127-2377   | I7ML63.1     | PF00454.25 | 74.70 | 0.00 |
| TRINITY_R9PA35_PSEHS/301-626     | R9PA35.1     | PF00176.21 | 74.70 | 0.00 |
| TRINITY_A0C4G5_PARTE/13-301      | A0C4G5.1     | PF00069.23 | 74.70 | 0.00 |
| TRINITY_A0CFW1_PARTE/22-104      | A0CFW1.1     | PF01016.17 | 74.70 | 0.00 |
| TRINITY_D8TYH5_VOLCA/16-426      | D8TYH5.1     | PF00860.18 | 74.70 | 0.00 |
| TRINITY_A8IZ83_CHLRE/1-162       | A8IZ83.1     | PF07714.15 | 74.70 | 0.00 |
| TRINITY_A8I1B6_CHLRE/82-217      | A8I1B6.1     | PF02146.15 | 74.70 | 0.00 |
| TRINITY_A0CVB3_PARTE/54-148      | A0CVB3.1     | PF01248.24 | 74.70 | 0.00 |
| TRINITY_Q84K56_CHLRE/133-225     | Q84K56.1     | PF00420.22 | 74.70 | 0.00 |
| TRINITY_W4GN10_9STRA/1046-1365   | W4GN10.1     | PF00225.21 | 74.70 | 0.00 |
| TRINITY_D8TZS0_VOLCA/209-505     | D8TZS0.1     | PF00069.23 | 74.70 | 0.00 |
| TRINITY_D8TVB0_VOLCA/25-224      | D8TVB0.1     | PF13419.4; | 74.70 | 0.00 |
| TRINITY_D8UI27_VOLCA/1-188       | D8UI27.1     | PF13898.4; | 74.70 | 0.00 |
| TRINITY_K9ZZN9_DEIPD/36-214      | K9ZZN9.1     | PF01227.20 | 74.70 | 0.00 |
| TRINITY_D8TJI0_VOLCA/186-764     | D8TJI0.1     | PF00133.20 | 74.70 | 0.00 |
| TRINITY_A8IYW8_CHLRE/488-717     | A8IYW8.1     | PF00326.19 | 74.70 | 0.00 |
| TRINITY_A4VCZ3_TETTS/109-258     | A4VCZ3.1     | PF00817.18 | 74.60 | 0.00 |
| TRINITY_A0BP58_PARTE/344-595     | A0BP58.1     | PF12775.5; | 74.60 | 0.00 |
| TRINITY_Q3SE39_PARTE/146-316     | Q3SE39.1     | PF05063.12 | 74.60 | 0.00 |
| TRINITY_I7MA75_TETTS/15-152      | I7MA75.2     | PF00179.24 | 74.60 | 0.00 |
| TRINITY_I3KGU8_ORENI/68-273      | I3KGU8.1     | PF01442.16 | 74.60 | 0.00 |
| TRINITY_I7M2Z5_TETTS/227-524     | I7M2Z5.2     | PF03133.13 | 74.60 | 0.00 |
| TRINITY_W4YD10_STRPU/46-116      | W4YD10.1     | PF00076.20 | 74.60 | 0.00 |
| TRINITY_G0R1C5_ICHMG/3-376       | G0R1C5.1     | PF00022.17 | 74.60 | 0.00 |
| TRINITY_A0A0P7UBI8_9TELE/235-418 | A0A0P7UBI8.1 | PF0144     | 74.60 | 0.00 |
| TRINITY_D8TGW6_VOLCA/193-334     | D8TGW6.1     | PF05173.12 | 74.60 | 0.00 |
| TRINITY_I0Z2P4_9CHLO/20-90       | I0Z2P4.1     | PF00076.20 | 74.60 | 0.00 |

|                                 |             |            |       |      |
|---------------------------------|-------------|------------|-------|------|
| TRINITY_A2PZC3_CHLRE/329-452    | A2PZC3.1    | PF03720.13 | 74.60 | 0.00 |
| TRINITY_E4XDI4_OIKDI/17-84      | E4XDI4.1    | PF12265.6; | 74.60 | 0.00 |
| TRINITY_A0DGN9_PARTE/20-152     | A0DGN9.1    | PF00237.17 | 74.60 | 0.00 |
| TRINITY_L8GKM5_ACACA/5-229      | L8GKM5.1    | PF00108.21 | 74.60 | 0.00 |
| TRINITY_D8UCR2_VOLCA/7-144      | D8UCR2.1    | PF00258.23 | 74.60 | 0.00 |
| TRINITY_D8UBN7_VOLCA/1293-1410  | D8UBN7.1    | PF00271.29 | 74.60 | 0.00 |
| TRINITY_D8TQK0_VOLCA/137-253    | D8TQK0.1    | PF13640.4; | 74.60 | 0.00 |
| TRINITY_A0E893_PARTE/36-101     | A0E893.1    | PF00550.23 | 74.60 | 0.00 |
| TRINITY_A0E1E7_PARTE/8-354      | A0E1E7.1    | PF00225.21 | 74.60 | 0.00 |
| TRINITY_H3ECV4_PRIIPA/376-525   | H3ECV4.1    | PF00005.25 | 74.60 | 0.00 |
| TRINITY_Q24F69_TETTS/174-303    | Q24F69.2    | PF00004.27 | 74.60 | 0.00 |
| TRINITY_I0Z1U6_9CHLO/11-413     | I0Z1U6.1    | PF03069.13 | 74.60 | 0.00 |
| TRINITY_L8H393_ACACA/1839-1910  | L8H393.1    | PF00240.21 | 74.60 | 0.00 |
| TRINITY_H2MTU0_ORYLA/52-111     | H2MTU0.1    | PF00137.19 | 74.60 | 0.00 |
| TRINITY_D8TIZ0_VOLCA/253-366    | D8TIZ0.1    | PF06565.10 | 74.60 | 0.00 |
| TRINITY_D3BKQ8_POLPA/426-602    | D3BKQ8.1    | PF13307.4; | 74.60 | 0.00 |
| TRINITY_I0Z7W7_9CHLO/156-336    | I0Z7W7.1    | PF00270.27 | 74.60 | 0.00 |
| TRINITY_D8U581_VOLCA/133-272    | D8U581.1    | PF01529.18 | 74.60 | 0.00 |
| TRINITY_D8U964_VOLCA/41-174     | D8U964.1    | PF01894.15 | 74.60 | 0.00 |
| TRINITY_Q22XT4_TETTS/475-635    | Q22XT4.1    | PF08662.9; | 74.50 | 0.00 |
| TRINITY_A0A066WV8_9BASI/183-237 | A0A066WV8.1 | PF0001     | 74.50 | 0.00 |
| TRINITY_F4PRU3_DICFS/168-564    | F4PRU3.1    | PF00180.18 | 74.50 | 0.00 |
| TRINITY_I7LXE3_TETTS/981-1239   | I7LXE3.2    | PF00069.23 | 74.50 | 0.00 |
| TRINITY_C1EFV0_MICSR/16-345     | C1EFV0.1    | PF00009.25 | 74.50 | 0.00 |
| TRINITY_A8IY85_CHLRE/275-397    | A8IY85.1    | PF13288.4; | 74.50 | 0.00 |
| TRINITY_D8U8G7_VOLCA/220-419    | D8U8G7.1    | PF13851.4; | 74.50 | 0.00 |
| TRINITY_A8JCS0_CHLRE/101-261    | A8JCS0.1    | PF04442.12 | 74.50 | 0.00 |
| TRINITY_T1G1B1_HELRO/13-404     | T1G1B1.1    | PF06068.11 | 74.50 | 0.00 |
| TRINITY_D8TNC2_VOLCA/225-271    | D8TNC2.1    | PF01479.23 | 74.50 | 0.00 |
| TRINITY_A8IDN1_CHLRE/5-97       | A8IDN1.1    | PF00166.19 | 74.50 | 0.00 |
| TRINITY_E1Z766_CHLVA/250-301    | E1Z766.1    | PF00415.16 | 74.50 | 0.00 |
| TRINITY_D8U7J1_VOLCA/93-463     | D8U7J1.1    | PF00285.19 | 74.50 | 0.00 |
| TRINITY_F0ZD57_DICPU/18-72      | F0ZD57.1    | PF06961.11 | 74.50 | 0.00 |
| TRINITY_A8I6F3_CHLRE/385-587    | A8I6F3.1    | PF07714.15 | 74.50 | 0.00 |
| TRINITY_A8J8V7_CHLRE/28-176     | A8J8V7.1    | PF00069.23 | 74.50 | 0.00 |
| TRINITY_I7ML74_TETTS/5678-6228  | I7ML74.2    | PF00899.19 | 74.50 | 0.00 |
| TRINITY_L8GUU1_ACACA/68-321     | L8GUU1.1    | PF00069.23 | 74.50 | 0.00 |
| TRINITY_C1GTN3_PARBA/179-359    | C1GTN3.2    | PF13945.4; | 74.50 | 0.00 |
| TRINITY_M2XTV4_GALSU/218-264    | M2XTV4.1    | PF00249.29 | 74.50 | 0.00 |
| TRINITY_L8HKU1_ACACA/362-412    | L8HKU1.1    | PF00249.29 | 74.50 | 0.00 |
| TRINITY_A8J4T9_CHLRE/27-180     | A8J4T9.1    | PF00211.18 | 74.50 | 0.00 |
| TRINITY_A8J4N6_CHLRE/18-68      | A8J4N6.1    | PF00249.29 | 74.50 | 0.00 |
| TRINITY_D8TSQ7_VOLCA/51-360     | D8TSQ7.1    | PF01008.15 | 74.50 | 0.00 |
| TRINITY_A8HPU0_CHLRE/161-472    | A8HPU0.1    | PF04111.10 | 74.50 | 0.00 |
| TRINITY_A8JA79_CHLRE/25-184     | A8JA79.1    | PF00069.23 | 74.50 | 0.00 |
| TRINITY_D8TJR2_VOLCA/372-757    | D8TJR2.1    | PF00155.19 | 74.50 | 0.00 |
| TRINITY_A8JFG0_CHLRE/36-148     | A8JFG0.1    | PF10184.7; | 74.50 | 0.00 |
| TRINITY_G0R248_ICHMG/14-502     | G0R248.1    | PF00443.27 | 74.40 | 0.00 |
| TRINITY_L8H2M8_ACACA/18-150     | L8H2M8.1    | PF00380.17 | 74.40 | 0.00 |
| TRINITY_A0CXK7_PARTE/16-143     | A0CXK7.1    | PF01592.14 | 74.40 | 0.00 |
| TRINITY_A7HJC7_FERNB/27-141     | A7HJC7.1    | PF01661.19 | 74.40 | 0.00 |
| TRINITY_M3ZY45_XIPMA/53-299     | M3ZY45.1    | PF00795.20 | 74.40 | 0.00 |
| TRINITY_F0YCW2_AURAN/9-90       | F0YCW2.1    | PF01198.17 | 74.40 | 0.00 |
| TRINITY_I7MOD5_TETTS/4-286      | I7MOD5.2    | PF00069.23 | 74.40 | 0.00 |
| TRINITY_A8J0Z1_CHLRE/44-418     | A8J0Z1.1    | PF00155.19 | 74.40 | 0.00 |
| TRINITY_A8JC68_CHLRE/6-45       | A8JC68.1    | PF10013.7; | 74.40 | 0.00 |
| TRINITY_F4Q1T9_DICFS/260-472    | F4Q1T9.1    | PF00300.20 | 74.40 | 0.00 |
| TRINITY_A0BSN3_PARTE/14-266     | A0BSN3.1    | PF00069.23 | 74.40 | 0.00 |
| TRINITY_C3Y522_BRAFL/967-1080   | C3Y522.1    | PF00271.29 | 74.40 | 0.00 |
| TRINITY_G4TRT7_PIRID/13-103     | G4TRT7.1    | PF00125.22 | 74.40 | 0.00 |
| TRINITY_V2X5W0_MONRO/112-261    | V2X5W0.1    | PF00849.20 | 74.40 | 0.00 |

|                                   |              |            |       |      |
|-----------------------------------|--------------|------------|-------|------|
| TRINITY_L8HD92_ACACA/1328-1501    | L8HD92.1     | PF00270.27 | 74.40 | 0.00 |
| TRINITY_L8FWR5_PSED2/349-387      | L8FWR5.1     | PF00400.30 | 74.40 | 0.00 |
| TRINITY_B3RRL1_TRIAD/533-571      | B3RRL1.1     | PF00400.30 | 74.40 | 0.00 |
| TRINITY_D3B5B2_POLPA/50-303       | D3B5B2.1     | PF00069.23 | 74.40 | 0.00 |
| TRINITY_L1J966_GUIETH/6-44        | L1J966.1     | PF00400.30 | 74.40 | 0.00 |
| TRINITY_Q22T35_TETTS/4-288        | Q22T35.2     | PF00069.23 | 74.40 | 0.00 |
| TRINITY_D8TKS9_VOLCA/633-722      | D8TKS9.1     | PF00626.20 | 74.40 | 0.00 |
| TRINITY_B8B024_ORYSI/165-472      | B8B024.1     | PF00365.18 | 74.40 | 0.00 |
| TRINITY_D8U2W7_VOLCA/234-432      | D8U2W7.1     | PF08662.9; | 74.40 | 0.00 |
| TRINITY_D8SX17_SELML/2-91         | D8SX17.1     | PF00447.15 | 74.40 | 0.00 |
| TRINITY_D8UBE0_VOLCA/3-108        | D8UBE0.1     | PF00163.17 | 74.40 | 0.00 |
| TRINITY_E1ZRS1_CHLVA/4-340        | E1ZRS1.1     | PF03214.11 | 74.40 | 0.00 |
| TRINITY_E1Z6G3_CHLVA/49-392       | E1Z6G3.1     | PF01433.18 | 74.40 | 0.00 |
| TRINITY_D8U2V0_VOLCA/461-542      | D8U2V0.1     | PF00069.23 | 74.40 | 0.00 |
| TRINITY_A8J044_CHLRE/35-198       | A8J044.1     | PF03031.16 | 74.40 | 0.00 |
| TRINITY_A8HXJ4_CHLRE/89-561       | A8HXJ4.1     | PF00939.17 | 74.40 | 0.00 |
| TRINITY_A8JHC0_CHLRE/32-77        | A8JHC0.1     | PF00249.29 | 74.40 | 0.00 |
| TRINITY_A8JH37_CHLRE/445-772      | A8JH37.1     | PF01717.16 | 74.40 | 0.00 |
| TRINITY_A8JCD7_CHLRE/88-172       | A8JCD7.1     | PF04676.12 | 74.40 | 0.00 |
| TRINITY_D8TUT1_VOLCA/28-147       | D8TUT1.1     | PF03420.11 | 74.40 | 0.00 |
| TRINITY_U5D9W5_AMBTC/184-696      | U5D9W5.1     | PF00183.16 | 74.40 | 0.00 |
| TRINITY_E1ZGY2_CHLVA/153-316      | E1ZGY2.1     | PF03031.16 | 74.40 | 0.00 |
| TRINITY_Q01GS9_OSTTA/26-245       | Q01GS9.1     | PF03332.11 | 74.40 | 0.00 |
| TRINITY_J3MIZ1_ORYBR/565-602      | J3MIZ1.1     | PF03638.13 | 74.30 | 0.00 |
| TRINITY_L1J8G2_GUIETH/21-282      | L1J8G2.1     | PF00069.23 | 74.30 | 0.00 |
| TRINITY_I7M4Q4_TETTS/47-304       | I7M4Q4.1     | PF00069.23 | 74.30 | 0.00 |
| TRINITY_A0A0A0LJA2_CUCSA/2-134    | A0A0A0LJA2.1 | PF0712     | 74.30 | 0.00 |
| TRINITY_D7FLX8_ECTSI/53-219       | D7FLX8.1     | PF00270.27 | 74.30 | 0.00 |
| TRINITY_Q22NA0_TETTS/1407-1551    | Q22NA0.2     | PF00005.25 | 74.30 | 0.00 |
| TRINITY_Q24BW0_TETTS/593-630      | Q24BW0.2     | PF03638.13 | 74.30 | 0.00 |
| TRINITY_K4BS77_SOLLC/165-309      | K4BS77.1     | PF03033.18 | 74.30 | 0.00 |
| TRINITY_A0A0F4ZLK4_9PEZI/293-327  | A0A0F4ZLK4.1 | PF0032     | 74.30 | 0.00 |
| TRINITY_I7MFA4_TETTS/258-407      | I7MFA4.1     | PF00441.22 | 74.30 | 0.00 |
| TRINITY_D8TSX7_VOLCA/266-378      | D8TSX7.1     | PF00271.29 | 74.30 | 0.00 |
| TRINITY_K1QRR1_CRAGI/6-78         | K1QRR1.1     | PF13499.4; | 74.30 | 0.00 |
| TRINITY_A0BZN0_PARTE/60-429       | A0BZN0.1     | PF00285.19 | 74.30 | 0.00 |
| TRINITY_F4PRV3_DICFS/4-411        | F4PRV3.1     | PF00022.17 | 74.30 | 0.00 |
| TRINITY_D8TP32_VOLCA/174-390      | D8TP32.1     | PF01556.16 | 74.30 | 0.00 |
| TRINITY_A8HYH9_CHLRE/34-242       | A8HYH9.1     | PF01027.18 | 74.30 | 0.00 |
| TRINITY_A8JEN1_CHLRE/1-122        | A8JEN1.1     | PF00293.26 | 74.30 | 0.00 |
| TRINITY_A8JEA1_CHLRE/40-292       | A8JEA1.1     | PF14779.4; | 74.30 | 0.00 |
| TRINITY_D8TLA7_VOLCA/379-474      | D8TLA7.1     | PF01926.21 | 74.30 | 0.00 |
| TRINITY_D8TL59_VOLCA/198-793      | D8TL59.1     | PF08385.10 | 74.30 | 0.00 |
| TRINITY_Q546J6_CHLRE/30-276       | Q546J6.1     | PF06705.9; | 74.30 | 0.00 |
| TRINITY_A8IZI8_CHLRE/163-626      | A8IZI8.1     | PF00136.19 | 74.30 | 0.00 |
| TRINITY_A8HQT1_CHLRE/33-146       | A8HQT1.1     | PF00085.18 | 74.30 | 0.00 |
| TRINITY_A8J7D6_CHLRE/247-423      | A8J7D6.1     | PF13870.4; | 74.30 | 0.00 |
| TRINITY_E1ZQ58_CHLVA/40-113       | E1ZQ58.1     | PF00076.20 | 74.30 | 0.00 |
| TRINITY_A8IAH1_CHLRE/287-469      | A8IAH1.1     | PF03441.12 | 74.30 | 0.00 |
| TRINITY_A0A0D2X4N9_CAPO3/412-1052 | A0A0D2X4N9.1 | PF0032     | 74.20 | 0.00 |
| TRINITY_G0QV49_ICHMG/2561-2592    | G0QV49.1     | PF02260.18 | 74.20 | 0.00 |
| TRINITY_D8UEC0_VOLCA/1-102        | D8UEC0.1     | PF00543.20 | 74.20 | 0.00 |
| TRINITY_A0D8A1_PARTE/9-283        | A0D8A1.1     | PF00069.23 | 74.20 | 0.00 |
| TRINITY_L8HDV5_ACACA/6-380        | L8HDV5.1     | PF00022.17 | 74.20 | 0.00 |
| TRINITY_A0D8A1_PARTE/9-283        | A0D8A1.1     | PF00069.23 | 74.20 | 0.00 |
| TRINITY_C3Z6V7_BRAFL/18-180       | C3Z6V7.1     | PF03190.13 | 74.20 | 0.00 |
| TRINITY_A0D8A1_PARTE/9-283        | A0D8A1.1     | PF00069.23 | 74.20 | 0.00 |
| TRINITY_D8UCL7_VOLCA/162-371      | D8UCL7.1     | PF00297.20 | 74.20 | 0.00 |
| TRINITY_T1FMA9_HELRO/17-344       | T1FMA9.1     | PF00009.25 | 74.20 | 0.00 |
| TRINITY_S2J4P9_MUCC1/361-519      | S2J4P9.1     | PF00441.22 | 74.20 | 0.00 |
| TRINITY_A0CS93_PARTE/11-301       | A0CS93.1     | PF00069.23 | 74.20 | 0.00 |

|                                    |              |            |       |      |
|------------------------------------|--------------|------------|-------|------|
| TRINITY_Q231W2_TETTS/18-753        | Q231W2.1     | PF03030.14 | 74.20 | 0.00 |
| TRINITY_W7TIE3_9STRA/305-432       | W7TIE3.1     | PF00004.27 | 74.20 | 0.00 |
| TRINITY_CCR1_MAIZE/36-291          | P0C8M8.1     | PF00069.23 | 74.20 | 0.00 |
| TRINITY_G0R1B4_ICHMG/8-259         | G0R1B4.1     | PF00069.23 | 74.20 | 0.00 |
| TRINITY_A8HVJ9_CHLRE/1-298         | A8HVJ9.1     | PF14870.4; | 74.20 | 0.00 |
| TRINITY_A8J0R2_CHLRE/160-318       | A8J0R2.1     | PF01553.19 | 74.20 | 0.00 |
| TRINITY_A8IEU2_CHLRE/29-295        | A8IEU2.1     | PF01026.19 | 74.20 | 0.00 |
| TRINITY_Q3SD87_PARTE/6-613         | Q3SD87.1     | PF00012.18 | 74.20 | 0.00 |
| TRINITY_I0Z664_9CHLO/510-765       | I0Z664.1     | PF16203.3; | 74.20 | 0.00 |
| TRINITY_A8IU68_CHLRE/98-653        | A8IU68.1     | PF00133.20 | 74.20 | 0.00 |
| TRINITY_Q3SD10_PARTE/7-191         | Q3SD10.1     | PF00025.19 | 74.10 | 0.00 |
| TRINITY_X6M4L5_RETFI/6-65          | X6M4L5.1     | PF04193.12 | 74.10 | 0.00 |
| TRINITY_A8JI35_CHLRE/4-300         | A8JI35.1     | PF00069.23 | 74.10 | 0.00 |
| TRINITY_A8IFG0_CHLRE/344-605       | A8IFG0.1     | PF00899.19 | 74.10 | 0.00 |
| TRINITY_D8UEB9_VOLCA/1-192         | D8UEB9.1     | PF03721.12 | 74.10 | 0.00 |
| TRINITY_A0A077YX33_TRITR/1118-1518 | A0A077YX33.1 | PF0390     | 74.10 | 0.00 |
| TRINITY_I0YWF3_9CHLO/229-309       | I0YWF3.1     | PF04000.13 | 74.10 | 0.00 |
| TRINITY_F4PMV2_DICFS/89-458        | F4PMV2.1     | PF00285.19 | 74.10 | 0.00 |
| TRINITY_Q23D84_TETTS/68-437        | Q23D84.1     | PF00285.19 | 74.10 | 0.00 |
| TRINITY_F4QE85_DICFS/5-97          | F4QE85.1     | PF05670.11 | 74.10 | 0.00 |
| TRINITY_D8TKZ3_VOLCA/45-224        | D8TKZ3.1     | PF01300.16 | 74.10 | 0.00 |
| TRINITY_A8I087_CHLRE/147-226       | A8I087.1     | PF00595.22 | 74.10 | 0.00 |
| TRINITY_A8JG58_CHLRE/250-555       | A8JG58.1     | PF00587.23 | 74.10 | 0.00 |
| TRINITY_A8HYW8_CHLRE/207-276       | A8HYW8.1     | PF14360.4; | 74.10 | 0.00 |
| TRINITY_I0Z473_9CHLO/7-181         | I0Z473.1     | PF00025.19 | 74.10 | 0.00 |
| TRINITY_N4VI40_COLOR/14-178        | N4VI40.1     | PF00160.19 | 74.10 | 0.00 |
| TRINITY_A8HPZ4_CHLRE/321-635       | A8HPZ4.1     | PF00493.21 | 74.10 | 0.00 |
| TRINITY_D8UG85_VOLCA/40-517        | D8UG85.1     | PF01532.18 | 74.10 | 0.00 |
| TRINITY_D8TQZ7_VOLCA/265-459       | D8TQZ7.1     | PF08323.9; | 74.10 | 0.00 |
| TRINITY_D8TRJ9_VOLCA/14-234        | D8TRJ9.1     | PF04012.10 | 74.10 | 0.00 |
| TRINITY_D8U694_VOLCA/30-303        | D8U694.1     | PF01459.20 | 74.10 | 0.00 |
| TRINITY_D8U013_VOLCA/37-329        | D8U013.1     | PF02934.13 | 74.10 | 0.00 |
| TRINITY_A0A0D2U007_CAPO3/379-490   | A0A0D2U007.1 | PF0030     | 74.10 | 0.00 |
| TRINITY_D2KP25_ORENI/23-288        | D2KP25.1     | PF00361.18 | 74.10 | 0.00 |
| TRINITY_A8IUI9_CHLRE/197-379       | A8IUI9.1     | PF04055.19 | 74.10 | 0.00 |
| TRINITY_E1Z6D1_CHLVA/2002-2055     | E1Z6D1.1     | PF11793.6; | 74.10 | 0.00 |
| TRINITY_E1Z6D1_CHLVA/2002-2055     | E1Z6D1.1     | PF11793.6; | 74.10 | 0.00 |
| TRINITY_D8U7B0_VOLCA/64-740        | D8U7B0.1     | PF00063.19 | 74.10 | 0.00 |
| TRINITY_A0A0A1NSM9_9FUNG/1-126     | A0A0A1NSM9.1 | PF0109     | 74.00 | 0.00 |
| TRINITY_A8JA79_CHLRE/25-184        | A8JA79.1     | PF00069.23 | 74.00 | 0.00 |
| TRINITY_D3BNV2_POLPA/438-587       | D3BNV2.1     | PF00441.22 | 74.00 | 0.00 |
| TRINITY_G0QVV1_ICHMG/11-394        | G0QVV1.1     | PF00199.17 | 74.00 | 0.00 |
| TRINITY_L8H3G5_ACACA/1-175         | L8H3G5.1     | PF00025.19 | 74.00 | 0.00 |
| TRINITY_Q22Z33_TETTS/46-240        | Q22Z33.1     | PF00149.26 | 74.00 | 0.00 |
| TRINITY_D8UC36_VOLCA/80-302        | D8UC36.1     | PF03407.14 | 74.00 | 0.00 |
| TRINITY_D8TLB0_VOLCA/190-695       | D8TLB0.1     | PF00183.16 | 74.00 | 0.00 |
| TRINITY_D8TRN2_VOLCA/1964-2313     | D8TRN2.1     | PF12777.5; | 74.00 | 0.00 |
| TRINITY_G8JRJ8_ERECY/6-56          | G8JRJ8.1     | PF00253.19 | 74.00 | 0.00 |
| TRINITY_A0A087SRH3_AUXPR/169-242   | A0A087SRH3.1 | PF0007     | 74.00 | 0.00 |
| TRINITY_I0Z3A0_9CHLO/204-277       | I0Z3A0.1     | PF00173.26 | 74.00 | 0.00 |
| TRINITY_D8U288_VOLCA/1-154         | D8U288.1     | PF00211.18 | 74.00 | 0.00 |
| TRINITY_A8JH47_CHLRE/50-264        | A8JH47.1     | PF13460.4; | 74.00 | 0.00 |
| TRINITY_D8U0B6_VOLCA/1-312         | D8U0B6.1     | PF01916.15 | 74.00 | 0.00 |
| TRINITY_A0A067R1A6_ZOONE/18-144    | A0A067R1A6.1 | PF0146     | 74.00 | 0.00 |
| TRINITY_D8TVP7_VOLCA/20-322        | D8TVP7.1     | PF02374.13 | 74.00 | 0.00 |
| TRINITY_D8U5I0_VOLCA/499-857       | D8U5I0.1     | PF00654.18 | 74.00 | 0.00 |
| TRINITY_D8UGV0_VOLCA/186-450       | D8UGV0.1     | PF00122.18 | 74.00 | 0.00 |
| TRINITY_D8TSA8_VOLCA/761-1236      | D8TSA8.1     | PF01432.18 | 74.00 | 0.00 |
| TRINITY_Q22S16_TETTS/15-271        | Q22S16.3     | PF00069.23 | 73.90 | 0.00 |
| TRINITY_A0EEF5_PARTE/29-120        | A0EEF5.1     | PF00447.15 | 73.90 | 0.00 |
| TRINITY_Q22NA0_TETTS/1407-1551     | Q22NA0.2     | PF00005.25 | 73.90 | 0.00 |



|                                  |                     |       |      |
|----------------------------------|---------------------|-------|------|
| TRINITY_F4QD81_DICFS/62-323      | F4QD81.1 PF00295.15 | 73.90 | 0.00 |
| TRINITY_F4PKB5_DICFS/4-285       | F4PKB5.1 PF00069.23 | 73.90 | 0.00 |
| TRINITY_A0A068S232_9FUNG/48-162  | A0A068S232.1 PF0139 | 73.90 | 0.00 |
| TRINITY_A0D3T1_PARTE/120-234     | A0D3T1.1 PF00355.24 | 73.90 | 0.00 |
| TRINITY_Q23QT9_TETTS/74-119      | Q23QT9.2 PF00249.29 | 73.90 | 0.00 |
| TRINITY_E1Z207_CHLVA/8-77        | E1Z207.1 PF01423.20 | 73.90 | 0.00 |
| TRINITY_I7LVI5_TETTS/8-141       | I7LVI5.2 PF00179.24 | 73.90 | 0.00 |
| TRINITY_D8TJ16_VOLCA/47-488      | D8TJ16.1 PF00067.20 | 73.90 | 0.00 |
| TRINITY_D8TS39_VOLCA/55-405      | D8TS39.1 PF00266.17 | 73.90 | 0.00 |
| TRINITY_D8TUW4_VOLCA/64-325      | D8TUW4.1 PF02127.13 | 73.90 | 0.00 |
| TRINITY_D8U2M3_VOLCA/84-222      | D8U2M3.1 PF02577.12 | 73.90 | 0.00 |
| TRINITY_A8IS13_CHLRE/197-399     | A8IS13.1 PF14681.4; | 73.90 | 0.00 |
| TRINITY_A0A015ISW7_9GLOM/163-273 | A0A015ISW7.1 PF0277 | 73.90 | 0.00 |
| TRINITY_Q6Y682_CHLRE/61-280      | Q6Y682.1 PF01370.19 | 73.90 | 0.00 |
| TRINITY_E1ZQE8_CHLVA/39-192      | E1ZQE8.1 PF02605.13 | 73.90 | 0.00 |
| TRINITY_A8IC95_CHLRE/519-881     | A8IC95.1 PF02896.16 | 73.90 | 0.00 |
| TRINITY_I7MA75_TETTS/15-152      | I7MA75.2 PF00179.24 | 73.90 | 0.00 |
| TRINITY_A8IY43_CHLRE/85-241      | A8IY43.1 PF00160.19 | 73.90 | 0.00 |
| TRINITY_V4C6I3_LOTGI/521-639     | V4C6I3.1 PF11978.6; | 73.90 | 0.00 |
| TRINITY_A0CR98_PARTE/229-416     | A0CR98.1 PF00587.23 | 73.90 | 0.00 |
| TRINITY_A0A087SHG3_AUXPR/29-204  | A0A087SHG3.1 PF0027 | 73.90 | 0.00 |
| TRINITY_A2EC21_TRIVA/8-171       | A2EC21.1 PF00160.19 | 73.90 | 0.00 |
| TRINITY_D8U6G0_VOLCA/102-178     | D8U6G0.1 PF13417.4; | 73.90 | 0.00 |
| TRINITY_A8ITP6_CHLRE/676-966     | A8ITP6.1 PF00069.23 | 73.90 | 0.00 |
| TRINITY_D8UJ42_VOLCA/430-567     | D8UJ42.1 PF07683.12 | 73.90 | 0.00 |
| TRINITY_I3TW47_TISMK/50-437      | I3TW47.1 PF01979.18 | 73.80 | 0.00 |
| TRINITY_A0A067JRP4_JATCU/28-285  | A0A067JRP4.1 PF0070 | 73.80 | 0.00 |
| TRINITY_A0D8A1_PARTE/9-283       | A0D8A1.1 PF00069.23 | 73.80 | 0.00 |
| TRINITY_A0DD78_PARTE/6-291       | A0DD78.1 PF00069.23 | 73.80 | 0.00 |
| TRINITY_L8GIQ2_ACACA/74-303      | L8GIQ2.1 PF01269.15 | 73.80 | 0.00 |
| TRINITY_T1H7D4_MEGSC/107-186     | T1H7D4.1 PF00318.18 | 73.80 | 0.00 |
| TRINITY_L8HHR2_ACACA/1-660       | L8HHR2.1 PF00063.19 | 73.80 | 0.00 |
| TRINITY_D8U9J9_VOLCA/8-234       | D8U9J9.1 PF01168.18 | 73.80 | 0.00 |
| TRINITY_A8J7A7_CHLRE/10-173      | A8J7A7.1 PF00071.20 | 73.80 | 0.00 |
| TRINITY_W7TGG0_9STRA/84-381      | W7TGG0.1 PF00291.23 | 73.80 | 0.00 |
| TRINITY_D8U6J2_VOLCA/7-178       | D8U6J2.1 PF00270.27 | 73.80 | 0.00 |
| TRINITY_I0Z5Y6_9CHLO/110-236     | I0Z5Y6.1 PF01553.19 | 73.80 | 0.00 |
| TRINITY_D8TIF3_VOLCA/121-253     | D8TIF3.1 PF00252.16 | 73.80 | 0.00 |
| TRINITY_A0E600_PARTE/46-194      | A0E600.1 PF01257.17 | 73.80 | 0.00 |
| TRINITY_A8JGB0_CHLRE/102-444     | A8JGB0.1 PF02374.13 | 73.80 | 0.00 |
| TRINITY_I0YTU8_9CHLO/23-358      | I0YTU8.1 PF16363.3; | 73.80 | 0.00 |
| TRINITY_A8JGP9_CHLRE/57-171      | A8JGP9.1 PF00101.18 | 73.80 | 0.00 |
| TRINITY_D8TSX7_VOLCA/62-231      | D8TSX7.1 PF00270.27 | 73.80 | 0.00 |
| TRINITY_A8ITH8_CHLRE/54-560      | A8ITH8.1 PF00118.22 | 73.80 | 0.00 |
| TRINITY_I0YT93_9CHLO/120-251     | I0YT93.1 PF12923.5; | 73.80 | 0.00 |
| TRINITY_A8II74_CHLRE/185-405     | A8II74.1 PF13086.4; | 73.80 | 0.00 |
| TRINITY_Q23QY9_TETTS/11-178      | Q23QY9.2 PF00160.19 | 73.80 | 0.00 |
| TRINITY_D8U7B6_VOLCA/44-255      | D8U7B6.1 PF13419.4; | 73.80 | 0.00 |
| TRINITY_A0A0F0KX75_9MICO/11-148  | A0A0F0KX75.1 PF0561 | 73.70 | 0.00 |
| TRINITY_D8TPG3_VOLCA/100-302     | D8TPG3.1 PF00004.27 | 73.70 | 0.00 |
| TRINITY_A0A0D3FXD7_9ORYZ/682-788 | A0A0D3FXD7.1 PF0500 | 73.70 | 0.00 |
| TRINITY_A9SRD0_PHYPA/81-141      | A9SRD0.1 PF05030.10 | 73.70 | 0.00 |
| TRINITY_D8U4I7_VOLCA/96-133      | D8U4I7.1 PF02861.18 | 73.70 | 0.00 |
| TRINITY_K4CG47_SOLLC/29-213      | K4CG47.1 PF00227.24 | 73.70 | 0.00 |
| TRINITY_T1K154_TETUR/223-477     | T1K154.1 PF00122.18 | 73.70 | 0.00 |
| TRINITY_E1Z2U6_CHLVA/123-591     | E1Z2U6.1 PF01293.18 | 73.70 | 0.00 |
| TRINITY_R1DSV0_EMIHU/23-79       | R1DSV0.1 PF08207.10 | 73.70 | 0.00 |
| TRINITY_A8IQH3_CHLRE/1-180       | A8IQH3.1 PF01184.17 | 73.70 | 0.00 |
| TRINITY_T1FYE9_HELRO/23-315      | T1FYE9.1 PF00850.17 | 73.70 | 0.00 |
| TRINITY_D3BFF5_POLPA/368-556     | D3BFF5.1 PF01163.20 | 73.70 | 0.00 |
| TRINITY_G0QXX8_ICHMG/49-106      | G0QXX8.1 PF01849.16 | 73.70 | 0.00 |

|                                 |              |            |       |      |
|---------------------------------|--------------|------------|-------|------|
| TRINITY_A8IXP8_CHLRE/25-340     | A8IXP8.1     | PF00225.21 | 73.70 | 0.00 |
| TRINITY_F1A3H0_DICPU/186-253    | F1A3H0.1     | PF01485.19 | 73.70 | 0.00 |
| TRINITY_D8UDW8_VOLCA/1298-1470  | D8UDW8.1     | PF08148.10 | 73.70 | 0.00 |
| TRINITY_A8HPY3_CHLRE/45-165     | A8HPY3.1     | PF03567.12 | 73.70 | 0.00 |
| TRINITY_D8U0P6_VOLCA/36-243     | D8U0P6.1     | PF01189.15 | 73.70 | 0.00 |
| TRINITY_A8HT53_CHLRE/18-325     | A8HT53.1     | PF00069.23 | 73.70 | 0.00 |
| TRINITY_I7MGJ7_TETTS/43-393     | I7MGJ7.1     | PF00225.21 | 73.70 | 0.00 |
| TRINITY_E4U4P6_OCEP5/129-184    | E4U4P6.1     | PF09285.9; | 73.70 | 0.00 |
| TRINITY_W1PYU1_AMBTC/723-855    | W1PYU1.1     | PF00004.27 | 73.70 | 0.00 |
| TRINITY_A8IQW5_CHLRE/92-259     | A8IQW5.1     | PF13911.4; | 73.70 | 0.00 |
| TRINITY_D8UCT7_VOLCA/816-914    | D8UCT7.1     | PF13640.4; | 73.70 | 0.00 |
| TRINITY_E1ZR84_CHLVA/4-63       | E1ZR84.1     | PF00076.20 | 73.70 | 0.00 |
| TRINITY_A8I6T5_CHLRE/1202-1411  | A8I6T5.1     | PF01326.17 | 73.70 | 0.00 |
| TRINITY_A8JAC5_CHLRE/85-308     | A8JAC5.1     | PF01128.17 | 73.70 | 0.00 |
| TRINITY_Q22T35_TETTS/4-288      | Q22T35.2     | PF00069.23 | 73.70 | 0.00 |
| TRINITY_D8TY00_VOLCA/15-360     | D8TY00.1     | PF03630.12 | 73.70 | 0.00 |
| TRINITY_A4VCZ6_TETTS/85-391     | A4VCZ6.2     | PF01866.15 | 73.70 | 0.00 |
| TRINITY_A0A0N4XWF5_NIPBR/74-172 | A0A0N4XWF5.1 | PF00067    | 73.70 | 0.00 |
| TRINITY_A8I501_CHLRE/9-221      | A8I501.1     | PF01988.17 | 73.70 | 0.00 |
| TRINITY_D8TS97_VOLCA/30-272     | D8TS97.1     | PF00069.23 | 73.70 | 0.00 |
| TRINITY_D8UAJ8_VOLCA/135-267    | D8UAJ8.1     | PF03464.13 | 73.70 | 0.00 |
| TRINITY_A8IZZ9_CHLRE/452-770    | A8IZZ9.1     | PF01515.17 | 73.70 | 0.00 |
| TRINITY_A8JFV3_CHLRE/95-388     | A8JFV3.1     | PF00069.23 | 73.70 | 0.00 |
| TRINITY_A8J481_CHLRE/187-343    | A8J481.1     | PF00005.25 | 73.70 | 0.00 |
| TRINITY_A0BE74_PARTE/27-121     | A0BE74.1     | PF01247.16 | 73.70 | 0.00 |
| TRINITY_A8NCG5_COPC7/2-119      | A8NCG5.1     | PF00125.22 | 73.60 | 0.00 |
| TRINITY_Q236T8_TETTS/38-401     | Q236T8.2     | PF00266.17 | 73.60 | 0.00 |
| TRINITY_M0U8S7_MUSAM/347-404    | M0U8S7.1     | PF03106.13 | 73.60 | 0.00 |
| TRINITY_A8I960_CHLRE/24-194     | A8I960.1     | PF00270.27 | 73.60 | 0.00 |
| TRINITY_D8TM23_VOLCA/34-204     | D8TM23.1     | PF00925.18 | 73.60 | 0.00 |
| TRINITY_D8TI63_VOLCA/177-320    | D8TI63.1     | PF01764.23 | 73.60 | 0.00 |
| TRINITY_D8TWK7_VOLCA/1-154      | D8TWK7.1     | PF00211.18 | 73.60 | 0.00 |
| TRINITY_F0ZN98_DICPU/6-241      | F0ZN98.1     | PF00149.26 | 73.60 | 0.00 |
| TRINITY_D8UDZ8_VOLCA/216-360    | D8UDZ8.1     | PF08920.8; | 73.60 | 0.00 |
| TRINITY_D8UAL7_VOLCA/12-470     | D8UAL7.1     | PF02516.12 | 73.60 | 0.00 |
| TRINITY_E1Z2X5_CHLVA/270-543    | E1Z2X5.1     | PF00128.22 | 73.60 | 0.00 |
| TRINITY_A8IRU2_CHLRE/81-151     | A8IRU2.1     | PF02135.14 | 73.60 | 0.00 |
| TRINITY_D8U8A9_VOLCA/17-742     | D8U8A9.1     | PF03030.14 | 73.60 | 0.00 |
| TRINITY_D8U263_VOLCA/31-215     | D8U263.1     | PF00227.24 | 73.60 | 0.00 |
| TRINITY_K1QWS3_CRAGI/14-101     | K1QWS3.1     | PF01172.16 | 73.60 | 0.00 |
| TRINITY_D8TKM1_VOLCA/60-237     | D8TKM1.1     | PF11891.6; | 73.60 | 0.00 |
| TRINITY_D8U945_VOLCA/3-117      | D8U945.1     | PF11527.6; | 73.60 | 0.00 |
| TRINITY_E1ZF83_CHLVA/18-386     | E1ZF83.1     | PF00199.17 | 73.60 | 0.00 |
| TRINITY_A8I6R1_CHLRE/72-158     | A8I6R1.1     | PF04158.12 | 73.60 | 0.00 |
| TRINITY_L8HBG2_ACACA/50-121     | L8HBG2.1     | PF00717.21 | 73.60 | 0.00 |
| TRINITY_Q9ZTA7_CHLRE/91-554     | Q9ZTA7.1     | PF01593.22 | 73.60 | 0.00 |
| TRINITY_G0QRP9_ICHMG/62-152     | G0QRP9.1     | PF01215.17 | 73.60 | 0.00 |
| TRINITY_Q22A67_TETTS/3863-4617  | Q22A67.1     | PF03028.13 | 73.60 | 0.00 |
| TRINITY_D8U477_VOLCA/18-657     | D8U477.1     | PF04551.12 | 73.60 | 0.00 |
| TRINITY_F4QEL1_DICFS/1211-1425  | F4QEL1.1     | PF00454.25 | 73.60 | 0.00 |
| TRINITY_D8TTG0_VOLCA/101-205    | D8TTG0.1     | PF00085.18 | 73.60 | 0.00 |
| TRINITY_A0A0N4ZT82_PARTI/13-66  | A0A0N4ZT82.1 | PF00058    | 73.60 | 0.00 |
| TRINITY_N1PJZ1_DOTSN/106-334    | N1PJZ1.1     | PF12706.5; | 73.50 | 0.00 |
| TRINITY_K7IYF0_NASVI/3312-4022  | K7IYF0.1     | PF03028.13 | 73.50 | 0.00 |
| TRINITY_J9FK96_9SPIT/795-1052   | J9FK96.1     | PF00069.23 | 73.50 | 0.00 |
| TRINITY_A0E3Q5_PARTE/29-357     | A0E3Q5.1     | PF00850.17 | 73.50 | 0.00 |
| TRINITY_G0QPV5_ICHMG/91-228     | G0QPV5.1     | PF14671.4; | 73.50 | 0.00 |
| TRINITY_I7MN19_TETTS/35-532     | I7MN19.1     | PF00118.22 | 73.50 | 0.00 |
| TRINITY_U5H7A1_USTV1/26-191     | U5H7A1.1     | PF00071.20 | 73.50 | 0.00 |
| TRINITY_A8J9P9_CHLRE/14-167     | A8J9P9.1     | PF00160.19 | 73.50 | 0.00 |
| TRINITY_A8J836_CHLRE/61-158     | A8J836.1     | PF10084.7; | 73.50 | 0.00 |

|                                   |                     |       |      |
|-----------------------------------|---------------------|-------|------|
| TRINITY_D8U3S6_VOLCA/175-279      | D8U3S6.1 PF00085.18 | 73.50 | 0.00 |
| TRINITY_A0A0D2X2D5_CAPO3/103-590  | A0A0D2X2D5.1 PF0103 | 73.50 | 0.00 |
| TRINITY_D8TLR7_VOLCA/44-93        | D8TLR7.1 PF00584.18 | 73.50 | 0.00 |
| TRINITY_H2TQQ9_TAKRU/1524-1641    | H2TQQ9.1 PF01759.19 | 73.50 | 0.00 |
| TRINITY_H3FJT1_PRIIPA/252-319     | H3FJT1.1 PF01423.20 | 73.50 | 0.00 |
| TRINITY_L8HC03_ACACA/63-447       | L8HC03.1 PF00344.18 | 73.50 | 0.00 |
| TRINITY_L8H2K8_ACACA/208-276      | L8H2K8.1 PF00382.17 | 73.50 | 0.00 |
| TRINITY_A8IFM3_CHLRE/1-128        | A8IFM3.1 PF00005.25 | 73.50 | 0.00 |
| TRINITY_D8TKA0_VOLCA/255-358      | D8TKA0.1 PF03109.14 | 73.50 | 0.00 |
| TRINITY_A0A067FJA4_CITSI/608-722  | A0A067FJA4.1 PF0027 | 73.50 | 0.00 |
| TRINITY_D8TKQ2_VOLCA/556-871      | D8TKQ2.1 PF00176.21 | 73.50 | 0.00 |
| TRINITY_D8UCL3_VOLCA/40-194       | D8UCL3.1 PF08534.8; | 73.50 | 0.00 |
| TRINITY_A0A0D2WX19_CAPO3/13-116   | A0A0D2WX19.1 PF0299 | 73.50 | 0.00 |
| TRINITY_A8J905_CHLRE/234-329      | A8J905.1 PF01575.17 | 73.50 | 0.00 |
| TRINITY_D8TPV9_VOLCA/41-385       | D8TPV9.1 PF01208.15 | 73.50 | 0.00 |
| TRINITY_A8J9F3_CHLRE/20-663       | A8J9F3.1 PF00133.20 | 73.50 | 0.00 |
| TRINITY_D8UJP2_VOLCA/71-428       | D8UJP2.1 PF01237.16 | 73.50 | 0.00 |
| TRINITY_R4X6B7_TAPDE/246-279      | R4X6B7.1 PF00806.17 | 73.50 | 0.00 |
| TRINITY_A8IYS5_CHLRE/107-400      | A8IYS5.1 PF00735.16 | 73.50 | 0.00 |
| TRINITY_M2SVV7_COCH5/53-264       | M2SVV7.1 PF13945.4; | 73.50 | 0.00 |
| TRINITY_G0R1F8_ICHMG/1-722        | G0R1F8.1 PF03030.14 | 73.50 | 0.00 |
| TRINITY_A0A059LRV1_9CHLO/348-513  | A0A059LRV1.1 PF0010 | 73.50 | 0.00 |
| TRINITY_D0MZ70_PHYIT/6-73         | D0MZ70.1 PF00076.20 | 73.50 | 0.00 |
| TRINITY_I0Z0C9_9CHLO/187-220      | I0Z0C9.1 PF08238.10 | 73.50 | 0.00 |
| TRINITY_G0QNU9_ICHMG/5-258        | G0QNU9.1 PF01201.20 | 73.50 | 0.00 |
| TRINITY_I0Z952_9CHLO/60-323       | I0Z952.1 PF00082.20 | 73.50 | 0.00 |
| TRINITY_D3BE51_POLPA/540-684      | D3BE51.1 PF00005.25 | 73.50 | 0.00 |
| TRINITY_D8U8F7_VOLCA/192-323      | D8U8F7.1 PF00005.25 | 73.50 | 0.00 |
| TRINITY_A4VDV3_TETTS/129-225      | A4VDV3.1 PF00153.25 | 73.40 | 0.00 |
| TRINITY_J9IFT1_9SPIT/16-145       | J9IFT1.1 PF00828.17 | 73.40 | 0.00 |
| TRINITY_A0BKT3_PARTE/6-401        | A0BKT3.1 PF00180.18 | 73.40 | 0.00 |
| TRINITY_H2XVN3_CIOIN/20-314       | H2XVN3.1 PF00291.23 | 73.40 | 0.00 |
| TRINITY_W1NFB7_AMBTC/7-616        | W1NFB7.1 PF00012.18 | 73.40 | 0.00 |
| TRINITY_A0A0N1E2S5_9FLAO/26-441   | A0A0N1E2S5.1 PF0020 | 73.40 | 0.00 |
| TRINITY_A0C4G5_PARTE/13-301       | A0C4G5.1 PF00069.23 | 73.40 | 0.00 |
| TRINITY_D8TRL9_VOLCA/216-387      | D8TRL9.1 PF08547.10 | 73.40 | 0.00 |
| TRINITY_D7FNK5_ECTSI/311-454      | D7FNK5.1 PF00475.16 | 73.40 | 0.00 |
| TRINITY_A8J4S1_CHLRE/44-219       | A8J4S1.1 PF02507.13 | 73.40 | 0.00 |
| TRINITY_D8TZI0_VOLCA/70-329       | D8TZI0.1 PF04921.12 | 73.40 | 0.00 |
| TRINITY_A8JEM3_CHLRE/48-224       | A8JEM3.1 PF00702.24 | 73.40 | 0.00 |
| TRINITY_D8U637_VOLCA/15-321       | D8U637.1 PF00176.21 | 73.40 | 0.00 |
| TRINITY_E5SX20_TRISP/61-244       | E5SX20.1 PF01926.21 | 73.40 | 0.00 |
| TRINITY_A8J063_CHLRE/819-1225     | A8J063.1 PF08393.11 | 73.40 | 0.00 |
| TRINITY_D8U9A5_VOLCA/30-553       | D8U9A5.1 PF00118.22 | 73.40 | 0.00 |
| TRINITY_A8IS11_CHLRE/406-740      | A8IS11.1 PF00702.24 | 73.40 | 0.00 |
| TRINITY_A8HYR2_CHLRE/947-1224     | A8HYR2.1 PF02965.15 | 73.40 | 0.00 |
| TRINITY_L8HJA5_ACACA/2-388        | L8HJA5.1 PF00022.17 | 73.40 | 0.00 |
| TRINITY_D8U3G5_VOLCA/95-425       | D8U3G5.1 PF07992.12 | 73.40 | 0.00 |
| TRINITY_E1ZTL2_CHLVA/961-1039     | E1ZTL2.1 PF12812.5; | 73.40 | 0.00 |
| TRINITY_F2UBE5_SALR5/5-166        | F2UBE5.1 PF00071.20 | 73.30 | 0.00 |
| TRINITY_A0CR44_PARTE/304-440      | A0CR44.1 PF08443.9; | 73.30 | 0.00 |
| TRINITY_C5L4E2_PERM5/63-92        | C5L4E2.1 PF00397.24 | 73.30 | 0.00 |
| TRINITY_A0A058ZDU1_9EUKA/786-1000 | A0A058ZDU1.1 PF0045 | 73.30 | 0.00 |
| TRINITY_D8U7Q8_VOLCA/24-125       | D8U7Q8.1 PF01521.18 | 73.30 | 0.00 |
| TRINITY_MOB1A_DICDI/31-202        | Q54XJ0.1 PF03637.15 | 73.30 | 0.00 |
| TRINITY_Q241B6_TETTS/1199-1363    | Q241B6.2 PF03031.16 | 73.30 | 0.00 |
| TRINITY_A0A078ALM0_STYLE/473-767  | A0A078ALM0.1 PF0006 | 73.30 | 0.00 |
| TRINITY_D3B6T5_POLPA/268-312      | D3B6T5.1 PF00569.15 | 73.30 | 0.00 |
| TRINITY_D8U5N0_VOLCA/679-740      | D8U5N0.1 PF08240.10 | 73.30 | 0.00 |
| TRINITY_L1ICM6_GUIITH/49-87       | L1ICM6.1 PF00400.30 | 73.30 | 0.00 |
| TRINITY_D8UIG4_VOLCA/163-267      | D8UIG4.1 PF13661.4; | 73.30 | 0.00 |

|                                  |              |            |       |      |
|----------------------------------|--------------|------------|-------|------|
| TRINITY_D8TYL1_VOLCA/3-133       | D8TYL1.1     | PF04099.10 | 73.30 | 0.00 |
| TRINITY_Q6QJE0_CHLRE/143-398     | Q6QJE0.1     | PF13531.4; | 73.30 | 0.00 |
| TRINITY_A8I8F2_CHLRE/3-187       | A8I8F2.1     | PF00625.19 | 73.30 | 0.00 |
| TRINITY_D8UFN4_VOLCA/1689-1806   | D8UFN4.1     | PF01661.19 | 73.30 | 0.00 |
| TRINITY_A8IPJ0_CHLRE/119-217     | A8IPJ0.1     | PF00153.25 | 73.30 | 0.00 |
| TRINITY_D8UA41_VOLCA/65-182      | D8UA41.1     | PF09745.7; | 73.30 | 0.00 |
| TRINITY_G0R088_ICHMG/41-328      | G0R088.1     | PF00069.23 | 73.30 | 0.00 |
| TRINITY_D8U2T7_VOLCA/62-151      | D8U2T7.1     | PF06831.12 | 73.30 | 0.00 |
| TRINITY_D8TGS3_VOLCA/766-928     | D8TGS3.1     | PF03572.16 | 73.30 | 0.00 |
| TRINITY_D8TM31_VOLCA/342-683     | D8TM31.1     | PF00493.21 | 73.30 | 0.00 |
| TRINITY_A8IJT8_CHLRE/9-135       | A8IJT8.1     | PF01014.16 | 73.30 | 0.00 |
| TRINITY_A0A061DMP8_THECC/350-439 | A0A061DMP8.1 | PF0007     | 73.30 | 0.00 |
| TRINITY_D8R9B3_SELML/325-369     | D8R9B3.1     | PF00400.30 | 73.30 | 0.00 |
| TRINITY_D8TN03_VOLCA/51-349      | D8TN03.1     | PF03133.13 | 73.30 | 0.00 |
| TRINITY_D8TKI2_VOLCA/1226-1356   | D8TKI2.1     | PF02732.13 | 73.30 | 0.00 |
| TRINITY_E1ZE87_CHLVA/19-257      | E1ZE87.1     | PF01946.15 | 73.30 | 0.00 |
| TRINITY_R1FM73_EMIHU/100-139     | R1FM73.1     | PF01753.16 | 73.30 | 0.00 |
| TRINITY_Q23D15_TETTS/14-179      | Q23D15.1     | PF00160.19 | 73.20 | 0.00 |
| TRINITY_A0C3X5_PARTE/32-114      | A0C3X5.1     | PF00111.25 | 73.20 | 0.00 |
| TRINITY_KLP3_SCHPO/9-325         | Q9US60.1     | PF00225.21 | 73.20 | 0.00 |
| TRINITY_V7CY33_PHAVU/13-85       | V7CY33.1     | PF13304.4; | 73.20 | 0.00 |
| TRINITY_S9X060_9CETA/78-191      | S9X060.1     | PF00828.17 | 73.20 | 0.00 |
| TRINITY_A0A0D2WI65_CAPO3/65-186  | A0A0D2WI65.1 | PF0000     | 73.20 | 0.00 |
| TRINITY_M4DRK5_BRARP/69-297      | M4DRK5.1     | PF01269.15 | 73.20 | 0.00 |
| TRINITY_D8UIY4_VOLCA/1-274       | D8UIY4.1     | PF00225.21 | 73.20 | 0.00 |
| TRINITY_A0A068YEU6_ECHMU/52-247  | A0A068YEU6.1 | PF0014     | 73.20 | 0.00 |
| TRINITY_I7ML30_TETTS/420-576     | I7ML30.2     | PF00271.29 | 73.20 | 0.00 |
| TRINITY_A8JFM7_CHLRE/12-149      | A8JFM7.1     | PF00179.24 | 73.20 | 0.00 |
| TRINITY_I0Z9R9_9CHLO/51-217      | I0Z9R9.1     | PF00009.25 | 73.20 | 0.00 |
| TRINITY_D8UDS8_VOLCA/42-152      | D8UDS8.1     | PF10184.7; | 73.20 | 0.00 |
| TRINITY_A8I4N7_CHLRE/69-107      | A8I4N7.1     | PF01096.16 | 73.20 | 0.00 |
| TRINITY_E1ZMJ7_CHLVA/38-377      | E1ZMJ7.1     | PF01979.18 | 73.20 | 0.00 |
| TRINITY_G3PD63_GASAC/48-411      | G3PD63.1     | PF00079.18 | 73.20 | 0.00 |
| TRINITY_A0A087SPZ3_AUXPR/56-212  | A0A087SPZ3.1 | PF0000     | 73.20 | 0.00 |
| TRINITY_D7MGC5_ARALL/4-104       | D7MGC5.1     | PF03297.13 | 73.20 | 0.00 |
| TRINITY_A8JAY5_CHLRE/85-391      | A8JAY5.1     | PF00579.23 | 73.20 | 0.00 |
| TRINITY_D8TQE6_VOLCA/1663-1897   | D8TQE6.1     | PF13087.4; | 73.20 | 0.00 |
| TRINITY_I0YQT6_9CHLO/40-326      | I0YQT6.1     | PF02535.20 | 73.20 | 0.00 |
| TRINITY_A8ISA5_CHLRE/9-212       | A8ISA5.1     | PF00106.23 | 73.20 | 0.00 |
| TRINITY_D8TYG6_VOLCA/7-70        | D8TYG6.1     | PF08154.10 | 73.20 | 0.00 |
| TRINITY_I7LXG7_TETTS/35-529      | I7LXG7.1     | PF00118.22 | 73.20 | 0.00 |
| TRINITY_D8UCZ9_VOLCA/61-318      | D8UCZ9.1     | PF00795.20 | 73.20 | 0.00 |
| TRINITY_D8U367_VOLCA/1-178       | D8U367.1     | PF02630.12 | 73.20 | 0.00 |
| TRINITY_A0A0A1PIE4_9FUNG/6-143   | A0A0A1PIE4.1 | PF0017     | 73.20 | 0.00 |
| TRINITY_A8IDM1_CHLRE/29-241      | A8IDM1.1     | PF02919.13 | 73.20 | 0.00 |
| TRINITY_D8TRR9_VOLCA/403-468     | D8TRR9.1     | PF04825.11 | 73.20 | 0.00 |
| TRINITY_A8IFQ9_CHLRE/596-707     | A8IFQ9.1     | PF12014.6; | 73.20 | 0.00 |
| TRINITY_A8IVZ2_CHLRE/70-222      | A8IVZ2.1     | PF00005.25 | 73.20 | 0.00 |
| TRINITY_B4L337_DROMO/117-166     | B4L337.1     | PF06221.11 | 73.20 | 0.00 |
| TRINITY_D8UCJ4_VOLCA/672-743     | D8UCJ4.1     | PF12253.6; | 73.10 | 0.00 |
| TRINITY_Q23R84_TETTS/138-345     | Q23R84.2     | PF00009.25 | 73.10 | 0.00 |
| TRINITY_I7M0C0_TETTS/39-287      | I7M0C0.1     | PF00378.18 | 73.10 | 0.00 |
| TRINITY_I7MN19_TETTS/35-532      | I7MN19.1     | PF00118.22 | 73.10 | 0.00 |
| TRINITY_Q22RL3_TETTS/148-199     | Q22RL3.2     | PF01805.18 | 73.10 | 0.00 |
| TRINITY_A8I6J1_CHLRE/10-264      | A8I6J1.1     | PF00069.23 | 73.10 | 0.00 |
| TRINITY_Q22MB4_TETTS/42-542      | Q22MB4.3     | PF00118.22 | 73.10 | 0.00 |
| TRINITY_A8JGG4_CHLRE/505-786     | A8JGG4.1     | PF02626.13 | 73.10 | 0.00 |
| TRINITY_D8U0Y4_VOLCA/61-183      | D8U0Y4.1     | PF02678.14 | 73.10 | 0.00 |
| TRINITY_G7KRK6_MEDTR/200-274     | G7KRK6.1     | PF00364.20 | 73.10 | 0.00 |
| TRINITY_D8UJ05_VOLCA/69-344      | D8UJ05.1     | PF00899.19 | 73.10 | 0.00 |
| TRINITY_K1RE71_CRAGI/11-77       | K1RE71.1     | PF01423.20 | 73.10 | 0.00 |

|                                  |                     |       |      |
|----------------------------------|---------------------|-------|------|
| TRINITY_I0Z6A9_9CHLO/124-387     | I0Z6A9.1 PF00069.23 | 73.10 | 0.00 |
| TRINITY_E1Z4R7_CHLVA/63-124      | E1Z4R7.1 PF00013.27 | 73.10 | 0.00 |
| TRINITY_D8UCJ5_VOLCA/37-155      | D8UCJ5.1 PF04178.10 | 73.10 | 0.00 |
| TRINITY_A0A0A2VTW1_BEABA/102-706 | A0A0A2VTW1.1 PF1403 | 73.10 | 0.00 |
| TRINITY_A8IH85_CHLRE/30-562      | A8IH85.1 PF02516.12 | 73.10 | 0.00 |
| TRINITY_D8UIN9_VOLCA/2094-2451   | D8UIN9.1 PF00224.19 | 73.10 | 0.00 |
| TRINITY_D8UIP0_VOLCA/9-539       | D8UIP0.1 PF01274.20 | 73.10 | 0.00 |
| TRINITY_A0A068RG97_9FUNG/2-54    | A0A068RG97.1 PF0190 | 73.10 | 0.00 |
| TRINITY_A0A068RG97_9FUNG/2-54    | A0A068RG97.1 PF0190 | 73.10 | 0.00 |
| TRINITY_A8IFC8_CHLRE/9-477       | A8IFC8.1 PF05694.9; | 73.10 | 0.00 |
| TRINITY_D8TVF8_VOLCA/3-77        | D8TVF8.1 PF03110.12 | 73.10 | 0.00 |
| TRINITY_I1KVB3_SOYBN/319-519     | I1KVB3.2 PF03441.12 | 73.00 | 0.00 |
| TRINITY_B9GKY3_POPTR/440-477     | B9GKY3.2 PF03638.13 | 73.00 | 0.00 |
| TRINITY_A0A0F7KCK0_9PROT/27-164  | A0A0F7KCK0.1 PF1286 | 73.00 | 0.00 |
| TRINITY_D3BAK5_POLPA/88-483      | D3BAK5.1 PF01134.20 | 73.00 | 0.00 |
| TRINITY_I3K0S0_ORENI/15-104      | I3K0S0.1 PF05825.9; | 73.00 | 0.00 |
| TRINITY_Q234P9_TETTS/544-689     | Q234P9.1 PF00004.27 | 73.00 | 0.00 |
| TRINITY_F0Z9M2_DICPU/415-584     | F0Z9M2.1 PF00270.27 | 73.00 | 0.00 |
| TRINITY_D8U2H8_VOLCA/2-319       | D8U2H8.1 PF07992.12 | 73.00 | 0.00 |
| TRINITY_A0A067JZZ9_JATCU/119-156 | A0A067JZZ9.1 PF0142 | 73.00 | 0.00 |
| TRINITY_A0A078AS87_STYLE/137-297 | A0A078AS87.1 PF0027 | 73.00 | 0.00 |
| TRINITY_G0QUI7_ICHMG/220-415     | G0QUI7.1 PF00149.26 | 73.00 | 0.00 |
| TRINITY_A0A0D2WIE4_CAPO3/71-135  | A0A0D2WIE4.1 PF0231 | 73.00 | 0.00 |
| TRINITY_A0A0F5YAJ2_9CYAN/93-184  | A0A0F5YAJ2.1 PF0025 | 73.00 | 0.00 |
| TRINITY_L8HFG1_ACACA/38-503      | L8HFG1.1 PF02516.12 | 73.00 | 0.00 |
| TRINITY_A8JHA9_CHLRE/39-103      | A8JHA9.1 PF00462.22 | 73.00 | 0.00 |
| TRINITY_A8IH03_CHLRE/49-392      | A8IH03.1 PF00266.17 | 73.00 | 0.00 |
| TRINITY_W9RSB6_9ROSA/51-120      | W9RSB6.1 PF00076.20 | 73.00 | 0.00 |
| TRINITY_K4BVU7_SOLLC/2-153       | K4BVU7.1 PF00257.17 | 73.00 | 0.00 |
| TRINITY_A8ITU1_CHLRE/159-280     | A8ITU1.1 PF10502.7; | 73.00 | 0.00 |
| TRINITY_P93664_CHLRE/45-210      | P93664.1 PF00504.19 | 73.00 | 0.00 |
| TRINITY_M0ZYP5_SOLTU/142-469     | M0ZYP5.1 PF00733.19 | 73.00 | 0.00 |
| TRINITY_A8I3M7_CHLRE/1181-1220   | A8I3M7.1 PF00226.29 | 73.00 | 0.00 |
| TRINITY_A8IV05_CHLRE/51-224      | A8IV05.1 PF00227.24 | 73.00 | 0.00 |
| TRINITY_D8U7K4_VOLCA/714-1036    | D8U7K4.1 PF08767.9; | 73.00 | 0.00 |
| TRINITY_M2WSH9_GALSU/397-434     | M2WSH9.1 PF03638.13 | 73.00 | 0.00 |
| TRINITY_A0DIN0_PARTE/9-195       | A0DIN0.1 PF03256.14 | 73.00 | 0.00 |
| TRINITY_I7M129_TETTS/32-216      | I7M129.1 PF01145.23 | 72.90 | 0.00 |
| TRINITY_G4MSD5_MAGO7/19-339      | G4MSD5.1 PF00303.17 | 72.90 | 0.00 |
| TRINITY_A9V782_MONBE/6-53        | A9V782.1 PF16891.3; | 72.90 | 0.00 |
| TRINITY_Q22G04_TETTS/58-197      | Q22G04.2 PF00578.19 | 72.90 | 0.00 |
| TRINITY_I7M3W6_TETTS/237-558     | I7M3W6.2 PF00152.18 | 72.90 | 0.00 |
| TRINITY_A0A096LTZ0_POEFO/22-80   | A0A096LTZ0.1 PF0005 | 72.90 | 0.00 |
| TRINITY_A0A074XWJ0_AURPU/12-166  | A0A074XWJ0.1 PF0025 | 72.90 | 0.00 |
| TRINITY_F0ZTH4_DICPU/47-356      | F0ZTH4.1 PF01406.17 | 72.90 | 0.00 |
| TRINITY_A0A078AK98_STYLE/24-200  | A0A078AK98.1 PF0172 | 72.90 | 0.00 |
| TRINITY_L8HBV7_ACACA/83-337      | L8HBV7.1 PF00069.23 | 72.90 | 0.00 |
| TRINITY_A0DZP1_PARTE/30-624      | A0DZP1.1 PF00012.18 | 72.90 | 0.00 |
| TRINITY_A8J625_CHLRE/26-151      | A8J625.1 PF01926.21 | 72.90 | 0.00 |
| TRINITY_A8J654_CHLRE/51-361      | A8J654.1 PF00248.19 | 72.90 | 0.00 |
| TRINITY_A0A078A9T0_STYLE/80-292  | A0A078A9T0.1 PF0011 | 72.90 | 0.00 |
| TRINITY_A8IBJ5_CHLRE/140-260     | A8IBJ5.1 PF03109.14 | 72.90 | 0.00 |
| TRINITY_D8U7F8_VOLCA/1707-1755   | D8U7F8.1 PF02042.13 | 72.90 | 0.00 |
| TRINITY_D8UFL9_VOLCA/279-388     | D8UFL9.1 PF00271.29 | 72.90 | 0.00 |
| TRINITY_D8TJB9_VOLCA/44-317      | D8TJB9.1 PF06472.13 | 72.90 | 0.00 |
| TRINITY_G0QSP9_ICHMG/8-66        | G0QSP9.1 PF03946.12 | 72.90 | 0.00 |
| TRINITY_A8IMT5_CHLRE/325-394     | A8IMT5.1 PF00240.21 | 72.90 | 0.00 |
| TRINITY_A7SH82_NEMVE/14-142      | A7SH82.1 PF00416.20 | 72.90 | 0.00 |
| TRINITY_G3NQ97_GASAC/152-245     | G3NQ97.1 PF00031.19 | 72.90 | 0.00 |
| TRINITY_C5YXL4_SORBI/281-330     | C5YXL4.1 PF13920.4; | 72.90 | 0.00 |
| TRINITY_D8U2K3_VOLCA/185-439     | D8U2K3.1 PF00928.19 | 72.90 | 0.00 |

|                                   |                     |       |      |
|-----------------------------------|---------------------|-------|------|
| TRINITY_Q23FU4_TETTS/44-246       | Q23FU4.2 PF00106.23 | 72.90 | 0.00 |
| TRINITY_D8U1Y8_VOLCA/89-217       | D8U1Y8.1 PF07386.9; | 72.90 | 0.00 |
| TRINITY_A0A061EEG7_THECC/589-749  | A0A061EEG7.1 PF0007 | 72.90 | 0.00 |
| TRINITY_A0A090M9L0_OSTTA/651-839  | A0A090M9L0.1 PF0048 | 72.90 | 0.00 |
| TRINITY_E1ZIE5_CHLVA/8-245        | E1ZIE5.1 PF00294.22 | 72.90 | 0.00 |
| TRINITY_A0A078DMU8_BRANA/411-458  | A0A078DMU8.1 PF0040 | 72.90 | 0.00 |
| TRINITY_A0CXB5_PARTE/27-357       | A0CXB5.1 PF00206.18 | 72.90 | 0.00 |
| TRINITY_E1Z768_CHLVA/311-358      | E1Z768.1 PF13920.4; | 72.90 | 0.00 |
| TRINITY_F2UC19_SALR5/15-73        | F2UC19.1 PF08207.10 | 72.90 | 0.00 |
| TRINITY_I7LZU3_TETTS/215-299      | I7LZU3.1 PF04433.15 | 72.90 | 0.00 |
| TRINITY_A0A077ZVC4_STYLE/74-162   | A0A077ZVC4.1 PF0313 | 72.90 | 0.00 |
| TRINITY_I0YVW2_9CHLO/10-94        | I0YVW2.1 PF00867.16 | 72.90 | 0.00 |
| TRINITY_A8HY12_CHLRE/2-258        | A8HY12.1 PF08323.9; | 72.90 | 0.00 |
| TRINITY_D8TWM9_VOLCA/889-969      | D8TWM9.1 PF10431.7; | 72.80 | 0.00 |
| TRINITY_D8U4R5_VOLCA/799-913      | D8U4R5.1 PF00271.29 | 72.80 | 0.00 |
| TRINITY_D8UCK6_VOLCA/1279-1453    | D8UCK6.1 PF01789.14 | 72.80 | 0.00 |
| TRINITY_Q238Z8_TETTS/20-275       | Q238Z8.2 PF00069.23 | 72.80 | 0.00 |
| TRINITY_J9IGQ2_9SPIT/61-567       | J9IGQ2.1 PF00330.18 | 72.80 | 0.00 |
| TRINITY_W2RAX8_PHYPN/14-175       | W2RAX8.1 PF00071.20 | 72.80 | 0.00 |
| TRINITY_K5VRE6_PHACS/17-308       | K5VRE6.1 PF00248.19 | 72.80 | 0.00 |
| TRINITY_D8TLB0_VOLCA/190-695      | D8TLB0.1 PF00183.16 | 72.80 | 0.00 |
| TRINITY_E1ZFX9_CHLVA/15-322       | E1ZFX9.1 PF00248.19 | 72.80 | 0.00 |
| TRINITY_I0YTS3_9CHLO/36-300       | I0YTS3.1 PF02263.17 | 72.80 | 0.00 |
| TRINITY_I7MD69_TETTS/14-307       | I7MD69.1 PF00069.23 | 72.80 | 0.00 |
| TRINITY_A0A0G4IHD2_PLABS/115-310  | A0A0G4IHD2.1 PF0044 | 72.80 | 0.00 |
| TRINITY_Q7XJ66_CHLRE/90-384       | Q7XJ66.1 PF03151.14 | 72.80 | 0.00 |
| TRINITY_T1IGS0_STRMM/121-585      | T1IGS0.1 PF00221.17 | 72.80 | 0.00 |
| TRINITY_L8GRD1_ACACA/668-1044     | L8GRD1.1 PF00562.26 | 72.80 | 0.00 |
| TRINITY_C1D3B0_DEIDV/63-298       | C1D3B0.1 PF13561.4; | 72.80 | 0.00 |
| TRINITY_A8JHP9_CHLRE/44-235       | A8JHP9.1 PF00551.17 | 72.80 | 0.00 |
| TRINITY_D8U2E0_VOLCA/10-182       | D8U2E0.1 PF01145.23 | 72.80 | 0.00 |
| TRINITY_A8IB12_CHLRE/4-161        | A8IB12.1 PF01018.20 | 72.80 | 0.00 |
| TRINITY_D8UIF2_VOLCA/72-354       | D8UIF2.1 PF06472.13 | 72.80 | 0.00 |
| TRINITY_A8IZE7_CHLRE/74-209       | A8IZE7.1 PF13522.4; | 72.80 | 0.00 |
| TRINITY_I7MMN9_TETTS/8-128        | I7MMN9.1 PF00583.23 | 72.70 | 0.00 |
| TRINITY_I7MD88_TETTS/227-422      | I7MD88.2 PF04055.19 | 72.70 | 0.00 |
| TRINITY_A0A087SPT2_AUXPR/14-167   | A0A087SPT2.1 PF0016 | 72.70 | 0.00 |
| TRINITY_A0A0D2WLP0_CAPO3/348-479  | A0A0D2WLP0.1 PF0000 | 72.70 | 0.00 |
| TRINITY_A0A0D2WXT2_CAPO3/716-1103 | A0A0D2WXT2.1 PF0238 | 72.70 | 0.00 |
| TRINITY_E1Z3B9_CHLVA/3-112        | E1Z3B9.1 PF10497.7; | 72.70 | 0.00 |
| TRINITY_K2RSE9_MACPH/140-207      | K2RSE9.1 PF08606.9; | 72.70 | 0.00 |
| TRINITY_D8U7J5_VOLCA/6-105        | D8U7J5.1 PF03650.11 | 72.70 | 0.00 |
| TRINITY_J4CD27_THEOR/10-74        | J4CD27.1 PF13499.4; | 72.70 | 0.00 |
| TRINITY_F0ZCH2_DICPU/18-531       | F0ZCH2.1 PF01642.20 | 72.70 | 0.00 |
| TRINITY_D8TWR1_VOLCA/23-311       | D8TWR1.1 PF00069.23 | 72.70 | 0.00 |
| TRINITY_L5K105_PTEAL/5-361        | L5K105.1 PF00009.25 | 72.70 | 0.00 |
| TRINITY_D8TJ19_VOLCA/158-319      | D8TJ19.1 PF09416.8; | 72.70 | 0.00 |
| TRINITY_A8J345_CHLRE/96-451       | A8J345.1 PF00224.19 | 72.70 | 0.00 |
| TRINITY_Q8GV23_CHLRE/7-73         | Q8GV23.2 PF00313.20 | 72.70 | 0.00 |
| TRINITY_D8U4C5_VOLCA/313-528      | D8U4C5.1 PF00246.22 | 72.70 | 0.00 |
| TRINITY_E1ZHW8_CHLVA/50-209       | E1ZHW8.1 PF00270.27 | 72.70 | 0.00 |
| TRINITY_D8UEK9_VOLCA/130-230      | D8UEK9.1 PF01205.17 | 72.70 | 0.00 |
| TRINITY_A0A059LM82_9CHLO/191-257  | A0A059LM82.1 PF0148 | 72.70 | 0.00 |
| TRINITY_A0A078B7E7_STYLE/11-282   | A0A078B7E7.1 PF0046 | 72.70 | 0.00 |
| TRINITY_D8TJI5_VOLCA/29-431       | D8TJI5.1 PF00464.17 | 72.70 | 0.00 |
| TRINITY_C5D5D3_GEOSW/5-336        | C5D5D3.1 PF00180.18 | 72.70 | 0.00 |
| TRINITY_C1FG00_MICSR/21-97        | C1FG00.1 PF07650.15 | 72.70 | 0.00 |
| TRINITY_I7MD55_TETTS/531-788      | I7MD55.2 PF00069.23 | 72.70 | 0.00 |
| TRINITY_D3BF00_POLPA/218-261      | D3BF00.1 PF01505.16 | 72.70 | 0.00 |
| TRINITY_D8TUR7_VOLCA/529-606      | D8TUR7.1 PF03061.20 | 72.70 | 0.00 |
| TRINITY_Q75JR6_DICDI/887-1109     | Q75JR6.1 PF13236.4; | 72.70 | 0.00 |

|                                  |              |            |       |      |
|----------------------------------|--------------|------------|-------|------|
| TRINITY_A0D3A2_PARTE/89-647      | A0D3A2.1     | PF01175.16 | 72.70 | 0.00 |
| TRINITY_A8HN56_CHLRE/225-326     | A8HN56.1     | PF13499.4; | 72.70 | 0.00 |
| TRINITY_A8INJ9_CHLRE/159-309     | A8INJ9.1     | PF14252.4; | 72.70 | 0.00 |
| TRINITY_D8TW92_VOLCA/91-227      | D8TW92.1     | PF00472.18 | 72.70 | 0.00 |
| TRINITY_A0CEN8_PARTE/455-521     | A0CEN8.1     | PF14559.4; | 72.70 | 0.00 |
| TRINITY_A8IE23_CHLRE/119-618     | A8IE23.1     | PF00342.17 | 72.70 | 0.00 |
| TRINITY_D8U4W9_VOLCA/246-364     | D8U4W9.1     | PF00012.18 | 72.70 | 0.00 |
| TRINITY_Q241B6_TETTS/1199-1363   | Q241B6.2     | PF03031.16 | 72.70 | 0.00 |
| TRINITY_I0YY61_9CHLO/79-297      | I0YY61.1     | PF01940.14 | 72.70 | 0.00 |
| TRINITY_A0A024WRW2_PLAFA/3-212   | A0A024WRW2.1 | PF0009     | 72.60 | 0.00 |
| TRINITY_A0BVN2_PARTE/135-194     | A0BVN2.1     | PF04968.10 | 72.60 | 0.00 |
| TRINITY_G0QRF2_ICHMG/154-323     | G0QRF2.1     | PF05063.12 | 72.60 | 0.00 |
| TRINITY_I3K2Q4_ORENI/65-126      | I3K2Q4.1     | PF07448.9; | 72.60 | 0.00 |
| TRINITY_G0R463_ICHMG/40-325      | G0R463.1     | PF00069.23 | 72.60 | 0.00 |
| TRINITY_B8C7U0_THAPS/3-129       | B8C7U0.1     | PF01592.14 | 72.60 | 0.00 |
| TRINITY_Q22UW8_TETTS/5-177       | Q22UW8.2     | PF00025.19 | 72.60 | 0.00 |
| TRINITY_C1FFF0_MICSR/114-280     | C1FFF0.1     | PF00270.27 | 72.60 | 0.00 |
| TRINITY_Q235X6_TETTS/109-170     | Q235X6.2     | PF00226.29 | 72.60 | 0.00 |
| TRINITY_A0A075AY65_9FUNG/29-112  | A0A075AY65.1 | PF0011     | 72.60 | 0.00 |
| TRINITY_B6TKH0_MAIZE/220-416     | B6TKH0.1     | PF00149.26 | 72.60 | 0.00 |
| TRINITY_A8HMH4_CHLRE/20-281      | A8HMH4.1     | PF00069.23 | 72.60 | 0.00 |
| TRINITY_Q695H0_CHLRE/184-287     | Q695H0.1     | PF00027.27 | 72.60 | 0.00 |
| TRINITY_A0A087SUC5_AUXPR/436-614 | A0A087SUC5.1 | PF0027     | 72.60 | 0.00 |
| TRINITY_G0QMT4_ICHMG/1-243       | G0QMT4.1     | PF13714.4; | 72.60 | 0.00 |
| TRINITY_A0BK54_PARTE/463-606     | A0BK54.1     | PF00005.25 | 72.60 | 0.00 |
| TRINITY_A8IR24_CHLRE/83-353      | A8IR24.1     | PF00487.22 | 72.60 | 0.00 |
| TRINITY_A8I5C3_CHLRE/1467-1736   | A8I5C3.1     | PF12775.5; | 72.60 | 0.00 |
| TRINITY_A0CBT9_PARTE/24-142      | A0CBT9.1     | PF13863.4; | 72.60 | 0.00 |
| TRINITY_A8HSF6_CHLRE/65-181      | A8HSF6.1     | PF00072.22 | 72.60 | 0.00 |
| TRINITY_D8TVI0_VOLCA/15-318      | D8TVI0.1     | PF05890.10 | 72.60 | 0.00 |
| TRINITY_A9SDI8_PHYPA/535-607     | A9SDI8.1     | PF14492.4; | 72.60 | 0.00 |
| TRINITY_I1M2V2_SOYBN/6-137       | I1M2V2.1     | PF06314.9; | 72.60 | 0.00 |
| TRINITY_D8UGY5_VOLCA/1551-1798   | D8UGY5.1     | PF07059.10 | 72.60 | 0.00 |
| TRINITY_I7MH10_TETTS/124-450     | I7MH10.2     | PF00225.21 | 72.60 | 0.00 |
| TRINITY_F0Y6L3_AURAN/5-178       | F0Y6L3.1     | PF00071.20 | 72.60 | 0.00 |
| TRINITY_W0IXY9_9BACT/20-136      | W0IXY9.1     | PF01894.15 | 72.60 | 0.00 |
| TRINITY_H2KS42_CLOSI/133-205     | H2KS42.1     | PF01191.17 | 72.60 | 0.00 |
| TRINITY_A8JIN8_CHLRE/110-448     | A8JIN8.1     | PF01546.26 | 72.60 | 0.00 |
| TRINITY_A0A090M7N4_OSTTA/22-313  | A0A090M7N4.1 | PF0085     | 72.60 | 0.00 |
| TRINITY_D8UJG7_VOLCA/41-266      | D8UJG7.1     | PF05368.11 | 72.60 | 0.00 |
| TRINITY_A8JD62_CHLRE/10-122      | A8JD62.1     | PF13673.5; | 72.60 | 0.00 |
| TRINITY_D8TNS1_VOLCA/9-82        | D8TNS1.1     | PF02953.13 | 72.60 | 0.00 |
| TRINITY_A8J5M7_CHLRE/219-336     | A8J5M7.1     | PF09273.9; | 72.60 | 0.00 |
| TRINITY_A8IVJ7_CHLRE/320-643     | A8IVJ7.1     | PF00384.20 | 72.60 | 0.00 |
| TRINITY_D8TP15_VOLCA/86-557      | D8TP15.1     | PF00501.26 | 72.60 | 0.00 |
| TRINITY_A8I8D2_CHLRE/105-225     | A8I8D2.1     | PF13640.4; | 72.60 | 0.00 |
| TRINITY_A8JFL7_CHLRE/275-425     | A8JFL7.1     | PF00069.23 | 72.60 | 0.00 |
| TRINITY_E2AUA4_CAMFO/24-104      | E2AUA4.1     | PF00887.17 | 72.50 | 0.00 |
| TRINITY_A0A0M3IK75_ASCLU/22-197  | A0A0M3IK75.1 | PF0172     | 72.50 | 0.00 |
| TRINITY_W4H832_9STRA/799-914     | W4H832.1     | PF01398.19 | 72.50 | 0.00 |
| TRINITY_A0BJM5_PARTE/1-113       | A0BJM5.1     | PF01283.17 | 72.50 | 0.00 |
| TRINITY_L9L3D3_TUPCH/116-174     | L9L3D3.1     | PF13921.4; | 72.50 | 0.00 |
| TRINITY_J9IZT8_9SPIT/23-368      | J9IZT8.1     | PF00224.19 | 72.50 | 0.00 |
| TRINITY_S9X060_9CETA/78-191      | S9X060.1     | PF00828.17 | 72.50 | 0.00 |
| TRINITY_D8UDZ9_VOLCA/100-179     | D8UDZ9.1     | PF00347.21 | 72.50 | 0.00 |
| TRINITY_A0C9U4_PARTE/24-299      | A0C9U4.1     | PF00009.25 | 72.50 | 0.00 |
| TRINITY_D8TYV3_VOLCA/51-266      | D8TYV3.1     | PF10243.7; | 72.50 | 0.00 |
| TRINITY_A8J5F6_CHLRE/25-200      | A8J5F6.1     | PF00270.27 | 72.50 | 0.00 |
| TRINITY_D8TP13_VOLCA/1-259       | D8TP13.1     | PF01201.20 | 72.50 | 0.00 |
| TRINITY_A8J9M4_CHLRE/411-506     | A8J9M4.1     | PF01619.16 | 72.50 | 0.00 |
| TRINITY_A8I3J2_CHLRE/862-901     | A8I3J2.1     | PF05920.9; | 72.50 | 0.00 |

|                                  |              |            |       |      |
|----------------------------------|--------------|------------|-------|------|
| TRINITY_D2VBG3_NAEGR/61-468      | D2VBG3.1     | PF00962.20 | 72.50 | 0.00 |
| TRINITY_E3M8I4_CAERE/11-77       | E3M8I4.1     | PF00076.20 | 72.50 | 0.00 |
| TRINITY_I7LVT5_TETTS/1-175       | I7LVT5.1     | PF03657.11 | 72.50 | 0.00 |
| TRINITY_A0A0D9Y8J9_9ORYZ/216-512 | A0A0D9Y8J9.1 | PF0017     | 72.50 | 0.00 |
| TRINITY_A8INX1_CHLRE/68-250      | A8INX1.1     | PF00574.21 | 72.50 | 0.00 |
| TRINITY_E5SX20_TRISP/61-244      | E5SX20.1     | PF01926.21 | 72.50 | 0.00 |
| TRINITY_D8U3K0_VOLCA/855-1058    | D8U3K0.1     | PF00689.19 | 72.50 | 0.00 |
| TRINITY_A8ISS7_CHLRE/217-307     | A8ISS7.1     | PF11360.6; | 72.50 | 0.00 |
| TRINITY_A8IGG5_CHLRE/567-774     | A8IGG5.1     | PF07714.15 | 72.50 | 0.00 |
| TRINITY_H2ZAB9_CIOSA/257-398     | H2ZAB9.1     | PF00637.18 | 72.50 | 0.00 |
| TRINITY_I0Z267_9CHLO/112-345     | I0Z267.1     | PF01544.16 | 72.50 | 0.00 |
| TRINITY_D3B6V8_POLPA/15-181      | D3B6V8.1     | PF00071.20 | 72.50 | 0.00 |
| TRINITY_A8J2V7_CHLRE/26-121      | A8J2V7.1     | PF12796.5; | 72.50 | 0.00 |
| TRINITY_A0A0N5CDG6_STREA/630-765 | A0A0N5CDG6.1 | PF0000     | 72.50 | 0.00 |
| TRINITY_V5I3U6_BYSSN/3-58        | V5I3U6.1     | PF04758.12 | 72.50 | 0.00 |
| TRINITY_D8UJ31_VOLCA/253-352     | D8UJ31.1     | PF03129.18 | 72.50 | 0.00 |
| TRINITY_V3ZIM1_LOTGI/157-566     | V3ZIM1.1     | PF00654.18 | 72.50 | 0.00 |
| TRINITY_A0A0D2QXC4_GOSRA/53-198  | A0A0D2QXC4.1 | PF1335     | 72.50 | 0.00 |
| TRINITY_M1C2L8_SOLTU/13-92       | M1C2L8.1     | PF16845.3; | 72.50 | 0.00 |
| TRINITY_G5B4D5_HETGA/1-90        | G5B4D5.1     | PF03227.14 | 72.50 | 0.00 |
| TRINITY_W7XI32_TETTS/8-116       | W7XI32.1     | PF01412.16 | 72.50 | 0.00 |
| TRINITY_C3K7J0_PSEFS/2-81        | C3K7J0.1     | PF02798.18 | 72.50 | 0.00 |
| TRINITY_A0DJ53_PARTE/197-334     | A0DJ53.1     | PF00004.27 | 72.40 | 0.00 |
| TRINITY_D8LFS8_ECTSI/11-287      | D8LFS8.1     | PF00009.25 | 72.40 | 0.00 |
| TRINITY_I7LUR8_TETTS/853-986     | I7LUR8.2     | PF00637.18 | 72.40 | 0.00 |
| TRINITY_I7MGN0_TETTS/178-378     | I7MGN0.2     | PF00856.26 | 72.40 | 0.00 |
| TRINITY_A0A067R7B6_ZOONE/53-150  | A0A067R7B6.1 | PF0123     | 72.40 | 0.00 |
| TRINITY_L8GQE5_ACACA/87-221      | L8GQE5.1     | PF00334.17 | 72.40 | 0.00 |
| TRINITY_I7M7Z9_TETTS/616-760     | I7M7Z9.1     | PF00005.25 | 72.40 | 0.00 |
| TRINITY_Q7G6A5_ORYSJ/539-699     | Q7G6A5.1     | PF00078.25 | 72.40 | 0.00 |
| TRINITY_D8U0L4_VOLCA/423-486     | D8U0L4.1     | PF03457.12 | 72.40 | 0.00 |
| TRINITY_A8JA68_CHLRE/1-273       | A8JA68.1     | PF01008.15 | 72.40 | 0.00 |
| TRINITY_G0QSX6_ICHMG/4-221       | G0QSX6.1     | PF00112.21 | 72.40 | 0.00 |
| TRINITY_I7M998_TETTS/451-480     | I7M998.2     | PF01422.15 | 72.40 | 0.00 |
| TRINITY_B3RNF8_TRIAD/14-176      | B3RNF8.1     | PF17144.2; | 72.40 | 0.00 |
| TRINITY_A0C124_PARTE/465-540     | A0C124.1     | PF03144.23 | 72.40 | 0.00 |
| TRINITY_A8J3C4_CHLRE/30-226      | A8J3C4.1     | PF03462.16 | 72.40 | 0.00 |
| TRINITY_L1J321_GUITH/32-638      | L1J321.1     | PF00012.18 | 72.40 | 0.00 |
| TRINITY_D8U2M6_VOLCA/20-246      | D8U2M6.1     | PF00069.23 | 72.40 | 0.00 |
| TRINITY_Q8W4V3_CHLRE/61-460      | Q8W4V3.1     | PF00464.17 | 72.40 | 0.00 |
| TRINITY_A8I6G3_CHLRE/189-516     | A8I6G3.1     | PF00493.21 | 72.40 | 0.00 |
| TRINITY_A8JH69_CHLRE/34-92       | A8JH69.1     | PF08642.8; | 72.40 | 0.00 |
| TRINITY_A8HN88_CHLRE/81-140      | A8HN88.1     | PF13812.4; | 72.40 | 0.00 |
| TRINITY_Q23GA8_TETTS/212-398     | Q23GA8.3     | PF01529.18 | 72.40 | 0.00 |
| TRINITY_A8ITP1_CHLRE/141-245     | A8ITP1.1     | PF11987.6; | 72.40 | 0.00 |
| TRINITY_D8TMX0_VOLCA/175-376     | D8TMX0.1     | PF00448.20 | 72.40 | 0.00 |
| TRINITY_L8HI43_ACACA/81-359      | L8HI43.1     | PF01761.18 | 72.40 | 0.00 |
| TRINITY_A8J3Y6_CHLRE/1133-1398   | A8J3Y6.1     | PF13507.4; | 72.40 | 0.00 |
| TRINITY_A8HXX4_CHLRE/114-363     | A8HXX4.1     | PF07228.10 | 72.40 | 0.00 |
| TRINITY_A8IYR9_CHLRE/1221-1493   | A8IYR9.1     | PF12775.5; | 72.40 | 0.00 |
| TRINITY_W7X5J4_TETTS/21-67       | W7X5J4.1     | PF12554.6; | 72.30 | 0.00 |
| TRINITY_Q24IM0_TETTS/4374-5086   | Q24IM0.2     | PF03028.13 | 72.30 | 0.00 |
| TRINITY_A0C046_PARTE/90-390      | A0C046.1     | PF03133.13 | 72.30 | 0.00 |
| TRINITY_Q6BFM8_PARTE/531-718     | Q6BFM8.1     | PF00488.19 | 72.30 | 0.00 |
| TRINITY_F4PL91_DICFS/32-143      | F4PL91.1     | PF13669.4; | 72.30 | 0.00 |
| TRINITY_A0DVW7_PARTE/13-297      | A0DVW7.1     | PF00069.23 | 72.30 | 0.00 |
| TRINITY_D2UXS3_NAEGR/418-464     | D2UXS3.1     | PF00249.29 | 72.30 | 0.00 |
| TRINITY_Q234I5_TETTS/11-618      | Q234I5.1     | PF00012.18 | 72.30 | 0.00 |
| TRINITY_G0QW64_ICHMG/273-469     | G0QW64.1     | PF13086.4; | 72.30 | 0.00 |
| TRINITY_F4Q6S2_DICFS/285-332     | F4Q6S2.1     | PF02042.13 | 72.30 | 0.00 |
| TRINITY_D8U9E1_VOLCA/862-912     | D8U9E1.1     | PF13920.4; | 72.30 | 0.00 |



|                                    |              |            |       |      |
|------------------------------------|--------------|------------|-------|------|
| TRINITY_A8JAR0_CHLRE/16-136        | A8JAR0.1     | PF01641.16 | 72.30 | 0.00 |
| TRINITY_I0YRK9_9CHLO/3-162         | I0YRK9.1     | PF01734.20 | 72.30 | 0.00 |
| TRINITY_I7MF70_TETTS/40-534        | I7MF70.1     | PF00118.22 | 72.30 | 0.00 |
| TRINITY_D8UAR4_VOLCA/160-278       | D8UAR4.1     | PF00271.29 | 72.30 | 0.00 |
| TRINITY_D8TIQ5_VOLCA/106-517       | D8TIQ5.1     | PF05834.10 | 72.30 | 0.00 |
| TRINITY_G0QL09_ICHMG/65-248        | G0QL09.1     | PF01926.21 | 72.30 | 0.00 |
| TRINITY_D8TQ59_VOLCA/165-475       | D8TQ59.1     | PF05291.9; | 72.30 | 0.00 |
| TRINITY_I7MGM4_TETTS/21-207        | I7MGM4.2     | PF01728.17 | 72.30 | 0.00 |
| TRINITY_A4S316_OSTLU/9-74          | A4S316.1     | PF01423.20 | 72.30 | 0.00 |
| TRINITY_A8IYL4_CHLRE/471-625       | A8IYL4.1     | PF13844.4; | 72.30 | 0.00 |
| TRINITY_F4PMI7_DICFS/27-634        | F4PMI7.1     | PF00012.18 | 72.30 | 0.00 |
| TRINITY_A0CZ26_PARTE/1343-1557     | A0CZ26.1     | PF12781.5; | 72.30 | 0.00 |
| TRINITY_N1RCT6_FUSC4/14-178        | N1RCT6.1     | PF00160.19 | 72.30 | 0.00 |
| TRINITY_A0BVS2_PARTE/98-234        | A0BVS2.1     | PF03947.16 | 72.30 | 0.00 |
| TRINITY_D2VLQ1_NAEGR/5-192         | D2VLQ1.1     | PF02492.17 | 72.30 | 0.00 |
| TRINITY_D8U252_VOLCA/5-52          | D8U252.1     | PF12906.5; | 72.30 | 0.00 |
| TRINITY_Q247Z0_TETTS/1359-1503     | Q247Z0.3     | PF00005.25 | 72.30 | 0.00 |
| TRINITY_D8U751_VOLCA/1183-1591     | D8U751.1     | PF08393.11 | 72.30 | 0.00 |
| TRINITY_A0DGD7_PARTE/230-572       | A0DGD7.1     | PF03133.13 | 72.30 | 0.00 |
| TRINITY_G0R0I9_ICHMG/1-266         | G0R0I9.1     | PF00009.25 | 72.20 | 0.00 |
| TRINITY_Q22C84_TETTS/307-580       | Q22C84.2     | PF02138.16 | 72.20 | 0.00 |
| TRINITY_H2V759_TAKRU/249-485       | H2V759.1     | PF00089.24 | 72.20 | 0.00 |
| TRINITY_L8H3W5_ACACA/971-1093      | L8H3W5.1     | PF00271.29 | 72.20 | 0.00 |
| TRINITY_F4QB04_DICFS/230-484       | F4QB04.1     | PF00069.23 | 72.20 | 0.00 |
| TRINITY_A0A095CHZ4_CRYGA/228-554   | A0A095CHZ4.1 | PF0015     | 72.20 | 0.00 |
| TRINITY_L5K105_PTEAL/5-361         | L5K105.1     | PF00009.25 | 72.20 | 0.00 |
| TRINITY_F0Y200_AURAN/464-581       | F0Y200.1     | PF01751.20 | 72.20 | 0.00 |
| TRINITY_Q241B6_TETTS/1199-1363     | Q241B6.2     | PF03031.16 | 72.20 | 0.00 |
| TRINITY_D8TUF5_VOLCA/117-328       | D8TUF5.1     | PF12317.6; | 72.20 | 0.00 |
| TRINITY_Q9ATK5_CHLRE/2095-2192     | Q9ATK5.1     | PF14874.4; | 72.20 | 0.00 |
| TRINITY_I0Z8B5_9CHLO/174-487       | I0Z8B5.1     | PF00282.17 | 72.20 | 0.00 |
| TRINITY_Q22HF4_TETTS/267-471       | Q22HF4.2     | PF01189.15 | 72.20 | 0.00 |
| TRINITY_Q0V5H8_PHANO/386-544       | Q0V5H8.1     | PF00441.22 | 72.20 | 0.00 |
| TRINITY_A8JDH3_CHLRE/10-84         | A8JDH3.1     | PF04969.14 | 72.20 | 0.00 |
| TRINITY_A0A087SMM2_AUXPR/532-621   | A0A087SMM2.1 | PF0854     | 72.20 | 0.00 |
| TRINITY_D8TN75_VOLCA/173-409       | D8TN75.1     | PF00233.17 | 72.20 | 0.00 |
| TRINITY_A8IMJ7_CHLRE/9-44          | A8IMJ7.1     | PF06220.10 | 72.20 | 0.00 |
| TRINITY_L8GGT2_ACACA/354-435       | L8GGT2.1     | PF00017.22 | 72.20 | 0.00 |
| TRINITY_D8TUM3_VOLCA/223-475       | D8TUM3.1     | PF00266.17 | 72.20 | 0.00 |
| TRINITY_A0A077ZY60_STYLE/6352-6887 | A0A077ZY60.1 | PF0089     | 72.20 | 0.00 |
| TRINITY_D8TV39_VOLCA/305-753       | D8TV39.1     | PF01055.24 | 72.20 | 0.00 |
| TRINITY_E1ZL40_CHLVA/67-105        | E1ZL40.1     | PF00400.30 | 72.20 | 0.00 |
| TRINITY_J9FVJ9_9SPIT/25-280        | J9FVJ9.1     | PF00069.23 | 72.20 | 0.00 |
| TRINITY_F0ZR55_DICPU/66-326        | F0ZR55.1     | PF01650.16 | 72.20 | 0.00 |
| TRINITY_Q23TU2_TETTS/1994-2229     | Q23TU2.2     | PF12774.5; | 72.20 | 0.00 |
| TRINITY_A9S9W1_PHYPA/526-565       | A9S9W1.1     | PF00400.30 | 72.20 | 0.00 |
| TRINITY_A8HTI5_CHLRE/224-447       | A8HTI5.1     | PF00149.26 | 72.20 | 0.00 |
| TRINITY_A0A059LHQ1_9CHLO/78-113    | A0A059LHQ1.1 | PF0109     | 72.20 | 0.00 |
| TRINITY_C1E5F4_MICSR/209-312       | C1E5F4.1     | PF12796.5; | 72.20 | 0.00 |
| TRINITY_D8TJG1_VOLCA/7-287         | D8TJG1.1     | PF01940.14 | 72.20 | 0.00 |
| TRINITY_D8TTD9_VOLCA/507-641       | D8TTD9.1     | PF02910.18 | 72.20 | 0.00 |
| TRINITY_A0A024URK1_9STRA/85-138    | A0A024URK1.1 | PF0138     | 72.20 | 0.00 |
| TRINITY_J7U8K5_MORMO/156-262       | J7U8K5.1     | PF13583.4; | 72.10 | 0.00 |
| TRINITY_A0BP79_PARTE/515-640       | A0BP79.1     | PF00069.23 | 72.10 | 0.00 |
| TRINITY_A0C160_PARTE/124-184       | A0C160.1     | PF13921.4; | 72.10 | 0.00 |
| TRINITY_G0QQH8_ICHMG/137-204       | G0QQH8.1     | PF00542.17 | 72.10 | 0.00 |
| TRINITY_D8QMW4_SELML/2-69          | D8QMW4.1     | PF01111.17 | 72.10 | 0.00 |
| TRINITY_I0YM48_9CHLO/123-208       | I0YM48.1     | PF00203.19 | 72.10 | 0.00 |
| TRINITY_Q7PXP8_ANOGA/255-297       | Q7PXP8.5     | PF05182.11 | 72.10 | 0.00 |
| TRINITY_F0Z8J7_DICPU/441-569       | F0Z8J7.1     | PF13091.4; | 72.10 | 0.00 |
| TRINITY_D8TQL7_VOLCA/34-100        | D8TQL7.1     | PF01197.16 | 72.10 | 0.00 |

|                                  |              |            |       |      |
|----------------------------------|--------------|------------|-------|------|
| TRINITY_D8TXZ2_VOLCA/49-343      | D8TXZ2.1     | PF03151.14 | 72.10 | 0.00 |
| TRINITY_L8GYQ9_ACACA/8-73        | L8GYQ9.1     | PF03931.13 | 72.10 | 0.00 |
| TRINITY_D8TY52_VOLCA/729-877     | D8TY52.1     | PF00733.19 | 72.10 | 0.00 |
| TRINITY_A8JFR4_CHLRE/54-441      | A8JFR4.1     | PF00202.19 | 72.10 | 0.00 |
| TRINITY_A9S2N9_PHYPA/6-369       | A9S2N9.1     | PF00266.17 | 72.10 | 0.00 |
| TRINITY_A8HQC2_CHLRE/23-259      | A8HQC2.1     | PF13561.4; | 72.10 | 0.00 |
| TRINITY_A0A015M072_9GLOM/14-82   | A0A015M072.1 | PF0142     | 72.10 | 0.00 |
| TRINITY_HSTC_CHLRE/91-359        | A1JHN0.1     | PF01040.16 | 72.10 | 0.00 |
| TRINITY_A8I6R4_CHLRE/209-373     | A8I6R4.1     | PF02769.20 | 72.10 | 0.00 |
| TRINITY_Q0F4X0_9RHOB/25-475      | Q0F4X0.1     | PF01425.19 | 72.10 | 0.00 |
| TRINITY_D8TNT6_VOLCA/43-690      | D8TNT6.1     | PF00995.21 | 72.10 | 0.00 |
| TRINITY_D8U4F3_VOLCA/38-173      | D8U4F3.1     | PF02681.12 | 72.10 | 0.00 |
| TRINITY_I0YZ53_9CHLO/51-202      | I0YZ53.1     | PF11016.6; | 72.10 | 0.00 |
| TRINITY_D8UF47_VOLCA/826-1058    | D8UF47.1     | PF02682.14 | 72.10 | 0.00 |
| TRINITY_D8TIL1_VOLCA/2-62        | D8TIL1.1     | PF04193.12 | 72.10 | 0.00 |
| TRINITY_A8JF38_CHLRE/108-269     | A8JF38.1     | PF00293.26 | 72.10 | 0.00 |
| TRINITY_A8J6D4_CHLRE/100-167     | A8J6D4.1     | PF03776.12 | 72.10 | 0.00 |
| TRINITY_A0A0F6W2V7_9DELTA/32-163 | A0A0F6W2V7.1 | PF1318     | 72.10 | 0.00 |
| TRINITY_I1G913_AMPQE/207-506     | I1G913.1     | PF00557.22 | 72.10 | 0.00 |
| TRINITY_D8TX39_VOLCA/111-220     | D8TX39.1     | PF13353.4; | 72.10 | 0.00 |
| TRINITY_H2R1J3_PANTR/113-216     | H2R1J3.1     | PF02777.16 | 72.10 | 0.00 |
| TRINITY_M3ZEG1_XIPMA/149-244     | M3ZEG1.1     | PF00031.19 | 72.10 | 0.00 |
| TRINITY_D8U435_VOLCA/275-493     | D8U435.1     | PF00069.23 | 72.10 | 0.00 |
| TRINITY_A0A078A0I1_STYLE/51-321  | A0A078A0I1.1 | PF0015     | 72.10 | 0.00 |
| TRINITY_F4P5I7_BATDJ/163-273     | F4P5I7.1     | PF02770.17 | 72.10 | 0.00 |
| TRINITY_A0A0G4FWU4_9ALVE/233-404 | A0A0G4FWU4.1 | PF0027     | 72.10 | 0.00 |
| TRINITY_A8ITF3_CHLRE/22-440      | A8ITF3.1     | PF01704.16 | 72.10 | 0.00 |
| TRINITY_A8ISQ5_CHLRE/527-928     | A8ISQ5.1     | PF13086.4; | 72.10 | 0.00 |
| TRINITY_A8IE47_CHLRE/154-333     | A8IE47.1     | PF01852.17 | 72.10 | 0.00 |
| TRINITY_A0A0K9NTT1_ZOSMR/20-330  | A0A0K9NTT1.1 | PF0006     | 72.10 | 0.00 |
| TRINITY_A9TN58_PHYPA/199-274     | A9TN58.1     | PF00076.20 | 72.10 | 0.00 |
| TRINITY_G0QN37_ICHMG/30-529      | G0QN37.1     | PF00118.22 | 72.10 | 0.00 |
| TRINITY_A8I996_CHLRE/133-271     | A8I996.1     | PF00004.27 | 72.10 | 0.00 |
| TRINITY_Q247Z0_TETTS/1359-1503   | Q247Z0.3     | PF00005.25 | 72.10 | 0.00 |
| TRINITY_I7M713_TETTS/140-385     | I7M713.1     | PF10609.7; | 72.10 | 0.00 |
| TRINITY_B7KET3_CYAP7/17-206      | B7KET3.1     | PF01078.19 | 72.10 | 0.00 |
| TRINITY_A0BH68_PARTE/9-286       | A0BH68.1     | PF00069.23 | 72.00 | 0.00 |
| TRINITY_W9RJG5_9ROSA/175-865     | W9RJG5.1     | PF00305.17 | 72.00 | 0.00 |
| TRINITY_L8HHX5_ACACA/8-250       | L8HHX5.1     | PF00454.25 | 72.00 | 0.00 |
| TRINITY_W2PQP4_PHYPN/64-184      | W2PQP4.1     | PF00004.27 | 72.00 | 0.00 |
| TRINITY_I7MMJ3_TETTS/101-375     | I7MMJ3.2     | PF00682.17 | 72.00 | 0.00 |
| TRINITY_A0D3K4_PARTE/152-201     | A0D3K4.1     | PF13920.4; | 72.00 | 0.00 |
| TRINITY_L8HGT5_ACACA/61-145      | L8HGT5.1     | PF03061.20 | 72.00 | 0.00 |
| TRINITY_J9HY32_9SPIT/83-139      | J9HY32.1     | PF13418.4; | 72.00 | 0.00 |
| TRINITY_D3AXW6_POLPA/88-287      | D3AXW6.1     | PF07002.14 | 72.00 | 0.00 |
| TRINITY_A8HVQ1_CHLRE/1-188       | A8HVQ1.1     | PF01201.20 | 72.00 | 0.00 |
| TRINITY_A0A015LHU2_9GLOM/54-365  | A0A015LHU2.1 | PF0191     | 72.00 | 0.00 |
| TRINITY_D8UDE6_VOLCA/151-243     | D8UDE6.1     | PF00153.25 | 72.00 | 0.00 |
| TRINITY_Q64FN7_CHLRE/295-369     | Q64FN7.1     | PF13424.4; | 72.00 | 0.00 |
| TRINITY_A8IDE6_CHLRE/59-491      | A8IDE6.1     | PF07994.10 | 72.00 | 0.00 |
| TRINITY_A0A0D3END7_9ORYZ/154-260 | A0A0D3END7.1 | PF0008     | 72.00 | 0.00 |
| TRINITY_E2BY81_HARSA/5-166       | E2BY81.1     | PF00071.20 | 72.00 | 0.00 |
| TRINITY_A8JHT1_CHLRE/5710-5825   | A8JHT1.1     | PF06101.9; | 72.00 | 0.00 |
| TRINITY_I0YUC4_9CHLO/62-396      | I0YUC4.1     | PF01207.15 | 72.00 | 0.00 |
| TRINITY_G0QQ59_ICHMG/1-119       | G0QQ59.1     | PF00833.16 | 72.00 | 0.00 |
| TRINITY_M4DND9_BRARP/82-228      | M4DND9.1     | PF02383.16 | 72.00 | 0.00 |
| TRINITY_D8TMZ9_VOLCA/1-149       | D8TMZ9.1     | PF09752.7; | 72.00 | 0.00 |
| TRINITY_E1ZGN4_CHLVA/213-289     | E1ZGN4.1     | PF13242.4; | 72.00 | 0.00 |
| TRINITY_A8J9F6_CHLRE/116-201     | A8J9F6.1     | PF02536.12 | 72.00 | 0.00 |
| TRINITY_D8TTC2_VOLCA/10-183      | D8TTC2.1     | PF07714.15 | 72.00 | 0.00 |
| TRINITY_A8JGY0_CHLRE/5-117       | A8JGY0.1     | PF01984.18 | 72.00 | 0.00 |

|                                |                     |       |      |
|--------------------------------|---------------------|-------|------|
| TRINITY_D8UGT4_VOLCA/323-605   | D8UGT4.1 PF09359.8; | 72.00 | 0.00 |
| TRINITY_D8U2V0_VOLCA/461-542   | D8U2V0.1 PF00069.23 | 72.00 | 0.00 |
| TRINITY_A0A0A0LAX1_CUCSA/2-152 | A0A0A0LAX1.1 PF0040 | 72.00 | 0.00 |
| TRINITY_A0EB42_PARTE/37-322    | A0EB42.1 PF00069.23 | 71.90 | 0.00 |
| TRINITY_G0R1B7_ICHMG/7-66      | G0R1B7.1 PF04193.12 | 71.90 | 0.00 |
| TRINITY_L8GMA0_ACACA/2496-2774 | L8GMA0.1 PF02138.16 | 71.90 | 0.00 |
| TRINITY_D2VGW7_NAEGR/11-149    | D2VGW7.1 PF00179.24 | 71.90 | 0.00 |
| TRINITY_G0R3Y7_ICHMG/212-270   | G0R3Y7.1 PF14050.4; | 71.90 | 0.00 |
| TRINITY_T1FNM2_HELRO/28-123    | T1FNM2.1 PF01248.24 | 71.90 | 0.00 |
| TRINITY_F1A122_DICPU/10-288    | F1A122.1 PF00069.23 | 71.90 | 0.00 |
| TRINITY_D3BDY0_POLPA/106-283   | D3BDY0.1 PF01163.20 | 71.90 | 0.00 |
| TRINITY_F1A075_DICPU/24-207    | F1A075.1 PF01012.19 | 71.90 | 0.00 |
| TRINITY_M4BGE8_HYAAE/184-223   | M4BGE8.1 PF00400.30 | 71.90 | 0.00 |
| TRINITY_A8IN95_CHLRE/29-214    | A8IN95.1 PF00227.24 | 71.90 | 0.00 |
| TRINITY_D8UCG3_VOLCA/61-471    | D8UCG3.1 PF05889.11 | 71.90 | 0.00 |
| TRINITY_A8JEV1_CHLRE/5-198     | A8JEV1.1 PF05757.9; | 71.90 | 0.00 |
| TRINITY_D3B072_POLPA/93-386    | D3B072.1 PF00579.23 | 71.90 | 0.00 |
| TRINITY_A8IA75_CHLRE/44-181    | A8IA75.1 PF03330.16 | 71.90 | 0.00 |
| TRINITY_D8TP03_VOLCA/143-238   | D8TP03.1 PF00166.19 | 71.90 | 0.00 |
| TRINITY_D8TIL2_VOLCA/2158-2243 | D8TIL2.1 PF01068.19 | 71.90 | 0.00 |
| TRINITY_A8ICA8_CHLRE/27-323    | A8ICA8.1 PF00294.22 | 71.90 | 0.00 |
| TRINITY_L8H556_ACACA/732-1068  | L8H556.1 PF00476.18 | 71.90 | 0.00 |
| TRINITY_E1Z4M5_CHLVA/81-379    | E1Z4M5.1 PF04106.10 | 71.90 | 0.00 |
| TRINITY_I0YMY0_9CHLO/259-447   | I0YMY0.1 PF00300.20 | 71.90 | 0.00 |

|                                  |              |            |       |      |
|----------------------------------|--------------|------------|-------|------|
| TRINITY_M1D4E4_SOLTU/4-67        | M1D4E4.1     | PF00226.29 | 71.90 | 0.00 |
| TRINITY_I0Z462_9CHLO/34-319      | I0Z462.1     | PF00069.23 | 71.90 | 0.00 |
| TRINITY_D8TSR3_VOLCA/221-391     | D8TSR3.1     | PF10520.7; | 71.90 | 0.00 |
| TRINITY_A0A0G4IUP9_PLABS/33-64   | A0A0G4IUP9.1 | PF0360     | 71.90 | 0.00 |
| TRINITY_A8HTL0_CHLRE/8-65        | A8HTL0.1     | PF05347.13 | 71.90 | 0.00 |
| TRINITY_G0QU91_ICHMG/11-177      | G0QU91.1     | PF00071.20 | 71.90 | 0.00 |
| TRINITY_L8GW32_ACACA/63-498      | L8GW32.1     | PF07994.10 | 71.90 | 0.00 |
| TRINITY_G1RUC5_NOMLE/44-205      | G1RUC5.1     | PF00071.20 | 71.90 | 0.00 |
| TRINITY_Q4VKB5_CHLRE/128-265     | Q4VKB5.1     | PF04116.11 | 71.90 | 0.00 |
| TRINITY_A8JA32_CHLRE/65-238      | A8JA32.1     | PF01425.19 | 71.90 | 0.00 |
| TRINITY_D8U4A4_VOLCA/176-409     | D8U4A4.1     | PF01798.16 | 71.90 | 0.00 |
| TRINITY_I0YMS5_9CHLO/72-517      | I0YMS5.1     | PF08801.9; | 71.90 | 0.00 |
| TRINITY_S8CCD2_9LAMI/30-65       | S8CCD2.1     | PF00320.25 | 71.90 | 0.00 |
| TRINITY_D8TQS8_VOLCA/150-597     | D8TQS8.1     | PF01593.22 | 71.90 | 0.00 |
| TRINITY_A0A059LLW8_9CHLO/225-320 | A0A059LLW8.1 | PF0158     | 71.90 | 0.00 |
| TRINITY_I0YPT8_9CHLO/2-115       | I0YPT8.1     | PF03834.12 | 71.90 | 0.00 |
| TRINITY_D8TIE9_VOLCA/450-754     | D8TIE9.1     | PF00176.21 | 71.90 | 0.00 |
| TRINITY_I0YT34_9CHLO/31-160      | I0YT34.1     | PF08240.10 | 71.90 | 0.00 |
| TRINITY_H3EXF1_PRIIPA/197-267    | H3EXF1.1     | PF00076.20 | 71.90 | 0.00 |
| TRINITY_G0R280_ICHMG/52-338      | G0R280.1     | PF01704.16 | 71.80 | 0.00 |
| TRINITY_A4VEZ5_TETTS/23-342      | A4VEZ5.1     | PF00814.23 | 71.80 | 0.00 |
| TRINITY_R1DYD4_EMIHU/16-142      | R1DYD4.1     | PF00134.21 | 71.80 | 0.00 |
| TRINITY_A0BID5_PARTE/6-91        | A0BID5.1     | PF01388.19 | 71.80 | 0.00 |
| TRINITY_C3XPH3_BRAFL/317-387     | C3XPH3.1     | PF00076.20 | 71.80 | 0.00 |
| TRINITY_I7MEJ2_TETTS/122-336     | I7MEJ2.1     | PF00112.21 | 71.80 | 0.00 |
| TRINITY_W7XB73_TETTS/470-511     | W7XB73.1     | PF05186.11 | 71.80 | 0.00 |
| TRINITY_I0ZAV6_9CHLO/30-82       | I0ZAV6.1     | PF07491.9; | 71.80 | 0.00 |
| TRINITY_D8U802_VOLCA/6-45        | D8U802.1     | PF01428.14 | 71.80 | 0.00 |
| TRINITY_U6MZR3_9EIME/1-71        | U6MZR3.1     | PF00076.20 | 71.80 | 0.00 |
| TRINITY_A0A0C4BF04_WHEAT/1-57    | A0A0C4BF04.1 | PF0042     | 71.80 | 0.00 |
| TRINITY_D8TTL6_VOLCA/6-263       | D8TTL6.1     | PF00069.23 | 71.80 | 0.00 |
| TRINITY_A8HQB8_CHLRE/129-294     | A8HQB8.1     | PF04055.19 | 71.80 | 0.00 |
| TRINITY_D7SYC1_VITVI/39-112      | D7SYC1.1     | PF00364.20 | 71.80 | 0.00 |
| TRINITY_D3BD64_POLPA/685-724     | D3BD64.1     | PF00400.30 | 71.80 | 0.00 |
| TRINITY_K1PDE3_CRAGI/12-173      | K1PDE3.1     | PF00071.20 | 71.80 | 0.00 |
| TRINITY_W4FBG8_9STRA/93-138      | W4FBG8.1     | PF10502.7; | 71.80 | 0.00 |
| TRINITY_A8I087_CHLRE/296-471     | A8I087.1     | PF03572.16 | 71.80 | 0.00 |
| TRINITY_A8I696_CHLRE/1-144       | A8I696.1     | PF00566.16 | 71.80 | 0.00 |
| TRINITY_E1ZL16_CHLVA/23-140      | E1ZL16.1     | PF06487.10 | 71.80 | 0.00 |
| TRINITY_L8GT97_ACACA/137-369     | L8GT97.1     | PF00198.21 | 71.80 | 0.00 |
| TRINITY_G0QNJ3_ICHMG/13-115      | G0QNJ3.1     | PF01990.15 | 71.80 | 0.00 |
| TRINITY_A0BPU1_PARTE/40-457      | A0BPU1.1     | PF01603.18 | 71.80 | 0.00 |
| TRINITY_D8UHF7_VOLCA/11-188      | D8UHF7.1     | PF00270.27 | 71.80 | 0.00 |
| TRINITY_E1Z6F1_CHLVA/152-254     | E1Z6F1.1     | PF07978.11 | 71.80 | 0.00 |
| TRINITY_D8TLQ5_VOLCA/580-703     | D8TLQ5.1     | PF13640.4; | 71.80 | 0.00 |
| TRINITY_D8UCK6_VOLCA/1279-1453   | D8UCK6.1     | PF01789.14 | 71.80 | 0.00 |
| TRINITY_D8U3H0_VOLCA/1215-1429   | D8U3H0.1     | PF00488.19 | 71.80 | 0.00 |
| TRINITY_MVPA_DICDI/504-621       | P34118.1     | PF11978.6; | 71.80 | 0.00 |
| TRINITY_A8HMR0_CHLRE/112-281     | A8HMR0.1     | PF04055.19 | 71.80 | 0.00 |
| TRINITY_A8INM9_CHLRE/26-403      | A8INM9.1     | PF07690.14 | 71.80 | 0.00 |
| TRINITY_A8J3U8_CHLRE/18-191      | A8J3U8.1     | PF13177.4; | 71.80 | 0.00 |
| TRINITY_D8U2W0_VOLCA/10-80       | D8U2W0.1     | PF00076.20 | 71.80 | 0.00 |
| TRINITY_D8TSY5_VOLCA/1-349       | D8TSY5.1     | PF08393.11 | 71.80 | 0.00 |
| TRINITY_G0QK68_ICHMG/86-259      | G0QK68.1     | PF00025.19 | 71.80 | 0.00 |
| TRINITY_I7M8Y1_TETTS/109-271     | I7M8Y1.2     | PF03483.15 | 71.80 | 0.00 |
| TRINITY_C1E9S6_MICSR/1-354       | C1E9S6.1     | PF16363.3; | 71.80 | 0.00 |
| TRINITY_B9SQE3_RICCO/5-254       | B9SQE3.1     | PF00335.18 | 71.80 | 0.00 |
| TRINITY_H3BB87_LATCH/126-221     | H3BB87.2     | PF00153.25 | 71.70 | 0.00 |
| TRINITY_D3B0E6_POLPA/9-108       | D3B0E6.1     | PF00034.19 | 71.70 | 0.00 |
| TRINITY_U9UN07_RHIID/1-145       | U9UN07.1     | PF01125.15 | 71.70 | 0.00 |
| TRINITY_A0A061FSZ2_THECC/367-414 | A0A061FSZ2.1 | PF1392     | 71.70 | 0.00 |

|                                  |              |            |       |      |
|----------------------------------|--------------|------------|-------|------|
| TRINITY_GOROB5_ICHMG/45-346      | GOROB5.1     | PF03133.13 | 71.70 | 0.00 |
| TRINITY_I7MOD5_TETTS/4-286       | I7MOD5.2     | PF00069.23 | 71.70 | 0.00 |
| TRINITY_A8JA07_CHLRE/449-848     | A8JA07.1     | PF03016.13 | 71.70 | 0.00 |
| TRINITY_A0A067QDD7_9HOMO/1-367   | A0A067QDD7.1 | PF0029     | 71.70 | 0.00 |
| TRINITY_D8TTM4_VOLCA/754-812     | D8TTM4.1     | PF03959.11 | 71.70 | 0.00 |
| TRINITY_D8TTV8_VOLCA/81-324      | D8TTV8.1     | PF00233.17 | 71.70 | 0.00 |
| TRINITY_A8I2G1_CHLRE/183-305     | A8I2G1.1     | PF00254.26 | 71.70 | 0.00 |
| TRINITY_E1ZG76_CHLVA/1-138       | E1ZG76.1     | PF02580.14 | 71.70 | 0.00 |
| TRINITY_A8HTE8_CHLRE/130-195     | A8HTE8.1     | PF12352.6; | 71.70 | 0.00 |
| TRINITY_D8TXR9_VOLCA/225-319     | D8TXR9.1     | PF00153.25 | 71.70 | 0.00 |
| TRINITY_Q22DR0_TETTS/17-338      | Q22DR0.2     | PF00009.25 | 71.70 | 0.00 |
| TRINITY_D8U2C8_VOLCA/51-288      | D8U2C8.1     | PF05721.11 | 71.70 | 0.00 |
| TRINITY_D3BI11_POLPA/90-647      | D3BI11.1     | PF01175.16 | 71.70 | 0.00 |
| TRINITY_A0A0M9UC29_9CHLR/9-254   | A0A0M9UC29.1 | PF0046     | 71.70 | 0.00 |
| TRINITY_D8U240_VOLCA/226-324     | D8U240.1     | PF13180.4; | 71.70 | 0.00 |
| TRINITY_A0CGU9_PARTE/3-228       | A0CGU9.1     | PF00108.21 | 71.70 | 0.00 |
| TRINITY_E1ZB53_CHLVA/77-203      | E1ZB53.1     | PF00828.17 | 71.70 | 0.00 |
| TRINITY_R4XA01_TAPDE/306-366     | R4XA01.1     | PF12706.5; | 71.70 | 0.00 |
| TRINITY_D8TQL1_VOLCA/71-359      | D8TQL1.1     | PF00291.23 | 71.70 | 0.00 |
| TRINITY_A0A066WM51_9BASI/47-207  | A0A066WM51.1 | PF0303     | 71.70 | 0.00 |
| TRINITY_A8JBV3_CHLRE/4-269       | A8JBV3.1     | PF00069.23 | 71.70 | 0.00 |
| TRINITY_D8U2E3_VOLCA/120-479     | D8U2E3.1     | PF01733.16 | 71.70 | 0.00 |
| TRINITY_D8TQR2_VOLCA/38-197      | D8TQR2.1     | PF00160.19 | 71.70 | 0.00 |
| TRINITY_V4ACB1_LOTGI/2-54        | V4ACB1.1     | PF01907.17 | 71.70 | 0.00 |
| TRINITY_D8U6D1_VOLCA/94-140      | D8U6D1.1     | PF10447.7; | 71.70 | 0.00 |
| TRINITY_L8H1C8_ACACA/343-532     | L8H1C8.1     | PF00350.21 | 71.70 | 0.00 |
| TRINITY_D8U5W7_VOLCA/1-134       | D8U5W7.1     | PF00005.25 | 71.70 | 0.00 |
| TRINITY_A0EEF5_PARTE/29-120      | A0EEF5.1     | PF00447.15 | 71.70 | 0.00 |
| TRINITY_A8JEN2_CHLRE/214-443     | A8JEN2.1     | PF00487.22 | 71.70 | 0.00 |
| TRINITY_A0A078AEX3_STYLE/8-351   | A0A078AEX3.1 | PF0022     | 71.60 | 0.00 |
| TRINITY_G4UHU0_NEUT9/78-207      | G4UHU0.1     | PF00043.23 | 71.60 | 0.00 |
| TRINITY_Q2JQ46_SYNJB/2-89        | Q2JQ46.1     | PF04248.10 | 71.60 | 0.00 |
| TRINITY_H3EZQ6_PRIIPA/42-207     | H3EZQ6.1     | PF04055.19 | 71.60 | 0.00 |
| TRINITY_D3AYM5_POLPA/12-208      | D3AYM5.1     | PF00596.19 | 71.60 | 0.00 |
| TRINITY_A8ISQ5_CHLRE/2007-2137   | A8ISQ5.1     | PF00004.27 | 71.60 | 0.00 |
| TRINITY_I0Z615_9CHLO/3-475       | I0Z615.1     | PF05694.9; | 71.60 | 0.00 |
| TRINITY_A0A077ZZ83_STYLE/13-301  | A0A077ZZ83.1 | PF0006     | 71.60 | 0.00 |
| TRINITY_A0A061DMP8_THECC/350-439 | A0A061DMP8.1 | PF0007     | 71.60 | 0.00 |
| TRINITY_D8UEZ1_VOLCA/81-175      | D8UEZ1.1     | PF00338.20 | 71.60 | 0.00 |
| TRINITY_PI3K4_DICDI/557-762      | P54676.2     | PF00454.25 | 71.60 | 0.00 |
| TRINITY_A0A0N4UII4_DRAME/113-211 | A0A0N4UII4.1 | PF0015     | 71.60 | 0.00 |
| TRINITY_F0YCA9_AURAN/13-174      | F0YCA9.1     | PF00071.20 | 71.60 | 0.00 |
| TRINITY_D8U154_VOLCA/1-138       | D8U154.1     | PF05419.10 | 71.60 | 0.00 |
| TRINITY_Q24IB1_TETTS/24-305      | Q24IB1.1     | PF00069.23 | 71.60 | 0.00 |
| TRINITY_A8IIE9_CHLRE/4-130       | A8IIE9.1     | PF12165.6; | 71.60 | 0.00 |
| TRINITY_I7MGZ7_TETTS/104-197     | I7MGZ7.2     | PF01588.18 | 71.60 | 0.00 |
| TRINITY_D8TRG3_VOLCA/135-229     | D8TRG3.1     | PF07683.12 | 71.60 | 0.00 |
| TRINITY_G0QY52_ICHMG/59-125      | G0QY52.1     | PF04716.12 | 71.60 | 0.00 |
| TRINITY_A8IUY7_CHLRE/197-421     | A8IUY7.1     | PF03407.14 | 71.60 | 0.00 |
| TRINITY_G0R0V1_ICHMG/15-209      | G0R0V1.1     | PF00687.19 | 71.60 | 0.00 |
| TRINITY_A8INT0_CHLRE/1165-1307   | A8INT0.1     | PF00211.18 | 71.60 | 0.00 |
| TRINITY_D3BEH4_POLPA/456-651     | D3BEH4.1     | PF00270.27 | 71.60 | 0.00 |
| TRINITY_I0YRB1_9CHLO/194-267     | I0YRB1.1     | PF00382.17 | 71.60 | 0.00 |
| TRINITY_D8TLL8_VOLCA/22-269      | D8TLL8.1     | PF00557.22 | 71.60 | 0.00 |
| TRINITY_A8IZA8_CHLRE/4-79        | A8IZA8.1     | PF12701.5; | 71.60 | 0.00 |
| TRINITY_A8JCM5_CHLRE/592-791     | A8JCM5.1     | PF01369.18 | 71.60 | 0.00 |
| TRINITY_D8UBI0_VOLCA/14-440      | D8UBI0.1     | PF00067.20 | 71.60 | 0.00 |
| TRINITY_A0A078AHP9_STYLE/355-421 | A0A078AHP9.1 | PF0022     | 71.60 | 0.00 |
| TRINITY_A0CCX5_PARTE/60-126      | A0CCX5.1     | PF00550.23 | 71.60 | 0.00 |
| TRINITY_A0CCX5_PARTE/60-126      | A0CCX5.1     | PF00550.23 | 71.60 | 0.00 |
| TRINITY_A8IS11_CHLRE/406-740     | A8IS11.1     | PF00702.24 | 71.60 | 0.00 |

|                                  |              |            |       |      |
|----------------------------------|--------------|------------|-------|------|
| TRINITY_Q241B6_TETTS/1199-1363   | Q241B6.2     | PF03031.16 | 71.50 | 0.00 |
| TRINITY_D8UKJ5_VOLCA/169-433     | D8UKJ5.1     | PF00069.23 | 71.50 | 0.00 |
| TRINITY_F4QBH6_DICFS/16-280      | F4QBH6.1     | PF00069.23 | 71.50 | 0.00 |
| TRINITY_D8TIH5_VOLCA/37-194      | D8TIH5.1     | PF00504.19 | 71.50 | 0.00 |
| TRINITY_RL5_TETTS/14-176         | Q231U7.2     | PF17144.2; | 71.50 | 0.00 |
| TRINITY_I7LSV4_TETTS/3173-3398   | I7LSV4.2     | PF12781.5; | 71.50 | 0.00 |
| TRINITY_I7MJT9_TETTS/19-342      | I7MJT9.1     | PF00225.21 | 71.50 | 0.00 |
| TRINITY_DEGP2_ARATH/121-308      | O82261.2     | PF00089.24 | 71.50 | 0.00 |
| TRINITY_B7G964_PHATC/54-201      | B7G964.1     | PF01257.17 | 71.50 | 0.00 |
| TRINITY_PGM1_DICDI/18-161        | Q23919.1     | PF02878.14 | 71.50 | 0.00 |
| TRINITY_B4FBC2_MAIZE/32-271      | B4FBC2.1     | PF01370.19 | 71.50 | 0.00 |
| TRINITY_A8IBF9_CHLRE/92-269      | A8IBF9.1     | PF00551.17 | 71.50 | 0.00 |
| TRINITY_A0A0E3ZJV1_9BACT/33-379  | A0A0E3ZJV1.1 | PF1028     | 71.40 | 0.00 |
| TRINITY_G8YBA3_PICSO/217-342     | G8YBA3.1     | PF00383.21 | 71.40 | 0.00 |
| TRINITY_A0A096T653_MAIZE/226-297 | A0A096T653.1 | PF1343     | 71.40 | 0.00 |
| TRINITY_I7M8Q5_TETTS/67-185      | I7M8Q5.2     | PF01641.16 | 71.40 | 0.00 |
| TRINITY_K7MTZ1_SOYBN/120-251     | K7MTZ1.1     | PF01529.18 | 71.40 | 0.00 |
| TRINITY_D8TZC1_VOLCA/821-877     | D8TZC1.1     | PF00004.27 | 71.40 | 0.00 |
| TRINITY_D8TSH1_VOLCA/17-104      | D8TSH1.1     | PF00153.25 | 71.40 | 0.00 |
| TRINITY_D3BK65_POLPA/49-450      | D3BK65.1     | PF05889.11 | 71.40 | 0.00 |
| TRINITY_I7MGT3_TETTS/477-511     | I7MGT3.2     | PF13831.4; | 71.40 | 0.00 |
| TRINITY_J9HXH4_9SPIT/314-525     | J9HXH4.1     | PF00211.18 | 71.40 | 0.00 |
| TRINITY_R1FJW2_EMIHU/3-75        | R1FJW2.1     | PF13499.4; | 71.40 | 0.00 |
| TRINITY_Q6UKY7_CHLRE/11-73       | Q6UKY7.1     | PF05676.11 | 71.40 | 0.00 |
| TRINITY_U3J4Z9_ANAPL/87-548      | U3J4Z9.1     | PF00501.26 | 71.40 | 0.00 |
| TRINITY_DNAJH_SYNY3/8-70         | P50027.1     | PF00226.29 | 71.40 | 0.00 |
| TRINITY_A0DZP1_PARTE/30-624      | A0DZP1.1     | PF00012.18 | 71.40 | 0.00 |
| TRINITY_D8TGW1_VOLCA/127-365     | D8TGW1.1     | PF00557.22 | 71.40 | 0.00 |
| TRINITY_G0R0D8_ICHMG/37-295      | G0R0D8.1     | PF04078.11 | 71.40 | 0.00 |
| TRINITY_D8TYS8_VOLCA/1-137       | D8TYS8.1     | PF02527.13 | 71.40 | 0.00 |
| TRINITY_A0A0A1MD11_9BACI/7-124   | A0A0A1MD11.1 | PF0058     | 71.40 | 0.00 |
| TRINITY_D8UC57_VOLCA/315-398     | D8UC57.1     | PF01494.17 | 71.40 | 0.00 |
| TRINITY_E1ZN42_CHLVA/148-241     | E1ZN42.1     | PF00166.19 | 71.40 | 0.00 |
| TRINITY_A0DAK7_PARTE/9-358       | A0DAK7.1     | PF00285.19 | 71.40 | 0.00 |
| TRINITY_W5MEL6_LEPOC/11-266      | W5MEL6.1     | PF03437.13 | 71.40 | 0.00 |
| TRINITY_D8U1V2_VOLCA/50-218      | D8U1V2.1     | PF00504.19 | 71.40 | 0.00 |
| TRINITY_E9HEH0_DAPPU/125-181     | E9HEH0.1     | PF00013.27 | 71.40 | 0.00 |
| TRINITY_I7MA65_TETTS/30-100      | I7MA65.1     | PF00076.20 | 71.40 | 0.00 |
| TRINITY_A8IWF9_CHLRE/284-500     | A8IWF9.1     | PF05127.12 | 71.40 | 0.00 |
| TRINITY_E1ZKU2_CHLVA/285-636     | E1ZKU2.1     | PF00493.21 | 71.40 | 0.00 |
| TRINITY_A0A059CC78_EUCGR/285-348 | A0A059CC78.1 | PF0007     | 71.40 | 0.00 |
| TRINITY_Q235I9_TETTS/1375-1547   | Q235I9.2     | PF00270.27 | 71.40 | 0.00 |
| TRINITY_A8J3Q2_CHLRE/82-165      | A8J3Q2.1     | PF03061.20 | 71.40 | 0.00 |
| TRINITY_A0A0B2VWK9_TOXCA/3-379   | A0A0B2VWK9.1 | PF0002     | 71.40 | 0.00 |
| TRINITY_PDC2_ORYSJ/44-218        | Q10MW3.1     | PF02776.16 | 71.40 | 0.00 |
| TRINITY_L8H006_ACACA/393-494     | L8H006.1     | PF06047.9; | 71.40 | 0.00 |
| TRINITY_I7MFC1_TETTS/454-574     | I7MFC1.2     | PF02852.20 | 71.40 | 0.00 |
| TRINITY_I0YMS5_9CHLO/72-517      | I0YMS5.1     | PF08801.9; | 71.40 | 0.00 |
| TRINITY_A8I3M7_CHLRE/1181-1220   | A8I3M7.1     | PF00226.29 | 71.40 | 0.00 |
| TRINITY_A0A0D2VWK4_CAPO3/60-99   | A0A0D2VWK4.1 | PF0142     | 71.40 | 0.00 |
| TRINITY_A0A0D2VWK4_CAPO3/60-99   | A0A0D2VWK4.1 | PF0142     | 71.40 | 0.00 |
| TRINITY_A8I3X6_CHLRE/1-372       | A8I3X6.1     | PF08393.11 | 71.40 | 0.00 |
| TRINITY_D8TF39_SELML/12-144      | D8TF39.1     | PF00380.17 | 71.40 | 0.00 |
| TRINITY_A8IDT8_CHLRE/297-359     | A8IDT8.1     | PF00076.20 | 71.40 | 0.00 |
| TRINITY_A8ISP5_CHLRE/116-218     | A8ISP5.1     | PF00153.25 | 71.40 | 0.00 |
| TRINITY_A8JAI8_CHLRE/4-182       | A8JAI8.1     | PF00227.24 | 71.40 | 0.00 |
| TRINITY_O24426_CHLRE/6-380       | O24426.1     | PF00022.17 | 71.40 | 0.00 |
| TRINITY_I0Z955_9CHLO/143-197     | I0Z955.1     | PF10309.7; | 71.40 | 0.00 |
| TRINITY_D8UK85_VOLCA/265-463     | D8UK85.1     | PF00587.23 | 71.40 | 0.00 |
| TRINITY_D8TTJ4_VOLCA/17-94       | D8TTJ4.1     | PF12894.5; | 71.40 | 0.00 |
| TRINITY_D8TH65_VOLCA/561-753     | D8TH65.1     | PF03950.16 | 71.40 | 0.00 |

|                                    |                     |       |      |
|------------------------------------|---------------------|-------|------|
| TRINITY_D8UDL2_VOLCA/636-712       | D8UDL2.1 PF00069.23 | 71.40 | 0.00 |
| TRINITY_A0A0G4GWI5_9ALVE/604-813   | A0A0G4GWI5.1 PF0021 | 71.40 | 0.00 |
| TRINITY_V4B5R1_LOTGI/1-115         | V4B5R1.1 PF00583.23 | 71.30 | 0.00 |
| TRINITY_D8LJW0_ECTSI/3-176         | D8LJW0.1 PF00025.19 | 71.30 | 0.00 |
| TRINITY_Q23BX7_TETTS/77-169        | Q23BX7.2 PF00254.26 | 71.30 | 0.00 |
| TRINITY_D8QXE2_SELML/8-171         | D8QXE2.1 PF00160.19 | 71.30 | 0.00 |
| TRINITY_F4PLV5_DICFS/13-332        | F4PLV5.1 PF00180.18 | 71.30 | 0.00 |
| TRINITY_C1MQM4_MICPC/64-230        | C1MQM4.1 PF00270.27 | 71.30 | 0.00 |
| TRINITY_Q23W06_TETTS/135-298       | Q23W06.3 PF03167.17 | 71.30 | 0.00 |
| TRINITY_U9T4N2_RHIID/27-275        | U9T4N2.1 PF00753.25 | 71.30 | 0.00 |
| TRINITY_A8JB54_CHLRE/70-297        | A8JB54.1 PF01237.16 | 71.30 | 0.00 |
| TRINITY_I3ZC34_TERRK/3-275         | I3ZC34.1 PF00749.19 | 71.30 | 0.00 |
| TRINITY_L8H6J5_ACACA/267-374       | L8H6J5.1 PF01661.19 | 71.30 | 0.00 |
| TRINITY_D8TRN4_VOLCA/77-333        | D8TRN4.1 PF08704.8; | 71.30 | 0.00 |
| TRINITY_A8I9T2_CHLRE/11-335        | A8I9T2.1 PF00225.21 | 71.30 | 0.00 |
| TRINITY_B6AB19_CRYMR/57-223        | B6AB19.1 PF00270.27 | 71.30 | 0.00 |
| TRINITY_A0A061E0L6_THECC/1443-1653 | A0A061E0L6.1 PF0045 | 71.30 | 0.00 |
| TRINITY_G1X9L3_ARTOA/2-143         | G1X9L3.1 PF00125.22 | 71.30 | 0.00 |
| TRINITY_W7TKS0_9STRA/126-321       | W7TKS0.1 PF03171.18 | 71.30 | 0.00 |
| TRINITY_A8HY76_CHLRE/17-265        | A8HY76.1 PF02110.13 | 71.30 | 0.00 |
| TRINITY_A8JEV1_CHLRE/5-198         | A8JEV1.1 PF05757.9; | 71.30 | 0.00 |
| TRINITY_A8NC61_COPC7/99-247        | A8NC61.2 PF00005.25 | 71.30 | 0.00 |
| TRINITY_E1ZTT0_CHLVA/507-717       | E1ZTT0.1 PF00326.19 | 71.30 | 0.00 |
| TRINITY_A8I1M5_CHLRE/630-818       | A8I1M5.1 PF07724.12 | 71.30 | 0.00 |
| TRINITY_D8UE51_VOLCA/16-238        | D8UE51.1 PF09084.9; | 71.30 | 0.00 |
| TRINITY_D8U6Y4_VOLCA/85-387        | D8U6Y4.1 PF00128.22 | 71.30 | 0.00 |
| TRINITY_A0D6H4_PARTE/25-310        | A0D6H4.1 PF00069.23 | 71.30 | 0.00 |
| TRINITY_A8J3J7_CHLRE/7-187         | A8J3J7.1 PF00857.18 | 71.30 | 0.00 |
| TRINITY_J9JUQ1_ACYPI/18-466        | J9JUQ1.1 PF01425.19 | 71.20 | 0.00 |
| TRINITY_A0A0G4IP29_PLABS/13-302    | A0A0G4IP29.1 PF0006 | 71.20 | 0.00 |
| TRINITY_U1MDL2_ASCSU/20-114        | U1MDL2.1 PF01248.24 | 71.20 | 0.00 |
| TRINITY_H2LRL9_ORYLA/1096-1185     | H2LRL9.1 PF07677.12 | 71.20 | 0.00 |
| TRINITY_L8HFM0_ACACA/458-593       | L8HFM0.1 PF02867.13 | 71.20 | 0.00 |
| TRINITY_M4B270_HYAAE/28-128        | M4B270.1 PF13302.5; | 71.20 | 0.00 |
| TRINITY_F0VJ54_NEOCL/73-222        | F0VJ54.1 PF12146.6; | 71.20 | 0.00 |
| TRINITY_F4Q137_DICFS/5-143         | F4Q137.1 PF00179.24 | 71.20 | 0.00 |
| TRINITY_Q8LNT1_ORYSJ/143-278       | Q8LNT1.1 PF00892.18 | 71.20 | 0.00 |
| TRINITY_I3J7Q1_ORENI/42-187        | I3J7Q1.1 PF00061.21 | 71.20 | 0.00 |
| TRINITY_I7MHK8_TETTS/244-385       | I7MHK8.1 PF02773.14 | 71.20 | 0.00 |
| TRINITY_F0ZP19_DICPU/70-509        | F0ZP19.1 PF13520.4; | 71.20 | 0.00 |
| TRINITY_G0R2W8_ICHMG/56-116        | G0R2W8.1 PF00288.24 | 71.20 | 0.00 |
| TRINITY_A0BK10_PARTE/327-399       | A0BK10.1 PF00313.20 | 71.20 | 0.00 |
| TRINITY_E1ZGT7_CHLVA/875-1022      | E1ZGT7.1 PF00004.27 | 71.20 | 0.00 |
| TRINITY_D8U0I3_VOLCA/1-208         | D8U0I3.1 PF01591.16 | 71.20 | 0.00 |
| TRINITY_I0YSG4_9CHLO/1-79          | I0YSG4.1 PF01249.16 | 71.20 | 0.00 |
| TRINITY_C3XQV0_BRAFL/8-73          | C3XQV0.1 PF01423.20 | 71.20 | 0.00 |
| TRINITY_A0A078ACN6_STYLE/494-552   | A0A078ACN6.1 PF1392 | 71.20 | 0.00 |
| TRINITY_D8TTC3_VOLCA/645-758       | D8TTC3.1 PF01061.22 | 71.20 | 0.00 |
| TRINITY_D8TSK9_VOLCA/4-203         | D8TSK9.1 PF01513.19 | 71.20 | 0.00 |
| TRINITY_A1D7V8_NEOFI/6-162         | A1D7V8.1 PF00160.19 | 71.20 | 0.00 |
| TRINITY_I0YIS4_9CHLO/494-644       | I0YIS4.1 PF00160.19 | 71.20 | 0.00 |
| TRINITY_I0YN57_9CHLO/106-225       | I0YN57.1 PF09335.9; | 71.20 | 0.00 |
| TRINITY_J9JCA5_9SPIT/125-339       | J9JCA5.1 PF00112.21 | 71.20 | 0.00 |
| TRINITY_D8TRH3_VOLCA/858-1070      | D8TRH3.1 PF01061.22 | 71.20 | 0.00 |
| TRINITY_E3T5C1_CROVB/3-74          | E3T5C1.1 PF00240.21 | 71.20 | 0.00 |
| TRINITY_Q4RHD1_TETNG/8-109         | Q4RHD1.1 PF00042.20 | 71.20 | 0.00 |
| TRINITY_A0A0G4ET17_9ALVE/1-249     | A0A0G4ET17.1 PF0096 | 71.20 | 0.00 |
| TRINITY_A0BFU1_PARTE/28-283        | A0BFU1.1 PF00069.23 | 71.20 | 0.00 |
| TRINITY_S7XFB7_SPRLO/42-237        | S7XFB7.1 PF00149.26 | 71.20 | 0.00 |
| TRINITY_A8J9I1_CHLRE/67-139        | A8J9I1.1 PF04640.12 | 71.20 | 0.00 |
| TRINITY_A0A058ZGC8_9EUKA/17-258    | A0A058ZGC8.1 PF0057 | 71.20 | 0.00 |

|                                    |              |            |       |      |
|------------------------------------|--------------|------------|-------|------|
| TRINITY_A0DS30_PARTE/165-395       | A0DS30.1     | PF00198.21 | 71.20 | 0.00 |
| TRINITY_D8TVM2_VOLCA/291-443       | D8TVM2.1     | PF00441.22 | 71.20 | 0.00 |
| TRINITY_D8TQE1_VOLCA/181-346       | D8TQE1.1     | PF04127.13 | 71.20 | 0.00 |
| TRINITY_A8IWM0_CHLRE/93-193        | A8IWM0.1     | PF00561.18 | 71.20 | 0.00 |
| TRINITY_A8INC7_CHLRE/152-211       | A8INC7.1     | PF12656.5; | 71.20 | 0.00 |
| TRINITY_E1Z8K6_CHLVA/428-581       | E1Z8K6.1     | PF01343.16 | 71.20 | 0.00 |
| TRINITY_D8UA96_VOLCA/198-448       | D8UA96.1     | PF07766.11 | 71.20 | 0.00 |
| TRINITY_Q3SDM6_PARTE/17-177        | Q3SDM6.1     | PF00071.20 | 71.20 | 0.00 |
| TRINITY_D8U2N0_VOLCA/133-249       | D8U2N0.1     | PF00128.22 | 71.20 | 0.00 |
| TRINITY_G3SDF1_GORGO/734-1359      | G3SDF1.1     | PF01576.17 | 71.20 | 0.00 |
| TRINITY_F7II54_CALJA/13-214        | F7II54.1     | PF00330.18 | 71.20 | 0.00 |
| TRINITY_A0BSI3_PARTE/7-123         | A0BSI3.1     | PF00235.17 | 71.10 | 0.00 |
| TRINITY_I7MMF7_TETTS/570-607       | I7MMF7.2     | PF03638.13 | 71.10 | 0.00 |
| TRINITY_F4PRW5_DICFS/17-294        | F4PRW5.1     | PF00398.18 | 71.10 | 0.00 |
| TRINITY_A0A068SDF3_9FUNG/19-94     | A0A068SDF3.1 | PF0093     | 71.10 | 0.00 |
| TRINITY_A8JC77_CHLRE/1-279         | A8JC77.1     | PF00225.21 | 71.10 | 0.00 |
| TRINITY_E1ZHV9_CHLVA/66-201        | E1ZHV9.1     | PF04116.11 | 71.10 | 0.00 |
| TRINITY_M4ASI0_XIPMA/32-183        | M4ASI0.1     | PF11032.6; | 71.10 | 0.00 |
| TRINITY_A0A067HHJ2_CITSI/382-426   | A0A067HHJ2.1 | PF0040     | 71.10 | 0.00 |
| TRINITY_I7MLB6_TETTS/13-264        | I7MLB6.1     | PF00069.23 | 71.10 | 0.00 |
| TRINITY_J9HVL7_9SPIT/73-307        | J9HVL7.1     | PF01674.16 | 71.10 | 0.00 |
| TRINITY_I7M3G5_TETTS/1235-1331     | I7M3G5.1     | PF04059.10 | 71.10 | 0.00 |
| TRINITY_A8I872_CHLRE/401-536       | A8I872.1     | PF00005.25 | 71.10 | 0.00 |
| TRINITY_E1ZR27_CHLVA/519-691       | E1ZR27.1     | PF07992.12 | 71.10 | 0.00 |
| TRINITY_A0A059LLR6_9CHLO/7-71      | A0A059LLR6.1 | PF1343     | 71.10 | 0.00 |
| TRINITY_D8TZC2_VOLCA/19-63         | D8TZC2.1     | PF01585.21 | 71.10 | 0.00 |
| TRINITY_I0Z7E8_9CHLO/53-147        | I0Z7E8.1     | PF13409.4; | 71.10 | 0.00 |
| TRINITY_A8J212_CHLRE/65-251        | A8J212.1     | PF00227.24 | 71.10 | 0.00 |
| TRINITY_G0R4K3_ICHMG/302-340       | G0R4K3.1     | PF00400.30 | 71.10 | 0.00 |
| TRINITY_A0BFU1_PARTE/28-283        | A0BFU1.1     | PF00069.23 | 71.10 | 0.00 |
| TRINITY_M1UVS2_CYAME/1080-1282     | M1UVS2.1     | PF02786.15 | 71.10 | 0.00 |
| TRINITY_A0A0J8D431_BETVU/1134-1171 | A0A0J8D431.1 | PF0062     | 71.10 | 0.00 |
| TRINITY_D8UJ23_VOLCA/23-144        | D8UJ23.1     | PF00572.16 | 71.10 | 0.00 |
| TRINITY_D8U5K4_VOLCA/61-210        | D8U5K4.1     | PF08231.10 | 71.10 | 0.00 |
| TRINITY_D8TQ42_VOLCA/214-445       | D8TQ42.1     | PF01262.19 | 71.10 | 0.00 |
| TRINITY_I7MD69_TETTS/14-307        | I7MD69.1     | PF00069.23 | 71.10 | 0.00 |
| TRINITY_Q22XN2_TETTS/43-220        | Q22XN2.1     | PF02146.15 | 71.10 | 0.00 |
| TRINITY_Q236J1_TETTS/86-573        | Q236J1.1     | PF01039.20 | 71.10 | 0.00 |
| TRINITY_A8INK2_CHLRE/17-54         | A8INK2.1     | PF01753.16 | 71.10 | 0.00 |
| TRINITY_U6M3F7_EIMMA/104-182       | U6M3F7.1     | PF01529.18 | 71.10 | 0.00 |
| TRINITY_G0QRB2_ICHMG/101-199       | G0QRB2.1     | PF00153.25 | 71.10 | 0.00 |
| TRINITY_Q24DR4_TETTS/102-148       | Q24DR4.2     | PF00249.29 | 71.10 | 0.00 |
| TRINITY_Q24DR4_TETTS/102-148       | Q24DR4.2     | PF00249.29 | 71.10 | 0.00 |
| TRINITY_I0YM50_9CHLO/67-252        | I0YM50.1     | PF00350.21 | 71.10 | 0.00 |
| TRINITY_D8TWL3_VOLCA/5-253         | D8TWL3.1     | PF02361.14 | 71.10 | 0.00 |
| TRINITY_A8HX99_CHLRE/214-381       | A8HX99.1     | PF00160.19 | 71.10 | 0.00 |
| TRINITY_A0A0D3B882_BRAOL/178-215   | A0A0D3B882.1 | PF0142     | 71.10 | 0.00 |
| TRINITY_D3BHK7_POLPA/1514-1634     | D3BHK7.1     | PF02687.19 | 71.10 | 0.00 |
| TRINITY_I0YNX0_9CHLO/469-606       | I0YNX0.1     | PF02910.18 | 71.10 | 0.00 |
| TRINITY_A0A0D3F9S3_9ORYZ/694-790   | A0A0D3F9S3.1 | PF0405     | 71.10 | 0.00 |
| TRINITY_H1SFD6_9BURK/7-160         | H1SFD6.1     | PF01625.19 | 71.10 | 0.00 |
| TRINITY_W2RAX8_PHYPN/14-175        | W2RAX8.1     | PF00071.20 | 71.00 | 0.00 |
| TRINITY_D8UEM2_VOLCA/42-134        | D8UEM2.1     | PF00254.26 | 71.00 | 0.00 |
| TRINITY_J9HWN9_9SPIT/176-304       | J9HWN9.1     | PF01467.24 | 71.00 | 0.00 |
| TRINITY_S7UK71_TOXGO/169-306       | S7UK71.1     | PF00179.24 | 71.00 | 0.00 |
| TRINITY_A0A067QKL9_9HOMO/6-183     | A0A067QKL9.1 | PF0172     | 71.00 | 0.00 |
| TRINITY_J9HWY1_9SPIT/263-327       | J9HWY1.1     | PF13499.4; | 71.00 | 0.00 |
| TRINITY_D8TS54_VOLCA/44-151        | D8TS54.1     | PF01521.18 | 71.00 | 0.00 |
| TRINITY_J9IU65_9SPIT/608-801       | J9IU65.1     | PF05057.12 | 71.00 | 0.00 |
| TRINITY_G0QX71_ICHMG/303-372       | G0QX71.1     | PF00076.20 | 71.00 | 0.00 |
| TRINITY_A0A0D9VXY0_9ORYZ/17-139    | A0A0D9VXY0.1 | PF0346     | 71.00 | 0.00 |



|                                  |                     |       |      |
|----------------------------------|---------------------|-------|------|
| TRINITY_A0A0D3DJ59_BRAOL/54-157  | A0A0D3DJ59.1 PF0648 | 71.00 | 0.00 |
| TRINITY_I0ANS2_IGNAJ/4-227       | I0ANS2.1 PF00300.20 | 71.00 | 0.00 |
| TRINITY_S8CMQ1_9LAMI/383-615     | S8CMQ1.1 PF00149.26 | 71.00 | 0.00 |
| TRINITY_A0A087SC98_AUXPR/3-72    | A0A087SC98.1 PF0548 | 71.00 | 0.00 |
| TRINITY_D8UJC9_VOLCA/697-758     | D8UJC9.1 PF00226.29 | 71.00 | 0.00 |
| TRINITY_G5EDD4_CAEEL/3-212       | G5EDD4.1 PF00091.23 | 71.00 | 0.00 |
| TRINITY_J9IF18_9SPIT/297-439     | J9IF18.1 PF02840.13 | 71.00 | 0.00 |
| TRINITY_A0D319_PARTE/71-135      | A0D319.1 PF13499.4; | 71.00 | 0.00 |
| TRINITY_M1UVD9_CYAME/1-104       | M1UVD9.1 PF03656.11 | 71.00 | 0.00 |
| TRINITY_F7G4M4_MONDO/5-252       | F7G4M4.2 PF01086.15 | 71.00 | 0.00 |
| TRINITY_T1G8U8_HELRO/132-239     | T1G8U8.1 PF00307.29 | 71.00 | 0.00 |
| TRINITY_A8IXI7_CHLRE/236-341     | A8IXI7.1 PF00153.25 | 71.00 | 0.00 |
| TRINITY_A0A078A3F5_STYLE/487-630 | A0A078A3F5.1 PF0000 | 71.00 | 0.00 |
| TRINITY_A8J7T7_CHLRE/102-321     | A8J7T7.1 PF00112.21 | 71.00 | 0.00 |
| TRINITY_A0A068RH38_9FUNG/6-60    | A0A068RH38.1 PF0520 | 70.90 | 0.00 |
| TRINITY_G0QXR4_ICHMG/82-136      | G0QXR4.1 PF01192.20 | 70.90 | 0.00 |
| TRINITY_Q23QF2_TETTS/248-571     | Q23QF2.2 PF03133.13 | 70.90 | 0.00 |
| TRINITY_U4LU72_PYROM/47-258      | U4LU72.1 PF01184.17 | 70.90 | 0.00 |
| TRINITY_E1Z343_CHLVA/26-211      | E1Z343.1 PF01012.19 | 70.90 | 0.00 |
| TRINITY_M2R1T0_CERS8/1-126       | M2R1T0.1 PF01092.17 | 70.90 | 0.00 |
| TRINITY_B3PDE1_CELJU/181-470     | B3PDE1.1 PF00393.17 | 70.90 | 0.00 |
| TRINITY_A8IGM5_CHLRE/7-296       | A8IGM5.1 PF00795.20 | 70.90 | 0.00 |
| TRINITY_A8J911_CHLRE/146-200     | A8J911.1 PF13639.4; | 70.90 | 0.00 |
| TRINITY_A0A078ATQ4_STYLE/166-308 | A0A078ATQ4.1 PF0551 | 70.90 | 0.00 |
| TRINITY_G0QX41_ICHMG/40-335      | G0QX41.1 PF00069.23 | 70.90 | 0.00 |
| TRINITY_TCPB_DICDI/34-524        | Q54ES9.1 PF00118.22 | 70.90 | 0.00 |
| TRINITY_U6GK02_EIMAC/106-385     | U6GK02.1 PF08648.10 | 70.90 | 0.00 |
| TRINITY_FEN1_NEMVE/1-107         | A7RRJ0.1 PF00752.15 | 70.90 | 0.00 |
| TRINITY_A8JIS8_CHLRE/44-194      | A8JIS8.1 PF00005.25 | 70.90 | 0.00 |
| TRINITY_A8J7C8_CHLRE/230-580     | A8J7C8.1 PF00152.18 | 70.90 | 0.00 |
| TRINITY_J9HXX1_9SPIT/130-420     | J9HXX1.1 PF00069.23 | 70.90 | 0.00 |
| TRINITY_S8BVD4_9LAMI/137-311     | S8BVD4.1 PF07717.14 | 70.90 | 0.00 |
| TRINITY_E1ZEY4_CHLVA/1-175       | E1ZEY4.1 PF14580.4; | 70.90 | 0.00 |
| TRINITY_A8IE17_CHLRE/15-164      | A8IE17.1 PF03073.13 | 70.90 | 0.00 |
| TRINITY_A0A090MCW7_OSTTA/6-240   | A0A090MCW7.1 PF0137 | 70.90 | 0.00 |
| TRINITY_UGGG_DICDI/1372-1605     | Q8T191.2 PF01501.18 | 70.90 | 0.00 |
| TRINITY_W1P3N8_AMBTC/981-1177    | W1P3N8.1 PF12717.5; | 70.90 | 0.00 |
| TRINITY_A8IJF1_CHLRE/7-265       | A8IJF1.1 PF03619.14 | 70.90 | 0.00 |
| TRINITY_A8HN56_CHLRE/225-326     | A8HN56.1 PF13499.4; | 70.90 | 0.00 |
| TRINITY_A0A023B7Q3_GRENI/27-81   | A0A023B7Q3.1 PF0166 | 70.90 | 0.00 |
| TRINITY_A0A023B7Q3_GRENI/27-81   | A0A023B7Q3.1 PF0166 | 70.90 | 0.00 |
| TRINITY_G7IDZ4_MEDTR/189-687     | G7IDZ4.1 PF00183.16 | 70.90 | 0.00 |
| TRINITY_D8TJG4_VOLCA/48-173      | D8TJG4.1 PF10155.7; | 70.90 | 0.00 |
| TRINITY_A8J2W0_CHLRE/9-227       | A8J2W0.1 PF00171.20 | 70.90 | 0.00 |
| TRINITY_Q84X76_CHLRE/163-272     | Q84X76.1 PF10507.7; | 70.90 | 0.00 |
| TRINITY_I7M700_TETTS/181-443     | I7M700.2 PF00069.23 | 70.90 | 0.00 |
| TRINITY_K9T3X2_9CYAN/32-477      | K9T3X2.1 PF00521.18 | 70.90 | 0.00 |
| TRINITY_A8HZR1_CHLRE/19353-19622 | A8HZR1.1 PF00975.18 | 70.90 | 0.00 |
| TRINITY_Q24IL9_TETTS/1333-1477   | Q24IL9.2 PF00005.25 | 70.90 | 0.00 |
| TRINITY_D8U7E7_VOLCA/13-187      | D8U7E7.1 PF00270.27 | 70.90 | 0.00 |
| TRINITY_I7M967_TETTS/407-548     | I7M967.1 PF04377.13 | 70.90 | 0.00 |
| TRINITY_D8TZN5_VOLCA/93-195      | D8TZN5.1 PF16131.3; | 70.90 | 0.00 |
| TRINITY_A0E5G8_PARTE/143-683     | A0E5G8.1 PF03571.13 | 70.90 | 0.00 |
| TRINITY_G0QJ46_ICHMG/1-145       | G0QJ46.1 PF01125.15 | 70.90 | 0.00 |
| TRINITY_A0DXT9_PARTE/396-460     | A0DXT9.1 PF13432.4; | 70.80 | 0.00 |
| TRINITY_D3BF71_POLPA/219-289     | D3BF71.1 PF15906.3; | 70.80 | 0.00 |
| TRINITY_F7AX64_CALJA/58-219      | F7AX64.1 PF00071.20 | 70.80 | 0.00 |
| TRINITY_A0A0K9Q6D6_ZOSMR/82-266  | A0A0K9Q6D6.1 PF0475 | 70.80 | 0.00 |
| TRINITY_B7Q170_IXOSC/51-317      | B7Q170.1 PF00899.19 | 70.80 | 0.00 |
| TRINITY_L8H7L6_ACACA/2-162       | L8H7L6.1 PF00160.19 | 70.80 | 0.00 |
| TRINITY_D8TWN7_VOLCA/6-278       | D8TWN7.1 PF00795.20 | 70.80 | 0.00 |

|                                    |              |            |       |      |
|------------------------------------|--------------|------------|-------|------|
| TRINITY_Q3SD81_PARTE/16-176        | Q3SD81.1     | PF00071.20 | 70.80 | 0.00 |
| TRINITY_Q23KG1_TETTS/160-231       | Q23KG1.3     | PF03719.13 | 70.80 | 0.00 |
| TRINITY_C1E0B3_MICSR/14-152        | C1E0B3.1     | PF00179.24 | 70.80 | 0.00 |
| TRINITY_W2QSL5_PHYPN/1-107         | W2QSL5.1     | PF04825.11 | 70.80 | 0.00 |
| TRINITY_D8TVT1_VOLCA/62-167        | D8TVT1.1     | PF00085.18 | 70.80 | 0.00 |
| TRINITY_D8U345_VOLCA/113-255       | D8U345.1     | PF00650.18 | 70.80 | 0.00 |
| TRINITY_A0E153_PARTE/125-437       | A0E153.1     | PF00012.18 | 70.80 | 0.00 |
| TRINITY_A8JHP0_CHLRE/60-465        | A8JHP0.1     | PF01593.22 | 70.80 | 0.00 |
| TRINITY_D8TM87_VOLCA/30-104        | D8TM87.1     | PF13656.4; | 70.80 | 0.00 |
| TRINITY_A8JI35_CHLRE/4-300         | A8JI35.1     | PF00069.23 | 70.80 | 0.00 |
| TRINITY_D8UFI6_VOLCA/112-190       | D8UFI6.1     | PF00622.26 | 70.80 | 0.00 |
| TRINITY_Q5TNJ4_ANOGA/104-168       | Q5TNJ4.3     | PF00327.18 | 70.80 | 0.00 |
| TRINITY_W7XBY2_TETTS/275-798       | W7XBY2.1     | PF02867.13 | 70.80 | 0.00 |
| TRINITY_O64927_CHLRE/149-401       | O64927.2     | PF08323.9; | 70.80 | 0.00 |
| TRINITY_D8U7F8_VOLCA/1707-1755     | D8U7F8.1     | PF02042.13 | 70.80 | 0.00 |
| TRINITY_I0YNU2_9CHLO/91-261        | I0YNU2.1     | PF13439.4; | 70.80 | 0.00 |
| TRINITY_D8U986_VOLCA/307-378       | D8U986.1     | PF00575.21 | 70.80 | 0.00 |
| TRINITY_D8TSH3_VOLCA/615-663       | D8TSH3.1     | PF10403.7; | 70.80 | 0.00 |
| TRINITY_A0A077ZPL9_STYLE/99-171    | A0A077ZPL9.1 | PF1349     | 70.80 | 0.00 |
| TRINITY_D8UGC4_VOLCA/18-338        | D8UGC4.1     | PF00225.21 | 70.80 | 0.00 |
| TRINITY_V7C1H6_PHAVU/153-219       | V7C1H6.1     | PF14559.4; | 70.70 | 0.00 |
| TRINITY_A0A0D2WL90_CAPO3/1704-1922 | A0A0D2WL90.1 | PF0214     | 70.70 | 0.00 |
| TRINITY_G0QZ21_ICHMG/64-162        | G0QZ21.1     | PF00673.19 | 70.70 | 0.00 |
| TRINITY_A0A067CH25_SAPPC/30-278    | A0A067CH25.1 | PF0037     | 70.70 | 0.00 |
| TRINITY_G3IVK3_9GAMM/389-530       | G3IVK3.1     | PF02775.19 | 70.70 | 0.00 |
| TRINITY_M4C049_HYAAE/417-566       | M4C049.1     | PF00005.25 | 70.70 | 0.00 |
| TRINITY_T1IA37_RHOPR/3-169         | T1IA37.1     | PF05856.10 | 70.70 | 0.00 |
| TRINITY_A0E741_PARTE/638-836       | A0E741.1     | PF01434.16 | 70.70 | 0.00 |
| TRINITY_A9TGY2_PHYPA/315-454       | A9TGY2.1     | PF00004.27 | 70.70 | 0.00 |
| TRINITY_E1ZMC1_CHLVA/1-86          | E1ZMC1.1     | PF00111.25 | 70.70 | 0.00 |
| TRINITY_A0A058ZR90_EUCGR/392-535   | A0A058ZR90.1 | PF0277     | 70.70 | 0.00 |
| TRINITY_A8I815_CHLRE/125-257       | A8I815.1     | PF00730.23 | 70.70 | 0.00 |
| TRINITY_Q234I5_TETTS/11-618        | Q234I5.1     | PF00012.18 | 70.70 | 0.00 |
| TRINITY_F4Q6H9_DICFS/339-402       | F4Q6H9.1     | PF13921.4; | 70.70 | 0.00 |
| TRINITY_A8J921_CHLRE/279-389       | A8J921.1     | PF07522.12 | 70.70 | 0.00 |
| TRINITY_G0R210_ICHMG/224-577       | G0R210.1     | PF00152.18 | 70.70 | 0.00 |
| TRINITY_D8TZV2_VOLCA/32-154        | D8TZV2.1     | PF13589.4; | 70.70 | 0.00 |
| TRINITY_E1ZEH1_CHLVA/412-551       | E1ZEH1.1     | PF00004.27 | 70.70 | 0.00 |
| TRINITY_D8U3B8_VOLCA/16-330        | D8U3B8.1     | PF00225.21 | 70.70 | 0.00 |
| TRINITY_D8TPK4_VOLCA/13-76         | D8TPK4.1     | PF01066.19 | 70.70 | 0.00 |
| TRINITY_L8GZ33_ACACA/1-430         | L8GZ33.1     | PF01532.18 | 70.70 | 0.00 |
| TRINITY_T1KVR0_TETUR/210-496       | T1KVR0.1     | PF01409.18 | 70.70 | 0.00 |
| TRINITY_B6BIT4_SULGG/4-65          | B6BIT4.1     | PF00226.29 | 70.70 | 0.00 |
| TRINITY_D8UHW6_VOLCA/104-529       | D8UHW6.1     | PF00310.19 | 70.70 | 0.00 |
| TRINITY_B8ALV9_ORYSI/25-308        | B8ALV9.1     | PF00069.23 | 70.70 | 0.00 |
| TRINITY_A0A015KWK9_9GLOM/362-402   | A0A015KWK9.1 | PF1363     | 70.70 | 0.00 |
| TRINITY_I7M0F7_TETTS/1-239         | I7M0F7.2     | PF00149.26 | 70.70 | 0.00 |
| TRINITY_D8UHR3_VOLCA/53-145        | D8UHR3.1     | PF02225.20 | 70.70 | 0.00 |
| TRINITY_D8TT81_VOLCA/280-477       | D8TT81.1     | PF01734.20 | 70.70 | 0.00 |
| TRINITY_I0YZT6_9CHLO/13-422        | I0YZT6.1     | PF05834.10 | 70.70 | 0.00 |
| TRINITY_D8TZK2_VOLCA/16946-17196   | D8TZK2.1     | PF00109.24 | 70.70 | 0.00 |
| TRINITY_A8HQT5_CHLRE/54-428        | A8HQT5.1     | PF01933.16 | 70.70 | 0.00 |
| TRINITY_A8JGY0_CHLRE/5-117         | A8JGY0.1     | PF01984.18 | 70.70 | 0.00 |
| TRINITY_D8TW13_VOLCA/228-326       | D8TW13.1     | PF13640.4; | 70.70 | 0.00 |
| TRINITY_I0YWU5_9CHLO/707-938       | I0YWU5.1     | PF00005.25 | 70.70 | 0.00 |
| TRINITY_A8HTX4_CHLRE/6-135         | A8HTX4.1     | PF04446.10 | 70.70 | 0.00 |
| TRINITY_D8UGG9_VOLCA/958-1056      | D8UGG9.1     | PF04676.12 | 70.70 | 0.00 |
| TRINITY_B1Y7Z0_LEPCP/762-878       | B1Y7Z0.1     | PF02518.24 | 70.70 | 0.00 |
| TRINITY_G0R4S1_ICHMG/27-120        | G0R4S1.1     | PF01248.24 | 70.60 | 0.00 |
| TRINITY_A0EH23_PARTE/630-898       | A0EH23.1     | PF00365.18 | 70.60 | 0.00 |
| TRINITY_I7MEY9_TETTS/1352-1465     | I7MEY9.2     | PF00271.29 | 70.60 | 0.00 |

|                                   |              |            |       |      |
|-----------------------------------|--------------|------------|-------|------|
| TRINITY_F6WMP0_MACMU/1-57         | F6WMP0.1     | PF16273.3; | 70.60 | 0.00 |
| TRINITY_A0DJ02_PARTE/58-309       | A0DJ02.1     | PF10609.7; | 70.60 | 0.00 |
| TRINITY_A0A0M0JX63_9EUKA/192-467  | A0A0M0JX63.1 | PF0035     | 70.60 | 0.00 |
| TRINITY_A0DN29_PARTE/563-813      | A0DN29.1     | PF00454.25 | 70.60 | 0.00 |
| TRINITY_J9HT64_9SPIT/322-441      | J9HT64.1     | PF00622.26 | 70.60 | 0.00 |
| TRINITY_G0QZX4_ICHMG/13-301       | G0QZX4.1     | PF00069.23 | 70.60 | 0.00 |
| TRINITY_L8HDT1_ACACA/11-405       | L8HDT1.1     | PF00464.17 | 70.60 | 0.00 |
| TRINITY_D8TS86_VOLCA/309-393      | D8TS86.1     | PF00677.15 | 70.60 | 0.00 |
| TRINITY_I7MLN0_TETTS/228-363      | I7MLN0.2     | PF04116.11 | 70.60 | 0.00 |
| TRINITY_J9FXA2_9SPIT/25-291       | J9FXA2.1     | PF02263.17 | 70.60 | 0.00 |
| TRINITY_A8I901_CHLRE/262-511      | A8I901.1     | PF00928.19 | 70.60 | 0.00 |
| TRINITY_D8TI05_VOLCA/66-119       | D8TI05.1     | PF04193.12 | 70.60 | 0.00 |
| TRINITY_D8SD29_SELML/9-310        | D8SD29.1     | PF00069.23 | 70.60 | 0.00 |
| TRINITY_D8U8W9_VOLCA/2-69         | D8U8W9.1     | PF01781.16 | 70.60 | 0.00 |
| TRINITY_A9T0A6_PHYPA/52-137       | A9T0A6.1     | PF00717.21 | 70.60 | 0.00 |
| TRINITY_E1ZQ41_CHLVA/90-248       | E1ZQ41.1     | PF00005.25 | 70.60 | 0.00 |
| TRINITY_A8IAU3_CHLRE/769-853      | A8IAU3.1     | PF00069.23 | 70.60 | 0.00 |
| TRINITY_I0YW34_9CHLO/120-188      | I0YW34.1     | PF13424.4; | 70.60 | 0.00 |
| TRINITY_A8J092_CHLRE/159-261      | A8J092.1     | PF00781.22 | 70.60 | 0.00 |
| TRINITY_WDR12_CHLRE/266-301       | A8IR43.2     | PF00400.30 | 70.60 | 0.00 |
| TRINITY_I0YP88_9CHLO/51-213       | I0YP88.1     | PF00270.27 | 70.60 | 0.00 |
| TRINITY_I0YJB2_9CHLO/12-175       | I0YJB2.1     | PF00994.22 | 70.60 | 0.00 |
| TRINITY_D8TL09_VOLCA/12-62        | D8TL09.1     | PF00327.18 | 70.60 | 0.00 |
| TRINITY_D8UG84_VOLCA/141-461      | D8UG84.1     | PF00443.27 | 70.60 | 0.00 |
| TRINITY_D8R568_SELML/322-423      | D8R568.1     | PF13499.4; | 70.60 | 0.00 |
| TRINITY_D8TNY1_VOLCA/72-191       | D8TNY1.1     | PF00622.26 | 70.60 | 0.00 |
| TRINITY_A8HHP6_CHLRE/474-677      | A8HHP6.1     | PF00488.19 | 70.60 | 0.00 |
| TRINITY_A8IVJ6_CHLRE/868-1120     | A8IVJ6.1     | PF16212.3; | 70.60 | 0.00 |
| TRINITY_A8HYQ4_CHLRE/1-259        | A8HYQ4.1     | PF00069.23 | 70.60 | 0.00 |
| TRINITY_A8IRU2_CHLRE/549-764      | A8IRU2.1     | PF08214.9; | 70.60 | 0.00 |
| TRINITY_A8IIK4_CHLRE/40-249       | A8IIK4.1     | PF01370.19 | 70.60 | 0.00 |
| TRINITY_A0BUE7_PARTE/26-60        | A0BUE7.1     | PF06747.11 | 70.60 | 0.00 |
| TRINITY_Q22XN5_TETTS/43-220       | Q22XN5.1     | PF02146.15 | 70.60 | 0.00 |
| TRINITY_Q22W27_TETTS/68-135       | Q22W27.2     | PF08606.9; | 70.50 | 0.00 |
| TRINITY_D8UD96_VOLCA/47-207       | D8UD96.1     | PF00270.27 | 70.50 | 0.00 |
| TRINITY_Q23FJ3_TETTS/38-349       | Q23FJ3.2     | PF00206.18 | 70.50 | 0.00 |
| TRINITY_Q247Z0_TETTS/1359-1503    | Q247Z0.3     | PF00005.25 | 70.50 | 0.00 |
| TRINITY_A0A022RGC4_ERYGU/34-77    | A0A022RGC4.1 | PF0147     | 70.50 | 0.00 |
| TRINITY_E1Z7Y2_CHLVA/358-468      | E1Z7Y2.1     | PF00271.29 | 70.50 | 0.00 |
| TRINITY_A0A059LKY6_9CHLO/227-377  | A0A059LKY6.1 | PF0044     | 70.50 | 0.00 |
| TRINITY_G0R5N5_ICHMG/142-439      | G0R5N5.1     | PF00176.21 | 70.50 | 0.00 |
| TRINITY_L8HBZ4_ACACA/484-607      | L8HBZ4.1     | PF09732.7; | 70.50 | 0.00 |
| TRINITY_I0ZA76_9CHLO/1744-1888    | I0ZA76.1     | PF13901.4; | 70.50 | 0.00 |
| TRINITY_A0A0G4EPF7_9ALVE/3-474    | A0A0G4EPF7.1 | PF0522     | 70.50 | 0.00 |
| TRINITY_H2R1B6_PANTR/5-118        | H2R1B6.1     | PF00572.16 | 70.50 | 0.00 |
| TRINITY_D8TH42_VOLCA/90-214       | D8TH42.1     | PF13911.4; | 70.50 | 0.00 |
| TRINITY_D8THK9_VOLCA/34-111       | D8THK9.1     | PF04232.10 | 70.50 | 0.00 |
| TRINITY_D8UFJ8_VOLCA/9-406        | D8UFJ8.1     | PF00999.19 | 70.50 | 0.00 |
| TRINITY_A8J5W8_CHLRE/599-740      | A8J5W8.1     | PF00004.27 | 70.50 | 0.00 |
| TRINITY_D8THC5_VOLCA/241-456      | D8THC5.1     | PF01435.16 | 70.50 | 0.00 |
| TRINITY_AP1S2_DICDI/2-143         | B0G185.1     | PF01217.18 | 70.50 | 0.00 |
| TRINITY_A8I3X6_CHLRE/2565-3295    | A8I3X6.1     | PF03028.13 | 70.50 | 0.00 |
| TRINITY_D8UHE9_VOLCA/1-77         | D8UHE9.1     | PF10163.7; | 70.50 | 0.00 |
| TRINITY_A0D1R8_PARTE/167-469      | A0D1R8.1     | PF00365.18 | 70.50 | 0.00 |
| TRINITY_E1ZFK1_CHLVA/59-444       | E1ZFK1.1     | PF01979.18 | 70.50 | 0.00 |
| TRINITY_D8TVC0_VOLCA/1983-2096    | D8TVC0.1     | PF00665.24 | 70.50 | 0.00 |
| TRINITY_T1NNB4_TRIUA/316-490      | T1NNB4.1     | PF00270.27 | 70.50 | 0.00 |
| TRINITY_I9BWL2_9RALS/2-80         | I9BWL2.1     | PF02798.18 | 70.50 | 0.00 |
| TRINITY_A0A0G4EJ89_9ALVE/444-1017 | A0A0G4EJ89.1 | PF0518     | 70.50 | 0.00 |
| TRINITY_A8HTK2_CHLRE/419-543      | A8HTK2.1     | PF13460.4; | 70.50 | 0.00 |
| TRINITY_D8U4B9_VOLCA/79-456       | D8U4B9.1     | PF00890.22 | 70.50 | 0.00 |

|                                  |              |            |       |      |
|----------------------------------|--------------|------------|-------|------|
| TRINITY_D8TQE1_VOLCA/778-879     | D8TQE1.1     | PF13676.4; | 70.50 | 0.00 |
| TRINITY_A8IJK9_CHLRE/110-170     | A8IJK9.1     | PF00839.15 | 70.50 | 0.00 |
| TRINITY_D8U1W0_VOLCA/944-987     | D8U1W0.1     | PF13920.4; | 70.50 | 0.00 |
| TRINITY_A8JCJ2_CHLRE/191-376     | A8JCJ2.1     | PF10300.7; | 70.50 | 0.00 |
| TRINITY_D8TQ46_VOLCA/1-152       | D8TQ46.1     | PF01965.22 | 70.50 | 0.00 |
| TRINITY_W1QA96_OGAPD/109-203     | W1QA96.1     | PF08351.9; | 70.50 | 0.00 |
| TRINITY_A8I5C3_CHLRE/2838-3549   | A8I5C3.1     | PF03028.13 | 70.50 | 0.00 |
| TRINITY_A8IWH9_CHLRE/172-322     | A8IWH9.1     | PF01764.23 | 70.50 | 0.00 |
| TRINITY_E6X0L4_NITSE/5-67        | E6X0L4.1     | PF00226.29 | 70.50 | 0.00 |
| TRINITY_A0A0C4DX99_MAGP6/8-389   | A0A0C4DX99.1 | PF0126     | 70.40 | 0.00 |
| TRINITY_E9HRY0_DAPPU/700-829     | E9HRY0.1     | PF00694.17 | 70.40 | 0.00 |
| TRINITY_W4Y2A5_STRPU/36-106      | W4Y2A5.1     | PF00076.20 | 70.40 | 0.00 |
| TRINITY_F4PJR8_DICFS/7-158       | F4PJR8.1     | PF00179.24 | 70.40 | 0.00 |
| TRINITY_A8ICK6_CHLRE/46-171      | A8ICK6.1     | PF00578.19 | 70.40 | 0.00 |
| TRINITY_A8IWT7_CHLRE/8-115       | A8IWT7.1     | PF00635.24 | 70.40 | 0.00 |
| TRINITY_G0R010_ICHMG/505-961     | G0R010.1     | PF00136.19 | 70.40 | 0.00 |
| TRINITY_D8U162_VOLCA/140-368     | D8U162.1     | PF02475.14 | 70.40 | 0.00 |
| TRINITY_A0A0M0K079_9EUKA/14-84   | A0A0M0K079.1 | PF1226     | 70.40 | 0.00 |
| TRINITY_A0A068YEU6_ECHMU/52-247  | A0A068YEU6.1 | PF0014     | 70.40 | 0.00 |
| TRINITY_D8UG57_VOLCA/22-359      | D8UG57.1     | PF00443.27 | 70.40 | 0.00 |
| TRINITY_A8IGZ3_CHLRE/12-113      | A8IGZ3.1     | PF12680.5; | 70.40 | 0.00 |
| TRINITY_D8UAD2_VOLCA/233-313     | D8UAD2.1     | PF08240.10 | 70.40 | 0.00 |
| TRINITY_J9ISJ3_9SPIT/90-258      | J9ISJ3.1     | PF04427.16 | 70.40 | 0.00 |
| TRINITY_D8TZ23_VOLCA/49-119      | D8TZ23.1     | PF00076.20 | 70.40 | 0.00 |
| TRINITY_L8GW25_ACACA/462-582     | L8GW25.1     | PF00004.27 | 70.40 | 0.00 |
| TRINITY_D8TPR9_VOLCA/5-90        | D8TPR9.1     | PF06294.9; | 70.40 | 0.00 |
| TRINITY_A4VDB5_TETTS/67-400      | A4VDB5.2     | PF00225.21 | 70.40 | 0.00 |
| TRINITY_A0C095_PARTE/256-397     | A0C095.1     | PF00004.27 | 70.40 | 0.00 |
| TRINITY_E9FVW5_DAPPU/14-220      | E9FVW5.1     | PF00149.26 | 70.40 | 0.00 |
| TRINITY_A8J0S3_CHLRE/81-215      | A8J0S3.1     | PF13301.4; | 70.40 | 0.00 |
| TRINITY_D8U986_VOLCA/307-378     | D8U986.1     | PF00575.21 | 70.40 | 0.00 |
| TRINITY_A8I6V0_CHLRE/188-301     | A8I6V0.1     | PF02797.13 | 70.40 | 0.00 |
| TRINITY_I7LSW1_TETTS/10-170      | I7LSW1.1     | PF00071.20 | 70.40 | 0.00 |
| TRINITY_A8I282_CHLRE/52-291      | A8I282.1     | PF01709.18 | 70.40 | 0.00 |
| TRINITY_D8TL67_VOLCA/78-499      | D8TL67.1     | PF00654.18 | 70.40 | 0.00 |
| TRINITY_A8JH52_CHLRE/89-557      | A8JH52.1     | PF02446.15 | 70.40 | 0.00 |
| TRINITY_A0A0G4GMJ0_9ALVE/266-561 | A0A0G4GMJ0.1 | PF0006     | 70.40 | 0.00 |
| TRINITY_D8UIN4_VOLCA/109-467     | D8UIN4.1     | PF00750.17 | 70.40 | 0.00 |
| TRINITY_A8J9X1_CHLRE/71-151      | A8J9X1.1     | PF02823.14 | 70.40 | 0.00 |
| TRINITY_A8IQ53_CHLRE/2-175       | A8IQ53.1     | PF01184.17 | 70.40 | 0.00 |
| TRINITY_E1Z2U6_CHLVA/123-591     | E1Z2U6.1     | PF01293.18 | 70.40 | 0.00 |
| TRINITY_A8JBN5_CHLRE/42-346      | A8JBN5.1     | PF01180.19 | 70.40 | 0.00 |
| TRINITY_K1QM08_CRAGI/25-134      | K1QM08.1     | PF11969.6; | 70.30 | 0.00 |
| TRINITY_W7X4E2_TETTS/398-434     | W7X4E2.1     | PF01753.16 | 70.30 | 0.00 |
| TRINITY_A0CVD0_PARTE/83-383      | A0CVD0.1     | PF03133.13 | 70.30 | 0.00 |
| TRINITY_F0VMA6_NEOCL/118-188     | F0VMA6.1     | PF00076.20 | 70.30 | 0.00 |
| TRINITY_A0E0K1_PARTE/14-270      | A0E0K1.1     | PF00069.23 | 70.30 | 0.00 |
| TRINITY_A0CW82_PARTE/237-374     | A0CW82.1     | PF00334.17 | 70.30 | 0.00 |
| TRINITY_F4B373_DOKS4/28-145      | F4B373.1     | PF08240.10 | 70.30 | 0.00 |
| TRINITY_F4PL90_DICFS/95-474      | F4PL90.1     | PF00285.19 | 70.30 | 0.00 |
| TRINITY_V2XHJ7_MONRO/11-110      | V2XHJ7.1     | PF00153.25 | 70.30 | 0.00 |
| TRINITY_CLPP_ANAMF/29-210        | B9KHZ4.1     | PF00574.21 | 70.30 | 0.00 |
| TRINITY_W7XDP3_TETTS/1821-2090   | W7XDP3.1     | PF12775.5; | 70.30 | 0.00 |
| TRINITY_B2VT60_PYRTR/488-668     | B2VT60.1     | PF00623.18 | 70.30 | 0.00 |
| TRINITY_Q244Y3_TETTS/6-149       | Q244Y3.1     | PF05517.10 | 70.30 | 0.00 |
| TRINITY_H3S9A0_9BACL/16-466      | H3S9A0.1     | PF03972.12 | 70.30 | 0.00 |
| TRINITY_R4X8G3_TAPDE/22-366      | R4X8G3.1     | PF00884.21 | 70.30 | 0.00 |
| TRINITY_D8U2F3_VOLCA/264-593     | D8U2F3.1     | PF12631.5; | 70.30 | 0.00 |
| TRINITY_D8TSF9_VOLCA/9-302       | D8TSF9.1     | PF02569.13 | 70.30 | 0.00 |
| TRINITY_D8TM65_VOLCA/36-136      | D8TM65.1     | PF02362.19 | 70.30 | 0.00 |
| TRINITY_D8UIV9_VOLCA/632-668     | D8UIV9.1     | PF00400.30 | 70.30 | 0.00 |

|                                    |                     |       |      |
|------------------------------------|---------------------|-------|------|
| TRINITY_A0A0L6VHX5_9BASI/108-172   | A0A0L6VHX5.1 PF1349 | 70.30 | 0.00 |
| TRINITY_B4N953_DROWI/43-80         | B4N953.2 PF00400.30 | 70.30 | 0.00 |
| TRINITY_A8J0S3_CHLRE/81-215        | A8J0S3.1 PF13301.4; | 70.30 | 0.00 |
| TRINITY_J9I207_9SPIT/218-497       | J9I207.1 PF01409.18 | 70.30 | 0.00 |
| TRINITY_E9FQX1_DAPPU/3-76          | E9FQX1.1 PF08783.9; | 70.30 | 0.00 |
| TRINITY_I4YDX4_WALMC/34-201        | I4YDX4.1 PF00270.27 | 70.30 | 0.00 |
| TRINITY_A8HUN7_CHLRE/420-490       | A8HUN7.1 PF08164.10 | 70.30 | 0.00 |
| TRINITY_D8UE34_VOLCA/786-893       | D8UE34.1 PF07683.12 | 70.30 | 0.00 |
| TRINITY_A0A0A1NV14_9FUNG/72-508    | A0A0A1NV14.1 PF0033 | 70.30 | 0.00 |
| TRINITY_D8TLS6_VOLCA/130-240       | D8TLS6.1 PF00581.18 | 70.30 | 0.00 |
| TRINITY_B8PGK3_POSPM/1159-1305     | B8PGK3.1 PF00005.25 | 70.30 | 0.00 |
| TRINITY_D8TL05_VOLCA/10-212        | D8TL05.1 PF02146.15 | 70.30 | 0.00 |
| TRINITY_D8SBS3_SELML/9-153         | D8SBS3.1 PF00179.24 | 70.30 | 0.00 |
| TRINITY_D8TJA7_VOLCA/116-184       | D8TJA7.1 PF00076.20 | 70.30 | 0.00 |
| TRINITY_A8IU30_CHLRE/6-70          | A8IU30.1 PF00226.29 | 70.30 | 0.00 |
| TRINITY_D8U9R6_VOLCA/505-633       | D8U9R6.1 PF03109.14 | 70.30 | 0.00 |
| TRINITY_A0A0K9NXN2_ZOSMR/88-219    | A0A0K9NXN2.1 PF0078 | 70.30 | 0.00 |
| TRINITY_A0A068RG59_9FUNG/1-366     | A0A068RG59.1 PF0029 | 70.30 | 0.00 |
| TRINITY_D8TW88_VOLCA/1436-1578     | D8TW88.1 PF00637.18 | 70.30 | 0.00 |
| TRINITY_B3LBC1_PLAKH/255-779       | B3LBC1.1 PF02867.13 | 70.20 | 0.00 |
| TRINITY_A0A0D2UB67_CAPO3/112-282   | A0A0D2UB67.1 PF0172 | 70.20 | 0.00 |
| TRINITY_L8H934_ACACA/59-311        | L8H934.1 PF10609.7; | 70.20 | 0.00 |
| TRINITY_Q231N6_TETTS/18-179        | Q231N6.3 PF00071.20 | 70.20 | 0.00 |
| TRINITY_Q00ZX4 OSTTA/54-141        | Q00ZX4.1 PF05175.12 | 70.20 | 0.00 |
| TRINITY_D8TNH8_VOLCA/9-55          | D8TNH8.1 PF13639.4; | 70.20 | 0.00 |
| TRINITY_K4BTQ3_SOLLC/13-107        | K4BTQ3.1 PF01248.24 | 70.20 | 0.00 |
| TRINITY_Q3SD81_PARTE/16-176        | Q3SD81.1 PF00071.20 | 70.20 | 0.00 |
| TRINITY_L8GWV4_ACACA/132-255       | L8GWV4.1 PF03153.11 | 70.20 | 0.00 |
| TRINITY_A8HWF0_CHLRE/35-291        | A8HWF0.1 PF00069.23 | 70.20 | 0.00 |
| TRINITY_A0A059LRS6_9CHLO/159-279   | A0A059LRS6.1 PF0192 | 70.20 | 0.00 |
| TRINITY_F4Q6S2_DICFS/285-332       | F4Q6S2.1 PF02042.13 | 70.20 | 0.00 |
| TRINITY_D8TR11_VOLCA/20-187        | D8TR11.1 PF07933.12 | 70.20 | 0.00 |
| TRINITY_Q00TP1 OSTTA/98-216        | Q00TP1.1 PF00383.21 | 70.20 | 0.00 |
| TRINITY_D8U2L0_VOLCA/73-217        | D8U2L0.1 PF01699.22 | 70.20 | 0.00 |
| TRINITY_B9IH29_POPTR/44-89         | B9IH29.1 PF00569.15 | 70.20 | 0.00 |
| TRINITY_A8J594_CHLRE/10-113        | A8J594.1 PF00085.18 | 70.20 | 0.00 |
| TRINITY_L8GP72_ACACA/123-377       | L8GP72.1 PF00069.23 | 70.20 | 0.00 |
| TRINITY_J9FRH7_9SPIT/20-284        | J9FRH7.1 PF01650.16 | 70.20 | 0.00 |
| TRINITY_A8IE32_CHLRE/452-798       | A8IE32.1 PF01103.21 | 70.20 | 0.00 |
| TRINITY_D8UJ42_VOLCA/36-250        | D8UJ42.1 PF02492.17 | 70.20 | 0.00 |
| TRINITY_A0A0F2R845_9PROT/30-434    | A0A0F2R845.1 PF0050 | 70.20 | 0.00 |
| TRINITY_L1IH70_GUIH/122-177        | L1IH70.1 PF13513.4; | 70.20 | 0.00 |
| TRINITY_L8GJY4_ACACA/379-528       | L8GJY4.1 PF00005.25 | 70.20 | 0.00 |
| TRINITY_D8TX75_VOLCA/101-214       | D8TX75.1 PF13640.4; | 70.20 | 0.00 |
| TRINITY_A0A077ZY60_STYLE/5897-6330 | A0A077ZY60.1 PF0089 | 70.20 | 0.00 |
| TRINITY_D8TUH4_VOLCA/83-248        | D8TUH4.1 PF01734.20 | 70.20 | 0.00 |
| TRINITY_J9IEB5_9SPIT/3-74          | J9IEB5.1 PF00240.21 | 70.20 | 0.00 |
| TRINITY_D8UFW2_VOLCA/35-207        | D8UFW2.1 PF00270.27 | 70.20 | 0.00 |
| TRINITY_D8S3D3_SELML/139-309       | D8S3D3.1 PF00270.27 | 70.20 | 0.00 |
| TRINITY_A8IU49_CHLRE/6-199         | A8IU49.1 PF13460.4; | 70.20 | 0.00 |
| TRINITY_D8U874_VOLCA/184-307       | D8U874.1 PF09335.9; | 70.20 | 0.00 |
| TRINITY_E1ZCG2_CHLVA/71-434        | E1ZCG2.1 PF01704.16 | 70.20 | 0.00 |
| TRINITY_D8UIZ7_VOLCA/369-849       | D8UIZ7.1 PF00759.17 | 70.20 | 0.00 |
| TRINITY_D8TGX0_VOLCA/2112-2380     | D8TGX0.1 PF12780.5; | 70.20 | 0.00 |
| TRINITY_W0E7C0_MARPU/48-414        | W0E7C0.1 PF00285.19 | 70.10 | 0.00 |
| TRINITY_L8GF06_ACACA/751-1260      | L8GF06.1 PF02538.12 | 70.10 | 0.00 |
| TRINITY_I7MFU9_TETTS/14-114        | I7MFU9.1 PF01230.21 | 70.10 | 0.00 |
| TRINITY_G0QY62_ICHMG/14-153        | G0QY62.1 PF01565.21 | 70.10 | 0.00 |
| TRINITY_I7M316_TETTS/3-177         | I7M316.1 PF00025.19 | 70.10 | 0.00 |
| TRINITY_J9HXH4_9SPIT/314-525       | J9HXH4.1 PF00211.18 | 70.10 | 0.00 |
| TRINITY_D8U2P2_VOLCA/607-721       | D8U2P2.1 PF00271.29 | 70.10 | 0.00 |

|                                  |                     |       |      |
|----------------------------------|---------------------|-------|------|
| TRINITY_A0A068RQB0_9FUNG/13-231  | A0A068RQB0.1 PF0255 | 70.10 | 0.00 |
| TRINITY_S8EWC3_FOMPI/732-811     | S8EWC3.1 PF08282.10 | 70.10 | 0.00 |
| TRINITY_A0BN60_PARTE/55-373      | A0BN60.1 PF00225.21 | 70.10 | 0.00 |
| TRINITY_L8H6F1_ACACA/387-1227    | L8H6F1.1 PF05994.9; | 70.10 | 0.00 |
| TRINITY_E1ZKP9_CHLVA/344-410     | E1ZKP9.1 PF01106.15 | 70.10 | 0.00 |
| TRINITY_I0Z960_9CHLO/524-668     | I0Z960.1 PF02775.19 | 70.10 | 0.00 |
| TRINITY_U1HHE9_ENDPU/1158-1366   | U1HHE9.1 PF02786.15 | 70.10 | 0.00 |
| TRINITY_D8UFN5_VOLCA/1-213       | D8UFN5.1 PF00069.23 | 70.10 | 0.00 |
| TRINITY_E1ZPH9_CHLVA/94-719      | E1ZPH9.1 PF00133.20 | 70.10 | 0.00 |
| TRINITY_A8HP10_CHLRE/27-189      | A8HP10.1 PF00160.19 | 70.10 | 0.00 |
| TRINITY_A8HMJ8_CHLRE/48-474      | A8HMJ8.1 PF13520.4; | 70.10 | 0.00 |
| TRINITY_A8JI17_CHLRE/255-345     | A8JI17.1 PF00153.25 | 70.10 | 0.00 |
| TRINITY_Q3SDT3_PARTE/63-246      | Q3SDT3.1 PF01926.21 | 70.10 | 0.00 |
| TRINITY_D8TYF3_VOLCA/286-402     | D8TYF3.1 PF02373.20 | 70.10 | 0.00 |
| TRINITY_A8J940_CHLRE/199-654     | A8J940.1 PF09418.8; | 70.10 | 0.00 |
| TRINITY_D8TJ29_VOLCA/745-825     | D8TJ29.1 PF10431.7; | 70.10 | 0.00 |
| TRINITY_D8U9Q6_VOLCA/12-318      | D8U9Q6.1 PF08449.9; | 70.10 | 0.00 |
| TRINITY_A8JFB8_CHLRE/12-388      | A8JFB8.1 PF07690.14 | 70.10 | 0.00 |
| TRINITY_D8TLP0_VOLCA/19-126      | D8TLP0.1 PF00255.17 | 70.10 | 0.00 |
| TRINITY_A0A0G4G804_9ALVE/77-459  | A0A0G4G804.1 PF0034 | 70.10 | 0.00 |
| TRINITY_A8J9E9_CHLRE/74-564      | A8J9E9.1 PF01593.22 | 70.10 | 0.00 |
| TRINITY_I0YVT0_9CHLO/110-216     | I0YVT0.1 PF00675.18 | 70.10 | 0.00 |
| TRINITY_C1MIV7_MICPC/34-170      | C1MIV7.1 PF00179.24 | 70.00 | 0.00 |
| TRINITY_A0DY12_PARTE/14-183      | A0DY12.1 PF00071.20 | 70.00 | 0.00 |
| TRINITY_A0BR59_PARTE/14-240      | A0BR59.1 PF14713.4; | 70.00 | 0.00 |
| TRINITY_Q22A43_TETTS/570-685     | Q22A43.2 PF01412.16 | 70.00 | 0.00 |
| TRINITY_J3N297_ORYBR/120-184     | J3N297.1 PF13499.4; | 70.00 | 0.00 |
| TRINITY_A0A0M0JPE1_9EUKA/348-379 | A0A0M0JPE1.1 PF1318 | 70.00 | 0.00 |
| TRINITY_A8PUV0_MALGO/95-164      | A8PUV0.1 PF00076.20 | 70.00 | 0.00 |
| TRINITY_W4YTR2_STRPU/82-118      | W4YTR2.1 PF10276.7; | 70.00 | 0.00 |
| TRINITY_I7M3D8_TETTS/206-439     | I7M3D8.2 PF01702.16 | 70.00 | 0.00 |
| TRINITY_D8TZ40_VOLCA/777-1279    | D8TZ40.1 PF04998.15 | 70.00 | 0.00 |
| TRINITY_D8RBM7_SELML/270-310     | D8RBM7.1 PF00400.30 | 70.00 | 0.00 |
| TRINITY_A0A075B1B2_9FUNG/246-507 | A0A075B1B2.1 PF0107 | 70.00 | 0.00 |
| TRINITY_D8UG12_VOLCA/197-259     | D8UG12.1 PF00010.24 | 70.00 | 0.00 |
| TRINITY_D8UCL7_VOLCA/162-371     | D8UCL7.1 PF00297.20 | 70.00 | 0.00 |
| TRINITY_A0A068RHT9_9FUNG/63-102  | A0A068RHT9.1 PF0017 | 70.00 | 0.00 |
| TRINITY_A0A067DKF7_CITSI/10-139  | A0A067DKF7.1 PF0012 | 70.00 | 0.00 |
| TRINITY_L8GTX7_ACACA/29-258      | L8GTX7.1 PF01144.21 | 70.00 | 0.00 |
| TRINITY_C1E009_MICSR/281-415     | C1E009.1 PF13679.4; | 70.00 | 0.00 |
| TRINITY_Q23DM3_TETTS/193-382     | Q23DM3.1 PF01163.20 | 70.00 | 0.00 |
| TRINITY_A8JE89_CHLRE/422-617     | A8JE89.1 PF04055.19 | 70.00 | 0.00 |
| TRINITY_S0ES67_CHTCT/49-539      | S0ES67.1 PF00342.17 | 70.00 | 0.00 |
| TRINITY_I0Z062_9CHLO/726-884     | I0Z062.1 PF00179.24 | 70.00 | 0.00 |
| TRINITY_D8UJC6_VOLCA/308-381     | D8UJC6.1 PF14360.4; | 70.00 | 0.00 |
| TRINITY_D8TJK7_VOLCA/147-198     | D8TJK7.1 PF03909.15 | 70.00 | 0.00 |
| TRINITY_A8J6J4_CHLRE/41-303      | A8J6J4.1 PF00459.23 | 70.00 | 0.00 |
| TRINITY_A8JJY7_CHLRE/9-161       | A8JJY7.1 PF00004.27 | 70.00 | 0.00 |
| TRINITY_A0A090M7B0_OSTTA/51-202  | A0A090M7B0.1 PF0260 | 70.00 | 0.00 |
| TRINITY_A0A023BBI7_GRENI/52-309  | A0A023BBI7.1 PF0006 | 70.00 | 0.00 |
| TRINITY_D8TN51_VOLCA/181-224     | D8TN51.1 PF15985.3; | 70.00 | 0.00 |
| TRINITY_D8TN51_VOLCA/181-224     | D8TN51.1 PF15985.3; | 70.00 | 0.00 |
| TRINITY_D8TKS9_VOLCA/120-393     | D8TKS9.1 PF04811.13 | 70.00 | 0.00 |
| TRINITY_I7MH10_TETTS/124-450     | I7MH10.2 PF00225.21 | 70.00 | 0.00 |
| TRINITY_Q22YU1_TETTS/85-594      | Q22YU1.3 PF00118.22 | 70.00 | 0.00 |
| TRINITY_D8TZ28_VOLCA/2137-2238   | D8TZ28.1 PF01248.24 | 70.00 | 0.00 |
| TRINITY_H3H405_PHYRM/37-151      | H3H405.1 PF00665.24 | 70.00 | 0.00 |
| TRINITY_F4PYF0_DICFS/1573-1749   | F4PYF0.1 PF00689.19 | 70.00 | 0.00 |
| TRINITY_D8U3B9_VOLCA/286-484     | D8U3B9.1 PF03016.13 | 70.00 | 0.00 |
| TRINITY_D8UBS2_VOLCA/5-73        | D8UBS2.1 PF13921.4; | 70.00 | 0.00 |
| TRINITY_A0A067KCA8_JATCU/387-527 | A0A067KCA8.1 PF0053 | 70.00 | 0.00 |

|                                  |                     |       |      |
|----------------------------------|---------------------|-------|------|
| TRINITY_D8TJP7_VOLCA/78-344      | D8TJP7.1 PF08323.9; | 70.00 | 0.00 |
| TRINITY_C1E9S6_MICSR/1-354       | C1E9S6.1 PF16363.3; | 70.00 | 0.00 |
| TRINITY_G0R4M5_ICHMG/51-307      | G0R4M5.1 PF00481.19 | 70.00 | 0.00 |
| TRINITY_A8IZR1_CHLRE/67-638      | A8IZR1.1 PF03063.18 | 70.00 | 0.00 |
| TRINITY_A0A059LEQ3_9CHLO/1-225   | A0A059LEQ3.1 PF0315 | 70.00 | 0.00 |
| TRINITY_D8U6E1_VOLCA/443-651     | D8U6E1.1 PF01061.22 | 70.00 | 0.00 |
| TRINITY_W5E6X5_WHEAT/258-297     | W5E6X5.1 PF05920.9; | 70.00 | 0.00 |
| TRINITY_A8J1F4_CHLRE/136-240     | A8J1F4.1 PF12894.5; | 70.00 | 0.00 |
| TRINITY_A0D4J6_PARTE/38-180      | A0D4J6.1 PF00080.18 | 69.90 | 0.00 |
| TRINITY_L8GGG2_ACACA/628-752     | L8GGG2.1 PF00754.23 | 69.90 | 0.00 |
| TRINITY_A0BXM4_PARTE/6-118       | A0BXM4.1 PF01778.15 | 69.90 | 0.00 |
| TRINITY_G6DM41_DANPL/13-105      | G6DM41.1 PF00254.26 | 69.90 | 0.00 |
| TRINITY_J9IXJ6_9SPIT/12-173      | J9IXJ6.1 PF00071.20 | 69.90 | 0.00 |
| TRINITY_A0A098C1Y0_9PORP/5-398   | A0A098C1Y0.1 PF0018 | 69.90 | 0.00 |
| TRINITY_I7M0Y2_TETTS/35-440      | I7M0Y2.1 PF01134.20 | 69.90 | 0.00 |
| TRINITY_D8TWR1_VOLCA/23-311      | D8TWR1.1 PF00069.23 | 69.90 | 0.00 |
| TRINITY_L8GYI0_ACACA/117-249     | L8GYI0.1 PF04116.11 | 69.90 | 0.00 |
| TRINITY_E1ZK31_CHLVA/55-147      | E1ZK31.1 PF00254.26 | 69.90 | 0.00 |
| TRINITY_G0QUB8_ICHMG/9-264       | G0QUB8.1 PF00069.23 | 69.90 | 0.00 |
| TRINITY_J9HQW6_9SPIT/1043-1343   | J9HQW6.1 PF03133.13 | 69.90 | 0.00 |
| TRINITY_D2VBK4_NAEGR/81-263      | D2VBK4.1 PF00227.24 | 69.90 | 0.00 |
| TRINITY_A0A077ZT83_STYLE/26-281  | A0A077ZT83.1 PF0006 | 69.90 | 0.00 |
| TRINITY_A8JIG3_CHLRE/178-353     | A8JIG3.1 PF13870.4; | 69.90 | 0.00 |
| TRINITY_A8ID84_CHLRE/1-367       | A8ID84.1 PF00297.20 | 69.90 | 0.00 |
| TRINITY_A8JFE1_CHLRE/108-243     | A8JFE1.1 PF00730.23 | 69.90 | 0.00 |
| TRINITY_I0YQQ2_9CHLO/61-427      | I0YQQ2.1 PF00155.19 | 69.90 | 0.00 |
| TRINITY_I7M251_TETTS/85-252      | I7M251.1 PF00650.18 | 69.90 | 0.00 |
| TRINITY_D8TN16_VOLCA/470-582     | D8TN16.1 PF00168.28 | 69.90 | 0.00 |
| TRINITY_Q22RW2_TETTS/60-133      | Q22RW2.1 PF13656.4; | 69.90 | 0.00 |
| TRINITY_C5D5D3_GEOSW/5-336       | C5D5D3.1 PF00180.18 | 69.90 | 0.00 |
| TRINITY_A0A087S9Z1_AUXPR/19-207  | A0A087S9Z1.1 PF0003 | 69.90 | 0.00 |
| TRINITY_D8UAU0_VOLCA/6-256       | D8UAU0.1 PF00069.23 | 69.90 | 0.00 |
| TRINITY_F4PGI6_DICFS/51-216      | F4PGI6.1 PF02776.16 | 69.90 | 0.00 |
| TRINITY_D8TQW5_VOLCA/248-390     | D8TQW5.1 PF08005.10 | 69.90 | 0.00 |
| TRINITY_A8JD76_CHLRE/119-191     | A8JD76.1 PF00226.29 | 69.90 | 0.00 |
| TRINITY_R1FIW4_EMIHU/154-427     | R1FIW4.1 PF00928.19 | 69.90 | 0.00 |
| TRINITY_D8U9E2_VOLCA/144-305     | D8U9E2.1 PF06472.13 | 69.90 | 0.00 |
| TRINITY_Q23DD6_TETTS/62-499      | Q23DD6.2 PF04997.10 | 69.90 | 0.00 |
| TRINITY_E1ZN95_CHLVA/455-604     | E1ZN95.1 PF00005.25 | 69.90 | 0.00 |
| TRINITY_J9HWA9_9SPIT/8-351       | J9HWA9.1 PF00225.21 | 69.80 | 0.00 |
| TRINITY_B9L955_NAUPA/2-64        | B9L955.1 PF00226.29 | 69.80 | 0.00 |
| TRINITY_A0A0G4EHW8_9ALVE/46-108  | A0A0G4EHW8.1 PF0184 | 69.80 | 0.00 |
| TRINITY_B3S9B3_TRIAD/85-147      | B3S9B3.1 PF13499.4; | 69.80 | 0.00 |
| TRINITY_V4A936_LOTGI/166-580     | V4A936.1 PF01131.18 | 69.80 | 0.00 |
| TRINITY_G8P069_GRAMM/78-242      | G8P069.1 PF13472.4; | 69.80 | 0.00 |
| TRINITY_F4PJU0_DICFS/308-467     | F4PJU0.1 PF00441.22 | 69.80 | 0.00 |
| TRINITY_F6HVS8_VITVI/215-258     | F6HVS8.1 PF13639.4; | 69.80 | 0.00 |
| TRINITY_F6HVS8_VITVI/215-258     | F6HVS8.1 PF13639.4; | 69.80 | 0.00 |
| TRINITY_D3PBZ6_DEFDS/311-436     | D3PBZ6.1 PF16921.3; | 69.80 | 0.00 |
| TRINITY_A0A0P7ZDF3_9TELE/26-88   | A0A0P7ZDF3.1 PF0046 | 69.80 | 0.00 |
| TRINITY_G0QR69_ICHMG/1-229       | G0QR69.1 PF00069.23 | 69.80 | 0.00 |
| TRINITY_A8JGV6_CHLRE/11-235      | A8JGV6.1 PF00244.18 | 69.80 | 0.00 |
| TRINITY_A0A061E403_THECC/222-265 | A0A061E403.1 PF1363 | 69.80 | 0.00 |
| TRINITY_G0QP27_ICHMG/30-508      | G0QP27.1 PF01293.18 | 69.80 | 0.00 |
| TRINITY_D8U5C9_VOLCA/33-191      | D8U5C9.1 PF00160.19 | 69.80 | 0.00 |
| TRINITY_A8JFG8_CHLRE/29-537      | A8JFG8.1 PF00759.17 | 69.80 | 0.00 |
| TRINITY_D8TZK0_VOLCA/36-151      | D8TZK0.1 PF01981.14 | 69.80 | 0.00 |
| TRINITY_D8THU5_VOLCA/1538-1582   | D8THU5.1 PF00249.29 | 69.80 | 0.00 |
| TRINITY_A0A078AVM5_STYLE/320-363 | A0A078AVM5.1 PF0056 | 69.80 | 0.00 |
| TRINITY_I0YNI1_9CHLO/1161-1216   | I0YNI1.1 PF01844.21 | 69.80 | 0.00 |
| TRINITY_L8HIM0_ACACA/5-177       | L8HIM0.1 PF00025.19 | 69.80 | 0.00 |

|                                  |              |            |       |      |
|----------------------------------|--------------|------------|-------|------|
| TRINITY_I7M8Z5_TETTS/107-277     | I7M8Z5.2     | PF00270.27 | 69.80 | 0.00 |
| TRINITY_E1ZH39_CHLVA/14-56       | E1ZH39.1     | PF08271.10 | 69.80 | 0.00 |
| TRINITY_A8IF21_CHLRE/105-379     | A8IF21.1     | PF00069.23 | 69.80 | 0.00 |
| TRINITY_TTL3C_TETTS/705-1030     | Q23FE2.1     | PF03133.13 | 69.80 | 0.00 |
| TRINITY_A0A087SIH8_AUXPR/181-244 | A0A087SIH8.1 | PF0041     | 69.80 | 0.00 |
| TRINITY_A8I8C6_CHLRE/135-217     | A8I8C6.1     | PF01169.17 | 69.80 | 0.00 |
| TRINITY_I7M2W8_TETTS/134-424     | I7M2W8.2     | PF00069.23 | 69.80 | 0.00 |
| TRINITY_W1P857_AMBTC/33-199      | W1P857.1     | PF05019.11 | 69.80 | 0.00 |
| TRINITY_D8U0H5_VOLCA/63-256      | D8U0H5.1     | PF00535.24 | 69.80 | 0.00 |
| TRINITY_E1ZRG2_CHLVA/108-338     | E1ZRG2.1     | PF04493.12 | 69.80 | 0.00 |
| TRINITY_D8UHK6_VOLCA/116-180     | D8UHK6.1     | PF13499.4; | 69.80 | 0.00 |
| TRINITY_F4PYU5_DICFS/82-558      | F4PYU5.1     | PF01039.20 | 69.80 | 0.00 |
| TRINITY_A8IRR7_CHLRE/290-417     | A8IRR7.1     | PF00271.29 | 69.80 | 0.00 |
| TRINITY_D8U4P2_VOLCA/8-128       | D8U4P2.1     | PF13238.4; | 69.80 | 0.00 |
| TRINITY_UNG_DICDI/172-334        | P53766.2     | PF03167.17 | 69.80 | 0.00 |
| TRINITY_A8HWW0_CHLRE/6-166       | A8HWW0.1     | PF00005.25 | 69.80 | 0.00 |
| TRINITY_D8TVI5_VOLCA/233-449     | D8TVI5.1     | PF01786.15 | 69.80 | 0.00 |
| TRINITY_A8I1A4_CHLRE/52-365      | A8I1A4.1     | PF00248.19 | 69.80 | 0.00 |
| TRINITY_L1LGC8_THEEQ/39-193      | L1LGC8.1     | PF00177.19 | 69.70 | 0.00 |
| TRINITY_A0EA65_PARTE/11-205      | A0EA65.1     | PF01813.15 | 69.70 | 0.00 |
| TRINITY_L8HDP2_ACACA/6-81        | L8HDP2.1     | PF01722.16 | 69.70 | 0.00 |
| TRINITY_B4FN08_MAIZE/21-336      | B4FN08.1     | PF02463.17 | 69.70 | 0.00 |
| TRINITY_A0A0A0LF44_CUCSA/15-117  | A0A0A0LF44.1 | PF0023     | 69.70 | 0.00 |
| TRINITY_E3KZV8_PUCGT/77-528      | E3KZV8.2     | PF01406.17 | 69.70 | 0.00 |
| TRINITY_S0ETZ9_CHTCT/482-606     | S0ETZ9.1     | PF02780.18 | 69.70 | 0.00 |
| TRINITY_A0A0D2WLA8_CAPO3/9-128   | A0A0D2WLA8.1 | PF0058     | 69.70 | 0.00 |
| TRINITY_L8GWD8_ACACA/49-315      | L8GWD8.1     | PF00561.18 | 69.70 | 0.00 |
| TRINITY_F0ZME5_DICPU/115-445     | F0ZME5.1     | PF00351.19 | 69.70 | 0.00 |
| TRINITY_C4ZM53_THASP/1-77        | C4ZM53.1     | PF02798.18 | 69.70 | 0.00 |
| TRINITY_J9JC12_9SPIT/231-416     | J9JC12.1     | PF00587.23 | 69.70 | 0.00 |
| TRINITY_A8IMK5_CHLRE/545-666     | A8IMK5.1     | PF04153.16 | 69.70 | 0.00 |
| TRINITY_A0A099NQ59_PICKU/19-56   | A0A099NQ59.1 | PF0040     | 69.70 | 0.00 |
| TRINITY_B3RW99_TRIAD/199-299     | B3RW99.1     | PF00153.25 | 69.70 | 0.00 |
| TRINITY_A0A0G4G3B3_9ALVE/2-145   | A0A0G4G3B3.1 | PF0128     | 69.70 | 0.00 |
| TRINITY_D3B3W9_POLPA/31-182      | D3B3W9.1     | PF13177.4; | 69.70 | 0.00 |
| TRINITY_A8ISQ5_CHLRE/1729-1856   | A8ISQ5.1     | PF00004.27 | 69.70 | 0.00 |
| TRINITY_C5KE35_PERM5/655-693     | C5KE35.1     | PF00400.30 | 69.70 | 0.00 |
| TRINITY_A0A0A1NLD6_9FUNG/567-720 | A0A0A1NLD6.1 | PF0027     | 69.70 | 0.00 |
| TRINITY_D8U1M4_VOLCA/81-232      | D8U1M4.1     | PF00297.20 | 69.70 | 0.00 |
| TRINITY_A0A068S9F6_9FUNG/6-450   | A0A068S9F6.1 | PF0089     | 69.70 | 0.00 |
| TRINITY_A8ISZ7_CHLRE/11-105      | A8ISZ7.1     | PF05477.9; | 69.70 | 0.00 |
| TRINITY_GTAA_DICDI/294-329       | Q550D5.1     | PF00320.25 | 69.70 | 0.00 |
| TRINITY_A8IYK0_CHLRE/1-155       | A8IYK0.1     | PF07714.15 | 69.70 | 0.00 |
| TRINITY_A8I2Y4_CHLRE/16-324      | A8I2Y4.1     | PF13393.4; | 69.70 | 0.00 |
| TRINITY_A0A078AZN1_STYLE/5-70    | A0A078AZN1.1 | PF0142     | 69.70 | 0.00 |
| TRINITY_Q22DI1_TETTS/70-229      | Q22DI1.1     | PF02731.13 | 69.70 | 0.00 |
| TRINITY_D8TRS5_VOLCA/107-172     | D8TRS5.1     | PF12352.6; | 69.70 | 0.00 |
| TRINITY_I0YKJ9_9CHLO/163-335     | I0YKJ9.1     | PF17177.2; | 69.70 | 0.00 |
| TRINITY_J9HQ37_9SPIT/2176-2315   | J9HQ37.1     | PF07728.12 | 69.70 | 0.00 |
| TRINITY_D8U9E2_VOLCA/144-305     | D8U9E2.1     | PF06472.13 | 69.70 | 0.00 |
| TRINITY_L8H251_ACACA/215-485     | L8H251.1     | PF00082.20 | 69.70 | 0.00 |
| TRINITY_A8JGG6_CHLRE/51-459      | A8JGG6.1     | PF00474.15 | 69.70 | 0.00 |
| TRINITY_D8U3R6_VOLCA/859-896     | D8U3R6.1     | PF03638.13 | 69.70 | 0.00 |
| TRINITY_D8TSA4_VOLCA/2733-3552   | D8TSA4.1     | PF02364.13 | 69.70 | 0.00 |
| TRINITY_D8UIV0_VOLCA/25-394      | D8UIV0.1     | PF00224.19 | 69.70 | 0.00 |
| TRINITY_E1X1Z7_HALMS/34-321      | E1X1Z7.1     | PF00294.22 | 69.60 | 0.00 |
| TRINITY_K4M9S9_9EURY/28-275      | K4M9S9.1     | PF02784.14 | 69.60 | 0.00 |
| TRINITY_X6MSS0_RETFI/8-145       | X6MSS0.1     | PF00179.24 | 69.60 | 0.00 |
| TRINITY_A0EEF5_PARTE/29-120      | A0EEF5.1     | PF00447.15 | 69.60 | 0.00 |
| TRINITY_D8U5N5_VOLCA/206-284     | D8U5N5.1     | PF00789.18 | 69.60 | 0.00 |
| TRINITY_A8I2Y6_CHLRE/11-265      | A8I2Y6.1     | PF00069.23 | 69.60 | 0.00 |



|                                    |                     |       |      |
|------------------------------------|---------------------|-------|------|
| TRINITY_A8IDE3_CHLRE/126-260       | A8IDE3.1 PF00258.23 | 69.60 | 0.00 |
| TRINITY_A0A087SCB0_AUXPR/70-204    | A0A087SCB0.1 PF0033 | 69.60 | 0.00 |
| TRINITY_L8GEL6_ACACA/329-543       | L8GEL6.1 PF13236.4; | 69.60 | 0.00 |
| TRINITY_L8H3V4_ACACA/180-304       | L8H3V4.1 PF09668.8; | 69.60 | 0.00 |
| TRINITY_L8HM80_ACACA/121-301       | L8HM80.1 PF00390.17 | 69.60 | 0.00 |
| TRINITY_D8TS98_VOLCA/47-118        | D8TS98.1 PF00173.26 | 69.60 | 0.00 |
| TRINITY_A0CS57_PARTE/161-431       | A0CS57.1 PF00928.19 | 69.60 | 0.00 |
| TRINITY_A8I8C3_CHLRE/53-289        | A8I8C3.1 PF01209.16 | 69.60 | 0.00 |
| TRINITY_A8IY03_CHLRE/43-427        | A8IY03.1 PF04563.13 | 69.60 | 0.00 |
| TRINITY_A8J131_CHLRE/55-173        | A8J131.1 PF00622.26 | 69.60 | 0.00 |
| TRINITY_A8J9A9_CHLRE/9-118         | A8J9A9.1 PF01398.19 | 69.60 | 0.00 |
| TRINITY_A8IWG9_CHLRE/37-167        | A8IWG9.1 PF06658.10 | 69.60 | 0.00 |
| TRINITY_A8JC72_CHLRE/4-278         | A8JC72.1 PF00069.23 | 69.60 | 0.00 |
| TRINITY_D8TT01_VOLCA/22-159        | D8TT01.1 PF05832.10 | 69.60 | 0.00 |
| TRINITY_Q6BGF1_PARTE/393-606       | Q6BGF1.1 PF07859.11 | 69.60 | 0.00 |
| TRINITY_A8JAK4_CHLRE/54-555        | A8JAK4.1 PF02990.14 | 69.60 | 0.00 |
| TRINITY_Q9FV97_CHLRE/132-382       | Q9FV97.1 PF00510.16 | 69.60 | 0.00 |
| TRINITY_A5UM58_METS3/427-631       | A5UM58.1 PF13087.4; | 69.60 | 0.00 |
| TRINITY_A8HPQ4_CHLRE/133-377       | A8HPQ4.1 PF05770.9; | 69.60 | 0.00 |
| TRINITY_A8I481_CHLRE/44-106        | A8I481.1 PF01276.18 | 69.60 | 0.00 |
| TRINITY_E1ZR28_CHLVA/100-466       | E1ZR28.1 PF02906.12 | 69.60 | 0.00 |
| TRINITY_B8HKC8_CYAP4/160-335       | B8HKC8.1 PF14518.4; | 69.60 | 0.00 |
| TRINITY_A0A077ZY60_STYLE/6352-6887 | A0A077ZY60.1 PF0089 | 69.60 | 0.00 |
| TRINITY_A0A0J8BYD9_BETVU/76-190    | A0A0J8BYD9.1 PF0000 | 69.60 | 0.00 |
| TRINITY_A8ISQ5_CHLRE/1729-1856     | A8ISQ5.1 PF00004.27 | 69.60 | 0.00 |
| TRINITY_A0A0D2WTS7_CAPO3/32-443    | A0A0D2WTS7.1 PF0020 | 69.50 | 0.00 |
| TRINITY_Q23A33_TETTS/2-240         | Q23A33.1 PF00590.18 | 69.50 | 0.00 |
| TRINITY_F4QD63_DICFS/2-233         | F4QD63.1 PF00483.21 | 69.50 | 0.00 |
| TRINITY_A0A0E3UWF6_9BACT/52-529    | A0A0E3UWF6.1 PF0120 | 69.50 | 0.00 |
| TRINITY_A8IY85_CHLRE/58-186        | A8IY85.1 PF02670.14 | 69.50 | 0.00 |
| TRINITY_I0Z0I1_9CHLO/15-145        | I0Z0I1.1 PF00828.17 | 69.50 | 0.00 |
| TRINITY_A8I795_CHLRE/8-120         | A8I795.1 PF02391.15 | 69.50 | 0.00 |
| TRINITY_D8U027_VOLCA/4-158         | D8U027.1 PF01265.15 | 69.50 | 0.00 |
| TRINITY_E2C7C6_HARSA/378-471       | E2C7C6.1 PF01926.21 | 69.50 | 0.00 |
| TRINITY_D8TJ71_VOLCA/102-211       | D8TJ71.1 PF15739.3; | 69.50 | 0.00 |
| TRINITY_A0A075ARR7_9FUNG/247-456   | A0A075ARR7.1 PF0118 | 69.50 | 0.00 |
| TRINITY_L8GE89_ACACA/64-237        | L8GE89.1 PF01154.15 | 69.50 | 0.00 |
| TRINITY_A8HQ52_CHLRE/1511-1569     | A8HQ52.1 PF14874.4; | 69.50 | 0.00 |
| TRINITY_Q24GH8_TETTS/10-259        | Q24GH8.2 PF00398.18 | 69.50 | 0.00 |
| TRINITY_U5H8V4_USTV1/11-407        | U5H8V4.1 PF00162.17 | 69.50 | 0.00 |
| TRINITY_A8IWD2_CHLRE/25-261        | A8IWD2.1 PF13561.4; | 69.50 | 0.00 |
| TRINITY_A9S0R9_PHYPA/98-345        | A9S0R9.1 PF00120.22 | 69.50 | 0.00 |
| TRINITY_A8J1K6_CHLRE/27-159        | A8J1K6.1 PF06148.9; | 69.50 | 0.00 |
| TRINITY_Q4KX33_CHLRE/41-243        | Q4KX33.1 PF00702.24 | 69.50 | 0.00 |
| TRINITY_A0EEU3_PARTE/113-206       | A0EEU3.1 PF01588.18 | 69.50 | 0.00 |
| TRINITY_D8U260_VOLCA/79-183        | D8U260.1 PF06426.12 | 69.50 | 0.00 |
| TRINITY_D8U9R0_VOLCA/29-115        | D8U9R0.1 PF17146.2; | 69.50 | 0.00 |
| TRINITY_D8U459_VOLCA/305-868       | D8U459.1 PF08385.10 | 69.50 | 0.00 |
| TRINITY_D8TQE8_VOLCA/51-168        | D8TQE8.1 PF13815.4; | 69.50 | 0.00 |
| TRINITY_D8TIT3_VOLCA/179-414       | D8TIT3.1 PF13641.4; | 69.50 | 0.00 |
| TRINITY_D8TZ32_VOLCA/66-240        | D8TZ32.1 PF02776.16 | 69.50 | 0.00 |
| TRINITY_C1MVG4_MICPC/1087-1191     | C1MVG4.1 PF00856.26 | 69.50 | 0.00 |
| TRINITY_E1X1Z7_HALMS/34-321        | E1X1Z7.1 PF00294.22 | 69.40 | 0.00 |
| TRINITY_Q3SDM6_PARTE/17-177        | Q3SDM6.1 PF00071.20 | 69.40 | 0.00 |
| TRINITY_U5HFI2_USTV1/242-348       | U5HFI2.1 PF12894.5; | 69.40 | 0.00 |
| TRINITY_E3RIZ4_PYRTT/432-675       | E3RIZ4.1 PF12708.5; | 69.40 | 0.00 |
| TRINITY_ENV_XMRV6/21-615           | Q27ID8.1 PF00429.17 | 69.40 | 0.00 |
| TRINITY_M2Y135_GALSU/20-178        | M2Y135.1 PF00071.20 | 69.40 | 0.00 |
| TRINITY_I0Z0T5_9CHLO/103-228       | I0Z0T5.1 PF10497.7; | 69.40 | 0.00 |
| TRINITY_R9AAJ6_WALI9/2-179         | R9AAJ6.1 PF13869.4; | 69.40 | 0.00 |
| TRINITY_A8IAF7_CHLRE/62-257        | A8IAF7.1 PF00849.20 | 69.40 | 0.00 |

|                                   |              |            |       |      |
|-----------------------------------|--------------|------------|-------|------|
| TRINITY_Q235I3_TETTS/2-101        | Q235I3.1     | PF00453.16 | 69.40 | 0.00 |
| TRINITY_D8UAY8_VOLCA/20-183       | D8UAY8.1     | PF00929.22 | 69.40 | 0.00 |
| TRINITY_D8U841_VOLCA/324-612      | D8U841.1     | PF00122.18 | 69.40 | 0.00 |
| TRINITY_I0Z393_9CHLO/25-477       | I0Z393.1     | PF01384.18 | 69.40 | 0.00 |
| TRINITY_D8UAY5_VOLCA/11-407       | D8UAY5.1     | PF01053.18 | 69.40 | 0.00 |
| TRINITY_A8J1H5_CHLRE/26-174       | A8J1H5.1     | PF07690.14 | 69.40 | 0.00 |
| TRINITY_Q65Z16_CHLRE/138-186      | Q65Z16.1     | PF00010.24 | 69.40 | 0.00 |
| TRINITY_I7M435_TETTS/17-177       | I7M435.2     | PF00071.20 | 69.40 | 0.00 |
| TRINITY_M4E1Q7_BRARP/63-99        | M4E1Q7.1     | PF00504.19 | 69.40 | 0.00 |
| TRINITY_A0EGB9_PARTE/32-287       | A0EGB9.1     | PF00069.23 | 69.40 | 0.00 |
| TRINITY_A8I2K8_CHLRE/37-330       | A8I2K8.1     | PF00850.17 | 69.40 | 0.00 |
| TRINITY_D8UDF3_VOLCA/894-1029     | D8UDF3.1     | PF13472.4; | 69.40 | 0.00 |
| TRINITY_A8HS81_CHLRE/45-155       | A8HS81.1     | PF11255.6; | 69.40 | 0.00 |
| TRINITY_A9U198_PHYPA/427-463      | A9U198.1     | PF01851.20 | 69.40 | 0.00 |
| TRINITY_D8U656_VOLCA/537-572      | D8U656.1     | PF00320.25 | 69.40 | 0.00 |
| TRINITY_B3RRA4_TRIAD/270-311      | B3RRA4.1     | PF00569.15 | 69.40 | 0.00 |
| TRINITY_E1Z5P6_CHLVA/24-206       | E1Z5P6.1     | PF13439.4; | 69.40 | 0.00 |
| TRINITY_A0A087SKJ3_AUXPR/234-390  | A0A087SKJ3.1 | PF0280     | 69.40 | 0.00 |
| TRINITY_D8UC15_VOLCA/233-379      | D8UC15.1     | PF02840.13 | 69.40 | 0.00 |
| TRINITY_D8UD29_VOLCA/129-190      | D8UD29.1     | PF04117.10 | 69.40 | 0.00 |
| TRINITY_D8TVX6_VOLCA/1-304        | D8TVX6.1     | PF00225.21 | 69.40 | 0.00 |
| TRINITY_A8JBT8_CHLRE/1-130        | A8JBT8.1     | PF12146.6; | 69.40 | 0.00 |
| TRINITY_A8IWB5_CHLRE/1-288        | A8IWB5.1     | PF04733.12 | 69.40 | 0.00 |
| TRINITY_A8IT69_CHLRE/27-375       | A8IT69.1     | PF06437.9; | 69.40 | 0.00 |
| TRINITY_A8JDL8_CHLRE/10-207       | A8JDL8.1     | PF00106.23 | 69.40 | 0.00 |
| TRINITY_I0YXZ8_9CHLO/18-247       | I0YXZ8.1     | PF00149.26 | 69.40 | 0.00 |
| TRINITY_W7XDP3_TETTS/3204-3907    | W7XDP3.1     | PF03028.13 | 69.40 | 0.00 |
| TRINITY_B9GSN5_POPTR/530-637      | B9GSN5.2     | PF00651.29 | 69.40 | 0.00 |
| TRINITY_D8TZG7_VOLCA/127-396      | D8TZG7.1     | PF00557.22 | 69.40 | 0.00 |
| TRINITY_Q22BJ7_TETTS/366-422      | Q22BJ7.2     | PF01485.19 | 69.40 | 0.00 |
| TRINITY_L8GGG2_ACACA/628-752      | L8GGG2.1     | PF00754.23 | 69.30 | 0.00 |
| TRINITY_A0A074ST19_HAMHA/95-169   | A0A074ST19.1 | PF00090    | 69.30 | 0.00 |
| TRINITY_G3NGT4_GASAC/24-99        | G3NGT4.1     | PF05355.9; | 69.30 | 0.00 |
| TRINITY_A0A0G4GIW3_9ALVE/170-245  | A0A0G4GIW3.1 | PF0509     | 69.30 | 0.00 |
| TRINITY_M1PDW1_DESSD/226-515      | M1PDW1.1     | PF00977.19 | 69.30 | 0.00 |
| TRINITY_A0D6Q8_PARTE/170-399      | A0D6Q8.1     | PF01798.16 | 69.30 | 0.00 |
| TRINITY_D3BJU4_POLPA/5-155        | D3BJU4.1     | PF00179.24 | 69.30 | 0.00 |
| TRINITY_S8EWC3_FOMPI/732-811      | S8EWC3.1     | PF08282.10 | 69.30 | 0.00 |
| TRINITY_C1EF17_MICSR/72-185       | C1EF17.1     | PF08241.10 | 69.30 | 0.00 |
| TRINITY_V4BFL7_LOTGI/22-203       | V4BFL7.1     | PF16661.3; | 69.30 | 0.00 |
| TRINITY_A8J1Z7_CHLRE/52-192       | A8J1Z7.1     | PF03188.14 | 69.30 | 0.00 |
| TRINITY_A8HPM0_CHLRE/19-202       | A8HPM0.1     | PF01214.16 | 69.30 | 0.00 |
| TRINITY_V4NAF4_EUTSA/460-556      | V4NAF4.1     | PF13432.4; | 69.30 | 0.00 |
| TRINITY_D8U977_VOLCA/128-254      | D8U977.1     | PF01529.18 | 69.30 | 0.00 |
| TRINITY_D8UB96_VOLCA/670-833      | D8UB96.1     | PF01544.16 | 69.30 | 0.00 |
| TRINITY_D8UJT5_VOLCA/505-722      | D8UJT5.1     | PF00112.21 | 69.30 | 0.00 |
| TRINITY_I0YMU2_9CHLO/78-152       | I0YMU2.1     | PF03110.12 | 69.30 | 0.00 |
| TRINITY_A8HRK2_CHLRE/43-301       | A8HRK2.1     | PF00664.21 | 69.30 | 0.00 |
| TRINITY_A8IGH4_CHLRE/1709-1823    | A8IGH4.1     | PF01477.21 | 69.30 | 0.00 |
| TRINITY_G0QW84_ICHMG/19-190       | G0QW84.1     | PF13177.4; | 69.20 | 0.00 |
| TRINITY_M1CAV2_SOLTU/42-171       | M1CAV2.1     | PF00692.17 | 69.20 | 0.00 |
| TRINITY_MAAI_DICDI/8-87           | Q54YN2.1     | PF13417.4; | 69.20 | 0.00 |
| TRINITY_Q22GZ6_TETTS/169-289      | Q22GZ6.1     | PF14833.4; | 69.20 | 0.00 |
| TRINITY_A0A0R4IDH6_DANRE/19-507   | A0A0R4IDH6.1 | PF0315     | 69.20 | 0.00 |
| TRINITY_A0A0G4F3P2_9ALVE/864-1138 | A0A0G4F3P2.1 | PF0313     | 69.20 | 0.00 |
| TRINITY_A0E388_PARTE/154-420      | A0E388.1     | PF08014.9; | 69.20 | 0.00 |
| TRINITY_A9T7V0_PHYPA/35-73        | A9T7V0.1     | PF13923.4; | 69.20 | 0.00 |
| TRINITY_A8IVC2_CHLRE/79-199       | A8IVC2.1     | PF08292.10 | 69.20 | 0.00 |
| TRINITY_A8IVC2_CHLRE/79-199       | A8IVC2.1     | PF08292.10 | 69.20 | 0.00 |
| TRINITY_G0QK71_ICHMG/189-227      | G0QK71.1     | PF00400.30 | 69.20 | 0.00 |
| TRINITY_A8JHW9_CHLRE/42-387       | A8JHW9.1     | PF07690.14 | 69.20 | 0.00 |

|                                  |                     |       |      |
|----------------------------------|---------------------|-------|------|
| TRINITY_A0A078AAD9_STYLE/328-454 | A0A078AAD9.1 PF0013 | 69.20 | 0.00 |
| TRINITY_A0A022PWX0_ERYGU/13-52   | A0A022PWX0.1 PF0142 | 69.20 | 0.00 |
| TRINITY_G0QXX3_ICHMG/245-365     | G0QXX3.1 PF00622.26 | 69.20 | 0.00 |
| TRINITY_D8UCK7_VOLCA/66-172      | D8UCK7.1 PF16589.3; | 69.20 | 0.00 |
| TRINITY_A8HV10_CHLRE/101-275     | A8HV10.1 PF01612.18 | 69.20 | 0.00 |
| TRINITY_A0A077ZY10_STYLE/590-848 | A0A077ZY10.1 PF0006 | 69.20 | 0.00 |
| TRINITY_L8HIH5_ACACA/40-527      | L8HIH5.1 PF00118.22 | 69.20 | 0.00 |
| TRINITY_B8MET7_TALSN/73-243      | B8MET7.1 PF00270.27 | 69.20 | 0.00 |
| TRINITY_Q55AW0_DICDI/246-414     | Q55AW0.2 PF01612.18 | 69.20 | 0.00 |
| TRINITY_D8UDE2_VOLCA/11-283      | D8UDE2.1 PF00069.23 | 69.20 | 0.00 |
| TRINITY_A8HSY2_CHLRE/37-412      | A8HSY2.1 PF02535.20 | 69.20 | 0.00 |
| TRINITY_A8IFJ6_CHLRE/65-283      | A8IFJ6.1 PF00856.26 | 69.20 | 0.00 |
| TRINITY_A8HVC8_CHLRE/11-102      | A8HVC8.1 PF05670.11 | 69.20 | 0.00 |
| TRINITY_GLRX3_DICDI/156-220      | Q86H62.1 PF00462.22 | 69.20 | 0.00 |
| TRINITY_A8JCU9_CHLRE/1-62        | A8JCU9.1 PF10203.7; | 69.20 | 0.00 |
| TRINITY_D8TH61_VOLCA/13-486      | D8TH61.1 PF00478.23 | 69.20 | 0.00 |
| TRINITY_A8I4A8_CHLRE/416-481     | A8I4A8.1 PF00076.20 | 69.20 | 0.00 |
| TRINITY_A9U358_PHYPA/745-1059    | A9U358.1 PF03178.13 | 69.20 | 0.00 |
| TRINITY_D8TJI1_VOLCA/348-401     | D8TJI1.1 PF13432.4; | 69.20 | 0.00 |
| TRINITY_D8THC3_VOLCA/74-255      | D8THC3.1 PF01758.14 | 69.20 | 0.00 |
| TRINITY_A0E493_PARTE/11-338      | A0E493.1 PF00225.21 | 69.20 | 0.00 |
| TRINITY_A8J3Z7_CHLRE/1-51        | A8J3Z7.1 PF03055.13 | 69.20 | 0.00 |
| TRINITY_U6N203_9EIME/5-88        | U6N203.1 PF01221.16 | 69.20 | 0.00 |
| TRINITY_D8TX81_VOLCA/1-135       | D8TX81.1 PF03656.11 | 69.20 | 0.00 |
| TRINITY_A8I8K9_CHLRE/173-286     | A8I8K9.1 PF01416.18 | 69.20 | 0.00 |
| TRINITY_D8UCL0_VOLCA/1-120       | D8UCL0.1 PF00238.17 | 69.20 | 0.00 |
| TRINITY_G0R213_ICHMG/16-192      | G0R213.1 PF01433.18 | 69.20 | 0.00 |
| TRINITY_I0Z554_9CHLO/96-515      | I0Z554.1 PF01373.15 | 69.20 | 0.00 |
| TRINITY_D8U295_VOLCA/98-278      | D8U295.1 PF11891.6; | 69.20 | 0.00 |
| TRINITY_C3Z927_BRAFL/251-427     | C3Z927.1 PF01979.18 | 69.20 | 0.00 |
| TRINITY_D8U133_VOLCA/3-322       | D8U133.1 PF03405.12 | 69.20 | 0.00 |
| TRINITY_D8TMW4_VOLCA/135-459     | D8TMW4.1 PF00009.25 | 69.20 | 0.00 |
| TRINITY_L5LTN0_MYODS/23-100      | L5LTN0.1 PF00935.17 | 69.20 | 0.00 |
| TRINITY_D8UG85_VOLCA/594-710     | D8UG85.1 PF09725.7; | 69.20 | 0.00 |
| TRINITY_I1HS90_BRADI/568-920     | I1HS90.1 PF00176.21 | 69.20 | 0.00 |
| TRINITY_G0R081_ICHMG/66-109      | G0R081.1 PF00643.22 | 69.20 | 0.00 |
| TRINITY_A8HVJ4_CHLRE/171-515     | A8HVJ4.1 PF00009.25 | 69.20 | 0.00 |
| TRINITY_I7LSV4_TETTS/3534-4237   | I7LSV4.2 PF03028.13 | 69.20 | 0.00 |
| TRINITY_I7LUR8_TETTS/995-1140    | I7LUR8.2 PF00637.18 | 69.20 | 0.00 |
| TRINITY_F0ZPW7_DICPU/88-747      | F0ZPW7.1 PF00063.19 | 69.20 | 0.00 |
| TRINITY_J9JAX5_9SPIT/137-263     | J9JAX5.1 PF00134.21 | 69.20 | 0.00 |
| TRINITY_A0A059LDR7_9CHLO/55-122  | A0A059LDR7.1 PF0055 | 69.10 | 0.00 |
| TRINITY_G8Q5U0_PSEFL/3-184       | G8Q5U0.1 PF01965.22 | 69.10 | 0.00 |
| TRINITY_Q23DW5_TETTS/611-969     | Q23DW5.2 PF00476.18 | 69.10 | 0.00 |
| TRINITY_A0A078AEL1_STYLE/19-303  | A0A078AEL1.1 PF0006 | 69.10 | 0.00 |
| TRINITY_I4C388_DESTA/23-372      | I4C388.1 PF00266.17 | 69.10 | 0.00 |
| TRINITY_A0A0E9NPS3_9ASCO/349-566 | A0A0E9NPS3.1 PF1270 | 69.10 | 0.00 |
| TRINITY_A0EGU8_PARTE/540-749     | A0EGU8.1 PF00211.18 | 69.10 | 0.00 |
| TRINITY_Q7XLE8_ORYSJ/857-1017    | Q7XLE8.2 PF00078.25 | 69.10 | 0.00 |
| TRINITY_Q54BQ2_DICDI/95-233      | Q54BQ2.1 PF01743.18 | 69.10 | 0.00 |
| TRINITY_D8TIX1_VOLCA/41-296      | D8TIX1.1 PF12697.5; | 69.10 | 0.00 |
| TRINITY_I7MH21_TETTS/71-139      | I7MH21.2 PF00076.20 | 69.10 | 0.00 |
| TRINITY_I7M3G5_TETTS/1235-1331   | I7M3G5.1 PF04059.10 | 69.10 | 0.00 |
| TRINITY_A8JEJ8_CHLRE/56-123      | A8JEJ8.1 PF01066.19 | 69.10 | 0.00 |
| TRINITY_L8GNJ4_ACACA/100-377     | L8GNJ4.1 PF00069.23 | 69.10 | 0.00 |
| TRINITY_D8TZS1_VOLCA/168-450     | D8TZS1.1 PF00928.19 | 69.10 | 0.00 |
| TRINITY_D8U8M8_VOLCA/2-115       | D8U8M8.1 PF07123.10 | 69.10 | 0.00 |
| TRINITY_Q23AP4_TETTS/312-462     | Q23AP4.1 PF00160.19 | 69.10 | 0.00 |
| TRINITY_F1A1I2_DICPU/3-99        | F1A1I2.1 PF01157.16 | 69.10 | 0.00 |
| TRINITY_D8U2V4_VOLCA/3-96        | D8U2V4.1 PF00203.19 | 69.10 | 0.00 |
| TRINITY_A9VAA2_MONBE/9-170       | A9VAA2.1 PF00071.20 | 69.10 | 0.00 |

|                                 |                     |       |      |
|---------------------------------|---------------------|-------|------|
| TRINITY_A8JC02_CHLRE/1-216      | A8JC02.1 PF13621.4; | 69.10 | 0.00 |
| TRINITY_D8TVS8_VOLCA/777-1067   | D8TVS8.1 PF04227.10 | 69.10 | 0.00 |
| TRINITY_A8II54_CHLRE/359-510    | A8II54.1 PF00005.25 | 69.10 | 0.00 |
| TRINITY_A8I1U5_CHLRE/107-229    | A8I1U5.1 PF00254.26 | 69.10 | 0.00 |
| TRINITY_D8UD45_VOLCA/445-567    | D8UD45.1 PF00306.25 | 69.10 | 0.00 |
| TRINITY_I7MHS8_TETTS/328-395    | I7MHS8.2 PF00498.24 | 69.10 | 0.00 |
| TRINITY_D8U8T8_VOLCA/50-657     | D8U8T8.1 PF00888.20 | 69.10 | 0.00 |
| TRINITY_Q23H40_TETTS/63-592     | Q23H40.1 PF02516.12 | 69.10 | 0.00 |
| TRINITY_A8JBB9_CHLRE/9-104      | A8JBB9.1 PF06294.9; | 69.10 | 0.00 |
| TRINITY_A0A060QCK4_9PROT/41-485 | A0A060QCK4.1 PF0008 | 69.10 | 0.00 |
| TRINITY_A8IFS5_CHLRE/189-410    | A8IFS5.1 PF07944.10 | 69.10 | 0.00 |
| TRINITY_D8UEC8_VOLCA/43-247     | D8UEC8.1 PF02683.13 | 69.10 | 0.00 |
| TRINITY_D3BDQ8_POLPA/12-329     | D3BDQ8.1 PF00225.21 | 69.10 | 0.00 |
| TRINITY_G0QQF6_ICHMG/8-146      | G0QQF6.1 PF00179.24 | 69.10 | 0.00 |
| TRINITY_Q23KA2_TETTS/98-168     | Q23KA2.1 PF13499.4; | 69.00 | 0.00 |
| TRINITY_Q01V52_SOLUE/29-174     | Q01V52.1 PF13673.5; | 69.00 | 0.00 |
| TRINITY_Q24HY7_TETTS/120-163    | Q24HY7.3 PF13639.4; | 69.00 | 0.00 |
| TRINITY_A8HSS0_CHLRE/293-723    | A8HSS0.1 PF01432.18 | 69.00 | 0.00 |
| TRINITY_J9J9Q5_9SPIT/339-382    | J9J9Q5.1 PF00569.15 | 69.00 | 0.00 |
| TRINITY_RL34_NAUPA/1-44         | B9L9D4.1 PF00468.15 | 69.00 | 0.00 |
| TRINITY_A0BX73_PARTE/422-514    | A0BX73.1 PF00153.25 | 69.00 | 0.00 |
| TRINITY_Q22KA9_TETTS/18-102     | Q22KA9.1 PF12895.5; | 69.00 | 0.00 |
| TRINITY_I7M9X1_TETTS/613-683    | I7M9X1.1 PF00313.20 | 69.00 | 0.00 |
| TRINITY_A8J5L3_CHLRE/85-203     | A8J5L3.1 PF01926.21 | 69.00 | 0.00 |

|                                  |              |            |       |      |
|----------------------------------|--------------|------------|-------|------|
| TRINITY_D8UFH7_VOLCA/121-308     | D8UFH7.1     | PF10294.7; | 69.00 | 0.00 |
| TRINITY_G3UE99_LOXAF/2-91        | G3UE99.1     | PF00125.22 | 69.00 | 0.00 |
| TRINITY_D8UJN9_VOLCA/195-305     | D8UJN9.1     | PF00271.29 | 69.00 | 0.00 |
| TRINITY_D8TUY1_VOLCA/58-157      | D8TUY1.1     | PF00970.22 | 69.00 | 0.00 |
| TRINITY_D8TON5_SELML/36-106      | D8TON5.1     | PF00076.20 | 69.00 | 0.00 |
| TRINITY_L8GWE7_ACACA/35-528      | L8GWE7.1     | PF00118.22 | 69.00 | 0.00 |
| TRINITY_A0A0E9NBB2_9ASCO/551-738 | A0A0E9NBB2.1 | PF0027     | 69.00 | 0.00 |
| TRINITY_D8TI60_VOLCA/24-107      | D8TI60.1     | PF03083.14 | 69.00 | 0.00 |
| TRINITY_A8I9I0_CHLRE/1727-1832   | A8I9I0.1     | PF00211.18 | 69.00 | 0.00 |
| TRINITY_KCY_DICDI/12-169         | P20425.2     | PF00406.20 | 69.00 | 0.00 |
| TRINITY_D8U2F3_VOLCA/264-593     | D8U2F3.1     | PF12631.5; | 69.00 | 0.00 |
| TRINITY_D8U9M9_VOLCA/28-86       | D8U9M9.1     | PF14444.4; | 69.00 | 0.00 |
| TRINITY_A8IWN3_CHLRE/1-184       | A8IWN3.1     | PF00248.19 | 69.00 | 0.00 |
| TRINITY_A8IJT8_CHLRE/9-135       | A8IJT8.1     | PF01014.16 | 69.00 | 0.00 |
| TRINITY_Q24FH6_TETTS/26-513      | Q24FH6.2     | PF03972.12 | 69.00 | 0.00 |
| TRINITY_E1Z9E9_CHLVA/207-314     | E1Z9E9.1     | PF05834.10 | 69.00 | 0.00 |
| TRINITY_A8I338_CHLRE/75-399      | A8I338.1     | PF00648.19 | 69.00 | 0.00 |
| TRINITY_D8TNP8_VOLCA/116-223     | D8TNP8.1     | PF00091.23 | 69.00 | 0.00 |
| TRINITY_A0A0H4KYG8_9RHOB/7-354   | A0A0H4KYG8.1 | PF0045     | 69.00 | 0.00 |
| TRINITY_A8J9B2_CHLRE/52-177      | A8J9B2.1     | PF10357.7; | 69.00 | 0.00 |
| TRINITY_A8HM35_CHLRE/39-83       | A8HM35.1     | PF13445.4; | 69.00 | 0.00 |
| TRINITY_D8U7V5_VOLCA/43-236      | D8U7V5.1     | PF00106.23 | 69.00 | 0.00 |
| TRINITY_D8TLG6_VOLCA/250-413     | D8TLG6.1     | PF05179.12 | 69.00 | 0.00 |
| TRINITY_J9IV20_9SPIT/3490-4193   | J9IV20.1     | PF03028.13 | 69.00 | 0.00 |
| TRINITY_SYTC_ENCCU/314-524       | Q8SRH2.1     | PF00587.23 | 68.90 | 0.00 |
| TRINITY_I7M3P1_TETTS/107-196     | I7M3P1.1     | PF00027.27 | 68.90 | 0.00 |
| TRINITY_Q240X5_TETTS/179-268     | Q240X5.2     | PF00027.27 | 68.90 | 0.00 |
| TRINITY_I7MDC9_TETTS/35-225      | I7MDC9.2     | PF00316.18 | 68.90 | 0.00 |
| TRINITY_A8IZ65_CHLRE/1-328       | A8IZ65.1     | PF00069.23 | 68.90 | 0.00 |
| TRINITY_A0CVD0_PARTE/83-383      | A0CVD0.1     | PF03133.13 | 68.90 | 0.00 |
| TRINITY_G4NJ54_MAGO7/479-523     | G4NJ54.1     | PF00400.30 | 68.90 | 0.00 |
| TRINITY_J9IU65_9SPIT/608-801     | J9IU65.1     | PF05057.12 | 68.90 | 0.00 |
| TRINITY_A0DFK5_PARTE/51-306      | A0DFK5.1     | PF00069.23 | 68.90 | 0.00 |
| TRINITY_A8IVB9_CHLRE/354-458     | A8IVB9.1     | PF04003.10 | 68.90 | 0.00 |
| TRINITY_D8U7F8_VOLCA/1707-1755   | D8U7F8.1     | PF02042.13 | 68.90 | 0.00 |
| TRINITY_D8TLT5_VOLCA/18-126      | D8TLT5.1     | PF01412.16 | 68.90 | 0.00 |
| TRINITY_NDK_CYAP4/2-136          | B8HUM7.1     | PF00334.17 | 68.90 | 0.00 |
| TRINITY_D8TZE2_VOLCA/21-65       | D8TZE2.1     | PF07496.13 | 68.90 | 0.00 |
| TRINITY_F4PHW4_DICFS/249-555     | F4PHW4.1     | PF00749.19 | 68.90 | 0.00 |
| TRINITY_D8TSJ5_VOLCA/2597-3305   | D8TSJ5.1     | PF03028.13 | 68.90 | 0.00 |
| TRINITY_D8U1P8_VOLCA/49-480      | D8U1P8.1     | PF00909.19 | 68.90 | 0.00 |
| TRINITY_I0Z4M3_9CHLO/127-427     | I0Z4M3.1     | PF00176.21 | 68.90 | 0.00 |
| TRINITY_A0A068RKL8_9FUNG/26-202  | A0A068RKL8.1 | PF0172     | 68.90 | 0.00 |
| TRINITY_D8TLV9_VOLCA/362-640     | D8TLV9.1     | PF00702.24 | 68.90 | 0.00 |
| TRINITY_D8UIB3_VOLCA/764-970     | D8UIB3.1     | PF08214.9; | 68.90 | 0.00 |
| TRINITY_A0BQ47_PARTE/3-95        | A0BQ47.1     | PF03259.15 | 68.80 | 0.00 |
| TRINITY_M4AU00_XIPMA/1-323       | M4AU00.1     | PF01122.17 | 68.80 | 0.00 |
| TRINITY_U9TLQ1_RHIID/331-370     | U9TLQ1.1     | PF00400.30 | 68.80 | 0.00 |
| TRINITY_H3G9K1_PHYRM/83-147      | H3G9K1.1     | PF13499.4; | 68.80 | 0.00 |
| TRINITY_A0A0E0PRJ8_ORYRU/753-911 | A0A0E0PRJ8.1 | PF0007     | 68.80 | 0.00 |
| TRINITY_Q3SDM6_PARTE/17-177      | Q3SDM6.1     | PF00071.20 | 68.80 | 0.00 |
| TRINITY_A0A094F0M8_9PEZI/64-193  | A0A094F0M8.1 | PF0069     | 68.80 | 0.00 |
| TRINITY_W4YVI5_STRPU/36-147      | W4YVI5.1     | PF08240.10 | 68.80 | 0.00 |
| TRINITY_J9I6B6_9SPIT/8-264       | J9I6B6.1     | PF00069.23 | 68.80 | 0.00 |
| TRINITY_D8U6W6_VOLCA/80-177      | D8U6W6.1     | PF01196.17 | 68.80 | 0.00 |
| TRINITY_B3S900_TRIAD/188-252     | B3S900.1     | PF00462.22 | 68.80 | 0.00 |
| TRINITY_A8J4P1_CHLRE/202-362     | A8J4P1.1     | PF01077.20 | 68.80 | 0.00 |
| TRINITY_Q23AM3_TETTS/375-524     | Q23AM3.2     | PF00005.25 | 68.80 | 0.00 |
| TRINITY_A8ISQ5_CHLRE/1729-1856   | A8ISQ5.1     | PF00004.27 | 68.80 | 0.00 |
| TRINITY_I0RRG9_MYCPH/20-169      | I0RRG9.1     | PF00005.25 | 68.80 | 0.00 |
| TRINITY_D8U3D7_VOLCA/774-888     | D8U3D7.1     | PF00072.22 | 68.80 | 0.00 |

|                                  |              |            |       |      |
|----------------------------------|--------------|------------|-------|------|
| TRINITY_D8TT93_VOLCA/60-222      | D8TT93.1     | PF01195.17 | 68.80 | 0.00 |
| TRINITY_A8HWS1_CHLRE/2584-2904   | A8HWS1.1     | PF12777.5; | 68.80 | 0.00 |
| TRINITY_D8U7H9_VOLCA/70-449      | D8U7H9.1     | PF00632.23 | 68.80 | 0.00 |
| TRINITY_D8TWN6_VOLCA/49-376      | D8TWN6.1     | PF00012.18 | 68.80 | 0.00 |
| TRINITY_D3BC33_POLPA/5-166       | D3BC33.1     | PF00071.20 | 68.80 | 0.00 |
| TRINITY_A0A068RLI7_9FUNG/34-530  | A0A068RLI7.1 | PF0011     | 68.80 | 0.00 |
| TRINITY_D8UKL7_VOLCA/84-133      | D8UKL7.1     | PF00415.16 | 68.80 | 0.00 |
| TRINITY_I7LTC5_TETTS/314-458     | I7LTC5.2     | PF00005.25 | 68.80 | 0.00 |
| TRINITY_D3BDM9_POLPA/5-36        | D3BDM9.1     | PF03604.11 | 68.80 | 0.00 |
| TRINITY_L2FVU6_COLGN/36-309      | L2FVU6.1     | PF00264.18 | 68.80 | 0.00 |
| TRINITY_D8TSI9_VOLCA/91-251      | D8TSI9.1     | PF00753.25 | 68.80 | 0.00 |
| TRINITY_A8I4W2_CHLRE/1-181       | A8I4W2.1     | PF00211.18 | 68.80 | 0.00 |
| TRINITY_D8TMK9_VOLCA/311-362     | D8TMK9.1     | PF01846.17 | 68.80 | 0.00 |
| TRINITY_A7RU37_NEMVE/31-537      | A7RU37.1     | PF00330.18 | 68.80 | 0.00 |
| TRINITY_D8ULS6_VOLCA/67-321      | D8ULS6.1     | PF01636.21 | 68.80 | 0.00 |
| TRINITY_D8U5R7_VOLCA/7-126       | D8U5R7.1     | PF08477.11 | 68.80 | 0.00 |
| TRINITY_Q247W5_TETTS/30-198      | Q247W5.1     | PF00227.24 | 68.80 | 0.00 |
| TRINITY_D8TMI8_VOLCA/5-161       | D8TMI8.1     | PF00106.23 | 68.80 | 0.00 |
| TRINITY_Q22DC6_TETTS/70-165      | Q22DC6.2     | PF00338.20 | 68.80 | 0.00 |
| TRINITY_D8U7F8_VOLCA/1707-1755   | D8U7F8.1     | PF02042.13 | 68.80 | 0.00 |
| TRINITY_A8I985_CHLRE/223-459     | A8I985.1     | PF04811.13 | 68.80 | 0.00 |
| TRINITY_G3WLT7_SARHA/41-278      | G3WLT7.1     | PF04884.12 | 68.80 | 0.00 |
| TRINITY_J0KPW8_9BURK/278-481     | J0KPW8.1     | PF03441.12 | 68.80 | 0.00 |
| TRINITY_A0BWL4_PARTE/26-288      | A0BWL4.1     | PF00069.23 | 68.80 | 0.00 |
| TRINITY_E1ZFN2_CHLVA/22-277      | E1ZFN2.1     | PF01040.16 | 68.80 | 0.00 |
| TRINITY_D8TQB0_VOLCA/1630-1755   | D8TQB0.1     | PF00211.18 | 68.80 | 0.00 |
| TRINITY_A0A0I9NA30_BRUMA/16-81   | A0A0I9NA30.1 | PF0142     | 68.80 | 0.00 |
| TRINITY_L8HC09_ACACA/233-325     | L8HC09.1     | PF05761.12 | 68.80 | 0.00 |
| TRINITY_Q22W11_TETTS/50-150      | Q22W11.1     | PF00111.25 | 68.70 | 0.00 |
| TRINITY_F0Z713_DICPU/3-213       | F0Z713.1     | PF00091.23 | 68.70 | 0.00 |
| TRINITY_D3BPE3_POLPA/1-135       | D3BPE3.1     | PF01217.18 | 68.70 | 0.00 |
| TRINITY_D0MQG3_PHYIT/261-376     | D0MQG3.1     | PF02801.20 | 68.70 | 0.00 |
| TRINITY_A0A078AHP9_STYLE/355-421 | A0A078AHP9.1 | PF0022     | 68.70 | 0.00 |
| TRINITY_A0A078AR09_STYLE/8-169   | A0A078AR09.1 | PF0007     | 68.70 | 0.00 |
| TRINITY_I0YV20_9CHLO/60-294      | I0YV20.1     | PF01370.19 | 68.70 | 0.00 |
| TRINITY_A8IX31_CHLRE/146-272     | A8IX31.1     | PF00134.21 | 68.70 | 0.00 |
| TRINITY_W4GSZ0_9STRA/1585-1861   | W4GSZ0.1     | PF02138.16 | 68.70 | 0.00 |
| TRINITY_A8JFN4_CHLRE/30-188      | A8JFN4.1     | PF00160.19 | 68.70 | 0.00 |
| TRINITY_D3BSA4_POLPA/117-365     | D3BSA4.1     | PF01063.17 | 68.70 | 0.00 |
| TRINITY_D8UAD8_VOLCA/126-306     | D8UAD8.1     | PF00270.27 | 68.70 | 0.00 |
| TRINITY_A0A078AQC9_STYLE/701-959 | A0A078AQC9.1 | PF0006     | 68.70 | 0.00 |
| TRINITY_L8H1T2_ACACA/189-371     | L8H1T2.1     | PF00117.26 | 68.70 | 0.00 |
| TRINITY_G5EDF9_CAEEL/417-566     | G5EDF9.1     | PF00005.25 | 68.70 | 0.00 |
| TRINITY_C1MZF2_MICPC/167-287     | C1MZF2.1     | PF00271.29 | 68.70 | 0.00 |
| TRINITY_I0Z246_9CHLO/667-749     | I0Z246.1     | PF09369.8; | 68.70 | 0.00 |
| TRINITY_Q6BG73_PARTE/7-73        | Q6BG73.1     | PF13921.4; | 68.70 | 0.00 |
| TRINITY_G3RKE6_GORGO/13-813      | G3RKE6.1     | PF04563.13 | 68.70 | 0.00 |
| TRINITY_D8U2W9_VOLCA/23-287      | D8U2W9.1     | PF00459.23 | 68.70 | 0.00 |
| TRINITY_A8HYK7_CHLRE/141-358     | A8HYK7.1     | PF02096.18 | 68.70 | 0.00 |
| TRINITY_D8TJ80_VOLCA/167-396     | D8TJ80.1     | PF01798.16 | 68.70 | 0.00 |
| TRINITY_A8IXP1_CHLRE/1840-2022   | A8IXP1.1     | PF00211.18 | 68.70 | 0.00 |
| TRINITY_A0A015JFC3_9GLOM/15-346  | A0A015JFC3.1 | PF0020     | 68.70 | 0.00 |
| TRINITY_E1Z466_CHLVA/57-351      | E1Z466.1     | PF00248.19 | 68.70 | 0.00 |
| TRINITY_F2IAW3_FLUTR/160-316     | F2IAW3.1     | PF02800.18 | 68.70 | 0.00 |
| TRINITY_A8JAJ2_CHLRE/92-306      | A8JAJ2.1     | PF01036.16 | 68.70 | 0.00 |
| TRINITY_L8GQL0_ACACA/48-299      | L8GQL0.1     | PF00069.23 | 68.70 | 0.00 |
| TRINITY_Q9A8K3_CAUCR/227-377     | Q9A8K3.1     | PF00441.22 | 68.70 | 0.00 |
| TRINITY_D3BDQ8_POLPA/12-329      | D3BDQ8.1     | PF00225.21 | 68.70 | 0.00 |
| TRINITY_A8J6U8_CHLRE/3-261       | A8J6U8.1     | PF00069.23 | 68.70 | 0.00 |
| TRINITY_G0QJ07_ICHMG/10-191      | G0QJ07.1     | PF00227.24 | 68.70 | 0.00 |
| TRINITY_W7X227_TETTS/314-349     | W7X227.1     | PF08238.10 | 68.60 | 0.00 |

|                                  |              |            |       |      |
|----------------------------------|--------------|------------|-------|------|
| TRINITY_F4PRE1_DICFS/194-228     | F4PRE1.1     | PF00320.25 | 68.60 | 0.00 |
| TRINITY_S2KFF9_MUCC1/19-136      | S2KFF9.1     | PF01894.15 | 68.60 | 0.00 |
| TRINITY_S2KFF9_MUCC1/19-136      | S2KFF9.1     | PF01894.15 | 68.60 | 0.00 |
| TRINITY_A0A0G4LJ84_9PEZI/114-328 | A0A0G4LJ84.1 | PF0009     | 68.60 | 0.00 |
| TRINITY_A0A0P7VAB1_9TELE/21-192  | A0A0P7VAB1.1 | PF0026     | 68.60 | 0.00 |
| TRINITY_I7MJD5_TETTS/89-391      | I7MJD5.1     | PF00676.18 | 68.60 | 0.00 |
| TRINITY_A0D712_PARTE/195-452     | A0D712.1     | PF00069.23 | 68.60 | 0.00 |
| TRINITY_A0A0G4J5Y5_PLABS/8-361   | A0A0G4J5Y5.1 | PF0126     | 68.60 | 0.00 |
| TRINITY_I7M7Z9_TETTS/616-760     | I7M7Z9.1     | PF00005.25 | 68.60 | 0.00 |
| TRINITY_D8THB0_VOLCA/261-500     | D8THB0.1     | PF00814.23 | 68.60 | 0.00 |
| TRINITY_K7U0V6_MAIZE/58-353      | K7U0V6.1     | PF00579.23 | 68.60 | 0.00 |
| TRINITY_A8J673_CHLRE/1-121       | A8J673.1     | PF08315.10 | 68.60 | 0.00 |
| TRINITY_L8GVQ4_ACACA/573-690     | L8GVQ4.1     | PF02310.17 | 68.60 | 0.00 |
| TRINITY_Q22UZ7_TETTS/14-118      | Q22UZ7.2     | PF00307.29 | 68.60 | 0.00 |
| TRINITY_A0BED7_PARTE/44-252      | A0BED7.1     | PF08442.8; | 68.60 | 0.00 |
| TRINITY_D8UI45_VOLCA/1-169       | D8UI45.1     | PF01545.19 | 68.60 | 0.00 |
| TRINITY_A0A087SQB4_AUXPR/47-116  | A0A087SQB4.1 | PF0267     | 68.60 | 0.00 |
| TRINITY_D8TUF3_VOLCA/32-168      | D8TUF3.1     | PF01814.21 | 68.60 | 0.00 |
| TRINITY_D8U5R4_VOLCA/306-375     | D8U5R4.1     | PF00076.20 | 68.60 | 0.00 |
| TRINITY_A0DHP1_PARTE/551-761     | A0DHP1.1     | PF00211.18 | 68.60 | 0.00 |
| TRINITY_Q233N6_TETTS/33-289      | Q233N6.2     | PF00069.23 | 68.60 | 0.00 |
| TRINITY_M4BMA1_HYAAE/108-159     | M4BMA1.1     | PF00400.30 | 68.60 | 0.00 |
| TRINITY_A0A078A864_STYLE/29-333  | A0A078A864.1 | PF0313     | 68.60 | 0.00 |
| TRINITY_L8GUT5_ACACA/47-135      | L8GUT5.1     | PF00062.18 | 68.60 | 0.00 |
| TRINITY_A0A0D2TAC2_GOSRA/51-457  | A0A0D2TAC2.1 | PF0518     | 68.60 | 0.00 |
| TRINITY_A0A0G4J868_PLABS/11-48   | A0A0G4J868.1 | PF0040     | 68.60 | 0.00 |
| TRINITY_A8HVF8_CHLRE/9-127       | A8HVF8.1     | PF02338.17 | 68.60 | 0.00 |
| TRINITY_A7SGD9_NEMVE/51-86       | A7SGD9.1     | PF00400.30 | 68.60 | 0.00 |
| TRINITY_I7MD55_TETTS/531-788     | I7MD55.2     | PF00069.23 | 68.60 | 0.00 |
| TRINITY_G0QLS3_ICHMG/25-209      | G0QLS3.1     | PF00227.24 | 68.60 | 0.00 |
| TRINITY_U6PHM9_HAECO/501-829     | U6PHM9.1     | PF00176.21 | 68.60 | 0.00 |
| TRINITY_I0YVN5_9CHLO/16-242      | I0YVN5.1     | PF00850.17 | 68.60 | 0.00 |
| TRINITY_A0E493_PARTE/11-338      | A0E493.1     | PF00225.21 | 68.60 | 0.00 |
| TRINITY_D8TJP6_VOLCA/149-473     | D8TJP6.1     | PF00443.27 | 68.60 | 0.00 |
| TRINITY_K1QHT8_CRAGI/74-144      | K1QHT8.1     | PF00076.20 | 68.60 | 0.00 |
| TRINITY_M2Y471_GALSU/29-219      | M2Y471.1     | PF00227.24 | 68.60 | 0.00 |
| TRINITY_A8JFW5_CHLRE/24-180      | A8JFW5.1     | PF05351.9; | 68.60 | 0.00 |
| TRINITY_A0A0M2HVVO_9MICO/28-144  | A0A0M2HVVO.1 | PF0824     | 68.60 | 0.00 |
| TRINITY_D8TII1_VOLCA/7-490       | D8TII1.1     | PF00982.19 | 68.60 | 0.00 |
| TRINITY_I1K7D4_SOYBN/18-391      | I1K7D4.1     | PF00199.17 | 68.60 | 0.00 |
| TRINITY_M1VCC4_CYAME/278-464     | M1VCC4.1     | PF07724.12 | 68.60 | 0.00 |
| TRINITY_A8I0B3_CHLRE/1-207       | A8I0B3.1     | PF00481.19 | 68.60 | 0.00 |
| TRINITY_A9U311_PHYPA/469-571     | A9U311.1     | PF00085.18 | 68.60 | 0.00 |
| TRINITY_D8TUH3_VOLCA/26-235      | D8TUH3.1     | PF12706.5; | 68.60 | 0.00 |
| TRINITY_I7MDE4_TETTS/57-274      | I7MDE4.2     | PF03332.11 | 68.60 | 0.00 |
| TRINITY_A8IPH2_CHLRE/150-269     | A8IPH2.1     | PF04982.11 | 68.60 | 0.00 |
| TRINITY_G7ZEL6_AZOL4/114-433     | G7ZEL6.1     | PF01546.26 | 68.50 | 0.00 |
| TRINITY_E0VEF9_PEDHC/79-132      | E0VEF9.1     | PF01381.20 | 68.50 | 0.00 |
| TRINITY_A0CNM0_PARTE/7-99        | A0CNM0.1     | PF00153.25 | 68.50 | 0.00 |
| TRINITY_A8HME1_CHLRE/44-213      | A8HME1.1     | PF16166.3; | 68.50 | 0.00 |
| TRINITY_A0BXQ9_PARTE/10-344      | A0BXQ9.1     | PF00225.21 | 68.50 | 0.00 |
| TRINITY_M2Y2Z1_GALSU/166-292     | M2Y2Z1.1     | PF00134.21 | 68.50 | 0.00 |
| TRINITY_A0DZP1_PARTE/30-624      | A0DZP1.1     | PF00012.18 | 68.50 | 0.00 |
| TRINITY_I7MG82_TETTS/90-413      | I7MG82.2     | PF00225.21 | 68.50 | 0.00 |
| TRINITY_E1ZKP2_CHLVA/286-366     | E1ZKP2.1     | PF00498.24 | 68.50 | 0.00 |
| TRINITY_D8TIW2_VOLCA/287-378     | D8TIW2.1     | PF02517.14 | 68.50 | 0.00 |
| TRINITY_A8IRP0_CHLRE/1-360       | A8IRP0.1     | PF07690.14 | 68.50 | 0.00 |
| TRINITY_A0DQV4_PARTE/2-236       | A0DQV4.1     | PF00483.21 | 68.50 | 0.00 |
| TRINITY_D8TQV2_VOLCA/457-709     | D8TQV2.1     | PF12697.5; | 68.50 | 0.00 |
| TRINITY_A8JGJ4_CHLRE/324-589     | A8JGJ4.1     | PF00069.23 | 68.50 | 0.00 |
| TRINITY_D3B882_POLPA/43-231      | D3B882.1     | PF00069.23 | 68.50 | 0.00 |

|                                  |              |            |       |      |
|----------------------------------|--------------|------------|-------|------|
| TRINITY_A8I8K4_CHLRE/36-301      | A8I8K4.1     | PF00459.23 | 68.50 | 0.00 |
| TRINITY_B0THU3_HELMI/5-266       | B0THU3.1     | PF00795.20 | 68.50 | 0.00 |
| TRINITY_E1ZFM0_CHLVA/58-200      | E1ZFM0.1     | PF13365.4; | 68.50 | 0.00 |
| TRINITY_I0Z2W4_9CHLO/48-225      | I0Z2W4.1     | PF01634.16 | 68.50 | 0.00 |
| TRINITY_I0Z2Z0_9CHLO/345-422     | I0Z2Z0.1     | PF02020.16 | 68.50 | 0.00 |
| TRINITY_D8TQ08_VOLCA/100-172     | D8TQ08.1     | PF02325.15 | 68.50 | 0.00 |
| TRINITY_I7LUG9_TETTS/17-335      | I7LUG9.2     | PF00225.21 | 68.50 | 0.00 |
| TRINITY_A8IPI3_CHLRE/31-103      | A8IPI3.1     | PF07883.9; | 68.50 | 0.00 |
| TRINITY_D8U3X9_VOLCA/1-254       | D8U3X9.1     | PF00069.23 | 68.50 | 0.00 |
| TRINITY_L8HFC7_ACACA/637-816     | L8HFC7.1     | PF05063.12 | 68.50 | 0.00 |
| TRINITY_A8HX99_CHLRE/214-381     | A8HX99.1     | PF00160.19 | 68.50 | 0.00 |
| TRINITY_A8IAK1_CHLRE/13-231      | A8IAK1.1     | PF01031.18 | 68.50 | 0.00 |
| TRINITY_A8J6W3_CHLRE/6-208       | A8J6W3.1     | PF02854.17 | 68.50 | 0.00 |
| TRINITY_W4Z930_STRPU/42-190      | W4Z930.1     | PF00005.25 | 68.50 | 0.00 |
| TRINITY_I7LSV4_TETTS/3534-4237   | I7LSV4.2     | PF03028.13 | 68.50 | 0.00 |
| TRINITY_A8JGN8_CHLRE/797-969     | A8JGN8.1     | PF02460.16 | 68.50 | 0.00 |
| TRINITY_U4U9B7_DENPD/47-258      | U4U9B7.1     | PF01351.16 | 68.40 | 0.00 |
| TRINITY_G0R5C0_ICHMG/323-360     | G0R5C0.1     | PF00400.30 | 68.40 | 0.00 |
| TRINITY_V8NPF4_OPHHA/193-277     | V8NPF4.1     | PF01974.15 | 68.40 | 0.00 |
| TRINITY_G0QQX6_ICHMG/619-733     | G0QQX6.1     | PF00271.29 | 68.40 | 0.00 |
| TRINITY_I7M0P6_TETTS/42-98       | I7M0P6.1     | PF01849.16 | 68.40 | 0.00 |
| TRINITY_F0Z6W5_DICPU/32-323      | F0Z6W5.1     | PF00850.17 | 68.40 | 0.00 |
| TRINITY_I7M4Q4_TETTS/47-304      | I7M4Q4.1     | PF00069.23 | 68.40 | 0.00 |
| TRINITY_B9XKX6_PEDPL/39-443      | B9XKX6.1     | PF00202.19 | 68.40 | 0.00 |
| TRINITY_A8IDE3_CHLRE/567-680     | A8IDE3.1     | PF00175.19 | 68.40 | 0.00 |
| TRINITY_Q23JY6_TETTS/610-893     | Q23JY6.2     | PF00481.19 | 68.40 | 0.00 |
| TRINITY_A8IYH5_CHLRE/1-189       | A8IYH5.1     | PF00551.17 | 68.40 | 0.00 |
| TRINITY_A0A067RA84_ZOONE/106-735 | A0A067RA84.1 | PF0013     | 68.40 | 0.00 |
| TRINITY_A8IV51_CHLRE/123-238     | A8IV51.1     | PF13640.4; | 68.40 | 0.00 |
| TRINITY_A0A059LHG8_9CHLO/1-220   | A0A059LHG8.1 | PF1356     | 68.40 | 0.00 |
| TRINITY_I0YXK4_9CHLO/3-146       | I0YXK4.1     | PF06799.9; | 68.40 | 0.00 |
| TRINITY_G3PBA6_GASAC/5-62        | G3PBA6.1     | PF00412.20 | 68.40 | 0.00 |
| TRINITY_A0A094GNB2_9PEZI/42-212  | A0A094GNB2.1 | PF0214     | 68.40 | 0.00 |
| TRINITY_Q24GE4_TETTS/399-611     | Q24GE4.3     | PF00644.18 | 68.40 | 0.00 |
| TRINITY_A0A094GNB2_9PEZI/42-212  | A0A094GNB2.1 | PF0214     | 68.40 | 0.00 |
| TRINITY_RL4_TETTS/23-269         | P0DJ55.1     | PF00573.20 | 68.40 | 0.00 |
| TRINITY_A0A061DMP8_THECC/350-439 | A0A061DMP8.1 | PF0007     | 68.40 | 0.00 |
| TRINITY_Q22UI8_TETTS/2041-2254   | Q22UI8.2     | PF00454.25 | 68.40 | 0.00 |
| TRINITY_D8UJL1_VOLCA/640-868     | D8UJL1.1     | PF00326.19 | 68.40 | 0.00 |
| TRINITY_I0YLA3_9CHLO/43-441      | I0YLA3.1     | PF00464.17 | 68.40 | 0.00 |
| TRINITY_A8HME9_CHLRE/130-227     | A8HME9.1     | PF00561.18 | 68.40 | 0.00 |
| TRINITY_A9T8K5_PHYPA/288-484     | A9T8K5.1     | PF04389.15 | 68.40 | 0.00 |
| TRINITY_F4Q5T3_DICFS/12-408      | F4Q5T3.1     | PF00162.17 | 68.40 | 0.00 |
| TRINITY_A7EX43_SCLS1/411-558     | A7EX43.1     | PF00731.18 | 68.40 | 0.00 |
| TRINITY_A8J6C7_CHLRE/445-655     | A8J6C7.1     | PF01434.16 | 68.40 | 0.00 |
| TRINITY_A7SC77_NEMVE/56-189      | A7SC77.1     | PF00578.19 | 68.40 | 0.00 |
| TRINITY_D8TI22_VOLCA/166-394     | D8TI22.1     | PF03040.12 | 68.40 | 0.00 |
| TRINITY_A8IL08_CHLRE/489-703     | A8IL08.1     | PF01434.16 | 68.40 | 0.00 |
| TRINITY_D8U5Z4_VOLCA/87-202      | D8U5Z4.1     | PF13640.4; | 68.40 | 0.00 |
| TRINITY_D8TLC8_VOLCA/60-639      | D8TLC8.1     | PF05470.10 | 68.40 | 0.00 |
| TRINITY_D8U4P6_VOLCA/58-162      | D8U4P6.1     | PF00588.17 | 68.40 | 0.00 |
| TRINITY_L8GQL5_ACACA/626-1215    | L8GQL5.1     | PF00821.16 | 68.40 | 0.00 |
| TRINITY_L8GQL5_ACACA/626-1215    | L8GQL5.1     | PF00821.16 | 68.40 | 0.00 |
| TRINITY_A8I318_CHLRE/2-286       | A8I318.1     | PF03151.14 | 68.40 | 0.00 |
| TRINITY_A0A0B2VWK9_TOXCA/3-379   | A0A0B2VWK9.1 | PF0002     | 68.40 | 0.00 |
| TRINITY_A0A0G1MNI9_9BACT/9-281   | A0A0G1MNI9.1 | PF0000     | 68.30 | 0.00 |
| TRINITY_Q245G5_TETTS/3-166       | Q245G5.2     | PF08613.9; | 68.30 | 0.00 |
| TRINITY_Q245G5_TETTS/3-166       | Q245G5.2     | PF08613.9; | 68.30 | 0.00 |
| TRINITY_I0YWU4_9CHLO/8-153       | I0YWU4.1     | PF01751.20 | 68.30 | 0.00 |
| TRINITY_I7MJ35_TETTS/25-211      | I7MJ35.1     | PF01012.19 | 68.30 | 0.00 |
| TRINITY_I0XNV4_9LEPT/1-77        | I0XNV4.1     | PF02798.18 | 68.30 | 0.00 |



|                                  |              |            |       |      |
|----------------------------------|--------------|------------|-------|------|
| TRINITY_G0QQF6_ICHMG/8-146       | G0QQF6.1     | PF00179.24 | 68.30 | 0.00 |
| TRINITY_A0EGS7_PARTE/54-95       | A0EGS7.1     | PF13923.4; | 68.30 | 0.00 |
| TRINITY_Q24DJ0_TETTS/30-131      | Q24DJ0.1     | PF14772.4; | 68.30 | 0.00 |
| TRINITY_D7FTN9_ECTSI/26-139      | D7FTN9.1     | PF01398.19 | 68.30 | 0.00 |
| TRINITY_G0QPV5_ICHMG/284-405     | G0QPV5.1     | PF00782.18 | 68.30 | 0.00 |
| TRINITY_D3AWC6_POLPA/24-347      | D3AWC6.1     | PF00899.19 | 68.30 | 0.00 |
| TRINITY_A8IFE0_CHLRE/525-1063    | A8IFE0.1     | PF04998.15 | 68.30 | 0.00 |
| TRINITY_D8TNA1_VOLCA/128-418     | D8TNA1.1     | PF06814.11 | 68.30 | 0.00 |
| TRINITY_A0BK26_PARTE/10-356      | A0BK26.1     | PF00225.21 | 68.30 | 0.00 |
| TRINITY_D8UD65_VOLCA/308-348     | D8UD65.1     | PF00400.30 | 68.30 | 0.00 |
| TRINITY_W5AA68_WHEAT/3-184       | W5AA68.1     | PF00012.18 | 68.30 | 0.00 |
| TRINITY_F0ZR56_DICPU/72-332      | F0ZR56.1     | PF00122.18 | 68.30 | 0.00 |
| TRINITY_D8UEP9_VOLCA/1198-1364   | D8UEP9.1     | PF00270.27 | 68.30 | 0.00 |
| TRINITY_A8I1W3_CHLRE/2979-3226   | A8I1W3.1     | PF00454.25 | 68.30 | 0.00 |
| TRINITY_Q84TR5_CHLRE/17-117      | Q84TR5.1     | PF00307.29 | 68.30 | 0.00 |
| TRINITY_Q22AZ2_TETTS/11-309      | Q22AZ2.2     | PF00463.19 | 68.30 | 0.00 |
| TRINITY_D8TUE1_VOLCA/55-325      | D8TUE1.1     | PF01513.19 | 68.30 | 0.00 |
| TRINITY_A8J629_CHLRE/229-374     | A8J629.1     | PF01699.22 | 68.30 | 0.00 |
| TRINITY_A0A087SAG6_AUXPR/336-376 | A0A087SAG6.1 | PF00040    | 68.30 | 0.00 |
| TRINITY_L8HKC2_ACACA/226-268     | L8HKC2.1     | PF00569.15 | 68.30 | 0.00 |
| TRINITY_A8J7U7_CHLRE/2-344       | A8J7U7.1     | PF01137.19 | 68.30 | 0.00 |
| TRINITY_A0EDS7_PARTE/465-664     | A0EDS7.1     | PF01434.16 | 68.30 | 0.00 |
| TRINITY_D8UGS8_VOLCA/11-249      | D8UGS8.1     | PF00899.19 | 68.30 | 0.00 |
| TRINITY_A0A0D2X094_CAPO3/2-82    | A0A0D2X094.1 | PF00088    | 68.30 | 0.00 |
| TRINITY_A4VDD6_TETTS/15-172      | A4VDD6.1     | PF02099.15 | 68.20 | 0.00 |
| TRINITY_D2VUH3_NAEGR/405-524     | D2VUH3.1     | PF00917.24 | 68.20 | 0.00 |
| TRINITY_W7TKH0_9STRA/1-223       | W7TKH0.1     | PF06418.12 | 68.20 | 0.00 |
| TRINITY_D3AX77_POLPA/30-357      | D3AX77.1     | PF04909.12 | 68.20 | 0.00 |
| TRINITY_G0R585_ICHMG/543-822     | G0R585.1     | PF12775.5; | 68.20 | 0.00 |
| TRINITY_Q24IJ5_TETTS/374-418     | Q24IJ5.1     | PF06203.12 | 68.20 | 0.00 |
| TRINITY_MYOD_DICDI/9-674         | P34109.2     | PF00063.19 | 68.20 | 0.00 |
| TRINITY_J9JCA5_9SPIT/125-339     | J9JCA5.1     | PF00112.21 | 68.20 | 0.00 |
| TRINITY_I1CHR9_RHIO9/197-291     | I1CHR9.1     | PF00153.25 | 68.20 | 0.00 |
| TRINITY_I0Z1Z3_9CHLO/21-112      | I0Z1Z3.1     | PF00428.17 | 68.20 | 0.00 |
| TRINITY_I0YZR3_9CHLO/5-159       | I0YZR3.1     | PF00929.22 | 68.20 | 0.00 |
| TRINITY_F4K151_ARATH/29-74       | F4K151.1     | PF13639.4; | 68.20 | 0.00 |
| TRINITY_A8HQW1_CHLRE/5-232       | A8HQW1.1     | PF01182.18 | 68.20 | 0.00 |
| TRINITY_E1Z3R6_CHLVA/113-623     | E1Z3R6.1     | PF07969.9; | 68.20 | 0.00 |
| TRINITY_G0QN21_ICHMG/543-674     | G0QN21.1     | PF00005.25 | 68.20 | 0.00 |
| TRINITY_A0CMX3_PARTE/57-210      | A0CMX3.1     | PF00005.25 | 68.20 | 0.00 |
| TRINITY_D8UAS6_VOLCA/335-465     | D8UAS6.1     | PF00566.16 | 68.20 | 0.00 |
| TRINITY_I0YML0_9CHLO/1-132       | I0YML0.1     | PF00504.19 | 68.20 | 0.00 |
| TRINITY_L8GZG8_ACACA/214-302     | L8GZG8.1     | PF07571.11 | 68.20 | 0.00 |
| TRINITY_I7LTN8_TETTS/14-165      | I7LTN8.1     | PF00179.24 | 68.20 | 0.00 |
| TRINITY_A0A087SME0_AUXPR/3-322   | A0A087SME0.1 | PF0369     | 68.20 | 0.00 |
| TRINITY_D8U3F5_VOLCA/48-269      | D8U3F5.1     | PF01370.19 | 68.20 | 0.00 |
| TRINITY_A8J201_CHLRE/78-123      | A8J201.1     | PF00400.30 | 68.20 | 0.00 |
| TRINITY_A8IIZ5_CHLRE/19-278      | A8IIZ5.1     | PF00069.23 | 68.20 | 0.00 |
| TRINITY_A9TN94_PHYPA/43-165      | A9TN94.1     | PF00903.23 | 68.20 | 0.00 |
| TRINITY_A0A0D9VUL1_9ORYZ/7-183   | A0A0D9VUL1.1 | PF0016     | 68.20 | 0.00 |
| TRINITY_A0A0F5L2E0_9RHIZ/426-749 | A0A0F5L2E0.1 | PF0171     | 68.20 | 0.00 |
| TRINITY_A8IHQ2_CHLRE/12-181      | A8IHQ2.1     | PF04893.15 | 68.20 | 0.00 |
| TRINITY_L8H6I3_ACACA/416-480     | L8H6I3.1     | PF01485.19 | 68.20 | 0.00 |
| TRINITY_D8TY38_VOLCA/1581-1689   | D8TY38.1     | PF00856.26 | 68.20 | 0.00 |
| TRINITY_D8UE48_VOLCA/38-167      | D8UE48.1     | PF00271.29 | 68.20 | 0.00 |
| TRINITY_Q23K21_TETTS/369-636     | Q23K21.2     | PF00487.22 | 68.20 | 0.00 |
| TRINITY_D7G1J2_ECTSI/274-437     | D7G1J2.1     | PF00270.27 | 68.20 | 0.00 |
| TRINITY_A0A0M9UDC4_9CHLR/12-275  | A0A0M9UDC4.1 | PF1356     | 68.20 | 0.00 |
| TRINITY_L8GF06_ACACA/12-222      | L8GF06.1     | PF05378.11 | 68.10 | 0.00 |
| TRINITY_A0A068XFX1_HYMMI/1-132   | A0A068XFX1.1 | PF0012     | 68.10 | 0.00 |
| TRINITY_A8JBC8_CHLRE/11-125      | A8JBC8.1     | PF01398.19 | 68.10 | 0.00 |

|                                  |              |            |       |      |
|----------------------------------|--------------|------------|-------|------|
| TRINITY_I0YWD0_9CHLO/8-264       | I0YWD0.1     | PF00069.23 | 68.10 | 0.00 |
| TRINITY_A0A087SA88_AUXPR/261-382 | A0A087SA88.1 | PF0395     | 68.10 | 0.00 |
| TRINITY_L8GVQ7_ACACA/9-125       | L8GVQ7.1     | PF02678.14 | 68.10 | 0.00 |
| TRINITY_A8IYL8_CHLRE/50-137      | A8IYL8.1     | PF05172.11 | 68.10 | 0.00 |
| TRINITY_D8TKT9_VOLCA/549-804     | D8TKT9.1     | PF00425.16 | 68.10 | 0.00 |
| TRINITY_D8TZ47_VOLCA/242-358     | D8TZ47.1     | PF00932.17 | 68.10 | 0.00 |
| TRINITY_L8GW58_ACACA/230-524     | L8GW58.1     | PF02781.14 | 68.10 | 0.00 |
| TRINITY_D8U5Y2_VOLCA/952-1077    | D8U5Y2.1     | PF07728.12 | 68.10 | 0.00 |
| TRINITY_I7MLL9_TETTS/291-547     | I7MLL9.2     | PF00069.23 | 68.10 | 0.00 |
| TRINITY_K1QCY0_CRAGI/35-433      | K1QCY0.1     | PF00464.17 | 68.10 | 0.00 |
| TRINITY_C4JNN2_UNCRE/73-160      | C4JNN2.1     | PF04488.13 | 68.10 | 0.00 |
| TRINITY_Q4QCN8_LEIMA/134-211     | Q4QCN8.1     | PF05002.13 | 68.10 | 0.00 |
| TRINITY_Q239M6_TETTS/768-1156    | Q239M6.2     | PF00940.17 | 68.10 | 0.00 |
| TRINITY_K4AE64_SETIT/14-140      | K4AE64.1     | PF12165.6; | 68.10 | 0.00 |
| TRINITY_F4Q353_DICFS/600-717     | F4Q353.1     | PF02466.17 | 68.10 | 0.00 |
| TRINITY_Q239R2_TETTS/10-57       | Q239R2.2     | PF00319.16 | 68.10 | 0.00 |
| TRINITY_I0Z920_9CHLO/37-305      | I0Z920.1     | PF00494.17 | 68.10 | 0.00 |
| TRINITY_C5XJE3_SORBI/299-460     | C5XJE3.1     | PF08662.9; | 68.10 | 0.00 |
| TRINITY_FEN11_PARTE/1-111        | A0CXT3.1     | PF00752.15 | 68.10 | 0.00 |
| TRINITY_L8GT20_ACACA/17-342      | L8GT20.1     | PF00009.25 | 68.10 | 0.00 |
| TRINITY_I7MDB1_TETTS/296-654     | I7MDB1.2     | PF03133.13 | 68.10 | 0.00 |
| TRINITY_D6WWC9_TRICA/1052-1123   | D6WWC9.1     | PF04564.13 | 68.10 | 0.00 |
| TRINITY_A8J3T4_CHLRE/72-440      | A8J3T4.1     | PF01979.18 | 68.10 | 0.00 |
| TRINITY_A0BWW1_PARTE/272-340     | A0BWW1.1     | PF00498.24 | 68.10 | 0.00 |
| TRINITY_D3B0D6_POLPA/8-284       | D3B0D6.1     | PF03643.13 | 68.10 | 0.00 |
| TRINITY_A0A087YGB1_POEFO/20-271  | A0A087YGB1.2 | PF0006     | 68.10 | 0.00 |
| TRINITY_A8J326_CHLRE/65-436      | A8J326.1     | PF01979.18 | 68.10 | 0.00 |
| TRINITY_D8U0A7_VOLCA/524-587     | D8U0A7.1     | PF13432.4; | 68.10 | 0.00 |
| TRINITY_B3S5T2_TRIAD/107-153     | B3S5T2.1     | PF13921.4; | 68.10 | 0.00 |
| TRINITY_D8U9P4_VOLCA/143-212     | D8U9P4.1     | PF00076.20 | 68.10 | 0.00 |
| TRINITY_D3BR06_POLPA/461-695     | D3BR06.1     | PF00198.21 | 68.10 | 0.00 |
| TRINITY_PR38A_DANRE/10-175       | Q6DHU4.1     | PF03371.13 | 68.10 | 0.00 |
| TRINITY_I0YP89_9CHLO/15-422      | I0YP89.1     | PF06838.9; | 68.10 | 0.00 |
| TRINITY_D3BTL7_POLPA/1505-1792   | D3BTL7.1     | PF01031.18 | 68.10 | 0.00 |
| TRINITY_Q24C33_TETTS/16-62       | Q24C33.1     | PF01281.17 | 68.10 | 0.00 |
| TRINITY_D8UK57_VOLCA/430-594     | D8UK57.1     | PF00534.18 | 68.10 | 0.00 |
| TRINITY_I7M700_TETTS/181-443     | I7M700.2     | PF00069.23 | 68.10 | 0.00 |
| TRINITY_D8U2Q8_VOLCA/673-763     | D8U2Q8.1     | PF03982.11 | 68.10 | 0.00 |
| TRINITY_A0A0E9NBZ0_9ASCO/15-61   | A0A0E9NBZ0.1 | PF1290     | 68.10 | 0.00 |
| TRINITY_A8J537_CHLRE/18-399      | A8J537.1     | PF00199.17 | 68.10 | 0.00 |
| TRINITY_I0Z8F4_9CHLO/651-787     | I0Z8F4.1     | PF00005.25 | 68.10 | 0.00 |
| TRINITY_D8TI09_VOLCA/114-277     | D8TI09.1     | PF04116.11 | 68.10 | 0.00 |
| TRINITY_D8UCZ7_VOLCA/23-229      | D8UCZ7.1     | PF00106.23 | 68.10 | 0.00 |
| TRINITY_D8TZ40_VOLCA/777-1279    | D8TZ40.1     | PF04998.15 | 68.10 | 0.00 |
| TRINITY_A8J046_CHLRE/643-936     | A8J046.1     | PF03715.11 | 68.10 | 0.00 |
| TRINITY_I7LV68_TETTS/19-199      | I7LV68.1     | PF13439.4; | 68.10 | 0.00 |
| TRINITY_X6MRY1_RETFI/247-315     | X6MRY1.1     | PF04564.13 | 68.00 | 0.00 |
| TRINITY_B8HSG8_CYAP4/8-137       | B8HSG8.1     | PF07080.9; | 68.00 | 0.00 |
| TRINITY_ITPA_MICSR/9-188         | C1FI13.1     | PF01725.14 | 68.00 | 0.00 |
| TRINITY_G0QL25_ICHMG/300-478     | G0QL25.1     | PF11931.6; | 68.00 | 0.00 |
| TRINITY_A0A072PK09_9EURO/17-112  | A0A072PK09.1 | PF0042     | 68.00 | 0.00 |
| TRINITY_A0DAW7_PARTE/169-243     | A0DAW7.1     | PF01169.17 | 68.00 | 0.00 |
| TRINITY_D8TKV7_VOLCA/614-688     | D8TKV7.1     | PF11732.6; | 68.00 | 0.00 |
| TRINITY_A8IV40_CHLRE/38-112      | A8IV40.1     | PF00111.25 | 68.00 | 0.00 |
| TRINITY_Q238V7_TETTS/58-226      | Q238V7.2     | PF00270.27 | 68.00 | 0.00 |
| TRINITY_E1ZKT8_CHLVA/93-167      | E1ZKT8.1     | PF03110.12 | 68.00 | 0.00 |
| TRINITY_I0ZAA1_9CHLO/56-167      | I0ZAA1.1     | PF00072.22 | 68.00 | 0.00 |
| TRINITY_I7MLG1_TETTS/1-175       | I7MLG1.1     | PF14580.4; | 68.00 | 0.00 |
| TRINITY_A8IVD4_CHLRE/52-173      | A8IVD4.1     | PF13409.4; | 68.00 | 0.00 |
| TRINITY_Q7XLE8_ORYSJ/857-1017    | Q7XLE8.2     | PF00078.25 | 68.00 | 0.00 |
| TRINITY_D8TQK9_VOLCA/19-93       | D8TQK9.1     | PF04969.14 | 68.00 | 0.00 |

|                                  |              |            |       |      |
|----------------------------------|--------------|------------|-------|------|
| TRINITY_I0YMS0_9CHLO/96-197      | I0YMS0.1     | PF00153.25 | 68.00 | 0.00 |
| TRINITY_Q24HK9_TETTS/22-280      | Q24HK9.3     | PF00069.23 | 68.00 | 0.00 |
| TRINITY_A8IHL8_CHLRE/15-117      | A8IHL8.1     | PF13815.4; | 68.00 | 0.00 |
| TRINITY_D8TU26_VOLCA/70-514      | D8TU26.1     | PF00899.19 | 68.00 | 0.00 |
| TRINITY_E1Z439_CHLVA/15-334      | E1Z439.1     | PF03747.12 | 68.00 | 0.00 |
| TRINITY_A8IMP0_CHLRE/47-242      | A8IMP0.1     | PF00149.26 | 68.00 | 0.00 |
| TRINITY_I7M3W6_TETTS/237-558     | I7M3W6.2     | PF00152.18 | 68.00 | 0.00 |
| TRINITY_D8UIV0_VOLCA/25-394      | D8UIV0.1     | PF00224.19 | 68.00 | 0.00 |
| TRINITY_A8JAT5_CHLRE/39-89       | A8JAT5.1     | PF00847.18 | 68.00 | 0.00 |
| TRINITY_F0ZZF5_DICPU/9-255       | F0ZZF5.1     | PF13714.4; | 68.00 | 0.00 |
| TRINITY_D8TP06_VOLCA/164-311     | D8TP06.1     | PF03031.16 | 68.00 | 0.00 |
| TRINITY_A8IIN4_CHLRE/53-510      | A8IIN4.1     | PF01425.19 | 68.00 | 0.00 |
| TRINITY_D8TH36_VOLCA/208-334     | D8TH36.1     | PF01980.14 | 68.00 | 0.00 |
| TRINITY_D8UFG0_VOLCA/350-786     | D8UFG0.1     | PF00654.18 | 68.00 | 0.00 |
| TRINITY_A0A0N4TT30_BRUPA/1-101   | A0A0N4TT30.1 | PF0012     | 68.00 | 0.00 |
| TRINITY_G0QXH1_ICHMG/83-135      | G0QXH1.1     | PF01381.20 | 67.90 | 0.00 |
| TRINITY_B3S8A3_TRIAD/15-255      | B3S8A3.1     | PF13621.4; | 67.90 | 0.00 |
| TRINITY_B2ZPK7_SOLLC/151-363     | B2ZPK7.1     | PF03181.13 | 67.90 | 0.00 |
| TRINITY_Q4S823_TETNG/14-176      | Q4S823.1     | PF00160.19 | 67.90 | 0.00 |
| TRINITY_A0A078A5I6_STYLE/47-225  | A0A078A5I6.1 | PF0035     | 67.90 | 0.00 |
| TRINITY_D8M736_BLAHO/107-315     | D8M736.1     | PF00112.21 | 67.90 | 0.00 |
| TRINITY_Q24GG1_TETTS/54-209      | Q24GG1.2     | PF09416.8; | 67.90 | 0.00 |
| TRINITY_I7LZX7_TETTS/8-264       | I7LZX7.2     | PF00069.23 | 67.90 | 0.00 |
| TRINITY_X6NYM3_RETFI/392-506     | X6NYM3.1     | PF00188.24 | 67.90 | 0.00 |
| TRINITY_A8J2D1_CHLRE/1-56        | A8J2D1.1     | PF12796.5; | 67.90 | 0.00 |
| TRINITY_A8ISQ5_CHLRE/1729-1856   | A8ISQ5.1     | PF00004.27 | 67.90 | 0.00 |
| TRINITY_B4J6T2_DROGR/47-154      | B4J6T2.1     | PF13085.4; | 67.90 | 0.00 |
| TRINITY_A0BWW1_PARTE/272-340     | A0BWW1.1     | PF00498.24 | 67.90 | 0.00 |
| TRINITY_I2EPL2_EMTOG/3-295       | I2EPL2.1     | PF00732.17 | 67.90 | 0.00 |
| TRINITY_A8HXG2_CHLRE/256-343     | A8HXG2.1     | PF16561.3; | 67.90 | 0.00 |
| TRINITY_J9JCA5_9SPIT/125-339     | J9JCA5.1     | PF00112.21 | 67.90 | 0.00 |
| TRINITY_E1ZE86_CHLVA/64-141      | E1ZE86.1     | PF00076.20 | 67.90 | 0.00 |
| TRINITY_A0E7B4_PARTE/247-358     | A0E7B4.1     | PF06565.10 | 67.90 | 0.00 |
| TRINITY_E1Z4H4_CHLVA/267-425     | E1Z4H4.1     | PF00204.23 | 67.90 | 0.00 |
| TRINITY_G0QTD0_ICHMG/10-221      | G0QTD0.1     | PF01145.23 | 67.90 | 0.00 |
| TRINITY_D8TQW2_VOLCA/49-126      | D8TQW2.1     | PF00173.26 | 67.90 | 0.00 |
| TRINITY_T1KP71_TETUR/34-290      | T1KP71.1     | PF01650.16 | 67.90 | 0.00 |
| TRINITY_A8IKY9_CHLRE/2-121       | A8IKY9.1     | PF03966.14 | 67.90 | 0.00 |
| TRINITY_D8UDL2_VOLCA/636-712     | D8UDL2.1     | PF00069.23 | 67.90 | 0.00 |
| TRINITY_A0A087SBP1_AUXPR/23-164  | A0A087SBP1.1 | PF0014     | 67.90 | 0.00 |
| TRINITY_D8U1K7_VOLCA/238-345     | D8U1K7.1     | PF00085.18 | 67.90 | 0.00 |
| TRINITY_A0A0J7KVV5_LASNI/257-464 | A0A0J7KVV5.1 | PF0113     | 67.90 | 0.00 |
| TRINITY_G0QPY8_ICHMG/8-406       | G0QPY8.1     | PF01264.19 | 67.90 | 0.00 |
| TRINITY_D8TW87_VOLCA/17-209      | D8TW87.1     | PF00687.19 | 67.90 | 0.00 |
| TRINITY_A8IZP3_CHLRE/4-466       | A8IZP3.1     | PF07779.10 | 67.90 | 0.00 |
| TRINITY_A8HPY4_CHLRE/80-358      | A8HPY4.1     | PF00795.20 | 67.90 | 0.00 |
| TRINITY_L5LTN0_MYODS/23-100      | L5LTN0.1     | PF00935.17 | 67.90 | 0.00 |
| TRINITY_A8IQD6_CHLRE/150-339     | A8IQD6.1     | PF04802.13 | 67.90 | 0.00 |
| TRINITY_A8J4P3_CHLRE/37-399      | A8J4P3.1     | PF07690.14 | 67.90 | 0.00 |
| TRINITY_A8JGG5_CHLRE/37-505      | A8JGG5.1     | PF01425.19 | 67.90 | 0.00 |
| TRINITY_D8UJC8_VOLCA/1-224       | D8UJC8.1     | PF01902.15 | 67.90 | 0.00 |
| TRINITY_G0R5X3_ICHMG/62-122      | G0R5X3.1     | PF10203.7; | 67.80 | 0.00 |
| TRINITY_K1PGI9_CRAGI/524-659     | K1PGI9.1     | PF00005.25 | 67.80 | 0.00 |
| TRINITY_D8TRX1_VOLCA/123-216     | D8TRX1.1     | PF00166.19 | 67.80 | 0.00 |
| TRINITY_A8IQW5_CHLRE/92-259      | A8IQW5.1     | PF13911.4; | 67.80 | 0.00 |
| TRINITY_G0QVM2_ICHMG/72-361      | G0QVM2.1     | PF00579.23 | 67.80 | 0.00 |
| TRINITY_K3WQ17_PYTUL/63-407      | K3WQ17.1     | PF00155.19 | 67.80 | 0.00 |
| TRINITY_D8U1E9_VOLCA/47-105      | D8U1E9.1     | PF05383.15 | 67.80 | 0.00 |
| TRINITY_D8U0M7_VOLCA/159-303     | D8U0M7.1     | PF01699.22 | 67.80 | 0.00 |
| TRINITY_A8IU88_CHLRE/35-156      | A8IU88.1     | PF08311.10 | 67.80 | 0.00 |
| TRINITY_D8TNQ4_VOLCA/48-346      | D8TNQ4.1     | PF00732.17 | 67.80 | 0.00 |

|                                  |              |            |       |      |
|----------------------------------|--------------|------------|-------|------|
| TRINITY_I3BVD7_9GAMM/3-177       | I3BVD7.1     | PF00227.24 | 67.80 | 0.00 |
| TRINITY_A0BEL1_PARTE/237-357     | A0BEL1.1     | PF00622.26 | 67.80 | 0.00 |
| TRINITY_L5K105_PTEAL/5-361       | L5K105.1     | PF00009.25 | 67.80 | 0.00 |
| TRINITY_A0CC74_PARTE/73-372      | A0CC74.1     | PF03133.13 | 67.80 | 0.00 |
| TRINITY_F4XNB4_9CYAN/28-490      | F4XNB4.1     | PF00171.20 | 67.80 | 0.00 |
| TRINITY_C1N1C6_MICPC/1681-1949   | C1N1C6.1     | PF12780.5; | 67.80 | 0.00 |
| TRINITY_D8TX36_VOLCA/31-175      | D8TX36.1     | PF00005.25 | 67.80 | 0.00 |
| TRINITY_U5D0K8_AMBTC/138-226     | U5D0K8.1     | PF00867.16 | 67.80 | 0.00 |
| TRINITY_C5KAN2_PERM5/114-259     | C5KAN2.1     | PF00005.25 | 67.80 | 0.00 |
| TRINITY_C6Y1V7_PEDHD/4-261       | C6Y1V7.1     | PF00108.21 | 67.80 | 0.00 |
| TRINITY_A8IFT8_CHLRE/600-698     | A8IFT8.1     | PF00211.18 | 67.80 | 0.00 |
| TRINITY_I7M6Y9_TETTS/9-179       | I7M6Y9.1     | PF00535.24 | 67.80 | 0.00 |
| TRINITY_Q240X5_TETTS/179-268     | Q240X5.2     | PF00027.27 | 67.80 | 0.00 |
| TRINITY_Q22XN5_TETTS/43-220      | Q22XN5.1     | PF02146.15 | 67.80 | 0.00 |
| TRINITY_R4K6C0_CLOPA/9-298       | R4K6C0.1     | PF00251.18 | 67.80 | 0.00 |
| TRINITY_I0YJB7_9CHLO/10-248      | I0YJB7.1     | PF13621.4; | 67.80 | 0.00 |
| TRINITY_D8U097_VOLCA/530-621     | D8U097.1     | PF12796.5; | 67.80 | 0.00 |
| TRINITY_A0A0E0QA79_ORYRU/263-392 | A0A0E0QA79.1 | PF0395     | 67.80 | 0.00 |
| TRINITY_D8TII4_VOLCA/175-245     | D8TII4.1     | PF04845.11 | 67.80 | 0.00 |
| TRINITY_D8U9Y0_VOLCA/1-143       | D8U9Y0.1     | PF00588.17 | 67.80 | 0.00 |
| TRINITY_F4B1G5_DOKS4/2-110       | F4B1G5.1     | PF00903.23 | 67.70 | 0.00 |
| TRINITY_L8GNF3_ACACA/465-529     | L8GNF3.1     | PF06628.10 | 67.70 | 0.00 |
| TRINITY_A0BSN3_PARTE/14-266      | A0BSN3.1     | PF00069.23 | 67.70 | 0.00 |
| TRINITY_D8SX26_SELML/44-116      | D8SX26.1     | PF00173.26 | 67.70 | 0.00 |
| TRINITY_I7MH42_TETTS/165-435     | I7MH42.1     | PF00928.19 | 67.70 | 0.00 |
| TRINITY_Q54FV6_DICDI/11-71       | Q54FV6.1     | PF00412.20 | 67.70 | 0.00 |
| TRINITY_M2Y2Z1_GALSU/166-292     | M2Y2Z1.1     | PF00134.21 | 67.70 | 0.00 |
| TRINITY_D8TS03_VOLCA/34-195      | D8TS03.1     | PF02815.17 | 67.70 | 0.00 |
| TRINITY_G0QZL5_ICHMG/10-170      | G0QZL5.1     | PF00071.20 | 67.70 | 0.00 |
| TRINITY_F1A1K2_DICPU/35-199      | F1A1K2.1     | PF00160.19 | 67.70 | 0.00 |
| TRINITY_Q23JY6_TETTS/610-893     | Q23JY6.2     | PF00481.19 | 67.70 | 0.00 |
| TRINITY_A0CDX9_PARTE/544-846     | A0CDX9.1     | PF01180.19 | 67.70 | 0.00 |
| TRINITY_I7M6T2_TETTS/301-464     | I7M6T2.2     | PF00160.19 | 67.70 | 0.00 |
| TRINITY_A0BN60_PARTE/55-373      | A0BN60.1     | PF00225.21 | 67.70 | 0.00 |
| TRINITY_L8GVX9_ACACA/3-80        | L8GVX9.1     | PF03650.11 | 67.70 | 0.00 |
| TRINITY_D8UD76_VOLCA/695-824     | D8UD76.1     | PF06398.9; | 67.70 | 0.00 |
| TRINITY_I0Z8B4_9CHLO/5-176       | I0Z8B4.1     | PF00929.22 | 67.70 | 0.00 |
| TRINITY_A8J5W6_CHLRE/31-285      | A8J5W6.1     | PF12697.5; | 67.70 | 0.00 |
| TRINITY_D8U0G0_VOLCA/59-397      | D8U0G0.1     | PF00206.18 | 67.70 | 0.00 |
| TRINITY_A0A0E0LJL9_ORYPU/262-459 | A0A0E0LJL9.1 | PF0278     | 67.70 | 0.00 |
| TRINITY_I0Z6M3_9CHLO/18-112      | I0Z6M3.1     | PF08698.9; | 67.70 | 0.00 |
| TRINITY_A8HQN4_CHLRE/363-427     | A8HQN4.1     | PF00226.29 | 67.70 | 0.00 |
| TRINITY_D8U0E7_VOLCA/59-182      | D8U0E7.1     | PF02466.17 | 67.70 | 0.00 |
| TRINITY_D8TKS8_VOLCA/334-429     | D8TKS8.1     | PF08295.10 | 67.70 | 0.00 |
| TRINITY_IFT27_CHLRE/18-188       | A8HN58.1     | PF00071.20 | 67.70 | 0.00 |
| TRINITY_D8UIP0_VOLCA/9-539       | D8UIP0.1     | PF01274.20 | 67.70 | 0.00 |
| TRINITY_D8UE50_VOLCA/48-270      | D8UE50.1     | PF03407.14 | 67.70 | 0.00 |
| TRINITY_I0YPL0_9CHLO/97-349      | I0YPL0.1     | PF08323.9; | 67.70 | 0.00 |
| TRINITY_E1ZCV9_CHLVA/573-1684    | E1ZCV9.1     | PF02463.17 | 67.70 | 0.00 |
| TRINITY_Q245X8_TETTS/386-454     | Q245X8.1     | PF00076.20 | 67.70 | 0.00 |
| TRINITY_U6JDZ7_ECHGR/13-174      | U6JDZ7.1     | PF00071.20 | 67.60 | 0.00 |
| TRINITY_A0A0D1VZF4_ANEMI/9-178   | A0A0D1VZF4.1 | PF0088     | 67.60 | 0.00 |
| TRINITY_E1ZQY0_CHLVA/78-247      | E1ZQY0.1     | PF14543.4; | 67.60 | 0.00 |
| TRINITY_F2U9H6_SALR5/181-233     | F2U9H6.1     | PF00071.20 | 67.60 | 0.00 |
| TRINITY_F4PIQ2_DICFS/4-144       | F4PIQ2.1     | PF00179.24 | 67.60 | 0.00 |
| TRINITY_T1IXR9_STRMM/18-91       | T1IXR9.1     | PF01423.20 | 67.60 | 0.00 |
| TRINITY_V5EMR8_PSEBG/280-319     | V5EMR8.1     | PF05920.9; | 67.60 | 0.00 |
| TRINITY_X1W3S7_TETTS/4-262       | X1W3S7.1     | PF00069.23 | 67.60 | 0.00 |
| TRINITY_I0YKX7_9CHLO/155-269     | I0YKX7.1     | PF00504.19 | 67.60 | 0.00 |
| TRINITY_A0A077ZRC7_STYLE/176-249 | A0A077ZRC7.1 | PF0038     | 67.60 | 0.00 |
| TRINITY_A0A0B2VWK9_TOXCA/3-379   | A0A0B2VWK9.1 | PF0002     | 67.60 | 0.00 |

|                                    |                     |       |      |
|------------------------------------|---------------------|-------|------|
| TRINITY_G0QW93_ICHMG/62-317        | G0QW93.1 PF00069.23 | 67.60 | 0.00 |
| TRINITY_A0A0N4Y0F3_NIPBR/36-320    | A0A0N4Y0F3.1 PF0006 | 67.60 | 0.00 |
| TRINITY_A8JDI7_CHLRE/86-341        | A8JDI7.1 PF08423.9; | 67.60 | 0.00 |
| TRINITY_Q238R8_TETTS/18-286        | Q238R8.1 PF02263.17 | 67.60 | 0.00 |
| TRINITY_E1ZKT8_CHLVA/93-167        | E1ZKT8.1 PF03110.12 | 67.60 | 0.00 |
| TRINITY_D8U8W6_VOLCA/27-494        | D8U8W6.1 PF01384.18 | 67.60 | 0.00 |
| TRINITY_A0A088A820_APIME/55-202    | A0A088A820.1 PF0067 | 67.60 | 0.00 |
| TRINITY_A9S530_PHYPA/43-80         | A9S530.1 PF00400.30 | 67.60 | 0.00 |
| TRINITY_A8IBQ0_CHLRE/60-244        | A8IBQ0.1 PF01728.17 | 67.60 | 0.00 |
| TRINITY_Q944P3_CHLRE/38-319        | Q944P3.1 PF01430.17 | 67.60 | 0.00 |
| TRINITY_A0A061FIQ2_THECC/17-196    | A0A061FIQ2.1 PF0050 | 67.60 | 0.00 |
| TRINITY_I7LTH0_TETTS/41-222        | I7LTH0.1 PF00350.21 | 67.60 | 0.00 |
| TRINITY_F2U3A2_SALR5/20-125        | F2U3A2.1 PF00085.18 | 67.60 | 0.00 |
| TRINITY_K1QNG9_CRAGI/93-166        | K1QNG9.1 PF00276.18 | 67.60 | 0.00 |
| TRINITY_G0QX41_ICHMG/40-335        | G0QX41.1 PF00069.23 | 67.60 | 0.00 |
| TRINITY_D8U9K9_VOLCA/5-174         | D8U9K9.1 PF07106.11 | 67.60 | 0.00 |
| TRINITY_A0A0N4Z578_PARTI/31-148    | A0A0N4Z578.1 PF0018 | 67.60 | 0.00 |
| TRINITY_Q110A4_TRIEI/111-328       | Q110A4.1 PF13604.4; | 67.60 | 0.00 |
| TRINITY_Q3M0X3_PARTE/2-375         | Q3M0X3.1 PF00022.17 | 67.60 | 0.00 |
| TRINITY_D8UAX7_VOLCA/1116-1281     | D8UAX7.1 PF00246.22 | 67.60 | 0.00 |
| TRINITY_J9HZY6_9SPIT/1-105         | J9HZY6.1 PF00125.22 | 67.60 | 0.00 |
| TRINITY_W7XKA0_TETTS/123-161       | W7XKA0.1 PF00400.30 | 67.60 | 0.00 |
| TRINITY_A8HQB8_CHLRE/129-294       | A8HQB8.1 PF04055.19 | 67.60 | 0.00 |
| TRINITY_A8I637_CHLRE/938-1005      | A8I637.1 PF13499.4; | 67.60 | 0.00 |
| TRINITY_A0A0L0P6V1_9ASCO/1164-1325 | A0A0L0P6V1.1 PF0000 | 67.60 | 0.00 |
| TRINITY_D3BUM8_POLPA/833-1106      | D3BUM8.1 PF00176.21 | 67.60 | 0.00 |
| TRINITY_Q23JK8_TETTS/655-953       | Q23JK8.2 PF03133.13 | 67.50 | 0.00 |
| TRINITY_F0YGR3_AURAN/343-780       | F0YGR3.1 PF04053.12 | 67.50 | 0.00 |
| TRINITY_B9N2M6_POPTR/20-67         | B9N2M6.1 PF06221.11 | 67.50 | 0.00 |
| TRINITY_A0A0G4FWU4_9ALVE/233-404   | A0A0G4FWU4.1 PF0027 | 67.50 | 0.00 |
| TRINITY_A0A0A0LUG4_CUCSA/256-295   | A0A0A0LUG4.1 PF0040 | 67.50 | 0.00 |
| TRINITY_L8GJF7_ACACA/99-177        | L8GJF7.1 PF00347.21 | 67.50 | 0.00 |
| TRINITY_V4BDG5_LOTGI/47-164        | V4BDG5.1 PF09725.7; | 67.50 | 0.00 |
| TRINITY_LOPE19_PNEJ8/2-181         | LOPE19.1 PF13177.4; | 67.50 | 0.00 |
| TRINITY_W1PU38_AMBTC/88-250        | W1PU38.1 PF04055.19 | 67.50 | 0.00 |
| TRINITY_K7M393_SOYBN/193-235       | K7M393.1 PF00400.30 | 67.50 | 0.00 |
| TRINITY_D8THZ0_VOLCA/58-178        | D8THZ0.1 PF09335.9; | 67.50 | 0.00 |
| TRINITY_A0A067R639_ZOONE/156-480   | A0A067R639.1 PF0107 | 67.50 | 0.00 |
| TRINITY_D8TQN1_VOLCA/5-273         | D8TQN1.1 PF00481.19 | 67.50 | 0.00 |
| TRINITY_H3DL28_TETNG/1337-1431     | H3DL28.1 PF07677.12 | 67.50 | 0.00 |
| TRINITY_L8H7N6_ACACA/177-303       | L8H7N6.1 PF04037.11 | 67.50 | 0.00 |
| TRINITY_I7LUR8_TETTS/1292-1437     | I7LUR8.2 PF00637.18 | 67.50 | 0.00 |
| TRINITY_D8TKU4_VOLCA/79-204        | D8TKU4.1 PF04536.12 | 67.50 | 0.00 |
| TRINITY_F0ZB76_DICPU/5-166         | F0ZB76.1 PF00071.20 | 67.50 | 0.00 |
| TRINITY_L8HDT0_ACACA/49-350        | L8HDT0.1 PF00579.23 | 67.50 | 0.00 |
| TRINITY_A0CRV2_PARTE/124-203       | A0CRV2.1 PF00013.27 | 67.50 | 0.00 |
| TRINITY_A0A0E0KYK6_ORYPU/693-820   | A0A0E0KYK6.1 PF0500 | 67.50 | 0.00 |
| TRINITY_Q233B2_TETTS/10-51         | Q233B2.1 PF05186.11 | 67.50 | 0.00 |
| TRINITY_D8TPE8_VOLCA/146-261       | D8TPE8.1 PF03556.13 | 67.50 | 0.00 |
| TRINITY_A0A084W1R2_ANOSI/121-283   | A0A084W1R2.1 PF0348 | 67.50 | 0.00 |
| TRINITY_D8U3E4_VOLCA/58-142        | D8U3E4.1 PF14159.4; | 67.50 | 0.00 |
| TRINITY_A0A0F2NWX3_9FLAO/24-465    | A0A0F2NWX3.1 PF0142 | 67.50 | 0.00 |
| TRINITY_A8IW37_CHLRE/116-195       | A8IW37.1 PF04176.11 | 67.50 | 0.00 |
| TRINITY_A0CHQ4_PARTE/1987-2260     | A0CHQ4.1 PF12775.5; | 67.50 | 0.00 |
| TRINITY_J5P7M9_SACK1/210-249       | J5P7M9.1 PF05920.9; | 67.50 | 0.00 |
| TRINITY_A8JCC7_CHLRE/57-180        | A8JCC7.1 PF01553.19 | 67.50 | 0.00 |
| TRINITY_A8IZM7_CHLRE/65-202        | A8IZM7.1 PF14580.4; | 67.50 | 0.00 |
| TRINITY_A8JGW6_CHLRE/119-413       | A8JGW6.1 PF01008.15 | 67.50 | 0.00 |
| TRINITY_D8TNC3_VOLCA/359-437       | D8TNC3.1 PF08149.9; | 67.50 | 0.00 |
| TRINITY_Q22A67_TETTS/2454-2736     | Q22A67.1 PF12775.5; | 67.50 | 0.00 |
| TRINITY_H2XYB1_CIOIN/109-154       | H2XYB1.1 PF00249.29 | 67.40 | 0.00 |

|                                  |              |            |       |      |
|----------------------------------|--------------|------------|-------|------|
| TRINITY_R1DB01_EMIHU/11-56       | R1DB01.1     | PF05051.11 | 67.40 | 0.00 |
| TRINITY_A9TSQ4_PHYPA/264-675     | A9TSQ4.1     | PF00962.20 | 67.40 | 0.00 |
| TRINITY_Q245S5_TETTS/6-262       | Q245S5.1     | PF00069.23 | 67.40 | 0.00 |
| TRINITY_I0YML2_9CHLO/47-91       | I0YML2.1     | PF01585.21 | 67.40 | 0.00 |
| TRINITY_A0EEF5_PARTE/29-120      | A0EEF5.1     | PF00447.15 | 67.40 | 0.00 |
| TRINITY_Q24FC7_TETTS/25-161      | Q24FC7.2     | PF00782.18 | 67.40 | 0.00 |
| TRINITY_S8BVD4_9LAMI/137-311     | S8BVD4.1     | PF07717.14 | 67.40 | 0.00 |
| TRINITY_A8J990_CHLRE/3-117       | A8J990.1     | PF01042.19 | 67.40 | 0.00 |
| TRINITY_K3WH50_PYTUL/48-360      | K3WH50.1     | PF01916.15 | 67.40 | 0.00 |
| TRINITY_A0A078AVM5_STYLE/320-363 | A0A078AVM5.1 | PF0056     | 67.40 | 0.00 |
| TRINITY_A8I2G1_CHLRE/183-305     | A8I2G1.1     | PF00254.26 | 67.40 | 0.00 |
| TRINITY_I1GC88_AMPQE/167-380     | I1GC88.1     | PF00112.21 | 67.40 | 0.00 |
| TRINITY_D8UD64_VOLCA/3-606       | D8UD64.1     | PF00443.27 | 67.40 | 0.00 |
| TRINITY_F0ZXI3_DICPU/2-96        | F0ZXI3.1     | PF09138.9; | 67.40 | 0.00 |
| TRINITY_HUTU_DICDI/87-647        | Q86AX3.2     | PF01175.16 | 67.40 | 0.00 |
| TRINITY_W4YTW3_STRPU/244-336     | W4YTW3.1     | PF00153.25 | 67.40 | 0.00 |
| TRINITY_D8UBT5_VOLCA/37-279      | D8UBT5.1     | PF00956.16 | 67.40 | 0.00 |
| TRINITY_D3BKC2_POLPA/110-529     | D3BKC2.1     | PF00368.16 | 67.40 | 0.00 |
| TRINITY_A0A061DMP8_THECC/350-439 | A0A061DMP8.1 | PF0007     | 67.40 | 0.00 |
| TRINITY_W7XAD3_TETTS/339-665     | W7XAD3.1     | PF00493.21 | 67.40 | 0.00 |
| TRINITY_I1CF79_RHIO9/7-240       | I1CF79.1     | PF00149.26 | 67.40 | 0.00 |
| TRINITY_A0A0J8CE11_BETVU/16-293  | A0A0J8CE11.1 | PF1362     | 67.40 | 0.00 |
| TRINITY_A8IQH3_CHLRE/1-180       | A8IQH3.1     | PF01184.17 | 67.40 | 0.00 |
| TRINITY_Q235M5_TETTS/736-779     | Q235M5.2     | PF06203.12 | 67.40 | 0.00 |
| TRINITY_PURA_PARTE/13-428        | A0BD92.1     | PF00709.19 | 67.40 | 0.00 |
| TRINITY_A0A0E9NMV7_9ASCO/188-280 | A0A0E9NMV7.1 | PF0015     | 67.40 | 0.00 |
| TRINITY_A8I6B9_CHLRE/19-260      | A8I6B9.1     | PF13561.4; | 67.40 | 0.00 |
| TRINITY_B8AEH2_ORYSI/853-895     | B8AEH2.1     | PF00400.30 | 67.40 | 0.00 |
| TRINITY_D8UBG9_VOLCA/219-399     | D8UBG9.1     | PF04055.19 | 67.40 | 0.00 |
| TRINITY_A8ISV4_CHLRE/26-122      | A8ISV4.1     | PF11378.6; | 67.40 | 0.00 |
| TRINITY_A0A077ZWA5_STYLE/272-315 | A0A077ZWA5.1 | PF0056     | 67.40 | 0.00 |
| TRINITY_A0A078AVM5_STYLE/320-363 | A0A078AVM5.1 | PF0056     | 67.40 | 0.00 |
| TRINITY_A0A078AVM5_STYLE/320-363 | A0A078AVM5.1 | PF0056     | 67.40 | 0.00 |
| TRINITY_D8TU46_VOLCA/1-365       | D8TU46.1     | PF10498.7; | 67.40 | 0.00 |
| TRINITY_L8GXZ4_ACACA/90-225      | L8GXZ4.1     | PF00179.24 | 67.40 | 0.00 |
| TRINITY_F4NTH8_BATDJ/623-677     | F4NTH8.1     | PF00628.27 | 67.40 | 0.00 |
| TRINITY_D8UFJ1_VOLCA/103-391     | D8UFJ1.1     | PF00664.21 | 67.40 | 0.00 |
| TRINITY_F4PBP5_BATDJ/207-387     | F4PBP5.1     | PF00270.27 | 67.40 | 0.00 |
| TRINITY_D8TT36_VOLCA/1047-1091   | D8TT36.1     | PF01585.21 | 67.40 | 0.00 |
| TRINITY_D8TN57_VOLCA/1-144       | D8TN57.1     | PF01762.19 | 67.40 | 0.00 |
| TRINITY_A9UWF4_MONBE/13-244      | A9UWF4.1     | PF00141.21 | 67.40 | 0.00 |
| TRINITY_A0A017SEC6_9EURO/5-68    | A0A017SEC6.1 | PF0907     | 67.30 | 0.00 |
| TRINITY_B2B5E3_PODAN/1665-1801   | B2B5E3.1     | PF00271.29 | 67.30 | 0.00 |
| TRINITY_A0DZ19_PARTE/27-125      | A0DZ19.1     | PF00438.18 | 67.30 | 0.00 |
| TRINITY_A0DQI4_PARTE/1345-1481   | A0DQI4.1     | PF07728.12 | 67.30 | 0.00 |
| TRINITY_F4QE82_DICFS/231-284     | F4QE82.1     | PF07653.15 | 67.30 | 0.00 |
| TRINITY_F1A3Q8_DICPU/206-262     | F1A3Q8.1     | PF00046.27 | 67.30 | 0.00 |
| TRINITY_Q54F04_DICDI/45-467      | Q54F04.1     | PF13520.4; | 67.30 | 0.00 |
| TRINITY_Q24FR9_TETTS/28-281      | Q24FR9.2     | PF00069.23 | 67.30 | 0.00 |
| TRINITY_K1Q6X5_CRAGI/23-127      | K1Q6X5.1     | PF00085.18 | 67.30 | 0.00 |
| TRINITY_A0A087YQG5_POEFO/33-182  | A0A087YQG5.2 | PF1103     | 67.30 | 0.00 |
| TRINITY_E1ZDD6_CHLVA/131-250     | E1ZDD6.1     | PF00006.23 | 67.30 | 0.00 |
| TRINITY_D8U4C5_VOLCA/313-528     | D8U4C5.1     | PF00246.22 | 67.30 | 0.00 |
| TRINITY_G0QXV0_ICHMG/52-760      | G0QXV0.1     | PF03030.14 | 67.30 | 0.00 |
| TRINITY_L8GP92_ACACA/40-250      | L8GP92.1     | PF02786.15 | 67.30 | 0.00 |
| TRINITY_A0A087SC76_AUXPR/80-254  | A0A087SC76.1 | PF0178     | 67.30 | 0.00 |
| TRINITY_D8UG79_VOLCA/1109-1205   | D8UG79.1     | PF04059.10 | 67.30 | 0.00 |
| TRINITY_A8ISQ5_CHLRE/1729-1856   | A8ISQ5.1     | PF00004.27 | 67.30 | 0.00 |
| TRINITY_G0R663_ICHMG/137-188     | G0R663.1     | PF13415.4; | 67.30 | 0.00 |
| TRINITY_D8U0P6_VOLCA/36-243      | D8U0P6.1     | PF01189.15 | 67.30 | 0.00 |
| TRINITY_A0A078ANA5_STYLE/18-270  | A0A078ANA5.1 | PF0006     | 67.30 | 0.00 |

|                                    |              |            |       |      |
|------------------------------------|--------------|------------|-------|------|
| TRINITY_F6GVT0_VITVI/52-378        | F6GVT0.1     | PF01536.14 | 67.30 | 0.00 |
| TRINITY_A8IN76_CHLRE/1169-1379     | A8IN76.1     | PF00454.25 | 67.30 | 0.00 |
| TRINITY_C1ECL1_MICSR/22-70         | C1ECL1.1     | PF12906.5; | 67.30 | 0.00 |
| TRINITY_A8J1E5_CHLRE/97-206        | A8J1E5.1     | PF00254.26 | 67.30 | 0.00 |
| TRINITY_A8IEW6_CHLRE/22-317        | A8IEW6.1     | PF16363.3; | 67.30 | 0.00 |
| TRINITY_D8U6V0_VOLCA/134-351       | D8U6V0.1     | PF00112.21 | 67.30 | 0.00 |
| TRINITY_A5GJW6_SYNPW/37-145        | A5GJW6.1     | PF08241.10 | 67.30 | 0.00 |
| TRINITY_E1Z4H4_CHLVA/693-1146      | E1Z4H4.1     | PF00521.18 | 67.30 | 0.00 |
| TRINITY_D8U9Z2_VOLCA/59-107        | D8U9Z2.1     | PF00415.16 | 67.30 | 0.00 |
| TRINITY_A8JIJ1_CHLRE/64-233        | A8JIJ1.1     | PF00270.27 | 67.30 | 0.00 |
| TRINITY_D8U3L8_VOLCA/25-270        | D8U3L8.1     | PF00248.19 | 67.30 | 0.00 |
| TRINITY_D8U8A6_VOLCA/8-169         | D8U8A6.1     | PF03446.13 | 67.30 | 0.00 |
| TRINITY_D8U532_VOLCA/3-106         | D8U532.1     | PF01408.20 | 67.30 | 0.00 |
| TRINITY_A0A087SI38_AUXPR/89-535    | A0A087SI38.1 | PF00050    | 67.30 | 0.00 |
| TRINITY_A8HME7_CHLRE/455-567       | A8HME7.1     | PF00175.19 | 67.30 | 0.00 |
| TRINITY_A0A0N0RRX5_9BASI/35-89     | A0A0N0RRX5.1 | PF0166     | 67.30 | 0.00 |
| TRINITY_A8IWW5_CHLRE/1531-1644     | A8IWW5.1     | PF00856.26 | 67.30 | 0.00 |
| TRINITY_I0Z062_9CHLO/726-884       | I0Z062.1     | PF00179.24 | 67.30 | 0.00 |
| TRINITY_A0A078AJ02_STYLE/72-396    | A0A078AJ02.1 | PF0022     | 67.30 | 0.00 |
| TRINITY_Q8LLV9_CHLRE/7-125         | Q8LLV9.1     | PF14931.4; | 67.30 | 0.00 |
| TRINITY_D8UF49_VOLCA/74-482        | D8UF49.1     | PF00474.15 | 67.30 | 0.00 |
| TRINITY_I0YNB1_9CHLO/845-1015      | I0YNB1.1     | PF08148.10 | 67.30 | 0.00 |
| TRINITY_D8UCT8_VOLCA/75-127        | D8UCT8.1     | PF01805.18 | 67.30 | 0.00 |
| TRINITY_W0SBT4_9RHOO/9-264         | W0SBT4.1     | PF00378.18 | 67.30 | 0.00 |
| TRINITY_A8IYC3_CHLRE/398-620       | A8IYC3.1     | PF01061.22 | 67.30 | 0.00 |
| TRINITY_A0E9C2_PARTE/3-52          | A0E9C2.1     | PF04135.10 | 67.30 | 0.00 |
| TRINITY_J9IZV4_9SPIT/54-108        | J9IZV4.1     | PF09597.8; | 67.30 | 0.00 |
| TRINITY_G0QLR8_ICHMG/22-143        | G0QLR8.1     | PF13238.4; | 67.20 | 0.00 |
| TRINITY_G0R1F7_ICHMG/29-105        | G0R1F7.1     | PF12895.5; | 67.20 | 0.00 |
| TRINITY_A0A0P7UBI8_9TELE/235-418   | A0A0P7UBI8.1 | PF0144     | 67.20 | 0.00 |
| TRINITY_Q23FV5_TETTS/249-318       | Q23FV5.1     | PF01485.19 | 67.20 | 0.00 |
| TRINITY_Q22LN3_TETTS/139-201       | Q22LN3.1     | PF00957.19 | 67.20 | 0.00 |
| TRINITY_F6X9E5_CIOIN/19-486        | F6X9E5.2     | PF05694.9; | 67.20 | 0.00 |
| TRINITY_I7M250_TETTS/101-222       | I7M250.1     | PF09335.9; | 67.20 | 0.00 |
| TRINITY_A0DIT9_PARTE/34-353        | A0DIT9.1     | PF00180.18 | 67.20 | 0.00 |
| TRINITY_A0E0K1_PARTE/14-270        | A0E0K1.1     | PF00069.23 | 67.20 | 0.00 |
| TRINITY_A0BFU1_PARTE/28-283        | A0BFU1.1     | PF00069.23 | 67.20 | 0.00 |
| TRINITY_F4PZT8_DICFS/26-206        | F4PZT8.1     | PF01183.18 | 67.20 | 0.00 |
| TRINITY_Q6BG73_PARTE/7-73          | Q6BG73.1     | PF13921.4; | 67.20 | 0.00 |
| TRINITY_A8I3J5_CHLRE/51-318        | A8I3J5.1     | PF00459.23 | 67.20 | 0.00 |
| TRINITY_A0BIB7_PARTE/16-98         | A0BIB7.1     | PF10163.7; | 67.20 | 0.00 |
| TRINITY_A0A078BB17_STYLE/30-281    | A0A078BB17.1 | PF0006     | 67.20 | 0.00 |
| TRINITY_D8TJB0_VOLCA/34-172        | D8TJB0.1     | PF07534.14 | 67.20 | 0.00 |
| TRINITY_G0QZ58_ICHMG/8-69          | G0QZ58.1     | PF00226.29 | 67.20 | 0.00 |
| TRINITY_C1E976_MICSR/1-199         | C1E976.1     | PF01135.17 | 67.20 | 0.00 |
| TRINITY_A8J163_CHLRE/127-188       | A8J163.1     | PF04117.10 | 67.20 | 0.00 |
| TRINITY_I0YQ45_9CHLO/43-196        | I0YQ45.1     | PF00504.19 | 67.20 | 0.00 |
| TRINITY_Q23KJ6_TETTS/622-886       | Q23KJ6.2     | PF00069.23 | 67.20 | 0.00 |
| TRINITY_A8JEV0_CHLRE/9-145         | A8JEV0.1     | PF00179.24 | 67.20 | 0.00 |
| TRINITY_Q23RV4_TETTS/6-262         | Q23RV4.2     | PF00069.23 | 67.20 | 0.00 |
| TRINITY_R4FL09_RHOPR/3-66          | R4FL09.1     | PF00226.29 | 67.20 | 0.00 |
| TRINITY_A8ITR2_CHLRE/55-186        | A8ITR2.1     | PF03641.12 | 67.20 | 0.00 |
| TRINITY_T1FNL1_HELRO/3-168         | T1FNL1.1     | PF12038.6; | 67.20 | 0.00 |
| TRINITY_A0A072V987_MEDTR/257-421   | A0A072V987.1 | PF0196     | 67.20 | 0.00 |
| TRINITY_D8UD36_VOLCA/42-510        | D8UD36.1     | PF01490.16 | 67.20 | 0.00 |
| TRINITY_M1VG33_CYAME/32-94         | M1VG33.1     | PF01176.17 | 67.20 | 0.00 |
| TRINITY_A0A067M391_9HOMO/1310-1466 | A0A067M391.1 | PF0000     | 67.20 | 0.00 |
| TRINITY_D8UBS1_VOLCA/47-242        | D8UBS1.1     | PF04427.16 | 67.20 | 0.00 |
| TRINITY_F4PLW9_DICFS/425-485       | F4PLW9.1     | PF04193.12 | 67.20 | 0.00 |
| TRINITY_I0Z8F4_9CHLO/1266-1414     | I0Z8F4.1     | PF00005.25 | 67.20 | 0.00 |
| TRINITY_A8JEB7_CHLRE/516-889       | A8JEB7.1     | PF00856.26 | 67.20 | 0.00 |

|                                  |                     |       |      |
|----------------------------------|---------------------|-------|------|
| TRINITY_G0QTV5_ICHMG/76-136      | G0QTV5.1 PF00226.29 | 67.20 | 0.00 |
| TRINITY_A8JFA2_CHLRE/28-287      | A8JFA2.1 PF12697.5; | 67.20 | 0.00 |
| TRINITY_D8TK69_VOLCA/36-388      | D8TK69.1 PF01070.16 | 67.20 | 0.00 |
| TRINITY_A0DFK5_PARTE/51-306      | A0DFK5.1 PF00069.23 | 67.20 | 0.00 |
| TRINITY_A8J1A7_CHLRE/15-272      | A8J1A7.1 PF00069.23 | 67.20 | 0.00 |
| TRINITY_A0A060SK24_PYCCI/128-195 | A0A060SK24.1 PF1343 | 67.20 | 0.00 |
| TRINITY_D8TPM1_VOLCA/127-271     | D8TPM1.1 PF07823.9; | 67.20 | 0.00 |
| TRINITY_A8J5C4_CHLRE/18-103      | A8J5C4.1 PF01221.16 | 67.20 | 0.00 |
| TRINITY_D8TI23_VOLCA/231-520     | D8TI23.1 PF14308.4; | 67.20 | 0.00 |
| TRINITY_A0A087ST01_AUXPR/256-320 | A0A087ST01.1 PF0084 | 67.20 | 0.00 |
| TRINITY_D8TMY5_VOLCA/48-525      | D8TMY5.1 PF00501.26 | 67.20 | 0.00 |
| TRINITY_I0YQM2_9CHLO/15-121      | I0YQM2.1 PF00255.17 | 67.20 | 0.00 |
| TRINITY_U5H3W5_USTV1/1325-1473   | U5H3W5.1 PF00005.25 | 67.20 | 0.00 |
| TRINITY_I7M423_TETTS/244-392     | I7M423.2 PF01751.20 | 67.10 | 0.00 |
| TRINITY_A0D9E0_PARTE/137-400     | A0D9E0.1 PF00481.19 | 67.10 | 0.00 |
| TRINITY_D2VMQ6_NAEGR/60-212      | D2VMQ6.1 PF00182.17 | 67.10 | 0.00 |
| TRINITY_V2XH51_MONRO/1-79        | V2XH51.1 PF01249.16 | 67.10 | 0.00 |
| TRINITY_D8TLR6_VOLCA/28-288      | D8TLR6.1 PF00069.23 | 67.10 | 0.00 |
| TRINITY_G0R640_ICHMG/538-830     | G0R640.1 PF00176.21 | 67.10 | 0.00 |
| TRINITY_Q22W55_TETTS/12-233      | Q22W55.2 PF00244.18 | 67.10 | 0.00 |
| TRINITY_Q22W55_TETTS/12-233      | Q22W55.2 PF00244.18 | 67.10 | 0.00 |
| TRINITY_I0Z225_9CHLO/1827-2140   | I0Z225.1 PF02889.14 | 67.10 | 0.00 |
| TRINITY_A8IRT1_CHLRE/1-144       | A8IRT1.1 PF10229.7; | 67.10 | 0.00 |
| TRINITY_A8HVT9_CHLRE/12-303      | A8HVT9.1 PF17184.2; | 67.10 | 0.00 |
| TRINITY_A0A0D2WKM4_CAPO3/125-381 | A0A0D2WKM4.1 PF0102 | 67.10 | 0.00 |
| TRINITY_A8I5C3_CHLRE/2838-3549   | A8I5C3.1 PF03028.13 | 67.10 | 0.00 |
| TRINITY_D8UAG0_VOLCA/22-183      | D8UAG0.1 PF00071.20 | 67.10 | 0.00 |
| TRINITY_D8U140_VOLCA/48-120      | D8U140.1 PF00226.29 | 67.10 | 0.00 |
| TRINITY_Q84XW3_CHLRE/83-381      | Q84XW3.1 PF03151.14 | 67.10 | 0.00 |
| TRINITY_G0R646_ICHMG/414-563     | G0R646.1 PF00005.25 | 67.10 | 0.00 |
| TRINITY_Q23R92_TETTS/152-318     | Q23R92.1 PF00071.20 | 67.10 | 0.00 |
| TRINITY_L8GUA1_ACACA/32-127      | L8GUA1.1 PF03650.11 | 67.10 | 0.00 |
| TRINITY_Q7G6A5_ORYSJ/539-699     | Q7G6A5.1 PF00078.25 | 67.10 | 0.00 |
| TRINITY_D8TTV8_VOLCA/81-324      | D8TTV8.1 PF00233.17 | 67.10 | 0.00 |
| TRINITY_D3BNL1_POLPA/140-395     | D3BNL1.1 PF07714.15 | 67.10 | 0.00 |
| TRINITY_A8I843_CHLRE/4-339       | A8I843.1 PF02628.13 | 67.10 | 0.00 |
| TRINITY_D8U8S0_VOLCA/51-352      | D8U8S0.1 PF01513.19 | 67.10 | 0.00 |
| TRINITY_D8TUM3_VOLCA/511-627     | D8TUM3.1 PF03476.14 | 67.10 | 0.00 |
| TRINITY_D8U9J7_VOLCA/303-375     | D8U9J7.1 PF03451.12 | 67.10 | 0.00 |
| TRINITY_A8J629_CHLRE/49-208      | A8J629.1 PF01699.22 | 67.10 | 0.00 |
| TRINITY_A0A0N1E411_9FLAO/19-231  | A0A0N1E411.1 PF0357 | 67.10 | 0.00 |
| TRINITY_L8GVZ3_ACACA/2654-2901   | L8GVZ3.1 PF00454.25 | 67.10 | 0.00 |
| TRINITY_A0A077ZYU8_STYLE/71-382  | A0A077ZYU8.1 PF0313 | 67.10 | 0.00 |
| TRINITY_D8U1S9_VOLCA/42-131      | D8U1S9.1 PF13671.4; | 67.10 | 0.00 |
| TRINITY_D8TI91_VOLCA/241-409     | D8TI91.1 PF08547.10 | 67.10 | 0.00 |
| TRINITY_D8U303_VOLCA/63-392      | D8U303.1 PF00069.23 | 67.10 | 0.00 |
| TRINITY_A0A0D2X0N5_CAPO3/122-252 | A0A0D2X0N5.1 PF0411 | 67.00 | 0.00 |
| TRINITY_Q23D14_TETTS/13-112      | Q23D14.2 PF03226.12 | 67.00 | 0.00 |
| TRINITY_COQ5_DICDI/49-313        | Q54VN2.1 PF01209.16 | 67.00 | 0.00 |
| TRINITY_D8UK42_VOLCA/1182-1274   | D8UK42.1 PF00271.29 | 67.00 | 0.00 |
| TRINITY_L8WZS6_THACA/41-156      | L8WZS6.1 PF02678.14 | 67.00 | 0.00 |
| TRINITY_I7MCU1_TETTS/89-194      | I7MCU1.1 PF06565.10 | 67.00 | 0.00 |
| TRINITY_Q29DY2_DROPS/156-498     | Q29DY2.2 PF00155.19 | 67.00 | 0.00 |
| TRINITY_W5KX88_ASTMX/131-240     | W5KX88.1 PF12894.5; | 67.00 | 0.00 |
| TRINITY_D8UDA8_VOLCA/127-234     | D8UDA8.1 PF13640.4; | 67.00 | 0.00 |
| TRINITY_A0BYK2_PARTE/116-313     | A0BYK2.1 PF00406.20 | 67.00 | 0.00 |
| TRINITY_L8HGY3_ACACA/42-251      | L8HGY3.1 PF05023.12 | 67.00 | 0.00 |
| TRINITY_T1JNG4_STRMM/9-146       | T1JNG4.1 PF00258.23 | 67.00 | 0.00 |
| TRINITY_D8TY75_VOLCA/150-249     | D8TY75.1 PF07707.13 | 67.00 | 0.00 |
| TRINITY_D8TQ02_VOLCA/606-696     | D8TQ02.1 PF04408.21 | 67.00 | 0.00 |
| TRINITY_Q23QN9_TETTS/2588-2848   | Q23QN9.3 PF12780.5; | 67.00 | 0.00 |



|                                  |              |            |       |      |
|----------------------------------|--------------|------------|-------|------|
| TRINITY_J9IBL8_9SPIT/60-394      | J9IBL8.1     | PF00225.21 | 67.00 | 0.00 |
| TRINITY_D8UDW1_VOLCA/207-377     | D8UDW1.1     | PF00534.18 | 67.00 | 0.00 |
| TRINITY_L8GI45_ACACA/286-561     | L8GI45.1     | PF00069.23 | 67.00 | 0.00 |
| TRINITY_A8I8X5_CHLRE/91-196      | A8I8X5.1     | PF12680.5; | 67.00 | 0.00 |
| TRINITY_D8TR32_VOLCA/127-263     | D8TR32.1     | PF00293.26 | 67.00 | 0.00 |
| TRINITY_D8TSE8_VOLCA/554-647     | D8TSE8.1     | PF13640.4; | 67.00 | 0.00 |
| TRINITY_D8THF4_VOLCA/99-388      | D8THF4.1     | PF08392.10 | 67.00 | 0.00 |
| TRINITY_A0DN76_PARTE/3850-4562   | A0DN76.1     | PF03028.13 | 67.00 | 0.00 |
| TRINITY_L1JNZ4_GUITH/284-466     | L1JNZ4.1     | PF04055.19 | 67.00 | 0.00 |
| TRINITY_A8J129_CHLRE/50-423      | A8J129.1     | PF00155.19 | 67.00 | 0.00 |
| TRINITY_A0A0D3B3Z8_BRAOL/218-303 | A0A0D3B3Z8.1 | PF0001     | 67.00 | 0.00 |
| TRINITY_A0A078AP91_STYLE/413-592 | A0A078AP91.1 | PF0660     | 67.00 | 0.00 |
| TRINITY_D8TR18_VOLCA/4-367       | D8TR18.1     | PF05631.12 | 67.00 | 0.00 |
| TRINITY_A8JHX8_CHLRE/134-251     | A8JHX8.1     | PF13673.5; | 67.00 | 0.00 |
| TRINITY_A0EA85_PARTE/16-242      | A0EA85.1     | PF04981.11 | 67.00 | 0.00 |
| TRINITY_D8TYV3_VOLCA/154-527     | D8TYV3.1     | PF10243.7; | 67.00 | 0.00 |
| TRINITY_A0A087SRM2_AUXPR/556-752 | A0A087SRM2.1 | PF1308     | 67.00 | 0.00 |
| TRINITY_A8J2H1_CHLRE/591-689     | A8J2H1.1     | PF02806.16 | 67.00 | 0.00 |
| TRINITY_A0A0D9VUL1_9ORYZ/7-183   | A0A0D9VUL1.1 | PF0016     | 66.90 | 0.00 |
| TRINITY_A0A015MDK1_9GLOM/369-543 | A0A015MDK1.1 | PF0286     | 66.90 | 0.00 |
| TRINITY_A7RH52_NEMVE/525-960     | A7RH52.1     | PF00136.19 | 66.90 | 0.00 |
| TRINITY_A0A059AUW9_EUCGR/17-411  | A0A059AUW9.1 | PF0933     | 66.90 | 0.00 |
| TRINITY_A0D VW7_PARTE/13-297     | A0D VW7.1    | PF00069.23 | 66.90 | 0.00 |
| TRINITY_A0A024TW57_9STRA/26-146  | A0A024TW57.1 | PF0082     | 66.90 | 0.00 |
| TRINITY_D2W2Z5_NAEGR/163-328     | D2W2Z5.1     | PF09414.8; | 66.90 | 0.00 |
| TRINITY_J3PCN6_GAGT3/124-422     | J3PCN6.1     | PF00128.22 | 66.90 | 0.00 |
| TRINITY_D8UC91_VOLCA/67-241      | D8UC91.1     | PF07798.9; | 66.90 | 0.00 |
| TRINITY_D8UCJ1_VOLCA/46-240      | D8UCJ1.1     | PF01557.16 | 66.90 | 0.00 |
| TRINITY_E1Z565_CHLVA/12-286      | E1Z565.1     | PF00682.17 | 66.90 | 0.00 |
| TRINITY_A8I6U1_CHLRE/29-336      | A8I6U1.1     | PF00291.23 | 66.90 | 0.00 |
| TRINITY_G0QP V4_ICHMG/536-846    | G0QP V4.1    | PF04950.10 | 66.90 | 0.00 |
| TRINITY_Q4J8D7_SULAC/8-161       | Q4J8D7.1     | PF04008.12 | 66.90 | 0.00 |
| TRINITY_F4PA58_BATDJ/14-174      | F4PA58.1     | PF00071.20 | 66.90 | 0.00 |
| TRINITY_D8TXV2_VOLCA/2-122       | D8TXV2.1     | PF12624.5; | 66.90 | 0.00 |
| TRINITY_D8TH53_VOLCA/54-179      | D8TH53.1     | PF13638.4; | 66.90 | 0.00 |
| TRINITY_A0A0L6V9S5_9BASI/44-217  | A0A0L6V9S5.1 | PF0002     | 66.90 | 0.00 |
| TRINITY_A8JH58_CHLRE/39-518      | A8JH58.1     | PF00501.26 | 66.90 | 0.00 |
| TRINITY_B8HGH0_ARTCA/28-144      | B8HGH0.1     | PF08240.10 | 66.90 | 0.00 |
| TRINITY_A8HQ44_CHLRE/7-158       | A8HQ44.1     | PF13419.4; | 66.90 | 0.00 |
| TRINITY_K4C8Q1_SOLLC/79-345      | K4C8Q1.1     | PF00009.25 | 66.90 | 0.00 |
| TRINITY_D8TGZ7_VOLCA/449-690     | D8TGZ7.1     | PF00122.18 | 66.90 | 0.00 |
| TRINITY_E1ZRK0_CHLVA/806-926     | E1ZRK0.1     | PF04607.15 | 66.90 | 0.00 |
| TRINITY_F2CS06_HORVD/31-248      | F2CS06.1     | PF03332.11 | 66.80 | 0.00 |
| TRINITY_Q247W0_TETTS/149-864     | Q247W0.1     | PF00343.18 | 66.80 | 0.00 |
| TRINITY_D8TTQ5_VOLCA/98-351      | D8TTQ5.1     | PF04305.12 | 66.80 | 0.00 |
| TRINITY_D8U1I3_VOLCA/56-475      | D8U1I3.1     | PF00709.19 | 66.80 | 0.00 |
| TRINITY_PSA1_DICDI/29-216        | Q27562.1     | PF00227.24 | 66.80 | 0.00 |
| TRINITY_E1ZL76_CHLVA/91-362      | E1ZL76.1     | PF00860.18 | 66.80 | 0.00 |
| TRINITY_A8J6H8_CHLRE/243-427     | A8J6H8.1     | PF05193.19 | 66.80 | 0.00 |
| TRINITY_D8TPE1_VOLCA/50-346      | D8TPE1.1     | PF01207.15 | 66.80 | 0.00 |
| TRINITY_D8UIN9_VOLCA/1371-1729   | D8UIN9.1     | PF00224.19 | 66.80 | 0.00 |
| TRINITY_G0R1C4_ICHMG/49-235      | G0R1C4.1     | PF10211.7; | 66.80 | 0.00 |
| TRINITY_Q22XN2_TETTS/43-220      | Q22XN2.1     | PF02146.15 | 66.70 | 0.00 |
| TRINITY_E9G2X2_DAPPU/421-573     | E9G2X2.1     | PF00005.25 | 66.70 | 0.00 |
| TRINITY_A0DHQ8_PARTE/13-161      | A0DHQ8.1     | PF02099.15 | 66.70 | 0.00 |
| TRINITY_Q0IIY3_XENTR/9-72        | Q0IIY3.1     | PF01066.19 | 66.70 | 0.00 |
| TRINITY_J9HZC4_9SPIT/10-65       | J9HZC4.1     | PF14777.4; | 66.70 | 0.00 |
| TRINITY_J9I9P2_9SPIT/356-394     | J9I9P2.1     | PF00400.30 | 66.70 | 0.00 |
| TRINITY_S6AIB6_9PROT/3-43        | S6AIB6.1     | PF09360.8; | 66.70 | 0.00 |
| TRINITY_W7XD08_TETTS/123-343     | W7XD08.1     | PF02475.14 | 66.70 | 0.00 |
| TRINITY_ACYP2_MELGA/14-101       | P00821.2     | PF00708.16 | 66.70 | 0.00 |

|                                  |              |            |       |      |
|----------------------------------|--------------|------------|-------|------|
| TRINITY_I7M304_TETTS/2743-3020   | I7M304.2     | PF12780.5; | 66.70 | 0.00 |
| TRINITY_I3IW28_ORENI/1426-1537   | I3IW28.1     | PF01759.19 | 66.70 | 0.00 |
| TRINITY_J4CDA2_THEOR/29-74       | J4CDA2.1     | PF05051.11 | 66.70 | 0.00 |
| TRINITY_Q241N4_TETTS/523-658     | Q241N4.2     | PF00005.25 | 66.70 | 0.00 |
| TRINITY_A0CLD6_PARTE/82-333      | A0CLD6.1     | PF00069.23 | 66.70 | 0.00 |
| TRINITY_A0A0A7LLI1_9BACT/4-177   | A0A0A7LLI1.1 | PF0053     | 66.70 | 0.00 |
| TRINITY_A0CVG6_PARTE/11-268      | A0CVG6.1     | PF00069.23 | 66.70 | 0.00 |
| TRINITY_I0YPN5_9CHLO/742-942     | I0YPN5.1     | PF11865.6; | 66.70 | 0.00 |
| TRINITY_A0DBM3_PARTE/273-356     | A0DBM3.1     | PF00439.23 | 66.70 | 0.00 |
| TRINITY_F0YPS5_AURAN/7-63        | F0YPS5.1     | PF00831.21 | 66.70 | 0.00 |
| TRINITY_D8M3T0_BLAHO/27-92       | D8M3T0.1     | PF00808.21 | 66.70 | 0.00 |
| TRINITY_G0QU80_ICHMG/220-439     | G0QU80.1     | PF07002.14 | 66.70 | 0.00 |
| TRINITY_L8H083_ACACA/9-144       | L8H083.1     | PF00578.19 | 66.70 | 0.00 |
| TRINITY_A0A0D2UG50_CAPO3/388-425 | A0A0D2UG50.1 | PF0040     | 66.70 | 0.00 |
| TRINITY_C3YUB2_BRAFL/188-372     | C3YUB2.1     | PF02145.13 | 66.70 | 0.00 |
| TRINITY_A0A067Q3X5_9HOMO/17-111  | A0A067Q3X5.1 | PF0042     | 66.70 | 0.00 |
| TRINITY_B7P6Q1_IXOSC/390-431     | B7P6Q1.1     | PF00396.16 | 66.70 | 0.00 |
| TRINITY_Q5KI84_CRYNJ/11-366      | Q5KI84.1     | PF00180.18 | 66.70 | 0.00 |
| TRINITY_L8H3W5_ACACA/971-1093    | L8H3W5.1     | PF00271.29 | 66.70 | 0.00 |
| TRINITY_K3WM84_PYTUL/304-379     | K3WM84.1     | PF02138.16 | 66.70 | 0.00 |
| TRINITY_SYAM_DICDI/32-589        | Q86H43.1     | PF01411.17 | 66.70 | 0.00 |
| TRINITY_G0R5F1_ICHMG/174-302     | G0R5F1.1     | PF00454.25 | 66.70 | 0.00 |
| TRINITY_A0A078AC84_STYLE/371-406 | A0A078AC84.1 | PF0040     | 66.70 | 0.00 |
| TRINITY_F6PXA9_CIOIN/291-438     | F6PXA9.2     | PF00271.29 | 66.70 | 0.00 |
| TRINITY_PI3K3_DICDI/1331-1545    | P54675.2     | PF00454.25 | 66.70 | 0.00 |
| TRINITY_Q22NA0_TETTS/1407-1551   | Q22NA0.2     | PF00005.25 | 66.70 | 0.00 |
| TRINITY_A0A0K9PDE5_ZOSMR/104-150 | A0A0K9PDE5.1 | PF1363     | 66.70 | 0.00 |
| TRINITY_R4XLQ6_TAPDE/115-205     | R4XLQ6.1     | PF00043.23 | 66.70 | 0.00 |
| TRINITY_A0A078AVM5_STYLE/320-363 | A0A078AVM5.1 | PF0056     | 66.70 | 0.00 |
| TRINITY_A8IQI1_CHLRE/1-179       | A8IQI1.1     | PF01184.17 | 66.70 | 0.00 |
| TRINITY_L8GZS8_ACACA/644-714     | L8GZS8.1     | PF04564.13 | 66.70 | 0.00 |
| TRINITY_D3B725_POLPA/72-139      | D3B725.1     | PF08606.9; | 66.70 | 0.00 |
| TRINITY_F6SC57_CIOIN/2-375       | F6SC57.2     | PF00022.17 | 66.70 | 0.00 |
| TRINITY_A0BTN4_PARTE/489-626     | A0BTN4.1     | PF00005.25 | 66.70 | 0.00 |
| TRINITY_B2A9X4_PODAN/55-130      | B2A9X4.1     | PF01066.19 | 66.70 | 0.00 |
| TRINITY_A8I7G7_CHLRE/107-226     | A8I7G7.1     | PF13640.4; | 66.70 | 0.00 |
| TRINITY_A8J4N6_CHLRE/18-68       | A8J4N6.1     | PF00249.29 | 66.70 | 0.00 |
| TRINITY_M4BL21_HYAAE/239-277     | M4BL21.1     | PF13923.4; | 66.70 | 0.00 |
| TRINITY_F0ZQAQ3_DICPU/6-54       | F0ZQAQ3.1    | PF01679.15 | 66.70 | 0.00 |
| TRINITY_D8UJW1_VOLCA/2648-2740   | D8UJW1.1     | PF04777.11 | 66.70 | 0.00 |
| TRINITY_E1Z986_CHLVA/102-243     | E1Z986.1     | PF10075.7; | 66.70 | 0.00 |
| TRINITY_H9IZ84_BOMMO/144-251     | H9IZ84.1     | PF00085.18 | 66.70 | 0.00 |
| TRINITY_A8IEC7_CHLRE/155-247     | A8IEC7.1     | PF04777.11 | 66.70 | 0.00 |
| TRINITY_K7IPJ4_NASVI/12-388      | K7IPJ4.1     | PF01433.18 | 66.70 | 0.00 |
| TRINITY_L8H164_ACACA/6-54        | L8H164.1     | PF02042.13 | 66.70 | 0.00 |
| TRINITY_D8RRS9_SELML/20-117      | D8RRS9.1     | PF03226.12 | 66.70 | 0.00 |
| TRINITY_I0YQM8_9CHLO/239-347     | I0YQM8.1     | PF01399.25 | 66.70 | 0.00 |
| TRINITY_A8HNX9_CHLRE/48-218      | A8HNX9.1     | PF04755.10 | 66.70 | 0.00 |
| TRINITY_L8GRQ4_ACACA/222-320     | L8GRQ4.1     | PF13661.4; | 66.70 | 0.00 |
| TRINITY_U9TF24_RHIID/25-265      | U9TF24.1     | PF03029.15 | 66.70 | 0.00 |
| TRINITY_A0A061DMP8_THECC/350-439 | A0A061DMP8.1 | PF0007     | 66.70 | 0.00 |
| TRINITY_D8TJ35_VOLCA/507-704     | D8TJ35.1     | PF04916.11 | 66.70 | 0.00 |
| TRINITY_H9GHR5_ANOCA/124-192     | H9GHR5.2     | PF01302.23 | 66.70 | 0.00 |
| TRINITY_A0DAW7_PARTE/169-243     | A0DAW7.1     | PF01169.17 | 66.70 | 0.00 |
| TRINITY_I1JJ06_SOYBN/511-549     | I1JJ06.1     | PF00400.30 | 66.70 | 0.00 |
| TRINITY_D8U6D5_VOLCA/376-492     | D8U6D5.1     | PF00271.29 | 66.70 | 0.00 |
| TRINITY_C3Z3Z3_BRAFL/43-143      | C3Z3Z3.1     | PF13589.4; | 66.70 | 0.00 |
| TRINITY_H9H038_HORSE/164-207     | H9H038.1     | PF13639.4; | 66.70 | 0.00 |
| TRINITY_I0ZAW8_9CHLO/360-815     | I0ZAW8.1     | PF14648.4; | 66.70 | 0.00 |
| TRINITY_A0A0J8D1N5_BETVU/217-475 | A0A0J8D1N5.1 | PF1047     | 66.70 | 0.00 |
| TRINITY_A0A0J8CX97_BETVU/25-97   | A0A0J8CX97.1 | PF0437     | 66.70 | 0.00 |

|                                  |              |            |       |      |
|----------------------------------|--------------|------------|-------|------|
| TRINITY_A8I268_CHLRE/191-326     | A8I268.1     | PF00005.25 | 66.70 | 0.00 |
| TRINITY_A0BYR7_PARTE/34-293      | A0BYR7.1     | PF00069.23 | 66.70 | 0.00 |
| TRINITY_D8TIU4_VOLCA/101-307     | D8TIU4.1     | PF13460.4; | 66.70 | 0.00 |
| TRINITY_D8U288_VOLCA/1-154       | D8U288.1     | PF00211.18 | 66.70 | 0.00 |
| TRINITY_A8IXA1_CHLRE/102-140     | A8IXA1.1     | PF00400.30 | 66.70 | 0.00 |
| TRINITY_D8UDB0_VOLCA/268-499     | D8UDB0.1     | PF04791.14 | 66.70 | 0.00 |
| TRINITY_A8J9I5_CHLRE/244-339     | A8J9I5.1     | PF00153.25 | 66.70 | 0.00 |
| TRINITY_J9FDL8_9SPIT/54-95       | J9FDL8.1     | PF00400.30 | 66.70 | 0.00 |
| TRINITY_A8J3V0_CHLRE/8-70        | A8J3V0.1     | PF00808.21 | 66.70 | 0.00 |
| TRINITY_I0YYL9_9CHLO/15-52       | I0YYL9.1     | PF00400.30 | 66.70 | 0.00 |
| TRINITY_A9SCH2_PHYPA/219-298     | A9SCH2.1     | PF00107.24 | 66.70 | 0.00 |
| TRINITY_E1Z774_CHLVA/14-243      | E1Z774.1     | PF00149.26 | 66.70 | 0.00 |
| TRINITY_A0A072U9H1_MEDTR/209-254 | A0A072U9H1.1 | PF0024     | 66.70 | 0.00 |
| TRINITY_Q23RG9_TETTS/116-209     | Q23RG9.1     | PF16531.3; | 66.70 | 0.00 |
| TRINITY_I0YX02_9CHLO/106-280     | I0YX02.1     | PF03572.16 | 66.70 | 0.00 |
| TRINITY_A8J2B6_CHLRE/53-121      | A8J2B6.1     | PF15247.4; | 66.70 | 0.00 |
| TRINITY_V2XVC4_MONRO/112-449     | V2XVC4.1     | PF03104.17 | 66.70 | 0.00 |
| TRINITY_U9V1C7_RHIID/19-122      | U9V1C7.1     | PF08241.10 | 66.70 | 0.00 |
| TRINITY_A0E1G8_PARTE/540-795     | A0E1G8.1     | PF00069.23 | 66.70 | 0.00 |
| TRINITY_E1ZGI7_CHLVA/158-356     | E1ZGI7.1     | PF04989.10 | 66.70 | 0.00 |
| TRINITY_D8TL86_VOLCA/716-874     | D8TL86.1     | PF00153.25 | 66.70 | 0.00 |
| TRINITY_A8HPU2_CHLRE/70-200      | A8HPU2.1     | PF01127.20 | 66.70 | 0.00 |
| TRINITY_D3BK04_POLPA/1050-1098   | D3BK04.1     | PF14604.4; | 66.70 | 0.00 |
| TRINITY_A8JH92_CHLRE/203-385     | A8JH92.1     | PF02417.13 | 66.70 | 0.00 |
| TRINITY_D8THW1_VOLCA/32-257      | D8THW1.1     | PF01255.17 | 66.70 | 0.00 |
| TRINITY_A8JAW8_CHLRE/513-575     | A8JAW8.1     | PF07714.15 | 66.70 | 0.00 |
| TRINITY_W4XZG3_STRPU/29-79       | W4XZG3.1     | PF13920.4; | 66.70 | 0.00 |
| TRINITY_Q22DX0_TETTS/130-389     | Q22DX0.1     | PF00494.17 | 66.70 | 0.00 |
| TRINITY_I7MAL0_TETTS/12-201      | I7MAL0.1     | PF00596.19 | 66.70 | 0.00 |
| TRINITY_D8UG37_VOLCA/206-269     | D8UG37.1     | PF00170.19 | 66.70 | 0.00 |
| TRINITY_I0YR66_9CHLO/426-473     | I0YR66.1     | PF02891.18 | 66.70 | 0.00 |
| TRINITY_A0A087SB57_AUXPR/89-364  | A0A087SB57.1 | PF0032     | 66.70 | 0.00 |
| TRINITY_A0BWW1_PARTE/272-340     | A0BWW1.1     | PF00498.24 | 66.70 | 0.00 |
| TRINITY_A8I6V8_CHLRE/39-74       | A8I6V8.1     | PF00320.25 | 66.70 | 0.00 |
| TRINITY_Q4U0V8_CHLRE/49-349      | Q4U0V8.1     | PF01218.16 | 66.70 | 0.00 |
| TRINITY_D8TPP1_VOLCA/104-246     | D8TPP1.1     | PF02469.20 | 66.70 | 0.00 |
| TRINITY_Q8S3U7_CHLRE/18-278      | Q8S3U7.1     | PF00069.23 | 66.70 | 0.00 |
| TRINITY_I7M280_TETTS/857-971     | I7M280.2     | PF09111.8; | 66.70 | 0.00 |
| TRINITY_K1QTP1_CRAGI/434-645     | K1QTP1.1     | PF00326.19 | 66.70 | 0.00 |
| TRINITY_A0BWW1_PARTE/272-340     | A0BWW1.1     | PF00498.24 | 66.70 | 0.00 |
| TRINITY_A0A075AS88_9FUNG/581-798 | A0A075AS88.1 | PF0032     | 66.70 | 0.00 |
| TRINITY_RL26_TETTS/8-121         | Q23F79.2     | PF16906.3; | 66.70 | 0.00 |
| TRINITY_RL26_TETTS/8-121         | Q23F79.2     | PF16906.3; | 66.70 | 0.00 |
| TRINITY_A0DZS9_PARTE/39-80       | A0DZS9.1     | PF13445.4; | 66.70 | 0.00 |
| TRINITY_R1C902_EMIHU/442-490     | R1C902.1     | PF00628.27 | 66.70 | 0.00 |
| TRINITY_M0TZ95_MUSAM/623-690     | M0TZ95.1     | PF00658.16 | 66.70 | 0.00 |
| TRINITY_A0A059LFT7_9CHLO/113-267 | A0A059LFT7.1 | PF0050     | 66.70 | 0.00 |
| TRINITY_M5VM98_PRUPE/561-708     | M5VM98.1     | PF00078.25 | 66.70 | 0.00 |
| TRINITY_C4Y7D3_CLAL4/242-402     | C4Y7D3.1     | PF00078.25 | 66.70 | 0.00 |
| TRINITY_I0YP34_9CHLO/86-231      | I0YP34.1     | PF00210.22 | 66.70 | 0.00 |
| TRINITY_A8J8S4_CHLRE/3-71        | A8J8S4.1     | PF00076.20 | 66.70 | 0.00 |
| TRINITY_A8HN56_CHLRE/225-326     | A8HN56.1     | PF13499.4; | 66.70 | 0.00 |
| TRINITY_A8HN56_CHLRE/225-326     | A8HN56.1     | PF13499.4; | 66.70 | 0.00 |
| TRINITY_Q22UJ1_TETTS/89-234      | Q22UJ1.1     | PF14580.4; | 66.70 | 0.00 |
| TRINITY_A8IS63_CHLRE/7-142       | A8IS63.1     | PF00258.23 | 66.70 | 0.00 |
| TRINITY_I0Z2C4_9CHLO/1-304       | I0Z2C4.1     | PF00248.19 | 66.70 | 0.00 |
| TRINITY_D8TNN8_VOLCA/63-306      | D8TNN8.1     | PF00112.21 | 66.70 | 0.00 |
| TRINITY_A0A087SBJ9_AUXPR/105-178 | A0A087SBJ9.1 | PF0128     | 66.70 | 0.00 |
| TRINITY_B9J6Z0_AGRRK/36-313      | B9J6Z0.1     | PF00150.16 | 66.70 | 0.00 |
| TRINITY_E1Z9K0_CHLVA/64-322      | E1Z9K0.1     | PF08145.10 | 66.70 | 0.00 |
| TRINITY_D8TYX9_VOLCA/666-861     | D8TYX9.1     | PF00211.18 | 66.70 | 0.00 |

|                                  |              |            |       |      |
|----------------------------------|--------------|------------|-------|------|
| TRINITY_D2V0W5_NAEGR/206-247     | D2V0W5.1     | PF00400.30 | 66.70 | 0.00 |
| TRINITY_A8J9D9_CHLRE/105-169     | A8J9D9.1     | PF17136.2; | 66.70 | 0.00 |
| TRINITY_A8I6F3_CHLRE/385-587     | A8I6F3.1     | PF07714.15 | 66.70 | 0.00 |
| TRINITY_I0Z7K6_9CHLO/17-331      | I0Z7K6.1     | PF00225.21 | 66.70 | 0.00 |
| TRINITY_D8TTV8_VOLCA/81-324      | D8TTV8.1     | PF00233.17 | 66.70 | 0.00 |
| TRINITY_W7X0K6_TETTS/22-140      | W7X0K6.1     | PF01894.15 | 66.70 | 0.00 |
| TRINITY_F4PWL2_DICFS/91-392      | F4PWL2.1     | PF00676.18 | 66.60 | 0.00 |
| TRINITY_A4RRK6_OSTLU/9-300       | A4RRK6.1     | PF00069.23 | 66.60 | 0.00 |
| TRINITY_D8TMH6_VOLCA/62-346      | D8TMH6.1     | PF00632.23 | 66.60 | 0.00 |
| TRINITY_A8J6K6_CHLRE/229-518     | A8J6K6.1     | PF01031.18 | 66.60 | 0.00 |
| TRINITY_A8HYZ5_CHLRE/53-384      | A8HYZ5.1     | PF00069.23 | 66.60 | 0.00 |
| TRINITY_M1CRH4_SOLTU/15-176      | M1CRH4.1     | PF00071.20 | 66.50 | 0.00 |
| TRINITY_A0A096P9X9_OSTTA/129-296 | A0A096P9X9.1 | PF0288     | 66.50 | 0.00 |
| TRINITY_A8JHW6_CHLRE/43-718      | A8JHW6.1     | PF00995.21 | 66.50 | 0.00 |
| TRINITY_E1ZTF6_CHLVA/45-198      | E1ZTF6.1     | PF00406.20 | 66.50 | 0.00 |
| TRINITY_D8UI94_VOLCA/26-188      | D8UI94.1     | PF01652.16 | 66.50 | 0.00 |
| TRINITY_A9TB22_PHYPA/75-590      | A9TB22.1     | PF10433.7; | 66.50 | 0.00 |
| TRINITY_A8HMX2_CHLRE/97-689      | A8HMX2.1     | PF02901.13 | 66.50 | 0.00 |
| TRINITY_D3B3X6_POLPA/215-540     | D3B3X6.1     | PF00733.19 | 66.50 | 0.00 |
| TRINITY_D8TSD0_VOLCA/116-318     | D8TSD0.1     | PF00590.18 | 66.50 | 0.00 |
| TRINITY_A0A087SKD7_AUXPR/233-504 | A0A087SKD7.1 | PF0066     | 66.50 | 0.00 |
| TRINITY_D8UHE6_VOLCA/620-857     | D8UHE6.1     | PF00069.23 | 66.50 | 0.00 |
| TRINITY_D3B2W9_POLPA/20-667      | D3B2W9.1     | PF00888.20 | 66.50 | 0.00 |
| TRINITY_Q7XX43_ORYSJ/585-745     | Q7XX43.2     | PF00078.25 | 66.50 | 0.00 |
| TRINITY_Q7XX43_ORYSJ/585-745     | Q7XX43.2     | PF00078.25 | 66.50 | 0.00 |
| TRINITY_A0A0A1NYQ7_9FUNG/96-537  | A0A0A1NYQ7.1 | PF0050     | 66.40 | 0.00 |
| TRINITY_Q22EZ7_TETTS/48-509      | Q22EZ7.1     | PF00171.20 | 66.40 | 0.00 |
| TRINITY_S8CW06_9LAMI/33-141      | S8CW06.1     | PF00255.17 | 66.40 | 0.00 |
| TRINITY_A0EID1_PARTE/75-324      | A0EID1.1     | PF00069.23 | 66.40 | 0.00 |
| TRINITY_C1E1A5_MICSR/1-125       | C1E1A5.1     | PF00705.16 | 66.40 | 0.00 |
| TRINITY_D8TVF4_VOLCA/25-437      | D8TVF4.1     | PF01704.16 | 66.40 | 0.00 |
| TRINITY_E1G463_LOALO/14-142      | E1G463.1     | PF00416.20 | 66.40 | 0.00 |
| TRINITY_A0EG30_PARTE/10-359      | A0EG30.1     | PF00274.17 | 66.40 | 0.00 |
| TRINITY_A8J0U4_CHLRE/27-488      | A8J0U4.1     | PF01384.18 | 66.40 | 0.00 |
| TRINITY_A0A0D2WUX5_CAPO3/529-755 | A0A0D2WUX5.1 | PF1371     | 66.40 | 0.00 |
| TRINITY_A0BL44_PARTE/620-730     | A0BL44.1     | PF13426.5; | 66.40 | 0.00 |
| TRINITY_I7ME83_TETTS/11-124      | I7ME83.1     | PF01398.19 | 66.40 | 0.00 |
| TRINITY_A0A078ABM6_STYLE/46-281  | A0A078ABM6.1 | PF0011     | 66.40 | 0.00 |
| TRINITY_A7SK20_NEMVE/1-113       | A7SK20.1     | PF01778.15 | 66.40 | 0.00 |
| TRINITY_E1ZA18_CHLVA/75-196      | E1ZA18.1     | PF00581.18 | 66.40 | 0.00 |
| TRINITY_F8PG43_SERL3/67-171      | F8PG43.1     | PF00639.19 | 66.30 | 0.00 |
| TRINITY_A9S740_PHYPA/3098-3376   | A9S740.1     | PF02138.16 | 66.30 | 0.00 |
| TRINITY_L8HD25_ACACA/7-190       | L8HD25.1     | PF00025.19 | 66.30 | 0.00 |
| TRINITY_I1C5V8_RHIO9/33-220      | I1C5V8.1     | PF00227.24 | 66.30 | 0.00 |
| TRINITY_A8I1Y7_CHLRE/6-281       | A8I1Y7.1     | PF14938.4; | 66.30 | 0.00 |
| TRINITY_G0R3T4_ICHMG/1-117       | G0R3T4.1     | PF12775.5; | 66.30 | 0.00 |
| TRINITY_Q23GD1_TETTS/1838-1959   | Q23GD1.2     | PF00069.23 | 66.30 | 0.00 |
| TRINITY_Q23VX2_TETTS/36-127      | Q23VX2.2     | PF00447.15 | 66.30 | 0.00 |
| TRINITY_ABCB4_DICDI/542-691      | Q54W24.1     | PF00005.25 | 66.30 | 0.00 |
| TRINITY_Q55CR6_DICDI/72-241      | Q55CR6.1     | PF00270.27 | 66.30 | 0.00 |
| TRINITY_D8TII8_VOLCA/13-280      | D8TII8.1     | PF00459.23 | 66.30 | 0.00 |
| TRINITY_D8TKB0_VOLCA/20-165      | D8TKB0.1     | PF00005.25 | 66.30 | 0.00 |
| TRINITY_A0CSP0_PARTE/193-289     | A0CSP0.1     | PF01248.24 | 66.30 | 0.00 |
| TRINITY_A0DZ73_PARTE/168-416     | A0DZ73.1     | PF00069.23 | 66.30 | 0.00 |
| TRINITY_F4PMI7_DICFS/27-634      | F4PMI7.1     | PF00012.18 | 66.30 | 0.00 |
| TRINITY_W5LQY3_ASTMX/1-167       | W5LQY3.1     | PF00838.15 | 66.30 | 0.00 |
| TRINITY_A8J8B2_CHLRE/72-172      | A8J8B2.1     | PF02482.17 | 66.30 | 0.00 |
| TRINITY_I7MAY1_TETTS/3674-4379   | I7MAY1.1     | PF03028.13 | 66.30 | 0.00 |
| TRINITY_D8U5C6_VOLCA/1-392       | D8U5C6.1     | PF13520.4; | 66.30 | 0.00 |
| TRINITY_A0A077ZW97_STYLE/111-205 | A0A077ZW97.1 | PF1683     | 66.30 | 0.00 |
| TRINITY_D8TJ79_VOLCA/552-647     | D8TJ79.1     | PF12936.5; | 66.30 | 0.00 |

|                                  |                     |       |      |
|----------------------------------|---------------------|-------|------|
| TRINITY_A8J924_CHLRE/124-212     | A8J924.1 PF00957.19 | 66.30 | 0.00 |
| TRINITY_K1QUF8_CRAGI/40-110      | K1QUF8.1 PF00076.20 | 66.20 | 0.00 |
| TRINITY_I7MIS4_TETTS/1-83        | I7MIS4.2 PF12861.5; | 66.20 | 0.00 |
| TRINITY_M4AYU5_XIPMA/24-136      | M4AYU5.1 PF00074.18 | 66.20 | 0.00 |
| TRINITY_L8H823_ACACA/184-369     | L8H823.1 PF07065.12 | 66.20 | 0.00 |
| TRINITY_Q2RWI6_RHORT/16-80       | Q2RWI6.1 PF00462.22 | 66.20 | 0.00 |
| TRINITY_F0ZR69_DICPU/692-883     | F0ZR69.1 PF08282.10 | 66.20 | 0.00 |
| TRINITY_A0DC90_PARTE/163-363     | A0DC90.1 PF00856.26 | 66.20 | 0.00 |
| TRINITY_SUMO1_ARATH/18-91        | P55852.2 PF00240.21 | 66.20 | 0.00 |
| TRINITY_Q236N2_TETTS/32-570      | Q236N2.1 PF00995.21 | 66.20 | 0.00 |
| TRINITY_Q22V76_TETTS/529-664     | Q22V76.2 PF00005.25 | 66.20 | 0.00 |
| TRINITY_A0A0M2SZE4_9BACI/4-217   | A0A0M2SZE4.1 PF0179 | 66.20 | 0.00 |
| TRINITY_A0CFQ7_PARTE/349-467     | A0CFQ7.1 PF00622.26 | 66.20 | 0.00 |
| TRINITY_L8GPS3_ACACA/400-478     | L8GPS3.1 PF08149.9; | 66.20 | 0.00 |
| TRINITY_B1XJD9_SYNP2/730-795     | B1XJD9.1 PF00512.23 | 66.20 | 0.00 |
| TRINITY_H2TE27_TAKRU/12-130      | H2TE27.1 PF07686.15 | 66.20 | 0.00 |
| TRINITY_A0E741_PARTE/638-836     | A0E741.1 PF01434.16 | 66.20 | 0.00 |
| TRINITY_D8U5Y4_VOLCA/1-248       | D8U5Y4.1 PF00225.21 | 66.20 | 0.00 |
| TRINITY_D8U650_VOLCA/3-70        | D8U650.1 PF01066.19 | 66.20 | 0.00 |
| TRINITY_L8HGI8_ACACA/89-695      | L8HGI8.1 PF00133.20 | 66.20 | 0.00 |
| TRINITY_A0A087SBU5_AUXPR/287-356 | A0A087SBU5.1 PF0877 | 66.20 | 0.00 |
| TRINITY_A8JGT2_CHLRE/86-154      | A8JGT2.1 PF02201.16 | 66.20 | 0.00 |
| TRINITY_A0CWR1_PARTE/401-628     | A0CWR1.1 PF00198.21 | 66.20 | 0.00 |
| TRINITY_D8U9G4_VOLCA/52-168      | D8U9G4.1 PF03099.17 | 66.20 | 0.00 |

|                                  |                     |       |      |
|----------------------------------|---------------------|-------|------|
| TRINITY_A0A015J5F3_9GLOM/2-79    | A0A015J5F3.1 PF0718 | 66.20 | 0.00 |
| TRINITY_A8HQD2_CHLRE/65-209      | A8HQD2.1 PF10607.7; | 66.20 | 0.00 |
| TRINITY_D3BRS6_POLPA/217-623     | D3BRS6.1 PF00962.20 | 66.20 | 0.00 |
| TRINITY_D8UK61_VOLCA/227-395     | D8UK61.1 PF04832.10 | 66.20 | 0.00 |
| TRINITY_D8U6D4_VOLCA/109-491     | D8U6D4.1 PF00632.23 | 66.20 | 0.00 |
| TRINITY_L7WAY7_NONDD/31-309      | L7WAY7.1 PF00248.19 | 66.20 | 0.00 |
| TRINITY_D8TXM0_VOLCA/44-111      | D8TXM0.1 PF00076.20 | 66.20 | 0.00 |
| TRINITY_RS3A_CHLRE/15-221        | A8HS48.1 PF01015.16 | 66.20 | 0.00 |
| TRINITY_G0R6B9_ICHMG/35-104      | G0R6B9.1 PF10407.7; | 66.20 | 0.00 |
| TRINITY_F4NW08_BATDJ/1-138       | F4NW08.1 PF00179.24 | 66.20 | 0.00 |
| TRINITY_Q3SDM6_PARTE/17-177      | Q3SDM6.1 PF00071.20 | 66.20 | 0.00 |
| TRINITY_A8IIS8_CHLRE/45-114      | A8IIS8.1 PF02416.14 | 66.20 | 0.00 |
| TRINITY_D8U4B9_VOLCA/79-456      | D8U4B9.1 PF00890.22 | 66.20 | 0.00 |
| TRINITY_A0A078AJC6_STYLE/38-250  | A0A078AJC6.1 PF0072 | 66.20 | 0.00 |
| TRINITY_D8U0H6_VOLCA/123-187     | D8U0H6.1 PF00076.20 | 66.20 | 0.00 |
| TRINITY_I7M2D2_TETTS/40-113      | I7M2D2.2 PF02798.18 | 66.20 | 0.00 |
| TRINITY_A8I459_CHLRE/89-433      | A8I459.1 PF01546.26 | 66.20 | 0.00 |
| TRINITY_A0A0A1MQX3_9FUNG/93-171  | A0A0A1MQX3.1 PF0147 | 66.20 | 0.00 |
| TRINITY_E1ZLP7_CHLVA/204-432     | E1ZLP7.1 PF00557.22 | 66.20 | 0.00 |
| TRINITY_K1PGH0_CRAGI/9-165       | K1PGH0.1 PF12850.5; | 66.20 | 0.00 |
| TRINITY_I0YN96_9CHLO/60-564      | I0YN96.1 PF00118.22 | 66.20 | 0.00 |
| TRINITY_I0YKC2_9CHLO/1-154       | I0YKC2.1 PF04729.11 | 66.20 | 0.00 |
| TRINITY_G0QMF6_ICHMG/19-283      | G0QMF6.1 PF02263.17 | 66.20 | 0.00 |
| TRINITY_X5D8J8_9BACT/110-281     | X5D8J8.1 PF00589.20 | 66.20 | 0.00 |
| TRINITY_U3J5I5_ANAPL/285-901     | U3J5I5.1 PF00443.27 | 66.10 | 0.00 |
| TRINITY_A0A075AZL7_9FUNG/132-459 | A0A075AZL7.1 PF0049 | 66.10 | 0.00 |
| TRINITY_I7MMR4_TETTS/183-264     | I7MMR4.1 PF12895.5; | 66.10 | 0.00 |
| TRINITY_D3B5F9_POLPA/16-194      | D3B5F9.1 PF02301.16 | 66.10 | 0.00 |
| TRINITY_S7UK71_TOXGO/169-306     | S7UK71.1 PF00179.24 | 66.10 | 0.00 |
| TRINITY_H1YCL7_9SPHI/51-213      | H1YCL7.1 PF03167.17 | 66.10 | 0.00 |
| TRINITY_A0A0D2VTJ8_CAPO3/132-305 | A0A0D2VTJ8.1 PF0602 | 66.10 | 0.00 |
| TRINITY_Q22W39_TETTS/56-311      | Q22W39.2 PF00069.23 | 66.10 | 0.00 |
| TRINITY_I7M1U7_TETTS/515-650     | I7M1U7.1 PF00005.25 | 66.10 | 0.00 |
| TRINITY_F0Z8T4_DICPU/179-349     | F0Z8T4.1 PF02866.16 | 66.10 | 0.00 |
| TRINITY_C8X1V8_DESRD/5-119       | C8X1V8.1 PF09996.7; | 66.10 | 0.00 |
| TRINITY_A8IWK6_CHLRE/17-269      | A8IWK6.1 PF07714.15 | 66.10 | 0.00 |
| TRINITY_A0BTM6_PARTE/247-554     | A0BTM6.1 PF00749.19 | 66.10 | 0.00 |
| TRINITY_U6NK01_HAECO/73-145      | U6NK01.1 PF02594.14 | 66.10 | 0.00 |
| TRINITY_E1ZKP1_CHLVA/20-212      | E1ZKP1.1 PF00857.18 | 66.10 | 0.00 |
| TRINITY_A8IYH3_CHLRE/127-188     | A8IYH3.1 PF04117.10 | 66.10 | 0.00 |
| TRINITY_U3K0G6_FICAL/1325-1473   | U3K0G6.1 PF00005.25 | 66.10 | 0.00 |
| TRINITY_CCR1_MAIZE/36-291        | P0C8M8.1 PF00069.23 | 66.10 | 0.00 |
| TRINITY_A8J1X1_CHLRE/197-257     | A8J1X1.1 PF04117.10 | 66.10 | 0.00 |
| TRINITY_A8JHQ1_CHLRE/328-388     | A8JHQ1.1 PF00226.29 | 66.10 | 0.00 |
| TRINITY_V4TVT0_9ROSI/84-377      | V4TVT0.1 PF05185.14 | 66.10 | 0.00 |
| TRINITY_A8IUC0_CHLRE/192-310     | A8IUC0.1 PF01544.16 | 66.10 | 0.00 |
| TRINITY_D8TMQ9_VOLCA/165-600     | D8TMQ9.1 PF01131.18 | 66.10 | 0.00 |
| TRINITY_A0BD97_PARTE/9-70        | A0BD97.1 PF00886.17 | 66.10 | 0.00 |
| TRINITY_I7LZU3_TETTS/215-299     | I7LZU3.1 PF04433.15 | 66.10 | 0.00 |
| TRINITY_A8J0A8_CHLRE/143-217     | A8J0A8.1 PF09368.8; | 66.10 | 0.00 |
| TRINITY_R8BQX2_TOGMI/2-183       | R8BQX2.1 PF17135.2; | 66.10 | 0.00 |
| TRINITY_I7LU51_TETTS/84-400      | I7LU51.1 PF01406.17 | 66.10 | 0.00 |
| TRINITY_A0BDP7_PARTE/12-138      | A0BDP7.1 PF00179.24 | 66.10 | 0.00 |
| TRINITY_M0S5G6_MUSAM/335-651     | M0S5G6.1 PF02540.15 | 66.10 | 0.00 |
| TRINITY_D8U751_VOLCA/2314-2574   | D8U751.1 PF12775.5; | 66.10 | 0.00 |
| TRINITY_I1QGW5_ORYGL/64-128      | I1QGW5.1 PF00076.20 | 66.10 | 0.00 |
| TRINITY_M0Z181_HORVD/16-118      | M0Z181.1 PF13304.4; | 66.10 | 0.00 |
| TRINITY_I0YK34_9CHLO/173-228     | I0YK34.1 PF13370.4; | 66.10 | 0.00 |
| TRINITY_A8HNX9_CHLRE/48-218      | A8HNX9.1 PF04755.10 | 66.10 | 0.00 |
| TRINITY_F0ZAE5_DICPU/489-544     | F0ZAE5.1 PF00412.20 | 66.10 | 0.00 |
| TRINITY_D8UGC1_VOLCA/164-275     | D8UGC1.1 PF01205.17 | 66.10 | 0.00 |

|                                    |              |            |       |      |
|------------------------------------|--------------|------------|-------|------|
| TRINITY_D8U821_VOLCA/5-290         | D8U821.1     | PF00069.23 | 66.10 | 0.00 |
| TRINITY_A8IBU9_CHLRE/138-261       | A8IBU9.1     | PF03109.14 | 66.10 | 0.00 |
| TRINITY_I0Z2E4_9CHLO/522-831       | I0Z2E4.1     | PF02889.14 | 66.10 | 0.00 |
| TRINITY_I0YL17_9CHLO/29-208        | I0YL17.1     | PF00270.27 | 66.10 | 0.00 |
| TRINITY_C1FII7_MICSR/12-58         | C1FII7.1     | PF12554.6; | 66.00 | 0.00 |
| TRINITY_A0BMT1_PARTE/17-71         | A0BMT1.1     | PF00226.29 | 66.00 | 0.00 |
| TRINITY_I3KEJ4_ORENI/13-139        | I3KEJ4.1     | PF00828.17 | 66.00 | 0.00 |
| TRINITY_Q22YP6_TETTS/3235-3331     | Q22YP6.2     | PF09333.9; | 66.00 | 0.00 |
| TRINITY_I7LY30_TETTS/325-418       | I7LY30.1     | PF03147.12 | 66.00 | 0.00 |
| TRINITY_I1GBR9_AMPQE/103-201       | I1GBR9.1     | PF14497.4; | 66.00 | 0.00 |
| TRINITY_A0A022PSY2_ERYGU/17-69     | A0A022PSY2.1 | PF0971     | 66.00 | 0.00 |
| TRINITY_A0BX73_PARTE/218-318       | A0BX73.1     | PF00153.25 | 66.00 | 0.00 |
| TRINITY_I3JLH7_ORENI/145-239       | I3JLH7.1     | PF00031.19 | 66.00 | 0.00 |
| TRINITY_D8M2T5_BLAHO/134-181       | D8M2T5.1     | PF13920.4; | 66.00 | 0.00 |
| TRINITY_A0A0M8K7X2_9CHLR/384-533   | A0A0M8K7X2.1 | PF0000     | 66.00 | 0.00 |
| TRINITY_A0A068RSS3_9FUNG/161-210   | A0A068RSS3.1 | PF0354     | 66.00 | 0.00 |
| TRINITY_A0A067DPW2_CITSI/95-292    | A0A067DPW2.1 | PF1308     | 66.00 | 0.00 |
| TRINITY_A0E1G8_PARTE/540-795       | A0E1G8.1     | PF00069.23 | 66.00 | 0.00 |
| TRINITY_A0D3K4_PARTE/152-201       | A0D3K4.1     | PF13920.4; | 66.00 | 0.00 |
| TRINITY_Q22W39_TETTS/56-311        | Q22W39.2     | PF00069.23 | 66.00 | 0.00 |
| TRINITY_A0A058ZA67_9EUKA/9-170     | A0A058ZA67.1 | PF0007     | 66.00 | 0.00 |
| TRINITY_L1IJY6_GUITH/93-250        | L1IJY6.1     | PF02518.24 | 66.00 | 0.00 |
| TRINITY_A0A078AYS6_STYLE/9-55      | A0A078AYS6.1 | PF0047     | 66.00 | 0.00 |
| TRINITY_C1E1U5_MICSR/94-250        | C1E1U5.1     | PF02535.20 | 66.00 | 0.00 |
| TRINITY_A8IQH3_CHLRE/1-180         | A8IQH3.1     | PF01184.17 | 66.00 | 0.00 |
| TRINITY_U6N408_9EIME/83-147        | U6N408.1     | PF13499.4; | 66.00 | 0.00 |
| TRINITY_A0DFK5_PARTE/51-306        | A0DFK5.1     | PF00069.23 | 66.00 | 0.00 |
| TRINITY_E1ZHU6_CHLVA/51-276        | E1ZHU6.1     | PF00082.20 | 66.00 | 0.00 |
| TRINITY_D8UJW1_VOLCA/1579-1721     | D8UJW1.1     | PF12842.5; | 66.00 | 0.00 |
| TRINITY_W7XFH3_TETTS/470-624       | W7XFH3.1     | PF00005.25 | 66.00 | 0.00 |
| TRINITY_G1N1B4_MELGA/1-241         | G1N1B4.2     | PF03437.13 | 66.00 | 0.00 |
| TRINITY_Q23MM8_TETTS/343-397       | Q23MM8.2     | PF00076.20 | 66.00 | 0.00 |
| TRINITY_C1MZY5_MICPC/483-532       | C1MZY5.1     | PF00847.18 | 66.00 | 0.00 |
| TRINITY_A8IRP8_CHLRE/2-206         | A8IRP8.1     | PF00091.23 | 66.00 | 0.00 |
| TRINITY_E1Z4J6_CHLVA/166-333       | E1Z4J6.1     | PF13640.4; | 66.00 | 0.00 |
| TRINITY_A8IA47_CHLRE/9-142         | A8IA47.1     | PF05871.10 | 66.00 | 0.00 |
| TRINITY_A8JGF9_CHLRE/112-208       | A8JGF9.1     | PF13864.4; | 66.00 | 0.00 |
| TRINITY_D0P397_PHYIT/201-459       | D0P397.1     | PF00069.23 | 66.00 | 0.00 |
| TRINITY_D3B6E7_POLPA/21-441        | D3B6E7.1     | PF04209.11 | 66.00 | 0.00 |
| TRINITY_D8TNU6_VOLCA/93-344        | D8TNU6.1     | PF01040.16 | 66.00 | 0.00 |
| TRINITY_A8I6Y0_CHLRE/141-334       | A8I6Y0.1     | PF01556.16 | 66.00 | 0.00 |
| TRINITY_A0A075ATC3_9FUNG/49-177    | A0A075ATC3.1 | PF0152     | 66.00 | 0.00 |
| TRINITY_Q239R2_TETTS/10-57         | Q239R2.2     | PF00319.16 | 66.00 | 0.00 |
| TRINITY_D8TPJ7_VOLCA/169-322       | D8TPJ7.1     | PF01556.16 | 66.00 | 0.00 |
| TRINITY_I0Z4D4_9CHLO/20-126        | I0Z4D4.1     | PF11267.6; | 66.00 | 0.00 |
| TRINITY_A8ID30_CHLRE/13-183        | A8ID30.1     | PF10237.7; | 66.00 | 0.00 |
| TRINITY_A8JC80_CHLRE/16-196        | A8JC80.1     | PF03357.19 | 66.00 | 0.00 |
| TRINITY_R6T066_9CLOT/673-721       | R6T066.1     | PF13538.4; | 66.00 | 0.00 |
| TRINITY_Q23CW4_TETTS/196-365       | Q23CW4.2     | PF02866.16 | 66.00 | 0.00 |
| TRINITY_A8IRJ6_CHLRE/159-209       | A8IRJ6.1     | PF13639.4; | 66.00 | 0.00 |
| TRINITY_D8TKW7_VOLCA/131-373       | D8TKW7.1     | PF00112.21 | 66.00 | 0.00 |
| TRINITY_Q23YB5_TETTS/199-456       | Q23YB5.2     | PF00069.23 | 66.00 | 0.00 |
| TRINITY_D8TLB9_VOLCA/79-355        | D8TLB9.1     | PF02353.18 | 66.00 | 0.00 |
| TRINITY_PGM2_DICDI/44-187          | Q54UQ2.1     | PF02878.14 | 66.00 | 0.00 |
| TRINITY_F4PRM5_DICFS/283-491       | F4PRM5.1     | PF04055.19 | 66.00 | 0.00 |
| TRINITY_I0YSE8_9CHLO/45-385        | I0YSE8.1     | PF00274.17 | 66.00 | 0.00 |
| TRINITY_A8HWC2_CHLRE/332-590       | A8HWC2.1     | PF03949.13 | 66.00 | 0.00 |
| TRINITY_A0A0G2ZWH9_9DELT/1116-1168 | A0A0G2ZWH9.1 | PF0067     | 66.00 | 0.00 |
| TRINITY_A8J1E8_CHLRE/66-271        | A8J1E8.1     | PF07002.14 | 66.00 | 0.00 |
| TRINITY_A8INZ7_CHLRE/69-346        | A8INZ7.1     | PF03982.11 | 66.00 | 0.00 |
| TRINITY_L8HMU1_ACACA/91-775        | L8HMU1.1     | PF00063.19 | 66.00 | 0.00 |

|                                   |              |            |       |      |
|-----------------------------------|--------------|------------|-------|------|
| TRINITY_I7ML74_TETTS/5678-6228    | I7ML74.2     | PF00899.19 | 66.00 | 0.00 |
| TRINITY_A9RQZ4_PHYPA/20-489       | A9RQZ4.1     | PF00171.20 | 66.00 | 0.00 |
| TRINITY_A0A0D2VUK7_CAPO3/553-737  | A0A0D2VUK7.1 | PF0027     | 66.00 | 0.00 |
| TRINITY_A9U1T0_PHYPA/12-337       | A9U1T0.1     | PF00069.23 | 66.00 | 0.00 |
| TRINITY_W5JBT3_ANODA/175-435      | W5JBT3.1     | PF01189.15 | 66.00 | 0.00 |
| TRINITY_A9UUZ7_MONBE/1923-2066    | A9UUZ7.1     | PF07728.12 | 66.00 | 0.00 |
| TRINITY_A8I3J5_CHLRE/51-318       | A8I3J5.1     | PF00459.23 | 66.00 | 0.00 |
| TRINITY_Q8YV84_NOSS1/37-134       | Q8YV84.1     | PF00355.24 | 66.00 | 0.00 |
| TRINITY_A8JGS8_CHLRE/319-763      | A8JGS8.1     | PF04053.12 | 66.00 | 0.00 |
| TRINITY_M5VM98_PRUPE/561-708      | M5VM98.1     | PF00078.25 | 66.00 | 0.00 |
| TRINITY_J9HJ22_9SPIT/3-99         | J9HJ22.1     | PF01157.16 | 66.00 | 0.00 |
| TRINITY_MANA_DICDI/43-353         | P34098.2     | PF01074.20 | 65.90 | 0.00 |
| TRINITY_U5DAJ6_AMBTC/68-108       | U5DAJ6.1     | PF01096.16 | 65.90 | 0.00 |
| TRINITY_L8HHK4_ACACA/13-94        | L8HHK4.1     | PF04241.13 | 65.90 | 0.00 |
| TRINITY_A0A077ZVL1_STYLE/189-765  | A0A077ZVL1.1 | PF0838     | 65.90 | 0.00 |
| TRINITY_G0QPU0_ICHMG/54-487       | G0QPU0.1     | PF07994.10 | 65.90 | 0.00 |
| TRINITY_Q23AF8_TETTS/106-149      | Q23AF8.3     | PF13639.4; | 65.90 | 0.00 |
| TRINITY_W4XZV9_STRPU/157-237      | W4XZV9.1     | PF01336.23 | 65.90 | 0.00 |
| TRINITY_J9EN44_9SPIT/738-778      | J9EN44.1     | PF05186.11 | 65.90 | 0.00 |
| TRINITY_H3CEP8_TETNG/9-186        | H3CEP8.1     | PF11032.6; | 65.90 | 0.00 |
| TRINITY_G0QX41_ICHMG/40-335       | G0QX41.1     | PF00069.23 | 65.90 | 0.00 |
| TRINITY_A7SMN7_NEMVE/5-178        | A7SMN7.1     | PF00071.20 | 65.90 | 0.00 |
| TRINITY_A9UP20_MONBE/90-256       | A9UP20.1     | PF04427.16 | 65.90 | 0.00 |
| TRINITY_L8HD99_ACACA/100-180      | L8HD99.1     | PF03366.14 | 65.90 | 0.00 |
| TRINITY_I0YKX7_9CHLO/155-269      | I0YKX7.1     | PF00504.19 | 65.90 | 0.00 |
| TRINITY_I0YKX7_9CHLO/155-269      | I0YKX7.1     | PF00504.19 | 65.90 | 0.00 |
| TRINITY_A0A0N4TTI4_BRUPA/409-452  | A0A0N4TTI4.1 | PF1363     | 65.90 | 0.00 |
| TRINITY_A0A0F3IMW9_9GAMM/81-520   | A0A0F3IMW9.1 | PF0050     | 65.90 | 0.00 |
| TRINITY_K9TKX8_9CYAN/243-286      | K9TKX8.1     | PF01505.16 | 65.90 | 0.00 |
| TRINITY_A8INH4_CHLRE/30-266       | A8INH4.1     | PF00069.23 | 65.90 | 0.00 |
| TRINITY_A8IG04_CHLRE/28-151       | A8IG04.1     | PF00067.20 | 65.90 | 0.00 |
| TRINITY_D8UFH7_VOLCA/121-308      | D8UFH7.1     | PF10294.7; | 65.90 | 0.00 |
| TRINITY_A0A078AVM5_STYLE/320-363  | A0A078AVM5.1 | PF0056     | 65.90 | 0.00 |
| TRINITY_F1NKR8_CHICK/217-260      | F1NKR8.2     | PF01505.16 | 65.90 | 0.00 |
| TRINITY_G0R673_ICHMG/55-221       | G0R673.1     | PF00270.27 | 65.90 | 0.00 |
| TRINITY_A0B6T0_METTP/484-615      | A0B6T0.1     | PF00004.27 | 65.90 | 0.00 |
| TRINITY_Q23JR2_TETTS/338-482      | Q23JR2.2     | PF00005.25 | 65.90 | 0.00 |
| TRINITY_A0BL44_PARTE/620-730      | A0BL44.1     | PF13426.5; | 65.90 | 0.00 |
| TRINITY_A0A067FM35_CITSI/738-950  | A0A067FM35.1 | PF0064     | 65.90 | 0.00 |
| TRINITY_A8I7V2_CHLRE/44-214       | A8I7V2.1     | PF08534.8; | 65.90 | 0.00 |
| TRINITY_A0A0G4IWK8_PLABS/55-128   | A0A0G4IWK8.1 | PF0071     | 65.90 | 0.00 |
| TRINITY_F4PTV7_DICFS/4405-4494    | F4PTV7.1     | PF09333.9; | 65.90 | 0.00 |
| TRINITY_A8I8G1_CHLRE/21-65        | A8I8G1.1     | PF01585.21 | 65.90 | 0.00 |
| TRINITY_Q23CU3_TETTS/69-513       | Q23CU3.1     | PF00501.26 | 65.90 | 0.00 |
| TRINITY_A8I032_CHLRE/24-135       | A8I032.1     | PF02466.17 | 65.90 | 0.00 |
| TRINITY_A0A087SJT0_AUXPR/71-167   | A0A087SJT0.1 | PF1289     | 65.90 | 0.00 |
| TRINITY_A8HTA5_CHLRE/677-924      | A8HTA5.1     | PF07714.15 | 65.90 | 0.00 |
| TRINITY_W7AJD3_9APIC/6-229        | W7AJD3.1     | PF00300.20 | 65.90 | 0.00 |
| TRINITY_A0A058Z5I0_9EUKA/950-1099 | A0A058Z5I0.1 | PF0000     | 65.90 | 0.00 |
| TRINITY_A8ICB6_CHLRE/231-427      | A8ICB6.1     | PF12315.6; | 65.90 | 0.00 |
| TRINITY_D8U6J8_VOLCA/489-599      | D8U6J8.1     | PF01926.21 | 65.90 | 0.00 |
| TRINITY_E1ZEN1_CHLVA/289-465      | E1ZEN1.1     | PF00270.27 | 65.90 | 0.00 |
| TRINITY_A8JFD5_CHLRE/394-482      | A8JFD5.1     | PF08544.11 | 65.90 | 0.00 |
| TRINITY_A8J6D5_CHLRE/102-360      | A8J6D5.1     | PF00122.18 | 65.90 | 0.00 |
| TRINITY_A8ISI4_CHLRE/11-98        | A8ISI4.1     | PF02970.14 | 65.90 | 0.00 |
| TRINITY_A8IQI1_CHLRE/1-179        | A8IQI1.1     | PF01184.17 | 65.90 | 0.00 |
| TRINITY_L8HBF6_ACACA/1-126        | L8HBF6.1     | PF00235.17 | 65.90 | 0.00 |
| TRINITY_A8HPA3_CHLRE/760-803      | A8HPA3.1     | PF13920.4; | 65.90 | 0.00 |
| TRINITY_Q23ZH6_TETTS/1205-1354    | Q23ZH6.2     | PF00005.25 | 65.90 | 0.00 |
| TRINITY_A8IC88_CHLRE/107-224      | A8IC88.1     | PF13640.4; | 65.90 | 0.00 |
| TRINITY_Q6UKY8_CHLRE/13-72        | Q6UKY8.1     | PF05347.13 | 65.90 | 0.00 |



|                                   |                     |       |      |
|-----------------------------------|---------------------|-------|------|
| TRINITY_I1EYR0_AMPQE/51-129       | I1EYR0.1 PF00717.21 | 65.80 | 0.00 |
| TRINITY_I7LZR6_TETTS/63-261       | I7LZR6.1 PF00106.23 | 65.80 | 0.00 |
| TRINITY_A0A078B7E7_STYLE/269-506  | A0A078B7E7.1 PF0046 | 65.80 | 0.00 |
| TRINITY_A0A058ZFB3_9EUKA/1-108    | A0A058ZFB3.1 PF0128 | 65.80 | 0.00 |
| TRINITY_C4R522_PICPG/162-202      | C4R522.1 PF00514.21 | 65.80 | 0.00 |
| TRINITY_L1JX35_GUIITH/119-245     | L1JX35.1 PF04116.11 | 65.80 | 0.00 |
| TRINITY_B4GNZ7_DROPE/46-86        | B4GNZ7.1 PF00400.30 | 65.80 | 0.00 |
| TRINITY_D8SL27_SELML/138-242      | D8SL27.1 PF12894.5; | 65.80 | 0.00 |
| TRINITY_A0D3E5_PARTE/45-322       | A0D3E5.1 PF00069.23 | 65.80 | 0.00 |
| TRINITY_A0A0D2VJK4_CAPO3/673-820  | A0A0D2VJK4.1 PF0029 | 65.80 | 0.00 |
| TRINITY_B8D016_HALOH/8-124        | B8D016.1 PF13793.4; | 65.80 | 0.00 |
| TRINITY_L8GJP7_ACACA/9-182        | L8GJP7.1 PF02776.16 | 65.80 | 0.00 |
| TRINITY_MOC2A_CHLRE/5-83          | A8JJB2.1 PF02597.18 | 65.80 | 0.00 |
| TRINITY_I1G9X5_AMPQE/63-217       | I1G9X5.1 PF00675.18 | 65.80 | 0.00 |
| TRINITY_Q230X5_TETTS/14-75        | Q230X5.3 PF13499.4; | 65.80 | 0.00 |
| TRINITY_A0A059CW53_EUCGR/96-133   | A0A059CW53.1 PF0142 | 65.80 | 0.00 |
| TRINITY_A0BNB7_PARTE/164-432      | A0BNB7.1 PF00928.19 | 65.80 | 0.00 |
| TRINITY_Q09B48_STIAD/174-291      | Q09B48.1 PF03171.18 | 65.80 | 0.00 |
| TRINITY_L8HFI6_ACACA/84-198       | L8HFI6.1 PF02338.17 | 65.80 | 0.00 |
| TRINITY_Q3SD81_PARTE/16-176       | Q3SD81.1 PF00071.20 | 65.80 | 0.00 |
| TRINITY_Q23FP2_TETTS/142-252      | Q23FP2.2 PF02770.17 | 65.80 | 0.00 |
| TRINITY_F1A0D6_DICPU/2-259        | F1A0D6.1 PF00069.23 | 65.80 | 0.00 |
| TRINITY_A8IN84_CHLRE/1-86         | A8IN84.1 PF12796.5; | 65.80 | 0.00 |
| TRINITY_A0E5C3_PARTE/963-1060     | A0E5C3.1 PF00581.18 | 65.80 | 0.00 |
| TRINITY_G0QJA0_ICHMG/157-432      | G0QJA0.1 PF08634.8; | 65.80 | 0.00 |
| TRINITY_Q21MT3_SACD2/4-326        | Q21MT3.1 PF16363.3; | 65.80 | 0.00 |
| TRINITY_W4K881_9HOMO/629-923      | W4K881.1 PF04950.10 | 65.80 | 0.00 |
| TRINITY_A0A059LMP9_9CHLO/127-248  | A0A059LMP9.1 PF1340 | 65.80 | 0.00 |
| TRINITY_D8TMZ3_VOLCA/1-193        | D8TMZ3.1 PF00069.23 | 65.80 | 0.00 |
| TRINITY_A8JES1_CHLRE/78-260       | A8JES1.1 PF01025.17 | 65.80 | 0.00 |
| TRINITY_I1G913_AMPQE/207-506      | I1G913.1 PF00557.22 | 65.80 | 0.00 |
| TRINITY_T1KZR4_TETUR/12-476       | T1KZR4.1 PF00221.17 | 65.80 | 0.00 |
| TRINITY_A7SJM7_NEMVE/332-369      | A7SJM7.1 PF00400.30 | 65.80 | 0.00 |
| TRINITY_A8HNJ4_CHLRE/1-185        | A8HNJ4.1 PF02492.17 | 65.80 | 0.00 |
| TRINITY_I7MIX1_TETTS/178-297      | I7MIX1.2 PF02373.20 | 65.80 | 0.00 |
| TRINITY_A8J448_CHLRE/16-348       | A8J448.2 PF07992.12 | 65.80 | 0.00 |
| TRINITY_F1A3F4_DICPU/109-243      | F1A3F4.1 PF01926.21 | 65.80 | 0.00 |
| TRINITY_A8HSI6_CHLRE/10-133       | A8HSI6.1 PF04628.11 | 65.80 | 0.00 |
| TRINITY_B3RKR4_TRIAD/3-376        | B3RKR4.1 PF00022.17 | 65.80 | 0.00 |
| TRINITY_I7M3D3_TETTS/42-666       | I7M3D3.2 PF00133.20 | 65.80 | 0.00 |
| TRINITY_A8I478_CHLRE/307-344      | A8I478.1 PF05184.13 | 65.80 | 0.00 |
| TRINITY_A8JH04_CHLRE/12-203       | A8JH04.1 PF13385.4; | 65.80 | 0.00 |
| TRINITY_D3BFW2_POLPA/33-76        | D3BFW2.1 PF01585.21 | 65.80 | 0.00 |
| TRINITY_I0Z4V2_9CHLO/13-278       | I0Z4V2.1 PF01263.18 | 65.80 | 0.00 |
| TRINITY_A0A075B3Z7_9FUNG/21-207   | A0A075B3Z7.1 PF0040 | 65.80 | 0.00 |
| TRINITY_A0A0D1XZS4_ANEMI/11-85    | A0A0D1XZS4.1 PF0399 | 65.80 | 0.00 |
| TRINITY_A8IAZ1_CHLRE/51-88        | A8IAZ1.1 PF00400.30 | 65.80 | 0.00 |
| TRINITY_A0A074S0Z7_9HOMO/1-227    | A0A074S0Z7.1 PF0315 | 65.80 | 0.00 |
| TRINITY_D8U1P8_VOLCA/49-480       | D8U1P8.1 PF00909.19 | 65.80 | 0.00 |
| TRINITY_A0A061DMP8_THECC/350-439  | A0A061DMP8.1 PF0007 | 65.80 | 0.00 |
| TRINITY_A0BK10_PARTE/327-399      | A0BK10.1 PF00313.20 | 65.80 | 0.00 |
| TRINITY_A8I3X6_CHLRE/2565-3295    | A8I3X6.1 PF03028.13 | 65.80 | 0.00 |
| TRINITY_J9I8E2_9SPIT/28-186       | J9I8E2.1 PF00071.20 | 65.80 | 0.00 |
| TRINITY_I7MFR5_TETTS/26-354       | I7MFR5.2 PF00180.18 | 65.70 | 0.00 |
| TRINITY_A0A0D2VGN8_CAPO3/875-1090 | A0A0D2VGN8.1 PF1308 | 65.70 | 0.00 |
| TRINITY_A0A096M5E4_POEFO/325-433  | A0A096M5E4.1 PF0062 | 65.70 | 0.00 |
| TRINITY_M1CRH4_SOLTU/15-176       | M1CRH4.1 PF00071.20 | 65.70 | 0.00 |
| TRINITY_I3KUZ0_ORENI/24-92        | I3KUZ0.1 PF00021.19 | 65.70 | 0.00 |
| TRINITY_Q22UZ7_TETTS/14-118       | Q22UZ7.2 PF00307.29 | 65.70 | 0.00 |
| TRINITY_A0E1G8_PARTE/540-795      | A0E1G8.1 PF00069.23 | 65.70 | 0.00 |
| TRINITY_A0A022PWX0_ERYGU/13-52    | A0A022PWX0.1 PF0142 | 65.70 | 0.00 |

|                                  |                     |       |      |
|----------------------------------|---------------------|-------|------|
| TRINITY_T1FMX8_HELRO/221-290     | T1FMX8.1 PF00076.20 | 65.70 | 0.00 |
| TRINITY_D5BHW7_ZUNPS/132-464     | D5BHW7.1 PF05089.10 | 65.70 | 0.00 |
| TRINITY_A0BK25_PARTE/80-121      | A0BK25.1 PF00643.22 | 65.70 | 0.00 |
| TRINITY_G0QPV5_ICHMG/91-228      | G0QPV5.1 PF14671.4; | 65.70 | 0.00 |
| TRINITY_A9TV44_PHYPA/95-219      | A9TV44.1 PF00583.23 | 65.70 | 0.00 |
| TRINITY_A0A078ANA5_STYLE/18-270  | A0A078ANA5.1 PF0006 | 65.70 | 0.00 |
| TRINITY_Q22UZ7_TETTS/14-118      | Q22UZ7.2 PF00307.29 | 65.70 | 0.00 |
| TRINITY_A8IFW1_CHLRE/4-233       | A8IFW1.1 PF01048.18 | 65.70 | 0.00 |
| TRINITY_A0A0F7HNP9_9STAP/9-44    | A0A0F7HNP9.1 PF0013 | 65.70 | 0.00 |
| TRINITY_R4G4X7_RHOPR/10-44       | R4G4X7.1 PF06842.10 | 65.70 | 0.00 |
| TRINITY_L8GTY7_ACACA/7-254       | L8GTY7.1 PF03029.15 | 65.70 | 0.00 |
| TRINITY_D8THU3_VOLCA/43-122      | D8THU3.1 PF00312.20 | 65.70 | 0.00 |
| TRINITY_J9HU22_9SPIT/4-283       | J9HU22.1 PF00069.23 | 65.70 | 0.00 |
| TRINITY_D8UJZ6_VOLCA/269-443     | D8UJZ6.1 PF12430.6; | 65.70 | 0.00 |
| TRINITY_A0A061DMP8_THECC/350-439 | A0A061DMP8.1 PF0007 | 65.70 | 0.00 |
| TRINITY_F4PHG1_DICFS/31-284      | F4PHG1.1 PF00069.23 | 65.70 | 0.00 |
| TRINITY_D8TLU3_VOLCA/9-79        | D8TLU3.1 PF00076.20 | 65.70 | 0.00 |
| TRINITY_D8UD36_VOLCA/42-510      | D8UD36.1 PF01490.16 | 65.70 | 0.00 |
| TRINITY_A8HP70_CHLRE/54-170      | A8HP70.1 PF03099.17 | 65.70 | 0.00 |
| TRINITY_D8QP39_SELML/16-117      | D8QP39.1 PF01990.15 | 65.70 | 0.00 |
| TRINITY_A8HVA6_CHLRE/314-418     | A8HVA6.1 PF01399.25 | 65.70 | 0.00 |
| TRINITY_A0CH51_PARTE/341-417     | A0CH51.1 PF08544.11 | 65.70 | 0.00 |
| TRINITY_B9N0P5_POPTR/8-88        | B9N0P5.1 PF14438.4; | 65.70 | 0.00 |
| TRINITY_A0DKF0_PARTE/2-336       | A0DKF0.1 PF00225.21 | 65.70 | 0.00 |
| TRINITY_A8IA67_CHLRE/15-425      | A8IA67.1 PF01222.15 | 65.70 | 0.00 |
| TRINITY_A8HYH4_CHLRE/412-639     | A8HYH4.1 PF00198.21 | 65.70 | 0.00 |
| TRINITY_A9RTR4_PHYPA/354-424     | A9RTR4.1 PF04542.12 | 65.70 | 0.00 |
| TRINITY_D8TJY1_VOLCA/90-344      | D8TJY1.1 PF00149.26 | 65.70 | 0.00 |
| TRINITY_D8TVC0_VOLCA/1983-2096   | D8TVC0.1 PF00665.24 | 65.70 | 0.00 |
| TRINITY_A8JHT2_CHLRE/90-361      | A8JHT2.1 PF01650.16 | 65.70 | 0.00 |
| TRINITY_A0BHN3_PARTE/4-73        | A0BHN3.1 PF00076.20 | 65.70 | 0.00 |
| TRINITY_D8UBS2_VOLCA/5-73        | D8UBS2.1 PF13921.4; | 65.70 | 0.00 |
| TRINITY_Q22A43_TETTS/570-685     | Q22A43.2 PF01412.16 | 65.70 | 0.00 |
| TRINITY_A0A067RUW4_ZOONE/3-74    | A0A067RUW4.1 PF0024 | 65.70 | 0.00 |
| TRINITY_D2VS08_NAEGR/119-258     | D2VS08.1 PF00182.17 | 65.70 | 0.00 |
| TRINITY_J9J2V1_9SPIT/660-878     | J9J2V1.1 PF07859.11 | 65.60 | 0.00 |
| TRINITY_K2K6U2_9PROT/14-98       | K2K6U2.1 PF06155.10 | 65.60 | 0.00 |
| TRINITY_F0ZZ65_DICPU/7-70        | F0ZZ65.1 PF13499.4; | 65.60 | 0.00 |
| TRINITY_G0R6G4_ICHMG/17-176      | G0R6G4.1 PF00071.20 | 65.60 | 0.00 |
| TRINITY_G0QVD2_ICHMG/39-208      | G0QVD2.1 PF00009.25 | 65.60 | 0.00 |
| TRINITY_Q3SDY9_PARTE/141-230     | Q3SDY9.1 PF00027.27 | 65.60 | 0.00 |
| TRINITY_L8GZ36_ACACA/502-627     | L8GZ36.1 PF00271.29 | 65.60 | 0.00 |
| TRINITY_L8HKV9_ACACA/23-322      | L8HKV9.1 PF02374.13 | 65.60 | 0.00 |
| TRINITY_Q24FR9_TETTS/28-281      | Q24FR9.2 PF00069.23 | 65.60 | 0.00 |
| TRINITY_F0VH16_NEOCL/49-92       | F0VH16.1 PF00400.30 | 65.60 | 0.00 |
| TRINITY_H3A085_LATCH/794-1004    | H3A085.1 PF00644.18 | 65.60 | 0.00 |
| TRINITY_A0A0G4ILL0_PLABS/1-93    | A0A0G4ILL0.1 PF0119 | 65.60 | 0.00 |
| TRINITY_A0CY99_PARTE/217-391     | A0CY99.1 PF14572.4; | 65.60 | 0.00 |
| TRINITY_G4ZMR6_PHYSP/3-95        | G4ZMR6.1 PF03501.13 | 65.60 | 0.00 |
| TRINITY_J9J1K8_9SPIT/166-255     | J9J1K8.1 PF00027.27 | 65.60 | 0.00 |
| TRINITY_Q5TNJ4_ANOGA/104-168     | Q5TNJ4.3 PF00327.18 | 65.60 | 0.00 |
| TRINITY_A0A061EEG7_THECC/589-749 | A0A061EEG7.1 PF0007 | 65.60 | 0.00 |
| TRINITY_C1FIS7_MICSR/3449-4152   | C1FIS7.1 PF03028.13 | 65.60 | 0.00 |
| TRINITY_A8IGF0_CHLRE/107-282     | A8IGF0.1 PF01202.20 | 65.60 | 0.00 |
| TRINITY_I1CGX7_RHIO9/526-586     | I1CGX7.1 PF13432.4; | 65.60 | 0.00 |
| TRINITY_A0A087SRH6_AUXPR/15-285  | A0A087SRH6.1 PF0089 | 65.60 | 0.00 |
| TRINITY_A4CPY6_ROBBH/31-262      | A4CPY6.1 PF01182.18 | 65.60 | 0.00 |
| TRINITY_I7MMC0_TETTS/13-345      | I7MMC0.2 PF00225.21 | 65.60 | 0.00 |
| TRINITY_A0A087SSS1_AUXPR/190-294 | A0A087SSS1.1 PF1275 | 65.60 | 0.00 |
| TRINITY_D8UI18_VOLCA/50-224      | D8UI18.1 PF05042.11 | 65.60 | 0.00 |
| TRINITY_D8UHJ0_VOLCA/23-604      | D8UHJ0.1 PF00995.21 | 65.60 | 0.00 |

|                                  |              |            |       |      |
|----------------------------------|--------------|------------|-------|------|
| TRINITY_Q3SDY9_PARTE/141-230     | Q3SDY9.1     | PF00027.27 | 65.60 | 0.00 |
| TRINITY_A0ZLZ1_NODSP/3-97        | A0ZLZ1.1     | PF12766.5; | 65.60 | 0.00 |
| TRINITY_A8JJ74_CHLRE/617-738     | A8JJ74.1     | PF06419.9; | 65.60 | 0.00 |
| TRINITY_D8TS24_VOLCA/54-242      | D8TS24.1     | PF13460.4; | 65.60 | 0.00 |
| TRINITY_A0A0D3CVX9_BRAOL/315-377 | A0A0D3CVX9.1 | PF1343     | 65.60 | 0.00 |
| TRINITY_I0Z645_9CHLO/68-454      | I0Z645.1     | PF01266.22 | 65.60 | 0.00 |
| TRINITY_A8IX31_CHLRE/146-272     | A8IX31.1     | PF00134.21 | 65.60 | 0.00 |
| TRINITY_D2V9F0_NAEGR/46-106      | D2V9F0.1     | PF13921.4; | 65.60 | 0.00 |
| TRINITY_D8TS22_VOLCA/30-108      | D8TS22.1     | PF01016.17 | 65.60 | 0.00 |
| TRINITY_S2JSH4_MUCC1/92-190      | S2JSH4.1     | PF01841.17 | 65.60 | 0.00 |
| TRINITY_E1Z570_CHLVA/75-366      | E1Z570.1     | PF03095.13 | 65.60 | 0.00 |
| TRINITY_D8TWL1_VOLCA/694-951     | D8TWL1.1     | PF00520.29 | 65.60 | 0.00 |
| TRINITY_A8IE86_CHLRE/144-413     | A8IE86.1     | PF00664.21 | 65.60 | 0.00 |
| TRINITY_A0CW61_PARTE/9-264       | A0CW61.1     | PF00069.23 | 65.60 | 0.00 |
| TRINITY_I3JY17_ORENI/66-120      | I3JY17.1     | PF00084.18 | 65.50 | 0.00 |
| TRINITY_L0PGP6_PNEJ8/12-172      | L0PGP6.1     | PF00071.20 | 65.50 | 0.00 |
| TRINITY_W1QIU2_OGAPD/64-189      | W1QIU2.1     | PF02585.15 | 65.50 | 0.00 |
| TRINITY_W4YHL3_STRPU/16-61       | W4YHL3.1     | PF13445.4; | 65.50 | 0.00 |
| TRINITY_Q246D1_TETTS/522-749     | Q246D1.2     | PF00326.19 | 65.50 | 0.00 |
| TRINITY_F0V7R9_NEOCL/93-188      | F0V7R9.1     | PF01217.18 | 65.50 | 0.00 |
| TRINITY_Q22A67_TETTS/206-780     | Q22A67.1     | PF08385.10 | 65.50 | 0.00 |
| TRINITY_G0R500_ICHMG/297-509     | G0R500.1     | PF00454.25 | 65.50 | 0.00 |
| TRINITY_A0A015LBY6_9GLOM/353-631 | A0A015LBY6.1 | PF0213     | 65.50 | 0.00 |
| TRINITY_L8GQX7_ACACA/1030-1086   | L8GQX7.1     | PF00412.20 | 65.50 | 0.00 |
| TRINITY_Q23K61_TETTS/4970-5279   | Q23K61.2     | PF00632.23 | 65.50 | 0.00 |
| TRINITY_A0BTN4_PARTE/489-626     | A0BTN4.1     | PF00005.25 | 65.50 | 0.00 |
| TRINITY_A0BX57_PARTE/51-189      | A0BX57.1     | PF01743.18 | 65.50 | 0.00 |
| TRINITY_I7MH21_TETTS/71-139      | I7MH21.2     | PF00076.20 | 65.50 | 0.00 |
| TRINITY_D8THB0_VOLCA/261-500     | D8THB0.1     | PF00814.23 | 65.50 | 0.00 |
| TRINITY_W3WQH0_9PEZI/17-317      | W3WQH0.1     | PF00248.19 | 65.50 | 0.00 |
| TRINITY_D8TZ47_VOLCA/242-358     | D8TZ47.1     | PF00932.17 | 65.50 | 0.00 |
| TRINITY_I0Z7R4_9CHLO/183-296     | I0Z7R4.1     | PF01624.18 | 65.50 | 0.00 |
| TRINITY_D8TZX3_VOLCA/5-184       | D8TZX3.1     | PF00025.19 | 65.50 | 0.00 |
| TRINITY_D8UJ11_VOLCA/25-281      | D8UJ11.1     | PF00756.18 | 65.50 | 0.00 |
| TRINITY_L8GVQ7_ACACA/9-125       | L8GVQ7.1     | PF02678.14 | 65.50 | 0.00 |
| TRINITY_Q24CJ1_TETTS/143-542     | Q24CJ1.1     | PF14740.4; | 65.50 | 0.00 |
| TRINITY_A8I3J7_CHLRE/208-407     | A8I3J7.1     | PF00742.17 | 65.50 | 0.00 |
| TRINITY_W5FCD2_WHEAT/10-175      | W5FCD2.1     | PF03371.13 | 65.50 | 0.00 |
| TRINITY_I7LVW0_TETTS/6-146       | I7LVW0.1     | PF05903.12 | 65.50 | 0.00 |
| TRINITY_B3RU20_TRIAD/28-82       | B3RU20.1     | PF01667.15 | 65.50 | 0.00 |
| TRINITY_Q23U85_TETTS/23-120      | Q23U85.2     | PF02678.14 | 65.50 | 0.00 |
| TRINITY_A8I1M1_CHLRE/91-288      | A8I1M1.1     | PF13469.4; | 65.50 | 0.00 |
| TRINITY_A0A077ZUD0_STYLE/232-495 | A0A077ZUD0.1 | PF0006     | 65.50 | 0.00 |
| TRINITY_I0YSG3_9CHLO/50-231      | I0YSG3.1     | PF01625.19 | 65.50 | 0.00 |
| TRINITY_A8IL88_CHLRE/8-153       | A8IL88.1     | PF14186.4; | 65.50 | 0.00 |
| TRINITY_A0A0F5PDJ0_9SPHN/29-120  | A0A0F5PDJ0.1 | PF0267     | 65.50 | 0.00 |
| TRINITY_A8I5K4_CHLRE/78-192      | A8I5K4.1     | PF02338.17 | 65.50 | 0.00 |
| TRINITY_D8TX35_VOLCA/4-148       | D8TX35.1     | PF00005.25 | 65.50 | 0.00 |
| TRINITY_L8GNB3_ACACA/14-388      | L8GNB3.1     | PF01053.18 | 65.50 | 0.00 |
| TRINITY_D8TUH7_VOLCA/1-350       | D8TUH7.1     | PF02005.14 | 65.50 | 0.00 |
| TRINITY_A8J0L0_CHLRE/98-184      | A8J0L0.1     | PF00153.25 | 65.50 | 0.00 |
| TRINITY_A0A087SB36_AUXPR/128-225 | A0A087SB36.1 | PF0610     | 65.50 | 0.00 |
| TRINITY_A8J9K7_CHLRE/163-468     | A8J9K7.1     | PF00069.23 | 65.50 | 0.00 |
| TRINITY_A8JFV7_CHLRE/13-425      | A8JFV7.1     | PF00909.19 | 65.50 | 0.00 |
| TRINITY_D8TSC2_VOLCA/521-578     | D8TSC2.1     | PF15911.3; | 65.50 | 0.00 |
| TRINITY_A8IB95_CHLRE/25-150      | A8IB95.1     | PF08240.10 | 65.50 | 0.00 |
| TRINITY_G0R3C8_ICHMG/145-194     | G0R3C8.1     | PF01344.23 | 65.40 | 0.00 |
| TRINITY_A3ZKW9_9PLAN/33-196      | A3ZKW9.1     | PF00160.19 | 65.40 | 0.00 |
| TRINITY_W7XKA4_TETTS/3-80        | W7XKA4.1     | PF07189.9; | 65.40 | 0.00 |
| TRINITY_A0EB42_PARTE/37-322      | A0EB42.1     | PF00069.23 | 65.40 | 0.00 |
| TRINITY_D8U4E0_VOLCA/45-212      | D8U4E0.1     | PF00650.18 | 65.40 | 0.00 |

|                                  |              |            |       |      |
|----------------------------------|--------------|------------|-------|------|
| TRINITY_A0D476_PARTE/34-353      | A0D476.1     | PF00180.18 | 65.40 | 0.00 |
| TRINITY_A0BDP7_PARTE/12-138      | A0BDP7.1     | PF00179.24 | 65.40 | 0.00 |
| TRINITY_F6RA07_XENTR/86-142      | F6RA07.1     | PF01494.17 | 65.40 | 0.00 |
| TRINITY_A8HS11_CHLRE/7-114       | A8HS11.1     | PF03694.11 | 65.40 | 0.00 |
| TRINITY_A0A0A1NWK7_9FUNG/31-221  | A0A0A1NWK7.1 | PF0022     | 65.40 | 0.00 |
| TRINITY_A0DS37_PARTE/1-284       | A0DS37.1     | PF00579.23 | 65.40 | 0.00 |
| TRINITY_I7MLL9_TETTS/291-547     | I7MLL9.2     | PF00069.23 | 65.40 | 0.00 |
| TRINITY_D8TJF1_VOLCA/39-225      | D8TJF1.1     | PF03193.14 | 65.40 | 0.00 |
| TRINITY_T1EGA9_HELRO/31-538      | T1EGA9.1     | PF00118.22 | 65.40 | 0.00 |
| TRINITY_D8U2X0_VOLCA/43-149      | D8U2X0.1     | PF09799.7; | 65.40 | 0.00 |
| TRINITY_A8IIG3_CHLRE/28-135      | A8IIG3.1     | PF00255.17 | 65.40 | 0.00 |
| TRINITY_I0Z4G6_9CHLO/5-111       | I0Z4G6.1     | PF00466.18 | 65.40 | 0.00 |
| TRINITY_D3AYJ1_POLPA/449-567     | D3AYJ1.1     | PF01926.21 | 65.40 | 0.00 |
| TRINITY_E1ZGX1_CHLVA/16-177      | E1ZGX1.1     | PF04755.10 | 65.40 | 0.00 |
| TRINITY_E1Z4P6_CHLVA/409-639     | E1Z4P6.1     | PF00198.21 | 65.40 | 0.00 |
| TRINITY_E4X7T3_OIKDI/17-108      | E4X7T3.1     | PF00428.17 | 65.40 | 0.00 |
| TRINITY_D8UED0_VOLCA/39-399      | D8UED0.1     | PF00262.16 | 65.40 | 0.00 |
| TRINITY_D8UJR1_VOLCA/47-221      | D8UJR1.1     | PF16166.3; | 65.40 | 0.00 |
| TRINITY_D8TS46_VOLCA/39-121      | D8TS46.1     | PF07713.11 | 65.40 | 0.00 |
| TRINITY_D8TLB2_VOLCA/1-167       | D8TLB2.1     | PF01956.14 | 65.40 | 0.00 |
| TRINITY_Q5SKY7_THET8/6-520       | Q5SKY7.1     | PF01274.20 | 65.40 | 0.00 |
| TRINITY_I1P1S4_ORYGL/57-108      | I1P1S4.1     | PF00847.18 | 65.40 | 0.00 |
| TRINITY_I0Z6L3_9CHLO/345-550     | I0Z6L3.1     | PF02475.14 | 65.40 | 0.00 |
| TRINITY_F4PUZ7_DICFS/7-168       | F4PUZ7.1     | PF00071.20 | 65.40 | 0.00 |
| TRINITY_I7M3D3_TETTS/42-666      | I7M3D3.2     | PF00133.20 | 65.40 | 0.00 |
| TRINITY_F4QBL1_DICFS/1326-1509   | F4QBL1.1     | PF00211.18 | 65.40 | 0.00 |
| TRINITY_M0TY87_MUSAM/442-714     | M0TY87.1     | PF13476.4; | 65.40 | 0.00 |
| TRINITY_A8J6A5_CHLRE/74-203      | A8J6A5.1     | PF07738.11 | 65.40 | 0.00 |
| TRINITY_A8ISI1_CHLRE/223-484     | A8ISI1.1     | PF01167.16 | 65.40 | 0.00 |
| TRINITY_A9RL89_PHYPA/3-207       | A9RL89.1     | PF01088.19 | 65.40 | 0.00 |
| TRINITY_A8I2P1_CHLRE/73-218      | A8I2P1.1     | PF09424.8; | 65.40 | 0.00 |
| TRINITY_D8U635_VOLCA/284-414     | D8U635.1     | PF03109.14 | 65.40 | 0.00 |
| TRINITY_A8IW47_CHLRE/16-224      | A8IW47.1     | PF01991.16 | 65.40 | 0.00 |
| TRINITY_D8U8L3_VOLCA/556-682     | D8U8L3.1     | PF00565.15 | 65.40 | 0.00 |
| TRINITY_I0YVX4_9CHLO/3-155       | I0YVX4.1     | PF00005.25 | 65.40 | 0.00 |
| TRINITY_A8NKQ4_COPC7/200-349     | A8NKQ4.2     | PF02518.24 | 65.30 | 0.00 |
| TRINITY_I7LT01_TETTS/50-170      | I7LT01.1     | PF00293.26 | 65.30 | 0.00 |
| TRINITY_L8GTD8_ACACA/607-806     | L8GTD8.1     | PF00326.19 | 65.30 | 0.00 |
| TRINITY_A0CYG1_PARTE/160-260     | A0CYG1.1     | PF13864.4; | 65.30 | 0.00 |
| TRINITY_A0A0E0LCQ0_ORYPU/799-847 | A0A0E0LCQ0.1 | PF0040     | 65.30 | 0.00 |
| TRINITY_A0DAW7_PARTE/169-243     | A0DAW7.1     | PF01169.17 | 65.30 | 0.00 |
| TRINITY_G6CNF7_DANPL/112-206     | G6CNF7.1     | PF16835.3; | 65.30 | 0.00 |
| TRINITY_I7M7P8_TETTS/17-342      | I7M7P8.2     | PF00225.21 | 65.30 | 0.00 |
| TRINITY_D8UAZ8_VOLCA/185-234     | D8UAZ8.1     | PF07496.13 | 65.30 | 0.00 |
| TRINITY_E1ZJY5_CHLVA/229-278     | E1ZJY5.1     | PF13639.4; | 65.30 | 0.00 |
| TRINITY_A0A090M4H2_OSTTA/116-285 | A0A090M4H2.1 | PF0000     | 65.30 | 0.00 |
| TRINITY_D2VA17_NAEGR/157-329     | D2VA17.1     | PF02866.16 | 65.30 | 0.00 |
| TRINITY_I0YHZ8_9CHLO/11-411      | I0YHZ8.1     | PF03155.13 | 65.30 | 0.00 |
| TRINITY_I7M6H6_TETTS/54-166      | I7M6H6.1     | PF10908.6; | 65.30 | 0.00 |
| TRINITY_D8THC5_VOLCA/241-456     | D8THC5.1     | PF01435.16 | 65.30 | 0.00 |
| TRINITY_A8ITN7_CHLRE/25-107      | A8ITN7.1     | PF12895.5; | 65.30 | 0.00 |
| TRINITY_L8HBG2_ACACA/50-121      | L8HBG2.1     | PF00717.21 | 65.30 | 0.00 |
| TRINITY_A8HXX1_CHLRE/172-245     | A8HXX1.1     | PF07915.11 | 65.30 | 0.00 |
| TRINITY_D8TSR6_VOLCA/479-964     | D8TSR6.1     | PF00311.15 | 65.30 | 0.00 |
| TRINITY_L8GZY2_ACACA/223-485     | L8GZY2.1     | PF00082.20 | 65.30 | 0.00 |
| TRINITY_E1ZC58_CHLVA/255-304     | E1ZC58.1     | PF01805.18 | 65.30 | 0.00 |
| TRINITY_D8TJX1_VOLCA/79-335      | D8TJX1.1     | PF09353.8; | 65.30 | 0.00 |
| TRINITY_D8TNV0_VOLCA/25-197      | D8TNV0.1     | PF13579.4; | 65.30 | 0.00 |
| TRINITY_I1IPJ0_BRADI/59-130      | I1IPJ0.1     | PF00240.21 | 65.30 | 0.00 |
| TRINITY_A7RKB9_NEMVE/20-70       | A7RKB9.1     | PF01805.18 | 65.30 | 0.00 |
| TRINITY_A8J822_CHLRE/27-277      | A8J822.1     | PF07714.15 | 65.30 | 0.00 |

|                                  |              |            |       |      |
|----------------------------------|--------------|------------|-------|------|
| TRINITY_D8TV48_VOLCA/298-451     | D8TV48.1     | PF14688.4; | 65.30 | 0.00 |
| TRINITY_E1ZCL0_CHLVA/62-357      | E1ZCL0.1     | PF00698.19 | 65.30 | 0.00 |
| TRINITY_A8HWI3_CHLRE/14-351      | A8HWI3.1     | PF07289.9; | 65.30 | 0.00 |
| TRINITY_I7M6H4_TETTS/3452-4165   | I7M6H4.2     | PF03028.13 | 65.30 | 0.00 |
| TRINITY_H2L7Q5_ORYLA/1-119       | H2L7Q5.1     | PF00833.16 | 65.30 | 0.00 |
| TRINITY_D8U0H6_VOLCA/6-77        | D8U0H6.1     | PF00076.20 | 65.30 | 0.00 |
| TRINITY_D8UDF2_VOLCA/95-323      | D8UDF2.1     | PF00561.18 | 65.30 | 0.00 |
| TRINITY_L8H475_ACACA/6-151       | L8H475.1     | PF01699.22 | 65.30 | 0.00 |
| TRINITY_T1KPR8_TETUR/102-147     | T1KPR8.1     | PF01599.17 | 65.30 | 0.00 |
| TRINITY_I7M700_TETTS/181-443     | I7M700.2     | PF00069.23 | 65.30 | 0.00 |
| TRINITY_H2SY51_TAKRU/39-177      | H2SY51.1     | PF00988.20 | 65.30 | 0.00 |
| TRINITY_I0Z456_9CHLO/86-232      | I0Z456.1     | PF00929.22 | 65.30 | 0.00 |
| TRINITY_A8IZH9_CHLRE/236-411     | A8IZH9.1     | PF11891.6; | 65.30 | 0.00 |
| TRINITY_D8UE71_VOLCA/1-261       | D8UE71.1     | PF00069.23 | 65.30 | 0.00 |
| TRINITY_D8UAX2_VOLCA/22-298      | D8UAX2.1     | PF01326.17 | 65.30 | 0.00 |
| TRINITY_D8THA5_VOLCA/511-744     | D8THA5.1     | PF00005.25 | 65.30 | 0.00 |
| TRINITY_G0QRB2_ICHMG/101-199     | G0QRB2.1     | PF00153.25 | 65.30 | 0.00 |
| TRINITY_E7RMK9_9BACT/29-164      | E7RMK9.1     | PF13580.4; | 65.20 | 0.00 |
| TRINITY_A0A0G4LJ84_9PEZI/114-328 | A0A0G4LJ84.1 | PF00009    | 65.20 | 0.00 |
| TRINITY_F0ZLS3_DICPU/481-616     | F0ZLS3.1     | PF00005.25 | 65.20 | 0.00 |
| TRINITY_D3BAH5_POLPA/202-293     | D3BAH5.1     | PF00153.25 | 65.20 | 0.00 |
| TRINITY_E1VQD3_9GAMM/331-445     | E1VQD3.1     | PF08328.9; | 65.20 | 0.00 |
| TRINITY_A9SBP8_PHYPA/3-68        | A9SBP8.1     | PF01246.18 | 65.20 | 0.00 |
| TRINITY_A0A096STN8_MAIZE/6-117   | A0A096STN8.1 | PF1351     | 65.20 | 0.00 |
| TRINITY_A0BTC1_PARTE/366-624     | A0BTC1.1     | PF00069.23 | 65.20 | 0.00 |
| TRINITY_A0A0D2QTE0_GOSRA/31-120  | A0A0D2QTE0.1 | PF0029     | 65.20 | 0.00 |
| TRINITY_A0D788_PARTE/126-474     | A0D788.1     | PF13868.4; | 65.20 | 0.00 |
| TRINITY_A0BWW1_PARTE/272-340     | A0BWW1.1     | PF00498.24 | 65.20 | 0.00 |
| TRINITY_L8GQD6_ACACA/30-104      | L8GQD6.1     | PF13656.4; | 65.20 | 0.00 |
| TRINITY_D8TJU1_VOLCA/648-709     | D8TJU1.1     | PF08492.10 | 65.20 | 0.00 |
| TRINITY_A0A0D2WGZ6_CAPO3/307-538 | A0A0D2WGZ6.1 | PF0019     | 65.20 | 0.00 |
| TRINITY_Q6CC81_YARLI/184-256     | Q6CC81.1     | PF00173.26 | 65.20 | 0.00 |
| TRINITY_D8UG12_VOLCA/197-259     | D8UG12.1     | PF00010.24 | 65.20 | 0.00 |
| TRINITY_D8U0B6_VOLCA/1-312       | D8U0B6.1     | PF01916.15 | 65.20 | 0.00 |
| TRINITY_D8U4L8_VOLCA/947-1031    | D8U4L8.1     | PF01733.16 | 65.20 | 0.00 |
| TRINITY_A8IRU0_CHLRE/5-311       | A8IRU0.1     | PF02535.20 | 65.20 | 0.00 |
| TRINITY_A8I3Q3_CHLRE/2-108       | A8I3Q3.1     | PF02109.14 | 65.20 | 0.00 |
| TRINITY_A0E6B4_PARTE/180-334     | A0E6B4.1     | PF00903.23 | 65.20 | 0.00 |
| TRINITY_A8HQI0_CHLRE/478-646     | A8HQI0.1     | PF03441.12 | 65.20 | 0.00 |
| TRINITY_A8IA75_CHLRE/44-181      | A8IA75.1     | PF03330.16 | 65.20 | 0.00 |
| TRINITY_J9ITL9_9SPIT/13-268      | J9ITL9.1     | PF00069.23 | 65.20 | 0.00 |
| TRINITY_U4KWQ2_PYROM/4781-4944   | U4KWQ2.1     | PF00092.26 | 65.20 | 0.00 |
| TRINITY_A8J3R6_CHLRE/36-222      | A8J3R6.1     | PF03997.10 | 65.20 | 0.00 |
| TRINITY_D8UII8_VOLCA/1-89        | D8UII8.1     | PF08216.9; | 65.20 | 0.00 |
| TRINITY_I0Z9Z0_9CHLO/140-959     | I0Z9Z0.1     | PF00311.15 | 65.20 | 0.00 |
| TRINITY_D8ULA0_VOLCA/109-171     | D8ULA0.1     | PF00415.16 | 65.20 | 0.00 |
| TRINITY_A8I1T0_CHLRE/166-281     | A8I1T0.1     | PF03171.18 | 65.20 | 0.00 |
| TRINITY_I7MFT0_TETTS/25-577      | I7MFT0.2     | PF01602.18 | 65.20 | 0.00 |
| TRINITY_A8JBW3_CHLRE/80-235      | A8JBW3.1     | PF00650.18 | 65.20 | 0.00 |
| TRINITY_A8I406_CHLRE/61-235      | A8I406.1     | PF06003.10 | 65.20 | 0.00 |
| TRINITY_J9IWR3_9SPIT/8-73        | J9IWR3.1     | PF01423.20 | 65.20 | 0.00 |
| TRINITY_L1I441_GUIITH/17-320     | L1I441.1     | PF00069.23 | 65.20 | 0.00 |
| TRINITY_A0A015KUS6_9GLOM/82-193  | A0A015KUS6.1 | PF0754     | 65.20 | 0.00 |
| TRINITY_D8TUL8_VOLCA/9-255       | D8TUL8.1     | PF04427.16 | 65.20 | 0.00 |
| TRINITY_H2Y0X5_CIOIN/22-223      | H2Y0X5.1     | PF01557.16 | 65.20 | 0.00 |
| TRINITY_G0QPH9_ICHMG/237-360     | G0QPH9.1     | PF00069.23 | 65.20 | 0.00 |
| TRINITY_I1L1L2_SOYBN/717-1087    | I1L1L2.1     | PF00562.26 | 65.20 | 0.00 |
| TRINITY_I0ZAQ2_9CHLO/12-272      | I0ZAQ2.1     | PF03803.13 | 65.20 | 0.00 |
| TRINITY_I7MAB4_TETTS/36-500      | I7MAB4.1     | PF00171.20 | 65.20 | 0.00 |
| TRINITY_A0A059D3Y5_EUCGR/395-511 | A0A059D3Y5.1 | PF0237     | 65.20 | 0.00 |
| TRINITY_A8HQB6_CHLRE/32-408      | A8HQB6.1     | PF00282.17 | 65.20 | 0.00 |

|                                  |                     |       |      |
|----------------------------------|---------------------|-------|------|
| TRINITY_D8TPF9_VOLCA/18-597      | D8TPF9.1 PF01602.18 | 65.20 | 0.00 |
| TRINITY_K9VEN6_9CYAN/467-898     | K9VEN6.1 PF02347.14 | 65.20 | 0.00 |
| TRINITY_A0A087SHE2_AUXPR/23-163  | A0A087SHE2.1 PF1468 | 65.20 | 0.00 |
| TRINITY_F4PZ54_DICFS/50-234      | F4PZ54.1 PF00485.16 | 65.20 | 0.00 |
| TRINITY_D8TKQ5_VOLCA/87-279      | D8TKQ5.1 PF04056.12 | 65.20 | 0.00 |
| TRINITY_A0A078AR09_STYLE/8-169   | A0A078AR09.1 PF0007 | 65.20 | 0.00 |
| TRINITY_A7T106_NEMVE/7-254       | A7T106.1 PF04641.10 | 65.10 | 0.00 |
| TRINITY_L8GUT5_ACACA/47-135      | L8GUT5.1 PF00062.18 | 65.10 | 0.00 |
| TRINITY_Q22RW5_TETTS/292-401     | Q22RW5.2 PF00472.18 | 65.10 | 0.00 |
| TRINITY_J9HYH4_9SPIT/23-307      | J9HYH4.1 PF00069.23 | 65.10 | 0.00 |
| TRINITY_H1Y7W2_9SPHI/49-435      | H1Y7W2.1 PF01979.18 | 65.10 | 0.00 |
| TRINITY_D7FUD3_ECTSI/69-384      | D7FUD3.1 PF00225.21 | 65.10 | 0.00 |
| TRINITY_W7XI32_TETTS/8-116       | W7XI32.1 PF01412.16 | 65.10 | 0.00 |
| TRINITY_T1J7U2_STRMM/83-145      | T1J7U2.1 PF13499.4; | 65.10 | 0.00 |
| TRINITY_A0A0P7UC39_9TELE/461-503 | A0A0P7UC39.1 PF0009 | 65.10 | 0.00 |
| TRINITY_DNAK_OLICO/4-599         | B6JCI3.1 PF00012.18 | 65.10 | 0.00 |
| TRINITY_S2KI81_MUCC1/12-84       | S2KI81.1 PF00173.26 | 65.10 | 0.00 |
| TRINITY_A0A0G4EQP5_9ALVE/78-141  | A0A0G4EQP5.1 PF0007 | 65.10 | 0.00 |
| TRINITY_L8HES9_ACACA/21-69       | L8HES9.1 PF13920.4; | 65.10 | 0.00 |
| TRINITY_D8TL86_VOLCA/577-686     | D8TL86.1 PF00153.25 | 65.10 | 0.00 |
| TRINITY_E1ZI90_CHLVA/2-165       | E1ZI90.1 PF11965.6; | 65.10 | 0.00 |
| TRINITY_Q235M5_TETTS/736-779     | Q235M5.2 PF06203.12 | 65.10 | 0.00 |
| TRINITY_K7IWT7_NASVI/282-433     | K7IWT7.1 PF00160.19 | 65.10 | 0.00 |
| TRINITY_L8HET6_ACACA/43-369      | L8HET6.1 PF07992.12 | 65.10 | 0.00 |
| TRINITY_D8U3H2_VOLCA/1-587       | D8U3H2.1 PF04734.11 | 65.10 | 0.00 |
| TRINITY_Q22VV2_TETTS/3889-4192   | Q22VV2.2 PF00632.23 | 65.10 | 0.00 |
| TRINITY_I7M1V6_TETTS/314-533     | I7M1V6.1 PF07002.14 | 65.10 | 0.00 |
| TRINITY_K3YA69_SETIT/111-155     | K3YA69.1 PF13639.4; | 65.10 | 0.00 |
| TRINITY_A0A061F7D5_THECC/54-176  | A0A061F7D5.1 PF1270 | 65.10 | 0.00 |
| TRINITY_A8JIJ6_CHLRE/8-182       | A8JIJ6.1 PF01595.18 | 65.10 | 0.00 |
| TRINITY_A8JHC6_CHLRE/3-255       | A8JHC6.1 PF03618.12 | 65.10 | 0.00 |
| TRINITY_A8HMF3_CHLRE/52-279      | A8HMF3.1 PF04755.10 | 65.10 | 0.00 |
| TRINITY_D8UD74_VOLCA/17-256      | D8UD74.1 PF13561.4; | 65.10 | 0.00 |
| TRINITY_D2V2M8_NAEGR/181-417     | D2V2M8.1 PF00009.25 | 65.10 | 0.00 |
| TRINITY_I0YS81_9CHLO/13-161      | I0YS81.1 PF00179.24 | 65.10 | 0.00 |
| TRINITY_A8JD42_CHLRE/86-357      | A8JD42.1 PF07082.9; | 65.10 | 0.00 |
| TRINITY_A0A087SPC4_AUXPR/77-448  | A0A087SPC4.1 PF0769 | 65.10 | 0.00 |
| TRINITY_E1ZI46_CHLVA/12-125      | E1ZI46.1 PF02338.17 | 65.10 | 0.00 |
| TRINITY_L8GX47_ACACA/1-273       | L8GX47.1 PF04005.10 | 65.10 | 0.00 |
| TRINITY_A0A078AVM5_STYLE/320-363 | A0A078AVM5.1 PF0056 | 65.10 | 0.00 |
| TRINITY_A0CMB4_PARTE/14-269      | A0CMB4.1 PF00069.23 | 65.10 | 0.00 |
| TRINITY_D8UAB6_VOLCA/19-231      | D8UAB6.1 PF00834.17 | 65.10 | 0.00 |
| TRINITY_T1L5E2_TETUR/34-246      | T1L5E2.1 PF00063.19 | 65.10 | 0.00 |
| TRINITY_A8IW20_CHLRE/203-431     | A8IW20.1 PF02854.17 | 65.10 | 0.00 |
| TRINITY_A0CMB4_PARTE/14-269      | A0CMB4.1 PF00069.23 | 65.10 | 0.00 |
| TRINITY_A0CVP4_PARTE/188-358     | A0CVP4.1 PF02317.15 | 65.10 | 0.00 |
| TRINITY_Q22BB4_TETTS/128-254     | Q22BB4.1 PF02747.13 | 65.10 | 0.00 |
| TRINITY_A0E1L0_PARTE/62-435      | A0E1L0.1 PF00285.19 | 65.00 | 0.00 |
| TRINITY_A0A077ZY01_STYLE/5-283   | A0A077ZY01.1 PF0006 | 65.00 | 0.00 |
| TRINITY_H2MN76_ORYLA/1-231       | H2MN76.1 PF00069.23 | 65.00 | 0.00 |
| TRINITY_V4S761_9ROSI/13-52       | V4S761.1 PF01428.14 | 65.00 | 0.00 |
| TRINITY_C6XKL0_HIRBI/7-61        | C6XKL0.1 PF16177.3; | 65.00 | 0.00 |
| TRINITY_X1X5I6_ACYPI/1-138       | X1X5I6.1 PF00005.25 | 65.00 | 0.00 |
| TRINITY_G0R6G4_ICHMG/17-176      | G0R6G4.1 PF00071.20 | 65.00 | 0.00 |
| TRINITY_A5CF32_ORITB/23-470      | A5CF32.1 PF00115.18 | 65.00 | 0.00 |
| TRINITY_A0DA51_PARTE/476-579     | A0DA51.1 PF02770.17 | 65.00 | 0.00 |
| TRINITY_A0A0G4GY06_9ALVE/17-104  | A0A0G4GY06.1 PF0015 | 65.00 | 0.00 |
| TRINITY_L8GYL0_ACACA/427-549     | L8GYL0.1 PF01575.17 | 65.00 | 0.00 |
| TRINITY_W4Z2W7_STRPU/52-200      | W4Z2W7.1 PF00005.25 | 65.00 | 0.00 |
| TRINITY_D8TZR1_VOLCA/88-258      | D8TZR1.1 PF01126.18 | 65.00 | 0.00 |
| TRINITY_C1MVV9_MICPC/172-288     | C1MVV9.1 PF02373.20 | 65.00 | 0.00 |

|                                    |                     |       |      |
|------------------------------------|---------------------|-------|------|
| TRINITY_I7MHC4_TETTS/1048-1120     | I7MHC4.1 PF14418.4; | 65.00 | 0.00 |
| TRINITY_Q22W19_TETTS/115-323       | Q22W19.3 PF00112.21 | 65.00 | 0.00 |
| TRINITY_D8U8R3_VOLCA/137-279       | D8U8R3.1 PF00849.20 | 65.00 | 0.00 |
| TRINITY_B6AAR2_CRYMR/38-343        | B6AAR2.1 PF00749.19 | 65.00 | 0.00 |
| TRINITY_D8TN79_VOLCA/33-213        | D8TN79.1 PF00069.23 | 65.00 | 0.00 |
| TRINITY_D8TT40_VOLCA/253-805       | D8TT40.1 PF00183.16 | 65.00 | 0.00 |
| TRINITY_A8JGC0_CHLRE/1-221         | A8JGC0.1 PF04889.10 | 65.00 | 0.00 |
| TRINITY_I0YL34_9CHLO/34-94         | I0YL34.1 PF03810.17 | 65.00 | 0.00 |
| TRINITY_A0A059A3L1_EUCGR/62-101    | A0A059A3L1.1 PF0040 | 65.00 | 0.00 |
| TRINITY_F5SG62_9BACL/6-145         | F5SG62.1 PF08719.9; | 65.00 | 0.00 |
| TRINITY_F0ZHZ2_DICPU/221-566       | F0ZHZ2.1 PF00155.19 | 65.00 | 0.00 |
| TRINITY_A5BGC5_VITVI/9-145         | A5BGC5.1 PF01090.17 | 65.00 | 0.00 |
| TRINITY_I0Z7R1_9CHLO/62-270        | I0Z7R1.1 PF05577.10 | 65.00 | 0.00 |
| TRINITY_A0A077ZUV7_STYLE/56-208    | A0A077ZUV7.1 PF1473 | 65.00 | 0.00 |
| TRINITY_D8UHA1_VOLCA/14-431        | D8UHA1.1 PF00067.20 | 65.00 | 0.00 |
| TRINITY_I0Z3M4_9CHLO/311-447       | I0Z3M4.1 PF00271.29 | 65.00 | 0.00 |
| TRINITY_A8IBM5_CHLRE/42-236        | A8IBM5.1 PF05721.11 | 65.00 | 0.00 |
| TRINITY_D8UBE1_VOLCA/26-435        | D8UBE1.1 PF00232.16 | 65.00 | 0.00 |
| TRINITY_D3BG33_POLPA/4-85          | D3BG33.1 PF00887.17 | 65.00 | 0.00 |
| TRINITY_A0A0M3JTP0_ANISI/349-388   | A0A0M3JTP0.1 PF0592 | 65.00 | 0.00 |
| TRINITY_A0A0M3JTP0_ANISI/349-388   | A0A0M3JTP0.1 PF0592 | 65.00 | 0.00 |
| TRINITY_V4T5T4_9ROSI/257-296       | V4T5T4.1 PF05920.9; | 65.00 | 0.00 |
| TRINITY_A8J3L0_CHLRE/13-395        | A8J3L0.1 PF07690.14 | 65.00 | 0.00 |
| TRINITY_B0TB11_HELMI/616-802       | B0TB11.1 PF00488.19 | 65.00 | 0.00 |
| TRINITY_A9SIZ2_PHYPA/68-108        | A9SIZ2.1 PF01096.16 | 65.00 | 0.00 |
| TRINITY_A0BJU5_PARTE/1-81          | A0BJU5.1 PF12861.5; | 64.90 | 0.00 |
| TRINITY_K5XTP2_AGABU/3-50          | K5XTP2.1 PF09791.7; | 64.90 | 0.00 |
| TRINITY_A0A078B4S2_STYLE/39-101    | A0A078B4S2.1 PF0232 | 64.90 | 0.00 |
| TRINITY_G0QX38_ICHMG/832-928       | G0QX38.1 PF08454.9; | 64.90 | 0.00 |
| TRINITY_I1BX44_RHIO9/11-67         | I1BX44.1 PF00412.20 | 64.90 | 0.00 |
| TRINITY_G0QK53_ICHMG/367-497       | G0QK53.1 PF00004.27 | 64.90 | 0.00 |
| TRINITY_L8GRH2_ACACA/50-526        | L8GRH2.1 PF01039.20 | 64.90 | 0.00 |
| TRINITY_J9FK96_9SPIT/795-1052      | J9FK96.1 PF00069.23 | 64.90 | 0.00 |
| TRINITY_B6KHB5_TOXGO/12-50         | B6KHB5.1 PF13917.4; | 64.90 | 0.00 |
| TRINITY_W7TVR0_9STRA/422-494       | W7TVR0.1 PF04564.13 | 64.90 | 0.00 |
| TRINITY_G3Q173_GASAC/268-353       | G3Q173.1 PF12894.5; | 64.90 | 0.00 |
| TRINITY_L8GWB2_ACACA/300-470       | L8GWB2.1 PF12430.6; | 64.90 | 0.00 |
| TRINITY_C3XQS7_BRAFL/192-491       | C3XQS7.1 PF00557.22 | 64.90 | 0.00 |
| TRINITY_Q23D68_TETTS/517-710       | Q23D68.2 PF05057.12 | 64.90 | 0.00 |
| TRINITY_Q23MP4_TETTS/227-406       | Q23MP4.2 PF00534.18 | 64.90 | 0.00 |
| TRINITY_D8U7B6_VOLCA/44-255        | D8U7B6.1 PF13419.4; | 64.90 | 0.00 |
| TRINITY_F4PH56_DICFS/34-638        | F4PH56.1 PF00888.20 | 64.90 | 0.00 |
| TRINITY_A0A0D2UHJ2_CAPO3/1461-1609 | A0A0D2UHJ2.1 PF0000 | 64.90 | 0.00 |
| TRINITY_G0QPK0_ICHMG/7-249         | G0QPK0.1 PF00121.16 | 64.90 | 0.00 |
| TRINITY_A8IB95_CHLRE/25-150        | A8IB95.1 PF08240.10 | 64.90 | 0.00 |
| TRINITY_A0A0D2V4C6_GOSRA/379-806   | A0A0D2V4C6.1 PF0096 | 64.90 | 0.00 |
| TRINITY_U3J7M9_ANAPL/142-256       | U3J7M9.1 PF11969.6; | 64.90 | 0.00 |
| TRINITY_A0A078AAI9_STYLE/21-285    | A0A078AAI9.1 PF0165 | 64.90 | 0.00 |
| TRINITY_C4LUE1_ENTHI/13-268        | C4LUE1.1 PF00069.23 | 64.90 | 0.00 |
| TRINITY_D3AXV1_POLPA/114-372       | D3AXV1.1 PF02548.13 | 64.90 | 0.00 |
| TRINITY_E1ZIK2_CHLVA/502-660       | E1ZIK2.1 PF00005.25 | 64.90 | 0.00 |
| TRINITY_A8I4K1_CHLRE/197-369       | A8I4K1.1 PF05050.10 | 64.90 | 0.00 |
| TRINITY_A0A078BYM5_BRANA/260-333   | A0A078BYM5.1 PF0007 | 64.90 | 0.00 |
| TRINITY_V4UIP7_9ROSI/302-358       | V4UIP7.1 PF03106.13 | 64.90 | 0.00 |
| TRINITY_A0A078B2G5_STYLE/98-245    | A0A078B2G5.1 PF0303 | 64.90 | 0.00 |
| TRINITY_A0A078ARC7_STYLE/92-264    | A0A078ARC7.1 PF0092 | 64.90 | 0.00 |
| TRINITY_C0W8U7_9ACTO/1-271         | C0W8U7.1 PF00365.18 | 64.90 | 0.00 |
| TRINITY_F4PPP9_DICFS/27-217        | F4PPP9.1 PF01145.23 | 64.90 | 0.00 |
| TRINITY_G0QYA3_ICHMG/572-716       | G0QYA3.1 PF04053.12 | 64.90 | 0.00 |
| TRINITY_J9HNV3_9SPIT/116-153       | J9HNV3.1 PF01428.14 | 64.90 | 0.00 |
| TRINITY_A0A087SKT9_AUXPR/14-192    | A0A087SKT9.1 PF0475 | 64.90 | 0.00 |

|                                  |              |            |       |      |
|----------------------------------|--------------|------------|-------|------|
| TRINITY_A8J9F3_CHLRE/20-663      | A8J9F3.1     | PF00133.20 | 64.90 | 0.00 |
| TRINITY_J9J1F3_9SPIT/102-627     | J9J1F3.1     | PF01411.17 | 64.90 | 0.00 |
| TRINITY_F4Q586_DICFS/676-789     | F4Q586.1     | PF13271.4; | 64.90 | 0.00 |
| TRINITY_D8U6S6_VOLCA/68-306      | D8U6S6.1     | PF00233.17 | 64.90 | 0.00 |
| TRINITY_A8J637_CHLRE/761-993     | A8J637.1     | PF00889.17 | 64.90 | 0.00 |
| TRINITY_A8J3P1_CHLRE/954-1161    | A8J3P1.1     | PF00211.18 | 64.90 | 0.00 |
| TRINITY_Q9LLJ1_CHLRE/37-302      | Q9LLJ1.1     | PF00069.23 | 64.90 | 0.00 |
| TRINITY_A0A0N5DQK4_TRIMR/409-552 | A0A0N5DQK4.1 | PF0000     | 64.90 | 0.00 |
| TRINITY_Q23KJ6_TETTS/622-886     | Q23KJ6.2     | PF00069.23 | 64.80 | 0.00 |
| TRINITY_A0A0N1J0J1_9BACT/4-124   | A0A0N1J0J1.1 | PF0090     | 64.80 | 0.00 |
| TRINITY_Q23A33_TETTS/2-240       | Q23A33.1     | PF00590.18 | 64.80 | 0.00 |
| TRINITY_G0QWD0_ICHMG/622-801     | G0QWD0.1     | PF08282.10 | 64.80 | 0.00 |
| TRINITY_L8HD92_ACACA/1814-2187   | L8HD92.1     | PF02889.14 | 64.80 | 0.00 |
| TRINITY_G0QKV0_ICHMG/1158-1563   | G0QKV0.1     | PF08393.11 | 64.80 | 0.00 |
| TRINITY_A0A087SSH8_AUXPR/237-346 | A0A087SSH8.1 | PF0027     | 64.80 | 0.00 |
| TRINITY_A8J2F0_CHLRE/19-89       | A8J2F0.1     | PF00076.20 | 64.80 | 0.00 |
| TRINITY_A8J3A8_CHLRE/15-85       | A8J3A8.1     | PF11976.6; | 64.80 | 0.00 |
| TRINITY_I0HZS9_CALAS/5-265       | I0HZS9.1     | PF00682.17 | 64.80 | 0.00 |
| TRINITY_L1IFX3_GUITH/4-62        | L1IFX3.1     | PF06624.10 | 64.80 | 0.00 |
| TRINITY_A0CWR1_PARTE/401-628     | A0CWR1.1     | PF00198.21 | 64.80 | 0.00 |
| TRINITY_CCR1_MAIZE/36-291        | P0C8M8.1     | PF00069.23 | 64.80 | 0.00 |
| TRINITY_D8UAM1_VOLCA/99-303      | D8UAM1.1     | PF00856.26 | 64.80 | 0.00 |
| TRINITY_A0A0J8FQX1_BETVU/72-133  | A0A0J8FQX1.1 | PF1392     | 64.80 | 0.00 |
| TRINITY_D8TN79_VOLCA/305-478     | D8TN79.1     | PF00069.23 | 64.80 | 0.00 |
| TRINITY_D8TYZ4_VOLCA/83-263      | D8TYZ4.1     | PF01789.14 | 64.80 | 0.00 |
| TRINITY_W7TZE3_9STRA/267-428     | W7TZE3.1     | PF03031.16 | 64.80 | 0.00 |
| TRINITY_I7M9A5_TETTS/443-496     | I7M9A5.1     | PF13639.4; | 64.80 | 0.00 |
| TRINITY_F0ZQL5_DICPU/271-341     | F0ZQL5.1     | PF00076.20 | 64.80 | 0.00 |
| TRINITY_D8TJ36_VOLCA/107-195     | D8TJ36.1     | PF12333.6; | 64.80 | 0.00 |
| TRINITY_D8U0Y8_VOLCA/115-261     | D8U0Y8.1     | PF00069.23 | 64.80 | 0.00 |
| TRINITY_A8IHL6_CHLRE/3-133       | A8IHL6.1     | PF08332.8; | 64.80 | 0.00 |
| TRINITY_A8JDN4_CHLRE/48-138      | A8JDN4.1     | PF01649.16 | 64.80 | 0.00 |
| TRINITY_A9SKW3_PHYPA/217-440     | A9SKW3.1     | PF00667.18 | 64.80 | 0.00 |
| TRINITY_W4Z475_STRPU/2-390       | W4Z475.1     | PF02463.17 | 64.80 | 0.00 |
| TRINITY_D3B3G3_POLPA/31-240      | D3B3G3.1     | PF08442.8; | 64.80 | 0.00 |
| TRINITY_D8TP55_VOLCA/67-324      | D8TP55.1     | PF00233.17 | 64.80 | 0.00 |
| TRINITY_L8GDT9_ACACA/329-399     | L8GDT9.1     | PF00076.20 | 64.80 | 0.00 |
| TRINITY_L8GVK4_ACACA/31-192      | L8GVK4.1     | PF00071.20 | 64.80 | 0.00 |
| TRINITY_D4Z5U1_SPHJU/54-215      | D4Z5U1.1     | PF03167.17 | 64.80 | 0.00 |
| TRINITY_A8ICZ0_CHLRE/1-181       | A8ICZ0.1     | PF07714.15 | 64.80 | 0.00 |
| TRINITY_B9RF67_RICCO/181-854     | B9RF67.1     | PF00305.17 | 64.80 | 0.00 |
| TRINITY_A8JEP4_CHLRE/267-445     | A8JEP4.1     | PF00174.17 | 64.80 | 0.00 |
| TRINITY_D8UG75_VOLCA/130-306     | D8UG75.1     | PF00005.25 | 64.80 | 0.00 |
| TRINITY_I7M3Y4_TETTS/103-224     | I7M3Y4.1     | PF09335.9; | 64.80 | 0.00 |
| TRINITY_I7MLH2_TETTS/45-262      | I7MLH2.2     | PF01370.19 | 64.70 | 0.00 |
| TRINITY_K1QRR1_CRAGI/6-78        | K1QRR1.1     | PF13499.4; | 64.70 | 0.00 |
| TRINITY_Q22UZ5_TETTS/25-175      | Q22UZ5.1     | PF02878.14 | 64.70 | 0.00 |
| TRINITY_L8H577_ACACA/11-86       | L8H577.1     | PF01280.18 | 64.70 | 0.00 |
| TRINITY_D8U4C0_VOLCA/255-304     | D8U4C0.1     | PF00415.16 | 64.70 | 0.00 |
| TRINITY_Q23PV4_TETTS/135-245     | Q23PV4.2     | PF02770.17 | 64.70 | 0.00 |
| TRINITY_D8UFN8_VOLCA/399-518     | D8UFN8.1     | PF04677.13 | 64.70 | 0.00 |
| TRINITY_I1FHQ1_AMPQE/555-690     | I1FHQ1.1     | PF00005.25 | 64.70 | 0.00 |
| TRINITY_Q22TC3_TETTS/11-164      | Q22TC3.1     | PF05833.9; | 64.70 | 0.00 |
| TRINITY_D8TL16_VOLCA/14-549      | D8TL16.1     | PF01602.18 | 64.70 | 0.00 |
| TRINITY_D8TVA7_VOLCA/191-460     | D8TVA7.1     | PF04095.14 | 64.70 | 0.00 |
| TRINITY_D8TPF9_VOLCA/18-597      | D8TPF9.1     | PF01602.18 | 64.70 | 0.00 |
| TRINITY_A8JG53_CHLRE/62-529      | A8JG53.1     | PF00067.20 | 64.70 | 0.00 |
| TRINITY_A8JE75_CHLRE/448-533     | A8JE75.1     | PF00083.22 | 64.70 | 0.00 |
| TRINITY_S2KFH5_MUCC1/273-308     | S2KFH5.1     | PF00320.25 | 64.70 | 0.00 |
| TRINITY_I7M1P1_TETTS/6-124       | I7M1P1.1     | PF14931.4; | 64.70 | 0.00 |
| TRINITY_A8I5X7_CHLRE/77-195      | A8I5X7.1     | PF00153.25 | 64.70 | 0.00 |



|                                  |              |            |       |      |
|----------------------------------|--------------|------------|-------|------|
| TRINITY_A2FFU6_TRIVA/124-180     | A2FFU6.1     | PF04193.12 | 64.70 | 0.00 |
| TRINITY_A8J7C2_CHLRE/241-448     | A8J7C2.1     | PF00962.20 | 64.70 | 0.00 |
| TRINITY_A8IDY0_CHLRE/16-346      | A8IDY0.1     | PF01992.14 | 64.70 | 0.00 |
| TRINITY_I0YJA4_9CHLO/37-324      | I0YJA4.1     | PF04142.13 | 64.70 | 0.00 |
| TRINITY_I0YVN9_9CHLO/162-510     | I0YVN9.1     | PF07992.12 | 64.70 | 0.00 |
| TRINITY_CORO_SCHPO/345-387       | O13923.1     | PF16300.3; | 64.70 | 0.00 |
| TRINITY_G0QY17_ICHMG/18-250      | G0QY17.1     | PF01144.21 | 64.70 | 0.00 |
| TRINITY_A0A087SDA1_AUXPR/398-670 | A0A087SDA1.1 | PF0006     | 64.70 | 0.00 |
| TRINITY_A0A061EEG7_THECC/589-749 | A0A061EEG7.1 | PF0007     | 64.70 | 0.00 |
| TRINITY_D8TSY5_VOLCA/2523-3232   | D8TSY5.1     | PF03028.13 | 64.70 | 0.00 |
| TRINITY_A0EB84_PARTE/306-460     | A0EB84.1     | PF00609.17 | 64.70 | 0.00 |
| TRINITY_I7MMI9_TETTS/391-540     | I7MMI9.2     | PF00005.25 | 64.70 | 0.00 |
| TRINITY_D8SNX9_SELML/224-529     | D8SNX9.1     | PF00749.19 | 64.70 | 0.00 |
| TRINITY_A8J3K3_CHLRE/55-544      | A8J3K3.1     | PF01593.22 | 64.70 | 0.00 |
| TRINITY_S3DNG1_GLAL2/173-275     | S3DNG1.1     | PF01363.19 | 64.70 | 0.00 |
| TRINITY_C3Z2P3_BRAFL/305-514     | C3Z2P3.1     | PF00644.18 | 64.70 | 0.00 |
| TRINITY_A7SDH9_NEMVE/209-352     | A7SDH9.1     | PF00388.17 | 64.70 | 0.00 |
| TRINITY_D5BV10_NITHN/89-190      | D5BV10.1     | PF02777.16 | 64.70 | 0.00 |
| TRINITY_A8IGT6_CHLRE/67-356      | A8IGT6.1     | PF04258.11 | 64.70 | 0.00 |
| TRINITY_F0Y476_AURAN/8-251       | F0Y476.1     | PF00348.15 | 64.70 | 0.00 |
| TRINITY_D8U2L0_VOLCA/468-621     | D8U2L0.1     | PF01699.22 | 64.70 | 0.00 |
| TRINITY_A8HPK7_CHLRE/79-270      | A8HPK7.1     | PF01300.16 | 64.70 | 0.00 |
| TRINITY_A0A061EEG7_THECC/589-749 | A0A061EEG7.1 | PF0007     | 64.70 | 0.00 |
| TRINITY_D8TYC0_VOLCA/26-210      | D8TYC0.1     | PF01184.17 | 64.70 | 0.00 |
| TRINITY_T1JZP5_TETUR/104-171     | T1JZP5.1     | PF03847.11 | 64.70 | 0.00 |
| TRINITY_D8UFL5_VOLCA/67-164      | D8UFL5.1     | PF01521.18 | 64.70 | 0.00 |
| TRINITY_A8I0B3_CHLRE/1-207       | A8I0B3.1     | PF00481.19 | 64.70 | 0.00 |
| TRINITY_U9UC80_RHIID/1-89        | U9UC80.1     | PF00125.22 | 64.70 | 0.00 |
| TRINITY_M5VQ69_PRUPE/1-98        | M5VQ69.1     | PF03242.11 | 64.60 | 0.00 |
| TRINITY_D8RUT0_SELML/117-215     | D8RUT0.1     | PF00153.25 | 64.60 | 0.00 |
| TRINITY_Q22FZ3_TETTS/111-209     | Q22FZ3.1     | PF00153.25 | 64.60 | 0.00 |
| TRINITY_Q22DP0_TETTS/27-164      | Q22DP0.2     | PF00675.18 | 64.60 | 0.00 |
| TRINITY_D8TW91_VOLCA/13-143      | D8TW91.1     | PF13673.5; | 64.60 | 0.00 |
| TRINITY_M2XTQ8_GALSU/187-325     | M2XTQ8.1     | PF13365.4; | 64.60 | 0.00 |
| TRINITY_A8JHA9_CHLRE/39-103      | A8JHA9.1     | PF00462.22 | 64.60 | 0.00 |
| TRINITY_A0A067QAD5_9HOMO/41-256  | A0A067QAD5.1 | PF0035     | 64.60 | 0.00 |
| TRINITY_I7MAF1_TETTS/67-145      | I7MAF1.1     | PF05046.12 | 64.60 | 0.00 |
| TRINITY_D8THX6_VOLCA/7-109       | D8THX6.1     | PF02271.14 | 64.60 | 0.00 |
| TRINITY_A0A0F5YF43_9CYAN/223-601 | A0A0F5YF43.1 | PF0072     | 64.60 | 0.00 |
| TRINITY_D2W338_NAEGR/12-250      | D2W338.1     | PF08713.9; | 64.60 | 0.00 |
| TRINITY_ASNA2_PARTE/14-318       | A0E7A5.1     | PF02374.13 | 64.60 | 0.00 |
| TRINITY_A0A0G4ER15_9ALVE/428-778 | A0A0G4ER15.1 | PF0015     | 64.60 | 0.00 |
| TRINITY_Q23QZ5_TETTS/6-263       | Q23QZ5.2     | PF00069.23 | 64.60 | 0.00 |
| TRINITY_W4XFX6_STRPU/58-308      | W4XFX6.1     | PF10609.7; | 64.60 | 0.00 |
| TRINITY_A3VAW8_9RHOB/509-588     | A3VAW8.1     | PF13193.4; | 64.60 | 0.00 |
| TRINITY_D8UHV8_VOLCA/129-323     | D8UHV8.1     | PF07970.10 | 64.60 | 0.00 |
| TRINITY_D8RM97_SELML/70-667      | D8RM97.1     | PF00888.20 | 64.60 | 0.00 |
| TRINITY_L8GIJ1_ACACA/425-561     | L8GIJ1.1     | PF00005.25 | 64.60 | 0.00 |
| TRINITY_J9JBC1_9SPIT/37-248      | J9JBC1.1     | PF00722.19 | 64.60 | 0.00 |
| TRINITY_L8GIA8_ACACA/26-458      | L8GIA8.1     | PF00450.20 | 64.60 | 0.00 |
| TRINITY_D8G576_9CYAN/39-86       | D8G576.1     | PF04839.11 | 64.60 | 0.00 |
| TRINITY_I0YRT6_9CHLO/78-159      | I0YRT6.1     | PF00575.21 | 64.60 | 0.00 |
| TRINITY_D8U625_VOLCA/163-241     | D8U625.1     | PF11998.6; | 64.60 | 0.00 |
| TRINITY_D8U746_VOLCA/113-207     | D8U746.1     | PF16835.3; | 64.60 | 0.00 |
| TRINITY_A0DNX8_PARTE/1-308       | A0DNX8.1     | PF00443.27 | 64.60 | 0.00 |
| TRINITY_D8U4G0_VOLCA/558-765     | D8U4G0.1     | PF00623.18 | 64.60 | 0.00 |
| TRINITY_A0A0D9VCE0_9ORYZ/14-321  | A0A0D9VCE0.1 | PF0000     | 64.60 | 0.00 |
| TRINITY_I4C074_DESTA/30-442      | I4C074.1     | PF00501.26 | 64.60 | 0.00 |
| TRINITY_A0A0G4F7G8_9ALVE/22-121  | A0A0G4F7G8.1 | PF1289     | 64.60 | 0.00 |
| TRINITY_J9G5M8_9SPIT/464-784     | J9G5M8.1     | PF13393.4; | 64.60 | 0.00 |
| TRINITY_D8TVC0_VOLCA/1983-2096   | D8TVC0.1     | PF00665.24 | 64.60 | 0.00 |

|                                  |                     |       |      |
|----------------------------------|---------------------|-------|------|
| TRINITY_R1BWN0_EMIHU/31-209      | R1BWN0.1 PF00955.19 | 64.60 | 0.00 |
| TRINITY_A0A078C9S1_BRANA/4-98    | A0A078C9S1.1 PF1420 | 64.50 | 0.00 |
| TRINITY_J9ENV1_9SPIT/415-758     | J9ENV1.1 PF00493.21 | 64.50 | 0.00 |
| TRINITY_Q240Q4_TETTS/341-560     | Q240Q4.3 PF00557.22 | 64.50 | 0.00 |
| TRINITY_F4PX31_DICFS/215-337     | F4PX31.1 PF02984.17 | 64.50 | 0.00 |
| TRINITY_Q23YB5_TETTS/199-456     | Q23YB5.2 PF00069.23 | 64.50 | 0.00 |
| TRINITY_I7MHS8_TETTS/213-274     | I7MHS8.2 PF12906.5; | 64.50 | 0.00 |
| TRINITY_M2XX77_GALSU/665-775     | M2XX77.1 PF00271.29 | 64.50 | 0.00 |
| TRINITY_D8TL55_VOLCA/18-128      | D8TL55.1 PF00173.26 | 64.50 | 0.00 |
| TRINITY_I7LWN1_TETTS/4-96        | I7LWN1.1 PF05670.11 | 64.50 | 0.00 |
| TRINITY_S8E0Y0_9LAMI/146-269     | S8E0Y0.1 PF01553.19 | 64.50 | 0.00 |
| TRINITY_L8H5N4_ACACA/10-130      | L8H5N4.1 PF13238.4; | 64.50 | 0.00 |
| TRINITY_D8T9A7_SELML/78-232      | D8T9A7.1 PF00504.19 | 64.50 | 0.00 |
| TRINITY_D8TS14_VOLCA/10-152      | D8TS14.1 PF01625.19 | 64.50 | 0.00 |
| TRINITY_D8UJQ9_VOLCA/63-496      | D8UJQ9.1 PF00854.19 | 64.50 | 0.00 |
| TRINITY_D8UD76_VOLCA/695-824     | D8UD76.1 PF06398.9; | 64.50 | 0.00 |
| TRINITY_A0E1Y7_PARTE/446-512     | A0E1Y7.1 PF00659.16 | 64.50 | 0.00 |
| TRINITY_A0CS16_PARTE/344-450     | A0CS16.1 PF02847.15 | 64.50 | 0.00 |
| TRINITY_D8TL36_VOLCA/61-378      | D8TL36.1 PF16363.3; | 64.50 | 0.00 |
| TRINITY_A4VF59_TETTS/56-131      | A4VF59.1 PF01066.19 | 64.50 | 0.00 |
| TRINITY_C1EIK2_MICSR/1-193       | C1EIK2.1 PF00069.23 | 64.50 | 0.00 |
| TRINITY_J4CD27_THEOR/10-74       | J4CD27.1 PF13499.4; | 64.50 | 0.00 |
| TRINITY_A8JGC9_CHLRE/17-78       | A8JGC9.1 PF00226.29 | 64.50 | 0.00 |
| TRINITY_A8I5X1_CHLRE/126-374     | A8I5X1.1 PF01896.17 | 64.50 | 0.00 |
| TRINITY_E1ZND9_CHLVA/929-1188    | E1ZND9.1 PF00069.23 | 64.50 | 0.00 |
| TRINITY_A0A0G1W8L6_9BACT/210-391 | A0A0G1W8L6.1 PF0053 | 64.50 | 0.00 |
| TRINITY_T0PW96_9STRA/35-391      | T0PW96.1 PF09334.9; | 64.50 | 0.00 |
| TRINITY_A8IKM0_CHLRE/45-119      | A8IKM0.1 PF02656.13 | 64.50 | 0.00 |
| TRINITY_L8GYB8_ACACA/255-364     | L8GYB8.1 PF08022.10 | 64.50 | 0.00 |
| TRINITY_A8IZ48_CHLRE/45-159      | A8IZ48.1 PF00293.26 | 64.50 | 0.00 |
| TRINITY_C7PLA0_CHIPD/8-216       | C7PLA0.1 PF00753.25 | 64.50 | 0.00 |
| TRINITY_Q66YD1_CHLRE/72-133      | Q66YD1.1 PF00226.29 | 64.50 | 0.00 |
| TRINITY_A8I3P4_CHLRE/1-384       | A8I3P4.1 PF13520.4; | 64.50 | 0.00 |
| TRINITY_D8U719_VOLCA/28-288      | D8U719.1 PF12697.5; | 64.50 | 0.00 |
| TRINITY_A8HYR6_CHLRE/286-348     | A8HYR6.1 PF00013.27 | 64.50 | 0.00 |
| TRINITY_I0Z8B5_9CHLO/174-487     | I0Z8B5.1 PF00282.17 | 64.50 | 0.00 |
| TRINITY_E1Z5Q9_CHLVA/247-324     | E1Z5Q9.1 PF05684.10 | 64.50 | 0.00 |
| TRINITY_D8TIT7_VOLCA/772-837     | D8TIT7.1 PF13432.4; | 64.50 | 0.00 |
| TRINITY_A8HMG4_CHLRE/48-108      | A8HMG4.1 PF13691.4; | 64.50 | 0.00 |
| TRINITY_J2IF11_9BACL/46-290      | J2IF11.1 PF02274.15 | 64.50 | 0.00 |
| TRINITY_A0A087H1X4_ARAAL/15-137  | A0A087H1X4.1 PF0017 | 64.40 | 0.00 |
| TRINITY_J9HU22_9SPIT/4-283       | J9HU22.1 PF00069.23 | 64.40 | 0.00 |
| TRINITY_A0A0G4H4N9_9ALVE/11-150  | A0A0G4H4N9.1 PF1458 | 64.40 | 0.00 |
| TRINITY_A0A0G4GQ90_9ALVE/50-668  | A0A0G4GQ90.1 PF0044 | 64.40 | 0.00 |
| TRINITY_L8GUS5_ACACA/34-120      | L8GUS5.1 PF04110.11 | 64.40 | 0.00 |
| TRINITY_W7XEI3_TETTS/144-320     | W7XEI3.1 PF04427.16 | 64.40 | 0.00 |
| TRINITY_A0A0C4EL35_PUCT1/283-363 | A0A0C4EL35.1 PF0049 | 64.40 | 0.00 |
| TRINITY_Q22XT4_TETTS/475-635     | Q22XT4.1 PF08662.9; | 64.40 | 0.00 |
| TRINITY_A0CYG1_PARTE/160-260     | A0CYG1.1 PF13864.4; | 64.40 | 0.00 |
| TRINITY_A0A067CLG0_SAPPC/220-264 | A0A067CLG0.1 PF0040 | 64.40 | 0.00 |
| TRINITY_Q247Z0_TETTS/1359-1503   | Q247Z0.3 PF00005.25 | 64.40 | 0.00 |
| TRINITY_A0DI20_PARTE/19-543      | A0DI20.1 PF01602.18 | 64.40 | 0.00 |
| TRINITY_J9J7C7_9SPIT/46-148      | J9J7C7.1 PF08241.10 | 64.40 | 0.00 |
| TRINITY_E8QYX7_ISOPI/16-175      | E8QYX7.1 PF03446.13 | 64.40 | 0.00 |
| TRINITY_G0R1V5_ICHMG/624-842     | G0R1V5.1 PF12781.5; | 64.40 | 0.00 |
| TRINITY_E9HWN6_DAPPU/1040-1188   | E9HWN6.1 PF00005.25 | 64.40 | 0.00 |
| TRINITY_A0A059LH28_9CHLO/1-116   | A0A059LH28.1 PF0073 | 64.40 | 0.00 |
| TRINITY_D8TT44_VOLCA/311-511     | D8TT44.1 PF01425.19 | 64.40 | 0.00 |
| TRINITY_I1FVG2_AMPQE/134-296     | I1FVG2.1 PF00317.19 | 64.40 | 0.00 |
| TRINITY_A8IZU0_CHLRE/1-580       | A8IZU0.1 PF00012.18 | 64.40 | 0.00 |
| TRINITY_D7SIR1_VITVI/13-371      | D7SIR1.1 PF04371.13 | 64.40 | 0.00 |

|                                    |                     |       |      |
|------------------------------------|---------------------|-------|------|
| TRINITY_D2VPF0_NAEGR/10-183        | D2VPF0.1 PF00071.20 | 64.40 | 0.00 |
| TRINITY_A0A087SK44_AUXPR/609-723   | A0A087SK44.1 PF0027 | 64.40 | 0.00 |
| TRINITY_I0YPX2_9CHLO/757-1117      | I0YPX2.1 PF00328.20 | 64.40 | 0.00 |
| TRINITY_A0A0M2LPS2_9SPHN/343-477   | A0A0M2LPS2.1 PF0000 | 64.40 | 0.00 |
| TRINITY_L8H7U8_ACACA/492-702       | L8H7U8.1 PF00326.19 | 64.40 | 0.00 |
| TRINITY_D8TV14_VOLCA/61-218        | D8TV14.1 PF10436.7; | 64.40 | 0.00 |
| TRINITY_E9FRU0_DAPPU/24-130        | E9FRU0.1 PF13616.4; | 64.40 | 0.00 |
| TRINITY_A8HMH6_CHLRE/121-284       | A8HMH6.1 PF01596.15 | 64.40 | 0.00 |
| TRINITY_E1Z9L4_CHLVA/22-155        | E1Z9L4.1 PF07231.10 | 64.40 | 0.00 |
| TRINITY_W7XHC6_TETTS/183-324       | W7XHC6.1 PF07479.12 | 64.40 | 0.00 |
| TRINITY_H3AVK4_LATCH/596-1043      | H3AVK4.1 PF13086.4; | 64.40 | 0.00 |
| TRINITY_W4Z2W7_STRPU/52-200        | W4Z2W7.1 PF00005.25 | 64.40 | 0.00 |
| TRINITY_J9I4R1_9SPIT/251-324       | J9I4R1.1 PF03451.12 | 64.40 | 0.00 |
| TRINITY_I0YXD9_9CHLO/216-510       | I0YXD9.1 PF02781.14 | 64.40 | 0.00 |
| TRINITY_D8U7B5_VOLCA/451-777       | D8U7B5.1 PF00225.21 | 64.40 | 0.00 |
| TRINITY_A8IU68_CHLRE/707-855       | A8IU68.1 PF08264.11 | 64.40 | 0.00 |
| TRINITY_A8J838_CHLRE/2-97          | A8J838.1 PF10084.7; | 64.40 | 0.00 |
| TRINITY_L1JER9_GUITH/328-856       | L1JER9.1 PF00443.27 | 64.40 | 0.00 |
| TRINITY_A0A093XHF8_9PEZI/60-146    | A0A093XHF8.1 PF0062 | 64.40 | 0.00 |
| TRINITY_D8UJD9_VOLCA/37-534        | D8UJD9.1 PF00118.22 | 64.40 | 0.00 |
| TRINITY_I7MD55_TETTS/531-788       | I7MD55.2 PF00069.23 | 64.40 | 0.00 |
| TRINITY_A0A0G4EVB2_9ALVE/139-300   | A0A0G4EVB2.1 PF0476 | 64.40 | 0.00 |
| TRINITY_A0A0D1DZ70_USTMA/33-109    | A0A0D1DZ70.1 PF0125 | 64.40 | 0.00 |
| TRINITY_LOG510_ECHVK/25-388        | LOG510.1 PF14587.4; | 64.40 | 0.00 |
| TRINITY_A0BNQ0_PARTE/32-276        | A0BNQ0.1 PF00069.23 | 64.30 | 0.00 |
| TRINITY_L8GXT7_ACACA/1726-1939     | L8GXT7.1 PF00454.25 | 64.30 | 0.00 |
| TRINITY_A0A087SPW5_AUXPR/32-101    | A0A087SPW5.1 PF1524 | 64.30 | 0.00 |
| TRINITY_A8J5Y5_CHLRE/211-445       | A8J5Y5.1 PF01167.16 | 64.30 | 0.00 |
| TRINITY_E2AZT8_CAMFO/5-107         | E2AZT8.1 PF00466.18 | 64.30 | 0.00 |
| TRINITY_A0C2G3_PARTE/131-256       | A0C2G3.1 PF09335.9; | 64.30 | 0.00 |
| TRINITY_F4PTP3_DICFS/137-548       | F4PTP3.1 PF00465.17 | 64.30 | 0.00 |
| TRINITY_A4VCZ9_TETTS/28-319        | A4VCZ9.2 PF01026.19 | 64.30 | 0.00 |
| TRINITY_A8IZS5_CHLRE/5-74          | A8IZS5.1 PF00076.20 | 64.30 | 0.00 |
| TRINITY_A8JDF8_CHLRE/1-213         | A8JDF8.1 PF02517.14 | 64.30 | 0.00 |
| TRINITY_A0EE63_PARTE/3584-4294     | A0EE63.1 PF03028.13 | 64.30 | 0.00 |
| TRINITY_W3WQH0_9PEZI/17-317        | W3WQH0.1 PF00248.19 | 64.30 | 0.00 |
| TRINITY_Q22XT4_TETTS/475-635       | Q22XT4.1 PF08662.9; | 64.30 | 0.00 |
| TRINITY_A0CMB4_PARTE/14-269        | A0CMB4.1 PF00069.23 | 64.30 | 0.00 |
| TRINITY_A8IR22_CHLRE/1-180         | A8IR22.1 PF00230.18 | 64.30 | 0.00 |
| TRINITY_B4D029_9BACT/5-275         | B4D029.1 PF00749.19 | 64.30 | 0.00 |
| TRINITY_I7LUG9_TETTS/17-335        | I7LUG9.2 PF00225.21 | 64.30 | 0.00 |
| TRINITY_K0KSV0_WICCF/346-415       | K0KSV0.1 PF00076.20 | 64.30 | 0.00 |
| TRINITY_A8HNH0_CHLRE/596-829       | A8HNH0.1 PF07717.14 | 64.30 | 0.00 |
| TRINITY_D8UJ01_VOLCA/7-76          | D8UJ01.1 PF11605.6; | 64.30 | 0.00 |
| TRINITY_F4Q9S8_DICFS/3-60          | F4Q9S8.1 PF04758.12 | 64.30 | 0.00 |
| TRINITY_D8TU63_VOLCA/154-209       | D8TU63.1 PF12646.5; | 64.30 | 0.00 |
| TRINITY_Q238R8_TETTS/848-963       | Q238R8.1 PF00787.22 | 64.30 | 0.00 |
| TRINITY_T1G6V1_HELRO/297-341       | T1G6V1.1 PF01585.21 | 64.30 | 0.00 |
| TRINITY_D8ULV7_VOLCA/1-185         | D8ULV7.1 PF06966.10 | 64.30 | 0.00 |
| TRINITY_C3YCG6_BRAFL/2-105         | C3YCG6.1 PF00085.18 | 64.30 | 0.00 |
| TRINITY_A0A0D9ZS63_9ORYZ/74-185    | A0A0D9ZS63.1 PF0413 | 64.30 | 0.00 |
| TRINITY_A8IZN0_CHLRE/131-439       | A8IZN0.1 PF03486.12 | 64.30 | 0.00 |
| TRINITY_E1ZFF3_CHLVA/46-344        | E1ZFF3.1 PF01866.15 | 64.30 | 0.00 |
| TRINITY_V4UDH9_9ROSI/86-370        | V4UDH9.1 PF00009.25 | 64.30 | 0.00 |
| TRINITY_A0A075AR84_9FUNG/64-192    | A0A075AR84.1 PF0017 | 64.30 | 0.00 |
| TRINITY_A0A077ZUV7_STYLE/56-208    | A0A077ZUV7.1 PF1473 | 64.30 | 0.00 |
| TRINITY_A0CCB3_PARTE/50-120        | A0CCB3.1 PF00076.20 | 64.30 | 0.00 |
| TRINITY_A0A0E9NI79_9ASCO/1503-1793 | A0A0E9NI79.1 PF0006 | 64.30 | 0.00 |
| TRINITY_Q24GF5_TETTS/192-235       | Q24GF5.1 PF13639.4; | 64.30 | 0.00 |
| TRINITY_A0A022RCY7_ERYGU/331-611   | A0A022RCY7.1 PF0120 | 64.30 | 0.00 |
| TRINITY_A8J3T4_CHLRE/72-440        | A8J3T4.1 PF01979.18 | 64.30 | 0.00 |

|                                  |              |            |       |      |
|----------------------------------|--------------|------------|-------|------|
| TRINITY_L8H8M4_ACACA/72-337      | L8H8M4.1     | PF01193.22 | 64.30 | 0.00 |
| TRINITY_C4Y7D3_CLAL4/242-402     | C4Y7D3.1     | PF00078.25 | 64.30 | 0.00 |
| TRINITY_A8I268_CHLRE/466-743     | A8I268.1     | PF00664.21 | 64.30 | 0.00 |
| TRINITY_A0A087SFG2_AUXPR/609-698 | A0A087SFG2.1 | PF0015     | 64.30 | 0.00 |
| TRINITY_D8U968_VOLCA/279-518     | D8U968.1     | PF04884.12 | 64.30 | 0.00 |
| TRINITY_I0YJJ0_9CHLO/27-182      | I0YJJ0.1     | PF02518.24 | 64.30 | 0.00 |
| TRINITY_A0BIT3_PARTE/166-286     | A0BIT3.1     | PF01575.17 | 64.20 | 0.00 |
| TRINITY_A0D270_PARTE/367-467     | A0D270.1     | PF12796.5; | 64.20 | 0.00 |
| TRINITY_D3B1V2_POLPA/5-372       | D3B1V2.1     | PF00022.17 | 64.20 | 0.00 |
| TRINITY_J9FBS9_9SPIT/259-507     | J9FBS9.1     | PF00009.25 | 64.20 | 0.00 |
| TRINITY_C3Z578_BRAFL/7-211       | C3Z578.1     | PF03575.15 | 64.20 | 0.00 |
| TRINITY_L8GX50_ACACA/28-221      | L8GX50.1     | PF00227.24 | 64.20 | 0.00 |
| TRINITY_F4QBM2_DICFS/48-337      | F4QBM2.1     | PF01008.15 | 64.20 | 0.00 |
| TRINITY_I7MG57_TETTS/680-735     | I7MG57.2     | PF17120.3; | 64.20 | 0.00 |
| TRINITY_C3Z9A3_BRAFL/297-569     | C3Z9A3.1     | PF02138.16 | 64.20 | 0.00 |
| TRINITY_L8GDZ9_ACACA/65-381      | L8GDZ9.1     | PF00749.19 | 64.20 | 0.00 |
| TRINITY_A0A078ABS3_STYLE/96-356  | A0A078ABS3.1 | PF0006     | 64.20 | 0.00 |
| TRINITY_L8H6C4_ACACA/201-373     | L8H6C4.1     | PF00174.17 | 64.20 | 0.00 |
| TRINITY_D8TVI1_VOLCA/43-160      | D8TVI1.1     | PF06417.10 | 64.20 | 0.00 |
| TRINITY_A8I3V3_CHLRE/47-202      | A8I3V3.1     | PF14306.4; | 64.20 | 0.00 |
| TRINITY_D8TUZ2_VOLCA/101-232     | D8TUZ2.1     | PF04366.10 | 64.20 | 0.00 |
| TRINITY_G0QLJ9_ICHMG/51-234      | G0QLJ9.1     | PF05063.12 | 64.20 | 0.00 |
| TRINITY_D8TK70_VOLCA/76-461      | D8TK70.1     | PF00344.18 | 64.20 | 0.00 |
| TRINITY_D3PD64_DEFDS/53-528      | D3PD64.1     | PF00171.20 | 64.20 | 0.00 |
| TRINITY_T0RQL2_9STRA/132-184     | T0RQL2.1     | PF13964.4; | 64.20 | 0.00 |
| TRINITY_A0A096SHJ9_MAIZE/112-192 | A0A096SHJ9.1 | PF0035     | 64.20 | 0.00 |
| TRINITY_D8TIB1_VOLCA/100-431     | D8TIB1.1     | PF07887.9; | 64.20 | 0.00 |
| TRINITY_F4PVZ6_DICFS/12-183      | F4PVZ6.1     | PF00071.20 | 64.20 | 0.00 |
| TRINITY_Q24FC7_TETTS/25-161      | Q24FC7.2     | PF00782.18 | 64.20 | 0.00 |
| TRINITY_PAP_DICDI/54-396         | Q54J73.1     | PF04928.15 | 64.20 | 0.00 |
| TRINITY_I7LSV4_TETTS/3534-4237   | I7LSV4.2     | PF03028.13 | 64.20 | 0.00 |
| TRINITY_A0A087SAS6_AUXPR/214-289 | A0A087SAS6.1 | PF0620     | 64.20 | 0.00 |
| TRINITY_D8U5J5_VOLCA/53-475      | D8U5J5.1     | PF00654.18 | 64.20 | 0.00 |
| TRINITY_A8IZ05_CHLRE/23-214      | A8IZ05.1     | PF08856.9; | 64.20 | 0.00 |
| TRINITY_A1ZSD1_9BACT/38-190      | A1ZSD1.1     | PF00484.17 | 64.20 | 0.00 |
| TRINITY_A8JA31_CHLRE/67-347      | A8JA31.1     | PF00246.22 | 64.20 | 0.00 |
| TRINITY_E1ZM44_CHLVA/121-407     | E1ZM44.1     | PF05007.11 | 64.20 | 0.00 |
| TRINITY_D8UIV1_VOLCA/157-391     | D8UIV1.1     | PF09325.8; | 64.20 | 0.00 |
| TRINITY_D8UB93_VOLCA/33-525      | D8UB93.1     | PF00118.22 | 64.20 | 0.00 |
| TRINITY_I0REP9_MYCPH/59-501      | I0REP9.1     | PF00501.26 | 64.20 | 0.00 |
| TRINITY_A8J304_CHLRE/23-170      | A8J304.1     | PF04051.14 | 64.20 | 0.00 |
| TRINITY_A8HZX4_CHLRE/9-174       | A8HZX4.1     | PF03453.15 | 64.20 | 0.00 |
| TRINITY_W4XGG4_STRPU/640-750     | W4XGG4.1     | PF00271.29 | 64.20 | 0.00 |
| TRINITY_Q8LPN9_CHLRE/133-237     | Q8LPN9.1     | PF06426.12 | 64.20 | 0.00 |
| TRINITY_A0A078DNT7_BRANA/370-586 | A0A078DNT7.1 | PF0500     | 64.20 | 0.00 |
| TRINITY_A8HM32_CHLRE/167-302     | A8HM32.1     | PF00107.24 | 64.20 | 0.00 |
| TRINITY_Q23KL1_TETTS/74-139      | Q23KL1.1     | PF15393.4; | 64.10 | 0.00 |
| TRINITY_A0E2W5_PARTE/196-452     | A0E2W5.1     | PF00069.23 | 64.10 | 0.00 |
| TRINITY_G0R500_ICHMG/297-509     | G0R500.1     | PF00454.25 | 64.10 | 0.00 |
| TRINITY_I0YWV4_9CHLO/88-151      | I0YWV4.1     | PF00076.20 | 64.10 | 0.00 |
| TRINITY_J9J9Q5_9SPIT/339-382     | J9J9Q5.1     | PF00569.15 | 64.10 | 0.00 |
| TRINITY_Q23JY6_TETTS/610-893     | Q23JY6.2     | PF00481.19 | 64.10 | 0.00 |
| TRINITY_A8ITW3_CHLRE/1-127       | A8ITW3.1     | PF03364.18 | 64.10 | 0.00 |
| TRINITY_D8TNP4_VOLCA/20-98       | D8TNP4.1     | PF16131.3; | 64.10 | 0.00 |
| TRINITY_L8HFB8_ACACA/127-166     | L8HFB8.1     | PF13923.4; | 64.10 | 0.00 |
| TRINITY_H9JBI6_BOMMO/283-544     | H9JBI6.1     | PF00069.23 | 64.10 | 0.00 |
| TRINITY_A8J635_CHLRE/81-251      | A8J635.1     | PF13301.4; | 64.10 | 0.00 |
| TRINITY_A8J9P0_CHLRE/74-378      | A8J9P0.1     | PF00248.19 | 64.10 | 0.00 |
| TRINITY_G7JHY7_MEDTR/29-69       | G7JHY7.1     | PF00514.21 | 64.10 | 0.00 |
| TRINITY_G7JHY7_MEDTR/29-69       | G7JHY7.1     | PF00514.21 | 64.10 | 0.00 |
| TRINITY_J9JBX5_9SPIT/149-408     | J9JBX5.1     | PF00069.23 | 64.10 | 0.00 |

|                                    |              |            |       |      |
|------------------------------------|--------------|------------|-------|------|
| TRINITY_A8IYY3_CHLRE/2-287         | A8IYY3.1     | PF00069.23 | 64.10 | 0.00 |
| TRINITY_D3B161_POLPA/45-433        | D3B161.1     | PF00202.19 | 64.10 | 0.00 |
| TRINITY_A8I7J0_CHLRE/17-187        | A8I7J0.1     | PF03357.19 | 64.10 | 0.00 |
| TRINITY_I1CSZ3_RHIO9/260-602       | I1CSZ3.1     | PF00750.17 | 64.10 | 0.00 |
| TRINITY_K1VK41_TRIAC/10-74         | K1VK41.1     | PF13499.4; | 64.10 | 0.00 |
| TRINITY_D8S3L2_SELML/19-84         | D8S3L2.1     | PF01918.19 | 64.10 | 0.00 |
| TRINITY_Q23R92_TETTS/152-318       | Q23R92.1     | PF00071.20 | 64.10 | 0.00 |
| TRINITY_D8U6W4_VOLCA/9-110         | D8U6W4.1     | PF12624.5; | 64.10 | 0.00 |
| TRINITY_A9RZL7_PHYPA/11-637        | A9RZL7.1     | PF03169.13 | 64.10 | 0.00 |
| TRINITY_A0A024TID3_9STRA/5-178     | A0A024TID3.1 | PF0007     | 64.10 | 0.00 |
| TRINITY_D8TQN2_VOLCA/1042-1224     | D8TQN2.1     | PF02581.15 | 64.10 | 0.00 |
| TRINITY_A8I960_CHLRE/24-194        | A8I960.1     | PF00270.27 | 64.10 | 0.00 |
| TRINITY_A8HXA6_CHLRE/5-349         | A8HXA6.1     | PF07992.12 | 64.10 | 0.00 |
| TRINITY_A0A075B4E8_9FUNG/35-330    | A0A075B4E8.1 | PF0029     | 64.10 | 0.00 |
| TRINITY_A8J7F2_CHLRE/937-1258      | A8J7F2.1     | PF00632.23 | 64.10 | 0.00 |
| TRINITY_D8UIV0_VOLCA/408-525       | D8UIV0.1     | PF02887.14 | 64.10 | 0.00 |
| TRINITY_A0A0C2XP57_BACBA/17-186    | A0A0C2XP57.1 | PF0088     | 64.10 | 0.00 |
| TRINITY_D8TN49_VOLCA/90-232        | D8TN49.1     | PF04116.11 | 64.10 | 0.00 |
| TRINITY_A8JGJ4_CHLRE/324-589       | A8JGJ4.1     | PF00069.23 | 64.10 | 0.00 |
| TRINITY_A0DZ75_PARTE/8-105         | A0DZ75.1     | PF00153.25 | 64.10 | 0.00 |
| TRINITY_B3MHS2_DROAN/42-244        | B3MHS2.2     | PF00106.23 | 64.10 | 0.00 |
| TRINITY_A0CNX9_PARTE/179-246       | A0CNX9.1     | PF13833.4; | 64.00 | 0.00 |
| TRINITY_Q23BV8_TETTS/160-349       | Q23BV8.1     | PF13489.4; | 64.00 | 0.00 |
| TRINITY_W2RHI5_PHYPN/46-548        | W2RHI5.1     | PF00342.17 | 64.00 | 0.00 |
| TRINITY_A0A074XB46_AURPU/51-136    | A0A074XB46.1 | PF0020     | 64.00 | 0.00 |
| TRINITY_A0A024TNL1_9STRA/29-108    | A0A024TNL1.1 | PF1377     | 64.00 | 0.00 |
| TRINITY_Q22W55_TETTS/12-233        | Q22W55.2     | PF00244.18 | 64.00 | 0.00 |
| TRINITY_A0CVD0_PARTE/83-383        | A0CVD0.1     | PF03133.13 | 64.00 | 0.00 |
| TRINITY_J9HU22_9SPIT/4-283         | J9HU22.1     | PF00069.23 | 64.00 | 0.00 |
| TRINITY_D8UE16_VOLCA/2-127         | D8UE16.1     | PF03244.12 | 64.00 | 0.00 |
| TRINITY_A0A087YCQ2_POEFO/12-263    | A0A087YCQ2.2 | PF0079     | 64.00 | 0.00 |
| TRINITY_A2AU08_MOUSE/14-76         | A2AU08.1     | PF04851.13 | 64.00 | 0.00 |
| TRINITY_A9RGF0_PHYPA/71-122        | A9RGF0.1     | PF00847.18 | 64.00 | 0.00 |
| TRINITY_I7LX18_TETTS/11-362        | I7LX18.1     | PF00285.19 | 64.00 | 0.00 |
| TRINITY_D8U1I5_VOLCA/8-145         | D8U1I5.1     | PF01090.17 | 64.00 | 0.00 |
| TRINITY_A0DPK2_PARTE/224-334       | A0DPK2.1     | PF16131.3; | 64.00 | 0.00 |
| TRINITY_A8I7F2_CHLRE/54-181        | A8I7F2.1     | PF11317.6; | 64.00 | 0.00 |
| TRINITY_G0J100_CYCMS/29-323        | G0J100.1     | PF00294.22 | 64.00 | 0.00 |
| TRINITY_D8UEP5_VOLCA/160-219       | D8UEP5.1     | PF04900.10 | 64.00 | 0.00 |
| TRINITY_A8HYJ1_CHLRE/93-253        | A8HYJ1.1     | PF04548.14 | 64.00 | 0.00 |
| TRINITY_D8TMW1_VOLCA/578-754       | D8TMW1.1     | PF04072.12 | 64.00 | 0.00 |
| TRINITY_D8UCG1_VOLCA/148-249       | D8UCG1.1     | PF02204.16 | 64.00 | 0.00 |
| TRINITY_D8UD64_VOLCA/3-606         | D8UD64.1     | PF00443.27 | 64.00 | 0.00 |
| TRINITY_A0A059D108_EUCGR/1001-1077 | A0A059D108.1 | PF0549     | 64.00 | 0.00 |
| TRINITY_W4Y3K6_STRPU/371-574       | W4Y3K6.1     | PF02190.14 | 64.00 | 0.00 |
| TRINITY_D8UHR4_VOLCA/55-338        | D8UHR4.1     | PF02089.13 | 64.00 | 0.00 |
| TRINITY_A8HQJ4_CHLRE/170-255       | A8HQJ4.1     | PF03439.11 | 64.00 | 0.00 |
| TRINITY_L8H2W6_ACACA/144-363       | L8H2W6.1     | PF07970.10 | 64.00 | 0.00 |
| TRINITY_A8JG42_CHLRE/1-100         | A8JG42.1     | PF04134.10 | 64.00 | 0.00 |
| TRINITY_D8TPT6_VOLCA/374-448       | D8TPT6.1     | PF03110.12 | 64.00 | 0.00 |
| TRINITY_D8TPT6_VOLCA/374-448       | D8TPT6.1     | PF03110.12 | 64.00 | 0.00 |
| TRINITY_D8TQW6_VOLCA/21-192        | D8TQW6.1     | PF06925.9; | 64.00 | 0.00 |
| TRINITY_A0A067F6F8_CITSI/271-345   | A0A067F6F8.1 | PF0040     | 64.00 | 0.00 |
| TRINITY_I7M858_TETTS/25-110        | I7M858.1     | PF00439.23 | 64.00 | 0.00 |
| TRINITY_G0QX38_ICHMG/832-928       | G0QX38.1     | PF08454.9; | 64.00 | 0.00 |
| TRINITY_A8JFS8_CHLRE/138-226       | A8JFS8.1     | PF00867.16 | 64.00 | 0.00 |
| TRINITY_I0YNH7_9CHLO/13-109        | I0YNH7.1     | PF00153.25 | 64.00 | 0.00 |
| TRINITY_A8JAX0_CHLRE/230-448       | A8JAX0.1     | PF00233.17 | 64.00 | 0.00 |
| TRINITY_A0A067QQ98_ZOONE/85-133    | A0A067QQ98.1 | PF0040     | 64.00 | 0.00 |
| TRINITY_W7X4T7_TETTS/1-455         | W7X4T7.1     | PF00171.20 | 63.90 | 0.00 |
| TRINITY_A0A068RPI6_9FUNG/147-230   | A0A068RPI6.1 | PF0122     | 63.90 | 0.00 |

|                                 |                     |       |      |
|---------------------------------|---------------------|-------|------|
| TRINITY_A0A0M0K115_9EUKA/22-129 | A0A0M0K115.1 PF0177 | 63.90 | 0.00 |
| TRINITY_E3FDX6_STIAD/55-174     | E3FDX6.1 PF01641.16 | 63.90 | 0.00 |
| TRINITY_A8HWD0_CHLRE/106-251    | A8HWD0.1 PF00535.24 | 63.90 | 0.00 |
| TRINITY_Q22LN3_TETTS/139-201    | Q22LN3.1 PF00957.19 | 63.90 | 0.00 |
| TRINITY_Q2WAP0_MAGSA/27-227     | Q2WAP0.1 PF00596.19 | 63.90 | 0.00 |
| TRINITY_A7S548_NEMVE/26-81      | A7S548.1 PF00412.20 | 63.90 | 0.00 |
| TRINITY_G0QU69_ICHMG/12-144     | G0QU69.1 PF05222.13 | 63.90 | 0.00 |
| TRINITY_A0D657_PARTE/575-719    | A0D657.1 PF00005.25 | 63.90 | 0.00 |
| TRINITY_A0A098GFW5_TATMI/92-465 | A0A098GFW5.1 PF0154 | 63.90 | 0.00 |
| TRINITY_A8HWB1_CHLRE/6-66       | A8HWB1.1 PF09493.8; | 63.90 | 0.00 |
| TRINITY_I7LX13_TETTS/4-205      | I7LX13.1 PF01088.19 | 63.90 | 0.00 |
| TRINITY_D7TBY5_VITVI/191-298    | D7TBY5.1 PF00175.19 | 63.90 | 0.00 |
| TRINITY_C1FIQ0_MICSR/78-400     | C1FIQ0.1 PF00152.18 | 63.90 | 0.00 |
| TRINITY_D3B236_POLPA/93-355     | D3B236.1 PF00154.19 | 63.90 | 0.00 |
| TRINITY_Q244Y1_TETTS/6-149      | Q244Y1.1 PF05517.10 | 63.90 | 0.00 |
| TRINITY_A8JBQ5_CHLRE/72-323     | A8JBQ5.1 PF01259.16 | 63.90 | 0.00 |
| TRINITY_Q24C80_TETTS/314-509    | Q24C80.2 PF00122.18 | 63.90 | 0.00 |
| TRINITY_D8TH82_VOLCA/1-111      | D8TH82.1 PF01477.21 | 63.90 | 0.00 |
| TRINITY_M4BFE1_HYAAE/23-104     | M4BFE1.1 PF00081.20 | 63.90 | 0.00 |
| TRINITY_A8J2P9_CHLRE/180-424    | A8J2P9.1 PF13087.4; | 63.90 | 0.00 |
| TRINITY_G0QX42_ICHMG/1-451      | G0QX42.1 PF00996.16 | 63.90 | 0.00 |
| TRINITY_A0CWY4_PARTE/48-300     | A0CWY4.1 PF00069.23 | 63.90 | 0.00 |
| TRINITY_D8TJL4_VOLCA/30-90      | D8TJL4.1 PF13499.4; | 63.90 | 0.00 |
| TRINITY_A8IF29_CHLRE/93-176     | A8IF29.1 PF00439.23 | 63.90 | 0.00 |

|                                  |              |            |       |      |
|----------------------------------|--------------|------------|-------|------|
| TRINITY_E1ZJ01_CHLVA/214-327     | E1ZJ01.1     | PF00271.29 | 63.90 | 0.00 |
| TRINITY_A0A0G0NFV6_9BACT/197-257 | A0A0G0NFV6.1 | PF1319     | 63.90 | 0.00 |
| TRINITY_A8IDN7_CHLRE/1-167       | A8IDN7.1     | PF03371.13 | 63.90 | 0.00 |
| TRINITY_D8U986_VOLCA/307-378     | D8U986.1     | PF00575.21 | 63.90 | 0.00 |
| TRINITY_A8HW46_CHLRE/34-172      | A8HW46.1     | PF00388.17 | 63.90 | 0.00 |
| TRINITY_X6N4P2_RETFI/201-618     | X6N4P2.1     | PF00962.20 | 63.90 | 0.00 |
| TRINITY_A8IRI7_CHLRE/381-479     | A8IRI7.1     | PF08544.11 | 63.90 | 0.00 |
| TRINITY_A8JGJ7_CHLRE/158-219     | A8JGJ7.1     | PF00415.16 | 63.90 | 0.00 |
| TRINITY_D8TX00_VOLCA/7-257       | D8TX00.1     | PF00483.21 | 63.90 | 0.00 |
| TRINITY_F4Q412_DICFS/123-377     | F4Q412.1     | PF00069.23 | 63.90 | 0.00 |
| TRINITY_F4PYF0_DICFS/912-1172    | F4PYF0.1     | PF00122.18 | 63.90 | 0.00 |
| TRINITY_G0QN11_ICHMG/255-400     | G0QN11.1     | PF00441.22 | 63.90 | 0.00 |
| TRINITY_E1ZH11_CHLVA/9-91        | E1ZH11.1     | PF08640.9; | 63.90 | 0.00 |
| TRINITY_A9STA8_PHYPA/204-241     | A9STA8.1     | PF00400.30 | 63.90 | 0.00 |
| TRINITY_I1GHB5_AMPQE/60-719      | I1GHB5.1     | PF00063.19 | 63.80 | 0.00 |
| TRINITY_I7MLR3_TETTS/9-205       | I7MLR3.2     | PF00834.17 | 63.80 | 0.00 |
| TRINITY_G0R1J7_ICHMG/20-328      | G0R1J7.1     | PF00557.22 | 63.80 | 0.00 |
| TRINITY_L8GVZ4_ACACA/237-292     | L8GVZ4.1     | PF08635.8; | 63.80 | 0.00 |
| TRINITY_W4H922_9STRA/11-79       | W4H922.1     | PF01423.20 | 63.80 | 0.00 |
| TRINITY_G2PSK8_MURRD/55-200      | G2PSK8.1     | PF10067.7; | 63.80 | 0.00 |
| TRINITY_Q22MG9_TETTS/410-664     | Q22MG9.2     | PF00069.23 | 63.80 | 0.00 |
| TRINITY_Q54EU1_DICDI/7-167       | Q54EU1.1     | PF09419.8; | 63.80 | 0.00 |
| TRINITY_C5Z7K5_SORBI/93-212      | C5Z7K5.1     | PF01641.16 | 63.80 | 0.00 |
| TRINITY_Q23MB9_TETTS/114-293     | Q23MB9.2     | PF02390.15 | 63.80 | 0.00 |
| TRINITY_F0ZR16_DICPU/2-153       | F0ZR16.1     | PF00160.19 | 63.80 | 0.00 |
| TRINITY_L8GCF9_ACACA/109-300     | L8GCF9.1     | PF02750.12 | 63.80 | 0.00 |
| TRINITY_K1PZI7_CRAGI/291-611     | K1PZI7.1     | PF00493.21 | 63.80 | 0.00 |
| TRINITY_Q239R2_TETTS/10-57       | Q239R2.2     | PF00319.16 | 63.80 | 0.00 |
| TRINITY_Q23YB5_TETTS/199-456     | Q23YB5.2     | PF00069.23 | 63.80 | 0.00 |
| TRINITY_C3Y0X8_BRAFL/1013-1161   | C3Y0X8.1     | PF00005.25 | 63.80 | 0.00 |
| TRINITY_L1J3Y8_GUIITH/9-322      | L1J3Y8.1     | PF13393.4; | 63.80 | 0.00 |
| TRINITY_Q229U9_TETTS/47-305      | Q229U9.2     | PF00069.23 | 63.80 | 0.00 |
| TRINITY_D8U5A6_VOLCA/371-559     | D8U5A6.1     | PF01764.23 | 63.80 | 0.00 |
| TRINITY_A8HT69_CHLRE/689-903     | A8HT69.1     | PF07569.9; | 63.80 | 0.00 |
| TRINITY_I0Z539_9CHLO/162-258     | I0Z539.1     | PF00173.26 | 63.80 | 0.00 |
| TRINITY_A0A0M2U5X9_9FIRM/45-442  | A0A0M2U5X9.1 | PF0020     | 63.80 | 0.00 |
| TRINITY_K9ZX98_DEIPD/466-536     | K9ZX98.1     | PF03725.13 | 63.80 | 0.00 |
| TRINITY_E1Z860_CHLVA/90-389      | E1Z860.1     | PF00632.23 | 63.80 | 0.00 |
| TRINITY_D8TZH6_VOLCA/22-283      | D8TZH6.1     | PF00233.17 | 63.80 | 0.00 |
| TRINITY_D8TZH6_VOLCA/22-283      | D8TZH6.1     | PF00233.17 | 63.80 | 0.00 |
| TRINITY_GABT_DICDI/61-489        | Q55FI1.1     | PF00202.19 | 63.80 | 0.00 |
| TRINITY_A8JFF9_CHLRE/17-202      | A8JFF9.1     | PF01105.22 | 63.80 | 0.00 |
| TRINITY_F2SQ31_TRIRC/53-111      | F2SQ31.1     | PF12678.5; | 63.80 | 0.00 |
| TRINITY_D8UF31_VOLCA/562-668     | D8UF31.1     | PF01426.16 | 63.80 | 0.00 |
| TRINITY_A8HZ94_CHLRE/10-103      | A8HZ94.1     | PF12796.5; | 63.80 | 0.00 |
| TRINITY_D3BV36_POLPA/91-309      | D3BV36.1     | PF01591.16 | 63.80 | 0.00 |
| TRINITY_I0K5M5_9BACT/33-364      | I0K5M5.1     | PF00251.18 | 63.80 | 0.00 |
| TRINITY_A0A058Z1P5_9EUKA/8-261   | A0A058Z1P5.1 | PF0006     | 63.80 | 0.00 |
| TRINITY_D8TKM3_VOLCA/1072-1235   | D8TKM3.1     | PF08623.8; | 63.80 | 0.00 |
| TRINITY_D8TMS2_VOLCA/103-407     | D8TMS2.1     | PF00850.17 | 63.80 | 0.00 |
| TRINITY_A8JEM7_CHLRE/230-394     | A8JEM7.1     | PF03407.14 | 63.80 | 0.00 |
| TRINITY_E1ZFR6_CHLVA/491-840     | E1ZFR6.1     | PF00773.17 | 63.80 | 0.00 |
| TRINITY_D8TZZ9_VOLCA/109-201     | D8TZZ9.1     | PF12796.5; | 63.80 | 0.00 |
| TRINITY_D8U9I3_VOLCA/6-105       | D8U9I3.1     | PF00168.28 | 63.80 | 0.00 |
| TRINITY_E1ZP23_CHLVA/396-454     | E1ZP23.1     | PF01485.19 | 63.80 | 0.00 |
| TRINITY_D8TPC7_VOLCA/39-285      | D8TPC7.1     | PF00566.16 | 63.80 | 0.00 |
| TRINITY_A8IW93_CHLRE/555-749     | A8IW93.1     | PF00211.18 | 63.80 | 0.00 |
| TRINITY_L8HMU1_ACACA/812-1162    | L8HMU1.1     | PF01576.17 | 63.80 | 0.00 |
| TRINITY_A8JFA1_CHLRE/3-102       | A8JFA1.1     | PF00235.17 | 63.80 | 0.00 |
| TRINITY_A8IX73_CHLRE/114-562     | A8IX73.1     | PF00083.22 | 63.80 | 0.00 |
| TRINITY_F4P307_BATDJ/345-413     | F4P307.1     | PF15247.4; | 63.80 | 0.00 |

|                                  |                     |       |      |
|----------------------------------|---------------------|-------|------|
| TRINITY_D8TUI3_VOLCA/202-270     | D8TUI3.1 PF00498.24 | 63.80 | 0.00 |
| TRINITY_A0A067QPP7_ZOONE/268-558 | A0A067QPP7.1 PF0066 | 63.80 | 0.00 |
| TRINITY_Q24BB2_TETTS/349-579     | Q24BB2.2 PF01028.18 | 63.80 | 0.00 |
| TRINITY_L1JJ97_GUITH/358-487     | L1JJ97.1 PF00005.25 | 63.80 | 0.00 |
| TRINITY_A8HMQ9_CHLRE/1-129       | A8HMQ9.1 PF05255.9; | 63.80 | 0.00 |
| TRINITY_D8TMU9_VOLCA/6-157       | D8TMU9.1 PF09349.8; | 63.80 | 0.00 |
| TRINITY_E1ZDY4_CHLVA/478-638     | E1ZDY4.1 PF02518.24 | 63.80 | 0.00 |
| TRINITY_E1ZEH7_CHLVA/121-367     | E1ZEH7.1 PF00561.18 | 63.80 | 0.00 |
| TRINITY_F0ZR48_DICPU/670-1006    | F0ZR48.1 PF00176.21 | 63.80 | 0.00 |
| TRINITY_G0R4A1_ICHMG/1-230       | G0R4A1.1 PF00225.21 | 63.80 | 0.00 |
| TRINITY_W7T228_9STRA/208-331     | W7T228.1 PF09668.8; | 63.70 | 0.00 |
| TRINITY_Q42475_SOLLC/1-90        | Q42475.1 PF03242.11 | 63.70 | 0.00 |
| TRINITY_A0A0M9F2X8_9HYPO/223-518 | A0A0M9F2X8.1 PF0012 | 63.70 | 0.00 |
| TRINITY_U3K139_FICAL/18-188      | U3K139.1 PF13177.4; | 63.70 | 0.00 |
| TRINITY_D8U1P8_VOLCA/49-480      | D8U1P8.1 PF00909.19 | 63.70 | 0.00 |
| TRINITY_I7LTP7_TETTS/3726-4428   | I7LTP7.2 PF03028.13 | 63.70 | 0.00 |
| TRINITY_A0A078A9T0_STYLE/80-292  | A0A078A9T0.1 PF0011 | 63.70 | 0.00 |
| TRINITY_I7MCU1_TETTS/405-506     | I7MCU1.1 PF06565.10 | 63.70 | 0.00 |
| TRINITY_M2UE92_COCH5/492-660     | M2UE92.1 PF00009.25 | 63.70 | 0.00 |
| TRINITY_A8JHD4_CHLRE/855-967     | A8JHD4.1 PF13832.4; | 63.70 | 0.00 |
| TRINITY_D8UIJ0_VOLCA/8-357       | D8UIJ0.1 PF00274.17 | 63.70 | 0.00 |
| TRINITY_A0A087SH64_AUXPR/7-119   | A0A087SH64.1 PF0213 | 63.70 | 0.00 |
| TRINITY_A0A0D2X2H1_CAPO3/607-950 | A0A0D2X2H1.1 PF1474 | 63.70 | 0.00 |
| TRINITY_D8THE7_VOLCA/190-448     | D8THE7.1 PF04258.11 | 63.70 | 0.00 |
| TRINITY_E1ZBC0_CHLVA/20-351      | E1ZBC0.1 PF00225.21 | 63.70 | 0.00 |
| TRINITY_A0A068S2T4_9FUNG/35-224  | A0A068S2T4.1 PF0442 | 63.70 | 0.00 |
| TRINITY_A8IUN1_CHLRE/1083-1429   | A8IUN1.1 PF04054.13 | 63.70 | 0.00 |
| TRINITY_A0A087ST14_AUXPR/88-233  | A0A087ST14.1 PF0081 | 63.70 | 0.00 |
| TRINITY_I7M6H6_TETTS/54-166      | I7M6H6.1 PF10908.6; | 63.70 | 0.00 |
| TRINITY_A0ECC8_PARTE/8-135       | A0ECC8.1 PF00782.18 | 63.60 | 0.00 |
| TRINITY_D3AVJ6_POLPA/582-722     | D3AVJ6.1 PF00005.25 | 63.60 | 0.00 |
| TRINITY_Q22T35_TETTS/4-288       | Q22T35.2 PF00069.23 | 63.60 | 0.00 |
| TRINITY_I7MMM1_TETTS/27-188      | I7MMM1.1 PF05351.9; | 63.60 | 0.00 |
| TRINITY_F0VNN1_NEOCL/211-337     | F0VNN1.1 PF00782.18 | 63.60 | 0.00 |
| TRINITY_D3BVL0_POLPA/330-389     | D3BVL0.1 PF00076.20 | 63.60 | 0.00 |
| TRINITY_K0KIU4_WICCF/2-270       | K0KIU4.1 PF06418.12 | 63.60 | 0.00 |
| TRINITY_S3CAE7_OPHP1/691-1013    | S3CAE7.1 PF00176.21 | 63.60 | 0.00 |
| TRINITY_F4PQE4_DICFS/63-138      | F4PQE4.1 PF01066.19 | 63.60 | 0.00 |
| TRINITY_A0A084WUY1_ANOSI/27-70   | A0A084WUY1.1 PF0040 | 63.60 | 0.00 |
| TRINITY_G7I2B1_MEDTR/142-202     | G7I2B1.1 PF04193.12 | 63.60 | 0.00 |
| TRINITY_E1Z692_CHLVA/4-137       | E1Z692.1 PF00271.29 | 63.60 | 0.00 |
| TRINITY_Q54GD2_DICDI/145-273     | Q54GD2.1 PF01467.24 | 63.60 | 0.00 |
| TRINITY_URM1_CHLRE/3-99          | A8IC48.1 PF09138.9; | 63.60 | 0.00 |
| TRINITY_I7MMT5_TETTS/48-124      | I7MMT5.2 PF01066.19 | 63.60 | 0.00 |
| TRINITY_F4PQK3_DICFS/22-352      | F4PQK3.1 PF01992.14 | 63.60 | 0.00 |
| TRINITY_Q23FG2_TETTS/1702-2050   | Q23FG2.2 PF00443.27 | 63.60 | 0.00 |
| TRINITY_W9SPR0_9ROSA/192-235     | W9SPR0.1 PF00432.19 | 63.60 | 0.00 |
| TRINITY_G0QXE3_ICHMG/23-411      | G0QXE3.1 PF00202.19 | 63.60 | 0.00 |
| TRINITY_Q240Q4_TETTS/341-560     | Q240Q4.3 PF00557.22 | 63.60 | 0.00 |
| TRINITY_A8ICV4_CHLRE/37-96       | A8ICV4.1 PF02427.15 | 63.60 | 0.00 |
| TRINITY_Q23DV6_TETTS/25-350      | Q23DV6.2 PF07992.12 | 63.60 | 0.00 |
| TRINITY_A9SFG7_PHYPA/138-291     | A9SFG7.1 PF10602.7; | 63.60 | 0.00 |
| TRINITY_A8HVT9_CHLRE/12-303      | A8HVT9.1 PF17184.2; | 63.60 | 0.00 |
| TRINITY_W5JTG6_ANODA/381-471     | W5JTG6.1 PF12894.5; | 63.60 | 0.00 |
| TRINITY_A0A087SAE1_AUXPR/105-205 | A0A087SAE1.1 PF0147 | 63.60 | 0.00 |
| TRINITY_A8IAF7_CHLRE/62-257      | A8IAF7.1 PF00849.20 | 63.60 | 0.00 |
| TRINITY_A0CMX3_PARTE/57-210      | A0CMX3.1 PF00005.25 | 63.60 | 0.00 |
| TRINITY_A0A087STB2_AUXPR/21-106  | A0A087STB2.1 PF0103 | 63.60 | 0.00 |
| TRINITY_L8GSN9_ACACA/40-123      | L8GSN9.1 PF04683.11 | 63.60 | 0.00 |
| TRINITY_A8HYJ4_CHLRE/45-302      | A8HYJ4.1 PF08282.10 | 63.60 | 0.00 |
| TRINITY_A0A078B0Q9_STYLE/402-508 | A0A078B0Q9.1 PF1289 | 63.60 | 0.00 |



|                                 |              |            |       |      |
|---------------------------------|--------------|------------|-------|------|
| TRINITY_J9HU22_9SPIT/4-283      | J9HU22.1     | PF00069.23 | 63.60 | 0.00 |
| TRINITY_R6FU95_9CLOT/5-67       | R6FU95.1     | PF00226.29 | 63.60 | 0.00 |
| TRINITY_NFYB_DICDI/51-116       | Q54WV0.1     | PF00808.21 | 63.60 | 0.00 |
| TRINITY_D8THP0_VOLCA/118-279    | D8THP0.1     | PF01789.14 | 63.60 | 0.00 |
| TRINITY_U4KTV3_PYROM/215-258    | U4KTV3.1     | PF10590.7; | 63.60 | 0.00 |
| TRINITY_J9ICB1_9SPIT/267-310    | J9ICB1.1     | PF00569.15 | 63.60 | 0.00 |
| TRINITY_I4A2S0_ORNRL/43-393     | I4A2S0.1     | PF00155.19 | 63.60 | 0.00 |
| TRINITY_A0E826_PARTE/289-506    | A0E826.1     | PF07002.14 | 63.60 | 0.00 |
| TRINITY_D8TX79_VOLCA/1-108      | D8TX79.1     | PF04825.11 | 63.60 | 0.00 |
| TRINITY_D8U1X0_VOLCA/12-381     | D8U1X0.1     | PF07690.14 | 63.60 | 0.00 |
| TRINITY_A9RIN7_PHYPA/44-288     | A9RIN7.1     | PF00743.17 | 63.60 | 0.00 |
| TRINITY_L8HGD4_ACACA/42-536     | L8HGD4.1     | PF00478.23 | 63.60 | 0.00 |
| TRINITY_D8TLP7_VOLCA/868-976    | D8TLP7.1     | PF00069.23 | 63.60 | 0.00 |
| TRINITY_D8TJV3_VOLCA/38-154     | D8TJV3.1     | PF02466.17 | 63.60 | 0.00 |
| TRINITY_I7M308_TETTS/37-322     | I7M308.1     | PF06098.9; | 63.60 | 0.00 |
| TRINITY_D3B5K0_POLPA/337-650    | D3B5K0.1     | PF02540.15 | 63.60 | 0.00 |
| TRINITY_A8IF06_CHLRE/80-459     | A8IF06.1     | PF01490.16 | 63.60 | 0.00 |
| TRINITY_F0ZLJ3_DICPU/142-259    | F0ZLJ3.1     | PF02770.17 | 63.60 | 0.00 |
| TRINITY_A0C0W6_PARTE/7-154      | A0C0W6.1     | PF00056.21 | 63.60 | 0.00 |
| TRINITY_I1E641_AMPQE/154-314    | I1E641.1     | PF00078.25 | 63.60 | 0.00 |
| TRINITY_G0R468_ICHMG/39-145     | G0R468.1     | PF01521.18 | 63.60 | 0.00 |
| TRINITY_D8UAB4_VOLCA/54-366     | D8UAB4.1     | PF03133.13 | 63.60 | 0.00 |
| TRINITY_C1E8T4_MICSR/55-208     | C1E8T4.1     | PF13365.4; | 63.60 | 0.00 |
| TRINITY_D8TPF9_VOLCA/18-597     | D8TPF9.1     | PF01602.18 | 63.60 | 0.00 |
| TRINITY_A8JHU5_CHLRE/130-356    | A8JHU5.1     | PF04499.13 | 63.60 | 0.00 |
| TRINITY_D8TX83_VOLCA/28-241     | D8TX83.1     | PF13532.4; | 63.60 | 0.00 |
| TRINITY_A8IA75_CHLRE/44-181     | A8IA75.1     | PF03330.16 | 63.60 | 0.00 |
| TRINITY_A8IF64_CHLRE/192-351    | A8IF64.1     | PF05673.11 | 63.60 | 0.00 |
| TRINITY_I1KBT9_SOYBN/27-466     | I1KBT9.1     | PF05602.10 | 63.60 | 0.00 |
| TRINITY_D8U5G0_VOLCA/3-122      | D8U5G0.1     | PF00188.24 | 63.60 | 0.00 |
| TRINITY_J9IT19_9SPIT/9-63       | J9IT19.1     | PF13637.4; | 63.60 | 0.00 |
| TRINITY_L8GWB5_ACACA/1009-1313  | L8GWB5.1     | PF02889.14 | 63.60 | 0.00 |
| TRINITY_A8HZ69_CHLRE/55-159     | A8HZ69.1     | PF08241.10 | 63.60 | 0.00 |
| TRINITY_G0QZT8_ICHMG/236-838    | G0QZT8.1     | PF08385.10 | 63.50 | 0.00 |
| TRINITY_A0BTN4_PARTE/489-626    | A0BTN4.1     | PF00005.25 | 63.50 | 0.00 |
| TRINITY_Q22L38_TETTS/79-141     | Q22L38.2     | PF00226.29 | 63.50 | 0.00 |
| TRINITY_L8GF06_ACACA/751-1260   | L8GF06.1     | PF02538.12 | 63.50 | 0.00 |
| TRINITY_G4ZC07_PHYSP/4-55       | G4ZC07.1     | PF00471.18 | 63.50 | 0.00 |
| TRINITY_A0E6G5_PARTE/4-110      | A0E6G5.1     | PF00307.29 | 63.50 | 0.00 |
| TRINITY_I7MJ19_TETTS/50-149     | I7MJ19.2     | PF01230.21 | 63.50 | 0.00 |
| TRINITY_A0A072UGZ0_MEDTR/7-71   | A0A072UGZ0.1 | PF0080     | 63.50 | 0.00 |
| TRINITY_D8TXD2_VOLCA/290-341    | D8TXD2.1     | PF14279.4; | 63.50 | 0.00 |
| TRINITY_A0A0G4IGU5_PLABS/58-161 | A0A0G4IGU5.1 | PF0824     | 63.50 | 0.00 |
| TRINITY_I0YUP2_9CHLO/269-343    | I0YUP2.1     | PF07572.10 | 63.50 | 0.00 |
| TRINITY_M0VBU1_HORVD/11-359     | M0VBU1.1     | PF16499.3; | 63.50 | 0.00 |
| TRINITY_A8JBZ1_CHLRE/43-328     | A8JBZ1.1     | PF03151.14 | 63.50 | 0.00 |
| TRINITY_A0BH07_PARTE/232-358    | A0BH07.1     | PF00169.27 | 63.50 | 0.00 |
| TRINITY_I7MIF3_TETTS/425-676    | I7MIF3.1     | PF00756.18 | 63.50 | 0.00 |
| TRINITY_L0PE19_PNEJ8/2-181      | L0PE19.1     | PF13177.4; | 63.50 | 0.00 |
| TRINITY_A8JGM8_CHLRE/17-401     | A8JGM8.1     | PF01546.26 | 63.50 | 0.00 |
| TRINITY_A8J567_CHLRE/116-213    | A8J567.1     | PF01248.24 | 63.50 | 0.00 |
| TRINITY_A5H8I1_CHLRE/64-268     | A5H8I1.1     | PF11152.6; | 63.50 | 0.00 |
| TRINITY_A8JBM0_CHLRE/4-366      | A8JBM0.1     | PF05631.12 | 63.50 | 0.00 |
| TRINITY_G0QU54_ICHMG/58-355     | G0QU54.1     | PF00676.18 | 63.50 | 0.00 |
| TRINITY_L8GUM8_ACACA/94-179     | L8GUM8.1     | PF04719.12 | 63.50 | 0.00 |
| TRINITY_A8HYU2_CHLRE/3-363      | A8HYU2.1     | PF03223.13 | 63.50 | 0.00 |
| TRINITY_E1ZGK8_CHLVA/274-460    | E1ZGK8.1     | PF02782.14 | 63.50 | 0.00 |
| TRINITY_I0ZAC1_9CHLO/31-369     | I0ZAC1.1     | PF00155.19 | 63.50 | 0.00 |
| TRINITY_D8TZ18_VOLCA/229-407    | D8TZ18.1     | PF00225.21 | 63.50 | 0.00 |
| TRINITY_L8GV46_ACACA/115-166    | L8GV46.1     | PF01805.18 | 63.50 | 0.00 |
| TRINITY_E1ZN61_CHLVA/1018-1299  | E1ZN61.1     | PF00664.21 | 63.50 | 0.00 |

|                                    |              |            |       |      |
|------------------------------------|--------------|------------|-------|------|
| TRINITY_I7ME40_TETTS/13-116        | I7ME40.1     | PF00318.18 | 63.50 | 0.00 |
| TRINITY_B3RQS2_TRIAD/688-825       | B3RQS2.1     | PF03764.16 | 63.50 | 0.00 |
| TRINITY_D8U9D7_VOLCA/311-620       | D8U9D7.1     | PF05192.16 | 63.50 | 0.00 |
| TRINITY_D8TKH5_VOLCA/385-739       | D8TKH5.1     | PF03016.13 | 63.50 | 0.00 |
| TRINITY_L8H2P4_ACACA/120-1087      | L8H2P4.1     | PF02463.17 | 63.50 | 0.00 |
| TRINITY_C1MIT9_MICPC/12-181        | C1MIT9.1     | PF13439.4; | 63.50 | 0.00 |
| TRINITY_A8IYH2_CHLRE/1-172         | A8IYH2.1     | PF00211.18 | 63.50 | 0.00 |
| TRINITY_I7MHY7_TETTS/368-473       | I7MHY7.1     | PF00085.18 | 63.50 | 0.00 |
| TRINITY_Q22AX2_TETTS/19-81         | Q22AX2.3     | PF02320.14 | 63.50 | 0.00 |
| TRINITY_G0QLU3_ICHMG/4-88          | G0QLU3.1     | PF01780.17 | 63.50 | 0.00 |
| TRINITY_G0QLU3_ICHMG/4-88          | G0QLU3.1     | PF01780.17 | 63.50 | 0.00 |
| TRINITY_D8Twx1_VOLCA/342-415       | D8Twx1.1     | PF03451.12 | 63.50 | 0.00 |
| TRINITY_A8JFG8_CHLRE/29-537        | A8JFG8.1     | PF00759.17 | 63.50 | 0.00 |
| TRINITY_D8UB72_VOLCA/8-263         | D8UB72.1     | PF08433.8; | 63.50 | 0.00 |
| TRINITY_A8IXP1_CHLRE/1840-2022     | A8IXP1.1     | PF00211.18 | 63.50 | 0.00 |
| TRINITY_D8TTV8_VOLCA/81-324        | D8TTV8.1     | PF00233.17 | 63.50 | 0.00 |
| TRINITY_M5VM98_PRUPE/561-708       | M5VM98.1     | PF00078.25 | 63.50 | 0.00 |
| TRINITY_G0QP92_ICHMG/6-205         | G0QP92.1     | PF00227.24 | 63.50 | 0.00 |
| TRINITY_A0C010_PARTE/19-116        | A0C010.1     | PF00034.19 | 63.40 | 0.00 |
| TRINITY_W6V622_ECHGR/367-406       | W6V622.1     | PF00400.30 | 63.40 | 0.00 |
| TRINITY_D8U578_VOLCA/555-682       | D8U578.1     | PF16898.3; | 63.40 | 0.00 |
| TRINITY_L8HDU4_ACACA/23-77         | L8HDU4.1     | PF10152.7; | 63.40 | 0.00 |
| TRINITY_A0A087SCI6_AUXPR/115-156   | A0A087SCI6.1 | PF0051     | 63.40 | 0.00 |
| TRINITY_A0A078AQ35_STYLE/5-179     | A0A078AQ35.1 | PF0002     | 63.40 | 0.00 |
| TRINITY_G0Qsx0_ICHMG/7-148         | G0Qsx0.1     | PF05517.10 | 63.40 | 0.00 |
| TRINITY_A9V2B9_MONBE/227-497       | A9V2B9.1     | PF13598.4; | 63.40 | 0.00 |
| TRINITY_U5H3G6_USTV1/2-375         | U5H3G6.1     | PF00022.17 | 63.40 | 0.00 |
| TRINITY_G7Y3S9_CLOSI/3-391         | G7Y3S9.1     | PF00022.17 | 63.40 | 0.00 |
| TRINITY_Q22NA0_TETTS/1407-1551     | Q22NA0.2     | PF00005.25 | 63.40 | 0.00 |
| TRINITY_D8UGV1_VOLCA/161-275       | D8UGV1.1     | PF00583.23 | 63.40 | 0.00 |
| TRINITY_E5SFZ6_TRISP/46-134        | E5SFZ6.1     | PF15663.3; | 63.40 | 0.00 |
| TRINITY_A0A068SB59_9FUNG/249-388   | A0A068SB59.1 | PF0027     | 63.40 | 0.00 |
| TRINITY_M4A3Z5_XIPMA/37-87         | M4A3Z5.1     | PF06446.10 | 63.40 | 0.00 |
| TRINITY_PAN2_SCHPO/860-1033        | Q09798.2     | PF00929.22 | 63.40 | 0.00 |
| TRINITY_M3JB19_CANMX/6-167         | M3JB19.1     | PF00071.20 | 63.40 | 0.00 |
| TRINITY_D8TUM3_VOLCA/223-475       | D8TUM3.1     | PF00266.17 | 63.40 | 0.00 |
| TRINITY_PIRA_DICDI/393-1224        | Q6UK63.1     | PF05994.9; | 63.40 | 0.00 |
| TRINITY_A8J2Y1_CHLRE/341-490       | A8J2Y1.1     | PF13532.4; | 63.40 | 0.00 |
| TRINITY_B6IMU6_RHOCS/29-494        | B6IMU6.1     | PF00171.20 | 63.40 | 0.00 |
| TRINITY_J9J9Q5_9SPIT/339-382       | J9J9Q5.1     | PF00569.15 | 63.40 | 0.00 |
| TRINITY_T0RJF7_9STRA/23-99         | T0RJF7.1     | PF01253.20 | 63.40 | 0.00 |
| TRINITY_D8TP18_VOLCA/1-249         | D8TP18.1     | PF00795.20 | 63.40 | 0.00 |
| TRINITY_L8HFT5_ACACA/271-321       | L8HFT5.1     | PF02272.17 | 63.40 | 0.00 |
| TRINITY_B3SAC1_TRIAD/191-351       | B3SAC1.1     | PF02731.13 | 63.40 | 0.00 |
| TRINITY_A0A0G4EI57_9ALVE/1306-1711 | A0A0G4EI57.1 | PF0839     | 63.40 | 0.00 |
| TRINITY_A0A024RE44_VAVCU/259-521   | A0A024RE44.1 | PF0058     | 63.40 | 0.00 |
| TRINITY_J9IG73_9SPIT/121-352       | J9IG73.1     | PF00009.25 | 63.40 | 0.00 |
| TRINITY_D8UF21_VOLCA/109-298       | D8UF21.1     | PF16575.3; | 63.40 | 0.00 |
| TRINITY_Q7MGD2_VIBVY/76-156        | Q7MGD2.1     | PF01035.18 | 63.40 | 0.00 |
| TRINITY_Q22CT9_TETTS/7-296         | Q22CT9.3     | PF00069.23 | 63.40 | 0.00 |
| TRINITY_A8PC17_COPC7/8-56          | A8PC17.1     | PF01679.15 | 63.40 | 0.00 |
| TRINITY_A8JGN0_CHLRE/32-131        | A8JGN0.1     | PF04430.12 | 63.40 | 0.00 |
| TRINITY_D3B8N7_POLPA/197-466       | D3B8N7.1     | PF00069.23 | 63.40 | 0.00 |
| TRINITY_A8IRC0_CHLRE/5-225         | A8IRC0.1     | PF04157.14 | 63.40 | 0.00 |
| TRINITY_FEN11_PARTE/1-111          | A0CXT3.1     | PF00752.15 | 63.40 | 0.00 |
| TRINITY_I0YPW0_9CHLO/282-626       | I0YPW0.1     | PF00493.21 | 63.40 | 0.00 |
| TRINITY_F4P3W7_BATDJ/274-383       | F4P3W7.1     | PF01398.19 | 63.40 | 0.00 |
| TRINITY_A8HSD3_CHLRE/90-188        | A8HSD3.1     | PF00383.21 | 63.40 | 0.00 |
| TRINITY_A8JGL3_CHLRE/53-302        | A8JGL3.1     | PF01370.19 | 63.40 | 0.00 |
| TRINITY_D8UHI9_VOLCA/117-368       | D8UHI9.1     | PF12697.5; | 63.40 | 0.00 |
| TRINITY_E1ZFR6_CHLVA/491-840       | E1ZFR6.1     | PF00773.17 | 63.40 | 0.00 |

|                                  |                     |       |      |
|----------------------------------|---------------------|-------|------|
| TRINITY_L8GIF1_ACACA/60-448      | L8GIF1.1 PF01979.18 | 63.40 | 0.00 |
| TRINITY_B3SC84_TRIAD/226-266     | B3SC84.1 PF13639.4; | 63.40 | 0.00 |
| TRINITY_A0A0D3FK07_9ORYZ/574-631 | A0A0D3FK07.1 PF0837 | 63.40 | 0.00 |
| TRINITY_A0A0G4J8S9_PLABS/29-325  | A0A0G4J8S9.1 PF0799 | 63.40 | 0.00 |
| TRINITY_A8J979_CHLRE/177-389     | A8J979.1 PF02786.15 | 63.40 | 0.00 |
| TRINITY_D8TKR0_VOLCA/126-399     | D8TKR0.1 PF01189.15 | 63.40 | 0.00 |
| TRINITY_E1Z854_CHLVA/803-925     | E1Z854.1 PF03109.14 | 63.40 | 0.00 |
| TRINITY_F0ZN13_DICPU/38-111      | F0ZN13.1 PF01722.16 | 63.40 | 0.00 |
| TRINITY_A0EDI7_PARTE/1191-1469   | A0EDI7.1 PF00069.23 | 63.40 | 0.00 |
| TRINITY_Q23K21_TETTS/369-636     | Q23K21.2 PF00487.22 | 63.40 | 0.00 |
| TRINITY_RDRP_ASPVP/1752-2169     | Q64962.1 PF00978.19 | 63.40 | 0.00 |
| TRINITY_M1A3V7_SOLTU/2-114       | M1A3V7.1 PF00183.16 | 63.30 | 0.00 |
| TRINITY_A7GU23_BACCN/2-118       | A7GU23.1 PF00903.23 | 63.30 | 0.00 |
| TRINITY_A0DJ75_PARTE/483-760     | A0DJ75.1 PF00702.24 | 63.30 | 0.00 |
| TRINITY_A0A0M2R937_9PROT/8-99    | A0A0M2R937.1 PF0132 | 63.30 | 0.00 |
| TRINITY_M2Y724_GALSU/9-281       | M2Y724.1 PF00069.23 | 63.30 | 0.00 |
| TRINITY_Q234R4_TETTS/265-337     | Q234R4.3 PF00173.26 | 63.30 | 0.00 |
| TRINITY_A0A0D2X5C2_CAPO3/59-309  | A0A0D2X5C2.1 PF0037 | 63.30 | 0.00 |
| TRINITY_H2TE24_TAKRU/18-131      | H2TE24.1 PF07686.15 | 63.30 | 0.00 |
| TRINITY_D3BAR7_POLPA/506-673     | D3BAR7.1 PF00270.27 | 63.30 | 0.00 |
| TRINITY_A0E5F0_PARTE/57-215      | A0E5F0.1 PF03034.13 | 63.30 | 0.00 |
| TRINITY_A0EFQ7_PARTE/75-330      | A0EFQ7.1 PF00069.23 | 63.30 | 0.00 |
| TRINITY_L1K3Q8_GUITH/147-198     | L1K3Q8.1 PF00249.29 | 63.30 | 0.00 |
| TRINITY_A0A0R4IU56_DANRE/1-241   | A0A0R4IU56.1 PF0059 | 63.30 | 0.00 |
| TRINITY_D3B058_POLPA/665-713     | D3B058.1 PF17102.3; | 63.30 | 0.00 |
| TRINITY_Q5AWT4_EMENI/461-784     | Q5AWT4.1 PF13086.4; | 63.30 | 0.00 |
| TRINITY_H3HAJ2_PHYRM/359-478     | H3HAJ2.1 PF00665.24 | 63.30 | 0.00 |
| TRINITY_Q23DI7_TETTS/1868-2219   | Q23DI7.2 PF00443.27 | 63.30 | 0.00 |
| TRINITY_D3BJ98_POLPA/447-728     | D3BJ98.1 PF00176.21 | 63.30 | 0.00 |
| TRINITY_E1Z419_CHLVA/40-506      | E1Z419.1 PF00171.20 | 63.30 | 0.00 |
| TRINITY_A8JII1_CHLRE/35-212      | A8JII1.1 PF09439.8; | 63.30 | 0.00 |
| TRINITY_C3XZD0_BRAFL/41-209      | C3XZD0.1 PF10263.7; | 63.30 | 0.00 |
| TRINITY_D8UF13_VOLCA/742-963     | D8UF13.1 PF13725.4; | 63.30 | 0.00 |
| TRINITY_Q22RC8_TETTS/135-363     | Q22RC8.1 PF00557.22 | 63.30 | 0.00 |
| TRINITY_Q52WZ8_CHLRE/11-107      | Q52WZ8.1 PF06294.9; | 63.30 | 0.00 |
| TRINITY_E9G068_DAPPU/1-436       | E9G068.1 PF00996.16 | 63.30 | 0.00 |
| TRINITY_A8IZ85_CHLRE/350-640     | A8IZ85.1 PF02836.15 | 63.30 | 0.00 |
| TRINITY_G0QLE7_ICHMG/123-414     | G0QLE7.1 PF00009.25 | 63.30 | 0.00 |
| TRINITY_G0QKJ0_ICHMG/93-465      | G0QKJ0.1 PF01546.26 | 63.30 | 0.00 |
| TRINITY_Q228S4_TETTS/411-674     | Q228S4.2 PF00069.23 | 63.30 | 0.00 |
| TRINITY_L8H3G3_ACACA/12-254      | L8H3G3.1 PF00348.15 | 63.30 | 0.00 |
| TRINITY_A8J5R5_CHLRE/1031-1196   | A8J5R5.1 PF01504.16 | 63.30 | 0.00 |
| TRINITY_A8JIJ9_CHLRE/11-261      | A8JIJ9.1 PF00069.23 | 63.30 | 0.00 |
| TRINITY_D8TWI2_VOLCA/58-251      | D8TWI2.1 PF01928.19 | 63.30 | 0.00 |
| TRINITY_F4QEF1_DICFS/291-617     | F4QEF1.1 PF00676.18 | 63.30 | 0.00 |
| TRINITY_A8ICT4_CHLRE/7-55        | A8ICT4.1 PF04627.11 | 63.30 | 0.00 |
| TRINITY_C1N2K6_MICPC/50-260      | C1N2K6.1 PF00590.18 | 63.30 | 0.00 |
| TRINITY_A0A0K9P8S9_ZOSMR/111-254 | A0A0K9P8S9.1 PF0303 | 63.30 | 0.00 |
| TRINITY_E1Z9L2_CHLVA/59-244      | E1Z9L2.1 PF00350.21 | 63.30 | 0.00 |
| TRINITY_D8TZN2_VOLCA/94-268      | D8TZN2.1 PF01595.18 | 63.30 | 0.00 |
| TRINITY_Q234E6_TETTS/453-713     | Q234E6.2 PF00069.23 | 63.30 | 0.00 |
| TRINITY_I7MIX1_TETTS/178-297     | I7MIX1.2 PF02373.20 | 63.30 | 0.00 |
| TRINITY_D8UF85_VOLCA/179-263     | D8UF85.1 PF05699.12 | 63.30 | 0.00 |
| TRINITY_Q23DW6_TETTS/27-380      | Q23DW6.1 PF16499.3; | 63.20 | 0.00 |
| TRINITY_Q23K54_TETTS/999-1188    | Q23K54.1 PF00488.19 | 63.20 | 0.00 |
| TRINITY_D8MOV1_BLAHO/40-78       | D8MOV1.1 PF00400.30 | 63.20 | 0.00 |
| TRINITY_A0A078B9J1_STYLE/6-262   | A0A078B9J1.1 PF0006 | 63.20 | 0.00 |
| TRINITY_F8EPR6_RUNSL/17-162      | F8EPR6.1 PF00106.23 | 63.20 | 0.00 |
| TRINITY_L1I7I0_GUITH/5-178       | L1I7I0.1 PF00071.20 | 63.20 | 0.00 |
| TRINITY_A0A0G4H1C2_9ALVE/10-381  | A0A0G4H1C2.1 PF0002 | 63.20 | 0.00 |
| TRINITY_A3DCA3_CLOTH/160-383     | A3DCA3.1 PF03949.13 | 63.20 | 0.00 |

|                                  |              |            |       |      |
|----------------------------------|--------------|------------|-------|------|
| TRINITY_H0VVA8_CAVPO/123-413     | H0VVA8.1     | PF01557.16 | 63.20 | 0.00 |
| TRINITY_A7S107_NEMVE/113-152     | A7S107.1     | PF00400.30 | 63.20 | 0.00 |
| TRINITY_I0YNI5_9CHLO/35-101      | I0YNI5.1     | PF00498.24 | 63.20 | 0.00 |
| TRINITY_A8ISQ5_CHLRE/2275-2409   | A8ISQ5.1     | PF00004.27 | 63.20 | 0.00 |
| TRINITY_O24426_CHLRE/6-380       | O24426.1     | PF00022.17 | 63.20 | 0.00 |
| TRINITY_A8JDF6_CHLRE/27-233      | A8JDF6.1     | PF03741.14 | 63.20 | 0.00 |
| TRINITY_D3BL62_POLPA/284-465     | D3BL62.1     | PF02146.15 | 63.20 | 0.00 |
| TRINITY_A0A087SS47_AUXPR/18-112  | A0A087SS47.1 | PF0612     | 63.20 | 0.00 |
| TRINITY_Q229Y3_TETTS/2010-2423   | Q229Y3.2     | PF00856.26 | 63.20 | 0.00 |
| TRINITY_A8MK44_ALKOO/8-124       | A8MK44.1     | PF13793.4; | 63.20 | 0.00 |
| TRINITY_TTL3E_TETTS/968-1246     | Q23AS2.1     | PF03133.13 | 63.20 | 0.00 |
| TRINITY_I0YVI1_9CHLO/44-119      | I0YVI1.1     | PF01066.19 | 63.20 | 0.00 |
| TRINITY_D7TJ66_VITVI/10-48       | D7TJ66.1     | PF00400.30 | 63.20 | 0.00 |
| TRINITY_J9FM16_9SPIT/6-163       | J9FM16.1     | PF00790.17 | 63.20 | 0.00 |
| TRINITY_A0C636_PARTE/191-324     | A0C636.1     | PF14580.4; | 63.20 | 0.00 |
| TRINITY_D2VE41_NAAGR/1-342       | D2VE41.1     | PF00022.17 | 63.20 | 0.00 |
| TRINITY_A9TYS8_PHYPA/8-96        | A9TYS8.1     | PF00125.22 | 63.20 | 0.00 |
| TRINITY_A0A087SGF1_AUXPR/12-87   | A0A087SGF1.1 | PF1015     | 63.20 | 0.00 |
| TRINITY_D8TU89_VOLCA/319-430     | D8TU89.1     | PF00787.22 | 63.20 | 0.00 |
| TRINITY_G0QYS8_ICHMG/16-216      | G0QYS8.1     | PF00069.23 | 63.20 | 0.00 |
| TRINITY_L8HG59_ACACA/44-379      | L8HG59.1     | PF07992.12 | 63.20 | 0.00 |
| TRINITY_D8TKC8_VOLCA/6-187       | D8TKC8.1     | PF12263.6; | 63.20 | 0.00 |
| TRINITY_A8J688_CHLRE/146-349     | A8J688.1     | PF00106.23 | 63.20 | 0.00 |
| TRINITY_D8UBS2_VOLCA/5-73        | D8UBS2.1     | PF13921.4; | 63.20 | 0.00 |
| TRINITY_E1ZAL6_CHLVA/652-690     | E1ZAL6.1     | PF00400.30 | 63.20 | 0.00 |
| TRINITY_A9TT36_PHYPA/88-262      | A9TT36.1     | PF10602.7; | 63.20 | 0.00 |
| TRINITY_K8GGY5_9CYAN/3-257       | K8GGY5.1     | PF01926.21 | 63.20 | 0.00 |
| TRINITY_D8UJA4_VOLCA/186-243     | D8UJA4.1     | PF03909.15 | 63.20 | 0.00 |
| TRINITY_D8UJ40_VOLCA/721-962     | D8UJ40.1     | PF00122.18 | 63.20 | 0.00 |
| TRINITY_Q22TJ1_TETTS/178-486     | Q22TJ1.1     | PF00365.18 | 63.20 | 0.00 |
| TRINITY_A8IYU9_CHLRE/9-204       | A8IYU9.1     | PF05648.12 | 63.20 | 0.00 |
| TRINITY_A9PD24_POPTR/207-295     | A9PD24.1     | PF13813.4; | 63.20 | 0.00 |
| TRINITY_D8U9Z0_VOLCA/954-1167    | D8U9Z0.1     | PF05153.13 | 63.20 | 0.00 |
| TRINITY_A8JES7_CHLRE/33-169      | A8JES7.1     | PF00179.24 | 63.20 | 0.00 |
| TRINITY_M2WZS1_GALSU/23-243      | M2WZS1.1     | PF00817.18 | 63.20 | 0.00 |
| TRINITY_A8J3R3_CHLRE/414-557     | A8J3R3.1     | PF13602.4; | 63.20 | 0.00 |
| TRINITY_A0A087SL28_AUXPR/20-209  | A0A087SL28.1 | PF0249     | 63.20 | 0.00 |
| TRINITY_C1MY91_MICPC/103-141     | C1MY91.1     | PF00400.30 | 63.20 | 0.00 |
| TRINITY_D8UFN6_VOLCA/191-315     | D8UFN6.1     | PF00241.18 | 63.20 | 0.00 |
| TRINITY_A0BMI9_PARTE/267-334     | A0BMI9.1     | PF00498.24 | 63.20 | 0.00 |
| TRINITY_A0CKF8_PARTE/1118-1269   | A0CKF8.1     | PF00005.25 | 63.20 | 0.00 |
| TRINITY_A8I6F0_CHLRE/131-262     | A8I6F0.1     | PF00782.18 | 63.20 | 0.00 |
| TRINITY_D8RCY3_SELML/4-188       | D8RCY3.1     | PF01351.16 | 63.20 | 0.00 |
| TRINITY_D8TQU3_VOLCA/613-764     | D8TQU3.1     | PF09127.9; | 63.20 | 0.00 |
| TRINITY_D8S9R5_SELML/151-188     | D8S9R5.1     | PF00400.30 | 63.20 | 0.00 |
| TRINITY_D8UBB8_VOLCA/40-453      | D8UBB8.1     | PF01406.17 | 63.20 | 0.00 |
| TRINITY_A8JGX6_CHLRE/3-96        | A8JGX6.1     | PF01250.15 | 63.20 | 0.00 |
| TRINITY_D8TY45_VOLCA/121-196     | D8TY45.1     | PF03703.12 | 63.20 | 0.00 |
| TRINITY_E1ZNE5_CHLVA/1-246       | E1ZNE5.1     | PF00225.21 | 63.20 | 0.00 |
| TRINITY_A0A0D2M173_GOSRA/148-215 | A0A0D2M173.1 | PF0049     | 63.20 | 0.00 |
| TRINITY_G0QKD4_ICHMG/49-354      | G0QKD4.1     | PF00899.19 | 63.20 | 0.00 |
| TRINITY_D8UEF4_VOLCA/478-657     | D8UEF4.1     | PF07724.12 | 63.20 | 0.00 |
| TRINITY_H9GJL0_ANOCA/451-488     | H9GJL0.2     | PF00400.30 | 63.20 | 0.00 |
| TRINITY_A0A0F7JRH6_9DEIO/27-525  | A0A0F7JRH6.1 | PF0013     | 63.20 | 0.00 |
| TRINITY_A0A0J8CJE8_BETVU/66-103  | A0A0J8CJE8.1 | PF0142     | 63.20 | 0.00 |
| TRINITY_A0C0W6_PARTE/7-154       | A0C0W6.1     | PF00056.21 | 63.10 | 0.00 |
| TRINITY_G0R3Z3_ICHMG/38-122      | G0R3Z3.1     | PF16561.3; | 63.10 | 0.00 |
| TRINITY_F4Q976_DICFS/77-141      | F4Q976.1     | PF00808.21 | 63.10 | 0.00 |
| TRINITY_A7RQX5_NEMVE/83-227      | A7RQX5.1     | PF02252.16 | 63.10 | 0.00 |
| TRINITY_Q21EK4_SACD2/60-238      | Q21EK4.1     | PF13847.4; | 63.10 | 0.00 |
| TRINITY_L8H813_ACACA/26-277      | L8H813.1     | PF00069.23 | 63.10 | 0.00 |

|                                  |              |            |       |      |
|----------------------------------|--------------|------------|-------|------|
| TRINITY_A8J629_CHLRE/49-208      | A8J629.1     | PF01699.22 | 63.10 | 0.00 |
| TRINITY_I0YQJ9_9CHLO/124-485     | I0YQJ9.1     | PF01594.14 | 63.10 | 0.00 |
| TRINITY_A8J6F4_CHLRE/46-300      | A8J6F4.1     | PF00474.15 | 63.10 | 0.00 |
| TRINITY_L8H1T2_ACACA/1503-1836   | L8H1T2.1     | PF01979.18 | 63.10 | 0.00 |
| TRINITY_D8UGZ5_VOLCA/112-246     | D8UGZ5.1     | PF15305.4; | 63.10 | 0.00 |
| TRINITY_A8JH46_CHLRE/26-513      | A8JH46.1     | PF01039.20 | 63.10 | 0.00 |
| TRINITY_I0YYU3_9CHLO/67-131      | I0YYU3.1     | PF01066.19 | 63.10 | 0.00 |
| TRINITY_A8IW16_CHLRE/695-1085    | A8IW16.1     | PF03372.21 | 63.10 | 0.00 |
| TRINITY_H3G886_PHYRM/24-302      | H3G886.1     | PF00814.23 | 63.10 | 0.00 |
| TRINITY_E1Z786_CHLVA/443-591     | E1Z786.1     | PF02775.19 | 63.10 | 0.00 |
| TRINITY_K9QZ12_NOSS7/12-223      | K9QZ12.1     | PF01379.18 | 63.10 | 0.00 |
| TRINITY_A8JCE7_CHLRE/177-241     | A8JCE7.1     | PF00076.20 | 63.10 | 0.00 |
| TRINITY_E1ZGM8_CHLVA/298-409     | E1ZGM8.1     | PF00004.27 | 63.10 | 0.00 |
| TRINITY_D8TSL7_VOLCA/63-224      | D8TSL7.1     | PF00160.19 | 63.10 | 0.00 |
| TRINITY_L8GNA6_ACACA/12-76       | L8GNA6.1     | PF13499.4; | 63.10 | 0.00 |
| TRINITY_A0A075ASD8_9FUNG/454-785 | A0A075ASD8.1 | PF0077     | 63.10 | 0.00 |
| TRINITY_D8UE04_VOLCA/56-615      | D8UE04.1     | PF02990.14 | 63.10 | 0.00 |
| TRINITY_I0YZG5_9CHLO/15-98       | I0YZG5.1     | PF00887.17 | 63.10 | 0.00 |
| TRINITY_DNAJ_CLOCE/6-68          | B8I304.1     | PF00226.29 | 63.00 | 0.00 |
| TRINITY_A0A0G4KUT2_9PEZI/4-132   | A0A0G4KUT2.1 | PF1587     | 63.00 | 0.00 |
| TRINITY_D7FM58_ECTSI/182-316     | D7FM58.1     | PF00730.23 | 63.00 | 0.00 |
| TRINITY_G0QU93_ICHMG/188-379     | G0QU93.1     | PF00227.24 | 63.00 | 0.00 |
| TRINITY_B3QYP7_CHLT3/38-191      | B3QYP7.1     | PF01625.19 | 63.00 | 0.00 |
| TRINITY_A0A0D2X5I7_CAPO3/54-299  | A0A0D2X5I7.1 | PF1060     | 63.00 | 0.00 |
| TRINITY_J9IXT9_9SPIT/144-217     | J9IXT9.1     | PF13499.4; | 63.00 | 0.00 |
| TRINITY_A0A0E0BMZ8_9ORYZ/15-114  | A0A0E0BMZ8.1 | PF0023     | 63.00 | 0.00 |
| TRINITY_A0A0G4IZR2_PLABS/16-150  | A0A0G4IZR2.1 | PF0017     | 63.00 | 0.00 |
| TRINITY_A8IL90_CHLRE/74-226      | A8IL90.1     | PF12638.5; | 63.00 | 0.00 |
| TRINITY_Q22BV7_TETTS/174-334     | Q22BV7.2     | PF00120.22 | 63.00 | 0.00 |
| TRINITY_A0A0G4GQ90_9ALVE/50-668  | A0A0G4GQ90.1 | PF0044     | 63.00 | 0.00 |
| TRINITY_D8U6Q6_VOLCA/22-225      | D8U6Q6.1     | PF01105.22 | 63.00 | 0.00 |
| TRINITY_I7M9W8_TETTS/2-179       | I7M9W8.2     | PF17135.2; | 63.00 | 0.00 |
| TRINITY_A0A0G4KUT2_9PEZI/4-132   | A0A0G4KUT2.1 | PF1587     | 63.00 | 0.00 |
| TRINITY_A8HX98_CHLRE/44-144      | A8HX98.1     | PF00027.27 | 63.00 | 0.00 |
| TRINITY_A0A067NBV4_PLEOS/4-111   | A0A067NBV4.1 | PF0025     | 63.00 | 0.00 |
| TRINITY_G0QLX6_ICHMG/31-195      | G0QLX6.1     | PF03031.16 | 63.00 | 0.00 |
| TRINITY_A8I4G8_CHLRE/5-77        | A8I4G8.1     | PF05251.10 | 63.00 | 0.00 |
| TRINITY_D8UIY0_VOLCA/88-344      | D8UIY0.1     | PF01207.15 | 63.00 | 0.00 |
| TRINITY_J9J4F0_9SPIT/9-265       | J9J4F0.1     | PF00069.23 | 63.00 | 0.00 |
| TRINITY_G0R323_ICHMG/28-216      | G0R323.1     | PF00227.24 | 63.00 | 0.00 |
| TRINITY_A0CEN2_PARTE/1195-1399   | A0CEN2.1     | PF00069.23 | 63.00 | 0.00 |
| TRINITY_D8U258_VOLCA/26-155      | D8U258.1     | PF01184.17 | 63.00 | 0.00 |
| TRINITY_J9I4F7_9SPIT/364-418     | J9I4F7.1     | PF00046.27 | 63.00 | 0.00 |
| TRINITY_D8U380_VOLCA/93-229      | D8U380.1     | PF01569.19 | 63.00 | 0.00 |
| TRINITY_F4QBH8_DICFS/1949-2123   | F4QBH8.1     | PF01504.16 | 63.00 | 0.00 |
| TRINITY_RL23A_TETTS/69-142       | P0DJ57.1     | PF00276.18 | 63.00 | 0.00 |
| TRINITY_A8IMV6_CHLRE/56-113      | A8IMV6.1     | PF03109.14 | 63.00 | 0.00 |
| TRINITY_Q23QY4_TETTS/796-1116    | Q23QY4.2     | PF03133.13 | 63.00 | 0.00 |
| TRINITY_U9UZZ9_RHIID/23-241      | U9UZZ9.1     | PF00557.22 | 63.00 | 0.00 |
| TRINITY_L1JMU5_GUITH/70-166      | L1JMU5.1     | PF12755.5; | 63.00 | 0.00 |
| TRINITY_D8U338_VOLCA/274-367     | D8U338.1     | PF05705.12 | 63.00 | 0.00 |
| TRINITY_D8TLH6_VOLCA/190-248     | D8TLH6.1     | PF07529.11 | 63.00 | 0.00 |
| TRINITY_L1ISC9_GUITH/1329-1522   | L1ISC9.1     | PF13087.4; | 63.00 | 0.00 |
| TRINITY_I0YLB0_9CHLO/54-356      | I0YLB0.1     | PF01866.15 | 63.00 | 0.00 |
| TRINITY_I0Z0B7_9CHLO/68-241      | I0Z0B7.1     | PF10602.7; | 63.00 | 0.00 |
| TRINITY_F0ZQQ8_DICPU/161-436     | F0ZQQ8.1     | PF00928.19 | 63.00 | 0.00 |
| TRINITY_D8TGS7_VOLCA/23-187      | D8TGS7.1     | PF13023.4; | 63.00 | 0.00 |
| TRINITY_L8GYS4_ACACA/31-525      | L8GYS4.1     | PF00118.22 | 63.00 | 0.00 |
| TRINITY_A8I975_CHLRE/1-86        | A8I975.1     | PF00153.25 | 63.00 | 0.00 |
| TRINITY_S2KHY2_MUCC1/130-422     | S2KHY2.1     | PF00012.18 | 63.00 | 0.00 |
| TRINITY_D8SD29_SELML/9-310       | D8SD29.1     | PF00069.23 | 63.00 | 0.00 |

|                                  |              |            |       |      |
|----------------------------------|--------------|------------|-------|------|
| TRINITY_Q5CPQ8_CRYPI/271-319     | Q5CPQ8.1     | PF00628.27 | 63.00 | 0.00 |
| TRINITY_A8HWS1_CHLRE/874-1281    | A8HWS1.1     | PF08393.11 | 63.00 | 0.00 |
| TRINITY_A8J510_CHLRE/41-713      | A8J510.1     | PF00063.19 | 63.00 | 0.00 |
| TRINITY_A4VE98_TETTS/337-580     | A4VE98.1     | PF00112.21 | 63.00 | 0.00 |
| TRINITY_A8I3V9_CHLRE/1060-1326   | A8I3V9.1     | PF12775.5; | 63.00 | 0.00 |
| TRINITY_Q248E9_TETTS/284-336     | Q248E9.1     | PF13418.4; | 63.00 | 0.00 |
| TRINITY_A0A0A1NFX3_9FUNG/158-239 | A0A0A1NFX3.1 | PF0268     | 63.00 | 0.00 |
| TRINITY_Q5CPQ8_CRYPI/271-319     | Q5CPQ8.1     | PF00628.27 | 63.00 | 0.00 |
| TRINITY_S3ECM3_GLAL2/20-228      | S3ECM3.1     | PF01557.16 | 63.00 | 0.00 |
| TRINITY_C6XYG7_PEDHD/132-254     | C6XYG7.1     | PF01678.17 | 63.00 | 0.00 |
| TRINITY_G0R3C8_ICHMG/804-1213    | G0R3C8.1     | PF08393.11 | 62.90 | 0.00 |
| TRINITY_S8CJ07_9LAMI/313-454     | S8CJ07.1     | PF01926.21 | 62.90 | 0.00 |
| TRINITY_I7M372_TETTS/24-109      | I7M372.1     | PF00439.23 | 62.90 | 0.00 |
| TRINITY_A0E666_PARTE/19-269      | A0E666.1     | PF00248.19 | 62.90 | 0.00 |
| TRINITY_F8KYZ3_PARAV/9-533       | F8KYZ3.1     | PF01274.20 | 62.90 | 0.00 |
| TRINITY_H6SIN7_RHOPH/14-298      | H6SIN7.1     | PF02934.13 | 62.90 | 0.00 |
| TRINITY_G0R128_ICHMG/15-444      | G0R128.1     | PF04209.11 | 62.90 | 0.00 |
| TRINITY_A0A0D2WHX7_CAPO3/174-264 | A0A0D2WHX7.1 | PF0195     | 62.90 | 0.00 |
| TRINITY_L8HFB9_ACACA/8-70        | L8HFB9.1     | PF00076.20 | 62.90 | 0.00 |
| TRINITY_B6AHC4_CRYMR/589-680     | B6AHC4.1     | PF02212.16 | 62.90 | 0.00 |
| TRINITY_W4XHX1_STRPU/26-367      | W4XHX1.1     | PF00270.27 | 62.90 | 0.00 |
| TRINITY_D3AXW6_POLPA/88-287      | D3AXW6.1     | PF07002.14 | 62.90 | 0.00 |
| TRINITY_G4CNT7_9NEIS/3-185       | G4CNT7.1     | PF01965.22 | 62.90 | 0.00 |
| TRINITY_A8JBH7_CHLRE/27-131      | A8JBH7.1     | PF00085.18 | 62.90 | 0.00 |
| TRINITY_A8J098_CHLRE/134-233     | A8J098.1     | PF13864.4; | 62.90 | 0.00 |
| TRINITY_Q3SD32_PARTE/10-176      | Q3SD32.1     | PF00071.20 | 62.90 | 0.00 |
| TRINITY_D8U9U4_VOLCA/6-78        | D8U9U4.1     | PF05915.10 | 62.90 | 0.00 |
| TRINITY_E1Z4R7_CHLVA/63-124      | E1Z4R7.1     | PF00013.27 | 62.90 | 0.00 |
| TRINITY_I7MB24_TETTS/12-253      | I7MB24.2     | PF01370.19 | 62.90 | 0.00 |
| TRINITY_I7ML74_TETTS/5678-6228   | I7ML74.2     | PF00899.19 | 62.90 | 0.00 |
| TRINITY_G0R3B1_ICHMG/35-559      | G0R3B1.1     | PF00022.17 | 62.90 | 0.00 |
| TRINITY_D8TPI3_VOLCA/152-267     | D8TPI3.1     | PF00753.25 | 62.90 | 0.00 |
| TRINITY_A0BKF7_PARTE/129-420     | A0BKF7.1     | PF01557.16 | 62.90 | 0.00 |
| TRINITY_D8TSA2_VOLCA/92-565      | D8TSA2.1     | PF05140.12 | 62.90 | 0.00 |
| TRINITY_I1FI58_AMPQE/22-257      | I1FI58.1     | PF00262.16 | 62.90 | 0.00 |
| TRINITY_B3RKH2_TRIAD/61-247      | B3RKH2.1     | PF00149.26 | 62.90 | 0.00 |
| TRINITY_I7MHS8_TETTS/213-274     | I7MHS8.2     | PF12906.5; | 62.90 | 0.00 |
| TRINITY_I7M2Q0_TETTS/35-469      | I7M2Q0.2     | PF00999.19 | 62.90 | 0.00 |
| TRINITY_L8HA37_ACACA/375-633     | L8HA37.1     | PF00069.23 | 62.90 | 0.00 |
| TRINITY_A8J3W4_CHLRE/78-147      | A8J3W4.1     | PF13499.4; | 62.90 | 0.00 |
| TRINITY_I0YQS8_9CHLO/608-694     | I0YQS8.1     | PF02077.13 | 62.90 | 0.00 |
| TRINITY_A8I7W6_CHLRE/7-257       | A8I7W6.1     | PF03029.15 | 62.90 | 0.00 |
| TRINITY_A8J6R9_CHLRE/56-154      | A8J6R9.1     | PF00276.18 | 62.90 | 0.00 |
| TRINITY_A0A0M9G5U1_9TRYP/169-257 | A0A0M9G5U1.1 | PF1289     | 62.90 | 0.00 |
| TRINITY_D8TU20_VOLCA/455-524     | D8TU20.1     | PF00076.20 | 62.90 | 0.00 |
| TRINITY_J3B5Q2_9BACL/17-217      | J3B5Q2.1     | PF01596.15 | 62.90 | 0.00 |
| TRINITY_D8TN85_VOLCA/552-651     | D8TN85.1     | PF05517.10 | 62.90 | 0.00 |
| TRINITY_I7MDL9_TETTS/3-99        | I7MDL9.2     | PF03650.11 | 62.90 | 0.00 |
| TRINITY_D3BK16_POLPA/30-526      | D3BK16.1     | PF00118.22 | 62.90 | 0.00 |
| TRINITY_I1QGW5_ORYGL/64-128      | I1QGW5.1     | PF00076.20 | 62.90 | 0.00 |
| TRINITY_I7M9J2_TETTS/3860-4581   | I7M9J2.1     | PF03028.13 | 62.90 | 0.00 |
| TRINITY_D8TTL6_VOLCA/6-263       | D8TTL6.1     | PF00069.23 | 62.90 | 0.00 |
| TRINITY_I2GJL0_9BACT/4-261       | I2GJL0.1     | PF00108.21 | 62.90 | 0.00 |
| TRINITY_K4AZ06_SOLLC/54-343      | K4AZ06.1     | PF00176.21 | 62.90 | 0.00 |
| TRINITY_A0CR10_PARTE/25-70       | A0CR10.1     | PF02953.13 | 62.80 | 0.00 |
| TRINITY_J9IP56_9SPIT/145-317     | J9IP56.1     | PF00953.19 | 62.80 | 0.00 |
| TRINITY_A0A0G0GHG9_9BACT/10-349  | A0A0G0GHG9.1 | PF0769     | 62.80 | 0.00 |
| TRINITY_L8GSJ5_ACACA/191-458     | L8GSJ5.1     | PF08811.9; | 62.80 | 0.00 |
| TRINITY_G0R5D6_ICHMG/106-164     | G0R5D6.1     | PF13921.4; | 62.80 | 0.00 |
| TRINITY_D8LQ28_ECTSI/3-89        | D8LQ28.1     | PF00125.22 | 62.80 | 0.00 |
| TRINITY_I7M7Z9_TETTS/616-760     | I7M7Z9.1     | PF00005.25 | 62.80 | 0.00 |

|                                  |              |            |       |      |
|----------------------------------|--------------|------------|-------|------|
| TRINITY_E1ZTK5_CHLVA/222-684     | E1ZTK5.1     | PF05292.9; | 62.80 | 0.00 |
| TRINITY_D6RK63_COPC7/12-263      | D6RK63.1     | PF00069.23 | 62.80 | 0.00 |
| TRINITY_I7MLG9_TETTS/376-605     | I7MLG9.2     | PF00112.21 | 62.80 | 0.00 |
| TRINITY_L8H9B8_ACACA/1085-1287   | L8H9B8.1     | PF02786.15 | 62.80 | 0.00 |
| TRINITY_L8HAB6_ACACA/85-471      | L8HAB6.1     | PF02463.17 | 62.80 | 0.00 |
| TRINITY_A8IU23_CHLRE/7-84        | A8IU23.1     | PF09429.8; | 62.80 | 0.00 |
| TRINITY_G4T6T5_PIRID/31-151      | G4T6T5.1     | PF01408.20 | 62.80 | 0.00 |
| TRINITY_E1X1Z7_HALMS/34-321      | E1X1Z7.1     | PF00294.22 | 62.80 | 0.00 |
| TRINITY_I7M6F2_TETTS/272-314     | I7M6F2.1     | PF00400.30 | 62.80 | 0.00 |
| TRINITY_L8GUU1_ACACA/68-321      | L8GUU1.1     | PF00069.23 | 62.80 | 0.00 |
| TRINITY_D8UEG7_VOLCA/1411-1882   | D8UEG7.1     | PF02738.16 | 62.80 | 0.00 |
| TRINITY_A8JHW6_CHLRE/43-718      | A8JHW6.1     | PF00995.21 | 62.80 | 0.00 |
| TRINITY_A8HWL3_CHLRE/1-192       | A8HWL3.1     | PF07837.10 | 62.80 | 0.00 |
| TRINITY_A0D2Y8_PARTE/22-645      | A0D2Y8.1     | PF00133.20 | 62.80 | 0.00 |
| TRINITY_C1MW67_MICPC/420-627     | C1MW67.1     | PF00448.20 | 62.80 | 0.00 |
| TRINITY_E1Z9J1_CHLVA/157-454     | E1Z9J1.1     | PF00632.23 | 62.80 | 0.00 |
| TRINITY_D8UC10_VOLCA/180-416     | D8UC10.1     | PF03407.14 | 62.80 | 0.00 |
| TRINITY_G0R514_ICHMG/672-757     | G0R514.1     | PF00867.16 | 62.80 | 0.00 |
| TRINITY_F4PZD1_DICFS/58-409      | F4PZD1.1     | PF00285.19 | 62.80 | 0.00 |
| TRINITY_K1PMZ3_CRAGI/4622-4780   | K1PMZ3.1     | PF00179.24 | 62.80 | 0.00 |
| TRINITY_E1Z2A8_CHLVA/13-426      | E1Z2A8.1     | PF01593.22 | 62.80 | 0.00 |
| TRINITY_D8TVP0_VOLCA/34-178      | D8TVP0.1     | PF08190.10 | 62.80 | 0.00 |
| TRINITY_D8UBI0_VOLCA/14-440      | D8UBI0.1     | PF00067.20 | 62.80 | 0.00 |
| TRINITY_E1ZBC0_CHLVA/20-351      | E1ZBC0.1     | PF00225.21 | 62.80 | 0.00 |
| TRINITY_I0YPG1_9CHLO/7-423       | I0YPG1.1     | PF00501.26 | 62.80 | 0.00 |
| TRINITY_G0R4A1_ICHMG/1-230       | G0R4A1.1     | PF00225.21 | 62.80 | 0.00 |
| TRINITY_A0A078AB47_STYLE/144-465 | A0A078AB47.1 | PF0064     | 62.80 | 0.00 |
| TRINITY_F4PJU2_DICFS/59-319      | F4PJU2.1     | PF00069.23 | 62.80 | 0.00 |
| TRINITY_F2UBG1_SALR5/68-126      | F2UBG1.1     | PF05608.10 | 62.70 | 0.00 |
| TRINITY_G7Q415_9DELT/111-229     | G7Q415.1     | PF00877.17 | 62.70 | 0.00 |
| TRINITY_A0D4V9_PARTE/19-283      | A0D4V9.1     | PF02263.17 | 62.70 | 0.00 |
| TRINITY_C5LAN5_PERM5/8-168       | C5LAN5.1     | PF00406.20 | 62.70 | 0.00 |
| TRINITY_D3BFW6_POLPA/46-147      | D3BFW6.1     | PF00011.19 | 62.70 | 0.00 |
| TRINITY_H2XN33_CIOIN/273-341     | H2XN33.1     | PF00076.20 | 62.70 | 0.00 |
| TRINITY_M0QSG0_ACACA/39-129      | M0QSG0.1     | PF02214.20 | 62.70 | 0.00 |
| TRINITY_F1A589_DICPU/12-113      | F1A589.1     | PF01990.15 | 62.70 | 0.00 |
| TRINITY_S8CF35_9LAMI/516-629     | S8CF35.1     | PF00271.29 | 62.70 | 0.00 |
| TRINITY_TTL3C_TETTS/705-1030     | Q23FE2.1     | PF03133.13 | 62.70 | 0.00 |
| TRINITY_Q5ZUW7_LEGPH/33-284      | Q5ZUW7.1     | PF01259.16 | 62.70 | 0.00 |
| TRINITY_A9RI14_PHYPA/120-458     | A9RI14.1     | PF01074.20 | 62.70 | 0.00 |
| TRINITY_E7KVV6_YEASL/41-142      | E7KVV6.1     | PF13649.4; | 62.70 | 0.00 |
| TRINITY_F4S555_MELLP/761-969     | F4S555.1     | PF00702.24 | 62.70 | 0.00 |
| TRINITY_Q22V76_TETTS/529-664     | Q22V76.2     | PF00005.25 | 62.70 | 0.00 |
| TRINITY_L8HKM6_ACACA/8-83        | L8HKM6.1     | PF12701.5; | 62.70 | 0.00 |
| TRINITY_F0ZGG2_DICPU/3-254       | F0ZGG2.1     | PF10609.7; | 62.70 | 0.00 |
| TRINITY_A8J6H2_CHLRE/100-254     | A8J6H2.1     | PF14996.4; | 62.70 | 0.00 |
| TRINITY_Q23DJ0_TETTS/477-557     | Q23DJ0.1     | PF02319.18 | 62.70 | 0.00 |
| TRINITY_D8TZE1_VOLCA/133-328     | D8TZE1.1     | PF09991.7; | 62.70 | 0.00 |
| TRINITY_MYOD_DICDI/9-674         | P34109.2     | PF00063.19 | 62.70 | 0.00 |
| TRINITY_E1ZTC6_CHLVA/34-107      | E1ZTC6.1     | PF03703.12 | 62.70 | 0.00 |
| TRINITY_A0E719_PARTE/9-357       | A0E719.1     | PF00225.21 | 62.70 | 0.00 |
| TRINITY_A8IC88_CHLRE/107-224     | A8IC88.1     | PF13640.4; | 62.70 | 0.00 |
| TRINITY_G3W6X4_SARHA/274-326     | G3W6X4.1     | PF00628.27 | 62.70 | 0.00 |
| TRINITY_A0A0K0E3Y2_STRER/6-65    | A0A0K0E3Y2.1 | PF0022     | 62.70 | 0.00 |
| TRINITY_A8JH94_CHLRE/12-74       | A8JH94.1     | PF01423.20 | 62.70 | 0.00 |
| TRINITY_F2K4M5_MARM1/466-865     | F2K4M5.1     | PF02347.14 | 62.70 | 0.00 |
| TRINITY_A8JFK5_CHLRE/351-433     | A8JFK5.1     | PF00789.18 | 62.70 | 0.00 |
| TRINITY_A9STP2_PHYPA/980-1079    | A9STP2.1     | PF11923.6; | 62.70 | 0.00 |
| TRINITY_A8JHW5_CHLRE/324-436     | A8JHW5.1     | PF04780.10 | 62.70 | 0.00 |
| TRINITY_A0DWB8_PARTE/118-215     | A0DWB8.1     | PF00581.18 | 62.70 | 0.00 |
| TRINITY_Q23GD1_TETTS/1838-1959   | Q23GD1.2     | PF00069.23 | 62.70 | 0.00 |

|                                    |              |            |       |      |
|------------------------------------|--------------|------------|-------|------|
| TRINITY_D8U9E7_VOLCA/173-708       | D8U9E7.1     | PF14740.4; | 62.70 | 0.00 |
| TRINITY_L8GP31_ACACA/22-272        | L8GP31.1     | PF00069.23 | 62.70 | 0.00 |
| TRINITY_D8THK9_VOLCA/34-111        | D8THK9.1     | PF04232.10 | 62.70 | 0.00 |
| TRINITY_D7FVB1_ECTSI/366-501       | D7FVB1.1     | PF00005.25 | 62.70 | 0.00 |
| TRINITY_B8C9T3_THAPS/326-385       | B8C9T3.1     | PF01485.19 | 62.70 | 0.00 |
| TRINITY_A0BL44_PARTE/620-730       | A0BL44.1     | PF13426.5; | 62.70 | 0.00 |
| TRINITY_A8IUJ0_CHLRE/149-489       | A8IUJ0.1     | PF00883.19 | 62.70 | 0.00 |
| TRINITY_D8U239_VOLCA/1-248         | D8U239.1     | PF00294.22 | 62.70 | 0.00 |
| TRINITY_F0ZP53_DICPU/58-468        | F0ZP53.1     | PF01704.16 | 62.70 | 0.00 |
| TRINITY_G0QQZ2_ICHMG/14-154        | G0QQZ2.1     | PF00080.18 | 62.70 | 0.00 |
| TRINITY_D2VEZ6_NAEGR/6-109         | D2VEZ6.1     | PF00307.29 | 62.70 | 0.00 |
| TRINITY_A0A087SI65_AUXPR/343-497   | A0A087SI65.1 | PF1308     | 62.70 | 0.00 |
| TRINITY_E1Z7M6_CHLVA/19-145        | E1Z7M6.1     | PF00134.21 | 62.70 | 0.00 |
| TRINITY_Q8LSS7_ORYSJ/928-1073      | Q8LSS7.1     | PF00078.25 | 62.70 | 0.00 |
| TRINITY_E1ZEY2_CHLVA/58-141        | E1ZEY2.1     | PF04359.12 | 62.70 | 0.00 |
| TRINITY_E1ZDD9_CHLVA/24-466        | E1ZDD9.1     | PF05577.10 | 62.70 | 0.00 |
| TRINITY_A0DL63_PARTE/5-202         | A0DL63.1     | PF02114.14 | 62.70 | 0.00 |
| TRINITY_D8UGY5_VOLCA/697-931       | D8UGY5.1     | PF07059.10 | 62.70 | 0.00 |
| TRINITY_U6PTD8_HAECO/13-83         | U6PTD8.1     | PF13499.4; | 62.70 | 0.00 |
| TRINITY_G2PN37_MURRD/2-184         | G2PN37.1     | PF01965.22 | 62.60 | 0.00 |
| TRINITY_K3X9M8_PYTUL/42-511        | K3X9M8.1     | PF00171.20 | 62.60 | 0.00 |
| TRINITY_D8TL53_VOLCA/30-163        | D8TL53.1     | PF00782.18 | 62.60 | 0.00 |
| TRINITY_PHB2_DICDI/42-223          | Q54Q31.1     | PF01145.23 | 62.60 | 0.00 |
| TRINITY_D8TP55_VOLCA/67-324        | D8TP55.1     | PF00233.17 | 62.60 | 0.00 |
| TRINITY_G0MGC2_CAEBE/1-132         | G0MGC2.1     | PF00125.22 | 62.60 | 0.00 |
| TRINITY_C7M9I1_CAPOD/34-265        | C7M9I1.1     | PF01182.18 | 62.60 | 0.00 |
| TRINITY_A8HPM8_CHLRE/71-161        | A8HPM8.1     | PF14347.4; | 62.60 | 0.00 |
| TRINITY_F6HY26_VITVI/73-235        | F6HY26.1     | PF03446.13 | 62.60 | 0.00 |
| TRINITY_E1ZKG3_CHLVA/126-281       | E1ZKG3.1     | PF13847.4; | 62.60 | 0.00 |
| TRINITY_J9I6X9_9SPIT/47-180        | J9I6X9.1     | PF00578.19 | 62.60 | 0.00 |
| TRINITY_A0EEH1_PARTE/11-437        | A0EEH1.1     | PF00171.20 | 62.60 | 0.00 |
| TRINITY_H1YF66_9SPHI/5-196         | H1YF66.1     | PF00316.18 | 62.60 | 0.00 |
| TRINITY_F0ZMB0_DICPU/159-249       | F0ZMB0.1     | PF02214.20 | 62.60 | 0.00 |
| TRINITY_A0A0N4Z2A3_PARTI/161-322   | A0A0N4Z2A3.1 | PF0007     | 62.60 | 0.00 |
| TRINITY_PI3K4_DICDI/557-762        | P54676.2     | PF00454.25 | 62.60 | 0.00 |
| TRINITY_A7RU37_NEMVE/31-537        | A7RU37.1     | PF00330.18 | 62.60 | 0.00 |
| TRINITY_M2XX62_GALSU/4-177         | M2XX62.1     | PF00163.17 | 62.60 | 0.00 |
| TRINITY_D8TL22_VOLCA/37-856        | D8TL22.1     | PF01496.17 | 62.60 | 0.00 |
| TRINITY_A8ISU4_CHLRE/484-681       | A8ISU4.1     | PF01061.22 | 62.60 | 0.00 |
| TRINITY_D8TNC6_VOLCA/84-266        | D8TNC6.1     | PF04755.10 | 62.60 | 0.00 |
| TRINITY_A8I832_CHLRE/131-229       | A8I832.1     | PF03091.13 | 62.60 | 0.00 |
| TRINITY_A8JGE8_CHLRE/187-322       | A8JGE8.1     | PF01170.16 | 62.60 | 0.00 |
| TRINITY_D8TIC3_VOLCA/148-427       | D8TIC3.1     | PF00009.25 | 62.60 | 0.00 |
| TRINITY_J3MXD5_ORYBR/40-148        | J3MXD5.1     | PF13616.4; | 62.60 | 0.00 |
| TRINITY_A0A068XBT7_HYMMI/1021-1170 | A0A068XBT7.2 | PF0000     | 62.60 | 0.00 |
| TRINITY_W5KLE2_ASTMX/189-285       | W5KLE2.1     | PF11069.6; | 62.60 | 0.00 |
| TRINITY_A0A0M3JBN3_ANISI/3-59      | A0A0M3JBN3.1 | PF0456     | 62.50 | 0.00 |
| TRINITY_W5M8K1_LEPOC/13-52         | W5M8K1.1     | PF03966.14 | 62.50 | 0.00 |
| TRINITY_E4T484_PALPW/44-249        | E4T484.1     | PF04402.12 | 62.50 | 0.00 |
| TRINITY_B3RL36_TRIAD/117-506       | B3RL36.1     | PF01979.18 | 62.50 | 0.00 |
| TRINITY_B4QP44_DROSI/37-109        | B4QP44.1     | PF02594.14 | 62.50 | 0.00 |
| TRINITY_A0A0A0KW25_CUCSA/102-181   | A0A0A0KW25.1 | PF0034     | 62.50 | 0.00 |
| TRINITY_Q231M6_TETTS/6-197         | Q231M6.1     | PF11539.6; | 62.50 | 0.00 |
| TRINITY_D8TIL0_VOLCA/2037-2086     | D8TIL0.1     | PF00847.18 | 62.50 | 0.00 |
| TRINITY_B3S565_TRIAD/8-71          | B3S565.1     | PF01066.19 | 62.50 | 0.00 |
| TRINITY_I7MOD5_TETTS/4-286         | I7MOD5.2     | PF00069.23 | 62.50 | 0.00 |
| TRINITY_A0CCP6_PARTE/592-655       | A0CCP6.1     | PF13432.4; | 62.50 | 0.00 |
| TRINITY_D8TH10_VOLCA/161-276       | D8TH10.1     | PF01565.21 | 62.50 | 0.00 |
| TRINITY_A0D7X4_PARTE/11-52         | A0D7X4.1     | PF05186.11 | 62.50 | 0.00 |
| TRINITY_Q0CVY7_ASPTN/153-264       | Q0CVY7.1     | PF00970.22 | 62.50 | 0.00 |
| TRINITY_A0A078AAI9_STYLE/21-285    | A0A078AAI9.1 | PF0165     | 62.50 | 0.00 |



|                                  |              |            |       |      |
|----------------------------------|--------------|------------|-------|------|
| TRINITY_M3ZYP5_XIPMA/1-230       | M3ZYP5.1     | PF00149.26 | 62.50 | 0.00 |
| TRINITY_D8U203_VOLCA/5-111       | D8U203.1     | PF03179.13 | 62.50 | 0.00 |
| TRINITY_I7MMG7_TETTS/4-265       | I7MMG7.1     | PF00069.23 | 62.50 | 0.00 |
| TRINITY_D8U467_VOLCA/4-95        | D8U467.1     | PF12796.5; | 62.50 | 0.00 |
| TRINITY_Q23BQ5_TETTS/133-203     | Q23BQ5.1     | PF01287.18 | 62.50 | 0.00 |
| TRINITY_A8J2V3_CHLRE/15-193      | A8J2V3.1     | PF01871.15 | 62.50 | 0.00 |
| TRINITY_Q234R3_TETTS/8-301       | Q234R3.1     | PF04502.11 | 62.50 | 0.00 |
| TRINITY_D8TSJ5_VOLCA/2597-3305   | D8TSJ5.1     | PF03028.13 | 62.50 | 0.00 |
| TRINITY_U9UGD1_RHIID/9-71        | U9UGD1.1     | PF08154.10 | 62.50 | 0.00 |
| TRINITY_D8TPH2_VOLCA/7-288       | D8TPH2.1     | PF01148.18 | 62.50 | 0.00 |
| TRINITY_A8JB70_CHLRE/362-427     | A8JB70.1     | PF00226.29 | 62.50 | 0.00 |
| TRINITY_RUB2_ARATH/79-150        | Q8RUC6.3     | PF00240.21 | 62.50 | 0.00 |
| TRINITY_A0CYP7_PARTE/16-152      | A0CYP7.1     | PF00782.18 | 62.50 | 0.00 |
| TRINITY_A0A078B2X8_STYLE/192-239 | A0A078B2X8.1 | PF1341     | 62.50 | 0.00 |
| TRINITY_A8IYC3_CHLRE/90-243      | A8IYC3.1     | PF00005.25 | 62.50 | 0.00 |
| TRINITY_S8C461_9LAMI/592-752     | S8C461.1     | PF00078.25 | 62.50 | 0.00 |
| TRINITY_K1RXS2_CRAGI/10-121      | K1RXS2.1     | PF03874.14 | 62.50 | 0.00 |
| TRINITY_F4PER5_BATDJ/27-305      | F4PER5.1     | PF00814.23 | 62.50 | 0.00 |
| TRINITY_W5KQJ9_ASTMX/424-719     | W5KQJ9.1     | PF00176.21 | 62.50 | 0.00 |
| TRINITY_A0A0D2X315_CAPO3/79-542  | A0A0D2X315.1 | PF0022     | 62.50 | 0.00 |
| TRINITY_A8HPD4_CHLRE/13-273      | A8HPD4.1     | PF00520.29 | 62.50 | 0.00 |
| TRINITY_A8JBE4_CHLRE/465-642     | A8JBE4.1     | PF11916.6; | 62.50 | 0.00 |
| TRINITY_A8HYL9_CHLRE/331-803     | A8HYL9.1     | PF00939.17 | 62.50 | 0.00 |
| TRINITY_A0BV71_PARTE/2-85        | A0BV71.1     | PF08648.10 | 62.50 | 0.00 |
| TRINITY_D8TX09_VOLCA/154-320     | D8TX09.1     | PF04851.13 | 62.50 | 0.00 |
| TRINITY_A8J0A5_CHLRE/308-363     | A8J0A5.1     | PF13513.4; | 62.50 | 0.00 |
| TRINITY_A8IQI1_CHLRE/1-179       | A8IQI1.1     | PF01184.17 | 62.50 | 0.00 |
| TRINITY_I0Z6C9_9CHLO/39-314      | I0Z6C9.1     | PF00850.17 | 62.50 | 0.00 |
| TRINITY_Q1WWC9_DROME/1031-1079   | Q1WWC9.1     | PF14604.4; | 62.50 | 0.00 |
| TRINITY_L8H2N6_ACACA/244-611     | L8H2N6.1     | PF00916.18 | 62.50 | 0.00 |
| TRINITY_LONM_OSTLU/725-932       | A4S6Y4.1     | PF05362.11 | 62.50 | 0.00 |
| TRINITY_A8HSY0_CHLRE/44-461      | A8HSY0.1     | PF00474.15 | 62.50 | 0.00 |
| TRINITY_D3BLR6_POLPA/274-329     | D3BLR6.1     | PF00412.20 | 62.50 | 0.00 |
| TRINITY_A8HVT9_CHLRE/12-303      | A8HVT9.1     | PF17184.2; | 62.50 | 0.00 |
| TRINITY_D5GEP6_TUBMM/30-69       | D5GEP6.1     | PF05920.9; | 62.50 | 0.00 |
| TRINITY_D8U978_VOLCA/2-203       | D8U978.1     | PF07714.15 | 62.50 | 0.00 |
| TRINITY_A0BIX8_PARTE/187-226     | A0BIX8.1     | PF05920.9; | 62.50 | 0.00 |
| TRINITY_A0A058ZZ18_EUCGR/78-186  | A0A058ZZ18.1 | PF0149     | 62.50 | 0.00 |
| TRINITY_A0A078AEL1_STYLE/19-303  | A0A078AEL1.1 | PF0006     | 62.50 | 0.00 |
| TRINITY_C5Z583_SORBI/934-1179    | C5Z583.1     | PF07727.12 | 62.50 | 0.00 |
| TRINITY_G0IY52_CYCMS/2-184       | G0IY52.1     | PF01965.22 | 62.40 | 0.00 |
| TRINITY_L8GXR0_ACACA/7-117       | L8GXR0.1     | PF02136.18 | 62.40 | 0.00 |
| TRINITY_F0ZGK2_DICPU/47-224      | F0ZGK2.1     | PF00719.17 | 62.40 | 0.00 |
| TRINITY_F0ZTG5_DICPU/6-231       | F0ZTG5.1     | PF03731.13 | 62.40 | 0.00 |
| TRINITY_A0A088AP06_APIME/31-216  | A0A088AP06.1 | PF0022     | 62.40 | 0.00 |
| TRINITY_F0Z9J5_DICPU/99-202      | F0Z9J5.1     | PF04191.11 | 62.40 | 0.00 |
| TRINITY_F0Z6C1_DICPU/120-348     | F0Z6C1.1     | PF00557.22 | 62.40 | 0.00 |
| TRINITY_A0E226_PARTE/313-438     | A0E226.1     | PF00134.21 | 62.40 | 0.00 |
| TRINITY_A0A0A1NXR9_9FUNG/178-611 | A0A0A1NXR9.1 | PF0015     | 62.40 | 0.00 |
| TRINITY_A0A078ATQ4_STYLE/166-308 | A0A078ATQ4.1 | PF0551     | 62.40 | 0.00 |
| TRINITY_A8HVE3_CHLRE/27-112      | A8HVE3.1     | PF03083.14 | 62.40 | 0.00 |
| TRINITY_L8HGG8_ACACA/19-143      | L8HGG8.1     | PF14226.4; | 62.40 | 0.00 |
| TRINITY_L8GYR2_ACACA/26-254      | L8GYR2.1     | PF04981.11 | 62.40 | 0.00 |
| TRINITY_D8UDG7_VOLCA/130-319     | D8UDG7.1     | PF00119.18 | 62.40 | 0.00 |
| TRINITY_A0A078BAI8_STYLE/6-263   | A0A078BAI8.1 | PF0006     | 62.40 | 0.00 |
| TRINITY_A8IAG6_CHLRE/48-294      | A8IAG6.1     | PF01080.15 | 62.40 | 0.00 |
| TRINITY_D8SLV4_SELML/2-167       | D8SLV4.1     | PF01217.18 | 62.40 | 0.00 |
| TRINITY_A0A0N4UQK4_DRAME/19-197  | A0A0N4UQK4.1 | PF0122     | 62.40 | 0.00 |
| TRINITY_M2N7K9_BAUCO/19-318      | M2N7K9.1     | PF00248.19 | 62.40 | 0.00 |
| TRINITY_G0QPK0_ICHMG/7-249       | G0QPK0.1     | PF00121.16 | 62.40 | 0.00 |
| TRINITY_Q22A08_TETTS/126-234     | Q22A08.2     | PF04430.12 | 62.40 | 0.00 |

|                                    |                     |       |      |
|------------------------------------|---------------------|-------|------|
| TRINITY_A0A0N4UWM2_ENTVE/608-775   | A0A0N4UWM2.1 PF1330 | 62.40 | 0.00 |
| TRINITY_A8HMI1_CHLRE/46-131        | A8HMI1.1 PF01627.21 | 62.40 | 0.00 |
| TRINITY_A8HY41_CHLRE/145-368       | A8HY41.1 PF07228.10 | 62.40 | 0.00 |
| TRINITY_A0A068S0Q9_9FUNG/99-436    | A0A068S0Q9.1 PF0310 | 62.40 | 0.00 |
| TRINITY_A8JFP4_CHLRE/222-560       | A8JFP4.1 PF03372.21 | 62.40 | 0.00 |
| TRINITY_I0YML0_9CHLO/1-132         | I0YML0.1 PF00504.19 | 62.40 | 0.00 |
| TRINITY_D3B782_POLPA/7-248         | D3B782.1 PF00121.16 | 62.40 | 0.00 |
| TRINITY_E1ZKH7_CHLVA/16-179        | E1ZKH7.1 PF12706.5; | 62.40 | 0.00 |
| TRINITY_D3AXW6_POLPA/88-287        | D3AXW6.1 PF07002.14 | 62.40 | 0.00 |
| TRINITY_D8TUX7_VOLCA/78-160        | D8TUX7.1 PF16282.3; | 62.40 | 0.00 |
| TRINITY_A1ZPA1_9BACT/45-169        | A1ZPA1.1 PF01661.19 | 62.40 | 0.00 |
| TRINITY_D8LEI9_ECTSI/185-413       | D8LEI9.1 PF13621.4; | 62.40 | 0.00 |
| TRINITY_A0A078B8U4_STYLE/32-494    | A0A078B8U4.1 PF0017 | 62.40 | 0.00 |
| TRINITY_D8U584_VOLCA/216-459       | D8U584.1 PF03092.14 | 62.40 | 0.00 |
| TRINITY_D8UBC2_VOLCA/92-232        | D8UBC2.1 PF00588.17 | 62.40 | 0.00 |
| TRINITY_Q23YB5_TETTS/199-456       | Q23YB5.2 PF00069.23 | 62.30 | 0.00 |
| TRINITY_I7MGI4_TETTS/15-68         | I7MGI4.1 PF05347.13 | 62.30 | 0.00 |
| TRINITY_Q54PB7_DICDI/1358-1684     | Q54PB7.1 PF06920.11 | 62.30 | 0.00 |
| TRINITY_I7MDU0_TETTS/12-274        | I7MDU0.1 PF00069.23 | 62.30 | 0.00 |
| TRINITY_L8GRH2_ACACA/50-526        | L8GRH2.1 PF01039.20 | 62.30 | 0.00 |
| TRINITY_H8Z269_9GAMM/13-315        | H8Z269.1 PF00923.17 | 62.30 | 0.00 |
| TRINITY_TTL6A_TETTS/399-697        | Q23MT7.1 PF03133.13 | 62.30 | 0.00 |
| TRINITY_F0ZGW6_DICPU/11-678        | F0ZGW6.1 PF00063.19 | 62.30 | 0.00 |
| TRINITY_I7MLH4_TETTS/52-165        | I7MLH4.1 PF11527.6; | 62.30 | 0.00 |
| TRINITY_A9RB21_PHYPA/45-204        | A9RB21.1 PF01233.17 | 62.30 | 0.00 |
| TRINITY_F4Q3F3_DICFS/139-199       | F4Q3F3.1 PF00957.19 | 62.30 | 0.00 |
| TRINITY_K9VUP7_9CYAN/15-318        | K9VUP7.1 PF00248.19 | 62.30 | 0.00 |
| TRINITY_A8HQ67_CHLRE/8-327         | A8HQ67.1 PF16499.3; | 62.30 | 0.00 |
| TRINITY_A8II54_CHLRE/13-296        | A8II54.1 PF00664.21 | 62.30 | 0.00 |
| TRINITY_D8TID0_VOLCA/38-138        | D8TID0.1 PF00466.18 | 62.30 | 0.00 |
| TRINITY_D8U7J2_VOLCA/97-150        | D8U7J2.1 PF01344.23 | 62.30 | 0.00 |
| TRINITY_A0EG50_PARTE/304-525       | A0EG50.1 PF07002.14 | 62.30 | 0.00 |
| TRINITY_I0YS07_9CHLO/29-89         | I0YS07.1 PF04193.12 | 62.30 | 0.00 |
| TRINITY_C2M6V4_CAPGI/2-222         | C2M6V4.1 PF01026.19 | 62.30 | 0.00 |
| TRINITY_A8I5W8_CHLRE/36-112        | A8I5W8.1 PF03992.14 | 62.30 | 0.00 |
| TRINITY_D8TYP4_VOLCA/93-412        | D8TYP4.1 PF01546.26 | 62.30 | 0.00 |
| TRINITY_I7M700_TETTS/181-443       | I7M700.2 PF00069.23 | 62.30 | 0.00 |
| TRINITY_D8U5B9_VOLCA/23-226        | D8U5B9.1 PF01965.22 | 62.30 | 0.00 |
| TRINITY_A0EFU5_PARTE/59-386        | A0EFU5.1 PF01148.18 | 62.30 | 0.00 |
| TRINITY_A8IHD9_CHLRE/504-670       | A8IHD9.1 PF07717.14 | 62.30 | 0.00 |
| TRINITY_B1H117_XENTR/33-212        | B1H117.1 PF00270.27 | 62.30 | 0.00 |
| TRINITY_D8UJ84_VOLCA/1008-1082     | D8UJ84.1 PF04640.12 | 62.30 | 0.00 |
| TRINITY_Q22T18_TETTS/2-176         | Q22T18.1 PF00025.19 | 62.30 | 0.00 |
| TRINITY_A0A015IDK6_9GLOM/201-443   | A0A015IDK6.1 PF1362 | 62.30 | 0.00 |
| TRINITY_Q23Q10_TETTS/220-310       | Q23Q10.2 PF15963.3; | 62.30 | 0.00 |
| TRINITY_Q54G77_DICDI/24-165        | Q54G77.1 PF09286.9; | 62.30 | 0.00 |
| TRINITY_G0QQT1_ICHMG/68-119        | G0QQT1.1 PF00415.16 | 62.30 | 0.00 |
| TRINITY_A0A077ZVL1_STYLE/3835-4552 | A0A077ZVL1.1 PF0302 | 62.30 | 0.00 |
| TRINITY_I1C2M6_RHIO9/30-175        | I1C2M6.1 PF00293.26 | 62.30 | 0.00 |
| TRINITY_F0ZMG6_DICPU/616-703       | F0ZMG6.1 PF00679.22 | 62.30 | 0.00 |
| TRINITY_D6WW15_TRICA/43-94         | D6WW15.1 PF02229.14 | 62.30 | 0.00 |
| TRINITY_L8GES2_ACACA/67-143        | L8GES2.1 PF13499.4; | 62.30 | 0.00 |
| TRINITY_D8UHF7_VOLCA/536-669       | D8UHF7.1 PF07717.14 | 62.30 | 0.00 |
| TRINITY_E1ZK06_CHLVA/262-317       | E1ZK06.1 PF00226.29 | 62.30 | 0.00 |
| TRINITY_G0QL61_ICHMG/18-265        | G0QL61.1 PF06705.9; | 62.30 | 0.00 |
| TRINITY_D8TJS4_VOLCA/266-380       | D8TJS4.1 PF02576.15 | 62.30 | 0.00 |
| TRINITY_A8J4K4_CHLRE/57-279        | A8J4K4.1 PF02602.13 | 62.30 | 0.00 |
| TRINITY_A8IR64_CHLRE/183-235       | A8IR64.1 PF05739.17 | 62.30 | 0.00 |
| TRINITY_A0A0A1PIP5_9FUNG/166-244   | A0A0A1PIP5.1 PF1364 | 62.30 | 0.00 |
| TRINITY_D8TVC0_VOLCA/1983-2096     | D8TVC0.1 PF00665.24 | 62.30 | 0.00 |
| TRINITY_F8JKS3_STREN/564-731       | F8JKS3.1 PF08760.9; | 62.20 | 0.00 |

|                                  |                     |       |      |
|----------------------------------|---------------------|-------|------|
| TRINITY_G2G1L5_9FIRM/28-276      | G2G1L5.1 PF02784.14 | 62.20 | 0.00 |
| TRINITY_A0A0G4F0S1_9ALVE/11-50   | A0A0G4F0S1.1 PF0142 | 62.20 | 0.00 |
| TRINITY_A0D3Y9_PARTE/54-129      | A0D3Y9.1 PF08241.10 | 62.20 | 0.00 |
| TRINITY_A0EBG4_PARTE/41-332      | A0EBG4.1 PF05185.14 | 62.20 | 0.00 |
| TRINITY_L1IB99_GUITH/5-101       | L1IB99.1 PF01133.15 | 62.20 | 0.00 |
| TRINITY_A0A0J7K787_LASNI/141-178 | A0A0J7K787.1 PF0933 | 62.20 | 0.00 |
| TRINITY_C1EFY8_MICSR/1-98        | C1EFY8.1 PF00453.16 | 62.20 | 0.00 |
| TRINITY_A0D476_PARTE/34-353      | A0D476.1 PF00180.18 | 62.20 | 0.00 |
| TRINITY_A0A0D2UGV5_CAPO3/32-187  | A0A0D2UGV5.1 PF0163 | 62.20 | 0.00 |
| TRINITY_CLCE_DICDI/235-609       | Q54LQ4.1 PF00654.18 | 62.20 | 0.00 |
| TRINITY_Q7V4P6_PROMM/458-658     | Q7V4P6.1 PF00106.23 | 62.20 | 0.00 |
| TRINITY_D2VMQ6_NAEGR/60-212      | D2VMQ6.1 PF00182.17 | 62.20 | 0.00 |
| TRINITY_F0ZJT3_DICPU/35-109      | F0ZJT3.1 PF13656.4; | 62.20 | 0.00 |
| TRINITY_C1E4S7_MICSR/834-960     | C1E4S7.1 PF14806.4; | 62.20 | 0.00 |
| TRINITY_Q23QY3_TETTS/416-917     | Q23QY3.2 PF00899.19 | 62.20 | 0.00 |
| TRINITY_A8IHC4_CHLRE/607-855     | A8IHC4.1 PF00082.20 | 62.20 | 0.00 |
| TRINITY_G1KBH5_ANOCA/186-475     | G1KBH5.2 PF05291.9; | 62.20 | 0.00 |
| TRINITY_I7MGA5_TETTS/126-350     | I7MGA5.1 PF00687.19 | 62.20 | 0.00 |
| TRINITY_D8TTK6_VOLCA/730-956     | D8TTK6.1 PF12576.6; | 62.20 | 0.00 |
| TRINITY_L8HCN5_ACACA/51-374      | L8HCN5.1 PF08627.8; | 62.20 | 0.00 |
| TRINITY_D8TJC9_VOLCA/6-275       | D8TJC9.1 PF00109.24 | 62.20 | 0.00 |
| TRINITY_E1Z921_CHLVA/46-198      | E1Z921.1 PF00929.22 | 62.20 | 0.00 |
| TRINITY_K3Y5M4_SETIT/355-646     | K3Y5M4.1 PF00069.23 | 62.20 | 0.00 |
| TRINITY_W5NAE3_LEPOC/86-270      | W5NAE3.1 PF02146.15 | 62.20 | 0.00 |
| TRINITY_D8U8B9_VOLCA/387-523     | D8U8B9.1 PF00069.23 | 62.20 | 0.00 |
| TRINITY_A0E876_PARTE/28-215      | A0E876.1 PF00227.24 | 62.20 | 0.00 |
| TRINITY_I7LUR8_TETTS/1292-1437   | I7LUR8.2 PF00637.18 | 62.20 | 0.00 |
| TRINITY_M1VII6_CYAME/556-744     | M1VII6.1 PF13481.4; | 62.20 | 0.00 |
| TRINITY_D3B3I9_POLPA/42-544      | D3B3I9.1 PF00118.22 | 62.20 | 0.00 |
| TRINITY_D8UBW1_VOLCA/31-522      | D8UBW1.1 PF00118.22 | 62.20 | 0.00 |
| TRINITY_A8IV13_CHLRE/26-108      | A8IV13.1 PF08700.9; | 62.20 | 0.00 |
| TRINITY_E3LME5_CAERE/1-148       | E3LME5.1 PF01217.18 | 62.20 | 0.00 |
| TRINITY_L8GEZ6_ACACA/756-1044    | L8GEZ6.1 PF00176.21 | 62.20 | 0.00 |
| TRINITY_D8U9B6_VOLCA/193-239     | D8U9B6.1 PF13415.4; | 62.20 | 0.00 |
| TRINITY_F4QCT6_DICFS/606-750     | F4QCT6.1 PF00005.25 | 62.20 | 0.00 |
| TRINITY_D3AYP3_POLPA/1472-1615   | D3AYP3.1 PF00588.17 | 62.20 | 0.00 |
| TRINITY_I1LXZ7_SOYBN/198-371     | I1LXZ7.1 PF02866.16 | 62.20 | 0.00 |
| TRINITY_D8U962_VOLCA/204-366     | D8U962.1 PF06733.13 | 62.20 | 0.00 |
| TRINITY_D8TQZ7_VOLCA/265-459     | D8TQZ7.1 PF08323.9; | 62.20 | 0.00 |
| TRINITY_H3ERC5_PRIIPA/29-149     | H3ERC5.1 PF01873.15 | 62.20 | 0.00 |
| TRINITY_X1W3S0_TETTS/318-363     | X1W3S0.1 PF13639.4; | 62.20 | 0.00 |
| TRINITY_D8TNU9_VOLCA/13-614      | D8TNU9.1 PF00888.20 | 62.20 | 0.00 |
| TRINITY_B8CFV7_THAPS/409-453     | B8CFV7.1 PF13639.4; | 62.20 | 0.00 |
| TRINITY_A8JHU5_CHLRE/130-356     | A8JHU5.1 PF04499.13 | 62.20 | 0.00 |
| TRINITY_A0BML3_PARTE/159-391     | A0BML3.1 PF00122.18 | 62.20 | 0.00 |
| TRINITY_E1Z4Y7_CHLVA/643-686     | E1Z4Y7.1 PF00400.30 | 62.20 | 0.00 |
| TRINITY_D8UB19_VOLCA/380-475     | D8UB19.1 PF13650.4; | 62.20 | 0.00 |
| TRINITY_J3NDH4_ORYBR/147-405     | J3NDH4.1 PF00069.23 | 62.20 | 0.00 |
| TRINITY_D8U1P0_VOLCA/190-448     | D8U1P0.1 PF00704.26 | 62.20 | 0.00 |
| TRINITY_Q8LP67_CHLRE/27-494      | Q8LP67.2 PF01384.18 | 62.20 | 0.00 |
| TRINITY_D8U2S1_VOLCA/86-258      | D8U2S1.1 PF10294.7; | 62.20 | 0.00 |
| TRINITY_I1NBN5_SOYBN/673-757     | I1NBN5.1 PF08033.10 | 62.20 | 0.00 |
| TRINITY_H0HLR9_9RHIZ/181-299     | H0HLR9.1 PF13673.5; | 62.20 | 0.00 |
| TRINITY_G0S1D0_CHATD/503-547     | G0S1D0.1 PF00400.30 | 62.20 | 0.00 |
| TRINITY_I7M465_TETTS/267-321     | I7M465.1 PF01485.19 | 62.20 | 0.00 |
| TRINITY_L8HG70_ACACA/1131-1300   | L8HG70.1 PF13091.4; | 62.20 | 0.00 |
| TRINITY_A0DRN1_PARTE/90-336      | A0DRN1.1 PF03372.21 | 62.10 | 0.00 |
| TRINITY_A0A087SA88_AUXPR/3-212   | A0A087SA88.1 PF0009 | 62.10 | 0.00 |
| TRINITY_A0C046_PARTE/90-390      | A0C046.1 PF03133.13 | 62.10 | 0.00 |
| TRINITY_A0A0J8BP99_BETVU/27-294  | A0A0J8BP99.1 PF0006 | 62.10 | 0.00 |
| TRINITY_I7MKU0_TETTS/11-96       | I7MKU0.1 PF10235.7; | 62.10 | 0.00 |

|                                    |              |            |       |      |
|------------------------------------|--------------|------------|-------|------|
| TRINITY_E1ZC14_CHLVA/145-340       | E1ZC14.1     | PF07859.11 | 62.10 | 0.00 |
| TRINITY_V5BPK4_TRYCR/251-504       | V5BPK4.1     | PF00069.23 | 62.10 | 0.00 |
| TRINITY_G8BY52_TETPH/1063-1540     | G8BY52.1     | PF06202.12 | 62.10 | 0.00 |
| TRINITY_F1A4R1_DICPU/94-192        | F1A4R1.1     | PF00153.25 | 62.10 | 0.00 |
| TRINITY_L8H350_ACACA/3-284         | L8H350.1     | PF03643.13 | 62.10 | 0.00 |
| TRINITY_A0A0G4ETT9_9ALVE/1700-1885 | A0A0G4ETT9.1 | PF0053     | 62.10 | 0.00 |
| TRINITY_L8HGA2_ACACA/177-385       | L8HGA2.1     | PF02475.14 | 62.10 | 0.00 |
| TRINITY_W7TKS0_9STRA/126-321       | W7TKS0.1     | PF03171.18 | 62.10 | 0.00 |
| TRINITY_A8JH37_CHLRE/6-324         | A8JH37.1     | PF08267.10 | 62.10 | 0.00 |
| TRINITY_B2RZH9_VOLCA/39-279        | B2RZH9.1     | PF00121.16 | 62.10 | 0.00 |
| TRINITY_A8J9T2_CHLRE/21-86         | A8J9T2.1     | PF12254.6; | 62.10 | 0.00 |
| TRINITY_A0A068RW80_9FUNG/216-433   | A0A068RW80.1 | PF0514     | 62.10 | 0.00 |
| TRINITY_SPTC2_DICDI/110-470        | Q54EX5.1     | PF00155.19 | 62.10 | 0.00 |
| TRINITY_A8JBV9_CHLRE/72-227        | A8JBV9.1     | PF10294.7; | 62.10 | 0.00 |
| TRINITY_I7LTE1_TETTS/844-1165      | I7LTE1.1     | PF03178.13 | 62.10 | 0.00 |
| TRINITY_D8TRM7_VOLCA/133-258       | D8TRM7.1     | PF13640.4; | 62.10 | 0.00 |
| TRINITY_D8UJ39_VOLCA/18-298        | D8UJ39.1     | PF06027.10 | 62.10 | 0.00 |
| TRINITY_H0ZFW0_TAEGU/1642-1785     | H0ZFW0.1     | PF07728.12 | 62.10 | 0.00 |
| TRINITY_M3XQ36_MUSPF/73-326        | M3XQ36.1     | PF03159.16 | 62.10 | 0.00 |
| TRINITY_D3B6M3_POLPA/229-533       | D3B6M3.1     | PF00082.20 | 62.10 | 0.00 |
| TRINITY_G0QUB2_ICHMG/81-382        | G0QUB2.1     | PF00999.19 | 62.10 | 0.00 |
| TRINITY_A0A087SJE4_AUXPR/92-310    | A0A087SJE4.1 | PF0216     | 62.10 | 0.00 |
| TRINITY_A0E4T2_PARTE/382-534       | A0E4T2.1     | PF00005.25 | 62.10 | 0.00 |
| TRINITY_A8IZE1_CHLRE/504-623       | A8IZE1.1     | PF13474.4; | 62.10 | 0.00 |
| TRINITY_G4QHL6_GLANF/22-153        | G4QHL6.1     | PF13185.4; | 62.10 | 0.00 |
| TRINITY_A8JHB2_CHLRE/220-447       | A8JHB2.1     | PF01458.15 | 62.10 | 0.00 |
| TRINITY_A8IAC7_CHLRE/163-265       | A8IAC7.1     | PF01588.18 | 62.10 | 0.00 |
| TRINITY_E1ZTC4_CHLVA/4-307         | E1ZTC4.1     | PF00923.17 | 62.10 | 0.00 |
| TRINITY_Q22N18_TETTS/6443-6855     | Q22N18.2     | PF00899.19 | 62.10 | 0.00 |
| TRINITY_D8TQZ7_VOLCA/498-682       | D8TQZ7.1     | PF00534.18 | 62.10 | 0.00 |
| TRINITY_R1CA39_EMIHU/22-90         | R1CA39.1     | PF04564.13 | 62.10 | 0.00 |
| TRINITY_A8IBR0_CHLRE/1139-1279     | A8IBR0.1     | PF05843.12 | 62.10 | 0.00 |
| TRINITY_A0A059LLR0_9CHLO/29-278    | A0A059LLR0.1 | PF0075     | 62.10 | 0.00 |
| TRINITY_A8JHJ5_CHLRE/128-220       | A8JHJ5.1     | PF00153.25 | 62.10 | 0.00 |
| TRINITY_Q22TY7_TETTS/3-233         | Q22TY7.1     | PF04670.10 | 62.10 | 0.00 |
| TRINITY_SULT2_CHLRE/98-492         | A8J6J0.1     | PF00916.18 | 62.10 | 0.00 |
| TRINITY_E4X5J3_OIKDI/140-434       | E4X5J3.1     | PF00082.20 | 62.10 | 0.00 |
| TRINITY_D8UI03_VOLCA/42-637        | D8UI03.1     | PF00012.18 | 62.10 | 0.00 |
| TRINITY_R6EU84_9FIRM/363-512       | R6EU84.1     | PF00005.25 | 62.10 | 0.00 |
| TRINITY_C3YGH6_BRAFL/5-211         | C3YGH6.1     | PF00149.26 | 62.10 | 0.00 |
| TRINITY_Q22RG0_TETTS/26-78         | Q22RG0.2     | PF05047.14 | 62.00 | 0.00 |
| TRINITY_R4XG17_TAPDE/5-54          | R4XG17.1     | PF01679.15 | 62.00 | 0.00 |
| TRINITY_A7GM30_BACCN/8-529         | A7GM30.1     | PF01274.20 | 62.00 | 0.00 |
| TRINITY_I7MD37_TETTS/11-258        | I7MD37.1     | PF03029.15 | 62.00 | 0.00 |
| TRINITY_T1FNC7_HELRO/9-149         | T1FNC7.1     | PF00080.18 | 62.00 | 0.00 |
| TRINITY_L8HJC1_ACACA/5-75          | L8HJC1.1     | PF00076.20 | 62.00 | 0.00 |
| TRINITY_E2AJR5_CAMFO/1620-1767     | E2AJR5.1     | PF00005.25 | 62.00 | 0.00 |
| TRINITY_W2RL36_9EURO/311-410       | W2RL36.1     | PF01545.19 | 62.00 | 0.00 |
| TRINITY_E1ZQC0_CHLVA/1-314         | E1ZQC0.1     | PF16420.3; | 62.00 | 0.00 |
| TRINITY_G0R3K3_ICHMG/10-172        | G0R3K3.1     | PF00071.20 | 62.00 | 0.00 |
| TRINITY_U6M9K5_EIMMA/2543-2722     | U6M9K5.1     | PF00534.18 | 62.00 | 0.00 |
| TRINITY_M2N7K9_BAUCO/19-318        | M2N7K9.1     | PF00248.19 | 62.00 | 0.00 |
| TRINITY_D8U0F4_VOLCA/142-300       | D8U0F4.1     | PF01556.16 | 62.00 | 0.00 |
| TRINITY_A9USC1_MONBE/6-76          | A9USC1.1     | PF00076.20 | 62.00 | 0.00 |
| TRINITY_F4PLK7_DICFS/36-501        | F4PLK7.1     | PF00171.20 | 62.00 | 0.00 |
| TRINITY_A0A0G4EB95_9ALVE/641-835   | A0A0G4EB95.1 | PF0505     | 62.00 | 0.00 |
| TRINITY_C1MLP4_MICPC/766-989       | C1MLP4.1     | PF01136.17 | 62.00 | 0.00 |
| TRINITY_D8TUL4_VOLCA/2-165         | D8TUL4.1     | PF03453.15 | 62.00 | 0.00 |
| TRINITY_F0VN86_NEOCL/225-295       | F0VN86.1     | PF00076.20 | 62.00 | 0.00 |
| TRINITY_F0ZTE2_DICPU/105-183       | F0ZTE2.1     | PF00076.20 | 62.00 | 0.00 |
| TRINITY_A0A078L386_9CHLA/610-815   | A0A078L386.1 | PF0536     | 62.00 | 0.00 |

|                                   |              |            |       |      |
|-----------------------------------|--------------|------------|-------|------|
| TRINITY_E2C0I9_HARSA/25-117       | E2C0I9.1     | PF01243.18 | 62.00 | 0.00 |
| TRINITY_Q237J4_TETTS/105-303      | Q237J4.1     | PF03587.12 | 62.00 | 0.00 |
| TRINITY_D8UJ72_VOLCA/109-179      | D8UJ72.1     | PF00076.20 | 62.00 | 0.00 |
| TRINITY_D8U4C4_VOLCA/2-132        | D8U4C4.1     | PF04756.11 | 62.00 | 0.00 |
| TRINITY_A8IMU0_CHLRE/150-241      | A8IMU0.1     | PF00153.25 | 62.00 | 0.00 |
| TRINITY_D8TX10_VOLCA/3-160        | D8TX10.1     | PF13328.4; | 62.00 | 0.00 |
| TRINITY_G0QL09_ICHMG/65-248       | G0QL09.1     | PF01926.21 | 62.00 | 0.00 |
| TRINITY_I0YJB4_9CHLO/65-154       | I0YJB4.1     | PF13881.4; | 62.00 | 0.00 |
| TRINITY_Q23CU3_TETTS/521-600      | Q23CU3.1     | PF13193.4; | 62.00 | 0.00 |
| TRINITY_D8UFK2_VOLCA/39-209       | D8UFK2.1     | PF00504.19 | 62.00 | 0.00 |
| TRINITY_D8TY55_VOLCA/277-416      | D8TY55.1     | PF02797.13 | 62.00 | 0.00 |
| TRINITY_S2K6K5_MUCC1/522-772      | S2K6K5.1     | PF16203.3; | 62.00 | 0.00 |
| TRINITY_I1IJT0_BRADI/17-352       | I1IJT0.1     | PF00248.19 | 62.00 | 0.00 |
| TRINITY_M2Y7F6_GALSU/41-353       | M2Y7F6.1     | PF00389.28 | 62.00 | 0.00 |
| TRINITY_D3B5K0_POLPA/337-650      | D3B5K0.1     | PF02540.15 | 62.00 | 0.00 |
| TRINITY_A8JKB8_CHLRE/3-82         | A8JKB8.1     | PF08386.8; | 62.00 | 0.00 |
| TRINITY_I0YI54_9CHLO/1666-2217    | I0YI54.1     | PF01039.20 | 62.00 | 0.00 |
| TRINITY_D8TN96_VOLCA/20-315       | D8TN96.1     | PF05653.12 | 62.00 | 0.00 |
| TRINITY_I7LXP9_TETTS/257-308      | I7LXP9.2     | PF13920.4; | 62.00 | 0.00 |
| TRINITY_T1KAI4_TETUR/159-262      | T1KAI4.1     | PF04857.18 | 62.00 | 0.00 |
| TRINITY_Q6J214_CHLRE/95-363       | Q6J214.1     | PF00494.17 | 62.00 | 0.00 |
| TRINITY_A8IVU1_CHLRE/157-347      | A8IVU1.1     | PF01758.14 | 62.00 | 0.00 |
| TRINITY_D8TTW5_VOLCA/2-253        | D8TTW5.1     | PF00999.19 | 62.00 | 0.00 |
| TRINITY_A0A074SRS4_HAMHA/863-1002 | A0A074SRS4.1 | PF00663    | 62.00 | 0.00 |
| TRINITY_G0R4U1_ICHMG/30-190       | G0R4U1.1     | PF00160.19 | 61.90 | 0.00 |
| TRINITY_Q22ZI1_TETTS/49-356       | Q22ZI1.1     | PF00443.27 | 61.90 | 0.00 |
| TRINITY_I4B1X5_TURPD/4-137        | I4B1X5.1     | PF00578.19 | 61.90 | 0.00 |
| TRINITY_A0A067K6N7_JATCU/94-157   | A0A067K6N7.1 | PF1349     | 61.90 | 0.00 |
| TRINITY_F2TZG9_SALR5/133-174      | F2TZG9.1     | PF13639.4; | 61.90 | 0.00 |
| TRINITY_A0CMB2_PARTE/43-298       | A0CMB2.1     | PF00069.23 | 61.90 | 0.00 |
| TRINITY_I7MGY2_TETTS/301-415      | I7MGY2.1     | PF02338.17 | 61.90 | 0.00 |
| TRINITY_H3CEP1_TETNG/170-286      | H3CEP1.1     | PF02373.20 | 61.90 | 0.00 |
| TRINITY_M0QSG3_ACACA/116-206      | M0QSG3.1     | PF02214.20 | 61.90 | 0.00 |
| TRINITY_A0A0G4GU86_9ALVE/492-612  | A0A0G4GU86.1 | PF0268     | 61.90 | 0.00 |
| TRINITY_J9HMM9_9SPIT/852-1080     | J9HMM9.1     | PF16212.3; | 61.90 | 0.00 |
| TRINITY_A0A096LR37_POEFO/605-648  | A0A096LR37.1 | PF1363     | 61.90 | 0.00 |
| TRINITY_D8TKR5_VOLCA/1743-2169    | D8TKR5.1     | PF08490.10 | 61.90 | 0.00 |
| TRINITY_D8TIU9_VOLCA/1-243        | D8TIU9.1     | PF00149.26 | 61.90 | 0.00 |
| TRINITY_D8U7H9_VOLCA/70-449       | D8U7H9.1     | PF00632.23 | 61.90 | 0.00 |
| TRINITY_C1EGQ2_MICSR/3-282        | C1EGQ2.1     | PF00069.23 | 61.90 | 0.00 |
| TRINITY_A8JIP7_CHLRE/12-146       | A8JIP7.1     | PF03435.16 | 61.90 | 0.00 |
| TRINITY_A8HVV8_CHLRE/131-217      | A8HVV8.1     | PF03083.14 | 61.90 | 0.00 |
| TRINITY_A0DTL9_PARTE/204-384      | A0DTL9.1     | PF01853.16 | 61.90 | 0.00 |
| TRINITY_T1JDX2_STRMM/461-504      | T1JDX2.1     | PF13639.4; | 61.90 | 0.00 |
| TRINITY_M0QSG3_ACACA/116-206      | M0QSG3.1     | PF02214.20 | 61.90 | 0.00 |
| TRINITY_I7LWI9_TETTS/119-217      | I7LWI9.2     | PF00581.18 | 61.90 | 0.00 |
| TRINITY_A8IHH9_CHLRE/174-286      | A8IHH9.1     | PF01789.14 | 61.90 | 0.00 |
| TRINITY_A8HX98_CHLRE/512-668      | A8HX98.1     | PF01734.20 | 61.90 | 0.00 |
| TRINITY_Q23RV6_TETTS/6-277        | Q23RV6.1     | PF06732.9; | 61.90 | 0.00 |
| TRINITY_A8I678_CHLRE/1-190        | A8I678.1     | PF05158.10 | 61.90 | 0.00 |
| TRINITY_I0Z859_9CHLO/371-414      | I0Z859.1     | PF13639.4; | 61.90 | 0.00 |
| TRINITY_A0A096UDI9_MAIZE/100-144  | A0A096UDI9.1 | PF1363     | 61.90 | 0.00 |
| TRINITY_A8J4Z9_CHLRE/223-598      | A8J4Z9.1     | PF07690.14 | 61.90 | 0.00 |
| TRINITY_F4Q1X8_DICFS/1246-1394    | F4Q1X8.1     | PF00005.25 | 61.90 | 0.00 |
| TRINITY_I0Z601_9CHLO/442-816      | I0Z601.1     | PF03016.13 | 61.90 | 0.00 |
| TRINITY_A2DG97_TRIVA/91-155       | A2DG97.1     | PF13499.4; | 61.90 | 0.00 |
| TRINITY_D8TZS8_VOLCA/96-370       | D8TZS8.1     | PF00685.25 | 61.90 | 0.00 |
| TRINITY_D8THI7_VOLCA/30-155       | D8THI7.1     | PF10392.7; | 61.90 | 0.00 |
| TRINITY_A8J3N0_CHLRE/60-401       | A8J3N0.1     | PF07690.14 | 61.90 | 0.00 |
| TRINITY_D8UAV1_VOLCA/6-306        | D8UAV1.1     | PF04189.11 | 61.90 | 0.00 |
| TRINITY_D8U8Q8_VOLCA/981-1095     | D8U8Q8.1     | PF04560.18 | 61.90 | 0.00 |

|                                  |                     |       |      |
|----------------------------------|---------------------|-------|------|
| TRINITY_I7LXC9_TETTS/121-511     | I7LXC9.1 PF00155.19 | 61.80 | 0.00 |
| TRINITY_L8GWU5_ACACA/543-592     | L8GWU5.1 PF13920.4; | 61.80 | 0.00 |
| TRINITY_I7MLG5_TETTS/24-278      | I7MLG5.2 PF02263.17 | 61.80 | 0.00 |
| TRINITY_D3BLH3_POLPA/671-830     | D3BLH3.1 PF11865.6; | 61.80 | 0.00 |
| TRINITY_A0A078G387_BRANA/225-511 | A0A078G387.1 PF0794 | 61.80 | 0.00 |
| TRINITY_K3WV80_PYTUL/3-175       | K3WV80.1 PF01923.16 | 61.80 | 0.00 |
| TRINITY_A0A0B5AJA9_9BACL/336-460 | A0A0B5AJA9.1 PF1692 | 61.80 | 0.00 |
| TRINITY_F0Z7I3_DICPU/9-801       | F0Z7I3.1 PF00063.19 | 61.80 | 0.00 |
| TRINITY_I7ML76_TETTS/9-131       | I7ML76.1 PF01873.15 | 61.80 | 0.00 |
| TRINITY_D2V9R9_NAEGR/5-190       | D2V9R9.1 PF00227.24 | 61.80 | 0.00 |
| TRINITY_J9JA03_9SPIT/172-345     | J9JA03.1 PF08662.9; | 61.80 | 0.00 |
| TRINITY_A0A0L0NS74_9ASCO/167-414 | A0A0L0NS74.1 PF0118 | 61.80 | 0.00 |
| TRINITY_A0A067CC13_SAPPC/5-298   | A0A067CC13.1 PF0000 | 61.80 | 0.00 |
| TRINITY_A8J3E7_CHLRE/65-166      | A8J3E7.1 PF00630.17 | 61.80 | 0.00 |
| TRINITY_E1ZHJ7_CHLVA/1-134       | E1ZHJ7.1 PF13344.4; | 61.80 | 0.00 |
| TRINITY_F1A552_DICPU/32-163      | F1A552.1 PF01966.20 | 61.80 | 0.00 |
| TRINITY_A0A068SCF9_9FUNG/35-101  | A0A068SCF9.1 PF0069 | 61.80 | 0.00 |
| TRINITY_A0A087SC48_AUXPR/130-229 | A0A087SC48.1 PF1364 | 61.80 | 0.00 |
| TRINITY_D8TSV2_VOLCA/52-209      | D8TSV2.1 PF01789.14 | 61.80 | 0.00 |
| TRINITY_G0R0J2_ICHMG/131-378     | G0R0J2.1 PF00122.18 | 61.80 | 0.00 |
| TRINITY_I7M3G1_TETTS/208-776     | I7M3G1.1 PF00183.16 | 61.80 | 0.00 |
| TRINITY_D8M1W7_BLAHO/168-334     | D8M1W7.1 PF02421.16 | 61.80 | 0.00 |
| TRINITY_E1ZH58_CHLVA/1-248       | E1ZH58.1 PF00454.25 | 61.80 | 0.00 |
| TRINITY_A0A067QLN0_ZOONE/42-257  | A0A067QLN0.1 PF0014 | 61.80 | 0.00 |
| TRINITY_D8UBW9_VOLCA/5-216       | D8UBW9.1 PF08442.8; | 61.80 | 0.00 |
| TRINITY_I0Z3G2_9CHLO/789-892     | I0Z3G2.1 PF02984.17 | 61.80 | 0.00 |
| TRINITY_A0CBE5_PARTE/106-283     | A0CBE5.1 PF01163.20 | 61.80 | 0.00 |
| TRINITY_I7MD12_TETTS/59-126      | I7MD12.1 PF00550.23 | 61.80 | 0.00 |
| TRINITY_A8JEK6_CHLRE/155-260     | A8JEK6.1 PF00254.26 | 61.80 | 0.00 |
| TRINITY_D8UBS2_VOLCA/5-73        | D8UBS2.1 PF13921.4; | 61.80 | 0.00 |
| TRINITY_D8TJJ9_VOLCA/4-113       | D8TJJ9.1 PF00411.17 | 61.80 | 0.00 |
| TRINITY_A0A078B4I1_STYLE/16-344  | A0A078B4I1.1 PF0089 | 61.80 | 0.00 |
| TRINITY_F2KY65_PREDF/3-203       | F2KY65.1 PF00590.18 | 61.80 | 0.00 |
| TRINITY_Q235L2_TETTS/74-150      | Q235L2.1 PF03134.17 | 61.80 | 0.00 |
| TRINITY_D8TJ25_VOLCA/8-123       | D8TJ25.1 PF14580.4; | 61.80 | 0.00 |
| TRINITY_L8H3W5_ACACA/971-1093    | L8H3W5.1 PF00271.29 | 61.80 | 0.00 |
| TRINITY_Q551W4_DICDI/546-624     | Q551W4.1 PF13193.4; | 61.80 | 0.00 |
| TRINITY_Q5W9T0_CHLRE/210-282     | Q5W9T0.1 PF00504.19 | 61.80 | 0.00 |
| TRINITY_D8UCI5_VOLCA/121-196     | D8UCI5.1 PF00076.20 | 61.80 | 0.00 |
| TRINITY_Q5AWT4_EMENI/461-784     | Q5AWT4.1 PF13086.4; | 61.80 | 0.00 |
| TRINITY_I9BU49_9RALS/186-452     | I9BU49.1 PF03313.13 | 61.80 | 0.00 |
| TRINITY_A0A0E9NMI7_9ASCO/175-287 | A0A0E9NMI7.1 PF0295 | 61.80 | 0.00 |
| TRINITY_I7MMG8_TETTS/8-169       | I7MMG8.1 PF00071.20 | 61.70 | 0.00 |
| TRINITY_L8GUK1_ACACA/237-488     | L8GUK1.1 PF07714.15 | 61.70 | 0.00 |
| TRINITY_R9AGT5_WALI9/349-415     | R9AGT5.1 PF01423.20 | 61.70 | 0.00 |
| TRINITY_A9U389_PHYPA/2-143       | A9U389.1 PF01217.18 | 61.70 | 0.00 |
| TRINITY_F4XSE4_9CYAN/117-379     | F4XSE4.1 PF07995.9; | 61.70 | 0.00 |
| TRINITY_G0QMA7_ICHMG/113-358     | G0QMA7.1 PF02906.12 | 61.70 | 0.00 |
| TRINITY_Q1IJR4_KORVE/50-364      | Q1IJR4.1 PF00251.18 | 61.70 | 0.00 |
| TRINITY_Q22T22_TETTS/520-735     | Q22T22.3 PF07859.11 | 61.70 | 0.00 |
| TRINITY_A7S5U3_NEMVE/23-275      | A7S5U3.1 PF00756.18 | 61.70 | 0.00 |
| TRINITY_M2Y664_GALSU/13-174      | M2Y664.1 PF00071.20 | 61.70 | 0.00 |
| TRINITY_A0A022QSG7_ERYGU/141-295 | A0A022QSG7.1 PF0444 | 61.70 | 0.00 |
| TRINITY_A0A0D2UGE9_CAPO3/18-165  | A0A0D2UGE9.1 PF0405 | 61.70 | 0.00 |
| TRINITY_K1RU04_CRAGI/3-376       | K1RU04.1 PF00022.17 | 61.70 | 0.00 |
| TRINITY_D8TX33_VOLCA/7-126       | D8TX33.1 PF00637.18 | 61.70 | 0.00 |
| TRINITY_A0A0N1HZ48_9EURO/127-265 | A0A0N1HZ48.1 PF0000 | 61.70 | 0.00 |
| TRINITY_A0A078AF24_STYLE/251-493 | A0A078AF24.1 PF0012 | 61.70 | 0.00 |
| TRINITY_W5MEL6_LEPOC/11-266      | W5MEL6.1 PF03437.13 | 61.70 | 0.00 |
| TRINITY_A0CC48_PARTE/14-196      | A0CC48.1 PF00227.24 | 61.70 | 0.00 |
| TRINITY_A0CC48_PARTE/14-196      | A0CC48.1 PF00227.24 | 61.70 | 0.00 |

|                                  |                     |       |      |
|----------------------------------|---------------------|-------|------|
| TRINITY_I4YCC2_WALMC/1210-1553   | I4YCC2.1 PF00176.21 | 61.70 | 0.00 |
| TRINITY_A0BN60_PARTE/55-373      | A0BN60.1 PF00225.21 | 61.70 | 0.00 |
| TRINITY_D8TTV8_VOLCA/81-324      | D8TTV8.1 PF00233.17 | 61.70 | 0.00 |
| TRINITY_A4VCZ5_TETTS/564-728     | A4VCZ5.1 PF12931.5; | 61.70 | 0.00 |
| TRINITY_A0EAW6_PARTE/188-236     | A0EAW6.1 PF13833.4; | 61.70 | 0.00 |
| TRINITY_L8H537_ACACA/119-311     | L8H537.1 PF01071.17 | 61.70 | 0.00 |
| TRINITY_E1Z882_CHLVA/22-272      | E1Z882.1 PF12740.5; | 61.70 | 0.00 |
| TRINITY_A8I243_CHLRE/5-153       | A8I243.1 PF03801.11 | 61.70 | 0.00 |
| TRINITY_Q23QI5_TETTS/56-189      | Q23QI5.1 PF13350.4; | 61.70 | 0.00 |
| TRINITY_A0D3K4_PARTE/152-201     | A0D3K4.1 PF13920.4; | 61.70 | 0.00 |
| TRINITY_D8UEU2_VOLCA/503-670     | D8UEU2.1 PF01885.14 | 61.70 | 0.00 |
| TRINITY_A0A078D7A8_BRANA/47-111  | A0A078D7A8.1 PF1349 | 61.70 | 0.00 |
| TRINITY_E7F643_DANRE/401-761     | E7F643.1 PF00493.21 | 61.70 | 0.00 |
| TRINITY_M1AI07_SOLTU/29-88       | M1AI07.1 PF00400.30 | 61.70 | 0.00 |
| TRINITY_D8UAY6_VOLCA/22-101      | D8UAY6.1 PF10273.7; | 61.70 | 0.00 |
| TRINITY_A0A061FPA9_THECC/161-335 | A0A061FPA9.1 PF0073 | 61.70 | 0.00 |
| TRINITY_F6I015_VITVI/6-146       | F6I015.1 PF05903.12 | 61.70 | 0.00 |
| TRINITY_C6VWI0_DYAFD/52-521      | C6VWI0.1 PF00171.20 | 61.70 | 0.00 |
| TRINITY_I7M3R0_TETTS/275-389     | I7M3R0.1 PF01926.21 | 61.70 | 0.00 |
| TRINITY_D8TZH6_VOLCA/22-283      | D8TZH6.1 PF00233.17 | 61.70 | 0.00 |
| TRINITY_I0YUL0_9CHLO/44-186      | I0YUL0.1 PF13365.4; | 61.70 | 0.00 |
| TRINITY_W4GI63_9STRA/1-186       | W4GI63.1 PF01201.20 | 61.70 | 0.00 |
| TRINITY_L8GSW4_ACACA/36-82       | L8GSW4.1 PF01281.17 | 61.70 | 0.00 |
| TRINITY_L8GL86_ACACA/16-585      | L8GL86.1 PF01411.17 | 61.70 | 0.00 |

|                                    |              |            |       |      |
|------------------------------------|--------------|------------|-------|------|
| TRINITY_G0QU69_ICHMG/12-144        | G0QU69.1     | PF05222.13 | 61.70 | 0.00 |
| TRINITY_A8HN56_CHLRE/225-326       | A8HN56.1     | PF13499.4; | 61.70 | 0.00 |
| TRINITY_A7REQ2_NEMVE/4-157         | A7REQ2.1     | PF00005.25 | 61.70 | 0.00 |
| TRINITY_D8TQB4_VOLCA/266-516       | D8TQB4.1     | PF00069.23 | 61.70 | 0.00 |
| TRINITY_F1A0B3_DICPU/165-273       | F1A0B3.1     | PF08616.8; | 61.70 | 0.00 |
| TRINITY_A8IBL5_CHLRE/76-217        | A8IBL5.1     | PF01529.18 | 61.70 | 0.00 |
| TRINITY_A8J5V2_CHLRE/8-268         | A8J5V2.1     | PF08323.9; | 61.70 | 0.00 |
| TRINITY_A0A059B6L1_EUCGR/13-172    | A0A059B6L1.1 | PF0410     | 61.70 | 0.00 |
| TRINITY_L8GDC4_ACACA/12-153        | L8GDC4.1     | PF00080.18 | 61.70 | 0.00 |
| TRINITY_C1E8C1_MICSR/212-300       | C1E8C1.1     | PF03908.11 | 61.70 | 0.00 |
| TRINITY_D8UF73_VOLCA/251-332       | D8UF73.1     | PF00211.18 | 61.70 | 0.00 |
| TRINITY_C1E160_MICSR/172-281       | C1E160.1     | PF13640.4; | 61.70 | 0.00 |
| TRINITY_E1Z915_CHLVA/484-803       | E1Z915.1     | PF01937.17 | 61.70 | 0.00 |
| TRINITY_D8UEF2_VOLCA/54-237        | D8UEF2.1     | PF00504.19 | 61.70 | 0.00 |
| TRINITY_W7X957_TETTS/108-419       | W7X957.1     | PF02636.15 | 61.70 | 0.00 |
| TRINITY_Q23AM3_TETTS/1054-1231     | Q23AM3.2     | PF00005.25 | 61.60 | 0.00 |
| TRINITY_G6CIB4_DANPL/49-293        | G6CIB4.1     | PF01209.16 | 61.60 | 0.00 |
| TRINITY_A0A068RTD5_9FUNG/12-173    | A0A068RTD5.1 | PF0007     | 61.60 | 0.00 |
| TRINITY_G0R4W3_ICHMG/13-112        | G0R4W3.1     | PF03226.12 | 61.60 | 0.00 |
| TRINITY_A0A078A3V7_STYLE/126-338   | A0A078A3V7.1 | PF0011     | 61.60 | 0.00 |
| TRINITY_I4AK14_FLELS/6-265         | I4AK14.1     | PF00108.21 | 61.60 | 0.00 |
| TRINITY_I7M9L6_TETTS/1063-1226     | I7M9L6.1     | PF00005.25 | 61.60 | 0.00 |
| TRINITY_L8GNP9_ACACA/1-74          | L8GNP9.1     | PF05251.10 | 61.60 | 0.00 |
| TRINITY_M1MTR0_9CLOT/74-285        | M1MTR0.1     | PF07859.11 | 61.60 | 0.00 |
| TRINITY_A0A059LP53_9CHLO/51-227    | A0A059LP53.1 | PF0438     | 61.60 | 0.00 |
| TRINITY_A8HTI5_CHLRE/224-447       | A8HTI5.1     | PF00149.26 | 61.60 | 0.00 |
| TRINITY_F0Z9X7_DICPU/19-269        | F0Z9X7.1     | PF00069.23 | 61.60 | 0.00 |
| TRINITY_A8JI17_CHLRE/39-132        | A8JI17.1     | PF00153.25 | 61.60 | 0.00 |
| TRINITY_U3IHR3_ANAPL/140-303       | U3IHR3.1     | PF00005.25 | 61.60 | 0.00 |
| TRINITY_W5BIS0_WHEAT/1-160         | W5BIS0.1     | PF00899.19 | 61.60 | 0.00 |
| TRINITY_J2ZWG3_9CAUL/2-181         | J2ZWG3.1     | PF01121.18 | 61.60 | 0.00 |
| TRINITY_E1ZGE3_CHLVA/24-296        | E1ZGE3.1     | PF00069.23 | 61.60 | 0.00 |
| TRINITY_S8CD85_9LAMI/5-102         | S8CD85.1     | PF00125.22 | 61.60 | 0.00 |
| TRINITY_A0A096Q8F0_MAIZE/61-420    | A0A096Q8F0.1 | PF0933     | 61.60 | 0.00 |
| TRINITY_A8JFQ2_CHLRE/9-158         | A8JFQ2.1     | PF02099.15 | 61.60 | 0.00 |
| TRINITY_A0A0J8D1N5_BETVU/217-475   | A0A0J8D1N5.1 | PF1047     | 61.60 | 0.00 |
| TRINITY_D8TZF0_VOLCA/126-211       | D8TZF0.1     | PF03083.14 | 61.60 | 0.00 |
| TRINITY_L8HBC4_ACACA/1006-1169     | L8HBC4.1     | PF08623.8; | 61.60 | 0.00 |
| TRINITY_D8UFR6_VOLCA/71-385        | D8UFR6.1     | PF00069.23 | 61.60 | 0.00 |
| TRINITY_A8JC77_CHLRE/1-279         | A8JC77.1     | PF00225.21 | 61.60 | 0.00 |
| TRINITY_DST2_DICDI/20-276          | Q55GC2.1     | PF00069.23 | 61.60 | 0.00 |
| TRINITY_I0YS28_9CHLO/336-547       | I0YS28.1     | PF01434.16 | 61.60 | 0.00 |
| TRINITY_A0A078B3U9_STYLE/406-642   | A0A078B3U9.1 | PF0006     | 61.60 | 0.00 |
| TRINITY_E0UPF7_SULAO/21-158        | E0UPF7.1     | PF12867.5; | 61.50 | 0.00 |
| TRINITY_I7MCW0_TETTS/37-114        | I7MCW0.1     | PF09398.8; | 61.50 | 0.00 |
| TRINITY_A0A059CK21_EUCGR/37-128    | A0A059CK21.1 | PF0188     | 61.50 | 0.00 |
| TRINITY_F4NYW3_BATDJ/653-1037      | F4NYW3.1     | PF05192.16 | 61.50 | 0.00 |
| TRINITY_B6JVL7_SCHJY/88-450        | B6JVL7.1     | PF00291.23 | 61.50 | 0.00 |
| TRINITY_K9R9X6_9CYAN/33-125        | K9R9X6.1     | PF04248.10 | 61.50 | 0.00 |
| TRINITY_X1W3S8_TETTS/285-401       | X1W3S8.1     | PF02373.20 | 61.50 | 0.00 |
| TRINITY_Q22EY8_TETTS/112-209       | Q22EY8.1     | PF00153.25 | 61.50 | 0.00 |
| TRINITY_M4BMA1_HYAAE/108-159       | M4BMA1.1     | PF00400.30 | 61.50 | 0.00 |
| TRINITY_Q239R9_TETTS/1112-1262     | Q239R9.2     | PF00005.25 | 61.50 | 0.00 |
| TRINITY_T1J7S0_STRMM/622-667       | T1J7S0.1     | PF13920.4; | 61.50 | 0.00 |
| TRINITY_L8HAK4_ACACA/43-223        | L8HAK4.1     | PF02737.16 | 61.50 | 0.00 |
| TRINITY_GPX7_ARATH/76-184          | Q9SZ54.2     | PF00255.17 | 61.50 | 0.00 |
| TRINITY_L8GLU7_ACACA/23-201        | L8GLU7.1     | PF01300.16 | 61.50 | 0.00 |
| TRINITY_L8H4R8_ACACA/22-218        | L8H4R8.1     | PF04664.11 | 61.50 | 0.00 |
| TRINITY_H2YP11_CIOSA/230-438       | H2YP11.1     | PF00005.25 | 61.50 | 0.00 |
| TRINITY_L8H7T0_ACACA/33-396        | L8H7T0.1     | PF00155.19 | 61.50 | 0.00 |
| TRINITY_A0A096MH05_POEFO/1172-1320 | A0A096MH05.1 | PF0000     | 61.50 | 0.00 |



|                                  |                     |       |      |
|----------------------------------|---------------------|-------|------|
| TRINITY_A9TQ97_PHYPA/269-325     | A9TQ97.1 PF09280.9; | 61.50 | 0.00 |
| TRINITY_J9HPY2_9SPIT/10-48       | J9HPY2.1 PF13917.4; | 61.50 | 0.00 |
| TRINITY_A0A087SBZ8_AUXPR/221-410 | A0A087SBZ8.1 PF0058 | 61.50 | 0.00 |
| TRINITY_A0DIP7_PARTE/2051-2134   | A0DIP7.1 PF05406.13 | 61.50 | 0.00 |
| TRINITY_A8HMM6_CHLRE/139-249     | A8HMM6.1 PF02517.14 | 61.50 | 0.00 |
| TRINITY_A8JEB7_CHLRE/516-889     | A8JEB7.1 PF00856.26 | 61.50 | 0.00 |
| TRINITY_A8J8D4_CHLRE/40-220      | A8J8D4.1 PF13419.4; | 61.50 | 0.00 |
| TRINITY_C6W4K0_DYAFD/4-370       | C6W4K0.1 PF01663.20 | 61.50 | 0.00 |
| TRINITY_M5GC36_DACSP/667-845     | M5GC36.1 PF11916.6; | 61.50 | 0.00 |
| TRINITY_Y3393_SYNFM/110-252      | A0LNR4.1 PF07286.10 | 61.50 | 0.00 |
| TRINITY_K9VY32_9CYAN/312-350     | K9VY32.1 PF00400.30 | 61.50 | 0.00 |
| TRINITY_Q5TNJ4_ANOGA/104-168     | Q5TNJ4.3 PF00327.18 | 61.50 | 0.00 |
| TRINITY_K1QEC4_CRAGI/17-106      | K1QEC4.1 PF02214.20 | 61.50 | 0.00 |
| TRINITY_D8TX29_VOLCA/96-436      | D8TX29.1 PF00724.18 | 61.50 | 0.00 |
| TRINITY_D8UIZ7_VOLCA/369-849     | D8UIZ7.1 PF00759.17 | 61.50 | 0.00 |
| TRINITY_L8HLI2_ACACA/228-282     | L8HLI2.1 PF08063.10 | 61.50 | 0.00 |
| TRINITY_V4L9F1_EUTSA/130-411     | V4L9F1.1 PF00176.21 | 61.50 | 0.00 |
| TRINITY_D8TUG8_VOLCA/629-854     | D8TUG8.1 PF00149.26 | 61.50 | 0.00 |
| TRINITY_A0A068S411_9FUNG/317-355 | A0A068S411.1 PF0481 | 61.50 | 0.00 |
| TRINITY_A8JCE5_CHLRE/121-255     | A8JCE5.1 PF04073.13 | 61.50 | 0.00 |
| TRINITY_Q24JG1_TETTS/16-326      | Q24JG1.1 PF07992.12 | 61.50 | 0.00 |
| TRINITY_AP1G_DICDI/21-578        | Q8I8U2.1 PF01602.18 | 61.50 | 0.00 |
| TRINITY_I7M6H6_TETTS/54-166      | I7M6H6.1 PF10908.6; | 61.50 | 0.00 |
| TRINITY_A0A0D1VZF4_ANEMI/9-178   | A0A0D1VZF4.1 PF0088 | 61.50 | 0.00 |
| TRINITY_F4PYU2_DICFS/181-889     | F4PYU2.1 PF00343.18 | 61.50 | 0.00 |
| TRINITY_A0EBG4_PARTE/41-332      | A0EBG4.1 PF05185.14 | 61.50 | 0.00 |
| TRINITY_D8UBE1_VOLCA/26-435      | D8UBE1.1 PF00232.16 | 61.50 | 0.00 |
| TRINITY_D8U9S9_VOLCA/599-793     | D8U9S9.1 PF00211.18 | 61.50 | 0.00 |
| TRINITY_D8UCM4_VOLCA/1-110       | D8UCM4.1 PF07001.9; | 61.50 | 0.00 |
| TRINITY_C1E5J4_MICSR/37-128      | C1E5J4.1 PF01248.24 | 61.50 | 0.00 |
| TRINITY_D8TTX4_VOLCA/18-408      | D8TTX4.1 PF07690.14 | 61.50 | 0.00 |
| TRINITY_A0A0A0KIY4_CUCSA/103-167 | A0A0A0KIY4.1 PF1349 | 61.50 | 0.00 |
| TRINITY_F0SSI4_RUBBR/11-136      | F0SSI4.1 PF00578.19 | 61.50 | 0.00 |
| TRINITY_A0E189_PARTE/446-495     | A0E189.1 PF13920.4; | 61.40 | 0.00 |
| TRINITY_Q22RZ8_TETTS/183-242     | Q22RZ8.2 PF13921.4; | 61.40 | 0.00 |
| TRINITY_J9ELK2_9SPIT/58-353      | J9ELK2.1 PF00069.23 | 61.40 | 0.00 |
| TRINITY_M2PPP9_CERS8/675-986     | M2PPP9.1 PF05843.12 | 61.40 | 0.00 |
| TRINITY_A0A0J8B2Q8_BETVU/356-401 | A0A0J8B2Q8.1 PF1363 | 61.40 | 0.00 |
| TRINITY_A0EGG4_PARTE/7-89        | A0EGG4.1 PF01221.16 | 61.40 | 0.00 |
| TRINITY_A0A0A7LLI1_9BACT/4-177   | A0A0A7LLI1.1 PF0053 | 61.40 | 0.00 |
| TRINITY_G0R374_ICHMG/25-316      | G0R374.1 PF03095.13 | 61.40 | 0.00 |
| TRINITY_B9PQT4_TOXGO/12-383      | B9PQT4.1 PF00022.17 | 61.40 | 0.00 |
| TRINITY_D8U0Q2_VOLCA/308-569     | D8U0Q2.1 PF10672.7; | 61.40 | 0.00 |
| TRINITY_L8GUR2_ACACA/284-351     | L8GUR2.1 PF02207.18 | 61.40 | 0.00 |
| TRINITY_J9FRH7_9SPIT/20-284      | J9FRH7.1 PF01650.16 | 61.40 | 0.00 |
| TRINITY_B8BVC5_THAPS/7-64        | B8BVC5.1 PF13921.4; | 61.40 | 0.00 |
| TRINITY_I0YKX7_9CHLO/155-269     | I0YKX7.1 PF00504.19 | 61.40 | 0.00 |
| TRINITY_L1JEC9_GUITH/16-205      | L1JEC9.1 PF00270.27 | 61.40 | 0.00 |
| TRINITY_D3BGU2_POLPA/134-214     | D3BGU2.1 PF00071.20 | 61.40 | 0.00 |
| TRINITY_TILS_THEEB/24-201        | Q8DIH2.1 PF01171.18 | 61.40 | 0.00 |
| TRINITY_C3ZMR5_BRAFL/4-377       | C3ZMR5.1 PF00022.17 | 61.40 | 0.00 |
| TRINITY_C1DZQ0_MICSR/2034-2102   | C1DZQ0.1 PF02207.18 | 61.40 | 0.00 |
| TRINITY_F1A2B8_DICPU/35-339      | F1A2B8.1 PF00069.23 | 61.40 | 0.00 |
| TRINITY_I7M864_TETTS/33-294      | I7M864.1 PF00069.23 | 61.40 | 0.00 |
| TRINITY_A0A0J6R8B7_9RHIZ/33-83   | A0A0J6R8B7.1 PF1139 | 61.40 | 0.00 |
| TRINITY_A0BFS0_PARTE/154-197     | A0BFS0.1 PF00569.15 | 61.40 | 0.00 |
| TRINITY_A0D197_PARTE/10-69       | A0D197.1 PF06624.10 | 61.40 | 0.00 |
| TRINITY_D8UHB1_VOLCA/404-473     | D8UHB1.1 PF00571.26 | 61.40 | 0.00 |
| TRINITY_D8UGG6_VOLCA/17-191      | D8UGG6.1 PF10188.7; | 61.40 | 0.00 |
| TRINITY_Q248H8_TETTS/3600-3822   | Q248H8.1 PF12781.5; | 61.40 | 0.00 |
| TRINITY_A8HP31_CHLRE/4-166       | A8HP31.1 PF04573.10 | 61.40 | 0.00 |

|                                  |                     |       |      |
|----------------------------------|---------------------|-------|------|
| TRINITY_L8HMW5_ACACA/38-177      | L8HMW5.1 PF08719.9; | 61.40 | 0.00 |
| TRINITY_W3WQH0_9PEZI/17-317      | W3WQH0.1 PF00248.19 | 61.40 | 0.00 |
| TRINITY_U1MTI7_ASCSU/188-330     | U1MTI7.1 PF00156.25 | 61.40 | 0.00 |
| TRINITY_A0A0D2WMT8_CAPO3/13-354  | A0A0D2WMT8.1 PF0112 | 61.40 | 0.00 |
| TRINITY_D8TVC0_VOLCA/1983-2096   | D8TVC0.1 PF00665.24 | 61.40 | 0.00 |
| TRINITY_D8RGS1_SELML/17-144      | D8RGS1.1 PF13625.4; | 61.40 | 0.00 |
| TRINITY_L8HJK9_ACACA/14-635      | L8HJK9.1 PF00888.20 | 61.40 | 0.00 |
| TRINITY_L8H7E1_ACACA/163-365     | L8H7E1.1 PF02750.12 | 61.40 | 0.00 |
| TRINITY_G0R1B7_ICHMG/7-66        | G0R1B7.1 PF04193.12 | 61.40 | 0.00 |
| TRINITY_L8GIR2_ACACA/45-227      | L8GIR2.1 PF13532.4; | 61.40 | 0.00 |
| TRINITY_B7XKC3_ENTBH/234-373     | B7XKC3.1 PF00004.27 | 61.40 | 0.00 |
| TRINITY_D8UB15_VOLCA/264-324     | D8UB15.1 PF03105.17 | 61.40 | 0.00 |
| TRINITY_A0A0A1NH53_9FUNG/12-62   | A0A0A1NH53.1 PF0038 | 61.40 | 0.00 |
| TRINITY_D8TT41_VOLCA/30-634      | D8TT41.1 PF00012.18 | 61.40 | 0.00 |
| TRINITY_E1Z5J0_CHLVA/71-358      | E1Z5J0.1 PF01207.15 | 61.40 | 0.00 |
| TRINITY_K4CET7_SOLLC/200-244     | K4CET7.1 PF13396.4; | 61.40 | 0.00 |
| TRINITY_A0A077AV43_9RICK/4-107   | A0A077AV43.1 PF0152 | 61.40 | 0.00 |
| TRINITY_D8U1I6_VOLCA/153-493     | D8U1I6.1 PF00152.18 | 61.40 | 0.00 |
| TRINITY_F0ZKN4_DICPU/472-543     | F0ZKN4.1 PF02825.18 | 61.40 | 0.00 |
| TRINITY_I0YXA9_9CHLO/19-419      | I0YXA9.1 PF00202.19 | 61.40 | 0.00 |
| TRINITY_W5K6K0_ASTMX/59-146      | W5K6K0.1 PF08712.9; | 61.40 | 0.00 |
| TRINITY_V4TQM7_9ROSI/538-738     | V4TQM7.1 PF12931.5; | 61.40 | 0.00 |
| TRINITY_A0A0D2WMY3_CAPO3/287-433 | A0A0D2WMY3.1 PF0062 | 61.40 | 0.00 |
| TRINITY_J9F683_9SPIT/731-774     | J9F683.1 PF06203.12 | 61.40 | 0.00 |
| TRINITY_C1MV11_MICPC/439-838     | C1MV11.1 PF00940.17 | 61.40 | 0.00 |
| TRINITY_D8TMB1_VOLCA/383-522     | D8TMB1.1 PF01399.25 | 61.40 | 0.00 |
| TRINITY_G0R454_ICHMG/13-82       | G0R454.1 PF01423.20 | 61.40 | 0.00 |
| TRINITY_B0W062_CULQU/317-754     | B0W062.1 PF00501.26 | 61.40 | 0.00 |
| TRINITY_Q16I11_AEDAE/993-1140    | Q16I11.1 PF00005.25 | 61.40 | 0.00 |
| TRINITY_E4T5G0_PALPW/31-384      | E4T5G0.1 PF16499.3; | 61.30 | 0.00 |
| TRINITY_Q3SDL5_PARTE/12-173      | Q3SDL5.1 PF00071.20 | 61.30 | 0.00 |
| TRINITY_W9YR47_9EURO/37-188      | W9YR47.1 PF01743.18 | 61.30 | 0.00 |
| TRINITY_A0CW36_PARTE/237-420     | A0CW36.1 PF02799.13 | 61.30 | 0.00 |
| TRINITY_E1ZQ79_CHLVA/143-400     | E1ZQ79.1 PF10672.7; | 61.30 | 0.00 |
| TRINITY_L8GIJ7_ACACA/461-567     | L8GIJ7.1 PF00175.19 | 61.30 | 0.00 |
| TRINITY_A0A067CFX7_SAPPC/106-352 | A0A067CFX7.1 PF0012 | 61.30 | 0.00 |
| TRINITY_I7MHS8_TETTS/213-274     | I7MHS8.2 PF12906.5; | 61.30 | 0.00 |
| TRINITY_A0A059LS92_9CHLO/560-705 | A0A059LS92.1 PF0251 | 61.30 | 0.00 |
| TRINITY_I0Z6H7_9CHLO/21-95       | I0Z6H7.1 PF00364.20 | 61.30 | 0.00 |
| TRINITY_A8J5Y7_CHLRE/75-168      | A8J5Y7.1 PF01250.15 | 61.30 | 0.00 |
| TRINITY_C6RNY4_ACIRA/4-65        | C6RNY4.1 PF00226.29 | 61.30 | 0.00 |
| TRINITY_G0GEA9_SPITZ/216-397     | G0GEA9.1 PF00587.23 | 61.30 | 0.00 |
| TRINITY_V9G1A7_PHYPR/152-221     | V9G1A7.1 PF13424.4; | 61.30 | 0.00 |
| TRINITY_I7MDU0_TETTS/12-274      | I7MDU0.1 PF00069.23 | 61.30 | 0.00 |
| TRINITY_R4XC98_TAPDE/138-274     | R4XC98.1 PF04116.11 | 61.30 | 0.00 |
| TRINITY_D8TJL5_VOLCA/90-167      | D8TJL5.1 PF09420.8; | 61.30 | 0.00 |
| TRINITY_A0A024RE44_VAVCU/259-521 | A0A024RE44.1 PF0058 | 61.30 | 0.00 |
| TRINITY_Q66YD1_CHLRE/72-133      | Q66YD1.1 PF00226.29 | 61.30 | 0.00 |
| TRINITY_W3WQH0_9PEZI/17-317      | W3WQH0.1 PF00248.19 | 61.30 | 0.00 |
| TRINITY_D8TL16_VOLCA/14-549      | D8TL16.1 PF01602.18 | 61.30 | 0.00 |
| TRINITY_D8UI50_VOLCA/3-153       | D8UI50.1 PF04099.10 | 61.30 | 0.00 |
| TRINITY_A0A0N4UMD3_DRAME/5-177   | A0A0N4UMD3.1 PF0002 | 61.30 | 0.00 |
| TRINITY_A0A078A6A0_STYLE/8-70    | A0A078A6A0.1 PF0007 | 61.30 | 0.00 |
| TRINITY_A0EA10_PARTE/59-340      | A0EA10.1 PF06472.13 | 61.30 | 0.00 |
| TRINITY_D0MXE0_PHYIT/188-370     | D0MXE0.1 PF00270.27 | 61.30 | 0.00 |
| TRINITY_Q23R00_TETTS/6-298       | Q23R00.2 PF00579.23 | 61.30 | 0.00 |
| TRINITY_F0ZYM8_DICPU/393-643     | F0ZYM8.1 PF07714.15 | 61.30 | 0.00 |
| TRINITY_Q8MML7_DICDI/240-382     | Q8MML7.1 PF02840.13 | 61.30 | 0.00 |
| TRINITY_A0A0G4EZU4_9ALVE/291-621 | A0A0G4EZU4.1 PF0081 | 61.30 | 0.00 |
| TRINITY_FYV1_DICDI/935-1227      | B0G126.1 PF00118.22 | 61.30 | 0.00 |
| TRINITY_D8UF04_VOLCA/7-220       | D8UF04.1 PF01088.19 | 61.30 | 0.00 |

|                                  |              |            |       |      |
|----------------------------------|--------------|------------|-------|------|
| TRINITY_Q23VX7_TETTS/222-459     | Q23VX7.1     | PF00198.21 | 61.30 | 0.00 |
| TRINITY_K9VES7_9CYAN/141-246     | K9VES7.1     | PF08241.10 | 61.30 | 0.00 |
| TRINITY_D8UJ00_VOLCA/198-351     | D8UJ00.1     | PF13328.4; | 61.30 | 0.00 |
| TRINITY_D8UHT9_VOLCA/5-258       | D8UHT9.1     | PF00069.23 | 61.30 | 0.00 |
| TRINITY_A0A078AA42_STYLE/1-191   | A0A078AA42.1 | PF0120     | 61.30 | 0.00 |
| TRINITY_D1VX60_9BACT/15-351      | D1VX60.1     | PF13393.4; | 61.20 | 0.00 |
| TRINITY_Q234S6_TETTS/45-667      | Q234S6.3     | PF00443.27 | 61.20 | 0.00 |
| TRINITY_Q3SDT4_PARTE/8-173       | Q3SDT4.1     | PF00071.20 | 61.20 | 0.00 |
| TRINITY_G0R2Q6_ICHMG/2-287       | G0R2Q6.1     | PF00248.19 | 61.20 | 0.00 |
| TRINITY_L8GF85_ACACA/2138-2306   | L8GF85.1     | PF00520.29 | 61.20 | 0.00 |
| TRINITY_J9HXH4_9SPIT/314-525     | J9HXH4.1     | PF00211.18 | 61.20 | 0.00 |
| TRINITY_L0G6R7_ECHVK/36-378      | L0G6R7.1     | PF07221.9; | 61.20 | 0.00 |
| TRINITY_E7KVV6_YEASL/41-142      | E7KVV6.1     | PF13649.4; | 61.20 | 0.00 |
| TRINITY_C6SYH7_SOYBN/19-85       | C6SYH7.1     | PF01423.20 | 61.20 | 0.00 |
| TRINITY_C6SYH7_SOYBN/19-85       | C6SYH7.1     | PF01423.20 | 61.20 | 0.00 |
| TRINITY_Q22BY0_TETTS/1870-1918   | Q22BY0.2     | PF00415.16 | 61.20 | 0.00 |
| TRINITY_D5DVZ6_BACMQ/25-194      | D5DVZ6.1     | PF00881.22 | 61.20 | 0.00 |
| TRINITY_C5LIW9_PERM5/8-85        | C5LIW9.1     | PF01423.20 | 61.20 | 0.00 |
| TRINITY_A7REQ2_NEMVE/4-157       | A7REQ2.1     | PF00005.25 | 61.20 | 0.00 |
| TRINITY_I0YYW7_9CHLO/18-115      | I0YYW7.1     | PF16455.3; | 61.20 | 0.00 |
| TRINITY_T1K519_TETUR/34-291      | T1K519.1     | PF01650.16 | 61.20 | 0.00 |
| TRINITY_L8HHJ0_ACACA/66-247      | L8HHJ0.1     | PF00535.24 | 61.20 | 0.00 |
| TRINITY_D8U2P4_VOLCA/55-250      | D8U2P4.1     | PF00406.20 | 61.20 | 0.00 |
| TRINITY_A0A0D2WP71_CAPO3/367-660 | A0A0D2WP71.1 | PF0089     | 61.20 | 0.00 |
| TRINITY_D8TVL1_VOLCA/2020-2517   | D8TVL1.1     | PF00443.27 | 61.20 | 0.00 |
| TRINITY_E7NPP2_TREPH/23-227      | E7NPP2.1     | PF01145.23 | 61.20 | 0.00 |
| TRINITY_I7MIU6_TETTS/36-84       | I7MIU6.2     | PF00415.16 | 61.20 | 0.00 |
| TRINITY_A0A077JEV5_9CYAN/11-217  | A0A077JEV5.1 | PF0049     | 61.20 | 0.00 |
| TRINITY_F6TKY7_HORSE/75-371      | F6TKY7.1     | PF00291.23 | 61.20 | 0.00 |
| TRINITY_I0Z554_9CHLO/96-515      | I0Z554.1     | PF01373.15 | 61.20 | 0.00 |
| TRINITY_D8UE55_VOLCA/49-359      | D8UE55.1     | PF00294.22 | 61.20 | 0.00 |
| TRINITY_A0D712_PARTE/195-452     | A0D712.1     | PF00069.23 | 61.20 | 0.00 |
| TRINITY_M0YB45_HORVD/257-445     | M0YB45.1     | PF03062.17 | 61.20 | 0.00 |
| TRINITY_A0BF49_PARTE/4-177       | A0BF49.1     | PF00265.16 | 61.20 | 0.00 |
| TRINITY_I7LUR8_TETTS/1292-1437   | I7LUR8.2     | PF00637.18 | 61.20 | 0.00 |
| TRINITY_Q24FS1_TETTS/14-305      | Q24FS1.1     | PF04227.10 | 61.20 | 0.00 |
| TRINITY_A8J5A3_CHLRE/88-237      | A8J5A3.1     | PF02544.14 | 61.20 | 0.00 |
| TRINITY_D8U3J0_VOLCA/3-143       | D8U3J0.1     | PF08610.8; | 61.20 | 0.00 |
| TRINITY_I0YYY9_9CHLO/17-98       | I0YYY9.1     | PF12895.5; | 61.20 | 0.00 |
| TRINITY_A0DD95_PARTE/1-247       | A0DD95.1     | PF01902.15 | 61.20 | 0.00 |
| TRINITY_I0Z389_9CHLO/124-275     | I0Z389.1     | PF00817.18 | 61.20 | 0.00 |
| TRINITY_D8THF9_VOLCA/214-341     | D8THF9.1     | PF12014.6; | 61.20 | 0.00 |
| TRINITY_D8TTV8_VOLCA/81-324      | D8TTV8.1     | PF00233.17 | 61.20 | 0.00 |
| TRINITY_D8TK71_VOLCA/3-185       | D8TK71.1     | PF04055.19 | 61.20 | 0.00 |
| TRINITY_I0Z9X6_9CHLO/59-388      | I0Z9X6.1     | PF00176.21 | 61.20 | 0.00 |
| TRINITY_A0A0E9NR88_9ASCO/216-330 | A0A0E9NR88.1 | PF0141     | 61.20 | 0.00 |
| TRINITY_W2R8A8_PHYPN/163-447     | W2R8A8.1     | PF04095.14 | 61.20 | 0.00 |
| TRINITY_A8JGU7_CHLRE/38-240      | A8JGU7.1     | PF00349.19 | 61.20 | 0.00 |
| TRINITY_Q22GW0_TETTS/1651-1813   | Q22GW0.2     | PF00069.23 | 61.20 | 0.00 |
| TRINITY_A8HVM9_CHLRE/80-432      | A8HVM9.1     | PF07690.14 | 61.20 | 0.00 |
| TRINITY_TTL3C_TETTS/705-1030     | Q23FE2.1     | PF03133.13 | 61.20 | 0.00 |
| TRINITY_I0YRN9_9CHLO/94-384      | I0YRN9.1     | PF00487.22 | 61.20 | 0.00 |
| TRINITY_A8IWA3_CHLRE/107-492     | A8IWA3.1     | PF01979.18 | 61.20 | 0.00 |
| TRINITY_D8TL05_VOLCA/10-212      | D8TL05.1     | PF02146.15 | 61.20 | 0.00 |
| TRINITY_A0A059A4T3_EUCGR/566-712 | A0A059A4T3.1 | PF0000     | 61.20 | 0.00 |
| TRINITY_A8HZR1_CHLRE/17086-17364 | A8HZR1.1     | PF00109.24 | 61.20 | 0.00 |
| TRINITY_I7MAW2_TETTS/928-1107    | I7MAW2.2     | PF13091.4; | 61.20 | 0.00 |
| TRINITY_W5JZ43_ASTMX/344-429     | W5JZ43.1     | PF08544.11 | 61.20 | 0.00 |
| TRINITY_J9HT96_9SPIT/260-331     | J9HT96.1     | PF02187.15 | 61.20 | 0.00 |
| TRINITY_I0YQL2_9CHLO/174-274     | I0YQL2.1     | PF06552.10 | 61.20 | 0.00 |
| TRINITY_C1E0R4_MICSR/940-1343    | C1E0R4.1     | PF08393.11 | 61.20 | 0.00 |

|                                  |              |            |       |      |
|----------------------------------|--------------|------------|-------|------|
| TRINITY_A8IE97_CHLRE/193-399     | A8IE97.1     | PF08543.10 | 61.20 | 0.00 |
| TRINITY_A0BJW5_PARTE/673-824     | A0BJW5.1     | PF00005.25 | 61.20 | 0.00 |
| TRINITY_A8IYR9_CHLRE/24-434      | A8IYR9.1     | PF08393.11 | 61.20 | 0.00 |
| TRINITY_D8UC96_VOLCA/594-693     | D8UC96.1     | PF00211.18 | 61.20 | 0.00 |
| TRINITY_LOG510_ECHVK/25-388      | LOG510.1     | PF14587.4; | 61.20 | 0.00 |
| TRINITY_A0CYK6_PARTE/20-129      | A0CYK6.1     | PF00255.17 | 61.20 | 0.00 |
| TRINITY_A0A078B887_STYLE/93-437  | A0A078B887.1 | PF0310     | 61.10 | 0.00 |
| TRINITY_T0QVA0_9STRA/14-121      | T0QVA0.1     | PF01776.15 | 61.10 | 0.00 |
| TRINITY_E1Z6L6_CHLVA/1126-1433   | E1Z6L6.1     | PF02889.14 | 61.10 | 0.00 |
| TRINITY_G0R0T4_ICHMG/1-228       | G0R0T4.1     | PF00069.23 | 61.10 | 0.00 |
| TRINITY_K1Q151_CRAGI/43-150      | K1Q151.1     | PF01655.16 | 61.10 | 0.00 |
| TRINITY_A8MJ89_ALKOO/5-288       | A8MJ89.1     | PF01212.19 | 61.10 | 0.00 |
| TRINITY_A0DPJ4_PARTE/293-338     | A0DPJ4.1     | PF13639.4; | 61.10 | 0.00 |
| TRINITY_S2JF03_MUCC1/11-106      | S2JF03.1     | PF01230.21 | 61.10 | 0.00 |
| TRINITY_A0A078B0I2_STYLE/23-113  | A0A078B0I2.1 | PF0496     | 61.10 | 0.00 |
| TRINITY_F9XQ77_ZYMTI/189-369     | F9XQ77.1     | PF02774.16 | 61.10 | 0.00 |
| TRINITY_D0NKN9_PHYIT/305-429     | D0NKN9.1     | PF10155.7; | 61.10 | 0.00 |
| TRINITY_G3TRR7_LOXAF/493-813     | G3TRR7.1     | PF03372.21 | 61.10 | 0.00 |
| TRINITY_G0QJK3_ICHMG/16-196      | G0QJK3.1     | PF02737.16 | 61.10 | 0.00 |
| TRINITY_A0DTP8_PARTE/77-166      | A0DTP8.1     | PF16531.3; | 61.10 | 0.00 |
| TRINITY_I7MCP6_TETTS/244-601     | I7MCP6.2     | PF00152.18 | 61.10 | 0.00 |
| TRINITY_V4UHG4_9ROSI/55-448      | V4UHG4.1     | PF05577.10 | 61.10 | 0.00 |
| TRINITY_A7RL90_NEMVE/6-148       | A7RL90.1     | PF00179.24 | 61.10 | 0.00 |
| TRINITY_F4PJZ2_DICFS/426-527     | F4PJZ2.1     | PF00616.17 | 61.10 | 0.00 |
| TRINITY_I0HJT5_CALAS/6-348       | I0HJT5.1     | PF00180.18 | 61.10 | 0.00 |
| TRINITY_T0R6L1_9STRA/24-351      | T0R6L1.1     | PF01137.19 | 61.10 | 0.00 |
| TRINITY_W2SCP1_9EURO/803-1296    | W2SCP1.1     | PF02463.17 | 61.10 | 0.00 |
| TRINITY_A0A0G4ERS4_9ALVE/381-452 | A0A0G4ERS4.1 | PF0007     | 61.10 | 0.00 |
| TRINITY_E1ZBF1_CHLVA/23-168      | E1ZBF1.1     | PF00254.26 | 61.10 | 0.00 |
| TRINITY_A0A0D2WME3_CAPO3/65-361  | A0A0D2WME3.1 | PF0067     | 61.10 | 0.00 |
| TRINITY_D8TUZ0_VOLCA/326-458     | D8TUZ0.1     | PF13679.4; | 61.10 | 0.00 |
| TRINITY_G0QRJ3_ICHMG/395-534     | G0QRJ3.1     | PF01529.18 | 61.10 | 0.00 |
| TRINITY_A0A0G4IR21_PLABS/101-470 | A0A0G4IR21.1 | PF0156     | 61.10 | 0.00 |
| TRINITY_A8HZW8_CHLRE/157-347     | A8HZW8.1     | PF01612.18 | 61.10 | 0.00 |
| TRINITY_D8TRW7_VOLCA/284-377     | D8TRW7.1     | PF12894.5; | 61.10 | 0.00 |
| TRINITY_DAAF1_CHLRE/86-224       | Q09JZ4.1     | PF14580.4; | 61.10 | 0.00 |
| TRINITY_A8J807_CHLRE/44-241      | A8J807.1     | PF01812.18 | 61.10 | 0.00 |
| TRINITY_A8IKA6_CHLRE/72-154      | A8IKA6.1     | PF04359.12 | 61.10 | 0.00 |
| TRINITY_B9XKL5_PEDPL/646-757     | B9XKL5.1     | PF00072.22 | 61.10 | 0.00 |
| TRINITY_D8U610_VOLCA/52-269      | D8U610.1     | PF00856.26 | 61.10 | 0.00 |
| TRINITY_F4PLR0_DICFS/9-266       | F4PLR0.1     | PF00069.23 | 61.10 | 0.00 |
| TRINITY_D8U6E5_VOLCA/457-510     | D8U6E5.1     | PF13637.4; | 61.10 | 0.00 |
| TRINITY_E1ZC14_CHLVA/145-340     | E1ZC14.1     | PF07859.11 | 61.10 | 0.00 |
| TRINITY_F7EQM6_XENTR/5-178       | F7EQM6.1     | PF00071.20 | 61.10 | 0.00 |
| TRINITY_Q23YB7_TETTS/26-283      | Q23YB7.2     | PF00108.21 | 61.10 | 0.00 |
| TRINITY_H9JDW8_BOMMO/655-700     | H9JDW8.1     | PF13920.4; | 61.10 | 0.00 |
| TRINITY_A0A022QK02_ERYGU/391-605 | A0A022QK02.1 | PF1342     | 61.10 | 0.00 |
| TRINITY_A8ISR6_CHLRE/237-390     | A8ISR6.1     | PF05057.12 | 61.10 | 0.00 |
| TRINITY_I7M6I7_TETTS/33-261      | I7M6I7.1     | PF04981.11 | 61.10 | 0.00 |
| TRINITY_C1DYN4_MICSR/252-390     | C1DYN4.1     | PF07690.14 | 61.10 | 0.00 |
| TRINITY_I1FN95_AMPQE/387-832     | I1FN95.1     | PF01055.24 | 61.10 | 0.00 |
| TRINITY_E1ZLM6_CHLVA/510-646     | E1ZLM6.1     | PF00754.23 | 61.10 | 0.00 |
| TRINITY_D8TWG5_VOLCA/75-164      | D8TWG5.1     | PF00027.27 | 61.10 | 0.00 |
| TRINITY_D8TY97_VOLCA/648-998     | D8TY97.1     | PF00176.21 | 61.10 | 0.00 |
| TRINITY_W8QWE2_PSEST/13-147      | W8QWE2.1     | PF13302.5; | 61.10 | 0.00 |
| TRINITY_D8THN5_VOLCA/82-424      | D8THN5.1     | PF00520.29 | 61.10 | 0.00 |
| TRINITY_Q234R4_TETTS/265-337     | Q234R4.3     | PF00173.26 | 61.10 | 0.00 |
| TRINITY_J6LG81_9RHOB/17-264      | J6LG81.1     | PF13561.4; | 61.10 | 0.00 |
| TRINITY_Q6LRN4_PHOPR/16-142      | Q6LRN4.1     | PF01553.19 | 61.10 | 0.00 |
| TRINITY_I0Z1R1_9CHLO/33-297      | I0Z1R1.1     | PF00069.23 | 61.10 | 0.00 |
| TRINITY_A8IZ72_CHLRE/38-253      | A8IZ72.1     | PF01487.13 | 61.10 | 0.00 |

|                                  |              |            |       |      |
|----------------------------------|--------------|------------|-------|------|
| TRINITY_W2PXB2_PHYPN/493-609     | W2PXB2.1     | PF00665.24 | 61.10 | 0.00 |
| TRINITY_A4VCU9_TETTS/541-621     | A4VCU9.1     | PF14714.4; | 61.10 | 0.00 |
| TRINITY_M5BMA8_THACB/1-217       | M5BMA8.1     | PF00795.20 | 61.00 | 0.00 |
| TRINITY_A0A023BDG7_GRENI/225-368 | A0A023BDG7.1 | PF00006    | 61.00 | 0.00 |
| TRINITY_A0A0N5BS40_STREA/255-384 | A0A0N5BS40.1 | PF00000    | 61.00 | 0.00 |
| TRINITY_K9QKU9_9NOSO/8-132       | K9QKU9.1     | PF14226.4; | 61.00 | 0.00 |
| TRINITY_A0E0J0_PARTE/110-343     | A0E0J0.1     | PF01702.16 | 61.00 | 0.00 |
| TRINITY_I7MB50_TETTS/88-420      | I7MB50.1     | PF02628.13 | 61.00 | 0.00 |
| TRINITY_J9JA50_9SPIT/52-203      | J9JA50.1     | PF00675.18 | 61.00 | 0.00 |
| TRINITY_A0A0G4EV97_9ALVE/284-324 | A0A0G4EV97.1 | PF1363     | 61.00 | 0.00 |
| TRINITY_L1JU42_GUIITH/47-90      | L1JU42.1     | PF00432.19 | 61.00 | 0.00 |
| TRINITY_F4PZT8_DICFS/26-206      | F4PZT8.1     | PF01183.18 | 61.00 | 0.00 |
| TRINITY_L8HAC7_ACACA/15-184      | L8HAC7.1     | PF00071.20 | 61.00 | 0.00 |
| TRINITY_G0R0F8_ICHMG/378-537     | G0R0F8.1     | PF00406.20 | 61.00 | 0.00 |
| TRINITY_MYOC_DICDI/17-685        | P42522.2     | PF00063.19 | 61.00 | 0.00 |
| TRINITY_F4R630_MELLP/9-83        | F4R630.1     | PF00575.21 | 61.00 | 0.00 |
| TRINITY_D8TIL1_VOLCA/194-254     | D8TIL1.1     | PF04193.12 | 61.00 | 0.00 |
| TRINITY_A0A087SB97_AUXPR/41-161  | A0A087SB97.1 | PF1477     | 61.00 | 0.00 |
| TRINITY_Q23JV0_TETTS/48-415      | Q23JV0.2     | PF00155.19 | 61.00 | 0.00 |
| TRINITY_A8HUC0_CHLRE/205-556     | A8HUC0.1     | PF02636.15 | 61.00 | 0.00 |
| TRINITY_M2WUI5_GALSU/24-368      | M2WUI5.1     | PF00224.19 | 61.00 | 0.00 |
| TRINITY_A0DG60_PARTE/75-304      | A0DG60.1     | PF01798.16 | 61.00 | 0.00 |
| TRINITY_F0ZDG1_DICPU/32-320      | F0ZDG1.1     | PF00069.23 | 61.00 | 0.00 |
| TRINITY_F6VHV0_HORSE/118-447     | F6VHV0.1     | PF01074.20 | 61.00 | 0.00 |
| TRINITY_D3BIP5_POLPA/728-993     | D3BIP5.1     | PF00069.23 | 61.00 | 0.00 |
| TRINITY_M0RRI2_MUSAM/5-212       | M0RRI2.1     | PF04722.11 | 61.00 | 0.00 |
| TRINITY_M5X2N3_PRUPE/33-178      | M5X2N3.1     | PF02580.14 | 61.00 | 0.00 |
| TRINITY_W6QM76_PENRO/104-144     | W6QM76.1     | PF00187.17 | 61.00 | 0.00 |
| TRINITY_I7MB53_TETTS/73-236      | I7MB53.2     | PF00071.20 | 61.00 | 0.00 |
| TRINITY_W1NHW5_AMBTC/75-225      | W1NHW5.1     | PF00005.25 | 61.00 | 0.00 |
| TRINITY_M2XK48_GALSU/162-472     | M2XK48.1     | PF00365.18 | 61.00 | 0.00 |
| TRINITY_F1A642_DICPU/62-295      | F1A642.1     | PF00112.21 | 61.00 | 0.00 |
| TRINITY_D8U3D7_VOLCA/992-1109    | D8U3D7.1     | PF00072.22 | 61.00 | 0.00 |
| TRINITY_L8HBT1_ACACA/46-185      | L8HBT1.1     | PF08719.9; | 61.00 | 0.00 |
| TRINITY_D8UES1_VOLCA/58-162      | D8UES1.1     | PF00970.22 | 61.00 | 0.00 |
| TRINITY_G0QUX8_ICHMG/208-464     | G0QUX8.1     | PF00069.23 | 61.00 | 0.00 |
| TRINITY_I0YTA5_9CHLO/317-481     | I0YTA5.1     | PF00994.22 | 61.00 | 0.00 |
| TRINITY_A8IGD3_CHLRE/51-240      | A8IGD3.1     | PF00270.27 | 61.00 | 0.00 |
| TRINITY_A0A0G4IYM2_PLABS/106-147 | A0A0G4IYM2.1 | PF00051    | 61.00 | 0.00 |
| TRINITY_D2VS08_NAEGR/119-258     | D2VS08.1     | PF00182.17 | 61.00 | 0.00 |
| TRINITY_B8AIK5_ORYSI/9-129       | B8AIK5.1     | PF00581.18 | 61.00 | 0.00 |
| TRINITY_D8U6E5_VOLCA/949-1048    | D8U6E5.1     | PF12796.5; | 61.00 | 0.00 |
| TRINITY_A8IVP3_CHLRE/1-172       | A8IVP3.1     | PF02737.16 | 61.00 | 0.00 |
| TRINITY_U9TU81_RHIID/109-418     | U9TU81.1     | PF02574.14 | 61.00 | 0.00 |
| TRINITY_FTSH_THET1/233-367       | D1CDT8.1     | PF00004.27 | 61.00 | 0.00 |
| TRINITY_I0YNZ6_9CHLO/32-378      | I0YNZ6.1     | PF00773.17 | 61.00 | 0.00 |
| TRINITY_A8JFV5_CHLRE/17-152      | A8JFV5.1     | PF00892.18 | 61.00 | 0.00 |
| TRINITY_A8J5F2_CHLRE/110-374     | A8J5F2.1     | PF00069.23 | 61.00 | 0.00 |
| TRINITY_L8GPA8_ACACA/1396-1737   | L8GPA8.1     | PF00443.27 | 61.00 | 0.00 |
| TRINITY_A2DCC3_TRIVA/3-376       | A2DCC3.1     | PF00022.17 | 60.90 | 0.00 |
| TRINITY_A0A074RR78_9HOMO/382-674 | A0A074RR78.1 | PF0012     | 60.90 | 0.00 |
| TRINITY_A0DSW5_PARTE/265-406     | A0DSW5.1     | PF05728.10 | 60.90 | 0.00 |
| TRINITY_D6WWM4_TRICA/124-287     | D6WWM4.1     | PF08662.9; | 60.90 | 0.00 |
| TRINITY_F4QEP8_DICFS/752-1151    | F4QEP8.1     | PF00176.21 | 60.90 | 0.00 |
| TRINITY_A4CAA3_9GAMM/193-448     | A4CAA3.1     | PF03781.14 | 60.90 | 0.00 |
| TRINITY_C5LVG8_PERM5/4-72        | C5LVG8.1     | PF13304.4; | 60.90 | 0.00 |
| TRINITY_L8HKS3_ACACA/4-70        | L8HKS3.1     | PF01423.20 | 60.90 | 0.00 |
| TRINITY_A0E309_PARTE/27-98       | A0E309.1     | PF16209.3; | 60.90 | 0.00 |
| TRINITY_G0R1C5_ICHMG/3-376       | G0R1C5.1     | PF00022.17 | 60.90 | 0.00 |
| TRINITY_I7M601_TETTS/1212-1358   | I7M601.2     | PF03031.16 | 60.90 | 0.00 |
| TRINITY_I7M8T5_TETTS/163-273     | I7M8T5.2     | PF02770.17 | 60.90 | 0.00 |

|                                  |              |            |       |      |
|----------------------------------|--------------|------------|-------|------|
| TRINITY_V4AVQ0_LOTGI/421-889     | V4AVQ0.1     | PF01055.24 | 60.90 | 0.00 |
| TRINITY_A0A0J8D5U2_BETVU/39-155  | A0A0J8D5U2.1 | PF0390     | 60.90 | 0.00 |
| TRINITY_F0ZWT6_DICPU/16-309      | F0ZWT6.1     | PF07159.10 | 60.90 | 0.00 |
| TRINITY_D3B8P7_POLPA/35-160      | D3B8P7.1     | PF00102.25 | 60.90 | 0.00 |
| TRINITY_E1ZJU5_CHLVA/389-681     | E1ZJU5.1     | PF00850.17 | 60.90 | 0.00 |
| TRINITY_M2XYK1_GALSU/109-358     | M2XYK1.1     | PF00120.22 | 60.90 | 0.00 |
| TRINITY_E3HN58_ACHXA/11-258      | E3HN58.1     | PF13561.4; | 60.90 | 0.00 |
| TRINITY_A0DTL9_PARTE/31-95       | A0DTL9.1     | PF11717.6; | 60.90 | 0.00 |
| TRINITY_E1Z6G9_CHLVA/128-298     | E1Z6G9.1     | PF00892.18 | 60.90 | 0.00 |
| TRINITY_D8TJ36_VOLCA/107-195     | D8TJ36.1     | PF12333.6; | 60.90 | 0.00 |
| TRINITY_Q24F10_TETTS/11-394      | Q24F10.2     | PF00199.17 | 60.90 | 0.00 |
| TRINITY_W2RAX8_PHYPN/14-175      | W2RAX8.1     | PF00071.20 | 60.90 | 0.00 |
| TRINITY_Q54J76_DICDI/150-326     | Q54J76.1     | PF04055.19 | 60.90 | 0.00 |
| TRINITY_A0DG06_PARTE/625-771     | A0DG06.1     | PF00454.25 | 60.90 | 0.00 |
| TRINITY_A0BRT5_PARTE/364-413     | A0BRT5.1     | PF13920.4; | 60.90 | 0.00 |
| TRINITY_A0BNF3_PARTE/145-507     | A0BNF3.1     | PF03133.13 | 60.90 | 0.00 |
| TRINITY_D8TWQ7_VOLCA/44-273      | D8TWQ7.1     | PF00566.16 | 60.90 | 0.00 |
| TRINITY_D3PQC1_MEIRD/29-378      | D3PQC1.1     | PF00155.19 | 60.90 | 0.00 |
| TRINITY_A8I7G0_CHLRE/1-160       | A8I7G0.1     | PF03031.16 | 60.90 | 0.00 |
| TRINITY_D8TST4_VOLCA/59-324      | D8TST4.1     | PF01263.18 | 60.90 | 0.00 |
| TRINITY_J9I4N9_9SPIT/622-711     | J9I4N9.1     | PF00626.20 | 60.90 | 0.00 |
| TRINITY_F4PQQ2_DICFS/9-262       | F4PQQ2.1     | PF00069.23 | 60.90 | 0.00 |
| TRINITY_M2XX62_GALSU/4-177       | M2XX62.1     | PF00163.17 | 60.90 | 0.00 |
| TRINITY_A8HY85_CHLRE/42-92       | A8HY85.1     | PF13920.4; | 60.90 | 0.00 |
| TRINITY_L1JZL8_GUIITH/135-326    | L1JZL8.1     | PF01734.20 | 60.90 | 0.00 |
| TRINITY_A0A078ARV0_STYLE/502-593 | A0A078ARV0.1 | PF1289     | 60.90 | 0.00 |
| TRINITY_D8U2F3_VOLCA/264-593     | D8U2F3.1     | PF12631.5; | 60.90 | 0.00 |
| TRINITY_D8THH3_VOLCA/345-424     | D8THH3.1     | PF01494.17 | 60.90 | 0.00 |
| TRINITY_C1MK75_MICPC/173-283     | C1MK75.1     | PF02770.17 | 60.90 | 0.00 |
| TRINITY_C1EGA3_MICSR/16-192      | C1EGA3.1     | PF02776.16 | 60.90 | 0.00 |
| TRINITY_V4N6Q8_EUTSA/185-283     | V4N6Q8.1     | PF00153.25 | 60.90 | 0.00 |
| TRINITY_A8IAC0_CHLRE/12-77       | A8IAC0.1     | PF13499.4; | 60.90 | 0.00 |
| TRINITY_D8UB42_VOLCA/33-193      | D8UB42.1     | PF00156.25 | 60.90 | 0.00 |
| TRINITY_D8U9R1_VOLCA/444-517     | D8U9R1.1     | PF08409.9; | 60.90 | 0.00 |
| TRINITY_A0C1Q8_PARTE/313-381     | A0C1Q8.1     | PF00076.20 | 60.90 | 0.00 |
| TRINITY_A0A0M2ZCZ3_9MYCO/13-413  | A0A0M2ZCZ3.1 | PF0050     | 60.90 | 0.00 |
| TRINITY_I0YWV4_9CHLO/88-151      | I0YWV4.1     | PF00076.20 | 60.90 | 0.00 |
| TRINITY_C1FH03_MICSR/16-120      | C1FH03.1     | PF04695.11 | 60.90 | 0.00 |
| TRINITY_Q8LP67_CHLRE/27-494      | Q8LP67.2     | PF01384.18 | 60.90 | 0.00 |
| TRINITY_Q23FV5_TETTS/249-318     | Q23FV5.1     | PF01485.19 | 60.90 | 0.00 |
| TRINITY_C1FG26_MICSR/197-263     | C1FG26.1     | PF01302.23 | 60.90 | 0.00 |
| TRINITY_F7DDC1_XENTR/62-218      | F7DDC1.1     | PF00179.24 | 60.90 | 0.00 |
| TRINITY_G0R3Z2_ICHMG/42-178      | G0R3Z2.1     | PF00768.18 | 60.90 | 0.00 |
| TRINITY_I0YXL0_9CHLO/17-195      | I0YXL0.1     | PF02441.17 | 60.90 | 0.00 |
| TRINITY_A0A0J8C200_BETVU/11-357  | A0A0J8C200.1 | PF0027     | 60.90 | 0.00 |
| TRINITY_D8TW17_VOLCA/26-284      | D8TW17.1     | PF00454.25 | 60.90 | 0.00 |
| TRINITY_A0D8S8_PARTE/638-896     | A0D8S8.1     | PF07714.15 | 60.90 | 0.00 |
| TRINITY_B2J555_NOSP7/29-290      | B2J555.1     | PF00657.20 | 60.90 | 0.00 |
| TRINITY_A8IZN8_CHLRE/348-602     | A8IZN8.1     | PF07690.14 | 60.90 | 0.00 |
| TRINITY_G4YV14_PHYSP/6-75        | G4YV14.1     | PF02798.18 | 60.90 | 0.00 |
| TRINITY_I0YLU4_9CHLO/93-211      | I0YLU4.1     | PF02906.12 | 60.90 | 0.00 |
| TRINITY_D8U9S9_VOLCA/599-793     | D8U9S9.1     | PF00211.18 | 60.90 | 0.00 |
| TRINITY_I7M4Q4_TETTS/47-304      | I7M4Q4.1     | PF00069.23 | 60.90 | 0.00 |
| TRINITY_C3YMX3_BRAFL/10-217      | C3YMX3.1     | PF01545.19 | 60.80 | 0.00 |
| TRINITY_L8GHY8_ACACA/6-92        | L8GHY8.1     | PF00708.16 | 60.80 | 0.00 |
| TRINITY_J9HMM9_9SPIT/852-1080    | J9HMM9.1     | PF16212.3; | 60.80 | 0.00 |
| TRINITY_G0QUG8_ICHMG/87-410      | G0QUG8.1     | PF00069.23 | 60.80 | 0.00 |
| TRINITY_A8IQL7_CHLRE/1-150       | A8IQL7.1     | PF00316.18 | 60.80 | 0.00 |
| TRINITY_G0QSE6_ICHMG/15-273      | G0QSE6.1     | PF00248.19 | 60.80 | 0.00 |
| TRINITY_Q22AH3_TETTS/20-208      | Q22AH3.2     | PF00485.16 | 60.80 | 0.00 |
| TRINITY_D0MSW7_PHYIT/76-243      | D0MSW7.1     | PF00270.27 | 60.80 | 0.00 |

|                                      |                     |       |      |
|--------------------------------------|---------------------|-------|------|
| TRINITY_A0A0A1TYI7_ENTIV/482-603     | A0A0A1TYI7.1 PF0000 | 60.80 | 0.00 |
| TRINITY_A0A068RPQ1_9FUNG/48-417      | A0A068RPQ1.1 PF0015 | 60.80 | 0.00 |
| TRINITY_G0QVP9_ICHMG/2-103           | G0QVP9.1 PF01158.16 | 60.80 | 0.00 |
| TRINITY_C8X4A4_DESRD/265-456         | C8X4A4.1 PF02782.14 | 60.80 | 0.00 |
| TRINITY_A8J7F6_CHLRE/35-108          | A8J7F6.1 PF00364.20 | 60.80 | 0.00 |
| TRINITY_D8U511_VOLCA/389-562         | D8U511.1 PF09736.7; | 60.80 | 0.00 |
| TRINITY_M7B3B1_CHEMY/73-178          | M7B3B1.1 PF01661.19 | 60.80 | 0.00 |
| TRINITY_A8HNU5_CHLRE/78-128          | A8HNU5.1 PF00415.16 | 60.80 | 0.00 |
| TRINITY_W4ZKD8_STRPU/281-385         | W4ZKD8.1 PF01399.25 | 60.80 | 0.00 |
| TRINITY_Q23AM3_TETTS/1054-1231       | Q23AM3.2 PF00005.25 | 60.80 | 0.00 |
| TRINITY_D8TYH1_VOLCA/97-221          | D8TYH1.1 PF04178.10 | 60.80 | 0.00 |
| TRINITY_I0Z3D4_9CHLO/59-178          | I0Z3D4.1 PF00622.26 | 60.80 | 0.00 |
| TRINITY_G3IFJ2_CRIGR/33-252          | G3IFJ2.1 PF00149.26 | 60.80 | 0.00 |
| TRINITY_M2XRY9_GALSU/223-392         | M2XRY9.1 PF12710.5; | 60.80 | 0.00 |
| TRINITY_A5GB05_GEOUR/54-510          | A5GB05.1 PF00171.20 | 60.80 | 0.00 |
| TRINITY_D3BLA2_POLPA/49-377          | D3BLA2.1 PF00128.22 | 60.80 | 0.00 |
| TRINITY_E1ZBM9_CHLVA/55-150          | E1ZBM9.1 PF10187.7; | 60.80 | 0.00 |
| TRINITY_L8HHI9_ACACA/243-535         | L8HHI9.1 PF01504.16 | 60.80 | 0.00 |
| TRINITY_A8HX34_CHLRE/56-171          | A8HX34.1 PF13911.4; | 60.80 | 0.00 |
| TRINITY_A0EFQ7_PARTE/75-330          | A0EFQ7.1 PF00069.23 | 60.80 | 0.00 |
| TRINITY_D8UIC0_VOLCA/170-480         | D8UIC0.1 PF00176.21 | 60.80 | 0.00 |
| TRINITY_A8J925_CHLRE/343-430         | A8J925.1 PF04720.10 | 60.80 | 0.00 |
| TRINITY_A8IQV5_CHLRE/92-496          | A8IQV5.1 PF10255.7; | 60.80 | 0.00 |
| TRINITY_A0A023X102_9ACTN/521-633     | A0A023X102.1 PF0251 | 60.80 | 0.00 |
| TRINITY_A8IQK4_CHLRE/15-342          | A8IQK4.1 PF00248.19 | 60.80 | 0.00 |
| TRINITY_A8IPE0_CHLRE/268-418         | A8IPE0.1 PF00441.22 | 60.80 | 0.00 |
| TRINITY_A0A024HC74_PSEKB/11-476      | A0A024HC74.1 PF0017 | 60.80 | 0.00 |
| TRINITY_A8JAW8_CHLRE/513-575         | A8JAW8.1 PF07714.15 | 60.80 | 0.00 |
| TRINITY_D8UCY0_VOLCA/560-694         | D8UCY0.1 PF03188.14 | 60.80 | 0.00 |
| TRINITY_A0A087SB57_AUXPR/89-364      | A0A087SB57.1 PF0032 | 60.80 | 0.00 |
| TRINITY_G0R4H4_ICHMG/196-460         | G0R4H4.1 PF00557.22 | 60.80 | 0.00 |
| TRINITY_I7M643_TETTS/75-442          | I7M643.1 PF01207.15 | 60.80 | 0.00 |
| TRINITY_A8HVG5_CHLRE/56-124          | A8HVG5.1 PF00076.20 | 60.80 | 0.00 |
| TRINITY_I0ZA66_9CHLO/57-248          | I0ZA66.1 PF01545.19 | 60.80 | 0.00 |
| TRINITY_I1HGN0_BRADI/83-162          | I1HGN0.1 PF00111.25 | 60.80 | 0.00 |
| TRINITY_Q22RI9_TETTS/289-441         | Q22RI9.1 PF01467.24 | 60.80 | 0.00 |
| TRINITY_E1ZCS4_CHLVA/37-115          | E1ZCS4.1 PF03810.17 | 60.80 | 0.00 |
| TRINITY_F4PSM6_DICFS/3-127           | F4PSM6.1 PF00583.23 | 60.80 | 0.00 |
| TRINITY_A0A087SSY7_AUXPR/12268-12330 | A0A087SSY7.1 PF0055 | 60.80 | 0.00 |
| TRINITY_A8JXX1_CHLRE/1-168           | A8JXX1.1 PF00211.18 | 60.80 | 0.00 |
| TRINITY_M0T8F5_MUSAM/4-79            | M0T8F5.1 PF01722.16 | 60.80 | 0.00 |
| TRINITY_D8RT90_SELML/13-293          | D8RT90.1 PF00069.23 | 60.80 | 0.00 |
| TRINITY_A0DUD1_PARTE/60-138          | A0DUD1.1 PF03061.20 | 60.80 | 0.00 |
| TRINITY_I7MA19_TETTS/70-345          | I7MA19.2 PF00487.22 | 60.70 | 0.00 |
| TRINITY_A0BUS1_PARTE/18-141          | A0BUS1.1 PF01775.15 | 60.70 | 0.00 |
| TRINITY_F0ZZ51_DICPU/1-174           | F0ZZ51.1 PF04062.12 | 60.70 | 0.00 |
| TRINITY_V4AWN0_LOTGI/221-327         | V4AWN0.1 PF02770.17 | 60.70 | 0.00 |
| TRINITY_I7MIK7_TETTS/172-349         | I7MIK7.1 PF02866.16 | 60.70 | 0.00 |
| TRINITY_L1IH70_GUIH/122-177          | L1IH70.1 PF13513.4; | 60.70 | 0.00 |
| TRINITY_Q240X8_TETTS/533-757         | Q240X8.2 PF00149.26 | 60.70 | 0.00 |
| TRINITY_A8IJ00_CHLRE/2-163           | A8IJ00.1 PF12850.5; | 60.70 | 0.00 |
| TRINITY_I7M700_TETTS/181-443         | I7M700.2 PF00069.23 | 60.70 | 0.00 |
| TRINITY_D8UBI3_VOLCA/2-142           | D8UBI3.1 PF00179.24 | 60.70 | 0.00 |
| TRINITY_GELA_DICDI/12-118            | P13466.1 PF00307.29 | 60.70 | 0.00 |
| TRINITY_D8TIM4_VOLCA/675-744         | D8TIM4.1 PF16326.3; | 60.70 | 0.00 |
| TRINITY_U3JZB3_FICAL/200-466         | U3JZB3.1 PF00557.22 | 60.70 | 0.00 |
| TRINITY_A8ISQ5_CHLRE/1729-1856       | A8ISQ5.1 PF00004.27 | 60.70 | 0.00 |
| TRINITY_J9HY32_9SPIT/83-139          | J9HY32.1 PF13418.4; | 60.70 | 0.00 |
| TRINITY_L8GUI1_ACACA/1063-1317       | L8GUI1.1 PF01504.16 | 60.70 | 0.00 |
| TRINITY_A8J7D5_CHLRE/111-230         | A8J7D5.1 PF12146.6; | 60.70 | 0.00 |
| TRINITY_M2VXJ2_GALSU/118-200         | M2VXJ2.1 PF15963.3; | 60.70 | 0.00 |

|                                    |              |            |       |      |
|------------------------------------|--------------|------------|-------|------|
| TRINITY_F4PRM6_DICFS/415-693       | F4PRM6.1     | PF02089.13 | 60.70 | 0.00 |
| TRINITY_A8J3T8_CHLRE/773-845       | A8J3T8.1     | PF02214.20 | 60.70 | 0.00 |
| TRINITY_D8U0X3_VOLCA/27-233        | D8U0X3.1     | PF00664.21 | 60.70 | 0.00 |
| TRINITY_Q5LUM3_RUEPO/28-222        | Q5LUM3.1     | PF00753.25 | 60.70 | 0.00 |
| TRINITY_I7MCM8_TETTS/22-110        | I7MCM8.1     | PF01221.16 | 60.70 | 0.00 |
| TRINITY_D8UAR2_VOLCA/40-165        | D8UAR2.1     | PF06979.10 | 60.70 | 0.00 |
| TRINITY_I0YY21_9CHLO/23-435        | I0YY21.1     | PF03486.12 | 60.70 | 0.00 |
| TRINITY_H0XNX4_OTOGA/140-573       | H0XNX4.1     | PF00654.18 | 60.70 | 0.00 |
| TRINITY_A8IZN8_CHLRE/149-294       | A8IZN8.1     | PF07690.14 | 60.70 | 0.00 |
| TRINITY_A0A087SDT6_AUXPR/1023-1248 | A0A087SDT6.1 | PF0246     | 60.70 | 0.00 |
| TRINITY_D8TH51_VOLCA/203-334       | D8TH51.1     | PF00012.18 | 60.70 | 0.00 |
| TRINITY_D8TZ46_VOLCA/4-152         | D8TZ46.1     | PF02469.20 | 60.70 | 0.00 |
| TRINITY_L8HJ83_ACACA/415-598       | L8HJ83.1     | PF02145.13 | 60.70 | 0.00 |
| TRINITY_D8U2I5_VOLCA/121-481       | D8U2I5.1     | PF07690.14 | 60.70 | 0.00 |
| TRINITY_A8HQ2_CHLRE/716-773        | A8HQ2.1      | PF00839.15 | 60.70 | 0.00 |
| TRINITY_E1ZLM9_CHLVA/205-324       | E1ZLM9.1     | PF13410.4; | 60.70 | 0.00 |
| TRINITY_D8TS44_VOLCA/61-200        | D8TS44.1     | PF00328.20 | 60.70 | 0.00 |
| TRINITY_Q4KX33_CHLRE/41-243        | Q4KX33.1     | PF00702.24 | 60.70 | 0.00 |
| TRINITY_E1ZE44_CHLVA/390-768       | E1ZE44.1     | PF00702.24 | 60.70 | 0.00 |
| TRINITY_E1ZNG0_CHLVA/135-423       | E1ZNG0.1     | PF00664.21 | 60.70 | 0.00 |
| TRINITY_A8IM09_CHLRE/15-199        | A8IM09.1     | PF13419.4; | 60.70 | 0.00 |
| TRINITY_I7MMC6_TETTS/8-267         | I7MMC6.1     | PF00795.20 | 60.70 | 0.00 |
| TRINITY_A0A078ATQ4_STYLE/10-147    | A0A078ATQ4.1 | PF0551     | 60.70 | 0.00 |
| TRINITY_A0BWW1_PARTE/272-340       | A0BWW1.1     | PF00498.24 | 60.60 | 0.00 |
| TRINITY_I7MLH5_TETTS/110-313       | I7MLH5.1     | PF02630.12 | 60.60 | 0.00 |
| TRINITY_G0R559_ICHMG/162-325       | G0R559.1     | PF03031.16 | 60.60 | 0.00 |
| TRINITY_A0A022QPS6_ERYGU/47-118    | A0A022QPS6.1 | PF0017     | 60.60 | 0.00 |
| TRINITY_O96212_PLAF7/4-69          | O96212.1     | PF00226.29 | 60.60 | 0.00 |
| TRINITY_I7MKM3_TETTS/42-327        | I7MKM3.2     | PF01875.15 | 60.60 | 0.00 |
| TRINITY_Q3SDM6_PARTE/17-177        | Q3SDM6.1     | PF00071.20 | 60.60 | 0.00 |
| TRINITY_A6CKQ5_9BACI/6-206         | A6CKQ5.1     | PF00106.23 | 60.60 | 0.00 |
| TRINITY_B7G8G3_PHATC/71-206        | B7G8G3.1     | PF00179.24 | 60.60 | 0.00 |
| TRINITY_A0A077ZRM4_STYLE/9-353     | A0A077ZRM4.1 | PF0072     | 60.60 | 0.00 |
| TRINITY_G1XAK0_ARTOA/259-586       | G1XAK0.1     | PF00152.18 | 60.60 | 0.00 |
| TRINITY_D2V2H2_NAEGR/29-165        | D2V2H2.1     | PF01138.19 | 60.60 | 0.00 |
| TRINITY_F4PWL5_DICFS/65-135        | F4PWL5.1     | PF07258.12 | 60.60 | 0.00 |
| TRINITY_LOPEQ1_PNEJ8/1982-2232     | LOPEQ1.1     | PF00454.25 | 60.60 | 0.00 |
| TRINITY_A8IV68_CHLRE/10-170        | A8IV68.1     | PF01554.16 | 60.60 | 0.00 |
| TRINITY_W5L3X6_ASTMX/15-361        | W5L3X6.1     | PF01208.15 | 60.60 | 0.00 |
| TRINITY_D8UCM9_VOLCA/16-368        | D8UCM9.1     | PF14249.4; | 60.60 | 0.00 |
| TRINITY_I0Z8B5_9CHLO/174-487       | I0Z8B5.1     | PF00282.17 | 60.60 | 0.00 |
| TRINITY_D8UB55_VOLCA/53-527        | D8UB55.1     | PF03917.15 | 60.60 | 0.00 |
| TRINITY_E1ZCZ4_CHLVA/177-413       | E1ZCZ4.1     | PF13621.4; | 60.60 | 0.00 |
| TRINITY_A8IZX0_CHLRE/194-290       | A8IZX0.1     | PF00153.25 | 60.60 | 0.00 |
| TRINITY_A0A078AR09_STYLE/8-169     | A0A078AR09.1 | PF0007     | 60.60 | 0.00 |
| TRINITY_I3SWQ0_MEDTR/4-177         | I3SWQ0.1     | PF00025.19 | 60.60 | 0.00 |
| TRINITY_Q22W33_TETTS/214-501       | Q22W33.2     | PF01031.18 | 60.60 | 0.00 |
| TRINITY_L8GTX7_ACACA/29-258        | L8GTX7.1     | PF01144.21 | 60.60 | 0.00 |
| TRINITY_A0A067CN16_SAPPC/176-246   | A0A067CN16.1 | PF0007     | 60.60 | 0.00 |
| TRINITY_D8TQR8_VOLCA/39-141        | D8TQR8.1     | PF06984.11 | 60.60 | 0.00 |
| TRINITY_D8TTV8_VOLCA/81-324        | D8TTV8.1     | PF00233.17 | 60.60 | 0.00 |
| TRINITY_A8J5G1_CHLRE/62-132        | A8J5G1.1     | PF00076.20 | 60.60 | 0.00 |
| TRINITY_D8TIW7_VOLCA/25-159        | D8TIW7.1     | PF10358.7; | 60.60 | 0.00 |
| TRINITY_A8IIK8_CHLRE/22-646        | A8IIK8.1     | PF00012.18 | 60.60 | 0.00 |
| TRINITY_W7XI32_TETTS/8-116         | W7XI32.1     | PF01412.16 | 60.60 | 0.00 |
| TRINITY_NC2B_DICDI/11-76           | Q55DJ5.1     | PF00808.21 | 60.60 | 0.00 |
| TRINITY_A8IP41_CHLRE/256-440       | A8IP41.1     | PF17177.2; | 60.60 | 0.00 |
| TRINITY_D8UHG2_VOLCA/303-495       | D8UHG2.1     | PF00625.19 | 60.60 | 0.00 |
| TRINITY_A8JGR9_CHLRE/78-301        | A8JGR9.1     | PF07859.11 | 60.60 | 0.00 |
| TRINITY_D8UBU5_VOLCA/35-166        | D8UBU5.1     | PF00582.24 | 60.60 | 0.00 |
| TRINITY_G0QP90_ICHMG/68-301        | G0QP90.1     | PF08709.9; | 60.60 | 0.00 |



|                                  |                     |       |      |
|----------------------------------|---------------------|-------|------|
| TRINITY_I7LXC1_TETTS/15-327      | I7LXC1.1 PF00248.19 | 60.60 | 0.00 |
| TRINITY_A0A087SN26_AUXPR/253-511 | A0A087SN26.1 PF0042 | 60.60 | 0.00 |
| TRINITY_A8I2W2_CHLRE/20-271      | A8I2W2.1 PF00378.18 | 60.60 | 0.00 |
| TRINITY_D8TVC0_VOLCA/1983-2096   | D8TVC0.1 PF00665.24 | 60.60 | 0.00 |
| TRINITY_I7M910_TETTS/11-285      | I7M910.1 PF00069.23 | 60.60 | 0.00 |
| TRINITY_I1FJ82_AMPQE/74-164      | I1FJ82.1 PF02214.20 | 60.60 | 0.00 |
| TRINITY_I0YIK0_9CHLO/2-1118      | I0YIK0.1 PF02463.17 | 60.60 | 0.00 |
| TRINITY_G0QNX2_ICHMG/458-558     | G0QNX2.1 PF13246.4; | 60.60 | 0.00 |
| TRINITY_A8JH01_CHLRE/760-1287    | A8JH01.1 PF02538.12 | 60.60 | 0.00 |
| TRINITY_D8THC3_VOLCA/345-463     | D8THC3.1 PF03398.12 | 60.60 | 0.00 |
| TRINITY_C6X4G5_FLAB3/3-109       | C6X4G5.1 PF00453.16 | 60.60 | 0.00 |
| TRINITY_A0E1Y7_PARTE/546-611     | A0E1Y7.1 PF00659.16 | 60.60 | 0.00 |
| TRINITY_A0D0Z9_PARTE/173-301     | A0D0Z9.1 PF17207.1; | 60.60 | 0.00 |
| TRINITY_B9HAK1_POPTR/1-38        | B9HAK1.1 PF00444.16 | 60.50 | 0.00 |
| TRINITY_W4GIQ7_9STRA/55-461      | W4GIQ7.1 PF03901.15 | 60.50 | 0.00 |
| TRINITY_Q24GF5_TETTS/192-235     | Q24GF5.1 PF13639.4; | 60.50 | 0.00 |
| TRINITY_F4PQP3_DICFS/61-212      | F4PQP3.1 PF12146.6; | 60.50 | 0.00 |
| TRINITY_Q22BR3_TETTS/13-180      | Q22BR3.2 PF00071.20 | 60.50 | 0.00 |
| TRINITY_D3BKU3_POLPA/99-247      | D3BKU3.1 PF04051.14 | 60.50 | 0.00 |
| TRINITY_L1IBT4_GUIITH/87-131     | L1IBT4.1 PF00400.30 | 60.50 | 0.00 |
| TRINITY_G4VDS7_SCHMA/18-67       | G4VDS7.1 PF00385.22 | 60.50 | 0.00 |
| TRINITY_A0A015JS03_9GLOM/219-473 | A0A015JS03.1 PF0042 | 60.50 | 0.00 |
| TRINITY_W7TBG8_9STRA/23-109      | W7TBG8.1 PF10217.7; | 60.50 | 0.00 |
| TRINITY_PAKF_DICDI/394-646       | Q869T7.1 PF00069.23 | 60.50 | 0.00 |
| TRINITY_A4RWA9_OSTLU/932-974     | A4RWA9.1 PF00569.15 | 60.50 | 0.00 |
| TRINITY_A0A078BAY1_STYLE/2-421   | A0A078BAY1.1 PF0002 | 60.50 | 0.00 |
| TRINITY_F8KZ09_PARAV/42-385      | F8KZ09.1 PF00155.19 | 60.50 | 0.00 |
| TRINITY_S7RV90_GLOTA/2-92        | S7RV90.1 PF00153.25 | 60.50 | 0.00 |
| TRINITY_D8RSP9_SELML/19-278      | D8RSP9.1 PF00108.21 | 60.50 | 0.00 |
| TRINITY_E4Y0P8_OIKDI/192-320     | E4Y0P8.1 PF14833.4; | 60.50 | 0.00 |
| TRINITY_D3BAY6_POLPA/1281-1386   | D3BAY6.1 PF00307.29 | 60.50 | 0.00 |
| TRINITY_F4PVW8_DICFS/49-173      | F4PVW8.1 PF00782.18 | 60.50 | 0.00 |
| TRINITY_L8GHG3_ACACA/31-111      | L8GHG3.1 PF13774.4; | 60.50 | 0.00 |
| TRINITY_D8UFD4_VOLCA/1148-1364   | D8UFD4.1 PF02301.16 | 60.50 | 0.00 |
| TRINITY_D8TN22_VOLCA/1491-1533   | D8TN22.1 PF00400.30 | 60.50 | 0.00 |
| TRINITY_A8J576_CHLRE/30-84       | A8J576.1 PF01667.15 | 60.50 | 0.00 |
| TRINITY_V4AHX0_LOTGI/87-328      | V4AHX0.1 PF08627.8; | 60.50 | 0.00 |
| TRINITY_A0A075AW01_9FUNG/299-343 | A0A075AW01.1 PF1363 | 60.50 | 0.00 |
| TRINITY_Q6U9W9_CHLRE/45-120      | Q6U9W9.1 PF01066.19 | 60.50 | 0.00 |
| TRINITY_D8U396_VOLCA/10-273      | D8U396.1 PF04641.10 | 60.50 | 0.00 |
| TRINITY_A8IL82_CHLRE/88-164      | A8IL82.1 PF14933.4; | 60.50 | 0.00 |
| TRINITY_F2UFQ3_SALR5/2479-2561   | F2UFQ3.1 PF05406.13 | 60.50 | 0.00 |
| TRINITY_H3HAJ2_PHYRM/359-478     | H3HAJ2.1 PF00665.24 | 60.50 | 0.00 |
| TRINITY_A0A0F4JJD4_9ACTN/29-473  | A0A0F4JJD4.1 PF1352 | 60.50 | 0.00 |
| TRINITY_A0A0F8BLB8_CERFI/630-920 | A0A0F8BLB8.1 PF0519 | 60.50 | 0.00 |
| TRINITY_A0A0D2WVY6_CAPO3/6-314   | A0A0D2WVY6.1 PF0337 | 60.50 | 0.00 |
| TRINITY_L8H169_ACACA/11-527      | L8H169.1 PF01019.19 | 60.50 | 0.00 |
| TRINITY_L8HA47_ACACA/343-485     | L8HA47.1 PF13768.4; | 60.50 | 0.00 |
| TRINITY_A8IFT8_CHLRE/600-698     | A8IFT8.1 PF00211.18 | 60.50 | 0.00 |
| TRINITY_A8HQ85_CHLRE/29-108      | A8HQ85.1 PF00717.21 | 60.50 | 0.00 |
| TRINITY_A8HPM7_CHLRE/39-76       | A8HPM7.1 PF12907.5; | 60.50 | 0.00 |
| TRINITY_A8J940_CHLRE/199-654     | A8J940.1 PF09418.8; | 60.50 | 0.00 |
| TRINITY_A0BI43_PARTE/13-346      | A0BI43.1 PF00225.21 | 60.50 | 0.00 |
| TRINITY_Q22T22_TETTS/520-735     | Q22T22.3 PF07859.11 | 60.50 | 0.00 |
| TRINITY_K5W5T9_PHACS/160-202     | K5W5T9.1 PF15985.3; | 60.50 | 0.00 |
| TRINITY_D8UJA5_VOLCA/42-123      | D8UJA5.1 PF03366.14 | 60.50 | 0.00 |
| TRINITY_D8TZ34_VOLCA/1-77        | D8TZ34.1 PF00300.20 | 60.50 | 0.00 |
| TRINITY_Q5CXU5_CRYPI/210-254     | Q5CXU5.1 PF13639.4; | 60.50 | 0.00 |
| TRINITY_D8U7H0_VOLCA/304-342     | D8U7H0.1 PF00400.30 | 60.50 | 0.00 |
| TRINITY_E1ZGK4_CHLVA/25-99       | E1ZGK4.1 PF12895.5; | 60.50 | 0.00 |
| TRINITY_R7JIC3_9PORP/14-318      | R7JIC3.1 PF00206.18 | 60.50 | 0.00 |

|                                  |              |            |       |      |
|----------------------------------|--------------|------------|-------|------|
| TRINITY_A4S165_OSTLU/201-315     | A4S165.1     | PF00387.17 | 60.50 | 0.00 |
| TRINITY_K2K6U2_9PROT/14-98       | K2K6U2.1     | PF06155.10 | 60.50 | 0.00 |
| TRINITY_I0YWB9_9CHLO/268-310     | I0YWB9.1     | PF05182.11 | 60.50 | 0.00 |
| TRINITY_D8UJ17_VOLCA/237-357     | D8UJ17.1     | PF08294.9; | 60.50 | 0.00 |
| TRINITY_D8TNV3_VOLCA/57-246      | D8TNV3.1     | PF02431.13 | 60.50 | 0.00 |
| TRINITY_D8THM5_VOLCA/20-316      | D8THM5.1     | PF00291.23 | 60.50 | 0.00 |
| TRINITY_I0YYP7_9CHLO/26-829      | I0YYP7.1     | PF01496.17 | 60.50 | 0.00 |
| TRINITY_F0ZPV3_DICPU/326-403     | F0ZPV3.1     | PF00626.20 | 60.50 | 0.00 |
| TRINITY_I1KAV1_SOYBN/23-103      | I1KAV1.1     | PF03810.17 | 60.50 | 0.00 |
| TRINITY_D8UER9_VOLCA/17-281      | D8UER9.1     | PF00069.23 | 60.50 | 0.00 |
| TRINITY_D8TJA9_VOLCA/41-757      | D8TJA9.1     | PF05879.10 | 60.50 | 0.00 |
| TRINITY_A0A0D2RPE2_GOSRA/79-123  | A0A0D2RPE2.1 | PF1363     | 60.50 | 0.00 |
| TRINITY_D8TM14_VOLCA/44-264      | D8TM14.1     | PF01036.16 | 60.50 | 0.00 |
| TRINITY_A0DEC4_PARTE/157-332     | A0DEC4.1     | PF00297.20 | 60.50 | 0.00 |
| TRINITY_J9FGP4_9SPIT/3326-3635   | J9FGP4.1     | PF00520.29 | 60.50 | 0.00 |
| TRINITY_W5B1M5_WHEAT/1031-1109   | W5B1M5.1     | PF16770.3; | 60.50 | 0.00 |
| TRINITY_A0BJW5_PARTE/673-824     | A0BJW5.1     | PF00005.25 | 60.50 | 0.00 |
| TRINITY_A8HMX4_CHLRE/2800-2846   | A8HMX4.1     | PF13920.4; | 60.50 | 0.00 |
| TRINITY_I0YVX4_9CHLO/299-509     | I0YVX4.1     | PF01061.22 | 60.50 | 0.00 |
| TRINITY_A8JOU4_CHLRE/27-488      | A8JOU4.1     | PF01384.18 | 60.50 | 0.00 |
| TRINITY_I7LZH4_TETTS/16-180      | I7LZH4.1     | PF10237.7; | 60.50 | 0.00 |
| TRINITY_A0CM91_PARTE/146-237     | A0CM91.1     | PF02770.17 | 60.40 | 0.00 |
| TRINITY_L8GN11_ACACA/11-328      | L8GN11.1     | PF16363.3; | 60.40 | 0.00 |
| TRINITY_A0A090N2X0_OSTTA/7-430   | A0A090N2X0.1 | PF0390     | 60.40 | 0.00 |
| TRINITY_D8Q147_SCHCM/127-219     | D8Q147.1     | PF13640.4; | 60.40 | 0.00 |
| TRINITY_Q24FD5_TETTS/395-493     | Q24FD5.2     | PF12796.5; | 60.40 | 0.00 |
| TRINITY_G3ASL6_SPAPN/310-357     | G3ASL6.1     | PF14604.4; | 60.40 | 0.00 |
| TRINITY_C7PLA0_CHIPD/8-216       | C7PLA0.1     | PF00753.25 | 60.40 | 0.00 |
| TRINITY_V7BFG5_PHAVU/653-788     | V7BFG5.1     | PF00005.25 | 60.40 | 0.00 |
| TRINITY_D3B1V2_POLPA/5-372       | D3B1V2.1     | PF00022.17 | 60.40 | 0.00 |
| TRINITY_Q236N6_TETTS/11-335      | Q236N6.2     | PF00225.21 | 60.40 | 0.00 |
| TRINITY_D2UXL3_NAEGR/231-284     | D2UXL3.1     | PF13639.4; | 60.40 | 0.00 |
| TRINITY_A8I3E9_CHLRE/6-101       | A8I3E9.1     | PF00168.28 | 60.40 | 0.00 |
| TRINITY_A0DXZ0_PARTE/196-452     | A0DXZ0.1     | PF00069.23 | 60.40 | 0.00 |
| TRINITY_A0CMJ9_PARTE/173-229     | A0CMJ9.1     | PF08063.10 | 60.40 | 0.00 |
| TRINITY_F4Q879_DICFS/343-583     | F4Q879.1     | PF00122.18 | 60.40 | 0.00 |
| TRINITY_D8TH82_VOLCA/2119-2230   | D8TH82.1     | PF01477.21 | 60.40 | 0.00 |
| TRINITY_K1RLC3_CRAGI/178-234     | K1RLC3.1     | PF03909.15 | 60.40 | 0.00 |
| TRINITY_E1ZSH0_CHLVA/182-287     | E1ZSH0.1     | PF13813.4; | 60.40 | 0.00 |
| TRINITY_A8HTI5_CHLRE/224-447     | A8HTI5.1     | PF00149.26 | 60.40 | 0.00 |
| TRINITY_J9F675_9SPIT/89-719      | J9F675.1     | PF00133.20 | 60.40 | 0.00 |
| TRINITY_C1FHE0_MICSR/238-341     | C1FHE0.1     | PF13266.4; | 60.40 | 0.00 |
| TRINITY_E1Z4Q4_CHLVA/32-185      | E1Z4Q4.1     | PF02590.15 | 60.40 | 0.00 |
| TRINITY_A0A067QXN5_ZOONE/105-425 | A0A067QXN5.1 | PF0017     | 60.40 | 0.00 |
| TRINITY_B4N4L3_DROWI/10-97       | B4N4L3.1     | PF00708.16 | 60.40 | 0.00 |
| TRINITY_D8TWB2_VOLCA/396-443     | D8TWB2.1     | PF13639.4; | 60.40 | 0.00 |
| TRINITY_K2JWG6_9GAMM/175-508     | K2JWG6.1     | PF00883.19 | 60.40 | 0.00 |
| TRINITY_G3PJM8_GASAC/67-736      | G3PJM8.1     | PF00063.19 | 60.40 | 0.00 |
| TRINITY_Q22TJ1_TETTS/178-486     | Q22TJ1.1     | PF00365.18 | 60.40 | 0.00 |
| TRINITY_D8SAX2_SELML/206-432     | D8SAX2.1     | PF13621.4; | 60.40 | 0.00 |
| TRINITY_A0BD09_PARTE/2285-2969   | A0BD09.1     | PF03028.13 | 60.40 | 0.00 |
| TRINITY_D8TN99_VOLCA/23-445      | D8TN99.1     | PF04597.12 | 60.40 | 0.00 |
| TRINITY_I1N9L1_SOYBN/10-174      | I1N9L1.1     | PF00160.19 | 60.40 | 0.00 |
| TRINITY_D8TVU2_VOLCA/33-362      | D8TVU2.1     | PF00180.18 | 60.40 | 0.00 |
| TRINITY_A8HXN9_CHLRE/61-524      | A8HXN9.1     | PF04100.10 | 60.40 | 0.00 |
| TRINITY_D8TIK2_VOLCA/20-442      | D8TIK2.1     | PF00999.19 | 60.40 | 0.00 |
| TRINITY_B3ESW8_AMOA5/41-239      | B3ESW8.1     | PF01734.20 | 60.40 | 0.00 |
| TRINITY_D8U1G9_VOLCA/1333-1663   | D8U1G9.1     | PF00225.21 | 60.40 | 0.00 |
| TRINITY_H3B4W6_LATCH/552-647     | H3B4W6.1     | PF05495.10 | 60.40 | 0.00 |
| TRINITY_I1G3Y8_AMPQE/366-838     | I1G3Y8.1     | PF03200.14 | 60.40 | 0.00 |
| TRINITY_I7MHC4_TETTS/1048-1120   | I7MHC4.1     | PF14418.4; | 60.40 | 0.00 |

|                                    |                     |       |      |
|------------------------------------|---------------------|-------|------|
| TRINITY_Q5AH29_CANAL/74-136        | Q5AH29.1 PF00462.22 | 60.40 | 0.00 |
| TRINITY_A8IVY2_CHLRE/426-558       | A8IVY2.1 PF07732.13 | 60.40 | 0.00 |
| TRINITY_S8E968_9LAMI/38-286        | S8E968.1 PF03372.21 | 60.40 | 0.00 |
| TRINITY_A0A068RY16_9FUNG/1113-1219 | A0A068RY16.1 PF0085 | 60.40 | 0.00 |
| TRINITY_I0Z9K0_9CHLO/143-285       | I0Z9K0.1 PF10607.7; | 60.40 | 0.00 |
| TRINITY_CFA74_CHLRE/607-707        | D4P3R7.1 PF14874.4; | 60.40 | 0.00 |
| TRINITY_T1JNQ3_STRMM/6-283         | T1JNQ3.1 PF00795.20 | 60.30 | 0.00 |
| TRINITY_A0A0D3HDK8_9ORYZ/63-128    | A0A0D3HDK8.1 PF1620 | 60.30 | 0.00 |
| TRINITY_A1U9N9_MYCSK/11-219        | A1U9N9.1 PF00743.17 | 60.30 | 0.00 |
| TRINITY_A0A058Z427_9EUKA/28-247    | A0A058Z427.1 PF0332 | 60.30 | 0.00 |
| TRINITY_K4B118_SOLLC/7-112         | K4B118.1 PF05564.10 | 60.30 | 0.00 |
| TRINITY_A0A078B9W6_STYLE/3791-4496 | A0A078B9W6.1 PF0302 | 60.30 | 0.00 |
| TRINITY_L8HMW5_ACACA/38-177        | L8HMW5.1 PF08719.9; | 60.30 | 0.00 |
| TRINITY_W4GV92_9STRA/64-139        | W4GV92.1 PF01066.19 | 60.30 | 0.00 |
| TRINITY_A0DS94_PARTE/230-586       | A0DS94.1 PF08613.9; | 60.30 | 0.00 |
| TRINITY_A9TLF9_PHYPA/34-95         | A9TLF9.1 PF00226.29 | 60.30 | 0.00 |
| TRINITY_G0R0U0_ICHMG/14-286        | G0R0U0.1 PF10234.7; | 60.30 | 0.00 |
| TRINITY_C1MKD3_MICPC/15-79         | C1MKD3.1 PF13499.4; | 60.30 | 0.00 |
| TRINITY_I7LV14_TETTS/122-336       | I7LV14.1 PF00112.21 | 60.30 | 0.00 |
| TRINITY_A0A0G4H4N9_9ALVE/11-150    | A0A0G4H4N9.1 PF1458 | 60.30 | 0.00 |
| TRINITY_A0A0G1QZP5_9BACT/13-346    | A0A0G1QZP5.1 PF0120 | 60.30 | 0.00 |
| TRINITY_G4YIK5_PHYSP/252-375       | G4YIK5.1 PF01926.21 | 60.30 | 0.00 |
| TRINITY_L8GEQ6_ACACA/44-387        | L8GEQ6.1 PF00724.18 | 60.30 | 0.00 |
| TRINITY_D8TUM3_VOLCA/223-475       | D8TUM3.1 PF00266.17 | 60.30 | 0.00 |
| TRINITY_I7M198_TETTS/52-316        | I7M198.2 PF00069.23 | 60.30 | 0.00 |
| TRINITY_D8TNS7_VOLCA/490-809       | D8TNS7.1 PF10498.7; | 60.30 | 0.00 |
| TRINITY_YR260_MIMIV/7-69           | Q5UP23.1 PF00226.29 | 60.30 | 0.00 |
| TRINITY_A0DBR4_PARTE/173-230       | A0DBR4.1 PF00415.16 | 60.30 | 0.00 |
| TRINITY_C1MN06_MICPC/482-595       | C1MN06.1 PF00271.29 | 60.30 | 0.00 |
| TRINITY_A8IGG5_CHLRE/30-160        | A8IGG5.1 PF01590.24 | 60.30 | 0.00 |
| TRINITY_D3BTH5_POLPA/151-413       | D3BTH5.1 PF00566.16 | 60.30 | 0.00 |
| TRINITY_L8GZC6_ACACA/162-341       | L8GZC6.1 PF01612.18 | 60.30 | 0.00 |
| TRINITY_F1A249_DICPU/27-235        | F1A249.1 PF08442.8; | 60.30 | 0.00 |
| TRINITY_D3B5K6_POLPA/1245-1393     | D3B5K6.1 PF00005.25 | 60.30 | 0.00 |
| TRINITY_K9T8B5_9CYAN/155-580       | K9T8B5.1 PF00501.26 | 60.30 | 0.00 |
| TRINITY_A0A0D2WIU1_CAPO3/627-784   | A0A0D2WIU1.1 PF0703 | 60.30 | 0.00 |
| TRINITY_D3B5L4_POLPA/76-144        | D3B5L4.1 PF12265.6; | 60.30 | 0.00 |
| TRINITY_C1MVV9_MICPC/172-288       | C1MVV9.1 PF02373.20 | 60.30 | 0.00 |
| TRINITY_I0YP20_9CHLO/96-251        | I0YP20.1 PF01625.19 | 60.30 | 0.00 |
| TRINITY_A0E1B7_PARTE/222-546       | A0E1B7.1 PF00676.18 | 60.30 | 0.00 |
| TRINITY_A0ZJS6_NODSP/13-341        | A0ZJS6.1 PF07690.14 | 60.30 | 0.00 |
| TRINITY_D8U9J7_VOLCA/756-823       | D8U9J7.1 PF12894.5; | 60.30 | 0.00 |
| TRINITY_A0A024WRW2_PLAFA/3-212     | A0A024WRW2.1 PF0009 | 60.30 | 0.00 |
| TRINITY_Q22AH3_TETTS/20-208        | Q22AH3.2 PF00485.16 | 60.30 | 0.00 |
| TRINITY_Q3SEQ6_PARTE/138-200       | Q3SEQ6.1 PF00957.19 | 60.30 | 0.00 |
| TRINITY_A8J0I9_CHLRE/27-230        | A8J0I9.1 PF00106.23 | 60.30 | 0.00 |
| TRINITY_A0A0D2U0A2_CAPO3/664-793   | A0A0D2U0A2.1 PF0063 | 60.30 | 0.00 |
| TRINITY_D8TNS2_VOLCA/256-775       | D8TNS2.1 PF00183.16 | 60.30 | 0.00 |
| TRINITY_D8UDU0_VOLCA/334-939       | D8UDU0.1 PF02446.15 | 60.30 | 0.00 |
| TRINITY_A0A068XM71_HYMMI/64-359    | A0A068XM71.1 PF0154 | 60.30 | 0.00 |
| TRINITY_A8HP50_CHLRE/3-278         | A8HP50.1 PF03194.13 | 60.30 | 0.00 |
| TRINITY_I0YX80_9CHLO/2-489         | I0YX80.1 PF02074.13 | 60.30 | 0.00 |
| TRINITY_A8ITR3_CHLRE/395-621       | A8ITR3.1 PF00067.20 | 60.30 | 0.00 |
| TRINITY_G7KCZ8_MEDTR/8-70          | G7KCZ8.1 PF00280.16 | 60.30 | 0.00 |
| TRINITY_I1BT58_RHIO9/516-691       | I1BT58.1 PF01725.14 | 60.20 | 0.00 |
| TRINITY_I7M706_TETTS/16-370        | I7M706.2 PF00225.21 | 60.20 | 0.00 |
| TRINITY_D3B006_POLPA/20-124        | D3B006.1 PF00307.29 | 60.20 | 0.00 |
| TRINITY_A0A0G4ESR1_9ALVE/93-308    | A0A0G4ESR1.1 PF0214 | 60.20 | 0.00 |
| TRINITY_D8TUF1_VOLCA/74-355        | D8TUF1.1 PF00850.17 | 60.20 | 0.00 |
| TRINITY_D8UBW7_VOLCA/3-270         | D8UBW7.1 PF01459.20 | 60.20 | 0.00 |
| TRINITY_A8J6V4_CHLRE/40-273        | A8J6V4.1 PF00923.17 | 60.20 | 0.00 |

|                                  |                     |       |      |
|----------------------------------|---------------------|-------|------|
| TRINITY_W2RUV3_9EURO/292-396     | W2RUV3.1 PF00307.29 | 60.20 | 0.00 |
| TRINITY_D8U7L1_VOLCA/68-150      | D8U7L1.1 PF12796.5; | 60.20 | 0.00 |
| TRINITY_A0A091E6Y3_FUKDA/802-907 | A0A091E6Y3.1 PF0828 | 60.20 | 0.00 |
| TRINITY_A8HQ95_CHLRE/22-183      | A8HQ95.1 PF01554.16 | 60.20 | 0.00 |
| TRINITY_A5FUJ8_ACICJ/536-886     | A5FUJ8.1 PF01212.19 | 60.20 | 0.00 |
| TRINITY_E1Z7H0_CHLVA/96-228      | E1Z7H0.1 PF00293.26 | 60.20 | 0.00 |
| TRINITY_V7BY08_PHAVU/6-93        | V7BY08.1 PF14368.4; | 60.20 | 0.00 |
| TRINITY_A6C7R0_9PLAN/13-219      | A6C7R0.1 PF02492.17 | 60.20 | 0.00 |
| TRINITY_L8GQT8_ACACA/655-748     | L8GQT8.1 PF13661.4; | 60.20 | 0.00 |
| TRINITY_K9T216_9CYAN/49-161      | K9T216.1 PF03641.12 | 60.20 | 0.00 |
| TRINITY_D3B9Q6_POLPA/99-347      | D3B9Q6.1 PF07714.15 | 60.20 | 0.00 |
| TRINITY_C4WTZ1_ACYPI/29-118      | C4WTZ1.1 PF02269.14 | 60.20 | 0.00 |
| TRINITY_G0QZK0_ICHMG/203-416     | G0QZK0.1 PF00208.19 | 60.20 | 0.00 |
| TRINITY_A0A087XSU4_POEFO/226-404 | A0A087XSU4.1 PF0017 | 60.20 | 0.00 |
| TRINITY_I7ML66_TETTS/12-99       | I7ML66.1 PF01172.16 | 60.20 | 0.00 |
| TRINITY_A0A0E3UWF6_9BACT/52-529  | A0A0E3UWF6.1 PF0120 | 60.20 | 0.00 |
| TRINITY_D8TY39_VOLCA/74-187      | D8TY39.1 PF01245.18 | 60.20 | 0.00 |
| TRINITY_I7M1V6_TETTS/314-533     | I7M1V6.1 PF07002.14 | 60.20 | 0.00 |
| TRINITY_A0DCA2_PARTE/43-238      | A0DCA2.1 PF00149.26 | 60.20 | 0.00 |
| TRINITY_D8TQ52_VOLCA/268-455     | D8TQ52.1 PF00534.18 | 60.20 | 0.00 |
| TRINITY_V4TM29_9ROSI/102-251     | V4TM29.1 PF06574.10 | 60.20 | 0.00 |
| TRINITY_A8J9U6_CHLRE/66-326      | A8J9U6.1 PF12697.5; | 60.20 | 0.00 |
| TRINITY_A0A068S3R7_9FUNG/169-382 | A0A068S3R7.1 PF0291 | 60.20 | 0.00 |
| TRINITY_D8TRM7_VOLCA/133-258     | D8TRM7.1 PF13640.4; | 60.20 | 0.00 |
| TRINITY_A0A0F3K961_9GAMM/71-236  | A0A0F3K961.1 PF1347 | 60.20 | 0.00 |
| TRINITY_D8THQ9_VOLCA/562-677     | D8THQ9.1 PF10366.7; | 60.20 | 0.00 |
| TRINITY_A0CWH1_PARTE/397-1150    | A0CWH1.1 PF03028.13 | 60.20 | 0.00 |
| TRINITY_D8TKW0_VOLCA/57-415      | D8TKW0.1 PF01566.16 | 60.20 | 0.00 |
| TRINITY_A8IBB6_CHLRE/141-344     | A8IBB6.1 PF00211.18 | 60.20 | 0.00 |
| TRINITY_A8WKQ6_CAEBR/1-344       | A8WKQ6.2 PF00022.17 | 60.20 | 0.00 |
| TRINITY_K8YSS9_9STRA/22-327      | K8YSS9.1 PF16363.3; | 60.10 | 0.00 |
| TRINITY_A0BP85_PARTE/12-233      | A0BP85.1 PF00244.18 | 60.10 | 0.00 |
| TRINITY_Q22HI3_TETTS/105-331     | Q22HI3.2 PF13347.4; | 60.10 | 0.00 |
| TRINITY_A0BWL4_PARTE/26-288      | A0BWL4.1 PF00069.23 | 60.10 | 0.00 |
| TRINITY_D8UGD2_VOLCA/9-340       | D8UGD2.1 PF01536.14 | 60.10 | 0.00 |
| TRINITY_Q7X7A7_CHLRE/13-236      | Q7X7A7.1 PF00244.18 | 60.10 | 0.00 |
| TRINITY_V9FL50_PHYPR/153-293     | V9FL50.1 PF00107.24 | 60.10 | 0.00 |
| TRINITY_B3RPW9_TRIAD/5-178       | B3RPW9.1 PF00071.20 | 60.10 | 0.00 |
| TRINITY_D3BKT1_POLPA/724-1258    | D3BKT1.1 PF02738.16 | 60.10 | 0.00 |
| TRINITY_J9J3B4_9SPIT/124-338     | J9J3B4.1 PF00112.21 | 60.10 | 0.00 |
| TRINITY_GPA1_DICDI/15-344        | P16894.1 PF00503.18 | 60.10 | 0.00 |
| TRINITY_A0A087SHY5_AUXPR/4-168   | A0A087SHY5.1 PF0196 | 60.10 | 0.00 |
| TRINITY_L1JN59_GUIH/23-218       | L1JN59.1 PF03587.12 | 60.10 | 0.00 |
| TRINITY_F0ZJQ6_DICPU/27-492      | F0ZJQ6.1 PF00171.20 | 60.10 | 0.00 |
| TRINITY_A8HY17_CHLRE/88-376      | A8HY17.1 PF01643.15 | 60.10 | 0.00 |
| TRINITY_E1Z5A8_CHLVA/8-148       | E1Z5A8.1 PF03870.13 | 60.10 | 0.00 |
| TRINITY_E1Z551_CHLVA/1297-1614   | E1Z551.1 PF13871.4; | 60.10 | 0.00 |
| TRINITY_Q9ATG8_CHLRE/87-411      | Q9ATG8.1 PF00762.17 | 60.10 | 0.00 |
| TRINITY_D8TSA1_VOLCA/1283-1531   | D8TSA1.1 PF02714.13 | 60.10 | 0.00 |
| TRINITY_D8U342_VOLCA/534-910     | D8U342.1 PF03378.13 | 60.10 | 0.00 |
| TRINITY_C1E430_MICSR/135-271     | C1E430.1 PF13673.5; | 60.10 | 0.00 |
| TRINITY_A8J110_CHLRE/37-324      | A8J110.1 PF03982.11 | 60.10 | 0.00 |
| TRINITY_A8HV32_CHLRE/124-295     | A8HV32.1 PF02582.12 | 60.10 | 0.00 |
| TRINITY_I7MK02_TETTS/82-122      | I7MK02.1 PF10276.7; | 60.00 | 0.00 |
| TRINITY_U3KCU9_FICAL/38-238      | U3KCU9.1 PF01965.22 | 60.00 | 0.00 |
| TRINITY_B8C4W0_THAPS/3589-3983   | B8C4W0.1 PF07394.10 | 60.00 | 0.00 |
| TRINITY_A0EDX8_PARTE/605-720     | A0EDX8.1 PF00472.18 | 60.00 | 0.00 |
| TRINITY_A0A072PFG7_9EURO/171-283 | A0A072PFG7.1 PF0017 | 60.00 | 0.00 |
| TRINITY_I7MKM3_TETTS/42-327      | I7MKM3.2 PF01875.15 | 60.00 | 0.00 |
| TRINITY_K7J0G1_NASVI/47-96       | K7J0G1.1 PF07896.10 | 60.00 | 0.00 |
| TRINITY_Q54TE8_DICDI/628-748     | Q54TE8.1 PF00271.29 | 60.00 | 0.00 |

|                                    |              |            |       |      |
|------------------------------------|--------------|------------|-------|------|
| TRINITY_W5LA12_ASTMX/72-254        | W5LA12.1     | PF00535.24 | 60.00 | 0.00 |
| TRINITY_F4PNZ2_DICFS/423-671       | F4PNZ2.1     | PF07714.15 | 60.00 | 0.00 |
| TRINITY_A0A060S5Q7_PYCCI/11-142    | A0A060S5Q7.1 | PF0864     | 60.00 | 0.00 |
| TRINITY_A0BZD1_PARTE/27-212        | A0BZD1.1     | PF01145.23 | 60.00 | 0.00 |
| TRINITY_GNA1_DICDI/17-140          | Q54WR8.1     | PF00583.23 | 60.00 | 0.00 |
| TRINITY_G0QWD0_ICHMG/622-801       | G0QWD0.1     | PF08282.10 | 60.00 | 0.00 |
| TRINITY_D3B339_POLPA/183-305       | D3B339.1     | PF00241.18 | 60.00 | 0.00 |
| TRINITY_A0A096M629_POEFO/648-698   | A0A096M629.1 | PF1460     | 60.00 | 0.00 |
| TRINITY_I7M0Y2_TETTS/442-655       | I7M0Y2.1     | PF13932.4; | 60.00 | 0.00 |
| TRINITY_W4XXC1_STRPU/103-275       | W4XXC1.1     | PF00953.19 | 60.00 | 0.00 |
| TRINITY_A0A0M2CU82_9MICC/240-462   | A0A0M2CU82.1 | PF0012     | 60.00 | 0.00 |
| TRINITY_A0C7D7_PARTE/9-285         | A0C7D7.1     | PF00069.23 | 60.00 | 0.00 |
| TRINITY_D8TZ58_VOLCA/138-226       | D8TZ58.1     | PF00867.16 | 60.00 | 0.00 |
| TRINITY_D3BJT3_POLPA/369-583       | D3BJT3.1     | PF00300.20 | 60.00 | 0.00 |
| TRINITY_A8J165_CHLRE/133-193       | A8J165.1     | PF04117.10 | 60.00 | 0.00 |
| TRINITY_A0A0D2WUV3_CAPO3/23-228    | A0A0D2WUV3.1 | PF0254     | 60.00 | 0.00 |
| TRINITY_D8U5Z6_VOLCA/23-152        | D8U5Z6.1     | PF01288.18 | 60.00 | 0.00 |
| TRINITY_A0A074RY28_9HOMO/35-123    | A0A074RY28.1 | PF1289     | 60.00 | 0.00 |
| TRINITY_G0R4A3_ICHMG/52-199        | G0R4A3.1     | PF13847.4; | 60.00 | 0.00 |
| TRINITY_D8TU06_VOLCA/34-230        | D8TU06.1     | PF03798.14 | 60.00 | 0.00 |
| TRINITY_Q238R8_TETTS/848-963       | Q238R8.1     | PF00787.22 | 60.00 | 0.00 |
| TRINITY_V7D020_PHAVU/173-249       | V7D020.1     | PF13646.4; | 60.00 | 0.00 |
| TRINITY_F6HZ81_VITVI/16-90         | F6HZ81.1     | PF00538.17 | 60.00 | 0.00 |
| TRINITY_I7MKT7_TETTS/1324-1364     | I7MKT7.2     | PF00400.30 | 60.00 | 0.00 |
| TRINITY_A0A0A1MD11_9BACI/7-124     | A0A0A1MD11.1 | PF0058     | 60.00 | 0.00 |
| TRINITY_Q54EU5_DICDI/201-291       | Q54EU5.1     | PF02214.20 | 60.00 | 0.00 |
| TRINITY_A0CCE1_PARTE/35-105        | A0CCE1.1     | PF00076.20 | 60.00 | 0.00 |
| TRINITY_I0Z0H4_9CHLO/506-817       | I0Z0H4.1     | PF00069.23 | 60.00 | 0.00 |
| TRINITY_B4S9S9_PELPB/85-400        | B4S9S9.1     | PF01546.26 | 60.00 | 0.00 |
| TRINITY_E1ZEQ5_CHLVA/621-660       | E1ZEQ5.1     | PF00400.30 | 60.00 | 0.00 |
| TRINITY_D8U575_VOLCA/212-449       | D8U575.1     | PF03399.14 | 60.00 | 0.00 |
| TRINITY_D7T402_VITVI/254-312       | D7T402.1     | PF01485.19 | 60.00 | 0.00 |
| TRINITY_B3MNH4_DROAN/1482-1833     | B3MNH4.1     | PF02259.21 | 60.00 | 0.00 |
| TRINITY_E1Z4Y8_CHLVA/180-244       | E1Z4Y8.1     | PF00076.20 | 60.00 | 0.00 |
| TRINITY_E1ZP48_CHLVA/105-230       | E1ZP48.1     | PF00782.18 | 60.00 | 0.00 |
| TRINITY_U4LGE2_PYROM/440-494       | U4LGE2.1     | PF13513.4; | 60.00 | 0.00 |
| TRINITY_D8TZB4_VOLCA/16-197        | D8TZB4.1     | PF10294.7; | 60.00 | 0.00 |
| TRINITY_F2UMI5_SALR5/10-176        | F2UMI5.1     | PF00071.20 | 60.00 | 0.00 |
| TRINITY_A9RDN7_PHYPA/1-342         | A9RDN7.1     | PF00443.27 | 60.00 | 0.00 |
| TRINITY_R0FNM0_9BRAS/503-587       | R0FNM0.1     | PF00439.23 | 60.00 | 0.00 |
| TRINITY_H3F2B5_PRIIPA/28-132       | H3F2B5.1     | PF00085.18 | 60.00 | 0.00 |
| TRINITY_Q23QT6_TETTS/242-612       | Q23QT6.2     | PF03074.14 | 60.00 | 0.00 |
| TRINITY_D8UF65_VOLCA/7-108         | D8UF65.1     | PF01416.18 | 60.00 | 0.00 |
| TRINITY_J3LD11_ORYBR/535-693       | J3LD11.1     | PF00730.23 | 60.00 | 0.00 |
| TRINITY_I0YPQ0_9CHLO/7-122         | I0YPQ0.1     | PF00072.22 | 60.00 | 0.00 |
| TRINITY_A0A078B7W0_STYLE/1247-1559 | A0A078B7W0.1 | PF0313     | 60.00 | 0.00 |
| TRINITY_K3WGZ0_PYTUL/6-414         | K3WGZ0.1     | PF00202.19 | 60.00 | 0.00 |
| TRINITY_A8IU24_CHLRE/114-221       | A8IU24.1     | PF02517.14 | 60.00 | 0.00 |
| TRINITY_Q8LPN9_CHLRE/133-237       | Q8LPN9.1     | PF06426.12 | 60.00 | 0.00 |
| TRINITY_D8U4M4_VOLCA/4-64          | D8U4M4.1     | PF15459.4; | 60.00 | 0.00 |
| TRINITY_E1ZBV4_CHLVA/379-589       | E1ZBV4.1     | PF04959.11 | 60.00 | 0.00 |
| TRINITY_L8GR31_ACACA/27-95         | L8GR31.1     | PF00076.20 | 60.00 | 0.00 |
| TRINITY_Q22RE7_TETTS/435-519       | Q22RE7.2     | PF02319.18 | 60.00 | 0.00 |
| TRINITY_D8TMS6_VOLCA/1-185         | D8TMS6.1     | PF00488.19 | 60.00 | 0.00 |
| TRINITY_M1V6V4_CYAME/377-456       | M1V6V4.1     | PF15963.3; | 60.00 | 0.00 |
| TRINITY_C6D5M5_PAESJ/50-181        | C6D5M5.1     | PF01565.21 | 60.00 | 0.00 |
| TRINITY_D2W495_NAEGR/37-143        | D2W495.1     | PF00307.29 | 60.00 | 0.00 |
| TRINITY_J9JBL9_9SPIT/441-611       | J9JBL9.1     | PF00271.29 | 60.00 | 0.00 |
| TRINITY_G0QYI6_ICHMG/319-574       | G0QYI6.1     | PF01636.21 | 60.00 | 0.00 |
| TRINITY_A8JF94_CHLRE/124-282       | A8JF94.1     | PF01694.20 | 60.00 | 0.00 |
| TRINITY_W7A303_9APIC/239-649       | W7A303.1     | PF00962.20 | 60.00 | 0.00 |

|                                    |              |            |       |      |
|------------------------------------|--------------|------------|-------|------|
| TRINITY_I7M450_TETTS/2253-2375     | I7M450.2     | PF00069.23 | 60.00 | 0.00 |
| TRINITY_A0A096MBY0_POEFO/238-281   | A0A096MBY0.1 | PF1363     | 60.00 | 0.00 |
| TRINITY_A8HQM3_CHLRE/111-155       | A8HQM3.1     | PF00400.30 | 60.00 | 0.00 |
| TRINITY_I7MKS8_TETTS/312-371       | I7MKS8.1     | PF13297.4; | 60.00 | 0.00 |
| TRINITY_D8UGA8_VOLCA/34-275        | D8UGA8.1     | PF15669.3; | 60.00 | 0.00 |
| TRINITY_D8U274_VOLCA/495-541       | D8U274.1     | PF00249.29 | 60.00 | 0.00 |
| TRINITY_E1ZE56_CHLVA/4456-4520     | E1ZE56.1     | PF00550.23 | 60.00 | 0.00 |
| TRINITY_Q7XW39_ORYSJ/722-882       | Q7XW39.2     | PF00078.25 | 60.00 | 0.00 |
| TRINITY_C7RG14_ANAPD/573-776       | C7RG14.1     | PF05362.11 | 60.00 | 0.00 |
| TRINITY_D8TVK0_VOLCA/1-60          | D8TVK0.1     | PF13616.4; | 60.00 | 0.00 |
| TRINITY_I7LUE3_TETTS/406-451       | I7LUE3.2     | PF13639.4; | 60.00 | 0.00 |
| TRINITY_D8TZ90_VOLCA/77-184        | D8TZ90.1     | PF00583.23 | 60.00 | 0.00 |
| TRINITY_X6MAS1_RETFI/199-243       | X6MAS1.1     | PF00569.15 | 60.00 | 0.00 |
| TRINITY_X6MAS1_RETFI/199-243       | X6MAS1.1     | PF00569.15 | 60.00 | 0.00 |
| TRINITY_X6MAS1_RETFI/199-243       | X6MAS1.1     | PF00569.15 | 60.00 | 0.00 |
| TRINITY_C5YN68_SORBI/639-832       | C5YN68.1     | PF13844.4; | 60.00 | 0.00 |
| TRINITY_A8IRU1_CHLRE/249-321       | A8IRU1.1     | PF14559.4; | 60.00 | 0.00 |
| TRINITY_I7LX26_TETTS/136-483       | I7LX26.2     | PF03969.14 | 60.00 | 0.00 |
| TRINITY_G0QN11_ICHMG/255-400       | G0QN11.1     | PF00441.22 | 60.00 | 0.00 |
| TRINITY_A8HY85_CHLRE/42-92         | A8HY85.1     | PF13920.4; | 60.00 | 0.00 |
| TRINITY_A8J9K5_CHLRE/137-186       | A8J9K5.1     | PF13920.4; | 60.00 | 0.00 |
| TRINITY_D8UF60_VOLCA/4-191         | D8UF60.1     | PF01007.18 | 60.00 | 0.00 |
| TRINITY_I7M3R1_TETTS/59-238        | I7M3R1.2     | PF01728.17 | 60.00 | 0.00 |
| TRINITY_A8JF41_CHLRE/171-378       | A8JF41.1     | PF07250.9; | 60.00 | 0.00 |
| TRINITY_A0C1X6_PARTE/38-292        | A0C1X6.1     | PF00069.23 | 60.00 | 0.00 |
| TRINITY_E1ZHH1_CHLVA/57-281        | E1ZHH1.1     | PF04884.12 | 60.00 | 0.00 |
| TRINITY_A0A067H4J3_CITSI/1156-1204 | A0A067H4J3.1 | PF0062     | 60.00 | 0.00 |
| TRINITY_D8RLJ6_SELML/4-105         | D8RLJ6.1     | PF03297.13 | 60.00 | 0.00 |
| TRINITY_D8TJV4_VOLCA/5-99          | D8TJV4.1     | PF06294.9; | 60.00 | 0.00 |
| TRINITY_A0A0D2NSD1_GOSRA/24-141    | A0A0D2NSD1.1 | PF0025     | 60.00 | 0.00 |
| TRINITY_L1JQL2_GUIETH/8-233        | L1JQL2.1     | PF00817.18 | 60.00 | 0.00 |
| TRINITY_T0Q1R5_9STRA/36-222        | T0Q1R5.1     | PF00406.20 | 60.00 | 0.00 |
| TRINITY_I7LU65_TETTS/183-282       | I7LU65.1     | PF00168.28 | 60.00 | 0.00 |
| TRINITY_I7LTY0_TETTS/1086-1488     | I7LTY0.2     | PF03133.13 | 59.90 | 0.00 |
| TRINITY_Q3SDL0_PARTE/12-173        | Q3SDL0.1     | PF00071.20 | 59.90 | 0.00 |
| TRINITY_I7M185_TETTS/116-375       | I7M185.1     | PF00348.15 | 59.90 | 0.00 |
| TRINITY_L8GYQ1_ACACA/45-195        | L8GYQ1.1     | PF00179.24 | 59.90 | 0.00 |
| TRINITY_I1G1K5_AMPQE/1-295         | I1G1K5.1     | PF06524.10 | 59.90 | 0.00 |
| TRINITY_A0A0G4G1J3_9ALVE/251-434   | A0A0G4G1J3.1 | PF0027     | 59.90 | 0.00 |
| TRINITY_I1LMF9_SOYBN/316-479       | I1LMF9.2     | PF08662.9; | 59.90 | 0.00 |
| TRINITY_A0A098VUP0_9MICR/2-375     | A0A098VUP0.1 | PF0002     | 59.90 | 0.00 |
| TRINITY_A8I5A0_CHLRE/41-174        | A8I5A0.1     | PF13326.4; | 59.90 | 0.00 |
| TRINITY_D8U414_VOLCA/35-318        | D8U414.1     | PF01545.19 | 59.90 | 0.00 |
| TRINITY_A7S629_NEMVE/52-373        | A7S629.1     | PF00762.17 | 59.90 | 0.00 |
| TRINITY_D8SD29_SELML/9-310         | D8SD29.1     | PF00069.23 | 59.90 | 0.00 |
| TRINITY_V7CQ85_PHAVU/113-314       | V7CQ85.1     | PF01786.15 | 59.90 | 0.00 |
| TRINITY_G2LEJ3_CHLTF/49-201        | G2LEJ3.1     | PF00484.17 | 59.90 | 0.00 |
| TRINITY_L8H813_ACACA/26-277        | L8H813.1     | PF00069.23 | 59.90 | 0.00 |
| TRINITY_A8J2S4_CHLRE/1-395         | A8J2S4.1     | PF00743.17 | 59.90 | 0.00 |
| TRINITY_A8IWG3_CHLRE/30-177        | A8IWG3.1     | PF13419.4; | 59.90 | 0.00 |
| TRINITY_UNC50_DICDI/33-257         | Q54DD7.1     | PF05216.11 | 59.90 | 0.00 |
| TRINITY_E1Z3M6_CHLVA/53-252        | E1Z3M6.1     | PF13489.4; | 59.90 | 0.00 |
| TRINITY_A9TIH6_PHYPA/37-298        | A9TIH6.1     | PF01650.16 | 59.90 | 0.00 |
| TRINITY_A8JF21_CHLRE/228-378       | A8JF21.1     | PF00650.18 | 59.90 | 0.00 |
| TRINITY_D8TWK2_VOLCA/969-1135      | D8TWK2.1     | PF14738.4; | 59.90 | 0.00 |
| TRINITY_A8IIZ1_CHLRE/10-171        | A8IIZ1.1     | PF01554.16 | 59.90 | 0.00 |
| TRINITY_T2GA88_DESGI/300-467       | T2GA88.1     | PF03441.12 | 59.90 | 0.00 |
| TRINITY_A8I3S3_CHLRE/106-302       | A8I3S3.1     | PF04389.15 | 59.90 | 0.00 |
| TRINITY_A8JDA6_CHLRE/844-1310      | A8JDA6.1     | PF08016.10 | 59.90 | 0.00 |
| TRINITY_E1ZJ92_CHLVA/81-283        | E1ZJ92.1     | PF12706.5; | 59.90 | 0.00 |
| TRINITY_A0A0J8BB47_BETVU/26-282    | A0A0J8BB47.1 | PF0006     | 59.90 | 0.00 |

|                                  |              |            |       |      |
|----------------------------------|--------------|------------|-------|------|
| TRINITY_A0DWM6_PARTE/516-794     | A0DWM6.1     | PF03133.13 | 59.80 | 0.00 |
| TRINITY_I2K3U4_DEKBR/161-284     | I2K3U4.1     | PF10996.6; | 59.80 | 0.00 |
| TRINITY_Q54P30_DICDI/1396-1570   | Q54P30.1     | PF02145.13 | 59.80 | 0.00 |
| TRINITY_F0ZDF3_DICPU/52-230      | F0ZDF3.1     | PF02390.15 | 59.80 | 0.00 |
| TRINITY_A0BQ47_PARTE/3-95        | A0BQ47.1     | PF03259.15 | 59.80 | 0.00 |
| TRINITY_A0A0G0YDQ8_9BACT/6-244   | A0A0G0YDQ8.1 | PF0137     | 59.80 | 0.00 |
| TRINITY_I3K5J1_ORENI/93-208      | I3K5J1.1     | PF00059.19 | 59.80 | 0.00 |
| TRINITY_L8GX11_ACACA/313-483     | L8GX11.1     | PF13091.4; | 59.80 | 0.00 |
| TRINITY_CCA31_ARATH/90-217       | Q9FMH5.1     | PF00134.21 | 59.80 | 0.00 |
| TRINITY_I7M3Q7_TETTS/390-506     | I7M3Q7.2     | PF02373.20 | 59.80 | 0.00 |
| TRINITY_Q24GE4_TETTS/399-611     | Q24GE4.3     | PF00644.18 | 59.80 | 0.00 |
| TRINITY_A8J255_CHLRE/171-445     | A8J255.1     | PF05116.11 | 59.80 | 0.00 |
| TRINITY_D8SJV7_SELML/197-318     | D8SJV7.1     | PF09335.9; | 59.80 | 0.00 |
| TRINITY_A8IXD5_CHLRE/72-207      | A8IXD5.1     | PF01694.20 | 59.80 | 0.00 |
| TRINITY_I7M9T0_TETTS/42-205      | I7M9T0.2     | PF14908.4; | 59.80 | 0.00 |
| TRINITY_D8TXV6_VOLCA/1-121       | D8TXV6.1     | PF14822.4; | 59.80 | 0.00 |
| TRINITY_Q23AM3_TETTS/1054-1231   | Q23AM3.2     | PF00005.25 | 59.80 | 0.00 |
| TRINITY_E1ZLB2_CHLVA/322-442     | E1ZLB2.1     | PF04379.12 | 59.80 | 0.00 |
| TRINITY_D8U6U2_VOLCA/208-422     | D8U6U2.1     | PF10672.7; | 59.80 | 0.00 |
| TRINITY_D8TZ82_VOLCA/36-233      | D8TZ82.1     | PF00106.23 | 59.80 | 0.00 |
| TRINITY_M0U8F6_MUSAM/1022-1128   | M0U8F6.1     | PF00856.26 | 59.80 | 0.00 |
| TRINITY_I0Z2E6_9CHLO/384-490     | I0Z2E6.1     | PF13426.5; | 59.80 | 0.00 |
| TRINITY_A8HXK0_CHLRE/277-519     | A8HXK0.1     | PF14308.4; | 59.80 | 0.00 |
| TRINITY_M0QSG0_ACACA/39-129      | M0QSG0.1     | PF02214.20 | 59.80 | 0.00 |
| TRINITY_A0A024TBZ2_9STRA/126-336 | A0A024TBZ2.1 | PF0247     | 59.80 | 0.00 |
| TRINITY_D8TIL2_VOLCA/453-563     | D8TIL2.1     | PF07522.12 | 59.80 | 0.00 |
| TRINITY_T1EDA0_HELRO/8-286       | T1EDA0.1     | PF00009.25 | 59.80 | 0.00 |
| TRINITY_H3H405_PHYRM/37-151      | H3H405.1     | PF00665.24 | 59.80 | 0.00 |
| TRINITY_E3EIC2_PAEPS/11-245      | E3EIC2.1     | PF06314.9; | 59.80 | 0.00 |
| TRINITY_I0YLG4_9CHLO/199-335     | I0YLG4.1     | PF01764.23 | 59.80 | 0.00 |
| TRINITY_A8IR25_CHLRE/1-289       | A8IR25.1     | PF08433.8; | 59.80 | 0.00 |
| TRINITY_A8I874_CHLRE/64-181      | A8I874.1     | PF07000.9; | 59.80 | 0.00 |
| TRINITY_D8TRY1_VOLCA/329-426     | D8TRY1.1     | PF00153.25 | 59.80 | 0.00 |
| TRINITY_B3RTR0_TRIAD/6-257       | B3RTR0.1     | PF00795.20 | 59.80 | 0.00 |
| TRINITY_L8H3S2_ACACA/849-997     | L8H3S2.1     | PF08676.9; | 59.70 | 0.00 |
| TRINITY_I7ME32_TETTS/19-92       | I7ME32.1     | PF07491.9; | 59.70 | 0.00 |
| TRINITY_D7G4D0_ECTSI/79-145      | D7G4D0.1     | PF01193.22 | 59.70 | 0.00 |
| TRINITY_W7XI32_TETTS/8-116       | W7XI32.1     | PF01412.16 | 59.70 | 0.00 |
| TRINITY_F4Q960_DICFS/60-352      | F4Q960.1     | PF00128.22 | 59.70 | 0.00 |
| TRINITY_A0A0F6W723_9DELTA/34-204 | A0A0F6W723.1 | PF0085     | 59.70 | 0.00 |
| TRINITY_A8IVY4_CHLRE/15-196      | A8IVY4.1     | PF00227.24 | 59.70 | 0.00 |
| TRINITY_I1G7D7_AMPQE/8-475       | I1G7D7.1     | PF05694.9; | 59.70 | 0.00 |
| TRINITY_A0A075AZB6_9FUNG/55-199  | A0A075AZB6.1 | PF0073     | 59.70 | 0.00 |
| TRINITY_R1D4T2_EMIHU/10-171      | R1D4T2.1     | PF00071.20 | 59.70 | 0.00 |
| TRINITY_F2U4H2_SALR5/23-112      | F2U4H2.1     | PF11175.6; | 59.70 | 0.00 |
| TRINITY_A0A0M0KA22_9EUKA/51-144  | A0A0M0KA22.1 | PF1029     | 59.70 | 0.00 |
| TRINITY_D8U0Z9_VOLCA/65-259      | D8U0Z9.1     | PF02676.12 | 59.70 | 0.00 |
| TRINITY_D2VP14_NAEGR/98-301      | D2VP14.1     | PF00149.26 | 59.70 | 0.00 |
| TRINITY_Q00XW1_OSTTA/2-187       | Q00XW1.1     | PF00625.19 | 59.70 | 0.00 |
| TRINITY_Q22MP1_TETTS/37-190      | Q22MP1.1     | PF00005.25 | 59.70 | 0.00 |
| TRINITY_W5D8K4_WHEAT/654-1020    | W5D8K4.1     | PF02463.17 | 59.70 | 0.00 |
| TRINITY_E1ZCH3_CHLVA/293-451     | E1ZCH3.1     | PF00534.18 | 59.70 | 0.00 |
| TRINITY_I7ME23_TETTS/19-90       | I7ME23.1     | PF13499.4; | 59.70 | 0.00 |
| TRINITY_G0QVT5_ICHMG/238-337     | G0QVT5.1     | PF08454.9; | 59.70 | 0.00 |
| TRINITY_A8JHX5_CHLRE/2-78        | A8JHX5.1     | PF00498.24 | 59.70 | 0.00 |
| TRINITY_T1G2P3_HELRO/1-333       | T1G2P3.1     | PF05185.14 | 59.70 | 0.00 |
| TRINITY_L8H0B4_ACACA/93-357      | L8H0B4.1     | PF04811.13 | 59.70 | 0.00 |
| TRINITY_E3JVN0_PUCGT/1-80        | E3JVN0.1     | PF01249.16 | 59.70 | 0.00 |
| TRINITY_D8TR89_VOLCA/21-149      | D8TR89.1     | PF01138.19 | 59.70 | 0.00 |
| TRINITY_D2VAE1_NAEGR/114-496     | D2VAE1.1     | PF00199.17 | 59.70 | 0.00 |
| TRINITY_G0QXL5_ICHMG/691-767     | G0QXL5.1     | PF14559.4; | 59.70 | 0.00 |

|                                |                     |       |      |
|--------------------------------|---------------------|-------|------|
| TRINITY_D8TUM3_VOLCA/655-775   | D8TUM3.1 PF03473.15 | 59.70 | 0.00 |
| TRINITY_D8THW2_VOLCA/9-219     | D8THW2.1 PF05648.12 | 59.70 | 0.00 |
| TRINITY_A8ID15_CHLRE/20-207    | A8ID15.1 PF10248.7; | 59.70 | 0.00 |
| TRINITY_F0ZGT3_DICPU/243-315   | F0ZGT3.1 PF02825.18 | 59.70 | 0.00 |
| TRINITY_Q23A17_TETTS/301-520   | Q23A17.1 PF07002.14 | 59.70 | 0.00 |
| TRINITY_Q7NC33_MYCGA/9-70      | Q7NC33.1 PF00226.29 | 59.70 | 0.00 |
| TRINITY_F4PGE7_DICFS/977-1179  | F4PGE7.1 PF01434.16 | 59.70 | 0.00 |
| TRINITY_D8TJI7_VOLCA/7-220     | D8TJI7.1 PF01738.16 | 59.70 | 0.00 |
| TRINITY_A0E4A1_PARTE/27-303    | A0E4A1.1 PF00231.17 | 59.70 | 0.00 |
| TRINITY_L8H0T8_ACACA/98-471    | L8H0T8.1 PF01546.26 | 59.70 | 0.00 |
| TRINITY_A8ICB6_CHLRE/231-427   | A8ICB6.1 PF12315.6; | 59.70 | 0.00 |
| TRINITY_A8I754_CHLRE/177-244   | A8I754.1 PF00170.19 | 59.70 | 0.00 |
| TRINITY_L8GUS4_ACACA/70-276    | L8GUS4.1 PF09511.8; | 59.70 | 0.00 |
| TRINITY_A8IZS5_CHLRE/5-74      | A8IZS5.1 PF00076.20 | 59.70 | 0.00 |
| TRINITY_D8UCY0_VOLCA/560-694   | D8UCY0.1 PF03188.14 | 59.70 | 0.00 |
| TRINITY_A8JAY4_CHLRE/1-198     | A8JAY4.1 PF00009.25 | 59.70 | 0.00 |
| TRINITY_W4YUT1_STRPU/82-421    | W4YUT1.1 PF01979.18 | 59.70 | 0.00 |
| TRINITY_D2VQ41_NAEGR/1223-1371 | D2VQ41.1 PF00005.25 | 59.70 | 0.00 |
| TRINITY_R5PLD7_9CLOT/4-290     | R5PLD7.1 PF00009.25 | 59.70 | 0.00 |
| TRINITY_A8J7D7_CHLRE/1-212     | A8J7D7.1 PF00850.17 | 59.70 | 0.00 |
| TRINITY_A4VE98_TETTS/337-580   | A4VE98.1 PF00112.21 | 59.70 | 0.00 |
| TRINITY_A8J3P5_CHLRE/6-664     | A8J3P5.1 PF00012.18 | 59.70 | 0.00 |
| TRINITY_I7MB77_TETTS/156-227   | I7MB77.2 PF01529.18 | 59.70 | 0.00 |
| TRINITY_D2VMY7_NAEGR/253-729   | D2VMY7.1 PF01055.24 | 59.70 | 0.00 |



|                                  |              |            |       |      |
|----------------------------------|--------------|------------|-------|------|
| TRINITY_D8U6R8_VOLCA/6-435       | D8U6R8.1     | PF00266.17 | 59.70 | 0.00 |
| TRINITY_H3G570_PHYRM/11-232      | H3G570.1     | PF00009.25 | 59.70 | 0.00 |
| TRINITY_A0C4X3_PARTE/1548-1824   | A0C4X3.1     | PF02138.16 | 59.60 | 0.00 |
| TRINITY_R4GF85_CHICK/1-160       | R4GF85.1     | PF00071.20 | 59.60 | 0.00 |
| TRINITY_A0A0A6D1I8_9SPHN/14-256  | A0A0A6D1I8.1 | PF1356     | 59.60 | 0.00 |
| TRINITY_J9J9I1_9SPIT/470-590     | J9J9I1.1     | PF02518.24 | 59.60 | 0.00 |
| TRINITY_K1RSZ6_CRAGI/7-189       | K1RSZ6.1     | PF01251.16 | 59.60 | 0.00 |
| TRINITY_T1JTS6_TETUR/100-385     | T1JTS6.1     | PF12257.6; | 59.60 | 0.00 |
| TRINITY_W5MYE7_LEPOC/651-786     | W5MYE7.1     | PF00005.25 | 59.60 | 0.00 |
| TRINITY_J9FIJ3_9SPIT/747-905     | J9FIJ3.1     | PF03031.16 | 59.60 | 0.00 |
| TRINITY_F4Q7L2_DICFS/13-96       | F4Q7L2.1     | PF01453.22 | 59.60 | 0.00 |
| TRINITY_A0A0G4IP82_PLABS/175-385 | A0A0G4IP82.1 | PF0154     | 59.60 | 0.00 |
| TRINITY_D8U4L8_VOLCA/670-733     | D8U4L8.1     | PF01733.16 | 59.60 | 0.00 |
| TRINITY_D8TUT5_VOLCA/57-145      | D8TUT5.1     | PF13649.4; | 59.60 | 0.00 |
| TRINITY_L8GLW0_ACACA/708-815     | L8GLW0.1     | PF00651.29 | 59.60 | 0.00 |
| TRINITY_A0A099TFJ7_9RHOB/40-177  | A0A099TFJ7.1 | PF0156     | 59.60 | 0.00 |
| TRINITY_A0A084VF30_ANOSI/103-309 | A0A084VF30.1 | PF0014     | 59.60 | 0.00 |
| TRINITY_M4BMA1_HYAAE/108-159     | M4BMA1.1     | PF00400.30 | 59.60 | 0.00 |
| TRINITY_M4BMA1_HYAAE/108-159     | M4BMA1.1     | PF00400.30 | 59.60 | 0.00 |
| TRINITY_A0E741_PARTE/638-836     | A0E741.1     | PF01434.16 | 59.60 | 0.00 |
| TRINITY_D5DX48_BACMQ/160-384     | D5DX48.1     | PF03949.13 | 59.60 | 0.00 |
| TRINITY_T1FYY7_HELRO/62-264      | T1FYY7.1     | PF00149.26 | 59.60 | 0.00 |
| TRINITY_I7MIE8_TETTS/22-184      | I7MIE8.1     | PF01926.21 | 59.60 | 0.00 |
| TRINITY_I7M9A1_TETTS/31-209      | I7M9A1.2     | PF14753.4; | 59.60 | 0.00 |
| TRINITY_A0A078ANK0_STYLE/101-417 | A0A078ANK0.1 | PF0154     | 59.60 | 0.00 |
| TRINITY_A0A087STU0_AUXPR/427-677 | A0A087STU0.1 | PF0063     | 59.60 | 0.00 |
| TRINITY_W1QF11_OGAPD/365-424     | W1QF11.1     | PF01485.19 | 59.60 | 0.00 |
| TRINITY_G0QSM7_ICHMG/602-816     | G0QSM7.1     | PF05362.11 | 59.60 | 0.00 |
| TRINITY_I7ME97_TETTS/54-318      | I7ME97.1     | PF00069.23 | 59.60 | 0.00 |
| TRINITY_J9G2U8_9SPIT/24-114      | J9G2U8.1     | PF00153.25 | 59.60 | 0.00 |
| TRINITY_A0A0G4FJZ0_9ALVE/12-173  | A0A0G4FJZ0.1 | PF0007     | 59.60 | 0.00 |
| TRINITY_A8I382_CHLRE/52-192      | A8I382.1     | PF00581.18 | 59.60 | 0.00 |
| TRINITY_S2J9M9_MUCC1/73-173      | S2J9M9.1     | PF13646.4; | 59.60 | 0.00 |
| TRINITY_L1IH70_GUIH/122-177      | L1IH70.1     | PF13513.4; | 59.60 | 0.00 |
| TRINITY_M7ZZU9_TRIUA/103-332     | M7ZZU9.1     | PF12706.5; | 59.60 | 0.00 |
| TRINITY_Q6WEE4_CHLRE/187-285     | Q6WEE4.1     | PF08241.10 | 59.60 | 0.00 |
| TRINITY_A0E308_PARTE/95-202      | A0E308.1     | PF10262.7; | 59.60 | 0.00 |
| TRINITY_W7XFG4_TETTS/26-279      | W7XFG4.1     | PF01571.19 | 59.60 | 0.00 |
| TRINITY_A8IFZ9_CHLRE/100-433     | A8IFZ9.1     | PF00291.23 | 59.60 | 0.00 |
| TRINITY_A8JCU7_CHLRE/396-559     | A8JCU7.1     | PF03914.15 | 59.60 | 0.00 |
| TRINITY_A8HYT2_CHLRE/1-283       | A8HYT2.1     | PF13593.4; | 59.60 | 0.00 |
| TRINITY_D8U819_VOLCA/63-369      | D8U819.1     | PF02383.16 | 59.60 | 0.00 |
| TRINITY_C5DFZ2_LACTC/2-122       | C5DFZ2.1     | PF00125.22 | 59.60 | 0.00 |
| TRINITY_D8TSE6_VOLCA/605-849     | D8TSE6.1     | PF02535.20 | 59.60 | 0.00 |
| TRINITY_D8THV1_VOLCA/93-361      | D8THV1.1     | PF00069.23 | 59.60 | 0.00 |
| TRINITY_A8J0N3_CHLRE/123-316     | A8J0N3.1     | PF01729.17 | 59.60 | 0.00 |
| TRINITY_I0YJD2_9CHLO/402-453     | I0YJD2.1     | PF01805.18 | 59.60 | 0.00 |
| TRINITY_D8UEF4_VOLCA/45-208      | D8UEF4.1     | PF00004.27 | 59.60 | 0.00 |
| TRINITY_J9I105_9SPIT/748-1060    | J9I105.1     | PF03133.13 | 59.60 | 0.00 |
| TRINITY_E1Z917_CHLVA/42-215      | E1Z917.1     | PF00504.19 | 59.60 | 0.00 |
| TRINITY_D8TTV8_VOLCA/81-324      | D8TTV8.1     | PF00233.17 | 59.60 | 0.00 |
| TRINITY_A8JBS8_CHLRE/56-197      | A8JBS8.1     | PF01612.18 | 59.60 | 0.00 |
| TRINITY_A8HP62_CHLRE/179-430     | A8HP62.1     | PF05548.9; | 59.60 | 0.00 |
| TRINITY_A0A059LDC2_9CHLO/19-223  | A0A059LDC2.1 | PF0430     | 59.60 | 0.00 |
| TRINITY_D8RK80_SELML/210-263     | D8RK80.1     | PF12417.6; | 59.60 | 0.00 |
| TRINITY_A8IDF6_CHLRE/121-317     | A8IDF6.1     | PF03167.17 | 59.60 | 0.00 |
| TRINITY_D8TTV8_VOLCA/81-324      | D8TTV8.1     | PF00233.17 | 59.60 | 0.00 |
| TRINITY_A0A078B4E1_STYLE/16-67   | A0A078B4E1.1 | PF1344     | 59.60 | 0.00 |
| TRINITY_A0DUV3_PARTE/152-197     | A0DUV3.1     | PF13920.4; | 59.50 | 0.00 |
| TRINITY_G6CHT9_DANPL/16-65       | G6CHT9.1     | PF00385.22 | 59.50 | 0.00 |
| TRINITY_J9J1V2_9SPIT/5-143       | J9J1V2.1     | PF00179.24 | 59.50 | 0.00 |

|                                  |                     |       |      |
|----------------------------------|---------------------|-------|------|
| TRINITY_D3SGJ3_THISK/5-83        | D3SGJ3.1 PF14216.4; | 59.50 | 0.00 |
| TRINITY_R6I2T3_9FIRM/263-453     | R6I2T3.1 PF02782.14 | 59.50 | 0.00 |
| TRINITY_S8BXP8_9LAMI/37-157      | S8BXP8.1 PF01597.17 | 59.50 | 0.00 |
| TRINITY_G0QZI5_ICHMG/1-443       | G0QZI5.1 PF00342.17 | 59.50 | 0.00 |
| TRINITY_L8GGX4_ACACA/142-246     | L8GGX4.1 PF00085.18 | 59.50 | 0.00 |
| TRINITY_A0A015M2R0_9GLOM/42-194  | A0A015M2R0.1 PF0405 | 59.50 | 0.00 |
| TRINITY_A0A0D2X2K3_CAPO3/532-638 | A0A0D2X2K3.1 PF0073 | 59.50 | 0.00 |
| TRINITY_E2BY81_HARSA/5-166       | E2BY81.1 PF00071.20 | 59.50 | 0.00 |
| TRINITY_A0A0F4ZAI8_9PEZI/94-131  | A0A0F4ZAI8.1 PF0017 | 59.50 | 0.00 |
| TRINITY_A0BEH9_PARTE/36-77       | A0BEH9.1 PF13639.4; | 59.50 | 0.00 |
| TRINITY_X6M8Y4_RETFI/359-412     | X6M8Y4.1 PF00385.22 | 59.50 | 0.00 |
| TRINITY_D8TMA0_VOLCA/15-196      | D8TMA0.1 PF00227.24 | 59.50 | 0.00 |
| TRINITY_B9SDZ9_RICCO/29-158      | B9SDZ9.1 PF00917.24 | 59.50 | 0.00 |
| TRINITY_A0A015II56_9GLOM/376-548 | A0A015II56.1 PF1421 | 59.50 | 0.00 |
| TRINITY_A8IY12_CHLRE/26-105      | A8IY12.1 PF04241.13 | 59.50 | 0.00 |
| TRINITY_D2VQU5_NAEGR/47-242      | D2VQU5.1 PF00149.26 | 59.50 | 0.00 |
| TRINITY_W5P0R0_SHEEP/22-244      | W5P0R0.1 PF01602.18 | 59.50 | 0.00 |
| TRINITY_I1BKV5_RHIO9/319-714     | I1BKV5.1 PF06862.10 | 59.50 | 0.00 |
| TRINITY_D8TJW5_VOLCA/14-164      | D8TJW5.1 PF13302.5; | 59.50 | 0.00 |
| TRINITY_J0LGA5_9BACT/1-296       | J0LGA5.1 PF01204.16 | 59.50 | 0.00 |
| TRINITY_M0QSG3_ACACA/116-206     | M0QSG3.1 PF02214.20 | 59.50 | 0.00 |
| TRINITY_A8JHY4_CHLRE/94-135      | A8JHY4.1 PF00132.22 | 59.50 | 0.00 |
| TRINITY_Q23QF2_TETTS/248-571     | Q23QF2.2 PF03133.13 | 59.50 | 0.00 |
| TRINITY_I0YJY8_9CHLO/292-439     | I0YJY8.1 PF02880.14 | 59.50 | 0.00 |
| TRINITY_A8IKU4_CHLRE/95-317      | A8IKU4.1 PF02141.19 | 59.50 | 0.00 |
| TRINITY_Q23JY6_TETTS/610-893     | Q23JY6.2 PF00481.19 | 59.50 | 0.00 |
| TRINITY_I7LZN5_TETTS/536-926     | I7LZN5.2 PF00368.16 | 59.50 | 0.00 |
| TRINITY_C1N665_MICPC/20-107      | C1N665.1 PF00428.17 | 59.50 | 0.00 |
| TRINITY_Q24DE2_TETTS/709-750     | Q24DE2.2 PF00400.30 | 59.50 | 0.00 |
| TRINITY_M9LX83_PSEA3/276-328     | M9LX83.1 PF00385.22 | 59.50 | 0.00 |
| TRINITY_G0QKI2_ICHMG/2-112       | G0QKI2.1 PF03966.14 | 59.50 | 0.00 |
| TRINITY_A8IWB7_CHLRE/38-199      | A8IWB7.1 PF01507.17 | 59.50 | 0.00 |
| TRINITY_A8IS72_CHLRE/29-323      | A8IS72.1 PF04086.11 | 59.50 | 0.00 |
| TRINITY_D8TZH6_VOLCA/22-283      | D8TZH6.1 PF00233.17 | 59.50 | 0.00 |
| TRINITY_D2V0F2_NAEGR/56-208      | D2V0F2.1 PF00005.25 | 59.50 | 0.00 |
| TRINITY_A8HNI5_CHLRE/39-425      | A8HNI5.1 PF00155.19 | 59.50 | 0.00 |
| TRINITY_A0A088A591_APIME/114-257 | A0A088A591.1 PF1214 | 59.50 | 0.00 |
| TRINITY_A0A078G3N8_BRANA/161-203 | A0A078G3N8.1 PF0040 | 59.50 | 0.00 |
| TRINITY_A0A087SL58_AUXPR/133-369 | A0A087SL58.1 PF0024 | 59.50 | 0.00 |
| TRINITY_A0CWH1_PARTE/397-1150    | A0CWH1.1 PF03028.13 | 59.50 | 0.00 |
| TRINITY_A0CYU6_PARTE/98-357      | A0CYU6.1 PF00069.23 | 59.40 | 0.00 |
| TRINITY_A0A0C4DW14_MAGP6/5-147   | A0A0C4DW14.1 PF0017 | 59.40 | 0.00 |
| TRINITY_Q238Z1_TETTS/96-250      | Q238Z1.1 PF00650.18 | 59.40 | 0.00 |
| TRINITY_A7RPZ7_NEMVE/42-111      | A7RPZ7.1 PF00076.20 | 59.40 | 0.00 |
| TRINITY_U5QIH0_9CYAN/30-331      | U5QIH0.1 PF00248.19 | 59.40 | 0.00 |
| TRINITY_G0QSW4_ICHMG/29-97       | G0QSW4.1 PF00366.18 | 59.40 | 0.00 |
| TRINITY_Q23FX2_TETTS/36-451      | Q23FX2.3 PF00999.19 | 59.40 | 0.00 |
| TRINITY_A0A0N0D2H4_9DELT/189-254 | A0A0N0D2H4.1 PF0051 | 59.40 | 0.00 |
| TRINITY_B0WZR8_CULQU/14-182      | B0WZR8.1 PF00071.20 | 59.40 | 0.00 |
| TRINITY_L8HLP2_ACACA/9-202       | L8HLP2.1 PF00834.17 | 59.40 | 0.00 |
| TRINITY_B9ICR1_POPTR/84-179      | B9ICR1.2 PF00173.26 | 59.40 | 0.00 |
| TRINITY_F0ZN65_DICPU/59-351      | F0ZN65.1 PF00128.22 | 59.40 | 0.00 |
| TRINITY_B3RN54_TRIAD/23-224      | B3RN54.1 PF07992.12 | 59.40 | 0.00 |
| TRINITY_F0ZXI3_DICPU/2-96        | F0ZXI3.1 PF09138.9; | 59.40 | 0.00 |
| TRINITY_C1FIF0_MICSR/52-437      | C1FIF0.1 PF04563.13 | 59.40 | 0.00 |
| TRINITY_D7FTM7_ECTSI/5-252       | D7FTM7.1 PF00370.19 | 59.40 | 0.00 |
| TRINITY_A8J650_CHLRE/49-258      | A8J650.1 PF00697.20 | 59.40 | 0.00 |
| TRINITY_Q3SE66_PARTE/97-259      | Q3SE66.1 PF03167.17 | 59.40 | 0.00 |
| TRINITY_Q24HI2_TETTS/127-344     | Q24HI2.1 PF00112.21 | 59.40 | 0.00 |
| TRINITY_D8TJD1_VOLCA/814-918     | D8TJD1.1 PF04003.10 | 59.40 | 0.00 |
| TRINITY_L8H9Z0_ACACA/196-375     | L8H9Z0.1 PF00270.27 | 59.40 | 0.00 |

|                                  |              |            |       |      |
|----------------------------------|--------------|------------|-------|------|
| TRINITY_A8I8N0_CHLRE/95-286      | A8I8N0.1     | PF00300.20 | 59.40 | 0.00 |
| TRINITY_A0DTL9_PARTE/31-95       | A0DTL9.1     | PF11717.6; | 59.40 | 0.00 |
| TRINITY_D8TWM8_VOLCA/153-220     | D8TWM8.1     | PF10260.7; | 59.40 | 0.00 |
| TRINITY_A8IR47_CHLRE/9-342       | A8IR47.1     | PF08569.9; | 59.40 | 0.00 |
| TRINITY_A8IZH0_CHLRE/174-387     | A8IZH0.1     | PF04042.14 | 59.40 | 0.00 |
| TRINITY_D8U8M1_VOLCA/7-310       | D8U8M1.1     | PF03372.21 | 59.40 | 0.00 |
| TRINITY_D8U9S9_VOLCA/599-793     | D8U9S9.1     | PF00211.18 | 59.40 | 0.00 |
| TRINITY_D8U3H2_VOLCA/1-587       | D8U3H2.1     | PF04734.11 | 59.40 | 0.00 |
| TRINITY_A0A0M2R709_9PROT/218-408 | A0A0M2R709.1 | PF0769     | 59.40 | 0.00 |
| TRINITY_D8U273_VOLCA/4-107       | D8U273.1     | PF00085.18 | 59.40 | 0.00 |
| TRINITY_D8TJ78_VOLCA/60-314      | D8TJ78.1     | PF10275.7; | 59.40 | 0.00 |
| TRINITY_G0QU48_ICHMG/662-757     | G0QU48.1     | PF09333.9; | 59.40 | 0.00 |
| TRINITY_A0A075AVH6_9FUNG/98-266  | A0A075AVH6.1 | PF0442     | 59.40 | 0.00 |
| TRINITY_D8U6Q5_VOLCA/76-242      | D8U6Q5.1     | PF00650.18 | 59.40 | 0.00 |
| TRINITY_D8UEW3_VOLCA/53-435      | D8UEW3.1     | PF13621.4; | 59.40 | 0.00 |
| TRINITY_A8J7T0_CHLRE/100-165     | A8J7T0.1     | PF03719.13 | 59.40 | 0.00 |
| TRINITY_D8R7I0_SELML/13-121      | D8R7I0.1     | PF01920.18 | 59.40 | 0.00 |
| TRINITY_D8U168_VOLCA/87-282      | D8U168.1     | PF13369.4; | 59.40 | 0.00 |
| TRINITY_C3YHE8_BRAFL/385-428     | C3YHE8.1     | PF13639.4; | 59.40 | 0.00 |
| TRINITY_G0QZ46_ICHMG/4-87        | G0QZ46.1     | PF01221.16 | 59.30 | 0.00 |
| TRINITY_W7XGD4_TETTS/87-322      | W7XGD4.1     | PF12146.6; | 59.30 | 0.00 |
| TRINITY_A0CZ01_PARTE/4-96        | A0CZ01.1     | PF03501.13 | 59.30 | 0.00 |
| TRINITY_X6M4L5_RETFI/6-65        | X6M4L5.1     | PF04193.12 | 59.30 | 0.00 |
| TRINITY_Q09B48_STIAD/174-291     | Q09B48.1     | PF03171.18 | 59.30 | 0.00 |
| TRINITY_F6USE7_XENTR/29-200      | F6USE7.1     | PF00270.27 | 59.30 | 0.00 |
| TRINITY_J9IMT2_9SPIT/146-246     | J9IMT2.1     | PF00153.25 | 59.30 | 0.00 |
| TRINITY_B3RKM6_TRIAD/5-291       | B3RKM6.1     | PF01875.15 | 59.30 | 0.00 |
| TRINITY_A0A0H2UIW8_WHEAT/1-223   | A0A0H2UIW8.1 | PF0450     | 59.30 | 0.00 |
| TRINITY_A0D7P8_PARTE/1491-1674   | A0D7P8.1     | PF00534.18 | 59.30 | 0.00 |
| TRINITY_A0DI20_PARTE/19-543      | A0DI20.1     | PF01602.18 | 59.30 | 0.00 |
| TRINITY_N4W6M1_COLOR/267-416     | N4W6M1.1     | PF04410.12 | 59.30 | 0.00 |
| TRINITY_I0I634_CALAS/15-339      | I0I634.1     | PF00266.17 | 59.30 | 0.00 |
| TRINITY_D6WV22_TRICA/26-271      | D6WV22.1     | PF01145.23 | 59.30 | 0.00 |
| TRINITY_INT9_NEMVE/90-246        | A7SBF0.1     | PF16661.3; | 59.30 | 0.00 |
| TRINITY_J9EFC8_9SPIT/704-837     | J9EFC8.1     | PF02518.24 | 59.30 | 0.00 |
| TRINITY_A0E7K0_PARTE/175-280     | A0E7K0.1     | PF01416.18 | 59.30 | 0.00 |
| TRINITY_F4Q1R8_DICFS/16-344      | F4Q1R8.1     | PF00503.18 | 59.30 | 0.00 |
| TRINITY_D8TTC1_VOLCA/228-356     | D8TTC1.1     | PF04097.12 | 59.30 | 0.00 |
| TRINITY_E1ZGH5_CHLVA/16-177      | E1ZGH5.1     | PF13419.4; | 59.30 | 0.00 |
| TRINITY_Q23FG2_TETTS/1702-2050   | Q23FG2.2     | PF00443.27 | 59.30 | 0.00 |
| TRINITY_A0BSP4_PARTE/28-177      | A0BSP4.1     | PF00179.24 | 59.30 | 0.00 |
| TRINITY_D8U8H6_VOLCA/1-97        | D8U8H6.1     | PF13664.4; | 59.30 | 0.00 |
| TRINITY_A0A0M0K094_9EUKA/27-120  | A0A0M0K094.1 | PF1390     | 59.30 | 0.00 |
| TRINITY_J9HZM9_9SPIT/78-296      | J9HZM9.1     | PF00112.21 | 59.30 | 0.00 |
| TRINITY_D8U6I4_VOLCA/26-255      | D8U6I4.1     | PF00687.19 | 59.30 | 0.00 |
| TRINITY_Q22EH7_TETTS/100-154     | Q22EH7.2     | PF03909.15 | 59.30 | 0.00 |
| TRINITY_A0BKD0_PARTE/99-237      | A0BKD0.1     | PF14580.4; | 59.30 | 0.00 |
| TRINITY_G0QL35_ICHMG/210-567     | G0QL35.1     | PF00246.22 | 59.30 | 0.00 |
| TRINITY_A8J3M3_CHLRE/46-296      | A8J3M3.1     | PF01636.21 | 59.30 | 0.00 |
| TRINITY_D8THE4_VOLCA/708-799     | D8THE4.1     | PF02212.16 | 59.30 | 0.00 |
| TRINITY_D8TTU4_VOLCA/420-563     | D8TTU4.1     | PF01612.18 | 59.30 | 0.00 |
| TRINITY_L8H244_ACACA/118-237     | L8H244.1     | PF00622.26 | 59.30 | 0.00 |
| TRINITY_A0CN21_PARTE/290-662     | A0CN21.1     | PF03074.14 | 59.30 | 0.00 |
| TRINITY_A8HSR5_CHLRE/161-392     | A8HSR5.1     | PF00246.22 | 59.30 | 0.00 |
| TRINITY_D8U9F4_VOLCA/173-306     | D8U9F4.1     | PF13012.4; | 59.30 | 0.00 |
| TRINITY_A0A0F2RJP9_9PROT/13-396  | A0A0F2RJP9.1 | PF0019     | 59.30 | 0.00 |
| TRINITY_B4FYT5_MAIZE/176-324     | B4FYT5.1     | PF00485.16 | 59.30 | 0.00 |
| TRINITY_A0BL44_PARTE/620-730     | A0BL44.1     | PF13426.5; | 59.30 | 0.00 |
| TRINITY_A7RSI0_NEMVE/8-120       | A7RSI0.1     | PF02391.15 | 59.30 | 0.00 |
| TRINITY_I1E296_9GAMM/80-160      | I1E296.1     | PF01035.18 | 59.30 | 0.00 |
| TRINITY_Q23YT4_TETTS/253-339     | Q23YT4.2     | PF00736.17 | 59.30 | 0.00 |

|                                  |                     |       |      |
|----------------------------------|---------------------|-------|------|
| TRINITY_A0A0N4Z2H2_PARTI/535-738 | A0A0N4Z2H2.1 PF0143 | 59.30 | 0.00 |
| TRINITY_C1MTS7_MICPC/2072-2343   | C1MTS7.1 PF12775.5; | 59.30 | 0.00 |
| TRINITY_D3BIJ9_POLPA/690-861     | D3BIJ9.1 PF00270.27 | 59.30 | 0.00 |
| TRINITY_E1ZSF7_CHLVA/18-169      | E1ZSF7.1 PF00857.18 | 59.30 | 0.00 |
| TRINITY_D8TKK5_VOLCA/94-546      | D8TKK5.1 PF05185.14 | 59.30 | 0.00 |
| TRINITY_A8HSU4_CHLRE/1-143       | A8HSU4.1 PF14437.4; | 59.30 | 0.00 |
| TRINITY_A8JCR3_CHLRE/12-76       | A8JCR3.1 PF13499.4; | 59.30 | 0.00 |
| TRINITY_A0A087SNS7_AUXPR/51-362  | A0A087SNS7.1 PF0315 | 59.30 | 0.00 |
| TRINITY_A8HU48_CHLRE/1149-1287   | A8HU48.1 PF11816.6; | 59.30 | 0.00 |
| TRINITY_A0A024TZW5_9STRA/77-491  | A0A024TZW5.1 PF0070 | 59.30 | 0.00 |
| TRINITY_A0BJJ0_PARTE/87-192      | A0BJJ0.1 PF06565.10 | 59.30 | 0.00 |
| TRINITY_L8GL09_ACACA/247-304     | L8GL09.1 PF00571.26 | 59.30 | 0.00 |
| TRINITY_A8HZD1_CHLRE/1-350       | A8HZD1.1 PF00225.21 | 59.30 | 0.00 |
| TRINITY_W2PXB2_PHYPN/493-609     | W2PXB2.1 PF00665.24 | 59.30 | 0.00 |
| TRINITY_K9SQ14_9CYAN/405-542     | K9SQ14.1 PF02518.24 | 59.20 | 0.00 |
| TRINITY_I7M2D2_TETTS/40-113      | I7M2D2.2 PF02798.18 | 59.20 | 0.00 |
| TRINITY_A0A024UAY1_9STRA/8-329   | A0A024UAY1.1 PF0293 | 59.20 | 0.00 |
| TRINITY_D5GJQ0_TUBMM/674-726     | D5GJQ0.1 PF13513.4; | 59.20 | 0.00 |
| TRINITY_Q238R8_TETTS/18-286      | Q238R8.1 PF02263.17 | 59.20 | 0.00 |
| TRINITY_A4VCS2_TETTS/102-221     | A4VCS2.1 PF01981.14 | 59.20 | 0.00 |
| TRINITY_A9TAJ1_PHYPA/1-185       | A9TAJ1.1 PF05018.11 | 59.20 | 0.00 |
| TRINITY_G4QFB8_GLANF/33-277      | G4QFB8.1 PF02784.14 | 59.20 | 0.00 |
| TRINITY_M0XYK6_HORVD/40-120      | M0XYK6.1 PF01016.17 | 59.20 | 0.00 |
| TRINITY_U9SSL5_RHIID/3-1230      | U9SSL5.1 PF02463.17 | 59.20 | 0.00 |
| TRINITY_D8UIB4_VOLCA/392-592     | D8UIB4.1 PF08662.9; | 59.20 | 0.00 |
| TRINITY_I0YKW1_9CHLO/8-84        | I0YKW1.1 PF13499.4; | 59.20 | 0.00 |
| TRINITY_L8H1J5_ACACA/387-531     | L8H1J5.1 PF00300.20 | 59.20 | 0.00 |
| TRINITY_E1ZE86_CHLVA/64-141      | E1ZE86.1 PF00076.20 | 59.20 | 0.00 |
| TRINITY_F2U697_SALR5/3015-3236   | F2U697.1 PF12781.5; | 59.20 | 0.00 |
| TRINITY_G0QMS4_ICHMG/137-465     | G0QMS4.1 PF00069.23 | 59.20 | 0.00 |
| TRINITY_J9J5P5_9SPIT/28-172      | J9J5P5.1 PF00810.16 | 59.20 | 0.00 |
| TRINITY_Q23KJ6_TETTS/622-886     | Q23KJ6.2 PF00069.23 | 59.20 | 0.00 |
| TRINITY_G0R119_ICHMG/152-200     | G0R119.1 PF00400.30 | 59.20 | 0.00 |
| TRINITY_I0Z997_9CHLO/17-136      | I0Z997.1 PF13671.4; | 59.20 | 0.00 |
| TRINITY_A0BGA7_PARTE/140-295     | A0BGA7.1 PF13847.4; | 59.20 | 0.00 |
| TRINITY_A0A0D2VQT8_CAPO3/19-143  | A0A0D2VQT8.1 PF0029 | 59.20 | 0.00 |
| TRINITY_A0A0C4DL18_MAGP6/21-224  | A0A0C4DL18.1 PF0642 | 59.20 | 0.00 |
| TRINITY_D8TSH3_VOLCA/788-863     | D8TSH3.1 PF10405.7; | 59.20 | 0.00 |
| TRINITY_A8JBY6_CHLRE/203-662     | A8JBY6.1 PF04130.11 | 59.20 | 0.00 |
| TRINITY_AMT1_DICDI/41-440        | Q9BLG4.1 PF00909.19 | 59.20 | 0.00 |
| TRINITY_D8TRH3_VOLCA/1836-2055   | D8TRH3.1 PF01061.22 | 59.20 | 0.00 |
| TRINITY_I0YR51_9CHLO/128-422     | I0YR51.1 PF01557.16 | 59.20 | 0.00 |
| TRINITY_U9SW31_RHIID/110-183     | U9SW31.1 PF05495.10 | 59.20 | 0.00 |
| TRINITY_I2FW02_USTH4/107-155     | I2FW02.1 PF00628.27 | 59.20 | 0.00 |
| TRINITY_L8GLJ2_ACACA/616-664     | L8GLJ2.1 PF14604.4; | 59.20 | 0.00 |
| TRINITY_F4PHT1_DICFS/491-542     | F4PHT1.1 PF13833.4; | 59.20 | 0.00 |
| TRINITY_L8H670_ACACA/88-235      | L8H670.1 PF10609.7; | 59.20 | 0.00 |
| TRINITY_E1ZD03_CHLVA/322-419     | E1ZD03.1 PF13180.4; | 59.20 | 0.00 |
| TRINITY_G0QWP0_ICHMG/124-181     | G0QWP0.1 PF01485.19 | 59.20 | 0.00 |
| TRINITY_D8U9N9_VOLCA/98-267      | D8U9N9.1 PF00270.27 | 59.20 | 0.00 |
| TRINITY_PCDP1_CHLRE/112-209      | A8J6X7.1 PF14874.4; | 59.20 | 0.00 |
| TRINITY_D3B6M3_POLPA/229-533     | D3B6M3.1 PF00082.20 | 59.20 | 0.00 |
| TRINITY_Q8YWS5_NOSS1/35-264      | Q8YWS5.1 PF02522.12 | 59.20 | 0.00 |
| TRINITY_A8JDY7_CHLRE/10-58       | A8JDY7.1 PF12906.5; | 59.20 | 0.00 |
| TRINITY_A0A087SBU1_AUXPR/606-800 | A0A087SBU1.1 PF1341 | 59.20 | 0.00 |
| TRINITY_L8GJZ1_ACACA/243-460     | L8GJZ1.1 PF01189.15 | 59.20 | 0.00 |
| TRINITY_I0Z9A9_9CHLO/745-1340    | I0Z9A9.1 PF04998.15 | 59.20 | 0.00 |
| TRINITY_D8UI70_VOLCA/213-633     | D8UI70.1 PF00171.20 | 59.20 | 0.00 |
| TRINITY_Q9ZSJ4_CHLRE/68-236      | Q9ZSJ4.2 PF00504.19 | 59.20 | 0.00 |
| TRINITY_A8J6I8_CHLRE/888-1113    | A8J6I8.1 PF05193.19 | 59.20 | 0.00 |
| TRINITY_Q8S653_ORYSJ/452-609     | Q8S653.1 PF00078.25 | 59.20 | 0.00 |

|                                  |                     |       |      |
|----------------------------------|---------------------|-------|------|
| TRINITY_I7MA77_TETTS/29-80       | I7MA77.2 PF05047.14 | 59.20 | 0.00 |
| TRINITY_M1CZP3_SOLTU/72-309      | M1CZP3.1 PF01255.17 | 59.10 | 0.00 |
| TRINITY_A0A067R4S1_ZOONE/93-369  | A0A067R4S1.1 PF0364 | 59.10 | 0.00 |
| TRINITY_L8HJK0_ACACA/186-408     | L8HJK0.1 PF13236.4; | 59.10 | 0.00 |
| TRINITY_L1IRT5_GUITH/383-589     | L1IRT5.1 PF01061.22 | 59.10 | 0.00 |
| TRINITY_I1CH46_RHIO9/26-333      | I1CH46.1 PF01266.22 | 59.10 | 0.00 |
| TRINITY_A0A0E3UY03_9BACT/4-308   | A0A0E3UY03.1 PF0111 | 59.10 | 0.00 |
| TRINITY_A0A0E4GD53_9FIRM/6-68    | A0A0E4GD53.1 PF0022 | 59.10 | 0.00 |
| TRINITY_M2Y8C7_GALSU/442-709     | M2Y8C7.1 PF01513.19 | 59.10 | 0.00 |
| TRINITY_A0A078ERX2_BRANA/26-250  | A0A078ERX2.1 PF0192 | 59.10 | 0.00 |
| TRINITY_A0A078ARM2_STYLE/135-202 | A0A078ARM2.1 PF0022 | 59.10 | 0.00 |
| TRINITY_H2LXA0_ORYLA/83-257      | H2LXA0.1 PF02146.15 | 59.10 | 0.00 |
| TRINITY_L8GLB6_ACACA/1279-1454   | L8GLB6.1 PF00092.26 | 59.10 | 0.00 |
| TRINITY_N1PE77_DOTSN/19-318      | N1PE77.1 PF00248.19 | 59.10 | 0.00 |
| TRINITY_F1A219_DICPU/111-281     | F1A219.1 PF02769.20 | 59.10 | 0.00 |
| TRINITY_G0R1F0_ICHMG/20-315      | G0R1F0.1 PF00069.23 | 59.10 | 0.00 |
| TRINITY_B9S9S4_RICCO/112-239     | B9S9S4.1 PF00293.26 | 59.10 | 0.00 |
| TRINITY_D2UZX2_NAEGR/143-328     | D2UZX2.1 PF13521.4; | 59.10 | 0.00 |
| TRINITY_H6L1T3_SAPGL/18-402      | H6L1T3.1 PF00368.16 | 59.10 | 0.00 |
| TRINITY_J9J3B4_9SPIT/124-338     | J9J3B4.1 PF00112.21 | 59.10 | 0.00 |
| TRINITY_A0DIQ1_PARTE/466-597     | A0DIQ1.1 PF00782.18 | 59.10 | 0.00 |
| TRINITY_K0IJ19_NITGG/6-472       | K0IJ19.1 PF00478.23 | 59.10 | 0.00 |
| TRINITY_A0A0G4IUN0_PLABS/94-139  | A0A0G4IUN0.1 PF0041 | 59.10 | 0.00 |
| TRINITY_I0YKJ3_9CHLO/305-395     | I0YKJ3.1 PF00027.27 | 59.10 | 0.00 |
| TRINITY_D8TNV9_VOLCA/175-458     | D8TNV9.1 PF00656.20 | 59.10 | 0.00 |
| TRINITY_A0A0D2X3T7_CAPO3/36-185  | A0A0D2X3T7.1 PF0853 | 59.10 | 0.00 |
| TRINITY_A0A059CL54_EUCGR/64-347  | A0A059CL54.1 PF0085 | 59.10 | 0.00 |
| TRINITY_D8U9T2_VOLCA/248-480     | D8U9T2.1 PF00069.23 | 59.10 | 0.00 |
| TRINITY_H3G684_PHYRM/1-81        | H3G684.1 PF00665.24 | 59.10 | 0.00 |
| TRINITY_A0A0L7KPY5_9NEOP/11-106  | A0A0L7KPY5.1 PF0014 | 59.10 | 0.00 |
| TRINITY_D8TRJ9_VOLCA/14-234      | D8TRJ9.1 PF04012.10 | 59.10 | 0.00 |
| TRINITY_E1ZGW5_CHLVA/631-675     | E1ZGW5.1 PF00249.29 | 59.10 | 0.00 |
| TRINITY_A8IPD5_CHLRE/146-189     | A8IPD5.1 PF01753.16 | 59.10 | 0.00 |
| TRINITY_B0W537_CULQU/638-773     | B0W537.1 PF00005.25 | 59.10 | 0.00 |
| TRINITY_D8UCA1_VOLCA/10-375      | D8UCA1.1 PF07851.11 | 59.10 | 0.00 |
| TRINITY_A0A0M9G5U1_9TRYP/169-257 | A0A0M9G5U1.1 PF1289 | 59.10 | 0.00 |
| TRINITY_M1BYH8_SOLTU/55-116      | M1BYH8.1 PF06325.11 | 59.10 | 0.00 |
| TRINITY_A0A087SQ99_AUXPR/131-532 | A0A087SQ99.1 PF0091 | 59.10 | 0.00 |
| TRINITY_I0YXN6_9CHLO/225-641     | I0YXN6.1 PF01179.18 | 59.10 | 0.00 |
| TRINITY_C1FFN1_MICSR/350-393     | C1FFN1.1 PF13639.4; | 59.10 | 0.00 |
| TRINITY_D8TL19_VOLCA/110-460     | D8TL19.1 PF00654.18 | 59.10 | 0.00 |
| TRINITY_A8IXY4_CHLRE/14-432      | A8IXY4.1 PF02897.13 | 59.10 | 0.00 |
| TRINITY_R4GCI3_ANOCA/1-108       | R4GCI3.1 PF00665.24 | 59.10 | 0.00 |
| TRINITY_G0R3W3_ICHMG/1142-1282   | G0R3W3.1 PF00637.18 | 59.10 | 0.00 |
| TRINITY_Q23AS6_TETTS/7-98        | Q23AS6.1 PF00166.19 | 59.10 | 0.00 |
| TRINITY_A0DNI8_PARTE/201-510     | A0DNI8.1 PF00632.23 | 59.00 | 0.00 |
| TRINITY_K9V0E6_9CYAN/31-123      | K9V0E6.1 PF04248.10 | 59.00 | 0.00 |
| TRINITY_L8GVJ0_ACACA/36-118      | L8GVJ0.1 PF12861.5; | 59.00 | 0.00 |
| TRINITY_C5LTF4_PERM5/86-148      | C5LTF4.1 PF13499.4; | 59.00 | 0.00 |
| TRINITY_Q54C20_DICDI/221-281     | Q54C20.1 PF04193.12 | 59.00 | 0.00 |
| TRINITY_A0A0A2TVU3_9BACL/316-444 | A0A0A2TVU3.1 PF0283 | 59.00 | 0.00 |
| TRINITY_F2UQY4_SALR5/39-238      | F2UQY4.1 PF00106.23 | 59.00 | 0.00 |
| TRINITY_M7XBN2_RHOT1/1-127       | M7XBN2.1 PF00125.22 | 59.00 | 0.00 |
| TRINITY_I0YSC3_9CHLO/14-127      | I0YSC3.1 PF07934.10 | 59.00 | 0.00 |
| TRINITY_I2H725_TETBL/29-519      | I2H725.1 PF00118.22 | 59.00 | 0.00 |
| TRINITY_M4BRB5_HYAAE/27-197      | M4BRB5.1 PF00586.22 | 59.00 | 0.00 |
| TRINITY_D8TRF2_VOLCA/63-520      | D8TRF2.1 PF13520.4; | 59.00 | 0.00 |
| TRINITY_J9J7F2_9SPIT/261-301     | J9J7F2.1 PF00400.30 | 59.00 | 0.00 |
| TRINITY_H2LMM4_ORYLA/473-721     | H2LMM4.1 PF00089.24 | 59.00 | 0.00 |
| TRINITY_D8TZA2_VOLCA/167-347     | D8TZA2.1 PF00849.20 | 59.00 | 0.00 |
| TRINITY_E1ZEL2_CHLVA/1-142       | E1ZEL2.1 PF01217.18 | 59.00 | 0.00 |

|                                  |              |            |       |      |
|----------------------------------|--------------|------------|-------|------|
| TRINITY_D8U4X1_VOLCA/43-120      | D8U4X1.1     | PF08561.8; | 59.00 | 0.00 |
| TRINITY_T1EDY3_HELRO/130-445     | T1EDY3.1     | PF00009.25 | 59.00 | 0.00 |
| TRINITY_A8IA80_CHLRE/1-365       | A8IA80.1     | PF05684.10 | 59.00 | 0.00 |
| TRINITY_B3RRA4_TRIAD/270-311     | B3RRA4.1     | PF00569.15 | 59.00 | 0.00 |
| TRINITY_Q8V3N1_SWPV1/8-179       | Q8V3N1.1     | PF00265.16 | 59.00 | 0.00 |
| TRINITY_A0D5K9_PARTE/135-221     | A0D5K9.1     | PF12796.5; | 59.00 | 0.00 |
| TRINITY_A8JAQ3_CHLRE/38-173      | A8JAQ3.1     | PF00583.23 | 59.00 | 0.00 |
| TRINITY_D8TNL8_VOLCA/36-226      | D8TNL8.1     | PF01145.23 | 59.00 | 0.00 |
| TRINITY_I0Z9Z8_9CHLO/47-196      | I0Z9Z8.1     | PF01553.19 | 59.00 | 0.00 |
| TRINITY_D8UB59_VOLCA/11-326      | D8UB59.1     | PF03151.14 | 59.00 | 0.00 |
| TRINITY_D8TRB5_VOLCA/1-106       | D8TRB5.1     | PF08585.10 | 59.00 | 0.00 |
| TRINITY_I0YVN9_9CHLO/162-510     | I0YVN9.1     | PF07992.12 | 59.00 | 0.00 |
| TRINITY_L8GUU1_ACACA/68-321      | L8GUU1.1     | PF00069.23 | 59.00 | 0.00 |
| TRINITY_A0A090N2N5_OSTTA/40-101  | A0A090N2N5.1 | PF0022     | 59.00 | 0.00 |
| TRINITY_A0A0N4V4F1_ENTVE/4-73    | A0A0N4V4F1.1 | PF0279     | 59.00 | 0.00 |
| TRINITY_I0Z2M9_9CHLO/3-327       | I0Z2M9.1     | PF00294.22 | 59.00 | 0.00 |
| TRINITY_D8TZF9_VOLCA/151-233     | D8TZF9.1     | PF01833.22 | 59.00 | 0.00 |
| TRINITY_G0QQJ8_ICHMG/9-131       | G0QQJ8.1     | PF08477.11 | 59.00 | 0.00 |
| TRINITY_D8UEL6_VOLCA/79-252      | D8UEL6.1     | PF02330.14 | 59.00 | 0.00 |
| TRINITY_A8IHE7_CHLRE/70-516      | A8IHE7.1     | PF13520.4; | 59.00 | 0.00 |
| TRINITY_V3Z559_LOTGI/256-294     | V3Z559.1     | PF04810.13 | 59.00 | 0.00 |
| TRINITY_D8UIC2_VOLCA/42-312      | D8UIC2.1     | PF07942.10 | 59.00 | 0.00 |
| TRINITY_I0YPH9_9CHLO/124-475     | I0YPH9.1     | PF04109.14 | 59.00 | 0.00 |
| TRINITY_E1ZAY8_CHLVA/25-236      | E1ZAY8.1     | PF02492.17 | 59.00 | 0.00 |
| TRINITY_D8UCG7_VOLCA/266-518     | D8UCG7.1     | PF03133.13 | 59.00 | 0.00 |
| TRINITY_D8TKS7_VOLCA/1-197       | D8TKS7.1     | PF16879.3; | 59.00 | 0.00 |
| TRINITY_K9SEK3_9CYAN/14-209      | K9SEK3.1     | PF00106.23 | 59.00 | 0.00 |
| TRINITY_G0QJK2_ICHMG/26-210      | G0QJK2.1     | PF00227.24 | 59.00 | 0.00 |
| TRINITY_I0Z8J3_9CHLO/4-317       | I0Z8J3.1     | PF08267.10 | 59.00 | 0.00 |
| TRINITY_D8TXI8_VOLCA/4-119       | D8TXI8.1     | PF09822.7; | 59.00 | 0.00 |
| TRINITY_D8TLS2_VOLCA/270-308     | D8TLS2.1     | PF00400.30 | 59.00 | 0.00 |
| TRINITY_I7ME62_TETTS/523-742     | I7ME62.2     | PF13718.4; | 59.00 | 0.00 |
| TRINITY_A8HQG9_CHLRE/32-344      | A8HQG9.1     | PF00459.23 | 59.00 | 0.00 |
| TRINITY_V7B9E6_PHAVU/90-153      | V7B9E6.1     | PF13499.4; | 59.00 | 0.00 |
| TRINITY_W7XD08_TETTS/123-343     | W7XD08.1     | PF02475.14 | 58.90 | 0.00 |
| TRINITY_A2FR27_TRIVA/28-204      | A2FR27.1     | PF00350.21 | 58.90 | 0.00 |
| TRINITY_I7ML70_TETTS/56-343      | I7ML70.2     | PF01875.15 | 58.90 | 0.00 |
| TRINITY_Q22W36_TETTS/25-114      | Q22W36.2     | PF06984.11 | 58.90 | 0.00 |
| TRINITY_A0A087X566_POEFO/714-938 | A0A087X566.2 | PF1308     | 58.90 | 0.00 |
| TRINITY_S2J0U7_MUCC1/7-79        | S2J0U7.1     | PF00173.26 | 58.90 | 0.00 |
| TRINITY_I7M0N5_TETTS/125-295     | I7M0N5.1     | PF00092.26 | 58.90 | 0.00 |
| TRINITY_A0A023AY35_GRENI/3-118   | A0A023AY35.1 | PF0141     | 58.90 | 0.00 |
| TRINITY_W4HC62_9STRA/62-464      | W4HC62.1     | PF05889.11 | 58.90 | 0.00 |
| TRINITY_A8J3K1_CHLRE/1842-2127   | A8J3K1.1     | PF07714.15 | 58.90 | 0.00 |
| TRINITY_B9PZT4_TOXGO/9-211       | B9PZT4.1     | PF00687.19 | 58.90 | 0.00 |
| TRINITY_A0A067CAF5_SAPPC/81-424  | A0A067CAF5.1 | PF0197     | 58.90 | 0.00 |
| TRINITY_Q118R4_TRIEI/27-139      | Q118R4.1     | PF08240.10 | 58.90 | 0.00 |
| TRINITY_Q54Z02_DICDI/259-353     | Q54Z02.1     | PF00153.25 | 58.90 | 0.00 |
| TRINITY_E0VRM3_PEDHC/699-848     | E0VRM3.1     | PF08282.10 | 58.90 | 0.00 |
| TRINITY_A8ILL9_CHLRE/66-359      | A8ILL9.1     | PF03151.14 | 58.90 | 0.00 |
| TRINITY_A8IIZ1_CHLRE/237-400     | A8IIZ1.1     | PF01554.16 | 58.90 | 0.00 |
| TRINITY_A0LMI0_SYNFM/73-377      | A0LMI0.1     | PF00365.18 | 58.90 | 0.00 |
| TRINITY_E3GGZ4_EUBLK/17-113      | E3GGZ4.1     | PF01196.17 | 58.90 | 0.00 |
| TRINITY_Q22XT4_TETTS/475-635     | Q22XT4.1     | PF08662.9; | 58.90 | 0.00 |
| TRINITY_I0YVT0_9CHLO/20-89       | I0YVT0.1     | PF00675.18 | 58.90 | 0.00 |
| TRINITY_D8U5D4_VOLCA/100-363     | D8U5D4.1     | PF04104.12 | 58.90 | 0.00 |
| TRINITY_A8ITF1_CHLRE/137-265     | A8ITF1.1     | PF00107.24 | 58.90 | 0.00 |
| TRINITY_D3BAA7_POLPA/15-484      | D3BAA7.1     | PF00171.20 | 58.90 | 0.00 |
| TRINITY_I7M1V6_TETTS/314-533     | I7M1V6.1     | PF07002.14 | 58.90 | 0.00 |
| TRINITY_L1IH70_GUIH/122-177      | L1IH70.1     | PF13513.4; | 58.90 | 0.00 |
| TRINITY_D8TIQ3_VOLCA/163-237     | D8TIQ3.1     | PF08511.9; | 58.90 | 0.00 |

|                                  |                     |       |      |
|----------------------------------|---------------------|-------|------|
| TRINITY_F0ZA00_DICPU/59-694      | F0ZA00.1 PF05693.11 | 58.90 | 0.00 |
| TRINITY_L8GTG9_ACACA/36-446      | L8GTG9.1 PF01055.24 | 58.90 | 0.00 |
| TRINITY_A8J8V3_CHLRE/161-386     | A8J8V3.1 PF10253.7; | 58.90 | 0.00 |
| TRINITY_K4D4D0_SOLLC/8-307       | K4D4D0.1 PF10243.7; | 58.90 | 0.00 |
| TRINITY_D8U5V9_VOLCA/54-144      | D8U5V9.1 PF00153.25 | 58.90 | 0.00 |
| TRINITY_A0A024URQ3_9STRA/30-121  | A0A024URQ3.1 PF0482 | 58.90 | 0.00 |
| TRINITY_A8J979_CHLRE/401-517     | A8J979.1 PF02785.17 | 58.90 | 0.00 |
| TRINITY_I0YKY3_9CHLO/718-905     | I0YKY3.1 PF01369.18 | 58.90 | 0.00 |
| TRINITY_A0A0D2WKM9_CAPO3/329-594 | A0A0D2WKM9.1 PF0048 | 58.90 | 0.00 |
| TRINITY_D8UJW1_VOLCA/1103-1292   | D8UJW1.1 PF16415.3; | 58.90 | 0.00 |
| TRINITY_I7LUL6_TETTS/1643-1715   | I7LUL6.2 PF03451.12 | 58.90 | 0.00 |
| TRINITY_Q23RK6_TETTS/259-331     | Q23RK6.2 PF11523.6; | 58.90 | 0.00 |
| TRINITY_L8GT26_ACACA/11-396      | L8GT26.1 PF01433.18 | 58.90 | 0.00 |
| TRINITY_A9SF14_PHYPA/48-159      | A9SF14.1 PF02847.15 | 58.90 | 0.00 |
| TRINITY_C3XYC3_BRAFL/5-378       | C3XYC3.1 PF00022.17 | 58.90 | 0.00 |
| TRINITY_A8IZI4_CHLRE/95-364      | A8IZI4.1 PF00685.25 | 58.90 | 0.00 |
| TRINITY_A8JGI3_CHLRE/270-557     | A8JGI3.1 PF00233.17 | 58.90 | 0.00 |
| TRINITY_D2VS08_NAEGR/119-258     | D2VS08.1 PF00182.17 | 58.90 | 0.00 |
| TRINITY_D8TNR8_VOLCA/2040-2146   | D8TNR8.1 PF00856.26 | 58.90 | 0.00 |
| TRINITY_A0A077KKX4_9FLAO/38-144  | A0A077KKX4.1 PF0025 | 58.90 | 0.00 |
| TRINITY_A8IK88_CHLRE/163-299     | A8IK88.1 PF00892.18 | 58.90 | 0.00 |
| TRINITY_A8JAY8_CHLRE/277-401     | A8JAY8.1 PF01189.15 | 58.90 | 0.00 |
| TRINITY_I1GAF7_AMPQE/406-501     | I1GAF7.1 PF08295.10 | 58.90 | 0.00 |
| TRINITY_L8GY02_ACACA/175-566     | L8GY02.1 PF00962.20 | 58.90 | 0.00 |
| TRINITY_I0YWY4_9CHLO/7-508       | I0YWY4.1 PF05833.9; | 58.90 | 0.00 |
| TRINITY_D8U6I8_VOLCA/1149-1343   | D8U6I8.1 PF00211.18 | 58.90 | 0.00 |
| TRINITY_DEGP3_ARATH/100-287      | Q9SHZ1.1 PF00089.24 | 58.90 | 0.00 |
| TRINITY_D8UEZ9_VOLCA/123-392     | D8UEZ9.1 PF11708.6; | 58.90 | 0.00 |
| TRINITY_D8TKA2_VOLCA/1-90        | D8TKA2.1 PF00153.25 | 58.90 | 0.00 |
| TRINITY_A0BRK1_PARTE/6-155       | A0BRK1.1 PF00588.17 | 58.80 | 0.00 |
| TRINITY_L8H6N0_ACACA/39-378      | L8H6N0.1 PF04563.13 | 58.80 | 0.00 |
| TRINITY_Q23QF5_TETTS/161-229     | Q23QF5.2 PF00505.17 | 58.80 | 0.00 |
| TRINITY_A0BJW5_PARTE/673-824     | A0BJW5.1 PF00005.25 | 58.80 | 0.00 |
| TRINITY_C1FIZ8_MICSR/58-109      | C1FIZ8.1 PF13920.4; | 58.80 | 0.00 |
| TRINITY_A0A0D2U5L7_CAPO3/45-198  | A0A0D2U5L7.1 PF0472 | 58.80 | 0.00 |
| TRINITY_J9HVL1_9SPIT/989-1056    | J9HVL1.1 PF00498.24 | 58.80 | 0.00 |
| TRINITY_I7LZU8_TETTS/276-465     | I7LZU8.1 PF00743.17 | 58.80 | 0.00 |
| TRINITY_F1A3E2_DICPU/47-206      | F1A3E2.1 PF04893.15 | 58.80 | 0.00 |
| TRINITY_G7Y3S9_CLOSI/3-391       | G7Y3S9.1 PF00022.17 | 58.80 | 0.00 |
| TRINITY_Q22UZ4_TETTS/669-923     | Q22UZ4.2 PF00069.23 | 58.80 | 0.00 |
| TRINITY_L8GM48_ACACA/6-105       | L8GM48.1 PF02036.15 | 58.80 | 0.00 |
| TRINITY_Q8IOX9_OIKDI/2-90        | Q8IOX9.1 PF00125.22 | 58.80 | 0.00 |
| TRINITY_I7M6M9_TETTS/644-940     | I7M6M9.2 PF00069.23 | 58.80 | 0.00 |
| TRINITY_I7LX53_TETTS/117-484     | I7LX53.1 PF00750.17 | 58.80 | 0.00 |
| TRINITY_J9HM31_9SPIT/21-117      | J9HM31.1 PF00169.27 | 58.80 | 0.00 |
| TRINITY_RPAB3_DICDI/7-141        | Q54YW8.1 PF03870.13 | 58.80 | 0.00 |
| TRINITY_K1PRQ6_CRAGI/12-109      | K1PRQ6.1 PF02214.20 | 58.80 | 0.00 |
| TRINITY_F9W9Y1_TRYCI/1-98        | F9W9Y1.1 PF00665.24 | 58.80 | 0.00 |
| TRINITY_D3BIA3_POLPA/39-260      | D3BIA3.1 PF00112.21 | 58.80 | 0.00 |
| TRINITY_D8THD1_VOLCA/120-495     | D8THD1.1 PF00443.27 | 58.80 | 0.00 |
| TRINITY_D8TML8_VOLCA/431-482     | D8TML8.1 PF13639.4; | 58.80 | 0.00 |
| TRINITY_I1FU93_AMPQE/114-413     | I1FU93.1 PF13532.4; | 58.80 | 0.00 |
| TRINITY_C0NA16_TETTS/219-378     | C0NA16.1 PF00005.25 | 58.80 | 0.00 |
| TRINITY_D8UC51_VOLCA/360-524     | D8UC51.1 PF08757.9; | 58.80 | 0.00 |
| TRINITY_Q23AM3_TETTS/1054-1231   | Q23AM3.2 PF00005.25 | 58.80 | 0.00 |
| TRINITY_F2UJ11_SALR5/237-437     | F2UJ11.1 PF00149.26 | 58.80 | 0.00 |
| TRINITY_A7SAJ2_NEMVE/1-231       | A7SAJ2.1 PF04884.12 | 58.80 | 0.00 |
| TRINITY_A0A096TLD8_MAIZE/76-538  | A0A096TLD8.1 PF1043 | 58.80 | 0.00 |
| TRINITY_A0EE63_PARTE/3584-4294   | A0EE63.1 PF03028.13 | 58.80 | 0.00 |
| TRINITY_K6VRX0_9MICO/27-143      | K6VRX0.1 PF08240.10 | 58.80 | 0.00 |
| TRINITY_A0DTA6_PARTE/314-534     | A0DTA6.1 PF07002.14 | 58.80 | 0.00 |

|                                  |                     |       |      |
|----------------------------------|---------------------|-------|------|
| TRINITY_A8HPP9_CHLRE/43-139      | A8HPP9.1 PF04140.12 | 58.80 | 0.00 |
| TRINITY_A0A015JQY8_9GLOM/125-534 | A0A015JQY8.1 PF0160 | 58.80 | 0.00 |
| TRINITY_A8IA75_CHLRE/44-181      | A8IA75.1 PF03330.16 | 58.80 | 0.00 |
| TRINITY_A8J0B6_CHLRE/58-327      | A8J0B6.1 PF00248.19 | 58.80 | 0.00 |
| TRINITY_D8TQ06_VOLCA/22-86       | D8TQ06.1 PF13499.4; | 58.80 | 0.00 |
| TRINITY_D8UDE3_VOLCA/306-378     | D8UDE3.1 PF04564.13 | 58.80 | 0.00 |
| TRINITY_Q45QX4_CHLRE/57-154      | Q45QX4.1 PF14769.4; | 58.80 | 0.00 |
| TRINITY_I7MMI9_TETTS/391-540     | I7MMI9.2 PF00005.25 | 58.80 | 0.00 |
| TRINITY_I0I3H4_CALAS/35-165      | I0I3H4.1 PF03641.12 | 58.80 | 0.00 |
| TRINITY_C3ZLG7_BRAFL/44-214      | C3ZLG7.1 PF01595.18 | 58.80 | 0.00 |
| TRINITY_A6G8G3_9DELT/10-78       | A6G8G3.1 PF13450.4; | 58.80 | 0.00 |
| TRINITY_D8TKI2_VOLCA/1226-1356   | D8TKI2.1 PF02732.13 | 58.80 | 0.00 |
| TRINITY_I0YK64_9CHLO/2-459       | I0YK64.1 PF00232.16 | 58.80 | 0.00 |
| TRINITY_I0YPH7_9CHLO/3-233       | I0YPH7.1 PF04065.13 | 58.80 | 0.00 |
| TRINITY_A0A024UJ54_9STRA/4-73    | A0A024UJ54.1 PF0279 | 58.80 | 0.00 |
| TRINITY_D8TT27_VOLCA/101-313     | D8TT27.1 PF12481.6; | 58.80 | 0.00 |
| TRINITY_I0Z7G6_9CHLO/812-1273    | I0Z7G6.1 PF00136.19 | 58.80 | 0.00 |
| TRINITY_D9S262_THEOJ/493-710     | D9S262.1 PF00702.24 | 58.80 | 0.00 |
| TRINITY_D8UBQ5_VOLCA/27-120      | D8UBQ5.1 PF00686.17 | 58.80 | 0.00 |
| TRINITY_A8HSE8_CHLRE/44-130      | A8HSE8.1 PF01388.19 | 58.80 | 0.00 |
| TRINITY_A8JHU2_CHLRE/3-98        | A8JHU2.1 PF01158.16 | 58.80 | 0.00 |
| TRINITY_E1Z8X2_CHLVA/426-620     | E1Z8X2.1 PF03602.13 | 58.80 | 0.00 |
| TRINITY_I0YM63_9CHLO/9-169       | I0YM63.1 PF03031.16 | 58.80 | 0.00 |
| TRINITY_A0A067KM87_JATCU/330-380 | A0A067KM87.1 PF0062 | 58.80 | 0.00 |
| TRINITY_G7L177_MEDTR/186-400     | G7L177.1 PF00270.27 | 58.80 | 0.00 |
| TRINITY_C1MZV2_MICPC/102-152     | C1MZV2.1 PF01753.16 | 58.80 | 0.00 |
| TRINITY_D8U2N0_VOLCA/476-575     | D8U2N0.1 PF02806.16 | 58.80 | 0.00 |
| TRINITY_L8GWW2_ACACA/318-616     | L8GWW2.1 PF00069.23 | 58.80 | 0.00 |
| TRINITY_A0A0M0JE94_9EUKA/117-208 | A0A0M0JE94.1 PF0027 | 58.70 | 0.00 |
| TRINITY_J9HYF8_9SPIT/799-1284    | J9HYF8.1 PF00136.19 | 58.70 | 0.00 |
| TRINITY_D2VK18_NAEGR/919-1071    | D2VK18.1 PF00005.25 | 58.70 | 0.00 |
| TRINITY_G7JZ43_MEDTR/9-81        | G7JZ43.1 PF00173.26 | 58.70 | 0.00 |
| TRINITY_B3S2H1_TRIAD/213-338     | B3S2H1.1 PF00782.18 | 58.70 | 0.00 |
| TRINITY_L8HH73_ACACA/11-114      | L8HH73.1 PF04178.10 | 58.70 | 0.00 |
| TRINITY_H3CEP8_TETNG/9-186       | H3CEP8.1 PF11032.6; | 58.70 | 0.00 |
| TRINITY_D3B844_POLPA/641-686     | D3B844.1 PF13920.4; | 58.70 | 0.00 |
| TRINITY_R9AGL6_WALI9/521-692     | R9AGL6.1 PF07717.14 | 58.70 | 0.00 |
| TRINITY_I7M700_TETTS/181-443     | I7M700.2 PF00069.23 | 58.70 | 0.00 |
| TRINITY_A0A0N8JXW8_9TELE/798-962 | A0A0N8JXW8.1 PF0519 | 58.70 | 0.00 |
| TRINITY_U3KN62_RABIT/56-225      | U3KN62.1 PF00078.25 | 58.70 | 0.00 |
| TRINITY_J9I2R8_9SPIT/282-345     | J9I2R8.1 PF00498.24 | 58.70 | 0.00 |
| TRINITY_F4PTY5_DICFS/4-286       | F4PTY5.1 PF00069.23 | 58.70 | 0.00 |
| TRINITY_A0CMD2_PARTE/512-586     | A0CMD2.1 PF08059.11 | 58.70 | 0.00 |
| TRINITY_A0A0G2ZF02_9DELT/207-312 | A0A0G2ZF02.1 PF0255 | 58.70 | 0.00 |
| TRINITY_S2J4F2_MUCC1/516-759     | S2J4F2.1 PF00122.18 | 58.70 | 0.00 |
| TRINITY_L8GRY6_ACACA/17-481      | L8GRY6.1 PF01602.18 | 58.70 | 0.00 |
| TRINITY_Q23JX7_TETTS/316-378     | Q23JX7.2 PF00170.19 | 58.70 | 0.00 |
| TRINITY_I7M286_TETTS/153-256     | I7M286.2 PF12756.5; | 58.70 | 0.00 |
| TRINITY_L8GH56_ACACA/26-138      | L8GH56.1 PF08487.8; | 58.70 | 0.00 |
| TRINITY_G0QXL5_ICHMG/691-767     | G0QXL5.1 PF14559.4; | 58.70 | 0.00 |
| TRINITY_L8H6M2_ACACA/5-273       | L8H6M2.1 PF00218.19 | 58.70 | 0.00 |
| TRINITY_G7EA73_MIXOS/494-542     | G7EA73.1 PF00628.27 | 58.70 | 0.00 |
| TRINITY_A0A0A1TYJ5_ENTIV/244-291 | A0A0A1TYJ5.1 PF1460 | 58.70 | 0.00 |
| TRINITY_Q3SDT3_PARTE/63-246      | Q3SDT3.1 PF01926.21 | 58.70 | 0.00 |
| TRINITY_A4VDB2_TETTS/31-294      | A4VDB2.2 PF00069.23 | 58.70 | 0.00 |
| TRINITY_D3BE54_POLPA/200-587     | D3BE54.1 PF00155.19 | 58.70 | 0.00 |
| TRINITY_Q5NYT6_AROAE/134-284     | Q5NYT6.1 PF05175.12 | 58.70 | 0.00 |
| TRINITY_J9J3B4_9SPIT/124-338     | J9J3B4.1 PF00112.21 | 58.70 | 0.00 |
| TRINITY_H2XK01_CIOIN/56-103      | H2XK01.1 PF00628.27 | 58.70 | 0.00 |
| TRINITY_W7X4G9_TETTS/95-250      | W7X4G9.1 PF00650.18 | 58.70 | 0.00 |
| TRINITY_Q24DL3_TETTS/233-295     | Q24DL3.2 PF07647.15 | 58.70 | 0.00 |



|                                  |                     |       |      |
|----------------------------------|---------------------|-------|------|
| TRINITY_D8TILO_VOLCA/40-231      | D8TILO.1 PF03942.13 | 58.70 | 0.00 |
| TRINITY_I7M7B9_TETTS/137-405     | I7M7B9.2 PF00561.18 | 58.70 | 0.00 |
| TRINITY_A8ILB4_CHLRE/605-717     | A8ILB4.1 PF00251.18 | 58.70 | 0.00 |
| TRINITY_A0A078B325_STYLE/32-117  | A0A078B325.1 PF0042 | 58.70 | 0.00 |
| TRINITY_D3B4H6_POLPA/4-75        | D3B4H6.1 PF00240.21 | 58.70 | 0.00 |
| TRINITY_D8TMW1_VOLCA/578-754     | D8TMW1.1 PF04072.12 | 58.70 | 0.00 |
| TRINITY_E1Z7K9_CHLVA/14-439      | E1Z7K9.1 PF04209.11 | 58.70 | 0.00 |
| TRINITY_D8U7A0_VOLCA/662-914     | D8U7A0.1 PF03914.15 | 58.70 | 0.00 |
| TRINITY_H2Z6A0_CIOSA/284-404     | H2Z6A0.1 PF00293.26 | 58.70 | 0.00 |
| TRINITY_I7M9C4_TETTS/167-241     | I7M9C4.2 PF00900.18 | 58.70 | 0.00 |
| TRINITY_M2N7K9_BAUCO/19-318      | M2N7K9.1 PF00248.19 | 58.70 | 0.00 |
| TRINITY_D0MTJ2_PHYIT/91-154      | D0MTJ2.1 PF05180.10 | 58.70 | 0.00 |
| TRINITY_D8UF71_VOLCA/1141-1369   | D8UF71.1 PF09353.8; | 58.70 | 0.00 |
| TRINITY_I1YUQ4_PREI7/5-67        | I1YUQ4.1 PF00226.29 | 58.70 | 0.00 |
| TRINITY_D8TK63_VOLCA/1-121       | D8TK63.1 PF01926.21 | 58.70 | 0.00 |
| TRINITY_E1Z2V1_CHLVA/15-376      | E1Z2V1.1 PF00248.19 | 58.70 | 0.00 |
| TRINITY_I0Z2E6_9CHLO/627-761     | I0Z2E6.1 PF02518.24 | 58.70 | 0.00 |
| TRINITY_A8IT01_CHLRE/39-374      | A8IT01.1 PF00194.19 | 58.70 | 0.00 |
| TRINITY_A8IVZ4_CHLRE/1-150       | A8IVZ4.1 PF11911.6; | 58.70 | 0.00 |
| TRINITY_I0Z6A9_9CHLO/124-387     | I0Z6A9.1 PF00069.23 | 58.70 | 0.00 |
| TRINITY_L8H2X2_ACACA/22-576      | L8H2X2.1 PF01602.18 | 58.70 | 0.00 |
| TRINITY_D8UIZ7_VOLCA/369-849     | D8UIZ7.1 PF00759.17 | 58.70 | 0.00 |
| TRINITY_D8UHA9_VOLCA/879-1087    | D8UHA9.1 PF07250.9; | 58.70 | 0.00 |
| TRINITY_H0EQ64_GLAL7/39-118      | H0EQ64.1 PF02878.14 | 58.70 | 0.00 |
| TRINITY_Q248E9_TETTS/284-336     | Q248E9.1 PF13418.4; | 58.70 | 0.00 |
| TRINITY_A0A0A0KIY4_CUCSA/103-167 | A0A0A0KIY4.1 PF1349 | 58.70 | 0.00 |
| TRINITY_L8HG26_ACACA/287-428     | L8HG26.1 PF01189.15 | 58.60 | 0.00 |
| TRINITY_M2Y4X3_GALSU/55-262      | M2Y4X3.1 PF00106.23 | 58.60 | 0.00 |
| TRINITY_A0D2I3_PARTE/30-100      | A0D2I3.1 PF05347.13 | 58.60 | 0.00 |
| TRINITY_I4YPI0_9RHIZ/293-408     | I4YPI0.1 PF02518.24 | 58.60 | 0.00 |
| TRINITY_A0A078AKP0_STYLE/68-336  | A0A078AKP0.1 PF0226 | 58.60 | 0.00 |
| TRINITY_J9FGN9_9SPIT/840-1097    | J9FGN9.1 PF00481.19 | 58.60 | 0.00 |
| TRINITY_Q54NK9_DICDI/51-227      | Q54NK9.1 PF10294.7; | 58.60 | 0.00 |
| TRINITY_W4G762_9STRA/203-335     | W4G762.1 PF00583.23 | 58.60 | 0.00 |
| TRINITY_G0QKY7_ICHMG/168-327     | G0QKY7.1 PF00406.20 | 58.60 | 0.00 |
| TRINITY_F4QCM6_DICFS/1249-1547   | F4QCM6.1 PF00069.23 | 58.60 | 0.00 |
| TRINITY_L8HJG4_ACACA/72-245      | L8HJG4.1 PF10602.7; | 58.60 | 0.00 |
| TRINITY_F4PIH5_DICFS/22-331      | F4PIH5.1 PF01008.15 | 58.60 | 0.00 |
| TRINITY_F4PVI5_DICFS/14-70       | F4PVI5.1 PF00412.20 | 58.60 | 0.00 |
| TRINITY_F0ZDJ6_DICPU/473-685     | F0ZDJ6.1 PF13236.4; | 58.60 | 0.00 |
| TRINITY_L8HDC4_ACACA/76-192      | L8HDC4.1 PF01661.19 | 58.60 | 0.00 |
| TRINITY_A7SPF1_NEMVE/30-122      | A7SPF1.1 PF00153.25 | 58.60 | 0.00 |
| TRINITY_I7MJV9_TETTS/69-545      | I7MJV9.1 PF00501.26 | 58.60 | 0.00 |
| TRINITY_L8GPW4_ACACA/35-152      | L8GPW4.1 PF08240.10 | 58.60 | 0.00 |
| TRINITY_I7M700_TETTS/181-443     | I7M700.2 PF00069.23 | 58.60 | 0.00 |
| TRINITY_J9HVL7_9SPIT/73-307      | J9HVL7.1 PF01674.16 | 58.60 | 0.00 |
| TRINITY_B0X3U8_CULQU/65-234      | B0X3U8.1 PF00270.27 | 58.60 | 0.00 |
| TRINITY_Q22Y91_TETTS/368-602     | Q22Y91.1 PF01167.16 | 58.60 | 0.00 |
| TRINITY_G0QQC9_ICHMG/712-856     | G0QQC9.1 PF00005.25 | 58.60 | 0.00 |
| TRINITY_A0A0F6W8X8_9DELT/415-575 | A0A0F6W8X8.1 PF0044 | 58.60 | 0.00 |
| TRINITY_A0A067CPB0_SAPPC/160-415 | A0A067CPB0.1 PF0409 | 58.60 | 0.00 |
| TRINITY_B5G2K2_TAEGU/24-121      | B5G2K2.1 PF01230.21 | 58.60 | 0.00 |
| TRINITY_A0A078AVZ2_STYLE/100-248 | A0A078AVZ2.1 PF0000 | 58.60 | 0.00 |
| TRINITY_A8I3K8_CHLRE/124-290     | A8I3K8.1 PF04055.19 | 58.60 | 0.00 |
| TRINITY_D8TZ27_VOLCA/330-623     | D8TZ27.1 PF00899.19 | 58.60 | 0.00 |
| TRINITY_A8J6D5_CHLRE/484-760     | A8J6D5.1 PF00702.24 | 58.60 | 0.00 |
| TRINITY_A8JB50_CHLRE/10-265      | A8JB50.1 PF00069.23 | 58.60 | 0.00 |
| TRINITY_I0YPE8_9CHLO/863-1042    | I0YPE8.1 PF00689.19 | 58.60 | 0.00 |
| TRINITY_F4R632_MELLP/44-195      | F4R632.1 PF04098.13 | 58.60 | 0.00 |
| TRINITY_Q22W25_TETTS/269-397     | Q22W25.2 PF04153.16 | 58.60 | 0.00 |
| TRINITY_M5XT00_PRUPE/24-151      | M5XT00.1 PF04073.13 | 58.60 | 0.00 |

|                                  |              |            |       |      |
|----------------------------------|--------------|------------|-------|------|
| TRINITY_D8U496_VOLCA/89-239      | D8U496.1     | PF12146.6; | 58.60 | 0.00 |
| TRINITY_A8J7G2_CHLRE/615-923     | A8J7G2.1     | PF00176.21 | 58.60 | 0.00 |
| TRINITY_E1ZTF1_CHLVA/187-273     | E1ZTF1.1     | PF01909.21 | 58.60 | 0.00 |
| TRINITY_C0Z502_BREBN/4-157       | C0Z502.1     | PF13420.5; | 58.60 | 0.00 |
| TRINITY_A0DTM2_PARTE/98-446      | A0DTM2.1     | PF13868.4; | 58.60 | 0.00 |
| TRINITY_A0DGY7_PARTE/114-212     | A0DGY7.1     | PF00153.25 | 58.60 | 0.00 |
| TRINITY_A8J9X5_CHLRE/165-251     | A8J9X5.1     | PF00189.18 | 58.60 | 0.00 |
| TRINITY_A0A078A0I1_STYLE/51-321  | A0A078A0I1.1 | PF0015     | 58.60 | 0.00 |
| TRINITY_E1ZLK8_CHLVA/56-427      | E1ZLK8.1     | PF01137.19 | 58.60 | 0.00 |
| TRINITY_L8GDU5_ACACA/21-186      | L8GDU5.1     | PF03357.19 | 58.60 | 0.00 |
| TRINITY_L8HJK9_ACACA/14-635      | L8HJK9.1     | PF00888.20 | 58.60 | 0.00 |
| TRINITY_A0CXN8_PARTE/37-405      | A0CXN8.1     | PF00155.19 | 58.60 | 0.00 |
| TRINITY_D8THI6_VOLCA/146-208     | D8THI6.1     | PF01485.19 | 58.60 | 0.00 |
| TRINITY_E1ZB62_CHLVA/52-175      | E1ZB62.1     | PF01575.17 | 58.60 | 0.00 |
| TRINITY_I0YP30_9CHLO/11-241      | I0YP30.1     | PF02602.13 | 58.60 | 0.00 |
| TRINITY_D8TU75_VOLCA/97-213      | D8TU75.1     | PF10184.7; | 58.60 | 0.00 |
| TRINITY_I0Z7P1_9CHLO/7-77        | I0Z7P1.1     | PF00076.20 | 58.60 | 0.00 |
| TRINITY_L8HHG5_ACACA/403-695     | L8HHG5.1     | PF00632.23 | 58.60 | 0.00 |
| TRINITY_A0A087STE3_AUXPR/40-137  | A0A087STE3.1 | PF0812     | 58.60 | 0.00 |
| TRINITY_A0A087SC18_AUXPR/51-204  | A0A087SC18.1 | PF0975     | 58.60 | 0.00 |
| TRINITY_I1FC34_AMPQE/179-503     | I1FC34.1     | PF00176.21 | 58.60 | 0.00 |
| TRINITY_D3B9B5_POLPA/307-358     | D3B9B5.1     | PF00415.16 | 58.50 | 0.00 |
| TRINITY_A0A078A9A6_STYLE/490-629 | A0A078A9A6.1 | PF1467     | 58.50 | 0.00 |
| TRINITY_G0R4M5_ICHMG/51-307      | G0R4M5.1     | PF00481.19 | 58.50 | 0.00 |
| TRINITY_W4XEW9_STRPU/5-113       | W4XEW9.1     | PF02109.14 | 58.50 | 0.00 |
| TRINITY_A4BFQ8_9GAMM/22-387      | A4BFQ8.1     | PF00916.18 | 58.50 | 0.00 |
| TRINITY_I7LV57_TETTS/19-212      | I7LV57.1     | PF00106.23 | 58.50 | 0.00 |
| TRINITY_D8M9G4_BLAHO/200-250     | D8M9G4.1     | PF02820.16 | 58.50 | 0.00 |
| TRINITY_A0EAY1_PARTE/296-618     | A0EAY1.1     | PF00384.20 | 58.50 | 0.00 |
| TRINITY_A0DYN1_PARTE/250-413     | A0DYN1.1     | PF03031.16 | 58.50 | 0.00 |
| TRINITY_A0A0G4IXE7_PLABS/3-137   | A0A0G4IXE7.1 | PF0121     | 58.50 | 0.00 |
| TRINITY_A0A0D2WU03_CAPO3/526-643 | A0A0D2WU03.1 | PF1197     | 58.50 | 0.00 |
| TRINITY_L8H1U1_ACACA/20-480      | L8H1U1.1     | PF00171.20 | 58.50 | 0.00 |
| TRINITY_SLT2_CHLRE/16-750        | D2K6F1.1     | PF03600.14 | 58.50 | 0.00 |
| TRINITY_A0CDQ2_PARTE/31-219      | A0CDQ2.1     | PF00227.24 | 58.50 | 0.00 |
| TRINITY_A0A0D2WU03_CAPO3/526-643 | A0A0D2WU03.1 | PF1197     | 58.50 | 0.00 |
| TRINITY_H2L694_ORYLA/710-1243    | H2L694.1     | PF02738.16 | 58.50 | 0.00 |
| TRINITY_A8J0M8_CHLRE/597-713     | A8J0M8.1     | PF00271.29 | 58.50 | 0.00 |
| TRINITY_F0YD11_AURAN/754-825     | F0YD11.1     | PF04564.13 | 58.50 | 0.00 |
| TRINITY_A8IJ64_CHLRE/11-302      | A8IJ64.1     | PF03151.14 | 58.50 | 0.00 |
| TRINITY_B0WMS8_CULQU/14-158      | B0WMS8.1     | PF14580.4; | 58.50 | 0.00 |
| TRINITY_B3RT61_TRIAD/41-306      | B3RT61.1     | PF00561.18 | 58.50 | 0.00 |
| TRINITY_I7LTG4_TETTS/318-462     | I7LTG4.2     | PF00388.17 | 58.50 | 0.00 |
| TRINITY_F4P3I1_BATDJ/9-283       | F4P3I1.1     | PF02900.16 | 58.50 | 0.00 |
| TRINITY_A4VDB2_TETTS/31-294      | A4VDB2.2     | PF00069.23 | 58.50 | 0.00 |
| TRINITY_A8J3C8_CHLRE/1-296       | A8J3C8.1     | PF03942.13 | 58.50 | 0.00 |
| TRINITY_R9AMY5_WALI9/88-713      | R9AMY5.1     | PF00133.20 | 58.50 | 0.00 |
| TRINITY_A0D5K9_PARTE/135-221     | A0D5K9.1     | PF12796.5; | 58.50 | 0.00 |
| TRINITY_A0E576_PARTE/650-695     | A0E576.1     | PF13920.4; | 58.50 | 0.00 |
| TRINITY_A0A0N4T425_BRUPA/42-84   | A0A0N4T425.1 | PF1363     | 58.50 | 0.00 |
| TRINITY_A0A0N4T425_BRUPA/42-84   | A0A0N4T425.1 | PF1363     | 58.50 | 0.00 |
| TRINITY_L8GZN5_ACACA/388-506     | L8GZN5.1     | PF00106.23 | 58.50 | 0.00 |
| TRINITY_F4PR82_DICFS/446-698     | F4PR82.1     | PF00069.23 | 58.50 | 0.00 |
| TRINITY_W7X4G9_TETTS/95-250      | W7X4G9.1     | PF00650.18 | 58.50 | 0.00 |
| TRINITY_A9SWK3_PHYPA/96-205      | A9SWK3.1     | PF00583.23 | 58.50 | 0.00 |
| TRINITY_Q22D35_TETTS/926-1042    | Q22D35.2     | PF02518.24 | 58.50 | 0.00 |
| TRINITY_F8ELC3_RUNSL/306-442     | F8ELC3.1     | PF04030.12 | 58.50 | 0.00 |
| TRINITY_L8GYA7_ACACA/28-169      | L8GYA7.1     | PF00810.16 | 58.50 | 0.00 |
| TRINITY_D8TSW2_VOLCA/15-187      | D8TSW2.1     | PF14580.4; | 58.50 | 0.00 |
| TRINITY_L8H399_ACACA/66-353      | L8H399.1     | PF05185.14 | 58.50 | 0.00 |
| TRINITY_D8TUH4_VOLCA/83-248      | D8TUH4.1     | PF01734.20 | 58.50 | 0.00 |

|                                  |              |            |       |      |
|----------------------------------|--------------|------------|-------|------|
| TRINITY_I1AXL1_9RHOB/5-268       | I1AXL1.1     | PF02900.16 | 58.50 | 0.00 |
| TRINITY_D8UHD7_VOLCA/269-321     | D8UHD7.1     | PF13920.4; | 58.50 | 0.00 |
| TRINITY_A8JFH1_CHLRE/93-580      | A8JFH1.1     | PF00759.17 | 58.50 | 0.00 |
| TRINITY_D8TV82_VOLCA/6-218       | D8TV82.1     | PF13460.4; | 58.50 | 0.00 |
| TRINITY_A8IGE2_CHLRE/6-210       | A8IGE2.1     | PF01975.15 | 58.50 | 0.00 |
| TRINITY_M1VCC4_CYAME/278-464     | M1VCC4.1     | PF07724.12 | 58.50 | 0.00 |
| TRINITY_I0YVX4_9CHLO/3-155       | I0YVX4.1     | PF00005.25 | 58.50 | 0.00 |
| TRINITY_D8UCK7_VOLCA/66-172      | D8UCK7.1     | PF16589.3; | 58.50 | 0.00 |
| TRINITY_F4Q2H1_DICFS/1503-1853   | F4Q2H1.1     | PF00476.18 | 58.50 | 0.00 |
| TRINITY_A0C2J6_PARTE/65-132      | A0C2J6.1     | PF00550.23 | 58.50 | 0.00 |
| TRINITY_E7KA58_YEASA/419-459     | E7KA58.1     | PF00400.30 | 58.50 | 0.00 |
| TRINITY_Q3SD57_PARTE/13-173      | Q3SD57.1     | PF00071.20 | 58.50 | 0.00 |
| TRINITY_I7M7V0_TETTS/141-205     | I7M7V0.2     | PF07258.12 | 58.50 | 0.00 |
| TRINITY_I0Z3Z5_9CHLO/270-624     | I0Z3Z5.1     | PF03016.13 | 58.50 | 0.00 |
| TRINITY_A0A0A0KIY4_CUCSA/103-167 | A0A0A0KIY4.1 | PF1349     | 58.50 | 0.00 |
| TRINITY_A0A0A0KIY4_CUCSA/103-167 | A0A0A0KIY4.1 | PF1349     | 58.50 | 0.00 |
| TRINITY_A0CYQ1_PARTE/321-362     | A0CYQ1.1     | PF00400.30 | 58.50 | 0.00 |
| TRINITY_J9IT22_9SPIT/499-822     | J9IT22.1     | PF00702.24 | 58.40 | 0.00 |
| TRINITY_MPCP_CAEEL/40-130        | P40614.1     | PF00153.25 | 58.40 | 0.00 |
| TRINITY_J9IZ27_9SPIT/31-320      | J9IZ27.1     | PF04616.12 | 58.40 | 0.00 |
| TRINITY_F3ZVQ2_MAHA5/29-163      | F3ZVQ2.1     | PF14871.4; | 58.40 | 0.00 |
| TRINITY_J9IQR8_9SPIT/20-190      | J9IQR8.1     | PF01871.15 | 58.40 | 0.00 |
| TRINITY_D3BTW3_POLPA/48-402      | D3BTW3.1     | PF01207.15 | 58.40 | 0.00 |
| TRINITY_F5SKU2_9BACL/11-163      | F5SKU2.1     | PF01625.19 | 58.40 | 0.00 |
| TRINITY_L8GGJ1_ACACA/139-335     | L8GGJ1.1     | PF02750.12 | 58.40 | 0.00 |
| TRINITY_G0R2T0_ICHMG/33-283      | G0R2T0.1     | PF00069.23 | 58.40 | 0.00 |
| TRINITY_A0A077ZUP3_STYLE/22-211  | A0A077ZUP3.1 | PF0130     | 58.40 | 0.00 |
| TRINITY_F0ZPW4_DICPU/4-230       | F0ZPW4.1     | PF04670.10 | 58.40 | 0.00 |
| TRINITY_Q225Q9_TETTS/99-223      | Q225Q9.1     | PF13091.4; | 58.40 | 0.00 |
| TRINITY_A1DIM3_NEOFI/533-969     | A1DIM3.1     | PF00136.19 | 58.40 | 0.00 |
| TRINITY_D5X5V5_THIK1/71-152      | D5X5V5.1     | PF01035.18 | 58.40 | 0.00 |
| TRINITY_V4BJX4_LOTGI/7-249       | V4BJX4.1     | PF01564.15 | 58.40 | 0.00 |
| TRINITY_Q9XUW5_CAEEL/153-324     | Q9XUW5.1     | PF00270.27 | 58.40 | 0.00 |
| TRINITY_A8IAU3_CHLRE/93-264      | A8IAU3.1     | PF00069.23 | 58.40 | 0.00 |
| TRINITY_L8H9J9_ACACA/133-458     | L8H9J9.1     | PF01808.16 | 58.40 | 0.00 |
| TRINITY_A7SFF2_NEMVE/4-136       | A7SFF2.1     | PF02966.14 | 58.40 | 0.00 |
| TRINITY_I0YLR2_9CHLO/8-326       | I0YLR2.1     | PF13872.4; | 58.40 | 0.00 |
| TRINITY_U6GK02_EIMAC/106-385     | U6GK02.1     | PF08648.10 | 58.40 | 0.00 |
| TRINITY_A8JHD4_CHLRE/503-591     | A8JHD4.1     | PF01342.19 | 58.40 | 0.00 |
| TRINITY_I1KQH1_SOYBN/78-445      | I1KQH1.1     | PF00009.25 | 58.40 | 0.00 |
| TRINITY_D8TJA8_VOLCA/81-422      | D8TJA8.1     | PF04124.10 | 58.40 | 0.00 |
| TRINITY_D8U9S2_VOLCA/5-143       | D8U9S2.1     | PF00179.24 | 58.40 | 0.00 |
| TRINITY_A0A0G4ENF6_9ALVE/238-543 | A0A0G4ENF6.1 | PF0058     | 58.40 | 0.00 |
| TRINITY_A8HUP3_CHLRE/217-445     | A8HUP3.1     | PF05996.10 | 58.40 | 0.00 |
| TRINITY_D3B897_POLPA/546-622     | D3B897.1     | PF00017.22 | 58.40 | 0.00 |
| TRINITY_Q23DR0_TETTS/3824-4544   | Q23DR0.2     | PF03028.13 | 58.40 | 0.00 |
| TRINITY_A8HQP1_CHLRE/46-376      | A8HQP1.1     | PF02685.14 | 58.40 | 0.00 |
| TRINITY_D8U980_VOLCA/175-378     | D8U980.1     | PF08801.9; | 58.40 | 0.00 |
| TRINITY_I7MMT5_TETTS/48-124      | I7MMT5.2     | PF01066.19 | 58.40 | 0.00 |
| TRINITY_L8H0E9_ACACA/65-222      | L8H0E9.1     | PF01652.16 | 58.40 | 0.00 |
| TRINITY_B0WPI5_CULQU/202-326     | B0WPI5.1     | PF00781.22 | 58.40 | 0.00 |
| TRINITY_L8H505_ACACA/79-640      | L8H505.1     | PF03063.18 | 58.40 | 0.00 |
| TRINITY_I0KFX4_9BACT/26-138      | I0KFX4.1     | PF01661.19 | 58.40 | 0.00 |
| TRINITY_R4X8K9_TAPDE/13-174      | R4X8K9.1     | PF00071.20 | 58.40 | 0.00 |
| TRINITY_I7MMT5_TETTS/48-124      | I7MMT5.2     | PF01066.19 | 58.40 | 0.00 |
| TRINITY_A8IUI1_CHLRE/36-146      | A8IUI1.1     | PF08240.10 | 58.40 | 0.00 |
| TRINITY_W2PXB2_PHYPN/493-609     | W2PXB2.1     | PF00665.24 | 58.40 | 0.00 |
| TRINITY_A8IDR1_CHLRE/59-159      | A8IDR1.1     | PF03330.16 | 58.40 | 0.00 |
| TRINITY_D8TJ30_VOLCA/555-818     | D8TJ30.1     | PF05346.9; | 58.40 | 0.00 |
| TRINITY_L8GX59_ACACA/136-414     | L8GX59.1     | PF00494.17 | 58.40 | 0.00 |
| TRINITY_L8GRS0_ACACA/1563-1914   | L8GRS0.1     | PF00443.27 | 58.40 | 0.00 |

|                                  |              |            |       |      |
|----------------------------------|--------------|------------|-------|------|
| TRINITY_E1ZFM0_CHLVA/58-200      | E1ZFM0.1     | PF13365.4; | 58.40 | 0.00 |
| TRINITY_A8IQU4_CHLRE/3-468       | A8IQU4.1     | PF03219.12 | 58.40 | 0.00 |
| TRINITY_A0A0D2WTL5_CAPO3/513-630 | A0A0D2WTL5.1 | PF0141     | 58.30 | 0.00 |
| TRINITY_D8QNB6_SELML/77-462      | D8QNB6.1     | PF05292.9; | 58.30 | 0.00 |
| TRINITY_F0ZLB7_DICPU/2-271       | F0ZLB7.1     | PF06432.9; | 58.30 | 0.00 |
| TRINITY_D2UXT8_NAEGR/264-327     | D2UXT8.1     | PF13432.4; | 58.30 | 0.00 |
| TRINITY_Q22UZ4_TETTS/669-923     | Q22UZ4.2     | PF00069.23 | 58.30 | 0.00 |
| TRINITY_V4ARF4_LOTGI/299-354     | V4ARF4.1     | PF00412.20 | 58.30 | 0.00 |
| TRINITY_G0QX12_ICHMG/518-692     | G0QX12.1     | PF04983.16 | 58.30 | 0.00 |
| TRINITY_A0DYY1_PARTE/126-253     | A0DYY1.1     | PF00134.21 | 58.30 | 0.00 |
| TRINITY_A8N9L1_COPC7/1112-1588   | A8N9L1.1     | PF06202.12 | 58.30 | 0.00 |
| TRINITY_D2VT76_NAEGR/265-345     | D2VT76.1     | PF04000.13 | 58.30 | 0.00 |
| TRINITY_M5EBX6_MALS4/8-169       | M5EBX6.1     | PF00071.20 | 58.30 | 0.00 |
| TRINITY_D8TY67_VOLCA/261-527     | D8TY67.1     | PF00664.21 | 58.30 | 0.00 |
| TRINITY_A0EID1_PARTE/75-324      | A0EID1.1     | PF00069.23 | 58.30 | 0.00 |
| TRINITY_M5XT60_PRUPE/38-168      | M5XT60.1     | PF00782.18 | 58.30 | 0.00 |
| TRINITY_L8GZB8_ACACA/129-440     | L8GZB8.1     | PF16653.3; | 58.30 | 0.00 |
| TRINITY_SRFC_DICDI/10-57         | Q55F37.2     | PF00319.16 | 58.30 | 0.00 |
| TRINITY_A0A0E9N7P2_9ASCO/94-222  | A0A0E9N7P2.1 | PF0029     | 58.30 | 0.00 |
| TRINITY_I1EQY4_AMPQE/281-440     | I1EQY4.1     | PF00441.22 | 58.30 | 0.00 |
| TRINITY_A8IZ85_CHLRE/54-229      | A8IZ85.1     | PF02837.16 | 58.30 | 0.00 |
| TRINITY_A0CQU3_PARTE/310-530     | A0CQU3.1     | PF07002.14 | 58.30 | 0.00 |
| TRINITY_F4QBZ3_DICFS/1-155       | F4QBZ3.1     | PF06052.10 | 58.30 | 0.00 |
| TRINITY_G0PC99_CAEBE/259-308     | G0PC99.1     | PF02891.18 | 58.30 | 0.00 |
| TRINITY_T1HHY4_RHOPR/39-363      | T1HHY4.1     | PF01074.20 | 58.30 | 0.00 |
| TRINITY_I7M483_TETTS/113-361     | I7M483.1     | PF01063.17 | 58.30 | 0.00 |
| TRINITY_I0YID6_9CHLO/101-197     | I0YID6.1     | PF00153.25 | 58.30 | 0.00 |
| TRINITY_E1Z4D4_CHLVA/17-278      | E1Z4D4.1     | PF01073.17 | 58.30 | 0.00 |
| TRINITY_D8U4P4_VOLCA/210-295     | D8U4P4.1     | PF14693.4; | 58.30 | 0.00 |
| TRINITY_C1DY55_MICSR/32-253      | C1DY55.1     | PF05721.11 | 58.30 | 0.00 |
| TRINITY_I4MN02_9BURK/9-328       | I4MN02.1     | PF00962.20 | 58.30 | 0.00 |
| TRINITY_D3AW49_POLPA/91-217      | D3AW49.1     | PF04034.11 | 58.30 | 0.00 |
| TRINITY_L8GWB9_ACACA/441-524     | L8GWB9.1     | PF00017.22 | 58.30 | 0.00 |
| TRINITY_D8U0T9_VOLCA/66-570      | D8U0T9.1     | PF02696.12 | 58.30 | 0.00 |
| TRINITY_E1ZNN0_CHLVA/86-426      | E1ZNN0.1     | PF01494.17 | 58.30 | 0.00 |
| TRINITY_D1C2X0_SPHTD/3-118       | D1C2X0.1     | PF06983.11 | 58.30 | 0.00 |
| TRINITY_Q22T03_TETTS/214-383     | Q22T03.1     | PF00270.27 | 58.30 | 0.00 |
| TRINITY_A8JCF5_CHLRE/31-360      | A8JCF5.1     | PF00150.16 | 58.30 | 0.00 |
| TRINITY_W4G9W3_9STRA/32-202      | W4G9W3.1     | PF04893.15 | 58.30 | 0.00 |
| TRINITY_I1CDY0_RHIO9/132-234     | I1CDY0.1     | PF01159.17 | 58.30 | 0.00 |
| TRINITY_A8NTI7_COPC7/176-350     | A8NTI7.2     | PF00150.16 | 58.30 | 0.00 |
| TRINITY_L8HAN6_ACACA/270-325     | L8HAN6.1     | PF00571.26 | 58.30 | 0.00 |
| TRINITY_A0A059LHS0_9CHLO/2-51    | A0A059LHS0.1 | PF0040     | 58.30 | 0.00 |
| TRINITY_L8GZ17_ACACA/7-220       | L8GZ17.1     | PF00300.20 | 58.30 | 0.00 |
| TRINITY_D8U315_VOLCA/132-268     | D8U315.1     | PF03330.16 | 58.30 | 0.00 |
| TRINITY_Q8T6B8_DICDI/197-358     | Q8T6B8.1     | PF00005.25 | 58.30 | 0.00 |
| TRINITY_D8TL13_VOLCA/212-337     | D8TL13.1     | PF14580.4; | 58.30 | 0.00 |
| TRINITY_A0A087SDQ3_AUXPR/1-246   | A0A087SDQ3.1 | PF0014     | 58.30 | 0.00 |
| TRINITY_B3S5N5_TRIAD/577-704     | B3S5N5.1     | PF13646.4; | 58.30 | 0.00 |
| TRINITY_A0D515_PARTE/43-239      | A0D515.1     | PF00149.26 | 58.30 | 0.00 |
| TRINITY_A0A0D2VGU2_CAPO3/80-369  | A0A0D2VGU2.1 | PF0647     | 58.30 | 0.00 |
| TRINITY_J3NKC5_GAGT3/341-390     | J3NKC5.1     | PF02891.18 | 58.30 | 0.00 |
| TRINITY_D8TZL1_VOLCA/29-94       | D8TZL1.1     | PF00536.28 | 58.30 | 0.00 |
| TRINITY_Q22BL2_TETTS/10-119      | Q22BL2.2     | PF00255.17 | 58.30 | 0.00 |
| TRINITY_A0A078AE02_STYLE/23-329  | A0A078AE02.1 | PF0024     | 58.30 | 0.00 |
| TRINITY_D8U9E6_VOLCA/223-308     | D8U9E6.1     | PF00707.20 | 58.30 | 0.00 |
| TRINITY_L8GWW6_ACACA/39-76       | L8GWW6.1     | PF12907.5; | 58.30 | 0.00 |
| TRINITY_A8JHW9_CHLRE/42-387      | A8JHW9.1     | PF07690.14 | 58.30 | 0.00 |
| TRINITY_L8H8K0_ACACA/18-112      | L8H8K0.1     | PF06127.9; | 58.30 | 0.00 |
| TRINITY_A0A0L6VS53_9BASI/21-185  | A0A0L6VS53.1 | PF0010     | 58.30 | 0.00 |
| TRINITY_D8UA75_VOLCA/248-321     | D8UA75.1     | PF04564.13 | 58.30 | 0.00 |

|                                  |              |            |       |      |
|----------------------------------|--------------|------------|-------|------|
| TRINITY_A8HZR1_CHLRE/14486-14621 | A8HZR1.1     | PF13602.4; | 58.30 | 0.00 |
| TRINITY_J9J5P5_9SPIT/28-172      | J9J5P5.1     | PF00810.16 | 58.30 | 0.00 |
| TRINITY_B3S5N5_TRIAD/577-704     | B3S5N5.1     | PF13646.4; | 58.30 | 0.00 |
| TRINITY_I0Z0D9_9CHLO/180-344     | I0Z0D9.1     | PF00160.19 | 58.30 | 0.00 |
| TRINITY_I7M1U7_TETTS/1176-1331   | I7M1U7.1     | PF00005.25 | 58.30 | 0.00 |
| TRINITY_C5LPP9_PERM5/1-205       | C5LPP9.1     | PF00022.17 | 58.30 | 0.00 |
| TRINITY_E9HTT4_DAPPU/1052-1100   | E9HTT4.1     | PF00628.27 | 58.30 | 0.00 |
| TRINITY_K3XBN6_PYTUL/60-178      | K3XBN6.1     | PF07986.10 | 58.30 | 0.00 |
| TRINITY_Q235W0_TETTS/37-189      | Q235W0.2     | PF05071.14 | 58.30 | 0.00 |
| TRINITY_A0A095C721_CRYGA/74-315  | A0A095C721.2 | PF0000     | 58.20 | 0.00 |
| TRINITY_J9HMM9_9SPIT/101-388     | J9HMM9.1     | PF00122.18 | 58.20 | 0.00 |
| TRINITY_L8H2L6_ACACA/21-154      | L8H2L6.1     | PF00237.17 | 58.20 | 0.00 |
| TRINITY_Q22SK7_TETTS/32-174      | Q22SK7.1     | PF00485.16 | 58.20 | 0.00 |
| TRINITY_E3HZV5_RHOVT/102-346     | E3HZV5.1     | PF10609.7; | 58.20 | 0.00 |
| TRINITY_F4PJM4_DICFS/12-398      | F4PJM4.1     | PF01053.18 | 58.20 | 0.00 |
| TRINITY_A0A0D2WNJ4_CAPO3/773-827 | A0A0D2WNJ4.1 | PF0041     | 58.20 | 0.00 |
| TRINITY_G0QVH9_ICHMG/93-465      | G0QVH9.1     | PF01546.26 | 58.20 | 0.00 |
| TRINITY_Q54G51_DICDI/238-559     | Q54G51.1     | PF03630.12 | 58.20 | 0.00 |
| TRINITY_E2BIM3_HARSA/11-266      | E2BIM3.1     | PF00370.19 | 58.20 | 0.00 |
| TRINITY_I0APD5_IGNAJ/4-186       | I0APD5.1     | PF01965.22 | 58.20 | 0.00 |
| TRINITY_A8IJV9_CHLRE/373-692     | A8IJV9.1     | PF00702.24 | 58.20 | 0.00 |
| TRINITY_B9SNT8_RICCO/1030-1139   | B9SNT8.1     | PF00005.25 | 58.20 | 0.00 |
| TRINITY_D8TMX3_VOLCA/1-97        | D8TMX3.1     | PF03073.13 | 58.20 | 0.00 |
| TRINITY_L8GJ62_ACACA/8-255       | L8GJ62.1     | PF03029.15 | 58.20 | 0.00 |
| TRINITY_A0A074WMF9_9PEZI/42-261  | A0A074WMF9.1 | PF0035     | 58.20 | 0.00 |
| TRINITY_A0A067SYC7_9AGAR/3-126   | A0A067SYC7.1 | PF0177     | 58.20 | 0.00 |
| TRINITY_H2LJS9_ORYLA/16-322      | H2LJS9.1     | PF01556.16 | 58.20 | 0.00 |
| TRINITY_A0A067NIU5_PLEOS/110-373 | A0A067NIU5.1 | PF0006     | 58.20 | 0.00 |
| TRINITY_J9IGI9_9SPIT/49-304      | J9IGI9.1     | PF00069.23 | 58.20 | 0.00 |
| TRINITY_D8U0B5_VOLCA/34-237      | D8U0B5.1     | PF05997.10 | 58.20 | 0.00 |
| TRINITY_D8U2V5_VOLCA/32-176      | D8U2V5.1     | PF00071.20 | 58.20 | 0.00 |
| TRINITY_L8GS12_ACACA/6-211       | L8GS12.1     | PF00108.21 | 58.20 | 0.00 |
| TRINITY_C4M4R8_ENTHI/24-138      | C4M4R8.1     | PF01412.16 | 58.20 | 0.00 |
| TRINITY_D8UBJ0_VOLCA/157-235     | D8UBJ0.1     | PF11282.6; | 58.20 | 0.00 |
| TRINITY_A0A0D2T6A5_GOSRA/46-177  | A0A0D2T6A5.1 | PF0012     | 58.20 | 0.00 |
| TRINITY_NOXA_DICDI/237-347       | Q9XYS3.1     | PF08022.10 | 58.20 | 0.00 |
| TRINITY_A0A087SLA0_AUXPR/25-104  | A0A087SLA0.1 | PF0128     | 58.20 | 0.00 |
| TRINITY_E1Z9P0_CHLVA/12-226      | E1Z9P0.1     | PF04757.12 | 58.20 | 0.00 |
| TRINITY_L8GYB8_ACACA/255-364     | L8GYB8.1     | PF08022.10 | 58.20 | 0.00 |
| TRINITY_D8UG67_VOLCA/120-260     | D8UG67.1     | PF13365.4; | 58.20 | 0.00 |
| TRINITY_D8U0B7_VOLCA/5-118       | D8U0B7.1     | PF06094.10 | 58.20 | 0.00 |
| TRINITY_F4PWV9_DICFS/586-847     | F4PWV9.1     | PF07714.15 | 58.20 | 0.00 |
| TRINITY_D8TMZ1_VOLCA/7-443       | D8TMZ1.1     | PF05577.10 | 58.20 | 0.00 |
| TRINITY_MLH1_MOUSE/23-248        | Q9JK91.2     | PF02518.24 | 58.20 | 0.00 |
| TRINITY_Q6UKY3_CHLRE/53-119      | Q6UKY3.1     | PF04716.12 | 58.20 | 0.00 |
| TRINITY_L8HLC2_ACACA/17-345      | L8HLC2.1     | PF00503.18 | 58.20 | 0.00 |
| TRINITY_E1ZXV4_CAMFO/514-1046    | E1ZXV4.1     | PF13423.4; | 58.20 | 0.00 |
| TRINITY_L8HJG5_ACACA/67-313      | L8HJG5.1     | PF03381.13 | 58.20 | 0.00 |
| TRINITY_A8HW34_CHLRE/1-390       | A8HW34.1     | PF01373.15 | 58.20 | 0.00 |
| TRINITY_C1MTS7_MICPC/2072-2343   | C1MTS7.1     | PF12775.5; | 58.20 | 0.00 |
| TRINITY_A0A078GK44_BRANA/667-868 | A0A078GK44.1 | PF0285     | 58.20 | 0.00 |
| TRINITY_A0A078AYX4_STYLE/85-816  | A0A078AYX4.1 | PF0303     | 58.20 | 0.00 |
| TRINITY_A0CF26_PARTE/22-275      | A0CF26.1     | PF03803.13 | 58.20 | 0.00 |
| TRINITY_D8TZI8_VOLCA/219-453     | D8TZI8.1     | PF03407.14 | 58.20 | 0.00 |
| TRINITY_D8M1W7_BLAHO/168-334     | D8M1W7.1     | PF02421.16 | 58.20 | 0.00 |
| TRINITY_H2AZ07_KAZAF/7-297       | H2AZ07.1     | PF00069.23 | 58.20 | 0.00 |
| TRINITY_E1Z4L0_CHLVA/312-586     | E1Z4L0.1     | PF00082.20 | 58.20 | 0.00 |
| TRINITY_A9SNT8_PHYPA/19-274      | A9SNT8.1     | PF00069.23 | 58.20 | 0.00 |
| TRINITY_H3HAJ2_PHYRM/359-478     | H3HAJ2.1     | PF00665.24 | 58.20 | 0.00 |
| TRINITY_R4GCI3_ANOCA/1-108       | R4GCI3.1     | PF00665.24 | 58.20 | 0.00 |
| TRINITY_A4VCZ6_TETTS/85-391      | A4VCZ6.2     | PF01866.15 | 58.20 | 0.00 |

|                                   |              |            |       |      |
|-----------------------------------|--------------|------------|-------|------|
| TRINITY_D8TCQ6_SELML/752-1283     | D8TCQ6.1     | PF02538.12 | 58.10 | 0.00 |
| TRINITY_J9IZ27_9SPIT/31-320       | J9IZ27.1     | PF04616.12 | 58.10 | 0.00 |
| TRINITY_A0A078AMJ2_STYLE/15-197   | A0A078AMJ2.1 | PF0502     | 58.10 | 0.00 |
| TRINITY_B4RDU7_PHEZH/59-204       | B4RDU7.1     | PF00903.23 | 58.10 | 0.00 |
| TRINITY_E0W122_PEDHC/14-87        | E0W122.1     | PF01722.16 | 58.10 | 0.00 |
| TRINITY_I1G153_AMPQE/19-61        | I1G153.1     | PF02150.14 | 58.10 | 0.00 |
| TRINITY_I7LVW0_TETTS/6-146        | I7LVW0.1     | PF05903.12 | 58.10 | 0.00 |
| TRINITY_M0V1V7_HORVD/41-207       | M0V1V7.1     | PF08662.9; | 58.10 | 0.00 |
| TRINITY_L8GJG4_ACACA/20-138       | L8GJG4.1     | PF00307.29 | 58.10 | 0.00 |
| TRINITY_C7PPF7_CHIPD/460-723      | C7PPF7.1     | PF12972.5; | 58.10 | 0.00 |
| TRINITY_D3B612_POLPA/43-240       | D3B612.1     | PF00106.23 | 58.10 | 0.00 |
| TRINITY_A0A068RSW5_9FUNG/641-776  | A0A068RSW5.1 | PF0000     | 58.10 | 0.00 |
| TRINITY_D8UES2_VOLCA/60-121       | D8UES2.1     | PF04818.11 | 58.10 | 0.00 |
| TRINITY_G0R0U0_ICHMG/14-286       | G0R0U0.1     | PF10234.7; | 58.10 | 0.00 |
| TRINITY_A0A078A7J6_STYLE/762-1058 | A0A078A7J6.1 | PF0006     | 58.10 | 0.00 |
| TRINITY_Q23YX7_TETTS/1-171        | Q23YX7.2     | PF05856.10 | 58.10 | 0.00 |
| TRINITY_W4XI36_STRPU/662-777      | W4XI36.1     | PF00665.24 | 58.10 | 0.00 |
| TRINITY_G4TH90_PIRID/51-445       | G4TH90.1     | PF00999.19 | 58.10 | 0.00 |
| TRINITY_D8THX1_VOLCA/227-448      | D8THX1.1     | PF13672.4; | 58.10 | 0.00 |
| TRINITY_A0A0G4H2P4_9ALVE/364-449  | A0A0G4H2P4.1 | PF1349     | 58.10 | 0.00 |
| TRINITY_A8J288_CHLRE/392-604      | A8J288.1     | PF07690.14 | 58.10 | 0.00 |
| TRINITY_A8HNT1_CHLRE/52-191       | A8HNT1.2     | PF10262.7; | 58.10 | 0.00 |
| TRINITY_D8U5R3_VOLCA/259-485      | D8U5R3.1     | PF00667.18 | 58.10 | 0.00 |
| TRINITY_Q23Q10_TETTS/220-310      | Q23Q10.2     | PF15963.3; | 58.10 | 0.00 |
| TRINITY_K4C2L5_SOLLC/85-129       | K4C2L5.1     | PF13639.4; | 58.10 | 0.00 |
| TRINITY_A5D7H4_BOVIN/614-657      | A5D7H4.1     | PF13639.4; | 58.10 | 0.00 |
| TRINITY_D8TUC5_VOLCA/7-195        | D8TUC5.1     | PF13869.4; | 58.10 | 0.00 |
| TRINITY_G0QUA3_ICHMG/83-385       | G0QUA3.1     | PF00648.19 | 58.10 | 0.00 |
| TRINITY_L8HFB9_ACACA/8-70         | L8HFB9.1     | PF00076.20 | 58.10 | 0.00 |
| TRINITY_E1VQB4_9GAMM/598-665      | E1VQB4.1     | PF00364.20 | 58.10 | 0.00 |
| TRINITY_A8JEK5_CHLRE/22-141       | A8JEK5.1     | PF02221.13 | 58.10 | 0.00 |
| TRINITY_B7RZD3_9GAMM/4-382        | B7RZD3.1     | PF02515.15 | 58.10 | 0.00 |
| TRINITY_E1ZPN0_CHLVA/23-186       | E1ZPN0.1     | PF09419.8; | 58.10 | 0.00 |
| TRINITY_A4VCU9_TETTS/362-480      | A4VCU9.1     | PF01926.21 | 58.10 | 0.00 |
| TRINITY_I7MCL6_TETTS/651-743      | I7MCL6.2     | PF13424.4; | 58.10 | 0.00 |
| TRINITY_D8TRZ5_VOLCA/14-244       | D8TRZ5.1     | PF12740.5; | 58.10 | 0.00 |
| TRINITY_A0A0G4IX38_PLABS/3-60     | A0A0G4IX38.1 | PF0475     | 58.10 | 0.00 |
| TRINITY_A8IRK5_CHLRE/40-113       | A8IRK5.1     | PF00364.20 | 58.10 | 0.00 |
| TRINITY_D8TRG8_VOLCA/542-742      | D8TRG8.1     | PF00488.19 | 58.10 | 0.00 |
| TRINITY_I0YJE2_9CHLO/24-288       | I0YJE2.1     | PF01193.22 | 58.10 | 0.00 |
| TRINITY_J9J7E3_9SPIT/2162-2244    | J9J7E3.1     | PF05406.13 | 58.10 | 0.00 |
| TRINITY_D8TI56_VOLCA/411-534      | D8TI56.1     | PF05285.10 | 58.10 | 0.00 |
| TRINITY_F4PV19_DICFS/1034-1076    | F4PV19.1     | PF01585.21 | 58.10 | 0.00 |
| TRINITY_L8H3C4_ACACA/231-487      | L8H3C4.1     | PF00069.23 | 58.10 | 0.00 |
| TRINITY_U9T9G2_RHIID/228-351      | U9T9G2.1     | PF00271.29 | 58.10 | 0.00 |
| TRINITY_A0A0M8SM37_9ACTN/11-450   | A0A0M8SM37.1 | PF1352     | 58.10 | 0.00 |
| TRINITY_D8TJ74_VOLCA/20-139       | D8TJ74.1     | PF13537.4; | 58.10 | 0.00 |
| TRINITY_D8UI89_VOLCA/116-212      | D8UI89.1     | PF13649.4; | 58.10 | 0.00 |
| TRINITY_D8TS95_VOLCA/19-308       | D8TS95.1     | PF00069.23 | 58.10 | 0.00 |
| TRINITY_A8J1Y2_CHLRE/46-453       | A8J1Y2.1     | PF00450.20 | 58.10 | 0.00 |
| TRINITY_I7M910_TETTS/11-285       | I7M910.1     | PF00069.23 | 58.10 | 0.00 |
| TRINITY_I0Z955_9CHLO/143-197      | I0Z955.1     | PF10309.7; | 58.10 | 0.00 |
| TRINITY_Q2H7U0_CHAGB/401-534      | Q2H7U0.1     | PF00005.25 | 58.10 | 0.00 |
| TRINITY_L8GEL6_ACACA/329-543      | L8GEL6.1     | PF13236.4; | 58.10 | 0.00 |
| TRINITY_A0A0G4EL00_9ALVE/28-158   | A0A0G4EL00.1 | PF0411     | 58.10 | 0.00 |
| TRINITY_S9UGY6_9TRYP/384-515      | S9UGY6.1     | PF09976.7; | 58.10 | 0.00 |
| TRINITY_D8U2P2_VOLCA/281-578      | D8U2P2.1     | PF00176.21 | 58.10 | 0.00 |
| TRINITY_D8U3D7_VOLCA/31-246       | D8U3D7.1     | PF01036.16 | 58.10 | 0.00 |
| TRINITY_L8H393_ACACA/160-347      | L8H393.1     | PF00644.18 | 58.10 | 0.00 |
| TRINITY_A8I807_CHLRE/1018-1101    | A8I807.1     | PF00211.18 | 58.10 | 0.00 |
| TRINITY_Q232M9_TETTS/5-90         | Q232M9.3     | PF00887.17 | 58.10 | 0.00 |

|                                  |                     |       |      |
|----------------------------------|---------------------|-------|------|
| TRINITY_G0QWU3_ICHMG/12-121      | G0QWU3.1 PF00787.22 | 58.10 | 0.00 |
| TRINITY_A0CNX9_PARTE/179-246     | A0CNX9.1 PF13833.4; | 58.00 | 0.00 |
| TRINITY_F0XXR9_AURAN/4-179       | F0XXR9.1 PF00025.19 | 58.00 | 0.00 |
| TRINITY_F0ZDJ6_DICPU/473-685     | F0ZDJ6.1 PF13236.4; | 58.00 | 0.00 |
| TRINITY_R1E6D9_BOTPV/7-94        | R1E6D9.1 PF01035.18 | 58.00 | 0.00 |
| TRINITY_G0QRM1_ICHMG/13-169      | G0QRM1.1 PF12850.5; | 58.00 | 0.00 |
| TRINITY_L8GGG2_ACACA/628-752     | L8GGG2.1 PF00754.23 | 58.00 | 0.00 |
| TRINITY_J9INC1_9SPIT/455-710     | J9INC1.1 PF00069.23 | 58.00 | 0.00 |
| TRINITY_A0A085N172_9BILA/8-121   | A0A085N172.1 PF1690 | 58.00 | 0.00 |
| TRINITY_G0QW14_ICHMG/165-434     | G0QW14.1 PF00928.19 | 58.00 | 0.00 |
| TRINITY_I0YIA4_9CHLO/3-165       | I0YIA4.1 PF00071.20 | 58.00 | 0.00 |
| TRINITY_FTSZ2_RHIME/15-176       | P45484.2 PF00091.23 | 58.00 | 0.00 |
| TRINITY_S8ED18_9LAMI/13-126      | S8ED18.1 PF01981.14 | 58.00 | 0.00 |
| TRINITY_F0ZA90_DICPU/22-375      | F0ZA90.1 PF04757.12 | 58.00 | 0.00 |
| TRINITY_L8HG30_ACACA/14-111      | L8HG30.1 PF00153.25 | 58.00 | 0.00 |
| TRINITY_A0DTP8_PARTE/77-166      | A0DTP8.1 PF16531.3; | 58.00 | 0.00 |
| TRINITY_E1ZLK8_CHLVA/56-427      | E1ZLK8.1 PF01137.19 | 58.00 | 0.00 |
| TRINITY_I1G7R9_AMPQE/53-103      | I1G7R9.1 PF00415.16 | 58.00 | 0.00 |
| TRINITY_I7MDY6_TETTS/636-751     | I7MDY6.2 PF00188.24 | 58.00 | 0.00 |
| TRINITY_A0E9I5_PARTE/35-123      | A0E9I5.1 PF01221.16 | 58.00 | 0.00 |
| TRINITY_D8UBS2_VOLCA/5-73        | D8UBS2.1 PF13921.4; | 58.00 | 0.00 |
| TRINITY_A0A0F4ZED4_9PEZI/281-347 | A0A0F4ZED4.1 PF0148 | 58.00 | 0.00 |
| TRINITY_T2GA88_DESGI/300-467     | T2GA88.1 PF03441.12 | 58.00 | 0.00 |
| TRINITY_A0EBQ7_PARTE/465-697     | A0EBQ7.1 PF00233.17 | 58.00 | 0.00 |
| TRINITY_A0D8S8_PARTE/638-896     | A0D8S8.1 PF07714.15 | 58.00 | 0.00 |
| TRINITY_A4AGI9_9ACTN/14-329      | A4AGI9.1 PF07993.10 | 58.00 | 0.00 |
| TRINITY_D8TTJ2_VOLCA/574-753     | D8TTJ2.1 PF13532.4; | 58.00 | 0.00 |
| TRINITY_F0Z8I9_DICPU/17-186      | F0Z8I9.1 PF00071.20 | 58.00 | 0.00 |
| TRINITY_A0A0B2UU04_TOXCA/25-95   | A0A0B2UU04.1 PF0007 | 58.00 | 0.00 |
| TRINITY_A0A0G4ERG2_9ALVE/5-294   | A0A0G4ERG2.1 PF0121 | 58.00 | 0.00 |
| TRINITY_F4QFF3_DICFS/61-180      | F4QFF3.1 PF02338.17 | 58.00 | 0.00 |
| TRINITY_A0DYA9_PARTE/9-80        | A0DYA9.1 PF00240.21 | 58.00 | 0.00 |
| TRINITY_A0A078AMN3_STYLE/203-269 | A0A078AMN3.1 PF1392 | 58.00 | 0.00 |
| TRINITY_H2V6H5_TAKRU/370-643     | H2V6H5.1 PF02913.17 | 58.00 | 0.00 |
| TRINITY_A8IS78_CHLRE/5-74        | A8IS78.1 PF02325.15 | 58.00 | 0.00 |
| TRINITY_D8TUV8_VOLCA/6-258       | D8TUV8.1 PF03343.11 | 58.00 | 0.00 |
| TRINITY_G0QKW1_ICHMG/111-281     | G0QKW1.1 PF00092.26 | 58.00 | 0.00 |
| TRINITY_M4BXD5_HYAAE/4-455       | M4BXD5.1 PF00171.20 | 58.00 | 0.00 |
| TRINITY_A0A067MEM0_9HOMO/6-117   | A0A067MEM0.1 PF1351 | 58.00 | 0.00 |
| TRINITY_H0X010_OTOGA/2-104       | H0X010.1 PF00085.18 | 58.00 | 0.00 |
| TRINITY_D8MBA7_BLAHO/1-174       | D8MBA7.1 PF00025.19 | 58.00 | 0.00 |
| TRINITY_E1ZSC6_CHLVA/5-192       | E1ZSC6.1 PF13460.4; | 58.00 | 0.00 |
| TRINITY_D8UBS2_VOLCA/5-73        | D8UBS2.1 PF13921.4; | 58.00 | 0.00 |
| TRINITY_A8ICB8_CHLRE/5-295       | A8ICB8.1 PF00225.21 | 58.00 | 0.00 |
| TRINITY_A8JGI3_CHLRE/270-557     | A8JGI3.1 PF00233.17 | 58.00 | 0.00 |
| TRINITY_CMT1_DICDI/4-361         | Q54JH6.1 PF00145.15 | 58.00 | 0.00 |
| TRINITY_C1ECL1_MICSR/22-70       | C1ECL1.1 PF12906.5; | 58.00 | 0.00 |
| TRINITY_A0A0A0LPU3_CUCSA/26-143  | A0A0A0LPU3.1 PF0115 | 58.00 | 0.00 |
| TRINITY_G1PQS7_MYOLU/16-221      | G1PQS7.1 PF01015.16 | 58.00 | 0.00 |
| TRINITY_E0VFJ1_PEDHC/31-114      | E0VFJ1.1 PF00027.27 | 58.00 | 0.00 |
| TRINITY_E1ZJ62_CHLVA/25-310      | E1ZJ62.1 PF00862.17 | 58.00 | 0.00 |
| TRINITY_L8HEV2_ACACA/41-347      | L8HEV2.1 PF01074.20 | 58.00 | 0.00 |
| TRINITY_E1Z5N4_CHLVA/1185-1342   | E1Z5N4.1 PF00179.24 | 58.00 | 0.00 |
| TRINITY_D8TZJ0_VOLCA/13-112      | D8TZJ0.1 PF00651.29 | 58.00 | 0.00 |
| TRINITY_Q23FR5_TETTS/51-305      | Q23FR5.2 PF00069.23 | 58.00 | 0.00 |
| TRINITY_I7LWK7_TETTS/31-345      | I7LWK7.1 PF00850.17 | 58.00 | 0.00 |
| TRINITY_A0CEE8_PARTE/74-215      | A0CEE8.1 PF01966.20 | 58.00 | 0.00 |
| TRINITY_A8IYR9_CHLRE/2598-3304   | A8IYR9.1 PF03028.13 | 58.00 | 0.00 |
| TRINITY_I3ITW0_ORENI/22-89       | I3ITW0.1 PF00021.19 | 58.00 | 0.00 |
| TRINITY_J9JBC0_9SPIT/113-238     | J9JBC0.1 PF00293.26 | 57.90 | 0.00 |
| TRINITY_A0A0F8DL43_CERFI/735-872 | A0A0F8DL43.1 PF0027 | 57.90 | 0.00 |

|                                  |                     |       |      |
|----------------------------------|---------------------|-------|------|
| TRINITY_A0A078B349_STYLE/444-804 | A0A078B349.1 PF0070 | 57.90 | 0.00 |
| TRINITY_G0QW14_ICHMG/165-434     | G0QW14.1 PF00928.19 | 57.90 | 0.00 |
| TRINITY_A8HQ22_CHLRE/163-586     | A8HQ22.1 PF12739.5; | 57.90 | 0.00 |
| TRINITY_A0BHV8_PARTE/64-106      | A0BHV8.1 PF00643.22 | 57.90 | 0.00 |
| TRINITY_A0A091DU58_FUKDA/11-162  | A0A091DU58.1 PF1332 | 57.90 | 0.00 |
| TRINITY_F4Q487_DICFS/425-550     | F4Q487.1 PF04628.11 | 57.90 | 0.00 |
| TRINITY_E9PR47_HUMAN/6-165       | E9PR47.1 PF04430.12 | 57.90 | 0.00 |
| TRINITY_D8UEB8_VOLCA/42-168      | D8UEB8.1 PF00067.20 | 57.90 | 0.00 |
| TRINITY_G0R409_ICHMG/421-565     | G0R409.1 PF00005.25 | 57.90 | 0.00 |
| TRINITY_F4PSP2_DICFS/256-385     | F4PSP2.1 PF04494.13 | 57.90 | 0.00 |
| TRINITY_A7SBR8_NEMVE/13-144      | A7SBR8.1 PF13589.4; | 57.90 | 0.00 |
| TRINITY_RPA1_DICDI/622-799       | Q86H36.1 PF04983.16 | 57.90 | 0.00 |
| TRINITY_L8GUP7_ACACA/25-206      | L8GUP7.1 PF04664.11 | 57.90 | 0.00 |
| TRINITY_I7MJV9_TETTS/69-545      | I7MJV9.1 PF00501.26 | 57.90 | 0.00 |
| TRINITY_A0A0G4FB00_9ALVE/8-65    | A0A0G4FB00.1 PF0083 | 57.90 | 0.00 |
| TRINITY_L8HCD5_ACACA/44-209      | L8HCD5.1 PF09414.8; | 57.90 | 0.00 |
| TRINITY_D8TLS0_VOLCA/13-212      | D8TLS0.1 PF09778.7; | 57.90 | 0.00 |
| TRINITY_E1ZH81_CHLVA/26-178      | E1ZH81.1 PF01509.16 | 57.90 | 0.00 |
| TRINITY_I7MI70_TETTS/14-137      | I7MI70.1 PF13893.4; | 57.90 | 0.00 |
| TRINITY_A0A077ZZ86_STYLE/16-83   | A0A077ZZ86.1 PF1586 | 57.90 | 0.00 |
| TRINITY_L8GQX7_ACACA/1030-1086   | L8GQX7.1 PF00412.20 | 57.90 | 0.00 |
| TRINITY_L8GGE2_ACACA/32-145      | L8GGE2.1 PF07876.10 | 57.90 | 0.00 |
| TRINITY_D3BSL6_POLPA/4-431       | D3BSL6.1 PF00171.20 | 57.90 | 0.00 |
| TRINITY_A8J6Q3_CHLRE/107-166     | A8J6Q3.1 PF05421.9; | 57.90 | 0.00 |
| TRINITY_A8IJQ1_CHLRE/86-172      | A8IJQ1.1 PF08712.9; | 57.90 | 0.00 |
| TRINITY_A8J5M0_CHLRE/19-212      | A8J5M0.1 PF13419.4; | 57.90 | 0.00 |
| TRINITY_L8GHB5_ACACA/140-315     | L8GHB5.1 PF00270.27 | 57.90 | 0.00 |
| TRINITY_D8U5V1_VOLCA/37-396      | D8U5V1.1 PF07944.10 | 57.90 | 0.00 |
| TRINITY_A8J8U9_CHLRE/45-302      | A8J8U9.1 PF07082.9; | 57.90 | 0.00 |
| TRINITY_L8GRF8_ACACA/491-786     | L8GRF8.1 PF03635.15 | 57.90 | 0.00 |
| TRINITY_A8JIV5_CHLRE/68-245      | A8JIV5.1 PF01612.18 | 57.90 | 0.00 |
| TRINITY_B2IX05_NOSP7/90-197      | B2IX05.1 PF13578.4; | 57.90 | 0.00 |
| TRINITY_A0A0D2PZV3_GOSRA/11-126  | A0A0D2PZV3.1 PF0141 | 57.90 | 0.00 |
| TRINITY_D8U3Y1_VOLCA/28-189      | D8U3Y1.1 PF11947.6; | 57.90 | 0.00 |
| TRINITY_A8J3R1_CHLRE/1-130       | A8J3R1.1 PF09366.8; | 57.90 | 0.00 |
| TRINITY_F0ZRZ2_DICPU/4-79        | F0ZRZ2.1 PF07297.10 | 57.90 | 0.00 |
| TRINITY_D8TKB8_VOLCA/41-663      | D8TKB8.1 PF01602.18 | 57.90 | 0.00 |
| TRINITY_D8UF05_VOLCA/50-301      | D8UF05.1 PF00494.17 | 57.90 | 0.00 |
| TRINITY_Q111M9_TRIEI/24-486      | Q111M9.1 PF00171.20 | 57.90 | 0.00 |
| TRINITY_A0E493_PARTE/11-338      | A0E493.1 PF00225.21 | 57.90 | 0.00 |
| TRINITY_W7TAA3_9STRA/119-293     | W7TAA3.1 PF00270.27 | 57.90 | 0.00 |
| TRINITY_A8IBK6_CHLRE/1-131       | A8IBK6.1 PF14811.4; | 57.90 | 0.00 |
| TRINITY_A8J1A0_CHLRE/250-682     | A8J1A0.1 PF00152.18 | 57.90 | 0.00 |
| TRINITY_D8ULY9_VOLCA/128-258     | D8ULY9.1 PF01156.17 | 57.90 | 0.00 |
| TRINITY_D2VS08_NAEGR/119-258     | D2VS08.1 PF00182.17 | 57.90 | 0.00 |
| TRINITY_U9SW55_RHIID/233-302     | U9SW55.1 PF00013.27 | 57.90 | 0.00 |
| TRINITY_D8TKH0_VOLCA/161-515     | D8TKH0.1 PF01103.21 | 57.90 | 0.00 |
| TRINITY_F7AW79_CALJA/105-327     | F7AW79.1 PF00009.25 | 57.90 | 0.00 |
| TRINITY_D8TMY3_VOLCA/29-292      | D8TMY3.1 PF00069.23 | 57.90 | 0.00 |
| TRINITY_A8J4W1_CHLRE/1-418       | A8J4W1.1 PF00202.19 | 57.90 | 0.00 |
| TRINITY_G0R409_ICHMG/421-565     | G0R409.1 PF00005.25 | 57.90 | 0.00 |
| TRINITY_A8INF6_CHLRE/2101-2396   | A8INF6.1 PF00069.23 | 57.90 | 0.00 |
| TRINITY_T0PYF1_9STRA/70-184      | T0PYF1.1 PF01981.14 | 57.90 | 0.00 |
| TRINITY_D8TH37_VOLCA/318-449     | D8TH37.1 PF07683.12 | 57.90 | 0.00 |
| TRINITY_G1N8F2_MELGA/80-381      | G1N8F2.2 PF00561.18 | 57.80 | 0.00 |
| TRINITY_A0C6C2_PARTE/5-172       | A0C6C2.1 PF05301.9; | 57.80 | 0.00 |
| TRINITY_B5EG20_GEOBB/14-188      | B5EG20.1 PF00857.18 | 57.80 | 0.00 |
| TRINITY_A0A0D9WUG4_9ORYZ/254-302 | A0A0D9WUG4.1 PF0062 | 57.80 | 0.00 |
| TRINITY_A0A0M0JS54_9EUKA/57-649  | A0A0M0JS54.1 PF0363 | 57.80 | 0.00 |
| TRINITY_Q23FD8_TETTS/19-112      | Q23FD8.4 PF01230.21 | 57.80 | 0.00 |
| TRINITY_A0A078AU69_STYLE/106-169 | A0A078AU69.1 PF0518 | 57.80 | 0.00 |



|                                  |                     |       |      |
|----------------------------------|---------------------|-------|------|
| TRINITY_F0ZUP2_DICPU/5-195       | F0ZUP2.1 PF02545.12 | 57.80 | 0.00 |
| TRINITY_GCST_DICDI/29-290        | Q54DD3.1 PF01571.19 | 57.80 | 0.00 |
| TRINITY_D3BJV1_POLPA/136-322     | D3BJV1.1 PF00485.16 | 57.80 | 0.00 |
| TRINITY_Q86HU8_DICDI/6-243       | Q86HU8.1 PF01370.19 | 57.80 | 0.00 |
| TRINITY_A8J3K1_CHLRE/1842-2127   | A8J3K1.1 PF07714.15 | 57.80 | 0.00 |
| TRINITY_J9IA35_9SPIT/13-289      | J9IA35.1 PF07993.10 | 57.80 | 0.00 |
| TRINITY_A0A0F9ZEW7_9MICR/186-229 | A0A0F9ZEW7.1 PF1363 | 57.80 | 0.00 |
| TRINITY_F4NSD2_BATDJ/224-374     | F4NSD2.1 PF00005.25 | 57.80 | 0.00 |
| TRINITY_F4PRR1_DICFS/28-120      | F4PRR1.1 PF02214.20 | 57.80 | 0.00 |
| TRINITY_W7X388_TETTS/56-115      | W7X388.1 PF01363.19 | 57.80 | 0.00 |
| TRINITY_D8U8Q9_VOLCA/3-158       | D8U8Q9.1 PF13019.4; | 57.80 | 0.00 |
| TRINITY_L8HFJ6_ACACA/43-464      | L8HFJ6.1 PF05577.10 | 57.80 | 0.00 |
| TRINITY_L8GKG8_ACACA/21-183      | L8GKG8.1 PF00071.20 | 57.80 | 0.00 |
| TRINITY_A0A0A1PCH1_9FUNG/7-327   | A0A0A1PCH1.1 PF0049 | 57.80 | 0.00 |
| TRINITY_W1NUB4_AMBTC/284-525     | W1NUB4.1 PF02913.17 | 57.80 | 0.00 |
| TRINITY_D8UHG2_VOLCA/1220-1413   | D8UHG2.1 PF00406.20 | 57.80 | 0.00 |
| TRINITY_A0A078A9T0_STYLE/80-292  | A0A078A9T0.1 PF0011 | 57.80 | 0.00 |
| TRINITY_Q23Q10_TETTS/220-310     | Q23Q10.2 PF15963.3; | 57.80 | 0.00 |
| TRINITY_I0YX02_9CHLO/106-280     | I0YX02.1 PF03572.16 | 57.80 | 0.00 |
| TRINITY_D2VRR8_NAEGR/260-481     | D2VRR8.1 PF00215.22 | 57.80 | 0.00 |
| TRINITY_W7X994_TETTS/109-415     | W7X994.1 PF00648.19 | 57.80 | 0.00 |
| TRINITY_Q1DEU4_MYXXD/197-302     | Q1DEU4.1 PF02557.15 | 57.80 | 0.00 |
| TRINITY_A0A0E9NBT1_9ASCO/21-211  | A0A0E9NBT1.1 PF0092 | 57.80 | 0.00 |
| TRINITY_A0A0N4XS36_NIPBR/5-53    | A0A0N4XS36.1 PF0062 | 57.80 | 0.00 |

|                                   |                     |       |      |
|-----------------------------------|---------------------|-------|------|
| TRINITY_A0A087SPB6_AUXPR/165-516  | A0A087SPB6.1 PF0410 | 57.80 | 0.00 |
| TRINITY_A8HP45_CHLRE/1-215        | A8HP45.1 PF04305.12 | 57.80 | 0.00 |
| TRINITY_E1ZCK6_CHLVA/58-340       | E1ZCK6.1 PF00009.25 | 57.80 | 0.00 |
| TRINITY_L8HCT5_ACACA/1-304        | L8HCT5.1 PF00009.25 | 57.80 | 0.00 |
| TRINITY_ABCD2_DICDI/93-376        | Q8T8P3.1 PF06472.13 | 57.80 | 0.00 |
| TRINITY_I0Z472_9CHLO/55-358       | I0Z472.1 PF00225.21 | 57.80 | 0.00 |
| TRINITY_PR46B_CHLRE/99-205        | Q94EY1.1 PF13877.4; | 57.80 | 0.00 |
| TRINITY_A8I2T6_CHLRE/51-181       | A8I2T6.1 PF13398.4; | 57.80 | 0.00 |
| TRINITY_W5NEL6_LEPOC/257-501      | W5NEL6.1 PF00481.19 | 57.80 | 0.00 |
| TRINITY_A0A078B349_STYLE/444-804  | A0A078B349.1 PF0070 | 57.80 | 0.00 |
| TRINITY_A0BF61_PARTE/17-269       | A0BF61.1 PF00069.23 | 57.80 | 0.00 |
| TRINITY_A8IQ02_CHLRE/1471-1681    | A8IQ02.1 PF14228.4; | 57.80 | 0.00 |
| TRINITY_A0BJ29_PARTE/7-340        | A0BJ29.1 PF07992.12 | 57.80 | 0.00 |
| TRINITY_A8JEL8_CHLRE/56-300       | A8JEL8.1 PF09295.8; | 57.80 | 0.00 |
| TRINITY_A8J3S4_CHLRE/110-273      | A8J3S4.1 PF00211.18 | 57.80 | 0.00 |
| TRINITY_L8HI43_ACACA/398-832      | L8HI43.1 PF00275.18 | 57.80 | 0.00 |
| TRINITY_I0I8C5_CALAS/40-411       | I0I8C5.1 PF00155.19 | 57.80 | 0.00 |
| TRINITY_R1DE31_EMIHU/14-210       | R1DE31.1 PF00106.23 | 57.80 | 0.00 |
| TRINITY_A8HPW9_CHLRE/1369-1561    | A8HPW9.1 PF00211.18 | 57.80 | 0.00 |
| TRINITY_A8HXY9_CHLRE/27-123       | A8HXY9.1 PF00153.25 | 57.80 | 0.00 |
| TRINITY_CALL3_RAT/10-74           | Q5U206.1 PF13499.4; | 57.80 | 0.00 |
| TRINITY_A8HZR1_CHLRE/6512-6779    | A8HZR1.1 PF00109.24 | 57.70 | 0.00 |
| TRINITY_Q22GW0_TETTS/1651-1813    | Q22GW0.2 PF00069.23 | 57.70 | 0.00 |
| TRINITY_G0QXC5_ICHMG/9-406        | G0QXC5.1 PF00162.17 | 57.70 | 0.00 |
| TRINITY_G0QQR1_ICHMG/26-120       | G0QQR1.1 PF00995.21 | 57.70 | 0.00 |
| TRINITY_C1EF89_MICSR/177-433      | C1EF89.1 PF00176.21 | 57.70 | 0.00 |
| TRINITY_A0A0A0KTZ4_CUCSA/17-227   | A0A0A0KTZ4.1 PF0135 | 57.70 | 0.00 |
| TRINITY_A0A0N4WHM5_HAEPC/23-118   | A0A0N4WHM5.1 PF0124 | 57.70 | 0.00 |
| TRINITY_T2L481_9GAMM/25-120       | T2L481.1 PF04828.12 | 57.70 | 0.00 |
| TRINITY_D2VS08_NAEGR/119-258      | D2VS08.1 PF00182.17 | 57.70 | 0.00 |
| TRINITY_Q239A0_TETTS/806-868      | Q239A0.1 PF02187.15 | 57.70 | 0.00 |
| TRINITY_J9IM53_9SPIT/388-673      | J9IM53.1 PF00481.19 | 57.70 | 0.00 |
| TRINITY_TTL3C_TETTS/705-1030      | Q23FE2.1 PF03133.13 | 57.70 | 0.00 |
| TRINITY_U6GK02_EIMAC/106-385      | U6GK02.1 PF08648.10 | 57.70 | 0.00 |
| TRINITY_K1QS40_CRAGI/89-337       | K1QS40.1 PF00112.21 | 57.70 | 0.00 |
| TRINITY_Q60DB4_ORYSJ/141-303      | Q60DB4.1 PF00078.25 | 57.70 | 0.00 |
| TRINITY_I7M3Q0_TETTS/233-414      | I7M3Q0.1 PF00270.27 | 57.70 | 0.00 |
| TRINITY_J9HZ29_9SPIT/335-483      | J9HZ29.1 PF00817.18 | 57.70 | 0.00 |
| TRINITY_A8J818_CHLRE/57-109       | A8J818.1 PF05739.17 | 57.70 | 0.00 |
| TRINITY_S2J644_MUCC1/47-117       | S2J644.1 PF01480.15 | 57.70 | 0.00 |
| TRINITY_E0VFT2_PEDHC/270-407      | E0VFT2.1 PF04146.13 | 57.70 | 0.00 |
| TRINITY_A8IZL0_CHLRE/600-696      | A8IZL0.1 PF07801.9; | 57.70 | 0.00 |
| TRINITY_I1LMF9_SOYBN/316-479      | I1LMF9.2 PF08662.9; | 57.70 | 0.00 |
| TRINITY_A0A087SDW0_AUXPR/327-464  | A0A087SDW0.1 PF0010 | 57.70 | 0.00 |
| TRINITY_A0A0F6YJJ3_9DELTA/331-518 | A0A0F6YJJ3.1 PF1360 | 57.70 | 0.00 |
| TRINITY_A8IZS3_CHLRE/136-240      | A8IZS3.1 PF02338.17 | 57.70 | 0.00 |
| TRINITY_A8JD03_CHLRE/54-312       | A8JD03.1 PF00069.23 | 57.70 | 0.00 |
| TRINITY_D8TYJ0_VOLCA/80-323       | D8TYJ0.1 PF01226.15 | 57.70 | 0.00 |
| TRINITY_D8TIN2_VOLCA/1-163        | D8TIN2.1 PF10436.7; | 57.70 | 0.00 |
| TRINITY_Q01D64_OSTTA/169-411      | Q01D64.1 PF01136.17 | 57.70 | 0.00 |
| TRINITY_D3BKA7_POLPA/113-448      | D3BKA7.1 PF07992.12 | 57.70 | 0.00 |
| TRINITY_E1Z2I0_CHLVA/60-159       | E1Z2I0.1 PF03330.16 | 57.70 | 0.00 |
| TRINITY_J9HT96_9SPIT/260-331      | J9HT96.1 PF02187.15 | 57.70 | 0.00 |
| TRINITY_J9I2Q5_9SPIT/540-610      | J9I2Q5.1 PF14791.4; | 57.70 | 0.00 |
| TRINITY_D8U6I8_VOLCA/629-717      | D8U6I8.1 PF00211.18 | 57.70 | 0.00 |
| TRINITY_A8JDX0_CHLRE/164-273      | A8JDX0.1 PF06859.10 | 57.70 | 0.00 |
| TRINITY_A8JB50_CHLRE/10-265       | A8JB50.1 PF00069.23 | 57.70 | 0.00 |
| TRINITY_A8J1Z2_CHLRE/36-257       | A8J1Z2.1 PF13460.4; | 57.70 | 0.00 |
| TRINITY_I1HKP9_BRADI/1-52         | I1HKP9.1 PF13920.4; | 57.70 | 0.00 |
| TRINITY_B8C531_THAPS/4-166        | B8C531.1 PF00071.20 | 57.70 | 0.00 |
| TRINITY_A8IRK2_CHLRE/356-957      | A8IRK2.1 PF00328.20 | 57.70 | 0.00 |

|                                  |              |            |       |      |
|----------------------------------|--------------|------------|-------|------|
| TRINITY_D8U2N8_VOLCA/151-247     | D8U2N8.1     | PF00211.18 | 57.70 | 0.00 |
| TRINITY_D3BVE1_POLPA/180-887     | D3BVE1.1     | PF00343.18 | 57.70 | 0.00 |
| TRINITY_DYHC2_CHLRE/3624-4332    | Q9SMH5.2     | PF03028.13 | 57.70 | 0.00 |
| TRINITY_D8TZ09_VOLCA/273-394     | D8TZ09.1     | PF01412.16 | 57.70 | 0.00 |
| TRINITY_A8HYE3_CHLRE/960-1164    | A8HYE3.1     | PF07714.15 | 57.70 | 0.00 |
| TRINITY_I0ZAL4_9CHLO/164-311     | I0ZAL4.1     | PF12422.6; | 57.70 | 0.00 |
| TRINITY_M0ZZV1_SOLTU/323-401     | M0ZZV1.1     | PF09409.8; | 57.70 | 0.00 |
| TRINITY_Q22SL3_TETTS/348-483     | Q22SL3.3     | PF01590.24 | 57.70 | 0.00 |
| TRINITY_G0R2T3_ICHMG/22-99       | G0R2T3.1     | PF01282.17 | 57.70 | 0.00 |
| TRINITY_A0C9R8_PARTE/6-92        | A0C9R8.1     | PF08700.9; | 57.70 | 0.00 |
| TRINITY_E1ZSQ4_CHLVA/98-176      | E1ZSQ4.1     | PF01472.18 | 57.70 | 0.00 |
| TRINITY_G0QP08_ICHMG/102-340     | G0QP08.1     | PF00069.23 | 57.60 | 0.00 |
| TRINITY_L8GIS7_ACACA/19-169      | L8GIS7.1     | PF13768.4; | 57.60 | 0.00 |
| TRINITY_Q23K28_TETTS/1-286       | Q23K28.1     | PF02586.12 | 57.60 | 0.00 |
| TRINITY_A0BVN4_PARTE/6-78        | A0BVN4.1     | PF02798.18 | 57.60 | 0.00 |
| TRINITY_I7MFS0_TETTS/260-418     | I7MFS0.1     | PF03367.11 | 57.60 | 0.00 |
| TRINITY_MNMA_ALKMQ/8-359         | A6TUB2.1     | PF03054.14 | 57.60 | 0.00 |
| TRINITY_G0R1C1_ICHMG/28-126      | G0R1C1.1     | PF03645.11 | 57.60 | 0.00 |
| TRINITY_A0CNM0_PARTE/7-99        | A0CNM0.1     | PF00153.25 | 57.60 | 0.00 |
| TRINITY_G0QK50_ICHMG/177-323     | G0QK50.1     | PF05843.12 | 57.60 | 0.00 |
| TRINITY_V9FEZ6_PHYPR/29-201      | V9FEZ6.1     | PF03853.13 | 57.60 | 0.00 |
| TRINITY_G0R2V0_ICHMG/53-221      | G0R2V0.1     | PF04893.15 | 57.60 | 0.00 |
| TRINITY_E9FY13_DAPPU/3-101       | E9FY13.1     | PF03091.13 | 57.60 | 0.00 |
| TRINITY_A0A015JV36_9GLOM/16-189  | A0A015JV36.1 | PF0335     | 57.60 | 0.00 |
| TRINITY_L8GFE5_ACACA/8-113       | L8GFE5.1     | PF01920.18 | 57.60 | 0.00 |
| TRINITY_L8HCT8_ACACA/124-189     | L8HCT8.1     | PF00076.20 | 57.60 | 0.00 |
| TRINITY_L8GRN2_ACACA/498-555     | L8GRN2.1     | PF13884.4; | 57.60 | 0.00 |
| TRINITY_A0A0J8BHR0_BETVU/21-308  | A0A0J8BHR0.1 | PF0024     | 57.60 | 0.00 |
| TRINITY_A0A0M8K8G3_9CHLR/9-154   | A0A0M8K8G3.1 | PF0099     | 57.60 | 0.00 |
| TRINITY_I7MLG9_TETTS/376-605     | I7MLG9.2     | PF00112.21 | 57.60 | 0.00 |
| TRINITY_M2XPD2_GALSU/207-497     | M2XPD2.1     | PF00291.23 | 57.60 | 0.00 |
| TRINITY_F4PK47_DICFS/824-1029    | F4PK47.1     | PF00454.25 | 57.60 | 0.00 |
| TRINITY_I7LV96_TETTS/890-1181    | I7LV96.1     | PF00069.23 | 57.60 | 0.00 |
| TRINITY_C1EDW5_MICSR/3-188       | C1EDW5.1     | PF00625.19 | 57.60 | 0.00 |
| TRINITY_A0A0G4GZH6_9ALVE/419-599 | A0A0G4GZH6.1 | PF0281     | 57.60 | 0.00 |
| TRINITY_G0R0N7_ICHMG/32-549      | G0R0N7.1     | PF01602.18 | 57.60 | 0.00 |
| TRINITY_T1IG80_RHOPR/112-327     | T1IG80.1     | PF00112.21 | 57.60 | 0.00 |
| TRINITY_L8GE59_ACACA/389-656     | L8GE59.1     | PF00702.24 | 57.60 | 0.00 |
| TRINITY_A0A061GVN5_THECC/418-662 | A0A061GVN5.1 | PF0006     | 57.60 | 0.00 |
| TRINITY_F0ZHE3_DICPU/392-643     | F0ZHE3.1     | PF00069.23 | 57.60 | 0.00 |
| TRINITY_A0A0G4GAG3_9ALVE/133-198 | A0A0G4GAG3.1 | PF1392     | 57.60 | 0.00 |
| TRINITY_I7MLL9_TETTS/291-547     | I7MLL9.2     | PF00069.23 | 57.60 | 0.00 |
| TRINITY_G0QQ97_ICHMG/55-152      | G0QQ97.1     | PF12894.5; | 57.60 | 0.00 |
| TRINITY_E1ZCZ4_CHLVA/177-413     | E1ZCZ4.1     | PF13621.4; | 57.60 | 0.00 |
| TRINITY_A0DRB0_PARTE/269-386     | A0DRB0.1     | PF03764.16 | 57.60 | 0.00 |
| TRINITY_A0A0D2WKM9_CAPO3/329-594 | A0A0D2WKM9.1 | PF0048     | 57.60 | 0.00 |
| TRINITY_A8JF65_CHLRE/335-864     | A8JF65.1     | PF05691.10 | 57.60 | 0.00 |
| TRINITY_D8U9U1_VOLCA/4-89        | D8U9U1.1     | PF02290.13 | 57.60 | 0.00 |
| TRINITY_A8HV44_CHLRE/53-401      | A8HV44.1     | PF00294.22 | 57.60 | 0.00 |
| TRINITY_D8UFI3_VOLCA/48-224      | D8UFI3.1     | PF08660.9; | 57.60 | 0.00 |
| TRINITY_C1MGE7_MICPC/335-709     | C1MGE7.1     | PF01433.18 | 57.60 | 0.00 |
| TRINITY_W1PKI2_AMBTC/46-184      | W1PKI2.1     | PF01743.18 | 57.60 | 0.00 |
| TRINITY_A8IVN6_CHLRE/8-192       | A8IVN6.1     | PF06552.10 | 57.60 | 0.00 |
| TRINITY_L8GQY9_ACACA/530-672     | L8GQY9.1     | PF00620.25 | 57.60 | 0.00 |
| TRINITY_I1NGX0_SOYBN/765-943     | I1NGX0.2     | PF05063.12 | 57.60 | 0.00 |
| TRINITY_D8TJ88_VOLCA/347-405     | D8TJ88.1     | PF08711.9; | 57.60 | 0.00 |
| TRINITY_A8HZ59_CHLRE/31-292      | A8HZ59.1     | PF01697.25 | 57.60 | 0.00 |
| TRINITY_Q23YR9_TETTS/7-439       | Q23YR9.1     | PF00171.20 | 57.60 | 0.00 |
| TRINITY_A8HYK1_CHLRE/19-314      | A8HYK1.1     | PF15294.4; | 57.60 | 0.00 |
| TRINITY_D8TH36_VOLCA/208-334     | D8TH36.1     | PF01980.14 | 57.60 | 0.00 |
| TRINITY_K1PUG4_CRAGI/1381-1529   | K1PUG4.1     | PF00005.25 | 57.60 | 0.00 |

|                                  |                      |       |      |
|----------------------------------|----------------------|-------|------|
| TRINITY_D3BDQ8_POLPA/12-329      | D3BDQ8.1 PF00225.21  | 57.60 | 0.00 |
| TRINITY_H3B651_LATCH/318-461     | H3B651.1 PF00388.17  | 57.60 | 0.00 |
| TRINITY_A8IZM6_CHLRE/14-437      | A8IZM6.1 PF01593.22  | 57.60 | 0.00 |
| TRINITY_I0YYK1_9CHLO/49-324      | I0YYK1.1 PF00664.21  | 57.60 | 0.00 |
| TRINITY_F0VD63_NEOCL/195-288     | F0VD63.1 PF01209.16  | 57.60 | 0.00 |
| TRINITY_B7PEW3_IXOSC/119-180     | B7PEW3.1 PF00226.29  | 57.60 | 0.00 |
| TRINITY_D8UK61_VOLCA/227-395     | D8UK61.1 PF04832.10  | 57.60 | 0.00 |
| TRINITY_T1ELD1_HELRO/10-231      | T1ELD1.1 PF00244.18  | 57.50 | 0.00 |
| TRINITY_D2W2M3_NAEGR/33-71       | D2W2M3.1 PF00172.16  | 57.50 | 0.00 |
| TRINITY_Q241V8_TETTS/718-905     | Q241V8.2 PF00613.18  | 57.50 | 0.00 |
| TRINITY_A0A0G4EYE2_9ALVE/19-94   | A0A0G4EYE2.1 PF0093  | 57.50 | 0.00 |
| TRINITY_L8HFE9_ACACA/3-181       | L8HFE9.1 PF13236.4;  | 57.50 | 0.00 |
| TRINITY_J9I4X4_9SPIT/1061-1316   | J9I4X4.1 PF00069.23  | 57.50 | 0.00 |
| TRINITY_A0A0N4XCC7_NIPBR/3-253   | A0A0N4XCC7.1 PF0037  | 57.50 | 0.00 |
| TRINITY_F2U7V2_SALR5/92-306      | F2U7V2.1 PF01786.15  | 57.50 | 0.00 |
| TRINITY_M0RJ8C8_MUSAM/108-180    | M0RJ8C8.1 PF00076.20 | 57.50 | 0.00 |
| TRINITY_C6SWC1_SOYBN/9-121       | C6SWC1.1 PF01984.18  | 57.50 | 0.00 |
| TRINITY_D3BLJ5_POLPA/1315-1446   | D3BLJ5.1 PF08477.11  | 57.50 | 0.00 |
| TRINITY_H8N2F2_CORCM/104-196     | H8N2F2.1 PF13640.4;  | 57.50 | 0.00 |
| TRINITY_MYLKB_DICDI/20-278       | Q86AD7.1 PF00069.23  | 57.50 | 0.00 |
| TRINITY_A0A0G3A017_9DELT/39-267  | A0A0G3A017.1 PF0048  | 57.50 | 0.00 |
| TRINITY_L8H2S3_ACACA/18-72       | L8H2S3.1 PF14813.4;  | 57.50 | 0.00 |
| TRINITY_F6HT97_VITVI/91-430      | F6HT97.1 PF01546.26  | 57.50 | 0.00 |
| TRINITY_A9UR38_MONBE/5-142       | A9UR38.1 PF00179.24  | 57.50 | 0.00 |
| TRINITY_H2A2_PICGU/4-90          | A5DJJ2.1 PF00125.22  | 57.50 | 0.00 |
| TRINITY_J9G2U8_9SPIT/24-114      | J9G2U8.1 PF00153.25  | 57.50 | 0.00 |
| TRINITY_D3B4M5_POLPA/129-174     | D3B4M5.1 PF09360.8;  | 57.50 | 0.00 |
| TRINITY_I7M1V6_TETTS/314-533     | I7M1V6.1 PF07002.14  | 57.50 | 0.00 |
| TRINITY_D8TWK4_VOLCA/491-577     | D8TWK4.1 PF04232.10  | 57.50 | 0.00 |
| TRINITY_A0A072NXX1_9EURO/5-192   | A0A072NXX1.1 PF0010  | 57.50 | 0.00 |
| TRINITY_I0YW85_9CHLO/2-252       | I0YW85.1 PF00218.19  | 57.50 | 0.00 |
| TRINITY_A8JGM1_CHLRE/218-338     | A8JGM1.1 PF00581.18  | 57.50 | 0.00 |
| TRINITY_D8TMB4_VOLCA/171-394     | D8TMB4.1 PF16953.3;  | 57.50 | 0.00 |
| TRINITY_A0A087SPY8_AUXPR/251-525 | A0A087SPY8.1 PF0291  | 57.50 | 0.00 |
| TRINITY_I0Z9F9_9CHLO/439-555     | I0Z9F9.1 PF05064.11  | 57.50 | 0.00 |
| TRINITY_B4H991_DROPE/139-212     | B4H991.1 PF12861.5;  | 57.50 | 0.00 |
| TRINITY_F1A4V5_DICPU/233-486     | F1A4V5.1 PF07714.15  | 57.50 | 0.00 |
| TRINITY_G0R1C4_ICHMG/49-235      | G0R1C4.1 PF10211.7;  | 57.50 | 0.00 |
| TRINITY_H2CAX0_9LEPT/178-396     | H2CAX0.1 PF00120.22  | 57.50 | 0.00 |
| TRINITY_A0A0D9MX36_ASPFL/286-390 | A0A0D9MX36.1 PF0030  | 57.50 | 0.00 |
| TRINITY_D8TIB7_VOLCA/36-439      | D8TIB7.1 PF01150.15  | 57.50 | 0.00 |
| TRINITY_A8JGZ8_CHLRE/33-118      | A8JGZ8.1 PF03795.12  | 57.50 | 0.00 |
| TRINITY_A0DSS8_PARTE/4-75        | A0DSS8.1 PF15906.3;  | 57.50 | 0.00 |
| TRINITY_D8TKU7_VOLCA/132-339     | D8TKU7.1 PF00300.20  | 57.50 | 0.00 |
| TRINITY_D8U4A8_VOLCA/140-199     | D8U4A8.1 PF00137.19  | 57.50 | 0.00 |
| TRINITY_MYLKB_DICDI/20-278       | Q86AD7.1 PF00069.23  | 57.50 | 0.00 |
| TRINITY_D8TMG1_VOLCA/789-869     | D8TMG1.1 PF10431.7;  | 57.50 | 0.00 |
| TRINITY_E4UN52_ARTGP/42-227      | E4UN52.1 PF04055.19  | 57.50 | 0.00 |
| TRINITY_Q23JD9_TETTS/681-821     | Q23JD9.3 PF07718.10  | 57.50 | 0.00 |
| TRINITY_A0A087ST35_AUXPR/103-356 | A0A087ST35.1 PF1346  | 57.50 | 0.00 |
| TRINITY_H3H405_PHYRM/37-151      | H3H405.1 PF00665.24  | 57.50 | 0.00 |
| TRINITY_I7MHV9_TETTS/142-248     | I7MHV9.2 PF04857.18  | 57.50 | 0.00 |
| TRINITY_D8TUT9_VOLCA/1-195       | D8TUT9.1 PF03159.16  | 57.50 | 0.00 |
| TRINITY_E1ZG54_CHLVA/38-210      | E1ZG54.1 PF00856.26  | 57.50 | 0.00 |
| TRINITY_V4TVT0_9ROSI/84-377      | V4TVT0.1 PF05185.14  | 57.50 | 0.00 |
| TRINITY_W2SCP1_9EURO/803-1296    | W2SCP1.1 PF02463.17  | 57.50 | 0.00 |
| TRINITY_D8U9I9_VOLCA/104-190     | D8U9I9.1 PF04719.12  | 57.50 | 0.00 |
| TRINITY_I7LXR5_TETTS/227-312     | I7LXR5.1 PF08542.9;  | 57.50 | 0.00 |
| TRINITY_F2ACK3_RHIET/646-719     | F2ACK3.1 PF00575.21  | 57.50 | 0.00 |
| TRINITY_A0D750_PARTE/381-527     | A0D750.1 PF03031.16  | 57.50 | 0.00 |
| TRINITY_G3Q7G3_GASAC/183-328     | G3Q7G3.1 PF00856.26  | 57.40 | 0.00 |

|                                  |                     |       |      |
|----------------------------------|---------------------|-------|------|
| TRINITY_C5LTF4_PERM5/86-148      | C5LTF4.1 PF13499.4; | 57.40 | 0.00 |
| TRINITY_D3AWY3_POLPA/164-210     | D3AWY3.1 PF01585.21 | 57.40 | 0.00 |
| TRINITY_A0A0G4G959_9ALVE/6-133   | A0A0G4G959.1 PF0111 | 57.40 | 0.00 |
| TRINITY_M1LXF0_9PROT/150-600     | M1LXF0.1 PF01131.18 | 57.40 | 0.00 |
| TRINITY_Q7QIH6_ANOGA/17-126      | Q7QIH6.3 PF00651.29 | 57.40 | 0.00 |
| TRINITY_K1P9S7_CRAGI/54-229      | K1P9S7.1 PF04427.16 | 57.40 | 0.00 |
| TRINITY_I7M0N6_TETTS/161-343     | I7M0N6.1 PF04678.11 | 57.40 | 0.00 |
| TRINITY_A0A0C2XP57_BACBA/17-186  | A0A0C2XP57.1 PF0088 | 57.40 | 0.00 |
| TRINITY_A0A0M9DYW8_9DELT/250-366 | A0A0M9DYW8.1 PF0251 | 57.40 | 0.00 |
| TRINITY_B9SNT8_RICCO/1030-1139   | B9SNT8.1 PF00005.25 | 57.40 | 0.00 |
| TRINITY_A0A0A0LKP7_CUCSA/67-317  | A0A0A0LKP7.1 PF0515 | 57.40 | 0.00 |
| TRINITY_A0A068RJJ4_9FUNG/154-202 | A0A068RJJ4.1 PF1598 | 57.40 | 0.00 |
| TRINITY_A0A0D2WWS7_CAPO3/58-459  | A0A0D2WWS7.1 PF0557 | 57.40 | 0.00 |
| TRINITY_A0A067CCZ7_SAPPC/230-458 | A0A067CCZ7.1 PF0170 | 57.40 | 0.00 |
| TRINITY_Q233Z3_TETTS/947-1211    | Q233Z3.2 PF00069.23 | 57.40 | 0.00 |
| TRINITY_I1FL82_AMPQE/474-536     | I1FL82.1 PF13432.4; | 57.40 | 0.00 |
| TRINITY_G7DWQ1_MIXOS/278-403     | G7DWQ1.1 PF00004.27 | 57.40 | 0.00 |
| TRINITY_G0QUI0_ICHMG/278-349     | G0QUI0.1 PF00498.24 | 57.40 | 0.00 |
| TRINITY_A8JFJ3_CHLRE/162-254     | A8JFJ3.1 PF05684.10 | 57.40 | 0.00 |
| TRINITY_A9TK03_PHYPA/460-553     | A9TK03.1 PF14578.4; | 57.40 | 0.00 |
| TRINITY_R4GEK9_DANRE/100-220     | R4GEK9.1 PF01980.14 | 57.40 | 0.00 |
| TRINITY_Q239R2_TETTS/10-57       | Q239R2.2 PF00319.16 | 57.40 | 0.00 |
| TRINITY_A8IDR1_CHLRE/59-159      | A8IDR1.1 PF03330.16 | 57.40 | 0.00 |
| TRINITY_E1Z307_CHLVA/23-382      | E1Z307.1 PF01231.16 | 57.40 | 0.00 |
| TRINITY_A8HRZ0_CHLRE/47-116      | A8HRZ0.1 PF00538.17 | 57.40 | 0.00 |
| TRINITY_C5XSH9_SORBI/8-261       | C5XSH9.1 PF05116.11 | 57.40 | 0.00 |
| TRINITY_D8TYS8_VOLCA/1-137       | D8TYS8.1 PF02527.13 | 57.40 | 0.00 |
| TRINITY_L8HGY3_ACACA/42-251      | L8HGY3.1 PF05023.12 | 57.40 | 0.00 |
| TRINITY_Q22MB3_TETTS/37-521      | Q22MB3.3 PF00118.22 | 57.40 | 0.00 |
| TRINITY_D8TRJ9_VOLCA/14-234      | D8TRJ9.1 PF04012.10 | 57.40 | 0.00 |
| TRINITY_A0A0J8D2W5_BETVU/290-546 | A0A0J8D2W5.1 PF0171 | 57.40 | 0.00 |
| TRINITY_E0W224_PEDHC/4-85        | E0W224.1 PF12796.5; | 57.40 | 0.00 |
| TRINITY_G0QPV5_ICHMG/91-228      | G0QPV5.1 PF14671.4; | 57.40 | 0.00 |
| TRINITY_D3BT40_POLPA/479-585     | D3BT40.1 PF00307.29 | 57.40 | 0.00 |
| TRINITY_EPN_DICDI/19-141         | Q54EH1.1 PF01417.18 | 57.40 | 0.00 |
| TRINITY_E4V3H0_ARTGP/597-670     | E4V3H0.1 PF10405.7; | 57.40 | 0.00 |
| TRINITY_D8UFI1_VOLCA/32-328      | D8UFI1.1 PF00246.22 | 57.40 | 0.00 |
| TRINITY_D8UDF3_VOLCA/894-1029    | D8UDF3.1 PF13472.4; | 57.40 | 0.00 |
| TRINITY_Q8YRK3_NOSS1/427-682     | Q8YRK3.1 PF00425.16 | 57.40 | 0.00 |
| TRINITY_D8UH56_VOLCA/268-335     | D8UH56.1 PF00347.21 | 57.40 | 0.00 |
| TRINITY_G7Y450_CLOSI/319-372     | G7Y450.1 PF00400.30 | 57.40 | 0.00 |
| TRINITY_A8I3I6_CHLRE/67-485      | A8I3I6.1 PF01266.22 | 57.40 | 0.00 |
| TRINITY_A8J8G2_CHLRE/1-322       | A8J8G2.1 PF07690.14 | 57.40 | 0.00 |
| TRINITY_A8J3P3_CHLRE/1-295       | A8J3P3.1 PF08449.9; | 57.40 | 0.00 |
| TRINITY_D8TNW8_VOLCA/29-302      | D8TNW8.1 PF01073.17 | 57.40 | 0.00 |
| TRINITY_F2UBE5_SALR5/5-166       | F2UBE5.1 PF00071.20 | 57.40 | 0.00 |
| TRINITY_I7LV68_TETTS/201-381     | I7LV68.1 PF00534.18 | 57.40 | 0.00 |
| TRINITY_Q23PY2_TETTS/45-118      | Q23PY2.2 PF02798.18 | 57.40 | 0.00 |
| TRINITY_I0ZAK7_9CHLO/38-179      | I0ZAK7.1 PF00561.18 | 57.40 | 0.00 |
| TRINITY_Q23FM4_TETTS/126-440     | Q23FM4.1 PF00009.25 | 57.40 | 0.00 |
| TRINITY_D8U7I1_VOLCA/1020-1138   | D8U7I1.1 PF02466.17 | 57.40 | 0.00 |
| TRINITY_A0A067JC81_JATCU/108-271 | A0A067JC81.1 PF0176 | 57.40 | 0.00 |
| TRINITY_Q23RK4_TETTS/1793-2067   | Q23RK4.2 PF00069.23 | 57.40 | 0.00 |
| TRINITY_A8JFK2_CHLRE/13-113      | A8JFK2.1 PF01738.16 | 57.40 | 0.00 |
| TRINITY_I7M1M3_TETTS/515-650     | I7M1M3.2 PF00005.25 | 57.40 | 0.00 |
| TRINITY_D8U5A8_VOLCA/79-306      | D8U5A8.1 PF00069.23 | 57.40 | 0.00 |
| TRINITY_F4PQQ2_DICFS/9-262       | F4PQQ2.1 PF00069.23 | 57.40 | 0.00 |
| TRINITY_M0TYW1_MUSAM/165-261     | M0TYW1.1 PF08241.10 | 57.40 | 0.00 |
| TRINITY_DNAJ_LACRD/5-66          | A5VJE8.1 PF00226.29 | 57.40 | 0.00 |
| TRINITY_E1Z6X5_CHLVA/472-776     | E1Z6X5.1 PF07690.14 | 57.40 | 0.00 |
| TRINITY_D7G7W1_ECTSI/280-355     | D7G7W1.1 PF14437.4; | 57.40 | 0.00 |

|                                  |              |            |       |      |
|----------------------------------|--------------|------------|-------|------|
| TRINITY_F7AX64_CALJA/58-219      | F7AX64.1     | PF00071.20 | 57.40 | 0.00 |
| TRINITY_D8TJV1_VOLCA/246-390     | D8TJV1.1     | PF00271.29 | 57.40 | 0.00 |
| TRINITY_D8TTV8_VOLCA/81-324      | D8TTV8.1     | PF00233.17 | 57.40 | 0.00 |
| TRINITY_G8Y0G9_PICSO/1-94        | G8Y0G9.1     | PF01199.16 | 57.40 | 0.00 |
| TRINITY_I7LXC9_TETTS/121-511     | I7LXC9.1     | PF00155.19 | 57.30 | 0.00 |
| TRINITY_A0A0F6YLI4_9DELT/74-167  | A0A0F6YLI4.1 | PF0255     | 57.30 | 0.00 |
| TRINITY_M5W4R7_PRUPE/93-315      | M5W4R7.1     | PF01255.17 | 57.30 | 0.00 |
| TRINITY_A0A0G4FZ83_9ALVE/13-108  | A0A0G4FZ83.1 | PF0016     | 57.30 | 0.00 |
| TRINITY_G0QVG9_ICHMG/32-198      | G0QVG9.1     | PF00071.20 | 57.30 | 0.00 |
| TRINITY_L8HET6_ACACA/43-369      | L8HET6.1     | PF07992.12 | 57.30 | 0.00 |
| TRINITY_J9HZN8_9SPIT/420-538     | J9HZN8.1     | PF00581.18 | 57.30 | 0.00 |
| TRINITY_H2BU57_9FLAO/15-223      | H2BU57.1     | PF00106.23 | 57.30 | 0.00 |
| TRINITY_A0A067QDS9_9HOMO/615-750 | A0A067QDS9.1 | PF0000     | 57.30 | 0.00 |
| TRINITY_F0ZD36_DICPU/3232-3570   | F0ZD36.1     | PF12777.5; | 57.30 | 0.00 |
| TRINITY_A6C3U5_9PLAN/115-458     | A6C3U5.1     | PF00152.18 | 57.30 | 0.00 |
| TRINITY_M7XC99_RHOT1/988-1131    | M7XC99.1     | PF12842.5; | 57.30 | 0.00 |
| TRINITY_G0R213_ICHMG/186-430     | G0R213.1     | PF01433.18 | 57.30 | 0.00 |
| TRINITY_I7M0N5_TETTS/125-295     | I7M0N5.1     | PF00092.26 | 57.30 | 0.00 |
| TRINITY_A0DJ78_PARTE/1961-2231   | A0DJ78.1     | PF12775.5; | 57.30 | 0.00 |
| TRINITY_A7RV33_NEMVE/13-133      | A7RV33.1     | PF01124.16 | 57.30 | 0.00 |
| TRINITY_F4PVW8_DICFS/49-173      | F4PVW8.1     | PF00782.18 | 57.30 | 0.00 |
| TRINITY_A8J6L3_CHLRE/82-185      | A8J6L3.1     | PF00355.24 | 57.30 | 0.00 |
| TRINITY_A0A015JAT3_9GLOM/292-422 | A0A015JAT3.1 | PF0000     | 57.30 | 0.00 |
| TRINITY_D8TI00_VOLCA/18-121      | D8TI00.1     | PF00466.18 | 57.30 | 0.00 |
| TRINITY_A0A0G0IMV6_9BACT/8-139   | A0A0G0IMV6.1 | PF0146     | 57.30 | 0.00 |
| TRINITY_E1ZR28_CHLVA/100-466     | E1ZR28.1     | PF02906.12 | 57.30 | 0.00 |
| TRINITY_F2UFQ3_SALR5/2479-2561   | F2UFQ3.1     | PF05406.13 | 57.30 | 0.00 |
| TRINITY_F2UGU8_SALR5/3442-4146   | F2UGU8.1     | PF03028.13 | 57.30 | 0.00 |
| TRINITY_I7LT49_TETTS/89-213      | I7LT49.2     | PF01926.21 | 57.30 | 0.00 |
| TRINITY_D3BR25_POLPA/200-289     | D3BR25.1     | PF00153.25 | 57.30 | 0.00 |
| TRINITY_A0EFQ7_PARTE/75-330      | A0EFQ7.1     | PF00069.23 | 57.30 | 0.00 |
| TRINITY_E1ZC52_CHLVA/15-403      | E1ZC52.1     | PF01433.18 | 57.30 | 0.00 |
| TRINITY_L8GTQ9_ACACA/202-506     | L8GTQ9.1     | PF00443.27 | 57.30 | 0.00 |
| TRINITY_D8U6T6_VOLCA/1-119       | D8U6T6.1     | PF12796.5; | 57.30 | 0.00 |
| TRINITY_D2VMS7_NAEGR/158-405     | D2VMS7.1     | PF00756.18 | 57.30 | 0.00 |
| TRINITY_E1ZN16_CHLVA/259-441     | E1ZN16.1     | PF05193.19 | 57.30 | 0.00 |
| TRINITY_D8UIH0_VOLCA/82-265      | D8UIH0.1     | PF13506.4; | 57.30 | 0.00 |
| TRINITY_L8H3W5_ACACA/971-1093    | L8H3W5.1     | PF00271.29 | 57.30 | 0.00 |
| TRINITY_A8IDU2_CHLRE/877-1024    | A8IDU2.1     | PF03330.16 | 57.30 | 0.00 |
| TRINITY_D8TJR4_VOLCA/503-639     | D8TJR4.1     | PF00892.18 | 57.30 | 0.00 |
| TRINITY_D8U2G1_VOLCA/130-249     | D8U2G1.1     | PF01553.19 | 57.30 | 0.00 |
| TRINITY_A0CYK6_PARTE/20-129      | A0CYK6.1     | PF00255.17 | 57.30 | 0.00 |
| TRINITY_A9TT62_PHYPA/30-132      | A9TT62.1     | PF00355.24 | 57.30 | 0.00 |
| TRINITY_D8U0R7_VOLCA/48-409      | D8U0R7.1     | PF07690.14 | 57.30 | 0.00 |
| TRINITY_W4YY43_STRPU/1-194       | W4YY43.1     | PF13087.4; | 57.30 | 0.00 |
| TRINITY_A0A087SLT3_AUXPR/8-175   | A0A087SLT3.1 | PF0398     | 57.30 | 0.00 |
| TRINITY_Q235L2_TETTS/74-150      | Q235L2.1     | PF03134.17 | 57.30 | 0.00 |
| TRINITY_A0DN21_PARTE/1115-1266   | A0DN21.1     | PF00005.25 | 57.30 | 0.00 |
| TRINITY_A8I6Q2_CHLRE/10-242      | A8I6Q2.1     | PF08392.10 | 57.30 | 0.00 |
| TRINITY_V4B0M8_LOTGI/419-833     | V4B0M8.1     | PF00702.24 | 57.30 | 0.00 |
| TRINITY_M1MTR0_9CLOT/74-285      | M1MTR0.1     | PF07859.11 | 57.30 | 0.00 |
| TRINITY_I0Z0T0_9CHLO/131-282     | I0Z0T0.1     | PF00588.17 | 57.30 | 0.00 |
| TRINITY_J9HVL7_9SPIT/73-307      | J9HVL7.1     | PF01674.16 | 57.30 | 0.00 |
| TRINITY_I0YK42_9CHLO/4-285       | I0YK42.1     | PF00069.23 | 57.30 | 0.00 |
| TRINITY_I7M699_TETTS/80-309      | I7M699.1     | PF00557.22 | 57.20 | 0.00 |
| TRINITY_L8H2Q9_ACACA/7-182       | L8H2Q9.1     | PF00071.20 | 57.20 | 0.00 |
| TRINITY_A5KCF1_PLAVS/5-177       | A5KCF1.1     | PF00025.19 | 57.20 | 0.00 |
| TRINITY_D5EN24_CORAD/1-160       | D5EN24.1     | PF01408.20 | 57.20 | 0.00 |
| TRINITY_D8TSN5_VOLCA/38-217      | D8TSN5.1     | PF03798.14 | 57.20 | 0.00 |
| TRINITY_D8UJW0_VOLCA/85-273      | D8UJW0.1     | PF07714.15 | 57.20 | 0.00 |
| TRINITY_G0R6H5_ICHMG/16-510      | G0R6H5.1     | PF00478.23 | 57.20 | 0.00 |

|                                    |              |            |       |      |
|------------------------------------|--------------|------------|-------|------|
| TRINITY_D3BB15_POLPA/229-481       | D3BB15.1     | PF00348.15 | 57.20 | 0.00 |
| TRINITY_L8H2S4_ACACA/76-413        | L8H2S4.1     | PF08627.8; | 57.20 | 0.00 |
| TRINITY_G0R409_ICHMG/421-565       | G0R409.1     | PF00005.25 | 57.20 | 0.00 |
| TRINITY_B8HSK0_CYAP4/26-176        | B8HSK0.1     | PF02481.13 | 57.20 | 0.00 |
| TRINITY_E1ZLF7_CHLVA/28-387        | E1ZLF7.1     | PF16499.3; | 57.20 | 0.00 |
| TRINITY_I0YIQ3_9CHLO/3-277         | I0YIQ3.1     | PF00370.19 | 57.20 | 0.00 |
| TRINITY_F4NRF8_BATDJ/944-1152      | F4NRF8.1     | PF05362.11 | 57.20 | 0.00 |
| TRINITY_D8TSE2_VOLCA/53-220        | D8TSE2.1     | PF08819.9; | 57.20 | 0.00 |
| TRINITY_A0A098VY53_9MICR/66-218    | A0A098VY53.1 | PF0000     | 57.20 | 0.00 |
| TRINITY_A0A0K9PUS7_ZOSMR/4-377     | A0A0K9PUS7.1 | PF0002     | 57.20 | 0.00 |
| TRINITY_A0A0G4J1G0_PLABS/106-352   | A0A0G4J1G0.1 | PF0012     | 57.20 | 0.00 |
| TRINITY_D8UAB7_VOLCA/60-464        | D8UAB7.1     | PF00450.20 | 57.20 | 0.00 |
| TRINITY_L8H3Y8_ACACA/315-570       | L8H3Y8.1     | PF00069.23 | 57.20 | 0.00 |
| TRINITY_A8IL75_CHLRE/24-301        | A8IL75.1     | PF06454.9; | 57.20 | 0.00 |
| TRINITY_J9JJ17_ACYPI/10-171        | J9JJ17.1     | PF00071.20 | 57.20 | 0.00 |
| TRINITY_G0QP95_ICHMG/6-183         | G0QP95.1     | PF05677.10 | 57.10 | 0.00 |
| TRINITY_A0CY63_PARTE/292-365       | A0CY63.1     | PF00027.27 | 57.10 | 0.00 |
| TRINITY_W2PTU3_PHYPN/17-113        | W2PTU3.1     | PF00708.16 | 57.10 | 0.00 |
| TRINITY_A0A0G4GH78_9ALVE/276-543   | A0A0G4GH78.1 | PF0120     | 57.10 | 0.00 |
| TRINITY_S7QMW6_GLOTA/32-147        | S7QMW6.1     | PF08240.10 | 57.10 | 0.00 |
| TRINITY_A0A0E3UWF6_9BACT/52-529    | A0A0E3UWF6.1 | PF0120     | 57.10 | 0.00 |
| TRINITY_A0A078B4M6_STYLE/289-456   | A0A078B4M6.1 | PF0053     | 57.10 | 0.00 |
| TRINITY_Q3SDK9_PARTE/13-174        | Q3SDK9.1     | PF00071.20 | 57.10 | 0.00 |
| TRINITY_E6X099_NITSE/253-371       | E6X099.1     | PF02518.24 | 57.10 | 0.00 |
| TRINITY_J9EG36_9SPIT/111-295       | J9EG36.1     | PF00270.27 | 57.10 | 0.00 |
| TRINITY_A0A068RVW5_9FUNG/1289-1437 | A0A068RVW5.1 | PF0000     | 57.10 | 0.00 |
| TRINITY_L8H823_ACACA/184-369       | L8H823.1     | PF07065.12 | 57.10 | 0.00 |
| TRINITY_B4VZR7_9CYAN/533-655       | B4VZR7.1     | PF02518.24 | 57.10 | 0.00 |
| TRINITY_COAE_BACAN/3-184           | Q6HSG2.1     | PF01121.18 | 57.10 | 0.00 |
| TRINITY_A0EHM3_PARTE/2237-2575     | A0EHM3.1     | PF12777.5; | 57.10 | 0.00 |
| TRINITY_F0SM98_RUBBR/33-177        | F0SM98.1     | PF00160.19 | 57.10 | 0.00 |
| TRINITY_G0QW14_ICHMG/165-434       | G0QW14.1     | PF00928.19 | 57.10 | 0.00 |
| TRINITY_G0R1C5_ICHMG/3-376         | G0R1C5.1     | PF00022.17 | 57.10 | 0.00 |
| TRINITY_I7ME97_TETTS/54-318        | I7ME97.1     | PF00069.23 | 57.10 | 0.00 |
| TRINITY_A0A077C591_9RICK/4-61      | A0A077C591.1 | PF0820     | 57.10 | 0.00 |
| TRINITY_G0QJL0_ICHMG/3-152         | G0QJL0.1     | PF06602.12 | 57.10 | 0.00 |
| TRINITY_A0A078AVM5_STYLE/320-363   | A0A078AVM5.1 | PF0056     | 57.10 | 0.00 |
| TRINITY_S7RV90_GLOTA/2-92          | S7RV90.1     | PF00153.25 | 57.10 | 0.00 |
| TRINITY_TALA_DICDI/163-275         | P0CE94.1     | PF00373.16 | 57.10 | 0.00 |
| TRINITY_G0R099_ICHMG/58-319        | G0R099.1     | PF03034.13 | 57.10 | 0.00 |
| TRINITY_I7LW20_TETTS/148-308       | I7LW20.2     | PF03031.16 | 57.10 | 0.00 |
| TRINITY_L8H642_ACACA/613-682       | L8H642.1     | PF01480.15 | 57.10 | 0.00 |
| TRINITY_I2F868_9BACT/3-157         | I2F868.1     | PF01327.19 | 57.10 | 0.00 |
| TRINITY_A0DTP8_PARTE/77-166        | A0DTP8.1     | PF16531.3; | 57.10 | 0.00 |
| TRINITY_A0A094F571_9PEZI/310-422   | A0A094F571.1 | PF0066     | 57.10 | 0.00 |
| TRINITY_L8GUB9_ACACA/284-439       | L8GUB9.1     | PF13768.4; | 57.10 | 0.00 |
| TRINITY_Q1GRJ8_SPHAL/1-286         | Q1GRJ8.1     | PF00579.23 | 57.10 | 0.00 |
| TRINITY_A0D1K9_PARTE/24-590        | A0D1K9.1     | PF01602.18 | 57.10 | 0.00 |
| TRINITY_A3XP40_LEEBM/28-145        | A3XP40.1     | PF08240.10 | 57.10 | 0.00 |
| TRINITY_I7MMA1_TETTS/1281-1428     | I7MMA1.2     | PF00005.25 | 57.10 | 0.00 |
| TRINITY_A0A0N4UEW4_DRAME/61-102    | A0A0N4UEW4.1 | PF1363     | 57.10 | 0.00 |
| TRINITY_G0QNE2_ICHMG/99-359        | G0QNE2.1     | PF00069.23 | 57.10 | 0.00 |
| TRINITY_A4VD54_TETTS/1086-1248     | A4VD54.1     | PF00005.25 | 57.10 | 0.00 |
| TRINITY_G0QVI6_ICHMG/266-473       | G0QVI6.1     | PF03133.13 | 57.10 | 0.00 |
| TRINITY_A0A098EUG0_9BACI/4-122     | A0A098EUG0.1 | PF1323     | 57.10 | 0.00 |
| TRINITY_I7M198_TETTS/52-316        | I7M198.2     | PF00069.23 | 57.10 | 0.00 |
| TRINITY_I0Z997_9CHLO/17-136        | I0Z997.1     | PF13671.4; | 57.10 | 0.00 |
| TRINITY_U9UB77_RHIID/104-402       | U9UB77.1     | PF01866.15 | 57.10 | 0.00 |
| TRINITY_Q53QL2_ORYSJ/1085-1197     | Q53QL2.1     | PF00665.24 | 57.10 | 0.00 |
| TRINITY_D8UBS2_VOLCA/5-73          | D8UBS2.1     | PF13921.4; | 57.10 | 0.00 |
| TRINITY_A0D8S8_PARTE/638-896       | A0D8S8.1     | PF07714.15 | 57.10 | 0.00 |

|                                    |                     |       |      |
|------------------------------------|---------------------|-------|------|
| TRINITY_F0ZJ03_DICPU/494-612       | F0ZJ03.1 PF01412.16 | 57.10 | 0.00 |
| TRINITY_F2U3N6_SALR5/48-132        | F2U3N6.1 PF08240.10 | 57.10 | 0.00 |
| TRINITY_Q22Y34_TETTS/17-463        | Q22Y34.1 PF02127.13 | 57.10 | 0.00 |
| TRINITY_D8TSL6_VOLCA/36-126        | D8TSL6.1 PF01241.16 | 57.10 | 0.00 |
| TRINITY_W5MWV1_LEPOC/272-471       | W5MWV1.1 PF13901.4; | 57.10 | 0.00 |
| TRINITY_A0A0K9PHI9_ZOSMR/94-282    | A0A0K9PHI9.1 PF0975 | 57.10 | 0.00 |
| TRINITY_C6XKL0_HIRBI/7-61          | C6XKL0.1 PF16177.3; | 57.10 | 0.00 |
| TRINITY_A4RTE2_OSTLU/31-370        | A4RTE2.1 PF04997.10 | 57.10 | 0.00 |
| TRINITY_A0EEN4_PARTE/1565-1920     | A0EEN4.1 PF12777.5; | 57.10 | 0.00 |
| TRINITY_A0BDU6_PARTE/323-596       | A0BDU6.1 PF02913.17 | 57.10 | 0.00 |
| TRINITY_Q23A17_TETTS/139-248       | Q23A17.1 PF00168.28 | 57.10 | 0.00 |
| TRINITY_L8GN02_ACACA/559-628       | L8GN02.1 PF00017.22 | 57.10 | 0.00 |
| TRINITY_Q23GZ7_TETTS/211-419       | Q23GZ7.2 PF00112.21 | 57.10 | 0.00 |
| TRINITY_D8TUC1_VOLCA/8-180         | D8TUC1.1 PF00566.16 | 57.10 | 0.00 |
| TRINITY_D8U9Z0_VOLCA/954-1167      | D8U9Z0.1 PF05153.13 | 57.10 | 0.00 |
| TRINITY_M0WFQ1_HORVD/44-111        | M0WFQ1.1 PF16209.3; | 57.10 | 0.00 |
| TRINITY_A8J7H2_CHLRE/1264-1437     | A8J7H2.1 PF07228.10 | 57.10 | 0.00 |
| TRINITY_Q5KHY4_CRYNJ/528-577       | Q5KHY4.1 PF14604.4; | 57.10 | 0.00 |
| TRINITY_D8SVI8_SELML/691-882       | D8SVI8.1 PF00488.19 | 57.10 | 0.00 |
| TRINITY_A0A024TF60_9STRA/347-446   | A0A024TF60.1 PF0016 | 57.10 | 0.00 |
| TRINITY_E1ZKX2_CHLVA/8-198         | E1ZKX2.1 PF13460.4; | 57.10 | 0.00 |
| TRINITY_A0A0A1T3C9_9HYPO/440-598   | A0A0A1T3C9.1 PF0000 | 57.10 | 0.00 |
| TRINITY_G0QWH7_ICHMG/52-110        | G0QWH7.1 PF08063.10 | 57.10 | 0.00 |
| TRINITY_Q7NUF0_CHRVO/47-137        | Q7NUF0.1 PF08241.10 | 57.10 | 0.00 |
| TRINITY_A0A087SIT8_AUXPR/25-103    | A0A087SIT8.1 PF0142 | 57.10 | 0.00 |
| TRINITY_B3RKH4_TRIAD/45-507        | B3RKH4.1 PF01593.22 | 57.10 | 0.00 |
| TRINITY_A8IFT4_CHLRE/30-162        | A8IFT4.1 PF14908.4; | 57.10 | 0.00 |
| TRINITY_I0YS12_9CHLO/16-86         | I0YS12.1 PF00076.20 | 57.10 | 0.00 |
| TRINITY_D8UD04_VOLCA/2-346         | D8UD04.1 PF00443.27 | 57.10 | 0.00 |
| TRINITY_D8TZD6_VOLCA/11-124        | D8TZD6.1 PF06058.11 | 57.10 | 0.00 |
| TRINITY_I1G374_AMPQE/612-798       | I1G374.1 PF00211.18 | 57.10 | 0.00 |
| TRINITY_A8J5U5_CHLRE/85-240        | A8J5U5.1 PF00650.18 | 57.10 | 0.00 |
| TRINITY_D8UEG1_VOLCA/25-627        | D8UEG1.1 PF00995.21 | 57.10 | 0.00 |
| TRINITY_A8JB50_CHLRE/10-265        | A8JB50.1 PF00069.23 | 57.10 | 0.00 |
| TRINITY_E1ZB42_CHLVA/13-89         | E1ZB42.1 PF00575.21 | 57.10 | 0.00 |
| TRINITY_C1E8Y5_MICSR/20-201        | C1E8Y5.1 PF00483.21 | 57.10 | 0.00 |
| TRINITY_T1K5B5_TETUR/776-1081      | T1K5B5.1 PF00632.23 | 57.10 | 0.00 |
| TRINITY_A8ISN7_CHLRE/59-260        | A8ISN7.1 PF06862.10 | 57.10 | 0.00 |
| TRINITY_I0YKL1_9CHLO/222-315       | I0YKL1.1 PF00153.25 | 57.10 | 0.00 |
| TRINITY_D8QR38_SELML/15-176        | D8QR38.1 PF00270.27 | 57.10 | 0.00 |
| TRINITY_F4PYX8_DICFS/631-809       | F4PYX8.1 PF00617.17 | 57.10 | 0.00 |
| TRINITY_Q23U84_TETTS/23-120        | Q23U84.1 PF02678.14 | 57.10 | 0.00 |
| TRINITY_I0YJU5_9CHLO/516-725       | I0YJU5.1 PF03441.12 | 57.10 | 0.00 |
| TRINITY_Q22KG5_TETTS/34-173        | Q22KG5.3 PF00782.18 | 57.10 | 0.00 |
| TRINITY_D8TR90_VOLCA/25-230        | D8TR90.1 PF05700.9; | 57.10 | 0.00 |
| TRINITY_I0Z904_9CHLO/17-303        | I0Z904.1 PF03416.17 | 57.10 | 0.00 |
| TRINITY_D8U978_VOLCA/2-203         | D8U978.1 PF07714.15 | 57.10 | 0.00 |
| TRINITY_A8I807_CHLRE/1018-1101     | A8I807.1 PF00211.18 | 57.10 | 0.00 |
| TRINITY_D8TTV8_VOLCA/81-324        | D8TTV8.1 PF00233.17 | 57.10 | 0.00 |
| TRINITY_D8TW00_VOLCA/697-980       | D8TW00.1 PF00664.21 | 57.10 | 0.00 |
| TRINITY_W0EN80_9PORP/5-192         | W0EN80.1 PF04011.10 | 57.10 | 0.00 |
| TRINITY_A0BQ47_PARTE/3-95          | A0BQ47.1 PF03259.15 | 57.00 | 0.00 |
| TRINITY_L8HM13_ACACA/10-146        | L8HM13.1 PF04756.11 | 57.00 | 0.00 |
| TRINITY_A0A078AVJ8_STYLE/16-272    | A0A078AVJ8.1 PF0006 | 57.00 | 0.00 |
| TRINITY_F1A482_DICPU/1767-1976     | F1A482.1 PF16095.3; | 57.00 | 0.00 |
| TRINITY_A0A0A1U6N2_ENTIV/1420-1674 | A0A0A1U6N2.1 PF0771 | 57.00 | 0.00 |
| TRINITY_C3Z661_BRAFL/3-348         | C3Z661.1 PF02515.15 | 57.00 | 0.00 |
| TRINITY_Q86K39_DICDI/356-457       | Q86K39.1 PF12894.5; | 57.00 | 0.00 |
| TRINITY_D8TK01_VOLCA/12-360        | D8TK01.1 PF01148.18 | 57.00 | 0.00 |
| TRINITY_I7MHC3_TETTS/22-425        | I7MHC3.2 PF01433.18 | 57.00 | 0.00 |
| TRINITY_B7GD27_PHATC/164-234       | B7GD27.1 PF00382.17 | 57.00 | 0.00 |



|                                  |              |            |       |      |
|----------------------------------|--------------|------------|-------|------|
| TRINITY_L8GUH2_ACACA/267-438     | L8GUH2.1     | PF01979.18 | 57.00 | 0.00 |
| TRINITY_C3XRT7_BRAFL/49-255      | C3XRT7.1     | PF00106.23 | 57.00 | 0.00 |
| TRINITY_Q23TS6_TETTS/41-176      | Q23TS6.2     | PF00005.25 | 57.00 | 0.00 |
| TRINITY_A8HQJ9_CHLRE/14-109      | A8HQJ9.1     | PF06916.11 | 57.00 | 0.00 |
| TRINITY_D8UED2_VOLCA/2081-2182   | D8UED2.1     | PF01477.21 | 57.00 | 0.00 |
| TRINITY_D8TQN2_VOLCA/16-126      | D8TQN2.1     | PF03070.14 | 57.00 | 0.00 |
| TRINITY_D8TNB9_VOLCA/33-337      | D8TNB9.1     | PF03006.18 | 57.00 | 0.00 |
| TRINITY_C4LSY9_ENTHI/11-169      | C4LSY9.1     | PF00071.20 | 57.00 | 0.00 |
| TRINITY_A0A0K6G6D9_9HOMO/306-907 | A0A0K6G6D9.1 | PF0519     | 57.00 | 0.00 |
| TRINITY_A8INS0_CHLRE/4-845       | A8INS0.1     | PF16399.3; | 57.00 | 0.00 |
| TRINITY_J9IGI9_9SPIT/49-304      | J9IGI9.1     | PF00069.23 | 57.00 | 0.00 |
| TRINITY_D8THQ9_VOLCA/1195-1302   | D8THQ9.1     | PF10367.7; | 57.00 | 0.00 |
| TRINITY_L1JQA2_GUIITH/374-479    | L1JQA2.1     | PF00085.18 | 57.00 | 0.00 |
| TRINITY_Q231W2_TETTS/18-753      | Q231W2.1     | PF03030.14 | 57.00 | 0.00 |
| TRINITY_A8HQC1_CHLRE/216-346     | A8HQC1.1     | PF02338.17 | 57.00 | 0.00 |
| TRINITY_I7M3W2_TETTS/27-163      | I7M3W2.2     | PF00782.18 | 57.00 | 0.00 |
| TRINITY_D3BS03_POLPA/40-147      | D3BS03.1     | PF00635.24 | 57.00 | 0.00 |
| TRINITY_D8TVH0_VOLCA/91-285      | D8TVH0.1     | PF13875.4; | 57.00 | 0.00 |
| TRINITY_W4FH29_9STRA/206-638     | W4FH29.1     | PF01532.18 | 57.00 | 0.00 |
| TRINITY_D8U030_VOLCA/188-279     | D8U030.1     | PF11919.6; | 57.00 | 0.00 |
| TRINITY_A6LNE4_THEM4/221-510     | A6LNE4.1     | PF02906.12 | 57.00 | 0.00 |
| TRINITY_D8TM63_VOLCA/78-222      | D8TM63.1     | PF00810.16 | 57.00 | 0.00 |
| TRINITY_D8TU52_VOLCA/1-101       | D8TU52.1     | PF14226.4; | 57.00 | 0.00 |
| TRINITY_A8IPU0_CHLRE/155-397     | A8IPU0.1     | PF03878.13 | 57.00 | 0.00 |
| TRINITY_L8GSC4_ACACA/45-257      | L8GSC4.1     | PF08245.10 | 57.00 | 0.00 |
| TRINITY_D8UB01_VOLCA/95-192      | D8UB01.1     | PF01588.18 | 57.00 | 0.00 |
| TRINITY_A8IB22_CHLRE/22-195      | A8IB22.1     | PF14825.4; | 57.00 | 0.00 |
| TRINITY_D8TMD0_VOLCA/54-312      | D8TMD0.1     | PF00069.23 | 57.00 | 0.00 |
| TRINITY_F4PT49_DICFS/46-223      | F4PT49.1     | PF00719.17 | 57.00 | 0.00 |
| TRINITY_A8I6F3_CHLRE/385-587     | A8I6F3.1     | PF07714.15 | 57.00 | 0.00 |
| TRINITY_D8UBW5_VOLCA/500-606     | D8UBW5.1     | PF13519.4; | 57.00 | 0.00 |
| TRINITY_C1DIX7_AZOVD/10-205      | C1DIX7.1     | PF00753.25 | 57.00 | 0.00 |
| TRINITY_B7JVL0_CYAP8/1-129       | B7JVL0.1     | PF14437.4; | 57.00 | 0.00 |
| TRINITY_A8JFH1_CHLRE/93-580      | A8JFH1.1     | PF00759.17 | 57.00 | 0.00 |
| TRINITY_B8C1N5_THAPS/11-175      | B8C1N5.1     | PF00270.27 | 57.00 | 0.00 |
| TRINITY_A0A087SCV9_AUXPR/36-318  | A0A087SCV9.1 | PF0006     | 57.00 | 0.00 |
| TRINITY_E0UDP4_CYAP2/129-203     | E0UDP4.1     | PF01169.17 | 56.90 | 0.00 |
| TRINITY_A0A087SR84_AUXPR/814-890 | A0A087SR84.1 | PF0134     | 56.90 | 0.00 |
| TRINITY_R1C984_EMIHU/989-1276    | R1C984.1     | PF08811.9; | 56.90 | 0.00 |
| TRINITY_F4Q879_DICFS/343-583     | F4Q879.1     | PF00122.18 | 56.90 | 0.00 |
| TRINITY_E1X552_HALMS/50-182      | E1X552.1     | PF01380.20 | 56.90 | 0.00 |
| TRINITY_A0E309_PARTE/27-98       | A0E309.1     | PF16209.3; | 56.90 | 0.00 |
| TRINITY_C5D3X8_GEOSW/2-205       | C5D3X8.1     | PF01323.18 | 56.90 | 0.00 |
| TRINITY_T1G126_HELRO/39-90       | T1G126.1     | PF04588.11 | 56.90 | 0.00 |
| TRINITY_Q22T22_TETTS/520-735     | Q22T22.3     | PF07859.11 | 56.90 | 0.00 |
| TRINITY_M4EKQ8_BRARP/82-247      | M4EKQ8.1     | PF13012.4; | 56.90 | 0.00 |
| TRINITY_F4PXA4_DICFS/1-331       | F4PXA4.1     | PF01207.15 | 56.90 | 0.00 |
| TRINITY_F2G9F8_ALTMD/624-740     | F2G9F8.1     | PF02518.24 | 56.90 | 0.00 |
| TRINITY_I7M967_TETTS/407-548     | I7M967.1     | PF04377.13 | 56.90 | 0.00 |
| TRINITY_D3BU33_POLPA/111-235     | D3BU33.1     | PF04495.12 | 56.90 | 0.00 |
| TRINITY_T0SBM8_9STRA/625-911     | T0SBM8.1     | PF00128.22 | 56.90 | 0.00 |
| TRINITY_R4FNG2_RHOPR/51-244      | R4FNG2.1     | PF00753.25 | 56.90 | 0.00 |
| TRINITY_J9IJ53_9SPIT/76-190      | J9IJ53.1     | PF00622.26 | 56.90 | 0.00 |
| TRINITY_A0A078AI59_STYLE/31-95   | A0A078AI59.1 | PF1349     | 56.90 | 0.00 |
| TRINITY_A0A0M0JB56_9EUKA/14-175  | A0A0M0JB56.1 | PF0007     | 56.90 | 0.00 |
| TRINITY_A0A078A1V0_STYLE/258-516 | A0A078A1V0.1 | PF0006     | 56.90 | 0.00 |
| TRINITY_E1ZQ85_CHLVA/21-84       | E1ZQ85.1     | PF01176.17 | 56.90 | 0.00 |
| TRINITY_A8JBG1_CHLRE/74-210      | A8JBG1.1     | PF13716.4; | 56.90 | 0.00 |
| TRINITY_A0A067Q0T2_9HOMO/33-148  | A0A067Q0T2.1 | PF0824     | 56.90 | 0.00 |
| TRINITY_F4PLJ9_DICFS/696-840     | F4PLJ9.1     | PF01553.19 | 56.90 | 0.00 |
| TRINITY_A8JCT0_CHLRE/35-235      | A8JCT0.1     | PF01027.18 | 56.90 | 0.00 |

|                                  |              |            |       |      |
|----------------------------------|--------------|------------|-------|------|
| TRINITY_A0EB06_PARTE/1-70        | A0EB06.1     | PF01302.23 | 56.90 | 0.00 |
| TRINITY_A8IT21_CHLRE/54-219      | A8IT21.1     | PF02622.13 | 56.90 | 0.00 |
| TRINITY_W9QMK2_9ROSA/322-692     | W9QMK2.1     | PF00890.22 | 56.90 | 0.00 |
| TRINITY_I0YVF7_9CHLO/505-604     | I0YVF7.1     | PF00300.20 | 56.90 | 0.00 |
| TRINITY_Q22YS0_TETTS/11-186      | Q22YS0.1     | PF05603.10 | 56.90 | 0.00 |
| TRINITY_A0DCS5_PARTE/76-348      | A0DCS5.1     | PF00248.19 | 56.90 | 0.00 |
| TRINITY_M7NNX9_PNEMU/12-172      | M7NNX9.1     | PF00071.20 | 56.90 | 0.00 |
| TRINITY_Q6UP31_CHLRE/49-151      | Q6UP31.1     | PF05071.14 | 56.90 | 0.00 |
| TRINITY_A0A078AAI9_STYLE/21-285  | A0A078AAI9.1 | PF0165     | 56.90 | 0.00 |
| TRINITY_G0QJD2_ICHMG/409-632     | G0QJD2.1     | PF13236.4; | 56.90 | 0.00 |
| TRINITY_A0BZD8_PARTE/231-430     | A0BZD8.1     | PF13851.4; | 56.90 | 0.00 |
| TRINITY_A0A075AS09_9FUNG/185-265 | A0A075AS09.1 | PF0400     | 56.90 | 0.00 |
| TRINITY_A0A0K0DKC6_ANGCA/267-394 | A0A0K0DKC6.1 | PF0023     | 56.90 | 0.00 |
| TRINITY_U6LJF0_9EIME/8-73        | U6LJF0.1     | PF01246.18 | 56.90 | 0.00 |
| TRINITY_A8N0R4_COPC7/3-111       | A8N0R4.1     | PF03966.14 | 56.90 | 0.00 |
| TRINITY_I0YJW0_9CHLO/18-124      | I0YJW0.1     | PF14765.4; | 56.90 | 0.00 |
| TRINITY_Q22T22_TETTS/520-735     | Q22T22.3     | PF07859.11 | 56.90 | 0.00 |
| TRINITY_I2GE79_9BACT/5-172       | I2GE79.1     | PF00535.24 | 56.90 | 0.00 |
| TRINITY_F4PLI7_DICFS/1581-2117   | F4PLI7.1     | PF03571.13 | 56.90 | 0.00 |
| TRINITY_J9I6A1_9SPIT/73-210      | J9I6A1.1     | PF01966.20 | 56.90 | 0.00 |
| TRINITY_E1Z438_CHLVA/277-336     | E1Z438.1     | PF13855.4; | 56.90 | 0.00 |
| TRINITY_D8U1T7_VOLCA/393-574     | D8U1T7.1     | PF09273.9; | 56.90 | 0.00 |
| TRINITY_D8TX27_VOLCA/36-313      | D8TX27.1     | PF00481.19 | 56.90 | 0.00 |
| TRINITY_A8IH64_CHLRE/46-108      | A8IH64.1     | PF17136.2; | 56.90 | 0.00 |
| TRINITY_A0BHS7_PARTE/77-199      | A0BHS7.1     | PF00638.16 | 56.90 | 0.00 |
| TRINITY_D8U2U8_VOLCA/40-107      | D8U2U8.1     | PF00013.27 | 56.90 | 0.00 |
| TRINITY_D8UJY1_VOLCA/524-588     | D8UJY1.1     | PF00536.28 | 56.90 | 0.00 |
| TRINITY_D8U252_VOLCA/5-52        | D8U252.1     | PF12906.5; | 56.90 | 0.00 |
| TRINITY_A8JF24_CHLRE/5-76        | A8JF24.1     | PF04969.14 | 56.90 | 0.00 |
| TRINITY_A8IZ74_CHLRE/179-435     | A8IZ74.1     | PF03781.14 | 56.90 | 0.00 |
| TRINITY_A0BIL8_PARTE/1261-1405   | A0BIL8.1     | PF12842.5; | 56.90 | 0.00 |
| TRINITY_CFA45_CHLRE/140-488      | A8I9E8.1     | PF13868.4; | 56.90 | 0.00 |
| TRINITY_I0YNX6_9CHLO/3-292       | I0YNX6.1     | PF05890.10 | 56.90 | 0.00 |
| TRINITY_D8STS7_SELML/825-1160    | D8STS7.1     | PF12777.5; | 56.90 | 0.00 |
| TRINITY_A0A087SU36_AUXPR/3-309   | A0A087SU36.1 | PF0050     | 56.90 | 0.00 |
| TRINITY_Q22HG2_TETTS/74-222      | Q22HG2.1     | PF04442.12 | 56.90 | 0.00 |
| TRINITY_C9RD40_AMMDK/6-118       | C9RD40.1     | PF00072.22 | 56.80 | 0.00 |
| TRINITY_A0A0K9NRU0_ZOSMR/130-174 | A0A0K9NRU0.1 | PF1363     | 56.80 | 0.00 |
| TRINITY_A0A077ZN15_STYLE/119-156 | A0A077ZN15.1 | PF0142     | 56.80 | 0.00 |
| TRINITY_I7LTY4_TETTS/276-599     | I7LTY4.2     | PF04515.10 | 56.80 | 0.00 |
| TRINITY_U9UTZ8_RHIID/86-324      | U9UTZ8.1     | PF00899.19 | 56.80 | 0.00 |
| TRINITY_E6ZR54_SPORE/209-444     | E6ZR54.1     | PF00069.23 | 56.80 | 0.00 |
| TRINITY_A0A015LBX0_9GLOM/11-97   | A0A015LBX0.1 | PF1023     | 56.80 | 0.00 |
| TRINITY_D3BHH6_POLPA/16-194      | D3BHH6.1     | PF03357.19 | 56.80 | 0.00 |
| TRINITY_D2VIA4_NAEGR/392-466     | D2VIA4.1     | PF14492.4; | 56.80 | 0.00 |
| TRINITY_A0A0B0NP41_GOSAR/40-125  | A0A0B0NP41.1 | PF0698     | 56.80 | 0.00 |
| TRINITY_A0E8S4_PARTE/1-104       | A0E8S4.1     | PF12763.5; | 56.80 | 0.00 |
| TRINITY_V3ZA01_LOTGI/240-411     | V3ZA01.1     | PF01068.19 | 56.80 | 0.00 |
| TRINITY_A0A0G4J1G0_PLABS/106-352 | A0A0G4J1G0.1 | PF0012     | 56.80 | 0.00 |
| TRINITY_A0A084WUY1_ANOSI/27-70   | A0A084WUY1.1 | PF0040     | 56.80 | 0.00 |
| TRINITY_F7BXQ2_ORNAN/101-144     | F7BXQ2.1     | PF00569.15 | 56.80 | 0.00 |
| TRINITY_G0QR70_ICHMG/24-173      | G0QR70.1     | PF00782.18 | 56.80 | 0.00 |
| TRINITY_F0ZJW2_DICPU/563-743     | F0ZJW2.1     | PF02145.13 | 56.80 | 0.00 |
| TRINITY_D8U077_VOLCA/4-112       | D8U077.1     | PF12998.5; | 56.80 | 0.00 |
| TRINITY_Q24HH9_TETTS/52-312      | Q24HH9.2     | PF00069.23 | 56.80 | 0.00 |
| TRINITY_A0A0D2QGM6_GOSRA/224-355 | A0A0D2QGM6.1 | PF0004     | 56.80 | 0.00 |
| TRINITY_A0A088AMB1_APIME/35-225  | A0A088AMB1.1 | PF0114     | 56.80 | 0.00 |
| TRINITY_L8GTG1_ACACA/168-315     | L8GTG1.1     | PF00588.17 | 56.80 | 0.00 |
| TRINITY_L8GUM9_ACACA/46-140      | L8GUM9.1     | PF01158.16 | 56.80 | 0.00 |
| TRINITY_A0A072V8C4_MEDTR/140-183 | A0A072V8C4.1 | PF1363     | 56.80 | 0.00 |
| TRINITY_E1Z921_CHLVA/46-198      | E1Z921.1     | PF00929.22 | 56.80 | 0.00 |

|                                  |                     |       |      |
|----------------------------------|---------------------|-------|------|
| TRINITY_I7LTD5_TETTS/235-367     | I7LTD5.2 PF14580.4; | 56.80 | 0.00 |
| TRINITY_A8JB02_CHLRE/91-278      | A8JB02.1 PF02698.15 | 56.80 | 0.00 |
| TRINITY_J9ICA8_9SPIT/818-1100    | J9ICA8.1 PF00481.19 | 56.80 | 0.00 |
| TRINITY_Q23RI2_TETTS/875-1059    | Q23RI2.2 PF00689.19 | 56.80 | 0.00 |
| TRINITY_G0QK00_ICHMG/9-339       | G0QK00.1 PF01148.18 | 56.80 | 0.00 |
| TRINITY_A0A078G0Q8_BRANA/273-317 | A0A078G0Q8.1 PF1363 | 56.80 | 0.00 |
| TRINITY_D8U0P8_VOLCA/37-131      | D8U0P8.1 PF13905.4; | 56.80 | 0.00 |
| TRINITY_I7LXS6_TETTS/57-758      | I7LXS6.2 PF00133.20 | 56.80 | 0.00 |
| TRINITY_A8INB8_CHLRE/529-609     | A8INB8.1 PF01253.20 | 56.80 | 0.00 |
| TRINITY_A0A0P7YEZ4_9TELE/146-540 | A0A0P7YEZ4.1 PF0113 | 56.80 | 0.00 |
| TRINITY_G6D343_DANPL/652-725     | G6D343.1 PF10405.7; | 56.80 | 0.00 |
| TRINITY_G2E1S7_9GAMM/532-648     | G2E1S7.1 PF02518.24 | 56.80 | 0.00 |
| TRINITY_I0YRN9_9CHLO/94-384      | I0YRN9.1 PF00487.22 | 56.80 | 0.00 |
| TRINITY_K3WRI4_PYTUL/1-142       | K3WRI4.1 PF14753.4; | 56.80 | 0.00 |
| TRINITY_V4B2C3_LOTGI/12-106      | V4B2C3.1 PF02214.20 | 56.80 | 0.00 |
| TRINITY_U6LJD0_9EIME/21-65       | U6LJD0.1 PF01585.21 | 56.80 | 0.00 |
| TRINITY_A0A067L5Q9_JATCU/65-285  | A0A067L5Q9.1 PF0027 | 56.80 | 0.00 |
| TRINITY_G8BJW8_CANPC/6-167       | G8BJW8.1 PF00071.20 | 56.80 | 0.00 |
| TRINITY_D8UCP4_VOLCA/360-468     | D8UCP4.1 PF00271.29 | 56.80 | 0.00 |
| TRINITY_E1Z1W2_CHLVA/3-141       | E1Z1W2.1 PF03800.12 | 56.80 | 0.00 |
| TRINITY_I0YP56_9CHLO/10-161      | I0YP56.1 PF00293.26 | 56.80 | 0.00 |
| TRINITY_D8TUN2_VOLCA/1-188       | D8TUN2.1 PF00069.23 | 56.80 | 0.00 |
| TRINITY_D3BC33_POLPA/5-166       | D3BC33.1 PF00071.20 | 56.80 | 0.00 |
| TRINITY_C5Z583_SORBI/934-1179    | C5Z583.1 PF07727.12 | 56.80 | 0.00 |
| TRINITY_D8SPU1_SELML/284-446     | D8SPU1.1 PF00270.27 | 56.80 | 0.00 |
| TRINITY_D8TMP7_VOLCA/11-642      | D8TMP7.1 PF03600.14 | 56.80 | 0.00 |
| TRINITY_A0D1C3_PARTE/64-223      | A0D1C3.1 PF01343.16 | 56.80 | 0.00 |
| TRINITY_E0UFG5_CYAP2/7-202       | E0UFG5.1 PF00106.23 | 56.80 | 0.00 |
| TRINITY_Q23QY4_TETTS/796-1116    | Q23QY4.2 PF03133.13 | 56.70 | 0.00 |
| TRINITY_A0A068SEF3_9FUNG/34-341  | A0A068SEF3.1 PF0337 | 56.70 | 0.00 |
| TRINITY_J9IZ27_9SPIT/31-320      | J9IZ27.1 PF04616.12 | 56.70 | 0.00 |
| TRINITY_G0R4J0_ICHMG/295-619     | G0R4J0.1 PF00493.21 | 56.70 | 0.00 |
| TRINITY_Q22GW0_TETTS/1651-1813   | Q22GW0.2 PF00069.23 | 56.70 | 0.00 |
| TRINITY_K7MLD4_SOYBN/76-138      | K7MLD4.1 PF09415.8; | 56.70 | 0.00 |
| TRINITY_J9J5F8_9SPIT/511-624     | J9J5F8.1 PF02518.24 | 56.70 | 0.00 |
| TRINITY_B4J7Z6_DROGR/290-495     | B4J7Z6.1 PF00106.23 | 56.70 | 0.00 |
| TRINITY_Q23QF2_TETTS/248-571     | Q23QF2.2 PF03133.13 | 56.70 | 0.00 |
| TRINITY_Q22U45_TETTS/225-538     | Q22U45.1 PF00883.19 | 56.70 | 0.00 |
| TRINITY_A0A078AHC7_STYLE/13-268  | A0A078AHC7.1 PF0006 | 56.70 | 0.00 |
| TRINITY_D8TKG8_VOLCA/103-423     | D8TKG8.1 PF00398.18 | 56.70 | 0.00 |
| TRINITY_A0A0D2X0P2_CAPO3/15-243  | A0A0D2X0P2.1 PF1356 | 56.70 | 0.00 |
| TRINITY_B0C408_ACAM1/40-133      | B0C408.1 PF01243.18 | 56.70 | 0.00 |
| TRINITY_A0A015J2R3_9GLOM/17-196  | A0A015J2R3.1 PF1343 | 56.70 | 0.00 |
| TRINITY_A0A0M0JR79_9EUKA/247-386 | A0A0M0JR79.1 PF0139 | 56.70 | 0.00 |
| TRINITY_D8LJ67_ECTSI/5-155       | D8LJ67.1 PF00176.21 | 56.70 | 0.00 |
| TRINITY_G8BTR7_TETPH/129-225     | G8BTR7.1 PF04140.12 | 56.70 | 0.00 |
| TRINITY_A8J4I9_CHLRE/17-270      | A8J4I9.1 PF02900.16 | 56.70 | 0.00 |
| TRINITY_A8ISQ5_CHLRE/941-1186    | A8ISQ5.1 PF13087.4; | 56.70 | 0.00 |
| TRINITY_B2ACQ8_PODAN/66-442      | B2ACQ8.1 PF00155.19 | 56.70 | 0.00 |
| TRINITY_G0QZF2_ICHMG/23-289      | G0QZF2.1 PF02263.17 | 56.70 | 0.00 |
| TRINITY_D2VTI9_NAEGR/37-143      | D2VTI9.1 PF00307.29 | 56.70 | 0.00 |
| TRINITY_G0QKW1_ICHMG/111-281     | G0QKW1.1 PF00092.26 | 56.70 | 0.00 |
| TRINITY_I7M0N5_TETTS/125-295     | I7M0N5.1 PF00092.26 | 56.70 | 0.00 |
| TRINITY_R0GVR1_9BRAS/47-473      | R0GVR1.1 PF01532.18 | 56.70 | 0.00 |
| TRINITY_I0YJ19_9CHLO/201-328     | I0YJ19.1 PF04366.10 | 56.70 | 0.00 |
| TRINITY_Q22A31_TETTS/163-484     | Q22A31.4 PF01207.15 | 56.70 | 0.00 |
| TRINITY_A0A0D2WM34_CAPO3/100-531 | A0A0D2WM34.1 PF0147 | 56.70 | 0.00 |
| TRINITY_A0DC59_PARTE/3-141       | A0DC59.1 PF01217.18 | 56.70 | 0.00 |
| TRINITY_W9XM97_9EURO/41-128      | W9XM97.1 PF07713.11 | 56.70 | 0.00 |
| TRINITY_D8T044_SELML/198-454     | D8T044.1 PF01704.16 | 56.70 | 0.00 |
| TRINITY_L8HF73_ACACA/111-202     | L8HF73.1 PF13426.5; | 56.70 | 0.00 |

|                                  |              |            |       |      |
|----------------------------------|--------------|------------|-------|------|
| TRINITY_D8TZS8_VOLCA/96-370      | D8TZS8.1     | PF00685.25 | 56.70 | 0.00 |
| TRINITY_A0E9L0_PARTE/73-288      | A0E9L0.1     | PF12317.6; | 56.70 | 0.00 |
| TRINITY_A0BR56_PARTE/569-683     | A0BR56.1     | PF00387.17 | 56.70 | 0.00 |
| TRINITY_F4NRF8_BATDJ/944-1152    | F4NRF8.1     | PF05362.11 | 56.70 | 0.00 |
| TRINITY_H2LJS9_ORYLA/16-322      | H2LJS9.1     | PF01556.16 | 56.70 | 0.00 |
| TRINITY_Q6IYG1_CHLRE/156-401     | Q6IYG1.1     | PF01226.15 | 56.70 | 0.00 |
| TRINITY_M2PRS3_CERS8/7-68        | M2PRS3.1     | PF00226.29 | 56.70 | 0.00 |
| TRINITY_M7XE34_RHOT1/468-848     | M7XE34.1     | PF04109.14 | 56.70 | 0.00 |
| TRINITY_A8J3P1_CHLRE/954-1161    | A8J3P1.1     | PF00211.18 | 56.70 | 0.00 |
| TRINITY_A0C6I2_PARTE/147-212     | A0C6I2.1     | PF13499.4; | 56.70 | 0.00 |
| TRINITY_I0YWU5_9CHLO/707-938     | I0YWU5.1     | PF00005.25 | 56.70 | 0.00 |
| TRINITY_G0QJS6_ICHMG/1-248       | G0QJS6.1     | PF03159.16 | 56.60 | 0.00 |
| TRINITY_W7XI36_TETTS/344-791     | W7XI36.1     | PF03200.14 | 56.60 | 0.00 |
| TRINITY_A0BUC8_PARTE/5-143       | A0BUC8.1     | PF00179.24 | 56.60 | 0.00 |
| TRINITY_I7LTA1_TETTS/47-227      | I7LTA1.1     | PF01965.22 | 56.60 | 0.00 |
| TRINITY_A0A072UTH7_MEDTR/65-168  | A0A072UTH7.1 | PF0023     | 56.60 | 0.00 |
| TRINITY_Q23DI0_TETTS/65-244      | Q23DI0.3     | PF00535.24 | 56.60 | 0.00 |
| TRINITY_H1VJD0_COLHI/32-109      | H1VJD0.1     | PF14821.4; | 56.60 | 0.00 |
| TRINITY_H0XZR6_OTOGA/23-105      | H0XZR6.1     | PF01336.23 | 56.60 | 0.00 |
| TRINITY_J9GC40_9SPIT/788-1282    | J9GC40.1     | PF04998.15 | 56.60 | 0.00 |
| TRINITY_D3BLA2_POLPA/49-377      | D3BLA2.1     | PF00128.22 | 56.60 | 0.00 |
| TRINITY_A0A0F5AT32_9GAMM/449-560 | A0A0F5AT32.1 | PF0251     | 56.60 | 0.00 |
| TRINITY_D8U5N3_VOLCA/4-176       | D8U5N3.1     | PF00929.22 | 56.60 | 0.00 |
| TRINITY_F0ZJT2_DICPU/38-322      | F0ZJT2.1     | PF01207.15 | 56.60 | 0.00 |
| TRINITY_A0A0D9V0U0_9ORYZ/1-326   | A0A0D9V0U0.1 | PF0450     | 56.60 | 0.00 |
| TRINITY_N4U6Y1_FUSC1/73-209      | N4U6Y1.1     | PF14342.4; | 56.60 | 0.00 |
| TRINITY_A0E9Q1_PARTE/19-396      | A0E9Q1.1     | PF01053.18 | 56.60 | 0.00 |
| TRINITY_A0A0F7N102_9ACTN/18-155  | A0A0F7N102.1 | PF0058     | 56.60 | 0.00 |
| TRINITY_D8U023_VOLCA/49-190      | D8U023.1     | PF09335.9; | 56.60 | 0.00 |
| TRINITY_C3XTE8_BRAFL/65-760      | C3XTE8.1     | PF00063.19 | 56.60 | 0.00 |
| TRINITY_D8TH09_VOLCA/55-197      | D8TH09.1     | PF01764.23 | 56.60 | 0.00 |
| TRINITY_A0A067Q261_9HOMO/198-480 | A0A067Q261.1 | PF0500     | 56.60 | 0.00 |
| TRINITY_W7TSN9_9STRA/70-230      | W7TSN9.1     | PF01451.19 | 56.60 | 0.00 |
| TRINITY_E1Z6A2_CHLVA/331-642     | E1Z6A2.1     | PF08637.8; | 56.60 | 0.00 |
| TRINITY_E1ZRP5_CHLVA/44-345      | E1ZRP5.1     | PF04950.10 | 56.60 | 0.00 |
| TRINITY_J9HSA4_9SPIT/276-557     | J9HSA4.1     | PF00481.19 | 56.60 | 0.00 |
| TRINITY_A0CNI6_PARTE/314-523     | A0CNI6.1     | PF07002.14 | 56.60 | 0.00 |
| TRINITY_D8UJM0_VOLCA/106-206     | D8UJM0.1     | PF03330.16 | 56.60 | 0.00 |
| TRINITY_J9I3N5_9SPIT/288-363     | J9I3N5.1     | PF00076.20 | 56.60 | 0.00 |
| TRINITY_Q23R92_TETTS/152-318     | Q23R92.1     | PF00071.20 | 56.60 | 0.00 |
| TRINITY_A0A087SIL7_AUXPR/175-500 | A0A087SIL7.1 | PF0186     | 56.60 | 0.00 |
| TRINITY_I1CSK8_RHIO9/13-66       | I1CSK8.1     | PF00385.22 | 56.60 | 0.00 |
| TRINITY_A8J2K2_CHLRE/34-168      | A8J2K2.1     | PF02114.14 | 56.60 | 0.00 |
| TRINITY_I0YLA5_9CHLO/2-167       | I0YLA5.1     | PF00005.25 | 56.60 | 0.00 |
| TRINITY_W7X3C5_TETTS/169-244     | W7X3C5.1     | PF00789.18 | 56.60 | 0.00 |
| TRINITY_D1AFY6_SEBTE/11-254      | D1AFY6.1     | PF08543.10 | 56.60 | 0.00 |
| TRINITY_A8HMP3_CHLRE/281-499     | A8HMP3.1     | PF07774.11 | 56.60 | 0.00 |
| TRINITY_D8TPX3_VOLCA/983-1066    | D8TPX3.1     | PF09324.8; | 56.60 | 0.00 |
| TRINITY_C1MRF4_MICPC/139-213     | C1MRF4.1     | PF00076.20 | 56.60 | 0.00 |
| TRINITY_E1Z8K9_CHLVA/36-403      | E1Z8K9.1     | PF01276.18 | 56.60 | 0.00 |
| TRINITY_C5LTF4_PERM5/86-148      | C5LTF4.1     | PF13499.4; | 56.60 | 0.00 |
| TRINITY_Q1IJR4_KORVE/50-364      | Q1IJR4.1     | PF00251.18 | 56.60 | 0.00 |
| TRINITY_A0A0L1KUH4_9EUGL/17-343  | A0A0L1KUH4.1 | PF0000     | 56.60 | 0.00 |
| TRINITY_A8HVZ5_CHLRE/96-382      | A8HVZ5.1     | PF00069.23 | 56.60 | 0.00 |
| TRINITY_A8IHW3_CHLRE/282-550     | A8IHW3.1     | PF00520.29 | 56.60 | 0.00 |
| TRINITY_F4PN45_DICFS/1769-1851   | F4PN45.1     | PF01833.22 | 56.60 | 0.00 |
| TRINITY_E1ZL55_CHLVA/97-362      | E1ZL55.1     | PF00069.23 | 56.60 | 0.00 |
| TRINITY_I7LTH0_TETTS/231-521     | I7LTH0.1     | PF01031.18 | 56.60 | 0.00 |
| TRINITY_Q23WQ1_TETTS/51-171      | Q23WQ1.3     | PF02996.15 | 56.60 | 0.00 |
| TRINITY_L8GJP4_ACACA/126-202     | L8GJP4.1     | PF06384.9; | 56.60 | 0.00 |
| TRINITY_D8U580_VOLCA/69-435      | D8U580.1     | PF02383.16 | 56.60 | 0.00 |

|                                  |              |            |       |      |
|----------------------------------|--------------|------------|-------|------|
| TRINITY_D8TTV8_VOLCA/81-324      | D8TTV8.1     | PF00233.17 | 56.60 | 0.00 |
| TRINITY_D8TTV8_VOLCA/81-324      | D8TTV8.1     | PF00233.17 | 56.60 | 0.00 |
| TRINITY_L7UL82_MYXSD/6-194       | L7UL82.1     | PF00106.23 | 56.60 | 0.00 |
| TRINITY_DPOL_HBVCJ/601-843       | Q69028.2     | PF00336.16 | 56.60 | 0.00 |
| TRINITY_Q1ZXK4_DICDI/7-55        | Q1ZXK4.1     | PF01679.15 | 56.50 | 0.00 |
| TRINITY_C5L9M0_PERM5/63-132      | C5L9M0.1     | PF13499.4; | 56.50 | 0.00 |
| TRINITY_I7MGN3_TETTS/143-312     | I7MGN3.1     | PF01556.16 | 56.50 | 0.00 |
| TRINITY_L9KTK3_TUPCH/396-587     | L9KTK3.1     | PF00587.23 | 56.50 | 0.00 |
| TRINITY_Q23UD8_TETTS/821-870     | Q23UD8.2     | PF13920.4; | 56.50 | 0.00 |
| TRINITY_D3BU00_POLPA/7-62        | D3BU00.1     | PF00412.20 | 56.50 | 0.00 |
| TRINITY_U1ZQL5_9BURK/517-630     | U1ZQL5.2     | PF02518.24 | 56.50 | 0.00 |
| TRINITY_A0BXR0_PARTE/306-355     | A0BXR0.1     | PF13920.4; | 56.50 | 0.00 |
| TRINITY_A0A068S287_9FUNG/6-65    | A0A068S287.1 | PF0022     | 56.50 | 0.00 |
| TRINITY_A0EHV9_PARTE/4-278       | A0EHV9.1     | PF03643.13 | 56.50 | 0.00 |
| TRINITY_A0A077ZZ82_STYLE/17-255  | A0A077ZZ82.1 | PF0089     | 56.50 | 0.00 |
| TRINITY_L8GVF1_ACACA/95-436      | L8GVF1.1     | PF01244.19 | 56.50 | 0.00 |
| TRINITY_L5K396_PTEAL/915-1387    | L5K396.1     | PF06202.12 | 56.50 | 0.00 |
| TRINITY_M2Y3H7_GALSU/69-317      | M2Y3H7.1     | PF00378.18 | 56.50 | 0.00 |
| TRINITY_Q8Y8K3_LISMO/12-197      | Q8Y8K3.1     | PF09371.8; | 56.50 | 0.00 |
| TRINITY_Q54Y48_DICDI/54-183      | Q54Y48.1     | PF00561.18 | 56.50 | 0.00 |
| TRINITY_D8TZL4_VOLCA/118-181     | D8TZL4.1     | PF13499.4; | 56.50 | 0.00 |
| TRINITY_Q22D97_TETTS/1219-1386   | Q22D97.1     | PF00005.25 | 56.50 | 0.00 |
| TRINITY_L8H107_ACACA/542-664     | L8H107.1     | PF04153.16 | 56.50 | 0.00 |
| TRINITY_TTL3C_TETTS/705-1030     | Q23FE2.1     | PF03133.13 | 56.50 | 0.00 |
| TRINITY_G4VIN8_SCHMA/422-755     | G4VIN8.1     | PF03372.21 | 56.50 | 0.00 |
| TRINITY_A9TR69_PHYPA/255-298     | A9TR69.1     | PF13639.4; | 56.50 | 0.00 |
| TRINITY_E1ZGD0_CHLVA/314-359     | E1ZGD0.1     | PF00646.31 | 56.50 | 0.00 |
| TRINITY_A0A068RMS3_9FUNG/104-467 | A0A068RMS3.1 | PF0026     | 56.50 | 0.00 |
| TRINITY_B3RLQ8_TRIAD/9-325       | B3RLQ8.1     | PF07992.12 | 56.50 | 0.00 |
| TRINITY_A0A059LG41_9CHLO/232-413 | A0A059LG41.1 | PF0027     | 56.50 | 0.00 |
| TRINITY_A0A0L6V5C6_9BASI/107-175 | A0A0L6V5C6.1 | PF0022     | 56.50 | 0.00 |
| TRINITY_A8I4W2_CHLRE/1-181       | A8I4W2.1     | PF00211.18 | 56.50 | 0.00 |
| TRINITY_C4M9I2_ENTHI/311-357     | C4M9I2.1     | PF14604.4; | 56.50 | 0.00 |
| TRINITY_A0A0A1MD11_9BACI/7-124   | A0A0A1MD11.1 | PF0058     | 56.50 | 0.00 |
| TRINITY_C1EI16_MICSR/132-379     | C1EI16.1     | PF02475.14 | 56.50 | 0.00 |
| TRINITY_A0A059LJY7_9CHLO/64-125  | A0A059LJY7.1 | PF0295     | 56.50 | 0.00 |
| TRINITY_I0Z657_9CHLO/15-263      | I0Z657.1     | PF00149.26 | 56.50 | 0.00 |
| TRINITY_A0CWK3_PARTE/1832-1933   | A0CWK3.1     | PF12796.5; | 56.50 | 0.00 |
| TRINITY_F4Q9B2_DICFS/36-104      | F4Q9B2.1     | PF00076.20 | 56.50 | 0.00 |
| TRINITY_B3MPW9_DROAN/206-266     | B3MPW9.1     | PF13921.4; | 56.50 | 0.00 |
| TRINITY_A0A0G4EJ55_9ALVE/242-541 | A0A0G4EJ55.1 | PF0942     | 56.50 | 0.00 |
| TRINITY_A0A078ARV0_STYLE/502-593 | A0A078ARV0.1 | PF1289     | 56.50 | 0.00 |
| TRINITY_R1CP06_EMIHU/11-154      | R1CP06.1     | PF00071.20 | 56.50 | 0.00 |
| TRINITY_G0QR87_ICHMG/122-270     | G0QR87.1     | PF00817.18 | 56.50 | 0.00 |
| TRINITY_A8ISE1_CHLRE/178-331     | A8ISE1.1     | PF06963.10 | 56.50 | 0.00 |
| TRINITY_A0A088AAZ0_APIME/237-405 | A0A088AAZ0.1 | PF0492     | 56.50 | 0.00 |
| TRINITY_I7M1S5_TETTS/8-201       | I7M1S5.1     | PF00149.26 | 56.50 | 0.00 |
| TRINITY_I7MLI1_TETTS/1260-1444   | I7MLI1.2     | PF00005.25 | 56.50 | 0.00 |
| TRINITY_D8TJ08_VOLCA/9-196       | D8TJ08.1     | PF00106.23 | 56.50 | 0.00 |
| TRINITY_A0BW49_PARTE/79-330      | A0BW49.1     | PF00069.23 | 56.50 | 0.00 |
| TRINITY_F3ZXB2_MAHA5/6-321       | F3ZXB2.1     | PF00389.28 | 56.50 | 0.00 |
| TRINITY_H3GG74_PHYRM/74-440      | H3GG74.1     | PF01266.22 | 56.50 | 0.00 |
| TRINITY_D3B6M3_POLPA/229-533     | D3B6M3.1     | PF00082.20 | 56.50 | 0.00 |
| TRINITY_F0ZSA3_DICPU/25-166      | F0ZSA3.1     | PF09286.9; | 56.50 | 0.00 |
| TRINITY_E1ZQH6_CHLVA/17-108      | E1ZQH6.1     | PF06831.12 | 56.50 | 0.00 |
| TRINITY_Q22AQ5_TETTS/371-416     | Q22AQ5.1     | PF13639.4; | 56.50 | 0.00 |
| TRINITY_E1ZC64_CHLVA/294-347     | E1ZC64.1     | PF13821.4; | 56.50 | 0.00 |
| TRINITY_F2TYB8_SALR5/166-420     | F2TYB8.1     | PF01358.16 | 56.50 | 0.00 |
| TRINITY_G0QYY5_ICHMG/38-207      | G0QYY5.1     | PF13847.4; | 56.50 | 0.00 |
| TRINITY_A0A015L9B6_9GLOM/3-226   | A0A015L9B6.1 | PF0187     | 56.50 | 0.00 |
| TRINITY_K3WIE3_PYTUL/441-526     | K3WIE3.1     | PF00439.23 | 56.50 | 0.00 |

|                                  |                     |       |      |
|----------------------------------|---------------------|-------|------|
| TRINITY_D8TYP9_VOLCA/272-328     | D8TYP9.1 PF07576.10 | 56.50 | 0.00 |
| TRINITY_D8U7A0_VOLCA/276-367     | D8U7A0.1 PF07540.9; | 56.50 | 0.00 |
| TRINITY_BOWL15_CULQU/916-1063    | BOWL15.1 PF00005.25 | 56.50 | 0.00 |
| TRINITY_A0A087SN34_AUXPR/433-529 | A0A087SN34.1 PF1400 | 56.50 | 0.00 |
| TRINITY_A8IZF1_CHLRE/32-101      | A8IZF1.1 PF01480.15 | 56.50 | 0.00 |
| TRINITY_K9SV99_9SYNE/229-400     | K9SV99.1 PF00204.23 | 56.50 | 0.00 |
| TRINITY_D8U9H2_VOLCA/8-391       | D8U9H2.1 PF03097.16 | 56.50 | 0.00 |
| TRINITY_D8TW13_VOLCA/585-635     | D8TW13.1 PF00847.18 | 56.50 | 0.00 |
| TRINITY_D8U9V6_VOLCA/76-298      | D8U9V6.1 PF03531.12 | 56.50 | 0.00 |
| TRINITY_I0Z0M5_9CHLO/2-126       | I0Z0M5.1 PF04031.11 | 56.50 | 0.00 |
| TRINITY_A8I7L6_CHLRE/263-616     | A8I7L6.1 PF03016.13 | 56.50 | 0.00 |
| TRINITY_E1Z7K2_CHLVA/29-386      | E1Z7K2.1 PF00704.26 | 56.50 | 0.00 |
| TRINITY_D8TNL7_VOLCA/339-763     | D8TNL7.1 PF03372.21 | 56.50 | 0.00 |
| TRINITY_G2PLE0_MURRD/6-68        | G2PLE0.1 PF06902.9; | 56.50 | 0.00 |
| TRINITY_B3E2J7_GEOLS/5-304       | B3E2J7.1 PF00698.19 | 56.40 | 0.00 |
| TRINITY_C3XYC3_BRAFL/5-378       | C3XYC3.1 PF00022.17 | 56.40 | 0.00 |
| TRINITY_F4QB04_DICFS/230-484     | F4QB04.1 PF00069.23 | 56.40 | 0.00 |
| TRINITY_A0DVJ8_PARTE/823-943     | A0DVJ8.1 PF00069.23 | 56.40 | 0.00 |
| TRINITY_A0A0F5I701_9BACI/4-145   | A0A0F5I701.1 PF0145 | 56.40 | 0.00 |
| TRINITY_A0A015LL06_9GLOM/224-430 | A0A015LL06.1 PF0143 | 56.40 | 0.00 |
| TRINITY_K1PYU3_CRAGI/13-269      | K1PYU3.1 PF00069.23 | 56.40 | 0.00 |
| TRINITY_Q22P17_TETTS/146-401     | Q22P17.3 PF00069.23 | 56.40 | 0.00 |
| TRINITY_F4Q0T3_DICFS/285-699     | F4Q0T3.1 PF01373.15 | 56.40 | 0.00 |
| TRINITY_F4PJP8_DICFS/360-420     | F4PJP8.1 PF00571.26 | 56.40 | 0.00 |
| TRINITY_Q23KI3_TETTS/3416-4122   | Q23KI3.2 PF03028.13 | 56.40 | 0.00 |
| TRINITY_A0A0D2UDJ0_CAPO3/193-604 | A0A0D2UDJ0.1 PF0065 | 56.40 | 0.00 |
| TRINITY_A0A078AB65_STYLE/310-782 | A0A078AB65.1 PF0044 | 56.40 | 0.00 |
| TRINITY_A8JET7_CHLRE/10-155      | A8JET7.1 PF01217.18 | 56.40 | 0.00 |
| TRINITY_A0A077ZUB0_STYLE/515-998 | A0A077ZUB0.1 PF0023 | 56.40 | 0.00 |
| TRINITY_A8HTT6_CHLRE/6-60        | A8HTT6.1 PF05347.13 | 56.40 | 0.00 |
| TRINITY_L8HEJ0_ACACA/46-141      | L8HEJ0.1 PF10046.7; | 56.40 | 0.00 |
| TRINITY_Q22W19_TETTS/115-323     | Q22W19.3 PF00112.21 | 56.40 | 0.00 |
| TRINITY_M2XZ12_GALSU/232-284     | M2XZ12.1 PF13639.4; | 56.40 | 0.00 |
| TRINITY_D8TQW1_VOLCA/73-212      | D8TQW1.1 PF03188.14 | 56.40 | 0.00 |
| TRINITY_A8HXJ4_CHLRE/89-561      | A8HXJ4.1 PF00939.17 | 56.40 | 0.00 |
| TRINITY_A8JB14_CHLRE/440-619     | A8JB14.1 PF02734.15 | 56.40 | 0.00 |
| TRINITY_E1ZGP5_CHLVA/978-1270    | E1ZGP5.1 PF13621.4; | 56.40 | 0.00 |
| TRINITY_I7MD14_TETTS/11-177      | I7MD14.1 PF00071.20 | 56.40 | 0.00 |
| TRINITY_D2VB32_NAEGR/32-70       | D2VB32.1 PF00172.16 | 56.40 | 0.00 |
| TRINITY_Q23A17_TETTS/301-520     | Q23A17.1 PF07002.14 | 56.40 | 0.00 |
| TRINITY_A0EHU5_PARTE/441-644     | A0EHU5.1 PF00454.25 | 56.40 | 0.00 |
| TRINITY_W5LE58_ASTMX/270-502     | W5LE58.1 PF00198.21 | 56.40 | 0.00 |
| TRINITY_G0QT51_ICHMG/105-433     | G0QT51.1 PF00676.18 | 56.40 | 0.00 |
| TRINITY_I0Z1Z9_9CHLO/189-441     | I0Z1Z9.1 PF00809.20 | 56.40 | 0.00 |
| TRINITY_D3AW13_POLPA/79-419      | D3AW13.1 PF01494.17 | 56.40 | 0.00 |
| TRINITY_A0CRZ5_PARTE/180-218     | A0CRZ5.1 PF04810.13 | 56.40 | 0.00 |
| TRINITY_K3ZVR6_SETIT/13-52       | K3ZVR6.1 PF01428.14 | 56.40 | 0.00 |
| TRINITY_Q8S6Z2_ORYSJ/980-1121    | Q8S6Z2.1 PF00078.25 | 56.40 | 0.00 |
| TRINITY_L8HK05_ACACA/283-533     | L8HK05.1 PF00069.23 | 56.40 | 0.00 |
| TRINITY_A8J9D1_CHLRE/1-152       | A8J9D1.1 PF00588.17 | 56.40 | 0.00 |
| TRINITY_V4UAJ7_9ROSI/161-416     | V4UAJ7.1 PF05193.19 | 56.40 | 0.00 |
| TRINITY_H0YR09_TAEGU/495-601     | H0YR09.1 PF02847.15 | 56.40 | 0.00 |
| TRINITY_I7ML74_TETTS/5678-6228   | I7ML74.2 PF00899.19 | 56.40 | 0.00 |
| TRINITY_A8JF16_CHLRE/28-294      | A8JF16.1 PF00069.23 | 56.40 | 0.00 |
| TRINITY_L8GWI1_ACACA/131-259     | L8GWI1.1 PF08920.8; | 56.40 | 0.00 |
| TRINITY_E1Z4H3_CHLVA/1661-1859   | E1Z4H3.1 PF13378.4; | 56.40 | 0.00 |
| TRINITY_A0A0N0NL56_9EURO/60-256  | A0A0N0NL56.1 PF1348 | 56.40 | 0.00 |
| TRINITY_K9VGI6_9CYAN/8-301       | K9VGI6.1 PF00291.23 | 56.40 | 0.00 |
| TRINITY_I7MHS0_TETTS/26-176      | I7MHS0.1 PF04446.10 | 56.30 | 0.00 |
| TRINITY_G0QV33_ICHMG/81-320      | G0QV33.1 PF00443.27 | 56.30 | 0.00 |
| TRINITY_A0CXP2_PARTE/13-372      | A0CXP2.1 PF01992.14 | 56.30 | 0.00 |

|                                  |              |            |       |      |
|----------------------------------|--------------|------------|-------|------|
| TRINITY_G1XR80_ARTOA/12-95       | G1XR80.1     | PF01221.16 | 56.30 | 0.00 |
| TRINITY_L8GGP9_ACACA/18-187      | L8GGP9.1     | PF01923.16 | 56.30 | 0.00 |
| TRINITY_D6U7R5_9CHLR/11-187      | D6U7R5.1     | PF00857.18 | 56.30 | 0.00 |
| TRINITY_K1VQR1_TRIAC/143-213     | K1VQR1.1     | PF06741.11 | 56.30 | 0.00 |
| TRINITY_F0ZRT4_DICPU/137-269     | F0ZRT4.1     | PF04116.11 | 56.30 | 0.00 |
| TRINITY_O93325_CHICK/2-88        | O93325.1     | PF00125.22 | 56.30 | 0.00 |
| TRINITY_L8HHR2_ACACA/1-660       | L8HHR2.1     | PF00063.19 | 56.30 | 0.00 |
| TRINITY_F4NUZ2_BATDJ/3-112       | F4NUZ2.1     | PF00168.28 | 56.30 | 0.00 |
| TRINITY_I7MGE9_TETTS/1162-1351   | I7MGE9.2     | PF00488.19 | 56.30 | 0.00 |
| TRINITY_I7M483_TETTS/113-361     | I7M483.1     | PF01063.17 | 56.30 | 0.00 |
| TRINITY_E1ZM59_CHLVA/232-413     | E1ZM59.1     | PF00160.19 | 56.30 | 0.00 |
| TRINITY_Q01B63_OSTTA/364-434     | Q01B63.1     | PF00076.20 | 56.30 | 0.00 |
| TRINITY_D8TKM2_VOLCA/17-87       | D8TKM2.1     | PF00076.20 | 56.30 | 0.00 |
| TRINITY_B6K341_SCHJY/21-455      | B6K341.1     | PF02127.13 | 56.30 | 0.00 |
| TRINITY_I1EPA9_AMPQE/11-98       | I1EPA9.1     | PF14216.4; | 56.30 | 0.00 |
| TRINITY_A8JEV7_CHLRE/99-216      | A8JEV7.1     | PF03367.11 | 56.30 | 0.00 |
| TRINITY_M2T2S0_COCH5/23-450      | M2T2S0.1     | PF01937.17 | 56.30 | 0.00 |
| TRINITY_A8J137_CHLRE/416-726     | A8J137.1     | PF01103.21 | 56.30 | 0.00 |
| TRINITY_D8U1U1_VOLCA/14-201      | D8U1U1.1     | PF01227.20 | 56.30 | 0.00 |
| TRINITY_D8TVF4_VOLCA/25-437      | D8TVF4.1     | PF01704.16 | 56.30 | 0.00 |
| TRINITY_A8JCM8_CHLRE/16-589      | A8JCM8.1     | PF00995.21 | 56.30 | 0.00 |
| TRINITY_A0A068RTH5_9FUNG/5-178   | A0A068RTH5.1 | PF0007     | 56.30 | 0.00 |
| TRINITY_I7M6G5_TETTS/59-200      | I7M6G5.2     | PF08719.9; | 56.30 | 0.00 |
| TRINITY_A8IW64_CHLRE/56-142      | A8IW64.1     | PF00041.19 | 56.30 | 0.00 |
| TRINITY_A8IVV9_CHLRE/238-371     | A8IVV9.1     | PF00258.23 | 56.30 | 0.00 |
| TRINITY_A8IGR6_CHLRE/225-527     | A8IGR6.1     | PF04258.11 | 56.30 | 0.00 |
| TRINITY_D8UG07_VOLCA/87-173      | D8UG07.1     | PF09793.7; | 56.30 | 0.00 |
| TRINITY_A0A089LV66_9BACL/4-116   | A0A089LV66.1 | PF0038     | 56.20 | 0.00 |
| TRINITY_G0QRN4_ICHMG/6-105       | G0QRN4.1     | PF00153.25 | 56.20 | 0.00 |
| TRINITY_Q3SDM6_PARTE/17-177      | Q3SDM6.1     | PF00071.20 | 56.20 | 0.00 |
| TRINITY_G0R4F8_ICHMG/80-145      | G0R4F8.1     | PF00462.22 | 56.20 | 0.00 |
| TRINITY_A0A0J8BS38_BETVU/8-71    | A0A0J8BS38.1 | PF0028     | 56.20 | 0.00 |
| TRINITY_E1ZEF9_CHLVA/278-352     | E1ZEF9.1     | PF03110.12 | 56.20 | 0.00 |
| TRINITY_I7MMG8_TETTS/8-169       | I7MMG8.1     | PF00071.20 | 56.20 | 0.00 |
| TRINITY_C4LV99_ENTHI/13-76       | C4LV99.1     | PF00226.29 | 56.20 | 0.00 |
| TRINITY_KIF3_DICDI/9-329         | Q54UC9.1     | PF00225.21 | 56.20 | 0.00 |
| TRINITY_Q22BA7_TETTS/59-282      | Q22BA7.1     | PF07228.10 | 56.20 | 0.00 |
| TRINITY_U9SYG8_RHIID/7-102       | U9SYG8.1     | PF05728.10 | 56.20 | 0.00 |
| TRINITY_D3RQW6_ALLVD/164-268     | D3RQW6.1     | PF14748.4; | 56.20 | 0.00 |
| TRINITY_L8H286_ACACA/20-197      | L8H286.1     | PF03997.10 | 56.20 | 0.00 |
| TRINITY_A0A0G3BNF0_9BURK/610-828 | A0A0G3BNF0.1 | PF0936     | 56.20 | 0.00 |
| TRINITY_A0A0A1P208_9FUNG/115-327 | A0A0A1P208.1 | PF0155     | 56.20 | 0.00 |
| TRINITY_T1KBR7_TETUR/161-209     | T1KBR7.1     | PF14604.4; | 56.20 | 0.00 |
| TRINITY_B2VWQ3_PYRTR/385-719     | B2VWQ3.1     | PF00176.21 | 56.20 | 0.00 |
| TRINITY_I7M328_TETTS/23-132      | I7M328.1     | PF00787.22 | 56.20 | 0.00 |
| TRINITY_F4PTE6_DICFS/521-632     | F4PTE6.1     | PF00072.22 | 56.20 | 0.00 |
| TRINITY_D8TPR6_VOLCA/558-621     | D8TPR6.1     | PF08590.8; | 56.20 | 0.00 |
| TRINITY_I7MGY5_TETTS/3550-4238   | I7MGY5.2     | PF03028.13 | 56.20 | 0.00 |
| TRINITY_A0A0A1NH74_9FUNG/78-129  | A0A0A1NH74.1 | PF0798     | 56.20 | 0.00 |
| TRINITY_H8MT64_CORCM/655-766     | H8MT64.1     | PF00072.22 | 56.20 | 0.00 |
| TRINITY_D0P397_PHYIT/201-459     | D0P397.1     | PF00069.23 | 56.20 | 0.00 |
| TRINITY_L8GIH5_ACACA/118-300     | L8GIH5.1     | PF02146.15 | 56.20 | 0.00 |
| TRINITY_L8GJV6_ACACA/286-373     | L8GJV6.1     | PF00789.18 | 56.20 | 0.00 |
| TRINITY_A8HY85_CHLRE/42-92       | A8HY85.1     | PF13920.4; | 56.20 | 0.00 |
| TRINITY_L1I701_GUIITH/69-270     | L1I701.1     | PF07002.14 | 56.20 | 0.00 |
| TRINITY_D8U7K5_VOLCA/154-487     | D8U7K5.1     | PF00155.19 | 56.20 | 0.00 |
| TRINITY_Q3SDK9_PARTE/13-174      | Q3SDK9.1     | PF00071.20 | 56.20 | 0.00 |
| TRINITY_D8U6A9_VOLCA/77-347      | D8U6A9.1     | PF01193.22 | 56.20 | 0.00 |
| TRINITY_D6TNU0_9CHLR/3-300       | D6TNU0.1     | PF01156.17 | 56.20 | 0.00 |
| TRINITY_F1A1R9_DICPU/992-1069    | F1A1R9.1     | PF00626.20 | 56.20 | 0.00 |
| TRINITY_B0WL15_CULQU/916-1063    | B0WL15.1     | PF00005.25 | 56.20 | 0.00 |

|                                  |              |            |       |      |
|----------------------------------|--------------|------------|-------|------|
| TRINITY_A8IK66_CHLRE/240-312     | A8IK66.1     | PF07743.11 | 56.20 | 0.00 |
| TRINITY_D8TRT9_VOLCA/27-343      | D8TRT9.1     | PF00856.26 | 56.20 | 0.00 |
| TRINITY_L8HHD7_ACACA/399-693     | L8HHD7.1     | PF01008.15 | 56.20 | 0.00 |
| TRINITY_I0Z2I2_9CHLO/14-356      | I0Z2I2.1     | PF00009.25 | 56.20 | 0.00 |
| TRINITY_R5Y7H5_9CLOT/4-325       | R5Y7H5.1     | PF16363.3; | 56.20 | 0.00 |
| TRINITY_G0R2Y4_ICHMG/103-174     | G0R2Y4.1     | PF04564.13 | 56.20 | 0.00 |
| TRINITY_A0A077AUY9_9RICK/43-114  | A0A077AUY9.1 | PF0456     | 56.20 | 0.00 |
| TRINITY_B9HRF2_POPTR/13-184      | B9HRF2.2     | PF03152.12 | 56.20 | 0.00 |
| TRINITY_Q248A8_TETTS/75-338      | Q248A8.2     | PF08145.10 | 56.20 | 0.00 |
| TRINITY_D8U978_VOLCA/2-203       | D8U978.1     | PF07714.15 | 56.20 | 0.00 |
| TRINITY_F5HH60_NEUCR/868-998     | F5HH60.1     | PF00271.29 | 56.20 | 0.00 |
| TRINITY_E1Z3T0_CHLVA/1-183       | E1Z3T0.1     | PF04072.12 | 56.20 | 0.00 |
| TRINITY_L1INW0_GUIITH/3-74       | L1INW0.1     | PF00240.21 | 56.20 | 0.00 |
| TRINITY_A0A0A7LN38_9BACT/16-380  | A0A0A7LN38.1 | PF0026     | 56.20 | 0.00 |
| TRINITY_H3AKG0_LATCH/49-338      | H3AKG0.1     | PF02219.15 | 56.20 | 0.00 |
| TRINITY_D3BH48_POLPA/164-480     | D3BH48.1     | PF00728.20 | 56.20 | 0.00 |
| TRINITY_I0Z502_9CHLO/30-503      | I0Z502.1     | PF10243.7; | 56.20 | 0.00 |
| TRINITY_A0A0D3AF02_BRAOL/4-67    | A0A0D3AF02.1 | PF0022     | 56.20 | 0.00 |
| TRINITY_T1KGR1_TETUR/6-612       | T1KGR1.1     | PF00012.18 | 56.20 | 0.00 |
| TRINITY_L8H2N3_ACACA/58-547      | L8H2N3.1     | PF02990.14 | 56.20 | 0.00 |
| TRINITY_A8HV32_CHLRE/124-295     | A8HV32.1     | PF02582.12 | 56.20 | 0.00 |
| TRINITY_I1FCH5_AMPQE/13-174      | I1FCH5.1     | PF00071.20 | 56.20 | 0.00 |
| TRINITY_I4C4E4_DESTA/14-154      | I4C4E4.1     | PF01625.19 | 56.20 | 0.00 |
| TRINITY_C1EBY4_MICSR/311-401     | C1EBY4.1     | PF12894.5; | 56.20 | 0.00 |
| TRINITY_J9J3D6_9SPIT/1-244       | J9J3D6.1     | PF01902.15 | 56.20 | 0.00 |
| TRINITY_A0A087G4R9_ARAAL/635-730 | A0A087G4R9.1 | PF0158     | 56.20 | 0.00 |
| TRINITY_L8GPZ7_ACACA/15-171      | L8GPZ7.1     | PF13563.4; | 56.20 | 0.00 |
| TRINITY_I1GC88_AMPQE/167-380     | I1GC88.1     | PF00112.21 | 56.20 | 0.00 |
| TRINITY_D8UK64_VOLCA/8-471       | D8UK64.1     | PF13520.4; | 56.20 | 0.00 |
| TRINITY_A8IHW3_CHLRE/2254-2527   | A8IHW3.1     | PF00520.29 | 56.20 | 0.00 |
| TRINITY_D3B1V2_POLPA/5-372       | D3B1V2.1     | PF00022.17 | 56.20 | 0.00 |
| TRINITY_A0A089LV66_9BACL/4-116   | A0A089LV66.1 | PF0038     | 56.20 | 0.00 |
| TRINITY_G0QXL9_ICHMG/177-426     | G0QXL9.1     | PF07714.15 | 56.10 | 0.00 |
| TRINITY_A0CGP3_PARTE/111-168     | A0CGP3.1     | PF13921.4; | 56.10 | 0.00 |
| TRINITY_Q230X4_TETTS/30-358      | Q230X4.2     | PF16113.3; | 56.10 | 0.00 |
| TRINITY_A0DOV0_PARTE/71-112      | A0DOV0.1     | PF05186.11 | 56.10 | 0.00 |
| TRINITY_S6EFY1_ZYGB2/247-337     | S6EFY1.1     | PF08544.11 | 56.10 | 0.00 |
| TRINITY_Q23D11_TETTS/154-431     | Q23D11.1     | PF00069.23 | 56.10 | 0.00 |
| TRINITY_Q5XJM7_DANRE/18-275      | Q5XJM7.1     | PF00248.19 | 56.10 | 0.00 |
| TRINITY_L8H0M8_ACACA/8-74        | L8H0M8.1     | PF00076.20 | 56.10 | 0.00 |
| TRINITY_J9I3N0_9SPIT/1-183       | J9I3N0.1     | PF00069.23 | 56.10 | 0.00 |
| TRINITY_F0ZG66_DICPU/173-232     | F0ZG66.1     | PF00786.26 | 56.10 | 0.00 |
| TRINITY_D8SSH7_SELML/15-372      | D8SSH7.1     | PF00176.21 | 56.10 | 0.00 |
| TRINITY_F1A2J8_DICPU/1032-1088   | F1A2J8.1     | PF17103.3; | 56.10 | 0.00 |
| TRINITY_D8UFU5_VOLCA/644-695     | D8UFU5.1     | PF12906.5; | 56.10 | 0.00 |
| TRINITY_A8I807_CHLRE/1018-1101   | A8I807.1     | PF00211.18 | 56.10 | 0.00 |
| TRINITY_L8HER1_ACACA/228-321     | L8HER1.1     | PF02148.17 | 56.10 | 0.00 |
| TRINITY_I7MIQ2_TETTS/1022-1280   | I7MIQ2.2     | PF07714.15 | 56.10 | 0.00 |
| TRINITY_D8U7H1_VOLCA/144-209     | D8U7H1.1     | PF13432.4; | 56.10 | 0.00 |
| TRINITY_A0CTX8_PARTE/90-309      | A0CTX8.1     | PF07970.10 | 56.10 | 0.00 |
| TRINITY_X6N8Z0_RETFI/66-153      | X6N8Z0.1     | PF01541.22 | 56.10 | 0.00 |
| TRINITY_L8GTU8_ACACA/76-547      | L8GTU8.1     | PF07969.9; | 56.10 | 0.00 |
| TRINITY_I7M4K8_TETTS/73-244      | I7M4K8.2     | PF01595.18 | 56.10 | 0.00 |
| TRINITY_Q245G5_TETTS/3-166       | Q245G5.2     | PF08613.9; | 56.10 | 0.00 |
| TRINITY_C3YX76_BRAFL/17-261      | C3YX76.1     | PF03372.21 | 56.10 | 0.00 |
| TRINITY_R1D5U8_EMIHU/83-299      | R1D5U8.1     | PF05023.12 | 56.10 | 0.00 |
| TRINITY_F6RV21_ORNAN/110-245     | F6RV21.1     | PF04116.11 | 56.10 | 0.00 |
| TRINITY_I0Z1R7_9CHLO/5-502       | I0Z1R7.1     | PF05091.10 | 56.10 | 0.00 |
| TRINITY_D8U6H7_VOLCA/9-152       | D8U6H7.1     | PF07933.12 | 56.10 | 0.00 |
| TRINITY_I7MHY1_TETTS/1126-1276   | I7MHY1.2     | PF00005.25 | 56.10 | 0.00 |
| TRINITY_I7MHY1_TETTS/1126-1276   | I7MHY1.2     | PF00005.25 | 56.10 | 0.00 |



|                                    |                     |       |      |
|------------------------------------|---------------------|-------|------|
| TRINITY_K6XR77_9ALTE/18-317        | K6XR77.1 PF01156.17 | 56.10 | 0.00 |
| TRINITY_C5GMC3_AJEDR/96-249        | C5GMC3.1 PF13673.5; | 56.10 | 0.00 |
| TRINITY_A0A0K0DNX8_ANGCA/156-282   | A0A0K0DNX8.1 PF1324 | 56.10 | 0.00 |
| TRINITY_D8TGX6_VOLCA/877-1013      | D8TGX6.1 PF01925.17 | 56.10 | 0.00 |
| TRINITY_A8I2P4_CHLRE/206-295       | A8I2P4.1 PF04488.13 | 56.10 | 0.00 |
| TRINITY_D2UDI3_XANAP/14-122        | D2UDI3.1 PF00856.26 | 56.10 | 0.00 |
| TRINITY_I0YQY8_9CHLO/23-161        | I0YQY8.1 PF00781.22 | 56.10 | 0.00 |
| TRINITY_Q23DB7_TETTS/8-263         | Q23DB7.2 PF00069.23 | 56.10 | 0.00 |
| TRINITY_L8HAJ3_ACACA/30-143        | L8HAJ3.1 PF01398.19 | 56.10 | 0.00 |
| TRINITY_A0A087SQ95_AUXPR/6-172     | A0A087SQ95.1 PF0778 | 56.10 | 0.00 |
| TRINITY_T1HIN0_RHOPR/617-1085      | T1HIN0.1 PF13844.4; | 56.10 | 0.00 |
| TRINITY_A0A061FR92_THECC/58-102    | A0A061FR92.1 PF1392 | 56.10 | 0.00 |
| TRINITY_D8UFU1_VOLCA/1-281         | D8UFU1.1 PF00481.19 | 56.10 | 0.00 |
| TRINITY_B4FJK8_MAIZE/8-69          | B4FJK8.1 PF02320.14 | 56.10 | 0.00 |
| TRINITY_K3WHU2_PYTUL/657-699       | K3WHU2.1 PF00400.30 | 56.10 | 0.00 |
| TRINITY_Q22A96_TETTS/376-441       | Q22A96.2 PF00498.24 | 56.10 | 0.00 |
| TRINITY_A8HQF7_CHLRE/968-1179      | A8HQF7.1 PF01061.22 | 56.10 | 0.00 |
| TRINITY_E1Z8Z0_CHLVA/13-192        | E1Z8Z0.1 PF02223.15 | 56.10 | 0.00 |
| TRINITY_D8SYE6_SELML/15-206        | D8SYE6.1 PF07910.11 | 56.10 | 0.00 |
| TRINITY_I7MAE9_TETTS/49-204        | I7MAE9.1 PF13847.4; | 56.10 | 0.00 |
| TRINITY_A8HN19_CHLRE/83-198        | A8HN19.1 PF05195.14 | 56.10 | 0.00 |
| TRINITY_A8JIA0_CHLRE/148-349       | A8JIA0.1 PF07478.11 | 56.10 | 0.00 |
| TRINITY_J9HQD5_9SPIT/229-287       | J9HQD5.1 PF00498.24 | 56.10 | 0.00 |
| TRINITY_D2V2A3_NAEGR/415-919       | D2V2A3.1 PF00899.19 | 56.10 | 0.00 |
| TRINITY_A0A0M0L002_9EUKA/1987-2131 | A0A0M0L002.1 PF0000 | 56.10 | 0.00 |
| TRINITY_G3WMB5_SARHA/62-225        | G3WMB5.1 PF08662.9; | 56.10 | 0.00 |
| TRINITY_J9J3B4_9SPIT/124-338       | J9J3B4.1 PF00112.21 | 56.10 | 0.00 |
| TRINITY_S8CKT9_9LAMI/21-340        | S8CKT9.1 PF02733.15 | 56.10 | 0.00 |
| TRINITY_I4ECZ1_9CHLR/3-117         | I4ECZ1.1 PF06983.11 | 56.10 | 0.00 |
| TRINITY_Q22P17_TETTS/11-125        | Q22P17.3 PF00072.22 | 56.00 | 0.00 |
| TRINITY_BGAL_SOLLC/30-336          | P48980.1 PF01301.17 | 56.00 | 0.00 |
| TRINITY_V4AWS4_LOTGI/3-64          | V4AWS4.1 PF00226.29 | 56.00 | 0.00 |
| TRINITY_A0A0D2WMX1_CAPO3/127-230   | A0A0D2WMX1.1 PF0061 | 56.00 | 0.00 |
| TRINITY_D3F3H7_CONWI/123-182       | D3F3H7.1 PF13376.4; | 56.00 | 0.00 |
| TRINITY_L8H880_ACACA/28-209        | L8H880.1 PF01183.18 | 56.00 | 0.00 |
| TRINITY_D8UDD9_VOLCA/30-246        | D8UDD9.1 PF00856.26 | 56.00 | 0.00 |
| TRINITY_J9H4G8_9ACTN/395-544       | J9H4G8.1 PF00005.25 | 56.00 | 0.00 |
| TRINITY_D7FSC0_ECTSI/20-203        | D7FSC0.1 PF02223.15 | 56.00 | 0.00 |
| TRINITY_C7PPF7_CHIPD/460-723       | C7PPF7.1 PF12972.5; | 56.00 | 0.00 |
| TRINITY_J9IMT2_9SPIT/146-246       | J9IMT2.1 PF00153.25 | 56.00 | 0.00 |
| TRINITY_J9FRH7_9SPIT/20-284        | J9FRH7.1 PF01650.16 | 56.00 | 0.00 |
| TRINITY_A0A0G2ZF02_9DELT/207-312   | A0A0G2ZF02.1 PF0255 | 56.00 | 0.00 |
| TRINITY_D1B7C5_THEAS/8-349         | D1B7C5.1 PF00266.17 | 56.00 | 0.00 |
| TRINITY_A0A087XGU5_POEFO/8-68      | A0A087XGU5.1 PF0022 | 56.00 | 0.00 |
| TRINITY_A0A0D2WQ34_CAPO3/2-186     | A0A0D2WQ34.1 PF0273 | 56.00 | 0.00 |
| TRINITY_Q22W19_TETTS/115-323       | Q22W19.3 PF00112.21 | 56.00 | 0.00 |
| TRINITY_A0CUS1_PARTE/180-292       | A0CUS1.1 PF05708.10 | 56.00 | 0.00 |
| TRINITY_A0CWV2_PARTE/507-606       | A0CWV2.1 PF04815.13 | 56.00 | 0.00 |
| TRINITY_K9X806_9CHRO/230-637       | K9X806.1 PF01179.18 | 56.00 | 0.00 |
| TRINITY_I1FHZ4_AMPQE/488-551       | I1FHZ4.1 PF01485.19 | 56.00 | 0.00 |
| TRINITY_A0A087XHP4_POEFO/512-659   | A0A087XHP4.2 PF0911 | 56.00 | 0.00 |
| TRINITY_A0CH03_PARTE/40-316        | A0CH03.1 PF00664.21 | 56.00 | 0.00 |
| TRINITY_I8UA81_9BACI/56-152        | I8UA81.1 PF08241.10 | 56.00 | 0.00 |
| TRINITY_D8U3Z3_VOLCA/6-409         | D8U3Z3.1 PF03372.21 | 56.00 | 0.00 |
| TRINITY_A8JEQ7_CHLRE/115-265       | A8JEQ7.1 PF00581.18 | 56.00 | 0.00 |
| TRINITY_D8TCM5_SELML/343-475       | D8TCM5.1 PF01553.19 | 56.00 | 0.00 |
| TRINITY_F0V8T6_NEOCL/5-88          | F0V8T6.1 PF01221.16 | 56.00 | 0.00 |
| TRINITY_A0A087SQ98_AUXPR/82-179    | A0A087SQ98.1 PF0419 | 56.00 | 0.00 |
| TRINITY_A8J937_CHLRE/104-222       | A8J937.1 PF00188.24 | 56.00 | 0.00 |
| TRINITY_W2RL69_9EURO/448-506       | W2RL69.1 PF01485.19 | 56.00 | 0.00 |
| TRINITY_A2SS06_METLZ/5-66          | A2SS06.1 PF00226.29 | 56.00 | 0.00 |

|                                  |                     |       |      |
|----------------------------------|---------------------|-------|------|
| TRINITY_D3B6M3_POLPA/229-533     | D3B6M3.1 PF00082.20 | 56.00 | 0.00 |
| TRINITY_A0A0D2WKR6_CAPO3/303-496 | A0A0D2WKR6.1 PF0438 | 56.00 | 0.00 |
| TRINITY_L8GQL5_ACACA/626-1215    | L8GQL5.1 PF00821.16 | 56.00 | 0.00 |
| TRINITY_I1BK57_RHIO9/844-1034    | I1BK57.1 PF13087.4; | 56.00 | 0.00 |
| TRINITY_Q22X13_TETTS/1-295       | Q22X13.2 PF08610.8; | 56.00 | 0.00 |
| TRINITY_A0CX64_PARTE/177-410     | A0CX64.1 PF01798.16 | 56.00 | 0.00 |
| TRINITY_D8UG46_VOLCA/440-574     | D8UG46.1 PF00581.18 | 56.00 | 0.00 |
| TRINITY_A0CLD6_PARTE/82-333      | A0CLD6.1 PF00069.23 | 56.00 | 0.00 |
| TRINITY_A0A077FR81_9RICK/8-137   | A0A077FR81.1 PF0192 | 56.00 | 0.00 |
| TRINITY_A0A0G4IH02_PLABS/188-236 | A0A0G4IH02.1 PF1392 | 56.00 | 0.00 |
| TRINITY_A8JI29_CHLRE/455-744     | A8JI29.1 PF06046.11 | 56.00 | 0.00 |
| TRINITY_I0YS50_9CHLO/95-197      | I0YS50.1 PF02777.16 | 56.00 | 0.00 |
| TRINITY_F4P7G3_BATDJ/1816-1998   | F4P7G3.1 PF12348.6; | 56.00 | 0.00 |
| TRINITY_A0A0A0KJ41_CUCSA/48-198  | A0A0A0KJ41.1 PF1429 | 55.90 | 0.00 |
| TRINITY_B7FQH6_PHATC/4-92        | B7FQH6.1 PF00153.25 | 55.90 | 0.00 |
| TRINITY_H3CFC6_TETNG/1489-1604   | H3CFC6.1 PF00271.29 | 55.90 | 0.00 |
| TRINITY_F4QDR0_DICFS/205-312     | F4QDR0.1 PF00175.19 | 55.90 | 0.00 |
| TRINITY_C1MIT9_MICPC/12-181      | C1MIT9.1 PF13439.4; | 55.90 | 0.00 |
| TRINITY_A6L9N3_PARD8/670-787     | A6L9N3.1 PF00072.22 | 55.90 | 0.00 |
| TRINITY_L8GS45_ACACA/110-198     | L8GS45.1 PF00957.19 | 55.90 | 0.00 |
| TRINITY_J9F9Y8_9SPIT/10-381      | J9F9Y8.1 PF00022.17 | 55.90 | 0.00 |
| TRINITY_G7WIC3_DESOD/8-126       | G7WIC3.1 PF01575.17 | 55.90 | 0.00 |
| TRINITY_DHE3_DICDI/217-453       | Q54KB7.1 PF00208.19 | 55.90 | 0.00 |
| TRINITY_G0QW95_ICHMG/250-437     | G0QW95.1 PF02799.13 | 55.90 | 0.00 |

|                                  |              |            |       |      |
|----------------------------------|--------------|------------|-------|------|
| TRINITY_J9J0J0_9SPIT/1450-1691   | J9J0J0.1     | PF00520.29 | 55.90 | 0.00 |
| TRINITY_F4PSS6_DICFS/422-518     | F4PSS6.1     | PF00153.25 | 55.90 | 0.00 |
| TRINITY_D3AVR4_POLPA/17-262      | D3AVR4.1     | PF00069.23 | 55.90 | 0.00 |
| TRINITY_A0DAI9_PARTE/12-124      | A0DAI9.1     | PF01412.16 | 55.90 | 0.00 |
| TRINITY_A0A0J7KD70_LASNI/25-145  | A0A0J7KD70.1 | PF0289     | 55.90 | 0.00 |
| TRINITY_Q758Y6_ASHGO/4-130       | Q758Y6.1     | PF00125.22 | 55.90 | 0.00 |
| TRINITY_A0A022QYL1_ERYGU/109-178 | A0A022QYL1.1 | PF0697     | 55.90 | 0.00 |
| TRINITY_I7M706_TETTS/16-370      | I7M706.2     | PF00225.21 | 55.90 | 0.00 |
| TRINITY_A0CK56_PARTE/2-375       | A0CK56.1     | PF01222.15 | 55.90 | 0.00 |
| TRINITY_D8UIG4_VOLCA/308-609     | D8UIG4.1     | PF10637.7; | 55.90 | 0.00 |
| TRINITY_A0E2M3_PARTE/3-103       | A0E2M3.1     | PF00168.28 | 55.90 | 0.00 |
| TRINITY_D8TKG8_VOLCA/103-423     | D8TKG8.1     | PF00398.18 | 55.90 | 0.00 |
| TRINITY_D8TXM1_VOLCA/46-287      | D8TXM1.1     | PF07714.15 | 55.90 | 0.00 |
| TRINITY_D8TR61_VOLCA/1-236       | D8TR61.1     | PF06105.10 | 55.90 | 0.00 |
| TRINITY_G0QVH9_ICHMG/93-465      | G0QVH9.1     | PF01546.26 | 55.90 | 0.00 |
| TRINITY_A8JHW6_CHLRE/43-718      | A8JHW6.1     | PF00995.21 | 55.90 | 0.00 |
| TRINITY_L8GKG4_ACACA/104-164     | L8GKG4.1     | PF12656.5; | 55.90 | 0.00 |
| TRINITY_D8TRX0_VOLCA/247-317     | D8TRX0.1     | PF00575.21 | 55.90 | 0.00 |
| TRINITY_I0Z981_9CHLO/3-133       | I0Z981.1     | PF02130.15 | 55.90 | 0.00 |
| TRINITY_L8GLR0_ACACA/875-1195    | L8GLR0.1     | PF03178.13 | 55.90 | 0.00 |
| TRINITY_G0R216_ICHMG/467-534     | G0R216.1     | PF01480.15 | 55.90 | 0.00 |
| TRINITY_A0A087SL48_AUXPR/2-291   | A0A087SL48.1 | PF0315     | 55.90 | 0.00 |
| TRINITY_Q24F23_TETTS/322-390     | Q24F23.1     | PF08059.11 | 55.90 | 0.00 |
| TRINITY_G0QNE2_ICHMG/99-359      | G0QNE2.1     | PF00069.23 | 55.90 | 0.00 |
| TRINITY_W4G762_9STRA/203-335     | W4G762.1     | PF00583.23 | 55.90 | 0.00 |
| TRINITY_D8U4A9_VOLCA/393-582     | D8U4A9.1     | PF07887.9; | 55.90 | 0.00 |
| TRINITY_W5MNV1_LEPOC/4-107       | W5MNV1.1     | PF14933.4; | 55.90 | 0.00 |
| TRINITY_C3XRT7_BRAFL/49-255      | C3XRT7.1     | PF00106.23 | 55.90 | 0.00 |
| TRINITY_M1BNR5_SOLTU/95-164      | M1BNR5.1     | PF00076.20 | 55.90 | 0.00 |
| TRINITY_I7MLL9_TETTS/291-547     | I7MLL9.2     | PF00069.23 | 55.90 | 0.00 |
| TRINITY_G3XRB0_ASPNA/5-106       | G3XRB0.1     | PF00085.18 | 55.90 | 0.00 |
| TRINITY_Q22T22_TETTS/520-735     | Q22T22.3     | PF07859.11 | 55.90 | 0.00 |
| TRINITY_A0A087SP99_AUXPR/16-273  | A0A087SP99.1 | PF0337     | 55.90 | 0.00 |
| TRINITY_Q00SW9_OSTTA/582-755     | Q00SW9.1     | PF02769.20 | 55.90 | 0.00 |
| TRINITY_I0YV30_9CHLO/201-384     | I0YV30.1     | PF05193.19 | 55.90 | 0.00 |
| TRINITY_GELA_DICDI/12-118        | P13466.1     | PF00307.29 | 55.90 | 0.00 |
| TRINITY_M7C5U4_CHEMY/2-373       | M7C5U4.1     | PF00022.17 | 55.90 | 0.00 |
| TRINITY_A0A096PAY4_OSTTA/138-206 | A0A096PAY4.1 | PF0001     | 55.90 | 0.00 |
| TRINITY_A0A0D2VRM0_CAPO3/28-335  | A0A0D2VRM0.1 | PF0036     | 55.90 | 0.00 |
| TRINITY_J9I2R8_9SPIT/282-345     | J9I2R8.1     | PF00498.24 | 55.90 | 0.00 |
| TRINITY_L8H0X3_ACACA/523-817     | L8H0X3.1     | PF04950.10 | 55.90 | 0.00 |
| TRINITY_L8H4Q3_ACACA/5-358       | L8H4Q3.1     | PF00443.27 | 55.90 | 0.00 |
| TRINITY_D3BDQ8_POLPA/12-329      | D3BDQ8.1     | PF00225.21 | 55.90 | 0.00 |
| TRINITY_K9QCP6_9NOSO/32-144      | K9QCP6.1     | PF00355.24 | 55.90 | 0.00 |
| TRINITY_A0A059A334_EUCGR/77-151  | A0A059A334.1 | PF0311     | 55.90 | 0.00 |
| TRINITY_A0A0L0C6F7_LUCCU/717-852 | A0A0L0C6F7.1 | PF0000     | 55.90 | 0.00 |
| TRINITY_D8UFR9_VOLCA/717-924     | D8UFR9.1     | PF00481.19 | 55.90 | 0.00 |
| TRINITY_C5KZM2_PERM5/29-216      | C5KZM2.1     | PF00227.24 | 55.90 | 0.00 |
| TRINITY_E1ZAZ4_CHLVA/6-98        | E1ZAZ4.1     | PF00166.19 | 55.90 | 0.00 |
| TRINITY_A0C0W6_PARTE/7-154       | A0C0W6.1     | PF00056.21 | 55.80 | 0.00 |
| TRINITY_B9RB46_RICCO/80-124      | B9RB46.1     | PF13639.4; | 55.80 | 0.00 |
| TRINITY_A0A0K6GHT1_9HOMO/109-457 | A0A0K6GHT1.1 | PF0310     | 55.80 | 0.00 |
| TRINITY_S2J9M4_MUCC1/226-394     | S2J9M4.1     | PF01612.18 | 55.80 | 0.00 |
| TRINITY_J9IXJ6_9SPIT/12-173      | J9IXJ6.1     | PF00071.20 | 55.80 | 0.00 |
| TRINITY_H2N283_ORYLA/37-97       | H2N283.1     | PF00050.19 | 55.80 | 0.00 |
| TRINITY_F0ZCS1_DICPU/21-68       | F0ZCS1.1     | PF13920.4; | 55.80 | 0.00 |
| TRINITY_F4PMN3_DICFS/350-629     | F4PMN3.1     | PF12257.6; | 55.80 | 0.00 |
| TRINITY_I7M1S8_TETTS/492-689     | I7M1S8.2     | PF05958.9; | 55.80 | 0.00 |
| TRINITY_D8FWW1_9CYAN/72-190      | D8FWW1.1     | PF09335.9; | 55.80 | 0.00 |
| TRINITY_B7ZX64_MAIZE/53-527      | B7ZX64.1     | PF00501.26 | 55.80 | 0.00 |
| TRINITY_A0DD10_PARTE/379-525     | A0DD10.1     | PF03031.16 | 55.80 | 0.00 |

|                                  |                     |       |      |
|----------------------------------|---------------------|-------|------|
| TRINITY_J9DM28_EDHAE/188-231     | J9DM28.1 PF13639.4; | 55.80 | 0.00 |
| TRINITY_B8BES4_ORYSI/707-805     | B8BES4.1 PF13304.4; | 55.80 | 0.00 |
| TRINITY_A0A015J9E1_9GLOM/123-174 | A0A015J9E1.1 PF1363 | 55.80 | 0.00 |
| TRINITY_A0A022RBP7_ERYGU/435-478 | A0A022RBP7.1 PF1363 | 55.80 | 0.00 |
| TRINITY_J9HVL7_9SPIT/73-307      | J9HVL7.1 PF01674.16 | 55.80 | 0.00 |
| TRINITY_A0A087SEF3_AUXPR/73-194  | A0A087SEF3.1 PF0828 | 55.80 | 0.00 |
| TRINITY_K9X7H8_9NOST/344-533     | K9X7H8.1 PF13604.4; | 55.80 | 0.00 |
| TRINITY_I0YUK2_9CHLO/10-84       | I0YUK2.1 PF13656.4; | 55.80 | 0.00 |
| TRINITY_W9X2X5_9EURO/161-524     | W9X2X5.1 PF00266.17 | 55.80 | 0.00 |
| TRINITY_A0A087XF22_POEFO/159-287 | A0A087XF22.2 PF0010 | 55.80 | 0.00 |
| TRINITY_A0A067BDQ4_SAPPC/403-574 | A0A067BDQ4.1 PF0814 | 55.80 | 0.00 |
| TRINITY_A0A087SQU6_AUXPR/2-78    | A0A087SQU6.1 PF0512 | 55.80 | 0.00 |
| TRINITY_A3QAA4_SHELP/5-371       | A3QAA4.1 PF01266.22 | 55.80 | 0.00 |
| TRINITY_F0ZB10_DICPU/389-622     | F0ZB10.1 PF01545.19 | 55.80 | 0.00 |
| TRINITY_D8U0A7_VOLCA/66-160      | D8U0A7.1 PF12542.6; | 55.80 | 0.00 |
| TRINITY_Q24F54_TETTS/168-427     | Q24F54.4 PF02263.17 | 55.80 | 0.00 |
| TRINITY_U4KVX6_PYROM/277-320     | U4KVX6.1 PF13639.4; | 55.80 | 0.00 |
| TRINITY_D8TIZ1_VOLCA/51-145      | D8TIZ1.1 PF00686.17 | 55.80 | 0.00 |
| TRINITY_A0A087SSY0_AUXPR/20-105  | A0A087SSY0.1 PF0796 | 55.80 | 0.00 |
| TRINITY_A8J8P1_CHLRE/31-280      | A8J8P1.1 PF00225.21 | 55.80 | 0.00 |
| TRINITY_D8THZ3_VOLCA/156-424     | D8THZ3.1 PF00928.19 | 55.80 | 0.00 |
| TRINITY_D8UGL3_VOLCA/426-506     | D8UGL3.1 PF00168.28 | 55.80 | 0.00 |
| TRINITY_A8J3V3_CHLRE/10-183      | A8J3V3.1 PF03547.16 | 55.80 | 0.00 |
| TRINITY_A0A087SBA0_AUXPR/25-190  | A0A087SBA0.1 PF1366 | 55.80 | 0.00 |
| TRINITY_A0A078ADF2_STYLE/166-294 | A0A078ADF2.1 PF0076 | 55.80 | 0.00 |
| TRINITY_L8H4I8_ACACA/10-1020     | L8H4I8.1 PF02463.17 | 55.80 | 0.00 |
| TRINITY_A0A077ZVR1_STYLE/127-198 | A0A077ZVR1.1 PF0007 | 55.80 | 0.00 |
| TRINITY_Q5CQG6_CRYPI/335-477     | Q5CQG6.1 PF04893.15 | 55.80 | 0.00 |
| TRINITY_W5MNV1_LEPOC/4-107       | W5MNV1.1 PF14933.4; | 55.80 | 0.00 |
| TRINITY_A0A0C4ENE9_PUCT1/252-356 | A0A0C4ENE9.1 PF0030 | 55.80 | 0.00 |
| TRINITY_I3L5Q2_PIG/13-60         | I3L5Q2.1 PF13920.4; | 55.80 | 0.00 |
| TRINITY_Q23DI7_TETTS/1868-2219   | Q23DI7.2 PF00443.27 | 55.80 | 0.00 |
| TRINITY_A8JAR8_CHLRE/1-204       | A8JAR8.1 PF05057.12 | 55.80 | 0.00 |
| TRINITY_S2K4R7_MUCC1/8-126       | S2K4R7.1 PF01042.19 | 55.80 | 0.00 |
| TRINITY_A8J8W0_CHLRE/288-488     | A8J8W0.1 PF03441.12 | 55.80 | 0.00 |
| TRINITY_D2V9F0_NAEGR/1-51        | D2V9F0.1 PF13921.4; | 55.80 | 0.00 |
| TRINITY_E1Z8J3_CHLVA/1-97        | E1Z8J3.1 PF02410.13 | 55.80 | 0.00 |
| TRINITY_Q22KE9_TETTS/144-692     | Q22KE9.1 PF03571.13 | 55.80 | 0.00 |
| TRINITY_A0C2C1_PARTE/372-421     | A0C2C1.1 PF13920.4; | 55.80 | 0.00 |
| TRINITY_Q229B1_TETTS/1-270       | Q229B1.1 PF08433.8; | 55.70 | 0.00 |
| TRINITY_I7ML74_TETTS/5240-5676   | I7ML74.2 PF00899.19 | 55.70 | 0.00 |
| TRINITY_D2VA04_NAEGR/1-326       | D2VA04.1 PF13393.4; | 55.70 | 0.00 |
| TRINITY_S8ANP7_PENO1/505-638     | S8ANP7.1 PF03404.14 | 55.70 | 0.00 |
| TRINITY_A0C2G1_PARTE/125-233     | A0C2G1.1 PF02770.17 | 55.70 | 0.00 |
| TRINITY_C3Z4S4_BRAFL/15-164      | C3Z4S4.1 PF00857.18 | 55.70 | 0.00 |
| TRINITY_L7U781_MYXSD/88-193      | L7U781.1 PF01553.19 | 55.70 | 0.00 |
| TRINITY_L8H7V4_ACACA/94-172      | L8H7V4.1 PF00076.20 | 55.70 | 0.00 |
| TRINITY_I7M0V3_TETTS/377-638     | I7M0V3.2 PF00069.23 | 55.70 | 0.00 |
| TRINITY_D3AYR5_POLPA/92-343      | D3AYR5.1 PF00069.23 | 55.70 | 0.00 |
| TRINITY_A8ILB2_CHLRE/23-298      | A8ILB2.1 PF00251.18 | 55.70 | 0.00 |
| TRINITY_K5VG38_PHACS/42-103      | K5VG38.1 PF00403.24 | 55.70 | 0.00 |
| TRINITY_F4PJV7_DICFS/77-370      | F4PJV7.1 PF12705.5; | 55.70 | 0.00 |
| TRINITY_A0A015ICW4_9GLOM/276-552 | A0A015ICW4.1 PF0066 | 55.70 | 0.00 |
| TRINITY_W9XVR6_9EURO/26-98       | W9XVR6.1 PF13499.4; | 55.70 | 0.00 |
| TRINITY_I0Z970_9CHLO/3-151       | I0Z970.1 PF13365.4; | 55.70 | 0.00 |
| TRINITY_W1PAH0_AMBTC/16-78       | W1PAH0.1 PF00226.29 | 55.70 | 0.00 |
| TRINITY_A8LQG8_DINSH/4-242       | A8LQG8.1 PF01144.21 | 55.70 | 0.00 |
| TRINITY_G7J420_MEDTR/11-290      | G7J420.1 PF00370.19 | 55.70 | 0.00 |
| TRINITY_V6LTL1_9EUKA/3-74        | V6LTL1.1 PF00240.21 | 55.70 | 0.00 |
| TRINITY_A0A0N4VA03_ENTVE/17-187  | A0A0N4VA03.1 PF0335 | 55.70 | 0.00 |
| TRINITY_R0IAX6_9BRAS/128-200     | R0IAX6.1 PF01472.18 | 55.70 | 0.00 |

|                                  |                     |       |      |
|----------------------------------|---------------------|-------|------|
| TRINITY_I0YPZ4_9CHLO/5-140       | I0YPZ4.1 PF00504.19 | 55.70 | 0.00 |
| TRINITY_F4PHG1_DICFS/31-284      | F4PHG1.1 PF00069.23 | 55.70 | 0.00 |
| TRINITY_W7XBL0_TETTS/482-665     | W7XBL0.1 PF11916.6; | 55.70 | 0.00 |
| TRINITY_A0A0N1NYS6_9EURO/109-167 | A0A0N1NYS6.1 PF0411 | 55.70 | 0.00 |
| TRINITY_Q229Q4_TETTS/33-368      | Q229Q4.2 PF00225.21 | 55.70 | 0.00 |
| TRINITY_L8HBF0_ACACA/20-205      | L8HBF0.1 PF16661.3; | 55.70 | 0.00 |
| TRINITY_N1JGE9_BLUG1/99-248      | N1JGE9.1 PF00005.25 | 55.70 | 0.00 |
| TRINITY_RECA_BURCJ/7-269         | B4EBY3.1 PF00154.19 | 55.70 | 0.00 |
| TRINITY_A8JG04_CHLRE/72-269      | A8JG04.1 PF07466.9; | 55.70 | 0.00 |
| TRINITY_B9ICS6_POPTR/118-434     | B9ICS6.2 PF00251.18 | 55.70 | 0.00 |
| TRINITY_D8TZS9_VOLCA/306-373     | D8TZS9.1 PF00789.18 | 55.70 | 0.00 |
| TRINITY_A8IA75_CHLRE/44-181      | A8IA75.1 PF03330.16 | 55.70 | 0.00 |
| TRINITY_L8HFF6_ACACA/21-280      | L8HFF6.1 PF00491.19 | 55.70 | 0.00 |
| TRINITY_W9SCN3_9ROSA/200-348     | W9SCN3.1 PF00929.22 | 55.70 | 0.00 |
| TRINITY_B9GVF4_POPTR/64-407      | B9GVF4.2 PF00009.25 | 55.70 | 0.00 |
| TRINITY_F0ZY14_DICPU/351-612     | F0ZY14.1 PF07714.15 | 55.70 | 0.00 |
| TRINITY_GELA_DICDI/12-118        | P13466.1 PF00307.29 | 55.70 | 0.00 |
| TRINITY_A0A059LJ23_9CHLO/282-790 | A0A059LJ23.1 PF0017 | 55.70 | 0.00 |
| TRINITY_A0A0R4I9K8_DANRE/12-105  | A0A0R4I9K8.1 PF1017 | 55.70 | 0.00 |
| TRINITY_A8I7P2_CHLRE/17-260      | A8I7P2.1 PF06966.10 | 55.70 | 0.00 |
| TRINITY_D8U494_VOLCA/3-139       | D8U494.1 PF10294.7; | 55.70 | 0.00 |
| TRINITY_K5VY91_PHACS/357-763     | K5VY91.1 PF00962.20 | 55.70 | 0.00 |
| TRINITY_G0QRM1_ICHMG/13-169      | G0QRM1.1 PF12850.5; | 55.70 | 0.00 |
| TRINITY_A0CG28_PARTE/9-130       | A0CG28.1 PF01042.19 | 55.70 | 0.00 |
| TRINITY_Q7XLT8_ORYSJ/503-697     | Q7XLT8.2 PF00078.25 | 55.70 | 0.00 |
| TRINITY_D3B1V2_POLPA/5-372       | D3B1V2.1 PF00022.17 | 55.70 | 0.00 |
| TRINITY_G0QX82_ICHMG/451-647     | G0QX82.1 PF00566.16 | 55.70 | 0.00 |
| TRINITY_A0EEX5_PARTE/21-575      | A0EEX5.1 PF01602.18 | 55.60 | 0.00 |
| TRINITY_F4QED2_DICFS/611-718     | F4QED2.1 PF00307.29 | 55.60 | 0.00 |
| TRINITY_A4VEZ3_TETTS/248-296     | A4VEZ3.1 PF00400.30 | 55.60 | 0.00 |
| TRINITY_D8UBJ9_VOLCA/160-331     | D8UBJ9.1 PF16575.3; | 55.60 | 0.00 |
| TRINITY_C6J521_9BACL/48-380      | C6J521.1 PF02055.14 | 55.60 | 0.00 |
| TRINITY_I7M1V6_TETTS/314-533     | I7M1V6.1 PF07002.14 | 55.60 | 0.00 |
| TRINITY_Q5TNJ4_ANOGA/104-168     | Q5TNJ4.3 PF00327.18 | 55.60 | 0.00 |
| TRINITY_Q3SDW1_PARTE/11-74       | Q3SDW1.1 PF13499.4; | 55.60 | 0.00 |
| TRINITY_G0QUC0_ICHMG/33-271      | G0QUC0.1 PF08704.8; | 55.60 | 0.00 |
| TRINITY_B4UXL3_9ACTN/7-233       | B4UXL3.1 PF05368.11 | 55.60 | 0.00 |
| TRINITY_I0Z580_9CHLO/57-483      | I0Z580.1 PF01222.15 | 55.60 | 0.00 |
| TRINITY_D8TDQ2_SELML/11-266      | D8TDQ2.1 PF00069.23 | 55.60 | 0.00 |
| TRINITY_Q22CC8_TETTS/4-483       | Q22CC8.2 PF04791.14 | 55.60 | 0.00 |
| TRINITY_D3B6M3_POLPA/229-533     | D3B6M3.1 PF00082.20 | 55.60 | 0.00 |
| TRINITY_D3B581_POLPA/295-339     | D3B581.1 PF01084.18 | 55.60 | 0.00 |
| TRINITY_F7E8Y2_ORNAN/252-299     | F7E8Y2.1 PF13920.4; | 55.60 | 0.00 |
| TRINITY_L1JWW5_GUITH/129-200     | L1JWW5.1 PF04564.13 | 55.60 | 0.00 |
| TRINITY_L8HGS9_ACACA/1-197       | L8HGS9.1 PF02115.15 | 55.60 | 0.00 |
| TRINITY_A0A078FHA5_BRANA/210-310 | A0A078FHA5.1 PF1289 | 55.60 | 0.00 |
| TRINITY_A0A0D2X3R4_CAPO3/24-592  | A0A0D2X3R4.1 PF0160 | 55.60 | 0.00 |
| TRINITY_D3BNN2_POLPA/173-243     | D3BNN2.1 PF15159.4; | 55.60 | 0.00 |
| TRINITY_A7STF6_NEMVE/2-108       | A7STF6.1 PF01521.18 | 55.60 | 0.00 |
| TRINITY_E1Z750_CHLVA/56-323      | E1Z750.1 PF00122.18 | 55.60 | 0.00 |
| TRINITY_A0A077FJN5_9RICK/1-283   | A0A077FJN5.1 PF0057 | 55.60 | 0.00 |
| TRINITY_U5H3G6_USTV1/2-375       | U5H3G6.1 PF00022.17 | 55.60 | 0.00 |
| TRINITY_A0A0G4ERS4_9ALVE/381-452 | A0A0G4ERS4.1 PF0007 | 55.60 | 0.00 |
| TRINITY_D3BT91_POLPA/163-335     | D3BT91.1 PF10520.7; | 55.60 | 0.00 |
| TRINITY_A0EFQ7_PARTE/75-330      | A0EFQ7.1 PF00069.23 | 55.60 | 0.00 |
| TRINITY_J9J754_9SPIT/543-600     | J9J754.1 PF01485.19 | 55.60 | 0.00 |
| TRINITY_L8GG36_ACACA/72-255      | L8GG36.1 PF02145.13 | 55.60 | 0.00 |
| TRINITY_Q54RS0_DICDI/66-205      | Q54RS0.1 PF00849.20 | 55.60 | 0.00 |
| TRINITY_G0QT22_ICHMG/18-134      | G0QT22.1 PF00583.23 | 55.60 | 0.00 |
| TRINITY_S2JKZ2_MUCC1/571-773     | S2JKZ2.1 PF00566.16 | 55.60 | 0.00 |
| TRINITY_A0A0M3J5J0_ANISI/4-73    | A0A0M3J5J0.1 PF0279 | 55.60 | 0.00 |

|                                  |              |            |       |      |
|----------------------------------|--------------|------------|-------|------|
| TRINITY_A8I5Y8_CHLRE/3-173       | A8I5Y8.1     | PF05078.10 | 55.60 | 0.00 |
| TRINITY_A0A078B8T9_STYLE/13-150  | A0A078B8T9.1 | PF1458     | 55.60 | 0.00 |
| TRINITY_V7AXD5_PHAVU/35-93       | V7AXD5.1     | PF00013.27 | 55.60 | 0.00 |
| TRINITY_Q54HY5_DICDI/490-673     | Q54HY5.2     | PF00644.18 | 55.60 | 0.00 |
| TRINITY_M3WQG6_FELCA/66-392      | M3WQG6.1     | PF00009.25 | 55.60 | 0.00 |
| TRINITY_L8H3W5_ACACA/971-1093    | L8H3W5.1     | PF00271.29 | 55.60 | 0.00 |
| TRINITY_L8H3W5_ACACA/971-1093    | L8H3W5.1     | PF00271.29 | 55.60 | 0.00 |
| TRINITY_F0ZXF1_DICPU/1-269       | F0ZXF1.1     | PF01545.19 | 55.60 | 0.00 |
| TRINITY_H3CHL6_TETNG/976-1284    | H3CHL6.1     | PF02889.14 | 55.60 | 0.00 |
| TRINITY_B3RWZ4_TRIAD/73-117      | B3RWZ4.1     | PF00569.15 | 55.60 | 0.00 |
| TRINITY_M7ZW29_TRIUA/635-826     | M7ZW29.1     | PF13844.4; | 55.60 | 0.00 |
| TRINITY_Q23PW9_TETTS/29-162      | Q23PW9.2     | PF01138.19 | 55.60 | 0.00 |
| TRINITY_D8UFX2_VOLCA/571-829     | D8UFX2.1     | PF01734.20 | 55.60 | 0.00 |
| TRINITY_E1ZK98_CHLVA/2-185       | E1ZK98.1     | PF06941.10 | 55.60 | 0.00 |
| TRINITY_A0A0G4FGY8_9ALVE/32-100  | A0A0G4FGY8.1 | PF0050     | 55.60 | 0.00 |
| TRINITY_B6AEW6_CRYMR/10-73       | B6AEW6.1     | PF01423.20 | 55.60 | 0.00 |
| TRINITY_A0A0G3QF21_KLUIN/97-209  | A0A0G3QF21.1 | PF0018     | 55.60 | 0.00 |
| TRINITY_D0N363_PHYIT/406-475     | D0N363.1     | PF02798.18 | 55.60 | 0.00 |
| TRINITY_C1E094_MICSR/52-268      | C1E094.1     | PF01988.17 | 55.60 | 0.00 |
| TRINITY_Q8GWA5_ARATH/2-329       | Q8GWA5.1     | PF00022.17 | 55.60 | 0.00 |
| TRINITY_A7RR70_NEMVE/7-107       | A7RR70.1     | PF01247.16 | 55.60 | 0.00 |
| TRINITY_I1BK57_RHIO9/844-1034    | I1BK57.1     | PF13087.4; | 55.60 | 0.00 |
| TRINITY_F2U7V2_SALR5/92-306      | F2U7V2.1     | PF01786.15 | 55.60 | 0.00 |
| TRINITY_R5NRG8_9FIRM/195-265     | R5NRG8.1     | PF00575.21 | 55.60 | 0.00 |
| TRINITY_W4K5L4_9HOMO/103-194     | W4K5L4.1     | PF00153.25 | 55.60 | 0.00 |
| TRINITY_A8IKD4_CHLRE/117-217     | A8IKD4.1     | PF13410.4; | 55.60 | 0.00 |
| TRINITY_Q23G19_TETTS/51-248      | Q23G19.1     | PF02330.14 | 55.60 | 0.00 |
| TRINITY_G0R646_ICHMG/414-563     | G0R646.1     | PF00005.25 | 55.60 | 0.00 |
| TRINITY_C5VRP7_CLOBO/5-67        | C5VRP7.1     | PF00226.29 | 55.60 | 0.00 |
| TRINITY_A0D2X6_PARTE/2-135       | A0D2X6.1     | PF05914.10 | 55.60 | 0.00 |
| TRINITY_D8TZ80_VOLCA/781-992     | D8TZ80.1     | PF01434.16 | 55.60 | 0.00 |
| TRINITY_E1ZQ10_CHLVA/38-341      | E1ZQ10.1     | PF00443.27 | 55.60 | 0.00 |
| TRINITY_E1ZB02_CHLVA/101-362     | E1ZB02.1     | PF03009.15 | 55.60 | 0.00 |
| TRINITY_D8U3E6_VOLCA/14-218      | D8U3E6.1     | PF05057.12 | 55.60 | 0.00 |
| TRINITY_C7RCK1_KANKD/4-154       | C7RCK1.1     | PF08534.8; | 55.60 | 0.00 |
| TRINITY_Q247Y9_TETTS/39-137      | Q247Y9.2     | PF00034.19 | 55.60 | 0.00 |
| TRINITY_D3BAQ9_POLPA/142-437     | D3BAQ9.1     | PF06027.10 | 55.60 | 0.00 |
| TRINITY_A0DYC6_PARTE/574-750     | A0DYC6.1     | PF13870.4; | 55.60 | 0.00 |
| TRINITY_A8IS90_CHLRE/98-398      | A8IS90.1     | PF00248.19 | 55.60 | 0.00 |
| TRINITY_D8UHA9_VOLCA/879-1087    | D8UHA9.1     | PF07250.9; | 55.60 | 0.00 |
| TRINITY_A0A059BGQ8_EUCGR/38-100  | A0A059BGQ8.1 | PF0184     | 55.60 | 0.00 |
| TRINITY_A8IYP3_CHLRE/14-85       | A8IYP3.1     | PF00240.21 | 55.60 | 0.00 |
| TRINITY_A8HTU8_CHLRE/13-251      | A8HTU8.1     | PF00856.26 | 55.60 | 0.00 |
| TRINITY_A8J851_CHLRE/66-237      | A8J851.1     | PF00891.16 | 55.60 | 0.00 |
| TRINITY_I1C775_RHIO9/8-129       | I1C775.1     | PF02291.13 | 55.60 | 0.00 |
| TRINITY_D8U9S9_VOLCA/599-793     | D8U9S9.1     | PF00211.18 | 55.60 | 0.00 |
| TRINITY_A8JJ05_CHLRE/562-633     | A8JJ05.1     | PF05699.12 | 55.60 | 0.00 |
| TRINITY_Q23M99_TETTS/10-108      | Q23M99.1     | PF00153.25 | 55.60 | 0.00 |
| TRINITY_Q23QF2_TETTS/248-571     | Q23QF2.2     | PF03133.13 | 55.60 | 0.00 |
| TRINITY_W7X719_TETTS/9-66        | W7X719.1     | PF00076.20 | 55.60 | 0.00 |
| TRINITY_A0A068S3W9_9FUNG/253-296 | A0A068S3W9.1 | PF1363     | 55.60 | 0.00 |
| TRINITY_Q22WQ3_TETTS/116-190     | Q22WQ3.2     | PF12796.5; | 55.60 | 0.00 |
| TRINITY_A0DNM9_PARTE/10-137      | A0DNM9.1     | PF00293.26 | 55.50 | 0.00 |
| TRINITY_L8H455_ACACA/1-182       | L8H455.1     | PF00227.24 | 55.50 | 0.00 |
| TRINITY_L1J820_GUIITH/223-386    | L1J820.1     | PF01399.25 | 55.50 | 0.00 |
| TRINITY_F0Y6L3_AURAN/5-178       | F0Y6L3.1     | PF00071.20 | 55.50 | 0.00 |
| TRINITY_A0A068RTH5_9FUNG/5-178   | A0A068RTH5.1 | PF0007     | 55.50 | 0.00 |
| TRINITY_A0A0D2WM63_CAPO3/25-134  | A0A0D2WM63.1 | PF0196     | 55.50 | 0.00 |
| TRINITY_F4PH79_DICFS/17-684      | F4PH79.1     | PF00063.19 | 55.50 | 0.00 |
| TRINITY_D8TWR3_VOLCA/83-425      | D8TWR3.1     | PF02383.16 | 55.50 | 0.00 |
| TRINITY_A0DQM7_PARTE/243-406     | A0DQM7.1     | PF03031.16 | 55.50 | 0.00 |

|                                  |              |            |       |      |
|----------------------------------|--------------|------------|-------|------|
| TRINITY_B6QFY4_TALMQ/58-194      | B6QFY4.1     | PF00293.26 | 55.50 | 0.00 |
| TRINITY_E2R9S3_CANLF/155-266     | E2R9S3.2     | PF07757.11 | 55.50 | 0.00 |
| TRINITY_I0YMP7_9CHLO/538-648     | I0YMP7.1     | PF02847.15 | 55.50 | 0.00 |
| TRINITY_G0R5C3_ICHMG/2-671       | G0R5C3.1     | PF02463.17 | 55.50 | 0.00 |
| TRINITY_Q22U45_TETTS/225-538     | Q22U45.1     | PF00883.19 | 55.50 | 0.00 |
| TRINITY_C1MVB0_MICPC/12-130      | C1MVB0.1     | PF13863.4; | 55.50 | 0.00 |
| TRINITY_B9S046_RICCO/3-206       | B9S046.1     | PF01088.19 | 55.50 | 0.00 |
| TRINITY_A0C8M5_PARTE/110-338     | A0C8M5.1     | PF00487.22 | 55.50 | 0.00 |
| TRINITY_U5QLE8_9CYAN/15-160      | U5QLE8.1     | PF05118.13 | 55.50 | 0.00 |
| TRINITY_A8IDU2_CHLRE/877-1024    | A8IDU2.1     | PF03330.16 | 55.50 | 0.00 |
| TRINITY_Q22RI1_TETTS/11-256      | Q22RI1.1     | PF13561.4; | 55.50 | 0.00 |
| TRINITY_A0A087Y149_POEFO/231-464 | A0A087Y149.1 | PF1362     | 55.50 | 0.00 |
| TRINITY_D3AY16_POLPA/236-600     | D3AY16.1     | PF03074.14 | 55.50 | 0.00 |
| TRINITY_U9SUN3_RHIID/5-178       | U9SUN3.1     | PF00071.20 | 55.50 | 0.00 |
| TRINITY_D8UAV7_VOLCA/928-1103    | D8UAV7.1     | PF13874.4; | 55.50 | 0.00 |
| TRINITY_A0A077ZUB0_STYLE/515-998 | A0A077ZUB0.1 | PF0023     | 55.50 | 0.00 |
| TRINITY_M0S8C6_MUSAM/344-789     | M0S8C6.1     | PF04053.12 | 55.50 | 0.00 |
| TRINITY_D8TH58_VOLCA/24-423      | D8TH58.1     | PF03345.12 | 55.50 | 0.00 |
| TRINITY_A8IGG2_CHLRE/2-183       | A8IGG2.1     | PF01121.18 | 55.50 | 0.00 |
| TRINITY_C1N091_MICPC/229-368     | C1N091.1     | PF00160.19 | 55.50 | 0.00 |
| TRINITY_E1ZP63_CHLVA/17-231      | E1ZP63.1     | PF00817.18 | 55.50 | 0.00 |
| TRINITY_A0A098EUG0_9BACI/4-122   | A0A098EUG0.1 | PF1323     | 55.50 | 0.00 |
| TRINITY_D3BDQ8_POLPA/12-329      | D3BDQ8.1     | PF00225.21 | 55.50 | 0.00 |
| TRINITY_I7M9T0_TETTS/42-205      | I7M9T0.2     | PF14908.4; | 55.50 | 0.00 |
| TRINITY_A8IG04_CHLRE/236-482     | A8IG04.1     | PF00067.20 | 55.50 | 0.00 |
| TRINITY_I7M328_TETTS/23-132      | I7M328.1     | PF00787.22 | 55.40 | 0.00 |
| TRINITY_M2Y4W0_GALSU/84-230      | M2Y4W0.1     | PF00588.17 | 55.40 | 0.00 |
| TRINITY_A0A078A3V7_STYLE/126-338 | A0A078A3V7.1 | PF0011     | 55.40 | 0.00 |
| TRINITY_W4ZJ67_STRPU/6-295       | W4ZJ67.1     | PF01026.19 | 55.40 | 0.00 |
| TRINITY_D8LST0_ECTSI/14-138      | D8LST0.1     | PF00572.16 | 55.40 | 0.00 |
| TRINITY_F4Q0Q7_DICFS/10-147      | F4Q0Q7.1     | PF00179.24 | 55.40 | 0.00 |
| TRINITY_F4Q0M1_DICFS/50-482      | F4Q0M1.1     | PF13520.4; | 55.40 | 0.00 |
| TRINITY_D2VAL1_NAEGR/10-175      | D2VAL1.1     | PF00071.20 | 55.40 | 0.00 |
| TRINITY_F4PMG8_DICFS/24-1090     | F4PMG8.1     | PF10266.7; | 55.40 | 0.00 |
| TRINITY_Q22P73_TETTS/71-322      | Q22P73.2     | PF00069.23 | 55.40 | 0.00 |
| TRINITY_F8I5P3_SULAT/13-80       | F8I5P3.1     | PF00366.18 | 55.40 | 0.00 |
| TRINITY_I0Z8F4_9CHLO/937-1204    | I0Z8F4.1     | PF00664.21 | 55.40 | 0.00 |
| TRINITY_I7M0U2_TETTS/23-1098     | I7M0U2.2     | PF10266.7; | 55.40 | 0.00 |
| TRINITY_L8GF13_ACACA/142-338     | L8GF13.1     | PF01068.19 | 55.40 | 0.00 |
| TRINITY_I0YU42_9CHLO/7-203       | I0YU42.1     | PF00270.27 | 55.40 | 0.00 |
| TRINITY_L8H8X8_ACACA/120-212     | L8H8X8.1     | PF00153.25 | 55.40 | 0.00 |
| TRINITY_D8TGY3_VOLCA/165-303     | D8TGY3.1     | PF02926.15 | 55.40 | 0.00 |
| TRINITY_D8U3Q5_VOLCA/24-179      | D8U3Q5.1     | PF00160.19 | 55.40 | 0.00 |
| TRINITY_J9GCX4_9SPIT/78-251      | J9GCX4.1     | PF01068.19 | 55.40 | 0.00 |
| TRINITY_D8U172_VOLCA/142-280     | D8U172.1     | PF00258.23 | 55.40 | 0.00 |
| TRINITY_D0MK82_RHOM4/15-320      | D0MK82.1     | PF00248.19 | 55.40 | 0.00 |
| TRINITY_I0YXC4_9CHLO/1-58        | I0YXC4.1     | PF04564.13 | 55.40 | 0.00 |
| TRINITY_Q54T47_DICDI/30-211      | Q54T47.1     | PF00596.19 | 55.40 | 0.00 |
| TRINITY_D4ZZ36_ARTPN/26-390      | D4ZZ36.1     | PF03738.12 | 55.40 | 0.00 |
| TRINITY_L8HBE6_ACACA/360-488     | L8HBE6.1     | PF04784.12 | 55.40 | 0.00 |
| TRINITY_A0BIT4_PARTE/126-209     | A0BIT4.1     | PF01529.18 | 55.40 | 0.00 |
| TRINITY_G7YR19_CLOSI/2-103       | G7YR19.1     | PF00085.18 | 55.40 | 0.00 |
| TRINITY_D8UIV0_VOLCA/25-394      | D8UIV0.1     | PF00224.19 | 55.40 | 0.00 |
| TRINITY_Q240Y1_TETTS/863-931     | Q240Y1.3     | PF13499.4; | 55.40 | 0.00 |
| TRINITY_A0A077ZYN3_STYLE/16-177  | A0A077ZYN3.1 | PF0007     | 55.40 | 0.00 |
| TRINITY_F1A0J6_DICPU/33-136      | F1A0J6.1     | PF10205.7; | 55.40 | 0.00 |
| TRINITY_D2V342_NAEGR/575-752     | D2V342.1     | PF13761.4; | 55.40 | 0.00 |
| TRINITY_Q2JH92_SYNJB/25-89       | Q2JH92.1     | PF01066.19 | 55.40 | 0.00 |
| TRINITY_I7MHC8_TETTS/479-543     | I7MHC8.2     | PF13499.4; | 55.40 | 0.00 |
| TRINITY_A0A0D2WTS7_CAPO3/32-443  | A0A0D2WTS7.1 | PF0020     | 55.40 | 0.00 |
| TRINITY_A0DZ84_PARTE/87-248      | A0DZ84.1     | PF01746.19 | 55.40 | 0.00 |

|                                  |                     |       |      |
|----------------------------------|---------------------|-------|------|
| TRINITY_D8TQ27_VOLCA/156-320     | D8TQ27.1 PF04072.12 | 55.40 | 0.00 |
| TRINITY_A8IWR0_CHLRE/61-406      | A8IWR0.1 PF05625.9; | 55.40 | 0.00 |
| TRINITY_A8IVP1_CHLRE/64-130      | A8IVP1.1 PF00498.24 | 55.40 | 0.00 |
| TRINITY_M7WHB3_RHOT1/20-83       | M7WHB3.1 PF01817.19 | 55.40 | 0.00 |
| TRINITY_E1ZGP7_CHLVA/103-232     | E1ZGP7.1 PF08695.8; | 55.40 | 0.00 |
| TRINITY_Q24FP1_TETTS/133-395     | Q24FP1.1 PF00069.23 | 55.40 | 0.00 |
| TRINITY_D8TRX0_VOLCA/247-317     | D8TRX0.1 PF00575.21 | 55.40 | 0.00 |
| TRINITY_I0Z7G6_9CHLO/812-1273    | I0Z7G6.1 PF00136.19 | 55.40 | 0.00 |
| TRINITY_A0A0G4IJ65_PLABS/11-68   | A0A0G4IJ65.1 PF0538 | 55.40 | 0.00 |
| TRINITY_E1Z8Z3_CHLVA/100-197     | E1Z8Z3.1 PF10294.7; | 55.40 | 0.00 |
| TRINITY_S8EGD3_9LAMI/11-122      | S8EGD3.1 PF02338.17 | 55.40 | 0.00 |
| TRINITY_B9SQ25_RICCO/695-1026    | B9SQ25.1 PF00009.25 | 55.40 | 0.00 |
| TRINITY_I7MF85_TETTS/30-143      | I7MF85.1 PF00307.29 | 55.40 | 0.00 |
| TRINITY_A0A0E0PZ67_ORYRU/562-682 | A0A0E0PZ67.1 PF1444 | 55.40 | 0.00 |
| TRINITY_A8IAF3_CHLRE/81-429      | A8IAF3.1 PF01546.26 | 55.40 | 0.00 |
| TRINITY_A0A087SL44_AUXPR/222-322 | A0A087SL44.1 PF0035 | 55.40 | 0.00 |
| TRINITY_Q22RV0_TETTS/39-90       | Q22RV0.1 PF05186.11 | 55.40 | 0.00 |
| TRINITY_L1IMU1_GUIETH/84-255     | L1IMU1.1 PF02816.16 | 55.40 | 0.00 |
| TRINITY_Q237J4_TETTS/105-303     | Q237J4.1 PF03587.12 | 55.40 | 0.00 |
| TRINITY_A0A078ATQ4_STYLE/166-308 | A0A078ATQ4.1 PF0551 | 55.40 | 0.00 |
| TRINITY_I7MDT7_TETTS/18-115      | I7MDT7.2 PF03650.11 | 55.30 | 0.00 |
| TRINITY_A0A0F4XC52_HANUV/18-299  | A0A0F4XC52.1 PF0024 | 55.30 | 0.00 |
| TRINITY_L8GKQ1_ACACA/188-236     | L8GKQ1.1 PF13415.4; | 55.30 | 0.00 |
| TRINITY_A0E5L3_PARTE/49-221      | A0E5L3.1 PF00270.27 | 55.30 | 0.00 |
| TRINITY_Q22AQ2_TETTS/63-169      | Q22AQ2.2 PF00027.27 | 55.30 | 0.00 |
| TRINITY_C3Y972_BRAFL/27-164      | C3Y972.1 PF01951.14 | 55.30 | 0.00 |
| TRINITY_G3NLB9_GASAC/22-115      | G3NLB9.1 PF00031.19 | 55.30 | 0.00 |
| TRINITY_D3BU71_POLPA/11-282      | D3BU71.1 PF01267.15 | 55.30 | 0.00 |
| TRINITY_J9HR05_9SPIT/1567-1710   | J9HR05.1 PF00588.17 | 55.30 | 0.00 |
| TRINITY_K3Z3R1_SETIT/635-784     | K3Z3R1.1 PF00179.24 | 55.30 | 0.00 |
| TRINITY_X6MRN4_RETFI/13-98       | X6MRN4.1 PF00439.23 | 55.30 | 0.00 |
| TRINITY_F4Q7L2_DICFS/13-96       | F4Q7L2.1 PF01453.22 | 55.30 | 0.00 |
| TRINITY_A0A078AVG4_STYLE/25-176  | A0A078AVG4.1 PF0010 | 55.30 | 0.00 |
| TRINITY_F6T7M4_XENTR/323-476     | F6T7M4.1 PF13091.4; | 55.30 | 0.00 |
| TRINITY_F4Q468_DICFS/146-420     | F4Q468.1 PF02353.18 | 55.30 | 0.00 |
| TRINITY_Q22P73_TETTS/71-322      | Q22P73.2 PF00069.23 | 55.30 | 0.00 |
| TRINITY_Q7XRL9_ORYSJ/564-738     | Q7XRL9.2 PF00078.25 | 55.30 | 0.00 |
| TRINITY_D8U5A6_VOLCA/371-559     | D8U5A6.1 PF01764.23 | 55.30 | 0.00 |
| TRINITY_A0A0D2QGM6_GOSRA/224-355 | A0A0D2QGM6.1 PF0004 | 55.30 | 0.00 |
| TRINITY_F2UBX6_SALR5/366-627     | F2UBX6.1 PF00218.19 | 55.30 | 0.00 |
| TRINITY_A8HYT0_CHLRE/62-334      | A8HYT0.1 PF01256.15 | 55.30 | 0.00 |
| TRINITY_A0A067QTF4_ZOONE/4-97    | A0A067QTF4.1 PF1279 | 55.30 | 0.00 |
| TRINITY_A0A078D6D3_BRANA/113-500 | A0A078D6D3.1 PF0583 | 55.30 | 0.00 |
| TRINITY_G0R4Y1_ICHMG/49-124      | G0R4Y1.1 PF01929.15 | 55.30 | 0.00 |
| TRINITY_E1Z768_CHLVA/16-250      | E1Z768.1 PF04757.12 | 55.30 | 0.00 |
| TRINITY_D8TGY2_VOLCA/2-216       | D8TGY2.1 PF06244.10 | 55.30 | 0.00 |
| TRINITY_B7J4U6_ACIF2/43-145      | B7J4U6.1 PF00011.19 | 55.30 | 0.00 |
| TRINITY_A8IDR3_CHLRE/6-149       | A8IDR3.1 PF01554.16 | 55.30 | 0.00 |
| TRINITY_L8HL85_ACACA/435-627     | L8HL85.1 PF02902.17 | 55.30 | 0.00 |
| TRINITY_A0D6X3_PARTE/79-164      | A0D6X3.1 PF00153.25 | 55.30 | 0.00 |
| TRINITY_L8HHG1_ACACA/13-59       | L8HHG1.1 PF13920.4; | 55.30 | 0.00 |
| TRINITY_D8UHN3_VOLCA/9-149       | D8UHN3.1 PF10914.6; | 55.30 | 0.00 |
| TRINITY_B9RNS0_RICCO/406-607     | B9RNS0.1 PF08662.9; | 55.30 | 0.00 |
| TRINITY_A0A0Q9WQD4_DROWI/21-227  | A0A0Q9WQD4.1 PF0010 | 55.30 | 0.00 |
| TRINITY_D8UJA2_VOLCA/1384-1512   | D8UJA2.1 PF13640.4; | 55.30 | 0.00 |
| TRINITY_A0A0M0JSM2_9EUKA/51-589  | A0A0M0JSM2.1 PF0299 | 55.30 | 0.00 |
| TRINITY_A0A078AVM5_STYLE/320-363 | A0A078AVM5.1 PF0056 | 55.30 | 0.00 |
| TRINITY_A8IRW3_CHLRE/249-516     | A8IRW3.1 PF00566.16 | 55.30 | 0.00 |
| TRINITY_A8ISP8_CHLRE/33-146      | A8ISP8.1 PF01152.19 | 55.30 | 0.00 |
| TRINITY_G0QNS9_ICHMG/23-353      | G0QNS9.1 PF00389.28 | 55.30 | 0.00 |
| TRINITY_D8TZE8_VOLCA/51-367      | D8TZE8.1 PF13000.5; | 55.30 | 0.00 |



|                                 |              |            |       |      |
|---------------------------------|--------------|------------|-------|------|
| TRINITY_H9JRI2_BOMMO/756-948    | H9JRI2.1     | PF03200.14 | 55.30 | 0.00 |
| TRINITY_D8U7U1_VOLCA/35-300     | D8U7U1.1     | PF01036.16 | 55.30 | 0.00 |
| TRINITY_A8JFC7_CHLRE/3-207      | A8JFC7.1     | PF03932.12 | 55.30 | 0.00 |
| TRINITY_D8U618_VOLCA/659-764    | D8U618.1     | PF13426.5; | 55.30 | 0.00 |
| TRINITY_A0A0M0LRY4_9EUKA/18-190 | A0A0M0LRY4.1 | PF1018     | 55.20 | 0.00 |
| TRINITY_Q23CX7_TETTS/74-325     | Q23CX7.2     | PF00378.18 | 55.20 | 0.00 |
| TRINITY_E4XG21_OIKDI/6-78       | E4XG21.1     | PF00173.26 | 55.20 | 0.00 |
| TRINITY_A0A0F5PWD3_9RHIZ/5-331  | A0A0F5PWD3.1 | PF0799     | 55.20 | 0.00 |
| TRINITY_G4ZR71_PHYSP/17-181     | G4ZR71.1     | PF13023.4; | 55.20 | 0.00 |
| TRINITY_L8HHA3_ACACA/7-64       | L8HHA3.1     | PF00403.24 | 55.20 | 0.00 |
| TRINITY_A0DC59_PARTE/3-141      | A0DC59.1     | PF01217.18 | 55.20 | 0.00 |
| TRINITY_A0DRY7_PARTE/472-713    | A0DRY7.1     | PF01504.16 | 55.20 | 0.00 |
| TRINITY_I7M0W4_TETTS/279-641    | I7M0W4.2     | PF06602.12 | 55.20 | 0.00 |
| TRINITY_K3W8N7_PYTUL/8-329      | K3W8N7.1     | PF01406.17 | 55.20 | 0.00 |
| TRINITY_Q9EMN2_AMEPV/3-74       | Q9EMN2.1     | PF00240.21 | 55.20 | 0.00 |
| TRINITY_A8IWS7_CHLRE/8-76       | A8IWS7.1     | PF03992.14 | 55.20 | 0.00 |
| TRINITY_I7M1N7_TETTS/84-192     | I7M1N7.1     | PF14580.4; | 55.20 | 0.00 |
| TRINITY_D2VTJ0_NAEGR/20-144     | D2VTJ0.1     | PF13671.4; | 55.20 | 0.00 |
| TRINITY_G0QUU8_ICHMG/120-541    | G0QUU8.1     | PF00443.27 | 55.20 | 0.00 |
| TRINITY_L8GTU6_ACACA/1-159      | L8GTU6.1     | PF00071.20 | 55.20 | 0.00 |
| TRINITY_D8UJ40_VOLCA/967-1176   | D8UJ40.1     | PF00702.24 | 55.20 | 0.00 |
| TRINITY_I7MIT2_TETTS/90-275     | I7MIT2.2     | PF01121.18 | 55.20 | 0.00 |
| TRINITY_F0Z9K8_DICPU/44-444     | F0Z9K8.1     | PF06728.11 | 55.20 | 0.00 |
| TRINITY_B9SNT8_RICCO/1030-1139  | B9SNT8.1     | PF00005.25 | 55.20 | 0.00 |
| TRINITY_D8TP89_VOLCA/472-662    | D8TP89.1     | PF11833.6; | 55.20 | 0.00 |
| TRINITY_I7MMX0_TETTS/304-523    | I7MMX0.1     | PF07002.14 | 55.20 | 0.00 |
| TRINITY_Q233Z3_TETTS/947-1211   | Q233Z3.2     | PF00069.23 | 55.20 | 0.00 |
| TRINITY_L8H9I7_ACACA/66-504     | L8H9I7.1     | PF01425.19 | 55.20 | 0.00 |
| TRINITY_E5S5P0_TRISP/24-128     | E5S5P0.1     | PF00085.18 | 55.20 | 0.00 |
| TRINITY_Q24DL3_TETTS/233-295    | Q24DL3.2     | PF07647.15 | 55.20 | 0.00 |
| TRINITY_L8HGS4_ACACA/419-928    | L8HGS4.1     | PF00899.19 | 55.20 | 0.00 |
| TRINITY_A0BW08_PARTE/27-287     | A0BW08.1     | PF02263.17 | 55.20 | 0.00 |
| TRINITY_F1A0J6_DICPU/33-136     | F1A0J6.1     | PF10205.7; | 55.20 | 0.00 |
| TRINITY_I0Z055_9CHLO/36-156     | I0Z055.1     | PF00856.26 | 55.20 | 0.00 |
| TRINITY_D8TJE4_VOLCA/96-272     | D8TJE4.1     | PF04063.12 | 55.20 | 0.00 |
| TRINITY_C3YCJ5_BRAFL/1-175      | C3YCJ5.1     | PF14580.4; | 55.20 | 0.00 |
| TRINITY_A8J3C6_CHLRE/33-205     | A8J3C6.1     | PF00270.27 | 55.20 | 0.00 |
| TRINITY_A0A0N4VKG2_ENTVE/3-458  | A0A0N4VKG2.1 | PF0022     | 55.20 | 0.00 |
| TRINITY_K4C1X2_SOLLC/67-276     | K4C1X2.1     | PF08245.10 | 55.20 | 0.00 |
| TRINITY_H1XSX2_9BACT/4-365      | H1XSX2.1     | PF00266.17 | 55.20 | 0.00 |
| TRINITY_B3S5N5_TRIAD/577-704    | B3S5N5.1     | PF13646.4; | 55.20 | 0.00 |
| TRINITY_A0CS29_PARTE/2561-2834  | A0CS29.1     | PF00520.29 | 55.20 | 0.00 |
| TRINITY_L8H3C5_ACACA/115-368    | L8H3C5.1     | PF07714.15 | 55.20 | 0.00 |
| TRINITY_L8GUU7_ACACA/465-928    | L8GUU7.1     | PF12157.6; | 55.20 | 0.00 |
| TRINITY_M5XN62_PRUPE/53-307     | M5XN62.1     | PF00108.21 | 55.20 | 0.00 |
| TRINITY_A8JJ05_CHLRE/562-633    | A8JJ05.1     | PF05699.12 | 55.20 | 0.00 |
| TRINITY_D8UC61_VOLCA/12-133     | D8UC61.1     | PF03009.15 | 55.20 | 0.00 |
| TRINITY_Q22RZ8_TETTS/183-242    | Q22RZ8.2     | PF13921.4; | 55.20 | 0.00 |
| TRINITY_A8JB06_CHLRE/182-297    | A8JB06.1     | PF00581.18 | 55.20 | 0.00 |
| TRINITY_K7L0E8_SOYBN/435-562    | K7L0E8.1     | PF01909.21 | 55.20 | 0.00 |
| TRINITY_A8I807_CHLRE/1018-1101  | A8I807.1     | PF00211.18 | 55.20 | 0.00 |
| TRINITY_M2W5E2_GALSU/2-375      | M2W5E2.1     | PF00022.17 | 55.20 | 0.00 |
| TRINITY_Q22DU3_TETTS/53-268     | Q22DU3.1     | PF01988.17 | 55.20 | 0.00 |
| TRINITY_G0R147_ICHMG/150-282    | G0R147.1     | PF06003.10 | 55.10 | 0.00 |
| TRINITY_G0QTU9_ICHMG/187-497    | G0QTU9.1     | PF00883.19 | 55.10 | 0.00 |
| TRINITY_J3QRK3_HUMAN/11-61      | J3QRK3.1     | PF13920.4; | 55.10 | 0.00 |
| TRINITY_F4PTN1_DICFS/42-388     | F4PTN1.1     | PF07690.14 | 55.10 | 0.00 |
| TRINITY_G0QRM1_ICHMG/13-169     | G0QRM1.1     | PF12850.5; | 55.10 | 0.00 |
| TRINITY_I1F0T5_AMPQE/143-214    | I1F0T5.1     | PF07258.12 | 55.10 | 0.00 |
| TRINITY_A0A0N5BCJ9_STREA/12-342 | A0A0N5BCJ9.1 | PF0050     | 55.10 | 0.00 |
| TRINITY_Q23FX2_TETTS/36-451     | Q23FX2.3     | PF00999.19 | 55.10 | 0.00 |

|                                  |              |            |       |      |
|----------------------------------|--------------|------------|-------|------|
| TRINITY_G7YTC4_CLOSI/599-734     | G7YTC4.1     | PF04146.13 | 55.10 | 0.00 |
| TRINITY_G8R4J3_OWEHD/54-189      | G8R4J3.1     | PF02557.15 | 55.10 | 0.00 |
| TRINITY_F0ZHR0_DICPU/110-202     | F0ZHR0.1     | PF04777.11 | 55.10 | 0.00 |
| TRINITY_A9SGR7_PHYPA/200-606     | A9SGR7.1     | PF00962.20 | 55.10 | 0.00 |
| TRINITY_A0A077ZQS0_STYLE/68-262  | A0A077ZQS0.1 | PF1214     | 55.10 | 0.00 |
| TRINITY_I2JY54_DEKBR/1-329       | I2JY54.1     | PF00022.17 | 55.10 | 0.00 |
| TRINITY_H0A378_9PROT/13-362      | H0A378.1     | PF01266.22 | 55.10 | 0.00 |
| TRINITY_S2JIV7_MUCC1/97-174      | S2JIV7.1     | PF16282.3; | 55.10 | 0.00 |
| TRINITY_Q22D97_TETTS/564-699     | Q22D97.1     | PF00005.25 | 55.10 | 0.00 |
| TRINITY_I1FJ82_AMPQE/74-164      | I1FJ82.1     | PF02214.20 | 55.10 | 0.00 |
| TRINITY_K9Z194_CYAAP/83-151      | K9Z194.1     | PF00610.19 | 55.10 | 0.00 |
| TRINITY_I7MJV9_TETTS/69-545      | I7MJV9.1     | PF00501.26 | 55.10 | 0.00 |
| TRINITY_F6QE47_CIOIN/32-189      | F6QE47.2     | PF03367.11 | 55.10 | 0.00 |
| TRINITY_Q22Z04_TETTS/53-204      | Q22Z04.1     | PF13847.4; | 55.10 | 0.00 |
| TRINITY_A0E0U7_PARTE/391-585     | A0E0U7.1     | PF05057.12 | 55.10 | 0.00 |
| TRINITY_D8TK81_VOLCA/60-235      | D8TK81.1     | PF01595.18 | 55.10 | 0.00 |
| TRINITY_A0A0G3QF21_KLUIN/97-209  | A0A0G3QF21.1 | PF0018     | 55.10 | 0.00 |
| TRINITY_W4FT02_9STRA/188-499     | W4FT02.1     | PF00883.19 | 55.10 | 0.00 |
| TRINITY_D8TNX4_VOLCA/199-291     | D8TNX4.1     | PF00085.18 | 55.10 | 0.00 |
| TRINITY_G0SZ73_RHOG2/396-454     | G0SZ73.1     | PF00226.29 | 55.10 | 0.00 |
| TRINITY_D8TSB6_VOLCA/10-279      | D8TSB6.1     | PF03998.11 | 55.10 | 0.00 |
| TRINITY_J9IHW3_9SPIT/644-695     | J9IHW3.1     | PF04968.10 | 55.10 | 0.00 |
| TRINITY_D3BT40_POLPA/479-585     | D3BT40.1     | PF00307.29 | 55.10 | 0.00 |
| TRINITY_D3B2T4_POLPA/258-512     | D3B2T4.1     | PF03949.13 | 55.10 | 0.00 |
| TRINITY_D3B2K0_POLPA/101-590     | D3B2K0.1     | PF00118.22 | 55.10 | 0.00 |
| TRINITY_D8TGY6_VOLCA/234-486     | D8TGY6.1     | PF03949.13 | 55.10 | 0.00 |
| TRINITY_F4PJE6_DICFS/386-434     | F4PJE6.1     | PF14604.4; | 55.10 | 0.00 |
| TRINITY_A0C0F4_PARTE/399-612     | A0C0F4.1     | PF07859.11 | 55.10 | 0.00 |
| TRINITY_D8U111_VOLCA/16-117      | D8U111.1     | PF12796.5; | 55.10 | 0.00 |
| TRINITY_A0A0D2WU03_CAPO3/526-643 | A0A0D2WU03.1 | PF1197     | 55.10 | 0.00 |
| TRINITY_I7LUL2_TETTS/109-268     | I7LUL2.1     | PF00849.20 | 55.10 | 0.00 |
| TRINITY_L8H596_ACACA/587-655     | L8H596.1     | PF13884.4; | 55.10 | 0.00 |
| TRINITY_A0A059BFV3_EUCGR/483-532 | A0A059BFV3.1 | PF0041     | 55.10 | 0.00 |
| TRINITY_A0A067N164_9HOMO/74-127  | A0A067N164.1 | PF0222     | 55.10 | 0.00 |
| TRINITY_A8HQM9_CHLRE/18-261      | A8HQM9.1     | PF07264.9; | 55.10 | 0.00 |
| TRINITY_A0A078AWA6_STYLE/56-620  | A0A078AWA6.1 | PF0044     | 55.10 | 0.00 |
| TRINITY_F8L621_SIMNZ/408-626     | F8L621.1     | PF00702.24 | 55.10 | 0.00 |
| TRINITY_M0U7P0_MUSAM/675-724     | M0U7P0.1     | PF00415.16 | 55.10 | 0.00 |
| TRINITY_D8TGX6_VOLCA/877-1013    | D8TGX6.1     | PF01925.17 | 55.10 | 0.00 |
| TRINITY_T1NWZ3_TRIUA/3-405       | T1NWZ3.1     | PF02897.13 | 55.10 | 0.00 |
| TRINITY_A0A078A5E8_STYLE/235-303 | A0A078A5E8.1 | PF0007     | 55.10 | 0.00 |
| TRINITY_Q7XXT3_CHLRE/210-446     | Q7XXT3.1     | PF00208.19 | 55.10 | 0.00 |
| TRINITY_D8TNV2_VOLCA/856-1080    | D8TNV2.1     | PF00069.23 | 55.10 | 0.00 |
| TRINITY_A6G013_9DELT/29-479      | A6G013.1     | PF02133.13 | 55.10 | 0.00 |
| TRINITY_D8UEG9_VOLCA/181-367     | D8UEG9.1     | PF13848.4; | 55.10 | 0.00 |
| TRINITY_Q7XRL9_ORYSJ/564-738     | Q7XRL9.2     | PF00078.25 | 55.10 | 0.00 |
| TRINITY_L8GJ61_ACACA/82-379      | L8GJ61.1     | PF00579.23 | 55.10 | 0.00 |
| TRINITY_A0A087HDY2_ARAAL/25-123  | A0A087HDY2.1 | PF0038     | 55.10 | 0.00 |
| TRINITY_G0QYG5_ICHMG/141-688     | G0QYG5.1     | PF03571.13 | 55.10 | 0.00 |
| TRINITY_V2XGQ0_MONRO/218-326     | V2XGQ0.1     | PF00175.19 | 55.10 | 0.00 |
| TRINITY_S9WXX3_SCHCR/161-230     | S9WXX3.1     | PF00076.20 | 55.00 | 0.00 |
| TRINITY_L8H857_ACACA/42-209      | L8H857.1     | PF06884.9; | 55.00 | 0.00 |
| TRINITY_Q23CX0_TETTS/24-63       | Q23CX0.2     | PF15227.4; | 55.00 | 0.00 |
| TRINITY_A0A024QH81_9BACI/6-150   | A0A024QH81.1 | PF0871     | 55.00 | 0.00 |
| TRINITY_A0A074Y438_9PEZI/553-739 | A0A074Y438.1 | PF0498     | 55.00 | 0.00 |
| TRINITY_I4C884_DESTA/350-499     | I4C884.1     | PF00005.25 | 55.00 | 0.00 |
| TRINITY_Q24CZ5_TETTS/7-168       | Q24CZ5.2     | PF00071.20 | 55.00 | 0.00 |
| TRINITY_Q234R6_TETTS/130-349     | Q234R6.1     | PF01556.16 | 55.00 | 0.00 |
| TRINITY_K1PZP8_CRAGI/95-259      | K1PZP8.1     | PF01746.19 | 55.00 | 0.00 |
| TRINITY_D2V4S4_NAEGR/16-181      | D2V4S4.1     | PF08534.8; | 55.00 | 0.00 |
| TRINITY_I1BGP6_RHIO9/12-73       | I1BGP6.1     | PF00226.29 | 55.00 | 0.00 |

|                                    |              |            |       |      |
|------------------------------------|--------------|------------|-------|------|
| TRINITY_A0DYX2_PARTE/54-188        | A0DYX2.1     | PF04146.13 | 55.00 | 0.00 |
| TRINITY_A0C4I4_PARTE/1-218         | A0C4I4.1     | PF01591.16 | 55.00 | 0.00 |
| TRINITY_I7MF78_TETTS/79-205        | I7MF78.1     | PF00828.17 | 55.00 | 0.00 |
| TRINITY_L8H8X3_ACACA/150-369       | L8H8X3.1     | PF01556.16 | 55.00 | 0.00 |
| TRINITY_M1V5K1_CYAME/772-813       | M1V5K1.1     | PF00400.30 | 55.00 | 0.00 |
| TRINITY_A0BJC2_PARTE/318-756       | A0BJC2.1     | PF04053.12 | 55.00 | 0.00 |
| TRINITY_F4QDK7_DICFS/154-257       | F4QDK7.1     | PF12756.5; | 55.00 | 0.00 |
| TRINITY_L8GLT8_ACACA/131-535       | L8GLT8.1     | PF13520.4; | 55.00 | 0.00 |
| TRINITY_G0FN68_AMYMS/122-379       | G0FN68.1     | PF00487.22 | 55.00 | 0.00 |
| TRINITY_A0A015LLT8_9GLOM/312-428   | A0A015LLT8.1 | PF0066     | 55.00 | 0.00 |
| TRINITY_F0ZHG6_DICPU/113-449       | F0ZHG6.1     | PF02628.13 | 55.00 | 0.00 |
| TRINITY_Q22W19_TETTS/115-323       | Q22W19.3     | PF00112.21 | 55.00 | 0.00 |
| TRINITY_A8JCM5_CHLRE/592-791       | A8JCM5.1     | PF01369.18 | 55.00 | 0.00 |
| TRINITY_Q23A17_TETTS/301-520       | Q23A17.1     | PF07002.14 | 55.00 | 0.00 |
| TRINITY_I0Z315_9CHLO/276-512       | I0Z315.1     | PF13641.4; | 55.00 | 0.00 |
| TRINITY_A0DRP1_PARTE/26-544        | A0DRP1.1     | PF01602.18 | 55.00 | 0.00 |
| TRINITY_A0C4I4_PARTE/1-218         | A0C4I4.1     | PF01591.16 | 55.00 | 0.00 |
| TRINITY_A0E5L3_PARTE/49-221        | A0E5L3.1     | PF00270.27 | 55.00 | 0.00 |
| TRINITY_M5GGS4_DACSP/71-254        | M5GGS4.1     | PF02630.12 | 55.00 | 0.00 |
| TRINITY_S7QDQ3_GLOTA/11-231        | S7QDQ3.1     | PF00710.18 | 55.00 | 0.00 |
| TRINITY_A0CRV1_PARTE/99-317        | A0CRV1.1     | PF01556.16 | 55.00 | 0.00 |
| TRINITY_D8U202_VOLCA/350-568       | D8U202.1     | PF00149.26 | 55.00 | 0.00 |
| TRINITY_V9F1A7_PHYPR/115-362       | V9F1A7.1     | PF00155.19 | 55.00 | 0.00 |
| TRINITY_D8TP49_VOLCA/639-682       | D8TP49.1     | PF13920.4; | 55.00 | 0.00 |
| TRINITY_L8GTJ0_ACACA/1-167         | L8GTJ0.1     | PF00069.23 | 55.00 | 0.00 |
| TRINITY_D2VAN2_NAEGR/6-526         | D2VAN2.1     | PF04734.11 | 55.00 | 0.00 |
| TRINITY_A9U358_PHYPA/745-1059      | A9U358.1     | PF03178.13 | 55.00 | 0.00 |
| TRINITY_Q23MB3_TETTS/79-354        | Q23MB3.2     | PF02383.16 | 55.00 | 0.00 |
| TRINITY_I1FE07_AMPQE/138-289       | I1FE07.1     | PF00849.20 | 55.00 | 0.00 |
| TRINITY_A0A023B855_GRENI/22-64     | A0A023B855.1 | PF1290     | 55.00 | 0.00 |
| TRINITY_D3B601_POLPA/76-445        | D3B601.1     | PF01979.18 | 55.00 | 0.00 |
| TRINITY_K9S7I1_9CYAN/456-567       | K9S7I1.1     | PF00072.22 | 55.00 | 0.00 |
| TRINITY_Q23QY3_TETTS/416-917       | Q23QY3.2     | PF00899.19 | 55.00 | 0.00 |
| TRINITY_A8J018_CHLRE/492-680       | A8J018.1     | PF13307.4; | 55.00 | 0.00 |
| TRINITY_Q3SDM6_PARTE/17-177        | Q3SDM6.1     | PF00071.20 | 55.00 | 0.00 |
| TRINITY_G0QKM2_ICHMG/159-223       | G0QKM2.1     | PF13499.4; | 55.00 | 0.00 |
| TRINITY_A8J1V6_CHLRE/56-196        | A8J1V6.1     | PF11051.6; | 55.00 | 0.00 |
| TRINITY_A0A087SN24_AUXPR/114-276   | A0A087SN24.1 | PF1384     | 55.00 | 0.00 |
| TRINITY_D8TZS8_VOLCA/96-370        | D8TZS8.1     | PF00685.25 | 55.00 | 0.00 |
| TRINITY_Q22RZ8_TETTS/183-242       | Q22RZ8.2     | PF13921.4; | 55.00 | 0.00 |
| TRINITY_K9VDR2_9CYAN/6-137         | K9VDR2.1     | PF01124.16 | 55.00 | 0.00 |
| TRINITY_D8TMJ4_VOLCA/2-264         | D8TMJ4.1     | PF00481.19 | 55.00 | 0.00 |
| TRINITY_A4XRA0_PSEMY/26-259        | A4XRA0.1     | PF03575.15 | 55.00 | 0.00 |
| TRINITY_D8TNH5_VOLCA/832-942       | D8TNH5.1     | PF00251.18 | 55.00 | 0.00 |
| TRINITY_A7SX93_NEMVE/403-769       | A7SX93.1     | PF04685.11 | 55.00 | 0.00 |
| TRINITY_I7M8Z3_TETTS/14-184        | I7M8Z3.2     | PF00025.19 | 55.00 | 0.00 |
| TRINITY_J9J7M7_9SPIT/238-317       | J9J7M7.1     | PF10159.7; | 55.00 | 0.00 |
| TRINITY_A0CFP3_PARTE/86-235        | A0CFP3.1     | PF00650.18 | 54.90 | 0.00 |
| TRINITY_A0EG16_PARTE/9-79          | A0EG16.1     | PF00076.20 | 54.90 | 0.00 |
| TRINITY_J9I2N4_9SPIT/16-128        | J9I2N4.1     | PF02466.17 | 54.90 | 0.00 |
| TRINITY_I7MLI6_TETTS/33-173        | I7MLI6.1     | PF13185.4; | 54.90 | 0.00 |
| TRINITY_D2VK26_NAEGR/13-300        | D2VK26.1     | PF00069.23 | 54.90 | 0.00 |
| TRINITY_W4XPK0_STRPU/4-207         | W4XPK0.1     | PF00106.23 | 54.90 | 0.00 |
| TRINITY_D2VFG0_NAEGR/336-551       | D2VFG0.1     | PF07002.14 | 54.90 | 0.00 |
| TRINITY_A0A078B270_STYLE/2405-2625 | A0A078B270.1 | PF0064     | 54.90 | 0.00 |
| TRINITY_A0A0M0J609_9EUKA/34-265    | A0A0M0J609.1 | PF0116     | 54.90 | 0.00 |
| TRINITY_A0EBN0_PARTE/66-334        | A0EBN0.1     | PF00069.23 | 54.90 | 0.00 |
| TRINITY_Q22BA7_TETTS/59-282        | Q22BA7.1     | PF07228.10 | 54.90 | 0.00 |
| TRINITY_G0QM20_ICHMG/331-399       | G0QM20.1     | PF00498.24 | 54.90 | 0.00 |
| TRINITY_A0A0L0BZ22_LUCCU/8-78      | A0A0L0BZ22.1 | PF0664     | 54.90 | 0.00 |
| TRINITY_D6WFW5_TRICA/366-590       | D6WFW5.1     | PF00009.25 | 54.90 | 0.00 |

|                                  |                     |       |      |
|----------------------------------|---------------------|-------|------|
| TRINITY_A0A0G4FRX5_9ALVE/6-341   | A0A0G4FRX5.1 PF0563 | 54.90 | 0.00 |
| TRINITY_A0A0G4F0P3_9ALVE/46-96   | A0A0G4F0P3.1 PF1290 | 54.90 | 0.00 |
| TRINITY_I7LXB6_TETTS/1143-1299   | I7LXB6.2 PF00005.25 | 54.90 | 0.00 |
| TRINITY_Q54UP1_DICDI/142-283     | Q54UP1.1 PF04851.13 | 54.90 | 0.00 |
| TRINITY_D8SIG5_SELML/2-156       | D8SIG5.1 PF03079.12 | 54.90 | 0.00 |
| TRINITY_G3IVK3_9GAMM/389-530     | G3IVK3.1 PF02775.19 | 54.90 | 0.00 |
| TRINITY_I7MKW7_TETTS/16-270      | I7MKW7.1 PF08450.10 | 54.90 | 0.00 |
| TRINITY_W1PZS0_AMBTC/33-443      | W1PZS0.1 PF03901.15 | 54.90 | 0.00 |
| TRINITY_E3CZV0_9BACT/24-354      | E3CZV0.1 PF00155.19 | 54.90 | 0.00 |
| TRINITY_G0R6E8_ICHMG/182-459     | G0R6E8.1 PF00246.22 | 54.90 | 0.00 |
| TRINITY_S3C2H7_OPHP1/1044-1114   | S3C2H7.1 PF04564.13 | 54.90 | 0.00 |
| TRINITY_L8HEB5_ACACA/599-681     | L8HEB5.1 PF03366.14 | 54.90 | 0.00 |
| TRINITY_A8J0C9_CHLRE/70-168      | A8J0C9.1 PF08576.8; | 54.90 | 0.00 |
| TRINITY_MCFG_DICDI/11-103        | Q54BM3.1 PF00153.25 | 54.90 | 0.00 |
| TRINITY_A0A0M8MT83_9BASI/126-176 | A0A0M8MT83.1 PF0009 | 54.90 | 0.00 |
| TRINITY_A0A061E799_THECC/412-703 | A0A061E799.1 PF0006 | 54.90 | 0.00 |
| TRINITY_K3WDP5_PYTUL/54-135      | K3WDP5.1 PF00076.20 | 54.90 | 0.00 |
| TRINITY_I0YW03_9CHLO/108-400     | I0YW03.1 PF03095.13 | 54.90 | 0.00 |
| TRINITY_A4VDQ6_TETTS/51-165      | A4VDQ6.1 PF05071.14 | 54.90 | 0.00 |
| TRINITY_D8TKX3_VOLCA/242-413     | D8TKX3.1 PF13229.4; | 54.90 | 0.00 |
| TRINITY_D8TVJ4_VOLCA/22-281      | D8TVJ4.1 PF03372.21 | 54.90 | 0.00 |
| TRINITY_I7M323_TETTS/94-382      | I7M323.1 PF00579.23 | 54.90 | 0.00 |
| TRINITY_L8GTK3_ACACA/495-608     | L8GTK3.1 PF00989.23 | 54.90 | 0.00 |
| TRINITY_MLH1_MOUSE/23-248        | Q9JK91.2 PF02518.24 | 54.90 | 0.00 |
| TRINITY_Q22GW0_TETTS/1651-1813   | Q22GW0.2 PF00069.23 | 54.90 | 0.00 |
| TRINITY_M0TLF4_MUSAM/89-401      | M0TLF4.1 PF01074.20 | 54.90 | 0.00 |
| TRINITY_L1JHU7_GUIITH/1-193      | L1JHU7.1 PF08450.10 | 54.90 | 0.00 |
| TRINITY_I7M701_TETTS/137-332     | I7M701.1 PF00092.26 | 54.90 | 0.00 |
| TRINITY_A8IME4_CHLRE/1-185       | A8IME4.1 PF05018.11 | 54.90 | 0.00 |
| TRINITY_A8I1W3_CHLRE/2374-2753   | A8I1W3.1 PF02259.21 | 54.90 | 0.00 |
| TRINITY_A8J8G9_CHLRE/153-439     | A8J8G9.1 PF00122.18 | 54.90 | 0.00 |
| TRINITY_A8JB24_CHLRE/3-73        | A8JB24.1 PF00076.20 | 54.90 | 0.00 |
| TRINITY_D8UEU3_VOLCA/110-291     | D8UEU3.1 PF13419.4; | 54.90 | 0.00 |
| TRINITY_M7NW25_PNEMU/332-655     | M7NW25.1 PF00176.21 | 54.90 | 0.00 |
| TRINITY_D8TIL7_VOLCA/250-554     | D8TIL7.1 PF02274.15 | 54.90 | 0.00 |
| TRINITY_L8H601_ACACA/278-728     | L8H601.1 PF00183.16 | 54.90 | 0.00 |
| TRINITY_A9SFY1_PHYPA/1448-1765   | A9SFY1.1 PF00176.21 | 54.90 | 0.00 |
| TRINITY_A0A0K9P5E0_ZOSMR/22-116  | A0A0K9P5E0.1 PF0566 | 54.90 | 0.00 |
| TRINITY_I7LWF2_TETTS/9-141       | I7LWF2.1 PF00179.24 | 54.90 | 0.00 |
| TRINITY_A0A090L8Y6_STRRB/482-834 | A0A090L8Y6.1 PF0000 | 54.90 | 0.00 |
| TRINITY_I0YT59_9CHLO/9-172       | I0YT59.1 PF01170.16 | 54.90 | 0.00 |
| TRINITY_W4FD00_9STRA/147-197     | W4FD00.1 PF13432.4; | 54.90 | 0.00 |
| TRINITY_I7LT38_TETTS/33-104      | I7LT38.1 PF16209.3; | 54.90 | 0.00 |
| TRINITY_D0MUC9_PHYIT/140-211     | D0MUC9.1 PF07572.10 | 54.90 | 0.00 |
| TRINITY_D8TUA7_VOLCA/875-1016    | D8TUA7.1 PF01764.23 | 54.90 | 0.00 |
| TRINITY_A8IU18_CHLRE/645-803     | A8IU18.1 PF01764.23 | 54.90 | 0.00 |
| TRINITY_A0DVR4_PARTE/17-87       | A0DVR4.1 PF13499.4; | 54.90 | 0.00 |
| TRINITY_A0A087SSB9_AUXPR/159-276 | A0A087SSB9.1 PF0933 | 54.90 | 0.00 |
| TRINITY_A8HMC1_CHLRE/34-479      | A8HMC1.1 PF00067.20 | 54.90 | 0.00 |
| TRINITY_C1DIX7_AZOVD/10-205      | C1DIX7.1 PF00753.25 | 54.90 | 0.00 |
| TRINITY_D8UFG3_VOLCA/542-705     | D8UFG3.1 PF07534.14 | 54.90 | 0.00 |
| TRINITY_D8UJP5_VOLCA/5-122       | D8UJP5.1 PF05773.20 | 54.90 | 0.00 |
| TRINITY_A0CL90_PARTE/477-726     | A0CL90.1 PF07714.15 | 54.90 | 0.00 |
| TRINITY_Q5CUZ6_CRYPI/11-183      | Q5CUZ6.1 PF00025.19 | 54.80 | 0.00 |
| TRINITY_I4EHU7_9CHLR/282-401     | I4EHU7.1 PF07731.12 | 54.80 | 0.00 |
| TRINITY_G0R1C4_ICHMG/49-235      | G0R1C4.1 PF10211.7; | 54.80 | 0.00 |
| TRINITY_A0A078DCT9_BRANA/1-112   | A0A078DCT9.1 PF0240 | 54.80 | 0.00 |
| TRINITY_F4PGH8_DICFS/309-533     | F4PGH8.1 PF13236.4; | 54.80 | 0.00 |
| TRINITY_A0EG50_PARTE/15-118      | A0EG50.1 PF00168.28 | 54.80 | 0.00 |
| TRINITY_Q5CQI6_CRYPI/19-156      | Q5CQI6.1 PF00179.24 | 54.80 | 0.00 |
| TRINITY_F0ZFF8_DICPU/18-131      | F0ZFF8.1 PF01398.19 | 54.80 | 0.00 |

|                                  |              |            |       |      |
|----------------------------------|--------------|------------|-------|------|
| TRINITY_F2UETO_SALR5/191-280     | F2UETO.1     | PF09451.8; | 54.80 | 0.00 |
| TRINITY_Q23KI7_TETTS/1600-1806   | Q23KI7.2     | PF12348.6; | 54.80 | 0.00 |
| TRINITY_L8HIK1_ACACA/126-176     | L8HIK1.1     | PF13418.4; | 54.80 | 0.00 |
| TRINITY_Q00SL7_OSTTA/43-132      | Q00SL7.1     | PF00153.25 | 54.80 | 0.00 |
| TRINITY_Q22A31_TETTS/163-484     | Q22A31.4     | PF01207.15 | 54.80 | 0.00 |
| TRINITY_B3S0L3_TRIAD/4-66        | B3S0L3.1     | PF00076.20 | 54.80 | 0.00 |
| TRINITY_L8H6V3_ACACA/29-430      | L8H6V3.1     | PF00450.20 | 54.80 | 0.00 |
| TRINITY_A0BEV3_PARTE/80-358      | A0BEV3.1     | PF02383.16 | 54.80 | 0.00 |
| TRINITY_H3G7I0_PHYRM/25-154      | H3G7I0.1     | PF13589.4; | 54.80 | 0.00 |
| TRINITY_G0R2M8_ICHMG/1378-1595   | G0R2M8.1     | PF00609.17 | 54.80 | 0.00 |
| TRINITY_B7G074_PHATC/413-475     | B7G074.1     | PF12738.5; | 54.80 | 0.00 |
| TRINITY_I0Z559_9CHLO/145-582     | I0Z559.1     | PF01131.18 | 54.80 | 0.00 |
| TRINITY_K9TMT3_9CYAN/114-396     | K9TMT3.1     | PF00082.20 | 54.80 | 0.00 |
| TRINITY_D0YXL3_PHODD/796-907     | D0YXL3.1     | PF02518.24 | 54.80 | 0.00 |
| TRINITY_A0A061F2E7_THECC/190-438 | A0A061F2E7.1 | PF0012     | 54.80 | 0.00 |
| TRINITY_NDRB_DICDI/130-437       | Q54IH8.1     | PF00069.23 | 54.80 | 0.00 |
| TRINITY_I7MDB1_TETTS/296-654     | I7MDB1.2     | PF03133.13 | 54.80 | 0.00 |
| TRINITY_D8UJN2_VOLCA/21-260      | D8UJN2.1     | PF00248.19 | 54.80 | 0.00 |
| TRINITY_D8TP59_VOLCA/83-228      | D8TP59.1     | PF00675.18 | 54.80 | 0.00 |
| TRINITY_D6CWL4_9BACE/148-449     | D6CWL4.1     | PF00251.18 | 54.80 | 0.00 |
| TRINITY_T1GP12_MEGSC/76-228      | T1GP12.1     | PF00929.22 | 54.80 | 0.00 |
| TRINITY_M0QSM4_ACACA/400-492     | M0QSM4.1     | PF02214.20 | 54.80 | 0.00 |
| TRINITY_L8HIA3_ACACA/6-287       | L8HIA3.1     | PF04909.12 | 54.80 | 0.00 |
| TRINITY_A8J409_CHLRE/3-75        | A8J409.1     | PF00240.21 | 54.80 | 0.00 |
| TRINITY_B0WZR8_CULQU/14-182      | B0WZR8.1     | PF00071.20 | 54.80 | 0.00 |
| TRINITY_D8TUM0_VOLCA/73-555      | D8TUM0.1     | PF10433.7; | 54.80 | 0.00 |
| TRINITY_E1ZCN5_CHLVA/397-598     | E1ZCN5.1     | PF12706.5; | 54.80 | 0.00 |
| TRINITY_F0ZF65_DICPU/175-440     | F0ZF65.1     | PF01189.15 | 54.80 | 0.00 |
| TRINITY_I0Z0E5_9CHLO/7-287       | I0Z0E5.1     | PF01875.15 | 54.80 | 0.00 |
| TRINITY_D7KK04_ARALL/107-294     | D7KK04.1     | PF02698.15 | 54.80 | 0.00 |
| TRINITY_A8I4K4_CHLRE/128-297     | A8I4K4.1     | PF03031.16 | 54.80 | 0.00 |
| TRINITY_A8J1H0_CHLRE/65-495      | A8J1H0.1     | PF00909.19 | 54.80 | 0.00 |
| TRINITY_L8GEB3_ACACA/338-766     | L8GEB3.1     | PF04053.12 | 54.80 | 0.00 |
| TRINITY_U3K2G7_FICAL/81-402      | U3K2G7.1     | PF01546.26 | 54.80 | 0.00 |
| TRINITY_G0QNT4_ICHMG/321-534     | G0QNT4.1     | PF00246.22 | 54.80 | 0.00 |
| TRINITY_I0XNB0_9LEPT/41-103      | I0XNB0.1     | PF03625.12 | 54.80 | 0.00 |
| TRINITY_M7WPF2_RHOT1/493-595     | M7WPF2.1     | PF02204.16 | 54.80 | 0.00 |
| TRINITY_A8I9C1_CHLRE/175-267     | A8I9C1.1     | PF00153.25 | 54.80 | 0.00 |
| TRINITY_D8TVL4_VOLCA/254-358     | D8TVL4.1     | PF01399.25 | 54.80 | 0.00 |
| TRINITY_D7TBS7_VITVI/99-223      | D7TBS7.1     | PF14226.4; | 54.80 | 0.00 |
| TRINITY_E1ZDS3_CHLVA/17-203      | E1ZDS3.1     | PF10263.7; | 54.80 | 0.00 |
| TRINITY_D7FKH8_ECTSI/433-566     | D7FKH8.1     | PF01841.17 | 54.80 | 0.00 |
| TRINITY_D3B5I3_POLPA/203-296     | D3B5I3.1     | PF00153.25 | 54.80 | 0.00 |
| TRINITY_A8HZG7_CHLRE/8-169       | A8HZG7.1     | PF03547.16 | 54.80 | 0.00 |
| TRINITY_A8IP72_CHLRE/3640-3875   | A8IP72.1     | PF12781.5; | 54.80 | 0.00 |
| TRINITY_D8U702_VOLCA/48-293      | D8U702.1     | PF07714.15 | 54.80 | 0.00 |
| TRINITY_L8H3W5_ACACA/971-1093    | L8H3W5.1     | PF00271.29 | 54.80 | 0.00 |
| TRINITY_D8UD65_VOLCA/1295-1479   | D8UD65.1     | PF08148.10 | 54.80 | 0.00 |
| TRINITY_A0A080WS87_TRIRC/1-299   | A0A080WS87.1 | PF0006     | 54.80 | 0.00 |
| TRINITY_C3YCQ4_BRAFL/2-75        | C3YCQ4.1     | PF02798.18 | 54.80 | 0.00 |
| TRINITY_A7AS55_BABBO/4-104       | A7AS55.1     | PF03297.13 | 54.80 | 0.00 |
| TRINITY_B4WMW0_9SYNE/1370-1484   | B4WMW0.1     | PF00072.22 | 54.80 | 0.00 |
| TRINITY_D8UEM9_VOLCA/200-272     | D8UEM9.1     | PF04564.13 | 54.80 | 0.00 |
| TRINITY_A8JGH3_CHLRE/759-1028    | A8JGH3.1     | PF02714.13 | 54.80 | 0.00 |
| TRINITY_D8U6I8_VOLCA/629-717     | D8U6I8.1     | PF00211.18 | 54.80 | 0.00 |
| TRINITY_A0A0J7KDP1_LASNI/474-593 | A0A0J7KDP1.1 | PF0066     | 54.80 | 0.00 |
| TRINITY_D8UJ52_VOLCA/83-339      | D8UJ52.1     | PF01237.16 | 54.80 | 0.00 |
| TRINITY_C4M6A4_ENTHI/5-468       | C4M6A4.1     | PF01039.20 | 54.80 | 0.00 |
| TRINITY_I0YVK1_9CHLO/101-520     | I0YVK1.1     | PF02897.13 | 54.80 | 0.00 |
| TRINITY_D2A369_TRICA/29-113      | D2A369.1     | PF13417.4; | 54.80 | 0.00 |
| TRINITY_T1G2W1_HELRO/10-79       | T1G2W1.1     | PF02798.18 | 54.80 | 0.00 |

|                                  |                     |       |      |
|----------------------------------|---------------------|-------|------|
| TRINITY_A0A087SNF7_AUXPR/636-724 | A0A087SNF7.1 PF0202 | 54.80 | 0.00 |
| TRINITY_Q7XRL9_ORYSJ/564-738     | Q7XRL9.2 PF00078.25 | 54.80 | 0.00 |
| TRINITY_Q23G43_TETTS/140-301     | Q23G43.2 PF00326.19 | 54.70 | 0.00 |
| TRINITY_R1G8R0_BOTPV/91-297      | R1G8R0.1 PF01871.15 | 54.70 | 0.00 |
| TRINITY_B3RI21_TRIAD/3-160       | B3RI21.1 PF04101.14 | 54.70 | 0.00 |
| TRINITY_I7M6P2_TETTS/611-745     | I7M6P2.2 PF07717.14 | 54.70 | 0.00 |
| TRINITY_L8HHS3_ACACA/744-951     | L8HHS3.1 PF00566.16 | 54.70 | 0.00 |
| TRINITY_Q23PP8_TETTS/225-367     | Q23PP8.1 PF04116.11 | 54.70 | 0.00 |
| TRINITY_I3KW27_ORENI/187-334     | I3KW27.1 PF00849.20 | 54.70 | 0.00 |
| TRINITY_I7MFQ7_TETTS/652-907     | I7MFQ7.2 PF00069.23 | 54.70 | 0.00 |
| TRINITY_A0A0M0LRP5_9EUKA/1-407   | A0A0M0LRP5.1 PF1283 | 54.70 | 0.00 |
| TRINITY_A0A0F4ZAA3_9PEZI/198-462 | A0A0F4ZAA3.1 PF0006 | 54.70 | 0.00 |
| TRINITY_A0A0J8BV14_BETVU/162-227 | A0A0J8BV14.1 PF0007 | 54.70 | 0.00 |
| TRINITY_Q22T76_TETTS/30-371      | Q22T76.2 PF00225.21 | 54.70 | 0.00 |
| TRINITY_I8REC5_9FIRM/8-198       | I8REC5.1 PF01734.20 | 54.70 | 0.00 |
| TRINITY_A8JBZ2_CHLRE/108-313     | A8JBZ2.1 PF13460.4; | 54.70 | 0.00 |
| TRINITY_J9IX82_9SPIT/757-1008    | J9IX82.1 PF16212.3; | 54.70 | 0.00 |
| TRINITY_A0A059AGJ9_EUCGR/161-422 | A0A059AGJ9.1 PF0263 | 54.70 | 0.00 |
| TRINITY_L8GZH9_ACACA/38-295      | L8GZH9.1 PF04427.16 | 54.70 | 0.00 |
| TRINITY_D2VNB4_NAEGR/168-493     | D2VNB4.1 PF00176.21 | 54.70 | 0.00 |
| TRINITY_M0RXA8_MUSAM/117-180     | M0RXA8.1 PF00400.30 | 54.70 | 0.00 |
| TRINITY_A0A059LER1_9CHLO/66-239  | A0A059LER1.1 PF0599 | 54.70 | 0.00 |
| TRINITY_H2MLX9_ORYLA/17-80       | H2MLX9.1 PF01442.16 | 54.70 | 0.00 |
| TRINITY_F4Q169_DICFS/12-262      | F4Q169.1 PF00069.23 | 54.70 | 0.00 |
| TRINITY_D8TUL9_VOLCA/147-372     | D8TUL9.1 PF09353.8; | 54.70 | 0.00 |
| TRINITY_G0QS55_ICHMG/919-1039    | G0QS55.1 PF02687.19 | 54.70 | 0.00 |
| TRINITY_Q24GQ7_TETTS/133-301     | Q24GQ7.1 PF04664.11 | 54.70 | 0.00 |
| TRINITY_Q1IIS4_KORVE/170-433     | Q1IIS4.1 PF03571.13 | 54.70 | 0.00 |
| TRINITY_E1Z9L5_CHLVA/93-351      | E1Z9L5.1 PF13469.4; | 54.70 | 0.00 |
| TRINITY_D3BT40_POLPA/479-585     | D3BT40.1 PF00307.29 | 54.70 | 0.00 |
| TRINITY_A0E8D8_PARTE/487-711     | A0E8D8.1 PF00149.26 | 54.70 | 0.00 |
| TRINITY_A0A022QR24_ERYGU/129-199 | A0A022QR24.1 PF1026 | 54.70 | 0.00 |
| TRINITY_L8H039_ACACA/206-457     | L8H039.1 PF00069.23 | 54.70 | 0.00 |
| TRINITY_Q5CUZ6_CRYPI/11-183      | Q5CUZ6.1 PF00025.19 | 54.70 | 0.00 |
| TRINITY_A0A0N4YGY5_NIPBR/309-824 | A0A0N4YGY5.1 PF0519 | 54.70 | 0.00 |
| TRINITY_B4WRB7_9SYNE/4-82        | B4WRB7.1 PF05239.14 | 54.70 | 0.00 |
| TRINITY_L8H0X9_ACACA/9-146       | L8H0X9.1 PF00179.24 | 54.70 | 0.00 |
| TRINITY_L8H0T4_ACACA/417-589     | L8H0T4.1 PF00644.18 | 54.70 | 0.00 |
| TRINITY_A0CKF8_PARTE/1118-1269   | A0CKF8.1 PF00005.25 | 54.70 | 0.00 |
| TRINITY_D8TQ93_VOLCA/109-161     | D8TQ93.1 PF09834.7; | 54.70 | 0.00 |
| TRINITY_W7X7I9_TETTS/323-408     | W7X7I9.1 PF00439.23 | 54.70 | 0.00 |
| TRINITY_A0E7H1_PARTE/82-449      | A0E7H1.1 PF00155.19 | 54.70 | 0.00 |
| TRINITY_I0ZAB0_9CHLO/226-314     | I0ZAB0.1 PF00153.25 | 54.70 | 0.00 |
| TRINITY_A0A087SSF7_AUXPR/366-672 | A0A087SSF7.1 PF0371 | 54.70 | 0.00 |
| TRINITY_D8U3D7_VOLCA/31-246      | D8U3D7.1 PF01036.16 | 54.70 | 0.00 |
| TRINITY_D8UJH8_VOLCA/5-69        | D8UJH8.1 PF13499.4; | 54.70 | 0.00 |
| TRINITY_B6IN35_RHOCS/786-841     | B6IN35.1 PF13368.4; | 54.70 | 0.00 |
| TRINITY_A7SJK6_NEMVE/4-377       | A7SJK6.1 PF00022.17 | 54.70 | 0.00 |
| TRINITY_G0R3J0_ICHMG/181-308     | G0R3J0.1 PF14833.4; | 54.70 | 0.00 |
| TRINITY_D8U0S3_VOLCA/739-921     | D8U0S3.1 PF05193.19 | 54.70 | 0.00 |
| TRINITY_R1D9Q6_EMIHU/11-61       | R1D9Q6.1 PF00628.27 | 54.70 | 0.00 |
| TRINITY_Q3SD15_PARTE/6-168       | Q3SD15.1 PF00071.20 | 54.70 | 0.00 |
| TRINITY_B9H981_POPTR/146-504     | B9H981.2 PF00152.18 | 54.70 | 0.00 |
| TRINITY_I1CC05_RHIO9/28-143      | I1CC05.1 PF00085.18 | 54.70 | 0.00 |
| TRINITY_F4PSU3_DICFS/306-385     | F4PSU3.1 PF01453.22 | 54.70 | 0.00 |
| TRINITY_L8H446_ACACA/214-362     | L8H446.1 PF00179.24 | 54.70 | 0.00 |
| TRINITY_J9HMM9_9SPIT/101-388     | J9HMM9.1 PF00122.18 | 54.70 | 0.00 |
| TRINITY_K2D3R8_9BACT/180-337     | K2D3R8.1 PF00128.22 | 54.70 | 0.00 |
| TRINITY_Q75JA1_DICDI/1040-1293   | Q75JA1.1 PF08235.11 | 54.70 | 0.00 |
| TRINITY_A0A075AV78_9FUNG/154-274 | A0A075AV78.1 PF0184 | 54.70 | 0.00 |
| TRINITY_D8TQI6_VOLCA/239-337     | D8TQI6.1 PF00027.27 | 54.70 | 0.00 |

|                                    |                     |       |      |
|------------------------------------|---------------------|-------|------|
| TRINITY_A0A078A9T0_STYLE/80-292    | A0A078A9T0.1 PF0011 | 54.70 | 0.00 |
| TRINITY_D8TIN2_VOLCA/1-163         | D8TIN2.1 PF10436.7; | 54.70 | 0.00 |
| TRINITY_A0DF13_PARTE/219-645       | A0DF13.1 PF06862.10 | 54.70 | 0.00 |
| TRINITY_S7Q0J7_GLOTA/499-741       | S7Q0J7.1 PF16203.3; | 54.70 | 0.00 |
| TRINITY_V6S698_9FLAO/3-238         | V6S698.1 PF03721.12 | 54.70 | 0.00 |
| TRINITY_E0W0I4_PEDHC/872-1326      | E0W0I4.1 PF00145.15 | 54.60 | 0.00 |
| TRINITY_DUS1_ARATH/58-188          | Q9ZR37.1 PF00782.18 | 54.60 | 0.00 |
| TRINITY_H8K3Y5_RICAG/5-395         | H8K3Y5.1 PF01134.20 | 54.60 | 0.00 |
| TRINITY_G0R101_ICHMG/12-220        | G0R101.1 PF00149.26 | 54.60 | 0.00 |
| TRINITY_A8IQ53_CHLRE/2-175         | A8IQ53.1 PF01184.17 | 54.60 | 0.00 |
| TRINITY_E1ZDV7_CHLVA/13-202        | E1ZDV7.1 PF02545.12 | 54.60 | 0.00 |
| TRINITY_Q22MC1_TETTS/26-195        | Q22MC1.2 PF00270.27 | 54.60 | 0.00 |
| TRINITY_G0R3E4_ICHMG/224-490       | G0R3E4.1 PF05021.13 | 54.60 | 0.00 |
| TRINITY_F0ZUT3_DICPU/104-579       | F0ZUT3.1 PF05761.12 | 54.60 | 0.00 |
| TRINITY_A0A060BGL7_9GAMM/12-358    | A0A060BGL7.1 PF0126 | 54.60 | 0.00 |
| TRINITY_L8H7B2_ACACA/14-280        | L8H7B2.1 PF07714.15 | 54.60 | 0.00 |
| TRINITY_I0YLU1_9CHLO/2-217         | I0YLU1.1 PF04012.10 | 54.60 | 0.00 |
| TRINITY_A0A0G4GZV6_9ALVE/5-178     | A0A0G4GZV6.1 PF0002 | 54.60 | 0.00 |
| TRINITY_L1JGW3_GUIITH/93-242       | L1JGW3.1 PF03073.13 | 54.60 | 0.00 |
| TRINITY_D8UD75_VOLCA/62-359        | D8UD75.1 PF00248.19 | 54.60 | 0.00 |
| TRINITY_I0YXH0_9CHLO/4-274         | I0YXH0.1 PF14938.4; | 54.60 | 0.00 |
| TRINITY_I1GYV5_BRADI/706-951       | I1GYV5.1 PF07727.12 | 54.60 | 0.00 |
| TRINITY_I3ZX87_ORNRL/211-533       | I3ZX87.1 PF00733.19 | 54.60 | 0.00 |
| TRINITY_A3WF44_9SPHN/23-526        | A3WF44.1 PF00118.22 | 54.60 | 0.00 |
| TRINITY_A0A068RPQ9_9FUNG/64-500    | A0A068RPQ9.1 PF0153 | 54.60 | 0.00 |
| TRINITY_A2FSG1_TRIVA/297-416       | A2FSG1.1 PF00723.19 | 54.60 | 0.00 |
| TRINITY_A8HWY6_CHLRE/83-260        | A8HWY6.1 PF09366.8; | 54.60 | 0.00 |
| TRINITY_A0A087XPG7_POEFO/49-145    | A0A087XPG7.2 PF0219 | 54.60 | 0.00 |
| TRINITY_A8J2R2_CHLRE/226-459       | A8J2R2.1 PF04194.11 | 54.60 | 0.00 |
| TRINITY_N1RA27_FUSC4/247-366       | N1RA27.1 PF01399.25 | 54.60 | 0.00 |
| TRINITY_A0A068RPY8_9FUNG/55-243    | A0A068RPY8.1 PF0022 | 54.60 | 0.00 |
| TRINITY_W7XCF2_TETTS/36-200        | W7XCF2.1 PF03637.15 | 54.50 | 0.00 |
| TRINITY_A0A0E3ZGI9_9BACT/111-270   | A0A0E3ZGI9.1 PF0295 | 54.50 | 0.00 |
| TRINITY_Q22AH3_TETTS/20-208        | Q22AH3.2 PF00485.16 | 54.50 | 0.00 |
| TRINITY_F0ZEM8_DICPU/96-468        | F0ZEM8.1 PF01546.26 | 54.50 | 0.00 |
| TRINITY_A0A0F2T7R1_9ACTN/109-337   | A0A0F2T7R1.1 PF0010 | 54.50 | 0.00 |
| TRINITY_Q23TC9_TETTS/457-522       | Q23TC9.2 PF01485.19 | 54.50 | 0.00 |
| TRINITY_L8GVK7_ACACA/26-246        | L8GVK7.1 PF01965.22 | 54.50 | 0.00 |
| TRINITY_D2A482_TRICA/997-1142      | D2A482.1 PF00005.25 | 54.50 | 0.00 |
| TRINITY_G0R050_ICHMG/14-167        | G0R050.1 PF13302.5; | 54.50 | 0.00 |
| TRINITY_A0DZH7_PARTE/105-216       | A0DZH7.1 PF00651.29 | 54.50 | 0.00 |
| TRINITY_T1EM35_HELRO/362-1082      | T1EM35.1 PF03028.13 | 54.50 | 0.00 |
| TRINITY_L8GQ15_ACACA/505-723       | L8GQ15.1 PF02450.13 | 54.50 | 0.00 |
| TRINITY_A0A015K3X5_9GLOM/1348-1691 | A0A015K3X5.1 PF0225 | 54.50 | 0.00 |
| TRINITY_Q555X7_DICDI/54-355        | Q555X7.1 PF10343.7; | 54.50 | 0.00 |
| TRINITY_I7MGP2_TETTS/91-280        | I7MGP2.1 PF00573.20 | 54.50 | 0.00 |
| TRINITY_Q22U45_TETTS/225-538       | Q22U45.1 PF00883.19 | 54.50 | 0.00 |
| TRINITY_K9TLZ5_9CYAN/145-327       | K9TLZ5.1 PF00211.18 | 54.50 | 0.00 |
| TRINITY_F6B8F6_DESCC/11-109        | F6B8F6.1 PF01230.21 | 54.50 | 0.00 |
| TRINITY_D8UDD9_VOLCA/30-246        | D8UDD9.1 PF00856.26 | 54.50 | 0.00 |
| TRINITY_D8M2B1_BLAHO/16-178        | D8M2B1.1 PF00071.20 | 54.50 | 0.00 |
| TRINITY_L8HGE6_ACACA/7-152         | L8HGE6.1 PF00071.20 | 54.50 | 0.00 |
| TRINITY_H3DN92_TETNG/14-447        | H3DN92.1 PF02005.14 | 54.50 | 0.00 |
| TRINITY_A0A087ZSG8_APIME/204-327   | A0A087ZSG8.1 PF0966 | 54.50 | 0.00 |
| TRINITY_G0QVK5_ICHMG/1-165         | G0QVK5.1 PF00838.15 | 54.50 | 0.00 |
| TRINITY_G0QNF4_ICHMG/82-412        | G0QNF4.1 PF00150.16 | 54.50 | 0.00 |
| TRINITY_Q22W19_TETTS/115-323       | Q22W19.3 PF00112.21 | 54.50 | 0.00 |
| TRINITY_J9J7E3_9SPIT/2429-2649     | J9J7E3.1 PF00644.18 | 54.50 | 0.00 |
| TRINITY_Q23QF2_TETTS/248-571       | Q23QF2.2 PF03133.13 | 54.50 | 0.00 |
| TRINITY_I7LW62_TETTS/2-387         | I7LW62.1 PF00022.17 | 54.50 | 0.00 |
| TRINITY_I7M2I4_TETTS/392-512       | I7M2I4.2 PF02687.19 | 54.50 | 0.00 |

|                                    |              |            |       |      |
|------------------------------------|--------------|------------|-------|------|
| TRINITY_T1ELD6_HELRO/5-166         | T1ELD6.1     | PF00071.20 | 54.50 | 0.00 |
| TRINITY_L8H779_ACACA/2-133         | L8H779.1     | PF13527.5; | 54.50 | 0.00 |
| TRINITY_A8JHR4_CHLRE/13-142        | A8JHR4.1     | PF01124.16 | 54.50 | 0.00 |
| TRINITY_L8HEJ6_ACACA/94-154        | L8HEJ6.1     | PF00571.26 | 54.50 | 0.00 |
| TRINITY_A8ILC7_CHLRE/1-98          | A8ILC7.1     | PF03556.13 | 54.50 | 0.00 |
| TRINITY_A0DOU1_PARTE/12-281        | A0DOU1.1     | PF00069.23 | 54.50 | 0.00 |
| TRINITY_A8IQ59_CHLRE/1465-1608     | A8IQ59.1     | PF00520.29 | 54.50 | 0.00 |
| TRINITY_F4PYE9_DICFS/464-585       | F4PYE9.1     | PF02338.17 | 54.50 | 0.00 |
| TRINITY_K7J987_NASVI/460-578       | K7J987.1     | PF00665.24 | 54.50 | 0.00 |
| TRINITY_I0ZA59_9CHLO/97-564        | I0ZA59.1     | PF00939.17 | 54.50 | 0.00 |
| TRINITY_A8J9U8_CHLRE/258-417       | A8J9U8.1     | PF01554.16 | 54.50 | 0.00 |
| TRINITY_L8H7R1_ACACA/43-388        | L8H7R1.1     | PF00224.19 | 54.50 | 0.00 |
| TRINITY_D7FY41_ECTSI/52-95         | D7FY41.1     | PF13639.4; | 54.50 | 0.00 |
| TRINITY_D8R2N6_SELML/7-165         | D8R2N6.1     | PF01699.22 | 54.50 | 0.00 |
| TRINITY_C3XRT7_BRAFL/49-255        | C3XRT7.1     | PF00106.23 | 54.50 | 0.00 |
| TRINITY_D8TTV8_VOLCA/81-324        | D8TTV8.1     | PF00233.17 | 54.50 | 0.00 |
| TRINITY_I0YYI3_9CHLO/7-77          | I0YYI3.1     | PF00076.20 | 54.50 | 0.00 |
| TRINITY_D8UGX0_VOLCA/39-423        | D8UGX0.1     | PF03148.12 | 54.50 | 0.00 |
| TRINITY_A8JJ30_CHLRE/1-100         | A8JJ30.1     | PF01417.18 | 54.50 | 0.00 |
| TRINITY_A9TT91_PHYPA/166-357       | A9TT91.1     | PF00270.27 | 54.50 | 0.00 |
| TRINITY_I0YS69_9CHLO/104-193       | I0YS69.1     | PF00153.25 | 54.50 | 0.00 |
| TRINITY_I0ZA39_9CHLO/1-155         | I0ZA39.1     | PF00535.24 | 54.50 | 0.00 |
| TRINITY_F4WL33_ACREC/62-117        | F4WL33.1     | PF04818.11 | 54.50 | 0.00 |
| TRINITY_E1Z7K7_CHLVA/1096-1264     | E1Z7K7.1     | PF08148.10 | 54.50 | 0.00 |
| TRINITY_A0BNU8_PARTE/87-254        | A0BNU8.1     | PF00650.18 | 54.50 | 0.00 |
| TRINITY_M0SHF5_MUSAM/145-250       | M0SHF5.1     | PF00581.18 | 54.50 | 0.00 |
| TRINITY_L8GN02_ACACA/559-628       | L8GN02.1     | PF00017.22 | 54.50 | 0.00 |
| TRINITY_A0A0A1NT77_9FUNG/31-206    | A0A0A1NT77.1 | PF0027     | 54.50 | 0.00 |
| TRINITY_A0BZG0_PARTE/490-812       | A0BZG0.1     | PF03133.13 | 54.50 | 0.00 |
| TRINITY_Q24C42_TETTS/18-248        | Q24C42.1     | PF03803.13 | 54.50 | 0.00 |
| TRINITY_A0A0D9MFL4_9EURO/9-355     | A0A0D9MFL4.1 | PF0028     | 54.50 | 0.00 |
| TRINITY_W5LD68_ASTMX/138-301       | W5LD68.1     | PF03031.16 | 54.50 | 0.00 |
| TRINITY_D8UH89_VOLCA/5-117         | D8UH89.1     | PF01778.15 | 54.50 | 0.00 |
| TRINITY_W7X737_TETTS/315-581       | W7X737.1     | PF00481.19 | 54.50 | 0.00 |
| TRINITY_I0Z500_9CHLO/2-262         | I0Z500.1     | PF03403.11 | 54.50 | 0.00 |
| TRINITY_A0A0D2WR81_CAPO3/170-391   | A0A0D2WR81.1 | PF0125     | 54.50 | 0.00 |
| TRINITY_D9S0F3_THEOJ/6-161         | D9S0F3.1     | PF00156.25 | 54.50 | 0.00 |
| TRINITY_A0A060S8N1_PYCCI/1968-2088 | A0A060S8N1.1 | PF0066     | 54.50 | 0.00 |
| TRINITY_Q55EX4_DICDI/567-736       | Q55EX4.1     | PF02390.15 | 54.40 | 0.00 |
| TRINITY_A0DHI6_PARTE/87-146        | A0DHI6.1     | PF13921.4; | 54.40 | 0.00 |
| TRINITY_Q245Y0_TETTS/8-169         | Q245Y0.1     | PF00071.20 | 54.40 | 0.00 |
| TRINITY_V4KJ74_EUTSA/268-349       | V4KJ74.1     | PF00400.30 | 54.40 | 0.00 |
| TRINITY_F6QZC4_XENTR/70-368        | F6QZC4.1     | PF01406.17 | 54.40 | 0.00 |
| TRINITY_Q22HF8_TETTS/19-257        | Q22HF8.1     | PF13561.4; | 54.40 | 0.00 |
| TRINITY_A0A0G4IZI2_PLABS/8-169     | A0A0G4IZI2.1 | PF0007     | 54.40 | 0.00 |
| TRINITY_A0BU06_PARTE/27-216        | A0BU06.1     | PF01145.23 | 54.40 | 0.00 |
| TRINITY_V3ZSB5_LOTGI/10-115        | V3ZSB5.1     | PF01920.18 | 54.40 | 0.00 |
| TRINITY_G0QWP0_ICHMG/124-181       | G0QWP0.1     | PF01485.19 | 54.40 | 0.00 |
| TRINITY_G0QIZ2_ICHMG/16-177        | G0QIZ2.1     | PF00071.20 | 54.40 | 0.00 |
| TRINITY_M2PPD1_CERS8/446-564       | M2PPD1.1     | PF12708.5; | 54.40 | 0.00 |
| TRINITY_A0A078AR51_STYLE/8-287     | A0A078AR51.1 | PF0006     | 54.40 | 0.00 |
| TRINITY_E8QX25_ISOPI/79-315        | E8QX25.1     | PF04055.19 | 54.40 | 0.00 |
| TRINITY_Q3SDT4_PARTE/8-173         | Q3SDT4.1     | PF00071.20 | 54.40 | 0.00 |
| TRINITY_F1A5Z4_DICPU/161-217       | F1A5Z4.1     | PF13639.4; | 54.40 | 0.00 |
| TRINITY_G0QVH9_ICHMG/93-465        | G0QVH9.1     | PF01546.26 | 54.40 | 0.00 |
| TRINITY_F4QF57_DICFS/124-262       | F4QF57.1     | PF03734.12 | 54.40 | 0.00 |
| TRINITY_A1WG70_VEREI/650-717       | A1WG70.1     | PF00364.20 | 54.40 | 0.00 |
| TRINITY_L8GGT0_ACACA/221-344       | L8GGT0.1     | PF00241.18 | 54.40 | 0.00 |
| TRINITY_J9J3B4_9SPIT/124-338       | J9J3B4.1     | PF00112.21 | 54.40 | 0.00 |
| TRINITY_A0C099_PARTE/53-181        | A0C099.1     | PF00877.17 | 54.40 | 0.00 |
| TRINITY_E9G222_DAPPU/164-280       | E9G222.1     | PF01873.15 | 54.40 | 0.00 |



|                                    |              |            |       |      |
|------------------------------------|--------------|------------|-------|------|
| TRINITY_A8JD26_CHLRE/231-393       | A8JD26.1     | PF01554.16 | 54.40 | 0.00 |
| TRINITY_D8UD04_VOLCA/2-346         | D8UD04.1     | PF00443.27 | 54.40 | 0.00 |
| TRINITY_D8TJY8_VOLCA/379-944       | D8TJY8.1     | PF00328.20 | 54.40 | 0.00 |
| TRINITY_L8H309_ACACA/23-135        | L8H309.1     | PF02338.17 | 54.40 | 0.00 |
| TRINITY_A8I807_CHLRE/1018-1101     | A8I807.1     | PF00211.18 | 54.40 | 0.00 |
| TRINITY_A8J8P1_CHLRE/31-280        | A8J8P1.1     | PF00225.21 | 54.40 | 0.00 |
| TRINITY_D8UDM2_VOLCA/126-221       | D8UDM2.1     | PF00012.18 | 54.40 | 0.00 |
| TRINITY_D8G5U1_9CYAN/576-700       | D8G5U1.1     | PF02518.24 | 54.40 | 0.00 |
| TRINITY_A0DIQ1_PARTE/466-597       | A0DIQ1.1     | PF00782.18 | 54.40 | 0.00 |
| TRINITY_E6NUC5_JATCU/13-132        | E6NUC5.1     | PF00903.23 | 54.40 | 0.00 |
| TRINITY_Q23AM3_TETTS/1054-1231     | Q23AM3.2     | PF00005.25 | 54.40 | 0.00 |
| TRINITY_G0QWP0_ICHMG/124-181       | G0QWP0.1     | PF01485.19 | 54.40 | 0.00 |
| TRINITY_I0YL92_9CHLO/41-120        | I0YL92.1     | PF00504.19 | 54.40 | 0.00 |
| TRINITY_A8J998_CHLRE/100-183       | A8J998.1     | PF04720.10 | 54.40 | 0.00 |
| TRINITY_J4C8J7_THEOR/331-460       | J4C8J7.1     | PF00004.27 | 54.40 | 0.00 |
| TRINITY_I1FZF5_AMPQE/424-568       | I1FZF5.1     | PF00005.25 | 54.40 | 0.00 |
| TRINITY_H2YP11_CIOSA/230-438       | H2YP11.1     | PF00005.25 | 54.40 | 0.00 |
| TRINITY_L8HAQ1_ACACA/941-1132      | L8HAQ1.1     | PF02145.13 | 54.40 | 0.00 |
| TRINITY_A0DYC6_PARTE/574-750       | A0DYC6.1     | PF13870.4; | 54.40 | 0.00 |
| TRINITY_D8TZ80_VOLCA/781-992       | D8TZ80.1     | PF01434.16 | 54.40 | 0.00 |
| TRINITY_D8UBP9_VOLCA/83-318        | D8UBP9.1     | PF00194.19 | 54.40 | 0.00 |
| TRINITY_E1ZLM6_CHLVA/82-177        | E1ZLM6.1     | PF12248.6; | 54.40 | 0.00 |
| TRINITY_A8JHP2_CHLRE/61-382        | A8JHP2.1     | PF01546.26 | 54.40 | 0.00 |
| TRINITY_A8IZI1_CHLRE/208-298       | A8IZI1.1     | PF16561.3; | 54.40 | 0.00 |
| TRINITY_E1ZCJ2_CHLVA/69-399        | E1ZCJ2.1     | PF03405.12 | 54.40 | 0.00 |
| TRINITY_D8UGD4_VOLCA/25-305        | D8UGD4.1     | PF00069.23 | 54.40 | 0.00 |
| TRINITY_D8U819_VOLCA/63-369        | D8U819.1     | PF02383.16 | 54.40 | 0.00 |
| TRINITY_A8I9X2_CHLRE/3-151         | A8I9X2.1     | PF05903.12 | 54.40 | 0.00 |
| TRINITY_D8TLD2_VOLCA/16-292        | D8TLD2.1     | PF06432.9; | 54.40 | 0.00 |
| TRINITY_A0A067CI89_SAPPC/11-172    | A0A067CI89.1 | PF00007    | 54.40 | 0.00 |
| TRINITY_E1ZNA5_CHLVA/106-362       | E1ZNA5.1     | PF00248.19 | 54.40 | 0.00 |
| TRINITY_A0A078KZ82_9CHLA/128-232   | A0A078KZ82.1 | PF1364     | 54.40 | 0.00 |
| TRINITY_F2UJD2_SALR5/129-336       | F2UJD2.1     | PF00112.21 | 54.40 | 0.00 |
| TRINITY_E1ZCH3_CHLVA/293-451       | E1ZCH3.1     | PF00534.18 | 54.40 | 0.00 |
| TRINITY_D8TXF5_VOLCA/622-733       | D8TXF5.1     | PF00989.23 | 54.40 | 0.00 |
| TRINITY_E4XK02_OIKDI/5-72          | E4XK02.1     | PF01423.20 | 54.30 | 0.00 |
| TRINITY_U6JI51_ECHGR/8-80          | U6JI51.1     | PF00173.26 | 54.30 | 0.00 |
| TRINITY_A0DKE3_PARTE/353-402       | A0DKE3.1     | PF13920.4; | 54.30 | 0.00 |
| TRINITY_A0CDV3_PARTE/213-277       | A0CDV3.1     | PF01485.19 | 54.30 | 0.00 |
| TRINITY_G0QZ29_ICHMG/1143-1601     | G0QZ29.1     | PF06202.12 | 54.30 | 0.00 |
| TRINITY_I7M8J3_TETTS/17-410        | I7M8J3.2     | PF00450.20 | 54.30 | 0.00 |
| TRINITY_A0A059LAX3_9CHLO/2-186     | A0A059LAX3.1 | PF00070    | 54.30 | 0.00 |
| TRINITY_A0C657_PARTE/5-84          | A0C657.1     | PF09340.8; | 54.30 | 0.00 |
| TRINITY_F0ZD07_DICPU/119-261       | F0ZD07.1     | PF00620.25 | 54.30 | 0.00 |
| TRINITY_A0A0G4FP44_9ALVE/2954-3289 | A0A0G4FP44.1 | PF1277     | 54.30 | 0.00 |
| TRINITY_A0DY68_PARTE/382-462       | A0DY68.1     | PF13646.4; | 54.30 | 0.00 |
| TRINITY_A0BXR0_PARTE/306-355       | A0BXR0.1     | PF13920.4; | 54.30 | 0.00 |
| TRINITY_G0QW62_ICHMG/11-232        | G0QW62.1     | PF00244.18 | 54.30 | 0.00 |
| TRINITY_V8NJ50_OPHHA/48-128        | V8NJ50.1     | PF00887.17 | 54.30 | 0.00 |
| TRINITY_S9WXX3_SCHCR/161-230       | S9WXX3.1     | PF00076.20 | 54.30 | 0.00 |
| TRINITY_A0BG07_PARTE/1-82          | A0BG07.1     | PF14846.4; | 54.30 | 0.00 |
| TRINITY_A0A058ZFN9_9EUKA/412-522   | A0A058ZFN9.1 | PF0027     | 54.30 | 0.00 |
| TRINITY_A0A0A1UCS6_ENTIV/1389-1650 | A0A0A1UCS6.1 | PF0006     | 54.30 | 0.00 |
| TRINITY_A0A067QYX3_ZOONE/5-80      | A0A067QYX3.1 | PF0279     | 54.30 | 0.00 |
| TRINITY_F0ZDN0_DICPU/1-96          | F0ZDN0.1     | PF12796.5; | 54.30 | 0.00 |
| TRINITY_I7M475_TETTS/2217-2320     | I7M475.2     | PF08454.9; | 54.30 | 0.00 |
| TRINITY_E1ZLB3_CHLVA/13-82         | E1ZLB3.1     | PF00076.20 | 54.30 | 0.00 |
| TRINITY_I7LZV2_TETTS/151-413       | I7LZV2.1     | PF00069.23 | 54.30 | 0.00 |
| TRINITY_V4RIN0_9ROSI/56-225        | V4RIN0.1     | PF05042.11 | 54.30 | 0.00 |
| TRINITY_M1BGI1_SOLTU/16-105        | M1BGI1.1     | PF00447.15 | 54.30 | 0.00 |
| TRINITY_A0D8S8_PARTE/638-896       | A0D8S8.1     | PF07714.15 | 54.30 | 0.00 |

|                                   |              |            |       |      |
|-----------------------------------|--------------|------------|-------|------|
| TRINITY_G0QPP3_ICHMG/85-222       | G0QPP3.1     | PF01529.18 | 54.30 | 0.00 |
| TRINITY_A0A0P7VT48_9TELE/762-1082 | A0A0P7VT48.1 | PF0017     | 54.30 | 0.00 |
| TRINITY_A0E826_PARTE/128-238      | A0E826.1     | PF00168.28 | 54.30 | 0.00 |
| TRINITY_A0A087HP96_ARAAL/63-131   | A0A087HP96.1 | PF0007     | 54.30 | 0.00 |
| TRINITY_L8GR35_ACACA/37-107       | L8GR35.1     | PF00076.20 | 54.30 | 0.00 |
| TRINITY_A8JAJ9_CHLRE/62-304       | A8JAJ9.1     | PF04755.10 | 54.30 | 0.00 |
| TRINITY_A4VDU7_TETTS/32-438       | A4VDU7.2     | PF00899.19 | 54.30 | 0.00 |
| TRINITY_K3WKL6_PYTUL/299-382      | K3WKL6.1     | PF00013.27 | 54.30 | 0.00 |
| TRINITY_A0EA12_PARTE/35-340       | A0EA12.1     | PF00456.19 | 54.30 | 0.00 |
| TRINITY_D8U7C3_VOLCA/5-569        | D8U7C3.1     | PF08553.8; | 54.30 | 0.00 |
| TRINITY_W5MNV1_LEPOC/4-107        | W5MNV1.1     | PF14933.4; | 54.30 | 0.00 |
| TRINITY_E8N328_ANATU/15-318       | E8N328.1     | PF00248.19 | 54.30 | 0.00 |
| TRINITY_D8UCJ2_VOLCA/53-156       | D8UCJ2.1     | PF06110.9; | 54.30 | 0.00 |
| TRINITY_A8IS69_CHLRE/18-327       | A8IS69.1     | PF03009.15 | 54.30 | 0.00 |
| TRINITY_E1Z240_CHLVA/31-171       | E1Z240.1     | PF01138.19 | 54.30 | 0.00 |
| TRINITY_D8UC96_VOLCA/594-693      | D8UC96.1     | PF00211.18 | 54.30 | 0.00 |
| TRINITY_E1ZE62_CHLVA/196-716      | E1ZE62.1     | PF12569.6; | 54.30 | 0.00 |
| TRINITY_I7M910_TETTS/11-285       | I7M910.1     | PF00069.23 | 54.30 | 0.00 |
| TRINITY_A0A0A1N3N7_9FUNG/267-511  | A0A0A1N3N7.1 | PF0118     | 54.30 | 0.00 |
| TRINITY_T1G9L5_HELRO/74-372       | T1G9L5.1     | PF00291.23 | 54.30 | 0.00 |
| TRINITY_D8U8R7_VOLCA/29-293       | D8U8R7.1     | PF00069.23 | 54.30 | 0.00 |
| TRINITY_C1N1Y8_MICPC/190-434      | C1N1Y8.1     | PF08572.8; | 54.30 | 0.00 |
| TRINITY_K1XUG6_MARBU/19-319       | K1XUG6.1     | PF00248.19 | 54.30 | 0.00 |
| TRINITY_D8TNV2_VOLCA/856-1080     | D8TNV2.1     | PF00069.23 | 54.30 | 0.00 |
| TRINITY_A0A0M9E9Y5_9DELTA/508-624 | A0A0M9E9Y5.1 | PF0251     | 54.30 | 0.00 |
| TRINITY_D8TKK7_VOLCA/1-188        | D8TKK7.1     | PF07714.15 | 54.30 | 0.00 |
| TRINITY_E1ZE44_CHLVA/390-768      | E1ZE44.1     | PF00702.24 | 54.30 | 0.00 |
| TRINITY_Q22RX1_TETTS/26-322       | Q22RX1.2     | PF00069.23 | 54.30 | 0.00 |
| TRINITY_G0R2T0_ICHMG/33-283       | G0R2T0.1     | PF00069.23 | 54.30 | 0.00 |
| TRINITY_G0QQ97_ICHMG/55-152       | G0QQ97.1     | PF12894.5; | 54.30 | 0.00 |
| TRINITY_A7TPP5_VANPO/27-100       | A7TPP5.1     | PF01722.16 | 54.30 | 0.00 |
| TRINITY_R4XFE9_TAPDE/681-796      | R4XFE9.1     | PF00665.24 | 54.30 | 0.00 |
| TRINITY_D8TQK7_VOLCA/86-340       | D8TQK7.1     | PF00856.26 | 54.30 | 0.00 |
| TRINITY_Q4UEX5_THEAN/244-287      | Q4UEX5.1     | PF13639.4; | 54.30 | 0.00 |
| TRINITY_V2XT82_MONRO/20-161       | V2XT82.1     | PF00125.22 | 54.30 | 0.00 |
| TRINITY_M2QZG3_CERS8/31-79        | M2QZG3.1     | PF01679.15 | 54.20 | 0.00 |
| TRINITY_H3GFZ1_PHYRM/18-298       | H3GFZ1.1     | PF03747.12 | 54.20 | 0.00 |
| TRINITY_A0CW58_PARTE/436-485      | A0CW58.1     | PF13920.4; | 54.20 | 0.00 |
| TRINITY_I7M692_TETTS/132-377      | I7M692.2     | PF00561.18 | 54.20 | 0.00 |
| TRINITY_V3ZQH9_LOTGI/67-180       | V3ZQH9.1     | PF00581.18 | 54.20 | 0.00 |
| TRINITY_G0QY39_ICHMG/147-345      | G0QY39.1     | PF07992.12 | 54.20 | 0.00 |
| TRINITY_L8H314_ACACA/14-297       | L8H314.1     | PF03151.14 | 54.20 | 0.00 |
| TRINITY_L8GYQ1_ACACA/45-195       | L8GYQ1.1     | PF00179.24 | 54.20 | 0.00 |
| TRINITY_Q23DB1_TETTS/874-1050     | Q23DB1.2     | PF13091.4; | 54.20 | 0.00 |
| TRINITY_C1N7V7_MICPC/1-187        | C1N7V7.1     | PF01265.15 | 54.20 | 0.00 |
| TRINITY_D3BSD2_POLPA/53-310       | D3BSD2.1     | PF00069.23 | 54.20 | 0.00 |
| TRINITY_L8H5Z5_ACACA/38-485       | L8H5Z5.1     | PF05577.10 | 54.20 | 0.00 |
| TRINITY_L8GK67_ACACA/447-561      | L8GK67.1     | PF00271.29 | 54.20 | 0.00 |
| TRINITY_K5UZ20_PHACS/84-444       | K5UZ20.1     | PF00266.17 | 54.20 | 0.00 |
| TRINITY_G0QMH1_ICHMG/62-324       | G0QMH1.1     | PF00069.23 | 54.20 | 0.00 |
| TRINITY_L8GNJ5_ACACA/2442-2524    | L8GNJ5.1     | PF05406.13 | 54.20 | 0.00 |
| TRINITY_Q8S653_ORYSJ/452-609      | Q8S653.1     | PF00078.25 | 54.20 | 0.00 |
| TRINITY_L8HJ51_ACACA/91-488       | L8HJ51.1     | PF00026.21 | 54.20 | 0.00 |
| TRINITY_B3RVA8_TRIAD/484-656      | B3RVA8.1     | PF07717.14 | 54.20 | 0.00 |
| TRINITY_F1NX57_CHICK/16-334       | F1NX57.2     | PF00389.28 | 54.20 | 0.00 |
| TRINITY_C1MMC3_MICPC/125-264      | C1MMC3.1     | PF13679.4; | 54.20 | 0.00 |
| TRINITY_E1Z307_CHLVA/23-382       | E1Z307.1     | PF01231.16 | 54.20 | 0.00 |
| TRINITY_F4PKS2_DICFS/13-73        | F4PKS2.1     | PF00076.20 | 54.20 | 0.00 |
| TRINITY_A9SSI1_PHYPA/93-303       | A9SSI1.1     | PF00454.25 | 54.20 | 0.00 |
| TRINITY_A0BQA6_PARTE/560-677      | A0BQA6.1     | PF02518.24 | 54.20 | 0.00 |
| TRINITY_A8HYI2_CHLRE/152-298      | A8HYI2.1     | PF12049.6; | 54.20 | 0.00 |

|                                  |                     |       |      |
|----------------------------------|---------------------|-------|------|
| TRINITY_I0YWK3_9CHLO/29-205      | I0YWK3.1 PF04675.12 | 54.20 | 0.00 |
| TRINITY_A0A077ZTQ1_STYLE/305-470 | A0A077ZTQ1.1 PF0044 | 54.20 | 0.00 |
| TRINITY_A0A087SPK2_AUXPR/569-730 | A0A087SPK2.1 PF0007 | 54.20 | 0.00 |
| TRINITY_I2GLZ1_9BACT/11-166      | I2GLZ1.1 PF14328.4; | 54.20 | 0.00 |
| TRINITY_D8THV5_VOLCA/124-361     | D8THV5.1 PF00122.18 | 54.20 | 0.00 |
| TRINITY_B0JH77_MICAN/400-538     | B0JH77.1 PF00005.25 | 54.20 | 0.00 |
| TRINITY_D8U4R6_VOLCA/3-217       | D8U4R6.1 PF10191.7; | 54.20 | 0.00 |
| TRINITY_I7MA07_TETTS/32-269      | I7MA07.2 PF00481.19 | 54.20 | 0.00 |
| TRINITY_E1ZEV3_CHLVA/5-272       | E1ZEV3.1 PF01040.16 | 54.20 | 0.00 |
| TRINITY_D2VRI8_NAEGR/1028-1193   | D2VRI8.1 PF02146.15 | 54.20 | 0.00 |
| TRINITY_G4ZCB9_PHYSP/108-179     | G4ZCB9.1 PF00240.21 | 54.20 | 0.00 |
| TRINITY_B6K6Y0_SCHJY/131-296     | B6K6Y0.1 PF00270.27 | 54.20 | 0.00 |
| TRINITY_A0A0D2WKC1_CAPO3/200-284 | A0A0D2WKC1.1 PF1484 | 54.20 | 0.00 |
| TRINITY_A0DIQ1_PARTE/466-597     | A0DIQ1.1 PF00782.18 | 54.20 | 0.00 |
| TRINITY_S2JN73_MUCC1/38-191      | S2JN73.1 PF04051.14 | 54.20 | 0.00 |
| TRINITY_A8IWT5_CHLRE/361-504     | A8IWT5.1 PF09384.8; | 54.20 | 0.00 |
| TRINITY_I0Z1Z1_9CHLO/36-150      | I0Z1Z1.1 PF00254.26 | 54.20 | 0.00 |
| TRINITY_F4Q5X2_DICFS/522-639     | F4Q5X2.1 PF13671.4; | 54.20 | 0.00 |
| TRINITY_D8TKF3_VOLCA/105-363     | D8TKF3.1 PF03235.12 | 54.20 | 0.00 |
| TRINITY_F4PTA8_DICFS/9-405       | F4PTA8.1 PF01490.16 | 54.20 | 0.00 |
| TRINITY_Q22BR3_TETTS/13-180      | Q22BR3.2 PF00071.20 | 54.20 | 0.00 |
| TRINITY_A0BZ18_PARTE/112-171     | A0BZ18.1 PF00076.20 | 54.20 | 0.00 |
| TRINITY_A8IXK6_CHLRE/1-265       | A8IXK6.1 PF00176.21 | 54.20 | 0.00 |
| TRINITY_A0E5D8_PARTE/235-310     | A0E5D8.1 PF02798.18 | 54.20 | 0.00 |

|                                  |              |            |       |      |
|----------------------------------|--------------|------------|-------|------|
| TRINITY_A8JI30_CHLRE/12-145      | A8JI30.1     | PF00588.17 | 54.20 | 0.00 |
| TRINITY_D3B3N0_POLPA/42-229      | D3B3N0.1     | PF03942.13 | 54.20 | 0.00 |
| TRINITY_Q22SJ9_TETTS/1450-1600   | Q22SJ9.2     | PF07534.14 | 54.20 | 0.00 |
| TRINITY_A8HUI6_CHLRE/69-145      | A8HUI6.1     | PF13193.4; | 54.20 | 0.00 |
| TRINITY_A0A0K9P9W3_ZOSMR/623-847 | A0A0K9P9W3.1 | PF0823     | 54.20 | 0.00 |
| TRINITY_Q22MP0_TETTS/38-191      | Q22MP0.2     | PF00005.25 | 54.20 | 0.00 |
| TRINITY_A0A0D2X0S6_CAPO3/711-763 | A0A0D2X0S6.1 | PF0831     | 54.20 | 0.00 |
| TRINITY_Q23FG9_TETTS/2610-2860   | Q23FG9.2     | PF00520.29 | 54.20 | 0.00 |
| TRINITY_Q22AB0_TETTS/141-425     | Q22AB0.2     | PF00566.16 | 54.20 | 0.00 |
| TRINITY_A0A078AY45_STYLE/121-266 | A0A078AY45.1 | PF0078     | 54.20 | 0.00 |
| TRINITY_J9J144_9SPIT/92-349      | J9J144.1     | PF00069.23 | 54.20 | 0.00 |
| TRINITY_A8JFU2_CHLRE/234-292     | A8JFU2.1     | PF14874.4; | 54.20 | 0.00 |
| TRINITY_A8I1G7_CHLRE/1-184       | A8I1G7.1     | PF00211.18 | 54.20 | 0.00 |
| TRINITY_D8UA57_VOLCA/8-89        | D8UA57.1     | PF14846.4; | 54.20 | 0.00 |
| TRINITY_A0A0F3K961_9GAMM/71-236  | A0A0F3K961.1 | PF1347     | 54.20 | 0.00 |
| TRINITY_K1PW81_CRAGI/34-495      | K1PW81.1     | PF00082.20 | 54.20 | 0.00 |
| TRINITY_A8JAS9_CHLRE/125-378     | A8JAS9.1     | PF05007.11 | 54.20 | 0.00 |
| TRINITY_A8JIH3_CHLRE/67-169      | A8JIH3.1     | PF08855.8; | 54.20 | 0.00 |
| TRINITY_D8U6K4_VOLCA/23-594      | D8U6K4.1     | PF02696.12 | 54.20 | 0.00 |
| TRINITY_R4GAB7_ANOCA/908-1154    | R4GAB7.1     | PF07727.12 | 54.20 | 0.00 |
| TRINITY_G0QYX1_ICHMG/10-68       | G0QYX1.1     | PF13637.4; | 54.20 | 0.00 |
| TRINITY_A0DYF8_PARTE/433-482     | A0DYF8.1     | PF13920.4; | 54.20 | 0.00 |
| TRINITY_Q22BR3_TETTS/13-180      | Q22BR3.2     | PF00071.20 | 54.20 | 0.00 |
| TRINITY_I7M7D5_TETTS/682-731     | I7M7D5.2     | PF01344.23 | 54.20 | 0.00 |
| TRINITY_B3RZ00_TRIAD/8-190       | B3RZ00.1     | PF00370.19 | 54.20 | 0.00 |
| TRINITY_Q22MH4_TETTS/143-377     | Q22MH4.1     | PF13532.4; | 54.10 | 0.00 |
| TRINITY_G0QYY5_ICHMG/38-207      | G0QYY5.1     | PF13847.4; | 54.10 | 0.00 |
| TRINITY_A4I6U0_LEIIN/7-173       | A4I6U0.1     | PF01931.16 | 54.10 | 0.00 |
| TRINITY_Q24IM0_TETTS/4374-5086   | Q24IM0.2     | PF03028.13 | 54.10 | 0.00 |
| TRINITY_H2ZLT1_CIOSA/2-73        | H2ZLT1.1     | PF02798.18 | 54.10 | 0.00 |
| TRINITY_E8R2Z6_ISOPI/209-360     | E8R2Z6.1     | PF13185.4; | 54.10 | 0.00 |
| TRINITY_W7X2L6_TETTS/41-297      | W7X2L6.1     | PF01209.16 | 54.10 | 0.00 |
| TRINITY_A0A015MTC7_9GLOM/5-187   | A0A015MTC7.1 | PF0244     | 54.10 | 0.00 |
| TRINITY_F0YD47_AURAN/46-120      | F0YD47.1     | PF01929.15 | 54.10 | 0.00 |
| TRINITY_A0A024TP29_9STRA/11-259  | A0A024TP29.1 | PF0010     | 54.10 | 0.00 |
| TRINITY_R0FGT8_9BRAS/11-185      | R0FGT8.1     | PF00069.23 | 54.10 | 0.00 |
| TRINITY_A0A067QIB6_ZOONE/1-91    | A0A067QIB6.1 | PF0015     | 54.10 | 0.00 |
| TRINITY_G6FXD7_9CYAN/19-321      | G6FXD7.1     | PF00248.19 | 54.10 | 0.00 |
| TRINITY_MECR_DICDI/172-303       | Q54YT4.1     | PF00107.24 | 54.10 | 0.00 |
| TRINITY_K7JUI4_NASVI/1045-1110   | K7JUI4.1     | PF01363.19 | 54.10 | 0.00 |
| TRINITY_G1KK58_ANOCA/805-869     | G1KK58.2     | PF01363.19 | 54.10 | 0.00 |
| TRINITY_A4VDD3_TETTS/7-79        | A4VDD3.1     | PF02798.18 | 54.10 | 0.00 |
| TRINITY_L8GUP7_ACACA/25-206      | L8GUP7.1     | PF04664.11 | 54.10 | 0.00 |
| TRINITY_J9FYL2_9SPIT/398-662     | J9FYL2.1     | PF00069.23 | 54.10 | 0.00 |
| TRINITY_L8H4R4_ACACA/43-293      | L8H4R4.1     | PF01040.16 | 54.10 | 0.00 |
| TRINITY_E1ZPZ5_CHLVA/17-232      | E1ZPZ5.1     | PF00106.23 | 54.10 | 0.00 |
| TRINITY_I7M250_TETTS/101-222     | I7M250.1     | PF09335.9; | 54.10 | 0.00 |
| TRINITY_I7M910_TETTS/11-285      | I7M910.1     | PF00069.23 | 54.10 | 0.00 |
| TRINITY_H3CG24_TETNG/13-278      | H3CG24.1     | PF07942.10 | 54.10 | 0.00 |
| TRINITY_I7MMV5_TETTS/55-352      | I7MMV5.2     | PF00443.27 | 54.10 | 0.00 |
| TRINITY_D0NJV0_PHYIT/56-170      | D0NJV0.1     | PF00787.22 | 54.10 | 0.00 |
| TRINITY_V3ZIZ6_LOTGI/185-317     | V3ZIZ6.1     | PF00107.24 | 54.10 | 0.00 |
| TRINITY_Q8LP67_CHLRE/27-494      | Q8LP67.2     | PF01384.18 | 54.10 | 0.00 |
| TRINITY_D3B388_POLPA/36-371      | D3B388.1     | PF16113.3; | 54.10 | 0.00 |
| TRINITY_A0A0G4J2X3_PLABS/751-865 | A0A0G4J2X3.1 | PF0066     | 54.10 | 0.00 |
| TRINITY_J9IMY3_9SPIT/15-201      | J9IMY3.1     | PF13460.4; | 54.10 | 0.00 |
| TRINITY_D3B1I3_POLPA/193-379     | D3B1I3.1     | PF00852.17 | 54.10 | 0.00 |
| TRINITY_A0A060SLW1_PYCCI/25-332  | A0A060SLW1.1 | PF0024     | 54.10 | 0.00 |
| TRINITY_W4FNE7_9STRA/257-695     | W4FNE7.1     | PF01055.24 | 54.10 | 0.00 |
| TRINITY_D8TTM5_VOLCA/12-85       | D8TTM5.1     | PF00240.21 | 54.10 | 0.00 |
| TRINITY_I1G417_AMPQE/105-426     | I1G417.1     | PF03747.12 | 54.10 | 0.00 |

|                                    |                     |       |      |
|------------------------------------|---------------------|-------|------|
| TRINITY_W4YW78_STRPU/40-245        | W4YW78.1 PF00106.23 | 54.10 | 0.00 |
| TRINITY_A0A059LKS4_9CHLO/66-176    | A0A059LKS4.1 PF1099 | 54.10 | 0.00 |
| TRINITY_I0Z8K2_9CHLO/52-140        | I0Z8K2.1 PF00504.19 | 54.10 | 0.00 |
| TRINITY_A8IDU2_CHLRE/877-1024      | A8IDU2.1 PF03330.16 | 54.10 | 0.00 |
| TRINITY_D8U5G0_VOLCA/3-122         | D8U5G0.1 PF00188.24 | 54.10 | 0.00 |
| TRINITY_D8U0W9_VOLCA/157-323       | D8U0W9.1 PF05712.11 | 54.10 | 0.00 |
| TRINITY_D8TSJ5_VOLCA/1589-1853     | D8TSJ5.1 PF12780.5; | 54.10 | 0.00 |
| TRINITY_E1ZED1_CHLVA/12-210        | E1ZED1.1 PF13460.4; | 54.10 | 0.00 |
| TRINITY_D8TX44_VOLCA/516-713       | D8TX44.1 PF02854.17 | 54.10 | 0.00 |
| TRINITY_F0ZV38_DICPU/17-262        | F0ZV38.1 PF00069.23 | 54.10 | 0.00 |
| TRINITY_H3HAJ2_PHYRM/359-478       | H3HAJ2.1 PF00665.24 | 54.10 | 0.00 |
| TRINITY_A0A078AKP0_STYLE/68-336    | A0A078AKP0.1 PF0226 | 54.10 | 0.00 |
| TRINITY_A0BNQ0_PARTE/32-276        | A0BNQ0.1 PF00069.23 | 54.10 | 0.00 |
| TRINITY_A0A0D3A1E3_BRAOL/880-1124  | A0A0D3A1E3.1 PF0772 | 54.10 | 0.00 |
| TRINITY_Q8LL16_CHLRE/258-451       | Q8LL16.1 PF03239.12 | 54.10 | 0.00 |
| TRINITY_I7M055_TETTS/291-404       | I7M055.1 PF08616.8; | 54.10 | 0.00 |
| TRINITY_Q17DH5_AEDAE/171-352       | Q17DH5.1 PF02145.13 | 54.10 | 0.00 |
| TRINITY_B4KVZ2_DROMO/275-344       | B4KVZ2.1 PF01485.19 | 54.10 | 0.00 |
| TRINITY_D8TWR1_VOLCA/23-311        | D8TWR1.1 PF00069.23 | 54.10 | 0.00 |
| TRINITY_A0A0D2X543_CAPO3/27-289    | A0A0D2X543.1 PF0006 | 54.10 | 0.00 |
| TRINITY_A8HNY7_CHLRE/32-329        | A8HNY7.1 PF12698.5; | 54.10 | 0.00 |
| TRINITY_R6DR55_9FIRM/122-281       | R6DR55.1 PF02882.17 | 54.10 | 0.00 |
| TRINITY_W7U2W9_9STRA/85-305        | W7U2W9.1 PF05019.11 | 54.10 | 0.00 |
| TRINITY_K4BM70_SOLLC/7-93          | K4BM70.1 PF14368.4; | 54.00 | 0.00 |
| TRINITY_L8GRF9_ACACA/15-170        | L8GRF9.1 PF13563.4; | 54.00 | 0.00 |
| TRINITY_A0CPA4_PARTE/232-506       | A0CPA4.1 PF00481.19 | 54.00 | 0.00 |
| TRINITY_Q5TNJ4_ANOGA/104-168       | Q5TNJ4.3 PF00327.18 | 54.00 | 0.00 |
| TRINITY_W7X626_TETTS/95-219        | W7X626.1 PF00572.16 | 54.00 | 0.00 |
| TRINITY_A0A0G4EH92_9ALVE/233-501   | A0A0G4EH92.1 PF0378 | 54.00 | 0.00 |
| TRINITY_A0A0N5B4U9_STREA/94-236    | A0A0N5B4U9.1 PF0176 | 54.00 | 0.00 |
| TRINITY_E9GA05_DAPPU/477-955       | E9GA05.1 PF07748.11 | 54.00 | 0.00 |
| TRINITY_A0EBQ7_PARTE/465-697       | A0EBQ7.1 PF00233.17 | 54.00 | 0.00 |
| TRINITY_D2VT99_NAEGR/698-760       | D2VT99.1 PF10557.7; | 54.00 | 0.00 |
| TRINITY_A0CWS5_PARTE/255-401       | A0CWS5.1 PF05728.10 | 54.00 | 0.00 |
| TRINITY_E1ZDP4_CHLVA/818-1116      | E1ZDP4.1 PF00664.21 | 54.00 | 0.00 |
| TRINITY_V7BFG5_PHAVU/653-788       | V7BFG5.1 PF00005.25 | 54.00 | 0.00 |
| TRINITY_A0A088AGE7_APIME/51-194    | A0A088AGE7.1 PF0057 | 54.00 | 0.00 |
| TRINITY_G0QRW1_ICHMG/96-486        | G0QRW1.1 PF00155.19 | 54.00 | 0.00 |
| TRINITY_A4VEW4_TETTS/134-185       | A4VEW4.1 PF13833.4; | 54.00 | 0.00 |
| TRINITY_A0A0D6JB15_9RHIZ/2218-2267 | A0A0D6JB15.1 PF1388 | 54.00 | 0.00 |
| TRINITY_L8HKJ7_ACACA/259-385       | L8HKJ7.1 PF00004.27 | 54.00 | 0.00 |
| TRINITY_L8HKJ7_ACACA/259-385       | L8HKJ7.1 PF00004.27 | 54.00 | 0.00 |
| TRINITY_D8TUF0_VOLCA/155-576       | D8TUF0.1 PF03164.12 | 54.00 | 0.00 |
| TRINITY_A0E387_PARTE/199-271       | A0E387.1 PF00076.20 | 54.00 | 0.00 |
| TRINITY_A0A096RCN9_MAIZE/1-168     | A0A096RCN9.1 PF0363 | 54.00 | 0.00 |
| TRINITY_A0A059LSC9_9CHLO/145-230   | A0A059LSC9.1 PF0197 | 54.00 | 0.00 |
| TRINITY_D8U0T7_VOLCA/304-642       | D8U0T7.1 PF10373.7; | 54.00 | 0.00 |
| TRINITY_C1EE69_MICSR/50-518        | C1EE69.1 PF00082.20 | 54.00 | 0.00 |
| TRINITY_J9FXX4_9SPIT/3487-3802     | J9FXX4.1 PF00520.29 | 54.00 | 0.00 |
| TRINITY_A0A078B8E5_STYLE/126-338   | A0A078B8E5.1 PF0011 | 54.00 | 0.00 |
| TRINITY_K1Q7R8_CRAGI/54-179        | K1Q7R8.1 PF10357.7; | 54.00 | 0.00 |
| TRINITY_A0D0E3_PARTE/7-96          | A0D0E3.1 PF01118.22 | 54.00 | 0.00 |
| TRINITY_A0A077ZT92_STYLE/94-145    | A0A077ZT92.1 PF0222 | 54.00 | 0.00 |
| TRINITY_A8IZM2_CHLRE/1-136         | A8IZM2.1 PF03476.14 | 54.00 | 0.00 |
| TRINITY_L8H039_ACACA/206-457       | L8H039.1 PF00069.23 | 54.00 | 0.00 |
| TRINITY_L8H1J5_ACACA/387-531       | L8H1J5.1 PF00300.20 | 54.00 | 0.00 |
| TRINITY_A8JJ05_CHLRE/562-633       | A8JJ05.1 PF05699.12 | 54.00 | 0.00 |
| TRINITY_F7B414_HORSE/11-334        | F7B414.1 PF00026.21 | 54.00 | 0.00 |
| TRINITY_L8H9D8_ACACA/83-203        | L8H9D8.1 PF07992.12 | 54.00 | 0.00 |
| TRINITY_A0CBQ5_PARTE/198-342       | A0CBQ5.1 PF00929.22 | 54.00 | 0.00 |
| TRINITY_A0A058Z6E6_9EUKA/622-686   | A0A058Z6E6.1 PF0136 | 54.00 | 0.00 |

|                                   |                     |       |      |
|-----------------------------------|---------------------|-------|------|
| TRINITY_S3CIM7_OPHP1/647-699      | S3CIM7.1 PF00385.22 | 54.00 | 0.00 |
| TRINITY_D8U0I1_VOLCA/250-406      | D8U0I1.1 PF01494.17 | 54.00 | 0.00 |
| TRINITY_A8IPQ9_CHLRE/171-429      | A8IPQ9.1 PF00069.23 | 54.00 | 0.00 |
| TRINITY_D8U7A4_VOLCA/874-951      | D8U7A4.1 PF00076.20 | 54.00 | 0.00 |
| TRINITY_A8IQQ8_CHLRE/597-709      | A8IQQ8.1 PF00989.23 | 54.00 | 0.00 |
| TRINITY_A0A087SQB7_AUXPR/10-142   | A0A087SQB7.1 PF0023 | 54.00 | 0.00 |
| TRINITY_A8I9P4_CHLRE/58-131       | A8I9P4.1 PF01926.21 | 54.00 | 0.00 |
| TRINITY_A8IRB6_CHLRE/37-136       | A8IRB6.1 PF08551.8; | 54.00 | 0.00 |
| TRINITY_A0A0K0F1H0_9BILA/906-1108 | A0A0K0F1H0.1 PF0061 | 54.00 | 0.00 |
| TRINITY_I1CEQ7_RHIO9/64-296       | I1CEQ7.1 PF02784.14 | 54.00 | 0.00 |
| TRINITY_A0BEV9_PARTE/21-218       | A0BEV9.1 PF14753.4; | 54.00 | 0.00 |
| TRINITY_D8U9J1_VOLCA/7-145        | D8U9J1.1 PF04658.11 | 54.00 | 0.00 |
| TRINITY_A8J200_CHLRE/65-399       | A8J200.1 PF00632.23 | 54.00 | 0.00 |
| TRINITY_I0Z522_9CHLO/13-186       | I0Z522.1 PF01925.17 | 54.00 | 0.00 |
| TRINITY_A0A087SL44_AUXPR/222-322  | A0A087SL44.1 PF0035 | 54.00 | 0.00 |
| TRINITY_I7M6H4_TETTS/2601-2958    | I7M6H4.2 PF12777.5; | 54.00 | 0.00 |
| TRINITY_I0YV31_9CHLO/168-401      | I0YV31.1 PF00149.26 | 54.00 | 0.00 |
| TRINITY_I7LTH0_TETTS/231-521      | I7LTH0.1 PF01031.18 | 54.00 | 0.00 |
| TRINITY_A8J018_CHLRE/492-680      | A8J018.1 PF13307.4; | 54.00 | 0.00 |
| TRINITY_I7M5Z3_TETTS/393-553      | I7M5Z3.2 PF00441.22 | 54.00 | 0.00 |
| TRINITY_D8U6I8_VOLCA/629-717      | D8U6I8.1 PF00211.18 | 54.00 | 0.00 |
| TRINITY_D8U3D7_VOLCA/31-246       | D8U3D7.1 PF01036.16 | 54.00 | 0.00 |
| TRINITY_A8IBW2_CHLRE/139-344      | A8IBW2.1 PF00211.18 | 54.00 | 0.00 |
| TRINITY_A0A0G4EDW6_9ALVE/4-204    | A0A0G4EDW6.1 PF0085 | 54.00 | 0.00 |
| TRINITY_I7MFC1_TETTS/56-423       | I7MFC1.2 PF07992.12 | 53.90 | 0.00 |
| TRINITY_Q23QF2_TETTS/248-571      | Q23QF2.2 PF03133.13 | 53.90 | 0.00 |
| TRINITY_F0ZAJ2_DICPU/56-156       | F0ZAJ2.1 PF00829.19 | 53.90 | 0.00 |
| TRINITY_Q1HPR3_BOMMO/39-272       | Q1HPR3.1 PF02784.14 | 53.90 | 0.00 |
| TRINITY_A0CWG9_PARTE/1279-1697    | A0CWG9.1 PF08393.11 | 53.90 | 0.00 |
| TRINITY_F6RED4_HORSE/427-619      | F6RED4.1 PF00566.16 | 53.90 | 0.00 |
| TRINITY_Q23PT3_TETTS/717-870      | Q23PT3.3 PF00005.25 | 53.90 | 0.00 |
| TRINITY_A0CTJ4_PARTE/53-356       | A0CTJ4.1 PF00128.22 | 53.90 | 0.00 |
| TRINITY_A8JFB7_CHLRE/26-179       | A8JFB7.1 PF04051.14 | 53.90 | 0.00 |
| TRINITY_A0A0E9NF63_9ASCO/6-410    | A0A0E9NF63.1 PF0050 | 53.90 | 0.00 |
| TRINITY_A9ER91_SORC5/76-715       | A9ER91.1 PF03639.11 | 53.90 | 0.00 |
| TRINITY_A0A078A8V3_STYLE/25-119   | A0A078A8V3.1 PF1390 | 53.90 | 0.00 |
| TRINITY_I7M6I7_TETTS/33-261       | I7M6I7.1 PF04981.11 | 53.90 | 0.00 |
| TRINITY_A0A0M8K9R9_9CHLR/21-422   | A0A0M8K9R9.1 PF0050 | 53.90 | 0.00 |
| TRINITY_A8JI33_CHLRE/71-161       | A8JI33.1 PF13832.4; | 53.90 | 0.00 |
| TRINITY_D8UJ06_VOLCA/6-84         | D8UJ06.1 PF13417.4; | 53.90 | 0.00 |
| TRINITY_C3XQU6_BRAFL/256-445      | C3XQU6.1 PF04389.15 | 53.90 | 0.00 |
| TRINITY_D3BFW6_POLPA/46-147       | D3BFW6.1 PF00011.19 | 53.90 | 0.00 |
| TRINITY_D8TGU6_VOLCA/104-269      | D8TGU6.1 PF01789.14 | 53.90 | 0.00 |
| TRINITY_A0A0G4IQT5_PLABS/1-127    | A0A0G4IQT5.1 PF0000 | 53.90 | 0.00 |
| TRINITY_D8M1W7_BLAHO/168-334      | D8M1W7.1 PF02421.16 | 53.90 | 0.00 |
| TRINITY_D8U5V1_VOLCA/37-396       | D8U5V1.1 PF07944.10 | 53.90 | 0.00 |
| TRINITY_E1ZF97_CHLVA/15-242       | E1ZF97.1 PF00378.18 | 53.90 | 0.00 |
| TRINITY_D8U0A8_VOLCA/366-760      | D8U0A8.1 PF04515.10 | 53.90 | 0.00 |
| TRINITY_H2KSG7_CLOSI/57-218       | H2KSG7.1 PF04733.12 | 53.90 | 0.00 |
| TRINITY_Q22BR3_TETTS/13-180       | Q22BR3.2 PF00071.20 | 53.90 | 0.00 |
| TRINITY_A8IR95_CHLRE/401-503      | A8IR95.1 PF13426.5; | 53.90 | 0.00 |
| TRINITY_L8HDH4_ACACA/74-421       | L8HDH4.1 PF00155.19 | 53.90 | 0.00 |
| TRINITY_N8TG76_ACIGI/9-357        | N8TG76.1 PF07287.9; | 53.90 | 0.00 |
| TRINITY_A0A096P3C0_PAPAN/1-436    | A0A096P3C0.1 PF0099 | 53.90 | 0.00 |
| TRINITY_D3BI36_POLPA/1029-1279    | D3BI36.1 PF07714.15 | 53.90 | 0.00 |
| TRINITY_A8HN65_CHLRE/87-190       | A8HN65.1 PF00565.15 | 53.90 | 0.00 |
| TRINITY_A9RFT7_PHYPA/99-592       | A9RFT7.1 PF01593.22 | 53.90 | 0.00 |
| TRINITY_M0T515_MUSAM/223-331      | M0T515.1 PF08616.8; | 53.90 | 0.00 |
| TRINITY_D8U5A5_VOLCA/12-547       | D8U5A5.1 PF00899.19 | 53.90 | 0.00 |
| TRINITY_E1Z904_CHLVA/10-198       | E1Z904.1 PF00270.27 | 53.90 | 0.00 |
| TRINITY_A0BFP5_PARTE/56-247       | A0BFP5.1 PF10243.7; | 53.90 | 0.00 |

|                                  |                     |       |      |
|----------------------------------|---------------------|-------|------|
| TRINITY_A8J3T6_CHLRE/55-168      | A8J3T6.1 PF00504.19 | 53.90 | 0.00 |
| TRINITY_F2UBN5_SALR5/152-407     | F2UBN5.1 PF04305.12 | 53.90 | 0.00 |
| TRINITY_A0A0K9P2B6_ZOSMR/2-865   | A0A0K9P2B6.1 PF0246 | 53.90 | 0.00 |
| TRINITY_A8J750_CHLRE/1-94        | A8J750.1 PF13943.4; | 53.90 | 0.00 |
| TRINITY_D3BJ38_POLPA/101-179     | D3BJ38.1 PF01253.20 | 53.90 | 0.00 |
| TRINITY_I0YV72_9CHLO/31-534      | I0YV72.1 PF05761.12 | 53.90 | 0.00 |
| TRINITY_B1ZSD7_OPITP/28-392      | B1ZSD7.1 PF00916.18 | 53.90 | 0.00 |
| TRINITY_D8U0P0_VOLCA/133-278     | D8U0P0.1 PF01694.20 | 53.90 | 0.00 |
| TRINITY_A0A078BAP0_STYLE/225-510 | A0A078BAP0.1 PF0118 | 53.90 | 0.00 |
| TRINITY_D8TIX0_VOLCA/336-697     | D8TIX0.1 PF03016.13 | 53.90 | 0.00 |
| TRINITY_A0BS93_PARTE/8-191       | A0BS93.1 PF14913.4; | 53.90 | 0.00 |
| TRINITY_A0A0J8BSN9_BETVU/38-123  | A0A0J8BSN9.1 PF1684 | 53.90 | 0.00 |
| TRINITY_I7MIU6_TETTS/87-138      | I7MIU6.2 PF00415.16 | 53.80 | 0.00 |
| TRINITY_A0A072TZX1_MEDTR/2-1165  | A0A072TZX1.1 PF0246 | 53.80 | 0.00 |
| TRINITY_M1B5B5_SOLTU/248-328     | M1B5B5.1 PF00498.24 | 53.80 | 0.00 |
| TRINITY_I1FE35_AMPQE/260-318     | I1FE35.1 PF12894.5; | 53.80 | 0.00 |
| TRINITY_B8CA70_THAPS/124-338     | B8CA70.1 PF13563.4; | 53.80 | 0.00 |
| TRINITY_J9J7N7_9SPIT/498-715     | J9J7N7.1 PF08014.9; | 53.80 | 0.00 |
| TRINITY_F4Q3L0_DICFS/517-661     | F4Q3L0.1 PF00005.25 | 53.80 | 0.00 |
| TRINITY_I7MCX7_TETTS/268-349     | I7MCX7.1 PF13242.4; | 53.80 | 0.00 |
| TRINITY_L8HA43_ACACA/8-290       | L8HA43.1 PF00704.26 | 53.80 | 0.00 |
| TRINITY_L8GNV1_ACACA/26-201      | L8GNV1.1 PF00149.26 | 53.80 | 0.00 |
| TRINITY_G0R2V0_ICHMG/53-221      | G0R2V0.1 PF04893.15 | 53.80 | 0.00 |
| TRINITY_Q22BA7_TETTS/59-282      | Q22BA7.1 PF07228.10 | 53.80 | 0.00 |
| TRINITY_A0A075AMP7_9FUNG/470-588 | A0A075AMP7.1 PF0058 | 53.80 | 0.00 |
| TRINITY_A0A063BMC1_9HYPO/7-83    | A0A063BMC1.1 PF0040 | 53.80 | 0.00 |
| TRINITY_F0ZGL2_DICPU/12-208      | F0ZGL2.1 PF04511.13 | 53.80 | 0.00 |
| TRINITY_D8U326_VOLCA/8-304       | D8U326.1 PF09743.7; | 53.80 | 0.00 |
| TRINITY_L8HEU1_ACACA/217-256     | L8HEU1.1 PF00400.30 | 53.80 | 0.00 |
| TRINITY_I7M1U7_TETTS/1176-1331   | I7M1U7.1 PF00005.25 | 53.80 | 0.00 |
| TRINITY_A8JIU8_CHLRE/35-321      | A8JIU8.1 PF00520.29 | 53.80 | 0.00 |
| TRINITY_A0A086SYF2_ACRCH/60-345  | A0A086SYF2.1 PF0012 | 53.80 | 0.00 |
| TRINITY_G3VDU7_SARHA/1-103       | G3VDU7.1 PF08487.8; | 53.80 | 0.00 |
| TRINITY_D8SE48_SELML/137-562     | D8SE48.1 PF01593.22 | 53.80 | 0.00 |
| TRINITY_C1FE42_MICSR/328-435     | C1FE42.1 PF02002.15 | 53.80 | 0.00 |
| TRINITY_F1RVZ1_PIG/396-576       | F1RVZ1.2 PF01756.17 | 53.80 | 0.00 |
| TRINITY_F1A1K8_DICPU/244-422     | F1A1K8.1 PF00621.18 | 53.80 | 0.00 |
| TRINITY_I3CDP0_9GAMM/61-411      | I3CDP0.1 PF01979.18 | 53.80 | 0.00 |
| TRINITY_F0ZQ10_DICPU/33-357      | F0ZQ10.1 PF00180.18 | 53.80 | 0.00 |
| TRINITY_U5D3H9_AMBTC/48-218      | U5D3H9.1 PF07786.10 | 53.80 | 0.00 |
| TRINITY_A0BDL2_PARTE/6-167       | A0BDL2.1 PF00071.20 | 53.80 | 0.00 |
| TRINITY_D8U771_VOLCA/39-168      | D8U771.1 PF03435.16 | 53.80 | 0.00 |
| TRINITY_W5L8V6_ASTMX/19-139      | W5L8V6.1 PF07738.11 | 53.80 | 0.00 |
| TRINITY_D8TN24_VOLCA/27-489      | D8TN24.1 PF01384.18 | 53.80 | 0.00 |
| TRINITY_Q23QF2_TETTS/248-571     | Q23QF2.2 PF03133.13 | 53.80 | 0.00 |
| TRINITY_D8UIE1_VOLCA/38-142      | D8UIE1.1 PF03692.13 | 53.80 | 0.00 |
| TRINITY_G3PDN2_GASAC/1400-1649   | G3PDN2.1 PF00856.26 | 53.80 | 0.00 |
| TRINITY_I7M483_TETTS/113-361     | I7M483.1 PF01063.17 | 53.80 | 0.00 |
| TRINITY_A8HZ83_CHLRE/125-240     | A8HZ83.1 PF07534.14 | 53.80 | 0.00 |
| TRINITY_A0A0D2UKD6_GOSRA/51-115  | A0A0D2UKD6.1 PF0007 | 53.80 | 0.00 |
| TRINITY_D3BSD2_POLPA/53-310      | D3BSD2.1 PF00069.23 | 53.80 | 0.00 |
| TRINITY_J3AVK9_9CAUL/83-252      | J3AVK9.1 PF02837.16 | 53.80 | 0.00 |
| TRINITY_A0A087SRZ5_AUXPR/6-131   | A0A087SRZ5.1 PF0029 | 53.80 | 0.00 |
| TRINITY_D3BL88_POLPA/9-166       | D3BL88.1 PF02099.15 | 53.80 | 0.00 |
| TRINITY_K1QAJ0_CRAGI/253-292     | K1QAJ0.1 PF00400.30 | 53.80 | 0.00 |
| TRINITY_I7MDT2_TETTS/149-278     | I7MDT2.1 PF00107.24 | 53.80 | 0.00 |
| TRINITY_D8TD38_SELML/88-179      | D8TD38.1 PF00504.19 | 53.80 | 0.00 |
| TRINITY_Q769F7_DICDI/20-209      | Q769F7.1 PF01105.22 | 53.80 | 0.00 |
| TRINITY_I1CK88_RHIO9/29-463      | I1CK88.1 PF02127.13 | 53.80 | 0.00 |
| TRINITY_D8TIM3_VOLCA/1-359       | D8TIM3.1 PF00443.27 | 53.80 | 0.00 |
| TRINITY_L8HG64_ACACA/2211-2633   | L8HG64.1 PF12166.6; | 53.80 | 0.00 |

|                                  |                     |       |      |
|----------------------------------|---------------------|-------|------|
| TRINITY_A0AOK0JY66_BRUMA/478-566 | A0AOK0JY66.1 PF0549 | 53.80 | 0.00 |
| TRINITY_Q54TP9_DICDI/15-133      | Q54TP9.1 PF01412.16 | 53.80 | 0.00 |
| TRINITY_D8TY37_VOLCA/354-459     | D8TY37.1 PF13307.4; | 53.80 | 0.00 |
| TRINITY_D2VRI8_NAEGR/1028-1193   | D2VRI8.1 PF02146.15 | 53.80 | 0.00 |
| TRINITY_I7MFT0_TETTS/25-577      | I7MFT0.2 PF01602.18 | 53.80 | 0.00 |
| TRINITY_I7MLB9_TETTS/842-958     | I7MLB9.1 PF00271.29 | 53.80 | 0.00 |
| TRINITY_A0AOK6FN84_9HOMO/26-148  | A0AOK6FN84.1 PF0063 | 53.80 | 0.00 |
| TRINITY_A8JE75_CHLRE/66-190      | A8JE75.1 PF00083.22 | 53.80 | 0.00 |
| TRINITY_D8U241_VOLCA/101-399     | D8U241.1 PF10475.7; | 53.80 | 0.00 |
| TRINITY_M4D8R6_BRARP/19-224      | M4D8R6.1 PF02114.14 | 53.80 | 0.00 |
| TRINITY_T1IZ26_STRMM/430-565     | T1IZ26.1 PF00005.25 | 53.80 | 0.00 |
| TRINITY_A0BQP4_PARTE/505-570     | A0BQP4.1 PF00659.16 | 53.80 | 0.00 |
| TRINITY_I0Z889_9CHLO/3-84        | I0Z889.1 PF07011.9; | 53.80 | 0.00 |
| TRINITY_A0BU39_PARTE/129-390     | A0BU39.1 PF00069.23 | 53.80 | 0.00 |
| TRINITY_D8TZK2_VOLCA/13092-13314 | D8TZK2.1 PF00109.24 | 53.80 | 0.00 |
| TRINITY_A0A096MFT6_POEFO/324-543 | A0A096MFT6.1 PF0700 | 53.80 | 0.00 |
| TRINITY_Q23QF2_TETTS/248-571     | Q23QF2.2 PF03133.13 | 53.80 | 0.00 |
| TRINITY_Q22ML2_TETTS/132-170     | Q22ML2.1 PF00400.30 | 53.80 | 0.00 |
| TRINITY_S9XQ78_9CETA/2-375       | S9XQ78.1 PF00022.17 | 53.80 | 0.00 |
| TRINITY_A8J375_CHLRE/133-491     | A8J375.1 PF02163.20 | 53.80 | 0.00 |
| TRINITY_D3BB49_POLPA/309-549     | D3BB49.1 PF00122.18 | 53.80 | 0.00 |
| TRINITY_SPKA_DICDI/351-612       | Q86AT8.1 PF07714.15 | 53.80 | 0.00 |
| TRINITY_D8TKU3_VOLCA/544-633     | D8TKU3.1 PF13193.4; | 53.80 | 0.00 |
| TRINITY_A0A087H3I3_ARAAL/153-246 | A0A087H3I3.1 PF0015 | 53.80 | 0.00 |
| TRINITY_Q22A96_TETTS/376-441     | Q22A96.2 PF00498.24 | 53.80 | 0.00 |
| TRINITY_A8J9U8_CHLRE/258-417     | A8J9U8.1 PF01554.16 | 53.80 | 0.00 |
| TRINITY_I0YN04_9CHLO/151-438     | I0YN04.1 PF00176.21 | 53.80 | 0.00 |
| TRINITY_A8J691_CHLRE/23-294      | A8J691.1 PF00069.23 | 53.80 | 0.00 |
| TRINITY_A8J3L0_CHLRE/13-395      | A8J3L0.1 PF07690.14 | 53.80 | 0.00 |
| TRINITY_D8U144_VOLCA/2295-3023   | D8U144.1 PF03028.13 | 53.80 | 0.00 |
| TRINITY_A0C2G7_PARTE/2-79        | A0C2G7.1 PF01781.16 | 53.80 | 0.00 |
| TRINITY_Q236Z5_TETTS/302-587     | Q236Z5.1 PF05206.12 | 53.80 | 0.00 |
| TRINITY_G0QJN1_ICHMG/433-510     | G0QJN1.1 PF13424.4; | 53.80 | 0.00 |
| TRINITY_G0GCI4_SPITZ/27-140      | G0GCI4.1 PF00072.22 | 53.70 | 0.00 |
| TRINITY_A9T0J4_PHYPA/437-479     | A9T0J4.1 PF00643.22 | 53.70 | 0.00 |
| TRINITY_G0QSQ4_ICHMG/3-73        | G0QSQ4.1 PF13802.4; | 53.70 | 0.00 |
| TRINITY_F0ZTE3_DICPU/290-475     | F0ZTE3.1 PF00753.25 | 53.70 | 0.00 |
| TRINITY_D8UE72_VOLCA/205-506     | D8UE72.1 PF00069.23 | 53.70 | 0.00 |
| TRINITY_A8J6M3_CHLRE/172-585     | A8J6M3.1 PF01131.18 | 53.70 | 0.00 |
| TRINITY_A0A0B1P9Z4_UNCNE/3-126   | A0A0B1P9Z4.1 PF1389 | 53.70 | 0.00 |
| TRINITY_H2LLQ1_ORYLA/60-151      | H2LLQ1.1 PF12894.5; | 53.70 | 0.00 |
| TRINITY_T1FTQ4_HELRO/309-373     | T1FTQ4.1 PF00076.20 | 53.70 | 0.00 |
| TRINITY_F4PWJ3_DICFS/510-572     | F4PWJ3.1 PF07647.15 | 53.70 | 0.00 |
| TRINITY_I0YKC1_9CHLO/32-104      | I0YKC1.1 PF00498.24 | 53.70 | 0.00 |
| TRINITY_Q24HI2_TETTS/127-344     | Q24HI2.1 PF00112.21 | 53.70 | 0.00 |
| TRINITY_L8GCZ7_ACACA/5-159       | L8GCZ7.1 PF01965.22 | 53.70 | 0.00 |
| TRINITY_S2JMN3_MUCC1/1-135       | S2JMN3.1 PF00773.17 | 53.70 | 0.00 |
| TRINITY_Q23K82_TETTS/274-327     | Q23K82.2 PF01084.18 | 53.70 | 0.00 |
| TRINITY_7TMK1_DICDI/363-623      | Q54N73.1 PF07714.15 | 53.70 | 0.00 |
| TRINITY_Q75JY8_DICDI/192-314     | Q75JY8.1 PF00241.18 | 53.70 | 0.00 |
| TRINITY_L8HKF4_ACACA/100-146     | L8HKF4.1 PF13920.4; | 53.70 | 0.00 |
| TRINITY_D2VQS1_NAEGR/368-482     | D2VQS1.1 PF04266.12 | 53.70 | 0.00 |
| TRINITY_I7MLV0_TETTS/461-797     | I7MLV0.2 PF00443.27 | 53.70 | 0.00 |
| TRINITY_A0A0G4J6A5_PLABS/162-268 | A0A0G4J6A5.1 PF0120 | 53.70 | 0.00 |
| TRINITY_Q24FC3_TETTS/272-351     | Q24FC3.3 PF13242.4; | 53.70 | 0.00 |
| TRINITY_V4A1H3_LOTGI/625-760     | V4A1H3.1 PF00005.25 | 53.70 | 0.00 |
| TRINITY_A0ECD8_PARTE/1092-1212   | A0ECD8.1 PF02687.19 | 53.70 | 0.00 |
| TRINITY_Q22GW0_TETTS/1651-1813   | Q22GW0.2 PF00069.23 | 53.70 | 0.00 |
| TRINITY_L8H318_ACACA/10-51       | L8H318.1 PF01585.21 | 53.70 | 0.00 |
| TRINITY_D2V5A5_NAEGR/214-344     | D2V5A5.1 PF00022.17 | 53.70 | 0.00 |
| TRINITY_A8IWP9_CHLRE/32-593      | A8IWP9.1 PF01204.16 | 53.70 | 0.00 |



|                                  |              |            |       |      |
|----------------------------------|--------------|------------|-------|------|
| TRINITY_I0I796_CALAS/35-409      | I0I796.1     | PF00282.17 | 53.70 | 0.00 |
| TRINITY_M0QSN0_ACACA/73-165      | M0QSN0.1     | PF02214.20 | 53.70 | 0.00 |
| TRINITY_Q24HH9_TETTS/52-312      | Q24HH9.2     | PF00069.23 | 53.70 | 0.00 |
| TRINITY_D8TLE4_VOLCA/425-658     | D8TLE4.1     | PF08161.10 | 53.70 | 0.00 |
| TRINITY_Q4G298_TRIVA/9-169       | Q4G298.1     | PF00071.20 | 53.70 | 0.00 |
| TRINITY_G0QZB3_ICHMG/327-396     | G0QZB3.1     | PF00498.24 | 53.70 | 0.00 |
| TRINITY_C1MW00_MICPC/337-405     | C1MW00.1     | PF07529.11 | 53.70 | 0.00 |
| TRINITY_K0T5T5_THAOC/511-560     | K0T5T5.1     | PF13920.4; | 53.70 | 0.00 |
| TRINITY_I0YSF3_9CHLO/48-367      | I0YSF3.1     | PF01937.17 | 53.70 | 0.00 |
| TRINITY_A0A078ANA5_STYLE/18-270  | A0A078ANA5.1 | PF0006     | 53.70 | 0.00 |
| TRINITY_A0A0A1P9T2_9FUNG/432-572 | A0A0A1P9T2.1 | PF0152     | 53.70 | 0.00 |
| TRINITY_I3TP22_TISMK/8-195       | I3TP22.1     | PF07992.12 | 53.70 | 0.00 |
| TRINITY_E5SFZ6_TRISP/46-134      | E5SFZ6.1     | PF15663.3; | 53.70 | 0.00 |
| TRINITY_F1A5J4_DICPU/566-819     | F1A5J4.1     | PF00069.23 | 53.70 | 0.00 |
| TRINITY_A0A075B2H7_9FUNG/53-379  | A0A075B2H7.1 | PF0799     | 53.70 | 0.00 |
| TRINITY_F0ZRD8_DICPU/247-426     | F0ZRD8.1     | PF00270.27 | 53.70 | 0.00 |
| TRINITY_E1ZSA8_CHLVA/103-221     | E1ZSA8.1     | PF16036.3; | 53.70 | 0.00 |
| TRINITY_A8IXM4_CHLRE/1640-1791   | A8IXM4.1     | PF03712.13 | 53.70 | 0.00 |
| TRINITY_A8ISP2_CHLRE/200-468     | A8ISP2.1     | PF00248.19 | 53.70 | 0.00 |
| TRINITY_D8UFD3_VOLCA/71-660      | D8UFD3.1     | PF16940.3; | 53.70 | 0.00 |
| TRINITY_D8TP12_VOLCA/546-938     | D8TP12.1     | PF00773.17 | 53.70 | 0.00 |
| TRINITY_F4PMG8_DICFS/24-1090     | F4PMG8.1     | PF10266.7; | 53.70 | 0.00 |
| TRINITY_Q3SD73_PARTE/8-167       | Q3SD73.1     | PF00071.20 | 53.70 | 0.00 |
| TRINITY_B2J2T9_NOSP7/31-127      | B2J2T9.1     | PF00355.24 | 53.70 | 0.00 |
| TRINITY_D8THR7_VOLCA/300-536     | D8THR7.1     | PF12697.5; | 53.70 | 0.00 |
| TRINITY_A9FAR4_SORC5/21-203      | A9FAR4.1     | PF07081.9; | 53.70 | 0.00 |
| TRINITY_D8U819_VOLCA/63-369      | D8U819.1     | PF02383.16 | 53.70 | 0.00 |
| TRINITY_E1ZCK1_CHLVA/40-178      | E1ZCK1.1     | PF00892.18 | 53.70 | 0.00 |
| TRINITY_L8HIS0_ACACA/29-314      | L8HIS0.1     | PF04258.11 | 53.70 | 0.00 |
| TRINITY_A8IHE7_CHLRE/70-516      | A8IHE7.1     | PF13520.4; | 53.70 | 0.00 |
| TRINITY_F0ZYQ8_DICPU/339-461     | F0ZYQ8.1     | PF13271.4; | 53.70 | 0.00 |
| TRINITY_B3KYI2_PHAVU/209-536     | B3KYI2.1     | PF00733.19 | 53.70 | 0.00 |
| TRINITY_Q3SDK9_PARTE/13-174      | Q3SDK9.1     | PF00071.20 | 53.70 | 0.00 |
| TRINITY_G0R646_ICHMG/1087-1249   | G0R646.1     | PF00005.25 | 53.60 | 0.00 |
| TRINITY_A0DWJ3_PARTE/548-668     | A0DWJ3.1     | PF02518.24 | 53.60 | 0.00 |
| TRINITY_A0A0G4ETE6_9ALVE/5-177   | A0A0G4ETE6.1 | PF0002     | 53.60 | 0.00 |
| TRINITY_F4PRU3_DICFS/5-70        | F4PRU3.1     | PF00808.21 | 53.60 | 0.00 |
| TRINITY_H3GMZ0_PHYRM/40-372      | H3GMZ0.1     | PF04922.10 | 53.60 | 0.00 |
| TRINITY_E2BNF8_HARSA/50-255      | E2BNF8.1     | PF00106.23 | 53.60 | 0.00 |
| TRINITY_H2XUH7_CIOIN/393-562     | H2XUH7.1     | PF02182.15 | 53.60 | 0.00 |
| TRINITY_L8GMQ5_ACACA/2-258       | L8GMQ5.1     | PF00398.18 | 53.60 | 0.00 |
| TRINITY_E1REZ7_METP4/12-150      | E1REZ7.1     | PF13302.5; | 53.60 | 0.00 |
| TRINITY_L8GXG2_ACACA/21-262      | L8GXG2.1     | PF07714.15 | 53.60 | 0.00 |
| TRINITY_D3PDK7_DEFDS/861-971     | D3PDK7.1     | PF00072.22 | 53.60 | 0.00 |
| TRINITY_L8GDX3_ACACA/118-294     | L8GDX3.1     | PF13532.4; | 53.60 | 0.00 |
| TRINITY_D8THX1_VOLCA/227-448     | D8THX1.1     | PF13672.4; | 53.60 | 0.00 |
| TRINITY_L8GFG9_ACACA/67-280      | L8GFG9.1     | PF01135.17 | 53.60 | 0.00 |
| TRINITY_A0A0F3H0L8_9BACT/58-180  | A0A0F3H0L8.1 | PF0498     | 53.60 | 0.00 |
| TRINITY_G0QS77_ICHMG/9-177       | G0QS77.1     | PF00188.24 | 53.60 | 0.00 |
| TRINITY_A8IAW5_CHLRE/63-149      | A8IAW5.1     | PF14159.4; | 53.60 | 0.00 |
| TRINITY_A0D9N4_PARTE/343-722     | A0D9N4.1     | PF00702.24 | 53.60 | 0.00 |
| TRINITY_C7LR38_DESBD/5-73        | C7LR38.1     | PF00076.20 | 53.60 | 0.00 |
| TRINITY_D8TQC4_VOLCA/18-543      | D8TQC4.1     | PF05600.10 | 53.60 | 0.00 |
| TRINITY_Q23QF5_TETTS/161-229     | Q23QF5.2     | PF00505.17 | 53.60 | 0.00 |
| TRINITY_C1N8D4_MICPC/206-292     | C1N8D4.1     | PF04379.12 | 53.60 | 0.00 |
| TRINITY_L8GL32_ACACA/1-129       | L8GL32.1     | PF03463.13 | 53.60 | 0.00 |
| TRINITY_K4AT24_SOLLC/39-162      | K4AT24.1     | PF10238.7; | 53.60 | 0.00 |
| TRINITY_A0A022R7Q1_ERYGU/124-346 | A0A022R7Q1.1 | PF0155     | 53.60 | 0.00 |
| TRINITY_D8TI14_VOLCA/22-1084     | D8TI14.1     | PF04147.10 | 53.60 | 0.00 |
| TRINITY_L8GVQ6_ACACA/315-425     | L8GVQ6.1     | PF09070.9; | 53.60 | 0.00 |
| TRINITY_A8HVG5_CHLRE/56-124      | A8HVG5.1     | PF00076.20 | 53.60 | 0.00 |

|                                    |              |            |       |      |
|------------------------------------|--------------|------------|-------|------|
| TRINITY_F4QCC5_DICFS/10-118        | F4QCC5.1     | PF01398.19 | 53.60 | 0.00 |
| TRINITY_A0A067CUV9_SAPPC/9-104     | A0A067CUV9.1 | PF0864     | 53.60 | 0.00 |
| TRINITY_E1Z4P9_CHLVA/76-352        | E1Z4P9.1     | PF01048.18 | 53.60 | 0.00 |
| TRINITY_L1IH70_GUITH/122-177       | L1IH70.1     | PF13513.4; | 53.60 | 0.00 |
| TRINITY_H3GI85_PHYRM/29-361        | H3GI85.1     | PF00155.19 | 53.60 | 0.00 |
| TRINITY_D8UFK9_VOLCA/270-358       | D8UFK9.1     | PF07571.11 | 53.60 | 0.00 |
| TRINITY_A8JEP4_CHLRE/267-445       | A8JEP4.1     | PF00174.17 | 53.60 | 0.00 |
| TRINITY_A0A078B270_STYLE/2405-2625 | A0A078B270.1 | PF0064     | 53.60 | 0.00 |
| TRINITY_D8TVB7_VOLCA/70-209        | D8TVB7.1     | PF14108.4; | 53.60 | 0.00 |
| TRINITY_L8HHA4_ACACA/11-122        | L8HHA4.1     | PF01412.16 | 53.60 | 0.00 |
| TRINITY_Q23QF5_TETTS/161-229       | Q23QF5.2     | PF00505.17 | 53.60 | 0.00 |
| TRINITY_D8U5M9_VOLCA/31-238        | D8U5M9.1     | PF01027.18 | 53.60 | 0.00 |
| TRINITY_D8U0W0_VOLCA/18-141        | D8U0W0.1     | PF09801.7; | 53.60 | 0.00 |
| TRINITY_W7XHC6_TETTS/6-164         | W7XHC6.1     | PF01210.21 | 53.60 | 0.00 |
| TRINITY_F4Q989_DICFS/407-604       | F4Q989.1     | PF01434.16 | 53.60 | 0.00 |
| TRINITY_D8TVJ2_VOLCA/146-262       | D8TVJ2.1     | PF03129.18 | 53.60 | 0.00 |
| TRINITY_L8H1F7_ACACA/71-180        | L8H1F7.1     | PF02338.17 | 53.60 | 0.00 |
| TRINITY_D8TRU7_VOLCA/47-296        | D8TRU7.1     | PF01571.19 | 53.60 | 0.00 |
| TRINITY_E1ZQP7_CHLVA/9-316         | E1ZQP7.1     | PF07992.12 | 53.60 | 0.00 |
| TRINITY_D8M2P3_BLAHO/26-94         | D8M2P3.1     | PF00505.17 | 53.60 | 0.00 |
| TRINITY_F4PJ18_DICFS/1-374         | F4PJ18.1     | PF00022.17 | 53.60 | 0.00 |
| TRINITY_K6VRX0_9MICO/27-143        | K6VRX0.1     | PF08240.10 | 53.60 | 0.00 |
| TRINITY_M1V4Y7_CYAME/154-222       | M1V4Y7.1     | PF00610.19 | 53.60 | 0.00 |
| TRINITY_L8H0B4_ACACA/93-357        | L8H0B4.1     | PF04811.13 | 53.60 | 0.00 |
| TRINITY_D8TNV2_VOLCA/856-1080      | D8TNV2.1     | PF00069.23 | 53.60 | 0.00 |
| TRINITY_F4PL66_DICFS/461-680       | F4PL66.1     | PF13236.4; | 53.60 | 0.00 |
| TRINITY_G8X9B9_FLACA/1-118         | G8X9B9.1     | PF01925.17 | 53.60 | 0.00 |
| TRINITY_U5GEP5_POPTR/138-331       | U5GEP5.1     | PF04055.19 | 53.60 | 0.00 |
| TRINITY_A8HSZ4_CHLRE/128-229       | A8HSZ4.1     | PF01909.21 | 53.60 | 0.00 |
| TRINITY_J9J3B4_9SPIT/124-338       | J9J3B4.1     | PF00112.21 | 53.60 | 0.00 |
| TRINITY_A8I4J6_CHLRE/57-253        | A8I4J6.1     | PF00106.23 | 53.60 | 0.00 |
| TRINITY_A8J6M5_CHLRE/1-274         | A8J6M5.1     | PF00664.21 | 53.60 | 0.00 |
| TRINITY_A8JF90_CHLRE/1546-1844     | A8JF90.1     | PF00520.29 | 53.60 | 0.00 |
| TRINITY_A8I1G7_CHLRE/1-184         | A8I1G7.1     | PF00211.18 | 53.60 | 0.00 |
| TRINITY_Q2UPL3_ASPOR/566-682       | Q2UPL3.1     | PF00665.24 | 53.60 | 0.00 |
| TRINITY_Q22X69_TETTS/149-192       | Q22X69.2     | PF13639.4; | 53.50 | 0.00 |
| TRINITY_W9RTZ7_9ROSA/126-170       | W9RTZ7.1     | PF13639.4; | 53.50 | 0.00 |
| TRINITY_G6DK36_DANPL/398-512       | G6DK36.1     | PF00856.26 | 53.50 | 0.00 |
| TRINITY_Q22LW9_TETTS/480-571       | Q22LW9.2     | PF07885.14 | 53.50 | 0.00 |
| TRINITY_A0CB90_PARTE/31-436        | A0CB90.1     | PF05577.10 | 53.50 | 0.00 |
| TRINITY_A0D2N3_PARTE/21-149        | A0D2N3.1     | PF02466.17 | 53.50 | 0.00 |
| TRINITY_A0A0K9PWV4_ZOSMR/192-235   | A0A0K9PWV4.1 | PF1363     | 53.50 | 0.00 |
| TRINITY_G0QY85_ICHMG/26-111        | G0QY85.1     | PF01221.16 | 53.50 | 0.00 |
| TRINITY_Q245X8_TETTS/495-565       | Q245X8.1     | PF00076.20 | 53.50 | 0.00 |
| TRINITY_A0BEH2_PARTE/1-140         | A0BEH2.1     | PF00134.21 | 53.50 | 0.00 |
| TRINITY_A0A077ZPT0_STYLE/897-969   | A0A077ZPT0.1 | PF0456     | 53.50 | 0.00 |
| TRINITY_F4QED8_DICFS/130-220       | F4QED8.1     | PF13640.4; | 53.50 | 0.00 |
| TRINITY_A0CQ64_PARTE/35-105        | A0CQ64.1     | PF13499.4; | 53.50 | 0.00 |
| TRINITY_Q24GQ7_TETTS/133-301       | Q24GQ7.1     | PF04664.11 | 53.50 | 0.00 |
| TRINITY_F0YDD5_AURAN/17-173        | F0YDD5.1     | PF00156.25 | 53.50 | 0.00 |
| TRINITY_A0A0G2ZMH7_9DELTA/8-249    | A0A0G2ZMH7.1 | PF0037     | 53.50 | 0.00 |
| TRINITY_A7RPJ4_NEMVE/13-362        | A7RPJ4.1     | PF05208.11 | 53.50 | 0.00 |
| TRINITY_Q23K91_TETTS/486-612       | Q23K91.2     | PF00134.21 | 53.50 | 0.00 |
| TRINITY_A5H8H8_CHLRE/85-256        | A5H8H8.1     | PF12046.6; | 53.50 | 0.00 |
| TRINITY_D3B3S1_POLPA/40-228        | D3B3S1.1     | PF10294.7; | 53.50 | 0.00 |
| TRINITY_J9ICB1_9SPIT/267-310       | J9ICB1.1     | PF00569.15 | 53.50 | 0.00 |
| TRINITY_A0E2M3_PARTE/3-103         | A0E2M3.1     | PF00168.28 | 53.50 | 0.00 |
| TRINITY_A0D334_PARTE/1-89          | A0D334.1     | PF00169.27 | 53.50 | 0.00 |
| TRINITY_A0A087SIS3_AUXPR/5-432     | A0A087SIS3.1 | PF0418     | 53.50 | 0.00 |
| TRINITY_V4N0N0_EUTSA/113-157       | V4N0N0.1     | PF13639.4; | 53.50 | 0.00 |
| TRINITY_F4QED2_DICFS/996-1169      | F4QED2.1     | PF00621.18 | 53.50 | 0.00 |

|                                    |              |            |       |      |
|------------------------------------|--------------|------------|-------|------|
| TRINITY_D2V036_NAEGR/53-331        | D2V036.1     | PF05853.10 | 53.50 | 0.00 |
| TRINITY_M2VXJ2_GALSU/118-200       | M2VXJ2.1     | PF15963.3; | 53.50 | 0.00 |
| TRINITY_A8JF91_CHLRE/7-125         | A8JF91.1     | PF05348.9; | 53.50 | 0.00 |
| TRINITY_L1JI00_GUIITH/19-66        | L1JI00.1     | PF02042.13 | 53.50 | 0.00 |
| TRINITY_A0A059CYP0_EUCGR/78-122    | A0A059CYP0.1 | PF1363     | 53.50 | 0.00 |
| TRINITY_A0D6M4_PARTE/91-395        | A0D6M4.1     | PF02383.16 | 53.50 | 0.00 |
| TRINITY_D3BSB4_POLPA/66-254        | D3BSB4.1     | PF12697.5; | 53.50 | 0.00 |
| TRINITY_A0CEZ8_PARTE/353-396       | A0CEZ8.1     | PF13639.4; | 53.50 | 0.00 |
| TRINITY_L8GE60_ACACA/531-659       | L8GE60.1     | PF00241.18 | 53.50 | 0.00 |
| TRINITY_W9WAK1_9EURO/306-565       | W9WAK1.1     | PF13360.4; | 53.50 | 0.00 |
| TRINITY_A0A078AKR1_STYLE/126-337   | A0A078AKR1.1 | PF0011     | 53.50 | 0.00 |
| TRINITY_A8IVU6_CHLRE/3378-3666     | A8IVU6.1     | PF00520.29 | 53.50 | 0.00 |
| TRINITY_A0A087S9P8_AUXPR/95-266    | A0A087S9P8.1 | PF0161     | 53.50 | 0.00 |
| TRINITY_A0A015M8V8_9GLOM/124-353   | A0A015M8V8.1 | PF0179     | 53.50 | 0.00 |
| TRINITY_D8SCH3_SELML/372-473       | D8SCH3.1     | PF06584.11 | 53.50 | 0.00 |
| TRINITY_T1J1G3_STRMM/245-319       | T1J1G3.1     | PF04564.13 | 53.50 | 0.00 |
| TRINITY_A0A0E0PRJ8_ORYRU/753-911   | A0A0E0PRJ8.1 | PF0007     | 53.50 | 0.00 |
| TRINITY_A8IDQ8_CHLRE/8-151         | A8IDQ8.1     | PF10568.7; | 53.50 | 0.00 |
| TRINITY_G0QWD7_ICHMG/33-211        | G0QWD7.1     | PF00270.27 | 53.50 | 0.00 |
| TRINITY_A0DVR4_PARTE/17-87         | A0DVR4.1     | PF13499.4; | 53.50 | 0.00 |
| TRINITY_L8GQL5_ACACA/626-1215      | L8GQL5.1     | PF00821.16 | 53.50 | 0.00 |
| TRINITY_D8TNS6_VOLCA/1-284         | D8TNS6.1     | PF12697.5; | 53.50 | 0.00 |
| TRINITY_H3GEM8_PHYRM/190-315       | H3GEM8.1     | PF03171.18 | 53.50 | 0.00 |
| TRINITY_A8IRU3_CHLRE/135-292       | A8IRU3.1     | PF02622.13 | 53.50 | 0.00 |
| TRINITY_W0RQB7_9BACT/7-153         | W0RQB7.1     | PF01408.20 | 53.50 | 0.00 |
| TRINITY_F0ZXU8_DICPU/314-400       | F0ZXU8.1     | PF00439.23 | 53.50 | 0.00 |
| TRINITY_A0A0M0JR79_9EUKA/247-386   | A0A0M0JR79.1 | PF0139     | 53.50 | 0.00 |
| TRINITY_D8ULK7_VOLCA/8-219         | D8ULK7.1     | PF00106.23 | 53.50 | 0.00 |
| TRINITY_A8IFT8_CHLRE/600-698       | A8IFT8.1     | PF00211.18 | 53.50 | 0.00 |
| TRINITY_I7MJZ2_TETTS/407-470       | I7MJZ2.2     | PF01485.19 | 53.50 | 0.00 |
| TRINITY_A0DA13_PARTE/277-608       | A0DA13.1     | PF03124.12 | 53.40 | 0.00 |
| TRINITY_L8GYY1_ACACA/191-600       | L8GYY1.1     | PF13520.4; | 53.40 | 0.00 |
| TRINITY_Q22BY0_TETTS/1678-1732     | Q22BY0.2     | PF00415.16 | 53.40 | 0.00 |
| TRINITY_G1PVH4_MYOLU/15-139        | G1PVH4.1     | PF04857.18 | 53.40 | 0.00 |
| TRINITY_H1A007_TAEGU/17-165        | H1A007.1     | PF00753.25 | 53.40 | 0.00 |
| TRINITY_B9RY99_RICCO/88-165        | B9RY99.1     | PF05347.13 | 53.40 | 0.00 |
| TRINITY_A0A078HR88_BRANA/158-310   | A0A078HR88.1 | PF0254     | 53.40 | 0.00 |
| TRINITY_B8C2F6_THAPS/183-287       | B8C2F6.1     | PF00856.26 | 53.40 | 0.00 |
| TRINITY_I7MMC2_TETTS/118-205       | I7MMC2.2     | PF04969.14 | 53.40 | 0.00 |
| TRINITY_D8TIX0_VOLCA/336-697       | D8TIX0.1     | PF03016.13 | 53.40 | 0.00 |
| TRINITY_E1ZMG6_CHLVA/69-319        | E1ZMG6.1     | PF08704.8; | 53.40 | 0.00 |
| TRINITY_W7U7D9_9STRA/21-262        | W7U7D9.1     | PF13561.4; | 53.40 | 0.00 |
| TRINITY_A0E8V2_PARTE/129-259       | A0E8V2.1     | PF00782.18 | 53.40 | 0.00 |
| TRINITY_D3BGA1_POLPA/8-299         | D3BGA1.1     | PF00480.18 | 53.40 | 0.00 |
| TRINITY_A0A074RTM7_9HOMO/1276-1423 | A0A074RTM7.1 | PF0000     | 53.40 | 0.00 |
| TRINITY_I7M1N7_TETTS/84-192        | I7M1N7.1     | PF14580.4; | 53.40 | 0.00 |
| TRINITY_A0A078AAD9_STYLE/456-573   | A0A078AAD9.1 | PF0298     | 53.40 | 0.00 |
| TRINITY_F0ZTN0_DICPU/29-87         | F0ZTN0.1     | PF00786.26 | 53.40 | 0.00 |
| TRINITY_D8UEA8_VOLCA/143-403       | D8UEA8.1     | PF08007.10 | 53.40 | 0.00 |
| TRINITY_Q22GW0_TETTS/1651-1813     | Q22GW0.2     | PF00069.23 | 53.40 | 0.00 |
| TRINITY_D8LJS2_ECTSI/20-262        | D8LJS2.1     | PF00348.15 | 53.40 | 0.00 |
| TRINITY_G0QRW1_ICHMG/96-486        | G0QRW1.1     | PF00155.19 | 53.40 | 0.00 |
| TRINITY_Q22RZ8_TETTS/183-242       | Q22RZ8.2     | PF13921.4; | 53.40 | 0.00 |
| TRINITY_SUN2_DICDI/534-657         | Q54MI3.1     | PF07738.11 | 53.40 | 0.00 |
| TRINITY_K3W5S1_PYTUL/49-320        | K3W5S1.1     | PF01545.19 | 53.40 | 0.00 |
| TRINITY_A9TT93_PHYPA/1-251         | A9TT93.1     | PF05742.10 | 53.40 | 0.00 |
| TRINITY_B8FAM2_DESAA/4-298         | B8FAM2.1     | PF00294.22 | 53.40 | 0.00 |
| TRINITY_A0E826_PARTE/128-238       | A0E826.1     | PF00168.28 | 53.40 | 0.00 |
| TRINITY_A0A0M8KB64_9CHLR/83-139    | A0A0M8KB64.1 | PF0057     | 53.40 | 0.00 |
| TRINITY_A8IZ02_CHLRE/5-108         | A8IZ02.1     | PF00504.19 | 53.40 | 0.00 |
| TRINITY_I0YML3_9CHLO/74-193        | I0YML3.1     | PF00622.26 | 53.40 | 0.00 |

|                                   |              |            |       |      |
|-----------------------------------|--------------|------------|-------|------|
| TRINITY_Q23DB7_TETTS/8-263        | Q23DB7.2     | PF00069.23 | 53.40 | 0.00 |
| TRINITY_A8IMY7_CHLRE/43-215       | A8IMY7.1     | PF00445.16 | 53.40 | 0.00 |
| TRINITY_D0NV41_PHYIT/12-174       | D0NV41.1     | PF00071.20 | 53.40 | 0.00 |
| TRINITY_A8J233_CHLRE/172-261      | A8J233.1     | PF16760.3; | 53.40 | 0.00 |
| TRINITY_A0A096TV93_MAIZE/17-168   | A0A096TV93.1 | PF0006     | 53.40 | 0.00 |
| TRINITY_A8IRL5_CHLRE/87-234       | A8IRL5.1     | PF08670.9; | 53.40 | 0.00 |
| TRINITY_A0C6C2_PARTE/5-172        | A0C6C2.1     | PF05301.9; | 53.40 | 0.00 |
| TRINITY_D3BNC5_POLPA/1335-1452    | D3BNC5.1     | PF00072.22 | 53.40 | 0.00 |
| TRINITY_A0A022QW50_ERYGU/15-107   | A0A022QW50.1 | PF1279     | 53.40 | 0.00 |
| TRINITY_A8IVU6_CHLRE/482-724      | A8IVU6.1     | PF00520.29 | 53.40 | 0.00 |
| TRINITY_A0CES3_PARTE/634-752      | A0CES3.1     | PF00072.22 | 53.40 | 0.00 |
| TRINITY_F0ZLU7_DICPU/181-297      | F0ZLU7.1     | PF14792.4; | 53.40 | 0.00 |
| TRINITY_G3BAW3_CANTC/210-276      | G3BAW3.1     | PF01485.19 | 53.40 | 0.00 |
| TRINITY_F4QE14_DICFS/72-540       | F4QE14.1     | PF00171.20 | 53.40 | 0.00 |
| TRINITY_D7FKH8_ECTSI/433-566      | D7FKH8.1     | PF01841.17 | 53.40 | 0.00 |
| TRINITY_A8HZF2_CHLRE/68-224       | A8HZF2.1     | PF04143.12 | 53.40 | 0.00 |
| TRINITY_T0R2U2_9STRA/44-116       | T0R2U2.1     | PF09398.8; | 53.40 | 0.00 |
| TRINITY_RL27_PARL1/2-81           | A7HT69.1     | PF01016.17 | 53.40 | 0.00 |
| TRINITY_A8J6M6_CHLRE/100-170      | A8J6M6.1     | PF00076.20 | 53.40 | 0.00 |
| TRINITY_A8IJW5_CHLRE/71-276       | A8IJW5.1     | PF03403.11 | 53.40 | 0.00 |
| TRINITY_G0QJ87_ICHMG/6-199        | G0QJ87.1     | PF00069.23 | 53.40 | 0.00 |
| TRINITY_J9FBS9_9SPIT/259-507      | J9FBS9.1     | PF00009.25 | 53.40 | 0.00 |
| TRINITY_G0QKE9_ICHMG/201-285      | G0QKE9.1     | PF00027.27 | 53.40 | 0.00 |
| TRINITY_D8TI57_VOLCA/11-171       | D8TI57.1     | PF05285.10 | 53.40 | 0.00 |
| TRINITY_F4P544_BATDJ/979-1123     | F4P544.1     | PF00637.18 | 53.40 | 0.00 |
| TRINITY_A8IFT8_CHLRE/600-698      | A8IFT8.1     | PF00211.18 | 53.40 | 0.00 |
| TRINITY_Q23KD1_TETTS/1-249        | Q23KD1.1     | PF04641.10 | 53.40 | 0.00 |
| TRINITY_Q235X0_TETTS/59-332       | Q235X0.3     | PF01193.22 | 53.30 | 0.00 |
| TRINITY_I6Z4X1_MELRP/33-329       | I6Z4X1.1     | PF01263.18 | 53.30 | 0.00 |
| TRINITY_A0A0E3ZJV1_9BACT/33-379   | A0A0E3ZJV1.1 | PF1028     | 53.30 | 0.00 |
| TRINITY_A0A067TAS5_9AGAR/33-107   | A0A067TAS5.1 | PF1289     | 53.30 | 0.00 |
| TRINITY_G0QJM6_ICHMG/4-283        | G0QJM6.1     | PF02383.16 | 53.30 | 0.00 |
| TRINITY_A4S6N9_OSTLU/207-255      | A4S6N9.1     | PF00400.30 | 53.30 | 0.00 |
| TRINITY_M0QSN1_ACACA/309-399      | M0QSN1.1     | PF02214.20 | 53.30 | 0.00 |
| TRINITY_G0QW64_ICHMG/554-754      | G0QW64.1     | PF13087.4; | 53.30 | 0.00 |
| TRINITY_I7LWJ8_TETTS/52-307       | I7LWJ8.1     | PF00069.23 | 53.30 | 0.00 |
| TRINITY_D3BM00_POLPA/28-88        | D3BM00.1     | PF00830.17 | 53.30 | 0.00 |
| TRINITY_Q0YR84_9CHLB/108-286      | Q0YR84.1     | PF07478.11 | 53.30 | 0.00 |
| TRINITY_Q46CR5_METBF/475-543      | Q46CR5.1     | PF13424.4; | 53.30 | 0.00 |
| TRINITY_L8GYJ5_ACACA/1646-1904    | L8GYJ5.1     | PF07714.15 | 53.30 | 0.00 |
| TRINITY_J9IJY7_9SPIT/252-297      | J9IJY7.1     | PF13639.4; | 53.30 | 0.00 |
| TRINITY_C7G039_DICDI/1-107        | C7G039.1     | PF04471.10 | 53.30 | 0.00 |
| TRINITY_Q65P25_BACLD/104-279      | Q65P25.1     | PF02655.12 | 53.30 | 0.00 |
| TRINITY_I7MLV0_TETTS/461-797      | I7MLV0.2     | PF00443.27 | 53.30 | 0.00 |
| TRINITY_B7G4K9_PHATC/179-223      | B7G4K9.1     | PF13639.4; | 53.30 | 0.00 |
| TRINITY_Q29PC4_DROPS/124-168      | Q29PC4.1     | PF00569.15 | 53.30 | 0.00 |
| TRINITY_D8TQ43_VOLCA/10-71        | D8TQ43.1     | PF05030.10 | 53.30 | 0.00 |
| TRINITY_A0A072PHZ5_9EURO/92-153   | A0A072PHZ5.1 | PF0022     | 53.30 | 0.00 |
| TRINITY_L8GMF7_ACACA/729-802      | L8GMF7.1     | PF00498.24 | 53.30 | 0.00 |
| TRINITY_A0A0D2WIY8_CAPO3/885-1002 | A0A0D2WIY8.1 | PF0141     | 53.30 | 0.00 |
| TRINITY_F4Q8K6_DICFS/32-131       | F4Q8K6.1     | PF05071.14 | 53.30 | 0.00 |
| TRINITY_GLU2B_ORYSI/457-614       | A2WNF5.1     | PF13015.4; | 53.30 | 0.00 |
| TRINITY_K7J1L6_NASVI/543-615      | K7J1L6.1     | PF05022.10 | 53.30 | 0.00 |
| TRINITY_I0ZAS5_9CHLO/1575-1619    | I0ZAS5.1     | PF00249.29 | 53.30 | 0.00 |
| TRINITY_C6J078_9BACL/6-125        | C6J078.1     | PF01408.20 | 53.30 | 0.00 |
| TRINITY_Q24HH9_TETTS/52-312       | Q24HH9.2     | PF00069.23 | 53.30 | 0.00 |
| TRINITY_I1GYV5_BRADI/706-951      | I1GYV5.1     | PF07727.12 | 53.30 | 0.00 |
| TRINITY_I0YRH1_9CHLO/107-438      | I0YRH1.1     | PF03062.17 | 53.30 | 0.00 |
| TRINITY_E1ZGN4_CHLVA/213-289      | E1ZGN4.1     | PF13242.4; | 53.30 | 0.00 |
| TRINITY_A0CMJ3_PARTE/426-538      | A0CMJ3.1     | PF14792.4; | 53.30 | 0.00 |
| TRINITY_A1S364_SHEAM/3-328        | A1S364.1     | PF00389.28 | 53.30 | 0.00 |

|                                   |              |            |       |      |
|-----------------------------------|--------------|------------|-------|------|
| TRINITY_C4VA82_NOSCE/28-175       | C4VA82.1     | PF01926.21 | 53.30 | 0.00 |
| TRINITY_SLA2_SCHPO/16-279         | Q9P6L5.2     | PF07651.14 | 53.30 | 0.00 |
| TRINITY_D8U338_VOLCA/274-367      | D8U338.1     | PF05705.12 | 53.30 | 0.00 |
| TRINITY_B6IRA2_RHOCS/37-303       | B6IRA2.1     | PF01636.21 | 53.30 | 0.00 |
| TRINITY_D8U2E9_VOLCA/1-78         | D8U2E9.1     | PF00153.25 | 53.30 | 0.00 |
| TRINITY_L8HA48_ACACA/25-177       | L8HA48.1     | PF10152.7; | 53.30 | 0.00 |
| TRINITY_J9IA49_9SPIT/254-345      | J9IA49.1     | PF00447.15 | 53.30 | 0.00 |
| TRINITY_A0A087SL84_AUXPR/66-315   | A0A087SL84.1 | PF0705     | 53.30 | 0.00 |
| TRINITY_G0R0B5_ICHMG/45-346       | G0R0B5.1     | PF03133.13 | 53.30 | 0.00 |
| TRINITY_F4PHK8_DICFS/156-470      | F4PHK8.1     | PF02383.16 | 53.30 | 0.00 |
| TRINITY_A0A0N4UL36_DRAME/64-256   | A0A0N4UL36.1 | PF0113     | 53.30 | 0.00 |
| TRINITY_A0A0D3GJH5_9ORYZ/228-328  | A0A0D3GJH5.1 | PF0104     | 53.30 | 0.00 |
| TRINITY_D8TL05_VOLCA/10-212       | D8TL05.1     | PF02146.15 | 53.30 | 0.00 |
| TRINITY_D8TI15_VOLCA/1-167        | D8TI15.1     | PF05856.10 | 53.30 | 0.00 |
| TRINITY_C1E469_MICSR/149-341      | C1E469.1     | PF08325.8; | 53.30 | 0.00 |
| TRINITY_V9EPL4_PHYPR/52-300       | V9EPL4.1     | PF06966.10 | 53.30 | 0.00 |
| TRINITY_A0A015N5W5_9GLOM/109-260  | A0A015N5W5.1 | PF0000     | 53.30 | 0.00 |
| TRINITY_D8U5Y8_VOLCA/2-366        | D8U5Y8.1     | PF02005.14 | 53.30 | 0.00 |
| TRINITY_E1ZBK3_CHLVA/422-629      | E1ZBK3.1     | PF00448.20 | 53.30 | 0.00 |
| TRINITY_A9SXH5_PHYPA/24-252       | A9SXH5.1     | PF06966.10 | 53.30 | 0.00 |
| TRINITY_A8I3N8_CHLRE/39-150       | A8I3N8.1     | PF07714.15 | 53.30 | 0.00 |
| TRINITY_D8UKY2_VOLCA/1209-1430    | D8UKY2.1     | PF07714.15 | 53.30 | 0.00 |
| TRINITY_A0A066WZL8_COLSU/805-949  | A0A066WZL8.1 | PF0027     | 53.30 | 0.00 |
| TRINITY_I0YYG8_9CHLO/12-184       | I0YYG8.1     | PF05063.12 | 53.30 | 0.00 |
| TRINITY_A0CWK0_PARTE/410-529      | A0CWK0.1     | PF02518.24 | 53.20 | 0.00 |
| TRINITY_I0LED3_9ACTN/92-398       | I0LED3.1     | PF00082.20 | 53.20 | 0.00 |
| TRINITY_S8A3P0_DACHA/824-944      | S8A3P0.1     | PF01412.16 | 53.20 | 0.00 |
| TRINITY_I7M4C2_TETTS/42-276       | I7M4C2.1     | PF00149.26 | 53.20 | 0.00 |
| TRINITY_R1FHC9_EMIHU/26-218       | R1FHC9.1     | PF04118.12 | 53.20 | 0.00 |
| TRINITY_L0PAP9_PNEJ8/2-143        | L0PAP9.1     | PF01217.18 | 53.20 | 0.00 |
| TRINITY_A0A0N0LZU9_9GAMM/969-1089 | A0A0N0LZU9.1 | PF0007     | 53.20 | 0.00 |
| TRINITY_I0YXQ2_9CHLO/111-392      | I0YXQ2.1     | PF05971.10 | 53.20 | 0.00 |
| TRINITY_G0QPH4_ICHMG/437-665      | G0QPH4.1     | PF13932.4; | 53.20 | 0.00 |
| TRINITY_G0QPY6_ICHMG/30-344       | G0QPY6.1     | PF01074.20 | 53.20 | 0.00 |
| TRINITY_Q54CZ3_DICDI/187-344      | Q54CZ3.1     | PF00730.23 | 53.20 | 0.00 |
| TRINITY_A7RNS4_NEMVE/406-526      | A7RNS4.1     | PF00083.22 | 53.20 | 0.00 |
| TRINITY_F5J0Z1_9PORP/9-132        | F5J0Z1.1     | PF00583.23 | 53.20 | 0.00 |
| TRINITY_D8TZD2_VOLCA/241-481      | D8TZD2.1     | PF10494.7; | 53.20 | 0.00 |
| TRINITY_T1JIR4_STRMM/41-277       | T1JIR4.1     | PF01370.19 | 53.20 | 0.00 |
| TRINITY_L8GZG2_ACACA/46-186       | L8GZG2.1     | PF01135.17 | 53.20 | 0.00 |
| TRINITY_A0A059LL00_9CHLO/125-202  | A0A059LL00.1 | PF0275     | 53.20 | 0.00 |
| TRINITY_A0A087STY5_AUXPR/124-295  | A0A087STY5.1 | PF0173     | 53.20 | 0.00 |
| TRINITY_D8TT65_VOLCA/80-202       | D8TT65.1     | PF13401.4; | 53.20 | 0.00 |
| TRINITY_D3BTW1_POLPA/43-94        | D3BTW1.1     | PF07646.13 | 53.20 | 0.00 |
| TRINITY_F4PU36_DICFS/130-410      | F4PU36.1     | PF03034.13 | 53.20 | 0.00 |
| TRINITY_I7LT74_TETTS/2-115        | I7LT74.2     | PF09822.7; | 53.20 | 0.00 |
| TRINITY_D8TYP6_VOLCA/7-236        | D8TYP6.1     | PF05764.11 | 53.20 | 0.00 |
| TRINITY_D8S292_SELML/247-291      | D8S292.1     | PF00097.23 | 53.20 | 0.00 |
| TRINITY_B8M547_TALSN/177-376      | B8M547.1     | PF01262.19 | 53.20 | 0.00 |
| TRINITY_D8TRM1_VOLCA/9-55         | D8TRM1.1     | PF08122.10 | 53.20 | 0.00 |
| TRINITY_W4FEE0_9STRA/137-198      | W4FEE0.1     | PF00957.19 | 53.20 | 0.00 |
| TRINITY_C1MWU7_MICPC/78-201       | C1MWU7.1     | PF01769.14 | 53.20 | 0.00 |
| TRINITY_A0A068S0X7_9FUNG/67-352   | A0A068S0X7.1 | PF0006     | 53.20 | 0.00 |
| TRINITY_D3BMQ7_POLPA/597-742      | D3BMQ7.1     | PF01694.20 | 53.20 | 0.00 |
| TRINITY_A8INA3_CHLRE/1-158        | A8INA3.1     | PF08603.9; | 53.20 | 0.00 |
| TRINITY_A0A077ZQW9_STYLE/49-359   | A0A077ZQW9.1 | PF0024     | 53.20 | 0.00 |
| TRINITY_A0CJL2_PARTE/227-274      | A0CJL2.1     | PF00415.16 | 53.20 | 0.00 |
| TRINITY_G0QKW1_ICHMG/111-281      | G0QKW1.1     | PF00092.26 | 53.20 | 0.00 |
| TRINITY_D3BM29_POLPA/88-372       | D3BM29.1     | PF03308.14 | 53.20 | 0.00 |
| TRINITY_A0A099NW38_PICKU/146-302  | A0A099NW38.1 | PF0007     | 53.20 | 0.00 |
| TRINITY_D8TZY9_VOLCA/23-157       | D8TZY9.1     | PF10063.7; | 53.20 | 0.00 |

|                                  |              |            |       |      |
|----------------------------------|--------------|------------|-------|------|
| TRINITY_I0Z396_9CHLO/6-329       | I0Z396.1     | PF07992.12 | 53.20 | 0.00 |
| TRINITY_F2JMJ6_CELLD/12-249      | F2JMJ6.1     | PF13561.4; | 53.20 | 0.00 |
| TRINITY_I7MGV0_TETTS/599-693     | I7MGV0.2     | PF12796.5; | 53.20 | 0.00 |
| TRINITY_E9GIT2_DAPPU/699-895     | E9GIT2.1     | PF02259.21 | 53.20 | 0.00 |
| TRINITY_F0ZYD6_DICPU/27-173      | F0ZYD6.1     | PF00483.21 | 53.20 | 0.00 |
| TRINITY_D2A1C7_TRICA/865-1023    | D2A1C7.1     | PF08433.8; | 53.20 | 0.00 |
| TRINITY_E1ZMM7_CHLVA/264-482     | E1ZMM7.1     | PF07059.10 | 53.20 | 0.00 |
| TRINITY_A0A087SAP6_AUXPR/2-67    | A0A087SAP6.1 | PF0549     | 53.20 | 0.00 |
| TRINITY_A8I6K1_CHLRE/3-111       | A8I6K1.1     | PF03164.12 | 53.20 | 0.00 |
| TRINITY_D6WRW1_TRICA/241-291     | D6WRW1.1     | PF10058.7; | 53.20 | 0.00 |
| TRINITY_D8TR85_VOLCA/7-153       | D8TR85.1     | PF01925.17 | 53.20 | 0.00 |
| TRINITY_A8IKW6_CHLRE/43-242      | A8IKW6.1     | PF00834.17 | 53.20 | 0.00 |
| TRINITY_L8H1U2_ACACA/19-539      | L8H1U2.1     | PF01602.18 | 53.20 | 0.00 |
| TRINITY_A8IYC6_CHLRE/17-176      | A8IYC6.1     | PF00211.18 | 53.20 | 0.00 |
| TRINITY_H2Y4I3_CIOSA/26-621      | H2Y4I3.1     | PF04563.13 | 53.20 | 0.00 |
| TRINITY_A0A0N4Z6H1_PARTI/38-114  | A0A0N4Z6H1.1 | PF0188     | 53.20 | 0.00 |
| TRINITY_D8U0D0_VOLCA/83-393      | D8U0D0.1     | PF00632.23 | 53.20 | 0.00 |
| TRINITY_Q239Q7_TETTS/71-416      | Q239Q7.2     | PF00225.21 | 53.20 | 0.00 |
| TRINITY_A0A0D2X4E2_CAPO3/576-810 | A0A0D2X4E2.1 | PF0012     | 53.20 | 0.00 |
| TRINITY_A0A078BCF8_STYLE/3-64    | A0A078BCF8.1 | PF0007     | 53.20 | 0.00 |
| TRINITY_S3CQ68_OPHP1/12-322      | S3CQ68.1     | PF00069.23 | 53.20 | 0.00 |
| TRINITY_E1Z997_CHLVA/7-108       | E1Z997.1     | PF00085.18 | 53.20 | 0.00 |
| TRINITY_E3MI87_CAERE/184-457     | E3MI87.1     | PF07714.15 | 53.10 | 0.00 |
| TRINITY_V8N9K4_OPHHA/45-170      | V8N9K4.1     | PF00005.25 | 53.10 | 0.00 |
| TRINITY_A0A0C2UC57_BACBA/8-253   | A0A0C2UC57.1 | PF0227     | 53.10 | 0.00 |
| TRINITY_J9K1U4_ACYPI/4-67        | J9K1U4.1     | PF00226.29 | 53.10 | 0.00 |
| TRINITY_Q23QF2_TETTS/248-571     | Q23QF2.2     | PF03133.13 | 53.10 | 0.00 |
| TRINITY_A0DAI9_PARTE/12-124      | A0DAI9.1     | PF01412.16 | 53.10 | 0.00 |
| TRINITY_A0D6M9_PARTE/6-345       | A0D6M9.1     | PF00724.18 | 53.10 | 0.00 |
| TRINITY_D3BE38_POLPA/22-144      | D3BE38.1     | PF00787.22 | 53.10 | 0.00 |
| TRINITY_W7T6I3_9STRA/76-208      | W7T6I3.1     | PF00472.18 | 53.10 | 0.00 |
| TRINITY_F4PHG0_DICFS/285-427     | F4PHG0.1     | PF00441.22 | 53.10 | 0.00 |
| TRINITY_U9UKY8_RHIID/250-425     | U9UKY8.1     | PF05063.12 | 53.10 | 0.00 |
| TRINITY_L8GF10_ACACA/1-543       | L8GF10.1     | PF04858.11 | 53.10 | 0.00 |
| TRINITY_W7XJ81_TETTS/240-289     | W7XJ81.1     | PF13920.4; | 53.10 | 0.00 |
| TRINITY_T1JR84_TETUR/56-200      | T1JR84.1     | PF00005.25 | 53.10 | 0.00 |
| TRINITY_I7MJV7_TETTS/57-267      | I7MJV7.1     | PF00710.18 | 53.10 | 0.00 |
| TRINITY_Q3JEP1_NITOC/4-348       | Q3JEP1.1     | PF00266.17 | 53.10 | 0.00 |
| TRINITY_I7M2Z5_TETTS/227-524     | I7M2Z5.2     | PF03133.13 | 53.10 | 0.00 |
| TRINITY_K7J0P1_NASVI/185-522     | K7J0P1.1     | PF05028.12 | 53.10 | 0.00 |
| TRINITY_A0A087SJB7_AUXPR/215-475 | A0A087SJB7.1 | PF0085     | 53.10 | 0.00 |
| TRINITY_Q22WB5_TETTS/12-124      | Q22WB5.2     | PF01412.16 | 53.10 | 0.00 |
| TRINITY_G0QWF3_ICHMG/180-406     | G0QWF3.1     | PF00557.22 | 53.10 | 0.00 |
| TRINITY_G0QYC9_ICHMG/6-247       | G0QYC9.1     | PF01115.15 | 53.10 | 0.00 |
| TRINITY_Q22XX1_TETTS/200-263     | Q22XX1.2     | PF12906.5; | 53.10 | 0.00 |
| TRINITY_G0QQP7_ICHMG/8-263       | G0QQP7.1     | PF00069.23 | 53.10 | 0.00 |
| TRINITY_D8TTG4_VOLCA/36-241      | D8TTG4.1     | PF01351.16 | 53.10 | 0.00 |
| TRINITY_B4FYZ2_MAIZE/186-550     | B4FYZ2.1     | PF00728.20 | 53.10 | 0.00 |
| TRINITY_D8TRM2_VOLCA/1-210       | D8TRM2.1     | PF01594.14 | 53.10 | 0.00 |
| TRINITY_E1Z3Z4_CHLVA/54-215      | E1Z3Z4.1     | PF04387.12 | 53.10 | 0.00 |
| TRINITY_D8U978_VOLCA/2-203       | D8U978.1     | PF07714.15 | 53.10 | 0.00 |
| TRINITY_F1A0T9_DICPU/142-239     | F1A0T9.1     | PF01833.22 | 53.10 | 0.00 |
| TRINITY_I3YYD4_AEQSU/21-199      | I3YYD4.1     | PF14124.4; | 53.10 | 0.00 |
| TRINITY_F7W7F7_SORMK/277-424     | F7W7F7.1     | PF13692.4; | 53.10 | 0.00 |
| TRINITY_Q2H7U0_CHAGB/401-534     | Q2H7U0.1     | PF00005.25 | 53.10 | 0.00 |
| TRINITY_F2CVA4_HORVD/116-320     | F2CVA4.1     | PF00485.16 | 53.10 | 0.00 |
| TRINITY_Q23TB4_TETTS/337-449     | Q23TB4.1     | PF09070.9; | 53.10 | 0.00 |
| TRINITY_A8JA23_CHLRE/167-512     | A8JA23.1     | PF04910.12 | 53.10 | 0.00 |
| TRINITY_D2V826_NAEGR/15-78       | D2V826.1     | PF01918.19 | 53.10 | 0.00 |
| TRINITY_I0Z5Z6_9CHLO/1-400       | I0Z5Z6.1     | PF00022.17 | 53.10 | 0.00 |
| TRINITY_H2Y4I3_CIOSA/26-621      | H2Y4I3.1     | PF04563.13 | 53.10 | 0.00 |

|                                    |                     |       |      |
|------------------------------------|---------------------|-------|------|
| TRINITY_A0A067EBU9_CITSI/37-101    | A0A067EBU9.1 PF1343 | 53.10 | 0.00 |
| TRINITY_I7M048_TETTS/1-155         | I7M048.1 PF04729.11 | 53.10 | 0.00 |
| TRINITY_A0A078AUG7_STYLE/11-91     | A0A078AUG7.1 PF1349 | 53.10 | 0.00 |
| TRINITY_A8HTS4_CHLRE/73-136        | A8HTS4.1 PF13432.4; | 53.10 | 0.00 |
| TRINITY_K1PT87_CRAGI/1655-1734     | K1PT87.1 PF13771.4; | 53.10 | 0.00 |
| TRINITY_Q24CZ5_TETTS/7-168         | Q24CZ5.2 PF00071.20 | 53.10 | 0.00 |
| TRINITY_I0Z8P8_9CHLO/1-153         | I0Z8P8.1 PF00566.16 | 53.10 | 0.00 |
| TRINITY_C4LVM6_ENTHI/287-578       | C4LVM6.1 PF00176.21 | 53.10 | 0.00 |
| TRINITY_L8HFN6_ACACA/331-559       | L8HFN6.1 PF06314.9; | 53.10 | 0.00 |
| TRINITY_D8UEJ7_VOLCA/8-793         | D8UEJ7.1 PF05804.10 | 53.10 | 0.00 |
| TRINITY_D8THA7_VOLCA/1-124         | D8THA7.1 PF05057.12 | 53.10 | 0.00 |
| TRINITY_I1C0E6_RHIO9/491-715       | I1C0E6.1 PF16415.3; | 53.10 | 0.00 |
| TRINITY_D8U9S9_VOLCA/599-793       | D8U9S9.1 PF00211.18 | 53.10 | 0.00 |
| TRINITY_A8IID5_CHLRE/1-302         | A8IID5.1 PF10149.7; | 53.10 | 0.00 |
| TRINITY_L8GEL6_ACACA/329-543       | L8GEL6.1 PF13236.4; | 53.10 | 0.00 |
| TRINITY_H3D7Q3_TETNG/584-648       | H3D7Q3.1 PF01363.19 | 53.10 | 0.00 |
| TRINITY_I7MAM9_TETTS/250-530       | I7MAM9.2 PF01189.15 | 53.10 | 0.00 |
| TRINITY_D8UJZ9_VOLCA/1479-1570     | D8UJZ9.1 PF00207.20 | 53.10 | 0.00 |
| TRINITY_A8IFT8_CHLRE/600-698       | A8IFT8.1 PF00211.18 | 53.10 | 0.00 |
| TRINITY_A0A022Q2R9_ERYGU/817-911   | A0A022Q2R9.1 PF1270 | 53.10 | 0.00 |
| TRINITY_E6TYI3_BACCJ/4-148         | E6TYI3.1 PF01451.19 | 53.10 | 0.00 |
| TRINITY_Q0UIN5_PHANO/161-364       | Q0UIN5.1 PF00742.17 | 53.00 | 0.00 |
| TRINITY_A0DZT1_PARTE/4-196         | A0DZT1.1 PF01652.16 | 53.00 | 0.00 |
| TRINITY_C3YRH6_BRAFL/289-443       | C3YRH6.1 PF13768.4; | 53.00 | 0.00 |
| TRINITY_K7ITS3_NASVI/167-504       | K7ITS3.1 PF06602.12 | 53.00 | 0.00 |
| TRINITY_Q22U45_TETTS/225-538       | Q22U45.1 PF00883.19 | 53.00 | 0.00 |
| TRINITY_I7LVQ8_TETTS/213-363       | I7LVQ8.2 PF07992.12 | 53.00 | 0.00 |
| TRINITY_L8HFY7_ACACA/34-232        | L8HFY7.1 PF02492.17 | 53.00 | 0.00 |
| TRINITY_L8GIV1_ACACA/257-449       | L8GIV1.1 PF00270.27 | 53.00 | 0.00 |
| TRINITY_A0A0D2WK40_CAPO3/1001-1326 | A0A0D2WK40.1 PF0063 | 53.00 | 0.00 |
| TRINITY_D3BEH4_POLPA/456-651       | D3BEH4.1 PF00270.27 | 53.00 | 0.00 |
| TRINITY_G0R410_ICHMG/23-292        | G0R410.1 PF00481.19 | 53.00 | 0.00 |
| TRINITY_D8TZI3_VOLCA/5-83          | D8TZI3.1 PF04969.14 | 53.00 | 0.00 |
| TRINITY_A4S9S4_OSTLU/72-247        | A4S9S4.1 PF00534.18 | 53.00 | 0.00 |
| TRINITY_M7B8U5_CHEMY/293-390       | M7B8U5.1 PF08022.10 | 53.00 | 0.00 |
| TRINITY_J9FWB3_9SPIT/489-626       | J9FWB3.1 PF12146.6; | 53.00 | 0.00 |
| TRINITY_A0A015KH76_9GLOM/26-190    | A0A015KH76.1 PF0385 | 53.00 | 0.00 |
| TRINITY_A8HT37_CHLRE/1198-1411     | A8HT37.1 PF16206.3; | 53.00 | 0.00 |
| TRINITY_L8HIQ5_ACACA/114-277       | L8HIQ5.1 PF08645.9; | 53.00 | 0.00 |
| TRINITY_C3Y8X7_BRAFL/7-276         | C3Y8X7.1 PF01073.17 | 53.00 | 0.00 |
| TRINITY_D8TSG0_VOLCA/222-374       | D8TSG0.1 PF01529.18 | 53.00 | 0.00 |
| TRINITY_B0RH91_CLAMS/133-220       | B0RH91.1 PF16697.3; | 53.00 | 0.00 |
| TRINITY_L8HLI8_ACACA/115-329       | L8HLI8.1 PF00112.21 | 53.00 | 0.00 |
| TRINITY_A0A0D2T7E2_GOSRA/130-278   | A0A0D2T7E2.1 PF0029 | 53.00 | 0.00 |
| TRINITY_K8GI83_9CYAN/140-352       | K8GI83.1 PF00171.20 | 53.00 | 0.00 |
| TRINITY_B9GQT7_POPTR/61-125        | B9GQT7.1 PF00226.29 | 53.00 | 0.00 |
| TRINITY_I2GZY6_TETBL/58-201        | I2GZY6.1 PF08662.9; | 53.00 | 0.00 |
| TRINITY_A9HBS4_GLUDA/13-388        | A9HBS4.1 PF04339.10 | 53.00 | 0.00 |
| TRINITY_S8CEZ3_9LAMI/164-445       | S8CEZ3.1 PF00566.16 | 53.00 | 0.00 |
| TRINITY_I0K4V8_9BACT/18-321        | I0K4V8.1 PF00294.22 | 53.00 | 0.00 |
| TRINITY_F0ZYR6_DICPU/124-420       | F0ZYR6.1 PF00069.23 | 53.00 | 0.00 |
| TRINITY_D8TU71_VOLCA/262-361       | D8TU71.1 PF07707.13 | 53.00 | 0.00 |
| TRINITY_A8JJW2_CHLRE/66-256        | A8JJW2.1 PF01370.19 | 53.00 | 0.00 |
| TRINITY_E1ZLD4_CHLVA/328-548       | E1ZLD4.1 PF05362.11 | 53.00 | 0.00 |
| TRINITY_D8U9S9_VOLCA/599-793       | D8U9S9.1 PF00211.18 | 53.00 | 0.00 |
| TRINITY_C1E245_MICSR/28-260        | C1E245.1 PF03407.14 | 53.00 | 0.00 |
| TRINITY_A0A099NWK8_PICKU/112-302   | A0A099NWK8.1 PF0007 | 53.00 | 0.00 |
| TRINITY_F4Q691_DICFS/694-1078      | F4Q691.1 PF00940.17 | 53.00 | 0.00 |
| TRINITY_I7MKZ5_TETTS/850-1202      | I7MKZ5.2 PF00773.17 | 53.00 | 0.00 |
| TRINITY_L8GWZ4_ACACA/279-461       | L8GWZ4.1 PF00270.27 | 53.00 | 0.00 |
| TRINITY_A8ISF0_CHLRE/4-391         | A8ISF0.1 PF00022.17 | 53.00 | 0.00 |

|                                  |                     |       |      |
|----------------------------------|---------------------|-------|------|
| TRINITY_E1ZE38_CHLVA/277-473     | E1ZE38.1 PF00534.18 | 53.00 | 0.00 |
| TRINITY_G1N063_MELGA/197-609     | G1N063.1 PF01131.18 | 53.00 | 0.00 |
| TRINITY_A8ILZ7_CHLRE/84-382      | A8ILZ7.1 PF01007.18 | 53.00 | 0.00 |
| TRINITY_G7Y6D9_CLOSI/616-802     | G7Y6D9.1 PF00702.24 | 53.00 | 0.00 |
| TRINITY_A0A091DLJ5_FUKDA/167-876 | A0A091DLJ5.1 PF0013 | 53.00 | 0.00 |
| TRINITY_R4XFE9_TAPDE/681-796     | R4XFE9.1 PF00665.24 | 53.00 | 0.00 |
| TRINITY_I0YWD0_9CHLO/8-264       | I0YWD0.1 PF00069.23 | 53.00 | 0.00 |
| TRINITY_I7MMG8_TETTS/8-169       | I7MMG8.1 PF00071.20 | 53.00 | 0.00 |
| TRINITY_U9U4H0_RHIID/1-204       | U9U4H0.1 PF00122.18 | 53.00 | 0.00 |
| TRINITY_J9JBX5_9SPIT/149-408     | J9JBX5.1 PF00069.23 | 53.00 | 0.00 |
| TRINITY_W7XG98_TETTS/15-84       | W7XG98.1 PF13499.4; | 52.90 | 0.00 |
| TRINITY_A0CSI2_PARTE/27-156      | A0CSI2.1 PF00782.18 | 52.90 | 0.00 |
| TRINITY_K7IV52_NASVI/14-106      | K7IV52.1 PF13233.4; | 52.90 | 0.00 |
| TRINITY_A0A0A1P236_9FUNG/284-755 | A0A0A1P236.1 PF0620 | 52.90 | 0.00 |
| TRINITY_A0A0D9VWR2_9ORYZ/46-175  | A0A0D9VWR2.1 PF0851 | 52.90 | 0.00 |
| TRINITY_B3QRX7_CHLT3/148-394     | B3QRX7.1 PF01564.15 | 52.90 | 0.00 |
| TRINITY_C5Y2L6_SORBI/25-334      | C5Y2L6.1 PF00899.19 | 52.90 | 0.00 |
| TRINITY_A6EQ69_9BACT/162-272     | A6EQ69.1 PF00072.22 | 52.90 | 0.00 |
| TRINITY_Q24FE9_TETTS/125-249     | Q24FE9.2 PF00561.18 | 52.90 | 0.00 |
| TRINITY_J9ICA0_9SPIT/1036-1087   | J9ICA0.1 PF00415.16 | 52.90 | 0.00 |
| TRINITY_D0N3V4_PHYIT/61-209      | D0N3V4.1 PF04727.11 | 52.90 | 0.00 |
| TRINITY_V3ZKW3_LOTGI/19-108      | V3ZKW3.1 PF13646.4; | 52.90 | 0.00 |
| TRINITY_RL24_ACICJ/40-104        | A5FZV4.1 PF17136.2; | 52.90 | 0.00 |
| TRINITY_A7S1D0_NEMVE/18-158      | A7S1D0.1 PF01217.18 | 52.90 | 0.00 |
| TRINITY_DAAF1_CHLRE/86-224       | Q09JZ4.1 PF14580.4; | 52.90 | 0.00 |
| TRINITY_D8U9W9_VOLCA/12-348      | D8U9W9.1 PF03224.12 | 52.90 | 0.00 |
| TRINITY_D8PJF8_9BACT/55-157      | D8PJF8.1 PF00011.19 | 52.90 | 0.00 |
| TRINITY_H3CZ55_TETNG/1-146       | H3CZ55.1 PF01429.17 | 52.90 | 0.00 |
| TRINITY_A8JCW7_CHLRE/69-254      | A8JCW7.1 PF02431.13 | 52.90 | 0.00 |
| TRINITY_I7MH53_TETTS/28-94       | I7MH53.1 PF00498.24 | 52.90 | 0.00 |
| TRINITY_A8XXM7_CAEBR/23-294      | A8XXM7.1 PF01926.21 | 52.90 | 0.00 |
| TRINITY_A0A067QYX3_ZOONE/5-80    | A0A067QYX3.1 PF0279 | 52.90 | 0.00 |
| TRINITY_R1CKZ4_EMIHU/50-141      | R1CKZ4.1 PF02214.20 | 52.90 | 0.00 |
| TRINITY_Q247R2_TETTS/585-696     | Q247R2.2 PF13246.4; | 52.90 | 0.00 |
| TRINITY_I7MLA5_TETTS/7-226       | I7MLA5.2 PF01168.18 | 52.90 | 0.00 |
| TRINITY_Q22T51_TETTS/44-513      | Q22T51.2 PF00067.20 | 52.90 | 0.00 |
| TRINITY_K2H6W1_9RHOB/3-233       | K2H6W1.1 PF00297.20 | 52.90 | 0.00 |
| TRINITY_M0SUF6_MUSAM/11-179      | M0SUF6.1 PF06728.11 | 52.90 | 0.00 |
| TRINITY_V3ZXS3_LOTGI/97-188      | V3ZXS3.1 PF00153.25 | 52.90 | 0.00 |
| TRINITY_A0DF57_PARTE/61-385      | A0DF57.1 PF00069.23 | 52.90 | 0.00 |
| TRINITY_D8MBA7_BLAHO/1-174       | D8MBA7.1 PF00025.19 | 52.90 | 0.00 |
| TRINITY_Q24FE9_TETTS/125-249     | Q24FE9.2 PF00561.18 | 52.90 | 0.00 |
| TRINITY_G3VF29_SARHA/15-362      | G3VF29.1 PF01070.16 | 52.90 | 0.00 |
| TRINITY_D2VYJ1_NAEGR/1343-1528   | D2VYJ1.1 PF02145.13 | 52.90 | 0.00 |
| TRINITY_F0ZP74_DICPU/221-539     | F0ZP74.1 PF00657.20 | 52.90 | 0.00 |
| TRINITY_A7BR79_9GAMM/15-298      | A7BR79.1 PF03747.12 | 52.90 | 0.00 |
| TRINITY_D1CD72_THET1/288-642     | D1CD72.1 PF13361.4; | 52.90 | 0.00 |
| TRINITY_D8UJ36_VOLCA/93-448      | D8UJ36.1 PF04938.10 | 52.90 | 0.00 |
| TRINITY_Q24HK5_TETTS/22-161      | Q24HK5.2 PF00501.26 | 52.90 | 0.00 |
| TRINITY_X1WIA8_ACYPI/258-307     | X1WIA8.1 PF13639.4; | 52.90 | 0.00 |
| TRINITY_D8TKZ7_VOLCA/1579-2019   | D8TKZ7.1 PF00443.27 | 52.90 | 0.00 |
| TRINITY_I0YTT5_9CHLO/19-259      | I0YTT5.1 PF03649.11 | 52.90 | 0.00 |
| TRINITY_D3BJZ4_POLPA/1611-1794   | D3BJZ4.1 PF02145.13 | 52.90 | 0.00 |
| TRINITY_G0R2T0_ICHMG/33-283      | G0R2T0.1 PF00069.23 | 52.90 | 0.00 |
| TRINITY_L8GPM7_ACACA/156-303     | L8GPM7.1 PF01170.16 | 52.90 | 0.00 |
| TRINITY_A0A090M4G4_OSTTA/6-76    | A0A090M4G4.1 PF0007 | 52.90 | 0.00 |
| TRINITY_L8GVV1_ACACA/94-272      | L8GVV1.1 PF10602.7; | 52.90 | 0.00 |
| TRINITY_L8GPF5_ACACA/46-355      | L8GPF5.1 PF01593.22 | 52.90 | 0.00 |
| TRINITY_A0A085NAW1_9BILA/83-135  | A0A085NAW1.1 PF0001 | 52.90 | 0.00 |
| TRINITY_A0BKH0_PARTE/437-726     | A0BKH0.1 PF03133.13 | 52.90 | 0.00 |
| TRINITY_L8GD76_ACACA/67-365      | L8GD76.1 PF13249.4; | 52.90 | 0.00 |



|                                    |                     |       |      |
|------------------------------------|---------------------|-------|------|
| TRINITY_I0Z005_9CHLO/54-303        | I0Z005.1 PF13343.4; | 52.90 | 0.00 |
| TRINITY_D8TS64_VOLCA/5-517         | D8TS64.1 PF00501.26 | 52.90 | 0.00 |
| TRINITY_D8TQ64_VOLCA/608-670       | D8TQ64.1 PF01424.20 | 52.90 | 0.00 |
| TRINITY_M1VG03_CYAME/11-173        | M1VG03.1 PF00071.20 | 52.90 | 0.00 |
| TRINITY_Q22ZB8_TETTS/896-1015      | Q22ZB8.2 PF08578.8; | 52.90 | 0.00 |
| TRINITY_D8TIX0_VOLCA/336-697       | D8TIX0.1 PF03016.13 | 52.90 | 0.00 |
| TRINITY_A8IP12_CHLRE/72-509        | A8IP12.1 PF01490.16 | 52.90 | 0.00 |
| TRINITY_D8TYN7_VOLCA/4-93          | D8TYN7.1 PF04536.12 | 52.90 | 0.00 |
| TRINITY_A0BJC2_PARTE/318-756       | A0BJC2.1 PF04053.12 | 52.90 | 0.00 |
| TRINITY_E8QX25_ISOPI/79-315        | E8QX25.1 PF04055.19 | 52.90 | 0.00 |
| TRINITY_W1NZ48_AMBTC/40-177        | W1NZ48.1 PF09750.7; | 52.90 | 0.00 |
| TRINITY_C1EBU4_MICSR/64-161        | C1EBU4.1 PF12796.5; | 52.90 | 0.00 |
| TRINITY_I0YZS0_9CHLO/5-148         | I0YZS0.1 PF03073.13 | 52.90 | 0.00 |
| TRINITY_B8CC85_THAPS/233-469       | B8CC85.1 PF04811.13 | 52.90 | 0.00 |
| TRINITY_A8HRZ0_CHLRE/47-116        | A8HRZ0.1 PF00538.17 | 52.90 | 0.00 |
| TRINITY_D8TYX9_VOLCA/666-861       | D8TYX9.1 PF00211.18 | 52.90 | 0.00 |
| TRINITY_L8GAQ0_PSED2/1125-1318     | L8GAQ0.1 PF13087.4; | 52.90 | 0.00 |
| TRINITY_A0A060T0U9_PYCCI/1009-1125 | A0A060T0U9.1 PF0066 | 52.90 | 0.00 |
| TRINITY_D8LMM6_ECTSI/1-175         | D8LMM6.1 PF01145.23 | 52.90 | 0.00 |
| TRINITY_I7MH25_TETTS/266-611       | I7MH25.2 PF03124.12 | 52.90 | 0.00 |
| TRINITY_A0A075AXP8_9FUNG/1685-1961 | A0A075AXP8.1 PF0006 | 52.80 | 0.00 |
| TRINITY_J9I8P6_9SPIT/142-505       | J9I8P6.1 PF05028.12 | 52.80 | 0.00 |
| TRINITY_Q22E94_TETTS/13-86         | Q22E94.1 PF01423.20 | 52.80 | 0.00 |
| TRINITY_Q099W1_STIAD/478-664       | Q099W1.1 PF01186.15 | 52.80 | 0.00 |
| TRINITY_I7LVV2_TETTS/2-75          | I7LVV2.1 PF02798.18 | 52.80 | 0.00 |
| TRINITY_G0R0U2_ICHMG/19-320        | G0R0U2.1 PF00491.19 | 52.80 | 0.00 |
| TRINITY_G0QNF3_ICHMG/123-438       | G0QNF3.1 PF00351.19 | 52.80 | 0.00 |
| TRINITY_A7SWI0_NEMVE/11-95         | A7SWI0.1 PF09809.7; | 52.80 | 0.00 |
| TRINITY_I7ME47_TETTS/120-274       | I7ME47.1 PF00650.18 | 52.80 | 0.00 |
| TRINITY_L0G0W3_ECHVK/170-296       | L0G0W3.1 PF00107.24 | 52.80 | 0.00 |
| TRINITY_G0QW69_ICHMG/157-289       | G0QW69.1 PF00107.24 | 52.80 | 0.00 |
| TRINITY_F0VJ54_NEOCL/73-222        | F0VJ54.1 PF12146.6; | 52.80 | 0.00 |
| TRINITY_B6JVQ9_SCHJY/193-264       | B6JVQ9.1 PF00076.20 | 52.80 | 0.00 |
| TRINITY_G0QJQ7_ICHMG/12-286        | G0QJQ7.1 PF00069.23 | 52.80 | 0.00 |
| TRINITY_C3XWL8_BRAFL/22-271        | C3XWL8.1 PF00481.19 | 52.80 | 0.00 |
| TRINITY_I7M0X0_TETTS/460-654       | I7M0X0.2 PF08662.9; | 52.80 | 0.00 |
| TRINITY_I3YJA3_ALIFI/88-363        | I3YJA3.1 PF00078.25 | 52.80 | 0.00 |
| TRINITY_E1ZQ10_CHLVA/38-341        | E1ZQ10.1 PF00443.27 | 52.80 | 0.00 |
| TRINITY_D3B860_POLPA/197-458       | D3B860.1 PF07714.15 | 52.80 | 0.00 |
| TRINITY_G0QXV0_ICHMG/52-760        | G0QXV0.1 PF03030.14 | 52.80 | 0.00 |
| TRINITY_Q08MK1_STIAD/195-335       | Q08MK1.1 PF03561.13 | 52.80 | 0.00 |
| TRINITY_W0J5E9_9BACT/286-592       | W0J5E9.1 PF02836.15 | 52.80 | 0.00 |
| TRINITY_D8TRD2_VOLCA/436-547       | D8TRD2.1 PF01416.18 | 52.80 | 0.00 |
| TRINITY_L8H039_ACACA/206-457       | L8H039.1 PF00069.23 | 52.80 | 0.00 |
| TRINITY_NDH_DICDI/40-362           | Q55CD9.2 PF07992.12 | 52.80 | 0.00 |
| TRINITY_L8HIJ0_ACACA/40-237        | L8HIJ0.1 PF00106.23 | 52.80 | 0.00 |
| TRINITY_A0A0M0J5D8_9EUKA/75-587    | A0A0M0J5D8.1 PF1043 | 52.80 | 0.00 |
| TRINITY_D8U0Z7_VOLCA/39-188        | D8U0Z7.1 PF00504.19 | 52.80 | 0.00 |
| TRINITY_D3B9P3_POLPA/85-246        | D3B9P3.1 PF03031.16 | 52.80 | 0.00 |
| TRINITY_I0YJ67_9CHLO/1-387         | I0YJ67.1 PF00145.15 | 52.80 | 0.00 |
| TRINITY_D8U5L8_VOLCA/41-437        | D8U5L8.1 PF00856.26 | 52.80 | 0.00 |
| TRINITY_A0C161_PARTE/15-325        | A0C161.1 PF00248.19 | 52.80 | 0.00 |
| TRINITY_Q6BGF7_PARTE/428-813       | Q6BGF7.1 PF00702.24 | 52.80 | 0.00 |
| TRINITY_A0DRX0_PARTE/123-371       | A0DRX0.1 PF12697.5; | 52.80 | 0.00 |
| TRINITY_A0A0G4IY42_PLABS/1-168     | A0A0G4IY42.1 PF0861 | 52.80 | 0.00 |
| TRINITY_A8IFT8_CHLRE/600-698       | A8IFT8.1 PF00211.18 | 52.80 | 0.00 |
| TRINITY_B8P2A8_POSPM/116-288       | B8P2A8.1 PF02222.20 | 52.80 | 0.00 |
| TRINITY_F4RDE8_MELLP/7-194         | F4RDE8.1 PF03357.19 | 52.80 | 0.00 |
| TRINITY_D8TR51_VOLCA/679-786       | D8TR51.1 PF01909.21 | 52.80 | 0.00 |
| TRINITY_A0A0J8BP20_BETVU/10-171    | A0A0J8BP20.1 PF0007 | 52.80 | 0.00 |
| TRINITY_D8TS58_VOLCA/15-293        | D8TS58.1 PF03133.13 | 52.80 | 0.00 |

|                                   |              |            |       |      |
|-----------------------------------|--------------|------------|-------|------|
| TRINITY_A8JJ05_CHLRE/562-633      | A8JJ05.1     | PF05699.12 | 52.80 | 0.00 |
| TRINITY_D8THB9_VOLCA/33-139       | D8THB9.1     | PF09799.7; | 52.80 | 0.00 |
| TRINITY_D0MID8_RHOM4/42-365       | D0MID8.1     | PF00144.22 | 52.80 | 0.00 |
| TRINITY_E1Z4G9_CHLVA/221-385      | E1Z4G9.1     | PF16575.3; | 52.80 | 0.00 |
| TRINITY_D8TKG0_VOLCA/59-161       | D8TKG0.1     | PF08241.10 | 52.80 | 0.00 |
| TRINITY_Q23YR9_TETTS/7-439        | Q23YR9.1     | PF00171.20 | 52.80 | 0.00 |
| TRINITY_K3XAX2_PYTUL/861-1065     | K3XAX2.1     | PF00454.25 | 52.80 | 0.00 |
| TRINITY_I0YQ38_9CHLO/146-206      | I0YQ38.1     | PF04117.10 | 52.80 | 0.00 |
| TRINITY_H9IV50_BOMMO/11-254       | H9IV50.1     | PF01545.19 | 52.80 | 0.00 |
| TRINITY_G0QJN1_ICHMG/433-510      | G0QJN1.1     | PF13424.4; | 52.80 | 0.00 |
| TRINITY_B8KSY6_9GAMM/97-212       | B8KSY6.1     | PF13469.4; | 52.80 | 0.00 |
| TRINITY_C1EIK2_MICSR/1-193        | C1EIK2.1     | PF00069.23 | 52.80 | 0.00 |
| TRINITY_I0Z5Q3_9CHLO/6-741        | I0Z5Q3.1     | PF03635.15 | 52.80 | 0.00 |
| TRINITY_A8J006_CHLRE/165-571      | A8J006.1     | PF07690.14 | 52.80 | 0.00 |
| TRINITY_A8JJ05_CHLRE/562-633      | A8JJ05.1     | PF05699.12 | 52.80 | 0.00 |
| TRINITY_A0BP38_PARTE/6-195        | A0BP38.1     | PF11539.6; | 52.80 | 0.00 |
| TRINITY_A0A078A8N4_STYLE/65-263   | A0A078A8N4.1 | PF0010     | 52.80 | 0.00 |
| TRINITY_A0A061DVZ4_THECC/15-98    | A0A061DVZ4.1 | PF1341     | 52.70 | 0.00 |
| TRINITY_G0QNT9_ICHMG/146-265      | G0QNT9.1     | PF04266.12 | 52.70 | 0.00 |
| TRINITY_Q24D55_TETTS/15-181       | Q24D55.1     | PF10294.7; | 52.70 | 0.00 |
| TRINITY_I7LZR1_TETTS/114-210      | I7LZR1.1     | PF00153.25 | 52.70 | 0.00 |
| TRINITY_R5ZF84_9ACTN/12-214       | R5ZF84.1     | PF14681.4; | 52.70 | 0.00 |
| TRINITY_Q236A7_TETTS/291-667      | Q236A7.1     | PF00493.21 | 52.70 | 0.00 |
| TRINITY_Q3SDP8_PARTE/11-174       | Q3SDP8.1     | PF00071.20 | 52.70 | 0.00 |
| TRINITY_G0QJT1_ICHMG/92-233       | G0QJT1.1     | PF00005.25 | 52.70 | 0.00 |
| TRINITY_L8H8X9_ACACA/269-577      | L8H8X9.1     | PF06087.10 | 52.70 | 0.00 |
| TRINITY_A0A0G4ERH9_9ALVE/48-231   | A0A0G4ERH9.1 | PF0087     | 52.70 | 0.00 |
| TRINITY_I7MHI4_TETTS/19-149       | I7MHI4.1     | PF14886.4; | 52.70 | 0.00 |
| TRINITY_C4WSL9_ACYPI/25-193       | C4WSL9.1     | PF03232.11 | 52.70 | 0.00 |
| TRINITY_A4VCZ9_TETTS/28-319       | A4VCZ9.2     | PF01026.19 | 52.70 | 0.00 |
| TRINITY_C5LQ52_PERM5/31-288       | C5LQ52.1     | PF00069.23 | 52.70 | 0.00 |
| TRINITY_ACT_ASPOR/2-375           | Q2U7A3.1     | PF00022.17 | 52.70 | 0.00 |
| TRINITY_A0A061DJX7_THECC/104-200  | A0A061DJX7.1 | PF1289     | 52.70 | 0.00 |
| TRINITY_Q241T7_TETTS/122-328      | Q241T7.1     | PF00112.21 | 52.70 | 0.00 |
| TRINITY_L8HFK5_ACACA/20-200       | L8HFK5.1     | PF13532.4; | 52.70 | 0.00 |
| TRINITY_D8UEW3_VOLCA/53-435       | D8UEW3.1     | PF13621.4; | 52.70 | 0.00 |
| TRINITY_W7A9C1_9APIC/862-1087     | W7A9C1.1     | PF08235.11 | 52.70 | 0.00 |
| TRINITY_A0A0N1GXE4_9EURO/29-358   | A0A0N1GXE4.1 | PF0015     | 52.70 | 0.00 |
| TRINITY_D3BA29_POLPA/3755-4092    | D3BA29.1     | PF00632.23 | 52.70 | 0.00 |
| TRINITY_Q22CC9_TETTS/27-248       | Q22CC9.2     | PF00687.19 | 52.70 | 0.00 |
| TRINITY_A0A0K8L121_9EURO/998-1115 | A0A0K8L121.1 | PF0007     | 52.70 | 0.00 |
| TRINITY_Q23G35_TETTS/134-438      | Q23G35.1     | PF03133.13 | 52.70 | 0.00 |
| TRINITY_D8UIW9_VOLCA/52-303       | D8UIW9.1     | PF08538.8; | 52.70 | 0.00 |
| TRINITY_F7IEP9_CALJA/143-253      | F7IEP9.1     | PF00730.23 | 52.70 | 0.00 |
| TRINITY_D3BM92_POLPA/29-281       | D3BM92.1     | PF00069.23 | 52.70 | 0.00 |
| TRINITY_D8UIC1_VOLCA/20-114       | D8UIC1.1     | PF06127.9; | 52.70 | 0.00 |
| TRINITY_U9SQ30_RHIID/5-408        | U9SQ30.1     | PF04841.11 | 52.70 | 0.00 |
| TRINITY_I0YWU6_9CHLO/805-859      | I0YWU6.1     | PF00628.27 | 52.70 | 0.00 |
| TRINITY_E1ZPX6_CHLVA/248-417      | E1ZPX6.1     | PF07910.11 | 52.70 | 0.00 |
| TRINITY_M2XZ12_GALSU/232-284      | M2XZ12.1     | PF13639.4; | 52.70 | 0.00 |
| TRINITY_A8HT53_CHLRE/18-325       | A8HT53.1     | PF00069.23 | 52.70 | 0.00 |
| TRINITY_D3F372_CONWI/46-181       | D3F372.1     | PF01565.21 | 52.70 | 0.00 |
| TRINITY_A0D5W6_PARTE/591-1119     | A0D5W6.1     | PF12157.6; | 52.70 | 0.00 |
| TRINITY_A8I7P7_CHLRE/1-181        | A8I7P7.1     | PF00609.17 | 52.70 | 0.00 |
| TRINITY_D8SYZ7_SELML/836-1427     | D8SYZ7.1     | PF04998.15 | 52.70 | 0.00 |
| TRINITY_A8IDI2_CHLRE/155-305      | A8IDI2.1     | PF00892.18 | 52.70 | 0.00 |
| TRINITY_A8IS85_CHLRE/4-172        | A8IS85.1     | PF03446.13 | 52.70 | 0.00 |
| TRINITY_A8IZH2_CHLRE/548-643      | A8IZH2.1     | PF00211.18 | 52.70 | 0.00 |
| TRINITY_D8LU94_ECTSI/82-277       | D8LU94.1     | PF11715.6; | 52.70 | 0.00 |
| TRINITY_A8I3U0_CHLRE/22-158       | A8I3U0.1     | PF03364.18 | 52.70 | 0.00 |
| TRINITY_L8HID3_ACACA/81-268       | L8HID3.1     | PF02141.19 | 52.70 | 0.00 |

|                                   |                     |       |      |
|-----------------------------------|---------------------|-------|------|
| TRINITY_A0A0N4XDG5_NIPBR/1-95     | A0A0N4XDG5.1 PF1390 | 52.70 | 0.00 |
| TRINITY_D1AE16_THECD/254-473      | D1AE16.1 PF04389.15 | 52.70 | 0.00 |
| TRINITY_A8JBA2_CHLRE/102-475      | A8JBA2.1 PF07690.14 | 52.70 | 0.00 |
| TRINITY_L8H7Z4_ACACA/62-190       | L8H7Z4.1 PF00782.18 | 52.70 | 0.00 |
| TRINITY_A8IGG5_CHLRE/30-160       | A8IGG5.1 PF01590.24 | 52.70 | 0.00 |
| TRINITY_D8UCH3_VOLCA/408-695      | D8UCH3.1 PF00632.23 | 52.70 | 0.00 |
| TRINITY_E1Z7Y3_CHLVA/54-162       | E1Z7Y3.1 PF02893.18 | 52.70 | 0.00 |
| TRINITY_G0QJD8_ICHMG/12-266       | G0QJD8.1 PF00108.21 | 52.70 | 0.00 |
| TRINITY_Q22FY1_TETTS/75-422       | Q22FY1.2 PF00443.27 | 52.70 | 0.00 |
| TRINITY_S2J338_MUCC1/6-296        | S2J338.1 PF03095.13 | 52.70 | 0.00 |
| TRINITY_D8TMT3_VOLCA/73-165       | D8TMT3.1 PF00254.26 | 52.70 | 0.00 |
| TRINITY_H0X7V6_OTOGA/341-578      | H0X7V6.1 PF02836.15 | 52.70 | 0.00 |
| TRINITY_I1FK56_AMPQE/235-397      | I1FK56.1 PF13191.4; | 52.70 | 0.00 |
| TRINITY_A0BYH4_PARTE/37-622       | A0BYH4.1 PF00995.21 | 52.70 | 0.00 |
| TRINITY_A0A0K0EFA0_STRER/1-526    | A0A0K0EFA0.1 PF0074 | 52.60 | 0.00 |
| TRINITY_K7J951_NASVI/21-1070      | K7J951.1 PF14750.4; | 52.60 | 0.00 |
| TRINITY_A0ECD1_PARTE/120-507      | A0ECD1.1 PF00443.27 | 52.60 | 0.00 |
| TRINITY_H2ZJF1_CIOSA/98-313       | H2ZJF1.1 PF01545.19 | 52.60 | 0.00 |
| TRINITY_W1PAY6_AMBTC/20-115       | W1PAY6.1 PF00173.26 | 52.60 | 0.00 |
| TRINITY_W5LI81_ASTMX/270-330      | W5LI81.1 PF04193.12 | 52.60 | 0.00 |
| TRINITY_Q22Z31_TETTS/543-620      | Q22Z31.4 PF00027.27 | 52.60 | 0.00 |
| TRINITY_A0A015K4I0_9GLOM/211-305  | A0A015K4I0.1 PF0869 | 52.60 | 0.00 |
| TRINITY_F0ZG51_DICPU/29-342       | F0ZG51.1 PF03820.15 | 52.60 | 0.00 |
| TRINITY_A0A0D2QTE0_GOSRA/31-120   | A0A0D2QTE0.1 PF0029 | 52.60 | 0.00 |
| TRINITY_A0E5C3_PARTE/963-1060     | A0E5C3.1 PF00581.18 | 52.60 | 0.00 |
| TRINITY_Q7XCY0_ORYSJ/59-456       | Q7XCY0.2 PF05577.10 | 52.60 | 0.00 |
| TRINITY_Q6BFT8_PARTE/121-366      | Q6BFT8.1 PF11708.6; | 52.60 | 0.00 |
| TRINITY_F4Y204_9CYAN/242-414      | F4Y204.1 PF00201.16 | 52.60 | 0.00 |
| TRINITY_D3B1Q0_POLPA/79-502       | D3B1Q0.1 PF01704.16 | 52.60 | 0.00 |
| TRINITY_L8H3W5_ACACA/497-720      | L8H3W5.1 PF00176.21 | 52.60 | 0.00 |
| TRINITY_I7ML74_TETTS/5678-6228    | I7ML74.2 PF00899.19 | 52.60 | 0.00 |
| TRINITY_I7MAL7_TETTS/150-223      | I7MAL7.1 PF12265.6; | 52.60 | 0.00 |
| TRINITY_A0A0P7UBE8_9TELE/803-1086 | A0A0P7UBE8.1 PF0066 | 52.60 | 0.00 |
| TRINITY_B4VM58_9CYAN/119-249      | B4VM58.1 PF00782.18 | 52.60 | 0.00 |
| TRINITY_B7KBM6_CYAP7/9-203        | B7KBM6.1 PF00106.23 | 52.60 | 0.00 |
| TRINITY_I7M466_TETTS/5-184        | I7M466.1 PF06644.9; | 52.60 | 0.00 |
| TRINITY_Q22TJ1_TETTS/178-486      | Q22TJ1.1 PF00365.18 | 52.60 | 0.00 |
| TRINITY_A0A0J8E2C9_BETVU/94-308   | A0A0J8E2C9.1 PF0113 | 52.60 | 0.00 |
| TRINITY_I0YKS0_9CHLO/346-500      | I0YKS0.1 PF17098.3; | 52.60 | 0.00 |
| TRINITY_W7X994_TETTS/783-919      | W7X994.1 PF01067.20 | 52.60 | 0.00 |
| TRINITY_I1FE73_AMPQE/40-233       | I1FE73.1 PF00149.26 | 52.60 | 0.00 |
| TRINITY_I0I7K4_CALAS/1-394        | I0I7K4.1 PF03702.12 | 52.60 | 0.00 |
| TRINITY_A0A068RPG8_9FUNG/50-335   | A0A068RPG8.1 PF1034 | 52.60 | 0.00 |
| TRINITY_A0EDK2_PARTE/307-528      | A0EDK2.1 PF07002.14 | 52.60 | 0.00 |
| TRINITY_A8I8X5_CHLRE/638-797      | A8I8X5.1 PF02194.13 | 52.60 | 0.00 |
| TRINITY_I7M7L0_TETTS/1-232        | I7M7L0.1 PF05648.12 | 52.60 | 0.00 |
| TRINITY_I0Z8F8_9CHLO/42-188       | I0Z8F8.1 PF00160.19 | 52.60 | 0.00 |
| TRINITY_Q024C7_SOLUE/41-331       | Q024C7.1 PF00933.19 | 52.60 | 0.00 |
| TRINITY_I0Z218_9CHLO/2-265        | I0Z218.1 PF00069.23 | 52.60 | 0.00 |
| TRINITY_A8IZH2_CHLRE/548-643      | A8IZH2.1 PF00211.18 | 52.60 | 0.00 |
| TRINITY_M1V4W3_CYAME/268-322      | M1V4W3.1 PF13418.4; | 52.60 | 0.00 |
| TRINITY_Q3SDB5_PARTE/105-403      | Q3SDB5.1 PF00122.18 | 52.60 | 0.00 |
| TRINITY_G3AV41_SPAPN/216-460      | G3AV41.1 PF01633.18 | 52.60 | 0.00 |
| TRINITY_I0YT05_9CHLO/139-289      | I0YT05.1 PF01569.19 | 52.60 | 0.00 |
| TRINITY_D3BHH5_POLPA/638-963      | D3BHH5.1 PF16653.3; | 52.60 | 0.00 |
| TRINITY_G0QZL8_ICHMG/314-544      | G0QZL8.1 PF00233.17 | 52.60 | 0.00 |
| TRINITY_D9V6J0_9ACTN/39-381       | D9V6J0.1 PF00282.17 | 52.60 | 0.00 |
| TRINITY_A0A0E9NJ37_9ASCO/88-221   | A0A0E9NJ37.1 PF0029 | 52.60 | 0.00 |
| TRINITY_F6GSP4_VITVI/896-1185     | F6GSP4.1 PF00069.23 | 52.60 | 0.00 |
| TRINITY_Q23CV4_TETTS/238-295      | Q23CV4.1 PF13921.4; | 52.60 | 0.00 |
| TRINITY_A8HV78_CHLRE/111-149      | A8HV78.1 PF00400.30 | 52.60 | 0.00 |

|                                  |                     |       |      |
|----------------------------------|---------------------|-------|------|
| TRINITY_A0A067KRD3_JATCU/85-435  | A0A067KRD3.1 PF0413 | 52.60 | 0.00 |
| TRINITY_A8J3Q7_CHLRE/869-1071    | A8J3Q7.1 PF00211.18 | 52.60 | 0.00 |
| TRINITY_D8TZG3_VOLCA/2436-2604   | D8TZG3.1 PF13229.4; | 52.60 | 0.00 |
| TRINITY_A7SAS1_NEMVE/13-174      | A7SAS1.1 PF00071.20 | 52.50 | 0.00 |
| TRINITY_A7RLD5_NEMVE/3-186       | A7RLD5.1 PF02146.15 | 52.50 | 0.00 |
| TRINITY_B7PNG4_IXOSC/3-130       | B7PNG4.1 PF00091.23 | 52.50 | 0.00 |
| TRINITY_A0A0D2UQ09_CAPO3/106-349 | A0A0D2UQ09.1 PF0142 | 52.50 | 0.00 |
| TRINITY_A0A0D8I9J3_9CLOT/9-150   | A0A0D8I9J3.1 PF1330 | 52.50 | 0.00 |
| TRINITY_G0QKM2_ICHMG/159-223     | G0QKM2.1 PF13499.4; | 52.50 | 0.00 |
| TRINITY_A0A0D5C5Q2_9ARCH/6-67    | A0A0D5C5Q2.1 PF0022 | 52.50 | 0.00 |
| TRINITY_T1JL22_STRMM/313-418     | T1JL22.1 PF00581.18 | 52.50 | 0.00 |
| TRINITY_PYRG_DICDI/322-561       | Q54V77.1 PF00117.26 | 52.50 | 0.00 |
| TRINITY_D3AZJ7_POLPA/170-233     | D3AZJ7.1 PF00333.18 | 52.50 | 0.00 |
| TRINITY_A0A0K1QN11_PSEFL/5-73    | A0A0K1QN11.1 PF0022 | 52.50 | 0.00 |
| TRINITY_J9FRH7_9SPIT/20-284      | J9FRH7.1 PF01650.16 | 52.50 | 0.00 |
| TRINITY_L8GJ67_ACACA/71-172      | L8GJ67.1 PF16131.3; | 52.50 | 0.00 |
| TRINITY_L8H8P6_ACACA/5-166       | L8H8P6.1 PF00071.20 | 52.50 | 0.00 |
| TRINITY_G0QUN0_ICHMG/10-151      | G0QUN0.1 PF01090.17 | 52.50 | 0.00 |
| TRINITY_K7IQQ6_NASVI/17-131      | K7IQQ6.1 PF01412.16 | 52.50 | 0.00 |
| TRINITY_D2V297_NAEGR/8-169       | D2V297.1 PF00071.20 | 52.50 | 0.00 |
| TRINITY_A0A0N0HDI4_THEVU/104-279 | A0A0N0HDI4.1 PF0265 | 52.50 | 0.00 |
| TRINITY_A5DLF2_PICGU/191-232     | A5DLF2.2 PF00400.30 | 52.50 | 0.00 |
| TRINITY_I7LV60_TETTS/36-201      | I7LV60.1 PF00071.20 | 52.50 | 0.00 |
| TRINITY_Q2UPL3_ASPOR/566-682     | Q2UPL3.1 PF00665.24 | 52.50 | 0.00 |

|                                  |              |            |       |      |
|----------------------------------|--------------|------------|-------|------|
| TRINITY_J9BIQ0_WUCBA/253-317     | J9BIQ0.1     | PF01363.19 | 52.50 | 0.00 |
| TRINITY_Q24D80_TETTS/178-486     | Q24D80.2     | PF08014.9; | 52.50 | 0.00 |
| TRINITY_J9ELB2_9SPIT/196-397     | J9ELB2.1     | PF13532.4; | 52.50 | 0.00 |
| TRINITY_I0YYU8_9CHLO/9-260       | I0YYU8.1     | PF07714.15 | 52.50 | 0.00 |
| TRINITY_A0DE75_PARTE/346-500     | A0DE75.1     | PF04108.10 | 52.50 | 0.00 |
| TRINITY_A0A0D2WQ32_CAPO3/229-428 | A0A0D2WQ32.1 | PF0832     | 52.50 | 0.00 |
| TRINITY_Q23G27_TETTS/573-1166    | Q23G27.2     | PF00443.27 | 52.50 | 0.00 |
| TRINITY_K4C109_SOLLC/15-352      | K4C109.1     | PF01112.16 | 52.50 | 0.00 |
| TRINITY_F0ZPB8_DICPU/23-285      | F0ZPB8.1     | PF00069.23 | 52.50 | 0.00 |
| TRINITY_Q23A17_TETTS/139-248     | Q23A17.1     | PF00168.28 | 52.50 | 0.00 |
| TRINITY_G0QRB8_ICHMG/54-342      | G0QRB8.1     | PF00069.23 | 52.50 | 0.00 |
| TRINITY_M1BNQ0_SOLTU/21-84       | M1BNQ0.1     | PF02953.13 | 52.50 | 0.00 |
| TRINITY_A0A078AMG9_STYLE/130-467 | A0A078AMG9.1 | PF0024     | 52.50 | 0.00 |
| TRINITY_A0A078B8T9_STYLE/13-150  | A0A078B8T9.1 | PF1458     | 52.50 | 0.00 |
| TRINITY_F4Q9D4_DICFS/162-426     | F4Q9D4.1     | PF00069.23 | 52.50 | 0.00 |
| TRINITY_A0A0E9NRK3_9ASCO/115-177 | A0A0E9NRK3.1 | PF1273     | 52.50 | 0.00 |
| TRINITY_A0A0D2WWF4_CAPO3/373-573 | A0A0D2WWF4.1 | PF0116     | 52.50 | 0.00 |
| TRINITY_A0A0M8K9R9_9CHLR/21-422  | A0A0M8K9R9.1 | PF0050     | 52.50 | 0.00 |
| TRINITY_A0A0F0K8V7_9MICO/4-65    | A0A0F0K8V7.1 | PF0022     | 52.50 | 0.00 |
| TRINITY_A8J9Y9_CHLRE/74-289      | A8J9Y9.1     | PF01036.16 | 52.50 | 0.00 |
| TRINITY_C9S5A1_VERA1/326-510     | C9S5A1.1     | PF00201.16 | 52.50 | 0.00 |
| TRINITY_D8U4J9_VOLCA/149-346     | D8U4J9.1     | PF03839.14 | 52.50 | 0.00 |
| TRINITY_W3XP60_9PEZI/112-558     | W3XP60.1     | PF00083.22 | 52.50 | 0.00 |
| TRINITY_L1I579_GUIITH/77-199     | L1I579.1     | PF02996.15 | 52.50 | 0.00 |
| TRINITY_L8H6D1_ACACA/645-898     | L8H6D1.1     | PF07714.15 | 52.50 | 0.00 |
| TRINITY_E1ZKG7_CHLVA/267-390     | E1ZKG7.1     | PF08327.9; | 52.50 | 0.00 |
| TRINITY_A9B7N2_HERA2/4-143       | A9B7N2.1     | PF08719.9; | 52.50 | 0.00 |
| TRINITY_A8JCQ8_CHLRE/128-575     | A8JCQ8.1     | PF00501.26 | 52.50 | 0.00 |
| TRINITY_D8UFK1_VOLCA/49-416      | D8UFK1.1     | PF07992.12 | 52.50 | 0.00 |
| TRINITY_K1ZUE7_9BACT/6-67        | K1ZUE7.1     | PF00226.29 | 52.50 | 0.00 |
| TRINITY_A4S9Q9_OSTLU/23-87       | A4S9Q9.1     | PF13499.4; | 52.50 | 0.00 |
| TRINITY_U5D205_AMBTC/686-1008    | U5D205.1     | PF08767.9; | 52.50 | 0.00 |
| TRINITY_A0EIL2_PARTE/105-216     | A0EIL2.1     | PF00651.29 | 52.50 | 0.00 |
| TRINITY_D8UGT5_VOLCA/205-418     | D8UGT5.1     | PF01061.22 | 52.50 | 0.00 |
| TRINITY_L8H6I7_ACACA/100-313     | L8H6I7.1     | PF04921.12 | 52.50 | 0.00 |
| TRINITY_D8U7U2_VOLCA/1-264       | D8U7U2.1     | PF04080.11 | 52.50 | 0.00 |
| TRINITY_F1R9Z2_DANRE/529-730     | F1R9Z2.1     | PF03914.15 | 52.50 | 0.00 |
| TRINITY_L8HG59_ACACA/44-379      | L8HG59.1     | PF07992.12 | 52.50 | 0.00 |
| TRINITY_K9UDB7_9CHRO/3-129       | K9UDB7.1     | PF12681.5; | 52.50 | 0.00 |
| TRINITY_A0A087SIS5_AUXPR/23-183  | A0A087SIS5.1 | PF1270     | 52.50 | 0.00 |
| TRINITY_A8J6G7_CHLRE/513-669     | A8J6G7.1     | PF04727.11 | 52.50 | 0.00 |
| TRINITY_A0A090LTL4_STRRB/5-166   | A0A090LTL4.1 | PF0007     | 52.50 | 0.00 |
| TRINITY_A8IZU4_CHLRE/79-157      | A8IZU4.1     | PF04232.10 | 52.50 | 0.00 |
| TRINITY_H3AUA0_LATCH/345-491     | H3AUA0.1     | PF12781.5; | 52.50 | 0.00 |
| TRINITY_F4QFV0_DICFS/86-241      | F4QFV0.1     | PF00005.25 | 52.50 | 0.00 |
| TRINITY_A8JGR6_CHLRE/140-304     | A8JGR6.1     | PF01746.19 | 52.50 | 0.00 |
| TRINITY_A8IZ91_CHLRE/337-455     | A8IZ91.1     | PF07714.15 | 52.50 | 0.00 |
| TRINITY_E1ZN95_CHLVA/866-1132    | E1ZN95.1     | PF00664.21 | 52.50 | 0.00 |
| TRINITY_D8TPW1_VOLCA/4-124       | D8TPW1.1     | PF13326.4; | 52.50 | 0.00 |
| TRINITY_A8ICD3_CHLRE/3-145       | A8ICD3.1     | PF09801.7; | 52.50 | 0.00 |
| TRINITY_A0A078B3M0_STYLE/472-532 | A0A078B3M0.1 | PF1395     | 52.50 | 0.00 |
| TRINITY_H8ZCL5_NEMS1/3-374       | H8ZCL5.1     | PF00022.17 | 52.50 | 0.00 |
| TRINITY_Q3SDP8_PARTE/11-174      | Q3SDP8.1     | PF00071.20 | 52.40 | 0.00 |
| TRINITY_V2XDV5_MONRO/83-147      | V2XDV5.1     | PF13499.4; | 52.40 | 0.00 |
| TRINITY_I7MGY5_TETTS/2250-2501   | I7MGY5.2     | PF12775.5; | 52.40 | 0.00 |
| TRINITY_A0D6M9_PARTE/6-345       | A0D6M9.1     | PF00724.18 | 52.40 | 0.00 |
| TRINITY_V7BDZ6_PHAVU/8-70        | V7BDZ6.1     | PF00280.16 | 52.40 | 0.00 |
| TRINITY_L7N3A5_XENTR/13-75       | L7N3A5.1     | PF00226.29 | 52.40 | 0.00 |
| TRINITY_D7FTR8_ECTSI/67-129      | D7FTR8.1     | PF10181.7; | 52.40 | 0.00 |
| TRINITY_A0A078A3M1_STYLE/248-329 | A0A078A3M1.1 | PF0496     | 52.40 | 0.00 |
| TRINITY_Q8SUM5_ENCCU/189-232     | Q8SUM5.1     | PF13639.4; | 52.40 | 0.00 |

|                                  |                     |       |      |
|----------------------------------|---------------------|-------|------|
| TRINITY_J9J5L0_9SPIT/92-259      | J9J5L0.1 PF00650.18 | 52.40 | 0.00 |
| TRINITY_A0A0J8BQ47_BETVU/55-131  | A0A0J8BQ47.1 PF0851 | 52.40 | 0.00 |
| TRINITY_L8HEV1_ACACA/56-120      | L8HEV1.1 PF13499.4; | 52.40 | 0.00 |
| TRINITY_A0A0D2WX97_CAPO3/45-164  | A0A0D2WX97.1 PF0441 | 52.40 | 0.00 |
| TRINITY_I7MEA2_TETTS/352-496     | I7MEA2.1 PF00005.25 | 52.40 | 0.00 |
| TRINITY_F4QFE8_DICFS/272-458     | F4QFE8.1 PF13489.4; | 52.40 | 0.00 |
| TRINITY_A0A015JL8_9GLOM/86-364   | A0A015JL8.1 PF0048  | 52.40 | 0.00 |
| TRINITY_B8HP17_CYAP4/998-1116    | B8HP17.1 PF02518.24 | 52.40 | 0.00 |
| TRINITY_I7M7Z9_TETTS/616-760     | I7M7Z9.1 PF00005.25 | 52.40 | 0.00 |
| TRINITY_D8TVZ9_VOLCA/7-333       | D8TVZ9.1 PF00150.16 | 52.40 | 0.00 |
| TRINITY_A0A0N0JQK4_9BRAD/209-298 | A0A0N0JQK4.1 PF1456 | 52.40 | 0.00 |
| TRINITY_A8I6F3_CHLRE/385-587     | A8I6F3.1 PF07714.15 | 52.40 | 0.00 |
| TRINITY_D2VCT4_NAEGR/118-362     | D2VCT4.1 PF00122.18 | 52.40 | 0.00 |
| TRINITY_A0CPL9_PARTE/47-528      | A0CPL9.1 PF00501.26 | 52.40 | 0.00 |
| TRINITY_A0A0F2QT72_9PSED/790-907 | A0A0F2QT72.1 PF0007 | 52.40 | 0.00 |
| TRINITY_D8TZA3_VOLCA/30-444      | D8TZA3.1 PF01266.22 | 52.40 | 0.00 |
| TRINITY_C0ZHF8_BREBN/6-160       | C0ZHF8.1 PF00156.25 | 52.40 | 0.00 |
| TRINITY_A0A0D2X269_CAPO3/247-328 | A0A0D2X269.1 PF0078 | 52.40 | 0.00 |
| TRINITY_V4A6R2_LOTGI/19-124      | V4A6R2.1 PF00085.18 | 52.40 | 0.00 |
| TRINITY_F6SRN2_XENTR/4-66        | F6SRN2.1 PF00076.20 | 52.40 | 0.00 |
| TRINITY_E1ZII3_CHLVA/133-196     | E1ZII3.1 PF04406.12 | 52.40 | 0.00 |
| TRINITY_D8TVF5_VOLCA/108-230     | D8TVF5.1 PF00293.26 | 52.40 | 0.00 |
| TRINITY_D8TQR7_VOLCA/192-273     | D8TQR7.1 PF00454.25 | 52.40 | 0.00 |
| TRINITY_D8U1I0_VOLCA/272-506     | D8U1I0.1 PF01458.15 | 52.40 | 0.00 |
| TRINITY_F2U272_SALR5/62-424      | F2U272.1 PF00155.19 | 52.40 | 0.00 |
| TRINITY_D8UD63_VOLCA/25-106      | D8UD63.1 PF09409.8; | 52.40 | 0.00 |
| TRINITY_I0YUX0_9CHLO/2-256       | I0YUX0.1 PF02668.14 | 52.40 | 0.00 |
| TRINITY_Q172U1_AEDAE/112-338     | Q172U1.1 PF00271.29 | 52.40 | 0.00 |
| TRINITY_L8GRV1_ACACA/206-432     | L8GRV1.1 PF00557.22 | 52.40 | 0.00 |
| TRINITY_A0A015K4H0_9GLOM/97-347  | A0A015K4H0.1 PF0012 | 52.40 | 0.00 |
| TRINITY_A8I2M1_CHLRE/105-395     | A8I2M1.1 PF03016.13 | 52.40 | 0.00 |
| TRINITY_A8JII7_CHLRE/36-301      | A8JII7.1 PF00149.26 | 52.40 | 0.00 |
| TRINITY_A0DYM5_PARTE/61-463      | A0DYM5.1 PF05889.11 | 52.40 | 0.00 |
| TRINITY_D8TX15_VOLCA/501-770     | D8TX15.1 PF02714.13 | 52.40 | 0.00 |
| TRINITY_B7P150_IXOSC/13-219      | B7P150.1 PF00149.26 | 52.40 | 0.00 |
| TRINITY_V7BQG8_PHAVU/77-221      | V7BQG8.1 PF10607.7; | 52.40 | 0.00 |
| TRINITY_A0A078FAF1_BRANA/608-731 | A0A078FAF1.1 PF1383 | 52.40 | 0.00 |
| TRINITY_D8TJ49_VOLCA/2822-3161   | D8TJ49.1 PF02259.21 | 52.40 | 0.00 |
| TRINITY_Q3SDP8_PARTE/11-174      | Q3SDP8.1 PF00071.20 | 52.40 | 0.00 |
| TRINITY_J9F9C2_9SPIT/12-241      | J9F9C2.1 PF13561.4; | 52.40 | 0.00 |
| TRINITY_L8GIU2_ACACA/23-338      | L8GIU2.1 PF00248.19 | 52.40 | 0.00 |
| TRINITY_A0BMD4_PARTE/522-774     | A0BMD4.1 PF01237.16 | 52.30 | 0.00 |
| TRINITY_J9FRG5_9SPIT/274-319     | J9FRG5.1 PF13639.4; | 52.30 | 0.00 |
| TRINITY_N0BAD0_9EURY/266-337     | N0BAD0.1 PF00801.18 | 52.30 | 0.00 |
| TRINITY_F0XZ49_AURAN/1-402       | F0XZ49.1 PF00171.20 | 52.30 | 0.00 |
| TRINITY_A0A0F4XC52_HANUV/18-299  | A0A0F4XC52.1 PF0024 | 52.30 | 0.00 |
| TRINITY_A9UZN1_MONBE/32-140      | A9UZN1.1 PF14113.4; | 52.30 | 0.00 |
| TRINITY_Q229R4_TETTS/829-1227    | Q229R4.1 PF06957.9; | 52.30 | 0.00 |
| TRINITY_A0A0M0UMY9_9PEZI/711-849 | A0A0M0UMY9.1 PF0273 | 52.30 | 0.00 |
| TRINITY_K3XAB2_PYTUL/309-516     | K3XAB2.1 PF01925.17 | 52.30 | 0.00 |
| TRINITY_L0EIF6_THECK/558-601     | L0EIF6.1 PF01476.18 | 52.30 | 0.00 |
| TRINITY_K9ZI10_ANACC/19-321      | K9ZI10.1 PF00248.19 | 52.30 | 0.00 |
| TRINITY_I7MDK2_TETTS/9-142       | I7MDK2.1 PF00293.26 | 52.30 | 0.00 |
| TRINITY_D3BLJ5_POLPA/1841-2108   | D3BLJ5.1 PF07714.15 | 52.30 | 0.00 |
| TRINITY_GPX8_ARATH/9-117         | Q8LBU2.1 PF00255.17 | 52.30 | 0.00 |
| TRINITY_L8HBN0_ACACA/204-390     | L8HBN0.1 PF00852.17 | 52.30 | 0.00 |
| TRINITY_A0A067R8P5_ZOONE/135-245 | A0A067R8P5.1 PF0355 | 52.30 | 0.00 |
| TRINITY_G0QJS9_ICHMG/119-291     | G0QJS9.1 PF05677.10 | 52.30 | 0.00 |
| TRINITY_D2V7B5_NAEGR/69-430      | D2V7B5.1 PF05139.12 | 52.30 | 0.00 |
| TRINITY_W4XFF3_STRPU/197-480     | W4XFF3.1 PF01457.14 | 52.30 | 0.00 |
| TRINITY_L8HJR8_ACACA/134-243     | L8HJR8.1 PF10998.6; | 52.30 | 0.00 |

|                                  |              |            |       |      |
|----------------------------------|--------------|------------|-------|------|
| TRINITY_Q247W8_TETTS/1117-1244   | Q247W8.2     | PF00069.23 | 52.30 | 0.00 |
| TRINITY_A4VE41_TETTS/736-919     | A4VE41.2     | PF01369.18 | 52.30 | 0.00 |
| TRINITY_D8LJA3_ECTSI/664-759     | D8LJA3.1     | PF02852.20 | 52.30 | 0.00 |
| TRINITY_R1DYV5_EMIHU/9-182       | R1DYV5.1     | PF00071.20 | 52.30 | 0.00 |
| TRINITY_F5YBL2_TREAZ/367-483     | F5YBL2.1     | PF00072.22 | 52.30 | 0.00 |
| TRINITY_F0ZJ65_DICPU/29-418      | F0ZJ65.1     | PF00155.19 | 52.30 | 0.00 |
| TRINITY_A0A0D2U4K6_CAPO3/73-371  | A0A0D2U4K6.1 | PF0473     | 52.30 | 0.00 |
| TRINITY_A0A0G2JY53_RAT/84-757    | A0A0G2JY53.1 | PF0006     | 52.30 | 0.00 |
| TRINITY_F0Z9F9_DICPU/146-396     | F0Z9F9.1     | PF00069.23 | 52.30 | 0.00 |
| TRINITY_D8U5Y8_VOLCA/2-366       | D8U5Y8.1     | PF02005.14 | 52.30 | 0.00 |
| TRINITY_U6L0Q4_EIMTE/278-348     | U6L0Q4.1     | PF12906.5; | 52.30 | 0.00 |
| TRINITY_F4Q3G5_DICFS/68-324      | F4Q3G5.1     | PF05721.11 | 52.30 | 0.00 |
| TRINITY_F0ZHG2_DICPU/191-404     | F0ZHG2.1     | PF01556.16 | 52.30 | 0.00 |
| TRINITY_B3RXG2_TRIAD/48-495      | B3RXG2.1     | PF00067.20 | 52.30 | 0.00 |
| TRINITY_S9XAY6_SCHCR/191-411     | S9XAY6.1     | PF01591.16 | 52.30 | 0.00 |
| TRINITY_A8I1G7_CHLRE/1-184       | A8I1G7.1     | PF00211.18 | 52.30 | 0.00 |
| TRINITY_I1FVK3_AMPQE/42-255      | I1FVK3.1     | PF01135.17 | 52.30 | 0.00 |
| TRINITY_F0ZAS8_DICPU/3-229       | F0ZAS8.1     | PF07786.10 | 52.30 | 0.00 |
| TRINITY_R1BIM9_EMIHU/22-255      | R1BIM9.1     | PF13561.4; | 52.30 | 0.00 |
| TRINITY_U9SKD1_RHIID/65-328      | U9SKD1.1     | PF00069.23 | 52.30 | 0.00 |
| TRINITY_A0A090M731_OSTTA/111-280 | A0A090M731.1 | PF0027     | 52.30 | 0.00 |
| TRINITY_W2PXB2_PHYPN/493-609     | W2PXB2.1     | PF00665.24 | 52.30 | 0.00 |
| TRINITY_G0QP44_ICHMG/256-681     | G0QP44.1     | PF00183.16 | 52.30 | 0.00 |
| TRINITY_D8TPQ3_VOLCA/270-395     | D8TPQ3.1     | PF00188.24 | 52.30 | 0.00 |
| TRINITY_B0VV52_ACIBS/24-262      | B0VV52.1     | PF13561.4; | 52.30 | 0.00 |
| TRINITY_A0DJI1_PARTE/152-367     | A0DJI1.1     | PF01556.16 | 52.30 | 0.00 |
| TRINITY_W5MLC4_LEPOC/33-284      | W5MLC4.1     | PF00069.23 | 52.30 | 0.00 |
| TRINITY_F0Z8Z6_DICPU/388-581     | F0Z8Z6.1     | PF01699.22 | 52.30 | 0.00 |
| TRINITY_Q8RU52_ORYSJ/606-827     | Q8RU52.1     | PF07727.12 | 52.30 | 0.00 |
| TRINITY_G3HPN4_CRIGR/113-296     | G3HPN4.1     | PF00517.15 | 52.30 | 0.00 |
| TRINITY_Q23VE6_TETTS/45-109      | Q23VE6.3     | PF01363.19 | 52.30 | 0.00 |
| TRINITY_A8HYL5_CHLRE/47-152      | A8HYL5.1     | PF05916.9; | 52.30 | 0.00 |
| TRINITY_F9W568_TRYCI/42-275      | F9W568.1     | PF02784.14 | 52.30 | 0.00 |
| TRINITY_A0A022PTQ8_ERYGU/28-310  | A0A022PTQ8.1 | PF0285     | 52.30 | 0.00 |
| TRINITY_L8H6U6_ACACA/87-250      | L8H6U6.1     | PF03371.13 | 52.30 | 0.00 |
| TRINITY_A0A077ZQS0_STYLE/68-262  | A0A077ZQS0.1 | PF1214     | 52.30 | 0.00 |
| TRINITY_W4G917_9STRA/20-167      | W4G917.1     | PF14588.4; | 52.30 | 0.00 |
| TRINITY_N1PWF8_DOTSN/28-220      | N1PWF8.1     | PF13489.4; | 52.30 | 0.00 |
| TRINITY_A0BE95_PARTE/82-430      | A0BE95.1     | PF00155.19 | 52.30 | 0.00 |
| TRINITY_A8IBR0_CHLRE/860-935     | A8IBR0.1     | PF00575.21 | 52.30 | 0.00 |
| TRINITY_R9PHE7_PSEHS/581-747     | R9PHE7.1     | PF11875.6; | 52.30 | 0.00 |
| TRINITY_F0ZB76_DICPU/5-166       | F0ZB76.1     | PF00071.20 | 52.30 | 0.00 |
| TRINITY_D8U6T6_VOLCA/1-119       | D8U6T6.1     | PF12796.5; | 52.30 | 0.00 |
| TRINITY_A0A0G4J2X3_PLABS/751-865 | A0A0G4J2X3.1 | PF0066     | 52.30 | 0.00 |
| TRINITY_A8J5U5_CHLRE/85-240      | A8J5U5.1     | PF00650.18 | 52.30 | 0.00 |
| TRINITY_D3BAA5_POLPA/36-100      | D3BAA5.1     | PF13499.4; | 52.30 | 0.00 |
| TRINITY_Q22TH1_TETTS/202-459     | Q22TH1.2     | PF00069.23 | 52.30 | 0.00 |
| TRINITY_I0YMW7_9CHLO/2-201       | I0YMW7.1     | PF00141.21 | 52.30 | 0.00 |
| TRINITY_M2XGC5_GALSU/24-440      | M2XGC5.1     | PF00501.26 | 52.30 | 0.00 |
| TRINITY_A8IJG2_CHLRE/26-238      | A8IJG2.1     | PF15665.3; | 52.30 | 0.00 |
| TRINITY_E1ZH69_CHLVA/262-391     | E1ZH69.1     | PF15982.3; | 52.30 | 0.00 |
| TRINITY_D8U9S9_VOLCA/599-793     | D8U9S9.1     | PF00211.18 | 52.30 | 0.00 |
| TRINITY_D8UAK9_VOLCA/119-585     | D8UAK9.1     | PF14643.4; | 52.30 | 0.00 |
| TRINITY_A0A067MKT0_9HOMO/134-519 | A0A067MKT0.1 | PF0015     | 52.30 | 0.00 |
| TRINITY_D8U3J1_VOLCA/85-259      | D8U3J1.1     | PF12263.6; | 52.30 | 0.00 |
| TRINITY_W7X2I6_TETTS/101-283     | W7X2I6.1     | PF00069.23 | 52.30 | 0.00 |
| TRINITY_I1FX47_AMPQE/13-266      | I1FX47.1     | PF01370.19 | 52.30 | 0.00 |
| TRINITY_A0DJ75_PARTE/483-760     | A0DJ75.1     | PF00702.24 | 52.20 | 0.00 |
| TRINITY_A0CKD6_PARTE/642-939     | A0CKD6.1     | PF00632.23 | 52.20 | 0.00 |
| TRINITY_G7DSU2_MIXOS/241-468     | G7DSU2.1     | PF01896.17 | 52.20 | 0.00 |
| TRINITY_G0QWT9_ICHMG/1-339       | G0QWT9.1     | PF03345.12 | 52.20 | 0.00 |

|                                  |              |            |       |      |
|----------------------------------|--------------|------------|-------|------|
| TRINITY_Q23UC8_TETTS/103-344     | Q23UC8.3     | PF08704.8; | 52.20 | 0.00 |
| TRINITY_I7M8J3_TETTS/17-410      | I7M8J3.2     | PF00450.20 | 52.20 | 0.00 |
| TRINITY_A0BMN9_PARTE/5-287       | A0BMN9.1     | PF00480.18 | 52.20 | 0.00 |
| TRINITY_G4MVG4_MAGO7/8-74        | G4MVG4.1     | PF13432.4; | 52.20 | 0.00 |
| TRINITY_Q6C6K7_YARLI/9-170       | Q6C6K7.2     | PF00071.20 | 52.20 | 0.00 |
| TRINITY_A0CJV4_PARTE/111-373     | A0CJV4.1     | PF00069.23 | 52.20 | 0.00 |
| TRINITY_Q23UD7_TETTS/667-716     | Q23UD7.2     | PF13920.4; | 52.20 | 0.00 |
| TRINITY_W5JRN5_ANODA/45-254      | W5JRN5.1     | PF15924.3; | 52.20 | 0.00 |
| TRINITY_G8JNS0_ERECY/265-333     | G8JNS0.1     | PF00076.20 | 52.20 | 0.00 |
| TRINITY_A0A0G4J477_PLABS/25-252  | A0A0G4J477.1 | PF0475     | 52.20 | 0.00 |
| TRINITY_Q9SZ91_ARATH/44-249      | Q9SZ91.1     | PF00106.23 | 52.20 | 0.00 |
| TRINITY_A0EFU1_PARTE/162-228     | A0EFU1.1     | PF01302.23 | 52.20 | 0.00 |
| TRINITY_G0R0Z8_ICHMG/307-442     | G0R0Z8.1     | PF00005.25 | 52.20 | 0.00 |
| TRINITY_D2V443_NAEGR/138-207     | D2V443.1     | PF00076.20 | 52.20 | 0.00 |
| TRINITY_W5NIX2_LEPOC/291-587     | W5NIX2.1     | PF00069.23 | 52.20 | 0.00 |
| TRINITY_D8U0E6_VOLCA/33-194      | D8U0E6.1     | PF04939.10 | 52.20 | 0.00 |
| TRINITY_Q248E9_TETTS/284-336     | Q248E9.1     | PF13418.4; | 52.20 | 0.00 |
| TRINITY_B3RWZ2_TRIAD/17-264      | B3RWZ2.1     | PF03372.21 | 52.20 | 0.00 |
| TRINITY_I7MGG4_TETTS/247-411     | I7MGG4.2     | PF07534.14 | 52.20 | 0.00 |
| TRINITY_A0C8F2_PARTE/1-86        | A0C8F2.1     | PF00005.25 | 52.20 | 0.00 |
| TRINITY_A4S3C2_OSTLU/53-332      | A4S3C2.1     | PF02353.18 | 52.20 | 0.00 |
| TRINITY_Q22W19_TETTS/115-323     | Q22W19.3     | PF00112.21 | 52.20 | 0.00 |
| TRINITY_D0MQP4_PHYIT/223-288     | D0MQP4.1     | PF01918.19 | 52.20 | 0.00 |
| TRINITY_I0YVX4_9CHLO/299-509     | I0YVX4.1     | PF01061.22 | 52.20 | 0.00 |
| TRINITY_L8GL88_ACACA/966-1225    | L8GL88.1     | PF00664.21 | 52.20 | 0.00 |
| TRINITY_D8UCG0_VOLCA/59-148      | D8UCG0.1     | PF08241.10 | 52.20 | 0.00 |
| TRINITY_I2FS14_USTH4/233-318     | I2FS14.1     | PF02146.15 | 52.20 | 0.00 |
| TRINITY_L8GTU8_ACACA/76-547      | L8GTU8.1     | PF07969.9; | 52.20 | 0.00 |
| TRINITY_A0A068SIM2_9FUNG/187-303 | A0A068SIM2.1 | PF0066     | 52.20 | 0.00 |
| TRINITY_D8TIM4_VOLCA/675-744     | D8TIM4.1     | PF16326.3; | 52.20 | 0.00 |
| TRINITY_A0CNX9_PARTE/179-246     | A0CNX9.1     | PF13833.4; | 52.20 | 0.00 |
| TRINITY_Q24FP1_TETTS/133-395     | Q24FP1.1     | PF00069.23 | 52.20 | 0.00 |
| TRINITY_U9SIS7_RHIID/1-312       | U9SIS7.1     | PF07992.12 | 52.20 | 0.00 |
| TRINITY_Q3SEA4_PARTE/73-258      | Q3SEA4.1     | PF00625.19 | 52.20 | 0.00 |
| TRINITY_I7MDV7_TETTS/219-569     | I7MDV7.2     | PF00009.25 | 52.20 | 0.00 |
| TRINITY_D8TJ10_VOLCA/96-269      | D8TJ10.1     | PF04727.11 | 52.20 | 0.00 |
| TRINITY_M2Y4X3_GALSU/55-262      | M2Y4X3.1     | PF00106.23 | 52.20 | 0.00 |
| TRINITY_I0Z724_9CHLO/211-302     | I0Z724.1     | PF00153.25 | 52.20 | 0.00 |
| TRINITY_A0A0P7V2U8_9TELE/66-330  | A0A0P7V2U8.1 | PF0842     | 52.20 | 0.00 |
| TRINITY_D2VJV1_NAEGR/844-994     | D2VJV1.1     | PF02275.16 | 52.20 | 0.00 |
| TRINITY_V2XS26_MONRO/26-71       | V2XS26.1     | PF06839.10 | 52.20 | 0.00 |
| TRINITY_A7SJL0_NEMVE/206-295     | A7SJL0.1     | PF01336.23 | 52.20 | 0.00 |
| TRINITY_T1ELD6_HELRO/5-166       | T1ELD6.1     | PF00071.20 | 52.20 | 0.00 |
| TRINITY_D8THE3_VOLCA/348-443     | D8THE3.1     | PF08777.9; | 52.20 | 0.00 |
| TRINITY_E4U659_OCEP5/2-66        | E4U659.1     | PF00313.20 | 52.20 | 0.00 |
| TRINITY_L8H838_ACACA/32-353      | L8H838.1     | PF01301.17 | 52.20 | 0.00 |
| TRINITY_A0A0G4IR31_PLABS/443-537 | A0A0G4IR31.1 | PF1293     | 52.20 | 0.00 |
| TRINITY_A8JIV0_CHLRE/150-309     | A8JIV0.1     | PF03033.18 | 52.20 | 0.00 |
| TRINITY_J9IA49_9SPIT/254-345     | J9IA49.1     | PF00447.15 | 52.20 | 0.00 |
| TRINITY_M2Y4X3_GALSU/55-262      | M2Y4X3.1     | PF00106.23 | 52.20 | 0.00 |
| TRINITY_A8J1D4_CHLRE/32-158      | A8J1D4.1     | PF09732.7; | 52.20 | 0.00 |
| TRINITY_K9YAW7_HALP7/44-193      | K9YAW7.1     | PF01947.14 | 52.20 | 0.00 |
| TRINITY_D2V0L9_NAEGR/410-476     | D2V0L9.1     | PF01363.19 | 52.20 | 0.00 |
| TRINITY_A0A015LPX9_9GLOM/340-671 | A0A015LPX9.1 | PF0006     | 52.20 | 0.00 |
| TRINITY_A0A015KWK9_9GLOM/362-402 | A0A015KWK9.1 | PF1363     | 52.20 | 0.00 |
| TRINITY_T1FY05_HELRO/14-161      | T1FY05.1     | PF04098.13 | 52.20 | 0.00 |
| TRINITY_D8QZ95_SELML/193-357     | D8QZ95.1     | PF08007.10 | 52.20 | 0.00 |
| TRINITY_D8THU4_VOLCA/76-201      | D8THU4.1     | PF00572.16 | 52.20 | 0.00 |
| TRINITY_A8I1G7_CHLRE/1-184       | A8I1G7.1     | PF00211.18 | 52.20 | 0.00 |
| TRINITY_C1EBE2_MICSR/50-251      | C1EBE2.1     | PF02545.12 | 52.20 | 0.00 |
| TRINITY_E1ZBS9_CHLVA/188-322     | E1ZBS9.1     | PF04695.11 | 52.20 | 0.00 |



|                                  |              |            |       |      |
|----------------------------------|--------------|------------|-------|------|
| TRINITY_F4QFV0_DICFS/86-241      | F4QFV0.1     | PF00005.25 | 52.20 | 0.00 |
| TRINITY_K9SZG2_9CYAN/110-382     | K9SZG2.1     | PF01636.21 | 52.20 | 0.00 |
| TRINITY_D8U9S9_VOLCA/599-793     | D8U9S9.1     | PF00211.18 | 52.20 | 0.00 |
| TRINITY_J9HZG8_9SPIT/452-565     | J9HZG8.1     | PF02518.24 | 52.20 | 0.00 |
| TRINITY_D0NM42_PHYIT/90-205      | D0NM42.1     | PF01266.22 | 52.20 | 0.00 |
| TRINITY_L8H985_ACACA/67-139      | L8H985.1     | PF13499.4; | 52.10 | 0.00 |
| TRINITY_Q23CW4_TETTS/196-365     | Q23CW4.2     | PF02866.16 | 52.10 | 0.00 |
| TRINITY_W7X1L8_TETTS/52-266      | W7X1L8.1     | PF05891.10 | 52.10 | 0.00 |
| TRINITY_I1I505_BRADI/3-74        | I1I505.1     | PF00240.21 | 52.10 | 0.00 |
| TRINITY_T1IVB0_STRMM/20-70       | T1IVB0.1     | PF00385.22 | 52.10 | 0.00 |
| TRINITY_GXCDD_DICDI/16-123       | Q1ZXH8.3     | PF00307.29 | 52.10 | 0.00 |
| TRINITY_C5YZE6_SORBI/230-280     | C5YZE6.1     | PF13920.4; | 52.10 | 0.00 |
| TRINITY_A0BVC3_PARTE/23-117      | A0BVC3.1     | PF13905.4; | 52.10 | 0.00 |
| TRINITY_G0QUI0_ICHMG/278-349     | G0QUI0.1     | PF00498.24 | 52.10 | 0.00 |
| TRINITY_Q3SDK9_PARTE/13-174      | Q3SDK9.1     | PF00071.20 | 52.10 | 0.00 |
| TRINITY_Q4E658_TRYCC/165-299     | Q4E658.1     | PF00004.27 | 52.10 | 0.00 |
| TRINITY_A8IVT4_CHLRE/510-880     | A8IVT4.1     | PF00060.24 | 52.10 | 0.00 |
| TRINITY_Q0FMV9_PELBH/204-320     | Q0FMV9.1     | PF07687.12 | 52.10 | 0.00 |
| TRINITY_Q22DR4_TETTS/671-764     | Q22DR4.2     | PF12796.5; | 52.10 | 0.00 |
| TRINITY_M0YGB8_HORVD/122-194     | M0YGB8.1     | PF04564.13 | 52.10 | 0.00 |
| TRINITY_A0A0G4IYR4_PLABS/33-382  | A0A0G4IYR4.1 | PF0022     | 52.10 | 0.00 |
| TRINITY_I7MM56_TETTS/332-571     | I7MM56.1     | PF00117.26 | 52.10 | 0.00 |
| TRINITY_A8JF90_CHLRE/1546-1844   | A8JF90.1     | PF00520.29 | 52.10 | 0.00 |
| TRINITY_ATX10_DICDI/500-598      | Q55EI6.1     | PF09759.7; | 52.10 | 0.00 |
| TRINITY_A0A0D2VZA5_CAPO3/33-171  | A0A0D2VZA5.1 | PF0008     | 52.10 | 0.00 |
| TRINITY_L8GPY4_ACACA/167-252     | L8GPY4.1     | PF13640.4; | 52.10 | 0.00 |
| TRINITY_A9TN91_PHYPA/128-246     | A9TN91.1     | PF01926.21 | 52.10 | 0.00 |
| TRINITY_Q54C42_DICDI/342-587     | Q54C42.1     | PF05958.9; | 52.10 | 0.00 |
| TRINITY_I7MHC3_TETTS/22-425      | I7MHC3.2     | PF01433.18 | 52.10 | 0.00 |
| TRINITY_G0QK71_ICHMG/314-776     | G0QK71.1     | PF04053.12 | 52.10 | 0.00 |
| TRINITY_I1MTB1_SOYBN/15-374      | I1MTB1.1     | PF04371.13 | 52.10 | 0.00 |
| TRINITY_L8HIQ7_ACACA/482-586     | L8HIQ7.1     | PF00618.18 | 52.10 | 0.00 |
| TRINITY_U9U3G2_RHIID/135-534     | U9U3G2.1     | PF10255.7; | 52.10 | 0.00 |
| TRINITY_L8H874_ACACA/42-307      | L8H874.1     | PF09423.8; | 52.10 | 0.00 |
| TRINITY_Q6PPG2_CHLRE/1-397       | Q6PPG2.1     | PF00909.19 | 52.10 | 0.00 |
| TRINITY_C1D3B0_DEIDV/63-298      | C1D3B0.1     | PF13561.4; | 52.10 | 0.00 |
| TRINITY_A0CTM1_PARTE/151-369     | A0CTM1.1     | PF01556.16 | 52.10 | 0.00 |
| TRINITY_A0A087SRN0_AUXPR/74-530  | A0A087SRN0.1 | PF0052     | 52.10 | 0.00 |
| TRINITY_D3B128_POLPA/192-442     | D3B128.1     | PF00069.23 | 52.10 | 0.00 |
| TRINITY_A8HSM1_CHLRE/54-427      | A8HSM1.1     | PF03222.11 | 52.10 | 0.00 |
| TRINITY_Q9EMN2_AMEPV/3-74        | Q9EMN2.1     | PF00240.21 | 52.10 | 0.00 |
| TRINITY_Q9EMN2_AMEPV/3-74        | Q9EMN2.1     | PF00240.21 | 52.10 | 0.00 |
| TRINITY_H2YP11_CIOSA/230-438     | H2YP11.1     | PF00005.25 | 52.10 | 0.00 |
| TRINITY_A0E686_PARTE/138-276     | A0E686.1     | PF12146.6; | 52.10 | 0.00 |
| TRINITY_A0E0I9_PARTE/102-233     | A0E0I9.1     | PF00782.18 | 52.10 | 0.00 |
| TRINITY_L8H6Z9_ACACA/332-376     | L8H6Z9.1     | PF06839.10 | 52.10 | 0.00 |
| TRINITY_A0A090M6I7_OSTTA/69-139  | A0A090M6I7.1 | PF0007     | 52.10 | 0.00 |
| TRINITY_A8IG60_CHLRE/89-225      | A8IG60.1     | PF06101.9; | 52.10 | 0.00 |
| TRINITY_A0DHR7_PARTE/216-415     | A0DHR7.1     | PF13851.4; | 52.10 | 0.00 |
| TRINITY_A8IHE7_CHLRE/70-516      | A8IHE7.1     | PF13520.4; | 52.10 | 0.00 |
| TRINITY_A0EG50_PARTE/15-118      | A0EG50.1     | PF00168.28 | 52.10 | 0.00 |
| TRINITY_I0YXM8_9CHLO/12-285      | I0YXM8.1     | PF07714.15 | 52.10 | 0.00 |
| TRINITY_G0R3R3_ICHMG/550-644     | G0R3R3.1     | PF12936.5; | 52.10 | 0.00 |
| TRINITY_CDPK_SOYBN/34-292        | P28583.1     | PF00069.23 | 52.10 | 0.00 |
| TRINITY_J9FBN2_9SPIT/564-662     | J9FBN2.1     | PF08647.9; | 52.10 | 0.00 |
| TRINITY_A0A0D2X4D0_CAPO3/274-436 | A0A0D2X4D0.1 | PF0864     | 52.10 | 0.00 |
| TRINITY_D8U9M4_VOLCA/314-443     | D8U9M4.1     | PF12796.5; | 52.10 | 0.00 |
| TRINITY_A8IXU9_CHLRE/109-258     | A8IXU9.1     | PF01789.14 | 52.10 | 0.00 |
| TRINITY_G0R1I2_ICHMG/31-228      | G0R1I2.1     | PF03462.16 | 52.10 | 0.00 |
| TRINITY_M3B6K5_PSEFD/7-258       | M3B6K5.1     | PF01370.19 | 52.10 | 0.00 |
| TRINITY_I1XKK3_METNJ/6-255       | I1XKK3.1     | PF10127.7; | 52.10 | 0.00 |

|                                  |                     |       |      |
|----------------------------------|---------------------|-------|------|
| TRINITY_F6UMT9_MACMU/12-284      | F6UMT9.1 PF01073.17 | 52.10 | 0.00 |
| TRINITY_D3BDG4_POLPA/314-432     | D3BDG4.1 PF02518.24 | 52.10 | 0.00 |
| TRINITY_A8J691_CHLRE/23-294      | A8J691.1 PF00069.23 | 52.10 | 0.00 |
| TRINITY_A0A077ZZE8_STYLE/725-771 | A0A077ZZE8.1 PF1392 | 52.10 | 0.00 |
| TRINITY_G3RZ16_GORGO/55-477      | G3RZ16.1 PF05577.10 | 52.10 | 0.00 |
| TRINITY_A0A0A0KNH1_CUCSA/285-405 | A0A0A0KNH1.1 PF0038 | 52.10 | 0.00 |
| TRINITY_YDIU_ECOLI/1-451         | P77649.1 PF02696.12 | 52.10 | 0.00 |
| TRINITY_D8FWV8_9CYAN/51-244      | D8FWV8.1 PF09511.8; | 52.10 | 0.00 |
| TRINITY_D8SD29_SELML/9-310       | D8SD29.1 PF00069.23 | 52.10 | 0.00 |
| TRINITY_CMTR2_DROME/110-319      | Q9UAS6.2 PF01728.17 | 52.10 | 0.00 |
| TRINITY_C1EGU9_MICSR/265-402     | C1EGU9.1 PF00271.29 | 52.10 | 0.00 |
| TRINITY_A0A0G4FAZ2_9ALVE/139-353 | A0A0G4FAZ2.1 PF0178 | 52.10 | 0.00 |
| TRINITY_A0A0F6SHT8_9DELT/6-95    | A0A0F6SHT8.1 PF0058 | 52.10 | 0.00 |
| TRINITY_A8IQW3_CHLRE/1244-1324   | A8IQW3.1 PF13020.4; | 52.10 | 0.00 |
| TRINITY_D8U7Y5_VOLCA/8-101       | D8U7Y5.1 PF03647.11 | 52.10 | 0.00 |
| TRINITY_E1ZED9_CHLVA/43-259      | E1ZED9.1 PF13500.4; | 52.10 | 0.00 |
| TRINITY_Q86HL7_DICDI/771-841     | Q86HL7.1 PF00076.20 | 52.10 | 0.00 |
| TRINITY_A8JB60_CHLRE/3-174       | A8JB60.1 PF01636.21 | 52.10 | 0.00 |
| TRINITY_D2UXN7_NAEGR/381-585     | D2UXN7.1 PF14648.4; | 52.10 | 0.00 |
| TRINITY_I0YII0_9CHLO/48-213      | I0YII0.1 PF13532.4; | 52.10 | 0.00 |
| TRINITY_A9U271_PHYPA/28-469      | A9U271.1 PF07690.14 | 52.10 | 0.00 |
| TRINITY_D8TYH3_VOLCA/1126-1230   | D8TYH3.1 PF10367.7; | 52.10 | 0.00 |
| TRINITY_B8KT62_9GAMM/38-328      | B8KT62.1 PF00850.17 | 52.10 | 0.00 |
| TRINITY_W2QLG7_PHYPN/170-298     | W2QLG7.1 PF03171.18 | 52.10 | 0.00 |
| TRINITY_I0Z5L8_9CHLO/28-198      | I0Z5L8.1 PF04979.12 | 52.10 | 0.00 |
| TRINITY_K1VH30_TRIAC/1299-1414   | K1VH30.1 PF00665.24 | 52.10 | 0.00 |
| TRINITY_A0A077ZPB4_STYLE/1-123   | A0A077ZPB4.1 PF0141 | 52.10 | 0.00 |
| TRINITY_E1Z9C8_CHLVA/364-442     | E1Z9C8.1 PF00789.18 | 52.10 | 0.00 |
| TRINITY_I0ZAR9_9CHLO/1175-1469   | I0ZAR9.1 PF13871.4; | 52.10 | 0.00 |
| TRINITY_I7M1V6_TETTS/314-533     | I7M1V6.1 PF07002.14 | 52.10 | 0.00 |
| TRINITY_A0A087SGH3_AUXPR/484-710 | A0A087SGH3.1 PF0017 | 52.10 | 0.00 |
| TRINITY_A0A0A1UBU5_ENTIV/727-986 | A0A0A1UBU5.1 PF0771 | 52.10 | 0.00 |
| TRINITY_R4XFE9_TAPDE/681-796     | R4XFE9.1 PF00665.24 | 52.10 | 0.00 |
| TRINITY_D8TXT6_VOLCA/657-764     | D8TXT6.1 PF08172.10 | 52.10 | 0.00 |
| TRINITY_H3FGM2_PRIIPA/3-98       | H3FGM2.1 PF13417.4; | 52.10 | 0.00 |
| TRINITY_H3HAJ2_PHYRM/359-478     | H3HAJ2.1 PF00665.24 | 52.10 | 0.00 |
| TRINITY_D8U2N8_VOLCA/151-247     | D8U2N8.1 PF00211.18 | 52.10 | 0.00 |
| TRINITY_A0A097QNB7_9VIBR/592-708 | A0A097QNB7.1 PF0251 | 52.10 | 0.00 |
| TRINITY_W7XG48_TETTS/15-139      | W7XG48.1 PF00583.23 | 52.00 | 0.00 |
| TRINITY_A0EFY2_PARTE/12-118      | A0EFY2.1 PF02109.14 | 52.00 | 0.00 |
| TRINITY_E1VPP4_9GAMM/167-285     | E1VPP4.1 PF01575.17 | 52.00 | 0.00 |
| TRINITY_I7LX02_TETTS/145-266     | I7LX02.1 PF13456.4; | 52.00 | 0.00 |
| TRINITY_T1FYL8_HELRO/230-283     | T1FYL8.1 PF00400.30 | 52.00 | 0.00 |
| TRINITY_A0DK90_PARTE/257-447     | A0DK90.1 PF02782.14 | 52.00 | 0.00 |
| TRINITY_J9FDB9_9SPIT/10-149      | J9FDB9.1 PF01321.16 | 52.00 | 0.00 |
| TRINITY_A0BGA7_PARTE/140-295     | A0BGA7.1 PF13847.4; | 52.00 | 0.00 |
| TRINITY_L8HHX1_ACACA/206-452     | L8HHX1.1 PF13621.4; | 52.00 | 0.00 |
| TRINITY_S2J9M9_MUCC1/73-173      | S2J9M9.1 PF13646.4; | 52.00 | 0.00 |
| TRINITY_W4XT28_STRPU/127-252     | W4XT28.1 PF04669.11 | 52.00 | 0.00 |
| TRINITY_K6Z1A1_9ALTE/225-329     | K6Z1A1.1 PF10503.7; | 52.00 | 0.00 |
| TRINITY_D8U4Q3_VOLCA/231-353     | D8U4Q3.1 PF02893.18 | 52.00 | 0.00 |
| TRINITY_E1ZCM2_CHLVA/47-222      | E1ZCM2.1 PF00534.18 | 52.00 | 0.00 |
| TRINITY_W7X9P5_TETTS/69-195      | W7X9P5.1 PF00782.18 | 52.00 | 0.00 |
| TRINITY_A9SG48_PHYPA/246-602     | A9SG48.1 PF00443.27 | 52.00 | 0.00 |
| TRINITY_A8IW01_CHLRE/83-235      | A8IW01.1 PF00781.22 | 52.00 | 0.00 |
| TRINITY_F8EN41_RUNSL/15-310      | F8EN41.1 PF02274.15 | 52.00 | 0.00 |
| TRINITY_A0A0L1JFH3_ASPNO/50-395  | A0A0L1JFH3.1 PF0026 | 52.00 | 0.00 |
| TRINITY_G0QMQ9_ICHMG/30-285      | G0QMQ9.1 PF00069.23 | 52.00 | 0.00 |
| TRINITY_Q23U84_TETTS/23-120      | Q23U84.1 PF02678.14 | 52.00 | 0.00 |
| TRINITY_G0NFV9_CAEBE/23-271      | G0NFV9.1 PF00756.18 | 52.00 | 0.00 |
| TRINITY_F4PIH2_DICFS/1-99        | F4PIH2.1 PF00752.15 | 52.00 | 0.00 |

|                                    |              |            |       |      |
|------------------------------------|--------------|------------|-------|------|
| TRINITY_G0QNE0_ICHMG/208-288       | G0QNE0.1     | PF05406.13 | 52.00 | 0.00 |
| TRINITY_D8TJG2_VOLCA/32-227        | D8TJG2.1     | PF03798.14 | 52.00 | 0.00 |
| TRINITY_B4KUQ9_DROMO/83-359        | B4KUQ9.2     | PF00248.19 | 52.00 | 0.00 |
| TRINITY_F2CVE6_HORVD/260-487       | F2CVE6.1     | PF00149.26 | 52.00 | 0.00 |
| TRINITY_E4WWA2_OIKDI/170-221       | E4WWA2.1     | PF00385.22 | 52.00 | 0.00 |
| TRINITY_NDRA_DICDI/112-406         | Q54Y26.1     | PF00069.23 | 52.00 | 0.00 |
| TRINITY_D8U5Y6_VOLCA/619-729       | D8U5Y6.1     | PF00989.23 | 52.00 | 0.00 |
| TRINITY_I7M6D1_TETTS/15-195        | I7M6D1.1     | PF00929.22 | 52.00 | 0.00 |
| TRINITY_D8U5W2_VOLCA/26-208        | D8U5W2.1     | PF11209.6; | 52.00 | 0.00 |
| TRINITY_L8GFL6_ACACA/87-162        | L8GFL6.1     | PF05965.12 | 52.00 | 0.00 |
| TRINITY_K9RSW8_SYNP3/378-540       | K9RSW8.1     | PF00270.27 | 52.00 | 0.00 |
| TRINITY_M4FBR7_BRARP/23-349        | M4FBR7.1     | PF00443.27 | 52.00 | 0.00 |
| TRINITY_A0A090LXU0_OSTTA/87-136    | A0A090LXU0.1 | PF1290     | 52.00 | 0.00 |
| TRINITY_J9IVT6_9SPIT/28-125        | J9IVT6.1     | PF02678.14 | 52.00 | 0.00 |
| TRINITY_G0R253_ICHMG/33-82         | G0R253.1     | PF08583.8; | 52.00 | 0.00 |
| TRINITY_I7MI43_TETTS/43-172        | I7MI43.1     | PF03100.13 | 52.00 | 0.00 |
| TRINITY_D8S477_SELML/399-448       | D8S477.1     | PF01846.17 | 52.00 | 0.00 |
| TRINITY_D8TYX9_VOLCA/666-861       | D8TYX9.1     | PF00211.18 | 52.00 | 0.00 |
| TRINITY_A0A087SGS7_AUXPR/533-739   | A0A087SGS7.1 | PF1308     | 52.00 | 0.00 |
| TRINITY_D8TR57_VOLCA/1-169         | D8TR57.1     | PF00211.18 | 52.00 | 0.00 |
| TRINITY_S3CIM7_OPHP1/647-699       | S3CIM7.1     | PF00385.22 | 52.00 | 0.00 |
| TRINITY_I0YVV6_9CHLO/305-541       | I0YVV6.1     | PF13641.4; | 52.00 | 0.00 |
| TRINITY_A0D4B0_PARTE/4-259         | A0D4B0.1     | PF00069.23 | 52.00 | 0.00 |
| TRINITY_Q234P9_TETTS/860-1069      | Q234P9.1     | PF05362.11 | 51.90 | 0.00 |
| TRINITY_A0A078B0D1_STYLE/1223-1283 | A0A078B0D1.1 | PF1385     | 51.90 | 0.00 |
| TRINITY_Q23ED0_TETTS/691-811       | Q23ED0.2     | PF02518.24 | 51.90 | 0.00 |
| TRINITY_Q3SDA6_PARTE/83-149        | Q3SDA6.1     | PF13499.4; | 51.90 | 0.00 |
| TRINITY_J9ICA0_9SPIT/1329-1380     | J9ICA0.1     | PF00415.16 | 51.90 | 0.00 |
| TRINITY_F1A2C1_DICPU/148-386       | F1A2C1.1     | PF16908.3; | 51.90 | 0.00 |
| TRINITY_D9QQ12_ACEAZ/6-191         | D9QQ12.1     | PF02245.14 | 51.90 | 0.00 |
| TRINITY_D2VZL2_NAEGR/226-473       | D2VZL2.1     | PF13378.4; | 51.90 | 0.00 |
| TRINITY_D2D956_JATCU/1-77          | D2D956.1     | PF01439.16 | 51.90 | 0.00 |
| TRINITY_Q11Y26_CYTH3/5-471         | Q11Y26.1     | PF00982.19 | 51.90 | 0.00 |
| TRINITY_D2VRY6_NAEGR/12-173        | D2VRY6.1     | PF00071.20 | 51.90 | 0.00 |
| TRINITY_I3KRS9_ORENI/6-194         | I3KRS9.1     | PF04722.11 | 51.90 | 0.00 |
| TRINITY_A0A077ZSC1_STYLE/1-177     | A0A077ZSC1.1 | PF1458     | 51.90 | 0.00 |
| TRINITY_A9UNQ4_MONBE/153-394       | A9UNQ4.1     | PF11175.6; | 51.90 | 0.00 |
| TRINITY_A0BEL5_PARTE/9-71          | A0BEL5.1     | PF00280.16 | 51.90 | 0.00 |
| TRINITY_A0A096PMV0_MAIZE/266-315   | A0A096PMV0.1 | PF0041     | 51.90 | 0.00 |
| TRINITY_E1VQX9_9GAMM/44-288        | E1VQX9.1     | PF00561.18 | 51.90 | 0.00 |
| TRINITY_F4QCJ4_DICFS/213-689       | F4QCJ4.1     | PF01055.24 | 51.90 | 0.00 |
| TRINITY_M2XFA0_GALSU/177-357       | M2XFA0.1     | PF00006.23 | 51.90 | 0.00 |
| TRINITY_E1ZR18_CHLVA/622-700       | E1ZR18.1     | PF08170.10 | 51.90 | 0.00 |
| TRINITY_D2UZX2_NAEGR/143-328       | D2UZX2.1     | PF13521.4; | 51.90 | 0.00 |
| TRINITY_A4VD01_TETTS/854-1082      | A4VD01.1     | PF16212.3; | 51.90 | 0.00 |
| TRINITY_F0ZLB0_DICPU/338-685       | F0ZLB0.1     | PF12698.5; | 51.90 | 0.00 |
| TRINITY_H3GEM8_PHYRM/190-315       | H3GEM8.1     | PF03171.18 | 51.90 | 0.00 |
| TRINITY_A5K3I1_PLAVS/154-283       | A5K3I1.1     | PF00004.27 | 51.90 | 0.00 |
| TRINITY_L8HEJ6_ACACA/94-154        | L8HEJ6.1     | PF00571.26 | 51.90 | 0.00 |
| TRINITY_A0A0G4J2X3_PLABS/751-865   | A0A0G4J2X3.1 | PF0066     | 51.90 | 0.00 |
| TRINITY_A0DYX2_PARTE/54-188        | A0DYX2.1     | PF04146.13 | 51.90 | 0.00 |
| TRINITY_V9G1A7_PHYPR/152-221       | V9G1A7.1     | PF13424.4; | 51.90 | 0.00 |
| TRINITY_A0A067LA91_JATCU/277-640   | A0A067LA91.1 | PF0012     | 51.90 | 0.00 |
| TRINITY_A0A0K9NIL4_ZOSMR/222-282   | A0A0K9NIL4.1 | PF1341     | 51.90 | 0.00 |
| TRINITY_A0D6M9_PARTE/6-345         | A0D6M9.1     | PF00724.18 | 51.90 | 0.00 |
| TRINITY_Y0010_DICDI/201-462        | Q54WW7.1     | PF00069.23 | 51.90 | 0.00 |
| TRINITY_A0A0N5DJ00_TRIMR/2-286     | A0A0N5DJ00.1 | PF0058     | 51.90 | 0.00 |
| TRINITY_C3Z2N5_BRAFL/34-323        | C3Z2N5.1     | PF00850.17 | 51.90 | 0.00 |
| TRINITY_M0VP57_HORVD/67-313        | M0VP57.1     | PF01963.15 | 51.90 | 0.00 |
| TRINITY_I0Z256_9CHLO/47-238        | I0Z256.1     | PF00300.20 | 51.90 | 0.00 |
| TRINITY_Q0IXJ3_ORYSJ/567-684       | Q0IXJ3.2     | PF00665.24 | 51.90 | 0.00 |

|                                  |                     |       |      |
|----------------------------------|---------------------|-------|------|
| TRINITY_A8JGU6_CHLRE/108-203     | A8JGU6.1 PF12796.5; | 51.90 | 0.00 |
| TRINITY_U9SIS7_RHIID/1-312       | U9SIS7.1 PF07992.12 | 51.90 | 0.00 |
| TRINITY_L8HHC6_ACACA/135-311     | L8HHC6.1 PF04675.12 | 51.90 | 0.00 |
| TRINITY_A0A0G4IR21_PLABS/101-470 | A0A0G4IR21.1 PF0156 | 51.90 | 0.00 |
| TRINITY_A0A0E0L501_ORYPU/104-218 | A0A0E0L501.1 PF0940 | 51.90 | 0.00 |
| TRINITY_M2Y4X3_GALSU/55-262      | M2Y4X3.1 PF00106.23 | 51.90 | 0.00 |
| TRINITY_A0A078A9T0_STYLE/80-292  | A0A078A9T0.1 PF0011 | 51.90 | 0.00 |
| TRINITY_A0A0P7X2K9_9TELE/123-254 | A0A0P7X2K9.1 PF0184 | 51.90 | 0.00 |
| TRINITY_L8HJ53_ACACA/762-973     | L8HJ53.1 PF00069.23 | 51.90 | 0.00 |
| TRINITY_L8H5Y2_ACACA/40-458      | L8H5Y2.1 PF02897.13 | 51.90 | 0.00 |
| TRINITY_A9TJI8_PHYPA/100-525     | A9TJI8.1 PF03092.14 | 51.90 | 0.00 |
| TRINITY_B9XKY4_PEDPL/8-164       | B9XKY4.1 PF09349.8; | 51.90 | 0.00 |
| TRINITY_A0A068S627_9FUNG/147-231 | A0A068S627.1 PF0343 | 51.90 | 0.00 |
| TRINITY_D7FUH9_ECTSI/200-254     | D7FUH9.1 PF13513.4; | 51.90 | 0.00 |
| TRINITY_C1EHA6_MICSR/457-509     | C1EHA6.1 PF02213.14 | 51.90 | 0.00 |
| TRINITY_Q9A7U7_CAUCR/13-298      | Q9A7U7.1 PF02129.16 | 51.90 | 0.00 |
| TRINITY_I0YK20_9CHLO/7-315       | I0YK20.1 PF04321.15 | 51.90 | 0.00 |
| TRINITY_B9H058_POPTR/125-328     | B9H058.2 PF13532.4; | 51.90 | 0.00 |
| TRINITY_G3N717_GASAC/14-224      | G3N717.1 PF01130.19 | 51.90 | 0.00 |
| TRINITY_W7T2P8_9STRA/149-251     | W7T2P8.1 PF13646.4; | 51.90 | 0.00 |
| TRINITY_A8HXA9_CHLRE/38-384      | A8HXA9.1 PF01263.18 | 51.90 | 0.00 |
| TRINITY_Q5W9T0_CHLRE/210-282     | Q5W9T0.1 PF00504.19 | 51.90 | 0.00 |
| TRINITY_SPKA_DICDI/351-612       | Q86AT8.1 PF07714.15 | 51.90 | 0.00 |
| TRINITY_J9KAS1_ACYPI/214-373     | J9KAS1.2 PF13359.4; | 51.90 | 0.00 |
| TRINITY_A0YVW9_LYNBP/57-111      | A0YVW9.1 PF00856.26 | 51.90 | 0.00 |
| TRINITY_I0Z5M5_9CHLO/93-249      | I0Z5M5.1 PF00650.18 | 51.90 | 0.00 |
| TRINITY_F1P100_CHICK/518-733     | F1P100.2 PF12706.5; | 51.90 | 0.00 |
| TRINITY_MORE52_MUSAM/21-101      | MORE52.1 PF03810.17 | 51.90 | 0.00 |
| TRINITY_D8TR57_VOLCA/1-169       | D8TR57.1 PF00211.18 | 51.90 | 0.00 |
| TRINITY_D8U583_VOLCA/285-594     | D8U583.1 PF00883.19 | 51.90 | 0.00 |
| TRINITY_S9V190_9TRYP/107-251     | S9V190.1 PF00782.18 | 51.90 | 0.00 |
| TRINITY_A8J151_CHLRE/549-830     | A8J151.1 PF00069.23 | 51.90 | 0.00 |
| TRINITY_F2U0X9_SALR5/5-144       | F2U0X9.1 PF08719.9; | 51.80 | 0.00 |
| TRINITY_A0A078B3U9_STYLE/406-642 | A0A078B3U9.1 PF0006 | 51.80 | 0.00 |
| TRINITY_F4NV00_BATDJ/83-227      | F4NV00.1 PF10607.7; | 51.80 | 0.00 |
| TRINITY_L8GGE2_ACACA/32-145      | L8GGE2.1 PF07876.10 | 51.80 | 0.00 |
| TRINITY_I7M6P2_TETTS/41-229      | I7M6P2.2 PF00270.27 | 51.80 | 0.00 |
| TRINITY_F4PRM8_DICFS/512-641     | F4PRM8.1 PF00782.18 | 51.80 | 0.00 |
| TRINITY_B3RLP7_TRIAD/67-211      | B3RLP7.1 PF13522.4; | 51.80 | 0.00 |
| TRINITY_A0A0D2UJE3_CAPO3/7-91    | A0A0D2UJE3.1 PF1341 | 51.80 | 0.00 |
| TRINITY_F0ZUX0_DICPU/138-266     | F0ZUX0.1 PF09335.9; | 51.80 | 0.00 |
| TRINITY_I7MKW6_TETTS/644-994     | I7MKW6.2 PF14744.4; | 51.80 | 0.00 |
| TRINITY_I0Z512_9CHLO/375-519     | I0Z512.1 PF01593.22 | 51.80 | 0.00 |
| TRINITY_R9S628_SIMAS/59-142      | R9S628.1 PF00565.15 | 51.80 | 0.00 |
| TRINITY_I1FE51_AMPQE/7-102       | I1FE51.1 PF00153.25 | 51.80 | 0.00 |
| TRINITY_W4Y616_STRPU/5-95        | W4Y616.1 PF02214.20 | 51.80 | 0.00 |
| TRINITY_D8UE48_VOLCA/347-514     | D8UE48.1 PF07717.14 | 51.80 | 0.00 |
| TRINITY_G0R3D4_ICHMG/149-213     | G0R3D4.1 PF01485.19 | 51.80 | 0.00 |
| TRINITY_A0A099NW38_PICKU/146-302 | A0A099NW38.1 PF0007 | 51.80 | 0.00 |
| TRINITY_C1N0A8_MICPC/365-557     | C1N0A8.1 PF00753.25 | 51.80 | 0.00 |
| TRINITY_M0W3Y7_HORVD/194-398     | M0W3Y7.1 PF07137.9; | 51.80 | 0.00 |
| TRINITY_I0ZAY0_9CHLO/33-684      | I0ZAY0.1 PF06419.9; | 51.80 | 0.00 |
| TRINITY_Q23ZH8_TETTS/79-176      | Q23ZH8.1 PF14769.4; | 51.80 | 0.00 |
| TRINITY_PRLA_DICDI/26-330        | Q1ZXG4.1 PF00557.22 | 51.80 | 0.00 |
| TRINITY_R0GTS5_9BRAS/91-413      | R0GTS5.1 PF00291.23 | 51.80 | 0.00 |
| TRINITY_W7XAD3_TETTS/166-299     | W7XAD3.1 PF17207.1; | 51.80 | 0.00 |
| TRINITY_A8IYH9_CHLRE/107-281     | A8IYH9.1 PF01789.14 | 51.80 | 0.00 |
| TRINITY_F0ZLY1_DICPU/16-303      | F0ZLY1.1 PF03151.14 | 51.80 | 0.00 |
| TRINITY_D8UEF8_VOLCA/192-619     | D8UEF8.1 PF07517.12 | 51.80 | 0.00 |
| TRINITY_A4VEG9_TETTS/264-465     | A4VEG9.1 PF02735.14 | 51.80 | 0.00 |
| TRINITY_G0R0E4_ICHMG/471-925     | G0R0E4.1 PF00521.18 | 51.80 | 0.00 |

|                                    |              |            |       |      |
|------------------------------------|--------------|------------|-------|------|
| TRINITY_F4P040_BATDJ/2-139         | F4P040.1     | PF05832.10 | 51.80 | 0.00 |
| TRINITY_A0A059LM93_9CHLO/128-293   | A0A059LM93.1 | PF0143     | 51.80 | 0.00 |
| TRINITY_A8IGH1_CHLRE/126-228       | A8IGH1.1     | PF02777.16 | 51.80 | 0.00 |
| TRINITY_D8TJZ3_VOLCA/218-459       | D8TJZ3.1     | PF00294.22 | 51.80 | 0.00 |
| TRINITY_A0A0J8CMM6_BETVU/212-323   | A0A0J8CMM6.1 | PF0027     | 51.80 | 0.00 |
| TRINITY_K2A6F5_9BACT/37-285        | K2A6F5.1     | PF01048.18 | 51.80 | 0.00 |
| TRINITY_A0A087SK75_AUXPR/124-221   | A0A087SK75.1 | PF0335     | 51.80 | 0.00 |
| TRINITY_A0A087G746_ARAAL/372-505   | A0A087G746.1 | PF0113     | 51.80 | 0.00 |
| TRINITY_B9I5E6_POPTR/16-160        | B9I5E6.1     | PF06201.11 | 51.80 | 0.00 |
| TRINITY_D8TIB1_VOLCA/100-431       | D8TIB1.1     | PF07887.9; | 51.80 | 0.00 |
| TRINITY_G7V9B0_THELD/210-320       | G7V9B0.1     | PF00472.18 | 51.80 | 0.00 |
| TRINITY_V4RUS0_9ROSI/993-1308      | V4RUS0.1     | PF00225.21 | 51.80 | 0.00 |
| TRINITY_C5KBW8_PERM5/10-171        | C5KBW8.1     | PF00071.20 | 51.80 | 0.00 |
| TRINITY_A0CS29_PARTE/2561-2834     | A0CS29.1     | PF00520.29 | 51.80 | 0.00 |
| TRINITY_U6GMYS8_EIMAC/1849-2009    | U6GMYS8.1    | PF08240.10 | 51.80 | 0.00 |
| TRINITY_A8JI07_CHLRE/533-929       | A8JI07.1     | PF00465.17 | 51.80 | 0.00 |
| TRINITY_W4FSJ9_9STRA/1228-1335     | W4FSJ9.1     | PF00005.25 | 51.80 | 0.00 |
| TRINITY_A8I2Z0_CHLRE/359-633       | A8I2Z0.1     | PF08757.9; | 51.80 | 0.00 |
| TRINITY_D8UAY2_VOLCA/103-259       | D8UAY2.1     | PF00996.16 | 51.80 | 0.00 |
| TRINITY_I0YMI8_9CHLO/391-532       | I0YMI8.1     | PF00637.18 | 51.80 | 0.00 |
| TRINITY_A0BVZ5_PARTE/262-539       | A0BVZ5.1     | PF00069.23 | 51.80 | 0.00 |
| TRINITY_B8NPY1_ASPFN/4-122         | B8NPY1.1     | PF01814.21 | 51.70 | 0.00 |
| TRINITY_Q22RZ8_TETTS/183-242       | Q22RZ8.2     | PF13921.4; | 51.70 | 0.00 |
| TRINITY_I1CQT4_RHIO9/195-453       | I1CQT4.1     | PF00069.23 | 51.70 | 0.00 |
| TRINITY_G1NSS6_MYOLU/4067-4374     | G1NSS6.1     | PF00632.23 | 51.70 | 0.00 |
| TRINITY_H8MEU3_CORCM/58-379        | H8MEU3.1     | PF07995.9; | 51.70 | 0.00 |
| TRINITY_Q22RZ8_TETTS/183-242       | Q22RZ8.2     | PF13921.4; | 51.70 | 0.00 |
| TRINITY_U3IHM8_ANAPL/14-129        | U3IHM8.1     | PF00583.23 | 51.70 | 0.00 |
| TRINITY_F1A021_DICPU/6-65          | F1A021.1     | PF04667.15 | 51.70 | 0.00 |
| TRINITY_A0A0B4HIH8_9HYPO/1107-1229 | A0A0B4HIH8.1 | PF0007     | 51.70 | 0.00 |
| TRINITY_A0A0E0RDB0_ORYRU/61-226    | A0A0E0RDB0.1 | PF1352     | 51.70 | 0.00 |
| TRINITY_Q245N9_TETTS/30-118        | Q245N9.1     | PF17146.2; | 51.70 | 0.00 |
| TRINITY_A0A087SRA4_AUXPR/51-514    | A0A087SRA4.1 | PF0008     | 51.70 | 0.00 |
| TRINITY_B8C1H9_THAPS/8-265         | B8C1H9.1     | PF00069.23 | 51.70 | 0.00 |
| TRINITY_F1A0L6_DICPU/16-102        | F1A0L6.1     | PF17146.2; | 51.70 | 0.00 |
| TRINITY_A0DY11_PARTE/22-1088       | A0DY11.1     | PF10266.7; | 51.70 | 0.00 |
| TRINITY_D8U9I2_VOLCA/41-265        | D8U9I2.1     | PF00328.20 | 51.70 | 0.00 |
| TRINITY_A0A0D2TUG4_GOSRA/1-743     | A0A0D2TUG4.1 | PF0149     | 51.70 | 0.00 |
| TRINITY_D8TQP3_VOLCA/171-273       | D8TQP3.1     | PF05546.9; | 51.70 | 0.00 |
| TRINITY_D8TZ69_VOLCA/12-134        | D8TZ69.1     | PF02291.13 | 51.70 | 0.00 |
| TRINITY_I7MCV7_TETTS/96-369        | I7MCV7.1     | PF00248.19 | 51.70 | 0.00 |
| TRINITY_D8UCQ9_VOLCA/212-360       | D8UCQ9.1     | PF01556.16 | 51.70 | 0.00 |
| TRINITY_V7B8S5_PHAVU/71-293        | V7B8S5.1     | PF01255.17 | 51.70 | 0.00 |
| TRINITY_A0A087SJ79_AUXPR/628-814   | A0A087SJ79.1 | PF0048     | 51.70 | 0.00 |
| TRINITY_Q22RZ8_TETTS/183-242       | Q22RZ8.2     | PF13921.4; | 51.70 | 0.00 |
| TRINITY_L8H344_ACACA/275-728       | L8H344.1     | PF00501.26 | 51.70 | 0.00 |
| TRINITY_M2Y425_GALSU/295-353       | M2Y425.1     | PF00076.20 | 51.70 | 0.00 |
| TRINITY_A8JCR3_CHLRE/12-76         | A8JCR3.1     | PF13499.4; | 51.70 | 0.00 |
| TRINITY_D8TY44_VOLCA/285-608       | D8TY44.1     | PF09423.8; | 51.70 | 0.00 |
| TRINITY_L8GNW6_ACACA/47-481        | L8GNW6.1     | PF01406.17 | 51.70 | 0.00 |
| TRINITY_A0A0G4J1L3_PLABS/178-263   | A0A0G4J1L3.1 | PF1596     | 51.70 | 0.00 |
| TRINITY_A8J614_CHLRE/570-725       | A8J614.1     | PF00625.19 | 51.70 | 0.00 |
| TRINITY_R4XGA1_TAPDE/6-280         | R4XGA1.1     | PF06732.9; | 51.70 | 0.00 |
| TRINITY_L8H5V6_ACACA/5-62          | L8H5V6.1     | PF00412.20 | 51.70 | 0.00 |
| TRINITY_I0YMR5_9CHLO/36-344        | I0YMR5.1     | PF01180.19 | 51.70 | 0.00 |
| TRINITY_G0QRB8_ICHMG/54-342        | G0QRB8.1     | PF00069.23 | 51.70 | 0.00 |
| TRINITY_I7M6S3_TETTS/55-312        | I7M6S3.1     | PF00069.23 | 51.70 | 0.00 |
| TRINITY_A0A0K9Q208_ZOSMR/407-497   | A0A0K9Q208.1 | PF0349     | 51.70 | 0.00 |
| TRINITY_Q22RZ8_TETTS/183-242       | Q22RZ8.2     | PF13921.4; | 51.70 | 0.00 |
| TRINITY_Q22RZ8_TETTS/183-242       | Q22RZ8.2     | PF13921.4; | 51.70 | 0.00 |
| TRINITY_A8IUJ9_CHLRE/41-331        | A8IUJ9.1     | PF03151.14 | 51.70 | 0.00 |

|                                    |                     |       |      |
|------------------------------------|---------------------|-------|------|
| TRINITY_A0A059LM16_9CHLO/271-318   | A0A059LM16.1 PF0039 | 51.70 | 0.00 |
| TRINITY_K1PRU0_CRAGI/549-754       | K1PRU0.1 PF01431.19 | 51.70 | 0.00 |
| TRINITY_A0A078BB69_STYLE/58-324    | A0A078BB69.1 PF0338 | 51.70 | 0.00 |
| TRINITY_A8J715_CHLRE/7-153         | A8J715.1 PF00211.18 | 51.70 | 0.00 |
| TRINITY_DHKD_DICDI/323-440         | Q54SP4.1 PF02518.24 | 51.70 | 0.00 |
| TRINITY_C1FDK5_MICSR/32-313        | C1FDK5.1 PF00483.21 | 51.70 | 0.00 |
| TRINITY_A0A060T0U9_PYCCI/1009-1125 | A0A060T0U9.1 PF0066 | 51.70 | 0.00 |
| TRINITY_Q8LP67_CHLRE/27-494        | Q8LP67.2 PF01384.18 | 51.70 | 0.00 |
| TRINITY_A0A099NWK8_PICKU/112-302   | A0A099NWK8.1 PF0007 | 51.70 | 0.00 |
| TRINITY_C6W8M6_ACTMD/11-73         | C6W8M6.1 PF00280.16 | 51.60 | 0.00 |
| TRINITY_D3AVJ6_POLPA/582-722       | D3AVJ6.1 PF00005.25 | 51.60 | 0.00 |
| TRINITY_C7LQT5_DESBD/479-544       | C7LQT5.1 PF00512.23 | 51.60 | 0.00 |
| TRINITY_J9FKD6_9SPIT/7-192         | J9FKD6.1 PF01294.16 | 51.60 | 0.00 |
| TRINITY_Q22XX1_TETTS/200-263       | Q22XX1.2 PF12906.5; | 51.60 | 0.00 |
| TRINITY_A0E1G8_PARTE/540-795       | A0E1G8.1 PF00069.23 | 51.60 | 0.00 |
| TRINITY_L8GY68_ACACA/20-143        | L8GY68.1 PF00241.18 | 51.60 | 0.00 |
| TRINITY_G1R190_NOMLE/177-520       | G1R190.1 PF12631.5; | 51.60 | 0.00 |
| TRINITY_M0S9Q5_MUSAM/108-171       | M0S9Q5.1 PF13432.4; | 51.60 | 0.00 |
| TRINITY_V4AKP0_LOTGI/1-160         | V4AKP0.1 PF01956.14 | 51.60 | 0.00 |
| TRINITY_A0DPK5_PARTE/1-260         | A0DPK5.1 PF04889.10 | 51.60 | 0.00 |
| TRINITY_A0C0R9_PARTE/182-243       | A0C0R9.1 PF12906.5; | 51.60 | 0.00 |
| TRINITY_V9E928_PHYPR/45-406        | V9E928.1 PF00083.22 | 51.60 | 0.00 |
| TRINITY_D3B1R6_POLPA/12-311        | D3B1R6.1 PF02274.15 | 51.60 | 0.00 |
| TRINITY_E1ZR92_CHLVA/447-739       | E1ZR92.1 PF00481.19 | 51.60 | 0.00 |
| TRINITY_F4PQX3_DICFS/2-227         | F4PQX3.1 PF04065.13 | 51.60 | 0.00 |
| TRINITY_E4X453_OIKDI/18-179        | E4X453.1 PF00071.20 | 51.60 | 0.00 |
| TRINITY_Q3SDM6_PARTE/17-177        | Q3SDM6.1 PF00071.20 | 51.60 | 0.00 |
| TRINITY_A0D1K9_PARTE/24-590        | A0D1K9.1 PF01602.18 | 51.60 | 0.00 |
| TRINITY_H3AIK0_LATCH/14-212        | H3AIK0.1 PF02545.12 | 51.60 | 0.00 |
| TRINITY_L8H468_ACACA/39-379        | L8H468.1 PF00155.19 | 51.60 | 0.00 |
| TRINITY_A0EDK2_PARTE/18-123        | A0EDK2.1 PF00168.28 | 51.60 | 0.00 |
| TRINITY_Q23H79_TETTS/226-497       | Q23H79.1 PF12018.6; | 51.60 | 0.00 |
| TRINITY_Q6LPU2_PHOPR/528-595       | Q6LPU2.1 PF00364.20 | 51.60 | 0.00 |
| TRINITY_I7M1V6_TETTS/314-533       | I7M1V6.1 PF07002.14 | 51.60 | 0.00 |
| TRINITY_K3WQA3_PYTUL/86-274        | K3WQA3.1 PF00573.20 | 51.60 | 0.00 |
| TRINITY_F0ZXH1_DICPU/36-289        | F0ZXH1.1 PF00378.18 | 51.60 | 0.00 |
| TRINITY_A0A059LQ77_9CHLO/1-219     | A0A059LQ77.1 PF0315 | 51.60 | 0.00 |
| TRINITY_A0A087SEG7_AUXPR/271-565   | A0A087SEG7.1 PF0398 | 51.60 | 0.00 |
| TRINITY_D8UCJ0_VOLCA/119-224       | D8UCJ0.1 PF09366.8; | 51.60 | 0.00 |
| TRINITY_D8TUF2_VOLCA/178-372       | D8TUF2.1 PF00344.18 | 51.60 | 0.00 |
| TRINITY_C3YKU6_BRAFL/40-237        | C3YKU6.1 PF00106.23 | 51.60 | 0.00 |
| TRINITY_H9GH48_ANOCA/17-365        | H9GH48.1 PF00009.25 | 51.60 | 0.00 |
| TRINITY_GTDC1_DANRE/246-398        | Q568B7.2 PF00534.18 | 51.60 | 0.00 |
| TRINITY_I0YX01_9CHLO/2-193         | I0YX01.1 PF01490.16 | 51.60 | 0.00 |
| TRINITY_A0EFU5_PARTE/59-386        | A0EFU5.1 PF01148.18 | 51.60 | 0.00 |
| TRINITY_G0R1C0_ICHMG/87-270        | G0R1C0.1 PF00270.27 | 51.60 | 0.00 |
| TRINITY_Q23CN1_TETTS/13-195        | Q23CN1.1 PF01885.14 | 51.60 | 0.00 |
| TRINITY_A0A0H5C0S1_CYBJA/140-353   | A0A0H5C0S1.1 PF0166 | 51.60 | 0.00 |
| TRINITY_A0A0D3BCI3_BRAOL/104-536   | A0A0D3BCI3.1 PF0153 | 51.60 | 0.00 |
| TRINITY_D8U7T5_VOLCA/1-379         | D8U7T5.1 PF01238.19 | 51.60 | 0.00 |
| TRINITY_D8TJF5_VOLCA/313-455       | D8TJF5.1 PF07534.14 | 51.60 | 0.00 |
| TRINITY_W1NX64_AMBTC/4-444         | W1NX64.1 PF00022.17 | 51.60 | 0.00 |
| TRINITY_D3BEB3_POLPA/1642-1881     | D3BEB3.1 PF00082.20 | 51.60 | 0.00 |
| TRINITY_A8HZR1_CHLRE/15132-15384   | A8HZR1.1 PF00109.24 | 51.60 | 0.00 |
| TRINITY_C7Q3T8_CATAD/28-144        | C7Q3T8.1 PF08240.10 | 51.60 | 0.00 |
| TRINITY_G0QWM6_ICHMG/175-428       | G0QWM6.1 PF00069.23 | 51.60 | 0.00 |
| TRINITY_D8U1A5_VOLCA/27-185        | D8U1A5.1 PF06424.10 | 51.60 | 0.00 |
| TRINITY_W5MCV8_LEPOC/15-77         | W5MCV8.1 PF01066.19 | 51.60 | 0.00 |
| TRINITY_A8J3P1_CHLRE/954-1161      | A8J3P1.1 PF00211.18 | 51.60 | 0.00 |
| TRINITY_A8IUL9_CHLRE/21-122        | A8IUL9.1 PF02036.15 | 51.60 | 0.00 |
| TRINITY_U1SBP_DANRE/52-122         | Q4KMD3.1 PF00076.20 | 51.60 | 0.00 |

|                                  |                      |       |      |
|----------------------------------|----------------------|-------|------|
| TRINITY_A0A0P7XRF3_9TELE/158-268 | A0A0P7XRF3.1 PF0355  | 51.60 | 0.00 |
| TRINITY_A0A078B196_STYLE/206-298 | A0A078B196.1 PF1279  | 51.60 | 0.00 |
| TRINITY_A0A0E3ZHW8_9BACT/9-157   | A0A0E3ZHW8.1 PF1624  | 51.60 | 0.00 |
| TRINITY_E5SVL2_TRISP/135-242     | E5SVL2.1 PF00665.24  | 51.60 | 0.00 |
| TRINITY_I7LUD3_TETTS/90-229      | I7LUD3.1 PF00782.18  | 51.60 | 0.00 |
| TRINITY_X5DJF9_9BACT/10-77       | X5DJF9.1 PF04542.12  | 51.50 | 0.00 |
| TRINITY_Q248F0_TETTS/19-502      | Q248F0.2 PF04916.11  | 51.50 | 0.00 |
| TRINITY_J9I WV5_9SPIT/47-287     | J9I WV5.1 PF00069.23 | 51.50 | 0.00 |
| TRINITY_D8QNI9_SELML/8-116       | D8QNI9.1 PF00255.17  | 51.50 | 0.00 |
| TRINITY_A0A068RWJ7_9FUNG/3-212   | A0A068RWJ7.1 PF0009  | 51.50 | 0.00 |
| TRINITY_W6FUH4_NODSP/15-183      | W6FUH4.1 PF13385.4;  | 51.50 | 0.00 |
| TRINITY_J9G9V4_9SPIT/1151-1280   | J9G9V4.1 PF04096.12  | 51.50 | 0.00 |
| TRINITY_F2UG91_SALR5/227-643     | F2UG91.1 PF01432.18  | 51.50 | 0.00 |
| TRINITY_W7TKS0_9STRA/126-321     | W7TKS0.1 PF03171.18  | 51.50 | 0.00 |
| TRINITY_U5NBE3_9BURK/245-311     | U5NBE3.1 PF00512.23  | 51.50 | 0.00 |
| TRINITY_Q24GQ7_TETTS/133-301     | Q24GQ7.1 PF04664.11  | 51.50 | 0.00 |
| TRINITY_A8IQQ8_CHLRE/597-709     | A8IQQ8.1 PF00989.23  | 51.50 | 0.00 |
| TRINITY_F7EQ32_MONDO/78-378      | F7EQ32.2 PF00561.18  | 51.50 | 0.00 |
| TRINITY_A8JFR7_CHLRE/99-366      | A8JFR7.1 PF01062.19  | 51.50 | 0.00 |
| TRINITY_H3ATB2_LATCH/105-403     | H3ATB2.1 PF00443.27  | 51.50 | 0.00 |
| TRINITY_A0A0D2WVS2_CAPO3/1-331   | A0A0D2WVS2.1 PF0450  | 51.50 | 0.00 |
| TRINITY_W7I460_9PEZI/190-533     | W7I460.1 PF00176.21  | 51.50 | 0.00 |
| TRINITY_F4QBH5_DICFS/1205-1402   | F4QBH5.1 PF00621.18  | 51.50 | 0.00 |
| TRINITY_Q22EC6_TETTS/68-359      | Q22EC6.2 PF04258.11  | 51.50 | 0.00 |
| TRINITY_Q22AR0_TETTS/17-145      | Q22AR0.1 PF13529.4;  | 51.50 | 0.00 |
| TRINITY_E1Z1Y2_CHLVA/2-106       | E1Z1Y2.1 PF00504.19  | 51.50 | 0.00 |
| TRINITY_R1D643_EMIHU/94-205      | R1D643.1 PF02211.13  | 51.50 | 0.00 |
| TRINITY_A0A0G4GZH6_9ALVE/419-599 | A0A0G4GZH6.1 PF0281  | 51.50 | 0.00 |
| TRINITY_Q24C34_TETTS/105-170     | Q24C34.1 PF17136.2;  | 51.50 | 0.00 |
| TRINITY_A0CEH0_PARTE/17-332      | A0CEH0.1 PF00009.25  | 51.50 | 0.00 |
| TRINITY_L8H1H1_ACACA/128-330     | L8H1H1.1 PF04389.15  | 51.50 | 0.00 |
| TRINITY_D8TCH6_SELML/10-283      | D8TCH6.1 PF00696.26  | 51.50 | 0.00 |
| TRINITY_B9H0D7_POPTR/559-627     | B9H0D7.1 PF00505.17  | 51.50 | 0.00 |
| TRINITY_D3B1Q1_POLPA/635-841     | D3B1Q1.1 PF00566.16  | 51.50 | 0.00 |
| TRINITY_A0A0G0E2J9_9BACT/264-431 | A0A0G0E2J9.1 PF0015  | 51.50 | 0.00 |
| TRINITY_A8JCT6_CHLRE/204-275     | A8JCT6.1 PF06741.11  | 51.50 | 0.00 |
| TRINITY_H2SE72_TAKRU/14-1649     | H2SE72.1 PF11894.6;  | 51.50 | 0.00 |
| TRINITY_I7MA07_TETTS/32-269      | I7MA07.2 PF00481.19  | 51.50 | 0.00 |
| TRINITY_D8U6N2_VOLCA/596-799     | D8U6N2.1 PF07714.15  | 51.50 | 0.00 |
| TRINITY_Q2GG22_EHRCCR/6-112      | Q2GG22.1 PF00436.23  | 51.50 | 0.00 |
| TRINITY_K6XR77_9ALTE/18-317      | K6XR77.1 PF01156.17  | 51.50 | 0.00 |
| TRINITY_Q553C7_DICDI/37-133      | Q553C7.1 PF14580.4;  | 51.50 | 0.00 |
| TRINITY_Q23YD6_TETTS/29-282      | Q23YD6.1 PF00069.23  | 51.50 | 0.00 |
| TRINITY_F4Q3D5_DICFS/22-285      | F4Q3D5.1 PF01193.22  | 51.50 | 0.00 |
| TRINITY_L8HFR9_ACACA/221-419     | L8HFR9.1 PF00149.26  | 51.50 | 0.00 |
| TRINITY_A7SPU8_NEMVE/95-163      | A7SPU8.1 PF00076.20  | 51.50 | 0.00 |
| TRINITY_E1Z751_CHLVA/73-748      | E1Z751.1 PF00063.19  | 51.50 | 0.00 |
| TRINITY_X6NML8_RETFI/12-173      | X6NML8.1 PF00071.20  | 51.50 | 0.00 |
| TRINITY_A0A078AQU9_STYLE/782-892 | A0A078AQU9.1 PF0064  | 51.50 | 0.00 |
| TRINITY_F8W2M8_DANRE/214-518     | F8W2M8.1 PF00082.20  | 51.50 | 0.00 |
| TRINITY_A0A059B9U1_EUCGR/362-547 | A0A059B9U1.1 PF0258  | 51.50 | 0.00 |
| TRINITY_M2PPP9_CERS8/675-986     | M2PPP9.1 PF05843.12  | 51.50 | 0.00 |
| TRINITY_Q8Y MJ8_NOSS1/554-625    | Q8Y MJ8.1 PF13448.4; | 51.50 | 0.00 |
| TRINITY_A8I6F3_CHLRE/385-587     | A8I6F3.1 PF07714.15  | 51.50 | 0.00 |
| TRINITY_J9I7Z3_9SPIT/528-596     | J9I7Z3.1 PF02187.15  | 51.50 | 0.00 |
| TRINITY_D8TQ79_VOLCA/98-546      | D8TQ79.1 PF00501.26  | 51.50 | 0.00 |
| TRINITY_A0A0K0F7Z5_9BILA/97-165  | A0A0K0F7Z5.1 PF0050  | 51.50 | 0.00 |
| TRINITY_L8HAP8_ACACA/12-144      | L8HAP8.1 PF01467.24  | 51.50 | 0.00 |
| TRINITY_I0YYZ3_9CHLO/38-280      | I0YYZ3.1 PF08190.10  | 51.50 | 0.00 |
| TRINITY_A8HZ49_CHLRE/38-151      | A8HZ49.1 PF01843.17  | 51.50 | 0.00 |
| TRINITY_D8TJE3_VOLCA/737-861     | D8TJE3.1 PF00134.21  | 51.50 | 0.00 |

|                                    |                     |       |      |
|------------------------------------|---------------------|-------|------|
| TRINITY_D8U7T4_VOLCA/32-384        | D8U7T4.1 PF00224.19 | 51.50 | 0.00 |
| TRINITY_D8TZG3_VOLCA/2436-2604     | D8TZG3.1 PF13229.4; | 51.50 | 0.00 |
| TRINITY_A8J6I6_CHLRE/134-532       | A8J6I6.1 PF04137.13 | 51.50 | 0.00 |
| TRINITY_A5H8H9_CHLRE/77-306        | A5H8H9.1 PF11152.6; | 51.50 | 0.00 |
| TRINITY_A8IBX2_CHLRE/464-568       | A8IBX2.1 PF13426.5; | 51.50 | 0.00 |
| TRINITY_A0DMC7_PARTE/1-451         | A0DMC7.1 PF00171.20 | 51.40 | 0.00 |
| TRINITY_A0A078ACD1_STYLE/54-167    | A0A078ACD1.1 PF1152 | 51.40 | 0.00 |
| TRINITY_A0A0M2NC82_9FIRM/1438-1555 | A0A0M2NC82.1 PF0007 | 51.40 | 0.00 |
| TRINITY_J9IJ11_9SPIT/431-592       | J9IJ11.1 PF02518.24 | 51.40 | 0.00 |
| TRINITY_A0A075MLK6_9RICK/34-371    | A0A075MLK6.1 PF0093 | 51.40 | 0.00 |
| TRINITY_A0A066VMD9_9BASI/20-182    | A0A066VMD9.1 PF0007 | 51.40 | 0.00 |
| TRINITY_F0Z7E7_DICPU/1467-1681     | F0Z7E7.1 PF00454.25 | 51.40 | 0.00 |
| TRINITY_K9TLZ5_9CYAN/145-327       | K9TLZ5.1 PF00211.18 | 51.40 | 0.00 |
| TRINITY_A0A0D2WGS6_CAPO3/41-325    | A0A0D2WGS6.1 PF0065 | 51.40 | 0.00 |
| TRINITY_L1IW65_GUITH/6-299         | L1IW65.1 PF00443.27 | 51.40 | 0.00 |
| TRINITY_Q23JY6_TETTS/610-893       | Q23JY6.2 PF00481.19 | 51.40 | 0.00 |
| TRINITY_D8UA31_VOLCA/1397-1652     | D8UA31.1 PF08326.10 | 51.40 | 0.00 |
| TRINITY_A0A067QYX3_ZOONE/5-80      | A0A067QYX3.1 PF0279 | 51.40 | 0.00 |
| TRINITY_E1R9M4_SPISS/43-153        | E1R9M4.1 PF03099.17 | 51.40 | 0.00 |
| TRINITY_A0A0G4H6R4_9ALVE/223-367   | A0A0G4H6R4.1 PF0073 | 51.40 | 0.00 |
| TRINITY_A0BT76_PARTE/42-155        | A0BT76.1 PF00970.22 | 51.40 | 0.00 |
| TRINITY_A0A0G4GCP6_9ALVE/33-172    | A0A0G4GCP6.1 PF0535 | 51.40 | 0.00 |
| TRINITY_F4Q197_DICFS/73-310        | F4Q197.1 PF00149.26 | 51.40 | 0.00 |
| TRINITY_D7MDC3_ARALL/176-362       | D7MDC3.1 PF08662.9; | 51.40 | 0.00 |
| TRINITY_G0QNL8_ICHMG/17-231        | G0QNL8.1 PF02230.14 | 51.40 | 0.00 |
| TRINITY_J9JCA5_9SPIT/125-339       | J9JCA5.1 PF00112.21 | 51.40 | 0.00 |
| TRINITY_A8IQQ5_CHLRE/39-165        | A8IQQ5.1 PF04034.11 | 51.40 | 0.00 |
| TRINITY_A6G1S3_9DELT/651-724       | A6G1S3.1 PF00575.21 | 51.40 | 0.00 |
| TRINITY_A8IXB2_CHLRE/37-327        | A8IXB2.1 PF03982.11 | 51.40 | 0.00 |
| TRINITY_I0YXW3_9CHLO/68-190        | I0YXW3.1 PF13369.4; | 51.40 | 0.00 |
| TRINITY_L8GZX6_ACACA/240-400       | L8GZX6.1 PF04152.12 | 51.40 | 0.00 |
| TRINITY_I7MFP4_TETTS/185-254       | I7MFP4.1 PF00076.20 | 51.40 | 0.00 |
| TRINITY_D8TIL5_VOLCA/23-103        | D8TIL5.1 PF10785.7; | 51.40 | 0.00 |
| TRINITY_E1ZKT7_CHLVA/421-785       | E1ZKT7.1 PF03372.21 | 51.40 | 0.00 |
| TRINITY_A0A087SDT2_AUXPR/175-284   | A0A087SDT2.1 PF0008 | 51.40 | 0.00 |
| TRINITY_V9FIY6_PHYPR/89-393        | V9FIY6.1 PF00561.18 | 51.40 | 0.00 |
| TRINITY_E1ZGG3_CHLVA/1-323         | E1ZGG3.1 PF01207.15 | 51.40 | 0.00 |
| TRINITY_R5CVJ7_9FIRM/854-970       | R5CVJ7.1 PF00072.22 | 51.40 | 0.00 |
| TRINITY_D8UDX8_VOLCA/15-306        | D8UDX8.1 PF13872.4; | 51.40 | 0.00 |
| TRINITY_A8J701_CHLRE/150-244       | A8J701.1 PF13879.4; | 51.40 | 0.00 |
| TRINITY_L8GL73_ACACA/29-174        | L8GL73.1 PF06201.11 | 51.40 | 0.00 |
| TRINITY_A0CKH3_PARTE/10-115        | A0CKH3.1 PF12796.5; | 51.40 | 0.00 |
| TRINITY_A9V4S2_MONBE/204-426       | A9V4S2.1 PF04389.15 | 51.40 | 0.00 |
| TRINITY_E1ZIE5_CHLVA/234-347       | E1ZIE5.1 PF00294.22 | 51.40 | 0.00 |
| TRINITY_B4JDR4_DROGR/30-323        | B4JDR4.1 PF04227.10 | 51.40 | 0.00 |
| TRINITY_A0A0D2VQ46_CAPO3/350-817   | A0A0D2VQ46.1 PF0105 | 51.40 | 0.00 |
| TRINITY_E1Z4I8_CHLVA/45-256        | E1Z4I8.1 PF02190.14 | 51.40 | 0.00 |
| TRINITY_A0A0F2RSV7_9PROT/27-304    | A0A0F2RSV7.1 PF0015 | 51.40 | 0.00 |
| TRINITY_J9EHC1_9SPIT/1166-1271     | J9EHC1.1 PF00168.28 | 51.40 | 0.00 |
| TRINITY_I0YY29_9CHLO/32-376        | I0YY29.1 PF00155.19 | 51.40 | 0.00 |
| TRINITY_A0BDM2_PARTE/435-648       | A0BDM2.1 PF07859.11 | 51.40 | 0.00 |
| TRINITY_A0A0G4II46_PLABS/21-126    | A0A0G4II46.1 PF0030 | 51.40 | 0.00 |
| TRINITY_D8UF81_VOLCA/4-73          | D8UF81.1 PF02798.18 | 51.40 | 0.00 |
| TRINITY_D8U9M0_VOLCA/80-404        | D8U9M0.1 PF13896.4; | 51.40 | 0.00 |
| TRINITY_E1ZFK8_CHLVA/344-459       | E1ZFK8.1 PF09070.9; | 51.40 | 0.00 |
| TRINITY_D8UKB1_VOLCA/988-1273      | D8UKB1.1 PF03133.13 | 51.40 | 0.00 |
| TRINITY_A0A078A9T0_STYLE/80-292    | A0A078A9T0.1 PF0011 | 51.40 | 0.00 |
| TRINITY_A8IRX6_CHLRE/14-154        | A8IRX6.1 PF15025.4; | 51.40 | 0.00 |
| TRINITY_W7U6T6_9STRA/37-189        | W7U6T6.1 PF00857.18 | 51.40 | 0.00 |
| TRINITY_I7M7R1_TETTS/11-180        | I7M7R1.1 PF00071.20 | 51.30 | 0.00 |
| TRINITY_D8TSD6_VOLCA/425-880       | D8TSD6.1 PF11894.6; | 51.30 | 0.00 |



|                                  |                     |       |      |
|----------------------------------|---------------------|-------|------|
| TRINITY_D3BFK1_POLPA/293-519     | D3BFK1.1 PF13236.4; | 51.30 | 0.00 |
| TRINITY_W5WFW8_9PSEU/2-442       | W5WFW8.1 PF00743.17 | 51.30 | 0.00 |
| TRINITY_W5NJ56_LEPOC/942-1254    | W5NJ56.1 PF00664.21 | 51.30 | 0.00 |
| TRINITY_A0A0D2USD7_CAPO3/130-207 | A0A0D2USD7.1 PF0725 | 51.30 | 0.00 |
| TRINITY_I7M2G3_TETTS/68-184      | I7M2G3.2 PF00622.26 | 51.30 | 0.00 |
| TRINITY_L8GS79_ACACA/32-421      | L8GS79.1 PF01053.18 | 51.30 | 0.00 |
| TRINITY_L8GTK1_ACACA/146-395     | L8GTK1.1 PF07714.15 | 51.30 | 0.00 |
| TRINITY_L8GLW3_ACACA/10-209      | L8GLW3.1 PF00225.21 | 51.30 | 0.00 |
| TRINITY_E8N055_ANATU/196-314     | E8N055.1 PF01926.21 | 51.30 | 0.00 |
| TRINITY_Q235L2_TETTS/74-150      | Q235L2.1 PF03134.17 | 51.30 | 0.00 |
| TRINITY_V5SB04_9RHIZ/12-204      | V5SB04.1 PF03462.16 | 51.30 | 0.00 |
| TRINITY_I7MN18_TETTS/134-383     | I7MN18.2 PF00122.18 | 51.30 | 0.00 |
| TRINITY_G0QJS9_ICHMG/119-291     | G0QJS9.1 PF05677.10 | 51.30 | 0.00 |
| TRINITY_A9UT62_MONBE/15-91       | A9UT62.1 PF06093.11 | 51.30 | 0.00 |
| TRINITY_A0D0R4_PARTE/36-191      | A0D0R4.1 PF02815.17 | 51.30 | 0.00 |
| TRINITY_A0A0F5FWU6_9RHIZ/3-279   | A0A0F5FWU6.1 PF0256 | 51.30 | 0.00 |
| TRINITY_S2IV79_MUCC1/38-333      | S2IV79.1 PF03151.14 | 51.30 | 0.00 |
| TRINITY_A0A060SJ25_PYCCI/64-170  | A0A060SJ25.1 PF0058 | 51.30 | 0.00 |
| TRINITY_A8JFV1_CHLRE/37-296      | A8JFV1.1 PF01062.19 | 51.30 | 0.00 |
| TRINITY_D8TIF2_VOLCA/197-723     | D8TIF2.1 PF12569.6; | 51.30 | 0.00 |
| TRINITY_L8H293_ACACA/380-718     | L8H293.1 PF05028.12 | 51.30 | 0.00 |
| TRINITY_W4Y0M1_STRPU/293-645     | W4Y0M1.1 PF01457.14 | 51.30 | 0.00 |
| TRINITY_Q16K07_AEDAE/76-303      | Q16K07.1 PF00557.22 | 51.30 | 0.00 |
| TRINITY_A8J3I2_CHLRE/205-360     | A8J3I2.1 PF05645.11 | 51.30 | 0.00 |
| TRINITY_A0A059LR00_9CHLO/217-347 | A0A059LR00.1 PF0023 | 51.30 | 0.00 |
| TRINITY_L8HCJ2_ACACA/105-328     | L8HCJ2.1 PF01556.16 | 51.30 | 0.00 |
| TRINITY_F4Q882_DICFS/91-313      | F4Q882.1 PF02811.17 | 51.30 | 0.00 |
| TRINITY_A8HN61_CHLRE/2-203       | A8HN61.1 PF04127.13 | 51.30 | 0.00 |
| TRINITY_Q22X34_TETTS/82-235      | Q22X34.2 PF00810.16 | 51.30 | 0.00 |
| TRINITY_M0TL63_MUSAM/98-287      | M0TL63.1 PF03031.16 | 51.30 | 0.00 |
| TRINITY_I0YQQ6_9CHLO/334-489     | I0YQQ6.1 PF13671.4; | 51.30 | 0.00 |
| TRINITY_I0YSK5_9CHLO/592-711     | I0YSK5.1 PF10193.7; | 51.30 | 0.00 |
| TRINITY_W8ERK8_9BACT/56-809      | W8ERK8.1 PF01804.16 | 51.30 | 0.00 |
| TRINITY_D8UEF8_VOLCA/1333-1647   | D8UEF8.1 PF07516.11 | 51.30 | 0.00 |
| TRINITY_F4PGG9_DICFS/359-434     | F4PGG9.1 PF00017.22 | 51.30 | 0.00 |
| TRINITY_D2VUA2_NAEGR/472-642     | D2VUA2.1 PF00025.19 | 51.30 | 0.00 |
| TRINITY_Q6BGF7_PARTE/428-813     | Q6BGF7.1 PF00702.24 | 51.30 | 0.00 |
| TRINITY_H3HAJ2_PHYRM/359-478     | H3HAJ2.1 PF00665.24 | 51.30 | 0.00 |
| TRINITY_A0A0G4FYC6_9ALVE/127-300 | A0A0G4FYC6.1 PF0047 | 51.30 | 0.00 |
| TRINITY_D8U5G0_VOLCA/3-122       | D8U5G0.1 PF00188.24 | 51.30 | 0.00 |
| TRINITY_D8UA76_VOLCA/46-324      | D8UA76.1 PF00231.17 | 51.30 | 0.00 |
| TRINITY_CDK10_DICDI/7-293        | Q55GS4.1 PF00069.23 | 51.30 | 0.00 |
| TRINITY_A0A0D3FKV1_9ORYZ/91-246  | A0A0D3FKV1.1 PF1456 | 51.30 | 0.00 |
| TRINITY_D8R4M1_SELML/2-80        | D8R4M1.1 PF05129.11 | 51.30 | 0.00 |
| TRINITY_F9GER5_FUSOF/39-215      | F9GER5.1 PF00485.16 | 51.30 | 0.00 |
| TRINITY_D8TM33_VOLCA/1610-1805   | D8TM33.1 PF00211.18 | 51.30 | 0.00 |
| TRINITY_D2VI22_NAEGR/414-634     | D2VI22.1 PF13236.4; | 51.30 | 0.00 |
| TRINITY_L8HAW3_ACACA/654-873     | L8HAW3.1 PF13236.4; | 51.30 | 0.00 |
| TRINITY_C7LRE2_DESBD/427-512     | C7LRE2.1 PF00355.24 | 51.30 | 0.00 |
| TRINITY_D8TXU8_VOLCA/17-1207     | D8TXU8.1 PF02463.17 | 51.30 | 0.00 |
| TRINITY_A0A072UZD8_MEDTR/36-152  | A0A072UZD8.1 PF0017 | 51.30 | 0.00 |
| TRINITY_A0A076K2L8_9RHOB/2-123   | A0A076K2L8.1 PF0090 | 51.30 | 0.00 |
| TRINITY_W7X7N0_TETTS/5-44        | W7X7N0.1 PF06677.10 | 51.30 | 0.00 |
| TRINITY_G0QKA0_ICHMG/1960-2256   | G0QKA0.1 PF00632.23 | 51.30 | 0.00 |
| TRINITY_A0A059LME8_9CHLO/27-307  | A0A059LME8.1 PF0363 | 51.20 | 0.00 |
| TRINITY_C5KAG4_PERM5/145-190     | C5KAG4.1 PF01344.23 | 51.20 | 0.00 |
| TRINITY_I7LTA5_TETTS/34-118      | I7LTA5.1 PF03795.12 | 51.20 | 0.00 |
| TRINITY_I7MCW7_TETTS/50-135      | I7MCW7.1 PF12894.5; | 51.20 | 0.00 |
| TRINITY_G0R6D6_ICHMG/98-267      | G0R6D6.1 PF10274.7; | 51.20 | 0.00 |
| TRINITY_Q3SD80_PARTE/13-180      | Q3SD80.1 PF00071.20 | 51.20 | 0.00 |
| TRINITY_A0A078BBM2_STYLE/736-852 | A0A078BBM2.1 PF1364 | 51.20 | 0.00 |

|                                  |              |            |       |      |
|----------------------------------|--------------|------------|-------|------|
| TRINITY_M2XR81_GALSU/167-210     | M2XR81.1     | PF13639.4; | 51.20 | 0.00 |
| TRINITY_F4KT89_HALH1/36-176      | F4KT89.1     | PF00188.24 | 51.20 | 0.00 |
| TRINITY_UXT_DICDI/29-159         | Q54ND3.1     | PF02996.15 | 51.20 | 0.00 |
| TRINITY_M7AP01_CHEMY/434-482     | M7AP01.1     | PF13920.4; | 51.20 | 0.00 |
| TRINITY_D3BR29_POLPA/314-555     | D3BR29.1     | PF02913.17 | 51.20 | 0.00 |
| TRINITY_I7MID1_TETTS/134-392     | I7MID1.2     | PF00069.23 | 51.20 | 0.00 |
| TRINITY_I7IGD3_BABMI/2-82        | I7IGD3.1     | PF00081.20 | 51.20 | 0.00 |
| TRINITY_F0ZEM4_DICPU/808-1204    | F0ZEM4.1     | PF06957.9; | 51.20 | 0.00 |
| TRINITY_Q234Q1_TETTS/3-340       | Q234Q1.1     | PF01137.19 | 51.20 | 0.00 |
| TRINITY_D8RRA3_SELML/21-126      | D8RRA3.1     | PF00085.18 | 51.20 | 0.00 |
| TRINITY_G3NA74_GASAC/66-272      | G3NA74.1     | PF13489.4; | 51.20 | 0.00 |
| TRINITY_A0A0N4ZX25_PARTI/3-213   | A0A0N4ZX25.1 | PF0009     | 51.20 | 0.00 |
| TRINITY_Q22RJ8_TETTS/269-765     | Q22RJ8.3     | PF01055.24 | 51.20 | 0.00 |
| TRINITY_D8TPI1_VOLCA/329-417     | D8TPI1.1     | PF00686.17 | 51.20 | 0.00 |
| TRINITY_Q22Y58_TETTS/31-206      | Q22Y58.2     | PF03152.12 | 51.20 | 0.00 |
| TRINITY_I7MMI7_TETTS/43-214      | I7MMI7.1     | PF00213.16 | 51.20 | 0.00 |
| TRINITY_D3BE39_POLPA/6-244       | D3BE39.1     | PF01370.19 | 51.20 | 0.00 |
| TRINITY_I7MCL9_TETTS/190-488     | I7MCL9.2     | PF00648.19 | 51.20 | 0.00 |
| TRINITY_A0A0F2NX53_9FLAO/37-431  | A0A0F2NX53.1 | PF0378     | 51.20 | 0.00 |
| TRINITY_M0T2D0_MUSAM/307-383     | M0T2D0.1     | PF09169.8; | 51.20 | 0.00 |
| TRINITY_M2RQ51_CERS8/309-362     | M2RQ51.1     | PF13821.4; | 51.20 | 0.00 |
| TRINITY_Q22DP0_TETTS/183-364     | Q22DP0.2     | PF05193.19 | 51.20 | 0.00 |
| TRINITY_F0Z6M0_DICPU/1-332       | F0Z6M0.1     | PF01148.18 | 51.20 | 0.00 |
| TRINITY_F1A4S2_DICPU/369-501     | F1A4S2.1     | PF13716.4; | 51.20 | 0.00 |
| TRINITY_A0A077KMY8_9FLAO/166-484 | A0A077KMY8.1 | PF0096     | 51.20 | 0.00 |
| TRINITY_A0A098GD03_TATMI/503-737 | A0A098GD03.1 | PF0278     | 51.20 | 0.00 |
| TRINITY_A0EC42_PARTE/101-492     | A0EC42.1     | PF01619.16 | 51.20 | 0.00 |
| TRINITY_A0DVX9_PARTE/401-444     | A0DVX9.1     | PF13639.4; | 51.20 | 0.00 |
| TRINITY_E1ZKA8_CHLVA/18-215      | E1ZKA8.1     | PF06080.10 | 51.20 | 0.00 |
| TRINITY_D7UBL1_VITVI/257-752     | D7UBL1.1     | PF06862.10 | 51.20 | 0.00 |
| TRINITY_A0A024TID3_9STRA/5-178   | A0A024TID3.1 | PF0007     | 51.20 | 0.00 |
| TRINITY_E1ZQM4_CHLVA/233-323     | E1ZQM4.1     | PF00781.22 | 51.20 | 0.00 |
| TRINITY_I1G689_AMPQE/65-366      | I1G689.1     | PF03747.12 | 51.20 | 0.00 |
| TRINITY_D8TMP7_VOLCA/11-642      | D8TMP7.1     | PF03600.14 | 51.20 | 0.00 |
| TRINITY_A8IXQ8_CHLRE/344-468     | A8IXQ8.1     | PF07986.10 | 51.20 | 0.00 |
| TRINITY_B0WVE0_CULQU/175-214     | B0WVE0.1     | PF07645.13 | 51.20 | 0.00 |
| TRINITY_F6I499_VITVI/284-363     | F6I499.1     | PF00400.30 | 51.20 | 0.00 |
| TRINITY_F4Q7L0_DICFS/19-59       | F4Q7L0.1     | PF13639.4; | 51.20 | 0.00 |
| TRINITY_M3WQG6_FELCA/66-392      | M3WQG6.1     | PF00009.25 | 51.20 | 0.00 |
| TRINITY_L8GT53_ACACA/70-602      | L8GT53.1     | PF00995.21 | 51.20 | 0.00 |
| TRINITY_A8IQV3_CHLRE/555-697     | A8IQV3.1     | PF05517.10 | 51.20 | 0.00 |
| TRINITY_K4CI03_SOLLC/101-144     | K4CI03.1     | PF13639.4; | 51.20 | 0.00 |
| TRINITY_A8HWI9_CHLRE/348-571     | A8HWI9.1     | PF07714.15 | 51.20 | 0.00 |
| TRINITY_E1ZLH0_CHLVA/22-325      | E1ZLH0.1     | PF00814.23 | 51.20 | 0.00 |
| TRINITY_I7MA05_TETTS/49-723      | I7MA05.1     | PF02463.17 | 51.20 | 0.00 |
| TRINITY_Q0IM09_ORYSJ/93-213      | Q0IM09.1     | PF00581.18 | 51.20 | 0.00 |
| TRINITY_I7LXM8_TETTS/241-404     | I7LXM8.1     | PF03031.16 | 51.20 | 0.00 |
| TRINITY_D8TT51_VOLCA/426-589     | D8TT51.1     | PF03031.16 | 51.20 | 0.00 |
| TRINITY_D8TNM5_VOLCA/493-720     | D8TNM5.1     | PF11718.6; | 51.20 | 0.00 |
| TRINITY_Q237K5_TETTS/252-442     | Q237K5.3     | PF13229.4; | 51.20 | 0.00 |
| TRINITY_A8HPG3_CHLRE/275-438     | A8HPG3.1     | PF01554.16 | 51.20 | 0.00 |
| TRINITY_L1IZV4_GUIETH/21-244     | L1IZV4.1     | PF01207.15 | 51.20 | 0.00 |
| TRINITY_D2V8A1_NAEGR/1019-1139   | D2V8A1.1     | PF02687.19 | 51.20 | 0.00 |
| TRINITY_D8UJ46_VOLCA/1047-1282   | D8UJ46.1     | PF07714.15 | 51.20 | 0.00 |
| TRINITY_ACT_ASPOR/2-375          | Q2U7A3.1     | PF00022.17 | 51.20 | 0.00 |
| TRINITY_A0A087GQD8_ARAAL/252-615 | A0A087GQD8.1 | PF0012     | 51.20 | 0.00 |
| TRINITY_D8U8D8_VOLCA/174-843     | D8U8D8.1     | PF04615.11 | 51.20 | 0.00 |
| TRINITY_J0LCW4_AURST/382-795     | J0LCW4.1     | PF05088.10 | 51.20 | 0.00 |
| TRINITY_E1ZB58_CHLVA/3-139       | E1ZB58.1     | PF07047.10 | 51.20 | 0.00 |
| TRINITY_S8CJ07_9LAMI/313-454     | S8CJ07.1     | PF01926.21 | 51.20 | 0.00 |
| TRINITY_Q22AR6_TETTS/17-145      | Q22AR6.3     | PF13529.4; | 51.10 | 0.00 |

|                                  |                     |       |      |
|----------------------------------|---------------------|-------|------|
| TRINITY_A0A0M0JRU3_9EUKA/3-89    | A0A0M0JRU3.1 PF0456 | 51.10 | 0.00 |
| TRINITY_A0A078AF27_STYLE/20-227  | A0A078AF27.1 PF0155 | 51.10 | 0.00 |
| TRINITY_U9UPN8_RHIID/1-404       | U9UPN8.1 PF00022.17 | 51.10 | 0.00 |
| TRINITY_B0S768_DANRE/21-71       | B0S768.1 PF00385.22 | 51.10 | 0.00 |
| TRINITY_Q23QF2_TETTS/248-571     | Q23QF2.2 PF03133.13 | 51.10 | 0.00 |
| TRINITY_W9RKT2_9ROSA/29-165      | W9RKT2.1 PF13489.4; | 51.10 | 0.00 |
| TRINITY_A0DBI4_PARTE/123-180     | A0DBI4.1 PF13921.4; | 51.10 | 0.00 |
| TRINITY_I0Z4B7_9CHLO/8-125       | I0Z4B7.1 PF05348.9; | 51.10 | 0.00 |
| TRINITY_Q231T2_TETTS/85-131      | Q231T2.2 PF13445.4; | 51.10 | 0.00 |
| TRINITY_Q22EY1_TETTS/40-131      | Q22EY1.1 PF00276.18 | 51.10 | 0.00 |
| TRINITY_Q23JD8_TETTS/35-79       | Q23JD8.1 PF00097.23 | 51.10 | 0.00 |
| TRINITY_G4D1L1_9FIRM/35-287      | G4D1L1.1 PF00561.18 | 51.10 | 0.00 |
| TRINITY_D3BLA2_POLPA/49-377      | D3BLA2.1 PF00128.22 | 51.10 | 0.00 |
| TRINITY_L0A9E0_DEIPD/46-181      | L0A9E0.1 PF09346.8; | 51.10 | 0.00 |
| TRINITY_I7LXB6_TETTS/1143-1299   | I7LXB6.2 PF00005.25 | 51.10 | 0.00 |
| TRINITY_G0QW69_ICHMG/157-289     | G0QW69.1 PF00107.24 | 51.10 | 0.00 |
| TRINITY_I7MFD5_TETTS/394-587     | I7MFD5.2 PF13901.4; | 51.10 | 0.00 |
| TRINITY_E1G5M1_LOALO/40-219      | E1G5M1.2 PF01294.16 | 51.10 | 0.00 |
| TRINITY_Q24DF0_TETTS/748-1037    | Q24DF0.2 PF00648.19 | 51.10 | 0.00 |
| TRINITY_Q8ESL7_OCEIH/26-192      | Q8ESL7.1 PF00270.27 | 51.10 | 0.00 |
| TRINITY_M5X747_PRUPE/959-1138    | M5X747.1 PF12816.5; | 51.10 | 0.00 |
| TRINITY_Q23QF2_TETTS/248-571     | Q23QF2.2 PF03133.13 | 51.10 | 0.00 |
| TRINITY_A0A067STQ1_9AGAR/42-221  | A0A067STQ1.1 PF0114 | 51.10 | 0.00 |
| TRINITY_I7M2G9_TETTS/752-929     | I7M2G9.2 PF00069.23 | 51.10 | 0.00 |
| TRINITY_A0A059ARR8_EUCGR/219-276 | A0A059ARR8.1 PF0148 | 51.10 | 0.00 |
| TRINITY_I7M6I7_TETTS/33-261      | I7M6I7.1 PF04981.11 | 51.10 | 0.00 |
| TRINITY_I0YTS8_9CHLO/855-957     | I0YTS8.1 PF00271.29 | 51.10 | 0.00 |
| TRINITY_J9IMI2_9SPIT/315-376     | J9IMI2.1 PF12906.5; | 51.10 | 0.00 |
| TRINITY_I7LTS7_TETTS/32-217      | I7LTS7.2 PF00227.24 | 51.10 | 0.00 |
| TRINITY_A8ICH8_CHLRE/72-332      | A8ICH8.1 PF12146.6; | 51.10 | 0.00 |
| TRINITY_Q6BGA6_PARTE/227-274     | Q6BGA6.1 PF00415.16 | 51.10 | 0.00 |
| TRINITY_E1Z4Q7_CHLVA/43-325      | E1Z4Q7.1 PF14500.4; | 51.10 | 0.00 |
| TRINITY_I0YTA7_9CHLO/19-233      | I0YTA7.1 PF05721.11 | 51.10 | 0.00 |
| TRINITY_Q23QF2_TETTS/248-571     | Q23QF2.2 PF03133.13 | 51.10 | 0.00 |
| TRINITY_B3SD13_TRIAD/235-607     | B3SD13.1 PF00587.23 | 51.10 | 0.00 |
| TRINITY_A0A0N5C759_STREA/4-334   | A0A0N5C759.1 PF0856 | 51.10 | 0.00 |
| TRINITY_A0A068SDR8_9FUNG/779-900 | A0A068SDR8.1 PF0157 | 51.10 | 0.00 |
| TRINITY_G0QPI1_ICHMG/26-576      | G0QPI1.1 PF01602.18 | 51.10 | 0.00 |
| TRINITY_S2J1Z4_MUCC1/378-695     | S2J1Z4.1 PF00069.23 | 51.10 | 0.00 |
| TRINITY_F4PGY2_DICFS/41-142      | F4PGY2.1 PF00011.19 | 51.10 | 0.00 |
| TRINITY_I0YPU3_9CHLO/12-259      | I0YPU3.1 PF00561.18 | 51.10 | 0.00 |
| TRINITY_A0CM85_PARTE/515-588     | A0CM85.1 PF00173.26 | 51.10 | 0.00 |
| TRINITY_A4S9E8_OSTLU/168-383     | A4S9E8.1 PF12706.5; | 51.10 | 0.00 |
| TRINITY_D8TGV7_VOLCA/12-194      | D8TGV7.1 PF00227.24 | 51.10 | 0.00 |
| TRINITY_L8HCK5_ACACA/530-801     | L8HCK5.1 PF07714.15 | 51.10 | 0.00 |
| TRINITY_D8M555_BLAHO/64-112      | D8M555.1 PF00628.27 | 51.10 | 0.00 |
| TRINITY_W7XFS0_TETTS/147-236     | W7XFS0.1 PF02978.17 | 51.10 | 0.00 |
| TRINITY_D8TR33_VOLCA/19-284      | D8TR33.1 PF03644.11 | 51.10 | 0.00 |
| TRINITY_D8TTM9_VOLCA/774-953     | D8TTM9.1 PF15625.4; | 51.10 | 0.00 |
| TRINITY_A8J3P1_CHLRE/954-1161    | A8J3P1.1 PF00211.18 | 51.10 | 0.00 |
| TRINITY_A8JHW6_CHLRE/43-718      | A8JHW6.1 PF00995.21 | 51.10 | 0.00 |
| TRINITY_I0YZC8_9CHLO/135-227     | I0YZC8.1 PF00867.16 | 51.10 | 0.00 |
| TRINITY_F0ZJW2_DICPU/563-743     | F0ZJW2.1 PF02145.13 | 51.10 | 0.00 |
| TRINITY_Q23CZ3_TETTS/246-390     | Q23CZ3.2 PF01170.16 | 51.10 | 0.00 |
| TRINITY_Q23K98_TETTS/2488-2701   | Q23K98.2 PF00520.29 | 51.10 | 0.00 |
| TRINITY_C1EB37_MICSR/504-899     | C1EB37.1 PF00940.17 | 51.10 | 0.00 |
| TRINITY_D8U5A8_VOLCA/79-306      | D8U5A8.1 PF00069.23 | 51.10 | 0.00 |
| TRINITY_C5L7Q9_PERM5/16-385      | C5L7Q9.1 PF00009.25 | 51.10 | 0.00 |
| TRINITY_K7V3P2_MAIZE/98-541      | K7V3P2.1 PF00067.20 | 51.10 | 0.00 |
| TRINITY_D8UG06_VOLCA/2308-2398   | D8UG06.1 PF08743.8; | 51.10 | 0.00 |
| TRINITY_L8HLY7_ACACA/2-230       | L8HLY7.1 PF00233.17 | 51.10 | 0.00 |

|                                  |              |            |       |      |
|----------------------------------|--------------|------------|-------|------|
| TRINITY_A8JAF1_CHLRE/70-391      | A8JAF1.1     | PF07992.12 | 51.10 | 0.00 |
| TRINITY_V4A8I2_LOTGI/135-269     | V4A8I2.1     | PF08433.8; | 51.10 | 0.00 |
| TRINITY_A8IZ68_CHLRE/17-192      | A8IZ68.1     | PF02301.16 | 51.10 | 0.00 |
| TRINITY_I7MHV4_TETTS/46-141      | I7MHV4.1     | PF01329.17 | 51.00 | 0.00 |
| TRINITY_Q54JK0_DICDI/144-585     | Q54JK0.1     | PF00501.26 | 51.00 | 0.00 |
| TRINITY_I7MLM4_TETTS/239-295     | I7MLM4.2     | PF00571.26 | 51.00 | 0.00 |
| TRINITY_Q22AW2_TETTS/85-366      | Q22AW2.1     | PF00664.21 | 51.00 | 0.00 |
| TRINITY_G4TRG8_PIRID/542-763     | G4TRG8.1     | PF00326.19 | 51.00 | 0.00 |
| TRINITY_A0A084VZV5_ANOSI/113-165 | A0A084VZV5.1 | PF0139     | 51.00 | 0.00 |
| TRINITY_J9HQC6_9SPIT/15-385      | J9HQC6.1     | PF01008.15 | 51.00 | 0.00 |
| TRINITY_A0BJD5_PARTE/63-126      | A0BJD5.1     | PF13499.4; | 51.00 | 0.00 |
| TRINITY_W5M5D7_LEPOC/156-505     | W5M5D7.1     | PF12631.5; | 51.00 | 0.00 |
| TRINITY_J9F1H9_9SPIT/12-116      | J9F1H9.1     | PF02991.14 | 51.00 | 0.00 |
| TRINITY_R8BMD6_TOGMI/112-271     | R8BMD6.1     | PF00078.25 | 51.00 | 0.00 |
| TRINITY_Q22KI6_TETTS/5-326       | Q22KI6.2     | PF00294.22 | 51.00 | 0.00 |
| TRINITY_F0ZG46_DICPU/17-281      | F0ZG46.1     | PF00248.19 | 51.00 | 0.00 |
| TRINITY_A3U3V4_OCEBH/299-401     | A3U3V4.1     | PF02566.17 | 51.00 | 0.00 |
| TRINITY_A0A0G3A7I0_9DELT/1-292   | A0A0G3A7I0.1 | PF0029     | 51.00 | 0.00 |
| TRINITY_A0A087SBN5_AUXPR/15-272  | A0A087SBN5.1 | PF0079     | 51.00 | 0.00 |
| TRINITY_J9J5I9_9SPIT/631-835     | J9J5I9.1     | PF01852.17 | 51.00 | 0.00 |
| TRINITY_A0A0G4FE33_9ALVE/654-908 | A0A0G4FE33.1 | PF0006     | 51.00 | 0.00 |
| TRINITY_Q23CL0_TETTS/804-906     | Q23CL0.1     | PF04003.10 | 51.00 | 0.00 |
| TRINITY_D0LL56_HALO1/26-161      | D0LL56.1     | PF08240.10 | 51.00 | 0.00 |
| TRINITY_I7MI70_TETTS/14-137      | I7MI70.1     | PF13893.4; | 51.00 | 0.00 |
| TRINITY_A0E768_PARTE/18-136      | A0E768.1     | PF02466.17 | 51.00 | 0.00 |
| TRINITY_A0A0K9P6H7_ZOSMR/143-205 | A0A0K9P6H7.1 | PF0518     | 51.00 | 0.00 |
| TRINITY_D8U183_VOLCA/501-651     | D8U183.1     | PF01699.22 | 51.00 | 0.00 |
| TRINITY_A0E826_PARTE/128-238     | A0E826.1     | PF00168.28 | 51.00 | 0.00 |
| TRINITY_D8UEE4_VOLCA/8-204       | D8UEE4.1     | PF03959.11 | 51.00 | 0.00 |
| TRINITY_E1ZQ47_CHLVA/199-476     | E1ZQ47.1     | PF00069.23 | 51.00 | 0.00 |
| TRINITY_A8JH58_CHLRE/39-518      | A8JH58.1     | PF00501.26 | 51.00 | 0.00 |
| TRINITY_A0A0A7LKC0_9BACT/1-349   | A0A0A7LKC0.1 | PF0149     | 51.00 | 0.00 |
| TRINITY_A0A024WMR2_PLAFA/292-549 | A0A024WMR2.1 | PF0006     | 51.00 | 0.00 |
| TRINITY_A0A0M0K741_9EUKA/109-268 | A0A0M0K741.1 | PF1384     | 51.00 | 0.00 |
| TRINITY_J9IVT6_9SPIT/28-125      | J9IVT6.1     | PF02678.14 | 51.00 | 0.00 |
| TRINITY_W4YLM9_STRPU/197-528     | W4YLM9.1     | PF00443.27 | 51.00 | 0.00 |
| TRINITY_Q6MNK0_BDEBA/4-192       | Q6MNK0.1     | PF01557.16 | 51.00 | 0.00 |
| TRINITY_L8H3B2_ACACA/7-401       | L8H3B2.1     | PF00266.17 | 51.00 | 0.00 |
| TRINITY_K6XR77_9ALTE/18-317      | K6XR77.1     | PF01156.17 | 51.00 | 0.00 |
| TRINITY_A0A0E0NR04_ORYRU/248-372 | A0A0E0NR04.1 | PF0139     | 51.00 | 0.00 |
| TRINITY_I1CAR9_RHIO9/36-149      | I1CAR9.1     | PF00188.24 | 51.00 | 0.00 |
| TRINITY_E1ZFJ6_CHLVA/275-376     | E1ZFJ6.1     | PF00134.21 | 51.00 | 0.00 |
| TRINITY_D8TLU8_VOLCA/1-257       | D8TLU8.1     | PF01213.17 | 51.00 | 0.00 |
| TRINITY_A8J6C9_CHLRE/173-278     | A8J6C9.1     | PF05548.9; | 51.00 | 0.00 |
| TRINITY_A0A0A1MZZ8_9FUNG/164-296 | A0A0A1MZZ8.1 | PF0010     | 51.00 | 0.00 |
| TRINITY_A0A087SEE8_AUXPR/23-129  | A0A087SEE8.1 | PF0277     | 51.00 | 0.00 |
| TRINITY_I7M104_TETTS/32-282      | I7M104.1     | PF00069.23 | 51.00 | 0.00 |
| TRINITY_A0A094GVQ6_9PEZI/366-473 | A0A094GVQ6.1 | PF0058     | 51.00 | 0.00 |
| TRINITY_K5BAQ8_9MYCO/60-502      | K5BAQ8.1     | PF00501.26 | 51.00 | 0.00 |
| TRINITY_I7LTQ3_TETTS/124-278     | I7LTQ3.2     | PF00650.18 | 51.00 | 0.00 |
| TRINITY_D8UAI2_VOLCA/117-272     | D8UAI2.1     | PF01746.19 | 51.00 | 0.00 |
| TRINITY_L8GQP6_ACACA/131-425     | L8GQP6.1     | PF07992.12 | 51.00 | 0.00 |
| TRINITY_L8HC71_ACACA/163-263     | L8HC71.1     | PF00085.18 | 51.00 | 0.00 |
| TRINITY_D8U6S6_VOLCA/68-306      | D8U6S6.1     | PF00233.17 | 51.00 | 0.00 |
| TRINITY_A8JFF5_CHLRE/13-156      | A8JFF5.1     | PF00106.23 | 51.00 | 0.00 |
| TRINITY_F4Q4A3_DICFS/16-269      | F4Q4A3.1     | PF00069.23 | 51.00 | 0.00 |
| TRINITY_I0Z3R2_9CHLO/102-212     | I0Z3R2.1     | PF10998.6; | 51.00 | 0.00 |
| TRINITY_I1G6Z0_AMPQE/84-498      | I1G6Z0.1     | PF00450.20 | 51.00 | 0.00 |
| TRINITY_C5XC66_SORBI/97-147      | C5XC66.1     | PF09465.8; | 51.00 | 0.00 |
| TRINITY_A8ISB0_CHLRE/37-325      | A8ISB0.1     | PF00291.23 | 51.00 | 0.00 |
| TRINITY_A0BML7_PARTE/19-118      | A0BML7.1     | PF00447.15 | 51.00 | 0.00 |

|                                 |                     |       |      |
|---------------------------------|---------------------|-------|------|
| TRINITY_F0ZY14_DICPU/351-612    | F0ZY14.1 PF07714.15 | 51.00 | 0.00 |
| TRINITY_A0A067U0W0_9AGAR/21-182 | A0A067U0W0.1 PF0007 | 51.00 | 0.00 |
| TRINITY_A0A0A1NH53_9FUNG/12-62  | A0A0A1NH53.1 PF0038 | 51.00 | 0.00 |
| TRINITY_E2A359_CAMFO/103-152    | E2A359.1 PF00415.16 | 51.00 | 0.00 |
| TRINITY_G0QLT6_ICHMG/132-333    | G0QLT6.1 PF00112.21 | 51.00 | 0.00 |
| TRINITY_A8IQQ8_CHLRE/597-709    | A8IQQ8.1 PF00989.23 | 51.00 | 0.00 |
| TRINITY_K7JCF9_NASVI/173-377    | K7JCF9.1 PF00078.25 | 51.00 | 0.00 |
| TRINITY_V4AE46_LOTGI/10-66      | V4AE46.1 PF00412.20 | 50.90 | 0.00 |
| TRINITY_A2E3Y5_TRIVA/92-154     | A2E3Y5.1 PF01485.19 | 50.90 | 0.00 |
| TRINITY_I0YKX7_9CHLO/155-269    | I0YKX7.1 PF00504.19 | 50.90 | 0.00 |
| TRINITY_A0A0N5DDZ9_TRIMR/71-197 | A0A0N5DDZ9.1 PF0403 | 50.90 | 0.00 |
| TRINITY_W4HAE7_9STRA/32-262     | W4HAE7.1 PF13489.4; | 50.90 | 0.00 |
| TRINITY_B8ANZ6_ORYSI/328-561    | B8ANZ6.1 PF08282.10 | 50.90 | 0.00 |
| TRINITY_DHX33_MOUSE/219-401     | Q80VY9.1 PF00271.29 | 50.90 | 0.00 |
| TRINITY_Q17KA5_AEDAE/466-686    | Q17KA5.1 PF00888.20 | 50.90 | 0.00 |
| TRINITY_Q23RE5_TETTS/230-338    | Q23RE5.2 PF01399.25 | 50.90 | 0.00 |
| TRINITY_Q2IQ30_ANADE/26-103     | Q2IQ30.1 PF03061.20 | 50.90 | 0.00 |
| TRINITY_F0XXR9_AURAN/4-179      | F0XXR9.1 PF00025.19 | 50.90 | 0.00 |
| TRINITY_F4QCM6_DICFS/1657-1787  | F4QCM6.1 PF00782.18 | 50.90 | 0.00 |
| TRINITY_T1HWY1_RHOPR/29-318     | T1HWY1.2 PF00069.23 | 50.90 | 0.00 |
| TRINITY_I7M2Q8_TETTS/92-356     | I7M2Q8.2 PF00069.23 | 50.90 | 0.00 |
| TRINITY_K1W3V0_TRIAC/206-269    | K1W3V0.1 PF05970.12 | 50.90 | 0.00 |
| TRINITY_G1U9F0_RABIT/4-92       | G1U9F0.1 PF00031.19 | 50.90 | 0.00 |
| TRINITY_A9SHN8_PHYPA/109-165    | A9SHN8.1 PF00412.20 | 50.90 | 0.00 |

|                                  |                     |       |      |
|----------------------------------|---------------------|-------|------|
| TRINITY_D8UJM5_VOLCA/866-973     | D8UJM5.1 PF00168.28 | 50.90 | 0.00 |
| TRINITY_A0A015LWF2_9GLOM/60-342  | A0A015LWF2.1 PF1438 | 50.90 | 0.00 |
| TRINITY_B7FVL6_PHATC/17-178      | B7FVL6.1 PF00071.20 | 50.90 | 0.00 |
| TRINITY_E1ZIJ2_CHLVA/54-219      | E1ZIJ2.1 PF00994.22 | 50.90 | 0.00 |
| TRINITY_H9GB02_ANOCA/324-379     | H9GB02.2 PF00412.20 | 50.90 | 0.00 |
| TRINITY_A0A077ZS92_STYLE/199-359 | A0A077ZS92.1 PF0303 | 50.90 | 0.00 |
| TRINITY_A8ILF4_CHLRE/732-839     | A8ILF4.1 PF02883.18 | 50.90 | 0.00 |
| TRINITY_M2XFY2_GALSU/50-155      | M2XFY2.1 PF00613.18 | 50.90 | 0.00 |
| TRINITY_D3AXU6_POLPA/3-143       | D3AXU6.1 PF10604.7; | 50.90 | 0.00 |
| TRINITY_A8JCP0_CHLRE/22-190      | A8JCP0.1 PF03357.19 | 50.90 | 0.00 |
| TRINITY_A8J8D9_CHLRE/22-258      | A8J8D9.1 PF07714.15 | 50.90 | 0.00 |
| TRINITY_A0A0G4ENY6_9ALVE/191-300 | A0A0G4ENY6.1 PF0017 | 50.90 | 0.00 |
| TRINITY_A0A099NW38_PICKU/146-302 | A0A099NW38.1 PF0007 | 50.90 | 0.00 |
| TRINITY_E1ZEX7_CHLVA/18-277      | E1ZEX7.1 PF01959.14 | 50.90 | 0.00 |
| TRINITY_H2YU38_CIOSA/1-194       | H2YU38.1 PF00112.21 | 50.90 | 0.00 |
| TRINITY_E5SXV8_TRISP/503-619     | E5SXV8.1 PF00665.24 | 50.90 | 0.00 |
| TRINITY_G0QWH7_ICHMG/52-110      | G0QWH7.1 PF08063.10 | 50.90 | 0.00 |
| TRINITY_G4ZRE7_PHYSP/4-181       | G4ZRE7.1 PF00025.19 | 50.90 | 0.00 |
| TRINITY_D8TSG4_VOLCA/126-300     | D8TSG4.1 PF04144.11 | 50.90 | 0.00 |
| TRINITY_H0ZQB3_TAEGU/134-313     | H0ZQB3.1 PF13429.4; | 50.90 | 0.00 |
| TRINITY_G0QKW1_ICHMG/111-281     | G0QKW1.1 PF00092.26 | 50.90 | 0.00 |
| TRINITY_A8J114_CHLRE/10-389      | A8J114.1 PF00083.22 | 50.90 | 0.00 |
| TRINITY_D8U9E7_VOLCA/9-116       | D8U9E7.1 PF14737.4; | 50.90 | 0.00 |
| TRINITY_D3BGU0_POLPA/57-295      | D3BGU0.1 PF00795.20 | 50.90 | 0.00 |
| TRINITY_F5SZQ1_9GAMM/482-668     | F5SZQ1.1 PF05272.9; | 50.90 | 0.00 |
| TRINITY_A0A0G3IW95_9MYCO/186-309 | A0A0G3IW95.1 PF0010 | 50.90 | 0.00 |
| TRINITY_A8IHD2_CHLRE/184-407     | A8IHD2.1 PF05686.10 | 50.90 | 0.00 |
| TRINITY_D8TTH2_VOLCA/1584-1696   | D8TTH2.1 PF00307.29 | 50.90 | 0.00 |
| TRINITY_F4Q084_DICFS/88-744      | F4Q084.1 PF00063.19 | 50.90 | 0.00 |
| TRINITY_A8HW46_CHLRE/352-463     | A8HW46.1 PF00168.28 | 50.90 | 0.00 |
| TRINITY_D8UFC0_VOLCA/1-516       | D8UFC0.1 PF04791.14 | 50.90 | 0.00 |
| TRINITY_D8TJ43_VOLCA/551-744     | D8TJ43.1 PF00860.18 | 50.90 | 0.00 |
| TRINITY_F1N6B1_BOVIN/35-176      | F1N6B1.2 PF05175.12 | 50.90 | 0.00 |
| TRINITY_A8IGG5_CHLRE/567-774     | A8IGG5.1 PF07714.15 | 50.90 | 0.00 |
| TRINITY_Q3SDB5_PARTE/105-403     | Q3SDB5.1 PF00122.18 | 50.90 | 0.00 |
| TRINITY_J9LSZ4_ACYPI/496-633     | J9LSZ4.2 PF00004.27 | 50.90 | 0.00 |
| TRINITY_G0QW77_ICHMG/43-324      | G0QW77.1 PF03619.14 | 50.80 | 0.00 |
| TRINITY_A0A0D3ADZ0_BRAOL/16-271  | A0A0D3ADZ0.1 PF0006 | 50.80 | 0.00 |
| TRINITY_H2KNZ3_CLOSI/10-231      | H2KNZ3.1 PF00244.18 | 50.80 | 0.00 |
| TRINITY_Q0DG78_ORYSJ/1-179       | Q0DG78.2 PF13847.4; | 50.80 | 0.00 |
| TRINITY_U9U2M9_RHIID/923-1112    | U9U2M9.1 PF00488.19 | 50.80 | 0.00 |
| TRINITY_Q54KJ2_DICDI/332-552     | Q54KJ2.1 PF13236.4; | 50.80 | 0.00 |
| TRINITY_C1F1Y1_ACIC5/526-690     | C1F1Y1.1 PF08760.9; | 50.80 | 0.00 |
| TRINITY_L8H5H5_ACACA/34-507      | L8H5H5.1 PF01229.15 | 50.80 | 0.00 |
| TRINITY_Q23FS8_TETTS/33-196      | Q23FS8.2 PF14956.4; | 50.80 | 0.00 |
| TRINITY_D9W3Z4_9ACTN/20-100      | D9W3Z4.1 PF13304.4; | 50.80 | 0.00 |
| TRINITY_A0A0Q3UWS4_SETIT/75-165  | A0A0Q3UWS4.1 PF0015 | 50.80 | 0.00 |
| TRINITY_I7M6G4_TETTS/82-228      | I7M6G4.2 PF12922.5; | 50.80 | 0.00 |
| TRINITY_D5GLZ2_TUBMM/4-146       | D5GLZ2.1 PF00106.23 | 50.80 | 0.00 |
| TRINITY_A0A090M6F3_OSTTA/22-82   | A0A090M6F3.1 PF0083 | 50.80 | 0.00 |
| TRINITY_A0A0N4ZN70_PARTI/54-114  | A0A0N4ZN70.1 PF0419 | 50.80 | 0.00 |
| TRINITY_C7JBV9_ACEP3/15-302      | C7JBV9.1 PF01040.16 | 50.80 | 0.00 |
| TRINITY_I7MM31_TETTS/85-222      | I7MM31.2 PF01529.18 | 50.80 | 0.00 |
| TRINITY_A0A022RE77_ERYGU/162-217 | A0A022RE77.1 PF0204 | 50.80 | 0.00 |
| TRINITY_K9R703_9CYAN/197-277     | K9R703.1 PF08445.8; | 50.80 | 0.00 |
| TRINITY_A0A067QYA9_ZOONE/4-88    | A0A067QYA9.1 PF1279 | 50.80 | 0.00 |
| TRINITY_B6IVT1_RHOCS/39-312      | B6IVT1.1 PF01636.21 | 50.80 | 0.00 |
| TRINITY_A0A0D2WXF0_CAPO3/284-676 | A0A0D2WXF0.1 PF0149 | 50.80 | 0.00 |
| TRINITY_T1EI44_HELRO/49-109      | T1EI44.1 PF13921.4; | 50.80 | 0.00 |
| TRINITY_L8HMC9_ACACA/70-852      | L8HMC9.1 PF08553.8; | 50.80 | 0.00 |
| TRINITY_F0ZLI6_DICPU/14-141      | F0ZLI6.1 PF00134.21 | 50.80 | 0.00 |

|                                    |              |            |       |      |
|------------------------------------|--------------|------------|-------|------|
| TRINITY_I0Z754_9CHLO/80-144        | I0Z754.1     | PF13432.4; | 50.80 | 0.00 |
| TRINITY_A0D3J7_PARTE/113-382       | A0D3J7.1     | PF00069.23 | 50.80 | 0.00 |
| TRINITY_N6TU53_DENPD/2-117         | N6TU53.1     | PF03656.11 | 50.80 | 0.00 |
| TRINITY_A0DFQ3_PARTE/150-411       | A0DFQ3.1     | PF00481.19 | 50.80 | 0.00 |
| TRINITY_D8U2C8_VOLCA/51-288        | D8U2C8.1     | PF05721.11 | 50.80 | 0.00 |
| TRINITY_C5KE40_PERM5/231-416       | C5KE40.1     | PF00270.27 | 50.80 | 0.00 |
| TRINITY_Q23RD3_TETTS/32-97         | Q23RD3.2     | PF13499.4; | 50.80 | 0.00 |
| TRINITY_I7M450_TETTS/2253-2375     | I7M450.2     | PF00069.23 | 50.80 | 0.00 |
| TRINITY_RACA_DICDI/5-171           | P34147.2     | PF00071.20 | 50.80 | 0.00 |
| TRINITY_A0A059CIA7_EUCGR/152-219   | A0A059CIA7.1 | PF1026     | 50.80 | 0.00 |
| TRINITY_V9EPL4_PHYPR/52-300        | V9EPL4.1     | PF06966.10 | 50.80 | 0.00 |
| TRINITY_G0QUF2_ICHMG/19-193        | G0QUF2.1     | PF13439.4; | 50.80 | 0.00 |
| TRINITY_J9IXE9_9SPIT/299-361       | J9IXE9.1     | PF00170.19 | 50.80 | 0.00 |
| TRINITY_A0A0D2WTH3_CAPO3/67-257    | A0A0D2WTH3.1 | PF0014     | 50.80 | 0.00 |
| TRINITY_L8GG94_ACACA/5-162         | L8GG94.1     | PF07933.12 | 50.80 | 0.00 |
| TRINITY_G0QPZ9_ICHMG/16-280        | G0QPZ9.1     | PF04811.13 | 50.80 | 0.00 |
| TRINITY_F2U898_SALR5/16-176        | F2U898.1     | PF00071.20 | 50.80 | 0.00 |
| TRINITY_D8TM37_VOLCA/48-225        | D8TM37.1     | PF13326.4; | 50.80 | 0.00 |
| TRINITY_A0A0D3B9H3_BRAOL/3-266     | A0A0D3B9H3.1 | PF0045     | 50.80 | 0.00 |
| TRINITY_A0A087SAV1_AUXPR/120-283   | A0A087SAV1.1 | PF1214     | 50.80 | 0.00 |
| TRINITY_A0DC58_PARTE/9-534         | A0DC58.1     | PF01602.18 | 50.80 | 0.00 |
| TRINITY_Q24C26_TETTS/16-259        | Q24C26.3     | PF00069.23 | 50.80 | 0.00 |
| TRINITY_H2ZI06_CIOSA/8-243         | H2ZI06.1     | PF02784.14 | 50.80 | 0.00 |
| TRINITY_G0R442_ICHMG/8-260         | G0R442.1     | PF00069.23 | 50.80 | 0.00 |
| TRINITY_D8ULI0_VOLCA/1-183         | D8ULI0.1     | PF00160.19 | 50.80 | 0.00 |
| TRINITY_A0EC59_PARTE/148-317       | A0EC59.1     | PF01068.19 | 50.80 | 0.00 |
| TRINITY_A8J000_CHLRE/25-420        | A8J000.1     | PF00871.15 | 50.80 | 0.00 |
| TRINITY_E1Z620_CHLVA/19-302        | E1Z620.1     | PF08538.8; | 50.80 | 0.00 |
| TRINITY_A8J3C2_CHLRE/32-153        | A8J3C2.1     | PF10218.7; | 50.80 | 0.00 |
| TRINITY_I7MA91_TETTS/672-1130      | I7MA91.2     | PF00521.18 | 50.80 | 0.00 |
| TRINITY_A0A067C5K4_SAPPC/1127-1244 | A0A067C5K4.1 | PF0007     | 50.80 | 0.00 |
| TRINITY_A0A096PAK6_OSTTA/5-143     | A0A096PAK6.1 | PF0017     | 50.80 | 0.00 |
| TRINITY_L8GRR7_ACACA/534-605       | L8GRR7.1     | PF01485.19 | 50.80 | 0.00 |
| TRINITY_D3AWT2_POLPA/361-423       | D3AWT2.1     | PF13432.4; | 50.80 | 0.00 |
| TRINITY_F7B069_MACMU/20-276        | F7B069.1     | PF00069.23 | 50.80 | 0.00 |
| TRINITY_Q7XRL9_ORYSJ/564-738       | Q7XRL9.2     | PF00078.25 | 50.80 | 0.00 |
| TRINITY_W7XA27_TETTS/236-568       | W7XA27.1     | PF12309.6; | 50.80 | 0.00 |
| TRINITY_Q23R00_TETTS/6-298         | Q23R00.2     | PF00579.23 | 50.80 | 0.00 |
| TRINITY_Q6CSC0_KLULA/276-338       | Q6CSC0.1     | PF01485.19 | 50.80 | 0.00 |
| TRINITY_Q54F04_DICDI/45-467        | Q54F04.1     | PF13520.4; | 50.80 | 0.00 |
| TRINITY_G0QWQ0_ICHMG/415-899       | G0QWQ0.1     | PF00899.19 | 50.80 | 0.00 |
| TRINITY_Q8I7P3_DICDI/141-423       | Q8I7P3.1     | PF03372.21 | 50.80 | 0.00 |
| TRINITY_A0A078FU68_BRANA/15-77     | A0A078FU68.1 | PF0046     | 50.80 | 0.00 |
| TRINITY_L8H265_ACACA/43-772        | L8H265.1     | PF03635.15 | 50.80 | 0.00 |
| TRINITY_Q22KI6_TETTS/5-326         | Q22KI6.2     | PF00294.22 | 50.80 | 0.00 |
| TRINITY_L8HJX9_ACACA/36-222        | L8HJX9.1     | PF02146.15 | 50.80 | 0.00 |
| TRINITY_E1ZN61_CHLVA/1401-1550     | E1ZN61.1     | PF00005.25 | 50.80 | 0.00 |
| TRINITY_E9G3A8_DAPPU/52-441        | E9G3A8.1     | PF00144.22 | 50.80 | 0.00 |
| TRINITY_A8IAA5_CHLRE/115-366       | A8IAA5.1     | PF00566.16 | 50.80 | 0.00 |
| TRINITY_I7M9L3_TETTS/26-279        | I7M9L3.2     | PF02263.17 | 50.80 | 0.00 |
| TRINITY_D8TTC1_VOLCA/415-853       | D8TTC1.1     | PF04097.12 | 50.80 | 0.00 |
| TRINITY_D7SRR6_VITVI/26-97         | D7SRR6.1     | PF00240.21 | 50.80 | 0.00 |
| TRINITY_D8TIN0_VOLCA/58-342        | D8TIN0.1     | PF03381.13 | 50.80 | 0.00 |
| TRINITY_L8GPA6_ACACA/21-278        | L8GPA6.1     | PF00378.18 | 50.80 | 0.00 |
| TRINITY_S2J6K5_MUCC1/33-95         | S2J6K5.1     | PF00076.20 | 50.80 | 0.00 |
| TRINITY_K2E0Y4_9BACT/13-145        | K2E0Y4.1     | PF00390.17 | 50.80 | 0.00 |
| TRINITY_A8J8J1_CHLRE/220-658       | A8J8J1.1     | PF02889.14 | 50.80 | 0.00 |
| TRINITY_G0QMZ8_ICHMG/182-250       | G0QMZ8.1     | PF13424.4; | 50.80 | 0.00 |
| TRINITY_G0QPQ5_ICHMG/48-200        | G0QPQ5.1     | PF14908.4; | 50.80 | 0.00 |
| TRINITY_E1Z8Z4_CHLVA/291-808       | E1Z8Z4.1     | PF03200.14 | 50.80 | 0.00 |
| TRINITY_A8ISQ5_CHLRE/527-928       | A8ISQ5.1     | PF13086.4; | 50.80 | 0.00 |

|                                  |              |            |       |      |
|----------------------------------|--------------|------------|-------|------|
| TRINITY_L8GR08_ACACA/206-388     | L8GR08.1     | PF02145.13 | 50.80 | 0.00 |
| TRINITY_Q23YD4_TETTS/903-1281    | Q23YD4.2     | PF12698.5; | 50.80 | 0.00 |
| TRINITY_A8J7Q7_CHLRE/89-325      | A8J7Q7.1     | PF12697.5; | 50.80 | 0.00 |
| TRINITY_A0A0G4EQ84_9ALVE/661-725 | A0A0G4EQ84.1 | PF1343     | 50.80 | 0.00 |
| TRINITY_D8TN37_VOLCA/1910-2160   | D8TN37.1     | PF00520.29 | 50.80 | 0.00 |
| TRINITY_B3RXG0_TRIAD/41-489      | B3RXG0.1     | PF00067.20 | 50.80 | 0.00 |
| TRINITY_L8H072_ACACA/127-268     | L8H072.1     | PF12014.6; | 50.80 | 0.00 |
| TRINITY_F0ZDP7_DICPU/387-536     | F0ZDP7.1     | PF00620.25 | 50.80 | 0.00 |
| TRINITY_I7MAC8_TETTS/3673-3968   | I7MAC8.2     | PF00632.23 | 50.70 | 0.00 |
| TRINITY_A0CJA5_PARTE/79-275      | A0CJA5.1     | PF02630.12 | 50.70 | 0.00 |
| TRINITY_Q24HP0_TETTS/705-821     | Q24HP0.2     | PF02518.24 | 50.70 | 0.00 |
| TRINITY_A0CN15_PARTE/130-424     | A0CN15.1     | PF00481.19 | 50.70 | 0.00 |
| TRINITY_Q22DR6_TETTS/64-212      | Q22DR6.3     | PF09758.7; | 50.70 | 0.00 |
| TRINITY_A0DQ58_PARTE/137-400     | A0DQ58.1     | PF00069.23 | 50.70 | 0.00 |
| TRINITY_Q6BG72_PARTE/10-174      | Q6BG72.1     | PF01370.19 | 50.70 | 0.00 |
| TRINITY_I7MMC5_TETTS/472-769     | I7MMC5.2     | PF00632.23 | 50.70 | 0.00 |
| TRINITY_S2J3Z6_MUCC1/14-179      | S2J3Z6.1     | PF00071.20 | 50.70 | 0.00 |
| TRINITY_Q24BS9_TETTS/921-1178    | Q24BS9.2     | PF00481.19 | 50.70 | 0.00 |
| TRINITY_A0A098GEW6_TATMI/6-528   | A0A098GEW6.1 | PF0127     | 50.70 | 0.00 |
| TRINITY_I7M0L2_TETTS/8-119       | I7M0L2.1     | PF11969.6; | 50.70 | 0.00 |
| TRINITY_A0E1C9_PARTE/22-92       | A0E1C9.1     | PF13499.4; | 50.70 | 0.00 |
| TRINITY_D3B760_POLPA/17-238      | D3B760.1     | PF01048.18 | 50.70 | 0.00 |
| TRINITY_E3M8I4_CAERE/11-77       | E3M8I4.1     | PF00076.20 | 50.70 | 0.00 |
| TRINITY_A0A078AG39_STYLE/151-365 | A0A078AG39.1 | PF0155     | 50.70 | 0.00 |
| TRINITY_G0QJQ7_ICHMG/12-286      | G0QJQ7.1     | PF00069.23 | 50.70 | 0.00 |
| TRINITY_J4KMF2_BEAB2/252-629     | J4KMF2.1     | PF00176.21 | 50.70 | 0.00 |
| TRINITY_A7RPQ4_NEMVE/135-551     | A7RPQ4.1     | PF00930.19 | 50.70 | 0.00 |
| TRINITY_D8UKL5_VOLCA/150-225     | D8UKL5.1     | PF00338.20 | 50.70 | 0.00 |
| TRINITY_Q54SB7_DICDI/2115-2262   | Q54SB7.2     | PF00179.24 | 50.70 | 0.00 |
| TRINITY_F4QEN5_DICFS/35-320      | F4QEN5.1     | PF01008.15 | 50.70 | 0.00 |
| TRINITY_C4M7N9_ENTHI/808-1067    | C4M7N9.1     | PF00069.23 | 50.70 | 0.00 |
| TRINITY_A0A0A1PID5_9FUNG/30-98   | A0A0A1PID5.1 | PF0007     | 50.70 | 0.00 |
| TRINITY_I7LZQ9_TETTS/100-246     | I7LZQ9.2     | PF10075.7; | 50.70 | 0.00 |
| TRINITY_Q6BFC5_PARTE/2079-2177   | Q6BFC5.1     | PF08454.9; | 50.70 | 0.00 |
| TRINITY_A7SPT7_NEMVE/31-241      | A7SPT7.1     | PF07722.11 | 50.70 | 0.00 |
| TRINITY_Q54DZ1_DICDI/232-306     | Q54DZ1.1     | PF03456.16 | 50.70 | 0.00 |
| TRINITY_A0A078B539_STYLE/66-169  | A0A078B539.1 | PF0007     | 50.70 | 0.00 |
| TRINITY_A0A0N4UQT1_DRAME/104-178 | A0A0N4UQT1.1 | PF1455     | 50.70 | 0.00 |
| TRINITY_Q22TZ6_TETTS/170-240     | Q22TZ6.1     | PF15159.4; | 50.70 | 0.00 |
| TRINITY_D8TLT7_VOLCA/38-166      | D8TLT7.1     | PF04424.11 | 50.70 | 0.00 |
| TRINITY_A0A061G294_THECC/35-107  | A0A061G294.1 | PF0017     | 50.70 | 0.00 |
| TRINITY_Q01DB3_OSTTA/60-134      | Q01DB3.1     | PF00076.20 | 50.70 | 0.00 |
| TRINITY_Q6FXM8_CANGA/10-171      | Q6FXM8.1     | PF00071.20 | 50.70 | 0.00 |
| TRINITY_A8HPQ1_CHLRE/1343-1424   | A8HPQ1.1     | PF16135.3; | 50.70 | 0.00 |
| TRINITY_A0A0G4EHM0_9ALVE/13-373  | A0A0G4EHM0.1 | PF0015     | 50.70 | 0.00 |
| TRINITY_D8TTJ9_VOLCA/2-172       | D8TTJ9.1     | PF00106.23 | 50.70 | 0.00 |
| TRINITY_I7MMC4_TETTS/63-228      | I7MMC4.2     | PF08547.10 | 50.70 | 0.00 |
| TRINITY_A9TQT2_PHYPA/3-78        | A9TQT2.1     | PF12894.5; | 50.70 | 0.00 |
| TRINITY_A0A0J8CND6_BETVU/11-209  | A0A0J8CND6.1 | PF0976     | 50.70 | 0.00 |
| TRINITY_Q245Z0_TETTS/9-210       | Q245Z0.3     | PF01088.19 | 50.70 | 0.00 |
| TRINITY_D8R1A8_SELML/10-81       | D8R1A8.1     | PF12894.5; | 50.70 | 0.00 |
| TRINITY_A8J1Y6_CHLRE/551-620     | A8J1Y6.1     | PF00226.29 | 50.70 | 0.00 |
| TRINITY_A0A0K9P3T5_ZOSMR/29-105  | A0A0K9P3T5.1 | PF1289     | 50.70 | 0.00 |
| TRINITY_D2VSE5_NAEGR/55-399      | D2VSE5.1     | PF02055.14 | 50.70 | 0.00 |
| TRINITY_D8U7P5_VOLCA/18-335      | D8U7P5.1     | PF00225.21 | 50.70 | 0.00 |
| TRINITY_I7LTH0_TETTS/231-521     | I7LTH0.1     | PF01031.18 | 50.70 | 0.00 |
| TRINITY_G0QLN1_ICHMG/579-666     | G0QLN1.1     | PF12796.5; | 50.70 | 0.00 |
| TRINITY_I0YWLO_9CHLO/10-149      | I0YWLO.1     | PF00581.18 | 50.70 | 0.00 |
| TRINITY_A8JHE7_CHLRE/3-293       | A8JHE7.1     | PF03881.12 | 50.70 | 0.00 |
| TRINITY_W5KP64_ASTMX/256-327     | W5KP64.1     | PF13424.4; | 50.70 | 0.00 |
| TRINITY_I0Z3G2_9CHLO/789-892     | I0Z3G2.1     | PF02984.17 | 50.70 | 0.00 |



|                                    |              |            |       |      |
|------------------------------------|--------------|------------|-------|------|
| TRINITY_B0CYV5_LACBS/101-170       | B0CYV5.1     | PF00076.20 | 50.70 | 0.00 |
| TRINITY_D8QXZ8_SELML/9-81          | D8QXZ8.1     | PF00076.20 | 50.70 | 0.00 |
| TRINITY_F4PQV3_DICFS/219-491       | F4PQV3.1     | PF00082.20 | 50.70 | 0.00 |
| TRINITY_A0A078B161_STYLE/1505-1876 | A0A078B161.1 | PF0044     | 50.70 | 0.00 |
| TRINITY_D8TVH3_VOLCA/34-177        | D8TVH3.1     | PF03208.17 | 50.70 | 0.00 |
| TRINITY_L8H596_ACACA/587-655       | L8H596.1     | PF13884.4; | 50.70 | 0.00 |
| TRINITY_J9HQD5_9SPIT/115-187       | J9HQD5.1     | PF00498.24 | 50.70 | 0.00 |
| TRINITY_D8U2P8_VOLCA/502-654       | D8U2P8.1     | PF02622.13 | 50.70 | 0.00 |
| TRINITY_J9IJC6_9SPIT/230-303       | J9IJC6.1     | PF08059.11 | 50.70 | 0.00 |
| TRINITY_H2V477_TAKRU/309-380       | H2V477.1     | PF04564.13 | 50.70 | 0.00 |
| TRINITY_A0A0A1NSH3_9FUNG/411-613   | A0A0A1NSH3.1 | PF0438     | 50.70 | 0.00 |
| TRINITY_A0CAK3_PARTE/7-76          | A0CAK3.1     | PF01834.14 | 50.70 | 0.00 |
| TRINITY_D7KSF0_ARALL/115-252       | D7KSF0.1     | PF13365.4; | 50.70 | 0.00 |
| TRINITY_D8U0M2_VOLCA/6-147         | D8U0M2.1     | PF00582.24 | 50.70 | 0.00 |
| TRINITY_W5JHV0_ANODA/13-515        | W5JHV0.1     | PF01457.14 | 50.70 | 0.00 |
| TRINITY_M0RGE8_MUSAM/42-271        | M0RGE8.1     | PF00566.16 | 50.70 | 0.00 |
| TRINITY_E1ZE38_CHLVA/277-473       | E1ZE38.1     | PF00534.18 | 50.70 | 0.00 |
| TRINITY_A9B7L6_HERA2/397-546       | A9B7L6.1     | PF00005.25 | 50.70 | 0.00 |
| TRINITY_C4R3N7_PICPG/16-177        | C4R3N7.1     | PF00071.20 | 50.70 | 0.00 |
| TRINITY_A0A078ADF2_STYLE/8-121     | A0A078ADF2.1 | PF0076     | 50.70 | 0.00 |
| TRINITY_E1ZSR2_CHLVA/168-303       | E1ZSR2.1     | PF00107.24 | 50.70 | 0.00 |
| TRINITY_H8KQX5_SOLCM/9-302         | H8KQX5.1     | PF02274.15 | 50.70 | 0.00 |
| TRINITY_L8GR65_ACACA/345-515       | L8GR65.1     | PF03770.14 | 50.70 | 0.00 |
| TRINITY_A8IXM3_CHLRE/179-474       | A8IXM3.1     | PF00481.19 | 50.70 | 0.00 |
| TRINITY_Q24DF0_TETTS/748-1037      | Q24DF0.2     | PF00648.19 | 50.70 | 0.00 |
| TRINITY_A8JBS8_CHLRE/56-197        | A8JBS8.1     | PF01612.18 | 50.70 | 0.00 |
| TRINITY_L8H596_ACACA/587-655       | L8H596.1     | PF13884.4; | 50.70 | 0.00 |
| TRINITY_A0A0L6U7J0_9BASI/410-764   | A0A0L6U7J0.1 | PF0070     | 50.70 | 0.00 |
| TRINITY_A8IZN8_CHLRE/149-294       | A8IZN8.1     | PF07690.14 | 50.70 | 0.00 |
| TRINITY_F4S280_MELLP/47-120        | F4S280.1     | PF01480.15 | 50.70 | 0.00 |
| TRINITY_W6QVR6_PENRO/4-74          | W6QVR6.1     | PF00076.20 | 50.70 | 0.00 |
| TRINITY_D8TKZ7_VOLCA/1579-2019     | D8TKZ7.1     | PF00443.27 | 50.70 | 0.00 |
| TRINITY_Q23TU2_TETTS/4051-4801     | Q23TU2.2     | PF03028.13 | 50.70 | 0.00 |
| TRINITY_H3AJZ9_LATCH/39-112        | H3AJZ9.2     | PF01722.16 | 50.70 | 0.00 |
| TRINITY_A0CV13_PARTE/21-225        | A0CV13.1     | PF05013.10 | 50.60 | 0.00 |
| TRINITY_I7MLV3_TETTS/2-96          | I7MLV3.2     | PF03669.11 | 50.60 | 0.00 |
| TRINITY_I0KA28_9BACT/153-420       | I0KA28.1     | PF07995.9; | 50.60 | 0.00 |
| TRINITY_Q5FUT4_GLUOX/43-224        | Q5FUT4.1     | PF13489.4; | 50.60 | 0.00 |
| TRINITY_J9J5L0_9SPIT/92-259        | J9J5L0.1     | PF00650.18 | 50.60 | 0.00 |
| TRINITY_G0R049_ICHMG/53-326        | G0R049.1     | PF00069.23 | 50.60 | 0.00 |
| TRINITY_D5XB11_THEPJ/73-253        | D5XB11.1     | PF13847.4; | 50.60 | 0.00 |
| TRINITY_I7LXU5_TETTS/95-420        | I7LXU5.2     | PF02535.20 | 50.60 | 0.00 |
| TRINITY_A3GFG7_PICST/80-164        | A3GFG7.1     | PF00575.21 | 50.60 | 0.00 |
| TRINITY_C6XSN3_PEDHD/455-717       | C6XSN3.1     | PF12972.5; | 50.60 | 0.00 |
| TRINITY_A0BE11_PARTE/7-89          | A0BE11.1     | PF05495.10 | 50.60 | 0.00 |
| TRINITY_E0VIL0_PEDHC/279-437       | E0VIL0.1     | PF02872.16 | 50.60 | 0.00 |
| TRINITY_Q23QF2_TETTS/248-571       | Q23QF2.2     | PF03133.13 | 50.60 | 0.00 |
| TRINITY_G5GGH4_9FIRM/7-87          | G5GGH4.1     | PF00312.20 | 50.60 | 0.00 |
| TRINITY_W6FUH4_NODSP/15-183        | W6FUH4.1     | PF13385.4; | 50.60 | 0.00 |
| TRINITY_Q110A4_TRIEI/111-328       | Q110A4.1     | PF13604.4; | 50.60 | 0.00 |
| TRINITY_D8TIV9_VOLCA/4-251         | D8TIV9.1     | PF14926.4; | 50.60 | 0.00 |
| TRINITY_Q23FG9_TETTS/2610-2860     | Q23FG9.2     | PF00520.29 | 50.60 | 0.00 |
| TRINITY_D8UGE5_VOLCA/164-277       | D8UGE5.1     | PF00644.18 | 50.60 | 0.00 |
| TRINITY_L8HF00_ACACA/100-261       | L8HF00.1     | PF01652.16 | 50.60 | 0.00 |
| TRINITY_E3CZV0_9BACT/24-354        | E3CZV0.1     | PF00155.19 | 50.60 | 0.00 |
| TRINITY_A8IH52_CHLRE/113-189       | A8IH52.1     | PF02536.12 | 50.60 | 0.00 |
| TRINITY_K1R4I2_CRAGI/95-237        | K1R4I2.1     | PF01399.25 | 50.60 | 0.00 |
| TRINITY_K1PT59_CRAGI/33-126        | K1PT59.1     | PF13905.4; | 50.60 | 0.00 |
| TRINITY_G0QV45_ICHMG/138-367       | G0QV45.1     | PF01798.16 | 50.60 | 0.00 |
| TRINITY_R6P4I1_9FIRM/30-106        | R6P4I1.1     | PF03061.20 | 50.60 | 0.00 |
| TRINITY_F4PRX4_DICFS/3-79          | F4PRX4.1     | PF07524.11 | 50.60 | 0.00 |

|                                  |              |            |       |      |
|----------------------------------|--------------|------------|-------|------|
| TRINITY_C3ZP28_BRAFL/5-178       | C3ZP28.1     | PF00071.20 | 50.60 | 0.00 |
| TRINITY_I7M433_TETTS/1051-1168   | I7M433.2     | PF02518.24 | 50.60 | 0.00 |
| TRINITY_Q4YVP7_PLABA/27-105      | Q4YVP7.1     | PF05608.10 | 50.60 | 0.00 |
| TRINITY_B1W187_STRGG/1-299       | B1W187.1     | PF00248.19 | 50.60 | 0.00 |
| TRINITY_D8U978_VOLCA/2-203       | D8U978.1     | PF07714.15 | 50.60 | 0.00 |
| TRINITY_S8CL60_9LAMI/418-503     | S8CL60.1     | PF00439.23 | 50.60 | 0.00 |
| TRINITY_L8GJE1_ACACA/32-414      | L8GJE1.1     | PF00144.22 | 50.60 | 0.00 |
| TRINITY_I0YPA9_9CHLO/18-167      | I0YPA9.1     | PF01947.14 | 50.60 | 0.00 |
| TRINITY_A4VD11_TETTS/21-261      | A4VD11.2     | PF00481.19 | 50.60 | 0.00 |
| TRINITY_A8J1L6_CHLRE/28-183      | A8J1L6.1     | PF12796.5; | 50.60 | 0.00 |
| TRINITY_L8H393_ACACA/160-347     | L8H393.1     | PF00644.18 | 50.60 | 0.00 |
| TRINITY_Q23YR9_TETTS/7-439       | Q23YR9.1     | PF00171.20 | 50.60 | 0.00 |
| TRINITY_I7LVZ2_TETTS/119-388     | I7LVZ2.2     | PF00664.21 | 50.60 | 0.00 |
| TRINITY_D7FH31_ECTSI/15-440      | D7FH31.1     | PF01663.20 | 50.60 | 0.00 |
| TRINITY_I0YZY2_9CHLO/181-311     | I0YZY2.1     | PF00583.23 | 50.60 | 0.00 |
| TRINITY_A8JCE4_CHLRE/156-246     | A8JCE4.1     | PF00041.19 | 50.60 | 0.00 |
| TRINITY_A0A0F2RSV7_9PROT/27-304  | A0A0F2RSV7.1 | PF0015     | 50.60 | 0.00 |
| TRINITY_D8U417_VOLCA/198-314     | D8U417.1     | PF00504.19 | 50.60 | 0.00 |
| TRINITY_A0A075AS09_9FUNG/185-265 | A0A075AS09.1 | PF0400     | 50.60 | 0.00 |
| TRINITY_D8TJI7_VOLCA/7-220       | D8TJI7.1     | PF01738.16 | 50.60 | 0.00 |
| TRINITY_D8TU89_VOLCA/319-430     | D8TU89.1     | PF00787.22 | 50.60 | 0.00 |
| TRINITY_A8IP92_CHLRE/3-79        | A8IP92.1     | PF07524.11 | 50.60 | 0.00 |
| TRINITY_A8HM85_CHLRE/59-327      | A8HM85.1     | PF00069.23 | 50.60 | 0.00 |
| TRINITY_I7MCL9_TETTS/190-488     | I7MCL9.2     | PF00648.19 | 50.60 | 0.00 |
| TRINITY_I0YVV3_9CHLO/785-1087    | I0YVV3.1     | PF07064.11 | 50.60 | 0.00 |
| TRINITY_I0YS09_9CHLO/19-96       | I0YS09.1     | PF03134.17 | 50.60 | 0.00 |
| TRINITY_I0Z826_9CHLO/160-291     | I0Z826.1     | PF00782.18 | 50.60 | 0.00 |
| TRINITY_A0DFT1_PARTE/3-85        | A0DFT1.1     | PF00778.15 | 50.60 | 0.00 |
| TRINITY_L8HJ37_ACACA/6-88        | L8HJ37.1     | PF03259.15 | 50.60 | 0.00 |
| TRINITY_I7M104_TETTS/32-282      | I7M104.1     | PF00069.23 | 50.60 | 0.00 |
| TRINITY_F4QF56_DICFS/241-413     | F4QF56.1     | PF03031.16 | 50.60 | 0.00 |
| TRINITY_Q22GW0_TETTS/1651-1813   | Q22GW0.2     | PF00069.23 | 50.60 | 0.00 |
| TRINITY_J9IST0_9SPIT/130-284     | J9IST0.1     | PF13768.4; | 50.60 | 0.00 |
| TRINITY_H9GIE1_ANOCA/105-454     | H9GIE1.2     | PF00773.17 | 50.60 | 0.00 |
| TRINITY_D8TYV0_VOLCA/326-491     | D8TYV0.1     | PF10173.7; | 50.60 | 0.00 |
| TRINITY_A8HM51_CHLRE/256-491     | A8HM51.1     | PF04811.13 | 50.60 | 0.00 |
| TRINITY_V4KQR7_EUTSA/287-399     | V4KQR7.1     | PF03835.13 | 50.60 | 0.00 |
| TRINITY_C4WXA7_ACYPI/23-101      | C4WXA7.1     | PF01423.20 | 50.60 | 0.00 |
| TRINITY_L8GCT6_ACACA/23-104      | L8GCT6.1     | PF14542.4; | 50.60 | 0.00 |
| TRINITY_YTA12_SCHPO/134-230      | Q9HGM3.1     | PF06480.13 | 50.60 | 0.00 |
| TRINITY_A0A078AGR2_STYLE/52-145  | A0A078AGR2.1 | PF0177     | 50.50 | 0.00 |
| TRINITY_I4B3F1_TURPD/61-196      | I4B3F1.1     | PF00188.24 | 50.50 | 0.00 |
| TRINITY_A0A067CMQ3_SAPPC/225-321 | A0A067CMQ3.1 | PF1654     | 50.50 | 0.00 |
| TRINITY_E1ZQW8_CHLVA/294-422     | E1ZQW8.1     | PF06479.10 | 50.50 | 0.00 |
| TRINITY_Q22AV5_TETTS/18-120      | Q22AV5.3     | PF00466.18 | 50.50 | 0.00 |
| TRINITY_I0Z658_9CHLO/14-184      | I0Z658.1     | PF00270.27 | 50.50 | 0.00 |
| TRINITY_L8GXJ8_ACACA/333-582     | L8GXJ8.1     | PF07065.12 | 50.50 | 0.00 |
| TRINITY_M0SCI7_MUSAM/848-955     | M0SCI7.1     | PF00970.22 | 50.50 | 0.00 |
| TRINITY_G8BJW8_CANPC/6-167       | G8BJW8.1     | PF00071.20 | 50.50 | 0.00 |
| TRINITY_Q22DU5_TETTS/61-276      | Q22DU5.3     | PF01988.17 | 50.50 | 0.00 |
| TRINITY_A0DY44_PARTE/5-114       | A0DY44.1     | PF00787.22 | 50.50 | 0.00 |
| TRINITY_A4B9B6_9GAMM/5-197       | A4B9B6.1     | PF00316.18 | 50.50 | 0.00 |
| TRINITY_E1ZQW0_CHLVA/4-287       | E1ZQW0.1     | PF00069.23 | 50.50 | 0.00 |
| TRINITY_I1BWC7_RHIO9/616-710     | I1BWC7.1     | PF04676.12 | 50.50 | 0.00 |
| TRINITY_A9URG4_MONBE/17-320      | A9URG4.1     | PF00933.19 | 50.50 | 0.00 |
| TRINITY_E6TZQ2_BACCJ/5-113       | E6TZQ2.1     | PF04134.10 | 50.50 | 0.00 |
| TRINITY_I7MMY6_TETTS/639-738     | I7MMY6.2     | PF00989.23 | 50.50 | 0.00 |
| TRINITY_A0DMS6_PARTE/43-308      | A0DMS6.1     | PF03381.13 | 50.50 | 0.00 |
| TRINITY_I0YIQ4_9CHLO/34-136      | I0YIQ4.1     | PF00583.23 | 50.50 | 0.00 |
| TRINITY_D8U031_VOLCA/422-597     | D8U031.1     | PF16507.3; | 50.50 | 0.00 |
| TRINITY_F4PZZ1_DICFS/16-111      | F4PZZ1.1     | PF00169.27 | 50.50 | 0.00 |

|                                    |              |            |       |      |
|------------------------------------|--------------|------------|-------|------|
| TRINITY_A0BCH6_PARTE/98-199        | A0BCH6.1     | PF00829.19 | 50.50 | 0.00 |
| TRINITY_C3YM49_BRAFL/34-172        | C3YM49.1     | PF13532.4; | 50.50 | 0.00 |
| TRINITY_D3BVR3_POLPA/201-453       | D3BVR3.1     | PF07714.15 | 50.50 | 0.00 |
| TRINITY_A8IUH2_CHLRE/119-324       | A8IUH2.1     | PF07714.15 | 50.50 | 0.00 |
| TRINITY_D8TQ02_VOLCA/862-1054      | D8TQ02.1     | PF07717.14 | 50.50 | 0.00 |
| TRINITY_I7M279_TETTS/162-262       | I7M279.1     | PF13864.4; | 50.50 | 0.00 |
| TRINITY_A8HQ93_CHLRE/25-123        | A8HQ93.1     | PF00085.18 | 50.50 | 0.00 |
| TRINITY_A8I341_CHLRE/1-292         | A8I341.1     | PF04916.11 | 50.50 | 0.00 |
| TRINITY_A0A087SS12_AUXPR/84-521    | A0A087SS12.1 | PF00099    | 50.50 | 0.00 |
| TRINITY_A0A0G4FFD9_9ALVE/90-555    | A0A0G4FFD9.1 | PF0006     | 50.50 | 0.00 |
| TRINITY_L1IEU9_GUIITH/3-212        | L1IEU9.1     | PF00091.23 | 50.50 | 0.00 |
| TRINITY_D8TKK8_VOLCA/284-440       | D8TKK8.1     | PF04755.10 | 50.50 | 0.00 |
| TRINITY_B0CTS7_LACBS/26-235        | B0CTS7.1     | PF13489.4; | 50.50 | 0.00 |
| TRINITY_I0YK29_9CHLO/86-684        | I0YK29.1     | PF03169.13 | 50.50 | 0.00 |
| TRINITY_E1Z6K7_CHLVA/53-256        | E1Z6K7.1     | PF00856.26 | 50.50 | 0.00 |
| TRINITY_Q22T22_TETTS/520-735       | Q22T22.3     | PF07859.11 | 50.50 | 0.00 |
| TRINITY_U2FW98_9GAMM/144-399       | U2FW98.1     | PF00067.20 | 50.50 | 0.00 |
| TRINITY_A0CJJ5_PARTE/148-258       | A0CJJ5.1     | PF00085.18 | 50.50 | 0.00 |
| TRINITY_F4PYX7_DICFS/450-662       | F4PYX7.1     | PF13236.4; | 50.50 | 0.00 |
| TRINITY_D8TV76_VOLCA/263-363       | D8TV76.1     | PF01399.25 | 50.50 | 0.00 |
| TRINITY_D8TXQ4_VOLCA/134-237       | D8TXQ4.1     | PF02269.14 | 50.50 | 0.00 |
| TRINITY_L8HHZ1_ACACA/27-668        | L8HHZ1.1     | PF01496.17 | 50.50 | 0.00 |
| TRINITY_U9T380_RHIID/3-184         | U9T380.1     | PF01145.23 | 50.50 | 0.00 |
| TRINITY_D3BDG4_POLPA/512-623       | D3BDG4.1     | PF00072.22 | 50.50 | 0.00 |
| TRINITY_I0Z9K8_9CHLO/1-199         | I0Z9K8.1     | PF01545.19 | 50.50 | 0.00 |
| TRINITY_D8TQQ3_VOLCA/75-581        | D8TQQ3.1     | PF04129.10 | 50.50 | 0.00 |
| TRINITY_I1CRD3_RHIO9/362-587       | I1CRD3.1     | PF00133.20 | 50.50 | 0.00 |
| TRINITY_V7AZU6_PHAVU/330-774       | V7AZU6.1     | PF01055.24 | 50.50 | 0.00 |
| TRINITY_A8IEX1_CHLRE/352-562       | A8IEX1.1     | PF01061.22 | 50.50 | 0.00 |
| TRINITY_A0A0G4FFD9_9ALVE/90-555    | A0A0G4FFD9.1 | PF0006     | 50.50 | 0.00 |
| TRINITY_A7HR89_PARL1/16-441        | A7HR89.1     | PF00501.26 | 50.50 | 0.00 |
| TRINITY_G0QKR4_ICHMG/620-711       | G0QKR4.1     | PF03129.18 | 50.50 | 0.00 |
| TRINITY_D8U5K2_VOLCA/113-191       | D8U5K2.1     | PF03061.20 | 50.50 | 0.00 |
| TRINITY_A8J3P1_CHLRE/954-1161      | A8J3P1.1     | PF00211.18 | 50.50 | 0.00 |
| TRINITY_Q021V3_SOLUE/2015-2114     | Q021V3.1     | PF02369.14 | 50.50 | 0.00 |
| TRINITY_I7M328_TETTS/23-132        | I7M328.1     | PF00787.22 | 50.50 | 0.00 |
| TRINITY_A0A0P7TRU5_9TELE/547-700   | A0A0P7TRU5.1 | PF0000     | 50.50 | 0.00 |
| TRINITY_A8J6B3_CHLRE/199-368       | A8J6B3.1     | PF00069.23 | 50.50 | 0.00 |
| TRINITY_D8U9S9_VOLCA/599-793       | D8U9S9.1     | PF00211.18 | 50.50 | 0.00 |
| TRINITY_L8HFK7_ACACA/695-881       | L8HFK7.1     | PF00644.18 | 50.50 | 0.00 |
| TRINITY_K3XV70_SETIT/273-738       | K3XV70.1     | PF01055.24 | 50.50 | 0.00 |
| TRINITY_F4Q5I7_DICFS/473-706       | F4Q5I7.1     | PF00233.17 | 50.50 | 0.00 |
| TRINITY_B2IT25_NOSP7/32-490        | B2IT25.1     | PF03055.13 | 50.50 | 0.00 |
| TRINITY_E5SHN1_TRISP/301-751       | E5SHN1.1     | PF01055.24 | 50.40 | 0.00 |
| TRINITY_F1A043_DICPU/1229-1482     | F1A043.1     | PF07714.15 | 50.40 | 0.00 |
| TRINITY_A0A078BB69_STYLE/58-324    | A0A078BB69.1 | PF0338     | 50.40 | 0.00 |
| TRINITY_C4MB22_ENTHI/3-139         | C4MB22.1     | PF02502.16 | 50.40 | 0.00 |
| TRINITY_A0EH94_PARTE/143-486       | A0EH94.1     | PF03062.17 | 50.40 | 0.00 |
| TRINITY_Q234E4_TETTS/260-515       | Q234E4.2     | PF05677.10 | 50.40 | 0.00 |
| TRINITY_Q23YS8_TETTS/179-436       | Q23YS8.2     | PF02666.13 | 50.40 | 0.00 |
| TRINITY_M3ZSR5_XIPMA/122-254       | M3ZSR5.1     | PF17207.1; | 50.40 | 0.00 |
| TRINITY_A0A0M8K928_9CHLR/19-151    | A0A0M8K928.1 | PF0258     | 50.40 | 0.00 |
| TRINITY_Q54UH9_DICDI/297-423       | Q54UH9.1     | PF01569.19 | 50.40 | 0.00 |
| TRINITY_K3WM25_PYTUL/97-215        | K3WM25.1     | PF03834.12 | 50.40 | 0.00 |
| TRINITY_A0A078AEE4_STYLE/1534-1673 | A0A078AEE4.1 | PF1027     | 50.40 | 0.00 |
| TRINITY_E1ZN56_CHLVA/84-366        | E1ZN56.1     | PF00664.21 | 50.40 | 0.00 |
| TRINITY_G0QXS2_ICHMG/1-334         | G0QXS2.1     | PF00724.18 | 50.40 | 0.00 |
| TRINITY_I0Z307_9CHLO/78-324        | I0Z307.1     | PF00561.18 | 50.40 | 0.00 |
| TRINITY_A0A078AJ77_STYLE/19-206    | A0A078AJ77.1 | PF0090     | 50.40 | 0.00 |
| TRINITY_Q183E8_PEPD6/4-324         | Q183E8.1     | PF16363.3; | 50.40 | 0.00 |
| TRINITY_A0A022RC66_ERYGU/150-384   | A0A022RC66.1 | PF1362     | 50.40 | 0.00 |

|                                  |              |            |       |      |
|----------------------------------|--------------|------------|-------|------|
| TRINITY_L8GMG2_ACACA/38-448      | L8GMG2.1     | PF00450.20 | 50.40 | 0.00 |
| TRINITY_D2VII2_NAEGR/70-302      | D2VII2.1     | PF04185.12 | 50.40 | 0.00 |
| TRINITY_I7MMV5_TETTS/55-352      | I7MMV5.2     | PF00443.27 | 50.40 | 0.00 |
| TRINITY_D3B1D9_POLPA/14-486      | D3B1D9.1     | PF01229.15 | 50.40 | 0.00 |
| TRINITY_A0A0H4VMJ0_9BACT/6-246   | A0A0H4VMJ0.1 | PF0778     | 50.40 | 0.00 |
| TRINITY_F2NKK1_MARHT/45-180      | F2NKK1.1     | PF01565.21 | 50.40 | 0.00 |
| TRINITY_A8JEJ5_CHLRE/61-186      | A8JEJ5.1     | PF02225.20 | 50.40 | 0.00 |
| TRINITY_A0A0D3C966_BRAOL/461-593 | A0A0D3C966.1 | PF0141     | 50.40 | 0.00 |
| TRINITY_A0A0A6D1K0_9SPHN/18-142  | A0A0A6D1K0.1 | PF1358     | 50.40 | 0.00 |
| TRINITY_D2VI09_NAEGR/2-296       | D2VI09.1     | PF00069.23 | 50.40 | 0.00 |
| TRINITY_H3CGY9_TETNG/863-1085    | H3CGY9.1     | PF03178.13 | 50.40 | 0.00 |
| TRINITY_I7MA07_TETTS/32-269      | I7MA07.2     | PF00481.19 | 50.40 | 0.00 |
| TRINITY_A0C4Z1_PARTE/13-292      | A0C4Z1.1     | PF07993.10 | 50.40 | 0.00 |
| TRINITY_D8TKH1_VOLCA/3-235       | D8TKH1.1     | PF08597.8; | 50.40 | 0.00 |
| TRINITY_C5YK16_SORBI/1050-1167   | C5YK16.1     | PF00665.24 | 50.40 | 0.00 |
| TRINITY_A0A067E2Y8_CITSI/13-132  | A0A067E2Y8.1 | PF0090     | 50.40 | 0.00 |
| TRINITY_G8YM70_PICSO/5-126       | G8YM70.1     | PF03311.12 | 50.40 | 0.00 |
| TRINITY_V6LK02_9EUKA/3-212       | V6LK02.1     | PF00091.23 | 50.40 | 0.00 |
| TRINITY_D8UCU9_VOLCA/285-401     | D8UCU9.1     | PF06565.10 | 50.40 | 0.00 |
| TRINITY_D8TXN9_VOLCA/18-203      | D8TXN9.1     | PF03357.19 | 50.40 | 0.00 |
| TRINITY_I0YS22_9CHLO/25-200      | I0YS22.1     | PF05175.12 | 50.40 | 0.00 |
| TRINITY_A8JID7_CHLRE/377-635     | A8JID7.1     | PF00112.21 | 50.40 | 0.00 |
| TRINITY_D8UE69_VOLCA/79-352      | D8UE69.1     | PF00270.27 | 50.40 | 0.00 |
| TRINITY_A8JF64_CHLRE/376-794     | A8JF64.1     | PF05557.11 | 50.40 | 0.00 |
| TRINITY_L8GZ22_ACACA/175-421     | L8GZ22.1     | PF00149.26 | 50.40 | 0.00 |
| TRINITY_Q22SL3_TETTS/348-483     | Q22SL3.3     | PF01590.24 | 50.40 | 0.00 |
| TRINITY_D2UXN1_NAEGR/204-317     | D2UXN1.1     | PF02373.20 | 50.40 | 0.00 |
| TRINITY_I0Z535_9CHLO/41-385      | I0Z535.1     | PF00266.17 | 50.40 | 0.00 |
| TRINITY_A0C0U9_PARTE/95-431      | A0C0U9.1     | PF03969.14 | 50.40 | 0.00 |
| TRINITY_A0A087SKR7_AUXPR/207-323 | A0A087SKR7.1 | PF0176     | 50.40 | 0.00 |
| TRINITY_A8JG06_CHLRE/8-378       | A8JG06.1     | PF03097.16 | 50.40 | 0.00 |
| TRINITY_W5AB19_WHEAT/542-682     | W5AB19.1     | PF04096.12 | 50.40 | 0.00 |
| TRINITY_D8U7H7_VOLCA/11-359      | D8U7H7.1     | PF04928.15 | 50.40 | 0.00 |
| TRINITY_D8TZH6_VOLCA/22-283      | D8TZH6.1     | PF00233.17 | 50.40 | 0.00 |
| TRINITY_A8JHV6_CHLRE/431-702     | A8JHV6.1     | PF00069.23 | 50.40 | 0.00 |
| TRINITY_A0CYT3_PARTE/95-208      | A0CYT3.1     | PF01159.17 | 50.40 | 0.00 |
| TRINITY_A0CJY8_PARTE/436-698     | A0CJY8.1     | PF00069.23 | 50.30 | 0.00 |
| TRINITY_Q245K3_TETTS/327-677     | Q245K3.2     | PF01237.16 | 50.30 | 0.00 |
| TRINITY_L8GHY4_ACACA/84-371      | L8GHY4.1     | PF07690.14 | 50.30 | 0.00 |
| TRINITY_L8GF65_ACACA/32-171      | L8GF65.1     | PF01138.19 | 50.30 | 0.00 |
| TRINITY_T1HIC0_RHOPR/10-171      | T1HIC0.1     | PF00071.20 | 50.30 | 0.00 |
| TRINITY_D3AVJ6_POLPA/226-391     | D3AVJ6.1     | PF00005.25 | 50.30 | 0.00 |
| TRINITY_D3BLJ5_POLPA/1841-2108   | D3BLJ5.1     | PF07714.15 | 50.30 | 0.00 |
| TRINITY_Q54TS5_DICDI/59-351      | Q54TS5.1     | PF00128.22 | 50.30 | 0.00 |
| TRINITY_A8IFG0_CHLRE/3-330       | A8IFG0.1     | PF16420.3; | 50.30 | 0.00 |
| TRINITY_I7M0N5_TETTS/125-295     | I7M0N5.1     | PF00092.26 | 50.30 | 0.00 |
| TRINITY_I7M6K2_TETTS/65-258      | I7M6K2.1     | PF01145.23 | 50.30 | 0.00 |
| TRINITY_D8TSX5_VOLCA/1-202       | D8TSX5.1     | PF04139.11 | 50.30 | 0.00 |
| TRINITY_D3BMQ2_POLPA/45-229      | D3BMQ2.1     | PF00406.20 | 50.30 | 0.00 |
| TRINITY_Q22W19_TETTS/115-323     | Q22W19.3     | PF00112.21 | 50.30 | 0.00 |
| TRINITY_A0A075AXX5_9FUNG/49-226  | A0A075AXX5.1 | PF0000     | 50.30 | 0.00 |
| TRINITY_D3BP99_POLPA/174-329     | D3BP99.1     | PF00903.23 | 50.30 | 0.00 |
| TRINITY_F4PH07_DICFS/583-780     | F4PH07.1     | PF00617.17 | 50.30 | 0.00 |
| TRINITY_F0ZJW2_DICPU/563-743     | F0ZJW2.1     | PF02145.13 | 50.30 | 0.00 |
| TRINITY_G0QNF3_ICHMG/123-438     | G0QNF3.1     | PF00351.19 | 50.30 | 0.00 |
| TRINITY_A0CKF0_PARTE/1023-1167   | A0CKF0.1     | PF00005.25 | 50.30 | 0.00 |
| TRINITY_L8HEV2_ACACA/41-347      | L8HEV2.1     | PF01074.20 | 50.30 | 0.00 |
| TRINITY_G4V6C8_SCHMA/54-247      | G4V6C8.1     | PF04733.12 | 50.30 | 0.00 |
| TRINITY_Q19VH5_CHLRE/2-151       | Q19VH5.1     | PF03358.13 | 50.30 | 0.00 |
| TRINITY_D8TPF1_VOLCA/22-214      | D8TPF1.1     | PF16661.3; | 50.30 | 0.00 |
| TRINITY_A7SIF7_NEMVE/134-316     | A7SIF7.1     | PF02145.13 | 50.30 | 0.00 |

|                                  |                     |       |      |
|----------------------------------|---------------------|-------|------|
| TRINITY_A0A078AN29_STYLE/103-278 | A0A078AN29.1 PF0471 | 50.30 | 0.00 |
| TRINITY_E1Z3R9_CHLVA/105-275     | E1Z3R9.1 PF12068.6; | 50.30 | 0.00 |
| TRINITY_F4PSM9_DICFS/33-212      | F4PSM9.1 PF13460.4; | 50.30 | 0.00 |
| TRINITY_A8J2P8_CHLRE/467-630     | A8J2P8.1 PF06728.11 | 50.30 | 0.00 |
| TRINITY_A0DRY4_PARTE/120-281     | A0DRY4.1 PF14580.4; | 50.30 | 0.00 |
| TRINITY_I7MCL9_TETTS/190-488     | I7MCL9.2 PF00648.19 | 50.30 | 0.00 |
| TRINITY_L8GQN2_ACACA/447-624     | L8GQN2.1 PF00617.17 | 50.30 | 0.00 |
| TRINITY_W7X4T7_TETTS/1-455       | W7X4T7.1 PF00171.20 | 50.30 | 0.00 |
| TRINITY_A0A075AWU8_9FUNG/39-183  | A0A075AWU8.1 PF0010 | 50.30 | 0.00 |
| TRINITY_E1Z6Q9_CHLVA/24-203      | E1Z6Q9.1 PF01012.19 | 50.30 | 0.00 |
| TRINITY_Q7XLT8_ORYSJ/503-697     | Q7XLT8.2 PF00078.25 | 50.30 | 0.00 |
| TRINITY_Q23DI7_TETTS/1868-2219   | Q23DI7.2 PF00443.27 | 50.30 | 0.00 |
| TRINITY_K6XR77_9ALTE/18-317      | K6XR77.1 PF01156.17 | 50.20 | 0.00 |
| TRINITY_G7Z4V8_AZOL4/33-281      | G7Z4V8.1 PF12697.5; | 50.20 | 0.00 |
| TRINITY_D8TSD6_VOLCA/425-880     | D8TSD6.1 PF11894.6; | 50.20 | 0.00 |
| TRINITY_I7M7G3_TETTS/21-302      | I7M7G3.1 PF00069.23 | 50.20 | 0.00 |
| TRINITY_A9U2F6_PHYPA/53-547      | A9U2F6.1 PF02990.14 | 50.20 | 0.00 |
| TRINITY_C5NXZ0_9BACL/3-212       | C5NXZ0.1 PF01791.7; | 50.20 | 0.00 |
| TRINITY_A9V4S2_MONBE/204-426     | A9V4S2.1 PF04389.15 | 50.20 | 0.00 |
| TRINITY_Q22W19_TETTS/115-323     | Q22W19.3 PF00112.21 | 50.20 | 0.00 |
| TRINITY_D8TPH6_VOLCA/875-1156    | D8TPH6.1 PF10595.7; | 50.20 | 0.00 |
| TRINITY_I0YIS2_9CHLO/89-346      | I0YIS2.1 PF00561.18 | 50.20 | 0.00 |
| TRINITY_L8HKC9_ACACA/286-508     | L8HKC9.1 PF04389.15 | 50.20 | 0.00 |
| TRINITY_L8HAW3_ACACA/654-873     | L8HAW3.1 PF13236.4; | 50.20 | 0.00 |
| TRINITY_D8TN00_VOLCA/1-276       | D8TN00.1 PF01433.18 | 50.20 | 0.00 |
| TRINITY_A0A074WT85_9PEZI/321-526 | A0A074WT85.1 PF0056 | 50.20 | 0.00 |
| TRINITY_D8U819_VOLCA/63-369      | D8U819.1 PF02383.16 | 50.20 | 0.00 |
| TRINITY_A8J6M5_CHLRE/663-937     | A8J6M5.1 PF00664.21 | 50.20 | 0.00 |
| TRINITY_A6Q2C0_NITSB/20-221      | A6Q2C0.1 PF02146.15 | 50.20 | 0.00 |
| TRINITY_D8TTV8_VOLCA/81-324      | D8TTV8.1 PF00233.17 | 50.20 | 0.00 |
| TRINITY_A8I4W2_CHLRE/1-181       | A8I4W2.1 PF00211.18 | 50.20 | 0.00 |
| TRINITY_G0QMH5_ICHMG/105-461     | G0QMH5.1 PF06602.12 | 50.10 | 0.00 |
| TRINITY_Q0DG76_ORYSJ/129-450     | Q0DG76.1 PF00069.23 | 50.10 | 0.00 |
| TRINITY_D8TKH5_VOLCA/385-739     | D8TKH5.1 PF03016.13 | 50.10 | 0.00 |
| TRINITY_SLT2_CHLRE/16-750        | D2K6F1.1 PF03600.14 | 50.10 | 0.00 |
| TRINITY_Q7Z113_PARTE/30-110      | Q7Z113.1 PF13774.4; | 50.00 | 0.00 |
| TRINITY_I7MH25_TETTS/266-611     | I7MH25.2 PF03124.12 | 50.00 | 0.00 |
| TRINITY_L8H823_ACACA/184-369     | L8H823.1 PF07065.12 | 50.00 | 0.00 |
| TRINITY_D8UBR5_VOLCA/567-935     | D8UBR5.1 PF03215.13 | 50.00 | 0.00 |
| TRINITY_A0CXJ7_PARTE/74-221      | A0CXJ7.1 PF01553.19 | 50.00 | 0.00 |
| TRINITY_G0QJ72_ICHMG/112-320     | G0QJ72.1 PF00112.21 | 50.00 | 0.00 |
| TRINITY_A0A078A070_STYLE/521-739 | A0A078A070.1 PF0785 | 50.00 | 0.00 |
| TRINITY_Q7RLR7_PLAYO/177-256     | Q7RLR7.1 PF03371.13 | 50.00 | 0.00 |
| TRINITY_I7M2I2_TETTS/204-299     | I7M2I2.1 PF00153.25 | 50.00 | 0.00 |
| TRINITY_I7MGE9_TETTS/750-1106    | I7MGE9.2 PF05192.16 | 50.00 | 0.00 |
| TRINITY_Q1ZXJ3_DICDI/154-439     | Q1ZXJ3.1 PF03034.13 | 50.00 | 0.00 |
| TRINITY_Q23FD8_TETTS/19-112      | Q23FD8.4 PF01230.21 | 50.00 | 0.00 |
| TRINITY_J9ICS8_9SPIT/235-354     | J9ICS8.1 PF00383.21 | 50.00 | 0.00 |
| TRINITY_Q245F6_TETTS/838-909     | Q245F6.2 PF14791.4; | 50.00 | 0.00 |
| TRINITY_E1C1F8_CHICK/851-1054    | E1C1F8.2 PF00488.19 | 50.00 | 0.00 |
| TRINITY_T1KTS2_TETUR/45-205      | T1KTS2.1 PF03031.16 | 50.00 | 0.00 |
| TRINITY_A0C5H1_PARTE/22-271      | A0C5H1.1 PF00378.18 | 50.00 | 0.00 |
| TRINITY_J0LG47_9BACT/30-232      | J0LG47.1 PF04402.12 | 50.00 | 0.00 |
| TRINITY_A0A078LAK8_9CHLA/47-214  | A0A078LAK8.1 PF0258 | 50.00 | 0.00 |
| TRINITY_V4LMZ4_EUTSA/9-153       | V4LMZ4.1 PF00179.24 | 50.00 | 0.00 |
| TRINITY_I0Z567_9CHLO/1670-1720   | I0Z567.1 PF00847.18 | 50.00 | 0.00 |
| TRINITY_A0E9F9_PARTE/141-258     | A0E9F9.1 PF12146.6; | 50.00 | 0.00 |
| TRINITY_U9SM67_RHIID/195-278     | U9SM67.1 PF12861.5; | 50.00 | 0.00 |
| TRINITY_L8GTT3_ACACA/772-1081    | L8GTT3.1 PF00632.23 | 50.00 | 0.00 |
| TRINITY_B3E8K8_GEOLS/331-515     | B3E8K8.1 PF13489.4; | 50.00 | 0.00 |
| TRINITY_Q232W6_TETTS/660-768     | Q232W6.3 PF01248.24 | 50.00 | 0.00 |

|                                  |                     |       |      |
|----------------------------------|---------------------|-------|------|
| TRINITY_L8GW12_ACACA/1-423       | L8GW12.1 PF00022.17 | 50.00 | 0.00 |
| TRINITY_D2VGX1_NAEGR/83-147      | D2VGX1.1 PF13499.4; | 50.00 | 0.00 |
| TRINITY_I1IZ00_BRADI/799-857     | I1IZ00.1 PF08672.9; | 50.00 | 0.00 |
| TRINITY_Q246C6_TETTS/4-223       | Q246C6.1 PF00300.20 | 50.00 | 0.00 |
| TRINITY_A0BPY0_PARTE/414-535     | A0BPY0.1 PF02518.24 | 50.00 | 0.00 |
| TRINITY_A0CJA5_PARTE/79-275      | A0CJA5.1 PF02630.12 | 50.00 | 0.00 |
| TRINITY_A0A0D2UQJ9_CAPO3/69-137  | A0A0D2UQJ9.1 PF1384 | 50.00 | 0.00 |
| TRINITY_H1XQG2_9BACT/3-135       | H1XQG2.1 PF02878.14 | 50.00 | 0.00 |
| TRINITY_W4K583_9HOMO/427-473     | W4K583.1 PF13639.4; | 50.00 | 0.00 |
| TRINITY_K7J0U5_NASVI/298-365     | K7J0U5.1 PF00076.20 | 50.00 | 0.00 |
| TRINITY_G0R2N3_ICHMG/123-174     | G0R2N3.1 PF13833.4; | 50.00 | 0.00 |
| TRINITY_W7X388_TETTS/56-115      | W7X388.1 PF01363.19 | 50.00 | 0.00 |
| TRINITY_I4ALD6_FLELS/7-286       | I4ALD6.1 PF07992.12 | 50.00 | 0.00 |
| TRINITY_F6WF51_CIOIN/57-145      | F6WF51.2 PF00355.24 | 50.00 | 0.00 |
| TRINITY_K1QH83_CRAGI/11-474      | K1QH83.1 PF03155.13 | 50.00 | 0.00 |
| TRINITY_A0A077ZUK1_STYLE/214-500 | A0A077ZUK1.1 PF0103 | 50.00 | 0.00 |
| TRINITY_F4Q277_DICFS/68-123      | F4Q277.1 PF00412.20 | 50.00 | 0.00 |
| TRINITY_A9U107_PHYPA/108-245     | A9U107.1 PF12706.5; | 50.00 | 0.00 |
| TRINITY_A4VDX0_TETTS/52-359      | A4VDX0.1 PF14664.4; | 50.00 | 0.00 |
| TRINITY_A0A0A1NFD8_9FUNG/129-275 | A0A0A1NFD8.1 PF0007 | 50.00 | 0.00 |
| TRINITY_A0A0F5Q7C2_9RHIZ/18-222  | A0A0F5Q7C2.1 PF1348 | 50.00 | 0.00 |
| TRINITY_G3Y0Z8_ASPNA/1-169       | G3Y0Z8.1 PF13561.4; | 50.00 | 0.00 |
| TRINITY_C3YID1_BRAFL/211-416     | C3YID1.1 PF01189.15 | 50.00 | 0.00 |
| TRINITY_U5QRF4_9CYAN/14-91       | U5QRF4.1 PF01266.22 | 50.00 | 0.00 |
| TRINITY_F1A5F9_DICPU/1-112       | F1A5F9.1 PF08510.10 | 50.00 | 0.00 |
| TRINITY_I7LY21_TETTS/1717-1892   | I7LY21.2 PF00520.29 | 50.00 | 0.00 |
| TRINITY_I4BY26_ANAMD/4-474       | I4BY26.1 PF00982.19 | 50.00 | 0.00 |
| TRINITY_F0Y6L3_AURAN/5-178       | F0Y6L3.1 PF00071.20 | 50.00 | 0.00 |
| TRINITY_M2XIP2_GALSU/52-123      | M2XIP2.1 PF00076.20 | 50.00 | 0.00 |
| TRINITY_C1GTA6_PARBA/7-112       | C1GTA6.2 PF00383.21 | 50.00 | 0.00 |
| TRINITY_A0LZE2_GRAFK/28-145      | A0LZE2.1 PF08240.10 | 50.00 | 0.00 |
| TRINITY_A0D2X6_PARTE/2-135       | A0D2X6.1 PF05914.10 | 50.00 | 0.00 |
| TRINITY_A0A094GXC1_9PEZI/767-870 | A0A094GXC1.1 PF0015 | 50.00 | 0.00 |
| TRINITY_A0A0F9ZX14_TRIHA/65-234  | A0A0F9ZX14.1 PF1309 | 50.00 | 0.00 |
| TRINITY_V9F301_PHYPR/24-80       | V9F301.1 PF08207.10 | 50.00 | 0.00 |
| TRINITY_A0A0B1P9Z4_UNCNE/3-126   | A0A0B1P9Z4.1 PF1389 | 50.00 | 0.00 |
| TRINITY_Q22NP9_TETTS/339-441     | Q22NP9.2 PF02204.16 | 50.00 | 0.00 |
| TRINITY_APT_UREPA/9-164          | Q9PQ02.1 PF00156.25 | 50.00 | 0.00 |
| TRINITY_B4VTM8_9CYAN/5-199       | B4VTM8.1 PF00300.20 | 50.00 | 0.00 |
| TRINITY_J9IMT2_9SPIT/146-246     | J9IMT2.1 PF00153.25 | 50.00 | 0.00 |
| TRINITY_V8N9K4_OPHHA/45-170      | V8N9K4.1 PF00005.25 | 50.00 | 0.00 |
| TRINITY_A0BEL5_PARTE/9-71        | A0BEL5.1 PF00280.16 | 50.00 | 0.00 |
| TRINITY_D8THX1_VOLCA/227-448     | D8THX1.1 PF13672.4; | 50.00 | 0.00 |
| TRINITY_G0R4J9_ICHMG/260-436     | G0R4J9.1 PF00406.20 | 50.00 | 0.00 |
| TRINITY_W9CAR1_9HELO/208-486     | W9CAR1.1 PF00122.18 | 50.00 | 0.00 |
| TRINITY_I7MDH2_TETTS/627-734     | I7MDH2.2 PF13426.5; | 50.00 | 0.00 |
| TRINITY_D2S423_GEOOG/13-252      | D2S423.1 PF13561.4; | 50.00 | 0.00 |
| TRINITY_G5AYP1_HETGA/320-591     | G5AYP1.1 PF00664.21 | 50.00 | 0.00 |
| TRINITY_A0A088ADF8_APIME/634-677 | A0A088ADF8.1 PF1363 | 50.00 | 0.00 |
| TRINITY_C3XWK4_BRAFL/8-214       | C3XWK4.1 PF01088.19 | 50.00 | 0.00 |
| TRINITY_B6UHU2_MAIZE/9-57        | B6UHU2.1 PF04627.11 | 50.00 | 0.00 |
| TRINITY_Q22V58_TETTS/214-314     | Q22V58.2 PF00153.25 | 50.00 | 0.00 |
| TRINITY_Q231N2_TETTS/513-802     | Q231N2.3 PF04950.10 | 50.00 | 0.00 |
| TRINITY_A0A078DL47_BRANA/21-630  | A0A078DL47.1 PF0088 | 50.00 | 0.00 |
| TRINITY_E9QCK7_DANRE/639-797     | E9QCK7.1 PF05572.11 | 50.00 | 0.00 |
| TRINITY_I0YRC1_9CHLO/125-240     | I0YRC1.1 PF13238.4; | 50.00 | 0.00 |
| TRINITY_A0A078A2Y6_STYLE/244-434 | A0A078A2Y6.1 PF0506 | 50.00 | 0.00 |
| TRINITY_Q24G69_TETTS/13-259      | Q24G69.2 PF00069.23 | 50.00 | 0.00 |
| TRINITY_I7MID1_TETTS/134-392     | I7MID1.2 PF00069.23 | 50.00 | 0.00 |
| TRINITY_L8H3W5_ACACA/971-1093    | L8H3W5.1 PF00271.29 | 50.00 | 0.00 |
| TRINITY_I0YQ01_9CHLO/19-138      | I0YQ01.1 PF06212.10 | 50.00 | 0.00 |

|                                  |              |            |       |      |
|----------------------------------|--------------|------------|-------|------|
| TRINITY_W6FUH4_NODSP/15-183      | W6FUH4.1     | PF13385.4; | 50.00 | 0.00 |
| TRINITY_G0QU69_ICHMG/304-439     | G0QU69.1     | PF01262.19 | 50.00 | 0.00 |
| TRINITY_D3AWB1_POLPA/438-507     | D3AWB1.1     | PF12796.5; | 50.00 | 0.00 |
| TRINITY_B4JJA0_DROGR/927-982     | B4JJA0.1     | PF13513.4; | 50.00 | 0.00 |
| TRINITY_C1MH71_MICPC/142-195     | C1MH71.1     | PF00412.20 | 50.00 | 0.00 |
| TRINITY_L8GRJ6_ACACA/5-112       | L8GRJ6.1     | PF00307.29 | 50.00 | 0.00 |
| TRINITY_L8HKM5_ACACA/4-214       | L8HKM5.1     | PF04139.11 | 50.00 | 0.00 |
| TRINITY_G1SQP9_RABIT/65-237      | G1SQP9.2     | PF01596.15 | 50.00 | 0.00 |
| TRINITY_B3S094_TRIAD/15-158      | B3S094.1     | PF00134.21 | 50.00 | 0.00 |
| TRINITY_I7M9Y2_TETTS/44-181      | I7M9Y2.1     | PF00198.21 | 50.00 | 0.00 |
| TRINITY_G0QJ48_ICHMG/856-963     | G0QJ48.1     | PF10367.7; | 50.00 | 0.00 |
| TRINITY_D8TTV8_VOLCA/81-324      | D8TTV8.1     | PF00233.17 | 50.00 | 0.00 |
| TRINITY_A8HNZ4_CHLRE/178-321     | A8HNZ4.1     | PF00005.25 | 50.00 | 0.00 |
| TRINITY_A0A078A8V3_STYLE/25-119  | A0A078A8V3.1 | PF1390     | 50.00 | 0.00 |
| TRINITY_A0D8R6_PARTE/23-121      | A0D8R6.1     | PF03645.11 | 50.00 | 0.00 |
| TRINITY_B9SD10_RICCO/11-296      | B9SD10.1     | PF07992.12 | 50.00 | 0.00 |
| TRINITY_G0QMR6_ICHMG/167-275     | G0QMR6.1     | PF00085.18 | 50.00 | 0.00 |
| TRINITY_I0Z1I3_9CHLO/25-268      | I0Z1I3.1     | PF12146.6; | 50.00 | 0.00 |
| TRINITY_G8AWG3_AZOBR/633-755     | G8AWG3.1     | PF02518.24 | 50.00 | 0.00 |
| TRINITY_D8TXQ3_VOLCA/351-421     | D8TXQ3.1     | PF04818.11 | 50.00 | 0.00 |
| TRINITY_D8UA16_VOLCA/457-643     | D8UA16.1     | PF13469.4; | 50.00 | 0.00 |
| TRINITY_D0MQP4_PHYIT/223-288     | D0MQP4.1     | PF01918.19 | 50.00 | 0.00 |
| TRINITY_Q08MJ9_STIAD/4-113       | Q08MJ9.1     | PF00576.19 | 50.00 | 0.00 |
| TRINITY_G0QJA3_ICHMG/85-432      | G0QJA3.1     | PF00155.19 | 50.00 | 0.00 |
| TRINITY_I0Y LH8_9CHLO/764-861    | I0Y LH8.1    | PF02806.16 | 50.00 | 0.00 |
| TRINITY_Q23QF2_TETTS/248-571     | Q23QF2.2     | PF03133.13 | 50.00 | 0.00 |
| TRINITY_A9W9Z5_CHLAA/1-117       | A9W9Z5.1     | PF01408.20 | 50.00 | 0.00 |
| TRINITY_Q00YD9_OSTTA/268-339     | Q00YD9.1     | PF12894.5; | 50.00 | 0.00 |
| TRINITY_D8R7A4_SELML/134-230     | D8R7A4.1     | PF00153.25 | 50.00 | 0.00 |
| TRINITY_Q54R10_DICDI/49-285      | Q54R10.1     | PF00149.26 | 50.00 | 0.00 |
| TRINITY_A7SDR5_NEMVE/83-308      | A7SDR5.1     | PF00112.21 | 50.00 | 0.00 |
| TRINITY_W4H202_9STRA/290-475     | W4H202.1     | PF00689.19 | 50.00 | 0.00 |
| TRINITY_A0A068SAB1_9FUNG/123-211 | A0A068SAB1.1 | PF0095     | 50.00 | 0.00 |
| TRINITY_A0CXJ7_PARTE/74-221      | A0CXJ7.1     | PF01553.19 | 50.00 | 0.00 |
| TRINITY_H2KV20_CLOSI/39-198      | H2KV20.1     | PF08645.9; | 50.00 | 0.00 |
| TRINITY_A0CIZ1_PARTE/663-715     | A0CIZ1.1     | PF13833.4; | 50.00 | 0.00 |
| TRINITY_D6WWM4_TRICA/124-287     | D6WWM4.1     | PF08662.9; | 50.00 | 0.00 |
| TRINITY_A0A024TBB3_9STRA/10-218  | A0A024TBB3.1 | PF0307     | 50.00 | 0.00 |
| TRINITY_A9FAR4_SORC5/21-203      | A9FAR4.1     | PF07081.9; | 50.00 | 0.00 |
| TRINITY_A6GAQ0_9DELT/22-108      | A6GAQ0.1     | PF04379.12 | 50.00 | 0.00 |
| TRINITY_D8TPQ3_VOLCA/270-395     | D8TPQ3.1     | PF00188.24 | 50.00 | 0.00 |
| TRINITY_G0R0V5_ICHMG/25-299      | G0R0V5.1     | PF00069.23 | 50.00 | 0.00 |
| TRINITY_E1ZTC5_CHLVA/44-473      | E1ZTC5.1     | PF00856.26 | 50.00 | 0.00 |
| TRINITY_A8JBD8_CHLRE/71-321      | A8JBD8.1     | PF00481.19 | 50.00 | 0.00 |
| TRINITY_D8UHG6_VOLCA/270-381     | D8UHG6.1     | PF08718.9; | 50.00 | 0.00 |
| TRINITY_G0QWF1_ICHMG/47-134      | G0QWF1.1     | PF05873.10 | 50.00 | 0.00 |
| TRINITY_L8GG01_ACACA/221-375     | L8GG01.1     | PF13768.4; | 50.00 | 0.00 |
| TRINITY_T1KND4_TETUR/244-315     | T1KND4.1     | PF12894.5; | 50.00 | 0.00 |
| TRINITY_G0QIV3_ICHMG/284-335     | G0QIV3.1     | PF13418.4; | 50.00 | 0.00 |
| TRINITY_A0A0E9N0F0_9SPHI/271-327 | A0A0E9N0F0.1 | PF1341     | 50.00 | 0.00 |
| TRINITY_D0MJ84_RHOM4/509-745     | D0MJ84.1     | PF02784.14 | 50.00 | 0.00 |
| TRINITY_K7KDK2_SOYBN/252-309     | K7KDK2.1     | PF13921.4; | 50.00 | 0.00 |
| TRINITY_A0A067C8Q0_SAPPC/815-999 | A0A067C8Q0.1 | PF0068     | 50.00 | 0.00 |
| TRINITY_A0BN18_PARTE/24-154      | A0BN18.1     | PF00782.18 | 50.00 | 0.00 |
| TRINITY_I7M738_TETTS/333-442     | I7M738.2     | PF00271.29 | 50.00 | 0.00 |
| TRINITY_A0E3Z8_PARTE/64-123      | A0E3Z8.1     | PF13921.4; | 50.00 | 0.00 |
| TRINITY_K3WI24_PYTUL/382-620     | K3WI24.1     | PF00112.21 | 50.00 | 0.00 |
| TRINITY_A8J1W4_CHLRE/95-265      | A8J1W4.1     | PF01746.19 | 50.00 | 0.00 |
| TRINITY_M1APL9_SOLTU/202-287     | M1APL9.1     | PF00439.23 | 50.00 | 0.00 |
| TRINITY_D8RJ89_SELML/135-293     | D8RJ89.1     | PF01556.16 | 50.00 | 0.00 |
| TRINITY_G8BCR4_CANPC/5-179       | G8BCR4.1     | PF00071.20 | 50.00 | 0.00 |

|                                    |                     |       |      |
|------------------------------------|---------------------|-------|------|
| TRINITY_D8U424_VOLCA/106-437       | D8U424.1 PF07093.9; | 50.00 | 0.00 |
| TRINITY_I7MCL9_TETTS/190-488       | I7MCL9.2 PF00648.19 | 50.00 | 0.00 |
| TRINITY_A0A078AXV4_STYLE/252-312   | A0A078AXV4.1 PF1290 | 50.00 | 0.00 |
| TRINITY_D8TTG5_VOLCA/143-328       | D8TTG5.1 PF04802.13 | 50.00 | 0.00 |
| TRINITY_D8TVM4_VOLCA/425-634       | D8TVM4.1 PF06963.10 | 50.00 | 0.00 |
| TRINITY_V4TJX0_9ROSI/39-395        | V4TJX0.1 PF04185.12 | 50.00 | 0.00 |
| TRINITY_ATAT_TETTS/4-178           | Q22XZ3.2 PF05301.9; | 50.00 | 0.00 |
| TRINITY_I1FWW6_AMPQE/169-305       | I1FWW6.1 PF08920.8; | 50.00 | 0.00 |
| TRINITY_W5K2H6_ASTMX/409-514       | W5K2H6.1 PF00307.29 | 50.00 | 0.00 |
| TRINITY_K3YSJ3_SETIT/132-320       | K3YSJ3.1 PF16575.3; | 50.00 | 0.00 |
| TRINITY_B8N7G9_ASPFN/667-720       | B8N7G9.1 PF13637.4; | 50.00 | 0.00 |
| TRINITY_A0A096TH44_MAIZE/1-160     | A0A096TH44.1 PF1384 | 50.00 | 0.00 |
| TRINITY_A9UTS2_MONBE/373-438       | A9UTS2.1 PF00226.29 | 50.00 | 0.00 |
| TRINITY_A0A077AYK7_9RICK/5-110     | A0A077AYK7.1 PF0043 | 50.00 | 0.00 |
| TRINITY_M0UB95_MUSAM/328-506       | M0UB95.1 PF11931.6; | 50.00 | 0.00 |
| TRINITY_M7NRF1_PNEMU/1365-1713     | M7NRF1.1 PF02259.21 | 50.00 | 0.00 |
| TRINITY_A9THD7_PHYPA/5-80          | A9THD7.1 PF02798.18 | 50.00 | 0.00 |
| TRINITY_D8U5L8_VOLCA/41-437        | D8U5L8.1 PF00856.26 | 50.00 | 0.00 |
| TRINITY_H6N9S4_9BACL/1-342         | H6N9S4.1 PF01494.17 | 50.00 | 0.00 |
| TRINITY_D8UF31_VOLCA/562-668       | D8UF31.1 PF01426.16 | 50.00 | 0.00 |
| TRINITY_A0A074RNW8_9HOMO/1398-1514 | A0A074RNW8.1 PF0066 | 50.00 | 0.00 |
| TRINITY_L8GGC6_ACACA/243-303       | L8GGC6.1 PF00571.26 | 50.00 | 0.00 |
| TRINITY_T1J3Q6_STRMM/4-138         | T1J3Q6.1 PF03874.14 | 50.00 | 0.00 |
| TRINITY_G0QUL3_ICHMG/151-280       | G0QUL3.1 PF00107.24 | 50.00 | 0.00 |
| TRINITY_Q24FR8_TETTS/35-132        | Q24FR8.2 PF12796.5; | 50.00 | 0.00 |
| TRINITY_A0CAP2_PARTE/154-305       | A0CAP2.1 PF01529.18 | 50.00 | 0.00 |
| TRINITY_A7RWL7_NEMVE/44-277        | A7RWL7.1 PF02784.14 | 50.00 | 0.00 |
| TRINITY_A0A0N4XQ29_NIPBR/39-119    | A0A0N4XQ29.1 PF0940 | 50.00 | 0.00 |
| TRINITY_I7M433_TETTS/1051-1168     | I7M433.2 PF02518.24 | 50.00 | 0.00 |
| TRINITY_A0A0J8BFP5_BETVU/98-161    | A0A0J8BFP5.1 PF0007 | 50.00 | 0.00 |
| TRINITY_U9UA20_RHIID/211-275       | U9UA20.1 PF13432.4; | 50.00 | 0.00 |
| TRINITY_G0R363_ICHMG/11-273        | G0R363.1 PF00069.23 | 50.00 | 0.00 |
| TRINITY_K4DGX4_SOLLC/33-169        | K4DGX4.1 PF00179.24 | 50.00 | 0.00 |
| TRINITY_A0A066W870_9BASI/701-954   | A0A066W870.1 PF0070 | 50.00 | 0.00 |
| TRINITY_L8GNP7_ACACA/102-303       | L8GNP7.1 PF00149.26 | 50.00 | 0.00 |
| TRINITY_D7FKH8_ECTSI/433-566       | D7FKH8.1 PF01841.17 | 50.00 | 0.00 |
| TRINITY_A0A087SQX9_AUXPR/305-517   | A0A087SQX9.1 PF0008 | 50.00 | 0.00 |
| TRINITY_F0S119_DESTD/30-140        | F0S119.1 PF01661.19 | 50.00 | 0.00 |
| TRINITY_W4Z7S6_STRPU/13-77         | W4Z7S6.1 PF13499.4; | 50.00 | 0.00 |
| TRINITY_A8I857_CHLRE/5-85          | A8I857.1 PF12796.5; | 50.00 | 0.00 |
| TRINITY_L8GSG4_ACACA/468-550       | L8GSG4.1 PF01833.22 | 50.00 | 0.00 |
| TRINITY_G0QU83_ICHMG/195-287       | G0QU83.1 PF00153.25 | 50.00 | 0.00 |
| TRINITY_C0BXT1_9FIRM/482-599       | C0BXT1.1 PF02518.24 | 50.00 | 0.00 |
| TRINITY_C1FJI8_MICSR/203-318       | C1FJI8.1 PF13640.4; | 50.00 | 0.00 |
| TRINITY_A8JGE5_CHLRE/63-221        | A8JGE5.1 PF00156.25 | 50.00 | 0.00 |
| TRINITY_G3PVU7_GASAC/50-255        | G3PVU7.1 PF00106.23 | 50.00 | 0.00 |
| TRINITY_A0A078AR09_STYLE/8-169     | A0A078AR09.1 PF0007 | 50.00 | 0.00 |
| TRINITY_D8TPN9_VOLCA/226-466       | D8TPN9.1 PF05548.9; | 50.00 | 0.00 |
| TRINITY_L9JBY7_TUPCH/882-984       | L9JBY7.1 PF00005.25 | 50.00 | 0.00 |
| TRINITY_L8H6D1_ACACA/645-898       | L8H6D1.1 PF07714.15 | 50.00 | 0.00 |
| TRINITY_J9J3B4_9SPIT/124-338       | J9J3B4.1 PF00112.21 | 50.00 | 0.00 |
| TRINITY_M5WTV6_PRUPE/36-202        | M5WTV6.1 PF04727.11 | 50.00 | 0.00 |
| TRINITY_W7XA27_TETTS/236-568       | W7XA27.1 PF12309.6; | 50.00 | 0.00 |
| TRINITY_B4MMR6_DROWI/16-333        | B4MMR6.1 PF14647.4; | 50.00 | 0.00 |
| TRINITY_D2VGP7_NAEGR/9-261         | D2VGP7.1 PF00069.23 | 50.00 | 0.00 |
| TRINITY_F1NM51_CHICK/911-1180      | F1NM51.2 PF00664.21 | 50.00 | 0.00 |
| TRINITY_V7CQS1_PHAVU/168-234       | V7CQS1.1 PF00191.18 | 50.00 | 0.00 |
| TRINITY_D8TS65_VOLCA/33-205        | D8TS65.1 PF04832.10 | 50.00 | 0.00 |
| TRINITY_I7LU23_TETTS/37-151        | I7LU23.1 PF11527.6; | 50.00 | 0.00 |
| TRINITY_W4HBE9_9STRA/262-331       | W4HBE9.1 PF00076.20 | 50.00 | 0.00 |
| TRINITY_T1KQA6_TETUR/1588-1665     | T1KQA6.1 PF12861.5; | 50.00 | 0.00 |



|                                  |              |            |       |      |
|----------------------------------|--------------|------------|-------|------|
| TRINITY_L8H6D1_ACACA/645-898     | L8H6D1.1     | PF07714.15 | 50.00 | 0.00 |
| TRINITY_D8TZA0_VOLCA/605-695     | D8TZA0.1     | PF00211.18 | 50.00 | 0.00 |
| TRINITY_I7MAP5_TETTS/532-581     | I7MAP5.2     | PF13920.4; | 50.00 | 0.00 |
| TRINITY_A8J230_CHLRE/50-257      | A8J230.1     | PF09353.8; | 50.00 | 0.00 |
| TRINITY_J9B569_WUCBA/23-82       | J9B569.1     | PF00400.30 | 50.00 | 0.00 |
| TRINITY_D8U352_VOLCA/16-208      | D8U352.1     | PF02492.17 | 50.00 | 0.00 |
| TRINITY_F1L5G4_ASCSU/10-99       | F1L5G4.1     | PF08662.9; | 50.00 | 0.00 |
| TRINITY_A8J3J1_CHLRE/3-109       | A8J3J1.1     | PF00416.20 | 50.00 | 0.00 |
| TRINITY_Q2INW4_ANADE/41-163      | Q2INW4.1     | PF13456.4; | 50.00 | 0.00 |
| TRINITY_D8U7Q1_VOLCA/108-313     | D8U7Q1.1     | PF03798.14 | 50.00 | 0.00 |
| TRINITY_A0A078A1C7_STYLE/8-93    | A0A078A1C7.1 | PF1341     | 50.00 | 0.00 |
| TRINITY_I0YIM7_9CHLO/330-828     | I0YIM7.1     | PF00443.27 | 50.00 | 0.00 |
| TRINITY_R1CHP5_EMIHU/6-380       | R1CHP5.1     | PF00266.17 | 50.00 | 0.00 |
| TRINITY_L8HAX0_ACACA/6-175       | L8HAX0.1     | PF00590.18 | 50.00 | 0.00 |
| TRINITY_L8HCS9_ACACA/5-130       | L8HCS9.1     | PF01417.18 | 50.00 | 0.00 |
| TRINITY_F4Q375_DICFS/657-1119    | F4Q375.1     | PF12157.6; | 50.00 | 0.00 |
| TRINITY_M8A0N6_TRIUA/98-345      | M8A0N6.1     | PF13671.4; | 50.00 | 0.00 |
| TRINITY_I0YT53_9CHLO/313-453     | I0YT53.1     | PF02182.15 | 50.00 | 0.00 |
| TRINITY_A0A0D2WIN4_CAPO3/469-518 | A0A0D2WIN4.1 | PF0041     | 50.00 | 0.00 |
| TRINITY_A8I7E7_CHLRE/1-86        | A8I7E7.1     | PF08609.8; | 50.00 | 0.00 |
| TRINITY_A0A015JFG3_9GLOM/315-447 | A0A015JFG3.1 | PF0192     | 50.00 | 0.00 |
| TRINITY_D8TJR4_VOLCA/308-429     | D8TJR4.1     | PF00892.18 | 50.00 | 0.00 |
| TRINITY_A8I9T9_CHLRE/72-562      | A8I9T9.1     | PF03055.13 | 50.00 | 0.00 |
| TRINITY_D8QWG6_SELML/2-124       | D8QWG6.1     | PF10644.7; | 50.00 | 0.00 |
| TRINITY_D7FLF8_ECTSI/553-621     | D7FLF8.1     | PF00505.17 | 50.00 | 0.00 |
| TRINITY_B3ESW8_AMOA5/41-239      | B3ESW8.1     | PF01734.20 | 50.00 | 0.00 |
| TRINITY_I7M280_TETTS/857-971     | I7M280.2     | PF09111.8; | 50.00 | 0.00 |
| TRINITY_C1MH29_MICPC/526-828     | C1MH29.1     | PF00069.23 | 50.00 | 0.00 |
| TRINITY_A8IZT5_CHLRE/7-125       | A8IZT5.1     | PF00588.17 | 50.00 | 0.00 |
| TRINITY_G0R2T0_ICHMG/33-283      | G0R2T0.1     | PF00069.23 | 50.00 | 0.00 |
| TRINITY_M1VCY5_CYAME/316-387     | M1VCY5.1     | PF02207.18 | 50.00 | 0.00 |
| TRINITY_A0A015IAE9_9GLOM/273-356 | A0A015IAE9.1 | PF1324     | 50.00 | 0.00 |
| TRINITY_L8GPY7_ACACA/4-112       | L8GPY7.1     | PF03694.11 | 50.00 | 0.00 |
| TRINITY_A8XL17_CAEBR/353-625     | A8XL17.2     | PF07714.15 | 50.00 | 0.00 |
| TRINITY_D8UAS3_VOLCA/97-295      | D8UAS3.1     | PF03942.13 | 50.00 | 0.00 |
| TRINITY_T1IZ26_STRMM/430-565     | T1IZ26.1     | PF00005.25 | 50.00 | 0.00 |
| TRINITY_A8IPQ9_CHLRE/171-429     | A8IPQ9.1     | PF00069.23 | 50.00 | 0.00 |
| TRINITY_F0ZW58_DICPU/38-145      | F0ZW58.1     | PF00307.29 | 50.00 | 0.00 |
| TRINITY_A0A0G4J2X3_PLABS/751-865 | A0A0G4J2X3.1 | PF0066     | 50.00 | 0.00 |
| TRINITY_E8RT56_ASTEC/1-240       | E8RT56.1     | PF03883.12 | 50.00 | 0.00 |
| TRINITY_Q22RZ8_TETTS/183-242     | Q22RZ8.2     | PF13921.4; | 50.00 | 0.00 |
| TRINITY_A8IWD5_CHLRE/101-179     | A8IWD5.1     | PF05239.14 | 50.00 | 0.00 |
| TRINITY_Q23YR9_TETTS/7-439       | Q23YR9.1     | PF00171.20 | 50.00 | 0.00 |
| TRINITY_R1DK67_EMIHU/4-226       | R1DK67.1     | PF00664.21 | 50.00 | 0.00 |
| TRINITY_A0A0D2X385_CAPO3/82-162  | A0A0D2X385.1 | PF0336     | 50.00 | 0.00 |
| TRINITY_G0W4E6_NAUDC/21-89       | G0W4E6.1     | PF00505.17 | 50.00 | 0.00 |
| TRINITY_Q24FJ8_TETTS/86-365      | Q24FJ8.2     | PF00122.18 | 50.00 | 0.00 |
| TRINITY_W6V2S5_ECHGR/32-94       | W6V2S5.1     | PF01176.17 | 50.00 | 0.00 |
| TRINITY_W4FSJ9_9STRA/1228-1335   | W4FSJ9.1     | PF00005.25 | 50.00 | 0.00 |
| TRINITY_K9XSF6_STAC7/476-617     | K9XSF6.1     | PF02518.24 | 50.00 | 0.00 |
| TRINITY_L1JDL6_GUIITH/44-269     | L1JDL6.1     | PF07556.9; | 50.00 | 0.00 |
| TRINITY_A0BIT4_PARTE/126-209     | A0BIT4.1     | PF01529.18 | 50.00 | 0.00 |
| TRINITY_B3S125_TRIAD/544-612     | B3S125.1     | PF00658.16 | 50.00 | 0.00 |
| TRINITY_D6WPU4_TRICA/23-169      | D6WPU4.1     | PF05608.10 | 50.00 | 0.00 |
| TRINITY_C1E5P2_MICSR/25-127      | C1E5P2.1     | PF08216.9; | 50.00 | 0.00 |
| TRINITY_I0Z7Q3_9CHLO/405-952     | I0Z7Q3.1     | PF02460.16 | 50.00 | 0.00 |
| TRINITY_C1EGU1_MICSR/59-165      | C1EGU1.1     | PF00504.19 | 50.00 | 0.00 |
| TRINITY_K1QIC1_CRAGI/13-50       | K1QIC1.1     | PF01753.16 | 50.00 | 0.00 |
| TRINITY_L8HCA8_ACACA/4208-4473   | L8HCA8.1     | PF03028.13 | 50.00 | 0.00 |
| TRINITY_Q608D7_METCA/190-307     | Q608D7.1     | PF00581.18 | 50.00 | 0.00 |
| TRINITY_C7N732_SLAHD/37-147      | C7N732.1     | PF08487.8; | 50.00 | 0.00 |

|                                  |                     |       |      |
|----------------------------------|---------------------|-------|------|
| TRINITY_A9TH59_PHYPA/211-260     | A9TH59.1 PF00415.16 | 50.00 | 0.00 |
| TRINITY_A0A096P8D0_OSTTA/436-552 | A0A096P8D0.1 PF0237 | 50.00 | 0.00 |
| TRINITY_A8J1H0_CHLRE/65-495      | A8J1H0.1 PF00909.19 | 50.00 | 0.00 |
| TRINITY_I3J6Q2_ORENI/316-532     | I3J6Q2.1 PF07002.14 | 50.00 | 0.00 |
| TRINITY_A0A087XHP4_POEFO/512-659 | A0A087XHP4.2 PF0911 | 50.00 | 0.00 |
| TRINITY_D8TTP0_VOLCA/1124-1422   | D8TTP0.1 PF00069.23 | 50.00 | 0.00 |
| TRINITY_A8HZH0_CHLRE/103-256     | A8HZH0.1 PF03547.16 | 50.00 | 0.00 |
| TRINITY_A0DXZ6_PARTE/485-602     | A0DXZ6.1 PF02518.24 | 50.00 | 0.00 |
| TRINITY_A0A0B2V3L2_TOXCA/185-251 | A0A0B2V3L2.1 PF0007 | 50.00 | 0.00 |
| TRINITY_C1EFF0_MICSR/32-123      | C1EFF0.1 PF13499.4; | 50.00 | 0.00 |
| TRINITY_D8TN82_VOLCA/692-904     | D8TN82.1 PF12931.5; | 50.00 | 0.00 |
| TRINITY_D2A369_TRICA/29-113      | D2A369.1 PF13417.4; | 50.00 | 0.00 |
| TRINITY_M4EG11_BRARP/102-377     | M4EG11.1 PF09243.8; | 50.00 | 0.00 |
| TRINITY_K1RR22_CRAGI/43-122      | K1RR22.1 PF07019.10 | 50.00 | 0.00 |
| TRINITY_C4LUZ1_ENTHI/462-722     | C4LUZ1.1 PF00069.23 | 50.00 | 0.00 |
| TRINITY_E9GBA1_DAPPU/1-214       | E9GBA1.1 PF00135.26 | 50.00 | 0.00 |
| TRINITY_Q22C39_TETTS/292-540     | Q22C39.1 PF02535.20 | 50.00 | 0.00 |
| TRINITY_D8TTP0_VOLCA/1124-1422   | D8TTP0.1 PF00069.23 | 50.00 | 0.00 |
| TRINITY_A0A087SGK8_AUXPR/9-98    | A0A087SGK8.1 PF0408 | 50.00 | 0.00 |
| TRINITY_D8TZ90_VOLCA/77-184      | D8TZ90.1 PF00583.23 | 50.00 | 0.00 |
| TRINITY_I7LTQ5_TETTS/169-330     | I7LTQ5.1 PF01331.17 | 50.00 | 0.00 |
| TRINITY_A8JHV3_CHLRE/30-234      | A8JHV3.1 PF00145.15 | 50.00 | 0.00 |
| TRINITY_D8UJD9_VOLCA/37-534      | D8UJD9.1 PF00118.22 | 50.00 | 0.00 |
| TRINITY_D8THW0_VOLCA/1490-1598   | D8THW0.1 PF08372.8; | 50.00 | 0.00 |
| TRINITY_A8I1M3_CHLRE/18-152      | A8I1M3.1 PF12697.5; | 50.00 | 0.00 |
| TRINITY_A0BKI4_PARTE/27-441      | A0BKI4.1 PF07690.14 | 50.00 | 0.00 |
| TRINITY_I7M3E0_TETTS/62-213      | I7M3E0.2 PF12146.6; | 50.00 | 0.00 |
| TRINITY_A8X9V3_CAEBR/235-307     | A8X9V3.2 PF02201.16 | 50.00 | 0.00 |
| TRINITY_Q236Z5_TETTS/302-587     | Q236Z5.1 PF05206.12 | 50.00 | 0.00 |
| TRINITY_W9VIF1_9EURO/36-188      | W9VIF1.1 PF14234.4; | 50.00 | 0.00 |
| TRINITY_F2U5U5_SALR5/99-464      | F2U5U5.1 PF00295.15 | 49.90 | 0.00 |
| TRINITY_A8HP11_CHLRE/1-288       | A8HP11.1 PF03969.14 | 49.90 | 0.00 |
| TRINITY_E1Z539_CHLVA/9-250       | E1Z539.1 PF00149.26 | 49.80 | 0.00 |
| TRINITY_J5WTF5_9FIRM/120-356     | J5WTF5.1 PF00078.25 | 49.80 | 0.00 |
| TRINITY_F4Q4A3_DICFS/16-269      | F4Q4A3.1 PF00069.23 | 49.80 | 0.00 |
| TRINITY_A8HWI9_CHLRE/348-571     | A8HWI9.1 PF07714.15 | 49.80 | 0.00 |
| TRINITY_L8H188_ACACA/100-395     | L8H188.1 PF06472.13 | 49.80 | 0.00 |
| TRINITY_K4D2K3_SOLLC/87-277      | K4D2K3.1 PF13419.4; | 49.80 | 0.00 |
| TRINITY_E1ZP80_CHLVA/225-428     | E1ZP80.1 PF06733.13 | 49.80 | 0.00 |
| TRINITY_D8TTV8_VOLCA/81-324      | D8TTV8.1 PF00233.17 | 49.80 | 0.00 |
| TRINITY_A8JDM5_CHLRE/862-1055    | A8JDM5.1 PF07162.9; | 49.80 | 0.00 |
| TRINITY_A0DKQ5_PARTE/78-362      | A0DKQ5.1 PF00069.23 | 49.80 | 0.00 |
| TRINITY_A4VD54_TETTS/744-1018    | A4VD54.1 PF00664.21 | 49.80 | 0.00 |
| TRINITY_Q172U1_AEDAE/112-338     | Q172U1.1 PF00271.29 | 49.80 | 0.00 |
| TRINITY_L8HCT6_ACACA/45-631      | L8HCT6.1 PF00888.20 | 49.80 | 0.00 |
| TRINITY_D8TTN7_VOLCA/70-275      | D8TTN7.1 PF00856.26 | 49.80 | 0.00 |
| TRINITY_M0TWI2_MUSAM/36-556      | M0TWI2.1 PF03169.13 | 49.80 | 0.00 |
| TRINITY_D8U7B9_VOLCA/953-1207    | D8U7B9.1 PF16212.3; | 49.80 | 0.00 |
| TRINITY_C1FHA9_MICSR/36-219      | C1FHA9.1 PF02146.15 | 49.80 | 0.00 |
| TRINITY_L0DAL9_SINAD/21-273      | L0DAL9.1 PF00109.24 | 49.80 | 0.00 |
| TRINITY_D8U6M0_VOLCA/747-984     | D8U6M0.1 PF16212.3; | 49.80 | 0.00 |
| TRINITY_Q3SDP1_PARTE/8-169       | Q3SDP1.1 PF00071.20 | 49.70 | 0.00 |
| TRINITY_Q609M8_METCA/632-748     | Q609M8.1 PF02518.24 | 49.70 | 0.00 |
| TRINITY_G0QLZ6_ICHMG/5-338       | G0QLZ6.1 PF03690.11 | 49.70 | 0.00 |
| TRINITY_I1G6P3_AMPQE/29-327      | I1G6P3.1 PF00850.17 | 49.70 | 0.00 |
| TRINITY_A0EG50_PARTE/304-525     | A0EG50.1 PF07002.14 | 49.70 | 0.00 |
| TRINITY_E9FYH7_DAPPU/1-169       | E9FYH7.1 PF02776.16 | 49.70 | 0.00 |
| TRINITY_F4PXD0_DICFS/13-162      | F4PXD0.1 PF01399.25 | 49.70 | 0.00 |
| TRINITY_A0A0D2U7U3_CAPO3/12-174  | A0A0D2U7U3.1 PF0007 | 49.70 | 0.00 |
| TRINITY_D8TI68_VOLCA/292-458     | D8TI68.1 PF00069.23 | 49.70 | 0.00 |
| TRINITY_G0QVA6_ICHMG/11-162      | G0QVA6.1 PF00179.24 | 49.70 | 0.00 |

|                                  |                     |       |      |
|----------------------------------|---------------------|-------|------|
| TRINITY_A8HSL4_CHLRE/2830-3140   | A8HSL4.1 PF00454.25 | 49.70 | 0.00 |
| TRINITY_H8KQX5_SOLCM/9-302       | H8KQX5.1 PF02274.15 | 49.70 | 0.00 |
| TRINITY_A0A087SCV5_AUXPR/231-497 | A0A087SCV5.1 PF0935 | 49.70 | 0.00 |
| TRINITY_V4AI91_LOTGI/63-217      | V4AI91.1 PF01694.20 | 49.70 | 0.00 |
| TRINITY_I0Z7U3_9CHLO/233-569     | I0Z7U3.1 PF00176.21 | 49.70 | 0.00 |
| TRINITY_Q3SDB5_PARTE/105-403     | Q3SDB5.1 PF00122.18 | 49.70 | 0.00 |
| TRINITY_D8SW38_SELML/1-179       | D8SW38.1 PF07466.9; | 49.70 | 0.00 |
| TRINITY_L8H3P8_ACACA/9-435       | L8H3P8.1 PF00171.20 | 49.70 | 0.00 |
| TRINITY_D3B4H7_POLPA/29-194      | D3B4H7.1 PF12385.6; | 49.70 | 0.00 |
| TRINITY_D8UEY3_VOLCA/15-140      | D8UEY3.1 PF10513.7; | 49.70 | 0.00 |
| TRINITY_R6GQG5_9CLOT/72-275      | R6GQG5.1 PF06745.11 | 49.70 | 0.00 |
| TRINITY_A0A0D2X138_CAPO3/11-169  | A0A0D2X138.1 PF0007 | 49.70 | 0.00 |
| TRINITY_A0A078HL68_BRANA/612-794 | A0A078HL68.1 PF0136 | 49.70 | 0.00 |
| TRINITY_A8J745_CHLRE/6-189       | A8J745.1 PF00211.18 | 49.70 | 0.00 |
| TRINITY_A8IZ20_CHLRE/174-481     | A8IZ20.1 PF08495.8; | 49.70 | 0.00 |
| TRINITY_I0YTV7_9CHLO/367-731     | I0YTV7.1 PF00702.24 | 49.70 | 0.00 |
| TRINITY_D8TV10_VOLCA/114-261     | D8TV10.1 PF04136.13 | 49.70 | 0.00 |
| TRINITY_A9G1A8_SORC5/25-391      | A9G1A8.1 PF01433.18 | 49.70 | 0.00 |
| TRINITY_A8HMW8_CHLRE/212-403     | A8HMW8.1 PF17047.3; | 49.70 | 0.00 |
| TRINITY_D8TJZ3_VOLCA/218-459     | D8TJZ3.1 PF00294.22 | 49.70 | 0.00 |
| TRINITY_E1ZP54_CHLVA/45-185      | E1ZP54.1 PF01966.20 | 49.70 | 0.00 |
| TRINITY_I0Z1M1_9CHLO/82-282      | I0Z1M1.1 PF00270.27 | 49.70 | 0.00 |
| TRINITY_F4PHH2_DICFS/476-791     | F4PHH2.1 PF08637.8; | 49.60 | 0.00 |
| TRINITY_I7MFB3_TETTS/236-482     | I7MFB3.1 PF02913.17 | 49.60 | 0.00 |
| TRINITY_N6TAE8_DENPD/812-987     | N6TAE8.1 PF12295.6; | 49.60 | 0.00 |
| TRINITY_G0QKR3_ICHMG/42-350      | G0QKR3.1 PF14664.4; | 49.60 | 0.00 |
| TRINITY_Q22AR0_TETTS/17-145      | Q22AR0.1 PF13529.4; | 49.60 | 0.00 |
| TRINITY_C4M7N9_ENTHI/808-1067    | C4M7N9.1 PF00069.23 | 49.60 | 0.00 |
| TRINITY_J0DZ08_LOALO/6-305       | J0DZ08.1 PF06682.10 | 49.60 | 0.00 |
| TRINITY_TPC2L_DICDI/9-139        | Q54CU7.1 PF04628.11 | 49.60 | 0.00 |
| TRINITY_Q23QF2_TETTS/248-571     | Q23QF2.2 PF03133.13 | 49.60 | 0.00 |
| TRINITY_A9V8Y7_MONBE/333-442     | A9V8Y7.1 PF00271.29 | 49.60 | 0.00 |
| TRINITY_Q22W57_TETTS/127-261     | Q22W57.2 PF01641.16 | 49.60 | 0.00 |
| TRINITY_G8BJW8_CANPC/6-167       | G8BJW8.1 PF00071.20 | 49.60 | 0.00 |
| TRINITY_A0A059C0G5_EUCGR/25-162  | A0A059C0G5.1 PF0590 | 49.60 | 0.00 |
| TRINITY_Q099X4_STIAD/16-298      | Q099X4.1 PF00732.17 | 49.60 | 0.00 |
| TRINITY_H2URE4_TAKRU/5-121       | H2URE4.1 PF00466.18 | 49.60 | 0.00 |
| TRINITY_I7LXR4_TETTS/82-199      | I7LXR4.1 PF01873.15 | 49.60 | 0.00 |
| TRINITY_W7B190_PLAVN/374-631     | W7B190.1 PF00069.23 | 49.60 | 0.00 |
| TRINITY_I0Z8H2_9CHLO/8-139       | I0Z8H2.1 PF03435.16 | 49.60 | 0.00 |
| TRINITY_J9IKC1_9SPIT/18-253      | J9IKC1.1 PF13561.4; | 49.60 | 0.00 |
| TRINITY_A0A0D2UAY5_CAPO3/55-401  | A0A0D2UAY5.1 PF1649 | 49.60 | 0.00 |
| TRINITY_Q23K51_TETTS/27-150      | Q23K51.2 PF02996.15 | 49.60 | 0.00 |
| TRINITY_A0A0M9DW34_9BACT/11-135  | A0A0M9DW34.1 PF0058 | 49.60 | 0.00 |
| TRINITY_Q23QF2_TETTS/248-571     | Q23QF2.2 PF03133.13 | 49.60 | 0.00 |
| TRINITY_J9IJQ5_9SPIT/433-601     | J9IJQ5.1 PF13561.4; | 49.60 | 0.00 |
| TRINITY_J9IJQ5_9SPIT/433-601     | J9IJQ5.1 PF13561.4; | 49.60 | 0.00 |
| TRINITY_A0A015LT99_9GLOM/148-280 | A0A015LT99.1 PF0346 | 49.60 | 0.00 |
| TRINITY_Q22AQ4_TETTS/550-689     | Q22AQ4.1 PF01529.18 | 49.60 | 0.00 |
| TRINITY_A0A022RC66_ERYGU/150-384 | A0A022RC66.1 PF1362 | 49.60 | 0.00 |
| TRINITY_D8UDF3_VOLCA/894-1029    | D8UDF3.1 PF13472.4; | 49.60 | 0.00 |
| TRINITY_A0A059LQL1_9CHLO/239-355 | A0A059LQL1.1 PF0063 | 49.60 | 0.00 |
| TRINITY_I0Z109_9CHLO/256-889     | I0Z109.1 PF03343.11 | 49.60 | 0.00 |
| TRINITY_Q9RYT7_DEIRA/27-166      | Q9RYT7.1 PF09346.8; | 49.60 | 0.00 |
| TRINITY_H2U929_TAKRU/117-405     | H2U929.1 PF06079.9; | 49.60 | 0.00 |
| TRINITY_A0A095C3A6_CRYGA/90-202  | A0A095C3A6.1 PF1613 | 49.60 | 0.00 |
| TRINITY_A0A078A3V7_STYLE/126-338 | A0A078A3V7.1 PF0011 | 49.60 | 0.00 |
| TRINITY_H3FY79_PRIIPA/9-158      | H3FY79.1 PF10558.7; | 49.60 | 0.00 |
| TRINITY_A0CQE0_PARTE/146-402     | A0CQE0.1 PF00069.23 | 49.60 | 0.00 |
| TRINITY_A0A075ANW3_9FUNG/209-660 | A0A075ANW3.1 PF0143 | 49.60 | 0.00 |
| TRINITY_C3ZL63_BRAFL/350-687     | C3ZL63.1 PF06602.12 | 49.60 | 0.00 |

|                                    |                     |       |      |
|------------------------------------|---------------------|-------|------|
| TRINITY_I0ZAP1_9CHLO/34-522        | I0ZAP1.1 PF03372.21 | 49.60 | 0.00 |
| TRINITY_RIFK_SCHPO/20-147          | O74866.1 PF01687.15 | 49.60 | 0.00 |
| TRINITY_A0A058Z5C4_9EUKA/106-248   | A0A058Z5C4.1 PF0169 | 49.60 | 0.00 |
| TRINITY_I7M4R2_TETTS/53-317        | I7M4R2.1 PF10343.7; | 49.60 | 0.00 |
| TRINITY_A8HQ35_CHLRE/54-313        | A8HQ35.1 PF07714.15 | 49.60 | 0.00 |
| TRINITY_A0A0E0AJL1_9ORYZ/253-495   | A0A0E0AJL1.1 PF0771 | 49.60 | 0.00 |
| TRINITY_G0QVR2_ICHMG/491-907       | G0QVR2.1 PF02460.16 | 49.60 | 0.00 |
| TRINITY_K3W7P3_PYTUL/115-303       | K3W7P3.1 PF09756.7; | 49.60 | 0.00 |
| TRINITY_A8J8I4_CHLRE/47-327        | A8J8I4.1 PF00069.23 | 49.60 | 0.00 |
| TRINITY_D8TNW0_VOLCA/690-893       | D8TNW0.1 PF09787.7; | 49.60 | 0.00 |
| TRINITY_D2A543_TRICA/466-585       | D2A543.1 PF00665.24 | 49.60 | 0.00 |
| TRINITY_D8TNY3_VOLCA/1-151         | D8TNY3.1 PF01878.16 | 49.60 | 0.00 |
| TRINITY_A8J4X1_CHLRE/9-288         | A8J4X1.1 PF03643.13 | 49.60 | 0.00 |
| TRINITY_Q22W19_TETTS/115-323       | Q22W19.3 PF00112.21 | 49.60 | 0.00 |
| TRINITY_E1ZGK0_CHLVA/160-290       | E1ZGK0.1 PF00294.22 | 49.60 | 0.00 |
| TRINITY_V4KQ72_EUTSA/102-349       | V4KQ72.1 PF12697.5; | 49.60 | 0.00 |
| TRINITY_A0A059LRD4_9CHLO/607-765   | A0A059LRD4.1 PF0000 | 49.50 | 0.00 |
| TRINITY_A0C3F0_PARTE/8-164         | A0C3F0.1 PF07162.9; | 49.50 | 0.00 |
| TRINITY_A0A0A1U1N4_ENTIV/1327-1589 | A0A0A1U1N4.1 PF0006 | 49.50 | 0.00 |
| TRINITY_F1MYX5_BOVIN/515-625       | F1MYX5.1 PF00307.29 | 49.50 | 0.00 |
| TRINITY_Q23CY8_TETTS/56-353        | Q23CY8.2 PF00480.18 | 49.50 | 0.00 |
| TRINITY_D3AW94_POLPA/29-216        | D3AW94.1 PF02589.13 | 49.50 | 0.00 |
| TRINITY_D8TSZ7_VOLCA/1690-1975     | D8TSZ7.1 PF07714.15 | 49.50 | 0.00 |
| TRINITY_A0CTS6_PARTE/568-858       | A0CTS6.1 PF01237.16 | 49.50 | 0.00 |
| TRINITY_A0A0M0JGU0_9EUKA/93-271    | A0A0M0JGU0.1 PF0024 | 49.50 | 0.00 |
| TRINITY_D3BUX6_POLPA/12-324        | D3BUX6.1 PF01218.16 | 49.50 | 0.00 |
| TRINITY_Q23DC1_TETTS/461-1153      | Q23DC1.2 PF00443.27 | 49.50 | 0.00 |
| TRINITY_K4D228_SOLLC/12-104        | K4D228.1 PF02214.20 | 49.50 | 0.00 |
| TRINITY_L8GTK1_ACACA/146-395       | L8GTK1.1 PF07714.15 | 49.50 | 0.00 |
| TRINITY_F4Q2J6_DICFS/31-137        | F4Q2J6.1 PF00307.29 | 49.50 | 0.00 |
| TRINITY_Q3SDI0_PARTE/17-177        | Q3SDI0.1 PF00071.20 | 49.50 | 0.00 |
| TRINITY_E1Z9Z4_CHLVA/12-204        | E1Z9Z4.1 PF03357.19 | 49.50 | 0.00 |
| TRINITY_SPKA_DICDI/351-612         | Q86AT8.1 PF07714.15 | 49.50 | 0.00 |
| TRINITY_A8IRV7_CHLRE/54-272        | A8IRV7.1 PF11833.6; | 49.50 | 0.00 |
| TRINITY_A8HWI9_CHLRE/348-571       | A8HWI9.1 PF07714.15 | 49.50 | 0.00 |
| TRINITY_U6HMV9_ECHMU/75-215        | U6HMV9.1 PF00561.18 | 49.50 | 0.00 |
| TRINITY_A0CKP0_PARTE/8-263         | A0CKP0.1 PF00069.23 | 49.50 | 0.00 |
| TRINITY_F0ZH73_DICPU/405-577       | F0ZH73.1 PF00621.18 | 49.50 | 0.00 |
| TRINITY_A0A0L0BN69_LUCCU/264-405   | A0A0L0BN69.1 PF0116 | 49.50 | 0.00 |
| TRINITY_D3BJA2_POLPA/20-171        | D3BJA2.1 PF14580.4; | 49.50 | 0.00 |
| TRINITY_L8GIW0_ACACA/41-462        | L8GIW0.1 PF06824.9; | 49.50 | 0.00 |
| TRINITY_E1ZAE1_CHLVA/18-540        | E1ZAE1.1 PF12832.5; | 49.50 | 0.00 |
| TRINITY_I0Z2G1_9CHLO/80-263        | I0Z2G1.1 PF01789.14 | 49.50 | 0.00 |
| TRINITY_Q22WK1_TETTS/72-180        | Q22WK1.2 PF00787.22 | 49.50 | 0.00 |
| TRINITY_D7TXF1_VITVI/16-120        | D7TXF1.1 PF01920.18 | 49.50 | 0.00 |
| TRINITY_C1EEA0_MICSR/148-339       | C1EEA0.1 PF13532.4; | 49.50 | 0.00 |
| TRINITY_E5S262_TRISP/8-109         | E5S262.1 PF00568.21 | 49.50 | 0.00 |
| TRINITY_K1RML1_CRAGI/4-288         | K1RML1.1 PF00069.23 | 49.50 | 0.00 |
| TRINITY_Q231T5_TETTS/15-118        | Q231T5.1 PF03645.11 | 49.50 | 0.00 |
| TRINITY_G0VKB1_NAUCC/226-413       | G0VKB1.1 PF00300.20 | 49.50 | 0.00 |
| TRINITY_M3XGQ6_LATCH/1-113         | M3XGQ6.1 PF00568.21 | 49.50 | 0.00 |
| TRINITY_ADK_DICDI/23-336           | Q54MB5.2 PF00294.22 | 49.50 | 0.00 |
| TRINITY_L8GQZ4_ACACA/23-685        | L8GQZ4.1 PF07093.9; | 49.50 | 0.00 |
| TRINITY_D8U7C7_VOLCA/52-577        | D8U7C7.1 PF03055.13 | 49.50 | 0.00 |
| TRINITY_L8GUJ1_ACACA/207-501       | L8GUJ1.1 PF04515.10 | 49.50 | 0.00 |
| TRINITY_A8IBX2_CHLRE/464-568       | A8IBX2.1 PF13426.5; | 49.50 | 0.00 |
| TRINITY_A8IYS4_CHLRE/7-144         | A8IYS4.1 PF15011.4; | 49.50 | 0.00 |
| TRINITY_A0A072VKI5_MEDTR/502-835   | A0A072VKI5.1 PF0012 | 49.50 | 0.00 |
| TRINITY_D8TTG8_VOLCA/39-316        | D8TTG8.1 PF00294.22 | 49.50 | 0.00 |
| TRINITY_D3B5S9_POLPA/11-170        | D3B5S9.1 PF03986.11 | 49.50 | 0.00 |
| TRINITY_A8JHT1_CHLRE/167-417       | A8JHT1.1 PF16908.3; | 49.50 | 0.00 |

|                                    |              |            |       |      |
|------------------------------------|--------------|------------|-------|------|
| TRINITY_A1ZQ27_9BACT/9-271         | A1ZQ27.1     | PF00378.18 | 49.50 | 0.00 |
| TRINITY_E1ZEK6_CHLVA/4-111         | E1ZEK6.1     | PF00300.20 | 49.50 | 0.00 |
| TRINITY_C6W3F1_DYAFD/7-229         | C6W3F1.1     | PF00106.23 | 49.50 | 0.00 |
| TRINITY_Q22T22_TETTS/520-735       | Q22T22.3     | PF07859.11 | 49.50 | 0.00 |
| TRINITY_Q23JD9_TETTS/24-552        | Q23JD9.3     | PF01602.18 | 49.50 | 0.00 |
| TRINITY_B8I057_CLOCE/6-188         | B8I057.1     | PF01195.17 | 49.50 | 0.00 |
| TRINITY_Q24GE4_TETTS/399-611       | Q24GE4.3     | PF00644.18 | 49.50 | 0.00 |
| TRINITY_Q22NP9_TETTS/339-441       | Q22NP9.2     | PF02204.16 | 49.50 | 0.00 |
| TRINITY_W7X292_TETTS/58-150        | W7X292.1     | PF16455.3; | 49.50 | 0.00 |
| TRINITY_I0Z522_9CHLO/13-186        | I0Z522.1     | PF01925.17 | 49.50 | 0.00 |
| TRINITY_B0DSH5_LACBS/234-393       | B0DSH5.1     | PF01399.25 | 49.50 | 0.00 |
| TRINITY_A0A059B6L2_EUCGR/387-543   | A0A059B6L2.1 | PF0398     | 49.50 | 0.00 |
| TRINITY_D2V9V9_NAEGR/18-190        | D2V9V9.1     | PF00929.22 | 49.50 | 0.00 |
| TRINITY_I7M2H5_TETTS/224-317       | I7M2H5.1     | PF00153.25 | 49.50 | 0.00 |
| TRINITY_E1Z994_CHLVA/147-412       | E1Z994.1     | PF05116.11 | 49.50 | 0.00 |
| TRINITY_A8IP12_CHLRE/72-509        | A8IP12.1     | PF01490.16 | 49.50 | 0.00 |
| TRINITY_I7MMY6_TETTS/639-738       | I7MMY6.2     | PF00989.23 | 49.50 | 0.00 |
| TRINITY_A8IR95_CHLRE/401-503       | A8IR95.1     | PF13426.5; | 49.50 | 0.00 |
| TRINITY_A8IYT2_CHLRE/40-133        | A8IYT2.1     | PF12894.5; | 49.50 | 0.00 |
| TRINITY_D8TTV8_VOLCA/81-324        | D8TTV8.1     | PF00233.17 | 49.50 | 0.00 |
| TRINITY_Q22S90_TETTS/208-560       | Q22S90.1     | PF05028.12 | 49.50 | 0.00 |
| TRINITY_A0A024T955_9STRA/43-204    | A0A024T955.1 | PF0007     | 49.40 | 0.00 |
| TRINITY_J9FBW6_9SPIT/36-484        | J9FBW6.1     | PF05577.10 | 49.40 | 0.00 |
| TRINITY_Q24E55_TETTS/8-179         | Q24E55.1     | PF00071.20 | 49.40 | 0.00 |
| TRINITY_I7MIE2_TETTS/246-724       | I7MIE2.2     | PF01055.24 | 49.40 | 0.00 |
| TRINITY_A0E388_PARTE/154-420       | A0E388.1     | PF08014.9; | 49.40 | 0.00 |
| TRINITY_A0A0A1MPB6_9BACI/27-455    | A0A0A1MPB6.1 | PF0142     | 49.40 | 0.00 |
| TRINITY_I7LXL4_TETTS/220-317       | I7LXL4.1     | PF00153.25 | 49.40 | 0.00 |
| TRINITY_T1L3G8_TETUR/55-191        | T1L3G8.1     | PF07534.14 | 49.40 | 0.00 |
| TRINITY_A0A022R0V6_ERYGU/11-123    | A0A022R0V6.1 | PF0233     | 49.40 | 0.00 |
| TRINITY_F6Q9D5_CIOIN/58-324        | F6Q9D5.2     | PF00149.26 | 49.40 | 0.00 |
| TRINITY_L8GVF1_ACACA/95-436        | L8GVF1.1     | PF01244.19 | 49.40 | 0.00 |
| TRINITY_D3BRJ2_POLPA/219-314       | D3BRJ2.1     | PF00153.25 | 49.40 | 0.00 |
| TRINITY_G8BJW8_CANPC/6-167         | G8BJW8.1     | PF00071.20 | 49.40 | 0.00 |
| TRINITY_H3CBK3_TETNG/53-477        | H3CBK3.1     | PF05577.10 | 49.40 | 0.00 |
| TRINITY_J9I759_9SPIT/142-428       | J9I759.1     | PF00122.18 | 49.40 | 0.00 |
| TRINITY_A0A090M864_OSTTA/61-459    | A0A090M864.1 | PF0588     | 49.40 | 0.00 |
| TRINITY_A0D206_PARTE/25-225        | A0D206.1     | PF00106.23 | 49.40 | 0.00 |
| TRINITY_A0A0N5DKI9_TRIMR/456-610   | A0A0N5DKI9.1 | PF0944     | 49.40 | 0.00 |
| TRINITY_H2YP11_CIOSA/230-438       | H2YP11.1     | PF00005.25 | 49.40 | 0.00 |
| TRINITY_W6FUH4_NODSP/15-183        | W6FUH4.1     | PF13385.4; | 49.40 | 0.00 |
| TRINITY_W6FUH4_NODSP/15-183        | W6FUH4.1     | PF13385.4; | 49.40 | 0.00 |
| TRINITY_A0A058ZAA1_9EUKA/30-111    | A0A058ZAA1.1 | PF0282     | 49.40 | 0.00 |
| TRINITY_A0A0G4J2X3_PLABS/751-865   | A0A0G4J2X3.1 | PF0066     | 49.40 | 0.00 |
| TRINITY_C6CWU9_PAESJ/29-254        | C6CWU9.1     | PF06452.9; | 49.40 | 0.00 |
| TRINITY_A0A078ADF6_STYLE/3865-4174 | A0A078ADF6.1 | PF0063     | 49.40 | 0.00 |
| TRINITY_W2PR86_PHYPN/1-93          | W2PR86.1     | PF08544.11 | 49.40 | 0.00 |
| TRINITY_V4CBN3_LOTGI/41-446        | V4CBN3.1     | PF03164.12 | 49.40 | 0.00 |
| TRINITY_E1ZQ29_CHLVA/42-314        | E1ZQ29.1     | PF00069.23 | 49.40 | 0.00 |
| TRINITY_F0ZM09_DICPU/17-351        | F0ZM09.1     | PF02733.15 | 49.40 | 0.00 |
| TRINITY_G4THH4_PIRID/2049-2169     | G4THH4.1     | PF00665.24 | 49.40 | 0.00 |
| TRINITY_DOT1L_DICDI/1230-1434      | Q55AX2.2     | PF08123.11 | 49.40 | 0.00 |
| TRINITY_G0QXG1_ICHMG/263-484       | G0QXG1.1     | PF07002.14 | 49.40 | 0.00 |
| TRINITY_A7SLJ0_NEMVE/4-288         | A7SLJ0.1     | PF00069.23 | 49.40 | 0.00 |
| TRINITY_A8J3E8_CHLRE/4729-4882     | A8J3E8.1     | PF14309.4; | 49.40 | 0.00 |
| TRINITY_G0QZ92_ICHMG/19-335        | G0QZ92.1     | PF00069.23 | 49.40 | 0.00 |
| TRINITY_V4AGX3_LOTGI/44-222        | V4AGX3.1     | PF01699.22 | 49.40 | 0.00 |
| TRINITY_I7MEA2_TETTS/352-496       | I7MEA2.1     | PF00005.25 | 49.40 | 0.00 |
| TRINITY_D8T7B3_SELML/63-181        | D8T7B3.1     | PF01926.21 | 49.40 | 0.00 |
| TRINITY_NHAAB_MONBE/6-109          | A9V2C1.1     | PF02211.13 | 49.40 | 0.00 |
| TRINITY_A0A078A3V7_STYLE/126-338   | A0A078A3V7.1 | PF0011     | 49.40 | 0.00 |

|                                  |                     |       |      |
|----------------------------------|---------------------|-------|------|
| TRINITY_A3DPC2_STAMF/1-407       | A3DPC2.1 PF00232.16 | 49.40 | 0.00 |
| TRINITY_L8HIG4_ACACA/43-454      | L8HIG4.1 PF01490.16 | 49.40 | 0.00 |
| TRINITY_G0R1Y7_ICHMG/3-188       | G0R1Y7.1 PF01251.16 | 49.40 | 0.00 |
| TRINITY_V4AJZ4_LOTGI/51-222      | V4AJZ4.1 PF14124.4; | 49.40 | 0.00 |
| TRINITY_I7M8M1_TETTS/1021-1109   | I7M8M1.1 PF00679.22 | 49.40 | 0.00 |
| TRINITY_G0QUA8_ICHMG/3047-3315   | G0QUA8.1 PF00454.25 | 49.40 | 0.00 |
| TRINITY_A0A087SJ86_AUXPR/163-245 | A0A087SJ86.1 PF0306 | 49.40 | 0.00 |
| TRINITY_A8J6W0_CHLRE/118-282     | A8J6W0.1 PF04678.11 | 49.40 | 0.00 |
| TRINITY_D8UDA7_VOLCA/1-149       | D8UDA7.1 PF07714.15 | 49.40 | 0.00 |
| TRINITY_Q0YR84_9CHLB/108-286     | Q0YR84.1 PF07478.11 | 49.40 | 0.00 |
| TRINITY_W4YW97_STRPU/1-101       | W4YW97.1 PF00125.22 | 49.40 | 0.00 |
| TRINITY_B9L4Y8_THERP/1-166       | B9L4Y8.1 PF06559.9; | 49.40 | 0.00 |
| TRINITY_L8GFW8_ACACA/286-459     | L8GFW8.1 PF00441.22 | 49.40 | 0.00 |
| TRINITY_D8TJJ1_VOLCA/1356-1532   | D8TJJ1.1 PF02141.19 | 49.40 | 0.00 |
| TRINITY_A0A0D2UDJ0_CAPO3/193-604 | A0A0D2UDJ0.1 PF0065 | 49.40 | 0.00 |
| TRINITY_D8QSN2_SELML/263-400     | D8QSN2.1 PF01544.16 | 49.40 | 0.00 |
| TRINITY_A4VEL1_TETTS/1008-1157   | A4VEL1.2 PF00005.25 | 49.40 | 0.00 |
| TRINITY_G3PHL3_GASAC/294-434     | G3PHL3.1 PF09112.8; | 49.40 | 0.00 |
| TRINITY_A9SKG6_PHYPA/692-776     | A9SKG6.1 PF00637.18 | 49.40 | 0.00 |
| TRINITY_D8TLV7_VOLCA/779-974     | D8TLV7.1 PF00326.19 | 49.40 | 0.00 |
| TRINITY_A8JFP7_CHLRE/157-424     | A8JFP7.1 PF04187.11 | 49.40 | 0.00 |
| TRINITY_A0E936_PARTE/243-406     | A0E936.1 PF03031.16 | 49.40 | 0.00 |
| TRINITY_A0A0G4GRG0_9ALVE/2-181   | A0A0G4GRG0.1 PF0022 | 49.40 | 0.00 |
| TRINITY_D8TP55_VOLCA/67-324      | D8TP55.1 PF00233.17 | 49.40 | 0.00 |

|                                  |              |            |       |      |
|----------------------------------|--------------|------------|-------|------|
| TRINITY_I7MJ25_TETTS/230-402     | I7MJ25.1     | PF05193.19 | 49.40 | 0.00 |
| TRINITY_D8TYQ9_VOLCA/13-319      | D8TYQ9.1     | PF02574.14 | 49.40 | 0.00 |
| TRINITY_A0CMN6_PARTE/121-399     | A0CMN6.1     | PF01457.14 | 49.40 | 0.00 |
| TRINITY_I0YRQ7_9CHLO/88-217      | I0YRQ7.1     | PF00293.26 | 49.40 | 0.00 |
| TRINITY_F4PHF0_DICFS/606-854     | F4PHF0.1     | PF00481.19 | 49.40 | 0.00 |
| TRINITY_M7C1Z6_CHEMY/168-264     | M7C1Z6.1     | PF12894.5; | 49.40 | 0.00 |
| TRINITY_A0A075AXN4_9FUNG/162-414 | A0A075AXN4.1 | PF00006    | 49.40 | 0.00 |
| TRINITY_A0BJW5_PARTE/673-824     | A0BJW5.1     | PF00005.25 | 49.40 | 0.00 |
| TRINITY_L8GSM0_ACACA/1518-1768   | L8GSM0.1     | PF07714.15 | 49.40 | 0.00 |
| TRINITY_I0YUB8_9CHLO/105-257     | I0YUB8.1     | PF08389.10 | 49.40 | 0.00 |
| TRINITY_A8IV18_CHLRE/452-536     | A8IV18.1     | PF00887.17 | 49.40 | 0.00 |
| TRINITY_G0QU25_ICHMG/766-848     | G0QU25.1     | PF00635.24 | 49.40 | 0.00 |
| TRINITY_D8UB11_VOLCA/330-583     | D8UB11.1     | PF09325.8; | 49.40 | 0.00 |
| TRINITY_D5GFX0_TUBMM/96-251      | D5GFX0.1     | PF13499.4; | 49.40 | 0.00 |
| TRINITY_Q4BVL1_CROWT/39-452      | Q4BVL1.1     | PF03092.14 | 49.40 | 0.00 |
| TRINITY_G0QKJ2_ICHMG/22-183      | G0QKJ2.1     | PF00173.26 | 49.40 | 0.00 |
| TRINITY_Q23DI7_TETTS/1868-2219   | Q23DI7.2     | PF00443.27 | 49.40 | 0.00 |
| TRINITY_D8UJK8_VOLCA/363-743     | D8UJK8.1     | PF00702.24 | 49.40 | 0.00 |
| TRINITY_L8HM05_ACACA/513-681     | L8HM05.1     | PF05729.10 | 49.40 | 0.00 |
| TRINITY_F8ED73_RUNSL/2-93        | F8ED73.1     | PF03807.15 | 49.30 | 0.00 |
| TRINITY_A0DGX8_PARTE/729-814     | A0DGX8.1     | PF00027.27 | 49.30 | 0.00 |
| TRINITY_Q22BW3_TETTS/18-233      | Q22BW3.2     | PF02230.14 | 49.30 | 0.00 |
| TRINITY_Q22LR2_TETTS/173-344     | Q22LR2.3     | PF00270.27 | 49.30 | 0.00 |
| TRINITY_C3ZY00_BRAFL/336-556     | C3ZY00.1     | PF01734.20 | 49.30 | 0.00 |
| TRINITY_E5WNT4_9BACI/8-148       | E5WNT4.1     | PF13302.5; | 49.30 | 0.00 |
| TRINITY_A0BG56_PARTE/51-241      | A0BG56.1     | PF00106.23 | 49.30 | 0.00 |
| TRINITY_S2JQ85_MUCC1/13-150      | S2JQ85.1     | PF00334.17 | 49.30 | 0.00 |
| TRINITY_Q22KK3_TETTS/1692-1803   | Q22KK3.2     | PF00307.29 | 49.30 | 0.00 |
| TRINITY_A0A0G4J0S9_PLABS/5-178   | A0A0G4J0S9.1 | PF00007    | 49.30 | 0.00 |
| TRINITY_A5E688_LODEL/12-84       | A5E688.1     | PF00173.26 | 49.30 | 0.00 |
| TRINITY_Q86KA1_DICDI/114-182     | Q86KA1.1     | PF00542.17 | 49.30 | 0.00 |
| TRINITY_I1FE46_AMPQE/127-192     | I1FE46.1     | PF07258.12 | 49.30 | 0.00 |
| TRINITY_Q22EC6_TETTS/68-359      | Q22EC6.2     | PF04258.11 | 49.30 | 0.00 |
| TRINITY_E0VFC0_PEDHC/42-205      | E0VFC0.1     | PF01652.16 | 49.30 | 0.00 |
| TRINITY_B4KIM7_DROMO/984-1256    | B4KIM7.2     | PF00664.21 | 49.30 | 0.00 |
| TRINITY_D7FM24_ECTSI/20-195      | D7FM24.1     | PF02417.13 | 49.30 | 0.00 |
| TRINITY_Q23AY4_TETTS/31-436      | Q23AY4.2     | PF05577.10 | 49.30 | 0.00 |
| TRINITY_G4YQJ5_PHYSP/58-315      | G4YQJ5.1     | PF02636.15 | 49.30 | 0.00 |
| TRINITY_W7XK44_TETTS/3-75        | W7XK44.1     | PF02798.18 | 49.30 | 0.00 |
| TRINITY_A0A072U2E0_MEDTR/103-307 | A0A072U2E0.1 | PF00048    | 49.30 | 0.00 |
| TRINITY_C3ZB99_BRAFL/56-119      | C3ZB99.1     | PF04818.11 | 49.30 | 0.00 |
| TRINITY_L1JMZ5_GUITH/357-427     | L1JMZ5.1     | PF00076.20 | 49.30 | 0.00 |
| TRINITY_A8J1L7_CHLRE/28-111      | A8J1L7.1     | PF12796.5; | 49.30 | 0.00 |
| TRINITY_A7RRM0_NEMVE/31-173      | A7RRM0.1     | PF00102.25 | 49.30 | 0.00 |
| TRINITY_A7SKD9_NEMVE/156-246     | A7SKD9.1     | PF12894.5; | 49.30 | 0.00 |
| TRINITY_A8NF86_COPC7/232-300     | A8NF86.1     | PF00076.20 | 49.30 | 0.00 |
| TRINITY_L8GUR2_ACACA/284-351     | L8GUR2.1     | PF02207.18 | 49.30 | 0.00 |
| TRINITY_L8GH74_ACACA/214-289     | L8GH74.1     | PF00533.24 | 49.30 | 0.00 |
| TRINITY_G0QK40_ICHMG/27-393      | G0QK40.1     | PF07690.14 | 49.30 | 0.00 |
| TRINITY_Q24DE0_TETTS/57-384      | Q24DE0.2     | PF04137.13 | 49.30 | 0.00 |
| TRINITY_U9T1H6_RHIID/130-200     | U9T1H6.1     | PF00076.20 | 49.30 | 0.00 |
| TRINITY_G0QNE0_ICHMG/208-288     | G0QNE0.1     | PF05406.13 | 49.30 | 0.00 |
| TRINITY_I7M912_TETTS/429-502     | I7M912.1     | PF13424.4; | 49.30 | 0.00 |
| TRINITY_A0DUA5_PARTE/170-239     | A0DUA5.1     | PF14360.4; | 49.30 | 0.00 |
| TRINITY_G5EDF9_CAEEL/417-566     | G5EDF9.1     | PF00005.25 | 49.30 | 0.00 |
| TRINITY_I0Z0B5_9CHLO/6-78        | I0Z0B5.1     | PF00240.21 | 49.30 | 0.00 |
| TRINITY_F4Q1E4_DICFS/225-294     | F4Q1E4.1     | PF02825.18 | 49.30 | 0.00 |
| TRINITY_U5D852_AMBTC/4-79        | U5D852.1     | PF00808.21 | 49.30 | 0.00 |
| TRINITY_A8JCA4_CHLRE/66-273      | A8JCA4.1     | PF00566.16 | 49.30 | 0.00 |
| TRINITY_A0A0E3UVI8_9BACT/37-178  | A0A0E3UVI8.1 | PF0821     | 49.30 | 0.00 |
| TRINITY_L7U9F0_MYXSD/3-287       | L7U9F0.1     | PF01156.17 | 49.30 | 0.00 |

|                                  |               |            |       |      |
|----------------------------------|---------------|------------|-------|------|
| TRINITY_D8TTV8_VOLCA/81-324      | D8TTV8.1      | PF00233.17 | 49.30 | 0.00 |
| TRINITY_M5CDH7_THACB/489-602     | M5CDH7.1      | PF00665.24 | 49.30 | 0.00 |
| TRINITY_I0YUZ3_9CHLO/2-74        | I0YUZ3.1      | PF11571.6; | 49.30 | 0.00 |
| TRINITY_E1ZDW0_CHLVA/527-597     | E1ZDW0.1      | PF00575.21 | 49.30 | 0.00 |
| TRINITY_A0A066WUFU6_9BASI/3-74   | A0A066WUFU6.1 | PF0024     | 49.30 | 0.00 |
| TRINITY_I1FQJ7_AMPQE/21-96       | I1FQJ7.1      | PF15630.4; | 49.30 | 0.00 |
| TRINITY_D8TTX8_VOLCA/4-119       | D8TTX8.1      | PF01412.16 | 49.30 | 0.00 |
| TRINITY_F4Q8Q1_DICFS/32-805      | F4Q8Q1.1      | PF01496.17 | 49.30 | 0.00 |
| TRINITY_K5VBV7_PHACS/9-130       | K5VBV7.1      | PF01873.15 | 49.30 | 0.00 |
| TRINITY_B3E6I6_GEOLS/27-171      | B3E6I6.1      | PF08240.10 | 49.30 | 0.00 |
| TRINITY_W7X4T7_TETTS/1-455       | W7X4T7.1      | PF00171.20 | 49.30 | 0.00 |
| TRINITY_L8GVS0_ACACA/731-1032    | L8GVS0.1      | PF03133.13 | 49.30 | 0.00 |
| TRINITY_A0A078DNT7_BRANA/370-586 | A0A078DNT7.1  | PF0500     | 49.30 | 0.00 |
| TRINITY_U5HHP4_USTV1/52-122      | U5HHP4.1      | PF00076.20 | 49.30 | 0.00 |
| TRINITY_D8UBB0_VOLCA/187-259     | D8UBB0.1      | PF00076.20 | 49.30 | 0.00 |
| TRINITY_E1Z493_CHLVA/55-440      | E1Z493.1      | PF00501.26 | 49.30 | 0.00 |
| TRINITY_TPPC4_DICDI/3-134        | Q54UU1.1      | PF04099.10 | 49.30 | 0.00 |
| TRINITY_D8TR80_VOLCA/432-709     | D8TR80.1      | PF02854.17 | 49.30 | 0.00 |
| TRINITY_A8HNJ6_CHLRE/92-232      | A8HNJ6.1      | PF03981.10 | 49.30 | 0.00 |
| TRINITY_H2YA27_CIOSA/108-177     | H2YA27.1      | PF00076.20 | 49.30 | 0.00 |
| TRINITY_J9HLW6_9SPIT/39-360      | J9HLW6.1      | PF00022.17 | 49.30 | 0.00 |
| TRINITY_G0R3J1_ICHMG/14-292      | G0R3J1.1      | PF07993.10 | 49.30 | 0.00 |
| TRINITY_A0DG99_PARTE/634-720     | A0DG99.1      | PF00027.27 | 49.20 | 0.00 |
| TRINITY_A0D5U2_PARTE/69-148      | A0D5U2.1      | PF12796.5; | 49.20 | 0.00 |
| TRINITY_I7MKI3_TETTS/5-69        | I7MKI3.1      | PF00808.21 | 49.20 | 0.00 |
| TRINITY_G0R0W4_ICHMG/156-318     | G0R0W4.1      | PF01027.18 | 49.20 | 0.00 |
| TRINITY_A4ICT1_LEIIN/3-75        | A4ICT1.1      | PF00240.21 | 49.20 | 0.00 |
| TRINITY_I7LXZ0_TETTS/23-169      | I7LXZ0.1      | PF06201.11 | 49.20 | 0.00 |
| TRINITY_J9J0W3_9SPIT/51-328      | J9J0W3.1      | PF03747.12 | 49.20 | 0.00 |
| TRINITY_Q23YB5_TETTS/199-456     | Q23YB5.2      | PF00069.23 | 49.20 | 0.00 |
| TRINITY_D8TJV7_VOLCA/3641-4172   | D8TJV7.1      | PF02364.13 | 49.20 | 0.00 |
| TRINITY_R8BY23_TOGMI/12-74       | R8BY23.1      | PF05676.11 | 49.20 | 0.00 |
| TRINITY_A0DGL4_PARTE/163-424     | A0DGL4.1      | PF00149.26 | 49.20 | 0.00 |
| TRINITY_I1EX18_AMPQE/260-399     | I1EX18.1      | PF04377.13 | 49.20 | 0.00 |
| TRINITY_S8D991_9LAMI/469-530     | S8D991.1      | PF02297.15 | 49.20 | 0.00 |
| TRINITY_C3YIZ2_BRAFL/100-330     | C3YIZ2.1      | PF14680.4; | 49.20 | 0.00 |
| TRINITY_I7MJ44_TETTS/43-852      | I7MJ44.2      | PF01804.16 | 49.20 | 0.00 |
| TRINITY_W4ZJ46_STRPU/169-293     | W4ZJ46.1      | PF10996.6; | 49.20 | 0.00 |
| TRINITY_A8IBW2_CHLRE/139-344     | A8IBW2.1      | PF00211.18 | 49.20 | 0.00 |
| TRINITY_A0CT98_PARTE/1951-2193   | A0CT98.1      | PF00644.18 | 49.20 | 0.00 |
| TRINITY_L8HC90_ACACA/101-259     | L8HC90.1      | PF08231.10 | 49.20 | 0.00 |
| TRINITY_Y508_THEMA/445-561       | Q9WYX8.1      | PF01661.19 | 49.20 | 0.00 |
| TRINITY_L8H4H1_ACACA/451-620     | L8H4H1.1      | PF00069.23 | 49.20 | 0.00 |
| TRINITY_A8I4X1_CHLRE/212-340     | A8I4X1.1      | PF13369.4; | 49.20 | 0.00 |
| TRINITY_D3B009_POLPA/25-161      | D3B009.1      | PF13529.4; | 49.20 | 0.00 |
| TRINITY_I1Q3F9_ORYGL/20-84       | I1Q3F9.1      | PF01918.19 | 49.20 | 0.00 |
| TRINITY_E4U8M2_OCEP5/55-270      | E4U8M2.1      | PF08704.8; | 49.20 | 0.00 |
| TRINITY_D3B6M3_POLPA/229-533     | D3B6M3.1      | PF00082.20 | 49.20 | 0.00 |
| TRINITY_A0CS00_PARTE/134-484     | A0CS00.1      | PF13868.4; | 49.20 | 0.00 |
| TRINITY_I0YZP9_9CHLO/2-210       | I0YZP9.1      | PF00590.18 | 49.20 | 0.00 |
| TRINITY_B9SX98_RICCO/3-71        | B9SX98.1      | PF00240.21 | 49.20 | 0.00 |
| TRINITY_A8HPS6_CHLRE/8-137       | A8HPS6.1      | PF00179.24 | 49.20 | 0.00 |
| TRINITY_E1ZC62_CHLVA/232-333     | E1ZC62.1      | PF08755.9; | 49.20 | 0.00 |
| TRINITY_I1FPF0_AMPQE/81-258      | I1FPF0.1      | PF08892.9; | 49.20 | 0.00 |
| TRINITY_A8HQG8_CHLRE/150-407     | A8HQG8.1      | PF00481.19 | 49.20 | 0.00 |
| TRINITY_C3ZMD7_BRAFL/270-567     | C3ZMD7.1      | PF00632.23 | 49.20 | 0.00 |
| TRINITY_A0A0D9YAA1_9ORYZ/29-290  | A0A0D9YAA1.1  | PF1362     | 49.20 | 0.00 |
| TRINITY_G0QPZ9_ICHMG/16-280      | G0QPZ9.1      | PF04811.13 | 49.20 | 0.00 |
| TRINITY_L8GWH7_ACACA/4-194       | L8GWH7.1      | PF01956.14 | 49.20 | 0.00 |
| TRINITY_E1ZID6_CHLVA/915-981     | E1ZID6.1      | PF00439.23 | 49.20 | 0.00 |
| TRINITY_A0A0M9E444_9DELT/340-456 | A0A0M9E444.1  | PF0251     | 49.20 | 0.00 |



|                                  |              |            |       |      |
|----------------------------------|--------------|------------|-------|------|
| TRINITY_I1HR67_BRADI/14-266      | I1HR67.1     | PF00069.23 | 49.20 | 0.00 |
| TRINITY_Q2H7U0_CHAGB/401-534     | Q2H7U0.1     | PF00005.25 | 49.20 | 0.00 |
| TRINITY_C3YRH6_BRAFL/289-443     | C3YRH6.1     | PF13768.4; | 49.20 | 0.00 |
| TRINITY_A0BQA0_PARTE/27-116      | A0BQA0.1     | PF13011.4; | 49.20 | 0.00 |
| TRINITY_A8JJ05_CHLRE/562-633     | A8JJ05.1     | PF05699.12 | 49.20 | 0.00 |
| TRINITY_K3XVA6_SETIT/40-168      | K3XVA6.1     | PF00266.17 | 49.20 | 0.00 |
| TRINITY_D3BKP4_POLPA/83-143      | D3BKP4.1     | PF00571.26 | 49.20 | 0.00 |
| TRINITY_F0Z7L6_DICPU/1-247       | F0Z7L6.1     | PF02121.16 | 49.20 | 0.00 |
| TRINITY_F0ZB76_DICPU/5-166       | F0ZB76.1     | PF00071.20 | 49.20 | 0.00 |
| TRINITY_D8TL05_VOLCA/10-212      | D8TL05.1     | PF02146.15 | 49.20 | 0.00 |
| TRINITY_A8IKB4_CHLRE/123-518     | A8IKB4.1     | PF01546.26 | 49.20 | 0.00 |
| TRINITY_L8HKZ1_ACACA/368-1087    | L8HKZ1.1     | PF00443.27 | 49.20 | 0.00 |
| TRINITY_B8BL22_ORYSI/371-577     | B8BL22.1     | PF00501.26 | 49.20 | 0.00 |
| TRINITY_F1A079_DICPU/82-142      | F1A079.1     | PF13833.4; | 49.20 | 0.00 |
| TRINITY_D8TIQ8_VOLCA/641-853     | D8TIQ8.1     | PF07842.10 | 49.20 | 0.00 |
| TRINITY_A0A015II85_9GLOM/776-970 | A0A015II85.1 | PF0068     | 49.20 | 0.00 |
| TRINITY_F0ZW32_DICPU/315-390     | F0ZW32.1     | PF07650.15 | 49.20 | 0.00 |
| TRINITY_E1ZNL9_CHLVA/1-372       | E1ZNL9.1     | PF04916.11 | 49.20 | 0.00 |
| TRINITY_A0A0J8BEW9_BETVU/14-203  | A0A0J8BEW9.1 | PF0407     | 49.20 | 0.00 |
| TRINITY_A8IGD3_CHLRE/368-494     | A8IGD3.1     | PF02469.20 | 49.20 | 0.00 |
| TRINITY_D7A267_STAND/16-271      | D7A267.1     | PF00704.26 | 49.20 | 0.00 |
| TRINITY_I0YMU9_9CHLO/133-582     | I0YMU9.1     | PF00501.26 | 49.20 | 0.00 |
| TRINITY_A8IXM4_CHLRE/1640-1791   | A8IXM4.1     | PF03712.13 | 49.20 | 0.00 |
| TRINITY_G4VJB1_SCHMA/183-469     | G4VJB1.1     | PF00082.20 | 49.20 | 0.00 |
| TRINITY_I0YUQ5_9CHLO/33-353      | I0YUQ5.1     | PF01636.21 | 49.20 | 0.00 |
| TRINITY_D8UFU6_VOLCA/12-507      | D8UFU6.1     | PF07690.14 | 49.20 | 0.00 |
| TRINITY_D8TND4_VOLCA/49-240      | D8TND4.1     | PF00856.26 | 49.20 | 0.00 |
| TRINITY_I7M4A5_TETTS/168-343     | I7M4A5.2     | PF03031.16 | 49.20 | 0.00 |
| TRINITY_I7MMP1_TETTS/1561-1691   | I7MMP1.2     | PF00072.22 | 49.20 | 0.00 |
| TRINITY_A0DMK4_PARTE/24-339      | A0DMK4.1     | PF03372.21 | 49.10 | 0.00 |
| TRINITY_Q23BP9_TETTS/506-1002    | Q23BP9.2     | PF07748.11 | 49.10 | 0.00 |
| TRINITY_A5GVV7_SYNR3/127-329     | A5GVV7.1     | PF13604.4; | 49.10 | 0.00 |
| TRINITY_L8H969_ACACA/5-162       | L8H969.1     | PF00071.20 | 49.10 | 0.00 |
| TRINITY_A0A0G1TKJ1_9BACT/168-323 | A0A0G1TKJ1.1 | PF0000     | 49.10 | 0.00 |
| TRINITY_E7ELN7_MEDTR/632-739     | E7ELN7.1     | PF00970.22 | 49.10 | 0.00 |
| TRINITY_M5A0P1_9ACTN/2-107       | M5A0P1.1     | PF00085.18 | 49.10 | 0.00 |
| TRINITY_A0CJN5_PARTE/521-765     | A0CJN5.1     | PF01504.16 | 49.10 | 0.00 |
| TRINITY_A0A0D2QTE0_GOSRA/31-120  | A0A0D2QTE0.1 | PF0029     | 49.10 | 0.00 |
| TRINITY_A0A0D2WXF0_CAPO3/284-676 | A0A0D2WXF0.1 | PF0149     | 49.10 | 0.00 |
| TRINITY_F0ZYF9_DICPU/41-447      | F0ZYF9.1     | PF05577.10 | 49.10 | 0.00 |
| TRINITY_Q23CV4_TETTS/238-295     | Q23CV4.1     | PF13921.4; | 49.10 | 0.00 |
| TRINITY_PIRA_DICDI/393-1224      | Q6UK63.1     | PF05994.9; | 49.10 | 0.00 |
| TRINITY_D2CG46_TRICA/228-284     | D2CG46.1     | PF13414.4; | 49.10 | 0.00 |
| TRINITY_D2W6C4_NAEGR/55-109      | D2W6C4.1     | PF09597.8; | 49.10 | 0.00 |
| TRINITY_W9RC43_9ROSA/11-136      | W9RC43.1     | PF02338.17 | 49.10 | 0.00 |
| TRINITY_J3NX84_GAGT3/490-811     | J3NX84.1     | PF01504.16 | 49.10 | 0.00 |
| TRINITY_A0A0U1RQS7_HUMAN/11-163  | A0A0U1RQS7.1 | PF0078     | 49.10 | 0.00 |
| TRINITY_A0A068RIG1_9FUNG/28-137  | A0A068RIG1.1 | PF0018     | 49.10 | 0.00 |
| TRINITY_L8H0Y6_ACACA/58-360      | L8H0Y6.1     | PF03747.12 | 49.10 | 0.00 |
| TRINITY_A0A0D2VRW0_CAPO3/54-160  | A0A0D2VRW0.1 | PF0190     | 49.10 | 0.00 |
| TRINITY_A8JBC4_CHLRE/155-289     | A8JBC4.1     | PF09753.7; | 49.10 | 0.00 |
| TRINITY_A0ED46_PARTE/12-128      | A0ED46.1     | PF01412.16 | 49.10 | 0.00 |
| TRINITY_A0DEL7_PARTE/173-230     | A0DEL7.1     | PF13921.4; | 49.10 | 0.00 |
| TRINITY_Q22WK1_TETTS/72-180      | Q22WK1.2     | PF00787.22 | 49.10 | 0.00 |
| TRINITY_F1P4K1_CHICK/113-237     | F1P4K1.2     | PF04488.13 | 49.10 | 0.00 |
| TRINITY_A0A0G0BIW2_9BACT/23-178  | A0A0G0BIW2.1 | PF0150     | 49.10 | 0.00 |
| TRINITY_A8J6H6_CHLRE/198-406     | A8J6H6.1     | PF04893.15 | 49.10 | 0.00 |
| TRINITY_F1A1R9_DICPU/1114-1186   | F1A1R9.1     | PF00626.20 | 49.10 | 0.00 |
| TRINITY_A8IX94_CHLRE/4-104       | A8IX94.1     | PF05773.20 | 49.10 | 0.00 |
| TRINITY_L8GKC3_ACACA/11-128      | L8GKC3.1     | PF07792.10 | 49.10 | 0.00 |
| TRINITY_A0A024U529_9STRA/132-489 | A0A024U529.1 | PF0006     | 49.10 | 0.00 |

|                                  |              |            |       |      |
|----------------------------------|--------------|------------|-------|------|
| TRINITY_C1MM16_MICPC/148-266     | C1MM16.1     | PF13679.4; | 49.10 | 0.00 |
| TRINITY_I0YID9_9CHLO/1287-1402   | I0YID9.1     | PF02373.20 | 49.10 | 0.00 |
| TRINITY_G7Q122_MACFA/63-315      | G7Q122.1     | PF01556.16 | 49.10 | 0.00 |
| TRINITY_D8U4G0_VOLCA/1146-1840   | D8U4G0.1     | PF04998.15 | 49.10 | 0.00 |
| TRINITY_K7J987_NASVI/460-578     | K7J987.1     | PF00665.24 | 49.10 | 0.00 |
| TRINITY_I7MJT4_TETTS/15-283      | I7MJT4.1     | PF01073.17 | 49.10 | 0.00 |
| TRINITY_D8U9Y4_VOLCA/2633-2865   | D8U9Y4.1     | PF01494.17 | 49.10 | 0.00 |
| TRINITY_A8ISA5_CHLRE/9-212       | A8ISA5.1     | PF00106.23 | 49.10 | 0.00 |
| TRINITY_Q22BB6_TETTS/30-133      | Q22BB6.2     | PF01521.18 | 49.10 | 0.00 |
| TRINITY_I7LZL5_TETTS/3-180       | I7LZL5.1     | PF06017.11 | 49.10 | 0.00 |
| TRINITY_T5AQP3_OPHSC/13-170      | T5AQP3.1     | PF06424.10 | 49.10 | 0.00 |
| TRINITY_K1R4I2_CRAGI/95-237      | K1R4I2.1     | PF01399.25 | 49.10 | 0.00 |
| TRINITY_B0TDE0_HELMI/812-926     | B0TDE0.1     | PF00072.22 | 49.10 | 0.00 |
| TRINITY_L8GW37_ACACA/108-239     | L8GW37.1     | PF00828.17 | 49.10 | 0.00 |
| TRINITY_W5WET9_9PSEU/46-402      | W5WET9.1     | PF00561.18 | 49.10 | 0.00 |
| TRINITY_I0Z7P4_9CHLO/183-505     | I0Z7P4.1     | PF00493.21 | 49.10 | 0.00 |
| TRINITY_D8TTV8_VOLCA/81-324      | D8TTV8.1     | PF00233.17 | 49.10 | 0.00 |
| TRINITY_D8TPG7_VOLCA/13-263      | D8TPG7.1     | PF00251.18 | 49.10 | 0.00 |
| TRINITY_A0A087SBX9_AUXPR/28-162  | A0A087SBX9.1 | PF00089    | 49.10 | 0.00 |
| TRINITY_A8J6X0_CHLRE/1-220       | A8J6X0.1     | PF00149.26 | 49.10 | 0.00 |
| TRINITY_Q22T22_TETTS/520-735     | Q22T22.3     | PF07859.11 | 49.10 | 0.00 |
| TRINITY_A0A087SCV9_AUXPR/36-318  | A0A087SCV9.1 | PF0006     | 49.10 | 0.00 |
| TRINITY_C5KU79_PERM5/43-101      | C5KU79.1     | PF05383.15 | 49.10 | 0.00 |
| TRINITY_I7LTP2_TETTS/82-283      | I7LTP2.1     | PF03942.13 | 49.00 | 0.00 |
| TRINITY_F0RWF4_SPHGB/73-451      | F0RWF4.1     | PF00365.18 | 49.00 | 0.00 |
| TRINITY_W0SK07_9RHOO/185-250     | W0SK07.1     | PF14743.4; | 49.00 | 0.00 |
| TRINITY_Q236J0_TETTS/23-252      | Q236J0.1     | PF05023.12 | 49.00 | 0.00 |
| TRINITY_E0V8Z5_PEDHC/129-276     | E0V8Z5.1     | PF08662.9; | 49.00 | 0.00 |
| TRINITY_A0D0G9_PARTE/14-80       | A0D0G9.1     | PF02953.13 | 49.00 | 0.00 |
| TRINITY_C1E1J6_MICSR/20-116      | C1E1J6.1     | PF01196.17 | 49.00 | 0.00 |
| TRINITY_A0BML7_PARTE/19-118      | A0BML7.1     | PF00447.15 | 49.00 | 0.00 |
| TRINITY_A8HQ25_CHLRE/22-120      | A8HQ25.1     | PF14726.4; | 49.00 | 0.00 |
| TRINITY_I0YKN3_9CHLO/45-275      | I0YKN3.1     | PF00149.26 | 49.00 | 0.00 |
| TRINITY_S2J9M9_MUCC1/73-173      | S2J9M9.1     | PF13646.4; | 49.00 | 0.00 |
| TRINITY_L8GRB0_ACACA/166-309     | L8GRB0.1     | PF00293.26 | 49.00 | 0.00 |
| TRINITY_G0QPX7_ICHMG/754-994     | G0QPX7.1     | PF00520.29 | 49.00 | 0.00 |
| TRINITY_Q22HL7_TETTS/92-505      | Q22HL7.2     | PF02005.14 | 49.00 | 0.00 |
| TRINITY_A4VD57_TETTS/84-127      | A4VD57.2     | PF00097.23 | 49.00 | 0.00 |
| TRINITY_Q23JY6_TETTS/610-893     | Q23JY6.2     | PF00481.19 | 49.00 | 0.00 |
| TRINITY_S8BZM3_9LAMI/14-116      | S8BZM3.1     | PF00307.29 | 49.00 | 0.00 |
| TRINITY_L8GHU6_ACACA/376-526     | L8GHU6.1     | PF00620.25 | 49.00 | 0.00 |
| TRINITY_A8HMG5_CHLRE/9-174       | A8HMG5.1     | PF06813.11 | 49.00 | 0.00 |
| TRINITY_L8H5Y2_ACACA/40-458      | L8H5Y2.1     | PF02897.13 | 49.00 | 0.00 |
| TRINITY_I7MJZ2_TETTS/407-470     | I7MJZ2.2     | PF01485.19 | 49.00 | 0.00 |
| TRINITY_K9WA65_9CYAN/3-206       | K9WA65.1     | PF01126.18 | 49.00 | 0.00 |
| TRINITY_A0A077ZUB0_STYLE/515-998 | A0A077ZUB0.1 | PF0023     | 49.00 | 0.00 |
| TRINITY_W9QPY1_9ROSA/325-373     | W9QPY1.1     | PF02042.13 | 49.00 | 0.00 |
| TRINITY_A0A0P7VAT3_9TELE/4-110   | A0A0P7VAT3.1 | PF0457     | 49.00 | 0.00 |
| TRINITY_L8HIE7_ACACA/13-192      | L8HIE7.1     | PF00929.22 | 49.00 | 0.00 |
| TRINITY_D5BNU3_PUNMI/3-294       | D5BNU3.1     | PF00732.17 | 49.00 | 0.00 |
| TRINITY_X6NUE4_RETFI/19-214      | X6NUE4.1     | PF00929.22 | 49.00 | 0.00 |
| TRINITY_L8H9W4_ACACA/92-288      | L8H9W4.1     | PF13229.4; | 49.00 | 0.00 |
| TRINITY_Q23WL9_TETTS/1175-1377   | Q23WL9.2     | PF14644.4; | 49.00 | 0.00 |
| TRINITY_A0A0N1LKD1_9SPHN/11-191  | A0A0N1LKD1.1 | PF0059     | 49.00 | 0.00 |
| TRINITY_I7MLV0_TETTS/461-797     | I7MLV0.2     | PF00443.27 | 49.00 | 0.00 |
| TRINITY_A0A095C6U3_CRYGA/156-423 | A0A095C6U3.1 | PF0092     | 49.00 | 0.00 |
| TRINITY_D8U460_VOLCA/264-502     | D8U460.1     | PF12740.5; | 49.00 | 0.00 |
| TRINITY_D8TQZ7_VOLCA/158-254     | D8TQZ7.1     | PF16760.3; | 49.00 | 0.00 |
| TRINITY_A0A059LM08_9CHLO/35-237  | A0A059LM08.1 | PF1348     | 49.00 | 0.00 |
| TRINITY_A8IX54_CHLRE/271-486     | A8IX54.1     | PF05762.12 | 49.00 | 0.00 |
| TRINITY_A4ACG2_9GAMM/44-301      | A4ACG2.1     | PF01040.16 | 49.00 | 0.00 |

|                                    |              |            |       |      |
|------------------------------------|--------------|------------|-------|------|
| TRINITY_L8H4T0_ACACA/615-724       | L8H4T0.1     | PF00651.29 | 49.00 | 0.00 |
| TRINITY_A0A087SMG1_AUXPR/1-155     | A0A087SMG1.1 | PF1353     | 49.00 | 0.00 |
| TRINITY_U4UIV1_DENPD/165-221       | U4UIV1.1     | PF03909.15 | 49.00 | 0.00 |
| TRINITY_D2V5F0_NAEGR/143-242       | D2V5F0.1     | PF13640.4; | 49.00 | 0.00 |
| TRINITY_B2GUN0_XENTR/32-585        | B2GUN0.1     | PF01602.18 | 49.00 | 0.00 |
| TRINITY_Q65GW7_BACLD/39-349        | Q65GW7.1     | PF00251.18 | 49.00 | 0.00 |
| TRINITY_K1VNU6_TRIAC/870-965       | K1VNU6.1     | PF00169.27 | 49.00 | 0.00 |
| TRINITY_E3KGM4_PUCGT/342-712       | E3KGM4.2     | PF00702.24 | 49.00 | 0.00 |
| TRINITY_A7SCT7_NEMVE/1-157         | A7SCT7.1     | PF01399.25 | 49.00 | 0.00 |
| TRINITY_A0CYB1_PARTE/171-469       | A0CYB1.1     | PF07992.12 | 49.00 | 0.00 |
| TRINITY_I0YLD1_9CHLO/1-298         | I0YLD1.1     | PF06325.11 | 49.00 | 0.00 |
| TRINITY_F4KT89_HALH1/36-176        | F4KT89.1     | PF00188.24 | 49.00 | 0.00 |
| TRINITY_D8UIS1_VOLCA/104-280       | D8UIS1.1     | PF00753.25 | 49.00 | 0.00 |
| TRINITY_K1RMB2_CRAGI/43-137        | K1RMB2.1     | PF00355.24 | 49.00 | 0.00 |
| TRINITY_D8UGR3_VOLCA/153-288       | D8UGR3.1     | PF01590.24 | 49.00 | 0.00 |
| TRINITY_D8UFD3_VOLCA/71-660        | D8UFD3.1     | PF16940.3; | 49.00 | 0.00 |
| TRINITY_D8UEL0_VOLCA/47-385        | D8UEL0.1     | PF00648.19 | 49.00 | 0.00 |
| TRINITY_A8IR95_CHLRE/401-503       | A8IR95.1     | PF13426.5; | 49.00 | 0.00 |
| TRINITY_I7MB89_TETTS/43-816        | I7MB89.2     | PF01804.16 | 49.00 | 0.00 |
| TRINITY_F4PCH0_BATDJ/27-278        | F4PCH0.1     | PF00069.23 | 49.00 | 0.00 |
| TRINITY_A0A0J8F0H4_BETVU/49-473    | A0A0J8F0H4.1 | PF0557     | 49.00 | 0.00 |
| TRINITY_G0QXB1_ICHMG/7-102         | G0QXB1.1     | PF00153.25 | 48.90 | 0.00 |
| TRINITY_J9G2B2_9SPIT/13-164        | J9G2B2.1     | PF01124.16 | 48.90 | 0.00 |
| TRINITY_A0EG17_PARTE/4-357         | A0EG17.1     | PF07690.14 | 48.90 | 0.00 |
| TRINITY_A0D0Q8_PARTE/66-238        | A0D0Q8.1     | PF04727.11 | 48.90 | 0.00 |
| TRINITY_Q83CG0_COXBU/22-440        | Q83CG0.1     | PF01222.15 | 48.90 | 0.00 |
| TRINITY_I7M0V8_TETTS/1085-1228     | I7M0V8.2     | PF00005.25 | 48.90 | 0.00 |
| TRINITY_Q22V96_TETTS/83-148        | Q22V96.1     | PF13424.4; | 48.90 | 0.00 |
| TRINITY_A0E9M6_PARTE/88-133        | A0E9M6.1     | PF13639.4; | 48.90 | 0.00 |
| TRINITY_F4Q535_DICFS/51-562        | F4Q535.1     | PF01204.16 | 48.90 | 0.00 |
| TRINITY_J9IMT2_9SPIT/146-246       | J9IMT2.1     | PF00153.25 | 48.90 | 0.00 |
| TRINITY_A0A078B161_STYLE/1505-1876 | A0A078B161.1 | PF0044     | 48.90 | 0.00 |
| TRINITY_A0A0J8BQZ2_BETVU/162-500   | A0A0J8BQZ2.1 | PF0017     | 48.90 | 0.00 |
| TRINITY_M2R430_CERS8/103-197       | M2R430.1     | PF00153.25 | 48.90 | 0.00 |
| TRINITY_I7M185_TETTS/116-375       | I7M185.1     | PF00348.15 | 48.90 | 0.00 |
| TRINITY_Q3SD54_PARTE/17-177        | Q3SD54.1     | PF00071.20 | 48.90 | 0.00 |
| TRINITY_E1ZMN4_CHLVA/35-443        | E1ZMN4.1     | PF03985.11 | 48.90 | 0.00 |
| TRINITY_I0Z709_9CHLO/8-263         | I0Z709.1     | PF12697.5; | 48.90 | 0.00 |
| TRINITY_L8HI67_ACACA/12-196        | L8HI67.1     | PF04511.13 | 48.90 | 0.00 |
| TRINITY_E3MUW2_CAERE/7-97          | E3MUW2.1     | PF02214.20 | 48.90 | 0.00 |
| TRINITY_F0ZP74_DICPU/221-539       | F0ZP74.1     | PF00657.20 | 48.90 | 0.00 |
| TRINITY_I1FUD9_AMPQE/138-228       | I1FUD9.1     | PF13640.4; | 48.90 | 0.00 |
| TRINITY_A8IUR7_CHLRE/4-95          | A8IUR7.1     | PF03807.15 | 48.90 | 0.00 |
| TRINITY_I0Z981_9CHLO/187-446       | I0Z981.1     | PF08282.10 | 48.90 | 0.00 |
| TRINITY_W7TVN2_9STRA/95-579        | W7TVN2.1     | PF01425.19 | 48.90 | 0.00 |
| TRINITY_Q239M6_TETTS/302-644       | Q239M6.2     | PF14700.4; | 48.90 | 0.00 |
| TRINITY_A0A0A1NCR0_9FUNG/19-192    | A0A0A1NCR0.1 | PF0492     | 48.90 | 0.00 |
| TRINITY_D3B5Z4_POLPA/62-154        | D3B5Z4.1     | PF02214.20 | 48.90 | 0.00 |
| TRINITY_A0A078AYK1_STYLE/136-395   | A0A078AYK1.1 | PF0006     | 48.90 | 0.00 |
| TRINITY_G0QR68_ICHMG/177-395       | G0QR68.1     | PF04811.13 | 48.90 | 0.00 |
| TRINITY_I1GGB4_AMPQE/46-226        | I1GGB4.1     | PF00092.26 | 48.90 | 0.00 |
| TRINITY_A0C2U9_PARTE/4-97          | A0C2U9.1     | PF00153.25 | 48.90 | 0.00 |
| TRINITY_A7S5F1_NEMVE/15-61         | A7S5F1.1     | PF13445.4; | 48.90 | 0.00 |
| TRINITY_F4PRL8_DICFS/2-89          | F4PRL8.1     | PF04908.13 | 48.90 | 0.00 |
| TRINITY_D8TZ82_VOLCA/36-233        | D8TZ82.1     | PF00106.23 | 48.90 | 0.00 |
| TRINITY_G0QNV3_ICHMG/510-616       | G0QNV3.1     | PF00787.22 | 48.90 | 0.00 |
| TRINITY_D8UHF5_VOLCA/54-144        | D8UHF5.1     | PF13772.4; | 48.90 | 0.00 |
| TRINITY_L1IC59_GUIETH/17-357       | L1IC59.1     | PF04506.11 | 48.90 | 0.00 |
| TRINITY_Q9M6B0_CHLRE/5-367         | Q9M6B0.1     | PF05914.10 | 48.90 | 0.00 |
| TRINITY_D8U3A8_VOLCA/251-1086      | D8U3A8.1     | PF00176.21 | 48.90 | 0.00 |
| TRINITY_A8IEM4_CHLRE/32-214        | A8IEM4.1     | PF01150.15 | 48.90 | 0.00 |

|                                   |                      |       |      |
|-----------------------------------|----------------------|-------|------|
| TRINITY_F0ZY22_DICPU/659-881      | F0ZY22.1 PF02145.13  | 48.90 | 0.00 |
| TRINITY_A0A078D6D3_BRANA/113-500  | A0A078D6D3.1 PF0583  | 48.90 | 0.00 |
| TRINITY_A8J6M5_CHLRE/1-274        | A8J6M5.1 PF00664.21  | 48.90 | 0.00 |
| TRINITY_A0A059LGR6_9CHLO/125-471  | A0A059LGR6.1 PF0306  | 48.90 | 0.00 |
| TRINITY_G0QK23_ICHMG/3-104        | G0QK23.1 PF00168.28  | 48.90 | 0.00 |
| TRINITY_D8UAZ1_VOLCA/74-373       | D8UAZ1.1 PF04121.11  | 48.90 | 0.00 |
| TRINITY_A0A078AQT8_STYLE/753-1040 | A0A078AQT8.1 PF0032  | 48.90 | 0.00 |
| TRINITY_F0ZFI0_DICPU/392-647      | F0ZFI0.1 PF05990.10  | 48.90 | 0.00 |
| TRINITY_A0A067K683_JATCU/55-374   | A0A067K683.1 PF0369  | 48.90 | 0.00 |
| TRINITY_Q23AC3_TETTS/7-112        | Q23AC3.2 PF00787.22  | 48.90 | 0.00 |
| TRINITY_A8HZ72_CHLRE/72-253       | A8HZ72.1 PF01789.14  | 48.90 | 0.00 |
| TRINITY_A8JEW5_CHLRE/404-526      | A8JEW5.1 PF07714.15  | 48.90 | 0.00 |
| TRINITY_E1ZGI7_CHLVA/158-356      | E1ZGI7.1 PF04989.10  | 48.90 | 0.00 |
| TRINITY_F0ZYY4_DICPU/16-110       | F0ZYY4.1 PF02214.20  | 48.90 | 0.00 |
| TRINITY_A0A0G1W2M3_9BACT/3-223    | A0A0G1W2M3.1 PF0030  | 48.90 | 0.00 |
| TRINITY_A0A0D2PGX0_GOSRA/173-346  | A0A0D2PGX0.1 PF0027  | 48.90 | 0.00 |
| TRINITY_K4D4D0_SOLLC/8-307        | K4D4D0.1 PF10243.7;  | 48.90 | 0.00 |
| TRINITY_Q22U39_TETTS/54-238       | Q22U39.3 PF13460.4;  | 48.90 | 0.00 |
| TRINITY_I1FLG0_AMPQE/819-1036     | I1FLG0.1 PF13087.4;  | 48.90 | 0.00 |
| TRINITY_A8IUUY5_CHLRE/8-128       | A8IUUY5.1 PF09945.7; | 48.90 | 0.00 |
| TRINITY_Q8S6Z2_ORYSJ/980-1121     | Q8S6Z2.1 PF00078.25  | 48.90 | 0.00 |
| TRINITY_I7M3H7_TETTS/56-172       | I7M3H7.2 PF05348.9;  | 48.90 | 0.00 |
| TRINITY_J9F544_9SPIT/10-200       | J9F544.1 PF16213.3;  | 48.80 | 0.00 |
| TRINITY_A0EAB1_PARTE/28-329       | A0EAB1.1 PF01074.20  | 48.80 | 0.00 |
| TRINITY_Q22WQ9_TETTS/22-146       | Q22WQ9.1 PF07542.9;  | 48.80 | 0.00 |
| TRINITY_A7T4E5_NEMVE/13-95        | A7T4E5.1 PF04032.14  | 48.80 | 0.00 |
| TRINITY_L8GHY4_ACACA/353-545      | L8GHY4.1 PF07690.14  | 48.80 | 0.00 |
| TRINITY_I7MJM5_TETTS/3-168        | I7MJM5.1 PF10602.7;  | 48.80 | 0.00 |
| TRINITY_A8JGZ8_CHLRE/33-118       | A8JGZ8.1 PF03795.12  | 48.80 | 0.00 |
| TRINITY_H2YGU3_CIOSA/59-220       | H2YGU3.1 PF04387.12  | 48.80 | 0.00 |
| TRINITY_W6FUH4_NODSP/15-183       | W6FUH4.1 PF13385.4;  | 48.80 | 0.00 |
| TRINITY_I7MJ25_TETTS/230-402      | I7MJ25.1 PF05193.19  | 48.80 | 0.00 |
| TRINITY_M7SDG0_EUTLA/134-223      | M7SDG0.1 PF00153.25  | 48.80 | 0.00 |
| TRINITY_A0A0D2UGE6_CAPO3/10-171   | A0A0D2UGE6.1 PF0007  | 48.80 | 0.00 |
| TRINITY_W5KH01_ASTMX/89-413       | W5KH01.1 PF00443.27  | 48.80 | 0.00 |
| TRINITY_A0A0D2VFH8_CAPO3/177-259  | A0A0D2VFH8.1 PF0791  | 48.80 | 0.00 |
| TRINITY_A8HPQ7_CHLRE/1320-1574    | A8HPQ7.1 PF00211.18  | 48.80 | 0.00 |
| TRINITY_D3BC68_POLPA/41-230       | D3BC68.1 PF04427.16  | 48.80 | 0.00 |
| TRINITY_G0QVG8_ICHMG/709-842      | G0QVG8.1 PF00107.24  | 48.80 | 0.00 |
| TRINITY_L8GWQ0_ACACA/940-1189     | L8GWQ0.1 PF07714.15  | 48.80 | 0.00 |
| TRINITY_G0QUT7_ICHMG/11-305       | G0QUT7.1 PF00069.23  | 48.80 | 0.00 |
| TRINITY_V4A0Y3_LOTGI/56-179       | V4A0Y3.1 PF04424.11  | 48.80 | 0.00 |
| TRINITY_D8UJY2_VOLCA/9-141        | D8UJY2.1 PF00134.21  | 48.80 | 0.00 |
| TRINITY_A0A0D2SG08_GOSRA/184-225  | A0A0D2SG08.1 PF0154  | 48.80 | 0.00 |
| TRINITY_Q22GY6_TETTS/213-378      | Q22GY6.3 PF03031.16  | 48.80 | 0.00 |
| TRINITY_L8H9D8_ACACA/203-360      | L8H9D8.1 PF07992.12  | 48.80 | 0.00 |
| TRINITY_D8UBR3_VOLCA/34-208       | D8UBR3.1 PF04755.10  | 48.80 | 0.00 |
| TRINITY_D8SDA6_SELML/34-245       | D8SDA6.1 PF00106.23  | 48.80 | 0.00 |
| TRINITY_Q5CWY7_CRYPI/10-171       | Q5CWY7.1 PF00071.20  | 48.80 | 0.00 |
| TRINITY_D8U8R9_VOLCA/128-207      | D8U8R9.1 PF02319.18  | 48.80 | 0.00 |
| TRINITY_A0A0G4IR09_PLABS/500-730  | A0A0G4IR09.1 PF1308  | 48.80 | 0.00 |
| TRINITY_A0A068S1S4_9FUNG/263-433  | A0A068S1S4.1 PF1271  | 48.80 | 0.00 |
| TRINITY_A0A060SBA7_PYCCI/770-1215 | A0A060SBA7.1 PF0052  | 48.80 | 0.00 |
| TRINITY_H9G5X2_ANOCA/44-135       | H9G5X2.1 PF10447.7;  | 48.80 | 0.00 |
| TRINITY_D8UERO_VOLCA/28-200       | D8UERO.1 PF09750.7;  | 48.80 | 0.00 |
| TRINITY_I1K7E0_SOYBN/243-326      | I1K7E0.1 PF05542.9;  | 48.80 | 0.00 |
| TRINITY_L8GTW8_ACACA/410-578      | L8GTW8.1 PF00621.18  | 48.80 | 0.00 |
| TRINITY_K3WU70_PYTUL/516-749      | K3WU70.1 PF00233.17  | 48.80 | 0.00 |
| TRINITY_I7MEA1_TETTS/292-382      | I7MEA1.1 PF00153.25  | 48.80 | 0.00 |
| TRINITY_A7TPK5_VANPO/251-513      | A7TPK5.1 PF00122.18  | 48.80 | 0.00 |
| TRINITY_A8IAM0_CHLRE/330-429      | A8IAM0.1 PF11799.6;  | 48.80 | 0.00 |

|                                  |              |            |       |      |
|----------------------------------|--------------|------------|-------|------|
| TRINITY_I0Z541_9CHLO/270-469     | I0Z541.1     | PF02190.14 | 48.80 | 0.00 |
| TRINITY_A8I668_CHLRE/87-283      | A8I668.1     | PF06026.12 | 48.80 | 0.00 |
| TRINITY_W6FUH4_NODSP/15-183      | W6FUH4.1     | PF13385.4; | 48.80 | 0.00 |
| TRINITY_G0QQW5_ICHMG/13-98       | G0QQW5.1     | PF14560.4; | 48.80 | 0.00 |
| TRINITY_A7SU16_NEMVE/160-243     | A7SU16.1     | PF14768.4; | 48.80 | 0.00 |
| TRINITY_A0A090M5B6_OSTTA/141-247 | A0A090M5B6.1 | PF1049     | 48.80 | 0.00 |
| TRINITY_B7P150_IXOSC/288-446     | B7P150.1     | PF02872.16 | 48.80 | 0.00 |
| TRINITY_L8GL12_ACACA/119-330     | L8GL12.1     | PF00112.21 | 48.80 | 0.00 |
| TRINITY_E1ZGN0_CHLVA/8-431       | E1ZGN0.1     | PF00890.22 | 48.80 | 0.00 |
| TRINITY_A0A0A0KAX5_CUCSA/446-658 | A0A0A0KAX5.1 | PF0064     | 48.80 | 0.00 |
| TRINITY_H5WJN2_9BURK/687-803     | H5WJN2.1     | PF00072.22 | 48.80 | 0.00 |
| TRINITY_H5WJN2_9BURK/687-803     | H5WJN2.1     | PF00072.22 | 48.80 | 0.00 |
| TRINITY_A8J6S3_CHLRE/2038-2196   | A8J6S3.1     | PF06650.10 | 48.80 | 0.00 |
| TRINITY_D8TUB8_VOLCA/469-844     | D8TUB8.1     | PF00225.21 | 48.80 | 0.00 |
| TRINITY_A9T7W1_PHYPA/99-243      | A9T7W1.1     | PF13365.4; | 48.80 | 0.00 |
| TRINITY_A0A0D2UJE3_CAPO3/7-91    | A0A0D2UJE3.1 | PF1341     | 48.80 | 0.00 |
| TRINITY_A7RRA0_NEMVE/147-272     | A7RRA0.1     | PF02338.17 | 48.80 | 0.00 |
| TRINITY_A8JBX4_CHLRE/56-319      | A8JBX4.1     | PF13561.4; | 48.80 | 0.00 |
| TRINITY_I0Z1F9_9CHLO/13-192      | I0Z1F9.1     | PF13489.4; | 48.80 | 0.00 |
| TRINITY_I0YWQ7_9CHLO/58-293      | I0YWQ7.1     | PF08245.10 | 48.80 | 0.00 |
| TRINITY_I7MAC8_TETTS/3673-3968   | I7MAC8.2     | PF00632.23 | 48.80 | 0.00 |
| TRINITY_Q22W19_TETTS/115-323     | Q22W19.3     | PF00112.21 | 48.80 | 0.00 |
| TRINITY_D8TPI1_VOLCA/514-606     | D8TPI1.1     | PF00686.17 | 48.80 | 0.00 |
| TRINITY_I7LXA4_TETTS/158-324     | I7LXA4.1     | PF10238.7; | 48.70 | 0.00 |
| TRINITY_L1K0L5_GUIITH/1758-2072  | L1K0L5.1     | PF02889.14 | 48.70 | 0.00 |
| TRINITY_A0D8H4_PARTE/1416-1749   | A0D8H4.1     | PF00443.27 | 48.70 | 0.00 |
| TRINITY_A0A0E9NGE3_9ASCO/2-116   | A0A0E9NGE3.1 | PF1262     | 48.70 | 0.00 |
| TRINITY_K1QS76_CRAGI/36-177      | K1QS76.1     | PF09794.7; | 48.70 | 0.00 |
| TRINITY_L8H3Q1_ACACA/13-230      | L8H3Q1.1     | PF01171.18 | 48.70 | 0.00 |
| TRINITY_I1GJ44_AMPQE/19-375      | I1GJ44.1     | PF00503.18 | 48.70 | 0.00 |
| TRINITY_W7XGD4_TETTS/87-322      | W7XGD4.1     | PF12146.6; | 48.70 | 0.00 |
| TRINITY_G0QPB7_ICHMG/28-214      | G0QPB7.1     | PF00227.24 | 48.70 | 0.00 |
| TRINITY_Q23TU2_TETTS/4051-4801   | Q23TU2.2     | PF03028.13 | 48.70 | 0.00 |
| TRINITY_Q2SAD5_HAHCH/119-542     | Q2SAD5.1     | PF01425.19 | 48.70 | 0.00 |
| TRINITY_I4YMJ8_9RHIZ/5-185       | I4YMJ8.1     | PF00300.20 | 48.70 | 0.00 |
| TRINITY_Y508_THEMA/445-561       | Q9WYX8.1     | PF01661.19 | 48.70 | 0.00 |
| TRINITY_D3B9I0_POLPA/31-228      | D3B9I0.1     | PF00106.23 | 48.70 | 0.00 |
| TRINITY_F0ZZW8_DICPU/16-286      | F0ZZW8.1     | PF00069.23 | 48.70 | 0.00 |
| TRINITY_I0YZV0_9CHLO/1-203       | I0YZV0.1     | PF00106.23 | 48.70 | 0.00 |
| TRINITY_D8SRB3_SELML/118-235     | D8SRB3.1     | PF00307.29 | 48.70 | 0.00 |
| TRINITY_J4D5C0_THEOR/138-214     | J4D5C0.1     | PF00076.20 | 48.70 | 0.00 |
| TRINITY_I0Z4S6_9CHLO/54-216      | I0Z4S6.1     | PF10294.7; | 48.70 | 0.00 |
| TRINITY_A0A0A1TNZ7_9HYPO/56-138  | A0A0A1TNZ7.1 | PF0333     | 48.70 | 0.00 |
| TRINITY_I7M0X0_TETTS/460-654     | I7M0X0.2     | PF08662.9; | 48.70 | 0.00 |
| TRINITY_I7LT38_TETTS/868-1116    | I7LT38.1     | PF16212.3; | 48.70 | 0.00 |
| TRINITY_A4VD11_TETTS/21-261      | A4VD11.2     | PF00481.19 | 48.70 | 0.00 |
| TRINITY_F0Z6W2_DICPU/5-275       | F0Z6W2.1     | PF03850.12 | 48.70 | 0.00 |
| TRINITY_D8U6H1_VOLCA/280-435     | D8U6H1.1     | PF12576.6; | 48.70 | 0.00 |
| TRINITY_Q24IJ0_TETTS/27-299      | Q24IJ0.1     | PF00069.23 | 48.70 | 0.00 |
| TRINITY_D8THU7_VOLCA/193-274     | D8THU7.1     | PF00076.20 | 48.70 | 0.00 |
| TRINITY_Q24HR9_TETTS/46-305      | Q24HR9.2     | PF00069.23 | 48.70 | 0.00 |
| TRINITY_F0ZYQ5_DICPU/195-300     | F0ZYQ5.1     | PF12894.5; | 48.70 | 0.00 |
| TRINITY_D8THR7_VOLCA/300-536     | D8THR7.1     | PF12697.5; | 48.70 | 0.00 |
| TRINITY_D8U951_VOLCA/5-158       | D8U951.1     | PF05907.11 | 48.70 | 0.00 |
| TRINITY_Q23DD6_TETTS/1118-1721   | Q23DD6.2     | PF04998.15 | 48.70 | 0.00 |
| TRINITY_D3B268_POLPA/1-987       | D3B268.1     | PF04762.10 | 48.70 | 0.00 |
| TRINITY_D8U1P4_VOLCA/539-653     | D8U1P4.1     | PF00072.22 | 48.70 | 0.00 |
| TRINITY_A8HX31_CHLRE/21-249      | A8HX31.1     | PF04757.12 | 48.70 | 0.00 |
| TRINITY_J9J0W3_9SPIT/51-328      | J9J0W3.1     | PF03747.12 | 48.70 | 0.00 |
| TRINITY_A0A077ZUV7_STYLE/56-208  | A0A077ZUV7.1 | PF1473     | 48.70 | 0.00 |
| TRINITY_A0A066W1Y4_9HOMO/6-86    | A0A066W1Y4.1 | PF1341     | 48.70 | 0.00 |

|                                   |              |            |       |      |
|-----------------------------------|--------------|------------|-------|------|
| TRINITY_G0QZ92_ICHMG/19-335       | G0QZ92.1     | PF00069.23 | 48.70 | 0.00 |
| TRINITY_D8U7Q0_VOLCA/1416-1774    | D8U7Q0.1     | PF02259.21 | 48.70 | 0.00 |
| TRINITY_D8U4U1_VOLCA/300-526      | D8U4U1.1     | PF00248.19 | 48.70 | 0.00 |
| TRINITY_Q7XLT8_ORYSJ/503-697      | Q7XLT8.2     | PF00078.25 | 48.70 | 0.00 |
| TRINITY_A0A0B5ES46_STRA4/62-371   | A0A0B5ES46.1 | PF0025     | 48.70 | 0.00 |
| TRINITY_A0A085MQK8_9BILA/324-484  | A0A085MQK8.1 | PF0007     | 48.70 | 0.00 |
| TRINITY_F0ZLA6_DICPU/16-296       | F0ZLA6.1     | PF10222.7; | 48.70 | 0.00 |
| TRINITY_A0A087S9G6_AUXPR/46-310   | A0A087S9G6.1 | PF0006     | 48.70 | 0.00 |
| TRINITY_F0ZCT2_DICPU/601-783      | F0ZCT2.1     | PF00617.17 | 48.70 | 0.00 |
| TRINITY_T1IVC2_STRMM/88-349       | T1IVC2.1     | PF06246.10 | 48.70 | 0.00 |
| TRINITY_D3B1A4_POLPA/306-493      | D3B1A4.1     | PF14437.4; | 48.70 | 0.00 |
| TRINITY_E1ZN16_CHLVA/784-966      | E1ZN16.1     | PF05193.19 | 48.70 | 0.00 |
| TRINITY_M2Y0I1_GALSU/89-164       | M2Y0I1.1     | PF03061.20 | 48.70 | 0.00 |
| TRINITY_F4QBH6_DICFS/16-280       | F4QBH6.1     | PF00069.23 | 48.70 | 0.00 |
| TRINITY_Q30T31_SULDN/210-589      | Q30T31.1     | PF00285.19 | 48.70 | 0.00 |
| TRINITY_A0A087SJ57_AUXPR/981-1252 | A0A087SJ57.1 | PF0132     | 48.70 | 0.00 |
| TRINITY_D8UFD3_VOLCA/71-660       | D8UFD3.1     | PF16940.3; | 48.70 | 0.00 |
| TRINITY_A0A0G0MZM8_9BACT/12-671   | A0A0G0MZM8.1 | PF0013     | 48.70 | 0.00 |
| TRINITY_A0A0J7KC47_LASNI/473-592  | A0A0J7KC47.1 | PF0066     | 48.70 | 0.00 |
| TRINITY_A8IZH2_CHLRE/548-643      | A8IZH2.1     | PF00211.18 | 48.70 | 0.00 |
| TRINITY_Q7XLT8_ORYSJ/503-697      | Q7XLT8.2     | PF00078.25 | 48.70 | 0.00 |
| TRINITY_B5JM65_9BACT/782-897      | B5JM65.1     | PF00072.22 | 48.60 | 0.00 |
| TRINITY_I7LVZ5_TETTS/5-189        | I7LVZ5.1     | PF00106.23 | 48.60 | 0.00 |
| TRINITY_M4A9Z6_XIPMA/288-456      | M4A9Z6.1     | PF01612.18 | 48.60 | 0.00 |
| TRINITY_D8QMU7_SELML/18-180       | D8QMU7.1     | PF00071.20 | 48.60 | 0.00 |
| TRINITY_Q6BFJ6_PARTE/12-99        | Q6BFJ6.1     | PF00153.25 | 48.60 | 0.00 |
| TRINITY_BECNB_DICDI/503-810       | Q54JI9.1     | PF04111.10 | 48.60 | 0.00 |
| TRINITY_G0QK40_ICHMG/243-478      | G0QK40.1     | PF07690.14 | 48.60 | 0.00 |
| TRINITY_L8GP39_ACACA/2-191        | L8GP39.1     | PF01121.18 | 48.60 | 0.00 |
| TRINITY_I7M661_TETTS/232-447      | I7M661.1     | PF04042.14 | 48.60 | 0.00 |
| TRINITY_Q22RI2_TETTS/41-476       | Q22RI2.2     | PF05602.10 | 48.60 | 0.00 |
| TRINITY_A0CES7_PARTE/367-473      | A0CES7.1     | PF13646.4; | 48.60 | 0.00 |
| TRINITY_D6WFE0_TRICA/46-216       | D6WFE0.1     | PF08660.9; | 48.60 | 0.00 |
| TRINITY_E0W2T7_PEDHC/35-103       | E0W2T7.1     | PF00076.20 | 48.60 | 0.00 |
| TRINITY_H3EEF3_PRIIPA/100-216     | H3EEF3.1     | PF01873.15 | 48.60 | 0.00 |
| TRINITY_T0SAN3_9STRA/35-278       | T0SAN3.1     | PF12697.5; | 48.60 | 0.00 |
| TRINITY_I7MK41_TETTS/120-286      | I7MK41.2     | PF03062.17 | 48.60 | 0.00 |
| TRINITY_C1ECK5_MICSR/1873-2017    | C1ECK5.1     | PF05843.12 | 48.60 | 0.00 |
| TRINITY_Q22B41_TETTS/170-248      | Q22B41.1     | PF05022.10 | 48.60 | 0.00 |
| TRINITY_G0SVM5_RHOG2/116-265      | G0SVM5.1     | PF13091.4; | 48.60 | 0.00 |
| TRINITY_A0A0G0AZA9_9BACT/22-241   | A0A0G0AZA9.1 | PF0126     | 48.60 | 0.00 |
| TRINITY_A8HQ36_CHLRE/7-119        | A8HQ36.1     | PF00581.18 | 48.60 | 0.00 |
| TRINITY_DNAS1_RABIT/25-273        | O18998.1     | PF03372.21 | 48.60 | 0.00 |
| TRINITY_G2QNY2_MYCTT/196-323      | G2QNY2.1     | PF00107.24 | 48.60 | 0.00 |
| TRINITY_A8JJ05_CHLRE/562-633      | A8JJ05.1     | PF05699.12 | 48.60 | 0.00 |
| TRINITY_E1ZI47_CHLVA/2-294        | E1ZI47.1     | PF00850.17 | 48.60 | 0.00 |
| TRINITY_G0R0N7_ICHMG/32-549       | G0R0N7.1     | PF01602.18 | 48.60 | 0.00 |
| TRINITY_D8U315_VOLCA/132-268      | D8U315.1     | PF03330.16 | 48.60 | 0.00 |
| TRINITY_A0A067QVQ6_ZOONE/155-226  | A0A067QVQ6.1 | PF0024     | 48.60 | 0.00 |
| TRINITY_D8T4Q4_SELML/27-546       | D8T4Q4.1     | PF01602.18 | 48.60 | 0.00 |
| TRINITY_A0A015KSK4_9GLOM/344-503  | A0A015KSK4.1 | PF0391     | 48.60 | 0.00 |
| TRINITY_I1HUJ9_BRADI/39-109       | I1HUJ9.1     | PF00076.20 | 48.60 | 0.00 |
| TRINITY_F4QDB6_DICFS/16-310       | F4QDB6.1     | PF07159.10 | 48.60 | 0.00 |
| TRINITY_A0A087SFY1_AUXPR/677-889  | A0A087SFY1.1 | PF0006     | 48.60 | 0.00 |
| TRINITY_A2EWC0_TRIVA/30-243       | A2EWC0.1     | PF07002.14 | 48.60 | 0.00 |
| TRINITY_D8U4P3_VOLCA/41-332       | D8U4P3.1     | PF08449.9; | 48.60 | 0.00 |
| TRINITY_A8JGL2_CHLRE/105-341      | A8JGL2.1     | PF02358.14 | 48.60 | 0.00 |
| TRINITY_W1NUJ8_AMBTC/515-760      | W1NUJ8.1     | PF09258.8; | 48.60 | 0.00 |
| TRINITY_C1FJC7_MICSR/77-321       | C1FJC7.1     | PF12697.5; | 48.60 | 0.00 |
| TRINITY_Q22T22_TETTS/520-735      | Q22T22.3     | PF07859.11 | 48.60 | 0.00 |
| TRINITY_A8I108_CHLRE/67-274       | A8I108.1     | PF00566.16 | 48.60 | 0.00 |

|                                  |                     |       |      |
|----------------------------------|---------------------|-------|------|
| TRINITY_A0A0D2X453_CAPO3/177-285 | A0A0D2X453.1 PF0572 | 48.60 | 0.00 |
| TRINITY_G1PSI8_MYOLU/34-277      | G1PSI8.1 PF01593.22 | 48.60 | 0.00 |
| TRINITY_D3AY46_POLPA/593-775     | D3AY46.1 PF00617.17 | 48.60 | 0.00 |
| TRINITY_I1LEZ0_SOYBN/9-79        | I1LEZ0.1 PF00076.20 | 48.60 | 0.00 |
| TRINITY_B0PH80_9FIRM/979-1096    | B0PH80.1 PF00072.22 | 48.60 | 0.00 |
| TRINITY_A0A0E9NFD1_9ASCO/67-136  | A0A0E9NFD1.1 PF0007 | 48.60 | 0.00 |
| TRINITY_D8U0M3_VOLCA/103-328     | D8U0M3.1 PF00856.26 | 48.60 | 0.00 |
| TRINITY_G7YWE9_CLOSI/1652-1723   | G7YWE9.1 PF02207.18 | 48.60 | 0.00 |
| TRINITY_Q6C9V2_YARLI/189-300     | Q6C9V2.1 PF00188.24 | 48.60 | 0.00 |
| TRINITY_A0A0D2UFB5_CAPO3/250-338 | A0A0D2UFB5.1 PF0293 | 48.60 | 0.00 |
| TRINITY_A0DYX2_PARTE/54-188      | A0DYX2.1 PF04146.13 | 48.60 | 0.00 |
| TRINITY_A8JH76_CHLRE/10-98       | A8JH76.1 PF10270.7; | 48.60 | 0.00 |
| TRINITY_A9S9U0_PHYPA/6-313       | A9S9U0.1 PF03372.21 | 48.60 | 0.00 |
| TRINITY_W5J229_ANODA/1179-1326   | W5J229.1 PF00005.25 | 48.60 | 0.00 |
| TRINITY_A0A078CVI2_BRANA/94-239  | A0A078CVI2.1 PF0021 | 48.60 | 0.00 |
| TRINITY_A0A059LKZ4_9CHLO/1-159   | A0A059LKZ4.1 PF0924 | 48.60 | 0.00 |
| TRINITY_F4PV04_DICFS/87-528      | F4PV04.1 PF00501.26 | 48.60 | 0.00 |
| TRINITY_G7KIB0_MEDTR/67-272      | G7KIB0.2 PF00106.23 | 48.60 | 0.00 |
| TRINITY_D3BQ47_POLPA/174-421     | D3BQ47.1 PF04109.14 | 48.60 | 0.00 |
| TRINITY_G0R2T0_ICHMG/33-283      | G0R2T0.1 PF00069.23 | 48.60 | 0.00 |
| TRINITY_D2UY94_NAEGR/292-414     | D2UY94.1 PF00271.29 | 48.60 | 0.00 |
| TRINITY_A8J5D8_CHLRE/5-419       | A8J5D8.1 PF01676.16 | 48.60 | 0.00 |
| TRINITY_A0DG32_PARTE/47-189      | A0DG32.1 PF03193.14 | 48.60 | 0.00 |
| TRINITY_A0A067JIF2_JATCU/9-266   | A0A067JIF2.1 PF0006 | 48.50 | 0.00 |
| TRINITY_Q09CU7_STIAD/3-227       | Q09CU7.1 PF01370.19 | 48.50 | 0.00 |
| TRINITY_L8GTK1_ACACA/146-395     | L8GTK1.1 PF07714.15 | 48.50 | 0.00 |
| TRINITY_W9S2V3_9ROSA/63-340      | W9S2V3.1 PF00481.19 | 48.50 | 0.00 |
| TRINITY_A0A0D2NWK1_GOSRA/37-167  | A0A0D2NWK1.1 PF0078 | 48.50 | 0.00 |
| TRINITY_F4Q156_DICFS/452-627     | F4Q156.1 PF00621.18 | 48.50 | 0.00 |
| TRINITY_A0A0N4X5F8_HAEP/93-264   | A0A0N4X5F8.1 PF0176 | 48.50 | 0.00 |
| TRINITY_A0A075B583_9FUNG/12-181  | A0A075B583.1 PF0007 | 48.50 | 0.00 |
| TRINITY_F0ZSM2_DICPU/404-506     | F0ZSM2.1 PF14593.4; | 48.50 | 0.00 |
| TRINITY_Q22X26_TETTS/84-364      | Q22X26.2 PF01266.22 | 48.50 | 0.00 |
| TRINITY_Q22GH9_TETTS/22-286      | Q22GH9.1 PF00481.19 | 48.50 | 0.00 |
| TRINITY_F0Y6L3_AURAN/5-178       | F0Y6L3.1 PF00071.20 | 48.50 | 0.00 |
| TRINITY_A8I788_CHLRE/2-174       | A8I788.1 PF13019.4; | 48.50 | 0.00 |
| TRINITY_A0A068S2S3_9FUNG/56-483  | A0A068S2S3.1 PF0200 | 48.50 | 0.00 |
| TRINITY_I7MFD5_TETTS/394-587     | I7MFD5.2 PF13901.4; | 48.50 | 0.00 |
| TRINITY_G0QLX3_ICHMG/12-277      | G0QLX3.1 PF07714.15 | 48.50 | 0.00 |
| TRINITY_D3BUZ1_POLPA/29-265      | D3BUZ1.1 PF01636.21 | 48.50 | 0.00 |
| TRINITY_B3RLY5_TRIAD/95-165      | B3RLY5.1 PF07258.12 | 48.50 | 0.00 |
| TRINITY_I7MLB3_TETTS/170-454     | I7MLB3.1 PF01008.15 | 48.50 | 0.00 |
| TRINITY_D2VBB5_NAEGR/177-479     | D2VBB5.1 PF06079.9; | 48.50 | 0.00 |
| TRINITY_DCAM_DICDI/26-352        | Q8T1E3.3 PF01536.14 | 48.50 | 0.00 |
| TRINITY_D8UBG5_VOLCA/36-244      | D8UBG5.1 PF03896.14 | 48.50 | 0.00 |
| TRINITY_F0YD11_AURAN/754-825     | F0YD11.1 PF04564.13 | 48.50 | 0.00 |
| TRINITY_K6UY88_9APIC/75-189      | K6UY88.1 PF16531.3; | 48.50 | 0.00 |
| TRINITY_A8HWH6_CHLRE/477-630     | A8HWH6.1 PF01343.16 | 48.50 | 0.00 |
| TRINITY_A8J6D2_CHLRE/412-609     | A8J6D2.1 PF05057.12 | 48.50 | 0.00 |
| TRINITY_A0A0G4IKI4_PLABS/456-623 | A0A0G4IKI4.1 PF1309 | 48.50 | 0.00 |
| TRINITY_D3AXS4_POLPA/39-263      | D3AXS4.1 PF02666.13 | 48.50 | 0.00 |
| TRINITY_F1A3H0_DICPU/186-253     | F1A3H0.1 PF01485.19 | 48.50 | 0.00 |
| TRINITY_M5GEX9_DACSP/52-125      | M5GEX9.1 PF13517.4; | 48.50 | 0.00 |
| TRINITY_Q23CN6_TETTS/42-263      | Q23CN6.2 PF02230.14 | 48.50 | 0.00 |
| TRINITY_D8U4R9_VOLCA/1-136       | D8U4R9.1 PF04096.12 | 48.50 | 0.00 |
| TRINITY_D3BAG4_POLPA/82-505      | D3BAG4.1 PF00450.20 | 48.50 | 0.00 |
| TRINITY_E4X3N6_OIKDI/14-792      | E4X3N6.1 PF16399.3; | 48.50 | 0.00 |
| TRINITY_A9SNT8_PHYPA/19-274      | A9SNT8.1 PF00069.23 | 48.50 | 0.00 |
| TRINITY_F0ZLS2_DICPU/66-274      | F0ZLS2.1 PF13489.4; | 48.50 | 0.00 |
| TRINITY_C1MNQ1_MICPC/64-209      | C1MNQ1.1 PF02367.15 | 48.50 | 0.00 |
| TRINITY_J1RVG7_9ACTN/15-188      | J1RVG7.1 PF04072.12 | 48.50 | 0.00 |

|                                    |              |            |       |      |
|------------------------------------|--------------|------------|-------|------|
| TRINITY_F6RLE1_BOVIN/37-106        | F6RLE1.1     | PF00610.19 | 48.50 | 0.00 |
| TRINITY_I0Z9R3_9CHLO/262-526       | I0Z9R3.1     | PF12698.5; | 48.50 | 0.00 |
| TRINITY_Q6BG63_PARTE/135-272       | Q6BG63.1     | PF01529.18 | 48.50 | 0.00 |
| TRINITY_B8HYX6_CYAP4/26-200        | B8HYX6.1     | PF13532.4; | 48.50 | 0.00 |
| TRINITY_A0CXW7_PARTE/958-1287      | A0CXW7.1     | PF02889.14 | 48.50 | 0.00 |
| TRINITY_E6ZRN3_SPORE/61-227        | E6ZRN3.1     | PF00270.27 | 48.50 | 0.00 |
| TRINITY_F0ZB08_DICPU/112-415       | F0ZB08.1     | PF02906.12 | 48.50 | 0.00 |
| TRINITY_K7V0Y9_MAIZE/158-416       | K7V0Y9.1     | PF00069.23 | 48.50 | 0.00 |
| TRINITY_A0A087SCC4_AUXPR/51-217    | A0A087SCC4.1 | PF0610     | 48.50 | 0.00 |
| TRINITY_G0QYS9_ICHMG/215-317       | G0QYS9.1     | PF00168.28 | 48.50 | 0.00 |
| TRINITY_F6UC79_XENTR/435-628       | F6UC79.1     | PF00566.16 | 48.50 | 0.00 |
| TRINITY_F0ZU77_DICPU/256-473       | F0ZU77.1     | PF13236.4; | 48.50 | 0.00 |
| TRINITY_D0MZ70_PHYIT/6-73          | D0MZ70.1     | PF00076.20 | 48.50 | 0.00 |
| TRINITY_A0BX75_PARTE/58-413        | A0BX75.1     | PF01704.16 | 48.50 | 0.00 |
| TRINITY_A8IGC6_CHLRE/15-304        | A8IGC6.1     | PF09139.9; | 48.50 | 0.00 |
| TRINITY_Q22SV8_TETTS/139-277       | Q22SV8.1     | PF01553.19 | 48.50 | 0.00 |
| TRINITY_A8J5P0_CHLRE/384-551       | A8J5P0.1     | PF09088.9; | 48.50 | 0.00 |
| TRINITY_L8HD35_ACACA/690-920       | L8HD35.1     | PF00481.19 | 48.50 | 0.00 |
| TRINITY_A0A0N5DJ00_TRIMR/2-286     | A0A0N5DJ00.1 | PF0058     | 48.50 | 0.00 |
| TRINITY_K1Q3Y8_CRAGI/69-219        | K1Q3Y8.1     | PF07534.14 | 48.50 | 0.00 |
| TRINITY_D8F589_9DELT/424-537       | D8F589.1     | PF00072.22 | 48.50 | 0.00 |
| TRINITY_D8U5Y6_VOLCA/619-729       | D8U5Y6.1     | PF00989.23 | 48.50 | 0.00 |
| TRINITY_A8J1H0_CHLRE/65-495        | A8J1H0.1     | PF00909.19 | 48.50 | 0.00 |
| TRINITY_A0DMS6_PARTE/43-308        | A0DMS6.1     | PF03381.13 | 48.50 | 0.00 |
| TRINITY_Q16VZ3_AEDAE/83-208        | Q16VZ3.1     | PF04857.18 | 48.50 | 0.00 |
| TRINITY_A8HT24_CHLRE/1413-1659     | A8HT24.1     | PF02714.13 | 48.50 | 0.00 |
| TRINITY_J3KY02_ORYBR/637-893       | J3KY02.1     | PF12706.5; | 48.40 | 0.00 |
| TRINITY_A0A067LIX5_JATCU/2-151     | A0A067LIX5.1 | PF0040     | 48.40 | 0.00 |
| TRINITY_I7MK61_TETTS/82-178        | I7MK61.1     | PF04800.10 | 48.40 | 0.00 |
| TRINITY_A2EPG3_TRIVA/9-170         | A2EPG3.1     | PF00071.20 | 48.40 | 0.00 |
| TRINITY_I6XSN4_PROPF/19-635        | I6XSN4.1     | PF00133.20 | 48.40 | 0.00 |
| TRINITY_A0A0G1J0E2_9BACT/21-88     | A0A0G1J0E2.1 | PF0036     | 48.40 | 0.00 |
| TRINITY_A0A0M0J556_9EUKA/51-512    | A0A0M0J556.1 | PF1590     | 48.40 | 0.00 |
| TRINITY_A0A077ZY60_STYLE/5897-6330 | A0A077ZY60.1 | PF0089     | 48.40 | 0.00 |
| TRINITY_NDX1_CAEEL/72-197          | O45830.1     | PF00293.26 | 48.40 | 0.00 |
| TRINITY_J9IDU1_9SPIT/332-931       | J9IDU1.1     | PF08385.10 | 48.40 | 0.00 |
| TRINITY_Q22AS9_TETTS/396-460       | Q22AS9.1     | PF13499.4; | 48.40 | 0.00 |
| TRINITY_E1ZEZ8_CHLVA/496-844       | E1ZEZ8.1     | PF05192.16 | 48.40 | 0.00 |
| TRINITY_Q8T2H6_DICDI/31-218        | Q8T2H6.1     | PF02589.13 | 48.40 | 0.00 |
| TRINITY_H8MEU3_CORCM/58-379        | H8MEU3.1     | PF07995.9; | 48.40 | 0.00 |
| TRINITY_S8CMD2_9LAMI/36-166        | S8CMD2.1     | PF00782.18 | 48.40 | 0.00 |
| TRINITY_A0A0F4QN62_9GAMM/5-131     | A0A0F4QN62.1 | PF1443     | 48.40 | 0.00 |
| TRINITY_A0A078B8P5_STYLE/295-617   | A0A078B8P5.1 | PF0123     | 48.40 | 0.00 |
| TRINITY_F4R3K5_MELLP/20-115        | F4R3K5.1     | PF00153.25 | 48.40 | 0.00 |
| TRINITY_G0R3P6_ICHMG/8-169         | G0R3P6.1     | PF01765.17 | 48.40 | 0.00 |
| TRINITY_D8R3Q3_SELML/1-64          | D8R3Q3.1     | PF00280.16 | 48.40 | 0.00 |
| TRINITY_L8HDF4_ACACA/1013-1289     | L8HDF4.1     | PF07714.15 | 48.40 | 0.00 |
| TRINITY_D7FM24_ECTSI/244-406       | D7FM24.1     | PF02417.13 | 48.40 | 0.00 |
| TRINITY_J9IE32_9SPIT/16-80         | J9IE32.1     | PF01918.19 | 48.40 | 0.00 |
| TRINITY_G0R592_ICHMG/1-273         | G0R592.1     | PF00648.19 | 48.40 | 0.00 |
| TRINITY_D8UAZ5_VOLCA/71-252        | D8UAZ5.1     | PF13419.4; | 48.40 | 0.00 |
| TRINITY_A8HVN4_CHLRE/30-193        | A8HVN4.1     | PF03067.13 | 48.40 | 0.00 |
| TRINITY_Q3SD57_PARTE/13-173        | Q3SD57.1     | PF00071.20 | 48.40 | 0.00 |
| TRINITY_I7M4F9_TETTS/51-228        | I7M4F9.2     | PF01195.17 | 48.40 | 0.00 |
| TRINITY_L8H3W5_ACACA/971-1093      | L8H3W5.1     | PF00271.29 | 48.40 | 0.00 |
| TRINITY_E1ZR53_CHLVA/368-431       | E1ZR53.1     | PF01842.23 | 48.40 | 0.00 |
| TRINITY_A4VD54_TETTS/744-1018      | A4VD54.1     | PF00664.21 | 48.40 | 0.00 |
| TRINITY_D8RYU3_SELML/195-363       | D8RYU3.1     | PF00005.25 | 48.40 | 0.00 |
| TRINITY_A0A072V237_MEDTR/45-175    | A0A072V237.1 | PF0078     | 48.40 | 0.00 |
| TRINITY_B6H4J2_PENRW/28-96         | B6H4J2.1     | PF00505.17 | 48.40 | 0.00 |
| TRINITY_A0BDL2_PARTE/6-167         | A0BDL2.1     | PF00071.20 | 48.40 | 0.00 |



|                                    |                     |       |      |
|------------------------------------|---------------------|-------|------|
| TRINITY_A8JFA9_CHLRE/230-383       | A8JFA9.1 PF16016.3; | 48.40 | 0.00 |
| TRINITY_A7RTF3_NEMVE/273-427       | A7RTF3.1 PF13768.4; | 48.40 | 0.00 |
| TRINITY_I0YUF8_9CHLO/29-120        | I0YUF8.1 PF00581.18 | 48.40 | 0.00 |
| TRINITY_D3BAA5_POLPA/36-100        | D3BAA5.1 PF13499.4; | 48.40 | 0.00 |
| TRINITY_A0A058ZD03_9EUKA/391-497   | A0A058ZD03.1 PF0141 | 48.40 | 0.00 |
| TRINITY_E1ZR53_CHLVA/368-431       | E1ZR53.1 PF01842.23 | 48.40 | 0.00 |
| TRINITY_A0A0G4J3V7_PLABS/3789-4100 | A0A0G4J3V7.1 PF0063 | 48.40 | 0.00 |
| TRINITY_J9F6J0_9SPIT/6042-6471     | J9F6J0.1 PF00899.19 | 48.40 | 0.00 |
| TRINITY_A0A044S528_ONCVO/30-143    | A0A044S528.1 PF0299 | 48.40 | 0.00 |
| TRINITY_D8U5K1_VOLCA/20-262        | D8U5K1.1 PF00262.16 | 48.40 | 0.00 |
| TRINITY_D8U5M5_VOLCA/197-590       | D8U5M5.1 PF01619.16 | 48.40 | 0.00 |
| TRINITY_C1E3X7_MICSR/85-301        | C1E3X7.1 PF02353.18 | 48.40 | 0.00 |
| TRINITY_D8TS04_VOLCA/5-179         | D8TS04.1 PF03256.14 | 48.40 | 0.00 |
| TRINITY_D3BRC5_POLPA/498-682       | D3BRC5.1 PF02145.13 | 48.40 | 0.00 |
| TRINITY_I0Z054_9CHLO/1-486         | I0Z054.1 PF03055.13 | 48.40 | 0.00 |
| TRINITY_A1ZMR1_9BACT/19-139        | A1ZMR1.1 PF00583.23 | 48.40 | 0.00 |
| TRINITY_I1G2T0_AMPQE/174-530       | I1G2T0.1 PF00657.20 | 48.40 | 0.00 |
| TRINITY_D8TKF6_VOLCA/24-231        | D8TKF6.1 PF07250.9; | 48.40 | 0.00 |
| TRINITY_T1J5U4_STRMM/792-1094      | T1J5U4.1 PF13086.4; | 48.40 | 0.00 |
| TRINITY_D8ULQ2_VOLCA/4-208         | D8ULQ2.1 PF07714.15 | 48.40 | 0.00 |
| TRINITY_A0A060BGL7_9GAMM/12-358    | A0A060BGL7.1 PF0126 | 48.40 | 0.00 |
| TRINITY_L8H072_ACACA/127-268       | L8H072.1 PF12014.6; | 48.40 | 0.00 |
| TRINITY_A0A087SF89_AUXPR/266-435   | A0A087SF89.1 PF0146 | 48.40 | 0.00 |
| TRINITY_L8GG01_ACACA/221-375       | L8GG01.1 PF13768.4; | 48.40 | 0.00 |
| TRINITY_K9VL88_9CYAN/845-958       | K9VL88.1 PF00072.22 | 48.40 | 0.00 |
| TRINITY_A0E0V7_PARTE/895-1271      | A0E0V7.1 PF12698.5; | 48.40 | 0.00 |
| TRINITY_F6VVB7_CIOIN/7-134         | F6VVB7.2 PF00134.21 | 48.40 | 0.00 |
| TRINITY_Q54VB5_DICDI/255-321       | Q54VB5.1 PF01363.19 | 48.40 | 0.00 |
| TRINITY_M0RXA8_MUSAM/117-180       | M0RXA8.1 PF00400.30 | 48.40 | 0.00 |
| TRINITY_B4M409_DROVI/14-110        | B4M409.1 PF03645.11 | 48.40 | 0.00 |
| TRINITY_I7MDT1_TETTS/158-284       | I7MDT1.1 PF00107.24 | 48.30 | 0.00 |
| TRINITY_Q240V2_TETTS/2-160         | Q240V2.3 PF02580.14 | 48.30 | 0.00 |
| TRINITY_I7MMP5_TETTS/4189-4485     | I7MMP5.2 PF00632.23 | 48.30 | 0.00 |
| TRINITY_Q1NWK7_9DELTA/444-563      | Q1NWK7.1 PF02518.24 | 48.30 | 0.00 |
| TRINITY_D3AYL4_POLPA/358-420       | D3AYL4.1 PF13432.4; | 48.30 | 0.00 |
| TRINITY_A0D918_PARTE/28-94         | A0D918.1 PF10629.7; | 48.30 | 0.00 |
| TRINITY_L8HMC3_ACACA/10-132        | L8HMC3.1 PF00241.18 | 48.30 | 0.00 |
| TRINITY_L8GX54_ACACA/364-655       | L8GX54.1 PF00176.21 | 48.30 | 0.00 |
| TRINITY_U9TPN2_RHIID/70-158        | U9TPN2.1 PF01230.21 | 48.30 | 0.00 |
| TRINITY_W2QKH8_PHYPN/49-164        | W2QKH8.1 PF05916.9; | 48.30 | 0.00 |
| TRINITY_V7AU43_PHAVU/229-326       | V7AU43.1 PF00153.25 | 48.30 | 0.00 |
| TRINITY_K9T0U6_9CYAN/328-414       | K9T0U6.1 PF08447.10 | 48.30 | 0.00 |
| TRINITY_MYLKB_DICDI/20-278         | Q86AD7.1 PF00069.23 | 48.30 | 0.00 |
| TRINITY_A0A0F5W0E3_9ACTN/38-181    | A0A0F5W0E3.1 PF0824 | 48.30 | 0.00 |
| TRINITY_Q22S98_TETTS/953-1159      | Q22S98.1 PF01852.17 | 48.30 | 0.00 |
| TRINITY_E9ECE3_METAQ/14-113        | E9ECE3.1 PF02271.14 | 48.30 | 0.00 |
| TRINITY_F0ZDI2_DICPU/347-532       | F0ZDI2.1 PF00617.17 | 48.30 | 0.00 |
| TRINITY_G0QKA0_ICHMG/1960-2256     | G0QKA0.1 PF00632.23 | 48.30 | 0.00 |
| TRINITY_A0A0D2WH60_CAPO3/43-435    | A0A0D2WH60.1 PF0045 | 48.30 | 0.00 |
| TRINITY_PBX4_MOUSE/216-275         | Q99NE9.2 PF00046.27 | 48.30 | 0.00 |
| TRINITY_W6FUH4_NODSP/15-183        | W6FUH4.1 PF13385.4; | 48.30 | 0.00 |
| TRINITY_F0ZID3_DICPU/66-208        | F0ZID3.1 PF01794.17 | 48.30 | 0.00 |
| TRINITY_A0CWS5_PARTE/255-401       | A0CWS5.1 PF05728.10 | 48.30 | 0.00 |
| TRINITY_D3BSH8_POLPA/25-395        | D3BSH8.1 PF10142.7; | 48.30 | 0.00 |
| TRINITY_I4YCU4_WALMC/5-65          | I4YCU4.1 PF04193.12 | 48.30 | 0.00 |
| TRINITY_J9J5M4_9SPIT/47-304        | J9J5M4.1 PF00069.23 | 48.30 | 0.00 |
| TRINITY_Q236L3_TETTS/620-683       | Q236L3.1 PF13499.4; | 48.30 | 0.00 |
| TRINITY_F5Z9A3_ALTSS/30-182        | F5Z9A3.1 PF05175.12 | 48.30 | 0.00 |
| TRINITY_A8HZL5_CHLRE/1-327         | A8HZL5.1 PF03372.21 | 48.30 | 0.00 |
| TRINITY_F0ZTN0_DICPU/29-87         | F0ZTN0.1 PF00786.26 | 48.30 | 0.00 |
| TRINITY_L8GIE1_ACACA/28-436        | L8GIE1.1 PF00999.19 | 48.30 | 0.00 |

|                                  |              |            |       |      |
|----------------------------------|--------------|------------|-------|------|
| TRINITY_D8UCH9_VOLCA/147-243     | D8UCH9.1     | PF00169.27 | 48.30 | 0.00 |
| TRINITY_Q22W19_TETTS/115-323     | Q22W19.3     | PF00112.21 | 48.30 | 0.00 |
| TRINITY_D8U6V6_VOLCA/25-262      | D8U6V6.1     | PF02536.12 | 48.30 | 0.00 |
| TRINITY_I0Z3J9_9CHLO/60-210      | I0Z3J9.1     | PF00849.20 | 48.30 | 0.00 |
| TRINITY_C1MHH4_MICPC/147-496     | C1MHH4.1     | PF13868.4; | 48.30 | 0.00 |
| TRINITY_I1M943_SOYBN/2-287       | I1M943.2     | PF05653.12 | 48.30 | 0.00 |
| TRINITY_Q22RZ8_TETTS/183-242     | Q22RZ8.2     | PF13921.4; | 48.30 | 0.00 |
| TRINITY_R5PLD7_9CLOT/4-290       | R5PLD7.1     | PF00009.25 | 48.30 | 0.00 |
| TRINITY_E4WR67_OIKDI/552-620     | E4WR67.1     | PF00505.17 | 48.30 | 0.00 |
| TRINITY_A9U0X8_PHYPA/98-557      | A9U0X8.1     | PF00501.26 | 48.30 | 0.00 |
| TRINITY_E1ZGD7_CHLVA/1-261       | E1ZGD7.1     | PF06246.10 | 48.30 | 0.00 |
| TRINITY_A0A067U0K4_9AGAR/63-122  | A0A067U0K4.1 | PF1392     | 48.30 | 0.00 |
| TRINITY_N1PJZ1_DOTSN/106-334     | N1PJZ1.1     | PF12706.5; | 48.30 | 0.00 |
| TRINITY_D8TNV2_VOLCA/856-1080    | D8TNV2.1     | PF00069.23 | 48.30 | 0.00 |
| TRINITY_D8TL43_VOLCA/13-129      | D8TL43.1     | PF06487.10 | 48.30 | 0.00 |
| TRINITY_E1ZKX7_CHLVA/288-465     | E1ZKX7.1     | PF07092.10 | 48.30 | 0.00 |
| TRINITY_B7G1K5_PHATC/21-93       | B7G1K5.1     | PF04564.13 | 48.30 | 0.00 |
| TRINITY_F4PVF7_DICFS/511-835     | F4PVF7.1     | PF00176.21 | 48.30 | 0.00 |
| TRINITY_D8TNJ5_VOLCA/473-806     | D8TNJ5.1     | PF00773.17 | 48.30 | 0.00 |
| TRINITY_I7MH27_TETTS/188-490     | I7MH27.2     | PF00069.23 | 48.30 | 0.00 |
| TRINITY_Q22RZ8_TETTS/183-242     | Q22RZ8.2     | PF13921.4; | 48.30 | 0.00 |
| TRINITY_D8THM0_VOLCA/151-388     | D8THM0.1     | PF00687.19 | 48.30 | 0.00 |
| TRINITY_D8UGV7_VOLCA/6-313       | D8UGV7.1     | PF01008.15 | 48.30 | 0.00 |
| TRINITY_D8UJ01_VOLCA/442-703     | D8UJ01.1     | PF04157.14 | 48.30 | 0.00 |
| TRINITY_A0E7K6_PARTE/64-122      | A0E7K6.1     | PF13921.4; | 48.30 | 0.00 |
| TRINITY_A8IW93_CHLRE/811-1086    | A8IW93.1     | PF03133.13 | 48.30 | 0.00 |
| TRINITY_D8TGV3_VOLCA/197-257     | D8TGV3.1     | PF04117.10 | 48.30 | 0.00 |
| TRINITY_A0A078AT62_STYLE/63-123  | A0A078AT62.1 | PF0419     | 48.30 | 0.00 |
| TRINITY_A8HNP6_CHLRE/11-260      | A8HNP6.1     | PF07727.12 | 48.30 | 0.00 |
| TRINITY_J9ILA3_9SPIT/9-310       | J9ILA3.1     | PF00069.23 | 48.30 | 0.00 |
| TRINITY_D8TY55_VOLCA/277-416     | D8TY55.1     | PF02797.13 | 48.30 | 0.00 |
| TRINITY_D8TYQ8_VOLCA/773-1053    | D8TYQ8.1     | PF12698.5; | 48.30 | 0.00 |
| TRINITY_W6MMC1_9ASCO/16-368      | W6MMC1.1     | PF00009.25 | 48.30 | 0.00 |
| TRINITY_H2ZGU1_CIOSA/135-218     | H2ZGU1.1     | PF00017.22 | 48.30 | 0.00 |
| TRINITY_L8GGB3_ACACA/1052-1230   | L8GGB3.1     | PF00617.17 | 48.30 | 0.00 |
| TRINITY_A8J6B0_CHLRE/916-1326    | A8J6B0.1     | PF07714.15 | 48.30 | 0.00 |
| TRINITY_I0YX50_9CHLO/460-547     | I0YX50.1     | PF14791.4; | 48.30 | 0.00 |
| TRINITY_G1NFL7_MELGA/27-141      | G1NFL7.2     | PF08662.9; | 48.30 | 0.00 |
| TRINITY_G0QQH6_ICHMG/266-462     | G0QQH6.1     | PF07859.11 | 48.20 | 0.00 |
| TRINITY_A3J4K6_9FLAO/31-246      | A3J4K6.1     | PF00149.26 | 48.20 | 0.00 |
| TRINITY_F9VIH1_ARTSS/25-144      | F9VIH1.1     | PF01926.21 | 48.20 | 0.00 |
| TRINITY_A0A077ZW89_STYLE/21-290  | A0A077ZW89.1 | PF0024     | 48.20 | 0.00 |
| TRINITY_I7LVZ5_TETTS/5-189       | I7LVZ5.1     | PF00106.23 | 48.20 | 0.00 |
| TRINITY_I0YJM6_9CHLO/260-497     | I0YJM6.1     | PF13641.4; | 48.20 | 0.00 |
| TRINITY_Q1N2R9_9GAMM/772-890     | Q1N2R9.1     | PF00072.22 | 48.20 | 0.00 |
| TRINITY_H0EAU9_9ACTN/11-349      | H0EAU9.1     | PF00724.18 | 48.20 | 0.00 |
| TRINITY_D3BPQ9_POLPA/486-595     | D3BPQ9.1     | PF00271.29 | 48.20 | 0.00 |
| TRINITY_A0D6P8_PARTE/189-398     | A0D6P8.1     | PF00113.20 | 48.20 | 0.00 |
| TRINITY_E8RNC8_ASTEC/15-220      | E8RNC8.1     | PF01738.16 | 48.20 | 0.00 |
| TRINITY_Q245E1_TETTS/75-258      | Q245E1.1     | PF07998.9; | 48.20 | 0.00 |
| TRINITY_A8IDE3_CHLRE/126-260     | A8IDE3.1     | PF00258.23 | 48.20 | 0.00 |
| TRINITY_Q23ML0_TETTS/38-292      | Q23ML0.2     | PF00069.23 | 48.20 | 0.00 |
| TRINITY_A0A0D2UJE3_CAPO3/7-91    | A0A0D2UJE3.1 | PF1341     | 48.20 | 0.00 |
| TRINITY_A0A0H5C5W6_CYBJA/96-182  | A0A0H5C5W6.1 | PF1289     | 48.20 | 0.00 |
| TRINITY_C1EBI2_MICSR/59-135      | C1EBI2.1     | PF03061.20 | 48.20 | 0.00 |
| TRINITY_Q93X47_SOLLC/25-326      | Q93X47.1     | PF00069.23 | 48.20 | 0.00 |
| TRINITY_J3MQ70_ORYBR/4-443       | J3MQ70.1     | PF00022.17 | 48.20 | 0.00 |
| TRINITY_F4QK37_9CAUL/382-492     | F4QK37.1     | PF00072.22 | 48.20 | 0.00 |
| TRINITY_A8JH85_CHLRE/7-146       | A8JH85.1     | PF02577.12 | 48.20 | 0.00 |
| TRINITY_A0A074T522_HAMHA/154-349 | A0A074T522.1 | PF1214     | 48.20 | 0.00 |
| TRINITY_H3GPM7_PHYRM/358-482     | H3GPM7.1     | PF04677.13 | 48.20 | 0.00 |

|                                  |                     |       |      |
|----------------------------------|---------------------|-------|------|
| TRINITY_A0A077ZQT6_STYLE/504-743 | A0A077ZQT6.1 PF0379 | 48.20 | 0.00 |
| TRINITY_K7J5V0_NASVI/268-379     | K7J5V0.1 PF01399.25 | 48.20 | 0.00 |
| TRINITY_A0D747_PARTE/33-224      | A0D747.1 PF00227.24 | 48.20 | 0.00 |
| TRINITY_A7EJG1_SCLS1/195-540     | A7EJG1.1 PF00704.26 | 48.20 | 0.00 |
| TRINITY_E6SH94_THEM7/29-344      | E6SH94.1 PF12849.5; | 48.20 | 0.00 |
| TRINITY_I7MLH4_TETTS/52-165      | I7MLH4.1 PF11527.6; | 48.20 | 0.00 |
| TRINITY_A0A0M3J4C5_ANISI/18-185  | A0A0M3J4C5.1 PF0027 | 48.20 | 0.00 |
| TRINITY_A0A0G4J2X3_PLABS/751-865 | A0A0G4J2X3.1 PF0066 | 48.20 | 0.00 |
| TRINITY_A0A072UUB3_MEDTR/313-575 | A0A072UUB3.1 PF0771 | 48.20 | 0.00 |
| TRINITY_I0Z2L0_9CHLO/1-260       | I0Z2L0.1 PF00246.22 | 48.20 | 0.00 |
| TRINITY_A0A097QJW1_9VIBR/492-606 | A0A097QJW1.1 PF0007 | 48.20 | 0.00 |
| TRINITY_A8J1D6_CHLRE/44-170      | A8J1D6.1 PF07714.15 | 48.20 | 0.00 |
| TRINITY_Q6QAY4_CHLRE/46-164      | Q6QAY4.1 PF02466.17 | 48.20 | 0.00 |
| TRINITY_K1QUD2_CRAGI/21-580      | K1QUD2.1 PF02696.12 | 48.20 | 0.00 |
| TRINITY_A0A0M3JA26_ANISI/3-121   | A0A0M3JA26.1 PF0007 | 48.20 | 0.00 |
| TRINITY_E1ZBK6_CHLVA/5-138       | E1ZBK6.1 PF08534.8; | 48.20 | 0.00 |
| TRINITY_A0A078B349_STYLE/444-804 | A0A078B349.1 PF0070 | 48.20 | 0.00 |
| TRINITY_A8IDJ5_CHLRE/65-423      | A8IDJ5.1 PF12832.5; | 48.20 | 0.00 |
| TRINITY_D8Q0R8_SCHCM/345-567     | D8Q0R8.1 PF00082.20 | 48.20 | 0.00 |
| TRINITY_Q24JG1_TETTS/16-326      | Q24JG1.1 PF07992.12 | 48.20 | 0.00 |
| TRINITY_D8U9K8_VOLCA/158-468     | D8U9K8.1 PF08318.10 | 48.20 | 0.00 |
| TRINITY_D8TIY0_VOLCA/27-347      | D8TIY0.1 PF05185.14 | 48.20 | 0.00 |
| TRINITY_I0Z502_9CHLO/30-503      | I0Z502.1 PF10243.7; | 48.20 | 0.00 |
| TRINITY_Q4U9S0_THEAN/10-79       | Q4U9S0.1 PF00076.20 | 48.20 | 0.00 |
| TRINITY_D8UF48_VOLCA/43-512      | D8UF48.1 PF01425.19 | 48.20 | 0.00 |
| TRINITY_D8UK64_VOLCA/8-471       | D8UK64.1 PF13520.4; | 48.20 | 0.00 |
| TRINITY_D8THA8_VOLCA/22-139      | D8THA8.1 PF01152.19 | 48.20 | 0.00 |
| TRINITY_Q22RY4_TETTS/17-249      | Q22RY4.2 PF13561.4; | 48.20 | 0.00 |
| TRINITY_A0A068RVE3_9FUNG/37-177  | A0A068RVE3.1 PF0010 | 48.20 | 0.00 |
| TRINITY_G3N717_GASAC/14-224      | G3N717.1 PF01130.19 | 48.20 | 0.00 |
| TRINITY_A0A099NW38_PICKU/146-302 | A0A099NW38.1 PF0007 | 48.20 | 0.00 |
| TRINITY_Q24GQ7_TETTS/133-301     | Q24GQ7.1 PF04664.11 | 48.20 | 0.00 |
| TRINITY_L8HFM8_ACACA/51-472      | L8HFM8.1 PF13520.4; | 48.10 | 0.00 |
| TRINITY_F4PIG0_DICFS/3-277       | F4PIG0.1 PF09743.7; | 48.10 | 0.00 |
| TRINITY_G0R0S9_ICHMG/8-169       | G0R0S9.1 PF00071.20 | 48.10 | 0.00 |
| TRINITY_L8HG43_ACACA/2-237       | L8HG43.1 PF01026.19 | 48.10 | 0.00 |
| TRINITY_D3BLJ5_POLPA/1506-1723   | D3BLJ5.1 PF16095.3; | 48.10 | 0.00 |
| TRINITY_G0QLS5_ICHMG/84-228      | G0QLS5.1 PF00782.18 | 48.10 | 0.00 |
| TRINITY_J9JCA5_9SPIT/125-339     | J9JCA5.1 PF00112.21 | 48.10 | 0.00 |
| TRINITY_PATS1_DICDI/1724-1858    | Q55E58.1 PF08477.11 | 48.10 | 0.00 |
| TRINITY_L8GPA8_ACACA/1396-1737   | L8GPA8.1 PF00443.27 | 48.10 | 0.00 |
| TRINITY_A0CKF8_PARTE/1118-1269   | A0CKF8.1 PF00005.25 | 48.10 | 0.00 |
| TRINITY_G7UVT4_PSEUP/20-250      | G7UVT4.1 PF06966.10 | 48.10 | 0.00 |
| TRINITY_W5N4Z1_LEPOC/367-520     | W5N4Z1.1 PF13091.4; | 48.10 | 0.00 |
| TRINITY_A0A058ZCU4_9EUKA/174-384 | A0A058ZCU4.1 PF0438 | 48.10 | 0.00 |
| TRINITY_V4AKP7_LOTGI/34-119      | V4AKP7.1 PF05172.11 | 48.10 | 0.00 |
| TRINITY_Q232X8_TETTS/36-488      | Q232X8.1 PF00067.20 | 48.10 | 0.00 |
| TRINITY_I0YRR8_9CHLO/10-222      | I0YRR8.1 PF04755.10 | 48.10 | 0.00 |
| TRINITY_C7ZFC2_NECH7/12-267      | C7ZFC2.1 PF00370.19 | 48.10 | 0.00 |
| TRINITY_F4QBI1_DICFS/9-217       | F4QBI1.1 PF01135.17 | 48.10 | 0.00 |
| TRINITY_A0CXI4_PARTE/131-348     | A0CXI4.1 PF00112.21 | 48.10 | 0.00 |
| TRINITY_G0QWE9_ICHMG/1-205       | G0QWE9.1 PF03531.12 | 48.10 | 0.00 |
| TRINITY_X6LEC0_RETFI/128-273     | X6LEC0.1 PF07534.14 | 48.10 | 0.00 |
| TRINITY_W7U6S8_9STRA/84-164      | W7U6S8.1 PF05046.12 | 48.10 | 0.00 |
| TRINITY_U9TX15_RHIID/316-561     | U9TX15.1 PF00122.18 | 48.10 | 0.00 |
| TRINITY_A0BGJ9_PARTE/233-359     | A0BGJ9.1 PF00169.27 | 48.10 | 0.00 |
| TRINITY_D0MJ84_RHOM4/509-745     | D0MJ84.1 PF02784.14 | 48.10 | 0.00 |
| TRINITY_D2VCP2_NAEGR/25-231      | D2VCP2.1 PF00149.26 | 48.10 | 0.00 |
| TRINITY_A0A077JGQ4_9CYAN/5-157   | A0A077JGQ4.1 PF0053 | 48.10 | 0.00 |
| TRINITY_D8TXT6_VOLCA/540-616     | D8TXT6.1 PF08172.10 | 48.10 | 0.00 |
| TRINITY_A0A059F104_9MICR/244-374 | A0A059F104.1 PF0000 | 48.10 | 0.00 |

|                                   |                     |       |      |
|-----------------------------------|---------------------|-------|------|
| TRINITY_L0DQE9_SINAD/83-239       | L0DQE9.1 PF12831.5; | 48.10 | 0.00 |
| TRINITY_L8GL12_ACACA/119-330      | L8GL12.1 PF00112.21 | 48.10 | 0.00 |
| TRINITY_A0A0E0PAX7_ORYRU/784-1270 | A0A0E0PAX7.1 PF0499 | 48.10 | 0.00 |
| TRINITY_A0A089INQ2_9BACL/3-298    | A0A089INQ2.1 PF0115 | 48.10 | 0.00 |
| TRINITY_A8JFG1_CHLRE/27-174       | A8JFG1.1 PF00005.25 | 48.10 | 0.00 |
| TRINITY_D8T0H5_SELML/2010-2704    | D8T0H5.1 PF03028.13 | 48.10 | 0.00 |
| TRINITY_A0E2J1_PARTE/100-358      | A0E2J1.1 PF00069.23 | 48.10 | 0.00 |
| TRINITY_S2JXT8_MUCC1/140-216      | S2JXT8.1 PF01713.19 | 48.10 | 0.00 |
| TRINITY_I7MMU2_TETTS/406-489      | I7MMU2.2 PF00173.26 | 48.10 | 0.00 |
| TRINITY_D8TMB4_VOLCA/171-394      | D8TMB4.1 PF16953.3; | 48.10 | 0.00 |
| TRINITY_D8UB73_VOLCA/14-95        | D8UB73.1 PF00439.23 | 48.10 | 0.00 |
| TRINITY_D8UKR0_VOLCA/688-843      | D8UKR0.1 PF08625.9; | 48.10 | 0.00 |
| TRINITY_D8U810_VOLCA/723-1010     | D8U810.1 PF00689.19 | 48.10 | 0.00 |
| TRINITY_L8GTS3_ACACA/110-367      | L8GTS3.1 PF00082.20 | 48.10 | 0.00 |
| TRINITY_E1ZGW7_CHLVA/63-362       | E1ZGW7.1 PF00291.23 | 48.10 | 0.00 |
| TRINITY_L8GLQ1_ACACA/9-534        | L8GLQ1.1 PF00995.21 | 48.10 | 0.00 |
| TRINITY_I0ANS2_IGNAJ/4-227        | I0ANS2.1 PF00300.20 | 48.10 | 0.00 |
| TRINITY_A8ILY4_CHLRE/58-303       | A8ILY4.1 PF06966.10 | 48.10 | 0.00 |
| TRINITY_D8TJ44_VOLCA/283-744      | D8TJ44.1 PF01131.18 | 48.10 | 0.00 |
| TRINITY_A0A075B1I0_9FUNG/7-164    | A0A075B1I0.1 PF0010 | 48.10 | 0.00 |
| TRINITY_A0A058Z850_9EUKA/93-329   | A0A058Z850.1 PF0404 | 48.10 | 0.00 |
| TRINITY_L8GD76_ACACA/374-704      | L8GD76.1 PF13243.4; | 48.10 | 0.00 |
| TRINITY_U6PQX4_HAECO/8-143        | U6PQX4.1 PF05871.10 | 48.10 | 0.00 |
| TRINITY_G0QU25_ICHMG/766-848      | G0QU25.1 PF00635.24 | 48.10 | 0.00 |
| TRINITY_A8JCH8_CHLRE/152-639      | A8JCH8.1 PF01532.18 | 48.10 | 0.00 |
| TRINITY_W2QLZ0_PHYPN/255-412      | W2QLZ0.1 PF00903.23 | 48.10 | 0.00 |
| TRINITY_I0YUQ5_9CHLO/33-353       | I0YUQ5.1 PF01636.21 | 48.10 | 0.00 |
| TRINITY_C1KRF4_MICSR/10-318       | C1KRF4.1 PF00146.19 | 48.10 | 0.00 |
| TRINITY_I7MF85_TETTS/409-515      | I7MF85.1 PF00307.29 | 48.10 | 0.00 |
| TRINITY_I0Z4A2_9CHLO/348-426      | I0Z4A2.1 PF01713.19 | 48.10 | 0.00 |
| TRINITY_A0D0G9_PARTE/14-80        | A0D0G9.1 PF02953.13 | 48.10 | 0.00 |
| TRINITY_G0QZD1_ICHMG/22-199       | G0QZD1.1 PF00300.20 | 48.00 | 0.00 |
| TRINITY_A9E8E2_9RHOB/379-491      | A9E8E2.1 PF02518.24 | 48.00 | 0.00 |
| TRINITY_I7MHD1_TETTS/27-277       | I7MHD1.1 PF00194.19 | 48.00 | 0.00 |
| TRINITY_A0DSD5_PARTE/527-699      | A0DSD5.1 PF15901.3; | 48.00 | 0.00 |
| TRINITY_Q6MPK6_BDEBA/12-184       | Q6MPK6.1 PF01048.18 | 48.00 | 0.00 |
| TRINITY_W9QUK4_9ROSA/10-107       | W9QUK4.1 PF04749.15 | 48.00 | 0.00 |
| TRINITY_G7I4A8_MEDTR/136-211      | G7I4A8.2 PF04969.14 | 48.00 | 0.00 |
| TRINITY_Q54G72_DICDI/71-198       | Q54G72.1 PF04178.10 | 48.00 | 0.00 |
| TRINITY_A0A0K0GA30_9FIRM/79-280   | A0A0K0GA30.1 PF0785 | 48.00 | 0.00 |
| TRINITY_F4Q2G9_DICFS/1228-1485    | F4Q2G9.1 PF00069.23 | 48.00 | 0.00 |
| TRINITY_I1CP32_RHIO9/418-584      | I1CP32.1 PF08282.10 | 48.00 | 0.00 |
| TRINITY_S8ASF3_DACHA/11-257       | S8ASF3.1 PF05368.11 | 48.00 | 0.00 |
| TRINITY_J9G2T1_9SPIT/184-448      | J9G2T1.1 PF00069.23 | 48.00 | 0.00 |
| TRINITY_A0A0G2FCS4_9PEZI/613-798  | A0A0G2FCS4.1 PF0136 | 48.00 | 0.00 |
| TRINITY_A0A0G1TKJ1_9BACT/168-323  | A0A0G1TKJ1.1 PF0000 | 48.00 | 0.00 |
| TRINITY_D3BKD6_POLPA/841-1356     | D3BKD6.1 PF07690.14 | 48.00 | 0.00 |
| TRINITY_A9B7L6_HERA2/39-313       | A9B7L6.1 PF00664.21 | 48.00 | 0.00 |
| TRINITY_F0ZS77_DICPU/34-592       | F0ZS77.1 PF01602.18 | 48.00 | 0.00 |
| TRINITY_A0A0D2U0H3_CAPO3/48-269   | A0A0D2U0H3.1 PF1269 | 48.00 | 0.00 |
| TRINITY_L8GUS0_ACACA/40-365       | L8GUS0.1 PF05028.12 | 48.00 | 0.00 |
| TRINITY_A0A0D2U4X4_CAPO3/129-469  | A0A0D2U4X4.1 PF0028 | 48.00 | 0.00 |
| TRINITY_I7MJV0_TETTS/846-955      | I7MJV0.2 PF00069.23 | 48.00 | 0.00 |
| TRINITY_A0BYQ1_PARTE/967-1061     | A0BYQ1.1 PF12796.5; | 48.00 | 0.00 |
| TRINITY_G7KDK7_MEDTR/79-1040      | G7KDK7.1 PF03813.12 | 48.00 | 0.00 |
| TRINITY_A8J5N4_CHLRE/1-277        | A8J5N4.1 PF04005.10 | 48.00 | 0.00 |
| TRINITY_G3VCG1_SARHA/99-262       | G3VCG1.1 PF00160.19 | 48.00 | 0.00 |
| TRINITY_CAP_DICDI/7-295           | P54654.1 PF01213.17 | 48.00 | 0.00 |
| TRINITY_D8TYV9_VOLCA/182-326      | D8TYV9.1 PF01547.23 | 48.00 | 0.00 |
| TRINITY_I3M983 ICTTR/326-450      | I3M983.1 PF00637.18 | 48.00 | 0.00 |
| TRINITY_I7M1Q4_TETTS/136-379      | I7M1Q4.1 PF02104.13 | 48.00 | 0.00 |

|                                    |              |            |       |      |
|------------------------------------|--------------|------------|-------|------|
| TRINITY_J9J6J8_9SPIT/288-337       | J9J6J8.1     | PF13920.4; | 48.00 | 0.00 |
| TRINITY_D2V2K6_NAEGR/15-458        | D2V2K6.1     | PF01532.18 | 48.00 | 0.00 |
| TRINITY_B8CEK5_THAPS/115-168       | B8CEK5.1     | PF13920.4; | 48.00 | 0.00 |
| TRINITY_I0Z4U1_9CHLO/1-239         | I0Z4U1.1     | PF03029.15 | 48.00 | 0.00 |
| TRINITY_F0ZKI2_DICPU/61-525        | F0ZKI2.1     | PF00501.26 | 48.00 | 0.00 |
| TRINITY_E1ZNW4_CHLVA/74-194        | E1ZNW4.1     | PF03099.17 | 48.00 | 0.00 |
| TRINITY_C3Y231_BRAFL/41-301        | C3Y231.1     | PF13621.4; | 48.00 | 0.00 |
| TRINITY_B9J9K3_AGRRK/3-223         | B9J9K3.1     | PF01370.19 | 48.00 | 0.00 |
| TRINITY_A0A059LER1_9CHLO/66-239    | A0A059LER1.1 | PF0599     | 48.00 | 0.00 |
| TRINITY_D8TQ12_VOLCA/33-150        | D8TQ12.1     | PF00861.20 | 48.00 | 0.00 |
| TRINITY_Q2JN91_SYNJB/3-177         | Q2JN91.1     | PF00875.16 | 48.00 | 0.00 |
| TRINITY_Q23QD2_TETTS/366-575       | Q23QD2.2     | PF00566.16 | 48.00 | 0.00 |
| TRINITY_D8UHP4_VOLCA/36-304        | D8UHP4.1     | PF00481.19 | 48.00 | 0.00 |
| TRINITY_A8IJH7_CHLRE/73-337        | A8IJH7.1     | PF07690.14 | 48.00 | 0.00 |
| TRINITY_D8U114_VOLCA/14-254        | D8U114.1     | PF04278.10 | 48.00 | 0.00 |
| TRINITY_A0A022Q101_ERYGU/250-880   | A0A022Q101.1 | PF0244     | 48.00 | 0.00 |
| TRINITY_D8UGV3_VOLCA/80-368        | D8UGV3.1     | PF01062.19 | 48.00 | 0.00 |
| TRINITY_D8TZA3_VOLCA/30-444        | D8TZA3.1     | PF01266.22 | 48.00 | 0.00 |
| TRINITY_D8TNQ6_VOLCA/75-273        | D8TNQ6.1     | PF03798.14 | 48.00 | 0.00 |
| TRINITY_I0YZT9_9CHLO/111-270       | I0YZT9.1     | PF10294.7; | 48.00 | 0.00 |
| TRINITY_Q4U0V9_CHLRE/394-516       | Q4U0V9.1     | PF04145.13 | 48.00 | 0.00 |
| TRINITY_I3NI03_HUMAN/25-142        | I3NI03.1     | PF00085.18 | 48.00 | 0.00 |
| TRINITY_I7LZX2_TETTS/778-864       | I7LZX2.2     | PF15780.3; | 47.90 | 0.00 |
| TRINITY_M0YGB8_HORVD/122-194       | M0YGB8.1     | PF04564.13 | 47.90 | 0.00 |
| TRINITY_K5Y5M0_AGABU/807-904       | K5Y5M0.1     | PF00439.23 | 47.90 | 0.00 |
| TRINITY_U5D445_AMBTC/15-142        | U5D445.1     | PF04857.18 | 47.90 | 0.00 |
| TRINITY_F4KT89_HALH1/36-176        | F4KT89.1     | PF00188.24 | 47.90 | 0.00 |
| TRINITY_A0D8U5_PARTE/465-719       | A0D8U5.1     | PF01504.16 | 47.90 | 0.00 |
| TRINITY_Q23FA1_TETTS/3-173         | Q23FA1.2     | PF01956.14 | 47.90 | 0.00 |
| TRINITY_L8H072_ACACA/127-268       | L8H072.1     | PF12014.6; | 47.90 | 0.00 |
| TRINITY_F0ZH73_DICPU/405-577       | F0ZH73.1     | PF00621.18 | 47.90 | 0.00 |
| TRINITY_I7LUI2_TETTS/149-309       | I7LUI2.1     | PF02544.14 | 47.90 | 0.00 |
| TRINITY_B7QIS0_IXOSC/91-185        | B7QIS0.1     | PF04800.10 | 47.90 | 0.00 |
| TRINITY_C7PGG8_CHIPD/65-212        | C7PGG8.1     | PF00174.17 | 47.90 | 0.00 |
| TRINITY_L8GHQ5_ACACA/212-274       | L8GHQ5.1     | PF13840.4; | 47.90 | 0.00 |
| TRINITY_A0C833_PARTE/29-147        | A0C833.1     | PF07986.10 | 47.90 | 0.00 |
| TRINITY_Q24FP1_TETTS/133-395       | Q24FP1.1     | PF00069.23 | 47.90 | 0.00 |
| TRINITY_A2F6E0_TRIVA/259-408       | A2F6E0.1     | PF00005.25 | 47.90 | 0.00 |
| TRINITY_W2Q5C8_PHYPN/67-137        | W2Q5C8.1     | PF00076.20 | 47.90 | 0.00 |
| TRINITY_A0A084G6U9_9PEZI/1792-1911 | A0A084G6U9.1 | PF0007     | 47.90 | 0.00 |
| TRINITY_Q22ZB8_TETTS/896-1015      | Q22ZB8.2     | PF08578.8; | 47.90 | 0.00 |
| TRINITY_X6PD65_RETFI/417-571       | X6PD65.1     | PF09445.8; | 47.90 | 0.00 |
| TRINITY_A8IYR6_CHLRE/6-146         | A8IYR6.1     | PF05903.12 | 47.90 | 0.00 |
| TRINITY_A8IA75_CHLRE/44-181        | A8IA75.1     | PF03330.16 | 47.90 | 0.00 |
| TRINITY_A0A085MQK8_9BILA/324-484   | A0A085MQK8.1 | PF0007     | 47.90 | 0.00 |
| TRINITY_A0A0P7WDR4_9TELE/68-471    | A0A0P7WDR4.1 | PF0045     | 47.90 | 0.00 |
| TRINITY_K9RGX6_9CYAN/129-348       | K9RGX6.1     | PF00891.16 | 47.90 | 0.00 |
| TRINITY_Q54Q13_DICDI/172-276       | Q54Q13.1     | PF00616.17 | 47.90 | 0.00 |
| TRINITY_E1ZGY6_CHLVA/11-104        | E1ZGY6.1     | PF09696.8; | 47.90 | 0.00 |
| TRINITY_Q54QA5_DICDI/3-75          | Q54QA5.1     | PF00240.21 | 47.90 | 0.00 |
| TRINITY_D8TJ90_VOLCA/44-180        | D8TJ90.1     | PF01138.19 | 47.90 | 0.00 |
| TRINITY_D8TQI4_VOLCA/63-382        | D8TQI4.1     | PF05686.10 | 47.90 | 0.00 |
| TRINITY_D8TJ45_VOLCA/16-248        | D8TJ45.1     | PF13483.4; | 47.90 | 0.00 |
| TRINITY_C7R815_KANKD/38-416        | C7R815.1     | PF00266.17 | 47.90 | 0.00 |
| TRINITY_A0DA23_PARTE/4-77          | A0DA23.1     | PF00240.21 | 47.90 | 0.00 |
| TRINITY_A0A078A398_STYLE/78-203    | A0A078A398.1 | PF0502     | 47.90 | 0.00 |
| TRINITY_L8HHE2_ACACA/28-144        | L8HHE2.1     | PF00856.26 | 47.90 | 0.00 |
| TRINITY_D4ZZ36_ARTPN/26-390        | D4ZZ36.1     | PF03738.12 | 47.90 | 0.00 |
| TRINITY_Q22EG9_TETTS/11-197        | Q22EG9.1     | PF13460.4; | 47.90 | 0.00 |
| TRINITY_D8U9S9_VOLCA/599-793       | D8U9S9.1     | PF00211.18 | 47.90 | 0.00 |
| TRINITY_A0A0A8JNB0_BACXS/9-297     | A0A0A8JNB0.1 | PF0070     | 47.90 | 0.00 |

|                                  |                      |       |      |
|----------------------------------|----------------------|-------|------|
| TRINITY_C4M4F2_ENTHI/87-277      | C4M4F2.1 PF01545.19  | 47.90 | 0.00 |
| TRINITY_I0YPX2_9CHLO/757-1117    | I0YPX2.1 PF00328.20  | 47.90 | 0.00 |
| TRINITY_A0A0G4EI42_9ALVE/68-343  | A0A0G4EI42.1 PF0374  | 47.90 | 0.00 |
| TRINITY_M5WT69_PRUPE/136-299     | M5WT69.1 PF00156.25  | 47.90 | 0.00 |
| TRINITY_A0BSG8_PARTE/16-715      | A0BSG8.1 PF03030.14  | 47.90 | 0.00 |
| TRINITY_I2G5Z0_USTH4/119-189     | I2G5Z0.1 PF00076.20  | 47.90 | 0.00 |
| TRINITY_GANAB_DICDI/363-810      | Q94502.1 PF01055.24  | 47.90 | 0.00 |
| TRINITY_A0A067Q6E0_9HOMO/18-200  | A0A067Q6E0.1 PF0524  | 47.90 | 0.00 |
| TRINITY_A0D6N7_PARTE/232-422     | A0D6N7.1 PF05193.19  | 47.90 | 0.00 |
| TRINITY_A4VD54_TETTS/744-1018    | A4VD54.1 PF00664.21  | 47.90 | 0.00 |
| TRINITY_Q9S7V1_CHLRE/62-365      | Q9S7V1.1 PF01218.16  | 47.90 | 0.00 |
| TRINITY_A0A087SBU6_AUXPR/25-511  | A0A087SBU6.1 PF0305  | 47.90 | 0.00 |
| TRINITY_D7KSY9_ARALL/12-364      | D7KSY9.1 PF05282.9;  | 47.90 | 0.00 |
| TRINITY_I1LWH3_SOYBN/143-260     | I1LWH3.1 PF13640.4;  | 47.90 | 0.00 |
| TRINITY_E1ZHVA4_CHLVA/59-295     | E1ZHVA4.1 PF01063.17 | 47.90 | 0.00 |
| TRINITY_PEX1_DICDI/104-178       | Q54GX5.1 PF09262.9;  | 47.90 | 0.00 |
| TRINITY_M3XJS3_LATCH/384-728     | M3XJS3.1 PF01237.16  | 47.90 | 0.00 |
| TRINITY_A8HSS2_CHLRE/75-286      | A8HSS2.1 PF00856.26  | 47.90 | 0.00 |
| TRINITY_C3ZB32_BRAFL/9-126       | C3ZB32.1 PF09748.7;  | 47.90 | 0.00 |
| TRINITY_Q4Q2F7_LEIMA/2-211       | Q4Q2F7.1 PF00230.18  | 47.90 | 0.00 |
| TRINITY_A8IMI9_CHLRE/35-177      | A8IMI9.1 PF00810.16  | 47.90 | 0.00 |
| TRINITY_K9VG38_9CYAN/46-322      | K9VG38.1 PF02016.13  | 47.90 | 0.00 |
| TRINITY_A0A0G4F7A0_9ALVE/6-124   | A0A0G4F7A0.1 PF1600  | 47.90 | 0.00 |
| TRINITY_A0A067RDK5_ZOONE/223-365 | A0A067RDK5.1 PF0006  | 47.90 | 0.00 |
| TRINITY_J9J3S5_9SPIT/394-881     | J9J3S5.1 PF00232.16  | 47.90 | 0.00 |
| TRINITY_L8GRD3_ACACA/26-540      | L8GRD3.1 PF00135.26  | 47.90 | 0.00 |
| TRINITY_D8UJQ1_VOLCA/16-132      | D8UJQ1.1 PF00179.24  | 47.90 | 0.00 |
| TRINITY_E1ZLR3_CHLVA/1008-1219   | E1ZLR3.1 PF01061.22  | 47.90 | 0.00 |
| TRINITY_G0R413_ICHMG/18-299      | G0R413.1 PF00122.18  | 47.90 | 0.00 |
| TRINITY_V4AA96_LOTGI/115-252     | V4AA96.1 PF10238.7;  | 47.90 | 0.00 |
| TRINITY_A0A0G4GBM8_9ALVE/180-254 | A0A0G4GBM8.1 PF0024  | 47.90 | 0.00 |
| TRINITY_A0A0G4GVC2_9ALVE/10-176  | A0A0G4GVC2.1 PF0007  | 47.90 | 0.00 |
| TRINITY_K1PTG4_CRAGI/14-61       | K1PTG4.1 PF13920.4;  | 47.90 | 0.00 |
| TRINITY_A8IZS4_CHLRE/25-124      | A8IZS4.1 PF00583.23  | 47.90 | 0.00 |
| TRINITY_L8GWQ5_ACACA/986-1235    | L8GWQ5.1 PF07714.15  | 47.90 | 0.00 |
| TRINITY_D8U9E8_VOLCA/326-444     | D8U9E8.1 PF09273.9;  | 47.90 | 0.00 |
| TRINITY_A0A087SQQ5_AUXPR/81-201  | A0A087SQQ5.1 PF0933  | 47.90 | 0.00 |
| TRINITY_F0NZF5_WEEVC/18-168      | F0NZF5.1 PF01368.18  | 47.80 | 0.00 |
| TRINITY_F2G2I5_ALTMD/397-513     | F2G2I5.1 PF02518.24  | 47.80 | 0.00 |
| TRINITY_I7MGN1_TETTS/116-411     | I7MGN1.1 PF00648.19  | 47.80 | 0.00 |
| TRINITY_G0QL39_ICHMG/187-277     | G0QL39.1 PF00153.25  | 47.80 | 0.00 |
| TRINITY_Q247V8_TETTS/66-225      | Q247V8.2 PF01343.16  | 47.80 | 0.00 |
| TRINITY_A9PFT8_POPTR/187-232     | A9PFT8.1 PF13920.4;  | 47.80 | 0.00 |
| TRINITY_A0A067JGY6_JATCU/15-269  | A0A067JGY6.1 PF0006  | 47.80 | 0.00 |
| TRINITY_HSCB_RICPR/3-69          | Q9ZDW4.2 PF00226.29  | 47.80 | 0.00 |
| TRINITY_F4PJK8_DICFS/3330-3423   | F4PJK8.1 PF09333.9;  | 47.80 | 0.00 |
| TRINITY_J9IZH8_9SPIT/189-265     | J9IZH8.1 PF14360.4;  | 47.80 | 0.00 |
| TRINITY_C7RHS1_ANAPD/9-172       | C7RHS1.1 PF00156.25  | 47.80 | 0.00 |
| TRINITY_F2TWN2_SALR5/28-80       | F2TWN2.1 PF00130.20  | 47.80 | 0.00 |
| TRINITY_E1ZQH4_CHLVA/1-72        | E1ZQH4.1 PF00111.25  | 47.80 | 0.00 |
| TRINITY_L8H0M8_ACACA/8-74        | L8H0M8.1 PF00076.20  | 47.80 | 0.00 |
| TRINITY_A0A061EEG7_THECC/589-749 | A0A061EEG7.1 PF0007  | 47.80 | 0.00 |
| TRINITY_Q232X8_TETTS/36-488      | Q232X8.1 PF00067.20  | 47.80 | 0.00 |
| TRINITY_M1AV27_SOLTU/1-248       | M1AV27.1 PF04614.10  | 47.80 | 0.00 |
| TRINITY_D2VUC7_NAEGR/630-746     | D2VUC7.1 PF08785.9;  | 47.80 | 0.00 |
| TRINITY_C5CFM1_KOSOT/64-152      | C5CFM1.1 PF06108.10  | 47.80 | 0.00 |
| TRINITY_I7MA61_TETTS/288-628     | I7MA61.1 PF02841.12  | 47.80 | 0.00 |
| TRINITY_V7AHU9_PHAVU/431-499     | V7AHU9.1 PF00076.20  | 47.80 | 0.00 |
| TRINITY_E1ZP12_CHLVA/84-124      | E1ZP12.1 PF13923.4;  | 47.80 | 0.00 |
| TRINITY_H0DKM4_9STAP/5-117       | H0DKM4.1 PF02152.16  | 47.80 | 0.00 |
| TRINITY_A8BJ08_GIAIC/6-76        | A8BJ08.1 PF11976.6;  | 47.80 | 0.00 |

|                                  |                     |       |      |
|----------------------------------|---------------------|-------|------|
| TRINITY_C1MXI4_MICPC/1-152       | C1MXI4.1 PF13489.4; | 47.80 | 0.00 |
| TRINITY_L8H0D0_ACACA/265-492     | L8H0D0.1 PF13087.4; | 47.80 | 0.00 |
| TRINITY_Q22U39_TETTS/54-238      | Q22U39.3 PF13460.4; | 47.80 | 0.00 |
| TRINITY_A8IT81_CHLRE/4-456       | A8IT81.1 PF13520.4; | 47.80 | 0.00 |
| TRINITY_F6GXW2_VITVI/197-314     | F6GXW2.1 PF07500.12 | 47.80 | 0.00 |
| TRINITY_F2Z5T4_PIG/14-105        | F2Z5T4.1 PF02214.20 | 47.80 | 0.00 |
| TRINITY_A8GEY6_SERP5/149-325     | A8GEY6.1 PF02894.15 | 47.80 | 0.00 |
| TRINITY_D8UCK8_VOLCA/2-74        | D8UCK8.1 PF03937.14 | 47.80 | 0.00 |
| TRINITY_K2MXL3_TRYCR/193-267     | K2MXL3.1 PF14360.4; | 47.80 | 0.00 |
| TRINITY_B9XNB2_PEDPL/16-309      | B9XNB2.1 PF06626.10 | 47.80 | 0.00 |
| TRINITY_A8IS78_CHLRE/5-74        | A8IS78.1 PF02325.15 | 47.80 | 0.00 |
| TRINITY_D8U875_VOLCA/48-175      | D8U875.1 PF07967.11 | 47.80 | 0.00 |
| TRINITY_B5JCS6_9BACT/448-600     | B5JCS6.1 PF13229.4; | 47.80 | 0.00 |
| TRINITY_C1N0B1_MICPC/149-384     | C1N0B1.1 PF12850.5; | 47.80 | 0.00 |
| TRINITY_A0DB80_PARTE/91-183      | A0DB80.1 PF04777.11 | 47.80 | 0.00 |
| TRINITY_A0A0G4EFT4_9ALVE/392-487 | A0A0G4EFT4.1 PF1276 | 47.80 | 0.00 |
| TRINITY_A0CBK7_PARTE/79-221      | A0CBK7.1 PF01694.20 | 47.80 | 0.00 |
| TRINITY_V8PBV8_OPHHA/271-441     | V8PBV8.1 PF02836.15 | 47.80 | 0.00 |
| TRINITY_F4Q2G9_DICFS/1228-1485   | F4Q2G9.1 PF00069.23 | 47.80 | 0.00 |
| TRINITY_M0S1Q3_MUSAM/282-665     | M0S1Q3.1 PF01055.24 | 47.80 | 0.00 |
| TRINITY_GBPC_DICDI/2508-2603     | Q8MVR1.1 PF00027.27 | 47.80 | 0.00 |
| TRINITY_A8HQD3_CHLRE/65-178      | A8HQD3.1 PF05916.9; | 47.80 | 0.00 |
| TRINITY_FORM89_DEIPM/14-368      | FORM89.1 PF07992.12 | 47.80 | 0.00 |
| TRINITY_J9IA49_9SPIT/254-345     | J9IA49.1 PF00447.15 | 47.80 | 0.00 |

|                                  |              |            |       |      |
|----------------------------------|--------------|------------|-------|------|
| TRINITY_D3BLF1_POLPA/69-500      | D3BLF1.1     | PF00450.20 | 47.80 | 0.00 |
| TRINITY_C1E442_MICSR/168-316     | C1E442.1     | PF00929.22 | 47.80 | 0.00 |
| TRINITY_D8TI14_VOLCA/22-1084     | D8TI14.1     | PF04147.10 | 47.80 | 0.00 |
| TRINITY_A0A0G1VJ21_9BACT/163-331 | A0A0G1VJ21.1 | PF0053     | 47.80 | 0.00 |
| TRINITY_D8UBI0_VOLCA/14-440      | D8UBI0.1     | PF00067.20 | 47.80 | 0.00 |
| TRINITY_G2G577_9ACTN/11-453      | G2G577.1     | PF13520.4; | 47.80 | 0.00 |
| TRINITY_D8UC02_VOLCA/1132-1256   | D8UC02.1     | PF07714.15 | 47.80 | 0.00 |
| TRINITY_I1R4R8_ORYGL/175-305     | I1R4R8.1     | PF01419.15 | 47.80 | 0.00 |
| TRINITY_W5NJQ1_LEPOC/5-96        | W5NJQ1.1     | PF03647.11 | 47.80 | 0.00 |
| TRINITY_G0R3B2_ICHMG/13-265      | G0R3B2.1     | PF00069.23 | 47.80 | 0.00 |
| TRINITY_G0QK27_ICHMG/116-201     | G0QK27.1     | PF10785.7; | 47.70 | 0.00 |
| TRINITY_I7MGA5_TETTS/126-350     | I7MGA5.1     | PF00687.19 | 47.70 | 0.00 |
| TRINITY_A0A0G4IIY5_PLABS/444-547 | A0A0G4IIY5.1 | PF0085     | 47.70 | 0.00 |
| TRINITY_Q231W9_TETTS/41-172      | Q231W9.2     | PF08315.10 | 47.70 | 0.00 |
| TRINITY_A4H9T6_LEIBR/28-121      | A4H9T6.1     | PF01329.17 | 47.70 | 0.00 |
| TRINITY_I7M3C5_TETTS/44-281      | I7M3C5.1     | PF10275.7; | 47.70 | 0.00 |
| TRINITY_A0BLU0_PARTE/56-228      | A0BLU0.1     | PF07162.9; | 47.70 | 0.00 |
| TRINITY_V7C4E4_PHAVU/12-103      | V7C4E4.1     | PF02214.20 | 47.70 | 0.00 |
| TRINITY_A0C0D4_PARTE/39-227      | A0C0D4.1     | PF13862.4; | 47.70 | 0.00 |
| TRINITY_W9R525_9ROSA/8-98        | W9R525.1     | PF02970.14 | 47.70 | 0.00 |
| TRINITY_D6W9R7_TRICA/19-113      | D6W9R7.1     | PF00153.25 | 47.70 | 0.00 |
| TRINITY_F0ZA90_DICPU/22-375      | F0ZA90.1     | PF04757.12 | 47.70 | 0.00 |
| TRINITY_A0A078B856_STYLE/13-301  | A0A078B856.1 | PF0006     | 47.70 | 0.00 |
| TRINITY_MYLKB_DICDI/20-278       | Q86AD7.1     | PF00069.23 | 47.70 | 0.00 |
| TRINITY_W4Z0C5_STRPU/373-459     | W4Z0C5.1     | PF09261.9; | 47.70 | 0.00 |
| TRINITY_B4J7Z6_DROGR/290-495     | B4J7Z6.1     | PF00106.23 | 47.70 | 0.00 |
| TRINITY_Q23QF2_TETTS/248-571     | Q23QF2.2     | PF03133.13 | 47.70 | 0.00 |
| TRINITY_D0MQP4_PHYIT/223-288     | D0MQP4.1     | PF01918.19 | 47.70 | 0.00 |
| TRINITY_V4AY93_LOTGI/391-542     | V4AY93.1     | PF01699.22 | 47.70 | 0.00 |
| TRINITY_U3KB49_FICAL/116-350     | U3KB49.1     | PF04389.15 | 47.70 | 0.00 |
| TRINITY_I0Z8W9_9CHLO/1-165       | I0Z8W9.1     | PF05653.12 | 47.70 | 0.00 |
| TRINITY_A0A0G0EM12_9BACT/22-298  | A0A0G0EM12.1 | PF0058     | 47.70 | 0.00 |
| TRINITY_G0R3B8_ICHMG/412-571     | G0R3B8.1     | PF00637.18 | 47.70 | 0.00 |
| TRINITY_D7MP44_ARALL/704-971     | D7MP44.1     | PF12931.5; | 47.70 | 0.00 |
| TRINITY_D8UCD6_VOLCA/1046-1104   | D8UCD6.1     | PF08373.8; | 47.70 | 0.00 |
| TRINITY_A0A068RYC9_9FUNG/57-378  | A0A068RYC9.1 | PF0186     | 47.70 | 0.00 |
| TRINITY_A2FHQ0_TRIVA/5-116       | A2FHQ0.1     | PF01412.16 | 47.70 | 0.00 |
| TRINITY_D8TND4_VOLCA/49-240      | D8TND4.1     | PF00856.26 | 47.70 | 0.00 |
| TRINITY_F1A1W5_DICPU/73-242      | F1A1W5.1     | PF01553.19 | 47.70 | 0.00 |
| TRINITY_L8GFU2_ACACA/577-721     | L8GFU2.1     | PF00644.18 | 47.70 | 0.00 |
| TRINITY_C1MKL4_MICPC/125-232     | C1MKL4.1     | PF02002.15 | 47.70 | 0.00 |
| TRINITY_A8JEZ9_CHLRE/2139-2229   | A8JEZ9.1     | PF13020.4; | 47.70 | 0.00 |
| TRINITY_A8JJ74_CHLRE/1-248       | A8JJ74.1     | PF00756.18 | 47.70 | 0.00 |
| TRINITY_A0A084W838_ANOSI/22-81   | A0A084W838.1 | PF1392     | 47.70 | 0.00 |
| TRINITY_G0QR68_ICHMG/177-395     | G0QR68.1     | PF04811.13 | 47.70 | 0.00 |
| TRINITY_W9WCQ3_9EURO/72-287      | W9WCQ3.1     | PF13489.4; | 47.70 | 0.00 |
| TRINITY_E1ZLD4_CHLVA/75-218      | E1ZLD4.1     | PF00004.27 | 47.70 | 0.00 |
| TRINITY_A0CMX0_PARTE/135-272     | A0CMX0.1     | PF01529.18 | 47.70 | 0.00 |
| TRINITY_J9J1V2_9SPIT/5-143       | J9J1V2.1     | PF00179.24 | 47.70 | 0.00 |
| TRINITY_D8U4J4_VOLCA/20-324      | D8U4J4.1     | PF16363.3; | 47.70 | 0.00 |
| TRINITY_Q22NJ2_TETTS/2-450       | Q22NJ2.2     | PF00067.20 | 47.70 | 0.00 |
| TRINITY_Q6U9W9_CHLRE/45-120      | Q6U9W9.1     | PF01066.19 | 47.70 | 0.00 |
| TRINITY_A0DTA6_PARTE/314-534     | A0DTA6.1     | PF07002.14 | 47.70 | 0.00 |
| TRINITY_A0A0D2VSI5_CAPO3/35-145  | A0A0D2VSI5.1 | PF0848     | 47.70 | 0.00 |
| TRINITY_Q22ZG4_TETTS/603-784     | Q22ZG4.1     | PF02141.19 | 47.70 | 0.00 |
| TRINITY_L8HEV0_ACACA/102-580     | L8HEV0.1     | PF00890.22 | 47.70 | 0.00 |
| TRINITY_I0YXB3_9CHLO/6-211       | I0YXB3.1     | PF00106.23 | 47.70 | 0.00 |
| TRINITY_W7X7I9_TETTS/323-408     | W7X7I9.1     | PF00439.23 | 47.70 | 0.00 |
| TRINITY_A8INQ8_CHLRE/150-374     | A8INQ8.1     | PF07817.11 | 47.70 | 0.00 |
| TRINITY_A8I9K8_CHLRE/78-336      | A8I9K8.1     | PF01663.20 | 47.70 | 0.00 |
| TRINITY_D8TYL3_VOLCA/65-218      | D8TYL3.1     | PF12499.6; | 47.70 | 0.00 |



|                                    |                     |       |      |
|------------------------------------|---------------------|-------|------|
| TRINITY_I1GCH0_AMPQE/1-303         | I1GCH0.1 PF04641.10 | 47.70 | 0.00 |
| TRINITY_B0D263_LACBS/27-567        | B0D263.1 PF00135.26 | 47.70 | 0.00 |
| TRINITY_D8UA95_VOLCA/22-333        | D8UA95.1 PF00814.23 | 47.70 | 0.00 |
| TRINITY_D8TMB6_VOLCA/8-677         | D8TMB6.1 PF00063.19 | 47.70 | 0.00 |
| TRINITY_A0A085MQK8_9BILA/324-484   | A0A085MQK8.1 PF0007 | 47.70 | 0.00 |
| TRINITY_D8UCG7_VOLCA/266-518       | D8UCG7.1 PF03133.13 | 47.70 | 0.00 |
| TRINITY_A0A085ND65_9BILA/425-543   | A0A085ND65.1 PF0066 | 47.70 | 0.00 |
| TRINITY_Q478B9_DECAR/513-628       | Q478B9.1 PF00072.22 | 47.60 | 0.00 |
| TRINITY_D2VU90_NAEGR/548-662       | D2VU90.1 PF00072.22 | 47.60 | 0.00 |
| TRINITY_J9ISP5_9SPIT/145-363       | J9ISP5.1 PF00566.16 | 47.60 | 0.00 |
| TRINITY_A0A0A1U7P7_ENTIV/2307-2608 | A0A0A1U7P7.1 PF0063 | 47.60 | 0.00 |
| TRINITY_A0A024TZI0_9STRA/11-268    | A0A024TZI0.1 PF0006 | 47.60 | 0.00 |
| TRINITY_Q3SDP8_PARTE/11-174        | Q3SDP8.1 PF00071.20 | 47.60 | 0.00 |
| TRINITY_D8TXG7_VOLCA/661-718       | D8TXG7.1 PF13517.4; | 47.60 | 0.00 |
| TRINITY_L8HK06_ACACA/25-210        | L8HK06.1 PF01467.24 | 47.60 | 0.00 |
| TRINITY_J9FR32_9SPIT/300-343       | J9FR32.1 PF13639.4; | 47.60 | 0.00 |
| TRINITY_B8GS56_THISH/19-133        | B8GS56.1 PF07386.9; | 47.60 | 0.00 |
| TRINITY_A0BZS8_PARTE/33-282        | A0BZS8.1 PF00768.18 | 47.60 | 0.00 |
| TRINITY_G0QW57_ICHMG/65-210        | G0QW57.1 PF00071.20 | 47.60 | 0.00 |
| TRINITY_F7EQM6_XENTR/5-178         | F7EQM6.1 PF00071.20 | 47.60 | 0.00 |
| TRINITY_L8H8S1_ACACA/2-104         | L8H8S1.1 PF05456.9; | 47.60 | 0.00 |
| TRINITY_A0A078B349_STYLE/444-804   | A0A078B349.1 PF0070 | 47.60 | 0.00 |
| TRINITY_G0QQF0_ICHMG/1-230         | G0QQF0.1 PF03159.16 | 47.60 | 0.00 |
| TRINITY_E1Z6X4_CHLVA/17-92         | E1Z6X4.1 PF13450.4; | 47.60 | 0.00 |
| TRINITY_M5WU18_PRUPE/10-171        | M5WU18.1 PF00071.20 | 47.60 | 0.00 |
| TRINITY_I7M1V6_TETTS/314-533       | I7M1V6.1 PF07002.14 | 47.60 | 0.00 |
| TRINITY_T1JTJ1_TETUR/61-203        | T1JTJ1.1 PF08240.10 | 47.60 | 0.00 |
| TRINITY_L1J820_GUITH/223-386       | L1J820.1 PF01399.25 | 47.60 | 0.00 |
| TRINITY_A0D1Q9_PARTE/17-130        | A0D1Q9.1 PF01920.18 | 47.60 | 0.00 |
| TRINITY_I0Z997_9CHLO/17-136        | I0Z997.1 PF13671.4; | 47.60 | 0.00 |
| TRINITY_W5LHY3_ASTMX/501-587       | W5LHY3.1 PF13893.4; | 47.60 | 0.00 |
| TRINITY_A2FHQ0_TRIVA/5-116         | A2FHQ0.1 PF01412.16 | 47.60 | 0.00 |
| TRINITY_I7MHV7_TETTS/3658-3827     | I7MHV7.2 PF16909.3; | 47.60 | 0.00 |
| TRINITY_B9TBU4_RICCO/34-192        | B9TBU4.1 PF00043.23 | 47.60 | 0.00 |
| TRINITY_A0A087SBP4_AUXPR/75-333    | A0A087SBP4.1 PF1214 | 47.60 | 0.00 |
| TRINITY_L8GV37_ACACA/70-221        | L8GV37.1 PF12694.5; | 47.60 | 0.00 |
| TRINITY_H3FDM9_PRIIPA/77-152       | H3FDM9.1 PF01066.19 | 47.60 | 0.00 |
| TRINITY_L8H219_ACACA/5-289         | L8H219.1 PF05833.9; | 47.60 | 0.00 |
| TRINITY_E1ZEB5_CHLVA/404-575       | E1ZEB5.1 PF04755.10 | 47.60 | 0.00 |
| TRINITY_G0R1F7_ICHMG/29-105        | G0R1F7.1 PF12895.5; | 47.60 | 0.00 |
| TRINITY_I7MAB8_TETTS/24-405        | I7MAB8.1 PF07690.14 | 47.60 | 0.00 |
| TRINITY_G0QR68_ICHMG/177-395       | G0QR68.1 PF04811.13 | 47.60 | 0.00 |
| TRINITY_A0A067RIS5_ZOONE/12-338    | A0A067RIS5.1 PF0113 | 47.60 | 0.00 |
| TRINITY_G4V8C5_SCHMA/289-760       | G4V8C5.1 PF01055.24 | 47.60 | 0.00 |
| TRINITY_G0QTC5_ICHMG/44-199        | G0QTC5.1 PF03031.16 | 47.60 | 0.00 |
| TRINITY_B7G1K5_PHATC/21-93         | B7G1K5.1 PF04564.13 | 47.60 | 0.00 |
| TRINITY_D8UBV3_VOLCA/223-296       | D8UBV3.1 PF13424.4; | 47.60 | 0.00 |
| TRINITY_I7MA17_TETTS/370-645       | I7MA17.1 PF00657.20 | 47.60 | 0.00 |
| TRINITY_L8GJH9_ACACA/304-615       | L8GJH9.1 PF00632.23 | 47.60 | 0.00 |
| TRINITY_I0Z6E5_9CHLO/39-246        | I0Z6E5.1 PF07228.10 | 47.60 | 0.00 |
| TRINITY_E1ZJI9_CHLVA/117-197       | E1ZJI9.1 PF04182.10 | 47.60 | 0.00 |
| TRINITY_I0YIF8_9CHLO/21-168        | I0YIF8.1 PF06201.11 | 47.60 | 0.00 |
| TRINITY_A0A024U5X1_9STRA/115-328   | A0A024U5X1.1 PF0011 | 47.60 | 0.00 |
| TRINITY_D2QWB2_PIRSD/565-803       | D2QWB2.1 PF01593.22 | 47.60 | 0.00 |
| TRINITY_AIFM1_DICDI/96-417         | Q9GRX6.1 PF07992.12 | 47.60 | 0.00 |
| TRINITY_M4DIT4_BRARP/2-121         | M4DIT4.1 PF09775.7; | 47.60 | 0.00 |
| TRINITY_M2MER5_BAUCO/1-60          | M2MER5.1 PF03105.17 | 47.60 | 0.00 |
| TRINITY_L8HE93_ACACA/369-514       | L8HE93.1 PF07534.14 | 47.60 | 0.00 |
| TRINITY_I0Z4V9_9CHLO/14-136        | I0Z4V9.1 PF13806.4; | 47.60 | 0.00 |
| TRINITY_A0DL08_PARTE/182-272       | A0DL08.1 PF00153.25 | 47.60 | 0.00 |
| TRINITY_W9YHS4_9EURO/205-1398      | W9YHS4.1 PF02463.17 | 47.60 | 0.00 |

|                                  |              |            |       |      |
|----------------------------------|--------------|------------|-------|------|
| TRINITY_Q099W1_STIAD/478-664     | Q099W1.1     | PF01186.15 | 47.60 | 0.00 |
| TRINITY_E5SHF7_TRISP/288-377     | E5SHF7.1     | PF02214.20 | 47.60 | 0.00 |
| TRINITY_E5SHF7_TRISP/288-377     | E5SHF7.1     | PF02214.20 | 47.60 | 0.00 |
| TRINITY_D3B4E0_POLPA/113-558     | D3B4E0.1     | PF14655.4; | 47.60 | 0.00 |
| TRINITY_D3B4U3_POLPA/96-477      | D3B4U3.1     | PF01080.15 | 47.60 | 0.00 |
| TRINITY_D8TR25_VOLCA/152-372     | D8TR25.1     | PF07970.10 | 47.60 | 0.00 |
| TRINITY_J9HX68_9SPIT/57-359      | J9HX68.1     | PF00648.19 | 47.60 | 0.00 |
| TRINITY_L2GCP5_COLGN/682-784     | L2GCP5.1     | PF12796.5; | 47.60 | 0.00 |
| TRINITY_Q4C263_CROWT/345-440     | Q4C263.1     | PF02163.20 | 47.60 | 0.00 |
| TRINITY_I0Z3K2_9CHLO/34-261      | I0Z3K2.1     | PF05148.13 | 47.60 | 0.00 |
| TRINITY_D8UC02_VOLCA/1132-1256   | D8UC02.1     | PF07714.15 | 47.60 | 0.00 |
| TRINITY_D8TKH0_VOLCA/161-515     | D8TKH0.1     | PF01103.21 | 47.60 | 0.00 |
| TRINITY_D8U9Z7_VOLCA/584-707     | D8U9Z7.1     | PF10442.7; | 47.60 | 0.00 |
| TRINITY_G8YE80_PICSO/31-93       | G8YE80.1     | PF00462.22 | 47.60 | 0.00 |
| TRINITY_J9J144_9SPIT/92-349      | J9J144.1     | PF00069.23 | 47.50 | 0.00 |
| TRINITY_A0A072P8D0_9EURO/1-106   | A0A072P8D0.1 | PF0365     | 47.50 | 0.00 |
| TRINITY_D8R325_SELML/87-151      | D8R325.1     | PF13499.4; | 47.50 | 0.00 |
| TRINITY_A0A078BCF8_STYLE/3-64    | A0A078BCF8.1 | PF0007     | 47.50 | 0.00 |
| TRINITY_G0QKX0_ICHMG/51-329      | G0QKX0.1     | PF03034.13 | 47.50 | 0.00 |
| TRINITY_A4VD75_TETTS/10-116      | A4VD75.1     | PF00085.18 | 47.50 | 0.00 |
| TRINITY_W4YRK6_STRPU/145-212     | W4YRK6.1     | PF07258.12 | 47.50 | 0.00 |
| TRINITY_Q229H4_TETTS/1167-1284   | Q229H4.2     | PF00072.22 | 47.50 | 0.00 |
| TRINITY_U4KWA9_PYROM/98-270      | U4KWA9.1     | PF00775.19 | 47.50 | 0.00 |
| TRINITY_J9J078_9SPIT/277-392     | J9J078.1     | PF02518.24 | 47.50 | 0.00 |
| TRINITY_A7REQ2_NEMVE/4-157       | A7REQ2.1     | PF00005.25 | 47.50 | 0.00 |
| TRINITY_A0A0G2ZUL9_9DELT/201-261 | A0A0G2ZUL9.1 | PF1477     | 47.50 | 0.00 |
| TRINITY_K7I8C5_CAEJA/79-206      | K7I8C5.1     | PF00271.29 | 47.50 | 0.00 |
| TRINITY_A0DXS8_PARTE/25-438      | A0DXS8.1     | PF07690.14 | 47.50 | 0.00 |
| TRINITY_E1C6X4_CHICK/60-122      | E1C6X4.1     | PF13499.4; | 47.50 | 0.00 |
| TRINITY_A0A058Z2L7_9EUKA/41-283  | A0A058Z2L7.1 | PF0137     | 47.50 | 0.00 |
| TRINITY_Q23AY4_TETTS/31-436      | Q23AY4.2     | PF05577.10 | 47.50 | 0.00 |
| TRINITY_A0A0K9NHS8_ZOSMR/73-332  | A0A0K9NHS8.1 | PF0024     | 47.50 | 0.00 |
| TRINITY_L8H2P8_ACACA/253-311     | L8H2P8.1     | PF00786.26 | 47.50 | 0.00 |
| TRINITY_I7M0N5_TETTS/125-295     | I7M0N5.1     | PF00092.26 | 47.50 | 0.00 |
| TRINITY_L1IFE1_GUITH/66-327      | L1IFE1.1     | PF00591.19 | 47.50 | 0.00 |
| TRINITY_W5CIR0_WHEAT/54-184      | W5CIR0.1     | PF00782.18 | 47.50 | 0.00 |
| TRINITY_I1I3M9_BRADI/76-218      | I1I3M9.1     | PF10607.7; | 47.50 | 0.00 |
| TRINITY_I7M3V2_TETTS/53-319      | I7M3V2.1     | PF00069.23 | 47.50 | 0.00 |
| TRINITY_D8LVM2_BLAHO/81-144      | D8LVM2.1     | PF00226.29 | 47.50 | 0.00 |
| TRINITY_Q84QI2_CHLRE/13-106      | Q84QI2.1     | PF14966.4; | 47.50 | 0.00 |
| TRINITY_K3WVC7_PYTUL/120-247     | K3WVC7.1     | PF04116.11 | 47.50 | 0.00 |
| TRINITY_A0A015IMC7_9GLOM/126-421 | A0A015IMC7.1 | PF0056     | 47.50 | 0.00 |
| TRINITY_B3RYA0_TRIAD/140-479     | B3RYA0.1     | PF02163.20 | 47.50 | 0.00 |
| TRINITY_I7M3X7_TETTS/14-121      | I7M3X7.2     | PF14933.4; | 47.50 | 0.00 |
| TRINITY_M5VV76_PRUPE/1-485       | M5VV76.1     | PF04130.11 | 47.50 | 0.00 |
| TRINITY_A0A090BU49_9GAMM/570-686 | A0A090BU49.1 | PF0251     | 47.50 | 0.00 |
| TRINITY_L8H030_ACACA/25-454      | L8H030.1     | PF05602.10 | 47.50 | 0.00 |
| TRINITY_W7AAT9_9APIC/75-218      | W7AAT9.1     | PF16531.3; | 47.50 | 0.00 |
| TRINITY_A0E7G7_PARTE/121-385     | A0E7G7.1     | PF00069.23 | 47.50 | 0.00 |
| TRINITY_A0A068Y8Y9_ECHMU/356-468 | A0A068Y8Y9.1 | PF0322     | 47.50 | 0.00 |
| TRINITY_E8N3V4_ANATU/2-233       | E8N3V4.1     | PF03577.13 | 47.50 | 0.00 |
| TRINITY_D8TWR1_VOLCA/23-311      | D8TWR1.1     | PF00069.23 | 47.50 | 0.00 |
| TRINITY_M0RXY1_MUSAM/144-265     | M0RXY1.1     | PF01553.19 | 47.50 | 0.00 |
| TRINITY_U9T9S0_RHIID/1-459       | U9T9S0.1     | PF04006.10 | 47.50 | 0.00 |
| TRINITY_A8JG56_CHLRE/85-309      | A8JG56.1     | PF00141.21 | 47.50 | 0.00 |
| TRINITY_A0E2M3_PARTE/3-103       | A0E2M3.1     | PF00168.28 | 47.50 | 0.00 |
| TRINITY_G0QM33_ICHMG/33-214      | G0QM33.1     | PF00270.27 | 47.50 | 0.00 |
| TRINITY_D8UJA5_VOLCA/42-123      | D8UJA5.1     | PF03366.14 | 47.50 | 0.00 |
| TRINITY_D8TKV7_VOLCA/38-199      | D8TKV7.1     | PF16134.3; | 47.50 | 0.00 |
| TRINITY_I7MGZ3_TETTS/4-164       | I7MGZ3.1     | PF06127.9; | 47.50 | 0.00 |
| TRINITY_A0A022R067_ERYGU/5-225   | A0A022R067.1 | PF0415     | 47.50 | 0.00 |

|                                    |                     |       |      |
|------------------------------------|---------------------|-------|------|
| TRINITY_A0A0A1PIM2_9FUNG/7-117     | A0A0A1PIM2.1 PF0085 | 47.50 | 0.00 |
| TRINITY_L8HEU7_ACACA/28-342        | L8HEU7.1 PF14647.4; | 47.50 | 0.00 |
| TRINITY_A0A089JXQ9_9BACL/1-317     | A0A089JXQ9.1 PF0242 | 47.50 | 0.00 |
| TRINITY_A8IU15_CHLRE/11-266        | A8IU15.1 PF00069.23 | 47.50 | 0.00 |
| TRINITY_F0XYH0_AURAN/5-252         | F0XYH0.1 PF00975.18 | 47.50 | 0.00 |
| TRINITY_A0A068XYS6_ECHMU/153-259   | A0A068XYS6.1 PF0030 | 47.50 | 0.00 |
| TRINITY_C1E082_MICSR/7-89          | C1E082.1 PF10785.7; | 47.50 | 0.00 |
| TRINITY_E1ZS88_CHLVA/5-312         | E1ZS88.1 PF01156.17 | 47.50 | 0.00 |
| TRINITY_D8U792_VOLCA/1973-2038     | D8U792.1 PF00415.16 | 47.50 | 0.00 |
| TRINITY_A0A087GDX5_ARAAL/331-775   | A0A087GDX5.1 PF0105 | 47.50 | 0.00 |
| TRINITY_A8JFJ5_CHLRE/243-455       | A8JFJ5.1 PF05450.13 | 47.50 | 0.00 |
| TRINITY_Q23QF2_TETTS/248-571       | Q23QF2.2 PF03133.13 | 47.50 | 0.00 |
| TRINITY_A5KBZ1_PLAVS/4-69          | A5KBZ1.1 PF00226.29 | 47.50 | 0.00 |
| TRINITY_F4Q1F7_DICFS/372-584       | F4Q1F7.1 PF07228.10 | 47.50 | 0.00 |
| TRINITY_T0R0B8_9STRA/37-164        | T0R0B8.1 PF12796.5; | 47.50 | 0.00 |
| TRINITY_Q3SDM9_PARTE/30-193        | Q3SDM9.1 PF00071.20 | 47.50 | 0.00 |
| TRINITY_A0A078A4D4_STYLE/430-659   | A0A078A4D4.1 PF0584 | 47.50 | 0.00 |
| TRINITY_E5SHF7_TRISP/288-377       | E5SHF7.1 PF02214.20 | 47.50 | 0.00 |
| TRINITY_K3YY32_SETIT/31-151        | K3YY32.1 PF00188.24 | 47.50 | 0.00 |
| TRINITY_Q23KC0_TETTS/243-334       | Q23KC0.3 PF07683.12 | 47.50 | 0.00 |
| TRINITY_I7MKW8_TETTS/798-1133      | I7MKW8.2 PF03133.13 | 47.50 | 0.00 |
| TRINITY_A0A075AP28_9FUNG/87-370    | A0A075AP28.1 PF0339 | 47.50 | 0.00 |
| TRINITY_S2JYD2_MUCC1/27-185        | S2JYD2.1 PF01553.19 | 47.50 | 0.00 |
| TRINITY_D2UZB4_NAEGR/80-179        | D2UZB4.1 PF00173.26 | 47.50 | 0.00 |
| TRINITY_A0DMS4_PARTE/255-356       | A0DMS4.1 PF06565.10 | 47.50 | 0.00 |
| TRINITY_A8I7K9_CHLRE/1-88          | A8I7K9.1 PF07714.15 | 47.50 | 0.00 |
| TRINITY_PHOP2_XENTR/3-236          | Q66KD6.1 PF06888.10 | 47.50 | 0.00 |
| TRINITY_H3HAJ2_PHYRM/359-478       | H3HAJ2.1 PF00665.24 | 47.50 | 0.00 |
| TRINITY_A8J3P1_CHLRE/954-1161      | A8J3P1.1 PF00211.18 | 47.50 | 0.00 |
| TRINITY_E1Z6G9_CHLVA/128-298       | E1Z6G9.1 PF00892.18 | 47.50 | 0.00 |
| TRINITY_A0A0J7K0M9_LASNI/335-453   | A0A0J7K0M9.1 PF0066 | 47.50 | 0.00 |
| TRINITY_A8JDJ8_CHLRE/29-120        | A8JDJ8.1 PF05699.12 | 47.50 | 0.00 |
| TRINITY_B8HYX6_CYAP4/26-200        | B8HYX6.1 PF13532.4; | 47.50 | 0.00 |
| TRINITY_D8U0S2_VOLCA/944-1143      | D8U0S2.1 PF07714.15 | 47.50 | 0.00 |
| TRINITY_J9J800_9SPIT/592-723       | J9J800.1 PF00293.26 | 47.50 | 0.00 |
| TRINITY_A0A0A1TNZ7_9HYPO/56-138    | A0A0A1TNZ7.1 PF0333 | 47.50 | 0.00 |
| TRINITY_Q1N2R9_9GAMM/772-890       | Q1N2R9.1 PF00072.22 | 47.40 | 0.00 |
| TRINITY_T1FYE9_HELRO/23-315        | T1FYE9.1 PF00850.17 | 47.40 | 0.00 |
| TRINITY_D3BQP3_POLPA/114-258       | D3BQP3.1 PF08737.8; | 47.40 | 0.00 |
| TRINITY_K1Q470_CRAGI/4-98          | K1Q470.1 PF14216.4; | 47.40 | 0.00 |
| TRINITY_I7LXT2_TETTS/158-424       | I7LXT2.2 PF00069.23 | 47.40 | 0.00 |
| TRINITY_B8MPJ7_TALSN/61-536        | B8MPJ7.1 PF00067.20 | 47.40 | 0.00 |
| TRINITY_A0A078B207_STYLE/111-202   | A0A078B207.1 PF0190 | 47.40 | 0.00 |
| TRINITY_Q22AI0_TETTS/688-801       | Q22AI0.2 PF02887.14 | 47.40 | 0.00 |
| TRINITY_D8U320_VOLCA/46-142        | D8U320.1 PF00293.26 | 47.40 | 0.00 |
| TRINITY_A0A0D9X011_9ORYZ/57-207    | A0A0D9X011.1 PF0029 | 47.40 | 0.00 |
| TRINITY_D7FNH9_ECTSI/61-176        | D7FNH9.1 PF12894.5; | 47.40 | 0.00 |
| TRINITY_A9V494_MONBE/287-459       | A9V494.1 PF00534.18 | 47.40 | 0.00 |
| TRINITY_A0A0F5ZTC1_9GAMM/1030-1145 | A0A0F5ZTC1.1 PF0007 | 47.40 | 0.00 |
| TRINITY_I7M1V6_TETTS/314-533       | I7M1V6.1 PF07002.14 | 47.40 | 0.00 |
| TRINITY_G3XX32_ASPNA/97-234        | G3XX32.1 PF13091.4; | 47.40 | 0.00 |
| TRINITY_UBR7_DICDI/239-293         | Q54DV0.2 PF00628.27 | 47.40 | 0.00 |
| TRINITY_L8H4S7_ACACA/16-207        | L8H4S7.1 PF00106.23 | 47.40 | 0.00 |
| TRINITY_L8GYG8_ACACA/142-276       | L8GYG8.1 PF00782.18 | 47.40 | 0.00 |
| TRINITY_E9IRE1_SOLIN/4-173         | E9IRE1.1 PF08547.10 | 47.40 | 0.00 |
| TRINITY_M0QSM4_ACACA/400-492       | M0QSM4.1 PF02214.20 | 47.40 | 0.00 |
| TRINITY_L8GDW5_ACACA/38-251        | L8GDW5.1 PF09414.8; | 47.40 | 0.00 |
| TRINITY_L8HDA6_ACACA/205-295       | L8HDA6.1 PF07885.14 | 47.40 | 0.00 |
| TRINITY_I7MJT4_TETTS/15-283        | I7MJT4.1 PF01073.17 | 47.40 | 0.00 |
| TRINITY_C5GAB2_AJEDR/9-139         | C5GAB2.1 PF03435.16 | 47.40 | 0.00 |
| TRINITY_A0C4U0_PARTE/156-220       | A0C4U0.1 PF00153.25 | 47.40 | 0.00 |

|                                  |              |            |       |      |
|----------------------------------|--------------|------------|-------|------|
| TRINITY_A0CTM1_PARTE/151-369     | A0CTM1.1     | PF01556.16 | 47.40 | 0.00 |
| TRINITY_W7X7D0_TETTS/127-467     | W7X7D0.1     | PF16653.3; | 47.40 | 0.00 |
| TRINITY_I1JXK9_SOYBN/29-387      | I1JXK9.2     | PF04185.12 | 47.40 | 0.00 |
| TRINITY_A0A0G4B5X6_9BACT/334-445 | A0A0G4B5X6.1 | PF0251     | 47.40 | 0.00 |
| TRINITY_A8J4E2_CHLRE/159-328     | A8J4E2.1     | PF01223.21 | 47.40 | 0.00 |
| TRINITY_I0YX01_9CHLO/213-357     | I0YX01.1     | PF01490.16 | 47.40 | 0.00 |
| TRINITY_D8U8R8_VOLCA/29-111      | D8U8R8.1     | PF10251.7; | 47.40 | 0.00 |
| TRINITY_G1KFB0_ANOCA/789-999     | G1KFB0.2     | PF00644.18 | 47.40 | 0.00 |
| TRINITY_V4B185_LOTGI/96-380      | V4B185.1     | PF00443.27 | 47.40 | 0.00 |
| TRINITY_K7IQ87_NASVI/181-299     | K7IQ87.1     | PF00665.24 | 47.40 | 0.00 |
| TRINITY_A9S9P1_PHYPA/7-262       | A9S9P1.1     | PF10160.7; | 47.40 | 0.00 |
| TRINITY_V6LCP3_9EUKA/29-329      | V6LCP3.1     | PF00009.25 | 47.40 | 0.00 |
| TRINITY_D8T3Y6_SELML/60-263      | D8T3Y6.1     | PF00804.23 | 47.40 | 0.00 |
| TRINITY_I7MH91_TETTS/186-488     | I7MH91.1     | PF00883.19 | 47.40 | 0.00 |
| TRINITY_I7MKW7_TETTS/16-270      | I7MKW7.1     | PF08450.10 | 47.40 | 0.00 |
| TRINITY_A0A0D2WTZ0_CAPO3/236-510 | A0A0D2WTZ0.1 | PF0113     | 47.40 | 0.00 |
| TRINITY_D8TP76_VOLCA/24-120      | D8TP76.1     | PF03704.15 | 47.40 | 0.00 |
| TRINITY_K9WN24_9CYAN/827-940     | K9WN24.1     | PF08448.8; | 47.40 | 0.00 |
| TRINITY_G0R1Y7_ICHMG/3-188       | G0R1Y7.1     | PF01251.16 | 47.40 | 0.00 |
| TRINITY_A0BJW5_PARTE/673-824     | A0BJW5.1     | PF00005.25 | 47.40 | 0.00 |
| TRINITY_F4PQQ1_DICFS/380-541     | F4PQQ1.1     | PF01343.16 | 47.40 | 0.00 |
| TRINITY_A8IR44_CHLRE/424-884     | A8IR44.1     | PF03547.16 | 47.40 | 0.00 |
| TRINITY_D8TYS9_VOLCA/105-194     | D8TYS9.1     | PF00686.17 | 47.40 | 0.00 |
| TRINITY_L1I9Z9_GUIITH/167-420    | L1I9Z9.1     | PF00928.19 | 47.40 | 0.00 |
| TRINITY_C1H6W8_PARBA/144-651     | C1H6W8.2     | PF03098.13 | 47.40 | 0.00 |
| TRINITY_D8TKX7_VOLCA/49-142      | D8TKX7.1     | PF00686.17 | 47.40 | 0.00 |
| TRINITY_M2VVT6_GALSU/41-311      | M2VVT6.1     | PF00664.21 | 47.40 | 0.00 |
| TRINITY_I3KHL5_ORENI/590-742     | I3KHL5.1     | PF00753.25 | 47.40 | 0.00 |
| TRINITY_T1IQQ9_STRMM/764-975     | T1IQQ9.1     | PF00644.18 | 47.40 | 0.00 |
| TRINITY_A9TBZ2_PHYPA/187-703     | A9TBZ2.1     | PF12569.6; | 47.40 | 0.00 |
| TRINITY_A0A0G0FN99_9BACT/7-494   | A0A0G0FN99.1 | PF0141     | 47.40 | 0.00 |
| TRINITY_A0CFL4_PARTE/1647-1747   | A0CFL4.1     | PF16455.3; | 47.40 | 0.00 |
| TRINITY_A8JBZ0_CHLRE/15-224      | A8JBZ0.1     | PF01126.18 | 47.40 | 0.00 |
| TRINITY_M2Y4X3_GALSU/55-262      | M2Y4X3.1     | PF00106.23 | 47.40 | 0.00 |
| TRINITY_Q22S54_TETTS/173-326     | Q22S54.3     | PF00929.22 | 47.40 | 0.00 |
| TRINITY_C1E862_MICSR/43-180      | C1E862.1     | PF00293.26 | 47.40 | 0.00 |
| TRINITY_A0A0G4FHT3_9ALVE/97-227  | A0A0G4FHT3.1 | PF0152     | 47.40 | 0.00 |
| TRINITY_D8TLC4_VOLCA/28-233      | D8TLC4.1     | PF13472.4; | 47.40 | 0.00 |
| TRINITY_U7PPQ1_SPOS1/150-654     | U7PPQ1.1     | PF03098.13 | 47.40 | 0.00 |
| TRINITY_F2UC22_SALR5/539-752     | F2UC22.1     | PF07859.11 | 47.40 | 0.00 |
| TRINITY_D2QCA4_SPILD/4-366       | D2QCA4.1     | PF01266.22 | 47.40 | 0.00 |
| TRINITY_L8HI32_ACACA/42-157      | L8HI32.1     | PF00169.27 | 47.40 | 0.00 |
| TRINITY_A8HZZ8_CHLRE/12-186      | A8HZZ8.1     | PF04752.10 | 47.40 | 0.00 |
| TRINITY_A4S6D3_OSTLU/79-383      | A4S6D3.1     | PF00487.22 | 47.40 | 0.00 |
| TRINITY_E1Z3Q9_CHLVA/75-167      | E1Z3Q9.1     | PF00686.17 | 47.40 | 0.00 |
| TRINITY_A8JGS1_CHLRE/156-363     | A8JGS1.1     | PF04614.10 | 47.40 | 0.00 |
| TRINITY_C1MRG7_MICPC/57-273      | C1MRG7.1     | PF01988.17 | 47.40 | 0.00 |
| TRINITY_I7LX71_TETTS/33-164      | I7LX71.1     | PF00782.18 | 47.40 | 0.00 |
| TRINITY_I7MKP3_TETTS/27-347      | I7MKP3.2     | PF00443.27 | 47.40 | 0.00 |
| TRINITY_V7BZ82_PHAVU/8-182       | V7BZ82.1     | PF01145.23 | 47.40 | 0.00 |
| TRINITY_I7M1X2_TETTS/313-443     | I7M1X2.2     | PF01529.18 | 47.40 | 0.00 |
| TRINITY_A8IWM1_CHLRE/227-702     | A8IWM1.1     | PF01055.24 | 47.40 | 0.00 |
| TRINITY_A0A0A0LGR9_CUCSA/173-622 | A0A0A0LGR9.1 | PF0518     | 47.40 | 0.00 |
| TRINITY_W2PE18_PHYPN/147-241     | W2PE18.1     | PF01922.15 | 47.40 | 0.00 |
| TRINITY_I7MD86_TETTS/149-260     | I7MD86.1     | PF13519.4; | 47.40 | 0.00 |
| TRINITY_A0A090LAM2_STRRB/7-114   | A0A090LAM2.1 | PF0063     | 47.40 | 0.00 |
| TRINITY_G0QVK9_ICHMG/261-559     | G0QVK9.1     | PF00632.23 | 47.30 | 0.00 |
| TRINITY_Q23QF2_TETTS/248-571     | Q23QF2.2     | PF03133.13 | 47.30 | 0.00 |
| TRINITY_I7LWV6_TETTS/492-585     | I7LWV6.1     | PF12796.5; | 47.30 | 0.00 |
| TRINITY_D3BLH3_POLPA/1312-1636   | D3BLH3.1     | PF02259.21 | 47.30 | 0.00 |
| TRINITY_A0A0N4UDI6_DRAME/543-786 | A0A0N4UDI6.1 | PF0584     | 47.30 | 0.00 |

|                                   |              |            |       |      |
|-----------------------------------|--------------|------------|-------|------|
| TRINITY_A0BJG4_PARTE/43-103       | A0BJG4.1     | PF10247.7; | 47.30 | 0.00 |
| TRINITY_I7LWC5_TETTS/371-638      | I7LWC5.1     | PF00481.19 | 47.30 | 0.00 |
| TRINITY_K1Q7Z5_CRAGI/2-58         | K1Q7Z5.1     | PF05347.13 | 47.30 | 0.00 |
| TRINITY_W4FUJ0_9STRA/146-253      | W4FUJ0.1     | PF00071.20 | 47.30 | 0.00 |
| TRINITY_A0A024TJX9_9STRA/1-173    | A0A024TJX9.1 | PF0406     | 47.30 | 0.00 |
| TRINITY_B8CBR8_THAPS/90-420       | B8CBR8.1     | PF00291.23 | 47.30 | 0.00 |
| TRINITY_L1IAI5_GUITH/36-218       | L1IAI5.1     | PF01121.18 | 47.30 | 0.00 |
| TRINITY_Q0VSF8_ALCBS/675-792      | Q0VSF8.1     | PF00072.22 | 47.30 | 0.00 |
| TRINITY_D3BA25_POLPA/354-660      | D3BA25.1     | PF05970.12 | 47.30 | 0.00 |
| TRINITY_G0QVI4_ICHMG/212-511      | G0QVI4.1     | PF03133.13 | 47.30 | 0.00 |
| TRINITY_D8LKX8_ECTSI/231-443      | D8LKX8.1     | PF00149.26 | 47.30 | 0.00 |
| TRINITY_L8GW48_ACACA/228-483      | L8GW48.1     | PF00069.23 | 47.30 | 0.00 |
| TRINITY_I7M1B3_TETTS/91-221       | I7M1B3.2     | PF00782.18 | 47.30 | 0.00 |
| TRINITY_J9EMC8_9SPIT/1395-1489    | J9EMC8.1     | PF01833.22 | 47.30 | 0.00 |
| TRINITY_A0A077ZB5_STYLE/25-119    | A0A077ZB5.1  | PF1390     | 47.30 | 0.00 |
| TRINITY_L8GNF2_ACACA/21-241       | L8GNF2.1     | PF00149.26 | 47.30 | 0.00 |
| TRINITY_V4TZR8_9ROSI/13-107       | V4TZR8.1     | PF01922.15 | 47.30 | 0.00 |
| TRINITY_I0YW63_9CHLO/16-326       | I0YW63.1     | PF00225.21 | 47.30 | 0.00 |
| TRINITY_D8UL08_VOLCA/9-201        | D8UL08.1     | PF00300.20 | 47.30 | 0.00 |
| TRINITY_D8UJD3_VOLCA/6-53         | D8UJD3.1     | PF14570.4; | 47.30 | 0.00 |
| TRINITY_Q22WQ4_TETTS/3-444        | Q22WQ4.2     | PF00022.17 | 47.30 | 0.00 |
| TRINITY_I7MHG9_TETTS/819-1072     | I7MHG9.2     | PF00233.17 | 47.30 | 0.00 |
| TRINITY_A8IRK2_CHLRE/356-957      | A8IRK2.1     | PF00328.20 | 47.30 | 0.00 |
| TRINITY_A0BLX9_PARTE/634-738      | A0BLX9.1     | PF13426.5; | 47.30 | 0.00 |
| TRINITY_A8HT27_CHLRE/2550-3400    | A8HT27.1     | PF02364.13 | 47.30 | 0.00 |
| TRINITY_D8TQS0_VOLCA/3-260        | D8TQS0.1     | PF00756.18 | 47.30 | 0.00 |
| TRINITY_A0E0L6_PARTE/109-206      | A0E0L6.1     | PF00153.25 | 47.30 | 0.00 |
| TRINITY_A8JF52_CHLRE/1721-2039    | A8JF52.1     | PF00520.29 | 47.30 | 0.00 |
| TRINITY_D8TQC8_VOLCA/57-186       | D8TQC8.1     | PF02338.17 | 47.30 | 0.00 |
| TRINITY_A0A0E9NFI9_9ASCO/26-160   | A0A0E9NFI9.1 | PF1289     | 47.30 | 0.00 |
| TRINITY_J9IMI7_9SPIT/716-901      | J9IMI7.1     | PF04983.16 | 47.30 | 0.00 |
| TRINITY_D8TZ68_VOLCA/56-151       | D8TZ68.1     | PF00153.25 | 47.30 | 0.00 |
| TRINITY_M4A3G0_XIPMA/134-562      | M4A3G0.1     | PF00654.18 | 47.30 | 0.00 |
| TRINITY_B9IJH8_POPTR/232-905      | B9IJH8.1     | PF00443.27 | 47.30 | 0.00 |
| TRINITY_A0A077ZQW9_STYLE/49-359   | A0A077ZQW9.1 | PF0024     | 47.30 | 0.00 |
| TRINITY_A8J9V7_CHLRE/33-104       | A8J9V7.1     | PF00498.24 | 47.30 | 0.00 |
| TRINITY_U3KC04_FICAL/85-321       | U3KC04.1     | PF00704.26 | 47.30 | 0.00 |
| TRINITY_E1ZF17_CHLVA/2-516        | E1ZF17.1     | PF03055.13 | 47.30 | 0.00 |
| TRINITY_A0CJY8_PARTE/436-698      | A0CJY8.1     | PF00069.23 | 47.30 | 0.00 |
| TRINITY_M5WP91_PRUPE/57-197       | M5WP91.1     | PF01597.17 | 47.30 | 0.00 |
| TRINITY_W5WA22_9PSEU/53-163       | W5WA22.1     | PF08448.8; | 47.30 | 0.00 |
| TRINITY_A8HMB1_CHLRE/5-281        | A8HMB1.1     | PF01062.19 | 47.30 | 0.00 |
| TRINITY_A8HNP6_CHLRE/11-260       | A8HNP6.1     | PF07727.12 | 47.30 | 0.00 |
| TRINITY_V6LW21_9EUKA/15-303       | V6LW21.1     | PF00069.23 | 47.30 | 0.00 |
| TRINITY_A0A068RQM9_9FUNG/885-1159 | A0A068RQM9.1 | PF0006     | 47.30 | 0.00 |
| TRINITY_Q24BS9_TETTS/921-1178     | Q24BS9.2     | PF00481.19 | 47.30 | 0.00 |
| TRINITY_A0A0M2PU93_PROHO/94-505   | A0A0M2PU93.1 | PF0001     | 47.30 | 0.00 |
| TRINITY_A0A0D2UV53_GOSRA/10-106   | A0A0D2UV53.1 | PF1279     | 47.30 | 0.00 |
| TRINITY_SODM_DEIRA/100-206        | Q9RUV2.3     | PF02777.16 | 47.30 | 0.00 |
| TRINITY_G3AYK2_CANTC/419-519      | G3AYK2.1     | PF00153.25 | 47.30 | 0.00 |
| TRINITY_A8I5Q6_CHLRE/245-370      | A8I5Q6.1     | PF00581.18 | 47.30 | 0.00 |
| TRINITY_L8GUI1_ACACA/1063-1317    | L8GUI1.1     | PF01504.16 | 47.30 | 0.00 |
| TRINITY_D8U9S9_VOLCA/599-793      | D8U9S9.1     | PF00211.18 | 47.30 | 0.00 |
| TRINITY_J9JBX5_9SPIT/149-408      | J9JBX5.1     | PF00069.23 | 47.30 | 0.00 |
| TRINITY_Q8SB62_ORYSJ/971-1085     | Q8SB62.1     | PF00665.24 | 47.30 | 0.00 |
| TRINITY_J2LGI7_9BURK/6-153        | J2LGI7.1     | PF03358.13 | 47.30 | 0.00 |
| TRINITY_W9SEV9_9ROSA/43-182       | W9SEV9.1     | PF01743.18 | 47.20 | 0.00 |
| TRINITY_K3XBG4_PYTUL/100-168      | K3XBG4.1     | PF08726.8; | 47.20 | 0.00 |
| TRINITY_I7MM31_TETTS/85-222       | I7MM31.2     | PF01529.18 | 47.20 | 0.00 |
| TRINITY_Q3SDM9_PARTE/30-193       | Q3SDM9.1     | PF00071.20 | 47.20 | 0.00 |
| TRINITY_I1ELT8_AMPQE/210-327      | I1ELT8.1     | PF03764.16 | 47.20 | 0.00 |

|                                    |                     |       |      |
|------------------------------------|---------------------|-------|------|
| TRINITY_K0KJA7_WICCF/147-254       | K0KJA7.1 PF00175.19 | 47.20 | 0.00 |
| TRINITY_A0A022RM38_ERYGU/36-166    | A0A022RM38.1 PF0078 | 47.20 | 0.00 |
| TRINITY_M1UVD9_CYAME/1-104         | M1UVD9.1 PF03656.11 | 47.20 | 0.00 |
| TRINITY_A0CWT1_PARTE/157-265       | A0CWT1.1 PF00787.22 | 47.20 | 0.00 |
| TRINITY_F1A2V0_DICPU/25-187        | F1A2V0.1 PF13532.4; | 47.20 | 0.00 |
| TRINITY_A0CEP9_PARTE/460-569       | A0CEP9.1 PF12796.5; | 47.20 | 0.00 |
| TRINITY_V4B1I8_LOTGI/477-584       | V4B1I8.1 PF00085.18 | 47.20 | 0.00 |
| TRINITY_F4PKM0_DICFS/1539-1756     | F4PKM0.1 PF16095.3; | 47.20 | 0.00 |
| TRINITY_D8G265_9CYAN/13-295        | D8G265.1 PF01007.18 | 47.20 | 0.00 |
| TRINITY_F4Q916_DICFS/16-247        | F4Q916.1 PF00378.18 | 47.20 | 0.00 |
| TRINITY_R4LFA6_9ACTN/34-164        | R4LFA6.1 PF00293.26 | 47.20 | 0.00 |
| TRINITY_A0A0A1UEQ8_ENTIV/1122-1381 | A0A0A1UEQ8.1 PF0006 | 47.20 | 0.00 |
| TRINITY_Q23AY4_TETTS/31-436        | Q23AY4.2 PF05577.10 | 47.20 | 0.00 |
| TRINITY_A0A0D2WRU5_CAPO3/136-260   | A0A0D2WRU5.1 PF0411 | 47.20 | 0.00 |
| TRINITY_A8IIR9_CHLRE/66-192        | A8IIR9.1 PF11712.6; | 47.20 | 0.00 |
| TRINITY_I7M1L3_TETTS/318-762       | I7M1L3.1 PF04053.12 | 47.20 | 0.00 |
| TRINITY_A0C6A0_PARTE/601-713       | A0C6A0.1 PF08785.9; | 47.20 | 0.00 |
| TRINITY_W7WZC8_TETTS/6-197         | W7WZC8.1 PF04072.12 | 47.20 | 0.00 |
| TRINITY_A7RTF3_NEMVE/273-427       | A7RTF3.1 PF13768.4; | 47.20 | 0.00 |
| TRINITY_Q22AW2_TETTS/85-366        | Q22AW2.1 PF00664.21 | 47.20 | 0.00 |
| TRINITY_A0DPD0_PARTE/462-730       | A0DPD0.1 PF00149.26 | 47.20 | 0.00 |
| TRINITY_A8HUF5_CHLRE/3-152         | A8HUF5.1 PF08534.8; | 47.20 | 0.00 |
| TRINITY_D3BKA1_POLPA/2-144         | D3BKA1.1 PF09801.7; | 47.20 | 0.00 |
| TRINITY_A0A0J8D496_BETVU/6-286     | A0A0J8D496.1 PF0187 | 47.20 | 0.00 |
| TRINITY_D2VRY9_NAEGR/382-533       | D2VRY9.1 PF00005.25 | 47.20 | 0.00 |
| TRINITY_A0DMK4_PARTE/24-339        | A0DMK4.1 PF03372.21 | 47.20 | 0.00 |
| TRINITY_A8IXA0_CHLRE/596-759       | A8IXA0.1 PF01554.16 | 47.20 | 0.00 |
| TRINITY_A0DIB1_PARTE/38-559        | A0DIB1.1 PF01602.18 | 47.20 | 0.00 |
| TRINITY_V4A564_LOTGI/44-223        | V4A564.1 PF00092.26 | 47.20 | 0.00 |
| TRINITY_E1ZKZ3_CHLVA/56-500        | E1ZKZ3.1 PF00083.22 | 47.20 | 0.00 |
| TRINITY_U3K101_FICAL/407-570       | U3K101.1 PF05572.11 | 47.20 | 0.00 |
| TRINITY_B3M057_DROAN/142-468       | B3M057.1 PF01074.20 | 47.20 | 0.00 |
| TRINITY_Q54VS5_DICDI/550-660       | Q54VS5.1 PF02204.16 | 47.20 | 0.00 |
| TRINITY_D8UF85_VOLCA/179-263       | D8UF85.1 PF05699.12 | 47.20 | 0.00 |
| TRINITY_G0R3R5_ICHMG/1-259         | G0R3R5.1 PF00069.23 | 47.20 | 0.00 |
| TRINITY_F4PKA1_DICFS/40-147        | F4PKA1.1 PF00307.29 | 47.20 | 0.00 |
| TRINITY_F0ZEI2_DICPU/318-489       | F0ZEI2.1 PF04377.13 | 47.20 | 0.00 |
| TRINITY_A9RX41_PHYPA/953-1080      | A9RX41.1 PF06461.9; | 47.20 | 0.00 |
| TRINITY_L8H896_ACACA/33-195        | L8H896.1 PF00071.20 | 47.20 | 0.00 |
| TRINITY_H3D6C5_TETNG/114-454       | H3D6C5.1 PF00282.17 | 47.20 | 0.00 |
| TRINITY_I7M3I9_TETTS/58-293        | I7M3I9.1 PF04176.11 | 47.20 | 0.00 |
| TRINITY_A8IPD2_CHLRE/123-314       | A8IPD2.1 PF00743.17 | 47.20 | 0.00 |
| TRINITY_D8TLN5_VOLCA/747-863       | D8TLN5.1 PF11969.6; | 47.20 | 0.00 |
| TRINITY_Q6CA40_YARLI/185-295       | Q6CA40.1 PF00188.24 | 47.20 | 0.00 |
| TRINITY_A0DB80_PARTE/91-183        | A0DB80.1 PF04777.11 | 47.20 | 0.00 |
| TRINITY_K4CP98_SOLLC/627-679       | K4CP98.1 PF02928.14 | 47.20 | 0.00 |
| TRINITY_F0ZNF5_DICPU/8-113         | F0ZNF5.1 PF12998.5; | 47.20 | 0.00 |
| TRINITY_A8JF96_CHLRE/61-351        | A8JF96.1 PF02104.13 | 47.20 | 0.00 |
| TRINITY_I7LT94_TETTS/441-529       | I7LT94.2 PF08164.10 | 47.20 | 0.00 |
| TRINITY_A8TTY1_9PROT/7-196         | A8TTY1.1 PF12007.6; | 47.20 | 0.00 |
| TRINITY_D3BM63_POLPA/430-612       | D3BM63.1 PF00326.19 | 47.20 | 0.00 |
| TRINITY_A0A077ZJP7_TRITR/54-141    | A0A077ZJP7.1 PF1364 | 47.20 | 0.00 |
| TRINITY_I7MCL9_TETTS/190-488       | I7MCL9.2 PF00648.19 | 47.20 | 0.00 |
| TRINITY_D8TY82_VOLCA/96-294        | D8TY82.1 PF00504.19 | 47.20 | 0.00 |
| TRINITY_H0ZIZ5_TAEGU/106-175       | H0ZIZ5.1 PF00076.20 | 47.20 | 0.00 |
| TRINITY_A8IT81_CHLRE/4-456         | A8IT81.1 PF13520.4; | 47.20 | 0.00 |
| TRINITY_B7G8Z0_PHATC/142-411       | B7G8Z0.1 PF00389.28 | 47.20 | 0.00 |
| TRINITY_D8TIL4_VOLCA/417-993       | D8TIL4.1 PF16969.3; | 47.20 | 0.00 |
| TRINITY_V3ZYV1_LOTGI/193-350       | V3ZYV1.1 PF00179.24 | 47.20 | 0.00 |
| TRINITY_A8HVN4_CHLRE/30-193        | A8HVN4.1 PF03067.13 | 47.20 | 0.00 |
| TRINITY_D8TPA9_VOLCA/111-230       | D8TPA9.1 PF00158.24 | 47.20 | 0.00 |

|                                  |              |            |       |      |
|----------------------------------|--------------|------------|-------|------|
| TRINITY_D8U8W2_VOLCA/347-627     | D8U8W2.1     | PF07842.10 | 47.20 | 0.00 |
| TRINITY_G4LZB0_SCHMA/44-134      | G4LZB0.1     | PF02214.20 | 47.20 | 0.00 |
| TRINITY_E1ZIB9_CHLVA/81-428      | E1ZIB9.1     | PF00459.23 | 47.20 | 0.00 |
| TRINITY_G3WIQ8_SARHA/3-212       | G3WIQ8.1     | PF00091.23 | 47.20 | 0.00 |
| TRINITY_M2Y8Z7_GALSU/16-374      | M2Y8Z7.1     | PF04928.15 | 47.20 | 0.00 |
| TRINITY_K9XCD8_9CHRO/1102-1339   | K9XCD8.1     | PF07993.10 | 47.20 | 0.00 |
| TRINITY_A0BRA8_PARTE/7-108       | A0BRA8.1     | PF00168.28 | 47.10 | 0.00 |
| TRINITY_A0A078ID03_BRANA/153-246 | A0A078ID03.1 | PF0015     | 47.10 | 0.00 |
| TRINITY_A8HZR1_CHLRE/17086-17364 | A8HZR1.1     | PF00109.24 | 47.10 | 0.00 |
| TRINITY_L8H6V3_ACACA/29-430      | L8H6V3.1     | PF00450.20 | 47.10 | 0.00 |
| TRINITY_I7LXH2_TETTS/36-330      | I7LXH2.2     | PF09423.8; | 47.10 | 0.00 |
| TRINITY_V8PAJ1_OPHHA/50-136      | V8PAJ1.1     | PF02970.14 | 47.10 | 0.00 |
| TRINITY_J9I165_9SPIT/605-907     | J9I165.1     | PF03372.21 | 47.10 | 0.00 |
| TRINITY_A0A068NVT3_9BACT/763-877 | A0A068NVT3.1 | PF0007     | 47.10 | 0.00 |
| TRINITY_I7LXC8_TETTS/30-186      | I7LXC8.2     | PF01124.16 | 47.10 | 0.00 |
| TRINITY_C3Z2P3_BRAFL/166-302     | C3Z2P3.1     | PF02877.12 | 47.10 | 0.00 |
| TRINITY_A0A0N0VH21_9TRYP/4-258   | A0A0N0VH21.1 | PF0006     | 47.10 | 0.00 |
| TRINITY_C4QXV0_PICPG/30-147      | C4QXV0.1     | PF01042.19 | 47.10 | 0.00 |
| TRINITY_S6E3Q8_ZYGB2/57-352      | S6E3Q8.1     | PF00176.21 | 47.10 | 0.00 |
| TRINITY_W6MFQ4_9ASCO/7-198       | W6MFQ4.1     | PF13462.4; | 47.10 | 0.00 |
| TRINITY_I7LU42_TETTS/219-308     | I7LU42.1     | PF00153.25 | 47.10 | 0.00 |
| TRINITY_R1EJ93_EMIHU/552-944     | R1EJ93.1     | PF07394.10 | 47.10 | 0.00 |
| TRINITY_I7MJZ2_TETTS/407-470     | I7MJZ2.2     | PF01485.19 | 47.10 | 0.00 |
| TRINITY_B4GLJ8_DROPE/29-367      | B4GLJ8.1     | PF03265.13 | 47.10 | 0.00 |
| TRINITY_U6JEY5_ECHGR/5-177       | U6JEY5.1     | PF00025.19 | 47.10 | 0.00 |
| TRINITY_I0Z703_9CHLO/261-382     | I0Z703.1     | PF03953.15 | 47.10 | 0.00 |
| TRINITY_H9GCJ4_ANOCA/1-73        | H9GCJ4.1     | PF07061.9; | 47.10 | 0.00 |
| TRINITY_M2XSQ2_GALSU/201-287     | M2XSQ2.1     | PF01388.19 | 47.10 | 0.00 |
| TRINITY_V4B961_LOTGI/162-496     | V4B961.1     | PF00443.27 | 47.10 | 0.00 |
| TRINITY_A0A098EUG0_9BACI/4-122   | A0A098EUG0.1 | PF1323     | 47.10 | 0.00 |
| TRINITY_A8JD70_CHLRE/16-151      | A8JD70.1     | PF04048.12 | 47.10 | 0.00 |
| TRINITY_S2JN63_MUCC1/4-378       | S2JN63.1     | PF01238.19 | 47.10 | 0.00 |
| TRINITY_V8PGX3_OPHHA/6-119       | V8PGX3.1     | PF00696.26 | 47.10 | 0.00 |
| TRINITY_I7LUE5_TETTS/10-734      | I7LUE5.2     | PF03635.15 | 47.10 | 0.00 |
| TRINITY_F4PIZ1_DICFS/122-267     | F4PIZ1.1     | PF13091.4; | 47.10 | 0.00 |
| TRINITY_L8GPA5_ACACA/108-239     | L8GPA5.1     | PF04116.11 | 47.10 | 0.00 |
| TRINITY_G0QK71_ICHMG/834-1225    | G0QK71.1     | PF06957.9; | 47.10 | 0.00 |
| TRINITY_L8HIU8_ACACA/24-185      | L8HIU8.1     | PF01327.19 | 47.10 | 0.00 |
| TRINITY_Q247R2_TETTS/942-1215    | Q247R2.2     | PF16212.3; | 47.10 | 0.00 |
| TRINITY_A0BFR4_PARTE/111-265     | A0BFR4.1     | PF00650.18 | 47.10 | 0.00 |
| TRINITY_Q24GJ3_TETTS/1773-1849   | Q24GJ3.2     | PF16561.3; | 47.10 | 0.00 |
| TRINITY_A0A0P7V782_9TELE/147-328 | A0A0P7V782.1 | PF0139     | 47.10 | 0.00 |
| TRINITY_L9JBY7_TUPCH/882-984     | L9JBY7.1     | PF00005.25 | 47.10 | 0.00 |
| TRINITY_J9JYY0_ACYPI/27-195      | J9JYY0.1     | PF00043.23 | 47.10 | 0.00 |
| TRINITY_A0A0D2WLU9_CAPO3/139-291 | A0A0D2WLU9.1 | PF1384     | 47.10 | 0.00 |
| TRINITY_L1ILZ4_GUIH/20-180       | L1ILZ4.1     | PF00071.20 | 47.10 | 0.00 |
| TRINITY_E5A958_LEPMJ/739-844     | E5A958.1     | PF04003.10 | 47.10 | 0.00 |
| TRINITY_A0D650_PARTE/108-461     | A0D650.1     | PF00282.17 | 47.10 | 0.00 |
| TRINITY_A0A087SU48_AUXPR/329-587 | A0A087SU48.1 | PF0771     | 47.10 | 0.00 |
| TRINITY_A0A067R9Q6_ZOONE/8-135   | A0A067R9Q6.1 | PF0493     | 47.10 | 0.00 |
| TRINITY_A0A077ZV76_STYLE/219-298 | A0A077ZV76.1 | PF1279     | 47.10 | 0.00 |
| TRINITY_F2U0Y4_SALR5/31-184      | F2U0Y4.1     | PF09295.8; | 47.10 | 0.00 |
| TRINITY_J9IZH8_9SPIT/189-265     | J9IZH8.1     | PF14360.4; | 47.10 | 0.00 |
| TRINITY_A4RW13_OSTLU/32-429      | A4RW13.1     | PF01055.24 | 47.10 | 0.00 |
| TRINITY_D8TM14_VOLCA/44-264      | D8TM14.1     | PF01036.16 | 47.10 | 0.00 |
| TRINITY_A0BN51_PARTE/187-314     | A0BN51.1     | PF00107.24 | 47.10 | 0.00 |
| TRINITY_I1QCX5_ORYGL/137-224     | I1QCX5.1     | PF00736.17 | 47.10 | 0.00 |
| TRINITY_A8IE07_CHLRE/28-226      | A8IE07.1     | PF02492.17 | 47.10 | 0.00 |
| TRINITY_W6FUH4_NODSP/15-183      | W6FUH4.1     | PF13385.4; | 47.10 | 0.00 |
| TRINITY_F0ZJL1_DICPU/4-73        | F0ZJL1.1     | PF07258.12 | 47.10 | 0.00 |
| TRINITY_I7LU42_TETTS/123-212     | I7LU42.1     | PF00153.25 | 47.10 | 0.00 |

|                                  |                     |       |      |
|----------------------------------|---------------------|-------|------|
| TRINITY_G0QS15_ICHMG/223-300     | G0QS15.1 PF00789.18 | 47.10 | 0.00 |
| TRINITY_A0D2Z5_PARTE/151-399     | A0D2Z5.1 PF01457.14 | 47.10 | 0.00 |
| TRINITY_L8H1Q6_ACACA/35-109      | L8H1Q6.1 PF02148.17 | 47.10 | 0.00 |
| TRINITY_A0A015K277_9GLOM/181-420 | A0A015K277.1 PF0012 | 47.10 | 0.00 |
| TRINITY_A9T5C7_PHYPA/343-459     | A9T5C7.1 PF03109.14 | 47.10 | 0.00 |
| TRINITY_A0CDK4_PARTE/404-736     | A0CDK4.1 PF00702.24 | 47.10 | 0.00 |
| TRINITY_I0YR44_9CHLO/12-1196     | I0YR44.1 PF02463.17 | 47.10 | 0.00 |
| TRINITY_H1VKX7_COLHI/177-458     | H1VKX7.1 PF02540.15 | 47.10 | 0.00 |
| TRINITY_I0YK30_9CHLO/217-372     | I0YK30.1 PF00293.26 | 47.10 | 0.00 |
| TRINITY_K9SS25_9SYNE/45-161      | K9SS25.1 PF04536.12 | 47.10 | 0.00 |
| TRINITY_I7M2R5_TETTS/19-173      | I7M2R5.2 PF00406.20 | 47.10 | 0.00 |
| TRINITY_D8TND4_VOLCA/49-240      | D8TND4.1 PF00856.26 | 47.10 | 0.00 |
| TRINITY_A0A0G4F821_9ALVE/39-330  | A0A0G4F821.1 PF0006 | 47.10 | 0.00 |
| TRINITY_U6PGJ8_HAECO/38-118      | U6PGJ8.1 PF01883.17 | 47.10 | 0.00 |
| TRINITY_D7FN74_ECTSI/48-147      | D7FN74.1 PF00083.22 | 47.10 | 0.00 |
| TRINITY_A8IT81_CHLRE/4-456       | A8IT81.1 PF13520.4; | 47.10 | 0.00 |
| TRINITY_E1ZGI7_CHLVA/158-356     | E1ZGI7.1 PF04989.10 | 47.10 | 0.00 |
| TRINITY_H3H0L4_PHYRM/68-590      | H3H0L4.1 PF03639.11 | 47.10 | 0.00 |
| TRINITY_A8JJ05_CHLRE/562-633     | A8JJ05.1 PF05699.12 | 47.10 | 0.00 |
| TRINITY_A8I2C0_CHLRE/1-171       | A8I2C0.1 PF05620.9; | 47.10 | 0.00 |
| TRINITY_A0A0D8PXB3_9GAMM/581-694 | A0A0D8PXB3.1 PF0251 | 47.00 | 0.00 |
| TRINITY_A0A0G4EYQ6_9ALVE/5-181   | A0A0G4EYQ6.1 PF0087 | 47.00 | 0.00 |
| TRINITY_I7MA61_TETTS/288-628     | I7MA61.1 PF02841.12 | 47.00 | 0.00 |
| TRINITY_G0QV43_ICHMG/249-568     | G0QV43.1 PF04515.10 | 47.00 | 0.00 |
| TRINITY_A4VDY4_TETTS/34-116      | A4VDY4.1 PF08240.10 | 47.00 | 0.00 |
| TRINITY_E6SJG6_THEM7/272-355     | E6SJG6.1 PF06071.11 | 47.00 | 0.00 |
| TRINITY_A0A0N4Y4L7_NIPBR/185-334 | A0A0N4Y4L7.1 PF0104 | 47.00 | 0.00 |
| TRINITY_A0A078ASQ4_STYLE/1-375   | A0A078ASQ4.1 PF0002 | 47.00 | 0.00 |
| TRINITY_A0A0G4J6M2_PLABS/10-171  | A0A0G4J6M2.1 PF0007 | 47.00 | 0.00 |
| TRINITY_A0A0M0K766_9EUKA/14-174  | A0A0M0K766.1 PF0324 | 47.00 | 0.00 |
| TRINITY_A0A067CDN1_SAPPC/56-432  | A0A067CDN1.1 PF1362 | 47.00 | 0.00 |
| TRINITY_A0DPQ3_PARTE/89-206      | A0DPQ3.1 PF01909.21 | 47.00 | 0.00 |
| TRINITY_A0CVZ1_PARTE/75-272      | A0CVZ1.1 PF02096.18 | 47.00 | 0.00 |
| TRINITY_A0A068RST3_9FUNG/46-164  | A0A068RST3.1 PF0413 | 47.00 | 0.00 |
| TRINITY_K9WVK1_9NOST/2149-2386   | K9WVK1.1 PF07993.10 | 47.00 | 0.00 |
| TRINITY_L8HGG6_ACACA/132-402     | L8HGG6.1 PF03372.21 | 47.00 | 0.00 |
| TRINITY_F4Q1R8_DICFS/16-344      | F4Q1R8.1 PF00503.18 | 47.00 | 0.00 |
| TRINITY_A0A075ANC9_9FUNG/8-264   | A0A075ANC9.1 PF0006 | 47.00 | 0.00 |
| TRINITY_A0A0J8CCV8_BETVU/1-132   | A0A0J8CCV8.1 PF0169 | 47.00 | 0.00 |
| TRINITY_A0A0D2VT98_CAPO3/389-590 | A0A0D2VT98.1 PF0273 | 47.00 | 0.00 |
| TRINITY_A0A0D2WRW2_CAPO3/74-406  | A0A0D2WRW2.1 PF0197 | 47.00 | 0.00 |
| TRINITY_A8J3P1_CHLRE/954-1161    | A8J3P1.1 PF00211.18 | 47.00 | 0.00 |
| TRINITY_A8JFA0_CHLRE/6-129       | A8JFA0.1 PF01417.18 | 47.00 | 0.00 |
| TRINITY_C5KYR6_PERM5/167-351     | C5KYR6.1 PF13868.4; | 47.00 | 0.00 |
| TRINITY_C1MZX9_MICPC/195-329     | C1MZX9.1 PF05517.10 | 47.00 | 0.00 |
| TRINITY_A0A0J8EDR7_BETVU/401-548 | A0A0J8EDR7.1 PF0081 | 47.00 | 0.00 |
| TRINITY_A0A067KN01_JATCU/413-773 | A0A067KN01.1 PF0070 | 47.00 | 0.00 |
| TRINITY_Q246C6_TETTS/4-223       | Q246C6.1 PF00300.20 | 47.00 | 0.00 |
| TRINITY_I0Z838_9CHLO/271-504     | I0Z838.1 PF00149.26 | 47.00 | 0.00 |
| TRINITY_Q22NW8_TETTS/199-479     | Q22NW8.2 PF06098.9; | 47.00 | 0.00 |
| TRINITY_A8JD26_CHLRE/31-191      | A8JD26.1 PF01554.16 | 47.00 | 0.00 |
| TRINITY_B6QSQ9_TALMQ/136-379     | B6QSQ9.1 PF12706.5; | 47.00 | 0.00 |
| TRINITY_I0YVQ8_9CHLO/75-367      | I0YVQ8.1 PF03372.21 | 47.00 | 0.00 |
| TRINITY_I0YM78_9CHLO/8-231       | I0YM78.1 PF00780.20 | 47.00 | 0.00 |
| TRINITY_I0YR65_9CHLO/69-283      | I0YR65.1 PF01633.18 | 47.00 | 0.00 |
| TRINITY_D3B0Y8_POLPA/74-258      | D3B0Y8.1 PF08857.9; | 47.00 | 0.00 |
| TRINITY_F2TZL1_SALR5/109-381     | F2TZL1.1 PF04041.11 | 47.00 | 0.00 |
| TRINITY_E9EDL0_METAQ/44-330      | E9EDL0.1 PF00264.18 | 47.00 | 0.00 |
| TRINITY_A0A0B4H7V2_9HYPO/227-516 | A0A0B4H7V2.1 PF0012 | 47.00 | 0.00 |
| TRINITY_E1ZE61_CHLVA/105-410     | E1ZE61.1 PF00443.27 | 47.00 | 0.00 |
| TRINITY_L8HLC2_ACACA/17-345      | L8HLC2.1 PF00503.18 | 47.00 | 0.00 |



|                                  |              |            |       |      |
|----------------------------------|--------------|------------|-------|------|
| TRINITY_C3YPL1_BRAFL/9-386       | C3YPL1.1     | PF01433.18 | 47.00 | 0.00 |
| TRINITY_H3HA27_PHYRM/82-199      | H3HA27.1     | PF00665.24 | 47.00 | 0.00 |
| TRINITY_DEGP2_ARATH/121-308      | O82261.2     | PF00089.24 | 47.00 | 0.00 |
| TRINITY_G0QN83_ICHMG/542-647     | G0QN83.1     | PF07717.14 | 47.00 | 0.00 |
| TRINITY_J9G2B2_9SPIT/13-164      | J9G2B2.1     | PF01124.16 | 47.00 | 0.00 |
| TRINITY_V4LXM5_EUTSA/193-367     | V4LXM5.1     | PF00022.17 | 47.00 | 0.00 |
| TRINITY_D3B9V6_POLPA/831-1080    | D3B9V6.1     | PF07714.15 | 47.00 | 0.00 |
| TRINITY_Q5TKD7_ORYSJ/846-1091    | Q5TKD7.1     | PF07727.12 | 47.00 | 0.00 |
| TRINITY_D8TVP6_VOLCA/9-279       | D8TVP6.1     | PF03291.14 | 47.00 | 0.00 |
| TRINITY_D0NBG3_PHYIT/336-495     | D0NBG3.1     | PF16796.3; | 47.00 | 0.00 |
| TRINITY_I7LUW4_TETTS/744-850     | I7LUW4.2     | PF02847.15 | 47.00 | 0.00 |
| TRINITY_A9V2U7_MONBE/303-718     | A9V2U7.1     | PF01266.22 | 47.00 | 0.00 |
| TRINITY_A8HPK0_CHLRE/62-165      | A8HPK0.1     | PF08241.10 | 47.00 | 0.00 |
| TRINITY_D8TPW2_VOLCA/405-522     | D8TPW2.1     | PF07500.12 | 47.00 | 0.00 |
| TRINITY_D8UEK5_VOLCA/70-191      | D8UEK5.1     | PF00781.22 | 47.00 | 0.00 |
| TRINITY_H2XP71_CIOIN/399-482     | H2XP71.1     | PF00439.23 | 47.00 | 0.00 |
| TRINITY_D8TZU6_VOLCA/420-780     | D8TZU6.1     | PF00155.19 | 47.00 | 0.00 |
| TRINITY_D8SEV5_SELML/124-975     | D8SEV5.1     | PF00311.15 | 47.00 | 0.00 |
| TRINITY_LIAS_CHLRE/53-236        | A8JGF7.1     | PF04055.19 | 47.00 | 0.00 |
| TRINITY_A8J7M9_CHLRE/742-1038    | A8J7M9.1     | PF00069.23 | 47.00 | 0.00 |
| TRINITY_Q3SD10_PARTE/7-191       | Q3SD10.1     | PF00025.19 | 47.00 | 0.00 |
| TRINITY_A0CK29_PARTE/31-245      | A0CK29.1     | PF01027.18 | 47.00 | 0.00 |
| TRINITY_A0CG00_PARTE/11-106      | A0CG00.1     | PF01230.21 | 46.90 | 0.00 |
| TRINITY_J9IE32_9SPIT/16-80       | J9IE32.1     | PF01918.19 | 46.90 | 0.00 |
| TRINITY_A0A067QRL2_ZOONE/3-213   | A0A067QRL2.1 | PF0009     | 46.90 | 0.00 |
| TRINITY_L8GTY3_ACACA/3-81        | L8GTY3.1     | PF16511.3; | 46.90 | 0.00 |
| TRINITY_A0A075AZD4_9FUNG/14-188  | A0A075AZD4.1 | PF0222     | 46.90 | 0.00 |
| TRINITY_R1DMU8_EMIHU/62-422      | R1DMU8.1     | PF07394.10 | 46.90 | 0.00 |
| TRINITY_W4YX96_STRPU/218-379     | W4YX96.1     | PF05188.15 | 46.90 | 0.00 |
| TRINITY_L8WVS7_THACA/438-564     | L8WVS7.1     | PF00176.21 | 46.90 | 0.00 |
| TRINITY_I7LXP5_TETTS/139-427     | I7LXP5.2     | PF00122.18 | 46.90 | 0.00 |
| TRINITY_D2VDY2_NAEGR/834-985     | D2VDY2.1     | PF01699.22 | 46.90 | 0.00 |
| TRINITY_F0ZC70_DICPU/196-325     | F0ZC70.1     | PF00782.18 | 46.90 | 0.00 |
| TRINITY_F0VMP6_NEOCL/39-200      | F0VMP6.1     | PF13847.4; | 46.90 | 0.00 |
| TRINITY_Q54UM3_DICDI/35-284      | Q54UM3.1     | PF01048.18 | 46.90 | 0.00 |
| TRINITY_R4LFA6_9ACTN/34-164      | R4LFA6.1     | PF00293.26 | 46.90 | 0.00 |
| TRINITY_S8CMD2_9LAMI/36-166      | S8CMD2.1     | PF00782.18 | 46.90 | 0.00 |
| TRINITY_L8GKH0_ACACA/49-150      | L8GKH0.1     | PF13600.4; | 46.90 | 0.00 |
| TRINITY_D8LJN0_ECTSI/87-261      | D8LJN0.1     | PF04053.12 | 46.90 | 0.00 |
| TRINITY_I7MJK6_TETTS/611-875     | I7MJK6.1     | PF00481.19 | 46.90 | 0.00 |
| TRINITY_A0A024UKA9_9STRA/421-527 | A0A024UKA9.1 | PF0065     | 46.90 | 0.00 |
| TRINITY_C1EFA8_MICSR/1-272       | C1EFA8.1     | PF04997.10 | 46.90 | 0.00 |
| TRINITY_G0R646_ICHMG/745-1019    | G0R646.1     | PF00664.21 | 46.90 | 0.00 |
| TRINITY_A0CTS6_PARTE/568-858     | A0CTS6.1     | PF01237.16 | 46.90 | 0.00 |
| TRINITY_D2VIR9_NAEGR/12-171      | D2VIR9.1     | PF00071.20 | 46.90 | 0.00 |
| TRINITY_H3C425_TETNG/9-149       | H3C425.1     | PF04603.10 | 46.90 | 0.00 |
| TRINITY_B0W9I3_CULQU/211-318     | B0W9I3.1     | PF00651.29 | 46.90 | 0.00 |
| TRINITY_F0ZYR6_DICPU/124-420     | F0ZYR6.1     | PF00069.23 | 46.90 | 0.00 |
| TRINITY_L8GQG3_ACACA/1-193       | L8GQG3.1     | PF04148.11 | 46.90 | 0.00 |
| TRINITY_J9IT22_9SPIT/499-822     | J9IT22.1     | PF00702.24 | 46.90 | 0.00 |
| TRINITY_D8TRL5_VOLCA/234-457     | D8TRL5.1     | PF00520.29 | 46.90 | 0.00 |
| TRINITY_A0A0D2WQD1_CAPO3/65-259  | A0A0D2WQD1.1 | PF0010     | 46.90 | 0.00 |
| TRINITY_L9LDS6_TUPCH/20-143      | L9LDS6.1     | PF04263.14 | 46.90 | 0.00 |
| TRINITY_L8H892_ACACA/48-115      | L8H892.1     | PF00505.17 | 46.90 | 0.00 |
| TRINITY_A0E806_PARTE/2-134       | A0E806.1     | PF07047.10 | 46.90 | 0.00 |
| TRINITY_W6FUH4_NODSP/15-183      | W6FUH4.1     | PF13385.4; | 46.90 | 0.00 |
| TRINITY_Q9FWI2_ORYSJ/795-1030    | Q9FWI2.2     | PF07727.12 | 46.90 | 0.00 |
| TRINITY_I7MDT2_TETTS/149-278     | I7MDT2.1     | PF00107.24 | 46.90 | 0.00 |
| TRINITY_Q22NV2_TETTS/1650-1768   | Q22NV2.1     | PF08683.9; | 46.90 | 0.00 |
| TRINITY_G0QT52_ICHMG/1139-1415   | G0QT52.1     | PF00520.29 | 46.90 | 0.00 |
| TRINITY_D3B1P0_POLPA/183-439     | D3B1P0.1     | PF07714.15 | 46.90 | 0.00 |

|                                    |                     |       |      |
|------------------------------------|---------------------|-------|------|
| TRINITY_B6QR46_TALMQ/3-65          | B6QR46.1 PF14497.4; | 46.90 | 0.00 |
| TRINITY_A0A087SD81_AUXPR/312-540   | A0A087SD81.1 PF0578 | 46.90 | 0.00 |
| TRINITY_L8GD19_ACACA/407-451       | L8GD19.1 PF13639.4; | 46.90 | 0.00 |
| TRINITY_D8TT91_VOLCA/32-164        | D8TT91.1 PF00583.23 | 46.90 | 0.00 |
| TRINITY_C1FIS7_MICSR/830-1238      | C1FIS7.1 PF08393.11 | 46.90 | 0.00 |
| TRINITY_T1FQ89_HELRO/187-525       | T1FQ89.1 PF06602.12 | 46.90 | 0.00 |
| TRINITY_D2VJC3_NAEGR/5-177         | D2VJC3.1 PF00025.19 | 46.90 | 0.00 |
| TRINITY_A0D515_PARTE/43-239        | A0D515.1 PF00149.26 | 46.90 | 0.00 |
| TRINITY_A8IRX8_CHLRE/440-520       | A8IRX8.1 PF00789.18 | 46.90 | 0.00 |
| TRINITY_C4LZL0_ENTHI/154-328       | C4LZL0.1 PF00350.21 | 46.90 | 0.00 |
| TRINITY_L8H676_ACACA/180-264       | L8H676.1 PF03439.11 | 46.90 | 0.00 |
| TRINITY_Q22R76_TETTS/156-952       | Q22R76.2 PF04762.10 | 46.90 | 0.00 |
| TRINITY_A0A0E0NVU7_ORYRU/96-256    | A0A0E0NVU7.1 PF0141 | 46.90 | 0.00 |
| TRINITY_I0YQL8_9CHLO/1474-1869     | I0YQL8.1 PF00632.23 | 46.90 | 0.00 |
| TRINITY_E1VHL4_9GAMM/921-1033      | E1VHL4.1 PF00072.22 | 46.90 | 0.00 |
| TRINITY_K1ZH36_9BACT/100-185       | K1ZH36.1 PF04488.13 | 46.90 | 0.00 |
| TRINITY_Q54A44_CYAME/3-377         | Q54A44.1 PF00022.17 | 46.90 | 0.00 |
| TRINITY_A0A0N5A8P3_9BILA/8-221     | A0A0N5A8P3.1 PF0113 | 46.90 | 0.00 |
| TRINITY_A8HP62_CHLRE/179-430       | A8HP62.1 PF05548.9; | 46.90 | 0.00 |
| TRINITY_D8U9S9_VOLCA/599-793       | D8U9S9.1 PF00211.18 | 46.90 | 0.00 |
| TRINITY_E1ZSA7_CHLVA/196-504       | E1ZSA7.1 PF04030.12 | 46.90 | 0.00 |
| TRINITY_A0A067CV48_SAPPC/96-289    | A0A067CV48.1 PF0281 | 46.90 | 0.00 |
| TRINITY_Q23QD2_TETTS/366-575       | Q23QD2.2 PF00566.16 | 46.90 | 0.00 |
| TRINITY_R7KSH0_9FIRM/287-491       | R7KSH0.1 PF01144.21 | 46.80 | 0.00 |
| TRINITY_A0E189_PARTE/446-495       | A0E189.1 PF13920.4; | 46.80 | 0.00 |
| TRINITY_A0A059LK99_9CHLO/143-244   | A0A059LK99.1 PF1349 | 46.80 | 0.00 |
| TRINITY_J9J9I6_9SPIT/56-413        | J9J9I6.1 PF15902.3; | 46.80 | 0.00 |
| TRINITY_M1VLE0_CYAME/17-81         | M1VLE0.1 PF13432.4; | 46.80 | 0.00 |
| TRINITY_A0A097EGI2_9SPHN/51-177    | A0A097EGI2.1 PF0018 | 46.80 | 0.00 |
| TRINITY_I7LX25_TETTS/48-128        | I7LX25.1 PF09398.8; | 46.80 | 0.00 |
| TRINITY_T1KPW7_TETUR/7-120         | T1KPW7.1 PF01412.16 | 46.80 | 0.00 |
| TRINITY_K1R1A1_CRAGI/479-586       | K1R1A1.1 PF01315.20 | 46.80 | 0.00 |
| TRINITY_B3L3A9_PLAKH/641-702       | B3L3A9.1 PF12906.5; | 46.80 | 0.00 |
| TRINITY_W5MXN2_LEPOC/10-224        | W5MXN2.1 PF00702.24 | 46.80 | 0.00 |
| TRINITY_L8GTK1_ACACA/146-395       | L8GTK1.1 PF07714.15 | 46.80 | 0.00 |
| TRINITY_J9IBV7_9SPIT/751-1030      | J9IBV7.1 PF00122.18 | 46.80 | 0.00 |
| TRINITY_G5A9X4_PHYSP/228-479       | G5A9X4.1 PF07714.15 | 46.80 | 0.00 |
| TRINITY_G0R6D5_ICHMG/134-280       | G0R6D5.1 PF03031.16 | 46.80 | 0.00 |
| TRINITY_A0A024UFZ7_9STRA/209-678   | A0A024UFZ7.1 PF0143 | 46.80 | 0.00 |
| TRINITY_A0A0A1P476_9FUNG/139-258   | A0A0A1P476.1 PF0062 | 46.80 | 0.00 |
| TRINITY_Q23Q42_TETTS/887-1010      | Q23Q42.2 PF02518.24 | 46.80 | 0.00 |
| TRINITY_C3ZVM6_BRAFL/123-491       | C3ZVM6.1 PF01546.26 | 46.80 | 0.00 |
| TRINITY_Q42420_MAIZE/14-73         | Q42420.1 PF00280.16 | 46.80 | 0.00 |
| TRINITY_I1XN16_METNJ/199-323       | I1XN16.1 PF10017.7; | 46.80 | 0.00 |
| TRINITY_A9SBN3_PHYPA/3-195         | A9SBN3.1 PF15251.4; | 46.80 | 0.00 |
| TRINITY_A0A078B349_STYLE/444-804   | A0A078B349.1 PF0070 | 46.80 | 0.00 |
| TRINITY_A0BDL2_PARTE/6-167         | A0BDL2.1 PF00071.20 | 46.80 | 0.00 |
| TRINITY_Q965M4_CAEEL/312-493       | Q965M4.1 PF02145.13 | 46.80 | 0.00 |
| TRINITY_A0A077ZVZ5_STYLE/1412-1476 | A0A077ZVZ5.1 PF1349 | 46.80 | 0.00 |
| TRINITY_A8I356_CHLRE/64-445        | A8I356.1 PF01490.16 | 46.80 | 0.00 |
| TRINITY_L8GZ65_ACACA/20-84         | L8GZ65.1 PF13499.4; | 46.80 | 0.00 |
| TRINITY_A0A024ULS4_9STRA/32-248    | A0A024ULS4.1 PF0223 | 46.80 | 0.00 |
| TRINITY_L8GVQ3_ACACA/116-380       | L8GVQ3.1 PF07766.11 | 46.80 | 0.00 |
| TRINITY_A0DTA6_PARTE/314-534       | A0DTA6.1 PF07002.14 | 46.80 | 0.00 |
| TRINITY_A0A0D2WRI8_CAPO3/947-1198  | A0A0D2WRI8.1 PF0771 | 46.80 | 0.00 |
| TRINITY_D8LWE9_BLAHO/35-189        | D8LWE9.1 PF01652.16 | 46.80 | 0.00 |
| TRINITY_J9I8E2_9SPIT/28-186        | J9I8E2.1 PF00071.20 | 46.80 | 0.00 |
| TRINITY_I1FZZ4_AMPQE/233-565       | I1FZZ4.1 PF05028.12 | 46.80 | 0.00 |
| TRINITY_B7PNU9_IXOSC/20-82         | B7PNU9.1 PF00226.29 | 46.80 | 0.00 |
| TRINITY_A0A078F732_BRANA/8-194     | A0A078F732.1 PF0117 | 46.80 | 0.00 |
| TRINITY_F0VL60_NEOCL/26-105        | F0VL60.1 PF01282.17 | 46.80 | 0.00 |

|                                   |              |            |       |      |
|-----------------------------------|--------------|------------|-------|------|
| TRINITY_L7U7N8_MYXSD/32-303       | L7U7N8.1     | PF00664.21 | 46.80 | 0.00 |
| TRINITY_W5JKD9_ANODA/60-214       | W5JKD9.1     | PF13847.4; | 46.80 | 0.00 |
| TRINITY_F0ZJ03_DICPU/294-386      | F0ZJ03.1     | PF00169.27 | 46.80 | 0.00 |
| TRINITY_F0ZJC1_DICPU/222-612      | F0ZJC1.1     | PF00916.18 | 46.80 | 0.00 |
| TRINITY_S2JH36_MUCC1/189-444      | S2JH36.1     | PF08145.10 | 46.80 | 0.00 |
| TRINITY_K3X2Y4_PYTUL/147-383      | K3X2Y4.1     | PF00122.18 | 46.80 | 0.00 |
| TRINITY_L8GWQ5_ACACA/986-1235     | L8GWQ5.1     | PF07714.15 | 46.80 | 0.00 |
| TRINITY_I1FHP7_AMPQE/40-314       | I1FHP7.1     | PF00664.21 | 46.80 | 0.00 |
| TRINITY_D7G211_ECTSI/397-445      | D7G211.1     | PF00097.23 | 46.80 | 0.00 |
| TRINITY_A0A087SML6_AUXPR/83-264   | A0A087SML6.1 | PF1346     | 46.80 | 0.00 |
| TRINITY_A0A087SQT5_AUXPR/380-517  | A0A087SQT5.1 | PF0273     | 46.80 | 0.00 |
| TRINITY_W7XI32_TETTS/8-116        | W7XI32.1     | PF01412.16 | 46.80 | 0.00 |
| TRINITY_G0R6G3_ICHMG/54-245       | G0R6G3.1     | PF01145.23 | 46.80 | 0.00 |
| TRINITY_A0A062XE64_LEUPS/12-303   | A0A062XE64.1 | PF0769     | 46.80 | 0.00 |
| TRINITY_D8TQT5_VOLCA/180-508      | D8TQT5.1     | PF00082.20 | 46.80 | 0.00 |
| TRINITY_W7X4T7_TETTS/1-455        | W7X4T7.1     | PF00171.20 | 46.80 | 0.00 |
| TRINITY_A8HQ11_CHLRE/395-521      | A8HQ11.1     | PF05118.13 | 46.80 | 0.00 |
| TRINITY_U2E7K8_9BACT/35-264       | U2E7K8.1     | PF02522.12 | 46.80 | 0.00 |
| TRINITY_A0A024WRW2_PLAFA/3-212    | A0A024WRW2.1 | PF0009     | 46.80 | 0.00 |
| TRINITY_W2PUW6_PHYPN/2-375        | W2PUW6.1     | PF00022.17 | 46.80 | 0.00 |
| TRINITY_D8U886_VOLCA/105-335      | D8U886.1     | PF01728.17 | 46.80 | 0.00 |
| TRINITY_H6NE65_9BACL/18-262       | H6NE65.1     | PF08450.10 | 46.80 | 0.00 |
| TRINITY_M7NLM8_PNEMU/837-954      | M7NLM8.1     | PF04408.21 | 46.80 | 0.00 |
| TRINITY_A8JIJ9_CHLRE/11-261       | A8JIJ9.1     | PF00069.23 | 46.80 | 0.00 |
| TRINITY_I0YQM6_9CHLO/1-105        | I0YQM6.1     | PF00085.18 | 46.80 | 0.00 |
| TRINITY_G0QVG7_ICHMG/239-716      | G0QVG7.1     | PF04791.14 | 46.80 | 0.00 |
| TRINITY_A0A096QB17_MAIZE/144-427  | A0A096QB17.1 | PF0045     | 46.70 | 0.00 |
| TRINITY_G0QR55_ICHMG/103-222      | G0QR55.1     | PF02518.24 | 46.70 | 0.00 |
| TRINITY_I7MMW7_TETTS/113-305      | I7MMW7.2     | PF00270.27 | 46.70 | 0.00 |
| TRINITY_I7MHF3_TETTS/13-173       | I7MHF3.1     | PF00071.20 | 46.70 | 0.00 |
| TRINITY_L1LFE5_THEEQ/14-268       | L1LFE5.1     | PF00069.23 | 46.70 | 0.00 |
| TRINITY_A9TXN9_PHYPA/196-318      | A9TXN9.1     | PF05971.10 | 46.70 | 0.00 |
| TRINITY_F8VPK0_MOUSE/10-84        | F8VPK0.1     | PF13432.4; | 46.70 | 0.00 |
| TRINITY_A0A087SMY6_AUXPR/803-1077 | A0A087SMY6.1 | PF0066     | 46.70 | 0.00 |
| TRINITY_W7X292_TETTS/58-150       | W7X292.1     | PF16455.3; | 46.70 | 0.00 |
| TRINITY_I4BY13_ANAMD/456-543      | I4BY13.1     | PF00581.18 | 46.70 | 0.00 |
| TRINITY_Q23QF2_TETTS/248-571      | Q23QF2.2     | PF03133.13 | 46.70 | 0.00 |
| TRINITY_F6YGC4_XENTR/241-331      | F6YGC4.1     | PF08743.8; | 46.70 | 0.00 |
| TRINITY_C3XZI6_BRAFL/131-196      | C3XZI6.1     | PF12352.6; | 46.70 | 0.00 |
| TRINITY_Q22EI4_TETTS/243-433      | Q22EI4.2     | PF05193.19 | 46.70 | 0.00 |
| TRINITY_G0R080_ICHMG/9-179        | G0R080.1     | PF00300.20 | 46.70 | 0.00 |
| TRINITY_L1I5M4_GUITH/5-195        | L1I5M4.1     | PF10294.7; | 46.70 | 0.00 |
| TRINITY_D8TXZ2_VOLCA/49-343       | D8TXZ2.1     | PF03151.14 | 46.70 | 0.00 |
| TRINITY_H8KY18_SOLCM/14-377       | H8KY18.1     | PF01266.22 | 46.70 | 0.00 |
| TRINITY_PTP2_DICDI/56-346         | P34138.1     | PF00102.25 | 46.70 | 0.00 |
| TRINITY_F6GD80_LACS5/19-92        | F6GD80.1     | PF09907.7; | 46.70 | 0.00 |
| TRINITY_M5GGP1_DACSP/1-147        | M5GGP1.1     | PF00125.22 | 46.70 | 0.00 |
| TRINITY_L8H2B5_ACACA/449-511      | L8H2B5.1     | PF13424.4; | 46.70 | 0.00 |
| TRINITY_Q23QF2_TETTS/248-571      | Q23QF2.2     | PF03133.13 | 46.70 | 0.00 |
| TRINITY_A8JGS5_CHLRE/358-511      | A8JGS5.1     | PF13692.4; | 46.70 | 0.00 |
| TRINITY_D0NLH6_PHYIT/126-232      | D0NLH6.1     | PF00307.29 | 46.70 | 0.00 |
| TRINITY_F8W2M8_DANRE/214-518      | F8W2M8.1     | PF00082.20 | 46.70 | 0.00 |
| TRINITY_D8TTA0_VOLCA/12-77        | D8TTA0.1     | PF11470.6; | 46.70 | 0.00 |
| TRINITY_F6QDG2_HORSE/10-84        | F6QDG2.1     | PF13432.4; | 46.70 | 0.00 |
| TRINITY_L8HGG1_ACACA/468-729      | L8HGG1.1     | PF00069.23 | 46.70 | 0.00 |
| TRINITY_D8UIN7_VOLCA/64-172       | D8UIN7.1     | PF04800.10 | 46.70 | 0.00 |
| TRINITY_E1ZGR2_CHLVA/377-472      | E1ZGR2.1     | PF03129.18 | 46.70 | 0.00 |
| TRINITY_A0DMF5_PARTE/180-251      | A0DMF5.1     | PF01485.19 | 46.70 | 0.00 |
| TRINITY_D8TN27_VOLCA/564-828      | D8TN27.1     | PF00069.23 | 46.70 | 0.00 |
| TRINITY_D8U8K1_VOLCA/1-246        | D8U8K1.1     | PF05096.10 | 46.70 | 0.00 |
| TRINITY_B9H8D7_POPTR/18-295       | B9H8D7.2     | PF13621.4; | 46.70 | 0.00 |

|                                   |              |            |       |      |
|-----------------------------------|--------------|------------|-------|------|
| TRINITY_D8TNE1_VOLCA/86-242       | D8TNE1.1     | PF00650.18 | 46.70 | 0.00 |
| TRINITY_F0ZBL5_DICPU/1981-2245    | F0ZBL5.1     | PF07714.15 | 46.70 | 0.00 |
| TRINITY_A8J165_CHLRE/133-193      | A8J165.1     | PF04117.10 | 46.70 | 0.00 |
| TRINITY_M5FYW4_DACSP/6-170        | M5FYW4.1     | PF00071.20 | 46.70 | 0.00 |
| TRINITY_M2X230_GALSU/401-613      | M2X230.1     | PF07859.11 | 46.70 | 0.00 |
| TRINITY_E1ZCE5_CHLVA/104-280      | E1ZCE5.1     | PF00551.17 | 46.70 | 0.00 |
| TRINITY_E1Z8Q3_CHLVA/99-250       | E1Z8Q3.1     | PF08389.10 | 46.70 | 0.00 |
| TRINITY_U3JF38_FICAL/133-194      | U3JF38.1     | PF04117.10 | 46.70 | 0.00 |
| TRINITY_D3BKY1_POLPA/404-538      | D3BKY1.1     | PF07534.14 | 46.70 | 0.00 |
| TRINITY_L8H7D9_ACACA/29-322       | L8H7D9.1     | PF00850.17 | 46.70 | 0.00 |
| TRINITY_A8IDW0_CHLRE/76-192       | A8IDW0.1     | PF10236.7; | 46.70 | 0.00 |
| TRINITY_A0A0G4ENJ3_9ALVE/137-405  | A0A0G4ENJ3.1 | PF1338     | 46.70 | 0.00 |
| TRINITY_I1GSS6_BRADI/9-114        | I1GSS6.1     | PF05915.10 | 46.70 | 0.00 |
| TRINITY_Q23QF2_TETTS/248-571      | Q23QF2.2     | PF03133.13 | 46.70 | 0.00 |
| TRINITY_D8THD3_VOLCA/212-384      | D8THD3.1     | PF00685.25 | 46.70 | 0.00 |
| TRINITY_H3HAM5_PHYRM/167-517      | H3HAM5.1     | PF00069.23 | 46.70 | 0.00 |
| TRINITY_D3B844_POLPA/641-686      | D3B844.1     | PF13920.4; | 46.70 | 0.00 |
| TRINITY_A8J2X9_CHLRE/125-257      | A8J2X9.1     | PF00504.19 | 46.70 | 0.00 |
| TRINITY_A0A0G4FY22_9ALVE/62-543   | A0A0G4FY22.1 | PF0050     | 46.70 | 0.00 |
| TRINITY_A8J0Z0_CHLRE/6-151        | A8J0Z0.1     | PF05517.10 | 46.70 | 0.00 |
| TRINITY_D3BSK9_POLPA/389-510      | D3BSK9.1     | PF01569.19 | 46.70 | 0.00 |
| TRINITY_Q22TA6_TETTS/252-367      | Q22TA6.2     | PF01416.18 | 46.70 | 0.00 |
| TRINITY_L8HDF4_ACACA/508-622      | L8HDF4.1     | PF08477.11 | 46.70 | 0.00 |
| TRINITY_A8HXD3_CHLRE/54-176       | A8HXD3.1     | PF02996.15 | 46.70 | 0.00 |
| TRINITY_A8J937_CHLRE/104-222      | A8J937.1     | PF00188.24 | 46.70 | 0.00 |
| TRINITY_A0BMS3_PARTE/40-160       | A0BMS3.1     | PF01597.17 | 46.70 | 0.00 |
| TRINITY_Q24I26_TETTS/15-212       | Q24I26.2     | PF16213.3; | 46.70 | 0.00 |
| TRINITY_L0A9E0_DEIPD/46-181       | L0A9E0.1     | PF09346.8; | 46.70 | 0.00 |
| TRINITY_A0A078AZ38_STYLE/853-1037 | A0A078AZ38.1 | PF0068     | 46.60 | 0.00 |
| TRINITY_B2AXL9_PODAN/47-390       | B2AXL9.1     | PF00150.16 | 46.60 | 0.00 |
| TRINITY_I7MJV0_TETTS/846-955      | I7MJV0.2     | PF00069.23 | 46.60 | 0.00 |
| TRINITY_F4PQG8_DICFS/394-556      | F4PQG8.1     | PF03666.11 | 46.60 | 0.00 |
| TRINITY_K3W6E1_PYTUL/147-285      | K3W6E1.1     | PF17207.1; | 46.60 | 0.00 |
| TRINITY_D3HKH9_LEGLN/14-149       | D3HKH9.1     | PF00583.23 | 46.60 | 0.00 |
| TRINITY_E0VTM7_PEDHC/5-96         | E0VTM7.1     | PF03647.11 | 46.60 | 0.00 |
| TRINITY_Q22NP9_TETTS/339-441      | Q22NP9.2     | PF02204.16 | 46.60 | 0.00 |
| TRINITY_E2BCV0_HARSA/63-172       | E2BCV0.1     | PF07992.12 | 46.60 | 0.00 |
| TRINITY_J9FR16_9SPIT/32-356       | J9FR16.1     | PF04041.11 | 46.60 | 0.00 |
| TRINITY_I0YM25_9CHLO/47-337       | I0YM25.1     | PF03151.14 | 46.60 | 0.00 |
| TRINITY_A8I9R7_CHLRE/283-767      | A8I9R7.1     | PF01432.18 | 46.60 | 0.00 |
| TRINITY_L1IVP8_GUIITH/472-575     | L1IVP8.1     | PF14874.4; | 46.60 | 0.00 |
| TRINITY_A8J6P8_CHLRE/44-163       | A8J6P8.1     | PF07542.9; | 46.60 | 0.00 |
| TRINITY_TM120_DICDI/34-361        | Q54IK2.1     | PF07851.11 | 46.60 | 0.00 |
| TRINITY_J9IMA0_9SPIT/532-645      | J9IMA0.1     | PF02518.24 | 46.60 | 0.00 |
| TRINITY_K1Q3Y8_CRAGI/69-219       | K1Q3Y8.1     | PF07534.14 | 46.60 | 0.00 |
| TRINITY_D8TVT9_VOLCA/521-846      | D8TVT9.1     | PF03399.14 | 46.60 | 0.00 |
| TRINITY_E3FRS4_STIAD/140-391      | E3FRS4.1     | PF03372.21 | 46.60 | 0.00 |
| TRINITY_A8J8Y2_CHLRE/797-855      | A8J8Y2.1     | PF02358.14 | 46.60 | 0.00 |
| TRINITY_I0YMK7_9CHLO/41-221       | I0YMK7.1     | PF07714.15 | 46.60 | 0.00 |
| TRINITY_V8P9E3_OPHHA/130-207      | V8P9E3.1     | PF03061.20 | 46.60 | 0.00 |
| TRINITY_C3ZM89_BRAFL/5-354        | C3ZM89.1     | PF16317.3; | 46.60 | 0.00 |
| TRINITY_V6S777_9FLAO/37-449       | V6S777.1     | PF00266.17 | 46.60 | 0.00 |
| TRINITY_D8RI41_SELML/492-592      | D8RI41.1     | PF00168.28 | 46.60 | 0.00 |
| TRINITY_A8IMU3_CHLRE/397-552      | A8IMU3.1     | PF15964.3; | 46.60 | 0.00 |
| TRINITY_A8JD56_CHLRE/362-522      | A8JD56.1     | PF05698.12 | 46.60 | 0.00 |
| TRINITY_D8SM72_SELML/3-368        | D8SM72.1     | PF01494.17 | 46.60 | 0.00 |
| TRINITY_D8UHH6_VOLCA/99-319       | D8UHH6.1     | PF00573.20 | 46.60 | 0.00 |
| TRINITY_A0A024UTX6_9STRA/17-316   | A0A024UTX6.1 | PF0844     | 46.60 | 0.00 |
| TRINITY_I0Z703_9CHLO/261-382      | I0Z703.1     | PF03953.15 | 46.60 | 0.00 |
| TRINITY_K1QA57_CRAGI/136-268      | K1QA57.1     | PF03464.13 | 46.60 | 0.00 |
| TRINITY_E1ZN16_CHLVA/784-966      | E1ZN16.1     | PF05193.19 | 46.60 | 0.00 |

|                                  |                     |       |      |
|----------------------------------|---------------------|-------|------|
| TRINITY_DUS1_ARATH/58-188        | Q9ZR37.1 PF00782.18 | 46.60 | 0.00 |
| TRINITY_A8J4N7_CHLRE/147-340     | A8J4N7.1 PF00481.19 | 46.60 | 0.00 |
| TRINITY_A0A058Z3I3_9EUKA/133-262 | A0A058Z3I3.1 PF0000 | 46.60 | 0.00 |
| TRINITY_A0A084FUX2_9PEZI/172-302 | A0A084FUX2.1 PF0000 | 46.60 | 0.00 |
| TRINITY_I0YR17_9CHLO/1-190       | I0YR17.1 PF00106.23 | 46.60 | 0.00 |
| TRINITY_A0A078A5D1_STYLE/12-162  | A0A078A5D1.1 PF0112 | 46.60 | 0.00 |
| TRINITY_A0A087SEK8_AUXPR/17-445  | A0A087SEK8.1 PF0089 | 46.60 | 0.00 |
| TRINITY_SACC_BACSU/39-349        | P05656.1 PF00251.18 | 46.60 | 0.00 |
| TRINITY_A8HNP6_CHLRE/11-260      | A8HNP6.1 PF07727.12 | 46.60 | 0.00 |
| TRINITY_Q22D58_TETTS/15-329      | Q22D58.1 PF00248.19 | 46.60 | 0.00 |
| TRINITY_A6DLQ3_9BACT/17-244      | A6DLQ3.1 PF01738.16 | 46.60 | 0.00 |
| TRINITY_Q23CV4_TETTS/238-295     | Q23CV4.1 PF13921.4; | 46.60 | 0.00 |
| TRINITY_A0A0D2QGM6_GOSRA/224-355 | A0A0D2QGM6.1 PF0004 | 46.60 | 0.00 |
| TRINITY_I0Z9F5_9CHLO/485-642     | I0Z9F5.1 PF07731.12 | 46.60 | 0.00 |
| TRINITY_A8HNP6_CHLRE/11-260      | A8HNP6.1 PF07727.12 | 46.60 | 0.00 |
| TRINITY_E1ZGV4_CHLVA/261-464     | E1ZGV4.1 PF01331.17 | 46.60 | 0.00 |
| TRINITY_D8TR79_VOLCA/50-236      | D8TR79.1 PF05197.11 | 46.60 | 0.00 |
| TRINITY_A0A0G2ZK96_9DELTA/98-408 | A0A0G2ZK96.1 PF0008 | 46.60 | 0.00 |
| TRINITY_A0BGA7_PARTE/140-295     | A0BGA7.1 PF13847.4; | 46.60 | 0.00 |
| TRINITY_D8UAV2_VOLCA/5-78        | D8UAV2.1 PF08783.9; | 46.60 | 0.00 |
| TRINITY_D8TY55_VOLCA/1-316       | D8TY55.1 PF08392.10 | 46.60 | 0.00 |
| TRINITY_L0PBL5_PNEJ8/22-125      | L0PBL5.1 PF13344.4; | 46.60 | 0.00 |
| TRINITY_D8U3Q0_VOLCA/57-316      | D8U3Q0.1 PF00069.23 | 46.60 | 0.00 |
| TRINITY_A0CPN7_PARTE/24-297      | A0CPN7.1 PF00069.23 | 46.60 | 0.00 |
| TRINITY_A0CUS6_PARTE/513-811     | A0CUS6.1 PF03372.21 | 46.50 | 0.00 |
| TRINITY_I7MM85_TETTS/11-175      | I7MM85.1 PF13460.4; | 46.50 | 0.00 |
| TRINITY_D2W1D5_NAEGR/81-231      | D2W1D5.1 PF00782.18 | 46.50 | 0.00 |
| TRINITY_I7LZN5_TETTS/536-926     | I7LZN5.2 PF00368.16 | 46.50 | 0.00 |
| TRINITY_G1P929_MYOLU/9-432       | G1P929.1 PF05577.10 | 46.50 | 0.00 |
| TRINITY_G0QX53_ICHMG/28-565      | G0QX53.1 PF00995.21 | 46.50 | 0.00 |
| TRINITY_M3ZQ64_XIPMA/212-456     | M3ZQ64.1 PF00566.16 | 46.50 | 0.00 |
| TRINITY_E1ZJM7_CHLVA/29-208      | E1ZJM7.1 PF00265.16 | 46.50 | 0.00 |
| TRINITY_F4Q9T6_DICFS/1388-1946   | F4Q9T6.1 PF06920.11 | 46.50 | 0.00 |
| TRINITY_F6TYN3_CIOIN/5-177       | F6TYN3.2 PF00025.19 | 46.50 | 0.00 |
| TRINITY_R4YTU2_OLEAN/390-509     | R4YTU2.1 PF02518.24 | 46.50 | 0.00 |
| TRINITY_G4VST9_SCHMA/28-420      | G4VST9.1 PF00270.27 | 46.50 | 0.00 |
| TRINITY_L8H349_ACACA/353-471     | L8H349.1 PF05064.11 | 46.50 | 0.00 |
| TRINITY_I7M706_TETTS/16-370      | I7M706.2 PF00225.21 | 46.50 | 0.00 |
| TRINITY_A0A0G4J5Z2_PLABS/225-268 | A0A0G4J5Z2.1 PF1363 | 46.50 | 0.00 |
| TRINITY_A0DRJ0_PARTE/9-177       | A0DRJ0.1 PF00188.24 | 46.50 | 0.00 |
| TRINITY_A0A059LFA5_9CHLO/31-127  | A0A059LFA5.1 PF1279 | 46.50 | 0.00 |
| TRINITY_A0A0M0JSR8_9EUKA/1-158   | A0A0M0JSR8.1 PF0975 | 46.50 | 0.00 |
| TRINITY_A0EBT4_PARTE/159-442     | A0EBT4.1 PF04712.10 | 46.50 | 0.00 |
| TRINITY_A0A067L493_JATCU/87-130  | A0A067L493.1 PF1363 | 46.50 | 0.00 |
| TRINITY_A0A0C4EPX9_PUCT1/384-738 | A0A0C4EPX9.1 PF0070 | 46.50 | 0.00 |
| TRINITY_W4XFF3_STRPU/197-480     | W4XFF3.1 PF01457.14 | 46.50 | 0.00 |
| TRINITY_D8TEF7_SELML/494-813     | D8TEF7.1 PF01504.16 | 46.50 | 0.00 |
| TRINITY_G4ZY58_PHYSP/182-609     | G4ZY58.1 PF05185.14 | 46.50 | 0.00 |
| TRINITY_G0QNP0_ICHMG/104-376     | G0QNP0.1 PF00233.17 | 46.50 | 0.00 |
| TRINITY_JMJCC_DICDI/9-293        | Q54LV7.2 PF13621.4; | 46.50 | 0.00 |
| TRINITY_F0Z7K0_DICPU/185-314     | F0Z7K0.1 PF00241.18 | 46.50 | 0.00 |
| TRINITY_A8JG06_CHLRE/384-671     | A8JG06.1 PF13949.4; | 46.50 | 0.00 |
| TRINITY_H2MVB9_ORYLA/351-580     | H2MVB9.1 PF02836.15 | 46.50 | 0.00 |
| TRINITY_A0A059LFH9_9CHLO/84-174  | A0A059LFH9.1 PF0133 | 46.50 | 0.00 |
| TRINITY_D8UKC2_VOLCA/33-146      | D8UKC2.1 PF01966.20 | 46.50 | 0.00 |
| TRINITY_D3BGV1_POLPA/114-495     | D3BGV1.1 PF07690.14 | 46.50 | 0.00 |
| TRINITY_A0E2J1_PARTE/100-358     | A0E2J1.1 PF00069.23 | 46.50 | 0.00 |
| TRINITY_D8TZM6_VOLCA/8-296       | D8TZM6.1 PF00704.26 | 46.50 | 0.00 |
| TRINITY_I0ZAZ9_9CHLO/77-250      | I0ZAZ9.1 PF04548.14 | 46.50 | 0.00 |
| TRINITY_J9JQJ9_ACYPI/168-488     | J9JQJ9.1 PF00069.23 | 46.50 | 0.00 |
| TRINITY_A8IVV3_CHLRE/21-122      | A8IVV3.1 PF13967.4; | 46.50 | 0.00 |

|                                  |              |            |       |      |
|----------------------------------|--------------|------------|-------|------|
| TRINITY_D8U9S9_VOLCA/599-793     | D8U9S9.1     | PF00211.18 | 46.50 | 0.00 |
| TRINITY_J9EXT5_9SPIT/263-461     | J9EXT5.1     | PF00117.26 | 46.50 | 0.00 |
| TRINITY_G0QKW1_ICHMG/111-281     | G0QKW1.1     | PF00092.26 | 46.50 | 0.00 |
| TRINITY_D2VTM9_NAEGR/497-639     | D2VTM9.1     | PF00644.18 | 46.50 | 0.00 |
| TRINITY_F4PY90_DICFS/118-394     | F4PY90.1     | PF00122.18 | 46.50 | 0.00 |
| TRINITY_B1WYH5_CYAA5/33-300      | B1WYH5.1     | PF00756.18 | 46.50 | 0.00 |
| TRINITY_A5DMW0_PICGU/24-166      | A5DMW0.2     | PF10604.7; | 46.50 | 0.00 |
| TRINITY_A0A0D2W2W6_GOSRA/101-248 | A0A0D2W2W6.1 | PF00081    | 46.50 | 0.00 |
| TRINITY_F0ZQX2_DICPU/45-354      | F0ZQX2.1     | PF00176.21 | 46.50 | 0.00 |
| TRINITY_I1IAH5_BRADI/1140-1407   | I1IAH5.1     | PF00856.26 | 46.50 | 0.00 |
| TRINITY_A0E9F9_PARTE/141-258     | A0E9F9.1     | PF12146.6; | 46.50 | 0.00 |
| TRINITY_D2VGY2_NAEGR/306-540     | D2VGY2.1     | PF06314.9; | 46.50 | 0.00 |
| TRINITY_W4FKN9_9STRA/2-119       | W4FKN9.1     | PF13806.4; | 46.50 | 0.00 |
| TRINITY_L8GQB4_ACACA/35-395      | L8GQB4.1     | PF01433.18 | 46.50 | 0.00 |
| TRINITY_L8GYB8_ACACA/73-218      | L8GYB8.1     | PF01794.17 | 46.50 | 0.00 |
| TRINITY_A0A061FSJ2_THECC/107-524 | A0A061FSJ2.1 | PF00086    | 46.50 | 0.00 |
| TRINITY_A9SNE7_PHYPA/3-88        | A9SNE7.1     | PF13417.4; | 46.50 | 0.00 |
| TRINITY_C1DYL3_MICSR/88-241      | C1DYL3.1     | PF00730.23 | 46.50 | 0.00 |
| TRINITY_A0A0D2URP3_CAPO3/339-607 | A0A0D2URP3.1 | PF00066    | 46.50 | 0.00 |
| TRINITY_A0A077ZR29_STYLE/143-358 | A0A077ZR29.1 | PF00011    | 46.50 | 0.00 |
| TRINITY_I0Z0Z9_9CHLO/830-1158    | I0Z0Z9.1     | PF01326.17 | 46.50 | 0.00 |
| TRINITY_Q22AR0_TETTS/17-145      | Q22AR0.1     | PF13529.4; | 46.50 | 0.00 |
| TRINITY_A8IBB6_CHLRE/141-344     | A8IBB6.1     | PF00211.18 | 46.50 | 0.00 |
| TRINITY_V5ED09_PSEBG/5-177       | V5ED09.1     | PF00025.19 | 46.50 | 0.00 |
| TRINITY_K3WZX0_PYTUL/2-110       | K3WZX0.1     | PF10256.7; | 46.40 | 0.00 |
| TRINITY_A4VD00_TETTS/44-155      | A4VD00.1     | PF09184.9; | 46.40 | 0.00 |
| TRINITY_L0D875_SINAD/48-362      | L0D875.1     | PF07995.9; | 46.40 | 0.00 |
| TRINITY_C1N3Y2_MICPC/168-228     | C1N3Y2.1     | PF12656.5; | 46.40 | 0.00 |
| TRINITY_Q54P73_DICDI/98-339      | Q54P73.1     | PF01636.21 | 46.40 | 0.00 |
| TRINITY_A0DZY7_PARTE/71-141      | A0DZY7.1     | PF10601.7; | 46.40 | 0.00 |
| TRINITY_G0QTH6_ICHMG/49-264      | G0QTH6.1     | PF01556.16 | 46.40 | 0.00 |
| TRINITY_I7LY25_TETTS/21-290      | I7LY25.2     | PF00069.23 | 46.40 | 0.00 |
| TRINITY_Q22WJ4_TETTS/279-392     | Q22WJ4.2     | PF12796.5; | 46.40 | 0.00 |
| TRINITY_I7M3I8_TETTS/279-794     | I7M3I8.1     | PF01055.24 | 46.40 | 0.00 |
| TRINITY_M4U5L4_9GAMM/2-203       | M4U5L4.1     | PF03932.12 | 46.40 | 0.00 |
| TRINITY_A0A0D2X4A7_CAPO3/26-399  | A0A0D2X4A7.1 | PF1014     | 46.40 | 0.00 |
| TRINITY_Q23QF5_TETTS/161-229     | Q23QF5.2     | PF00505.17 | 46.40 | 0.00 |
| TRINITY_D2V4M3_NAEGR/31-141      | D2V4M3.1     | PF15891.3; | 46.40 | 0.00 |
| TRINITY_J9HY65_9SPIT/97-190      | J9HY65.1     | PF12894.5; | 46.40 | 0.00 |
| TRINITY_F4PVG2_DICFS/12-140      | F4PVG2.1     | PF00782.18 | 46.40 | 0.00 |
| TRINITY_L8GLW0_ACACA/708-815     | L8GLW0.1     | PF00651.29 | 46.40 | 0.00 |
| TRINITY_Q54F12_DICDI/45-224      | Q54F12.1     | PF10294.7; | 46.40 | 0.00 |
| TRINITY_F1A131_DICPU/7-91        | F1A131.1     | PF04000.13 | 46.40 | 0.00 |
| TRINITY_F4Q2P4_DICFS/1-246       | F4Q2P4.1     | PF02121.16 | 46.40 | 0.00 |
| TRINITY_A0DZ98_PARTE/7-67        | A0DZ98.1     | PF04193.12 | 46.40 | 0.00 |
| TRINITY_W6FUH4_NODSP/15-183      | W6FUH4.1     | PF13385.4; | 46.40 | 0.00 |
| TRINITY_D8TMY6_VOLCA/279-490     | D8TMY6.1     | PF07714.15 | 46.40 | 0.00 |
| TRINITY_Q23ZF6_TETTS/19-311      | Q23ZF6.1     | PF01008.15 | 46.40 | 0.00 |
| TRINITY_R1FX63_EMIHU/5-180       | R1FX63.1     | PF00929.22 | 46.40 | 0.00 |
| TRINITY_D8TJS0_VOLCA/25-143      | D8TJS0.1     | PF07986.10 | 46.40 | 0.00 |
| TRINITY_C1AE84_GEMAT/24-380      | C1AE84.1     | PF01244.19 | 46.40 | 0.00 |
| TRINITY_M0S0V4_MUSAM/34-174      | M0S0V4.1     | PF11938.6; | 46.40 | 0.00 |
| TRINITY_C3Z710_BRAFL/85-154      | C3Z710.1     | PF00076.20 | 46.40 | 0.00 |
| TRINITY_U3I811_ANAPL/80-1064     | U3I811.1     | PF03813.12 | 46.40 | 0.00 |
| TRINITY_D8UA72_VOLCA/1-143       | D8UA72.1     | PF00588.17 | 46.40 | 0.00 |
| TRINITY_U6LP07_9EIME/637-706     | U6LP07.1     | PF00076.20 | 46.40 | 0.00 |
| TRINITY_M4XKR5_PSEDE/34-276      | M4XKR5.1     | PF00561.18 | 46.40 | 0.00 |
| TRINITY_B1XK59_SYNP2/12-118      | B1XK59.1     | PF00583.23 | 46.40 | 0.00 |
| TRINITY_S2JLV9_MUCC1/30-309      | S2JLV9.1     | PF01256.15 | 46.40 | 0.00 |
| TRINITY_J9J0E5_9SPIT/15-172      | J9J0E5.1     | PF00071.20 | 46.40 | 0.00 |
| TRINITY_L8GN51_ACACA/128-249     | L8GN51.1     | PF01648.18 | 46.40 | 0.00 |

|                                    |                     |       |      |
|------------------------------------|---------------------|-------|------|
| TRINITY_A0A024U6X7_9STRA/1427-1840 | A0A024U6X7.1 PF0170 | 46.40 | 0.00 |
| TRINITY_Q22L23_TETTS/258-471       | Q22L23.2 PF00667.18 | 46.40 | 0.00 |
| TRINITY_I7LW24_TETTS/45-152        | I7LW24.1 PF00970.22 | 46.40 | 0.00 |
| TRINITY_A0A067NSE5_PLEOS/285-490   | A0A067NSE5.1 PF0106 | 46.40 | 0.00 |
| TRINITY_A0A061F304_THECC/9-89      | A0A061F304.1 PF0870 | 46.40 | 0.00 |
| TRINITY_D8UAK9_VOLCA/119-585       | D8UAK9.1 PF14643.4; | 46.40 | 0.00 |
| TRINITY_A0A0D2X4U8_CAPO3/256-518   | A0A0D2X4U8.1 PF0055 | 46.40 | 0.00 |
| TRINITY_D5CQ56_SIDLE/33-306        | D5CQ56.1 PF00664.21 | 46.40 | 0.00 |
| TRINITY_G0QKB3_ICHMG/70-207        | G0QKB3.1 PF05832.10 | 46.40 | 0.00 |
| TRINITY_L8HMK7_ACACA/1726-1906     | L8HMK7.1 PF00617.17 | 46.40 | 0.00 |
| TRINITY_I7MLX1_TETTS/25-110        | I7MLX1.1 PF09409.8; | 46.40 | 0.00 |
| TRINITY_A0CJY8_PARTE/436-698       | A0CJY8.1 PF00069.23 | 46.40 | 0.00 |
| TRINITY_A4VCQ0_TETTS/13-99         | A4VCQ0.1 PF10217.7; | 46.40 | 0.00 |
| TRINITY_D8TRM3_VOLCA/14-214        | D8TRM3.1 PF05753.12 | 46.40 | 0.00 |
| TRINITY_A0A068SAP9_9FUNG/188-562   | A0A068SAP9.1 PF0197 | 46.40 | 0.00 |
| TRINITY_L8GWR3_ACACA/24-134        | L8GWR3.1 PF02893.18 | 46.40 | 0.00 |
| TRINITY_M2W0Y8_GALSU/92-216        | M2W0Y8.1 PF09377.8; | 46.40 | 0.00 |
| TRINITY_A4VDY4_TETTS/184-313       | A4VDY4.1 PF00107.24 | 46.40 | 0.00 |
| TRINITY_A0A067MUR2_9HOMO/49-211    | A0A067MUR2.1 PF0007 | 46.40 | 0.00 |
| TRINITY_E1Z6X0_CHLVA/69-304        | E1Z6X0.1 PF05368.11 | 46.40 | 0.00 |
| TRINITY_A0A0D2U4E0_CAPO3/653-889   | A0A0D2U4E0.1 PF0106 | 46.40 | 0.00 |
| TRINITY_A0A0G4J2X3_PLABS/751-865   | A0A0G4J2X3.1 PF0066 | 46.40 | 0.00 |
| TRINITY_T0RT30_9STRA/311-475       | T0RT30.1 PF00004.27 | 46.40 | 0.00 |
| TRINITY_I0ZAW8_9CHLO/10-318        | I0ZAW8.1 PF14647.4; | 46.40 | 0.00 |
| TRINITY_Q234Z9_TETTS/1982-2340     | Q234Z9.2 PF04054.13 | 46.40 | 0.00 |
| TRINITY_A9TZT0_PHYPA/35-465        | A9TZT0.1 PF00860.18 | 46.40 | 0.00 |
| TRINITY_A8J3I8_CHLRE/22-137        | A8J3I8.1 PF07386.9; | 46.40 | 0.00 |
| TRINITY_L8GCE7_ACACA/550-749       | L8GCE7.1 PF13087.4; | 46.40 | 0.00 |
| TRINITY_F4PDN3_BATDJ/6-85          | F4PDN3.1 PF08571.8; | 46.40 | 0.00 |
| TRINITY_L8HLG8_ACACA/502-679       | L8HLG8.1 PF00621.18 | 46.30 | 0.00 |
| TRINITY_V4L7Y5_EUTSA/13-121        | V4L7Y5.1 PF04081.11 | 46.30 | 0.00 |
| TRINITY_I7LW70_TETTS/31-393        | I7LW70.2 PF07690.14 | 46.30 | 0.00 |
| TRINITY_K1QEN4_CRAGI/565-816       | K1QEN4.1 PF00664.21 | 46.30 | 0.00 |
| TRINITY_A0A0K8NYB5_9BURK/22-285    | A0A0K8NYB5.1 PF1373 | 46.30 | 0.00 |
| TRINITY_Q23TC9_TETTS/457-522       | Q23TC9.2 PF01485.19 | 46.30 | 0.00 |
| TRINITY_F8Q1Q8_SERL3/1049-1119     | F8Q1Q8.1 PF14668.4; | 46.30 | 0.00 |
| TRINITY_F1A0E5_DICPU/83-317        | F1A0E5.1 PF09749.7; | 46.30 | 0.00 |
| TRINITY_A0A0N4UXM7_ENTVE/77-172    | A0A0N4UXM7.1 PF1279 | 46.30 | 0.00 |
| TRINITY_D8SGK2_SELML/212-377       | D8SGK2.1 PF01467.24 | 46.30 | 0.00 |
| TRINITY_U9SP46_RHIID/7-70          | U9SP46.1 PF00076.20 | 46.30 | 0.00 |
| TRINITY_F4Q789_DICFS/9-129         | F4Q789.1 PF00241.18 | 46.30 | 0.00 |
| TRINITY_K9RX27_SYNP3/7-119         | K9RX27.1 PF00583.23 | 46.30 | 0.00 |
| TRINITY_D8LCC9_ECTSI/93-216        | D8LCC9.1 PF04784.12 | 46.30 | 0.00 |
| TRINITY_G0QV97_ICHMG/256-492       | G0QV97.1 PF14309.4; | 46.30 | 0.00 |
| TRINITY_G0QTH6_ICHMG/49-264        | G0QTH6.1 PF01556.16 | 46.30 | 0.00 |
| TRINITY_J9J144_9SPIT/92-349        | J9J144.1 PF00069.23 | 46.30 | 0.00 |
| TRINITY_Q240Q4_TETTS/176-339       | Q240Q4.3 PF16189.3; | 46.30 | 0.00 |
| TRINITY_A0DP15_PARTE/106-362       | A0DP15.1 PF00069.23 | 46.30 | 0.00 |
| TRINITY_L8H9P5_ACACA/1162-1679     | L8H9P5.1 PF06920.11 | 46.30 | 0.00 |
| TRINITY_B4J7Z6_DROGR/290-495       | B4J7Z6.1 PF00106.23 | 46.30 | 0.00 |
| TRINITY_A9RJ33_PHYPA/30-164        | A9RJ33.1 PF01694.20 | 46.30 | 0.00 |
| TRINITY_A0A087SAY9_AUXPR/242-338   | A0A087SAY9.1 PF1049 | 46.30 | 0.00 |
| TRINITY_A0A0A2W5J0_BEABA/658-966   | A0A0A2W5J0.1 PF0111 | 46.30 | 0.00 |
| TRINITY_U9UT29_RHIID/176-382       | U9UT29.1 PF04389.15 | 46.30 | 0.00 |
| TRINITY_D8M708_BLAHO/4-279         | D8M708.1 PF14938.4; | 46.30 | 0.00 |
| TRINITY_D8TRM0_VOLCA/12-148        | D8TRM0.1 PF04603.10 | 46.30 | 0.00 |
| TRINITY_D8T2B5_SELML/134-422       | D8T2B5.1 PF06814.11 | 46.30 | 0.00 |
| TRINITY_H2YP11_CIOSA/230-438       | H2YP11.1 PF00005.25 | 46.30 | 0.00 |
| TRINITY_D3BVD2_POLPA/1706-1973     | D3BVD2.1 PF07714.15 | 46.30 | 0.00 |
| TRINITY_G0QXS8_ICHMG/51-117        | G0QXS8.1 PF08583.8; | 46.30 | 0.00 |
| TRINITY_A7SNI1_NEMVE/16-69         | A7SNI1.1 PF05676.11 | 46.30 | 0.00 |

|                                  |                     |       |      |
|----------------------------------|---------------------|-------|------|
| TRINITY_A9RKZ5_PHYPA/61-400      | A9RKZ5.1 PF04137.13 | 46.30 | 0.00 |
| TRINITY_F4C2F9_SPHS2/61-294      | F4C2F9.1 PF00487.22 | 46.30 | 0.00 |
| TRINITY_D8UGM7_VOLCA/6-420       | D8UGM7.1 PF03547.16 | 46.30 | 0.00 |
| TRINITY_A0A061F080_THECC/36-252  | A0A061F080.1 PF0113 | 46.30 | 0.00 |
| TRINITY_D3AX40_POLPA/311-727     | D3AX40.1 PF00083.22 | 46.30 | 0.00 |
| TRINITY_A8IRL1_CHLRE/164-299     | A8IRL1.1 PF00892.18 | 46.30 | 0.00 |
| TRINITY_L8GYS6_ACACA/75-348      | L8GYS6.1 PF08423.9; | 46.30 | 0.00 |
| TRINITY_A0A0B1P9Z4_UNCNE/3-126   | A0A0B1P9Z4.1 PF1389 | 46.30 | 0.00 |
| TRINITY_L8GGG7_ACACA/1114-1258   | L8GGG7.1 PF02877.12 | 46.30 | 0.00 |
| TRINITY_Q24FR8_TETTS/35-132      | Q24FR8.2 PF12796.5; | 46.30 | 0.00 |
| TRINITY_F0ZVY0_DICPU/172-440     | F0ZVY0.1 PF08491.8; | 46.30 | 0.00 |
| TRINITY_F0ZLC1_DICPU/453-547     | F0ZLC1.1 PF12755.5; | 46.30 | 0.00 |
| TRINITY_E1ZJS1_CHLVA/190-329     | E1ZJS1.1 PF04410.12 | 46.30 | 0.00 |
| TRINITY_A0A078I2C4_BRANA/104-238 | A0A078I2C4.1 PF1720 | 46.30 | 0.00 |
| TRINITY_K9SZG2_9CYAN/110-382     | K9SZG2.1 PF01636.21 | 46.30 | 0.00 |
| TRINITY_D8TJH5_VOLCA/40-247      | D8TJH5.1 PF01633.18 | 46.30 | 0.00 |
| TRINITY_F4PWQ0_DICFS/222-536     | F4PWQ0.1 PF02535.20 | 46.30 | 0.00 |
| TRINITY_K1QLY7_CRAGI/16-147      | K1QLY7.1 PF00782.18 | 46.30 | 0.00 |
| TRINITY_E5WNT4_9BACI/8-148       | E5WNT4.1 PF13302.5; | 46.30 | 0.00 |
| TRINITY_A8HQF5_CHLRE/280-399     | A8HQF5.1 PF00069.23 | 46.30 | 0.00 |
| TRINITY_I7MCL9_TETTS/190-488     | I7MCL9.2 PF00648.19 | 46.30 | 0.00 |
| TRINITY_A0A059LDS0_9CHLO/34-221  | A0A059LDS0.1 PF0176 | 46.30 | 0.00 |
| TRINITY_W7TKL6_9STRA/13-174      | W7TKL6.1 PF00071.20 | 46.30 | 0.00 |
| TRINITY_W7TKL6_9STRA/13-174      | W7TKL6.1 PF00071.20 | 46.30 | 0.00 |



|                                    |                     |       |      |
|------------------------------------|---------------------|-------|------|
| TRINITY_D8UBE1_VOLCA/26-435        | D8UBE1.1 PF00232.16 | 46.30 | 0.00 |
| TRINITY_A0A0L9SYQ2_9HYPO/89-158    | A0A0L9SYQ2.1 PF0007 | 46.30 | 0.00 |
| TRINITY_F8W2M8_DANRE/214-518       | F8W2M8.1 PF00082.20 | 46.30 | 0.00 |
| TRINITY_A0A078A3M9_STYLE/52-228    | A0A078A3M9.1 PF0009 | 46.30 | 0.00 |
| TRINITY_F4Q063_DICFS/153-478       | F4Q063.1 PF00676.18 | 46.30 | 0.00 |
| TRINITY_H2LIF3_ORYLA/1141-1234     | H2LIF3.1 PF12755.5; | 46.30 | 0.00 |
| TRINITY_DGAT2_DICDI/36-330         | Q54GC1.1 PF03982.11 | 46.30 | 0.00 |
| TRINITY_A0A089IJD8_9BACL/185-308   | A0A089IJD8.1 PF0010 | 46.30 | 0.00 |
| TRINITY_C4R3S3_PICPG/5-181         | C4R3S3.1 PF12999.5; | 46.30 | 0.00 |
| TRINITY_H8MQ77_CORCM/113-222       | H8MQ77.1 PF07819.11 | 46.30 | 0.00 |
| TRINITY_Q22YP9_TETTS/944-1208      | Q22YP9.2 PF16212.3; | 46.30 | 0.00 |
| TRINITY_I7MIP6_TETTS/67-577        | I7MIP6.2 PF04791.14 | 46.30 | 0.00 |
| TRINITY_A0A0M9E9X1_9DELT/500-583   | A0A0M9E9X1.1 PF0148 | 46.30 | 0.00 |
| TRINITY_A0BWM8_PARTE/771-894       | A0BWM8.1 PF00072.22 | 46.30 | 0.00 |
| TRINITY_L8HIS6_ACACA/291-541       | L8HIS6.1 PF16203.3; | 46.30 | 0.00 |
| TRINITY_A8HPD6_CHLRE/727-817       | A8HPD6.1 PF12796.5; | 46.30 | 0.00 |
| TRINITY_F8F3W2_TRECH/572-683       | F8F3W2.1 PF00072.22 | 46.30 | 0.00 |
| TRINITY_G0R1G3_ICHMG/80-301        | G0R1G3.1 PF00566.16 | 46.20 | 0.00 |
| TRINITY_L8HDL6_ACACA/1-64          | L8HDL6.1 PF06331.10 | 46.20 | 0.00 |
| TRINITY_F7DU67_XENTR/2326-2572     | F7DU67.1 PF00454.25 | 46.20 | 0.00 |
| TRINITY_H2KSV6_CLOSI/110-1035      | H2KSV6.1 PF09742.7; | 46.20 | 0.00 |
| TRINITY_A7AWS0_BABBO/3-252         | A7AWS0.1 PF00370.19 | 46.20 | 0.00 |
| TRINITY_L8GK68_ACACA/41-236        | L8GK68.1 PF05721.11 | 46.20 | 0.00 |
| TRINITY_A0E045_PARTE/204-339       | A0E045.1 PF01529.18 | 46.20 | 0.00 |
| TRINITY_M3XHV6_LATCH/47-162        | M3XHV6.1 PF10639.7; | 46.20 | 0.00 |
| TRINITY_A0C4J2_PARTE/42-423        | A0C4J2.1 PF00282.17 | 46.20 | 0.00 |
| TRINITY_C4LTV2_ENTHI/1486-1746     | C4LTV2.1 PF07714.15 | 46.20 | 0.00 |
| TRINITY_A0A0D2VQ46_CAPO3/350-817   | A0A0D2VQ46.1 PF0105 | 46.20 | 0.00 |
| TRINITY_H2UB91_TAKRU/26-129        | H2UB91.1 PF00168.28 | 46.20 | 0.00 |
| TRINITY_I0YMM8_9CHLO/86-517        | I0YMM8.1 PF03069.13 | 46.20 | 0.00 |
| TRINITY_G0QNF4_ICHMG/82-412        | G0QNF4.1 PF00150.16 | 46.20 | 0.00 |
| TRINITY_A0A078A4I9_STYLE/1445-1496 | A0A078A4I9.1 PF0041 | 46.20 | 0.00 |
| TRINITY_U6PGJ8_HAECO/38-118        | U6PGJ8.1 PF01883.17 | 46.20 | 0.00 |
| TRINITY_Q23YJ0_TETTS/28-372        | Q23YJ0.1 PF16499.3; | 46.20 | 0.00 |
| TRINITY_A0BT05_PARTE/750-873       | A0BT05.1 PF00072.22 | 46.20 | 0.00 |
| TRINITY_D8UF85_VOLCA/179-263       | D8UF85.1 PF05699.12 | 46.20 | 0.00 |
| TRINITY_I1JFU9_SOYBN/180-360       | I1JFU9.1 PF00270.27 | 46.20 | 0.00 |
| TRINITY_E1Z331_CHLVA/1024-1234     | E1Z331.1 PF12348.6; | 46.20 | 0.00 |
| TRINITY_A0A078AMG9_STYLE/130-467   | A0A078AMG9.1 PF0024 | 46.20 | 0.00 |
| TRINITY_I0YYQ8_9CHLO/34-403        | I0YYQ8.1 PF00224.19 | 46.20 | 0.00 |
| TRINITY_D8UMJ8_VOLCA/352-506       | D8UMJ8.1 PF00406.20 | 46.20 | 0.00 |
| TRINITY_A0A0P7TRU5_9TELE/547-700   | A0A0P7TRU5.1 PF0000 | 46.20 | 0.00 |
| TRINITY_L8GYA6_ACACA/206-328       | L8GYA6.1 PF10996.6; | 46.20 | 0.00 |
| TRINITY_F4QD49_DICFS/285-430       | F4QD49.1 PF01694.20 | 46.20 | 0.00 |
| TRINITY_Q23TB4_TETTS/477-736       | Q23TB4.1 PF08324.9; | 46.20 | 0.00 |
| TRINITY_D7G144_ECTSI/662-819       | D7G144.1 PF04087.12 | 46.20 | 0.00 |
| TRINITY_A8JFL7_CHLRE/275-425       | A8JFL7.1 PF00069.23 | 46.20 | 0.00 |
| TRINITY_D8TXN8_VOLCA/36-217        | D8TXN8.1 PF02390.15 | 46.20 | 0.00 |
| TRINITY_I0YU58_9CHLO/86-254        | I0YU58.1 PF00881.22 | 46.20 | 0.00 |
| TRINITY_G0R4M5_ICHMG/51-307        | G0R4M5.1 PF00481.19 | 46.20 | 0.00 |
| TRINITY_W5HJX8_WHEAT/70-203        | W5HJX8.1 PF12894.5; | 46.20 | 0.00 |
| TRINITY_A0A078AV94_STYLE/569-682   | A0A078AV94.1 PF0251 | 46.20 | 0.00 |
| TRINITY_D8U780_VOLCA/84-209        | D8U780.1 PF00583.23 | 46.20 | 0.00 |
| TRINITY_Q4G2C6_TRIVA/9-170         | Q4G2C6.1 PF00071.20 | 46.20 | 0.00 |
| TRINITY_M1V7G0_CYAME/130-294       | M1V7G0.1 PF08613.9; | 46.20 | 0.00 |
| TRINITY_C3Y7M2_BRAFL/152-530       | C3Y7M2.1 PF00443.27 | 46.20 | 0.00 |
| TRINITY_A0A0A0KSA7_CUCSA/61-340    | A0A0A0KSA7.1 PF0771 | 46.20 | 0.00 |
| TRINITY_Q5W9T0_CHLRE/28-202        | Q5W9T0.1 PF00504.19 | 46.20 | 0.00 |
| TRINITY_A9SWK6_PHYPA/87-335        | A9SWK6.1 PF01963.15 | 46.20 | 0.00 |
| TRINITY_D8TST9_VOLCA/621-848       | D8TST9.1 PF00211.18 | 46.20 | 0.00 |
| TRINITY_C9RQA6_FIBSS/1383-1499     | C9RQA6.1 PF00072.22 | 46.20 | 0.00 |

|                                   |              |            |       |      |
|-----------------------------------|--------------|------------|-------|------|
| TRINITY_A7RRK8_NEMVE/238-552      | A7RRK8.1     | PF03372.21 | 46.20 | 0.00 |
| TRINITY_A0A0B2UWJ7_TOXCA/194-421  | A0A0B2UWJ7.1 | PF0010     | 46.20 | 0.00 |
| TRINITY_I1KL83_SOYBN/10-108       | I1KL83.1     | PF04749.15 | 46.10 | 0.00 |
| TRINITY_H2MLP4_ORYLA/34-175       | H2MLP4.1     | PF09286.9; | 46.10 | 0.00 |
| TRINITY_U5QIM0_9CYAN/7-453        | U5QIM0.1     | PF05694.9; | 46.10 | 0.00 |
| TRINITY_K9UIC8_9CHRO/3-283        | K9UIC8.1     | PF01430.17 | 46.10 | 0.00 |
| TRINITY_J9FPH7_9SPIT/28-192       | J9FPH7.1     | PF00071.20 | 46.10 | 0.00 |
| TRINITY_L1JTR4_GUITH/243-344      | L1JTR4.1     | PF01248.24 | 46.10 | 0.00 |
| TRINITY_Q22CF9_TETTS/26-290       | Q22CF9.2     | PF06098.9; | 46.10 | 0.00 |
| TRINITY_Q22LY6_TETTS/26-166       | Q22LY6.2     | PF06201.11 | 46.10 | 0.00 |
| TRINITY_A0D0L1_PARTE/195-322      | A0D0L1.1     | PF00107.24 | 46.10 | 0.00 |
| TRINITY_G0R4M8_ICHMG/258-481      | G0R4M8.1     | PF00454.25 | 46.10 | 0.00 |
| TRINITY_B3RX98_TRIAD/8-175        | B3RX98.1     | PF03167.17 | 46.10 | 0.00 |
| TRINITY_Q23D11_TETTS/154-431      | Q23D11.1     | PF00069.23 | 46.10 | 0.00 |
| TRINITY_A0DJ79_PARTE/185-262      | A0DJ79.1     | PF03127.12 | 46.10 | 0.00 |
| TRINITY_L8H5H0_ACACA/20-282       | L8H5H0.1     | PF00069.23 | 46.10 | 0.00 |
| TRINITY_Q22RT0_TETTS/376-631      | Q22RT0.2     | PF10236.7; | 46.10 | 0.00 |
| TRINITY_A0A059D981_EUCGR/880-1125 | A0A059D981.1 | PF1621     | 46.10 | 0.00 |
| TRINITY_D8TQZ8_VOLCA/95-161       | D8TQZ8.1     | PF00542.17 | 46.10 | 0.00 |
| TRINITY_E1Z7I6_CHLVA/14-139       | E1Z7I6.1     | PF13673.5; | 46.10 | 0.00 |
| TRINITY_F0ZF52_DICPU/175-363      | F0ZF52.1     | PF13918.4; | 46.10 | 0.00 |
| TRINITY_A0A0N5A6S5_PARTI/5-166    | A0A0N5A6S5.1 | PF0007     | 46.10 | 0.00 |
| TRINITY_D8U2B3_VOLCA/14-273       | D8U2B3.1     | PF07160.10 | 46.10 | 0.00 |
| TRINITY_L8GR10_ACACA/254-510      | L8GR10.1     | PF12269.6; | 46.10 | 0.00 |
| TRINITY_K7IQ87_NASVI/181-299      | K7IQ87.1     | PF00665.24 | 46.10 | 0.00 |
| TRINITY_W5JXP9_ASTMX/309-526      | W5JXP9.1     | PF07002.14 | 46.10 | 0.00 |
| TRINITY_D8TW99_VOLCA/1136-1328    | D8TW99.1     | PF12295.6; | 46.10 | 0.00 |
| TRINITY_A0A0M2LPB6_9SPHN/49-175   | A0A0M2LPB6.1 | PF0018     | 46.10 | 0.00 |
| TRINITY_D8TYC0_VOLCA/26-210       | D8TYC0.1     | PF01184.17 | 46.10 | 0.00 |
| TRINITY_A9V7T3_MONBE/21-266       | A9V7T3.1     | PF09084.9; | 46.10 | 0.00 |
| TRINITY_A0DXE0_PARTE/145-304      | A0DXE0.1     | PF03031.16 | 46.10 | 0.00 |
| TRINITY_D4ZL63_SHEVD/387-830      | D4ZL63.1     | PF00305.17 | 46.10 | 0.00 |
| TRINITY_D6Y6S1_THEBD/346-498      | D6Y6S1.1     | PF01343.16 | 46.10 | 0.00 |
| TRINITY_L8HIV2_ACACA/313-488      | L8HIV2.1     | PF00621.18 | 46.10 | 0.00 |
| TRINITY_I1KQH1_SOYBN/78-445       | I1KQH1.1     | PF00009.25 | 46.10 | 0.00 |
| TRINITY_F4PX48_DICFS/113-397      | F4PX48.1     | PF00664.21 | 46.10 | 0.00 |
| TRINITY_F0ZT81_DICPU/1933-2183    | F0ZT81.1     | PF00454.25 | 46.10 | 0.00 |
| TRINITY_L8H188_ACACA/100-395      | L8H188.1     | PF06472.13 | 46.10 | 0.00 |
| TRINITY_A0C5M5_PARTE/424-685      | A0C5M5.1     | PF00069.23 | 46.10 | 0.00 |
| TRINITY_E0U6F7_CYAP2/20-261       | E0U6F7.1     | PF00809.20 | 46.10 | 0.00 |
| TRINITY_A0A087SQH9_AUXPR/230-400  | A0A087SQH9.1 | PF0505     | 46.10 | 0.00 |
| TRINITY_A0BR56_PARTE/569-683      | A0BR56.1     | PF00387.17 | 46.10 | 0.00 |
| TRINITY_H9GAZ3_ANOCA/42-445       | H9GAZ3.1     | PF02487.15 | 46.10 | 0.00 |
| TRINITY_A0A077ZWU2_STYLE/13-143   | A0A077ZWU2.1 | PF0078     | 46.10 | 0.00 |
| TRINITY_A9RDU7_PHYPA/693-887      | A9RDU7.1     | PF02816.16 | 46.10 | 0.00 |
| TRINITY_I0YNU5_9CHLO/11-274       | I0YNU5.1     | PF00248.19 | 46.10 | 0.00 |
| TRINITY_A0A0G4EVB2_9ALVE/139-300  | A0A0G4EVB2.1 | PF0476     | 46.10 | 0.00 |
| TRINITY_D3BQ59_POLPA/1691-1830    | D3BQ59.1     | PF00637.18 | 46.10 | 0.00 |
| TRINITY_A0A078ADH0_STYLE/236-312  | A0A078ADH0.1 | PF1342     | 46.10 | 0.00 |
| TRINITY_I7M1V6_TETTS/24-129       | I7M1V6.1     | PF00168.28 | 46.10 | 0.00 |
| TRINITY_ASPC1_HUMAN/386-463       | Q9BZE9.1     | PF00789.18 | 46.10 | 0.00 |
| TRINITY_I0YWI4_9CHLO/461-920      | I0YWI4.1     | PF07748.11 | 46.10 | 0.00 |
| TRINITY_D8UDF3_VOLCA/894-1029     | D8UDF3.1     | PF13472.4; | 46.10 | 0.00 |
| TRINITY_A8IQQ8_CHLRE/597-709      | A8IQQ8.1     | PF00989.23 | 46.10 | 0.00 |
| TRINITY_A0BQA6_PARTE/560-677      | A0BQA6.1     | PF02518.24 | 46.00 | 0.00 |
| TRINITY_I7MLW3_TETTS/3-82         | I7MLW3.1     | PF14892.4; | 46.00 | 0.00 |
| TRINITY_Q23TT4_TETTS/537-817      | Q23TT4.1     | PF03133.13 | 46.00 | 0.00 |
| TRINITY_W2Q0J9_PHYPN/239-542      | W2Q0J9.1     | PF01055.24 | 46.00 | 0.00 |
| TRINITY_Q4RUP7_TETNG/12-179       | Q4RUP7.1     | PF11032.6; | 46.00 | 0.00 |
| TRINITY_D7FVU4_ECTSI/132-361      | D7FVU4.1     | PF12146.6; | 46.00 | 0.00 |
| TRINITY_J9I3Q1_9SPIT/511-630      | J9I3Q1.1     | PF01529.18 | 46.00 | 0.00 |

|                                  |              |            |       |      |
|----------------------------------|--------------|------------|-------|------|
| TRINITY_L8GLJ9_ACACA/48-132      | L8GLJ9.1     | PF01777.16 | 46.00 | 0.00 |
| TRINITY_B3S1P2_TRIAD/83-136      | B3S1P2.1     | PF13920.4; | 46.00 | 0.00 |
| TRINITY_F0ZYB1_DICPU/209-508     | F0ZYB1.1     | PF03062.17 | 46.00 | 0.00 |
| TRINITY_A0A0G4GNN3_9ALVE/161-467 | A0A0G4GNN3.1 | PF1353     | 46.00 | 0.00 |
| TRINITY_L8HH71_ACACA/197-295     | L8HH71.1     | PF02517.14 | 46.00 | 0.00 |
| TRINITY_A0E2M3_PARTE/3-103       | A0E2M3.1     | PF00168.28 | 46.00 | 0.00 |
| TRINITY_L8GCU9_ACACA/1075-1170   | L8GCU9.1     | PF00169.27 | 46.00 | 0.00 |
| TRINITY_D8LW92_BLAHO/1-121       | D8LW92.1     | PF05477.9; | 46.00 | 0.00 |
| TRINITY_G0R698_ICHMG/1-203       | G0R698.1     | PF00069.23 | 46.00 | 0.00 |
| TRINITY_A0A0J8CE73_BETVU/7-69    | A0A0J8CE73.1 | PF0028     | 46.00 | 0.00 |
| TRINITY_G1KB57_ANOCA/52-264      | G1KB57.2     | PF01997.14 | 46.00 | 0.00 |
| TRINITY_L8HDY5_ACACA/41-161      | L8HDY5.1     | PF00188.24 | 46.00 | 0.00 |
| TRINITY_I0YRC5_9CHLO/366-465     | I0YRC5.1     | PF09759.7; | 46.00 | 0.00 |
| TRINITY_L8H3W5_ACACA/971-1093    | L8H3W5.1     | PF00271.29 | 46.00 | 0.00 |
| TRINITY_S8E0B0_9LAMI/93-255      | S8E0B0.1     | PF04893.15 | 46.00 | 0.00 |
| TRINITY_J9IRU0_9SPIT/190-239     | J9IRU0.1     | PF13415.4; | 46.00 | 0.00 |
| TRINITY_I7LWG9_TETTS/79-336      | I7LWG9.1     | PF00102.25 | 46.00 | 0.00 |
| TRINITY_F0ZXX3_DICPU/8-246       | F0ZXX3.1     | PF01027.18 | 46.00 | 0.00 |
| TRINITY_K9XXK3_STAC7/263-498     | K9XXK3.1     | PF00773.17 | 46.00 | 0.00 |
| TRINITY_D8TRD6_VOLCA/204-322     | D8TRD6.1     | PF13911.4; | 46.00 | 0.00 |
| TRINITY_F4Q9D3_DICFS/167-398     | F4Q9D3.1     | PF13621.4; | 46.00 | 0.00 |
| TRINITY_L8H5H6_ACACA/18-345      | L8H5H6.1     | PF00503.18 | 46.00 | 0.00 |
| TRINITY_D8THJ3_VOLCA/20-330      | D8THJ3.1     | PF03747.12 | 46.00 | 0.00 |
| TRINITY_I7MGS4_TETTS/171-373     | I7MGS4.2     | PF00149.26 | 46.00 | 0.00 |
| TRINITY_K1PAB4_CRAGI/1904-2205   | K1PAB4.1     | PF00291.23 | 46.00 | 0.00 |
| TRINITY_A0A0F4RGI4_9RHOB/21-269  | A0A0F4RGI4.1 | PF0075     | 46.00 | 0.00 |
| TRINITY_A0CS29_PARTE/2561-2834   | A0CS29.1     | PF00520.29 | 46.00 | 0.00 |
| TRINITY_H3GAE8_PHYRM/7-180       | H3GAE8.1     | PF00071.20 | 46.00 | 0.00 |
| TRINITY_J9G2X7_9SPIT/600-658     | J9G2X7.1     | PF00498.24 | 46.00 | 0.00 |
| TRINITY_L8GXL8_ACACA/109-274     | L8GXL8.1     | PF00650.18 | 46.00 | 0.00 |
| TRINITY_I7LTY4_TETTS/276-599     | I7LTY4.2     | PF04515.10 | 46.00 | 0.00 |
| TRINITY_Q23AC3_TETTS/7-112       | Q23AC3.2     | PF00787.22 | 46.00 | 0.00 |
| TRINITY_A0A078AKC9_STYLE/8-314   | A0A078AKC9.1 | PF0006     | 46.00 | 0.00 |
| TRINITY_A0D8M0_PARTE/6-277       | A0D8M0.1     | PF05096.10 | 46.00 | 0.00 |
| TRINITY_A0A078B3L0_STYLE/265-316 | A0A078B3L0.1 | PF1392     | 46.00 | 0.00 |
| TRINITY_A0D9G0_PARTE/399-612     | A0D9G0.1     | PF07859.11 | 46.00 | 0.00 |
| TRINITY_D8UHD7_VOLCA/269-321     | D8UHD7.1     | PF13920.4; | 46.00 | 0.00 |
| TRINITY_B8BSZ0_THAPS/4-370       | B8BSZ0.1     | PF07690.14 | 46.00 | 0.00 |
| TRINITY_A0A087SJ81_AUXPR/175-429 | A0A087SJ81.1 | PF0333     | 46.00 | 0.00 |
| TRINITY_D8UJ81_VOLCA/324-420     | D8UJ81.1     | PF01974.15 | 46.00 | 0.00 |
| TRINITY_D8TR08_VOLCA/49-335      | D8TR08.1     | PF01546.26 | 46.00 | 0.00 |
| TRINITY_I7MCL9_TETTS/190-488     | I7MCL9.2     | PF00648.19 | 46.00 | 0.00 |
| TRINITY_I0Z746_9CHLO/49-270      | I0Z746.1     | PF07808.11 | 46.00 | 0.00 |
| TRINITY_K9QM29_NOSS7/573-968     | K9QM29.1     | PF00476.18 | 46.00 | 0.00 |
| TRINITY_D8TYR8_VOLCA/31-351      | D8TYR8.1     | PF00225.21 | 46.00 | 0.00 |
| TRINITY_F2UN84_SALR5/57-134      | F2UN84.1     | PF03061.20 | 46.00 | 0.00 |
| TRINITY_I0YLG8_9CHLO/31-304      | I0YLG8.1     | PF00069.23 | 46.00 | 0.00 |
| TRINITY_A0A0C2MGC1_THEKT/4-177   | A0A0C2MGC1.1 | PF0002     | 46.00 | 0.00 |
| TRINITY_W1NTA4_AMBTC/143-244     | W1NTA4.1     | PF00254.26 | 46.00 | 0.00 |
| TRINITY_D8U7R8_VOLCA/1-335       | D8U7R8.1     | PF15239.4; | 46.00 | 0.00 |
| TRINITY_K4LIJ4_THEPS/4-116       | K4LIJ4.1     | PF00072.22 | 46.00 | 0.00 |
| TRINITY_Q0AXB8_SYNWW/535-649     | Q0AXB8.1     | PF00072.22 | 46.00 | 0.00 |
| TRINITY_I7M2G7_TETTS/73-181      | I7M2G7.1     | PF00787.22 | 45.90 | 0.00 |
| TRINITY_G0QQY5_ICHMG/243-493     | G0QQY5.1     | PF13532.4; | 45.90 | 0.00 |
| TRINITY_I7MAC8_TETTS/3673-3968   | I7MAC8.2     | PF00632.23 | 45.90 | 0.00 |
| TRINITY_A0BPY0_PARTE/414-535     | A0BPY0.1     | PF02518.24 | 45.90 | 0.00 |
| TRINITY_Q23QF2_TETTS/248-571     | Q23QF2.2     | PF03133.13 | 45.90 | 0.00 |
| TRINITY_Q39US8_GEOMG/342-457     | Q39US8.1     | PF00072.22 | 45.90 | 0.00 |
| TRINITY_I7M898_TETTS/218-305     | I7M898.2     | PF00326.19 | 45.90 | 0.00 |
| TRINITY_C1EG27_MICSR/13-344      | C1EG27.1     | PF07289.9; | 45.90 | 0.00 |
| TRINITY_W5I2C6_WHEAT/5-102       | W5I2C6.1     | PF04749.15 | 45.90 | 0.00 |

|                                   |                     |       |      |
|-----------------------------------|---------------------|-------|------|
| TRINITY_A0A0G3WBG6_9CLOT/9-282    | A0A0G3WBG6.1 PF1433 | 45.90 | 0.00 |
| TRINITY_J9G2B2_9SPIT/13-164       | J9G2B2.1 PF01124.16 | 45.90 | 0.00 |
| TRINITY_F0ZND0_DICPU/7-67         | F0ZND0.1 PF04193.12 | 45.90 | 0.00 |
| TRINITY_R5XLM3_9CLOT/612-730      | R5XLM3.1 PF00753.25 | 45.90 | 0.00 |
| TRINITY_A0A067QRE5_ZOONE/4-182    | A0A067QRE5.1 PF0002 | 45.90 | 0.00 |
| TRINITY_F9R8T7_VIBSN/691-807      | F9R8T7.1 PF00072.22 | 45.90 | 0.00 |
| TRINITY_D8TGZ7_VOLCA/449-690      | D8TGZ7.1 PF00122.18 | 45.90 | 0.00 |
| TRINITY_F0Y1S6_AURAN/100-357      | F0Y1S6.1 PF02353.18 | 45.90 | 0.00 |
| TRINITY_F4PUI7_DICFS/323-466      | F4PUI7.1 PF00892.18 | 45.90 | 0.00 |
| TRINITY_F4PYG0_DICFS/69-275       | F4PYG0.1 PF09511.8; | 45.90 | 0.00 |
| TRINITY_L8GWW2_ACACA/318-616      | L8GWW2.1 PF00069.23 | 45.90 | 0.00 |
| TRINITY_A0A0N5CY83_THECL/4-139    | A0A0N5CY83.1 PF1613 | 45.90 | 0.00 |
| TRINITY_Q86B07_DICDI/215-531      | Q86B07.1 PF00657.20 | 45.90 | 0.00 |
| TRINITY_A0A077ZMZ5_STYLE/548-782  | A0A077ZMZ5.1 PF0070 | 45.90 | 0.00 |
| TRINITY_A0A060QEJ3_9PROT/186-308  | A0A060QEJ3.1 PF0010 | 45.90 | 0.00 |
| TRINITY_B8HDF0_ARTCA/239-376      | B8HDF0.1 PF03641.12 | 45.90 | 0.00 |
| TRINITY_L8HHR2_ACACA/700-893      | L8HHR2.1 PF06017.11 | 45.90 | 0.00 |
| TRINITY_A0A087STE3_AUXPR/40-137   | A0A087STE3.1 PF0812 | 45.90 | 0.00 |
| TRINITY_TRUA_COPPD/7-102          | B5Y955.1 PF01416.18 | 45.90 | 0.00 |
| TRINITY_L8GUK1_ACACA/538-796      | L8GUK1.1 PF07714.15 | 45.90 | 0.00 |
| TRINITY_F4PLH6_DICFS/600-782      | F4PLH6.1 PF00617.17 | 45.90 | 0.00 |
| TRINITY_Q22KK0_TETTS/166-347      | Q22KK0.1 PF13870.4; | 45.90 | 0.00 |
| TRINITY_L8HD01_ACACA/632-698      | L8HD01.1 PF00017.22 | 45.90 | 0.00 |
| TRINITY_L8GUE5_ACACA/1-157        | L8GUE5.1 PF04446.10 | 45.90 | 0.00 |
| TRINITY_U3J628_ANAPL/331-776      | U3J628.1 PF01055.24 | 45.90 | 0.00 |
| TRINITY_A0C6X1_PARTE/171-244      | A0C6X1.1 PF13848.4; | 45.90 | 0.00 |
| TRINITY_A0A078ART0_STYLE/361-506  | A0A078ART0.1 PF0753 | 45.90 | 0.00 |
| TRINITY_E1ZJ28_CHLVA/7-148        | E1ZJ28.1 PF01025.17 | 45.90 | 0.00 |
| TRINITY_J9FSK1_9SPIT/15-207       | J9FSK1.1 PF14753.4; | 45.90 | 0.00 |
| TRINITY_L8GY76_ACACA/11-267       | L8GY76.1 PF08217.9; | 45.90 | 0.00 |
| TRINITY_U5RSG0_9CLOT/6-255        | U5RSG0.1 PF01073.17 | 45.90 | 0.00 |
| TRINITY_A0A0G4IZS4_PLABS/45-153   | A0A0G4IZS4.1 PF1613 | 45.90 | 0.00 |
| TRINITY_A0A0E9N797_9ASCO/872-1054 | A0A0E9N797.1 PF0061 | 45.90 | 0.00 |
| TRINITY_D8UHM7_VOLCA/6-148        | D8UHM7.1 PF00535.24 | 45.90 | 0.00 |
| TRINITY_A8I4W2_CHLRE/1-181        | A8I4W2.1 PF00211.18 | 45.90 | 0.00 |
| TRINITY_A0A0B0NKV3_GOSAR/34-203   | A0A0B0NKV3.1 PF1341 | 45.90 | 0.00 |
| TRINITY_L8HH52_ACACA/396-599      | L8HH52.1 PF00566.16 | 45.90 | 0.00 |
| TRINITY_L8GPZ7_ACACA/15-171       | L8GPZ7.1 PF13563.4; | 45.90 | 0.00 |
| TRINITY_W9WAK1_9EURO/306-565      | W9WAK1.1 PF13360.4; | 45.90 | 0.00 |
| TRINITY_D8TXA5_VOLCA/213-429      | D8TXA5.1 PF00112.21 | 45.90 | 0.00 |
| TRINITY_A8HUC0_CHLRE/205-556      | A8HUC0.1 PF02636.15 | 45.90 | 0.00 |
| TRINITY_D8U408_VOLCA/148-305      | D8U408.1 PF01694.20 | 45.90 | 0.00 |
| TRINITY_A4HDM4_LEIBR/16-304       | A4HDM4.1 PF07993.10 | 45.90 | 0.00 |
| TRINITY_A8Q2F7_MALGO/39-328       | A8Q2F7.1 PF00069.23 | 45.90 | 0.00 |
| TRINITY_A6G2C0_9DELT/175-346      | A6G2C0.1 PF12850.5; | 45.90 | 0.00 |
| TRINITY_F0NYY3_WEEVC/121-212      | F0NYY3.1 PF00581.18 | 45.90 | 0.00 |
| TRINITY_A9V270_MONBE/15-287       | A9V270.1 PF01358.16 | 45.90 | 0.00 |
| TRINITY_A0A0K9P6B5_ZOSMR/31-105   | A0A0K9P6B5.1 PF0609 | 45.90 | 0.00 |
| TRINITY_E1ZM81_CHLVA/1-228        | E1ZM81.1 PF00089.24 | 45.90 | 0.00 |
| TRINITY_G0QV43_ICHMG/249-568      | G0QV43.1 PF04515.10 | 45.90 | 0.00 |
| TRINITY_F1A0P0_DICPU/1-267        | F1A0P0.1 PF03619.14 | 45.90 | 0.00 |
| TRINITY_A8ITD7_CHLRE/3-78         | A8ITD7.1 PF00240.21 | 45.90 | 0.00 |
| TRINITY_A0A078D6D3_BRANA/113-500  | A0A078D6D3.1 PF0583 | 45.90 | 0.00 |
| TRINITY_A0A087SK32_AUXPR/29-511   | A0A087SK32.1 PF0321 | 45.90 | 0.00 |
| TRINITY_L1IE17_GUIITH/205-315     | L1IE17.1 PF00565.15 | 45.90 | 0.00 |
| TRINITY_H2TVA2_TAKRU/382-663      | H2TVA2.1 PF16187.3; | 45.90 | 0.00 |
| TRINITY_S8EB85_9LAMI/59-422       | S8EB85.1 PF03600.14 | 45.90 | 0.00 |
| TRINITY_A0A0E0NVU7_ORYRU/96-256   | A0A0E0NVU7.1 PF0141 | 45.90 | 0.00 |
| TRINITY_A8HT27_CHLRE/2550-3400    | A8HT27.1 PF02364.13 | 45.90 | 0.00 |
| TRINITY_I0YMZ8_9CHLO/74-403       | I0YMZ8.1 PF00155.19 | 45.90 | 0.00 |
| TRINITY_V3ZP91_LOTGI/73-422       | V3ZP91.1 PF00266.17 | 45.90 | 0.00 |

|                                  |              |            |       |      |
|----------------------------------|--------------|------------|-------|------|
| TRINITY_A8HPX1_CHLRE/2514-2793   | A8HPX1.1     | PF12777.5; | 45.90 | 0.00 |
| TRINITY_C5Z583_SORBI/934-1179    | C5Z583.1     | PF07727.12 | 45.90 | 0.00 |
| TRINITY_T1IQX5_STRMM/1067-1239   | T1IQX5.1     | PF08148.10 | 45.80 | 0.00 |
| TRINITY_A0BIJ5_PARTE/438-487     | A0BIJ5.1     | PF13920.4; | 45.80 | 0.00 |
| TRINITY_L8HJG2_ACACA/55-171      | L8HJG2.1     | PF01661.19 | 45.80 | 0.00 |
| TRINITY_Q1N2R9_9GAMM/772-890     | Q1N2R9.1     | PF00072.22 | 45.80 | 0.00 |
| TRINITY_F0ZZ09_DICPU/129-413     | F0ZZ09.1     | PF01733.16 | 45.80 | 0.00 |
| TRINITY_G3H850_CRIGR/668-769     | G3H850.1     | PF00005.25 | 45.80 | 0.00 |
| TRINITY_L8GIS9_ACACA/27-240      | L8GIS9.1     | PF04055.19 | 45.80 | 0.00 |
| TRINITY_C7Q3T8_CATAD/28-144      | C7Q3T8.1     | PF08240.10 | 45.80 | 0.00 |
| TRINITY_B9RBZ2_RICCO/46-164      | B9RBZ2.1     | PF06487.10 | 45.80 | 0.00 |
| TRINITY_I0Z9B3_9CHLO/185-274     | I0Z9B3.1     | PF01243.18 | 45.80 | 0.00 |
| TRINITY_A9SUE0_PHYPA/168-284     | A9SUE0.1     | PF09745.7; | 45.80 | 0.00 |
| TRINITY_Q23QF2_TETTS/248-571     | Q23QF2.2     | PF03133.13 | 45.80 | 0.00 |
| TRINITY_E1ZN66_CHLVA/1025-1170   | E1ZN66.1     | PF14566.4; | 45.80 | 0.00 |
| TRINITY_Q6ARD6_DESPS/790-902     | Q6ARD6.1     | PF00072.22 | 45.80 | 0.00 |
| TRINITY_I7MDS7_TETTS/37-166      | I7MDS7.2     | PF12298.6; | 45.80 | 0.00 |
| TRINITY_D8U1M1_VOLCA/66-180      | D8U1M1.1     | PF11527.6; | 45.80 | 0.00 |
| TRINITY_A0A068XPV1_HYMMI/83-147  | A0A068XPV1.1 | PF1349     | 45.80 | 0.00 |
| TRINITY_F4P9J4_BATDJ/272-410     | F4P9J4.1     | PF16418.3; | 45.80 | 0.00 |
| TRINITY_A7RMS4_NEMVE/12-59       | A7RMS4.1     | PF14604.4; | 45.80 | 0.00 |
| TRINITY_F6XDK0_MACMU/73-203      | F6XDK0.1     | PF00782.18 | 45.80 | 0.00 |
| TRINITY_F4Q7F4_DICFS/111-168     | F4Q7F4.1     | PF07973.12 | 45.80 | 0.00 |
| TRINITY_A4VEE1_TETTS/16-254      | A4VEE1.1     | PF01370.19 | 45.80 | 0.00 |
| TRINITY_A0DVV8_PARTE/1927-2317   | A0DVV8.1     | PF12166.6; | 45.80 | 0.00 |
| TRINITY_D3BPS2_POLPA/1341-1518   | D3BPS2.1     | PF00617.17 | 45.80 | 0.00 |
| TRINITY_S6AG68_PSERE/47-382      | S6AG68.1     | PF01244.19 | 45.80 | 0.00 |
| TRINITY_B8HT46_CYAP4/58-393      | B8HT46.1     | PF01244.19 | 45.80 | 0.00 |
| TRINITY_I7M4E9_TETTS/11-677      | I7M4E9.2     | PF00012.18 | 45.80 | 0.00 |
| TRINITY_L8GST7_ACACA/99-608      | L8GST7.1     | PF01019.19 | 45.80 | 0.00 |
| TRINITY_F0ZLC1_DICPU/453-547     | F0ZLC1.1     | PF12755.5; | 45.80 | 0.00 |
| TRINITY_I7LX71_TETTS/33-164      | I7LX71.1     | PF00782.18 | 45.80 | 0.00 |
| TRINITY_D3BJZ6_POLPA/100-462     | D3BJZ6.1     | PF00155.19 | 45.80 | 0.00 |
| TRINITY_W5ANU5_WHEAT/40-246      | W5ANU5.1     | PF03798.14 | 45.80 | 0.00 |
| TRINITY_A7SNT2_NEMVE/8-128       | A7SNT2.1     | PF01082.18 | 45.80 | 0.00 |
| TRINITY_D8U0K1_VOLCA/348-490     | D8U0K1.1     | PF08646.8; | 45.80 | 0.00 |
| TRINITY_L8GUR2_ACACA/284-351     | L8GUR2.1     | PF02207.18 | 45.80 | 0.00 |
| TRINITY_C3Z7M9_BRAFL/186-281     | C3Z7M9.1     | PF12894.5; | 45.80 | 0.00 |
| TRINITY_M4B3P6_HYAAE/8-161       | M4B3P6.1     | PF04031.11 | 45.80 | 0.00 |
| TRINITY_A0A087SCX2_AUXPR/9-229   | A0A087SCX2.1 | PF0149     | 45.80 | 0.00 |
| TRINITY_D7FXL4_ECTSI/354-797     | D7FXL4.1     | PF01432.18 | 45.80 | 0.00 |
| TRINITY_I1FBA4_AMPQE/207-465     | I1FBA4.1     | PF02263.17 | 45.80 | 0.00 |
| TRINITY_L8GNJ5_ACACA/2442-2524   | L8GNJ5.1     | PF05406.13 | 45.80 | 0.00 |
| TRINITY_L8HGG6_ACACA/132-402     | L8HGG6.1     | PF03372.21 | 45.80 | 0.00 |
| TRINITY_A0A091D197_FUKDA/478-731 | A0A091D197.1 | PF0283     | 45.80 | 0.00 |
| TRINITY_G3J709_CORMM/29-150      | G3J709.1     | PF00383.21 | 45.80 | 0.00 |
| TRINITY_I0Z872_9CHLO/151-222     | I0Z872.1     | PF08234.10 | 45.80 | 0.00 |
| TRINITY_D3B6Z4_POLPA/15-169      | D3B6Z4.1     | PF04707.12 | 45.80 | 0.00 |
| TRINITY_U9TN42_RHIID/384-782     | U9TN42.1     | PF00176.21 | 45.80 | 0.00 |
| TRINITY_L8HJR7_ACACA/270-398     | L8HJR7.1     | PF00781.22 | 45.80 | 0.00 |
| TRINITY_D8UJ77_VOLCA/630-847     | D8UJ77.1     | PF00702.24 | 45.80 | 0.00 |
| TRINITY_D8TL50_VOLCA/261-380     | D8TL50.1     | PF01909.21 | 45.80 | 0.00 |
| TRINITY_D8UJL0_VOLCA/2-171       | D8UJL0.1     | PF03009.15 | 45.80 | 0.00 |
| TRINITY_A9SQW4_PHYPA/111-371     | A9SQW4.1     | PF01702.16 | 45.80 | 0.00 |
| TRINITY_G1KFK8_ANOCA/161-246     | G1KFK8.1     | PF12894.5; | 45.80 | 0.00 |
| TRINITY_I7M2F2_TETTS/121-405     | I7M2F2.2     | PF05291.9; | 45.80 | 0.00 |
| TRINITY_A8IYR0_CHLRE/101-281     | A8IYR0.1     | PF03770.14 | 45.80 | 0.00 |
| TRINITY_W6FUH4_NODSP/15-183      | W6FUH4.1     | PF13385.4; | 45.80 | 0.00 |
| TRINITY_E1Z6P2_CHLVA/157-430     | E1Z6P2.1     | PF00557.22 | 45.80 | 0.00 |
| TRINITY_D8SKW4_SELML/64-170      | D8SKW4.1     | PF00134.21 | 45.80 | 0.00 |
| TRINITY_D8U5I9_VOLCA/8-186       | D8U5I9.1     | PF01007.18 | 45.80 | 0.00 |

|                                  |              |            |       |      |
|----------------------------------|--------------|------------|-------|------|
| TRINITY_D8U1I4_VOLCA/34-292      | D8U1I4.1     | PF00069.23 | 45.80 | 0.00 |
| TRINITY_B3S7X0_TRIAD/229-278     | B3S7X0.1     | PF00415.16 | 45.80 | 0.00 |
| TRINITY_D8UF85_VOLCA/179-263     | D8UF85.1     | PF05699.12 | 45.80 | 0.00 |
| TRINITY_D8TJB9_VOLCA/410-574     | D8TJB9.1     | PF00005.25 | 45.80 | 0.00 |
| TRINITY_V8P4L1_OPHHA/51-146      | V8P4L1.1     | PF02991.14 | 45.70 | 0.00 |
| TRINITY_A0CA32_PARTE/9-233       | A0CA32.1     | PF02230.14 | 45.70 | 0.00 |
| TRINITY_D8TQ62_VOLCA/2279-2520   | D8TQ62.1     | PF02259.21 | 45.70 | 0.00 |
| TRINITY_W5MU48_LEPOC/107-374     | W5MU48.1     | PF07942.10 | 45.70 | 0.00 |
| TRINITY_J9ITG1_9SPIT/22-292      | J9ITG1.1     | PF00248.19 | 45.70 | 0.00 |
| TRINITY_TMEDA_DICDI/24-200       | Q769F9.1     | PF01105.22 | 45.70 | 0.00 |
| TRINITY_A0A0J8E325_BETVU/28-210  | A0A0J8E325.1 | PF1341     | 45.70 | 0.00 |
| TRINITY_B9HJ54_POPTR/12-109      | B9HJ54.1     | PF00153.25 | 45.70 | 0.00 |
| TRINITY_H3CEP8_TETNG/9-186       | H3CEP8.1     | PF11032.6; | 45.70 | 0.00 |
| TRINITY_A0DUA5_PARTE/170-239     | A0DUA5.1     | PF14360.4; | 45.70 | 0.00 |
| TRINITY_A0BP90_PARTE/47-120      | A0BP90.1     | PF00076.20 | 45.70 | 0.00 |
| TRINITY_E3NLH6_CAERE/106-152     | E3NLH6.1     | PF13639.4; | 45.70 | 0.00 |
| TRINITY_A8HQ22_CHLRE/163-586     | A8HQ22.1     | PF12739.5; | 45.70 | 0.00 |
| TRINITY_F1A1E3_DICPU/37-330      | F1A1E3.1     | PF03982.11 | 45.70 | 0.00 |
| TRINITY_S8BLX5_DACHA/1-163       | S8BLX5.1     | PF00838.15 | 45.70 | 0.00 |
| TRINITY_G9A044_TORDC/243-507     | G9A044.1     | PF00122.18 | 45.70 | 0.00 |
| TRINITY_L8H1I6_ACACA/6-1219      | L8H1I6.1     | PF02463.17 | 45.70 | 0.00 |
| TRINITY_D3BN50_POLPA/12-267      | D3BN50.1     | PF00069.23 | 45.70 | 0.00 |
| TRINITY_L8GTS3_ACACA/110-367     | L8GTS3.1     | PF00082.20 | 45.70 | 0.00 |
| TRINITY_A0DER1_PARTE/316-457     | A0DER1.1     | PF00782.18 | 45.70 | 0.00 |
| TRINITY_J9INI5_9SPIT/488-743     | J9INI5.1     | PF00899.19 | 45.70 | 0.00 |
| TRINITY_F0ZC69_DICPU/186-316     | F0ZC69.1     | PF00782.18 | 45.70 | 0.00 |
| TRINITY_F4PM68_DICFS/19-198      | F4PM68.1     | PF16213.3; | 45.70 | 0.00 |
| TRINITY_D8LBC2_ECTSI/41-175      | D8LBC2.1     | PF12146.6; | 45.70 | 0.00 |
| TRINITY_A7BR79_9GAMM/15-298      | A7BR79.1     | PF03747.12 | 45.70 | 0.00 |
| TRINITY_W4YIV3_STRPU/135-245     | W4YIV3.1     | PF03556.13 | 45.70 | 0.00 |
| TRINITY_A0BPS9_PARTE/47-528      | A0BPS9.1     | PF00501.26 | 45.70 | 0.00 |
| TRINITY_A0A095DHY2_CRYGA/162-428 | A0A095DHY2.1 | PF0118     | 45.70 | 0.00 |
| TRINITY_F8KXV4_PARAV/23-504      | F8KXV4.1     | PF02446.15 | 45.70 | 0.00 |
| TRINITY_I7M328_TETTS/23-132      | I7M328.1     | PF00787.22 | 45.70 | 0.00 |
| TRINITY_F4PVI6_DICFS/286-442     | F4PVI6.1     | PF05179.12 | 45.70 | 0.00 |
| TRINITY_F2IG28_FLUTR/9-147       | F2IG28.1     | PF13302.5; | 45.70 | 0.00 |
| TRINITY_G0QNX2_ICHMG/838-1082    | G0QNX2.1     | PF16212.3; | 45.70 | 0.00 |
| TRINITY_I1BVS2_RHIO9/188-290     | I1BVS2.1     | PF12894.5; | 45.70 | 0.00 |
| TRINITY_A4VD54_TETTS/76-357      | A4VD54.1     | PF00664.21 | 45.70 | 0.00 |
| TRINITY_A0A0C2N390_THEKT/10-171  | A0A0C2N390.1 | PF0007     | 45.70 | 0.00 |
| TRINITY_D8TMY6_VOLCA/279-490     | D8TMY6.1     | PF07714.15 | 45.70 | 0.00 |
| TRINITY_A0A0G4H0Z9_9ALVE/24-182  | A0A0G4H0Z9.1 | PF0007     | 45.70 | 0.00 |
| TRINITY_A0E0M5_PARTE/573-711     | A0E0M5.1     | PF00004.27 | 45.70 | 0.00 |
| TRINITY_M7BBZ2_CHEMY/8-223       | M7BBZ2.1     | PF05891.10 | 45.70 | 0.00 |
| TRINITY_A0A0D2WMW4_CAPO3/198-359 | A0A0D2WMW4.1 | PF0673     | 45.70 | 0.00 |
| TRINITY_H2U0B8_TAKRU/576-712     | H2U0B8.1     | PF07534.14 | 45.70 | 0.00 |
| TRINITY_D3AY38_POLPA/846-1105    | D3AY38.1     | PF07714.15 | 45.70 | 0.00 |
| TRINITY_F4P893_BATDJ/24-194      | F4P893.1     | PF01871.15 | 45.70 | 0.00 |
| TRINITY_K9VY24_9CYAN/43-487      | K9VY24.1     | PF03055.13 | 45.70 | 0.00 |
| TRINITY_W4FSJ9_9STRA/1228-1335   | W4FSJ9.1     | PF00005.25 | 45.70 | 0.00 |
| TRINITY_D3BL66_POLPA/302-470     | D3BL66.1     | PF04727.11 | 45.70 | 0.00 |
| TRINITY_L8H0C4_ACACA/110-294     | L8H0C4.1     | PF09757.7; | 45.70 | 0.00 |
| TRINITY_L8HAY2_ACACA/1-176       | L8HAY2.1     | PF13462.4; | 45.70 | 0.00 |
| TRINITY_A8HPW8_CHLRE/149-319     | A8HPW8.1     | PF00270.27 | 45.70 | 0.00 |
| TRINITY_E0W407_PEDHC/12-180      | E0W407.1     | PF14580.4; | 45.70 | 0.00 |
| TRINITY_G8TDU0_NIAKG/33-344      | G8TDU0.1     | PF00251.18 | 45.70 | 0.00 |
| TRINITY_Q22UT0_TETTS/175-646     | Q22UT0.2     | PF00443.27 | 45.70 | 0.00 |
| TRINITY_I7LTJ4_TETTS/16-121      | I7LTJ4.1     | PF01920.18 | 45.70 | 0.00 |
| TRINITY_D8THR7_VOLCA/300-536     | D8THR7.1     | PF12697.5; | 45.70 | 0.00 |
| TRINITY_A0A0G4EWQ1_9ALVE/611-660 | A0A0G4EWQ1.1 | PF1341     | 45.70 | 0.00 |
| TRINITY_F4QPE4_9CAUL/28-149      | F4QPE4.1     | PF00188.24 | 45.70 | 0.00 |

|                                   |              |            |       |      |
|-----------------------------------|--------------|------------|-------|------|
| TRINITY_D8TZH6_VOLCA/22-283       | D8TZH6.1     | PF00233.17 | 45.70 | 0.00 |
| TRINITY_F1LAC2_ASCSU/8-170        | F1LAC2.1     | PF00071.20 | 45.70 | 0.00 |
| TRINITY_C0ZWC4_RHOE4/40-175       | C0ZWC4.1     | PF01565.21 | 45.70 | 0.00 |
| TRINITY_Q6TGW9_DANRE/142-233      | Q6TGW9.1     | PF06831.12 | 45.70 | 0.00 |
| TRINITY_G0QRB2_ICHMG/1-98         | G0QRB2.1     | PF00153.25 | 45.70 | 0.00 |
| TRINITY_D8UJ14_VOLCA/185-336      | D8UJ14.1     | PF01569.19 | 45.70 | 0.00 |
| TRINITY_M1WE29_CLAP2/186-274      | M1WE29.1     | PF12894.5; | 45.70 | 0.00 |
| TRINITY_D8TSG6_VOLCA/79-180       | D8TSG6.1     | PF00254.26 | 45.70 | 0.00 |
| TRINITY_A0JQX4_ARTS2/5-151        | A0JQX4.1     | PF16242.3; | 45.70 | 0.00 |
| TRINITY_Q23QD2_TETTS/366-575      | Q23QD2.2     | PF00566.16 | 45.70 | 0.00 |
| TRINITY_I7M6K2_TETTS/65-258       | I7M6K2.1     | PF01145.23 | 45.70 | 0.00 |
| TRINITY_J9J3B4_9SPIT/124-338      | J9J3B4.1     | PF00112.21 | 45.70 | 0.00 |
| TRINITY_D8U469_VOLCA/89-355       | D8U469.1     | PF00268.19 | 45.70 | 0.00 |
| TRINITY_D8TZK2_VOLCA/16462-16640  | D8TZK2.1     | PF08659.8; | 45.70 | 0.00 |
| TRINITY_D8UDG5_VOLCA/23-294       | D8UDG5.1     | PF05770.9; | 45.70 | 0.00 |
| TRINITY_G0QNX2_ICHMG/73-307       | G0QNX2.1     | PF00122.18 | 45.70 | 0.00 |
| TRINITY_A8JFG5_CHLRE/4-305        | A8JFG5.1     | PF00248.19 | 45.70 | 0.00 |
| TRINITY_B7GBX5_PHATC/147-215      | B7GBX5.1     | PF02207.18 | 45.70 | 0.00 |
| TRINITY_E9FYK7_DAPPU/332-447      | E9FYK7.1     | PF00271.29 | 45.70 | 0.00 |
| TRINITY_E1ZFY9_CHLVA/64-196       | E1ZFY9.1     | PF00583.23 | 45.70 | 0.00 |
| TRINITY_E4ZXV1_LEPMJ/601-1335     | E4ZXV1.1     | PF02460.16 | 45.70 | 0.00 |
| TRINITY_H3HAJ2_PHYRM/359-478      | H3HAJ2.1     | PF00665.24 | 45.70 | 0.00 |
| TRINITY_I1G2T0_AMPQE/174-530      | I1G2T0.1     | PF00657.20 | 45.70 | 0.00 |
| TRINITY_A8HVG8_CHLRE/54-275       | A8HVG8.1     | PF00856.26 | 45.70 | 0.00 |
| TRINITY_A0A060SIJ8_PYCCI/940-1185 | A0A060SIJ8.1 | PF0772     | 45.70 | 0.00 |
| TRINITY_A0A0M3JRG0_ANISI/33-246   | A0A0M3JRG0.1 | PF0113     | 45.70 | 0.00 |
| TRINITY_I1KBQ5_SOYBN/9-133        | I1KBQ5.1     | PF04628.11 | 45.70 | 0.00 |
| TRINITY_G4ZVE5_PHYSP/23-127       | G4ZVE5.1     | PF05916.9; | 45.60 | 0.00 |
| TRINITY_G0VGN4_NAUCC/243-508      | G0VGN4.1     | PF00122.18 | 45.60 | 0.00 |
| TRINITY_A0DNI0_PARTE/1-148        | A0DNI0.1     | PF03656.11 | 45.60 | 0.00 |
| TRINITY_A7THQ5_VANPO/285-389      | A7THQ5.1     | PF00307.29 | 45.60 | 0.00 |
| TRINITY_G0QV43_ICHMG/249-568      | G0QV43.1     | PF04515.10 | 45.60 | 0.00 |
| TRINITY_C3KLU7_RHISN/61-162       | C3KLU7.1     | PF00011.19 | 45.60 | 0.00 |
| TRINITY_Q16RK6_AEDAE/467-795      | Q16RK6.1     | PF07714.15 | 45.60 | 0.00 |
| TRINITY_U3IGT3_ANAPL/358-427      | U3IGT3.1     | PF12894.5; | 45.60 | 0.00 |
| TRINITY_C3XZG9_BRAFL/1-285        | C3XZG9.1     | PF04189.11 | 45.60 | 0.00 |
| TRINITY_A0CSC4_PARTE/899-1093     | A0CSC4.1     | PF14309.4; | 45.60 | 0.00 |
| TRINITY_B1WQY9_CYAA5/29-196       | B1WQY9.1     | PF06966.10 | 45.60 | 0.00 |
| TRINITY_A0A0M3AW95_9SPHN/64-191   | A0A0M3AW95.1 | PF0018     | 45.60 | 0.00 |
| TRINITY_I1G9N1_AMPQE/18-97        | I1G9N1.1     | PF09340.8; | 45.60 | 0.00 |
| TRINITY_A0DN99_PARTE/43-299       | A0DN99.1     | PF00069.23 | 45.60 | 0.00 |
| TRINITY_A0CXP9_PARTE/92-386       | A0CXP9.1     | PF01457.14 | 45.60 | 0.00 |
| TRINITY_T1JWJ8_TETUR/18-104       | T1JWJ8.1     | PF02970.14 | 45.60 | 0.00 |
| TRINITY_C1E8K9_MICSR/182-435      | C1E8K9.1     | PF01189.15 | 45.60 | 0.00 |
| TRINITY_K6UY88_9APIC/75-189       | K6UY88.1     | PF16531.3; | 45.60 | 0.00 |
| TRINITY_D8TXM1_VOLCA/1926-2033    | D8TXM1.1     | PF07714.15 | 45.60 | 0.00 |
| TRINITY_I7LXL4_TETTS/25-124       | I7LXL4.1     | PF00153.25 | 45.60 | 0.00 |
| TRINITY_Q22TN6_TETTS/693-784      | Q22TN6.3     | PF00027.27 | 45.60 | 0.00 |
| TRINITY_D3BM84_POLPA/157-305      | D3BM84.1     | PF01529.18 | 45.60 | 0.00 |
| TRINITY_L8GR65_ACACA/345-515      | L8GR65.1     | PF03770.14 | 45.60 | 0.00 |
| TRINITY_L8GXS7_ACACA/913-1039     | L8GXS7.1     | PF00241.18 | 45.60 | 0.00 |
| TRINITY_A8IHB6_CHLRE/1-172        | A8IHB6.1     | PF06041.9; | 45.60 | 0.00 |
| TRINITY_Q23CV4_TETTS/238-295      | Q23CV4.1     | PF13921.4; | 45.60 | 0.00 |
| TRINITY_Q23QV2_TETTS/229-494      | Q23QV2.2     | PF00122.18 | 45.60 | 0.00 |
| TRINITY_A0A0N5AZR8_9BILA/73-158   | A0A0N5AZR8.1 | PF0073     | 45.60 | 0.00 |
| TRINITY_J9IZH8_9SPIT/189-265      | J9IZH8.1     | PF14360.4; | 45.60 | 0.00 |
| TRINITY_D8U097_VOLCA/432-523      | D8U097.1     | PF12796.5; | 45.60 | 0.00 |
| TRINITY_A8IDU2_CHLRE/877-1024     | A8IDU2.1     | PF03330.16 | 45.60 | 0.00 |
| TRINITY_W5KDC8_ASTMX/1554-1702    | W5KDC8.1     | PF05843.12 | 45.60 | 0.00 |
| TRINITY_D8UCV0_VOLCA/107-209      | D8UCV0.1     | PF02536.12 | 45.60 | 0.00 |
| TRINITY_Q22NW8_TETTS/199-479      | Q22NW8.2     | PF06098.9; | 45.60 | 0.00 |

|                                    |                     |       |      |
|------------------------------------|---------------------|-------|------|
| TRINITY_A0A067QSY9_ZOONE/1-120     | A0A067QSY9.1 PF0075 | 45.60 | 0.00 |
| TRINITY_D8U5V1_VOLCA/480-704       | D8U5V1.1 PF07944.10 | 45.60 | 0.00 |
| TRINITY_A0A0G4IX44_PLABS/1187-1362 | A0A0G4IX44.1 PF0639 | 45.60 | 0.00 |
| TRINITY_A0A087SHX8_AUXPR/61-348    | A0A087SHX8.1 PF0029 | 45.60 | 0.00 |
| TRINITY_M2W588_GALSU/27-222        | M2W588.1 PF00106.23 | 45.60 | 0.00 |
| TRINITY_C1MS08_MICPC/71-164        | C1MS08.1 PF12796.5; | 45.60 | 0.00 |
| TRINITY_Q232H5_TETTS/29-208        | Q232H5.1 PF04939.10 | 45.60 | 0.00 |
| TRINITY_A8HNP6_CHLRE/11-260        | A8HNP6.1 PF07727.12 | 45.60 | 0.00 |
| TRINITY_L8GG55_ACACA/12-237        | L8GG55.1 PF05724.9; | 45.60 | 0.00 |
| TRINITY_A0A075AXW7_9FUNG/248-775   | A0A075AXW7.1 PF0044 | 45.60 | 0.00 |
| TRINITY_S8B4G2_PENO1/609-970       | S8B4G2.1 PF00702.24 | 45.60 | 0.00 |
| TRINITY_A0A078BAX9_STYLE/384-451   | A0A078BAX9.1 PF1349 | 45.60 | 0.00 |
| TRINITY_A0A090K3E3_9GAMM/6-288     | A0A090K3E3.1 PF0426 | 45.60 | 0.00 |
| TRINITY_A0A024TS32_9STRA/50-121    | A0A024TS32.1 PF0024 | 45.60 | 0.00 |
| TRINITY_A0A0A0L4P3_CUCSA/173-229   | A0A0A0L4P3.1 PF0824 | 45.60 | 0.00 |
| TRINITY_D8TTV8_VOLCA/81-324        | D8TTV8.1 PF00233.17 | 45.60 | 0.00 |
| TRINITY_A8J3P1_CHLRE/954-1161      | A8J3P1.1 PF00211.18 | 45.60 | 0.00 |
| TRINITY_A0A0E9N0F0_9SPHI/271-327   | A0A0E9N0F0.1 PF1341 | 45.60 | 0.00 |
| TRINITY_Q22T22_TETTS/520-735       | Q22T22.3 PF07859.11 | 45.50 | 0.00 |
| TRINITY_A0A0D2ULF9_CAPO3/34-349    | A0A0D2ULF9.1 PF0190 | 45.50 | 0.00 |
| TRINITY_L8H3W1_ACACA/3787-4090     | L8H3W1.1 PF00632.23 | 45.50 | 0.00 |
| TRINITY_L8GXI9_ACACA/77-276        | L8GXI9.1 PF09511.8; | 45.50 | 0.00 |
| TRINITY_A0A061E403_THECC/222-265   | A0A061E403.1 PF1363 | 45.50 | 0.00 |
| TRINITY_Q23QF2_TETTS/248-571       | Q23QF2.2 PF03133.13 | 45.50 | 0.00 |
| TRINITY_F0ZLB7_DICPU/2-271         | F0ZLB7.1 PF06432.9; | 45.50 | 0.00 |
| TRINITY_I7LY30_TETTS/57-313        | I7LY30.1 PF01409.18 | 45.50 | 0.00 |
| TRINITY_A0A087XVW6_POEFO/22-145    | A0A087XVW6.2 PF0299 | 45.50 | 0.00 |
| TRINITY_F0Z7X3_DICPU/435-489       | F0Z7X3.1 PF00412.20 | 45.50 | 0.00 |
| TRINITY_A0A084GFG0_9PEZI/34-416    | A0A084GFG0.1 PF0015 | 45.50 | 0.00 |
| TRINITY_Q54XN8_DICDI/4-79          | Q54XN8.1 PF12894.5; | 45.50 | 0.00 |
| TRINITY_Q22HI3_TETTS/105-331       | Q22HI3.2 PF13347.4; | 45.50 | 0.00 |
| TRINITY_I0Z5F8_9CHLO/188-273       | I0Z5F8.1 PF01342.19 | 45.50 | 0.00 |
| TRINITY_G0QL84_ICHMG/1-101         | G0QL84.1 PF01027.18 | 45.50 | 0.00 |
| TRINITY_A0A0D2WPY5_CAPO3/13-453    | A0A0D2WPY5.1 PF0307 | 45.50 | 0.00 |
| TRINITY_C4R5A8_PICPG/533-633       | C4R5A8.1 PF12763.5; | 45.50 | 0.00 |
| TRINITY_F0Z7M0_DICPU/15-209        | F0Z7M0.1 PF01813.15 | 45.50 | 0.00 |
| TRINITY_W0JY30_9EURY/94-226        | W0JY30.1 PF13185.4; | 45.50 | 0.00 |
| TRINITY_L8H3R1_ACACA/85-377        | L8H3R1.1 PF00083.22 | 45.50 | 0.00 |
| TRINITY_L8GRC5_ACACA/88-246        | L8GRC5.1 PF01652.16 | 45.50 | 0.00 |
| TRINITY_C0QIE8_DESAH/8-255         | C0QIE8.1 PF01226.15 | 45.50 | 0.00 |
| TRINITY_Q9ABV9_CAUCR/23-148        | Q9ABV9.1 PF04073.13 | 45.50 | 0.00 |
| TRINITY_I0Z206_9CHLO/66-412        | I0Z206.1 PF12697.5; | 45.50 | 0.00 |
| TRINITY_A0A0J7N2F4_LASNI/2-106     | A0A0J7N2F4.1 PF0066 | 45.50 | 0.00 |
| TRINITY_V8PI87_OPHHA/3-83          | V8PI87.1 PF02798.18 | 45.50 | 0.00 |
| TRINITY_A0A0E3S131_9EURY/14-150    | A0A0E3S131.1 PF1367 | 45.50 | 0.00 |
| TRINITY_D3AX40_POLPA/311-727       | D3AX40.1 PF00083.22 | 45.50 | 0.00 |
| TRINITY_A8IXV0_CHLRE/95-247        | A8IXV0.1 PF01789.14 | 45.50 | 0.00 |
| TRINITY_Q22Y90_TETTS/126-273       | Q22Y90.2 PF01553.19 | 45.50 | 0.00 |
| TRINITY_W4G407_9STRA/22-146        | W4G407.1 PF10502.7; | 45.50 | 0.00 |
| TRINITY_K9ZQ45_ANACC/366-572       | K9ZQ45.1 PF05729.10 | 45.50 | 0.00 |
| TRINITY_F4PN58_DICFS/628-838       | F4PN58.1 PF01823.17 | 45.50 | 0.00 |
| TRINITY_I7MM74_TETTS/141-434       | I7MM74.2 PF00454.25 | 45.50 | 0.00 |
| TRINITY_A0A0P7XRF3_9TELE/158-268   | A0A0P7XRF3.1 PF0355 | 45.50 | 0.00 |
| TRINITY_L8HHX4_ACACA/703-1129      | L8HHX4.1 PF00476.18 | 45.50 | 0.00 |
| TRINITY_D8UDQ7_VOLCA/593-735       | D8UDQ7.1 PF12499.6; | 45.50 | 0.00 |
| TRINITY_A8HTU8_CHLRE/13-251        | A8HTU8.1 PF00856.26 | 45.50 | 0.00 |
| TRINITY_Q22CW3_TETTS/227-323       | Q22CW3.1 PF12796.5; | 45.50 | 0.00 |
| TRINITY_A8IDJ5_CHLRE/422-860       | A8IDJ5.1 PF12832.5; | 45.50 | 0.00 |
| TRINITY_C3Z127_BRAFL/108-378       | C3Z127.1 PF03629.16 | 45.50 | 0.00 |
| TRINITY_I7MMY6_TETTS/639-738       | I7MMY6.2 PF00989.23 | 45.50 | 0.00 |
| TRINITY_V3ZCW0_LOTGI/106-315       | V3ZCW0.1 PF00566.16 | 45.50 | 0.00 |



|                                  |                     |       |      |
|----------------------------------|---------------------|-------|------|
| TRINITY_T1J449_STRMM/360-466     | T1J449.1 PF13646.4; | 45.50 | 0.00 |
| TRINITY_D8UK76_VOLCA/37-268      | D8UK76.1 PF01156.17 | 45.50 | 0.00 |
| TRINITY_A0BIF4_PARTE/119-382     | A0BIF4.1 PF00069.23 | 45.50 | 0.00 |
| TRINITY_A0A0K0EAQ3_STRER/29-132  | A0A0K0EAQ3.1 PF0008 | 45.50 | 0.00 |
| TRINITY_A9SM27_PHYPA/231-414     | A9SM27.1 PF00941.19 | 45.50 | 0.00 |
| TRINITY_D5BYY4_NITHN/24-95       | D5BYY4.1 PF11523.6; | 45.50 | 0.00 |
| TRINITY_E1Z9X6_CHLVA/862-1052    | E1Z9X6.1 PF07714.15 | 45.50 | 0.00 |
| TRINITY_A0A0J8BH52_BETVU/51-165  | A0A0J8BH52.1 PF0121 | 45.50 | 0.00 |
| TRINITY_A0A089PNS7_PLUGE/1-341   | A0A089PNS7.1 PF0149 | 45.50 | 0.00 |
| TRINITY_Q1DA84_MYXXD/113-198     | Q1DA84.1 PF13640.4; | 45.50 | 0.00 |
| TRINITY_J9IWS4_9SPIT/678-793     | J9IWS4.1 PF00168.28 | 45.50 | 0.00 |
| TRINITY_I7LZV2_TETTS/151-413     | I7LZV2.1 PF00069.23 | 45.50 | 0.00 |
| TRINITY_K9U7U1_9CYAN/443-580     | K9U7U1.1 PF02518.24 | 45.50 | 0.00 |
| TRINITY_I4BB66_TURPD/8-314       | I4BB66.1 PF01636.21 | 45.50 | 0.00 |
| TRINITY_A8HPJ4_CHLRE/15-97       | A8HPJ4.1 PF05542.9; | 45.50 | 0.00 |
| TRINITY_A8I550_CHLRE/6-465       | A8I550.1 PF04712.10 | 45.50 | 0.00 |
| TRINITY_I1GCR6_AMPQE/41-411      | I1GCR6.1 PF04857.18 | 45.50 | 0.00 |
| TRINITY_A8J9C1_CHLRE/48-416      | A8J9C1.1 PF01237.16 | 45.50 | 0.00 |
| TRINITY_A0CV01_PARTE/32-282      | A0CV01.1 PF00768.18 | 45.50 | 0.00 |
| TRINITY_A0A0J7K1H3_LASNI/67-147  | A0A0J7K1H3.1 PF1335 | 45.50 | 0.00 |
| TRINITY_A0A0D2VTR1_CAPO3/8-309   | A0A0D2VTR1.1 PF0049 | 45.50 | 0.00 |
| TRINITY_A9G978_SORC5/236-347     | A9G978.1 PF00271.29 | 45.50 | 0.00 |
| TRINITY_G0R413_ICHMG/765-1014    | G0R413.1 PF16212.3; | 45.50 | 0.00 |
| TRINITY_J9IM35_9SPIT/72-192      | J9IM35.1 PF14933.4; | 45.50 | 0.00 |
| TRINITY_A9RJZ5_PHYPA/276-381     | A9RJZ5.1 PF12325.6; | 45.50 | 0.00 |
| TRINITY_K3YXY4_SETIT/198-563     | K3YXY4.1 PF05970.12 | 45.50 | 0.00 |
| TRINITY_R0FJH1_9BRAS/651-744     | R0FJH1.1 PF02689.12 | 45.50 | 0.00 |
| TRINITY_I7MAC8_TETTS/3673-3968   | I7MAC8.2 PF00632.23 | 45.50 | 0.00 |
| TRINITY_A8J4Y3_CHLRE/2-209       | A8J4Y3.1 PF00069.23 | 45.50 | 0.00 |
| TRINITY_D8U1T3_VOLCA/80-649      | D8U1T3.1 PF03063.18 | 45.50 | 0.00 |
| TRINITY_G0QXM4_ICHMG/12-216      | G0QXM4.1 PF01088.19 | 45.50 | 0.00 |
| TRINITY_A8JH38_CHLRE/355-450     | A8JH38.1 PF08295.10 | 45.50 | 0.00 |
| TRINITY_Q1AZH8_RUBXD/36-477      | Q1AZH8.1 PF02133.13 | 45.40 | 0.00 |
| TRINITY_Q22M73_TETTS/17-124      | Q22M73.1 PF02991.14 | 45.40 | 0.00 |
| TRINITY_B9TN91_RICCO/190-303     | B9TN91.1 PF00072.22 | 45.40 | 0.00 |
| TRINITY_J9HSH9_9SPIT/67-426      | J9HSH9.1 PF07690.14 | 45.40 | 0.00 |
| TRINITY_A0E2J1_PARTE/100-358     | A0E2J1.1 PF00069.23 | 45.40 | 0.00 |
| TRINITY_D3B9A6_POLPA/115-227     | D3B9A6.1 PF00782.18 | 45.40 | 0.00 |
| TRINITY_D8TND6_VOLCA/38-192      | D8TND6.1 PF02542.14 | 45.40 | 0.00 |
| TRINITY_D3BL52_POLPA/124-232     | D3BL52.1 PF08240.10 | 45.40 | 0.00 |
| TRINITY_G0R0C9_ICHMG/17-291      | G0R0C9.1 PF00378.18 | 45.40 | 0.00 |
| TRINITY_L8H2P9_ACACA/62-245      | L8H2P9.1 PF14308.4; | 45.40 | 0.00 |
| TRINITY_D2A4K7_TRICA/36-208      | D2A4K7.1 PF03637.15 | 45.40 | 0.00 |
| TRINITY_I7M023_TETTS/534-690     | I7M023.1 PF04727.11 | 45.40 | 0.00 |
| TRINITY_Q9TVK6_DICDI/465-1321    | Q9TVK6.1 PF02460.16 | 45.40 | 0.00 |
| TRINITY_D8LU94_ECTSI/82-277      | D8LU94.1 PF11715.6; | 45.40 | 0.00 |
| TRINITY_H2KTH9_CLOSI/179-359     | H2KTH9.1 PF00270.27 | 45.40 | 0.00 |
| TRINITY_A0A015N2M8_9GLOM/217-520 | A0A015N2M8.1 PF0597 | 45.40 | 0.00 |
| TRINITY_D8TN00_VOLCA/1-276       | D8TN00.1 PF01433.18 | 45.40 | 0.00 |
| TRINITY_L8H533_ACACA/10-116      | L8H533.1 PF00307.29 | 45.40 | 0.00 |
| TRINITY_Q22BJ2_TETTS/163-335     | Q22BJ2.3 PF07162.9; | 45.40 | 0.00 |
| TRINITY_L8GV43_ACACA/128-238     | L8GV43.1 PF00373.16 | 45.40 | 0.00 |
| TRINITY_D8UEG8_VOLCA/121-251     | D8UEG8.1 PF03364.18 | 45.40 | 0.00 |
| TRINITY_W5K4E3_ASTMX/157-414     | W5K4E3.1 PF11708.6; | 45.40 | 0.00 |
| TRINITY_A2U192_9FLAO/445-555     | A2U192.3 PF00072.22 | 45.40 | 0.00 |
| TRINITY_H3GSE5_PHYRM/18-263      | H3GSE5.1 PF04305.12 | 45.40 | 0.00 |
| TRINITY_D3BL06_POLPA/649-893     | D3BL06.1 PF00481.19 | 45.40 | 0.00 |
| TRINITY_D8UFJ2_VOLCA/156-276     | D8UFJ2.1 PF03407.14 | 45.40 | 0.00 |
| TRINITY_J9FBN2_9SPIT/564-662     | J9FBN2.1 PF08647.9; | 45.40 | 0.00 |
| TRINITY_A0A087SE41_AUXPR/106-364 | A0A087SE41.1 PF0066 | 45.40 | 0.00 |
| TRINITY_J9F2X1_9SPIT/418-624     | J9F2X1.1 PF04811.13 | 45.40 | 0.00 |

|                                  |              |            |       |      |
|----------------------------------|--------------|------------|-------|------|
| TRINITY_K9X2I1_9NOST/29-219      | K9X2I1.1     | PF13532.4; | 45.40 | 0.00 |
| TRINITY_W2QGB8_PHYPN/92-396      | W2QGB8.1     | PF01301.17 | 45.30 | 0.00 |
| TRINITY_C8NB28_9GAMM/75-163      | C8NB28.1     | PF12796.5; | 45.30 | 0.00 |
| TRINITY_I1C5L9_RHIO9/18-625      | I1C5L9.1     | PF04130.11 | 45.30 | 0.00 |
| TRINITY_A0C1H5_PARTE/172-233     | A0C1H5.1     | PF04117.10 | 45.30 | 0.00 |
| TRINITY_A0D0H6_PARTE/190-319     | A0D0H6.1     | PF00782.18 | 45.30 | 0.00 |
| TRINITY_G0QIZ2_ICHMG/16-177      | G0QIZ2.1     | PF00071.20 | 45.30 | 0.00 |
| TRINITY_R1E4R6_EMIHU/5-166       | R1E4R6.1     | PF00071.20 | 45.30 | 0.00 |
| TRINITY_G4ZAG1_PHYSP/270-682     | G4ZAG1.1     | PF06602.12 | 45.30 | 0.00 |
| TRINITY_F2UEK7_SALR5/32-127      | F2UEK7.1     | PF13879.4; | 45.30 | 0.00 |
| TRINITY_L8GKR3_ACACA/5-118       | L8GKR3.1     | PF06320.11 | 45.30 | 0.00 |
| TRINITY_D2VRY6_NAEGR/12-173      | D2VRY6.1     | PF00071.20 | 45.30 | 0.00 |
| TRINITY_B9SDF9_RICCO/2-119       | B9SDF9.1     | PF12457.6; | 45.30 | 0.00 |
| TRINITY_A0A0A1U2T7_ENTIV/669-929 | A0A0A1U2T7.1 | PF0771     | 45.30 | 0.00 |
| TRINITY_V4B732_LOTGI/186-369     | V4B732.1     | PF07714.15 | 45.30 | 0.00 |
| TRINITY_J9HIW9_9SPIT/9-83        | J9HIW9.1     | PF04969.14 | 45.30 | 0.00 |
| TRINITY_A7S9M2_NEMVE/16-112      | A7S9M2.1     | PF03645.11 | 45.30 | 0.00 |
| TRINITY_I7LXB1_TETTS/1059-1123   | I7LXB1.2     | PF13499.4; | 45.30 | 0.00 |
| TRINITY_A0A074W9H8_9PEZI/159-727 | A0A074W9H8.1 | PF0518     | 45.30 | 0.00 |
| TRINITY_D3BAA5_POLPA/36-100      | D3BAA5.1     | PF13499.4; | 45.30 | 0.00 |
| TRINITY_A0DXK9_PARTE/23-179      | A0DXK9.1     | PF05477.9; | 45.30 | 0.00 |
| TRINITY_C9JUS5_HUMAN/5-152       | C9JUS5.2     | PF00780.20 | 45.30 | 0.00 |
| TRINITY_E1TJX2_BURSG/177-429     | E1TJX2.1     | PF03781.14 | 45.30 | 0.00 |
| TRINITY_A0DAV4_PARTE/5-111       | A0DAV4.1     | PF14469.4; | 45.30 | 0.00 |
| TRINITY_G9MNE4_HYPVG/42-440      | G9MNE4.1     | PF00999.19 | 45.30 | 0.00 |
| TRINITY_S0GJQ0_9PORP/664-780     | S0GJQ0.1     | PF00072.22 | 45.30 | 0.00 |
| TRINITY_Q55AW0_DICDI/30-119      | Q55AW0.2     | PF08066.10 | 45.30 | 0.00 |
| TRINITY_A0A078AFI0_STYLE/404-615 | A0A078AFI0.1 | PF0106     | 45.30 | 0.00 |
| TRINITY_D8SAB9_SELML/1092-1203   | D8SAB9.1     | PF00271.29 | 45.30 | 0.00 |
| TRINITY_E1Z6A9_CHLVA/799-867     | E1Z6A9.1     | PF15613.4; | 45.30 | 0.00 |
| TRINITY_I0YWA1_9CHLO/70-388      | I0YWA1.1     | PF12698.5; | 45.30 | 0.00 |
| TRINITY_A0DJE9_PARTE/430-486     | A0DJE9.1     | PF12678.5; | 45.30 | 0.00 |
| TRINITY_D3BAB9_POLPA/27-383      | D3BAB9.1     | PF16499.3; | 45.30 | 0.00 |
| TRINITY_I7LTE1_TETTS/844-1165    | I7LTE1.1     | PF03178.13 | 45.30 | 0.00 |
| TRINITY_Q23C23_TETTS/1-172       | Q23C23.1     | PF00025.19 | 45.30 | 0.00 |
| TRINITY_A8IC32_CHLRE/122-225     | A8IC32.1     | PF00085.18 | 45.30 | 0.00 |
| TRINITY_B9N5K1_POPTR/44-129      | B9N5K1.1     | PF01388.19 | 45.30 | 0.00 |
| TRINITY_L8H2D7_ACACA/248-333     | L8H2D7.1     | PF02761.12 | 45.30 | 0.00 |
| TRINITY_M2X0R2_GALSU/5-81        | M2X0R2.1     | PF02798.18 | 45.30 | 0.00 |
| TRINITY_A0A0D3A1U9_BRAOL/157-350 | A0A0D3A1U9.1 | PF1338     | 45.30 | 0.00 |
| TRINITY_E1ZM61_CHLVA/236-361     | E1ZM61.1     | PF06888.10 | 45.30 | 0.00 |
| TRINITY_G0QQW5_ICHMG/161-227     | G0QQW5.1     | PF01302.23 | 45.30 | 0.00 |
| TRINITY_D8TJS5_VOLCA/5-98        | D8TJS5.1     | PF09177.9; | 45.30 | 0.00 |
| TRINITY_W7X474_TETTS/3-234       | W7X474.1     | PF01876.14 | 45.30 | 0.00 |
| TRINITY_D8TJR4_VOLCA/308-429     | D8TJR4.1     | PF00892.18 | 45.30 | 0.00 |
| TRINITY_A0A0G4ILT0_PLABS/5-204   | A0A0G4ILT0.1 | PF0395     | 45.30 | 0.00 |
| TRINITY_I7MJIO_TETTS/1-168       | I7MJIO.1     | PF14580.4; | 45.30 | 0.00 |
| TRINITY_A0A074RY28_9HOMO/35-123  | A0A074RY28.1 | PF1289     | 45.30 | 0.00 |
| TRINITY_E1Z9P4_CHLVA/171-710     | E1Z9P4.1     | PF04130.11 | 45.30 | 0.00 |
| TRINITY_A0A078A8Z2_STYLE/34-167  | A0A078A8Z2.1 | PF1021     | 45.30 | 0.00 |
| TRINITY_E1ZNR9_CHLVA/1865-2215   | E1ZNR9.1     | PF02889.14 | 45.30 | 0.00 |
| TRINITY_D8U8C2_VOLCA/29-358      | D8U8C2.1     | PF07992.12 | 45.30 | 0.00 |
| TRINITY_A0A0N4UGN0_DRAME/194-461 | A0A0N4UGN0.1 | PF0055     | 45.30 | 0.00 |
| TRINITY_H2XVQ2_CIOIN/227-325     | H2XVQ2.1     | PF12763.5; | 45.30 | 0.00 |
| TRINITY_Q23QD2_TETTS/366-575     | Q23QD2.2     | PF00566.16 | 45.30 | 0.00 |
| TRINITY_C5X9N6_SORBI/14-139      | C5X9N6.1     | PF13671.4; | 45.30 | 0.00 |
| TRINITY_G0R0V5_ICHMG/25-299      | G0R0V5.1     | PF00069.23 | 45.30 | 0.00 |
| TRINITY_H2Z7Y9_CIOSA/125-464     | H2Z7Y9.1     | PF06602.12 | 45.30 | 0.00 |
| TRINITY_G0QKW0_ICHMG/98-205      | G0QKW0.1     | PF00787.22 | 45.30 | 0.00 |
| TRINITY_A7BR79_9GAMM/15-298      | A7BR79.1     | PF03747.12 | 45.30 | 0.00 |
| TRINITY_A0A0G2ZDT3_9DELT/10-158  | A0A0G2ZDT3.1 | PF1624     | 45.30 | 0.00 |

|                                  |              |            |       |      |
|----------------------------------|--------------|------------|-------|------|
| TRINITY_W1NNU8_AMBTC/171-302     | W1NNU8.1     | PF04696.11 | 45.30 | 0.00 |
| TRINITY_A0A066WL70_9BASI/93-431  | A0A066WL70.1 | PF1277     | 45.30 | 0.00 |
| TRINITY_I0YWI5_9CHLO/9-73        | I0YWI5.1     | PF00226.29 | 45.30 | 0.00 |
| TRINITY_A0CIM5_PARTE/204-331     | A0CIM5.1     | PF01926.21 | 45.30 | 0.00 |
| TRINITY_D8TJA9_VOLCA/41-757      | D8TJA9.1     | PF05879.10 | 45.30 | 0.00 |
| TRINITY_T1K5B5_TETUR/776-1081    | T1K5B5.1     | PF00632.23 | 45.30 | 0.00 |
| TRINITY_E1Z8P6_CHLVA/15-119      | E1Z8P6.1     | PF00581.18 | 45.30 | 0.00 |
| TRINITY_S3CQ68_OPHP1/12-322      | S3CQ68.1     | PF00069.23 | 45.30 | 0.00 |
| TRINITY_H2UVR9_TAKRU/12-283      | H2UVR9.1     | PF01073.17 | 45.30 | 0.00 |
| TRINITY_A0A015K817_9GLOM/26-201  | A0A015K817.1 | PF0114     | 45.30 | 0.00 |
| TRINITY_A0A087SE95_AUXPR/53-291  | A0A087SE95.1 | PF0014     | 45.30 | 0.00 |
| TRINITY_S8C461_9LAMI/1422-1487   | S8C461.1     | PF00385.22 | 45.30 | 0.00 |
| TRINITY_G4ZJG1_PHYSP/290-379     | G4ZJG1.1     | PF05699.12 | 45.30 | 0.00 |
| TRINITY_A8IWZ4_CHLRE/275-446     | A8IWZ4.1     | PF14288.4; | 45.30 | 0.00 |
| TRINITY_I7MHP0_TETTS/475-658     | I7MHP0.1     | PF01756.17 | 45.30 | 0.00 |
| TRINITY_Q3M0Y3_PARTE/32-235      | Q3M0Y3.1     | PF00804.23 | 45.20 | 0.00 |
| TRINITY_D8LF24_ECTSI/946-1351    | D8LF24.1     | PF08393.11 | 45.20 | 0.00 |
| TRINITY_W5MDB7_LEPOC/196-464     | W5MDB7.1     | PF00664.21 | 45.20 | 0.00 |
| TRINITY_A7SRL3_NEMVE/17-270      | A7SRL3.1     | PF00069.23 | 45.20 | 0.00 |
| TRINITY_E4X4L5_OIKDI/27-636      | E4X4L5.1     | PF00012.18 | 45.20 | 0.00 |
| TRINITY_V2WY49_MONRO/2-173       | V2WY49.1     | PF14437.4; | 45.20 | 0.00 |
| TRINITY_A4VDZ5_TETTS/5-135       | A4VDZ5.1     | PF05914.10 | 45.20 | 0.00 |
| TRINITY_D3BSQ8_POLPA/10-337      | D3BSQ8.1     | PF05631.12 | 45.20 | 0.00 |
| TRINITY_D8S0L6_SELML/388-492     | D8S0L6.1     | PF03450.15 | 45.20 | 0.00 |
| TRINITY_W6KPB0_9TRYP/165-337     | W6KPB0.1     | PF02475.14 | 45.20 | 0.00 |
| TRINITY_J9I759_9SPIT/142-428     | J9I759.1     | PF00122.18 | 45.20 | 0.00 |
| TRINITY_L8GMG2_ACACA/38-448      | L8GMG2.1     | PF00450.20 | 45.20 | 0.00 |
| TRINITY_Q22S98_TETTS/953-1159    | Q22S98.1     | PF01852.17 | 45.20 | 0.00 |
| TRINITY_A0DVX9_PARTE/401-444     | A0DVX9.1     | PF13639.4; | 45.20 | 0.00 |
| TRINITY_G0R0N7_ICHMG/32-549      | G0R0N7.1     | PF01602.18 | 45.20 | 0.00 |
| TRINITY_A9T2W4_PHYPA/14-175      | A9T2W4.1     | PF00071.20 | 45.20 | 0.00 |
| TRINITY_A4VDX0_TETTS/737-849     | A4VDX0.1     | PF14663.4; | 45.20 | 0.00 |
| TRINITY_A0A059C1L3_EUCGR/507-588 | A0A059C1L3.1 | PF0078     | 45.20 | 0.00 |
| TRINITY_I1C8R6_RHIO9/64-229      | I1C8R6.1     | PF10354.7; | 45.20 | 0.00 |
| TRINITY_B9IE05_POPTR/26-171      | B9IE05.2     | PF09794.7; | 45.20 | 0.00 |
| TRINITY_G0R4V0_ICHMG/469-626     | G0R4V0.1     | PF00637.18 | 45.20 | 0.00 |
| TRINITY_L8GLK0_ACACA/347-813     | L8GLK0.1     | PF06862.10 | 45.20 | 0.00 |
| TRINITY_I7MJIO_TETTS/1-168       | I7MJIO.1     | PF14580.4; | 45.20 | 0.00 |
| TRINITY_C3ZBN6_BRAFL/12-319      | C3ZBN6.1     | PF00225.21 | 45.20 | 0.00 |
| TRINITY_A8HQK6_CHLRE/313-437     | A8HQK6.1     | PF07732.13 | 45.20 | 0.00 |
| TRINITY_D8UHT4_VOLCA/1070-1142   | D8UHT4.1     | PF02941.13 | 45.20 | 0.00 |
| TRINITY_D8U5V1_VOLCA/480-704     | D8U5V1.1     | PF07944.10 | 45.20 | 0.00 |
| TRINITY_R4X9F3_TAPDE/1782-2011   | R4X9F3.1     | PF12134.6; | 45.20 | 0.00 |
| TRINITY_Q22RT8_TETTS/1160-1264   | Q22RT8.2     | PF02204.16 | 45.20 | 0.00 |
| TRINITY_D8UCH7_VOLCA/2-93        | D8UCH7.1     | PF14995.4; | 45.20 | 0.00 |
| TRINITY_RHBG_DANRE/21-432        | Q7T070.1     | PF00909.19 | 45.20 | 0.00 |
| TRINITY_L8HFX8_ACACA/67-479      | L8HFX8.1     | PF01490.16 | 45.20 | 0.00 |
| TRINITY_D5GIM7_TUBMM/269-381     | D5GIM7.1     | PF12014.6; | 45.20 | 0.00 |
| TRINITY_L8H3W5_ACACA/971-1093    | L8H3W5.1     | PF00271.29 | 45.20 | 0.00 |
| TRINITY_F2TXW1_SALR5/158-287     | F2TXW1.1     | PF00781.22 | 45.20 | 0.00 |
| TRINITY_F4QPE4_9CAUL/28-149      | F4QPE4.1     | PF00188.24 | 45.20 | 0.00 |
| TRINITY_L8H6W3_ACACA/15-134      | L8H6W3.1     | PF02136.18 | 45.20 | 0.00 |
| TRINITY_A0DKS0_PARTE/20-339      | A0DKS0.1     | PF00328.20 | 45.20 | 0.00 |
| TRINITY_F4PH07_DICFS/583-780     | F4PH07.1     | PF00617.17 | 45.20 | 0.00 |
| TRINITY_D8THD3_VOLCA/212-384     | D8THD3.1     | PF00685.25 | 45.20 | 0.00 |
| TRINITY_W5MLC4_LEPOC/33-284      | W5MLC4.1     | PF00069.23 | 45.20 | 0.00 |
| TRINITY_A0A0M0J3K1_9EUKA/23-87   | A0A0M0J3K1.1 | PF1349     | 45.20 | 0.00 |
| TRINITY_G0R2L7_ICHMG/18-285      | G0R2L7.1     | PF00069.23 | 45.20 | 0.00 |
| TRINITY_L8GUY8_ACACA/436-561     | L8GUY8.1     | PF10162.7; | 45.20 | 0.00 |
| TRINITY_Q23QF2_TETTS/248-571     | Q23QF2.2     | PF03133.13 | 45.20 | 0.00 |
| TRINITY_W2PSX8_PHYPN/461-539     | W2PSX8.1     | PF04433.15 | 45.20 | 0.00 |

|                                    |                     |       |      |
|------------------------------------|---------------------|-------|------|
| TRINITY_A0A0F5YGZ4_9CYAN/12-376    | A0A0F5YGZ4.1 PF0373 | 45.20 | 0.00 |
| TRINITY_A8IXG0_CHLRE/21-204        | A8IXG0.1 PF00069.23 | 45.20 | 0.00 |
| TRINITY_L8H3W5_ACACA/971-1093      | L8H3W5.1 PF00271.29 | 45.20 | 0.00 |
| TRINITY_A0A015JNE6_9GLOM/190-476   | A0A015JNE6.1 PF0154 | 45.20 | 0.00 |
| TRINITY_X6NKU2_RETFI/36-170        | X6NKU2.1 PF00782.18 | 45.20 | 0.00 |
| TRINITY_DOMZ56_PHYIT/6-67          | DOMZ56.1 PF00403.24 | 45.20 | 0.00 |
| TRINITY_I7MMD4_TETTS/81-328        | I7MMD4.2 PF09423.8; | 45.20 | 0.00 |
| TRINITY_A8J2X9_CHLRE/125-257       | A8J2X9.1 PF00504.19 | 45.20 | 0.00 |
| TRINITY_A0A0M2PJR3_9BACI/381-456   | A0A0M2PJR3.1 PF0824 | 45.20 | 0.00 |
| TRINITY_A0A0P7Z3L4_9TELE/166-268   | A0A0P7Z3L4.1 PF1364 | 45.20 | 0.00 |
| TRINITY_AT2B3_RAT/876-1058         | Q64568.2 PF00689.19 | 45.20 | 0.00 |
| TRINITY_G7KQK6_MEDTR/246-556       | G7KQK6.2 PF00201.16 | 45.20 | 0.00 |
| TRINITY_M2QL90_CERS8/55-263        | M2QL90.1 PF00350.21 | 45.20 | 0.00 |
| TRINITY_A0BG56_PARTE/51-241        | A0BG56.1 PF00106.23 | 45.20 | 0.00 |
| TRINITY_Q23FF9_TETTS/217-398       | Q23FF9.3 PF00022.17 | 45.20 | 0.00 |
| TRINITY_D8TN37_VOLCA/1910-2160     | D8TN37.1 PF00520.29 | 45.20 | 0.00 |
| TRINITY_H3C1Y9_TETNG/109-200       | H3C1Y9.1 PF12796.5; | 45.20 | 0.00 |
| TRINITY_C3Z6N3_BRAFL/365-470       | C3Z6N3.1 PF00085.18 | 45.10 | 0.00 |
| TRINITY_A0A0G4ITJ6_PLABS/3944-4038 | A0A0G4ITJ6.1 PF0933 | 45.10 | 0.00 |
| TRINITY_G0QY02_ICHMG/755-917       | G0QY02.1 PF00326.19 | 45.10 | 0.00 |
| TRINITY_L8HBE1_ACACA/154-348       | L8HBE1.1 PF13472.4; | 45.10 | 0.00 |
| TRINITY_A8JHQ7_CHLRE/10-171        | A8JHQ7.1 PF00071.20 | 45.10 | 0.00 |
| TRINITY_A0BHW3_PARTE/35-124        | A0BHW3.1 PF13011.4; | 45.10 | 0.00 |
| TRINITY_G0QK29_ICHMG/70-205        | G0QK29.1 PF02100.15 | 45.10 | 0.00 |
| TRINITY_A0EDD8_PARTE/1167-1337     | A0EDD8.1 PF01504.16 | 45.10 | 0.00 |
| TRINITY_Q23AY4_TETTS/31-436        | Q23AY4.2 PF05577.10 | 45.10 | 0.00 |
| TRINITY_I0YWR8_9CHLO/31-183        | I0YWR8.1 PF03024.12 | 45.10 | 0.00 |
| TRINITY_A7RRM0_NEMVE/31-173        | A7RRM0.1 PF00102.25 | 45.10 | 0.00 |
| TRINITY_D5EJC3_CORAD/442-515       | D5EJC3.1 PF00575.21 | 45.10 | 0.00 |
| TRINITY_A0A0G0LP85_9BACT/9-100     | A0A0G0LP85.1 PF0096 | 45.10 | 0.00 |
| TRINITY_B3RU29_TRIAD/10-171        | B3RU29.1 PF00071.20 | 45.10 | 0.00 |
| TRINITY_I0YWJ1_9CHLO/17-152        | I0YWJ1.1 PF04934.12 | 45.10 | 0.00 |
| TRINITY_L8GS37_ACACA/378-494       | L8GS37.1 PF02518.24 | 45.10 | 0.00 |
| TRINITY_G0QJG8_ICHMG/371-552       | G0QJG8.1 PF01756.17 | 45.10 | 0.00 |
| TRINITY_A0CNU6_PARTE/9-126         | A0CNU6.1 PF00855.15 | 45.10 | 0.00 |
| TRINITY_A0A067BZ43_SAPPC/32-320    | A0A067BZ43.1 PF0022 | 45.10 | 0.00 |
| TRINITY_R1EJ93_EMIHU/552-944       | R1EJ93.1 PF07394.10 | 45.10 | 0.00 |
| TRINITY_A0A0A1PED8_9FUNG/120-190   | A0A0A1PED8.1 PF0007 | 45.10 | 0.00 |
| TRINITY_Q218F5_RHOPB/27-449        | Q218F5.1 PF01425.19 | 45.10 | 0.00 |
| TRINITY_A9TR80_PHYPA/1-272         | A9TR80.1 PF06454.9; | 45.10 | 0.00 |
| TRINITY_K8GCU9_9CYAN/941-1063      | K8GCU9.1 PF02518.24 | 45.10 | 0.00 |
| TRINITY_E1Z5J8_CHLVA/185-287       | E1Z5J8.1 PF00085.18 | 45.10 | 0.00 |
| TRINITY_A8J9C9_CHLRE/114-217       | A8J9C9.1 PF01841.17 | 45.10 | 0.00 |
| TRINITY_A0A0L0CBW2_LUCCU/28-129    | A0A0L0CBW2.1 PF1349 | 45.10 | 0.00 |
| TRINITY_L8GE50_ACACA/461-783       | L8GE50.1 PF01593.22 | 45.10 | 0.00 |
| TRINITY_E4TKK0_MARTH/14-163        | E4TKK0.1 PF00849.20 | 45.10 | 0.00 |
| TRINITY_MY0J_DICDI/83-809          | P54697.2 PF00063.19 | 45.10 | 0.00 |
| TRINITY_A0A078AE25_STYLE/157-303   | A0A078AE25.1 PF0753 | 45.10 | 0.00 |
| TRINITY_A8I9T9_CHLRE/72-562        | A8I9T9.1 PF03055.13 | 45.10 | 0.00 |
| TRINITY_R1DRS4_EMIHU/374-577       | R1DRS4.1 PF13087.4; | 45.10 | 0.00 |
| TRINITY_A8IYN1_CHLRE/354-606       | A8IYN1.1 PF00520.29 | 45.10 | 0.00 |
| TRINITY_I7MGR5_TETTS/497-590       | I7MGR5.2 PF12796.5; | 45.10 | 0.00 |
| TRINITY_D8TI24_VOLCA/5-120         | D8TI24.1 PF13881.4; | 45.10 | 0.00 |
| TRINITY_D8TK82_VOLCA/651-941       | D8TK82.1 PF07993.10 | 45.10 | 0.00 |
| TRINITY_D8UB98_VOLCA/211-425       | D8UB98.1 PF01189.15 | 45.10 | 0.00 |
| TRINITY_V3Z5M5_LOTGI/58-380        | V3Z5M5.1 PF01866.15 | 45.10 | 0.00 |
| TRINITY_D8UK49_VOLCA/4-179         | D8UK49.1 PF00025.19 | 45.10 | 0.00 |
| TRINITY_E1ZE48_CHLVA/65-128        | E1ZE48.1 PF05347.13 | 45.10 | 0.00 |
| TRINITY_A0EC62_PARTE/382-547       | A0EC62.1 PF01699.22 | 45.10 | 0.00 |
| TRINITY_Q54XL4_DICDI/1195-1392     | Q54XL4.1 PF00617.17 | 45.10 | 0.00 |
| TRINITY_A0E5C3_PARTE/689-806       | A0E5C3.1 PF00072.22 | 45.10 | 0.00 |

|                                  |                     |       |      |
|----------------------------------|---------------------|-------|------|
| TRINITY_J9EW10_9SPIT/183-441     | J9EW10.1 PF00520.29 | 45.10 | 0.00 |
| TRINITY_A0A0N5A7B3_PARTI/375-436 | A0A0N5A7B3.1 PF0065 | 45.00 | 0.00 |
| TRINITY_T1HH24_RHOPR/1134-1557   | T1HH24.1 PF06602.12 | 45.00 | 0.00 |
| TRINITY_A0D1W7_PARTE/525-821     | A0D1W7.1 PF03372.21 | 45.00 | 0.00 |
| TRINITY_I7MB87_TETTS/63-523      | I7MB87.2 PF00067.20 | 45.00 | 0.00 |
| TRINITY_A0A077ZXH0_STYLE/111-176 | A0A077ZXH0.1 PF1349 | 45.00 | 0.00 |
| TRINITY_A0A067BHW8_SAPPC/1-131   | A0A067BHW8.1 PF0012 | 45.00 | 0.00 |
| TRINITY_I7M667_TETTS/167-431     | I7M667.1 PF00149.26 | 45.00 | 0.00 |
| TRINITY_U6MVI1_9EIME/171-246     | U6MVI1.1 PF04969.14 | 45.00 | 0.00 |
| TRINITY_I7M790_TETTS/28-207      | I7M790.2 PF01734.20 | 45.00 | 0.00 |
| TRINITY_A8PX58_MALGO/422-745     | A8PX58.1 PF03372.21 | 45.00 | 0.00 |
| TRINITY_A0DCZ2_PARTE/117-176     | A0DCZ2.1 PF13921.4; | 45.00 | 0.00 |
| TRINITY_G0QYL0_ICHMG/104-390     | G0QYL0.1 PF01457.14 | 45.00 | 0.00 |
| TRINITY_B9H2M0_POPTR/463-609     | B9H2M0.1 PF04408.21 | 45.00 | 0.00 |
| TRINITY_G0WAG4_NAUDC/14-392      | G0WAG4.1 PF08569.9; | 45.00 | 0.00 |
| TRINITY_S2J574_MUCC1/83-146      | S2J574.1 PF13499.4; | 45.00 | 0.00 |
| TRINITY_A7SRS7_NEMVE/41-178      | A7SRS7.1 PF00782.18 | 45.00 | 0.00 |
| TRINITY_W7XE61_TETTS/598-747     | W7XE61.1 PF01927.14 | 45.00 | 0.00 |
| TRINITY_I7MG40_TETTS/3-154       | I7MG40.1 PF09809.7; | 45.00 | 0.00 |
| TRINITY_A0A078B8P5_STYLE/295-617 | A0A078B8P5.1 PF0123 | 45.00 | 0.00 |
| TRINITY_A0A061J6Y9_TRYRA/1-229   | A0A061J6Y9.1 PF0006 | 45.00 | 0.00 |
| TRINITY_PIRA_DICDI/393-1224      | Q6UK63.1 PF05994.9; | 45.00 | 0.00 |
| TRINITY_A0A0G4J4J7_PLABS/9-230   | A0A0G4J4J7.1 PF0010 | 45.00 | 0.00 |
| TRINITY_A8J2E8_CHLRE/68-328      | A8J2E8.1 PF00487.22 | 45.00 | 0.00 |
| TRINITY_W4XR36_STRPU/437-714     | W4XR36.1 PF00069.23 | 45.00 | 0.00 |
| TRINITY_A0A0F4G4U9_9PEZI/77-228  | A0A0F4G4U9.1 PF0000 | 45.00 | 0.00 |
| TRINITY_G0QK40_ICHMG/243-478     | G0QK40.1 PF07690.14 | 45.00 | 0.00 |
| TRINITY_A9V1G0_MONBE/141-242     | A9V1G0.1 PF16656.3; | 45.00 | 0.00 |
| TRINITY_I0Z0T3_9CHLO/10-292      | I0Z0T3.1 PF00069.23 | 45.00 | 0.00 |
| TRINITY_A8J237_CHLRE/18-201      | A8J237.1 PF03357.19 | 45.00 | 0.00 |
| TRINITY_A0A0D2W0B3_CAPO3/484-581 | A0A0D2W0B3.1 PF0016 | 45.00 | 0.00 |
| TRINITY_F0ZP74_DICPU/221-539     | F0ZP74.1 PF00657.20 | 45.00 | 0.00 |
| TRINITY_Q54EI7_DICDI/72-491      | Q54EI7.1 PF01490.16 | 45.00 | 0.00 |
| TRINITY_A0A0G4J236_PLABS/53-171  | A0A0G4J236.1 PF0309 | 45.00 | 0.00 |
| TRINITY_A8HSY5_CHLRE/171-679     | A8HSY5.1 PF00654.18 | 45.00 | 0.00 |
| TRINITY_A0EFL7_PARTE/156-283     | A0EFL7.1 PF00107.24 | 45.00 | 0.00 |
| TRINITY_L8HCM1_ACACA/41-284      | L8HCM1.1 PF09414.8; | 45.00 | 0.00 |
| TRINITY_I3CDQ7_9GAMM/16-390      | I3CDQ7.1 PF01433.18 | 45.00 | 0.00 |
| TRINITY_I0YQS5_9CHLO/52-357      | I0YQS5.1 PF00291.23 | 45.00 | 0.00 |
| TRINITY_A8IL21_CHLRE/65-244      | A8IL21.1 PF00574.21 | 45.00 | 0.00 |
| TRINITY_A4VD54_TETTS/76-357      | A4VD54.1 PF00664.21 | 45.00 | 0.00 |
| TRINITY_A0A015K277_9GLOM/181-420 | A0A015K277.1 PF0012 | 45.00 | 0.00 |
| TRINITY_K6DXZ9_9BACI/45-456      | K6DXZ9.1 PF00266.17 | 45.00 | 0.00 |
| TRINITY_T0QLF1_9STRA/183-314     | T0QLF1.1 PF01553.19 | 45.00 | 0.00 |
| TRINITY_Q22D68_TETTS/29-277      | Q22D68.3 PF03803.13 | 45.00 | 0.00 |
| TRINITY_A9V1U1_MONBE/10-171      | A9V1U1.1 PF00071.20 | 45.00 | 0.00 |
| TRINITY_A0A0D2X453_CAPO3/177-285 | A0A0D2X453.1 PF0572 | 45.00 | 0.00 |
| TRINITY_G6DRL2_DANPL/310-440     | G6DRL2.1 PF00782.18 | 45.00 | 0.00 |
| TRINITY_H5X6P0_9PSEU/244-583     | H5X6P0.1 PF00144.22 | 45.00 | 0.00 |
| TRINITY_A0A098VPN8_9MICR/44-169  | A0A098VPN8.1 PF0405 | 45.00 | 0.00 |
| TRINITY_W2QUI9_PHYPN/848-1058    | W2QUI9.1 PF00689.19 | 45.00 | 0.00 |
| TRINITY_D8UG84_VOLCA/3-124       | D8UG84.1 PF00917.24 | 45.00 | 0.00 |
| TRINITY_D8TH57_VOLCA/40-476      | D8TH57.1 PF12698.5; | 45.00 | 0.00 |
| TRINITY_A8HNP6_CHLRE/11-260      | A8HNP6.1 PF07727.12 | 45.00 | 0.00 |
| TRINITY_A0DMV3_PARTE/527-841     | A0DMV3.1 PF05192.16 | 44.90 | 0.00 |
| TRINITY_G0QNM9_ICHMG/8-198       | G0QNM9.1 PF03092.14 | 44.90 | 0.00 |
| TRINITY_G2YZT3_FLABF/17-401      | G2YZT3.1 PF03702.12 | 44.90 | 0.00 |
| TRINITY_A0A0J8CZ44_BETVU/15-152  | A0A0J8CZ44.1 PF0590 | 44.90 | 0.00 |
| TRINITY_G2LEF4_CHLTF/33-507      | G2LEF4.1 PF01425.19 | 44.90 | 0.00 |
| TRINITY_A0A024UKA9_9STRA/421-527 | A0A024UKA9.1 PF0065 | 44.90 | 0.00 |
| TRINITY_Q240R7_TETTS/8-280       | Q240R7.3 PF05914.10 | 44.90 | 0.00 |

|                                  |              |            |       |      |
|----------------------------------|--------------|------------|-------|------|
| TRINITY_D2VE32_NAEGR/14-151      | D2VE32.1     | PF00754.23 | 44.90 | 0.00 |
| TRINITY_V8NRM8_OPHHA/139-245     | V8NRM8.1     | PF00307.29 | 44.90 | 0.00 |
| TRINITY_Q23A05_TETTS/171-240     | Q23A05.1     | PF14360.4; | 44.90 | 0.00 |
| TRINITY_Q236N2_TETTS/32-570      | Q236N2.1     | PF00995.21 | 44.90 | 0.00 |
| TRINITY_M0TEA9_MUSAM/325-573     | M0TEA9.1     | PF07714.15 | 44.90 | 0.00 |
| TRINITY_D3AVN9_POLPA/18-506      | D3AVN9.1     | PF13001.5; | 44.90 | 0.00 |
| TRINITY_Q235I9_TETTS/1861-2196   | Q235I9.2     | PF02889.14 | 44.90 | 0.00 |
| TRINITY_GSTM2_CHICK/3-82         | P20136.4     | PF02798.18 | 44.90 | 0.00 |
| TRINITY_A7RRG5_NEMVE/1069-1295   | A7RRG5.1     | PF16415.3; | 44.90 | 0.00 |
| TRINITY_D8UC17_VOLCA/28-143      | D8UC17.1     | PF04410.12 | 44.90 | 0.00 |
| TRINITY_A0A078AZH3_STYLE/295-407 | A0A078AZH3.1 | PF0251     | 44.90 | 0.00 |
| TRINITY_I0YQN0_9CHLO/447-610     | I0YQN0.1     | PF09192.8; | 44.90 | 0.00 |
| TRINITY_J9FYL2_9SPIT/398-662     | J9FYL2.1     | PF00069.23 | 44.90 | 0.00 |
| TRINITY_G3PRG1_GASAC/52-221      | G3PRG1.1     | PF02146.15 | 44.90 | 0.00 |
| TRINITY_A0DAD2_PARTE/11-147      | A0DAD2.1     | PF00334.17 | 44.90 | 0.00 |
| TRINITY_A0A059LS10_9CHLO/247-414 | A0A059LS10.1 | PF0505     | 44.90 | 0.00 |
| TRINITY_K8GCU9_9CYAN/941-1063    | K8GCU9.1     | PF02518.24 | 44.90 | 0.00 |
| TRINITY_D3BUS7_POLPA/1-381       | D3BUS7.1     | PF04506.11 | 44.90 | 0.00 |
| TRINITY_Q54XX2_DICDI/101-415     | Q54XX2.1     | PF03062.17 | 44.90 | 0.00 |
| TRINITY_A0A0B0MCH7_GOSAR/64-178  | A0A0B0MCH7.1 | PF0190     | 44.90 | 0.00 |
| TRINITY_G1KT98_ANOCA/1-292       | G1KT98.1     | PF05971.10 | 44.90 | 0.00 |
| TRINITY_A8IFF5_CHLRE/9-119       | A8IFF5.1     | PF14138.4; | 44.90 | 0.00 |
| TRINITY_A0BP90_PARTE/47-120      | A0BP90.1     | PF00076.20 | 44.90 | 0.00 |
| TRINITY_L8HGD8_ACACA/51-323      | L8HGD8.1     | PF07995.9; | 44.90 | 0.00 |
| TRINITY_Q2S2T9_SALRD/5-377       | Q2S2T9.1     | PF01053.18 | 44.90 | 0.00 |
| TRINITY_J7S154_KAZNA/374-462     | J7S154.1     | PF11715.6; | 44.90 | 0.00 |
| TRINITY_A0CK32_PARTE/4-158       | A0CK32.1     | PF12796.5; | 44.90 | 0.00 |
| TRINITY_W5JM09_ANODA/76-144      | W5JM09.1     | PF00505.17 | 44.90 | 0.00 |
| TRINITY_K7VF10_MAIZE/107-319     | K7VF10.1     | PF09747.7; | 44.90 | 0.00 |
| TRINITY_A0C428_PARTE/30-180      | A0C428.1     | PF09767.7; | 44.90 | 0.00 |
| TRINITY_D8TTK7_VOLCA/78-378      | D8TTK7.1     | PF13896.4; | 44.90 | 0.00 |
| TRINITY_A9V1F3_MONBE/178-284     | A9V1F3.1     | PF01416.18 | 44.90 | 0.00 |
| TRINITY_V2XSB3_MONRO/27-273      | V2XSB3.1     | PF11790.6; | 44.90 | 0.00 |
| TRINITY_J9JA41_9SPIT/35-290      | J9JA41.1     | PF04427.16 | 44.90 | 0.00 |
| TRINITY_I0Z7X8_9CHLO/278-395     | I0Z7X8.1     | PF07986.10 | 44.90 | 0.00 |
| TRINITY_I7M003_TETTS/55-364      | I7M003.2     | PF00962.20 | 44.90 | 0.00 |
| TRINITY_Q235I9_TETTS/701-851     | Q235I9.2     | PF00271.29 | 44.90 | 0.00 |
| TRINITY_L8GN46_ACACA/29-281      | L8GN46.1     | PF00069.23 | 44.90 | 0.00 |
| TRINITY_A0CMN7_PARTE/1075-1240   | A0CMN7.1     | PF00005.25 | 44.90 | 0.00 |
| TRINITY_H0ZEN8_TAEGU/280-533     | H0ZEN8.1     | PF00069.23 | 44.90 | 0.00 |
| TRINITY_J9IFZ4_9SPIT/31-129      | J9IFZ4.1     | PF13499.4; | 44.90 | 0.00 |
| TRINITY_J9HR16_9SPIT/123-375     | J9HR16.1     | PF00069.23 | 44.90 | 0.00 |
| TRINITY_I7M3M7_TETTS/22-131      | I7M3M7.1     | PF12796.5; | 44.90 | 0.00 |
| TRINITY_D8U5D1_VOLCA/16-278      | D8U5D1.1     | PF00069.23 | 44.90 | 0.00 |
| TRINITY_K4CAU9_SOLLC/154-406     | K4CAU9.1     | PF05021.13 | 44.90 | 0.00 |
| TRINITY_A0A059LRD3_9CHLO/19-199  | A0A059LRD3.1 | PF0006     | 44.90 | 0.00 |
| TRINITY_F4QPE4_9CAUL/28-149      | F4QPE4.1     | PF00188.24 | 44.90 | 0.00 |
| TRINITY_I7M889_TETTS/31-328      | I7M889.1     | PF09423.8; | 44.90 | 0.00 |
| TRINITY_L1J7H4_GUITH/303-465     | L1J7H4.1     | PF06699.9; | 44.80 | 0.00 |
| TRINITY_QOR_HUMAN/192-327        | Q08257.1     | PF13602.4; | 44.80 | 0.00 |
| TRINITY_A0A0K9NKF0_ZOSMR/654-855 | A0A0K9NKF0.1 | PF0285     | 44.80 | 0.00 |
| TRINITY_J9J708_9SPIT/51-217      | J9J708.1     | PF03009.15 | 44.80 | 0.00 |
| TRINITY_A7MCL7_DANRE/6-94        | A7MCL7.1     | PF00031.19 | 44.80 | 0.00 |
| TRINITY_I7LUK8_TETTS/15-119      | I7LUK8.1     | PF02991.14 | 44.80 | 0.00 |
| TRINITY_L8H7C2_ACACA/5-156       | L8H7C2.1     | PF09468.8; | 44.80 | 0.00 |
| TRINITY_H6NEC5_9BACL/123-181     | H6NEC5.1     | PF13376.4; | 44.80 | 0.00 |
| TRINITY_K9PGL6_9CYAN/23-254      | K9PGL6.1     | PF08894.9; | 44.80 | 0.00 |
| TRINITY_F4Q1H1_DICFS/279-467     | F4Q1H1.1     | PF01331.17 | 44.80 | 0.00 |
| TRINITY_I1G2T0_AMPQE/174-530     | I1G2T0.1     | PF00657.20 | 44.80 | 0.00 |
| TRINITY_A0BZT9_PARTE/8-137       | A0BZT9.1     | PF00782.18 | 44.80 | 0.00 |
| TRINITY_A0BUJ1_PARTE/272-330     | A0BUJ1.1     | PF13432.4; | 44.80 | 0.00 |

|                                    |                     |       |      |
|------------------------------------|---------------------|-------|------|
| TRINITY_G4UGJ9_NEUT9/259-384       | G4UGJ9.1 PF00622.26 | 44.80 | 0.00 |
| TRINITY_A0A077ZZ03_STYLE/8-287     | A0A077ZZ03.1 PF0006 | 44.80 | 0.00 |
| TRINITY_A0A0A0LDE1_CUCSA/322-694   | A0A0A0LDE1.1 PF0049 | 44.80 | 0.00 |
| TRINITY_D8TA01_SELML/21-165        | D8TA01.1 PF06201.11 | 44.80 | 0.00 |
| TRINITY_Q9LKH0_CHLRE/34-81         | Q9LKH0.1 PF05051.11 | 44.80 | 0.00 |
| TRINITY_I1CA35_RHIO9/23-261        | I1CA35.1 PF07819.11 | 44.80 | 0.00 |
| TRINITY_I0Z3E9_9CHLO/21-155        | I0Z3E9.1 PF07884.12 | 44.80 | 0.00 |
| TRINITY_C1EIK2_MICSR/1-193         | C1EIK2.1 PF00069.23 | 44.80 | 0.00 |
| TRINITY_A4RRI5_OSTLU/318-413       | A4RRI5.1 PF08295.10 | 44.80 | 0.00 |
| TRINITY_I0YSS6_9CHLO/10-67         | I0YSS6.1 PF08221.9; | 44.80 | 0.00 |
| TRINITY_B3RKZ3_TRIAD/1-417         | B3RKZ3.1 PF04188.11 | 44.80 | 0.00 |
| TRINITY_G0QN14_ICHMG/12-182        | G0QN14.1 PF00071.20 | 44.80 | 0.00 |
| TRINITY_H2YXH4_CIOSA/1120-1184     | H2YXH4.1 PF01363.19 | 44.80 | 0.00 |
| TRINITY_H8N1Q4_CORCM/22-90         | H8N1Q4.1 PF00498.24 | 44.80 | 0.00 |
| TRINITY_D8TMY6_VOLCA/279-490       | D8TMY6.1 PF07714.15 | 44.80 | 0.00 |
| TRINITY_A0CHC8_PARTE/261-354       | A0CHC8.1 PF12796.5; | 44.80 | 0.00 |
| TRINITY_A0A067CKA5_SAPPC/69-223    | A0A067CKA5.1 PF0864 | 44.80 | 0.00 |
| TRINITY_E1Z715_CHLVA/40-133        | E1Z715.1 PF02463.17 | 44.80 | 0.00 |
| TRINITY_I0ZA89_9CHLO/133-364       | I0ZA89.1 PF00198.21 | 44.80 | 0.00 |
| TRINITY_A0A085MQK8_9BILA/324-484   | A0A085MQK8.1 PF0007 | 44.80 | 0.00 |
| TRINITY_A8JEK4_CHLRE/889-1117      | A8JEK4.1 PF00069.23 | 44.80 | 0.00 |
| TRINITY_L8HB96_ACACA/273-714       | L8HB96.1 PF01142.16 | 44.80 | 0.00 |
| TRINITY_F2LK13_BURGS/275-390       | F2LK13.1 PF07683.12 | 44.80 | 0.00 |
| TRINITY_T0QIM3_9STRA/132-379       | T0QIM3.1 PF09423.8; | 44.80 | 0.00 |
| TRINITY_A0A068Y2T9_ECHMU/154-303   | A0A068Y2T9.1 PF0866 | 44.80 | 0.00 |
| TRINITY_F4QFV3_DICFS/1382-1559     | F4QFV3.1 PF00617.17 | 44.80 | 0.00 |
| TRINITY_Q23J69_TETTS/21-486        | Q23J69.2 PF00083.22 | 44.80 | 0.00 |
| TRINITY_D3BQH2_POLPA/3-97          | D3BQH2.1 PF00168.28 | 44.80 | 0.00 |
| TRINITY_M2TMX2_COCH5/60-163        | M2TMX2.1 PF00168.28 | 44.80 | 0.00 |
| TRINITY_R0GVH4_9BRAS/385-524       | R0GVH4.1 PF00534.18 | 44.80 | 0.00 |
| TRINITY_A0A077ZQS0_STYLE/68-262    | A0A077ZQS0.1 PF1214 | 44.80 | 0.00 |
| TRINITY_I0Z5U6_9CHLO/234-483       | I0Z5U6.1 PF01068.19 | 44.80 | 0.00 |
| TRINITY_G0QYS4_ICHMG/12-127        | G0QYS4.1 PF08327.9; | 44.80 | 0.00 |
| TRINITY_G1Q9K0_MYOLU/96-185        | G1Q9K0.1 PF00071.20 | 44.80 | 0.00 |
| TRINITY_A0EDA4_PARTE/11-172        | A0EDA4.1 PF01217.18 | 44.80 | 0.00 |
| TRINITY_G0QZC0_ICHMG/11-172        | G0QZC0.1 PF00071.20 | 44.80 | 0.00 |
| TRINITY_E1ZBW1_CHLVA/41-209        | E1ZBW1.1 PF09768.7; | 44.80 | 0.00 |
| TRINITY_I0YIC0_9CHLO/510-978       | I0YIC0.1 PF00082.20 | 44.80 | 0.00 |
| TRINITY_D8TSZ7_VOLCA/1690-1975     | D8TSZ7.1 PF07714.15 | 44.80 | 0.00 |
| TRINITY_G0QK71_ICHMG/834-1225      | G0QK71.1 PF06957.9; | 44.70 | 0.00 |
| TRINITY_Q6BFM7_PARTE/40-233        | Q6BFM7.1 PF00106.23 | 44.70 | 0.00 |
| TRINITY_U5QED8_9CYAN/96-245        | U5QED8.1 PF00849.20 | 44.70 | 0.00 |
| TRINITY_G0R6C8_ICHMG/129-261       | G0R6C8.1 PF01926.21 | 44.70 | 0.00 |
| TRINITY_D8U1R6_VOLCA/4-150         | D8U1R6.1 PF08560.8; | 44.70 | 0.00 |
| TRINITY_C0NPR6_AJECG/38-139        | C0NPR6.1 PF00168.28 | 44.70 | 0.00 |
| TRINITY_A0A0G4FC78_9ALVE/34-122    | A0A0G4FC78.1 PF0221 | 44.70 | 0.00 |
| TRINITY_I7MN11_TETTS/232-405       | I7MN11.1 PF04925.13 | 44.70 | 0.00 |
| TRINITY_F1QTX8_DANRE/374-480       | F1QTX8.1 PF00085.18 | 44.70 | 0.00 |
| TRINITY_Q57ZK9_TRYB2/21-219        | Q57ZK9.1 PF01852.17 | 44.70 | 0.00 |
| TRINITY_W7X1C7_TETTS/22-152        | W7X1C7.1 PF00782.18 | 44.70 | 0.00 |
| TRINITY_A0A0A1UCS6_ENTIV/1389-1650 | A0A0A1UCS6.1 PF0006 | 44.70 | 0.00 |
| TRINITY_I7MI70_TETTS/14-137        | I7MI70.1 PF13893.4; | 44.70 | 0.00 |
| TRINITY_L8GGB3_ACACA/1052-1230     | L8GGB3.1 PF00617.17 | 44.70 | 0.00 |
| TRINITY_I7MDS7_TETTS/37-166        | I7MDS7.2 PF12298.6; | 44.70 | 0.00 |
| TRINITY_D8SUK9_SELML/21-209        | D8SUK9.1 PF01612.18 | 44.70 | 0.00 |
| TRINITY_F0ZNX7_DICPU/186-461       | F0ZNX7.1 PF03151.14 | 44.70 | 0.00 |
| TRINITY_V7B491_PHAVU/53-333        | V7B491.1 PF01494.17 | 44.70 | 0.00 |
| TRINITY_I7MHS7_TETTS/50-527        | I7MHS7.1 PF00501.26 | 44.70 | 0.00 |
| TRINITY_F4PZV0_DICFS/18-113        | F4PZV0.1 PF00169.27 | 44.70 | 0.00 |
| TRINITY_F4PN46_DICFS/255-412       | F4PN46.1 PF00730.23 | 44.70 | 0.00 |
| TRINITY_A0A0N5C217_STREA/160-487   | A0A0N5C217.1 PF0107 | 44.70 | 0.00 |

|                                  |                     |       |      |
|----------------------------------|---------------------|-------|------|
| TRINITY_F4Q0L9_DICFS/16-121      | F4Q0L9.1 PF00568.21 | 44.70 | 0.00 |
| TRINITY_A0A0G4EL58_9ALVE/27-157  | A0A0G4EL58.1 PF0407 | 44.70 | 0.00 |
| TRINITY_A0A087SHU1_AUXPR/253-525 | A0A087SHU1.1 PF0553 | 44.70 | 0.00 |
| TRINITY_F0ZLD9_DICPU/606-972     | F0ZLD9.1 PF02181.21 | 44.70 | 0.00 |
| TRINITY_C3XRT4_BRAFL/8-176       | C3XRT4.1 PF00908.15 | 44.70 | 0.00 |
| TRINITY_K7LC65_SOYBN/150-507     | K7LC65.1 PF03062.17 | 44.70 | 0.00 |
| TRINITY_D2VBV7_NAEGR/17-532      | D2VBV7.1 PF04916.11 | 44.70 | 0.00 |
| TRINITY_D8TUH4_VOLCA/83-248      | D8TUH4.1 PF01734.20 | 44.70 | 0.00 |
| TRINITY_C5KZH2_PERM5/199-428     | C5KZH2.1 PF01728.17 | 44.70 | 0.00 |
| TRINITY_D8UK41_VOLCA/70-418      | D8UK41.1 PF15902.3; | 44.70 | 0.00 |
| TRINITY_TALA_DICDI/163-275       | P0CE94.1 PF00373.16 | 44.70 | 0.00 |
| TRINITY_G7J7M5_MEDTR/90-137      | G7J7M5.1 PF00249.29 | 44.70 | 0.00 |
| TRINITY_A0A0J8B878_BETVU/74-221  | A0A0J8B878.1 PF0095 | 44.70 | 0.00 |
| TRINITY_A8IS59_CHLRE/1-288       | A8IS59.1 PF00483.21 | 44.70 | 0.00 |
| TRINITY_E9HK74_DAPPU/229-559     | E9HK74.1 PF07992.12 | 44.70 | 0.00 |
| TRINITY_I7LVY1_TETTS/23-350      | I7LVY1.2 PF00225.21 | 44.70 | 0.00 |
| TRINITY_A8IGG5_CHLRE/30-160      | A8IGG5.1 PF01590.24 | 44.70 | 0.00 |
| TRINITY_D8T5X6_SELML/116-226     | D8T5X6.1 PF08389.10 | 44.70 | 0.00 |
| TRINITY_F7DM18_ORNAN/143-237     | F7DM18.2 PF08698.9; | 44.70 | 0.00 |
| TRINITY_L1JND6_GUIETH/150-376    | L1JND6.1 PF13621.4; | 44.70 | 0.00 |
| TRINITY_K9TZW6_9CYAN/45-184      | K9TZW6.1 PF13847.4; | 44.70 | 0.00 |
| TRINITY_A8IQ02_CHLRE/1240-1463   | A8IQ02.1 PF14228.4; | 44.70 | 0.00 |
| TRINITY_Q8HCR1_ORYSJ/11-256      | Q8HCR1.1 PF07727.12 | 44.70 | 0.00 |
| TRINITY_A0A0A1PIM2_9FUNG/7-117   | A0A0A1PIM2.1 PF0085 | 44.70 | 0.00 |
| TRINITY_A8HTU8_CHLRE/13-251      | A8HTU8.1 PF00856.26 | 44.70 | 0.00 |
| TRINITY_A9U123_PHYPA/2-1170      | A9U123.1 PF02463.17 | 44.70 | 0.00 |
| TRINITY_I8AKI3_9BACI/41-313      | I8AKI3.1 PF00082.20 | 44.70 | 0.00 |
| TRINITY_A0BRA8_PARTE/7-108       | A0BRA8.1 PF00168.28 | 44.70 | 0.00 |
| TRINITY_K3XB12_PYTUL/79-318      | K3XB12.1 PF04884.12 | 44.70 | 0.00 |
| TRINITY_D8THR0_VOLCA/108-289     | D8THR0.1 PF01273.23 | 44.70 | 0.00 |
| TRINITY_A0A0D6TCS9_9RHOB/2-151   | A0A0D6TCS9.1 PF0335 | 44.70 | 0.00 |
| TRINITY_RA51C_MOUSE/22-340       | Q924H5.1 PF08423.9; | 44.70 | 0.00 |
| TRINITY_K9T4R9_9CYAN/41-162      | K9T4R9.1 PF09837.7; | 44.70 | 0.00 |
| TRINITY_A0BYK2_PARTE/116-313     | A0BYK2.1 PF00406.20 | 44.70 | 0.00 |
| TRINITY_A0A0F0GW99_9ACTN/23-463  | A0A0F0GW99.1 PF1403 | 44.70 | 0.00 |
| TRINITY_D8U182_VOLCA/674-878     | D8U182.1 PF01434.16 | 44.70 | 0.00 |
| TRINITY_E3JYQ2_PUCGT/424-778     | E3JYQ2.2 PF00702.24 | 44.70 | 0.00 |
| TRINITY_A8IL34_CHLRE/21-289      | A8IL34.1 PF00069.23 | 44.70 | 0.00 |
| TRINITY_D8U3S5_VOLCA/63-138      | D8U3S5.1 PF09340.8; | 44.70 | 0.00 |
| TRINITY_D8U978_VOLCA/2-203       | D8U978.1 PF07714.15 | 44.70 | 0.00 |
| TRINITY_C5Z583_SORBI/934-1179    | C5Z583.1 PF07727.12 | 44.70 | 0.00 |
| TRINITY_F0VIJ0_NEOCL/1240-1430   | F0VIJ0.1 PF00689.19 | 44.70 | 0.00 |
| TRINITY_I7LSW7_TETTS/11-177      | I7LSW7.1 PF00316.18 | 44.70 | 0.00 |
| TRINITY_I7LVZ2_TETTS/119-388     | I7LVZ2.2 PF00664.21 | 44.60 | 0.00 |
| TRINITY_A0A078A0Q2_STYLE/458-744 | A0A078A0Q2.1 PF0337 | 44.60 | 0.00 |
| TRINITY_A0BWP2_PARTE/43-433      | A0BWP2.1 PF01490.16 | 44.60 | 0.00 |
| TRINITY_J9J5F8_9SPIT/511-624     | J9J5F8.1 PF02518.24 | 44.60 | 0.00 |
| TRINITY_L8HDL6_ACACA/1-64        | L8HDL6.1 PF06331.10 | 44.60 | 0.00 |
| TRINITY_G0AH21_COLFT/1-90        | G0AH21.1 PF00216.19 | 44.60 | 0.00 |
| TRINITY_A0A078B7J6_STYLE/170-246 | A0A078B7J6.1 PF1342 | 44.60 | 0.00 |
| TRINITY_G0QKV4_ICHMG/49-211      | G0QKV4.1 PF00067.20 | 44.60 | 0.00 |
| TRINITY_K9TP00_9CYAN/15-228      | K9TP00.1 PF00106.23 | 44.60 | 0.00 |
| TRINITY_F1A2P2_DICPU/37-159      | F1A2P2.1 PF03067.13 | 44.60 | 0.00 |
| TRINITY_A0A015KUS6_9GLOM/82-193  | A0A015KUS6.1 PF0754 | 44.60 | 0.00 |
| TRINITY_A0A066VSL3_9HOMO/35-393  | A0A066VSL3.1 PF0028 | 44.60 | 0.00 |
| TRINITY_W5BB92_WHEAT/25-307      | W5BB92.1 PF00487.22 | 44.60 | 0.00 |
| TRINITY_K1QG77_CRAGI/54-430      | K1QG77.1 PF01979.18 | 44.60 | 0.00 |
| TRINITY_L8GDH9_ACACA/994-1253    | L8GDH9.1 PF07714.15 | 44.60 | 0.00 |
| TRINITY_F2U695_SALR5/75-334      | F2U695.1 PF00069.23 | 44.60 | 0.00 |
| TRINITY_RAC1_CAEEL/5-178         | Q03206.2 PF00071.20 | 44.60 | 0.00 |
| TRINITY_L8HL68_ACACA/22-196      | L8HL68.1 PF05995.10 | 44.60 | 0.00 |



|                                  |                     |       |      |
|----------------------------------|---------------------|-------|------|
| TRINITY_G4E3U0_9GAMM/20-306      | G4E3U0.1 PF00850.17 | 44.60 | 0.00 |
| TRINITY_I7MI70_TETTS/14-137      | I7MI70.1 PF13893.4; | 44.60 | 0.00 |
| TRINITY_A7RRV3_NEMVE/15-171      | A7RRV3.1 PF08662.9; | 44.60 | 0.00 |
| TRINITY_G0QKY6_ICHMG/10-97       | G0QKY6.1 PF16561.3; | 44.60 | 0.00 |
| TRINITY_A0A024UKA9_9STRA/421-527 | A0A024UKA9.1 PF0065 | 44.60 | 0.00 |
| TRINITY_A7RIQ3_NEMVE/3-265       | A7RIQ3.1 PF01026.19 | 44.60 | 0.00 |
| TRINITY_A0A078BZL6_BRANA/305-450 | A0A078BZL6.1 PF0437 | 44.60 | 0.00 |
| TRINITY_U3JCM7_FICAL/23-277      | U3JCM7.1 PF00069.23 | 44.60 | 0.00 |
| TRINITY_F2U297_SALR5/2182-2441   | F2U297.1 PF00520.29 | 44.60 | 0.00 |
| TRINITY_J0WT80_AURST/119-238     | J0WT80.1 PF00168.28 | 44.60 | 0.00 |
| TRINITY_A7RGQ3_NEMVE/75-367      | A7RGQ3.1 PF00176.21 | 44.60 | 0.00 |
| TRINITY_D6WUY8_TRICA/64-189      | D6WUY8.1 PF10218.7; | 44.60 | 0.00 |
| TRINITY_A0A0F4NTH2_PSEO7/12-387  | A0A0F4NTH2.1 PF0373 | 44.60 | 0.00 |
| TRINITY_A0BTW1_PARTE/50-170      | A0BTW1.1 PF02338.17 | 44.60 | 0.00 |
| TRINITY_D8U2T8_VOLCA/63-195      | D8U2T8.1 PF00782.18 | 44.60 | 0.00 |
| TRINITY_C1EHB3_MICSR/11-134      | C1EHB3.1 PF02678.14 | 44.60 | 0.00 |
| TRINITY_L8HLM2_ACACA/705-992     | L8HLM2.1 PF01031.18 | 44.60 | 0.00 |
| TRINITY_Q0F3F6_9PROT/42-142      | Q0F3F6.1 PF00011.19 | 44.60 | 0.00 |
| TRINITY_G8M2N6_CLOCD/600-766     | G8M2N6.1 PF07724.12 | 44.60 | 0.00 |
| TRINITY_I7M2H5_TETTS/224-317     | I7M2H5.1 PF00153.25 | 44.60 | 0.00 |
| TRINITY_A9T6W9_PHYPA/102-248     | A9T6W9.1 PF04116.11 | 44.60 | 0.00 |
| TRINITY_K3WTT3_PYTUL/26-297      | K3WTT3.1 PF01650.16 | 44.60 | 0.00 |
| TRINITY_G6FSF2_9CYAN/1540-1967   | G6FSF2.1 PF00501.26 | 44.60 | 0.00 |
| TRINITY_F4QE03_DICFS/903-1096    | F4QE03.1 PF06017.11 | 44.60 | 0.00 |

|                                    |              |            |       |      |
|------------------------------------|--------------|------------|-------|------|
| TRINITY_A0CK88_PARTE/14-69         | A0CK88.1     | PF00385.22 | 44.60 | 0.00 |
| TRINITY_I0YUQ5_9CHLO/33-353        | I0YUQ5.1     | PF01636.21 | 44.60 | 0.00 |
| TRINITY_V3ZF78_LOTGI/343-420       | V3ZF78.1     | PF00622.26 | 44.60 | 0.00 |
| TRINITY_I7M2X3_TETTS/28-255        | I7M2X3.1     | PF00149.26 | 44.60 | 0.00 |
| TRINITY_U5DFD7_AMBTC/550-607       | U5DFD7.1     | PF08373.8; | 44.60 | 0.00 |
| TRINITY_A4BKN8_9GAMM/403-468       | A4BKN8.1     | PF00512.23 | 44.60 | 0.00 |
| TRINITY_K1QAL3_CRAGI/448-520       | K1QAL3.1     | PF00076.20 | 44.60 | 0.00 |
| TRINITY_A8I1M3_CHLRE/18-152        | A8I1M3.1     | PF12697.5; | 44.60 | 0.00 |
| TRINITY_KAD_TOLAT/5-187            | C4L8U2.1     | PF00406.20 | 44.60 | 0.00 |
| TRINITY_F0ZH73_DICPU/405-577       | F0ZH73.1     | PF00621.18 | 44.60 | 0.00 |
| TRINITY_A8JGX3_CHLRE/1139-1204     | A8JGX3.1     | PF00957.19 | 44.60 | 0.00 |
| TRINITY_A9REM2_PHYPA/25-487        | A9REM2.1     | PF01384.18 | 44.60 | 0.00 |
| TRINITY_D8ULH4_VOLCA/183-452       | D8ULH4.1     | PF00520.29 | 44.60 | 0.00 |
| TRINITY_A8J3P1_CHLRE/954-1161      | A8J3P1.1     | PF00211.18 | 44.60 | 0.00 |
| TRINITY_A0A066X8V5_COLSU/39-150    | A0A066X8V5.1 | PF0038     | 44.60 | 0.00 |
| TRINITY_I0ZAW8_9CHLO/360-815       | I0ZAW8.1     | PF14648.4; | 44.60 | 0.00 |
| TRINITY_A0A015J5P3_9GLOM/26-135    | A0A015J5P3.1 | PF0888     | 44.50 | 0.00 |
| TRINITY_F0Z7U6_DICPU/40-202        | F0Z7U6.1     | PF10294.7; | 44.50 | 0.00 |
| TRINITY_Q22T22_TETTS/520-735       | Q22T22.3     | PF07859.11 | 44.50 | 0.00 |
| TRINITY_Q7NK64_GLOVI/264-552       | Q7NK64.1     | PF00773.17 | 44.50 | 0.00 |
| TRINITY_G0QQW4_ICHMG/64-237        | G0QQW4.1     | PF13847.4; | 44.50 | 0.00 |
| TRINITY_A0A0G4INI1_PLABS/60-232    | A0A0G4INI1.1 | PF0363     | 44.50 | 0.00 |
| TRINITY_L8HI53_ACACA/58-628        | L8HI53.1     | PF01602.18 | 44.50 | 0.00 |
| TRINITY_D8UFD3_VOLCA/71-660        | D8UFD3.1     | PF16940.3; | 44.50 | 0.00 |
| TRINITY_Q23QF2_TETTS/248-571       | Q23QF2.2     | PF03133.13 | 44.50 | 0.00 |
| TRINITY_B9I062_POPTR/27-338        | B9I062.1     | PF03291.14 | 44.50 | 0.00 |
| TRINITY_L8GLB5_ACACA/120-346       | L8GLB5.1     | PF12146.6; | 44.50 | 0.00 |
| TRINITY_H3HAJ2_PHYRM/359-478       | H3HAJ2.1     | PF00665.24 | 44.50 | 0.00 |
| TRINITY_I7MLC4_TETTS/363-643       | I7MLC4.1     | PF00657.20 | 44.50 | 0.00 |
| TRINITY_A0E0I6_PARTE/13-410        | A0E0I6.1     | PF00899.19 | 44.50 | 0.00 |
| TRINITY_K3XAI6_PYTUL/186-434       | K3XAI6.1     | PF04042.14 | 44.50 | 0.00 |
| TRINITY_A0A078AYT5_STYLE/68-219    | A0A078AYT5.1 | PF0753     | 44.50 | 0.00 |
| TRINITY_G0R646_ICHMG/745-1019      | G0R646.1     | PF00664.21 | 44.50 | 0.00 |
| TRINITY_J9INA7_9SPIT/626-748       | J9INA7.1     | PF01857.18 | 44.50 | 0.00 |
| TRINITY_M0TTX4_MUSAM/42-371        | M0TTX4.1     | PF00069.23 | 44.50 | 0.00 |
| TRINITY_A8IKL2_CHLRE/43-432        | A8IKL2.1     | PF03416.17 | 44.50 | 0.00 |
| TRINITY_D8UCR5_VOLCA/725-974       | D8UCR5.1     | PF07393.9; | 44.50 | 0.00 |
| TRINITY_D8SJ59_SELML/20-342        | D8SJ59.1     | PF09139.9; | 44.50 | 0.00 |
| TRINITY_F2TZR2_SALR5/13-207        | F2TZR2.1     | PF06941.10 | 44.50 | 0.00 |
| TRINITY_A8JF89_CHLRE/400-723       | A8JF89.1     | PF00520.29 | 44.50 | 0.00 |
| TRINITY_D3B677_POLPA/110-266       | D3B677.1     | PF00005.25 | 44.50 | 0.00 |
| TRINITY_D8TND4_VOLCA/49-240        | D8TND4.1     | PF00856.26 | 44.50 | 0.00 |
| TRINITY_D8U9M7_VOLCA/253-490       | D8U9M7.1     | PF11051.6; | 44.50 | 0.00 |
| TRINITY_D6X2B1_TRICA/278-497       | D6X2B1.1     | PF00667.18 | 44.50 | 0.00 |
| TRINITY_M5VSU7_PRUPE/488-813       | M5VSU7.1     | PF01504.16 | 44.50 | 0.00 |
| TRINITY_I0Z502_9CHLO/30-503        | I0Z502.1     | PF10243.7; | 44.50 | 0.00 |
| TRINITY_I0Z1H2_9CHLO/42-459        | I0Z1H2.1     | PF00999.19 | 44.50 | 0.00 |
| TRINITY_A8HWI9_CHLRE/348-571       | A8HWI9.1     | PF07714.15 | 44.50 | 0.00 |
| TRINITY_A8HXI8_CHLRE/1160-1352     | A8HXI8.1     | PF00211.18 | 44.50 | 0.00 |
| TRINITY_D8TVK8_VOLCA/2148-2411     | D8TVK8.1     | PF00520.29 | 44.50 | 0.00 |
| TRINITY_B3RQW2_TRIAD/45-131        | B3RQW2.1     | PF14874.4; | 44.40 | 0.00 |
| TRINITY_A0A096QYU0_MAIZE/529-657   | A0A096QYU0.1 | PF0478     | 44.40 | 0.00 |
| TRINITY_C3YKQ0_BRAFL/6-195         | C3YKQ0.1     | PF01353.20 | 44.40 | 0.00 |
| TRINITY_A0A078A2M7_STYLE/3691-4473 | A0A078A2M7.1 | PF0302     | 44.40 | 0.00 |
| TRINITY_Q22A65_TETTS/524-741       | Q22A65.2     | PF01612.18 | 44.40 | 0.00 |
| TRINITY_D2W479_NAEGR/767-891       | D2W479.1     | PF07714.15 | 44.40 | 0.00 |
| TRINITY_Q23TD6_TETTS/82-200        | Q23TD6.2     | PF01926.21 | 44.40 | 0.00 |
| TRINITY_A0A072UR89_MEDTR/58-312    | A0A072UR89.1 | PF0771     | 44.40 | 0.00 |
| TRINITY_I7LT38_TETTS/108-339       | I7LT38.1     | PF00122.18 | 44.40 | 0.00 |
| TRINITY_G4YKZ0_PHYSP/36-341        | G4YKZ0.1     | PF01237.16 | 44.40 | 0.00 |
| TRINITY_U9T7D8_RHIID/265-375       | U9T7D8.1     | PF01398.19 | 44.40 | 0.00 |

|                                    |              |            |       |      |
|------------------------------------|--------------|------------|-------|------|
| TRINITY_F4PMH8_DICFS/72-202        | F4PMH8.1     | PF07967.11 | 44.40 | 0.00 |
| TRINITY_A0A087SSV0_AUXPR/118-234   | A0A087SSV0.1 | PF0155     | 44.40 | 0.00 |
| TRINITY_I7LXT2_TETTS/158-424       | I7LXT2.2     | PF00069.23 | 44.40 | 0.00 |
| TRINITY_M5EDH3_MALS4/201-396       | M5EDH3.1     | PF00733.19 | 44.40 | 0.00 |
| TRINITY_D8U8N7_VOLCA/113-236       | D8U8N7.1     | PF01398.19 | 44.40 | 0.00 |
| TRINITY_L8HKQ7_ACACA/361-718       | L8HKQ7.1     | PF00443.27 | 44.40 | 0.00 |
| TRINITY_C6W3C2_DYAFD/20-198        | C6W3C2.1     | PF13532.4; | 44.40 | 0.00 |
| TRINITY_A0A0M8MSS6_9BASI/8-170     | A0A0M8MSS6.1 | PF0007     | 44.40 | 0.00 |
| TRINITY_I0Z2A7_9CHLO/114-589       | I0Z2A7.1     | PF01293.18 | 44.40 | 0.00 |
| TRINITY_F0ZPI4_DICPU/1-102         | F0ZPI4.1     | PF00168.28 | 44.40 | 0.00 |
| TRINITY_I7MAS1_TETTS/209-350       | I7MAS1.2     | PF00781.22 | 44.40 | 0.00 |
| TRINITY_W4GNN6_9STRA/356-454       | W4GNN6.1     | PF16158.3; | 44.40 | 0.00 |
| TRINITY_D8U1X9_VOLCA/1617-1769     | D8U1X9.1     | PF07744.11 | 44.40 | 0.00 |
| TRINITY_I0YPQ0_9CHLO/7-122         | I0YPQ0.1     | PF00072.22 | 44.40 | 0.00 |
| TRINITY_G0QPQ5_ICHMG/48-200        | G0QPQ5.1     | PF14908.4; | 44.40 | 0.00 |
| TRINITY_A9VBV3_MONBE/113-301       | A9VBV3.1     | PF08613.9; | 44.40 | 0.00 |
| TRINITY_D8UDM0_VOLCA/9-413         | D8UDM0.1     | PF03348.13 | 44.40 | 0.00 |
| TRINITY_A0A0G4J3J9_PLABS/33-250    | A0A0G4J3J9.1 | PF0699     | 44.40 | 0.00 |
| TRINITY_L0AVB9_THEEQ/36-143        | L0AVB9.1     | PF00085.18 | 44.40 | 0.00 |
| TRINITY_H0W0T5_CAVPO/402-495       | H0W0T5.1     | PF12796.5; | 44.40 | 0.00 |
| TRINITY_D8TVK8_VOLCA/245-526       | D8TVK8.1     | PF00520.29 | 44.40 | 0.00 |
| TRINITY_A9S9L2_PHYPA/700-1078      | A9S9L2.1     | PF13423.4; | 44.40 | 0.00 |
| TRINITY_A0A098VUJ1_9MICR/152-260   | A0A098VUJ1.1 | PF1487     | 44.40 | 0.00 |
| TRINITY_M0RHE9_MUSAM/38-393        | M0RHE9.1     | PF04185.12 | 44.40 | 0.00 |
| TRINITY_L8GLZ0_ACACA/205-444       | L8GLZ0.1     | PF10486.7; | 44.40 | 0.00 |
| TRINITY_F1RFJ0_PIG/121-202         | F1RFJ0.2     | PF01822.17 | 44.40 | 0.00 |
| TRINITY_E3KL98_PUCGT/81-191        | E3KL98.2     | PF01491.14 | 44.40 | 0.00 |
| TRINITY_Q869V0_DICDI/657-841       | Q869V0.1     | PF02145.13 | 44.40 | 0.00 |
| TRINITY_K0IMK6_NITGG/2-223         | K0IMK6.1     | PF01269.15 | 44.40 | 0.00 |
| TRINITY_C4M0S0_ENTHI/4-74          | C4M0S0.1     | PF00076.20 | 44.40 | 0.00 |
| TRINITY_D2W2V3_NAEGR/71-211        | D2W2V3.1     | PF00782.18 | 44.40 | 0.00 |
| TRINITY_E1Z9C0_CHLVA/522-797       | E1Z9C0.1     | PF13532.4; | 44.40 | 0.00 |
| TRINITY_D8TIR1_VOLCA/82-185        | D8TIR1.1     | PF00085.18 | 44.40 | 0.00 |
| TRINITY_W5KK44_ASTMX/68-374        | W5KK44.1     | PF00026.21 | 44.40 | 0.00 |
| TRINITY_A0A067JDG7_JATCU/1367-1440 | A0A067JDG7.1 | PF0057     | 44.40 | 0.00 |
| TRINITY_L8HEU4_ACACA/47-335        | L8HEU4.1     | PF02383.16 | 44.40 | 0.00 |
| TRINITY_D8U0J3_VOLCA/3-532         | D8U0J3.1     | PF00759.17 | 44.40 | 0.00 |
| TRINITY_D8TCH9_SELML/127-258       | D8TCH9.1     | PF01529.18 | 44.40 | 0.00 |
| TRINITY_A0A024WH81_PLAFA/121-425   | A0A024WH81.1 | PF1050     | 44.40 | 0.00 |
| TRINITY_E1ZII9_CHLVA/424-615       | E1ZII9.1     | PF14881.4; | 44.40 | 0.00 |
| TRINITY_D8UHE8_VOLCA/111-192       | D8UHE8.1     | PF09409.8; | 44.40 | 0.00 |
| TRINITY_L8H0K3_ACACA/125-255       | L8H0K3.1     | PF17207.1; | 44.40 | 0.00 |
| TRINITY_K4MDB8_9EURY/98-153        | K4MDB8.1     | PF00571.26 | 44.40 | 0.00 |
| TRINITY_I7LZV2_TETTS/151-413       | I7LZV2.1     | PF00069.23 | 44.40 | 0.00 |
| TRINITY_E9DJQ9_COCPS/216-269       | E9DJQ9.1     | PF00249.29 | 44.40 | 0.00 |
| TRINITY_T0PTH5_9STRA/27-186        | T0PTH5.1     | PF04939.10 | 44.40 | 0.00 |
| TRINITY_S9VR53_9TRYP/106-249       | S9VR53.1     | PF00782.18 | 44.40 | 0.00 |
| TRINITY_A9TQ85_PHYPA/12-93         | A9TQ85.1     | PF04683.11 | 44.40 | 0.00 |
| TRINITY_D8TKD2_VOLCA/5-408         | D8TKD2.1     | PF04801.11 | 44.40 | 0.00 |
| TRINITY_A0YYD8_LYNBP/2-157         | A0YYD8.1     | PF05706.10 | 44.40 | 0.00 |
| TRINITY_C1E5C1_MICSR/25-305        | C1E5C1.1     | PF01904.16 | 44.40 | 0.00 |
| TRINITY_C0ZCI2_BREBN/109-247       | C0ZCI2.1     | PF00004.27 | 44.40 | 0.00 |
| TRINITY_A8IGD3_CHLRE/368-494       | A8IGD3.1     | PF02469.20 | 44.40 | 0.00 |
| TRINITY_D3BNR7_POLPA/86-176        | D3BNR7.1     | PF00626.20 | 44.40 | 0.00 |
| TRINITY_S8CXI3_9LAMI/320-390       | S8CXI3.1     | PF13620.4; | 44.40 | 0.00 |
| TRINITY_A0A0M9DTP7_9BACT/3-161     | A0A0M9DTP7.1 | PF1352     | 44.40 | 0.00 |
| TRINITY_B9JG80_AGRRK/156-333       | B9JG80.1     | PF00271.29 | 44.40 | 0.00 |
| TRINITY_D8U4Y7_VOLCA/38-111        | D8U4Y7.1     | PF00240.21 | 44.40 | 0.00 |
| TRINITY_V4RFV4_9ROSI/5-552         | V4RFV4.1     | PF00862.17 | 44.40 | 0.00 |
| TRINITY_A0A072U318_MEDTR/1434-1686 | A0A072U318.1 | PF0056     | 44.40 | 0.00 |
| TRINITY_L1IXT3_GUITH/1-178         | L1IXT3.1     | PF16909.3; | 44.40 | 0.00 |

|                                    |                     |       |      |
|------------------------------------|---------------------|-------|------|
| TRINITY_W4FSJ9_9STRA/1228-1335     | W4FSJ9.1 PF00005.25 | 44.40 | 0.00 |
| TRINITY_I1JF64_SOYBN/83-147        | I1JF64.1 PF13499.4; | 44.40 | 0.00 |
| TRINITY_Q245C4_TETTS/76-281        | Q245C4.1 PF00566.16 | 44.40 | 0.00 |
| TRINITY_W2PF29_PHYPN/5-86          | W2PF29.1 PF13417.4; | 44.30 | 0.00 |
| TRINITY_A0A0G4GXE9_9ALVE/227-438   | A0A0G4GXE9.1 PF1367 | 44.30 | 0.00 |
| TRINITY_M4A6Y6_XIPMA/7-199         | M4A6Y6.1 PF11032.6; | 44.30 | 0.00 |
| TRINITY_A0EDD8_PARTE/1167-1337     | A0EDD8.1 PF01504.16 | 44.30 | 0.00 |
| TRINITY_Q22BW3_TETTS/18-233        | Q22BW3.2 PF02230.14 | 44.30 | 0.00 |
| TRINITY_H2YT61_CIOSA/436-716       | H2YT61.1 PF00702.24 | 44.30 | 0.00 |
| TRINITY_A0A078BB17_STYLE/30-281    | A0A078BB17.1 PF0006 | 44.30 | 0.00 |
| TRINITY_Q245C4_TETTS/76-281        | Q245C4.1 PF00566.16 | 44.30 | 0.00 |
| TRINITY_M2XTZ6_GALSU/34-173        | M2XTZ6.1 PF05832.10 | 44.30 | 0.00 |
| TRINITY_K1WDM8_TRIAC/173-476       | K1WDM8.1 PF05970.12 | 44.30 | 0.00 |
| TRINITY_E1WY84_HALMS/472-586       | E1WY84.1 PF00072.22 | 44.30 | 0.00 |
| TRINITY_A9S1X0_PHYPA/23-92         | A9S1X0.1 PF00076.20 | 44.30 | 0.00 |
| TRINITY_M7ARK4_CHEMY/1192-1261     | M7ARK4.1 PF00076.20 | 44.30 | 0.00 |
| TRINITY_L8HE02_ACACA/133-229       | L8HE02.1 PF06916.11 | 44.30 | 0.00 |
| TRINITY_Q23DH5_TETTS/185-254       | Q23DH5.1 PF13921.4; | 44.30 | 0.00 |
| TRINITY_W5MFJ6_LEPOC/42-401        | W5MFJ6.1 PF05208.11 | 44.30 | 0.00 |
| TRINITY_K7JH06_NASVI/8-194         | K7JH06.1 PF01812.18 | 44.30 | 0.00 |
| TRINITY_J9I745_9SPIT/386-468       | J9I745.1 PF01833.22 | 44.30 | 0.00 |
| TRINITY_A0A0M3K351_ANISI/1167-1240 | A0A0M3K351.1 PF1279 | 44.30 | 0.00 |
| TRINITY_Q096Q7_STIAD/83-224        | Q096Q7.1 PF13847.4; | 44.30 | 0.00 |
| TRINITY_F2UHC5_SALR5/32-203        | F2UHC5.1 PF03637.15 | 44.30 | 0.00 |
| TRINITY_G6DCU0_DANPL/431-760       | G6DCU0.1 PF00702.24 | 44.30 | 0.00 |
| TRINITY_I7LU64_TETTS/7-127         | I7LU64.2 PF13344.4; | 44.30 | 0.00 |
| TRINITY_Q24DE8_TETTS/129-738       | Q24DE8.1 PF00443.27 | 44.30 | 0.00 |
| TRINITY_D3BPK6_POLPA/6-168         | D3BPK6.1 PF00071.20 | 44.30 | 0.00 |
| TRINITY_Q7Z1F7_TOXGO/185-703       | Q7Z1F7.1 PF00183.16 | 44.30 | 0.00 |
| TRINITY_G1N3M5_MELGA/134-215       | G1N3M5.1 PF12796.5; | 44.30 | 0.00 |
| TRINITY_A0DE81_PARTE/17-265        | A0DE81.1 PF02263.17 | 44.30 | 0.00 |
| TRINITY_I0Z9G3_9CHLO/483-760       | I0Z9G3.1 PF08324.9; | 44.30 | 0.00 |
| TRINITY_F4Q2G9_DICFS/1228-1485     | F4Q2G9.1 PF00069.23 | 44.30 | 0.00 |
| TRINITY_D7FVI2_ECTSI/108-188       | D7FVI2.1 PF09262.9; | 44.30 | 0.00 |
| TRINITY_A0CDJ1_PARTE/92-164        | A0CDJ1.1 PF13499.4; | 44.30 | 0.00 |
| TRINITY_A0CDJ1_PARTE/92-164        | A0CDJ1.1 PF13499.4; | 44.30 | 0.00 |
| TRINITY_F1A0Z3_DICPU/486-804       | F1A0Z3.1 PF09243.8; | 44.30 | 0.00 |
| TRINITY_B6Q3N7_TALMQ/30-112        | B6Q3N7.1 PF13233.4; | 44.30 | 0.00 |
| TRINITY_G0QZF5_ICHMG/394-482       | G0QZF5.1 PF01833.22 | 44.30 | 0.00 |
| TRINITY_A0A0G4GZH6_9ALVE/419-599   | A0A0G4GZH6.1 PF0281 | 44.30 | 0.00 |
| TRINITY_D8U1Y2_VOLCA/14-130        | D8U1Y2.1 PF00072.22 | 44.30 | 0.00 |
| TRINITY_C7RB04_KANKD/13-210        | C7RB04.1 PF01596.15 | 44.30 | 0.00 |
| TRINITY_L8GN09_ACACA/119-355       | L8GN09.1 PF03878.13 | 44.30 | 0.00 |
| TRINITY_E1ZCG5_CHLVA/58-447        | E1ZCG5.1 PF05536.9; | 44.30 | 0.00 |
| TRINITY_L8GKH0_ACACA/249-578       | L8GKH0.1 PF13598.4; | 44.30 | 0.00 |
| TRINITY_J9IZ86_9SPIT/129-645       | J9IZ86.1 PF00443.27 | 44.30 | 0.00 |
| TRINITY_D8TPG7_VOLCA/13-263        | D8TPG7.1 PF00251.18 | 44.30 | 0.00 |
| TRINITY_D8T1I5_SELML/13-265        | D8T1I5.1 PF07714.15 | 44.30 | 0.00 |
| TRINITY_F8AAY3_THEID/8-88          | F8AAY3.1 PF00312.20 | 44.30 | 0.00 |
| TRINITY_B9Q6X4_TOXGO/138-221       | B9Q6X4.1 PF00867.16 | 44.30 | 0.00 |
| TRINITY_D7A4Q9_STAND/67-269        | D7A4Q9.1 PF07859.11 | 44.30 | 0.00 |
| TRINITY_I0YLQ2_9CHLO/4-298         | I0YLQ2.1 PF02598.15 | 44.30 | 0.00 |
| TRINITY_Q22P47_TETTS/327-477       | Q22P47.2 PF16113.3; | 44.30 | 0.00 |
| TRINITY_L1J437_GUIITH/102-337      | L1J437.1 PF09423.8; | 44.30 | 0.00 |
| TRINITY_D8TNJ1_VOLCA/217-896       | D8TNJ1.1 PF04006.10 | 44.30 | 0.00 |
| TRINITY_C3Z710_BRAFL/85-154        | C3Z710.1 PF00076.20 | 44.30 | 0.00 |
| TRINITY_A0A0D3AIM6_BRAOL/116-259   | A0A0D3AIM6.1 PF0246 | 44.30 | 0.00 |
| TRINITY_K7E0X2_MONDO/56-126        | K7E0X2.1 PF13499.4; | 44.30 | 0.00 |
| TRINITY_D8UKR2_VOLCA/77-344        | D8UKR2.1 PF10343.7; | 44.30 | 0.00 |
| TRINITY_I0YPY6_9CHLO/7-342         | I0YPY6.1 PF01276.18 | 44.30 | 0.00 |
| TRINITY_A0A0D2X453_CAPO3/177-285   | A0A0D2X453.1 PF0572 | 44.30 | 0.00 |

|                                    |              |            |       |      |
|------------------------------------|--------------|------------|-------|------|
| TRINITY_L8H4X2_ACACA/32-109        | L8H4X2.1     | PF09696.8; | 44.30 | 0.00 |
| TRINITY_D8TLD5_VOLCA/44-175        | D8TLD5.1     | PF00293.26 | 44.30 | 0.00 |
| TRINITY_F7EZB8_ORNAN/49-170        | F7EZB8.1     | PF09335.9; | 44.30 | 0.00 |
| TRINITY_C5YLL1_SORBI/161-406       | C5YLL1.1     | PF07727.12 | 44.30 | 0.00 |
| TRINITY_A8I4F2_CHLRE/117-336       | A8I4F2.1     | PF07714.15 | 44.30 | 0.00 |
| TRINITY_E1ZMP9_CHLVA/411-697       | E1ZMP9.1     | PF12341.6; | 44.30 | 0.00 |
| TRINITY_I1GG91_AMPQE/394-601       | I1GG91.1     | PF00644.18 | 44.30 | 0.00 |
| TRINITY_A8JBE2_CHLRE/96-202        | A8JBE2.1     | PF14497.4; | 44.30 | 0.00 |
| TRINITY_A9PEF0_POPTR/65-138        | A9PEF0.1     | PF02201.16 | 44.30 | 0.00 |
| TRINITY_E4XGI0_OIKDI/237-305       | E4XGI0.1     | PF00076.20 | 44.30 | 0.00 |
| TRINITY_F4NSG0_BATDJ/183-312       | F4NSG0.1     | PF03188.14 | 44.30 | 0.00 |
| TRINITY_A0A078ALS8_STYLE/1012-1418 | A0A078ALS8.1 | PF0839     | 44.30 | 0.00 |
| TRINITY_J9F1H9_9SPIT/12-116        | J9F1H9.1     | PF02991.14 | 44.20 | 0.00 |
| TRINITY_I7MJT4_TETTS/15-283        | I7MJT4.1     | PF01073.17 | 44.20 | 0.00 |
| TRINITY_L9KU30_TUPCH/43-263        | L9KU30.1     | PF09749.7; | 44.20 | 0.00 |
| TRINITY_A0A068RQS6_9FUNG/55-131    | A0A068RQS6.1 | PF0313     | 44.20 | 0.00 |
| TRINITY_A0A087XW94_POEFO/6-94      | A0A087XW94.2 | PF0003     | 44.20 | 0.00 |
| TRINITY_Q23ZD1_TETTS/86-338        | Q23ZD1.2     | PF00566.16 | 44.20 | 0.00 |
| TRINITY_I7LZV2_TETTS/151-413       | I7LZV2.1     | PF00069.23 | 44.20 | 0.00 |
| TRINITY_W5LBQ2_ASTMX/1-271         | W5LBQ2.1     | PF08433.8; | 44.20 | 0.00 |
| TRINITY_A0CJL8_PARTE/108-301       | A0CJL8.1     | PF13901.4; | 44.20 | 0.00 |
| TRINITY_Q6LH92_PHOPR/8-198         | Q6LH92.1     | PF01734.20 | 44.20 | 0.00 |
| TRINITY_Q24HR9_TETTS/46-305        | Q24HR9.2     | PF00069.23 | 44.20 | 0.00 |
| TRINITY_G4YL70_PHYSP/103-480       | G4YL70.1     | PF00443.27 | 44.20 | 0.00 |
| TRINITY_B2GPU0_DANRE/4-371         | B2GPU0.1     | PF03223.13 | 44.20 | 0.00 |
| TRINITY_G2E9J5_9FLAO/29-146        | G2E9J5.1     | PF08240.10 | 44.20 | 0.00 |
| TRINITY_A0CDL7_PARTE/665-974       | A0CDL7.1     | PF00069.23 | 44.20 | 0.00 |
| TRINITY_A8ZWM7_DESOH/2-194         | A8ZWM7.1     | PF00106.23 | 44.20 | 0.00 |
| TRINITY_A0DPD0_PARTE/462-730       | A0DPD0.1     | PF00149.26 | 44.20 | 0.00 |
| TRINITY_M0Z034_HORVD/47-150        | M0Z034.1     | PF00011.19 | 44.20 | 0.00 |
| TRINITY_F0YAI9_AURAN/4-240         | F0YAI9.1     | PF00149.26 | 44.20 | 0.00 |
| TRINITY_A0CKQ7_PARTE/20-273        | A0CKQ7.1     | PF00069.23 | 44.20 | 0.00 |
| TRINITY_D7G7A9_ECTSI/222-420       | D7G7A9.1     | PF01545.19 | 44.20 | 0.00 |
| TRINITY_D3BRR7_POLPA/130-385       | D3BRR7.1     | PF07714.15 | 44.20 | 0.00 |
| TRINITY_A8IYP4_CHLRE/38-237        | A8IYP4.1     | PF00485.16 | 44.20 | 0.00 |
| TRINITY_K1S6R2_CRAGI/67-193        | K1S6R2.1     | PF00583.23 | 44.20 | 0.00 |
| TRINITY_D8TZ78_VOLCA/416-537       | D8TZ78.1     | PF01544.16 | 44.20 | 0.00 |
| TRINITY_A0A0D2VSI5_CAPO3/35-145    | A0A0D2VSI5.1 | PF0848     | 44.20 | 0.00 |
| TRINITY_E0CV79_VITVI/40-388        | E0CV79.1     | PF00856.26 | 44.20 | 0.00 |
| TRINITY_A0A0D2UHK5_GOSRA/5-168     | A0A0D2UHK5.1 | PF0346     | 44.20 | 0.00 |
| TRINITY_D4GLL5_PANAM/12-267        | D4GLL5.1     | PF00899.19 | 44.20 | 0.00 |
| TRINITY_C1DZ03_MICSR/595-1008      | C1DZ03.1     | PF04357.11 | 44.20 | 0.00 |
| TRINITY_A8J491_CHLRE/1-108         | A8J491.1     | PF03969.14 | 44.20 | 0.00 |
| TRINITY_I0YPY7_9CHLO/17-104        | I0YPY7.1     | PF04488.13 | 44.20 | 0.00 |
| TRINITY_I7MAX8_TETTS/82-258        | I7MAX8.2     | PF04727.11 | 44.20 | 0.00 |
| TRINITY_I7M4C2_TETTS/42-276        | I7M4C2.1     | PF00149.26 | 44.20 | 0.00 |
| TRINITY_W7X142_TETTS/122-276       | W7X142.1     | PF00650.18 | 44.20 | 0.00 |
| TRINITY_A0E2A8_PARTE/308-600       | A0E2A8.1     | PF13243.4; | 44.20 | 0.00 |
| TRINITY_F4Q7J1_DICFS/156-472       | F4Q7J1.1     | PF00728.20 | 44.20 | 0.00 |
| TRINITY_J9FZ76_9SPIT/15-176        | J9FZ76.1     | PF00071.20 | 44.20 | 0.00 |
| TRINITY_D8U516_VOLCA/39-285        | D8U516.1     | PF03407.14 | 44.20 | 0.00 |
| TRINITY_D8TTP6_VOLCA/535-692       | D8TTP6.1     | PF08646.8; | 44.20 | 0.00 |
| TRINITY_A8J0K8_CHLRE/1552-1659     | A8J0K8.1     | PF00651.29 | 44.20 | 0.00 |
| TRINITY_A8ITN3_CHLRE/83-328        | A8ITN3.1     | PF00233.17 | 44.20 | 0.00 |
| TRINITY_D8U645_VOLCA/3-62          | D8U645.1     | PF06624.10 | 44.20 | 0.00 |
| TRINITY_A8HQH0_CHLRE/38-357        | A8HQH0.1     | PF08627.8; | 44.20 | 0.00 |
| TRINITY_E1Z4T6_CHLVA/749-1168      | E1Z4T6.1     | PF08326.10 | 44.20 | 0.00 |
| TRINITY_D7L4R4_ARALL/68-330        | D7L4R4.1     | PF00069.23 | 44.20 | 0.00 |
| TRINITY_F4Q620_DICFS/392-441       | F4Q620.1     | PF00415.16 | 44.20 | 0.00 |
| TRINITY_D2V5F0_NAEGR/143-242       | D2V5F0.1     | PF13640.4; | 44.20 | 0.00 |
| TRINITY_A0A087SS49_AUXPR/653-766   | A0A087SS49.1 | PF0877     | 44.20 | 0.00 |

|                                  |              |            |       |      |
|----------------------------------|--------------|------------|-------|------|
| TRINITY_A8IKA4_CHLRE/2156-2500   | A8IKA4.1     | PF00443.27 | 44.20 | 0.00 |
| TRINITY_L8GS17_ACACA/603-781     | L8GS17.1     | PF00617.17 | 44.20 | 0.00 |
| TRINITY_T0Q7D4_9STRA/138-238     | T0Q7D4.1     | PF12763.5; | 44.20 | 0.00 |
| TRINITY_A0CL09_PARTE/55-165      | A0CL09.1     | PF12796.5; | 44.20 | 0.00 |
| TRINITY_D8TKH0_VOLCA/161-515     | D8TKH0.1     | PF01103.21 | 44.20 | 0.00 |
| TRINITY_H3CX28_TETNG/29-156      | H3CX28.1     | PF00134.21 | 44.20 | 0.00 |
| TRINITY_I7M2I7_TETTS/1351-1566   | I7M2I7.1     | PF00566.16 | 44.20 | 0.00 |
| TRINITY_D8TNZ3_VOLCA/555-849     | D8TNZ3.1     | PF03851.12 | 44.20 | 0.00 |
| TRINITY_A0A067FRR0_CITSI/37-121  | A0A067FRR0.1 | PF1017     | 44.20 | 0.00 |
| TRINITY_D8TIE8_VOLCA/640-737     | D8TIE8.1     | PF02806.16 | 44.20 | 0.00 |
| TRINITY_J9JCA5_9SPIT/125-339     | J9JCA5.1     | PF00112.21 | 44.20 | 0.00 |
| TRINITY_A8X9K0_CAEBR/3-166       | A8X9K0.2     | PF00091.23 | 44.20 | 0.00 |
| TRINITY_L0J865_MYCSM/7-158       | L0J865.1     | PF08768.9; | 44.10 | 0.00 |
| TRINITY_A0BRA8_PARTE/7-108       | A0BRA8.1     | PF00168.28 | 44.10 | 0.00 |
| TRINITY_K9XS7_7_103-215          | K9XS7.1      | PF01841.17 | 44.10 | 0.00 |
| TRINITY_Q23G56_TETTS/110-197     | Q23G56.2     | PF00153.25 | 44.10 | 0.00 |
| TRINITY_A0A078EB35_BRANA/617-822 | A0A078EB35.1 | PF0000     | 44.10 | 0.00 |
| TRINITY_M5FWE7_DACSP/103-196     | M5FWE7.1     | PF07818.11 | 44.10 | 0.00 |
| TRINITY_F4Q5E1_DICFS/42-384      | F4Q5E1.1     | PF00150.16 | 44.10 | 0.00 |
| TRINITY_L8GZ24_ACACA/23-205      | L8GZ24.1     | PF03962.13 | 44.10 | 0.00 |
| TRINITY_K1PZ87_CRAGI/39-172      | K1PZ87.1     | PF00782.18 | 44.10 | 0.00 |
| TRINITY_J9HMP7_9SPIT/7-124       | J9HMP7.1     | PF13815.4; | 44.10 | 0.00 |
| TRINITY_Q6MAQ5_PARUW/27-167      | Q6MAQ5.1     | PF06962.10 | 44.10 | 0.00 |
| TRINITY_A0A0G4IJE1_PLABS/7-102   | A0A0G4IJE1.1 | PF0141     | 44.10 | 0.00 |
| TRINITY_L1J9H4_GUIITH/347-522    | L1J9H4.1     | PF13870.4; | 44.10 | 0.00 |
| TRINITY_D8U3A0_VOLCA/3-209       | D8U3A0.1     | PF03665.11 | 44.10 | 0.00 |
| TRINITY_K1QM54_CRAGI/222-338     | K1QM54.1     | PF08327.9; | 44.10 | 0.00 |
| TRINITY_A0DSK2_PARTE/44-329      | A0DSK2.1     | PF01459.20 | 44.10 | 0.00 |
| TRINITY_C1MSG6_MICPC/3-207       | C1MSG6.1     | PF00069.23 | 44.10 | 0.00 |
| TRINITY_E1Z5P1_CHLVA/131-317     | E1Z5P1.1     | PF07714.15 | 44.10 | 0.00 |
| TRINITY_E1Z5T3_CHLVA/338-498     | E1Z5T3.1     | PF01734.20 | 44.10 | 0.00 |
| TRINITY_G4M023_SCHMA/13-385      | G4M023.1     | PF01433.18 | 44.10 | 0.00 |
| TRINITY_F0ZPC9_DICPU/681-926     | F0ZPC9.1     | PF08427.8; | 44.10 | 0.00 |
| TRINITY_M8AXH1_TRIUA/124-183     | M8AXH1.1     | PF13418.4; | 44.10 | 0.00 |
| TRINITY_K1QD00_CRAGI/691-770     | K1QD00.1     | PF12796.5; | 44.10 | 0.00 |
| TRINITY_I7LUV4_TETTS/6-94        | I7LUV4.2     | PF00855.15 | 44.10 | 0.00 |
| TRINITY_S5VR79_STRC3/295-393     | S5VR79.1     | PF01551.20 | 44.10 | 0.00 |
| TRINITY_C8VR19_EMENI/36-151      | C8VR19.1     | PF01571.19 | 44.10 | 0.00 |
| TRINITY_D8TKD3_VOLCA/49-222      | D8TKD3.1     | PF04832.10 | 44.10 | 0.00 |
| TRINITY_U9SRI9_RHIID/123-267     | U9SRI9.1     | PF05188.15 | 44.10 | 0.00 |
| TRINITY_A8I8P0_CHLRE/185-745     | A8I8P0.1     | PF10191.7; | 44.10 | 0.00 |
| TRINITY_G0R643_ICHMG/19-285      | G0R643.1     | PF02263.17 | 44.10 | 0.00 |
| TRINITY_G0R5L7_ICHMG/165-390     | G0R5L7.1     | PF12146.6; | 44.10 | 0.00 |
| TRINITY_D8SQH8_SELML/67-214      | D8SQH8.1     | PF04073.13 | 44.10 | 0.00 |
| TRINITY_I3JQL1_ORENI/184-358     | I3JQL1.1     | PF07786.10 | 44.10 | 0.00 |
| TRINITY_D8UK64_VOLCA/8-471       | D8UK64.1     | PF13520.4; | 44.10 | 0.00 |
| TRINITY_R7YJT1_CONA1/48-355      | R7YJT1.1     | PF00264.18 | 44.10 | 0.00 |
| TRINITY_A8J8Y6_CHLRE/19-396      | A8J8Y6.1     | PF16113.3; | 44.10 | 0.00 |
| TRINITY_H2W2V9_CAEJA/120-371     | H2W2V9.1     | PF07714.15 | 44.10 | 0.00 |
| TRINITY_A0BQW0_PARTE/27-209      | A0BQW0.1     | PF03357.19 | 44.10 | 0.00 |
| TRINITY_G0QJM7_ICHMG/14-137      | G0QJM7.1     | PF01042.19 | 44.10 | 0.00 |
| TRINITY_W2PQT4_PHYPN/122-348     | W2PQT4.1     | PF00667.18 | 44.10 | 0.00 |
| TRINITY_L8GL94_ACACA/389-614     | L8GL94.1     | PF13672.4; | 44.10 | 0.00 |
| TRINITY_A8HT69_CHLRE/689-903     | A8HT69.1     | PF07569.9; | 44.10 | 0.00 |
| TRINITY_K3X3N5_PYTUL/83-154      | K3X3N5.1     | PF03937.14 | 44.10 | 0.00 |
| TRINITY_A8HPX0_CHLRE/136-242     | A8HPX0.1     | PF07818.11 | 44.10 | 0.00 |
| TRINITY_D8TNI3_VOLCA/179-415     | D8TNI3.1     | PF00251.18 | 44.10 | 0.00 |
| TRINITY_X1WIT1_ACYPI/8-221       | X1WIT1.1     | PF01135.17 | 44.10 | 0.00 |
| TRINITY_L0A9E0_DEIPD/46-181      | L0A9E0.1     | PF09346.8; | 44.10 | 0.00 |
| TRINITY_V4AHX0_LOTGI/87-328      | V4AHX0.1     | PF08627.8; | 44.10 | 0.00 |
| TRINITY_D3B9V6_POLPA/831-1080    | D3B9V6.1     | PF07714.15 | 44.10 | 0.00 |

|                                  |              |            |       |      |
|----------------------------------|--------------|------------|-------|------|
| TRINITY_F0ZFB5_DICPU/246-376     | F0ZFB5.1     | PF01529.18 | 44.10 | 0.00 |
| TRINITY_I7MG17_TETTS/55-123      | I7MG17.2     | PF05198.14 | 44.10 | 0.00 |
| TRINITY_G8T7W2_NIAKG/266-324     | G8T7W2.1     | PF13415.4; | 44.10 | 0.00 |
| TRINITY_H9GKH8_ANOCA/45-119      | H9GKH8.1     | PF01883.17 | 44.10 | 0.00 |
| TRINITY_D8TS72_VOLCA/114-369     | D8TS72.1     | PF10343.7; | 44.10 | 0.00 |
| TRINITY_B4W5E8_9CYAN/32-542      | B4W5E8.1     | PF03098.13 | 44.10 | 0.00 |
| TRINITY_D3BIK5_POLPA/674-1142    | D3BIK5.1     | PF01055.24 | 44.10 | 0.00 |
| TRINITY_A0A067KN01_JATCU/413-773 | A0A067KN01.1 | PF0070     | 44.10 | 0.00 |
| TRINITY_A0C3K9_PARTE/12-186      | A0C3K9.1     | PF01885.14 | 44.10 | 0.00 |
| TRINITY_W5KHN2_ASTMX/504-686     | W5KHN2.1     | PF02145.13 | 44.10 | 0.00 |
| TRINITY_Q22D68_TETTS/29-277      | Q22D68.3     | PF03803.13 | 44.10 | 0.00 |
| TRINITY_F6RBW8_CIOIN/26-130      | F6RBW8.2     | PF00085.18 | 44.10 | 0.00 |
| TRINITY_A0BCB8_PARTE/4-136       | A0BCB8.1     | PF08613.9; | 44.10 | 0.00 |
| TRINITY_D5GLZ2_TUBMM/4-146       | D5GLZ2.1     | PF00106.23 | 44.10 | 0.00 |
| TRINITY_J9EF05_9SPIT/90-238      | J9EF05.1     | PF01694.20 | 44.10 | 0.00 |
| TRINITY_A8JFH1_CHLRE/93-580      | A8JFH1.1     | PF00759.17 | 44.10 | 0.00 |
| TRINITY_G0QK23_ICHMG/3-104       | G0QK23.1     | PF00168.28 | 44.10 | 0.00 |
| TRINITY_I7MJT4_TETTS/15-283      | I7MJT4.1     | PF01073.17 | 44.00 | 0.00 |
| TRINITY_Q23Q47_TETTS/4-162       | Q23Q47.2     | PF01652.16 | 44.00 | 0.00 |
| TRINITY_A0A0F3L1G8_9GAMM/75-177  | A0A0F3L1G8.1 | PF0419     | 44.00 | 0.00 |
| TRINITY_Q22A65_TETTS/524-741     | Q22A65.2     | PF01612.18 | 44.00 | 0.00 |
| TRINITY_S2J8G5_MUCC1/102-425     | S2J8G5.1     | PF00176.21 | 44.00 | 0.00 |
| TRINITY_F7DT46_MONDO/46-198      | F7DT46.2     | PF13847.4; | 44.00 | 0.00 |
| TRINITY_A0A023BA03_GRENI/11-172  | A0A023BA03.1 | PF0007     | 44.00 | 0.00 |
| TRINITY_I1FTI4_AMPQE/232-479     | I1FTI4.1     | PF07714.15 | 44.00 | 0.00 |
| TRINITY_A0A077ZQS0_STYLE/68-262  | A0A077ZQS0.1 | PF1214     | 44.00 | 0.00 |
| TRINITY_C3YJZ7_BRAFL/25-191      | C3YJZ7.1     | PF08740.9; | 44.00 | 0.00 |
| TRINITY_A0A0L7LG53_9NEOP/24-167  | A0A0L7LG53.1 | PF0146     | 44.00 | 0.00 |
| TRINITY_L8H1V7_ACACA/826-948     | L8H1V7.1     | PF00307.29 | 44.00 | 0.00 |
| TRINITY_Q23QF2_TETTS/248-571     | Q23QF2.2     | PF03133.13 | 44.00 | 0.00 |
| TRINITY_A8HQS2_CHLRE/22-83       | A8HQS2.1     | PF02953.13 | 44.00 | 0.00 |
| TRINITY_A9V005_MONBE/102-190     | A9V005.1     | PF00153.25 | 44.00 | 0.00 |
| TRINITY_D3BE01_POLPA/226-333     | D3BE01.1     | PF04410.12 | 44.00 | 0.00 |
| TRINITY_Q23QF2_TETTS/248-571     | Q23QF2.2     | PF03133.13 | 44.00 | 0.00 |
| TRINITY_A8JFV4_CHLRE/12-120      | A8JFV4.1     | PF03226.12 | 44.00 | 0.00 |
| TRINITY_A0A075AVX5_9FUNG/177-435 | A0A075AVX5.1 | PF1030     | 44.00 | 0.00 |
| TRINITY_D2V003_NAEGR/1-93        | D2V003.1     | PF00169.27 | 44.00 | 0.00 |
| TRINITY_F2U0C9_SALR5/32-247      | F2U0C9.1     | PF04493.12 | 44.00 | 0.00 |
| TRINITY_A0BNN4_PARTE/64-327      | A0BNN4.1     | PF00520.29 | 44.00 | 0.00 |
| TRINITY_L8H844_ACACA/109-517     | L8H844.1     | PF00909.19 | 44.00 | 0.00 |
| TRINITY_D3BB70_POLPA/28-221      | D3BB70.1     | PF02902.17 | 44.00 | 0.00 |
| TRINITY_G0R585_ICHMG/1209-1569   | G0R585.1     | PF12777.5; | 44.00 | 0.00 |
| TRINITY_D8UI53_VOLCA/138-281     | D8UI53.1     | PF00153.25 | 44.00 | 0.00 |
| TRINITY_A0A087SM36_AUXPR/9-296   | A0A087SM36.1 | PF0315     | 44.00 | 0.00 |
| TRINITY_A0A0K3AYF1_CAEEL/1-306   | A0A0K3AYF1.1 | PF0056     | 44.00 | 0.00 |
| TRINITY_A0A078AV48_STYLE/86-356  | A0A078AV48.1 | PF0012     | 44.00 | 0.00 |
| TRINITY_F0ZHQ8_DICPU/126-336     | F0ZHQ8.1     | PF04757.12 | 44.00 | 0.00 |
| TRINITY_A4RU80_OSTLU/392-595     | A4RU80.1     | PF01612.18 | 44.00 | 0.00 |
| TRINITY_PHEA_AQUAE/93-270        | O67085.1     | PF00800.16 | 44.00 | 0.00 |
| TRINITY_L8GCE7_ACACA/328-543     | L8GCE7.1     | PF13086.4; | 44.00 | 0.00 |
| TRINITY_D8TTZ8_VOLCA/6-184       | D8TTZ8.1     | PF00025.19 | 44.00 | 0.00 |
| TRINITY_B4HHW0_DROSE/31-815      | B4HHW0.1     | PF16399.3; | 44.00 | 0.00 |
| TRINITY_D8U8X5_VOLCA/76-184      | D8U8X5.1     | PF14924.4; | 44.00 | 0.00 |
| TRINITY_A8HP02_CHLRE/163-262     | A8HP02.1     | PF07707.13 | 44.00 | 0.00 |
| TRINITY_J9IAJ3_9SPIT/25-140      | J9IAJ3.1     | PF01966.20 | 44.00 | 0.00 |
| TRINITY_L8H2D7_ACACA/248-333     | L8H2D7.1     | PF02761.12 | 44.00 | 0.00 |
| TRINITY_B0C469_ACAM1/438-625     | B0C469.1     | PF13191.4; | 44.00 | 0.00 |
| TRINITY_Q7YZQ8_BABBO/9-171       | Q7YZQ8.1     | PF00071.20 | 44.00 | 0.00 |
| TRINITY_F1A0P0_DICPU/1-267       | F1A0P0.1     | PF03619.14 | 44.00 | 0.00 |
| TRINITY_A0DTT7_PARTE/327-627     | A0DTT7.1     | PF00069.23 | 44.00 | 0.00 |
| TRINITY_E1Z213_CHLVA/62-322      | E1Z213.1     | PF09353.8; | 44.00 | 0.00 |

|                                  |              |            |       |      |
|----------------------------------|--------------|------------|-------|------|
| TRINITY_L8H4T2_ACACA/305-409     | L8H4T2.1     | PF03792.11 | 44.00 | 0.00 |
| TRINITY_D2B907_STRRD/6-123       | D2B907.1     | PF00581.18 | 44.00 | 0.00 |
| TRINITY_F0ZI20_DICPU/3-217       | F0ZI20.1     | PF00091.23 | 44.00 | 0.00 |
| TRINITY_C1EFZ5_MICSR/3-109       | C1EFZ5.1     | PF00085.18 | 44.00 | 0.00 |
| TRINITY_L8H7R1_ACACA/43-388      | L8H7R1.1     | PF00224.19 | 44.00 | 0.00 |
| TRINITY_A0C764_PARTE/28-250      | A0C764.1     | PF00378.18 | 44.00 | 0.00 |
| TRINITY_F4Q5R2_DICFS/72-228      | F4Q5R2.1     | PF01652.16 | 44.00 | 0.00 |
| TRINITY_A8JGZ2_CHLRE/8-91        | A8JGZ2.1     | PF04110.11 | 44.00 | 0.00 |
| TRINITY_A7RXI9_NEMVE/46-278      | A7RXI9.1     | PF00102.25 | 44.00 | 0.00 |
| TRINITY_A8JIU8_CHLRE/35-321      | A8JIU8.1     | PF00520.29 | 44.00 | 0.00 |
| TRINITY_F1A2T0_DICPU/396-578     | F1A2T0.1     | PF01369.18 | 44.00 | 0.00 |
| TRINITY_A0A078AJI8_STYLE/155-505 | A0A078AJI8.1 | PF1386     | 44.00 | 0.00 |
| TRINITY_L8H3C1_ACACA/447-563     | L8H3C1.1     | PF00651.29 | 44.00 | 0.00 |
| TRINITY_B3SBW1_TRIAD/8-182       | B3SBW1.1     | PF15469.4; | 44.00 | 0.00 |
| TRINITY_NRAM1_DICDI/94-450       | Q869V1.1     | PF01566.16 | 44.00 | 0.00 |
| TRINITY_L8GF84_ACACA/748-1120    | L8GF84.1     | PF02259.21 | 44.00 | 0.00 |
| TRINITY_L8GFU2_ACACA/577-721     | L8GFU2.1     | PF00644.18 | 44.00 | 0.00 |
| TRINITY_A0CV13_PARTE/21-225      | A0CV13.1     | PF05013.10 | 44.00 | 0.00 |
| TRINITY_D8U7M2_VOLCA/12-126      | D8U7M2.1     | PF00651.29 | 44.00 | 0.00 |
| TRINITY_D2V9M8_NAEGR/13-146      | D2V9M8.1     | PF00782.18 | 44.00 | 0.00 |
| TRINITY_D8U5T7_VOLCA/76-294      | D8U5T7.1     | PF01036.16 | 44.00 | 0.00 |
| TRINITY_I0YLN8_9CHLO/172-489     | I0YLN8.1     | PF11735.6; | 44.00 | 0.00 |
| TRINITY_D8UIN9_VOLCA/1371-1729   | D8UIN9.1     | PF00224.19 | 44.00 | 0.00 |
| TRINITY_A0CB62_PARTE/773-896     | A0CB62.1     | PF00072.22 | 44.00 | 0.00 |
| TRINITY_Q248F0_TETTS/19-502      | Q248F0.2     | PF04916.11 | 43.90 | 0.00 |
| TRINITY_L8H300_ACACA/1-341       | L8H300.1     | PF12722.5; | 43.90 | 0.00 |
| TRINITY_A0A015JZN3_9GLOM/168-528 | A0A015JZN3.1 | PF0529     | 43.90 | 0.00 |
| TRINITY_Q23PV4_TETTS/274-435     | Q23PV4.2     | PF00441.22 | 43.90 | 0.00 |
| TRINITY_D3BK07_POLPA/84-175      | D3BK07.1     | PF02214.20 | 43.90 | 0.00 |
| TRINITY_TRM6_DICDI/34-336        | Q54UB1.1     | PF04189.11 | 43.90 | 0.00 |
| TRINITY_G0QQ97_ICHMG/55-152      | G0QQ97.1     | PF12894.5; | 43.90 | 0.00 |
| TRINITY_A0C9T6_PARTE/339-409     | A0C9T6.1     | PF12872.5; | 43.90 | 0.00 |
| TRINITY_A8P6D5_COPC7/41-435      | A8P6D5.1     | PF00999.19 | 43.90 | 0.00 |
| TRINITY_T1KM47_TETUR/561-617     | T1KM47.1     | PF00412.20 | 43.90 | 0.00 |
| TRINITY_D3BCX7_POLPA/108-185     | D3BCX7.1     | PF07258.12 | 43.90 | 0.00 |
| TRINITY_M0TYP2_MUSAM/266-514     | M0TYP2.1     | PF07714.15 | 43.90 | 0.00 |
| TRINITY_L7UF69_MYXSD/314-383     | L7UF69.1     | PF00801.18 | 43.90 | 0.00 |
| TRINITY_D3AY17_POLPA/19-125      | D3AY17.1     | PF00568.21 | 43.90 | 0.00 |
| TRINITY_I7MJ92_TETTS/146-409     | I7MJ92.1     | PF00069.23 | 43.90 | 0.00 |
| TRINITY_Q22S98_TETTS/953-1159    | Q22S98.1     | PF01852.17 | 43.90 | 0.00 |
| TRINITY_K4C3Y3_SOLLC/332-392     | K4C3Y3.1     | PF13620.4; | 43.90 | 0.00 |
| TRINITY_L8GNQ8_ACACA/1-226       | L8GNQ8.1     | PF03009.15 | 43.90 | 0.00 |
| TRINITY_A0A0A1NTH4_9FUNG/533-645 | A0A0A1NTH4.1 | PF0027     | 43.90 | 0.00 |
| TRINITY_L8H271_ACACA/165-267     | L8H271.1     | PF00168.28 | 43.90 | 0.00 |
| TRINITY_Q233Z3_TETTS/947-1211    | Q233Z3.2     | PF00069.23 | 43.90 | 0.00 |
| TRINITY_A8ZYB6_DESOH/9-118       | A8ZYB6.1     | PF13911.4; | 43.90 | 0.00 |
| TRINITY_Q23QF2_TETTS/248-571     | Q23QF2.2     | PF03133.13 | 43.90 | 0.00 |
| TRINITY_I7M4B7_TETTS/191-499     | I7M4B7.1     | PF00122.18 | 43.90 | 0.00 |
| TRINITY_D8U4G0_VOLCA/11-274      | D8U4G0.1     | PF04997.10 | 43.90 | 0.00 |
| TRINITY_L8HI63_ACACA/82-197      | L8HI63.1     | PF04178.10 | 43.90 | 0.00 |
| TRINITY_Q54DL9_DICDI/22-88       | Q54DL9.1     | PF01176.17 | 43.90 | 0.00 |
| TRINITY_A8IYC0_CHLRE/10-303      | A8IYC0.1     | PF02274.15 | 43.90 | 0.00 |
| TRINITY_I0YKL6_9CHLO/50-293      | I0YKL6.1     | PF13621.4; | 43.90 | 0.00 |
| TRINITY_Q23CN1_TETTS/13-195      | Q23CN1.1     | PF01885.14 | 43.90 | 0.00 |
| TRINITY_I0Z552_9CHLO/14-94       | I0Z552.1     | PF00076.20 | 43.90 | 0.00 |
| TRINITY_I0Z4D9_9CHLO/46-281      | I0Z4D9.1     | PF00149.26 | 43.90 | 0.00 |
| TRINITY_A0A067SDA6_9AGAR/22-283  | A0A067SDA6.1 | PF0006     | 43.90 | 0.00 |
| TRINITY_Q22D68_TETTS/29-277      | Q22D68.3     | PF03803.13 | 43.90 | 0.00 |
| TRINITY_Q24HP0_TETTS/705-821     | Q24HP0.2     | PF02518.24 | 43.90 | 0.00 |
| TRINITY_L8HBF7_ACACA/234-428     | L8HBF7.1     | PF02958.18 | 43.90 | 0.00 |
| TRINITY_R1FX63_EMIHU/5-180       | R1FX63.1     | PF00929.22 | 43.90 | 0.00 |



|                                    |                     |       |      |
|------------------------------------|---------------------|-------|------|
| TRINITY_A0A0A1NIL7_9FUNG/11-80     | A0A0A1NIL7.1 PF0496 | 43.90 | 0.00 |
| TRINITY_D2VNG5_NAEGR/186-510       | D2VNG5.1 PF00728.20 | 43.90 | 0.00 |
| TRINITY_A0BWQ1_PARTE/195-370       | A0BWQ1.1 PF13848.4; | 43.90 | 0.00 |
| TRINITY_A8JGL3_CHLRE/53-302        | A8JGL3.1 PF01370.19 | 43.90 | 0.00 |
| TRINITY_A8J2Q9_CHLRE/69-602        | A8J2Q9.1 PF03055.13 | 43.90 | 0.00 |
| TRINITY_A0A078EB35_BRANA/617-822   | A0A078EB35.1 PF0000 | 43.90 | 0.00 |
| TRINITY_L8GPT6_ACACA/118-448       | L8GPT6.1 PF00476.18 | 43.90 | 0.00 |
| TRINITY_A0A0G4ELM0_9ALVE/32-167    | A0A0G4ELM0.1 PF0861 | 43.90 | 0.00 |
| TRINITY_D4ZL63_SHEVD/387-830       | D4ZL63.1 PF00305.17 | 43.90 | 0.00 |
| TRINITY_C3XWS0_BRAFL/2-272         | C3XWS0.1 PF00282.17 | 43.90 | 0.00 |
| TRINITY_V7BWA6_PHAVU/189-252       | V7BWA6.1 PF00097.23 | 43.90 | 0.00 |
| TRINITY_A8JCA5_CHLRE/46-396        | A8JCA5.1 PF13868.4; | 43.90 | 0.00 |
| TRINITY_A8JFT4_CHLRE/24-412        | A8JFT4.1 PF00162.17 | 43.90 | 0.00 |
| TRINITY_E1Z9L2_CHLVA/59-244        | E1Z9L2.1 PF00350.21 | 43.90 | 0.00 |
| TRINITY_B8ALW3_ORYSI/150-251       | B8ALW3.1 PF13640.4; | 43.90 | 0.00 |
| TRINITY_B3L869_PLAKH/24-131        | B3L869.1 PF00085.18 | 43.90 | 0.00 |
| TRINITY_I0YYC7_9CHLO/212-512       | I0YYC7.1 PF00176.21 | 43.90 | 0.00 |
| TRINITY_A7RHN8_NEMVE/134-237       | A7RHN8.1 PF00307.29 | 43.90 | 0.00 |
| TRINITY_K2E0Y4_9BACT/13-145        | K2E0Y4.1 PF00390.17 | 43.90 | 0.00 |
| TRINITY_Q22YA0_TETTS/3-273         | Q22YA0.1 PF09743.7; | 43.80 | 0.00 |
| TRINITY_J9J104_9SPIT/9-266         | J9J104.1 PF00069.23 | 43.80 | 0.00 |
| TRINITY_A0A0D2UG24_GOSRA/94-323    | A0A0D2UG24.1 PF0079 | 43.80 | 0.00 |
| TRINITY_A0A0A8DUL9_9XANT/87-252    | A0A0A8DUL9.1 PF1347 | 43.80 | 0.00 |
| TRINITY_A0A0G4FL24_9ALVE/291-470   | A0A0G4FL24.1 PF0040 | 43.80 | 0.00 |
| TRINITY_X6NSF5_RETFI/88-345        | X6NSF5.1 PF07714.15 | 43.80 | 0.00 |
| TRINITY_Q23AP5_TETTS/32-425        | Q23AP5.1 PF03345.12 | 43.80 | 0.00 |
| TRINITY_Q5ALK5_CANAL/697-979       | Q5ALK5.1 PF00702.24 | 43.80 | 0.00 |
| TRINITY_D2A1W2_TRICA/266-553       | D2A1W2.1 PF00702.24 | 43.80 | 0.00 |
| TRINITY_Q22UG5_TETTS/31-658        | Q22UG5.2 PF05786.12 | 43.80 | 0.00 |
| TRINITY_F1A199_DICPU/421-797       | F1A199.1 PF00176.21 | 43.80 | 0.00 |
| TRINITY_A0A024UAH6_9STRA/9-297     | A0A024UAH6.1 PF0048 | 43.80 | 0.00 |
| TRINITY_SYHM_DICDI/61-389          | Q55D12.1 PF13393.4; | 43.80 | 0.00 |
| TRINITY_B3RNY6_TRIAD/11-248        | B3RNY6.1 PF02274.15 | 43.80 | 0.00 |
| TRINITY_I7MFM5_TETTS/56-201        | I7MFM5.1 PF01699.22 | 43.80 | 0.00 |
| TRINITY_Q240L9_TETTS/677-744       | Q240L9.2 PF00512.23 | 43.80 | 0.00 |
| TRINITY_U3K5A8_FICAL/227-675       | U3K5A8.1 PF01432.18 | 43.80 | 0.00 |
| TRINITY_Q22V58_TETTS/214-314       | Q22V58.2 PF00153.25 | 43.80 | 0.00 |
| TRINITY_A6GAH4_9DELT/4-198         | A6GAH4.1 PF00106.23 | 43.80 | 0.00 |
| TRINITY_L8HFX0_ACACA/26-189        | L8HFX0.1 PF09174.8; | 43.80 | 0.00 |
| TRINITY_A0A078AZ95_STYLE/187-469   | A0A078AZ95.1 PF0471 | 43.80 | 0.00 |
| TRINITY_F4Q2G9_DICFS/1228-1485     | F4Q2G9.1 PF00069.23 | 43.80 | 0.00 |
| TRINITY_G1N8F2_MELGA/80-381        | G1N8F2.2 PF00561.18 | 43.80 | 0.00 |
| TRINITY_G3P6H1_GASAC/86-386        | G3P6H1.1 PF00561.18 | 43.80 | 0.00 |
| TRINITY_D8QYJ4_SELML/155-291       | D8QYJ4.1 PF00107.24 | 43.80 | 0.00 |
| TRINITY_Q23KB0_TETTS/73-246        | Q23KB0.4 PF03357.19 | 43.80 | 0.00 |
| TRINITY_A0A022QX58_ERYGU/131-260   | A0A022QX58.1 PF0152 | 43.80 | 0.00 |
| TRINITY_A0A0L9T1J1_9HYPO/202-254   | A0A0L9T1J1.1 PF0038 | 43.80 | 0.00 |
| TRINITY_L1JFR0_GUIITH/69-276       | L1JFR0.1 PF12146.6; | 43.80 | 0.00 |
| TRINITY_I1Q599_ORYGL/52-383        | I1Q599.1 PF10186.7; | 43.80 | 0.00 |
| TRINITY_A0A0A1T1D1_9HYPO/1278-1421 | A0A0A1T1D1.1 PF0000 | 43.80 | 0.00 |
| TRINITY_F1QWW8_DANRE/60-259        | F1QWW8.1 PF00106.23 | 43.80 | 0.00 |
| TRINITY_L8H8Z5_ACACA/146-294       | L8H8Z5.1 PF13358.4; | 43.80 | 0.00 |
| TRINITY_A0A078B3T1_STYLE/585-748   | A0A078B3T1.1 PF0570 | 43.80 | 0.00 |
| TRINITY_Q233Z6_TETTS/6-165         | Q233Z6.1 PF00106.23 | 43.80 | 0.00 |
| TRINITY_A0BPW6_PARTE/424-1020      | A0BPW6.1 PF00443.27 | 43.80 | 0.00 |
| TRINITY_W1QAL9_OGAPD/40-114        | W1QAL9.1 PF00364.20 | 43.80 | 0.00 |
| TRINITY_A0BGZ6_PARTE/125-266       | A0BGZ6.1 PF01467.24 | 43.80 | 0.00 |
| TRINITY_D3BT06_POLPA/532-628       | D3BT06.1 PF16979.3; | 43.80 | 0.00 |
| TRINITY_D8TZ14_VOLCA/40-253        | D8TZ14.1 PF02230.14 | 43.80 | 0.00 |
| TRINITY_C3YP19_BRAFL/2-357         | C3YP19.1 PF04869.12 | 43.80 | 0.00 |
| TRINITY_G0QTZ1_ICHMG/40-256        | G0QTZ1.1 PF03731.13 | 43.80 | 0.00 |

|                                  |              |            |       |      |
|----------------------------------|--------------|------------|-------|------|
| TRINITY_A0BIF4_PARTE/119-382     | A0BIF4.1     | PF00069.23 | 43.80 | 0.00 |
| TRINITY_A8IIM2_CHLRE/41-762      | A8IIM2.1     | PF05879.10 | 43.80 | 0.00 |
| TRINITY_K3W600_PYTUL/2-431       | K3W600.1     | PF04188.11 | 43.80 | 0.00 |
| TRINITY_F0ZI24_DICPU/28-214      | F0ZI24.1     | PF01183.18 | 43.80 | 0.00 |
| TRINITY_A0CJY8_PARTE/436-698     | A0CJY8.1     | PF00069.23 | 43.80 | 0.00 |
| TRINITY_I1GJ64_AMPQE/75-338      | I1GJ64.1     | PF00657.20 | 43.80 | 0.00 |
| TRINITY_H3GJI2_PHYRM/6-206       | H3GJI2.1     | PF05997.10 | 43.80 | 0.00 |
| TRINITY_F4QEP8_DICFS/752-1151    | F4QEP8.1     | PF00176.21 | 43.80 | 0.00 |
| TRINITY_Q54L33_DICDI/4881-5216   | Q54L33.1     | PF00632.23 | 43.80 | 0.00 |
| TRINITY_L8H624_ACACA/41-114      | L8H624.1     | PF09341.8; | 43.80 | 0.00 |
| TRINITY_D8TS96_VOLCA/560-714     | D8TS96.1     | PF16213.3; | 43.80 | 0.00 |
| TRINITY_I7MDF9_TETTS/292-610     | I7MDF9.1     | PF04515.10 | 43.80 | 0.00 |
| TRINITY_D8U9V5_VOLCA/49-396      | D8U9V5.1     | PF03124.12 | 43.80 | 0.00 |
| TRINITY_I7MHB1_TETTS/6-102       | I7MHB1.2     | PF03259.15 | 43.80 | 0.00 |
| TRINITY_F0ZQK5_DICPU/35-293      | F0ZQK5.1     | PF12850.5; | 43.80 | 0.00 |
| TRINITY_I0JTM3_HALH3/9-148       | I0JTM3.1     | PF13302.5; | 43.80 | 0.00 |
| TRINITY_Q6F356_ORYSJ/774-1019    | Q6F356.1     | PF07727.12 | 43.80 | 0.00 |
| TRINITY_C1MIV1_MICPC/248-356     | C1MIV1.1     | PF06325.11 | 43.80 | 0.00 |
| TRINITY_I7LZV2_TETTS/151-413     | I7LZV2.1     | PF00069.23 | 43.80 | 0.00 |
| TRINITY_Q6LH92_PHOPR/8-198       | Q6LH92.1     | PF01734.20 | 43.80 | 0.00 |
| TRINITY_W2R8H4_PHYPN/131-359     | W2R8H4.1     | PF01633.18 | 43.80 | 0.00 |
| TRINITY_L1IW60_GUITH/398-496     | L1IW60.1     | PF07801.9; | 43.80 | 0.00 |
| TRINITY_A8I728_CHLRE/54-170      | A8I728.1     | PF13537.4; | 43.80 | 0.00 |
| TRINITY_T0QVQ8_9STRA/216-463     | T0QVQ8.1     | PF07714.15 | 43.80 | 0.00 |
| TRINITY_J9FBN2_9SPIT/564-662     | J9FBN2.1     | PF08647.9; | 43.80 | 0.00 |
| TRINITY_L8HA43_ACACA/8-290       | L8HA43.1     | PF00704.26 | 43.80 | 0.00 |
| TRINITY_A0A0C2I723_THEKT/9-170   | A0A0C2I723.1 | PF0007     | 43.80 | 0.00 |
| TRINITY_E1ZTC2_CHLVA/158-607     | E1ZTC2.1     | PF01425.19 | 43.80 | 0.00 |
| TRINITY_A0A0G4EYN0_9ALVE/80-431  | A0A0G4EYN0.1 | PF0862     | 43.80 | 0.00 |
| TRINITY_I7M2H5_TETTS/15-113      | I7M2H5.1     | PF00153.25 | 43.80 | 0.00 |
| TRINITY_I0Z4C8_9CHLO/210-521     | I0Z4C8.1     | PF16858.3; | 43.80 | 0.00 |
| TRINITY_T4ZYL3_OPHSC/1844-1962   | T4ZYL3.1     | PF00072.22 | 43.80 | 0.00 |
| TRINITY_K4IP70_PSYTT/5-127       | K4IP70.1     | PF14108.4; | 43.80 | 0.00 |
| TRINITY_I7MJIO_TETTS/1-168       | I7MJIO.1     | PF14580.4; | 43.80 | 0.00 |
| TRINITY_Q23QF2_TETTS/248-571     | Q23QF2.2     | PF03133.13 | 43.80 | 0.00 |
| TRINITY_F0ZG89_DICPU/62-135      | F0ZG89.1     | PF00498.24 | 43.70 | 0.00 |
| TRINITY_Q22KF0_TETTS/10-184      | Q22KF0.2     | PF00071.20 | 43.70 | 0.00 |
| TRINITY_C9JUS5_HUMAN/5-152       | C9JUS5.2     | PF00780.20 | 43.70 | 0.00 |
| TRINITY_H3DIR9_TETNG/11-126      | H3DIR9.1     | PF10639.7; | 43.70 | 0.00 |
| TRINITY_A0BIV9_PARTE/3-201       | A0BIV9.1     | PF01956.14 | 43.70 | 0.00 |
| TRINITY_W7XGH2_TETTS/51-249      | W7XGH2.1     | PF00856.26 | 43.70 | 0.00 |
| TRINITY_A0A0D2S9F0_GOSRA/348-509 | A0A0D2S9F0.1 | PF0391     | 43.70 | 0.00 |
| TRINITY_A0CV13_PARTE/21-225      | A0CV13.1     | PF05013.10 | 43.70 | 0.00 |
| TRINITY_I7MGN0_TETTS/409-544     | I7MGN0.2     | PF09273.9; | 43.70 | 0.00 |
| TRINITY_G1KGL2_ANOCA/1108-1607   | G1KGL2.2     | PF06920.11 | 43.70 | 0.00 |
| TRINITY_C3YLA6_BRAFL/5-96        | C3YLA6.1     | PF02214.20 | 43.70 | 0.00 |
| TRINITY_S2K500_MUCC1/52-292      | S2K500.1     | PF06644.9; | 43.70 | 0.00 |
| TRINITY_C3Z9P2_BRAFL/22-219      | C3Z9P2.1     | PF01997.14 | 43.70 | 0.00 |
| TRINITY_A0A059D5W5_EUCGR/56-151  | A0A059D5W5.1 | PF0015     | 43.70 | 0.00 |
| TRINITY_I7LZV2_TETTS/151-413     | I7LZV2.1     | PF00069.23 | 43.70 | 0.00 |
| TRINITY_F4QEH4_DICFS/16-150      | F4QEH4.1     | PF04061.12 | 43.70 | 0.00 |
| TRINITY_E1ZKX2_CHLVA/8-198       | E1ZKX2.1     | PF13460.4; | 43.70 | 0.00 |
| TRINITY_Q23GD7_TETTS/81-801      | Q23GD7.2     | PF00063.19 | 43.70 | 0.00 |
| TRINITY_A7T5Z1_NEMVE/16-257      | A7T5Z1.1     | PF02144.14 | 43.70 | 0.00 |
| TRINITY_A0A0A8JIY0_BACSX/1-240   | A0A0A8JIY0.1 | PF0574     | 43.70 | 0.00 |
| TRINITY_A8JFV0_CHLRE/219-502     | A8JFV0.1     | PF00069.23 | 43.70 | 0.00 |
| TRINITY_V9G338_PHYPR/143-625     | V9G338.1     | PF00152.18 | 43.70 | 0.00 |
| TRINITY_A0A068RX79_9FUNG/730-880 | A0A068RX79.1 | PF0062     | 43.70 | 0.00 |
| TRINITY_A0A0G4H0Z9_9ALVE/24-182  | A0A0G4H0Z9.1 | PF0007     | 43.70 | 0.00 |
| TRINITY_A0A087X0J3_HUMAN/238-392 | A0A087X0J3.1 | PF0860     | 43.70 | 0.00 |
| TRINITY_A8I777_CHLRE/173-306     | A8I777.1     | PF09229.9; | 43.70 | 0.00 |

|                                  |                     |       |      |
|----------------------------------|---------------------|-------|------|
| TRINITY_D8TRN5_VOLCA/467-662     | D8TRN5.1 PF08757.9; | 43.70 | 0.00 |
| TRINITY_E1ZMP2_CHLVA/16-203      | E1ZMP2.1 PF08626.9; | 43.70 | 0.00 |
| TRINITY_A0A0N0K611_9PROT/126-271 | A0A0N0K611.1 PF0134 | 43.70 | 0.00 |
| TRINITY_Q9A4E9_CAUCR/34-259      | Q9A4E9.1 PF00266.17 | 43.70 | 0.00 |
| TRINITY_F4PI13_DICFS/24-393      | F4PI13.1 PF10142.7; | 43.70 | 0.00 |
| TRINITY_F4Q138_DICFS/90-513      | F4Q138.1 PF00450.20 | 43.70 | 0.00 |
| TRINITY_G2LF82_CHLTF/4-225       | G2LF82.1 PF01370.19 | 43.70 | 0.00 |
| TRINITY_F3NDJ1_9ACTN/31-272      | F3NDJ1.1 PF12697.5; | 43.70 | 0.00 |
| TRINITY_L8HEN7_ACACA/434-510     | L8HEN7.1 PF00789.18 | 43.70 | 0.00 |
| TRINITY_U9SMA8_RHIID/1-107       | U9SMA8.1 PF03254.11 | 43.70 | 0.00 |
| TRINITY_A0A096LR09_POEFO/47-485  | A0A096LR09.1 PF0170 | 43.70 | 0.00 |
| TRINITY_D3BQC1_POLPA/385-635     | D3BQC1.1 PF07714.15 | 43.70 | 0.00 |
| TRINITY_E1FZR6_LOALO/5-178       | E1FZR6.2 PF00071.20 | 43.70 | 0.00 |
| TRINITY_K1QKF4_CRAGI/462-667     | K1QKF4.1 PF04087.12 | 43.70 | 0.00 |
| TRINITY_A0A0M0J9F0_9EUKA/37-326  | A0A0M0J9F0.1 PF0058 | 43.70 | 0.00 |
| TRINITY_D8TZH4_VOLCA/8-113       | D8TZH4.1 PF01920.18 | 43.70 | 0.00 |
| TRINITY_E1Z2R8_CHLVA/270-459     | E1Z2R8.1 PF05050.10 | 43.70 | 0.00 |
| TRINITY_D8TXR4_VOLCA/43-360      | D8TXR4.1 PF00194.19 | 43.70 | 0.00 |
| TRINITY_I2JNF8_9GAMM/27-136      | I2JNF8.1 PF04143.12 | 43.70 | 0.00 |
| TRINITY_L8H324_ACACA/42-327      | L8H324.1 PF09734.7; | 43.70 | 0.00 |
| TRINITY_I0YW25_9CHLO/7-136       | I0YW25.1 PF04049.11 | 43.70 | 0.00 |
| TRINITY_C1MUV0_MICPC/10-313      | C1MUV0.1 PF07992.12 | 43.70 | 0.00 |
| TRINITY_A0A022RVV5_ERYGU/217-302 | A0A022RVV5.1 PF0043 | 43.70 | 0.00 |
| TRINITY_C1N8L7_MICPC/137-806     | C1N8L7.1 PF10408.7; | 43.70 | 0.00 |
| TRINITY_E0VCP7_PEDHC/14-300      | E0VCP7.1 PF04118.12 | 43.70 | 0.00 |
| TRINITY_A8HPD4_CHLRE/451-711     | A8HPD4.1 PF00520.29 | 43.70 | 0.00 |
| TRINITY_H2XNP0_CIOIN/2-96        | H2XNP0.1 PF16770.3; | 43.70 | 0.00 |
| TRINITY_I4AKQ4_FLELS/53-342      | I4AKQ4.1 PF14388.4; | 43.70 | 0.00 |
| TRINITY_I7MIF5_TETTS/84-239      | I7MIF5.2 PF04855.10 | 43.60 | 0.00 |
| TRINITY_Q0VSF8_ALCBS/675-792     | Q0VSF8.1 PF00072.22 | 43.60 | 0.00 |
| TRINITY_A0A077ZPS4_STYLE/243-438 | A0A077ZPS4.1 PF0011 | 43.60 | 0.00 |
| TRINITY_D5G714_TUBMM/57-244      | D5G714.1 PF08740.9; | 43.60 | 0.00 |
| TRINITY_A0A0M8K8W8_9CHLR/1-198   | A0A0M8K8W8.1 PF0088 | 43.60 | 0.00 |
| TRINITY_B9RKG8_RICCO/17-301      | B9RKG8.1 PF17184.2; | 43.60 | 0.00 |
| TRINITY_B7JV57_CYAP8/33-307      | B7JV57.1 PF01007.18 | 43.60 | 0.00 |
| TRINITY_A0A0M0JUD7_9EUKA/134-330 | A0A0M0JUD7.1 PF0014 | 43.60 | 0.00 |
| TRINITY_W4YMC5_STRPU/24-275      | W4YMC5.1 PF13660.4; | 43.60 | 0.00 |
| TRINITY_F0ZET2_DICPU/10-303      | F0ZET2.1 PF01213.17 | 43.60 | 0.00 |
| TRINITY_A0A0G3BP10_9BURK/5-120   | A0A0G3BP10.1 PF0347 | 43.60 | 0.00 |
| TRINITY_G2IJ91_9SPHN/64-158      | G2IJ91.1 PF08241.10 | 43.60 | 0.00 |
| TRINITY_A4VDN1_TETTS/4-430       | A4VDN1.1 PF00067.20 | 43.60 | 0.00 |
| TRINITY_F0Y6L3_AURAN/5-178       | F0Y6L3.1 PF00071.20 | 43.60 | 0.00 |
| TRINITY_A0A0M8MZ18_9BASI/12-154  | A0A0M8MZ18.1 PF0465 | 43.60 | 0.00 |
| TRINITY_I0YRB1_9CHLO/401-489     | I0YRB1.1 PF07741.11 | 43.60 | 0.00 |
| TRINITY_G0R2W5_ICHMG/613-901     | G0R2W5.1 PF00069.23 | 43.60 | 0.00 |
| TRINITY_H3H5J1_PHYRM/141-340     | H3H5J1.1 PF00078.25 | 43.60 | 0.00 |
| TRINITY_W7TRG4_9STRA/152-319     | W7TRG4.1 PF01746.19 | 43.60 | 0.00 |
| TRINITY_E1ZHL6_CHLVA/325-606     | E1ZHL6.1 PF12698.5; | 43.60 | 0.00 |
| TRINITY_V3ZQM8_LOTGI/176-265     | V3ZQM8.1 PF12796.5; | 43.60 | 0.00 |
| TRINITY_L8HAY2_ACACA/1-176       | L8HAY2.1 PF13462.4; | 43.60 | 0.00 |
| TRINITY_A8I4F2_CHLRE/117-336     | A8I4F2.1 PF07714.15 | 43.60 | 0.00 |
| TRINITY_A0A087SS85_AUXPR/37-250  | A0A087SS85.1 PF0085 | 43.60 | 0.00 |
| TRINITY_L8H199_ACACA/70-358      | L8H199.1 PF01869.18 | 43.60 | 0.00 |
| TRINITY_A8JIC5_CHLRE/17-143      | A8JIC5.1 PF09229.9; | 43.60 | 0.00 |
| TRINITY_L8GWP3_ACACA/247-427     | L8GWP3.1 PF00621.18 | 43.60 | 0.00 |
| TRINITY_A7REZ3_NEMVE/300-780     | A7REZ3.1 PF00443.27 | 43.60 | 0.00 |
| TRINITY_A8J320_CHLRE/64-185      | A8J320.1 PF13578.4; | 43.60 | 0.00 |
| TRINITY_D8REA1_SELML/2457-3170   | D8REA1.1 PF03028.13 | 43.60 | 0.00 |
| TRINITY_W4XS62_STRPU/124-179     | W4XS62.1 PF16558.3; | 43.60 | 0.00 |
| TRINITY_A0E0V7_PARTE/895-1271    | A0E0V7.1 PF12698.5; | 43.60 | 0.00 |
| TRINITY_D8U710_VOLCA/574-720     | D8U710.1 PF10442.7; | 43.60 | 0.00 |

|                                  |                     |       |      |
|----------------------------------|---------------------|-------|------|
| TRINITY_A0A0D3CLB3_BRAOL/111-526 | A0A0D3CLB3.1 PF0086 | 43.60 | 0.00 |
| TRINITY_A0A0G4IJS4_PLABS/64-322  | A0A0G4IJS4.1 PF0040 | 43.60 | 0.00 |
| TRINITY_I0Z2K8_9CHLO/59-324      | I0Z2K8.1 PF11735.6; | 43.60 | 0.00 |
| TRINITY_L1IVP8_GUITH/472-575     | L1IVP8.1 PF14874.4; | 43.60 | 0.00 |
| TRINITY_I0Z0I0_9CHLO/150-316     | I0Z0I0.1 PF00849.20 | 43.60 | 0.00 |
| TRINITY_A8HPD4_CHLRE/451-711     | A8HPD4.1 PF00520.29 | 43.60 | 0.00 |
| TRINITY_A0A0L7LII1_9NEOP/131-358 | A0A0L7LII1.1 PF0245 | 43.50 | 0.00 |
| TRINITY_G0R0V4_ICHMG/11-248      | G0R0V4.1 PF01991.16 | 43.50 | 0.00 |
| TRINITY_A0BLZ4_PARTE/31-180      | A0BLZ4.1 PF00810.16 | 43.50 | 0.00 |
| TRINITY_H2YAX7_CIOSA/32-94       | H2YAX7.1 PF05347.13 | 43.50 | 0.00 |
| TRINITY_F0ZT81_DICPU/1337-1660   | F0ZT81.1 PF02259.21 | 43.50 | 0.00 |
| TRINITY_G9NFL1_HYPAI/175-440     | G9NFL1.1 PF13434.4; | 43.50 | 0.00 |
| TRINITY_Q3SDD4_PARTE/8-169       | Q3SDD4.1 PF00071.20 | 43.50 | 0.00 |
| TRINITY_ABCGC_DICDI/74-229       | Q8T685.1 PF00005.25 | 43.50 | 0.00 |
| TRINITY_F0ZK99_DICPU/30-201      | F0ZK99.1 PF10294.7; | 43.50 | 0.00 |
| TRINITY_G0QR52_ICHMG/10-328      | G0QR52.1 PF08449.9; | 43.50 | 0.00 |
| TRINITY_F4PQ87_DICFS/28-89       | F4PQ87.1 PF05047.14 | 43.50 | 0.00 |
| TRINITY_A0CDK4_PARTE/404-736     | A0CDK4.1 PF00702.24 | 43.50 | 0.00 |
| TRINITY_I7LTQ3_TETTS/124-278     | I7LTQ3.2 PF00650.18 | 43.50 | 0.00 |
| TRINITY_I7MMP0_TETTS/53-309      | I7MMP0.1 PF03381.13 | 43.50 | 0.00 |
| TRINITY_L8GRL4_ACACA/3-152       | L8GRL4.1 PF13350.4; | 43.50 | 0.00 |
| TRINITY_C6XHJ4_LIBAP/8-286       | C6XHJ4.1 PF00009.25 | 43.50 | 0.00 |
| TRINITY_L0J865_MYCSM/7-158       | L0J865.1 PF08768.9; | 43.50 | 0.00 |
| TRINITY_S2IWR4_MUCC1/262-511     | S2IWR4.1 PF00069.23 | 43.50 | 0.00 |
| TRINITY_A0A074X9B9_9PEZI/143-278 | A0A074X9B9.1 PF0437 | 43.50 | 0.00 |
| TRINITY_H0VK94_CAVPO/73-203      | H0VK94.1 PF00782.18 | 43.50 | 0.00 |
| TRINITY_L8HDY5_ACACA/41-161      | L8HDY5.1 PF00188.24 | 43.50 | 0.00 |
| TRINITY_F6CIF3_DESK7/263-470     | F6CIF3.1 PF00128.22 | 43.50 | 0.00 |
| TRINITY_Q54R70_DICDI/559-832     | Q54R70.1 PF08172.10 | 43.50 | 0.00 |
| TRINITY_I3KZI4_ORENI/1-183       | I3KZI4.1 PF11032.6; | 43.50 | 0.00 |
| TRINITY_K9TYV0_9CYAN/112-235     | K9TYV0.1 PF02469.20 | 43.50 | 0.00 |
| TRINITY_G1K9V9_ANOCA/32-1199     | G1K9V9.2 PF06427.9; | 43.50 | 0.00 |
| TRINITY_T1KE61_TETUR/267-370     | T1KE61.1 PF13676.4; | 43.50 | 0.00 |
| TRINITY_Q13R55_BURXL/388-563     | Q13R55.1 PF02734.15 | 43.50 | 0.00 |
| TRINITY_I3KB29_ORENI/92-239      | I3KB29.1 PF14580.4; | 43.50 | 0.00 |
| TRINITY_F6Z156_CIOIN/19-181      | F6Z156.2 PF00071.20 | 43.50 | 0.00 |
| TRINITY_I7LWR6_TETTS/477-659     | I7LWR6.2 PF01756.17 | 43.50 | 0.00 |
| TRINITY_D8TIJ3_VOLCA/319-573     | D8TIJ3.1 PF02902.17 | 43.50 | 0.00 |
| TRINITY_L8GE60_ACACA/531-659     | L8GE60.1 PF00241.18 | 43.50 | 0.00 |
| TRINITY_F6V9P3_CIOIN/10-137      | F6V9P3.2 PF08315.10 | 43.50 | 0.00 |
| TRINITY_D8TTP0_VOLCA/1124-1422   | D8TTP0.1 PF00069.23 | 43.50 | 0.00 |
| TRINITY_I0Z2X7_9CHLO/1496-1903   | I0Z2X7.1 PF00443.27 | 43.50 | 0.00 |
| TRINITY_H0VK94_CAVPO/73-203      | H0VK94.1 PF00782.18 | 43.50 | 0.00 |
| TRINITY_Q22P21_TETTS/167-388     | Q22P21.2 PF00566.16 | 43.50 | 0.00 |
| TRINITY_I7M700_TETTS/181-443     | I7M700.2 PF00069.23 | 43.50 | 0.00 |
| TRINITY_E1Z8M5_CHLVA/17-221      | E1Z8M5.1 PF10232.7; | 43.50 | 0.00 |
| TRINITY_D3BQC1_POLPA/385-635     | D3BQC1.1 PF07714.15 | 43.50 | 0.00 |
| TRINITY_R0GCG4_9BRAS/595-830     | R0GCG4.1 PF02358.14 | 43.50 | 0.00 |
| TRINITY_A0A0M2PJ24_9BACI/28-144  | A0A0M2PJ24.1 PF0824 | 43.50 | 0.00 |
| TRINITY_C3YS02_BRAFL/391-568     | C3YS02.1 PF00644.18 | 43.50 | 0.00 |
| TRINITY_Q75G45_ORYSJ/950-1193    | Q75G45.1 PF07727.12 | 43.50 | 0.00 |
| TRINITY_I7ME47_TETTS/120-274     | I7ME47.1 PF00650.18 | 43.50 | 0.00 |
| TRINITY_I1GFZ8_AMPQE/5-177       | I1GFZ8.1 PF00025.19 | 43.50 | 0.00 |
| TRINITY_B9GT62_POPTR/123-192     | B9GT62.1 PF00076.20 | 43.50 | 0.00 |
| TRINITY_J9K7G1_ACYPI/40-226      | J9K7G1.1 PF15862.3; | 43.50 | 0.00 |
| TRINITY_D8U3T0_VOLCA/2-136       | D8U3T0.1 PF08332.8; | 43.50 | 0.00 |
| TRINITY_A8IW16_CHLRE/695-1085    | A8IW16.1 PF03372.21 | 43.50 | 0.00 |
| TRINITY_L8GMR3_ACACA/270-526     | L8GMR3.1 PF07714.15 | 43.50 | 0.00 |
| TRINITY_D8UA01_VOLCA/193-533     | D8UA01.1 PF09786.7; | 43.50 | 0.00 |
| TRINITY_A0A061GIX2_THECC/1-133   | A0A061GIX2.1 PF0023 | 43.50 | 0.00 |
| TRINITY_D3BUV7_POLPA/393-543     | D3BUV7.1 PF00620.25 | 43.50 | 0.00 |

|                                  |              |            |       |      |
|----------------------------------|--------------|------------|-------|------|
| TRINITY_D8TU46_VOLCA/1-365       | D8TU46.1     | PF10498.7; | 43.50 | 0.00 |
| TRINITY_K0S9E4_THAOC/31-347      | K0S9E4.1     | PF03747.12 | 43.50 | 0.00 |
| TRINITY_F2U4V8_SALR5/237-299     | F2U4V8.1     | PF12738.5; | 43.50 | 0.00 |
| TRINITY_D3AY38_POLPA/846-1105    | D3AY38.1     | PF07714.15 | 43.50 | 0.00 |
| TRINITY_L8GN48_ACACA/67-128      | L8GN48.1     | PF04117.10 | 43.50 | 0.00 |
| TRINITY_J9IHI6_9SPIT/179-269     | J9IHI6.1     | PF12796.5; | 43.50 | 0.00 |
| TRINITY_A0CDK4_PARTE/404-736     | A0CDK4.1     | PF00702.24 | 43.50 | 0.00 |
| TRINITY_L8H653_ACACA/846-1065    | L8H653.1     | PF02854.17 | 43.50 | 0.00 |
| TRINITY_I0Z7D1_9CHLO/202-409     | I0Z7D1.1     | PF00924.16 | 43.50 | 0.00 |
| TRINITY_A8XGM9_CAEBR/3-73        | A8XGM9.1     | PF00240.21 | 43.50 | 0.00 |
| TRINITY_D8U2Q8_VOLCA/673-763     | D8U2Q8.1     | PF03982.11 | 43.50 | 0.00 |
| TRINITY_D8TSH7_VOLCA/518-608     | D8TSH7.1     | PF08574.8; | 43.50 | 0.00 |
| TRINITY_I0Z3T1_9CHLO/364-607     | I0Z3T1.1     | PF03399.14 | 43.50 | 0.00 |
| TRINITY_E1ZQK2_CHLVA/53-148      | E1ZQK2.1     | PF00686.17 | 43.50 | 0.00 |
| TRINITY_B9SD55_RICCO/669-811     | B9SD55.1     | PF02854.17 | 43.50 | 0.00 |
| TRINITY_Q23K99_TETTS/9-201       | Q23K99.2     | PF04511.13 | 43.50 | 0.00 |
| TRINITY_A0CWW0_PARTE/35-576      | A0CWW0.1     | PF00995.21 | 43.40 | 0.00 |
| TRINITY_A0A0M0JXL1_9EUKA/39-128  | A0A0M0JXL1.1 | PF1025     | 43.40 | 0.00 |
| TRINITY_U5DG69_AMBTC/13-290      | U5DG69.1     | PF04321.15 | 43.40 | 0.00 |
| TRINITY_F0ZS77_DICPU/34-592      | F0ZS77.1     | PF01602.18 | 43.40 | 0.00 |
| TRINITY_A2DTF0_TRIVA/15-267      | A2DTF0.1     | PF00069.23 | 43.40 | 0.00 |
| TRINITY_A0A0D2WVJ4_CAPO3/267-373 | A0A0D2WVJ4.1 | PF0030     | 43.40 | 0.00 |
| TRINITY_S2K8S0_MUCC1/8-268       | S2K8S0.1     | PF00483.21 | 43.40 | 0.00 |
| TRINITY_F0ZN57_DICPU/39-296      | F0ZN57.1     | PF02263.17 | 43.40 | 0.00 |
| TRINITY_C1MZS9_MICPC/743-954     | C1MZS9.1     | PF13087.4; | 43.40 | 0.00 |
| TRINITY_J9J7E3_9SPIT/2429-2649   | J9J7E3.1     | PF00644.18 | 43.40 | 0.00 |
| TRINITY_A0A0B0M9H7_GOSAR/41-446  | A0A0B0M9H7.1 | PF0769     | 43.40 | 0.00 |
| TRINITY_I4Y5Q9_WALMC/75-361      | I4Y5Q9.1     | PF00656.20 | 43.40 | 0.00 |
| TRINITY_C7N732_SLAHD/37-147      | C7N732.1     | PF08487.8; | 43.40 | 0.00 |
| TRINITY_G0QIY3_ICHMG/15-273      | G0QIY3.1     | PF00069.23 | 43.40 | 0.00 |
| TRINITY_G0R4Y1_ICHMG/49-124      | G0R4Y1.1     | PF01929.15 | 43.40 | 0.00 |
| TRINITY_A0A087SN04_AUXPR/283-436 | A0A087SN04.1 | PF0000     | 43.40 | 0.00 |
| TRINITY_A0A078A6D8_STYLE/844-957 | A0A078A6D8.1 | PF0289     | 43.40 | 0.00 |
| TRINITY_A8J7F0_CHLRE/9-153       | A8J7F0.1     | PF05255.9; | 43.40 | 0.00 |
| TRINITY_A0CQE0_PARTE/146-402     | A0CQE0.1     | PF00069.23 | 43.40 | 0.00 |
| TRINITY_A0A0D2UMU4_CAPO3/32-518  | A0A0D2UMU4.1 | PF1403     | 43.40 | 0.00 |
| TRINITY_A0A067CBT5_SAPPC/7-182   | A0A067CBT5.1 | PF0014     | 43.40 | 0.00 |
| TRINITY_W7MMH3_GIBM7/105-197     | W7MMH3.1     | PF12796.5; | 43.40 | 0.00 |
| TRINITY_A0A0D2X0U1_CAPO3/1-197   | A0A0D2X0U1.1 | PF0114     | 43.40 | 0.00 |
| TRINITY_A7SLH2_NEMVE/5-134       | A7SLH2.1     | PF00782.18 | 43.40 | 0.00 |
| TRINITY_Q22YV4_TETTS/1100-1325   | Q22YV4.3     | PF12612.6; | 43.40 | 0.00 |
| TRINITY_I7ML76_TETTS/9-131       | I7ML76.1     | PF01873.15 | 43.40 | 0.00 |
| TRINITY_D5G3Z1_TUBMM/42-168      | D5G3Z1.1     | PF02466.17 | 43.40 | 0.00 |
| TRINITY_D8U1E7_VOLCA/95-427      | D8U1E7.1     | PF07946.12 | 43.40 | 0.00 |
| TRINITY_K1PTD9_CRAGI/42-336      | K1PTD9.1     | PF00291.23 | 43.40 | 0.00 |
| TRINITY_R0I9A7_9BRAS/107-381     | R0I9A7.1     | PF00122.18 | 43.40 | 0.00 |
| TRINITY_CFA53_CHLRE/132-467      | A8IRJ7.1     | PF13868.4; | 43.40 | 0.00 |
| TRINITY_D8TLP9_VOLCA/889-1060    | D8TLP9.1     | PF17177.2; | 43.40 | 0.00 |
| TRINITY_A0E7T1_PARTE/778-901     | A0E7T1.1     | PF00072.22 | 43.40 | 0.00 |
| TRINITY_S7VXP5_TOXGO/1598-1905   | S7VXP5.1     | PF01237.16 | 43.40 | 0.00 |
| TRINITY_C4YC96_CLAL4/20-101      | C4YC96.1     | PF12763.5; | 43.40 | 0.00 |
| TRINITY_A0A067TKA0_9AGAR/99-242  | A0A067TKA0.1 | PF1007     | 43.40 | 0.00 |
| TRINITY_A0CMY4_PARTE/32-295      | A0CMY4.1     | PF00494.17 | 43.40 | 0.00 |
| TRINITY_E0VMP2_PEDHC/38-318      | E0VMP2.1     | PF13621.4; | 43.40 | 0.00 |
| TRINITY_A0A095CHE4_CRYGA/3-131   | A0A095CHE4.1 | PF0140     | 43.40 | 0.00 |
| TRINITY_Q24HR9_TETTS/46-305      | Q24HR9.2     | PF00069.23 | 43.40 | 0.00 |
| TRINITY_T0QTN3_9STRA/1-216       | T0QTN3.1     | PF01902.15 | 43.40 | 0.00 |
| TRINITY_D8TTC1_VOLCA/415-853     | D8TTC1.1     | PF04097.12 | 43.40 | 0.00 |
| TRINITY_A0A0A7LI04_9BACT/12-194  | A0A0A7LI04.1 | PF1353     | 43.40 | 0.00 |
| TRINITY_A0A0G4GZH6_9ALVE/419-599 | A0A0G4GZH6.1 | PF0281     | 43.40 | 0.00 |
| TRINITY_A0A072TMB4_MEDTR/15-273  | A0A072TMB4.1 | PF0006     | 43.40 | 0.00 |

|                                  |                     |       |      |
|----------------------------------|---------------------|-------|------|
| TRINITY_A0A015J5I9_9GLOM/468-586 | A0A015J5I9.1 PF0066 | 43.40 | 0.00 |
| TRINITY_E1Z3S1_CHLVA/369-540     | E1Z3S1.1 PF03031.16 | 43.40 | 0.00 |
| TRINITY_A4VEM8_TETTS/431-719     | A4VEM8.1 PF02995.15 | 43.40 | 0.00 |
| TRINITY_D8TQC4_VOLCA/18-543      | D8TQC4.1 PF05600.10 | 43.40 | 0.00 |
| TRINITY_A8JFG8_CHLRE/29-537      | A8JFG8.1 PF00759.17 | 43.40 | 0.00 |
| TRINITY_D8UE90_VOLCA/24-180      | D8UE90.1 PF05351.9; | 43.40 | 0.00 |
| TRINITY_W5HMB5_WHEAT/6-83        | W5HMB5.1 PF00068.17 | 43.40 | 0.00 |
| TRINITY_I7MB89_TETTS/43-816      | I7MB89.2 PF01804.16 | 43.30 | 0.00 |
| TRINITY_A0A0N5C0D5_STREA/59-201  | A0A0N5C0D5.1 PF0155 | 43.30 | 0.00 |
| TRINITY_Q23R21_TETTS/6-99        | Q23R21.2 PF10270.7; | 43.30 | 0.00 |
| TRINITY_A0EGL5_PARTE/997-1236    | A0EGL5.1 PF00233.17 | 43.30 | 0.00 |
| TRINITY_F2U1H3_SALR5/53-159      | F2U1H3.1 PF03226.12 | 43.30 | 0.00 |
| TRINITY_E5WNT4_9BACI/8-148       | E5WNT4.1 PF13302.5; | 43.30 | 0.00 |
| TRINITY_F2TK29_AJEDA/147-259     | F2TK29.1 PF02517.14 | 43.30 | 0.00 |
| TRINITY_E4PKM1_MARAH/481-675     | E4PKM1.1 PF13847.4; | 43.30 | 0.00 |
| TRINITY_M2Y827_GALSU/146-309     | M2Y827.1 PF03031.16 | 43.30 | 0.00 |
| TRINITY_Q247T9_TETTS/201-486     | Q247T9.2 PF00735.16 | 43.30 | 0.00 |
| TRINITY_C4M6G2_ENTHI/341-470     | C4M6G2.1 PF00782.18 | 43.30 | 0.00 |
| TRINITY_M5ECQ9_MALS4/316-722     | M5ECQ9.1 PF00962.20 | 43.30 | 0.00 |
| TRINITY_E1ZAR5_CHLVA/7-111       | E1ZAR5.1 PF01900.17 | 43.30 | 0.00 |
| TRINITY_D8TN37_VOLCA/1910-2160   | D8TN37.1 PF00520.29 | 43.30 | 0.00 |
| TRINITY_L8H8E7_ACACA/138-352     | L8H8E7.1 PF13236.4; | 43.30 | 0.00 |
| TRINITY_D2UYU1_NAEGR/118-218     | D2UYU1.1 PF00153.25 | 43.30 | 0.00 |
| TRINITY_A0A0P7YAT8_9TELE/393-487 | A0A0P7YAT8.1 PF1289 | 43.30 | 0.00 |
| TRINITY_F1A0P0_DICPU/1-267       | F1A0P0.1 PF03619.14 | 43.30 | 0.00 |
| TRINITY_A0A078LBB0_9CHLA/2-141   | A0A078LBB0.1 PF0259 | 43.30 | 0.00 |
| TRINITY_I7MA30_TETTS/1410-1531   | I7MA30.2 PF00072.22 | 43.30 | 0.00 |
| TRINITY_F0ZL87_DICPU/588-833     | F0ZL87.1 PF07714.15 | 43.30 | 0.00 |
| TRINITY_E0VAT2_PEDHC/3-217       | E0VAT2.1 PF02230.14 | 43.30 | 0.00 |
| TRINITY_A9TJL5_PHYPA/321-494     | A9TJL5.1 PF00201.16 | 43.30 | 0.00 |
| TRINITY_D2VAE5_NAEGR/8-341       | D2VAE5.1 PF00503.18 | 43.30 | 0.00 |
| TRINITY_L8HE52_ACACA/224-498     | L8HE52.1 PF00928.19 | 43.30 | 0.00 |
| TRINITY_A0A087SG51_AUXPR/19-146  | A0A087SG51.1 PF1524 | 43.30 | 0.00 |
| TRINITY_K3XDM5_PYTUL/113-294     | K3XDM5.1 PF00078.25 | 43.30 | 0.00 |
| TRINITY_F4PXJ9_DICFS/2-417       | F4PXJ9.1 PF13965.4; | 43.30 | 0.00 |
| TRINITY_DES6_PHYPA/230-498       | Q9ZNW2.1 PF00487.22 | 43.30 | 0.00 |
| TRINITY_A0DZE8_PARTE/290-351     | A0DZE8.1 PF01485.19 | 43.30 | 0.00 |
| TRINITY_B6SJA3_MAIZE/1-71        | B6SJA3.1 PF06645.11 | 43.30 | 0.00 |
| TRINITY_J9EPE0_9SPIT/85-154      | J9EPE0.1 PF00076.20 | 43.30 | 0.00 |
| TRINITY_I1IAH5_BRADI/1140-1407   | I1IAH5.1 PF00856.26 | 43.30 | 0.00 |
| TRINITY_D8U7B3_VOLCA/6-275       | D8U7B3.1 PF02492.17 | 43.30 | 0.00 |
| TRINITY_F0XZ84_AURAN/15-150      | F0XZ84.1 PF00753.25 | 43.30 | 0.00 |
| TRINITY_A7SBN5_NEMVE/204-405     | A7SBN5.1 PF05193.19 | 43.30 | 0.00 |
| TRINITY_D8U002_VOLCA/1333-1769   | D8U002.1 PF02181.21 | 43.30 | 0.00 |
| TRINITY_U5HE40_USTV1/555-793     | U5HE40.1 PF00270.27 | 43.30 | 0.00 |
| TRINITY_F4Q6Y0_DICFS/140-587     | F4Q6Y0.1 PF00501.26 | 43.30 | 0.00 |
| TRINITY_A0A072V2L0_MEDTR/270-519 | A0A072V2L0.1 PF0771 | 43.30 | 0.00 |
| TRINITY_A0A0G4EZX3_9ALVE/193-343 | A0A0G4EZX3.1 PF1388 | 43.30 | 0.00 |
| TRINITY_C5XP01_SORBI/98-317      | C5XP01.1 PF01148.18 | 43.30 | 0.00 |
| TRINITY_D8RFY2_SELML/510-661     | D8RFY2.1 PF08676.9; | 43.30 | 0.00 |
| TRINITY_A0A087SS18_AUXPR/88-276  | A0A087SS18.1 PF0057 | 43.30 | 0.00 |
| TRINITY_D8TIH2_VOLCA/1283-1461   | D8TIH2.1 PF12830.5; | 43.30 | 0.00 |
| TRINITY_A8J0K8_CHLRE/1552-1659   | A8J0K8.1 PF00651.29 | 43.30 | 0.00 |
| TRINITY_A0A015MLC3_9GLOM/495-577 | A0A015MLC3.1 PF0569 | 43.30 | 0.00 |
| TRINITY_A0A067NY02_PLEOS/23-184  | A0A067NY02.1 PF1029 | 43.30 | 0.00 |
| TRINITY_D8TIU1_VOLCA/173-363     | D8TIU1.1 PF07103.9; | 43.30 | 0.00 |
| TRINITY_F8W2M8_DANRE/214-518     | F8W2M8.1 PF00082.20 | 43.30 | 0.00 |
| TRINITY_L8GMG4_ACACA/32-285      | L8GMG4.1 PF02265.14 | 43.30 | 0.00 |
| TRINITY_Q24JG1_TETTS/16-326      | Q24JG1.1 PF07992.12 | 43.30 | 0.00 |
| TRINITY_D8UL35_VOLCA/26-349      | D8UL35.1 PF12849.5; | 43.30 | 0.00 |
| TRINITY_D8UEG1_VOLCA/25-627      | D8UEG1.1 PF00995.21 | 43.30 | 0.00 |

|                                    |                     |       |      |
|------------------------------------|---------------------|-------|------|
| TRINITY_I0YQ81_9CHLO/76-436        | I0YQ81.1 PF00251.18 | 43.30 | 0.00 |
| TRINITY_A0A087SRL9_AUXPR/40-236    | A0A087SRL9.1 PF0290 | 43.30 | 0.00 |
| TRINITY_D8U9S7_VOLCA/3-93          | D8U9S7.1 PF11527.6; | 43.30 | 0.00 |
| TRINITY_G0QKA0_ICHMG/1960-2256     | G0QKA0.1 PF00632.23 | 43.30 | 0.00 |
| TRINITY_F2U0M5_SALR5/49-345        | F2U0M5.1 PF04616.12 | 43.30 | 0.00 |
| TRINITY_A8IT81_CHLRE/4-456         | A8IT81.1 PF13520.4; | 43.30 | 0.00 |
| TRINITY_A0A068RWP6_9FUNG/21-124    | A0A068RWP6.1 PF1334 | 43.20 | 0.00 |
| TRINITY_I7MJV7_TETTS/451-541       | I7MJV7.1 PF12796.5; | 43.20 | 0.00 |
| TRINITY_A0A0A0LV37_CUCSA/9-335     | A0A0A0LV37.1 PF0126 | 43.20 | 0.00 |
| TRINITY_W5BL23_WHEAT/505-672       | W5BL23.1 PF00069.23 | 43.20 | 0.00 |
| TRINITY_B9Y8M0_9FIRM/44-405        | B9Y8M0.1 PF00282.17 | 43.20 | 0.00 |
| TRINITY_L8HB13_ACACA/23-289        | L8HB13.1 PF00069.23 | 43.20 | 0.00 |
| TRINITY_A0A0F8B106_CERFI/176-285   | A0A0F8B106.1 PF0572 | 43.20 | 0.00 |
| TRINITY_G0R0U2_ICHMG/19-320        | G0R0U2.1 PF00491.19 | 43.20 | 0.00 |
| TRINITY_X6NP50_RETFI/532-683       | X6NP50.1 PF07534.14 | 43.20 | 0.00 |
| TRINITY_G5AL54_HETGA/920-1084      | G5AL54.1 PF02902.17 | 43.20 | 0.00 |
| TRINITY_Q65GW7_BACLD/39-349        | Q65GW7.1 PF00251.18 | 43.20 | 0.00 |
| TRINITY_A0DKG2_PARTE/35-457        | A0DKG2.1 PF00450.20 | 43.20 | 0.00 |
| TRINITY_L8H2A4_ACACA/19-179        | L8H2A4.1 PF03398.12 | 43.20 | 0.00 |
| TRINITY_C7N732_SLAHD/37-147        | C7N732.1 PF08487.8; | 43.20 | 0.00 |
| TRINITY_A9VBY4_MONBE/44-295        | A9VBY4.1 PF00069.23 | 43.20 | 0.00 |
| TRINITY_L8H3W5_ACACA/971-1093      | L8H3W5.1 PF00271.29 | 43.20 | 0.00 |
| TRINITY_H2U6F6_TAKRU/14-209        | H2U6F6.1 PF02545.12 | 43.20 | 0.00 |
| TRINITY_D2VK62_NAEGR/37-344        | D2VK62.1 PF01207.15 | 43.20 | 0.00 |
| TRINITY_A0A0A1P481_9FUNG/102-237   | A0A0A1P481.1 PF0056 | 43.20 | 0.00 |
| TRINITY_F0ZM27_DICPU/3-173         | F0ZM27.1 PF03357.19 | 43.20 | 0.00 |
| TRINITY_D3BIF8_POLPA/11-104        | D3BIF8.1 PF12796.5; | 43.20 | 0.00 |
| TRINITY_F6ZLJ6_CALJA/11-110        | F6ZLJ6.1 PF16661.3; | 43.20 | 0.00 |
| TRINITY_A0A0J8C8A2_BETVU/137-407   | A0A0J8C8A2.1 PF0461 | 43.20 | 0.00 |
| TRINITY_L8H682_ACACA/25-274        | L8H682.1 PF07714.15 | 43.20 | 0.00 |
| TRINITY_A0A0A2VUL1_BEABA/1049-1277 | A0A0A2VUL1.1 PF1360 | 43.20 | 0.00 |
| TRINITY_A0A0D2WGB0_CAPO3/21-228    | A0A0D2WGB0.1 PF0681 | 43.20 | 0.00 |
| TRINITY_D8UB59_VOLCA/11-326        | D8UB59.1 PF03151.14 | 43.20 | 0.00 |
| TRINITY_F6ZBY5_CIOIN/51-228        | F6ZBY5.2 PF04176.11 | 43.20 | 0.00 |
| TRINITY_Q23QU7_TETTS/257-876       | Q23QU7.3 PF10408.7; | 43.20 | 0.00 |
| TRINITY_M7XQ60_RHOT1/22-283        | M7XQ60.1 PF00069.23 | 43.20 | 0.00 |
| TRINITY_A0A059LSB5_9CHLO/2-298     | A0A059LSB5.1 PF0015 | 43.20 | 0.00 |
| TRINITY_F4PYG0_DICFS/69-275        | F4PYG0.1 PF09511.8; | 43.20 | 0.00 |
| TRINITY_A0A0G0JDR4_9BACT/606-722   | A0A0G0JDR4.1 PF0251 | 43.20 | 0.00 |
| TRINITY_J9IKD2_9SPIT/2-108         | J9IKD2.1 PF14469.4; | 43.20 | 0.00 |
| TRINITY_A0A078HKA2_BRANA/474-721   | A0A078HKA2.1 PF0006 | 43.20 | 0.00 |
| TRINITY_A0A068SAB1_9FUNG/123-211   | A0A068SAB1.1 PF0095 | 43.20 | 0.00 |
| TRINITY_D3BG64_POLPA/3687-3964     | D3BG64.1 PF00454.25 | 43.20 | 0.00 |
| TRINITY_I7MIQ2_TETTS/1022-1280     | I7MIQ2.2 PF07714.15 | 43.20 | 0.00 |
| TRINITY_A0A077ZXU2_STYLE/908-1064  | A0A077ZXU2.1 PF1190 | 43.20 | 0.00 |
| TRINITY_L8GQB3_ACACA/358-538       | L8GQB3.1 PF00621.18 | 43.20 | 0.00 |
| TRINITY_B3S3V5_TRIAD/48-274        | B3S3V5.1 PF01734.20 | 43.20 | 0.00 |
| TRINITY_W4Y1D7_STRPU/18-141        | W4Y1D7.1 PF00168.28 | 43.20 | 0.00 |
| TRINITY_D2V5F0_NAEGR/143-242       | D2V5F0.1 PF13640.4; | 43.20 | 0.00 |
| TRINITY_J9IST0_9SPIT/130-284       | J9IST0.1 PF13768.4; | 43.20 | 0.00 |
| TRINITY_M2W2Z2_GALSU/198-337       | M2W2Z2.1 PF04116.11 | 43.20 | 0.00 |
| TRINITY_A0A0A1PFL8_9FUNG/161-335   | A0A0A1PFL8.1 PF1084 | 43.20 | 0.00 |
| TRINITY_A9TCM2_PHYPA/150-1138      | A9TCM2.1 PF14631.4; | 43.20 | 0.00 |
| TRINITY_W5HJX8_WHEAT/70-203        | W5HJX8.1 PF12894.5; | 43.20 | 0.00 |
| TRINITY_Q232X8_TETTS/36-488        | Q232X8.1 PF00067.20 | 43.20 | 0.00 |
| TRINITY_J0LG47_9BACT/30-232        | J0LG47.1 PF04402.12 | 43.20 | 0.00 |
| TRINITY_E1ZJ73_CHLVA/493-716       | E1ZJ73.1 PF12706.5; | 43.20 | 0.00 |
| TRINITY_E8UXX1_TERSS/201-448       | E8UXX1.1 PF04030.12 | 43.20 | 0.00 |
| TRINITY_Q1ZXE9_DICDI/3-266         | Q1ZXE9.1 PF07651.14 | 43.20 | 0.00 |
| TRINITY_A0A087SEE7_AUXPR/2-92      | A0A087SEE7.1 PF0008 | 43.20 | 0.00 |
| TRINITY_D3BU40_POLPA/287-362       | D3BU40.1 PF00626.20 | 43.20 | 0.00 |

|                                  |              |            |       |      |
|----------------------------------|--------------|------------|-------|------|
| TRINITY_A0A024WH81_PLAFA/121-425 | A0A024WH81.1 | PF1050     | 43.20 | 0.00 |
| TRINITY_M7C3J8_CHEMY/100-320     | M7C3J8.1     | PF00587.23 | 43.20 | 0.00 |
| TRINITY_F1A3K1_DICPU/89-240      | F1A3K1.1     | PF00293.26 | 43.20 | 0.00 |
| TRINITY_D2W2P1_NAEGR/1-133       | D2W2P1.1     | PF10166.7; | 43.20 | 0.00 |
| TRINITY_I7LUZ6_TETTS/119-269     | I7LUZ6.1     | PF00561.18 | 43.20 | 0.00 |
| TRINITY_A8J8J0_CHLRE/1-473       | A8J8J0.1     | PF03055.13 | 43.20 | 0.00 |
| TRINITY_A8HQG8_CHLRE/150-407     | A8HQG8.1     | PF00481.19 | 43.20 | 0.00 |
| TRINITY_L8HJ57_ACACA/262-482     | L8HJ57.1     | PF13236.4; | 43.20 | 0.00 |
| TRINITY_U4UAC1_DENPD/101-360     | U4UAC1.1     | PF07714.15 | 43.20 | 0.00 |
| TRINITY_H3HAJ2_PHYRM/359-478     | H3HAJ2.1     | PF00665.24 | 43.20 | 0.00 |
| TRINITY_G8MIM5_9BURK/9-199       | G8MIM5.1     | PF13419.4; | 43.20 | 0.00 |
| TRINITY_D8TN01_VOLCA/432-555     | D8TN01.1     | PF00069.23 | 43.20 | 0.00 |
| TRINITY_Q23RB4_TETTS/70-227      | Q23RB4.2     | PF01343.16 | 43.20 | 0.00 |
| TRINITY_A8IRE4_CHLRE/12-283      | A8IRE4.1     | PF00069.23 | 43.20 | 0.00 |
| TRINITY_K4L188_SIMAS/3-128       | K4L188.1     | PF01124.16 | 43.20 | 0.00 |
| TRINITY_C3YNL3_BRAFL/203-479     | C3YNL3.1     | PF00067.20 | 43.20 | 0.00 |
| TRINITY_I1FCU2_AMPQE/197-343     | I1FCU2.1     | PF13359.4; | 43.20 | 0.00 |
| TRINITY_Q8YMJ8_NOSS1/554-625     | Q8YMJ8.1     | PF13448.4; | 43.20 | 0.00 |
| TRINITY_A8HSJ3_CHLRE/66-324      | A8HSJ3.1     | PF00069.23 | 43.20 | 0.00 |
| TRINITY_A0A0M0LS19_9EUKA/162-238 | A0A0M0LS19.1 | PF0454     | 43.20 | 0.00 |
| TRINITY_B9XKX7_PEDPL/29-480      | B9XKX7.1     | PF02133.13 | 43.10 | 0.00 |
| TRINITY_Q23TU2_TETTS/303-899     | Q23TU2.2     | PF08385.10 | 43.10 | 0.00 |
| TRINITY_D0NZW4_PHYIT/6-352       | D0NZW4.1     | PF07690.14 | 43.10 | 0.00 |
| TRINITY_G0QZT8_ICHMG/1370-1783   | G0QZT8.1     | PF08393.11 | 43.10 | 0.00 |
| TRINITY_A0A0L7LVE1_9NEOP/18-286  | A0A0L7LVE1.1 | PF0014     | 43.10 | 0.00 |
| TRINITY_C5LNI1_PERM5/39-107      | C5LNI1.1     | PF10601.7; | 43.10 | 0.00 |
| TRINITY_F4QFV3_DICFS/1382-1559   | F4QFV3.1     | PF00617.17 | 43.10 | 0.00 |
| TRINITY_A7ST90_NEMVE/96-563      | A7ST90.1     | PF01457.14 | 43.10 | 0.00 |
| TRINITY_E6ZSW6_SPORE/8-72        | E6ZSW6.1     | PF00808.21 | 43.10 | 0.00 |
| TRINITY_M1PCZ5_BARAA/24-345      | M1PCZ5.1     | PF02628.13 | 43.10 | 0.00 |
| TRINITY_L8H5I3_ACACA/1-195       | L8H5I3.1     | PF05346.9; | 43.10 | 0.00 |
| TRINITY_W7X772_TETTS/112-346     | W7X772.1     | PF05148.13 | 43.10 | 0.00 |
| TRINITY_D3B4Y1_POLPA/156-397     | D3B4Y1.1     | PF00481.19 | 43.10 | 0.00 |
| TRINITY_F4PWT3_DICFS/123-503     | F4PWT3.1     | PF04801.11 | 43.10 | 0.00 |
| TRINITY_L7FPH0_ENTIV/1668-1929   | L7FPH0.1     | PF00069.23 | 43.10 | 0.00 |
| TRINITY_I2FQV0_USTH4/95-298      | I2FQV0.1     | PF01145.23 | 43.10 | 0.00 |
| TRINITY_Q23AY4_TETTS/31-436      | Q23AY4.2     | PF05577.10 | 43.10 | 0.00 |
| TRINITY_L8HI91_ACACA/91-321      | L8HI91.1     | PF05721.11 | 43.10 | 0.00 |
| TRINITY_A0A0D2UJE3_CAPO3/82-201  | A0A0D2UJE3.1 | PF0004     | 43.10 | 0.00 |
| TRINITY_L8H3V3_ACACA/627-901     | L8H3V3.1     | PF01513.19 | 43.10 | 0.00 |
| TRINITY_S2IWW5_MUCC1/154-424     | S2IWW5.1     | PF08634.8; | 43.10 | 0.00 |
| TRINITY_A0A0A1N5Q2_9FUNG/196-415 | A0A0A1N5Q2.1 | PF1223     | 43.10 | 0.00 |
| TRINITY_A9SVA6_PHYPA/785-918     | A9SVA6.1     | PF07928.10 | 43.10 | 0.00 |
| TRINITY_A0A0F4ZCY2_9PEZI/11-127  | A0A0F4ZCY2.1 | PF0058     | 43.10 | 0.00 |
| TRINITY_D8TNS7_VOLCA/490-809     | D8TNS7.1     | PF10498.7; | 43.10 | 0.00 |
| TRINITY_I7M4N1_TETTS/619-783     | I7M4N1.2     | PF13925.4; | 43.10 | 0.00 |
| TRINITY_U9U9M7_RHIID/105-486     | U9U9M7.1     | PF00443.27 | 43.10 | 0.00 |
| TRINITY_R1C984_EMIHU/989-1276    | R1C984.1     | PF08811.9; | 43.10 | 0.00 |
| TRINITY_Q22MF7_TETTS/48-249      | Q22MF7.1     | PF04427.16 | 43.10 | 0.00 |
| TRINITY_U5VRW5_9ACTN/261-458     | U5VRW5.1     | PF13489.4; | 43.10 | 0.00 |
| TRINITY_A0A085NEY6_9BILA/25-325  | A0A085NEY6.1 | PF0844     | 43.10 | 0.00 |
| TRINITY_L8HCU8_ACACA/47-175      | L8HCU8.1     | PF01138.19 | 43.10 | 0.00 |
| TRINITY_A8IKE6_CHLRE/67-216      | A8IKE6.1     | PF01789.14 | 43.10 | 0.00 |
| TRINITY_Q22FY9_TETTS/376-440     | Q22FY9.3     | PF13499.4; | 43.10 | 0.00 |
| TRINITY_A8JFH1_CHLRE/93-580      | A8JFH1.1     | PF00759.17 | 43.10 | 0.00 |
| TRINITY_E4WWA2_OIKDI/170-221     | E4WWA2.1     | PF00385.22 | 43.10 | 0.00 |
| TRINITY_G0QUL3_ICHMG/151-280     | G0QUL3.1     | PF00107.24 | 43.10 | 0.00 |
| TRINITY_Q23QF2_TETTS/248-571     | Q23QF2.2     | PF03133.13 | 43.10 | 0.00 |
| TRINITY_A8JB76_CHLRE/20-573      | A8JB76.1     | PF03155.13 | 43.10 | 0.00 |
| TRINITY_L8H307_ACACA/572-747     | L8H307.1     | PF00621.18 | 43.10 | 0.00 |
| TRINITY_V4LZZ1_EUTSA/32-162      | V4LZZ1.1     | PF00782.18 | 43.10 | 0.00 |



|                                    |              |            |       |      |
|------------------------------------|--------------|------------|-------|------|
| TRINITY_I0Z586_9CHLO/263-404       | I0Z586.1     | PF17216.1; | 43.10 | 0.00 |
| TRINITY_Q4QB38_LEIMA/127-278       | Q4QB38.1     | PF11715.6; | 43.10 | 0.00 |
| TRINITY_A8JFA3_CHLRE/2019-2494     | A8JFA3.1     | PF00476.18 | 43.10 | 0.00 |
| TRINITY_L8HI44_ACACA/353-561       | L8HI44.1     | PF00616.17 | 43.10 | 0.00 |
| TRINITY_F6B7E2_DESCC/215-462       | F6B7E2.1     | PF07221.9; | 43.10 | 0.00 |
| TRINITY_F1QJH5_DANRE/131-299       | F1QJH5.1     | PF05175.12 | 43.10 | 0.00 |
| TRINITY_C1MLQ6_MICPC/44-247        | C1MLQ6.1     | PF01018.20 | 43.10 | 0.00 |
| TRINITY_I7LWC2_TETTS/50-399        | I7LWC2.1     | PF00144.22 | 43.10 | 0.00 |
| TRINITY_C5XE22_SORBI/580-843       | C5XE22.1     | PF07714.15 | 43.10 | 0.00 |
| TRINITY_L8HJG2_ACACA/55-171        | L8HJG2.1     | PF01661.19 | 43.10 | 0.00 |
| TRINITY_H1XPJ5_9BACT/26-425        | H1XPJ5.1     | PF02897.13 | 43.10 | 0.00 |
| TRINITY_F7DMW1_MACMU/1-281         | F7DMW1.1     | PF00817.18 | 43.10 | 0.00 |
| TRINITY_G4ZJG1_PHYSP/290-379       | G4ZJG1.1     | PF05699.12 | 43.10 | 0.00 |
| TRINITY_A8ISP2_CHLRE/200-468       | A8ISP2.1     | PF00248.19 | 43.10 | 0.00 |
| TRINITY_L8GQB3_ACACA/358-538       | L8GQB3.1     | PF00621.18 | 43.10 | 0.00 |
| TRINITY_U3KBN7_FICAL/1081-1145     | U3KBN7.1     | PF07647.15 | 43.10 | 0.00 |
| TRINITY_A8IGR4_CHLRE/166-1418      | A8IGR4.1     | PF03813.12 | 43.10 | 0.00 |
| TRINITY_D8U024_VOLCA/89-305        | D8U024.1     | PF02096.18 | 43.10 | 0.00 |
| TRINITY_A8JHN4_CHLRE/6-148         | A8JHN4.1     | PF01217.18 | 43.10 | 0.00 |
| TRINITY_A8HZR1_CHLRE/17086-17364   | A8HZR1.1     | PF00109.24 | 43.10 | 0.00 |
| TRINITY_A0A078AZG6_STYLE/1083-1214 | A0A078AZG6.1 | PF0007     | 43.10 | 0.00 |
| TRINITY_Q23BP6_TETTS/28-199        | Q23BP6.2     | PF01734.20 | 43.10 | 0.00 |
| TRINITY_D8TKB1_VOLCA/654-912       | D8TKB1.1     | PF07714.15 | 43.10 | 0.00 |
| TRINITY_A0A059LFP0_9CHLO/13-151    | A0A059LFP0.1 | PF1035     | 43.10 | 0.00 |
| TRINITY_X1WWB9_ACYPI/250-471       | X1WWB9.1     | PF07727.12 | 43.10 | 0.00 |
| TRINITY_E1Z9Q2_CHLVA/1058-1739     | E1Z9Q2.1     | PF07539.10 | 43.10 | 0.00 |
| TRINITY_A8WZJ8_CAEBR/185-244       | A8WZJ8.1     | PF00046.27 | 43.10 | 0.00 |
| TRINITY_Q23YJ0_TETTS/28-372        | Q23YJ0.1     | PF16499.3; | 43.00 | 0.00 |
| TRINITY_A0CIG8_PARTE/136-677       | A0CIG8.1     | PF03571.13 | 43.00 | 0.00 |
| TRINITY_F7GFD0_MACMU/4-197         | F7GFD0.1     | PF01501.18 | 43.00 | 0.00 |
| TRINITY_R4GBR7_ANOCA/9-144         | R4GBR7.1     | PF05871.10 | 43.00 | 0.00 |
| TRINITY_Q23R88_TETTS/18-272        | Q23R88.1     | PF00069.23 | 43.00 | 0.00 |
| TRINITY_A0A0L7LGD6_9NEOP/3-604     | A0A0L7LGD6.1 | PF0001     | 43.00 | 0.00 |
| TRINITY_A0D0L1_PARTE/195-322       | A0D0L1.1     | PF00107.24 | 43.00 | 0.00 |
| TRINITY_M0SD13_MUSAM/131-217       | M0SD13.1     | PF03083.14 | 43.00 | 0.00 |
| TRINITY_A9T499_PHYPA/25-152        | A9T499.1     | PF03364.18 | 43.00 | 0.00 |
| TRINITY_A0A024UKA9_9STRA/421-527   | A0A024UKA9.1 | PF0065     | 43.00 | 0.00 |
| TRINITY_A0A0D2U9Z3_CAPO3/139-383   | A0A0D2U9Z3.1 | PF0582     | 43.00 | 0.00 |
| TRINITY_F0Y5R3_AURAN/29-109        | F0Y5R3.1     | PF03366.14 | 43.00 | 0.00 |
| TRINITY_L8HDF0_ACACA/65-441        | L8HDF0.1     | PF07690.14 | 43.00 | 0.00 |
| TRINITY_V4B438_LOTGI/23-1106       | V4B438.1     | PF10266.7; | 43.00 | 0.00 |
| TRINITY_A0D0L1_PARTE/195-322       | A0D0L1.1     | PF00107.24 | 43.00 | 0.00 |
| TRINITY_G0FMT1_AMYMS/32-279        | G0FMT1.1     | PF12697.5; | 43.00 | 0.00 |
| TRINITY_F0ZQD1_DICPU/175-295       | F0ZQD1.1     | PF00380.17 | 43.00 | 0.00 |
| TRINITY_W4GVX0_9STRA/4-213         | W4GVX0.1     | PF10229.7; | 43.00 | 0.00 |
| TRINITY_I0YZW7_9CHLO/66-185        | I0YZW7.1     | PF09335.9; | 43.00 | 0.00 |
| TRINITY_I7MLB9_TETTS/331-784       | I7MLB9.1     | PF00176.21 | 43.00 | 0.00 |
| TRINITY_F0ZHF8_DICPU/558-859       | F0ZHF8.1     | PF00069.23 | 43.00 | 0.00 |
| TRINITY_F6PR32_CIOIN/14-343        | F6PR32.2     | PF00503.18 | 43.00 | 0.00 |
| TRINITY_A0A0D3HPK5_9ORYZ/119-252   | A0A0D3HPK5.1 | PF1353     | 43.00 | 0.00 |
| TRINITY_A0A0D2W094_CAPO3/47-174    | A0A0D2W094.1 | PF0058     | 43.00 | 0.00 |
| TRINITY_I0YYH2_9CHLO/10-274        | I0YYH2.1     | PF05116.11 | 43.00 | 0.00 |
| TRINITY_D2Z5E3_9BACT/601-717       | D2Z5E3.1     | PF02518.24 | 43.00 | 0.00 |
| TRINITY_U3INF1_ANAPL/68-270        | U3INF1.1     | PF04678.11 | 43.00 | 0.00 |
| TRINITY_A0A059LE45_9CHLO/5-92      | A0A059LE45.1 | PF1656     | 43.00 | 0.00 |
| TRINITY_I7MHB3_TETTS/2068-2428     | I7MHB3.2     | PF00443.27 | 43.00 | 0.00 |
| TRINITY_A0A067BK62_SAPPC/136-393   | A0A067BK62.1 | PF0006     | 43.00 | 0.00 |
| TRINITY_K9XJA5_9CHRO/5-202         | K9XJA5.1     | PF00300.20 | 43.00 | 0.00 |
| TRINITY_I7LZV2_TETTS/151-413       | I7LZV2.1     | PF00069.23 | 43.00 | 0.00 |
| TRINITY_L8HBL0_ACACA/285-445       | L8HBL0.1     | PF02450.13 | 43.00 | 0.00 |
| TRINITY_E1ZG57_CHLVA/79-239        | E1ZG57.1     | PF04832.10 | 43.00 | 0.00 |

|                                  |                     |       |      |
|----------------------------------|---------------------|-------|------|
| TRINITY_D8U0K3_VOLCA/576-800     | D8U0K3.1 PF00326.19 | 43.00 | 0.00 |
| TRINITY_F2U4X2_SALR5/201-406     | F2U4X2.1 PF02979.14 | 43.00 | 0.00 |
| TRINITY_F4PI13_DICFS/24-393      | F4PI13.1 PF10142.7; | 43.00 | 0.00 |
| TRINITY_A8J1Y1_CHLRE/23-100      | A8J1Y1.1 PF12937.5; | 43.00 | 0.00 |
| TRINITY_J9EXT5_9SPIT/263-461     | J9EXT5.1 PF00117.26 | 43.00 | 0.00 |
| TRINITY_A0A0R4IW43_DANRE/130-277 | A0A0R4IW43.1 PF0413 | 43.00 | 0.00 |
| TRINITY_Q6MQ84_BDEBA/790-905     | Q6MQ84.1 PF00072.22 | 43.00 | 0.00 |
| TRINITY_D8TH98_VOLCA/18-105      | D8TH98.1 PF13499.4; | 43.00 | 0.00 |
| TRINITY_D3BQC1_POLPA/385-635     | D3BQC1.1 PF07714.15 | 43.00 | 0.00 |
| TRINITY_U4L329_PYROM/74-160      | U4L329.1 PF01336.23 | 43.00 | 0.00 |
| TRINITY_A0A073CMD8_PLAAG/265-555 | A0A073CMD8.1 PF0077 | 43.00 | 0.00 |
| TRINITY_D8TKU7_VOLCA/132-339     | D8TKU7.1 PF00300.20 | 43.00 | 0.00 |
| TRINITY_A0A0L1J239_ASPNO/736-827 | A0A0L1J239.1 PF1279 | 43.00 | 0.00 |
| TRINITY_E1Z8V4_CHLVA/5-283       | E1Z8V4.1 PF01040.16 | 43.00 | 0.00 |
| TRINITY_L1IXT3_GUITH/1-178       | L1IXT3.1 PF16909.3; | 43.00 | 0.00 |
| TRINITY_L8GCR5_ACACA/14-522      | L8GCR5.1 PF00899.19 | 43.00 | 0.00 |
| TRINITY_E1ZNK8_CHLVA/38-143      | E1ZNK8.1 PF06179.10 | 43.00 | 0.00 |
| TRINITY_L8H8P6_ACACA/5-166       | L8H8P6.1 PF00071.20 | 43.00 | 0.00 |
| TRINITY_L8GLH3_ACACA/236-467     | L8GLH3.1 PF12931.5; | 43.00 | 0.00 |
| TRINITY_A0A061F080_THECC/36-252  | A0A061F080.1 PF0113 | 43.00 | 0.00 |
| TRINITY_L8GQE8_ACACA/2-240       | L8GQE8.1 PF06105.10 | 43.00 | 0.00 |
| TRINITY_A8HTQ0_CHLRE/98-251      | A8HTQ0.1 PF12146.6; | 43.00 | 0.00 |
| TRINITY_A0A087SFD6_AUXPR/170-379 | A0A087SFD6.1 PF0030 | 43.00 | 0.00 |
| TRINITY_M4ANV9_XIPMA/26-349      | M4ANV9.1 PF01074.20 | 43.00 | 0.00 |

|                                    |                     |       |      |
|------------------------------------|---------------------|-------|------|
| TRINITY_A8ICG2_CHLRE/94-190        | A8ICG2.1 PF07052.9; | 43.00 | 0.00 |
| TRINITY_M4AGF1_XIPMA/1107-1209     | M4AGF1.1 PF14580.4; | 43.00 | 0.00 |
| TRINITY_K9QPK3_NOSS7/11-206        | K9QPK3.1 PF00106.23 | 43.00 | 0.00 |
| TRINITY_A8J7M9_CHLRE/742-1038      | A8J7M9.1 PF00069.23 | 43.00 | 0.00 |
| TRINITY_Q1N2R9_9GAMM/772-890       | Q1N2R9.1 PF00072.22 | 43.00 | 0.00 |
| TRINITY_Q239Q1_TETTS/221-389       | Q239Q1.2 PF07106.11 | 42.90 | 0.00 |
| TRINITY_A0A088ADF8_APIME/634-677   | A0A088ADF8.1 PF1363 | 42.90 | 0.00 |
| TRINITY_F4PNJ7_DICFS/52-298        | F4PNJ7.1 PF03381.13 | 42.90 | 0.00 |
| TRINITY_B4MX20_DROWI/670-764       | B4MX20.2 PF02225.20 | 42.90 | 0.00 |
| TRINITY_Q22HC6_TETTS/2408-2508     | Q22HC6.2 PF14844.4; | 42.90 | 0.00 |
| TRINITY_B3LD78_PLAKH/163-304       | B3LD78.1 PF00179.24 | 42.90 | 0.00 |
| TRINITY_F4PQG8_DICFS/89-407        | F4PQG8.1 PF03666.11 | 42.90 | 0.00 |
| TRINITY_B0CSA0_LACBS/199-340       | B0CSA0.1 PF08635.8; | 42.90 | 0.00 |
| TRINITY_A0BG18_PARTE/74-327        | A0BG18.1 PF00102.25 | 42.90 | 0.00 |
| TRINITY_Q248F0_TETTS/19-502        | Q248F0.2 PF04916.11 | 42.90 | 0.00 |
| TRINITY_A2F8P2_TRIVA/39-146        | A2F8P2.1 PF00168.28 | 42.90 | 0.00 |
| TRINITY_F1A0M6_DICPU/22-274        | F1A0M6.1 PF07714.15 | 42.90 | 0.00 |
| TRINITY_A0A0M8MM38_9BASI/220-393   | A0A0M8MM38.1 PF0165 | 42.90 | 0.00 |
| TRINITY_L8GQX9_ACACA/44-107        | L8GQX9.1 PF04818.11 | 42.90 | 0.00 |
| TRINITY_L8HGW6_ACACA/60-130        | L8HGW6.1 PF00076.20 | 42.90 | 0.00 |
| TRINITY_F4Q1A1_DICFS/125-194       | F4Q1A1.1 PF13499.4; | 42.90 | 0.00 |
| TRINITY_PNPP_SCHPO/18-258          | Q00472.2 PF00702.24 | 42.90 | 0.00 |
| TRINITY_A0A0J8CXM9_BETVU/74-329    | A0A0J8CXM9.1 PF0048 | 42.90 | 0.00 |
| TRINITY_F8J7A5_HYPSM/5-355         | F8J7A5.1 PF01266.22 | 42.90 | 0.00 |
| TRINITY_G0R0N7_ICHMG/32-549        | G0R0N7.1 PF01602.18 | 42.90 | 0.00 |
| TRINITY_Q22M86_TETTS/262-671       | Q22M86.1 PF04910.12 | 42.90 | 0.00 |
| TRINITY_A0BHW3_PARTE/35-124        | A0BHW3.1 PF13011.4; | 42.90 | 0.00 |
| TRINITY_L1JAY0_GUITH/42-332        | L1JAY0.1 PF03133.13 | 42.90 | 0.00 |
| TRINITY_A9UP34_MONBE/2-79          | A9UP34.1 PF14705.4; | 42.90 | 0.00 |
| TRINITY_A6QZS3_AJECN/105-362       | A6QZS3.1 PF04857.18 | 42.90 | 0.00 |
| TRINITY_Q23QF2_TETTS/248-571       | Q23QF2.2 PF03133.13 | 42.90 | 0.00 |
| TRINITY_C1E3X7_MICSR/85-301        | C1E3X7.1 PF02353.18 | 42.90 | 0.00 |
| TRINITY_Q22KS8_TETTS/371-683       | Q22KS8.2 PF00443.27 | 42.90 | 0.00 |
| TRINITY_I7M7C8_TETTS/9-251         | I7M7C8.1 PF05648.12 | 42.90 | 0.00 |
| TRINITY_M2TBK4_COCSN/4-242         | M2TBK4.1 PF01145.23 | 42.90 | 0.00 |
| TRINITY_A8J1F4_CHLRE/136-240       | A8J1F4.1 PF12894.5; | 42.90 | 0.00 |
| TRINITY_A9AXR9_HERA2/5-130         | A9AXR9.1 PF11528.6; | 42.90 | 0.00 |
| TRINITY_D8TYV9_VOLCA/182-326       | D8TYV9.1 PF01547.23 | 42.90 | 0.00 |
| TRINITY_A0DEP9_PARTE/295-411       | A0DEP9.1 PF16669.3; | 42.90 | 0.00 |
| TRINITY_L8H4Z2_ACACA/119-333       | L8H4Z2.1 PF00122.18 | 42.90 | 0.00 |
| TRINITY_A1WBB4_ACISJ/43-382        | A1WBB4.1 PF03009.15 | 42.90 | 0.00 |
| TRINITY_A0A072U329_MEDTR/1630-1731 | A0A072U329.1 PF1562 | 42.90 | 0.00 |
| TRINITY_E0W3G1_PEDHC/364-462       | E0W3G1.1 PF12755.5; | 42.90 | 0.00 |
| TRINITY_Q24DF0_TETTS/748-1037      | Q24DF0.2 PF00648.19 | 42.90 | 0.00 |
| TRINITY_A4VDR4_TETTS/17-290        | A4VDR4.1 PF01193.22 | 42.90 | 0.00 |
| TRINITY_E0VDI2_PEDHC/1298-1512     | E0VDI2.1 PF14633.4; | 42.90 | 0.00 |
| TRINITY_D8U5E5_VOLCA/603-733       | D8U5E5.1 PF00694.17 | 42.90 | 0.00 |
| TRINITY_G1MXH8_MELGA/241-296       | G1MXH8.1 PF00412.20 | 42.90 | 0.00 |
| TRINITY_L1JY95_GUITH/10-156        | L1JY95.1 PF06201.11 | 42.90 | 0.00 |
| TRINITY_L8GMJ6_ACACA/182-400       | L8GMJ6.1 PF00667.18 | 42.90 | 0.00 |
| TRINITY_Q3SJU2_THIDA/5-102         | Q3SJU2.1 PF00970.22 | 42.90 | 0.00 |
| TRINITY_I7LV61_TETTS/61-342        | I7LV61.2 PF02383.16 | 42.90 | 0.00 |
| TRINITY_D8THR7_VOLCA/300-536       | D8THR7.1 PF12697.5; | 42.90 | 0.00 |
| TRINITY_K9TMN2_9CYAN/32-292        | K9TMN2.1 PF01636.21 | 42.90 | 0.00 |
| TRINITY_Q245G5_TETTS/3-166         | Q245G5.2 PF08613.9; | 42.90 | 0.00 |
| TRINITY_G0R421_ICHMG/384-521       | G0R421.1 PF07534.14 | 42.90 | 0.00 |
| TRINITY_A8JF52_CHLRE/1721-2039     | A8JF52.1 PF00520.29 | 42.90 | 0.00 |
| TRINITY_A8J3P1_CHLRE/954-1161      | A8J3P1.1 PF00211.18 | 42.90 | 0.00 |
| TRINITY_F0LTS5_VIBFN/214-279       | F0LTS5.1 PF14743.4; | 42.90 | 0.00 |
| TRINITY_A9TQZ8_PHYPA/38-328        | A9TQZ8.1 PF00176.21 | 42.90 | 0.00 |
| TRINITY_K2E3Q2_9BACT/64-325        | K2E3Q2.1 PF12697.5; | 42.90 | 0.00 |

|                                   |                      |       |      |
|-----------------------------------|----------------------|-------|------|
| TRINITY_G0R1C5_ICHMG/3-376        | G0R1C5.1 PF00022.17  | 42.90 | 0.00 |
| TRINITY_L8GVC8_ACACA/416-697      | L8GVC8.1 PF00150.16  | 42.90 | 0.00 |
| TRINITY_I7MMP5_TETTS/4189-4485    | I7MMP5.2 PF00632.23  | 42.90 | 0.00 |
| TRINITY_Q23Q47_TETTS/4-162        | Q23Q47.2 PF01652.16  | 42.90 | 0.00 |
| TRINITY_A0A0N4ZQ78_PARTI/25-352   | A0A0N4ZQ78.1 PF00050 | 42.90 | 0.00 |
| TRINITY_G7YND5_CLOSI/13-343       | G7YND5.1 PF00503.18  | 42.90 | 0.00 |
| TRINITY_B9M6Y2_GEODF/355-673      | B9M6Y2.1 PF13243.4;  | 42.90 | 0.00 |
| TRINITY_D2A3W1_TRICA/153-237      | D2A3W1.1 PF00439.23  | 42.90 | 0.00 |
| TRINITY_D3BLW3_POLPA/16-123       | D3BLW3.1 PF00307.29  | 42.90 | 0.00 |
| TRINITY_A8JAG8_CHLRE/672-990      | A8JAG8.1 PF02171.15  | 42.90 | 0.00 |
| TRINITY_K4BB11_SOLLC/91-236       | K4BB11.1 PF01569.19  | 42.90 | 0.00 |
| TRINITY_A0A0B0PG55_GOSAR/152-315  | A0A0B0PG55.1 PF0173  | 42.90 | 0.00 |
| TRINITY_D3B6P4_POLPA/959-1095     | D3B6P4.1 PF07534.14  | 42.90 | 0.00 |
| TRINITY_L8GL42_ACACA/354-480      | L8GL42.1 PF00644.18  | 42.90 | 0.00 |
| TRINITY_E1ZAE1_CHLVA/18-540       | E1ZAE1.1 PF12832.5;  | 42.90 | 0.00 |
| TRINITY_D8U4A7_VOLCA/26-266       | D8U4A7.1 PF00481.19  | 42.90 | 0.00 |
| TRINITY_D8U2J0_VOLCA/102-256      | D8U2J0.1 PF02453.15  | 42.90 | 0.00 |
| TRINITY_F7BFK9_XENTR/9-95         | F7BFK9.1 PF02970.14  | 42.90 | 0.00 |
| TRINITY_A0A072VFE5_MEDTR/15-426   | A0A072VFE5.1 PF0609  | 42.90 | 0.00 |
| TRINITY_A8J152_CHLRE/83-238       | A8J152.1 PF08645.9;  | 42.90 | 0.00 |
| TRINITY_F0Y2A4_AURAN/256-356      | F0Y2A4.1 PF13180.4;  | 42.90 | 0.00 |
| TRINITY_A5PLC1_DANRE/160-516      | A5PLC1.1 PF05686.10  | 42.90 | 0.00 |
| TRINITY_R1FS95_EMIHU/3-114        | R1FS95.1 PF14770.4;  | 42.90 | 0.00 |
| TRINITY_D8UF85_VOLCA/179-263      | D8UF85.1 PF05699.12  | 42.90 | 0.00 |
| TRINITY_A9RL87_PHYPA/187-534      | A9RL87.1 PF01266.22  | 42.90 | 0.00 |
| TRINITY_A0A015J5I9_9GLOM/468-586  | A0A015J5I9.1 PF0066  | 42.90 | 0.00 |
| TRINITY_A0BKA4_PARTE/11-135       | A0BKA4.1 PF00241.18  | 42.90 | 0.00 |
| TRINITY_W7XE85_TETTS/5-84         | W7XE85.1 PF08571.8;  | 42.90 | 0.00 |
| TRINITY_I7LXC7_TETTS/17-452       | I7LXC7.1 PF00083.22  | 42.90 | 0.00 |
| TRINITY_Q6LI57_PHOPR/454-572      | Q6LI57.1 PF00072.22  | 42.90 | 0.00 |
| TRINITY_A0A015IQG9_9GLOM/18-169   | A0A015IQG9.1 PF0482  | 42.80 | 0.00 |
| TRINITY_L8HFI2_ACACA/43-231       | L8HFI2.1 PF09414.8;  | 42.80 | 0.00 |
| TRINITY_G0R0N7_ICHMG/649-793      | G0R0N7.1 PF08752.8;  | 42.80 | 0.00 |
| TRINITY_I1IG10_BRADI/222-591      | I1IG10.1 PF07995.9;  | 42.80 | 0.00 |
| TRINITY_D2VZ46_NAEGR/253-405      | D2VZ46.1 PF07534.14  | 42.80 | 0.00 |
| TRINITY_A0A075B5D3_9FUNG/690-1127 | A0A075B5D3.1 PF0105  | 42.80 | 0.00 |
| TRINITY_E1ZKY2_CHLVA/1-359        | E1ZKY2.1 PF04857.18  | 42.80 | 0.00 |
| TRINITY_G1KPC3_ANOCA/381-566      | G1KPC3.2 PF05241.10  | 42.80 | 0.00 |
| TRINITY_B6AAG7_CRYMR/5264-5570    | B6AAG7.1 PF00632.23  | 42.80 | 0.00 |
| TRINITY_F9WF79_TRYCI/16-301       | F9WF79.1 PF07993.10  | 42.80 | 0.00 |
| TRINITY_L8H7W7_ACACA/573-736      | L8H7W7.1 PF13692.4;  | 42.80 | 0.00 |
| TRINITY_X6MLH9_RETFI/78-383       | X6MLH9.1 PF02668.14  | 42.80 | 0.00 |
| TRINITY_D8TTP0_VOLCA/1124-1422    | D8TTP0.1 PF00069.23  | 42.80 | 0.00 |
| TRINITY_A0DJB8_PARTE/29-287       | A0DJB8.1 PF00194.19  | 42.70 | 0.00 |
| TRINITY_Q22AI5_TETTS/29-127       | Q22AI5.3 PF00085.18  | 42.70 | 0.00 |
| TRINITY_A0DGY3_PARTE/11-267       | A0DGY3.1 PF00069.23  | 42.70 | 0.00 |
| TRINITY_F1A489_DICPU/2-138        | F1A489.1 PF04699.12  | 42.70 | 0.00 |
| TRINITY_A0A0D3VAH0_9BACL/78-279   | A0A0D3VAH0.1 PF0785  | 42.70 | 0.00 |
| TRINITY_L8H8E7_ACACA/138-352      | L8H8E7.1 PF13236.4;  | 42.70 | 0.00 |
| TRINITY_L8H6M2_ACACA/339-525      | L8H6M2.1 PF00697.20  | 42.70 | 0.00 |
| TRINITY_U5FU41_POPTR/28-122       | U5FU41.1 PF05669.10  | 42.70 | 0.00 |
| TRINITY_L8GIJ5_ACACA/160-302      | L8GIJ5.1 PF01467.24  | 42.70 | 0.00 |
| TRINITY_A0A078AD16_STYLE/27-478   | A0A078AD16.1 PF0045  | 42.70 | 0.00 |
| TRINITY_F4Q789_DICFS/9-129        | F4Q789.1 PF00241.18  | 42.70 | 0.00 |
| TRINITY_A0A0A8K4P5_9RHIZ/34-213   | A0A0A8K4P5.1 PF0172  | 42.70 | 0.00 |
| TRINITY_U4UR29_DENPD/230-447      | U4UR29.1 PF00112.21  | 42.70 | 0.00 |
| TRINITY_I7MLV0_TETTS/461-797      | I7MLV0.2 PF00443.27  | 42.70 | 0.00 |
| TRINITY_I7LXB6_TETTS/1143-1299    | I7LXB6.2 PF00005.25  | 42.70 | 0.00 |
| TRINITY_I7LZV2_TETTS/151-413      | I7LZV2.1 PF00069.23  | 42.70 | 0.00 |
| TRINITY_A7RRE4_NEMVE/36-252       | A7RRE4.1 PF01370.19  | 42.70 | 0.00 |
| TRINITY_G6CJN5_DANPL/396-551      | G6CJN5.1 PF12783.5;  | 42.70 | 0.00 |

|                                  |                     |       |      |
|----------------------------------|---------------------|-------|------|
| TRINITY_F4PI13_DICFS/24-393      | F4PI13.1 PF10142.7; | 42.70 | 0.00 |
| TRINITY_A0A015LDJ2_9GLOM/73-241  | A0A015LDJ2.1 PF0610 | 42.70 | 0.00 |
| TRINITY_I1BMW8_RHIO9/7-126       | I1BMW8.1 PF10302.7; | 42.70 | 0.00 |
| TRINITY_D8TI14_VOLCA/22-1084     | D8TI14.1 PF04147.10 | 42.70 | 0.00 |
| TRINITY_I7MDT8_TETTS/9-130       | I7MDT8.2 PF03859.14 | 42.70 | 0.00 |
| TRINITY_C1E5C7_MICSR/1365-1459   | C1E5C7.1 PF03129.18 | 42.70 | 0.00 |
| TRINITY_D7FM70_ECTSI/474-608     | D7FM70.1 PF08662.9; | 42.70 | 0.00 |
| TRINITY_A0A0M0JCY4_9EUKA/507-827 | A0A0M0JCY4.1 PF0063 | 42.70 | 0.00 |
| TRINITY_E1Z5Q9_CHLVA/1-227       | E1Z5Q9.1 PF05684.10 | 42.70 | 0.00 |
| TRINITY_D8TST0_VOLCA/314-634     | D8TST0.1 PF14688.4; | 42.70 | 0.00 |
| TRINITY_D3BSH8_POLPA/25-395      | D3BSH8.1 PF10142.7; | 42.70 | 0.00 |
| TRINITY_A0CXP9_PARTE/92-386      | A0CXP9.1 PF01457.14 | 42.70 | 0.00 |
| TRINITY_J9F7V1_9SPIT/154-504     | J9F7V1.1 PF13868.4; | 42.70 | 0.00 |
| TRINITY_D7STJ7_VITVI/11-202      | D7STJ7.1 PF04511.13 | 42.70 | 0.00 |
| TRINITY_A0A0D2VP51_CAPO3/269-513 | A0A0D2VP51.1 PF0056 | 42.70 | 0.00 |
| TRINITY_Q2IQ35_ANADE/179-509     | Q2IQ35.1 PF00171.20 | 42.70 | 0.00 |
| TRINITY_D8LD63_ECTSI/224-370     | D8LD63.1 PF01694.20 | 42.70 | 0.00 |
| TRINITY_G0QT41_ICHMG/24-172      | G0QT41.1 PF00782.18 | 42.70 | 0.00 |
| TRINITY_A0CPZ2_PARTE/1051-1377   | A0CPZ2.1 PF12777.5; | 42.70 | 0.00 |
| TRINITY_F8W2M8_DANRE/214-518     | F8W2M8.1 PF00082.20 | 42.70 | 0.00 |
| TRINITY_A0A0B2VVD4_TOXCA/13-290  | A0A0B2VVD4.1 PF0063 | 42.70 | 0.00 |
| TRINITY_K3Z8Q6_SETIT/58-188      | K3Z8Q6.1 PF04263.14 | 42.70 | 0.00 |
| TRINITY_D8UKB6_VOLCA/44-157      | D8UKB6.1 PF07714.15 | 42.70 | 0.00 |
| TRINITY_L8GTK1_ACACA/146-395     | L8GTK1.1 PF07714.15 | 42.70 | 0.00 |
| TRINITY_A2DLY7_TRIVA/10-126      | A2DLY7.1 PF01412.16 | 42.70 | 0.00 |
| TRINITY_S7XRW0_SPRLO/11-173      | S7XRW0.1 PF00071.20 | 42.70 | 0.00 |
| TRINITY_D8TMY6_VOLCA/279-490     | D8TMY6.1 PF07714.15 | 42.70 | 0.00 |
| TRINITY_C3ZE50_BRAFL/11-386      | C3ZE50.1 PF00145.15 | 42.70 | 0.00 |
| TRINITY_Q22P47_TETTS/327-477     | Q22P47.2 PF16113.3; | 42.70 | 0.00 |
| TRINITY_D8U417_VOLCA/198-314     | D8U417.1 PF00504.19 | 42.70 | 0.00 |
| TRINITY_A2EHA2_TRIVA/171-421     | A2EHA2.1 PF07714.15 | 42.70 | 0.00 |
| TRINITY_A0A068SEF3_9FUNG/34-341  | A0A068SEF3.1 PF0337 | 42.70 | 0.00 |
| TRINITY_A0A059LRF5_9CHLO/301-422 | A0A059LRF5.1 PF0253 | 42.70 | 0.00 |
| TRINITY_Q23GE6_TETTS/664-765     | Q23GE6.1 PF04815.13 | 42.70 | 0.00 |
| TRINITY_A0A084WBI6_ANOSI/474-580 | A0A084WBI6.1 PF0030 | 42.70 | 0.00 |
| TRINITY_D8TTD6_VOLCA/12-283      | D8TTD6.1 PF01869.18 | 42.70 | 0.00 |
| TRINITY_D8TUM1_VOLCA/2-286       | D8TUM1.1 PF15239.4; | 42.70 | 0.00 |
| TRINITY_A8JBH7_CHLRE/27-131      | A8JBH7.1 PF00085.18 | 42.70 | 0.00 |
| TRINITY_A0A0B4GQ28_9HYPO/653-894 | A0A0B4GQ28.1 PF0772 | 42.70 | 0.00 |
| TRINITY_E3FU34_STIAD/40-322      | E3FU34.1 PF01636.21 | 42.70 | 0.00 |
| TRINITY_I0Z929_9CHLO/115-362     | I0Z929.1 PF01433.18 | 42.70 | 0.00 |
| TRINITY_A8JAQ5_CHLRE/488-591     | A8JAQ5.1 PF12796.5; | 42.70 | 0.00 |
| TRINITY_T0R0B8_9STRA/37-164      | T0R0B8.1 PF12796.5; | 42.70 | 0.00 |
| TRINITY_I0Z190_9CHLO/11-606      | I0Z190.1 PF00012.18 | 42.70 | 0.00 |
| TRINITY_I7LUV4_TETTS/6-94        | I7LUV4.2 PF00855.15 | 42.70 | 0.00 |
| TRINITY_A0A077ZZ05_STYLE/13-335  | A0A077ZZ05.1 PF0329 | 42.70 | 0.00 |
| TRINITY_A0A0G2FVY5_9PEZI/193-453 | A0A0G2FVY5.1 PF0006 | 42.60 | 0.00 |
| TRINITY_A5V585_SPHWW/37-167      | A5V585.1 PF00188.24 | 42.60 | 0.00 |
| TRINITY_G0QK23_ICHMG/3-104       | G0QK23.1 PF00168.28 | 42.60 | 0.00 |
| TRINITY_I7MIJ4_TETTS/15-231      | I7MIJ4.2 PF02230.14 | 42.60 | 0.00 |
| TRINITY_ACPS_DESVH/4-120         | Q72AT2.1 PF01648.18 | 42.60 | 0.00 |
| TRINITY_I1KL83_SOYBN/10-108      | I1KL83.1 PF04749.15 | 42.60 | 0.00 |
| TRINITY_I7MMH9_TETTS/212-523     | I7MMH9.2 PF00632.23 | 42.60 | 0.00 |
| TRINITY_F1NXC2_CHICK/38-153      | F1NXC2.2 PF00615.17 | 42.60 | 0.00 |
| TRINITY_D8QV77_SELML/62-307      | D8QV77.1 PF08704.8; | 42.60 | 0.00 |
| TRINITY_L8GWQ5_ACACA/986-1235    | L8GWQ5.1 PF07714.15 | 42.60 | 0.00 |
| TRINITY_S2K3Z9_MUCC1/5-158       | S2K3Z9.1 PF05907.11 | 42.60 | 0.00 |
| TRINITY_U1MSE1_ASCSU/193-284     | U1MSE1.1 PF08321.10 | 42.60 | 0.00 |
| TRINITY_A0A078B1Y8_STYLE/319-384 | A0A078B1Y8.1 PF0049 | 42.60 | 0.00 |
| TRINITY_A0DRK2_PARTE/202-274     | A0DRK2.1 PF00173.26 | 42.60 | 0.00 |
| TRINITY_G0QVG7_ICHMG/239-716     | G0QVG7.1 PF04791.14 | 42.60 | 0.00 |

|                                  |              |            |       |      |
|----------------------------------|--------------|------------|-------|------|
| TRINITY_L8GM38_ACACA/468-720     | L8GM38.1     | PF07714.15 | 42.60 | 0.00 |
| TRINITY_G5APF5_HETGA/1-317       | G5APF5.1     | PF01201.20 | 42.60 | 0.00 |
| TRINITY_K4BAL8_SOLLC/77-206      | K4BAL8.1     | PF00582.24 | 42.60 | 0.00 |
| TRINITY_E1Z947_CHLVA/294-456     | E1Z947.1     | PF00743.17 | 42.60 | 0.00 |
| TRINITY_G0QQC7_ICHMG/138-415     | G0QQC7.1     | PF00069.23 | 42.60 | 0.00 |
| TRINITY_D8TH75_VOLCA/74-173      | D8TH75.1     | PF13815.4; | 42.60 | 0.00 |
| TRINITY_B3L6C7_PLAKH/14-175      | B3L6C7.1     | PF00071.20 | 42.60 | 0.00 |
| TRINITY_T1K1A2_TETUR/106-536     | T1K1A2.1     | PF10433.7; | 42.60 | 0.00 |
| TRINITY_W5N955_LEPOC/19-328      | W5N955.1     | PF16420.3; | 42.60 | 0.00 |
| TRINITY_I0YZV3_9CHLO/123-427     | I0YZV3.1     | PF00069.23 | 42.60 | 0.00 |
| TRINITY_A0A024UX32_9STRA/62-134  | A0A024UX32.1 | PF00069    | 42.60 | 0.00 |
| TRINITY_F4PLA2_DICFS/498-650     | F4PLA2.1     | PF00620.25 | 42.60 | 0.00 |
| TRINITY_M5GEX9_DACSP/52-125      | M5GEX9.1     | PF13517.4; | 42.60 | 0.00 |
| TRINITY_G6YGX7_9RHIZ/6-251       | G6YGX7.1     | PF01370.19 | 42.60 | 0.00 |
| TRINITY_M0S2P3_MUSAM/119-185     | M0S2P3.1     | PF00013.27 | 42.60 | 0.00 |
| TRINITY_E9IKC8_SOLIN/9-264       | E9IKC8.1     | PF00069.23 | 42.60 | 0.00 |
| TRINITY_A0A0G2ZUL9_9DELT/277-452 | A0A0G2ZUL9.1 | PF1376     | 42.60 | 0.00 |
| TRINITY_A0A078AJL8_STYLE/420-527 | A0A078AJL8.1 | PF1364     | 42.60 | 0.00 |
| TRINITY_I0I884_CALAS/53-389      | I0I884.1     | PF01547.23 | 42.60 | 0.00 |
| TRINITY_A0D8M4_PARTE/180-432     | A0D8M4.1     | PF00233.17 | 42.60 | 0.00 |
| TRINITY_L8HAY2_ACACA/1-176       | L8HAY2.1     | PF13462.4; | 42.60 | 0.00 |
| TRINITY_A8IRH6_CHLRE/37-466      | A8IRH6.1     | PF01150.15 | 42.60 | 0.00 |
| TRINITY_A7RZS6_NEMVE/21-504      | A7RZS6.1     | PF03055.13 | 42.60 | 0.00 |
| TRINITY_A8HQ7_CHLRE/125-185      | A8HQ7.1      | PF14295.4; | 42.60 | 0.00 |
| TRINITY_K9UCD6_9CHRO/15-154      | K9UCD6.1     | PF08719.9; | 42.60 | 0.00 |
| TRINITY_G4VC11_SCHMA/93-420      | G4VC11.1     | PF00704.26 | 42.60 | 0.00 |
| TRINITY_D3BGC6_POLPA/239-445     | D3BGC6.1     | PF00616.17 | 42.60 | 0.00 |
| TRINITY_A0A087SA18_AUXPR/141-251 | A0A087SA18.1 | PF1364     | 42.60 | 0.00 |
| TRINITY_A8HPD4_CHLRE/451-711     | A8HPD4.1     | PF00520.29 | 42.60 | 0.00 |
| TRINITY_F0YCP8_AURAN/53-463      | F0YCP8.1     | PF00450.20 | 42.60 | 0.00 |
| TRINITY_A0A078DXQ9_BRANA/182-281 | A0A078DXQ9.1 | PF0016     | 42.60 | 0.00 |
| TRINITY_J3MBD2_ORYBR/517-715     | J3MBD2.1     | PF05724.9; | 42.60 | 0.00 |
| TRINITY_D8TTM6_VOLCA/6-138       | D8TTM6.1     | PF13676.4; | 42.60 | 0.00 |
| TRINITY_G0QV06_ICHMG/23-182      | G0QV06.1     | PF03357.19 | 42.60 | 0.00 |
| TRINITY_A0A024UK03_9STRA/17-187  | A0A024UK03.1 | PF0335     | 42.60 | 0.00 |
| TRINITY_A0A068RN78_9FUNG/262-373 | A0A068RN78.1 | PF0056     | 42.60 | 0.00 |
| TRINITY_F4PV61_DICFS/476-1360    | F4PV61.1     | PF02460.16 | 42.60 | 0.00 |
| TRINITY_I0YVV6_9CHLO/774-1265    | I0YVV6.1     | PF00759.17 | 42.60 | 0.00 |
| TRINITY_A8IEV8_CHLRE/3-288       | A8IEV8.1     | PF00069.23 | 42.60 | 0.00 |
| TRINITY_A0A087SKP2_AUXPR/5-174   | A0A087SKP2.1 | PF0612     | 42.60 | 0.00 |
| TRINITY_F4Q1V6_DICFS/12-291      | F4Q1V6.1     | PF10127.7; | 42.60 | 0.00 |
| TRINITY_D3B745_POLPA/298-395     | D3B745.1     | PF16158.3; | 42.60 | 0.00 |
| TRINITY_G0QT60_ICHMG/17-86       | G0QT60.1     | PF13499.4; | 42.60 | 0.00 |
| TRINITY_Q234R8_TETTS/286-375     | Q234R8.2     | PF14561.4; | 42.50 | 0.00 |
| TRINITY_L8HET9_ACACA/76-164      | L8HET9.1     | PF12894.5; | 42.50 | 0.00 |
| TRINITY_Q245E1_TETTS/75-258      | Q245E1.1     | PF07998.9; | 42.50 | 0.00 |
| TRINITY_L1I7Y3_GUIITH/29-102     | L1I7Y3.1     | PF16093.3; | 42.50 | 0.00 |
| TRINITY_W7X9B2_TETTS/39-342      | W7X9B2.1     | PF00850.17 | 42.50 | 0.00 |
| TRINITY_F1A652_DICPU/115-293     | F1A652.1     | PF05712.11 | 42.50 | 0.00 |
| TRINITY_K4BFL0_SOLLC/116-234     | K4BFL0.1     | PF00622.26 | 42.50 | 0.00 |
| TRINITY_I7LUD1_TETTS/1-227       | I7LUD1.1     | PF01086.15 | 42.50 | 0.00 |
| TRINITY_D8RZS1_SELML/1-142       | D8RZS1.1     | PF04658.11 | 42.50 | 0.00 |
| TRINITY_Q23AY4_TETTS/31-436      | Q23AY4.2     | PF05577.10 | 42.50 | 0.00 |
| TRINITY_Q232X8_TETTS/36-488      | Q232X8.1     | PF00067.20 | 42.50 | 0.00 |
| TRINITY_C3Z5Z8_BRAFL/34-140      | C3Z5Z8.1     | PF02837.16 | 42.50 | 0.00 |
| TRINITY_D8Q0R8_SCHCM/345-567     | D8Q0R8.1     | PF00082.20 | 42.50 | 0.00 |
| TRINITY_M1WE29_CLAP2/186-274     | M1WE29.1     | PF12894.5; | 42.50 | 0.00 |
| TRINITY_D6WQA3_TRICA/15-387      | D6WQA3.1     | PF01433.18 | 42.50 | 0.00 |
| TRINITY_A8JD96_CHLRE/7-176       | A8JD96.1     | PF00186.17 | 42.50 | 0.00 |
| TRINITY_Q23FR1_TETTS/29-247      | Q23FR1.2     | PF08442.8; | 42.50 | 0.00 |
| TRINITY_D8TPI1_VOLCA/191-280     | D8TPI1.1     | PF00686.17 | 42.50 | 0.00 |

|                                   |                     |       |      |
|-----------------------------------|---------------------|-------|------|
| TRINITY_D8TMF4_VOLCA/11-131       | D8TMF4.1 PF01398.19 | 42.50 | 0.00 |
| TRINITY_A7RIR3_NEMVE/12-456       | A7RIR3.1 PF03901.15 | 42.50 | 0.00 |
| TRINITY_A0A078ANZ7_STYLE/243-431  | A0A078ANZ7.1 PF0092 | 42.50 | 0.00 |
| TRINITY_Q54PB7_DICDI/1358-1684    | Q54PB7.1 PF06920.11 | 42.50 | 0.00 |
| TRINITY_D8PFW3_9BACT/753-985      | D8PFW3.1 PF00248.19 | 42.50 | 0.00 |
| TRINITY_F4PZT7_DICFS/149-338      | F4PZT7.1 PF04893.15 | 42.50 | 0.00 |
| TRINITY_Q23TZ6_TETTS/592-664      | Q23TZ6.1 PF00575.21 | 42.50 | 0.00 |
| TRINITY_A2D8V9_TRIVA/448-772      | A2D8V9.1 PF00702.24 | 42.50 | 0.00 |
| TRINITY_I0Z205_9CHLO/52-262       | I0Z205.1 PF01852.17 | 42.50 | 0.00 |
| TRINITY_A0A087YKX9_POEFO/31-223   | A0A087YKX9.1 PF1356 | 42.50 | 0.00 |
| TRINITY_L8GMP4_ACACA/297-555      | L8GMP4.1 PF07714.15 | 42.50 | 0.00 |
| TRINITY_A8HT24_CHLRE/1-153        | A8HT24.1 PF13967.4; | 42.50 | 0.00 |
| TRINITY_A8N128_COPC7/821-1417     | A8N128.2 PF04998.15 | 42.50 | 0.00 |
| TRINITY_H2AYA1_KAZAF/168-318      | H2AYA1.1 PF00650.18 | 42.50 | 0.00 |
| TRINITY_A0A0C2MRZ6_THEKT/508-668  | A0A0C2MRZ6.1 PF0007 | 42.50 | 0.00 |
| TRINITY_GXCDD_DICDI/464-636       | Q1ZXH8.3 PF00621.18 | 42.50 | 0.00 |
| TRINITY_I1I093_BRADI/214-419      | I1I093.1 PF05450.13 | 42.50 | 0.00 |
| TRINITY_E1ZG60_CHLVA/124-217      | E1ZG60.1 PF00686.17 | 42.50 | 0.00 |
| TRINITY_J9EG13_9SPIT/584-905      | J9EG13.1 PF05192.16 | 42.50 | 0.00 |
| TRINITY_J9I105_9SPIT/748-1060     | J9I105.1 PF03133.13 | 42.50 | 0.00 |
| TRINITY_A0A087SE27_AUXPR/662-921  | A0A087SE27.1 PF0006 | 42.50 | 0.00 |
| TRINITY_Q22Y90_TETTS/126-273      | Q22Y90.2 PF01553.19 | 42.50 | 0.00 |
| TRINITY_D3AXH6_POLPA/88-309       | D3AXH6.1 PF03531.12 | 42.50 | 0.00 |
| TRINITY_B7PNE9_IXOSC/191-298      | B7PNE9.1 PF00651.29 | 42.50 | 0.00 |
| TRINITY_L8H6Q9_ACACA/39-219       | L8H6Q9.1 PF00621.18 | 42.50 | 0.00 |
| TRINITY_A8IBB6_CHLRE/141-344      | A8IBB6.1 PF00211.18 | 42.50 | 0.00 |
| TRINITY_Q9FXC0_ARATH/9-217        | Q9FXC0.1 PF01470.15 | 42.50 | 0.00 |
| TRINITY_L8HHV9_ACACA/1409-1536    | L8HHV9.1 PF04784.12 | 42.50 | 0.00 |
| TRINITY_Q22NX2_TETTS/58-257       | Q22NX2.1 PF00106.23 | 42.50 | 0.00 |
| TRINITY_A0A0A1TX61_ENTIV/615-880  | A0A0A1TX61.1 PF0006 | 42.50 | 0.00 |
| TRINITY_D8TPI1_VOLCA/514-606      | D8TPI1.1 PF00686.17 | 42.50 | 0.00 |
| TRINITY_A0A074S5N7_9HOMO/876-1190 | A0A074S5N7.1 PF0020 | 42.50 | 0.00 |
| TRINITY_S2J153_MUCC1/962-1236     | S2J153.1 PF00664.21 | 42.50 | 0.00 |
| TRINITY_Q23QF2_TETTS/248-571      | Q23QF2.2 PF03133.13 | 42.50 | 0.00 |
| TRINITY_I3MYK3 ICTTR/5-377        | I3MYK3.1 PF00022.17 | 42.50 | 0.00 |
| TRINITY_R6P451_9FIRM/38-122       | R6P451.1 PF13508.5; | 42.40 | 0.00 |
| TRINITY_L8H2W8_ACACA/130-416      | L8H2W8.1 PF00955.19 | 42.40 | 0.00 |
| TRINITY_Q2KX37_BORA1/12-190       | Q2KX37.1 PF00857.18 | 42.40 | 0.00 |
| TRINITY_A9RTT7_PHYPA/174-241      | A9RTT7.1 PF00076.20 | 42.40 | 0.00 |
| TRINITY_F0UUU2_AJEC8/77-464       | F0UUU2.1 PF01266.22 | 42.40 | 0.00 |
| TRINITY_L8HED3_ACACA/1-118        | L8HED3.1 PF13350.4; | 42.40 | 0.00 |
| TRINITY_L8HED3_ACACA/1-118        | L8HED3.1 PF13350.4; | 42.40 | 0.00 |
| TRINITY_A0D6N3_PARTE/415-536      | A0D6N3.1 PF02518.24 | 42.40 | 0.00 |
| TRINITY_J3P2K8_GAGT3/209-270      | J3P2K8.1 PF00403.24 | 42.40 | 0.00 |
| TRINITY_J9I2H5_9SPIT/998-1122     | J9I2H5.1 PF07744.11 | 42.40 | 0.00 |
| TRINITY_C1MWE8_MICPC/31-276       | C1MWE8.1 PF12706.5; | 42.40 | 0.00 |
| TRINITY_A0A0L0CBX0_LUCCU/65-161   | A0A0L0CBX0.1 PF1275 | 42.40 | 0.00 |
| TRINITY_A9SK13_PHYPA/14-128       | A9SK13.1 PF01416.18 | 42.40 | 0.00 |
| TRINITY_K7L0E8_SOYBN/435-562      | K7L0E8.1 PF01909.21 | 42.40 | 0.00 |
| TRINITY_Q22KA1_TETTS/31-431       | Q22KA1.2 PF00155.19 | 42.40 | 0.00 |
| TRINITY_F0Z708_DICPU/34-273       | F0Z708.1 PF04190.11 | 42.40 | 0.00 |
| TRINITY_A0A015MTB8_9GLOM/426-625  | A0A015MTB8.1 PF0006 | 42.40 | 0.00 |
| TRINITY_G0QP91_ICHMG/89-387       | G0QP91.1 PF00648.19 | 42.40 | 0.00 |
| TRINITY_A0A0A1U0T6_ENTIV/4-232    | A0A0A1U0T6.1 PF0771 | 42.40 | 0.00 |
| TRINITY_Q6FQG5_CANGA/368-428      | Q6FQG5.1 PF09336.8; | 42.40 | 0.00 |
| TRINITY_A0A088A0P6_APIME/58-404   | A0A088A0P6.1 PF0514 | 42.40 | 0.00 |
| TRINITY_J9IW09_9SPIT/261-719      | J9IW09.1 PF04547.10 | 42.40 | 0.00 |
| TRINITY_A0A0A7KLL9_9DEIO/38-159   | A0A0A7KLL9.1 PF0246 | 42.40 | 0.00 |
| TRINITY_F4PWI6_DICFS/2-205        | F4PWI6.1 PF04161.11 | 42.40 | 0.00 |
| TRINITY_F2USG6_SALR5/66-240       | F2USG6.1 PF00092.26 | 42.40 | 0.00 |
| TRINITY_A0Q1G7_CLONN/318-600      | A0Q1G7.1 PF00759.17 | 42.40 | 0.00 |

|                                  |                     |       |      |
|----------------------------------|---------------------|-------|------|
| TRINITY_A0E2I7_PARTE/134-394     | A0E2I7.1 PF00069.23 | 42.40 | 0.00 |
| TRINITY_A0A0D2U6D4_CAPO3/422-639 | A0A0D2U6D4.1 PF0315 | 42.40 | 0.00 |
| TRINITY_C5XI79_SORBI/15-510      | C5XI79.1 PF01593.22 | 42.40 | 0.00 |
| TRINITY_G5A3Z6_PHYSP/16-367      | G5A3Z6.1 PF00225.21 | 42.40 | 0.00 |
| TRINITY_F0XZG0_AURAN/14-151      | F0XZG0.1 PF14226.4; | 42.40 | 0.00 |
| TRINITY_Q6MJD8_BDEBA/3-365       | Q6MJD8.1 PF04303.11 | 42.40 | 0.00 |
| TRINITY_M4BZI1_HYAAE/223-366     | M4BZI1.1 PF00892.18 | 42.40 | 0.00 |
| TRINITY_W4Z612_STRPU/466-705     | W4Z612.1 PF00850.17 | 42.40 | 0.00 |
| TRINITY_A0A0D2UI95_GOSRA/75-224  | A0A0D2UI95.1 PF0029 | 42.40 | 0.00 |
| TRINITY_E0XN34_SOLLC/490-1011    | E0XN34.1 PF07748.11 | 42.40 | 0.00 |
| TRINITY_E1ZMS8_CHLVA/193-304     | E1ZMS8.1 PF00271.29 | 42.40 | 0.00 |
| TRINITY_D8TNE3_VOLCA/48-267      | D8TNE3.1 PF00856.26 | 42.40 | 0.00 |
| TRINITY_I7MGS4_TETTS/171-373     | I7MGS4.2 PF00149.26 | 42.40 | 0.00 |
| TRINITY_A8IRD9_CHLRE/35-380      | A8IRD9.1 PF09766.7; | 42.40 | 0.00 |
| TRINITY_P2XB_DICDI/71-350        | Q553Y1.2 PF00864.17 | 42.40 | 0.00 |
| TRINITY_I0Z937_9CHLO/634-846     | I0Z937.1 PF07714.15 | 42.40 | 0.00 |
| TRINITY_A0A0N4Z0N8_PARTI/122-187 | A0A0N4Z0N8.1 PF1235 | 42.40 | 0.00 |
| TRINITY_Q8S692_ORYSJ/491-673     | Q8S692.1 PF00078.25 | 42.40 | 0.00 |
| TRINITY_G4T9G5_PIRID/312-596     | G4T9G5.1 PF00069.23 | 42.40 | 0.00 |
| TRINITY_Q22RP0_TETTS/768-1090    | Q22RP0.2 PF08767.9; | 42.40 | 0.00 |
| TRINITY_A8J0L7_CHLRE/8-430       | A8J0L7.1 PF04339.10 | 42.40 | 0.00 |
| TRINITY_A8J5C3_CHLRE/92-264      | A8J5C3.1 PF01997.14 | 42.40 | 0.00 |
| TRINITY_A0A067L5Q9_JATCU/65-285  | A0A067L5Q9.1 PF0027 | 42.40 | 0.00 |
| TRINITY_A9V2B9_MONBE/227-497     | A9V2B9.1 PF13598.4; | 42.40 | 0.00 |
| TRINITY_A0DFX3_PARTE/110-382     | A0DFX3.1 PF00069.23 | 42.40 | 0.00 |
| TRINITY_A0A0M0JT31_9EUKA/18-161  | A0A0M0JT31.1 PF1330 | 42.40 | 0.00 |
| TRINITY_V2XG74_MONRO/7-157       | V2XG74.1 PF02182.15 | 42.40 | 0.00 |
| TRINITY_B8BV76_THAPS/393-767     | B8BV76.1 PF01266.22 | 42.40 | 0.00 |
| TRINITY_B2AQ42_PODAN/293-439     | B2AQ42.1 PF13692.4; | 42.40 | 0.00 |
| TRINITY_D8UC19_VOLCA/408-790     | D8UC19.1 PF01432.18 | 42.40 | 0.00 |
| TRINITY_A0CDK4_PARTE/404-736     | A0CDK4.1 PF00702.24 | 42.40 | 0.00 |
| TRINITY_M5VZ74_PRUPE/110-250     | M5VZ74.1 PF09810.7; | 42.40 | 0.00 |
| TRINITY_D8UJ77_VOLCA/285-526     | D8UJ77.1 PF00122.18 | 42.40 | 0.00 |
| TRINITY_I7LUV4_TETTS/6-94        | I7LUV4.2 PF00855.15 | 42.40 | 0.00 |
| TRINITY_A8J3Q7_CHLRE/869-1071    | A8J3Q7.1 PF00211.18 | 42.40 | 0.00 |
| TRINITY_G6FV49_9CYAN/2-195       | G6FV49.1 PF00106.23 | 42.40 | 0.00 |
| TRINITY_L1JV11_GUITH/1217-1343   | L1JV11.1 PF00580.19 | 42.40 | 0.00 |
| TRINITY_A8J7M9_CHLRE/742-1038    | A8J7M9.1 PF00069.23 | 42.40 | 0.00 |
| TRINITY_A0A0J8CZF3_BETVU/13-293  | A0A0J8CZF3.1 PF0107 | 42.40 | 0.00 |
| TRINITY_G0R3W2_ICHMG/171-370     | G0R3W2.1 PF05019.11 | 42.40 | 0.00 |
| TRINITY_D2V0M3_NAEGR/179-278     | D2V0M3.1 PF05028.12 | 42.40 | 0.00 |
| TRINITY_D8M0W4_BLAHO/11-182      | D8M0W4.1 PF00621.18 | 42.40 | 0.00 |
| TRINITY_I7MKL6_TETTS/229-436     | I7MKL6.2 PF00566.16 | 42.30 | 0.00 |
| TRINITY_D7TD95_VITVI/109-584     | D7TD95.1 PF00501.26 | 42.30 | 0.00 |
| TRINITY_E1Z4B1_CHLVA/527-660     | E1Z4B1.1 PF01426.16 | 42.30 | 0.00 |
| TRINITY_J9JJ30_ACYPI/268-738     | J9JJ30.2 PF01055.24 | 42.30 | 0.00 |
| TRINITY_A0A091D0H7_FUKDA/27-157  | A0A091D0H7.1 PF0078 | 42.30 | 0.00 |
| TRINITY_F4NRB1_BATDJ/133-481     | F4NRB1.1 PF01180.19 | 42.30 | 0.00 |
| TRINITY_K4D4K1_SOLLC/1-73        | K4D4K1.1 PF10200.7; | 42.30 | 0.00 |
| TRINITY_A0A0G2FYM6_9PEZI/56-136  | A0A0G2FYM6.1 PF0333 | 42.30 | 0.00 |
| TRINITY_F7E2U7_MONDO/5-234       | F7E2U7.2 PF13561.4; | 42.30 | 0.00 |
| TRINITY_Q7D467_CLOAB/16-241      | Q7D467.1 PF04452.12 | 42.30 | 0.00 |
| TRINITY_A6VZR0_MARMS/1161-1276   | A6VZR0.1 PF00072.22 | 42.30 | 0.00 |
| TRINITY_A0BIL6_PARTE/986-1090    | A0BIL6.1 PF02204.16 | 42.30 | 0.00 |
| TRINITY_L8GEK5_ACACA/196-340     | L8GEK5.1 PF07534.14 | 42.30 | 0.00 |
| TRINITY_F0ZYB1_DICPU/209-508     | F0ZYB1.1 PF03062.17 | 42.30 | 0.00 |
| TRINITY_R6XHY1_9CLOT/12-606      | R6XHY1.1 PF02901.13 | 42.30 | 0.00 |
| TRINITY_W5MCU5_LEPOC/683-914     | W5MCU5.1 PF00102.25 | 42.30 | 0.00 |
| TRINITY_M3J9B4_CANMX/7-161       | M3J9B4.1 PF01687.15 | 42.30 | 0.00 |
| TRINITY_L8GVK1_ACACA/140-464     | L8GVK1.1 PF02181.21 | 42.30 | 0.00 |
| TRINITY_J9K5B4_ACYPI/832-1061    | J9K5B4.2 PF16212.3; | 42.30 | 0.00 |



|                                  |              |            |       |      |
|----------------------------------|--------------|------------|-------|------|
| TRINITY_Q23QF2_TETTS/248-571     | Q23QF2.2     | PF03133.13 | 42.30 | 0.00 |
| TRINITY_L5KD32_PTEAL/57-213      | L5KD32.1     | PF10255.7; | 42.30 | 0.00 |
| TRINITY_D8RTW3_SELML/703-814     | D8RTW3.1     | PF00072.22 | 42.30 | 0.00 |
| TRINITY_F7KIS7_9FIRM/862-979     | F7KIS7.1     | PF00072.22 | 42.30 | 0.00 |
| TRINITY_F0ZQR9_DICPU/2019-2148   | F0ZQR9.1     | PF00782.18 | 42.30 | 0.00 |
| TRINITY_C3YXY9_BRAFL/3-377       | C3YXY9.1     | PF09751.7; | 42.30 | 0.00 |
| TRINITY_I7LZV2_TETTS/151-413     | I7LZV2.1     | PF00069.23 | 42.30 | 0.00 |
| TRINITY_A0CS76_PARTE/16-224      | A0CS76.1     | PF01991.16 | 42.30 | 0.00 |
| TRINITY_F7IR60_CALJA/10-84       | F7IR60.1     | PF00076.20 | 42.30 | 0.00 |
| TRINITY_A0CC42_PARTE/16-287      | A0CC42.1     | PF00069.23 | 42.30 | 0.00 |
| TRINITY_K3X5V1_PYTUL/14-448      | K3X5V1.1     | PF01474.14 | 42.30 | 0.00 |
| TRINITY_W5MXZ8_LEPOC/20-140      | W5MXZ8.1     | PF05175.12 | 42.30 | 0.00 |
| TRINITY_A4VEE1_TETTS/16-254      | A4VEE1.1     | PF01370.19 | 42.30 | 0.00 |
| TRINITY_A0A0G4IT47_PLABS/363-457 | A0A0G4IT47.1 | PF1289     | 42.30 | 0.00 |
| TRINITY_G0R2J9_ICHMG/1-211       | G0R2J9.1     | PF00069.23 | 42.30 | 0.00 |
| TRINITY_I7LWA5_TETTS/1556-1748   | I7LWA5.2     | PF00406.20 | 42.30 | 0.00 |
| TRINITY_A9UQE2_MONBE/13-93       | A9UQE2.1     | PF12796.5; | 42.30 | 0.00 |
| TRINITY_V9EKI7_PHYPR/73-203      | V9EKI7.1     | PF00782.18 | 42.30 | 0.00 |
| TRINITY_L8HIG4_ACACA/43-454      | L8HIG4.1     | PF01490.16 | 42.30 | 0.00 |
| TRINITY_B5MF71_DANRE/24-281      | B5MF71.1     | PF00069.23 | 42.30 | 0.00 |
| TRINITY_W7X994_TETTS/597-768     | W7X994.1     | PF01067.20 | 42.30 | 0.00 |
| TRINITY_G1RP02_NOMLE/116-185     | G1RP02.1     | PF00076.20 | 42.30 | 0.00 |
| TRINITY_A8IBB6_CHLRE/141-344     | A8IBB6.1     | PF00211.18 | 42.30 | 0.00 |
| TRINITY_I7LUA5_TETTS/33-143      | I7LUA5.1     | PF08240.10 | 42.30 | 0.00 |
| TRINITY_GACH_DICDI/390-541       | Q86IG9.1     | PF00620.25 | 42.30 | 0.00 |
| TRINITY_D9S0T9_THEOJ/4-320       | D9S0T9.1     | PF00490.19 | 42.30 | 0.00 |
| TRINITY_J9ZAU4_LEPFM/4-98        | J9ZAU4.1     | PF00042.20 | 42.30 | 0.00 |
| TRINITY_D3B9E3_POLPA/2-74        | D3B9E3.1     | PF08520.8; | 42.30 | 0.00 |
| TRINITY_A0A061IX71_TRYRA/308-358 | A0A061IX71.1 | PF1392     | 42.30 | 0.00 |
| TRINITY_A0CUI8_PARTE/50-226      | A0CUI8.1     | PF03798.14 | 42.30 | 0.00 |
| TRINITY_A8HTH4_CHLRE/1-155       | A8HTH4.1     | PF11894.6; | 42.30 | 0.00 |
| TRINITY_J9EHK3_9SPIT/2-255       | J9EHK3.1     | PF03194.13 | 42.30 | 0.00 |
| TRINITY_I7MAM9_TETTS/250-530     | I7MAM9.2     | PF01189.15 | 42.30 | 0.00 |
| TRINITY_D3BIN2_POLPA/295-392     | D3BIN2.1     | PF03131.15 | 42.30 | 0.00 |
| TRINITY_T1GTY1_MEGSC/38-110      | T1GTY1.1     | PF02807.13 | 42.30 | 0.00 |
| TRINITY_C1N3S6_MICPC/4-201       | C1N3S6.1     | PF05724.9; | 42.30 | 0.00 |
| TRINITY_B7FYV8_PHATC/342-541     | B7FYV8.1     | PF03006.18 | 42.30 | 0.00 |
| TRINITY_L8GGT2_ACACA/266-351     | L8GGT2.1     | PF02761.12 | 42.30 | 0.00 |
| TRINITY_A0A0M3JWU8_ANISI/1-227   | A0A0M3JWU8.1 | PF0106     | 42.30 | 0.00 |
| TRINITY_I0Z8T8_9CHLO/471-753     | I0Z8T8.1     | PF07714.15 | 42.30 | 0.00 |
| TRINITY_D3BKI9_POLPA/132-385     | D3BKI9.1     | PF10192.7; | 42.30 | 0.00 |
| TRINITY_F4PIB6_DICFS/31-128      | F4PIB6.1     | PF01464.18 | 42.30 | 0.00 |
| TRINITY_T1IQ34_STRMM/22-421      | T1IQ34.1     | PF06602.12 | 42.30 | 0.00 |
| TRINITY_D8U202_VOLCA/350-568     | D8U202.1     | PF00149.26 | 42.30 | 0.00 |
| TRINITY_D8U7D6_VOLCA/35-449      | D8U7D6.1     | PF01130.19 | 42.30 | 0.00 |
| TRINITY_D8U183_VOLCA/1-169       | D8U183.1     | PF01699.22 | 42.30 | 0.00 |
| TRINITY_E4T0R7_PALPW/19-248      | E4T0R7.1     | PF06966.10 | 42.30 | 0.00 |
| TRINITY_I0YWA1_9CHLO/876-1281    | I0YWA1.1     | PF12698.5; | 42.30 | 0.00 |
| TRINITY_L8GL94_ACACA/389-614     | L8GL94.1     | PF13672.4; | 42.30 | 0.00 |
| TRINITY_F6SHW8_XENTR/104-190     | F6SHW8.1     | PF01248.24 | 42.30 | 0.00 |
| TRINITY_I0YVD7_9CHLO/62-468      | I0YVD7.1     | PF01490.16 | 42.30 | 0.00 |
| TRINITY_I1G2V3_AMPQE/8-158       | I1G2V3.1     | PF10914.6; | 42.30 | 0.00 |
| TRINITY_D3B5Y0_POLPA/16-91       | D3B5Y0.1     | PF00240.21 | 42.30 | 0.00 |
| TRINITY_A0A0M0JU59_9EUKA/376-505 | A0A0M0JU59.1 | PF1457     | 42.30 | 0.00 |
| TRINITY_I7M4Q8_TETTS/30-99       | I7M4Q8.2     | PF03810.17 | 42.20 | 0.00 |
| TRINITY_L8GHP8_ACACA/1394-1625   | L8GHP8.1     | PF16095.3; | 42.20 | 0.00 |
| TRINITY_H2Z2F3_CIOSA/14-176      | H2Z2F3.1     | PF00071.20 | 42.20 | 0.00 |
| TRINITY_F0Z7W7_DICPU/8-208       | F0Z7W7.1     | PF01470.15 | 42.20 | 0.00 |
| TRINITY_G4HL19_9BACL/13-251      | G4HL19.1     | PF00149.26 | 42.20 | 0.00 |
| TRINITY_F4Q9C3_DICFS/41-125      | F4Q9C3.1     | PF10241.7; | 42.20 | 0.00 |
| TRINITY_D3AW55_POLPA/307-519     | D3AW55.1     | PF00149.26 | 42.20 | 0.00 |

|                                   |              |            |       |      |
|-----------------------------------|--------------|------------|-------|------|
| TRINITY_L8HGU1_ACACA/324-572      | L8HGU1.1     | PF07714.15 | 42.20 | 0.00 |
| TRINITY_I7MFE1_TETTS/2-85         | I7MFE1.2     | PF00564.22 | 42.20 | 0.00 |
| TRINITY_GXCDD_DICDI/464-636       | Q1ZXH8.3     | PF00621.18 | 42.20 | 0.00 |
| TRINITY_I1FTI4_AMPQE/232-479      | I1FTI4.1     | PF07714.15 | 42.20 | 0.00 |
| TRINITY_D6U0E1_9CHLR/8-365        | D6U0E1.1     | PF01266.22 | 42.20 | 0.00 |
| TRINITY_A0CGH2_PARTE/14-116       | A0CGH2.1     | PF12796.5; | 42.20 | 0.00 |
| TRINITY_A4VDB7_TETTS/131-351      | A4VDB7.2     | PF00566.16 | 42.20 | 0.00 |
| TRINITY_D8UBZ4_VOLCA/102-215      | D8UBZ4.1     | PF00072.22 | 42.20 | 0.00 |
| TRINITY_R0F5G9_9BRAS/121-269      | R0F5G9.1     | PF00561.18 | 42.20 | 0.00 |
| TRINITY_E1ZEP7_CHLVA/760-891      | E1ZEP7.1     | PF00782.18 | 42.20 | 0.00 |
| TRINITY_F2NQ77_MARHT/11-101       | F2NQ77.1     | PF04930.13 | 42.20 | 0.00 |
| TRINITY_J7S154_KAZNA/36-132       | J7S154.1     | PF12894.5; | 42.20 | 0.00 |
| TRINITY_B3SD03_TRIAD/19-185       | B3SD03.1     | PF13439.4; | 42.20 | 0.00 |
| TRINITY_E8R687_ISOPI/422-672      | E8R687.1     | PF00768.18 | 42.20 | 0.00 |
| TRINITY_I7LUY7_TETTS/523-836      | I7LUY7.2     | PF00443.27 | 42.20 | 0.00 |
| TRINITY_G4ZGH2_PHYSP/27-511       | G4ZGH2.1     | PF03917.15 | 42.20 | 0.00 |
| TRINITY_D3BNX3_POLPA/460-588      | D3BNX3.1     | PF00134.21 | 42.20 | 0.00 |
| TRINITY_B6UCH8_MAIZE/25-539       | B6UCH8.1     | PF12070.6; | 42.20 | 0.00 |
| TRINITY_A0A077ZYF9_STYLE/402-524  | A0A077ZYF9.1 | PF1389     | 42.20 | 0.00 |
| TRINITY_J9INA7_9SPIT/626-748      | J9INA7.1     | PF01857.18 | 42.20 | 0.00 |
| TRINITY_I7MLF7_TETTS/127-357      | I7MLF7.2     | PF12146.6; | 42.20 | 0.00 |
| TRINITY_C6Y250_PEDHD/31-271       | C6Y250.1     | PF03372.21 | 42.20 | 0.00 |
| TRINITY_E3T5H3_CROVB/671-790      | E3T5H3.1     | PF00271.29 | 42.20 | 0.00 |
| TRINITY_F4PAM0_BATDJ/73-357       | F4PAM0.1     | PF00069.23 | 42.20 | 0.00 |
| TRINITY_A8J7G0_CHLRE/58-189       | A8J7G0.1     | PF14196.4; | 42.20 | 0.00 |
| TRINITY_A8IQ59_CHLRE/90-279       | A8IQ59.1     | PF00520.29 | 42.20 | 0.00 |
| TRINITY_F2NKM4_MARHT/49-761       | F2NKM4.1     | PF01804.16 | 42.20 | 0.00 |
| TRINITY_B0G157_DICDI/215-603      | B0G157.1     | PF00916.18 | 42.20 | 0.00 |
| TRINITY_I7MER1_TETTS/6-122        | I7MER1.1     | PF00072.22 | 42.20 | 0.00 |
| TRINITY_L8GTK3_ACACA/495-608      | L8GTK3.1     | PF00989.23 | 42.20 | 0.00 |
| TRINITY_I1NIU9_SOYBN/691-943      | I1NIU9.2     | PF07714.15 | 42.20 | 0.00 |
| TRINITY_I7M6A9_TETTS/15-456       | I7M6A9.1     | PF01593.22 | 42.20 | 0.00 |
| TRINITY_A9SW39_PHYPA/275-482      | A9SW39.1     | PF04042.14 | 42.20 | 0.00 |
| TRINITY_D8U4T2_VOLCA/12-139       | D8U4T2.1     | PF14108.4; | 42.20 | 0.00 |
| TRINITY_A0A0L1KTJ6_9EUGL/1-239    | A0A0L1KTJ6.1 | PF0190     | 42.20 | 0.00 |
| TRINITY_C9SC39_VERA1/285-374      | C9SC39.1     | PF00400.30 | 42.20 | 0.00 |
| TRINITY_D8U5D1_VOLCA/16-278       | D8U5D1.1     | PF00069.23 | 42.20 | 0.00 |
| TRINITY_A0A0J7K9E1_LASNI/612-853  | A0A0J7K9E1.1 | PF0772     | 42.20 | 0.00 |
| TRINITY_B7Q2C5_IXOSC/42-124       | B7Q2C5.1     | PF10163.7; | 42.20 | 0.00 |
| TRINITY_A0A0G0BZ10_9BACT/74-148   | A0A0G0BZ10.1 | PF1351     | 42.20 | 0.00 |
| TRINITY_G0QUJ8_ICHMG/504-567      | G0QUJ8.1     | PF13499.4; | 42.20 | 0.00 |
| TRINITY_Q22P47_TETTS/55-293       | Q22P47.2     | PF16113.3; | 42.20 | 0.00 |
| TRINITY_B3SD12_TRIAD/384-712      | B3SD12.1     | PF05192.16 | 42.20 | 0.00 |
| TRINITY_R1CK05_EMIHU/114-181      | R1CK05.1     | PF14835.4; | 42.10 | 0.00 |
| TRINITY_COAT_PVMR/117-257         | P17529.2     | PF00286.18 | 42.10 | 0.00 |
| TRINITY_R0HFC0_9BRAS/6-379        | R0HFC0.1     | PF00022.17 | 42.10 | 0.00 |
| TRINITY_A0D650_PARTE/108-461      | A0D650.1     | PF00282.17 | 42.10 | 0.00 |
| TRINITY_A0A0A1RNM4_9FLAO/19-135   | A0A0A1RNM4.1 | PF0166     | 42.10 | 0.00 |
| TRINITY_A0A0F8CZ33_CERFI/22-115   | A0A0F8CZ33.1 | PF0017     | 42.10 | 0.00 |
| TRINITY_F0ZSE8_DICPU/110-250      | F0ZSE8.1     | PF01764.23 | 42.10 | 0.00 |
| TRINITY_D3BF50_POLPA/766-874      | D3BF50.1     | PF10367.7; | 42.10 | 0.00 |
| TRINITY_M2YK38_PSEFD/995-1117     | M2YK38.1     | PF00072.22 | 42.10 | 0.00 |
| TRINITY_T1K3F8_TETUR/8-287        | T1K3F8.1     | PF01073.17 | 42.10 | 0.00 |
| TRINITY_A7SIC3_NEMVE/419-562      | A7SIC3.1     | PF00406.20 | 42.10 | 0.00 |
| TRINITY_I7LWS5_TETTS/825-940      | I7LWS5.1     | PF02518.24 | 42.10 | 0.00 |
| TRINITY_6PGL_DICDI/11-233         | Q54CJ3.1     | PF01182.18 | 42.10 | 0.00 |
| TRINITY_Q244Z6_TETTS/77-284       | Q244Z6.1     | PF01027.18 | 42.10 | 0.00 |
| TRINITY_I7MKT8_TETTS/187-659      | I7MKT8.2     | PF12569.6; | 42.10 | 0.00 |
| TRINITY_A0A0D2X4F4_CAPO3/760-1270 | A0A0D2X4F4.1 | PF0273     | 42.10 | 0.00 |
| TRINITY_M2Y0I1_GALSU/89-164       | M2Y0I1.1     | PF03061.20 | 42.10 | 0.00 |
| TRINITY_A2FHQ0_TRIVA/5-116        | A2FHQ0.1     | PF01412.16 | 42.10 | 0.00 |

|                                    |                     |       |      |
|------------------------------------|---------------------|-------|------|
| TRINITY_S2J5Q1_MUCC1/24-327        | S2J5Q1.1 PF03676.12 | 42.10 | 0.00 |
| TRINITY_B9IQV9_POPTR/61-193        | B9IQV9.1 PF12894.5; | 42.10 | 0.00 |
| TRINITY_A8JFG7_CHLRE/20-187        | A8JFG7.1 PF16016.3; | 42.10 | 0.00 |
| TRINITY_D5DUV3_BACMQ/4-208         | D5DUV3.1 PF00106.23 | 42.10 | 0.00 |
| TRINITY_W1PN16_AMBTC/264-486       | W1PN16.1 PF12230.6; | 42.10 | 0.00 |
| TRINITY_A0A0F6W723_9DELT/34-204    | A0A0F6W723.1 PF0085 | 42.10 | 0.00 |
| TRINITY_F2U7G3_SALR5/6-199         | F2U7G3.1 PF03547.16 | 42.10 | 0.00 |
| TRINITY_Q7U8B9_SYNPX/585-979       | Q7U8B9.1 PF00476.18 | 42.10 | 0.00 |
| TRINITY_L8HI91_ACACA/91-321        | L8HI91.1 PF05721.11 | 42.10 | 0.00 |
| TRINITY_L8H1D6_ACACA/34-1138       | L8H1D6.1 PF06427.9; | 42.10 | 0.00 |
| TRINITY_W7TSG7_9STRA/162-344       | W7TSG7.1 PF13489.4; | 42.10 | 0.00 |
| TRINITY_B9GG97_POPTR/234-459       | B9GG97.2 PF10189.7; | 42.10 | 0.00 |
| TRINITY_K7LGI4_SOYBN/14-124        | K7LGI4.1 PF16457.3; | 42.10 | 0.00 |
| TRINITY_D3B127_POLPA/7-702         | D3B127.1 PF04563.13 | 42.10 | 0.00 |
| TRINITY_L8GMG4_ACACA/32-285        | L8GMG4.1 PF02265.14 | 42.10 | 0.00 |
| TRINITY_A0DWG3_PARTE/57-420        | A0DWG3.1 PF08014.9; | 42.10 | 0.00 |
| TRINITY_D8TQB2_VOLCA/123-576       | D8TQB2.1 PF06087.10 | 42.10 | 0.00 |
| TRINITY_K6DS30_9BACI/321-446       | K6DS30.1 PF16921.3; | 42.10 | 0.00 |
| TRINITY_F0ZPI4_DICPU/1-102         | F0ZPI4.1 PF00168.28 | 42.10 | 0.00 |
| TRINITY_U5GDM3_POPTR/76-330        | U5GDM3.1 PF07714.15 | 42.10 | 0.00 |
| TRINITY_D3BLM9_POLPA/5-417         | D3BLM9.1 PF03348.13 | 42.10 | 0.00 |
| TRINITY_A8IY87_CHLRE/14-419        | A8IY87.1 PF00225.21 | 42.10 | 0.00 |
| TRINITY_A0A0D2UMU4_CAPO3/32-518    | A0A0D2UMU4.1 PF1403 | 42.10 | 0.00 |
| TRINITY_A0A072V6I0_MEDTR/24-100    | A0A072V6I0.1 PF0313 | 42.10 | 0.00 |
| TRINITY_I0Z5H8_9CHLO/124-332       | I0Z5H8.1 PF11397.6; | 42.10 | 0.00 |
| TRINITY_L8H174_ACACA/373-591       | L8H174.1 PF07690.14 | 42.10 | 0.00 |
| TRINITY_A0DS96_PARTE/7-120         | A0DS96.1 PF02136.18 | 42.10 | 0.00 |
| TRINITY_W6SJQ7_9CLOT/39-179        | W6SJQ7.2 PF00388.17 | 42.10 | 0.00 |
| TRINITY_F8L2G7_PARAV/112-247       | F8L2G7.1 PF14566.4; | 42.10 | 0.00 |
| TRINITY_A0A0E0NR04_ORYRU/248-372   | A0A0E0NR04.1 PF0139 | 42.10 | 0.00 |
| TRINITY_A8IJV3_CHLRE/389-451       | A8IJV3.1 PF13499.4; | 42.10 | 0.00 |
| TRINITY_L1LFM9_THEEQ/430-589       | L1LFM9.1 PF00613.18 | 42.10 | 0.00 |
| TRINITY_D8TML2_VOLCA/701-1072      | D8TML2.1 PF09763.7; | 42.10 | 0.00 |
| TRINITY_W4XUU0_STRPU/19-148        | W4XUU0.1 PF00153.25 | 42.10 | 0.00 |
| TRINITY_L8H4I8_ACACA/10-1020       | L8H4I8.1 PF02463.17 | 42.10 | 0.00 |
| TRINITY_A0A0D2X3J6_CAPO3/1040-1286 | A0A0D2X3J6.1 PF1621 | 42.10 | 0.00 |
| TRINITY_B7KET0_CYAP7/9-251         | B7KET0.1 PF09925.7; | 42.10 | 0.00 |
| TRINITY_D8UFJ6_VOLCA/43-258        | D8UFJ6.1 PF00005.25 | 42.10 | 0.00 |
| TRINITY_Q22GE2_TETTS/34-285        | Q22GE2.2 PF00069.23 | 42.10 | 0.00 |
| TRINITY_H0Q4S0_9RHOO/6-227         | H0Q4S0.1 PF05368.11 | 42.10 | 0.00 |
| TRINITY_A7S5W3_NEMVE/30-440        | A7S5W3.1 PF03345.12 | 42.10 | 0.00 |
| TRINITY_A8IMH9_CHLRE/18-331        | A8IMH9.1 PF00246.22 | 42.10 | 0.00 |
| TRINITY_I1P6K5_ORYGL/449-713       | I1P6K5.1 PF00069.23 | 42.10 | 0.00 |
| TRINITY_E1ZTF2_CHLVA/2-283         | E1ZTF2.1 PF03399.14 | 42.10 | 0.00 |
| TRINITY_A8JGN8_CHLRE/123-615       | A8JGN8.1 PF02460.16 | 42.10 | 0.00 |
| TRINITY_M5FYF3_DACSP/39-395        | M5FYF3.1 PF00067.20 | 42.10 | 0.00 |
| TRINITY_A0A0F5YH50_9CYAN/28-136    | A0A0F5YH50.1 PF0056 | 42.10 | 0.00 |
| TRINITY_A0A0D2WLK3_CAPO3/40-116    | A0A0D2WLK3.1 PF0576 | 42.10 | 0.00 |
| TRINITY_A0A0N0RFN5_9CHLR/1-451     | A0A0N0RFN5.1 PF0017 | 42.00 | 0.00 |
| TRINITY_A0E014_PARTE/337-474       | A0E014.1 PF07534.14 | 42.00 | 0.00 |
| TRINITY_Q233P3_TETTS/56-171        | Q233P3.2 PF08487.8; | 42.00 | 0.00 |
| TRINITY_ROCO9_DICDI/795-1404       | Q6XHA7.1 PF06602.12 | 42.00 | 0.00 |
| TRINITY_G0QIY3_ICHMG/15-273        | G0QIY3.1 PF00069.23 | 42.00 | 0.00 |
| TRINITY_A0A0G1MVQ3_9BACT/7-179     | A0A0G1MVQ3.1 PF0193 | 42.00 | 0.00 |
| TRINITY_A0A0D2VT60_CAPO3/8-170     | A0A0D2VT60.1 PF0612 | 42.00 | 0.00 |
| TRINITY_F8EMT3_RUNSL/38-203        | F8EMT3.1 PF01965.22 | 42.00 | 0.00 |
| TRINITY_I1BYH5_RHIO9/1238-1353     | I1BYH5.1 PF00665.24 | 42.00 | 0.00 |
| TRINITY_I1HEB8_BRADI/45-196        | I1HEB8.1 PF01694.20 | 42.00 | 0.00 |
| TRINITY_I7M4F9_TETTS/51-228        | I7M4F9.2 PF01195.17 | 42.00 | 0.00 |
| TRINITY_A0A072U3N2_MEDTR/535-642   | A0A072U3N2.1 PF0065 | 42.00 | 0.00 |
| TRINITY_W4YX03_STRPU/465-606       | W4YX03.1 PF01936.16 | 42.00 | 0.00 |

|                                  |              |            |       |      |
|----------------------------------|--------------|------------|-------|------|
| TRINITY_F4QDG7_DICFS/50-329      | F4QDG7.1     | PF07159.10 | 42.00 | 0.00 |
| TRINITY_L8GIZ6_ACACA/66-487      | L8GIZ6.1     | PF04587.13 | 42.00 | 0.00 |
| TRINITY_F4P XK2_DICFS/237-332    | F4P XK2.1    | PF12796.5; | 42.00 | 0.00 |
| TRINITY_A0DUQ8_PARTE/34-561      | A0DUQ8.1     | PF16969.3; | 42.00 | 0.00 |
| TRINITY_L8HAQ2_ACACA/138-434     | L8HAQ2.1     | PF01733.16 | 42.00 | 0.00 |
| TRINITY_F4QEK4_DICFS/1-172       | F4QEK4.1     | PF00149.26 | 42.00 | 0.00 |
| TRINITY_M0RWE8_MUSAM/20-395      | M0RWE8.1     | PF03215.13 | 42.00 | 0.00 |
| TRINITY_Q22C26_TETTS/11-618      | Q22C26.1     | PF00012.18 | 42.00 | 0.00 |
| TRINITY_A0A0G4IPY5_PLABS/12-534  | A0A0G4IPY5.1 | PF0160     | 42.00 | 0.00 |
| TRINITY_D8U002_VOLCA/1333-1769   | D8U002.1     | PF02181.21 | 42.00 | 0.00 |
| TRINITY_F1A1Z7_DICPU/11-129      | F1A1Z7.1     | PF00241.18 | 42.00 | 0.00 |
| TRINITY_A8UVI3_9AQUI/7-126       | A8UVI3.1     | PF03099.17 | 42.00 | 0.00 |
| TRINITY_F0ZEH2_DICPU/3-82        | F0ZEH2.1     | PF00564.22 | 42.00 | 0.00 |
| TRINITY_L8GEC7_ACACA/6-324       | L8GEC7.1     | PF01112.16 | 42.00 | 0.00 |
| TRINITY_K3WX01_PYTUL/34-102      | K3WX01.1     | PF00505.17 | 42.00 | 0.00 |
| TRINITY_D3BMY9_POLPA/174-320     | D3BMY9.1     | PF07534.14 | 42.00 | 0.00 |
| TRINITY_L8H1J8_ACACA/532-611     | L8H1J8.1     | PF13646.4; | 42.00 | 0.00 |
| TRINITY_C5LZF4_PERM5/19-298      | C5LZF4.1     | PF00664.21 | 42.00 | 0.00 |
| TRINITY_A0A0F9Z917_9MICR/131-248 | A0A0F9Z917.1 | PF0066     | 42.00 | 0.00 |
| TRINITY_G0R330_ICHMG/329-430     | G0R330.1     | PF01399.25 | 42.00 | 0.00 |
| TRINITY_L8GH09_ACACA/77-221      | L8GH09.1     | PF05118.13 | 42.00 | 0.00 |
| TRINITY_F0ZVG6_DICPU/9-103       | F0ZVG6.1     | PF10270.7; | 42.00 | 0.00 |
| TRINITY_A9S6E3_PHYPA/19-193      | A9S6E3.1     | PF10294.7; | 42.00 | 0.00 |
| TRINITY_A0A087ST44_AUXPR/143-575 | A0A087ST44.1 | PF0114     | 42.00 | 0.00 |
| TRINITY_D8TID5_VOLCA/47-174      | D8TID5.1     | PF01569.19 | 42.00 | 0.00 |
| TRINITY_K4L3H3_9FIRM/7-87        | K4L3H3.1     | PF00312.20 | 42.00 | 0.00 |
| TRINITY_A0A087SE41_AUXPR/106-364 | A0A087SE41.1 | PF0066     | 42.00 | 0.00 |
| TRINITY_A8HMH0_CHLRE/50-171      | A8HMH0.1     | PF13902.4; | 42.00 | 0.00 |
| TRINITY_D8SX78_SELML/328-890     | D8SX78.1     | PF05183.10 | 42.00 | 0.00 |
| TRINITY_G0R4I1_ICHMG/93-249      | G0R4I1.1     | PF06705.9; | 42.00 | 0.00 |
| TRINITY_Q23DB0_TETTS/210-405     | Q23DB0.2     | PF00566.16 | 42.00 | 0.00 |
| TRINITY_A0A087SUE7_AUXPR/3-172   | A0A087SUE7.1 | PF0192     | 42.00 | 0.00 |
| TRINITY_A0BGN6_PARTE/41-392      | A0BGN6.1     | PF13868.4; | 42.00 | 0.00 |
| TRINITY_A0A072TZJ6_MEDTR/418-499 | A0A072TZJ6.1 | PF0078     | 42.00 | 0.00 |
| TRINITY_E1ZBU8_CHLVA/98-365      | E1ZBU8.1     | PF12697.5; | 42.00 | 0.00 |
| TRINITY_A9TA33_PHYPA/48-150      | A9TA33.1     | PF13664.4; | 42.00 | 0.00 |
| TRINITY_A8JBE2_CHLRE/96-202      | A8JBE2.1     | PF14497.4; | 42.00 | 0.00 |
| TRINITY_A8JJ05_CHLRE/562-633     | A8JJ05.1     | PF05699.12 | 42.00 | 0.00 |
| TRINITY_Q24HN9_TETTS/108-178     | Q24HN9.1     | PF13499.4; | 42.00 | 0.00 |
| TRINITY_A0A0A2VBR5_BEABA/78-552  | A0A0A2VBR5.1 | PF0142     | 42.00 | 0.00 |
| TRINITY_H3SN11_9BACL/78-365      | H3SN11.1     | PF08450.10 | 42.00 | 0.00 |
| TRINITY_W5JTG0_ANODA/6-218       | W5JTG0.1     | PF13561.4; | 41.90 | 0.00 |
| TRINITY_A9SHY7_PHYPA/7-301       | A9SHY7.1     | PF01026.19 | 41.90 | 0.00 |
| TRINITY_H2XX86_CIOIN/165-293     | H2XX86.1     | PF04784.12 | 41.90 | 0.00 |
| TRINITY_J9I397_9SPIT/144-375     | J9I397.1     | PF03372.21 | 41.90 | 0.00 |
| TRINITY_A0CQ76_PARTE/32-273      | A0CQ76.1     | PF00481.19 | 41.90 | 0.00 |
| TRINITY_A0A078ARK2_STYLE/326-473 | A0A078ARK2.1 | PF0753     | 41.90 | 0.00 |
| TRINITY_W9WL36_9EURO/1-109       | W9WL36.1     | PF03656.11 | 41.90 | 0.00 |
| TRINITY_D3BQD3_POLPA/205-456     | D3BQD3.1     | PF07714.15 | 41.90 | 0.00 |
| TRINITY_A0A059CH48_EUCGR/116-267 | A0A059CH48.1 | PF0254     | 41.90 | 0.00 |
| TRINITY_A0A024TSY5_9STRA/10-156  | A0A024TSY5.1 | PF0598     | 41.90 | 0.00 |
| TRINITY_A0A077ZSF8_STYLE/367-472 | A0A077ZSF8.1 | PF0008     | 41.90 | 0.00 |
| TRINITY_I1IX59_BRADI/330-496     | I1IX59.1     | PF08585.10 | 41.90 | 0.00 |
| TRINITY_F0ZEG5_DICPU/238-412     | F0ZEG5.1     | PF16575.3; | 41.90 | 0.00 |
| TRINITY_A0A0M2MP12_9ACTN/150-316 | A0A0M2MP12.1 | PF0089     | 41.90 | 0.00 |
| TRINITY_W4GXX6_9STRA/9-527       | W4GXX6.1     | PF01274.20 | 41.90 | 0.00 |
| TRINITY_Q22D68_TETTS/29-277      | Q22D68.3     | PF03803.13 | 41.90 | 0.00 |
| TRINITY_F0ZCT2_DICPU/601-783     | F0ZCT2.1     | PF00617.17 | 41.90 | 0.00 |
| TRINITY_G3WDD0_SARHA/765-949     | G3WDD0.1     | PF05193.19 | 41.90 | 0.00 |
| TRINITY_A0A0A1UBU5_ENTIV/727-986 | A0A0A1UBU5.1 | PF0771     | 41.90 | 0.00 |
| TRINITY_S9X737_SCHCR/3-74        | S9X737.1     | PF00240.21 | 41.90 | 0.00 |

|                                  |                      |       |      |
|----------------------------------|----------------------|-------|------|
| TRINITY_E0MTL2_9RHOB/76-323      | E0MTL2.1 PF05292.9;  | 41.90 | 0.00 |
| TRINITY_R6KRQ7_9FIRM/452-569     | R6KRQ7.1 PF00072.22  | 41.90 | 0.00 |
| TRINITY_ACTG_EMENI/2-375         | P20359.2 PF00022.17  | 41.90 | 0.00 |
| TRINITY_A0CDL7_PARTE/665-974     | A0CDL7.1 PF00069.23  | 41.90 | 0.00 |
| TRINITY_Q1QL94_NITHX/18-166      | Q1QL94.1 PF00499.18  | 41.90 | 0.00 |
| TRINITY_I7M4N1_TETTS/619-783     | I7M4N1.2 PF13925.4;  | 41.90 | 0.00 |
| TRINITY_A0A059LHX5_9CHLO/154-349 | A0A059LHX5.1 PF00048 | 41.90 | 0.00 |
| TRINITY_C4LWB1_ENTHI/196-373     | C4LWB1.1 PF00644.18  | 41.90 | 0.00 |
| TRINITY_A0DVE4_PARTE/154-417     | A0DVE4.1 PF00069.23  | 41.90 | 0.00 |
| TRINITY_C1MTN3_MICPC/42-154      | C1MTN3.1 PF13589.4;  | 41.90 | 0.00 |
| TRINITY_H2ZC63_CIOSA/36-102      | H2ZC63.1 PF03810.17  | 41.90 | 0.00 |
| TRINITY_L8HK60_ACACA/154-481     | L8HK60.1 PF07690.14  | 41.90 | 0.00 |
| TRINITY_A0A077ZWA2_STYLE/66-158  | A0A077ZWA2.1 PF1254  | 41.90 | 0.00 |
| TRINITY_L8GSH4_ACACA/37-217      | L8GSH4.1 PF00621.18  | 41.90 | 0.00 |
| TRINITY_G3NEE7_GASAC/102-172     | G3NEE7.1 PF01472.18  | 41.90 | 0.00 |
| TRINITY_J0LJG4_9BACT/8-143       | J0LJG4.1 PF13673.5;  | 41.90 | 0.00 |
| TRINITY_D8TNZ7_VOLCA/521-584     | D8TNZ7.1 PF13499.4;  | 41.90 | 0.00 |
| TRINITY_B8HKC9_CYAP4/36-145      | B8HKC9.1 PF05175.12  | 41.90 | 0.00 |
| TRINITY_A0A067LA43_JATCU/589-650 | A0A067LA43.1 PF00057 | 41.90 | 0.00 |
| TRINITY_K9Y0F8_STAC7/144-341     | K9Y0F8.1 PF09414.8;  | 41.90 | 0.00 |
| TRINITY_D2VVN4_NAEGR/4-230       | D2VVN4.1 PF01370.19  | 41.90 | 0.00 |
| TRINITY_W5D0Y2_WHEAT/394-466     | W5D0Y2.1 PF00076.20  | 41.90 | 0.00 |
| TRINITY_B3QRX7_CHLT3/148-394     | B3QRX7.1 PF01564.15  | 41.90 | 0.00 |
| TRINITY_D8TH74_VOLCA/222-373     | D8TH74.1 PF00582.24  | 41.90 | 0.00 |
| TRINITY_H2YJI5_CIOSA/18-123      | H2YJI5.1 PF00085.18  | 41.90 | 0.00 |
| TRINITY_A0A0D2WXD3_CAPO3/14-111  | A0A0D2WXD3.1 PF0016  | 41.90 | 0.00 |
| TRINITY_K3X6J3_PYTUL/51-297      | K3X6J3.1 PF06966.10  | 41.90 | 0.00 |
| TRINITY_A4RUB8_OSTLU/240-304     | A4RUB8.1 PF00076.20  | 41.90 | 0.00 |
| TRINITY_B3S701_TRIAD/49-334      | B3S701.1 PF03133.13  | 41.90 | 0.00 |
| TRINITY_A0A0D2X4V9_CAPO3/630-791 | A0A0D2X4V9.1 PF0155  | 41.90 | 0.00 |
| TRINITY_K3YIM3_SETIT/150-261     | K3YIM3.1 PF00651.29  | 41.90 | 0.00 |
| TRINITY_G3H9M4_CRIGR/134-352     | G3H9M4.1 PF10152.7;  | 41.90 | 0.00 |
| TRINITY_A8J7M9_CHLRE/742-1038    | A8J7M9.1 PF00069.23  | 41.90 | 0.00 |
| TRINITY_A0A015JRC9_9GLOM/187-229 | A0A015JRC9.1 PF0874  | 41.90 | 0.00 |
| TRINITY_Q22D68_TETTS/29-277      | Q22D68.3 PF03803.13  | 41.90 | 0.00 |
| TRINITY_Q22CD1_TETTS/91-375      | Q22CD1.3 PF15239.4;  | 41.90 | 0.00 |
| TRINITY_B4N7D2_DROWI/8-102       | B4N7D2.2 PF12763.5;  | 41.90 | 0.00 |
| TRINITY_F4PMR5_DICFS/17-275      | F4PMR5.1 PF00069.23  | 41.90 | 0.00 |
| TRINITY_A8IGG5_CHLRE/30-160      | A8IGG5.1 PF01590.24  | 41.90 | 0.00 |
| TRINITY_M5DT52_9GAMM/962-1080    | M5DT52.1 PF00072.22  | 41.90 | 0.00 |
| TRINITY_A0A0B5AK87_9BACL/6-140   | A0A0B5AK87.1 PF1367  | 41.90 | 0.00 |
| TRINITY_A0C2U9_PARTE/199-297     | A0C2U9.1 PF00153.25  | 41.80 | 0.00 |
| TRINITY_A0DZU7_PARTE/220-392     | A0DZU7.1 PF02141.19  | 41.80 | 0.00 |
| TRINITY_F4PX08_DICFS/1189-1360   | F4PX08.1 PF00616.17  | 41.80 | 0.00 |
| TRINITY_A0CM38_PARTE/187-256     | A0CM38.1 PF14360.4;  | 41.80 | 0.00 |
| TRINITY_A0BQP2_PARTE/7-162       | A0BQP2.1 PF14825.4;  | 41.80 | 0.00 |
| TRINITY_UFL1_NEMVE/6-285         | A7S2N8.1 PF09743.7;  | 41.80 | 0.00 |
| TRINITY_Q236N2_TETTS/32-570      | Q236N2.1 PF00995.21  | 41.80 | 0.00 |
| TRINITY_A0A0D2X2T3_CAPO3/170-333 | A0A0D2X2T3.1 PF0150  | 41.80 | 0.00 |
| TRINITY_A7SJ08_NEMVE/1-193       | A7SJ08.1 PF05603.10  | 41.80 | 0.00 |
| TRINITY_B9Y3S3_9FIRM/34-274      | B9Y3S3.1 PF09234.8;  | 41.80 | 0.00 |
| TRINITY_G0QR98_ICHMG/111-321     | G0QR98.1 PF00481.19  | 41.80 | 0.00 |
| TRINITY_E1ZLK8_CHLVA/56-427      | E1ZLK8.1 PF01137.19  | 41.80 | 0.00 |
| TRINITY_I4B662_TURPD/34-279      | I4B662.1 PF00561.18  | 41.80 | 0.00 |
| TRINITY_E9FWX6_DAPPU/9-301       | E9FWX6.1 PF00459.23  | 41.80 | 0.00 |
| TRINITY_A0YRE9_LYNXP/27-168      | A0YRE9.1 PF08240.10  | 41.80 | 0.00 |
| TRINITY_T0Q0L4_9STRA/2173-2348   | T0Q0L4.1 PF00520.29  | 41.80 | 0.00 |
| TRINITY_Q238W5_TETTS/26-475      | Q238W5.1 PF00067.20  | 41.80 | 0.00 |
| TRINITY_L8HFF8_ACACA/783-882     | L8HFF8.1 PF04815.13  | 41.80 | 0.00 |
| TRINITY_A0A087SM46_AUXPR/22-344  | A0A087SM46.1 PF0022  | 41.80 | 0.00 |
| TRINITY_I1IXR1_BRADI/35-177      | I1IXR1.1 PF10075.7;  | 41.80 | 0.00 |

|                                  |              |            |       |      |
|----------------------------------|--------------|------------|-------|------|
| TRINITY_L8H8K8_ACACA/477-884     | L8H8K8.1     | PF02450.13 | 41.80 | 0.00 |
| TRINITY_D8TQV2_VOLCA/75-216      | D8TQV2.1     | PF00875.16 | 41.80 | 0.00 |
| TRINITY_A8IJP0_CHLRE/1-359       | A8IJP0.1     | PF03372.21 | 41.80 | 0.00 |
| TRINITY_J9ITQ4_9SPIT/400-466     | J9ITQ4.1     | PF00659.16 | 41.80 | 0.00 |
| TRINITY_I0Z1L6_9CHLO/71-262      | I0Z1L6.1     | PF13489.4; | 41.80 | 0.00 |
| TRINITY_V4MCG7_EUTSA/142-222     | V4MCG7.1     | PF10609.7; | 41.80 | 0.00 |
| TRINITY_B3RQX0_TRIAD/2-438       | B3RQX0.1     | PF00067.20 | 41.80 | 0.00 |
| TRINITY_J9I4Z2_9SPIT/36-141      | J9I4Z2.1     | PF00085.18 | 41.80 | 0.00 |
| TRINITY_A0A058Z2H3_9EUKA/776-953 | A0A058Z2H3.1 | PF0061     | 41.80 | 0.00 |
| TRINITY_D8TUE9_VOLCA/339-558     | D8TUE9.1     | PF12348.6; | 41.80 | 0.00 |
| TRINITY_W2QD38_PHYPN/821-913     | W2QD38.1     | PF12796.5; | 41.80 | 0.00 |
| TRINITY_C1EC92_MICSR/28-237      | C1EC92.1     | PF00106.23 | 41.80 | 0.00 |
| TRINITY_E1Z5Y3_CHLVA/6-105       | E1Z5Y3.1     | PF05773.20 | 41.80 | 0.00 |
| TRINITY_Q23KK9_TETTS/391-552     | Q23KK9.1     | PF14580.4; | 41.80 | 0.00 |
| TRINITY_A8HPQ8_CHLRE/224-321     | A8HPQ8.1     | PF01342.19 | 41.80 | 0.00 |
| TRINITY_G0QV21_ICHMG/3082-3254   | G0QV21.1     | PF16909.3; | 41.80 | 0.00 |
| TRINITY_A4RS27_OSTLU/1-507       | A4RS27.1     | PF01593.22 | 41.80 | 0.00 |
| TRINITY_A0A0G4EFT4_9ALVE/392-487 | A0A0G4EFT4.1 | PF1276     | 41.80 | 0.00 |
| TRINITY_A0A067KN01_JATCU/413-773 | A0A067KN01.1 | PF0070     | 41.80 | 0.00 |
| TRINITY_D8TY98_VOLCA/526-656     | D8TY98.1     | PF00004.27 | 41.80 | 0.00 |
| TRINITY_A0A0D2WWJ2_CAPO3/488-794 | A0A0D2WWJ2.1 | PF0371     | 41.80 | 0.00 |
| TRINITY_Q229C1_TETTS/81-547      | Q229C1.2     | PF00083.22 | 41.80 | 0.00 |
| TRINITY_G0R2D7_ICHMG/7-172       | G0R2D7.1     | PF00071.20 | 41.80 | 0.00 |
| TRINITY_L8GQV2_ACACA/6-257       | L8GQV2.1     | PF03194.13 | 41.80 | 0.00 |
| TRINITY_F0ZPA4_DICPU/191-422     | F0ZPA4.1     | PF00557.22 | 41.80 | 0.00 |
| TRINITY_A0A078APK7_STYLE/16-112  | A0A078APK7.1 | PF0017     | 41.80 | 0.00 |
| TRINITY_A0A091CYN1_FUKDA/425-618 | A0A091CYN1.1 | PF0056     | 41.80 | 0.00 |
| TRINITY_D8TUF0_VOLCA/155-576     | D8TUF0.1     | PF03164.12 | 41.80 | 0.00 |
| TRINITY_I0YVY5_9CHLO/13-438      | I0YVY5.1     | PF01532.18 | 41.80 | 0.00 |
| TRINITY_D8UFJ2_VOLCA/156-276     | D8UFJ2.1     | PF03407.14 | 41.80 | 0.00 |
| TRINITY_E1ZIQ9_CHLVA/318-396     | E1ZIQ9.1     | PF09409.8; | 41.70 | 0.00 |
| TRINITY_G0QJN5_ICHMG/3-324       | G0QJN5.1     | PF07690.14 | 41.70 | 0.00 |
| TRINITY_R9NWW6_PSEHS/42-243      | R9NWW6.1     | PF00270.27 | 41.70 | 0.00 |
| TRINITY_B3S5V4_TRIAD/37-486      | B3S5V4.1     | PF00067.20 | 41.70 | 0.00 |
| TRINITY_A0A0C2N3F1_THEKT/13-174  | A0A0C2N3F1.1 | PF0007     | 41.70 | 0.00 |
| TRINITY_I7M4C2_TETTS/42-276      | I7M4C2.1     | PF00149.26 | 41.70 | 0.00 |
| TRINITY_C5LZF4_PERM5/19-298      | C5LZF4.1     | PF00664.21 | 41.70 | 0.00 |
| TRINITY_L8GMP4_ACACA/297-555     | L8GMP4.1     | PF07714.15 | 41.70 | 0.00 |
| TRINITY_A0A024UP17_9STRA/27-123  | A0A024UP17.1 | PF1387     | 41.70 | 0.00 |
| TRINITY_A0A078AZE2_STYLE/57-170  | A0A078AZE2.1 | PF0097     | 41.70 | 0.00 |
| TRINITY_X6NTL5_RETFI/199-322     | X6NTL5.1     | PF13271.4; | 41.70 | 0.00 |
| TRINITY_G7YX44_CLOSI/74-306      | G7YX44.1     | PF00069.23 | 41.70 | 0.00 |
| TRINITY_A0A078ART0_STYLE/361-506 | A0A078ART0.1 | PF0753     | 41.70 | 0.00 |
| TRINITY_A0A087Y905_POEFO/1-122   | A0A087Y905.1 | PF0624     | 41.70 | 0.00 |
| TRINITY_L8GMR3_ACACA/270-526     | L8GMR3.1     | PF07714.15 | 41.70 | 0.00 |
| TRINITY_A0DYX2_PARTE/54-188      | A0DYX2.1     | PF04146.13 | 41.70 | 0.00 |
| TRINITY_S2JLP4_MUCC1/13-267      | S2JLP4.1     | PF00378.18 | 41.70 | 0.00 |
| TRINITY_L8HDD8_ACACA/1327-1576   | L8HDD8.1     | PF07714.15 | 41.70 | 0.00 |
| TRINITY_G8NQG5_GRAMM/20-239      | G8NQG5.1     | PF05368.11 | 41.70 | 0.00 |
| TRINITY_C5XSIO_SORBI/565-716     | C5XSIO.1     | PF08646.8; | 41.70 | 0.00 |
| TRINITY_G0S3W0_CHATD/10-171      | G0S3W0.1     | PF00071.20 | 41.70 | 0.00 |
| TRINITY_X6NSF5_RETFI/88-345      | X6NSF5.1     | PF07714.15 | 41.70 | 0.00 |
| TRINITY_A0DUB6_PARTE/233-698     | A0DUB6.1     | PF01055.24 | 41.70 | 0.00 |
| TRINITY_V3ZNT8_LOTGI/77-368      | V3ZNT8.1     | PF01008.15 | 41.70 | 0.00 |
| TRINITY_J9EMC8_9SPIT/1395-1489   | J9EMC8.1     | PF01833.22 | 41.70 | 0.00 |
| TRINITY_C556R7_DICDI/32-218      | Q556R7.1     | PF01183.18 | 41.70 | 0.00 |
| TRINITY_B8MLR9_TALSN/4-463       | B8MLR9.1     | PF00743.17 | 41.70 | 0.00 |
| TRINITY_G0QKT4_ICHMG/33-338      | G0QKT4.1     | PF04756.11 | 41.70 | 0.00 |
| TRINITY_C1N3N9_MICPC/250-346     | C1N3N9.1     | PF00153.25 | 41.70 | 0.00 |
| TRINITY_I0YWK9_9CHLO/100-333     | I0YWK9.1     | PF00149.26 | 41.70 | 0.00 |
| TRINITY_B3RXN7_TRIAD/22-269      | B3RXN7.1     | PF00481.19 | 41.70 | 0.00 |

|                                  |                     |       |      |
|----------------------------------|---------------------|-------|------|
| TRINITY_A6C4L7_9PLAN/434-549     | A6C4L7.1 PF00072.22 | 41.70 | 0.00 |
| TRINITY_I4D1P6_DESAJ/150-215     | I4D1P6.1 PF00512.23 | 41.70 | 0.00 |
| TRINITY_D8U0Z5_VOLCA/66-226      | D8U0Z5.1 PF04751.12 | 41.70 | 0.00 |
| TRINITY_G0QW56_ICHMG/288-451     | G0QW56.1 PF07690.14 | 41.70 | 0.00 |
| TRINITY_I0YSB4_9CHLO/407-612     | I0YSB4.1 PF09797.7; | 41.70 | 0.00 |
| TRINITY_A0A059LNL8_9CHLO/41-139  | A0A059LNL8.1 PF0322 | 41.70 | 0.00 |
| TRINITY_A0A0G1R6A7_9BACT/2-122   | A0A0G1R6A7.1 PF0871 | 41.70 | 0.00 |
| TRINITY_I0YM11_9CHLO/121-499     | I0YM11.1 PF09737.7; | 41.70 | 0.00 |
| TRINITY_A0A068X9X2_HYMMI/98-256  | A0A068X9X2.1 PF0123 | 41.70 | 0.00 |
| TRINITY_X6NZT3_RETFI/649-765     | X6NZT3.1 PF00454.25 | 41.70 | 0.00 |
| TRINITY_E1ZH45_CHLVA/404-606     | E1ZH45.1 PF08719.9; | 41.70 | 0.00 |
| TRINITY_M7NNA1_PNEMU/13-170      | M7NNA1.1 PF00071.20 | 41.70 | 0.00 |
| TRINITY_A0C3N3_PARTE/5-199       | A0C3N3.1 PF03031.16 | 41.70 | 0.00 |
| TRINITY_I1IWC9_BRADI/18-209      | I1IWC9.1 PF00300.20 | 41.70 | 0.00 |
| TRINITY_E1Z7R1_CHLVA/519-776     | E1Z7R1.1 PF07714.15 | 41.70 | 0.00 |
| TRINITY_A8JIH7_CHLRE/59-225      | A8JIH7.1 PF00650.18 | 41.70 | 0.00 |
| TRINITY_D8UHI9_VOLCA/117-368     | D8UHI9.1 PF12697.5; | 41.70 | 0.00 |
| TRINITY_A0A0G0VBZ0_9BACT/8-133   | A0A0G0VBZ0.1 PF0029 | 41.70 | 0.00 |
| TRINITY_L8GUF1_ACACA/338-497     | L8GUF1.1 PF02136.18 | 41.70 | 0.00 |
| TRINITY_A0A060SMB1_PYCCI/3-124   | A0A060SMB1.1 PF0024 | 41.70 | 0.00 |
| TRINITY_F4QD17_DICFS/238-364     | F4QD17.1 PF03188.14 | 41.70 | 0.00 |
| TRINITY_A9SXS5_PHYPA/609-839     | A9SXS5.1 PF01612.18 | 41.70 | 0.00 |
| TRINITY_S9WZ17_SCHCR/171-278     | S9WZ17.1 PF00175.19 | 41.70 | 0.00 |
| TRINITY_D3BF23_POLPA/294-416     | D3BF23.1 PF00917.24 | 41.70 | 0.00 |
| TRINITY_I0YPY2_9CHLO/2-154       | I0YPY2.1 PF04720.10 | 41.70 | 0.00 |
| TRINITY_F4PI07_DICFS/810-1059    | F4PI07.1 PF07714.15 | 41.70 | 0.00 |
| TRINITY_A0A0L6DIV3_CRYGA/274-399 | A0A0L6DIV3.1 PF0007 | 41.70 | 0.00 |
| TRINITY_B4N9W5_DROWI/120-193     | B4N9W5.2 PF13499.4; | 41.70 | 0.00 |
| TRINITY_B0C469_ACAM1/31-206      | B0C469.1 PF00211.18 | 41.70 | 0.00 |
| TRINITY_A0A0G4IH87_PLABS/70-292  | A0A0G4IH87.1 PF0845 | 41.70 | 0.00 |
| TRINITY_A0A0N5AAC6_9BILA/75-207  | A0A0N5AAC6.1 PF0078 | 41.70 | 0.00 |
| TRINITY_K9TJ96_9CYAN/29-277      | K9TJ96.1 PF00657.20 | 41.70 | 0.00 |
| TRINITY_A0CHY1_PARTE/11-268      | A0CHY1.1 PF00069.23 | 41.70 | 0.00 |
| TRINITY_F0ZDD1_DICPU/1-371       | F0ZDD1.1 PF03097.16 | 41.70 | 0.00 |
| TRINITY_A0EFW2_PARTE/159-373     | A0EFW2.1 PF06991.9; | 41.70 | 0.00 |
| TRINITY_D2V295_NAEGR/289-529     | D2V295.1 PF00082.20 | 41.70 | 0.00 |
| TRINITY_A5V585_SPHWW/37-167      | A5V585.1 PF00188.24 | 41.70 | 0.00 |
| TRINITY_I7MCJ9_TETTS/89-462      | I7MCJ9.1 PF03006.18 | 41.70 | 0.00 |
| TRINITY_X6NQF9_RETFI/38-135      | X6NQF9.1 PF13640.4; | 41.70 | 0.00 |
| TRINITY_G0R5B0_ICHMG/43-223      | G0R5B0.1 PF03357.19 | 41.70 | 0.00 |
| TRINITY_D8ULH4_VOLCA/183-452     | D8ULH4.1 PF00520.29 | 41.70 | 0.00 |
| TRINITY_K3X5W9_PYTUL/770-1032    | K3X5W9.1 PF00664.21 | 41.70 | 0.00 |
| TRINITY_A8BJ08_GIAIC/6-76        | A8BJ08.1 PF11976.6; | 41.70 | 0.00 |
| TRINITY_R0GSU3_9BRAS/9-145       | R0GSU3.1 PF00179.24 | 41.60 | 0.00 |
| TRINITY_F0VPP9_NEOCL/24-411      | F0VPP9.1 PF00022.17 | 41.60 | 0.00 |
| TRINITY_Q24GM0_TETTS/267-369     | Q24GM0.1 PF16656.3; | 41.60 | 0.00 |
| TRINITY_A0A077ZW35_STYLE/38-421  | A0A077ZW35.1 PF0022 | 41.60 | 0.00 |
| TRINITY_A0A084WHS3_ANOSI/246-395 | A0A084WHS3.1 PF0027 | 41.60 | 0.00 |
| TRINITY_I1CC69_RHIO9/32-317      | I1CC69.1 PF02383.16 | 41.60 | 0.00 |
| TRINITY_F0ZM84_DICPU/129-665     | F0ZM84.1 PF04791.14 | 41.60 | 0.00 |
| TRINITY_A0DFM4_PARTE/122-222     | A0DFM4.1 PF00237.17 | 41.60 | 0.00 |
| TRINITY_W4Y4C3_STRPU/3-113       | W4Y4C3.1 PF00071.20 | 41.60 | 0.00 |
| TRINITY_W7X142_TETTS/122-276     | W7X142.1 PF00650.18 | 41.60 | 0.00 |
| TRINITY_C1DYI8_MICSR/44-311      | C1DYI8.1 PF00248.19 | 41.60 | 0.00 |
| TRINITY_G0QVH1_ICHMG/13-130      | G0QVH1.1 PF00498.24 | 41.60 | 0.00 |
| TRINITY_A9V0E1_MONBE/11-355      | A9V0E1.1 PF03283.11 | 41.60 | 0.00 |
| TRINITY_A0A0M9UBV5_9CHLR/10-202  | A0A0M9UBV5.1 PF0030 | 41.60 | 0.00 |
| TRINITY_Q23QF2_TETTS/248-571     | Q23QF2.2 PF03133.13 | 41.60 | 0.00 |
| TRINITY_J9EXT5_9SPIT/263-461     | J9EXT5.1 PF00117.26 | 41.60 | 0.00 |
| TRINITY_A8I8T3_CHLRE/1528-1690   | A8I8T3.1 PF10475.7; | 41.60 | 0.00 |
| TRINITY_A0A0N5AC28_9BILA/45-151  | A0A0N5AC28.1 PF0016 | 41.60 | 0.00 |

|                                    |                     |       |      |
|------------------------------------|---------------------|-------|------|
| TRINITY_DOMI23_RHOM4/25-436        | DOMI23.1 PF00245.18 | 41.60 | 0.00 |
| TRINITY_D8U611_VOLCA/11-73         | D8U611.1 PF00886.17 | 41.60 | 0.00 |
| TRINITY_I0Z3X8_9CHLO/19-152        | I0Z3X8.1 PF17004.3; | 41.60 | 0.00 |
| TRINITY_A8HWK8_CHLRE/45-673        | A8HWK8.1 PF16969.3; | 41.60 | 0.00 |
| TRINITY_D8UIJ4_VOLCA/36-294        | D8UIJ4.1 PF02636.15 | 41.60 | 0.00 |
| TRINITY_A0A078A9S2_STYLE/86-176    | A0A078A9S2.1 PF1279 | 41.60 | 0.00 |
| TRINITY_A8I2D8_CHLRE/6-285         | A8I2D8.1 PF01875.15 | 41.60 | 0.00 |
| TRINITY_C5XNT7_SORBI/39-251        | C5XNT7.1 PF12146.6; | 41.60 | 0.00 |
| TRINITY_T1FM94_HELRO/45-137        | T1FM94.1 PF00254.26 | 41.60 | 0.00 |
| TRINITY_L8H311_ACACA/395-613       | L8H311.1 PF08427.8; | 41.60 | 0.00 |
| TRINITY_A0A067TKC9_9AGAR/118-210   | A0A067TKC9.1 PF1658 | 41.60 | 0.00 |
| TRINITY_A0BRQ6_PARTE/134-489       | A0BRQ6.1 PF03133.13 | 41.60 | 0.00 |
| TRINITY_F4QHS4_9CAUL/170-343       | F4QHS4.1 PF00848.17 | 41.60 | 0.00 |
| TRINITY_A0A0A1UAM9_ENTIV/575-835   | A0A0A1UAM9.1 PF0771 | 41.60 | 0.00 |
| TRINITY_H3FPL3_PRIIPA/86-223       | H3FPL3.1 PF01764.23 | 41.60 | 0.00 |
| TRINITY_D8TKQ1_VOLCA/18-228        | D8TKQ1.1 PF03152.12 | 41.60 | 0.00 |
| TRINITY_A0A0G4J0Q6_PLABS/20-282    | A0A0G4J0Q6.1 PF0048 | 41.60 | 0.00 |
| TRINITY_A0A024TZI0_9STRA/11-268    | A0A024TZI0.1 PF0006 | 41.60 | 0.00 |
| TRINITY_I7M910_TETTS/11-285        | I7M910.1 PF00069.23 | 41.60 | 0.00 |
| TRINITY_I0Z6W1_9CHLO/46-407        | I0Z6W1.1 PF04137.13 | 41.60 | 0.00 |
| TRINITY_A0A077ZYF9_STYLE/402-524   | A0A077ZYF9.1 PF1389 | 41.60 | 0.00 |
| TRINITY_L8GL94_ACACA/389-614       | L8GL94.1 PF13672.4; | 41.60 | 0.00 |
| TRINITY_I7M1H9_TETTS/18-275        | I7M1H9.1 PF00069.23 | 41.60 | 0.00 |
| TRINITY_B9XQP6_PEDPL/33-364        | B9XQP6.1 PF00144.22 | 41.60 | 0.00 |
| TRINITY_I7LZJ1_TETTS/122-329       | I7LZJ1.1 PF01027.18 | 41.60 | 0.00 |
| TRINITY_D8TJS9_VOLCA/99-464        | D8TJS9.1 PF00155.19 | 41.60 | 0.00 |
| TRINITY_E9FWK4_DAPPU/139-266       | E9FWK4.1 PF12923.5; | 41.60 | 0.00 |
| TRINITY_A0A0F4XAN2_HANUV/191-322   | A0A0F4XAN2.1 PF0013 | 41.60 | 0.00 |
| TRINITY_A0C7T4_PARTE/42-157        | A0C7T4.1 PF00787.22 | 41.60 | 0.00 |
| TRINITY_L8GIS6_ACACA/16-179        | L8GIS6.1 PF07106.11 | 41.60 | 0.00 |
| TRINITY_Q0C7B1_AEDAE/426-599       | Q0C7B1.1 PF00616.17 | 41.60 | 0.00 |
| TRINITY_I7ME47_TETTS/120-274       | I7ME47.1 PF00650.18 | 41.60 | 0.00 |
| TRINITY_L8GTK1_ACACA/146-395       | L8GTK1.1 PF07714.15 | 41.60 | 0.00 |
| TRINITY_M1D132_SOLTU/15-273        | M1D132.1 PF01545.19 | 41.50 | 0.00 |
| TRINITY_L8HG15_ACACA/1584-1834     | L8HG15.1 PF07714.15 | 41.50 | 0.00 |
| TRINITY_A0A078AZG6_STYLE/1083-1214 | A0A078AZG6.1 PF0007 | 41.50 | 0.00 |
| TRINITY_A0D220_PARTE/555-671       | A0D220.1 PF02518.24 | 41.50 | 0.00 |
| TRINITY_A0BM91_PARTE/555-881       | A0BM91.1 PF01237.16 | 41.50 | 0.00 |
| TRINITY_A0A0M0J338_9EUKA/27-132    | A0A0M0J338.1 PF0192 | 41.50 | 0.00 |
| TRINITY_G0QX56_ICHMG/29-236        | G0QX56.1 PF01027.18 | 41.50 | 0.00 |
| TRINITY_J9FPR6_9SPIT/21-190        | J9FPR6.1 PF01327.19 | 41.50 | 0.00 |
| TRINITY_K9U8Y4_9CYAN/3-109         | K9U8Y4.1 PF04273.11 | 41.50 | 0.00 |
| TRINITY_L8GFV3_ACACA/2-143         | L8GFV3.1 PF04099.10 | 41.50 | 0.00 |
| TRINITY_E8N2U7_ANATU/5-297         | E8N2U7.1 PF01156.17 | 41.50 | 0.00 |
| TRINITY_G0QWD0_ICHMG/802-1041      | G0QWD0.1 PF16212.3; | 41.50 | 0.00 |
| TRINITY_A0A067CV01_SAPPC/31-409    | A0A067CV01.1 PF0799 | 41.50 | 0.00 |
| TRINITY_D8T0J5_SELML/168-381       | D8T0J5.1 PF04157.14 | 41.50 | 0.00 |
| TRINITY_A0A0E0QZI9_ORYRU/480-547   | A0A0E0QZI9.1 PF0057 | 41.50 | 0.00 |
| TRINITY_K3X1T1_PYTUL/403-594       | K3X1T1.1 PF05990.10 | 41.50 | 0.00 |
| TRINITY_A4S3R8_OSTLU/32-277        | A4S3R8.1 PF04321.15 | 41.50 | 0.00 |
| TRINITY_F4PI69_DICFS/362-718       | F4PI69.1 PF12698.5; | 41.50 | 0.00 |
| TRINITY_A0A068XMD3_HYMMI/250-356   | A0A068XMD3.1 PF0085 | 41.50 | 0.00 |
| TRINITY_D6U116_9CHLR/6-340         | D6U116.1 PF01494.17 | 41.50 | 0.00 |
| TRINITY_Q22YP9_TETTS/108-386       | Q22YP9.2 PF00122.18 | 41.50 | 0.00 |
| TRINITY_D3B6M3_POLPA/229-533       | D3B6M3.1 PF00082.20 | 41.50 | 0.00 |
| TRINITY_A0A0A1UBU5_ENTIV/727-986   | A0A0A1UBU5.1 PF0771 | 41.50 | 0.00 |
| TRINITY_Q23DR5_TETTS/172-553       | Q23DR5.2 PF03062.17 | 41.50 | 0.00 |
| TRINITY_D8UFJ2_VOLCA/156-276       | D8UFJ2.1 PF03407.14 | 41.50 | 0.00 |
| TRINITY_I1G2T0_AMPQE/174-530       | I1G2T0.1 PF00657.20 | 41.50 | 0.00 |
| TRINITY_J9KQP3_ACYPI/152-267       | J9KQP3.2 PF00665.24 | 41.50 | 0.00 |
| TRINITY_A0A0D2WRJ1_CAPO3/144-365   | A0A0D2WRJ1.1 PF0300 | 41.50 | 0.00 |



|                                  |                     |       |      |
|----------------------------------|---------------------|-------|------|
| TRINITY_A0A087STZ8_AUXPR/140-426 | A0A087STZ8.1 PF0149 | 41.50 | 0.00 |
| TRINITY_D8TTA7_VOLCA/51-181      | D8TTA7.1 PF00782.18 | 41.50 | 0.00 |
| TRINITY_GEFD_DICDI/436-611       | Q8IS19.1 PF00617.17 | 41.50 | 0.00 |
| TRINITY_I7M3P8_TETTS/11-168      | I7M3P8.1 PF00179.24 | 41.50 | 0.00 |
| TRINITY_S8CEZ3_9LAMI/164-445     | S8CEZ3.1 PF00566.16 | 41.50 | 0.00 |
| TRINITY_D8UDA7_VOLCA/1-149       | D8UDA7.1 PF07714.15 | 41.50 | 0.00 |
| TRINITY_L8H4J3_ACACA/179-658     | L8H4J3.1 PF04636.11 | 41.50 | 0.00 |
| TRINITY_A0A0G4J2D0_PLABS/402-510 | A0A0G4J2D0.1 PF0861 | 41.50 | 0.00 |
| TRINITY_A0BG18_PARTE/74-327      | A0BG18.1 PF00102.25 | 41.50 | 0.00 |
| TRINITY_A8JAU8_CHLRE/318-547     | A8JAU8.1 PF07714.15 | 41.50 | 0.00 |
| TRINITY_L8H1Q6_ACACA/140-507     | L8H1Q6.1 PF00443.27 | 41.50 | 0.00 |
| TRINITY_G8YTL4_PICSO/591-663     | G8YTL4.1 PF00173.26 | 41.50 | 0.00 |
| TRINITY_V4AI83_LOTGI/253-402     | V4AI83.1 PF00620.25 | 41.50 | 0.00 |
| TRINITY_A0A088A484_APIME/23-250  | A0A088A484.1 PF0984 | 41.50 | 0.00 |
| TRINITY_U6JGN1_ECHGR/95-192      | U6JGN1.1 PF00043.23 | 41.50 | 0.00 |
| TRINITY_E1ZE38_CHLVA/277-473     | E1ZE38.1 PF00534.18 | 41.50 | 0.00 |
| TRINITY_D8TZ12_VOLCA/52-308      | D8TZ12.1 PF03372.21 | 41.50 | 0.00 |
| TRINITY_A0CEK2_PARTE/175-290     | A0CEK2.1 PF07986.10 | 41.50 | 0.00 |
| TRINITY_I1DUT7_9GAMM/34-367      | I1DUT7.1 PF00266.17 | 41.50 | 0.00 |
| TRINITY_E3LXN4_CAERE/1226-1292   | E3LXN4.1 PF02207.18 | 41.50 | 0.00 |
| TRINITY_I1ITK1_BRADI/304-435     | I1ITK1.1 PF14815.4; | 41.50 | 0.00 |
| TRINITY_D8THX8_VOLCA/233-377     | D8THX8.1 PF01569.19 | 41.50 | 0.00 |
| TRINITY_A8JDI5_CHLRE/988-1178    | A8JDI5.1 PF07714.15 | 41.50 | 0.00 |
| TRINITY_D8UF30_VOLCA/42-345      | D8UF30.1 PF01223.21 | 41.50 | 0.00 |
| TRINITY_A1ZK68_9BACT/4-128       | A1ZK68.1 PF14108.4; | 41.50 | 0.00 |
| TRINITY_L8GT04_ACACA/130-378     | L8GT04.1 PF02450.13 | 41.40 | 0.00 |
| TRINITY_A0A078AD16_STYLE/27-478  | A0A078AD16.1 PF0045 | 41.40 | 0.00 |
| TRINITY_T1ELF1_HELRO/15-176      | T1ELF1.1 PF00071.20 | 41.40 | 0.00 |
| TRINITY_W9WAK1_9EURO/306-565     | W9WAK1.1 PF13360.4; | 41.40 | 0.00 |
| TRINITY_A0A0H5C2I6_CYBJA/246-390 | A0A0H5C2I6.1 PF0677 | 41.40 | 0.00 |
| TRINITY_E1FZR6_LOALO/5-178       | E1FZR6.2 PF00071.20 | 41.40 | 0.00 |
| TRINITY_M7NRF1_PNEMU/1365-1713   | M7NRF1.1 PF02259.21 | 41.40 | 0.00 |
| TRINITY_A0A0K9PW93_ZOSMR/1-70    | A0A0K9PW93.1 PF0858 | 41.40 | 0.00 |
| TRINITY_E9HNW2_DAPPU/81-1277     | E9HNW2.1 PF02463.17 | 41.40 | 0.00 |
| TRINITY_A0A077KKH2_9FLAO/8-245   | A0A077KKH2.1 PF0137 | 41.40 | 0.00 |
| TRINITY_S2J9M9_MUCC1/73-173      | S2J9M9.1 PF13646.4; | 41.40 | 0.00 |
| TRINITY_A0A0F6W7C1_9DELT/4-206   | A0A0F6W7C1.1 PF0572 | 41.40 | 0.00 |
| TRINITY_FOL1_DICDI/4-113         | Q54YD9.1 PF02152.16 | 41.40 | 0.00 |
| TRINITY_G0R2J9_ICHMG/1-211       | G0R2J9.1 PF00069.23 | 41.40 | 0.00 |
| TRINITY_G3TG84_LOXAF/4-92        | G3TG84.1 PF00031.19 | 41.40 | 0.00 |
| TRINITY_A0A0A8USH3_LEGHA/18-115  | A0A0A8USH3.1 PF1717 | 41.40 | 0.00 |
| TRINITY_Q24FF7_TETTS/32-192      | Q24FF7.1 PF10294.7; | 41.40 | 0.00 |
| TRINITY_I1GJC5_AMPQE/5-178       | I1GJC5.1 PF00071.20 | 41.40 | 0.00 |
| TRINITY_I1GC88_AMPQE/167-380     | I1GC88.1 PF00112.21 | 41.40 | 0.00 |
| TRINITY_H1XTY4_9BACT/28-391      | H1XTY4.1 PF07690.14 | 41.40 | 0.00 |
| TRINITY_C9JUS5_HUMAN/5-152       | C9JUS5.2 PF00780.20 | 41.40 | 0.00 |
| TRINITY_A0BKL5_PARTE/147-405     | A0BKL5.1 PF00069.23 | 41.40 | 0.00 |
| TRINITY_F4PW26_DICFS/381-526     | F4PW26.1 PF00620.25 | 41.40 | 0.00 |
| TRINITY_D3AW03_POLPA/290-359     | D3AW03.1 PF04739.13 | 41.40 | 0.00 |
| TRINITY_R0GWW4_9BRAS/36-460      | R0GWW4.1 PF00450.20 | 41.40 | 0.00 |
| TRINITY_M2X4E0_GALSU/1-212       | M2X4E0.1 PF01151.16 | 41.40 | 0.00 |
| TRINITY_M2Y135_GALSU/20-178      | M2Y135.1 PF00071.20 | 41.40 | 0.00 |
| TRINITY_W9W9I5_9EURO/31-229      | W9W9I5.1 PF13862.4; | 41.40 | 0.00 |
| TRINITY_I7LWM3_TETTS/13-272      | I7LWM3.1 PF00069.23 | 41.40 | 0.00 |
| TRINITY_I0Z5G3_9CHLO/333-610     | I0Z5G3.1 PF16477.3; | 41.40 | 0.00 |
| TRINITY_A0A0F2Q731_9CLOT/5-128   | A0A0F2Q731.1 PF1352 | 41.40 | 0.00 |
| TRINITY_F4P7Z5_BATDJ/159-301     | F4P7Z5.1 PF00107.24 | 41.40 | 0.00 |
| TRINITY_Q02718_PODAN/556-712     | Q02718.1 PF01348.19 | 41.40 | 0.00 |
| TRINITY_H9GR50_ANOCA/3-369       | H9GR50.2 PF00022.17 | 41.40 | 0.00 |
| TRINITY_W4YEP7_STRPU/160-217     | W4YEP7.1 PF03909.15 | 41.40 | 0.00 |
| TRINITY_A0A0D2UP69_CAPO3/111-361 | A0A0D2UP69.1 PF1214 | 41.40 | 0.00 |

|                                    |                     |       |      |
|------------------------------------|---------------------|-------|------|
| TRINITY_I3KIP7_ORENI/454-610       | I3KIP7.1 PF05572.11 | 41.40 | 0.00 |
| TRINITY_L8GYM9_ACACA/12-272        | L8GYM9.1 PF00149.26 | 41.40 | 0.00 |
| TRINITY_A0A074WG56_9PEZI/162-329   | A0A074WG56.1 PF0303 | 41.40 | 0.00 |
| TRINITY_L8GTJ1_ACACA/5-168         | L8GTJ1.1 PF00071.20 | 41.40 | 0.00 |
| TRINITY_G3AUB2_SPAPN/40-172        | G3AUB2.1 PF12894.5; | 41.40 | 0.00 |
| TRINITY_A4VD54_TETTS/76-357        | A4VD54.1 PF00664.21 | 41.40 | 0.00 |
| TRINITY_F4Q4B4_DICFS/31-204        | F4Q4B4.1 PF02099.15 | 41.40 | 0.00 |
| TRINITY_D8UF85_VOLCA/179-263       | D8UF85.1 PF05699.12 | 41.40 | 0.00 |
| TRINITY_I3CJ36_9GAMM/63-303        | I3CJ36.1 PF12697.5; | 41.40 | 0.00 |
| TRINITY_F4PM20_DICFS/434-616       | F4PM20.1 PF00621.18 | 41.40 | 0.00 |
| TRINITY_A0A087SFP5_AUXPR/37-150    | A0A087SFP5.1 PF1015 | 41.40 | 0.00 |
| TRINITY_D3HKK6_LEGLN/43-145        | D3HKK6.1 PF00011.19 | 41.40 | 0.00 |
| TRINITY_I0ZA04_9CHLO/2-117         | I0ZA04.1 PF00072.22 | 41.40 | 0.00 |
| TRINITY_F4Q481_DICFS/654-807       | F4Q481.1 PF03914.15 | 41.40 | 0.00 |
| TRINITY_A0A0M0J8Q3_9EUKA/851-1028  | A0A0M0J8Q3.1 PF1336 | 41.40 | 0.00 |
| TRINITY_A0A0K9PPQ4_ZOSMR/94-333    | A0A0K9PPQ4.1 PF0048 | 41.40 | 0.00 |
| TRINITY_F0ZUU2_DICPU/1086-1467     | F0ZUU2.1 PF00632.23 | 41.40 | 0.00 |
| TRINITY_W7XLQ4_TETTS/8-169         | W7XLQ4.1 PF00134.21 | 41.40 | 0.00 |
| TRINITY_I0YXS8_9CHLO/33-321        | I0YXS8.1 PF01062.19 | 41.40 | 0.00 |
| TRINITY_G3Z774_9NEIS/14-147        | G3Z774.1 PF02182.15 | 41.40 | 0.00 |
| TRINITY_C3YIW1_BRAFL/1-95          | C3YIW1.1 PF00125.22 | 41.40 | 0.00 |
| TRINITY_Q16UY0_AEDAE/1-72          | Q16UY0.1 PF05254.10 | 41.30 | 0.00 |
| TRINITY_I7MHS2_TETTS/3-96          | I7MHS2.1 PF01250.15 | 41.30 | 0.00 |
| TRINITY_G0QJQ7_ICHMG/12-286        | G0QJQ7.1 PF00069.23 | 41.30 | 0.00 |
| TRINITY_V7CMI9_PHAVU/146-307       | V7CMI9.1 PF09419.8; | 41.30 | 0.00 |
| TRINITY_A0A0G4GV89_9ALVE/243-432   | A0A0G4GV89.1 PF1457 | 41.30 | 0.00 |
| TRINITY_K9T4E8_9CYAN/3-112         | K9T4E8.1 PF04273.11 | 41.30 | 0.00 |
| TRINITY_GLRX2_PONAB/66-128         | Q5RC53.1 PF00462.22 | 41.30 | 0.00 |
| TRINITY_Q24BX5_TETTS/50-136        | Q24BX5.2 PF12796.5; | 41.30 | 0.00 |
| TRINITY_A2G1A1_TRIVA/5-175         | A2G1A1.1 PF00071.20 | 41.30 | 0.00 |
| TRINITY_L8GZZ5_ACACA/3-97          | L8GZZ5.1 PF07876.10 | 41.30 | 0.00 |
| TRINITY_A0EIF0_PARTE/631-746       | A0EIF0.1 PF00072.22 | 41.30 | 0.00 |
| TRINITY_L8HH11_ACACA/217-300       | L8HH11.1 PF12371.6; | 41.30 | 0.00 |
| TRINITY_D0MW28_PHYIT/147-399       | D0MW28.1 PF01399.25 | 41.30 | 0.00 |
| TRINITY_L8GS57_ACACA/211-407       | L8GS57.1 PF02190.14 | 41.30 | 0.00 |
| TRINITY_K7IP59_NASVI/12-253        | K7IP59.1 PF03998.11 | 41.30 | 0.00 |
| TRINITY_A0A068RU92_9FUNG/90-540    | A0A068RU92.1 PF0006 | 41.30 | 0.00 |
| TRINITY_Q22X64_TETTS/2-598         | Q22X64.2 PF05804.10 | 41.30 | 0.00 |
| TRINITY_A0BZ03_PARTE/2627-2912     | A0BZ03.1 PF00520.29 | 41.30 | 0.00 |
| TRINITY_SARM1_CAEEL/612-676        | Q86DA5.1 PF00536.28 | 41.30 | 0.00 |
| TRINITY_I7MES6_TETTS/376-440       | I7MES6.1 PF07647.15 | 41.30 | 0.00 |
| TRINITY_L8GPR0_ACACA/208-389       | L8GPR0.1 PF00621.18 | 41.30 | 0.00 |
| TRINITY_I0X8M0_9SPIO/513-588       | I0X8M0.1 PF00533.24 | 41.30 | 0.00 |
| TRINITY_I7LTL1_TETTS/622-741       | I7LTL1.2 PF03351.15 | 41.30 | 0.00 |
| TRINITY_W7XCC6_TETTS/200-478       | W7XCC6.1 PF03372.21 | 41.30 | 0.00 |
| TRINITY_CD123_DICDI/20-363         | Q75JF9.1 PF07065.12 | 41.30 | 0.00 |
| TRINITY_K3XAQ9_PYTUL/43-155        | K3XAQ9.1 PF00583.23 | 41.30 | 0.00 |
| TRINITY_A0A078B8J0_STYLE/1532-1877 | A0A078B8J0.1 PF0063 | 41.30 | 0.00 |
| TRINITY_A0A0D2VJK4_CAPO3/6-268     | A0A0D2VJK4.1 PF0037 | 41.30 | 0.00 |
| TRINITY_U6PUQ4_HAECO/444-748       | U6PUQ4.1 PF00632.23 | 41.30 | 0.00 |
| TRINITY_A8IZV4_CHLRE/1072-1423     | A8IZV4.1 PF00069.23 | 41.30 | 0.00 |
| TRINITY_A0A059D6J6_EUCGR/16-307    | A0A059D6J6.1 PF0006 | 41.30 | 0.00 |
| TRINITY_A0A087HAW9_ARAAL/186-358   | A0A087HAW9.1 PF0084 | 41.30 | 0.00 |
| TRINITY_BZPJ_DICDI/516-613         | Q554P0.1 PF03131.15 | 41.30 | 0.00 |
| TRINITY_L1JXD7_GUIITH/351-429      | L1JXD7.1 PF00789.18 | 41.30 | 0.00 |
| TRINITY_G9P210_HYPAI/74-302        | G9P210.1 PF00230.18 | 41.30 | 0.00 |
| TRINITY_A8MR40_ARATH/21-274        | A8MR40.1 PF01556.16 | 41.30 | 0.00 |
| TRINITY_D8TN48_VOLCA/58-162        | D8TN48.1 PF00085.18 | 41.30 | 0.00 |
| TRINITY_J9JMZ2_ACYPI/277-496       | J9JMZ2.1 PF00667.18 | 41.30 | 0.00 |
| TRINITY_L1IXT3_GUIITH/1-178        | L1IXT3.1 PF16909.3; | 41.30 | 0.00 |
| TRINITY_A0A096MUE0_PAPAN/71-222    | A0A096MUE0.1 PF0062 | 41.30 | 0.00 |

|                                  |                     |       |      |
|----------------------------------|---------------------|-------|------|
| TRINITY_TPP1_MOUSE/33-176        | O89023.2 PF09286.9; | 41.30 | 0.00 |
| TRINITY_A0A0D2WUC6_CAPO3/250-562 | A0A0D2WUC6.1 PF0502 | 41.30 | 0.00 |
| TRINITY_I0YPN8_9CHLO/5-364       | I0YPN8.1 PF03849.12 | 41.30 | 0.00 |
| TRINITY_A0A0D9XHN4_9ORYZ/99-189  | A0A0D9XHN4.1 PF0179 | 41.30 | 0.00 |
| TRINITY_A0A015MLC3_9GLOM/495-577 | A0A015MLC3.1 PF0569 | 41.30 | 0.00 |
| TRINITY_I7LX25_TETTS/48-128      | I7LX25.1 PF09398.8; | 41.30 | 0.00 |
| TRINITY_A0A058Z5X4_9EUKA/12-173  | A0A058Z5X4.1 PF0007 | 41.30 | 0.00 |
| TRINITY_Q23AE6_TETTS/568-909     | Q23AE6.4 PF00069.23 | 41.30 | 0.00 |
| TRINITY_A8JFR0_CHLRE/22-142      | A8JFR0.1 PF00583.23 | 41.30 | 0.00 |
| TRINITY_A8J348_CHLRE/77-181      | A8J348.1 PF00085.18 | 41.30 | 0.00 |
| TRINITY_H6C292_EXODN/271-406     | H6C292.1 PF01399.25 | 41.30 | 0.00 |
| TRINITY_J3JUM0_DENPD/17-283      | J3JUM0.1 PF02089.13 | 41.30 | 0.00 |
| TRINITY_M0TH27_MUSAM/13-150      | M0TH27.1 PF05615.11 | 41.30 | 0.00 |
| TRINITY_E1Z6H8_CHLVA/853-1217    | E1Z6H8.1 PF02929.15 | 41.30 | 0.00 |
| TRINITY_F6XRR2_CALJA/672-802     | F6XRR2.1 PF04408.21 | 41.30 | 0.00 |
| TRINITY_Q8YQC2_NOSS1/14-413      | Q8YQC2.1 PF02897.13 | 41.30 | 0.00 |
| TRINITY_A0A078B9W1_STYLE/27-329  | A0A078B9W1.1 PF0056 | 41.20 | 0.00 |
| TRINITY_G0QTM0_ICHMG/757-875     | G0QTM0.1 PF13863.4; | 41.20 | 0.00 |
| TRINITY_A0A078ANS2_STYLE/627-760 | A0A078ANS2.1 PF0007 | 41.20 | 0.00 |
| TRINITY_A0A061DUJ6_THECC/168-405 | A0A061DUJ6.1 PF0411 | 41.20 | 0.00 |
| TRINITY_A0A084R1W7_9HYPO/206-287 | A0A084R1W7.1 PF0243 | 41.20 | 0.00 |
| TRINITY_F4PXD0_DICFS/13-162      | F4PXD0.1 PF01399.25 | 41.20 | 0.00 |
| TRINITY_T1EQ94_HELRO/158-242     | T1EQ94.1 PF00027.27 | 41.20 | 0.00 |
| TRINITY_F5YP91_TREPZ/683-801     | F5YP91.1 PF00072.22 | 41.20 | 0.00 |

|                                  |              |            |       |      |
|----------------------------------|--------------|------------|-------|------|
| TRINITY_R9ACX4_WALI9/10-171      | R9ACX4.1     | PF00071.20 | 41.20 | 0.00 |
| TRINITY_H2LMA6_ORYLA/481-730     | H2LMA6.1     | PF08367.9; | 41.20 | 0.00 |
| TRINITY_F4QC01_DICFS/33-201      | F4QC01.1     | PF09348.8; | 41.20 | 0.00 |
| TRINITY_G0QWP1_ICHMG/11-421      | G0QWP1.1     | PF02005.14 | 41.20 | 0.00 |
| TRINITY_D3B882_POLPA/43-231      | D3B882.1     | PF00069.23 | 41.20 | 0.00 |
| TRINITY_A7MPD5_CROS8/10-532      | A7MPD5.1     | PF01274.20 | 41.20 | 0.00 |
| TRINITY_I7LZV2_TETTS/151-413     | I7LZV2.1     | PF00069.23 | 41.20 | 0.00 |
| TRINITY_W4XWB3_STRPU/424-994     | W4XWB3.1     | PF05994.9; | 41.20 | 0.00 |
| TRINITY_I7M8C4_TETTS/709-1009    | I7M8C4.2     | PF00069.23 | 41.20 | 0.00 |
| TRINITY_I0YMI4_9CHLO/1-105       | I0YMI4.1     | PF08661.9; | 41.20 | 0.00 |
| TRINITY_R4X8T3_TAPDE/73-125      | R4X8T3.1     | PF14853.4; | 41.20 | 0.00 |
| TRINITY_U4UBW5_DENPD/321-540     | U4UBW5.1     | PF12215.6; | 41.20 | 0.00 |
| TRINITY_D8U5W1_VOLCA/1-114       | D8U5W1.1     | PF08839.9; | 41.20 | 0.00 |
| TRINITY_D3AWK8_POLPA/609-739     | D3AWK8.1     | PF00782.18 | 41.20 | 0.00 |
| TRINITY_L8GVE3_ACACA/437-678     | L8GVE3.1     | PF06738.10 | 41.20 | 0.00 |
| TRINITY_I7M4E9_TETTS/11-677      | I7M4E9.2     | PF00012.18 | 41.20 | 0.00 |
| TRINITY_A0A022QPX2_ERYGU/24-326  | A0A022QPX2.1 | PF0257     | 41.20 | 0.00 |
| TRINITY_M4BKF5_HYAAE/14-94       | M4BKF5.1     | PF10382.7; | 41.20 | 0.00 |
| TRINITY_A8JDA0_CHLRE/22-318      | A8JDA0.1     | PF00069.23 | 41.20 | 0.00 |
| TRINITY_Q1IPB6_KORVE/51-252      | Q1IPB6.1     | PF03575.15 | 41.20 | 0.00 |
| TRINITY_A0A077B136_9RICK/22-346  | A0A077B136.1 | PF1611     | 41.20 | 0.00 |
| TRINITY_A8IGG5_CHLRE/30-160      | A8IGG5.1     | PF01590.24 | 41.20 | 0.00 |
| TRINITY_D8UEU4_VOLCA/55-178      | D8UEU4.1     | PF00782.18 | 41.20 | 0.00 |
| TRINITY_A0A078A032_STYLE/460-607 | A0A078A032.1 | PF0753     | 41.20 | 0.00 |
| TRINITY_Q0V3A2_PHANO/164-486     | Q0V3A2.1     | PF01663.20 | 41.20 | 0.00 |
| TRINITY_L8HIQ7_ACACA/482-586     | L8HIQ7.1     | PF00618.18 | 41.20 | 0.00 |
| TRINITY_W4XQ31_STRPU/96-216      | W4XQ31.1     | PF04000.13 | 41.20 | 0.00 |
| TRINITY_A0A067HG76_CITSI/48-522  | A0A067HG76.1 | PF0050     | 41.20 | 0.00 |
| TRINITY_J9J4K4_9SPIT/309-521     | J9J4K4.1     | PF04811.13 | 41.20 | 0.00 |
| TRINITY_A0A0N5A6S5_PARTI/5-166   | A0A0N5A6S5.1 | PF0007     | 41.20 | 0.00 |
| TRINITY_I7MKV0_TETTS/148-266     | I7MKV0.2     | PF13863.4; | 41.20 | 0.00 |
| TRINITY_I7MDX6_TETTS/38-395      | I7MDX6.2     | PF00225.21 | 41.20 | 0.00 |
| TRINITY_A8HPJ5_CHLRE/6-106       | A8HPJ5.1     | PF00168.28 | 41.20 | 0.00 |
| TRINITY_DEGP2_ARATH/121-308      | O82261.2     | PF00089.24 | 41.20 | 0.00 |
| TRINITY_A0DVE4_PARTE/154-417     | A0DVE4.1     | PF00069.23 | 41.20 | 0.00 |
| TRINITY_A7SE78_NEMVE/44-348      | A7SE78.1     | PF00648.19 | 41.20 | 0.00 |
| TRINITY_U3JLY0_FICAL/604-875     | U3JLY0.1     | PF00118.22 | 41.20 | 0.00 |
| TRINITY_A0A078DXQ9_BRANA/182-281 | A0A078DXQ9.1 | PF0016     | 41.20 | 0.00 |
| TRINITY_A0A0A1TUY4_ENTIV/741-999 | A0A0A1TUY4.1 | PF0771     | 41.20 | 0.00 |
| TRINITY_A0A067GH93_CITSI/106-409 | A0A067GH93.1 | PF0120     | 41.20 | 0.00 |
| TRINITY_J9EBV0_WUCBA/232-390     | J9EBV0.1     | PF09976.7; | 41.20 | 0.00 |
| TRINITY_G0QVP1_ICHMG/862-1120    | G0QVP1.1     | PF16212.3; | 41.20 | 0.00 |
| TRINITY_A0A087SEM0_AUXPR/418-504 | A0A087SEM0.1 | PF1677     | 41.20 | 0.00 |
| TRINITY_A0A078IIF4_BRANA/385-832 | A0A078IIF4.1 | PF0020     | 41.20 | 0.00 |
| TRINITY_E1ZKI1_CHLVA/80-224      | E1ZKI1.1     | PF00160.19 | 41.20 | 0.00 |
| TRINITY_W4GF38_9STRA/74-355      | W4GF38.1     | PF00069.23 | 41.20 | 0.00 |
| TRINITY_A8JFL7_CHLRE/275-425     | A8JFL7.1     | PF00069.23 | 41.20 | 0.00 |
| TRINITY_A8J2Q9_CHLRE/69-602      | A8J2Q9.1     | PF03055.13 | 41.20 | 0.00 |
| TRINITY_V9E9N6_PHYPR/2756-2844   | V9E9N6.1     | PF15780.3; | 41.20 | 0.00 |
| TRINITY_D8UF85_VOLCA/179-263     | D8UF85.1     | PF05699.12 | 41.20 | 0.00 |
| TRINITY_A0A077ZVH2_STYLE/355-500 | A0A077ZVH2.1 | PF0753     | 41.20 | 0.00 |
| TRINITY_W7X8R9_TETTS/92-184      | W7X8R9.1     | PF10167.7; | 41.20 | 0.00 |
| TRINITY_B0WMA2_CULQU/11-178      | B0WMA2.1     | PF00071.20 | 41.10 | 0.00 |
| TRINITY_W7XEN5_TETTS/244-735     | W7XEN5.1     | PF01055.24 | 41.10 | 0.00 |
| TRINITY_A0A078AA00_STYLE/230-356 | A0A078AA00.1 | PF0085     | 41.10 | 0.00 |
| TRINITY_A0COW0_PARTE/3-412       | A0COW0.1     | PF00999.19 | 41.10 | 0.00 |
| TRINITY_A0BSD3_PARTE/41-235      | A0BSD3.1     | PF00106.23 | 41.10 | 0.00 |
| TRINITY_A0E014_PARTE/337-474     | A0E014.1     | PF07534.14 | 41.10 | 0.00 |
| TRINITY_M4U5L4_9GAMM/2-203       | M4U5L4.1     | PF03932.12 | 41.10 | 0.00 |
| TRINITY_C1E0I5_MICSR/121-686     | C1E0I5.1     | PF02364.13 | 41.10 | 0.00 |
| TRINITY_A0D0Q8_PARTE/66-238      | A0D0Q8.1     | PF04727.11 | 41.10 | 0.00 |

|                                  |                     |       |      |
|----------------------------------|---------------------|-------|------|
| TRINITY_A0A067Q6E2_9HOMO/17-139  | A0A067Q6E2.1 PF0024 | 41.10 | 0.00 |
| TRINITY_A0A0D2R6G2_GOSRA/133-262 | A0A0D2R6G2.1 PF0152 | 41.10 | 0.00 |
| TRINITY_M2WS09_GALSU/248-425     | M2WS09.1 PF03770.14 | 41.10 | 0.00 |
| TRINITY_G0R3D4_ICHMG/149-213     | G0R3D4.1 PF01485.19 | 41.10 | 0.00 |
| TRINITY_L8H1E1_ACACA/5-221       | L8H1E1.1 PF01370.19 | 41.10 | 0.00 |
| TRINITY_L8GII0_ACACA/41-782      | L8GII0.1 PF05786.12 | 41.10 | 0.00 |
| TRINITY_A0D9R2_PARTE/374-480     | A0D9R2.1 PF00651.29 | 41.10 | 0.00 |
| TRINITY_F7CSL0_ORNAN/129-269     | F7CSL0.2 PF01014.16 | 41.10 | 0.00 |
| TRINITY_Q23QF2_TETTS/248-571     | Q23QF2.2 PF03133.13 | 41.10 | 0.00 |
| TRINITY_F4PTD3_DICFS/26-214      | F4PTD3.1 PF01183.18 | 41.10 | 0.00 |
| TRINITY_F4Q2R9_DICFS/75-336      | F4Q2R9.1 PF14500.4; | 41.10 | 0.00 |
| TRINITY_K8EP65_CARML/4-162       | K8EP65.2 PF13238.4; | 41.10 | 0.00 |
| TRINITY_A8J7I4_CHLRE/1-165       | A8J7I4.1 PF07714.15 | 41.10 | 0.00 |
| TRINITY_A8IWT9_CHLRE/94-457      | A8IWT9.1 PF03747.12 | 41.10 | 0.00 |
| TRINITY_A0E5U0_PARTE/139-212     | A0E5U0.1 PF01253.20 | 41.10 | 0.00 |
| TRINITY_D8U3B5_VOLCA/1008-1129   | D8U3B5.1 PF02181.21 | 41.10 | 0.00 |
| TRINITY_D2VBV7_NAEGR/17-532      | D2VBV7.1 PF04916.11 | 41.10 | 0.00 |
| TRINITY_U9SWP3_RHIID/53-221      | U9SWP3.1 PF09768.7; | 41.10 | 0.00 |
| TRINITY_E9GZ69_DAPPU/27-448      | E9GZ69.1 PF04597.12 | 41.10 | 0.00 |
| TRINITY_L8GG64_ACACA/110-167     | L8GG64.1 PF00571.26 | 41.10 | 0.00 |
| TRINITY_I7MJIO_TETTS/1-168       | I7MJIO.1 PF14580.4; | 41.10 | 0.00 |
| TRINITY_W1NUC9_AMBTC/846-918     | W1NUC9.1 PF00533.24 | 41.10 | 0.00 |
| TRINITY_A0D818_PARTE/140-399     | A0D818.1 PF00069.23 | 41.10 | 0.00 |
| TRINITY_C4M6R0_ENTHI/343-452     | C4M6R0.1 PF00454.25 | 41.10 | 0.00 |
| TRINITY_W8F7T7_9BACT/175-491     | W8F7T7.1 PF00728.20 | 41.10 | 0.00 |
| TRINITY_A0A0H4VLW9_9BACT/5-225   | A0A0H4VLW9.1 PF0536 | 41.10 | 0.00 |
| TRINITY_B9SFB6_RICCO/56-390      | B9SFB6.1 PF07992.12 | 41.10 | 0.00 |
| TRINITY_G0R442_ICHMG/8-260       | G0R442.1 PF00069.23 | 41.10 | 0.00 |
| TRINITY_S2IUY4_MUCC1/31-205      | S2IUY4.1 PF09439.8; | 41.10 | 0.00 |
| TRINITY_Q018B9_OSTTA/47-153      | Q018B9.1 PF00581.18 | 41.10 | 0.00 |
| TRINITY_Q22Z53_TETTS/262-370     | Q22Z53.3 PF05517.10 | 41.10 | 0.00 |
| TRINITY_A7SV88_NEMVE/34-631      | A7SV88.1 PF00995.21 | 41.10 | 0.00 |
| TRINITY_A7S6G7_NEMVE/391-615     | A7S6G7.1 PF05843.12 | 41.10 | 0.00 |
| TRINITY_BBS2_RAT/276-715         | Q99MH9.1 PF14782.4; | 41.10 | 0.00 |
| TRINITY_A0A024UBD2_9STRA/265-453 | A0A024UBD2.1 PF0223 | 41.10 | 0.00 |
| TRINITY_K5WJY7_PHACS/170-321     | K5WJY7.1 PF01501.18 | 41.10 | 0.00 |
| TRINITY_D8U937_VOLCA/54-200      | D8U937.1 PF12499.6; | 41.10 | 0.00 |
| TRINITY_A0A0L1KXQ3_9EUGL/10-206  | A0A0L1KXQ3.1 PF0083 | 41.10 | 0.00 |
| TRINITY_F7CHL5_XENTR/27-313      | F7CHL5.1 PF00443.27 | 41.10 | 0.00 |
| TRINITY_D3BT39_POLPA/3-267       | D3BT39.1 PF07651.14 | 41.10 | 0.00 |
| TRINITY_K9RJU6_9CYAN/1-167       | K9RJU6.1 PF05163.10 | 41.10 | 0.00 |
| TRINITY_T1F1C4_HELRO/100-183     | T1F1C4.1 PF05699.12 | 41.10 | 0.00 |
| TRINITY_F6S301_XENTR/259-371     | F6S301.1 PF00169.27 | 41.10 | 0.00 |
| TRINITY_R0FZ65_9BRAS/178-278     | R0FZ65.1 PF02689.12 | 41.10 | 0.00 |
| TRINITY_I7MB89_TETTS/43-816      | I7MB89.2 PF01804.16 | 41.10 | 0.00 |
| TRINITY_A8J8V1_CHLRE/17-362      | A8J8V1.1 PF02567.14 | 41.10 | 0.00 |
| TRINITY_I0YVN8_9CHLO/1080-1316   | I0YVN8.1 PF05623.10 | 41.10 | 0.00 |
| TRINITY_I0Z126_9CHLO/17-129      | I0Z126.1 PF05916.9; | 41.10 | 0.00 |
| TRINITY_L8GS57_ACACA/211-407     | L8GS57.1 PF02190.14 | 41.10 | 0.00 |
| TRINITY_I0Z4Q7_9CHLO/119-248     | I0Z4Q7.1 PF00134.21 | 41.10 | 0.00 |
| TRINITY_I0Z379_9CHLO/120-500     | I0Z379.1 PF00176.21 | 41.10 | 0.00 |
| TRINITY_E3L492_PUCGT/9-138       | E3L492.2 PF01984.18 | 41.10 | 0.00 |
| TRINITY_A0A078AK08_STYLE/58-358  | A0A078AK08.1 PF0064 | 41.10 | 0.00 |
| TRINITY_I0Z893_9CHLO/60-343      | I0Z893.1 PF00069.23 | 41.10 | 0.00 |
| TRINITY_L8GTK1_ACACA/146-395     | L8GTK1.1 PF07714.15 | 41.10 | 0.00 |
| TRINITY_D8TQV9_VOLCA/173-366     | D8TQV9.1 PF01266.22 | 41.10 | 0.00 |
| TRINITY_A8IGB8_CHLRE/18-200      | A8IGB8.1 PF06644.9; | 41.10 | 0.00 |
| TRINITY_A8J192_CHLRE/156-505     | A8J192.1 PF04515.10 | 41.10 | 0.00 |
| TRINITY_D8TZH6_VOLCA/22-283      | D8TZH6.1 PF00233.17 | 41.10 | 0.00 |
| TRINITY_Q24DA4_TETTS/107-224     | Q24DA4.3 PF04153.16 | 41.00 | 0.00 |
| TRINITY_L8GTK1_ACACA/146-395     | L8GTK1.1 PF07714.15 | 41.00 | 0.00 |

|                                    |                     |       |      |
|------------------------------------|---------------------|-------|------|
| TRINITY_A0A067TTA6_9AGAR/11-133    | A0A067TTA6.1 PF0024 | 41.00 | 0.00 |
| TRINITY_A0CBG9_PARTE/12-286        | A0CBG9.1 PF00069.23 | 41.00 | 0.00 |
| TRINITY_A0A078L5Z7_9CHLA/167-375   | A0A078L5Z7.1 PF0117 | 41.00 | 0.00 |
| TRINITY_L8GK49_ACACA/197-397       | L8GK49.1 PF00149.26 | 41.00 | 0.00 |
| TRINITY_I1CEB1_RHIO9/6-81          | I1CEB1.1 PF00173.26 | 41.00 | 0.00 |
| TRINITY_D3BK07_POLPA/84-175        | D3BK07.1 PF02214.20 | 41.00 | 0.00 |
| TRINITY_A0A0D2VRK4_CAPO3/301-383   | A0A0D2VRK4.1 PF0088 | 41.00 | 0.00 |
| TRINITY_Q22VU8_TETTS/895-1163      | Q22VU8.2 PF00664.21 | 41.00 | 0.00 |
| TRINITY_J9IUL5_9SPIT/144-253       | J9IUL5.1 PF00787.22 | 41.00 | 0.00 |
| TRINITY_F0ZEH9_DICPU/1492-2015     | F0ZEH9.1 PF06920.11 | 41.00 | 0.00 |
| TRINITY_X6LP84_RETFI/433-580       | X6LP84.1 PF07534.14 | 41.00 | 0.00 |
| TRINITY_I7M9L6_TETTS/721-995       | I7M9L6.1 PF00664.21 | 41.00 | 0.00 |
| TRINITY_A0A078APX7_STYLE/277-459   | A0A078APX7.1 PF0064 | 41.00 | 0.00 |
| TRINITY_W4GC09_9STRA/173-449       | W4GC09.1 PF00928.19 | 41.00 | 0.00 |
| TRINITY_F0ZS95_DICPU/1020-1248     | F0ZS95.1 PF13378.4; | 41.00 | 0.00 |
| TRINITY_B3S4G2_TRIAD/5-337         | B3S4G2.1 PF01784.16 | 41.00 | 0.00 |
| TRINITY_A0DYB5_PARTE/75-171        | A0DYB5.1 PF12796.5; | 41.00 | 0.00 |
| TRINITY_L0KD63_HALHC/5-298         | L0KD63.1 PF09820.7; | 41.00 | 0.00 |
| TRINITY_D3BN92_POLPA/515-687       | D3BN92.1 PF00637.18 | 41.00 | 0.00 |
| TRINITY_X6MX50_RETFI/149-315       | X6MX50.1 PF05729.10 | 41.00 | 0.00 |
| TRINITY_D3BRW4_POLPA/8-89          | D3BRW4.1 PF02825.18 | 41.00 | 0.00 |
| TRINITY_B9HER4_POPTR/19-185        | B9HER4.2 PF12706.5; | 41.00 | 0.00 |
| TRINITY_U9UI46_RHIID/30-185        | U9UI46.1 PF00810.16 | 41.00 | 0.00 |
| TRINITY_A7RGR1_NEMVE/4-429         | A7RGR1.1 PF16496.3; | 41.00 | 0.00 |
| TRINITY_J9IUG9_9SPIT/1614-1848     | J9IUG9.1 PF00069.23 | 41.00 | 0.00 |
| TRINITY_T1IM08_STRMM/32-240        | T1IM08.1 PF09778.7; | 41.00 | 0.00 |
| TRINITY_A0A085N9K0_9BILA/353-472   | A0A085N9K0.1 PF0066 | 41.00 | 0.00 |
| TRINITY_M5VUJ3_PRUPE/209-406       | M5VUJ3.1 PF10312.7; | 41.00 | 0.00 |
| TRINITY_D8TSC3_VOLCA/26-137        | D8TSC3.1 PF00072.22 | 41.00 | 0.00 |
| TRINITY_D8U8A1_VOLCA/631-807       | D8U8A1.1 PF00995.21 | 41.00 | 0.00 |
| TRINITY_D8UCJ9_VOLCA/1-282         | D8UCJ9.1 PF00069.23 | 41.00 | 0.00 |
| TRINITY_G0QRL3_ICHMG/17-371        | G0QRL3.1 PF00899.19 | 41.00 | 0.00 |
| TRINITY_D2VPB7_NAEGR/707-816       | D2VPB7.1 PF01835.17 | 40.90 | 0.00 |
| TRINITY_T0QCJ3_9STRA/346-415       | T0QCJ3.1 PF14559.4; | 40.90 | 0.00 |
| TRINITY_D7G343_ECTSI/500-751       | D7G343.1 PF00069.23 | 40.90 | 0.00 |
| TRINITY_A0A0A8URD3_LEGHA/1119-1355 | A0A0A8URD3.1 PF0799 | 40.90 | 0.00 |
| TRINITY_K3X250_PYTUL/7-245         | K3X250.1 PF01370.19 | 40.90 | 0.00 |
| TRINITY_A9G0Q5_SORC5/53-346        | A9G0Q5.1 PF14388.4; | 40.90 | 0.00 |
| TRINITY_M3JWD8_CANMX/111-206       | M3JWD8.1 PF00153.25 | 40.90 | 0.00 |
| TRINITY_Q23CK3_TETTS/552-765       | Q23CK3.1 PF00326.19 | 40.90 | 0.00 |
| TRINITY_A0A0N0Y9M6_THEVU/137-385   | A0A0N0Y9M6.1 PF0008 | 40.90 | 0.00 |
| TRINITY_L7FPE7_ENTIV/1-104         | L7FPE7.1 PF02078.14 | 40.90 | 0.00 |
| TRINITY_Q55BA7_DICDI/1541-1873     | Q55BA7.1 PF16206.3; | 40.90 | 0.00 |
| TRINITY_M4B5M7_HYAAE/5-119         | M4B5M7.1 PF15490.4; | 40.90 | 0.00 |
| TRINITY_G0QJ48_ICHMG/856-963       | G0QJ48.1 PF10367.7; | 40.90 | 0.00 |
| TRINITY_D0MWR3_PHYIT/1-223         | D0MWR3.1 PF02586.12 | 40.90 | 0.00 |
| TRINITY_A7SSF9_NEMVE/31-101        | A7SSF9.1 PF10601.7; | 40.90 | 0.00 |
| TRINITY_D3B9E9_POLPA/16-242        | D3B9E9.1 PF00483.21 | 40.90 | 0.00 |
| TRINITY_D2QI58_SPILD/10-126        | D2QI58.1 PF13704.4; | 40.90 | 0.00 |
| TRINITY_Q24BN5_TETTS/927-1025      | Q24BN5.2 PF00169.27 | 40.90 | 0.00 |
| TRINITY_D8TKW3_VOLCA/617-803       | D8TKW3.1 PF01764.23 | 40.90 | 0.00 |
| TRINITY_B0JGD0_MICAN/413-505       | B0JGD0.1 PF02517.14 | 40.90 | 0.00 |
| TRINITY_W5GW52_WHEAT/103-416       | W5GW52.1 PF03062.17 | 40.90 | 0.00 |
| TRINITY_Q23Q47_TETTS/4-162         | Q23Q47.2 PF01652.16 | 40.90 | 0.00 |
| TRINITY_I2K2J3_DEKBR/29-136        | I2K2J3.1 PF00307.29 | 40.90 | 0.00 |
| TRINITY_A0A077ZWA2_STYLE/66-158    | A0A077ZWA2.1 PF1254 | 40.90 | 0.00 |
| TRINITY_K9T8N3_9CYAN/5-199         | K9T8N3.1 PF00300.20 | 40.90 | 0.00 |
| TRINITY_G3X324_SARHA/25-204        | G3X324.1 PF09762.7; | 40.90 | 0.00 |
| TRINITY_D8TL16_VOLCA/724-840       | D8TL16.1 PF09066.8; | 40.90 | 0.00 |
| TRINITY_I3KIP7_ORENI/454-610       | I3KIP7.1 PF05572.11 | 40.90 | 0.00 |
| TRINITY_F4PTY6_DICFS/660-885       | F4PTY6.1 PF00617.17 | 40.90 | 0.00 |

|                                  |                     |       |      |
|----------------------------------|---------------------|-------|------|
| TRINITY_D8U5S8_VOLCA/69-169      | D8U5S8.1 PF00085.18 | 40.90 | 0.00 |
| TRINITY_W5MYU2_LEPOC/542-687     | W5MYU2.1 PF09113.8; | 40.90 | 0.00 |
| TRINITY_A0A078AKP9_STYLE/375-534 | A0A078AKP9.1 PF1458 | 40.90 | 0.00 |
| TRINITY_B0WCA4_CULQU/353-814     | B0WCA4.1 PF13844.4; | 40.90 | 0.00 |
| TRINITY_I0YTS2_9CHLO/3-284       | I0YTS2.1 PF00481.19 | 40.90 | 0.00 |
| TRINITY_Q552T7_DICDI/119-554     | Q552T7.2 PF11957.6; | 40.90 | 0.00 |
| TRINITY_F4PEL5_BATDJ/37-331      | F4PEL5.1 PF03982.11 | 40.90 | 0.00 |
| TRINITY_L8HI91_ACACA/91-321      | L8HI91.1 PF05721.11 | 40.90 | 0.00 |
| TRINITY_A0A093YSK8_9PEZI/134-247 | A0A093YSK8.1 PF0322 | 40.90 | 0.00 |
| TRINITY_A0A078L9Y9_9CHLA/1-200   | A0A078L9Y9.1 PF0023 | 40.90 | 0.00 |
| TRINITY_I1FYR5_AMPQE/31-157      | I1FYR5.1 PF00134.21 | 40.90 | 0.00 |
| TRINITY_A0CXP3_PARTE/26-844      | A0CXP3.1 PF01496.17 | 40.90 | 0.00 |
| TRINITY_D8M2P3_BLAHO/26-94       | D8M2P3.1 PF00505.17 | 40.90 | 0.00 |
| TRINITY_Q4C0Q1_CROWT/8-467       | Q4C0Q1.1 PF03055.13 | 40.90 | 0.00 |
| TRINITY_G0QKY7_ICHMG/168-327     | G0QKY7.1 PF00406.20 | 40.90 | 0.00 |
| TRINITY_H3BYI0_TETNG/20-174      | H3BYI0.1 PF08603.9; | 40.90 | 0.00 |
| TRINITY_Q22DB9_TETTS/354-467     | Q22DB9.2 PF08642.8; | 40.90 | 0.00 |
| TRINITY_K3VNH2_FUSPC/87-353      | K3VNH2.1 PF00150.16 | 40.80 | 0.00 |
| TRINITY_A0A0J7L6J6_LASNI/109-581 | A0A0J7L6J6.1 PF0050 | 40.80 | 0.00 |
| TRINITY_L8HKG8_ACACA/73-171      | L8HKG8.1 PF13649.4; | 40.80 | 0.00 |
| TRINITY_Q234K7_TETTS/37-180      | Q234K7.2 PF00179.24 | 40.80 | 0.00 |
| TRINITY_G0QNG4_ICHMG/42-584      | G0QNG4.1 PF00995.21 | 40.80 | 0.00 |
| TRINITY_U3IKK7_ANAPL/406-500     | U3IKK7.1 PF12796.5; | 40.80 | 0.00 |
| TRINITY_V3ZY91_LOTGI/30-181      | V3ZY91.1 PF10152.7; | 40.80 | 0.00 |
| TRINITY_A0A0G4IY77_PLABS/137-395 | A0A0G4IY77.1 PF0006 | 40.80 | 0.00 |
| TRINITY_A0DB53_PARTE/121-198     | A0DB53.1 PF03061.20 | 40.80 | 0.00 |
| TRINITY_A0A0K9PMV7_ZOSMR/131-204 | A0A0K9PMV7.1 PF0007 | 40.80 | 0.00 |
| TRINITY_A0A067TXX9_9AGAR/165-319 | A0A067TXX9.1 PF0317 | 40.80 | 0.00 |
| TRINITY_D7CW28_TRURR/18-175      | D7CW28.1 PF03073.13 | 40.80 | 0.00 |
| TRINITY_A0A015LDZ0_9GLOM/118-260 | A0A015LDZ0.1 PF1060 | 40.80 | 0.00 |
| TRINITY_Q8INZ8_DROME/49-244      | Q8INZ8.2 PF00106.23 | 40.80 | 0.00 |
| TRINITY_A0A087YNU4_POEFO/38-433  | A0A087YNU4.1 PF0248 | 40.80 | 0.00 |
| TRINITY_F4Q3C0_DICFS/169-521     | F4Q3C0.1 PF00587.23 | 40.80 | 0.00 |
| TRINITY_K2HBN6_9RHOB/157-274     | K2HBN6.1 PF00581.18 | 40.80 | 0.00 |
| TRINITY_S2JQN6_MUCC1/15-345      | S2JQN6.1 PF00503.18 | 40.80 | 0.00 |
| TRINITY_E0V5V5_PEDHC/561-878     | E0V5V5.1 PF00702.24 | 40.80 | 0.00 |
| TRINITY_I7LY38_TETTS/121-191     | I7LY38.1 PF13499.4; | 40.80 | 0.00 |
| TRINITY_I0YVA9_9CHLO/319-409     | I0YVA9.1 PF02875.19 | 40.80 | 0.00 |
| TRINITY_A0A0C4EZ98_PUCT1/115-313 | A0A0C4EZ98.1 PF0405 | 40.80 | 0.00 |
| TRINITY_I7LSW3_TETTS/19-277      | I7LSW3.2 PF00069.23 | 40.80 | 0.00 |
| TRINITY_L8GGT0_ACACA/221-344     | L8GGT0.1 PF00241.18 | 40.80 | 0.00 |
| TRINITY_V4B630_LOTGI/57-315      | V4B630.1 PF00266.17 | 40.80 | 0.00 |
| TRINITY_A8JCN0_CHLRE/10-224      | A8JCN0.1 PF08325.8; | 40.80 | 0.00 |
| TRINITY_A0A0H5BYU1_CYBJA/12-89   | A0A0H5BYU1.1 PF0512 | 40.80 | 0.00 |
| TRINITY_A0CY07_PARTE/21-127      | A0CY07.1 PF09799.7; | 40.80 | 0.00 |
| TRINITY_E1ZBJ1_CHLVA/198-371     | E1ZBJ1.1 PF01454.17 | 40.80 | 0.00 |
| TRINITY_I0YLU5_9CHLO/46-280      | I0YLU5.1 PF00975.18 | 40.80 | 0.00 |
| TRINITY_H2SG74_TAKRU/136-465     | H2SG74.1 PF00083.22 | 40.80 | 0.00 |
| TRINITY_A0BMG4_PARTE/28-194      | A0BMG4.1 PF08718.9; | 40.80 | 0.00 |
| TRINITY_H2BU57_9FLAO/15-223      | H2BU57.1 PF00106.23 | 40.80 | 0.00 |
| TRINITY_C3Y383_BRAFL/1-325       | C3Y383.1 PF07857.10 | 40.80 | 0.00 |
| TRINITY_F0ZTB8_DICPU/351-556     | F0ZTB8.1 PF00566.16 | 40.80 | 0.00 |
| TRINITY_D8TMB5_VOLCA/111-375     | D8TMB5.1 PF00069.23 | 40.80 | 0.00 |
| TRINITY_B9SZ58_RICCO/191-282     | B9SZ58.1 PF12796.5; | 40.80 | 0.00 |
| TRINITY_F0Z9A5_DICPU/23-213      | F0Z9A5.1 PF01183.18 | 40.80 | 0.00 |
| TRINITY_A9USM9_MONBE/264-370     | A9USM9.1 PF00307.29 | 40.80 | 0.00 |
| TRINITY_A6G384_9DELT/139-255     | A6G384.1 PF08546.9; | 40.80 | 0.00 |
| TRINITY_A0CNR5_PARTE/331-380     | A0CNR5.1 PF13920.4; | 40.80 | 0.00 |
| TRINITY_W9R965_9ROSA/98-315      | W9R965.1 PF04755.10 | 40.80 | 0.00 |
| TRINITY_A8J2L9_CHLRE/84-199      | A8J2L9.1 PF10294.7; | 40.80 | 0.00 |
| TRINITY_G7I5V8_MEDTR/41-656      | G7I5V8.2 PF05470.10 | 40.80 | 0.00 |

|                                  |              |            |       |      |
|----------------------------------|--------------|------------|-------|------|
| TRINITY_G0QR38_ICHMG/43-305      | G0QR38.1     | PF00069.23 | 40.80 | 0.00 |
| TRINITY_L8HAB9_ACACA/836-943     | L8HAB9.1     | PF00651.29 | 40.80 | 0.00 |
| TRINITY_D8U5R0_VOLCA/26-273      | D8U5R0.1     | PF12146.6; | 40.80 | 0.00 |
| TRINITY_E1ZRG2_CHLVA/108-338     | E1ZRG2.1     | PF04493.12 | 40.80 | 0.00 |
| TRINITY_L8GT01_ACACA/132-437     | L8GT01.1     | PF08627.8; | 40.80 | 0.00 |
| TRINITY_M0VW02_HORVD/2-176       | M0VW02.1     | PF07847.10 | 40.80 | 0.00 |
| TRINITY_I0Z0F3_9CHLO/402-670     | I0Z0F3.1     | PF11831.6; | 40.80 | 0.00 |
| TRINITY_M2QW23_CERS8/68-195      | M2QW23.1     | PF00622.26 | 40.80 | 0.00 |
| TRINITY_D8TTP0_VOLCA/1124-1422   | D8TTP0.1     | PF00069.23 | 40.80 | 0.00 |
| TRINITY_A8IU02_CHLRE/22-115      | A8IU02.1     | PF08123.11 | 40.80 | 0.00 |
| TRINITY_D8TV59_VOLCA/8-713       | D8TV59.1     | PF05327.9; | 40.80 | 0.00 |
| TRINITY_I0S303_MYCPH/715-805     | I0S303.1     | PF16184.3; | 40.80 | 0.00 |
| TRINITY_T0JXF4_COLGC/1152-1269   | T0JXF4.1     | PF00072.22 | 40.80 | 0.00 |
| TRINITY_I1KVL7_SOYBN/19-273      | I1KVL7.1     | PF00069.23 | 40.80 | 0.00 |
| TRINITY_A0A0N0EC30_9BACI/3-197   | A0A0N0EC30.1 | PF0598     | 40.70 | 0.00 |
| TRINITY_A0DPA1_PARTE/82-191      | A0DPA1.1     | PF01569.19 | 40.70 | 0.00 |
| TRINITY_W7AAT9_9APIC/75-218      | W7AAT9.1     | PF16531.3; | 40.70 | 0.00 |
| TRINITY_D3BG34_POLPA/95-179      | D3BG34.1     | PF09793.7; | 40.70 | 0.00 |
| TRINITY_G0QXF6_ICHMG/1-194       | G0QXF6.1     | PF14309.4; | 40.70 | 0.00 |
| TRINITY_F4Q916_DICFS/16-247      | F4Q916.1     | PF00378.18 | 40.70 | 0.00 |
| TRINITY_D3B803_POLPA/36-206      | D3B803.1     | PF00445.16 | 40.70 | 0.00 |
| TRINITY_A0A0N5ART5_9BILA/657-796 | A0A0N5ART5.1 | PF0176     | 40.70 | 0.00 |
| TRINITY_V4A8R6_LOTGI/8-252       | V4A8R6.1     | PF01073.17 | 40.70 | 0.00 |
| TRINITY_E3MXL2_CAERE/1-286       | E3MXL2.1     | PF00294.22 | 40.70 | 0.00 |
| TRINITY_A0A015M955_9GLOM/179-498 | A0A015M955.1 | PF0006     | 40.70 | 0.00 |
| TRINITY_L8GTK1_ACACA/146-395     | L8GTK1.1     | PF07714.15 | 40.70 | 0.00 |
| TRINITY_D7KB12_ARALL/348-437     | D7KB12.1     | PF13877.4; | 40.70 | 0.00 |
| TRINITY_A0CMN6_PARTE/121-399     | A0CMN6.1     | PF01457.14 | 40.70 | 0.00 |
| TRINITY_B0CDR8_ACAM1/5-228       | B0CDR8.1     | PF01148.18 | 40.70 | 0.00 |
| TRINITY_Q24E29_TETTS/46-151      | Q24E29.1     | PF13649.4; | 40.70 | 0.00 |
| TRINITY_U9TNT0_RHIID/22-167      | U9TNT0.1     | PF13302.5; | 40.70 | 0.00 |
| TRINITY_I7MIN0_TETTS/9-308       | I7MIN0.1     | PF08449.9; | 40.70 | 0.00 |
| TRINITY_D3BR85_POLPA/18-223      | D3BR85.1     | PF00117.26 | 40.70 | 0.00 |
| TRINITY_F4QBC3_DICFS/131-212     | F4QBC3.1     | PF07258.12 | 40.70 | 0.00 |
| TRINITY_Q22VA7_TETTS/184-474     | Q22VA7.2     | PF00233.17 | 40.70 | 0.00 |
| TRINITY_L8GTS5_ACACA/3-666       | L8GTS5.1     | PF00012.18 | 40.70 | 0.00 |
| TRINITY_G3P0A4_GASAC/214-309     | G3P0A4.1     | PF00169.27 | 40.70 | 0.00 |
| TRINITY_E1ZS39_CHLVA/93-324      | E1ZS39.1     | PF00889.17 | 40.70 | 0.00 |
| TRINITY_A8J4D6_CHLRE/165-312     | A8J4D6.1     | PF07200.11 | 40.70 | 0.00 |
| TRINITY_L8GUA0_ACACA/175-340     | L8GUA0.1     | PF00609.17 | 40.70 | 0.00 |
| TRINITY_A0A067KXP8_JATCU/409-547 | A0A067KXP8.1 | PF0414     | 40.70 | 0.00 |
| TRINITY_A9V2C9_MONBE/525-757     | A9V2C9.1     | PF00149.26 | 40.70 | 0.00 |
| TRINITY_A0A0B0PYI6_GOSAR/18-294  | A0A0B0PYI6.1 | PF0126     | 40.70 | 0.00 |
| TRINITY_F6QWH2_HORSE/2185-2303   | F6QWH2.1     | PF10162.7; | 40.70 | 0.00 |
| TRINITY_D8U6D8_VOLCA/207-665     | D8U6D8.1     | PF00450.20 | 40.70 | 0.00 |
| TRINITY_I1M679_SOYBN/556-837     | I1M679.2     | PF12110.6; | 40.70 | 0.00 |
| TRINITY_E1ZU59_CHLVA/469-691     | E1ZU59.1     | PF05794.11 | 40.70 | 0.00 |
| TRINITY_I7LTS5_TETTS/100-452     | I7LTS5.2     | PF03372.21 | 40.70 | 0.00 |
| TRINITY_E1Z5T3_CHLVA/338-498     | E1Z5T3.1     | PF01734.20 | 40.70 | 0.00 |
| TRINITY_I7M4C2_TETTS/42-276      | I7M4C2.1     | PF00149.26 | 40.70 | 0.00 |
| TRINITY_W5LN34_ASTMX/22-386      | W5LN34.1     | PF09751.7; | 40.70 | 0.00 |
| TRINITY_A0A0G3EAR2_9BACT/17-242  | A0A0G3EAR2.1 | PF0445     | 40.70 | 0.00 |
| TRINITY_A7SVU0_NEMVE/7-118       | A7SVU0.1     | PF10644.7; | 40.70 | 0.00 |
| TRINITY_D8UK64_VOLCA/8-471       | D8UK64.1     | PF13520.4; | 40.70 | 0.00 |
| TRINITY_L8HHX4_ACACA/703-1129    | L8HHX4.1     | PF00476.18 | 40.70 | 0.00 |
| TRINITY_A0A087YFA1_POEFO/360-467 | A0A087YFA1.2 | PF0065     | 40.70 | 0.00 |
| TRINITY_D3B6M3_POLPA/229-533     | D3B6M3.1     | PF00082.20 | 40.70 | 0.00 |
| TRINITY_A0A0G1NLR9_9BACT/1-168   | A0A0G1NLR9.1 | PF0192     | 40.70 | 0.00 |
| TRINITY_A8J3M6_CHLRE/1-427       | A8J3M6.1     | PF00022.17 | 40.70 | 0.00 |
| TRINITY_J9HPH3_9SPIT/203-298     | J9HPH3.1     | PF00787.22 | 40.70 | 0.00 |
| TRINITY_E1Z7X4_CHLVA/30-382      | E1Z7X4.1     | PF01593.22 | 40.70 | 0.00 |



|                                    |                     |       |      |
|------------------------------------|---------------------|-------|------|
| TRINITY_A0A078I297_BRANA/61-293    | A0A078I297.1 PF0027 | 40.70 | 0.00 |
| TRINITY_F4PZZ1_DICFS/16-111        | F4PZZ1.1 PF00169.27 | 40.70 | 0.00 |
| TRINITY_B6IP52_RHOCS/51-204        | B6IP52.1 PF01738.16 | 40.70 | 0.00 |
| TRINITY_D8SKW4_SELML/64-170        | D8SKW4.1 PF00134.21 | 40.60 | 0.00 |
| TRINITY_A0A015JP33_9GLOM/12-80     | A0A015JP33.1 PF0858 | 40.60 | 0.00 |
| TRINITY_A0A078B6K5_STYLE/485-620   | A0A078B6K5.1 PF0251 | 40.60 | 0.00 |
| TRINITY_A0A078A108_STYLE/264-452   | A0A078A108.1 PF1717 | 40.60 | 0.00 |
| TRINITY_A0A078ASG5_STYLE/209-401   | A0A078ASG5.1 PF0009 | 40.60 | 0.00 |
| TRINITY_I7MI98_TETTS/575-967       | I7MI98.2 PF00176.21 | 40.60 | 0.00 |
| TRINITY_D5SX86_PLAL2/131-390       | D5SX86.1 PF00069.23 | 40.60 | 0.00 |
| TRINITY_R7R886_9FIRM/88-244        | R7R886.1 PF00849.20 | 40.60 | 0.00 |
| TRINITY_G7YUG8_CLOSI/12-174        | G7YUG8.1 PF00071.20 | 40.60 | 0.00 |
| TRINITY_F2NDY6_DESAR/54-186        | F2NDY6.1 PF13365.4; | 40.60 | 0.00 |
| TRINITY_MUS81_SCHPO/334-469        | P87231.2 PF02732.13 | 40.60 | 0.00 |
| TRINITY_F6ZX42_XENTR/50-390        | F6ZX42.1 PF04124.10 | 40.60 | 0.00 |
| TRINITY_U9UZ81_RHIID/6-111         | U9UZ81.1 PF01920.18 | 40.60 | 0.00 |
| TRINITY_A8J4M1_CHLRE/78-217        | A8J4M1.1 PF12499.6; | 40.60 | 0.00 |
| TRINITY_D2VCL5_NAEGR/5-169         | D2VCL5.1 PF00071.20 | 40.60 | 0.00 |
| TRINITY_L8GEW1_ACACA/53-301        | L8GEW1.1 PF03009.15 | 40.60 | 0.00 |
| TRINITY_A8JI94_CHLRE/16-125        | A8JI94.1 PF01776.15 | 40.60 | 0.00 |
| TRINITY_L8GTQ2_ACACA/12-212        | L8GTQ2.1 PF00106.23 | 40.60 | 0.00 |
| TRINITY_F0Z7L0_DICPU/2-530         | F0Z7L0.1 PF04916.11 | 40.60 | 0.00 |
| TRINITY_A0A0G1ZDX1_9BACT/68-233    | A0A0G1ZDX1.1 PF1338 | 40.60 | 0.00 |
| TRINITY_A0A078A1U0_STYLE/3115-3435 | A0A078A1U0.1 PF0052 | 40.60 | 0.00 |
| TRINITY_Q239B4_TETTS/549-761       | Q239B4.2 PF00326.19 | 40.60 | 0.00 |
| TRINITY_I7M148_TETTS/147-410       | I7M148.1 PF00069.23 | 40.60 | 0.00 |
| TRINITY_I0YKK0_9CHLO/8-180         | I0YKK0.1 PF01145.23 | 40.60 | 0.00 |
| TRINITY_I0ZAX4_9CHLO/60-233        | I0ZAX4.1 PF13460.4; | 40.60 | 0.00 |
| TRINITY_A0E2M3_PARTE/3-103         | A0E2M3.1 PF00168.28 | 40.60 | 0.00 |
| TRINITY_F6QYZ1_XENTR/575-830       | F6QYZ1.1 PF00078.25 | 40.60 | 0.00 |
| TRINITY_F4PYG0_DICFS/69-275        | F4PYG0.1 PF09511.8; | 40.60 | 0.00 |
| TRINITY_D8TPU4_VOLCA/1-251         | D8TPU4.1 PF00102.25 | 40.60 | 0.00 |
| TRINITY_C3YMS1_BRAFL/32-426        | C3YMS1.1 PF07690.14 | 40.60 | 0.00 |
| TRINITY_F0ZY85_DICPU/202-311       | F0ZY85.1 PF10363.7; | 40.60 | 0.00 |
| TRINITY_I7LUJ4_TETTS/1-176         | I7LUJ4.2 PF04062.12 | 40.60 | 0.00 |
| TRINITY_D8TWK0_VOLCA/1-143         | D8TWK0.1 PF01217.18 | 40.60 | 0.00 |
| TRINITY_F1A177_DICPU/18-421        | F1A177.1 PF07690.14 | 40.60 | 0.00 |
| TRINITY_G1LRV8_AILME/492-789       | G1LRV8.1 PF00702.24 | 40.60 | 0.00 |
| TRINITY_A7SPM1_NEMVE/19-272        | A7SPM1.1 PF00780.20 | 40.60 | 0.00 |
| TRINITY_A9VC39_MONBE/7-107         | A9VC39.1 PF13646.4; | 40.60 | 0.00 |
| TRINITY_D8TJA5_VOLCA/53-597        | D8TJA5.1 PF02990.14 | 40.60 | 0.00 |
| TRINITY_W7TE55_9STRA/34-299        | W7TE55.1 PF00069.23 | 40.60 | 0.00 |
| TRINITY_R1B2R3_EMIHU/13-218        | R1B2R3.1 PF05241.10 | 40.60 | 0.00 |
| TRINITY_L8HC31_ACACA/19-199        | L8HC31.1 PF05241.10 | 40.60 | 0.00 |
| TRINITY_V4TVT0_9ROSI/84-377        | V4TVT0.1 PF05185.14 | 40.60 | 0.00 |
| TRINITY_BTN1_ASHGO/9-400           | Q758C3.1 PF02487.15 | 40.60 | 0.00 |
| TRINITY_A0CXP9_PARTE/92-386        | A0CXP9.1 PF01457.14 | 40.60 | 0.00 |
| TRINITY_A0A067G1M8_CITSI/208-309   | A0A067G1M8.1 PF0304 | 40.60 | 0.00 |
| TRINITY_D7EIK9_TRICA/5-177         | D7EIK9.1 PF00025.19 | 40.60 | 0.00 |
| TRINITY_A7S4K7_NEMVE/114-484       | A7S4K7.1 PF08506.8; | 40.60 | 0.00 |
| TRINITY_D8UEC7_VOLCA/2-394         | D8UEC7.1 PF03348.13 | 40.60 | 0.00 |
| TRINITY_A8J3P1_CHLRE/954-1161      | A8J3P1.1 PF00211.18 | 40.60 | 0.00 |
| TRINITY_F8WZF9_9PORP/1-87          | F8WZF9.1 PF00686.17 | 40.60 | 0.00 |
| TRINITY_A0D5S5_PARTE/19-153        | A0D5S5.1 PF04178.10 | 40.60 | 0.00 |
| TRINITY_B7G054_PHATC/72-147        | B7G054.1 PF03134.17 | 40.50 | 0.00 |
| TRINITY_A0A024P1K9_9BACI/18-253    | A0A024P1K9.1 PF1356 | 40.50 | 0.00 |
| TRINITY_S2K0L0_MUCC1/59-241        | S2K0L0.1 PF03467.13 | 40.50 | 0.00 |
| TRINITY_C5LE07_PERM5/832-1258      | C5LE07.1 PF06957.9; | 40.50 | 0.00 |
| TRINITY_E5SAK8_TRISP/972-1481      | E5SAK8.1 PF00118.22 | 40.50 | 0.00 |
| TRINITY_Q3SDL5_PARTE/12-173        | Q3SDL5.1 PF00071.20 | 40.50 | 0.00 |
| TRINITY_K0C3B7_CYCSP/71-273        | K0C3B7.1 PF07859.11 | 40.50 | 0.00 |

|                                  |                     |       |      |
|----------------------------------|---------------------|-------|------|
| TRINITY_G0QJQ7_ICHMG/12-286      | G0QJQ7.1 PF00069.23 | 40.50 | 0.00 |
| TRINITY_F4Q7P1_DICFS/106-270     | F4Q7P1.1 PF08389.10 | 40.50 | 0.00 |
| TRINITY_Q23K54_TETTS/266-381     | Q23K54.1 PF01624.18 | 40.50 | 0.00 |
| TRINITY_D3B9Q6_POLPA/99-347      | D3B9Q6.1 PF07714.15 | 40.50 | 0.00 |
| TRINITY_D8LTQ5_ECTSI/28-199      | D8LTQ5.1 PF03152.12 | 40.50 | 0.00 |
| TRINITY_L1JFR0_GUIITH/69-276     | L1JFR0.1 PF12146.6; | 40.50 | 0.00 |
| TRINITY_A0DAB1_PARTE/334-1006    | A0DAB1.1 PF00443.27 | 40.50 | 0.00 |
| TRINITY_L8GJN4_ACACA/119-306     | L8GJN4.1 PF02750.12 | 40.50 | 0.00 |
| TRINITY_MKAR_COCIM/71-268        | Q1DNC5.2 PF00106.23 | 40.50 | 0.00 |
| TRINITY_G0QV75_ICHMG/42-337      | G0QV75.1 PF03619.14 | 40.50 | 0.00 |
| TRINITY_A7RPW5_NEMVE/6-444       | A7RPW5.1 PF00899.19 | 40.50 | 0.00 |
| TRINITY_BRD9_XENTR/153-240       | Q6NVM8.1 PF00439.23 | 40.50 | 0.00 |
| TRINITY_I7M495_TETTS/713-823     | I7M495.1 PF02204.16 | 40.50 | 0.00 |
| TRINITY_F4NSD5_BATDJ/57-236      | F4NSD5.1 PF03467.13 | 40.50 | 0.00 |
| TRINITY_I0YXM0_9CHLO/863-1066    | I0YXM0.1 PF13087.4; | 40.50 | 0.00 |
| TRINITY_W4FSJ9_9STRA/1228-1335   | W4FSJ9.1 PF00005.25 | 40.50 | 0.00 |
| TRINITY_T1JPK6_STRMM/21-141      | T1JPK6.1 PF05743.11 | 40.50 | 0.00 |
| TRINITY_A8J133_CHLRE/27-179      | A8J133.1 PF00719.17 | 40.50 | 0.00 |
| TRINITY_A8HQC2_CHLRE/23-259      | A8HQC2.1 PF13561.4; | 40.50 | 0.00 |
| TRINITY_A0A067C067_SAPPC/20-106  | A0A067C067.1 PF0437 | 40.50 | 0.00 |
| TRINITY_G0QNV6_ICHMG/23-97       | G0QNV6.1 PF03810.17 | 40.50 | 0.00 |
| TRINITY_A0A0G4EJ81_9ALVE/34-117  | A0A0G4EJ81.1 PF1341 | 40.50 | 0.00 |
| TRINITY_M1VCE7_CYAME/19-259      | M1VCE7.1 PF01151.16 | 40.50 | 0.00 |
| TRINITY_H3GQY3_PHYRM/105-170     | H3GQY3.1 PF01424.20 | 40.50 | 0.00 |
| TRINITY_K0TJT6_THAOC/257-659     | K0TJT6.1 PF01457.14 | 40.50 | 0.00 |
| TRINITY_A0A067CKA5_SAPPC/69-223  | A0A067CKA5.1 PF0864 | 40.50 | 0.00 |
| TRINITY_E1Z593_CHLVA/1-99        | E1Z593.1 PF02466.17 | 40.50 | 0.00 |
| TRINITY_D5GLZ2_TUBMM/4-146       | D5GLZ2.1 PF00106.23 | 40.50 | 0.00 |
| TRINITY_F0Z753_DICPU/189-311     | F0Z753.1 PF02338.17 | 40.50 | 0.00 |
| TRINITY_A0CLK7_PARTE/302-529     | A0CLK7.1 PF00149.26 | 40.50 | 0.00 |
| TRINITY_M5WBK9_PRUPE/339-411     | M5WBK9.1 PF12894.5; | 40.50 | 0.00 |
| TRINITY_D7T1Z1_VITVI/4-834       | D7T1Z1.1 PF10191.7; | 40.50 | 0.00 |
| TRINITY_A0D8U5_PARTE/465-719     | A0D8U5.1 PF01504.16 | 40.50 | 0.00 |
| TRINITY_I7M6F7_TETTS/1178-1445   | I7M6F7.2 PF01504.16 | 40.50 | 0.00 |
| TRINITY_PNPP_SCHPO/18-258        | Q00472.2 PF00702.24 | 40.50 | 0.00 |
| TRINITY_D3B954_POLPA/242-587     | D3B954.1 PF04910.12 | 40.50 | 0.00 |
| TRINITY_A0A074RY28_9HOMO/35-123  | A0A074RY28.1 PF1289 | 40.50 | 0.00 |
| TRINITY_B8BTM7_THAPS/220-314     | B8BTM7.1 PF02984.17 | 40.50 | 0.00 |
| TRINITY_H3GGG5_PHYRM/438-525     | H3GGG5.1 PF00651.29 | 40.50 | 0.00 |
| TRINITY_F2UKM1_SALR5/9-203       | F2UKM1.1 PF00009.25 | 40.50 | 0.00 |
| TRINITY_I0Z949_9CHLO/14-145      | I0Z949.1 PF02996.15 | 40.50 | 0.00 |
| TRINITY_A8IDJ5_CHLRE/422-860     | A8IDJ5.1 PF12832.5; | 40.50 | 0.00 |
| TRINITY_A0A0N8K258_9TELE/258-340 | A0A0N8K258.1 PF1289 | 40.50 | 0.00 |
| TRINITY_A0A089KRY0_9BACL/8-416   | A0A089KRY0.1 PF0142 | 40.50 | 0.00 |
| TRINITY_G0R1V3_ICHMG/699-811     | G0R1V3.1 PF00168.28 | 40.50 | 0.00 |
| TRINITY_J3NZX9_GAGT3/476-746     | J3NZX9.1 PF13476.4; | 40.50 | 0.00 |
| TRINITY_Q23R88_TETTS/18-272      | Q23R88.1 PF00069.23 | 40.50 | 0.00 |
| TRINITY_D8UJ46_VOLCA/1047-1282   | D8UJ46.1 PF07714.15 | 40.50 | 0.00 |
| TRINITY_J9J4K4_9SPIT/309-521     | J9J4K4.1 PF04811.13 | 40.50 | 0.00 |
| TRINITY_A0A078A6L2_STYLE/11-141  | A0A078A6L2.1 PF0078 | 40.50 | 0.00 |
| TRINITY_A0A0D2UKQ8_CAPO3/188-572 | A0A0D2UKQ8.1 PF0065 | 40.50 | 0.00 |
| TRINITY_H2PAR9_PONAB/74-692      | H2PAR9.1 PF00443.27 | 40.50 | 0.00 |
| TRINITY_A8IY68_CHLRE/1-382       | A8IY68.1 PF00022.17 | 40.50 | 0.00 |
| TRINITY_A0A066VDM6_9BASI/185-469 | A0A066VDM6.1 PF0589 | 40.50 | 0.00 |
| TRINITY_A8IP72_CHLRE/4180-5004   | A8IP72.1 PF03028.13 | 40.50 | 0.00 |
| TRINITY_A0A078BBP3_STYLE/94-223  | A0A078BBP3.1 PF0922 | 40.40 | 0.00 |
| TRINITY_A0A078B2J0_STYLE/41-343  | A0A078B2J0.1 PF0064 | 40.40 | 0.00 |
| TRINITY_W7X070_TETTS/33-148      | W7X070.1 PF06417.10 | 40.40 | 0.00 |
| TRINITY_A0DRG1_PARTE/852-1181    | A0DRG1.1 PF01237.16 | 40.40 | 0.00 |
| TRINITY_K9U4Q0_9CYAN/9-190       | K9U4Q0.1 PF06041.9; | 40.40 | 0.00 |
| TRINITY_F0Z756_DICPU/761-1025    | F0Z756.1 PF00069.23 | 40.40 | 0.00 |

|                                  |              |            |       |      |
|----------------------------------|--------------|------------|-------|------|
| TRINITY_A3LPJ1_PICST/46-164      | A3LPJ1.2     | PF06417.10 | 40.40 | 0.00 |
| TRINITY_I7M6F7_TETTS/1178-1445   | I7M6F7.2     | PF01504.16 | 40.40 | 0.00 |
| TRINITY_D3B0Q0_POLPA/425-685     | D3B0Q0.1     | PF00149.26 | 40.40 | 0.00 |
| TRINITY_I7MMI6_TETTS/8-379       | I7MMI6.1     | PF01238.19 | 40.40 | 0.00 |
| TRINITY_D8QPW9_SELML/6-146       | D8QPW9.1     | PF00892.18 | 40.40 | 0.00 |
| TRINITY_L8GZD2_ACACA/50-195      | L8GZD2.1     | PF10021.7; | 40.40 | 0.00 |
| TRINITY_THSA_AERPE/34-529        | Q9YDK6.2     | PF00118.22 | 40.40 | 0.00 |
| TRINITY_Q0AU63_SYNWW/45-196      | Q0AU63.1     | PF00484.17 | 40.40 | 0.00 |
| TRINITY_Q236B5_TETTS/16-110      | Q236B5.1     | PF12796.5; | 40.40 | 0.00 |
| TRINITY_J9JYL8_ACYPI/216-375     | J9JYL8.2     | PF01399.25 | 40.40 | 0.00 |
| TRINITY_D2VTD5_NAEGR/50-351      | D2VTD5.1     | PF02685.14 | 40.40 | 0.00 |
| TRINITY_W7XH00_TETTS/296-364     | W7XH00.1     | PF01485.19 | 40.40 | 0.00 |
| TRINITY_D2V2D9_NAEGR/1-106       | D2V2D9.1     | PF00125.22 | 40.40 | 0.00 |
| TRINITY_L8GPG1_ACACA/240-559     | L8GPG1.1     | PF02567.14 | 40.40 | 0.00 |
| TRINITY_C9SQ36_VERA1/59-525      | C9SQ36.1     | PF00443.27 | 40.40 | 0.00 |
| TRINITY_A0CJW2_PARTE/47-528      | A0CJW2.1     | PF00501.26 | 40.40 | 0.00 |
| TRINITY_F4Q2R1_DICFS/21-158      | F4Q2R1.1     | PF02221.13 | 40.40 | 0.00 |
| TRINITY_J4KMF2_BEAB2/252-629     | J4KMF2.1     | PF00176.21 | 40.40 | 0.00 |
| TRINITY_I0YPU8_9CHLO/38-335      | I0YPU8.1     | PF00083.22 | 40.40 | 0.00 |
| TRINITY_F0YER8_AURAN/12-109      | F0YER8.1     | PF01588.18 | 40.40 | 0.00 |
| TRINITY_F8WH20_MOUSE/459-803     | F8WH20.1     | PF01237.16 | 40.40 | 0.00 |
| TRINITY_E1ZFJ9_CHLVA/326-429     | E1ZFJ9.1     | PF11987.6; | 40.40 | 0.00 |
| TRINITY_A0A075B096_9FUNG/18-127  | A0A075B096.1 | PF0177     | 40.40 | 0.00 |
| TRINITY_E1ZIZ3_CHLVA/4-194       | E1ZIZ3.1     | PF07281.10 | 40.40 | 0.00 |
| TRINITY_F0Z871_DICPU/21-257      | F0Z871.1     | PF00481.19 | 40.40 | 0.00 |
| TRINITY_A0A059AJH8_EUCGR/121-227 | A0A059AJH8.1 | PF0015     | 40.40 | 0.00 |
| TRINITY_L8GPR0_ACACA/208-389     | L8GPR0.1     | PF00621.18 | 40.40 | 0.00 |
| TRINITY_A0A0N4TCS9_BRUPA/10-105  | A0A0N4TCS9.1 | PF0866     | 40.40 | 0.00 |
| TRINITY_A0A059LM80_9CHLO/187-411 | A0A059LM80.1 | PF0403     | 40.40 | 0.00 |
| TRINITY_I0Z6Q8_9CHLO/60-252      | I0Z6Q8.1     | PF03006.18 | 40.40 | 0.00 |
| TRINITY_A4VDN1_TETTS/4-430       | A4VDN1.1     | PF00067.20 | 40.40 | 0.00 |
| TRINITY_H3G9F8_PHYRM/463-692     | H3G9F8.1     | PF05843.12 | 40.40 | 0.00 |
| TRINITY_A0A0M9VL61_9MICO/7-194   | A0A0M9VL61.1 | PF0010     | 40.40 | 0.00 |
| TRINITY_Q54EQ6_DICDI/82-222      | Q54EQ6.1     | PF01764.23 | 40.40 | 0.00 |
| TRINITY_F0ZJW2_DICPU/563-743     | F0ZJW2.1     | PF02145.13 | 40.40 | 0.00 |
| TRINITY_D3BLW9_POLPA/1582-1669   | D3BLW9.1     | PF00027.27 | 40.40 | 0.00 |
| TRINITY_D8U0R7_VOLCA/48-409      | D8U0R7.1     | PF07690.14 | 40.40 | 0.00 |
| TRINITY_M0T2K1_MUSAM/14-175      | M0T2K1.1     | PF00071.20 | 40.40 | 0.00 |
| TRINITY_F0ZWR7_DICPU/375-764     | F0ZWR7.1     | PF11864.6; | 40.40 | 0.00 |
| TRINITY_L8HCV9_ACACA/8-432       | L8HCV9.1     | PF13347.4; | 40.40 | 0.00 |
| TRINITY_G8T8X8_NIAKG/18-219      | G8T8X8.1     | PF13568.4; | 40.40 | 0.00 |
| TRINITY_GEFK_DICDI/1319-1498     | Q54FF3.1     | PF00617.17 | 40.40 | 0.00 |
| TRINITY_D8TY73_VOLCA/22-158      | D8TY73.1     | PF13673.5; | 40.40 | 0.00 |
| TRINITY_A0CA55_PARTE/30-871      | A0CA55.1     | PF02460.16 | 40.40 | 0.00 |
| TRINITY_D8TLJ5_VOLCA/156-794     | D8TLJ5.1     | PF04762.10 | 40.40 | 0.00 |
| TRINITY_A0A022QNZ2_ERYGU/465-709 | A0A022QNZ2.1 | PF0771     | 40.40 | 0.00 |
| TRINITY_I0YSB3_9CHLO/32-246      | I0YSB3.1     | PF00106.23 | 40.40 | 0.00 |
| TRINITY_A0CQG7_PARTE/77-171      | A0CQG7.1     | PF12796.5; | 40.40 | 0.00 |
| TRINITY_B6HGX9_PENRW/378-750     | B6HGX9.1     | PF00702.24 | 40.40 | 0.00 |
| TRINITY_D8UJW0_VOLCA/85-273      | D8UJW0.1     | PF07714.15 | 40.40 | 0.00 |
| TRINITY_L5KHJ0_PTEAL/55-463      | L5KHJ0.1     | PF00083.22 | 40.40 | 0.00 |
| TRINITY_I4VUZ4_9GAMM/248-396     | I4VUZ4.1     | PF10282.7; | 40.40 | 0.00 |
| TRINITY_L8GHR5_ACACA/165-276     | L8GHR5.1     | PF13519.4; | 40.40 | 0.00 |
| TRINITY_D8TST9_VOLCA/621-848     | D8TST9.1     | PF00211.18 | 40.40 | 0.00 |
| TRINITY_A0A088AH46_APIME/4-157   | A0A088AH46.1 | PF0716     | 40.40 | 0.00 |
| TRINITY_S8CX08_9LAMI/494-827     | S8CX08.1     | PF00120.22 | 40.40 | 0.00 |
| TRINITY_D8TNB9_VOLCA/33-337      | D8TNB9.1     | PF03006.18 | 40.40 | 0.00 |
| TRINITY_I7MIX5_TETTS/2-121       | I7MIX5.1     | PF05915.10 | 40.40 | 0.00 |
| TRINITY_A0A078B9W1_STYLE/27-329  | A0A078B9W1.1 | PF0056     | 40.30 | 0.00 |
| TRINITY_T1K4Z2_TETUR/57-124      | T1K4Z2.1     | PF01722.16 | 40.30 | 0.00 |
| TRINITY_L9L202_TUPCH/116-185     | L9L202.1     | PF00076.20 | 40.30 | 0.00 |

|                                  |                     |       |      |
|----------------------------------|---------------------|-------|------|
| TRINITY_A0EBS1_PARTE/150-392     | A0EBS1.1 PF03133.13 | 40.30 | 0.00 |
| TRINITY_L8HCK6_ACACA/9-255       | L8HCK6.1 PF01370.19 | 40.30 | 0.00 |
| TRINITY_I0YKY3_9CHLO/718-905     | I0YKY3.1 PF01369.18 | 40.30 | 0.00 |
| TRINITY_A0ECR3_PARTE/7-288       | A0ECR3.1 PF14938.4; | 40.30 | 0.00 |
| TRINITY_F0Z6A9_DICPU/14-200      | F0Z6A9.1 PF00485.16 | 40.30 | 0.00 |
| TRINITY_A0BBG7_PARTE/2-367       | A0BBG7.1 PF00022.17 | 40.30 | 0.00 |
| TRINITY_A0A0A1UBU5_ENTIV/727-986 | A0A0A1UBU5.1 PF0771 | 40.30 | 0.00 |
| TRINITY_A9RW86_PHYPA/1-409       | A9RW86.1 PF03901.15 | 40.30 | 0.00 |
| TRINITY_A0A024VJJ5_PLAFA/28-278  | A0A024VJJ5.1 PF0192 | 40.30 | 0.00 |
| TRINITY_P80_DICDI/393-516        | Q7YXD4.1 PF04145.13 | 40.30 | 0.00 |
| TRINITY_A8PB07_COPC7/2-375       | A8PB07.1 PF00022.17 | 40.30 | 0.00 |
| TRINITY_A0A0J8F513_BETVU/156-360 | A0A0J8F513.1 PF1438 | 40.30 | 0.00 |
| TRINITY_I7MKV0_TETTS/148-266     | I7MKV0.2 PF13863.4; | 40.30 | 0.00 |
| TRINITY_J9ISW6_9SPIT/1229-1443   | J9ISW6.1 PF14633.4; | 40.30 | 0.00 |
| TRINITY_K9WEX9_9CYAN/10-331      | K9WEX9.1 PF13434.4; | 40.30 | 0.00 |
| TRINITY_C3YRI7_BRAFL/24-243      | C3YRI7.1 PF00149.26 | 40.30 | 0.00 |
| TRINITY_U9TU79_RHIID/30-109      | U9TU79.1 PF09409.8; | 40.30 | 0.00 |
| TRINITY_A0DFQ8_PARTE/4-232       | A0DFQ8.1 PF04670.10 | 40.30 | 0.00 |
| TRINITY_F0ZIS5_DICPU/509-828     | F0ZIS5.1 PF04840.10 | 40.30 | 0.00 |
| TRINITY_D8UJQ9_VOLCA/63-496      | D8UJQ9.1 PF00854.19 | 40.30 | 0.00 |
| TRINITY_A0A0P7XD05_9TELE/391-881 | A0A0P7XD05.1 PF0320 | 40.30 | 0.00 |
| TRINITY_S8DQN0_FOMPI/504-733     | S8DQN0.1 PF13604.4; | 40.30 | 0.00 |
| TRINITY_I3LZC5 ICTTR/3-535       | I3LZC5.1 PF00743.17 | 40.30 | 0.00 |
| TRINITY_Q22GJ3_TETTS/84-228      | Q22GJ3.1 PF04658.11 | 40.30 | 0.00 |
| TRINITY_A0A0D2UAR8_CAPO3/95-270  | A0A0D2UAR8.1 PF0062 | 40.30 | 0.00 |
| TRINITY_J9IMZ6_9SPIT/896-1027    | J9IMZ6.1 PF00072.22 | 40.30 | 0.00 |
| TRINITY_F4PZS0_DICFS/51-299      | F4PZS0.1 PF10230.7; | 40.30 | 0.00 |
| TRINITY_G4Z5K0_PHYSP/12-291      | G4Z5K0.1 PF07993.10 | 40.30 | 0.00 |
| TRINITY_L8H264_ACACA/433-569     | L8H264.1 PF06544.10 | 40.30 | 0.00 |
| TRINITY_D8U141_VOLCA/23-143      | D8U141.1 PF01138.19 | 40.30 | 0.00 |
| TRINITY_F4PGZ0_DICFS/296-492     | F4PGZ0.1 PF04811.13 | 40.30 | 0.00 |
| TRINITY_D8LU94_ECTSI/82-277      | D8LU94.1 PF11715.6; | 40.30 | 0.00 |
| TRINITY_E5T190_TRISP/41-158      | E5T190.1 PF00581.18 | 40.30 | 0.00 |
| TRINITY_F2TYP3_SALR5/9-336       | F2TYP3.1 PF00503.18 | 40.30 | 0.00 |
| TRINITY_L8GFH7_ACACA/620-829     | L8GFH7.1 PF00616.17 | 40.30 | 0.00 |
| TRINITY_D8TGX0_VOLCA/1790-1999   | D8TGX0.1 PF12775.5; | 40.30 | 0.00 |
| TRINITY_I0Z7Q5_9CHLO/1-366       | I0Z7Q5.1 PF00067.20 | 40.30 | 0.00 |
| TRINITY_A0A0G4IP25_PLABS/150-297 | A0A0G4IP25.1 PF0419 | 40.30 | 0.00 |
| TRINITY_G0R0B2_ICHMG/42-369      | G0R0B2.1 PF05770.9; | 40.30 | 0.00 |
| TRINITY_F0ZP92_DICPU/298-480     | F0ZP92.1 PF00621.18 | 40.30 | 0.00 |
| TRINITY_I0YKK8_9CHLO/313-503     | I0YKK8.1 PF08737.8; | 40.30 | 0.00 |
| TRINITY_A4RUB8_OSTLU/240-304     | A4RUB8.1 PF00076.20 | 40.30 | 0.00 |
| TRINITY_C1FFY4_MICSR/1990-2222   | C1FFY4.1 PF03568.15 | 40.30 | 0.00 |
| TRINITY_A0BK04_PARTE/149-277     | A0BK04.1 PF04326.12 | 40.30 | 0.00 |
| TRINITY_A0A0D2VIL9_CAPO3/5-77    | A0A0D2VIL9.1 PF0525 | 40.30 | 0.00 |
| TRINITY_J9GDG0_9SPIT/883-1129    | J9GDG0.1 PF16212.3; | 40.30 | 0.00 |
| TRINITY_I0Z6V9_9CHLO/48-349      | I0Z6V9.1 PF13896.4; | 40.30 | 0.00 |
| TRINITY_L8GS17_ACACA/603-781     | L8GS17.1 PF00617.17 | 40.30 | 0.00 |
| TRINITY_A9TCE6_PHYPA/157-467     | A9TCE6.1 PF08506.8; | 40.30 | 0.00 |
| TRINITY_L8GR65_ACACA/345-515     | L8GR65.1 PF03770.14 | 40.30 | 0.00 |
| TRINITY_K4C5W7_SOLLC/32-171      | K4C5W7.1 PF01909.21 | 40.30 | 0.00 |
| TRINITY_L8H3W5_ACACA/971-1093    | L8H3W5.1 PF00271.29 | 40.30 | 0.00 |
| TRINITY_A0A059LL35_9CHLO/12-297  | A0A059LL35.1 PF0338 | 40.30 | 0.00 |
| TRINITY_D8TWQ4_VOLCA/120-450     | D8TWQ4.1 PF01593.22 | 40.30 | 0.00 |
| TRINITY_H3CA14_TETNG/107-409     | H3CA14.1 PF00122.18 | 40.30 | 0.00 |
| TRINITY_D3B8P4_POLPA/1391-1620   | D3B8P4.1 PF07714.15 | 40.30 | 0.00 |
| TRINITY_C3YNI2_BRAFL/38-202      | C3YNI2.1 PF00270.27 | 40.30 | 0.00 |
| TRINITY_K1PP44_CRAGI/10-83       | K1PP44.1 PF00240.21 | 40.30 | 0.00 |
| TRINITY_A0A059LS85_9CHLO/131-341 | A0A059LS85.1 PF0505 | 40.30 | 0.00 |
| TRINITY_C4LXP5_ENTHI/8-168       | C4LXP5.1 PF00071.20 | 40.20 | 0.00 |
| TRINITY_K0IP37_NITGG/41-257      | K0IP37.1 PF12138.6; | 40.20 | 0.00 |

|                                   |              |            |       |      |
|-----------------------------------|--------------|------------|-------|------|
| TRINITY_G0R080_ICHMG/9-179        | G0R080.1     | PF00300.20 | 40.20 | 0.00 |
| TRINITY_H3CMX4_TETNG/13-257       | H3CMX4.1     | PF03998.11 | 40.20 | 0.00 |
| TRINITY_J9EIN9_9SPIT/452-555      | J9EIN9.1     | PF12796.5; | 40.20 | 0.00 |
| TRINITY_Q16QR4_AEDAE/180-429      | Q16QR4.1     | PF05206.12 | 40.20 | 0.00 |
| TRINITY_A0CJZ7_PARTE/8-163        | A0CJZ7.1     | PF00795.20 | 40.20 | 0.00 |
| TRINITY_B8A5M6_DANRE/403-508      | B8A5M6.1     | PF00085.18 | 40.20 | 0.00 |
| TRINITY_J9ILE1_9SPIT/1169-1300    | J9ILE1.1     | PF00072.22 | 40.20 | 0.00 |
| TRINITY_I7MHJ7_TETTS/1612-1732    | I7MHJ7.2     | PF00072.22 | 40.20 | 0.00 |
| TRINITY_T1JDY6_STRMM/63-161       | T1JDY6.1     | PF12894.5; | 40.20 | 0.00 |
| TRINITY_A0A058Z459_9EUKA/58-298   | A0A058Z459.1 | PF0115     | 40.20 | 0.00 |
| TRINITY_V4B1M3_LOTGI/23-303       | V4B1M3.1     | PF00069.23 | 40.20 | 0.00 |
| TRINITY_A0BMQ9_PARTE/112-376      | A0BMQ9.1     | PF00069.23 | 40.20 | 0.00 |
| TRINITY_G8BJW8_CANPC/6-167        | G8BJW8.1     | PF00071.20 | 40.20 | 0.00 |
| TRINITY_A0A0P7ZDX1_9TELE/109-398  | A0A0P7ZDX1.1 | PF0520     | 40.20 | 0.00 |
| TRINITY_M7BJX8_CHEMY/357-605      | M7BJX8.1     | PF09822.7; | 40.20 | 0.00 |
| TRINITY_C5KL65_PERM5/172-239      | C5KL65.1     | PF00013.27 | 40.20 | 0.00 |
| TRINITY_E2BR37_HARSA/2-398        | E2BR37.1     | PF00450.20 | 40.20 | 0.00 |
| TRINITY_Q23QF2_TETTS/248-571      | Q23QF2.2     | PF03133.13 | 40.20 | 0.00 |
| TRINITY_A0A078A0U8_STYLE/283-375  | A0A078A0U8.1 | PF0183     | 40.20 | 0.00 |
| TRINITY_I0YNY9_9CHLO/55-299       | I0YNY9.1     | PF10494.7; | 40.20 | 0.00 |
| TRINITY_J9K3I7_ACYPI/702-906      | J9K3I7.2     | PF00069.23 | 40.20 | 0.00 |
| TRINITY_A0A024UB11_9STRA/150-422  | A0A024UB11.1 | PF0066     | 40.20 | 0.00 |
| TRINITY_R0GI74_9BRAS/32-488       | R0GI74.1     | PF00450.20 | 40.20 | 0.00 |
| TRINITY_A0D3L9_PARTE/6-126        | A0D3L9.1     | PF00466.18 | 40.20 | 0.00 |
| TRINITY_A0A075API1_9FUNG/162-264  | A0A075API1.1 | PF1275     | 40.20 | 0.00 |
| TRINITY_D3B8L6_POLPA/799-915      | D3B8L6.1     | PF17034.3; | 40.20 | 0.00 |
| TRINITY_A0A0B0MP59_GOSAR/696-1148 | A0A0B0MP59.1 | PF0052     | 40.20 | 0.00 |
| TRINITY_D8LB42_ECTSI/657-909      | D8LB42.1     | PF07714.15 | 40.20 | 0.00 |
| TRINITY_D3BJM0_POLPA/633-901      | D3BJM0.1     | PF00069.23 | 40.20 | 0.00 |
| TRINITY_A0A0E0N1I3_ORYRU/75-189   | A0A0E0N1I3.1 | PF1226     | 40.20 | 0.00 |
| TRINITY_A0DSX0_PARTE/335-463      | A0DSX0.1     | PF00565.15 | 40.20 | 0.00 |
| TRINITY_A0A078A3P9_STYLE/651-804  | A0A078A3P9.1 | PF0056     | 40.20 | 0.00 |
| TRINITY_A0A078ALJ4_STYLE/354-498  | A0A078ALJ4.1 | PF0753     | 40.20 | 0.00 |
| TRINITY_R1E4R6_EMIHU/5-166        | R1E4R6.1     | PF00071.20 | 40.20 | 0.00 |
| TRINITY_M1VZW3_CLAP2/263-585      | M1VZW3.1     | PF09423.8; | 40.20 | 0.00 |
| TRINITY_Q23DV4_TETTS/29-454       | Q23DV4.1     | PF04597.12 | 40.20 | 0.00 |
| TRINITY_D2V1E9_NAEGR/25-106       | D2V1E9.1     | PF03951.17 | 40.20 | 0.00 |
| TRINITY_D8LIL3_ECTSI/337-443      | D8LIL3.1     | PF00651.29 | 40.20 | 0.00 |
| TRINITY_E1ZGW5_CHLVA/15-381       | E1ZGW5.1     | PF16496.3; | 40.20 | 0.00 |
| TRINITY_D3BUV7_POLPA/393-543      | D3BUV7.1     | PF00620.25 | 40.20 | 0.00 |
| TRINITY_I7M682_TETTS/710-925      | I7M682.2     | PF12807.5; | 40.20 | 0.00 |
| TRINITY_L8GZC0_ACACA/119-285      | L8GZC0.1     | PF01872.15 | 40.20 | 0.00 |
| TRINITY_A0A067QSY9_ZOONE/1-120    | A0A067QSY9.1 | PF0075     | 40.20 | 0.00 |
| TRINITY_D8TZ67_VOLCA/1522-1849    | D8TZ67.1     | PF03747.12 | 40.20 | 0.00 |
| TRINITY_A0A067JUG5_JATCU/42-416   | A0A067JUG5.1 | PF0028     | 40.20 | 0.00 |
| TRINITY_Q22XU8_TETTS/54-237       | Q22XU8.3     | PF06452.9; | 40.20 | 0.00 |
| TRINITY_D8UEH3_VOLCA/245-468      | D8UEH3.1     | PF13489.4; | 40.20 | 0.00 |
| TRINITY_H3E6W2_PRIIPA/841-961     | H3E6W2.1     | PF00622.26 | 40.20 | 0.00 |
| TRINITY_A9TUH0_PHYPA/288-386      | A9TUH0.1     | PF13499.4; | 40.20 | 0.00 |
| TRINITY_D8U2Y4_VOLCA/70-217       | D8U2Y4.1     | PF00106.23 | 40.20 | 0.00 |
| TRINITY_Q23R88_TETTS/18-272       | Q23R88.1     | PF00069.23 | 40.20 | 0.00 |
| TRINITY_L8GG36_ACACA/72-255       | L8GG36.1     | PF02145.13 | 40.20 | 0.00 |
| TRINITY_G0SDJ2_CHATD/240-715      | G0SDJ2.1     | PF06862.10 | 40.20 | 0.00 |
| TRINITY_A0EGL5_PARTE/997-1236     | A0EGL5.1     | PF00233.17 | 40.10 | 0.00 |
| TRINITY_A0DTT7_PARTE/327-627      | A0DTT7.1     | PF00069.23 | 40.10 | 0.00 |
| TRINITY_A0A0F3KNK0_9GAMM/14-193   | A0A0F3KNK0.1 | PF1353     | 40.10 | 0.00 |
| TRINITY_F4PJJ7_DICFS/115-484      | F4PJJ7.1     | PF00854.19 | 40.10 | 0.00 |
| TRINITY_A0A0E3ZJB7_9BACT/31-235   | A0A0E3ZJB7.1 | PF0440     | 40.10 | 0.00 |
| TRINITY_F0ZUR8_DICPU/9-209        | F0ZUR8.1     | PF14938.4; | 40.10 | 0.00 |
| TRINITY_A0A0D2WW75_CAPO3/6-180    | A0A0D2WW75.1 | PF0080     | 40.10 | 0.00 |
| TRINITY_A9RCP9_PHYPA/61-483       | A9RCP9.1     | PF00450.20 | 40.10 | 0.00 |

|                                  |              |            |       |      |
|----------------------------------|--------------|------------|-------|------|
| TRINITY_A0CUS6_PARTE/513-811     | A0CUS6.1     | PF03372.21 | 40.10 | 0.00 |
| TRINITY_D6W990_TRICA/133-463     | D6W990.1     | PF05028.12 | 40.10 | 0.00 |
| TRINITY_A0CS82_PARTE/14-193      | A0CS82.1     | PF03248.11 | 40.10 | 0.00 |
| TRINITY_I0YMM8_9CHLO/86-517      | I0YMM8.1     | PF03069.13 | 40.10 | 0.00 |
| TRINITY_U4K610_9VIBR/46-287      | U4K610.1     | PF00561.18 | 40.10 | 0.00 |
| TRINITY_G0QK40_ICHMG/27-393      | G0QK40.1     | PF07690.14 | 40.10 | 0.00 |
| TRINITY_L8GMG4_ACACA/32-285      | L8GMG4.1     | PF02265.14 | 40.10 | 0.00 |
| TRINITY_F0ZNA0_DICPU/21-199      | F0ZNA0.1     | PF01105.22 | 40.10 | 0.00 |
| TRINITY_L8GT92_ACACA/55-226      | L8GT92.1     | PF00092.26 | 40.10 | 0.00 |
| TRINITY_D8U3I5_VOLCA/269-427     | D8U3I5.1     | PF00270.27 | 40.10 | 0.00 |
| TRINITY_K7H5G4_CAEJA/381-536     | K7H5G4.1     | PF03712.13 | 40.10 | 0.00 |
| TRINITY_A0A0E3UVI8_9BACT/37-178  | A0A0E3UVI8.1 | PF0821     | 40.10 | 0.00 |
| TRINITY_M3ZMC0_XIPMA/67-318      | M3ZMC0.1     | PF00069.23 | 40.10 | 0.00 |
| TRINITY_A8IXA0_CHLRE/244-369     | A8IXA0.1     | PF01554.16 | 40.10 | 0.00 |
| TRINITY_I0YM35_9CHLO/12-222      | I0YM35.1     | PF04757.12 | 40.10 | 0.00 |
| TRINITY_L8HBF7_ACACA/234-428     | L8HBF7.1     | PF02958.18 | 40.10 | 0.00 |
| TRINITY_K4C6Z0_SOLLC/57-596      | K4C6Z0.1     | PF02990.14 | 40.10 | 0.00 |
| TRINITY_A0BG36_PARTE/5-220       | A0BG36.1     | PF08713.9; | 40.10 | 0.00 |
| TRINITY_E1ZR23_CHLVA/1-185       | E1ZR23.1     | PF00582.24 | 40.10 | 0.00 |
| TRINITY_T1HYY9_RHOPR/5-259       | T1HYY9.1     | PF03194.13 | 40.10 | 0.00 |
| TRINITY_D8TMZ5_VOLCA/89-222      | D8TMZ5.1     | PF04832.10 | 40.10 | 0.00 |
| TRINITY_A0CXP3_PARTE/26-844      | A0CXP3.1     | PF01496.17 | 40.10 | 0.00 |
| TRINITY_I4B662_TURPD/34-279      | I4B662.1     | PF00561.18 | 40.10 | 0.00 |
| TRINITY_D8TJ68_VOLCA/55-321      | D8TJ68.1     | PF01073.17 | 40.10 | 0.00 |
| TRINITY_D3B9P3_POLPA/85-246      | D3B9P3.1     | PF03031.16 | 40.10 | 0.00 |
| TRINITY_B9S9V5_RICCO/84-363      | B9S9V5.1     | PF06012.10 | 40.10 | 0.00 |
| TRINITY_I1N3M6_SOYBN/7-176       | I1N3M6.2     | PF00106.23 | 40.10 | 0.00 |
| TRINITY_W7UAA9_9STRA/162-337     | W7UAA9.1     | PF05050.10 | 40.10 | 0.00 |
| TRINITY_I0HIU6_ACTM4/505-636     | I0HIU6.1     | PF00004.27 | 40.10 | 0.00 |
| TRINITY_I1G669_AMPQE/284-402     | I1G669.1     | PF00581.18 | 40.10 | 0.00 |
| TRINITY_L8GVV2_ACACA/2-276       | L8GVV2.1     | PF06454.9; | 40.10 | 0.00 |
| TRINITY_D2VRF8_NAEGR/1-426       | D2VRF8.1     | PF14727.4; | 40.10 | 0.00 |
| TRINITY_A0A067CDF1_SAPPC/8-67    | A0A067CDF1.1 | PF0534     | 40.00 | 0.00 |
| TRINITY_Q23QF5_TETTS/161-229     | Q23QF5.2     | PF00505.17 | 40.00 | 0.00 |
| TRINITY_H3FEW2_PRIIPA/81-220     | H3FEW2.1     | PF01764.23 | 40.00 | 0.00 |
| TRINITY_I7MCK6_TETTS/51-569      | I7MCK6.2     | PF02990.14 | 40.00 | 0.00 |
| TRINITY_I7MHQ9_TETTS/20-306      | I7MHQ9.2     | PF00069.23 | 40.00 | 0.00 |
| TRINITY_G0QXF6_ICHMG/1-194       | G0QXF6.1     | PF14309.4; | 40.00 | 0.00 |
| TRINITY_I7MMP5_TETTS/4189-4485   | I7MMP5.2     | PF00632.23 | 40.00 | 0.00 |
| TRINITY_D6U2B0_9CHLR/18-113      | D6U2B0.1     | PF08818.9; | 40.00 | 0.00 |
| TRINITY_A0A0N8K0P3_9TELE/163-383 | A0A0N8K0P3.1 | PF1308     | 40.00 | 0.00 |
| TRINITY_G4VDJ6_SCHMA/5-177       | G4VDJ6.1     | PF00025.19 | 40.00 | 0.00 |
| TRINITY_A0BHK3_PARTE/94-275      | A0BHK3.1     | PF03357.19 | 40.00 | 0.00 |
| TRINITY_W7XFP0_TETTS/100-339     | W7XFP0.1     | PF00889.17 | 40.00 | 0.00 |
| TRINITY_A0A077ZW47_STYLE/354-499 | A0A077ZW47.1 | PF0753     | 40.00 | 0.00 |
| TRINITY_D3BGE8_POLPA/10-440      | D3BGE8.1     | PF01593.22 | 40.00 | 0.00 |
| TRINITY_M0QSN1_ACACA/309-399     | M0QSN1.1     | PF02214.20 | 40.00 | 0.00 |
| TRINITY_L8HBW7_ACACA/952-1197    | L8HBW7.1     | PF07714.15 | 40.00 | 0.00 |
| TRINITY_L8H764_ACACA/17-275      | L8H764.1     | PF03372.21 | 40.00 | 0.00 |
| TRINITY_L8GDV2_ACACA/554-812     | L8GDV2.1     | PF07714.15 | 40.00 | 0.00 |
| TRINITY_M5WNT3_PRUPE/256-392     | M5WNT3.1     | PF04146.13 | 40.00 | 0.00 |
| TRINITY_M4BH02_HYAAE/21-255      | M4BH02.1     | PF01370.19 | 40.00 | 0.00 |
| TRINITY_D8R2B4_SELML/111-306     | D8R2B4.1     | PF04389.15 | 40.00 | 0.00 |
| TRINITY_D8U3Z3_VOLCA/6-409       | D8U3Z3.1     | PF03372.21 | 40.00 | 0.00 |
| TRINITY_A0A0M8K6W4_9CHLR/16-417  | A0A0M8K6W4.1 | PF0597     | 40.00 | 0.00 |
| TRINITY_A0A088APP1_APIME/248-559 | A0A088APP1.1 | PF0451     | 40.00 | 0.00 |
| TRINITY_L8H4P4_ACACA/191-320     | L8H4P4.1     | PF00293.26 | 40.00 | 0.00 |
| TRINITY_A9AVH5_HERA2/104-281     | A9AVH5.1     | PF02655.12 | 40.00 | 0.00 |
| TRINITY_A0A0D2WST2_CAPO3/27-317  | A0A0D2WST2.1 | PF0842     | 40.00 | 0.00 |
| TRINITY_I0KFG2_9BACT/11-118      | I0KFG2.1     | PF12680.5; | 40.00 | 0.00 |
| TRINITY_A0A0G1X5K3_9BACT/25-151  | A0A0G1X5K3.1 | PF0164     | 40.00 | 0.00 |

|                                   |                     |       |      |
|-----------------------------------|---------------------|-------|------|
| TRINITY_A0A0F5Y7G7_9CYAN/389-507  | A0A0F5Y7G7.1 PF0251 | 40.00 | 0.00 |
| TRINITY_I7M9T1_TETTS/284-344      | I7M9T1.2 PF13499.4; | 40.00 | 0.00 |
| TRINITY_Q9RVJ8_DEIRA/11-370       | Q9RVJ8.1 PF00155.19 | 40.00 | 0.00 |
| TRINITY_F7BJ78_MACMU/83-176       | F7BJ78.1 PF12796.5; | 40.00 | 0.00 |
| TRINITY_F4QD17_DICFS/238-364      | F4QD17.1 PF03188.14 | 40.00 | 0.00 |
| TRINITY_G2QBT0_MYCTT/406-545      | G2QBT0.1 PF00005.25 | 40.00 | 0.00 |
| TRINITY_D8TWT3_VOLCA/56-182       | D8TWT3.1 PF03517.11 | 40.00 | 0.00 |
| TRINITY_F0ZB12_DICPU/1091-1610    | F0ZB12.1 PF06920.11 | 40.00 | 0.00 |
| TRINITY_A0A075R593_BRELA/182-435  | A0A075R593.1 PF0403 | 40.00 | 0.00 |
| TRINITY_C3Z2U8_BRAFL/1-91         | C3Z2U8.1 PF08285.9; | 40.00 | 0.00 |
| TRINITY_D8SQH8_SELML/67-214       | D8SQH8.1 PF04073.13 | 40.00 | 0.00 |
| TRINITY_J9IXZ0_9SPIT/597-711      | J9IXZ0.1 PF13893.4; | 40.00 | 0.00 |
| TRINITY_Q22CF9_TETTS/26-290       | Q22CF9.2 PF06098.9; | 40.00 | 0.00 |
| TRINITY_X6LEC0_RETFI/128-273      | X6LEC0.1 PF07534.14 | 40.00 | 0.00 |
| TRINITY_I7LV23_TETTS/355-496      | I7LV23.2 PF08016.10 | 40.00 | 0.00 |
| TRINITY_X1WJ08_ACYPI/105-211      | X1WJ08.1 PF00307.29 | 40.00 | 0.00 |
| TRINITY_G0QW53_ICHMG/57-236       | G0QW53.1 PF03959.11 | 40.00 | 0.00 |
| TRINITY_D8TSZ7_VOLCA/1690-1975    | D8TSZ7.1 PF07714.15 | 40.00 | 0.00 |
| TRINITY_H9UFC8_SPIAZ/7-212        | H9UFC8.1 PF00106.23 | 40.00 | 0.00 |
| TRINITY_D8REM8_SELML/150-380      | D8REM8.1 PF01544.16 | 40.00 | 0.00 |
| TRINITY_W7X1I7_TETTS/95-219       | W7X1I7.1 PF04178.10 | 40.00 | 0.00 |
| TRINITY_Q4DUM3_TRYCC/1-76         | Q4DUM3.1 PF02798.18 | 40.00 | 0.00 |
| TRINITY_Q0E511_SFAVA/202-508      | Q0E511.1 PF05686.10 | 40.00 | 0.00 |
| TRINITY_L8GZK0_ACACA/419-595      | L8GZK0.1 PF00621.18 | 40.00 | 0.00 |
| TRINITY_A0A022R2D1_ERYGU/4-111    | A0A022R2D1.1 PF0063 | 40.00 | 0.00 |
| TRINITY_W4Y2D5_STRPU/110-495      | W4Y2D5.1 PF02696.12 | 40.00 | 0.00 |
| TRINITY_A8JGH3_CHLRE/7-182        | A8JGH3.1 PF13967.4; | 40.00 | 0.00 |
| TRINITY_A0A0D3FDS0_9ORYZ/161-297  | A0A0D3FDS0.1 PF0549 | 40.00 | 0.00 |
| TRINITY_L8HDD8_ACACA/713-975      | L8HDD8.1 PF07714.15 | 40.00 | 0.00 |
| TRINITY_D2V5F8_NAEGR/81-284       | D2V5F8.1 PF00795.20 | 40.00 | 0.00 |
| TRINITY_K3ZSB1_SETIT/80-514       | K3ZSB1.1 PF00067.20 | 40.00 | 0.00 |
| TRINITY_A0A074RK62_9HOMO/1-233    | A0A074RK62.1 PF0772 | 40.00 | 0.00 |
| TRINITY_I1FLM8_AMPQE/195-377      | I1FLM8.1 PF00644.18 | 40.00 | 0.00 |
| TRINITY_A8J3P1_CHLRE/954-1161     | A8J3P1.1 PF00211.18 | 40.00 | 0.00 |
| TRINITY_E1ZRM2_CHLVA/1-112        | E1ZRM2.1 PF00078.25 | 40.00 | 0.00 |
| TRINITY_L8GMP4_ACACA/297-555      | L8GMP4.1 PF07714.15 | 40.00 | 0.00 |
| TRINITY_I0YRL6_9CHLO/75-235       | I0YRL6.1 PF01554.16 | 40.00 | 0.00 |
| TRINITY_V6M7F5_9EUKA/23-107       | V6M7F5.1 PF16561.3; | 40.00 | 0.00 |
| TRINITY_A0A015N2M8_9GLOM/217-520  | A0A015N2M8.1 PF0597 | 40.00 | 0.00 |
| TRINITY_H3NW39_9GAMM/139-517      | H3NW39.1 PF09423.8; | 40.00 | 0.00 |
| TRINITY_A8I4J0_CHLRE/1046-1288    | A8I4J0.1 PF00664.21 | 40.00 | 0.00 |
| TRINITY_A0A0A1U731_ENTIV/754-1013 | A0A0A1U731.1 PF0771 | 40.00 | 0.00 |
| TRINITY_N4W161_COLOR/21-375       | N4W161.1 PF01212.19 | 40.00 | 0.00 |
| TRINITY_A0A066X8U2_COLSU/106-230  | A0A066X8U2.1 PF0018 | 40.00 | 0.00 |
| TRINITY_A0A060SSE0_PYCCI/993-1239 | A0A060SSE0.1 PF0772 | 40.00 | 0.00 |
| TRINITY_A0A0G2HZ11_9PEZI/139-381  | A0A0G2HZ11.1 PF1690 | 40.00 | 0.00 |
| TRINITY_D3FF62_CONWI/28-99        | D3FF62.1 PF00240.21 | 40.00 | 0.00 |
| TRINITY_A0A077ZSB1_STYLE/58-301   | A0A077ZSB1.1 PF0052 | 40.00 | 0.00 |
| TRINITY_F0Z8D6_DICPU/32-210       | F0Z8D6.1 PF00621.18 | 39.90 | 0.00 |
| TRINITY_Q248F0_TETTS/19-502       | Q248F0.2 PF04916.11 | 39.90 | 0.00 |
| TRINITY_A0BHK3_PARTE/94-275       | A0BHK3.1 PF03357.19 | 39.90 | 0.00 |
| TRINITY_J9EZ03_9SPIT/89-238       | J9EZ03.1 PF01694.20 | 39.90 | 0.00 |
| TRINITY_A0A078B349_STYLE/444-804  | A0A078B349.1 PF0070 | 39.90 | 0.00 |
| TRINITY_A0A078A7I2_STYLE/51-320   | A0A078A7I2.1 PF0300 | 39.90 | 0.00 |
| TRINITY_Q23YB5_TETTS/2-179        | Q23YB5.2 PF06017.11 | 39.90 | 0.00 |
| TRINITY_I1FE73_AMPQE/40-233       | I1FE73.1 PF00149.26 | 39.90 | 0.00 |
| TRINITY_I7LX20_TETTS/11-287       | I7LX20.2 PF00069.23 | 39.90 | 0.00 |
| TRINITY_F4PV70_DICFS/126-308      | F4PV70.1 PF05527.9; | 39.90 | 0.00 |
| TRINITY_F4QDL1_DICFS/652-846      | F4QDL1.1 PF00350.21 | 39.90 | 0.00 |
| TRINITY_T1EMF6_HELRO/7-174        | T1EMF6.1 PF00071.20 | 39.90 | 0.00 |
| TRINITY_L8HHT7_ACACA/150-448      | L8HHT7.1 PF00561.18 | 39.90 | 0.00 |

|                                   |              |            |       |      |
|-----------------------------------|--------------|------------|-------|------|
| TRINITY_A0CMN6_PARTE/121-399      | A0CMN6.1     | PF01457.14 | 39.90 | 0.00 |
| TRINITY_A8HXX5_CHLRE/644-876      | A8HXX5.1     | PF00476.18 | 39.90 | 0.00 |
| TRINITY_A0A090M5K8 OSTTA/301-459  | A0A090M5K8.1 | PF0181     | 39.90 | 0.00 |
| TRINITY_D8TCX8_SELML/26-308       | D8TCX8.1     | PF12931.5; | 39.90 | 0.00 |
| TRINITY_D8TJM5_VOLCA/3-174        | D8TJM5.1     | PF12999.5; | 39.90 | 0.00 |
| TRINITY_C3Z4J5_BRAFL/1102-1273    | C3Z4J5.1     | PF05729.10 | 39.90 | 0.00 |
| TRINITY_D3ED10_GEOS4/20-227       | D3ED10.1     | PF01261.22 | 39.90 | 0.00 |
| TRINITY_A8J6A0_CHLRE/15-174       | A8J6A0.1     | PF00071.20 | 39.90 | 0.00 |
| TRINITY_A0A0E3ZJB7_9BACT/31-235   | A0A0E3ZJB7.1 | PF0440     | 39.90 | 0.00 |
| TRINITY_A8HPD6_CHLRE/16-276       | A8HPD6.1     | PF00520.29 | 39.90 | 0.00 |
| TRINITY_F0ZDP3_DICPU/30-614       | F0ZDP3.1     | PF04113.12 | 39.90 | 0.00 |
| TRINITY_B9ID98_POPTR/45-361       | B9ID98.1     | PF04258.11 | 39.90 | 0.00 |
| TRINITY_A0A0N4T787_BRUPA/6-154    | A0A0N4T787.1 | PF0997     | 39.90 | 0.00 |
| TRINITY_L8GQC0_ACACA/227-408      | L8GQC0.1     | PF00621.18 | 39.90 | 0.00 |
| TRINITY_K6Z0X8_9ALTE/377-558      | K6Z0X8.1     | PF02868.13 | 39.90 | 0.00 |
| TRINITY_A0A0D2ZUC0_BRAOL/383-663  | A0A0D2ZUC0.1 | PF1618     | 39.90 | 0.00 |
| TRINITY_A0A059LS32_9CHLO/49-519   | A0A059LS32.1 | PF0050     | 39.90 | 0.00 |
| TRINITY_G0R1M3_ICHMG/6-229        | G0R1M3.1     | PF00566.16 | 39.90 | 0.00 |
| TRINITY_D8TL04_VOLCA/85-342       | D8TL04.1     | PF00069.23 | 39.90 | 0.00 |
| TRINITY_L8GIR9_ACACA/27-209       | L8GIR9.1     | PF13462.4; | 39.90 | 0.00 |
| TRINITY_I0Z2U0_9CHLO/1-234        | I0Z2U0.1     | PF09468.8; | 39.90 | 0.00 |
| TRINITY_H2Z6S3_CIOSA/41-215       | H2Z6S3.1     | PF13847.4; | 39.90 | 0.00 |
| TRINITY_J9IQR1_9SPIT/1456-1607    | J9IQR1.1     | PF05708.10 | 39.80 | 0.00 |
| TRINITY_A0BV56_PARTE/20-148       | A0BV56.1     | PF09229.9; | 39.80 | 0.00 |
| TRINITY_A0A0A1NUK7_9FUNG/102-350  | A0A0A1NUK7.1 | PF0056     | 39.80 | 0.00 |
| TRINITY_Q22D68_TETTS/29-277       | Q22D68.3     | PF03803.13 | 39.80 | 0.00 |
| TRINITY_A0DV77_PARTE/1-119        | A0DV77.1     | PF01920.18 | 39.80 | 0.00 |
| TRINITY_A0A086YPT4_9FIRM/3-287    | A0A086YPT4.1 | PF0366     | 39.80 | 0.00 |
| TRINITY_K3Y8V3_SETIT/56-173       | K3Y8V3.1     | PF09745.7; | 39.80 | 0.00 |
| TRINITY_J9IG79_9SPIT/139-226      | J9IG79.1     | PF04969.14 | 39.80 | 0.00 |
| TRINITY_K9V5U7_9CYAN/5-202        | K9V5U7.1     | PF00300.20 | 39.80 | 0.00 |
| TRINITY_K9X3A0_9NOST/6-204        | K9X3A0.1     | PF00106.23 | 39.80 | 0.00 |
| TRINITY_B8C3S2_THAPS/695-800      | B8C3S2.1     | PF00651.29 | 39.80 | 0.00 |
| TRINITY_Q239J8_TETTS/159-436      | Q239J8.2     | PF00069.23 | 39.80 | 0.00 |
| TRINITY_X6MTW8_RETFI/11-288       | X6MTW8.1     | PF07065.12 | 39.80 | 0.00 |
| TRINITY_G0QR55_ICHMG/103-222      | G0QR55.1     | PF02518.24 | 39.80 | 0.00 |
| TRINITY_K1QVS3_CRAGI/167-617      | K1QVS3.1     | PF01432.18 | 39.80 | 0.00 |
| TRINITY_D3BD33_POLPA/218-338      | D3BD33.1     | PF10409.7; | 39.80 | 0.00 |
| TRINITY_A0C5Z6_PARTE/21-244       | A0C5Z6.1     | PF07722.11 | 39.80 | 0.00 |
| TRINITY_A0A078AWD3_STYLE/86-173   | A0A078AWD3.1 | PF0095     | 39.80 | 0.00 |
| TRINITY_A0A0A7KLL9_9DEIO/38-159   | A0A0A7KLL9.1 | PF0246     | 39.80 | 0.00 |
| TRINITY_A0A0G4IZH9_PLABS/340-428  | A0A0G4IZH9.1 | PF0138     | 39.80 | 0.00 |
| TRINITY_Q22CF9_TETTS/26-290       | Q22CF9.2     | PF06098.9; | 39.80 | 0.00 |
| TRINITY_A0A0N1H5B2_9EURO/227-347  | A0A0N1H5B2.1 | PF0062     | 39.80 | 0.00 |
| TRINITY_R7YPX5_CONA1/736-837      | R7YPX5.1     | PF04815.13 | 39.80 | 0.00 |
| TRINITY_A7SGM4_NEMVE/6-131        | A7SGM4.1     | PF00188.24 | 39.80 | 0.00 |
| TRINITY_L8H5E2_ACACA/175-397      | L8H5E2.1     | PF10469.7; | 39.80 | 0.00 |
| TRINITY_W5L4N5_ASTMX/13-269       | W5L4N5.1     | PF01073.17 | 39.80 | 0.00 |
| TRINITY_D8U6Z8_VOLCA/20-99        | D8U6Z8.1     | PF01722.16 | 39.80 | 0.00 |
| TRINITY_I0Z8I5_9CHLO/7-129        | I0Z8I5.1     | PF04145.13 | 39.80 | 0.00 |
| TRINITY_A0A0M9YGY2_9ACTN/37-482   | A0A0M9YGY2.1 | PF1352     | 39.80 | 0.00 |
| TRINITY_A8HSL4_CHLRE/1329-1518    | A8HSL4.1     | PF15785.3; | 39.80 | 0.00 |
| TRINITY_Q54EI7_DICDI/72-491       | Q54EI7.1     | PF01490.16 | 39.80 | 0.00 |
| TRINITY_A0A024URS6_9STRA/382-491  | A0A024URS6.1 | PF0065     | 39.80 | 0.00 |
| TRINITY_A0A0G4IP69_PLABS/26-227   | A0A0G4IP69.1 | PF0691     | 39.80 | 0.00 |
| TRINITY_L8HK60_ACACA/154-481      | L8HK60.1     | PF07690.14 | 39.80 | 0.00 |
| TRINITY_A0A077ZRC9_STYLE/288-425  | A0A077ZRC9.1 | PF0066     | 39.80 | 0.00 |
| TRINITY_A0A022S059_ERYGU/909-1026 | A0A022S059.1 | PF0058     | 39.80 | 0.00 |
| TRINITY_F0ZYQ9_DICPU/7-431        | F0ZYQ9.1     | PF04791.14 | 39.80 | 0.00 |
| TRINITY_I7LWU7_TETTS/6-212        | I7LWU7.1     | PF03731.13 | 39.80 | 0.00 |
| TRINITY_W4FRA5_9STRA/170-345      | W4FRA5.1     | PF01612.18 | 39.80 | 0.00 |



|                                    |                     |       |      |
|------------------------------------|---------------------|-------|------|
| TRINITY_L8GFH7_ACACA/620-829       | L8GFH7.1 PF00616.17 | 39.80 | 0.00 |
| TRINITY_L8GI83_ACACA/89-355        | L8GI83.1 PF03062.17 | 39.80 | 0.00 |
| TRINITY_U9SP08_RHIID/2-187         | U9SP08.1 PF04081.11 | 39.80 | 0.00 |
| TRINITY_A0A0N0D609_9DELTA/671-792  | A0A0N0D609.1 PF0007 | 39.80 | 0.00 |
| TRINITY_A0D7E3_PARTE/51-173        | A0D7E3.1 PF00134.21 | 39.80 | 0.00 |
| TRINITY_L8GFZ5_ACACA/382-614       | L8GFZ5.1 PF11831.6; | 39.80 | 0.00 |
| TRINITY_H8MU17_CORCM/22-473        | H8MU17.1 PF00501.26 | 39.80 | 0.00 |
| TRINITY_A8HVJ9_CHLRE/1-298         | A8HVJ9.1 PF14870.4; | 39.80 | 0.00 |
| TRINITY_Q245G5_TETTS/3-166         | Q245G5.2 PF08613.9; | 39.80 | 0.00 |
| TRINITY_A0A077AWJ9_9RICK/2-198     | A0A077AWJ9.1 PF0173 | 39.80 | 0.00 |
| TRINITY_J9F4Y5_9SPIT/78-412        | J9F4Y5.1 PF01237.16 | 39.80 | 0.00 |
| TRINITY_Q2H981_CHAGB/449-680       | Q2H981.1 PF00005.25 | 39.80 | 0.00 |
| TRINITY_D8TIN5_VOLCA/42-343        | D8TIN5.1 PF07082.9; | 39.80 | 0.00 |
| TRINITY_D8TLR9_VOLCA/72-156        | D8TLR9.1 PF16561.3; | 39.80 | 0.00 |
| TRINITY_A0A090M3H0_OSTTA/16-175    | A0A090M3H0.1 PF0007 | 39.80 | 0.00 |
| TRINITY_H1Y6N7_9SPHI/116-335       | H1Y6N7.1 PF09992.7; | 39.80 | 0.00 |
| TRINITY_B6IUG7_RHOCS/23-174        | B6IUG7.1 PF11911.6; | 39.80 | 0.00 |
| TRINITY_K9SZG2_9CYAN/110-382       | K9SZG2.1 PF01636.21 | 39.80 | 0.00 |
| TRINITY_G3PTT1_GASAC/1137-1233     | G3PTT1.1 PF12755.5; | 39.80 | 0.00 |
| TRINITY_I3BZQ3_9GAMM/37-447        | I3BZQ3.1 PF01593.22 | 39.80 | 0.00 |
| TRINITY_B8BSZ0_THAPS/4-370         | B8BSZ0.1 PF07690.14 | 39.80 | 0.00 |
| TRINITY_D8QVL3_SELML/68-528        | D8QVL3.1 PF00176.21 | 39.80 | 0.00 |
| TRINITY_G0QR68_ICHMG/177-395       | G0QR68.1 PF04811.13 | 39.80 | 0.00 |
| TRINITY_A0A0F9WG10_9MICR/1882-2185 | A0A0F9WG10.1 PF0063 | 39.70 | 0.00 |
| TRINITY_Q22NF5_TETTS/2-130         | Q22NF5.2 PF15305.4; | 39.70 | 0.00 |
| TRINITY_A0A078A8V4_STYLE/38-150    | A0A078A8V4.1 PF0314 | 39.70 | 0.00 |
| TRINITY_Q246C6_TETTS/4-223         | Q246C6.1 PF00300.20 | 39.70 | 0.00 |
| TRINITY_A0ZEC3_NODSP/1242-1563     | A0ZEC3.1 PF00698.19 | 39.70 | 0.00 |
| TRINITY_A0A0D2U6S3_CAPO3/3-121     | A0A0D2U6S3.1 PF0892 | 39.70 | 0.00 |
| TRINITY_A0A0J8EQB6_BETVU/47-500    | A0A0J8EQB6.1 PF0008 | 39.70 | 0.00 |
| TRINITY_A0A0N5B4U9_STREA/94-236    | A0A0N5B4U9.1 PF0176 | 39.70 | 0.00 |
| TRINITY_Q54U78_DICDI/386-507       | Q54U78.1 PF13671.4; | 39.70 | 0.00 |
| TRINITY_F0ZDR8_DICPU/7-189         | F0ZDR8.1 PF00025.19 | 39.70 | 0.00 |
| TRINITY_L8HE22_ACACA/223-472       | L8HE22.1 PF07714.15 | 39.70 | 0.00 |
| TRINITY_U5QH35_9CYAN/12-126        | U5QH35.1 PF00903.23 | 39.70 | 0.00 |
| TRINITY_C3Y0H0_BRAFL/1362-1490     | C3Y0H0.1 PF00004.27 | 39.70 | 0.00 |
| TRINITY_A0A077ZV54_STYLE/34-212    | A0A077ZV54.1 PF0173 | 39.70 | 0.00 |
| TRINITY_A7TRV1_VANPO/21-89         | A7TRV1.1 PF00505.17 | 39.70 | 0.00 |
| TRINITY_L8H8I9_ACACA/41-375        | L8H8I9.1 PF04143.12 | 39.70 | 0.00 |
| TRINITY_G0QX56_ICHMG/29-236        | G0QX56.1 PF01027.18 | 39.70 | 0.00 |
| TRINITY_A0CWZ6_PARTE/592-712       | A0CWZ6.1 PF00072.22 | 39.70 | 0.00 |
| TRINITY_L8GII0_ACACA/41-782        | L8GII0.1 PF05786.12 | 39.70 | 0.00 |
| TRINITY_Q23Q43_TETTS/594-871       | Q23Q43.2 PF00580.19 | 39.70 | 0.00 |
| TRINITY_T0RMX0_9STRA/713-836       | T0RMX0.1 PF00622.26 | 39.70 | 0.00 |
| TRINITY_F6UG60_ORNAN/264-513       | F6UG60.2 PF07714.15 | 39.70 | 0.00 |
| TRINITY_L8GIA0_ACACA/63-297        | L8GIA0.1 PF02230.14 | 39.70 | 0.00 |
| TRINITY_D8U323_VOLCA/113-253       | D8U323.1 PF12400.6; | 39.70 | 0.00 |
| TRINITY_A0A087SEF3_AUXPR/73-194    | A0A087SEF3.1 PF0828 | 39.70 | 0.00 |
| TRINITY_D8UCH0_VOLCA/1993-2176     | D8UCH0.1 PF08146.10 | 39.70 | 0.00 |
| TRINITY_A0A0K9NSC8_ZOSMR/431-668   | A0A0K9NSC8.1 PF0481 | 39.70 | 0.00 |
| TRINITY_A0A0D2WSN5_CAPO3/1169-1441 | A0A0D2WSN5.1 PF0066 | 39.70 | 0.00 |
| TRINITY_I7MI37_TETTS/11-167        | I7MI37.1 PF00179.24 | 39.70 | 0.00 |
| TRINITY_G3HFL8_CRIGR/98-346        | G3HFL8.1 PF00069.23 | 39.70 | 0.00 |
| TRINITY_A9T7I3_PHYPA/39-263        | A9T7I3.1 PF01370.19 | 39.70 | 0.00 |
| TRINITY_A9SX47_PHYPA/216-299       | A9SX47.1 PF00011.19 | 39.70 | 0.00 |
| TRINITY_J9I2H5_9SPIT/998-1122      | J9I2H5.1 PF07744.11 | 39.70 | 0.00 |
| TRINITY_C1FIB9_MICSR/337-470       | C1FIB9.1 PF01728.17 | 39.70 | 0.00 |
| TRINITY_I7M6D7_TETTS/137-346       | I7M6D7.1 PF03798.14 | 39.70 | 0.00 |
| TRINITY_K3X0F0_PYTUL/81-259        | K3X0F0.1 PF00092.26 | 39.70 | 0.00 |
| TRINITY_Q22D68_TETTS/29-277        | Q22D68.3 PF03803.13 | 39.70 | 0.00 |
| TRINITY_I0YYN4_9CHLO/278-509       | I0YYN4.1 PF07228.10 | 39.70 | 0.00 |

|                                    |              |            |       |      |
|------------------------------------|--------------|------------|-------|------|
| TRINITY_K1VQN0_TRIAC/270-425       | K1VQN0.1     | PF00069.23 | 39.70 | 0.00 |
| TRINITY_W4XFF3_STRPU/197-480       | W4XFF3.1     | PF01457.14 | 39.70 | 0.00 |
| TRINITY_G0R3R5_ICHMG/1-259         | G0R3R5.1     | PF00069.23 | 39.70 | 0.00 |
| TRINITY_Q9TXH9_CAEEL/217-297       | Q9TXH9.1     | PF00789.18 | 39.70 | 0.00 |
| TRINITY_F2U8H2_SALR5/43-141        | F2U8H2.1     | PF08022.10 | 39.70 | 0.00 |
| TRINITY_A0A0G4FKZ5_9ALVE/823-1093  | A0A0G4FKZ5.1 | PF0066     | 39.70 | 0.00 |
| TRINITY_L1JES3_GUITH/22-118        | L1JES3.1     | PF06058.11 | 39.70 | 0.00 |
| TRINITY_A7RIH2_NEMVE/41-162        | A7RIH2.1     | PF07890.10 | 39.70 | 0.00 |
| TRINITY_I7MOW4_TETTS/279-641       | I7MOW4.2     | PF06602.12 | 39.70 | 0.00 |
| TRINITY_Q3M0Y3_PARTE/32-235        | Q3M0Y3.1     | PF00804.23 | 39.70 | 0.00 |
| TRINITY_J9IGS5_9SPIT/95-325        | J9IGS5.1     | PF07228.10 | 39.70 | 0.00 |
| TRINITY_A0CXP9_PARTE/92-386        | A0CXP9.1     | PF01457.14 | 39.70 | 0.00 |
| TRINITY_D8TKD3_VOLCA/49-222        | D8TKD3.1     | PF04832.10 | 39.70 | 0.00 |
| TRINITY_W5P2G8_SHEEP/497-904       | W5P2G8.1     | PF03372.21 | 39.70 | 0.00 |
| TRINITY_K4C5G6_SOLLC/328-493       | K4C5G6.1     | PF03219.12 | 39.70 | 0.00 |
| TRINITY_A0A087SK67_AUXPR/319-613   | A0A087SK67.1 | PF1618     | 39.70 | 0.00 |
| TRINITY_L8H823_ACACA/184-369       | L8H823.1     | PF07065.12 | 39.70 | 0.00 |
| TRINITY_I7MDQ7_TETTS/112-319       | I7MDQ7.1     | PF01027.18 | 39.70 | 0.00 |
| TRINITY_A0A096PK38_MAIZE/7-105     | A0A096PK38.1 | PF0016     | 39.70 | 0.00 |
| TRINITY_D8TTM6_VOLCA/6-138         | D8TTM6.1     | PF13676.4; | 39.70 | 0.00 |
| TRINITY_D8RM07_SELML/139-188       | D8RM07.1     | PF00628.27 | 39.60 | 0.00 |
| TRINITY_C3YXK2_BRAFL/8-169         | C3YXK2.1     | PF00071.20 | 39.60 | 0.00 |
| TRINITY_A0A078ACA2_STYLE/7-156     | A0A078ACA2.1 | PF1458     | 39.60 | 0.00 |
| TRINITY_A0A067NQ02_PLEOS/5-180     | A0A067NQ02.1 | PF0002     | 39.60 | 0.00 |
| TRINITY_C1N3X3_MICPC/1-109         | C1N3X3.1     | PF04430.12 | 39.60 | 0.00 |
| TRINITY_F2G9F8_ALTMD/624-740       | F2G9F8.1     | PF02518.24 | 39.60 | 0.00 |
| TRINITY_I7M910_TETTS/11-285        | I7M910.1     | PF00069.23 | 39.60 | 0.00 |
| TRINITY_A9TXU9_PHYPA/274-593       | A9TXU9.1     | PF16529.3; | 39.60 | 0.00 |
| TRINITY_L8GMG4_ACACA/32-285        | L8GMG4.1     | PF02265.14 | 39.60 | 0.00 |
| TRINITY_T2KKS9_9FLAO/14-108        | T2KKS9.1     | PF02142.20 | 39.60 | 0.00 |
| TRINITY_D8TTE6_VOLCA/333-484       | D8TTE6.1     | PF12499.6; | 39.60 | 0.00 |
| TRINITY_D2VWH0_NAEGR/2-208         | D2VWH0.1     | PF07722.11 | 39.60 | 0.00 |
| TRINITY_A9RMR0_PHYPA/29-269        | A9RMR0.1     | PF00481.19 | 39.60 | 0.00 |
| TRINITY_M2XBK0_GALSU/9-199         | M2XBK0.1     | PF01612.18 | 39.60 | 0.00 |
| TRINITY_C0ZF04_BREBN/23-129        | C0ZF04.1     | PF13649.4; | 39.60 | 0.00 |
| TRINITY_L8H5S9_ACACA/282-451       | L8H5S9.1     | PF00621.18 | 39.60 | 0.00 |
| TRINITY_K1R3Q5_CRAGI/124-520       | K1R3Q5.1     | PF05185.14 | 39.60 | 0.00 |
| TRINITY_I1CFA0_RHIO9/11-133        | I1CFA0.1     | PF00241.18 | 39.60 | 0.00 |
| TRINITY_G7WK76_METH6/8-255         | G7WK76.1     | PF01226.15 | 39.60 | 0.00 |
| TRINITY_L8HAB9_ACACA/836-943       | L8HAB9.1     | PF00651.29 | 39.60 | 0.00 |
| TRINITY_A0C1Y5_PARTE/3-156         | A0C1Y5.1     | PF06127.9; | 39.60 | 0.00 |
| TRINITY_J9IGC9_9SPIT/43-342        | J9IGC9.1     | PF00648.19 | 39.60 | 0.00 |
| TRINITY_D8UJS3_VOLCA/84-263        | D8UJS3.1     | PF02330.14 | 39.60 | 0.00 |
| TRINITY_D8TY16_VOLCA/120-295       | D8TY16.1     | PF13419.4; | 39.60 | 0.00 |
| TRINITY_K4DH13_SOLLC/300-549       | K4DH13.1     | PF07714.15 | 39.60 | 0.00 |
| TRINITY_D8UK64_VOLCA/8-471         | D8UK64.1     | PF13520.4; | 39.60 | 0.00 |
| TRINITY_U4LEH5_PYROM/784-918       | U4LEH5.1     | PF04146.13 | 39.60 | 0.00 |
| TRINITY_A0A0D1BUD1_USTMA/372-515   | A0A0D1BUD1.1 | PF0007     | 39.60 | 0.00 |
| TRINITY_A0A087SE95_AUXPR/53-291    | A0A087SE95.1 | PF0014     | 39.60 | 0.00 |
| TRINITY_F0ZF55_DICPU/747-981       | F0ZF55.1     | PF00566.16 | 39.60 | 0.00 |
| TRINITY_Q231C5_TETTS/8-146         | Q231C5.2     | PF10358.7; | 39.60 | 0.00 |
| TRINITY_Q54JI4_DICDI/315-541       | Q54JI4.1     | PF13236.4; | 39.60 | 0.00 |
| TRINITY_A0A0D2WXG5_CAPO3/1256-1682 | A0A0D2WXG5.1 | PF1223     | 39.60 | 0.00 |
| TRINITY_I0YJI3_9CHLO/128-497       | I0YJI3.1     | PF07690.14 | 39.60 | 0.00 |
| TRINITY_D3AZL5_POLPA/665-855       | D3AZL5.1     | PF12816.5; | 39.60 | 0.00 |
| TRINITY_A8I5H6_CHLRE/37-316        | A8I5H6.1     | PF01209.16 | 39.60 | 0.00 |
| TRINITY_D4AIZ9_ARTBC/17-274        | D4AIZ9.1     | PF00248.19 | 39.60 | 0.00 |
| TRINITY_A0A078AX44_STYLE/604-698   | A0A078AX44.1 | PF1349     | 39.60 | 0.00 |
| TRINITY_E1ZK66_CHLVA/11-289        | E1ZK66.1     | PF00856.26 | 39.60 | 0.00 |
| TRINITY_D2VE99_NAEGR/20-378        | D2VE99.1     | PF00266.17 | 39.50 | 0.00 |
| TRINITY_F6UJ27_MONDO/44-243        | F6UJ27.2     | PF01965.22 | 39.50 | 0.00 |

|                                   |              |            |       |      |
|-----------------------------------|--------------|------------|-------|------|
| TRINITY_Q3SE55_PARTE/446-749      | Q3SE55.1     | PF02171.15 | 39.50 | 0.00 |
| TRINITY_G0QR05_ICHMG/472-730      | G0QR05.1     | PF01504.16 | 39.50 | 0.00 |
| TRINITY_C4M519_ENTHI/1324-1583    | C4M519.1     | PF00069.23 | 39.50 | 0.00 |
| TRINITY_Q23AB0_TETTS/39-265       | Q23AB0.1     | PF03372.21 | 39.50 | 0.00 |
| TRINITY_I7M6F7_TETTS/1178-1445    | I7M6F7.2     | PF01504.16 | 39.50 | 0.00 |
| TRINITY_C1E7I7_MICSR/92-269       | C1E7I7.1     | PF00719.17 | 39.50 | 0.00 |
| TRINITY_F4PQY7_DICFS/25-186       | F4PQY7.1     | PF00071.20 | 39.50 | 0.00 |
| TRINITY_D8U871_VOLCA/37-497       | D8U871.1     | PF09751.7; | 39.50 | 0.00 |
| TRINITY_E3T5H3_CROVB/671-790      | E3T5H3.1     | PF00271.29 | 39.50 | 0.00 |
| TRINITY_L8GF10_ACACA/1-543        | L8GF10.1     | PF04858.11 | 39.50 | 0.00 |
| TRINITY_L8GEX5_ACACA/864-1097     | L8GEX5.1     | PF07714.15 | 39.50 | 0.00 |
| TRINITY_Q23QF2_TETTS/248-571      | Q23QF2.2     | PF03133.13 | 39.50 | 0.00 |
| TRINITY_A0A015L3Q8_9GLOM/160-272  | A0A015L3Q8.1 | PF0266     | 39.50 | 0.00 |
| TRINITY_M4AR75_XIPMA/3-277        | M4AR75.1     | PF06218.9; | 39.50 | 0.00 |
| TRINITY_A0A0G4EWK7_9ALVE/51-336   | A0A0G4EWK7.1 | PF0006     | 39.50 | 0.00 |
| TRINITY_G0R3R5_ICHMG/1-259        | G0R3R5.1     | PF00069.23 | 39.50 | 0.00 |
| TRINITY_L8GXF3_ACACA/15-455       | L8GXF3.1     | PF03747.12 | 39.50 | 0.00 |
| TRINITY_Q86B07_DICDI/215-531      | Q86B07.1     | PF00657.20 | 39.50 | 0.00 |
| TRINITY_L8H0X8_ACACA/537-801      | L8H0X8.1     | PF07714.15 | 39.50 | 0.00 |
| TRINITY_Q22CP8_TETTS/1349-1720    | Q22CP8.2     | PF10595.7; | 39.50 | 0.00 |
| TRINITY_D3B1F7_POLPA/40-410       | D3B1F7.1     | PF05625.9; | 39.50 | 0.00 |
| TRINITY_F4PTN1_DICFS/42-388       | F4PTN1.1     | PF07690.14 | 39.50 | 0.00 |
| TRINITY_B0W6G8_CULQU/79-384       | B0W6G8.1     | PF00561.18 | 39.50 | 0.00 |
| TRINITY_A9UQJ2_MONBE/1-91         | A9UQJ2.1     | PF04178.10 | 39.50 | 0.00 |
| TRINITY_L8GZS1_ACACA/293-532      | L8GZS1.1     | PF07817.11 | 39.50 | 0.00 |
| TRINITY_L8GL94_ACACA/389-614      | L8GL94.1     | PF13672.4; | 39.50 | 0.00 |
| TRINITY_D5XA33_THEPJ/1-342        | D5XA33.1     | PF00224.19 | 39.50 | 0.00 |
| TRINITY_A0A067N0H1_9HOMO/425-1015 | A0A067N0H1.1 | PF0518     | 39.50 | 0.00 |
| TRINITY_B7FVV5_PHATC/1-82         | B7FVV5.1     | PF00439.23 | 39.50 | 0.00 |
| TRINITY_Q67ZB6_ARATH/19-275       | Q67ZB6.1     | PF13621.4; | 39.50 | 0.00 |
| TRINITY_E9QFH2_DANRE/10-278       | E9QFH2.2     | PF00069.23 | 39.50 | 0.00 |
| TRINITY_I0Z1Q9_9CHLO/19-207       | I0Z1Q9.1     | PF03962.13 | 39.50 | 0.00 |
| TRINITY_A4VCU8_TETTS/13-98        | A4VCU8.1     | PF15104.4; | 39.50 | 0.00 |
| TRINITY_D8U938_VOLCA/38-185       | D8U938.1     | PF03652.13 | 39.50 | 0.00 |
| TRINITY_D8UJ84_VOLCA/1008-1082    | D8UJ84.1     | PF04640.12 | 39.50 | 0.00 |
| TRINITY_D8THD3_VOLCA/212-384      | D8THD3.1     | PF00685.25 | 39.50 | 0.00 |
| TRINITY_A8JJJ7_CHLRE/93-269       | A8JJJ7.1     | PF13604.4; | 39.50 | 0.00 |
| TRINITY_W7U749_9STRA/103-319      | W7U749.1     | PF01925.17 | 39.50 | 0.00 |
| TRINITY_D8UJL9_VOLCA/131-436      | D8UJL9.1     | PF00331.18 | 39.50 | 0.00 |
| TRINITY_Q54B73_DICDI/144-412      | Q54B73.1     | PF02811.17 | 39.50 | 0.00 |
| TRINITY_D8ULP0_VOLCA/41-375       | D8ULP0.1     | PF00194.19 | 39.50 | 0.00 |
| TRINITY_K7VKG7_MAIZE/394-579      | K7VKG7.1     | PF04548.14 | 39.50 | 0.00 |
| TRINITY_L8GJU3_ACACA/32-554       | L8GJU3.1     | PF00135.26 | 39.50 | 0.00 |
| TRINITY_A0A067CIC8_SAPPC/301-462  | A0A067CIC8.1 | PF1029     | 39.50 | 0.00 |
| TRINITY_D8UD03_VOLCA/114-402      | D8UD03.1     | PF00155.19 | 39.50 | 0.00 |
| TRINITY_W7XCE4_TETTS/43-439       | W7XCE4.1     | PF02487.15 | 39.50 | 0.00 |
| TRINITY_B3SEY3_TRIAD/1-106        | B3SEY3.1     | PF00837.15 | 39.50 | 0.00 |
| TRINITY_D0NFV6_PHYIT/75-196       | D0NFV6.1     | PF00043.23 | 39.50 | 0.00 |
| TRINITY_A0A0D2X0V9_CAPO3/147-522  | A0A0D2X0V9.1 | PF0149     | 39.40 | 0.00 |
| TRINITY_T1N7W5_TRIUA/11-109       | T1N7W5.1     | PF04749.15 | 39.40 | 0.00 |
| TRINITY_W4KfV5_9HOMO/102-172      | W4KfV5.1     | PF00076.20 | 39.40 | 0.00 |
| TRINITY_A0A077ZQ47_STYLE/65-625   | A0A077ZQ47.1 | PF0099     | 39.40 | 0.00 |
| TRINITY_A0CNQ5_PARTE/260-688      | A0CNQ5.1     | PF03200.14 | 39.40 | 0.00 |
| TRINITY_U9T196_RHIID/51-246       | U9T196.1     | PF00882.16 | 39.40 | 0.00 |
| TRINITY_A0A068SHP7_9FUNG/758-911  | A0A068SHP7.1 | PF0062     | 39.40 | 0.00 |
| TRINITY_F0ZAK5_DICPU/72-456       | F0ZAK5.1     | PF00854.19 | 39.40 | 0.00 |
| TRINITY_A0A074RK62_9HOMO/1-233    | A0A074RK62.1 | PF0772     | 39.40 | 0.00 |
| TRINITY_Q54X10_DICDI/97-238       | Q54X10.1     | PF01553.19 | 39.40 | 0.00 |
| TRINITY_A0A0D2WIP8_CAPO3/213-474  | A0A0D2WIP8.1 | PF0014     | 39.40 | 0.00 |
| TRINITY_I7LV11_TETTS/352-566      | I7LV11.1     | PF00149.26 | 39.40 | 0.00 |
| TRINITY_F0Y7Z4_AURAN/206-283      | F0Y7Z4.1     | PF03061.20 | 39.40 | 0.00 |

|                                 |                     |       |      |
|---------------------------------|---------------------|-------|------|
| TRINITY_Q3M0Z2_PARTE/41-243     | Q3M0Z2.1 PF00804.23 | 39.40 | 0.00 |
| TRINITY_F6T310_CIOIN/24-445     | F6T310.2 PF04587.13 | 39.40 | 0.00 |
| TRINITY_A0A024TG81_9STRA/67-137 | A0A024TG81.1 PF0007 | 39.40 | 0.00 |
| TRINITY_U5H2U4_USTV1/101-329    | U5H2U4.1 PF05721.11 | 39.40 | 0.00 |
| TRINITY_W5JCJ5_ANODA/342-485    | W5JCJ5.1 PF00388.17 | 39.40 | 0.00 |
| TRINITY_D8TIW8_VOLCA/156-378    | D8TIW8.1 PF02450.13 | 39.40 | 0.00 |
| TRINITY_I7LY38_TETTS/121-191    | I7LY38.1 PF13499.4; | 39.40 | 0.00 |
| TRINITY_F2TZK1_SALR5/589-912    | F2TZK1.1 PF00176.21 | 39.40 | 0.00 |
| TRINITY_I7MER8_TETTS/31-519     | I7MER8.2 PF00083.22 | 39.40 | 0.00 |
| TRINITY_A4SBF0_OSTLU/16-246     | A4SBF0.1 PF04452.12 | 39.40 | 0.00 |
| TRINITY_A0A0L0CSS3_LUCCU/14-525 | A0A0L0CSS3.1 PF0509 | 39.40 | 0.00 |
| TRINITY_Q0C7B1_AEDAE/426-599    | Q0C7B1.1 PF00616.17 | 39.40 | 0.00 |
| TRINITY_U6JTR5_9EIME/4-219      | U6JTR5.1 PF06244.10 | 39.40 | 0.00 |
| TRINITY_J9KA86_ACYPI/512-664    | J9KA86.2 PF00620.25 | 39.40 | 0.00 |
| TRINITY_A8HNM5_CHLRE/2576-2866  | A8HNM5.1 PF06011.10 | 39.40 | 0.00 |
| TRINITY_A0A078B677_STYLE/33-135 | A0A078B677.1 PF0222 | 39.40 | 0.00 |
| TRINITY_A0A0M2PJR3_9BACI/20-336 | A0A0M2PJR3.1 PF0025 | 39.40 | 0.00 |
| TRINITY_J9IQ73_9SPIT/439-537    | J9IQ73.1 PF12796.5; | 39.40 | 0.00 |
| TRINITY_I7M2D0_TETTS/65-476     | I7M2D0.2 PF00155.19 | 39.40 | 0.00 |
| TRINITY_D3AYH4_POLPA/12-342     | D3AYH4.1 PF00503.18 | 39.40 | 0.00 |
| TRINITY_I7M2G7_TETTS/73-181     | I7M2G7.1 PF00787.22 | 39.40 | 0.00 |
| TRINITY_J9IME5_9SPIT/326-434    | J9IME5.1 PF00651.29 | 39.40 | 0.00 |
| TRINITY_S2J1T0_MUCC1/216-489    | S2J1T0.1 PF13632.4; | 39.40 | 0.00 |
| TRINITY_A0C8J4_PARTE/154-269    | A0C8J4.1 PF15261.4; | 39.40 | 0.00 |

|                                  |              |            |       |      |
|----------------------------------|--------------|------------|-------|------|
| TRINITY_A0CSW7_PARTE/37-297      | A0CSW7.1     | PF01715.15 | 39.40 | 0.00 |
| TRINITY_W5QAB8_SHEEP/79-201      | W5QAB8.1     | PF08292.10 | 39.40 | 0.00 |
| TRINITY_D2VNG5_NAEGR/186-510     | D2VNG5.1     | PF00728.20 | 39.40 | 0.00 |
| TRINITY_I7M7L8_TETTS/294-508     | I7M7L8.2     | PF00609.17 | 39.40 | 0.00 |
| TRINITY_A0A0A1NE54_9FUNG/345-473 | A0A0A1NE54.1 | PF0866     | 39.40 | 0.00 |
| TRINITY_R1B9I6_EMIHU/246-393     | R1B9I6.1     | PF07534.14 | 39.40 | 0.00 |
| TRINITY_A0D362_PARTE/61-535      | A0D362.1     | PF00501.26 | 39.40 | 0.00 |
| TRINITY_A0A078B349_STYLE/444-804 | A0A078B349.1 | PF0070     | 39.40 | 0.00 |
| TRINITY_Q234Z9_TETTS/1982-2340   | Q234Z9.2     | PF04054.13 | 39.40 | 0.00 |
| TRINITY_A8J9C5_CHLRE/1150-1292   | A8J9C5.1     | PF03114.16 | 39.40 | 0.00 |
| TRINITY_A0A0M0JCK3_9EUKA/69-195  | A0A0M0JCK3.1 | PF0013     | 39.40 | 0.00 |
| TRINITY_A0A061F4R3_THECC/18-215  | A0A061F4R3.1 | PF0030     | 39.40 | 0.00 |
| TRINITY_D1CD72_THET1/15-283      | D1CD72.1     | PF00580.19 | 39.40 | 0.00 |
| TRINITY_A8PYP1_MALGO/3-74        | A8PYP1.1     | PF00240.21 | 39.40 | 0.00 |
| TRINITY_A0A078AB07_STYLE/2-128   | A0A078AB07.1 | PF0409     | 39.30 | 0.00 |
| TRINITY_D7FZS6_ECTSI/5-275       | D7FZS6.1     | PF00009.25 | 39.30 | 0.00 |
| TRINITY_A0A0G4J631_PLABS/71-229  | A0A0G4J631.1 | PF0489     | 39.30 | 0.00 |
| TRINITY_L1JHU7_GUIH/1-193        | L1JHU7.1     | PF08450.10 | 39.30 | 0.00 |
| TRINITY_H3B7B0_LATCH/9-95        | H3B7B0.1     | PF02970.14 | 39.30 | 0.00 |
| TRINITY_I0Z727_9CHLO/78-581      | I0Z727.1     | PF02990.14 | 39.30 | 0.00 |
| TRINITY_A8JIQ5_CHLRE/292-449     | A8JIQ5.1     | PF00795.20 | 39.30 | 0.00 |
| TRINITY_G3HI91_CRIGR/279-409     | G3HI91.1     | PF00782.18 | 39.30 | 0.00 |
| TRINITY_A0DRG1_PARTE/852-1181    | A0DRG1.1     | PF01237.16 | 39.30 | 0.00 |
| TRINITY_Q6BFR2_PARTE/27-205      | Q6BFR2.1     | PF13462.4; | 39.30 | 0.00 |
| TRINITY_B7FNV6_PHATC/49-254      | B7FNV6.1     | PF01323.18 | 39.30 | 0.00 |
| TRINITY_F0Z9F9_DICPU/146-396     | F0Z9F9.1     | PF00069.23 | 39.30 | 0.00 |
| TRINITY_L8GMR3_ACACA/270-526     | L8GMR3.1     | PF07714.15 | 39.30 | 0.00 |
| TRINITY_A0DMK4_PARTE/24-339      | A0DMK4.1     | PF03372.21 | 39.30 | 0.00 |
| TRINITY_EIF2A_DICDI/257-447      | Q54PV7.1     | PF08662.9; | 39.30 | 0.00 |
| TRINITY_A8JJQ5_CHLRE/193-340     | A8JJQ5.1     | PF01764.23 | 39.30 | 0.00 |
| TRINITY_Q23BP9_TETTS/506-1002    | Q23BP9.2     | PF07748.11 | 39.30 | 0.00 |
| TRINITY_H2W6J2_CAEJA/21-126      | H2W6J2.2     | PF00856.26 | 39.30 | 0.00 |
| TRINITY_E9QCK7_DANRE/639-797     | E9QCK7.1     | PF05572.11 | 39.30 | 0.00 |
| TRINITY_I7LU61_TETTS/57-381      | I7LU61.1     | PF00026.21 | 39.30 | 0.00 |
| TRINITY_H9G6H0_ANOCA/32-235      | H9G6H0.2     | PF01852.17 | 39.30 | 0.00 |
| TRINITY_Q24C23_TETTS/91-326      | Q24C23.3     | PF00566.16 | 39.30 | 0.00 |
| TRINITY_A0A059C6R8_EUCGR/126-340 | A0A059C6R8.1 | PF0011     | 39.30 | 0.00 |
| TRINITY_Q81N74_BACAN/29-285      | Q81N74.1     | PF00561.18 | 39.30 | 0.00 |
| TRINITY_R4G4L9_RHOPR/45-106      | R4G4L9.1     | PF01424.20 | 39.30 | 0.00 |
| TRINITY_A0A078BA31_STYLE/82-334  | A0A078BA31.1 | PF0104     | 39.30 | 0.00 |
| TRINITY_D8TS85_VOLCA/84-353      | D8TS85.1     | PF13896.4; | 39.30 | 0.00 |
| TRINITY_F4PTP4_DICFS/618-739     | F4PTP4.1     | PF01067.20 | 39.30 | 0.00 |
| TRINITY_A0CKU6_PARTE/2-124       | A0CKU6.1     | PF05762.12 | 39.30 | 0.00 |
| TRINITY_A0A022RSE6_ERYGU/184-532 | A0A022RSE6.1 | PF0044     | 39.30 | 0.00 |
| TRINITY_I7MMP5_TETTS/4189-4485   | I7MMP5.2     | PF00632.23 | 39.30 | 0.00 |
| TRINITY_D0MW28_PHYIT/147-399     | D0MW28.1     | PF01399.25 | 39.30 | 0.00 |
| TRINITY_J3L0Z6_ORYBR/725-1439    | J3L0Z6.1     | PF12234.6; | 39.30 | 0.00 |
| TRINITY_A0A0R4IG88_DANRE/151-358 | A0A0R4IG88.1 | PF0102     | 39.30 | 0.00 |
| TRINITY_M1C579_SOLTU/116-321     | M1C579.1     | PF04616.12 | 39.30 | 0.00 |
| TRINITY_U9UD21_RHIID/386-466     | U9UD21.1     | PF13517.4; | 39.30 | 0.00 |
| TRINITY_A0D2Z5_PARTE/151-399     | A0D2Z5.1     | PF01457.14 | 39.30 | 0.00 |
| TRINITY_A0BU97_PARTE/108-301     | A0BU97.1     | PF13901.4; | 39.30 | 0.00 |
| TRINITY_A0A078AII6_STYLE/45-323  | A0A078AII6.1 | PF0026     | 39.30 | 0.00 |
| TRINITY_F6HVQ6_VITVI/89-407      | F6HVQ6.1     | PF13593.4; | 39.30 | 0.00 |
| TRINITY_A0DZ84_PARTE/87-248      | A0DZ84.1     | PF01746.19 | 39.30 | 0.00 |
| TRINITY_A0D2Z5_PARTE/151-399     | A0D2Z5.1     | PF01457.14 | 39.30 | 0.00 |
| TRINITY_F4PTD3_DICFS/26-214      | F4PTD3.1     | PF01183.18 | 39.30 | 0.00 |
| TRINITY_E2ATT4_CAMFO/86-503      | E2ATT4.1     | PF06602.12 | 39.30 | 0.00 |
| TRINITY_D8TTU9_VOLCA/16-183      | D8TTU9.1     | PF09174.8; | 39.30 | 0.00 |
| TRINITY_D8TV38_VOLCA/14-212      | D8TV38.1     | PF08638.9; | 39.30 | 0.00 |
| TRINITY_R9AXQ1_WALI9/19-279      | R9AXQ1.1     | PF00069.23 | 39.30 | 0.00 |

|                                  |                     |       |      |
|----------------------------------|---------------------|-------|------|
| TRINITY_A0A077ZTG6_STYLE/22-262  | A0A077ZTG6.1 PF0019 | 39.30 | 0.00 |
| TRINITY_F0ZGP7_DICPU/754-1122    | F0ZGP7.1 PF02181.21 | 39.30 | 0.00 |
| TRINITY_L8GP69_ACACA/67-530      | L8GP69.1 PF00443.27 | 39.30 | 0.00 |
| TRINITY_D8TV72_VOLCA/776-947     | D8TV72.1 PF14288.4; | 39.30 | 0.00 |
| TRINITY_I0YPJ5_9CHLO/9-156       | I0YPJ5.1 PF00849.20 | 39.30 | 0.00 |
| TRINITY_I0YKY3_9CHLO/1342-1430   | I0YKY3.1 PF09324.8; | 39.30 | 0.00 |
| TRINITY_D8U7Q2_VOLCA/436-900     | D8U7Q2.1 PF01504.16 | 39.30 | 0.00 |
| TRINITY_L8H9F6_ACACA/1730-1984   | L8H9F6.1 PF07714.15 | 39.30 | 0.00 |
| TRINITY_I7LT28_TETTS/74-187      | I7LT28.2 PF06320.11 | 39.30 | 0.00 |
| TRINITY_A0A078AYH6_STYLE/8-293   | A0A078AYH6.1 PF0006 | 39.20 | 0.00 |
| TRINITY_A0A078AUR0_STYLE/268-478 | A0A078AUR0.1 PF0377 | 39.20 | 0.00 |
| TRINITY_J9ISS6_9SPIT/789-920     | J9ISS6.1 PF00072.22 | 39.20 | 0.00 |
| TRINITY_D8S7B4_SELML/1034-1394   | D8S7B4.1 PF02259.21 | 39.20 | 0.00 |
| TRINITY_A0DI54_PARTE/15-331      | A0DI54.1 PF00899.19 | 39.20 | 0.00 |
| TRINITY_I0GJ09_CALEA/2-167       | I0GJ09.1 PF00857.18 | 39.20 | 0.00 |
| TRINITY_M5W3M6_PRUPE/244-328     | M5W3M6.1 PF16135.3; | 39.20 | 0.00 |
| TRINITY_A0A060SSC6_PYCCI/215-333 | A0A060SSC6.1 PF0851 | 39.20 | 0.00 |
| TRINITY_T0S798_9STRA/35-224      | T0S798.1 PF08648.10 | 39.20 | 0.00 |
| TRINITY_Q22PF6_TETTS/62-283      | Q22PF6.1 PF12348.6; | 39.20 | 0.00 |
| TRINITY_F4PX77_DICFS/710-859     | F4PX77.1 PF00620.25 | 39.20 | 0.00 |
| TRINITY_I7LTH0_TETTS/231-521     | I7LTH0.1 PF01031.18 | 39.20 | 0.00 |
| TRINITY_I7M9Y4_TETTS/83-364      | I7M9Y4.1 PF01266.22 | 39.20 | 0.00 |
| TRINITY_S2JQ56_MUCC1/127-289     | S2JQ56.1 PF00650.18 | 39.20 | 0.00 |
| TRINITY_L8GXS7_ACACA/913-1039    | L8GXS7.1 PF00241.18 | 39.20 | 0.00 |
| TRINITY_D8TKX7_VOLCA/49-142      | D8TKX7.1 PF00686.17 | 39.20 | 0.00 |
| TRINITY_A0ZJC5_NODSP/73-197      | A0ZJC5.1 PF02469.20 | 39.20 | 0.00 |
| TRINITY_I7MB87_TETTS/63-523      | I7MB87.2 PF00067.20 | 39.20 | 0.00 |
| TRINITY_A0DMK4_PARTE/24-339      | A0DMK4.1 PF03372.21 | 39.20 | 0.00 |
| TRINITY_I7M6D7_TETTS/137-346     | I7M6D7.1 PF03798.14 | 39.20 | 0.00 |
| TRINITY_W5KK03_ASTMX/493-657     | W5KK03.1 PF05572.11 | 39.20 | 0.00 |
| TRINITY_D8TTH8_VOLCA/123-760     | D8TTH8.1 PF14222.4; | 39.20 | 0.00 |
| TRINITY_R7EL07_9BACE/88-363      | R7EL07.1 PF00078.25 | 39.20 | 0.00 |
| TRINITY_A9RQK9_PHYPA/52-149      | A9RQK9.1 PF04900.10 | 39.20 | 0.00 |
| TRINITY_A0EFB4_PARTE/198-687     | A0EFB4.1 PF01055.24 | 39.20 | 0.00 |
| TRINITY_D3B3I8_POLPA/16-119      | D3B3I8.1 PF02893.18 | 39.20 | 0.00 |
| TRINITY_W5K1B6_ASTMX/73-584      | W5K1B6.1 PF00135.26 | 39.20 | 0.00 |
| TRINITY_A9SDG3_PHYPA/268-370     | A9SDG3.1 PF01399.25 | 39.20 | 0.00 |
| TRINITY_A0YCL9_9GAMM/7-109       | A0YCL9.1 PF03807.15 | 39.20 | 0.00 |
| TRINITY_A0A0D2QF67_GOSRA/145-287 | A0A0D2QF67.1 PF1060 | 39.20 | 0.00 |
| TRINITY_R4X8T7_TAPDE/1-82        | R4X8T7.1 PF12763.5; | 39.20 | 0.00 |
| TRINITY_L8H1R3_ACACA/495-744     | L8H1R3.1 PF07714.15 | 39.20 | 0.00 |
| TRINITY_A0A0P7VH63_9TELE/454-527 | A0A0P7VH63.1 PF0057 | 39.20 | 0.00 |
| TRINITY_Q1K3C1_DESAC/6-561       | Q1K3C1.1 PF01411.17 | 39.20 | 0.00 |
| TRINITY_C1E9J9_MICSR/312-418     | C1E9J9.1 PF04777.11 | 39.20 | 0.00 |
| TRINITY_A0D2Z5_PARTE/151-399     | A0D2Z5.1 PF01457.14 | 39.20 | 0.00 |
| TRINITY_F1A441_DICPU/81-384      | F1A441.1 PF01544.16 | 39.20 | 0.00 |
| TRINITY_A0A088ATE6_APIME/29-139  | A0A088ATE6.1 PF0065 | 39.20 | 0.00 |
| TRINITY_B9RRB9_RICCO/502-679     | B9RRB9.1 PF02141.19 | 39.20 | 0.00 |
| TRINITY_H3ELF8_PRIIPA/22-138     | H3ELF8.1 PF08477.11 | 39.20 | 0.00 |
| TRINITY_D8TWK8_VOLCA/102-558     | D8TWK8.1 PF01150.15 | 39.20 | 0.00 |
| TRINITY_W5MU09_LEPOC/18-248      | W5MU09.1 PF01168.18 | 39.20 | 0.00 |
| TRINITY_H2Z453_CIOSA/5-80        | H2Z453.1 PF02798.18 | 39.20 | 0.00 |
| TRINITY_A8IHE7_CHLRE/70-516      | A8IHE7.1 PF13520.4; | 39.20 | 0.00 |
| TRINITY_A8IRB8_CHLRE/110-310     | A8IRB8.1 PF06011.10 | 39.20 | 0.00 |
| TRINITY_A9TUH0_PHYPA/288-386     | A9TUH0.1 PF13499.4; | 39.20 | 0.00 |
| TRINITY_I7LUD7_TETTS/7-211       | I7LUD7.1 PF01557.16 | 39.10 | 0.00 |
| TRINITY_G0QT60_ICHMG/17-86       | G0QT60.1 PF13499.4; | 39.10 | 0.00 |
| TRINITY_L8H3W5_ACACA/971-1093    | L8H3W5.1 PF00271.29 | 39.10 | 0.00 |
| TRINITY_F0Z6A8_DICPU/12-319      | F0Z6A8.1 PF14647.4; | 39.10 | 0.00 |
| TRINITY_A0A0J8BV09_BETVU/20-273  | A0A0J8BV09.1 PF0006 | 39.10 | 0.00 |
| TRINITY_L0AVA8_THEEQ/18-382      | L0AVA8.1 PF00022.17 | 39.10 | 0.00 |

|                                    |                     |       |      |
|------------------------------------|---------------------|-------|------|
| TRINITY_A0A0R4J5L8_SOYBN/6-205     | A0A0R4J5L8.1 PF0065 | 39.10 | 0.00 |
| TRINITY_F0ZHA2_DICPU/18-202        | F0ZHA2.1 PF01209.16 | 39.10 | 0.00 |
| TRINITY_A0A084W9Q9_ANOSI/75-143    | A0A084W9Q9.1 PF0050 | 39.10 | 0.00 |
| TRINITY_Q22Z31_TETTS/156-426       | Q22Z31.4 PF00520.29 | 39.10 | 0.00 |
| TRINITY_A0DD58_PARTE/2-166         | A0DD58.1 PF01086.15 | 39.10 | 0.00 |
| TRINITY_A0D7P8_PARTE/1766-1840     | A0D7P8.1 PF16561.3; | 39.10 | 0.00 |
| TRINITY_A0A022QCI0_ERYGU/43-203    | A0A022QCI0.1 PF0155 | 39.10 | 0.00 |
| TRINITY_Q23QF2_TETTS/248-571       | Q23QF2.2 PF03133.13 | 39.10 | 0.00 |
| TRINITY_PAN3_DICDI/385-541         | P0CD65.1 PF00069.23 | 39.10 | 0.00 |
| TRINITY_L8GL12_ACACA/119-330       | L8GL12.1 PF00112.21 | 39.10 | 0.00 |
| TRINITY_F4PPV5_DICFS/1840-2098     | F4PPV5.1 PF00481.19 | 39.10 | 0.00 |
| TRINITY_W5FLH4_WHEAT/9-228         | W5FLH4.1 PF05004.11 | 39.10 | 0.00 |
| TRINITY_A0A067NNT9_PLEOS/46-439    | A0A067NNT9.1 PF0099 | 39.10 | 0.00 |
| TRINITY_E1BWZ1_CHICK/86-384        | E1BWZ1.1 PF00561.18 | 39.10 | 0.00 |
| TRINITY_H2WNI4_CAEJA/124-192       | H2WNI4.2 PF00505.17 | 39.10 | 0.00 |
| TRINITY_A8HPS0_CHLRE/20-643        | A8HPS0.1 PF04130.11 | 39.10 | 0.00 |
| TRINITY_A0A0G4EKP2_9ALVE/14-362    | A0A0G4EKP2.1 PF0492 | 39.10 | 0.00 |
| TRINITY_E1ZM78_CHLVA/583-838       | E1ZM78.1 PF00122.18 | 39.10 | 0.00 |
| TRINITY_I1PRK3_ORYGL/102-381       | I1PRK3.1 PF00122.18 | 39.10 | 0.00 |
| TRINITY_L8GRB2_ACACA/60-255        | L8GRB2.1 PF09511.8; | 39.10 | 0.00 |
| TRINITY_H2XVE9_CIOIN/15-255        | H2XVE9.1 PF13621.4; | 39.10 | 0.00 |
| TRINITY_A0A015JJN4_9GLOM/42-256    | A0A015JJN4.1 PF0035 | 39.10 | 0.00 |
| TRINITY_D8UGK8_VOLCA/146-384       | D8UGK8.1 PF01547.23 | 39.10 | 0.00 |
| TRINITY_I7MI70_TETTS/452-568       | I7MI70.1 PF13893.4; | 39.10 | 0.00 |
| TRINITY_D8U1Y3_VOLCA/10-144        | D8U1Y3.1 PF03133.13 | 39.10 | 0.00 |
| TRINITY_T1FPG7_HELRO/60-154        | T1FPG7.1 PF00855.15 | 39.10 | 0.00 |
| TRINITY_A0A0D2ULF9_CAPO3/34-349    | A0A0D2ULF9.1 PF0190 | 39.10 | 0.00 |
| TRINITY_W7X3N9_TETTS/98-166        | W7X3N9.1 PF10601.7; | 39.10 | 0.00 |
| TRINITY_A0A0D2UMU4_CAPO3/32-518    | A0A0D2UMU4.1 PF1403 | 39.10 | 0.00 |
| TRINITY_Q8YQN5_NOSS1/391-516       | Q8YQN5.1 PF02517.14 | 39.10 | 0.00 |
| TRINITY_M0S0K0_MUSAM/132-223       | M0S0K0.1 PF02536.12 | 39.10 | 0.00 |
| TRINITY_A0BQL3_PARTE/117-192       | A0BQL3.1 PF07258.12 | 39.10 | 0.00 |
| TRINITY_X6MTS8_RETFI/89-269        | X6MTS8.1 PF01467.24 | 39.10 | 0.00 |
| TRINITY_I7MB24_TETTS/12-253        | I7MB24.2 PF01370.19 | 39.10 | 0.00 |
| TRINITY_L8GVR8_ACACA/47-315        | L8GVR8.1 PF03372.21 | 39.10 | 0.00 |
| TRINITY_L1IIV3_GUITH/101-232       | L1IIV3.1 PF04784.12 | 39.10 | 0.00 |
| TRINITY_B9IQV9_POPTR/61-193        | B9IQV9.1 PF12894.5; | 39.10 | 0.00 |
| TRINITY_A0A078AGZ3_STYLE/3903-4621 | A0A078AGZ3.1 PF0302 | 39.10 | 0.00 |
| TRINITY_W1PYV6_AMBTC/587-841       | W1PYV6.1 PF07714.15 | 39.10 | 0.00 |
| TRINITY_A8J8L4_CHLRE/265-514       | A8J8L4.1 PF07714.15 | 39.10 | 0.00 |
| TRINITY_G0QVG7_ICHMG/239-716       | G0QVG7.1 PF04791.14 | 39.10 | 0.00 |
| TRINITY_E4WX43_OIKDI/40-324        | E4WX43.1 PF00069.23 | 39.10 | 0.00 |
| TRINITY_L8GFV5_ACACA/41-155        | L8GFV5.1 PF13669.4; | 39.10 | 0.00 |
| TRINITY_F6S0A5_XENTR/49-219        | F6S0A5.1 PF10294.7; | 39.10 | 0.00 |
| TRINITY_I0Z6C3_9CHLO/515-852       | I0Z6C3.1 PF04840.10 | 39.10 | 0.00 |
| TRINITY_J9I7Z3_9SPIT/528-596       | J9I7Z3.1 PF02187.15 | 39.10 | 0.00 |
| TRINITY_S7QP61_GLOTA/46-257        | S7QP61.1 PF12706.5; | 39.10 | 0.00 |
| TRINITY_D7CQK2_TRURR/26-262        | D7CQK2.1 PF12146.6; | 39.10 | 0.00 |
| TRINITY_A8ICQ7_CHLRE/117-203       | A8ICQ7.1 PF01985.19 | 39.10 | 0.00 |
| TRINITY_I0Z6U9_9CHLO/337-575       | I0Z6U9.1 PF07690.14 | 39.10 | 0.00 |
| TRINITY_D8TIR1_VOLCA/82-185        | D8TIR1.1 PF00085.18 | 39.10 | 0.00 |
| TRINITY_I0YIN0_9CHLO/121-407       | I0YIN0.1 PF03982.11 | 39.10 | 0.00 |
| TRINITY_G0R041_ICHMG/38-325        | G0R041.1 PF00069.23 | 39.10 | 0.00 |
| TRINITY_A0A0D2X1C4_CAPO3/53-347    | A0A0D2X1C4.1 PF0337 | 39.10 | 0.00 |
| TRINITY_D3AVM6_POLPA/321-522       | D3AVM6.1 PF00753.25 | 39.10 | 0.00 |
| TRINITY_A8IDQ0_CHLRE/3389-3498     | A8IDQ0.1 PF01477.21 | 39.10 | 0.00 |
| TRINITY_C1E3Y1_MICSR/27-178        | C1E3Y1.1 PF04051.14 | 39.00 | 0.00 |
| TRINITY_Q24CM8_TETTS/58-516        | Q24CM8.2 PF00067.20 | 39.00 | 0.00 |
| TRINITY_D3B0U2_POLPA/899-1144      | D3B0U2.1 PF13086.4; | 39.00 | 0.00 |
| TRINITY_J9I3A6_9SPIT/38-197        | J9I3A6.1 PF08534.8; | 39.00 | 0.00 |
| TRINITY_M2X6B6_GALSU/34-151        | M2X6B6.1 PF04263.14 | 39.00 | 0.00 |

|                                   |                     |       |      |
|-----------------------------------|---------------------|-------|------|
| TRINITY_A0C2Y4_PARTE/17-363       | A0C2Y4.1 PF10498.7; | 39.00 | 0.00 |
| TRINITY_C3Y0L7_BRAFL/2-249        | C3Y0L7.1 PF10036.7; | 39.00 | 0.00 |
| TRINITY_A0A0M0J5K3_9EUKA/130-214  | A0A0M0J5K3.1 PF0183 | 39.00 | 0.00 |
| TRINITY_I7MG63_TETTS/20-399       | I7MG63.1 PF00022.17 | 39.00 | 0.00 |
| TRINITY_D5BZD9_NITHN/8-98         | D5BZD9.1 PF02922.16 | 39.00 | 0.00 |
| TRINITY_A0A015L086_9GLOM/56-510   | A0A015L086.1 PF0390 | 39.00 | 0.00 |
| TRINITY_G4UGJ9_NEUT9/259-384      | G4UGJ9.1 PF00622.26 | 39.00 | 0.00 |
| TRINITY_A9UZH0_MONBE/972-1039     | A9UZH0.1 PF08583.8; | 39.00 | 0.00 |
| TRINITY_E1Z963_CHLVA/513-734      | E1Z963.1 PF00326.19 | 39.00 | 0.00 |
| TRINITY_I7LV11_TETTS/352-566      | I7LV11.1 PF00149.26 | 39.00 | 0.00 |
| TRINITY_A0A067P386_PLEOS/551-825  | A0A067P386.1 PF1323 | 39.00 | 0.00 |
| TRINITY_A0DJB3_PARTE/1058-1652    | A0DJB3.1 PF04998.15 | 39.00 | 0.00 |
| TRINITY_F4PZH3_DICFS/203-744      | F4PZH3.1 PF04114.12 | 39.00 | 0.00 |
| TRINITY_Q5B9E2_EMENI/63-187       | Q5B9E2.1 PF00561.18 | 39.00 | 0.00 |
| TRINITY_A0A075AWU8_9FUNG/39-183   | A0A075AWU8.1 PF0010 | 39.00 | 0.00 |
| TRINITY_G0QWU2_ICHMG/2144-2433    | G0QWU2.1 PF00520.29 | 39.00 | 0.00 |
| TRINITY_L1J5U3_GUITH/89-197       | L1J5U3.1 PF00651.29 | 39.00 | 0.00 |
| TRINITY_A0DMK4_PARTE/24-339       | A0DMK4.1 PF03372.21 | 39.00 | 0.00 |
| TRINITY_G3NMH4_GASAC/16-143       | G3NMH4.1 PF00293.26 | 39.00 | 0.00 |
| TRINITY_A7RGK5_NEMVE/7-160        | A7RGK5.1 PF00106.23 | 39.00 | 0.00 |
| TRINITY_K0SXE8_THAOC/71-304       | K0SXE8.1 PF07847.10 | 39.00 | 0.00 |
| TRINITY_A0A0B4GTV5_9HYPO/34-146   | A0A0B4GTV5.1 PF0018 | 39.00 | 0.00 |
| TRINITY_X6LHD5_RETFI/4-179        | X6LHD5.1 PF00069.23 | 39.00 | 0.00 |
| TRINITY_K7IQV8_NASVI/239-599      | K7IQV8.1 PF03074.14 | 39.00 | 0.00 |
| TRINITY_D8RYT4_SELML/4-165        | D8RYT4.1 PF04573.10 | 39.00 | 0.00 |
| TRINITY_A0A068RH27_9FUNG/967-1587 | A0A068RH27.1 PF0499 | 39.00 | 0.00 |
| TRINITY_E0VVX6_PEDHC/30-170       | E0VVX6.1 PF05832.10 | 39.00 | 0.00 |
| TRINITY_M7B141_CHEMY/446-578      | M7B141.1 PF00782.18 | 39.00 | 0.00 |
| TRINITY_Q54DW7_DICDI/35-213       | Q54DW7.1 PF00621.18 | 39.00 | 0.00 |
| TRINITY_E1ZS74_CHLVA/84-367       | E1ZS74.1 PF01715.15 | 39.00 | 0.00 |
| TRINITY_Y9955_DICDI/662-912       | Q55GU0.1 PF07714.15 | 39.00 | 0.00 |
| TRINITY_APC8_SCHPO/22-154         | O94556.2 PF04049.11 | 39.00 | 0.00 |
| TRINITY_A0A0F5YFM2_9CYAN/22-172   | A0A0F5YFM2.1 PF0019 | 39.00 | 0.00 |
| TRINITY_L8H653_ACACA/846-1065     | L8H653.1 PF02854.17 | 39.00 | 0.00 |
| TRINITY_C1E6Y9_MICSR/46-332       | C1E6Y9.1 PF01256.15 | 39.00 | 0.00 |
| TRINITY_A0BD19_PARTE/2961-3202    | A0BD19.1 PF04811.13 | 39.00 | 0.00 |
| TRINITY_F8W2M8_DANRE/214-518      | F8W2M8.1 PF00082.20 | 39.00 | 0.00 |
| TRINITY_Q247V8_TETTS/66-225       | Q247V8.2 PF01343.16 | 39.00 | 0.00 |
| TRINITY_A0A072VMN4_MEDTR/101-212  | A0A072VMN4.1 PF0473 | 39.00 | 0.00 |
| TRINITY_E4XWM2_OIKDI/171-301      | E4XWM2.1 PF02984.17 | 39.00 | 0.00 |
| TRINITY_D8U8H2_VOLCA/795-1749     | D8U8H2.1 PF02514.14 | 39.00 | 0.00 |
| TRINITY_L7U4U2_MYXSD/19-246       | L7U4U2.1 PF02230.14 | 39.00 | 0.00 |
| TRINITY_G0R3I1_ICHMG/75-256       | G0R3I1.1 PF04893.15 | 39.00 | 0.00 |
| TRINITY_I7M1F1_TETTS/187-504      | I7M1F1.1 PF00728.20 | 39.00 | 0.00 |
| TRINITY_A0A0A1U9M9_ENTIV/5-141    | A0A0A1U9M9.1 PF0250 | 39.00 | 0.00 |
| TRINITY_A0A0A7EJI4_9GAMM/455-573  | A0A0A7EJI4.1 PF0007 | 38.90 | 0.00 |
| TRINITY_G0R1G3_ICHMG/80-301       | G0R1G3.1 PF00566.16 | 38.90 | 0.00 |
| TRINITY_A0DMM7_PARTE/3-395        | A0DMM7.1 PF03223.13 | 38.90 | 0.00 |
| TRINITY_A0A024TCN9_9STRA/58-352   | A0A024TCN9.1 PF1034 | 38.90 | 0.00 |
| TRINITY_M7BJX8_CHEMY/357-605      | M7BJX8.1 PF09822.7; | 38.90 | 0.00 |
| TRINITY_B8P0A1_POSPM/256-355      | B8P0A1.1 PF01974.15 | 38.90 | 0.00 |
| TRINITY_L8GEX5_ACACA/864-1097     | L8GEX5.1 PF07714.15 | 38.90 | 0.00 |
| TRINITY_A0A0A0KIZ4_CUCSA/52-272   | A0A0A0KIZ4.1 PF0412 | 38.90 | 0.00 |
| TRINITY_Q6C321_YARLI/324-454      | Q6C321.1 PF05132.12 | 38.90 | 0.00 |
| TRINITY_G0R6G3_ICHMG/54-245       | G0R6G3.1 PF01145.23 | 38.90 | 0.00 |
| TRINITY_W2QTX1_PHYPN/177-320      | W2QTX1.1 PF06544.10 | 38.90 | 0.00 |
| TRINITY_J9IDD8_9SPIT/348-639      | J9IDD8.1 PF03372.21 | 38.90 | 0.00 |
| TRINITY_D6WN98_TRICA/134-244      | D6WN98.1 PF03556.13 | 38.90 | 0.00 |
| TRINITY_W4FX08_9STRA/724-847      | W4FX08.1 PF00622.26 | 38.90 | 0.00 |
| TRINITY_C3Y9Y1_BRAFL/347-461      | C3Y9Y1.1 PF09070.9; | 38.90 | 0.00 |
| TRINITY_I7M6W7_TETTS/15-180       | I7M6W7.2 PF14580.4; | 38.90 | 0.00 |



|                                  |                     |       |      |
|----------------------------------|---------------------|-------|------|
| TRINITY_G0QWI2_ICHMG/263-462     | G0QWI2.1 PF13886.4; | 38.90 | 0.00 |
| TRINITY_E1ZQY6_CHLVA/20-215      | E1ZQY6.1 PF05891.10 | 38.90 | 0.00 |
| TRINITY_W5PED5_SHEEP/51-519      | W5PED5.1 PF00067.20 | 38.90 | 0.00 |
| TRINITY_L8GGI0_ACACA/67-210      | L8GGI0.1 PF13862.4; | 38.90 | 0.00 |
| TRINITY_A8J7M9_CHLRE/742-1038    | A8J7M9.1 PF00069.23 | 38.90 | 0.00 |
| TRINITY_A0A0J7L3Z3_LASNI/6-218   | A0A0J7L3Z3.1 PF0137 | 38.90 | 0.00 |
| TRINITY_A8JG37_CHLRE/15-124      | A8JG37.1 PF14886.4; | 38.90 | 0.00 |
| TRINITY_A0A0A0KY84_CUCSA/543-894 | A0A0A0KY84.1 PF0070 | 38.90 | 0.00 |
| TRINITY_D2VCP2_NAEGR/25-231      | D2VCP2.1 PF00149.26 | 38.90 | 0.00 |
| TRINITY_D8U818_VOLCA/1231-1397   | D8U818.1 PF00069.23 | 38.90 | 0.00 |
| TRINITY_J3M370_ORYBR/218-403     | J3M370.1 PF14580.4; | 38.90 | 0.00 |
| TRINITY_A8HSK5_CHLRE/66-269      | A8HSK5.1 PF01596.15 | 38.90 | 0.00 |
| TRINITY_A0A087SMX3_AUXPR/167-722 | A0A087SMX3.1 PF0491 | 38.90 | 0.00 |
| TRINITY_A0A078AXN5_STYLE/270-479 | A0A078AXN5.1 PF0481 | 38.90 | 0.00 |
| TRINITY_A0A0D2UKQ8_CAPO3/188-572 | A0A0D2UKQ8.1 PF0065 | 38.90 | 0.00 |
| TRINITY_L8GWI2_ACACA/20-150      | L8GWI2.1 PF00782.18 | 38.90 | 0.00 |
| TRINITY_A8II37_CHLRE/690-902     | A8II37.1 PF10474.7; | 38.90 | 0.00 |
| TRINITY_A0A024U6H0_9STRA/657-862 | A0A024U6H0.1 PF1270 | 38.90 | 0.00 |
| TRINITY_W7X8T2_TETTS/26-295      | W7X8T2.1 PF01267.15 | 38.90 | 0.00 |
| TRINITY_PAPP1_HUMAN/499-660      | Q13219.3 PF05572.11 | 38.90 | 0.00 |
| TRINITY_Q24BY2_TETTS/111-218     | Q24BY2.4 PF12066.6; | 38.90 | 0.00 |
| TRINITY_D3B2S6_POLPA/24-418      | D3B2S6.1 PF12698.5; | 38.90 | 0.00 |
| TRINITY_C1MN46_MICPC/146-311     | C1MN46.1 PF04832.10 | 38.90 | 0.00 |
| TRINITY_H3CTV3_TETNG/6-190       | H3CTV3.1 PF00106.23 | 38.90 | 0.00 |
| TRINITY_F4PQZ7_DICFS/15-97       | F4PQZ7.1 PF00300.20 | 38.80 | 0.00 |
| TRINITY_A0A0D2X3I2_CAPO3/177-319 | A0A0D2X3I2.1 PF1060 | 38.80 | 0.00 |
| TRINITY_A0D9S3_PARTE/655-861     | A0D9S3.1 PF00566.16 | 38.80 | 0.00 |
| TRINITY_I7M4C2_TETTS/42-276      | I7M4C2.1 PF00149.26 | 38.80 | 0.00 |
| TRINITY_A9RLK7_PHYPA/51-149      | A9RLK7.1 PF08551.8; | 38.80 | 0.00 |
| TRINITY_Q22CM5_TETTS/61-238      | Q22CM5.2 PF09439.8; | 38.80 | 0.00 |
| TRINITY_A0A0K9PCK3_ZOSMR/121-256 | A0A0K9PCK3.1 PF0411 | 38.80 | 0.00 |
| TRINITY_Q22X64_TETTS/2-598       | Q22X64.2 PF05804.10 | 38.80 | 0.00 |
| TRINITY_Q24E70_TETTS/215-694     | Q24E70.1 PF04547.10 | 38.80 | 0.00 |
| TRINITY_A0A060SQP0_PYCCI/16-139  | A0A060SQP0.1 PF0024 | 38.80 | 0.00 |
| TRINITY_A0A090M924_OSTTA/112-305 | A0A090M924.1 PF1353 | 38.80 | 0.00 |
| TRINITY_A0A085N3S5_9BILA/268-600 | A0A085N3S5.1 PF0245 | 38.80 | 0.00 |
| TRINITY_A0A061FDQ8_THECC/291-540 | A0A061FDQ8.1 PF0771 | 38.80 | 0.00 |
| TRINITY_I7LZJ1_TETTS/122-329     | I7LZJ1.1 PF01027.18 | 38.80 | 0.00 |
| TRINITY_D8SBH1_SELML/307-564     | D8SBH1.1 PF12697.5; | 38.80 | 0.00 |
| TRINITY_G0QY83_ICHMG/6-220       | G0QY83.1 PF08190.10 | 38.80 | 0.00 |
| TRINITY_W1NZC1_AMBTC/2-545       | W1NZC1.1 PF05786.12 | 38.80 | 0.00 |
| TRINITY_G3AUB2_SPAPN/40-172      | G3AUB2.1 PF12894.5; | 38.80 | 0.00 |
| TRINITY_A0A0D2UKQ8_CAPO3/188-572 | A0A0D2UKQ8.1 PF0065 | 38.80 | 0.00 |
| TRINITY_F4NW06_BATDJ/30-213      | F4NW06.1 PF00117.26 | 38.80 | 0.00 |
| TRINITY_A0A0G4FFD9_9ALVE/90-555  | A0A0G4FFD9.1 PF0006 | 38.80 | 0.00 |
| TRINITY_H2Z8R3_CIOSA/5-208       | H2Z8R3.1 PF05721.11 | 38.80 | 0.00 |
| TRINITY_L8HJN0_ACACA/233-963     | L8HJN0.1 PF00443.27 | 38.80 | 0.00 |
| TRINITY_W9RE27_9ROSA/647-899     | W9RE27.1 PF07714.15 | 38.80 | 0.00 |
| TRINITY_L8GY59_ACACA/206-368     | L8GY59.1 PF01544.16 | 38.80 | 0.00 |
| TRINITY_K9RAZ6_9CYAN/9-199       | K9RAZ6.1 PF04755.10 | 38.80 | 0.00 |
| TRINITY_E5T1Z4_TRISP/103-346     | E5T1Z4.1 PF07727.12 | 38.80 | 0.00 |
| TRINITY_EF1A_CENSY/8-291         | A0RUM4.1 PF00009.25 | 38.80 | 0.00 |
| TRINITY_L8HFX4_ACACA/12-318      | L8HFX4.1 PF00443.27 | 38.80 | 0.00 |
| TRINITY_H3GM81_PHYRM/324-430     | H3GM81.1 PF00651.29 | 38.80 | 0.00 |
| TRINITY_Q01CK6_OSTTA/516-865     | Q01CK6.1 PF05185.14 | 38.80 | 0.00 |
| TRINITY_I0YJT0_9CHLO/4-342       | I0YJT0.1 PF01266.22 | 38.80 | 0.00 |
| TRINITY_L8H4W6_ACACA/18-130      | L8H4W6.1 PF07574.11 | 38.80 | 0.00 |
| TRINITY_Q23UC9_TETTS/106-388     | Q23UC9.2 PF00122.18 | 38.80 | 0.00 |
| TRINITY_A0C500_PARTE/33-127      | A0C500.1 PF01363.19 | 38.80 | 0.00 |
| TRINITY_U6KJ95_EIMTE/1-239       | U6KJ95.1 PF08648.10 | 38.80 | 0.00 |
| TRINITY_A7RW26_NEMVE/1-259       | A7RW26.1 PF00144.22 | 38.80 | 0.00 |

|                                   |                     |       |      |
|-----------------------------------|---------------------|-------|------|
| TRINITY_I0Z3X6_9CHLO/64-566       | I0Z3X6.1 PF01019.19 | 38.80 | 0.00 |
| TRINITY_F4QAY9_DICFS/7-518        | F4QAY9.1 PF00899.19 | 38.80 | 0.00 |
| TRINITY_D3B2S6_POLPA/24-418       | D3B2S6.1 PF12698.5; | 38.80 | 0.00 |
| TRINITY_V7B7B8_PHAVU/1191-1413    | V7B7B8.1 PF02854.17 | 38.80 | 0.00 |
| TRINITY_D8TST9_VOLCA/621-848      | D8TST9.1 PF00211.18 | 38.80 | 0.00 |
| TRINITY_J9EFQ5_9SPIT/709-775      | J9EFQ5.1 PF13499.4; | 38.80 | 0.00 |
| TRINITY_S8BSW8_9LAMI/2-340        | S8BSW8.1 PF05028.12 | 38.80 | 0.00 |
| TRINITY_Q17N45_AEDAE/51-246       | Q17N45.1 PF00106.23 | 38.80 | 0.00 |
| TRINITY_A0A0E9NK18_9ASCO/898-1021 | A0A0E9NK18.1 PF0007 | 38.70 | 0.00 |
| TRINITY_Q22TC2_TETTS/3-97         | Q22TC2.2 PF00686.17 | 38.70 | 0.00 |
| TRINITY_A0A078AX59_STYLE/713-871  | A0A078AX59.1 PF0303 | 38.70 | 0.00 |
| TRINITY_U9UI46_RHIID/30-185       | U9UI46.1 PF00810.16 | 38.70 | 0.00 |
| TRINITY_E7EN44_HUMAN/12-323       | E7EN44.1 PF02190.14 | 38.70 | 0.00 |
| TRINITY_R5AGF9_9FIRM/151-583      | R5AGF9.1 PF01131.18 | 38.70 | 0.00 |
| TRINITY_A0BQW0_PARTE/27-209       | A0BQW0.1 PF03357.19 | 38.70 | 0.00 |
| TRINITY_F1A037_DICPU/19-205       | F1A037.1 PF00300.20 | 38.70 | 0.00 |
| TRINITY_I3SRI9_MEDTR/7-144        | I3SRI9.1 PF03870.13 | 38.70 | 0.00 |
| TRINITY_A0A0R4ICG1_DANRE/101-195  | A0A0R4ICG1.1 PF0015 | 38.70 | 0.00 |
| TRINITY_I7M0J5_TETTS/133-598      | I7M0J5.1 PF01142.16 | 38.70 | 0.00 |
| TRINITY_A0A078AJQ0_STYLE/388-594  | A0A078AJQ0.1 PF0481 | 38.70 | 0.00 |
| TRINITY_A0CDC5_PARTE/838-1107     | A0CDC5.1 PF16212.3; | 38.70 | 0.00 |
| TRINITY_I2GIA8_9BACT/29-270       | I2GIA8.1 PF03372.21 | 38.70 | 0.00 |
| TRINITY_I0YYG8_9CHLO/12-184       | I0YYG8.1 PF05063.12 | 38.70 | 0.00 |
| TRINITY_C3ZFB5_BRAFL/367-474      | C3ZFB5.1 PF00651.29 | 38.70 | 0.00 |
| TRINITY_A0CBB5_PARTE/242-397      | A0CBB5.1 PF04280.13 | 38.70 | 0.00 |
| TRINITY_A0A0M9E7Z9_9DELT/1-155    | A0A0M9E7Z9.1 PF0015 | 38.70 | 0.00 |
| TRINITY_B7PDP2_IXOSC/71-243       | B7PDP2.1 PF13532.4; | 38.70 | 0.00 |
| TRINITY_F0ZN35_DICPU/390-679      | F0ZN35.1 PF01504.16 | 38.70 | 0.00 |
| TRINITY_D8UDK3_VOLCA/12-513       | D8UDK3.1 PF03155.13 | 38.70 | 0.00 |
| TRINITY_E1ZL08_CHLVA/10-95        | E1ZL08.1 PF13499.4; | 38.70 | 0.00 |
| TRINITY_M4CNA4_BRARP/221-405      | M4CNA4.1 PF03031.16 | 38.70 | 0.00 |
| TRINITY_L8GQZ4_ACACA/23-685       | L8GQZ4.1 PF07093.9; | 38.70 | 0.00 |
| TRINITY_G0S059_CHATD/1296-1468    | G0S059.1 PF00616.17 | 38.70 | 0.00 |
| TRINITY_D8TTK7_VOLCA/78-378       | D8TTK7.1 PF13896.4; | 38.70 | 0.00 |
| TRINITY_A9SWK6_PHYPA/87-335       | A9SWK6.1 PF01963.15 | 38.70 | 0.00 |
| TRINITY_A0A0B0N5I3_GOSAR/116-417  | A0A0B0N5I3.1 PF0044 | 38.70 | 0.00 |
| TRINITY_A0A059A8Z1_EUCGR/59-253   | A0A059A8Z1.1 PF0728 | 38.70 | 0.00 |
| TRINITY_T1G1M0_HELRO/271-426      | T1G1M0.1 PF13768.4; | 38.70 | 0.00 |
| TRINITY_F4QE60_DICFS/76-502       | F4QE60.1 PF00067.20 | 38.70 | 0.00 |
| TRINITY_Q23GZ0_TETTS/399-557      | Q23GZ0.1 PF00609.17 | 38.70 | 0.00 |
| TRINITY_C3YIS6_BRAFL/616-912      | C3YIS6.1 PF00664.21 | 38.70 | 0.00 |
| TRINITY_M2W641_GALSU/7-150        | M2W641.1 PF00106.23 | 38.70 | 0.00 |
| TRINITY_L8GMB8_ACACA/479-700      | L8GMB8.1 PF04959.11 | 38.70 | 0.00 |
| TRINITY_A0A067CKU8_SAPPC/62-152   | A0A067CKU8.1 PF1496 | 38.70 | 0.00 |
| TRINITY_I7MB87_TETTS/63-523       | I7MB87.2 PF00067.20 | 38.70 | 0.00 |
| TRINITY_T1JK96_STRMM/331-541      | T1JK96.1 PF07910.11 | 38.70 | 0.00 |
| TRINITY_A0A0M2PU93_PROHO/94-505   | A0A0M2PU93.1 PF0001 | 38.70 | 0.00 |
| TRINITY_L8GVQ1_ACACA/16-224       | L8GVQ1.1 PF01991.16 | 38.70 | 0.00 |
| TRINITY_A0A0M0BJJ4_9ARCH/6-328    | A0A0M0BJJ4.1 PF0000 | 38.70 | 0.00 |
| TRINITY_D8TJW1_VOLCA/6-189        | D8TJW1.1 PF10225.7; | 38.70 | 0.00 |
| TRINITY_B0D488_LACBS/608-916      | B0D488.1 PF02171.15 | 38.70 | 0.00 |
| TRINITY_U9T3K7_RHIID/196-498      | U9T3K7.1 PF03151.14 | 38.70 | 0.00 |
| TRINITY_A9UUA4_MONBE/112-221      | A9UUA4.1 PF02996.15 | 38.70 | 0.00 |
| TRINITY_G7WPF0_METH6/63-184       | G7WPF0.1 PF03351.15 | 38.70 | 0.00 |
| TRINITY_A8HS43_CHLRE/13-337       | A8HS43.1 PF00225.21 | 38.70 | 0.00 |
| TRINITY_K7J987_NASVI/460-578      | K7J987.1 PF00665.24 | 38.70 | 0.00 |
| TRINITY_D3BI36_POLPA/1029-1279    | D3BI36.1 PF07714.15 | 38.70 | 0.00 |
| TRINITY_A0E7T1_PARTE/778-901      | A0E7T1.1 PF00072.22 | 38.60 | 0.00 |
| TRINITY_E9J5D4_SOLIN/482-768      | E9J5D4.1 PF00702.24 | 38.60 | 0.00 |
| TRINITY_A0A0N4SZ21_BRUPA/274-490  | A0A0N4SZ21.1 PF1348 | 38.60 | 0.00 |
| TRINITY_J9I3R9_9SPIT/1-81         | J9I3R9.1 PF08293.9; | 38.60 | 0.00 |

|                                  |                     |       |      |
|----------------------------------|---------------------|-------|------|
| TRINITY_I7MAD4_TETTS/869-1238    | I7MAD4.2 PF12698.5; | 38.60 | 0.00 |
| TRINITY_L8H9F6_ACACA/1730-1984   | L8H9F6.1 PF07714.15 | 38.60 | 0.00 |
| TRINITY_V4AA81_LOTGI/7-311       | V4AA81.1 PF07714.15 | 38.60 | 0.00 |
| TRINITY_A0A0D2WN96_CAPO3/65-326  | A0A0D2WN96.1 PF0769 | 38.60 | 0.00 |
| TRINITY_A0D109_PARTE/22-300      | A0D109.1 PF00069.23 | 38.60 | 0.00 |
| TRINITY_Q23RJ8_TETTS/803-963     | Q23RJ8.1 PF01979.18 | 38.60 | 0.00 |
| TRINITY_H2Z6S3_CIOSA/41-215      | H2Z6S3.1 PF13847.4; | 38.60 | 0.00 |
| TRINITY_F0ZWF3_DICPU/198-398     | F0ZWF3.1 PF08737.8; | 38.60 | 0.00 |
| TRINITY_A0A0D2UT14_GOSRA/531-649 | A0A0D2UT14.1 PF0174 | 38.60 | 0.00 |
| TRINITY_A0A0F2QFA2_9RHOB/400-611 | A0A0F2QFA2.1 PF1393 | 38.60 | 0.00 |
| TRINITY_D3AYP0_POLPA/50-329      | D3AYP0.1 PF07992.12 | 38.60 | 0.00 |
| TRINITY_L1JQS5_GUITH/295-547     | L1JQS5.1 PF00069.23 | 38.60 | 0.00 |
| TRINITY_F4PYI7_DICFS/50-458      | F4PYI7.1 PF00083.22 | 38.60 | 0.00 |
| TRINITY_D3B570_POLPA/109-243     | D3B570.1 PF01764.23 | 38.60 | 0.00 |
| TRINITY_D3BF56_POLPA/97-304      | D3BF56.1 PF06003.10 | 38.60 | 0.00 |
| TRINITY_I1FA66_AMPQE/22-157      | I1FA66.1 PF01565.21 | 38.60 | 0.00 |
| TRINITY_L8GQK2_ACACA/79-161      | L8GQK2.1 PF01868.14 | 38.60 | 0.00 |
| TRINITY_R7HCF5_9FIRM/44-149      | R7HCF5.1 PF11380.6; | 38.60 | 0.00 |
| TRINITY_A0A078BAU4_STYLE/309-610 | A0A078BAU4.1 PF0313 | 38.60 | 0.00 |
| TRINITY_A0A078AJQ0_STYLE/388-594 | A0A078AJQ0.1 PF0481 | 38.60 | 0.00 |
| TRINITY_A8TKX4_9PROT/22-377      | A8TKX4.1 PF00266.17 | 38.60 | 0.00 |
| TRINITY_A8J9L4_CHLRE/43-170      | A8J9L4.1 PF10374.7; | 38.60 | 0.00 |
| TRINITY_U9TNM8_RHIID/101-284     | U9TNM8.1 PF13472.4; | 38.60 | 0.00 |
| TRINITY_F4NZF5_BATDJ/355-436     | F4NZF5.1 PF00789.18 | 38.60 | 0.00 |
| TRINITY_L8H9F6_ACACA/1730-1984   | L8H9F6.1 PF07714.15 | 38.60 | 0.00 |
| TRINITY_Q0DSR4_ORYSJ/108-227     | Q0DSR4.1 PF11969.6; | 38.60 | 0.00 |
| TRINITY_K3W780_PYTUL/38-193      | K3W780.1 PF01553.19 | 38.60 | 0.00 |
| TRINITY_K3WE87_PYTUL/612-725     | K3WE87.1 PF09404.8; | 38.60 | 0.00 |
| TRINITY_A0A0D2WMX1_CAPO3/403-580 | A0A0D2WMX1.1 PF0061 | 38.60 | 0.00 |
| TRINITY_F4PI07_DICFS/810-1059    | F4PI07.1 PF07714.15 | 38.60 | 0.00 |
| TRINITY_W5MSB0_LEPOC/103-461     | W5MSB0.1 PF00176.21 | 38.60 | 0.00 |
| TRINITY_D3AYL5_POLPA/432-874     | D3AYL5.1 PF06963.10 | 38.60 | 0.00 |
| TRINITY_D3B0C1_POLPA/232-428     | D3B0C1.1 PF07690.14 | 38.60 | 0.00 |
| TRINITY_I1HUS8_BRADI/81-234      | I1HUS8.1 PF00650.18 | 38.60 | 0.00 |
| TRINITY_F0ZID8_DICPU/269-482     | F0ZID8.1 PF02902.17 | 38.60 | 0.00 |
| TRINITY_B7GJA4_ANOFW/6-252       | B7GJA4.1 PF12705.5; | 38.60 | 0.00 |
| TRINITY_C1MYF3_MICPC/90-234      | C1MYF3.1 PF07386.9; | 38.60 | 0.00 |
| TRINITY_F4PS49_DICFS/142-327     | F4PS49.1 PF03407.14 | 38.60 | 0.00 |
| TRINITY_A8J7I7_CHLRE/57-230      | A8J7I7.1 PF13515.4; | 38.60 | 0.00 |
| TRINITY_M0U0Y8_MUSAM/35-510      | M0U0Y8.1 PF00067.20 | 38.60 | 0.00 |
| TRINITY_B3RN30_TRIAD/6-199       | B3RN30.1 PF04072.12 | 38.60 | 0.00 |
| TRINITY_U3K3Z9_FICAL/62-517      | U3K3Z9.1 PF00067.20 | 38.60 | 0.00 |
| TRINITY_A8J6K0_CHLRE/25-233      | A8J6K0.1 PF06775.12 | 38.60 | 0.00 |
| TRINITY_L8GPA8_ACACA/831-904     | L8GPA8.1 PF00240.21 | 38.60 | 0.00 |
| TRINITY_Q4DNT3_TRYCC/4-178       | Q4DNT3.1 PF02580.14 | 38.60 | 0.00 |
| TRINITY_M1P701_DESSD/110-357     | M1P701.1 PF07787.10 | 38.60 | 0.00 |
| TRINITY_K1QZF2_CRAGI/1141-1565   | K1QZF2.1 PF00759.17 | 38.60 | 0.00 |
| TRINITY_W5J671_ANODA/34-169      | W5J671.1 PF01161.18 | 38.60 | 0.00 |
| TRINITY_U3K3Z9_FICAL/62-517      | U3K3Z9.1 PF00067.20 | 38.60 | 0.00 |
| TRINITY_D8TLX0_VOLCA/633-924     | D8TLX0.1 PF03914.15 | 38.60 | 0.00 |
| TRINITY_I0YVX3_9CHLO/22-409      | I0YVX3.1 PF05282.9; | 38.60 | 0.00 |
| TRINITY_D8U927_VOLCA/125-458     | D8U927.1 PF08190.10 | 38.60 | 0.00 |
| TRINITY_I0YMF5_9CHLO/166-565     | I0YMF5.1 PF05192.16 | 38.60 | 0.00 |
| TRINITY_M4BQH7_HYAAE/473-545     | M4BQH7.1 PF04433.15 | 38.60 | 0.00 |
| TRINITY_L1JID5_GUITH/21-111      | L1JID5.1 PF12894.5; | 38.60 | 0.00 |
| TRINITY_Q23FY7_TETTS/410-514     | Q23FY7.1 PF04003.10 | 38.50 | 0.00 |
| TRINITY_I7MLS9_TETTS/119-280     | I7MLS9.1 PF01694.20 | 38.50 | 0.00 |
| TRINITY_L8HDM9_ACACA/41-282      | L8HDM9.1 PF00149.26 | 38.50 | 0.00 |
| TRINITY_M1VHH2_CYAME/294-665     | M1VHH2.1 PF02274.15 | 38.50 | 0.00 |
| TRINITY_C4LXW0_ENTHI/785-1043    | C4LXW0.1 PF07714.15 | 38.50 | 0.00 |
| TRINITY_L0DET2_SINAD/319-434     | L0DET2.1 PF00578.19 | 38.50 | 0.00 |

|                                  |                     |       |      |
|----------------------------------|---------------------|-------|------|
| TRINITY_A0A0M3K3E5_ANISI/4-332   | A0A0M3K3E5.1 PF0856 | 38.50 | 0.00 |
| TRINITY_A0DIV5_PARTE/61-259      | A0DIV5.1 PF00106.23 | 38.50 | 0.00 |
| TRINITY_K1Q3U3_CRAGI/22-247      | K1Q3U3.1 PF03388.11 | 38.50 | 0.00 |
| TRINITY_A0CE21_PARTE/56-517      | A0CE21.1 PF12698.5; | 38.50 | 0.00 |
| TRINITY_A8JFV5_CHLRE/17-152      | A8JFV5.1 PF00892.18 | 38.50 | 0.00 |
| TRINITY_A8JCL2_CHLRE/11-215      | A8JCL2.1 PF07855.10 | 38.50 | 0.00 |
| TRINITY_HGH1_DICDI/92-270        | Q76NW7.1 PF04063.12 | 38.50 | 0.00 |
| TRINITY_I7M8S5_TETTS/121-433     | I7M8S5.2 PF01546.26 | 38.50 | 0.00 |
| TRINITY_A0A059CCB1_EUCGR/104-189 | A0A059CCB1.1 PF0043 | 38.50 | 0.00 |
| TRINITY_G4VGM3_SCHMA/71-229      | G4VGM3.1 PF08662.9; | 38.50 | 0.00 |
| TRINITY_F1A4V0_DICPU/398-674     | F1A4V0.1 PF10186.7; | 38.50 | 0.00 |
| TRINITY_A0A087YCV1_POEFO/340-537 | A0A087YCV1.2 PF0285 | 38.50 | 0.00 |
| TRINITY_I7LTZ4_TETTS/63-290      | I7LTZ4.1 PF02104.13 | 38.50 | 0.00 |
| TRINITY_H2MSJ7_ORYLA/5-176       | H2MSJ7.1 PF00025.19 | 38.50 | 0.00 |
| TRINITY_A4C9D1_9GAMM/22-252      | A4C9D1.1 PF00520.29 | 38.50 | 0.00 |
| TRINITY_A0A078AX44_STYLE/604-698 | A0A078AX44.1 PF1349 | 38.50 | 0.00 |
| TRINITY_M0SD20_MUSAM/22-396      | M0SD20.1 PF01425.19 | 38.50 | 0.00 |
| TRINITY_A0DXX4_PARTE/105-473     | A0DXX4.1 PF01457.14 | 38.50 | 0.00 |
| TRINITY_Q24CW0_TETTS/47-201      | Q24CW0.2 PF01925.17 | 38.50 | 0.00 |
| TRINITY_A0A0A0K8Q2_CUCSA/107-523 | A0A0A0K8Q2.1 PF0086 | 38.50 | 0.00 |
| TRINITY_L8GMR3_ACACA/270-526     | L8GMR3.1 PF07714.15 | 38.50 | 0.00 |
| TRINITY_C4LYN8_ENTHI/147-276     | C4LYN8.1 PF00004.27 | 38.50 | 0.00 |
| TRINITY_B3RIX4_TRIAD/81-576      | B3RIX4.1 PF00501.26 | 38.50 | 0.00 |
| TRINITY_A0A059LQT9_9CHLO/36-318  | A0A059LQT9.1 PF0006 | 38.50 | 0.00 |
| TRINITY_I7MIQ1_TETTS/357-687     | I7MIQ1.2 PF12463.6; | 38.50 | 0.00 |
| TRINITY_A0A024TU53_9STRA/9-168   | A0A024TU53.1 PF0007 | 38.50 | 0.00 |
| TRINITY_U6NMJ5_HAECO/119-238     | U6NMJ5.1 PF00622.26 | 38.50 | 0.00 |
| TRINITY_F4Q0Y2_DICFS/53-303      | F4Q0Y2.1 PF01151.16 | 38.50 | 0.00 |
| TRINITY_D8TTH8_VOLCA/123-760     | D8TTH8.1 PF14222.4; | 38.50 | 0.00 |
| TRINITY_A0A0P7THD5_9TELE/11-249  | A0A0P7THD5.1 PF0688 | 38.50 | 0.00 |
| TRINITY_L8GMP4_ACACA/297-555     | L8GMP4.1 PF07714.15 | 38.50 | 0.00 |
| TRINITY_A7S1L5_NEMVE/71-266      | A7S1L5.1 PF01171.18 | 38.50 | 0.00 |
| TRINITY_D8U978_VOLCA/2-203       | D8U978.1 PF07714.15 | 38.50 | 0.00 |
| TRINITY_A8IY93_CHLRE/47-378      | A8IY93.1 PF09728.7; | 38.50 | 0.00 |
| TRINITY_A8IQ59_CHLRE/1465-1608   | A8IQ59.1 PF00520.29 | 38.50 | 0.00 |
| TRINITY_E3PWL6_CLOSD/1-109       | E3PWL6.1 PF07343.9; | 38.40 | 0.00 |
| TRINITY_Q22DT5_TETTS/36-180      | Q22DT5.4 PF00106.23 | 38.40 | 0.00 |
| TRINITY_A0A0D2UP61_CAPO3/584-737 | A0A0D2UP61.1 PF0060 | 38.40 | 0.00 |
| TRINITY_G0QW77_ICHMG/43-324      | G0QW77.1 PF03619.14 | 38.40 | 0.00 |
| TRINITY_A0A0E9NFI9_9ASCO/26-160  | A0A0E9NFI9.1 PF1289 | 38.40 | 0.00 |
| TRINITY_A9T4V6_PHYPA/145-269     | A9T4V6.1 PF01529.18 | 38.40 | 0.00 |
| TRINITY_F0ZC32_DICPU/152-235     | F0ZC32.1 PF06916.11 | 38.40 | 0.00 |
| TRINITY_G7JHQ5_MEDTR/166-270     | G7JHQ5.1 PF03171.18 | 38.40 | 0.00 |
| TRINITY_I7MAS1_TETTS/403-633     | I7MAS1.2 PF00609.17 | 38.40 | 0.00 |
| TRINITY_G0R4U6_ICHMG/19-318      | G0R4U6.1 PF00266.17 | 38.40 | 0.00 |
| TRINITY_I7MIN0_TETTS/9-308       | I7MIN0.1 PF08449.9; | 38.40 | 0.00 |
| TRINITY_E7FA74_DANRE/1687-1780   | E7FA74.1 PF16770.3; | 38.40 | 0.00 |
| TRINITY_M0S8A8_MUSAM/20-134      | M0S8A8.1 PF06246.10 | 38.40 | 0.00 |
| TRINITY_D8TU60_VOLCA/39-696      | D8TU60.1 PF04916.11 | 38.40 | 0.00 |
| TRINITY_SPKA_DICDI/351-612       | Q86AT8.1 PF07714.15 | 38.40 | 0.00 |
| TRINITY_G7JN28_MEDTR/76-215      | G7JN28.1 PF10262.7; | 38.40 | 0.00 |
| TRINITY_C1DYB7_MICSR/138-297     | C1DYB7.1 PF01765.17 | 38.40 | 0.00 |
| TRINITY_B9RVW1_RICCO/357-463     | B9RVW1.1 PF12214.6; | 38.40 | 0.00 |
| TRINITY_A9SWK6_PHYPA/87-335      | A9SWK6.1 PF01963.15 | 38.40 | 0.00 |
| TRINITY_DOME80_RHOM4/39-358      | DOME80.1 PF01663.20 | 38.40 | 0.00 |
| TRINITY_A9U4C0_PHYPA/2-190       | A9U4C0.1 PF14724.4; | 38.40 | 0.00 |
| TRINITY_C4LTX2_ENTHI/61-275      | C4LTX2.1 PF00149.26 | 38.40 | 0.00 |
| TRINITY_A0CVA1_PARTE/625-865     | A0CVA1.1 PF00566.16 | 38.40 | 0.00 |
| TRINITY_J9I249_9SPIT/72-231      | J9I249.1 PF01343.16 | 38.40 | 0.00 |
| TRINITY_L1JM38_GUIITH/149-313    | L1JM38.1 PF13535.4; | 38.40 | 0.00 |
| TRINITY_A0A067JL15_JATCU/434-599 | A0A067JL15.1 PF0007 | 38.40 | 0.00 |

|                                  |                     |       |      |
|----------------------------------|---------------------|-------|------|
| TRINITY_A8IR23_CHLRE/1-184       | A8IR23.1 PF13419.4; | 38.40 | 0.00 |
| TRINITY_A0A0A1TCV8_9HYPO/142-382 | A0A0A1TCV8.1 PF1319 | 38.40 | 0.00 |
| TRINITY_L8GLH0_ACACA/96-270      | L8GLH0.1 PF05843.12 | 38.40 | 0.00 |
| TRINITY_E1Z4H3_CHLVA/1661-1859   | E1Z4H3.1 PF13378.4; | 38.40 | 0.00 |
| TRINITY_G0QLT3_ICHMG/99-440      | G0QLT3.1 PF01237.16 | 38.40 | 0.00 |
| TRINITY_A0A0D9YAK9_9ORYZ/10-152  | A0A0D9YAK9.1 PF0002 | 38.30 | 0.00 |
| TRINITY_A0A0G2ZPA9_9DELT/216-336 | A0A0G2ZPA9.1 PF0018 | 38.30 | 0.00 |
| TRINITY_A0A0D2UJE3_CAPO3/82-201  | A0A0D2UJE3.1 PF0004 | 38.30 | 0.00 |
| TRINITY_A0A087SHI5_AUXPR/5-193   | A0A087SHI5.1 PF1621 | 38.30 | 0.00 |
| TRINITY_A0A0N5A8P3_9BILA/8-221   | A0A0N5A8P3.1 PF0113 | 38.30 | 0.00 |
| TRINITY_A0A0P7UKM0_9TELE/46-174  | A0A0P7UKM0.1 PF0478 | 38.30 | 0.00 |
| TRINITY_ABCCF_DICDI/875-1144     | Q54VC1.1 PF00664.21 | 38.30 | 0.00 |
| TRINITY_X6MTW8_RETFI/11-288      | X6MTW8.1 PF07065.12 | 38.30 | 0.00 |
| TRINITY_L8GPJ8_ACACA/129-640     | L8GPJ8.1 PF07690.14 | 38.30 | 0.00 |
| TRINITY_E1Z6B0_CHLVA/24-120      | E1Z6B0.1 PF10537.7; | 38.30 | 0.00 |
| TRINITY_L8H271_ACACA/165-267     | L8H271.1 PF00168.28 | 38.30 | 0.00 |
| TRINITY_D3B9W6_POLPA/171-597     | D3B9W6.1 PF00501.26 | 38.30 | 0.00 |
| TRINITY_D8U150_VOLCA/26-330      | D8U150.1 PF04756.11 | 38.30 | 0.00 |
| TRINITY_G0QU62_ICHMG/2185-2520   | G0QU62.1 PF12777.5; | 38.30 | 0.00 |
| TRINITY_B0WST7_CULQU/148-481     | B0WST7.1 PF05028.12 | 38.30 | 0.00 |
| TRINITY_J9FJH5_9SPIT/99-246      | J9FJH5.1 PF07534.14 | 38.30 | 0.00 |
| TRINITY_A0A010QCS2_9PEZI/87-211  | A0A010QCS2.1 PF0018 | 38.30 | 0.00 |
| TRINITY_T1FWZ5_HELRO/13-142      | T1FWZ5.1 PF00782.18 | 38.30 | 0.00 |
| TRINITY_A8IY98_CHLRE/366-502     | A8IY98.1 PF03188.14 | 38.30 | 0.00 |
| TRINITY_D8QRE9_SELML/4-615       | D8QRE9.1 PF04130.11 | 38.30 | 0.00 |
| TRINITY_I7M6D7_TETTS/137-346     | I7M6D7.1 PF03798.14 | 38.30 | 0.00 |
| TRINITY_A0A024UBD2_9STRA/265-453 | A0A024UBD2.1 PF0223 | 38.30 | 0.00 |
| TRINITY_N4W161_COLOR/21-375      | N4W161.1 PF01212.19 | 38.30 | 0.00 |
| TRINITY_A0A078AGW3_STYLE/63-550  | A0A078AGW3.1 PF0050 | 38.30 | 0.00 |
| TRINITY_D3B338_POLPA/992-1287    | D3B338.1 PF02171.15 | 38.30 | 0.00 |
| TRINITY_A0A0N4W0J1_HAEP/654-749  | A0A0N4W0J1.1 PF0222 | 38.30 | 0.00 |
| TRINITY_E1ZDV4_CHLVA/257-841     | E1ZDV4.1 PF10433.7; | 38.30 | 0.00 |
| TRINITY_B9ILR4_POPTR/776-1025    | B9ILR4.2 PF00069.23 | 38.30 | 0.00 |
| TRINITY_D3BJN3_POLPA/68-802      | D3BJN3.1 PF05879.10 | 38.30 | 0.00 |
| TRINITY_I1LKX3_SOYBN/6-130       | I1LKX3.1 PF16100.3; | 38.30 | 0.00 |
| TRINITY_J9IYY2_9SPIT/103-419     | J9IYY2.1 PF01546.26 | 38.30 | 0.00 |
| TRINITY_A0A0A0KAZ4_CUCSA/6-197   | A0A0A0KAZ4.1 PF0783 | 38.30 | 0.00 |
| TRINITY_D8TQ76_VOLCA/46-459      | D8TQ76.1 PF06870.10 | 38.30 | 0.00 |
| TRINITY_Q23FG2_TETTS/1702-2050   | Q23FG2.2 PF00443.27 | 38.30 | 0.00 |
| TRINITY_L8GZN8_ACACA/219-408     | L8GZN8.1 PF00617.17 | 38.30 | 0.00 |
| TRINITY_F1QXK7_DANRE/170-431     | F1QXK7.1 PF00069.23 | 38.30 | 0.00 |
| TRINITY_U5D935_AMBTC/366-517     | U5D935.1 PF04937.13 | 38.30 | 0.00 |
| TRINITY_D8TN95_VOLCA/102-337     | D8TN95.1 PF00118.22 | 38.30 | 0.00 |
| TRINITY_A8IK98_CHLRE/74-458      | A8IK98.1 PF00176.21 | 38.30 | 0.00 |
| TRINITY_L8GJ41_ACACA/177-473     | L8GJ41.1 PF09423.8; | 38.30 | 0.00 |
| TRINITY_A8J7M9_CHLRE/742-1038    | A8J7M9.1 PF00069.23 | 38.30 | 0.00 |
| TRINITY_A0A087SFL1_AUXPR/342-523 | A0A087SFL1.1 PF0185 | 38.30 | 0.00 |
| TRINITY_Q2IQ35_ANADE/179-509     | Q2IQ35.1 PF00171.20 | 38.30 | 0.00 |
| TRINITY_F4P4T9_BATDJ/43-311      | F4P4T9.1 PF00350.21 | 38.30 | 0.00 |
| TRINITY_I7MFL4_TETTS/618-718     | I7MFL4.2 PF12796.5; | 38.20 | 0.00 |
| TRINITY_R0HMD9_9BRAS/130-349     | R0HMD9.1 PF00112.21 | 38.20 | 0.00 |
| TRINITY_I7M249_TETTS/257-369     | I7M249.1 PF08695.8; | 38.20 | 0.00 |
| TRINITY_G0R560_ICHMG/1-229       | G0R560.1 PF00067.20 | 38.20 | 0.00 |
| TRINITY_G0QPQ7_ICHMG/153-915     | G0QPQ7.1 PF04762.10 | 38.20 | 0.00 |
| TRINITY_A2EQY4_TRIVA/71-171      | A2EQY4.1 PF08241.10 | 38.20 | 0.00 |
| TRINITY_VPS10_PICPG/729-1193     | C4R192.1 PF15902.3; | 38.20 | 0.00 |
| TRINITY_B3RUZ1_TRIAD/35-154      | B3RUZ1.1 PF03351.15 | 38.20 | 0.00 |
| TRINITY_J1FDE1_9BACT/5-271       | J1FDE1.1 PF01869.18 | 38.20 | 0.00 |
| TRINITY_L8H9P5_ACACA/1162-1679   | L8H9P5.1 PF06920.11 | 38.20 | 0.00 |
| TRINITY_L8HAW3_ACACA/947-1064    | L8HAW3.1 PF12807.5; | 38.20 | 0.00 |
| TRINITY_F8KX77_PARAV/15-456      | F8KX77.1 PF01593.22 | 38.20 | 0.00 |

|                                  |                     |       |      |
|----------------------------------|---------------------|-------|------|
| TRINITY_F0Z850_DICPU/211-305     | F0Z850.1 PF00153.25 | 38.20 | 0.00 |
| TRINITY_I1IR77_BRADI/131-226     | I1IR77.1 PF00651.29 | 38.20 | 0.00 |
| TRINITY_A0A0D9WVV7_9ORYZ/262-443 | A0A0D9WVV7.1 PF0094 | 38.20 | 0.00 |
| TRINITY_A0A078B9A8_STYLE/22-221  | A0A078B9A8.1 PF0114 | 38.20 | 0.00 |
| TRINITY_H0V5S4_CAVPO/197-298     | H0V5S4.1 PF00153.25 | 38.20 | 0.00 |
| TRINITY_J9HWC2_9SPIT/321-529     | J9HWC2.1 PF03770.14 | 38.20 | 0.00 |
| TRINITY_E1ZDV4_CHLVA/1238-1591   | E1ZDV4.1 PF03178.13 | 38.20 | 0.00 |
| TRINITY_D2VCX0_NAEGR/106-317     | D2VCX0.1 PF02750.12 | 38.20 | 0.00 |
| TRINITY_A0C866_PARTE/289-608     | A0C866.1 PF04515.10 | 38.20 | 0.00 |
| TRINITY_A0A015M7K9_9GLOM/318-474 | A0A015M7K9.1 PF0006 | 38.20 | 0.00 |
| TRINITY_D3BCH3_POLPA/1901-2160   | D3BCH3.1 PF00481.19 | 38.20 | 0.00 |
| TRINITY_C1MGF8_MICPC/33-222      | C1MGF8.1 PF13579.4; | 38.20 | 0.00 |
| TRINITY_A0A0K9PV01_ZOSMR/294-407 | A0A0K9PV01.1 PF0292 | 38.20 | 0.00 |
| TRINITY_Q2HHN2_CHAGB/234-468     | Q2HHN2.1 PF00856.26 | 38.20 | 0.00 |
| TRINITY_W6G5N1_NODSP/97-330      | W6G5N1.1 PF00891.16 | 38.20 | 0.00 |
| TRINITY_M4BET0_HYAAE/13-75       | M4BET0.1 PF00226.29 | 38.20 | 0.00 |
| TRINITY_L8H3W5_ACACA/497-720     | L8H3W5.1 PF00176.21 | 38.20 | 0.00 |
| TRINITY_K5XK64_AGABU/93-379      | K5XK64.1 PF00069.23 | 38.20 | 0.00 |
| TRINITY_L8GSQ7_ACACA/503-844     | L8GSQ7.1 PF00443.27 | 38.20 | 0.00 |
| TRINITY_F0ZW58_DICPU/38-145      | F0ZW58.1 PF00307.29 | 38.20 | 0.00 |
| TRINITY_D8UGK7_VOLCA/91-281      | D8UGK7.1 PF03798.14 | 38.20 | 0.00 |
| TRINITY_I0YLE6_9CHLO/727-871     | I0YLE6.1 PF13515.4; | 38.20 | 0.00 |
| TRINITY_A0A067C4C7_SAPPC/21-269  | A0A067C4C7.1 PF1477 | 38.20 | 0.00 |
| TRINITY_A8IPI0_CHLRE/175-335     | A8IPI0.1 PF05063.12 | 38.20 | 0.00 |
| TRINITY_E1ZLI8_CHLVA/13-184      | E1ZLI8.1 PF03152.12 | 38.20 | 0.00 |
| TRINITY_A8IWZ7_CHLRE/941-1752    | A8IWZ7.1 PF02364.13 | 38.20 | 0.00 |
| TRINITY_B3RVL5_TRIAD/13-116      | B3RVL5.1 PF02991.14 | 38.20 | 0.00 |
| TRINITY_I7M612_TETTS/2-121       | I7M612.2 PF08923.8; | 38.10 | 0.00 |
| TRINITY_U5GN11_POPTR/596-830     | U5GN11.1 PF02358.14 | 38.10 | 0.00 |
| TRINITY_M2TUY0_COCH5/323-879     | M2TUY0.1 PF01055.24 | 38.10 | 0.00 |
| TRINITY_T0QCC9_9STRA/12-266      | T0QCC9.1 PF07690.14 | 38.10 | 0.00 |
| TRINITY_Q248B0_TETTS/147-404     | Q248B0.3 PF00069.23 | 38.10 | 0.00 |
| TRINITY_A0A0F5K5I6_9BURK/5-211   | A0A0F5K5I6.1 PF0137 | 38.10 | 0.00 |
| TRINITY_K4BMJ3_SOLLC/197-324     | K4BMJ3.1 PF00134.21 | 38.10 | 0.00 |
| TRINITY_A0BSB9_PARTE/396-700     | A0BSB9.1 PF11904.6; | 38.10 | 0.00 |
| TRINITY_L8GIF3_ACACA/110-341     | L8GIF3.1 PF07065.12 | 38.10 | 0.00 |
| TRINITY_I4Y6B8_WALMC/11-127      | I4Y6B8.1 PF00383.21 | 38.10 | 0.00 |
| TRINITY_X6MIZ1_RETFI/93-249      | X6MIZ1.1 PF02544.14 | 38.10 | 0.00 |
| TRINITY_M4XFV7_PSEDE/2-246       | M4XFV7.1 PF00795.20 | 38.10 | 0.00 |
| TRINITY_D8T6F9_SELML/113-250     | D8T6F9.1 PF08652.9; | 38.10 | 0.00 |
| TRINITY_I7M136_TETTS/2403-2719   | I7M136.2 PF00520.29 | 38.10 | 0.00 |
| TRINITY_A0BPT3_PARTE/448-553     | A0BPT3.1 PF11987.6; | 38.10 | 0.00 |
| TRINITY_Q24FP1_TETTS/133-395     | Q24FP1.1 PF00069.23 | 38.10 | 0.00 |
| TRINITY_J9JVU9_ACYPI/15-416      | J9JVU9.1 PF03676.12 | 38.10 | 0.00 |
| TRINITY_L8GMR3_ACACA/270-526     | L8GMR3.1 PF07714.15 | 38.10 | 0.00 |
| TRINITY_Q23QF2_TETTS/248-571     | Q23QF2.2 PF03133.13 | 38.10 | 0.00 |
| TRINITY_L8GLW0_ACACA/708-815     | L8GLW0.1 PF00651.29 | 38.10 | 0.00 |
| TRINITY_A9V590_MONBE/142-406     | A9V590.1 PF13621.4; | 38.10 | 0.00 |
| TRINITY_A0A075B0K6_9FUNG/81-189  | A0A075B0K6.1 PF1179 | 38.10 | 0.00 |
| TRINITY_A0DYX2_PARTE/54-188      | A0DYX2.1 PF04146.13 | 38.10 | 0.00 |
| TRINITY_A0D0L1_PARTE/45-155      | A0D0L1.1 PF08240.10 | 38.10 | 0.00 |
| TRINITY_Q54PU3_DICDI/548-698     | Q54PU3.1 PF08598.9; | 38.10 | 0.00 |
| TRINITY_D8TRL6_VOLCA/310-457     | D8TRL6.1 PF12499.6; | 38.10 | 0.00 |
| TRINITY_L8GLF0_ACACA/19-262      | L8GLF0.1 PF03896.14 | 38.10 | 0.00 |
| TRINITY_Q54HR9_DICDI/14-448      | Q54HR9.1 PF01593.22 | 38.10 | 0.00 |
| TRINITY_F6YR48_XENTR/198-298     | F6YR48.1 PF00168.28 | 38.10 | 0.00 |
| TRINITY_D8TY51_VOLCA/72-295      | D8TY51.1 PF05721.11 | 38.10 | 0.00 |
| TRINITY_Q23AF4_TETTS/189-364     | Q23AF4.1 PF13768.4; | 38.10 | 0.00 |
| TRINITY_F6HWI4_VITVI/37-492      | F6HWI4.1 PF00450.20 | 38.10 | 0.00 |
| TRINITY_D6WDQ2_TRICA/3-115       | D6WDQ2.1 PF11969.6; | 38.10 | 0.00 |
| TRINITY_M0ZFR1_HORVD/9-153       | M0ZFR1.1 PF01694.20 | 38.10 | 0.00 |

|                                    |                     |       |      |
|------------------------------------|---------------------|-------|------|
| TRINITY_A0A0N0DC34_9HYPO/36-314    | A0A0N0DC34.1 PF0026 | 38.10 | 0.00 |
| TRINITY_U4U7P0_DENPD/53-185        | U4U7P0.1 PF00293.26 | 38.10 | 0.00 |
| TRINITY_A0A077C3V9_9RICK/1-137     | A0A077C3V9.1 PF0181 | 38.10 | 0.00 |
| TRINITY_A0A087SKA1_AUXPR/26-751    | A0A087SKA1.1 PF0001 | 38.10 | 0.00 |
| TRINITY_S2KEJ0_MUCC1/6-507         | S2KEJ0.1 PF05833.9; | 38.10 | 0.00 |
| TRINITY_A0A0J8D1Y5_BETVU/470-757   | A0A0J8D1Y5.1 PF1641 | 38.10 | 0.00 |
| TRINITY_A0A0E0AI18_9ORYZ/52-271    | A0A0E0AI18.1 PF0014 | 38.10 | 0.00 |
| TRINITY_A0A061DH64_THECC/47-236    | A0A061DH64.1 PF1029 | 38.10 | 0.00 |
| TRINITY_J9IR36_9SPIT/409-563       | J9IR36.1 PF04280.13 | 38.10 | 0.00 |
| TRINITY_F0ZJW7_DICPU/982-1087      | F0ZJW7.1 PF01843.17 | 38.10 | 0.00 |
| TRINITY_W5LA77_ASTMX/24-315        | W5LA77.1 PF09734.7; | 38.10 | 0.00 |
| TRINITY_A0BQJ6_PARTE/96-443        | A0BQJ6.1 PF00026.21 | 38.10 | 0.00 |
| TRINITY_Q23T76_TETTS/135-542       | Q23T76.2 PF10255.7; | 38.10 | 0.00 |
| TRINITY_A0A0J7K9E1_LASNI/612-853   | A0A0J7K9E1.1 PF0772 | 38.10 | 0.00 |
| TRINITY_D8TW66_VOLCA/1237-1337     | D8TW66.1 PF00431.18 | 38.10 | 0.00 |
| TRINITY_J9J1N0_9SPIT/5-189         | J9J1N0.1 PF00025.19 | 38.10 | 0.00 |
| TRINITY_W4GXX2_9STRA/31-251        | W4GXX2.1 PF07264.9; | 38.10 | 0.00 |
| TRINITY_A0A0L0NFJ1_9HYPO/1219-1391 | A0A0L0NFJ1.1 PF0061 | 38.10 | 0.00 |
| TRINITY_A0BKI4_PARTE/27-441        | A0BKI4.1 PF07690.14 | 38.00 | 0.00 |
| TRINITY_G4MLN4_MAGO7/55-239        | G4MLN4.1 PF00625.19 | 38.00 | 0.00 |
| TRINITY_C0BL88_9BACT/129-324       | C0BL88.1 PF13547.4; | 38.00 | 0.00 |
| TRINITY_A0A078B894_STYLE/114-360   | A0A078B894.1 PF1356 | 38.00 | 0.00 |
| TRINITY_W7TH15_9STRA/133-315       | W7TH15.1 PF03232.11 | 38.00 | 0.00 |
| TRINITY_M0TAD0_MUSAM/278-427       | M0TAD0.1 PF00005.25 | 38.00 | 0.00 |
| TRINITY_L8HBL0_ACACA/285-445       | L8HBL0.1 PF02450.13 | 38.00 | 0.00 |
| TRINITY_L8GLP7_ACACA/917-1126      | L8GLP7.1 PF16095.3; | 38.00 | 0.00 |
| TRINITY_A0DFC5_PARTE/13-272        | A0DFC5.1 PF00069.23 | 38.00 | 0.00 |
| TRINITY_Q7YT74_CIOIN/5-178         | Q7YT74.1 PF00071.20 | 38.00 | 0.00 |
| TRINITY_A2EWX3_TRIVA/24-280        | A2EWX3.1 PF00069.23 | 38.00 | 0.00 |
| TRINITY_A0A0A0LZ06_CUCSA/34-112    | A0A0A0LZ06.1 PF0701 | 38.00 | 0.00 |
| TRINITY_A0A024U8P3_9STRA/129-293   | A0A024U8P3.1 PF0085 | 38.00 | 0.00 |
| TRINITY_H3HED1_PHYRM/3-314         | H3HED1.1 PF00155.19 | 38.00 | 0.00 |
| TRINITY_L8H823_ACACA/184-369       | L8H823.1 PF07065.12 | 38.00 | 0.00 |
| TRINITY_A0CMN6_PARTE/121-399       | A0CMN6.1 PF01457.14 | 38.00 | 0.00 |
| TRINITY_L8GTK3_ACACA/373-483       | L8GTK3.1 PF00989.23 | 38.00 | 0.00 |
| TRINITY_A0A078AI46_STYLE/536-661   | A0A078AI46.1 PF0007 | 38.00 | 0.00 |
| TRINITY_L8GVF6_ACACA/53-250        | L8GVF6.1 PF09414.8; | 38.00 | 0.00 |
| TRINITY_A0A0D5EF57_9BURK/47-125    | A0A0D5EF57.1 PF0306 | 38.00 | 0.00 |
| TRINITY_A0A0N4WF97_HAEP/180-314    | A0A0N4WF97.1 PF0139 | 38.00 | 0.00 |
| TRINITY_E1ZGC8_CHLVA/516-908       | E1ZGC8.1 PF04357.11 | 38.00 | 0.00 |
| TRINITY_A0A0K0ELA3_STRER/230-425   | A0A0K0ELA3.1 PF0173 | 38.00 | 0.00 |
| TRINITY_I1CST3_RHIO9/36-202        | I1CST3.1 PF08423.9; | 38.00 | 0.00 |
| TRINITY_G0QPA4_ICHMG/1-528         | G0QPA4.1 PF16969.3; | 38.00 | 0.00 |
| TRINITY_D2TT12_CITRI/1-140         | D2TT12.1 PF13302.5; | 38.00 | 0.00 |
| TRINITY_A0CH91_PARTE/89-233        | A0CH91.1 PF01694.20 | 38.00 | 0.00 |
| TRINITY_L8GQC0_ACACA/227-408       | L8GQC0.1 PF00621.18 | 38.00 | 0.00 |
| TRINITY_Q54HM5_DICDI/67-270        | Q54HM5.1 PF00804.23 | 38.00 | 0.00 |
| TRINITY_A0A087SBT1_AUXPR/20-121    | A0A087SBT1.1 PF1605 | 38.00 | 0.00 |
| TRINITY_R1BPU4_EMIHU/38-122        | R1BPU4.1 PF16561.3; | 38.00 | 0.00 |
| TRINITY_A0BGJ9_PARTE/392-849       | A0BGJ9.1 PF06046.11 | 38.00 | 0.00 |
| TRINITY_D8TGX6_VOLCA/877-1013      | D8TGX6.1 PF01925.17 | 38.00 | 0.00 |
| TRINITY_M5VWD4_PRUPE/293-542       | M5VWD4.1 PF07714.15 | 38.00 | 0.00 |
| TRINITY_D8UCH5_VOLCA/671-922       | D8UCH5.1 PF13365.4; | 38.00 | 0.00 |
| TRINITY_J9HY65_9SPIT/97-190        | J9HY65.1 PF12894.5; | 38.00 | 0.00 |
| TRINITY_W9S288_9ROSA/14-232        | W9S288.1 PF00244.18 | 38.00 | 0.00 |
| TRINITY_C5ZVK3_9HELI/37-432        | C5ZVK3.1 PF00266.17 | 38.00 | 0.00 |
| TRINITY_M1C9K8_SOLTU/8-346         | M1C9K8.1 PF07767.9; | 38.00 | 0.00 |
| TRINITY_A0DJB8_PARTE/29-287        | A0DJB8.1 PF00194.19 | 38.00 | 0.00 |
| TRINITY_A0A087SL48_AUXPR/2-291     | A0A087SL48.1 PF0315 | 38.00 | 0.00 |
| TRINITY_R0F7Q0_9BRAS/19-271        | R0F7Q0.1 PF00069.23 | 38.00 | 0.00 |
| TRINITY_A0A0G4IS83_PLABS/350-703   | A0A0G4IS83.1 PF0149 | 38.00 | 0.00 |

|                                  |                     |       |      |
|----------------------------------|---------------------|-------|------|
| TRINITY_W5MAW9_LEPOC/320-410     | W5MAW9.1 PF12796.5; | 38.00 | 0.00 |
| TRINITY_DOMZH6_PHYIT/325-545     | DOMZH6.1 PF00149.26 | 38.00 | 0.00 |
| TRINITY_A0A087SK80_AUXPR/36-236  | A0A087SK80.1 PF0085 | 38.00 | 0.00 |
| TRINITY_L8HIM5_ACACA/67-355      | L8HIM5.1 PF00128.22 | 38.00 | 0.00 |
| TRINITY_A7SRR7_NEMVE/155-278     | A7SRR7.1 PF14641.4; | 38.00 | 0.00 |
| TRINITY_A0A0G4ED92_9ALVE/328-436 | A0A0G4ED92.1 PF0065 | 38.00 | 0.00 |
| TRINITY_E1Z7R8_CHLVA/67-445      | E1Z7R8.1 PF01494.17 | 38.00 | 0.00 |
| TRINITY_C1E286_MICSR/50-280      | C1E286.1 PF12146.6; | 38.00 | 0.00 |
| TRINITY_D8TYV0_VOLCA/326-491     | D8TYV0.1 PF10173.7; | 38.00 | 0.00 |
| TRINITY_C1EBP3_MICSR/11-234      | C1EBP3.1 PF01738.16 | 38.00 | 0.00 |
| TRINITY_A8IB76_CHLRE/818-1020    | A8IB76.1 PF00069.23 | 38.00 | 0.00 |
| TRINITY_A0A078AD61_STYLE/66-145  | A0A078AD61.1 PF0701 | 38.00 | 0.00 |
| TRINITY_I7LZD9_TETTS/6-127       | I7LZD9.2 PF01392.20 | 37.90 | 0.00 |
| TRINITY_D8M178_BLAHO/1-209       | D8M178.1 PF00149.26 | 37.90 | 0.00 |
| TRINITY_D3B1J8_POLPA/1226-1403   | D3B1J8.1 PF00617.17 | 37.90 | 0.00 |
| TRINITY_H2Z3Z7_CIOSA/317-419     | H2Z3Z7.1 PF03126.16 | 37.90 | 0.00 |
| TRINITY_W5MD04_LEPOC/29-262      | W5MD04.1 PF10223.7; | 37.90 | 0.00 |
| TRINITY_J9EQ41_9SPIT/87-364      | J9EQ41.1 PF05890.10 | 37.90 | 0.00 |
| TRINITY_A1ZJG8_9BACT/275-345     | A1ZJG8.1 PF13424.4; | 37.90 | 0.00 |
| TRINITY_I0YSI7_9CHLO/199-342     | I0YSI7.1 PF14617.4; | 37.90 | 0.00 |
| TRINITY_Q24CH5_TETTS/1154-1338   | Q24CH5.2 PF05708.10 | 37.90 | 0.00 |
| TRINITY_D8TTV8_VOLCA/81-324      | D8TTV8.1 PF00233.17 | 37.90 | 0.00 |
| TRINITY_Q54LK9_DICDI/7-142       | Q54LK9.1 PF15982.3; | 37.90 | 0.00 |
| TRINITY_A0A088A958_APIME/17-236  | A0A088A958.1 PF0010 | 37.90 | 0.00 |
| TRINITY_A9G0Q5_SORC5/53-346      | A9G0Q5.1 PF14388.4; | 37.90 | 0.00 |
| TRINITY_A0A088A2A6_APIME/145-298 | A0A088A2A6.1 PF0169 | 37.90 | 0.00 |
| TRINITY_A0A078AJQ0_STYLE/388-594 | A0A078AJQ0.1 PF0481 | 37.90 | 0.00 |
| TRINITY_Q28DS2_XENTR/329-467     | Q28DS2.1 PF13874.4; | 37.90 | 0.00 |
| TRINITY_PNPP_SCHPO/18-258        | Q00472.2 PF00702.24 | 37.90 | 0.00 |
| TRINITY_W4Z2A0_STRPU/116-413     | W4Z2A0.1 PF00566.16 | 37.90 | 0.00 |
| TRINITY_A0A078ALC0_STYLE/35-303  | A0A078ALC0.1 PF0170 | 37.90 | 0.00 |
| TRINITY_S9UWS8_9TRYP/44-243      | S9UWS8.1 PF01027.18 | 37.90 | 0.00 |
| TRINITY_Q3M0Z1_PARTE/41-243      | Q3M0Z1.1 PF00804.23 | 37.90 | 0.00 |
| TRINITY_A0A077ZPS4_STYLE/243-438 | A0A077ZPS4.1 PF0011 | 37.90 | 0.00 |
| TRINITY_L8GLJ5_ACACA/787-1048    | L8GLJ5.1 PF07714.15 | 37.90 | 0.00 |
| TRINITY_M3ZGA0_XIPMA/50-521      | M3ZGA0.1 PF00083.22 | 37.90 | 0.00 |
| TRINITY_A0D801_PARTE/617-862     | A0D801.1 PF02714.13 | 37.90 | 0.00 |
| TRINITY_C3Z471_BRAFL/355-540     | C3Z471.1 PF00616.17 | 37.90 | 0.00 |
| TRINITY_H1XPJ5_9BACT/483-700     | H1XPJ5.1 PF00326.19 | 37.90 | 0.00 |
| TRINITY_F2UIN7_SALR5/19-256      | F2UIN7.1 PF03222.11 | 37.90 | 0.00 |
| TRINITY_L8HFG4_ACACA/7-102       | L8HFG4.1 PF00338.20 | 37.90 | 0.00 |
| TRINITY_R4X8L7_TAPDE/1-113       | R4X8L7.1 PF08576.8; | 37.90 | 0.00 |
| TRINITY_G0R238_ICHMG/12-332      | G0R238.1 PF00162.17 | 37.90 | 0.00 |
| TRINITY_A0A077ZQS0_STYLE/68-262  | A0A077ZQS0.1 PF1214 | 37.90 | 0.00 |
| TRINITY_J9IZJ8_9SPIT/1-251       | J9IZJ8.1 PF00069.23 | 37.90 | 0.00 |
| TRINITY_B4VYT7_9CYAN/209-366     | B4VYT7.1 PF05128.10 | 37.90 | 0.00 |
| TRINITY_L8GWK5_ACACA/67-244      | L8GWK5.1 PF00621.18 | 37.90 | 0.00 |
| TRINITY_I0Z7B1_9CHLO/1-152       | I0Z7B1.1 PF05529.10 | 37.90 | 0.00 |
| TRINITY_L8GUK1_ACACA/237-488     | L8GUK1.1 PF07714.15 | 37.90 | 0.00 |
| TRINITY_Q22AB0_TETTS/141-425     | Q22AB0.2 PF00566.16 | 37.90 | 0.00 |
| TRINITY_M5EIW5_MALS4/63-528      | M5EIW5.1 PF00450.20 | 37.90 | 0.00 |
| TRINITY_I0YSZ2_9CHLO/11-177      | I0YSZ2.1 PF03398.12 | 37.90 | 0.00 |
| TRINITY_A0BLH9_PARTE/7-108       | A0BLH9.1 PF00168.28 | 37.90 | 0.00 |
| TRINITY_D8TTE6_VOLCA/811-970     | D8TTE6.1 PF12499.6; | 37.90 | 0.00 |
| TRINITY_A4SBG1_OSTLU/9-269       | A4SBG1.1 PF07714.15 | 37.90 | 0.00 |
| TRINITY_A0A0J8EFZ9_BETVU/16-511  | A0A0J8EFZ9.1 PF0821 | 37.90 | 0.00 |
| TRINITY_I7LXB9_TETTS/65-363      | I7LXB9.1 PF00996.16 | 37.90 | 0.00 |
| TRINITY_Q24CE7_TETTS/28-191      | Q24CE7.2 PF09768.7; | 37.90 | 0.00 |
| TRINITY_A0BCK0_PARTE/76-191      | A0BCK0.1 PF01569.19 | 37.90 | 0.00 |
| TRINITY_F4Q5E9_DICFS/471-609     | F4Q5E9.1 PF07534.14 | 37.90 | 0.00 |
| TRINITY_F1QJ75_DANRE/180-288     | F1QJ75.1 PF00175.19 | 37.80 | 0.00 |



|                                  |              |            |       |      |
|----------------------------------|--------------|------------|-------|------|
| TRINITY_E4X5G9_OIKDI/157-407     | E4X5G9.1     | PF00069.23 | 37.80 | 0.00 |
| TRINITY_G0QNL8_ICHMG/17-231      | G0QNL8.1     | PF02230.14 | 37.80 | 0.00 |
| TRINITY_A0A0L0CLN7_LUCCU/45-413  | A0A0L0CLN7.1 | PF0251     | 37.80 | 0.00 |
| TRINITY_K9RD56_9CYAN/12-439      | K9RD56.1     | PF00067.20 | 37.80 | 0.00 |
| TRINITY_C6W4V6_DYAFD/4-148       | C6W4V6.1     | PF09424.8; | 37.80 | 0.00 |
| TRINITY_F2UPC9_SALR5/196-493     | F2UPC9.1     | PF03372.21 | 37.80 | 0.00 |
| TRINITY_J0S039_9EURY/955-1172    | J0S039.1     | PF13087.4; | 37.80 | 0.00 |
| TRINITY_X5DER9_9BACT/3-119       | X5DER9.1     | PF00072.22 | 37.80 | 0.00 |
| TRINITY_A0A0L6UEM4_9BASI/111-332 | A0A0L6UEM4.1 | PF0155     | 37.80 | 0.00 |
| TRINITY_A0ECP3_PARTE/199-326     | A0ECP3.1     | PF10409.7; | 37.80 | 0.00 |
| TRINITY_A0DKA0_PARTE/20-488      | A0DKA0.1     | PF12698.5; | 37.80 | 0.00 |
| TRINITY_A0A090M924_OSTTA/112-305 | A0A090M924.1 | PF1353     | 37.80 | 0.00 |
| TRINITY_Q5CR89_CRYPI/181-313     | Q5CR89.1     | PF10104.7; | 37.80 | 0.00 |
| TRINITY_L8HFX4_ACACA/12-318      | L8HFX4.1     | PF00443.27 | 37.80 | 0.00 |
| TRINITY_A0DYR3_PARTE/708-848     | A0DYR3.1     | PF01909.21 | 37.80 | 0.00 |
| TRINITY_A8IRB8_CHLRE/110-310     | A8IRB8.1     | PF06011.10 | 37.80 | 0.00 |
| TRINITY_Q24DF0_TETTS/748-1037    | Q24DF0.2     | PF00648.19 | 37.80 | 0.00 |
| TRINITY_A0CIS4_PARTE/8-260       | A0CIS4.1     | PF00069.23 | 37.80 | 0.00 |
| TRINITY_A8IVC2_CHLRE/79-199      | A8IVC2.1     | PF08292.10 | 37.80 | 0.00 |
| TRINITY_S2JB42_MUCC1/120-512     | S2JB42.1     | PF09423.8; | 37.80 | 0.00 |
| TRINITY_L8HIN8_ACACA/120-272     | L8HIN8.1     | PF01926.21 | 37.80 | 0.00 |
| TRINITY_C1N472_MICPC/2-228       | C1N472.1     | PF04188.11 | 37.80 | 0.00 |
| TRINITY_G0QIZ2_ICHMG/16-177      | G0QIZ2.1     | PF00071.20 | 37.80 | 0.00 |
| TRINITY_A0A0D9LKZ3_9EURO/36-303  | A0A0D9LKZ3.1 | PF0015     | 37.80 | 0.00 |
| TRINITY_S2JPC7_MUCC1/1801-1889   | S2JPC7.1     | PF11919.6; | 37.80 | 0.00 |
| TRINITY_C1N0A5_MICPC/948-1102    | C1N0A5.1     | PF01927.14 | 37.80 | 0.00 |
| TRINITY_LYSG4_DICDI/23-204       | Q54BQ8.1     | PF01183.18 | 37.80 | 0.00 |
| TRINITY_D8U784_VOLCA/435-630     | D8U784.1     | PF16016.3; | 37.80 | 0.00 |
| TRINITY_A9SRQ1_PHYPA/50-142      | A9SRQ1.1     | PF00254.26 | 37.80 | 0.00 |
| TRINITY_E1ZDU3_CHLVA/68-210      | E1ZDU3.1     | PF14108.4; | 37.80 | 0.00 |
| TRINITY_H2Q6I7_PANTR/434-570     | H2Q6I7.1     | PF01529.18 | 37.80 | 0.00 |
| TRINITY_A0A078ACA2_STYLE/7-156   | A0A078ACA2.1 | PF1458     | 37.80 | 0.00 |
| TRINITY_Q231F3_TETTS/82-315      | Q231F3.1     | PF03009.15 | 37.80 | 0.00 |
| TRINITY_I0Z6C3_9CHLO/4-420       | I0Z6C3.1     | PF04841.11 | 37.80 | 0.00 |
| TRINITY_D8TVZ9_VOLCA/7-333       | D8TVZ9.1     | PF00150.16 | 37.80 | 0.00 |
| TRINITY_F4QAS0_DICFS/1-239       | F4QAS0.1     | PF00149.26 | 37.80 | 0.00 |
| TRINITY_W3X045_9PEZI/544-639     | W3X045.1     | PF12796.5; | 37.80 | 0.00 |
| TRINITY_D8TGX3_VOLCA/5-377       | D8TGX3.1     | PF03054.14 | 37.80 | 0.00 |
| TRINITY_L8GTK1_ACACA/146-395     | L8GTK1.1     | PF07714.15 | 37.80 | 0.00 |
| TRINITY_F4QE29_DICFS/40-243      | F4QE29.1     | PF05057.12 | 37.80 | 0.00 |
| TRINITY_U4UTU6_DENPD/81-343      | U4UTU6.1     | PF00664.21 | 37.80 | 0.00 |
| TRINITY_Q23YD4_TETTS/903-1281    | Q23YD4.2     | PF12698.5; | 37.80 | 0.00 |
| TRINITY_G8BYN1_TETPH/144-326     | G8BYN1.1     | PF01435.16 | 37.80 | 0.00 |
| TRINITY_Q4T616_TETNG/38-496      | Q4T616.1     | PF00067.20 | 37.80 | 0.00 |
| TRINITY_D8RJK1_SELML/4-111       | D8RJK1.1     | PF00635.24 | 37.80 | 0.00 |
| TRINITY_C5KD40_PERM5/279-352     | C5KD40.1     | PF00076.20 | 37.80 | 0.00 |
| TRINITY_A7RH45_NEMVE/1-375       | A7RH45.1     | PF01979.18 | 37.70 | 0.00 |
| TRINITY_I7MHX9_TETTS/57-385      | I7MHX9.2     | PF00026.21 | 37.70 | 0.00 |
| TRINITY_C3ZNS5_BRAFL/55-408      | C3ZNS5.1     | PF05292.9; | 37.70 | 0.00 |
| TRINITY_C3YB33_BRAFL/139-397     | C3YB33.1     | PF00939.17 | 37.70 | 0.00 |
| TRINITY_A0A078B2E5_STYLE/525-896 | A0A078B2E5.1 | PF1059     | 37.70 | 0.00 |
| TRINITY_M2XYD7_GALSU/14-176      | M2XYD7.1     | PF00071.20 | 37.70 | 0.00 |
| TRINITY_A6BZ09_9PLAN/29-165      | A6BZ09.1     | PF01878.16 | 37.70 | 0.00 |
| TRINITY_A0A068X5Z4_HYMMI/58-189  | A0A068X5Z4.1 | PF0078     | 37.70 | 0.00 |
| TRINITY_A0A058Z129_9EUKA/4-357   | A0A058Z129.1 | PF0006     | 37.70 | 0.00 |
| TRINITY_L8HI30_ACACA/810-1004    | L8HI30.1     | PF13901.4; | 37.70 | 0.00 |
| TRINITY_H2XTA5_CIOIN/343-503     | H2XTA5.1     | PF03712.13 | 37.70 | 0.00 |
| TRINITY_L8GNS3_ACACA/13-225      | L8GNS3.1     | PF03357.19 | 37.70 | 0.00 |
| TRINITY_E1ZFP4_CHLVA/23-228      | E1ZFP4.1     | PF05700.9; | 37.70 | 0.00 |
| TRINITY_A0DLL4_PARTE/80-373      | A0DLL4.1     | PF00648.19 | 37.70 | 0.00 |
| TRINITY_M4BSL2_HYAAE/596-661     | M4BSL2.1     | PF13499.4; | 37.70 | 0.00 |

|                                  |                     |       |      |
|----------------------------------|---------------------|-------|------|
| TRINITY_H8MJA6_CORCM/946-1175    | H8MJA6.1 PF07678.12 | 37.70 | 0.00 |
| TRINITY_U9SX29_RHIID/400-662     | U9SX29.1 PF00069.23 | 37.70 | 0.00 |
| TRINITY_M2Y691_GALSU/133-356     | M2Y691.1 PF01556.16 | 37.70 | 0.00 |
| TRINITY_A0A077LKW5_9PSED/24-168  | A0A077LKW5.1 PF0018 | 37.70 | 0.00 |
| TRINITY_B3S5V5_TRIAD/38-487      | B3S5V5.1 PF00067.20 | 37.70 | 0.00 |
| TRINITY_A0A078B9W1_STYLE/27-329  | A0A078B9W1.1 PF0056 | 37.70 | 0.00 |
| TRINITY_IKSA_DICDI/261-568       | Q54RJ4.1 PF00069.23 | 37.70 | 0.00 |
| TRINITY_L8GKH0_ACACA/249-578     | L8GKH0.1 PF13598.4; | 37.70 | 0.00 |
| TRINITY_K0R4W7_THAOC/3-179       | K0R4W7.1 PF00025.19 | 37.70 | 0.00 |
| TRINITY_A0A078BAY4_STYLE/8-267   | A0A078BAY4.1 PF0502 | 37.70 | 0.00 |
| TRINITY_A0C287_PARTE/52-458      | A0C287.1 PF00450.20 | 37.70 | 0.00 |
| TRINITY_I7LVA0_TETTS/7-130       | I7LVA0.1 PF05762.12 | 37.70 | 0.00 |
| TRINITY_A0A059A6B9_EUCGR/506-663 | A0A059A6B9.1 PF0060 | 37.70 | 0.00 |
| TRINITY_I0Z5N1_9CHLO/328-807     | I0Z5N1.1 PF04762.10 | 37.70 | 0.00 |
| TRINITY_D6Y1U4_THEBD/46-533      | D6Y1U4.1 PF07969.9; | 37.70 | 0.00 |
| TRINITY_F4QC97_DICFS/129-359     | F4QC97.1 PF04499.13 | 37.70 | 0.00 |
| TRINITY_M7XLX7_RHOT1/1-286       | M7XLX7.1 PF13230.4; | 37.70 | 0.00 |
| TRINITY_F4L116_HALH1/265-487     | F4L116.1 PF13229.4; | 37.70 | 0.00 |
| TRINITY_D3B9X7_POLPA/156-322     | D3B9X7.1 PF10294.7; | 37.70 | 0.00 |
| TRINITY_W7XGH0_TETTS/105-241     | W7XGH0.1 PF15294.4; | 37.70 | 0.00 |
| TRINITY_F6WG44_XENTR/1-949       | F6WG44.1 PF04762.10 | 37.70 | 0.00 |
| TRINITY_F1A080_DICPU/140-306     | F1A080.1 PF02544.14 | 37.70 | 0.00 |
| TRINITY_Q23G44_TETTS/233-493     | Q23G44.2 PF00069.23 | 37.70 | 0.00 |
| TRINITY_E4TUQ3_MARTH/24-193      | E4TUQ3.1 PF01612.18 | 37.70 | 0.00 |
| TRINITY_L8GJ41_ACACA/177-473     | L8GJ41.1 PF09423.8; | 37.70 | 0.00 |
| TRINITY_A0A0D2W0W3_CAPO3/475-686 | A0A0D2W0W3.1 PF0106 | 37.70 | 0.00 |
| TRINITY_G0R402_ICHMG/82-193      | G0R402.1 PF00043.23 | 37.70 | 0.00 |
| TRINITY_F4PQK5_DICFS/825-1095    | F4PQK5.1 PF00664.21 | 37.70 | 0.00 |
| TRINITY_F4Q6Y0_DICFS/140-587     | F4Q6Y0.1 PF00501.26 | 37.70 | 0.00 |
| TRINITY_A0BFR4_PARTE/111-265     | A0BFR4.1 PF00650.18 | 37.70 | 0.00 |
| TRINITY_A8JGR4_CHLRE/173-480     | A8JGR4.1 PF10250.7; | 37.70 | 0.00 |
| TRINITY_I0YSD2_9CHLO/11-512      | I0YSD2.1 PF13001.5; | 37.70 | 0.00 |
| TRINITY_I0YKK0_9CHLO/8-180       | I0YKK0.1 PF01145.23 | 37.70 | 0.00 |
| TRINITY_A0A0D2WTW2_CAPO3/209-314 | A0A0D2WTW2.1 PF0780 | 37.70 | 0.00 |
| TRINITY_L8GXI7_ACACA/95-287      | L8GXI7.1 PF02141.19 | 37.70 | 0.00 |
| TRINITY_D8TTE4_VOLCA/34-261      | D8TTE4.1 PF00487.22 | 37.70 | 0.00 |
| TRINITY_L8GFK9_ACACA/424-687     | L8GFK9.1 PF07714.15 | 37.70 | 0.00 |
| TRINITY_H2P144_PONAB/1-315       | H2P144.1 PF05158.10 | 37.70 | 0.00 |
| TRINITY_I0Z379_9CHLO/120-500     | I0Z379.1 PF00176.21 | 37.70 | 0.00 |
| TRINITY_Q22R41_TETTS/22-209      | Q22R41.1 PF01183.18 | 37.70 | 0.00 |
| TRINITY_A0A084W9Q9_ANOSI/75-143  | A0A084W9Q9.1 PF0050 | 37.70 | 0.00 |
| TRINITY_A0CS29_PARTE/2561-2834   | A0CS29.1 PF00520.29 | 37.60 | 0.00 |
| TRINITY_A0A078AB64_STYLE/56-359  | A0A078AB64.1 PF0056 | 37.60 | 0.00 |
| TRINITY_A0A024TNB1_9STRA/30-324  | A0A024TNB1.1 PF0024 | 37.60 | 0.00 |
| TRINITY_Q6CIF8_KLULA/233-352     | Q6CIF8.1 PF00581.18 | 37.60 | 0.00 |
| TRINITY_A0A067CLJ2_SAPPC/343-839 | A0A067CLJ2.1 PF0105 | 37.60 | 0.00 |
| TRINITY_I0JIX4_HALH3/7-199       | I0JIX4.1 PF13460.4; | 37.60 | 0.00 |
| TRINITY_I2B5C5_SHIBC/31-233      | I2B5C5.1 PF04402.12 | 37.60 | 0.00 |
| TRINITY_C6Y250_PEDHD/31-271      | C6Y250.1 PF03372.21 | 37.60 | 0.00 |
| TRINITY_W4XPG3_STRPU/702-984     | W4XPG3.1 PF00664.21 | 37.60 | 0.00 |
| TRINITY_G0R2W5_ICHMG/613-901     | G0R2W5.1 PF00069.23 | 37.60 | 0.00 |
| TRINITY_A7SAH3_NEMVE/6-671       | A7SAH3.1 PF10168.7; | 37.60 | 0.00 |
| TRINITY_W1PQR7_AMBTC/10-182      | W1PQR7.1 PF07855.10 | 37.60 | 0.00 |
| TRINITY_K3WRP8_PYTUL/356-499     | K3WRP8.1 PF09384.8; | 37.60 | 0.00 |
| TRINITY_L8H8T0_ACACA/97-293      | L8H8T0.1 PF00837.15 | 37.60 | 0.00 |
| TRINITY_F4P6A0_BATDJ/37-264      | F4P6A0.1 PF01872.15 | 37.60 | 0.00 |
| TRINITY_D6TVW2_9CHLR/181-385     | D6TVW2.1 PF13530.4; | 37.60 | 0.00 |
| TRINITY_A0BG18_PARTE/74-327      | A0BG18.1 PF00102.25 | 37.60 | 0.00 |
| TRINITY_A0A0L0BTR7_LUCCU/41-339  | A0A0L0BTR7.1 PF0056 | 37.60 | 0.00 |
| TRINITY_L8GH73_ACACA/285-622     | L8GH73.1 PF03124.12 | 37.60 | 0.00 |
| TRINITY_W7ARN9_PLAVN/3-118       | W7ARN9.1 PF00635.24 | 37.60 | 0.00 |

|                                  |                     |       |      |
|----------------------------------|---------------------|-------|------|
| TRINITY_L8H8C6_ACACA/11-258      | L8H8C6.1 PF07714.15 | 37.60 | 0.00 |
| TRINITY_F0ZKQ6_DICPU/12-173      | F0ZKQ6.1 PF00071.20 | 37.60 | 0.00 |
| TRINITY_Q24C23_TETTS/91-326      | Q24C23.3 PF00566.16 | 37.60 | 0.00 |
| TRINITY_A8J2N5_CHLRE/22-193      | A8J2N5.1 PF00535.24 | 37.60 | 0.00 |
| TRINITY_D3AXW2_POLPA/67-354      | D3AXW2.1 PF06472.13 | 37.60 | 0.00 |
| TRINITY_A0A0G4GZH6_9ALVE/419-599 | A0A0G4GZH6.1 PF0281 | 37.60 | 0.00 |
| TRINITY_A8JDD4_CHLRE/51-266      | A8JDD4.1 PF04755.10 | 37.60 | 0.00 |
| TRINITY_H6SSM3_RHOPH/62-180      | H6SSM3.1 PF07542.9; | 37.60 | 0.00 |
| TRINITY_A0A078DVH1_BRANA/779-996 | A0A078DVH1.1 PF0777 | 37.60 | 0.00 |
| TRINITY_U4TS54_DENPD/22-129      | U4TS54.1 PF00651.29 | 37.60 | 0.00 |
| TRINITY_F5RBA9_METUF/25-199      | F5RBA9.1 PF00270.27 | 37.60 | 0.00 |
| TRINITY_K9RFK2_9CYAN/34-290      | K9RFK2.1 PF00069.23 | 37.60 | 0.00 |
| TRINITY_I1F267_AMPQE/206-369     | I1F267.1 PF13359.4; | 37.60 | 0.00 |
| TRINITY_T0Q5K0_9STRA/19-535      | T0Q5K0.1 PF01457.14 | 37.60 | 0.00 |
| TRINITY_I0Z5M5_9CHLO/93-249      | I0Z5M5.1 PF00650.18 | 37.60 | 0.00 |
| TRINITY_G0QK85_ICHMG/890-1299    | G0QK85.1 PF02463.17 | 37.60 | 0.00 |
| TRINITY_G9NCI0_HYPVG/1-89        | G9NCI0.1 PF12796.5; | 37.60 | 0.00 |
| TRINITY_H3FV29_PRIIPA/87-225     | H3FV29.1 PF01764.23 | 37.60 | 0.00 |
| TRINITY_Q23QF2_TETTS/248-571     | Q23QF2.2 PF03133.13 | 37.60 | 0.00 |
| TRINITY_A0BZF6_PARTE/22-205      | A0BZF6.1 PF03357.19 | 37.60 | 0.00 |
| TRINITY_E9FXX8_DAPPU/553-865     | E9FXX8.1 PF02171.15 | 37.60 | 0.00 |
| TRINITY_A0A0D9VS64_9ORYZ/632-730 | A0A0D9VS64.1 PF1275 | 37.60 | 0.00 |
| TRINITY_K1ZBQ2_9BACT/157-316     | K1ZBQ2.1 PF13521.4; | 37.60 | 0.00 |
| TRINITY_E1ZJL7_CHLVA/684-852     | E1ZJL7.1 PF00270.27 | 37.60 | 0.00 |
| TRINITY_E1ZCW8_CHLVA/18-161      | E1ZCW8.1 PF02537.13 | 37.60 | 0.00 |
| TRINITY_A0A067TJX2_9AGAR/192-468 | A0A067TJX2.1 PF0066 | 37.50 | 0.00 |
| TRINITY_K5XB69_AGABU/4-165       | K5XB69.1 PF00071.20 | 37.50 | 0.00 |
| TRINITY_L0A9E0_DEIPD/46-181      | L0A9E0.1 PF09346.8; | 37.50 | 0.00 |
| TRINITY_I7LX20_TETTS/11-287      | I7LX20.2 PF00069.23 | 37.50 | 0.00 |
| TRINITY_G4TC67_PIRID/198-529     | G4TC67.1 PF03062.17 | 37.50 | 0.00 |
| TRINITY_F4PYT2_DICFS/180-296     | F4PYT2.1 PF07534.14 | 37.50 | 0.00 |
| TRINITY_L8H639_ACACA/7-94        | L8H639.1 PF16672.3; | 37.50 | 0.00 |
| TRINITY_B8CDM4_THAPS/12-219      | B8CDM4.1 PF13532.4; | 37.50 | 0.00 |
| TRINITY_E9H1Y4_DAPPU/4-193       | E9H1Y4.1 PF03665.11 | 37.50 | 0.00 |
| TRINITY_A0A0F2C634_9MICO/31-148  | A0A0F2C634.1 PF0824 | 37.50 | 0.00 |
| TRINITY_V8PIQ3_OPHHA/387-668     | V8PIQ3.1 PF16187.3; | 37.50 | 0.00 |
| TRINITY_A0A078B0K7_STYLE/11-329  | A0A078B0K7.1 PF0769 | 37.50 | 0.00 |
| TRINITY_L8GKF2_ACACA/262-608     | L8GKF2.1 PF02535.20 | 37.50 | 0.00 |
| TRINITY_A9G0Q5_SORC5/53-346      | A9G0Q5.1 PF14388.4; | 37.50 | 0.00 |
| TRINITY_H2KUF9_CLOSI/87-186      | H2KUF9.1 PF13499.4; | 37.50 | 0.00 |
| TRINITY_A0E8S5_PARTE/21-142      | A0E8S5.1 PF02466.17 | 37.50 | 0.00 |
| TRINITY_D9SRV2_CLOC7/256-555     | D9SRV2.1 PF02836.15 | 37.50 | 0.00 |
| TRINITY_D8TS78_VOLCA/34-111      | D8TS78.1 PF01253.20 | 37.50 | 0.00 |
| TRINITY_D8TRS3_VOLCA/737-937     | D8TRS3.1 PF02453.15 | 37.50 | 0.00 |
| TRINITY_W7XFP4_TETTS/74-196      | W7XFP4.1 PF01597.17 | 37.50 | 0.00 |
| TRINITY_A0A0D2WWI6_CAPO3/463-780 | A0A0D2WWI6.1 PF0070 | 37.50 | 0.00 |
| TRINITY_U9U8A3_RHIID/119-187     | U9U8A3.1 PF10601.7; | 37.50 | 0.00 |
| TRINITY_D3B3D2_POLPA/38-262      | D3B3D2.1 PF07786.10 | 37.50 | 0.00 |
| TRINITY_D8THB4_VOLCA/1-130       | D8THB4.1 PF03364.18 | 37.50 | 0.00 |
| TRINITY_A0EFC7_PARTE/160-290     | A0EFC7.1 PF00782.18 | 37.50 | 0.00 |
| TRINITY_D7LDM4_ARALL/9-117       | D7LDM4.1 PF00255.17 | 37.50 | 0.00 |
| TRINITY_K7TQJ3_MAIZE/33-636      | K7TQJ3.1 PF00888.20 | 37.50 | 0.00 |
| TRINITY_F4PTD9_DICFS/71-639      | F4PTD9.1 PF01457.14 | 37.50 | 0.00 |
| TRINITY_E1ZLU2_CHLVA/174-268     | E1ZLU2.1 PF00564.22 | 37.50 | 0.00 |
| TRINITY_B8P4X6_POSPM/8-248       | B8P4X6.1 PF01370.19 | 37.50 | 0.00 |
| TRINITY_I0YSS2_9CHLO/125-258     | I0YSS2.1 PF01590.24 | 37.50 | 0.00 |
| TRINITY_B3S6U8_TRIAD/16-404      | B3S6U8.1 PF07690.14 | 37.50 | 0.00 |
| TRINITY_A0A0D3FBQ7_9ORYZ/41-191  | A0A0D3FBQ7.1 PF0411 | 37.50 | 0.00 |
| TRINITY_A0A067BWY7_SAPPC/22-533  | A0A067BWY7.1 PF0145 | 37.50 | 0.00 |
| TRINITY_Q23ZH8_TETTS/79-176      | Q23ZH8.1 PF14769.4; | 37.50 | 0.00 |
| TRINITY_D8U322_VOLCA/1-272       | D8U322.1 PF01494.17 | 37.50 | 0.00 |

|                                  |              |            |       |      |
|----------------------------------|--------------|------------|-------|------|
| TRINITY_J9EJ94_9SPIT/12-113      | J9EJ94.1     | PF00168.28 | 37.50 | 0.00 |
| TRINITY_LIPG_RAT/77-377          | P04634.1     | PF00561.18 | 37.50 | 0.00 |
| TRINITY_I0YTX5_9CHLO/28-423      | I0YTX5.1     | PF00999.19 | 37.50 | 0.00 |
| TRINITY_I7MGM3_TETTS/23-732      | I7MGM3.2     | PF00012.18 | 37.50 | 0.00 |
| TRINITY_K7H5G4_CAEJA/381-536     | K7H5G4.1     | PF03712.13 | 37.50 | 0.00 |
| TRINITY_Q22X36_TETTS/3-313       | Q22X36.1     | PF05462.9; | 37.50 | 0.00 |
| TRINITY_S2JB42_MUCC1/120-512     | S2JB42.1     | PF09423.8; | 37.50 | 0.00 |
| TRINITY_W7XDL4_TETTS/43-187      | W7XDL4.1     | PF04099.10 | 37.50 | 0.00 |
| TRINITY_F4QDF0_DICFS/315-485     | F4QDF0.1     | PF09736.7; | 37.50 | 0.00 |
| TRINITY_I0YUA2_9CHLO/24-102      | I0YUA2.1     | PF07019.10 | 37.50 | 0.00 |
| TRINITY_A0A072VJQ0_MEDTR/7-552   | A0A072VJQ0.1 | PF0560     | 37.50 | 0.00 |
| TRINITY_A0A0K9NQX2_ZOSMR/67-408  | A0A0K9NQX2.1 | PF0002     | 37.50 | 0.00 |
| TRINITY_K2C0P0_9BACT/168-244     | K2C0P0.1     | PF13517.4; | 37.50 | 0.00 |
| TRINITY_I7M6I9_TETTS/8-269       | I7M6I9.2     | PF14808.4; | 37.50 | 0.00 |
| TRINITY_D8LB49_ECTSI/1135-1295   | D8LB49.1     | PF00005.25 | 37.50 | 0.00 |
| TRINITY_I0YLE6_9CHLO/727-871     | I0YLE6.1     | PF13515.4; | 37.50 | 0.00 |
| TRINITY_I7M3M5_TETTS/574-892     | I7M3M5.1     | PF11838.6; | 37.40 | 0.00 |
| TRINITY_I7MFP6_TETTS/20-150      | I7MFP6.2     | PF14886.4; | 37.40 | 0.00 |
| TRINITY_F4Q1M5_DICFS/126-588     | F4Q1M5.1     | PF04114.12 | 37.40 | 0.00 |
| TRINITY_A0A017SB10_9EURO/268-395 | A0A017SB10.1 | PF0866     | 37.40 | 0.00 |
| TRINITY_Q248F0_TETTS/19-502      | Q248F0.2     | PF04916.11 | 37.40 | 0.00 |
| TRINITY_A0D7M8_PARTE/251-571     | A0D7M8.1     | PF04515.10 | 37.40 | 0.00 |
| TRINITY_F0XWX9_AURAN/3-277       | F0XWX9.1     | PF00350.21 | 37.40 | 0.00 |
| TRINITY_A0A077ZTY2_STYLE/13-164  | A0A077ZTY2.1 | PF0112     | 37.40 | 0.00 |
| TRINITY_V9F6Q9_PHYPR/19-260      | V9F6Q9.1     | PF05875.10 | 37.40 | 0.00 |
| TRINITY_D4JTC6_9FIRM/188-305     | D4JTC6.1     | PF00072.22 | 37.40 | 0.00 |
| TRINITY_A0A067CQV9_SAPPC/27-209  | A0A067CQV9.1 | PF1029     | 37.40 | 0.00 |
| TRINITY_A0A091DGN3_FUKDA/74-189  | A0A091DGN3.1 | PF0061     | 37.40 | 0.00 |
| TRINITY_M7YJF8_TRIUA/295-535     | M7YJF8.1     | PF00069.23 | 37.40 | 0.00 |
| TRINITY_F4Q9I7_DICFS/37-203      | F4Q9I7.1     | PF10294.7; | 37.40 | 0.00 |
| TRINITY_I7LX20_TETTS/11-287      | I7LX20.2     | PF00069.23 | 37.40 | 0.00 |
| TRINITY_A9G0Q5_SORC5/53-346      | A9G0Q5.1     | PF14388.4; | 37.40 | 0.00 |
| TRINITY_A0A0F0H7L4_NOCAE/1-259   | A0A0F0H7L4.1 | PF0056     | 37.40 | 0.00 |
| TRINITY_A0A077ZPS4_STYLE/243-438 | A0A077ZPS4.1 | PF0011     | 37.40 | 0.00 |
| TRINITY_A0A087SH04_AUXPR/607-740 | A0A087SH04.1 | PF0078     | 37.40 | 0.00 |
| TRINITY_D3B3V7_POLPA/4-288       | D3B3V7.1     | PF11945.6; | 37.40 | 0.00 |
| TRINITY_F0ZIE2_DICPU/38-392      | F0ZIE2.1     | PF10510.7; | 37.40 | 0.00 |
| TRINITY_A8HSJ3_CHLRE/66-324      | A8HSJ3.1     | PF00069.23 | 37.40 | 0.00 |
| TRINITY_M7PL76_PNEMU/444-589     | M7PL76.1     | PF08646.8; | 37.40 | 0.00 |
| TRINITY_D8LW92_BLAHO/1-121       | D8LW92.1     | PF05477.9; | 37.40 | 0.00 |
| TRINITY_W1P048_AMBTC/29-693      | W1P048.1     | PF06419.9; | 37.40 | 0.00 |
| TRINITY_H3GTG5_PHYRM/57-476      | H3GTG5.1     | PF00450.20 | 37.40 | 0.00 |
| TRINITY_A0A0D2QTE0_GOSRA/31-120  | A0A0D2QTE0.1 | PF0029     | 37.40 | 0.00 |
| TRINITY_B2AE59_PODAN/97-307      | B2AE59.1     | PF00561.18 | 37.40 | 0.00 |
| TRINITY_D8UJ57_VOLCA/338-496     | D8UJ57.1     | PF04937.13 | 37.40 | 0.00 |
| TRINITY_D8SXV8_SELML/278-496     | D8SXV8.1     | PF12348.6; | 37.40 | 0.00 |
| TRINITY_Q55F12_DICDI/374-640     | Q55F12.1     | PF00149.26 | 37.40 | 0.00 |
| TRINITY_A0A068XUL1_ECHMU/28-314  | A0A068XUL1.1 | PF0006     | 37.40 | 0.00 |
| TRINITY_J9ISJ7_9SPIT/109-411     | J9ISJ7.1     | PF00648.19 | 37.40 | 0.00 |
| TRINITY_I7M6D7_TETTS/137-346     | I7M6D7.1     | PF03798.14 | 37.40 | 0.00 |
| TRINITY_F4Q3G0_DICFS/8-596       | F4Q3G0.1     | PF04916.11 | 37.40 | 0.00 |
| TRINITY_Q3SEP6_PARTE/37-615      | Q3SEP6.1     | PF00995.21 | 37.40 | 0.00 |
| TRINITY_W4GQ58_9STRA/105-353     | W4GQ58.1     | PF00120.22 | 37.40 | 0.00 |
| TRINITY_E1Z600_CHLVA/438-727     | E1Z600.1     | PF01636.21 | 37.40 | 0.00 |
| TRINITY_Q54SV5_DICDI/129-469     | Q54SV5.2     | PF03062.17 | 37.40 | 0.00 |
| TRINITY_D8UG16_VOLCA/66-170      | D8UG16.1     | PF12680.5; | 37.40 | 0.00 |
| TRINITY_A8J7M9_CHLRE/742-1038    | A8J7M9.1     | PF00069.23 | 37.40 | 0.00 |
| TRINITY_I7MEJ1_TETTS/13-399      | I7MEJ1.1     | PF07690.14 | 37.40 | 0.00 |
| TRINITY_A0DI05_PARTE/319-612     | A0DI05.1     | PF04547.10 | 37.40 | 0.00 |
| TRINITY_A8J0W8_CHLRE/37-466      | A8J0W8.1     | PF01490.16 | 37.40 | 0.00 |
| TRINITY_A0A0G4ED92_9ALVE/328-436 | A0A0G4ED92.1 | PF0065     | 37.40 | 0.00 |

|                                    |                     |       |      |
|------------------------------------|---------------------|-------|------|
| TRINITY_L8H163_ACACA/112-375       | L8H163.1 PF00069.23 | 37.40 | 0.00 |
| TRINITY_D8THA8_VOLCA/22-139        | D8THA8.1 PF01152.19 | 37.40 | 0.00 |
| TRINITY_F7FTV2_MONDO/265-614       | F7FTV2.1 PF03124.12 | 37.40 | 0.00 |
| TRINITY_F4QF50_DICFS/266-485       | F4QF50.1 PF04935.10 | 37.40 | 0.00 |
| TRINITY_W4YX46_STRPU/98-275        | W4YX46.1 PF00644.18 | 37.40 | 0.00 |
| TRINITY_A0BN06_PARTE/37-301        | A0BN06.1 PF01715.15 | 37.40 | 0.00 |
| TRINITY_K9RPD9_9CYAN/8-448         | K9RPD9.1 PF00067.20 | 37.40 | 0.00 |
| TRINITY_Q22AQ4_TETTS/550-689       | Q22AQ4.1 PF01529.18 | 37.40 | 0.00 |
| TRINITY_D8T6F9_SELML/113-250       | D8T6F9.1 PF08652.9; | 37.40 | 0.00 |
| TRINITY_A0A0G3BJH5_9BURK/5692-5798 | A0A0G3BJH5.1 PF1618 | 37.40 | 0.00 |
| TRINITY_E3FU34_STIAD/40-322        | E3FU34.1 PF01636.21 | 37.40 | 0.00 |
| TRINITY_Q23YD6_TETTS/29-282        | Q23YD6.1 PF00069.23 | 37.30 | 0.00 |
| TRINITY_A0A078BB69_STYLE/58-324    | A0A078BB69.1 PF0338 | 37.30 | 0.00 |
| TRINITY_V4AT78_LOTGI/35-620        | V4AT78.1 PF09739.7; | 37.30 | 0.00 |
| TRINITY_A4Z166_BRASO/3-129         | A4Z166.1 PF01124.16 | 37.30 | 0.00 |
| TRINITY_M0RKQ4_MUSAM/131-385       | M0RKQ4.1 PF07714.15 | 37.30 | 0.00 |
| TRINITY_Q54CM5_DICDI/15-438        | Q54CM5.1 PF00083.22 | 37.30 | 0.00 |
| TRINITY_L8GG36_ACACA/72-255        | L8GG36.1 PF02145.13 | 37.30 | 0.00 |
| TRINITY_F6RSI8_XENTR/103-443       | F6RSI8.1 PF00176.21 | 37.30 | 0.00 |
| TRINITY_G0R101_ICHMG/312-470       | G0R101.1 PF02872.16 | 37.30 | 0.00 |
| TRINITY_Q4YF61_PLABA/106-236       | Q4YF61.1 PF08662.9; | 37.30 | 0.00 |
| TRINITY_A0A022QPU9_ERYGU/9-201     | A0A022QPU9.1 PF1301 | 37.30 | 0.00 |
| TRINITY_S2JQ56_MUCC1/127-289       | S2JQ56.1 PF00650.18 | 37.30 | 0.00 |
| TRINITY_A8X5X4_CAEBR/298-570       | A8X5X4.2 PF00664.21 | 37.30 | 0.00 |

|                                   |                     |       |      |
|-----------------------------------|---------------------|-------|------|
| TRINITY_Q54CX3_DICDI/75-194       | Q54CX3.1 PF02466.17 | 37.30 | 0.00 |
| TRINITY_C0QRB5_PERMH/22-243       | C0QRB5.1 PF00194.19 | 37.30 | 0.00 |
| TRINITY_Q2J943_FRASC/218-410      | Q2J943.1 PF06414.10 | 37.30 | 0.00 |
| TRINITY_A0A0D2WGB0_CAPO3/21-228   | A0A0D2WGB0.1 PF0681 | 37.30 | 0.00 |
| TRINITY_A0A0P7XLZ5_9TELE/343-443  | A0A0P7XLZ5.1 PF1615 | 37.30 | 0.00 |
| TRINITY_A0CN16_PARTE/18-182       | A0CN16.1 PF03357.19 | 37.30 | 0.00 |
| TRINITY_A8IPH0_CHLRE/96-246       | A8IPH0.1 PF02469.20 | 37.30 | 0.00 |
| TRINITY_A8J4Z5_CHLRE/23-117       | A8J4Z5.1 PF00686.17 | 37.30 | 0.00 |
| TRINITY_I0Z5M5_9CHLO/93-249       | I0Z5M5.1 PF00650.18 | 37.30 | 0.00 |
| TRINITY_A8J5J8_CHLRE/194-755      | A8J5J8.1 PF04130.11 | 37.30 | 0.00 |
| TRINITY_A7RNL3_NEMVE/2777-2864    | A7RNL3.1 PF00630.17 | 37.30 | 0.00 |
| TRINITY_I7LX20_TETTS/11-287       | I7LX20.2 PF00069.23 | 37.30 | 0.00 |
| TRINITY_A0C424_PARTE/63-322       | A0C424.1 PF09511.8; | 37.30 | 0.00 |
| TRINITY_V3ZHK1_LOTGI/146-320      | V3ZHK1.1 PF08892.9; | 37.30 | 0.00 |
| TRINITY_G0QR98_ICHMG/111-321      | G0QR98.1 PF00481.19 | 37.30 | 0.00 |
| TRINITY_L8GW16_ACACA/17-115       | L8GW16.1 PF12796.5; | 37.30 | 0.00 |
| TRINITY_G4VDA7_SCHMA/1969-2145    | G4VDA7.1 PF02145.13 | 37.30 | 0.00 |
| TRINITY_L1IXT3_GUIITH/1-178       | L1IXT3.1 PF16909.3; | 37.30 | 0.00 |
| TRINITY_B8A5M6_DANRE/403-508      | B8A5M6.1 PF00085.18 | 37.30 | 0.00 |
| TRINITY_I7MDF9_TETTS/292-610      | I7MDF9.1 PF04515.10 | 37.30 | 0.00 |
| TRINITY_X6NRX3_RETFI/364-465      | X6NRX3.1 PF00085.18 | 37.30 | 0.00 |
| TRINITY_A8J465_CHLRE/78-330       | A8J465.1 PF09353.8; | 37.30 | 0.00 |
| TRINITY_T0QA30_9STRA/1198-1298    | T0QA30.1 PF00637.18 | 37.30 | 0.00 |
| TRINITY_A0A067R0B3_ZOONE/86-346   | A0A067R0B3.1 PF0006 | 37.30 | 0.00 |
| TRINITY_A0CYR0_PARTE/338-447      | A0CYR0.1 PF03015.17 | 37.30 | 0.00 |
| TRINITY_A0A0J7MWC3_LASNI/91-250   | A0A0J7MWC3.1 PF1335 | 37.30 | 0.00 |
| TRINITY_J9F4Y5_9SPIT/78-412       | J9F4Y5.1 PF01237.16 | 37.30 | 0.00 |
| TRINITY_F4NSG0_BATDJ/183-312      | F4NSG0.1 PF03188.14 | 37.30 | 0.00 |
| TRINITY_F4PJQ6_DICFS/104-474      | F4PJQ6.1 PF07690.14 | 37.30 | 0.00 |
| TRINITY_D8TP08_VOLCA/394-549      | D8TP08.1 PF05843.12 | 37.30 | 0.00 |
| TRINITY_D2V884_NAEGR/23-411       | D2V884.1 PF02274.15 | 37.30 | 0.00 |
| TRINITY_A8HPD4_CHLRE/451-711      | A8HPD4.1 PF00520.29 | 37.30 | 0.00 |
| TRINITY_A0DXA9_PARTE/13-322       | A0DXA9.1 PF03820.15 | 37.30 | 0.00 |
| TRINITY_L8HIE7_ACACA/13-192       | L8HIE7.1 PF00929.22 | 37.20 | 0.00 |
| TRINITY_H3A991_LATCH/268-561      | H3A991.1 PF01490.16 | 37.20 | 0.00 |
| TRINITY_Q22D95_TETTS/115-205      | Q22D95.2 PF00153.25 | 37.20 | 0.00 |
| TRINITY_L8HCK5_ACACA/530-801      | L8HCK5.1 PF07714.15 | 37.20 | 0.00 |
| TRINITY_L8HGY6_ACACA/4-352        | L8HGY6.1 PF11397.6; | 37.20 | 0.00 |
| TRINITY_G0QLI8_ICHMG/177-424      | G0QLI8.1 PF08367.9; | 37.20 | 0.00 |
| TRINITY_I7MEI2_TETTS/79-268       | I7MEI2.2 PF01145.23 | 37.20 | 0.00 |
| TRINITY_A0A0A7PE86_9SPHN/62-197   | A0A0A7PE86.1 PF0246 | 37.20 | 0.00 |
| TRINITY_A7S3C1_NEMVE/118-465      | A7S3C1.1 PF14782.4; | 37.20 | 0.00 |
| TRINITY_J9IDJ2_9SPIT/37-276       | J9IDJ2.1 PF00194.19 | 37.20 | 0.00 |
| TRINITY_A9G0Q5_SORC5/53-346       | A9G0Q5.1 PF14388.4; | 37.20 | 0.00 |
| TRINITY_I7M0U2_TETTS/23-1098      | I7M0U2.2 PF10266.7; | 37.20 | 0.00 |
| TRINITY_R7EQV0_9BACE/30-279       | R7EQV0.1 PF03372.21 | 37.20 | 0.00 |
| TRINITY_C1E237_MICSR/66-285       | C1E237.1 PF16690.3; | 37.20 | 0.00 |
| TRINITY_B0WXE5_CULQU/211-324      | B0WXE5.1 PF00373.16 | 37.20 | 0.00 |
| TRINITY_G8BSZ9_TETPH/231-743      | G8BSZ9.1 PF03935.13 | 37.20 | 0.00 |
| TRINITY_Q54E05_DICDI/198-431      | Q54E05.1 PF06027.10 | 37.20 | 0.00 |
| TRINITY_A0A0F2NFD9_9DELTA/33-203  | A0A0F2NFD9.1 PF0018 | 37.20 | 0.00 |
| TRINITY_Q22X60_TETTS/11-285       | Q22X60.1 PF00069.23 | 37.20 | 0.00 |
| TRINITY_Q23QF2_TETTS/248-571      | Q23QF2.2 PF03133.13 | 37.20 | 0.00 |
| TRINITY_A0A0B1P8K8_UNCNE/869-982  | A0A0B1P8K8.1 PF0078 | 37.20 | 0.00 |
| TRINITY_Q3SEP6_PARTE/37-615       | Q3SEP6.1 PF00995.21 | 37.20 | 0.00 |
| TRINITY_H3DYY8_PRIIPA/312-477     | H3DYY8.1 PF04851.13 | 37.20 | 0.00 |
| TRINITY_V7BC73_PHAVU/227-421      | V7BC73.1 PF01416.18 | 37.20 | 0.00 |
| TRINITY_A0A0D2WGB0_CAPO3/21-228   | A0A0D2WGB0.1 PF0681 | 37.20 | 0.00 |
| TRINITY_A0A078ABB5_STYLE/6-311    | A0A078ABB5.1 PF0799 | 37.20 | 0.00 |
| TRINITY_A0C424_PARTE/63-322       | A0C424.1 PF09511.8; | 37.20 | 0.00 |
| TRINITY_A0A0G4EHB4_9ALVE/748-1297 | A0A0G4EHB4.1 PF0273 | 37.20 | 0.00 |

|                                  |                     |       |      |
|----------------------------------|---------------------|-------|------|
| TRINITY_A9TCF0_PHYPA/176-670     | A9TCF0.1 PF02696.12 | 37.20 | 0.00 |
| TRINITY_I0Z064_9CHLO/340-703     | I0Z064.1 PF10168.7; | 37.20 | 0.00 |
| TRINITY_A0CMN6_PARTE/121-399     | A0CMN6.1 PF01457.14 | 37.20 | 0.00 |
| TRINITY_A0A075LPQ6_9BACI/7-106   | A0A075LPQ6.1 PF0141 | 37.20 | 0.00 |
| TRINITY_D8UKQ9_VOLCA/248-630     | D8UKQ9.1 PF00150.16 | 37.20 | 0.00 |
| TRINITY_L8GV23_ACACA/25-354      | L8GV23.1 PF03265.13 | 37.20 | 0.00 |
| TRINITY_A0A0J7KGR9_LASNI/8-199   | A0A0J7KGR9.1 PF0007 | 37.20 | 0.00 |
| TRINITY_L8H5E2_ACACA/175-397     | L8H5E2.1 PF10469.7; | 37.20 | 0.00 |
| TRINITY_H2SI60_TAKRU/31-123      | H2SI60.1 PF06337.10 | 37.20 | 0.00 |
| TRINITY_E1ZTK5_CHLVA/222-684     | E1ZTK5.1 PF05292.9; | 37.20 | 0.00 |
| TRINITY_L8GTK1_ACACA/146-395     | L8GTK1.1 PF07714.15 | 37.20 | 0.00 |
| TRINITY_D8TU13_VOLCA/649-861     | D8TU13.1 PF04192.10 | 37.20 | 0.00 |
| TRINITY_W7X5Q7_TETTS/17-155      | W7X5Q7.1 PF00520.29 | 37.20 | 0.00 |
| TRINITY_B8CG90_THAPS/533-811     | B8CG90.1 PF00664.21 | 37.20 | 0.00 |
| TRINITY_U1GKZ4_ENDPU/432-474     | U1GKZ4.1 PF13639.4; | 37.20 | 0.00 |
| TRINITY_W7WZB3_TETTS/5-151       | W7WZB3.1 PF07933.12 | 37.20 | 0.00 |
| TRINITY_A0D670_PARTE/33-111      | A0D670.1 PF07019.10 | 37.20 | 0.00 |
| TRINITY_G0QPH0_ICHMG/1-390       | G0QPH0.1 PF03917.15 | 37.10 | 0.00 |
| TRINITY_Q4G2D6_TRIVA/11-172      | Q4G2D6.1 PF00071.20 | 37.10 | 0.00 |
| TRINITY_Q5KJW8_CRYNJ/25-95       | Q5KJW8.1 PF00076.20 | 37.10 | 0.00 |
| TRINITY_W7ANE2_PLAVN/103-241     | W7ANE2.1 PF01529.18 | 37.10 | 0.00 |
| TRINITY_I7MIN0_TETTS/9-308       | I7MIN0.1 PF08449.9; | 37.10 | 0.00 |
| TRINITY_A0A0M8VC58_9ACTN/4-209   | A0A0M8VC58.1 PF1341 | 37.10 | 0.00 |
| TRINITY_I7LV11_TETTS/352-566     | I7LV11.1 PF00149.26 | 37.10 | 0.00 |
| TRINITY_W9SM68_9ROSA/116-324     | W9SM68.1 PF00566.16 | 37.10 | 0.00 |
| TRINITY_N6TSD4_DENPD/146-208     | N6TSD4.1 PF10180.7; | 37.10 | 0.00 |
| TRINITY_L8GKH0_ACACA/249-578     | L8GKH0.1 PF13598.4; | 37.10 | 0.00 |
| TRINITY_D8S383_SELML/101-256     | D8S383.1 PF02270.13 | 37.10 | 0.00 |
| TRINITY_A0A0F6W6A6_9DELT/19-223  | A0A0F6W6A6.1 PF0501 | 37.10 | 0.00 |
| TRINITY_A0EB86_PARTE/167-498     | A0EB86.1 PF03133.13 | 37.10 | 0.00 |
| TRINITY_L8H1E1_ACACA/5-221       | L8H1E1.1 PF01370.19 | 37.10 | 0.00 |
| TRINITY_J9EG13_9SPIT/584-905     | J9EG13.1 PF05192.16 | 37.10 | 0.00 |
| TRINITY_A0CF81_PARTE/292-769     | A0CF81.1 PF00443.27 | 37.10 | 0.00 |
| TRINITY_S2K416_MUCC1/38-400      | S2K416.1 PF00155.19 | 37.10 | 0.00 |
| TRINITY_D2W2M6_NAEGR/67-466      | D2W2M6.1 PF00450.20 | 37.10 | 0.00 |
| TRINITY_A8HTX4_CHLRE/6-135       | A8HTX4.1 PF04446.10 | 37.10 | 0.00 |
| TRINITY_K1L3B5_9BACT/13-214      | K1L3B5.1 PF01596.15 | 37.10 | 0.00 |
| TRINITY_D6TFG4_9CHLR/9-160       | D6TFG4.1 PF04851.13 | 37.10 | 0.00 |
| TRINITY_W7WZC0_TETTS/479-551     | W7WZC0.1 PF15016.4; | 37.10 | 0.00 |
| TRINITY_D3BEU5_POLPA/43-608      | D3BEU5.1 PF14745.4; | 37.10 | 0.00 |
| TRINITY_T1FN62_HELRO/6-132       | T1FN62.1 PF08662.9; | 37.10 | 0.00 |
| TRINITY_C1N2Y5_MICPC/184-742     | C1N2Y5.1 PF10433.7; | 37.10 | 0.00 |
| TRINITY_K9WF91_9CYAN/6-199       | K9WF91.1 PF00106.23 | 37.10 | 0.00 |
| TRINITY_L8H0B7_ACACA/3-150       | L8H0B7.1 PF00293.26 | 37.10 | 0.00 |
| TRINITY_B8CD21_THAPS/43-201      | B8CD21.1 PF01434.16 | 37.10 | 0.00 |
| TRINITY_A8JGR9_CHLRE/78-301      | A8JGR9.1 PF07859.11 | 37.10 | 0.00 |
| TRINITY_J9ICF8_9SPIT/1-131       | J9ICF8.1 PF00582.24 | 37.10 | 0.00 |
| TRINITY_Q7QIH6_ANOGA/17-126      | Q7QIH6.3 PF00651.29 | 37.10 | 0.00 |
| TRINITY_F0Z6A8_DICPU/419-855     | F0Z6A8.1 PF14648.4; | 37.10 | 0.00 |
| TRINITY_H3GM81_PHYRM/324-430     | H3GM81.1 PF00651.29 | 37.10 | 0.00 |
| TRINITY_Q81HV9_BACCR/16-265      | Q81HV9.1 PF01168.18 | 37.10 | 0.00 |
| TRINITY_F4Q584_DICFS/157-485     | F4Q584.1 PF03372.21 | 37.10 | 0.00 |
| TRINITY_V2YMJ2_MONRO/325-569     | V2YMJ2.1 PF13086.4; | 37.10 | 0.00 |
| TRINITY_L8HHX4_ACACA/703-1129    | L8HHX4.1 PF00476.18 | 37.10 | 0.00 |
| TRINITY_X6NZG4_RETFI/21-287      | X6NZG4.1 PF01504.16 | 37.10 | 0.00 |
| TRINITY_F6SY88_MONDO/3-177       | F6SY88.1 PF00025.19 | 37.10 | 0.00 |
| TRINITY_A8IF44_CHLRE/5-261       | A8IF44.1 PF16092.3; | 37.10 | 0.00 |
| TRINITY_D8U9S9_VOLCA/599-793     | D8U9S9.1 PF00211.18 | 37.10 | 0.00 |
| TRINITY_A0A0J7K6W1_LASNI/485-603 | A0A0J7K6W1.1 PF0066 | 37.10 | 0.00 |
| TRINITY_D8UIZ7_VOLCA/369-849     | D8UIZ7.1 PF00759.17 | 37.10 | 0.00 |
| TRINITY_I0Z879_9CHLO/15-480      | I0Z879.1 PF03155.13 | 37.10 | 0.00 |

|                                   |                     |       |      |
|-----------------------------------|---------------------|-------|------|
| TRINITY_A8HPE7_CHLRE/242-337      | A8HPE7.1 PF13242.4; | 37.10 | 0.00 |
| TRINITY_A0A074TTD6_HAMHA/22-118   | A0A074TTD6.1 PF0364 | 37.10 | 0.00 |
| TRINITY_D2VP40_NAEGR/75-303       | D2VP40.1 PF07065.12 | 37.00 | 0.00 |
| TRINITY_A0A0M0JZK3_9EUKA/232-431  | A0A0M0JZK3.1 PF1385 | 37.00 | 0.00 |
| TRINITY_C5DH94_LACTC/97-183       | C5DH94.1 PF12796.5; | 37.00 | 0.00 |
| TRINITY_G0R1G3_ICHMG/80-301       | G0R1G3.1 PF00566.16 | 37.00 | 0.00 |
| TRINITY_D7TLT1_VITVI/4-110        | D7TLT1.1 PF00168.28 | 37.00 | 0.00 |
| TRINITY_C1E5U8_MICSR/55-254       | C1E5U8.1 PF13360.4; | 37.00 | 0.00 |
| TRINITY_A7RJR6_NEMVE/10-191       | A7RJR6.1 PF13472.4; | 37.00 | 0.00 |
| TRINITY_I0YPY0_9CHLO/587-636      | I0YPY0.1 PF00628.27 | 37.00 | 0.00 |
| TRINITY_A0DLI9_PARTE/13-277       | A0DLI9.1 PF00069.23 | 37.00 | 0.00 |
| TRINITY_H3GGZ2_PHYRM/50-226       | H3GGZ2.1 PF01569.19 | 37.00 | 0.00 |
| TRINITY_G4VRU3_SCHMA/82-202       | G4VRU3.1 PF00622.26 | 37.00 | 0.00 |
| TRINITY_A4VDT5_TETTS/546-675      | A4VDT5.2 PF04499.13 | 37.00 | 0.00 |
| TRINITY_Q23RB4_TETTS/70-227       | Q23RB4.2 PF01343.16 | 37.00 | 0.00 |
| TRINITY_F4WZI8_ACREC/22-270       | F4WZI8.1 PF07714.15 | 37.00 | 0.00 |
| TRINITY_I7M2X3_TETTS/28-255       | I7M2X3.1 PF00149.26 | 37.00 | 0.00 |
| TRINITY_Q7RIF5_PLAYO/7-169        | Q7RIF5.1 PF00160.19 | 37.00 | 0.00 |
| TRINITY_A0A078AF49_STYLE/79-487   | A0A078AF49.1 PF1334 | 37.00 | 0.00 |
| TRINITY_Q237H9_TETTS/734-967      | Q237H9.2 PF12698.5; | 37.00 | 0.00 |
| TRINITY_K7E1N3_MONDO/159-270      | K7E1N3.1 PF00651.29 | 37.00 | 0.00 |
| TRINITY_D8TTP0_VOLCA/1124-1422    | D8TTP0.1 PF00069.23 | 37.00 | 0.00 |
| TRINITY_A0A0D1DY50_USTMA/875-1030 | A0A0D1DY50.1 PF1271 | 37.00 | 0.00 |
| TRINITY_B2IDJ8_BEII9/72-226       | B2IDJ8.1 PF10067.7; | 37.00 | 0.00 |
| TRINITY_L8H973_ACACA/26-179       | L8H973.1 PF00795.20 | 37.00 | 0.00 |
| TRINITY_S8ALH8_DACHA/280-587      | S8ALH8.1 PF09423.8; | 37.00 | 0.00 |
| TRINITY_A8HNZ5_CHLRE/73-227       | A8HNZ5.1 PF00177.19 | 37.00 | 0.00 |
| TRINITY_D8TZI2_VOLCA/63-251       | D8TZI2.1 PF01025.17 | 37.00 | 0.00 |
| TRINITY_I1GGB4_AMPQE/46-226       | I1GGB4.1 PF00092.26 | 37.00 | 0.00 |
| TRINITY_A0A0N5B837_STREA/222-429  | A0A0N5B837.1 PF0866 | 37.00 | 0.00 |
| TRINITY_A0A0D2WK61_CAPO3/512-847  | A0A0D2WK61.1 PF0312 | 37.00 | 0.00 |
| TRINITY_A0A090LXH8_OSTTA/514-699  | A0A090LXH8.1 PF1029 | 37.00 | 0.00 |
| TRINITY_L1JGQ3_GUIITH/3-193       | L1JGQ3.1 PF13419.4; | 37.00 | 0.00 |
| TRINITY_S8EE57_FOMPI/1-174        | S8EE57.1 PF05620.9; | 37.00 | 0.00 |
| TRINITY_A0A0J8D429_BETVU/420-1005 | A0A0J8D429.1 PF0518 | 37.00 | 0.00 |
| TRINITY_R6PMU9_9FIRM/4-154        | R6PMU9.1 PF12847.5; | 37.00 | 0.00 |
| TRINITY_D8TTP0_VOLCA/1124-1422    | D8TTP0.1 PF00069.23 | 37.00 | 0.00 |
| TRINITY_A0A0G4G478_9ALVE/26-579   | A0A0G4G478.1 PF0160 | 37.00 | 0.00 |
| TRINITY_A8J4Y5_CHLRE/1-425        | A8J4Y5.1 PF00450.20 | 37.00 | 0.00 |
| TRINITY_A8IEX1_CHLRE/352-562      | A8IEX1.1 PF01061.22 | 37.00 | 0.00 |
| TRINITY_D8TTP0_VOLCA/1124-1422    | D8TTP0.1 PF00069.23 | 37.00 | 0.00 |
| TRINITY_D8TZU5_VOLCA/290-568      | D8TZU5.1 PF12018.6; | 37.00 | 0.00 |
| TRINITY_A7H7K4_ANADF/264-412      | A7H7K4.1 PF00201.16 | 37.00 | 0.00 |
| TRINITY_A0A067NVA7_PLEOS/32-317   | A0A067NVA7.1 PF0006 | 37.00 | 0.00 |
| TRINITY_U2E9J7_9BACT/28-286       | U2E9J7.1 PF00561.18 | 36.90 | 0.00 |
| TRINITY_F0YGV4_AURAN/12-147       | F0YGV4.1 PF00892.18 | 36.90 | 0.00 |
| TRINITY_F4PTN1_DICFS/42-388       | F4PTN1.1 PF07690.14 | 36.90 | 0.00 |
| TRINITY_Q22PK5_TETTS/101-587      | Q22PK5.1 PF01425.19 | 36.90 | 0.00 |
| TRINITY_D8M5A1_BLAHO/1-212        | D8M5A1.1 PF00149.26 | 36.90 | 0.00 |
| TRINITY_B8HYX6_CYAP4/26-200       | B8HYX6.1 PF13532.4; | 36.90 | 0.00 |
| TRINITY_F4Q1S9_DICFS/33-286       | F4Q1S9.1 PF00561.18 | 36.90 | 0.00 |
| TRINITY_L8H1C1_ACACA/491-555      | L8H1C1.1 PF13432.4; | 36.90 | 0.00 |
| TRINITY_G0QLJ6_ICHMG/4-189        | G0QLJ6.1 PF00113.20 | 36.90 | 0.00 |
| TRINITY_L8H4K4_ACACA/104-337      | L8H4K4.1 PF04445.11 | 36.90 | 0.00 |
| TRINITY_F2UAW3_SALR5/119-262      | F2UAW3.1 PF03981.10 | 36.90 | 0.00 |
| TRINITY_D3HQ64_LEGLN/458-569      | D3HQ64.1 PF00072.22 | 36.90 | 0.00 |
| TRINITY_I4YMJ8_9RHIZ/5-185        | I4YMJ8.1 PF00300.20 | 36.90 | 0.00 |
| TRINITY_D8UG85_VOLCA/40-517       | D8UG85.1 PF01532.18 | 36.90 | 0.00 |
| TRINITY_A0A078AR51_STYLE/8-287    | A0A078AR51.1 PF0006 | 36.90 | 0.00 |
| TRINITY_A0A087STF8_AUXPR/1-249    | A0A087STF8.1 PF0627 | 36.90 | 0.00 |
| TRINITY_Q22PH2_TETTS/13-431       | Q22PH2.2 PF01137.19 | 36.90 | 0.00 |



|                                    |                     |       |      |
|------------------------------------|---------------------|-------|------|
| TRINITY_F2U800_SALR5/185-462       | F2U800.1 PF01602.18 | 36.90 | 0.00 |
| TRINITY_C1MVU4_MICPC/988-1289      | C1MVU4.1 PF11262.6; | 36.90 | 0.00 |
| TRINITY_A0A0G4IGI5_PLABS/360-474   | A0A0G4IGI5.1 PF0338 | 36.90 | 0.00 |
| TRINITY_Q236M1_TETTS/41-327        | Q236M1.2 PF01025.17 | 36.90 | 0.00 |
| TRINITY_SEY11_PARTE/49-739         | A0BKG2.1 PF05879.10 | 36.90 | 0.00 |
| TRINITY_A8J2X9_CHLRE/125-257       | A8J2X9.1 PF00504.19 | 36.90 | 0.00 |
| TRINITY_K7JBH5_NASVI/607-815       | K7JBH5.1 PF07727.12 | 36.90 | 0.00 |
| TRINITY_A0A0A0LDM0_CUCSA/81-222    | A0A0A0LDM0.1 PF0159 | 36.90 | 0.00 |
| TRINITY_I1FGX7_AMPQE/637-816       | I1FGX7.1 PF00644.18 | 36.90 | 0.00 |
| TRINITY_A0A0J8FSK4_BETVU/3618-4509 | A0A0J8FSK4.1 PF1376 | 36.90 | 0.00 |
| TRINITY_A0CCS6_PARTE/5-130         | A0CCS6.1 PF01778.15 | 36.90 | 0.00 |
| TRINITY_S3D856_OPHP1/4-177         | S3D856.1 PF00025.19 | 36.90 | 0.00 |
| TRINITY_I0Z118_9CHLO/375-636       | I0Z118.1 PF06209.11 | 36.90 | 0.00 |
| TRINITY_X6PDX4_RETFI/1195-1371     | X6PDX4.1 PF16909.3; | 36.90 | 0.00 |
| TRINITY_S2J1H8_MUCC1/361-991       | S2J1H8.1 PF10408.7; | 36.90 | 0.00 |
| TRINITY_Q2JKG0_SYNJB/9-302         | Q2JKG0.1 PF00266.17 | 36.90 | 0.00 |
| TRINITY_A0A0G4GLJ7_9ALVE/54-165    | A0A0G4GLJ7.1 PF0058 | 36.90 | 0.00 |
| TRINITY_A0A087SA60_AUXPR/19-283    | A0A087SA60.1 PF0006 | 36.90 | 0.00 |
| TRINITY_E1Z399_CHLVA/8-173         | E1Z399.1 PF11744.6; | 36.90 | 0.00 |
| TRINITY_B3SCI9_TRIAD/108-377       | B3SCI9.1 PF00664.21 | 36.90 | 0.00 |
| TRINITY_G4V9L8_SCHMA/203-365       | G4V9L8.1 PF04004.11 | 36.90 | 0.00 |
| TRINITY_D5X9L3_THEPJ/23-309        | D5X9L3.1 PF02541.14 | 36.90 | 0.00 |
| TRINITY_A0A096LSW9_POEFO/58-245    | A0A096LSW9.1 PF0080 | 36.90 | 0.00 |
| TRINITY_A0BGJ6_PARTE/13-125        | A0BGJ6.1 PF01920.18 | 36.90 | 0.00 |
| TRINITY_E1ZPU4_CHLVA/5-453         | E1ZPU4.1 PF05327.9; | 36.90 | 0.00 |
| TRINITY_G6FZL1_9CYAN/27-497        | G6FZL1.1 PF03055.13 | 36.90 | 0.00 |
| TRINITY_G7IA71_MEDTR/108-554       | G7IA71.1 PF02133.13 | 36.80 | 0.00 |
| TRINITY_A0A0M9GA61_9TRYP/46-331    | A0A0M9GA61.1 PF0006 | 36.80 | 0.00 |
| TRINITY_I4AKQ4_FLELS/53-342        | I4AKQ4.1 PF14388.4; | 36.80 | 0.00 |
| TRINITY_Q244Z6_TETTS/77-284        | Q244Z6.1 PF01027.18 | 36.80 | 0.00 |
| TRINITY_A0A067EW61_CITSI/22-161    | A0A067EW61.1 PF0000 | 36.80 | 0.00 |
| TRINITY_A0CY07_PARTE/21-127        | A0CY07.1 PF09799.7; | 36.80 | 0.00 |
| TRINITY_W7XDU4_TETTS/448-616       | W7XDU4.1 PF01699.22 | 36.80 | 0.00 |
| TRINITY_M4ZZ09_9ACTN/56-294        | M4ZZ09.1 PF14378.4; | 36.80 | 0.00 |
| TRINITY_A0EA64_PARTE/1-184         | A0EA64.1 PF00069.23 | 36.80 | 0.00 |
| TRINITY_H2XTA5_CIOIN/343-503       | H2XTA5.1 PF03712.13 | 36.80 | 0.00 |
| TRINITY_K1XZE6_MARBU/307-454       | K1XZE6.1 PF03031.16 | 36.80 | 0.00 |
| TRINITY_Q22Z31_TETTS/156-426       | Q22Z31.4 PF00520.29 | 36.80 | 0.00 |
| TRINITY_A0C7V9_PARTE/171-347       | A0C7V9.1 PF06911.10 | 36.80 | 0.00 |
| TRINITY_A9TZU1_PHYPA/16-235        | A9TZU1.1 PF00687.19 | 36.80 | 0.00 |
| TRINITY_K2EBL4_9BACT/19-146        | K2EBL4.1 PF03099.17 | 36.80 | 0.00 |
| TRINITY_L8GYH6_ACACA/1-275         | L8GYH6.1 PF03159.16 | 36.80 | 0.00 |
| TRINITY_A0A0L7L536_9NEOP/436-516   | A0A0L7L536.1 PF0183 | 36.80 | 0.00 |
| TRINITY_G3NPH7_GASAC/10-123        | G3NPH7.1 PF10256.7; | 36.80 | 0.00 |
| TRINITY_I1BZM4_RHIO9/2-295         | I1BZM4.1 PF07992.12 | 36.80 | 0.00 |
| TRINITY_W9WL24_9EURO/493-585       | W9WL24.1 PF12796.5; | 36.80 | 0.00 |
| TRINITY_A0A068XUV2_HYMMI/126-436   | A0A068XUV2.1 PF0426 | 36.80 | 0.00 |
| TRINITY_D8TN28_VOLCA/673-769       | D8TN28.1 PF07885.14 | 36.80 | 0.00 |
| TRINITY_A0BLH9_PARTE/7-108         | A0BLH9.1 PF00168.28 | 36.80 | 0.00 |
| TRINITY_A0BLH9_PARTE/7-108         | A0BLH9.1 PF00168.28 | 36.80 | 0.00 |
| TRINITY_A0A075AYI6_9FUNG/177-491   | A0A075AYI6.1 PF0154 | 36.80 | 0.00 |
| TRINITY_K9SCW4_9CYAN/247-433       | K9SCW4.1 PF02163.20 | 36.80 | 0.00 |
| TRINITY_D2W423_NAEGR/65-239        | D2W423.1 PF01273.23 | 36.80 | 0.00 |
| TRINITY_I7M7F9_TETTS/162-552       | I7M7F9.1 PF01619.16 | 36.80 | 0.00 |
| TRINITY_I3KIP7_ORENI/454-610       | I3KIP7.1 PF05572.11 | 36.80 | 0.00 |
| TRINITY_F0YC13_AURAN/81-304        | F0YC13.1 PF08450.10 | 36.80 | 0.00 |
| TRINITY_A8JDA0_CHLRE/443-662       | A8JDA0.1 PF00481.19 | 36.80 | 0.00 |
| TRINITY_A0DDF0_PARTE/853-1143      | A0DDF0.1 PF00689.19 | 36.80 | 0.00 |
| TRINITY_X1X2A4_ACYPI/26-255        | X1X2A4.1 PF12697.5; | 36.80 | 0.00 |
| TRINITY_A8J9Y6_CHLRE/15-130        | A8J9Y6.1 PF00787.22 | 36.80 | 0.00 |
| TRINITY_L8GKH1_ACACA/97-304        | L8GKH1.1 PF00856.26 | 36.80 | 0.00 |

|                                   |                     |       |      |
|-----------------------------------|---------------------|-------|------|
| TRINITY_H8KM12_SOLCM/12-444       | H8KM12.1 PF01593.22 | 36.80 | 0.00 |
| TRINITY_I1H6T4_BRADI/588-973      | I1H6T4.1 PF00145.15 | 36.80 | 0.00 |
| TRINITY_K9Y0F8_STAC7/144-341      | K9Y0F8.1 PF09414.8; | 36.80 | 0.00 |
| TRINITY_G0R4M5_ICHMG/51-307       | G0R4M5.1 PF00481.19 | 36.80 | 0.00 |
| TRINITY_A0A067K1E4_JATCU/180-331  | A0A067K1E4.1 PF0493 | 36.80 | 0.00 |
| TRINITY_A0A087SBA3_AUXPR/263-464  | A0A087SBA3.1 PF0407 | 36.80 | 0.00 |
| TRINITY_E1Z8M8_CHLVA/12-352       | E1Z8M8.1 PF04177.10 | 36.80 | 0.00 |
| TRINITY_A0A0D9VLX2_9ORYZ/403-572  | A0A0D9VLX2.1 PF0176 | 36.80 | 0.00 |
| TRINITY_A8J0I1_CHLRE/188-606      | A8J0I1.1 PF00067.20 | 36.80 | 0.00 |
| TRINITY_D8TW39_VOLCA/7-197        | D8TW39.1 PF05958.9; | 36.80 | 0.00 |
| TRINITY_L1IL48_GUIETH/13-186      | L1IL48.1 PF05706.10 | 36.80 | 0.00 |
| TRINITY_J9J5M4_9SPIT/47-304       | J9J5M4.1 PF00069.23 | 36.80 | 0.00 |
| TRINITY_A5FFM2_FLAJ1/36-211       | A5FFM2.1 PF13365.4; | 36.80 | 0.00 |
| TRINITY_E1Z251_CHLVA/143-289      | E1Z251.1 PF04072.12 | 36.80 | 0.00 |
| TRINITY_I7MGW2_TETTS/6-163        | I7MGW2.1 PF00106.23 | 36.80 | 0.00 |
| TRINITY_A8I3B9_CHLRE/91-352       | A8I3B9.1 PF07714.15 | 36.80 | 0.00 |
| TRINITY_E7EYU7_DANRE/215-381      | E7EYU7.2 PF13359.4; | 36.80 | 0.00 |
| TRINITY_A8JAT8_CHLRE/131-260      | A8JAT8.1 PF06463.11 | 36.80 | 0.00 |
| TRINITY_D8UJ89_VOLCA/98-1079      | D8UJ89.1 PF04931.11 | 36.80 | 0.00 |
| TRINITY_C5X8G4_SORBI/415-543      | C5X8G4.1 PF02170.20 | 36.80 | 0.00 |
| TRINITY_A0A015IWR6_9GLOM/146-259  | A0A015IWR6.1 PF1351 | 36.80 | 0.00 |
| TRINITY_D8UGJ8_VOLCA/13-286       | D8UGJ8.1 PF00069.23 | 36.80 | 0.00 |
| TRINITY_Q248E1_TETTS/241-551      | Q248E1.1 PF03133.13 | 36.80 | 0.00 |
| TRINITY_Q23KE2_TETTS/302-431      | Q23KE2.2 PF07534.14 | 36.80 | 0.00 |
| TRINITY_W4K3K9_9HOMO/77-277       | W4K3K9.1 PF00566.16 | 36.70 | 0.00 |
| TRINITY_A0A0A1MXW2_9FUNG/2-121    | A0A0A1MXW2.1 PF0156 | 36.70 | 0.00 |
| TRINITY_A0A0D2X579_CAPO3/862-1042 | A0A0D2X579.1 PF0061 | 36.70 | 0.00 |
| TRINITY_I7LZR7_TETTS/58-421       | I7LZR7.1 PF03062.17 | 36.70 | 0.00 |
| TRINITY_I0HJJ9_ACTM4/22-399       | I0HJJ9.1 PF00144.22 | 36.70 | 0.00 |
| TRINITY_B3RIS0_TRIAD/58-253       | B3RIS0.1 PF00804.23 | 36.70 | 0.00 |
| TRINITY_U3I342_ANAPL/203-382      | U3I342.1 PF05193.19 | 36.70 | 0.00 |
| TRINITY_L8H823_ACACA/184-369      | L8H823.1 PF07065.12 | 36.70 | 0.00 |
| TRINITY_A0DXK0_PARTE/649-996      | A0DXK0.1 PF14744.4; | 36.70 | 0.00 |
| TRINITY_D3B4A4_POLPA/7-179        | D3B4A4.1 PF05255.9; | 36.70 | 0.00 |
| TRINITY_D8UJ89_VOLCA/98-1079      | D8UJ89.1 PF04931.11 | 36.70 | 0.00 |
| TRINITY_A0DLQ7_PARTE/160-514      | A0DLQ7.1 PF03133.13 | 36.70 | 0.00 |
| TRINITY_I7MDP9_TETTS/397-645      | I7MDP9.2 PF00520.29 | 36.70 | 0.00 |
| TRINITY_L8H9P5_ACACA/1162-1679    | L8H9P5.1 PF06920.11 | 36.70 | 0.00 |
| TRINITY_B9XJ07_PEDPL/9-283        | B9XJ07.1 PF00749.19 | 36.70 | 0.00 |
| TRINITY_A0A0D3DME0_BRAOL/74-311   | A0A0D3DME0.1 PF1214 | 36.70 | 0.00 |
| TRINITY_S2IYB4_MUCC1/3-369        | S2IYB4.1 PF04857.18 | 36.70 | 0.00 |
| TRINITY_J9J9X0_9SPIT/234-491      | J9J9X0.1 PF00069.23 | 36.70 | 0.00 |
| TRINITY_G0R5F7_ICHMG/6-279        | G0R5F7.1 PF01457.14 | 36.70 | 0.00 |
| TRINITY_D3B6M3_POLPA/229-533      | D3B6M3.1 PF00082.20 | 36.70 | 0.00 |
| TRINITY_A0A078A6W1_STYLE/181-518  | A0A078A6W1.1 PF0072 | 36.70 | 0.00 |
| TRINITY_A0EAD7_PARTE/23-277       | A0EAD7.1 PF00956.16 | 36.70 | 0.00 |
| TRINITY_A8J7M9_CHLRE/742-1038     | A8J7M9.1 PF00069.23 | 36.70 | 0.00 |
| TRINITY_L8H9P3_ACACA/258-435      | L8H9P3.1 PF02145.13 | 36.70 | 0.00 |
| TRINITY_A7SGT0_NEMVE/9-138        | A7SGT0.1 PF10175.7; | 36.70 | 0.00 |
| TRINITY_A8IR48_CHLRE/1154-1335    | A8IR48.1 PF00069.23 | 36.70 | 0.00 |
| TRINITY_F6Z5D5_XENTR/729-1003     | F6Z5D5.1 PF00664.21 | 36.70 | 0.00 |
| TRINITY_Q241A5_TETTS/15-618       | Q241A5.1 PF04006.10 | 36.70 | 0.00 |
| TRINITY_B1LWC8_METRJ/35-279       | B1LWC8.1 PF00561.18 | 36.70 | 0.00 |
| TRINITY_D8UCR5_VOLCA/106-316      | D8UCR5.1 PF07393.9; | 36.70 | 0.00 |
| TRINITY_E1Z243_CHLVA/12-318       | E1Z243.1 PF05625.9; | 36.70 | 0.00 |
| TRINITY_A0A024TE61_9STRA/302-568  | A0A024TE61.1 PF0771 | 36.70 | 0.00 |
| TRINITY_G0QJG8_ICHMG/371-552      | G0QJG8.1 PF01756.17 | 36.70 | 0.00 |
| TRINITY_A0A0M0J6D3_9EUKA/396-638  | A0A0M0J6D3.1 PF0511 | 36.70 | 0.00 |
| TRINITY_W5N0L4_LEPOC/250-397      | W5N0L4.1 PF02735.14 | 36.70 | 0.00 |
| TRINITY_B8BR90_THAPS/164-450      | B8BR90.1 PF09423.8; | 36.70 | 0.00 |
| TRINITY_A8J3K1_CHLRE/1842-2127    | A8J3K1.1 PF07714.15 | 36.70 | 0.00 |

|                                    |                     |       |      |
|------------------------------------|---------------------|-------|------|
| TRINITY_A0A078AWY2_STYLE/4041-4144 | A0A078AWY2.1 PF0761 | 36.70 | 0.00 |
| TRINITY_G0QJM3_ICHMG/11-497        | G0QJM3.1 PF01425.19 | 36.70 | 0.00 |
| TRINITY_A0A015I1J8_9GLOM/321-462   | A0A015I1J8.1 PF0753 | 36.70 | 0.00 |
| TRINITY_D8R8Q7_SELML/359-695       | D8R8Q7.1 PF04869.12 | 36.70 | 0.00 |
| TRINITY_B4J5T1_DROGR/70-196        | B4J5T1.1 PF00043.23 | 36.60 | 0.00 |
| TRINITY_A0CZW4_PARTE/34-236        | A0CZW4.1 PF07162.9; | 36.60 | 0.00 |
| TRINITY_Q23EX0_TETTS/35-292        | Q23EX0.1 PF00069.23 | 36.60 | 0.00 |
| TRINITY_A0A087ZP88_APIME/3-509     | A0A087ZP88.1 PF0560 | 36.60 | 0.00 |
| TRINITY_Q23RV5_TETTS/815-1053      | Q23RV5.2 PF10474.7; | 36.60 | 0.00 |
| TRINITY_A0A0F8BVN1_CERFI/139-380   | A0A0F8BVN1.1 PF1690 | 36.60 | 0.00 |
| TRINITY_F4P898_BATDJ/374-522       | F4P898.1 PF08030.10 | 36.60 | 0.00 |
| TRINITY_A4RRF2_OSTLU/865-1000      | A4RRF2.1 PF04096.12 | 36.60 | 0.00 |
| TRINITY_L8HCK7_ACACA/3-298         | L8HCK7.1 PF04733.12 | 36.60 | 0.00 |
| TRINITY_F4PJT8_DICFS/4-196         | F4PJT8.1 PF08626.9; | 36.60 | 0.00 |
| TRINITY_I7MB89_TETTS/43-816        | I7MB89.2 PF01804.16 | 36.60 | 0.00 |
| TRINITY_I7LV11_TETTS/352-566       | I7LV11.1 PF00149.26 | 36.60 | 0.00 |
| TRINITY_A9G0Q5_SORC5/53-346        | A9G0Q5.1 PF14388.4; | 36.60 | 0.00 |
| TRINITY_GSTT2_MOUSE/5-86           | Q61133.4 PF13417.4; | 36.60 | 0.00 |
| TRINITY_G6DGH6_DANPL/73-234        | G6DGH6.1 PF04727.11 | 36.60 | 0.00 |
| TRINITY_A0A0D3C7G0_BRAOL/99-334    | A0A0D3C7G0.1 PF0584 | 36.60 | 0.00 |
| TRINITY_W1NQP2_AMBTC/158-836       | W1NQP2.1 PF05664.9; | 36.60 | 0.00 |
| TRINITY_D8UEC7_VOLCA/2-394         | D8UEC7.1 PF03348.13 | 36.60 | 0.00 |
| TRINITY_Q22WR6_TETTS/11-159        | Q22WR6.2 PF14825.4; | 36.60 | 0.00 |
| TRINITY_A9T695_PHYPA/214-281       | A9T695.1 PF14295.4; | 36.60 | 0.00 |
| TRINITY_K3YRE9_SETIT/74-164        | K3YRE9.1 PF02225.20 | 36.60 | 0.00 |
| TRINITY_F1A057_DICPU/303-489       | F1A057.1 PF01331.17 | 36.60 | 0.00 |
| TRINITY_AFG2_SCHPO/316-446         | O60058.1 PF00004.27 | 36.60 | 0.00 |
| TRINITY_D2S257_HALTV/3-143         | D2S257.1 PF02837.16 | 36.60 | 0.00 |
| TRINITY_A0DCM6_PARTE/47-264        | A0DCM6.1 PF01633.18 | 36.60 | 0.00 |
| TRINITY_A1S2J4_SHEAM/7-204         | A1S2J4.1 PF00106.23 | 36.60 | 0.00 |
| TRINITY_W7X474_TETTS/3-234         | W7X474.1 PF01876.14 | 36.60 | 0.00 |
| TRINITY_A8JF90_CHLRE/27-338        | A8JF90.1 PF00520.29 | 36.60 | 0.00 |
| TRINITY_I0Z6M2_9CHLO/10-284        | I0Z6M2.1 PF03850.12 | 36.60 | 0.00 |
| TRINITY_L8H6Q8_ACACA/2-499         | L8H6Q8.1 PF04791.14 | 36.60 | 0.00 |
| TRINITY_G4ZAC7_PHYSP/224-477       | G4ZAC7.1 PF02353.18 | 36.60 | 0.00 |
| TRINITY_A8J4M1_CHLRE/402-558       | A8J4M1.1 PF12499.6; | 36.60 | 0.00 |
| TRINITY_A0A077ZPR9_STYLE/1002-1272 | A0A077ZPR9.1 PF0006 | 36.60 | 0.00 |
| TRINITY_D8R3N2_SELML/416-565       | D8R3N2.1 PF13638.4; | 36.60 | 0.00 |
| TRINITY_A9SHP2_PHYPA/381-733       | A9SHP2.1 PF10373.7; | 36.60 | 0.00 |
| TRINITY_A0A059LS30_9CHLO/1-369     | A0A059LS30.1 PF0769 | 36.60 | 0.00 |
| TRINITY_A0A0A1U0D6_ENTIV/153-373   | A0A0A1U0D6.1 PF0706 | 36.60 | 0.00 |
| TRINITY_E1ZF83_CHLVA/18-386        | E1ZF83.1 PF00199.17 | 36.60 | 0.00 |
| TRINITY_A9UU07_MONBE/109-353       | A9UU07.1 PF00487.22 | 36.60 | 0.00 |
| TRINITY_I7M791_TETTS/73-229        | I7M791.1 PF01343.16 | 36.60 | 0.00 |
| TRINITY_G4V6L5_SCHMA/11-298        | G4V6L5.1 PF00069.23 | 36.50 | 0.00 |
| TRINITY_A9TZG1_PHYPA/59-379        | A9TZG1.1 PF14388.4; | 36.50 | 0.00 |
| TRINITY_A0A078ALS5_STYLE/6-235     | A0A078ALS5.1 PF1489 | 36.50 | 0.00 |
| TRINITY_M5G864_DACSP/168-312       | M5G864.1 PF04377.13 | 36.50 | 0.00 |
| TRINITY_D3BGC8_POLPA/1-436         | D3BGC8.1 PF00022.17 | 36.50 | 0.00 |
| TRINITY_D2H277_AILME/182-518       | D2H277.1 PF05277.10 | 36.50 | 0.00 |
| TRINITY_L8H850_ACACA/5-173         | L8H850.1 PF00071.20 | 36.50 | 0.00 |
| TRINITY_F4Q789_DICFS/9-129         | F4Q789.1 PF00241.18 | 36.50 | 0.00 |
| TRINITY_A0A061G2L0_THECC/31-207    | A0A061G2L0.1 PF0019 | 36.50 | 0.00 |
| TRINITY_I7LTU9_TETTS/76-336        | I7LTU9.2 PF00069.23 | 36.50 | 0.00 |
| TRINITY_A0A094EAX5_9PEZI/2-375     | A0A094EAX5.1 PF0002 | 36.50 | 0.00 |
| TRINITY_A8J814_CHLRE/14-119        | A8J814.1 PF01920.18 | 36.50 | 0.00 |
| TRINITY_Q245W3_TETTS/758-987       | Q245W3.2 PF07774.11 | 36.50 | 0.00 |
| TRINITY_R6E536_9BACT/23-342        | R6E536.1 PF01676.16 | 36.50 | 0.00 |
| TRINITY_T0QCM1_9STRA/21-176        | T0QCM1.1 PF08617.8; | 36.50 | 0.00 |
| TRINITY_M5Y326_PRUPE/354-929       | M5Y326.1 PF05183.10 | 36.50 | 0.00 |
| TRINITY_G1KTB3_ANOCA/56-306        | G1KTB3.2 PF00378.18 | 36.50 | 0.00 |

|                                    |              |            |       |      |
|------------------------------------|--------------|------------|-------|------|
| TRINITY_W9RER8_9ROSA/123-429       | W9RER8.1     | PF07993.10 | 36.50 | 0.00 |
| TRINITY_F0ZPQ3_DICPU/2-1142        | F0ZPQ3.1     | PF09735.7; | 36.50 | 0.00 |
| TRINITY_B3S546_TRIAD/200-377       | B3S546.1     | PF13369.4; | 36.50 | 0.00 |
| TRINITY_L8GMP4_ACACA/297-555       | L8GMP4.1     | PF07714.15 | 36.50 | 0.00 |
| TRINITY_L8H0X8_ACACA/537-801       | L8H0X8.1     | PF07714.15 | 36.50 | 0.00 |
| TRINITY_G0QVW8_ICHMG/43-249        | G0QVW8.1     | PF03878.13 | 36.50 | 0.00 |
| TRINITY_V4MEZ3_EUTSA/141-347       | V4MEZ3.1     | PF06941.10 | 36.50 | 0.00 |
| TRINITY_L8HG29_ACACA/51-299        | L8HG29.1     | PF00102.25 | 36.50 | 0.00 |
| TRINITY_A0CVI3_PARTE/151-343       | A0CVI3.1     | PF09414.8; | 36.50 | 0.00 |
| TRINITY_W2QJW7_PHYPN/1-171         | W2QJW7.1     | PF15469.4; | 36.50 | 0.00 |
| TRINITY_A0A0A0LQP7_CUCSA/9-368     | A0A0A0LQP7.1 | PF1018     | 36.50 | 0.00 |
| TRINITY_A8HWI9_CHLRE/348-571       | A8HWI9.1     | PF07714.15 | 36.50 | 0.00 |
| TRINITY_F6S925_CIOIN/133-326       | F6S925.2     | PF03798.14 | 36.50 | 0.00 |
| TRINITY_I7M7H8_TETTS/53-447        | I7M7H8.2     | PF01490.16 | 36.50 | 0.00 |
| TRINITY_D8U2F9_VOLCA/29-477        | D8U2F9.1     | PF01490.16 | 36.50 | 0.00 |
| TRINITY_D3BBV0_POLPA/592-771       | D3BBV0.1     | PF04678.11 | 36.50 | 0.00 |
| TRINITY_F0ZEQ0_DICPU/6-295         | F0ZEQ0.1     | PF07103.9; | 36.50 | 0.00 |
| TRINITY_Q237B2_TETTS/149-364       | Q237B2.1     | PF04678.11 | 36.50 | 0.00 |
| TRINITY_I0Z8X9_9CHLO/75-263        | I0Z8X9.1     | PF17047.3; | 36.50 | 0.00 |
| TRINITY_R4XE61_TAPDE/7-107         | R4XE61.1     | PF00153.25 | 36.50 | 0.00 |
| TRINITY_I1FMP4_AMPQE/22-289        | I1FMP4.1     | PF00701.20 | 36.50 | 0.00 |
| TRINITY_Q386Y5_TRYB2/2-167         | Q386Y5.1     | PF05241.10 | 36.50 | 0.00 |
| TRINITY_A0A0D2UAR8_CAPO3/95-270    | A0A0D2UAR8.1 | PF0062     | 36.50 | 0.00 |
| TRINITY_L8HG64_ACACA/2211-2633     | L8HG64.1     | PF12166.6; | 36.50 | 0.00 |
| TRINITY_A8IBW2_CHLRE/139-344       | A8IBW2.1     | PF00211.18 | 36.50 | 0.00 |
| TRINITY_A0YQS8_LYNBP/82-436        | A0YQS8.1     | PF13416.4; | 36.50 | 0.00 |
| TRINITY_F6U8N7_XENTR/103-278       | F6U8N7.1     | PF14580.4; | 36.40 | 0.00 |
| TRINITY_G0R0N7_ICHMG/649-793       | G0R0N7.1     | PF08752.8; | 36.40 | 0.00 |
| TRINITY_Q22P24_TETTS/166-362       | Q22P24.2     | PF00149.26 | 36.40 | 0.00 |
| TRINITY_F4PKG4_DICFS/116-392       | F4PKG4.1     | PF00664.21 | 36.40 | 0.00 |
| TRINITY_V4AJM9_LOTGI/9-211         | V4AJM9.1     | PF13419.4; | 36.40 | 0.00 |
| TRINITY_A0DCM6_PARTE/47-264        | A0DCM6.1     | PF01633.18 | 36.40 | 0.00 |
| TRINITY_I7LV51_TETTS/18-193        | I7LV51.1     | PF13532.4; | 36.40 | 0.00 |
| TRINITY_J9EKQ4_9SPIT/53-232        | J9EKQ4.1     | PF10294.7; | 36.40 | 0.00 |
| TRINITY_A0A0M0J5U1_9EUKA/369-459   | A0A0M0J5U1.1 | PF0002     | 36.40 | 0.00 |
| TRINITY_G5BU61_HETGA/5-166         | G5BU61.1     | PF00071.20 | 36.40 | 0.00 |
| TRINITY_A0A0A1TVT3_ENTIV/54-407    | A0A0A1TVT3.1 | PF0115     | 36.40 | 0.00 |
| TRINITY_SNX12_SCHPO/701-811        | Q9USN1.1     | PF00787.22 | 36.40 | 0.00 |
| TRINITY_F0ZVQ5_DICPU/78-431        | F0ZVQ5.1     | PF01925.17 | 36.40 | 0.00 |
| TRINITY_A0A078ACH3_STYLE/1513-1666 | A0A078ACH3.1 | PF1284     | 36.40 | 0.00 |
| TRINITY_L8GJ23_ACACA/18-272        | L8GJ23.1     | PF02900.16 | 36.40 | 0.00 |
| TRINITY_J9HLY7_9SPIT/86-256        | J9HLY7.1     | PF15160.4; | 36.40 | 0.00 |
| TRINITY_G0QJM1_ICHMG/22-245        | G0QJM1.1     | PF07722.11 | 36.40 | 0.00 |
| TRINITY_B1XNR2_SYNP2/58-163        | B1XNR2.1     | PF13673.5; | 36.40 | 0.00 |
| TRINITY_A0E8S5_PARTE/21-142        | A0E8S5.1     | PF02466.17 | 36.40 | 0.00 |
| TRINITY_A3ZS56_9PLAN/704-819       | A3ZS56.1     | PF00072.22 | 36.40 | 0.00 |
| TRINITY_T1IQI5_STRMM/46-177        | T1IQI5.1     | PF00782.18 | 36.40 | 0.00 |
| TRINITY_G0QXK0_ICHMG/11-169        | G0QXK0.1     | PF00339.27 | 36.40 | 0.00 |
| TRINITY_A0A0H5CAV3_CYBJA/28-146    | A0A0H5CAV3.1 | PF1015     | 36.40 | 0.00 |
| TRINITY_K1QSB7_CRAGI/753-899       | K1QSB7.1     | PF00339.27 | 36.40 | 0.00 |
| TRINITY_I1FWT4_AMPQE/4-97          | I1FWT4.1     | PF16589.3; | 36.40 | 0.00 |
| TRINITY_T1K7W1_TETUR/55-558        | T1K7W1.1     | PF12070.6; | 36.40 | 0.00 |
| TRINITY_R0G930_9BRAS/52-456        | R0G930.1     | PF01494.17 | 36.40 | 0.00 |
| TRINITY_Q23YQ8_TETTS/139-489       | Q23YQ8.3     | PF13868.4; | 36.40 | 0.00 |
| TRINITY_D8UER9_VOLCA/17-281        | D8UER9.1     | PF00069.23 | 36.40 | 0.00 |
| TRINITY_E9G5F2_DAPPU/68-300        | E9G5F2.1     | PF07808.11 | 36.40 | 0.00 |
| TRINITY_A0A068XN59_HYMMI/328-774   | A0A068XN59.1 | PF0105     | 36.40 | 0.00 |
| TRINITY_F2UB11_SALR5/54-261        | F2UB11.1     | PF01025.17 | 36.40 | 0.00 |
| TRINITY_D8U2H6_VOLCA/1-176         | D8U2H6.1     | PF05603.10 | 36.40 | 0.00 |
| TRINITY_J9EPZ7_9SPIT/375-485       | J9EPZ7.1     | PF00651.29 | 36.40 | 0.00 |
| TRINITY_Q23TE6_TETTS/25-352        | Q23TE6.2     | PF04177.10 | 36.40 | 0.00 |

|                                   |              |            |       |      |
|-----------------------------------|--------------|------------|-------|------|
| TRINITY_D8TTP0_VOLCA/1124-1422    | D8TTP0.1     | PF00069.23 | 36.40 | 0.00 |
| TRINITY_Q8CX67_OCEIH/6-370        | Q8CX67.1     | PF00079.18 | 36.40 | 0.00 |
| TRINITY_A8JIE4_CHLRE/4-187        | A8JIE4.1     | PF10173.7; | 36.40 | 0.00 |
| TRINITY_D8UJ15_VOLCA/1079-1295    | D8UJ15.1     | PF14633.4; | 36.40 | 0.00 |
| TRINITY_F2ULJ4_SALR5/197-326      | F2ULJ4.1     | PF00782.18 | 36.40 | 0.00 |
| TRINITY_A0A0M2CS90_9MICC/118-335  | A0A0M2CS90.1 | PF0155     | 36.40 | 0.00 |
| TRINITY_I7MLB9_TETTS/842-958      | I7MLB9.1     | PF00271.29 | 36.40 | 0.00 |
| TRINITY_W1QLP0_OGAPD/4-610        | W1QLP0.1     | PF00012.18 | 36.40 | 0.00 |
| TRINITY_D8TTW0_VOLCA/122-380      | D8TTW0.1     | PF00487.22 | 36.40 | 0.00 |
| TRINITY_E2Q1E2_STRC2/205-431      | E2Q1E2.1     | PF13360.4; | 36.40 | 0.00 |
| TRINITY_A8UVG6_9AQUI/23-374       | A8UVG6.1     | PF13458.4; | 36.40 | 0.00 |
| TRINITY_G0QUX8_ICHMG/2-192        | G0QUX8.1     | PF06017.11 | 36.40 | 0.00 |
| TRINITY_E1ZN98_CHLVA/91-319       | E1ZN98.1     | PF00149.26 | 36.40 | 0.00 |
| TRINITY_Q23QF2_TETTS/248-571      | Q23QF2.2     | PF03133.13 | 36.40 | 0.00 |
| TRINITY_A0A075ANP7_9FUNG/8-224    | A0A075ANP7.1 | PF0729     | 36.40 | 0.00 |
| TRINITY_D8TM88_VOLCA/93-341       | D8TM88.1     | PF00348.15 | 36.40 | 0.00 |
| TRINITY_I1GE80_AMPQE/220-564      | I1GE80.1     | PF13598.4; | 36.40 | 0.00 |
| TRINITY_Q22W07_TETTS/20-325       | Q22W07.2     | PF03224.12 | 36.40 | 0.00 |
| TRINITY_F0ZSP4_DICPU/121-459      | F0ZSP4.1     | PF01619.16 | 36.40 | 0.00 |
| TRINITY_K3WBK2_PYTUL/30-635       | K3WBK2.1     | PF09739.7; | 36.40 | 0.00 |
| TRINITY_F1A4L7_DICPU/143-232      | F1A4L7.1     | PF02984.17 | 36.40 | 0.00 |
| TRINITY_Q86IC6_DICDI/983-1088     | Q86IC6.1     | PF01843.17 | 36.40 | 0.00 |
| TRINITY_A8J752_CHLRE/2729-2884    | A8J752.1     | PF08016.10 | 36.40 | 0.00 |
| TRINITY_I7LXY2_TETTS/864-1187     | I7LXY2.2     | PF11904.6; | 36.30 | 0.00 |
| TRINITY_A0A0D2WXD3_CAPO3/14-111   | A0A0D2WXD3.1 | PF0016     | 36.30 | 0.00 |
| TRINITY_L8H3W5_ACACA/497-720      | L8H3W5.1     | PF00176.21 | 36.30 | 0.00 |
| TRINITY_F4PH72_DICFS/866-1045     | F4PH72.1     | PF10443.7; | 36.30 | 0.00 |
| TRINITY_A0DLE6_PARTE/17-195       | A0DLE6.1     | PF03357.19 | 36.30 | 0.00 |
| TRINITY_G3XX32_ASPNA/97-234       | G3XX32.1     | PF13091.4; | 36.30 | 0.00 |
| TRINITY_L8GMR9_ACACA/6-112        | L8GMR9.1     | PF00169.27 | 36.30 | 0.00 |
| TRINITY_E1Z5D7_CHLVA/48-399       | E1Z5D7.1     | PF00069.23 | 36.30 | 0.00 |
| TRINITY_A0A094GX46_9PEZI/7-210    | A0A094GX46.1 | PF0546     | 36.30 | 0.00 |
| TRINITY_Q23QF2_TETTS/248-571      | Q23QF2.2     | PF03133.13 | 36.30 | 0.00 |
| TRINITY_K2MIF5_TRYCR/448-615      | K2MIF5.1     | PF00856.26 | 36.30 | 0.00 |
| TRINITY_A0A087SSL8_AUXPR/215-510  | A0A087SSL8.1 | PF0006     | 36.30 | 0.00 |
| TRINITY_D8U5L5_VOLCA/20-315       | D8U5L5.1     | PF13896.4; | 36.30 | 0.00 |
| TRINITY_I7MEK3_TETTS/463-598      | I7MEK3.2     | PF03914.15 | 36.30 | 0.00 |
| TRINITY_I0I669_CALAS/1-240        | I0I669.1     | PF03577.13 | 36.30 | 0.00 |
| TRINITY_A0BFQ3_PARTE/18-326       | A0BFQ3.1     | PF00069.23 | 36.30 | 0.00 |
| TRINITY_A0A059LRX5_9CHLO/1-207    | A0A059LRX5.1 | PF0097     | 36.30 | 0.00 |
| TRINITY_Q22P29_TETTS/54-305       | Q22P29.1     | PF12697.5; | 36.30 | 0.00 |
| TRINITY_J3LUF2_ORYBR/19-117       | J3LUF2.1     | PF04749.15 | 36.30 | 0.00 |
| TRINITY_D8TJ93_VOLCA/2-159        | D8TJ93.1     | PF13883.4; | 36.30 | 0.00 |
| TRINITY_K3WHW0_PYTUL/22-237       | K3WHW0.1     | PF05057.12 | 36.30 | 0.00 |
| TRINITY_D8TSN5_VOLCA/497-764      | D8TSN5.1     | PF07714.15 | 36.30 | 0.00 |
| TRINITY_G0QNS7_ICHMG/5-165        | G0QNS7.1     | PF08613.9; | 36.30 | 0.00 |
| TRINITY_A4S8L4_OSTLU/133-461      | A4S8L4.1     | PF02535.20 | 36.30 | 0.00 |
| TRINITY_F4Q6G4_DICFS/350-494      | F4Q6G4.1     | PF13015.4; | 36.30 | 0.00 |
| TRINITY_U3JLE8_FICAL/62-177       | U3JLE8.1     | PF00615.17 | 36.30 | 0.00 |
| TRINITY_D8TQB6_VOLCA/2446-2678    | D8TQB6.1     | PF00069.23 | 36.30 | 0.00 |
| TRINITY_A0A078AWE8_STYLE/363-509  | A0A078AWE8.1 | PF0753     | 36.20 | 0.00 |
| TRINITY_W7XA27_TETTS/236-568      | W7XA27.1     | PF12309.6; | 36.20 | 0.00 |
| TRINITY_W6NXM7_HAECO/3-176        | W6NXM7.1     | PF00149.26 | 36.20 | 0.00 |
| TRINITY_G0R0R4_ICHMG/6-220        | G0R0R4.1     | PF02114.14 | 36.20 | 0.00 |
| TRINITY_U4LTM0_PYROM/303-794      | U4LTM0.1     | PF00443.27 | 36.20 | 0.00 |
| TRINITY_L8GMR3_ACACA/270-526      | L8GMR3.1     | PF07714.15 | 36.20 | 0.00 |
| TRINITY_D3BLY0_POLPA/116-243      | D3BLY0.1     | PF00004.27 | 36.20 | 0.00 |
| TRINITY_A0A0F4NSC0_PSEO7/394-550  | A0A0F4NSC0.1 | PF0519     | 36.20 | 0.00 |
| TRINITY_A0A0H4KTY1_9RHOB/13-238   | A0A0H4KTY1.1 | PF0056     | 36.20 | 0.00 |
| TRINITY_C3YUZ4_BRAFL/44-374       | C3YUZ4.1     | PF02450.13 | 36.20 | 0.00 |
| TRINITY_A0A0D2VQX5_CAPO3/824-1006 | A0A0D2VQX5.1 | PF0062     | 36.20 | 0.00 |

|                                  |                     |       |      |
|----------------------------------|---------------------|-------|------|
| TRINITY_B4CXZ2_9BACT/104-404     | B4CXZ2.1 PF14388.4; | 36.20 | 0.00 |
| TRINITY_D8TTP0_VOLCA/1124-1422   | D8TTP0.1 PF00069.23 | 36.20 | 0.00 |
| TRINITY_K7M3L4_SOYBN/201-462     | K7M3L4.1 PF00069.23 | 36.20 | 0.00 |
| TRINITY_L8H3W5_ACACA/497-720     | L8H3W5.1 PF00176.21 | 36.20 | 0.00 |
| TRINITY_D3B0Y6_POLPA/12-458      | D3B0Y6.1 PF05783.9; | 36.20 | 0.00 |
| TRINITY_A0A0C2IY93_THEKT/10-178  | A0A0C2IY93.1 PF0483 | 36.20 | 0.00 |
| TRINITY_I1FNA5_AMPQE/68-202      | I1FNA5.1 PF00043.23 | 36.20 | 0.00 |
| TRINITY_I0Z4U3_9CHLO/1399-1742   | I0Z4U3.1 PF07714.15 | 36.20 | 0.00 |
| TRINITY_U1N7Y3_ASCSU/265-452     | U1N7Y3.1 PF00211.18 | 36.20 | 0.00 |
| TRINITY_L8GF75_ACACA/5-335       | L8GF75.1 PF09786.7; | 36.20 | 0.00 |
| TRINITY_D8U5L5_VOLCA/20-315      | D8U5L5.1 PF13896.4; | 36.20 | 0.00 |
| TRINITY_Y1141_DICDI/405-641      | Q54F34.1 PF01545.19 | 36.20 | 0.00 |
| TRINITY_W1NX46_AMBTC/209-702     | W1NX46.1 PF01055.24 | 36.20 | 0.00 |
| TRINITY_Q230X1_TETTS/62-338      | Q230X1.1 PF00561.18 | 36.20 | 0.00 |
| TRINITY_A0A0D2WLC0_CAPO3/58-346  | A0A0D2WLC0.1 PF0238 | 36.20 | 0.00 |
| TRINITY_A0A077ZSN8_STYLE/26-129  | A0A077ZSN8.1 PF1049 | 36.20 | 0.00 |
| TRINITY_D8T984_SELML/233-611     | D8T984.1 PF00128.22 | 36.20 | 0.00 |
| TRINITY_I2GEF6_9BACT/158-355     | I2GEF6.1 PF13547.4; | 36.20 | 0.00 |
| TRINITY_I7MI70_TETTS/14-137      | I7MI70.1 PF13893.4; | 36.20 | 0.00 |
| TRINITY_A0A0G3XN11_9SPHN/9-200   | A0A0G3XN11.1 PF0029 | 36.20 | 0.00 |
| TRINITY_M7NVK0_PNEMU/43-199      | M7NVK0.1 PF03367.11 | 36.20 | 0.00 |
| TRINITY_F0Z8D9_DICPU/33-186      | F0Z8D9.1 PF00620.25 | 36.20 | 0.00 |
| TRINITY_A0A077ZU40_STYLE/70-398  | A0A077ZU40.1 PF0123 | 36.20 | 0.00 |
| TRINITY_F4QA18_DICFS/63-236      | F4QA18.1 PF00071.20 | 36.20 | 0.00 |
| TRINITY_L8GMP4_ACACA/297-555     | L8GMP4.1 PF07714.15 | 36.20 | 0.00 |
| TRINITY_G6DCU0_DANPL/431-760     | G6DCU0.1 PF00702.24 | 36.20 | 0.00 |
| TRINITY_F4QCT6_DICFS/87-521      | F4QCT6.1 PF12698.5; | 36.20 | 0.00 |
| TRINITY_D3BC27_POLPA/319-631     | D3BC27.1 PF05770.9; | 36.20 | 0.00 |
| TRINITY_Q3M0Z1_PARTE/41-243      | Q3M0Z1.1 PF00804.23 | 36.10 | 0.00 |
| TRINITY_G0QVL4_ICHMG/212-348     | G0QVL4.1 PF00153.25 | 36.10 | 0.00 |
| TRINITY_Q3M0Y0_PARTE/5-394       | Q3M0Y0.1 PF00022.17 | 36.10 | 0.00 |
| TRINITY_H7FU47_9FLAO/29-192      | H7FU47.1 PF04832.10 | 36.10 | 0.00 |
| TRINITY_Q230X4_TETTS/30-358      | Q230X4.2 PF16113.3; | 36.10 | 0.00 |
| TRINITY_I7M1G9_TETTS/131-202     | I7M1G9.1 PF07258.12 | 36.10 | 0.00 |
| TRINITY_A6G6X7_9DELT/30-241      | A6G6X7.1 PF03437.13 | 36.10 | 0.00 |
| TRINITY_ATG9_DICDI/189-546       | Q54NA3.1 PF04109.14 | 36.10 | 0.00 |
| TRINITY_F0Z7I9_DICPU/15-122      | F0Z7I9.1 PF00168.28 | 36.10 | 0.00 |
| TRINITY_Q238Z5_TETTS/22-242      | Q238Z5.3 PF07722.11 | 36.10 | 0.00 |
| TRINITY_A9V1M8_MONBE/390-579     | A9V1M8.1 PF00069.23 | 36.10 | 0.00 |
| TRINITY_A0A0D2WV55_CAPO3/693-875 | A0A0D2WV55.1 PF0062 | 36.10 | 0.00 |
| TRINITY_Q23RD3_TETTS/954-1026    | Q23RD3.2 PF13499.4; | 36.10 | 0.00 |
| TRINITY_G0QNB6_ICHMG/7-248       | G0QNB6.1 PF00069.23 | 36.10 | 0.00 |
| TRINITY_A0DTT7_PARTE/327-627     | A0DTT7.1 PF00069.23 | 36.10 | 0.00 |
| TRINITY_D8THH2_VOLCA/16-239      | D8THH2.1 PF01494.17 | 36.10 | 0.00 |
| TRINITY_A0A0G0P0M6_9BACT/2-140   | A0A0G0P0M6.1 PF1348 | 36.10 | 0.00 |
| TRINITY_LYSG3_DICDI/24-209       | Q8T2I5.1 PF01183.18 | 36.10 | 0.00 |
| TRINITY_A0A078AJQ0_STYLE/388-594 | A0A078AJQ0.1 PF0481 | 36.10 | 0.00 |
| TRINITY_I7M910_TETTS/11-285      | I7M910.1 PF00069.23 | 36.10 | 0.00 |
| TRINITY_A8J0T6_CHLRE/1-157       | A8J0T6.1 PF00071.20 | 36.10 | 0.00 |
| TRINITY_Q4Q2F7_LEIMA/2-211       | Q4Q2F7.1 PF00230.18 | 36.10 | 0.00 |
| TRINITY_F6WTJ7_HORSE/297-446     | F6WTJ7.1 PF02880.14 | 36.10 | 0.00 |
| TRINITY_L8H4A1_ACACA/20-132      | L8H4A1.1 PF01398.19 | 36.10 | 0.00 |
| TRINITY_W8F274_9BACT/83-211      | W8F274.1 PF02469.20 | 36.10 | 0.00 |
| TRINITY_S8C7T4_DACHA/264-674     | S8C7T4.1 PF00012.18 | 36.10 | 0.00 |
| TRINITY_A0A085N9K0_9BILA/353-472 | A0A085N9K0.1 PF0066 | 36.10 | 0.00 |
| TRINITY_B9HN43_POPTR/31-148      | B9HN43.2 PF00188.24 | 36.10 | 0.00 |
| TRINITY_A0A059LCS5_9CHLO/41-188  | A0A059LCS5.1 PF0006 | 36.10 | 0.00 |
| TRINITY_K9SNU5_9CYAN/240-360     | K9SNU5.1 PF00182.17 | 36.10 | 0.00 |
| TRINITY_A8HPT8_CHLRE/78-408      | A8HPT8.1 PF00206.18 | 36.10 | 0.00 |
| TRINITY_A0A067Q137_9HOMO/7-249   | A0A067Q137.1 PF0536 | 36.10 | 0.00 |
| TRINITY_A9V3Z9_MONBE/132-291     | A9V3Z9.1 PF08603.9; | 36.10 | 0.00 |

|                                   |              |            |       |      |
|-----------------------------------|--------------|------------|-------|------|
| TRINITY_K9WH26_9CYAN/899-1136     | K9WH26.1     | PF07993.10 | 36.10 | 0.00 |
| TRINITY_B6AF10_CRYMR/13-179       | B6AF10.1     | PF00071.20 | 36.10 | 0.00 |
| TRINITY_L8HAD7_ACACA/61-159       | L8HAD7.1     | PF00169.27 | 36.10 | 0.00 |
| TRINITY_W4YII5_STRPU/107-224      | W4YII5.1     | PF03283.11 | 36.10 | 0.00 |
| TRINITY_I0YUB5_9CHLO/55-241       | I0YUB5.1     | PF13385.4; | 36.10 | 0.00 |
| TRINITY_C3YB25_BRAFL/63-267       | C3YB25.1     | PF00149.26 | 36.10 | 0.00 |
| TRINITY_A0A0L0CMA9_LUCCU/49-176   | A0A0L0CMA9.1 | PF00078    | 36.10 | 0.00 |
| TRINITY_J9FYL2_9SPIT/398-662      | J9FYL2.1     | PF00069.23 | 36.10 | 0.00 |
| TRINITY_A8J192_CHLRE/156-505      | A8J192.1     | PF04515.10 | 36.10 | 0.00 |
| TRINITY_D8TTP0_VOLCA/1124-1422    | D8TTP0.1     | PF00069.23 | 36.10 | 0.00 |
| TRINITY_I7LSY6_TETTS/44-139       | I7LSY6.1     | PF13774.4; | 36.10 | 0.00 |
| TRINITY_D2UX37_NAEGR/136-313      | D2UX37.1     | PF00929.22 | 36.10 | 0.00 |
| TRINITY_F9DUI1_9BACL/71-321       | F9DUI1.1     | PF01636.21 | 36.10 | 0.00 |
| TRINITY_C1FGT1_MICSR/532-744      | C1FGT1.1     | PF12348.6; | 36.10 | 0.00 |
| TRINITY_A8IRM8_CHLRE/54-347       | A8IRM8.1     | PF00856.26 | 36.10 | 0.00 |
| TRINITY_A8IBI1_CHLRE/10-148       | A8IBI1.1     | PF00179.24 | 36.10 | 0.00 |
| TRINITY_A0A0N5DEW8_TRIMR/117-367  | A0A0N5DEW8.1 | PF0006     | 36.10 | 0.00 |
| TRINITY_I7M884_TETTS/59-160       | I7M884.2     | PF01363.19 | 36.00 | 0.00 |
| TRINITY_A0A022QZA6_ERYGU/10-187   | A0A022QZA6.1 | PF0192     | 36.00 | 0.00 |
| TRINITY_A0A0G4IGY6_PLABS/86-378   | A0A0G4IGY6.1 | PF0118     | 36.00 | 0.00 |
| TRINITY_Q22EG9_TETTS/11-197       | Q22EG9.1     | PF13460.4; | 36.00 | 0.00 |
| TRINITY_H3ALH2_LATCH/392-661      | H3ALH2.1     | PF07842.10 | 36.00 | 0.00 |
| TRINITY_U3IPM0_ANAPL/94-411       | U3IPM0.1     | PF00026.21 | 36.00 | 0.00 |
| TRINITY_D6X1Y5_TRICA/9-227        | D6X1Y5.1     | PF00335.18 | 36.00 | 0.00 |
| TRINITY_D8TLE6_VOLCA/14-651       | D8TLE6.1     | PF00888.20 | 36.00 | 0.00 |
| TRINITY_W4FVI6_9STRA/31-262       | W4FVI6.1     | PF01063.17 | 36.00 | 0.00 |
| TRINITY_A0CLK7_PARTE/302-529      | A0CLK7.1     | PF00149.26 | 36.00 | 0.00 |
| TRINITY_A0A0G4ILS6_PLABS/173-377  | A0A0G4ILS6.1 | PF0154     | 36.00 | 0.00 |
| TRINITY_Q54WT3_DICDI/164-524      | Q54WT3.1     | PF00026.21 | 36.00 | 0.00 |
| TRINITY_W7XHQ2_TETTS/623-861      | W7XHQ2.1     | PF02714.13 | 36.00 | 0.00 |
| TRINITY_W5KWU8_ASTMX/41-151       | W5KWU8.1     | PF00615.17 | 36.00 | 0.00 |
| TRINITY_A0A066V2Y0_9BASI/498-1230 | A0A066V2Y0.1 | PF0044     | 36.00 | 0.00 |
| TRINITY_A0CLK7_PARTE/302-529      | A0CLK7.1     | PF00149.26 | 36.00 | 0.00 |
| TRINITY_L8GIA8_ACACA/26-458       | L8GIA8.1     | PF00450.20 | 36.00 | 0.00 |
| TRINITY_A0A0D2VVY5_CAPO3/15-153   | A0A0D2VVY5.1 | PF1352     | 36.00 | 0.00 |
| TRINITY_Q234K7_TETTS/37-180       | Q234K7.2     | PF00179.24 | 36.00 | 0.00 |
| TRINITY_U4KU25_PYROM/171-293      | U4KU25.1     | PF00622.26 | 36.00 | 0.00 |
| TRINITY_A0A0B0MM04_GOSAR/744-831  | A0A0B0MM04.1 | PF1279     | 36.00 | 0.00 |
| TRINITY_C3Y7X6_BRAFL/35-230       | C3Y7X6.1     | PF01762.19 | 36.00 | 0.00 |
| TRINITY_V7D0Q5_PHAVU/32-200       | V7D0Q5.1     | PF11715.6; | 36.00 | 0.00 |
| TRINITY_T1IQ34_STRMM/22-421       | T1IQ34.1     | PF06602.12 | 36.00 | 0.00 |
| TRINITY_A0A087SP74_AUXPR/320-455  | A0A087SP74.1 | PF0176     | 36.00 | 0.00 |
| TRINITY_Q10WE1_TRIEI/63-224       | Q10WE1.1     | PF01434.16 | 36.00 | 0.00 |
| TRINITY_F1NN82_CHICK/492-836      | F1NN82.2     | PF01237.16 | 36.00 | 0.00 |
| TRINITY_C1E3A7_MICSR/962-1127     | C1E3A7.1     | PF13890.4; | 36.00 | 0.00 |
| TRINITY_D8TP23_VOLCA/10-139       | D8TP23.1     | PF12047.6; | 36.00 | 0.00 |
| TRINITY_V4AHX0_LOTGI/87-328       | V4AHX0.1     | PF08627.8; | 36.00 | 0.00 |
| TRINITY_A0A0J8C0D6_BETVU/141-301  | A0A0J8C0D6.1 | PF0155     | 36.00 | 0.00 |
| TRINITY_D8SJF1_SELML/791-1057     | D8SJF1.1     | PF12697.5; | 36.00 | 0.00 |
| TRINITY_I0Z2Y4_9CHLO/747-1368     | I0Z2Y4.1     | PF12157.6; | 36.00 | 0.00 |
| TRINITY_A8IFL6_CHLRE/1462-1762    | A8IFL6.1     | PF00069.23 | 36.00 | 0.00 |
| TRINITY_K6YJ79_9ALTE/12-122       | K6YJ79.1     | PF00583.23 | 36.00 | 0.00 |
| TRINITY_I0YZB1_9CHLO/66-171       | I0YZB1.1     | PF00085.18 | 36.00 | 0.00 |
| TRINITY_D8TKK7_VOLCA/1-188        | D8TKK7.1     | PF07714.15 | 36.00 | 0.00 |
| TRINITY_U5H7L5_USTV1/264-393      | U5H7L5.1     | PF03953.15 | 36.00 | 0.00 |
| TRINITY_I1F2E6_AMPQE/14-159       | I1F2E6.1     | PF00112.21 | 36.00 | 0.00 |
| TRINITY_A0A059LNH5_9CHLO/51-376   | A0A059LNH5.1 | PF0149     | 36.00 | 0.00 |
| TRINITY_A0A0J8D429_BETVU/420-1005 | A0A0J8D429.1 | PF0518     | 36.00 | 0.00 |
| TRINITY_Q1LQ74_CUPMC/3-125        | Q1LQ74.1     | PF01124.16 | 35.90 | 0.00 |
| TRINITY_A0A0D2W1A4_CAPO3/47-268   | A0A0D2W1A4.1 | PF0014     | 35.90 | 0.00 |
| TRINITY_A0A059LEK0_9CHLO/8-297    | A0A059LEK0.1 | PF0000     | 35.90 | 0.00 |

|                                    |              |            |       |      |
|------------------------------------|--------------|------------|-------|------|
| TRINITY_A0BZR0_PARTE/192-423       | A0BZR0.1     | PF00149.26 | 35.90 | 0.00 |
| TRINITY_Q76P10_DICDI/22-141        | Q76P10.1     | PF05005.13 | 35.90 | 0.00 |
| TRINITY_I7M9L3_TETTS/26-279        | I7M9L3.2     | PF02263.17 | 35.90 | 0.00 |
| TRINITY_G0QXV2_ICHMG/241-324       | G0QXV2.1     | PF14759.4; | 35.90 | 0.00 |
| TRINITY_I7M9S7_TETTS/86-331        | I7M9S7.2     | PF00481.19 | 35.90 | 0.00 |
| TRINITY_D3BTZ7_POLPA/115-265       | D3BTZ7.1     | PF00620.25 | 35.90 | 0.00 |
| TRINITY_W0RBU1_9BACT/3-152         | W0RBU1.1     | PF04525.10 | 35.90 | 0.00 |
| TRINITY_T1FNE1_HELRO/126-439       | T1FNE1.1     | PF01103.21 | 35.90 | 0.00 |
| TRINITY_Q0ARS9_MARMM/272-388       | Q0ARS9.1     | PF02518.24 | 35.90 | 0.00 |
| TRINITY_L8GQR1_ACACA/657-1024      | L8GQR1.1     | PF00176.21 | 35.90 | 0.00 |
| TRINITY_A9G0Q5_SORC5/53-346        | A9G0Q5.1     | PF14388.4; | 35.90 | 0.00 |
| TRINITY_W9XV54_9EURO/15-176        | W9XV54.1     | PF00071.20 | 35.90 | 0.00 |
| TRINITY_D8UJA8_VOLCA/964-1092      | D8UJA8.1     | PF14443.4; | 35.90 | 0.00 |
| TRINITY_A0CQI4_PARTE/709-830       | A0CQI4.1     | PF00072.22 | 35.90 | 0.00 |
| TRINITY_A0A0L9SQM7_9HYPO/4-181     | A0A0L9SQM7.1 | PF0015     | 35.90 | 0.00 |
| TRINITY_D8UKH2_VOLCA/264-655       | D8UKH2.1     | PF04857.18 | 35.90 | 0.00 |
| TRINITY_A0A067BWY7_SAPPC/22-533    | A0A067BWY7.1 | PF0145     | 35.90 | 0.00 |
| TRINITY_W5KMY9_ASTMX/70-182        | W5KMY9.1     | PF09430.8; | 35.90 | 0.00 |
| TRINITY_X6NSF5_RETFI/88-345        | X6NSF5.1     | PF07714.15 | 35.90 | 0.00 |
| TRINITY_A0A072TX86_MEDTR/276-421   | A0A072TX86.1 | PF0517     | 35.90 | 0.00 |
| TRINITY_I0Z3H3_9CHLO/15-170        | I0Z3H3.1     | PF00929.22 | 35.90 | 0.00 |
| TRINITY_D5GMB3_TUBMM/25-132        | D5GMB3.1     | PF06148.9; | 35.90 | 0.00 |
| TRINITY_L5JN97_PTEAL/29-462        | L5JN97.1     | PF00067.20 | 35.90 | 0.00 |
| TRINITY_I7M7B7_TETTS/109-362       | I7M7B7.2     | PF00069.23 | 35.90 | 0.00 |
| TRINITY_A7S4P7_NEMVE/630-748       | A7S4P7.1     | PF00168.28 | 35.90 | 0.00 |
| TRINITY_D8TIB1_VOLCA/100-431       | D8TIB1.1     | PF07887.9; | 35.90 | 0.00 |
| TRINITY_A0BLH9_PARTE/7-108         | A0BLH9.1     | PF00168.28 | 35.90 | 0.00 |
| TRINITY_A0A078AR51_STYLE/8-287     | A0A078AR51.1 | PF0006     | 35.90 | 0.00 |
| TRINITY_A0A067N7A8_9HOMO/28-183    | A0A067N7A8.1 | PF0156     | 35.90 | 0.00 |
| TRINITY_A2ENP4_TRIVA/27-279        | A2ENP4.1     | PF00069.23 | 35.90 | 0.00 |
| TRINITY_A0A0D2WR04_CAPO3/45-470    | A0A0D2WR04.1 | PF0075     | 35.90 | 0.00 |
| TRINITY_D8TST9_VOLCA/621-848       | D8TST9.1     | PF00211.18 | 35.90 | 0.00 |
| TRINITY_A0A0C2JY18_THEKT/17-771    | A0A0C2JY18.1 | PF1639     | 35.80 | 0.00 |
| TRINITY_W7XIE4_TETTS/21-297        | W7XIE4.1     | PF01430.17 | 35.80 | 0.00 |
| TRINITY_A0A067QH62_ZOONE/133-216   | A0A067QH62.1 | PF1389     | 35.80 | 0.00 |
| TRINITY_S8EMD3_FOMPI/471-598       | S8EMD3.1     | PF16901.3; | 35.80 | 0.00 |
| TRINITY_H7F3W4_9LIST/162-306       | H7F3W4.1     | PF01926.21 | 35.80 | 0.00 |
| TRINITY_A0EAP9_PARTE/41-162        | A0EAP9.1     | PF03351.15 | 35.80 | 0.00 |
| TRINITY_A0CC42_PARTE/16-287        | A0CC42.1     | PF00069.23 | 35.80 | 0.00 |
| TRINITY_C3XYB9_BRAFL/69-302        | C3XYB9.1     | PF08627.8; | 35.80 | 0.00 |
| TRINITY_E2BY81_HARSA/5-166         | E2BY81.1     | PF00071.20 | 35.80 | 0.00 |
| TRINITY_G0R352_ICHMG/26-211        | G0R352.1     | PF13462.4; | 35.80 | 0.00 |
| TRINITY_Q6BFR1_PARTE/25-209        | Q6BFR1.1     | PF13462.4; | 35.80 | 0.00 |
| TRINITY_A0A0F0HL75_9PSEU/28-183    | A0A0F0HL75.1 | PF0196     | 35.80 | 0.00 |
| TRINITY_H2CIM4_9LEPT/257-517       | H2CIM4.1     | PF01636.21 | 35.80 | 0.00 |
| TRINITY_I7M6Y1_TETTS/72-199        | I7M6Y1.1     | PF00134.21 | 35.80 | 0.00 |
| TRINITY_W4XSR8_STRPU/64-282        | W4XSR8.1     | PF14675.4; | 35.80 | 0.00 |
| TRINITY_L8HK25_ACACA/40-285        | L8HK25.1     | PF01637.16 | 35.80 | 0.00 |
| TRINITY_A8JGR4_CHLRE/173-480       | A8JGR4.1     | PF10250.7; | 35.80 | 0.00 |
| TRINITY_I7M910_TETTS/11-285        | I7M910.1     | PF00069.23 | 35.80 | 0.00 |
| TRINITY_A0CXP9_PARTE/92-386        | A0CXP9.1     | PF01457.14 | 35.80 | 0.00 |
| TRINITY_F1QUE8_DANRE/77-293        | F1QUE8.1     | PF02104.13 | 35.80 | 0.00 |
| TRINITY_G0QLS4_ICHMG/523-772       | G0QLS4.1     | PF07714.15 | 35.80 | 0.00 |
| TRINITY_Q23QF2_TETTS/248-571       | Q23QF2.2     | PF03133.13 | 35.80 | 0.00 |
| TRINITY_E1Z6P1_CHLVA/201-305       | E1Z6P1.1     | PF00168.28 | 35.80 | 0.00 |
| TRINITY_I0Z9R3_9CHLO/1171-1635     | I0Z9R3.1     | PF12698.5; | 35.80 | 0.00 |
| TRINITY_D3BRF9_POLPA/687-869       | D3BRF9.1     | PF14429.4; | 35.80 | 0.00 |
| TRINITY_L1JXL1_GUITH/9-407         | L1JXL1.1     | PF04841.11 | 35.80 | 0.00 |
| TRINITY_A0A078AX44_STYLE/604-698   | A0A078AX44.1 | PF1349     | 35.80 | 0.00 |
| TRINITY_A0A0D2VP60_CAPO3/1054-1165 | A0A0D2VP60.1 | PF0220     | 35.80 | 0.00 |
| TRINITY_A0A067BWY7_SAPPC/22-533    | A0A067BWY7.1 | PF0145     | 35.80 | 0.00 |



|                                   |                      |       |      |
|-----------------------------------|----------------------|-------|------|
| TRINITY_A8J0X4_CHLRE/280-402      | A8J0X4.1 PF02803.16  | 35.80 | 0.00 |
| TRINITY_I0ZAU1_9CHLO/192-343      | I0ZAU1.1 PF00069.23  | 35.80 | 0.00 |
| TRINITY_A0A061DY99_THECC/68-203   | A0A061DY99.1 PF0004  | 35.80 | 0.00 |
| TRINITY_L8GIZ0_ACACA/22-206       | L8GIZ0.1 PF00621.18  | 35.80 | 0.00 |
| TRINITY_D3B3M0_POLPA/345-611      | D3B3M0.1 PF11817.6;  | 35.80 | 0.00 |
| TRINITY_E1Z450_CHLVA/129-264      | E1Z450.1 PF07890.10  | 35.80 | 0.00 |
| TRINITY_M5ED10_MALS4/335-489      | M5ED10.1 PF00620.25  | 35.80 | 0.00 |
| TRINITY_A9S9U0_PHYPA/6-313        | A9S9U0.1 PF03372.21  | 35.80 | 0.00 |
| TRINITY_G0R402_ICHMG/82-193       | G0R402.1 PF00043.23  | 35.80 | 0.00 |
| TRINITY_F0ZM59_DICPU/346-477      | F0ZM59.1 PF04499.13  | 35.80 | 0.00 |
| TRINITY_D8TNM8_VOLCA/146-321      | D8TNM8.1 PF09750.7;  | 35.80 | 0.00 |
| TRINITY_A0A067JAX2_JATCU/600-1007 | A0A067JAX2.1 PF0017  | 35.80 | 0.00 |
| TRINITY_K1QRM1_CRAGI/216-808      | K1QRM1.1 PF04097.12  | 35.80 | 0.00 |
| TRINITY_A0BWC2_PARTE/204-435      | A0BWC2.1 PF10243.7;  | 35.80 | 0.00 |
| TRINITY_A8HP62_CHLRE/179-430      | A8HP62.1 PF05548.9;  | 35.80 | 0.00 |
| TRINITY_E1Z963_CHLVA/1-418        | E1Z963.1 PF02897.13  | 35.80 | 0.00 |
| TRINITY_Q23PV4_TETTS/274-435      | Q23PV4.2 PF00441.22  | 35.80 | 0.00 |
| TRINITY_C5KGV9_PERM5/124-230      | C5KGV9.1 PF13646.4;  | 35.80 | 0.00 |
| TRINITY_I1FAE8_AMPQE/829-998      | I1FAE8.1 PF01734.20  | 35.80 | 0.00 |
| TRINITY_C3Z276_BRAFL/163-315      | C3Z276.1 PF01936.16  | 35.80 | 0.00 |
| TRINITY_A0A0M2HAK2_9MICO/33-201   | A0A0M2HAK2.1 PF1348  | 35.80 | 0.00 |
| TRINITY_G0R3S9_ICHMG/1-224        | G0R3S9.1 PF00155.19  | 35.80 | 0.00 |
| TRINITY_A0C099_PARTE/280-614      | A0C099.1 PF03133.13  | 35.70 | 0.00 |
| TRINITY_A0A078A5X2_STYLE/11-211   | A0A078A5X2.1 PF0090  | 35.70 | 0.00 |
| TRINITY_F6S9N9_HORSE/80-380       | F6S9N9.1 PF00561.18  | 35.70 | 0.00 |
| TRINITY_R0HUIJ6_9BRAS/114-232     | R0HUIJ6.1 PF13911.4; | 35.70 | 0.00 |
| TRINITY_A0A0D2WQY8_CAPO3/79-304   | A0A0D2WQY8.1 PF0410  | 35.70 | 0.00 |
| TRINITY_Q3SDS6_PARTE/10-241       | Q3SDS6.1 PF04670.10  | 35.70 | 0.00 |
| TRINITY_A0A078B9W1_STYLE/27-329   | A0A078B9W1.1 PF0056  | 35.70 | 0.00 |
| TRINITY_E8MY14_ANATU/101-205      | E8MY14.1 PF16158.3;  | 35.70 | 0.00 |
| TRINITY_Q22YH7_TETTS/342-611      | Q22YH7.2 PF07714.15  | 35.70 | 0.00 |
| TRINITY_A0A0L9SWE8_9HYPO/257-633  | A0A0L9SWE8.1 PF0017  | 35.70 | 0.00 |
| TRINITY_A4VEV9_TETTS/181-339      | A4VEV9.2 PF02518.24  | 35.70 | 0.00 |
| TRINITY_G0R3Y2_ICHMG/15-274       | G0R3Y2.1 PF00069.23  | 35.70 | 0.00 |
| TRINITY_F0ZJS9_DICPU/436-674      | F0ZJS9.1 PF00003.20  | 35.70 | 0.00 |
| TRINITY_Q231C9_TETTS/30-286       | Q231C9.2 PF00069.23  | 35.70 | 0.00 |
| TRINITY_F1MJ49_BOVIN/70-386       | F1MJ49.2 PF00026.21  | 35.70 | 0.00 |
| TRINITY_A0A067GVP2_CITSI/67-435   | A0A067GVP2.1 PF1171  | 35.70 | 0.00 |
| TRINITY_E2AS81_CAMFO/17-236       | E2AS81.1 PF00106.23  | 35.70 | 0.00 |
| TRINITY_E1ZHQ5_CHLVA/1633-1861    | E1ZHQ5.1 PF02485.19  | 35.70 | 0.00 |
| TRINITY_D8UJG8_VOLCA/25-428       | D8UJG8.1 PF09724.7;  | 35.70 | 0.00 |
| TRINITY_M0XSI6_HORVD/108-224      | M0XSI6.1 PF02450.13  | 35.70 | 0.00 |
| TRINITY_A0A0M9G675_9TRYP/57-165   | A0A0M9G675.1 PF0709  | 35.70 | 0.00 |
| TRINITY_A8IKQ0_CHLRE/79-278       | A8IKQ0.1 PF00316.18  | 35.70 | 0.00 |
| TRINITY_A8J093_CHLRE/30-290       | A8J093.1 PF00856.26  | 35.70 | 0.00 |
| TRINITY_Q22BA6_TETTS/149-399      | Q22BA6.2 PF10192.7;  | 35.70 | 0.00 |
| TRINITY_E9GQH9_DAPPU/1-102        | E9GQH9.1 PF00651.29  | 35.70 | 0.00 |
| TRINITY_FORA_DICDI/352-549        | Q54WH2.1 PF06367.14  | 35.70 | 0.00 |
| TRINITY_F4Q5N9_DICFS/37-136       | F4Q5N9.1 PF06179.10  | 35.70 | 0.00 |
| TRINITY_A8IKT9_CHLRE/529-630      | A8IKT9.1 PF00134.21  | 35.70 | 0.00 |
| TRINITY_EF1A_CENSY/8-291          | A0RUM4.1 PF00009.25  | 35.70 | 0.00 |
| TRINITY_A0CEF3_PARTE/266-572      | A0CEF3.1 PF00443.27  | 35.70 | 0.00 |
| TRINITY_A0D5J3_PARTE/683-779      | A0D5J3.1 PF00679.22  | 35.60 | 0.00 |
| TRINITY_E4XE42_OIKDI/68-172       | E4XE42.1 PF00168.28  | 35.60 | 0.00 |
| TRINITY_M5G2M9_DACSP/146-250      | M5G2M9.1 PF01762.19  | 35.60 | 0.00 |
| TRINITY_A0A078B0U0_STYLE/21-275   | A0A078B0U0.1 PF0226  | 35.60 | 0.00 |
| TRINITY_A0A068S4Y8_9FUNG/2-103    | A0A068S4Y8.1 PF1085  | 35.60 | 0.00 |
| TRINITY_A0A078ASU1_STYLE/162-297  | A0A078ASU1.1 PF1602  | 35.60 | 0.00 |
| TRINITY_RUB1_YEAST/3-74           | Q03919.1 PF00240.21  | 35.60 | 0.00 |
| TRINITY_D8TUC0_VOLCA/1104-1208    | D8TUC0.1 PF02656.13  | 35.60 | 0.00 |
| TRINITY_L7N2K8_XENTR/57-480       | L7N2K8.1 PF05577.10  | 35.60 | 0.00 |

|                                  |                     |       |      |
|----------------------------------|---------------------|-------|------|
| TRINITY_A0A0J7L068_LASNI/157-267 | A0A0J7L068.1 PF0007 | 35.60 | 0.00 |
| TRINITY_A0A0D2VKV0_CAPO3/160-381 | A0A0D2VKV0.1 PF0797 | 35.60 | 0.00 |
| TRINITY_K7JAP6_NASVI/824-987     | K7JAP6.1 PF00145.15 | 35.60 | 0.00 |
| TRINITY_F7BXP1_XENTR/49-181      | F7BXP1.1 PF00782.18 | 35.60 | 0.00 |
| TRINITY_D3AWF6_POLPA/1305-1480   | D3AWF6.1 PF00617.17 | 35.60 | 0.00 |
| TRINITY_A8D8P8_BOMMO/315-448     | A8D8P8.1 PF02170.20 | 35.60 | 0.00 |
| TRINITY_A0C9H6_PARTE/29-196      | A0C9H6.1 PF08718.9; | 35.60 | 0.00 |
| TRINITY_F4PHW0_DICFS/359-537     | F4PHW0.1 PF01963.15 | 35.60 | 0.00 |
| TRINITY_D8TR12_VOLCA/14-230      | D8TR12.1 PF00856.26 | 35.60 | 0.00 |
| TRINITY_J9JUC1_ACYPI/764-916     | J9JUC1.2 PF00620.25 | 35.60 | 0.00 |
| TRINITY_A0A078ANW9_STYLE/8-254   | A0A078ANW9.1 PF0137 | 35.60 | 0.00 |
| TRINITY_I0YLJ5_9CHLO/1438-1705   | I0YLJ5.1 PF14228.4; | 35.60 | 0.00 |
| TRINITY_C1EDN7_MICSR/1-299       | C1EDN7.1 PF04111.10 | 35.60 | 0.00 |
| TRINITY_Q23RP1_TETTS/81-493      | Q23RP1.2 PF01457.14 | 35.60 | 0.00 |
| TRINITY_A0A067L3G3_JATCU/289-537 | A0A067L3G3.1 PF0771 | 35.60 | 0.00 |
| TRINITY_L8H6E1_ACACA/61-265      | L8H6E1.1 PF00092.26 | 35.60 | 0.00 |
| TRINITY_A0A0D9W1M2_9ORYZ/247-310 | A0A0D9W1M2.1 PF0040 | 35.60 | 0.00 |
| TRINITY_A0A061ETD8_THECC/53-369  | A0A061ETD8.1 PF0025 | 35.60 | 0.00 |
| TRINITY_T1IQP2_STRMM/60-199      | T1IQP2.1 PF10075.7; | 35.60 | 0.00 |
| TRINITY_K1QCA5_CRAGI/20-403      | K1QCA5.1 PF01041.15 | 35.60 | 0.00 |
| TRINITY_D8TQJ2_VOLCA/22-290      | D8TQJ2.1 PF05817.12 | 35.60 | 0.00 |
| TRINITY_G0QV43_ICHMG/249-568     | G0QV43.1 PF04515.10 | 35.60 | 0.00 |
| TRINITY_D8TSG5_VOLCA/121-242     | D8TSG5.1 PF08512.10 | 35.60 | 0.00 |
| TRINITY_Q22A65_TETTS/524-741     | Q22A65.2 PF01612.18 | 35.60 | 0.00 |
| TRINITY_D3B0L0_POLPA/251-374     | D3B0L0.1 PF00293.26 | 35.60 | 0.00 |
| TRINITY_Q231F3_TETTS/82-315      | Q231F3.1 PF03009.15 | 35.60 | 0.00 |
| TRINITY_D3BKE1_POLPA/249-636     | D3BKE1.1 PF01757.20 | 35.60 | 0.00 |
| TRINITY_A8J151_CHLRE/549-830     | A8J151.1 PF00069.23 | 35.60 | 0.00 |
| TRINITY_A0EAD7_PARTE/23-277      | A0EAD7.1 PF00956.16 | 35.50 | 0.00 |
| TRINITY_W3X1V6_9PEZI/165-391     | W3X1V6.1 PF04855.10 | 35.50 | 0.00 |
| TRINITY_A0A0G4EJZ4_9ALVE/53-190  | A0A0G4EJZ4.1 PF0582 | 35.50 | 0.00 |
| TRINITY_A0CJW5_PARTE/64-366      | A0CJW5.1 PF00995.21 | 35.50 | 0.00 |
| TRINITY_U6NG28_HAECO/90-229      | U6NG28.1 PF01764.23 | 35.50 | 0.00 |
| TRINITY_A0A0D2X3B4_CAPO3/50-343  | A0A0D2X3B4.1 PF0844 | 35.50 | 0.00 |
| TRINITY_H2MBE7_ORYLA/98-174      | H2MBE7.1 PF13499.4; | 35.50 | 0.00 |
| TRINITY_L8HI32_ACACA/42-157      | L8HI32.1 PF00169.27 | 35.50 | 0.00 |
| TRINITY_F7BX82_XENTR/13-137      | F7BX82.1 PF04488.13 | 35.50 | 0.00 |
| TRINITY_F9XH71_ZYMTI/10-116      | F9XH71.1 PF00307.29 | 35.50 | 0.00 |
| TRINITY_A0A0D2WPQ9_CAPO3/136-387 | A0A0D2WPQ9.1 PF1362 | 35.50 | 0.00 |
| TRINITY_U6NG28_HAECO/90-229      | U6NG28.1 PF01764.23 | 35.50 | 0.00 |
| TRINITY_A8IYX5_CHLRE/35-184      | A8IYX5.1 PF01694.20 | 35.50 | 0.00 |
| TRINITY_C5CDW1_KOSOT/131-317     | C5CDW1.1 PF16912.3; | 35.50 | 0.00 |
| TRINITY_G0R6A2_ICHMG/511-619     | G0R6A2.1 PF10367.7; | 35.50 | 0.00 |
| TRINITY_A0DDI6_PARTE/14-246      | A0DDI6.1 PF16414.3; | 35.50 | 0.00 |
| TRINITY_A2FTW9_TRIVA/10-171      | A2FTW9.1 PF00071.20 | 35.50 | 0.00 |
| TRINITY_M4BR64_HYAAE/345-692     | M4BR64.1 PF00750.17 | 35.50 | 0.00 |
| TRINITY_K7TNN3_MAIZE/440-597     | K7TNN3.1 PF00004.27 | 35.50 | 0.00 |
| TRINITY_A0A077ZSV4_STYLE/29-267  | A0A077ZSV4.1 PF0019 | 35.50 | 0.00 |
| TRINITY_A0CRH3_PARTE/53-407      | A0CRH3.1 PF00155.19 | 35.50 | 0.00 |
| TRINITY_D3B059_POLPA/358-943     | D3B059.1 PF05667.9; | 35.50 | 0.00 |
| TRINITY_D3B9F0_POLPA/11-162      | D3B9F0.1 PF00293.26 | 35.50 | 0.00 |
| TRINITY_A0A0M0JZK3_9EUKA/232-431 | A0A0M0JZK3.1 PF1385 | 35.50 | 0.00 |
| TRINITY_A0DIS6_PARTE/91-235      | A0DIS6.1 PF01529.18 | 35.50 | 0.00 |
| TRINITY_A0A059AFF4_EUCGR/353-948 | A0A059AFF4.1 PF0032 | 35.50 | 0.00 |
| TRINITY_L8GMR3_ACACA/270-526     | L8GMR3.1 PF07714.15 | 35.50 | 0.00 |
| TRINITY_A8ICH8_CHLRE/72-332      | A8ICH8.1 PF12146.6; | 35.50 | 0.00 |
| TRINITY_D3BC10_POLPA/164-322     | D3BC10.1 PF00620.25 | 35.50 | 0.00 |
| TRINITY_A0A0J7MWC3_LASNI/91-250  | A0A0J7MWC3.1 PF1335 | 35.50 | 0.00 |
| TRINITY_Q23DC1_TETTS/461-1153    | Q23DC1.2 PF00443.27 | 35.50 | 0.00 |
| TRINITY_A9T8M6_PHYPA/35-493      | A9T8M6.1 PF03215.13 | 35.50 | 0.00 |
| TRINITY_E1Z2I7_CHLVA/181-844     | E1Z2I7.1 PF04858.11 | 35.50 | 0.00 |

|                                  |                     |       |      |
|----------------------------------|---------------------|-------|------|
| TRINITY_W4K730_9HOMO/58-291      | W4K730.1 PF02940.13 | 35.50 | 0.00 |
| TRINITY_R4XIZ5_TAPDE/64-197      | R4XIZ5.1 PF00043.23 | 35.50 | 0.00 |
| TRINITY_F4PBS1_BATDJ/109-267     | F4PBS1.1 PF01764.23 | 35.50 | 0.00 |
| TRINITY_G0QU50_ICHMG/9-210       | G0QU50.1 PF00069.23 | 35.40 | 0.00 |
| TRINITY_A0A078ACB5_STYLE/210-312 | A0A078ACB5.1 PF1349 | 35.40 | 0.00 |
| TRINITY_B7G054_PHATC/72-147      | B7G054.1 PF03134.17 | 35.40 | 0.00 |
| TRINITY_T1K202_TETUR/21-103      | T1K202.1 PF12895.5; | 35.40 | 0.00 |
| TRINITY_A0A0J8BUF2_BETVU/178-389 | A0A0J8BUF2.1 PF0315 | 35.40 | 0.00 |
| TRINITY_A0E6K3_PARTE/11-167      | A0E6K3.1 PF00339.27 | 35.40 | 0.00 |
| TRINITY_L8HI30_ACACA/54-174      | L8HI30.1 PF02759.17 | 35.40 | 0.00 |
| TRINITY_C3ZCV4_BRAFL/185-607     | C3ZCV4.1 PF00246.22 | 35.40 | 0.00 |
| TRINITY_Q22CY1_TETTS/113-205     | Q22CY1.1 PF00153.25 | 35.40 | 0.00 |
| TRINITY_A0BF36_PARTE/51-151      | A0BF36.1 PF10256.7; | 35.40 | 0.00 |
| TRINITY_E0VXM7_PEDHC/29-108      | E0VXM7.1 PF13774.4; | 35.40 | 0.00 |
| TRINITY_A0A0F7KJC3_9PROT/7-186   | A0A0F7KJC3.1 PF0173 | 35.40 | 0.00 |
| TRINITY_Q54GF5_DICDI/555-753     | Q54GF5.1 PF02141.19 | 35.40 | 0.00 |
| TRINITY_A0A015N049_9GLOM/29-227  | A0A015N049.1 PF0136 | 35.40 | 0.00 |
| TRINITY_L8GMP4_ACACA/297-555     | L8GMP4.1 PF07714.15 | 35.40 | 0.00 |
| TRINITY_A0A0G4EYN0_9ALVE/80-431  | A0A0G4EYN0.1 PF0862 | 35.40 | 0.00 |
| TRINITY_G0PB55_CAEBE/48-208      | G0PB55.1 PF00071.20 | 35.40 | 0.00 |
| TRINITY_C3ZPP7_BRAFL/1129-1309   | C3ZPP7.1 PF00350.21 | 35.40 | 0.00 |
| TRINITY_F4Q324_DICFS/3-225       | F4Q324.1 PF08709.9; | 35.40 | 0.00 |
| TRINITY_C0GCP5_9FIRM/4-224       | C0GCP5.1 PF02517.14 | 35.40 | 0.00 |
| TRINITY_A0DS64_PARTE/289-550     | A0DS64.1 PF07690.14 | 35.40 | 0.00 |
| TRINITY_A8JGC0_CHLRE/1-221       | A8JGC0.1 PF04889.10 | 35.40 | 0.00 |
| TRINITY_F6ZGD4_CIOIN/495-670     | F6ZGD4.2 PF00637.18 | 35.40 | 0.00 |
| TRINITY_I0Z2P8_9CHLO/693-909     | I0Z2P8.1 PF08172.10 | 35.40 | 0.00 |
| TRINITY_C9Z291_STRSW/47-284      | C9Z291.1 PF12706.5; | 35.40 | 0.00 |
| TRINITY_M4VDU0_9DELT/480-595     | M4VDU0.1 PF00072.22 | 35.40 | 0.00 |
| TRINITY_A0A0M2U2L9_9FIRM/82-308  | A0A0M2U2L9.1 PF0163 | 35.40 | 0.00 |
| TRINITY_A0A078B6G9_STYLE/51-363  | A0A078B6G9.1 PF0107 | 35.40 | 0.00 |
| TRINITY_A8ITR3_CHLRE/39-175      | A8ITR3.1 PF00067.20 | 35.40 | 0.00 |
| TRINITY_A9TCE6_PHYPA/157-467     | A9TCE6.1 PF08506.8; | 35.40 | 0.00 |
| TRINITY_A9TYN8_PHYPA/180-297     | A9TYN8.1 PF04488.13 | 35.40 | 0.00 |
| TRINITY_A0A084VME3_ANOSI/413-680 | A0A084VME3.1 PF0784 | 35.40 | 0.00 |
| TRINITY_H3GRQ7_PHYRM/100-340     | H3GRQ7.1 PF13360.4; | 35.40 | 0.00 |
| TRINITY_U5D935_AMBTC/366-517     | U5D935.1 PF04937.13 | 35.40 | 0.00 |
| TRINITY_I0Z0R8_9CHLO/11-128      | I0Z0R8.1 PF00651.29 | 35.40 | 0.00 |
| TRINITY_D3BVF7_POLPA/2-430       | D3BVF7.1 PF00083.22 | 35.40 | 0.00 |
| TRINITY_M2W1N1_GALSU/52-163      | M2W1N1.1 PF13911.4; | 35.40 | 0.00 |
| TRINITY_L8GSH4_ACACA/37-217      | L8GSH4.1 PF00621.18 | 35.40 | 0.00 |
| TRINITY_D8TTC2_VOLCA/10-183      | D8TTC2.1 PF07714.15 | 35.40 | 0.00 |
| TRINITY_A0A077ZYF9_STYLE/402-524 | A0A077ZYF9.1 PF1389 | 35.40 | 0.00 |
| TRINITY_T1I4K7_RHOPR/121-187     | T1I4K7.1 PF12796.5; | 35.40 | 0.00 |
| TRINITY_D3B803_POLPA/36-206      | D3B803.1 PF00445.16 | 35.30 | 0.00 |
| TRINITY_A8HPQ8_CHLRE/224-321     | A8HPQ8.1 PF01342.19 | 35.30 | 0.00 |
| TRINITY_GEFI_DICDI/429-530       | Q8IS15.1 PF00618.18 | 35.30 | 0.00 |
| TRINITY_I1FBX1_AMPQE/7-152       | I1FBX1.1 PF13238.4; | 35.30 | 0.00 |
| TRINITY_A8IGR4_CHLRE/166-1418    | A8IGR4.1 PF03813.12 | 35.30 | 0.00 |
| TRINITY_A0A0G4EIW3_9ALVE/50-219  | A0A0G4EIW3.1 PF0414 | 35.30 | 0.00 |
| TRINITY_F1A5P9_DICPU/70-248      | F1A5P9.1 PF00621.18 | 35.30 | 0.00 |
| TRINITY_A2D9F5_TRIVA/531-673     | A2D9F5.1 PF07534.14 | 35.30 | 0.00 |
| TRINITY_L8GI47_ACACA/42-316      | L8GI47.1 PF09192.8; | 35.30 | 0.00 |
| TRINITY_A8J8W4_CHLRE/13-111      | A8J8W4.1 PF13233.4; | 35.30 | 0.00 |
| TRINITY_H2YUM9_CIOSA/1337-1489   | H2YUM9.1 PF00620.25 | 35.30 | 0.00 |
| TRINITY_A0DMA3_PARTE/467-923     | A0DMA3.1 PF04547.10 | 35.30 | 0.00 |
| TRINITY_A0A0R3NSP3_DROPS/219-488 | A0A0R3NSP3.1 PF0006 | 35.30 | 0.00 |
| TRINITY_A0A0D2X2X8_CAPO3/2-320   | A0A0D2X2X8.1 PF0126 | 35.30 | 0.00 |
| TRINITY_A0DEV0_PARTE/62-177      | A0DEV0.1 PF00069.23 | 35.30 | 0.00 |
| TRINITY_E1ZH04_CHLVA/10-112      | E1ZH04.1 PF01922.15 | 35.30 | 0.00 |
| TRINITY_D2VIY6_NAEGR/222-505     | D2VIY6.1 PF00657.20 | 35.30 | 0.00 |

|                                  |              |            |       |      |
|----------------------------------|--------------|------------|-------|------|
| TRINITY_M4CMD5_BRARP/71-470      | M4CMD5.1     | PF01704.16 | 35.30 | 0.00 |
| TRINITY_L8GQN2_ACACA/447-624     | L8GQN2.1     | PF00617.17 | 35.30 | 0.00 |
| TRINITY_A8IC13_CHLRE/326-455     | A8IC13.1     | PF00067.20 | 35.30 | 0.00 |
| TRINITY_I7MKV0_TETTS/148-266     | I7MKV0.2     | PF13863.4; | 35.30 | 0.00 |
| TRINITY_Q23NK4_TETTS/23-187      | Q23NK4.2     | PF06703.9; | 35.30 | 0.00 |
| TRINITY_F6TP15_ORNAN/12-228      | F6TP15.2     | PF00817.18 | 35.30 | 0.00 |
| TRINITY_A0A0D2VHU9_CAPO3/41-166  | A0A0D2VHU9.1 | PF0406     | 35.30 | 0.00 |
| TRINITY_F1QWL8_DANRE/161-312     | F1QWL8.1     | PF00620.25 | 35.30 | 0.00 |
| TRINITY_I1LEV7_SOYBN/78-478      | I1LEV7.1     | PF03062.17 | 35.30 | 0.00 |
| TRINITY_A0D1C3_PARTE/64-223      | A0D1C3.1     | PF01343.16 | 35.30 | 0.00 |
| TRINITY_A0A078IH43_BRANA/588-899 | A0A078IH43.1 | PF0225     | 35.30 | 0.00 |
| TRINITY_H3FEW2_PRIIPA/81-220     | H3FEW2.1     | PF01764.23 | 35.30 | 0.00 |
| TRINITY_L8GMR3_ACACA/270-526     | L8GMR3.1     | PF07714.15 | 35.30 | 0.00 |
| TRINITY_I7M9Y4_TETTS/83-364      | I7M9Y4.1     | PF01266.22 | 35.30 | 0.00 |
| TRINITY_A0BQY4_PARTE/98-531      | A0BQY4.1     | PF00443.27 | 35.30 | 0.00 |
| TRINITY_L8GZD6_ACACA/42-266      | L8GZD6.1     | PF04938.10 | 35.30 | 0.00 |
| TRINITY_D8TTP0_VOLCA/1124-1422   | D8TTP0.1     | PF00069.23 | 35.30 | 0.00 |
| TRINITY_I0ZAB5_9CHLO/587-893     | I0ZAB5.1     | PF00069.23 | 35.30 | 0.00 |
| TRINITY_A0E0G6_PARTE/229-512     | A0E0G6.1     | PF06664.10 | 35.30 | 0.00 |
| TRINITY_Q24FQ7_TETTS/18-275      | Q24FQ7.2     | PF00069.23 | 35.30 | 0.00 |
| TRINITY_A8HSY2_CHLRE/37-412      | A8HSY2.1     | PF02535.20 | 35.30 | 0.00 |
| TRINITY_A0A0M3JZP1_ANISI/75-430  | A0A0M3JZP1.1 | PF0008     | 35.30 | 0.00 |
| TRINITY_I7MH73_TETTS/135-287     | I7MH73.1     | PF12400.6; | 35.20 | 0.00 |
| TRINITY_A0A067MI27_9HOMO/37-680  | A0A067MI27.1 | PF0399     | 35.20 | 0.00 |
| TRINITY_V7B654_PHAVU/4-119       | V7B654.1     | PF00168.28 | 35.20 | 0.00 |
| TRINITY_F8EER8_RUNSL/34-238      | F8EER8.1     | PF01734.20 | 35.20 | 0.00 |
| TRINITY_T0KSM0_COLGC/10-235      | T0KSM0.1     | PF05721.11 | 35.20 | 0.00 |
| TRINITY_J9IX71_9SPIT/65-299      | J9IX71.1     | PF00566.16 | 35.20 | 0.00 |
| TRINITY_F0ZBZ4_DICPU/39-436      | F0ZBZ4.1     | PF04801.11 | 35.20 | 0.00 |
| TRINITY_Q231F3_TETTS/82-315      | Q231F3.1     | PF03009.15 | 35.20 | 0.00 |
| TRINITY_V6LEA6_9EUKA/78-294      | V6LEA6.1     | PF02146.15 | 35.20 | 0.00 |
| TRINITY_M2XXG5_GALSU/261-390     | M2XXG5.1     | PF04784.12 | 35.20 | 0.00 |
| TRINITY_D3B258_POLPA/403-555     | D3B258.1     | PF13359.4; | 35.20 | 0.00 |
| TRINITY_A9SAY2_PHYPA/2-220       | A9SAY2.1     | PF10494.7; | 35.20 | 0.00 |
| TRINITY_Q6BFR2_PARTE/27-205      | Q6BFR2.1     | PF13462.4; | 35.20 | 0.00 |
| TRINITY_L8HD88_ACACA/139-450     | L8HD88.1     | PF01266.22 | 35.20 | 0.00 |
| TRINITY_D8UJ89_VOLCA/98-1079     | D8UJ89.1     | PF04931.11 | 35.20 | 0.00 |
| TRINITY_F6PSQ8_XENTR/91-562      | F6PSQ8.1     | PF01425.19 | 35.20 | 0.00 |
| TRINITY_Q17I41_AEDAE/77-320      | Q17I41.1     | PF01663.20 | 35.20 | 0.00 |
| TRINITY_B3RMZ8_TRIAD/474-733     | B3RMZ8.1     | PF00003.20 | 35.20 | 0.00 |
| TRINITY_A0A078AR51_STYLE/8-287   | A0A078AR51.1 | PF0006     | 35.20 | 0.00 |
| TRINITY_L2GYX5_VAVCU/24-270      | L2GYX5.1     | PF00069.23 | 35.20 | 0.00 |
| TRINITY_A7SGS9_NEMVE/93-215      | A7SGS9.1     | PF09335.9; | 35.20 | 0.00 |
| TRINITY_Q54F56_DICDI/852-999     | Q54F56.1     | PF13926.4; | 35.20 | 0.00 |
| TRINITY_S9W6U9_SCHCR/739-844     | S9W6U9.1     | PF04003.10 | 35.20 | 0.00 |
| TRINITY_A0BXD2_PARTE/279-685     | A0BXD2.1     | PF01757.20 | 35.20 | 0.00 |
| TRINITY_I7M910_TETTS/11-285      | I7M910.1     | PF00069.23 | 35.20 | 0.00 |
| TRINITY_A0D3Z4_PARTE/49-222      | A0D3Z4.1     | PF01105.22 | 35.20 | 0.00 |
| TRINITY_U4TSW9_DENPD/48-334      | U4TSW9.1     | PF03096.12 | 35.20 | 0.00 |
| TRINITY_W7XDG7_TETTS/12-258      | W7XDG7.1     | PF04252.11 | 35.20 | 0.00 |
| TRINITY_D7FWV2_ECTSI/872-1054    | D7FWV2.1     | PF00092.26 | 35.20 | 0.00 |
| TRINITY_F4PMA7_DICFS/179-351     | F4PMA7.1     | PF00350.21 | 35.20 | 0.00 |
| TRINITY_C3XRI3_BRAFL/1097-1484   | C3XRI3.1     | PF00580.19 | 35.20 | 0.00 |
| TRINITY_I7LUW8_TETTS/182-376     | I7LUW8.2     | PF13886.4; | 35.20 | 0.00 |
| TRINITY_U9SUK0_RHIID/4-94        | U9SUK0.1     | PF00168.28 | 35.20 | 0.00 |
| TRINITY_I7LXL4_TETTS/220-317     | I7LXL4.1     | PF00153.25 | 35.20 | 0.00 |
| TRINITY_W4YIE0_STRPU/7-149       | W4YIE0.1     | PF00071.20 | 35.20 | 0.00 |
| TRINITY_A2E9I9_TRIVA/12-171      | A2E9I9.1     | PF00071.20 | 35.20 | 0.00 |
| TRINITY_A0A078AZ81_STYLE/9-188   | A0A078AZ81.1 | PF0530     | 35.20 | 0.00 |
| TRINITY_A0A072UXG8_MEDTR/130-293 | A0A072UXG8.1 | PF0316     | 35.20 | 0.00 |
| TRINITY_K7IT28_NASVI/57-405      | K7IT28.1     | PF05147.11 | 35.20 | 0.00 |

|                                  |                     |       |      |
|----------------------------------|---------------------|-------|------|
| TRINITY_A0A091DJ51_FUKDA/231-463 | A0A091DJ51.1 PF0115 | 35.20 | 0.00 |
| TRINITY_G7I9B4_MEDTR/38-219      | G7I9B4.1 PF04413.14 | 35.20 | 0.00 |
| TRINITY_G0QIX1_ICHMG/10-323      | G0QIX1.1 PF03630.12 | 35.20 | 0.00 |
| TRINITY_H3G8Q8_PHYRM/28-251      | H3G8Q8.1 PF01738.16 | 35.10 | 0.00 |
| TRINITY_Q54VB1_DICDI/23-175      | Q54VB1.1 PF14580.4; | 35.10 | 0.00 |
| TRINITY_L1LDB8_THEEQ/9-171       | L1LDB8.1 PF00071.20 | 35.10 | 0.00 |
| TRINITY_I7M4C2_TETTS/42-276      | I7M4C2.1 PF00149.26 | 35.10 | 0.00 |
| TRINITY_A0EGI8_PARTE/27-187      | A0EGI8.1 PF10294.7; | 35.10 | 0.00 |
| TRINITY_L8GJD9_ACACA/29-126      | L8GJD9.1 PF01133.15 | 35.10 | 0.00 |
| TRINITY_I7M3M5_TETTS/574-892     | I7M3M5.1 PF11838.6; | 35.10 | 0.00 |
| TRINITY_K9VIV2_9CYAN/51-244      | K9VIV2.1 PF09511.8; | 35.10 | 0.00 |
| TRINITY_A0A0G4G478_9ALVE/26-579  | A0A0G4G478.1 PF0160 | 35.10 | 0.00 |
| TRINITY_J9IDK5_9SPIT/476-700     | J9IDK5.1 PF12348.6; | 35.10 | 0.00 |
| TRINITY_A0C7I1_PARTE/42-301      | A0C7I1.1 PF00069.23 | 35.10 | 0.00 |
| TRINITY_M2Y691_GALSU/133-356     | M2Y691.1 PF01556.16 | 35.10 | 0.00 |
| TRINITY_D3BE12_POLPA/38-242      | D3BE12.1 PF00856.26 | 35.10 | 0.00 |
| TRINITY_L8H0Q4_ACACA/22-456      | L8H0Q4.1 PF00067.20 | 35.10 | 0.00 |
| TRINITY_A9U470_PHYPA/136-516     | A9U470.1 PF00012.18 | 35.10 | 0.00 |
| TRINITY_B0CCN0_ACAM1/40-193      | B0CCN0.1 PF13369.4; | 35.10 | 0.00 |
| TRINITY_D8TTA9_VOLCA/13-247      | D8TTA9.1 PF01026.19 | 35.10 | 0.00 |
| TRINITY_G0QJM1_ICHMG/22-245      | G0QJM1.1 PF07722.11 | 35.10 | 0.00 |
| TRINITY_A0A0L1IPV0_ASPNO/121-344 | A0A0L1IPV0.1 PF0155 | 35.10 | 0.00 |
| TRINITY_A0DI05_PARTE/319-612     | A0DI05.1 PF04547.10 | 35.10 | 0.00 |
| TRINITY_Q23YD6_TETTS/29-282      | Q23YD6.1 PF00069.23 | 35.10 | 0.00 |
| TRINITY_D8TZX8_VOLCA/219-341     | D8TZX8.1 PF01794.17 | 35.10 | 0.00 |
| TRINITY_A0A074Y688_9PEZI/256-375 | A0A074Y688.1 PF0283 | 35.10 | 0.00 |
| TRINITY_A8IXM4_CHLRE/1640-1791   | A8IXM4.1 PF03712.13 | 35.10 | 0.00 |
| TRINITY_R0GH80_9BRAS/178-465     | R0GH80.1 PF06814.11 | 35.10 | 0.00 |
| TRINITY_Q22X60_TETTS/11-285      | Q22X60.1 PF00069.23 | 35.10 | 0.00 |
| TRINITY_K4ABQ6_SETIT/140-318     | K4ABQ6.1 PF10294.7; | 35.10 | 0.00 |
| TRINITY_H0HU12_9RHIZ/41-294      | H0HU12.1 PF04230.11 | 35.10 | 0.00 |
| TRINITY_D2V048_NAEGR/86-253      | D2V048.1 PF00092.26 | 35.10 | 0.00 |
| TRINITY_Q7NK64_GLOVI/264-552     | Q7NK64.1 PF00773.17 | 35.10 | 0.00 |
| TRINITY_D8LU94_ECTSI/82-277      | D8LU94.1 PF11715.6; | 35.10 | 0.00 |
| TRINITY_K6XP07_9ALTE/44-253      | K6XP07.1 PF00149.26 | 35.10 | 0.00 |
| TRINITY_I1F267_AMPQE/206-369     | I1F267.1 PF13359.4; | 35.10 | 0.00 |
| TRINITY_D8THJ4_VOLCA/30-238      | D8THJ4.1 PF01027.18 | 35.10 | 0.00 |
| TRINITY_V3ZT54_LOTGI/1-173       | V3ZT54.1 PF00025.19 | 35.10 | 0.00 |
| TRINITY_A0A0A1NYH9_9FUNG/37-257  | A0A0A1NYH9.1 PF0085 | 35.10 | 0.00 |
| TRINITY_A0A067SRG2_9AGAR/160-271 | A0A067SRG2.1 PF0237 | 35.10 | 0.00 |
| TRINITY_A0A090N355_OSTTA/10-180  | A0A090N355.1 PF0007 | 35.10 | 0.00 |
| TRINITY_E1X1E3_HALMS/17-738      | E1X1E3.1 PF01804.16 | 35.10 | 0.00 |
| TRINITY_I0I884_CALAS/53-389      | I0I884.1 PF01547.23 | 35.10 | 0.00 |
| TRINITY_F6XLZ1_XENTR/6-391       | F6XLZ1.1 PF04857.18 | 35.00 | 0.00 |
| TRINITY_Q54JW6_DICDI/25-310      | Q54JW6.1 PF00856.26 | 35.00 | 0.00 |
| TRINITY_L8HBK7_ACACA/26-465      | L8HBK7.1 PF00067.20 | 35.00 | 0.00 |
| TRINITY_B8GKY5_METPE/683-820     | B8GKY5.1 PF03422.13 | 35.00 | 0.00 |
| TRINITY_E7FFS8_DANRE/98-290      | E7FFS8.2 PF07998.9; | 35.00 | 0.00 |
| TRINITY_A8J7M9_CHLRE/742-1038    | A8J7M9.1 PF00069.23 | 35.00 | 0.00 |
| TRINITY_A0A0N5ART5_9BILA/657-796 | A0A0N5ART5.1 PF0176 | 35.00 | 0.00 |
| TRINITY_G1KIY9_ANOCA/132-245     | G1KIY9.1 PF12796.5; | 35.00 | 0.00 |
| TRINITY_A0A0G4EFZ7_9ALVE/89-487  | A0A0G4EFZ7.1 PF0090 | 35.00 | 0.00 |
| TRINITY_L8GRV0_ACACA/57-333      | L8GRV0.1 PF01490.16 | 35.00 | 0.00 |
| TRINITY_D6GSF2_FILAD/8-144       | D6GSF2.1 PF02681.12 | 35.00 | 0.00 |
| TRINITY_M5WU18_PRUPE/10-171      | M5WU18.1 PF00071.20 | 35.00 | 0.00 |
| TRINITY_A0DCM6_PARTE/47-264      | A0DCM6.1 PF01633.18 | 35.00 | 0.00 |
| TRINITY_I7M198_TETTS/52-316      | I7M198.2 PF00069.23 | 35.00 | 0.00 |
| TRINITY_G0QSH9_ICHMG/120-525     | G0QSH9.1 PF01619.16 | 35.00 | 0.00 |
| TRINITY_H0VJ55_CAVPO/29-263      | H0VJ55.1 PF10223.7; | 35.00 | 0.00 |
| TRINITY_A0A0N0SEV8_9ACTN/25-510  | A0A0N0SEV8.1 PF0013 | 35.00 | 0.00 |
| TRINITY_D8TU64_VOLCA/75-249      | D8TU64.1 PF00089.24 | 35.00 | 0.00 |

|                                 |                     |       |      |
|---------------------------------|---------------------|-------|------|
| TRINITY_A0C319_PARTE/249-448    | A0C319.1 PF02735.14 | 35.00 | 0.00 |
| TRINITY_L8GKH0_ACACA/249-578    | L8GKH0.1 PF13598.4; | 35.00 | 0.00 |
| TRINITY_A0A0E3ZCV1_9BACT/53-433 | A0A0E3ZCV1.1 PF0564 | 35.00 | 0.00 |
| TRINITY_E1ZSN2_CHLVA/96-517     | E1ZSN2.1 PF11957.6; | 35.00 | 0.00 |
| TRINITY_G1PYV1_MYOLU/109-255    | G1PYV1.1 PF08662.9; | 35.00 | 0.00 |
| TRINITY_H2SUS1_TAKRU/37-837     | H2SUS1.1 PF04563.13 | 35.00 | 0.00 |
| TRINITY_A0CC42_PARTE/16-287     | A0CC42.1 PF00069.23 | 35.00 | 0.00 |
| TRINITY_C6WUF6_METML/905-1020   | C6WUF6.1 PF00072.22 | 35.00 | 0.00 |
| TRINITY_E1ZMM8_CHLVA/643-864    | E1ZMM8.1 PF05548.9; | 35.00 | 0.00 |
| TRINITY_D8TVU5_VOLCA/641-919    | D8TVU5.1 PF00233.17 | 35.00 | 0.00 |
| TRINITY_L8GPJ3_ACACA/267-618    | L8GPJ3.1 PF02386.14 | 35.00 | 0.00 |
| TRINITY_A0A0G4J2B1_PLABS/87-313 | A0A0G4J2B1.1 PF1485 | 35.00 | 0.00 |
| TRINITY_A8J5J3_CHLRE/34-413     | A8J5J3.1 PF00266.17 | 35.00 | 0.00 |
| TRINITY_A0CS29_PARTE/2561-2834  | A0CS29.1 PF00520.29 | 35.00 | 0.00 |
| TRINITY_A9T564_PHYPA/113-202    | A9T564.1 PF02362.19 | 35.00 | 0.00 |
| TRINITY_A8ISQ5_CHLRE/527-928    | A8ISQ5.1 PF13086.4; | 35.00 | 0.00 |
| TRINITY_B7P8R1_IXOSC/21-152     | B7P8R1.1 PF01138.19 | 34.90 | 0.00 |
| TRINITY_W5A4N3_WHEAT/11-265     | W5A4N3.1 PF00069.23 | 34.90 | 0.00 |
| TRINITY_I7MD42_TETTS/162-405    | I7MD42.2 PF00481.19 | 34.90 | 0.00 |
| TRINITY_A0A068S7T1_9FUNG/14-119 | A0A068S7T1.1 PF0192 | 34.90 | 0.00 |
| TRINITY_L8H1U3_ACACA/10-161     | L8H1U3.1 PF12239.6; | 34.90 | 0.00 |
| TRINITY_C3YNL0_BRAFL/11-197     | C3YNL0.1 PF09808.7; | 34.90 | 0.00 |
| TRINITY_K7IM30_NASVI/14-130     | K7IM30.1 PF02893.18 | 34.90 | 0.00 |
| TRINITY_K7JWY9_NASVI/466-724    | K7JWY9.1 PF00078.25 | 34.90 | 0.00 |

|                                  |              |            |       |      |
|----------------------------------|--------------|------------|-------|------|
| TRINITY_V3Z3J5_LOTGI/39-269      | V3Z3J5.1     | PF02114.14 | 34.90 | 0.00 |
| TRINITY_Q22Y38_TETTS/894-1231    | Q22Y38.2     | PF01237.16 | 34.90 | 0.00 |
| TRINITY_A9VAN1_MONBE/20-210      | A9VAN1.1     | PF01183.18 | 34.90 | 0.00 |
| TRINITY_A8J1A8_CHLRE/209-484     | A8J1A8.1     | PF04577.12 | 34.90 | 0.00 |
| TRINITY_A8IXP6_CHLRE/82-406      | A8IXP6.1     | PF00704.26 | 34.90 | 0.00 |
| TRINITY_A0DFS2_PARTE/641-821     | A0DFS2.1     | PF05193.19 | 34.90 | 0.00 |
| TRINITY_L8GSU3_ACACA/224-441     | L8GSU3.1     | PF12697.5; | 34.90 | 0.00 |
| TRINITY_L8GIC7_ACACA/9-353       | L8GIC7.1     | PF02535.20 | 34.90 | 0.00 |
| TRINITY_K9RIF6_9CYAN/7-198       | K9RIF6.1     | PF13460.4; | 34.90 | 0.00 |
| TRINITY_A0A068SB73_9FUNG/109-537 | A0A068SB73.1 | PF0006     | 34.90 | 0.00 |
| TRINITY_A0A087G948_ARAAL/94-480  | A0A087G948.1 | PF0322     | 34.90 | 0.00 |
| TRINITY_T1IVW8_STRMM/219-312     | T1IVW8.1     | PF00153.25 | 34.90 | 0.00 |
| TRINITY_L8HFI1_ACACA/52-233      | L8HFI1.1     | PF00617.17 | 34.90 | 0.00 |
| TRINITY_A0DN68_PARTE/31-272      | A0DN68.1     | PF00956.16 | 34.90 | 0.00 |
| TRINITY_D7U8S3_VITVI/608-818     | D7U8S3.1     | PF08626.9; | 34.90 | 0.00 |
| TRINITY_D4W7N2_9FIRM/76-204      | D4W7N2.1     | PF12740.5; | 34.90 | 0.00 |
| TRINITY_B9M8B0_GEODF/64-383      | B9M8B0.1     | PF01636.21 | 34.90 | 0.00 |
| TRINITY_D8QTH1_SELML/234-600     | D8QTH1.1     | PF09423.8; | 34.90 | 0.00 |
| TRINITY_D3BT39_POLPA/767-918     | D3BT39.1     | PF01608.15 | 34.90 | 0.00 |
| TRINITY_V9F1F2_PHYPR/428-714     | V9F1F2.1     | PF00481.19 | 34.90 | 0.00 |
| TRINITY_A0CBG9_PARTE/12-286      | A0CBG9.1     | PF00069.23 | 34.90 | 0.00 |
| TRINITY_G2MLV0_9ARCH/26-345      | G2MLV0.1     | PF11199.6; | 34.90 | 0.00 |
| TRINITY_M0T6L8_MUSAM/123-378     | M0T6L8.1     | PF04811.13 | 34.90 | 0.00 |
| TRINITY_A0BV64_PARTE/89-916      | A0BV64.1     | PF09773.7; | 34.90 | 0.00 |
| TRINITY_D2VET8_NAEGR/14-126      | D2VET8.1     | PF00307.29 | 34.90 | 0.00 |
| TRINITY_A0A067D823_SAPPC/140-257 | A0A067D823.1 | PF0190     | 34.90 | 0.00 |
| TRINITY_D8U479_VOLCA/954-1143    | D8U479.1     | PF12612.6; | 34.90 | 0.00 |
| TRINITY_L8GMR3_ACACA/270-526     | L8GMR3.1     | PF07714.15 | 34.90 | 0.00 |
| TRINITY_B7QDX1_IXOSC/40-182      | B7QDX1.1     | PF01699.22 | 34.90 | 0.00 |
| TRINITY_J9HX68_9SPIT/57-359      | J9HX68.1     | PF00648.19 | 34.90 | 0.00 |
| TRINITY_I1N4B2_SOYBN/79-285      | I1N4B2.1     | PF07847.10 | 34.90 | 0.00 |
| TRINITY_J9IR36_9SPIT/409-563     | J9IR36.1     | PF04280.13 | 34.90 | 0.00 |
| TRINITY_A0A059LHI8_9CHLO/11-343  | A0A059LHI8.1 | PF0006     | 34.90 | 0.00 |
| TRINITY_A0DI70_PARTE/340-617     | A0DI70.1     | PF04091.10 | 34.80 | 0.00 |
| TRINITY_F9X7C5_ZYMTI/8-244       | F9X7C5.1     | PF04157.14 | 34.80 | 0.00 |
| TRINITY_B9LQN8_HALLT/7-271       | B9LQN8.1     | PF03372.21 | 34.80 | 0.00 |
| TRINITY_Q3SD60_PARTE/9-170       | Q3SD60.1     | PF00071.20 | 34.80 | 0.00 |
| TRINITY_J9JBA7_9SPIT/17-165      | J9JBA7.1     | PF05188.15 | 34.80 | 0.00 |
| TRINITY_L8H2L4_ACACA/85-275      | L8H2L4.1     | PF05502.11 | 34.80 | 0.00 |
| TRINITY_L8H176_ACACA/28-188      | L8H176.1     | PF06703.9; | 34.80 | 0.00 |
| TRINITY_A8Q838_MALGO/105-416     | A8Q838.1     | PF00026.21 | 34.80 | 0.00 |
| TRINITY_F1NC47_CHICK/135-226     | F1NC47.2     | PF03908.11 | 34.80 | 0.00 |
| TRINITY_L8HCN3_ACACA/51-286      | L8HCN3.1     | PF04757.12 | 34.80 | 0.00 |
| TRINITY_A0A078AR51_STYLE/8-287   | A0A078AR51.1 | PF0006     | 34.80 | 0.00 |
| TRINITY_A0A0G0BAU5_9BACT/23-162  | A0A0G0BAU5.1 | PF0213     | 34.80 | 0.00 |
| TRINITY_D8U8G6_VOLCA/124-246     | D8U8G6.1     | PF00828.17 | 34.80 | 0.00 |
| TRINITY_U3J5E7_ANAPL/1978-2462   | U3J5E7.1     | PF00476.18 | 34.80 | 0.00 |
| TRINITY_I0RDF4_MYCXE/8-426       | I0RDF4.1     | PF02897.13 | 34.80 | 0.00 |
| TRINITY_A0A0D2VQW7_CAPO3/308-459 | A0A0D2VQW7.1 | PF0441     | 34.80 | 0.00 |
| TRINITY_J9IDS2_9SPIT/168-249     | J9IDS2.1     | PF01485.19 | 34.80 | 0.00 |
| TRINITY_H3AZR7_LATCH/38-401      | H3AZR7.1     | PF07000.9; | 34.80 | 0.00 |
| TRINITY_A0A0D2TLL4_GOSRA/110-403 | A0A0D2TLL4.1 | PF0972     | 34.80 | 0.00 |
| TRINITY_A0A098VN20_9MICR/5-175   | A0A098VN20.1 | PF0007     | 34.80 | 0.00 |
| TRINITY_F0R0T9_BACSH/759-1033    | F0R0T9.1     | PF02929.15 | 34.80 | 0.00 |
| TRINITY_D4M743_9BACT/24-179      | D4M743.1     | PF13563.4; | 34.80 | 0.00 |
| TRINITY_J9LBD5_ACYPI/71-378      | J9LBD5.2     | PF00561.18 | 34.80 | 0.00 |
| TRINITY_T1EZU6_HELRO/132-220     | T1EZU6.1     | PF13649.4; | 34.80 | 0.00 |
| TRINITY_L1IVY4_GUIETH/10-126     | L1IVY4.1     | PF10639.7; | 34.80 | 0.00 |
| TRINITY_A0CMN6_PARTE/121-399     | A0CMN6.1     | PF01457.14 | 34.80 | 0.00 |
| TRINITY_Q092W7_STIAD/118-356     | Q092W7.1     | PF06101.9; | 34.80 | 0.00 |
| TRINITY_F4PR64_DICFS/4-120       | F4PR64.1     | PF00615.17 | 34.80 | 0.00 |

|                                  |                     |       |      |
|----------------------------------|---------------------|-------|------|
| TRINITY_I0Z7L9_9CHLO/7-158       | I0Z7L9.1 PF00179.24 | 34.80 | 0.00 |
| TRINITY_M4BT05_HYAAE/2-408       | M4BT05.1 PF04188.11 | 34.80 | 0.00 |
| TRINITY_K9SZG2_9CYAN/110-382     | K9SZG2.1 PF01636.21 | 34.80 | 0.00 |
| TRINITY_L8H2X5_ACACA/755-874     | L8H2X5.1 PF01067.20 | 34.80 | 0.00 |
| TRINITY_A0A075AZS5_9FUNG/23-114  | A0A075AZS5.1 PF0468 | 34.80 | 0.00 |
| TRINITY_A8IKT9_CHLRE/529-630     | A8IKT9.1 PF00134.21 | 34.80 | 0.00 |
| TRINITY_A0A0G4IQ86_PLABS/632-902 | A0A0G4IQ86.1 PF0218 | 34.80 | 0.00 |
| TRINITY_Q54F78_DICDI/37-512      | Q54F78.2 PF16134.3; | 34.80 | 0.00 |
| TRINITY_F4PVD5_DICFS/35-289      | F4PVD5.1 PF07651.14 | 34.80 | 0.00 |
| TRINITY_A0A078B2E5_STYLE/525-896 | A0A078B2E5.1 PF1059 | 34.80 | 0.00 |
| TRINITY_A8JH49_CHLRE/24-120      | A8JH49.1 PF01196.17 | 34.80 | 0.00 |
| TRINITY_A0A068Y580_ECHMU/47-420  | A0A068Y580.1 PF0341 | 34.80 | 0.00 |
| TRINITY_A0A068S0W9_9FUNG/53-352  | A0A068S0W9.1 PF0238 | 34.80 | 0.00 |
| TRINITY_F5RD44_METUF/90-251      | F5RD44.1 PF02955.14 | 34.80 | 0.00 |
| TRINITY_A7SJV6_NEMVE/45-509      | A7SJV6.1 PF00067.20 | 34.80 | 0.00 |
| TRINITY_I0Z4X8_9CHLO/223-518     | I0Z4X8.1 PF08540.8; | 34.80 | 0.00 |
| TRINITY_I0YU33_9CHLO/43-470      | I0YU33.1 PF02450.13 | 34.80 | 0.00 |
| TRINITY_A8J3P1_CHLRE/954-1161    | A8J3P1.1 PF00211.18 | 34.80 | 0.00 |
| TRINITY_B6K5J7_SCHJY/463-767     | B6K5J7.1 PF00632.23 | 34.70 | 0.00 |
| TRINITY_A8Q838_MALGO/105-416     | A8Q838.1 PF00026.21 | 34.70 | 0.00 |
| TRINITY_A0BLH9_PARTE/7-108       | A0BLH9.1 PF00168.28 | 34.70 | 0.00 |
| TRINITY_G0QNA5_ICHMG/159-338     | G0QNA5.1 PF00443.27 | 34.70 | 0.00 |
| TRINITY_F0ZDB7_DICPU/280-899     | F0ZDB7.1 PF04130.11 | 34.70 | 0.00 |
| TRINITY_V6LL14_9EUKA/10-174      | V6LL14.1 PF00071.20 | 34.70 | 0.00 |
| TRINITY_F4P7C6_BATDJ/5-124       | F4P7C6.1 PF08146.10 | 34.70 | 0.00 |
| TRINITY_B3KZ91_PLAKH/192-310     | B3KZ91.1 PF01569.19 | 34.70 | 0.00 |
| TRINITY_J9ING1_9SPIT/21-645      | J9ING1.1 PF00888.20 | 34.70 | 0.00 |
| TRINITY_W5YNX9_9ALTE/6-200       | W5YNX9.1 PF00106.23 | 34.70 | 0.00 |
| TRINITY_D0MDL5_RHOM4/19-357      | D0MDL5.1 PF05977.11 | 34.70 | 0.00 |
| TRINITY_A0A0B2V7Q4_TOXCA/40-174  | A0A0B2V7Q4.1 PF0043 | 34.70 | 0.00 |
| TRINITY_A0A0D2WPQ9_CAPO3/136-387 | A0A0D2WPQ9.1 PF1362 | 34.70 | 0.00 |
| TRINITY_A0A078AR51_STYLE/8-287   | A0A078AR51.1 PF0006 | 34.70 | 0.00 |
| TRINITY_D3BBU1_POLPA/14-124      | D3BBU1.1 PF00169.27 | 34.70 | 0.00 |
| TRINITY_A0A087H8X7_ARAAL/21-346  | A0A087H8X7.1 PF0975 | 34.70 | 0.00 |
| TRINITY_Q1AUI2_RUBXD/25-266      | Q1AUI2.1 PF03009.15 | 34.70 | 0.00 |
| TRINITY_A0A015K3E4_9GLOM/5-105   | A0A015K3E4.1 PF0016 | 34.70 | 0.00 |
| TRINITY_Q6BJF3_DEBHA/225-415     | Q6BJF3.1 PF11715.6; | 34.70 | 0.00 |
| TRINITY_A0A0G4IVB0_PLABS/36-285  | A0A0G4IVB0.1 PF1362 | 34.70 | 0.00 |
| TRINITY_U1MKK4_ASCSU/61-304      | U1MKK4.1 PF13360.4; | 34.70 | 0.00 |
| TRINITY_G1N844_MELGA/89-387      | G1N844.1 PF00561.18 | 34.70 | 0.00 |
| TRINITY_L8GSM7_ACACA/2-268       | L8GSM7.1 PF03372.21 | 34.70 | 0.00 |
| TRINITY_Q244W6_TETTS/9-150       | Q244W6.2 PF02453.15 | 34.70 | 0.00 |
| TRINITY_A0A078ATL6_STYLE/22-309  | A0A078ATL6.1 PF1523 | 34.70 | 0.00 |
| TRINITY_A8IXZ2_CHLRE/6-158       | A8IXZ2.1 PF00582.24 | 34.70 | 0.00 |
| TRINITY_F0ZE88_DICPU/11-451      | F0ZE88.1 PF08217.9; | 34.70 | 0.00 |
| TRINITY_W7XJ96_TETTS/33-488      | W7XJ96.1 PF00067.20 | 34.70 | 0.00 |
| TRINITY_H3BZH9_TETNG/49-233      | H3BZH9.1 PF01762.19 | 34.70 | 0.00 |
| TRINITY_Q23K45_TETTS/268-368     | Q23K45.1 PF00085.18 | 34.70 | 0.00 |
| TRINITY_A0C868_PARTE/287-682     | A0C868.1 PF01757.20 | 34.70 | 0.00 |
| TRINITY_K7ITH4_NASVI/179-284     | K7ITH4.1 PF00651.29 | 34.70 | 0.00 |
| TRINITY_A0A0G0QXC1_9BACT/13-174  | A0A0G0QXC1.1 PF0316 | 34.70 | 0.00 |
| TRINITY_A0A061D898_BABBI/410-659 | A0A061D898.1 PF0150 | 34.70 | 0.00 |
| TRINITY_W5JU90_ANODA/491-629     | W5JU90.1 PF13716.4; | 34.70 | 0.00 |
| TRINITY_I7LWU9_TETTS/187-305     | I7LWU9.2 PF13863.4; | 34.70 | 0.00 |
| TRINITY_A0A078AYH2_STYLE/42-314  | A0A078AYH2.1 PF0374 | 34.70 | 0.00 |
| TRINITY_C5Z3M4_SORBI/88-327      | C5Z3M4.1 PF00481.19 | 34.70 | 0.00 |
| TRINITY_I7M7H8_TETTS/53-447      | I7M7H8.2 PF01490.16 | 34.70 | 0.00 |
| TRINITY_D8TH55_VOLCA/45-544      | D8TH55.1 PF03999.10 | 34.70 | 0.00 |
| TRINITY_G0PIW0_CAEBE/54-179      | G0PIW0.1 PF00651.29 | 34.70 | 0.00 |
| TRINITY_V8NLQ1_OPHHA/53-205      | V8NLQ1.1 PF00620.25 | 34.70 | 0.00 |
| TRINITY_A8J7D3_CHLRE/129-245     | A8J7D3.1 PF13640.4; | 34.70 | 0.00 |



|                                  |              |            |       |      |
|----------------------------------|--------------|------------|-------|------|
| TRINITY_A8IS63_CHLRE/199-437     | A8IS63.1     | PF00667.18 | 34.70 | 0.00 |
| TRINITY_I7LZY1_TETTS/2-293       | I7LZY1.2     | PF03643.13 | 34.70 | 0.00 |
| TRINITY_S2J6X3_MUCC1/13-174      | S2J6X3.1     | PF00071.20 | 34.70 | 0.00 |
| TRINITY_F0ZAI9_DICPU/651-1021    | F0ZAI9.1     | PF02181.21 | 34.70 | 0.00 |
| TRINITY_T0S211_9STRA/307-915     | T0S211.1     | PF10408.7; | 34.70 | 0.00 |
| TRINITY_A0A075AP74_9FUNG/1-126   | A0A075AP74.1 | PF0023     | 34.70 | 0.00 |
| TRINITY_A0C9E3_PARTE/20-157      | A0C9E3.1     | PF00179.24 | 34.70 | 0.00 |
| TRINITY_Q2SHR5_HAHCH/127-277     | Q2SHR5.1     | PF06445.13 | 34.70 | 0.00 |
| TRINITY_F7AJ67_XENTR/46-153      | F7AJ67.1     | PF00651.29 | 34.60 | 0.00 |
| TRINITY_A0A022RVM8_ERYGU/30-427  | A0A022RVM8.1 | PF0045     | 34.60 | 0.00 |
| TRINITY_K0KRE4_WICCF/375-544     | K0KRE4.1     | PF02902.17 | 34.60 | 0.00 |
| TRINITY_Q09E43_STIAD/320-840     | Q09E43.1     | PF02128.13 | 34.60 | 0.00 |
| TRINITY_Q23MA7_TETTS/15-440      | Q23MA7.1     | PF01593.22 | 34.60 | 0.00 |
| TRINITY_F6YM31_CIOIN/45-180      | F6YM31.2     | PF00782.18 | 34.60 | 0.00 |
| TRINITY_L8GET8_ACACA/107-282     | L8GET8.1     | PF09637.8; | 34.60 | 0.00 |
| TRINITY_PSMG2_NEMVE/19-240       | A7SGU6.1     | PF09754.7; | 34.60 | 0.00 |
| TRINITY_Q22MA8_TETTS/122-276     | Q22MA8.2     | PF00650.18 | 34.60 | 0.00 |
| TRINITY_G0RZP4_CHATD/19-209      | G0RZP4.1     | PF13472.4; | 34.60 | 0.00 |
| TRINITY_A0A084W2F1_ANOSI/532-718 | A0A084W2F1.1 | PF0161     | 34.60 | 0.00 |
| TRINITY_B4N666_DROWI/255-374     | B4N666.2     | PF00622.26 | 34.60 | 0.00 |
| TRINITY_I7MI06_TETTS/309-416     | I7MI06.2     | PF00085.18 | 34.60 | 0.00 |
| TRINITY_A4VDN1_TETTS/4-430       | A4VDN1.1     | PF00067.20 | 34.60 | 0.00 |
| TRINITY_I0ZAV6_9CHLO/30-82       | I0ZAV6.1     | PF07491.9; | 34.60 | 0.00 |
| TRINITY_A8J9J5_CHLRE/40-249      | A8J9J5.1     | PF00856.26 | 34.60 | 0.00 |
| TRINITY_A0A0L0C5U9_LUCCU/529-741 | A0A0L0C5U9.1 | PF1270     | 34.60 | 0.00 |
| TRINITY_A8JFG7_CHLRE/20-187      | A8JFG7.1     | PF16016.3; | 34.60 | 0.00 |
| TRINITY_F0ZNA5_DICPU/102-307     | F0ZNA5.1     | PF06999.10 | 34.60 | 0.00 |
| TRINITY_C3Z9X5_BRAFL/97-1081     | C3Z9X5.1     | PF03813.12 | 34.60 | 0.00 |
| TRINITY_A9V0E1_MONBE/11-355      | A9V0E1.1     | PF03283.11 | 34.60 | 0.00 |
| TRINITY_A7APB0_BABBO/869-1003    | A7APB0.1     | PF04096.12 | 34.60 | 0.00 |
| TRINITY_G0QXK0_ICHMG/11-169      | G0QXK0.1     | PF00339.27 | 34.60 | 0.00 |
| TRINITY_A0A078AI13_STYLE/16-119  | A0A078AI13.1 | PF0030     | 34.60 | 0.00 |
| TRINITY_Q55F12_DICDI/374-640     | Q55F12.1     | PF00149.26 | 34.60 | 0.00 |
| TRINITY_E9DJ49_COCPS/180-469     | E9DJ49.1     | PF08569.9; | 34.60 | 0.00 |
| TRINITY_J9IEP0_9SPIT/637-1073    | J9IEP0.1     | PF04547.10 | 34.60 | 0.00 |
| TRINITY_A0A0R4ICI6_DANRE/29-485  | A0A0R4ICI6.1 | PF0578     | 34.60 | 0.00 |
| TRINITY_D8FV64_9CYAN/82-418      | D8FV64.1     | PF01547.23 | 34.60 | 0.00 |
| TRINITY_A0A024TME2_9STRA/61-491  | A0A024TME2.1 | PF0006     | 34.60 | 0.00 |
| TRINITY_A0A078AEZ9_STYLE/129-236 | A0A078AEZ9.1 | PF0078     | 34.60 | 0.00 |
| TRINITY_M3AUV3_PSEFD/1096-1257   | M3AUV3.1     | PF04408.21 | 34.60 | 0.00 |
| TRINITY_K7L1S8_SOYBN/87-177      | K7L1S8.1     | PF00686.17 | 34.60 | 0.00 |
| TRINITY_L8HB44_ACACA/7-110       | L8HB44.1     | PF05773.20 | 34.60 | 0.00 |
| TRINITY_K9TNS6_9CYAN/49-502      | K9TNS6.1     | PF02113.13 | 34.60 | 0.00 |
| TRINITY_L8H8Z5_ACACA/146-294     | L8H8Z5.1     | PF13358.4; | 34.60 | 0.00 |
| TRINITY_G0QRX1_ICHMG/11-199      | G0QRX1.1     | PF04511.13 | 34.60 | 0.00 |
| TRINITY_L8H0F7_ACACA/10-170      | L8H0F7.1     | PF07074.10 | 34.60 | 0.00 |
| TRINITY_A0CN02_PARTE/64-622      | A0CN02.1     | PF00995.21 | 34.60 | 0.00 |
| TRINITY_A8J1Y1_CHLRE/568-1125    | A8J1Y1.1     | PF07969.9; | 34.60 | 0.00 |
| TRINITY_I0YKD6_9CHLO/181-440     | I0YKD6.1     | PF00520.29 | 34.60 | 0.00 |
| TRINITY_D8U5L5_VOLCA/20-315      | D8U5L5.1     | PF13896.4; | 34.60 | 0.00 |
| TRINITY_F4PUC9_DICFS/84-409      | F4PUC9.1     | PF00328.20 | 34.60 | 0.00 |
| TRINITY_A0A0D3CKW4_BRAOL/732-862 | A0A0D3CKW4.1 | PF0185     | 34.60 | 0.00 |
| TRINITY_D2VMI5_NAEGR/22-391      | D2VMI5.1     | PF07065.12 | 34.60 | 0.00 |
| TRINITY_L1IYY6_GUIITH/308-768    | L1IYY6.1     | PF00082.20 | 34.60 | 0.00 |
| TRINITY_Q2UT62_ASPOR/16-158      | Q2UT62.1     | PF12009.6; | 34.50 | 0.00 |
| TRINITY_D6U5T4_9CHLR/11-461      | D6U5T4.1     | PF00067.20 | 34.50 | 0.00 |
| TRINITY_A0A0K9NNN9_ZOSMR/54-398  | A0A0K9NNN9.1 | PF0245     | 34.50 | 0.00 |
| TRINITY_A0CTF8_PARTE/99-592      | A0CTF8.1     | PF01425.19 | 34.50 | 0.00 |
| TRINITY_G6FNB2_9CYAN/63-231      | G6FNB2.1     | PF00188.24 | 34.50 | 0.00 |
| TRINITY_Q22RP1_TETTS/123-413     | Q22RP1.2     | PF01513.19 | 34.50 | 0.00 |
| TRINITY_D3B9I0_POLPA/31-228      | D3B9I0.1     | PF00106.23 | 34.50 | 0.00 |

|                                  |                     |       |      |
|----------------------------------|---------------------|-------|------|
| TRINITY_A0A0E3UX38_9BACT/5-226   | A0A0E3UX38.1 PF0536 | 34.50 | 0.00 |
| TRINITY_V4BAJ3_LOTGI/22-109      | V4BAJ3.1 PF14712.4; | 34.50 | 0.00 |
| TRINITY_G0QQC4_ICHMG/15-404      | G0QQC4.1 PF07690.14 | 34.50 | 0.00 |
| TRINITY_F4PKR3_DICFS/803-1003    | F4PKR3.1 PF09184.9; | 34.50 | 0.00 |
| TRINITY_L8H0A3_ACACA/24-404      | L8H0A3.1 PF04912.12 | 34.50 | 0.00 |
| TRINITY_D8U571_VOLCA/783-1138    | D8U571.1 PF00069.23 | 34.50 | 0.00 |
| TRINITY_L8GFU2_ACACA/577-721     | L8GFU2.1 PF00644.18 | 34.50 | 0.00 |
| TRINITY_E1BUG3_CHICK/247-395     | E1BUG3.2 PF01794.17 | 34.50 | 0.00 |
| TRINITY_A0A0D2UKQ8_CAPO3/188-572 | A0A0D2UKQ8.1 PF0065 | 34.50 | 0.00 |
| TRINITY_D8SE62_SELML/1-97        | D8SE62.1 PF13499.4; | 34.50 | 0.00 |
| TRINITY_A7SN67_NEMVE/6-350       | A7SN67.1 PF00443.27 | 34.50 | 0.00 |
| TRINITY_F1RS99_PIG/625-793       | F1RS99.1 PF00092.26 | 34.50 | 0.00 |
| TRINITY_A0A087ST69_AUXPR/27-271  | A0A087ST69.1 PF1214 | 34.50 | 0.00 |
| TRINITY_F0ZRV9_DICPU/391-664     | F0ZRV9.1 PF02714.13 | 34.50 | 0.00 |
| TRINITY_J9I240_9SPIT/208-361     | J9I240.1 PF05708.10 | 34.50 | 0.00 |
| TRINITY_C3Z429_BRAFL/78-495      | C3Z429.1 PF00962.20 | 34.50 | 0.00 |
| TRINITY_F0ZMQ8_DICPU/111-220     | F0ZMQ8.1 PF14593.4; | 34.50 | 0.00 |
| TRINITY_G0R3L9_ICHMG/178-343     | G0R3L9.1 PF11721.6; | 34.50 | 0.00 |
| TRINITY_MYLKB_DICDI/20-278       | Q86AD7.1 PF00069.23 | 34.50 | 0.00 |
| TRINITY_GPA1_DICDI/15-344        | P16894.1 PF00503.18 | 34.50 | 0.00 |
| TRINITY_A9TF31_PHYPA/14-140      | A9TF31.1 PF00241.18 | 34.50 | 0.00 |
| TRINITY_V4LC58_9GAMM/34-514      | V4LC58.1 PF00135.26 | 34.50 | 0.00 |
| TRINITY_C4LUJ0_ENTHI/260-381     | C4LUJ0.1 PF03953.15 | 34.50 | 0.00 |
| TRINITY_J9HYJ6_9SPIT/30-171      | J9HYJ6.1 PF00179.24 | 34.50 | 0.00 |
| TRINITY_D8UIJ1_VOLCA/13-334      | D8UIJ1.1 PF01266.22 | 34.50 | 0.00 |
| TRINITY_Q22P24_TETTS/166-362     | Q22P24.2 PF00149.26 | 34.50 | 0.00 |
| TRINITY_D8U0C5_VOLCA/2-156       | D8U0C5.1 PF00929.22 | 34.50 | 0.00 |
| TRINITY_A0BU11_PARTE/3-311       | A0BU11.1 PF00459.23 | 34.50 | 0.00 |
| TRINITY_PNPP_SCHPO/18-258        | Q00472.2 PF00702.24 | 34.50 | 0.00 |
| TRINITY_D8TPN9_VOLCA/226-466     | D8TPN9.1 PF05548.9; | 34.50 | 0.00 |
| TRINITY_F4PW45_DICFS/16-125      | F4PW45.1 PF02991.14 | 34.50 | 0.00 |
| TRINITY_A0BXG1_PARTE/29-97       | A0BXG1.1 PF10601.7; | 34.40 | 0.00 |
| TRINITY_A0D054_PARTE/220-345     | A0D054.1 PF12796.5; | 34.40 | 0.00 |
| TRINITY_W4Y077_STRPU/146-350     | W4Y077.1 PF00278.20 | 34.40 | 0.00 |
| TRINITY_A0A0K0FFA1_9BILA/12-173  | A0A0K0FFA1.1 PF0007 | 34.40 | 0.00 |
| TRINITY_F4PXL5_DICFS/1-231       | F4PXL5.1 PF10574.7; | 34.40 | 0.00 |
| TRINITY_A0A078B2J0_STYLE/41-343  | A0A078B2J0.1 PF0064 | 34.40 | 0.00 |
| TRINITY_A0A0G4IYC6_PLABS/25-294  | A0A0G4IYC6.1 PF0120 | 34.40 | 0.00 |
| TRINITY_C3YV41_BRAFL/27-165      | C3YV41.1 PF03188.14 | 34.40 | 0.00 |
| TRINITY_A9G0Q5_SORC5/53-346      | A9G0Q5.1 PF14388.4; | 34.40 | 0.00 |
| TRINITY_F4PX08_DICFS/1189-1360   | F4PX08.1 PF00616.17 | 34.40 | 0.00 |
| TRINITY_L8HJL6_ACACA/18-211      | L8HJL6.1 PF01195.17 | 34.40 | 0.00 |
| TRINITY_A2F029_TRIVA/16-268      | A2F029.1 PF00069.23 | 34.40 | 0.00 |
| TRINITY_A0CKF8_PARTE/784-1056    | A0CKF8.1 PF00664.21 | 34.40 | 0.00 |
| TRINITY_L8H7T2_ACACA/124-454     | L8H7T2.1 PF16113.3; | 34.40 | 0.00 |
| TRINITY_R7YL61_CONA1/217-308     | R7YL61.1 PF00153.25 | 34.40 | 0.00 |
| TRINITY_Q232X8_TETTS/36-488      | Q232X8.1 PF00067.20 | 34.40 | 0.00 |
| TRINITY_B4VYJ3_9CYAN/988-1225    | B4VYJ3.1 PF07993.10 | 34.40 | 0.00 |
| TRINITY_A0A084WMK6_ANOSI/27-268  | A0A084WMK6.1 PF0115 | 34.40 | 0.00 |
| TRINITY_A0DN68_PARTE/31-272      | A0DN68.1 PF00956.16 | 34.40 | 0.00 |
| TRINITY_A0A078AJI8_STYLE/155-505 | A0A078AJI8.1 PF1386 | 34.40 | 0.00 |
| TRINITY_T1KU00_TETUR/83-406      | T1KU00.1 PF00561.18 | 34.40 | 0.00 |
| TRINITY_I0I884_CALAS/53-389      | I0I884.1 PF01547.23 | 34.40 | 0.00 |
| TRINITY_Q54B73_DICDI/144-412     | Q54B73.1 PF02811.17 | 34.40 | 0.00 |
| TRINITY_D2V9V6_NAEGR/44-290      | D2V9V6.1 PF03372.21 | 34.40 | 0.00 |
| TRINITY_V4TAC2_9ROSI/92-279      | V4TAC2.1 PF04893.15 | 34.40 | 0.00 |
| TRINITY_G5HA38_9BACT/48-249      | G5HA38.1 PF00106.23 | 34.40 | 0.00 |
| TRINITY_A8IPD2_CHLRE/123-314     | A8IPD2.1 PF00743.17 | 34.40 | 0.00 |
| TRINITY_A0A0G0WSL3_9BACT/52-473  | A0A0G0WSL3.1 PF0050 | 34.40 | 0.00 |
| TRINITY_A0DKC8_PARTE/3-166       | A0DKC8.1 PF14580.4; | 34.40 | 0.00 |
| TRINITY_G0R1P1_ICHMG/34-476      | G0R1P1.1 PF13347.4; | 34.40 | 0.00 |

|                                  |                     |       |      |
|----------------------------------|---------------------|-------|------|
| TRINITY_U4L3F9_PYROM/2305-2422   | U4L3F9.1 PF00622.26 | 34.40 | 0.00 |
| TRINITY_A0A068RPF7_9FUNG/254-500 | A0A068RPF7.1 PF0056 | 34.40 | 0.00 |
| TRINITY_T1L2L1_TETUR/51-149      | T1L2L1.1 PF04900.10 | 34.40 | 0.00 |
| TRINITY_A0A0D2WLJ2_CAPO3/18-142  | A0A0D2WLJ2.1 PF0370 | 34.40 | 0.00 |
| TRINITY_J9JR19_ACYPI/16-143      | J9JR19.2 PF00293.26 | 34.40 | 0.00 |
| TRINITY_A0A010REE5_9PEZI/155-273 | A0A010REE5.1 PF0246 | 34.40 | 0.00 |
| TRINITY_A0A0G4INY1_PLABS/49-372  | A0A0G4INY1.1 PF0777 | 34.40 | 0.00 |
| TRINITY_A0A0G4EVI0_9ALVE/37-191  | A0A0G4EVI0.1 PF0928 | 34.40 | 0.00 |
| TRINITY_A0A0M2PU93_PROHO/94-505  | A0A0M2PU93.1 PF0001 | 34.40 | 0.00 |
| TRINITY_M7BTK2_CHEMY/270-501     | M7BTK2.1 PF00233.17 | 34.40 | 0.00 |
| TRINITY_D8TGX7_VOLCA/102-547     | D8TGX7.1 PF05833.9; | 34.40 | 0.00 |
| TRINITY_X1X2G5_ACYPI/171-335     | X1X2G5.1 PF13359.4; | 34.40 | 0.00 |
| TRINITY_D8UBR9_VOLCA/5-112       | D8UBR9.1 PF00635.24 | 34.40 | 0.00 |
| TRINITY_F0Y6L3_AURAN/5-178       | F0Y6L3.1 PF00071.20 | 34.30 | 0.00 |
| TRINITY_A0BFQ7_PARTE/4-110       | A0BFQ7.1 PF02991.14 | 34.30 | 0.00 |
| TRINITY_A0CBG9_PARTE/12-286      | A0CBG9.1 PF00069.23 | 34.30 | 0.00 |
| TRINITY_F0XQS0_GROCL/534-680     | F0XQS0.1 PF01699.22 | 34.30 | 0.00 |
| TRINITY_E4XHQ3_OIKDI/2-154       | E4XHQ3.1 PF00106.23 | 34.30 | 0.00 |
| TRINITY_Q24G73_TETTS/4-188       | Q24G73.2 PF04573.10 | 34.30 | 0.00 |
| TRINITY_D3BAH8_POLPA/9-101       | D3BAH8.1 PF00153.25 | 34.30 | 0.00 |
| TRINITY_D3B3S3_POLPA/33-359      | D3B3S3.1 PF00328.20 | 34.30 | 0.00 |
| TRINITY_K3YS89_SETIT/12-266      | K3YS89.1 PF00069.23 | 34.30 | 0.00 |
| TRINITY_A0A0A8K1R1_9RHIZ/337-455 | A0A0A8K1R1.1 PF0251 | 34.30 | 0.00 |
| TRINITY_A0A023XZV5_9GAMM/5-303   | A0A023XZV5.1 PF0115 | 34.30 | 0.00 |
| TRINITY_W4FHE6_9STRA/391-642     | W4FHE6.1 PF07714.15 | 34.30 | 0.00 |
| TRINITY_D2VLS7_NAEGR/1151-1256   | D2VLS7.1 PF02204.16 | 34.30 | 0.00 |
| TRINITY_D2V0G2_NAEGR/7-240       | D2V0G2.1 PF06626.10 | 34.30 | 0.00 |
| TRINITY_E1ZKH6_CHLVA/2-115       | E1ZKH6.1 PF01187.16 | 34.30 | 0.00 |
| TRINITY_A0A0F4QY77_9GAMM/47-455  | A0A0F4QY77.1 PF0159 | 34.30 | 0.00 |
| TRINITY_D3B9C0_POLPA/41-264      | D3B9C0.1 PF10607.7; | 34.30 | 0.00 |
| TRINITY_I7M602_TETTS/109-470     | I7M602.2 PF07690.14 | 34.30 | 0.00 |
| TRINITY_C1ABJ6_GEMAT/11-217      | C1ABJ6.1 PF02492.17 | 34.30 | 0.00 |
| TRINITY_L8H4W5_ACACA/93-449      | L8H4W5.1 PF03372.21 | 34.30 | 0.00 |
| TRINITY_A0A0A0LB60_CUCSA/496-822 | A0A0A0LB60.1 PF0150 | 34.30 | 0.00 |
| TRINITY_A0A0G4H885_9ALVE/380-485 | A0A0G4H885.1 PF0008 | 34.30 | 0.00 |
| TRINITY_Q8XYB7_RALSO/12-284      | Q8XYB7.1 PF12697.5; | 34.30 | 0.00 |
| TRINITY_H6NNK5_9BACL/10-266      | H6NNK5.1 PF01026.19 | 34.30 | 0.00 |
| TRINITY_A0A075AYI6_9FUNG/177-491 | A0A075AYI6.1 PF0154 | 34.30 | 0.00 |
| TRINITY_A0A098D2C1_GIBZA/476-613 | A0A098D2C1.1 PF1200 | 34.30 | 0.00 |
| TRINITY_M3XL57_LATCH/3-188       | M3XL57.1 PF00078.25 | 34.30 | 0.00 |
| TRINITY_T1L0P2_TETUR/70-215      | T1L0P2.1 PF08212.10 | 34.30 | 0.00 |
| TRINITY_A0A078A6G9_STYLE/73-422  | A0A078A6G9.1 PF0268 | 34.30 | 0.00 |
| TRINITY_K7IW89_NASVI/186-293     | K7IW89.1 PF00651.29 | 34.30 | 0.00 |
| TRINITY_F1QNZ4_DANRE/117-321     | F1QNZ4.1 PF05557.11 | 34.30 | 0.00 |
| TRINITY_M4F625_BRARP/60-189      | M4F625.1 PF04494.13 | 34.30 | 0.00 |
| TRINITY_L8H9V4_ACACA/887-1150    | L8H9V4.1 PF12931.5; | 34.30 | 0.00 |
| TRINITY_Q22C93_TETTS/132-403     | Q22C93.2 PF00561.18 | 34.30 | 0.00 |
| TRINITY_D8TX27_VOLCA/36-313      | D8TX27.1 PF00481.19 | 34.30 | 0.00 |
| TRINITY_E6ZR41_SPORE/93-296      | E6ZR41.1 PF01145.23 | 34.30 | 0.00 |
| TRINITY_Q23DC1_TETTS/461-1153    | Q23DC1.2 PF00443.27 | 34.30 | 0.00 |
| TRINITY_A0A086SW02_ACRCH/105-245 | A0A086SW02.1 PF0091 | 34.30 | 0.00 |
| TRINITY_F9GA28_FUSOF/1-104       | F9GA28.1 PF08284.9; | 34.30 | 0.00 |
| TRINITY_D8LGZ7_ECTSI/34-842      | D8LGZ7.1 PF04563.13 | 34.30 | 0.00 |
| TRINITY_A0CY54_PARTE/132-237     | A0CY54.1 PF02517.14 | 34.30 | 0.00 |
| TRINITY_Q22WB2_TETTS/1109-1395   | Q22WB2.1 PF10300.7; | 34.30 | 0.00 |
| TRINITY_K1RDQ2_CRAGI/2-361       | K1RDQ2.1 PF05427.9; | 34.20 | 0.00 |
| TRINITY_I7LX27_TETTS/15-441      | I7LX27.1 PF01593.22 | 34.20 | 0.00 |
| TRINITY_Q232X8_TETTS/36-488      | Q232X8.1 PF00067.20 | 34.20 | 0.00 |
| TRINITY_I7LX20_TETTS/11-287      | I7LX20.2 PF00069.23 | 34.20 | 0.00 |
| TRINITY_G0SXU6_RHOG2/122-373     | G0SXU6.1 PF12146.6; | 34.20 | 0.00 |
| TRINITY_D8TTE6_VOLCA/333-484     | D8TTE6.1 PF12499.6; | 34.20 | 0.00 |

|                                   |                     |       |      |
|-----------------------------------|---------------------|-------|------|
| TRINITY_D2UXM3_NAEGR/141-412      | D2UXM3.1 PF07787.10 | 34.20 | 0.00 |
| TRINITY_K3ZS47_SETIT/263-367      | K3ZS47.1 PF00168.28 | 34.20 | 0.00 |
| TRINITY_W6QM71_PENRO/100-197      | W6QM71.1 PF13646.4; | 34.20 | 0.00 |
| TRINITY_A0A074T7I0_HAMHA/599-667  | A0A074T7I0.1 PF0220 | 34.20 | 0.00 |
| TRINITY_A0A0G2ZUN3_9DELT/30-172   | A0A0G2ZUN3.1 PF1358 | 34.20 | 0.00 |
| TRINITY_L8HBK7_ACACA/26-465       | L8HBK7.1 PF00067.20 | 34.20 | 0.00 |
| TRINITY_F2UPY7_SALR5/97-341       | F2UPY7.1 PF02263.17 | 34.20 | 0.00 |
| TRINITY_V5F2V9_PSEBG/234-429      | V5F2V9.1 PF06102.10 | 34.20 | 0.00 |
| TRINITY_H1A365_TAEGU/168-504      | H1A365.1 PF05277.10 | 34.20 | 0.00 |
| TRINITY_Q22U62_TETTS/7-459        | Q22U62.1 PF03348.13 | 34.20 | 0.00 |
| TRINITY_R5PHN4_9BACT/43-255       | R5PHN4.1 PF00149.26 | 34.20 | 0.00 |
| TRINITY_A0A0G3A2V9_9DELT/7-233    | A0A0G3A2V9.1 PF0536 | 34.20 | 0.00 |
| TRINITY_E9DHS1_COCPS/860-1228     | E9DHS1.1 PF01237.16 | 34.20 | 0.00 |
| TRINITY_W5JHU3_ANODA/948-1221     | W5JHU3.1 PF00664.21 | 34.20 | 0.00 |
| TRINITY_G1NLD9_MELGA/40-541       | G1NLD9.2 PF00443.27 | 34.20 | 0.00 |
| TRINITY_D3CUD7_9ACTN/45-303       | D3CUD7.1 PF00069.23 | 34.20 | 0.00 |
| TRINITY_Q245D9_TETTS/55-158       | Q245D9.2 PF08241.10 | 34.10 | 0.00 |
| TRINITY_T1JE67_STRMM/3-361        | T1JE67.1 PF05427.9; | 34.10 | 0.00 |
| TRINITY_A0E368_PARTE/250-369      | A0E368.1 PF14536.4; | 34.10 | 0.00 |
| TRINITY_A0A0D2WWW9_CAPO3/664-1017 | A0A0D2WWW9.1 PF0218 | 34.10 | 0.00 |
| TRINITY_E1ZDN5_CHLVA/279-378      | E1ZDN5.1 PF00153.25 | 34.10 | 0.00 |
| TRINITY_A9B4J4_HERA2/210-387      | A9B4J4.1 PF13229.4; | 34.10 | 0.00 |
| TRINITY_Q232X8_TETTS/36-488       | Q232X8.1 PF00067.20 | 34.10 | 0.00 |
| TRINITY_A0CXP9_PARTE/92-386       | A0CXP9.1 PF01457.14 | 34.10 | 0.00 |
| TRINITY_K1QS27_CRAGI/169-254      | K1QS27.1 PF09409.8; | 34.10 | 0.00 |
| TRINITY_A0A078AR51_STYLE/8-287    | A0A078AR51.1 PF0006 | 34.10 | 0.00 |
| TRINITY_A0A0D2VK03_CAPO3/191-608  | A0A0D2VK03.1 PF0316 | 34.10 | 0.00 |
| TRINITY_A0A067D6M2_SAPPC/26-209   | A0A067D6M2.1 PF1346 | 34.10 | 0.00 |
| TRINITY_A0A015KSL8_9GLOM/311-525  | A0A015KSL8.1 PF0083 | 34.10 | 0.00 |
| TRINITY_A0A0B0PQN3_GOSAR/128-371  | A0A0B0PQN3.1 PF0056 | 34.10 | 0.00 |
| TRINITY_L2GVH5_VAVCU/142-220      | L2GVH5.1 PF14360.4; | 34.10 | 0.00 |
| TRINITY_XPO6_DANRE/103-276        | Q8QHJ8.1 PF08389.10 | 34.10 | 0.00 |
| TRINITY_A0DT76_PARTE/26-439       | A0DT76.1 PF03164.12 | 34.10 | 0.00 |
| TRINITY_M7BVW1_CHEMY/82-218       | M7BVW1.1 PF07534.14 | 34.10 | 0.00 |
| TRINITY_D8THE2_VOLCA/31-230       | D8THE2.1 PF00227.24 | 34.10 | 0.00 |
| TRINITY_B9SH40_RICCO/305-574      | B9SH40.1 PF00069.23 | 34.10 | 0.00 |
| TRINITY_D3AWF6_POLPA/1305-1480    | D3AWF6.1 PF00617.17 | 34.10 | 0.00 |
| TRINITY_A0A024UEU9_9STRA/9-262    | A0A024UEU9.1 PF0385 | 34.10 | 0.00 |
| TRINITY_A0A068S5U1_9FUNG/59-521   | A0A068S5U1.1 PF0006 | 34.10 | 0.00 |
| TRINITY_A0A0A1NH50_9FUNG/11-444   | A0A0A1NH50.1 PF0360 | 34.10 | 0.00 |
| TRINITY_L1LA63_THEEQ/31-247       | L1LA63.1 PF00566.16 | 34.10 | 0.00 |
| TRINITY_H0Q4S0_9RHOO/6-227        | H0Q4S0.1 PF05368.11 | 34.10 | 0.00 |
| TRINITY_W8F5N9_9BACT/247-782      | W8F5N9.1 PF02128.13 | 34.10 | 0.00 |
| TRINITY_E1ZMD3_CHLVA/4-184        | E1ZMD3.1 PF01467.24 | 34.10 | 0.00 |
| TRINITY_D8TKX7_VOLCA/49-142       | D8TKX7.1 PF00686.17 | 34.10 | 0.00 |
| TRINITY_I0YKD0_9CHLO/7-215        | I0YKD0.1 PF03959.11 | 34.10 | 0.00 |
| TRINITY_F4PXG7_DICFS/6-148        | F4PXG7.1 PF10358.7; | 34.10 | 0.00 |
| TRINITY_D6TJN6_9CHLR/46-800       | D6TJN6.1 PF01804.16 | 34.10 | 0.00 |
| TRINITY_X6LE16_RETFI/317-409      | X6LE16.1 PF00169.27 | 34.10 | 0.00 |
| TRINITY_W7WVY8_TETTS/68-336       | W7WVY8.1 PF00069.23 | 34.10 | 0.00 |
| TRINITY_W5KRG5_ASTMX/4-257        | W5KRG5.1 PF00069.23 | 34.10 | 0.00 |
| TRINITY_M2M5B8_BAUCO/1-288        | M2M5B8.1 PF04724.11 | 34.10 | 0.00 |
| TRINITY_A0A078J9P7_BRANA/13-184   | A0A078J9P7.1 PF1265 | 34.10 | 0.00 |
| TRINITY_A0A024TMK6_9STRA/125-290  | A0A024TMK6.1 PF1029 | 34.10 | 0.00 |
| TRINITY_W9RCB9_9ROSA/47-245       | W9RCB9.1 PF00106.23 | 34.10 | 0.00 |
| TRINITY_L8HBZ7_ACACA/45-347       | L8HBZ7.1 PF01148.18 | 34.10 | 0.00 |
| TRINITY_A0A087SEB0_AUXPR/837-1291 | A0A087SEB0.1 PF0075 | 34.10 | 0.00 |
| TRINITY_A8J7J9_CHLRE/33-196       | A8J7J9.1 PF12499.6; | 34.10 | 0.00 |
| TRINITY_A0A024UBD2_9STRA/265-453  | A0A024UBD2.1 PF0223 | 34.10 | 0.00 |
| TRINITY_A0A0J7MYI6_LASNI/104-263  | A0A0J7MYI6.1 PF1335 | 34.10 | 0.00 |
| TRINITY_Q23YE6_TETTS/45-820       | Q23YE6.1 PF01804.16 | 34.00 | 0.00 |

|                                  |                     |       |      |
|----------------------------------|---------------------|-------|------|
| TRINITY_G0QUTO_ICHMG/10-300      | G0QUTO.1 PF00069.23 | 34.00 | 0.00 |
| TRINITY_LOPEF3_PNEJ8/829-1015    | LOPEF3.1 PF00617.17 | 34.00 | 0.00 |
| TRINITY_A0A0F5YFY0_9CYAN/7-191   | A0A0F5YFY0.1 PF1346 | 34.00 | 0.00 |
| TRINITY_A0A0M0K1H4_9EUKA/547-653 | A0A0M0K1H4.1 PF0220 | 34.00 | 0.00 |
| TRINITY_B7PRH5_IXOSC/38-506      | B7PRH5.1 PF00118.22 | 34.00 | 0.00 |
| TRINITY_A0CXP9_PARTE/92-386      | A0CXP9.1 PF01457.14 | 34.00 | 0.00 |
| TRINITY_RTK1_YEAST/303-575       | Q12100.1 PF00069.23 | 34.00 | 0.00 |
| TRINITY_A0A0A1P2K3_9FUNG/88-539  | A0A0A1P2K3.1 PF0006 | 34.00 | 0.00 |
| TRINITY_A8J4B3_CHLRE/54-397      | A8J4B3.1 PF10250.7; | 34.00 | 0.00 |
| TRINITY_A0A059LJV4_9CHLO/37-203  | A0A059LJV4.1 PF0303 | 34.00 | 0.00 |
| TRINITY_L8H0Q4_ACACA/22-456      | L8H0Q4.1 PF00067.20 | 34.00 | 0.00 |
| TRINITY_M2XUX5_GALSU/12-230      | M2XUX5.1 PF13489.4; | 34.00 | 0.00 |
| TRINITY_I7MD42_TETTS/162-405     | I7MD42.2 PF00481.19 | 34.00 | 0.00 |
| TRINITY_D8TIQ2_VOLCA/20-127      | D8TIQ2.1 PF12353.6; | 34.00 | 0.00 |
| TRINITY_J3K977_COCIM/635-811     | J3K977.2 PF03914.15 | 34.00 | 0.00 |
| TRINITY_B0T3U6_CAUSK/89-275      | B0T3U6.1 PF07859.11 | 34.00 | 0.00 |
| TRINITY_W4GTJ7_9STRA/26-526      | W4GTJ7.1 PF01457.14 | 34.00 | 0.00 |
| TRINITY_A7S7T2_NEMVE/1-225       | A7S7T2.1 PF08423.9; | 34.00 | 0.00 |
| TRINITY_A0A067L538_JATCU/1-438   | A0A067L538.1 PF1205 | 34.00 | 0.00 |
| TRINITY_A9UU07_MONBE/109-353     | A9UU07.1 PF00487.22 | 34.00 | 0.00 |
| TRINITY_K1VK27_TRIAC/159-712     | K1VK27.1 PF08553.8; | 34.00 | 0.00 |
| TRINITY_V8PGZ0_OPHHA/116-621     | V8PGZ0.1 PF16969.3; | 34.00 | 0.00 |
| TRINITY_A8JF93_CHLRE/567-861     | A8JF93.1 PF00069.23 | 34.00 | 0.00 |
| TRINITY_A8I5V9_CHLRE/18-421      | A8I5V9.1 PF07065.12 | 34.00 | 0.00 |
| TRINITY_L8H0Q4_ACACA/22-456      | L8H0Q4.1 PF00067.20 | 34.00 | 0.00 |
| TRINITY_Q22C93_TETTS/132-403     | Q22C93.2 PF00561.18 | 34.00 | 0.00 |
| TRINITY_F0ZC04_DICPU/25-339      | F0ZC04.1 PF09724.7; | 34.00 | 0.00 |
| TRINITY_I1IH10_BRADI/24-280      | I1IH10.1 PF00069.23 | 34.00 | 0.00 |
| TRINITY_E1Z6J1_CHLVA/60-213      | E1Z6J1.1 PF12708.5; | 34.00 | 0.00 |
| TRINITY_E1Z3N0_CHLVA/28-361      | E1Z3N0.1 PF00295.15 | 34.00 | 0.00 |
| TRINITY_A8I9N4_CHLRE/13-171      | A8I9N4.1 PF12499.6; | 34.00 | 0.00 |
| TRINITY_A7T3M9_NEMVE/41-280      | A7T3M9.1 PF12146.6; | 34.00 | 0.00 |
| TRINITY_L8H9N6_ACACA/19-590      | L8H9N6.1 PF05600.10 | 34.00 | 0.00 |
| TRINITY_L8H5A9_ACACA/74-237      | L8H5A9.1 PF04387.12 | 34.00 | 0.00 |
| TRINITY_D8TS85_VOLCA/84-353      | D8TS85.1 PF13896.4; | 34.00 | 0.00 |
| TRINITY_A0A087SMS4_AUXPR/403-512 | A0A087SMS4.1 PF1364 | 34.00 | 0.00 |
| TRINITY_A8IUH2_CHLRE/119-324     | A8IUH2.1 PF07714.15 | 34.00 | 0.00 |
| TRINITY_I0YU90_9CHLO/9-650       | I0YU90.1 PF04506.11 | 34.00 | 0.00 |
| TRINITY_A8JDQ6_CHLRE/523-667     | A8JDQ6.1 PF08016.10 | 34.00 | 0.00 |
| TRINITY_D8U6K8_VOLCA/164-377     | D8U6K8.1 PF03924.11 | 34.00 | 0.00 |
| TRINITY_A0A075B447_9FUNG/3-1130  | A0A075B447.1 PF0246 | 33.90 | 0.00 |
| TRINITY_Q6BJF3_DEBHA/225-415     | Q6BJF3.1 PF11715.6; | 33.90 | 0.00 |
| TRINITY_I7MKL5_TETTS/83-500      | I7MKL5.2 PF00067.20 | 33.90 | 0.00 |
| TRINITY_I7M910_TETTS/11-285      | I7M910.1 PF00069.23 | 33.90 | 0.00 |
| TRINITY_G1KK61_ANOCA/29-257      | G1KK61.1 PF10223.7; | 33.90 | 0.00 |
| TRINITY_A0A0D2VZL3_CAPO3/294-541 | A0A0D2VZL3.1 PF0052 | 33.90 | 0.00 |
| TRINITY_U6NMJ5_HAECO/119-238     | U6NMJ5.1 PF00622.26 | 33.90 | 0.00 |
| TRINITY_A0CRH3_PARTE/53-407      | A0CRH3.1 PF00155.19 | 33.90 | 0.00 |
| TRINITY_A0EBH2_PARTE/32-359      | A0EBH2.1 PF00328.20 | 33.90 | 0.00 |
| TRINITY_A0A010QE82_9PEZI/10-235  | A0A010QE82.1 PF0572 | 33.90 | 0.00 |
| TRINITY_C3ZVI6_BRAFL/29-413      | C3ZVI6.1 PF04922.10 | 33.90 | 0.00 |
| TRINITY_V3ZTL6_LOTGI/3-368       | V3ZTL6.1 PF05761.12 | 33.90 | 0.00 |
| TRINITY_T0KSM0_COLGC/10-235      | T0KSM0.1 PF05721.11 | 33.90 | 0.00 |
| TRINITY_F4PJ73_DICFS/7-1148      | F4PJ73.1 PF09735.7; | 33.90 | 0.00 |
| TRINITY_A4VDT5_TETTS/546-675     | A4VDT5.2 PF04499.13 | 33.90 | 0.00 |
| TRINITY_S8B4G2_PENO1/609-970     | S8B4G2.1 PF00702.24 | 33.90 | 0.00 |
| TRINITY_D2QN84_SPILD/3-301       | D2QN84.1 PF01156.17 | 33.90 | 0.00 |
| TRINITY_I7M9S7_TETTS/86-331      | I7M9S7.2 PF00481.19 | 33.90 | 0.00 |
| TRINITY_A4VDN1_TETTS/4-430       | A4VDN1.1 PF00067.20 | 33.90 | 0.00 |
| TRINITY_E1Z5C6_CHLVA/16-469      | E1Z5C6.1 PF03935.13 | 33.90 | 0.00 |
| TRINITY_B9I4K9_POPTR/49-179      | B9I4K9.1 PF03517.11 | 33.90 | 0.00 |

|                                  |              |            |       |      |
|----------------------------------|--------------|------------|-------|------|
| TRINITY_D2W423_NAEGR/65-239      | D2W423.1     | PF01273.23 | 33.90 | 0.00 |
| TRINITY_A8J514_CHLRE/16-293      | A8J514.1     | PF00069.23 | 33.90 | 0.00 |
| TRINITY_G7CB30_MYCTH/15-324      | G7CB30.1     | PF01326.17 | 33.90 | 0.00 |
| TRINITY_T1GBN4_MEGSC/141-290     | T1GBN4.1     | PF00620.25 | 33.90 | 0.00 |
| TRINITY_D8U200_VOLCA/57-377      | D8U200.1     | PF07466.9; | 33.90 | 0.00 |
| TRINITY_S3CQ68_OPHP1/12-322      | S3CQ68.1     | PF00069.23 | 33.90 | 0.00 |
| TRINITY_A0A0K2YE41_9NOCA/25-335  | A0A0K2YE41.1 | PF0132     | 33.90 | 0.00 |
| TRINITY_D8U381_VOLCA/40-148      | D8U381.1     | PF02694.13 | 33.90 | 0.00 |
| TRINITY_A0A0N1NYH5_9EURO/40-184  | A0A0N1NYH5.1 | PF1367     | 33.90 | 0.00 |
| TRINITY_T0RK07_9STRA/785-1026    | T0RK07.1     | PF02714.13 | 33.90 | 0.00 |
| TRINITY_D8TH77_VOLCA/22-210      | D8TH77.1     | PF00069.23 | 33.90 | 0.00 |
| TRINITY_D8UAW6_VOLCA/1386-1537   | D8UAW6.1     | PF00069.23 | 33.90 | 0.00 |
| TRINITY_A9RBI6_PHYPA/54-465      | A9RBI6.1     | PF02897.13 | 33.80 | 0.00 |
| TRINITY_G4VH12_SCHMA/450-920     | G4VH12.1     | PF00899.19 | 33.80 | 0.00 |
| TRINITY_A0A087HR20_ARAAL/15-237  | A0A087HR20.1 | PF0024     | 33.80 | 0.00 |
| TRINITY_F0ZI60_DICPU/25-436      | F0ZI60.1     | PF12698.5; | 33.80 | 0.00 |
| TRINITY_L8H446_ACACA/214-362     | L8H446.1     | PF00179.24 | 33.80 | 0.00 |
| TRINITY_I0Z4A4_9CHLO/51-323      | I0Z4A4.1     | PF00231.17 | 33.80 | 0.00 |
| TRINITY_I7M3L2_TETTS/5-159       | I7M3L2.2     | PF00790.17 | 33.80 | 0.00 |
| TRINITY_I7MJR6_TETTS/77-350      | I7MJR6.2     | PF00561.18 | 33.80 | 0.00 |
| TRINITY_L8HD92_ACACA/1814-2187   | L8HD92.1     | PF02889.14 | 33.80 | 0.00 |
| TRINITY_L8H748_ACACA/27-260      | L8H748.1     | PF02450.13 | 33.80 | 0.00 |
| TRINITY_F1A4E2_DICPU/12-173      | F1A4E2.1     | PF00071.20 | 33.80 | 0.00 |
| TRINITY_I1GE80_AMPQE/220-564     | I1GE80.1     | PF13598.4; | 33.80 | 0.00 |
| TRINITY_L8GXD6_ACACA/112-229     | L8GXD6.1     | PF01529.18 | 33.80 | 0.00 |
| TRINITY_D3BDY5_POLPA/440-647     | D3BDY5.1     | PF00924.16 | 33.80 | 0.00 |
| TRINITY_D8QSJ9_SELML/486-830     | D8QSJ9.1     | PF11865.6; | 33.80 | 0.00 |
| TRINITY_D8TRL6_VOLCA/310-457     | D8TRL6.1     | PF12499.6; | 33.80 | 0.00 |
| TRINITY_D8UJN4_VOLCA/97-364      | D8UJN4.1     | PF13862.4; | 33.80 | 0.00 |
| TRINITY_W5M6W3_LEPOC/35-350      | W5M6W3.1     | PF00328.20 | 33.80 | 0.00 |
| TRINITY_G3AUB2_SPAPN/40-172      | G3AUB2.1     | PF12894.5; | 33.80 | 0.00 |
| TRINITY_A0A077ZVR2_STYLE/565-708 | A0A077ZVR2.1 | PF1526     | 33.80 | 0.00 |
| TRINITY_G3P6H1_GASAC/86-386      | G3P6H1.1     | PF00561.18 | 33.80 | 0.00 |
| TRINITY_A0A0D2WSZ7_CAPO3/158-315 | A0A0D2WSZ7.1 | PF0062     | 33.80 | 0.00 |
| TRINITY_A0A078ACA2_STYLE/7-156   | A0A078ACA2.1 | PF1458     | 33.80 | 0.00 |
| TRINITY_A9V2G9_MONBE/59-462      | A9V2G9.1     | PF00450.20 | 33.80 | 0.00 |
| TRINITY_G0R1G3_ICHMG/80-301      | G0R1G3.1     | PF00566.16 | 33.80 | 0.00 |
| TRINITY_Q22E24_TETTS/241-462     | Q22E24.1     | PF02684.13 | 33.80 | 0.00 |
| TRINITY_Q9RZM6_DEIRA/82-311      | Q9RZM6.1     | PF12697.5; | 33.80 | 0.00 |
| TRINITY_E1ZCR5_CHLVA/245-673     | E1ZCR5.1     | PF01142.16 | 33.80 | 0.00 |
| TRINITY_A0A015JNE6_9GLOM/190-476 | A0A015JNE6.1 | PF0154     | 33.80 | 0.00 |
| TRINITY_K4BM04_SOLLC/882-1171    | K4BM04.1     | PF00069.23 | 33.80 | 0.00 |
| TRINITY_A0A0E0KTV1_ORYPU/5-189   | A0A0E0KTV1.1 | PF0006     | 33.80 | 0.00 |
| TRINITY_D8UD46_VOLCA/316-464     | D8UD46.1     | PF13671.4; | 33.80 | 0.00 |
| TRINITY_A0A015KAA8_9GLOM/374-518 | A0A015KAA8.1 | PF0006     | 33.80 | 0.00 |
| TRINITY_A0A078AND5_STYLE/23-125  | A0A078AND5.1 | PF0789     | 33.70 | 0.00 |
| TRINITY_S2JNV9_MUCC1/8-108       | S2JNV9.1     | PF00168.28 | 33.70 | 0.00 |
| TRINITY_C2W9U2_BACCE/34-290      | C2W9U2.1     | PF00561.18 | 33.70 | 0.00 |
| TRINITY_A4RXB0_OSTLU/28-319      | A4RXB0.1     | PF03151.14 | 33.70 | 0.00 |
| TRINITY_F4PIF8_DICFS/13-419      | F4PIF8.1     | PF00083.22 | 33.70 | 0.00 |
| TRINITY_B3RRX2_TRIAD/1-238       | B3RRX2.1     | PF00069.23 | 33.70 | 0.00 |
| TRINITY_J9F1T2_9SPIT/1-126       | J9F1T2.1     | PF14825.4; | 33.70 | 0.00 |
| TRINITY_G0R492_ICHMG/45-429      | G0R492.1     | PF00026.21 | 33.70 | 0.00 |
| TRINITY_L8H4S6_ACACA/29-449      | L8H4S6.1     | PF12832.5; | 33.70 | 0.00 |
| TRINITY_I1FIZ8_AMPQE/217-575     | I1FIZ8.1     | PF13598.4; | 33.70 | 0.00 |
| TRINITY_L8H258_ACACA/21-136      | L8H258.1     | PF00787.22 | 33.70 | 0.00 |
| TRINITY_A8HN94_CHLRE/105-201     | A8HN94.1     | PF01329.17 | 33.70 | 0.00 |
| TRINITY_D8RIB2_SELML/16-455      | D8RIB2.1     | PF06087.10 | 33.70 | 0.00 |
| TRINITY_F7FXQ5_ORNAN/179-496     | F7FXQ5.2     | PF00728.20 | 33.70 | 0.00 |
| TRINITY_A0A0F8VF03_9ARCH/29-236  | A0A0F8VF03.1 | PF0281     | 33.70 | 0.00 |
| TRINITY_J9IEP0_9SPIT/637-1073    | J9IEP0.1     | PF04547.10 | 33.70 | 0.00 |

|                                  |                     |       |      |
|----------------------------------|---------------------|-------|------|
| TRINITY_A0A068SCY1_9FUNG/173-379 | A0A068SCY1.1 PF0014 | 33.70 | 0.00 |
| TRINITY_B0WT67_CULQU/71-475      | B0WT67.1 PF00450.20 | 33.70 | 0.00 |
| TRINITY_Q238R6_TETTS/1-312       | Q238R6.3 PF10149.7; | 33.70 | 0.00 |
| TRINITY_D8TJN6_VOLCA/1-492       | D8TJN6.1 PF07058.9; | 33.70 | 0.00 |
| TRINITY_D8FV64_9CYAN/82-418      | D8FV64.1 PF01547.23 | 33.70 | 0.00 |
| TRINITY_F0ZHA2_DICPU/18-202      | F0ZHA2.1 PF01209.16 | 33.70 | 0.00 |
| TRINITY_H2ZXA1_LATCH/316-440     | H2ZXA1.1 PF09112.8; | 33.70 | 0.00 |
| TRINITY_X6NEQ3_RETFI/648-804     | X6NEQ3.1 PF00644.18 | 33.70 | 0.00 |
| TRINITY_A0A090M529_OSTTA/82-337  | A0A090M529.1 PF0058 | 33.70 | 0.00 |
| TRINITY_W4XPH5_STRPU/280-621     | W4XPH5.1 PF14782.4; | 33.70 | 0.00 |
| TRINITY_F4PU75_DICFS/62-443      | F4PU75.1 PF02274.15 | 33.70 | 0.00 |
| TRINITY_I7ME59_TETTS/50-504      | I7ME59.2 PF00067.20 | 33.60 | 0.00 |
| TRINITY_Q09AJ8_STIAD/9-122       | Q09AJ8.1 PF12680.5; | 33.60 | 0.00 |
| TRINITY_X6M5L4_RETFI/1-369       | X6M5L4.1 PF07690.14 | 33.60 | 0.00 |
| TRINITY_A0A0M8MRT5_9BASI/14-177  | A0A0M8MRT5.1 PF0007 | 33.60 | 0.00 |
| TRINITY_W4Y1D7_STRPU/18-141      | W4Y1D7.1 PF00168.28 | 33.60 | 0.00 |
| TRINITY_Q7S7R7_NEUCR/65-196      | Q7S7R7.1 PF00043.23 | 33.60 | 0.00 |
| TRINITY_B8C8E8_THAPS/382-562     | B8C8E8.1 PF07534.14 | 33.60 | 0.00 |
| TRINITY_Q3SE16_PARTE/50-248      | Q3SE16.1 PF06705.9; | 33.60 | 0.00 |
| TRINITY_K1VXN6_TRIAC/658-948     | K1VXN6.1 PF01504.16 | 33.60 | 0.00 |
| TRINITY_Q232X8_TETTS/36-488      | Q232X8.1 PF00067.20 | 33.60 | 0.00 |
| TRINITY_T1G8Z2_HELRO/76-328      | T1G8Z2.1 PF00069.23 | 33.60 | 0.00 |
| TRINITY_A0C5A5_PARTE/11-426      | A0C5A5.1 PF03348.13 | 33.60 | 0.00 |
| TRINITY_A0A087XPQ7_POEFO/32-173  | A0A087XPQ7.2 PF0928 | 33.60 | 0.00 |
| TRINITY_R6V291_9FIRM/722-839     | R6V291.1 PF00072.22 | 33.60 | 0.00 |
| TRINITY_J9ITG9_9SPIT/43-340      | J9ITG9.1 PF00648.19 | 33.60 | 0.00 |
| TRINITY_I7MD42_TETTS/162-405     | I7MD42.2 PF00481.19 | 33.60 | 0.00 |
| TRINITY_I7M910_TETTS/11-285      | I7M910.1 PF00069.23 | 33.60 | 0.00 |
| TRINITY_A0E3H2_PARTE/82-288      | A0E3H2.1 PF07651.14 | 33.60 | 0.00 |
| TRINITY_Q6CEL9_YARLI/113-499     | Q6CEL9.2 PF01433.18 | 33.60 | 0.00 |
| TRINITY_J9IFM7_9SPIT/442-784     | J9IFM7.1 PF05285.10 | 33.60 | 0.00 |
| TRINITY_F0Z817_DICPU/213-362     | F0Z817.1 PF04088.11 | 33.60 | 0.00 |
| TRINITY_A0CAB3_PARTE/485-621     | A0CAB3.1 PF00175.19 | 33.60 | 0.00 |
| TRINITY_D8TMI5_VOLCA/21-118      | D8TMI5.1 PF03645.11 | 33.60 | 0.00 |
| TRINITY_E1Z4L1_CHLVA/93-319      | E1Z4L1.1 PF13489.4; | 33.60 | 0.00 |
| TRINITY_A0A024UDE2_9STRA/138-385 | A0A024UDE2.1 PF0942 | 33.60 | 0.00 |
| TRINITY_F8PPC4_SERL3/1288-1661   | F8PPC4.1 PF02181.21 | 33.60 | 0.00 |
| TRINITY_L8GH56_ACACA/26-138      | L8GH56.1 PF08487.8; | 33.60 | 0.00 |
| TRINITY_A8IVV8_CHLRE/112-217     | A8IVV8.1 PF04359.12 | 33.60 | 0.00 |
| TRINITY_I7IFD4_BABMI/10-147      | I7IFD4.1 PF00179.24 | 33.60 | 0.00 |
| TRINITY_L8GF85_ACACA/2138-2306   | L8GF85.1 PF00520.29 | 33.60 | 0.00 |
| TRINITY_A7RPJ7_NEMVE/5-386       | A7RPJ7.1 PF00083.22 | 33.60 | 0.00 |
| TRINITY_D8SC35_SELML/433-611     | D8SC35.1 PF00924.16 | 33.60 | 0.00 |
| TRINITY_B7PNE9_IXOSC/191-298     | B7PNE9.1 PF00651.29 | 33.60 | 0.00 |
| TRINITY_D8U4S8_VOLCA/6-142       | D8U4S8.1 PF00582.24 | 33.60 | 0.00 |
| TRINITY_G0R1G3_ICHMG/80-301      | G0R1G3.1 PF00566.16 | 33.60 | 0.00 |
| TRINITY_D8TZV8_VOLCA/186-592     | D8TZV8.1 PF14646.4; | 33.60 | 0.00 |
| TRINITY_K0KR26_WICCF/154-404     | K0KR26.1 PF00069.23 | 33.60 | 0.00 |
| TRINITY_D8TRI1_VOLCA/20-204      | D8TRI1.1 PF04720.10 | 33.60 | 0.00 |
| TRINITY_I1BR12_RHIO9/37-261      | I1BR12.1 PF07819.11 | 33.60 | 0.00 |
| TRINITY_A0D933_PARTE/16-192      | A0D933.1 PF01105.22 | 33.50 | 0.00 |
| TRINITY_M7AQJ1_CHEMY/15-987      | M7AQJ1.1 PF11894.6; | 33.50 | 0.00 |
| TRINITY_M2W7G2_GALSU/46-292      | M2W7G2.1 PF00294.22 | 33.50 | 0.00 |
| TRINITY_Q22X26_TETTS/84-364      | Q22X26.2 PF01266.22 | 33.50 | 0.00 |
| TRINITY_I4BY26_ANAMD/508-730     | I4BY26.1 PF02358.14 | 33.50 | 0.00 |
| TRINITY_A0A0C4DL18_MAGP6/21-224  | A0A0C4DL18.1 PF0642 | 33.50 | 0.00 |
| TRINITY_A0A098EX32_9BACI/31-267  | A0A098EX32.1 PF0785 | 33.50 | 0.00 |
| TRINITY_Q23LQ9_TETTS/93-385      | Q23LQ9.2 PF01457.14 | 33.50 | 0.00 |
| TRINITY_G0R625_ICHMG/7-381       | G0R625.1 PF05761.12 | 33.50 | 0.00 |
| TRINITY_A0DL82_PARTE/243-453     | A0DL82.1 PF03403.11 | 33.50 | 0.00 |
| TRINITY_G0SZ38_RHOG2/34-256      | G0SZ38.1 PF05721.11 | 33.50 | 0.00 |

|                                  |                     |       |      |
|----------------------------------|---------------------|-------|------|
| TRINITY_A0DTM2_PARTE/98-446      | A0DTM2.1 PF13868.4; | 33.50 | 0.00 |
| TRINITY_A0A0G4IY77_PLABS/137-395 | A0A0G4IY77.1 PF0006 | 33.50 | 0.00 |
| TRINITY_H0XA36_OTOGA/16-175      | H0XA36.1 PF12706.5; | 33.50 | 0.00 |
| TRINITY_A8J8C1_CHLRE/99-326      | A8J8C1.1 PF00557.22 | 33.50 | 0.00 |
| TRINITY_D2V5Q4_NAEGR/10-261      | D2V5Q4.1 PF00069.23 | 33.50 | 0.00 |
| TRINITY_D8TY58_VOLCA/27-330      | D8TY58.1 PF09741.7; | 33.50 | 0.00 |
| TRINITY_I0ZAF3_9CHLO/1573-1786   | I0ZAF3.1 PF10441.7; | 33.50 | 0.00 |
| TRINITY_W5N1X5_LEPOC/377-632     | W5N1X5.1 PF00069.23 | 33.50 | 0.00 |
| TRINITY_D3BGC6_POLPA/239-445     | D3BGC6.1 PF00616.17 | 33.50 | 0.00 |
| TRINITY_T1JUM0_TETUR/213-387     | T1JUM0.1 PF00617.17 | 33.50 | 0.00 |
| TRINITY_G4TUB8_PIRID/5-178       | G4TUB8.1 PF00025.19 | 33.50 | 0.00 |
| TRINITY_A0A078AR51_STYLE/8-287   | A0A078AR51.1 PF0006 | 33.40 | 0.00 |
| TRINITY_L8GPJ8_ACACA/129-640     | L8GPJ8.1 PF07690.14 | 33.40 | 0.00 |
| TRINITY_SCY1_DICDI/31-371        | Q55GS2.1 PF00069.23 | 33.40 | 0.00 |
| TRINITY_L8GGA7_ACACA/516-881     | L8GGA7.1 PF03378.13 | 33.40 | 0.00 |
| TRINITY_PNPP_SCHPO/18-258        | Q00472.2 PF00702.24 | 33.30 | 0.00 |
| TRINITY_S7Q277_GLOTA/5-167       | S7Q277.1 PF00071.20 | 33.30 | 0.00 |
| TRINITY_A8JFK1_CHLRE/14-207      | A8JFK1.1 PF13589.4; | 33.30 | 0.00 |
| TRINITY_A0CTE6_PARTE/63-497      | A0CTE6.1 PF01490.16 | 33.30 | 0.00 |
| TRINITY_W4Y9I1_STRPU/534-669     | W4Y9I1.1 PF14815.4; | 33.30 | 0.00 |
| TRINITY_I7LXC7_TETTS/17-452      | I7LXC7.1 PF00083.22 | 33.30 | 0.00 |
| TRINITY_F0ZZN9_DICPU/600-775     | F0ZZN9.1 PF00621.18 | 33.30 | 0.00 |
| TRINITY_A0BZ71_PARTE/677-791     | A0BZ71.1 PF00072.22 | 33.30 | 0.00 |
| TRINITY_A0BXG1_PARTE/29-97       | A0BXG1.1 PF10601.7; | 33.30 | 0.00 |
| TRINITY_A0BXG1_PARTE/29-97       | A0BXG1.1 PF10601.7; | 33.30 | 0.00 |
| TRINITY_V8N4Z4_OPHHA/1-303       | V8N4Z4.1 PF00026.21 | 33.30 | 0.00 |
| TRINITY_T1H989_RHOPR/142-532     | T1H989.1 PF00930.19 | 33.30 | 0.00 |
| TRINITY_A0A015M0H2_9GLOM/8-143   | A0A015M0H2.1 PF0112 | 33.30 | 0.00 |
| TRINITY_L8GT75_ACACA/62-194      | L8GT75.1 PF00583.23 | 33.30 | 0.00 |
| TRINITY_A0CWW0_PARTE/35-576      | A0CWW0.1 PF00995.21 | 33.30 | 0.00 |
| TRINITY_C1N6C7_MICPC/171-454     | C1N6C7.1 PF00928.19 | 33.30 | 0.00 |
| TRINITY_F0ZU75_DICPU/166-360     | F0ZU75.1 PF11715.6; | 33.30 | 0.00 |
| TRINITY_V4U0D3_9ROSI/12-641      | V4U0D3.1 PF00888.20 | 33.30 | 0.00 |
| TRINITY_C4L908_TOLAT/21-158      | C4L908.1 PF09588.8; | 33.30 | 0.00 |
| TRINITY_Q5W9T4_CHLRE/42-167      | Q5W9T4.1 PF00504.19 | 33.30 | 0.00 |
| TRINITY_A0BLH9_PARTE/7-108       | A0BLH9.1 PF00168.28 | 33.30 | 0.00 |
| TRINITY_D2VMC5_NAEGR/6-132       | D2VMC5.1 PF15749.3; | 33.30 | 0.00 |
| TRINITY_U4LLW0_PYROM/192-508     | U4LLW0.1 PF00962.20 | 33.30 | 0.00 |
| TRINITY_W5LBU9_ASTMX/23-1186     | W5LBU9.1 PF06427.9; | 33.30 | 0.00 |
| TRINITY_Q232X8_TETTS/36-488      | Q232X8.1 PF00067.20 | 33.30 | 0.00 |
| TRINITY_L8HBA4_ACACA/57-414      | L8HBA4.1 PF07767.9; | 33.30 | 0.00 |
| TRINITY_GACY_DICDI/544-696       | Q54TH9.1 PF00620.25 | 33.30 | 0.00 |
| TRINITY_M1W5R4_CLAP2/71-196      | M1W5R4.1 PF00043.23 | 33.30 | 0.00 |
| TRINITY_Q23AR4_TETTS/1-276       | Q23AR4.2 PF04614.10 | 33.30 | 0.00 |
| TRINITY_C3YX54_BRAFL/13-254      | C3YX54.1 PF13561.4; | 33.30 | 0.00 |
| TRINITY_T1KEW3_TETUR/87-320      | T1KEW3.1 PF02902.17 | 33.30 | 0.00 |
| TRINITY_W0PGH6_9BURK/176-348     | W0PGH6.1 PF05175.12 | 33.30 | 0.00 |
| TRINITY_L8GUT4_ACACA/40-399      | L8GUT4.1 PF00155.19 | 33.30 | 0.00 |
| TRINITY_F0VAK5_NEOCL/36-164      | F0VAK5.1 PF04053.12 | 33.30 | 0.00 |
| TRINITY_I1GGB4_AMPQE/46-226      | I1GGB4.1 PF00092.26 | 33.30 | 0.00 |
| TRINITY_A0A099NXC9_PICKU/834-994 | A0A099NXC9.1 PF0062 | 33.30 | 0.00 |
| TRINITY_A0A0K9NVM7_ZOSMR/73-176  | A0A0K9NVM7.1 PF0222 | 33.30 | 0.00 |
| TRINITY_A0A0J8F894_BETVU/311-429 | A0A0J8F894.1 PF0448 | 33.30 | 0.00 |
| TRINITY_A0A078F7K0_BRANA/30-159  | A0A078F7K0.1 PF0091 | 33.30 | 0.00 |
| TRINITY_K9UAR6_9CHRO/5-101       | K9UAR6.1 PF05724.9; | 33.30 | 0.00 |
| TRINITY_W7U3X1_9STRA/182-521     | W7U3X1.1 PF10250.7; | 33.30 | 0.00 |
| TRINITY_F0ZW58_DICPU/689-833     | F0ZW58.1 PF12335.6; | 33.30 | 0.00 |
| TRINITY_L8HFG7_ACACA/132-452     | L8HFG7.1 PF04129.10 | 33.30 | 0.00 |
| TRINITY_I3J1D5_ORENI/161-282     | I3J1D5.1 PF12755.5; | 33.30 | 0.00 |
| TRINITY_L8GHU6_ACACA/376-526     | L8GHU6.1 PF00620.25 | 33.30 | 0.00 |
| TRINITY_A0DS68_PARTE/1-166       | A0DS68.1 PF06017.11 | 33.30 | 0.00 |



|                                    |                     |       |      |
|------------------------------------|---------------------|-------|------|
| TRINITY_I7LX20_TETTS/11-287        | I7LX20.2 PF00069.23 | 33.30 | 0.00 |
| TRINITY_A0A084VMY7_ANOSI/56-477    | A0A084VMY7.1 PF0213 | 33.30 | 0.00 |
| TRINITY_Q55F12_DICDI/374-640       | Q55F12.1 PF00149.26 | 33.30 | 0.00 |
| TRINITY_A8ISU6_CHLRE/593-795       | A8ISU6.1 PF07059.10 | 33.30 | 0.00 |
| TRINITY_V3ZMI5_LOTGI/10-184        | V3ZMI5.1 PF00071.20 | 33.30 | 0.00 |
| TRINITY_F0ZNT4_DICPU/393-543       | F0ZNT4.1 PF00620.25 | 33.30 | 0.00 |
| TRINITY_V4AJ35_LOTGI/5-108         | V4AJ35.1 PF05773.20 | 33.30 | 0.00 |
| TRINITY_A0A0R4IAQ8_DANRE/1333-1627 | A0A0R4IAQ8.1 PF1211 | 33.30 | 0.00 |
| TRINITY_G5IEU5_9CLOT/47-330        | G5IEU5.1 PF00664.21 | 33.30 | 0.00 |
| TRINITY_W1PHB5_AMBTC/30-149        | W1PHB5.1 PF02996.15 | 33.30 | 0.00 |
| TRINITY_B8E367_DICTD/33-400        | B8E367.1 PF00079.18 | 33.30 | 0.00 |
| TRINITY_F0ZVH2_DICPU/16-315        | F0ZVH2.1 PF03224.12 | 33.30 | 0.00 |
| TRINITY_A0DMA3_PARTE/467-923       | A0DMA3.1 PF04547.10 | 33.30 | 0.00 |
| TRINITY_W7UA30_9STRA/2-282         | W7UA30.1 PF02574.14 | 33.30 | 0.00 |
| TRINITY_B3KZ91_PLAKH/192-310       | B3KZ91.1 PF01569.19 | 33.30 | 0.00 |
| TRINITY_GEFQ_DICDI/967-1144        | Q86G47.1 PF00617.17 | 33.30 | 0.00 |
| TRINITY_A8J7C9_CHLRE/636-795       | A8J7C9.1 PF13925.4; | 33.30 | 0.00 |
| TRINITY_D8TV06_VOLCA/25-163        | D8TV06.1 PF08718.9; | 33.30 | 0.00 |
| TRINITY_I0Z854_9CHLO/68-247        | I0Z854.1 PF01048.18 | 33.30 | 0.00 |
| TRINITY_F1PNA2_CANLF/715-994       | F1PNA2.2 PF00664.21 | 33.30 | 0.00 |
| TRINITY_A0A075AT68_9FUNG/266-440   | A0A075AT68.1 PF0192 | 33.30 | 0.00 |
| TRINITY_D8TP82_VOLCA/367-1080      | D8TP82.1 PF10408.7; | 33.30 | 0.00 |
| TRINITY_T1IJ26_STRMM/44-286        | T1IJ26.1 PF01370.19 | 33.30 | 0.00 |
| TRINITY_I0Z4V6_9CHLO/26-104        | I0Z4V6.1 PF08142.10 | 33.30 | 0.00 |
| TRINITY_A0A098VT88_9MICR/400-812   | A0A098VT88.1 PF0808 | 33.30 | 0.00 |
| TRINITY_B3S1M2_TRIAD/43-432        | B3S1M2.1 PF04100.10 | 33.30 | 0.00 |
| TRINITY_A0A0D2WTN7_CAPO3/64-537    | A0A0D2WTN7.1 PF0238 | 33.30 | 0.00 |
| TRINITY_G0R0X8_ICHMG/6-109         | G0R0X8.1 PF03179.13 | 33.30 | 0.00 |
| TRINITY_L8GF85_ACACA/2138-2306     | L8GF85.1 PF00520.29 | 33.30 | 0.00 |
| TRINITY_A8IXF8_CHLRE/79-438        | A8IXF8.1 PF03009.15 | 33.30 | 0.00 |
| TRINITY_W4Y895_STRPU/330-534       | W4Y895.1 PF01858.15 | 33.30 | 0.00 |
| TRINITY_I0YSZ2_9CHLO/11-177        | I0YSZ2.1 PF03398.12 | 33.30 | 0.00 |
| TRINITY_A0BRA8_PARTE/7-108         | A0BRA8.1 PF00168.28 | 33.30 | 0.00 |
| TRINITY_I3DJE9_9PAST/33-323        | I3DJE9.1 PF06472.13 | 33.30 | 0.00 |
| TRINITY_A0A0D3G1G3_9ORYZ/41-258    | A0A0D3G1G3.1 PF0223 | 33.30 | 0.00 |
| TRINITY_I7LX20_TETTS/11-287        | I7LX20.2 PF00069.23 | 33.20 | 0.00 |
| TRINITY_B9RNK4_RICCO/465-730       | B9RNK4.1 PF04437.11 | 33.20 | 0.00 |
| TRINITY_A0A0A1NRN8_9FUNG/44-266    | A0A0A1NRN8.1 PF0414 | 33.20 | 0.00 |
| TRINITY_D8RIB2_SELML/16-455        | D8RIB2.1 PF06087.10 | 33.20 | 0.00 |
| TRINITY_A0CK34_PARTE/1-235         | A0CK34.1 PF02586.12 | 33.20 | 0.00 |
| TRINITY_B3ESW8_AMOA5/41-239        | B3ESW8.1 PF01734.20 | 33.20 | 0.00 |
| TRINITY_I0HYT0_CALAS/7-421         | I0HYT0.1 PF05977.11 | 33.20 | 0.00 |
| TRINITY_GRLE_DICDI/440-680         | Q54ET0.2 PF00003.20 | 33.20 | 0.00 |
| TRINITY_Q4N417_THEPA/77-520        | Q4N417.1 PF00443.27 | 33.20 | 0.00 |
| TRINITY_D8TT61_VOLCA/156-506       | D8TT61.1 PF11817.6; | 33.20 | 0.00 |
| TRINITY_E1Z3S2_CHLVA/29-254        | E1Z3S2.1 PF02146.15 | 33.20 | 0.00 |
| TRINITY_G0S3W8_CHATD/20-666        | G0S3W8.1 PF00888.20 | 33.20 | 0.00 |
| TRINITY_L8HCX4_ACACA/24-277        | L8HCX4.1 PF01026.19 | 33.20 | 0.00 |
| TRINITY_A0A078AWW8_STYLE/247-440   | A0A078AWW8.1 PF0011 | 33.20 | 0.00 |
| TRINITY_K9SZG2_9CYAN/110-382       | K9SZG2.1 PF01636.21 | 33.20 | 0.00 |
| TRINITY_A0CYW6_PARTE/28-289        | A0CYW6.1 PF00069.23 | 33.20 | 0.00 |
| TRINITY_I0Z807_9CHLO/145-411       | I0Z807.1 PF05116.11 | 33.20 | 0.00 |
| TRINITY_B7P719_IXOSC/905-1083      | B7P719.1 PF00617.17 | 33.20 | 0.00 |
| TRINITY_E2B1J0_CAMFO/1190-1419     | E2B1J0.1 PF12348.6; | 33.20 | 0.00 |
| TRINITY_W4GKY8_9STRA/7-270         | W4GKY8.1 PF03643.13 | 33.10 | 0.00 |
| TRINITY_C3ZGX7_BRAFL/7-151         | C3ZGX7.1 PF10513.7; | 33.10 | 0.00 |
| TRINITY_R7J8S3_9PORP/73-374        | R7J8S3.1 PF01619.16 | 33.10 | 0.00 |
| TRINITY_F8SXZ9_WHEAT/32-152        | F8SXZ9.1 PF00188.24 | 33.10 | 0.00 |
| TRINITY_I7M9S7_TETTS/86-331        | I7M9S7.2 PF00481.19 | 33.10 | 0.00 |
| TRINITY_A0EIC2_PARTE/22-327        | A0EIC2.1 PF07946.12 | 33.10 | 0.00 |
| TRINITY_R4X876_TAPDE/1-135         | R4X876.1 PF00125.22 | 33.10 | 0.00 |

|                                   |                     |       |      |
|-----------------------------------|---------------------|-------|------|
| TRINITY_Q22C93_TETTS/132-403      | Q22C93.2 PF00561.18 | 33.10 | 0.00 |
| TRINITY_A0A078A4C1_STYLE/982-1110 | A0A078A4C1.1 PF0409 | 33.10 | 0.00 |
| TRINITY_Q4FLK1_PELUB/10-176       | Q4FLK1.1 PF00994.22 | 33.10 | 0.00 |
| TRINITY_A0A077ZQS0_STYLE/68-262   | A0A077ZQS0.1 PF1214 | 33.10 | 0.00 |
| TRINITY_T1J8W5_STRMM/615-893      | T1J8W5.1 PF08925.9; | 33.10 | 0.00 |
| TRINITY_Q24HL5_TETTS/807-923      | Q24HL5.2 PF00072.22 | 33.10 | 0.00 |
| TRINITY_G0QPS2_ICHMG/376-660      | G0QPS2.1 PF00648.19 | 33.10 | 0.00 |
| TRINITY_Q22HD0_TETTS/59-363       | Q22HD0.1 PF00566.16 | 33.10 | 0.00 |
| TRINITY_A0A087SP41_AUXPR/27-351   | A0A087SP41.1 PF0398 | 33.10 | 0.00 |
| TRINITY_F0ZGP7_DICPU/754-1122     | F0ZGP7.1 PF02181.21 | 33.10 | 0.00 |
| TRINITY_E1ZSN3_CHLVA/103-252      | E1ZSN3.1 PF03114.16 | 33.10 | 0.00 |
| TRINITY_D8QTH1_SELML/234-600      | D8QTH1.1 PF09423.8; | 33.10 | 0.00 |
| TRINITY_A0A0J7MYI6_LASNI/104-263  | A0A0J7MYI6.1 PF1335 | 33.10 | 0.00 |
| TRINITY_T1FN62_HELRO/6-132        | T1FN62.1 PF08662.9; | 33.10 | 0.00 |
| TRINITY_E9HM72_DAPPU/23-156       | E9HM72.1 PF04145.13 | 33.10 | 0.00 |
| TRINITY_I0YLE6_9CHLO/727-871      | I0YLE6.1 PF13515.4; | 33.10 | 0.00 |
| TRINITY_C4LWM6_ENTHI/12-518       | C4LWM6.1 PF04916.11 | 33.10 | 0.00 |
| TRINITY_A0A067TKF0_9AGAR/58-206   | A0A067TKF0.1 PF0449 | 33.10 | 0.00 |
| TRINITY_R5EMZ2_9FIRM/22-195       | R5EMZ2.1 PF02146.15 | 33.10 | 0.00 |
| TRINITY_A8HUY7_CHLRE/42-247       | A8HUY7.1 PF00804.23 | 33.10 | 0.00 |
| TRINITY_A0C868_PARTE/287-682      | A0C868.1 PF01757.20 | 33.10 | 0.00 |
| TRINITY_J9ILZ0_9SPIT/61-293       | J9ILZ0.1 PF06011.10 | 33.10 | 0.00 |
| TRINITY_A9TI54_PHYPA/6-171        | A9TI54.1 PF01956.14 | 33.10 | 0.00 |
| TRINITY_Q1ZXE9_DICDI/805-957      | Q1ZXE9.1 PF01608.15 | 33.10 | 0.00 |
| TRINITY_A8J2X9_CHLRE/125-257      | A8J2X9.1 PF00504.19 | 33.10 | 0.00 |
| TRINITY_A0A085LV11_9BILA/13-136   | A0A085LV11.1 PF0024 | 33.10 | 0.00 |
| TRINITY_A7SUH9_NEMVE/38-412       | A7SUH9.1 PF00155.19 | 33.10 | 0.00 |
| TRINITY_A7HQR5_PARL1/40-217       | A7HQR5.1 PF04413.14 | 33.10 | 0.00 |
| TRINITY_A0A024UJV3_9STRA/11-461   | A0A024UJV3.1 PF0769 | 33.00 | 0.00 |
| TRINITY_E1ZEZ8_CHLVA/496-844      | E1ZEZ8.1 PF05192.16 | 33.00 | 0.00 |
| TRINITY_A0EGI5_PARTE/166-524      | A0EGI5.1 PF06602.12 | 33.00 | 0.00 |
| TRINITY_V9E5L3_PHYPR/324-430      | V9E5L3.1 PF00651.29 | 33.00 | 0.00 |
| TRINITY_H2AUK8_KAZAF/18-285       | H2AUK8.1 PF00069.23 | 33.00 | 0.00 |
| TRINITY_F0ZZN9_DICPU/600-775      | F0ZZN9.1 PF00621.18 | 33.00 | 0.00 |
| TRINITY_C3Y9V6_BRAFL/10-502       | C3Y9V6.1 PF13001.5; | 33.00 | 0.00 |
| TRINITY_V4CF92_LOTGI/13-162       | V4CF92.1 PF10572.7; | 33.00 | 0.00 |
| TRINITY_W6KV94_9TRYP/2-375        | W6KV94.1 PF00022.17 | 33.00 | 0.00 |
| TRINITY_W4HBP1_9STRA/40-313       | W4HBP1.1 PF05721.11 | 33.00 | 0.00 |
| TRINITY_D8U6K8_VOLCA/164-377      | D8U6K8.1 PF03924.11 | 33.00 | 0.00 |
| TRINITY_A0A0G2ZKP7_9DELT/512-677  | A0A0G2ZKP7.1 PF0357 | 33.00 | 0.00 |
| TRINITY_H3B9U4_LATCH/199-406      | H3B9U4.1 PF03770.14 | 33.00 | 0.00 |
| TRINITY_A0A0K0FG82_9BILA/181-288  | A0A0K0FG82.1 PF0065 | 33.00 | 0.00 |
| TRINITY_D8U6F6_VOLCA/129-404      | D8U6F6.1 PF00211.18 | 33.00 | 0.00 |
| TRINITY_ZDHC7_DICDI/244-370       | Q552M6.1 PF01529.18 | 33.00 | 0.00 |
| TRINITY_E3QHP5_COLGM/37-417       | E3QHP5.1 PF01266.22 | 33.00 | 0.00 |
| TRINITY_H6NFX2_9BACL/48-284       | H6NFX2.1 PF03059.14 | 33.00 | 0.00 |
| TRINITY_I4YY54_9RHIZ/5-243        | I4YY54.1 PF02353.18 | 33.00 | 0.00 |
| TRINITY_E9EJQ9_METRA/376-492      | E9EJQ9.2 PF08284.9; | 33.00 | 0.00 |
| TRINITY_I7MA04_TETTS/95-310       | I7MA04.1 PF04194.11 | 33.00 | 0.00 |
| TRINITY_A7HFL1_ANADF/119-220      | A7HFL1.1 PF00011.19 | 33.00 | 0.00 |
| TRINITY_D2UXU4_NAEGR/968-1064     | D2UXU4.1 PF00169.27 | 33.00 | 0.00 |
| TRINITY_D8UFU6_VOLCA/12-507       | D8UFU6.1 PF07690.14 | 33.00 | 0.00 |
| TRINITY_L1ILW8_GUIITH/2-98        | L1ILW8.1 PF11715.6; | 33.00 | 0.00 |
| TRINITY_R1BXT9_EMIHU/51-230       | R1BXT9.1 PF00350.21 | 33.00 | 0.00 |
| TRINITY_L8H1G2_ACACA/704-935      | L8H1G2.1 PF10474.7; | 33.00 | 0.00 |
| TRINITY_G1NH86_MELGA/954-1446     | G1NH86.2 PF00580.19 | 33.00 | 0.00 |
| TRINITY_F1SF79_PIG/221-355        | F1SF79.2 PF04326.12 | 33.00 | 0.00 |
| TRINITY_F2UN08_SALR5/810-1018     | F2UN08.1 PF08767.9; | 33.00 | 0.00 |
| TRINITY_A0A096P7D5_OSTTA/585-791  | A0A096P7D5.1 PF1308 | 33.00 | 0.00 |
| TRINITY_W9S2R2_9ROSA/1-228        | W9S2R2.1 PF02586.12 | 33.00 | 0.00 |
| TRINITY_A0BXD2_PARTE/279-685      | A0BXD2.1 PF01757.20 | 32.90 | 0.00 |

|                                    |              |            |       |      |
|------------------------------------|--------------|------------|-------|------|
| TRINITY_F1RYU7_PIG/130-359         | F1RYU7.1     | PF02275.16 | 32.90 | 0.00 |
| TRINITY_Q3SDQ2_PARTE/13-174        | Q3SDQ2.1     | PF00071.20 | 32.90 | 0.00 |
| TRINITY_A0BUW7_PARTE/301-621       | A0BUW7.1     | PF04515.10 | 32.90 | 0.00 |
| TRINITY_A0DYR3_PARTE/708-848       | A0DYR3.1     | PF01909.21 | 32.90 | 0.00 |
| TRINITY_G0QVB2_ICHMG/37-311        | G0QVB2.1     | PF07714.15 | 32.90 | 0.00 |
| TRINITY_A0D1D5_PARTE/180-443       | A0D1D5.1     | PF00069.23 | 32.90 | 0.00 |
| TRINITY_F0ZFB3_DICPU/264-425       | F0ZFB3.1     | PF01554.16 | 32.90 | 0.00 |
| TRINITY_B5JEZ5_9BACT/54-327        | B5JEZ5.1     | PF02353.18 | 32.90 | 0.00 |
| TRINITY_I7M6K2_TETTS/65-258        | I7M6K2.1     | PF01145.23 | 32.90 | 0.00 |
| TRINITY_B8HT58_CYAP4/8-334         | B8HT58.1     | PF13434.4; | 32.90 | 0.00 |
| TRINITY_D3BE55_POLPA/173-325       | D3BE55.1     | PF04004.11 | 32.90 | 0.00 |
| TRINITY_I4YJX6_WALMC/23-406        | I4YJX6.1     | PF09794.7; | 32.90 | 0.00 |
| TRINITY_J9HRZ5_9SPIT/1043-1207     | J9HRZ5.1     | PF08623.8; | 32.90 | 0.00 |
| TRINITY_W5WAY5_9PSEU/143-346       | W5WAY5.1     | PF07859.11 | 32.90 | 0.00 |
| TRINITY_A0A0D2WTG5_CAPO3/124-328   | A0A0D2WTG5.1 | PF0014     | 32.90 | 0.00 |
| TRINITY_I0ZAT9_9CHLO/267-451       | I0ZAT9.1     | PF15469.4; | 32.90 | 0.00 |
| TRINITY_A0CW99_PARTE/11-187        | A0CW99.1     | PF06017.11 | 32.90 | 0.00 |
| TRINITY_W7TVL8_9STRA/1078-1273     | W7TVL8.1     | PF01734.20 | 32.90 | 0.00 |
| TRINITY_A0A024UCN6_9STRA/19-525    | A0A024UCN6.1 | PF0145     | 32.90 | 0.00 |
| TRINITY_D8TQJ4_VOLCA/139-477       | D8TQJ4.1     | PF05686.10 | 32.90 | 0.00 |
| TRINITY_W4Y340_STRPU/212-375       | W4Y340.1     | PF13359.4; | 32.90 | 0.00 |
| TRINITY_Q7UYG2_RHOBA/201-690       | Q7UYG2.1     | PF03098.13 | 32.90 | 0.00 |
| TRINITY_Q23Q43_TETTS/594-871       | Q23Q43.2     | PF00580.19 | 32.90 | 0.00 |
| TRINITY_I1MDL7_SOYBN/41-338        | I1MDL7.2     | PF08423.9; | 32.90 | 0.00 |
| TRINITY_D2VJE0_NAEGR/547-1107      | D2VJE0.1     | PF01457.14 | 32.90 | 0.00 |
| TRINITY_G3VBJ7_SARHA/16-176        | G3VBJ7.1     | PF00071.20 | 32.90 | 0.00 |
| TRINITY_A0BLH9_PARTE/7-108         | A0BLH9.1     | PF00168.28 | 32.90 | 0.00 |
| TRINITY_G3PIU7_GASAC/42-204        | G3PIU7.1     | PF00071.20 | 32.90 | 0.00 |
| TRINITY_I1GK72_AMPQE/21-200        | I1GK72.1     | PF00483.21 | 32.90 | 0.00 |
| TRINITY_A0A059DIJ1_EUCGR/3-158     | A0A059DIJ1.1 | PF0598     | 32.90 | 0.00 |
| TRINITY_R1CGH4_EMIHU/60-184        | R1CGH4.1     | PF00004.27 | 32.90 | 0.00 |
| TRINITY_A0A090LZV0_OSTTA/5-163     | A0A090LZV0.1 | PF0838     | 32.90 | 0.00 |
| TRINITY_A0A015JYP1_9GLOM/195-349   | A0A015JYP1.1 | PF1335     | 32.90 | 0.00 |
| TRINITY_A0A078ASZ8_STYLE/2378-2684 | A0A078ASZ8.1 | PF0052     | 32.90 | 0.00 |
| TRINITY_A8JHV6_CHLRE/431-702       | A8JHV6.1     | PF00069.23 | 32.90 | 0.00 |
| TRINITY_A0A078ACE3_STYLE/158-461   | A0A078ACE3.1 | PF0064     | 32.90 | 0.00 |
| TRINITY_G0QNB6_ICHMG/7-248         | G0QNB6.1     | PF00069.23 | 32.80 | 0.00 |
| TRINITY_A0A077ZXG3_STYLE/206-409   | A0A077ZXG3.1 | PF1388     | 32.80 | 0.00 |
| TRINITY_A0A097AZT6_9VIBR/154-276   | A0A097AZT6.1 | PF0010     | 32.80 | 0.00 |
| TRINITY_J0LG47_9BACT/30-232        | J0LG47.1     | PF04402.12 | 32.80 | 0.00 |
| TRINITY_Q10JL7_ORYSJ/13-121        | Q10JL7.1     | PF02466.17 | 32.80 | 0.00 |
| TRINITY_G0R0W9_ICHMG/11-427        | G0R0W9.1     | PF03348.13 | 32.80 | 0.00 |
| TRINITY_J9HNI4_9SPIT/1-275         | J9HNI4.1     | PF00069.23 | 32.80 | 0.00 |
| TRINITY_A0A0A1U484_ENTIV/114-280   | A0A0A1U484.1 | PF0007     | 32.80 | 0.00 |
| TRINITY_Q22HC3_TETTS/1-722         | Q22HC3.1     | PF04615.11 | 32.80 | 0.00 |
| TRINITY_A0A0A1PI03_9FUNG/94-267    | A0A0A1PI03.1 | PF0065     | 32.80 | 0.00 |
| TRINITY_I7LX20_TETTS/11-287        | I7LX20.2     | PF00069.23 | 32.80 | 0.00 |
| TRINITY_T0Q5K0_9STRA/19-535        | T0Q5K0.1     | PF01457.14 | 32.80 | 0.00 |
| TRINITY_A0C424_PARTE/63-322        | A0C424.1     | PF09511.8; | 32.80 | 0.00 |
| TRINITY_A0A0A1MRK0_9FUNG/22-286    | A0A0A1MRK0.1 | PF0095     | 32.80 | 0.00 |
| TRINITY_A6TPT5_ALKMQ/3-218         | A6TPT5.1     | PF05368.11 | 32.80 | 0.00 |
| TRINITY_W7XDQ2_TETTS/43-354        | W7XDQ2.1     | PF04111.10 | 32.80 | 0.00 |
| TRINITY_A0A0G4EJL3_9ALVE/19-357    | A0A0G4EJL3.1 | PF0104     | 32.80 | 0.00 |
| TRINITY_A0A060LT03_9BACI/620-863   | A0A060LT03.1 | PF0799     | 32.80 | 0.00 |
| TRINITY_B8EP67_METSB/47-569        | B8EP67.1     | PF00135.26 | 32.80 | 0.00 |
| TRINITY_A0A0A1MUZ7_9FUNG/164-334   | A0A0A1MUZ7.1 | PF0027     | 32.80 | 0.00 |
| TRINITY_M2XB22_GALSU/54-251        | M2XB22.1     | PF05721.11 | 32.80 | 0.00 |
| TRINITY_V4ADM5_LOTGI/6-138         | V4ADM5.1     | PF05615.11 | 32.80 | 0.00 |
| TRINITY_D2VR12_NAEGR/55-299        | D2VR12.1     | PF09511.8; | 32.80 | 0.00 |
| TRINITY_I0YTU9_9CHLO/143-490       | I0YTU9.1     | PF04515.10 | 32.80 | 0.00 |
| TRINITY_A0A0A0LSU3_CUCSA/10-294    | A0A0A0LSU3.1 | PF0799     | 32.80 | 0.00 |

|                                  |                     |       |      |
|----------------------------------|---------------------|-------|------|
| TRINITY_A0A068S7F9_9FUNG/184-383 | A0A068S7F9.1 PF1028 | 32.80 | 0.00 |
| TRINITY_W1PKP1_AMBTC/12-420      | W1PKP1.1 PF00501.26 | 32.80 | 0.00 |
| TRINITY_A9TUK6_PHYPA/186-324     | A9TUK6.1 PF02219.15 | 32.80 | 0.00 |
| TRINITY_D8U671_VOLCA/42-290      | D8U671.1 PF10609.7; | 32.80 | 0.00 |
| TRINITY_A0A067BHM6_SAPPC/10-171  | A0A067BHM6.1 PF0007 | 32.80 | 0.00 |
| TRINITY_G0QK29_ICHMG/70-205      | G0QK29.1 PF02100.15 | 32.80 | 0.00 |
| TRINITY_M9X2Z3_MEIRD/146-562     | M9X2Z3.1 PF00082.20 | 32.80 | 0.00 |
| TRINITY_E9H4L7_DAPPU/18-118      | E9H4L7.1 PF14737.4; | 32.80 | 0.00 |
| TRINITY_A0DX79_PARTE/251-413     | A0DX79.1 PF01554.16 | 32.70 | 0.00 |
| TRINITY_I7M6C4_TETTS/263-473     | I7M6C4.1 PF00743.17 | 32.70 | 0.00 |
| TRINITY_D0NV41_PHYIT/12-174      | D0NV41.1 PF00071.20 | 32.70 | 0.00 |
| TRINITY_W7XLQ4_TETTS/8-169       | W7XLQ4.1 PF00134.21 | 32.70 | 0.00 |
| TRINITY_Q22X60_TETTS/11-285      | Q22X60.1 PF00069.23 | 32.70 | 0.00 |
| TRINITY_D6TIG8_9CHLR/37-376      | D6TIG8.1 PF00144.22 | 32.70 | 0.00 |
| TRINITY_A0E0N4_PARTE/14-469      | A0E0N4.1 PF00083.22 | 32.70 | 0.00 |
| TRINITY_U4UBN8_DENPD/65-319      | U4UBN8.1 PF00664.21 | 32.70 | 0.00 |
| TRINITY_A0DVZ3_PARTE/7-172       | A0DVZ3.1 PF06017.11 | 32.70 | 0.00 |
| TRINITY_I7M298_TETTS/2730-2998   | I7M298.2 PF00520.29 | 32.70 | 0.00 |
| TRINITY_A0A096P8A0_OSTTA/70-215  | A0A096P8A0.1 PF1342 | 32.70 | 0.00 |
| TRINITY_A9TYN8_PHYPA/180-297     | A9TYN8.1 PF04488.13 | 32.70 | 0.00 |
| TRINITY_D8TYT5_VOLCA/383-955     | D8TYT5.1 PF05664.9; | 32.70 | 0.00 |
| TRINITY_A0CUC4_PARTE/218-328     | A0CUC4.1 PF00027.27 | 32.70 | 0.00 |
| TRINITY_A2X165_ORYSI/12-266      | A2X165.1 PF00069.23 | 32.70 | 0.00 |
| TRINITY_A0A087G2T2_ARAAL/107-400 | A0A087G2T2.1 PF0315 | 32.70 | 0.00 |
| TRINITY_A0A078AN29_STYLE/103-278 | A0A078AN29.1 PF0471 | 32.70 | 0.00 |
| TRINITY_L8HCA6_ACACA/2-636       | L8HCA6.1 PF10191.7; | 32.70 | 0.00 |
| TRINITY_Q22X60_TETTS/11-285      | Q22X60.1 PF00069.23 | 32.70 | 0.00 |
| TRINITY_A7SE78_NEMVE/44-348      | A7SE78.1 PF00648.19 | 32.70 | 0.00 |
| TRINITY_L8GY71_ACACA/636-844     | L8GY71.1 PF08626.9; | 32.70 | 0.00 |
| TRINITY_F4P722_BATDJ/2-204       | F4P722.1 PF12698.5; | 32.70 | 0.00 |
| TRINITY_Q96ZQ4_SULTO/40-200      | Q96ZQ4.1 PF07929.9; | 32.70 | 0.00 |
| TRINITY_F9GA28_FUSOF/1-104       | F9GA28.1 PF08284.9; | 32.70 | 0.00 |
| TRINITY_A0BRP6_PARTE/103-318     | A0BRP6.1 PF04678.11 | 32.70 | 0.00 |
| TRINITY_A0A024UUM3_9STRA/144-390 | A0A024UUM3.1 PF0052 | 32.70 | 0.00 |
| TRINITY_I5C187_9BACT/39-230      | I5C187.1 PF07947.12 | 32.70 | 0.00 |
| TRINITY_A0A059DBX9_EUCGR/3-141   | A0A059DBX9.1 PF0079 | 32.70 | 0.00 |
| TRINITY_D8TJ82_VOLCA/9-667       | D8TJ82.1 PF04113.12 | 32.70 | 0.00 |
| TRINITY_I1HEE0_BRADI/103-213     | I1HEE0.1 PF13369.4; | 32.70 | 0.00 |
| TRINITY_E1ZCG6_CHLVA/36-348      | E1ZCG6.1 PF00856.26 | 32.70 | 0.00 |
| TRINITY_A8J0G9_CHLRE/37-593      | A8J0G9.1 PF00067.20 | 32.70 | 0.00 |
| TRINITY_W5JMC6_ANODA/81-193      | W5JMC6.1 PF04178.10 | 32.60 | 0.00 |
| TRINITY_I7M910_TETTS/11-285      | I7M910.1 PF00069.23 | 32.60 | 0.00 |
| TRINITY_A0A0E0JYX9_ORYPU/177-296 | A0A0E0JYX9.1 PF0065 | 32.60 | 0.00 |
| TRINITY_C1E040_MICSR/23-99       | C1E040.1 PF06093.11 | 32.60 | 0.00 |
| TRINITY_K0KX19_WICCF/124-576     | K0KX19.1 PF00443.27 | 32.60 | 0.00 |
| TRINITY_J9ITG9_9SPIT/43-340      | J9ITG9.1 PF00648.19 | 32.60 | 0.00 |
| TRINITY_A0A077ZN40_STYLE/4-266   | A0A077ZN40.1 PF0006 | 32.60 | 0.00 |
| TRINITY_F0ZTC2_DICPU/29-258      | F0ZTC2.1 PF16746.3; | 32.60 | 0.00 |
| TRINITY_Q23QF2_TETTS/248-571     | Q23QF2.2 PF03133.13 | 32.60 | 0.00 |
| TRINITY_D2V7J3_NAEGR/307-411     | D2V7J3.1 PF16770.3; | 32.60 | 0.00 |
| TRINITY_L8GI47_ACACA/42-316      | L8GI47.1 PF09192.8; | 32.60 | 0.00 |
| TRINITY_I7M7H8_TETTS/53-447      | I7M7H8.2 PF01490.16 | 32.60 | 0.00 |
| TRINITY_I2GZY6_TETBL/58-201      | I2GZY6.1 PF08662.9; | 32.60 | 0.00 |
| TRINITY_A7SFW1_NEMVE/731-908     | A7SFW1.1 PF00617.17 | 32.60 | 0.00 |
| TRINITY_W4GZP1_9STRA/12-153      | W4GZP1.1 PF00179.24 | 32.60 | 0.00 |
| TRINITY_A0A0K9PEF3_ZOSMR/44-232  | A0A0K9PEF3.1 PF0784 | 32.60 | 0.00 |
| TRINITY_A0A0B0PXH5_GOSAR/521-730 | A0A0B0PXH5.1 PF0173 | 32.60 | 0.00 |
| TRINITY_S8C7T4_DACHA/264-674     | S8C7T4.1 PF00012.18 | 32.60 | 0.00 |
| TRINITY_E1ZLX0_CHLVA/1313-1748   | E1ZLX0.1 PF00176.21 | 32.60 | 0.00 |
| TRINITY_A0A0L0C140_LUCCU/786-957 | A0A0L0C140.1 PF0061 | 32.60 | 0.00 |
| TRINITY_C1E1G3_MICSR/11-130      | C1E1G3.1 PF00754.23 | 32.60 | 0.00 |

|                                    |              |            |       |      |
|------------------------------------|--------------|------------|-------|------|
| TRINITY_L0AEB6_NATGS/8-186         | L0AEB6.1     | PF00406.20 | 32.60 | 0.00 |
| TRINITY_V4ABG2_LOTGI/25-214        | V4ABG2.1     | PF01852.17 | 32.60 | 0.00 |
| TRINITY_I7MLJ7_TETTS/146-230       | I7MLJ7.1     | PF00957.19 | 32.50 | 0.00 |
| TRINITY_D2VJG7_NAEGR/71-462        | D2VJG7.1     | PF00450.20 | 32.50 | 0.00 |
| TRINITY_H3GEI2_PHYRM/34-165        | H3GEI2.1     | PF00782.18 | 32.50 | 0.00 |
| TRINITY_M7AJ12_CHEMY/1363-1466     | M7AJ12.1     | PF02204.16 | 32.50 | 0.00 |
| TRINITY_U9T2P2_RHIID/1611-1744     | U9T2P2.1     | PF13716.4; | 32.50 | 0.00 |
| TRINITY_Q22UG5_TETTS/658-774       | Q22UG5.2     | PF05786.12 | 32.50 | 0.00 |
| TRINITY_A0CS93_PARTE/11-301        | A0CS93.1     | PF00069.23 | 32.50 | 0.00 |
| TRINITY_D2UYS2_NAEGR/34-187        | D2UYS2.1     | PF07534.14 | 32.50 | 0.00 |
| TRINITY_D0N3V3_PHYIT/209-435       | D0N3V3.1     | PF12348.6; | 32.50 | 0.00 |
| TRINITY_G0QK40_ICHMG/243-478       | G0QK40.1     | PF07690.14 | 32.50 | 0.00 |
| TRINITY_F1QS97_DANRE/63-212        | F1QS97.1     | PF00520.29 | 32.50 | 0.00 |
| TRINITY_A0A0G4J440_PLABS/4-216     | A0A0G4J440.1 | PF0009     | 32.50 | 0.00 |
| TRINITY_A4VDS8_TETTS/15-599        | A4VDS8.2     | PF05622.10 | 32.50 | 0.00 |
| TRINITY_F0ZCL0_DICPU/204-565       | F0ZCL0.1     | PF00026.21 | 32.50 | 0.00 |
| TRINITY_B8E367_DICTD/33-400        | B8E367.1     | PF00079.18 | 32.50 | 0.00 |
| TRINITY_A0A0A1TWN2_ENTIV/81-310    | A0A0A1TWN2.1 | PF1367     | 32.50 | 0.00 |
| TRINITY_D3BTD5_POLPA/174-320       | D3BTD5.1     | PF07534.14 | 32.50 | 0.00 |
| TRINITY_K9WC83_9CYAN/22-380        | K9WC83.1     | PF06772.9; | 32.50 | 0.00 |
| TRINITY_A8J999_CHLRE/299-570       | A8J999.1     | PF05206.12 | 32.50 | 0.00 |
| TRINITY_D3AWD8_POLPA/21-216        | D3AWD8.1     | PF01105.22 | 32.50 | 0.00 |
| TRINITY_U7PN91_SPOS1/32-123        | U7PN91.1     | PF00153.25 | 32.50 | 0.00 |
| TRINITY_A0A078AR51_STYLE/8-287     | A0A078AR51.1 | PF0006     | 32.50 | 0.00 |
| TRINITY_S9VCG6_9TRYP/10-260        | S9VCG6.1     | PF00069.23 | 32.50 | 0.00 |
| TRINITY_E1ZAT0_CHLVA/107-372       | E1ZAT0.1     | PF05548.9; | 32.50 | 0.00 |
| TRINITY_I1MS39_SOYBN/1-143         | I1MS39.1     | PF10075.7; | 32.50 | 0.00 |
| TRINITY_C1MP19_MICPC/54-367        | C1MP19.1     | PF13350.4; | 32.50 | 0.00 |
| TRINITY_A0A067KTU8_JATCU/670-1158  | A0A067KTU8.1 | PF1040     | 32.50 | 0.00 |
| TRINITY_PK1IP_DANRE/175-262        | Q6TNS2.1     | PF12894.5; | 32.50 | 0.00 |
| TRINITY_A0A0G0E1A9_9BACT/18-182    | A0A0G0E1A9.1 | PF1348     | 32.50 | 0.00 |
| TRINITY_A0A0D2PI00_GOSRA/591-752   | A0A0D2PI00.1 | PF1181     | 32.50 | 0.00 |
| TRINITY_L8GF17_ACACA/1522-1699     | L8GF17.1     | PF00617.17 | 32.50 | 0.00 |
| TRINITY_I0YJR7_9CHLO/443-593       | I0YJR7.1     | PF01925.17 | 32.50 | 0.00 |
| TRINITY_A0CXP9_PARTE/92-386        | A0CXP9.1     | PF01457.14 | 32.50 | 0.00 |
| TRINITY_H0X419_OTOGA/19-841        | H0X419.1     | PF04147.10 | 32.50 | 0.00 |
| TRINITY_E1ZG88_CHLVA/29-399        | E1ZG88.1     | PF16670.3; | 32.50 | 0.00 |
| TRINITY_E1Z3D0_CHLVA/45-252        | E1Z3D0.1     | PF10168.7; | 32.50 | 0.00 |
| TRINITY_A0A078AGI8_STYLE/1904-2163 | A0A078AGI8.1 | PF0052     | 32.50 | 0.00 |
| TRINITY_A0A094F7Z5_9PEZI/1-245     | A0A094F7Z5.1 | PF0056     | 32.50 | 0.00 |
| TRINITY_G2DKS0_9NEIS/32-178        | G2DKS0.1     | PF08212.10 | 32.40 | 0.00 |
| TRINITY_I7MEJ1_TETTS/13-399        | I7MEJ1.1     | PF07690.14 | 32.40 | 0.00 |
| TRINITY_Q23BN3_TETTS/516-1017      | Q23BN3.2     | PF07748.11 | 32.40 | 0.00 |
| TRINITY_A0A078A6W1_STYLE/181-518   | A0A078A6W1.1 | PF0072     | 32.40 | 0.00 |
| TRINITY_A0A078B1L0_STYLE/110-306   | A0A078B1L0.1 | PF0133     | 32.40 | 0.00 |
| TRINITY_A0BND2_PARTE/11-264        | A0BND2.1     | PF00069.23 | 32.40 | 0.00 |
| TRINITY_I1GJ78_AMPQE/13-214        | I1GJ78.1     | PF01852.17 | 32.40 | 0.00 |
| TRINITY_M0U346_MUSAM/95-360        | M0U346.1     | PF00561.18 | 32.40 | 0.00 |
| TRINITY_J9ILZ0_9SPIT/61-293        | J9ILZ0.1     | PF06011.10 | 32.40 | 0.00 |
| TRINITY_F4PL61_DICFS/169-481       | F4PL61.1     | PF05090.12 | 32.40 | 0.00 |
| TRINITY_D3B2M9_POLPA/852-1009      | D3B2M9.1     | PF12807.5; | 32.40 | 0.00 |
| TRINITY_B8HTJ8_CYAP4/10-264        | B8HTJ8.1     | PF00069.23 | 32.40 | 0.00 |
| TRINITY_L8GXJ8_ACACA/333-582       | L8GXJ8.1     | PF07065.12 | 32.40 | 0.00 |
| TRINITY_A0A0D9WRN5_9ORYZ/29-278    | A0A0D9WRN5.1 | PF0842     | 32.40 | 0.00 |
| TRINITY_L2GMV2_VITCO/126-234       | L2GMV2.1     | PF00307.29 | 32.40 | 0.00 |
| TRINITY_I0YQ81_9CHLO/480-583       | I0YQ81.1     | PF08244.10 | 32.40 | 0.00 |
| TRINITY_X1WBQ3_DANRE/31-235        | X1WBQ3.2     | PF04548.14 | 32.40 | 0.00 |
| TRINITY_A8J0G9_CHLRE/37-593        | A8J0G9.1     | PF00067.20 | 32.40 | 0.00 |
| TRINITY_M5W591_PRUPE/36-647        | M5W591.1     | PF05470.10 | 32.40 | 0.00 |
| TRINITY_A0A0A0LZV6_CUCSA/210-411   | A0A0A0LZV6.1 | PF0419     | 32.40 | 0.00 |
| TRINITY_D7FWV2_ECTSI/872-1054      | D7FWV2.1     | PF00092.26 | 32.40 | 0.00 |

|                                   |                     |       |      |
|-----------------------------------|---------------------|-------|------|
| TRINITY_L8H8T0_ACACA/97-293       | L8H8T0.1 PF00837.15 | 32.40 | 0.00 |
| TRINITY_F6ZY58_CIOIN/196-409      | F6ZY58.2 PF04389.15 | 32.40 | 0.00 |
| TRINITY_I1G263_AMPQE/158-459      | I1G263.1 PF03133.13 | 32.40 | 0.00 |
| TRINITY_D6TJN6_9CHLR/46-800       | D6TJN6.1 PF01804.16 | 32.40 | 0.00 |
| TRINITY_A0A0N4ZAC6_PARTI/94-236   | A0A0N4ZAC6.1 PF0176 | 32.40 | 0.00 |
| TRINITY_A0A0D2WV93_CAPO3/26-209   | A0A0D2WV93.1 PF0118 | 32.40 | 0.00 |
| TRINITY_W5LLC3_ASTMX/8-124        | W5LLC3.1 PF01412.16 | 32.40 | 0.00 |
| TRINITY_A8HPN3_CHLRE/286-388      | A8HPN3.1 PF00254.26 | 32.40 | 0.00 |
| TRINITY_A0A0L0BUP4_LUCCU/23-227   | A0A0L0BUP4.1 PF0395 | 32.40 | 0.00 |
| TRINITY_E1Z656_CHLVA/394-584      | E1Z656.1 PF01733.16 | 32.40 | 0.00 |
| TRINITY_A0A087SGZ0_AUXPR/671-773  | A0A087SGZ0.1 PF0016 | 32.40 | 0.00 |
| TRINITY_E1ZNH0_CHLVA/167-474      | E1ZNH0.1 PF05548.9; | 32.40 | 0.00 |
| TRINITY_Q24JG1_TETTS/16-326       | Q24JG1.1 PF07992.12 | 32.30 | 0.00 |
| TRINITY_A0A0M2U2L9_9FIRM/82-308   | A0A0M2U2L9.1 PF0163 | 32.30 | 0.00 |
| TRINITY_Q23D35_TETTS/322-668      | Q23D35.2 PF00616.17 | 32.30 | 0.00 |
| TRINITY_A0A078B5Q4_STYLE/58-219   | A0A078B5Q4.1 PF0007 | 32.30 | 0.00 |
| TRINITY_W4Z6Q3_STRPU/1-667        | W4Z6Q3.1 PF09742.7; | 32.30 | 0.00 |
| TRINITY_A9UV73_MONBE/12-344       | A9UV73.1 PF00728.20 | 32.30 | 0.00 |
| TRINITY_T0Q5K0_9STRA/19-535       | T0Q5K0.1 PF01457.14 | 32.30 | 0.00 |
| TRINITY_Q54BT0_DICDI/147-432      | Q54BT0.1 PF06664.10 | 32.30 | 0.00 |
| TRINITY_I4YGY6_WALMC/53-237       | I4YGY6.1 PF03798.14 | 32.30 | 0.00 |
| TRINITY_F4NZ57_BATDJ/6-142        | F4NZ57.1 PF10568.7; | 32.30 | 0.00 |
| TRINITY_A0A078AR51_STYLE/8-287    | A0A078AR51.1 PF0006 | 32.30 | 0.00 |
| TRINITY_A7RHU2_NEMVE/28-290       | A7RHU2.1 PF13621.4; | 32.30 | 0.00 |
| TRINITY_I3KY69_ORENI/162-314      | I3KY69.1 PF13358.4; | 32.30 | 0.00 |
| TRINITY_G0QWT0_ICHMG/7-314        | G0QWT0.1 PF01457.14 | 32.30 | 0.00 |
| TRINITY_U4LD78_PYROM/10-379       | U4LD78.1 PF06728.11 | 32.30 | 0.00 |
| TRINITY_C3YDJ8_BRAFL/4-449        | C3YDJ8.1 PF00067.20 | 32.30 | 0.00 |
| TRINITY_D3BDW1_POLPA/33-391       | D3BDW1.1 PF01237.16 | 32.30 | 0.00 |
| TRINITY_G0QYR4_ICHMG/1316-1557    | G0QYR4.1 PF06127.9; | 32.30 | 0.00 |
| TRINITY_E4XXW7_OIKDI/2-170        | E4XXW7.1 PF00025.19 | 32.30 | 0.00 |
| TRINITY_V3ZIL1_LOTGI/954-1214     | V3ZIL1.1 PF02460.16 | 32.30 | 0.00 |
| TRINITY_Q38BL0_TRYB2/23-290       | Q38BL0.1 PF00069.23 | 32.30 | 0.00 |
| TRINITY_I0Z1N8_9CHLO/15-437       | I0Z1N8.1 PF00067.20 | 32.30 | 0.00 |
| TRINITY_J9IIW2_9SPIT/167-1076     | J9IIW2.1 PF09773.7; | 32.30 | 0.00 |
| TRINITY_A0CMN6_PARTE/121-399      | A0CMN6.1 PF01457.14 | 32.30 | 0.00 |
| TRINITY_H3GC33_PHYRM/138-297      | H3GC33.1 PF03959.11 | 32.30 | 0.00 |
| TRINITY_A0A024UE41_9STRA/37-929   | A0A024UE41.1 PF0246 | 32.30 | 0.00 |
| TRINITY_A0A0D2X3B4_CAPO3/50-343   | A0A0D2X3B4.1 PF0844 | 32.30 | 0.00 |
| TRINITY_L1K102_GUIITH/308-439     | L1K102.1 PF04499.13 | 32.30 | 0.00 |
| TRINITY_A8HPV8_CHLRE/7-364        | A8HPV8.1 PF05958.9; | 32.30 | 0.00 |
| TRINITY_V8NB12_OPHHA/389-555      | V8NB12.1 PF00092.26 | 32.30 | 0.00 |
| TRINITY_F9GA28_FUSOF/1-104        | F9GA28.1 PF08284.9; | 32.30 | 0.00 |
| TRINITY_L8GFH4_ACACA/289-545      | L8GFH4.1 PF00078.25 | 32.30 | 0.00 |
| TRINITY_G0QYY5_ICHMG/38-207       | G0QYY5.1 PF13847.4; | 32.30 | 0.00 |
| TRINITY_A0A0J7NHJ8_LASNI/817-1064 | A0A0J7NHJ8.1 PF0772 | 32.30 | 0.00 |
| TRINITY_D8TP92_VOLCA/138-295      | D8TP92.1 PF01556.16 | 32.30 | 0.00 |
| TRINITY_L8H4Q7_ACACA/36-291       | L8H4Q7.1 PF14494.4; | 32.20 | 0.00 |
| TRINITY_G3HNE2_CRIGR/35-214       | G3HNE2.1 PF05241.10 | 32.20 | 0.00 |
| TRINITY_V6EY73_9PROT/98-241       | V6EY73.1 PF00588.17 | 32.20 | 0.00 |
| TRINITY_Q24IK5_TETTS/682-969      | Q24IK5.2 PF12719.5; | 32.20 | 0.00 |
| TRINITY_I7M8T5_TETTS/507-687      | I7M8T5.2 PF01756.17 | 32.20 | 0.00 |
| TRINITY_I7LXH5_TETTS/33-492       | I7LXH5.2 PF00067.20 | 32.20 | 0.00 |
| TRINITY_A0A0C1GFD0_9FLAO/321-626  | A0A0C1GFD0.1 PF0132 | 32.20 | 0.00 |
| TRINITY_I3YRY2_AEQSU/34-217       | I3YRY2.1 PF13563.4; | 32.20 | 0.00 |
| TRINITY_D2VYX4_NAEGR/317-462      | D2VYX4.1 PF01743.18 | 32.20 | 0.00 |
| TRINITY_A0EBB5_PARTE/44-269       | A0EBB5.1 PF03372.21 | 32.20 | 0.00 |
| TRINITY_Q23FZ2_TETTS/149-410      | Q23FZ2.1 PF00069.23 | 32.20 | 0.00 |
| TRINITY_I7M627_TETTS/31-676       | I7M627.2 PF05667.9; | 32.20 | 0.00 |
| TRINITY_D8FWV8_9CYAN/51-244       | D8FWV8.1 PF09511.8; | 32.20 | 0.00 |
| TRINITY_M7BHH1_CHEMY/6-378        | M7BHH1.1 PF00079.18 | 32.20 | 0.00 |

|                                 |                     |       |      |
|---------------------------------|---------------------|-------|------|
| TRINITY_A0A060SGI4_PYCCI/20-181 | A0A060SGI4.1 PF0007 | 32.20 | 0.00 |
| TRINITY_CCR4_CANAL/459-769      | Q5A761.1 PF03372.21 | 32.20 | 0.00 |
| TRINITY_A0DXS7_PARTE/271-599    | A0DXS7.1 PF04515.10 | 32.20 | 0.00 |
| TRINITY_A0A078AAY6_STYLE/18-304 | A0A078AAY6.1 PF0406 | 32.20 | 0.00 |
| TRINITY_W3WJ77_9PEZI/10-458     | W3WJ77.1 PF00067.20 | 32.20 | 0.00 |
| TRINITY_H3FZ36_PRIIPA/212-545   | H3FZ36.1 PF13598.4; | 32.20 | 0.00 |
| TRINITY_G3W7V8_SARHA/18-241     | G3W7V8.1 PF10277.7; | 32.20 | 0.00 |
| TRINITY_A0A078AR51_STYLE/8-287  | A0A078AR51.1 PF0006 | 32.20 | 0.00 |
| TRINITY_I0YS24_9CHLO/211-868    | I0YS24.1 PF10408.7; | 32.20 | 0.00 |
| TRINITY_W4XK16_STRPU/116-662    | W4XK16.1 PF00305.17 | 32.20 | 0.00 |
| TRINITY_A0EC62_PARTE/59-204     | A0EC62.1 PF01699.22 | 32.20 | 0.00 |
| TRINITY_OSB7_DICDI/30-402       | Q54RM1.1 PF01237.16 | 32.20 | 0.00 |
| TRINITY_F9UG22_9GAMM/29-326     | F9UG22.1 PF12849.5; | 32.20 | 0.00 |
| TRINITY_G0QK40_ICHMG/243-478    | G0QK40.1 PF07690.14 | 32.10 | 0.00 |
| TRINITY_K3X309_PYTUL/752-1014   | K3X309.1 PF12705.5; | 32.10 | 0.00 |
| TRINITY_Q54I67_DICDI/38-141     | Q54I67.1 PF05071.14 | 32.10 | 0.00 |
| TRINITY_W7TTJ9_9STRA/6-219      | W7TTJ9.1 PF00856.26 | 32.10 | 0.00 |
| TRINITY_A0A078A8F8_STYLE/36-193 | A0A078A8F8.1 PF0302 | 32.10 | 0.00 |
| TRINITY_M7NM14_PNEMU/158-286    | M7NM14.1 PF01909.21 | 32.10 | 0.00 |
| TRINITY_L8HGT4_ACACA/942-1115   | L8HGT4.1 PF14763.4; | 32.10 | 0.00 |
| TRINITY_A0A096N103_PAPAN/23-200 | A0A096N103.1 PF0976 | 32.10 | 0.00 |
| TRINITY_A0EDW6_PARTE/192-355    | A0EDW6.1 PF06757.11 | 32.10 | 0.00 |
| TRINITY_K3WX66_PYTUL/31-302     | K3WX66.1 PF05721.11 | 32.10 | 0.00 |
| TRINITY_C3XRN9_BRAFL/514-649    | C3XRN9.1 PF01967.19 | 32.10 | 0.00 |

|                                    |                     |       |      |
|------------------------------------|---------------------|-------|------|
| TRINITY_F0YQR7_AURAN/221-357       | F0YQR7.1 PF02518.24 | 32.10 | 0.00 |
| TRINITY_K7SIM7_PROA4/3-228         | K7SIM7.1 PF00300.20 | 32.10 | 0.00 |
| TRINITY_G0QWP9_ICHMG/11-475        | G0QWP9.1 PF05783.9; | 32.10 | 0.00 |
| TRINITY_F7BQA9_CIOIN/357-673       | F7BQA9.2 PF00995.21 | 32.10 | 0.00 |
| TRINITY_A0A0D2PTQ9_GOSRA/835-1324  | A0A0D2PTQ9.1 PF0317 | 32.10 | 0.00 |
| TRINITY_E1Z463_CHLVA/298-760       | E1Z463.1 PF01266.22 | 32.10 | 0.00 |
| TRINITY_R0I4R3_9BRAS/1-222         | R0I4R3.1 PF00230.18 | 32.10 | 0.00 |
| TRINITY_Q55F12_DICDI/374-640       | Q55F12.1 PF00149.26 | 32.10 | 0.00 |
| TRINITY_Q245X9_TETTS/19-134        | Q245X9.1 PF13774.4; | 32.10 | 0.00 |
| TRINITY_B0DCE7_LACBS/69-227        | B0DCE7.1 PF04548.14 | 32.10 | 0.00 |
| TRINITY_K7JX42_NASVI/338-596       | K7JX42.1 PF00078.25 | 32.10 | 0.00 |
| TRINITY_A0A087XNQ9_POEFO/109-366   | A0A087XNQ9.2 PF0006 | 32.10 | 0.00 |
| TRINITY_A0A096PB78_OSTTA/853-1050  | A0A096PB78.1 PF0876 | 32.10 | 0.00 |
| TRINITY_TRHBN_SYNY3/3-118          | P73925.1 PF01152.19 | 32.10 | 0.00 |
| TRINITY_Q8F2B5_LEPIN/60-299        | Q8F2B5.1 PF00795.20 | 32.10 | 0.00 |
| TRINITY_M0SCR3_MUSAM/61-750        | M0SCR3.1 PF00063.19 | 32.00 | 0.00 |
| TRINITY_F6VUA6_MONDO/10-171        | F6VUA6.1 PF00071.20 | 32.00 | 0.00 |
| TRINITY_Q16LW8_AEDAE/141-279       | Q16LW8.1 PF03188.14 | 32.00 | 0.00 |
| TRINITY_A0A0E9NHM9_9ASCO/1410-1710 | A0A0E9NHM9.1 PF1211 | 32.00 | 0.00 |
| TRINITY_A0A075WQU3_9BACT/7-161     | A0A075WQU3.1 PF0015 | 32.00 | 0.00 |
| TRINITY_Q234L4_TETTS/1203-1401     | Q234L4.2 PF12348.6; | 32.00 | 0.00 |
| TRINITY_Q23WL9_TETTS/100-567       | Q23WL9.2 PF14643.4; | 32.00 | 0.00 |
| TRINITY_F4PQD8_DICFS/713-935       | F4PQD8.1 PF13236.4; | 32.00 | 0.00 |
| TRINITY_I7MH68_TETTS/52-312        | I7MH68.2 PF04045.12 | 32.00 | 0.00 |
| TRINITY_M1C2B1_SOLTU/26-431        | M1C2B1.1 PF00450.20 | 32.00 | 0.00 |
| TRINITY_A0A0G2ZGB8_9DELT/122-254   | A0A0G2ZGB8.1 PF0411 | 32.00 | 0.00 |
| TRINITY_S2JJ35_MUCC1/555-762       | S2JJ35.1 PF00924.16 | 32.00 | 0.00 |
| TRINITY_W7X656_TETTS/412-792       | W7X656.1 PF12463.6; | 32.00 | 0.00 |
| TRINITY_I1BVZ2_RHIO9/77-520        | I1BVZ2.1 PF00067.20 | 32.00 | 0.00 |
| TRINITY_F6GXS3_VITVI/23-471        | F6GXS3.1 PF06963.10 | 32.00 | 0.00 |
| TRINITY_Y5795_DICDI/113-220        | Q1ZXLO.1 PF14593.4; | 32.00 | 0.00 |
| TRINITY_A8HZE3_CHLRE/2069-2245     | A8HZE3.1 PF00211.18 | 32.00 | 0.00 |
| TRINITY_D8UJ57_VOLCA/338-496       | D8UJ57.1 PF04937.13 | 32.00 | 0.00 |
| TRINITY_I7M8B5_TETTS/65-198        | I7M8B5.2 PF01569.19 | 32.00 | 0.00 |
| TRINITY_T0RQJ8_9STRA/33-274        | T0RQJ8.1 PF01636.21 | 32.00 | 0.00 |
| TRINITY_A1SG60_NOCSJ/59-419        | A1SG60.1 PF03415.12 | 32.00 | 0.00 |
| TRINITY_L8HIN8_ACACA/120-272       | L8HIN8.1 PF01926.21 | 32.00 | 0.00 |
| TRINITY_D8THR7_VOLCA/300-536       | D8THR7.1 PF12697.5; | 32.00 | 0.00 |
| TRINITY_A0D279_PARTE/21-391        | A0D279.1 PF01490.16 | 32.00 | 0.00 |
| TRINITY_A0A0M0J556_9EUKA/51-512    | A0A0M0J556.1 PF1590 | 32.00 | 0.00 |
| TRINITY_A9STI9_PHYPA/993-1309      | A9STI9.1 PF10350.7; | 32.00 | 0.00 |
| TRINITY_VCP_APIME/62-464           | C9WMM5.1 PF00450.20 | 32.00 | 0.00 |
| TRINITY_A0A0J7ZH40_STRVR/39-482    | A0A0J7ZH40.1 PF1352 | 32.00 | 0.00 |
| TRINITY_Y9955_DICDI/662-912        | Q55GU0.1 PF07714.15 | 32.00 | 0.00 |
| TRINITY_Q23QF2_TETTS/248-571       | Q23QF2.2 PF03133.13 | 32.00 | 0.00 |
| TRINITY_A8J7W4_CHLRE/77-369        | A8J7W4.1 PF04577.12 | 32.00 | 0.00 |
| TRINITY_E1Z5D7_CHLVA/48-399        | E1Z5D7.1 PF00069.23 | 32.00 | 0.00 |
| TRINITY_U5D935_AMBTC/366-517       | U5D935.1 PF04937.13 | 32.00 | 0.00 |
| TRINITY_Q23TF2_TETTS/1-251         | Q23TF2.1 PF03839.14 | 32.00 | 0.00 |
| TRINITY_J9IWX7_9SPIT/138-349       | J9IWX7.1 PF00069.23 | 31.90 | 0.00 |
| TRINITY_Q23G19_TETTS/51-248        | Q23G19.1 PF02330.14 | 31.90 | 0.00 |
| TRINITY_W7I8A1_9PEZI/104-253       | W7I8A1.1 PF02926.15 | 31.90 | 0.00 |
| TRINITY_A0A0D2TR40_GOSRA/23-277    | A0A0D2TR40.1 PF0006 | 31.90 | 0.00 |
| TRINITY_L8HMT0_ACACA/129-213       | L8HMT0.1 PF02761.12 | 31.90 | 0.00 |
| TRINITY_I7LX20_TETTS/11-287        | I7LX20.2 PF00069.23 | 31.90 | 0.00 |
| TRINITY_A0A059LS85_9CHLO/131-341   | A0A059LS85.1 PF0505 | 31.90 | 0.00 |
| TRINITY_F0Z9K8_DICPU/44-444        | F0Z9K8.1 PF06728.11 | 31.90 | 0.00 |
| TRINITY_E3NHQ1_CAERE/106-152       | E3NHQ1.1 PF13639.4; | 31.90 | 0.00 |
| TRINITY_Q22C93_TETTS/132-403       | Q22C93.2 PF00561.18 | 31.90 | 0.00 |
| TRINITY_F4PB48_BATDJ/1-814         | F4PB48.1 PF08553.8; | 31.90 | 0.00 |
| TRINITY_J9F1G3_9SPIT/7-107         | J9F1G3.1 PF00168.28 | 31.90 | 0.00 |



|                                  |              |            |       |      |
|----------------------------------|--------------|------------|-------|------|
| TRINITY_G0QJN5_ICHMG/3-324       | G0QJN5.1     | PF07690.14 | 31.90 | 0.00 |
| TRINITY_A0BE52_PARTE/149-264     | A0BE52.1     | PF03351.15 | 31.90 | 0.00 |
| TRINITY_Q23CV6_TETTS/277-487     | Q23CV6.1     | PF00743.17 | 31.90 | 0.00 |
| TRINITY_R6XZG7_9FIRM/10-475      | R6XZG7.1     | PF00478.23 | 31.90 | 0.00 |
| TRINITY_A0A077ZV54_STYLE/34-212  | A0A077ZV54.1 | PF0173     | 31.90 | 0.00 |
| TRINITY_I7M729_TETTS/286-590     | I7M729.1     | PF02841.12 | 31.90 | 0.00 |
| TRINITY_A9V3Z9_MONBE/132-291     | A9V3Z9.1     | PF08603.9; | 31.90 | 0.00 |
| TRINITY_A0C868_PARTE/287-682     | A0C868.1     | PF01757.20 | 31.90 | 0.00 |
| TRINITY_F0ZYY8_DICPU/171-319     | F0ZYY8.1     | PF00620.25 | 31.90 | 0.00 |
| TRINITY_A0A0D2X5C8_CAPO3/1-688   | A0A0D2X5C8.1 | PF0578     | 31.90 | 0.00 |
| TRINITY_W7WVY8_TETTS/68-336      | W7WVY8.1     | PF00069.23 | 31.90 | 0.00 |
| TRINITY_A0BXD2_PARTE/279-685     | A0BXD2.1     | PF01757.20 | 31.90 | 0.00 |
| TRINITY_I1C8Z7_RHIO9/84-365      | I1C8Z7.1     | PF00664.21 | 31.90 | 0.00 |
| TRINITY_I0YWA5_9CHLO/375-695     | I0YWA5.1     | PF00069.23 | 31.90 | 0.00 |
| TRINITY_A6EKX1_9SPHI/50-266      | A6EKX1.1     | PF00149.26 | 31.90 | 0.00 |
| TRINITY_R4FMH5_RHOPR/43-172      | R4FMH5.1     | PF04145.13 | 31.80 | 0.00 |
| TRINITY_F2SE28_TRIRC/346-532     | F2SE28.2     | PF05024.13 | 31.80 | 0.00 |
| TRINITY_Q81N74_BACAN/29-285      | Q81N74.1     | PF00561.18 | 31.80 | 0.00 |
| TRINITY_F4PW45_DICFS/16-125      | F4PW45.1     | PF02991.14 | 31.80 | 0.00 |
| TRINITY_K2BC96_9BACT/41-359      | K2BC96.1     | PF07065.12 | 31.80 | 0.00 |
| TRINITY_G4V8Q5_SCHMA/60-392      | G4V8Q5.1     | PF00022.17 | 31.80 | 0.00 |
| TRINITY_Q23YD6_TETTS/29-282      | Q23YD6.1     | PF00069.23 | 31.80 | 0.00 |
| TRINITY_M4BKM0_HYAAE/12-184      | M4BKM0.1     | PF00025.19 | 31.80 | 0.00 |
| TRINITY_R0H6R2_9BRAS/49-460      | R0H6R2.1     | PF13520.4; | 31.80 | 0.00 |
| TRINITY_H3A005_LATCH/325-822     | H3A005.1     | PF07748.11 | 31.80 | 0.00 |
| TRINITY_Q16ZJ5_AEDAE/5-150       | Q16ZJ5.1     | PF00339.27 | 31.80 | 0.00 |
| TRINITY_T0RQK7_9STRA/29-520      | T0RQK7.1     | PF00118.22 | 31.80 | 0.00 |
| TRINITY_C1EE69_MICSR/50-518      | C1EE69.1     | PF00082.20 | 31.80 | 0.00 |
| TRINITY_V4MB11_EUTSA/137-325     | V4MB11.1     | PF16575.3; | 31.80 | 0.00 |
| TRINITY_F8PU64_SERL3/1255-1441   | F8PU64.1     | PF00689.19 | 31.80 | 0.00 |
| TRINITY_A0CNI6_PARTE/314-523     | A0CNI6.1     | PF07002.14 | 31.80 | 0.00 |
| TRINITY_H1YBJ8_9SPHI/88-371      | H1YBJ8.1     | PF14388.4; | 31.80 | 0.00 |
| TRINITY_L8GF07_ACACA/1-313       | L8GF07.1     | PF09766.7; | 31.80 | 0.00 |
| TRINITY_B7KBN2_CYAP7/8-202       | B7KBN2.1     | PF01734.20 | 31.80 | 0.00 |
| TRINITY_I0YX07_9CHLO/5-130       | I0YX07.1     | PF01124.16 | 31.80 | 0.00 |
| TRINITY_I1CH54_RHIO9/77-484      | I1CH54.1     | PF00067.20 | 31.80 | 0.00 |
| TRINITY_A0CXP9_PARTE/92-386      | A0CXP9.1     | PF01457.14 | 31.80 | 0.00 |
| TRINITY_I1G1S2_AMPQE/24-275      | I1G1S2.1     | PF00069.23 | 31.80 | 0.00 |
| TRINITY_K3WUP1_PYTUL/141-255     | K3WUP1.1     | PF00787.22 | 31.80 | 0.00 |
| TRINITY_L8GJ19_ACACA/375-576     | L8GJ19.1     | PF08320.10 | 31.80 | 0.00 |
| TRINITY_D8UFM3_VOLCA/169-291     | D8UFM3.1     | PF03947.16 | 31.80 | 0.00 |
| TRINITY_D8TKE9_VOLCA/222-608     | D8TKE9.1     | PF00155.19 | 31.80 | 0.00 |
| TRINITY_A0A0J8CJD4_BETVU/183-371 | A0A0J8CJD4.1 | PF1270     | 31.80 | 0.00 |
| TRINITY_Q23FP4_TETTS/119-546     | Q23FP4.1     | PF07690.14 | 31.80 | 0.00 |
| TRINITY_A0A0M2PU93_PROHO/94-505  | A0A0M2PU93.1 | PF0001     | 31.80 | 0.00 |
| TRINITY_L8GL94_ACACA/389-614     | L8GL94.1     | PF13672.4; | 31.80 | 0.00 |
| TRINITY_S8EIK6_FOMPI/624-791     | S8EIK6.1     | PF00535.24 | 31.80 | 0.00 |
| TRINITY_F4PW74_DICFS/177-322     | F4PW74.1     | PF07534.14 | 31.80 | 0.00 |
| TRINITY_I7M1V6_TETTS/314-533     | I7M1V6.1     | PF07002.14 | 31.70 | 0.00 |
| TRINITY_A0A0G0Q6U1_9BACT/6-128   | A0A0G0Q6U1.1 | PF0857     | 31.70 | 0.00 |
| TRINITY_A0BKX3_PARTE/30-221      | A0BKX3.1     | PF00106.23 | 31.70 | 0.00 |
| TRINITY_H2UPR9_TAKRU/31-290      | H2UPR9.1     | PF00069.23 | 31.70 | 0.00 |
| TRINITY_A0A0D9X8Z8_9ORYZ/45-252  | A0A0D9X8Z8.1 | PF0784     | 31.70 | 0.00 |
| TRINITY_F4Q5A9_DICFS/154-532     | F4Q5A9.1     | PF04547.10 | 31.70 | 0.00 |
| TRINITY_A0E368_PARTE/250-369     | A0E368.1     | PF14536.4; | 31.70 | 0.00 |
| TRINITY_Q1ZXE9_DICDI/3-266       | Q1ZXE9.1     | PF07651.14 | 31.70 | 0.00 |
| TRINITY_I7MMH2_TETTS/14-276      | I7MMH2.2     | PF00069.23 | 31.70 | 0.00 |
| TRINITY_A0C020_PARTE/368-472     | A0C020.1     | PF00651.29 | 31.70 | 0.00 |
| TRINITY_U6B5F2_9RHIZ/125-419     | U6B5F2.1     | PF00361.18 | 31.70 | 0.00 |
| TRINITY_A8HUT6_CHLRE/23-167      | A8HUT6.1     | PF10487.7; | 31.70 | 0.00 |
| TRINITY_F4Q7N0_DICFS/96-215      | F4Q7N0.1     | PF00622.26 | 31.70 | 0.00 |

|                                  |              |            |       |      |
|----------------------------------|--------------|------------|-------|------|
| TRINITY_C6RET9_9PROT/18-412      | C6RET9.1     | PF00266.17 | 31.70 | 0.00 |
| TRINITY_J9HNI4_9SPIT/1-275       | J9HNI4.1     | PF00069.23 | 31.70 | 0.00 |
| TRINITY_C5M030_PERM5/217-379     | C5M030.1     | PF00153.25 | 31.70 | 0.00 |
| TRINITY_W5P6H3_SHEEP/32-289      | W5P6H3.1     | PF00328.20 | 31.70 | 0.00 |
| TRINITY_B8HNX9_CYAP4/38-272      | B8HNX9.1     | PF13472.4; | 31.70 | 0.00 |
| TRINITY_F6UVL5_XENTR/181-312     | F6UVL5.1     | PF00782.18 | 31.70 | 0.00 |
| TRINITY_A0DZ12_PARTE/10-257      | A0DZ12.1     | PF00069.23 | 31.70 | 0.00 |
| TRINITY_B4FTY7_MAIZE/39-199      | B4FTY7.1     | PF01554.16 | 31.70 | 0.00 |
| TRINITY_G8RWJ6_MYCRN/52-447      | G8RWJ6.1     | PF01593.22 | 31.70 | 0.00 |
| TRINITY_A0A067P330_PLEOS/146-376 | A0A067P330.1 | PF1690     | 31.70 | 0.00 |
| TRINITY_Q22B72_TETTS/137-570     | Q22B72.1     | PF02450.13 | 31.70 | 0.00 |
| TRINITY_I1C8D0_RHIO9/8-172       | I1C8D0.1     | PF00071.20 | 31.70 | 0.00 |
| TRINITY_G0QYJ1_ICHMG/448-655     | G0QYJ1.1     | PF12706.5; | 31.70 | 0.00 |
| TRINITY_G0QX11_ICHMG/67-192      | G0QX11.1     | PF00043.23 | 31.70 | 0.00 |
| TRINITY_Q6CD03_YARLI/252-467     | Q6CD03.1     | PF01803.14 | 31.70 | 0.00 |
| TRINITY_I0Z076_9CHLO/1-257       | I0Z076.1     | PF01963.15 | 31.70 | 0.00 |
| TRINITY_U3IAN3_ANAPL/11-275      | U3IAN3.1     | PF08423.9; | 31.70 | 0.00 |
| TRINITY_D7DNX3_METV0/558-820     | D7DNX3.1     | PF04230.11 | 31.70 | 0.00 |
| TRINITY_G0QWI2_ICHMG/263-462     | G0QWI2.1     | PF13886.4; | 31.70 | 0.00 |
| TRINITY_A0A067CTU0_SAPPC/6-130   | A0A067CTU0.1 | PF0139     | 31.70 | 0.00 |
| TRINITY_A0BKH8_PARTE/3-103       | A0BKH8.1     | PF00168.28 | 31.70 | 0.00 |
| TRINITY_A0A0G4J5G9_PLABS/30-194  | A0A0G4J5G9.1 | PF0033     | 31.60 | 0.00 |
| TRINITY_A8WZF7_CAEBR/8-152       | A8WZF7.1     | PF00179.24 | 31.60 | 0.00 |
| TRINITY_I1G8G1_AMPQE/1-365       | I1G8G1.1     | PF00022.17 | 31.60 | 0.00 |
| TRINITY_A0A0Q9WVY2_DROVI/37-349  | A0A0Q9WVY2.1 | PF0466     | 31.60 | 0.00 |
| TRINITY_A0A0M9DTB1_9BACT/125-419 | A0A0M9DTB1.1 | PF1438     | 31.60 | 0.00 |
| TRINITY_B4VJL9_9CYAN/30-242      | B4VJL9.1     | PF05023.12 | 31.60 | 0.00 |
| TRINITY_C5MDZ8_CANTT/1-439       | C5MDZ8.1     | PF10243.7; | 31.60 | 0.00 |
| TRINITY_E8MZB3_ANATU/34-184      | E8MZB3.1     | PF01509.16 | 31.60 | 0.00 |
| TRINITY_V6CJX7_CAEEL/1231-1361   | V6CJX7.1     | PF07738.11 | 31.60 | 0.00 |
| TRINITY_A8IPQ9_CHLRE/171-429     | A8IPQ9.1     | PF00069.23 | 31.60 | 0.00 |
| TRINITY_G5B4A8_HETGA/3-408       | G5B4A8.1     | PF00067.20 | 31.60 | 0.00 |
| TRINITY_F0ZA31_DICPU/69-581      | F0ZA31.1     | PF01457.14 | 31.60 | 0.00 |
| TRINITY_GGAP2_ARATH/207-382      | Q9FLP9.1     | PF16269.3; | 31.60 | 0.00 |
| TRINITY_G0QPU9_ICHMG/12-338      | G0QPU9.1     | PF04547.10 | 31.60 | 0.00 |
| TRINITY_M2R6G2_CERS8/26-258      | M2R6G2.1     | PF01738.16 | 31.60 | 0.00 |
| TRINITY_A2ERI4_TRIVA/14-265      | A2ERI4.1     | PF00069.23 | 31.60 | 0.00 |
| TRINITY_I7M910_TETTS/11-285      | I7M910.1     | PF00069.23 | 31.60 | 0.00 |
| TRINITY_G6CWQ7_DANPL/2750-3100   | G6CWQ7.1     | PF12777.5; | 31.60 | 0.00 |
| TRINITY_A0A0M0JVP8_9EUKA/5-445   | A0A0M0JVP8.1 | PF0017     | 31.60 | 0.00 |
| TRINITY_E9GLS7_DAPPU/17-157      | E9GLS7.1     | PF07884.12 | 31.60 | 0.00 |
| TRINITY_A0A0J7NMJ7_LASNI/194-349 | A0A0J7NMJ7.1 | PF1335     | 31.60 | 0.00 |
| TRINITY_A8IVR0_CHLRE/37-267      | A8IVR0.1     | PF01547.23 | 31.60 | 0.00 |
| TRINITY_B9IHY7_POPTR/46-324      | B9IHY7.2     | PF00481.19 | 31.60 | 0.00 |
| TRINITY_G0QP24_ICHMG/87-456      | G0QP24.1     | PF03006.18 | 31.60 | 0.00 |
| TRINITY_A0CNS7_PARTE/69-227      | A0CNS7.1     | PF01343.16 | 31.50 | 0.00 |
| TRINITY_A0BL69_PARTE/22-130      | A0BL69.1     | PF00085.18 | 31.50 | 0.00 |
| TRINITY_S8BZ88_9LAMI/110-271     | S8BZ88.1     | PF02518.24 | 31.50 | 0.00 |
| TRINITY_R0G3G4_9BRAS/551-816     | R0G3G4.1     | PF08324.9; | 31.50 | 0.00 |
| TRINITY_F4PJQ6_DICFS/104-474     | F4PJQ6.1     | PF07690.14 | 31.50 | 0.00 |
| TRINITY_A7SCI8_NEMVE/85-243      | A7SCI8.1     | PF04098.13 | 31.50 | 0.00 |
| TRINITY_J9FEL5_9SPIT/980-1214    | J9FEL5.1     | PF00520.29 | 31.50 | 0.00 |
| TRINITY_Q232X8_TETTS/36-488      | Q232X8.1     | PF00067.20 | 31.50 | 0.00 |
| TRINITY_L8H0Q4_ACACA/22-456      | L8H0Q4.1     | PF00067.20 | 31.50 | 0.00 |
| TRINITY_Q245X9_TETTS/19-134      | Q245X9.1     | PF13774.4; | 31.50 | 0.00 |
| TRINITY_M1VJ71_CYAME/102-468     | M1VJ71.1     | PF00026.21 | 31.50 | 0.00 |
| TRINITY_F6TXH8_CIOIN/149-273     | F6TXH8.2     | PF04116.11 | 31.50 | 0.00 |
| TRINITY_A0A0G4EC88_9ALVE/28-554  | A0A0G4EC88.1 | PF0145     | 31.50 | 0.00 |
| TRINITY_I7LU66_TETTS/331-735     | I7LU66.2     | PF03133.13 | 31.50 | 0.00 |
| TRINITY_D8UGK8_VOLCA/146-384     | D8UGK8.1     | PF01547.23 | 31.50 | 0.00 |
| TRINITY_A0A0H5C7P9_CYBJA/8-351   | A0A0H5C7P9.1 | PF0492     | 31.50 | 0.00 |

|                                   |                     |       |      |
|-----------------------------------|---------------------|-------|------|
| TRINITY_A0A0J8C356_BETVU/154-410  | A0A0J8C356.1 PF0006 | 31.50 | 0.00 |
| TRINITY_J9IK03_9SPIT/2-253        | J9IK03.1 PF00069.23 | 31.50 | 0.00 |
| TRINITY_B9IGR6_POPTR/19-179       | B9IGR6.2 PF01554.16 | 31.50 | 0.00 |
| TRINITY_S2J025_MUCC1/31-192       | S2J025.1 PF03031.16 | 31.50 | 0.00 |
| TRINITY_I1F8I9_AMPQE/100-276      | I1F8I9.1 PF00078.25 | 31.50 | 0.00 |
| TRINITY_Q09CN1_STIAD/65-325       | Q09CN1.1 PF12146.6; | 31.50 | 0.00 |
| TRINITY_A0CUN4_PARTE/19-217       | A0CUN4.1 PF05997.10 | 31.50 | 0.00 |
| TRINITY_A0A0N5DGI9_TRIMR/281-442  | A0A0N5DGI9.1 PF0438 | 31.40 | 0.00 |
| TRINITY_F0ZNA5_DICPU/102-307      | F0ZNA5.1 PF06999.10 | 31.40 | 0.00 |
| TRINITY_A0EHV9_PARTE/4-278        | A0EHV9.1 PF03643.13 | 31.40 | 0.00 |
| TRINITY_G0R4Q7_ICHMG/23-419       | G0R4Q7.1 PF03062.17 | 31.40 | 0.00 |
| TRINITY_A0A0L0CLW7_LUCCU/8-187    | A0A0L0CLW7.1 PF0575 | 31.40 | 0.00 |
| TRINITY_M7C1Y2_CHEMY/665-827      | M7C1Y2.1 PF05236.12 | 31.40 | 0.00 |
| TRINITY_F1A450_DICPU/64-267       | F1A450.1 PF00804.23 | 31.40 | 0.00 |
| TRINITY_U4KVC8_PYROM/118-410      | U4KVC8.1 PF00069.23 | 31.40 | 0.00 |
| TRINITY_F0ZW42_DICPU/356-671      | F0ZW42.1 PF05346.9; | 31.40 | 0.00 |
| TRINITY_H2ZGR1_CIOSA/60-513       | H2ZGR1.1 PF00067.20 | 31.40 | 0.00 |
| TRINITY_F1A5L9_DICPU/108-371      | F1A5L9.1 PF10672.7; | 31.40 | 0.00 |
| TRINITY_I1F4T3_AMPQE/46-289       | I1F4T3.1 PF00328.20 | 31.40 | 0.00 |
| TRINITY_W4XKP3_STRPU/695-863      | W4XKP3.1 PF12348.6; | 31.40 | 0.00 |
| TRINITY_L8H1G1_ACACA/50-875       | L8H1G1.1 PF04931.11 | 31.40 | 0.00 |
| TRINITY_A8J3P1_CHLRE/954-1161     | A8J3P1.1 PF00211.18 | 31.40 | 0.00 |
| TRINITY_A8J3P1_CHLRE/954-1161     | A8J3P1.1 PF00211.18 | 31.40 | 0.00 |
| TRINITY_D5E138_BACMQ/142-922      | D5E138.1 PF00311.15 | 31.40 | 0.00 |
| TRINITY_A8Zyb6_DESOH/9-118        | A8Zyb6.1 PF13911.4; | 31.40 | 0.00 |
| TRINITY_A8IGG5_CHLRE/567-774      | A8IGG5.1 PF07714.15 | 31.40 | 0.00 |
| TRINITY_H2LC57_ORYLA/21-126       | H2LC57.1 PF02991.14 | 31.40 | 0.00 |
| TRINITY_A0A0J6VSR9_9MYCO/122-353  | A0A0J6VSR9.1 PF0048 | 31.40 | 0.00 |
| TRINITY_A0A059CCP9_EUCGR/878-1687 | A0A059CCP9.1 PF0236 | 31.40 | 0.00 |
| TRINITY_I0Z7N3_9CHLO/842-1054     | I0Z7N3.1 PF14533.4; | 31.40 | 0.00 |
| TRINITY_Q54SQ0_DICDI/128-347      | Q54SQ0.1 PF01556.16 | 31.40 | 0.00 |
| TRINITY_W5Q128_SHEEP/162-441      | W5Q128.1 PF00664.21 | 31.30 | 0.00 |
| TRINITY_I7M910_TETTS/11-285       | I7M910.1 PF00069.23 | 31.30 | 0.00 |
| TRINITY_Q9VYJ5_DROME/395-629      | Q9VYJ5.3 PF02902.17 | 31.30 | 0.00 |
| TRINITY_K1VH25_TRIAC/83-385       | K1VH25.1 PF04261.10 | 31.30 | 0.00 |
| TRINITY_H0X7C3_OTOGA/6-377        | H0X7C3.1 PF00022.17 | 31.30 | 0.00 |
| TRINITY_A0A078A4C1_STYLE/982-1110 | A0A078A4C1.1 PF0409 | 31.30 | 0.00 |
| TRINITY_A0A087SIU5_AUXPR/572-700  | A0A087SIU5.1 PF1034 | 31.30 | 0.00 |
| TRINITY_A0BYU8_PARTE/71-258       | A0BYU8.1 PF00069.23 | 31.30 | 0.00 |
| TRINITY_A4S1H5_OSTLU/24-260       | A4S1H5.1 PF02353.18 | 31.30 | 0.00 |
| TRINITY_A0A059BFS0_EUCGR/89-295   | A0A059BFS0.1 PF0085 | 31.30 | 0.00 |
| TRINITY_T0PRM4_9STRA/349-595      | T0PRM4.1 PF03572.16 | 31.30 | 0.00 |
| TRINITY_F4QFK5_DICFS/780-958      | F4QFK5.1 PF00617.17 | 31.30 | 0.00 |
| TRINITY_D2V9N7_NAEGR/46-382       | D2V9N7.1 PF00732.17 | 31.30 | 0.00 |
| TRINITY_E1ZNI1_CHLVA/11-818       | E1ZNI1.1 PF12832.5; | 31.30 | 0.00 |
| TRINITY_W4G1Y7_9STRA/82-245       | W4G1Y7.1 PF00856.26 | 31.30 | 0.00 |
| TRINITY_A4S0K0_OSTLU/472-701      | A4S0K0.1 PF00702.24 | 31.30 | 0.00 |
| TRINITY_A8JF01_CHLRE/2490-2965    | A8JF01.1 PF10351.7; | 31.30 | 0.00 |
| TRINITY_L1IYK4_GUITH/62-339       | L1IYK4.1 PF05783.9; | 31.30 | 0.00 |
| TRINITY_A0A0G4EFF6_9ALVE/55-556   | A0A0G4EFF6.1 PF0299 | 31.30 | 0.00 |
| TRINITY_G0R4J9_ICHMG/260-436      | G0R4J9.1 PF00406.20 | 31.20 | 0.00 |
| TRINITY_V7C012_PHAVU/23-196       | V7C012.1 PF00445.16 | 31.20 | 0.00 |
| TRINITY_I7LUF5_TETTS/7-205        | I7LUF5.1 PF03665.11 | 31.20 | 0.00 |
| TRINITY_F4PLR5_DICFS/3-269        | F4PLR5.1 PF06454.9; | 31.20 | 0.00 |
| TRINITY_B4L339_DROMO/278-472      | B4L339.1 PF10312.7; | 31.20 | 0.00 |
| TRINITY_A0A0D9VST4_9ORYZ/139-314  | A0A0D9VST4.1 PF0084 | 31.20 | 0.00 |
| TRINITY_U4UBW7_DENPD/35-225       | U4UBW7.1 PF00445.16 | 31.20 | 0.00 |
| TRINITY_D3BB02_POLPA/74-277       | D3BB02.1 PF00804.23 | 31.20 | 0.00 |
| TRINITY_I7M910_TETTS/11-285       | I7M910.1 PF00069.23 | 31.20 | 0.00 |
| TRINITY_K2S878_MACPH/13-120       | K2S878.1 PF01624.18 | 31.20 | 0.00 |
| TRINITY_K3WZ12_PYTUL/20-301       | K3WZ12.1 PF03747.12 | 31.20 | 0.00 |

|                                  |                     |       |      |
|----------------------------------|---------------------|-------|------|
| TRINITY_A0A022RRH3_ERYGU/105-334 | A0A022RRH3.1 PF0196 | 31.20 | 0.00 |
| TRINITY_E1ZRN8_CHLVA/26-275      | E1ZRN8.1 PF04230.11 | 31.20 | 0.00 |
| TRINITY_A0A0D9VKR6_9ORYZ/242-451 | A0A0D9VKR6.1 PF0545 | 31.20 | 0.00 |
| TRINITY_Q24DE8_TETTS/129-738     | Q24DE8.1 PF00443.27 | 31.20 | 0.00 |
| TRINITY_K7IX85_NASVI/35-141      | K7IX85.1 PF00307.29 | 31.20 | 0.00 |
| TRINITY_I7MDW0_TETTS/6-395       | I7MDW0.2 PF04118.12 | 31.20 | 0.00 |
| TRINITY_F4Q2T9_DICFS/499-1098    | F4Q2T9.1 PF07748.11 | 31.20 | 0.00 |
| TRINITY_C1FEP4_MICSR/76-482      | C1FEP4.1 PF13476.4; | 31.20 | 0.00 |
| TRINITY_A0A074T8W2_HAMHA/433-572 | A0A074T8W2.1 PF0065 | 31.20 | 0.00 |
| TRINITY_A0DPV5_PARTE/314-534     | A0DPV5.1 PF07002.14 | 31.20 | 0.00 |
| TRINITY_D8UBI0_VOLCA/14-440      | D8UBI0.1 PF00067.20 | 31.20 | 0.00 |
| TRINITY_Q8RC82_CALS4/24-286      | Q8RC82.1 PF12146.6; | 31.10 | 0.00 |
| TRINITY_A0A044QZF2_ONCVO/14-262  | A0A044QZF2.1 PF0052 | 31.10 | 0.00 |
| TRINITY_S7QGE9_GLOTA/49-890      | S7QGE9.1 PF04147.10 | 31.10 | 0.00 |
| TRINITY_H2YYQ5_CIOSA/106-224     | H2YYQ5.1 PF00615.17 | 31.10 | 0.00 |
| TRINITY_A0A074S487_9HOMO/54-500  | A0A074S487.1 PF0006 | 31.10 | 0.00 |
| TRINITY_I0Z743_9CHLO/13-111      | I0Z743.1 PF05328.10 | 31.10 | 0.00 |
| TRINITY_A0A078AFR0_STYLE/378-507 | A0A078AFR0.1 PF1320 | 31.10 | 0.00 |
| TRINITY_F6HEG9_VITVI/51-442      | F6HEG9.1 PF00145.15 | 31.10 | 0.00 |
| TRINITY_Q23EX8_TETTS/145-491     | Q23EX8.2 PF13868.4; | 31.10 | 0.00 |
| TRINITY_E1Z3T1_CHLVA/282-447     | E1Z3T1.1 PF06423.10 | 31.10 | 0.00 |
| TRINITY_W2RHQ2_PHYPN/15-169      | W2RHQ2.1 PF04937.13 | 31.10 | 0.00 |
| TRINITY_J9K5F3_ACYPI/607-900     | J9K5F3.1 PF02171.15 | 31.10 | 0.00 |
| TRINITY_R1EAE4_EMIHU/15-190      | R1EAE4.1 PF13360.4; | 31.10 | 0.00 |
| TRINITY_C3ZJ54_BRAFL/64-290      | C3ZJ54.1 PF06159.11 | 31.10 | 0.00 |
| TRINITY_Q22M35_TETTS/45-209      | Q22M35.1 PF03357.19 | 31.10 | 0.00 |
| TRINITY_W2RLI5_9EURO/53-181      | W2RLI5.1 PF01569.19 | 31.10 | 0.00 |
| TRINITY_T0Q9N3_9STRA/459-671     | T0Q9N3.1 PF03372.21 | 31.10 | 0.00 |
| TRINITY_CRLA_DICDI/62-322        | Q54U75.1 PF05462.9; | 31.10 | 0.00 |
| TRINITY_D8M8H6_BLAHO/8-166       | D8M8H6.1 PF00071.20 | 31.10 | 0.00 |
| TRINITY_D0MW28_PHYIT/147-399     | D0MW28.1 PF01399.25 | 31.10 | 0.00 |
| TRINITY_I0ZAP1_9CHLO/34-522      | I0ZAP1.1 PF03372.21 | 31.10 | 0.00 |
| TRINITY_I0YMT6_9CHLO/42-205      | I0YMT6.1 PF01569.19 | 31.10 | 0.00 |
| TRINITY_F4Q8J5_DICFS/10-193      | F4Q8J5.1 PF06371.11 | 31.10 | 0.00 |
| TRINITY_Q22AM1_TETTS/51-391      | Q22AM1.3 PF00328.20 | 31.10 | 0.00 |
| TRINITY_J3M3N4_ORYBR/29-470      | J3M3N4.1 PF00759.17 | 31.10 | 0.00 |
| TRINITY_A8J3P1_CHLRE/954-1161    | A8J3P1.1 PF00211.18 | 31.10 | 0.00 |
| TRINITY_V7B6D9_PHAVU/51-187      | V7B6D9.1 PF14223.4; | 31.10 | 0.00 |
| TRINITY_I7MMA1_TETTS/931-1194    | I7MMA1.2 PF00664.21 | 31.00 | 0.00 |
| TRINITY_Q3M0Z2_PARTE/41-243      | Q3M0Z2.1 PF00804.23 | 31.00 | 0.00 |
| TRINITY_A0D9H0_PARTE/30-354      | A0D9H0.1 PF07690.14 | 31.00 | 0.00 |
| TRINITY_I7M910_TETTS/11-285      | I7M910.1 PF00069.23 | 31.00 | 0.00 |
| TRINITY_G3UQI6_MELGA/66-211      | G3UQI6.1 PF14996.4; | 31.00 | 0.00 |
| TRINITY_F0Z9S7_DICPU/344-682     | F0Z9S7.1 PF04869.12 | 31.00 | 0.00 |
| TRINITY_Q22A60_TETTS/15-411      | Q22A60.1 PF05761.12 | 31.00 | 0.00 |
| TRINITY_Q23YB5_TETTS/2-179       | Q23YB5.2 PF06017.11 | 31.00 | 0.00 |
| TRINITY_S0E838_GIBF5/48-357      | S0E838.1 PF04724.11 | 31.00 | 0.00 |
| TRINITY_A0CXP9_PARTE/92-386      | A0CXP9.1 PF01457.14 | 31.00 | 0.00 |
| TRINITY_Q54PA3_DICDI/95-276      | Q54PA3.1 PF01454.17 | 31.00 | 0.00 |
| TRINITY_R5Q7T6_9FIRM/2-136       | R5Q7T6.1 PF00892.18 | 31.00 | 0.00 |
| TRINITY_H2V6H4_TAKRU/7-186       | H2V6H4.1 PF00875.16 | 31.00 | 0.00 |
| TRINITY_D8U5W0_VOLCA/88-236      | D8U5W0.1 PF08546.9; | 31.00 | 0.00 |
| TRINITY_Y1782_THEKO/61-423       | Q5JJ64.1 PF00079.18 | 31.00 | 0.00 |
| TRINITY_J7LB74_NOCAA/62-403      | J7LB74.1 PF00144.22 | 31.00 | 0.00 |
| TRINITY_L8HK27_ACACA/473-724     | L8HK27.1 PF00069.23 | 31.00 | 0.00 |
| TRINITY_A9TYN8_PHYPA/180-297     | A9TYN8.1 PF04488.13 | 31.00 | 0.00 |
| TRINITY_D8LR70_ECTSI/20-279      | D8LR70.1 PF05004.11 | 31.00 | 0.00 |
| TRINITY_K1R1V6_CRAGI/17-321      | K1R1V6.1 PF05185.14 | 31.00 | 0.00 |
| TRINITY_A0A0M0JZK3_9EUKA/232-431 | A0A0M0JZK3.1 PF1385 | 31.00 | 0.00 |
| TRINITY_W9XUW2_9EURO/422-927     | W9XUW2.1 PF00899.19 | 31.00 | 0.00 |
| TRINITY_A0A074YH30_9PEZI/92-400  | A0A074YH30.1 PF0002 | 31.00 | 0.00 |

|                                    |                     |       |      |
|------------------------------------|---------------------|-------|------|
| TRINITY_A8IOH8_CHLRE/70-331        | A8IOH8.1 PF00561.18 | 31.00 | 0.00 |
| TRINITY_D8TSN5_VOLCA/497-764       | D8TSN5.1 PF07714.15 | 31.00 | 0.00 |
| TRINITY_W5KIR2_ASTMX/102-735       | W5KIR2.1 PF03343.11 | 31.00 | 0.00 |
| TRINITY_K1QYG2_CRAGI/568-1085      | K1QYG2.1 PF03177.12 | 31.00 | 0.00 |
| TRINITY_A0A0G2LAQ9_DANRE/514-761   | A0A0G2LAQ9.1 PF0007 | 31.00 | 0.00 |
| TRINITY_F0ZHZ6_DICPU/27-241        | F0ZHZ6.1 PF07722.11 | 31.00 | 0.00 |
| TRINITY_I1QCG5_ORYGL/32-212        | I1QCG5.1 PF00445.16 | 30.90 | 0.00 |
| TRINITY_A0A0A1H016_9LACO/29-371    | A0A0A1H016.1 PF0029 | 30.90 | 0.00 |
| TRINITY_L8GLD9_ACACA/51-301        | L8GLD9.1 PF00561.18 | 30.90 | 0.00 |
| TRINITY_A0A0F2IYK8_9BACT/61-163    | A0A0F2IYK8.1 PF0001 | 30.90 | 0.00 |
| TRINITY_C1E094_MICSR/52-268        | C1E094.1 PF01988.17 | 30.90 | 0.00 |
| TRINITY_B4LQ14_DROVI/5-462         | B4LQ14.1 PF00996.16 | 30.90 | 0.00 |
| TRINITY_A0A0R4IVS5_DANRE/650-1146  | A0A0R4IVS5.1 PF0774 | 30.90 | 0.00 |
| TRINITY_F8PWC3_SERL3/70-596        | F8PWC3.1 PF08118.9; | 30.90 | 0.00 |
| TRINITY_S2J038_MUCC1/49-202        | S2J038.1 PF04112.11 | 30.90 | 0.00 |
| TRINITY_GRLE_DICDI/440-680         | Q54ET0.2 PF00003.20 | 30.90 | 0.00 |
| TRINITY_R5Y700_9CLOT/174-367       | R5Y700.1 PF00092.26 | 30.90 | 0.00 |
| TRINITY_D0MI23_RHOM4/25-436        | D0MI23.1 PF00245.18 | 30.90 | 0.00 |
| TRINITY_Q22AM1_TETTS/51-391        | Q22AM1.3 PF00328.20 | 30.90 | 0.00 |
| TRINITY_Q22Y11_TETTS/1-289         | Q22Y11.2 PF05742.10 | 30.90 | 0.00 |
| TRINITY_Q22WK2_TETTS/10-120        | Q22WK2.1 PF05773.20 | 30.90 | 0.00 |
| TRINITY_C5KP64_PERM5/54-554        | C5KP64.1 PF15902.3; | 30.90 | 0.00 |
| TRINITY_Q7RW81_NEUCR/971-1135      | Q7RW81.3 PF00616.17 | 30.90 | 0.00 |
| TRINITY_A8IPG1_CHLRE/11-278        | A8IPG1.1 PF08433.8; | 30.90 | 0.00 |
| TRINITY_I0Z419_9CHLO/222-627       | I0Z419.1 PF08424.8; | 30.90 | 0.00 |
| TRINITY_I0Z3D8_9CHLO/42-416        | I0Z3D8.1 PF00999.19 | 30.90 | 0.00 |
| TRINITY_D2VTB2_NAEGR/349-710       | D2VTB2.1 PF09423.8; | 30.80 | 0.00 |
| TRINITY_A0CMN6_PARTE/121-399       | A0CMN6.1 PF01457.14 | 30.80 | 0.00 |
| TRINITY_A0A0K9PG53_ZOSMR/12-168    | A0A0K9PG53.1 PF0442 | 30.80 | 0.00 |
| TRINITY_Q23CV6_TETTS/29-283        | Q23CV6.1 PF00743.17 | 30.80 | 0.00 |
| TRINITY_Q24DC8_TETTS/44-337        | Q24DC8.2 PF03372.21 | 30.80 | 0.00 |
| TRINITY_E2BLD4_HARSA/3131-3319     | E2BLD4.1 PF00092.26 | 30.80 | 0.00 |
| TRINITY_K2B505_9BACT/11-278        | K2B505.1 PF07690.14 | 30.80 | 0.00 |
| TRINITY_A0CXP9_PARTE/92-386        | A0CXP9.1 PF01457.14 | 30.80 | 0.00 |
| TRINITY_A0E0X6_PARTE/134-309       | A0E0X6.1 PF00621.18 | 30.80 | 0.00 |
| TRINITY_A0A0F3FXH6_9LACO/613-761   | A0A0F3FXH6.1 PF0826 | 30.80 | 0.00 |
| TRINITY_I7MN29_TETTS/205-557       | I7MN29.2 PF03416.17 | 30.80 | 0.00 |
| TRINITY_M1VJ71_CYAME/102-468       | M1VJ71.1 PF00026.21 | 30.80 | 0.00 |
| TRINITY_J9IHM6_9SPIT/49-263        | J9IHM6.1 PF02146.15 | 30.80 | 0.00 |
| TRINITY_C1MJ95_MICPC/141-430       | C1MJ95.1 PF00856.26 | 30.80 | 0.00 |
| TRINITY_A8ZW01_DESOH/30-205        | A8ZW01.1 PF13365.4; | 30.80 | 0.00 |
| TRINITY_E0VAN1_PEDHC/151-362       | E0VAN1.1 PF03770.14 | 30.80 | 0.00 |
| TRINITY_F2U7K1_SALR5/94-298        | F2U7K1.1 PF01189.15 | 30.80 | 0.00 |
| TRINITY_F2UIN7_SALR5/19-256        | F2UIN7.1 PF03222.11 | 30.80 | 0.00 |
| TRINITY_A0A0D8MM79_PHOLE/324-435   | A0A0D8MM79.1 PF0251 | 30.80 | 0.00 |
| TRINITY_R1CP07_EMIHU/54-292        | R1CP07.1 PF04045.12 | 30.80 | 0.00 |
| TRINITY_X6NJ86_RETFI/467-597       | X6NJ86.1 PF04499.13 | 30.80 | 0.00 |
| TRINITY_E9G7P2_DAPPU/109-254       | E9G7P2.1 PF08389.10 | 30.80 | 0.00 |
| TRINITY_W7XHQ2_TETTS/623-861       | W7XHQ2.1 PF02714.13 | 30.80 | 0.00 |
| TRINITY_A0A0J8BKW5_BETVU/1193-1331 | A0A0J8BKW5.1 PF1620 | 30.80 | 0.00 |
| TRINITY_A0A059LKE0_9CHLO/105-282   | A0A059LKE0.1 PF1026 | 30.80 | 0.00 |
| TRINITY_D8S9X8_SELML/4-433         | D8S9X8.1 PF03372.21 | 30.80 | 0.00 |
| TRINITY_A8I935_CHLRE/132-414       | A8I935.1 PF13416.4; | 30.80 | 0.00 |
| TRINITY_D6WV93_TRICA/56-185        | D6WV93.1 PF00782.18 | 30.70 | 0.00 |
| TRINITY_A0A098EX32_9BACI/31-267    | A0A098EX32.1 PF0785 | 30.70 | 0.00 |
| TRINITY_F4PI23_DICFS/5-167         | F4PI23.1 PF00071.20 | 30.70 | 0.00 |
| TRINITY_Q232X8_TETTS/36-488        | Q232X8.1 PF00067.20 | 30.70 | 0.00 |
| TRINITY_Q24C23_TETTS/91-326        | Q24C23.3 PF00566.16 | 30.70 | 0.00 |
| TRINITY_A0A0M0KA26_9EUKA/367-475   | A0A0M0KA26.1 PF0065 | 30.70 | 0.00 |
| TRINITY_M2XZ77_GALSU/2-376         | M2XZ77.1 PF00022.17 | 30.70 | 0.00 |
| TRINITY_D8U6H8_VOLCA/913-1028      | D8U6H8.1 PF04091.10 | 30.70 | 0.00 |

|                                   |                     |       |      |
|-----------------------------------|---------------------|-------|------|
| TRINITY_A0A0G4GWL3_9ALVE/43-348   | A0A0G4GWL3.1 PF1137 | 30.70 | 0.00 |
| TRINITY_A1AUW3_PELPD/72-274       | A1AUW3.1 PF07859.11 | 30.70 | 0.00 |
| TRINITY_A0A0G4EN89_9ALVE/143-459  | A0A0G4EN89.1 PF0002 | 30.70 | 0.00 |
| TRINITY_K3WFF2_PYTUL/109-395      | K3WFF2.1 PF10236.7; | 30.70 | 0.00 |
| TRINITY_F4PBJ7_BATDJ/3-370        | F4PBJ7.1 PF04857.18 | 30.70 | 0.00 |
| TRINITY_A0A096SRJ4_MAIZE/405-614  | A0A096SRJ4.1 PF1336 | 30.70 | 0.00 |
| TRINITY_A0CMN6_PARTE/121-399      | A0CMN6.1 PF01457.14 | 30.70 | 0.00 |
| TRINITY_D8UGU8_VOLCA/204-452      | D8UGU8.1 PF03629.16 | 30.70 | 0.00 |
| TRINITY_A0A066WPY2_9BASI/380-661  | A0A066WPY2.1 PF0008 | 30.70 | 0.00 |
| TRINITY_A0A0J8B5S6_BETVU/861-1668 | A0A0J8B5S6.1 PF0236 | 30.70 | 0.00 |
| TRINITY_T1HCN7_RHOPR/582-767      | T1HCN7.1 PF00621.18 | 30.60 | 0.00 |
| TRINITY_W7XH58_TETTS/4-284        | W7XH58.1 PF04791.14 | 30.60 | 0.00 |
| TRINITY_D7MQ99_ARALL/14-316       | D7MQ99.1 PF00899.19 | 30.60 | 0.00 |
| TRINITY_A0A0A0LN37_CUCSA/5-163    | A0A0A0LN37.1 PF0590 | 30.60 | 0.00 |
| TRINITY_J9IAM0_9SPIT/410-562      | J9IAM0.1 PF10607.7; | 30.60 | 0.00 |
| TRINITY_K3WZW5_PYTUL/199-366      | K3WZW5.1 PF02582.12 | 30.60 | 0.00 |
| TRINITY_L8HCC5_ACACA/166-433      | L8HCC5.1 PF11904.6; | 30.60 | 0.00 |
| TRINITY_V4KH20_EUTSA/12-310       | V4KH20.1 PF07992.12 | 30.60 | 0.00 |
| TRINITY_I0YQX5_9CHLO/37-339       | I0YQX5.1 PF00067.20 | 30.60 | 0.00 |
| TRINITY_E1ZRN8_CHLVA/26-275       | E1ZRN8.1 PF04230.11 | 30.60 | 0.00 |
| TRINITY_A0A075R0X3_BRELA/5-237    | A0A075R0X3.1 PF0120 | 30.60 | 0.00 |
| TRINITY_E1Z549_CHLVA/41-381       | E1Z549.1 PF00497.18 | 30.60 | 0.00 |
| TRINITY_T0R5R8_9STRA/279-528      | T0R5R8.1 PF00928.19 | 30.60 | 0.00 |
| TRINITY_C5MDZ8_CANTT/1-439        | C5MDZ8.1 PF10243.7; | 30.60 | 0.00 |
| TRINITY_Q22X60_TETTS/11-285       | Q22X60.1 PF00069.23 | 30.60 | 0.00 |
| TRINITY_A0A0G4E9R1_9ALVE/130-242  | A0A0G4E9R1.1 PF0417 | 30.60 | 0.00 |
| TRINITY_C5LAE7_PERM5/461-585      | C5LAE7.1 PF08578.8; | 30.60 | 0.00 |
| TRINITY_A0A0M0JWR2_9EUKA/316-647  | A0A0M0JWR2.1 PF0179 | 30.60 | 0.00 |
| TRINITY_A0DMZ1_PARTE/10-174       | A0DMZ1.1 PF03986.11 | 30.60 | 0.00 |
| TRINITY_A9SGC0_PHYPA/143-537      | A9SGC0.1 PF03969.14 | 30.60 | 0.00 |
| TRINITY_W6RZ62_9CLOT/2-307        | W6RZ62.1 PF00009.25 | 30.50 | 0.00 |
| TRINITY_S9WE56_9CETA/6-377        | S9WE56.1 PF00022.17 | 30.50 | 0.00 |
| TRINITY_K1QAL0_CRAGI/111-580      | K1QAL0.1 PF00012.18 | 30.50 | 0.00 |
| TRINITY_I7MCY4_TETTS/74-434       | I7MCY4.1 PF06870.10 | 30.50 | 0.00 |
| TRINITY_Q22SJ7_TETTS/199-371      | Q22SJ7.1 PF00092.26 | 30.50 | 0.00 |
| TRINITY_EI24_DICDI/36-246         | Q54PW9.1 PF07264.9; | 30.50 | 0.00 |
| TRINITY_I1CVD4_RHIO9/7-523        | I1CVD4.1 PF01231.16 | 30.50 | 0.00 |
| TRINITY_A0A075B500_9FUNG/145-362  | A0A075B500.1 PF0006 | 30.50 | 0.00 |
| TRINITY_A0CXP9_PARTE/92-386       | A0CXP9.1 PF01457.14 | 30.50 | 0.00 |
| TRINITY_A0CRJ5_PARTE/9-482        | A0CRJ5.1 PF05833.9; | 30.50 | 0.00 |
| TRINITY_I7MEB9_TETTS/447-795      | I7MEB9.2 PF03635.15 | 30.50 | 0.00 |
| TRINITY_A0BZG6_PARTE/9-282        | A0BZG6.1 PF00069.23 | 30.50 | 0.00 |
| TRINITY_I0YQJ0_9CHLO/284-656      | I0YQJ0.1 PF03081.13 | 30.50 | 0.00 |
| TRINITY_W0DWQ5_9GAMM/10-205       | W0DWQ5.1 PF13419.4; | 30.50 | 0.00 |
| TRINITY_W7XA88_TETTS/420-618      | W7XA88.1 PF01925.17 | 30.50 | 0.00 |
| TRINITY_D8TST9_VOLCA/621-848      | D8TST9.1 PF00211.18 | 30.50 | 0.00 |
| TRINITY_A0BS05_PARTE/16-359       | A0BS05.1 PF00328.20 | 30.50 | 0.00 |
| TRINITY_F0Z7H3_DICPU/30-593       | F0Z7H3.1 PF00995.21 | 30.50 | 0.00 |
| TRINITY_F1A451_DICPU/346-524      | F1A451.1 PF05224.10 | 30.50 | 0.00 |
| TRINITY_D8SI89_SELML/53-311       | D8SI89.1 PF00069.23 | 30.50 | 0.00 |
| TRINITY_A6P0S8_9FIRM/99-314       | A6P0S8.1 PF00089.24 | 30.50 | 0.00 |
| TRINITY_A0A067QPV9_ZOONE/31-282   | A0A067QPV9.1 PF0006 | 30.50 | 0.00 |
| TRINITY_A0A0D2X509_CAPO3/313-530  | A0A0D2X509.1 PF0410 | 30.50 | 0.00 |
| TRINITY_D8TI53_VOLCA/419-573      | D8TI53.1 PF12499.6; | 30.50 | 0.00 |
| TRINITY_V7B654_PHAVU/4-119        | V7B654.1 PF00168.28 | 30.40 | 0.00 |
| TRINITY_Q75JR6_DICDI/1186-1338    | Q75JR6.1 PF12807.5; | 30.40 | 0.00 |
| TRINITY_Q2IQF1_ANADE/11-98        | Q2IQF1.1 PF00027.27 | 30.40 | 0.00 |
| TRINITY_A0A0J8C4W3_BETVU/25-204   | A0A0J8C4W3.1 PF0044 | 30.40 | 0.00 |
| TRINITY_G3PLJ6_GASAC/705-996      | G3PLJ6.1 PF00664.21 | 30.40 | 0.00 |
| TRINITY_Q9UYG1_PYRAB/4-237        | Q9UYG1.1 PF13660.4; | 30.40 | 0.00 |
| TRINITY_E1Z4Y5_CHLVA/59-192       | E1Z4Y5.1 PF10033.7; | 30.40 | 0.00 |

|                                   |                     |       |      |
|-----------------------------------|---------------------|-------|------|
| TRINITY_I7LX20_TETTS/11-287       | I7LX20.2 PF00069.23 | 30.40 | 0.00 |
| TRINITY_G6DNV4_DANPL/1240-1359    | G6DNV4.1 PF00638.16 | 30.40 | 0.00 |
| TRINITY_A0A075AQC1_9FUNG/976-1266 | A0A075AQC1.1 PF0248 | 30.40 | 0.00 |
| TRINITY_A0A074X9L6_AURPU/172-439  | A0A074X9L6.1 PF0154 | 30.40 | 0.00 |
| TRINITY_F0ZFR5_DICPU/149-409      | F0ZFR5.1 PF13489.4; | 30.40 | 0.00 |
| TRINITY_Q1H0A7_METFK/148-459      | Q1H0A7.1 PF07992.12 | 30.40 | 0.00 |
| TRINITY_H2TVA2_TAKRU/382-663      | H2TVA2.1 PF16187.3; | 30.40 | 0.00 |
| TRINITY_F4PLG0_DICFS/246-639      | F4PLG0.1 PF07690.14 | 30.40 | 0.00 |
| TRINITY_L8HCY8_ACACA/6-260        | L8HCY8.1 PF06454.9; | 30.40 | 0.00 |
| TRINITY_L8H515_ACACA/218-351      | L8H515.1 PF13499.4; | 30.40 | 0.00 |
| TRINITY_A0CXP9_PARTE/92-386       | A0CXP9.1 PF01457.14 | 30.40 | 0.00 |
| TRINITY_A0CRQ7_PARTE/61-392       | A0CRQ7.1 PF02628.13 | 30.40 | 0.00 |
| TRINITY_C5MDZ8_CANTT/1-439        | C5MDZ8.1 PF10243.7; | 30.40 | 0.00 |
| TRINITY_A0A068S5U1_9FUNG/59-521   | A0A068S5U1.1 PF0006 | 30.40 | 0.00 |
| TRINITY_L1J437_GUIITH/102-337     | L1J437.1 PF09423.8; | 30.40 | 0.00 |
| TRINITY_D8TID6_VOLCA/27-604       | D8TID6.1 PF02724.12 | 30.40 | 0.00 |
| TRINITY_I7M7R3_TETTS/69-230       | I7M7R3.1 PF01554.16 | 30.40 | 0.00 |
| TRINITY_A8JDG8_CHLRE/162-330      | A8JDG8.1 PF03567.12 | 30.40 | 0.00 |
| TRINITY_A0A0D2VFF2_CAPO3/256-566  | A0A0D2VFF2.1 PF0715 | 30.40 | 0.00 |
| TRINITY_D8TZV5_VOLCA/70-558       | D8TZV5.1 PF00026.21 | 30.40 | 0.00 |
| TRINITY_L8HBK7_ACACA/26-465       | L8HBK7.1 PF00067.20 | 30.40 | 0.00 |
| TRINITY_A0A0F0KQS0_9MICO/39-242   | A0A0F0KQS0.1 PF0023 | 30.30 | 0.00 |
| TRINITY_A9TG91_PHYPA/214-888      | A9TG91.1 PF10408.7; | 30.30 | 0.00 |
| TRINITY_A0CMN6_PARTE/121-399      | A0CMN6.1 PF01457.14 | 30.30 | 0.00 |
| TRINITY_F4PK46_DICFS/106-320      | F4PK46.1 PF05721.11 | 30.30 | 0.00 |
| TRINITY_L1JLX7_GUIITH/145-290     | L1JLX7.1 PF01764.23 | 30.30 | 0.00 |
| TRINITY_J9IFP1_9SPIT/145-520      | J9IFP1.1 PF00654.18 | 30.30 | 0.00 |
| TRINITY_A0A068SEW5_9FUNG/53-524   | A0A068SEW5.1 PF0006 | 30.30 | 0.00 |
| TRINITY_Q54YI0_DICDI/175-456      | Q54YI0.1 PF06814.11 | 30.30 | 0.00 |
| TRINITY_T23O2_RALSO/1-346         | Q8XRY7.1 PF03301.11 | 30.30 | 0.00 |
| TRINITY_A0A084WNK7_ANOSI/5-261    | A0A084WNK7.1 PF0090 | 30.30 | 0.00 |
| TRINITY_A0A060SRV2_PYCCI/40-663   | A0A060SRV2.1 PF0973 | 30.30 | 0.00 |
| TRINITY_H3D3Q8_TETNG/14-393       | H3D3Q8.1 PF07690.14 | 30.30 | 0.00 |
| TRINITY_A0A099P333_PICKU/90-251   | A0A099P333.1 PF0155 | 30.30 | 0.00 |
| TRINITY_A0A078BA76_STYLE/103-480  | A0A078BA76.1 PF0340 | 30.30 | 0.00 |
| TRINITY_W1NQV9_AMBTC/1-195        | W1NQV9.1 PF03959.11 | 30.30 | 0.00 |
| TRINITY_A0A067CDE6_SAPPC/94-446   | A0A067CDE6.1 PF0340 | 30.30 | 0.00 |
| TRINITY_GEFQ_DICDI/967-1144       | Q86G47.1 PF00617.17 | 30.30 | 0.00 |
| TRINITY_A0DEF1_PARTE/574-728      | A0DEF1.1 PF11618.6; | 30.30 | 0.00 |
| TRINITY_A9V028_MONBE/91-577       | A9V028.1 PF00135.26 | 30.30 | 0.00 |
| TRINITY_E1Z4R2_CHLVA/538-725      | E1Z4R2.1 PF13385.4; | 30.30 | 0.00 |
| TRINITY_GEFQ_DICDI/967-1144       | Q86G47.1 PF00617.17 | 30.30 | 0.00 |
| TRINITY_A8JCH8_CHLRE/152-639      | A8JCH8.1 PF01532.18 | 30.30 | 0.00 |
| TRINITY_C2W3H1_BACCE/1-249        | C2W3H1.1 PF10127.7; | 30.30 | 0.00 |
| TRINITY_A0E368_PARTE/250-369      | A0E368.1 PF14536.4; | 30.20 | 0.00 |
| TRINITY_Q22RK7_TETTS/62-182       | Q22RK7.2 PF16863.3; | 30.20 | 0.00 |
| TRINITY_A0A078AX44_STYLE/604-698  | A0A078AX44.1 PF1349 | 30.20 | 0.00 |
| TRINITY_W7XJ96_TETTS/33-488       | W7XJ96.1 PF00067.20 | 30.20 | 0.00 |
| TRINITY_A0DEE9_PARTE/43-499       | A0DEE9.1 PF00067.20 | 30.20 | 0.00 |
| TRINITY_D3BTH8_POLPA/29-261       | D3BTH8.1 PF00149.26 | 30.20 | 0.00 |
| TRINITY_L8GQR1_ACACA/657-1024     | L8GQR1.1 PF00176.21 | 30.20 | 0.00 |
| TRINITY_D3B861_POLPA/591-756      | D3B861.1 PF02390.15 | 30.20 | 0.00 |
| TRINITY_W4Y5G5_STRPU/17-160       | W4Y5G5.1 PF03208.17 | 30.20 | 0.00 |
| TRINITY_I0YMH8_9CHLO/78-426       | I0YMH8.1 PF00150.16 | 30.20 | 0.00 |
| TRINITY_A0A078A5B4_STYLE/158-540  | A0A078A5B4.1 PF0850 | 30.20 | 0.00 |
| TRINITY_A8JFR2_CHLRE/336-752      | A8JFR2.1 PF09797.7; | 30.20 | 0.00 |
| TRINITY_H3GXF1_PHYRM/63-450       | H3GXF1.1 PF01490.16 | 30.20 | 0.00 |
| TRINITY_V4MAU0_EUTSA/3515-3770    | V4MAU0.1 PF00454.25 | 30.20 | 0.00 |
| TRINITY_U9SJP4_RHIID/6-321        | U9SJP4.1 PF04177.10 | 30.20 | 0.00 |
| TRINITY_D3B1K4_POLPA/254-456      | D3B1K4.1 PF02886.15 | 30.20 | 0.00 |
| TRINITY_A0A088AFF7_APIME/6-240    | A0A088AFF7.1 PF0074 | 30.20 | 0.00 |

|                                  |              |            |       |      |
|----------------------------------|--------------|------------|-------|------|
| TRINITY_G0R5R6_ICHMG/21-294      | G0R5R6.1     | PF00069.23 | 30.20 | 0.00 |
| TRINITY_I7MG82_TETTS/90-413      | I7MG82.2     | PF00225.21 | 30.20 | 0.00 |
| TRINITY_G0R213_ICHMG/572-890     | G0R213.1     | PF11838.6; | 30.20 | 0.00 |
| TRINITY_F9DUI1_9BACL/71-321      | F9DUI1.1     | PF01636.21 | 30.20 | 0.00 |
| TRINITY_V3ZIL1_LOTGI/308-673     | V3ZIL1.1     | PF02460.16 | 30.20 | 0.00 |
| TRINITY_K4BC78_SOLLC/4174-5079   | K4BC78.1     | PF13764.4; | 30.20 | 0.00 |
| TRINITY_T1IDV6_RHOPR/992-1104    | T1IDV6.1     | PF12894.5; | 30.20 | 0.00 |
| TRINITY_A5BG02_VITVI/36-278      | A5BG02.1     | PF09749.7; | 30.20 | 0.00 |
| TRINITY_F0ZWB4_DICPU/26-725      | F0ZWB4.1     | PF00012.18 | 30.20 | 0.00 |
| TRINITY_I0YYH3_9CHLO/2-128       | I0YYH3.1     | PF01553.19 | 30.20 | 0.00 |
| TRINITY_A8HNP6_CHLRE/11-260      | A8HNP6.1     | PF07727.12 | 30.20 | 0.00 |
| TRINITY_A0DWU6_PARTE/3-366       | A0DWU6.1     | PF04857.18 | 30.20 | 0.00 |
| TRINITY_K2BC96_9BACT/41-359      | K2BC96.1     | PF07065.12 | 30.20 | 0.00 |
| TRINITY_G0GCI4_SPITZ/27-140      | G0GCI4.1     | PF00072.22 | 30.10 | 0.00 |
| TRINITY_W7X4A5_TETTS/149-399     | W7X4A5.1     | PF10192.7; | 30.10 | 0.00 |
| TRINITY_A0A078A0B3_STYLE/47-204  | A0A078A0B3.1 | PF0152     | 30.10 | 0.00 |
| TRINITY_E1ZRN8_CHLVA/26-275      | E1ZRN8.1     | PF04230.11 | 30.10 | 0.00 |
| TRINITY_A0CK29_PARTE/31-245      | A0CK29.1     | PF01027.18 | 30.10 | 0.00 |
| TRINITY_B3S4F9_TRIAD/25-206      | B3S4F9.1     | PF13462.4; | 30.10 | 0.00 |
| TRINITY_M7NSX7_PNEMU/974-1154    | M7NSX7.1     | PF00617.17 | 30.10 | 0.00 |
| TRINITY_B9NNU9_9RHOB/25-246      | B9NNU9.1     | PF00149.26 | 30.10 | 0.00 |
| TRINITY_I7LXH5_TETTS/33-492      | I7LXH5.2     | PF00067.20 | 30.10 | 0.00 |
| TRINITY_F8WWR8_9PORP/81-208      | F8WWR8.1     | PF01553.19 | 30.10 | 0.00 |
| TRINITY_F0ZKQ6_DICPU/12-173      | F0ZKQ6.1     | PF00071.20 | 30.10 | 0.00 |
| TRINITY_L8GVE8_ACACA/36-197      | L8GVE8.1     | PF08547.10 | 30.10 | 0.00 |
| TRINITY_D3B266_POLPA/273-653     | D3B266.1     | PF03416.17 | 30.10 | 0.00 |
| TRINITY_I0YLB1_9CHLO/37-547      | I0YLB1.1     | PF00067.20 | 30.10 | 0.00 |
| TRINITY_W4YKQ1_STRPU/5-378       | W4YKQ1.1     | PF00022.17 | 30.10 | 0.00 |
| TRINITY_Q22BY1_TETTS/300-566     | Q22BY1.1     | PF07714.15 | 30.00 | 0.00 |
| TRINITY_K1RE36_CRAGI/123-527     | K1RE36.1     | PF00930.19 | 30.00 | 0.00 |
| TRINITY_L8GSU8_ACACA/6-295       | L8GSU8.1     | PF02535.20 | 30.00 | 0.00 |
| TRINITY_C1MQD5_MICPC/1-127       | C1MQD5.1     | PF00235.17 | 30.00 | 0.00 |
| TRINITY_A0CXP9_PARTE/92-386      | A0CXP9.1     | PF01457.14 | 30.00 | 0.00 |
| TRINITY_A0CXP9_PARTE/92-386      | A0CXP9.1     | PF01457.14 | 30.00 | 0.00 |
| TRINITY_A9VAN1_MONBE/20-210      | A9VAN1.1     | PF01183.18 | 30.00 | 0.00 |
| TRINITY_A7RZ78_NEMVE/50-270      | A7RZ78.1     | PF01633.18 | 30.00 | 0.00 |
| TRINITY_D8UC13_VOLCA/1-301       | D8UC13.1     | PF01795.17 | 30.00 | 0.00 |
| TRINITY_Q5CWY7_CRYPI/10-171      | Q5CWY7.1     | PF00071.20 | 30.00 | 0.00 |
| TRINITY_F0ZJS9_DICPU/436-674     | F0ZJS9.1     | PF00003.20 | 30.00 | 0.00 |
| TRINITY_G3AXK5_CANTC/6-172       | G3AXK5.1     | PF00156.25 | 30.00 | 0.00 |
| TRINITY_A9ST26_PHYPA/26-530      | A9ST26.1     | PF04129.10 | 30.00 | 0.00 |
| TRINITY_W7TJL5_9STRA/73-422      | W7TJL5.1     | PF05686.10 | 30.00 | 0.00 |
| TRINITY_Q54FE3_DICDI/69-1056     | Q54FE3.1     | PF02463.17 | 30.00 | 0.00 |
| TRINITY_I4EDR2_9CHLR/14-139      | I4EDR2.1     | PF07366.10 | 30.00 | 0.00 |
| TRINITY_A0A078A5B4_STYLE/158-540 | A0A078A5B4.1 | PF0850     | 30.00 | 0.00 |
| TRINITY_I7LUY7_TETTS/523-836     | I7LUY7.2     | PF00443.27 | 30.00 | 0.00 |
| TRINITY_E9FB92_METRA/40-513      | E9FB92.2     | PF00067.20 | 30.00 | 0.00 |
| TRINITY_A0A059DIR9_EUCGR/255-587 | A0A059DIR9.1 | PF0337     | 29.90 | 0.00 |
| TRINITY_A0CW85_PARTE/39-324      | A0CW85.1     | PF07766.11 | 29.90 | 0.00 |
| TRINITY_A0BFW2_PARTE/49-173      | A0BFW2.1     | PF00782.18 | 29.90 | 0.00 |
| TRINITY_H1LBP6_9LACO/49-210      | H1LBP6.1     | PF01697.25 | 29.90 | 0.00 |
| TRINITY_V4I992_9ACTN/9-199       | V4I992.1     | PF00106.23 | 29.90 | 0.00 |
| TRINITY_I1FF60_AMPQE/550-779     | I1FF60.1     | PF13621.4; | 29.90 | 0.00 |
| TRINITY_A0A077ZPU9_STYLE/22-310  | A0A077ZPU9.1 | PF1523     | 29.90 | 0.00 |
| TRINITY_F6QNQ3_XENTR/164-1130    | F6QNQ3.1     | PF03813.12 | 29.90 | 0.00 |
| TRINITY_A0A073CK63_PLAAG/22-454  | A0A073CK63.1 | PF1334     | 29.90 | 0.00 |
| TRINITY_V9EVG4_PHYPR/9-198       | V9EVG4.1     | PF13460.4; | 29.90 | 0.00 |
| TRINITY_V4AP75_LOTGI/63-280      | V4AP75.1     | PF01633.18 | 29.90 | 0.00 |
| TRINITY_N1Q6P2_PSEFD/238-470     | N1Q6P2.1     | PF02735.14 | 29.90 | 0.00 |
| TRINITY_K9SJ15_9CYAN/5-177       | K9SJ15.1     | PF02739.14 | 29.90 | 0.00 |
| TRINITY_H2BYW0_9FLAO/184-344     | H2BYW0.1     | PF00406.20 | 29.90 | 0.00 |



|                                  |                     |       |      |
|----------------------------------|---------------------|-------|------|
| TRINITY_A0A0R4ICI5_DANRE/15-550  | A0A0R4ICI5.1 PF0532 | 29.90 | 0.00 |
| TRINITY_K3W895_PYTUL/13-597      | K3W895.1 PF16134.3; | 29.90 | 0.00 |
| TRINITY_I0YNC8_9CHLO/238-469     | I0YNC8.1 PF00089.24 | 29.90 | 0.00 |
| TRINITY_A0A0P7VCG3_9TELE/297-487 | A0A0P7VCG3.1 PF0061 | 29.90 | 0.00 |
| TRINITY_D3B978_POLPA/402-647     | D3B978.1 PF00003.20 | 29.90 | 0.00 |
| TRINITY_K9X2I1_9NOST/29-219      | K9X2I1.1 PF13532.4; | 29.90 | 0.00 |
| TRINITY_F0ZV95_DICPU/182-735     | F0ZV95.1 PF06046.11 | 29.90 | 0.00 |
| TRINITY_A8HPW8_CHLRE/149-319     | A8HPW8.1 PF00270.27 | 29.90 | 0.00 |
| TRINITY_M4E635_BRARP/205-381     | M4E635.1 PF04925.13 | 29.90 | 0.00 |
| TRINITY_F5Y2K1_RAMTT/298-678     | F5Y2K1.1 PF13361.4; | 29.90 | 0.00 |
| TRINITY_Q22CE3_TETTS/270-384     | Q22CE3.2 PF01152.19 | 29.80 | 0.00 |
| TRINITY_A8AVD3_STRGC/4-144       | A8AVD3.1 PF00582.24 | 29.80 | 0.00 |
| TRINITY_G4Z177_PHYSP/802-920     | G4Z177.1 PF12814.5; | 29.80 | 0.00 |
| TRINITY_G0R213_ICHMG/572-890     | G0R213.1 PF11838.6; | 29.80 | 0.00 |
| TRINITY_S9Y9N0_9CETA/22-442      | S9Y9N0.1 PF07690.14 | 29.80 | 0.00 |
| TRINITY_L8HI91_ACACA/91-321      | L8HI91.1 PF05721.11 | 29.80 | 0.00 |
| TRINITY_F4PNA6_DICFS/447-711     | F4PNA6.1 PF00069.23 | 29.80 | 0.00 |
| TRINITY_Q755N2_ASHGO/568-1065    | Q755N2.2 PF02386.14 | 29.80 | 0.00 |
| TRINITY_A9RDU7_PHYPA/693-887     | A9RDU7.1 PF02816.16 | 29.80 | 0.00 |
| TRINITY_L8HDY1_ACACA/30-199      | L8HDY1.1 PF08603.9; | 29.80 | 0.00 |
| TRINITY_A0A024U0B1_9STRA/44-328  | A0A024U0B1.1 PF0006 | 29.80 | 0.00 |
| TRINITY_E1Z8T8_CHLVA/250-379     | E1Z8T8.1 PF01687.15 | 29.80 | 0.00 |
| TRINITY_A0A067GV33_CITSI/9-131   | A0A067GV33.1 PF0611 | 29.80 | 0.00 |
| TRINITY_I7MEF8_TETTS/134-646     | I7MEF8.2 PF12698.5; | 29.80 | 0.00 |
| TRINITY_Q24CL6_TETTS/184-479     | Q24CL6.2 PF03715.11 | 29.80 | 0.00 |
| TRINITY_F0ZZ45_DICPU/6-254       | F0ZZ45.1 PF00069.23 | 29.80 | 0.00 |
| TRINITY_G0QVG7_ICHMG/239-716     | G0QVG7.1 PF04791.14 | 29.80 | 0.00 |
| TRINITY_A0A0B5HNB6_9ARCH/9-134   | A0A0B5HNB6.1 PF0857 | 29.80 | 0.00 |
| TRINITY_Q24FC1_TETTS/222-393     | Q24FC1.1 PF00006.23 | 29.80 | 0.00 |
| TRINITY_F4H4R3_CELFA/13-165      | F4H4R3.1 PF06445.13 | 29.80 | 0.00 |
| TRINITY_A0A0N5D2M8_THECL/28-250  | A0A0N5D2M8.1 PF0061 | 29.80 | 0.00 |
| TRINITY_B7FVV2_PHATC/256-443     | B7FVV2.1 PF02141.19 | 29.80 | 0.00 |
| TRINITY_A0A0G3BS48_9BURK/50-535  | A0A0G3BS48.1 PF0013 | 29.80 | 0.00 |
| TRINITY_W4Y135_STRPU/308-511     | W4Y135.1 PF12348.6; | 29.80 | 0.00 |
| TRINITY_A0A067T719_9AGAR/3-173   | A0A067T719.1 PF0255 | 29.80 | 0.00 |
| TRINITY_D8TPB1_VOLCA/1-169       | D8TPB1.1 PF01612.18 | 29.80 | 0.00 |
| TRINITY_I1G020_AMPQE/71-386      | I1G020.1 PF00026.21 | 29.80 | 0.00 |
| TRINITY_I7M910_TETTS/11-285      | I7M910.1 PF00069.23 | 29.80 | 0.00 |
| TRINITY_J9HYX5_9SPIT/46-224      | J9HYX5.1 PF00644.18 | 29.80 | 0.00 |
| TRINITY_L8HCD7_ACACA/180-492     | L8HCD7.1 PF16529.3; | 29.80 | 0.00 |
| TRINITY_U4L4I7_PYROM/527-843     | U4L4I7.1 PF11838.6; | 29.70 | 0.00 |
| TRINITY_D8TZB4_VOLCA/16-197      | D8TZB4.1 PF10294.7; | 29.70 | 0.00 |
| TRINITY_V4CK06_LOTGI/5-165       | V4CK06.1 PF00071.20 | 29.70 | 0.00 |
| TRINITY_A0A0D2UKA6_CAPO3/690-929 | A0A0D2UKA6.1 PF0000 | 29.70 | 0.00 |
| TRINITY_Q5CXE1_CRYPI/74-329      | Q5CXE1.1 PF02434.14 | 29.70 | 0.00 |
| TRINITY_A8HPW8_CHLRE/149-319     | A8HPW8.1 PF00270.27 | 29.70 | 0.00 |
| TRINITY_A0A078AR51_STYLE/8-287   | A0A078AR51.1 PF0006 | 29.70 | 0.00 |
| TRINITY_V3YZP5_LOTGI/460-707     | V3YZP5.1 PF00003.20 | 29.70 | 0.00 |
| TRINITY_F0ZSA1_DICPU/430-767     | F0ZSA1.1 PF00069.23 | 29.70 | 0.00 |
| TRINITY_R9AHK0_WALI9/322-547     | R9AHK0.1 PF13086.4; | 29.70 | 0.00 |
| TRINITY_L1I3Z7_GUIITH/1-215      | L1I3Z7.1 PF00149.26 | 29.70 | 0.00 |
| TRINITY_GRLE_DICDI/440-680       | Q54ET0.2 PF00003.20 | 29.70 | 0.00 |
| TRINITY_V3YZP5_LOTGI/460-707     | V3YZP5.1 PF00003.20 | 29.70 | 0.00 |
| TRINITY_J9EF32_WUCBA/17-207      | J9EF32.1 PF01105.22 | 29.70 | 0.00 |
| TRINITY_J9JAY6_9SPIT/8-292       | J9JAY6.1 PF00069.23 | 29.60 | 0.00 |
| TRINITY_G0QVE8_ICHMG/4-164       | G0QVE8.1 PF06017.11 | 29.60 | 0.00 |
| TRINITY_Q23EX0_TETTS/35-292      | Q23EX0.1 PF00069.23 | 29.60 | 0.00 |
| TRINITY_D5GKX1_TUBMM/1-302       | D5GKX1.1 PF05158.10 | 29.60 | 0.00 |
| TRINITY_W5K0F9_ASTMX/17-1659     | W5K0F9.1 PF11894.6; | 29.60 | 0.00 |
| TRINITY_J9I9S9_9SPIT/262-576     | J9I9S9.1 PF02841.12 | 29.60 | 0.00 |
| TRINITY_F0Z7Y1_DICPU/1320-1613   | F0Z7Y1.1 PF06454.9; | 29.60 | 0.00 |

|                                    |                     |       |      |
|------------------------------------|---------------------|-------|------|
| TRINITY_A0A068RYF4_9FUNG/6-110     | A0A068RYF4.1 PF0577 | 29.60 | 0.00 |
| TRINITY_D3AVZ9_POLPA/101-404       | D3AVZ9.1 PF07946.12 | 29.60 | 0.00 |
| TRINITY_D8TRQ9_VOLCA/4-179         | D8TRQ9.1 PF01697.25 | 29.60 | 0.00 |
| TRINITY_V4BB13_LOTGI/15-188        | V4BB13.1 PF00071.20 | 29.60 | 0.00 |
| TRINITY_A8J1H4_CHLRE/6324-6636     | A8J1H4.1 PF08016.10 | 29.60 | 0.00 |
| TRINITY_H2AQB0_KAZAF/11-237        | H2AQB0.1 PF00244.18 | 29.60 | 0.00 |
| TRINITY_W4XHU3_STRPU/28-549        | W4XHU3.1 PF00135.26 | 29.60 | 0.00 |
| TRINITY_D8TVP3_VOLCA/12-119        | D8TVP3.1 PF00636.24 | 29.60 | 0.00 |
| TRINITY_A8J658_CHLRE/123-291       | A8J658.1 PF00092.26 | 29.60 | 0.00 |
| TRINITY_W4GHI4_9STRA/158-604       | W4GHI4.1 PF01457.14 | 29.60 | 0.00 |
| TRINITY_I0YKN2_9CHLO/520-718       | I0YKN2.1 PF13385.4; | 29.60 | 0.00 |
| TRINITY_A0A0D2WTN7_CAPO3/64-537    | A0A0D2WTN7.1 PF0238 | 29.60 | 0.00 |
| TRINITY_D6WQX6_TRICA/52-199        | D6WQX6.1 PF04495.12 | 29.60 | 0.00 |
| TRINITY_D8U6K8_VOLCA/164-377       | D8U6K8.1 PF03924.11 | 29.60 | 0.00 |
| TRINITY_D8U5B5_VOLCA/230-615       | D8U5B5.1 PF09359.8; | 29.60 | 0.00 |
| TRINITY_F7A1M4_XENTR/359-614       | F7A1M4.1 PF00078.25 | 29.60 | 0.00 |
| TRINITY_E2BLD4_HARSA/3131-3319     | E2BLD4.1 PF00092.26 | 29.60 | 0.00 |
| TRINITY_I7LU14_TETTS/258-503       | I7LU14.1 PF00083.22 | 29.50 | 0.00 |
| TRINITY_G7J8G7_MEDTR/22-251        | G7J8G7.1 PF01048.18 | 29.50 | 0.00 |
| TRINITY_Q22AM1_TETTS/51-391        | Q22AM1.3 PF00328.20 | 29.50 | 0.00 |
| TRINITY_I7MIS1_TETTS/143-563       | I7MIS1.2 PF02450.13 | 29.50 | 0.00 |
| TRINITY_G0QVG7_ICHMG/239-716       | G0QVG7.1 PF04791.14 | 29.50 | 0.00 |
| TRINITY_A0A0L0NFJ1_9HYPO/1219-1391 | A0A0L0NFJ1.1 PF0061 | 29.50 | 0.00 |
| TRINITY_A0D7F5_PARTE/13-259        | A0D7F5.1 PF00069.23 | 29.50 | 0.00 |
| TRINITY_D8U7P3_VOLCA/11-149        | D8U7P3.1 PF04652.14 | 29.50 | 0.00 |
| TRINITY_L8GP97_ACACA/29-332        | L8GP97.1 PF03747.12 | 29.50 | 0.00 |
| TRINITY_A9ECT1_9FLAO/25-266        | A9ECT1.1 PF03372.21 | 29.50 | 0.00 |
| TRINITY_G4LXL2_SCHMA/225-332       | G4LXL2.1 PF00787.22 | 29.50 | 0.00 |
| TRINITY_H2Z7E9_CIOSA/675-974       | H2Z7E9.1 PF11262.6; | 29.50 | 0.00 |
| TRINITY_E5S2M9_TRISP/506-757       | E5S2M9.1 PF00003.20 | 29.50 | 0.00 |
| TRINITY_A8HYT4_CHLRE/20-244        | A8HYT4.1 PF05216.11 | 29.50 | 0.00 |
| TRINITY_A0A078AGI8_STYLE/1904-2163 | A0A078AGI8.1 PF0052 | 29.50 | 0.00 |
| TRINITY_A0CXP9_PARTE/92-386        | A0CXP9.1 PF01457.14 | 29.50 | 0.00 |
| TRINITY_F0Z9N8_DICPU/23-227        | F0Z9N8.1 PF05057.12 | 29.50 | 0.00 |
| TRINITY_U3IBN3_ANAPL/4-95          | U3IBN3.1 PF16589.3; | 29.50 | 0.00 |
| TRINITY_A0BKH8_PARTE/3-103         | A0BKH8.1 PF00168.28 | 29.40 | 0.00 |
| TRINITY_G0QW56_ICHMG/25-375        | G0QW56.1 PF07690.14 | 29.40 | 0.00 |
| TRINITY_A0A078AMC9_STYLE/9-109     | A0A078AMC9.1 PF0016 | 29.40 | 0.00 |
| TRINITY_L5MGU3_MYODS/75-400        | L5MGU3.1 PF13347.4; | 29.40 | 0.00 |
| TRINITY_A6GCY6_9DELT/8-435         | A6GCY6.1 PF00067.20 | 29.40 | 0.00 |
| TRINITY_S0F075_CHTCT/22-224        | S0F075.1 PF05721.11 | 29.40 | 0.00 |
| TRINITY_A0DMA3_PARTE/467-923       | A0DMA3.1 PF04547.10 | 29.40 | 0.00 |
| TRINITY_A0CXP9_PARTE/92-386        | A0CXP9.1 PF01457.14 | 29.40 | 0.00 |
| TRINITY_D8U6K8_VOLCA/164-377       | D8U6K8.1 PF03924.11 | 29.40 | 0.00 |
| TRINITY_L8HM05_ACACA/513-681       | L8HM05.1 PF05729.10 | 29.40 | 0.00 |
| TRINITY_A0CTN6_PARTE/65-241        | A0CTN6.1 PF00856.26 | 29.40 | 0.00 |
| TRINITY_D3B1Z5_POLPA/10-409        | D3B1Z5.1 PF10300.7; | 29.40 | 0.00 |
| TRINITY_A0A0D2W0P5_CAPO3/273-680   | A0A0D2W0P5.1 PF0149 | 29.40 | 0.00 |
| TRINITY_G0QK39_ICHMG/46-377        | G0QK39.1 PF00328.20 | 29.40 | 0.00 |
| TRINITY_A0BN74_PARTE/148-410       | A0BN74.1 PF00481.19 | 29.40 | 0.00 |
| TRINITY_K1PIJ8_CRAGI/20-308        | K1PIJ8.1 PF13621.4; | 29.40 | 0.00 |
| TRINITY_A0DS64_PARTE/289-550       | A0DS64.1 PF07690.14 | 29.40 | 0.00 |
| TRINITY_G4TPK8_PIRID/7-365         | G4TPK8.1 PF00503.18 | 29.30 | 0.00 |
| TRINITY_J9EUT0_9SPIT/265-521       | J9EUT0.1 PF02518.24 | 29.30 | 0.00 |
| TRINITY_I7M2E4_TETTS/2083-2267     | I7M2E4.1 PF08146.10 | 29.30 | 0.00 |
| TRINITY_W5N530_LEPOC/336-607       | W5N530.1 PF00664.21 | 29.30 | 0.00 |
| TRINITY_M5WTD1_PRUPE/231-411       | M5WTD1.1 PF00092.26 | 29.30 | 0.00 |
| TRINITY_D2UXM9_NAEGR/475-623       | D2UXM9.1 PF17177.2; | 29.30 | 0.00 |
| TRINITY_J9I443_9SPIT/34-311        | J9I443.1 PF00069.23 | 29.30 | 0.00 |
| TRINITY_F4PQC0_DICFS/53-391        | F4PQC0.1 PF00328.20 | 29.30 | 0.00 |
| TRINITY_W4YHX3_STRPU/44-311        | W4YHX3.1 PF04882.10 | 29.30 | 0.00 |

|                                    |                     |       |      |
|------------------------------------|---------------------|-------|------|
| TRINITY_Q556Z2_DICDI/209-508       | Q556Z2.1 PF00069.23 | 29.30 | 0.00 |
| TRINITY_W7X9E9_TETTS/12-119        | W7X9E9.1 PF01398.19 | 29.30 | 0.00 |
| TRINITY_I1CCX6_RHIO9/2-444         | I1CCX6.1 PF00067.20 | 29.30 | 0.00 |
| TRINITY_A0A078AUG4_STYLE/11-173    | A0A078AUG4.1 PF0007 | 29.30 | 0.00 |
| TRINITY_A0CXP9_PARTE/92-386        | A0CXP9.1 PF01457.14 | 29.30 | 0.00 |
| TRINITY_A0A077ZUU3_STYLE/1372-1637 | A0A077ZUU3.1 PF0052 | 29.30 | 0.00 |
| TRINITY_A8IWP6_CHLRE/152-313       | A8IWP6.1 PF01734.20 | 29.30 | 0.00 |
| TRINITY_D3BU27_POLPA/534-737       | D3BU27.1 PF00617.17 | 29.30 | 0.00 |
| TRINITY_H2XZL5_CIOIN/130-293       | H2XZL5.1 PF10421.7; | 29.30 | 0.00 |
| TRINITY_A8HSY2_CHLRE/37-412        | A8HSY2.1 PF02535.20 | 29.30 | 0.00 |
| TRINITY_D2V8H7_NAEGR/10-643        | D2V8H7.1 PF00888.20 | 29.30 | 0.00 |
| TRINITY_A0A024P5U1_9BACI/153-314   | A0A024P5U1.1 PF1457 | 29.20 | 0.00 |
| TRINITY_Q3A4V9_PELCD/29-209        | Q3A4V9.1 PF04832.10 | 29.20 | 0.00 |
| TRINITY_Q54CA6_DICDI/121-289       | Q54CA6.1 PF02453.15 | 29.20 | 0.00 |
| TRINITY_A0CXP9_PARTE/92-386        | A0CXP9.1 PF01457.14 | 29.20 | 0.00 |
| TRINITY_D8R2B4_SELML/111-306       | D8R2B4.1 PF04389.15 | 29.20 | 0.00 |
| TRINITY_L8H154_ACACA/1-343         | L8H154.1 PF16050.3; | 29.20 | 0.00 |
| TRINITY_A0A0A0LT21_CUCSA/9-195     | A0A0A0LT21.1 PF0465 | 29.20 | 0.00 |
| TRINITY_W5AE58_WHEAT/91-307        | W5AE58.1 PF07228.10 | 29.20 | 0.00 |
| TRINITY_F0ZUE1_DICPU/13-577        | F0ZUE1.1 PF01457.14 | 29.20 | 0.00 |
| TRINITY_I7M910_TETTS/11-285        | I7M910.1 PF00069.23 | 29.20 | 0.00 |
| TRINITY_A5VCB3_SPHWW/32-371        | A5VCB3.1 PF01266.22 | 29.20 | 0.00 |
| TRINITY_Q22WX4_TETTS/617-1013      | Q22WX4.2 PF12698.5; | 29.20 | 0.00 |
| TRINITY_A0A0G4ISF8_PLABS/111-501   | A0A0G4ISF8.1 PF0149 | 29.20 | 0.00 |
| TRINITY_E1ZTQ0_CHLVA/88-260        | E1ZTQ0.1 PF12239.6; | 29.20 | 0.00 |
| TRINITY_M5X1K9_PRUPE/1-408         | M5X1K9.1 PF00067.20 | 29.20 | 0.00 |
| TRINITY_S2JWW9_MUCC1/44-618        | S2JWW9.1 PF05327.9; | 29.20 | 0.00 |
| TRINITY_Q4G295_TRIVA/9-169         | Q4G295.1 PF00071.20 | 29.20 | 0.00 |
| TRINITY_W4YU07_STRPU/149-349       | W4YU07.1 PF00149.26 | 29.20 | 0.00 |
| TRINITY_Q23NK6_TETTS/59-360        | Q23NK6.2 PF07690.14 | 29.20 | 0.00 |
| TRINITY_D8U4A7_VOLCA/26-266        | D8U4A7.1 PF00481.19 | 29.20 | 0.00 |
| TRINITY_A0A067MAJ1_9HOMO/103-411   | A0A067MAJ1.1 PF0002 | 29.20 | 0.00 |
| TRINITY_A8HQD7_CHLRE/69-360        | A8HQD7.1 PF00351.19 | 29.20 | 0.00 |
| TRINITY_W5QAV6_SHEEP/566-861       | W5QAV6.1 PF02171.15 | 29.20 | 0.00 |
| TRINITY_Q22U03_TETTS/42-234        | Q22U03.2 PF00445.16 | 29.20 | 0.00 |
| TRINITY_G0QV22_ICHMG/24-163        | G0QV22.1 PF12409.6; | 29.20 | 0.00 |
| TRINITY_A8J5L0_CHLRE/107-1192      | A8J5L0.1 PF02463.17 | 29.20 | 0.00 |
| TRINITY_E1Z549_CHLVA/41-381        | E1Z549.1 PF00497.18 | 29.20 | 0.00 |
| TRINITY_B7GBW1_PHATC/8-213         | B7GBW1.1 PF01135.17 | 29.20 | 0.00 |
| TRINITY_X6M0W0_RETFI/58-401        | X6M0W0.1 PF00503.18 | 29.10 | 0.00 |
| TRINITY_A0A072TRJ4_MEDTR/55-217    | A0A072TRJ4.1 PF0438 | 29.10 | 0.00 |
| TRINITY_T1JHP0_STRMM/2-159         | T1JHP0.1 PF09767.7; | 29.10 | 0.00 |
| TRINITY_I7LZW4_TETTS/23-359        | I7LZW4.2 PF08569.9; | 29.10 | 0.00 |
| TRINITY_Q22SJ7_TETTS/199-371       | Q22SJ7.1 PF00092.26 | 29.10 | 0.00 |
| TRINITY_K3WIP2_PYTUL/367-652       | K3WIP2.1 PF02958.18 | 29.10 | 0.00 |
| TRINITY_K7L895_SOYBN/177-790       | K7L895.1 PF03343.11 | 29.10 | 0.00 |
| TRINITY_A0CXP9_PARTE/92-386        | A0CXP9.1 PF01457.14 | 29.10 | 0.00 |
| TRINITY_Q233H2_TETTS/5-219         | Q233H2.1 PF04750.12 | 29.10 | 0.00 |
| TRINITY_M4XLP1_PSEDE/29-263        | M4XLP1.1 PF00797.15 | 29.10 | 0.00 |
| TRINITY_C5CV60_VARPS/33-328        | C5CV60.1 PF02608.12 | 29.10 | 0.00 |
| TRINITY_A0A0G4J4N1_PLABS/554-806   | A0A0G4J4N1.1 PF0000 | 29.10 | 0.00 |
| TRINITY_W7XJ96_TETTS/33-488        | W7XJ96.1 PF00067.20 | 29.10 | 0.00 |
| TRINITY_C9JUS5_HUMAN/5-152         | C9JUS5.2 PF00780.20 | 29.10 | 0.00 |
| TRINITY_S2KKM8_MUCC1/1-129         | S2KKM8.1 PF11221.6; | 29.00 | 0.00 |
| TRINITY_A3N1G4_ACTP2/5-295         | A3N1G4.1 PF04261.10 | 29.00 | 0.00 |
| TRINITY_Q22BF9_TETTS/121-285       | Q22BF9.1 PF01554.16 | 29.00 | 0.00 |
| TRINITY_M2W791_GALSU/1135-1354     | M2W791.1 PF14678.4; | 29.00 | 0.00 |
| TRINITY_R1DL91_EMIHU/55-398        | R1DL91.1 PF00026.21 | 29.00 | 0.00 |
| TRINITY_LYSG4_DICDI/23-204         | Q54BQ8.1 PF01183.18 | 29.00 | 0.00 |
| TRINITY_A0A0N4VDF3_ENTVE/24-205    | A0A0N4VDF3.1 PF0118 | 29.00 | 0.00 |
| TRINITY_I7MKH3_TETTS/98-490        | I7MKH3.1 PF01457.14 | 29.00 | 0.00 |

|                                  |              |            |       |      |
|----------------------------------|--------------|------------|-------|------|
| TRINITY_A0CXP9_PARTE/92-386      | A0CXP9.1     | PF01457.14 | 29.00 | 0.00 |
| TRINITY_L8GVC5_ACACA/535-841     | L8GVC5.1     | PF16542.3; | 29.00 | 0.00 |
| TRINITY_I1BNC1_RHIO9/65-389      | I1BNC1.1     | PF03372.21 | 29.00 | 0.00 |
| TRINITY_A0CXP9_PARTE/92-386      | A0CXP9.1     | PF01457.14 | 29.00 | 0.00 |
| TRINITY_K2E113_9BACT/8-206       | K2E113.1     | PF01734.20 | 29.00 | 0.00 |
| TRINITY_A0A078AX44_STYLE/604-698 | A0A078AX44.1 | PF1349     | 29.00 | 0.00 |
| TRINITY_F4NZL9_BATDJ/700-875     | F4NZL9.1     | PF00617.17 | 29.00 | 0.00 |
| TRINITY_F6I1G5_VITVI/22-572      | F6I1G5.1     | PF12070.6; | 29.00 | 0.00 |
| TRINITY_A9U470_PHYPA/136-516     | A9U470.1     | PF00012.18 | 29.00 | 0.00 |
| TRINITY_A0A078A494_STYLE/100-311 | A0A078A494.1 | PF0379     | 28.90 | 0.00 |
| TRINITY_L8GSS6_ACACA/162-385     | L8GSS6.1     | PF10271.7; | 28.90 | 0.00 |
| TRINITY_D3BIA5_POLPA/85-280      | D3BIA5.1     | PF01852.17 | 28.90 | 0.00 |
| TRINITY_A0DWP8_PARTE/26-304      | A0DWP8.1     | PF00069.23 | 28.90 | 0.00 |
| TRINITY_A0A0D2U1B4_CAPO3/19-346  | A0A0D2U1B4.1 | PF0326     | 28.90 | 0.00 |
| TRINITY_H1W4V5_COLHI/5-267       | H1W4V5.1     | PF02460.16 | 28.90 | 0.00 |
| TRINITY_D3BAL6_POLPA/2-396       | D3BAL6.1     | PF01457.14 | 28.90 | 0.00 |
| TRINITY_A0DFI8_PARTE/389-577     | A0DFI8.1     | PF01564.15 | 28.90 | 0.00 |
| TRINITY_A0A0G3A2L3_9DELTA/83-295 | A0A0G3A2L3.1 | PF0014     | 28.90 | 0.00 |
| TRINITY_A0BN67_PARTE/37-406      | A0BN67.1     | PF07690.14 | 28.90 | 0.00 |
| TRINITY_T1F1D5_HELRO/57-243      | T1F1D5.1     | PF01762.19 | 28.90 | 0.00 |
| TRINITY_B1WBJ2_XENTR/49-505      | B1WBJ2.1     | PF00067.20 | 28.90 | 0.00 |
| TRINITY_Q22U03_TETTS/42-234      | Q22U03.2     | PF00445.16 | 28.90 | 0.00 |
| TRINITY_C5MDZ8_CANTT/1-439       | C5MDZ8.1     | PF10243.7; | 28.90 | 0.00 |
| TRINITY_E4XHV3_OIKDI/440-695     | E4XHV3.1     | PF00520.29 | 28.90 | 0.00 |
| TRINITY_T1NRF9_TRIUA/62-190      | T1NRF9.1     | PF01529.18 | 28.90 | 0.00 |
| TRINITY_C1E0S8_MICSR/118-273     | C1E0S8.1     | PF07173.10 | 28.90 | 0.00 |
| TRINITY_S6A5L0_9CREN/5-316       | S6A5L0.1     | PF00009.25 | 28.90 | 0.00 |
| TRINITY_A0E5J8_PARTE/12-183      | A0E5J8.1     | PF01105.22 | 28.80 | 0.00 |
| TRINITY_M4BWV5_HYAAE/298-449     | M4BWV5.1     | PF14580.4; | 28.80 | 0.00 |
| TRINITY_L8GQR1_ACACA/657-1024    | L8GQR1.1     | PF00176.21 | 28.80 | 0.00 |
| TRINITY_A0E368_PARTE/250-369     | A0E368.1     | PF14536.4; | 28.80 | 0.00 |
| TRINITY_K1Q6I4_CRAGI/226-394     | K1Q6I4.1     | PF01926.21 | 28.80 | 0.00 |
| TRINITY_V3ZQE4_LOTGI/6-334       | V3ZQE4.1     | PF10239.7; | 28.80 | 0.00 |
| TRINITY_F4PTD9_DICFS/71-639      | F4PTD9.1     | PF01457.14 | 28.80 | 0.00 |
| TRINITY_A9U470_PHYPA/136-516     | A9U470.1     | PF00012.18 | 28.80 | 0.00 |
| TRINITY_G7KQK6_MEDTR/246-556     | G7KQK6.2     | PF00201.16 | 28.80 | 0.00 |
| TRINITY_F4Y1I9_9CYAN/49-252      | F4Y1I9.1     | PF05050.10 | 28.80 | 0.00 |
| TRINITY_D8TJ10_VOLCA/96-269      | D8TJ10.1     | PF04727.11 | 28.80 | 0.00 |
| TRINITY_A3HTV5_9BACT/2-439       | A3HTV5.1     | PF00171.20 | 28.80 | 0.00 |
| TRINITY_A0A0A2EQ48_PORCN/6-187   | A0A0A2EQ48.1 | PF0496     | 28.80 | 0.00 |
| TRINITY_I1FTQ4_AMPQE/27-195      | I1FTQ4.1     | PF00071.20 | 28.80 | 0.00 |
| TRINITY_A0BCK7_PARTE/17-268      | A0BCK7.1     | PF00069.23 | 28.80 | 0.00 |
| TRINITY_A0A0A1N2H7_9FUNG/248-498 | A0A0A1N2H7.1 | PF0006     | 28.80 | 0.00 |
| TRINITY_G2LD78_CHLTF/15-456      | G2LD78.1     | PF00067.20 | 28.80 | 0.00 |
| TRINITY_D2VEC5_NAEGR/29-270      | D2VEC5.1     | PF12146.6; | 28.80 | 0.00 |
| TRINITY_A0A0B0PRQ4_GOSAR/144-336 | A0A0B0PRQ4.1 | PF0410     | 28.80 | 0.00 |
| TRINITY_A0A0E3UVI8_9BACT/37-178  | A0A0E3UVI8.1 | PF0821     | 28.70 | 0.00 |
| TRINITY_A0A0K0GDU6_9FIRM/47-265  | A0A0K0GDU6.1 | PF0049     | 28.70 | 0.00 |
| TRINITY_A0A067CFY4_SAPPC/57-315  | A0A067CFY4.1 | PF0771     | 28.70 | 0.00 |
| TRINITY_L5K193_PTEAL/37-209      | L5K193.1     | PF00213.16 | 28.70 | 0.00 |
| TRINITY_F6YM31_CIOIN/45-180      | F6YM31.2     | PF00782.18 | 28.70 | 0.00 |
| TRINITY_I7MKW6_TETTS/46-643      | I7MKW6.2     | PF14745.4; | 28.70 | 0.00 |
| TRINITY_I0Z971_9CHLO/85-456      | I0Z971.1     | PF01494.17 | 28.70 | 0.00 |
| TRINITY_A0A067PK03_9HOMO/425-702 | A0A067PK03.1 | PF0568     | 28.70 | 0.00 |
| TRINITY_Q54NV0_DICDI/913-1146    | Q54NV0.1     | PF10474.7; | 28.70 | 0.00 |
| TRINITY_A0A0N4ZI70_PARTI/264-369 | A0A0N4ZI70.1 | PF0016     | 28.70 | 0.00 |
| TRINITY_A0A0D2X3D6_CAPO3/12-202  | A0A0D2X3D6.1 | PF0033     | 28.70 | 0.00 |
| TRINITY_T0S962_9STRA/354-560     | T0S962.1     | PF03572.16 | 28.70 | 0.00 |
| TRINITY_C1EJH9_MICSR/428-775     | C1EJH9.1     | PF13086.4; | 28.70 | 0.00 |
| TRINITY_I0Z1V8_9CHLO/69-348      | I0Z1V8.1     | PF00069.23 | 28.70 | 0.00 |
| TRINITY_A9SFH0_PHYPA/66-379      | A9SFH0.1     | PF15967.3; | 28.70 | 0.00 |

|                                   |                     |       |      |
|-----------------------------------|---------------------|-------|------|
| TRINITY_A0A091DGF6_FUKDA/4-187    | A0A091DGF6.1 PF0002 | 28.70 | 0.00 |
| TRINITY_D3BPY7_POLPA/494-667      | D3BPY7.1 PF14429.4; | 28.60 | 0.00 |
| TRINITY_H0UZU7_CAVPO/8-169        | H0UZU7.1 PF00071.20 | 28.60 | 0.00 |
| TRINITY_Q245H7_TETTS/90-237       | Q245H7.1 PF11559.6; | 28.60 | 0.00 |
| TRINITY_H2MVG9_ORYLA/11-336       | H2MVG9.1 PF06113.10 | 28.60 | 0.00 |
| TRINITY_A0A0N4ZLN1_PARTI/5-256    | A0A0N4ZLN1.1 PF0243 | 28.60 | 0.00 |
| TRINITY_A0A075AQC1_9FUNG/976-1266 | A0A075AQC1.1 PF0248 | 28.60 | 0.00 |
| TRINITY_H3CAR2_TETNG/6-305        | H3CAR2.1 PF00561.18 | 28.60 | 0.00 |
| TRINITY_D6WFN7_TRICA/13-460       | D6WFN7.1 PF00067.20 | 28.60 | 0.00 |
| TRINITY_A0DI05_PARTE/319-612      | A0DI05.1 PF04547.10 | 28.60 | 0.00 |
| TRINITY_A1ZGJ1_9BACT/4-211        | A1ZGJ1.1 PF00106.23 | 28.60 | 0.00 |
| TRINITY_I7MKN2_TETTS/45-746       | I7MKN2.2 PF05879.10 | 28.60 | 0.00 |
| TRINITY_A0A0J7L7U6_LASNI/36-303   | A0A0J7L7U6.1 PF0032 | 28.60 | 0.00 |
| TRINITY_I1CDS8_RHIO9/36-274       | I1CDS8.1 PF01063.17 | 28.60 | 0.00 |
| TRINITY_E1ZB98_CHLVA/23-373       | E1ZB98.1 PF00497.18 | 28.60 | 0.00 |
| TRINITY_X6NPF9_RETFI/5-279        | X6NPF9.1 PF07690.14 | 28.60 | 0.00 |
| TRINITY_A0A0G4H7S9_9ALVE/200-585  | A0A0G4H7S9.1 PF0149 | 28.60 | 0.00 |
| TRINITY_U3IS56_ANAPL/520-987      | U3IS56.1 PF00580.19 | 28.60 | 0.00 |
| TRINITY_Q3SEP6_PARTE/37-615       | Q3SEP6.1 PF00995.21 | 28.50 | 0.00 |
| TRINITY_Q55E33_DICDI/111-498      | Q55E33.1 PF03985.11 | 28.50 | 0.00 |
| TRINITY_L5LR78_MYODS/36-348       | L5LR78.1 PF00026.21 | 28.50 | 0.00 |
| TRINITY_A0A0N4UP19_DRAME/266-429  | A0A0N4UP19.1 PF0062 | 28.50 | 0.00 |
| TRINITY_H8MPI2_CORCM/14-451       | H8MPI2.1 PF00067.20 | 28.50 | 0.00 |
| TRINITY_W9QEG3_9ROSA/63-317       | W9QEG3.1 PF02854.17 | 28.50 | 0.00 |
| TRINITY_W7XJ96_TETTS/33-488       | W7XJ96.1 PF00067.20 | 28.50 | 0.00 |
| TRINITY_D2HKU2_AILME/39-351       | D2HKU2.1 PF05185.14 | 28.50 | 0.00 |
| TRINITY_STRAP_DICDI/58-221        | Q54LT8.1 PF08662.9; | 28.50 | 0.00 |
| TRINITY_F0ZVQ5_DICPU/78-431       | F0ZVQ5.1 PF01925.17 | 28.40 | 0.00 |
| TRINITY_J1FAL0_9HELI/98-304       | J1FAL0.1 PF01266.22 | 28.40 | 0.00 |
| TRINITY_E2BIG5_HARSA/41-541       | E2BIG5.1 PF10154.7; | 28.40 | 0.00 |
| TRINITY_D8U6K8_VOLCA/164-377      | D8U6K8.1 PF03924.11 | 28.40 | 0.00 |
| TRINITY_A0A072NTN1_9EURO/87-314   | A0A072NTN1.1 PF0410 | 28.40 | 0.00 |
| TRINITY_W5LED3_ASTMX/66-181       | W5LED3.1 PF00615.17 | 28.40 | 0.00 |
| TRINITY_D3BQD7_POLPA/353-579      | D3BQD7.1 PF11744.6; | 28.40 | 0.00 |
| TRINITY_K7M8N3_SOYBN/1351-1725    | K7M8N3.1 PF13086.4; | 28.40 | 0.00 |
| TRINITY_B3QUP1_CHLT3/17-307       | B3QUP1.1 PF02541.14 | 28.40 | 0.00 |
| TRINITY_E1ZSN3_CHLVA/103-252      | E1ZSN3.1 PF03114.16 | 28.40 | 0.00 |
| TRINITY_A0EHH7_PARTE/8-264        | A0EHH7.1 PF02535.20 | 28.40 | 0.00 |
| TRINITY_W7X656_TETTS/412-792      | W7X656.1 PF12463.6; | 28.30 | 0.00 |
| TRINITY_W7XDU3_TETTS/50-395       | W7XDU3.1 PF10974.6; | 28.30 | 0.00 |
| TRINITY_A2BGQ6_DANRE/72-583       | A2BGQ6.1 PF03215.13 | 28.30 | 0.00 |
| TRINITY_A0E368_PARTE/250-369      | A0E368.1 PF14536.4; | 28.30 | 0.00 |
| TRINITY_I1FF60_AMPQE/550-779      | I1FF60.1 PF13621.4; | 28.30 | 0.00 |
| TRINITY_A8IX96_CHLRE/150-433      | A8IX96.1 PF00069.23 | 28.30 | 0.00 |
| TRINITY_L8GVE4_ACACA/1000-1189    | L8GVE4.1 PF00621.18 | 28.30 | 0.00 |
| TRINITY_J9K7F8_ACYPI/748-1036     | J9K7F8.2 PF00664.21 | 28.30 | 0.00 |
| TRINITY_F0ZVV4_DICPU/345-650      | F0ZVV4.1 PF09770.7; | 28.30 | 0.00 |
| TRINITY_I7M136_TETTS/2403-2719    | I7M136.2 PF00520.29 | 28.30 | 0.00 |
| TRINITY_L8GZY0_ACACA/7-180        | L8GZY0.1 PF00071.20 | 28.20 | 0.00 |
| TRINITY_L8GPX0_ACACA/178-559      | L8GPX0.1 PF00856.26 | 28.20 | 0.00 |
| TRINITY_A0A075AQC1_9FUNG/976-1266 | A0A075AQC1.1 PF0248 | 28.20 | 0.00 |
| TRINITY_A0E717_PARTE/286-554      | A0E717.1 PF02854.17 | 28.20 | 0.00 |
| TRINITY_Q23DL4_TETTS/944-1129     | Q23DL4.3 PF08625.9; | 28.20 | 0.00 |
| TRINITY_A0A067REZ3_ZOONE/23-292   | A0A067REZ3.1 PF0006 | 28.20 | 0.00 |
| TRINITY_D3BEG9_POLPA/129-339      | D3BEG9.1 PF06814.11 | 28.20 | 0.00 |
| TRINITY_A0A067BIS1_SAPPC/108-212  | A0A067BIS1.1 PF0400 | 28.20 | 0.00 |
| TRINITY_V4U3M1_9ROSI/105-251      | V4U3M1.1 PF01699.22 | 28.20 | 0.00 |
| TRINITY_B8DM82_DESVM/76-244       | B8DM82.1 PF01501.18 | 28.20 | 0.00 |
| TRINITY_W4Z461_STRPU/10-245       | W4Z461.1 PF13621.4; | 28.20 | 0.00 |
| TRINITY_D2A1W4_TRICA/604-875      | D2A1W4.1 PF01757.20 | 28.20 | 0.00 |
| TRINITY_A0BE76_PARTE/38-361       | A0BE76.1 PF00328.20 | 28.20 | 0.00 |

|                                  |                     |       |      |
|----------------------------------|---------------------|-------|------|
| TRINITY_G7KQK8_MEDTR/195-644     | G7KQK8.1 PF00067.20 | 28.20 | 0.00 |
| TRINITY_Q22TZ7_TETTS/70-310      | Q22TZ7.2 PF15239.4; | 28.10 | 0.00 |
| TRINITY_F4P471_BATDJ/263-623     | F4P471.1 PF03081.13 | 28.10 | 0.00 |
| TRINITY_W4FXX8_9STRA/2490-2794   | W4FXX8.1 PF00520.29 | 28.10 | 0.00 |
| TRINITY_H2LYD2_ORYLA/180-491     | H2LYD2.1 PF08318.10 | 28.10 | 0.00 |
| TRINITY_A0A0D2WIN0_CAPO3/195-762 | A0A0D2WIN0.1 PF1596 | 28.10 | 0.00 |
| TRINITY_C3XWC4_BRAFL/4-263       | C3XWC4.1 PF00069.23 | 28.10 | 0.00 |
| TRINITY_A1DC12_NEOFI/39-303      | A1DC12.1 PF07859.11 | 28.10 | 0.00 |
| TRINITY_L0D867_SINAD/130-368     | L0D867.1 PF13621.4; | 28.10 | 0.00 |
| TRINITY_F0ZRG8_DICPU/3225-3518   | F0ZRG8.1 PF06650.10 | 28.10 | 0.00 |
| TRINITY_D3CRA7_9ACTN/68-327      | D3CRA7.1 PF02958.18 | 28.10 | 0.00 |
| TRINITY_A0A067QZ59_ZOONE/34-492  | A0A067QZ59.1 PF0006 | 28.10 | 0.00 |
| TRINITY_D8TLY8_VOLCA/327-524     | D8TLY8.1 PF03184.17 | 28.10 | 0.00 |
| TRINITY_CHMP7_DICDI/249-433      | Q86K93.1 PF03357.19 | 28.00 | 0.00 |
| TRINITY_I1C6S2_RHIO9/7-261       | I1C6S2.1 PF14938.4; | 28.00 | 0.00 |
| TRINITY_C5DNJ3_LACTC/13-310      | C5DNJ3.1 PF00069.23 | 28.00 | 0.00 |
| TRINITY_K1QK98_CRAGI/12-176      | K1QK98.1 PF03398.12 | 28.00 | 0.00 |
| TRINITY_C1FHW0_MICSR/545-914     | C1FHW0.1 PF01494.17 | 28.00 | 0.00 |
| TRINITY_I7MKL5_TETTS/83-500      | I7MKL5.2 PF00067.20 | 28.00 | 0.00 |
| TRINITY_F4WZV1_ACREC/185-681     | F4WZV1.1 PF00888.20 | 28.00 | 0.00 |
| TRINITY_A0A094BAN5_9PEZI/96-296  | A0A094BAN5.1 PF0075 | 28.00 | 0.00 |
| TRINITY_V8P3G6_OPHHA/26-192      | V8P3G6.1 PF10294.7; | 28.00 | 0.00 |
| TRINITY_A0A078AT97_STYLE/378-634 | A0A078AT97.1 PF0079 | 27.90 | 0.00 |
| TRINITY_J9IHC9_9SPIT/7-346       | J9IHC9.1 PF00459.23 | 27.90 | 0.00 |
| TRINITY_A0A0P7VEE5_9TELE/81-349  | A0A0P7VEE5.1 PF0337 | 27.90 | 0.00 |
| TRINITY_Q233I3_TETTS/33-226      | Q233I3.1 PF01652.16 | 27.90 | 0.00 |
| TRINITY_I1BJN6_RHIO9/14-344      | I1BJN6.1 PF00503.18 | 27.90 | 0.00 |
| TRINITY_E4RRN3_LEAB4/56-282      | E4RRN3.1 PF07859.11 | 27.90 | 0.00 |
| TRINITY_E1ZBE8_CHLVA/325-1282    | E1ZBE8.1 PF04130.11 | 27.90 | 0.00 |
| TRINITY_A0A078A3Q8_STYLE/31-324  | A0A078A3Q8.1 PF0064 | 27.90 | 0.00 |
| TRINITY_A8J7X1_CHLRE/1-183       | A8J7X1.1 PF13419.4; | 27.90 | 0.00 |
| TRINITY_K9RZN8_SYNP3/37-248      | K9RZN8.1 PF05023.12 | 27.90 | 0.00 |
| TRINITY_A0A0F2QT83_9DELTA/39-781 | A0A0F2QT83.1 PF0180 | 27.90 | 0.00 |
| TRINITY_D5X9C5_THEPJ/8-202       | D5X9C5.1 PF01734.20 | 27.90 | 0.00 |
| TRINITY_A0A0F0HYQ4_ASPPA/18-273  | A0A0F0HYQ4.1 PF0006 | 27.90 | 0.00 |
| TRINITY_A0A0K9PP21_ZOSMR/13-263  | A0A0K9PP21.1 PF0214 | 27.90 | 0.00 |
| TRINITY_A0A099P227_PICKU/5-188   | A0A099P227.1 PF0002 | 27.90 | 0.00 |
| TRINITY_G3UW78_MOUSE/52-515      | G3UW78.1 PF00067.20 | 27.90 | 0.00 |
| TRINITY_A0A068XHG0_HYMMI/22-199  | A0A068XHG0.1 PF0110 | 27.80 | 0.00 |
| TRINITY_A8J3U9_CHLRE/57-225      | A8J3U9.1 PF00213.16 | 27.80 | 0.00 |
| TRINITY_J9IL07_9SPIT/4-217       | J9IL07.1 PF09420.8; | 27.80 | 0.00 |
| TRINITY_A8J7Q4_CHLRE/193-341     | A8J7Q4.1 PF01416.18 | 27.80 | 0.00 |
| TRINITY_D8TTE6_VOLCA/333-484     | D8TTE6.1 PF12499.6; | 27.80 | 0.00 |
| TRINITY_M3XKX3_LATCH/164-471     | M3XKX3.1 PF05804.10 | 27.80 | 0.00 |
| TRINITY_C5MDZ8_CANTT/1-439       | C5MDZ8.1 PF10243.7; | 27.80 | 0.00 |
| TRINITY_F4QAF1_DICFS/89-487      | F4QAF1.1 PF00450.20 | 27.80 | 0.00 |
| TRINITY_M4AM32_XIPMA/3-276       | M4AM32.1 PF01459.20 | 27.80 | 0.00 |
| TRINITY_Q4WBN3_ASPFU/39-303      | Q4WBN3.1 PF07859.11 | 27.80 | 0.00 |
| TRINITY_D8SJK6_SELML/4-253       | D8SJK6.1 PF00069.23 | 27.80 | 0.00 |
| TRINITY_E0VD49_PEDHC/23-372      | E0VD49.1 PF03265.13 | 27.80 | 0.00 |
| TRINITY_A9T4L0_PHYPA/60-255      | A9T4L0.1 PF05843.12 | 27.70 | 0.00 |
| TRINITY_E0W1B6_PEDHC/698-1148    | E0W1B6.1 PF00145.15 | 27.70 | 0.00 |
| TRINITY_EXOC5_DICDI/344-668      | B0G163.1 PF07393.9; | 27.70 | 0.00 |
| TRINITY_A9VAN1_MONBE/20-210      | A9VAN1.1 PF01183.18 | 27.70 | 0.00 |
| TRINITY_A0A0G4J0Z5_PLABS/30-217  | A0A0G4J0Z5.1 PF0394 | 27.70 | 0.00 |
| TRINITY_F2TNT7_AJEDA/10-387      | F2TNT7.1 PF03849.12 | 27.70 | 0.00 |
| TRINITY_A2DY61_TRIVA/6-259       | A2DY61.1 PF00069.23 | 27.70 | 0.00 |
| TRINITY_F4PGI0_DICFS/385-623     | F4PGI0.1 PF00003.20 | 27.70 | 0.00 |
| TRINITY_A0A073CX82_PLAAG/32-238  | A0A073CX82.1 PF0052 | 27.70 | 0.00 |
| TRINITY_A0BKH8_PARTE/3-103       | A0BKH8.1 PF00168.28 | 27.70 | 0.00 |
| TRINITY_T1HL42_RHOPR/4-488       | T1HL42.1 PF00067.20 | 27.70 | 0.00 |

|                                    |                     |       |      |
|------------------------------------|---------------------|-------|------|
| TRINITY_D3BRK2_POLPA/40-468        | D3BRK2.1 PF12832.5; | 27.70 | 0.00 |
| TRINITY_F4Q3P7_DICFS/653-804       | F4Q3P7.1 PF00620.25 | 27.70 | 0.00 |
| TRINITY_C1EJH9_MICSR/428-775       | C1EJH9.1 PF13086.4; | 27.70 | 0.00 |
| TRINITY_Q22BS7_TETTS/1-260         | Q22BS7.2 PF14938.4; | 27.70 | 0.00 |
| TRINITY_L7FM96_ENTIV/2-126         | L7FM96.1 PF00648.19 | 27.70 | 0.00 |
| TRINITY_A0A015JEP9_9GLOM/354-682   | A0A015JEP9.1 PF1282 | 27.70 | 0.00 |
| TRINITY_A0A024TQL6_9STRA/2-322     | A0A024TQL6.1 PF0126 | 27.70 | 0.00 |
| TRINITY_Q248J3_TETTS/29-415        | Q248J3.2 PF07690.14 | 27.60 | 0.00 |
| TRINITY_A0A0D2SJZ9_GOSRA/3-647     | A0A0D2SJZ9.1 PF0581 | 27.60 | 0.00 |
| TRINITY_A0A0G4IQ11_PLABS/110-443   | A0A0G4IQ11.1 PF0159 | 27.60 | 0.00 |
| TRINITY_I1BRE7_RHIO9/136-327       | I1BRE7.1 PF04855.10 | 27.60 | 0.00 |
| TRINITY_F4Q385_DICFS/15-119        | F4Q385.1 PF02991.14 | 27.60 | 0.00 |
| TRINITY_Q23AY7_TETTS/21-318        | Q23AY7.2 PF00069.23 | 27.60 | 0.00 |
| TRINITY_Q22YP6_TETTS/2455-2737     | Q22YP6.2 PF06650.10 | 27.60 | 0.00 |
| TRINITY_A5UM62_METS3/3-239         | A5UM62.1 PF00230.18 | 27.60 | 0.00 |
| TRINITY_A4C850_9GAMM/1-341         | A4C850.1 PF07690.14 | 27.60 | 0.00 |
| TRINITY_A4VED3_TETTS/46-415        | A4VED3.2 PF07690.14 | 27.60 | 0.00 |
| TRINITY_A8I935_CHLRE/132-414       | A8I935.1 PF13416.4; | 27.60 | 0.00 |
| TRINITY_A6CCI4_9PLAN/65-304        | A6CCI4.1 PF07859.11 | 27.60 | 0.00 |
| TRINITY_Q769F7_DICDI/20-209        | Q769F7.1 PF01105.22 | 27.50 | 0.00 |
| TRINITY_M7NM13_PNEMU/359-608       | M7NM13.1 PF00009.25 | 27.50 | 0.00 |
| TRINITY_D8UC96_VOLCA/50-243        | D8UC96.1 PF01547.23 | 27.50 | 0.00 |
| TRINITY_G1MLM6_AILME/32-361        | G1MLM6.1 PF03414.11 | 27.50 | 0.00 |
| TRINITY_I7LT45_TETTS/177-429       | I7LT45.2 PF00069.23 | 27.50 | 0.00 |
| TRINITY_C5DRW1_ZYGRC/591-883       | C5DRW1.1 PF05192.16 | 27.50 | 0.00 |
| TRINITY_Q5CXE1_CRYPI/74-329        | Q5CXE1.1 PF02434.14 | 27.50 | 0.00 |
| TRINITY_V6TYM4_GIAIN/9-206         | V6TYM4.1 PF01712.17 | 27.50 | 0.00 |
| TRINITY_L8HDK0_ACACA/42-278        | L8HDK0.1 PF06454.9; | 27.50 | 0.00 |
| TRINITY_T1L3P6_TETUR/129-463       | T1L3P6.1 PF02163.20 | 27.50 | 0.00 |
| TRINITY_R7EN63_9FIRM/5-186         | R7EN63.1 PF00406.20 | 27.40 | 0.00 |
| TRINITY_F0ZHF6_DICPU/91-299        | F0ZHF6.1 PF01852.17 | 27.40 | 0.00 |
| TRINITY_A0A077ZRI5_STYLE/1-278     | A0A077ZRI5.1 PF1014 | 27.40 | 0.00 |
| TRINITY_H2YHY8_CIOSA/2-150         | H2YHY8.1 PF01762.19 | 27.40 | 0.00 |
| TRINITY_A0A068RTV3_9FUNG/3638-3898 | A0A068RTV3.1 PF0045 | 27.40 | 0.00 |
| TRINITY_A0A0N8JZG7_9TELE/65-179    | A0A0N8JZG7.1 PF0061 | 27.40 | 0.00 |
| TRINITY_C4R802_PICPG/40-216        | C4R802.1 PF00270.27 | 27.40 | 0.00 |
| TRINITY_B9RR79_RICCO/3-376         | B9RR79.1 PF00022.17 | 27.40 | 0.00 |
| TRINITY_H9GJU0_ANOCA/1-314         | H9GJU0.2 PF04762.10 | 27.40 | 0.00 |
| TRINITY_A6C0H5_9PLAN/160-369       | A6C0H5.1 PF03417.14 | 27.40 | 0.00 |
| TRINITY_L8GQR1_ACACA/657-1024      | L8GQR1.1 PF00176.21 | 27.40 | 0.00 |
| TRINITY_B7GD43_PHATC/36-494        | B7GD43.1 PF00375.16 | 27.40 | 0.00 |
| TRINITY_Q26FF3_FLABB/84-425        | Q26FF3.1 PF01494.17 | 27.40 | 0.00 |
| TRINITY_D8U8T2_VOLCA/33-264        | D8U8T2.1 PF06977.9; | 27.40 | 0.00 |
| TRINITY_I0Z4T6_9CHLO/1812-1957     | I0Z4T6.1 PF10075.7; | 27.40 | 0.00 |
| TRINITY_G2XS07_BOTF4/169-858       | G2XS07.1 PF04388.10 | 27.40 | 0.00 |
| TRINITY_H2WIU9_CAEJA/187-437       | H2WIU9.2 PF00069.23 | 27.40 | 0.00 |
| TRINITY_P91469_CAEEL/7-159         | P91469.1 PF00339.27 | 27.40 | 0.00 |
| TRINITY_S2JIZ6_MUCC1/9-545         | S2JIZ6.1 PF05091.10 | 27.40 | 0.00 |
| TRINITY_L8HCD9_ACACA/473-634       | L8HCD9.1 PF12807.5; | 27.30 | 0.00 |
| TRINITY_A0DB40_PARTE/29-327        | A0DB40.1 PF00069.23 | 27.30 | 0.00 |
| TRINITY_D2A4J0_TRICA/44-278        | D2A4J0.1 PF05705.12 | 27.30 | 0.00 |
| TRINITY_L8H2E4_ACACA/24-502        | L8H2E4.1 PF10508.7; | 27.30 | 0.00 |
| TRINITY_E1Z549_CHLVA/41-381        | E1Z549.1 PF00497.18 | 27.30 | 0.00 |
| TRINITY_A0A0G2I322_9EURO/41-465    | A0A0G2I322.1 PF0122 | 27.30 | 0.00 |
| TRINITY_I3TW76_TISMK/34-323        | I3TW76.1 PF02608.12 | 27.30 | 0.00 |
| TRINITY_A0CKP6_PARTE/17-271        | A0CKP6.1 PF00069.23 | 27.30 | 0.00 |
| TRINITY_G8BND5_TETPH/198-485       | G8BND5.1 PF10296.7; | 27.30 | 0.00 |
| TRINITY_G6DL71_DANPL/3-259         | G6DL71.1 PF01633.18 | 27.30 | 0.00 |
| TRINITY_A0A099P4Q6_PICKU/55-460    | A0A099P4Q6.1 PF0149 | 27.30 | 0.00 |
| TRINITY_I7M2I3_TETTS/112-416       | I7M2I3.1 PF01733.16 | 27.30 | 0.00 |
| TRINITY_A0A067BWY7_SAPPC/22-533    | A0A067BWY7.1 PF0145 | 27.30 | 0.00 |

|                                  |                     |       |      |
|----------------------------------|---------------------|-------|------|
| TRINITY_I0YQ78_9CHLO/69-481      | I0YQ78.1 PF00474.15 | 27.30 | 0.00 |
| TRINITY_B3S6U8_TRIAD/16-404      | B3S6U8.1 PF07690.14 | 27.20 | 0.00 |
| TRINITY_Q23RZ9_TETTS/247-486     | Q23RZ9.3 PF04499.13 | 27.20 | 0.00 |
| TRINITY_W4JWJ2_9HOMO/386-617     | W4JWJ2.1 PF03572.16 | 27.20 | 0.00 |
| TRINITY_D8LU94_ECTSI/82-277      | D8LU94.1 PF11715.6; | 27.20 | 0.00 |
| TRINITY_T1JWP1_TETUR/23-284      | T1JWP1.1 PF00069.23 | 27.20 | 0.00 |
| TRINITY_A0A068XKR2_HYMMI/14-215  | A0A068XKR2.1 PF0185 | 27.20 | 0.00 |
| TRINITY_K9RNQ6_9CYAN/67-354      | K9RNQ6.1 PF14388.4; | 27.20 | 0.00 |
| TRINITY_A0A0E9LX87_9BACT/1-406   | A0A0E9LX87.1 PF0008 | 27.10 | 0.00 |
| TRINITY_Q22AM1_TETTS/51-391      | Q22AM1.3 PF00328.20 | 27.10 | 0.00 |
| TRINITY_A0CW99_PARTE/11-187      | A0CW99.1 PF06017.11 | 27.10 | 0.00 |
| TRINITY_D2VRQ2_NAEGR/487-679     | D2VRQ2.1 PF12146.6; | 27.10 | 0.00 |
| TRINITY_F6GU12_VITVI/354-490     | F6GU12.1 PF04499.13 | 27.10 | 0.00 |
| TRINITY_A0E1I0_PARTE/22-292      | A0E1I0.1 PF00069.23 | 27.10 | 0.00 |
| TRINITY_A0A068XKR2_HYMMI/14-215  | A0A068XKR2.1 PF0185 | 27.10 | 0.00 |
| TRINITY_Q28F16_XENTR/33-192      | Q28F16.1 PF01652.16 | 27.10 | 0.00 |
| TRINITY_D8UJH0_VOLCA/14-270      | D8UJH0.1 PF00069.23 | 27.10 | 0.00 |
| TRINITY_A8HQJ0_CHLRE/22-173      | A8HQJ0.1 PF08617.8; | 27.10 | 0.00 |
| TRINITY_Q248J3_TETTS/29-415      | Q248J3.2 PF07690.14 | 27.00 | 0.00 |
| TRINITY_I7I8D3_BABMI/250-575     | I7I8D3.1 PF02889.14 | 27.00 | 0.00 |
| TRINITY_A0A077ZDI3_TRITR/112-709 | A0A077ZDI3.1 PF0088 | 27.00 | 0.00 |
| TRINITY_K9VNS4_9CYAN/55-223      | K9VNS4.1 PF00350.21 | 27.00 | 0.00 |
| TRINITY_C5LHN9_PERM5/21-253      | C5LHN9.1 PF03661.11 | 27.00 | 0.00 |
| TRINITY_F4KFJ2_ARATH/43-179      | F4KFJ2.1 PF00790.17 | 27.00 | 0.00 |



|                                   |                     |       |      |
|-----------------------------------|---------------------|-------|------|
| TRINITY_U9UHH6_RHIID/72-387       | U9UHH6.1 PF00443.27 | 27.00 | 0.00 |
| TRINITY_J3N0P0_ORYBR/18-275       | J3N0P0.1 PF00069.23 | 27.00 | 0.00 |
| TRINITY_I7MKI8_TETTS/449-740      | I7MKI8.1 PF13949.4; | 27.00 | 0.00 |
| TRINITY_A0A0G4FFD9_9ALVE/90-555   | A0A0G4FFD9.1 PF0006 | 27.00 | 0.00 |
| TRINITY_D8TTM6_VOLCA/6-138        | D8TTM6.1 PF13676.4; | 27.00 | 0.00 |
| TRINITY_B3RIJ3_TRIAD/63-288       | B3RIJ3.1 PF14802.4; | 26.90 | 0.00 |
| TRINITY_L8GYA8_ACACA/88-255       | L8GYA8.1 PF07724.12 | 26.90 | 0.00 |
| TRINITY_MAEI_XENTR/141-344        | Q08D62.1 PF13017.4; | 26.90 | 0.00 |
| TRINITY_D2A1W4_TRICA/604-875      | D2A1W4.1 PF01757.20 | 26.90 | 0.00 |
| TRINITY_H2W7H8_CAEJA/9-362        | H2W7H8.2 PF13598.4; | 26.90 | 0.00 |
| TRINITY_Q011X9_OSTTA/28-214       | Q011X9.1 PF00069.23 | 26.90 | 0.00 |
| TRINITY_B9GI62_POPTR/146-709      | B9GI62.1 PF04114.12 | 26.90 | 0.00 |
| TRINITY_H0X825_OTOGA/15-401       | H0X825.1 PF01231.16 | 26.90 | 0.00 |
| TRINITY_F2UB45_SALR5/592-851      | F2UB45.1 PF00481.19 | 26.90 | 0.00 |
| TRINITY_A0D550_PARTE/11-336       | A0D550.1 PF11945.6; | 26.90 | 0.00 |
| TRINITY_E0VF17_PEDHC/143-369      | E0VF17.1 PF10469.7; | 26.80 | 0.00 |
| TRINITY_J9IVC4_9SPIT/69-432       | J9IVC4.1 PF01490.16 | 26.80 | 0.00 |
| TRINITY_D3B9G1_POLPA/32-541       | D3B9G1.1 PF01457.14 | 26.80 | 0.00 |
| TRINITY_A0E368_PARTE/250-369      | A0E368.1 PF14536.4; | 26.80 | 0.00 |
| TRINITY_A0EBH2_PARTE/32-359       | A0EBH2.1 PF00328.20 | 26.80 | 0.00 |
| TRINITY_Q10Z33_TRIEI/33-230       | Q10Z33.1 PF08495.8; | 26.80 | 0.00 |
| TRINITY_L8GQR1_ACACA/657-1024     | L8GQR1.1 PF00176.21 | 26.80 | 0.00 |
| TRINITY_A0A067CTW3_SAPPC/789-1030 | A0A067CTW3.1 PF0271 | 26.80 | 0.00 |
| TRINITY_PEPA_PIG/72-384           | P00791.3 PF00026.21 | 26.80 | 0.00 |
| TRINITY_D8UKQ9_VOLCA/248-630      | D8UKQ9.1 PF00150.16 | 26.80 | 0.00 |
| TRINITY_G1QVM3_NOMLE/20-291       | G1QVM3.1 PF00780.20 | 26.70 | 0.00 |
| TRINITY_D3BQD7_POLPA/353-579      | D3BQD7.1 PF11744.6; | 26.70 | 0.00 |
| TRINITY_L8GQR1_ACACA/657-1024     | L8GQR1.1 PF00176.21 | 26.70 | 0.00 |
| TRINITY_H3AN64_LATCH/64-359       | H3AN64.2 PF03253.12 | 26.70 | 0.00 |
| TRINITY_A0A024TT64_9STRA/7-312    | A0A024TT64.1 PF0253 | 26.60 | 0.00 |
| TRINITY_G7E8G4_MIXOS/1907-2076    | G7E8G4.1 PF12348.6; | 26.60 | 0.00 |
| TRINITY_W2QLV0_PHYPN/258-463      | W2QLV0.1 PF01925.17 | 26.60 | 0.00 |
| TRINITY_D2V0I7_NAEGR/175-372      | D2V0I7.1 PF01925.17 | 26.60 | 0.00 |
| TRINITY_N1RGN0_FUSC4/740-1179     | N1RGN0.1 PF02383.16 | 26.60 | 0.00 |
| TRINITY_S2JC17_MUCC1/140-436      | S2JC17.1 PF06814.11 | 26.60 | 0.00 |
| TRINITY_L8GQR1_ACACA/657-1024     | L8GQR1.1 PF00176.21 | 26.60 | 0.00 |
| TRINITY_K9V140_9CYAN/5-345        | K9V140.1 PF01494.17 | 26.60 | 0.00 |
| TRINITY_H9GL38_ANOCA/201-374      | H9GL38.1 PF03184.17 | 26.50 | 0.00 |
| TRINITY_G1KIX3_ANOCA/64-493       | G1KIX3.2 PF01490.16 | 26.50 | 0.00 |
| TRINITY_J9IBH8_9SPIT/23-371       | J9IBH8.1 PF00026.21 | 26.50 | 0.00 |
| TRINITY_Q6TU47_DICDI/97-653       | Q6TU47.1 PF01457.14 | 26.50 | 0.00 |
| TRINITY_A0A0J7KU38_LASNI/286-544  | A0A0J7KU38.1 PF0248 | 26.50 | 0.00 |
| TRINITY_A0A087GA27_ARAAL/299-431  | A0A087GA27.1 PF1598 | 26.50 | 0.00 |
| TRINITY_A0A0M8XQT7_9ACTN/42-311   | A0A0M8XQT7.1 PF0406 | 26.50 | 0.00 |
| TRINITY_F4W7P3_ACREC/12-395       | F4W7P3.1 PF00817.18 | 26.50 | 0.00 |
| TRINITY_Q46I05_PROMT/21-172       | Q46I05.1 PF10503.7; | 26.50 | 0.00 |
| TRINITY_L8GPR5_ACACA/62-354       | L8GPR5.1 PF01459.20 | 26.40 | 0.00 |
| TRINITY_D2UYT3_NAEGR/492-1002     | D2UYT3.1 PF07393.9; | 26.40 | 0.00 |
| TRINITY_A0A0D5LN73_9RHIZ/22-484   | A0A0D5LN73.1 PF0129 | 26.40 | 0.00 |
| TRINITY_B7FUT8_PHATC/27-372       | B7FUT8.1 PF14027.4; | 26.40 | 0.00 |
| TRINITY_J9JL56_ACYPI/38-521       | J9JL56.1 PF00201.16 | 26.40 | 0.00 |
| TRINITY_A1ZHW6_9BACT/26-221       | A1ZHW6.1 PF02146.15 | 26.40 | 0.00 |
| TRINITY_H3A969_LATCH/11-441       | H3A969.1 PF04180.12 | 26.40 | 0.00 |
| TRINITY_M0TY52_MUSAM/34-360       | M0TY52.1 PF00150.16 | 26.40 | 0.00 |
| TRINITY_U9SVQ2_RHIID/376-642      | U9SVQ2.1 PF02714.13 | 26.40 | 0.00 |
| TRINITY_D8U7H0_VOLCA/1412-1663    | D8U7H0.1 PF00520.29 | 26.40 | 0.00 |
| TRINITY_F0ZHF6_DICPU/91-299       | F0ZHF6.1 PF01852.17 | 26.40 | 0.00 |
| TRINITY_A8IIJ6_CHLRE/68-1078      | A8IIJ6.1 PF02463.17 | 26.40 | 0.00 |
| TRINITY_A0A077ZPB7_STYLE/91-323   | A0A077ZPB7.1 PF0011 | 26.30 | 0.00 |
| TRINITY_A0A0M0BJJ4_9ARCH/6-328    | A0A0M0BJJ4.1 PF0000 | 26.30 | 0.00 |
| TRINITY_F5J2H0_9PORP/1-341        | F5J2H0.1 PF06379.10 | 26.30 | 0.00 |

|                                   |                     |       |      |
|-----------------------------------|---------------------|-------|------|
| TRINITY_I7LXB6_TETTS/114-386      | I7LXB6.2 PF00664.21 | 26.30 | 0.00 |
| TRINITY_A0A017SDD2_9EURO/32-296   | A0A017SDD2.1 PF0785 | 26.30 | 0.00 |
| TRINITY_A8JBD1_CHLRE/17-133       | A8JBD1.1 PF01426.16 | 26.30 | 0.00 |
| TRINITY_Q55BT0_DICDI/10-412       | Q55BT0.1 PF10300.7; | 26.30 | 0.00 |
| TRINITY_A0A0J7L3D4_LASNI/214-502  | A0A0J7L3D4.1 PF0032 | 26.30 | 0.00 |
| TRINITY_A8HWH9_CHLRE/30-320       | A8HWH9.1 PF00069.23 | 26.30 | 0.00 |
| TRINITY_R0HFG8_9BRAS/33-499       | R0HFG8.1 PF00067.20 | 26.20 | 0.00 |
| TRINITY_G3UUP4_MELGA/1-283        | G3UUP4.1 PF16094.3; | 26.20 | 0.00 |
| TRINITY_A0A0A1NCR6_9FUNG/111-293  | A0A0A1NCR6.1 PF0974 | 26.20 | 0.00 |
| TRINITY_A0A075AQC1_9FUNG/976-1266 | A0A075AQC1.1 PF0248 | 26.20 | 0.00 |
| TRINITY_M0TSF6_MUSAM/147-407      | M0TSF6.1 PF00561.18 | 26.20 | 0.00 |
| TRINITY_F0ZVI8_DICPU/284-479      | F0ZVI8.1 PF01044.17 | 26.20 | 0.00 |
| TRINITY_A0A0G4FFD9_9ALVE/90-555   | A0A0G4FFD9.1 PF0006 | 26.20 | 0.00 |
| TRINITY_J3M769_ORYBR/39-201       | J3M769.1 PF04937.13 | 26.20 | 0.00 |
| TRINITY_A0CPS5_PARTE/123-450      | A0CPS5.1 PF01733.16 | 26.20 | 0.00 |
| TRINITY_Q55BN5_DICDI/1-224        | Q55BN5.1 PF15001.4; | 26.10 | 0.00 |
| TRINITY_K2RTG0_MACPH/12-173       | K2RTG0.1 PF07855.10 | 26.10 | 0.00 |
| TRINITY_A0BKU7_PARTE/45-349       | A0BKU7.1 PF03416.17 | 26.10 | 0.00 |
| TRINITY_E1ZRN8_CHLVA/26-275       | E1ZRN8.1 PF04230.11 | 26.10 | 0.00 |
| TRINITY_F6RW87_XENTR/18-525       | F6RW87.1 PF04129.10 | 26.10 | 0.00 |
| TRINITY_Q7V8V6_PROMM/26-254       | Q7V8V6.1 PF00520.29 | 26.10 | 0.00 |
| TRINITY_A0A059DCB7_EUCGR/572-938  | A0A059DCB7.1 PF0337 | 26.10 | 0.00 |
| TRINITY_X6NJD7_RETFI/5-321        | X6NJD7.1 PF00176.21 | 26.00 | 0.00 |
| TRINITY_A0A0G0UKN4_9BACT/1-268    | A0A0G0UKN4.1 PF0058 | 26.00 | 0.00 |
| TRINITY_A0A091D3J9_FUKDA/201-662  | A0A091D3J9.1 PF0412 | 26.00 | 0.00 |
| TRINITY_C5E336_LACTC/15-398       | C5E336.1 PF03547.16 | 26.00 | 0.00 |
| TRINITY_F4Q1V6_DICFS/12-291       | F4Q1V6.1 PF10127.7; | 26.00 | 0.00 |
| TRINITY_H3CAL8_TETNG/125-431      | H3CAL8.1 PF01733.16 | 26.00 | 0.00 |
| TRINITY_A0A067LZ84_9HOMO/33-449   | A0A067LZ84.1 PF0123 | 26.00 | 0.00 |
| TRINITY_A0DD82_PARTE/42-362       | A0DD82.1 PF00328.20 | 26.00 | 0.00 |
| TRINITY_E9GZ71_DAPPU/13-257       | E9GZ71.1 PF10259.7; | 25.90 | 0.00 |
| TRINITY_A9U470_PHYPA/136-516      | A9U470.1 PF00012.18 | 25.90 | 0.00 |
| TRINITY_A0A0L0BPK1_LUCCU/166-764  | A0A0L0BPK1.1 PF0088 | 25.90 | 0.00 |
| TRINITY_W9WWV3_9EURO/2-200        | W9WWV3.1 PF05462.9; | 25.90 | 0.00 |
| TRINITY_L7LLY3_9ACTN/5-221        | L7LLY3.1 PF00743.17 | 25.80 | 0.00 |
| TRINITY_H2VN59_CAEJA/69-458       | H2VN59.2 PF08569.9; | 25.80 | 0.00 |
| TRINITY_L8GQR1_ACACA/657-1024     | L8GQR1.1 PF00176.21 | 25.80 | 0.00 |
| TRINITY_A0A024U517_9STRA/51-338   | A0A024U517.1 PF0337 | 25.80 | 0.00 |
| TRINITY_F4NT21_BATDJ/3-340        | F4NT21.1 PF08610.8; | 25.80 | 0.00 |
| TRINITY_F7DUR0_XENTR/2-304        | F7DUR0.1 PF07773.9; | 25.80 | 0.00 |
| TRINITY_A9SW20_PHYPA/5-384        | A9SW20.1 PF03348.13 | 25.80 | 0.00 |
| TRINITY_A9TJ39_PHYPA/59-364       | A9TJ39.1 PF14388.4; | 25.80 | 0.00 |
| TRINITY_K9U7Q7_9CYAN/36-286       | K9U7Q7.1 PF00657.20 | 25.80 | 0.00 |
| TRINITY_A0A059DF10_EUCGR/35-240   | A0A059DF10.1 PF0085 | 25.80 | 0.00 |
| TRINITY_D6Y6C0_THEBD/15-172       | D6Y6C0.1 PF00583.23 | 25.80 | 0.00 |
| TRINITY_F4PGI0_DICFS/385-623      | F4PGI0.1 PF00003.20 | 25.80 | 0.00 |
| TRINITY_D8LU94_ECTSI/82-277       | D8LU94.1 PF11715.6; | 25.80 | 0.00 |
| TRINITY_M3XYU9_MUSPF/194-414      | M3XYU9.1 PF01823.17 | 25.80 | 0.00 |
| TRINITY_J9HSH9_9SPIT/67-426       | J9HSH9.1 PF07690.14 | 25.70 | 0.00 |
| TRINITY_A0EEJ2_PARTE/289-396      | A0EEJ2.1 PF02204.16 | 25.70 | 0.00 |
| TRINITY_E0W2A8_PEDHC/8-1115       | E0W2A8.1 PF09735.7; | 25.70 | 0.00 |
| TRINITY_Q17BE1_AEDAE/229-598      | Q17BE1.1 PF00443.27 | 25.70 | 0.00 |
| TRINITY_F0ZKL8_DICPU/17-302       | F0ZKL8.1 PF00856.26 | 25.70 | 0.00 |
| TRINITY_G4YY98_PHYSP/92-498       | G4YY98.1 PF00561.18 | 25.70 | 0.00 |
| TRINITY_G0R5R6_ICHMG/21-294       | G0R5R6.1 PF00069.23 | 25.70 | 0.00 |
| TRINITY_D8U0A8_VOLCA/366-760      | D8U0A8.1 PF04515.10 | 25.70 | 0.00 |
| TRINITY_G7J672_MEDTR/109-580      | G7J672.2 PF00759.17 | 25.70 | 0.00 |
| TRINITY_D2VDC1_NAEGR/86-317       | D2VDC1.1 PF01852.17 | 25.70 | 0.00 |
| TRINITY_A0A0P7V422_9TELE/1-297    | A0A0P7V422.1 PF0032 | 25.60 | 0.00 |
| TRINITY_K3W5F5_PYTUL/17-331       | K3W5F5.1 PF03198.12 | 25.60 | 0.00 |
| TRINITY_D3B2V1_POLPA/16-226       | D3B2V1.1 PF08397.9; | 25.60 | 0.00 |

|                                    |                     |       |      |
|------------------------------------|---------------------|-------|------|
| TRINITY_A0A0D3BPN9_BRAOL/155-477   | A0A0D3BPN9.1 PF0577 | 25.60 | 0.00 |
| TRINITY_A4S4Y8_OSTLU/1-230         | A4S4Y8.1 PF00149.26 | 25.60 | 0.00 |
| TRINITY_V7CKY5_PHAVU/9-410         | V7CKY5.1 PF03547.16 | 25.60 | 0.00 |
| TRINITY_L8HMQ5_ACACA/43-216        | L8HMQ5.1 PF00617.17 | 25.60 | 0.00 |
| TRINITY_F1SUG6_PIG/247-614         | F1SUG6.1 PF12309.6; | 25.60 | 0.00 |
| TRINITY_B5YK45_THEYD/26-379        | B5YK45.1 PF13458.4; | 25.60 | 0.00 |
| TRINITY_N1Q1D2_DOTSN/217-616       | N1Q1D2.1 PF06772.9; | 25.50 | 0.00 |
| TRINITY_B0C0P2_ACAM1/24-383        | B0C0P2.1 PF01494.17 | 25.50 | 0.00 |
| TRINITY_J9GCG0_9SPIT/180-340       | J9GCG0.1 PF02752.20 | 25.50 | 0.00 |
| TRINITY_A0A099NX72_PICKU/5-308     | A0A099NX72.1 PF0364 | 25.50 | 0.00 |
| TRINITY_D1CCQ7_THET1/1-527         | D1CCQ7.1 PF02463.17 | 25.50 | 0.00 |
| TRINITY_A0A067L8S5_JATCU/93-350    | A0A067L8S5.1 PF0645 | 25.50 | 0.00 |
| TRINITY_I1HVD3_BRADI/420-613       | I1HVD3.1 PF08161.10 | 25.50 | 0.00 |
| TRINITY_A0A0A1N7Q0_9FUNG/347-539   | A0A0A1N7Q0.1 PF0357 | 25.50 | 0.00 |
| TRINITY_I7ML21_TETTS/173-309       | I7ML21.1 PF00892.18 | 25.40 | 0.00 |
| TRINITY_A0A067RC97_ZOONE/52-483    | A0A067RC97.1 PF0008 | 25.40 | 0.00 |
| TRINITY_D8R6G9_SELML/22-403        | D8R6G9.1 PF00856.26 | 25.40 | 0.00 |
| TRINITY_A0BXC8_PARTE/163-515       | A0BXC8.1 PF00450.20 | 25.40 | 0.00 |
| TRINITY_I7M0E7_TETTS/70-526        | I7M0E7.2 PF07690.14 | 25.40 | 0.00 |
| TRINITY_A0A0L0CK75_LUCCU/34-311    | A0A0L0CK75.1 PF1362 | 25.30 | 0.00 |
| TRINITY_M7PBH8_PNEMU/26-318        | M7PBH8.1 PF04756.11 | 25.30 | 0.00 |
| TRINITY_E1ZDL1_CHLVA/76-432        | E1ZDL1.1 PF00497.18 | 25.30 | 0.00 |
| TRINITY_D3B105_POLPA/2231-2476     | D3B105.1 PF06650.10 | 25.30 | 0.00 |
| TRINITY_G0R306_ICHMG/5-418         | G0R306.1 PF01490.16 | 25.20 | 0.00 |
| TRINITY_A0A0D2UPS1_CAPO3/347-570   | A0A0D2UPS1.1 PF0155 | 25.20 | 0.00 |
| TRINITY_E1ZDL1_CHLVA/76-432        | E1ZDL1.1 PF00497.18 | 25.20 | 0.00 |
| TRINITY_F0ZVQ5_DICPU/78-431        | F0ZVQ5.1 PF01925.17 | 25.20 | 0.00 |
| TRINITY_A0E368_PARTE/250-369       | A0E368.1 PF14536.4; | 25.20 | 0.00 |
| TRINITY_W1NU56_AMBTC/41-438        | W1NU56.1 PF07690.14 | 25.20 | 0.00 |
| TRINITY_A0E717_PARTE/286-554       | A0E717.1 PF02854.17 | 25.20 | 0.00 |
| TRINITY_A0A074RN87_9HOMO/392-604   | A0A074RN87.1 PF0357 | 25.20 | 0.00 |
| TRINITY_A8HNM5_CHLRE/2576-2866     | A8HNM5.1 PF06011.10 | 25.20 | 0.00 |
| TRINITY_A0A0B5HNS2_9ARCH/5-183     | A0A0B5HNS2.1 PF0267 | 25.10 | 0.00 |
| TRINITY_A9RVM5_PHYPA/43-322        | A9RVM5.1 PF04190.11 | 25.10 | 0.00 |
| TRINITY_B6H109_PENRW/42-511        | B6H109.1 PF00067.20 | 25.10 | 0.00 |
| TRINITY_F4PR02_DICFS/48-357        | F4PR02.1 PF10483.7; | 25.10 | 0.00 |
| TRINITY_A0A072TU45_MEDTR/175-442   | A0A072TU45.1 PF0776 | 25.00 | 0.00 |
| TRINITY_B2HLW3_MYCMM/76-337        | B2HLW3.1 PF01636.21 | 25.00 | 0.00 |
| TRINITY_D8R6G9_SELML/22-403        | D8R6G9.1 PF00856.26 | 25.00 | 0.00 |
| TRINITY_A0A0D2W070_CAPO3/571-770   | A0A0D2W070.1 PF0501 | 25.00 | 0.00 |
| TRINITY_D7FSJ0_ECTSI/914-1098      | D7FSJ0.1 PF01852.17 | 25.00 | 0.00 |
| TRINITY_W5JZT8_ASTMX/35-207        | W5JZT8.1 PF00092.26 | 25.00 | 0.00 |
| TRINITY_A7S3U3_NEMVE/57-252        | A7S3U3.1 PF00804.23 | 25.00 | 0.00 |
| TRINITY_A0A022QP77_ERYGU/8-482     | A0A022QP77.1 PF0309 | 25.00 | 0.00 |
| TRINITY_A0A090AIL9_9GAMM/348-519   | A0A090AIL9.1 PF0009 | 25.00 | 0.00 |
| TRINITY_A0A0K6G2C5_9HOMO/50-492    | A0A0K6G2C5.1 PF0006 | 25.00 | 0.00 |
| TRINITY_G0AAC0_COLFT/211-469       | G0AAC0.1 PF00657.20 | 25.00 | 0.00 |
| TRINITY_E1ZE38_CHLVA/277-473       | E1ZE38.1 PF00534.18 | 25.00 | 0.00 |
| TRINITY_A0A061GGV8_THECC/1447-1826 | A0A061GGV8.1 PF1308 | 24.90 | 0.00 |
| TRINITY_A0A0D2TW14_GOSRA/21-293    | A0A0D2TW14.1 PF0645 | 24.90 | 0.00 |
| TRINITY_E4XV66_OIKDI/98-386        | E4XV66.1 PF13896.4; | 24.90 | 0.00 |
| TRINITY_I2FY45_USTH4/422-750       | I2FY45.1 PF03372.21 | 24.90 | 0.00 |
| TRINITY_G0R5R6_ICHMG/21-294        | G0R5R6.1 PF00069.23 | 24.90 | 0.00 |
| TRINITY_A0A0D2WI78_CAPO3/11-639    | A0A0D2WI78.1 PF0624 | 24.90 | 0.00 |
| TRINITY_G0N5I2_CAEBE/22-342        | G0N5I2.1 PF03265.13 | 24.90 | 0.00 |
| TRINITY_W7X7K1_TETTS/28-293        | W7X7K1.1 PF00069.23 | 24.80 | 0.00 |
| TRINITY_G3P833_GASAC/106-328       | G3P833.1 PF01556.16 | 24.80 | 0.00 |
| TRINITY_T1IUF6_STRMM/243-766       | T1IUF6.1 PF04437.11 | 24.80 | 0.00 |
| TRINITY_L8HBK7_ACACA/26-465        | L8HBK7.1 PF00067.20 | 24.80 | 0.00 |
| TRINITY_F1NQI9_CHICK/37-387        | F1NQI9.2 PF15053.4; | 24.70 | 0.00 |
| TRINITY_G0QVB2_ICHMG/37-311        | G0QVB2.1 PF07714.15 | 24.70 | 0.00 |

|                                    |                     |       |      |
|------------------------------------|---------------------|-------|------|
| TRINITY_G3WPU3_SARHA/33-293        | G3WPU3.1 PF00069.23 | 24.70 | 0.00 |
| TRINITY_A7URR6_ANOGA/222-617       | A7URR6.1 PF01757.20 | 24.70 | 0.00 |
| TRINITY_A0A044S4P6_ONCVO/3-385     | A0A044S4P6.1 PF0340 | 24.60 | 0.00 |
| TRINITY_A3TYU7_OCEBH/4-327         | A3TYU7.1 PF03372.21 | 24.60 | 0.00 |
| TRINITY_M7NLW5_PNEMU/586-822       | M7NLW5.1 PF16910.3; | 24.60 | 0.00 |
| TRINITY_A7RYH4_NEMVE/4-454         | A7RYH4.1 PF07778.9; | 24.60 | 0.00 |
| TRINITY_L8H9T2_ACACA/313-518       | L8H9T2.1 PF08506.8; | 24.50 | 0.00 |
| TRINITY_W4GAR7_9STRA/101-444       | W4GAR7.1 PF03403.11 | 24.50 | 0.00 |
| TRINITY_M3VX21_FELCA/61-1205       | M3VX21.1 PF15489.4; | 24.50 | 0.00 |
| TRINITY_A0A058Z138_9EUKA/111-404   | A0A058Z138.1 PF0085 | 24.40 | 0.00 |
| TRINITY_A0A067N0I9_9HOMO/43-515    | A0A067N0I9.1 PF0006 | 24.40 | 0.00 |
| TRINITY_F4PHT7_DICFS/77-434        | F4PHT7.1 PF10165.7; | 24.40 | 0.00 |
| TRINITY_G8BK67_CANPC/204-911       | G8BK67.1 PF04615.11 | 24.30 | 0.00 |
| TRINITY_I0Z6V9_9CHLO/48-349        | I0Z6V9.1 PF13896.4; | 24.30 | 0.00 |
| TRINITY_F2LTV5_HIPMA/22-456        | F2LTV5.1 PF00501.26 | 24.20 | 0.00 |
| TRINITY_F0ZHM0_DICPU/4-663         | F0ZHM0.1 PF05817.12 | 24.20 | 0.00 |
| TRINITY_A0A0M9UCN0_9CHLR/210-505   | A0A0M9UCN0.1 PF1359 | 24.20 | 0.00 |
| TRINITY_A0A087SC64_AUXPR/53-414    | A0A087SC64.1 PF0413 | 24.20 | 0.00 |
| TRINITY_A0A0D9VCY5_9ORYZ/145-503   | A0A0D9VCY5.1 PF0410 | 24.10 | 0.00 |
| TRINITY_A0A078DIS1_BRANA/648-890   | A0A078DIS1.1 PF0163 | 24.10 | 0.00 |
| TRINITY_W1NK52_AMBTC/744-1058      | W1NK52.1 PF03178.13 | 24.00 | 0.00 |
| TRINITY_CRLA_DICDI/62-322          | Q54U75.1 PF05462.9; | 24.00 | 0.00 |
| TRINITY_A8I9D0_CHLRE/49-490        | A8I9D0.1 PF00067.20 | 24.00 | 0.00 |
| TRINITY_U5DEY2_AMBTC/31-314        | U5DEY2.1 PF00856.26 | 24.00 | 0.00 |
| TRINITY_R0IVF5_SETT2/22-285        | R0IVF5.1 PF00332.16 | 24.00 | 0.00 |
| TRINITY_A0DJB8_PARTE/29-287        | A0DJB8.1 PF00194.19 | 23.90 | 0.00 |
| TRINITY_A0A072VG08_MEDTR/42-480    | A0A072VG08.1 PF0006 | 23.90 | 0.00 |
| TRINITY_F1QCZ3_DANRE/67-348        | F1QCZ3.2 PF09728.7; | 23.90 | 0.00 |
| TRINITY_A0A087ZYS2_APIME/516-832   | A0A087ZYS2.1 PF0484 | 23.80 | 0.00 |
| TRINITY_A0A0K9P2K7_ZOSMR/43-230    | A0A0K9P2K7.1 PF0587 | 23.80 | 0.00 |
| TRINITY_F7BBV8_CIOIN/27-291        | F7BBV8.2 PF00780.20 | 23.80 | 0.00 |
| TRINITY_F2UKP2_SALR5/128-526       | F2UKP2.1 PF01490.16 | 23.80 | 0.00 |
| TRINITY_G0QXK4_ICHMG/207-399       | G0QXK4.1 PF14703.4; | 23.80 | 0.00 |
| TRINITY_A0A024UH59_9STRA/294-590   | A0A024UH59.1 PF0145 | 23.70 | 0.00 |
| TRINITY_M2WYA1_GALSU/23-335        | M2WYA1.1 PF00328.20 | 23.70 | 0.00 |
| TRINITY_L8H960_ACACA/401-538       | L8H960.1 PF12717.5; | 23.70 | 0.00 |
| TRINITY_S0ETQ6_CHTCT/50-379        | S0ETQ6.1 PF13810.4; | 23.70 | 0.00 |
| TRINITY_K9YZ90_CYAAP/163-370       | K9YZ90.1 PF01170.16 | 23.70 | 0.00 |
| TRINITY_A0DD82_PARTE/42-362        | A0DD82.1 PF00328.20 | 23.70 | 0.00 |
| TRINITY_J9I221_9SPIT/379-690       | J9I221.1 PF00069.23 | 23.70 | 0.00 |
| TRINITY_A0A0LOND85_9HYPO/91-319    | A0A0LOND85.1 PF0085 | 23.70 | 0.00 |
| TRINITY_K1QZT6_CRAGI/38-276        | K1QZT6.1 PF05705.12 | 23.60 | 0.00 |
| TRINITY_A0A087X2S5_POEFO/50-490    | A0A087X2S5.1 PF0006 | 23.60 | 0.00 |
| TRINITY_A5E0P7_LODEL/777-988       | A5E0P7.1 PF01061.22 | 23.40 | 0.00 |
| TRINITY_M4BJ52_HYAAE/35-422        | M4BJ52.1 PF06870.10 | 23.40 | 0.00 |
| TRINITY_L9LAV3_TUPCH/5-202         | L9LAV3.1 PF09177.9; | 23.40 | 0.00 |
| TRINITY_A0A078A1U0_STYLE/3115-3435 | A0A078A1U0.1 PF0052 | 23.30 | 0.00 |
| TRINITY_K1R8G7_CRAGI/78-469        | K1R8G7.1 PF10257.7; | 23.00 | 0.00 |
| TRINITY_W7U0H7_9STRA/301-575       | W7U0H7.1 PF01793.14 | 22.90 | 0.00 |
| TRINITY_Q2L018_BORA1/30-384        | Q2L018.1 PF13458.4; | 22.80 | 0.00 |
| TRINITY_A0A015I738_9GLOM/31-277    | A0A015I738.1 PF1492 | 22.70 | 0.00 |
| TRINITY_A0A0F6W3W3_9DELT/26-274    | A0A0F6W3W3.1 PF1269 | 22.60 | 0.00 |
| TRINITY_L1J8Y9_GUIITH/134-479      | L1J8Y9.1 PF08016.10 | 22.60 | 0.00 |
| TRINITY_A5ABG2_ASPNC/30-462        | A5ABG2.1 PF00067.20 | 22.60 | 0.00 |
| TRINITY_A0A0A8JMV7_BACSX/24-281    | A0A0A8JMV7.1 PF0056 | 22.50 | 0.00 |
| TRINITY_A0A078AEU5_STYLE/182-343   | A0A078AEU5.1 PF0275 | 22.20 | 0.00 |
| TRINITY_G7DX31_MIXOS/31-346        | G7DX31.1 PF01793.14 | 22.20 | 0.00 |
| TRINITY_A0A0F6W3W3_9DELT/26-274    | A0A0F6W3W3.1 PF1269 | 22.20 | 0.00 |
| TRINITY_A0A066UXW6_9HOMO/20-360    | A0A066UXW6.1 PF0050 | 22.20 | 0.00 |
| TRINITY_A0A0A1MNK3_9FUNG/370-781   | A0A0A1MNK3.1 PF0677 | 22.00 | 0.00 |
| TRINITY_M1AIX2_SOLTU/365-698       | M1AIX2.1 PF00497.18 | 22.00 | 0.00 |

|                               |                     |       |      |
|-------------------------------|---------------------|-------|------|
| TRINITY_D3B253_POLPA/36-375   | D3B253.1 PF03265.13 | 21.50 | 0.00 |
| TRINITY_W4YU07_STRPU/149-349  | W4YU07.1 PF00149.26 | 21.40 | 0.00 |
| TRINITY_S2J7G1_MUCC1/659-1202 | S2J7G1.1 PF07919.10 | 20.60 | 0.00 |
| TRINITY_T1JPF9_STRMM/592-1878 | T1JPF9.1 PF14631.4; | 20.40 | 0.00 |
| TRINITY_V6KHC7_STRNV/37-306   | V6KHC7.1 PF04069.10 | 18.90 | 0.00 |
