# Supplementary material for: Transcriptome Analysis of the Accumulation of Astaxanthin in Haematococcus pluvialis Treated with White and Blue Lights as well as Salicylic Acid
Source: Hindawi journal article supplement (doi:10.1155/2022/4827595), 2022-01-01
Supplement: f6 [file 4827595.f6.pdf]

| PathwayEntry | PathwayDefinition                                 | S   | gene | TS | gene | B     | gene | 1TB | gene | pvalue |
|--------------|---------------------------------------------------|-----|------|----|------|-------|------|-----|------|--------|
| map04141     | Protein processing in endoplasmic reticulum       | 160 | 5410 |    | 497  | 19648 |      |     | 0.01 |        |
| map03008     | Ribosome biogenesis in eukaryotes                 | 102 | 5410 |    | 283  | 19648 |      |     | 0.00 |        |
| map04145     | Phagosome                                         | 98  | 5410 |    | 281  | 19648 |      |     | 0.00 |        |
| map04146     | Peroxisome                                        | 91  | 5410 |    | 262  | 19648 |      |     | 0.01 |        |
| map00010     | Glycolysis / Gluconeogenesis                      | 81  | 5410 |    | 231  | 19648 |      |     | 0.01 |        |
| map00630     | Glyoxylate and dicarboxylate metabolism           | 84  | 5410 |    | 198  | 19648 |      |     | 0.00 |        |
| map00620     | Pyruvate metabolism                               | 91  | 5410 |    | 197  | 19648 |      |     | 0.00 |        |
| map00500     | Starch and sucrose metabolism                     | 65  | 5410 |    | 196  | 19648 |      |     | 0.05 |        |
| map00270     | Cysteine and methionine metabolism                | 60  | 5410 |    | 174  | 19648 |      |     | 0.03 |        |
| map00710     | Carbon fixation in photosynthetic organisms       | 67  | 5410 |    | 164  | 19648 |      |     | 0.00 |        |
| map00020     | Citrate cycle (TCA cycle)                         | 76  | 5410 |    | 148  | 19648 |      |     | 0.00 |        |
| map00280     | Valine, leucine and isoleucine degradation        | 50  | 5410 |    | 132  | 19648 |      |     | 0.01 |        |
| map00260     | Glycine, serine and threonine metabolism          | 46  | 5410 |    | 131  | 19648 |      |     | 0.03 |        |
| map00330     | Arginine and proline metabolism                   | 48  | 5410 |    | 129  | 19648 |      |     | 0.01 |        |
| map00250     | Alanine, aspartate and glutamate metabolism       | 52  | 5410 |    | 125  | 19648 |      |     | 0.00 |        |
| map00195     | Photosynthesis                                    | 46  | 5410 |    | 122  | 19648 |      |     | 0.01 |        |
| map01040     | Biosynthesis of unsaturated fatty acids           | 42  | 5410 |    | 104  | 19648 |      |     | 0.00 |        |
| map04933     | AGE-RAGE signaling pathway in diabetic complicati | 35  | 5410 |    | 98   | 19648 |      |     | 0.05 |        |
| map00860     | Porphyrin and chlorophyll metabolism              | 52  | 5410 |    | 96   | 19648 |      |     | 0.00 |        |
| map00380     | Tryptophan metabolism                             | 34  | 5410 |    | 95   | 19648 |      |     | 0.05 |        |
| map00030     | Pentose phosphate pathway                         | 34  | 5410 |    | 93   | 19648 |      |     | 0.04 |        |
| map00640     | Propanoate metabolism                             | 45  | 5410 |    | 92   | 19648 |      |     | 0.00 |        |
| map00061     | Fatty acid biosynthesis                           | 37  | 5410 |    | 81   | 19648 |      |     | 0.00 |        |
| map00410     | beta-Alanine metabolism                           | 33  | 5410 |    | 78   | 19648 |      |     | 0.00 |        |
| map00360     | Phenylalanine metabolism                          | 29  | 5410 |    | 77   | 19648 |      |     | 0.03 |        |
| map00100     | Steroid biosynthesis                              | 41  | 5410 |    | 73   | 19648 |      |     | 0.00 |        |
| map00910     | Nitrogen metabolism                               | 26  | 5410 |    | 67   | 19648 |      |     | 0.03 |        |
| map00196     | Photosynthesis - antenna proteins                 | 39  | 5410 |    | 67   | 19648 |      |     | 0.00 |        |
| map00220     | Arginine biosynthesis                             | 26  | 5410 |    | 66   | 19648 |      |     | 0.02 |        |
| map00400     | Phenylalanine, tyrosine and tryptophan biosynthes | 26  | 5410 |    | 65   | 19648 |      |     | 0.02 |        |
| map00906     | Carotenoid biosynthesis                           | 28  | 5410 |    | 58   | 19648 |      |     | 0.00 |        |
| map00770     | Pantothenate and CoA biosynthesis                 | 22  | 5410 |    | 54   | 19648 |      |     | 0.02 |        |
| map00062     | Fatty acid elongation                             | 21  | 5410 |    | 52   | 19648 |      |     | 0.03 |        |
| map00650     | Butanoate metabolism                              | 19  | 5410 |    | 44   | 19648 |      |     | 0.02 |        |
| map04712     | Circadian rhythm - plant                          | 18  | 5410 |    | 43   | 19648 |      |     | 0.03 |        |
| map00960     | Tropane, piperidine and pyridine alkaloid biosynt | 19  | 5410 |    | 43   | 19648 |      |     | 0.01 |        |
| map00670     | One carbon pool by folate                         | 19  | 5410 |    | 40   | 19648 |      |     | 0.01 |        |
| map00780     | Biotin metabolism                                 | 17  | 5410 |    | 37   | 19648 |      |     | 0.01 |        |
| map00333     | Prodigiosin biosyntheses                          | 13  | 5410 |    | 24   | 19648 |      |     | 0.01 |        |
| map00290     | Valine, leucine and isoleucine biosynthesis       | 10  | 5410 |    | 21   | 19648 |      |     | 0.04 |        |
| map00945     | Stilbenoid, diarylheptanoid and gingerol biosynth | 7   | 5410 |    | 9    | 19648 |      |     | 0.00 |        |
| map00909     | Sesquiterpenoid and triterpenoid biosynthesis     | 4   | 5410 |    | 5    | 19648 |      |     | 0.02 |        |
| map00471     | D-Glutamine and D-glutamate metabolism            | 5   | 5410 |    | 5    | 19648 |      |     | 0.00 |        |
| map00254     | Aflatoxin biosynthesis                            | 4   | 5410 |    | 4    | 19648 |      |     | 0.01 |        |

| Pathway:PathwayDefinition                                    | S   | gene | TS  | gene  | B    | gene | TB | gene | pvalue |
|--------------------------------------------------------------|-----|------|-----|-------|------|------|----|------|--------|
| map0301 Ribosome                                             | 327 | 8723 | 657 | 19648 | 0.00 |      |    |      |        |
| map0401 MAPK signaling pathway - plant                       | 200 | 8723 | 389 | 19648 | 0.00 |      |    |      |        |
| map0062 Pyruvate metabolism                                  | 101 | 8723 | 197 | 19648 | 0.03 |      |    |      |        |
| map0026 Glycine, serine and threonine metabolism             | 71  | 8723 | 131 | 19648 | 0.01 |      |    |      |        |
| map0493 AGE-RAGE signaling pathway in diabetic complications | 54  | 8723 | 98  | 19648 | 0.02 |      |    |      |        |
| map0086 Porphyrin and chlorophyll metabolism                 | 60  | 8723 | 96  | 19648 | 0.00 |      |    |      |        |
| map0010 Steroid biosynthesis                                 | 45  | 8723 | 73  | 19648 | 0.00 |      |    |      |        |
| map0019 Photosynthesis - antenna proteins                    | 40  | 8723 | 67  | 19648 | 0.01 |      |    |      |        |
| map0006 Fatty acid elongation                                | 33  | 8723 | 52  | 19648 | 0.00 |      |    |      |        |
| map0471 Circadian rhythm - plant                             | 30  | 8723 | 43  | 19648 | 0.00 |      |    |      |        |
| map0029 Valine, leucine and isoleucine biosynthesis          | 14  | 8723 | 21  | 19648 | 0.03 |      |    |      |        |
| map0060 Glycosphingolipid biosynthesis - lactosylceramide    | 6   | 8723 | 7   | 19648 | 0.03 |      |    |      |        |

| Pathway:PathwayDefinition          | S   | gene | TS  | gene  | B    | gene | TB | gene | pvalue |
|------------------------------------|-----|------|-----|-------|------|------|----|------|--------|
| map0301.Ribosome                   | 270 | 6540 | 657 | 19648 | 0.00 |      |    |      |        |
| map0401.MAPK signaling pathway -   | 159 | 6540 | 389 | 19648 | 0.00 |      |    |      |        |
| map0300.Ribosome biogenesis in eu  | 117 | 6540 | 283 | 19648 | 0.00 |      |    |      |        |
| map0414.Phagosome                  | 114 | 6540 | 281 | 19648 | 0.01 |      |    |      |        |
| map0019.Oxidative phosphorylation  | 113 | 6540 | 271 | 19648 | 0.00 |      |    |      |        |
| map0462.Plant-pathogen interaction | 91  | 6540 | 225 | 19648 | 0.01 |      |    |      |        |
| map0305.Proteasome                 | 63  | 6540 | 135 | 19648 | 0.00 |      |    |      |        |
| map0056.Ether lipid metabolism     | 24  | 6540 | 53  | 19648 | 0.05 |      |    |      |        |
| map0006.Fatty acid elongation      | 25  | 6540 | 52  | 19648 | 0.02 |      |    |      |        |
| map0471.Circadian rhythm - plant   | 23  | 6540 | 43  | 19648 | 0.00 |      |    |      |        |
| map0096.Tropane, piperidine and p  | 21  | 6540 | 43  | 19648 | 0.02 |      |    |      |        |
| map0051.Other types of O-glycan    | 15  | 6540 | 30  | 19648 | 0.04 |      |    |      |        |
| map0007.Cutin, suberine and wax    | 9   | 6540 | 13  | 19648 | 0.01 |      |    |      |        |
| map0047.D-Glutamine and D-glutami  | 4   | 6540 | 5   | 19648 | 0.05 |      |    |      |        |

| Pathway | PathwayDefinition                                     | S gene | TS gene | B gene | TB gene | pvalue |
|---------|-------------------------------------------------------|--------|---------|--------|---------|--------|
| map0301 | Ribosome                                              | 228    | 5134    | 657    | 19648   | 0.00   |
| map0300 | Ribosome biogenesis in eukaryote                      | 91     | 5134    | 283    | 19648   | 0.01   |
| map0414 | Phagosome                                             | 95     | 5134    | 281    | 19648   | 0.00   |
| map0019 | Oxidative phosphorylation                             | 101    | 5134    | 271    | 19648   | 0.00   |
| map0414 | Peroxisome                                            | 81     | 5134    | 262    | 19648   | 0.05   |
| map0001 | Glycolysis / Gluconeogenesis                          | 82     | 5134    | 231    | 19648   | 0.00   |
| map0063 | Glyoxylate and dicarboxylate metabolism               | 82     | 5134    | 198    | 19648   | 0.00   |
| map0062 | Pyruvate metabolism                                   | 84     | 5134    | 197    | 19648   | 0.00   |
| map0097 | Aminoacyl-tRNA biosynthesis                           | 64     | 5134    | 182    | 19648   | 0.00   |
| map0071 | Carbon fixation in photosynthesis                     | 71     | 5134    | 164    | 19648   | 0.00   |
| map0002 | Citrate cycle (TCA cycle)                             | 70     | 5134    | 148    | 19648   | 0.00   |
| map0028 | Valine, leucine and isoleucine biosynthesis           | 48     | 5134    | 132    | 19648   | 0.01   |
| map0026 | Glycine, serine and threonine metabolism              | 50     | 5134    | 131    | 19648   | 0.00   |
| map0033 | Arginine and proline metabolism                       | 50     | 5134    | 129    | 19648   | 0.00   |
| map0025 | Alanine, aspartate and glutamate metabolism           | 46     | 5134    | 125    | 19648   | 0.01   |
| map0019 | Photosynthesis                                        | 52     | 5134    | 122    | 19648   | 0.00   |
| map0104 | Biosynthesis of unsaturated fatty acids               | 38     | 5134    | 104    | 19648   | 0.01   |
| map0086 | Porphyrin and chlorophyll metabolism                  | 51     | 5134    | 96     | 19648   | 0.00   |
| map0003 | Pentose phosphate pathway                             | 34     | 5134    | 93     | 19648   | 0.02   |
| map0064 | Propanoate metabolism                                 | 41     | 5134    | 92     | 19648   | 0.00   |
| map0006 | Fatty acid biosynthesis                               | 33     | 5134    | 81     | 19648   | 0.00   |
| map0041 | beta-Alanine metabolism                               | 33     | 5134    | 78     | 19648   | 0.00   |
| map0036 | Phenylalanine metabolism                              | 29     | 5134    | 77     | 19648   | 0.02   |
| map0010 | Steroid biosynthesis                                  | 37     | 5134    | 73     | 19648   | 0.00   |
| map0019 | Photosynthesis - antenna proteins                     | 40     | 5134    | 67     | 19648   | 0.00   |
| map0022 | Arginine biosynthesis                                 | 27     | 5134    | 66     | 19648   | 0.01   |
| map0040 | Phenylalanine, tyrosine and tryptophan biosynthesis   | 27     | 5134    | 65     | 19648   | 0.00   |
| map0090 | Carotenoid biosynthesis                               | 23     | 5134    | 58     | 19648   | 0.02   |
| map0077 | Pantothenate and CoA biosynthesis                     | 21     | 5134    | 54     | 19648   | 0.03   |
| map0065 | Butanoate metabolism                                  | 19     | 5134    | 44     | 19648   | 0.01   |
| map0096 | Tropane, piperidine and pyridine alkaloids            | 18     | 5134    | 43     | 19648   | 0.02   |
| map0471 | Circadian rhythm - plant                              | 18     | 5134    | 43     | 19648   | 0.02   |
| map0067 | One carbon pool by folate                             | 21     | 5134    | 40     | 19648   | 0.00   |
| map0033 | Prodigiosin biosyntheses                              | 11     | 5134    | 24     | 19648   | 0.03   |
| map0029 | Valine, leucine and isoleucine degradation            | 10     | 5134    | 21     | 19648   | 0.03   |
| map0043 | Taurine and hypotaurine metabolism                    | 7      | 5134    | 14     | 19648   | 0.05   |
| map0094 | Stilbenoid, diarylheptanoid and gingerol biosynthesis | 6      | 5134    | 9      | 19648   | 0.01   |
| map0090 | Sesquiterpenoid and triterpenoid biosynthesis         | 4      | 5134    | 5      | 19648   | 0.02   |
| map0047 | D-Glutamine and D-glutamate metabolism                | 4      | 5134    | 5      | 19648   | 0.02   |

| PathwayEntry | PathwayDefinition                         | S gene | TS gene | B gene | TB gene | pvalue |
|--------------|-------------------------------------------|--------|---------|--------|---------|--------|
| map03010     | Ribosome                                  | 327    | 6984    | 657    | 19648   | 0.00   |
| map04016     | MAPK signaling pathway                    | 161    | 6984    | 389    | 19648   | 0.01   |
| map04145     | Phagosome                                 | 122    | 6984    | 281    | 19648   | 0.00   |
| map00190     | Oxidative phosphorylation                 | 122    | 6984    | 271    | 19648   | 0.00   |
| map04626     | Plant-pathogen interaction                | 110    | 6984    | 225    | 19648   | 0.00   |
| map00620     | Pyruvate metabolism                       | 91     | 6984    | 197    | 19648   | 0.00   |
| map00710     | Carbon fixation in photosynthesis         | 75     | 6984    | 164    | 19648   | 0.00   |
| map00020     | Citrate cycle (TCA cycle)                 | 65     | 6984    | 148    | 19648   | 0.02   |
| map00195     | Photosynthesis                            | 68     | 6984    | 122    | 19648   | 0.00   |
| map00860     | Porphyrin and chlorophyll metabolism      | 52     | 6984    | 96     | 19648   | 0.00   |
| map00061     | Fatty acid biosynthesis                   | 41     | 6984    | 81     | 19648   | 0.00   |
| map00100     | Steroid biosynthesis                      | 36     | 6984    | 73     | 19648   | 0.01   |
| map00196     | Photosynthesis - antenna                  | 40     | 6984    | 67     | 19648   | 0.00   |
| map00910     | Nitrogen metabolism                       | 33     | 6984    | 67     | 19648   | 0.01   |
| map00590     | Arachidonic acid metabolism               | 32     | 6984    | 67     | 19648   | 0.03   |
| map04130     | SNARE interactions in vesicle trafficking | 33     | 6984    | 63     | 19648   | 0.00   |
| map00062     | Fatty acid elongation                     | 26     | 6984    | 52     | 19648   | 0.02   |
| map00730     | Thiamine metabolism                       | 26     | 6984    | 51     | 19648   | 0.02   |
| map04712     | Circadian rhythm - plant                  | 23     | 6984    | 43     | 19648   | 0.01   |
| map00514     | Other types of O-glycan                   | 16     | 6984    | 30     | 19648   | 0.03   |
| map00254     | Aflatoxin biosynthesis                    | 4      | 6984    | 4      | 19648   | 0.02   |

| Pathway | Pathway S | gene :TS | gene B | gene :TB | gene  | pvalue |
|---------|-----------|----------|--------|----------|-------|--------|
| map0023 | Purine    | 44       | 1076   | 469      | 19648 | 0.00   |
| map0401 | MAPK si   | 41       | 1076   | 389      | 19648 | 0.00   |
| map0201 | ABC tra   | 42       | 1076   | 378      | 19648 | 0.00   |
| map0300 | Ribosom   | 26       | 1076   | 283      | 19648 | 0.01   |
| map0407 | Plant h   | 35       | 1076   | 244      | 19648 | 0.00   |
| map0462 | Plant-p   | 31       | 1076   | 225      | 19648 | 0.00   |
| map0050 | Starch    | 19       | 1076   | 196      | 19648 | 0.01   |
| map0019 | Photosy   | 13       | 1076   | 122      | 19648 | 0.02   |
| map0006 | Fatty a   | 10       | 1076   | 81       | 19648 | 0.01   |
| map0059 | Arachid   | 10       | 1076   | 67       | 19648 | 0.00   |
| map0090 | Caroten   | 7        | 1076   | 58       | 19648 | 0.04   |
| map0006 | Fatty a   | 7        | 1076   | 52       | 19648 | 0.02   |
| map0051 | Other t   | 5        | 1076   | 30       | 19648 | 0.02   |
| map0033 | Prodigio  | 4        | 1076   | 24       | 19648 | 0.04   |
| map0007 | Cutin,    | 5        | 1076   | 13       | 19648 | 0.00   |

| Pathway:PathwayDefinition         | S gene | TS gene | B gene | TB gene | pvalue |
|-----------------------------------|--------|---------|--------|---------|--------|
| map0301 Ribosome                  | 240    | 3842    | 657    | 19648   | 0      |
| map0414 Endocytosis               | 120    | 3842    | 508    | 19648   | 0.01   |
| map0414 Protein processing in end | 132    | 3842    | 497    | 19648   | 0.00   |
| map0414 Phagosome                 | 77     | 3842    | 281    | 19648   | 0.00   |
| map0019 Oxidative phosphorylation | 90     | 3842    | 271    | 19648   | 0.00   |
| map0462 Plant-pathogen interactic | 59     | 3842    | 225    | 19648   | 0.01   |
| map0063 Glyoxylate and dicarboxyl | 60     | 3842    | 198    | 19648   | 0.00   |
| map0062 Pyruvate metabolism       | 51     | 3842    | 197    | 19648   | 0.02   |
| map0050 Starch and sucrose metabo | 55     | 3842    | 196    | 19648   | 0.00   |
| map0097 Aminoacyl-tRNA biosynthes | 47     | 3842    | 182    | 19648   | 0.02   |
| map0027 Cysteine and methionine m | 44     | 3842    | 174    | 19648   | 0.04   |
| map0071 Carbon fixation in photos | 57     | 3842    | 164    | 19648   | 0.00   |
| map0048 Glutathione metabolism    | 42     | 3842    | 161    | 19648   | 0.03   |
| map0002 Citrate cycle (TCA cycle) | 62     | 3842    | 148    | 19648   | 0.00   |
| map0305 Proteasome                | 65     | 3842    | 135    | 19648   | 0.00   |
| map0026 Glycine, serine and threc | 36     | 3842    | 131    | 19648   | 0.02   |
| map0033 Arginine and proline meta | 34     | 3842    | 129    | 19648   | 0.04   |
| map0025 Alanine, aspartate and gl | 37     | 3842    | 125    | 19648   | 0.00   |
| map0086 Porphyrin and chlorophyll | 29     | 3842    | 96     | 19648   | 0.01   |
| map0003 Pentose phosphate pathway | 26     | 3842    | 93     | 19648   | 0.03   |
| map0064 Propanoate metabolism     | 26     | 3842    | 92     | 19648   | 0.03   |
| map0010 Steroid biosynthesis      | 21     | 3842    | 73     | 19648   | 0.04   |
| map0091 Nitrogen metabolism       | 25     | 3842    | 67     | 19648   | 0.00   |
| map0059 Arachidonic acid metaboli | 22     | 3842    | 67     | 19648   | 0.01   |
| map0022 Arginine biosynthesis     | 20     | 3842    | 66     | 19648   | 0.02   |
| map0471.Circadian rhythm - plant  | 15     | 3842    | 43     | 19648   | 0.01   |
| map0025 Aflatoxin biosynthesis    | 4      | 3842    | 4      | 19648   | 0.00   |

| Pathway:PathwayDefinition                           | S gene | TS gene | B gene | TB gene | pvalue |
|-----------------------------------------------------|--------|---------|--------|---------|--------|
| map0023 Purine metabolism                           | 115    | 3638    | 469    | 19648   | 0.00   |
| map0019 Oxidative phosphorylation                   | 74     | 3638    | 271    | 19648   | 0.00   |
| map0001 Glycolysis / Gluconeogenesis                | 59     | 3638    | 231    | 19648   | 0.00   |
| map0462 Plant-pathogen interaction                  | 52     | 3638    | 225    | 19648   | 0.05   |
| map0063 Glyoxylate and dicarboxylate metabolism     | 53     | 3638    | 198    | 19648   | 0.00   |
| map0062 Pyruvate metabolism                         | 63     | 3638    | 197    | 19648   | 0.00   |
| map0050 Starch and sucrose metabolism               | 55     | 3638    | 196    | 19648   | 0.00   |
| map0071 Carbon fixation in photosynthesis           | 57     | 3638    | 164    | 19648   | 0.00   |
| map0025 Alanine, aspartate and glutamate metabolism | 33     | 3638    | 125    | 19648   | 0.02   |
| map0019 Photosynthesis                              | 62     | 3638    | 122    | 19648   | 0.00   |
| map0005 Fructose and mannose metabolism             | 28     | 3638    | 100    | 19648   | 0.01   |
| map0086 Porphyrin and chlorophyll metabolism        | 42     | 3638    | 96     | 19648   | 0.00   |
| map0064 Propanoate metabolism                       | 25     | 3638    | 92     | 19648   | 0.03   |
| map0006 Fatty acid biosynthesis                     | 23     | 3638    | 81     | 19648   | 0.02   |
| map0005 Ascorbate and aldarate metabolism           | 21     | 3638    | 77     | 19648   | 0.04   |
| map0010 Steroid biosynthesis                        | 23     | 3638    | 73     | 19648   | 0.01   |
| map0019 Photosynthesis - antenna proteins           | 37     | 3638    | 67     | 19648   | 0.00   |
| map0059 Arachidonic acid metabolism                 | 26     | 3638    | 67     | 19648   | 0.00   |
| map0091 Nitrogen metabolism                         | 25     | 3638    | 67     | 19648   | 0.00   |
| map0090 Carotenoid biosynthesis                     | 18     | 3638    | 58     | 19648   | 0.01   |
| map0006 Fatty acid elongation                       | 16     | 3638    | 52     | 19648   | 0.02   |
| map0471 Circadian rhythm - plant                    | 13     | 3638    | 43     | 19648   | 0.04   |
| map0051 Other types of O-glycan biosynthesis        | 13     | 3638    | 30     | 19648   | 0.00   |
| map0025 Aflatoxin biosynthesis                      | 4      | 3638    | 4      | 19648   | 0.00   |

| Pathway | Pathway S | gene :TS | gene B | gene :TB | gene  | pvalue |
|---------|-----------|----------|--------|----------|-------|--------|
| map0301 | Ribosom   | 93       | 2002   | 657      | 19648 | 0.00   |
| map0023 | Purine    | 75       | 2002   | 469      | 19648 | 0.00   |
| map0201 | ABC tra   | 51       | 2002   | 378      | 19648 | 0.02   |
| map0414 | Phagosom  | 39       | 2002   | 281      | 19648 | 0.03   |
| map0019 | Oxidati   | 38       | 2002   | 271      | 19648 | 0.03   |
| map0414 | Peroxis   | 37       | 2002   | 262      | 19648 | 0.03   |
| map0001 | Glycoly   | 35       | 2002   | 231      | 19648 | 0.01   |
| map0062 | Pyruvat   | 39       | 2002   | 197      | 19648 | 0.00   |
| map0050 | Starch    | 43       | 2002   | 196      | 19648 | 0.00   |
| map0002 | Citrate   | 31       | 2002   | 148      | 19648 | 0.00   |
| map0305 | Proteas   | 23       | 2002   | 135      | 19648 | 0.01   |
| map0019 | Photosy   | 28       | 2002   | 122      | 19648 | 0.00   |
| map0341 | Base ex   | 19       | 2002   | 116      | 19648 | 0.03   |
| map0086 | Porphyr   | 17       | 2002   | 96       | 19648 | 0.02   |
| map0006 | Fatty a   | 18       | 2002   | 81       | 19648 | 0.00   |
| map0041 | beta-Al   | 14       | 2002   | 78       | 19648 | 0.03   |
| map0005 | Ascorba   | 14       | 2002   | 77       | 19648 | 0.02   |
| map0019 | Photosy   | 24       | 2002   | 67       | 19648 | 0.00   |
| map0091 | Nitroge   | 15       | 2002   | 67       | 19648 | 0.00   |
| map0059 | Arachid   | 13       | 2002   | 67       | 19648 | 0.02   |
| map0090 | Caroten   | 12       | 2002   | 58       | 19648 | 0.01   |
| map0096 | Tropane   | 9        | 2002   | 43       | 19648 | 0.03   |
| map0051 | Other t   | 11       | 2002   | 30       | 19648 | 0.00   |
| map0046 | Cyanoam   | 7        | 2002   | 28       | 19648 | 0.02   |
| map0007 | Cutin,    | 6        | 2002   | 13       | 19648 | 0.00   |
| map0047 | D-Gluta   | 3        | 2002   | 5        | 19648 | 0.01   |

| Pathway | Pathway Definition | gene :TS | gene B | gene :TB | gene  | pvalue |
|---------|--------------------|----------|--------|----------|-------|--------|
| map0301 | Ribosome           | 230      | 4957   | 657      | 19648 | 0.00   |
| map0414 | Protein processin  | 148      | 4957   | 497      | 19648 | 0.01   |
| map0301 | RNA transport      | 126      | 4957   | 434      | 19648 | 0.04   |
| map0300 | Ribosome biogenes  | 100      | 4957   | 283      | 19648 | 0.00   |
| map0414 | Phagosome          | 96       | 4957   | 281      | 19648 | 0.00   |
| map0019 | Oxidative phospho  | 104      | 4957   | 271      | 19648 | 0.00   |
| map0001 | Glycolysis / Gluc  | 70       | 4957   | 231      | 19648 | 0.05   |
| map0462 | Plant-pathogen in  | 69       | 4957   | 225      | 19648 | 0.04   |
| map0063 | Glyoxylate and di  | 73       | 4957   | 198      | 19648 | 0.00   |
| map0062 | Pyruvate metaboli  | 70       | 4957   | 197      | 19648 | 0.00   |
| map0097 | Aminoacyl-tRNA bi  | 57       | 4957   | 182      | 19648 | 0.04   |
| map0027 | Cysteine and meth  | 55       | 4957   | 174      | 19648 | 0.03   |
| map0071 | Carbon fixation i  | 58       | 4957   | 164      | 19648 | 0.00   |
| map0002 | Citrate cycle (TC  | 67       | 4957   | 148      | 19648 | 0.00   |
| map0305 | Proteasome         | 52       | 4957   | 135      | 19648 | 0.00   |
| map0028 | Valine, leucine a  | 51       | 4957   | 132      | 19648 | 0.00   |
| map0026 | Glycine, serine a  | 44       | 4957   | 131      | 19648 | 0.02   |
| map0007 | Fatty acid degrad  | 43       | 4957   | 126      | 19648 | 0.02   |
| map0104 | Biosynthesis of u  | 36       | 4957   | 104      | 19648 | 0.02   |
| map0086 | Porphyrin and chl  | 32       | 4957   | 96       | 19648 | 0.05   |
| map0038 | Tryptophan metabc  | 34       | 4957   | 95       | 19648 | 0.01   |
| map0031 | Lysine degradatic  | 32       | 4957   | 93       | 19648 | 0.03   |
| map0003 | Pentose phosphate  | 31       | 4957   | 93       | 19648 | 0.05   |
| map0006 | Fatty acid biosyn  | 34       | 4957   | 81       | 19648 | 0.00   |
| map0041 | beta-Alanine meta  | 28       | 4957   | 78       | 19648 | 0.02   |
| map0010 | Steroid biosynthe  | 35       | 4957   | 73       | 19648 | 0.00   |
| map0019 | Photosynthesis -   | 31       | 4957   | 67       | 19648 | 0.00   |
| map0413 | SNARE interaction  | 25       | 4957   | 63       | 19648 | 0.01   |
| map0074 | Riboflavin metabc  | 22       | 4957   | 62       | 19648 | 0.05   |
| map0090 | Carotenoid biosyn  | 22       | 4957   | 58       | 19648 | 0.02   |
| map0056 | Ether lipid metak  | 20       | 4957   | 53       | 19648 | 0.03   |
| map0067 | One carbon pool k  | 16       | 4957   | 40       | 19648 | 0.03   |
| map0078 | Biotin metabolism  | 18       | 4957   | 37       | 19648 | 0.00   |
| map0046 | Cyanoamino acid r  | 14       | 4957   | 28       | 19648 | 0.00   |
| map0033 | Prodigiosin biosy  | 13       | 4957   | 24       | 19648 | 0.00   |
| map0090 | Zeatin biosynthes  | 11       | 4957   | 22       | 19648 | 0.01   |
| map0059 | Linoleic acid met  | 7        | 4957   | 14       | 19648 | 0.04   |
| map0094 | Stilbenoid, diary  | 6        | 4957   | 9        | 19648 | 0.01   |

| Pathway:PathwayDefinition      | S   | gene | TS  | gene  | B    | gene | TB | gene | pvalue |
|--------------------------------|-----|------|-----|-------|------|------|----|------|--------|
| map0414 Endocytosis            | 177 | 5127 | 508 | 19648 | 0.00 |      |    |      |        |
| map0401 MAPK signaling pathway | 130 | 5127 | 389 | 19648 | 0.00 |      |    |      |        |
| map0300 Ribosome biogenesis in | 88  | 5127 | 283 | 19648 | 0.03 |      |    |      |        |
| map0414 Phagosome              | 106 | 5127 | 281 | 19648 | 0.00 |      |    |      |        |
| map0414 Peroxisome             | 84  | 5127 | 262 | 19648 | 0.02 |      |    |      |        |
| map0056 Glycerophospholipid me | 60  | 5127 | 182 | 19648 | 0.02 |      |    |      |        |
| map0056.Inositol phosphate met | 63  | 5127 | 171 | 19648 | 0.00 |      |    |      |        |
| map0002 Citrate cycle (TCA cyc | 57  | 5127 | 148 | 19648 | 0.00 |      |    |      |        |
| map0305 Proteasome             | 45  | 5127 | 135 | 19648 | 0.04 |      |    |      |        |
| map0028 Valine, leucine and is | 49  | 5127 | 132 | 19648 | 0.00 |      |    |      |        |
| map0104 Biosynthesis of unsatu | 36  | 5127 | 104 | 19648 | 0.03 |      |    |      |        |
| map0493 AGE-RAGE signaling pat | 39  | 5127 | 98  | 19648 | 0.00 |      |    |      |        |
| map0038 Tryptophan metabolism  | 34  | 5127 | 95  | 19648 | 0.02 |      |    |      |        |
| map0031 Lysine degradation     | 33  | 5127 | 93  | 19648 | 0.03 |      |    |      |        |
| map0302.Basal transcription fa | 29  | 5127 | 80  | 19648 | 0.03 |      |    |      |        |
| map0010 Steroid biosynthesis   | 35  | 5127 | 73  | 19648 | 0.00 |      |    |      |        |
| map0094 Phenylpropanoid biosyr | 27  | 5127 | 68  | 19648 | 0.01 |      |    |      |        |
| map0056.Ether lipid metabolism | 25  | 5127 | 53  | 19648 | 0.00 |      |    |      |        |
| map0060 Glycosphingolipid bios | 13  | 5127 | 28  | 19648 | 0.02 |      |    |      |        |
| map0090 Zeatin biosynthesis    | 10  | 5127 | 22  | 19648 | 0.04 |      |    |      |        |
| map0094 Stilbenoid, diarylhept | 6   | 5127 | 9   | 19648 | 0.01 |      |    |      |        |
| map0060 Glycosphingolipid bios | 6   | 5127 | 7   | 19648 | 0.00 |      |    |      |        |

| Pathway | Pathway S | gene :TS | gene B | gene :TB | gene  | pvalue |
|---------|-----------|----------|--------|----------|-------|--------|
| map0301 | Ribosom   | 36       | 61     | 657      | 19648 | 0.00   |
| map0019 | Oxidati   | 14       | 61     | 271      | 19648 | 0.00   |

| Pathway:PathwayDefiniticS | gene .TS | gene B | gene :TB | gene pvalue |      |
|---------------------------|----------|--------|----------|-------------|------|
| map0414 Endocytosis       | 149      | 4607   | 508      | 19648       | 0.00 |
| map0401 MAPK signaling p  | 135      | 4607   | 389      | 19648       | 0.00 |
| map0300 Ribosome biogene  | 85       | 4607   | 283      | 19648       | 0.01 |
| map0414 Phagosome         | 87       | 4607   | 281      | 19648       | 0.00 |
| map0414 Peroxisome        | 74       | 4607   | 262      | 19648       | 0.04 |
| map0407 Plant hormone si  | 72       | 4607   | 244      | 19648       | 0.02 |
| map0462 Plant-pathogen i  | 73       | 4607   | 225      | 19648       | 0.00 |
| map0097 Aminoacyl-tRNA b  | 56       | 4607   | 182      | 19648       | 0.01 |
| map0056.Inositol phospho  | 54       | 4607   | 171      | 19648       | 0.01 |
| map0028 Valine, leucine   | 42       | 4607   | 132      | 19648       | 0.02 |
| map0493 AGE-RAGE signali  | 34       | 4607   | 98       | 19648       | 0.01 |
| map0302.Basal transcript  | 29       | 4607   | 80       | 19648       | 0.01 |
| map0010 Steroid biosynth  | 33       | 4607   | 73       | 19648       | 0.00 |
| map0094 Phenylpropanoid   | 23       | 4607   | 68       | 19648       | 0.03 |
| map0056 Ether lipid meta  | 19       | 4607   | 53       | 19648       | 0.03 |
| map0006.Fatty acid elong  | 19       | 4607   | 52       | 19648       | 0.02 |
| map0090 Brassinosteroid   | 8        | 4607   | 16       | 19648       | 0.02 |
| map0094 Stilbenoid, diar  | 5        | 4607   | 9        | 19648       | 0.04 |
